# Supplementary material
Source: PubMed Central journal article supplement (PMC6628594)
Supplement: jama-322-430-s002.pdf [file jama-322-430-s002.pdf]

## Supplementary Online Content

Lourida I, Hannon E, Littlejohns TJ, et al. Association of lifestyle and genetic risk with incidence of dementia [published online July 14, 2019]. *JAMA*. doi:10.1001/jama.2019.9879

### **Supplement 2.** eAppendix

This supplementary material has been provided by the authors to give readers additional information about their work.

| SNPs included in the PRS | Allele counted | log OR  |
|--------------------------|----------------|---------|
| rs1752684                | A              | 0.1541  |
| rs1410397                | C              | 0.0766  |
| rs4147104                | A              | 0.0774  |
| rs148031031              | T              | 0.3296  |
| rs74336880               | G              | -0.1518 |
| rs58817628               | G              | -0.0707 |
| rs77709072               | G              | 0.3375  |
| rs12076311               | A              | 0.0694  |
| rs12065199               | G              | 0.2124  |
| rs11807823               | G              | 0.127   |
| rs2297912                | C              | -0.0802 |
| rs16849237               | A              | 0.1852  |
| rs75121373               | T              | 0.1372  |
| rs6668320                | G              | 0.074   |
| rs78664461               | G              | -0.2917 |
| rs6686745                | T              | -0.1357 |
| rs2036701                | T              | 0.0872  |
| rs3122605                | G              | 0.0932  |
| rs12752996               | G              | -0.1586 |
| rs41304251               | T              | -0.3263 |
| rs12032765               | C              | -0.21   |
| rs12067173               | T              | 0.0823  |
| rs9426209                | C              | 0.0667  |
| rs12410656               | T              | -0.2287 |
| rs12045149               | T              | -0.0888 |
| rs4657763                | C              | 0.087   |
| rs61820480               | C              | -0.2689 |
| rs522395                 | T              | 0.1045  |
| rs115303709              | T              | 0.2823  |
| rs1571756                | A              | 0.0889  |
| rs1776161                | A              | 0.072   |
| rs11569869               | A              | -0.3127 |
| rs17128018               | G              | 0.2451  |
| rs6689604                | G              | -0.0611 |
| rs583315                 | C              | 0.0642  |
| rs2182913                | A              | 0.0632  |
| rs1192404                | G              | -0.0832 |
| rs10803021               | C              | -0.0869 |
| rs4314882                | T              | 0.245   |
| rs72767412               | C              | -0.0919 |
| rs61773269               | A              | -0.2197 |
| rs12138629               | A              | 0.0894  |
| rs17503335               | A              | 0.0612  |
| rs10900422               | A              | 0.2454  |
| rs2271017                | T              | -0.2023 |
| rs6673042                | G              | 0.074   |
| rs80107522               | C              | 0.0792  |

|             |   |         |
|-------------|---|---------|
| rs61779834  | T | 0.0797  |
| rs621662    | C | -0.0732 |
| rs2123079   | G | 0.2517  |
| rs138440611 | C | 0.1586  |
| rs4149991   | G | 0.1033  |
| rs142968483 | T | -0.2198 |
| rs72687503  | G | 0.2843  |
| rs2641342   | A | -0.0751 |
| rs6587723   | C | 0.0746  |
| rs115484269 | C | -0.1478 |
| rs10921647  | A | 0.0634  |
| rs10914282  | A | 0.0833  |
| rs7525640   | T | 0.0713  |
| rs12070913  | T | 0.1017  |
| rs1229119   | T | 0.0592  |
| rs4587570   | A | 0.0674  |
| rs78356043  | G | 0.3166  |
| rs7543190   | A | -0.0925 |
| rs112771478 | C | 0.2428  |
| rs17742222  | A | -0.064  |
| rs149640240 | G | 0.3763  |
| rs116753268 | A | -0.4021 |
| rs72753659  | T | 0.1267  |
| rs57802972  | C | 0.1339  |
| rs11585614  | C | -0.0633 |
| rs76346754  | T | 0.0725  |
| rs12069997  | G | 0.1174  |
| rs976189    | A | -0.0616 |
| rs16843725  | T | 0.1406  |
| rs7535494   | G | 0.0642  |
| rs76197787  | T | 0.3776  |
| rs1149054   | T | -0.0848 |
| rs12122364  | G | 0.1745  |
| rs12088244  | A | 0.0759  |
| rs6428949   | T | 0.231   |
| rs79795868  | C | -0.0682 |
| rs1144566   | T | 0.1788  |
| rs12043746  | A | -0.0702 |
| rs35123100  | A | 0.1391  |
| rs525357    | T | 0.0868  |
| rs12066052  | A | 0.0786  |
| rs4457559   | T | 0.1464  |
| rs145012408 | C | 0.1587  |
| rs712066    | T | -0.0715 |
| rs1431985   | A | 0.0547  |
| rs12087095  | A | 0.1396  |
| rs10911935  | T | 0.0671  |

|             |   |         |
|-------------|---|---------|
| rs7535510   | T | -0.0623 |
| rs9117      | G | -0.0961 |
| rs28551666  | A | -0.0785 |
| rs74226815  | G | 0.0893  |
| rs705271    | C | -0.1133 |
| rs3813647   | A | -0.0682 |
| rs947638    | T | -0.0703 |
| rs3001999   | G | 0.1382  |
| rs11803017  | T | -0.2339 |
| rs115791883 | T | 0.1847  |
| rs78363635  | C | 0.1434  |
| rs78640525  | A | -0.2258 |
| rs1444445   | C | -0.0527 |
| rs2383565   | A | -0.6551 |
| rs2310752   | A | -0.0547 |
| rs79134063  | A | -0.2815 |
| rs79666971  | G | 0.1919  |
| rs11185345  | C | -0.0538 |
| rs114475452 | A | -0.2388 |
| rs59664819  | A | 0.2253  |
| rs61821306  | T | 0.1621  |
| rs116348914 | T | 0.2937  |
| rs6688105   | C | 0.0587  |
| rs1288625   | G | 0.0655  |
| rs2643901   | T | 0.0922  |
| rs78392693  | G | -0.2556 |
| rs149241086 | G | -0.2476 |
| rs34350916  | C | -0.1026 |
| rs6684589   | C | -0.0753 |
| rs12405138  | T | 0.0774  |
| rs4949301   | T | 0.1409  |
| rs1328310   | C | -0.0759 |
| rs112929677 | A | 0.1859  |
| rs12137076  | G | -0.0605 |
| rs7550829   | T | 0.0876  |
| rs2338972   | C | 0.0516  |
| rs141116475 | C | -0.1865 |
| rs114852786 | C | -0.2626 |
| rs650676    | C | -0.0571 |
| rs1759499   | G | 0.056   |
| rs112053331 | C | 0.3206  |
| rs2236808   | T | 0.0839  |
| rs980640    | C | -0.0928 |
| rs2182107   | T | 0.0952  |
| rs480820    | C | -0.0512 |
| rs10914632  | A | -0.1169 |
| rs61768415  | C | 0.2697  |

|             |   |         |
|-------------|---|---------|
| rs10754853  | C | 0.0582  |
| rs1568485   | C | -0.0634 |
| rs11804045  | A | -0.086  |
| rs12030383  | C | -0.1893 |
| rs55738811  | T | 0.2504  |
| rs1418191   | C | -0.0821 |
| rs41311158  | G | 0.2601  |
| rs2759669   | G | -0.0701 |
| rs203798    | A | 0.0862  |
| rs12134217  | T | 0.1478  |
| rs10494890  | G | 0.0589  |
| rs55691432  | C | 0.1289  |
| rs17484960  | A | -0.0513 |
| rs4142491   | G | 0.0569  |
| rs1635516   | T | -0.0577 |
| rs56199562  | T | 0.153   |
| rs35089045  | C | 0.1481  |
| rs61850225  | G | 0.0931  |
| rs12077464  | C | 0.1499  |
| rs10924459  | C | -0.0924 |
| rs10918859  | A | -0.0657 |
| rs115513802 | C | 0.2286  |
| rs6701121   | T | 0.2309  |
| rs11585607  | G | -0.1154 |
| rs61833281  | C | 0.1477  |
| rs10925978  | G | -0.1348 |
| rs61768717  | A | -0.2306 |
| rs1170919   | A | -0.0545 |
| rs2816845   | T | 0.0601  |
| rs783037    | T | 0.1096  |
| rs9628986   | T | -0.0734 |
| rs11588551  | T | 0.0511  |
| rs61837146  | G | -0.0954 |
| rs2296223   | A | -0.1126 |
| rs150986713 | T | 0.3396  |
| rs76716335  | T | -0.2516 |
| rs8676      | G | 0.0518  |
| rs2491437   | T | 0.0674  |
| rs114014436 | A | 0.266   |
| rs1218664   | C | -0.0509 |
| rs11809207  | A | -0.0625 |
| rs4912082   | C | 0.0553  |
| rs142730860 | T | 0.2806  |
| rs74793582  | T | -0.2875 |
| rs28716020  | T | -0.1348 |
| rs74540749  | C | 0.097   |
| rs17530804  | A | -0.1069 |

|             |   |         |
|-------------|---|---------|
| rs12143775  | A | 0.1263  |
| rs17013227  | T | 0.1218  |
| rs6665928   | G | 0.1104  |
| rs111233893 | C | 0.1754  |
| rs114289594 | A | 0.2542  |
| rs2994326   | T | 0.067   |
| rs4332358   | T | 0.0591  |
| rs787716    | A | -0.0699 |
| rs2132303   | T | 0.0704  |
| rs12134558  | G | 0.1352  |
| rs6429215   | C | -0.0585 |
| rs12128502  | A | 0.0992  |
| rs35677013  | T | 0.1703  |
| rs11582184  | T | -0.0551 |
| rs114898689 | T | 0.164   |
| rs147549661 | A | 0.2325  |
| rs11165063  | G | 0.0729  |
| rs1043964   | C | 0.1931  |
| rs12401435  | C | 0.1088  |
| rs16856487  | G | -0.0608 |
| rs12723237  | C | 0.0867  |
| rs2780944   | T | -0.0569 |
| rs2040041   | T | 0.058   |
| rs146976795 | T | 0.1037  |
| rs17606040  | G | 0.0841  |
| rs12117349  | C | -0.1212 |
| rs10746436  | C | 0.0695  |
| rs12038151  | C | -0.1098 |
| rs12035356  | C | 0.2604  |
| rs4650222   | G | -0.0664 |
| rs74142895  | T | 0.1449  |
| rs6667494   | G | -0.0584 |
| rs12726441  | G | -0.0504 |
| rs12028587  | G | -0.0623 |
| rs77038884  | A | 0.1128  |
| rs4351623   | T | 0.054   |
| rs74048017  | C | -0.0874 |
| rs1472713   | C | 0.0613  |
| rs12403461  | G | 0.0742  |
| rs34627032  | A | 0.1091  |
| rs2185159   | C | 0.2001  |
| rs78803721  | G | 0.1512  |
| rs4659431   | A | 0.0641  |
| rs1011879   | T | -0.0518 |
| rs2255438   | A | 0.0515  |
| rs2649079   | A | -0.0566 |
| rs7526152   | C | -0.0842 |

|             |   |         |
|-------------|---|---------|
| rs112539820 | A | 0.2527  |
| rs7555047   | A | -0.198  |
| rs2025580   | A | 0.1046  |
| rs57540864  | T | 0.3288  |
| rs3001219   | G | -0.0529 |
| rs4653595   | T | 0.0568  |
| rs72719882  | T | 0.0683  |
| rs2802842   | G | 0.0492  |
| rs115541635 | C | -0.1461 |
| rs118188024 | T | 0.2446  |
| rs11211623  | A | 0.0553  |
| rs12240059  | A | -0.2906 |
| rs12743954  | C | 0.1162  |
| rs12086664  | G | 0.1179  |
| rs2842202   | G | 0.0848  |
| rs7524318   | G | -0.106  |
| rs11265218  | C | -0.0703 |
| rs79479034  | A | 0.1738  |
| rs11588775  | A | 0.0738  |
| rs61835564  | A | -0.1424 |
| rs115195733 | G | 0.2053  |
| rs146773183 | T | 0.0755  |
| rs72640753  | T | -0.1188 |
| rs11209203  | C | 0.1997  |
| rs79677537  | A | 0.1988  |
| rs9433778   | T | 0.078   |
| rs4659923   | C | 0.0506  |
| rs2819762   | T | 0.0524  |
| rs2821561   | A | -0.0489 |
| rs7518563   | A | -0.0535 |
| rs9428007   | A | 0.0608  |
| rs2117159   | C | 0.0485  |
| rs114073362 | A | -0.425  |
| rs57822295  | T | 0.1421  |
| rs10518338  | A | -0.0894 |
| rs11801074  | C | -0.1649 |
| rs12734448  | C | -0.0562 |
| rs80232791  | T | 0.1422  |
| rs10925607  | G | 0.2649  |
| rs7417523   | A | 0.1084  |
| rs17408784  | C | 0.1686  |
| rs12135202  | A | 0.1624  |
| rs11210306  | G | -0.0617 |
| rs12239620  | A | -0.0757 |
| rs115430437 | T | 0.1734  |
| rs7516288   | A | -0.0538 |
| rs114250833 | G | -0.3312 |

|             |   |         |
|-------------|---|---------|
| rs4598443   | T | 0.2149  |
| rs12407980  | G | 0.0488  |
| rs2478516   | C | -0.0679 |
| rs789367    | G | 0.0511  |
| rs114923359 | A | -0.2176 |
| rs77295312  | A | 0.2221  |
| rs11240594  | A | -0.064  |
| rs116134909 | C | 0.4711  |
| rs560779    | G | 0.0877  |
| rs112114268 | A | 0.081   |
| rs213024    | C | -0.048  |
| rs139982135 | C | 0.1333  |
| rs12135322  | C | -0.0528 |
| rs114009540 | A | 0.2365  |
| rs151146376 | G | 0.1787  |
| rs78786795  | T | -0.1883 |
| rs12751922  | G | 0.0699  |
| rs532807    | A | 0.0748  |
| rs4233366   | T | -0.0556 |
| rs12759169  | A | 0.0564  |
| rs111476185 | A | -0.3649 |
| rs12404723  | G | -0.0841 |
| rs11102502  | T | -0.05   |
| rs75638049  | T | -0.1207 |
| rs6675211   | C | -0.0523 |
| rs74422835  | T | 0.2019  |
| rs79947927  | C | -0.2477 |
| rs75210058  | A | -0.1922 |
| rs80269248  | G | -0.0575 |
| rs3795737   | C | -0.1054 |
| rs2186018   | G | 0.1903  |
| rs74399656  | T | -0.0729 |
| rs59295814  | T | -0.2082 |
| rs2152981   | C | 0.0532  |
| rs12022839  | A | -0.0475 |
| rs76169930  | G | 0.2867  |
| rs149746333 | A | -0.4032 |
| rs3817268   | T | 0.0737  |
| rs72722820  | A | 0.4104  |
| rs6687924   | A | 0.0998  |
| rs76395463  | A | -0.2894 |
| rs2404849   | T | -0.0931 |
| rs146822750 | T | 0.241   |
| rs10919246  | G | 0.0495  |
| rs7519456   | G | 0.0534  |
| rs79518294  | T | -0.1031 |
| rs36081001  | A | 0.0704  |



|             |   |         |
|-------------|---|---------|
| rs77612895  | T | -0.1016 |
| rs34545274  | A | -0.0775 |
| rs1128750   | A | -0.1163 |
| rs858486    | A | 0.0475  |
| rs141698843 | T | 0.3307  |
| rs847734    | T | -0.0579 |
| rs75844775  | G | -0.1968 |
| rs6686454   | A | -0.1145 |
| rs12059812  | T | 0.2417  |
| rs35252714  | T | -0.1271 |
| rs6672068   | T | 0.0791  |
| rs142455546 | G | 0.1912  |
| rs2247213   | A | -0.049  |
| rs3895089   | C | -0.0623 |
| rs1984492   | G | -0.0553 |
| rs1336791   | C | -0.0629 |
| rs797906    | A | 0.0482  |
| rs655296    | C | -0.0515 |
| rs56004362  | A | 0.0916  |
| rs112420812 | T | -0.0702 |
| rs11121265  | C | 0.0895  |
| rs4568816   | G | 0.0666  |
| rs12044611  | C | 0.1017  |
| rs731756    | A | 0.0775  |
| rs12733649  | C | 0.0907  |
| rs78078866  | T | 0.1952  |
| rs10067     | C | 0.0853  |
| rs77940542  | G | 0.2319  |
| rs1160222   | A | 0.2631  |
| rs113831359 | C | 0.2289  |
| rs144439986 | A | -0.0533 |
| rs12077607  | C | 0.074   |
| rs7540136   | A | -0.1848 |
| rs7548227   | C | -0.0516 |
| rs699529    | A | -0.0468 |
| rs72708792  | C | 0.2402  |
| rs17875978  | A | -0.0706 |
| rs74638211  | C | 0.2225  |
| rs2656095   | T | -0.051  |
| rs6429046   | T | -0.0757 |
| rs315063    | T | 0.0746  |
| rs2159498   | C | 0.0477  |
| rs114412074 | A | -0.1603 |
| rs72683270  | T | 0.2376  |
| rs12748412  | T | 0.1839  |
| rs4523491   | A | -0.0759 |
| rs11577685  | T | -0.0611 |

|             |   |         |
|-------------|---|---------|
| rs497687    | A | -0.088  |
| rs12567903  | A | -0.0867 |
| rs1194279   | A | 0.1617  |
| rs12037989  | A | 0.0837  |
| rs80166757  | T | 0.307   |
| rs77074059  | T | -0.1041 |
| rs339567    | C | -0.0567 |
| rs11584467  | A | -0.1252 |
| rs7546225   | T | -0.052  |
| rs147471990 | T | -0.2044 |
| rs79473113  | A | -0.2355 |
| rs41303059  | A | -0.0898 |
| rs3790665   | C | -0.0503 |
| rs57045219  | T | -0.0643 |
| rs2282193   | C | 0.0635  |
| rs115159510 | A | -0.2476 |
| rs834997    | G | -0.0506 |
| rs72909243  | A | 0.1509  |
| rs61796506  | C | -0.1136 |
| rs76344817  | G | -0.1187 |
| rs10873770  | C | 0.053   |
| rs2229297   | T | -0.402  |
| rs72703856  | A | 0.0503  |
| rs12076787  | A | -0.0979 |
| rs2842034   | A | -0.2096 |
| rs116346487 | T | 0.4238  |
| rs76344070  | A | 0.3055  |
| rs79682748  | G | 0.2286  |
| rs12043482  | C | -0.0564 |
| rs61822564  | G | -0.0814 |
| rs2744797   | T | 0.0818  |
| rs80248574  | T | 0.2283  |
| rs56258814  | G | -0.0465 |
| rs4920615   | T | -0.0454 |
| rs637466    | C | -0.0829 |
| rs212532    | C | 0.0455  |
| rs74997792  | C | 0.3975  |
| rs7539025   | G | -0.0752 |
| rs2179882   | A | -0.0673 |
| rs114366509 | T | -0.2065 |
| rs75901627  | A | 0.1165  |
| rs6674005   | T | 0.0562  |
| rs12079227  | A | 0.2573  |
| rs17372321  | G | 0.1506  |
| rs11117584  | T | -0.0553 |
| rs10864382  | C | -0.0496 |
| rs7519509   | C | -0.0469 |

|             |   |         |
|-------------|---|---------|
| rs2168769   | G | 0.0593  |
| rs17397422  | C | -0.1137 |
| rs16824833  | C | 0.0713  |
| rs75955851  | C | -0.3278 |
| rs4661262   | C | 0.2173  |
| rs1882024   | A | 0.0643  |
| rs11578268  | T | -0.2272 |
| rs114464102 | C | -0.2444 |
| rs55689297  | C | 0.0771  |
| rs2297184   | C | -0.0484 |
| rs67757470  | C | 0.112   |
| rs151010082 | T | 0.2542  |
| rs80340005  | T | -0.1358 |
| rs10925389  | C | -0.0554 |
| rs321586    | C | -0.0501 |
| rs115292367 | C | -0.1686 |
| rs277676    | G | -0.0458 |
| rs9725346   | G | 0.0474  |
| rs12137489  | C | -0.1775 |
| rs10888678  | A | -0.0878 |
| rs4970957   | G | -0.0603 |
| rs112656571 | G | -0.3113 |
| rs12728636  | C | -0.1076 |
| rs12088554  | C | 0.1906  |
| rs138721883 | T | 0.3184  |
| rs2146315   | T | 0.0549  |
| rs142889113 | A | -0.3571 |
| rs11809953  | G | -0.0442 |
| rs597669    | G | 0.0761  |
| rs12087956  | C | 0.0951  |
| rs75195152  | T | 0.1844  |
| rs79542482  | T | 0.3168  |
| rs1181870   | A | -0.0562 |
| rs2983157   | G | 0.102   |
| rs2809823   | C | 0.0451  |
| rs74577299  | C | -0.1471 |
| rs3860292   | C | -0.0569 |
| rs197605    | G | -0.0459 |
| rs56919372  | G | 0.1231  |
| rs12047613  | A | -0.0601 |
| rs56056346  | T | 0.0528  |
| rs114895449 | T | 0.0817  |
| rs41315868  | G | 0.1227  |
| rs7546428   | C | -0.0655 |
| rs9425586   | T | 0.0604  |
| rs147644868 | G | 0.1679  |
| rs79284691  | A | 0.3378  |

|             |   |         |
|-------------|---|---------|
| rs114592264 | T | -0.1517 |
| rs72682531  | T | 0.122   |
| rs1934213   | G | -0.046  |
| rs9429531   | A | -0.0724 |
| rs140487239 | A | -0.2502 |
| rs73135296  | G | 0.3173  |
| rs17417486  | G | -0.0689 |
| rs34383011  | A | -0.2944 |
| rs34032398  | G | 0.186   |
| rs4526562   | A | -0.0624 |
| rs6695068   | A | 0.1725  |
| rs2134845   | A | 0.0496  |
| rs61829202  | A | -0.1118 |
| rs12047612  | G | -0.0881 |
| rs74116845  | T | 0.1355  |
| rs57794103  | G | -0.1093 |
| rs157872    | C | -0.0465 |
| rs78899393  | A | -0.1617 |
| rs80295511  | T | 0.2421  |
| rs72922908  | T | -0.0681 |
| rs12239891  | T | 0.054   |
| rs111314109 | A | 0.2582  |
| rs35232728  | C | 0.1045  |
| rs12037966  | G | 0.0941  |
| rs7525200   | C | 0.1904  |
| rs1476606   | T | 0.0758  |
| rs111363595 | T | -0.227  |
| rs78729418  | T | 0.2235  |
| rs67730681  | T | -0.0893 |
| rs4598478   | G | 0.1557  |
| rs2821127   | G | -0.0503 |
| rs114692790 | T | -0.1716 |
| rs72641154  | A | 0.0579  |
| rs111430274 | C | 0.3722  |
| rs7514644   | G | 0.0452  |
| rs77936804  | T | -0.1912 |
| rs284288    | C | 0.0514  |
| rs12749485  | C | 0.28    |
| rs10732997  | G | 0.0436  |
| rs61815035  | G | -0.0487 |
| rs4557997   | C | -0.0576 |
| rs76297549  | A | -0.3517 |
| rs60976597  | C | 0.0992  |
| rs3891816   | G | 0.0948  |
| rs12737612  | A | -0.0838 |
| rs78357037  | T | 0.1438  |
| rs147478070 | A | 0.1251  |

|             |   |         |
|-------------|---|---------|
| rs78131560  | C | 0.1235  |
| rs35044371  | C | -0.0569 |
| rs2268554   | T | 0.0712  |
| rs72898937  | A | -0.076  |
| rs12078121  | G | 0.1497  |
| rs10927452  | C | -0.0685 |
| rs112645274 | T | 0.1893  |
| rs17163111  | T | 0.0707  |
| rs72667718  | A | 0.1293  |
| rs142633483 | A | 0.2435  |
| rs11805932  | A | 0.092   |
| rs148846166 | G | 0.1994  |
| rs3748630   | G | 0.0918  |
| rs150744952 | G | 0.2573  |
| rs17397639  | G | 0.306   |
| rs3737666   | T | 0.3291  |
| rs1146284   | G | 0.1185  |
| rs1213643   | C | -0.053  |
| rs79889387  | G | -0.1675 |
| rs12402993  | A | -0.049  |
| rs10916022  | A | 0.0449  |
| rs11804863  | T | 0.1561  |
| rs710826    | C | -0.0656 |
| rs59618064  | T | -0.1412 |
| rs2039818   | T | 0.2121  |
| rs4655452   | T | -0.1059 |
| rs148293164 | G | 0.0725  |
| rs1067221   | A | 0.0508  |
| rs10909892  | A | -0.1364 |
| rs7547636   | C | 0.1932  |
| rs10494066  | G | 0.0519  |
| rs576151    | A | -0.0437 |
| rs17701179  | G | -0.0925 |
| rs2898917   | T | -0.0846 |
| rs16828105  | C | -0.0828 |
| rs114025284 | G | -0.2746 |
| rs56131616  | C | 0.2479  |
| rs6702854   | G | 0.0446  |
| rs10926620  | T | -0.0903 |
| rs143721905 | G | 0.2069  |
| rs4650107   | C | 0.0445  |
| rs146848169 | G | -0.1835 |
| rs6668343   | A | -0.1337 |
| rs11264133  | A | -0.2083 |
| rs116206711 | C | -0.2238 |
| rs4915991   | T | 0.0731  |
| rs9651103   | T | 0.0503  |

|             |   |         |
|-------------|---|---------|
| rs114199982 | T | 0.1757  |
| rs78225439  | A | 0.2312  |
| rs72758859  | T | -0.3713 |
| rs339619    | C | 0.0457  |
| rs7547229   | T | 0.0451  |
| rs6679391   | C | 0.0517  |
| rs17106044  | T | -0.0628 |
| rs2840677   | A | -0.0469 |
| rs111945487 | T | 0.2947  |
| rs4244193   | A | -0.0558 |
| rs4649060   | T | 0.0448  |
| rs10914694  | T | 0.0865  |
| rs859436    | C | -0.0451 |
| rs16860492  | T | 0.1735  |
| rs17565935  | A | 0.0764  |
| rs116545401 | T | -0.0962 |
| rs3131313   | T | -0.053  |
| rs17460130  | T | 0.1289  |
| rs76650281  | G | -0.2287 |
| rs10782808  | G | -0.0451 |
| rs112137868 | A | 0.1912  |
| rs34676265  | A | 0.0498  |
| rs114013159 | T | -0.2348 |
| rs12723169  | T | 0.0855  |
| rs9287277   | A | -0.0596 |
| rs2311384   | A | 0.1756  |
| rs142026614 | C | 0.1524  |
| rs6676094   | G | 0.0557  |
| rs75315806  | A | 0.1618  |
| rs56314126  | G | 0.0687  |
| rs16825415  | A | 0.1698  |
| rs11162409  | A | 0.0492  |
| rs75936895  | G | 0.1833  |
| rs4276867   | A | -0.1605 |
| rs4650515   | T | 0.0671  |
| rs10801913  | A | 0.0468  |
| rs34450945  | T | 0.163   |
| rs55905375  | A | -0.1946 |
| rs1028316   | C | -0.0528 |
| rs141191610 | G | -0.2145 |
| rs12079333  | A | 0.0925  |
| rs2618668   | T | 0.2179  |
| rs6656246   | T | 0.122   |
| rs138811221 | G | -0.2679 |
| rs7517126   | G | -0.0638 |
| rs111638247 | T | -0.1724 |
| rs6657445   | T | -0.046  |

|             |   |         |
|-------------|---|---------|
| rs56004188  | G | 0.2156  |
| rs80221376  | G | -0.1638 |
| rs74738687  | A | 0.1225  |
| rs7522248   | T | 0.1086  |
| rs7540477   | A | 0.048   |
| rs1722763   | G | 0.0456  |
| rs374827    | C | 0.0445  |
| rs60179719  | T | -0.1118 |
| rs75077563  | A | -0.284  |
| rs203847    | G | -0.0469 |
| rs2275375   | T | -0.0552 |
| rs12085749  | C | 0.0923  |
| rs76860980  | A | 0.0916  |
| rs791002    | C | 0.0466  |
| rs114830750 | T | 0.2032  |
| rs12141486  | C | -0.1877 |
| rs7538389   | A | 0.0708  |
| rs12134781  | C | 0.0909  |
| rs2644608   | C | -0.0452 |
| rs930731    | T | 0.1073  |
| rs1930279   | T | 0.0625  |
| rs2745300   | A | 0.0775  |
| rs138628459 | T | -0.2039 |
| rs80325365  | T | -0.0806 |
| rs116567430 | G | 0.2287  |
| rs113198187 | A | 0.1513  |
| rs116168738 | A | 0.1799  |
| rs9424490   | G | -0.1096 |
| rs1628418   | C | 0.0527  |
| rs12023412  | G | -0.0507 |
| rs150537287 | T | 0.1478  |
| rs78569132  | C | 0.1845  |
| rs2603580   | G | -0.0451 |
| rs10910382  | G | 0.1159  |
| rs647831    | G | -0.066  |
| rs6667291   | A | 0.0441  |
| rs72755697  | G | 0.0963  |
| rs111509110 | C | 0.1474  |
| rs4420061   | C | -0.0891 |
| rs140243716 | A | 0.1953  |
| rs16833739  | G | -0.0688 |
| rs79358318  | A | 0.114   |
| rs76468219  | C | -0.0797 |
| rs78657937  | C | 0.1572  |
| rs861587    | T | 0.0485  |
| rs10752932  | T | 0.0579  |
| rs116357558 | G | 0.1576  |

|             |   |         |
|-------------|---|---------|
| rs2807392   | T | 0.0516  |
| rs114943318 | C | 0.2812  |
| rs707475    | A | 0.0442  |
| rs1467726   | A | 0.0456  |
| rs2480699   | A | 0.0461  |
| rs2225044   | T | 0.195   |
| rs4658833   | A | -0.0514 |
| rs12119825  | C | 0.0463  |
| rs17655162  | T | 0.048   |
| rs72726278  | T | -0.0824 |
| rs4460680   | G | -0.067  |
| rs10924394  | T | 0.0845  |
| rs75357961  | A | -0.2762 |
| rs4908685   | A | 0.2838  |
| rs2375702   | A | -0.0931 |
| rs2480468   | A | 0.0481  |
| rs1213288   | G | -0.0591 |
| rs2116374   | G | 0.0851  |
| rs10863712  | G | 0.0439  |
| rs1578624   | C | 0.0447  |
| rs6671200   | A | -0.0745 |
| rs72724131  | C | 0.0774  |
| rs10489806  | G | -0.0805 |
| rs4433375   | T | 0.0428  |
| rs115292553 | A | -0.2329 |
| rs481759    | C | 0.2373  |
| rs11247921  | C | 0.0513  |
| rs1780050   | C | -0.0443 |
| rs6541076   | G | -0.049  |
| rs7549164   | T | 0.0572  |
| rs699535    | T | -0.0703 |
| rs112288487 | C | -0.0984 |
| rs115969497 | T | 0.3059  |
| rs433675    | A | 0.05    |
| rs144453513 | A | 0.1703  |
| rs12743003  | A | 0.0476  |
| rs73026981  | G | 0.2143  |
| rs79161286  | T | 0.3637  |
| rs73074084  | C | -0.1922 |
| rs763219    | G | 0.0468  |
| rs61786222  | G | -0.2061 |
| rs76412988  | T | 0.1808  |
| rs78526594  | C | 0.1326  |
| rs2803244   | G | 0.059   |
| rs1856027   | T | -0.0458 |
| rs11578946  | A | -0.2602 |
| rs10489890  | C | 0.0935  |



|             |   |         |
|-------------|---|---------|
| rs79369860  | T | 0.1876  |
| rs10802770  | T | 0.0475  |
| rs72756379  | A | -0.1187 |
| rs145188671 | G | -0.2638 |
| rs67746085  | C | 0.0579  |
| rs78335709  | T | 0.2103  |
| rs10449700  | T | -0.0463 |
| rs144163113 | C | 0.2027  |
| rs111916956 | G | 0.2241  |
| rs12039796  | C | -0.0503 |
| rs55980496  | G | -0.0677 |
| rs146755088 | T | -0.2037 |
| rs78645485  | A | 0.3052  |
| rs72761619  | T | 0.1591  |
| rs11119727  | A | 0.1173  |
| rs7551741   | A | 0.0689  |
| rs1281181   | G | 0.1393  |
| rs142274302 | A | -0.219  |
| rs60786615  | C | 0.1487  |
| rs115750622 | T | -0.1725 |
| rs17487423  | A | 0.1099  |
| rs6686254   | G | 0.0581  |
| rs12727395  | C | -0.0571 |
| rs115438468 | A | 0.2059  |
| rs72722676  | T | 0.1525  |
| rs116470071 | T | 0.175   |
| rs6693181   | G | 0.0644  |
| rs7538772   | A | 0.1323  |
| rs141226860 | A | 0.2319  |
| rs3104467   | A | 0.0433  |
| rs151121627 | T | 0.186   |
| rs766429    | A | -0.0532 |
| rs10919982  | C | 0.2384  |
| rs624742    | T | -0.1077 |
| rs114064576 | A | 0.2129  |
| rs170827    | T | 0.0453  |
| rs17131142  | T | 0.0735  |
| rs80204268  | A | 0.12    |
| rs76084603  | T | -0.1308 |
| rs16852065  | A | 0.1037  |
| rs1007028   | T | 0.1937  |
| rs12138099  | T | -0.3695 |
| rs2812385   | G | -0.0466 |
| rs77079888  | A | -0.1474 |
| rs79684317  | T | -0.2196 |
| rs1326279   | A | -0.0452 |
| rs12142649  | G | -0.0746 |

|             |   |         |
|-------------|---|---------|
| rs74714424  | G | 0.1266  |
| rs56122223  | T | -0.065  |
| rs35706835  | G | 0.2329  |
| rs6674433   | T | -0.0841 |
| rs11811696  | T | 0.0747  |
| rs10800875  | T | -0.0595 |
| rs6686898   | T | 0.0578  |
| rs116164528 | G | 0.2081  |
| rs35505907  | A | 0.0688  |
| rs236320    | A | -0.079  |
| rs509828    | A | 0.0689  |
| rs2815247   | T | 0.0692  |
| rs56293054  | T | 0.0538  |
| rs41308206  | T | 0.3338  |
| rs710224    | T | -0.086  |
| rs72731413  | G | -0.1256 |
| rs147073774 | T | 0.1609  |
| rs12753970  | G | 0.1766  |
| rs12086137  | A | -0.2937 |
| rs34032320  | C | 0.2158  |
| rs80135504  | C | -0.3339 |
| rs262596    | T | -0.0437 |
| rs115685846 | G | -0.1008 |
| rs2251010   | T | -0.2338 |
| rs75351680  | T | -0.1582 |
| rs11803913  | A | 0.0814  |
| rs116625961 | T | 0.1272  |
| rs2518570   | C | 0.0618  |
| rs2746350   | T | 0.1455  |
| rs548499    | T | 0.1751  |
| rs71645448  | A | 0.2268  |
| rs284266    | G | 0.3066  |
| rs609880    | A | 0.0442  |
| rs3767441   | G | -0.0748 |
| rs17103980  | A | 0.1005  |
| rs60069507  | A | 0.1791  |
| rs56091603  | A | -0.0978 |
| rs12036656  | C | 0.0449  |
| rs74770412  | A | -0.1738 |
| rs12038031  | A | -0.0682 |
| rs1817913   | G | 0.0686  |
| rs10922534  | C | 0.0651  |
| rs11590967  | A | 0.1121  |
| rs12409072  | T | -0.0621 |
| rs57684757  | T | 0.0645  |
| rs75769139  | T | -0.1374 |
| rs76850880  | A | 0.1166  |

|             |   |         |
|-------------|---|---------|
| rs150447801 | T | -0.3348 |
| rs61138078  | A | -0.0534 |
| rs6593919   | T | 0.1414  |
| rs115459224 | A | 0.1696  |
| rs77055840  | G | 0.2653  |
| rs34144151  | T | 0.0661  |
| rs1536159   | C | 0.0445  |
| rs7366727   | T | -0.0603 |
| rs35634602  | G | -0.2039 |
| rs78677330  | G | -0.1345 |
| rs12144977  | T | 0.0634  |
| rs111518063 | C | -0.1922 |
| rs61811975  | A | 0.0564  |
| rs138291070 | G | 0.1112  |
| rs114850822 | G | 0.1052  |
| rs72687369  | G | 0.1749  |
| rs112665256 | T | -0.0597 |
| rs1318189   | T | 0.0616  |
| rs114968560 | A | 0.155   |
| rs116170514 | G | 0.2019  |
| rs77998119  | T | 0.0893  |
| rs61814243  | G | -0.2193 |
| rs72746703  | A | 0.1357  |
| rs115765157 | T | 0.2198  |
| rs55882564  | G | 0.2302  |
| rs12134208  | T | 0.1027  |
| rs10915864  | G | 0.0507  |
| rs74584113  | T | -0.0818 |
| rs72729593  | C | -0.2192 |
| rs74983154  | A | 0.0918  |
| rs447446    | T | 0.0442  |
| rs7537419   | T | 0.0423  |
| rs1333129   | C | -0.0497 |
| rs76520075  | G | -0.1666 |
| rs74684148  | G | 0.3117  |
| rs149696140 | A | 0.3566  |
| rs147024378 | T | -0.1707 |
| rs10902688  | G | 0.0549  |
| rs72666818  | G | 0.11    |
| rs10913472  | T | 0.0424  |
| rs140913219 | C | 0.1573  |
| rs72675916  | A | 0.1803  |
| rs12568268  | C | -0.064  |
| rs2271347   | A | 0.0533  |
| rs6668270   | G | 0.043   |
| rs6427152   | C | -0.0422 |
| rs10915726  | T | -0.1998 |

|             |   |         |
|-------------|---|---------|
| rs60874731  | T | 0.0836  |
| rs115679611 | T | -0.2159 |
| rs10495370  | T | 0.0892  |
| rs112474815 | A | -0.0955 |
| rs72679933  | A | 0.1714  |
| rs184361    | G | -0.0915 |
| rs114715932 | A | 0.1632  |
| rs74620997  | G | 0.3651  |
| rs3748761   | G | 0.0419  |
| rs79821910  | T | 0.1564  |
| rs10925030  | G | 0.0729  |
| rs1845463   | G | 0.0642  |
| rs75547306  | A | -0.0971 |
| rs6657768   | A | 0.0488  |
| rs2604095   | C | 0.0755  |
| rs115826743 | G | 0.1907  |
| rs1218556   | G | 0.1286  |
| rs71642408  | T | -0.1509 |
| rs12737373  | T | 0.0854  |
| rs2096345   | A | -0.051  |
| rs559728    | T | 0.0439  |
| rs3125630   | A | 0.0417  |
| rs4659014   | C | 0.0607  |
| rs17469160  | C | -0.0741 |
| rs11121429  | A | 0.097   |
| rs326008    | T | -0.0677 |
| rs7548751   | T | 0.0527  |
| rs12569057  | C | 0.0966  |
| rs12116476  | A | 0.1137  |
| rs2992632   | T | 0.0468  |
| rs10159239  | G | 0.0441  |
| rs12728353  | T | 0.0489  |
| rs12129289  | T | 0.181   |
| rs12140408  | T | 0.1922  |
| rs10798888  | T | 0.0601  |
| rs61839403  | C | 0.0815  |
| rs658150    | A | 0.0501  |
| rs74775502  | T | 0.2642  |
| rs72763355  | A | 0.1309  |
| rs111962241 | T | 0.1607  |
| rs12748650  | A | 0.0553  |
| rs11583236  | C | -0.0444 |
| rs12729561  | T | 0.0592  |
| rs75944134  | G | 0.0837  |
| rs116919389 | T | 0.2739  |
| rs77169114  | G | -0.0813 |
| rs613441    | T | 0.0524  |

|             |   |         |
|-------------|---|---------|
| rs3010109   | A | 0.0644  |
| rs114242793 | T | 0.3161  |
| rs114549212 | T | -0.1373 |
| rs6658921   | G | -0.0533 |
| rs10800341  | T | -0.1012 |
| rs116012710 | T | 0.1429  |
| rs2298633   | C | -0.0991 |
| rs140001599 | T | 0.2178  |
| rs11803657  | G | 0.1004  |
| rs138850825 | A | 0.2564  |
| rs111737447 | T | -0.0551 |
| rs6666537   | G | -0.0467 |
| rs56063497  | A | -0.0629 |
| rs17116602  | C | -0.0735 |
| rs56165537  | C | 0.1066  |
| rs2282705   | T | 0.2031  |
| rs76202527  | G | -0.1923 |
| rs34781518  | T | -0.2045 |
| rs2207216   | C | -0.0416 |
| rs72740355  | T | 0.1309  |
| rs17383059  | C | -0.0571 |
| rs785574    | G | 0.0506  |
| rs6695539   | C | 0.0441  |
| rs994024    | G | 0.0563  |
| rs7541872   | G | -0.0457 |
| rs6541139   | C | 0.0436  |
| rs61815654  | A | -0.1166 |
| rs4970610   | T | -0.0467 |
| rs2840945   | G | -0.0558 |
| rs10927026  | G | -0.1119 |
| rs10736375  | T | 0.0603  |
| rs4657213   | T | -0.0492 |
| rs61829198  | G | -0.2035 |
| rs6425583   | T | 0.2494  |
| rs858543    | A | -0.0495 |
| rs75219698  | A | -0.1324 |
| rs35252813  | A | 0.1808  |
| rs79949208  | A | 0.3667  |
| rs61447342  | A | 0.1326  |
| rs527955    | T | -0.0836 |
| rs12567801  | G | -0.2197 |
| rs12046434  | A | 0.0635  |
| rs34086860  | C | -0.0601 |
| rs2817179   | T | -0.0544 |
| rs114427742 | T | 0.2986  |
| rs145731988 | T | -0.2377 |
| rs10798873  | G | -0.1655 |

|             |   |         |
|-------------|---|---------|
| rs16860177  | G | 0.1411  |
| rs10902712  | G | -0.0581 |
| rs35297534  | G | -0.1881 |
| rs2796243   | C | 0.0408  |
| rs12562601  | G | 0.0655  |
| rs624612    | G | -0.0614 |
| rs116394272 | A | 0.276   |
| rs61803175  | G | 0.1519  |
| rs143273292 | C | 0.1453  |
| rs115780044 | A | 0.1263  |
| rs74115250  | A | 0.1199  |
| rs6425517   | T | -0.0404 |
| rs78401243  | G | -0.0764 |
| rs72739088  | A | -0.0656 |
| rs6427184   | G | 0.0615  |
| rs12736361  | T | -0.0427 |
| rs139672820 | A | -0.1581 |
| rs61799381  | T | -0.0588 |
| rs6694831   | A | -0.0694 |
| rs11578816  | T | -0.0434 |
| rs112985962 | T | -0.1627 |
| rs2130366   | A | 0.0402  |
| rs2871973   | G | 0.0763  |
| rs4397646   | A | 0.1246  |
| rs601452    | A | 0.0418  |
| rs115165870 | A | -0.1141 |
| rs72689984  | C | -0.139  |
| rs74546237  | G | 0.1421  |
| rs7518781   | A | -0.0481 |
| rs1223758   | C | -0.0806 |
| rs7543734   | C | 0.0521  |
| rs6686509   | T | -0.0428 |
| rs13374896  | C | 0.0553  |
| rs12735521  | T | -0.0445 |
| rs143979011 | T | -0.1662 |
| rs4659395   | G | 0.1241  |
| rs72672987  | C | 0.101   |
| rs78236612  | A | 0.0958  |
| rs150975022 | T | 0.2271  |
| rs12141478  | G | -0.0593 |
| rs145061193 | T | 0.142   |
| rs138051794 | A | 0.1834  |
| rs11118077  | C | 0.3547  |
| rs74471173  | C | 0.244   |
| rs7545531   | T | 0.2326  |
| rs203775    | T | 0.0504  |
| rs17106481  | T | -0.0634 |

|             |   |         |
|-------------|---|---------|
| rs112002427 | C | 0.1031  |
| rs113017684 | A | -0.0775 |
| rs115769604 | G | 0.0756  |
| rs12076501  | A | -0.0538 |
| rs6696698   | G | 0.1807  |
| rs79908727  | C | -0.2138 |
| rs2008429   | C | 0.0483  |
| rs4653295   | G | -0.0416 |
| rs72960501  | T | -0.161  |
| rs60260942  | A | -0.1266 |
| rs320377    | C | 0.2498  |
| rs17009652  | A | 0.0996  |
| rs73084670  | C | 0.061   |
| rs1010812   | C | 0.1259  |
| rs6680183   | G | 0.0689  |
| rs12735293  | C | 0.0657  |
| rs79160913  | A | -0.2805 |
| rs17046945  | G | 0.1461  |
| rs7537614   | A | -0.0517 |
| rs61804927  | G | 0.0423  |
| rs143914389 | C | 0.1114  |
| rs16838479  | T | 0.1363  |
| rs115492172 | C | 0.0875  |
| rs11119519  | A | 0.0465  |
| rs1002451   | T | -0.0641 |
| rs77340980  | T | -0.1091 |
| rs114688649 | G | -0.1482 |
| rs79142275  | G | -0.0583 |
| rs138575610 | A | 0.2946  |
| rs17452776  | A | 0.0468  |
| rs12121009  | A | 0.0945  |
| rs75797460  | A | 0.0559  |
| rs7517347   | G | -0.0644 |
| rs17030057  | A | -0.1017 |
| rs6699525   | C | -0.0567 |
| rs10925039  | T | 0.0541  |
| rs3917820   | A | 0.063   |
| rs12043071  | C | 0.0414  |
| rs11585858  | A | 0.0493  |
| rs958951    | G | -0.0611 |
| rs141874804 | G | 0.154   |
| rs7554607   | G | 0.0398  |
| rs7528948   | G | 0.2587  |
| rs114501582 | T | -0.2029 |
| rs78442404  | G | 0.2141  |
| rs67782817  | C | -0.0817 |
| rs72733841  | G | -0.1044 |

|             |   |         |
|-------------|---|---------|
| rs79430889  | A | 0.2479  |
| rs76092626  | A | 0.1155  |
| rs28822487  | G | 0.1512  |
| rs72872337  | T | 0.0592  |
| rs72659770  | A | 0.1703  |
| rs11804085  | C | 0.0424  |
| rs74095169  | T | 0.1668  |
| rs78583187  | G | -0.0786 |
| rs7534854   | A | 0.126   |
| rs60055409  | A | 0.269   |
| rs11590421  | A | -0.0521 |
| rs55856576  | T | 0.0525  |
| rs77618230  | T | 0.2848  |
| rs7538335   | G | 0.3652  |
| rs480267    | A | -0.0583 |
| rs643520    | T | -0.0405 |
| rs9728310   | A | -0.04   |
| rs957644    | T | 0.0472  |
| rs114616992 | T | 0.1314  |
| rs56712503  | T | 0.1171  |
| rs12406116  | C | 0.0791  |
| rs1151677   | A | -0.0487 |
| rs72674886  | T | -0.2125 |
| rs72718375  | T | 0.0864  |
| rs5010834   | T | -0.0443 |
| rs17044824  | T | 0.0655  |
| rs2236894   | T | 0.042   |
| rs10912078  | G | 0.13    |
| rs1339845   | T | -0.114  |
| rs12756204  | G | 0.1522  |
| rs10919851  | C | 0.0452  |
| rs4446948   | C | -0.0421 |
| rs1554286   | A | -0.052  |
| rs79847548  | G | 0.1043  |
| rs75018471  | T | 0.3478  |
| rs10158055  | G | -0.0499 |
| rs79568665  | A | 0.1254  |
| rs11580995  | A | -0.2715 |
| rs10493901  | G | -0.1099 |
| rs72705525  | G | -0.1235 |
| rs305533    | T | 0.042   |
| rs12027189  | T | 0.0726  |
| rs72751297  | G | 0.2038  |
| rs76232956  | G | 0.0911  |
| rs76538438  | C | 0.0853  |
| rs143401666 | A | 0.1461  |
| rs9793757   | A | -0.0442 |



|             |   |         |
|-------------|---|---------|
| rs10465626  | A | 0.051   |
| rs12048538  | G | 0.1097  |
| rs78427482  | A | -0.1638 |
| rs141482151 | C | 0.2977  |
| rs114860124 | T | -0.1736 |
| rs11810445  | T | -0.1275 |
| rs2275732   | G | 0.1323  |
| rs78578323  | C | 0.2317  |
| rs72679936  | T | 0.232   |
| rs115876749 | T | 0.199   |
| rs12030148  | A | 0.0609  |
| rs12750838  | A | 0.0576  |
| rs142070875 | T | -0.187  |
| rs2940677   | T | -0.0444 |
| rs17618402  | T | -0.2131 |
| rs11165448  | T | 0.0439  |
| rs864205    | C | 0.2372  |
| rs903125    | A | -0.0546 |
| rs78145167  | A | -0.0805 |
| rs56327957  | T | -0.145  |
| rs12079298  | T | -0.0667 |
| rs61760723  | T | -0.1373 |
| rs6692711   | T | -0.0481 |
| rs113436809 | A | 0.211   |
| rs149613445 | T | 0.3771  |
| rs72942513  | A | 0.304   |
| rs2842229   | T | 0.1415  |
| rs34768640  | A | -0.0487 |
| rs61773710  | T | 0.2372  |
| rs4845792   | T | -0.0458 |
| rs10493427  | T | -0.1053 |
| rs688938    | G | -0.0553 |
| rs77692907  | T | -0.0627 |
| rs75714777  | T | 0.1575  |
| rs116681047 | C | 0.2935  |
| rs80151830  | T | -0.2939 |
| rs145641429 | G | 0.1938  |
| rs75037309  | A | 0.2311  |
| rs78656354  | A | 0.205   |
| rs115280749 | A | -0.2357 |
| rs60154123  | T | -0.0603 |
| rs116037783 | T | 0.1977  |
| rs116363395 | T | -0.2066 |
| rs481036    | A | -0.0465 |
| rs1571500   | C | 0.0656  |
| rs6424089   | A | -0.0517 |
| rs74112342  | T | 0.1969  |

|             |   |         |
|-------------|---|---------|
| rs77077682  | C | 0.3265  |
| rs11582550  | A | 0.0453  |
| rs145583083 | G | 0.1167  |
| rs77178821  | T | 0.1242  |
| rs233102    | C | 0.0635  |
| rs111886299 | A | 0.1714  |
| rs78381548  | A | 0.27    |
| rs114570650 | C | -0.1636 |
| rs76829912  | C | -0.066  |
| rs523218    | T | 0.0844  |
| rs6425902   | T | 0.0519  |
| rs12122434  | G | 0.1777  |
| rs1338365   | C | 0.0847  |
| rs72693966  | G | 0.2392  |
| rs72652777  | T | -0.1361 |
| rs116432301 | A | -0.1961 |
| rs114872270 | G | -0.3418 |
| rs12091632  | G | 0.0543  |
| rs907784    | C | 0.1325  |
| rs3013763   | C | 0.0505  |
| rs75095710  | A | -0.2292 |
| rs138078266 | A | 0.1256  |
| rs12137561  | A | -0.0464 |
| rs12117032  | A | -0.1341 |
| rs140131860 | C | -0.2334 |
| rs10888585  | T | 0.0496  |
| rs7556173   | T | 0.0446  |
| rs2494436   | T | 0.0795  |
| rs17511171  | T | -0.0437 |
| rs34161369  | T | 0.116   |
| rs75791194  | T | 0.1394  |
| rs4256835   | A | -0.0452 |
| rs6427908   | T | 0.0568  |
| rs72750963  | T | 0.1203  |
| rs72731518  | T | -0.0788 |
| rs2788094   | T | -0.0901 |
| rs7533913   | G | 0.041   |
| rs1579634   | T | 0.0426  |
| rs74074196  | T | 0.1936  |
| rs204069    | A | -0.0431 |
| rs11799965  | G | 0.0448  |
| rs2382832   | A | -0.0549 |
| rs72761740  | T | 0.1474  |
| rs12562565  | A | 0.1164  |
| rs114072942 | G | 0.1777  |
| rs116154133 | A | 0.3296  |
| rs12130076  | G | -0.0613 |

|             |   |         |
|-------------|---|---------|
| rs1967043   | G | -0.0764 |
| rs1772911   | T | 0.0533  |
| rs12404952  | T | -0.0858 |
| rs6684832   | A | -0.0604 |
| rs12743366  | T | -0.1562 |
| rs657452    | A | 0.0411  |
| rs35018049  | A | 0.1496  |
| rs61775135  | A | -0.0727 |
| rs554454    | G | 0.0408  |
| rs2785988   | A | 0.0434  |
| rs61833761  | G | -0.165  |
| rs6682909   | T | -0.0522 |
| rs970538    | A | 0.0694  |
| rs78762402  | A | 0.1318  |
| rs12118133  | T | 0.1713  |
| rs76752387  | G | -0.1842 |
| rs74668832  | T | 0.3238  |
| rs80091625  | G | 0.211   |
| rs10800089  | T | -0.049  |
| rs114489089 | C | -0.2103 |
| rs76325291  | A | -0.1217 |
| rs6700588   | A | 0.0432  |
| rs10803239  | A | -0.0499 |
| rs4654518   | G | 0.3136  |
| rs72718404  | G | 0.1457  |
| rs12740505  | G | 0.0395  |
| rs74066613  | C | -0.1184 |
| rs1318243   | T | 0.0491  |
| rs10800905  | A | -0.1272 |
| rs7525624   | G | 0.0462  |
| rs12048410  | A | -0.0661 |
| rs148039894 | G | 0.2588  |
| rs116014316 | G | -0.2113 |
| rs6691243   | C | 0.0419  |
| rs2139931   | G | -0.0445 |
| rs11582252  | T | 0.0532  |
| rs61818035  | G | 0.0478  |
| rs72864464  | C | 0.1364  |
| rs12130762  | A | -0.1198 |
| rs12406787  | G | 0.051   |
| rs701488    | T | 0.0652  |
| rs6677513   | T | -0.0578 |
| rs4147848   | T | -0.045  |
| rs55964025  | C | 0.0566  |
| rs12401355  | C | -0.0564 |
| rs1173850   | T | 0.0718  |
| rs12037513  | G | 0.0417  |

|             |   |         |
|-------------|---|---------|
| rs115836139 | C | 0.1178  |
| rs150158697 | G | 0.1384  |
| rs61840453  | A | 0.1806  |
| rs16859673  | A | 0.0934  |
| rs78024409  | T | 0.2031  |
| rs56378043  | A | -0.3066 |
| rs117419725 | T | -0.1236 |
| rs12086036  | G | 0.0436  |
| rs76380284  | A | -0.1761 |
| rs79734452  | G | 0.1798  |
| rs4316382   | C | 0.0601  |
| rs12041266  | G | 0.0485  |
| rs2192116   | T | -0.0409 |
| rs60329960  | A | 0.1592  |
| rs558994    | T | 0.0443  |
| rs55931033  | T | 0.065   |
| rs4846466   | C | -0.055  |
| rs12088436  | A | 0.0687  |
| rs113142226 | C | 0.0419  |
| rs9729222   | T | 0.0592  |
| rs144064683 | C | 0.2239  |
| rs116064367 | C | 0.1373  |
| rs77919581  | A | 0.2118  |
| rs9428545   | C | -0.0511 |
| rs1521177   | G | -0.041  |
| rs72745141  | C | 0.2763  |
| rs11161547  | C | 0.0716  |
| rs17012244  | A | 0.0707  |
| rs17092934  | C | 0.2348  |
| rs75457438  | A | 0.0866  |
| rs112463761 | A | 0.1649  |
| rs114600457 | A | -0.1902 |
| rs72679947  | G | -0.1907 |
| rs12747683  | T | 0.0429  |
| rs483006    | A | -0.0795 |
| rs10518473  | C | -0.0682 |
| rs3118121   | A | -0.0564 |
| rs6662308   | G | 0.0675  |
| rs4466675   | T | 0.0427  |
| rs146827171 | T | -0.1735 |
| rs6678723   | A | 0.0565  |
| rs710874    | C | -0.1507 |
| rs61826794  | T | 0.1453  |
| rs965060    | A | -0.0416 |
| rs5005725   | A | -0.0562 |
| rs45553335  | C | 0.0594  |
| rs1486096   | A | -0.0383 |

|             |   |         |
|-------------|---|---------|
| rs78064272  | G | 0.098   |
| rs12403985  | G | 0.0528  |
| rs148648502 | A | -0.0836 |
| rs10863936  | G | -0.0384 |
| rs77375527  | C | 0.2248  |
| rs12044053  | A | -0.1281 |
| rs635664    | A | 0.1682  |
| rs7512598   | T | -0.0526 |
| rs75134790  | T | 0.0849  |
| rs11264799  | T | -0.0451 |
| rs77053649  | T | 0.2352  |
| rs115273594 | T | 0.2515  |
| rs114216907 | T | 0.2367  |
| rs145962584 | T | 0.167   |
| rs75904559  | T | 0.1708  |
| rs2493144   | T | -0.0409 |
| rs12760839  | A | -0.0425 |
| rs114436716 | G | 0.1068  |
| rs116766293 | C | 0.2315  |
| rs114686124 | T | -0.202  |
| rs11578202  | G | 0.0869  |
| rs77002349  | G | 0.1849  |
| rs3789650   | C | -0.0426 |
| rs6655988   | C | 0.097   |
| rs72735108  | T | 0.292   |
| rs114531386 | G | 0.184   |
| rs61765106  | T | 0.0738  |
| rs142973437 | A | -0.1509 |
| rs147383383 | C | -0.1412 |
| rs146224277 | C | 0.2271  |
| rs7538377   | C | -0.0396 |
| rs3790512   | T | -0.0424 |
| rs28649787  | C | -0.0382 |
| rs4077065   | G | -0.0753 |
| rs113681516 | C | -0.2557 |
| rs7527765   | T | 0.0687  |
| rs45505700  | C | 0.1668  |
| rs12730845  | T | 0.2529  |
| rs115814324 | A | -0.1994 |
| rs16848579  | C | 0.0845  |
| rs12134582  | T | 0.0402  |
| rs140139014 | T | -0.2618 |
| rs145643169 | T | 0.282   |
| rs34851637  | C | -0.0899 |
| rs4927153   | G | 0.2157  |
| rs73127292  | T | -0.1594 |
| rs2686220   | A | 0.0551  |

|             |   |         |
|-------------|---|---------|
| rs115646939 | T | 0.1039  |
| rs620070    | T | 0.0396  |
| rs12139891  | C | 0.0473  |
| rs11588898  | T | 0.0782  |
| rs80031514  | T | 0.2131  |
| rs11579186  | T | 0.0535  |
| rs12032936  | A | -0.1836 |
| rs11578153  | T | 0.1058  |
| rs158759    | T | 0.082   |
| rs2820706   | A | 0.0392  |
| rs4658686   | T | 0.0815  |
| rs6693246   | G | 0.0445  |
| rs115126322 | G | 0.1878  |
| rs2501850   | C | 0.0446  |
| rs9431656   | T | 0.0585  |
| rs12046840  | A | -0.077  |
| rs12042800  | C | 0.0598  |
| rs857858    | A | 0.077   |
| rs12144834  | G | 0.1792  |
| rs75013469  | G | 0.1844  |
| rs12135768  | A | -0.0757 |
| rs17376580  | C | -0.1701 |
| rs58063183  | T | 0.2532  |
| rs114679672 | A | 0.2284  |
| rs12140234  | G | 0.1436  |
| rs6588496   | A | 0.0479  |
| rs78468204  | T | -0.1529 |
| rs17009131  | G | 0.2132  |
| rs115270754 | A | -0.3086 |
| rs12096097  | T | 0.1199  |
| rs12562593  | C | -0.0575 |
| rs4916222   | T | -0.0455 |
| rs4132150   | C | 0.0512  |
| rs1342943   | G | 0.0801  |
| rs11120234  | A | 0.1306  |
| rs12036063  | C | -0.0716 |
| rs2247886   | A | 0.0417  |
| rs112334030 | G | 0.1653  |
| rs6662149   | T | -0.0386 |
| rs4266831   | G | 0.0386  |
| rs2245197   | T | 0.0467  |
| rs74628481  | A | 0.1078  |
| rs61776103  | T | 0.14    |
| rs12046807  | A | -0.057  |
| rs112941965 | T | -0.1938 |
| rs36040922  | A | -0.0668 |
| rs150972794 | T | 0.1401  |

|             |   |         |
|-------------|---|---------|
| rs9728569   | T | -0.0422 |
| rs7522398   | T | -0.0414 |
| rs75830586  | G | 0.13    |
| rs112381195 | C | 0.2072  |
| rs12064054  | C | -0.3173 |
| rs9804151   | C | -0.0483 |
| rs10889201  | T | -0.0628 |
| rs61772578  | G | 0.061   |
| rs12141461  | T | -0.0703 |
| rs17376574  | A | -0.0505 |
| rs2331546   | C | -0.0548 |
| rs3751284   | T | -0.0398 |
| rs142764679 | A | 0.2363  |
| rs2067881   | C | -0.0379 |
| rs145934555 | G | -0.1398 |
| rs2202222   | C | -0.0742 |
| rs2484867   | A | 0.183   |
| rs701489    | C | 0.0743  |
| rs76744374  | A | 0.0599  |
| rs11587260  | A | -0.0374 |
| rs77246635  | C | -0.1911 |
| rs820623    | T | 0.0437  |
| rs78429099  | A | -0.0602 |
| rs475359    | G | 0.0649  |
| rs141765609 | C | 0.0791  |
| rs116708605 | C | 0.2816  |
| rs7554332   | A | 0.0887  |
| rs17119190  | C | -0.1325 |
| rs10916366  | C | 0.0408  |
| rs7513157   | A | -0.2014 |
| rs12035437  | G | 0.07    |
| rs1697421   | C | -0.0392 |
| rs12143727  | A | -0.0402 |
| rs11590946  | G | -0.0801 |
| rs111558452 | A | 0.1196  |
| rs12139949  | C | -0.2348 |
| rs72693782  | T | 0.3245  |
| rs79691972  | C | 0.1713  |
| rs72714627  | A | 0.2268  |
| rs1481345   | T | -0.0498 |
| rs77551695  | G | 0.1252  |
| rs12038029  | C | -0.1061 |
| rs11184799  | G | 0.0596  |
| rs6685587   | A | -0.0759 |
| rs12088230  | C | -0.0578 |
| rs1182221   | A | 0.1273  |
| rs77059420  | G | 0.1843  |

|             |   |         |
|-------------|---|---------|
| rs76107942  | A | -0.1783 |
| rs116539394 | T | 0.2012  |
| rs111118180 | C | -0.0676 |
| rs77323299  | T | 0.1046  |
| rs115955722 | G | 0.2447  |
| rs1536169   | T | -0.0385 |
| rs12079878  | A | -0.0513 |
| rs1234318   | G | 0.0457  |
| rs72652995  | C | 0.1144  |
| rs79767297  | A | -0.2068 |
| rs1117325   | T | 0.0965  |
| rs74457048  | A | 0.2702  |
| rs61830682  | A | -0.1234 |
| rs12082407  | T | 0.0467  |
| rs78276076  | C | 0.0681  |
| rs79072103  | G | 0.1384  |
| rs77149197  | C | 0.1736  |
| rs114250564 | T | -0.2013 |
| rs150202666 | T | -0.1784 |
| rs7514406   | C | 0.1082  |
| rs12036669  | T | -0.0538 |
| rs2331902   | A | 0.0583  |
| rs74790636  | G | -0.1502 |
| rs1751342   | G | 0.0749  |
| rs4648440   | A | 0.0434  |
| rs12122550  | C | -0.0395 |
| rs702489    | A | 0.0613  |
| rs787533    | C | 0.0389  |
| rs77082262  | T | -0.1453 |
| rs12727756  | G | 0.0592  |
| rs12047154  | T | 0.1098  |
| rs6666492   | C | 0.0914  |
| rs7552841   | T | -0.0603 |
| rs115424225 | G | -0.1217 |
| rs9725514   | C | 0.1875  |
| rs76406940  | C | -0.1776 |
| rs7529438   | A | 0.1086  |
| rs72711693  | A | -0.0952 |
| rs35352810  | T | 0.2229  |
| rs12759726  | T | -0.0446 |
| rs77501302  | G | -0.1251 |
| rs13374417  | A | 0.0467  |
| rs112338578 | T | 0.1168  |
| rs77640218  | A | 0.2275  |
| rs10799973  | T | -0.0425 |
| rs61826963  | T | 0.1072  |
| rs147922073 | C | -0.1919 |



|             |   |         |
|-------------|---|---------|
| rs41266090  | A | -0.215  |
| rs553253    | C | 0.0469  |
| rs76979604  | G | 0.0904  |
| rs17509146  | G | -0.0436 |
| rs113197146 | A | 0.0759  |
| rs76446623  | T | 0.0592  |
| rs12563610  | T | 0.1746  |
| rs7552838   | C | -0.0396 |
| rs12125973  | A | -0.0412 |
| rs743113    | C | 0.0396  |
| rs10801372  | T | -0.0519 |
| rs76974308  | C | 0.2457  |
| rs59123063  | G | 0.0469  |
| rs115851838 | A | 0.1187  |
| rs320454    | G | 0.0444  |
| rs1497850   | C | 0.3423  |
| rs78926664  | T | 0.0815  |
| rs6664954   | G | 0.2525  |
| rs1907070   | T | 0.0382  |
| rs68174929  | T | 0.1365  |
| rs11590145  | A | -0.0592 |
| rs78846772  | G | 0.0992  |
| rs11809021  | C | -0.0426 |
| rs17473210  | T | 0.1092  |
| rs10489501  | C | -0.1584 |
| rs12123811  | T | -0.1845 |
| rs66519738  | T | 0.0752  |
| rs6664238   | A | 0.0444  |
| rs6676719   | T | -0.1602 |
| rs74525408  | T | 0.1434  |
| rs11583005  | A | 0.1191  |
| rs11166584  | A | -0.0494 |
| rs11264306  | C | 0.0378  |
| rs6685206   | G | 0.0589  |
| rs35414774  | G | -0.3385 |
| rs2929826   | G | 0.0432  |
| rs11264474  | C | 0.0542  |
| rs114654983 | T | 0.2945  |
| rs11578496  | G | 0.0425  |
| rs115933425 | A | -0.1058 |
| rs4661556   | T | 0.3425  |
| rs6683763   | A | 0.0402  |
| rs112819557 | C | 0.1738  |
| rs858819    | A | 0.0615  |
| rs11584349  | C | -0.0536 |
| rs7547864   | T | 0.1542  |
| rs2073185   | A | -0.0548 |

|             |   |         |
|-------------|---|---------|
| rs34320757  | C | 0.1912  |
| rs72744518  | T | -0.09   |
| rs12402198  | A | -0.0768 |
| rs113893583 | A | -0.0798 |
| rs72664990  | T | 0.1592  |
| rs495843    | A | 0.0391  |
| rs4839425   | T | 0.0855  |
| rs76224680  | C | -0.078  |
| rs2801991   | G | 0.04    |
| rs115315912 | C | 0.0879  |
| rs12404395  | T | -0.0493 |
| rs2011693   | A | -0.0994 |
| rs4915045   | C | 0.0717  |
| rs11210443  | C | 0.0388  |
| rs12401412  | T | -0.1329 |
| rs11205596  | T | 0.2199  |
| rs11485345  | A | 0.0406  |
| rs1122757   | T | -0.0446 |
| rs1144565   | G | 0.0882  |
| rs147526823 | C | -0.2541 |
| rs10917043  | C | 0.0695  |
| rs12144600  | G | -0.0818 |
| rs11120466  | G | -0.059  |
| rs12753780  | A | -0.0768 |
| rs79380592  | T | 0.1151  |
| rs2503279   | T | 0.0632  |
| rs6701227   | G | 0.0582  |
| rs111780338 | A | 0.1581  |
| rs12073510  | T | 0.0531  |
| rs4950974   | C | 0.0388  |
| rs4846426   | G | -0.0444 |
| rs34242311  | C | -0.0591 |
| rs11211319  | C | -0.039  |
| rs7531769   | A | 0.0444  |
| rs111983868 | G | -0.0691 |
| rs144874938 | A | -0.3146 |
| rs6694029   | G | -0.0571 |
| rs16830132  | A | -0.0613 |
| rs12728257  | C | -0.0698 |
| rs2369094   | C | -0.0456 |
| rs4987410   | T | -0.2805 |
| rs76304108  | G | -0.1664 |
| rs11265342  | T | -0.0448 |
| rs3176867   | T | -0.051  |
| rs77517044  | G | -0.17   |
| rs114669457 | A | -0.1749 |
| rs112862174 | T | -0.1765 |

|             |   |         |
|-------------|---|---------|
| rs2477858   | G | 0.038   |
| rs34384830  | T | 0.1614  |
| rs12750815  | T | 0.2445  |
| rs34378703  | A | 0.1729  |
| rs115619735 | T | -0.2231 |
| rs731641    | T | 0.0445  |
| rs77918499  | C | -0.1688 |
| rs55643746  | T | -0.0795 |
| rs723959    | A | -0.163  |
| rs115076819 | T | -0.1069 |
| rs11165886  | T | -0.0433 |
| rs3845428   | C | 0.0428  |
| rs72682815  | T | -0.2881 |
| rs72631078  | C | 0.1566  |
| rs2231304   | G | -0.1641 |
| rs148056944 | T | -0.232  |
| rs2297185   | T | 0.0415  |
| rs7537786   | A | -0.0493 |
| rs72683542  | T | 0.2896  |
| rs35572897  | C | 0.1253  |
| rs12049174  | T | 0.0482  |
| rs7521082   | A | -0.0428 |
| rs148471346 | A | 0.1199  |
| rs72639972  | T | -0.114  |
| rs2759280   | C | -0.0414 |
| rs116102380 | A | 0.172   |
| rs10888617  | A | 0.0432  |
| rs9426467   | G | 0.0467  |
| rs12730871  | G | 0.0532  |
| rs2809294   | G | -0.0383 |
| rs3768168   | A | -0.0732 |
| rs111840143 | A | 0.1902  |
| rs115135978 | G | 0.1362  |
| rs4661709   | T | 0.0865  |
| rs12124488  | G | 0.0447  |
| rs6674697   | G | 0.0843  |
| rs1609829   | T | -0.044  |
| rs112399701 | A | 0.1248  |
| rs114650411 | G | 0.1345  |
| rs6666043   | C | 0.0907  |
| rs17023386  | C | 0.0769  |
| rs12723928  | G | 0.1284  |
| rs11578020  | T | 0.0435  |
| rs114175569 | T | -0.1478 |
| rs116696591 | G | 0.1419  |
| rs954353    | G | -0.0378 |
| rs114820700 | G | 0.2766  |

|             |   |         |
|-------------|---|---------|
| rs61814095  | A | 0.0888  |
| rs116408121 | A | -0.197  |
| rs618036    | T | 0.0593  |
| rs77491623  | G | -0.0834 |
| rs41296022  | A | -0.2936 |
| rs12088730  | G | 0.1288  |
| rs111603758 | A | 0.1472  |
| rs78947234  | T | -0.2085 |
| rs4650571   | C | -0.0456 |
| rs74512616  | T | 0.1809  |
| rs115900765 | T | 0.1841  |
| rs75965310  | A | 0.1448  |
| rs112842969 | T | 0.1233  |
| rs75761604  | C | 0.2161  |
| rs12407450  | G | 0.093   |
| rs76977901  | A | 0.1913  |
| rs10493098  | C | 0.0392  |
| rs148225765 | T | -0.2863 |
| rs279027    | A | 0.0412  |
| rs12411177  | T | -0.0531 |
| rs77261529  | A | 0.083   |
| rs2804260   | T | 0.0747  |
| rs144284362 | T | -0.1634 |
| rs4575062   | C | -0.0528 |
| rs2015330   | T | 0.0373  |
| rs835378    | T | -0.039  |
| rs75548725  | A | -0.1387 |
| rs11166153  | G | 0.0804  |
| rs41291508  | G | -0.24   |
| rs3738478   | T | 0.0392  |
| rs2485420   | T | -0.103  |
| rs114141662 | C | 0.2848  |
| rs3123696   | C | -0.0479 |
| rs6694119   | G | -0.0413 |
| rs35675808  | G | 0.1999  |
| rs2644157   | C | 0.0374  |
| rs17130776  | T | 0.0891  |
| rs1124625   | A | 0.0372  |
| rs10788823  | T | 0.0548  |
| rs61821319  | C | -0.1351 |
| rs76024459  | G | 0.2177  |
| rs12738818  | A | -0.0645 |
| rs147232951 | G | -0.24   |
| rs72697837  | T | 0.111   |
| rs2843024   | A | 0.0531  |
| rs6676389   | G | -0.0378 |
| rs12028676  | A | -0.0467 |

|             |   |         |
|-------------|---|---------|
| rs79752373  | A | 0.2079  |
| rs12404293  | G | -0.0407 |
| rs4659794   | A | 0.0626  |
| rs4520451   | T | 0.0498  |
| rs56761935  | C | -0.0745 |
| rs67767675  | A | -0.0794 |
| rs12119183  | A | 0.1693  |
| rs76410275  | A | -0.1593 |
| rs59423584  | T | 0.133   |
| rs1883417   | T | -0.0512 |
| rs141358346 | T | 0.2035  |
| rs74108304  | T | -0.0805 |
| rs77047253  | A | 0.1479  |
| rs145063022 | A | -0.1536 |
| rs2554297   | G | -0.0411 |
| rs61786219  | G | -0.0991 |
| rs11578968  | G | -0.2146 |
| rs9436820   | T | 0.1138  |
| rs35369693  | C | 0.1147  |
| rs147697937 | G | 0.1367  |
| rs72640638  | G | -0.1559 |
| rs12736798  | A | 0.0678  |
| rs1188430   | C | -0.0373 |
| rs2753345   | A | 0.0544  |
| rs17455052  | T | 0.0974  |
| rs116730697 | C | -0.2615 |
| rs2221076   | G | -0.0934 |
| rs116777427 | A | 0.1911  |
| rs6682891   | G | -0.037  |
| rs143731650 | T | 0.1042  |
| rs11240085  | A | -0.1333 |
| rs61833066  | T | 0.0486  |
| rs10495434  | T | 0.0676  |
| rs10911995  | A | 0.0562  |
| rs2791385   | T | 0.1824  |
| rs2813759   | C | 0.038   |
| rs11260666  | A | 0.1049  |
| rs111868204 | G | -0.2405 |
| rs147516738 | T | 0.1675  |
| rs55704318  | A | -0.0858 |
| rs9431726   | T | 0.043   |
| rs6679472   | C | 0.0486  |
| rs10903118  | C | 0.0363  |
| rs10889711  | T | -0.0372 |
| rs12096161  | A | -0.1384 |
| rs10493183  | C | -0.0495 |
| rs34773620  | C | 0.2053  |

|             |   |         |
|-------------|---|---------|
| rs3815788   | G | 0.041   |
| rs72755914  | C | -0.0668 |
| rs79166863  | C | -0.2129 |
| rs12404536  | A | 0.0603  |
| rs111470595 | C | 0.0796  |
| rs12073174  | G | 0.0556  |
| rs56379806  | G | 0.2013  |
| rs528797    | G | 0.0508  |
| rs2744760   | C | 0.0387  |
| rs145550984 | T | -0.1217 |
| rs114675042 | T | -0.2184 |
| rs976332    | A | -0.0414 |
| rs59524596  | T | -0.1888 |
| rs75208040  | G | 0.0825  |
| rs6699417   | C | -0.0378 |
| rs696392    | T | 0.0392  |
| rs2448417   | G | 0.0613  |
| rs12032815  | C | -0.142  |
| rs2774287   | A | -0.0947 |
| rs17412003  | C | 0.1588  |
| rs74894212  | C | 0.0957  |
| rs61680681  | C | 0.1629  |
| rs77116611  | A | 0.1283  |
| rs1229364   | T | -0.0435 |
| rs12128364  | T | -0.039  |
| rs12749233  | T | -0.0368 |
| rs112568781 | G | -0.073  |
| rs72645987  | A | 0.1281  |
| rs1937011   | A | -0.0396 |
| rs61813851  | T | 0.1361  |
| rs116297572 | T | 0.1512  |
| rs17025035  | C | -0.2909 |
| rs149287328 | T | 0.1908  |
| rs12083063  | T | 0.0611  |
| rs1581763   | T | 0.0433  |
| rs12067321  | C | 0.1419  |
| rs60556029  | A | -0.0375 |
| rs78304637  | G | 0.1598  |
| rs28641887  | A | 0.1207  |
| rs111685145 | T | 0.0952  |
| rs114456379 | C | -0.1771 |
| rs12144700  | T | 0.0457  |
| rs1933545   | A | -0.0623 |
| rs11207178  | G | 0.07    |
| rs12128282  | A | 0.0371  |
| rs6697879   | T | -0.105  |
| rs116554892 | A | 0.1924  |

|             |   |         |
|-------------|---|---------|
| rs4846107   | G | 0.0606  |
| rs7519489   | C | -0.102  |
| rs12127847  | T | -0.1476 |
| rs115211497 | T | 0.1757  |
| rs72731354  | T | -0.0761 |
| rs72656059  | T | 0.2097  |
| rs72651593  | G | 0.0835  |
| rs72694441  | T | 0.2637  |
| rs79899415  | C | -0.1617 |
| rs116574439 | T | 0.1156  |
| rs143553186 | A | -0.3535 |
| rs623974    | G | -0.0554 |
| rs61774569  | C | 0.0407  |
| rs856840    | C | -0.1262 |
| rs56106513  | T | 0.1806  |
| rs76257796  | T | 0.2209  |
| rs6659338   | C | -0.223  |
| rs4652102   | G | 0.0367  |
| rs61827706  | G | 0.0373  |
| rs259640    | T | -0.0424 |
| rs114706124 | T | -0.2076 |
| rs34347370  | A | -0.0706 |
| rs2901189   | A | 0.0589  |
| rs17037726  | C | 0.2095  |
| rs1816566   | C | -0.1503 |
| rs10785825  | A | 0.0372  |
| rs79106728  | A | -0.143  |
| rs57714827  | T | -0.0448 |
| rs2802725   | A | -0.0367 |
| rs142945968 | T | 0.2316  |
| rs17369380  | C | -0.1114 |
| rs1456178   | G | -0.1327 |
| rs115972673 | T | -0.1364 |
| rs115896578 | A | -0.2032 |
| rs2297903   | C | 0.0358  |
| rs2808224   | C | 0.0433  |
| rs10779677  | A | -0.0459 |
| rs141517526 | G | -0.1125 |
| rs529989    | C | -0.0369 |
| rs1288587   | T | -0.0365 |
| rs17032358  | A | -0.1919 |
| rs10399879  | A | 0.1866  |
| rs10913256  | C | 0.0458  |
| rs72751700  | A | -0.2544 |
| rs4927083   | A | -0.0424 |
| rs632992    | A | 0.1326  |
| rs73119837  | T | 0.1069  |

|             |   |         |
|-------------|---|---------|
| rs10888430  | G | -0.0374 |
| rs4927205   | G | 0.0674  |
| rs149678686 | C | 0.2041  |
| rs61785859  | C | 0.067   |
| rs74768874  | C | 0.1231  |
| rs7553937   | T | 0.1484  |
| rs7522307   | C | 0.066   |
| rs140552012 | A | -0.2039 |
| rs34080032  | C | -0.0704 |
| rs1124171   | G | 0.0402  |
| rs11264635  | A | -0.0437 |
| rs141035071 | C | -0.2303 |
| rs12127447  | A | 0.1082  |
| rs562249    | T | -0.0872 |
| rs12116898  | A | -0.1497 |
| rs2477134   | G | 0.039   |
| rs56262620  | A | -0.0501 |
| rs116834807 | A | -0.2585 |
| rs10921374  | G | -0.0425 |
| rs61801976  | A | 0.1692  |
| rs113811299 | T | -0.1024 |
| rs1161146   | T | -0.041  |
| rs12129499  | G | 0.229   |
| rs77653823  | T | -0.0588 |
| rs10494099  | A | 0.0408  |
| rs116295011 | G | -0.0834 |
| rs75521800  | T | 0.1381  |
| rs12045520  | A | 0.0453  |
| rs77407806  | A | 0.1284  |
| rs1819278   | T | -0.04   |
| rs35646303  | A | 0.0897  |
| rs6662861   | C | 0.043   |
| rs138545218 | A | 0.1861  |
| rs35704457  | A | 0.0569  |
| rs75313099  | C | 0.1738  |
| rs2842028   | A | 0.0381  |
| rs2311388   | C | 0.0455  |
| rs569932    | T | 0.0383  |
| rs6427276   | A | -0.0402 |
| rs79677312  | G | 0.0963  |
| rs76439356  | T | -0.2346 |
| rs2133108   | C | -0.0578 |
| rs1336511   | G | 0.0431  |
| rs6588505   | T | -0.0446 |
| rs75860486  | A | 0.1323  |
| rs41267160  | C | 0.082   |
| rs61832589  | T | -0.0744 |



|             |   |         |
|-------------|---|---------|
| rs16861538  | G | 0.0746  |
| rs113519783 | T | -0.1325 |
| rs6662917   | T | -0.0413 |
| rs10926743  | C | -0.0375 |
| rs761518    | G | -0.0444 |
| rs7541524   | C | 0.0423  |
| rs35302893  | C | 0.1453  |
| rs542634    | A | -0.0383 |
| rs2686240   | T | 0.0363  |
| rs2753399   | T | -0.0411 |
| rs17457483  | C | -0.0908 |
| rs4987349   | C | 0.053   |
| rs72692723  | A | 0.1049  |
| rs112010598 | A | 0.0832  |
| rs114471561 | T | 0.2169  |
| rs151119099 | A | -0.1557 |
| rs75092007  | C | 0.1652  |
| rs12077019  | G | 0.1264  |
| rs4623769   | A | -0.09   |
| rs4414038   | A | -0.1542 |
| rs10494138  | T | -0.0633 |
| rs2489260   | A | 0.0656  |
| rs2802733   | T | -0.0637 |
| rs12126797  | A | 0.1753  |
| rs61790696  | A | 0.0803  |
| rs6678194   | G | -0.1611 |
| rs2657568   | T | -0.0921 |
| rs146930598 | T | -0.2008 |
| rs41266620  | T | -0.1934 |
| rs16840284  | C | 0.0648  |
| rs6690901   | G | 0.0463  |
| rs141031744 | C | -0.0987 |
| rs75390188  | A | -0.2298 |
| rs12029953  | A | 0.0419  |
| rs56003400  | T | 0.072   |
| rs12085577  | G | 0.0528  |
| rs17601477  | T | 0.1316  |
| rs11120239  | G | -0.1277 |
| rs2144687   | C | -0.1133 |
| rs6698476   | A | 0.0619  |
| rs78602772  | T | -0.0747 |
| rs11806185  | C | 0.094   |
| rs11118667  | T | 0.0989  |
| rs1963268   | A | 0.0372  |
| rs79574506  | T | 0.1865  |
| rs4626916   | A | 0.0372  |
| rs679224    | G | -0.0521 |

|             |   |         |
|-------------|---|---------|
| rs1105210   | A | -0.0866 |
| rs835672    | T | -0.0402 |
| rs199667    | T | 0.039   |
| rs34800677  | A | -0.0709 |
| rs12119402  | A | 0.1819  |
| rs146249174 | C | 0.2079  |
| rs79870386  | G | -0.237  |
| rs12131713  | G | 0.0744  |
| rs17163557  | G | -0.0762 |
| rs7530770   | C | -0.042  |
| rs1890798   | C | -0.0416 |
| rs61801582  | A | 0.1067  |
| rs61768273  | T | 0.2073  |
| rs116488763 | C | 0.2304  |
| rs2758739   | T | -0.0506 |
| rs11121249  | T | -0.0433 |
| rs4920378   | A | 0.1208  |
| rs115369740 | A | 0.2137  |
| rs150149269 | G | 0.2479  |
| rs113072109 | G | 0.2632  |
| rs113661382 | T | 0.2823  |
| rs71652425  | T | -0.0634 |
| rs114218136 | T | 0.1284  |
| rs12078797  | G | -0.0356 |
| rs114931168 | T | -0.1827 |
| rs1187765   | C | -0.0422 |
| rs72676940  | T | -0.1081 |
| rs7415377   | A | -0.0389 |
| rs12564919  | T | 0.0678  |
| rs77141328  | C | 0.2951  |
| rs115084809 | T | -0.0827 |
| rs138018894 | T | 0.232   |
| rs111933873 | T | -0.2074 |
| rs41301281  | A | -0.1428 |
| rs12071889  | C | 0.1303  |
| rs7553760   | G | -0.1564 |
| rs12735675  | C | 0.125   |
| rs72649518  | T | 0.1332  |
| rs16825491  | C | 0.0427  |
| rs147884674 | A | 0.2034  |
| rs298152    | A | -0.0402 |
| rs12122865  | C | -0.2669 |
| rs56832623  | T | -0.2691 |
| rs4275436   | C | 0.0493  |
| rs78208329  | G | 0.2281  |
| rs113526764 | G | -0.1196 |
| rs1252071   | T | 0.052   |

|             |   |         |
|-------------|---|---------|
| rs2213949   | G | -0.0363 |
| rs4656308   | C | -0.0445 |
| rs859452    | C | 0.2346  |
| rs145165378 | A | -0.2143 |
| rs78328018  | A | 0.0899  |
| rs12138939  | A | -0.0534 |
| rs1773558   | A | 0.0968  |
| rs2229712   | C | 0.0501  |
| rs80293531  | G | 0.3094  |
| rs10803099  | G | -0.0587 |
| rs74052149  | A | 0.0937  |
| rs6540844   | C | -0.0433 |
| rs2767567   | T | 0.1156  |
| rs6694684   | G | 0.1464  |
| rs10753759  | T | 0.0812  |
| rs12024082  | T | 0.1838  |
| rs149516707 | G | 0.1924  |
| rs139542008 | A | 0.1827  |
| rs6683231   | G | -0.0435 |
| rs35878506  | A | 0.2468  |
| rs72692356  | G | 0.1181  |
| rs114535044 | G | 0.2205  |
| rs4606308   | G | 0.0425  |
| rs545337    | G | 0.0354  |
| rs566572    | C | -0.036  |
| rs115765897 | G | 0.0965  |
| rs78171414  | T | -0.1861 |
| rs602227    | G | -0.0441 |
| rs10489745  | C | 0.0628  |
| rs7551581   | G | -0.0404 |
| rs7521601   | T | -0.0486 |
| rs17260014  | T | -0.044  |
| rs76176338  | T | 0.134   |
| rs12564515  | G | -0.1452 |
| rs61819643  | G | 0.1254  |
| rs55803523  | A | 0.168   |
| rs75370462  | C | 0.1443  |
| rs7548899   | C | -0.0373 |
| rs480676    | T | 0.0571  |
| rs11205982  | C | -0.0634 |
| rs78885825  | G | 0.1347  |
| rs75597013  | T | -0.1165 |
| rs616408    | A | 0.0352  |
| rs17046838  | T | 0.0368  |
| rs77279370  | A | -0.1151 |
| rs75556406  | A | 0.1696  |
| rs12563935  | C | 0.1058  |

|             |   |         |
|-------------|---|---------|
| rs116315911 | T | 0.1169  |
| rs140578039 | A | 0.1694  |
| rs116405828 | A | 0.1267  |
| rs10802582  | T | -0.0417 |
| rs55829230  | T | -0.051  |
| rs4132008   | C | -0.0392 |
| rs11264695  | G | 0.0573  |
| rs72646165  | C | -0.081  |
| rs12086134  | G | -0.0462 |
| rs10927746  | T | -0.0382 |
| rs4839435   | A | 0.1606  |
| rs10489605  | T | -0.0725 |
| rs61799438  | G | -0.0479 |
| rs72731134  | A | 0.1996  |
| rs6679399   | C | -0.2395 |
| rs2486256   | C | 0.1145  |
| rs73071276  | C | 0.1901  |
| rs75581935  | T | 0.0937  |
| rs10797915  | A | -0.053  |
| rs72653265  | A | -0.0847 |
| rs146143678 | T | 0.2061  |
| rs145904381 | C | 0.2321  |
| rs58313330  | T | 0.0505  |
| rs11580815  | C | 0.0995  |
| rs116239811 | C | -0.1272 |
| rs11165771  | A | -0.047  |
| rs12756329  | C | -0.0366 |
| rs116047992 | A | -0.1419 |
| rs12117326  | T | 0.0502  |
| rs115116587 | C | -0.2323 |
| rs56331099  | A | 0.0744  |
| rs141453275 | G | -0.1008 |
| rs4927287   | A | 0.1251  |
| rs3820521   | A | 0.1269  |
| rs11584867  | A | 0.1695  |
| rs1581749   | G | -0.0366 |
| rs171325    | G | 0.0359  |
| rs144464479 | A | 0.3138  |
| rs34544423  | G | -0.0687 |
| rs79692671  | T | 0.0669  |
| rs10802977  | T | 0.0448  |
| rs1360918   | G | -0.0394 |
| rs17504277  | T | -0.0365 |
| rs10863646  | T | -0.0568 |
| rs17637936  | C | -0.0493 |
| rs74348587  | T | 0.322   |
| rs2654878   | G | -0.091  |

|             |   |         |
|-------------|---|---------|
| rs697387    | T | 0.0428  |
| rs952754    | C | -0.0474 |
| rs4274037   | T | 0.0552  |
| rs59196483  | C | -0.0951 |
| rs7555690   | G | 0.0486  |
| rs78954875  | T | -0.1192 |
| rs74687512  | A | -0.1587 |
| rs78758935  | A | 0.1352  |
| rs857128    | C | -0.0528 |
| rs111817495 | C | -0.0915 |
| rs78402194  | G | 0.0766  |
| rs72680429  | G | -0.0954 |
| rs56051286  | C | 0.0889  |
| rs4654783   | T | -0.0398 |
| rs4596920   | T | -0.0396 |
| rs1933543   | T | -0.1481 |
| rs116469720 | T | 0.2277  |
| rs12752329  | C | 0.1642  |
| rs6698257   | G | -0.0645 |
| rs61810724  | A | -0.2579 |
| rs11809015  | A | 0.0527  |
| rs6691602   | G | 0.046   |
| rs61815348  | G | -0.1239 |
| rs111939409 | G | -0.1167 |
| rs7551194   | T | -0.048  |
| rs6678414   | C | 0.0522  |
| rs79754334  | A | 0.1159  |
| rs76771627  | C | 0.1019  |
| rs10922298  | C | -0.0361 |
| rs74951936  | T | -0.1429 |
| rs72664038  | A | -0.1363 |
| rs589298    | T | 0.1364  |
| rs320420    | T | 0.0532  |
| rs6604644   | G | 0.0376  |
| rs12760868  | A | -0.1151 |
| rs61777395  | T | -0.1314 |
| rs75199565  | T | 0.1175  |
| rs76686863  | T | 0.1783  |
| rs115784384 | T | 0.123   |
| rs145582754 | C | 0.1929  |
| rs76259161  | G | -0.1124 |
| rs7539471   | A | -0.0376 |
| rs11577758  | C | 0.1533  |
| rs72719879  | T | 0.3064  |
| rs7515173   | A | -0.0895 |
| rs115383596 | C | -0.1382 |
| rs61809121  | C | 0.1446  |

|             |   |         |
|-------------|---|---------|
| rs61823775  | T | 0.12    |
| rs34971911  | C | 0.1264  |
| rs1620073   | T | 0.1841  |
| rs6428588   | T | 0.0399  |
| rs61833497  | T | -0.0758 |
| rs11584967  | A | -0.1275 |
| rs2882289   | A | 0.0732  |
| rs150806275 | G | 0.1288  |
| rs142900823 | T | 0.1665  |
| rs74578461  | C | 0.042   |
| rs6694377   | C | 0.0517  |
| rs75514978  | A | 0.1804  |
| rs316913    | A | -0.0912 |
| rs114130871 | G | -0.1176 |
| rs74772537  | T | -0.2906 |
| rs79848811  | C | 0.1376  |
| rs4112336   | A | 0.1239  |
| rs7554805   | G | 0.2017  |
| rs352690    | T | 0.142   |
| rs75436219  | G | 0.2095  |
| rs73022764  | G | 0.0707  |
| rs6662239   | T | -0.0853 |
| rs77896069  | A | -0.1244 |
| rs61814614  | C | -0.1711 |
| rs34095348  | A | 0.2437  |
| rs1300066   | T | -0.0353 |
| rs4653277   | A | -0.0359 |
| rs12031880  | A | 0.0435  |
| rs149928094 | G | 0.1424  |
| rs72637550  | A | 0.0606  |
| rs146074043 | T | 0.1547  |
| rs72750761  | C | -0.1227 |
| rs17351243  | A | 0.0353  |
| rs821618    | A | -0.039  |
| rs145397092 | A | -0.1404 |
| rs139339865 | G | 0.1274  |
| rs17435109  | G | -0.0457 |
| rs12057284  | T | 0.161   |
| rs116359049 | G | 0.1851  |
| rs4578194   | T | -0.0395 |
| rs1974075   | T | -0.0374 |
| rs112039218 | C | 0.1975  |
| rs12748214  | A | 0.0738  |
| rs78342291  | C | 0.2084  |
| rs6656521   | C | -0.0589 |
| rs114489917 | T | -0.2519 |
| rs72680018  | C | -0.1612 |

|             |   |         |
|-------------|---|---------|
| rs113596134 | T | -0.2535 |
| rs12142898  | T | 0.1068  |
| rs2180750   | T | 0.0403  |
| rs114543753 | A | -0.1166 |
| rs7416003   | A | -0.0862 |
| rs17131635  | T | -0.0387 |
| rs138510177 | A | -0.1578 |
| rs10482808  | A | 0.1619  |
| rs6427541   | T | -0.0569 |
| rs116754882 | C | 0.0819  |
| rs9700646   | T | 0.0584  |
| rs138638077 | A | 0.1144  |
| rs79949950  | A | -0.15   |
| rs4951267   | G | -0.0575 |
| rs603005    | T | -0.0408 |
| rs1294249   | G | 0.0602  |
| rs75227907  | T | 0.0807  |
| rs12756041  | C | 0.0631  |
| rs114990734 | C | -0.0607 |
| rs112449650 | A | 0.0927  |
| rs4650109   | G | 0.2122  |
| rs1008078   | T | 0.0364  |
| rs12075743  | C | -0.0931 |
| rs2761504   | G | -0.0476 |
| rs140371183 | G | 0.1868  |
| rs148231086 | T | 0.154   |
| rs10916214  | A | -0.0492 |
| rs384893    | A | 0.0502  |
| rs10754313  | T | 0.1693  |
| rs141795791 | A | 0.0879  |
| rs11587322  | C | 0.1241  |
| rs946242    | A | -0.115  |
| rs12125032  | C | 0.0414  |
| rs2480244   | C | -0.0607 |
| rs78661642  | A | -0.2738 |
| rs147579949 | A | -0.1128 |
| rs605895    | T | -0.0349 |
| rs72749332  | A | 0.2543  |
| rs7521568   | C | -0.202  |
| rs4652989   | C | 0.0354  |
| rs145565738 | T | 0.128   |
| rs151250811 | T | 0.1287  |
| rs12564899  | G | 0.0412  |
| rs12130530  | T | -0.0366 |
| rs10858026  | T | 0.0434  |
| rs476490    | G | 0.1039  |
| rs12029024  | T | -0.0634 |

|             |   |         |
|-------------|---|---------|
| rs72764308  | C | -0.1256 |
| rs113244321 | C | -0.2262 |
| rs2820579   | A | -0.0634 |
| rs115156943 | G | 0.2732  |
| rs150915385 | A | 0.259   |
| rs41285000  | T | 0.1799  |
| rs6680807   | C | 0.0536  |
| rs4357565   | C | -0.0531 |
| rs17612648  | G | 0.2334  |
| rs79756798  | C | 0.0931  |
| rs76936487  | T | 0.1937  |
| rs143353772 | G | 0.1851  |
| rs9728563   | G | 0.0657  |
| rs77654292  | T | 0.1262  |
| rs452132    | A | 0.036   |
| rs145493176 | C | 0.1253  |
| rs76529943  | T | -0.0619 |
| rs1571965   | T | 0.1532  |
| rs6687891   | C | 0.1014  |
| rs61821321  | C | 0.1236  |
| rs141749221 | A | 0.1272  |
| rs111652150 | T | -0.3042 |
| rs77141950  | A | 0.0649  |
| rs12133510  | A | -0.0375 |
| rs12046142  | A | 0.0352  |
| rs144427379 | A | 0.2527  |
| rs12082327  | T | -0.1402 |
| rs11119801  | A | -0.2017 |
| rs72675147  | A | 0.1828  |
| rs10912505  | G | 0.0362  |
| rs947211    | A | -0.0399 |
| rs2632300   | A | -0.0365 |
| rs147495632 | A | -0.2368 |
| rs625643    | T | 0.041   |
| rs138574346 | A | 0.1244  |
| rs74131681  | C | 0.1747  |
| rs114304856 | T | 0.205   |
| rs145629160 | A | 0.1649  |
| rs12404235  | T | -0.1294 |
| rs10495182  | C | -0.0491 |
| rs2132443   | T | -0.0386 |
| rs911246    | A | -0.0683 |
| rs814320    | C | -0.0439 |
| rs6425558   | C | 0.0441  |
| rs3856087   | A | 0.0354  |
| rs72694438  | A | 0.0481  |
| rs116065483 | T | 0.1149  |



|             |   |         |
|-------------|---|---------|
| rs10927959  | A | -0.0343 |
| rs6668942   | T | 0.0902  |
| rs12081908  | T | -0.0493 |
| rs34441207  | T | 0.0448  |
| rs6604664   | C | 0.0399  |
| rs3856265   | A | -0.0431 |
| rs115015609 | C | 0.2267  |
| rs76163226  | G | 0.1855  |
| rs4844512   | G | 0.0539  |
| rs2275264   | G | -0.0477 |
| rs657436    | T | -0.0506 |
| rs74051929  | T | 0.1538  |
| rs35787990  | G | 0.0484  |
| rs11811663  | T | 0.0702  |
| rs4655858   | T | -0.0931 |
| rs76302239  | C | 0.2019  |
| rs72757414  | G | 0.0781  |
| rs55702221  | A | -0.0614 |
| rs2185285   | T | 0.038   |
| rs144614611 | T | 0.1576  |
| rs77440112  | T | -0.1229 |
| rs34234499  | T | -0.1226 |
| rs7534177   | G | 0.0677  |
| rs79101547  | A | -0.2588 |
| rs17421247  | T | -0.0397 |
| rs72663471  | T | 0.0809  |
| rs142247540 | G | -0.2961 |
| rs7418365   | G | -0.0366 |
| rs8179291   | C | 0.0471  |
| rs9660186   | G | 0.0392  |
| rs116272947 | C | 0.1952  |
| rs77059386  | C | -0.1367 |
| rs7416158   | A | 0.041   |
| rs139736570 | G | 0.2446  |
| rs115544062 | C | 0.1532  |
| rs2246670   | G | 0.0404  |
| rs143951536 | T | -0.2228 |
| rs11162827  | T | 0.1469  |
| rs111731378 | T | 0.1467  |
| rs10874175  | C | 0.0415  |
| rs555671    | A | 0.0774  |
| rs79502515  | T | -0.1585 |
| rs11263928  | C | 0.2287  |
| rs1749440   | C | -0.3123 |
| rs111646686 | C | 0.1718  |
| rs325888    | A | 0.0934  |
| rs76846867  | A | -0.0869 |

|             |   |         |
|-------------|---|---------|
| rs3010094   | C | 0.047   |
| rs80179883  | C | 0.1668  |
| rs6696988   | T | 0.1062  |
| rs146389272 | A | -0.1772 |
| rs12138984  | A | -0.0859 |
| rs115757931 | T | -0.1192 |
| rs34158521  | G | 0.1763  |
| rs146379341 | A | -0.2458 |
| rs4950840   | T | 0.0358  |
| rs75796399  | C | -0.1862 |
| rs12739119  | A | -0.1027 |
| rs10913349  | A | -0.038  |
| rs115752298 | A | -0.1048 |
| rs72677941  | C | 0.1672  |
| rs59019561  | A | 0.0816  |
| rs3845631   | C | -0.1876 |
| rs1930564   | G | 0.0354  |
| rs115328938 | G | 0.1292  |
| rs11184457  | A | 0.063   |
| rs77354825  | C | 0.1505  |
| rs67398618  | T | 0.0545  |
| rs11803296  | T | -0.1345 |
| rs10779675  | C | 0.0486  |
| rs2841899   | A | 0.0943  |
| rs16824722  | G | -0.058  |
| rs352683    | A | 0.0459  |
| rs116074981 | G | -0.2229 |
| rs56766546  | G | 0.0521  |
| rs1646771   | G | 0.0399  |
| rs114847706 | T | -0.1914 |
| rs78042665  | A | 0.0933  |
| rs55723005  | T | 0.0688  |
| rs146709978 | G | 0.1451  |
| rs6426321   | C | 0.0441  |
| rs2182426   | A | 0.0638  |
| rs1581872   | C | -0.0371 |
| rs11185389  | A | 0.0337  |
| rs12129671  | C | 0.2217  |
| rs148635459 | C | 0.0565  |
| rs79508632  | T | 0.0845  |
| rs2889481   | G | 0.0704  |
| rs79346115  | G | 0.2261  |
| rs1582102   | G | 0.1162  |
| rs6683989   | C | -0.0535 |
| rs820671    | A | 0.0681  |
| rs17385679  | G | -0.2091 |
| rs71639172  | G | 0.1213  |

|             |   |         |
|-------------|---|---------|
| rs915357    | G | 0.0359  |
| rs72760462  | A | 0.0759  |
| rs76916852  | T | 0.2408  |
| rs61770557  | G | -0.0558 |
| rs10158075  | G | 0.0457  |
| rs75733997  | T | 0.1022  |
| rs115867607 | T | 0.0954  |
| rs75395287  | C | 0.1314  |
| rs61825209  | C | 0.0494  |
| rs1777262   | T | -0.0379 |
| rs111416555 | T | -0.1913 |
| rs12047248  | C | 0.0473  |
| rs77641164  | G | 0.1152  |
| rs114904830 | T | 0.211   |
| rs78809121  | C | -0.0518 |
| rs11806983  | T | 0.099   |
| rs2054020   | C | -0.0363 |
| rs61025842  | A | 0.0458  |
| rs61602656  | C | 0.0617  |
| rs79876858  | T | 0.0888  |
| rs11589962  | G | 0.1224  |
| rs115820308 | T | 0.1697  |
| rs17638705  | C | -0.1024 |
| rs12123023  | T | 0.0374  |
| rs12044266  | G | -0.076  |
| rs4276916   | G | 0.0353  |
| rs79075972  | T | -0.0919 |
| rs7549511   | G | 0.0375  |
| rs2075864   | G | 0.0361  |
| rs4390219   | T | 0.0382  |
| rs72683359  | T | -0.0835 |
| rs35841185  | T | -0.0977 |
| rs16834824  | T | 0.1247  |
| rs12048139  | A | -0.042  |
| rs17117853  | A | -0.0738 |
| rs114223846 | T | 0.178   |
| rs145007396 | G | -0.0872 |
| rs12049513  | C | -0.0683 |
| rs10800042  | G | 0.0454  |
| rs12408571  | C | 0.0349  |
| rs2670442   | A | -0.0836 |
| rs10918709  | G | -0.0378 |
| rs12408792  | G | 0.0383  |
| rs80169561  | A | 0.1933  |
| rs164424    | C | -0.0608 |
| rs16851112  | A | 0.0599  |
| rs150406771 | T | -0.2049 |

|             |   |         |
|-------------|---|---------|
| rs139246828 | G | 0.161   |
| rs2235935   | T | -0.0561 |
| rs10799911  | G | -0.0744 |
| rs1539529   | C | -0.0397 |
| rs114042989 | A | 0.2142  |
| rs111380034 | C | -0.2432 |
| rs4462141   | C | 0.0353  |
| rs7514136   | G | -0.0712 |
| rs735475    | G | 0.1627  |
| rs12029581  | C | 0.035   |
| rs1590900   | G | 0.1215  |
| rs116834548 | A | -0.0879 |
| rs75103264  | G | 0.091   |
| rs6661718   | T | -0.0372 |
| rs141843009 | G | 0.2235  |
| rs72642355  | G | -0.134  |
| rs149027525 | A | -0.2001 |
| rs7513436   | A | 0.0357  |
| rs115951256 | G | 0.1561  |
| rs11575064  | C | -0.1117 |
| rs61815922  | A | -0.1152 |
| rs7518785   | T | 0.0349  |
| rs12136001  | A | -0.075  |
| rs1175056   | C | -0.0639 |
| rs114467561 | G | 0.1096  |
| rs61838193  | G | -0.1636 |
| rs61748637  | G | 0.0817  |
| rs115044898 | T | -0.2674 |
| rs6704267   | C | -0.0345 |
| rs138942670 | C | 0.3271  |
| rs77203605  | T | -0.0829 |
| rs116488331 | T | -0.1283 |
| rs4141867   | C | 0.0345  |
| rs111972115 | T | -0.1128 |
| rs12046950  | C | -0.0414 |
| rs564807    | G | -0.0427 |
| rs12723208  | G | -0.0452 |
| rs34349246  | T | 0.1391  |
| rs4970443   | A | -0.2587 |
| rs590041    | T | -0.036  |
| rs997474    | C | 0.0545  |
| rs35494358  | A | -0.1346 |
| rs11583078  | G | -0.036  |
| rs148676155 | G | 0.1384  |
| rs10900474  | A | 0.0972  |
| rs115808692 | A | -0.1458 |
| rs78035954  | A | -0.0566 |

|             |   |         |
|-------------|---|---------|
| rs7529340   | A | -0.1586 |
| rs7546346   | T | -0.0479 |
| rs6428998   | A | 0.0356  |
| rs61824464  | A | 0.0892  |
| rs76122590  | T | -0.2489 |
| rs77016325  | A | 0.1789  |
| rs17390990  | C | 0.0404  |
| rs75400926  | C | -0.0691 |
| rs1498350   | C | 0.0335  |
| rs60209947  | A | -0.1209 |
| rs6540803   | T | 0.0511  |
| rs1151655   | G | -0.0796 |
| rs7512723   | T | -0.035  |
| rs1342081   | T | -0.0345 |
| rs79864854  | G | 0.2571  |
| rs4659764   | G | 0.0374  |
| rs12746024  | A | -0.0364 |
| rs1679966   | C | 0.0497  |
| rs7538333   | C | -0.0339 |
| rs12131898  | A | 0.0345  |
| rs112929602 | C | 0.1055  |
| rs613922    | A | 0.0537  |
| rs2053509   | C | -0.0362 |
| rs12028395  | T | -0.0359 |
| rs72743511  | T | 0.1188  |
| rs61831996  | C | -0.0706 |
| rs2086650   | T | -0.0343 |
| rs67867153  | G | 0.0719  |
| rs150793953 | A | 0.1416  |
| rs10916672  | C | 0.0452  |
| rs1410245   | G | 0.0424  |
| rs78545514  | T | -0.1443 |
| rs77426774  | T | -0.0493 |
| rs72735621  | C | 0.2729  |
| rs111331208 | A | -0.1346 |
| rs75082097  | T | -0.191  |
| rs115215427 | C | 0.2399  |
| rs12128339  | C | 0.0461  |
| rs72686913  | A | 0.1495  |
| rs112672202 | T | 0.1612  |
| rs2737637   | T | -0.0784 |
| rs11204539  | C | 0.1126  |
| rs146673215 | A | 0.1169  |
| rs599569    | C | 0.0376  |
| rs61780920  | T | 0.1063  |
| rs798028    | C | 0.0946  |
| rs11582873  | T | 0.1695  |

|             |   |         |
|-------------|---|---------|
| rs6675650   | C | -0.0385 |
| rs78186327  | A | 0.0765  |
| rs12747947  | T | 0.1514  |
| rs4658122   | C | -0.0424 |
| rs3927765   | C | -0.0446 |
| rs608202    | G | 0.2763  |
| rs1277221   | T | 0.0393  |
| rs145397018 | T | 0.1402  |
| rs7540098   | G | 0.1026  |
| rs76407803  | T | 0.2296  |
| rs7512513   | C | 0.0443  |
| rs17463531  | A | -0.0801 |
| rs17502365  | T | 0.1295  |
| rs111376060 | C | -0.2347 |
| rs75191218  | A | -0.1101 |
| rs2566757   | T | 0.0492  |
| rs987319    | T | -0.0802 |
| rs77962848  | C | 0.0955  |
| rs7523985   | G | 0.0369  |
| rs10912463  | T | 0.0487  |
| rs3754481   | A | -0.0781 |
| rs12045788  | C | 0.2721  |
| rs59932910  | T | 0.1567  |
| rs10518658  | C | 0.0691  |
| rs6672691   | G | 0.0462  |
| rs116009627 | T | 0.1756  |
| rs2651240   | A | 0.1742  |
| rs140055706 | G | -0.2077 |
| rs72656584  | C | -0.1045 |
| rs114726171 | A | 0.0471  |
| rs35144622  | T | 0.1536  |
| rs10494494  | T | -0.0494 |
| rs78000481  | T | -0.1044 |
| rs291111    | C | 0.1433  |
| rs77794911  | G | 0.0785  |
| rs143000855 | T | 0.0909  |
| rs12070183  | A | -0.0519 |
| rs17525106  | G | -0.0517 |
| rs139781255 | T | 0.1499  |
| rs76278725  | A | -0.212  |
| rs9425887   | A | 0.0863  |
| rs116460664 | C | 0.1606  |
| rs116902644 | C | -0.1971 |
| rs549393    | T | 0.1316  |
| rs10911872  | C | -0.1262 |
| rs1767919   | C | -0.0405 |
| rs141780613 | C | 0.1441  |

|             |   |         |
|-------------|---|---------|
| rs75330564  | A | 0.1775  |
| rs11121404  | G | 0.0458  |
| rs116745525 | A | -0.2243 |
| rs3820556   | G | -0.1174 |
| rs11582339  | T | 0.0382  |
| rs7551586   | A | 0.0658  |
| rs72740520  | G | 0.1504  |
| rs150711386 | T | -0.1525 |
| rs7553558   | A | -0.1378 |
| rs41314264  | A | -0.1154 |
| rs34158391  | C | 0.0433  |
| rs112956836 | A | -0.1559 |
| rs6670327   | C | -0.0354 |
| rs10798670  | G | -0.0661 |
| rs12132760  | T | -0.1492 |
| rs6684192   | C | -0.0588 |
| rs12754929  | T | -0.0643 |
| rs116166005 | C | -0.1054 |
| rs112524224 | A | -0.1458 |
| rs9943217   | G | -0.0424 |
| rs144380007 | T | -0.1617 |
| rs75702822  | T | -0.1628 |
| rs35039660  | C | -0.1291 |
| rs12133524  | C | -0.0631 |
| rs74136057  | T | 0.0534  |
| rs3004081   | A | -0.0497 |
| rs706482    | A | -0.0386 |
| rs4839487   | C | 0.1009  |
| rs2358205   | A | -0.0334 |
| rs34480358  | A | -0.0777 |
| rs61826219  | C | 0.1377  |
| rs2298801   | G | -0.0361 |
| rs75226137  | G | 0.2941  |
| rs34495711  | G | 0.1557  |
| rs2782786   | C | -0.0355 |
| rs114680626 | A | 0.1135  |
| rs77817173  | C | 0.1574  |
| rs114162378 | T | 0.0967  |
| rs6682523   | A | -0.0576 |
| rs79678237  | G | 0.0764  |
| rs145028885 | A | -0.1712 |
| rs6671071   | T | 0.0764  |
| rs76958559  | A | 0.1599  |
| rs1180272   | G | -0.059  |
| rs78826493  | T | 0.1014  |
| rs10798780  | A | -0.0335 |
| rs112712327 | C | 0.1691  |

|             |   |         |
|-------------|---|---------|
| rs12354077  | C | -0.2002 |
| rs72639062  | G | 0.0927  |
| rs11206287  | T | -0.0429 |
| rs6667711   | C | 0.0586  |
| rs72681330  | A | -0.0341 |
| rs860372    | G | 0.2186  |
| rs114053412 | A | -0.1737 |
| rs74048003  | G | 0.0609  |
| rs76615408  | A | -0.2421 |
| rs34496347  | T | 0.1646  |
| rs354590    | A | -0.0412 |
| rs938128    | C | -0.0415 |
| rs7539076   | C | 0.2175  |
| rs12027278  | C | -0.0415 |
| rs111758308 | G | 0.1453  |
| rs112196627 | A | 0.0978  |
| rs7551781   | C | 0.0381  |
| rs72760323  | A | -0.0559 |
| rs141206156 | T | 0.1971  |
| rs2389163   | T | -0.0455 |
| rs10494504  | G | 0.0541  |
| rs1033409   | G | 0.089   |
| rs1890933   | A | 0.0721  |
| rs72631022  | T | 0.2067  |
| rs6704244   | G | 0.0352  |
| rs115057948 | G | -0.0903 |
| rs113520740 | G | -0.1004 |
| rs79654750  | G | 0.0732  |
| rs1498941   | A | -0.0334 |
| rs61810746  | T | 0.0726  |
| rs11572501  | A | 0.1628  |
| rs146779946 | T | 0.0856  |
| rs12086692  | T | 0.1178  |
| rs2892738   | G | 0.0439  |
| rs4845006   | A | 0.0351  |
| rs77613911  | C | 0.1041  |
| rs10753793  | A | -0.0353 |
| rs6681324   | A | -0.0382 |
| rs75306789  | T | 0.1036  |
| rs72679322  | A | -0.1848 |
| rs75371750  | A | 0.0584  |
| rs4648487   | C | 0.0368  |
| rs114429808 | G | 0.2504  |
| rs67311156  | G | -0.3065 |
| rs72742757  | C | -0.0976 |
| rs4040747   | G | -0.0489 |
| rs10801294  | G | 0.0637  |



|             |   |         |
|-------------|---|---------|
| rs111999640 | A | 0.1242  |
| rs4088634   | A | -0.0382 |
| rs11804833  | T | 0.0488  |
| rs41282500  | A | -0.0468 |
| rs36194643  | G | -0.0464 |
| rs1338610   | G | -0.0408 |
| rs565953    | C | 0.0333  |
| rs113526584 | G | 0.1694  |
| rs2065929   | G | 0.0494  |
| rs872315    | T | -0.0708 |
| rs12118318  | A | -0.0615 |
| rs12048986  | T | 0.0452  |
| rs74072547  | A | 0.1144  |
| rs12121785  | T | 0.0358  |
| rs76009378  | A | 0.2706  |
| rs1338570   | G | -0.034  |
| rs41300331  | A | 0.1545  |
| rs114915721 | A | 0.1726  |
| rs1691249   | G | 0.0559  |
| rs12064904  | C | -0.0749 |
| rs9659385   | T | -0.0725 |
| rs1756921   | A | -0.0415 |
| rs1367448   | A | 0.0373  |
| rs145060536 | A | 0.1441  |
| rs16855634  | G | 0.0555  |
| rs116117289 | T | -0.1695 |
| rs114956574 | C | -0.3036 |
| rs45456795  | T | -0.0697 |
| rs72729823  | G | -0.0818 |
| rs12034639  | A | 0.0337  |
| rs3813      | A | 0.1528  |
| rs2168338   | A | -0.0438 |
| rs1798246   | C | -0.0329 |
| rs71666243  | G | 0.0721  |
| rs1814051   | C | -0.0335 |
| rs140220394 | T | -0.2582 |
| rs79945145  | G | 0.1396  |
| rs3013080   | T | 0.073   |
| rs6699979   | C | 0.0485  |
| rs12026239  | T | -0.035  |
| rs76964137  | A | -0.21   |
| rs56172343  | C | 0.1191  |
| rs114241830 | A | 0.252   |
| rs6670240   | A | -0.2147 |
| rs80056967  | A | -0.2223 |
| rs7542916   | T | -0.0766 |
| rs11249216  | T | -0.0504 |

|             |   |         |
|-------------|---|---------|
| rs12136041  | A | 0.0636  |
| rs116453184 | G | 0.0838  |
| rs61768891  | A | -0.2058 |
| rs76560645  | G | 0.1521  |
| rs3795646   | A | 0.0412  |
| rs12408207  | T | 0.0377  |
| rs76181623  | A | 0.203   |
| rs12126188  | A | 0.1506  |
| rs78520735  | A | 0.194   |
| rs74135716  | T | -0.1684 |
| rs115548021 | C | -0.2414 |
| rs12124446  | A | -0.0981 |
| rs145331426 | A | 0.0838  |
| rs115770695 | G | 0.1843  |
| rs12044134  | C | -0.1245 |
| rs650707    | A | -0.0518 |
| rs10803359  | A | 0.0365  |
| rs11580932  | T | -0.0826 |
| rs115804585 | C | -0.2252 |
| rs75462238  | A | 0.1127  |
| rs17047230  | A | 0.126   |
| rs138522144 | T | 0.2196  |
| rs6672308   | A | -0.038  |
| rs1486475   | T | 0.0376  |
| rs342826    | T | 0.0431  |
| rs6695139   | T | 0.0376  |
| rs55710390  | T | -0.1704 |
| rs12120860  | A | 0.1432  |
| rs12025599  | C | -0.0456 |
| rs76678038  | A | 0.1604  |
| rs2318298   | T | 0.0343  |
| rs813762    | A | -0.0899 |
| rs116179833 | C | -0.1416 |
| rs9437816   | A | 0.1665  |
| rs77566509  | T | -0.1547 |
| rs2148639   | T | 0.1431  |
| rs9324141   | T | -0.059  |
| rs4661330   | G | 0.0391  |
| rs17492693  | C | 0.121   |
| rs11163189  | T | 0.0581  |
| rs1932334   | G | -0.1745 |
| rs72737111  | G | 0.2096  |
| rs1770372   | C | 0.0617  |
| rs12081530  | A | -0.034  |
| rs72700494  | G | -0.0481 |
| rs10917002  | T | -0.059  |
| rs61782546  | T | -0.1506 |

|             |   |         |
|-------------|---|---------|
| rs144164086 | C | 0.2112  |
| rs150915618 | T | -0.2303 |
| rs12410137  | G | -0.0975 |
| rs60552079  | G | 0.0724  |
| rs61769802  | A | 0.1395  |
| rs11161735  | C | 0.0387  |
| rs472188    | A | 0.0608  |
| rs74901015  | G | -0.0855 |
| rs12022854  | T | -0.0489 |
| rs116026298 | T | -0.122  |
| rs17126229  | A | 0.0374  |
| rs141636220 | T | -0.0648 |
| rs56278097  | G | 0.0859  |
| rs10494363  | A | 0.0609  |
| rs72663970  | G | -0.1784 |
| rs138043272 | A | 0.1802  |
| rs852996    | A | 0.1196  |
| rs77672058  | T | -0.1733 |
| rs12097905  | A | 0.0546  |
| rs72701252  | A | 0.2788  |
| rs138214725 | C | 0.1705  |
| rs1832047   | A | -0.0588 |
| rs3766550   | T | 0.058   |
| rs77996609  | T | 0.126   |
| rs116211115 | A | -0.1174 |
| rs12074878  | A | 0.0409  |
| rs1887808   | A | -0.0344 |
| rs12083630  | G | -0.0334 |
| rs984271    | G | 0.0352  |
| rs166604    | T | 0.043   |
| rs17536473  | C | 0.0618  |
| rs9662965   | T | -0.161  |
| rs10922782  | T | -0.1006 |
| rs74969528  | A | 0.0764  |
| rs568909    | G | 0.0557  |
| rs79120565  | T | 0.1419  |
| rs6659397   | C | 0.0357  |
| rs3002129   | G | -0.0508 |
| rs61841187  | C | -0.0505 |
| rs10796975  | A | 0.045   |
| rs10492924  | A | 0.139   |
| rs148871311 | A | -0.0935 |
| rs907057    | A | 0.0328  |
| rs10914841  | A | 0.044   |
| rs141827874 | T | -0.1466 |
| rs147634201 | C | 0.1463  |
| rs6664100   | C | -0.0989 |

|             |   |         |
|-------------|---|---------|
| rs6685752   | G | 0.0906  |
| rs9970908   | G | 0.0825  |
| rs12385740  | A | 0.115   |
| rs145137351 | T | 0.0934  |
| rs75665301  | G | 0.1575  |
| rs11208946  | C | -0.046  |
| rs4845698   | A | -0.1578 |
| rs72752593  | T | 0.1703  |
| rs12145173  | T | -0.0398 |
| rs10782760  | A | -0.0343 |
| rs4658413   | C | -0.0462 |
| rs6671901   | T | -0.0433 |
| rs114997913 | T | -0.1332 |
| rs2479412   | G | 0.0803  |
| rs7513180   | A | -0.0438 |
| rs56017365  | A | 0.1316  |
| rs12081912  | A | 0.0496  |
| rs2816041   | A | 0.0335  |
| rs28510979  | A | -0.093  |
| rs145909328 | T | 0.0931  |
| rs113372905 | T | 0.2551  |
| rs7515011   | C | -0.0588 |
| rs143833690 | T | -0.2282 |
| rs2793634   | G | 0.0415  |
| rs2861917   | T | 0.2032  |
| rs55654754  | G | -0.0387 |
| rs141927846 | A | -0.1511 |
| rs116606329 | C | 0.2432  |
| rs140524905 | T | -0.229  |
| rs34756201  | A | -0.1865 |
| rs76232329  | C | 0.2562  |
| rs574954    | A | -0.0703 |
| rs150078601 | A | 0.2103  |
| rs618779    | C | 0.0367  |
| rs138704523 | A | 0.2033  |
| rs6540483   | G | 0.0956  |
| rs116241056 | G | 0.2646  |
| rs6427053   | C | 0.0452  |
| rs72735517  | C | 0.0812  |
| rs71647012  | C | 0.1019  |
| rs147755353 | C | -0.2729 |
| rs7410964   | G | 0.0411  |
| rs10911054  | C | -0.0344 |
| rs79346361  | A | -0.1313 |
| rs882478    | T | 0.0634  |
| rs6675844   | A | 0.0551  |
| rs34761229  | T | 0.0414  |

|             |   |         |
|-------------|---|---------|
| rs12121937  | A | 0.0612  |
| rs10494531  | T | 0.0461  |
| rs141699997 | A | -0.0923 |
| rs11586126  | T | 0.0677  |
| rs2232842   | C | 0.1145  |
| rs12133288  | A | 0.2387  |
| rs817388    | A | 0.0507  |
| rs12119808  | G | 0.0331  |
| rs141904975 | T | 0.2558  |
| rs10753902  | T | 0.0367  |
| rs17259527  | T | 0.0961  |
| rs12737976  | A | 0.0616  |
| rs272500    | A | 0.0336  |
| rs76473235  | G | 0.1185  |
| rs56367429  | A | 0.0707  |
| rs145616618 | C | 0.2137  |
| rs111732473 | T | -0.1041 |
| rs1233814   | T | 0.0396  |
| rs12410581  | A | 0.0392  |
| rs144191026 | T | 0.1663  |
| rs17105974  | G | 0.0674  |
| rs2363561   | T | 0.0345  |
| rs581587    | T | -0.0423 |
| rs12125626  | G | -0.0332 |
| rs72676073  | G | 0.1085  |
| rs116654247 | T | -0.1464 |
| rs17420873  | A | 0.1753  |
| rs10158496  | C | 0.034   |
| rs61823663  | T | -0.0823 |
| rs479807    | G | 0.0329  |
| rs2356385   | C | -0.0639 |
| rs61812687  | A | -0.115  |
| rs79315100  | T | 0.1395  |
| rs28469253  | G | 0.0469  |
| rs56903400  | G | 0.2171  |
| rs147452080 | T | 0.1853  |
| rs2100516   | G | 0.0378  |
| rs3766924   | T | -0.0409 |
| rs111360221 | T | 0.0484  |
| rs150809061 | A | -0.1499 |
| rs113070999 | A | 0.2716  |
| rs11185125  | T | -0.0332 |
| rs78737903  | G | 0.161   |
| rs12567336  | A | -0.045  |
| rs12404040  | T | 0.0817  |
| rs12142958  | A | -0.0332 |
| rs114034661 | G | -0.3181 |

|             |   |         |
|-------------|---|---------|
| rs1136348   | T | -0.0448 |
| rs55958267  | C | -0.0329 |
| rs11118841  | T | 0.1325  |
| rs7525541   | C | 0.039   |
| rs75988537  | T | -0.0583 |
| rs7547238   | T | 0.0346  |
| rs114350361 | T | 0.2049  |
| rs145075626 | G | 0.1702  |
| rs7554267   | T | 0.0376  |
| rs7515342   | A | -0.0348 |
| rs148638480 | T | 0.1658  |
| rs1017767   | A | 0.0634  |
| rs10218658  | T | 0.0401  |
| rs12081480  | G | 0.0813  |
| rs61831141  | C | -0.0522 |
| rs6680748   | A | 0.0425  |
| rs75353683  | C | 0.1047  |
| rs71642221  | G | 0.1059  |
| rs149992425 | C | 0.2517  |
| rs2982479   | G | 0.0724  |
| rs17537105  | C | 0.1306  |
| rs79002750  | A | -0.1598 |
| rs780232    | G | 0.0362  |
| rs115589536 | T | 0.1843  |
| rs41267523  | G | -0.1331 |
| rs1254100   | T | 0.0415  |
| rs2782933   | C | -0.0391 |
| rs10803172  | C | -0.0468 |
| rs79453445  | A | 0.0985  |
| rs16859332  | A | 0.1267  |
| rs3195954   | C | -0.0426 |
| rs3918018   | T | 0.1305  |
| rs34995122  | C | 0.0701  |
| rs12750902  | C | -0.2653 |
| rs148055865 | A | -0.128  |
| rs115324946 | A | -0.1624 |
| rs9661442   | T | -0.0562 |
| rs12743364  | T | 0.0898  |
| rs75477420  | G | -0.2425 |
| rs12096885  | G | 0.0497  |
| rs11204849  | A | 0.0743  |
| rs72725009  | T | -0.105  |
| rs10443224  | C | 0.0473  |
| rs7553718   | T | 0.0335  |
| rs9424617   | A | -0.0452 |
| rs55667496  | G | -0.1071 |
| rs6687264   | C | -0.0556 |

|             |   |         |
|-------------|---|---------|
| rs36023544  | T | -0.138  |
| rs1589263   | G | -0.0552 |
| rs546975    | T | 0.1033  |
| rs79578204  | T | -0.2824 |
| rs76531788  | T | 0.1231  |
| rs12125382  | C | -0.086  |
| rs4987079   | T | 0.0911  |
| rs17267227  | C | 0.0833  |
| rs17382996  | A | 0.0854  |
| rs1166343   | A | -0.0841 |
| rs3845366   | A | -0.0463 |
| rs151181972 | T | -0.2745 |
| rs79171771  | C | 0.13    |
| rs17414421  | A | 0.0556  |
| rs55656416  | T | -0.0414 |
| rs6659011   | C | 0.0502  |
| rs76944438  | T | -0.1686 |
| rs72702791  | G | -0.1113 |
| rs10494425  | A | 0.0731  |
| rs17495152  | C | -0.1528 |
| rs12067269  | G | -0.033  |
| rs79486304  | C | 0.1238  |
| rs114447087 | A | -0.2141 |
| rs2104415   | G | 0.0355  |
| rs61765119  | A | -0.1385 |
| rs115543441 | C | 0.3197  |
| rs72689820  | A | -0.1629 |
| rs71633877  | A | 0.1048  |
| rs12565150  | A | 0.0418  |
| rs2820855   | A | 0.0503  |
| rs2615812   | C | -0.0424 |
| rs78695991  | A | -0.1452 |
| rs60598073  | G | 0.0472  |
| rs2477861   | T | 0.0435  |
| rs10924089  | G | 0.1262  |
| rs2615074   | A | -0.0348 |
| rs142412138 | A | 0.1059  |
| rs149091181 | T | -0.1509 |
| rs144740194 | T | -0.1825 |
| rs114984873 | T | 0.1727  |
| rs1865225   | A | -0.0346 |
| rs74732603  | A | 0.1241  |
| rs2666859   | T | 0.042   |
| rs116658355 | G | 0.1682  |
| rs7523841   | G | -0.0418 |
| rs611774    | T | -0.0492 |
| rs7540170   | T | 0.0373  |

|             |   |         |
|-------------|---|---------|
| rs617545    | C | -0.1406 |
| rs72759851  | T | -0.0674 |
| rs7554651   | A | -0.0321 |
| rs138999208 | G | -0.1839 |
| rs61763943  | G | 0.1197  |
| rs146899820 | G | 0.1444  |
| rs146496254 | C | 0.1406  |
| rs11811454  | T | -0.0347 |
| rs12727981  | G | 0.0366  |
| rs4656613   | A | 0.0385  |
| rs140247689 | T | 0.2024  |
| rs148261599 | G | 0.0711  |
| rs6692511   | T | -0.0357 |
| rs7542533   | C | -0.033  |
| rs1889233   | A | 0.0483  |
| rs2749732   | G | -0.048  |
| rs72689132  | T | 0.1875  |
| rs11578906  | A | 0.0417  |
| rs28398147  | A | 0.1056  |
| rs11584894  | T | -0.0368 |
| rs11240502  | A | 0.0347  |
| rs7529254   | T | 0.0334  |
| rs144607587 | C | 0.0569  |
| rs142427241 | A | 0.0994  |
| rs36114990  | T | 0.0543  |
| rs17185520  | A | -0.0434 |
| rs3125833   | A | 0.0421  |
| rs149152049 | A | 0.1596  |
| rs12134278  | A | 0.1091  |
| rs1005298   | A | -0.0328 |
| rs7542125   | C | 0.0393  |
| rs79156814  | A | 0.2046  |
| rs6676318   | C | -0.0445 |
| rs2404354   | T | 0.056   |
| rs7536709   | T | -0.0404 |
| rs2817520   | G | -0.0358 |
| rs116825850 | T | 0.134   |
| rs115839163 | C | 0.2703  |
| rs952499    | C | 0.0333  |
| rs115285348 | A | -0.1026 |
| rs61785853  | C | 0.1066  |
| rs61784708  | A | 0.0645  |
| rs12034727  | A | -0.0327 |
| rs2486763   | T | 0.1239  |
| rs10494797  | T | 0.0338  |
| rs17611358  | A | 0.0392  |
| rs908858    | C | -0.0327 |



|             |   |         |
|-------------|---|---------|
| rs1376811   | T | 0.0349  |
| rs140974146 | A | -0.1535 |
| rs695235    | G | -0.0612 |
| rs78806314  | T | 0.1345  |
| rs771204    | G | 0.0461  |
| rs76764035  | G | -0.1692 |
| rs115971580 | T | 0.1151  |
| rs150908968 | G | -0.1628 |
| rs12566397  | A | 0.0356  |
| rs10430061  | A | -0.0497 |
| rs114488795 | G | 0.2398  |
| rs10157598  | C | 0.2025  |
| rs12042160  | G | 0.0526  |
| rs12124028  | T | 0.0349  |
| rs59131085  | T | -0.11   |
| rs141072198 | A | -0.2078 |
| rs12727697  | T | 0.1676  |
| rs149870992 | T | 0.2664  |
| rs142493374 | A | 0.1213  |
| rs112337347 | A | 0.1493  |
| rs12567794  | T | -0.0457 |
| rs1007831   | A | -0.038  |
| rs6659725   | G | -0.1217 |
| rs411362    | A | 0.0725  |
| rs4949252   | T | 0.0763  |
| rs34849116  | A | 0.0795  |
| rs1019830   | T | -0.0339 |
| rs115386319 | G | 0.1894  |
| rs13343108  | C | 0.0385  |
| rs616690    | A | -0.1616 |
| rs73023419  | T | 0.0572  |
| rs148773548 | T | 0.2185  |
| rs114052415 | T | 0.1637  |
| rs709704    | C | 0.0341  |
| rs147515778 | T | -0.0929 |
| rs4423078   | T | -0.0377 |
| rs7527953   | T | 0.0348  |
| rs76636864  | A | -0.0512 |
| rs79411113  | G | 0.1857  |
| rs10908551  | G | 0.063   |
| rs114072431 | A | -0.1304 |
| rs9435019   | G | 0.0709  |
| rs113324056 | A | -0.1056 |
| rs111692157 | A | 0.1388  |
| rs115351548 | T | 0.2005  |
| rs80341783  | G | -0.0933 |
| rs1499395   | A | 0.0322  |

|             |   |         |
|-------------|---|---------|
| rs12040963  | T | 0.0683  |
| rs7514352   | A | 0.08    |
| rs12047365  | C | 0.078   |
| rs12409155  | T | 0.0615  |
| rs72632876  | G | 0.0335  |
| rs7524862   | T | 0.0383  |
| rs6678355   | G | 0.0452  |
| rs72699727  | G | 0.2069  |
| rs76524868  | A | 0.1279  |
| rs1603053   | T | 0.0789  |
| rs141286754 | A | -0.104  |
| rs79570899  | T | -0.1072 |
| rs12041443  | G | 0.0339  |
| rs12735764  | C | 0.1768  |
| rs12748999  | C | 0.0656  |
| rs10881465  | C | -0.032  |
| rs2661818   | C | -0.0331 |
| rs10925871  | A | 0.0422  |
| rs116197832 | A | -0.1766 |
| rs2494887   | C | 0.043   |
| rs150270663 | C | 0.2129  |
| rs72668245  | T | -0.0828 |
| rs1832087   | G | -0.1092 |
| rs139615499 | T | 0.1099  |
| rs3737593   | G | 0.0491  |
| rs139848457 | G | 0.156   |
| rs116602592 | A | 0.123   |
| rs1340760   | C | 0.0383  |
| rs4839371   | T | 0.0655  |
| rs7555467   | T | -0.0367 |
| rs149967238 | T | -0.1077 |
| rs1780365   | A | 0.0329  |
| rs12135627  | A | 0.1109  |
| rs149171534 | A | 0.2033  |
| rs1494121   | A | -0.0973 |
| rs111418312 | T | -0.2634 |
| rs6661561   | A | 0.0378  |
| rs12035493  | A | 0.0365  |
| rs76881198  | T | -0.164  |
| rs704328    | T | 0.0321  |
| rs78696654  | C | 0.0788  |
| rs72981743  | T | -0.0686 |
| rs74900976  | A | 0.0995  |
| rs56021911  | A | 0.1315  |
| rs6657076   | T | 0.157   |
| rs1323125   | G | 0.0798  |
| rs72651546  | C | -0.0706 |

|             |   |         |
|-------------|---|---------|
| rs72656036  | T | -0.0852 |
| rs56296024  | G | 0.0563  |
| rs17455546  | C | 0.049   |
| rs12749443  | A | -0.0707 |
| rs11184633  | T | -0.0379 |
| rs77081329  | A | 0.1382  |
| rs614320    | T | -0.0805 |
| rs570107    | G | -0.0517 |
| rs6673535   | C | 0.0346  |
| rs770712    | G | 0.0423  |
| rs615080    | C | -0.0485 |
| rs115279245 | A | 0.0935  |
| rs72730678  | G | 0.1172  |
| rs11583853  | T | -0.1149 |
| rs61759168  | C | -0.0838 |
| rs17236050  | G | -0.0339 |
| rs143521950 | A | 0.1725  |
| rs1252132   | G | -0.0492 |
| rs111347115 | G | 0.0915  |
| rs116073259 | C | 0.2417  |
| rs115091535 | T | 0.2392  |
| rs10493318  | C | -0.0339 |
| rs10737197  | A | -0.032  |
| rs17393206  | T | 0.1121  |
| rs339570    | A | 0.0472  |
| rs116252612 | C | -0.2094 |
| rs114312864 | C | 0.0871  |
| rs7542970   | A | 0.1024  |
| rs78489382  | G | -0.2221 |
| rs61779018  | A | -0.1533 |
| rs7534339   | C | -0.0378 |
| rs138764426 | C | -0.2725 |
| rs477155    | G | -0.0409 |
| rs116295773 | G | 0.1949  |
| rs6688544   | C | -0.0317 |
| rs4648451   | A | 0.0439  |
| rs114082130 | A | -0.1294 |
| rs75808047  | A | -0.1808 |
| rs6683116   | T | -0.0466 |
| rs641952    | G | -0.0903 |
| rs2088104   | C | 0.1764  |
| rs12042301  | A | 0.1072  |
| rs17388638  | A | -0.2161 |
| rs10158174  | C | 0.2568  |
| rs4288546   | C | 0.1149  |
| rs333957    | G | -0.0393 |
| rs75742872  | T | 0.091   |

|             |   |         |
|-------------|---|---------|
| rs61773980  | G | -0.0752 |
| rs57983726  | A | 0.0717  |
| rs11586173  | A | 0.0343  |
| rs7528436   | A | -0.0445 |
| rs17454536  | A | -0.0816 |
| rs10915562  | A | 0.0431  |
| rs111382161 | T | 0.0422  |
| rs11582374  | T | 0.0335  |
| rs10801017  | G | -0.0634 |
| rs144255141 | C | -0.0934 |
| rs145409717 | A | 0.139   |
| rs11120972  | G | 0.0377  |
| rs11590995  | C | -0.0711 |
| rs12068489  | C | 0.0642  |
| rs2819367   | T | -0.0363 |
| rs76532116  | A | -0.1153 |
| rs72666985  | T | -0.0641 |
| rs146928721 | A | -0.0667 |
| rs61820699  | C | 0.0657  |
| rs61809497  | T | 0.1394  |
| rs6658046   | T | 0.0636  |
| rs75688850  | C | 0.1747  |
| rs11161618  | T | -0.0328 |
| rs80123086  | A | -0.0689 |
| rs501260    | C | 0.0366  |
| rs570421    | A | -0.1178 |
| rs616378    | T | -0.0732 |
| rs17131039  | T | 0.1054  |
| rs10874851  | A | 0.0315  |
| rs35436045  | A | 0.0966  |
| rs146700447 | A | 0.0892  |
| rs72641774  | G | 0.12    |
| rs74123088  | T | -0.128  |
| rs141186972 | T | 0.2099  |
| rs116945620 | A | 0.3264  |
| rs115943891 | C | 0.0415  |
| rs137918185 | A | 0.1256  |
| rs2378788   | A | -0.0361 |
| rs11804900  | A | 0.0326  |
| rs12130551  | G | -0.0355 |
| rs6429256   | T | -0.0481 |
| rs323713    | T | -0.0359 |
| rs1281188   | G | 0.0423  |
| rs3753587   | A | -0.0414 |
| rs45572833  | A | -0.1353 |
| rs4908753   | C | -0.0559 |
| rs2245920   | G | 0.0599  |

|             |   |         |
|-------------|---|---------|
| rs3906232   | A | -0.0762 |
| rs61851764  | T | -0.1023 |
| rs590368    | A | 0.034   |
| rs116126380 | A | -0.1004 |
| rs79534351  | G | -0.3106 |
| rs10874425  | A | -0.1986 |
| rs12406851  | A | -0.0332 |
| rs111937937 | A | 0.212   |
| rs11577775  | C | 0.0444  |
| rs72694820  | G | 0.18    |
| rs11206104  | G | -0.0423 |
| rs7535288   | G | -0.035  |
| rs7535152   | G | -0.068  |
| rs34114668  | G | -0.0719 |
| rs78367025  | T | -0.1481 |
| rs80202405  | A | -0.1824 |
| rs117302037 | T | 0.0605  |
| rs6665242   | C | 0.0525  |
| rs7536356   | G | -0.075  |
| rs61818575  | G | 0.06    |
| rs2873553   | G | -0.0542 |
| rs114016347 | A | 0.1344  |
| rs17497383  | T | 0.0942  |
| rs16846735  | A | -0.0396 |
| rs76334534  | T | 0.0964  |
| rs112016665 | A | -0.1426 |
| rs12135654  | C | 0.1721  |
| rs55708311  | A | 0.0854  |
| rs12129487  | G | -0.1079 |
| rs12140153  | T | 0.0666  |
| rs72665836  | A | 0.044   |
| rs4839301   | T | 0.1184  |
| rs57680669  | T | 0.0326  |
| rs79956922  | A | -0.0806 |
| rs2244857   | C | -0.0545 |
| rs2502318   | C | -0.0357 |
| rs3935940   | G | -0.2454 |
| rs59530074  | T | 0.0397  |
| rs7526426   | C | -0.0351 |
| rs76735822  | C | -0.1234 |
| rs12742895  | G | -0.1132 |
| rs3001722   | A | -0.2083 |
| rs10890398  | C | -0.0468 |
| rs7546764   | T | 0.0673  |
| rs11102000  | C | 0.0346  |
| rs79061845  | C | -0.0802 |
| rs113283353 | A | 0.0774  |

|             |   |         |
|-------------|---|---------|
| rs4844573   | C | -0.0341 |
| rs76541192  | T | 0.2012  |
| rs1977414   | T | -0.0348 |
| rs2226179   | T | -0.037  |
| rs41308389  | G | -0.1236 |
| rs338932    | C | -0.034  |
| rs55819118  | T | 0.0733  |
| rs4658835   | A | -0.0389 |
| rs72743357  | G | -0.0442 |
| rs235856    | C | 0.0361  |
| rs1550970   | T | -0.066  |
| rs79583512  | A | 0.08    |
| rs360087    | A | -0.059  |
| rs12745100  | T | -0.0821 |
| rs13376101  | C | 0.0606  |
| rs12068666  | T | 0.0518  |
| rs4545315   | C | -0.0373 |
| rs116604536 | T | -0.143  |
| rs7527386   | T | 0.0901  |
| rs78095156  | T | -0.2331 |
| rs115618898 | A | -0.1799 |
| rs141167120 | T | -0.1946 |
| rs61763298  | T | 0.2255  |
| rs1166868   | T | -0.0371 |
| rs1317631   | C | 0.0457  |
| rs12047434  | G | 0.1015  |
| rs116585916 | A | 0.1243  |
| rs72695990  | G | 0.1099  |
| rs3121622   | T | -0.0327 |
| rs17650492  | C | 0.117   |
| rs12402310  | T | -0.0647 |
| rs4620600   | G | -0.0399 |
| rs10798715  | C | -0.0767 |
| rs278839    | C | -0.049  |
| rs2821023   | T | -0.0505 |
| rs75675868  | C | 0.1031  |
| rs79915742  | C | -0.0885 |
| rs2821038   | T | -0.0715 |
| rs138033929 | C | 0.2793  |
| rs34825404  | G | 0.0769  |
| rs67978715  | T | -0.2997 |
| rs6667220   | G | -0.0361 |
| rs74737352  | T | 0.1097  |
| rs74127990  | T | -0.1295 |
| rs114978803 | A | 0.1804  |
| rs2135924   | A | -0.0384 |
| rs12049426  | C | 0.0559  |

|             |   |         |
|-------------|---|---------|
| rs72923401  | T | -0.0489 |
| rs78847517  | C | 0.1788  |
| rs143013256 | C | -0.0929 |
| rs115651413 | G | 0.1972  |
| rs7412729   | G | 0.1588  |
| rs12760036  | C | 0.0562  |
| rs4483451   | C | 0.0777  |
| rs113362601 | C | 0.0932  |
| rs11586669  | T | 0.1598  |
| rs242044    | G | -0.0321 |
| rs79397849  | A | 0.1042  |
| rs12141683  | A | 0.1938  |
| rs146380617 | A | -0.0864 |
| rs7546439   | T | -0.036  |
| rs56113429  | A | -0.0569 |
| rs11578700  | C | -0.0372 |
| rs7526929   | T | -0.0593 |
| rs11264324  | T | -0.062  |
| rs71630256  | T | 0.0581  |
| rs4344265   | A | 0.1529  |
| rs4633289   | C | -0.0881 |
| rs150896255 | A | -0.0579 |
| rs12406113  | A | 0.1399  |
| rs3766977   | T | 0.0474  |
| rs12132738  | C | 0.038   |
| rs34998634  | A | -0.1277 |
| rs2301056   | C | -0.0341 |
| rs4658914   | C | -0.043  |
| rs12035751  | A | -0.0754 |
| rs3752954   | C | -0.0413 |
| rs76891978  | A | 0.1955  |
| rs12046698  | A | -0.1773 |
| rs139384581 | T | -0.1467 |
| rs113414440 | C | 0.0994  |
| rs142267605 | G | 0.1843  |
| rs61023741  | T | 0.0388  |
| rs12565521  | G | 0.0499  |
| rs11808494  | G | 0.0345  |
| rs116487794 | T | 0.1093  |
| rs1113484   | G | 0.0357  |
| rs1405479   | G | 0.0624  |
| rs12728917  | C | 0.0439  |
| rs1856316   | T | -0.0458 |
| rs10924627  | C | -0.2345 |
| rs80196739  | G | 0.1304  |
| rs1999885   | C | -0.0683 |
| rs1381526   | C | -0.0411 |

|             |   |         |
|-------------|---|---------|
| rs61766772  | A | -0.0814 |
| rs556585    | G | -0.0364 |
| rs10429825  | A | -0.0364 |
| rs11120277  | C | -0.1111 |
| rs144863561 | G | -0.171  |
| rs3766465   | C | -0.0441 |
| rs116445288 | C | 0.1604  |
| rs6679661   | T | -0.0871 |
| rs141306602 | C | -0.1112 |
| rs11587181  | T | -0.062  |
| rs116742627 | T | -0.161  |
| rs9442382   | C | -0.0449 |
| rs6541026   | T | 0.0411  |
| rs78522870  | C | -0.1343 |
| rs1201157   | A | -0.0331 |
| rs71639048  | A | 0.1386  |
| rs115791054 | T | -0.1648 |
| rs11808496  | T | -0.0957 |
| rs138060693 | T | 0.1202  |
| rs4847258   | A | -0.1271 |
| rs35020920  | A | 0.0985  |
| rs1246352   | T | 0.062   |
| rs75686596  | A | 0.1083  |
| rs80084090  | G | 0.1008  |
| rs12119296  | T | 0.0862  |
| rs74498361  | A | 0.0576  |
| rs12732427  | T | 0.0397  |
| rs1954264   | T | -0.0425 |
| rs7414690   | G | 0.0374  |
| rs56205442  | C | 0.0827  |
| rs883319    | T | -0.0388 |
| rs111776611 | T | -0.1784 |
| rs115911391 | G | 0.1899  |
| rs13375925  | T | 0.081   |
| rs72660365  | A | 0.1866  |
| rs138296028 | A | 0.1633  |
| rs11211290  | G | -0.0546 |
| rs11576327  | C | 0.0484  |
| rs11579738  | T | -0.0672 |
| rs11185145  | C | 0.036   |
| rs12132572  | C | -0.0354 |
| rs4915142   | T | 0.1358  |
| rs12089242  | T | 0.2302  |
| rs12059546  | G | -0.0397 |
| rs72753637  | G | -0.0369 |
| rs116016552 | C | 0.1041  |
| rs149443789 | A | 0.1239  |



|             |   |         |
|-------------|---|---------|
| rs3900555   | A | -0.0313 |
| rs6427901   | A | -0.0528 |
| rs9919220   | G | 0.0423  |
| rs12025243  | T | -0.0337 |
| rs11581770  | G | 0.1618  |
| rs10218565  | T | -0.0333 |
| rs61825395  | G | -0.2013 |
| rs138819140 | A | -0.1733 |
| rs947178    | G | 0.1032  |
| rs3923962   | C | 0.0711  |
| rs3766286   | G | -0.0398 |
| rs11161604  | T | 0.0897  |
| rs11584227  | C | 0.0413  |
| rs291095    | G | -0.0381 |
| rs7525979   | T | 0.0795  |
| rs7517888   | A | -0.0341 |
| rs2495501   | C | 0.0512  |
| rs10915880  | A | -0.0518 |
| rs11576620  | G | -0.1514 |
| rs78798498  | A | -0.0923 |
| rs61836866  | A | 0.0579  |
| rs114677102 | C | -0.1315 |
| rs148521712 | A | 0.2266  |
| rs1360733   | A | -0.0437 |
| rs145875360 | A | -0.229  |
| rs35030992  | A | 0.0764  |
| rs77655020  | C | 0.136   |
| rs147975232 | A | 0.1934  |
| rs16838364  | C | -0.1668 |
| rs2138290   | C | 0.0491  |
| rs1394882   | T | 0.0348  |
| rs2294636   | G | 0.0319  |
| rs2119336   | G | 0.0539  |
| rs12069980  | T | -0.0499 |
| rs3920806   | G | -0.0506 |
| rs907187    | G | -0.0424 |
| rs115164216 | C | 0.1637  |
| rs4970496   | T | -0.0467 |
| rs2789342   | A | -0.0381 |
| rs12734517  | C | -0.1807 |
| rs13374152  | A | 0.0691  |
| rs17420782  | G | -0.0429 |
| rs144785574 | T | -0.1291 |
| rs17585810  | T | 0.0927  |
| rs1621135   | A | -0.0638 |
| rs72694579  | G | 0.0793  |
| rs4523495   | A | 0.0382  |

|             |   |         |
|-------------|---|---------|
| rs148923683 | A | 0.1714  |
| rs4908488   | C | -0.0447 |
| rs10907223  | A | 0.0795  |
| rs9437448   | T | 0.0427  |
| rs6694531   | C | 0.0309  |
| rs6679885   | G | -0.0944 |
| rs116611170 | C | 0.0967  |
| rs10914201  | T | -0.0348 |
| rs112477277 | C | 0.1626  |
| rs116132160 | G | 0.1285  |
| rs6683111   | T | 0.0546  |
| rs12409716  | G | 0.0322  |
| rs78943498  | A | -0.2026 |
| rs16840993  | G | -0.0525 |
| rs6691909   | A | -0.0314 |
| rs74150740  | A | 0.1788  |
| rs6427327   | A | -0.0361 |
| rs9429915   | G | -0.0379 |
| rs608346    | T | 0.0889  |
| rs12117651  | C | 0.0339  |
| rs3000156   | T | -0.0683 |
| rs75018600  | T | -0.207  |
| rs10874811  | T | 0.0407  |
| rs10429892  | G | 0.031   |
| rs59119364  | T | -0.096  |
| rs76565548  | A | -0.1169 |
| rs34471599  | G | 0.1972  |
| rs74698167  | A | -0.1111 |
| rs72725162  | A | 0.1186  |
| rs911234    | T | 0.0347  |
| rs12408673  | G | 0.0338  |
| rs74467347  | C | 0.1011  |
| rs2298893   | T | -0.096  |
| rs78749904  | C | -0.1549 |
| rs1180383   | A | 0.0357  |
| rs59209359  | G | -0.0694 |
| rs12409175  | C | 0.1678  |
| rs2806427   | T | -0.038  |
| rs2782576   | A | 0.0697  |
| rs114218990 | A | 0.1326  |
| rs2068336   | A | 0.0352  |
| rs12041021  | A | 0.079   |
| rs10917945  | A | 0.0324  |
| rs1779441   | G | 0.0316  |
| rs75138502  | C | 0.2165  |
| rs1427231   | T | -0.0427 |
| rs1886004   | G | 0.0522  |

|             |   |         |
|-------------|---|---------|
| rs61786216  | A | -0.1497 |
| rs41264881  | C | 0.0453  |
| rs11582233  | C | 0.1444  |
| rs74476360  | T | 0.1277  |
| rs10753837  | C | 0.0615  |
| rs28359647  | A | 0.1766  |
| rs76006259  | A | 0.1011  |
| rs12133766  | A | -0.0639 |
| rs77610528  | A | -0.0601 |
| rs17503667  | A | 0.1441  |
| rs12137675  | C | -0.0343 |
| rs2821547   | G | 0.0379  |
| rs6671147   | G | 0.0674  |
| rs114322627 | T | 0.2007  |
| rs56048691  | A | 0.2672  |
| rs12096152  | A | 0.0375  |
| rs17188679  | T | 0.1929  |
| rs114659755 | T | 0.1569  |
| rs41313882  | A | -0.1702 |
| rs148721133 | A | -0.1343 |
| rs112015720 | C | -0.1476 |
| rs72697756  | C | 0.1009  |
| rs2786768   | G | -0.0381 |
| rs12740452  | A | 0.0314  |
| rs146343718 | A | -0.1495 |
| rs12131332  | A | 0.0334  |
| rs4488029   | A | 0.0322  |
| rs115617321 | A | 0.1655  |
| rs7551806   | A | -0.0354 |
| rs13302988  | A | 0.0628  |
| rs6698091   | T | -0.0343 |
| rs10913617  | A | 0.0543  |
| rs4481881   | C | -0.0324 |
| rs115224484 | A | -0.1015 |
| rs916394    | G | -0.0462 |
| rs147754718 | C | 0.2076  |
| rs6429700   | G | -0.0388 |
| rs1998762   | G | -0.0453 |
| rs4652091   | C | -0.0384 |
| rs55933101  | C | 0.0673  |
| rs1853782   | C | 0.0379  |
| rs4920297   | T | 0.038   |
| rs115333958 | A | -0.2116 |
| rs71653045  | G | 0.0399  |
| rs895934    | A | 0.0514  |
| rs671136    | C | 0.0402  |
| rs12073093  | G | 0.0414  |

|             |   |         |
|-------------|---|---------|
| rs116820418 | T | -0.1347 |
| rs41291502  | A | -0.0825 |
| rs2229450   | A | -0.0346 |
| rs2651909   | A | 0.1148  |
| rs11586980  | A | -0.0396 |
| rs72632714  | T | -0.0779 |
| rs147247900 | T | -0.0654 |
| rs11580517  | T | 0.065   |
| rs4648973   | T | -0.0444 |
| rs17424000  | C | 0.1525  |
| rs78904621  | C | 0.0976  |
| rs4494114   | C | -0.0326 |
| rs72752969  | G | 0.0624  |
| rs112514144 | A | -0.0994 |
| rs17124480  | G | -0.0396 |
| rs111923356 | C | -0.1556 |
| rs35014917  | A | 0.1635  |
| rs12410139  | G | -0.0495 |
| rs114470872 | T | -0.109  |
| rs1204674   | A | 0.0352  |
| rs139697447 | A | 0.1809  |
| rs139722383 | C | -0.1394 |
| rs2734815   | A | 0.0382  |
| rs75798828  | T | -0.1774 |
| rs10754556  | T | -0.12   |
| rs72709691  | G | 0.0736  |
| rs947344    | T | -0.0451 |
| rs76247987  | G | 0.141   |
| rs77416609  | T | -0.055  |
| rs76870185  | T | 0.1768  |
| rs2836      | C | -0.0306 |
| rs71512933  | C | -0.1299 |
| rs6662998   | C | -0.0405 |
| rs10913195  | C | -0.0493 |
| rs1411467   | G | -0.0729 |
| rs12025917  | C | -0.0721 |
| rs76638263  | A | 0.1021  |
| rs41292651  | C | 0.1776  |
| rs72707829  | A | 0.1983  |
| rs2889159   | T | 0.1696  |
| rs1093016   | C | -0.0339 |
| rs933001    | C | 0.0313  |
| rs9658900   | C | 0.0956  |
| rs12067797  | G | -0.097  |
| rs2884921   | C | 0.0365  |
| rs35211473  | T | -0.0562 |
| rs60706151  | G | 0.057   |

|             |   |         |
|-------------|---|---------|
| rs645868    | A | 0.0407  |
| rs10399845  | G | -0.0394 |
| rs12126049  | G | 0.0621  |
| rs76144165  | C | -0.2066 |
| rs78738825  | T | 0.1579  |
| rs149907464 | C | 0.2595  |
| rs4512621   | C | -0.0955 |
| rs309485    | G | -0.0687 |
| rs12755479  | A | 0.0861  |
| rs4578182   | G | -0.0399 |
| rs142082830 | C | 0.2771  |
| rs2758656   | G | 0.032   |
| rs1088441   | T | 0.0681  |
| rs74948210  | G | 0.1558  |
| rs75981740  | G | -0.0949 |
| rs7530910   | G | -0.0484 |
| rs12756242  | T | 0.044   |
| rs588246    | C | 0.0806  |
| rs2037679   | C | 0.0562  |
| rs79468905  | T | 0.0902  |
| rs140664804 | A | 0.1391  |
| rs7051095   | T | 0.1376  |
| rs139080750 | G | -0.1597 |
| rs2802959   | G | 0.0538  |
| rs12123582  | C | -0.0572 |
| rs145736721 | T | -0.238  |
| rs2576203   | G | 0.0488  |
| rs17590104  | G | 0.0972  |
| rs9440645   | C | -0.0965 |
| rs57441943  | T | 0.1901  |
| rs7531212   | G | 0.0311  |
| rs374007    | T | -0.0415 |
| rs6587910   | A | 0.1227  |
| rs10754496  | C | -0.2023 |
| rs7539286   | A | 0.1039  |
| rs12131205  | G | 0.0654  |
| rs75007311  | C | 0.1997  |
| rs12239208  | T | 0.0905  |
| rs4658794   | A | -0.0404 |
| rs78903965  | C | -0.1247 |
| rs71653937  | C | -0.1267 |
| rs116069863 | A | 0.0906  |
| rs12031746  | T | 0.0449  |
| rs61780504  | A | 0.0309  |
| rs11582450  | A | 0.0913  |
| rs7551486   | T | -0.0346 |
| rs140426423 | T | 0.1928  |

|             |   |         |
|-------------|---|---------|
| rs2308950   | T | -0.1974 |
| rs36006526  | A | -0.2065 |
| rs897619    | C | 0.0417  |
| rs7528148   | G | 0.0512  |
| rs12117728  | A | 0.0491  |
| rs6588338   | T | 0.0363  |
| rs13447514  | A | -0.1679 |
| rs115422931 | A | 0.0966  |
| rs115628221 | C | 0.0742  |
| rs11211002  | G | 0.0319  |
| rs6426994   | A | -0.037  |
| rs6663013   | G | -0.031  |
| rs7530939   | T | 0.0605  |
| rs17406291  | C | -0.0391 |
| rs12745424  | C | -0.0486 |
| rs11102710  | T | -0.0443 |
| rs12138106  | T | -0.1225 |
| rs115312129 | T | -0.1262 |
| rs61222848  | T | 0.0853  |
| rs2392859   | G | 0.0657  |
| rs12405855  | T | 0.0443  |
| rs12142027  | C | -0.0476 |
| rs11249089  | A | 0.0499  |
| rs78652687  | A | 0.107   |
| rs74866162  | C | -0.0717 |
| rs3000895   | T | 0.07    |
| rs115275803 | G | -0.0608 |
| rs146705531 | G | 0.145   |
| rs7525221   | A | -0.0426 |
| rs61825590  | C | 0.1616  |
| rs78008994  | T | -0.1786 |
| rs12134795  | T | 0.0493  |
| rs3117090   | A | -0.0369 |
| rs2065481   | C | -0.0335 |
| rs12406888  | A | -0.0527 |
| rs1018614   | G | 0.1193  |
| rs61827281  | A | 0.1396  |
| rs11211508  | C | 0.0425  |
| rs145223164 | C | 0.19    |
| rs78361046  | T | -0.1004 |
| rs56408651  | C | -0.0854 |
| rs1234304   | T | -0.0372 |
| rs142528261 | T | -0.1929 |
| rs114550186 | A | 0.1289  |
| rs72953563  | T | 0.0627  |
| rs6540935   | A | 0.1539  |
| rs2485568   | G | 0.0362  |

|             |   |         |
|-------------|---|---------|
| rs7556506   | G | 0.0426  |
| rs11577034  | T | 0.0555  |
| rs12058490  | G | -0.056  |
| rs148082431 | A | 0.119   |
| rs1876598   | C | -0.0616 |
| rs59853190  | A | 0.0329  |
| rs12068332  | C | 0.0502  |
| rs723821    | A | -0.0494 |
| rs34687326  | A | -0.0862 |
| rs71647133  | A | 0.148   |
| rs72702756  | A | -0.1271 |
| rs11204538  | C | -0.0363 |
| rs76088680  | T | 0.0852  |
| rs116489014 | T | 0.1594  |
| rs12749547  | T | -0.0671 |
| rs12141381  | A | 0.035   |
| rs12139097  | G | 0.1485  |
| rs6674434   | G | -0.2478 |
| rs149720446 | A | 0.1424  |
| rs113106636 | T | -0.0951 |
| rs112116518 | A | 0.0786  |
| rs17113017  | C | 0.0542  |
| rs71657290  | T | 0.187   |
| rs143397080 | A | 0.2284  |
| rs72742196  | C | -0.0825 |
| rs1213983   | T | 0.0423  |
| rs138134531 | G | 0.258   |
| rs951711    | C | -0.0617 |
| rs143951574 | A | 0.2862  |
| rs6687475   | G | 0.0358  |
| rs151201352 | T | -0.0719 |
| rs1282334   | C | 0.0309  |
| rs10158328  | A | 0.0323  |
| rs77973439  | A | -0.114  |
| rs10911710  | T | 0.0987  |
| rs28914542  | A | 0.1579  |
| rs72651458  | A | -0.0385 |
| rs115521300 | G | -0.0942 |
| rs235922    | C | -0.0308 |
| rs12043235  | G | 0.0326  |
| rs12139126  | C | -0.2808 |
| rs66958114  | T | -0.036  |
| rs61773571  | C | 0.1173  |
| rs12067856  | C | -0.0432 |
| rs7521765   | G | -0.0477 |
| rs80347210  | G | 0.0718  |
| rs74487757  | A | -0.0764 |

|             |   |         |
|-------------|---|---------|
| rs115927518 | A | 0.1296  |
| rs4915477   | A | 0.0323  |
| rs17098502  | T | -0.1376 |
| rs79832569  | T | 0.0816  |
| rs12125520  | A | 0.0424  |
| rs145487465 | T | 0.189   |
| rs72674102  | A | -0.1401 |
| rs72742142  | T | -0.1225 |
| rs146340614 | A | 0.0495  |
| rs12562823  | C | 0.0441  |
| rs41264517  | A | 0.1208  |
| rs112438759 | G | 0.1286  |
| rs113694636 | T | 0.1673  |
| rs141511255 | T | 0.1999  |
| rs3855968   | T | -0.1324 |
| rs298451    | T | 0.0437  |
| rs75567207  | G | 0.083   |
| rs143703694 | A | 0.0903  |
| rs17176041  | T | 0.0646  |
| rs114084997 | T | 0.1391  |
| rs10925529  | T | 0.0438  |
| rs116121521 | C | -0.0694 |
| rs17025931  | T | -0.0626 |
| rs17434130  | G | 0.051   |
| rs78747570  | A | -0.1873 |
| rs3010233   | T | -0.0487 |
| rs12735309  | C | -0.0432 |
| rs11585040  | G | -0.0322 |
| rs2154366   | A | -0.0442 |
| rs72761331  | A | -0.1085 |
| rs12031990  | A | -0.0821 |
| rs148541847 | C | -0.23   |
| rs7550997   | A | -0.0388 |
| rs140726631 | T | 0.1999  |
| rs4949720   | C | -0.0328 |
| rs926683    | G | 0.0374  |
| rs2181596   | A | 0.1081  |
| rs72740652  | T | -0.0956 |
| rs72651326  | T | -0.0712 |
| rs59342046  | C | 0.0628  |
| rs12401340  | C | -0.0349 |
| rs6685296   | C | 0.046   |
| rs2027469   | A | -0.0431 |
| rs12133427  | A | 0.034   |
| rs114027369 | T | -0.2115 |
| rs2853484   | A | -0.0968 |
| rs7555171   | C | 0.0476  |



|             |   |         |
|-------------|---|---------|
| rs116660507 | G | 0.1406  |
| rs10159449  | G | 0.0555  |
| rs4140519   | T | -0.0325 |
| rs4654184   | A | -0.1436 |
| rs1002681   | T | -0.0315 |
| rs78966901  | A | 0.0619  |
| rs140968675 | C | 0.1721  |
| rs113620386 | A | -0.1697 |
| rs2500496   | T | 0.0332  |
| rs7515312   | G | -0.0305 |
| rs1056513   | G | -0.0431 |
| rs58891337  | T | 0.0464  |
| rs11584713  | A | 0.0514  |
| rs17434335  | T | -0.0861 |
| rs1270843   | A | -0.0422 |
| rs56005728  | G | 0.0375  |
| rs310130    | C | 0.0561  |
| rs67600458  | C | -0.0786 |
| rs10159090  | G | -0.0376 |
| rs72734740  | G | 0.1012  |
| rs12139316  | A | -0.2554 |
| rs114178352 | A | 0.0848  |
| rs13376022  | T | -0.0722 |
| rs11121146  | C | 0.0409  |
| rs78346784  | A | -0.1162 |
| rs7523650   | G | 0.0648  |
| rs77516966  | C | -0.1581 |
| rs61831279  | T | -0.1337 |
| rs997419    | A | 0.0462  |
| rs7516155   | C | 0.0409  |
| rs149325010 | A | 0.0642  |
| rs75602318  | A | 0.0994  |
| rs71653015  | G | -0.2258 |
| rs12132944  | T | 0.041   |
| rs10864350  | G | 0.0381  |
| rs61817648  | T | 0.1694  |
| rs55714835  | G | -0.0857 |
| rs12569163  | G | -0.0389 |
| rs72647409  | T | 0.1091  |
| rs10917668  | A | 0.0416  |
| rs789188    | T | -0.1188 |
| rs61823568  | A | -0.0346 |
| rs114017068 | A | 0.1131  |
| rs198376    | G | -0.0605 |
| rs61783264  | T | 0.0797  |
| rs17303473  | A | 0.0411  |
| rs1059625   | G | -0.0301 |

|             |   |         |
|-------------|---|---------|
| rs12034263  | C | 0.0413  |
| rs17360044  | G | 0.0842  |
| rs144108408 | T | 0.0842  |
| rs858592    | C | -0.0933 |
| rs35364384  | A | 0.1948  |
| rs34809810  | T | -0.1842 |
| rs114772770 | T | -0.1091 |
| rs77738925  | T | -0.0895 |
| rs61827890  | C | -0.1434 |
| rs1856356   | G | -0.0872 |
| rs6703603   | T | -0.0352 |
| rs113137436 | T | -0.175  |
| rs1577955   | G | -0.0374 |
| rs72700220  | A | -0.1042 |
| rs1962725   | A | 0.0343  |
| rs3736956   | C | 0.031   |
| rs12036093  | A | 0.1915  |
| rs61768902  | G | 0.0985  |
| rs150732173 | C | 0.2493  |
| rs72733659  | T | 0.1409  |
| rs138487085 | G | -0.1388 |
| rs114182857 | C | 0.1689  |
| rs4581264   | C | -0.0467 |
| rs1262265   | T | -0.0361 |
| rs56363138  | G | -0.0912 |
| rs115465289 | A | -0.1644 |
| rs10494113  | T | -0.0314 |
| rs5027046   | C | -0.031  |
| rs10494090  | A | -0.0302 |
| rs148831186 | T | 0.1157  |
| rs142589146 | A | 0.1236  |
| rs6703583   | C | -0.0505 |
| rs6674500   | G | -0.0354 |
| rs3820549   | G | -0.0347 |
| rs112495771 | T | -0.189  |
| rs6598962   | A | -0.0319 |
| rs114824803 | T | -0.161  |
| rs349430    | T | -0.0402 |
| rs11810184  | G | -0.0414 |
| rs77199053  | T | -0.1214 |
| rs10921148  | T | 0.0392  |
| rs11119018  | C | -0.0311 |
| rs78501063  | T | -0.1673 |
| rs35008849  | T | 0.1662  |
| rs999017    | T | -0.0528 |
| rs623448    | G | -0.0378 |
| rs2245122   | T | -0.0344 |

|             |   |         |
|-------------|---|---------|
| rs2126342   | C | -0.0334 |
| rs76062133  | T | 0.1597  |
| rs12747711  | A | -0.0305 |
| rs4076058   | G | -0.0791 |
| rs3003480   | C | -0.08   |
| rs146193695 | T | -0.2784 |
| rs2810781   | A | -0.0662 |
| rs9425283   | C | 0.0316  |
| rs680382    | C | -0.0333 |
| rs75000987  | G | 0.068   |
| rs9287010   | T | 0.1035  |
| rs2761069   | T | 0.0575  |
| rs2842909   | T | -0.038  |
| rs11122253  | G | -0.0312 |
| rs79633859  | A | -0.0972 |
| rs1725233   | T | -0.0312 |
| rs4845117   | C | -0.0708 |
| rs6697425   | A | 0.0606  |
| rs78961122  | A | 0.1165  |
| rs139280070 | G | 0.13    |
| rs12129687  | G | 0.0413  |
| rs12407007  | T | 0.0742  |
| rs10863716  | A | -0.1817 |
| rs3014866   | T | 0.0362  |
| rs61771497  | C | -0.06   |
| rs12119400  | T | -0.1566 |
| rs61770989  | C | -0.0878 |
| rs490285    | A | -0.0305 |
| rs111393187 | A | -0.0399 |
| rs78962493  | G | 0.1814  |
| rs58201914  | C | 0.0632  |
| rs2643899   | C | -0.037  |
| rs7534614   | C | -0.031  |
| rs870328    | G | -0.0358 |
| rs12134681  | A | -0.1036 |
| rs2364572   | A | -0.096  |
| rs55826845  | A | 0.0802  |
| rs10492983  | A | 0.1434  |
| rs111052140 | G | 0.0455  |
| rs6427833   | C | -0.0414 |
| rs2093516   | C | -0.1855 |
| rs140876940 | T | 0.0824  |
| rs12071031  | G | -0.1301 |
| rs12036556  | T | 0.1355  |
| rs114239142 | T | 0.2378  |
| rs139339641 | A | 0.1611  |
| rs384044    | C | 0.0304  |

|             |   |         |
|-------------|---|---------|
| rs2235766   | G | 0.0558  |
| rs17130111  | A | -0.1614 |
| rs76218398  | A | -0.1455 |
| rs1888861   | C | 0.0365  |
| rs6675225   | A | -0.0374 |
| rs6688113   | A | -0.211  |
| rs61776536  | C | -0.1027 |
| rs6698696   | A | 0.0345  |
| rs76730565  | T | -0.1936 |
| rs113121828 | C | -0.0888 |
| rs146037254 | T | 0.0754  |
| rs7548866   | T | 0.187   |
| rs11583881  | A | 0.0394  |
| rs74512432  | G | -0.0859 |
| rs112568355 | A | 0.1275  |
| rs7519629   | G | -0.0944 |
| rs11590106  | G | -0.0361 |
| rs10927305  | C | 0.0409  |
| rs143056937 | C | 0.2084  |
| rs34125417  | A | 0.0608  |
| rs72665226  | T | -0.1376 |
| rs11577726  | C | 0.0371  |
| rs45483993  | C | -0.2626 |
| rs7546277   | A | 0.0757  |
| rs12022676  | A | 0.1007  |
| rs77414869  | A | 0.1466  |
| rs17035713  | G | 0.0653  |
| rs80081786  | C | 0.0481  |
| rs7537018   | T | 0.0347  |
| rs77314275  | G | 0.0755  |
| rs6695707   | C | -0.0444 |
| rs76354874  | C | 0.228   |
| rs10914655  | G | -0.0344 |
| rs1631056   | C | 0.0313  |
| rs80148997  | T | 0.056   |
| rs111695916 | T | 0.1653  |
| rs116164290 | A | 0.1416  |
| rs74688906  | A | -0.1642 |
| rs150311192 | A | 0.1595  |
| rs12138214  | T | 0.0317  |
| rs7514190   | T | 0.0352  |
| rs10911762  | A | 0.1639  |
| rs7519117   | T | 0.0429  |
| rs12030427  | A | 0.0446  |
| rs4906998   | A | 0.0636  |
| rs77995521  | T | 0.1215  |
| rs10732635  | G | -0.031  |

|             |   |         |
|-------------|---|---------|
| rs78234094  | G | -0.1117 |
| rs2794665   | A | -0.0315 |
| rs79739004  | G | -0.2401 |
| rs11581846  | G | -0.057  |
| rs12057471  | A | -0.0798 |
| rs114775827 | A | 0.2037  |
| rs149750356 | G | -0.1874 |
| rs11166001  | T | 0.0396  |
| rs72738944  | G | 0.0459  |
| rs1776222   | C | 0.0319  |
| rs2376034   | T | 0.069   |
| rs10918167  | A | -0.0536 |
| rs17526867  | C | -0.0563 |
| rs72699308  | G | 0.0792  |
| rs140816357 | T | 0.1919  |
| rs6698795   | T | -0.0896 |
| rs2076346   | C | -0.0357 |
| rs11184974  | G | -0.0455 |
| rs749664    | T | 0.0589  |
| rs74718581  | G | 0.2063  |
| rs6676599   | T | 0.042   |
| rs2564725   | G | -0.2445 |
| rs7550051   | G | -0.0356 |
| rs1635561   | T | 0.0389  |
| rs1029214   | A | 0.1917  |
| rs12121745  | G | 0.0486  |
| rs115815744 | A | 0.1032  |
| rs113608023 | T | -0.2367 |
| rs113944737 | G | -0.077  |
| rs74337541  | A | 0.13    |
| rs6427082   | T | 0.0299  |
| rs61818998  | C | 0.1557  |
| rs55654532  | T | -0.0642 |
| rs12747719  | T | -0.0373 |
| rs12164533  | A | -0.0433 |
| rs147322213 | C | 0.1576  |
| rs2173541   | C | 0.0306  |
| rs2379107   | G | -0.0429 |
| rs10799458  | A | 0.0381  |
| rs78059051  | T | -0.1195 |
| rs2391707   | G | 0.0355  |
| rs2744825   | G | -0.0457 |
| rs1964119   | A | 0.0698  |
| rs149723604 | A | 0.0827  |
| rs113555027 | G | -0.2178 |
| rs72685035  | C | -0.133  |
| rs74888290  | G | -0.1876 |

|             |   |         |
|-------------|---|---------|
| rs11580068  | C | 0.1366  |
| rs11122563  | T | 0.0316  |
| rs34008685  | G | -0.2196 |
| rs75154133  | T | -0.0572 |
| rs35972053  | A | 0.03    |
| rs12132229  | A | -0.0543 |
| rs77944413  | G | -0.0824 |
| rs11572630  | A | 0.1313  |
| rs1932260   | A | -0.0647 |
| rs882423    | T | 0.0435  |
| rs61841170  | G | 0.0545  |
| rs73030197  | T | 0.1984  |
| rs111739640 | C | 0.1308  |
| rs566421    | A | -0.0308 |
| rs35164209  | C | -0.0628 |
| rs17123306  | T | 0.079   |
| rs76638888  | C | -0.0594 |
| rs35200126  | A | 0.1823  |
| rs144136460 | T | 0.1683  |
| rs17375903  | C | 0.1977  |
| rs76491046  | A | 0.0865  |
| rs113483627 | G | 0.2621  |
| rs34019357  | T | 0.047   |
| rs59188898  | A | 0.1335  |
| rs116833970 | T | -0.184  |
| rs734995    | C | -0.0315 |
| rs28478311  | C | 0.0534  |
| rs11208152  | A | -0.0378 |
| rs115231753 | C | -0.1581 |
| rs72719891  | T | 0.0571  |
| rs146535763 | G | 0.2134  |
| rs7545755   | A | 0.0471  |
| rs78893050  | A | 0.111   |
| rs74625723  | A | -0.1041 |
| rs3850533   | C | 0.05    |
| rs12026325  | C | -0.0342 |
| rs11120675  | T | -0.0482 |
| rs1889463   | C | 0.0341  |
| rs112443956 | A | 0.0608  |
| rs2817889   | G | 0.0424  |
| rs76207091  | A | 0.0783  |
| rs2737821   | A | 0.1278  |
| rs634296    | A | 0.0926  |
| rs7551036   | A | 0.036   |
| rs72767984  | T | -0.1368 |
| rs1246018   | A | 0.0327  |
| rs56320158  | G | -0.1052 |

|             |   |         |
|-------------|---|---------|
| rs11573543  | C | -0.0389 |
| rs10158599  | G | -0.0529 |
| rs79124882  | C | -0.06   |
| rs12138627  | A | -0.0418 |
| rs7417172   | A | -0.2962 |
| rs1414484   | T | 0.0662  |
| rs78433152  | T | -0.1421 |
| rs116430226 | G | -0.0788 |
| rs114105326 | A | -0.1566 |
| rs115457091 | A | -0.1727 |
| rs11586424  | G | 0.046   |
| rs596695    | A | -0.0309 |
| rs12406843  | A | 0.1085  |
| rs79458861  | C | 0.2219  |
| rs114693481 | T | 0.2108  |
| rs114767183 | G | 0.185   |
| rs145514075 | T | -0.2268 |
| rs12724819  | G | 0.1178  |
| rs61822696  | C | -0.0707 |
| rs12067535  | C | -0.0684 |
| rs16826042  | G | 0.0451  |
| rs459064    | G | -0.0307 |
| rs145456171 | T | -0.2083 |
| rs7555026   | G | 0.0363  |
| rs72744690  | T | 0.0873  |
| rs4653443   | C | -0.0441 |
| rs72731104  | G | -0.0363 |
| rs144750259 | T | 0.1414  |
| rs77126691  | G | -0.1887 |
| rs909530    | T | 0.0355  |
| rs861907    | A | 0.0971  |
| rs4650057   | G | 0.0316  |
| rs148028168 | C | 0.2277  |
| rs7548753   | T | 0.0809  |
| rs12096399  | G | -0.211  |
| rs148580426 | A | 0.1577  |
| rs7526879   | T | -0.0311 |
| rs75105860  | T | -0.0606 |
| rs817468    | T | 0.0396  |
| rs17109961  | T | 0.1874  |
| rs12120628  | A | 0.0558  |
| rs10875042  | T | -0.0421 |
| rs17128163  | T | -0.1098 |
| rs17130987  | A | -0.042  |
| rs77915342  | T | -0.1279 |
| rs10874203  | A | -0.03   |
| rs41267327  | G | -0.1949 |

|             |   |         |
|-------------|---|---------|
| rs138654305 | T | 0.1751  |
| rs6662174   | A | -0.0354 |
| rs56760315  | G | -0.0907 |
| rs75782354  | A | 0.1521  |
| rs3026867   | T | 0.0943  |
| rs115092632 | A | -0.1738 |
| rs12135298  | A | -0.0475 |
| rs11579226  | G | 0.1872  |
| rs75330386  | A | 0.1366  |
| rs4431869   | A | -0.03   |
| rs116838002 | G | 0.1223  |
| rs61819914  | G | 0.167   |
| rs11572505  | C | -0.0662 |
| rs76451066  | G | 0.1012  |
| rs115799925 | A | 0.1571  |
| rs17483465  | A | 0.1407  |
| rs112420708 | T | -0.1119 |
| rs4609435   | G | 0.0475  |
| rs149301592 | G | 0.1488  |
| rs143363022 | A | -0.1235 |
| rs72707570  | C | -0.0411 |
| rs114305144 | T | 0.0671  |
| rs12081664  | T | -0.0472 |
| rs149759662 | A | -0.2671 |
| rs11591079  | T | -0.0486 |
| rs78315017  | G | 0.0431  |
| rs149096609 | C | 0.1461  |
| rs3027034   | T | 0.0493  |
| rs28409441  | A | -0.0682 |
| rs79886812  | T | 0.0383  |
| rs2039538   | G | 0.0356  |
| rs7513036   | T | 0.1034  |
| rs17504775  | A | 0.0503  |
| rs61790261  | A | 0.1737  |
| rs79176272  | T | -0.0941 |
| rs12058604  | C | 0.0445  |
| rs67186259  | A | -0.039  |
| rs72674290  | G | 0.2105  |
| rs1413207   | T | -0.034  |
| rs72641128  | G | 0.0488  |
| rs12045708  | T | -0.0731 |
| rs6665966   | A | -0.195  |
| rs55899252  | A | -0.2005 |
| rs145362781 | C | 0.1628  |
| rs6687745   | C | 0.0347  |
| rs72747093  | C | 0.1631  |
| rs115672193 | G | -0.16   |



|             |   |         |
|-------------|---|---------|
| rs12140225  | C | 0.0885  |
| rs10919806  | T | 0.0403  |
| rs7514550   | G | 0.0303  |
| rs4908473   | C | -0.0565 |
| rs6688694   | C | 0.0367  |
| rs12562849  | C | 0.0586  |
| rs12124122  | C | -0.0479 |
| rs35295903  | A | -0.0636 |
| rs148394487 | T | 0.1062  |
| rs77315719  | T | -0.3234 |
| rs12405932  | T | 0.0681  |
| rs2096224   | G | -0.0428 |
| rs142420651 | G | 0.1901  |
| rs9701244   | G | -0.0377 |
| rs78768215  | A | -0.169  |
| rs80191692  | G | 0.0519  |
| rs56744320  | A | -0.049  |
| rs12089393  | G | 0.0404  |
| rs80183858  | T | -0.1451 |
| rs142563288 | T | 0.274   |
| rs4000189   | T | 0.0836  |
| rs477265    | C | 0.0685  |
| rs77564194  | T | -0.1629 |
| rs6675673   | C | 0.0389  |
| rs267733    | G | -0.0409 |
| rs75946603  | A | -0.076  |
| rs80284744  | G | 0.0964  |
| rs6672992   | C | -0.0415 |
| rs117353438 | A | 0.1052  |
| rs72689536  | T | 0.113   |
| rs116674299 | T | -0.0943 |
| rs4575127   | T | 0.0714  |
| rs76823489  | C | 0.0659  |
| rs72758643  | G | -0.0533 |
| rs146700412 | G | -0.1262 |
| rs116363605 | G | -0.084  |
| rs77755874  | G | 0.1969  |
| rs113050636 | A | -0.0974 |
| rs10753010  | G | -0.0352 |
| rs114605935 | T | 0.0931  |
| rs59815839  | C | 0.0491  |
| rs17098770  | C | -0.1121 |
| rs142025618 | A | -0.1574 |
| rs6668536   | T | -0.0584 |
| rs114844370 | C | 0.1637  |
| rs7523718   | C | -0.0295 |
| rs61781864  | G | 0.1464  |

|             |   |         |
|-------------|---|---------|
| rs72969023  | T | 0.1787  |
| rs12131575  | T | 0.0392  |
| rs6691729   | A | -0.0427 |
| rs10918411  | C | 0.0314  |
| rs11260661  | C | -0.1092 |
| rs150809936 | T | -0.1182 |
| rs12126989  | C | 0.0347  |
| rs148326705 | C | -0.2613 |
| rs2494439   | C | 0.067   |
| rs116170836 | C | -0.1203 |
| rs116599348 | G | 0.204   |
| rs4412595   | A | 0.04    |
| rs380901    | T | -0.0314 |
| rs3738425   | G | -0.0372 |
| rs7531193   | T | -0.0464 |
| rs6697481   | C | -0.0308 |
| rs3849184   | G | 0.0327  |
| rs12093512  | T | 0.1467  |
| rs17431299  | G | -0.09   |
| rs1886136   | T | -0.1803 |
| rs17020510  | G | 0.0543  |
| rs1952019   | T | 0.0527  |
| rs77243091  | T | 0.1548  |
| rs150662239 | T | -0.1282 |
| rs78381757  | A | 0.0881  |
| rs12754706  | G | 0.0937  |
| rs74551536  | C | -0.0983 |
| rs12127732  | A | 0.2136  |
| rs112998422 | A | -0.0547 |
| rs116645026 | A | -0.1012 |
| rs72733271  | T | -0.0537 |
| rs12128887  | G | -0.0369 |
| rs2476161   | A | -0.1945 |
| rs111297859 | T | -0.0984 |
| rs66659021  | G | 0.0428  |
| rs61855716  | G | 0.1676  |
| rs41281396  | T | -0.1372 |
| rs75971130  | T | -0.0484 |
| rs146972054 | A | -0.1993 |
| rs33927012  | G | 0.1361  |
| rs143480539 | G | -0.1907 |
| rs35240478  | C | -0.0337 |
| rs112308692 | C | -0.1379 |
| rs17724965  | A | -0.0522 |
| rs60977529  | A | 0.1685  |
| rs11120931  | C | 0.0922  |
| rs77339597  | T | 0.0938  |

|             |   |         |
|-------------|---|---------|
| rs138487400 | A | 0.146   |
| rs140339978 | A | -0.1521 |
| rs72751851  | A | -0.0418 |
| rs9425530   | A | -0.063  |
| rs10910619  | C | 0.0391  |
| rs115681077 | T | 0.0413  |
| rs77333814  | T | 0.1891  |
| rs12564527  | T | 0.0419  |
| rs1040394   | T | -0.1209 |
| rs116538855 | G | -0.1369 |
| rs17351235  | T | -0.1422 |
| rs72977479  | T | 0.1739  |
| rs6672910   | C | -0.0328 |
| rs148816534 | G | 0.1523  |
| rs7542009   | G | 0.0421  |
| rs148872245 | G | -0.1536 |
| rs79948993  | C | 0.0671  |
| rs7537344   | T | 0.0292  |
| rs2842228   | C | 0.1293  |
| rs77766177  | T | -0.1856 |
| rs11578937  | G | -0.0464 |
| rs954206    | T | 0.0332  |
| rs12039194  | A | -0.0498 |
| rs2344671   | A | 0.0612  |
| rs3738782   | A | -0.0593 |
| rs72744421  | T | -0.2258 |
| rs57821446  | G | 0.1752  |
| rs61788009  | A | 0.0667  |
| rs72646414  | A | -0.0658 |
| rs12122559  | T | 0.0749  |
| rs6426905   | T | 0.0632  |
| rs78151551  | G | 0.1849  |
| rs41303625  | G | -0.2078 |
| rs77015604  | G | 0.1225  |
| rs10924544  | T | 0.2138  |
| rs12130061  | C | -0.1492 |
| rs4622135   | G | -0.0825 |
| rs9438021   | A | 0.1585  |
| rs1855844   | G | 0.0319  |
| rs140912950 | T | 0.1339  |
| rs12408896  | A | 0.0431  |
| rs116236688 | T | -0.2114 |
| rs116410651 | T | 0.2324  |
| rs72915883  | T | 0.13    |
| rs61825983  | C | -0.2252 |
| rs74740156  | G | -0.1541 |
| rs56236174  | A | 0.1135  |

|             |   |         |
|-------------|---|---------|
| rs72762374  | A | -0.0798 |
| rs7521697   | G | 0.0492  |
| rs116659780 | A | -0.1375 |
| rs10916398  | C | 0.0418  |
| rs35755728  | G | 0.0569  |
| rs1736450   | T | -0.0298 |
| rs7525512   | A | -0.1024 |
| rs138661339 | G | -0.1371 |
| rs12353954  | C | -0.0316 |
| rs4653515   | A | 0.0299  |
| rs115453772 | G | 0.2219  |
| rs4140534   | A | 0.048   |
| rs12082544  | C | 0.1098  |
| rs113347714 | C | 0.0786  |
| rs11581535  | T | 0.06    |
| rs4483396   | A | 0.0381  |
| rs55656811  | T | -0.0429 |
| rs61775450  | A | -0.075  |
| rs114929829 | G | 0.1213  |
| rs1737978   | G | 0.0366  |
| rs111231746 | C | -0.1512 |
| rs2994036   | G | -0.1157 |
| rs12141919  | C | -0.0871 |
| rs2842856   | C | 0.0456  |
| rs113383755 | A | 0.045   |
| rs906350    | C | 0.035   |
| rs74850688  | T | -0.0996 |
| rs669162    | T | 0.0886  |
| rs72641595  | G | 0.0386  |
| rs80314439  | G | -0.0824 |
| rs175322    | C | 0.0349  |
| rs78078952  | C | 0.0669  |
| rs7413674   | T | 0.0989  |
| rs707194    | T | -0.0303 |
| rs17350053  | C | -0.0616 |
| rs12406586  | T | -0.0554 |
| rs148477673 | G | 0.1126  |
| rs115552537 | A | -0.1163 |
| rs7543433   | C | -0.0359 |
| rs12408269  | C | 0.0336  |
| rs137913606 | G | 0.1101  |
| rs11584199  | C | -0.0657 |
| rs75673128  | A | 0.0684  |
| rs116282200 | T | -0.1244 |
| rs2343125   | C | 0.0335  |
| rs72733648  | G | 0.0604  |
| rs77884663  | G | -0.1557 |

|             |   |         |
|-------------|---|---------|
| rs72658944  | T | 0.1917  |
| rs12566559  | C | 0.0351  |
| rs150601375 | C | -0.0853 |
| rs12739458  | G | -0.0899 |
| rs147734925 | G | -0.2229 |
| rs12410417  | C | -0.0663 |
| rs1061631   | A | -0.0398 |
| rs115084184 | A | -0.1803 |
| rs72747113  | T | -0.099  |
| rs6678795   | A | 0.0288  |
| rs75378030  | A | 0.1396  |
| rs75054708  | T | 0.0672  |
| rs72669448  | A | 0.0912  |
| rs10881156  | A | -0.0329 |
| rs12129849  | T | 0.084   |
| rs1245489   | G | -0.0301 |
| rs142486420 | T | -0.1702 |
| rs12735704  | C | 0.1122  |
| rs491061    | G | -0.0293 |
| rs1166351   | T | -0.0298 |
| rs116045473 | C | -0.2163 |
| rs76470519  | T | 0.1994  |
| rs78620616  | C | 0.0709  |
| rs115922909 | A | 0.21    |
| rs1021462   | A | 0.0294  |
| rs55820829  | A | -0.1943 |
| rs72636881  | T | -0.0692 |
| rs1538757   | T | 0.0545  |
| rs12049158  | C | 0.0469  |
| rs17096289  | A | -0.0295 |
| rs2097514   | G | 0.0338  |
| rs111843096 | A | 0.1019  |
| rs6676345   | G | 0.0338  |
| rs927219    | A | -0.0342 |
| rs11121374  | G | -0.0525 |
| rs111800554 | G | 0.1805  |
| rs2275171   | T | 0.032   |
| rs4845954   | G | 0.0713  |
| rs41264013  | G | -0.1323 |
| rs72730333  | C | -0.0368 |
| rs2256883   | T | -0.0311 |
| rs311444    | G | 0.0397  |
| rs11264401  | A | 0.1113  |
| rs17497598  | C | -0.0799 |
| rs7553137   | C | -0.0436 |
| rs320896    | C | 0.0336  |
| rs79094989  | G | -0.0603 |

|             |   |         |
|-------------|---|---------|
| rs6424781   | T | -0.0293 |
| rs115181288 | T | 0.1023  |
| rs11208254  | T | 0.0329  |
| rs7523252   | A | 0.0437  |
| rs11205398  | A | 0.2206  |
| rs12088135  | T | 0.0893  |
| rs80087370  | T | 0.1782  |
| rs75761128  | G | -0.1694 |
| rs79521954  | G | 0.2088  |
| rs76556595  | A | 0.1125  |
| rs34157224  | T | 0.031   |
| rs78085588  | T | -0.0803 |
| rs4233429   | T | 0.0329  |
| rs113344258 | A | 0.1774  |
| rs12041612  | C | -0.0632 |
| rs116284958 | A | 0.2327  |
| rs6693489   | G | -0.0295 |
| rs11582914  | T | 0.0637  |
| rs115775786 | A | 0.3014  |
| rs4951711   | T | 0.0347  |
| rs150620219 | G | 0.214   |
| rs79758152  | C | -0.1034 |
| rs57868807  | A | -0.0907 |
| rs10158739  | A | 0.1104  |
| rs34303426  | C | 0.0467  |
| rs577623    | C | 0.0379  |
| rs61841163  | G | -0.0837 |
| rs112280142 | C | 0.1086  |
| rs11102933  | C | 0.0295  |
| rs115368200 | A | 0.1764  |
| rs4357530   | G | 0.0321  |
| rs6662276   | T | -0.0774 |
| rs1042832   | G | 0.0324  |
| rs78902343  | A | -0.1865 |
| rs4655461   | G | -0.0349 |
| rs35681973  | T | 0.1883  |
| rs12126429  | C | 0.1763  |
| rs115677550 | G | 0.1819  |
| rs305462    | T | -0.1529 |
| rs11807546  | A | 0.1865  |
| rs2208746   | C | 0.0432  |
| rs77627703  | A | 0.0957  |
| rs140328622 | G | -0.1687 |
| rs12049278  | C | 0.0597  |
| rs11585441  | C | 0.076   |
| rs55927702  | A | -0.071  |
| rs34015683  | T | -0.0698 |

|             |   |         |
|-------------|---|---------|
| rs114207830 | G | 0.1944  |
| rs114708011 | G | 0.1567  |
| rs12354382  | T | -0.1954 |
| rs11165173  | A | -0.0539 |
| rs140067547 | G | -0.1751 |
| rs6662967   | G | -0.0479 |
| rs6421760   | C | -0.046  |
| rs115809152 | A | 0.142   |
| rs55670708  | T | 0.0531  |
| rs2301478   | A | -0.0383 |
| rs143685616 | G | -0.2398 |
| rs77977974  | A | 0.0478  |
| rs319656    | G | 0.0755  |
| rs112935834 | A | -0.2188 |
| rs114107892 | C | 0.1558  |
| rs115832336 | A | 0.1128  |
| rs1446963   | G | 0.0408  |
| rs116596494 | C | -0.1762 |
| rs12133355  | A | 0.0331  |
| rs72697071  | T | -0.0622 |
| rs748488    | G | 0.0323  |
| rs76753577  | C | 0.1154  |
| rs34918275  | C | 0.1139  |
| rs114338560 | A | 0.0637  |
| rs114623508 | C | 0.1628  |
| rs2153036   | C | 0.0649  |
| rs36053005  | T | -0.0942 |
| rs12756207  | C | -0.0374 |
| rs59218143  | C | 0.0486  |
| rs11587481  | G | -0.0596 |
| rs1051740   | C | -0.0336 |
| rs3737983   | A | 0.0295  |
| rs113305678 | C | 0.0887  |
| rs11209241  | A | 0.0393  |
| rs7516762   | T | -0.0502 |
| rs72695345  | G | 0.1731  |
| rs3889259   | A | -0.0359 |
| rs4642950   | G | -0.0366 |
| rs11162243  | A | 0.0345  |
| rs4845396   | G | -0.0285 |
| rs61833720  | G | 0.0832  |
| rs12128858  | C | -0.0582 |
| rs57485568  | G | -0.0489 |
| rs1416036   | G | -0.0369 |
| rs11577774  | G | -0.1004 |
| rs144250798 | A | -0.0917 |
| rs569930    | A | -0.074  |

|             |   |         |
|-------------|---|---------|
| rs10127551  | G | -0.0336 |
| rs487675    | C | -0.0313 |
| rs74140388  | G | 0.0464  |
| rs76055902  | A | 0.0651  |
| rs2486545   | T | -0.0551 |
| rs819723    | T | -0.0367 |
| rs7416244   | G | -0.0465 |
| rs11249028  | T | 0.0667  |
| rs72877943  | A | 0.1318  |
| rs138533062 | A | -0.1605 |
| rs75799604  | G | -0.0618 |
| rs602802    | T | 0.0302  |
| rs12140216  | G | -0.0425 |
| rs76669841  | A | 0.0463  |
| rs1268475   | A | -0.16   |
| rs74344183  | C | -0.0535 |
| rs4364910   | A | 0.1273  |
| rs149777035 | A | -0.0975 |
| rs11162922  | G | -0.0579 |
| rs143103949 | T | -0.2266 |
| rs12084797  | G | 0.1366  |
| rs1809914   | A | -0.0367 |
| rs140555046 | T | 0.0491  |
| rs112254829 | T | -0.1149 |
| rs6690383   | T | 0.059   |
| rs11588483  | T | 0.1341  |
| rs6663989   | C | -0.0469 |
| rs111883670 | G | 0.1098  |
| rs72702696  | C | -0.0856 |
| rs16825572  | G | 0.0541  |
| rs11806282  | T | 0.0797  |
| rs10495369  | T | -0.046  |
| rs114887688 | T | -0.1168 |
| rs271749    | C | 0.0367  |
| rs79102785  | C | -0.1003 |
| rs35085899  | C | 0.0607  |
| rs7516175   | C | 0.0421  |
| rs78018044  | A | -0.0534 |
| rs6677623   | T | 0.0336  |
| rs61834716  | T | 0.127   |
| rs72859578  | C | 0.0758  |
| rs16844196  | C | -0.0386 |
| rs145264216 | T | -0.0859 |
| rs2391706   | C | -0.0294 |
| rs113852887 | T | -0.1604 |
| rs1291909   | G | -0.1185 |
| rs3790826   | G | -0.0614 |



|             |   |         |
|-------------|---|---------|
| rs171003    | G | -0.0288 |
| rs4656548   | G | -0.0488 |
| rs11590996  | A | 0.0433  |
| rs7544911   | G | 0.1938  |
| rs3125896   | A | -0.0393 |
| rs765838    | C | 0.0828  |
| rs61769622  | T | -0.1335 |
| rs72672608  | C | -0.0623 |
| rs1043941   | T | 0.0392  |
| rs143073914 | T | -0.1817 |
| rs784602    | A | -0.0297 |
| rs6424101   | G | 0.0306  |
| rs238098    | C | 0.0295  |
| rs72757552  | A | -0.1828 |
| rs7529963   | T | 0.0347  |
| rs17496235  | A | -0.0621 |
| rs1415865   | T | -0.0348 |
| rs12563179  | T | 0.0449  |
| rs11589665  | G | -0.1545 |
| rs11206930  | G | 0.0336  |
| rs4657020   | A | -0.0554 |
| rs74973473  | A | -0.0639 |
| rs1229349   | T | -0.1874 |
| rs566613    | G | 0.0408  |
| rs1415938   | T | -0.1058 |
| rs12093083  | G | 0.1151  |
| rs68002039  | G | -0.0628 |
| rs3121309   | A | -0.0362 |
| rs1546064   | T | 0.0346  |
| rs941518    | A | 0.0336  |
| rs76543990  | T | 0.232   |
| rs1933213   | G | 0.0427  |
| rs11583907  | T | 0.0462  |
| rs75424820  | T | 0.193   |
| rs11548311  | T | -0.0478 |
| rs12569275  | C | 0.0287  |
| rs58580749  | T | 0.1453  |
| rs61776509  | A | 0.054   |
| rs493950    | G | 0.0462  |
| rs74496297  | T | 0.1218  |
| rs10800103  | A | -0.0782 |
| rs10927462  | C | -0.0346 |
| rs55938763  | T | 0.12    |
| rs76047153  | T | -0.0985 |
| rs1764346   | C | 0.0614  |
| rs17478459  | G | -0.0364 |
| rs6658024   | C | -0.0328 |

|             |   |         |
|-------------|---|---------|
| rs115039341 | T | 0.1756  |
| rs59139973  | A | -0.0561 |
| rs9438687   | A | -0.0297 |
| rs148730864 | A | -0.0992 |
| rs144040277 | C | -0.0457 |
| rs4333890   | T | 0.0575  |
| rs74552465  | G | -0.1592 |
| rs10926315  | T | 0.0303  |
| rs2247895   | T | 0.0579  |
| rs78473820  | G | -0.131  |
| rs75969334  | G | 0.1307  |
| rs659580    | T | 0.0349  |
| rs75731445  | G | -0.1509 |
| rs35645512  | T | -0.0856 |
| rs6693156   | G | 0.0308  |
| rs6683921   | A | -0.124  |
| rs114473983 | T | -0.1145 |
| rs500639    | G | 0.0297  |
| rs61631424  | T | -0.0381 |
| rs10493275  | G | -0.0498 |
| rs11809303  | G | 0.0656  |
| rs3738565   | G | 0.1623  |
| rs4839163   | T | 0.2907  |
| rs7537500   | G | 0.0291  |
| rs34750609  | A | -0.113  |
| rs6661381   | G | -0.0322 |
| rs72760122  | G | -0.0769 |
| rs11466561  | C | -0.0602 |
| rs2223305   | A | 0.035   |
| rs113286557 | C | -0.0808 |
| rs10927157  | G | -0.1222 |
| rs74701588  | G | -0.0488 |
| rs147434392 | T | -0.1459 |
| rs144311621 | T | 0.1751  |
| rs76490676  | T | -0.1521 |
| rs114169818 | A | -0.1338 |
| rs2647119   | G | -0.0284 |
| rs11210049  | C | 0.0325  |
| rs115470507 | T | -0.0843 |
| rs142843721 | G | -0.1383 |
| rs1538259   | C | 0.0433  |
| rs115258174 | T | 0.072   |
| rs2180273   | C | -0.0396 |
| rs75509076  | T | 0.0963  |
| rs2027046   | T | -0.0617 |
| rs875140    | G | 0.0306  |
| rs112845846 | G | -0.1735 |

|             |   |         |
|-------------|---|---------|
| rs7410917   | C | 0.0339  |
| rs72668238  | A | -0.1109 |
| rs72718253  | C | -0.1154 |
| rs139397838 | T | -0.1129 |
| rs12032403  | G | -0.058  |
| rs76898602  | A | 0.1062  |
| rs75303797  | A | -0.1691 |
| rs2174219   | T | -0.0439 |
| rs11808307  | G | -0.1023 |
| rs10082123  | T | -0.051  |
| rs11578175  | A | 0.0451  |
| rs74068585  | C | 0.0951  |
| rs116599466 | A | 0.1503  |
| rs115276734 | A | 0.1912  |
| rs11102342  | C | 0.0305  |
| rs3737808   | C | 0.0315  |
| rs17025517  | G | 0.0882  |
| rs72728806  | T | 0.0766  |
| rs79228431  | A | -0.0862 |
| rs78210234  | G | -0.2595 |
| rs34991674  | A | -0.0339 |
| rs148520558 | T | 0.1774  |
| rs72657295  | G | -0.0499 |
| rs2357231   | T | -0.0303 |
| rs114855017 | T | -0.1024 |
| rs115947258 | G | 0.1111  |
| rs144599124 | T | -0.1778 |
| rs2807651   | T | -0.0607 |
| rs79944415  | A | 0.2766  |
| rs6665822   | A | -0.0302 |
| rs12405038  | A | 0.0904  |
| rs139690758 | A | 0.1813  |
| rs141113629 | T | -0.144  |
| rs12127182  | G | -0.0413 |
| rs143325743 | C | -0.1126 |
| rs72763483  | T | 0.1785  |
| rs17032048  | A | -0.0494 |
| rs2025761   | A | 0.0943  |
| rs607715    | G | -0.039  |
| rs17486797  | G | 0.0627  |
| rs17785388  | A | -0.2013 |
| rs12734878  | C | 0.0479  |
| rs116206127 | C | 0.1435  |
| rs1067244   | A | -0.0292 |
| rs111301847 | A | 0.1323  |
| rs12125628  | A | -0.08   |
| rs76567118  | T | 0.1708  |

|             |   |         |
|-------------|---|---------|
| rs705434    | T | -0.1112 |
| rs78536264  | T | -0.0943 |
| rs16841715  | G | 0.1087  |
| rs1538268   | A | -0.0288 |
| rs77112902  | A | -0.0769 |
| rs72674127  | T | -0.0651 |
| rs11590577  | A | -0.0369 |
| rs2250174   | T | 0.035   |
| rs12030960  | T | -0.0333 |
| rs114773628 | T | -0.0988 |
| rs150669412 | A | 0.0508  |
| rs3125830   | T | 0.0991  |
| rs1874121   | T | 0.035   |
| rs77217700  | A | -0.1384 |
| rs77510794  | A | 0.1022  |
| rs75499485  | G | -0.1198 |
| rs80019300  | G | 0.106   |
| rs35272378  | T | 0.0492  |
| rs6426514   | A | 0.0508  |
| rs146580149 | G | -0.0816 |
| rs12062028  | C | 0.0666  |
| rs480993    | A | -0.033  |
| rs6424961   | T | 0.0945  |
| rs141443600 | T | -0.059  |
| rs72692255  | G | -0.0599 |
| rs35381862  | G | -0.1097 |
| rs780255    | C | -0.0306 |
| rs1763922   | C | 0.0354  |
| rs115636515 | A | -0.076  |
| rs151231354 | A | -0.1221 |
| rs76374480  | G | 0.1306  |
| rs1120599   | T | 0.0347  |
| rs144917511 | T | -0.171  |
| rs10923790  | T | -0.032  |
| rs55734633  | T | -0.0807 |
| rs11590326  | A | 0.0333  |
| rs113811368 | G | 0.0665  |
| rs143184840 | T | -0.0702 |
| rs35469727  | C | 0.164   |
| rs12041887  | G | -0.1555 |
| rs195729    | T | -0.0297 |
| rs137923404 | G | -0.1826 |
| rs4844950   | T | 0.1276  |
| rs1332952   | G | 0.0387  |
| rs12085945  | A | 0.0778  |
| rs6588016   | G | 0.0286  |
| rs559051    | C | -0.0291 |

|             |   |         |
|-------------|---|---------|
| rs79989890  | C | 0.1305  |
| rs9726380   | C | -0.076  |
| rs61779033  | C | 0.1529  |
| rs868449    | C | 0.0363  |
| rs5013328   | T | 0.095   |
| rs140327358 | A | 0.2012  |
| rs337299    | A | 0.0374  |
| rs41267529  | T | -0.1112 |
| rs11211018  | G | -0.0342 |
| rs1603846   | G | 0.1214  |
| rs34669631  | A | 0.1397  |
| rs61824661  | G | 0.0686  |
| rs78788388  | G | 0.1173  |
| rs112684391 | G | 0.0669  |
| rs1570098   | A | -0.0495 |
| rs77563551  | C | 0.0363  |
| rs10802546  | A | -0.0423 |
| rs17373321  | T | 0.0354  |
| rs10157898  | G | -0.0411 |
| rs12066663  | C | 0.1771  |
| rs12145642  | G | 0.1057  |
| rs72696750  | A | 0.1114  |
| rs76391727  | T | 0.0752  |
| rs61788924  | T | 0.1391  |
| rs143196696 | A | 0.1714  |
| rs12723592  | T | -0.0491 |
| rs114839179 | A | 0.1692  |
| rs10915821  | T | 0.0341  |
| rs16834573  | G | 0.0545  |
| rs78268597  | G | -0.0872 |
| rs12405040  | G | 0.0508  |
| rs111283265 | T | 0.129   |
| rs35020387  | A | -0.054  |
| rs2284362   | T | 0.0295  |
| rs72743056  | G | -0.1053 |
| rs11210394  | T | -0.0357 |
| rs6697355   | A | 0.1291  |
| rs114168246 | G | -0.1563 |
| rs1075368   | A | 0.0377  |
| rs942756    | T | 0.0321  |
| rs7514193   | A | -0.0365 |
| rs150369892 | A | 0.1565  |
| rs72673625  | G | 0.0504  |
| rs79520136  | G | 0.0964  |
| rs3010056   | A | -0.0366 |
| rs77693068  | G | -0.1551 |
| rs149144680 | T | 0.1583  |

|             |   |         |
|-------------|---|---------|
| rs114884893 | G | -0.134  |
| rs144252729 | C | -0.1729 |
| rs113071481 | A | 0.14    |
| rs4908853   | A | 0.0334  |
| rs12039869  | A | -0.0355 |
| rs780075    | T | 0.0309  |
| rs114879138 | A | 0.119   |
| rs347008    | T | -0.0334 |
| rs978528    | C | 0.0524  |
| rs2587536   | C | 0.0358  |
| rs11572466  | T | -0.1313 |
| rs144007744 | A | -0.0661 |
| rs35768224  | C | -0.0803 |
| rs744924    | A | 0.2212  |
| rs45477495  | C | -0.1594 |
| rs10799005  | G | 0.0303  |
| rs12041056  | T | -0.0295 |
| rs114390375 | G | -0.1079 |
| rs16856552  | A | 0.2009  |
| rs7526340   | A | -0.0299 |
| rs77725480  | T | 0.1198  |
| rs72645999  | T | -0.0819 |
| rs115699904 | A | 0.1306  |
| rs965121    | G | 0.0314  |
| rs115916161 | T | 0.1209  |
| rs3765695   | A | -0.0438 |
| rs41311195  | G | 0.068   |
| rs74421592  | A | 0.126   |
| rs113169381 | C | 0.1931  |
| rs4926556   | C | -0.0397 |
| rs61783369  | C | -0.0627 |
| rs35238701  | T | -0.0494 |
| rs115679949 | T | -0.073  |
| rs56212313  | A | 0.0404  |
| rs4375253   | C | 0.029   |
| rs12041958  | T | 0.0454  |
| rs6659925   | T | -0.0522 |
| rs6673945   | A | 0.0582  |
| rs139187934 | G | 0.1309  |
| rs12138826  | G | -0.0385 |
| rs13303138  | A | -0.0539 |
| rs150443398 | A | 0.0706  |
| rs74697913  | A | 0.0815  |
| rs59246234  | G | -0.1002 |
| rs76966930  | A | 0.0531  |
| rs7535594   | T | 0.0512  |
| rs1053230   | T | -0.0346 |

|             |   |         |
|-------------|---|---------|
| rs1546412   | G | -0.0589 |
| rs115381054 | G | 0.1737  |
| rs1240440   | T | -0.0661 |
| rs116248572 | C | -0.2042 |
| rs11205495  | A | -0.1541 |
| rs350193    | T | -0.048  |
| rs45601536  | T | 0.0434  |
| rs12037664  | A | 0.0389  |
| rs1385119   | G | 0.0334  |
| rs113041060 | T | 0.1762  |
| rs72762217  | C | 0.1767  |
| rs60694879  | A | -0.0581 |
| rs72736899  | C | 0.1725  |
| rs111594792 | C | 0.191   |
| rs12044495  | T | -0.043  |
| rs28496967  | T | -0.0714 |
| rs114533230 | T | 0.1546  |
| rs2232359   | G | -0.0764 |
| rs11805090  | C | -0.128  |
| rs12143643  | C | 0.0502  |
| rs116019520 | T | -0.1885 |
| rs7541045   | C | 0.0625  |
| rs11260677  | A | 0.0316  |
| rs4920582   | G | 0.0358  |
| rs1361330   | G | 0.031   |
| rs10754489  | T | 0.0637  |
| rs12736315  | T | 0.1463  |
| rs12045824  | T | -0.0488 |
| rs3026868   | T | -0.0462 |
| rs11578764  | G | 0.0828  |
| rs12732878  | T | 0.1283  |
| rs1502904   | T | 0.0307  |
| rs72741396  | G | 0.1017  |
| rs12144695  | A | 0.0634  |
| rs17388303  | C | -0.0528 |
| rs114301248 | G | -0.2097 |
| rs59781050  | A | 0.1231  |
| rs77946654  | T | 0.0757  |
| rs10082244  | C | -0.0282 |
| rs213479    | T | 0.0299  |
| rs72728118  | A | 0.0591  |
| rs2383458   | A | 0.0408  |
| rs76942502  | C | 0.1287  |
| rs61803260  | A | -0.0558 |
| rs11581614  | C | 0.0404  |
| rs115405589 | C | 0.0748  |
| rs76307003  | G | -0.1277 |

|             |   |         |
|-------------|---|---------|
| rs73065558  | T | 0.1161  |
| rs114056218 | T | 0.0776  |
| rs115409575 | T | -0.1921 |
| rs138992974 | G | 0.1413  |
| rs859655    | A | 0.0344  |
| rs4525068   | A | 0.038   |
| rs41265779  | T | -0.2272 |
| rs821722    | A | 0.0339  |
| rs41304131  | T | -0.1366 |
| rs10157527  | G | 0.0363  |
| rs1963278   | G | -0.0295 |
| rs41267373  | G | 0.1442  |
| rs10915686  | T | 0.061   |
| rs79298583  | T | 0.1606  |
| rs12133575  | T | -0.07   |
| rs58604204  | T | 0.0444  |
| rs77108207  | G | 0.1349  |
| rs7544614   | C | -0.0511 |
| rs7540488   | C | -0.0307 |
| rs2365602   | C | 0.0818  |
| rs4654480   | T | -0.0423 |
| rs72747859  | T | 0.0405  |
| rs7518866   | A | -0.0508 |
| rs2820688   | T | 0.0404  |
| rs2815878   | C | 0.0424  |
| rs72644269  | T | 0.063   |
| rs1585364   | T | -0.0394 |
| rs76723583  | A | 0.1073  |
| rs12116495  | T | -0.1077 |
| rs9431732   | G | -0.0507 |
| rs12725269  | T | -0.0317 |
| rs12040453  | A | 0.0872  |
| rs7514012   | T | -0.0549 |
| rs3765768   | C | -0.0374 |
| rs141737069 | T | -0.1954 |
| rs79944107  | C | 0.0679  |
| rs666324    | C | -0.0455 |
| rs12076445  | C | 0.0563  |
| rs115545818 | T | 0.1222  |
| rs111879352 | A | 0.1528  |
| rs79656633  | T | -0.0615 |
| rs116561141 | A | 0.0889  |
| rs16854627  | A | 0.0453  |
| rs61789849  | A | 0.1467  |
| rs12045522  | T | 0.0477  |
| rs11808455  | A | -0.0541 |
| rs149289890 | T | -0.1706 |



|             |   |         |
|-------------|---|---------|
| rs111368804 | A | -0.1094 |
| rs150781545 | T | -0.1309 |
| rs149265857 | A | -0.0633 |
| rs12120061  | A | 0.0385  |
| rs115680973 | G | 0.1513  |
| rs12129086  | T | 0.12    |
| rs59585491  | C | 0.1236  |
| rs2566762   | T | 0.067   |
| rs4908930   | G | -0.0376 |
| rs11121432  | A | 0.0455  |
| rs10789081  | G | 0.0307  |
| rs4520425   | T | -0.0362 |
| rs72692418  | C | -0.1613 |
| rs60719859  | T | 0.0416  |
| rs773567    | C | 0.0461  |
| rs2389434   | A | 0.064   |
| rs76395324  | C | 0.1591  |
| rs9730228   | A | -0.0896 |
| rs78164936  | T | 0.1086  |
| rs1954369   | C | -0.0379 |
| rs6700254   | C | 0.0416  |
| rs11579499  | T | -0.0339 |
| rs34019243  | T | 0.1374  |
| rs116742949 | T | 0.1186  |
| rs115876871 | G | -0.1675 |
| rs75912520  | A | -0.0413 |
| rs79943341  | G | 0.1598  |
| rs72735036  | C | -0.0989 |
| rs10928034  | G | 0.0284  |
| rs74888190  | A | -0.0702 |
| rs150834404 | G | -0.1826 |
| rs157862    | T | 0.0499  |
| rs2816314   | C | 0.0313  |
| rs35684907  | G | 0.0543  |
| rs143837742 | A | 0.1932  |
| rs12125499  | T | -0.0476 |
| rs11590514  | A | 0.0969  |
| rs56074952  | T | -0.1134 |
| rs41363548  | A | -0.0526 |
| rs116040156 | A | 0.1888  |
| rs17020044  | G | 0.0687  |
| rs6662498   | C | -0.1177 |
| rs76921498  | G | -0.0622 |
| rs7526408   | T | -0.0285 |
| rs114269771 | C | -0.1868 |
| rs2493121   | T | 0.0295  |
| rs115067664 | T | 0.1411  |

|             |   |         |
|-------------|---|---------|
| rs61774392  | G | 0.1823  |
| rs58072093  | A | 0.0298  |
| rs2697467   | T | 0.1372  |
| rs10910188  | A | -0.0407 |
| rs1890760   | C | -0.087  |
| rs17648749  | A | -0.1594 |
| rs115483978 | A | -0.1921 |
| rs74892279  | A | 0.1707  |
| rs10874125  | C | 0.0333  |
| rs6702946   | A | 0.0372  |
| rs4847314   | C | 0.0286  |
| rs11804482  | G | 0.0291  |
| rs11808439  | A | -0.0496 |
| rs4387163   | G | -0.0289 |
| rs116394225 | G | 0.1675  |
| rs7526668   | A | 0.0827  |
| rs76724525  | C | -0.0899 |
| rs12075108  | T | -0.074  |
| rs79342748  | T | -0.1608 |
| rs333947    | A | -0.0396 |
| rs6668434   | C | -0.1423 |
| rs71635166  | C | -0.0308 |
| rs34063362  | A | -0.154  |
| rs116548122 | T | 0.1405  |
| rs115568045 | G | -0.1933 |
| rs72667215  | A | -0.0456 |
| rs78835386  | A | -0.0926 |
| rs148836183 | C | 0.1908  |
| rs115426402 | C | 0.0422  |
| rs17122238  | C | 0.0562  |
| rs12121260  | T | -0.042  |
| rs576572    | C | -0.0593 |
| rs442170    | C | -0.04   |
| rs12095424  | G | 0.0521  |
| rs12729062  | A | -0.0303 |
| rs227988    | T | -0.0434 |
| rs11264091  | T | -0.0388 |
| rs765316    | A | 0.0949  |
| rs75947258  | A | 0.2212  |
| rs10908564  | G | -0.0598 |
| rs10911661  | G | 0.0381  |
| rs11583637  | C | 0.0311  |
| rs7414784   | G | 0.0541  |
| rs4147202   | A | 0.0361  |
| rs6696206   | C | -0.1638 |
| rs114832588 | A | -0.1099 |
| rs145982761 | A | 0.1184  |

|             |   |         |
|-------------|---|---------|
| rs77003305  | G | 0.1867  |
| rs9658849   | C | -0.085  |
| rs1419110   | T | -0.0299 |
| rs635926    | T | 0.0401  |
| rs2897708   | C | -0.0302 |
| rs2981888   | C | -0.0383 |
| rs1497058   | G | -0.0364 |
| rs77263670  | T | 0.0563  |
| rs61815652  | C | -0.0285 |
| rs116716786 | T | 0.1999  |
| rs12403537  | A | 0.0354  |
| rs1701970   | C | 0.0305  |
| rs11577722  | A | -0.0306 |
| rs12758197  | C | 0.0363  |
| rs10924292  | T | -0.0633 |
| rs2232809   | C | -0.0293 |
| rs4481820   | A | 0.0319  |
| rs520171    | A | 0.0418  |
| rs10493246  | G | 0.0991  |
| rs61819479  | A | -0.0706 |
| rs1439523   | T | 0.0987  |
| rs1819247   | A | -0.0426 |
| rs3107146   | T | 0.0445  |
| rs12563277  | C | -0.0442 |
| rs591120    | C | 0.0281  |
| rs142025328 | A | 0.1154  |
| rs1264909   | G | 0.029   |
| rs61769266  | T | 0.0491  |
| rs17374803  | T | 0.0632  |
| rs76183136  | A | 0.1249  |
| rs11211484  | T | -0.0542 |
| rs72747839  | C | -0.0626 |
| rs17111959  | T | 0.0451  |
| rs72771959  | A | 0.0925  |
| rs114787867 | A | -0.1363 |
| rs12120812  | T | 0.1752  |
| rs12724123  | A | 0.052   |
| rs17394098  | A | 0.1475  |
| rs4661725   | C | 0.083   |
| rs996253    | T | -0.0444 |
| rs79585366  | G | -0.1192 |
| rs74497921  | C | 0.0879  |
| rs10798187  | C | -0.04   |
| rs34731132  | T | 0.1955  |
| rs61243266  | G | -0.2291 |
| rs12410980  | C | 0.0505  |
| rs114579171 | G | -0.1667 |

|             |   |         |
|-------------|---|---------|
| rs61774183  | A | -0.0718 |
| rs11210495  | A | 0.0334  |
| rs114149950 | T | -0.1319 |
| rs59264037  | C | 0.0313  |
| rs72662840  | T | 0.1615  |
| rs1289833   | C | 0.0279  |
| rs41311211  | T | 0.1303  |
| rs117413007 | C | 0.1562  |
| rs2644625   | A | -0.0599 |
| rs3789531   | A | 0.0489  |
| rs35446243  | A | -0.0378 |
| rs12041714  | G | 0.0346  |
| rs7533297   | C | -0.0315 |
| rs41310369  | C | -0.0574 |
| rs141127542 | T | -0.2031 |
| rs3104209   | A | -0.0294 |
| rs6701279   | T | 0.0433  |
| rs12046039  | G | 0.0641  |
| rs34864059  | A | -0.0708 |
| rs72689855  | A | -0.1091 |
| rs71647163  | C | 0.0436  |
| rs12126870  | T | -0.0791 |
| rs4844688   | G | 0.0359  |
| rs2003046   | A | 0.0325  |
| rs10889261  | T | 0.0419  |
| rs1171666   | C | 0.0396  |
| rs140256904 | C | -0.1411 |
| rs79953002  | A | -0.1226 |
| rs970973    | T | 0.0284  |
| rs748883    | G | 0.0324  |
| rs140165424 | T | 0.1243  |
| rs2008864   | A | 0.0315  |
| rs142275373 | A | -0.1095 |
| rs115953648 | C | 0.1421  |
| rs3119996   | C | -0.0465 |
| rs113525765 | C | -0.0814 |
| rs72649299  | T | -0.0946 |
| rs10753336  | T | -0.0407 |
| rs77830703  | G | 0.1637  |
| rs76267141  | T | -0.0511 |
| rs4600106   | G | 0.03    |
| rs61801811  | T | 0.0821  |
| rs138155098 | T | 0.1076  |
| rs12406823  | G | -0.0887 |
| rs12122228  | T | 0.0441  |
| rs144948095 | T | 0.1346  |
| rs78720060  | G | -0.1452 |

|             |   |         |
|-------------|---|---------|
| rs716197    | C | 0.0351  |
| rs12724806  | T | -0.0441 |
| rs35980929  | G | 0.1078  |
| rs149932571 | A | 0.1857  |
| rs78368411  | C | -0.1236 |
| rs9439028   | G | 0.0284  |
| rs11803159  | T | 0.0757  |
| rs141597728 | A | 0.109   |
| rs7536422   | T | 0.0297  |
| rs880296    | G | -0.0369 |
| rs17519749  | T | 0.0386  |
| rs76233114  | T | 0.0772  |
| rs197616    | T | 0.0345  |
| rs6663219   | A | 0.0685  |
| rs12123217  | T | -0.1477 |
| rs79201315  | C | -0.0432 |
| rs12127056  | T | -0.0622 |
| rs61819395  | A | -0.0454 |
| rs2483235   | A | 0.1053  |
| rs116141908 | T | 0.1222  |
| rs72724422  | C | 0.12    |
| rs72694432  | G | 0.1246  |
| rs7521497   | T | -0.0309 |
| rs148633555 | A | 0.1209  |
| rs12728620  | C | 0.0273  |
| rs79441061  | A | 0.114   |
| rs114695208 | A | -0.0951 |
| rs3768440   | A | 0.0582  |
| rs1416379   | A | -0.0556 |
| rs1005301   | T | -0.0441 |
| rs17019532  | G | -0.0293 |
| rs75477852  | A | 0.0731  |
| rs12095916  | A | -0.1227 |
| rs72962308  | A | 0.0842  |
| rs76156466  | A | 0.1387  |
| rs697708    | A | -0.0322 |
| rs17588143  | C | 0.0375  |
| rs11809695  | A | -0.0895 |
| rs74852515  | T | -0.1248 |
| rs4147599   | C | -0.028  |
| rs114434469 | T | 0.2245  |
| rs1008737   | G | -0.0401 |
| rs114507934 | C | 0.1683  |
| rs12065122  | A | -0.0344 |
| rs7537260   | C | 0.033   |
| rs79889059  | G | -0.1289 |
| rs7527654   | G | 0.0296  |

|             |   |         |
|-------------|---|---------|
| rs12759173  | C | -0.0319 |
| rs7529390   | A | 0.0499  |
| rs74895017  | T | -0.1209 |
| rs2893050   | C | 0.1501  |
| rs403594    | A | 0.0451  |
| rs149532521 | G | -0.1724 |
| rs12129286  | T | -0.0477 |
| rs114018987 | T | 0.1428  |
| rs61832523  | A | 0.0841  |
| rs12119075  | T | -0.0891 |
| rs74431987  | G | 0.0948  |
| rs12140871  | G | -0.0503 |
| rs112113025 | A | -0.036  |
| rs6680435   | G | 0.1091  |
| rs10915318  | A | 0.0391  |
| rs142358756 | C | -0.1824 |
| rs67092462  | C | -0.074  |
| rs72700111  | A | -0.1074 |
| rs17837965  | G | 0.0675  |
| rs55836408  | T | 0.1436  |
| rs74229867  | T | -0.0659 |
| rs72686346  | G | -0.1293 |
| rs77239088  | T | -0.1248 |
| rs76790996  | A | -0.1513 |
| rs11582767  | A | -0.0333 |
| rs2501354   | G | 0.0287  |
| rs4912459   | T | -0.0476 |
| rs35541403  | T | -0.2308 |
| rs7523193   | T | 0.1111  |
| rs16837217  | G | 0.2011  |
| rs115503376 | A | -0.2571 |
| rs10493975  | C | -0.0594 |
| rs9660873   | G | 0.0375  |
| rs12033875  | T | 0.0316  |
| rs2794850   | G | -0.0301 |
| rs112570019 | G | -0.0512 |
| rs113852342 | G | -0.0771 |
| rs4570445   | C | 0.0307  |
| rs12746707  | A | 0.1666  |
| rs2651237   | T | -0.0511 |
| rs35391558  | C | 0.131   |
| rs72757006  | T | 0.1578  |
| rs79570255  | A | -0.0623 |
| rs75288294  | A | 0.1687  |
| rs11164996  | A | 0.0993  |
| rs72720106  | G | 0.1363  |
| rs4657200   | G | -0.231  |

|             |   |         |
|-------------|---|---------|
| rs12141738  | A | 0.1599  |
| rs4660179   | C | -0.0299 |
| rs951241    | A | 0.0405  |
| rs77262565  | A | -0.0483 |
| rs7367544   | A | 0.0467  |
| rs11803085  | T | -0.1241 |
| rs6690658   | C | 0.0378  |
| rs4233110   | C | 0.0303  |
| rs77282289  | C | -0.1396 |
| rs3106364   | G | -0.0538 |
| rs142038910 | A | 0.1873  |
| rs80241289  | A | 0.1009  |
| rs737647    | G | 0.0359  |
| rs6659176   | G | 0.0505  |
| rs145886890 | C | 0.1727  |
| rs55858806  | G | -0.0491 |
| rs114763603 | G | 0.1261  |
| rs12033438  | T | 0.079   |
| rs12082063  | C | 0.146   |
| rs73007438  | G | 0.0515  |
| rs76845966  | C | 0.1297  |
| rs11101992  | C | -0.0318 |
| rs4244145   | G | -0.0391 |
| rs10864574  | C | 0.0299  |
| rs72742725  | C | 0.1185  |
| rs6428510   | C | 0.0523  |
| rs77520588  | A | -0.0949 |
| rs857838    | A | -0.0276 |
| rs77135199  | T | 0.1374  |
| rs1570330   | C | -0.0301 |
| rs116737387 | T | -0.2368 |
| rs72711975  | T | 0.0909  |
| rs12145387  | T | 0.1478  |
| rs74096364  | G | 0.0679  |
| rs142744082 | A | -0.1831 |
| rs7517628   | C | 0.0999  |
| rs903336    | C | -0.055  |
| rs4468222   | G | -0.1078 |
| rs10900434  | C | 0.0359  |
| rs74370033  | G | 0.1175  |
| rs72737448  | A | 0.131   |
| rs56259287  | G | -0.139  |
| rs6698022   | C | 0.0598  |
| rs10889183  | C | -0.0629 |
| rs116056180 | C | 0.1093  |
| rs12134721  | C | -0.0309 |
| rs12752712  | T | -0.0628 |

|             |   |         |
|-------------|---|---------|
| rs72905571  | T | -0.0498 |
| rs60162041  | G | -0.1304 |
| rs1123217   | C | -0.0738 |
| rs56167211  | T | 0.111   |
| rs4655201   | C | 0.0468  |
| rs78399301  | G | 0.1427  |
| rs112027306 | A | -0.129  |
| rs61809195  | C | 0.1169  |
| rs66473804  | T | 0.0459  |
| rs78064094  | T | -0.2174 |
| rs7535297   | G | 0.0519  |
| rs79776204  | T | -0.0556 |
| rs116156438 | G | -0.1455 |
| rs80106338  | T | 0.0696  |
| rs72711346  | C | 0.0963  |
| rs75434492  | C | -0.0764 |
| rs61746882  | C | 0.241   |
| rs10489133  | T | -0.0733 |
| rs12038819  | G | -0.0447 |
| rs12123967  | C | 0.1227  |
| rs17433313  | T | -0.1601 |
| rs116650800 | T | -0.1446 |
| rs3820285   | C | -0.1903 |
| rs4418565   | G | -0.0284 |
| rs6659749   | T | 0.0407  |
| rs472967    | C | 0.0289  |
| rs1256328   | T | 0.0375  |
| rs11161436  | T | 0.0344  |
| rs28729475  | C | -0.2491 |
| rs10801723  | G | -0.0301 |
| rs12126759  | T | 0.0278  |
| rs80301539  | T | -0.1368 |
| rs11809438  | T | 0.0337  |
| rs1481362   | A | 0.0302  |
| rs113558389 | T | 0.044   |
| rs1001880   | C | 0.0301  |
| rs284320    | C | 0.0364  |
| rs61163140  | C | -0.029  |
| rs6658889   | G | -0.028  |
| rs1451915   | A | -0.0497 |
| rs3131707   | C | -0.0293 |
| rs12752615  | A | 0.0312  |
| rs111598387 | G | 0.1393  |
| rs10915863  | A | 0.1076  |
| rs2842851   | T | -0.0282 |
| rs12036311  | A | -0.0334 |
| rs269275    | C | -0.0317 |



|             |   |         |
|-------------|---|---------|
| rs116568171 | T | 0.117   |
| rs77995738  | A | -0.1777 |
| rs35600686  | T | -0.0329 |
| rs12087082  | T | 0.1081  |
| rs12129026  | G | -0.0283 |
| rs17457613  | C | 0.124   |
| rs114194319 | T | -0.0926 |
| rs114459916 | C | 0.2307  |
| rs12117200  | G | 0.085   |
| rs6663709   | A | -0.0403 |
| rs11584392  | A | -0.0359 |
| rs9430736   | G | -0.0349 |
| rs28360378  | A | -0.1236 |
| rs12034146  | C | 0.031   |
| rs115825717 | G | 0.1006  |
| rs113588371 | G | 0.08    |
| rs296511    | C | -0.0635 |
| rs1361647   | G | -0.0947 |
| rs11161944  | C | -0.0449 |
| rs73049936  | T | -0.0605 |
| rs11260732  | C | -0.033  |
| rs71646779  | A | -0.0996 |
| rs687803    | G | 0.0346  |
| rs1934623   | C | 0.035   |
| rs79093863  | G | 0.1127  |
| rs9326067   | C | 0.1288  |
| rs6666618   | C | -0.036  |
| rs151066978 | T | 0.1772  |
| rs12569332  | C | 0.0444  |
| rs1764392   | C | 0.0424  |
| rs7531886   | A | 0.0295  |
| rs9887887   | G | 0.0291  |
| rs115768448 | G | 0.0659  |
| rs149361804 | A | -0.0743 |
| rs8192527   | C | 0.1273  |
| rs138114786 | A | -0.089  |
| rs10920627  | A | 0.0296  |
| rs7553605   | T | 0.1094  |
| rs77298200  | A | 0.0807  |
| rs7553347   | A | 0.0413  |
| rs72741265  | A | 0.1257  |
| rs115336063 | A | 0.1396  |
| rs41267375  | A | 0.1422  |
| rs1008082   | C | -0.032  |
| rs11582746  | T | -0.0744 |
| rs381304    | A | -0.0275 |
| rs11584682  | C | 0.0365  |

|             |   |         |
|-------------|---|---------|
| rs79752818  | A | -0.0908 |
| rs137923668 | G | 0.1234  |
| rs3754176   | A | 0.0284  |
| rs12058143  | A | 0.0372  |
| rs11209008  | A | 0.0745  |
| rs35956582  | A | 0.1136  |
| rs115704628 | T | -0.2849 |
| rs11576693  | T | 0.0313  |
| rs77751353  | T | 0.128   |
| rs12734683  | G | 0.0397  |
| rs1587022   | G | 0.0438  |
| rs143121812 | A | 0.2355  |
| rs10924832  | G | -0.0905 |
| rs145937180 | C | 0.1068  |
| rs72734623  | T | 0.1296  |
| rs114124780 | C | 0.2969  |
| rs116006081 | C | -0.1756 |
| rs144570260 | T | 0.2043  |
| rs77817282  | G | 0.0706  |
| rs72737763  | G | -0.2527 |
| rs35770173  | G | 0.0747  |
| rs75395835  | A | 0.1315  |
| rs10920618  | T | -0.0473 |
| rs67781210  | G | -0.0336 |
| rs115344677 | G | 0.1292  |
| rs7528969   | G | -0.0447 |
| rs115371705 | C | -0.1872 |
| rs58683637  | A | 0.0683  |
| rs2025602   | A | 0.0311  |
| rs10802415  | T | -0.0313 |
| rs228563    | A | -0.0332 |
| rs78674112  | T | 0.0671  |
| rs79609565  | T | -0.0502 |
| rs58930855  | A | -0.1411 |
| rs12127394  | G | 0.0592  |
| rs127293    | T | -0.0351 |
| rs12736293  | G | -0.0846 |
| rs9430155   | A | 0.0439  |
| rs12124780  | C | 0.0335  |
| rs138315843 | G | -0.0716 |
| rs79400467  | G | 0.0464  |
| rs12756936  | G | 0.0334  |
| rs483784    | C | -0.0304 |
| rs6425814   | A | 0.0808  |
| rs4652741   | C | -0.0324 |
| rs10493652  | T | -0.0392 |
| rs2810002   | T | -0.029  |

|             |   |         |
|-------------|---|---------|
| rs6664832   | T | 0.1754  |
| rs78007650  | A | 0.0831  |
| rs17342387  | G | -0.1811 |
| rs149657899 | G | 0.162   |
| rs2250036   | A | -0.0321 |
| rs7530256   | G | -0.0631 |
| rs78117627  | T | -0.1188 |
| rs164946    | A | 0.0338  |
| rs140364034 | T | -0.1084 |
| rs701187    | T | 0.0346  |
| rs989842    | C | 0.0285  |
| rs78772779  | T | 0.1389  |
| rs56201204  | A | -0.1445 |
| rs72670316  | A | -0.0653 |
| rs10802170  | G | 0.0426  |
| rs79935285  | G | 0.1053  |
| rs2310919   | A | -0.033  |
| rs12725866  | T | 0.1007  |
| rs316054    | A | -0.0316 |
| rs12089227  | A | -0.046  |
| rs927906    | A | 0.0553  |
| rs66653799  | A | -0.0318 |
| rs10803288  | A | 0.0302  |
| rs12401671  | A | 0.047   |
| rs11122314  | T | 0.0282  |
| rs72662569  | T | 0.0938  |
| rs149760135 | C | 0.0796  |
| rs12042489  | C | 0.1348  |
| rs77556951  | C | -0.1003 |
| rs17123142  | T | -0.0349 |
| rs148637726 | A | 0.0979  |
| rs28767544  | T | -0.0411 |
| rs6695420   | G | -0.0589 |
| rs76741200  | T | -0.1709 |
| rs77634081  | G | 0.1029  |
| rs2072039   | A | 0.0362  |
| rs6696643   | A | 0.0409  |
| rs6666190   | G | 0.0369  |
| rs59548259  | C | 0.0509  |
| rs10915480  | G | -0.0279 |
| rs114433770 | T | -0.1087 |
| rs55726127  | T | -0.1101 |
| rs112077932 | A | 0.0631  |
| rs12142777  | A | -0.0498 |
| rs72736541  | T | 0.1091  |
| rs35914008  | A | -0.11   |
| rs12131707  | T | 0.0342  |

|             |   |         |
|-------------|---|---------|
| rs111272734 | A | 0.1053  |
| rs60749823  | T | 0.0333  |
| rs6698817   | T | 0.0295  |
| rs115428488 | A | 0.1654  |
| rs147977587 | A | -0.116  |
| rs4846976   | G | -0.1067 |
| rs4659357   | A | 0.0373  |
| rs41267329  | T | -0.1619 |
| rs3730102   | A | 0.0425  |
| rs148184801 | G | 0.1086  |
| rs2803016   | T | -0.0387 |
| rs2307246   | A | -0.0345 |
| rs581645    | G | 0.123   |
| rs6656609   | A | 0.0318  |
| rs6685121   | G | -0.0503 |
| rs141712648 | T | 0.1644  |
| rs75472846  | A | 0.124   |
| rs12037785  | A | 0.058   |
| rs4460614   | G | -0.0589 |
| rs696694    | T | 0.0425  |
| rs148402504 | A | -0.1994 |
| rs138332637 | A | -0.2256 |
| rs72750056  | A | -0.1273 |
| rs587643    | C | -0.0705 |
| rs68105113  | A | 0.2081  |
| rs61777189  | A | 0.1262  |
| rs76170759  | C | 0.1462  |
| rs12075727  | T | 0.0579  |
| rs147021365 | A | -0.1484 |
| rs71642716  | A | 0.0548  |
| rs6677404   | C | -0.0454 |
| rs114684774 | A | 0.1631  |
| rs239980    | C | 0.0364  |
| rs79682567  | A | -0.0808 |
| rs141904623 | A | -0.1541 |
| rs79445166  | T | 0.1435  |
| rs2794731   | G | -0.0379 |
| rs4844640   | T | -0.0298 |
| rs531844    | C | -0.0859 |
| rs139814789 | C | 0.1917  |
| rs7539031   | A | 0.0305  |
| rs17011908  | C | 0.0477  |
| rs10776701  | G | 0.0303  |
| rs78820359  | G | 0.1488  |
| rs7553544   | A | -0.0286 |
| rs114548648 | A | -0.1016 |
| rs2780788   | C | -0.0335 |

|             |   |         |
|-------------|---|---------|
| rs3014875   | A | -0.0288 |
| rs78531930  | C | -0.0555 |
| rs3001101   | A | -0.0348 |
| rs72759516  | A | -0.0364 |
| rs2478165   | A | -0.029  |
| rs3789541   | A | -0.059  |
| rs142913072 | A | 0.2961  |
| rs544700    | G | -0.0342 |
| rs116603808 | T | -0.1262 |
| rs61778561  | T | -0.116  |
| rs112218328 | G | 0.1032  |
| rs111278924 | A | -0.0679 |
| rs4655324   | T | -0.0315 |
| rs3795816   | T | -0.0379 |
| rs985782    | T | 0.0388  |
| rs10927590  | T | 0.0494  |
| rs139459322 | A | -0.1599 |
| rs11484707  | C | 0.0896  |
| rs684014    | A | 0.0483  |
| rs61775945  | T | -0.0742 |
| rs6683789   | T | -0.0615 |
| rs6677603   | A | -0.0317 |
| rs4554698   | C | 0.0313  |
| rs115878853 | A | 0.0545  |
| rs34248917  | T | -0.1424 |
| rs12125307  | C | -0.0458 |
| rs72725057  | G | 0.0633  |
| rs12120885  | G | 0.0398  |
| rs4920266   | A | 0.0866  |
| rs147473053 | A | -0.1409 |
| rs138814070 | T | 0.1435  |
| rs34027220  | T | 0.1963  |
| rs17373453  | G | 0.0565  |
| rs7529535   | A | -0.0332 |
| rs679373    | T | -0.0406 |
| rs872032    | T | -0.028  |
| rs6671815   | G | -0.0322 |
| rs11121345  | G | 0.0408  |
| rs111267767 | G | -0.1362 |
| rs35385469  | A | -0.1237 |
| rs7548919   | C | 0.0496  |
| rs116066926 | G | -0.0979 |
| rs149693611 | G | 0.1404  |
| rs72763879  | G | 0.0948  |
| rs12733327  | C | -0.0288 |
| rs144461597 | G | 0.1181  |
| rs17018855  | A | -0.1735 |

|             |   |         |
|-------------|---|---------|
| rs149326963 | T | 0.1638  |
| rs11579548  | G | 0.1212  |
| rs79476959  | T | -0.1107 |
| rs78334653  | A | -0.0597 |
| rs61819214  | A | 0.0932  |
| rs2810898   | T | -0.0351 |
| rs1450818   | G | 0.1255  |
| rs72681750  | T | 0.1163  |
| rs2177192   | C | -0.1249 |
| rs75938035  | G | 0.2342  |
| rs142702565 | A | 0.2379  |
| rs16836788  | T | 0.1449  |
| rs12068037  | T | -0.0616 |
| rs144353075 | C | -0.1715 |
| rs116683361 | A | -0.1776 |
| rs115138606 | A | -0.1552 |
| rs12036801  | T | 0.0379  |
| rs61778233  | A | -0.0401 |
| rs11589061  | A | -0.0498 |
| rs78976052  | A | 0.075   |
| rs1200107   | C | 0.0308  |
| rs72641220  | C | 0.0894  |
| rs7547363   | A | 0.0271  |
| rs150216667 | C | 0.1459  |
| rs80102691  | C | 0.0631  |
| rs2634982   | T | -0.061  |
| rs4276925   | T | 0.0424  |
| rs143735679 | G | 0.148   |
| rs648629    | T | -0.0279 |
| rs11577089  | G | -0.064  |
| rs2981865   | C | -0.0328 |
| rs116364502 | C | 0.0906  |
| rs72730349  | T | -0.109  |
| rs146234421 | G | 0.104   |
| rs150629886 | A | -0.1847 |
| rs11121021  | A | -0.0277 |
| rs6658896   | T | 0.2121  |
| rs75212966  | C | 0.1278  |
| rs10803317  | C | 0.0546  |
| rs12747311  | T | -0.0641 |
| rs72632523  | A | 0.0515  |
| rs17457232  | A | -0.0679 |
| rs10754470  | G | -0.0281 |
| rs3765373   | A | -0.0738 |
| rs114798451 | C | 0.1253  |
| rs852794    | A | -0.1424 |
| rs75890056  | A | 0.1812  |

|             |   |         |
|-------------|---|---------|
| rs74733149  | G | -0.0774 |
| rs75936247  | C | 0.044   |
| rs1234315   | T | -0.028  |
| rs115170982 | C | -0.1874 |
| rs6688312   | T | 0.0436  |
| rs78200919  | T | -0.0667 |
| rs10458577  | G | -0.0454 |
| rs75767638  | G | -0.0758 |
| rs11584232  | C | -0.0346 |
| rs80242873  | T | 0.1072  |
| rs2275366   | G | 0.0311  |
| rs10858032  | A | 0.0275  |
| rs6667884   | A | 0.0272  |
| rs4625314   | C | 0.0269  |
| rs9728947   | A | -0.0656 |
| rs6689479   | G | 0.0384  |
| rs11579828  | T | -0.1245 |
| rs1148471   | G | -0.0333 |
| rs150975588 | T | -0.1156 |
| rs1149068   | T | 0.0289  |
| rs72689397  | A | -0.0817 |
| rs2715571   | T | -0.1631 |
| rs72968533  | A | -0.1598 |
| rs114508275 | A | 0.1163  |
| rs4653280   | A | -0.0627 |
| rs315093    | C | -0.0272 |
| rs12566882  | T | 0.0735  |
| rs76714553  | A | -0.0872 |
| rs77167125  | C | -0.1945 |
| rs114044000 | T | 0.1622  |
| rs80158091  | T | 0.1762  |
| rs12032446  | A | -0.0458 |
| rs6702465   | C | 0.0393  |
| rs696986    | A | -0.0375 |
| rs116689705 | C | -0.131  |
| rs870465    | A | 0.0476  |
| rs56240846  | C | 0.1131  |
| rs61809236  | C | 0.0783  |
| rs77976189  | T | 0.1185  |
| rs142445962 | T | -0.1281 |
| rs12116509  | G | 0.03    |
| rs7514084   | C | 0.0429  |
| rs4651476   | T | -0.031  |
| rs11265192  | T | 0.1004  |
| rs11207688  | C | -0.1784 |
| rs77542178  | C | -0.1072 |
| rs10900542  | G | -0.0503 |

|             |   |         |
|-------------|---|---------|
| rs116437604 | T | 0.1078  |
| rs4359077   | A | -0.0488 |
| rs72635396  | A | 0.0804  |
| rs142954128 | T | 0.1091  |
| rs61836243  | C | -0.0567 |
| rs58054176  | T | 0.0899  |
| rs11206423  | T | 0.036   |
| rs4652252   | G | -0.0277 |
| rs75317377  | G | 0.1312  |
| rs116311649 | A | 0.1407  |
| rs142409114 | T | -0.2491 |
| rs72698179  | A | -0.1149 |
| rs56277222  | C | -0.0408 |
| rs1891062   | T | -0.0302 |
| rs71637204  | A | -0.092  |
| rs3738196   | T | 0.0283  |
| rs7529831   | G | 0.0272  |
| rs17875913  | C | 0.0435  |
| rs12095716  | C | -0.0568 |
| rs79750084  | C | 0.1347  |
| rs78590348  | A | 0.0732  |
| rs72952858  | C | -0.0521 |
| rs140368624 | G | -0.3465 |
| rs4654765   | T | 0.0272  |
| rs77292479  | C | -0.0639 |
| rs4348695   | C | 0.0363  |
| rs11120170  | A | 0.0295  |
| rs10916972  | G | -0.0337 |
| rs72741221  | T | 0.0781  |
| rs145043955 | C | 0.17    |
| rs6676560   | C | -0.0411 |
| rs72676165  | A | -0.2979 |
| rs12728717  | T | -0.0522 |
| rs2996657   | G | 0.0348  |
| rs113337443 | T | 0.1657  |
| rs114041209 | C | 0.0978  |
| rs2143295   | C | 0.0757  |
| rs12568516  | A | -0.0762 |
| rs114251988 | A | -0.2322 |
| rs140299625 | G | 0.1308  |
| rs17131478  | T | 0.0868  |
| rs2553735   | A | -0.16   |
| rs61784351  | A | 0.1209  |
| rs1980508   | A | 0.0477  |
| rs11586761  | A | 0.0345  |
| rs11205275  | A | 0.043   |
| rs3753313   | A | -0.028  |



|             |   |         |
|-------------|---|---------|
| rs12131065  | A | -0.0322 |
| rs12024718  | A | -0.1744 |
| rs74771072  | T | -0.1164 |
| rs16834153  | A | 0.102   |
| rs79004982  | A | 0.1366  |
| rs114218301 | T | -0.1685 |
| rs12117288  | T | -0.028  |
| rs78390221  | A | -0.0457 |
| rs78064362  | T | 0.1516  |
| rs141645857 | T | -0.1706 |
| rs12120690  | T | -0.0402 |
| rs7526318   | C | 0.0654  |
| rs12119556  | A | 0.0447  |
| rs72725456  | G | 0.1376  |
| rs493894    | G | -0.0315 |
| rs6684983   | G | 0.034   |
| rs12123495  | C | -0.1929 |
| rs76624086  | C | -0.1038 |
| rs1467106   | G | -0.0608 |
| rs116027771 | T | 0.1726  |
| rs78543396  | A | -0.1135 |
| rs2406790   | G | 0.0325  |
| rs36019747  | G | 0.1641  |
| rs10888857  | A | 0.0833  |
| rs12038395  | C | -0.0748 |
| rs12030739  | T | 0.0743  |
| rs12135742  | A | 0.0415  |
| rs6426423   | A | 0.0284  |
| rs145492034 | G | -0.2375 |
| rs78656836  | G | -0.1776 |
| rs56733261  | G | 0.1185  |
| rs75386386  | G | 0.1802  |
| rs142478128 | C | -0.2226 |
| rs7544786   | G | 0.0724  |
| rs139228037 | G | -0.1864 |
| rs4654456   | T | 0.1012  |
| rs1202822   | A | -0.0365 |
| rs78111047  | G | 0.0632  |
| rs12738332  | A | 0.1088  |
| rs76610753  | T | -0.0584 |
| rs4243771   | A | 0.0291  |
| rs74796852  | T | -0.1069 |
| rs116399924 | T | -0.0775 |
| rs4240539   | T | -0.0483 |
| rs139445580 | A | 0.167   |
| rs10924197  | G | 0.0333  |
| rs2996544   | A | 0.11    |

|             |   |         |
|-------------|---|---------|
| rs41303129  | T | -0.1145 |
| rs12128145  | C | 0.0279  |
| rs115688555 | A | 0.0971  |
| rs145154291 | A | 0.1687  |
| rs9803690   | G | -0.0268 |
| rs10157499  | C | 0.0373  |
| rs150873882 | T | 0.0795  |
| rs114579991 | T | 0.1532  |
| rs4233364   | T | 0.0436  |
| rs9436798   | G | -0.0461 |
| rs2291063   | G | 0.0997  |
| rs61817688  | C | -0.0891 |
| rs2236795   | G | 0.1272  |
| rs6667721   | A | -0.0365 |
| rs115406854 | T | 0.1998  |
| rs115440193 | T | 0.1235  |
| rs668977    | T | 0.0283  |
| rs12131790  | C | -0.0688 |
| rs1870524   | A | 0.0401  |
| rs28890218  | A | -0.0781 |
| rs59555069  | A | 0.0525  |
| rs56328915  | C | -0.0459 |
| rs17392542  | A | 0.0625  |
| rs6676127   | T | 0.0276  |
| rs148508700 | T | -0.1307 |
| rs9287202   | A | -0.0366 |
| rs742069    | A | -0.0286 |
| rs12067434  | A | -0.085  |
| rs80226255  | C | 0.1762  |
| rs78437107  | T | 0.0554  |
| rs12031681  | G | -0.0301 |
| rs72693297  | A | 0.1145  |
| rs71632125  | C | -0.0458 |
| rs79711752  | A | -0.1528 |
| rs7535919   | C | 0.0315  |
| rs2386545   | G | -0.0328 |
| rs976881    | T | -0.03   |
| rs139901682 | T | -0.0851 |
| rs79841892  | G | 0.1448  |
| rs77065077  | G | 0.0956  |
| rs77560334  | C | -0.0797 |
| rs41277170  | T | -0.1441 |
| rs74070513  | C | 0.1294  |
| rs1032154   | C | 0.0482  |
| rs2696961   | C | 0.0402  |
| rs75494649  | G | 0.0863  |
| rs1555026   | C | -0.0575 |

|             |   |         |
|-------------|---|---------|
| rs4949653   | A | -0.038  |
| rs28548204  | A | -0.0358 |
| rs12563273  | T | -0.0518 |
| rs319958    | C | 0.0432  |
| rs114158223 | A | 0.086   |
| rs148980324 | C | -0.1746 |
| rs12728902  | C | -0.0286 |
| rs17376357  | C | -0.1066 |
| rs1121276   | C | 0.03    |
| rs116758700 | C | -0.1686 |
| rs11264080  | A | 0.1155  |
| rs567419    | A | 0.0514  |
| rs80108049  | A | -0.131  |
| rs1707336   | G | 0.0283  |
| rs144784743 | C | 0.0951  |
| rs11261079  | C | 0.0736  |
| rs12731816  | G | 0.1263  |
| rs1436884   | T | 0.1144  |
| rs12136758  | T | 0.0918  |
| rs11588434  | G | 0.03    |
| rs111966911 | T | -0.0995 |
| rs12039422  | G | 0.0462  |
| rs10889148  | T | 0.0374  |
| rs12130077  | T | -0.0297 |
| rs479323    | A | -0.0956 |
| rs79368535  | T | -0.0692 |
| rs35616158  | T | 0.0488  |
| rs34851670  | G | -0.0336 |
| rs12743253  | C | 0.047   |
| rs7415758   | G | -0.0283 |
| rs111622476 | G | 0.0573  |
| rs4282788   | G | 0.0299  |
| rs116674091 | T | -0.135  |
| rs77945630  | A | -0.0732 |
| rs10926029  | G | -0.0266 |
| rs56174386  | C | 0.1239  |
| rs12141023  | C | -0.0417 |
| rs61838772  | T | 0.1353  |
| rs12061847  | G | -0.0289 |
| rs7530089   | G | 0.0623  |
| rs12122058  | T | 0.0903  |
| rs17109974  | G | 0.1078  |
| rs17110517  | T | 0.1224  |
| rs61729352  | T | 0.166   |
| rs146444361 | G | -0.1327 |
| rs116138976 | A | -0.1595 |
| rs1325287   | C | 0.0265  |

|             |   |         |
|-------------|---|---------|
| rs116303053 | A | 0.0879  |
| rs115851674 | A | -0.1183 |
| rs141621777 | A | 0.1179  |
| rs7522254   | C | -0.0391 |
| rs41315599  | A | -0.0667 |
| rs11211371  | G | -0.1626 |
| rs112327837 | C | 0.1775  |
| rs72693801  | T | -0.1686 |
| rs116710014 | C | -0.0555 |
| rs114582708 | T | -0.1818 |
| rs16840439  | T | -0.0581 |
| rs12036710  | T | -0.0832 |
| rs1499579   | G | 0.0356  |
| rs9428185   | C | 0.131   |
| rs138448072 | G | -0.1103 |
| rs61786397  | G | -0.1135 |
| rs55834051  | A | -0.1046 |
| rs116099830 | A | 0.1517  |
| rs61817518  | A | -0.0452 |
| rs12143251  | G | 0.0302  |
| rs10900499  | T | 0.0265  |
| rs2224876   | G | -0.0397 |
| rs6677251   | G | 0.1022  |
| rs16853148  | T | -0.0635 |
| rs10922746  | C | 0.0547  |
| rs6666264   | A | -0.0278 |
| rs116282454 | C | 0.1146  |
| rs75056606  | G | -0.0481 |
| rs74115846  | G | -0.1111 |
| rs10890313  | A | -0.0381 |
| rs2243444   | T | -0.0541 |
| rs79541345  | C | 0.0607  |
| rs67912305  | C | 0.0387  |
| rs12032496  | C | -0.0961 |
| rs113968327 | T | 0.0609  |
| rs2996386   | C | 0.1433  |
| rs11162228  | C | -0.0414 |
| rs11165798  | A | 0.0307  |
| rs78320058  | C | 0.0664  |
| rs116839220 | A | -0.2268 |
| rs12118843  | G | 0.08    |
| rs12035567  | T | -0.0314 |
| rs139112739 | T | 0.1046  |
| rs10918148  | C | -0.0288 |
| rs78965499  | A | -0.0993 |
| rs10783020  | G | -0.0271 |
| rs2589583   | G | -0.1407 |

|             |   |         |
|-------------|---|---------|
| rs114508676 | A | 0.1375  |
| rs2148322   | A | -0.0329 |
| rs297786    | G | -0.0394 |
| rs11577097  | G | -0.0754 |
| rs61787107  | C | -0.0464 |
| rs11587756  | G | 0.0534  |
| rs6703114   | T | 0.031   |
| rs16843885  | A | 0.0752  |
| rs74049248  | A | -0.1174 |
| rs10917772  | C | 0.0405  |
| rs2152070   | C | 0.1416  |
| rs1833047   | A | -0.0295 |
| rs3838      | T | 0.0271  |
| rs76475425  | A | 0.1848  |
| rs6659991   | A | -0.142  |
| rs76256139  | T | 0.0651  |
| rs2135942   | T | 0.0737  |
| rs4846355   | A | -0.0261 |
| rs71640705  | T | -0.0777 |
| rs4240860   | T | 0.0276  |
| rs2760219   | T | 0.042   |
| rs4926941   | C | -0.1124 |
| rs115656116 | T | -0.2006 |
| rs116623172 | G | 0.0579  |
| rs914942    | T | 0.0262  |
| rs7536590   | T | 0.0414  |
| rs79154302  | T | 0.095   |
| rs10747316  | G | -0.0291 |
| rs6683896   | G | 0.0287  |
| rs34944829  | A | 0.0843  |
| rs12117352  | T | 0.1934  |
| rs12736865  | C | 0.029   |
| rs141641986 | T | 0.1903  |
| rs2807562   | A | -0.0309 |
| rs2291115   | T | -0.034  |
| rs581244    | A | -0.0341 |
| rs78841502  | C | -0.1033 |
| rs17375748  | T | -0.0627 |
| rs12031945  | C | -0.0482 |
| rs147559127 | T | -0.0849 |
| rs11119149  | A | 0.0468  |
| rs141703008 | A | -0.1611 |
| rs11185437  | C | -0.0567 |
| rs116256882 | T | -0.1905 |
| rs112642395 | T | -0.0792 |
| rs8179365   | G | 0.0711  |
| rs55728445  | T | -0.0443 |

|             |   |         |
|-------------|---|---------|
| rs2859333   | G | -0.0303 |
| rs115448174 | T | 0.1419  |
| rs4648464   | G | 0.0272  |
| rs114974212 | A | 0.1408  |
| rs10923800  | T | 0.1616  |
| rs76259356  | G | 0.0578  |
| rs116064282 | G | -0.131  |
| rs113487566 | T | -0.1413 |
| rs72717735  | G | -0.1661 |
| rs71524417  | C | -0.1435 |
| rs10796476  | C | 0.0297  |
| rs34008697  | G | 0.0279  |
| rs12736679  | A | 0.055   |
| rs10908773  | A | 0.0507  |
| rs78028693  | G | 0.1769  |
| rs12048612  | T | 0.0292  |
| rs34635301  | A | 0.2171  |
| rs1524180   | C | 0.0314  |
| rs79598945  | T | -0.1125 |
| rs144438477 | T | 0.1779  |
| rs116687161 | G | 0.1787  |
| rs71655828  | C | -0.1088 |
| rs12025734  | A | 0.0431  |
| rs11803632  | A | -0.1124 |
| rs145441566 | A | 0.0848  |
| rs17037979  | G | 0.2604  |
| rs4662044   | T | -0.0736 |
| rs79679347  | C | -0.0556 |
| rs140100321 | A | -0.0759 |
| rs78480301  | G | 0.203   |
| rs11805309  | G | -0.0871 |
| rs73021247  | A | 0.1079  |
| rs4845824   | G | 0.0356  |
| rs114727129 | C | -0.1169 |
| rs12121446  | A | 0.0987  |
| rs72673334  | T | -0.1038 |
| rs12031559  | T | -0.0381 |
| rs80308069  | T | -0.0893 |
| rs55707820  | C | 0.0641  |
| rs138517657 | A | -0.185  |
| rs61805425  | A | -0.0675 |
| rs6683099   | G | 0.0355  |
| rs151199684 | A | 0.1593  |
| rs12407983  | A | 0.1147  |
| rs148424011 | T | -0.1542 |
| rs4655041   | T | 0.0354  |
| rs75495734  | A | 0.1182  |

|             |   |         |
|-------------|---|---------|
| rs6701446   | G | -0.0989 |
| rs35669711  | T | -0.0561 |
| rs4839531   | A | 0.0343  |
| rs139312264 | G | -0.2425 |
| rs6588477   | A | 0.0492  |
| rs116737423 | C | -0.113  |
| rs72770771  | T | -0.0952 |
| rs17353053  | A | -0.0553 |
| rs73066178  | T | -0.0402 |
| rs77796932  | A | 0.1941  |
| rs517786    | T | -0.0342 |
| rs75902389  | T | 0.0686  |
| rs6669759   | A | 0.0878  |
| rs17454529  | A | -0.039  |
| rs114138649 | A | 0.1544  |
| rs11588257  | T | -0.048  |
| rs10864273  | A | 0.0494  |
| rs115927951 | T | 0.1148  |
| rs113346971 | G | 0.1043  |
| rs34571177  | G | 0.0342  |
| rs912772    | T | -0.0275 |
| rs7522003   | C | -0.0356 |
| rs36099588  | A | 0.1015  |
| rs17405997  | T | 0.0943  |
| rs11119309  | G | -0.1667 |
| rs879446    | T | -0.0271 |
| rs2032539   | T | 0.0276  |
| rs11583725  | G | 0.08    |
| rs2998419   | C | 0.0278  |
| rs75942571  | G | 0.0923  |
| rs11185103  | A | -0.0424 |
| rs58626409  | G | 0.0455  |
| rs116811962 | T | -0.0861 |
| rs72759029  | G | -0.1251 |
| rs115933407 | T | 0.1602  |
| rs12078902  | T | -0.0406 |
| rs17433909  | T | 0.0844  |
| rs1537783   | C | 0.0262  |
| rs4659972   | T | 0.0496  |
| rs712889    | T | 0.0298  |
| rs10754778  | G | 0.0295  |
| rs72758612  | A | -0.18   |
| rs17385817  | A | -0.0984 |
| rs592627    | C | 0.0291  |
| rs7513016   | A | 0.0485  |
| rs149098216 | C | -0.182  |
| rs12736032  | C | 0.0419  |

|             |   |         |
|-------------|---|---------|
| rs12088915  | C | -0.0284 |
| rs76361498  | A | 0.0508  |
| rs2172794   | G | -0.0271 |
| rs79458615  | A | 0.1263  |
| rs2690039   | C | 0.0473  |
| rs2284131   | C | 0.0384  |
| rs72663143  | C | 0.1391  |
| rs10753889  | A | 0.0343  |
| rs114822369 | T | 0.0794  |
| rs7339965   | A | 0.1413  |
| rs75244792  | G | -0.0487 |
| rs115843383 | C | -0.1274 |
| rs74898392  | T | 0.1407  |
| rs72660647  | A | -0.0795 |
| rs17673582  | A | -0.1171 |
| rs61780749  | A | 0.0887  |
| rs9431644   | G | 0.0871  |
| rs56884865  | T | -0.0306 |
| rs2781793   | G | -0.0295 |
| rs139802123 | G | 0.0929  |
| rs17666182  | T | 0.1565  |
| rs769891    | A | -0.0301 |
| rs148375054 | A | 0.1525  |
| rs116748471 | A | 0.0446  |
| rs2034525   | T | 0.0577  |
| rs145988643 | T | 0.1388  |
| rs114822073 | A | 0.1122  |
| rs77230360  | C | -0.0412 |
| rs55921643  | G | 0.0897  |
| rs74925855  | C | 0.1468  |
| rs10489329  | T | 0.0302  |
| rs12725096  | T | 0.082   |
| rs34941779  | T | 0.0404  |
| rs2500292   | A | 0.0272  |
| rs4534348   | C | -0.0939 |
| rs6671226   | G | 0.1529  |
| rs954679    | A | -0.0274 |
| rs10746497  | T | -0.0351 |
| rs74060274  | T | 0.0774  |
| rs12129377  | A | 0.0856  |
| rs139861483 | A | 0.2079  |
| rs945652    | A | 0.0295  |
| rs6696816   | C | 0.0283  |
| rs61800296  | T | -0.0569 |
| rs12065563  | A | -0.1259 |
| rs12138908  | C | 0.0891  |
| rs112764761 | C | 0.0801  |



|             |   |         |
|-------------|---|---------|
| rs7526403   | T | 0.0708  |
| rs149848601 | T | 0.1259  |
| rs3761923   | G | 0.0626  |
| rs3914855   | A | 0.0366  |
| rs12025933  | T | -0.0574 |
| rs2759282   | T | 0.0502  |
| rs140221071 | A | -0.1385 |
| rs11585422  | T | -0.0605 |
| rs146899755 | T | 0.1425  |
| rs78451385  | T | 0.0768  |
| rs113877915 | T | -0.1311 |
| rs35300120  | T | -0.0295 |
| rs143592906 | C | -0.0462 |
| rs1042772   | C | 0.0259  |
| rs486495    | T | -0.0414 |
| rs112374930 | C | 0.1481  |
| rs12033152  | C | -0.038  |
| rs114461105 | G | -0.1563 |
| rs4845962   | A | -0.0285 |
| rs2670441   | C | -0.0323 |
| rs10798435  | C | -0.1999 |
| rs1281296   | C | 0.0344  |
| rs57540377  | G | 0.0517  |
| rs12137808  | G | 0.0509  |
| rs149691162 | C | 0.0988  |
| rs3904042   | A | 0.0324  |
| rs11161621  | T | -0.0263 |
| rs34085616  | T | 0.0666  |
| rs7552562   | C | -0.0258 |
| rs77886090  | T | -0.0593 |
| rs113542571 | C | 0.0971  |
| rs12134439  | T | -0.0354 |
| rs17423972  | C | -0.094  |
| rs11587380  | G | -0.0501 |
| rs78713725  | C | -0.1155 |
| rs61770716  | C | -0.1084 |
| rs7537226   | A | 0.0375  |
| rs9283430   | C | 0.0392  |
| rs115939770 | T | -0.1485 |
| rs74752626  | A | -0.1294 |
| rs6673722   | T | -0.0615 |
| rs142342032 | C | -0.1608 |
| rs17091031  | A | 0.0454  |
| rs12137901  | C | -0.0369 |
| rs1490413   | A | -0.0318 |
| rs2245071   | G | -0.0666 |
| rs72724382  | A | 0.0283  |

|             |   |         |
|-------------|---|---------|
| rs113982697 | T | -0.1114 |
| rs12119235  | G | 0.039   |
| rs61775781  | T | 0.2341  |
| rs34148285  | A | 0.0534  |
| rs12131341  | C | 0.1083  |
| rs57372734  | T | 0.1556  |
| rs80053326  | C | 0.1055  |
| rs1419286   | C | 0.0269  |
| rs116218384 | T | 0.0661  |
| rs145439508 | G | -0.0925 |
| rs6704100   | A | -0.0272 |
| rs12410705  | C | 0.0642  |
| rs825216    | G | -0.0531 |
| rs78276316  | C | -0.1066 |
| rs2494500   | C | -0.1117 |
| rs2177817   | A | 0.044   |
| rs11209341  | G | -0.0294 |
| rs41307808  | A | 0.0645  |
| rs41309157  | T | 0.0681  |
| rs6586382   | C | 0.0399  |
| rs12098183  | T | 0.0432  |
| rs116471159 | T | 0.1194  |
| rs3765743   | T | 0.0304  |
| rs59658986  | C | -0.053  |
| rs146216440 | C | -0.0807 |
| rs79682530  | T | -0.1535 |
| rs12036432  | A | 0.0296  |
| rs76821532  | G | 0.0848  |
| rs141291554 | C | -0.0625 |
| rs55894201  | G | 0.0669  |
| rs147602759 | A | 0.1356  |
| rs17486391  | C | -0.0775 |
| rs12027180  | T | -0.0292 |
| rs11206244  | T | -0.0288 |
| rs140452146 | T | 0.1672  |
| rs12562880  | G | 0.0382  |
| rs11118207  | T | 0.046   |
| rs147883180 | A | 0.1689  |
| rs111379004 | A | 0.1183  |
| rs585942    | A | -0.1123 |
| rs75921042  | A | 0.0585  |
| rs640189    | T | -0.0261 |
| rs17094539  | A | 0.0673  |
| rs11588727  | T | -0.0921 |
| rs2096209   | T | -0.0941 |
| rs77091008  | A | 0.146   |
| rs116335966 | C | 0.1408  |

|             |   |         |
|-------------|---|---------|
| rs16831558  | T | -0.0413 |
| rs76482784  | A | -0.028  |
| rs36106146  | T | 0.1368  |
| rs1923949   | G | -0.0309 |
| rs115235714 | A | 0.0879  |
| rs74816897  | C | -0.1052 |
| rs356099    | C | -0.0413 |
| rs945794    | C | -0.1643 |
| rs79333083  | T | 0.1255  |
| rs9429617   | C | -0.0828 |
| rs17578266  | G | 0.1227  |
| rs71629883  | T | 0.0628  |
| rs10920628  | C | 0.0436  |
| rs142485203 | T | 0.225   |
| rs625146    | C | 0.0297  |
| rs146468519 | T | 0.1141  |
| rs12145112  | C | -0.041  |
| rs9778123   | C | -0.0763 |
| rs1176385   | T | 0.0301  |
| rs12132318  | C | -0.0978 |
| rs79499685  | C | 0.1397  |
| rs1273202   | A | -0.0688 |
| rs3767496   | A | -0.1205 |
| rs116028235 | A | 0.1044  |
| rs529758    | A | -0.0345 |
| rs17375010  | T | -0.0585 |
| rs605978    | G | -0.0285 |
| rs12083212  | T | 0.0682  |
| rs115744996 | C | -0.149  |
| rs115317969 | A | 0.0616  |
| rs56020439  | C | 0.0353  |
| rs142132186 | T | 0.1402  |
| rs4915009   | G | 0.0428  |
| rs2064893   | A | -0.033  |
| rs76838622  | T | 0.1631  |
| rs753612    | A | -0.0279 |
| rs72675224  | T | 0.1234  |
| rs2843142   | A | -0.027  |
| rs3856271   | C | 0.0698  |
| rs1924558   | G | 0.0291  |
| rs12120021  | A | 0.0502  |
| rs72683089  | G | 0.217   |
| rs114607187 | T | -0.2908 |
| rs78981068  | C | 0.1217  |
| rs2056047   | G | 0.0335  |
| rs1367444   | A | 0.0562  |
| rs945341    | A | 0.048   |

|             |   |         |
|-------------|---|---------|
| rs72764393  | T | 0.1059  |
| rs56274715  | G | 0.1376  |
| rs139388853 | T | 0.1823  |
| rs75749636  | C | -0.0891 |
| rs538060    | A | -0.0267 |
| rs55675282  | C | -0.1393 |
| rs1294037   | A | 0.0395  |
| rs3124455   | C | -0.0288 |
| rs698994    | T | 0.0305  |
| rs115685115 | G | -0.1492 |
| rs140038061 | C | 0.1255  |
| rs77993548  | C | 0.0963  |
| rs12401716  | G | -0.0476 |
| rs1986615   | G | 0.058   |
| rs151108870 | G | 0.1082  |
| rs79636736  | T | -0.0814 |
| rs78735799  | T | 0.2325  |
| rs17580827  | T | 0.1611  |
| rs947354    | T | -0.044  |
| rs114113108 | C | 0.1893  |
| rs2916193   | A | -0.0344 |
| rs61812076  | A | 0.0744  |
| rs55690061  | T | -0.0778 |
| rs7512379   | A | 0.0272  |
| rs72742850  | G | 0.0875  |
| rs74474202  | T | -0.1221 |
| rs17044239  | G | -0.0475 |
| rs112334902 | A | 0.0558  |
| rs114704742 | T | -0.2328 |
| rs228717    | A | -0.0265 |
| rs12754289  | C | 0.1421  |
| rs6674201   | T | 0.0333  |
| rs116328003 | A | 0.1915  |
| rs12035704  | C | 0.0942  |
| rs34303658  | T | 0.0401  |
| rs150258442 | A | 0.0571  |
| rs77449937  | C | -0.0606 |
| rs80183258  | A | -0.1406 |
| rs1289005   | G | -0.0257 |
| rs115101515 | G | 0.1249  |
| rs7535533   | G | -0.0267 |
| rs67585269  | A | -0.0397 |
| rs114918315 | G | 0.1533  |
| rs1181878   | A | -0.0446 |
| rs12354285  | A | 0.0708  |
| rs12748002  | T | 0.1705  |
| rs12127607  | C | -0.0294 |

|             |   |         |
|-------------|---|---------|
| rs150614649 | G | 0.1118  |
| rs74766563  | A | 0.157   |
| rs79489292  | T | 0.0914  |
| rs77640150  | G | 0.1317  |
| rs112582648 | A | -0.1797 |
| rs77908573  | A | 0.0951  |
| rs149287860 | T | 0.1172  |
| rs143468994 | T | 0.1297  |
| rs685324    | G | 0.03    |
| rs11264899  | A | -0.0287 |
| rs3011813   | C | -0.0275 |
| rs11578076  | G | 0.061   |
| rs76824778  | C | -0.0748 |
| rs10458382  | T | 0.0288  |
| rs423507    | A | 0.0472  |
| rs11581095  | A | -0.0274 |
| rs4658082   | G | 0.164   |
| rs111760471 | G | -0.0915 |
| rs78200510  | A | -0.1925 |
| rs9428653   | G | 0.0271  |
| rs6604660   | T | -0.2682 |
| rs4926734   | T | 0.1011  |
| rs35016303  | C | 0.0729  |
| rs56246831  | C | 0.1981  |
| rs75830776  | A | -0.16   |
| rs113175860 | T | -0.1502 |
| rs2791510   | T | -0.0418 |
| rs4661310   | T | 0.0304  |
| rs72755852  | G | -0.0937 |
| rs150538316 | T | -0.0523 |
| rs80287674  | C | -0.1001 |
| rs116106829 | A | -0.0783 |
| rs149410788 | A | 0.2039  |
| rs72711256  | A | 0.1323  |
| rs79762455  | T | -0.1084 |
| rs72735111  | G | 0.1539  |
| rs17131727  | C | -0.0601 |
| rs74585989  | A | -0.1349 |
| rs71628253  | A | -0.0921 |
| rs2480062   | A | 0.0259  |
| rs6701536   | G | -0.0287 |
| rs138894682 | A | 0.0778  |
| rs6426541   | A | 0.027   |
| rs768529    | A | 0.0292  |
| rs11811059  | C | -0.1202 |
| rs1166883   | G | 0.0328  |
| rs139311319 | T | -0.0934 |

|             |   |         |
|-------------|---|---------|
| rs1779268   | C | -0.0264 |
| rs116678056 | T | -0.1119 |
| rs12021949  | A | -0.0525 |
| rs707586    | C | 0.0378  |
| rs11161441  | T | 0.0276  |
| rs10858068  | A | 0.0289  |
| rs1998907   | G | -0.0259 |
| rs77238538  | A | -0.1674 |
| rs1612733   | T | -0.0837 |
| rs113900087 | G | 0.1223  |
| rs77699816  | C | 0.0826  |
| rs4469718   | C | 0.0359  |
| rs1521877   | A | 0.0392  |
| rs75136924  | C | -0.1018 |
| rs76708215  | T | 0.1185  |
| rs113142500 | G | 0.1685  |
| rs115442245 | C | 0.1183  |
| rs364716    | T | -0.0278 |
| rs1937184   | G | 0.0343  |
| rs61824228  | A | -0.0709 |
| rs3789539   | C | -0.0683 |
| rs4652097   | T | -0.0291 |
| rs61770097  | A | -0.1577 |
| rs2296760   | A | -0.1786 |
| rs2999893   | C | -0.0367 |
| rs6588412   | T | -0.0265 |
| rs72719633  | C | 0.0427  |
| rs1033638   | A | 0.0335  |
| rs28580415  | A | 0.0529  |
| rs72672800  | G | 0.1397  |
| rs7513747   | T | -0.03   |
| rs114111948 | A | 0.2221  |
| rs7540878   | T | -0.0909 |
| rs76758925  | G | -0.055  |
| rs114956635 | T | -0.0591 |
| rs10922750  | T | -0.0264 |
| rs11265395  | C | 0.0321  |
| rs12031881  | A | -0.046  |
| rs113580155 | C | 0.1573  |
| rs72758781  | A | 0.0612  |
| rs114623607 | A | 0.1306  |
| rs11120453  | T | 0.0489  |
| rs61784651  | T | -0.0392 |
| rs967244    | G | 0.0329  |
| rs149569294 | T | -0.1376 |
| rs112635856 | A | 0.1323  |
| rs72685887  | C | -0.0841 |

|             |   |         |
|-------------|---|---------|
| rs80345588  | C | 0.0531  |
| rs2317235   | G | -0.027  |
| rs17377408  | G | 0.0773  |
| rs78444298  | A | -0.2453 |
| rs74960082  | A | -0.1568 |
| rs145686077 | A | 0.1906  |
| rs769162    | A | -0.043  |
| rs146863854 | T | 0.1942  |
| rs4303074   | T | 0.11    |
| rs9333447   | T | -0.0901 |
| rs77305047  | A | -0.0961 |
| rs12060242  | C | -0.0379 |
| rs7517143   | C | 0.0609  |
| rs138944852 | C | 0.1967  |
| rs41485945  | G | -0.0727 |
| rs35247298  | T | -0.1484 |
| rs12562729  | T | -0.0689 |
| rs7517899   | T | 0.052   |
| rs55676906  | G | -0.0491 |
| rs17381050  | C | 0.057   |
| rs1565824   | G | -0.03   |
| rs75298171  | A | -0.1198 |
| rs1971304   | T | -0.0566 |
| rs116609258 | A | 0.1017  |
| rs2473314   | T | -0.0488 |
| rs11206144  | A | 0.066   |
| rs78236581  | C | 0.082   |
| rs140564768 | G | 0.0877  |
| rs607206    | T | 0.0355  |
| rs79742895  | C | -0.0763 |
| rs1932023   | G | -0.0399 |
| rs12753120  | T | -0.0465 |
| rs77840260  | C | 0.0845  |
| rs77028476  | C | 0.1583  |
| rs1983833   | A | 0.0326  |
| rs1260767   | C | 0.0261  |
| rs3093050   | C | 0.0552  |
| rs34127103  | G | -0.1988 |
| rs2184029   | A | -0.0305 |
| rs114387168 | C | 0.072   |
| rs12145205  | T | -0.0343 |
| rs11163320  | T | 0.0595  |
| rs10910867  | G | -0.0284 |
| rs7542919   | G | 0.0557  |
| rs4345854   | A | -0.0339 |
| rs164891    | A | 0.0721  |
| rs115420434 | C | -0.119  |

|             |   |         |
|-------------|---|---------|
| rs10900486  | C | 0.0283  |
| rs144002142 | T | 0.1803  |
| rs11589833  | A | -0.0678 |
| rs115227541 | T | 0.0885  |
| rs143085971 | G | -0.108  |
| rs6696077   | A | 0.0431  |
| rs17258955  | T | 0.1676  |
| rs4074962   | T | 0.1435  |
| rs61776679  | G | 0.0856  |
| rs10889933  | C | 0.0388  |
| rs114381319 | T | 0.1773  |
| rs10918048  | T | 0.0427  |
| rs115980112 | T | -0.1373 |
| rs7525534   | T | -0.0271 |
| rs6676516   | T | 0.0279  |
| rs12563910  | T | -0.0322 |
| rs144536245 | T | 0.1037  |
| rs116218514 | T | -0.2547 |
| rs7513940   | C | -0.0536 |
| rs485790    | G | -0.0258 |
| rs112305565 | G | 0.0513  |
| rs700024    | G | 0.0404  |
| rs60829247  | G | 0.126   |
| rs77496978  | G | 0.1792  |
| rs74331877  | A | 0.1978  |
| rs56725515  | A | -0.0679 |
| rs116532364 | T | -0.1018 |
| rs12046421  | A | 0.036   |
| rs1459763   | G | -0.0302 |
| rs557755    | A | 0.1137  |
| rs409378    | T | 0.1844  |
| rs35199952  | T | 0.0706  |
| rs473072    | G | -0.045  |
| rs77138986  | C | -0.1269 |
| rs115037911 | C | -0.2282 |
| rs3908048   | C | 0.0254  |
| rs3747960   | A | 0.0365  |
| rs41264867  | T | 0.0801  |
| rs147284305 | A | -0.1376 |
| rs74991754  | C | -0.1527 |
| rs56229718  | A | -0.0477 |
| rs11805150  | C | 0.0324  |
| rs79964016  | C | 0.0868  |
| rs7534173   | G | -0.0537 |
| rs10489489  | A | -0.0642 |
| rs77078256  | A | -0.107  |
| rs78424795  | A | 0.0476  |



|             |   |         |
|-------------|---|---------|
| rs3767430   | A | -0.0258 |
| rs7513821   | C | -0.0602 |
| rs17669728  | T | -0.0332 |
| rs35112997  | C | -0.0415 |
| rs17126906  | G | 0.0696  |
| rs71647497  | G | -0.0935 |
| rs72684156  | G | 0.0645  |
| rs7515649   | A | -0.034  |
| rs77210531  | T | 0.1869  |
| rs6679480   | T | -0.0346 |
| rs76776318  | A | -0.0978 |
| rs76432764  | C | -0.0771 |
| rs150378245 | C | 0.1094  |
| rs10863401  | C | -0.0348 |
| rs68035391  | T | 0.0768  |
| rs76397273  | G | -0.0394 |
| rs72771953  | A | 0.0604  |
| rs9439441   | A | -0.1012 |
| rs7540360   | T | -0.0262 |
| rs6692890   | C | -0.0689 |
| rs67958777  | C | 0.0273  |
| rs74066778  | C | 0.1715  |
| rs12405814  | T | -0.1223 |
| rs2391810   | T | 0.1074  |
| rs12040584  | A | -0.0705 |
| rs2169077   | T | -0.044  |
| rs4839469   | A | -0.0362 |
| rs10733094  | A | 0.0267  |
| rs12041297  | C | 0.0348  |
| rs115495197 | T | 0.1134  |
| rs56797685  | T | -0.0391 |
| rs664524    | C | 0.0255  |
| rs12739987  | C | -0.0677 |
| rs517053    | C | 0.0312  |
| rs997007    | G | -0.0476 |
| rs3011179   | A | 0.0444  |
| rs2126643   | T | -0.0275 |
| rs35407093  | A | 0.0721  |
| rs479225    | A | -0.0265 |
| rs4908640   | G | -0.058  |
| rs78331836  | C | 0.1706  |
| rs260916    | T | 0.1492  |
| rs77314057  | T | -0.1698 |
| rs12759905  | C | -0.1017 |
| rs12126570  | C | 0.1005  |
| rs10802200  | G | 0.0295  |
| rs4367782   | A | 0.0261  |

|             |   |         |
|-------------|---|---------|
| rs72689745  | G | 0.0689  |
| rs115856370 | A | -0.2462 |
| rs79328789  | C | -0.0852 |
| rs1890128   | A | 0.0891  |
| rs67490848  | C | 0.0574  |
| rs75375519  | A | -0.1659 |
| rs851310    | T | 0.0424  |
| rs67410899  | G | 0.0402  |
| rs6687601   | C | 0.0256  |
| rs2257059   | T | -0.0565 |
| rs1266380   | A | -0.0297 |
| rs7549132   | A | 0.0695  |
| rs72740276  | T | -0.06   |
| rs114259821 | T | -0.223  |
| rs61085916  | A | 0.0968  |
| rs1609840   | G | -0.0317 |
| rs437722    | A | 0.0304  |
| rs75309530  | A | -0.0554 |
| rs115038423 | C | -0.1223 |
| rs41274510  | A | -0.0926 |
| rs267643    | A | 0.0485  |
| rs12143334  | T | 0.0771  |
| rs6679810   | T | -0.0426 |
| rs72744964  | T | -0.0965 |
| rs151062553 | T | -0.1087 |
| rs114082272 | T | -0.1309 |
| rs75831216  | A | 0.0748  |
| rs114257582 | A | 0.1617  |
| rs565076    | A | 0.0268  |
| rs4475771   | C | 0.1011  |
| rs56654623  | G | -0.0571 |
| rs114133583 | A | 0.157   |
| rs12403399  | C | 0.0512  |
| rs2037621   | A | 0.0254  |
| rs3935799   | A | 0.0294  |
| rs14000     | C | 0.0425  |
| rs41308399  | T | -0.1181 |
| rs10799837  | G | 0.0263  |
| rs79081973  | C | -0.1405 |
| rs7541836   | G | 0.0284  |
| rs10442703  | T | 0.0442  |
| rs2256357   | T | -0.0322 |
| rs148637611 | A | 0.1026  |
| rs141440380 | T | -0.0923 |
| rs76472455  | G | -0.1282 |
| rs1340445   | C | 0.0292  |
| rs61810744  | A | -0.1332 |

|             |   |         |
|-------------|---|---------|
| rs2477972   | G | -0.0356 |
| rs11811999  | A | -0.0348 |
| rs141008435 | A | -0.0955 |
| rs11206809  | G | -0.0318 |
| rs11590534  | C | 0.0358  |
| rs77316548  | G | 0.1827  |
| rs74968601  | G | -0.1206 |
| rs116778079 | A | -0.1866 |
| rs72868493  | A | 0.1754  |
| rs145726514 | G | -0.0888 |
| rs11576485  | C | -0.0934 |
| rs12123470  | T | 0.0306  |
| rs77597214  | A | -0.1216 |
| rs76701547  | A | 0.0529  |
| rs113445054 | T | -0.0582 |
| rs76525396  | C | 0.161   |
| rs1571752   | G | -0.0378 |
| rs12141660  | T | -0.0358 |
| rs72985462  | A | -0.0541 |
| rs12119119  | T | -0.1166 |
| rs76550922  | C | -0.1876 |
| rs111587437 | T | 0.1228  |
| rs114244324 | T | 0.1393  |
| rs12131542  | C | -0.0278 |
| rs140109016 | T | 0.1556  |
| rs77807963  | A | 0.1307  |
| rs76100124  | A | 0.0634  |
| rs12034166  | C | 0.0298  |
| rs74844843  | A | 0.1676  |
| rs112585178 | T | 0.0941  |
| rs10493397  | C | -0.1888 |
| rs116774173 | T | 0.1313  |
| rs114337666 | A | 0.0949  |
| rs115120539 | A | 0.1011  |
| rs11800678  | T | 0.1301  |
| rs2369527   | G | -0.0585 |
| rs146629799 | C | -0.118  |
| rs7529768   | A | -0.068  |
| rs514514    | T | 0.0301  |
| rs61766664  | G | -0.1575 |
| rs17380703  | T | -0.033  |
| rs727334    | C | 0.0455  |
| rs17398958  | T | 0.0325  |
| rs112170876 | T | 0.0324  |
| rs28680958  | A | -0.03   |
| rs144492584 | A | 0.0813  |
| rs112530631 | T | 0.0897  |

|             |   |         |
|-------------|---|---------|
| rs111687706 | C | 0.0883  |
| rs74622388  | C | 0.1023  |
| rs75656303  | T | 0.1114  |
| rs112466115 | T | 0.0988  |
| rs116523253 | C | 0.1404  |
| rs61764989  | G | 0.1357  |
| rs6424984   | C | 0.1203  |
| rs12031580  | A | -0.0276 |
| rs78759867  | A | -0.0291 |
| rs17099445  | A | 0.0633  |
| rs140466306 | T | 0.1857  |
| rs12061105  | T | -0.0309 |
| rs41443445  | C | 0.0735  |
| rs78815349  | G | 0.0384  |
| rs1316515   | A | -0.0789 |
| rs6427123   | A | -0.0281 |
| rs3120773   | C | -0.0551 |
| rs10802381  | C | 0.0334  |
| rs116235398 | C | -0.1265 |
| rs116605743 | A | 0.0935  |
| rs80140681  | G | 0.1816  |
| rs10920129  | T | -0.0303 |
| rs2498036   | C | -0.1309 |
| rs72771963  | C | 0.1302  |
| rs6588518   | C | -0.0283 |
| rs12028899  | C | -0.0633 |
| rs3765968   | T | -0.0272 |
| rs77849205  | T | 0.1687  |
| rs4912205   | A | -0.0339 |
| rs61783724  | A | 0.0429  |
| rs3738480   | A | 0.0285  |
| rs115907965 | C | -0.1106 |
| rs10924826  | A | -0.0307 |
| rs78057964  | G | 0.0893  |
| rs3766734   | C | -0.0558 |
| rs6702224   | G | 0.1434  |
| rs72674074  | T | 0.158   |
| rs1347540   | A | 0.0712  |
| rs61769130  | G | -0.0785 |
| rs17466149  | C | -0.0791 |
| rs67860750  | C | 0.054   |
| rs77078001  | T | -0.1153 |
| rs115587256 | T | -0.0905 |
| rs12073044  | A | 0.0427  |
| rs80041284  | A | -0.1066 |
| rs114126005 | A | 0.1319  |
| rs79293429  | G | 0.1228  |

|             |   |         |
|-------------|---|---------|
| rs61008700  | T | 0.0638  |
| rs143152993 | G | -0.1304 |
| rs11211610  | C | -0.097  |
| rs12742649  | C | -0.0323 |
| rs9729280   | A | -0.0348 |
| rs781940    | G | 0.0293  |
| rs58044362  | A | -0.0627 |
| rs6429040   | T | -0.0259 |
| rs664777    | T | -0.0437 |
| rs503910    | G | 0.0271  |
| rs114218737 | T | 0.1789  |
| rs72700458  | A | -0.0581 |
| rs2840327   | A | 0.0492  |
| rs619283    | G | 0.0493  |
| rs112716838 | T | 0.1634  |
| rs73026685  | A | 0.0649  |
| rs12037463  | T | 0.0272  |
| rs12562591  | T | 0.041   |
| rs12728900  | A | -0.0289 |
| rs55808302  | T | 0.0422  |
| rs113360026 | G | 0.0926  |
| rs1203702   | G | -0.15   |
| rs2982502   | G | -0.0282 |
| rs7524907   | C | 0.0404  |
| rs12139284  | G | 0.135   |
| rs71632376  | T | -0.0885 |
| rs76993648  | G | 0.0422  |
| rs113806604 | C | 0.0458  |
| rs12028750  | A | -0.0256 |
| rs75457582  | T | -0.104  |
| rs10917400  | T | 0.0303  |
| rs142985089 | T | 0.1702  |
| rs7535404   | T | 0.0322  |
| rs315511    | A | 0.0282  |
| rs11587248  | A | -0.0516 |
| rs1853809   | G | 0.0249  |
| rs80098637  | C | -0.084  |
| rs10908792  | G | 0.0276  |
| rs17581674  | G | 0.0682  |
| rs55899314  | A | 0.0467  |
| rs9724895   | C | -0.0471 |
| rs10889757  | T | 0.042   |
| rs114683940 | A | 0.1567  |
| rs2348102   | C | 0.0268  |
| rs116292642 | T | 0.1417  |
| rs75598696  | G | 0.101   |
| rs115985912 | G | 0.1035  |

|             |   |         |
|-------------|---|---------|
| rs111272343 | T | 0.1436  |
| rs112285830 | T | -0.1134 |
| rs4657673   | A | -0.0256 |
| rs55861837  | T | 0.1456  |
| rs72762247  | A | -0.1102 |
| rs12037750  | A | 0.0341  |
| rs11806215  | C | -0.0486 |
| rs211679    | A | 0.0433  |
| rs1114120   | A | -0.06   |
| rs75263412  | T | -0.1303 |
| rs74144250  | A | -0.0965 |
| rs117989865 | T | 0.0898  |
| rs145321001 | T | -0.1589 |
| rs59295640  | T | 0.2452  |
| rs631130    | T | 0.0335  |
| rs80308334  | G | 0.0412  |
| rs114416916 | A | 0.1429  |
| rs16852953  | A | -0.0427 |
| rs149779043 | T | 0.1186  |
| rs11801927  | C | -0.1136 |
| rs7551221   | T | -0.0309 |
| rs76782076  | T | -0.1624 |
| rs11117796  | T | -0.0374 |
| rs139850698 | A | -0.2437 |
| rs12120945  | T | -0.0306 |
| rs71647714  | T | 0.0794  |
| rs4363450   | C | -0.0607 |
| rs141007956 | C | 0.0782  |
| rs116482992 | G | -0.1887 |
| rs3853555   | T | 0.1148  |
| rs12402873  | C | -0.0615 |
| rs17031888  | C | 0.0736  |
| rs150692133 | C | 0.112   |
| rs75592410  | T | -0.1936 |
| rs11583322  | C | -0.0268 |
| rs41267299  | T | -0.0732 |
| rs6670029   | T | -0.128  |
| rs113649048 | C | -0.1664 |
| rs722377    | A | 0.1     |
| rs61771705  | T | -0.0452 |
| rs141817176 | A | 0.115   |
| rs2800880   | C | 0.0341  |
| rs7554577   | A | -0.0269 |
| rs1418632   | T | 0.0267  |
| rs11249205  | T | 0.1565  |
| rs78172810  | A | 0.213   |
| rs34175297  | C | 0.1756  |

|             |   |         |
|-------------|---|---------|
| rs639208    | A | 0.0377  |
| rs10494964  | C | 0.0284  |
| rs1581797   | G | -0.0315 |
| rs11582540  | A | 0.0489  |
| rs17023457  | C | 0.0367  |
| rs75963117  | C | 0.1014  |
| rs3738047   | A | -0.0485 |
| rs78263317  | A | -0.1067 |
| rs12022435  | C | -0.0327 |
| rs115943349 | C | 0.0916  |
| rs1887631   | A | 0.0334  |
| rs12059841  | T | -0.039  |
| rs142075872 | A | -0.1825 |
| rs577605    | T | -0.207  |
| rs2251004   | C | 0.0273  |
| rs6668145   | C | -0.0539 |
| rs12753021  | T | 0.0447  |
| rs12755468  | T | 0.0393  |
| rs112980209 | A | 0.0381  |
| rs12410358  | T | 0.0406  |
| rs72716502  | G | 0.1278  |
| rs75178452  | A | 0.1052  |
| rs113763668 | G | -0.088  |
| rs115457674 | T | -0.1827 |
| rs112942343 | G | -0.0978 |
| rs10873936  | A | 0.0275  |
| rs1456328   | G | -0.0349 |
| rs7548116   | T | -0.0262 |
| rs138738884 | A | 0.1698  |
| rs41268448  | A | 0.1531  |
| rs74614395  | G | 0.0984  |
| rs149389171 | A | -0.1849 |
| rs142145679 | C | 0.0742  |
| rs80082110  | T | 0.1213  |
| rs6684393   | A | -0.0293 |
| rs2643011   | G | 0.1812  |
| rs10218792  | G | 0.0317  |
| rs12061913  | G | -0.1353 |
| rs112694883 | A | -0.1286 |
| rs3753928   | T | 0.0407  |
| rs7538112   | A | -0.027  |
| rs1126618   | T | 0.0378  |
| rs5024467   | T | 0.0278  |
| rs367629    | G | 0.0352  |
| rs12082832  | T | -0.0679 |
| rs147972973 | T | 0.1409  |
| rs142567407 | A | 0.1681  |

|             |   |         |
|-------------|---|---------|
| rs111264815 | C | 0.0625  |
| rs12062121  | T | 0.0263  |
| rs148672580 | G | 0.1414  |
| rs75308810  | G | 0.0966  |
| rs116135156 | G | 0.1214  |
| rs116254572 | T | 0.1418  |
| rs10874828  | T | 0.044   |
| rs609521    | C | 0.0256  |
| rs115141296 | T | 0.168   |
| rs4653441   | G | -0.042  |
| rs12074252  | C | 0.0464  |
| rs58546752  | T | 0.098   |
| rs112745585 | T | 0.124   |
| rs10779538  | G | 0.1704  |
| rs3132275   | G | 0.0782  |
| rs56304095  | C | 0.0979  |
| rs11206087  | T | -0.0641 |
| rs676292    | A | -0.0279 |
| rs116276371 | T | -0.1582 |
| rs61780969  | A | 0.1143  |
| rs116207421 | G | -0.0571 |
| rs1532158   | A | 0.027   |
| rs12035318  | A | 0.0295  |
| rs75055578  | T | 0.1368  |
| rs11118918  | T | -0.0338 |
| rs2275307   | C | -0.0307 |
| rs11583785  | T | 0.0285  |
| rs4926445   | A | 0.0304  |
| rs2924862   | A | 0.0361  |
| rs7545489   | A | -0.0256 |
| rs10753773  | C | 0.0284  |
| rs61773295  | C | 0.0959  |
| rs72699533  | G | -0.1086 |
| rs16852889  | C | 0.072   |
| rs3000920   | A | -0.0454 |
| rs9428019   | T | 0.0284  |
| rs618191    | T | -0.0385 |
| rs1118406   | G | 0.1531  |
| rs79869855  | A | 0.154   |
| rs17410015  | C | 0.046   |
| rs2335141   | A | -0.0343 |
| rs6692194   | C | -0.0265 |
| rs6683583   | A | 0.0424  |
| rs76656809  | A | -0.0636 |
| rs11809911  | T | -0.027  |
| rs79259149  | G | 0.1353  |
| rs77522067  | C | 0.0341  |



|             |   |         |
|-------------|---|---------|
| rs10927823  | A | -0.0268 |
| rs74364002  | T | -0.0425 |
| rs12120358  | T | 0.0308  |
| rs112343239 | G | 0.1316  |
| rs146050758 | G | 0.1165  |
| rs3767657   | T | 0.0374  |
| rs12066297  | G | 0.0561  |
| rs78036096  | T | -0.0714 |
| rs12029859  | T | 0.0825  |
| rs116804994 | T | 0.0691  |
| rs334668    | A | -0.029  |
| rs2811577   | T | 0.0467  |
| rs10914130  | G | 0.028   |
| rs146674281 | C | 0.2033  |
| rs12026627  | A | 0.0492  |
| rs138435918 | T | -0.1113 |
| rs9436949   | A | -0.0339 |
| rs77404016  | T | -0.0836 |
| rs114002014 | G | 0.2029  |
| rs4908597   | T | -0.0286 |
| rs6703791   | C | 0.0344  |
| rs114228368 | G | -0.1404 |
| rs12757286  | C | -0.0741 |
| rs145407043 | A | 0.0836  |
| rs76433036  | A | -0.0908 |
| rs491320    | A | -0.0508 |
| rs213641    | C | 0.0252  |
| rs12123831  | A | 0.0328  |
| rs274754    | G | -0.031  |
| rs72866207  | A | 0.1135  |
| rs115953903 | A | -0.1109 |
| rs10127584  | A | -0.1082 |
| rs34982367  | C | 0.0253  |
| rs17420160  | C | -0.0886 |
| rs12565406  | T | 0.0444  |
| rs149330681 | T | -0.1468 |
| rs2494429   | A | 0.0381  |
| rs2230625   | G | 0.1522  |
| rs12409409  | T | -0.126  |
| rs6593949   | A | 0.0902  |
| rs149504769 | A | -0.124  |
| rs72668010  | G | 0.0823  |
| rs74810816  | G | -0.0603 |
| rs77086949  | T | 0.1093  |
| rs12741053  | C | -0.0383 |
| rs150252686 | A | 0.1271  |
| rs3747948   | G | -0.0271 |

|             |   |         |
|-------------|---|---------|
| rs76397397  | G | 0.1036  |
| rs12724794  | T | 0.0247  |
| rs34715109  | T | 0.0634  |
| rs139069797 | A | 0.038   |
| rs10912534  | T | -0.0278 |
| rs141626564 | A | -0.1072 |
| rs74441312  | G | -0.1118 |
| rs77578874  | A | 0.0707  |
| rs2485306   | T | 0.0279  |
| rs1609583   | T | -0.1007 |
| rs17382685  | A | 0.0715  |
| rs2201795   | A | 0.0256  |
| rs1770015   | G | -0.0362 |
| rs12135017  | A | 0.0266  |
| rs115919252 | G | -0.1014 |
| rs6665426   | A | -0.0339 |
| rs74518103  | G | 0.1099  |
| rs17022944  | G | 0.035   |
| rs12757522  | A | -0.0442 |
| rs148390799 | A | 0.1477  |
| rs2281169   | A | 0.0263  |
| rs61759111  | T | -0.0394 |
| rs713333    | G | 0.0247  |
| rs2056110   | A | -0.0559 |
| rs6698525   | T | 0.0251  |
| rs116422493 | A | -0.1415 |
| rs1157127   | C | -0.0272 |
| rs7521682   | T | -0.0247 |
| rs78012835  | A | 0.1899  |
| rs11810101  | A | 0.0441  |
| rs143060883 | A | -0.1475 |
| rs3747617   | T | 0.0612  |
| rs4654607   | C | 0.0262  |
| rs55715364  | T | 0.1007  |
| rs143259067 | C | -0.2137 |
| rs138610694 | A | -0.2175 |
| rs74541713  | C | -0.0746 |
| rs625226    | C | -0.0361 |
| rs7524357   | G | -0.029  |
| rs115454090 | A | -0.1033 |
| rs115766674 | A | -0.1446 |
| rs74525208  | T | 0.1995  |
| rs9970901   | A | -0.064  |
| rs115140205 | A | -0.1323 |
| rs34463765  | G | -0.0255 |
| rs2486720   | A | -0.099  |
| rs80193509  | G | 0.0965  |

|             |   |         |
|-------------|---|---------|
| rs3748586   | A | -0.0309 |
| rs6428744   | T | 0.0282  |
| rs78304124  | C | 0.158   |
| rs146567656 | G | -0.1249 |
| rs151277129 | A | -0.1649 |
| rs74880631  | G | 0.0487  |
| rs116690229 | A | 0.0751  |
| rs11803356  | C | 0.0439  |
| rs17587612  | C | -0.0324 |
| rs12139910  | G | -0.0649 |
| rs116649576 | C | 0.1189  |
| rs988820    | G | -0.0461 |
| rs10802506  | T | -0.0428 |
| rs9426434   | T | -0.0317 |
| rs11589855  | T | 0.0262  |
| rs6425665   | G | 0.0831  |
| rs73110475  | T | -0.0722 |
| rs72685180  | T | -0.0757 |
| rs17539887  | T | -0.161  |
| rs320020    | A | 0.0271  |
| rs839607    | C | -0.0255 |
| rs72752040  | C | 0.0835  |
| rs1926279   | G | -0.026  |
| rs3014719   | G | -0.0264 |
| rs149589332 | T | 0.074   |
| rs6695279   | C | 0.0316  |
| rs61810270  | A | -0.0326 |
| rs6700355   | T | -0.0249 |
| rs1294335   | C | 0.0385  |
| rs821418    | G | -0.0254 |
| rs142662217 | A | -0.0852 |
| rs12117738  | G | 0.047   |
| rs2136686   | G | 0.032   |
| rs115595729 | C | -0.1776 |
| rs4301663   | A | 0.0431  |
| rs11120584  | C | -0.0392 |
| rs142418069 | A | -0.05   |
| rs1113462   | A | -0.079  |
| rs4657188   | C | -0.0295 |
| rs60685751  | T | 0.0376  |
| rs7349120   | A | 0.027   |
| rs2359668   | C | -0.0361 |
| rs12565195  | T | 0.0281  |
| rs17299470  | T | 0.1111  |
| rs143345192 | G | -0.1132 |
| rs79576611  | T | 0.0437  |
| rs72696988  | G | -0.1265 |

|             |   |         |
|-------------|---|---------|
| rs76964524  | A | -0.0933 |
| rs73115536  | T | -0.049  |
| rs146142363 | A | 0.1094  |
| rs2791388   | G | 0.1861  |
| rs56129414  | C | -0.1048 |
| rs6691840   | C | 0.0398  |
| rs565645    | T | 0.028   |
| rs79880495  | G | 0.0683  |
| rs56057245  | T | 0.0902  |
| rs6427418   | A | 0.0473  |
| rs10754455  | A | 0.0278  |
| rs61765968  | A | 0.0578  |
| rs11802217  | G | 0.0571  |
| rs4256831   | C | 0.027   |
| rs12135736  | C | 0.0409  |
| rs116122994 | A | 0.0837  |
| rs10449222  | A | -0.0612 |
| rs115984300 | C | 0.1442  |
| rs10874535  | C | 0.0299  |
| rs75986733  | T | -0.1395 |
| rs259589    | A | 0.0761  |
| rs10915428  | G | 0.0261  |
| rs12728849  | C | 0.0494  |
| rs142079150 | T | 0.0742  |
| rs862989    | G | 0.0296  |
| rs78439462  | C | -0.1216 |
| rs143666280 | T | -0.1267 |
| rs115621056 | A | -0.0938 |
| rs55865801  | G | 0.0334  |
| rs148552395 | G | 0.145   |
| rs116811541 | G | 0.0927  |
| rs141011158 | T | -0.0783 |
| rs4915219   | G | -0.0543 |
| rs73127686  | A | 0.1965  |
| rs144986107 | G | -0.0866 |
| rs61784815  | G | -0.0686 |
| rs770025    | T | 0.1308  |
| rs3766307   | G | 0.0538  |
| rs12123153  | G | 0.0879  |
| rs115179343 | C | -0.1042 |
| rs28429763  | G | 0.0245  |
| rs860294    | T | -0.0271 |
| rs6659127   | T | -0.0323 |
| rs2095411   | T | 0.0323  |
| rs4847195   | C | 0.1065  |
| rs115928135 | A | -0.1946 |
| rs114106982 | T | 0.1171  |

|             |   |         |
|-------------|---|---------|
| rs148208459 | A | -0.1489 |
| rs74417265  | A | 0.076   |
| rs28361215  | T | 0.0335  |
| rs150414325 | C | -0.1775 |
| rs149367378 | T | 0.1168  |
| rs12116756  | A | -0.0255 |
| rs147754070 | A | -0.0637 |
| rs17376426  | T | -0.1058 |
| rs78632757  | T | -0.1131 |
| rs10493228  | T | -0.0331 |
| rs7514667   | A | 0.0414  |
| rs142763482 | T | 0.1307  |
| rs1981252   | G | 0.0325  |
| rs6686422   | C | 0.029   |
| rs12744652  | G | -0.0511 |
| rs17160088  | C | 0.0993  |
| rs7526365   | C | 0.0265  |
| rs3213495   | A | -0.0405 |
| rs140888463 | A | 0.1144  |
| rs35481053  | T | -0.1652 |
| rs4328117   | G | -0.0249 |
| rs4442431   | T | -0.0251 |
| rs2661291   | A | 0.0247  |
| rs10913971  | C | 0.0496  |
| rs72752871  | A | -0.1376 |
| rs13373932  | A | 0.1085  |
| rs17131598  | G | -0.0318 |
| rs145103770 | G | 0.1086  |
| rs78658121  | A | -0.0983 |
| rs61834604  | G | 0.0333  |
| rs78276852  | G | -0.1933 |
| rs484220    | G | -0.0271 |
| rs72994373  | T | -0.0472 |
| rs34528220  | G | -0.1001 |
| rs56167245  | G | -0.0816 |
| rs61760756  | T | 0.0269  |
| rs55866178  | C | -0.0642 |
| rs11577618  | T | 0.1341  |
| rs12078214  | T | -0.041  |
| rs151283122 | A | 0.1862  |
| rs12566126  | T | -0.0603 |
| rs6678161   | G | 0.0445  |
| rs74448403  | A | 0.1144  |
| rs17415142  | C | 0.195   |
| rs61828738  | A | 0.1932  |
| rs138621610 | A | 0.1652  |
| rs35558768  | T | -0.127  |

|             |   |         |
|-------------|---|---------|
| rs1077603   | T | -0.0598 |
| rs142485517 | C | -0.1626 |
| rs75460941  | A | 0.1664  |
| rs138080031 | C | 0.0811  |
| rs143478860 | G | 0.1334  |
| rs114190610 | C | -0.153  |
| rs6669434   | C | -0.0425 |
| rs17362156  | C | -0.0901 |
| rs72852188  | A | 0.1058  |
| rs12404736  | A | -0.0324 |
| rs71659377  | G | 0.0407  |
| rs77822888  | A | -0.0962 |
| rs148983312 | A | -0.2095 |
| rs1203138   | A | -0.0412 |
| rs74860670  | G | -0.2164 |
| rs4515743   | T | 0.0274  |
| rs79804794  | A | -0.2147 |
| rs145027424 | C | 0.0859  |
| rs6673089   | A | 0.0257  |
| rs147653117 | T | 0.1514  |
| rs11209910  | T | 0.0585  |
| rs1725375   | A | -0.046  |
| rs2274788   | C | -0.0288 |
| rs79027656  | A | -0.1093 |
| rs7511766   | A | 0.0297  |
| rs116468848 | T | -0.0702 |
| rs623619    | T | -0.0316 |
| rs4915789   | A | 0.0319  |
| rs114657146 | T | -0.1377 |
| rs116015235 | A | -0.1208 |
| rs2359015   | T | 0.1257  |
| rs12565177  | G | 0.0478  |
| rs72864756  | G | 0.152   |
| rs59153811  | C | 0.1297  |
| rs113000383 | G | 0.0757  |
| rs60453441  | G | -0.0368 |
| rs41386251  | C | 0.0472  |
| rs3845445   | G | 0.0341  |
| rs11240601  | A | 0.0266  |
| rs116222714 | T | -0.114  |
| rs116375448 | A | 0.128   |
| rs61806719  | T | -0.089  |
| rs78075867  | C | 0.0483  |
| rs11118691  | T | 0.0281  |
| rs77968126  | A | -0.1837 |
| rs12730077  | G | -0.1431 |
| rs9434168   | G | -0.0241 |

|             |   |         |
|-------------|---|---------|
| rs12144895  | T | -0.0659 |
| rs11802620  | A | -0.0501 |
| rs6701728   | A | 0.0806  |
| rs621213    | A | 0.1187  |
| rs6685346   | A | -0.0253 |
| rs12409061  | T | -0.048  |
| rs77927145  | G | 0.0573  |
| rs76266303  | G | -0.1021 |
| rs76331809  | A | 0.1303  |
| rs17187568  | G | -0.0389 |
| rs144210637 | G | -0.1801 |
| rs12070530  | G | 0.0407  |
| rs10798911  | C | 0.0303  |
| rs645891    | G | -0.0248 |
| rs77081740  | T | -0.1371 |
| rs941934    | T | -0.0408 |
| rs28690884  | G | -0.0347 |
| rs6676670   | T | -0.0322 |
| rs11804762  | T | 0.1041  |
| rs145175417 | T | -0.2329 |
| rs1679971   | G | 0.0337  |
| rs72682520  | A | 0.0443  |
| rs146084957 | C | 0.1173  |
| rs75921077  | T | -0.0942 |
| rs56404909  | T | -0.037  |
| rs548267    | A | 0.1163  |
| rs7540387   | C | 0.0325  |
| rs3747978   | C | -0.0377 |
| rs72650313  | T | -0.0579 |
| rs7526066   | T | -0.1164 |
| rs11166019  | G | 0.0407  |
| rs4844402   | C | 0.0427  |
| rs74958964  | T | 0.1216  |
| rs12088443  | A | 0.1735  |
| rs80047136  | C | 0.0994  |
| rs75585263  | G | 0.1282  |
| rs142340982 | T | -0.0893 |
| rs198359    | C | 0.0408  |
| rs72726326  | G | 0.0442  |
| rs12757216  | T | -0.0618 |
| rs143115813 | G | 0.1275  |
| rs10889145  | G | -0.0248 |
| rs233105    | C | -0.0792 |
| rs75413771  | A | -0.1057 |
| rs11581532  | T | 0.0713  |
| rs9326028   | C | -0.0375 |
| rs968632    | G | 0.0517  |

|             |   |         |
|-------------|---|---------|
| rs76354655  | G | 0.1734  |
| rs77739064  | C | 0.0803  |
| rs75661872  | G | -0.1566 |
| rs2745272   | C | -0.0391 |
| rs34022709  | C | -0.0363 |
| rs12142887  | A | 0.1866  |
| rs116633310 | C | 0.1703  |
| rs3753276   | C | -0.034  |
| rs209876    | C | -0.0398 |
| rs10494335  | A | -0.0508 |
| rs144969872 | A | 0.1462  |
| rs78295519  | G | 0.1043  |
| rs12749819  | G | 0.0319  |
| rs61839663  | T | 0.0292  |
| rs77162525  | A | -0.1919 |
| rs10788759  | A | 0.0282  |
| rs2764679   | T | 0.0253  |
| rs112530376 | T | 0.0318  |
| rs7522733   | T | -0.1044 |
| rs114710070 | T | 0.0949  |
| rs10920574  | T | -0.0614 |
| rs74496394  | A | -0.05   |
| rs145224557 | A | 0.0768  |
| rs474167    | A | 0.028   |
| rs75323340  | C | 0.1106  |
| rs2497990   | C | 0.0292  |
| rs7543186   | A | 0.0332  |
| rs1766963   | A | 0.1208  |
| rs345320    | C | 0.0326  |
| rs116755477 | A | 0.1821  |
| rs149949381 | C | 0.1055  |
| rs949586    | A | -0.0254 |
| rs12120746  | A | 0.0556  |
| rs56299556  | A | -0.0341 |
| rs12739407  | A | 0.1317  |
| rs2308941   | A | 0.1633  |
| rs115085194 | A | -0.0865 |
| rs12566247  | T | 0.0282  |
| rs17110298  | C | -0.0952 |
| rs34517948  | A | -0.0456 |
| rs4999950   | G | -0.0332 |
| rs146360266 | G | 0.0599  |
| rs146396509 | A | -0.1053 |
| rs1328178   | T | 0.0351  |
| rs139053103 | T | -0.1149 |
| rs16856139  | T | -0.0591 |
| rs74143000  | C | 0.1607  |



|             |   |         |
|-------------|---|---------|
| rs55649576  | C | -0.0515 |
| rs72684042  | T | 0.1356  |
| rs76113026  | T | 0.1255  |
| rs979769    | G | -0.0328 |
| rs3765840   | T | 0.0312  |
| rs78521276  | A | 0.155   |
| rs2797609   | G | -0.1227 |
| rs17125714  | C | -0.0369 |
| rs56084000  | G | 0.0374  |
| rs12034484  | A | -0.0375 |
| rs41305056  | A | 0.112   |
| rs2788149   | A | -0.0316 |
| rs12734152  | T | 0.0542  |
| rs141746577 | G | -0.1689 |
| rs11583438  | G | -0.0302 |
| rs61771865  | A | -0.066  |
| rs72719871  | A | 0.0475  |
| rs7540476   | C | 0.0254  |
| rs6695522   | A | -0.095  |
| rs12745152  | A | 0.0678  |
| rs12144965  | C | 0.0338  |
| rs114473248 | A | -0.0913 |
| rs115285320 | T | -0.204  |
| rs75405637  | T | 0.0944  |
| rs4908635   | G | -0.0272 |
| rs117113278 | T | 0.0943  |
| rs58689292  | A | 0.0264  |
| rs10922199  | A | 0.0307  |
| rs61821021  | C | 0.0298  |
| rs143651982 | T | 0.0939  |
| rs652476    | T | 0.1084  |
| rs3001038   | A | 0.0243  |
| rs913060    | A | 0.0264  |
| rs114542357 | G | -0.1927 |
| rs59439448  | T | -0.0433 |
| rs1045893   | T | -0.0276 |
| rs72743311  | T | -0.0793 |
| rs7520026   | C | -0.1442 |
| rs12758386  | G | 0.0726  |
| rs7534148   | C | -0.0332 |
| rs11590951  | T | -0.0407 |
| rs12119514  | A | 0.0372  |
| rs57892796  | T | -0.031  |
| rs113983996 | A | 0.0727  |
| rs78444282  | T | -0.1634 |
| rs114654729 | A | 0.1777  |
| rs144802931 | T | -0.0417 |

|             |   |         |
|-------------|---|---------|
| rs10489868  | C | 0.0296  |
| rs12041820  | C | 0.0657  |
| rs1009658   | C | 0.0261  |
| rs12408919  | A | 0.0474  |
| rs11578834  | A | -0.0715 |
| rs6664672   | G | 0.0259  |
| rs113361061 | T | 0.1361  |
| rs1281610   | G | 0.0255  |
| rs35707164  | G | 0.0345  |
| rs10910556  | A | -0.1226 |
| rs538165    | G | 0.0415  |
| rs76670392  | T | -0.0957 |
| rs2774304   | G | -0.034  |
| rs77652010  | T | 0.1487  |
| rs61821553  | T | 0.2377  |
| rs115844298 | G | 0.1175  |
| rs12141078  | G | 0.1525  |
| rs140175040 | G | 0.0404  |
| rs319978    | T | -0.0365 |
| rs72664104  | T | 0.0466  |
| rs72757447  | T | 0.1516  |
| rs16829900  | T | 0.0899  |
| rs4657276   | C | -0.0282 |
| rs148802386 | T | -0.1313 |
| rs111772937 | G | -0.0539 |
| rs112802765 | G | 0.0973  |
| rs199687    | G | -0.0335 |
| rs11576541  | A | -0.0699 |
| rs2273675   | C | 0.0586  |
| rs1557132   | T | 0.0257  |
| rs149184991 | T | 0.1297  |
| rs139063492 | G | -0.0912 |
| rs7538034   | T | 0.0301  |
| rs111247357 | C | -0.1436 |
| rs115513320 | T | -0.2657 |
| rs16836398  | G | -0.1381 |
| rs947485    | A | -0.0249 |
| rs6667202   | C | 0.0248  |
| rs74381158  | T | 0.1237  |
| rs7556609   | C | 0.0377  |
| rs74536569  | C | 0.1497  |
| rs113971942 | G | 0.073   |
| rs138233143 | C | -0.0794 |
| rs41294538  | T | 0.0946  |
| rs12731144  | G | -0.0538 |
| rs1975915   | T | 0.0292  |
| rs138212289 | T | -0.1232 |

|             |   |         |
|-------------|---|---------|
| rs113478941 | T | -0.0522 |
| rs72643919  | A | 0.0897  |
| rs7552628   | A | 0.0567  |
| rs12128603  | T | 0.0559  |
| rs141886212 | G | -0.0858 |
| rs58252767  | C | 0.1436  |
| rs11583332  | C | -0.0373 |
| rs16846260  | T | 0.0292  |
| rs35287629  | C | -0.0396 |
| rs115370145 | T | 0.0704  |
| rs151323823 | C | 0.1628  |
| rs2810889   | T | 0.0492  |
| rs139357158 | C | 0.1289  |
| rs2999865   | A | -0.0286 |
| rs12043848  | G | 0.0324  |
| rs150908935 | C | 0.0969  |
| rs75886730  | T | 0.1553  |
| rs17490891  | C | -0.0246 |
| rs9427216   | A | -0.0247 |
| rs2185550   | C | 0.0254  |
| rs78201373  | A | -0.1662 |
| rs111684247 | T | -0.0687 |
| rs10914935  | A | 0.0337  |
| rs11102014  | T | 0.1416  |
| rs305469    | G | 0.0309  |
| rs161115    | A | -0.0242 |
| rs476480    | C | 0.1345  |
| rs4655355   | T | 0.0301  |
| rs12139577  | C | -0.0453 |
| rs35329445  | T | -0.049  |
| rs75864196  | C | 0.0736  |
| rs10218758  | G | -0.0533 |
| rs76511104  | T | -0.0496 |
| rs4618985   | C | 0.0279  |
| rs4920502   | G | 0.0347  |
| rs79272713  | T | 0.1777  |
| rs61777685  | G | -0.034  |
| rs150096223 | A | 0.1792  |
| rs115578081 | G | 0.1183  |
| rs75375876  | A | -0.0594 |
| rs2095124   | A | -0.0371 |
| rs80082884  | T | 0.0787  |
| rs72854128  | T | -0.1027 |
| rs116019360 | G | -0.0679 |
| rs61788265  | A | -0.1091 |
| rs2511200   | C | 0.0298  |
| rs7546487   | T | 0.0525  |

|             |   |         |
|-------------|---|---------|
| rs34242288  | T | -0.0247 |
| rs12089924  | G | -0.0389 |
| rs6427111   | C | -0.038  |
| rs115475209 | A | -0.1508 |
| rs6429291   | T | 0.0305  |
| rs78761638  | A | -0.0584 |
| rs17377919  | T | -0.1064 |
| rs870031    | A | -0.0392 |
| rs75543269  | A | 0.1549  |
| rs147913285 | C | -0.1149 |
| rs1335855   | C | 0.0377  |
| rs36040885  | A | 0.0434  |
| rs12022634  | A | -0.0405 |
| rs111788017 | T | -0.0794 |
| rs72724144  | G | 0.1593  |
| rs115281275 | A | -0.1248 |
| rs114241102 | A | -0.0846 |
| rs10920930  | G | -0.0291 |
| rs57979130  | G | -0.1755 |
| rs12141471  | C | -0.0271 |
| rs17162164  | T | -0.0881 |
| rs76425763  | A | 0.0806  |
| rs12755964  | G | -0.0259 |
| rs10799611  | C | -0.0258 |
| rs4578210   | G | -0.0545 |
| rs4845743   | T | 0.0311  |
| rs115279853 | G | -0.0911 |
| rs1800678   | C | -0.0297 |
| rs138260138 | A | 0.0873  |
| rs277452    | C | -0.033  |
| rs476463    | A | -0.0365 |
| rs78798665  | A | 0.123   |
| rs676022    | T | 0.025   |
| rs10926531  | C | -0.0366 |
| rs76278891  | A | 0.0909  |
| rs12144813  | G | 0.0344  |
| rs75506084  | G | 0.0862  |
| rs10798640  | T | 0.0368  |
| rs700027    | A | 0.0887  |
| rs3795749   | C | -0.0397 |
| rs2995552   | T | 0.028   |
| rs7513063   | A | 0.0545  |
| rs72747084  | C | 0.1709  |
| rs12403541  | A | -0.0333 |
| rs115895927 | C | 0.1668  |
| rs144634752 | T | 0.1472  |
| rs1766167   | G | -0.0271 |

|             |   |         |
|-------------|---|---------|
| rs17730380  | A | 0.0262  |
| rs78949315  | T | 0.1903  |
| rs7512296   | T | -0.1112 |
| rs143533936 | G | -0.1935 |
| rs6671895   | T | -0.0675 |
| rs140596869 | T | 0.1459  |
| rs17687296  | A | 0.0471  |
| rs3128449   | G | 0.0262  |
| rs113352828 | T | -0.1388 |
| rs76943157  | A | -0.0715 |
| rs4912099   | G | -0.0245 |
| rs600746    | G | -0.0312 |
| rs10927401  | C | -0.0431 |
| rs114100693 | A | 0.079   |
| rs17299777  | G | -0.1009 |
| rs114295237 | C | 0.1522  |
| rs76963914  | A | 0.1115  |
| rs74978796  | A | 0.1785  |
| rs79776698  | T | 0.0624  |
| rs115230181 | G | -0.1922 |
| rs17109690  | A | -0.1666 |
| rs77040148  | G | -0.1032 |
| rs269101    | T | -0.0251 |
| rs71639910  | A | -0.0753 |
| rs72747397  | T | 0.106   |
| rs4845960   | A | -0.0253 |
| rs41450047  | T | 0.0728  |
| rs142192673 | A | -0.133  |
| rs61817687  | G | 0.0385  |
| rs7518712   | A | 0.0259  |
| rs112114309 | A | -0.1434 |
| rs12128186  | G | 0.1061  |
| rs78044256  | A | 0.1556  |
| rs10753869  | T | 0.0275  |
| rs7517633   | C | -0.0245 |
| rs7529898   | G | 0.027   |
| rs17048147  | T | 0.0303  |
| rs3885191   | A | 0.0317  |
| rs644959    | T | 0.032   |
| rs10888896  | G | 0.0333  |
| rs77881140  | C | -0.0734 |
| rs4971020   | T | 0.0278  |
| rs71636366  | T | -0.1113 |
| rs114857251 | T | 0.095   |
| rs2269237   | G | -0.0403 |
| rs114685394 | T | 0.2037  |
| rs41268472  | G | 0.0897  |

|             |   |         |
|-------------|---|---------|
| rs34813136  | T | 0.0681  |
| rs72742410  | T | 0.0686  |
| rs55742398  | G | 0.1039  |
| rs2806425   | T | -0.0261 |
| rs116823490 | T | -0.1453 |
| rs7519451   | T | 0.1166  |
| rs17358800  | G | 0.0385  |
| rs72704521  | A | -0.0548 |
| rs12129380  | A | -0.1846 |
| rs115944228 | A | 0.0693  |
| rs10909987  | G | -0.0315 |
| rs61770722  | T | -0.0631 |
| rs3013559   | G | 0.0258  |
| rs11810026  | A | -0.0572 |
| rs10492923  | G | -0.056  |
| rs77819033  | T | -0.0443 |
| rs7543337   | C | 0.0977  |
| rs566361    | A | -0.0496 |
| rs61811580  | A | 0.0384  |
| rs57667108  | G | -0.0306 |
| rs2500236   | G | -0.0319 |
| rs12038946  | T | 0.0755  |
| rs12404063  | G | 0.0529  |
| rs12121647  | C | -0.0538 |
| rs2296711   | A | 0.0272  |
| rs115461357 | C | 0.1081  |
| rs16835645  | T | -0.054  |
| rs6694848   | G | 0.0242  |
| rs113096683 | T | -0.0445 |
| rs78808250  | T | 0.1398  |
| rs1392745   | G | -0.0693 |
| rs9436132   | C | -0.0266 |
| rs12743211  | T | -0.0253 |
| rs631171    | C | -0.0501 |
| rs141808710 | T | 0.2417  |
| rs56102775  | A | 0.09    |
| rs12022192  | A | 0.0921  |
| rs7537416   | C | -0.0483 |
| rs116280106 | T | 0.1974  |
| rs74327965  | A | 0.1243  |
| rs116401858 | A | 0.0996  |
| rs6685044   | C | 0.0239  |
| rs12758156  | G | -0.0284 |
| rs11590017  | T | 0.115   |
| rs12567244  | G | 0.0355  |
| rs41301092  | C | -0.0979 |
| rs141792999 | T | 0.1525  |

|             |   |         |
|-------------|---|---------|
| rs3138158   | T | -0.0564 |
| rs76266717  | A | -0.1374 |
| rs760919    | A | -0.0344 |
| rs56177125  | A | 0.0635  |
| rs111228938 | T | 0.0993  |
| rs4128473   | C | 0.037   |
| rs12562874  | A | 0.0812  |
| rs6604579   | T | 0.0409  |
| rs11587473  | G | -0.0475 |
| rs11263934  | G | 0.0455  |
| rs10890384  | T | -0.0363 |
| rs113115082 | C | 0.0411  |
| rs77649874  | G | -0.0785 |
| rs114834322 | A | 0.1628  |
| rs72641693  | G | -0.0481 |
| rs146811622 | G | -0.1778 |
| rs12023458  | G | -0.0393 |
| rs10157731  | A | 0.0334  |
| rs61822419  | G | -0.0492 |
| rs10493679  | A | 0.056   |
| rs17111203  | G | 0.0978  |
| rs9332596   | G | -0.026  |
| rs116733183 | A | 0.1354  |
| rs12564551  | T | 0.0301  |
| rs10788767  | T | 0.0551  |
| rs7552333   | A | -0.1302 |
| rs1006963   | G | -0.0527 |
| rs143091690 | G | 0.1217  |
| rs1621294   | C | -0.0269 |
| rs9887913   | C | 0.1123  |
| rs4354499   | G | 0.052   |
| rs72758710  | G | -0.0438 |
| rs11586743  | A | -0.0263 |
| rs71646952  | T | 0.143   |
| rs28726372  | C | 0.0322  |
| rs6703052   | T | 0.1136  |
| rs76432797  | G | -0.1232 |
| rs2642422   | T | -0.0262 |
| rs149880668 | C | 0.1286  |
| rs11581519  | C | 0.1648  |
| rs115145200 | G | 0.0956  |
| rs114185676 | A | -0.1282 |
| rs72688288  | G | -0.0716 |
| rs115644757 | G | 0.1418  |
| rs74426955  | G | 0.1224  |
| rs113227645 | T | -0.1686 |
| rs790896    | A | 0.0329  |

|             |   |         |
|-------------|---|---------|
| rs72755202  | G | 0.0624  |
| rs10494139  | A | -0.0332 |
| rs113153996 | T | -0.1227 |
| rs1245011   | C | 0.0247  |
| rs10916007  | A | 0.0287  |
| rs7541903   | A | 0.0254  |
| rs12407575  | T | 0.1137  |
| rs6674830   | C | -0.0411 |
| rs2126332   | G | -0.028  |
| rs114733923 | G | 0.0371  |
| rs78142934  | T | 0.0965  |
| rs79533168  | A | -0.0825 |
| rs12740807  | T | 0.0243  |
| rs35559288  | A | 0.1091  |
| rs3856264   | T | 0.0297  |
| rs2665488   | G | 0.0252  |
| rs56050412  | C | 0.1405  |
| rs1877734   | A | -0.0237 |
| rs814886    | G | -0.0638 |
| rs76473498  | G | -0.0753 |
| rs111321612 | C | -0.1539 |
| rs11161471  | C | -0.0258 |
| rs115990999 | C | 0.1458  |
| rs10800802  | A | 0.0338  |
| rs112365750 | A | -0.1461 |
| rs35204761  | A | 0.0381  |
| rs35076930  | T | -0.1199 |
| rs114660104 | G | 0.1126  |
| rs142955616 | T | 0.125   |
| rs12071635  | C | 0.0348  |
| rs1993911   | C | 0.0259  |
| rs12759641  | A | -0.0318 |
| rs12087930  | A | -0.0373 |
| rs148169982 | G | -0.2085 |
| rs6684412   | C | 0.03    |
| rs3122720   | T | -0.0347 |
| rs707481    | C | -0.0558 |
| rs74501224  | T | -0.1176 |
| rs4660770   | T | 0.0253  |
| rs72747358  | A | 0.1049  |
| rs12036225  | T | 0.026   |
| rs12143231  | A | 0.0277  |
| rs75947972  | C | 0.0672  |
| rs78428228  | T | 0.0811  |
| rs150252231 | T | -0.0962 |
| rs729990    | A | -0.0461 |
| rs7553307   | G | -0.041  |



|             |   |         |
|-------------|---|---------|
| rs2476182   | C | 0.1097  |
| rs11580915  | T | -0.0448 |
| rs6703670   | A | 0.0754  |
| rs10493082  | C | 0.0751  |
| rs72919439  | T | -0.0555 |
| rs76198434  | A | -0.1015 |
| rs76855011  | G | 0.0761  |
| rs12080565  | T | -0.055  |
| rs10732966  | T | -0.0377 |
| rs60111082  | T | 0.0401  |
| rs6660946   | G | -0.0287 |
| rs139625781 | A | -0.1315 |
| rs17530163  | T | 0.0663  |
| rs76237720  | A | 0.1366  |
| rs9661059   | C | 0.0367  |
| rs1855786   | C | 0.031   |
| rs17258579  | C | 0.037   |
| rs2305812   | A | 0.0913  |
| rs6666086   | T | 0.0303  |
| rs10921354  | T | 0.0785  |
| rs78287186  | G | 0.0735  |
| rs67912614  | A | 0.0379  |
| rs7544395   | A | 0.0327  |
| rs77446158  | T | -0.0423 |
| rs115046878 | G | 0.1525  |
| rs7521105   | A | 0.1086  |
| rs10914988  | C | -0.0365 |
| rs706011    | T | -0.0748 |
| rs11488001  | T | 0.0883  |
| rs149555471 | C | 0.093   |
| rs79536980  | T | 0.0462  |
| rs150892223 | T | -0.1175 |
| rs12405640  | G | -0.0682 |
| rs9428022   | A | -0.0255 |
| rs116677839 | G | 0.1527  |
| rs17114640  | G | 0.0553  |
| rs828475    | C | -0.0424 |
| rs143468269 | T | -0.2196 |
| rs6661925   | A | 0.0264  |
| rs17389081  | G | -0.0906 |
| rs115474159 | A | -0.0899 |
| rs671914    | C | 0.0244  |
| rs75005855  | A | -0.061  |
| rs1036961   | G | -0.0265 |
| rs144246837 | G | -0.1129 |
| rs114510443 | A | 0.1091  |
| rs2246472   | T | -0.0733 |

|             |   |         |
|-------------|---|---------|
| rs4653636   | G | -0.0285 |
| rs140527012 | A | 0.0866  |
| rs148545044 | C | -0.1067 |
| rs6690267   | A | 0.081   |
| rs150900974 | C | -0.1376 |
| rs115917161 | A | 0.112   |
| rs6673311   | T | 0.0378  |
| rs2776857   | T | -0.0691 |
| rs10754855  | T | 0.0542  |
| rs12070731  | C | 0.1445  |
| rs9701126   | C | -0.0393 |
| rs943519    | C | 0.0631  |
| rs144330597 | T | -0.0774 |
| rs34897048  | T | -0.0329 |
| rs12726728  | T | 0.0242  |
| rs6668800   | A | 0.0335  |
| rs11587744  | C | 0.0316  |
| rs2993831   | C | 0.0257  |
| rs869896    | T | -0.0558 |
| rs115263101 | A | 0.089   |
| rs2296227   | T | -0.0263 |
| rs4326672   | T | 0.0365  |
| rs34890869  | A | -0.0694 |
| rs34217665  | A | -0.0598 |
| rs10916627  | C | 0.0318  |
| rs7526731   | A | 0.0237  |
| rs75676853  | C | -0.1241 |
| rs116247097 | G | -0.1699 |
| rs61811250  | T | -0.1409 |
| rs79082144  | A | -0.0681 |
| rs77208086  | A | -0.1335 |
| rs291351    | C | 0.025   |
| rs74079130  | T | 0.0716  |
| rs12353981  | A | 0.0615  |
| rs72648416  | A | 0.1447  |
| rs12085501  | C | -0.0387 |
| rs114930372 | A | -0.1342 |
| rs17110916  | A | 0.05    |
| rs10915025  | A | -0.0245 |
| rs61565555  | C | 0.1155  |
| rs76670570  | T | -0.0647 |
| rs12033865  | G | -0.0301 |
| rs78211640  | T | 0.1241  |
| rs10305748  | T | -0.1221 |
| rs4589116   | C | 0.0335  |
| rs74769899  | A | -0.0644 |
| rs7417232   | T | 0.0252  |

|             |   |         |
|-------------|---|---------|
| rs80228612  | T | 0.1579  |
| rs141673243 | T | 0.1569  |
| rs115138788 | A | 0.1372  |
| rs114340392 | A | 0.0939  |
| rs78730572  | A | 0.1002  |
| rs269340    | T | 0.0283  |
| rs113307684 | G | 0.0991  |
| rs71635578  | C | 0.0497  |
| rs76215943  | C | -0.1443 |
| rs113231585 | C | -0.1495 |
| rs16862099  | A | 0.0848  |
| rs3813219   | C | -0.0321 |
| rs17229354  | T | -0.1378 |
| rs79517478  | T | 0.0626  |
| rs146364775 | C | 0.0479  |
| rs6674415   | G | 0.0338  |
| rs4920565   | G | -0.038  |
| rs3738008   | A | -0.0473 |
| rs11120344  | G | 0.0615  |
| rs3923451   | C | 0.025   |
| rs116261643 | A | -0.1279 |
| rs116831740 | T | -0.2131 |
| rs12760914  | A | 0.0773  |
| rs11587290  | T | 0.0819  |
| rs12042287  | C | -0.031  |
| rs348332    | A | 0.0344  |
| rs79961898  | G | -0.0632 |
| rs849481    | A | 0.0248  |
| rs2490424   | C | 0.0537  |
| rs2143810   | C | 0.0237  |
| rs1334125   | T | -0.0247 |
| rs61825201  | C | 0.1769  |
| rs4658714   | G | -0.0347 |
| rs147699938 | G | 0.1061  |
| rs12137034  | A | -0.0261 |
| rs78932934  | T | 0.0755  |
| rs9425324   | G | -0.0268 |
| rs823140    | A | -0.0555 |
| rs12071761  | A | -0.0381 |
| rs55824232  | C | 0.1396  |
| rs78539971  | C | -0.2105 |
| rs61770275  | T | 0.0893  |
| rs1491646   | T | -0.0239 |
| rs114888965 | A | 0.103   |
| rs35268016  | T | 0.0273  |
| rs149266061 | T | -0.0781 |
| rs3010318   | T | 0.0337  |

|             |   |         |
|-------------|---|---------|
| rs41289388  | G | -0.1001 |
| rs12039035  | A | -0.0314 |
| rs11163743  | G | -0.0439 |
| rs151008748 | C | -0.1269 |
| rs10047115  | A | -0.0887 |
| rs61806193  | G | -0.0424 |
| rs857633    | T | -0.0242 |
| rs12089782  | T | -0.0915 |
| rs1059038   | G | 0.1326  |
| rs72693304  | A | 0.1066  |
| rs72703292  | A | -0.1466 |
| rs116602821 | A | 0.0417  |
| rs12058564  | A | 0.0296  |
| rs200567    | A | 0.0247  |
| rs12130420  | A | -0.0352 |
| rs75906549  | A | -0.0482 |
| rs10429916  | A | 0.0375  |
| rs7520257   | C | 0.0297  |
| rs10802551  | A | 0.0257  |
| rs2342272   | T | -0.0249 |
| rs61837556  | T | -0.0737 |
| rs72643281  | A | -0.1023 |
| rs7545004   | G | 0.05    |
| rs72901622  | G | 0.0875  |
| rs12754071  | G | -0.1064 |
| rs4658163   | C | 0.0268  |
| rs494740    | C | 0.0256  |
| rs11577201  | A | 0.0332  |
| rs56340142  | G | 0.0409  |
| rs6679318   | C | 0.0536  |
| rs6663181   | T | -0.03   |
| rs2486316   | T | 0.0393  |
| rs6687799   | G | 0.0274  |
| rs76232146  | A | -0.0807 |
| rs77566028  | C | -0.0884 |
| rs74119479  | T | 0.1447  |
| rs12735458  | G | 0.1605  |
| rs35923717  | T | 0.026   |
| rs4846346   | C | -0.0294 |
| rs2977608   | A | -0.0394 |
| rs61800719  | G | 0.1369  |
| rs113203823 | T | 0.1957  |
| rs16842847  | G | 0.0544  |
| rs146744082 | G | -0.1132 |
| rs76448722  | T | 0.148   |
| rs75485604  | T | 0.1152  |
| rs1677603   | G | 0.0943  |

|             |   |         |
|-------------|---|---------|
| rs140229723 | A | 0.0755  |
| rs6424237   | T | -0.0304 |
| rs77907715  | T | 0.0756  |
| rs17184651  | C | -0.0274 |
| rs4926774   | G | -0.0683 |
| rs6696715   | C | -0.0311 |
| rs12079690  | C | -0.0395 |
| rs139326853 | A | -0.1245 |
| rs61737591  | A | 0.1451  |
| rs4927191   | C | -0.0528 |
| rs2129577   | C | 0.0247  |
| rs7540551   | G | -0.0254 |
| rs10920316  | G | 0.0611  |
| rs11119529  | A | -0.0234 |
| rs12723846  | A | 0.0423  |
| rs138707712 | C | 0.1591  |
| rs56252451  | A | -0.077  |
| rs74433755  | A | 0.1266  |
| rs10924239  | A | -0.0513 |
| rs75042787  | G | 0.0651  |
| rs149083666 | A | 0.1088  |
| rs638372    | G | 0.0422  |
| rs1110218   | C | 0.0462  |
| rs61819230  | T | 0.0473  |
| rs649328    | C | 0.0303  |
| rs114621734 | T | 0.0687  |
| rs7413584   | A | 0.1262  |
| rs144945296 | A | -0.1654 |
| rs11804412  | A | -0.0459 |
| rs4656647   | A | 0.0357  |
| rs77236723  | T | 0.0624  |
| rs4147220   | T | 0.073   |
| rs2786106   | T | -0.0324 |
| rs115424752 | T | 0.1554  |
| rs4653953   | G | -0.1074 |
| rs315034    | G | -0.0412 |
| rs1038148   | G | 0.0248  |
| rs77599553  | A | -0.098  |
| rs115004666 | C | 0.1147  |
| rs7534703   | T | -0.0833 |
| rs116276261 | G | 0.1127  |
| rs12122479  | T | -0.072  |
| rs2815843   | C | -0.0258 |
| rs72680526  | C | -0.0623 |
| rs141797380 | A | -0.1461 |
| rs72936853  | G | -0.0651 |
| rs2311321   | C | -0.054  |

|             |   |         |
|-------------|---|---------|
| rs149606987 | T | -0.179  |
| rs1936709   | G | -0.0338 |
| rs11587457  | C | 0.0309  |
| rs7548060   | C | -0.0284 |
| rs61782495  | A | -0.033  |
| rs12095538  | G | -0.0241 |
| rs143707535 | A | -0.1584 |
| rs4653596   | G | 0.0312  |
| rs2076465   | T | -0.0321 |
| rs11587727  | C | 0.0285  |
| rs12045690  | G | 0.0255  |
| rs12406805  | A | 0.0406  |
| rs114117408 | C | 0.0692  |
| rs639599    | T | -0.0244 |
| rs7524397   | T | 0.0248  |
| rs6672322   | T | 0.0247  |
| rs704853    | T | -0.0395 |
| rs77675151  | T | -0.0538 |
| rs114704918 | G | -0.0604 |
| rs17277288  | C | 0.1387  |
| rs75779487  | G | 0.1351  |
| rs6605004   | G | -0.0334 |
| rs12042842  | G | 0.026   |
| rs629199    | T | 0.0324  |
| rs10493048  | T | 0.0372  |
| rs1361676   | T | -0.0359 |
| rs35749800  | G | -0.0387 |
| rs75804142  | C | -0.0854 |
| rs141947909 | T | -0.1534 |
| rs61776347  | T | 0.0248  |
| rs141067037 | C | 0.1273  |
| rs4656146   | A | 0.0247  |
| rs1230679   | A | -0.0483 |
| rs7548323   | A | 0.0327  |
| rs4393161   | C | 0.0267  |
| rs61820387  | A | -0.1417 |
| rs12045726  | T | -0.0331 |
| rs10737901  | G | -0.0259 |
| rs1291052   | A | 0.048   |
| rs197612    | T | 0.0479  |
| rs625167    | C | -0.0257 |
| rs77285433  | T | -0.1101 |
| rs4614300   | T | 0.0372  |
| rs71510742  | A | 0.0815  |
| rs7551463   | C | 0.0289  |
| rs3828058   | A | 0.0272  |
| rs11577435  | C | 0.1395  |

|             |   |         |
|-------------|---|---------|
| rs10913486  | G | -0.0257 |
| rs10925745  | T | -0.0246 |
| rs1193159   | T | -0.0417 |
| rs667444    | C | 0.0258  |
| rs2486014   | C | 0.039   |
| rs72678817  | A | -0.0944 |
| rs61742849  | A | -0.1098 |
| rs4631645   | A | 0.0505  |
| rs1234264   | T | 0.0803  |
| rs61833555  | T | -0.0401 |
| rs10802555  | C | -0.0414 |
| rs10802677  | G | -0.0367 |
| rs75159520  | A | -0.1637 |
| rs16860525  | C | 0.0356  |
| rs55818039  | T | -0.0995 |
| rs79608612  | A | 0.0731  |
| rs16851659  | G | -0.0235 |
| rs11809000  | C | 0.0777  |
| rs142570762 | A | -0.1493 |
| rs4846996   | C | 0.1175  |
| rs10746510  | T | 0.0518  |
| rs7417418   | T | -0.0494 |
| rs6666337   | A | -0.049  |
| rs74403973  | C | 0.1472  |
| rs144879671 | G | 0.1105  |
| rs1000452   | C | -0.0278 |
| rs55993474  | T | 0.0816  |
| rs71652655  | A | 0.0895  |
| rs55828205  | A | 0.0552  |
| rs77499776  | C | -0.0564 |
| rs77427725  | G | 0.1287  |
| rs146864617 | A | -0.2186 |
| rs12757141  | T | 0.048   |
| rs76754594  | A | -0.1332 |
| rs9287256   | C | -0.0244 |
| rs4623666   | G | 0.0248  |
| rs9425054   | G | -0.0324 |
| rs2221659   | G | 0.0459  |
| rs12129479  | C | 0.0367  |
| rs80133103  | G | 0.1872  |
| rs28584674  | C | 0.049   |
| rs559344    | C | 0.0379  |
| rs141390900 | T | -0.139  |
| rs1566250   | T | -0.0263 |
| rs61785488  | G | 0.0412  |
| rs2993034   | A | -0.0423 |
| rs57005086  | G | 0.0577  |

|             |   |         |
|-------------|---|---------|
| rs144801526 | A | 0.1489  |
| rs113629806 | T | 0.1075  |
| rs76727439  | T | 0.1075  |
| rs143166259 | C | 0.099   |
| rs59987487  | A | 0.0585  |
| rs752130    | C | -0.0263 |
| rs148280595 | A | -0.0799 |
| rs35838799  | A | -0.0908 |
| rs114167277 | G | -0.0343 |
| rs2419374   | T | -0.0308 |
| rs7529167   | T | 0.0456  |
| rs12564411  | G | -0.0523 |
| rs111344771 | A | 0.0838  |
| rs34436704  | A | 0.0643  |
| rs78729372  | A | 0.1118  |
| rs115296365 | T | 0.1331  |
| rs75274294  | G | -0.0879 |
| rs11208193  | G | 0.0371  |
| rs17378539  | C | 0.0362  |
| rs75973841  | A | 0.063   |
| rs2661322   | G | 0.024   |
| rs151205994 | C | -0.1154 |
| rs12403557  | G | 0.0314  |
| rs17102247  | C | -0.0661 |
| rs299859    | C | -0.0309 |
| rs114877165 | A | -0.0603 |
| rs11585549  | A | -0.0791 |
| rs115440456 | C | -0.0624 |
| rs877722    | T | 0.04    |
| rs2889408   | T | -0.0332 |
| rs116668546 | A | -0.1469 |
| rs12756659  | G | 0.0463  |
| rs113843548 | C | 0.1101  |
| rs138466093 | A | 0.1321  |
| rs2487647   | A | 0.0258  |
| rs114005488 | A | -0.1069 |
| rs115269444 | A | 0.0733  |
| rs12563141  | C | 0.0574  |
| rs380095    | G | 0.0659  |
| rs7536351   | A | 0.0371  |
| rs4609432   | C | -0.0308 |
| rs139348353 | T | -0.1401 |
| rs12125300  | T | 0.0242  |
| rs6673454   | A | 0.0758  |
| rs7532660   | A | -0.0252 |
| rs114859124 | T | 0.1083  |
| rs58645363  | T | 0.0579  |



|             |   |         |
|-------------|---|---------|
| rs12117937  | G | 0.0235  |
| rs115926019 | C | 0.2009  |
| rs148042477 | A | -0.0794 |
| rs74908049  | C | 0.0425  |
| rs12039350  | G | 0.0268  |
| rs76694292  | A | 0.1174  |
| rs4295913   | G | -0.0302 |
| rs61785082  | A | -0.077  |
| rs113394501 | T | 0.115   |
| rs77421743  | A | -0.1008 |
| rs11585217  | T | -0.0261 |
| rs76812037  | T | 0.1174  |
| rs3753206   | G | -0.0366 |
| rs78006982  | T | -0.0572 |
| rs12743643  | A | -0.0348 |
| rs11102946  | A | -0.0275 |
| rs74434569  | C | 0.0847  |
| rs78087596  | A | -0.0582 |
| rs58651777  | C | 0.0314  |
| rs11206801  | A | 0.0377  |
| rs1875436   | G | 0.0244  |
| rs17474256  | G | -0.045  |
| rs204262    | A | -0.0271 |
| rs140382126 | A | -0.0784 |
| rs75321251  | A | 0.0779  |
| rs141218161 | G | 0.2012  |
| rs10913090  | G | 0.0234  |
| rs12141884  | C | 0.0271  |
| rs552749    | T | 0.028   |
| rs111779963 | C | -0.0866 |
| rs10779475  | G | 0.0253  |
| rs140687561 | C | 0.1091  |
| rs78831112  | T | 0.183   |
| rs17527562  | G | 0.1185  |
| rs72756819  | C | 0.0331  |
| rs1324663   | T | -0.063  |
| rs9787004   | C | 0.0384  |
| rs197427    | C | 0.0242  |
| rs11578030  | T | 0.0635  |
| rs79756905  | T | 0.157   |
| rs10924277  | G | 0.0907  |
| rs6664314   | C | 0.0294  |
| rs12066036  | A | -0.0717 |
| rs11205087  | C | 0.0245  |
| rs149905768 | A | -0.05   |
| rs148224929 | G | -0.1135 |
| rs114517646 | A | -0.1591 |

|             |   |         |
|-------------|---|---------|
| rs73005335  | T | 0.0594  |
| rs3766354   | A | 0.0423  |
| rs11260939  | G | 0.0256  |
| rs115958595 | C | 0.0815  |
| rs139864138 | A | 0.1681  |
| rs11162344  | T | 0.0286  |
| rs66477359  | C | 0.0811  |
| rs114277321 | A | 0.1038  |
| rs17627111  | G | 0.0234  |
| rs433546    | A | -0.0452 |
| rs112710870 | T | -0.1396 |
| rs2494474   | G | 0.21    |
| rs12118240  | G | 0.0233  |
| rs80049867  | A | -0.1456 |
| rs3117061   | T | 0.0426  |
| rs116631913 | A | 0.0847  |
| rs12034687  | C | 0.0361  |
| rs10915944  | G | 0.1065  |
| rs3129539   | G | -0.0439 |
| rs17432121  | A | -0.0306 |
| rs74069187  | G | 0.0562  |
| rs669402    | A | 0.0253  |
| rs606604    | A | 0.03    |
| rs2297764   | A | 0.0524  |
| rs17130006  | G | -0.0278 |
| rs17495607  | C | 0.0602  |
| rs72632126  | T | -0.0739 |
| rs6668976   | A | 0.0388  |
| rs142134884 | T | -0.134  |
| rs9332608   | A | 0.0689  |
| rs12133146  | A | 0.1527  |
| rs41306227  | T | -0.0534 |
| rs2256060   | C | -0.0332 |
| rs77406825  | T | -0.0678 |
| rs17490953  | G | -0.0256 |
| rs75654098  | A | -0.1866 |
| rs10494762  | C | -0.0294 |
| rs75609696  | A | 0.0599  |
| rs3896118   | C | -0.1144 |
| rs12407424  | G | -0.1602 |
| rs111776850 | T | -0.0912 |
| rs10489583  | C | -0.0232 |
| rs11572818  | C | 0.068   |
| rs4462110   | G | 0.0411  |
| rs4450012   | T | -0.0467 |
| rs1767523   | G | -0.0237 |
| rs116761983 | A | 0.1147  |

|             |   |         |
|-------------|---|---------|
| rs2644604   | A | -0.0466 |
| rs114711590 | G | -0.1807 |
| rs74135300  | G | -0.1096 |
| rs17497051  | T | -0.0767 |
| rs76144453  | T | -0.0841 |
| rs12354316  | A | -0.1547 |
| rs12118587  | A | 0.0693  |
| rs11588513  | C | -0.0505 |
| rs7516862   | G | 0.0376  |
| rs116729050 | A | 0.1074  |
| rs17361747  | T | -0.0257 |
| rs76633111  | T | -0.1586 |
| rs115481123 | C | 0.0997  |
| rs12040993  | A | -0.1601 |
| rs2800221   | T | 0.0253  |
| rs72668117  | A | 0.1536  |
| rs35680413  | T | 0.0791  |
| rs2181453   | T | -0.0261 |
| rs61831012  | G | 0.0557  |
| rs140523879 | G | 0.148   |
| rs113559963 | T | 0.1414  |
| rs145528960 | A | 0.0594  |
| rs3810993   | G | 0.0255  |
| rs72653672  | G | -0.1166 |
| rs112479902 | A | 0.0618  |
| rs12723774  | G | -0.0357 |
| rs77793038  | A | 0.0793  |
| rs1007097   | A | -0.0284 |
| rs41305850  | C | 0.1617  |
| rs6425207   | G | 0.029   |
| rs61832628  | G | -0.139  |
| rs11807554  | C | 0.0254  |
| rs10916254  | G | -0.0456 |
| rs72753753  | A | -0.0708 |
| rs80296059  | T | -0.0822 |
| rs2026448   | T | -0.0272 |
| rs78892170  | A | -0.2091 |
| rs111689685 | A | 0.0388  |
| rs41277198  | C | -0.0682 |
| rs7545182   | C | 0.0296  |
| rs7519544   | G | 0.0257  |
| rs1886647   | A | -0.0273 |
| rs6339      | T | -0.0649 |
| rs4950925   | T | -0.0239 |
| rs12724703  | C | -0.0666 |
| rs1578383   | T | -0.0512 |
| rs12724751  | T | -0.0241 |

|             |   |         |
|-------------|---|---------|
| rs56386473  | A | -0.0355 |
| rs2114213   | A | 0.0265  |
| rs12129187  | G | -0.077  |
| rs148371276 | T | -0.0939 |
| rs6427848   | G | -0.0243 |
| rs1120120   | C | 0.0374  |
| rs138242807 | A | 0.0991  |
| rs9727168   | A | -0.0663 |
| rs11809462  | T | -0.1062 |
| rs12040151  | T | 0.026   |
| rs72957000  | A | -0.0742 |
| rs45523333  | T | -0.0844 |
| rs148297540 | G | -0.132  |
| rs11555655  | T | 0.0758  |
| rs7546180   | T | 0.0944  |
| rs12410207  | G | -0.0239 |
| rs77824836  | A | 0.1285  |
| rs76817004  | G | -0.1237 |
| rs4658331   | C | -0.032  |
| rs629834    | A | 0.1483  |
| rs6673728   | A | 0.028   |
| rs115488207 | A | 0.0813  |
| rs78851326  | A | -0.0868 |
| rs1112300   | T | -0.0245 |
| rs139858738 | T | -0.1385 |
| rs138878872 | A | 0.1757  |
| rs112108624 | A | 0.1261  |
| rs12088062  | T | -0.0447 |
| rs34809534  | A | 0.0868  |
| rs61767483  | G | -0.2013 |
| rs80066669  | C | -0.1523 |
| rs80047387  | T | -0.1452 |
| rs73039770  | C | 0.0881  |
| rs114049126 | A | -0.0869 |
| rs80294996  | A | 0.1243  |
| rs12084848  | C | -0.1216 |
| rs726558    | G | -0.0264 |
| rs10047088  | T | 0.0582  |
| rs514230    | A | -0.0233 |
| rs6429127   | G | 0.174   |
| rs4659976   | A | -0.0258 |
| rs10889020  | A | -0.0255 |
| rs80300963  | A | 0.1182  |
| rs115965202 | C | 0.1233  |
| rs80253968  | C | -0.1165 |
| rs78799355  | T | -0.0478 |
| rs35104010  | G | -0.0379 |

|             |   |         |
|-------------|---|---------|
| rs7537542   | A | 0.0551  |
| rs10863776  | A | -0.0243 |
| rs2477730   | C | 0.1831  |
| rs12086013  | A | 0.0287  |
| rs17300009  | T | -0.0779 |
| rs6703518   | T | 0.0232  |
| rs74970102  | G | -0.0806 |
| rs191827    | C | 0.0244  |
| rs12035349  | G | 0.039   |
| rs6668126   | T | -0.0335 |
| rs116793391 | G | -0.0553 |
| rs11580672  | C | -0.0328 |
| rs146281617 | A | -0.1123 |
| rs72667801  | A | -0.0916 |
| rs9435207   | T | 0.0286  |
| rs12410196  | C | 0.0279  |
| rs4634948   | T | -0.032  |
| rs78224145  | T | -0.0386 |
| rs12117176  | A | 0.0755  |
| rs11584807  | T | 0.0317  |
| rs11162148  | C | 0.0315  |
| rs79003147  | C | -0.0719 |
| rs12074980  | C | -0.1489 |
| rs149377309 | G | -0.1688 |
| rs11121618  | A | 0.0787  |
| rs116245795 | C | -0.1116 |
| rs1546806   | T | 0.1469  |
| rs12738128  | C | 0.0581  |
| rs7544832   | A | -0.0368 |
| rs4149226   | T | 0.0245  |
| rs74751670  | A | 0.0825  |
| rs67081753  | T | 0.0343  |
| rs78619906  | T | -0.0462 |
| rs2710888   | T | -0.0439 |
| rs72722401  | C | 0.1704  |
| rs12083549  | G | 0.0862  |
| rs7536785   | C | 0.0271  |
| rs12724029  | C | -0.0337 |
| rs1144346   | A | -0.0234 |
| rs145617933 | T | 0.1695  |
| rs78296008  | C | 0.0899  |
| rs10799455  | T | 0.0274  |
| rs78525294  | G | 0.1351  |
| rs7553424   | C | 0.0291  |
| rs75889822  | A | 0.1958  |
| rs787500    | T | 0.0294  |
| rs114860958 | T | 0.1596  |

|             |   |         |
|-------------|---|---------|
| rs1327449   | G | -0.0291 |
| rs79194111  | T | 0.0667  |
| rs112397729 | A | 0.0677  |
| rs113645840 | A | 0.1621  |
| rs2026895   | G | 0.0303  |
| rs114797857 | A | -0.1348 |
| rs12024567  | T | 0.0441  |
| rs61782447  | A | -0.0699 |
| rs76890251  | G | -0.1068 |
| rs34898811  | G | 0.1391  |
| rs72747123  | T | 0.1393  |
| rs7521074   | C | -0.0328 |
| rs16830430  | T | 0.1217  |
| rs631704    | A | -0.0292 |
| rs79600737  | C | 0.046   |
| rs35744706  | T | 0.1136  |
| rs699770    | G | -0.0245 |
| rs17515629  | C | 0.1132  |
| rs1952315   | T | 0.0383  |
| rs4475717   | T | -0.037  |
| rs12078703  | C | 0.1291  |
| rs72723566  | A | 0.0577  |
| rs142962760 | A | -0.0996 |
| rs17447183  | A | 0.0844  |
| rs9435534   | A | -0.1453 |
| rs41270817  | A | -0.1206 |
| rs55951813  | A | -0.0817 |
| rs76302130  | T | 0.1651  |
| rs12029531  | T | -0.024  |
| rs138734858 | G | 0.1365  |
| rs17493453  | T | 0.0487  |
| rs115820989 | G | -0.0609 |
| rs35807758  | G | -0.0505 |
| rs115707748 | A | -0.1136 |
| rs139541693 | T | 0.1188  |
| rs9726412   | T | -0.0341 |
| rs1737388   | A | 0.1159  |
| rs77273543  | G | -0.1005 |
| rs3849174   | G | -0.0277 |
| rs17523079  | A | 0.0985  |
| rs9662290   | C | -0.0316 |
| rs116776590 | C | -0.1743 |
| rs7523792   | A | 0.0279  |
| rs61798859  | C | -0.0571 |
| rs35578526  | T | 0.0781  |
| rs17461252  | A | -0.1133 |
| rs115882141 | A | -0.0849 |

|             |   |         |
|-------------|---|---------|
| rs1071171   | G | 0.0281  |
| rs10753237  | A | -0.0342 |
| rs6673922   | T | 0.0575  |
| rs150297287 | A | 0.1075  |
| rs61829561  | G | -0.0864 |
| rs74461411  | T | 0.1237  |
| rs12739268  | C | -0.0368 |
| rs11584933  | A | -0.0535 |
| rs1004772   | T | -0.032  |
| rs7511675   | C | -0.031  |
| rs884940    | T | -0.0254 |
| rs113478642 | C | -0.1024 |
| rs78470177  | C | 0.1843  |
| rs34150900  | A | -0.1323 |
| rs114800513 | T | 0.1324  |
| rs148503112 | G | 0.1244  |
| rs10916436  | G | -0.0279 |
| rs80137753  | A | -0.1466 |
| rs77386332  | A | 0.0841  |
| rs1578049   | T | -0.0282 |
| rs2841408   | C | 0.0243  |
| rs4653437   | G | -0.0247 |
| rs1880418   | T | -0.0236 |
| rs17366894  | G | -0.1335 |
| rs11807775  | G | -0.048  |
| rs61772086  | A | -0.0429 |
| rs115155267 | T | -0.0991 |
| rs11210780  | G | 0.026   |
| rs11587523  | A | 0.0651  |
| rs75117939  | A | 0.173   |
| rs619334    | A | 0.0839  |
| rs12091356  | C | 0.0352  |
| rs1194587   | T | -0.0235 |
| rs6604639   | T | -0.0392 |
| rs76768009  | A | 0.0593  |
| rs6686482   | C | 0.0644  |
| rs11206315  | A | -0.0355 |
| rs34970857  | T | 0.052   |
| rs4915346   | G | -0.0372 |
| rs6688816   | T | 0.0443  |
| rs146880018 | C | 0.1265  |
| rs78192166  | T | -0.0898 |
| rs5001858   | G | 0.0597  |
| rs113269159 | G | 0.1208  |
| rs56383979  | A | -0.1198 |
| rs1934074   | T | -0.0255 |
| rs12408967  | T | 0.0914  |

|             |   |         |
|-------------|---|---------|
| rs56176872  | A | -0.058  |
| rs72755131  | G | 0.0749  |
| rs139012785 | T | 0.1328  |
| rs11210529  | C | -0.0291 |
| rs13374849  | T | -0.1009 |
| rs146278366 | T | -0.1388 |
| rs76257064  | A | 0.1067  |
| rs3790725   | T | 0.0243  |
| rs7511743   | A | -0.1004 |
| rs509161    | G | -0.0507 |
| rs72671260  | C | 0.0807  |
| rs61769571  | C | -0.0981 |
| rs11804324  | T | 0.0289  |
| rs71666794  | T | -0.0479 |
| rs72702998  | G | 0.0449  |
| rs10920447  | C | -0.0334 |
| rs77493087  | A | -0.0858 |
| rs10916711  | G | 0.0277  |
| rs16828576  | T | -0.1527 |
| rs12562100  | G | 0.0486  |
| rs77011850  | A | 0.1083  |
| rs11488272  | C | 0.037   |
| rs139140696 | T | 0.1332  |
| rs11585465  | T | 0.1015  |
| rs141883790 | G | -0.1916 |
| rs1229391   | T | -0.1235 |
| rs6691910   | A | 0.0304  |
| rs17487717  | C | -0.029  |
| rs116308950 | A | 0.0852  |
| rs6676000   | T | 0.0275  |
| rs147759805 | C | 0.1685  |
| rs689013    | T | -0.0274 |
| rs10920080  | C | 0.0284  |
| rs638005    | C | -0.0538 |
| rs7528008   | T | -0.0335 |
| rs3934748   | T | 0.1168  |
| rs1004626   | C | -0.0239 |
| rs77524435  | G | 0.0904  |
| rs59262563  | A | -0.0769 |
| rs11802275  | T | -0.0359 |
| rs73121444  | T | 0.0641  |
| rs7517723   | A | -0.0435 |
| rs1937034   | G | 0.0251  |
| rs58318880  | T | 0.1187  |
| rs11577174  | T | -0.1351 |
| rs6674245   | G | 0.0279  |
| rs2236799   | T | -0.0321 |



|             |   |         |
|-------------|---|---------|
| rs240104    | T | 0.0279  |
| rs7513425   | T | 0.1339  |
| rs12135835  | A | 0.0549  |
| rs9429894   | C | 0.0351  |
| rs532495    | A | 0.0239  |
| rs594360    | T | 0.03    |
| rs78615410  | T | -0.1195 |
| rs61781213  | T | -0.1084 |
| rs12022030  | A | 0.0458  |
| rs535714    | T | 0.0627  |
| rs16838537  | C | 0.0453  |
| rs35738193  | C | 0.0338  |
| rs142177373 | T | -0.0442 |
| rs115482605 | G | -0.1462 |
| rs7365712   | G | -0.0879 |
| rs12754064  | C | -0.0283 |
| rs17887218  | T | 0.0512  |
| rs7519191   | C | 0.0331  |
| rs12022529  | T | -0.0286 |
| rs149102698 | T | -0.1878 |
| rs116672312 | G | -0.1027 |
| rs76646290  | T | -0.1509 |
| rs112936226 | A | -0.0981 |
| rs140520608 | A | 0.0789  |
| rs2073017   | T | 0.032   |
| rs17019258  | T | 0.0938  |
| rs61823480  | G | -0.0347 |
| rs146048671 | A | 0.1402  |
| rs116737013 | T | 0.0571  |
| rs12125350  | C | -0.0711 |
| rs11578557  | A | 0.0927  |
| rs61773639  | T | -0.1443 |
| rs61781981  | A | -0.0524 |
| rs148110397 | T | -0.1579 |
| rs61828389  | A | 0.0934  |
| rs12040406  | C | -0.0538 |
| rs3766491   | T | 0.0751  |
| rs2495272   | A | -0.0347 |
| rs75268928  | T | -0.1554 |
| rs11185121  | G | -0.0264 |
| rs7519328   | A | 0.0282  |
| rs2926012   | G | 0.0361  |
| rs28405710  | A | 0.0366  |
| rs11805272  | G | 0.0374  |
| rs75735499  | C | 0.0921  |
| rs34954621  | C | 0.152   |
| rs139547894 | A | -0.1354 |

|             |   |         |
|-------------|---|---------|
| rs7524493   | C | -0.1088 |
| rs17460032  | C | -0.0447 |
| rs115458552 | C | 0.1389  |
| rs75594643  | C | 0.1107  |
| rs9658881   | T | -0.0377 |
| rs115789162 | C | 0.0823  |
| rs4949550   | T | 0.0286  |
| rs149048891 | C | 0.1549  |
| rs72708629  | G | -0.0932 |
| rs78813168  | T | -0.1305 |
| rs77510655  | C | 0.0686  |
| rs77721519  | A | -0.101  |
| rs619282    | T | -0.043  |
| rs111800065 | A | 0.0732  |
| rs12118633  | T | 0.1024  |
| rs59862786  | C | -0.0602 |
| rs320403    | A | -0.0252 |
| rs72760372  | T | -0.1315 |
| rs114764137 | A | -0.0388 |
| rs149872403 | C | -0.1147 |
| rs114651083 | A | 0.1858  |
| rs75385494  | G | 0.0624  |
| rs114767332 | A | -0.0923 |
| rs112320824 | C | 0.1445  |
| rs16837415  | G | 0.0615  |
| rs111229553 | C | 0.114   |
| rs35267708  | T | 0.0942  |
| rs6588552   | T | 0.1179  |
| rs72705100  | A | 0.0376  |
| rs12120382  | C | 0.029   |
| rs4970364   | C | -0.0335 |
| rs9438732   | T | -0.1092 |
| rs158760    | T | 0.0239  |
| rs78991805  | A | -0.1407 |
| rs61803869  | G | -0.0516 |
| rs11810933  | C | 0.0382  |
| rs114490070 | A | 0.0837  |
| rs2367160   | A | -0.0271 |
| rs6704282   | C | -0.0531 |
| rs138287574 | G | -0.1227 |
| rs11584076  | T | -0.1074 |
| rs115328987 | A | -0.0469 |
| rs610719    | T | -0.0315 |
| rs55868004  | C | 0.0789  |
| rs12405574  | T | 0.0236  |
| rs74600394  | A | -0.1033 |
| rs12567481  | A | -0.0518 |

|             |   |         |
|-------------|---|---------|
| rs79393389  | C | 0.0672  |
| rs11121676  | T | 0.0308  |
| rs11811702  | G | -0.0258 |
| rs12130909  | C | -0.032  |
| rs114129276 | A | 0.1434  |
| rs72747897  | T | 0.1539  |
| rs12734533  | G | 0.0598  |
| rs10127637  | G | 0.0562  |
| rs7529058   | G | -0.0291 |
| rs72636164  | C | -0.1013 |
| rs71641333  | A | 0.0728  |
| rs34343838  | A | 0.0456  |
| rs113860383 | C | 0.0807  |
| rs6681347   | C | -0.0258 |
| rs472093    | A | 0.0307  |
| rs9437136   | T | -0.0324 |
| rs11584581  | A | -0.0302 |
| rs164421    | A | 0.0403  |
| rs12141826  | C | -0.0335 |
| rs115822521 | A | -0.1118 |
| rs72644442  | T | 0.0575  |
| rs77786808  | A | -0.1551 |
| rs140086081 | T | -0.1114 |
| rs10919963  | T | -0.0236 |
| rs2038008   | C | 0.0285  |
| rs74521700  | C | -0.1595 |
| rs116092581 | A | -0.1757 |
| rs12022530  | C | 0.0235  |
| rs79879344  | G | 0.0997  |
| rs80283959  | C | -0.1025 |
| rs388820    | T | 0.036   |
| rs61782711  | G | 0.0897  |
| rs12743572  | T | 0.1249  |
| rs146150136 | G | -0.1522 |
| rs76685943  | G | 0.1417  |
| rs73002713  | A | -0.1331 |
| rs78014729  | A | 0.1421  |
| rs73081992  | T | 0.0414  |
| rs11807360  | T | -0.0558 |
| rs7531404   | C | 0.0268  |
| rs140465834 | T | -0.1451 |
| rs113679399 | G | 0.1049  |
| rs6699916   | A | 0.0258  |
| rs7517913   | T | -0.03   |
| rs10754185  | A | -0.1434 |
| rs114209595 | C | -0.0998 |
| rs7543472   | C | 0.0333  |

|             |   |         |
|-------------|---|---------|
| rs7546867   | A | 0.0418  |
| rs2505718   | C | 0.0238  |
| rs11102525  | A | -0.0238 |
| rs75593610  | C | 0.0965  |
| rs112233035 | G | -0.1745 |
| rs7354951   | G | -0.0366 |
| rs72631714  | T | 0.0317  |
| rs4100072   | T | 0.0283  |
| rs56001365  | T | 0.1041  |
| rs10495024  | C | 0.026   |
| rs61826712  | T | -0.1065 |
| rs10449705  | C | -0.1564 |
| rs115924474 | T | -0.1484 |
| rs41264568  | G | -0.0798 |
| rs60777787  | G | 0.0659  |
| rs1769316   | A | -0.0232 |
| rs74087039  | A | -0.1022 |
| rs56037862  | T | 0.0351  |
| rs10494305  | T | -0.0444 |
| rs75030460  | G | -0.1206 |
| rs72707738  | A | -0.1225 |
| rs4656717   | A | -0.1384 |
| rs141467530 | T | -0.1101 |
| rs79374744  | C | 0.1064  |
| rs149083727 | T | -0.121  |
| rs78442356  | A | -0.1085 |
| rs114425842 | T | 0.0827  |
| rs1361312   | A | -0.0342 |
| rs12072527  | G | -0.0295 |
| rs1999186   | G | -0.0483 |
| rs6604064   | C | 0.0227  |
| rs116478383 | A | 0.1391  |
| rs114623860 | T | 0.1082  |
| rs542405    | A | 0.0519  |
| rs4657357   | T | 0.0288  |
| rs6703000   | A | 0.0875  |
| rs4146634   | T | 0.0231  |
| rs491334    | C | -0.0242 |
| rs79722995  | G | -0.0601 |
| rs111867258 | T | 0.1097  |
| rs114871994 | T | 0.1757  |
| rs61801406  | A | -0.08   |
| rs148732491 | T | -0.0657 |
| rs116365606 | T | -0.1409 |
| rs112700903 | G | 0.1355  |
| rs142066354 | T | 0.0823  |
| rs12756211  | G | 0.0265  |

|             |   |         |
|-------------|---|---------|
| rs73072180  | A | 0.0496  |
| rs80018811  | C | -0.0519 |
| rs931449    | A | 0.0352  |
| rs12126476  | T | 0.0337  |
| rs1524002   | A | 0.0359  |
| rs12038533  | A | 0.0396  |
| rs75070067  | T | 0.1269  |
| rs10495381  | T | 0.1101  |
| rs4927316   | G | 0.0304  |
| rs12723684  | C | -0.0425 |
| rs12135733  | C | 0.0592  |
| rs868585    | C | -0.0262 |
| rs12734726  | T | -0.0443 |
| rs12045153  | T | -0.1003 |
| rs4657650   | A | 0.0882  |
| rs12734872  | A | 0.0357  |
| rs35461947  | T | 0.0239  |
| rs12031819  | G | 0.0689  |
| rs72475090  | T | -0.1068 |
| rs7530465   | A | 0.0413  |
| rs115270369 | A | 0.077   |
| rs187922    | A | 0.0527  |
| rs2491602   | C | -0.0242 |
| rs61770103  | C | -0.1053 |
| rs59396093  | T | -0.049  |
| rs12058218  | A | 0.1142  |
| rs3845419   | C | 0.0294  |
| rs2745486   | G | -0.0272 |
| rs855311    | G | -0.0312 |
| rs111667858 | A | -0.1211 |
| rs150754084 | T | 0.0671  |
| rs71645447  | T | -0.0434 |
| rs144702192 | A | -0.1468 |
| rs16856987  | A | 0.0368  |
| rs74966382  | G | -0.0457 |
| rs2226738   | C | 0.0388  |
| rs61824906  | G | 0.0661  |
| rs2636255   | G | -0.0229 |
| rs144071116 | T | 0.1502  |
| rs3863849   | G | -0.047  |
| rs72683572  | A | -0.0848 |
| rs499345    | A | 0.0242  |
| rs61825134  | T | 0.1562  |
| rs10465704  | T | 0.1253  |
| rs1027598   | C | -0.0369 |
| rs79518053  | C | 0.1512  |
| rs7537472   | T | 0.0266  |

|             |   |         |
|-------------|---|---------|
| rs80141951  | A | 0.0468  |
| rs72670306  | C | 0.0579  |
| rs1341149   | A | 0.0261  |
| rs12130690  | C | 0.0933  |
| rs12739816  | T | -0.1395 |
| rs77545679  | T | 0.0763  |
| rs1610410   | C | -0.0277 |
| rs1327611   | C | 0.0271  |
| rs143355286 | A | -0.1967 |
| rs113237675 | A | 0.1001  |
| rs112689575 | A | -0.1315 |
| rs72744696  | T | 0.0924  |
| rs4846755   | C | 0.0438  |
| rs72665501  | C | 0.0355  |
| rs56376223  | C | 0.1293  |
| rs72734018  | C | -0.0986 |
| rs143618505 | C | 0.1014  |
| rs141992885 | C | 0.1008  |
| rs115289688 | T | 0.1358  |
| rs12730697  | G | 0.0244  |
| rs76116808  | A | -0.0697 |
| rs17849501  | T | 0.0904  |
| rs142276163 | C | -0.038  |
| rs17378041  | G | 0.078   |
| rs112141719 | T | -0.144  |
| rs6660888   | C | 0.0409  |
| rs11580121  | G | 0.031   |
| rs6676404   | G | -0.0292 |
| rs1999527   | A | -0.0249 |
| rs4512698   | A | -0.0363 |
| rs61777376  | A | -0.037  |
| rs114098943 | A | 0.1043  |
| rs688498    | A | 0.0268  |
| rs149621902 | A | -0.0952 |
| rs12074960  | T | 0.1022  |
| rs10735502  | A | 0.0324  |
| rs16836703  | G | -0.0344 |
| rs1307985   | G | 0.0239  |
| rs11121293  | C | -0.0509 |
| rs139714838 | G | 0.0809  |
| rs41272467  | A | -0.0914 |
| rs1218598   | G | 0.0282  |
| rs74158952  | C | 0.045   |
| rs116497241 | T | 0.1823  |
| rs61829070  | A | 0.0554  |
| rs11585353  | C | 0.1251  |
| rs2746472   | T | 0.1627  |

|             |   |         |
|-------------|---|---------|
| rs2151846   | G | 0.0239  |
| rs2492631   | A | -0.0379 |
| rs3753559   | T | -0.0249 |
| rs143302590 | C | -0.0943 |
| rs11568054  | A | 0.0648  |
| rs72633064  | G | 0.2166  |
| rs13376554  | A | 0.0788  |
| rs114413838 | C | -0.2005 |
| rs1229359   | T | 0.0361  |
| rs74848658  | C | -0.1319 |
| rs12137966  | C | 0.1674  |
| rs61802920  | C | 0.054   |
| rs10923182  | T | -0.0273 |
| rs4265493   | T | 0.0246  |
| rs12407936  | C | -0.1002 |
| rs10864528  | G | 0.0279  |
| rs12145291  | C | -0.0491 |
| rs2984590   | A | -0.0239 |
| rs12758027  | C | 0.0237  |
| rs139029704 | G | -0.131  |
| rs3122591   | C | -0.0248 |
| rs12122170  | G | 0.0526  |
| rs114079829 | T | -0.2154 |
| rs7540109   | C | 0.0641  |
| rs151111900 | G | 0.0316  |
| rs11209388  | A | -0.0228 |
| rs34817060  | C | 0.0278  |
| rs2654854   | A | -0.0307 |
| rs4970484   | A | -0.0434 |
| rs12403951  | G | -0.0248 |
| rs115153075 | T | -0.0962 |
| rs76281252  | T | -0.0972 |
| rs6659580   | T | 0.0231  |
| rs143786694 | G | 0.093   |
| rs11209665  | T | -0.0237 |
| rs17344586  | A | 0.0665  |
| rs140907295 | G | -0.165  |
| rs6588399   | G | -0.0388 |
| rs17389226  | C | 0.0792  |
| rs75087057  | A | -0.0717 |
| rs77520732  | C | 0.0874  |
| rs79387949  | C | 0.1613  |
| rs116714246 | G | -0.1019 |
| rs1182589   | A | -0.0247 |
| rs17659359  | C | 0.03    |
| rs114126645 | A | 0.1498  |
| rs12117676  | A | 0.074   |

|             |   |         |
|-------------|---|---------|
| rs1878074   | G | -0.033  |
| rs78061576  | C | -0.173  |
| rs116379434 | T | 0.0799  |
| rs7554453   | T | 0.0373  |
| rs74837934  | C | -0.037  |
| rs114963479 | G | 0.2022  |
| rs926628    | C | 0.0281  |
| rs35270729  | A | -0.0335 |
| rs148505257 | C | 0.108   |
| rs116069066 | A | 0.0935  |
| rs112866845 | A | 0.1063  |
| rs28768459  | C | -0.0405 |
| rs142745042 | C | 0.1236  |
| rs78744949  | T | 0.1241  |
| rs3219492   | T | -0.044  |
| rs960722    | T | -0.0249 |
| rs12566049  | A | -0.0225 |
| rs113066240 | T | 0.1643  |
| rs76501670  | T | 0.1105  |
| rs12408193  | A | 0.0244  |
| rs142872320 | G | -0.1405 |
| rs1539098   | A | -0.0237 |
| rs76512233  | C | 0.1305  |
| rs2629810   | G | -0.0294 |
| rs114923254 | G | -0.1824 |
| rs1810467   | G | -0.0222 |
| rs2809287   | C | -0.0458 |
| rs9431706   | A | 0.0229  |
| rs7553232   | A | 0.0678  |
| rs113578258 | C | 0.0992  |
| rs12744921  | A | 0.0275  |
| rs77651116  | G | 0.0404  |
| rs34877649  | T | 0.2114  |
| rs114328185 | A | -0.1327 |
| rs10802580  | A | 0.0285  |
| rs12068103  | T | -0.0645 |
| rs4951059   | T | -0.088  |
| rs79057007  | A | -0.0736 |
| rs259574    | A | 0.0223  |
| rs11207234  | C | 0.0248  |
| rs2813950   | G | -0.0227 |
| rs10802925  | T | -0.0395 |
| rs12240201  | G | 0.0835  |
| rs77986900  | T | 0.034   |
| rs4915941   | G | 0.0295  |
| rs115630264 | T | -0.1446 |
| rs77306488  | A | -0.0472 |



|             |   |         |
|-------------|---|---------|
| rs35058288  | C | -0.1538 |
| rs9663078   | A | 0.0256  |
| rs872730    | T | 0.0333  |
| rs150332254 | A | -0.1034 |
| rs116132935 | G | 0.149   |
| rs6424981   | A | 0.1452  |
| rs1287948   | G | 0.0472  |
| rs10915314  | C | 0.0241  |
| rs139286514 | A | -0.112  |
| rs111536323 | G | 0.0954  |
| rs1415792   | T | -0.0295 |
| rs72693599  | C | 0.0816  |
| rs7529294   | C | 0.0232  |
| rs115554526 | T | 0.1074  |
| rs72720762  | A | 0.0561  |
| rs4304538   | A | 0.0317  |
| rs10927765  | C | 0.0261  |
| rs115560464 | T | 0.1888  |
| rs1857968   | A | 0.0272  |
| rs74419517  | T | 0.1141  |
| rs4915046   | A | 0.0837  |
| rs77199539  | T | 0.1031  |
| rs1554669   | G | -0.0456 |
| rs140372175 | C | 0.1078  |
| rs112672852 | T | 0.118   |
| rs1933064   | A | -0.0273 |
| rs79213421  | C | 0.0867  |
| rs76707624  | T | 0.0835  |
| rs12565080  | T | 0.0689  |
| rs78296988  | A | -0.0319 |
| rs75780493  | C | 0.0908  |
| rs61800494  | A | 0.0878  |
| rs114468433 | A | 0.195   |
| rs12033929  | T | -0.0338 |
| rs112259894 | A | -0.1064 |
| rs138715504 | C | -0.1073 |
| rs61818850  | T | -0.0962 |
| rs2366257   | G | 0.0227  |
| rs2455665   | A | -0.1297 |
| rs7522173   | A | -0.1    |
| rs116138661 | C | -0.1605 |
| rs114979698 | C | -0.1221 |
| rs2590697   | T | 0.1087  |
| rs12036734  | C | 0.0331  |
| rs56008308  | C | 0.0348  |
| rs77286206  | A | 0.1131  |
| rs149068751 | T | 0.0803  |

|             |   |         |
|-------------|---|---------|
| rs4926616   | T | -0.0256 |
| rs78019629  | G | -0.0976 |
| rs76780527  | A | 0.1145  |
| rs78301510  | G | 0.0774  |
| rs75801849  | T | -0.1277 |
| rs11122588  | G | 0.0336  |
| rs10910380  | T | 0.0258  |
| rs111664462 | T | 0.1096  |
| rs61759293  | A | -0.0501 |
| rs11579412  | G | -0.0386 |
| rs112509681 | T | -0.1118 |
| rs16859250  | T | 0.0294  |
| rs12755775  | A | -0.0399 |
| rs36185275  | C | -0.0512 |
| rs1359414   | G | -0.0253 |
| rs114673401 | A | 0.1734  |
| rs75015634  | C | 0.0321  |
| rs6662813   | G | -0.0257 |
| rs11209155  | A | 0.0247  |
| rs147746462 | T | -0.1132 |
| rs142001774 | A | 0.0882  |
| rs116435157 | T | 0.1011  |
| rs115440384 | T | 0.0877  |
| rs115761111 | T | 0.0718  |
| rs74835610  | G | 0.1035  |
| rs115648562 | T | 0.1126  |
| rs115940546 | A | 0.1338  |
| rs7546766   | C | 0.1691  |
| rs12562383  | T | 0.0226  |
| rs1311451   | A | -0.0363 |
| rs72720707  | A | 0.0507  |
| rs17645018  | G | -0.0673 |
| rs10910660  | C | 0.0263  |
| rs7529286   | A | -0.0377 |
| rs2807361   | C | 0.0229  |
| rs12048411  | C | -0.0279 |
| rs35665433  | G | 0.056   |
| rs34407103  | A | 0.0579  |
| rs12075706  | C | -0.0595 |
| rs113564317 | A | 0.187   |
| rs76729621  | G | -0.0564 |
| rs76874828  | C | -0.1444 |
| rs78980876  | T | 0.0347  |
| rs115833398 | C | -0.1138 |
| rs114115736 | A | -0.159  |
| rs72637248  | T | 0.0254  |
| rs150563707 | C | 0.1342  |

|             |   |         |
|-------------|---|---------|
| rs4846807   | C | 0.0223  |
| rs756245    | T | -0.0222 |
| rs113332300 | A | 0.1423  |
| rs11261048  | C | 0.1016  |
| rs114425589 | T | 0.0961  |
| rs114804787 | C | 0.1115  |
| rs2134941   | C | -0.0338 |
| rs72751115  | T | -0.0392 |
| rs1361332   | A | -0.0305 |
| rs1158050   | C | 0.0304  |
| rs112793256 | T | 0.0481  |
| rs7527826   | A | -0.0365 |
| rs12075120  | A | -0.0284 |
| rs143383674 | T | -0.1026 |
| rs151334674 | T | 0.1637  |
| rs74750613  | A | 0.0445  |
| rs72747007  | T | -0.1499 |
| rs869254    | C | 0.1082  |
| rs115979627 | C | 0.096   |
| rs4073922   | A | 0.0722  |
| rs11211020  | T | -0.0239 |
| rs426651    | A | -0.0313 |
| rs139640535 | G | -0.0841 |
| rs114887247 | C | -0.0711 |
| rs61803494  | T | -0.0617 |
| rs12734657  | G | -0.0426 |
| rs17641575  | T | -0.0443 |
| rs4660241   | A | -0.034  |
| rs60341734  | G | -0.0764 |
| rs114191443 | A | 0.1113  |
| rs7364854   | A | -0.1845 |
| rs545475    | T | 0.0299  |
| rs61826753  | A | 0.0307  |
| rs116706671 | C | -0.0798 |
| rs115659189 | G | -0.0924 |
| rs12730652  | C | 0.0503  |
| rs73008272  | T | 0.0983  |
| rs2803461   | A | -0.0247 |
| rs12748527  | T | 0.1527  |
| rs1106151   | A | -0.0443 |
| rs116105108 | G | 0.1188  |
| rs61835398  | A | 0.0514  |
| rs112095653 | G | 0.0658  |
| rs16844403  | C | 0.1652  |
| rs149312067 | A | 0.1145  |
| rs11590252  | G | 0.0718  |
| rs61760801  | G | -0.0482 |

|             |   |         |
|-------------|---|---------|
| rs874349    | T | -0.0268 |
| rs113544791 | A | 0.139   |
| rs12027987  | C | -0.0389 |
| rs148277892 | C | 0.0562  |
| rs10925451  | G | -0.0252 |
| rs12044473  | A | -0.0265 |
| rs11207037  | G | 0.0263  |
| rs113564013 | A | -0.137  |
| rs11803230  | G | -0.109  |
| rs11591136  | G | -0.1062 |
| rs744745    | A | 0.0226  |
| rs114043262 | A | 0.0701  |
| rs12130756  | A | -0.0825 |
| rs116446798 | T | -0.1697 |
| rs12730560  | G | -0.0329 |
| rs1113177   | C | 0.0997  |
| rs11207229  | C | 0.0433  |
| rs4460648   | G | 0.0801  |
| rs17374258  | T | 0.0293  |
| rs7539302   | T | 0.0254  |
| rs59438946  | C | 0.0713  |
| rs116401315 | A | -0.1639 |
| rs77355552  | A | -0.0745 |
| rs12045774  | A | 0.0872  |
| rs147322135 | A | 0.1274  |
| rs12087539  | G | 0.058   |
| rs12136324  | C | -0.0222 |
| rs9287130   | G | 0.0325  |
| rs12135777  | T | -0.0344 |
| rs1770212   | A | 0.0231  |
| rs1126367   | G | 0.0231  |
| rs115709148 | T | 0.094   |
| rs7554192   | A | -0.0299 |
| rs2024613   | C | 0.0639  |
| rs144872023 | T | 0.0977  |
| rs7555469   | T | 0.0331  |
| rs35340308  | G | 0.0969  |
| rs6695321   | G | 0.0224  |
| rs996864    | G | -0.0414 |
| rs17104423  | G | 0.0894  |
| rs1999796   | C | -0.0959 |
| rs6428841   | A | -0.0222 |
| rs6702543   | G | 0.0258  |
| rs76894643  | A | -0.0785 |
| rs112612015 | T | -0.152  |
| rs1928346   | G | 0.1275  |
| rs140929075 | T | 0.1436  |

|             |   |         |
|-------------|---|---------|
| rs1704203   | A | 0.0365  |
| rs12122171  | C | -0.0908 |
| rs146519801 | G | -0.1415 |
| rs4927071   | T | 0.0274  |
| rs9803840   | T | 0.0637  |
| rs1346864   | T | 0.0423  |
| rs12075780  | C | 0.0408  |
| rs10923574  | C | 0.0238  |
| rs78833820  | A | 0.0692  |
| rs3811015   | C | 0.038   |
| rs75062229  | C | -0.0796 |
| rs9428536   | T | 0.0232  |
| rs11102800  | T | 0.0228  |
| rs856084    | G | -0.027  |
| rs116433736 | T | -0.1061 |
| rs115971106 | T | 0.0622  |
| rs7533295   | A | -0.0315 |
| rs79273400  | T | -0.1241 |
| rs79440992  | C | 0.0773  |
| rs144598943 | G | 0.1759  |
| rs2304306   | T | 0.0754  |
| rs13374652  | A | -0.0471 |
| rs17477445  | T | 0.1754  |
| rs78452229  | C | 0.0734  |
| rs2132421   | T | -0.0287 |
| rs11119076  | A | 0.069   |
| rs72754524  | C | 0.0461  |
| rs16823978  | T | 0.074   |
| rs12125544  | C | -0.0717 |
| rs142353356 | C | 0.0564  |
| rs1020708   | A | -0.0219 |
| rs76098848  | T | 0.1109  |
| rs17106630  | T | 0.0471  |
| rs4265484   | G | 0.0271  |
| rs6687797   | A | 0.0332  |
| rs80256433  | G | -0.0652 |
| rs115543599 | A | 0.0935  |
| rs113706283 | T | -0.0655 |
| rs271747    | A | -0.026  |
| rs72669442  | A | 0.1034  |
| rs7517824   | C | -0.0258 |
| rs72691578  | T | 0.0688  |
| rs113462254 | T | 0.1626  |
| rs150934840 | A | 0.0492  |
| rs58905635  | C | -0.047  |
| rs115933125 | A | -0.0837 |
| rs149648316 | C | -0.0484 |

|             |   |         |
|-------------|---|---------|
| rs4949715   | T | 0.0264  |
| rs75500998  | T | 0.0353  |
| rs56404247  | T | 0.0434  |
| rs78731651  | T | 0.0844  |
| rs10465819  | T | 0.0239  |
| rs6675856   | G | 0.0884  |
| rs11806580  | T | -0.0778 |
| rs12740451  | T | -0.0333 |
| rs859050    | A | -0.0229 |
| rs116809154 | A | -0.1628 |
| rs147470466 | A | 0.103   |
| rs2065160   | G | -0.0381 |
| rs79409740  | A | -0.0689 |
| rs115517531 | G | -0.103  |
| rs12089708  | A | 0.051   |
| rs76789597  | A | 0.102   |
| rs12118914  | T | 0.0649  |
| rs77446002  | C | 0.0997  |
| rs139197234 | G | 0.17    |
| rs114223278 | A | -0.1093 |
| rs875148    | T | -0.0238 |
| rs74914251  | G | 0.1545  |
| rs12059757  | G | 0.0279  |
| rs266825    | G | 0.0642  |
| rs6692545   | A | 0.1049  |
| rs71633523  | A | 0.1214  |
| rs1280961   | A | 0.0366  |
| rs11249024  | C | 0.0416  |
| rs9428077   | C | 0.0421  |
| rs72734303  | A | 0.0346  |
| rs10863348  | G | 0.0347  |
| rs4078485   | A | 0.04    |
| rs2764688   | A | 0.029   |
| rs75218957  | G | 0.079   |
| rs76396453  | G | 0.0883  |
| rs116532272 | A | -0.1407 |
| rs4656682   | A | 0.0304  |
| rs150519885 | C | 0.1338  |
| rs10793750  | C | -0.0266 |
| rs78128854  | A | 0.0878  |
| rs12737672  | T | 0.1367  |
| rs4649413   | T | 0.033   |
| rs115978377 | C | 0.1277  |
| rs145708248 | G | 0.129   |
| rs10158584  | G | -0.1185 |
| rs583468    | T | 0.0235  |
| rs12140854  | C | 0.0358  |

|             |   |         |
|-------------|---|---------|
| rs11487432  | G | 0.0385  |
| rs77787851  | G | -0.0887 |
| rs61827414  | C | -0.0978 |
| rs3008881   | A | -0.0296 |
| rs79587190  | C | -0.0415 |
| rs12567872  | T | 0.0416  |
| rs2000394   | T | 0.0375  |
| rs2765035   | C | -0.0698 |
| rs10907311  | T | 0.0285  |
| rs232806    | T | 0.0591  |
| rs12406728  | T | 0.0426  |
| rs72675902  | T | 0.0764  |
| rs56008807  | A | -0.0362 |
| rs1321132   | G | 0.0227  |
| rs4268348   | G | -0.0255 |
| rs35521511  | A | 0.0483  |
| rs2576265   | T | -0.0238 |
| rs710133    | T | 0.0464  |
| rs76860733  | A | 0.082   |
| rs267854    | C | 0.0249  |
| rs670824    | T | -0.0338 |
| rs12119428  | A | -0.1594 |
| rs17446795  | G | 0.0803  |
| rs12136786  | T | -0.0231 |
| rs74059336  | G | 0.0408  |
| rs148458870 | A | -0.0843 |
| rs143918413 | T | -0.1326 |
| rs2842861   | T | 0.1187  |
| rs2268556   | C | -0.0359 |
| rs7528241   | G | 0.039   |
| rs61834219  | T | 0.1192  |
| rs12730226  | T | 0.0299  |
| rs9437984   | T | -0.0229 |
| rs11588930  | A | -0.0381 |
| rs17427125  | A | -0.0632 |
| rs76390707  | A | 0.1184  |
| rs140549724 | G | 0.1745  |
| rs857118    | T | -0.0224 |
| rs17541376  | C | 0.0413  |
| rs12119880  | G | 0.1043  |
| rs79092388  | T | -0.0999 |
| rs1889548   | A | -0.0246 |
| rs669996    | T | 0.0305  |
| rs72713469  | A | -0.0465 |
| rs10912917  | T | 0.0307  |
| rs79388106  | T | 0.0915  |
| rs115645346 | T | 0.1287  |

|             |   |         |
|-------------|---|---------|
| rs4660181   | G | -0.0324 |
| rs12033655  | C | 0.0245  |
| rs4916034   | T | 0.0251  |
| rs12076262  | A | 0.1018  |
| rs139853323 | T | 0.0998  |
| rs2789728   | T | -0.1837 |
| rs10910480  | G | 0.0366  |
| rs79210514  | G | -0.0888 |
| rs527208    | A | 0.0411  |
| rs61816632  | A | 0.0459  |
| rs207127    | G | -0.0354 |
| rs143387608 | T | -0.0964 |
| rs12138377  | C | 0.0457  |
| rs3181088   | T | -0.0307 |
| rs79780638  | T | 0.0845  |
| rs2000101   | T | -0.029  |
| rs560611    | C | -0.0307 |
| rs76487324  | A | -0.0386 |
| rs28878211  | A | -0.0973 |
| rs4970806   | C | 0.0233  |
| rs144510399 | A | -0.166  |
| rs4658605   | A | 0.0234  |
| rs72718707  | G | 0.0514  |
| rs2046842   | A | -0.035  |
| rs10495128  | A | -0.0306 |
| rs115244136 | T | -0.0853 |
| rs80058375  | G | -0.0915 |
| rs4656120   | T | 0.063   |
| rs7544268   | C | 0.0273  |
| rs56166784  | C | 0.0817  |
| rs72632834  | C | 0.0474  |
| rs113919697 | G | 0.0652  |
| rs6682619   | G | -0.024  |
| rs597181    | T | 0.0237  |
| rs75335011  | T | 0.0779  |
| rs2807837   | G | -0.0436 |
| rs116780327 | T | -0.1674 |
| rs11588595  | C | 0.0705  |
| rs41306187  | A | -0.0603 |
| rs4652579   | G | 0.0729  |
| rs10864225  | T | -0.0342 |
| rs1695946   | A | 0.0256  |
| rs4915988   | G | 0.0254  |
| rs7514211   | G | -0.0604 |
| rs55939934  | A | 0.0394  |
| rs11586615  | C | -0.0659 |
| rs78359763  | A | -0.0804 |



|             |   |         |
|-------------|---|---------|
| rs74608475  | C | 0.1615  |
| rs41269207  | T | 0.0754  |
| rs34199675  | G | -0.1081 |
| rs145208059 | A | 0.0878  |
| rs17571647  | A | -0.0702 |
| rs17323505  | G | 0.0278  |
| rs111907259 | A | -0.1599 |
| rs684287    | T | -0.0563 |
| rs76127600  | G | -0.0665 |
| rs1461919   | G | 0.022   |
| rs10495301  | A | 0.0246  |
| rs10798959  | T | 0.0244  |
| rs77425918  | A | -0.1213 |
| rs11589710  | C | 0.1024  |
| rs12141063  | A | 0.048   |
| rs115352944 | T | 0.0495  |
| rs16844291  | G | 0.0319  |
| rs7545500   | A | -0.066  |
| rs76740766  | T | -0.0982 |
| rs140314886 | A | -0.0955 |
| rs112336840 | C | -0.0413 |
| rs76147254  | C | -0.0671 |
| rs2803271   | G | -0.0225 |
| rs74112513  | A | -0.1029 |
| rs2265081   | C | -0.092  |
| rs61812704  | T | -0.171  |
| rs12748330  | G | -0.0271 |
| rs11811937  | T | 0.1211  |
| rs7556454   | T | 0.0226  |
| rs34581340  | G | -0.1504 |
| rs10925146  | C | -0.0314 |
| rs75028234  | A | -0.1126 |
| rs10917177  | G | 0.1302  |
| rs7529406   | C | 0.0312  |
| rs78799512  | A | 0.0459  |
| rs115888432 | A | -0.0535 |
| rs12753442  | G | -0.035  |
| rs3766606   | T | 0.0303  |
| rs1414474   | G | 0.026   |
| rs4459149   | T | 0.0395  |
| rs79768400  | A | 0.1436  |
| rs17357201  | A | 0.0284  |
| rs71659190  | C | 0.069   |
| rs112044341 | A | 0.1429  |
| rs1763457   | T | -0.0418 |
| rs71639162  | A | -0.029  |
| rs2451614   | G | 0.025   |

|             |   |         |
|-------------|---|---------|
| rs78932142  | T | -0.1419 |
| rs10800041  | G | -0.0307 |
| rs6669905   | T | 0.0226  |
| rs115106269 | C | -0.2528 |
| rs72751177  | T | -0.2236 |
| rs113833289 | C | 0.1816  |
| rs80173044  | G | 0.1002  |
| rs72757706  | T | 0.1164  |
| rs116707641 | C | -0.0887 |
| rs966321    | G | 0.0224  |
| rs112036902 | C | -0.163  |
| rs9286954   | G | 0.0285  |
| rs71638902  | G | 0.0327  |
| rs1704758   | T | -0.0265 |
| rs77278027  | T | 0.0615  |
| rs139636779 | C | 0.1681  |
| rs2992739   | A | -0.0271 |
| rs2499526   | T | 0.0234  |
| rs55976937  | T | 0.076   |
| rs12119828  | C | 0.0864  |
| rs1754528   | T | 0.029   |
| rs77399584  | G | -0.039  |
| rs78270548  | C | -0.0778 |
| rs4908611   | G | 0.022   |
| rs6662910   | T | 0.0549  |
| rs12135527  | A | -0.1104 |
| rs116563715 | A | 0.1114  |
| rs602226    | G | 0.0766  |
| rs7513998   | A | 0.0274  |
| rs349393    | C | 0.0236  |
| rs6674802   | C | 0.058   |
| rs41272507  | G | 0.0623  |
| rs12023019  | T | -0.0449 |
| rs114902224 | T | 0.1292  |
| rs209692    | A | 0.0242  |
| rs72669514  | T | -0.0702 |
| rs139071998 | A | 0.0627  |
| rs115490206 | C | 0.0939  |
| rs114887703 | G | -0.1386 |
| rs115056380 | A | 0.0677  |
| rs3896810   | G | 0.0245  |
| rs10494568  | G | 0.0237  |
| rs6659521   | A | -0.0231 |
| rs114857250 | C | 0.0632  |
| rs72663567  | T | 0.0873  |
| rs12123368  | A | -0.0444 |
| rs112091842 | C | -0.1281 |

|             |   |         |
|-------------|---|---------|
| rs16841293  | C | 0.0431  |
| rs115607533 | T | 0.1044  |
| rs77083882  | A | 0.1575  |
| rs10802516  | T | -0.0245 |
| rs2073110   | G | 0.0252  |
| rs17128649  | T | 0.0933  |
| rs61817491  | T | 0.0329  |
| rs804134    | G | 0.0246  |
| rs10925656  | A | 0.0839  |
| rs17366686  | C | 0.0673  |
| rs114797369 | A | -0.155  |
| rs2297183   | C | -0.0263 |
| rs1915275   | G | -0.0299 |
| rs12406196  | C | 0.0401  |
| rs61778970  | T | 0.1153  |
| rs78681939  | G | 0.0557  |
| rs984872    | C | 0.0303  |
| rs61818238  | T | 0.0444  |
| rs41282518  | A | 0.1018  |
| rs114470093 | T | 0.0907  |
| rs320431    | T | -0.0639 |
| rs58719925  | C | 0.0304  |
| rs72671563  | T | 0.0264  |
| rs11208252  | A | 0.0305  |
| rs2706194   | T | 0.1349  |
| rs12126200  | A | 0.0836  |
| rs927203    | C | 0.0234  |
| rs113889915 | T | 0.0479  |
| rs74126218  | A | 0.1191  |
| rs270703    | C | -0.0312 |
| rs142015271 | G | 0.2065  |
| rs45566732  | T | -0.0786 |
| rs78275388  | T | 0.1176  |
| rs12134610  | G | -0.0452 |
| rs6669720   | G | -0.0306 |
| rs12129875  | A | 0.0421  |
| rs61780622  | G | -0.0646 |
| rs12139965  | G | 0.1053  |
| rs17598123  | T | 0.032   |
| rs10915420  | G | -0.038  |
| rs75809912  | T | 0.0427  |
| rs12135067  | T | -0.0905 |
| rs10489788  | C | -0.025  |
| rs732210    | A | 0.041   |
| rs116568582 | A | 0.0994  |
| rs12036392  | C | 0.0247  |
| rs1544174   | T | -0.0545 |

|             |   |         |
|-------------|---|---------|
| rs139245669 | A | -0.1202 |
| rs79508140  | C | -0.2044 |
| rs7538133   | T | 0.0486  |
| rs12129251  | C | -0.0429 |
| rs115725122 | A | -0.1791 |
| rs16850697  | G | -0.0771 |
| rs75723690  | C | 0.1283  |
| rs72742485  | A | 0.1445  |
| rs12086322  | A | -0.0886 |
| rs115361948 | T | -0.1286 |
| rs35047221  | G | -0.0391 |
| rs143365325 | C | 0.1158  |
| rs9729887   | A | -0.0448 |
| rs7554648   | T | 0.0438  |
| rs10874276  | T | 0.0244  |
| rs12097445  | G | 0.0666  |
| rs12741523  | T | -0.0592 |
| rs11587363  | C | -0.0534 |
| rs11584416  | G | 0.0323  |
| rs56260551  | A | -0.0751 |
| rs7524898   | T | -0.0618 |
| rs79891281  | A | 0.106   |
| rs72686867  | A | 0.1385  |
| rs150783882 | T | 0.1482  |
| rs12116532  | A | 0.035   |
| rs61828161  | A | -0.0572 |
| rs74143120  | A | 0.1127  |
| rs1775833   | A | -0.0246 |
| rs71666204  | A | 0.0863  |
| rs7552692   | C | 0.0643  |
| rs3790515   | T | 0.0395  |
| rs77275204  | T | 0.0821  |
| rs59150958  | T | -0.0299 |
| rs4648854   | A | 0.0424  |
| rs518717    | C | 0.0259  |
| rs77602068  | A | -0.0477 |
| rs10791     | T | -0.0432 |
| rs77027094  | T | -0.0878 |
| rs116102697 | T | -0.1144 |
| rs12028075  | T | 0.0259  |
| rs113137043 | G | 0.0903  |
| rs142532713 | C | 0.0844  |
| rs41309621  | T | 0.0804  |
| rs17627448  | C | 0.1883  |
| rs7547898   | T | -0.0268 |
| rs7541453   | C | -0.0227 |
| rs12125753  | G | 0.1334  |

|             |   |         |
|-------------|---|---------|
| rs72743674  | G | 0.0232  |
| rs10907211  | A | -0.0268 |
| rs2485023   | G | 0.0247  |
| rs309474    | T | -0.0221 |
| rs11590667  | A | 0.074   |
| rs114199297 | G | 0.1235  |
| rs1001847   | A | 0.032   |
| rs17016501  | T | 0.0471  |
| rs2800879   | G | -0.0227 |
| rs16834286  | A | -0.0408 |
| rs10754688  | G | 0.022   |
| rs4949562   | A | -0.0325 |
| rs6700316   | A | -0.0504 |
| rs10912220  | T | 0.022   |
| rs115024239 | T | 0.0679  |
| rs12739067  | A | 0.0292  |
| rs78065931  | T | 0.0813  |
| rs61822967  | A | -0.0254 |
| rs2821054   | G | 0.0358  |
| rs34916501  | T | -0.052  |
| rs140199211 | G | 0.0992  |
| rs7517554   | G | 0.071   |
| rs842192    | A | -0.0304 |
| rs142601277 | A | -0.1219 |
| rs7551164   | G | -0.0394 |
| rs1809328   | T | -0.0602 |
| rs17382631  | A | 0.031   |
| rs12084257  | G | -0.0219 |
| rs1333717   | G | -0.0271 |
| rs112355921 | G | 0.0908  |
| rs116185673 | T | 0.1021  |
| rs12409237  | T | -0.0722 |
| rs369576    | C | -0.0259 |
| rs623400    | A | -0.0244 |
| rs3917863   | A | -0.1248 |
| rs80006548  | G | -0.0584 |
| rs72732232  | A | 0.1405  |
| rs12749003  | T | 0.0508  |
| rs12126794  | G | 0.0402  |
| rs74682864  | T | 0.0941  |
| rs16841924  | C | 0.0327  |
| rs56693991  | A | 0.1158  |
| rs669850    | T | -0.0993 |
| rs12045127  | T | -0.029  |
| rs114668813 | C | 0.0717  |
| rs12733060  | A | 0.034   |
| rs75465386  | A | -0.0984 |

|             |   |         |
|-------------|---|---------|
| rs11121379  | C | 0.0442  |
| rs2566761   | C | 0.0226  |
| rs151229545 | G | 0.0537  |
| rs814216    | A | 0.1177  |
| rs12407356  | A | 0.1281  |
| rs549944    | T | 0.0233  |
| rs76851529  | A | -0.0697 |
| rs17416299  | T | -0.047  |
| rs143462621 | C | 0.11    |
| rs6703261   | C | -0.0292 |
| rs648681    | T | -0.022  |
| rs76643357  | A | 0.0858  |
| rs12022038  | A | 0.0302  |
| rs72718930  | G | 0.136   |
| rs9786932   | A | -0.0222 |
| rs58218115  | A | 0.0302  |
| rs72648420  | G | -0.0321 |
| rs4839542   | T | -0.028  |
| rs5746014   | C | -0.0403 |
| rs140959869 | A | -0.1132 |
| rs17372091  | C | 0.1536  |
| rs145161038 | C | 0.0841  |
| rs112710779 | C | 0.0483  |
| rs150420852 | A | 0.1264  |
| rs894857    | A | -0.0407 |
| rs12405612  | T | -0.0647 |
| rs17130939  | C | -0.0942 |
| rs12028381  | G | 0.0228  |
| rs10922351  | T | -0.031  |
| rs76275764  | A | -0.0943 |
| rs17110430  | C | -0.0431 |
| rs72678971  | C | -0.0224 |
| rs116191817 | T | -0.2067 |
| rs56083914  | C | 0.1289  |
| rs7518979   | G | 0.04    |
| rs144007360 | T | -0.101  |
| rs2148579   | G | -0.0567 |
| rs1474325   | T | 0.0827  |
| rs11810250  | T | -0.023  |
| rs55998142  | T | 0.0426  |
| rs58488945  | T | -0.0682 |
| rs1338770   | T | -0.0227 |
| rs113418708 | T | -0.0546 |
| rs72913001  | T | -0.0424 |
| rs78292107  | C | -0.1187 |
| rs12135574  | T | 0.1292  |
| rs57046342  | G | -0.0967 |

|             |   |         |
|-------------|---|---------|
| rs7546539   | T | 0.0453  |
| rs72683874  | C | 0.054   |
| rs141751659 | G | 0.1036  |
| rs1537560   | C | 0.03    |
| rs77391939  | A | -0.0361 |
| rs114171077 | G | -0.1164 |
| rs142943956 | T | -0.1268 |
| rs150229248 | C | 0.0989  |
| rs2769264   | G | -0.0293 |
| rs17376524  | G | -0.0429 |
| rs11583174  | G | -0.0493 |
| rs9662700   | A | -0.0224 |
| rs6677228   | G | -0.0233 |
| rs10789018  | T | -0.0231 |
| rs17471891  | G | -0.0594 |
| rs17364300  | T | -0.0525 |
| rs1994606   | A | 0.0309  |
| rs12132885  | T | 0.0399  |
| rs868376    | T | 0.0249  |
| rs12038826  | C | -0.0442 |
| rs7550761   | T | 0.0506  |
| rs78386448  | G | 0.101   |
| rs115954194 | T | 0.0929  |
| rs78114766  | C | 0.0618  |
| rs932927    | A | 0.0271  |
| rs12127749  | T | -0.0358 |
| rs17116777  | T | 0.0638  |
| rs12044336  | A | 0.0789  |
| rs74757299  | G | -0.0937 |
| rs74443656  | T | 0.1022  |
| rs114505919 | A | -0.1709 |
| rs76377343  | G | 0.1107  |
| rs7514305   | G | 0.024   |
| rs11588636  | A | -0.0313 |
| rs12145891  | G | 0.0773  |
| rs17483469  | A | -0.0918 |
| rs113540940 | T | 0.1353  |
| rs116381680 | G | 0.0666  |
| rs56229522  | A | 0.0262  |
| rs12023442  | A | 0.0278  |
| rs1952251   | T | 0.0254  |
| rs4290117   | A | -0.0281 |
| rs114272158 | A | 0.1256  |
| rs35733093  | G | 0.024   |
| rs4285701   | A | 0.0275  |
| rs75071937  | A | 0.0323  |
| rs41289432  | G | 0.1296  |

|             |   |         |
|-------------|---|---------|
| rs7511845   | C | 0.0595  |
| rs114043479 | G | -0.1232 |
| rs2819370   | T | 0.0227  |
| rs115016970 | A | -0.0969 |
| rs12743815  | C | -0.0461 |
| rs75894787  | G | 0.0279  |
| rs10900502  | G | -0.0247 |
| rs11120319  | G | -0.0405 |
| rs11577259  | G | -0.0278 |
| rs55710143  | G | 0.0573  |
| rs2297140   | C | 0.022   |
| rs115590945 | C | 0.0819  |
| rs114184667 | C | -0.0553 |
| rs6685497   | A | 0.0225  |
| rs1202836   | G | -0.0248 |
| rs4133290   | C | 0.0239  |
| rs4233391   | T | 0.0303  |
| rs1213919   | C | -0.0244 |
| rs728611    | G | 0.026   |
| rs12731453  | T | 0.1312  |
| rs114003685 | T | 0.0996  |
| rs12023135  | C | -0.1226 |
| rs4655030   | T | 0.0224  |
| rs34262463  | C | -0.0285 |
| rs12122510  | G | -0.0673 |
| rs60789384  | A | -0.0577 |
| rs72732209  | A | -0.1125 |
| rs111899783 | C | -0.092  |
| rs74616535  | A | -0.0828 |
| rs2245988   | T | -0.0785 |
| rs1610399   | A | -0.0221 |
| rs6540987   | A | -0.0311 |
| rs67913534  | C | -0.0409 |
| rs6684650   | C | -0.0676 |
| rs61821763  | A | 0.0451  |
| rs4415564   | T | 0.1065  |
| rs16833716  | G | -0.1227 |
| rs817974    | T | 0.0347  |
| rs6694863   | A | -0.0877 |
| rs76087661  | T | -0.1001 |
| rs116426872 | T | 0.1024  |
| rs17740770  | G | 0.0948  |
| rs77001779  | G | 0.0758  |
| rs72866283  | A | 0.0734  |
| rs1780531   | T | -0.1413 |
| rs1780049   | G | -0.1671 |
| rs137909120 | G | -0.1821 |



|             |   |         |
|-------------|---|---------|
| rs114673335 | T | -0.1346 |
| rs6697145   | T | -0.0219 |
| rs11121282  | C | -0.0536 |
| rs113029877 | G | -0.1389 |
| rs78665342  | A | -0.087  |
| rs7524405   | C | 0.022   |
| rs17025152  | A | -0.1172 |
| rs55912319  | A | 0.1191  |
| rs72654956  | T | -0.111  |
| rs7528480   | A | -0.0227 |
| rs1561582   | C | -0.0219 |
| rs34929894  | T | 0.0749  |
| rs11807226  | T | 0.0861  |
| rs79787491  | T | 0.0673  |
| rs76399673  | G | 0.0483  |
| rs147566732 | C | 0.0986  |
| rs2821376   | G | -0.0384 |
| rs113223164 | G | 0.0452  |
| rs139194654 | G | 0.0975  |
| rs7534008   | T | -0.0232 |
| rs150127103 | T | 0.0677  |
| rs75157360  | T | 0.0913  |
| rs6659876   | G | -0.0233 |
| rs145337159 | C | 0.0766  |
| rs76839161  | C | 0.123   |
| rs7529479   | C | 0.0475  |
| rs111787496 | A | -0.1101 |
| rs7551256   | T | 0.066   |
| rs4284277   | T | 0.0519  |
| rs148451063 | A | 0.1638  |
| rs114615982 | C | 0.0805  |
| rs74815723  | A | 0.0609  |
| rs10047236  | A | -0.025  |
| rs76217525  | T | -0.1061 |
| rs17186233  | G | 0.0327  |
| rs9803973   | C | -0.0311 |
| rs28477803  | C | -0.0259 |
| rs61821541  | A | -0.067  |
| rs6697464   | T | -0.0353 |
| rs11585038  | C | -0.0372 |
| rs77204192  | A | -0.1117 |
| rs11578616  | C | -0.0276 |
| rs12756927  | G | 0.0467  |
| rs75829029  | G | 0.1135  |
| rs114194033 | A | 0.1115  |
| rs305217    | A | -0.0495 |
| rs114853421 | T | 0.0742  |

|             |   |         |
|-------------|---|---------|
| rs79423790  | G | -0.0659 |
| rs147854946 | C | 0.1994  |
| rs779040    | G | -0.0226 |
| rs6691063   | C | -0.0285 |
| rs74680409  | T | 0.1066  |
| rs79101638  | A | 0.1104  |
| rs116697543 | A | 0.1356  |
| rs3789545   | C | 0.029   |
| rs1924569   | T | 0.0319  |
| rs111482293 | A | -0.0961 |
| rs34089781  | A | -0.1157 |
| rs12040029  | T | 0.0338  |
| rs12086610  | T | -0.0571 |
| rs7518036   | A | 0.0487  |
| rs28831777  | A | 0.0213  |
| rs10921387  | T | 0.0227  |
| rs75414430  | C | 0.0602  |
| rs1107805   | G | 0.0238  |
| rs818199    | A | 0.0225  |
| rs1995662   | C | -0.0372 |
| rs12569254  | A | -0.0326 |
| rs61826737  | T | 0.1192  |
| rs351599    | T | -0.0445 |
| rs11576612  | G | 0.0298  |
| rs56088841  | C | 0.0608  |
| rs12563114  | T | -0.0877 |
| rs76372303  | A | 0.0723  |
| rs75933914  | A | 0.0823  |
| rs77139104  | T | -0.1469 |
| rs1202585   | C | -0.0225 |
| rs72664558  | T | 0.0806  |
| rs12403384  | A | -0.0979 |
| rs12067828  | A | 0.068   |
| rs35413565  | G | 0.031   |
| rs2807355   | A | -0.0337 |
| rs138213001 | C | 0.1209  |
| rs11208151  | A | 0.0547  |
| rs550091    | T | 0.0372  |
| rs142594309 | T | 0.1496  |
| rs4846616   | A | -0.0329 |
| rs146766110 | G | 0.1874  |
| rs2806457   | A | -0.0276 |
| rs61831862  | C | 0.0339  |
| rs59703516  | C | 0.1765  |
| rs10443385  | G | -0.0233 |
| rs79587638  | C | 0.1088  |
| rs12069882  | G | -0.0282 |

|             |   |         |
|-------------|---|---------|
| rs66837526  | G | 0.0339  |
| rs11260702  | A | 0.024   |
| rs1436086   | T | 0.0474  |
| rs149324089 | T | -0.118  |
| rs12144170  | C | -0.0677 |
| rs79158952  | C | 0.0426  |
| rs1775416   | A | -0.0213 |
| rs144484527 | G | -0.1257 |
| rs2504786   | C | -0.0252 |
| rs11163492  | C | 0.0283  |
| rs111897819 | A | 0.0643  |
| rs75633775  | T | -0.1194 |
| rs10923835  | T | -0.0533 |
| rs138839202 | T | 0.1414  |
| rs17122796  | C | -0.0526 |
| rs2263450   | G | 0.0892  |
| rs11579428  | G | 0.0694  |
| rs76570797  | T | -0.1571 |
| rs148712747 | A | 0.1384  |
| rs58092429  | A | 0.0776  |
| rs2803238   | G | -0.0224 |
| rs61786951  | G | 0.0224  |
| rs74530709  | T | 0.1573  |
| rs12032754  | C | 0.0426  |
| rs2643907   | A | -0.0422 |
| rs28739007  | A | -0.1224 |
| rs72738451  | T | 0.1806  |
| rs6424220   | A | -0.0862 |
| rs116095230 | A | -0.0993 |
| rs6685511   | A | -0.032  |
| rs35135921  | G | -0.0309 |
| rs2172586   | T | 0.0434  |
| rs7522444   | G | -0.0833 |
| rs10465542  | G | -0.0269 |
| rs12759185  | G | -0.0471 |
| rs79808004  | G | 0.0564  |
| rs1933116   | T | 0.0544  |
| rs147422269 | T | -0.1101 |
| rs115301910 | G | -0.0845 |
| rs1937022   | T | 0.0682  |
| rs61786221  | G | -0.027  |
| rs61797053  | A | 0.0608  |
| rs12023543  | G | -0.0395 |
| rs7516960   | G | 0.0221  |
| rs7521718   | G | -0.0253 |
| rs60599295  | T | -0.0596 |
| rs111905813 | C | -0.101  |

|             |   |         |
|-------------|---|---------|
| rs72727017  | A | -0.0823 |
| rs12026958  | C | 0.0455  |
| rs1040623   | T | 0.0357  |
| rs78062654  | T | 0.1188  |
| rs41285684  | T | 0.077   |
| rs12402076  | C | 0.0481  |
| rs4652245   | G | 0.0222  |
| rs10922056  | C | 0.1711  |
| rs10799062  | A | 0.0281  |
| rs143396174 | A | -0.1251 |
| rs11497367  | A | 0.0592  |
| rs12139055  | G | -0.0369 |
| rs7536670   | G | -0.0237 |
| rs1093730   | G | 0.0225  |
| rs115103728 | T | 0.1231  |
| rs75646621  | G | 0.1054  |
| rs17130677  | G | -0.0675 |
| rs7511927   | G | -0.0543 |
| rs12403423  | G | -0.0434 |
| rs115283754 | C | 0.1015  |
| rs115580699 | A | 0.0803  |
| rs6698566   | G | 0.0214  |
| rs114711020 | G | 0.1465  |
| rs61820445  | A | 0.0212  |
| rs68148988  | T | 0.0401  |
| rs111740046 | C | 0.0927  |
| rs111296093 | G | -0.0673 |
| rs61809296  | A | -0.0692 |
| rs72730720  | G | 0.1858  |
| rs61777777  | A | -0.1089 |
| rs116155519 | T | -0.1131 |
| rs12404239  | T | 0.0472  |
| rs28741370  | T | -0.0593 |
| rs7365031   | C | -0.0319 |
| rs61821644  | T | 0.1356  |
| rs72763318  | G | -0.0789 |
| rs10799660  | A | 0.0282  |
| rs79998886  | A | -0.0908 |
| rs10493437  | A | 0.0407  |
| rs17506202  | T | 0.1182  |
| rs148060323 | T | 0.1541  |
| rs628458    | G | -0.1212 |
| rs114143207 | T | 0.1029  |
| rs841853    | A | -0.024  |
| rs7519442   | A | -0.032  |
| rs2819365   | T | -0.0235 |
| rs116209351 | C | -0.182  |

|             |   |         |
|-------------|---|---------|
| rs7534613   | C | 0.1219  |
| rs72719779  | A | 0.0443  |
| rs75207146  | T | -0.1766 |
| rs45525832  | G | -0.0732 |
| rs139388048 | C | 0.0899  |
| rs149141747 | T | 0.0859  |
| rs145548355 | A | -0.095  |
| rs571095    | G | 0.0523  |
| rs76384561  | G | 0.1205  |
| rs113272409 | C | -0.0321 |
| rs11240340  | C | 0.035   |
| rs116675496 | A | -0.1423 |
| rs1058304   | T | 0.0248  |
| rs116534967 | G | 0.1262  |
| rs7537663   | A | -0.0231 |
| rs6695728   | A | 0.0344  |
| rs140785163 | T | -0.1256 |
| rs1101455   | G | -0.0506 |
| rs4285653   | C | -0.0442 |
| rs11206937  | A | -0.0264 |
| rs78816687  | A | -0.0787 |
| rs80119522  | T | 0.1106  |
| rs116660032 | G | -0.1445 |
| rs11578809  | A | -0.0436 |
| rs148147271 | G | 0.03    |
| rs2803242   | G | -0.0272 |
| rs12064834  | T | -0.0278 |
| rs10890064  | T | 0.0297  |
| rs6671188   | T | 0.0693  |
| rs80291245  | T | 0.1032  |
| rs508448    | G | -0.0217 |
| rs28914538  | A | 0.046   |
| rs41268456  | A | -0.1185 |
| rs12121226  | A | -0.032  |
| rs3767693   | G | -0.026  |
| rs149017905 | C | 0.0685  |
| rs2993250   | T | -0.0629 |
| rs947269    | C | 0.0254  |
| rs34666110  | G | -0.0957 |
| rs72737710  | G | 0.121   |
| rs7516252   | C | 0.033   |
| rs645776    | A | 0.0236  |
| rs17116806  | A | 0.0263  |
| rs2644449   | G | 0.0321  |
| rs7414229   | C | 0.1535  |
| rs141352657 | A | 0.0545  |
| rs115285858 | T | -0.122  |

|             |   |         |
|-------------|---|---------|
| rs56145549  | T | -0.0678 |
| rs6659859   | A | 0.0838  |
| rs141571232 | A | -0.0873 |
| rs12046045  | A | -0.0687 |
| rs12037741  | A | 0.0291  |
| rs12046141  | A | -0.0262 |
| rs76634076  | G | -0.0832 |
| rs10800799  | T | 0.0344  |
| rs2501841   | A | -0.0314 |
| rs12059547  | C | 0.022   |
| rs56076632  | C | -0.0855 |
| rs2786022   | G | -0.0404 |
| rs60046748  | T | -0.0696 |
| rs72638828  | T | -0.0762 |
| rs2359596   | T | -0.1262 |
| rs74898028  | T | -0.0638 |
| rs12739500  | C | -0.0246 |
| rs116775713 | A | -0.0833 |
| rs79079054  | T | 0.08    |
| rs2501358   | C | -0.0339 |
| rs145147106 | G | -0.1659 |
| rs72705895  | T | 0.0434  |
| rs521009    | T | 0.0216  |
| rs2184345   | C | -0.0234 |
| rs116043467 | A | -0.1774 |
| rs17124643  | G | -0.0461 |
| rs1893736   | C | 0.0246  |
| rs1390509   | G | -0.0609 |
| rs4661086   | A | 0.0402  |
| rs2810612   | A | -0.0414 |
| rs72649454  | G | 0.1934  |
| rs61811736  | C | -0.1107 |
| rs76621989  | G | -0.1291 |
| rs12126810  | G | 0.046   |
| rs12129461  | T | 0.0347  |
| rs56106339  | C | 0.0856  |
| rs114127217 | A | 0.1844  |
| rs59691927  | G | 0.0434  |
| rs4360581   | T | -0.0644 |
| rs114909737 | A | -0.089  |
| rs6680186   | G | -0.0242 |
| rs829000    | A | 0.0879  |
| rs77370669  | T | -0.0725 |
| rs2491284   | T | 0.0379  |
| rs4649322   | T | -0.0403 |
| rs150521862 | G | 0.1476  |
| rs61767267  | A | -0.0313 |

|             |   |         |
|-------------|---|---------|
| rs150540502 | A | 0.1453  |
| rs9425631   | T | 0.0731  |
| rs4654623   | G | 0.0646  |
| rs7528920   | C | -0.0256 |
| rs77914233  | C | 0.1219  |
| rs4436408   | A | -0.0247 |
| rs72663278  | G | -0.0936 |
| rs149264866 | C | -0.0831 |
| rs77476000  | A | 0.1083  |
| rs78639635  | G | -0.1435 |
| rs12747219  | G | -0.0294 |
| rs387831    | C | -0.0252 |
| rs9659230   | T | 0.0459  |
| rs696969    | G | -0.0488 |
| rs2764893   | T | -0.0214 |
| rs113224872 | T | -0.1351 |
| rs1229401   | G | 0.0447  |
| rs147678629 | G | -0.1377 |
| rs12734494  | A | 0.0216  |
| rs150462121 | T | -0.0631 |
| rs17509369  | G | 0.0277  |
| rs148523506 | A | 0.0909  |
| rs75462169  | T | -0.115  |
| rs6683191   | G | -0.0793 |
| rs78286557  | A | 0.0842  |
| rs6429820   | G | -0.0267 |
| rs11203475  | A | 0.0763  |
| rs145301517 | C | -0.1041 |
| rs1658748   | A | -0.1544 |
| rs6427065   | A | 0.0246  |
| rs59902877  | T | -0.0343 |
| rs12034373  | C | -0.1167 |
| rs1406412   | A | 0.0245  |
| rs72699549  | G | -0.0544 |
| rs140386550 | T | 0.1306  |
| rs116543199 | G | -0.1165 |
| rs115587016 | G | 0.1372  |
| rs10399945  | A | 0.0725  |
| rs242056    | G | -0.0227 |
| rs6661062   | T | 0.052   |
| rs113153450 | A | 0.1726  |
| rs74628352  | A | 0.1364  |
| rs12082071  | C | 0.0278  |
| rs12138786  | T | -0.0295 |
| rs487171    | A | -0.0303 |
| rs11806773  | C | 0.0332  |
| rs150702039 | T | -0.1221 |

|             |   |         |
|-------------|---|---------|
| rs16840504  | T | 0.0504  |
| rs36064908  | A | -0.0248 |
| rs115840169 | A | -0.0672 |
| rs142567332 | T | 0.1053  |
| rs144749971 | G | -0.1039 |
| rs75705853  | T | -0.0947 |
| rs115278712 | A | -0.1011 |
| rs34015427  | C | -0.0646 |
| rs145716861 | A | -0.1709 |
| rs2000399   | G | 0.0245  |
| rs115981709 | G | 0.0608  |
| rs4477213   | T | -0.0234 |
| rs34879791  | G | 0.0361  |
| rs10857999  | T | -0.0252 |
| rs6664831   | C | -0.131  |
| rs59069459  | A | -0.0842 |
| rs115109055 | T | -0.1534 |
| rs3748564   | C | -0.0779 |
| rs140015735 | C | -0.085  |
| rs10495189  | T | -0.0434 |
| rs17602478  | G | 0.0384  |
| rs71641058  | A | 0.1372  |
| rs144559459 | T | -0.0294 |
| rs11577291  | G | -0.0228 |
| rs706457    | G | -0.0224 |
| rs2147795   | T | 0.026   |
| rs140946514 | C | -0.1627 |
| rs12142993  | A | 0.0873  |
| rs2297838   | A | 0.0295  |
| rs1148458   | A | -0.0893 |
| rs67536075  | A | -0.0278 |
| rs75996151  | T | 0.0612  |
| rs75977753  | T | 0.0711  |
| rs142040100 | T | 0.071   |
| rs4971324   | G | 0.0301  |
| rs17013679  | C | 0.0548  |
| rs61778162  | T | 0.0309  |
| rs56314729  | T | -0.0692 |
| rs11590454  | C | -0.1443 |
| rs72706321  | G | -0.0376 |
| rs7534272   | C | -0.021  |
| rs35707912  | T | 0.0359  |
| rs58839584  | G | 0.0309  |
| rs115892924 | T | -0.0777 |
| rs7543486   | A | 0.0216  |
| rs60895205  | C | 0.0324  |
| rs12755040  | C | 0.0263  |



|             |   |         |
|-------------|---|---------|
| rs78123050  | G | -0.0958 |
| rs116422856 | G | -0.1186 |
| rs72750989  | T | -0.1047 |
| rs113335696 | T | -0.1209 |
| rs116361873 | A | 0.0965  |
| rs6704048   | G | 0.0365  |
| rs12402423  | C | 0.0605  |
| rs10920549  | G | -0.0571 |
| rs116771750 | C | -0.1009 |
| rs12143304  | G | -0.0291 |
| rs1459715   | T | -0.1834 |
| rs148888351 | A | -0.1523 |
| rs11580366  | C | -0.1101 |
| rs16848623  | T | 0.0448  |
| rs12760277  | C | -0.0213 |
| rs6679063   | C | 0.0317  |
| rs138288629 | A | -0.1308 |
| rs748405    | A | 0.0333  |
| rs74561334  | T | -0.0587 |
| rs2644445   | G | 0.052   |
| rs114762958 | G | -0.13   |
| rs6600434   | C | -0.0253 |
| rs145669799 | G | 0.085   |
| rs77124873  | A | -0.0786 |
| rs10494251  | T | 0.0448  |
| rs3766053   | C | 0.0217  |
| rs11118734  | C | 0.0212  |
| rs80191485  | G | 0.1265  |
| rs12405434  | C | -0.0285 |
| rs28363204  | G | -0.0682 |
| rs80309829  | T | 0.0937  |
| rs147757415 | C | -0.1378 |
| rs74538272  | A | 0.115   |
| rs61811641  | A | 0.0626  |
| rs150789257 | A | -0.0786 |
| rs116227486 | T | -0.1225 |
| rs2146201   | T | -0.0223 |
| rs12136037  | A | 0.0326  |
| rs696666    | T | -0.021  |
| rs77072440  | A | 0.0967  |
| rs145498240 | G | -0.0945 |
| rs10908431  | C | 0.0224  |
| rs9661433   | C | 0.0866  |
| rs75319920  | A | -0.108  |
| rs10799234  | G | 0.0209  |
| rs147765103 | T | 0.1232  |
| rs115048207 | G | 0.1258  |

|             |   |         |
|-------------|---|---------|
| rs140708969 | G | 0.0668  |
| rs77321987  | T | -0.0424 |
| rs114573015 | G | -0.0855 |
| rs59243717  | A | 0.1517  |
| rs1534053   | T | 0.0205  |
| rs7552426   | A | -0.0346 |
| rs115299575 | T | 0.1578  |
| rs12747481  | C | -0.0228 |
| rs55712124  | G | -0.0213 |
| rs4468199   | G | -0.0364 |
| rs112917817 | A | -0.0768 |
| rs68096351  | G | 0.0801  |
| rs77216985  | G | 0.0718  |
| rs148988406 | C | -0.1481 |
| rs12728521  | T | -0.0309 |
| rs35309209  | C | -0.0478 |
| rs35836191  | T | -0.0624 |
| rs12132705  | A | -0.088  |
| rs72649467  | A | -0.0288 |
| rs731862    | C | 0.0281  |
| rs67849785  | A | 0.0476  |
| rs74336390  | G | -0.0657 |
| rs80218635  | T | 0.0896  |
| rs112794153 | C | -0.1832 |
| rs56125823  | G | 0.0263  |
| rs74905578  | C | 0.0912  |
| rs138257770 | A | 0.13    |
| rs142215987 | T | 0.1223  |
| rs78816612  | T | 0.0916  |
| rs76711898  | C | 0.0947  |
| rs74535317  | A | -0.0722 |
| rs151293889 | A | -0.0772 |
| rs2815857   | C | 0.0214  |
| rs3738029   | A | 0.0223  |
| rs115102939 | C | -0.0834 |
| rs10803448  | G | 0.0252  |
| rs1409767   | C | -0.0392 |
| rs28704792  | C | -0.0239 |
| rs35366573  | T | 0.1301  |
| rs2796813   | C | 0.0216  |
| rs12048703  | G | 0.0528  |
| rs4359024   | G | -0.1126 |
| rs11586824  | G | -0.0349 |
| rs12131610  | A | 0.0487  |
| rs113556747 | A | -0.1337 |
| rs4915800   | T | 0.0291  |
| rs289694    | T | 0.0892  |

|             |   |         |
|-------------|---|---------|
| rs116604714 | C | -0.1451 |
| rs142439658 | T | 0.1755  |
| rs11206585  | C | -0.0311 |
| rs79471662  | G | -0.1265 |
| rs116805723 | C | -0.0995 |
| rs147217071 | A | -0.104  |
| rs3795757   | T | -0.0237 |
| rs80274891  | T | -0.0675 |
| rs11585507  | C | -0.0651 |
| rs10753370  | A | 0.0689  |
| rs1883575   | A | -0.0247 |
| rs12752804  | A | 0.1153  |
| rs142725809 | C | -0.1051 |
| rs11581194  | C | -0.069  |
| rs4600103   | A | -0.0369 |
| rs2818973   | C | 0.0296  |
| rs116776794 | G | 0.058   |
| rs10918315  | T | -0.0349 |
| rs149675414 | C | -0.0686 |
| rs333953    | A | -0.1409 |
| rs12119788  | A | 0.0397  |
| rs12145733  | T | 0.0872  |
| rs78587628  | C | -0.1427 |
| rs77960181  | T | 0.1188  |
| rs116393000 | G | 0.1275  |
| rs149635574 | T | -0.1228 |
| rs55707424  | A | 0.1183  |
| rs12750369  | G | 0.023   |
| rs12116616  | A | 0.0375  |
| rs72678297  | C | -0.0847 |
| rs114555369 | G | -0.0709 |
| rs1288476   | G | 0.0257  |
| rs61823707  | A | -0.1106 |
| rs12130294  | G | -0.0331 |
| rs4847565   | A | 0.0215  |
| rs6680355   | A | 0.0655  |
| rs17120263  | C | 0.0873  |
| rs115433305 | C | 0.0579  |
| rs12740348  | C | -0.0227 |
| rs146298873 | A | -0.1709 |
| rs1545933   | C | -0.0287 |
| rs114598863 | G | 0.1269  |
| rs2029356   | T | -0.0244 |
| rs79910482  | A | -0.1062 |
| rs12025416  | C | 0.0338  |
| rs143182217 | G | 0.1929  |
| rs3191      | G | 0.0794  |

|             |   |         |
|-------------|---|---------|
| rs146245458 | T | -0.1277 |
| rs66673003  | T | 0.0357  |
| rs74916854  | A | 0.0623  |
| rs11590621  | T | 0.0988  |
| rs41272511  | C | -0.1008 |
| rs12691507  | G | 0.0216  |
| rs2673979   | G | 0.0366  |
| rs4658649   | A | 0.0232  |
| rs2491142   | T | 0.0226  |
| rs35913405  | A | -0.0372 |
| rs7554191   | C | -0.0254 |
| rs11584036  | A | 0.0257  |
| rs140335383 | A | -0.0364 |
| rs112996201 | A | -0.069  |
| rs79784766  | T | -0.1518 |
| rs782262    | C | -0.0256 |
| rs72678124  | T | -0.1354 |
| rs55706120  | G | 0.0257  |
| rs4145764   | A | -0.1287 |
| rs17101925  | T | -0.1427 |
| rs75693851  | T | 0.1627  |
| rs138436882 | G | -0.0547 |
| rs78283337  | A | 0.0652  |
| rs6698963   | G | -0.0213 |
| rs669410    | C | 0.0301  |
| rs114216738 | T | -0.1104 |
| rs78933896  | T | -0.07   |
| rs114367251 | T | -0.1076 |
| rs9427709   | C | 0.1207  |
| rs559138    | G | 0.024   |
| rs7522097   | G | 0.0337  |
| rs6425863   | T | -0.0222 |
| rs139671484 | C | -0.1728 |
| rs140123438 | A | 0.0713  |
| rs55741360  | C | 0.078   |
| rs72925245  | T | -0.0884 |
| rs10874073  | T | 0.0724  |
| rs7532624   | A | 0.033   |
| rs61771723  | G | -0.0924 |
| rs12061052  | T | 0.1028  |
| rs138769061 | C | 0.1115  |
| rs72643142  | T | -0.0344 |
| rs12754930  | G | 0.0458  |
| rs145740324 | A | 0.094   |
| rs79659608  | T | -0.1337 |
| rs114921230 | A | -0.0524 |
| rs111258655 | A | -0.0794 |

|             |   |         |
|-------------|---|---------|
| rs76785864  | C | -0.1326 |
| rs80068944  | A | -0.0797 |
| rs72686459  | T | 0.0614  |
| rs35994602  | A | 0.0515  |
| rs11583172  | A | -0.0471 |
| rs6663588   | A | 0.0485  |
| rs78680986  | C | -0.0761 |
| rs75497644  | T | 0.1055  |
| rs79659593  | T | -0.1419 |
| rs61825587  | G | 0.0894  |
| rs11578009  | C | -0.0265 |
| rs78951511  | C | 0.0418  |
| rs80195991  | T | 0.0662  |
| rs114243257 | T | 0.0548  |
| rs10399914  | G | 0.0288  |
| rs79149949  | G | -0.0797 |
| rs527676    | A | -0.0348 |
| rs55766395  | T | -0.0898 |
| rs76741925  | A | 0.0295  |
| rs141704337 | A | 0.1296  |
| rs79171526  | G | 0.0529  |
| rs77808099  | T | 0.0859  |
| rs115190342 | G | -0.1629 |
| rs6697199   | G | -0.0223 |
| rs140372748 | T | -0.0387 |
| rs28695776  | G | 0.0492  |
| rs146985100 | T | -0.191  |
| rs12086356  | T | 0.0234  |
| rs145946585 | T | 0.164   |
| rs35795620  | T | -0.1049 |
| rs115005547 | T | 0.1314  |
| rs79431805  | T | -0.0918 |
| rs6675775   | T | 0.0235  |
| rs1672917   | A | -0.0223 |
| rs7543509   | G | -0.0398 |
| rs4657486   | G | 0.0211  |
| rs9659352   | A | 0.0297  |
| rs114006491 | C | 0.1006  |
| rs859670    | A | 0.0274  |
| rs12038863  | C | -0.0341 |
| rs115206394 | T | -0.0397 |
| rs147688030 | T | -0.111  |
| rs12134806  | G | 0.0224  |
| rs56871324  | C | 0.0956  |
| rs2986745   | G | 0.0368  |
| rs77089320  | A | 0.0904  |
| rs116201940 | C | -0.1197 |

|             |   |         |
|-------------|---|---------|
| rs7540795   | A | -0.1362 |
| rs56029120  | A | 0.1059  |
| rs61801951  | T | 0.0765  |
| rs144839329 | C | -0.098  |
| rs6692573   | C | 0.0473  |
| rs61765520  | T | 0.0742  |
| rs72749352  | T | -0.1058 |
| rs147293122 | C | -0.0872 |
| rs4001163   | T | -0.0224 |
| rs17414232  | T | 0.0435  |
| rs10494257  | C | -0.0276 |
| rs143289391 | G | -0.1643 |
| rs146585362 | A | -0.1471 |
| rs10864657  | A | -0.0394 |
| rs4949322   | T | -0.0357 |
| rs144652544 | A | -0.1136 |
| rs17727243  | C | -0.067  |
| rs139341891 | G | -0.147  |
| rs1472319   | C | -0.0305 |
| rs78898350  | T | -0.1068 |
| rs34781954  | T | -0.0371 |
| rs74411429  | T | 0.1679  |
| rs12021626  | G | 0.0233  |
| rs74077403  | T | -0.106  |
| rs742483    | G | -0.0295 |
| rs113159818 | T | 0.1141  |
| rs57182757  | A | 0.0292  |
| rs4147114   | C | 0.0235  |
| rs72952531  | A | 0.1234  |
| rs76146115  | G | -0.1106 |
| rs74698831  | A | -0.1126 |
| rs9429673   | A | -0.0385 |
| rs116067486 | T | -0.1232 |
| rs12144381  | A | 0.0381  |
| rs34756656  | A | -0.1206 |
| rs1157458   | A | 0.0227  |
| rs2456822   | T | 0.0265  |
| rs6587804   | C | 0.0211  |
| rs12408238  | A | -0.0418 |
| rs77588799  | A | -0.0632 |
| rs634218    | T | -0.0916 |
| rs958494    | T | -0.0227 |
| rs2294934   | A | 0.04    |
| rs12044523  | C | -0.0332 |
| rs75608493  | G | -0.0356 |
| rs28367943  | G | -0.0806 |
| rs144875070 | G | -0.1559 |

|             |   |         |
|-------------|---|---------|
| rs116795260 | G | 0.1023  |
| rs2817185   | G | -0.0252 |
| rs7524870   | T | 0.0299  |
| rs114720052 | T | 0.0765  |
| rs12566057  | A | 0.023   |
| rs61801219  | C | -0.0464 |
| rs3748534   | C | 0.0435  |
| rs148480593 | T | 0.0839  |
| rs148585379 | G | -0.159  |
| rs115757265 | G | 0.1091  |
| rs74390732  | G | -0.1179 |
| rs2781066   | T | -0.029  |
| rs1288339   | T | -0.0336 |
| rs146734351 | C | -0.1069 |
| rs11572739  | A | 0.1356  |
| rs17479730  | C | 0.0842  |
| rs116101065 | G | 0.1145  |
| rs74919679  | T | -0.0705 |
| rs72745774  | A | -0.0616 |
| rs78529941  | A | -0.0222 |
| rs28728263  | T | -0.0298 |
| rs1320969   | G | 0.0271  |
| rs75161690  | T | -0.1087 |
| rs116546216 | A | 0.0575  |
| rs10489931  | T | -0.0651 |
| rs61789705  | T | 0.1622  |
| rs114164209 | T | 0.1142  |
| rs12091485  | C | -0.0243 |
| rs7365305   | G | 0.1147  |
| rs151073654 | C | -0.1857 |
| rs1539581   | G | 0.0436  |
| rs11584547  | A | 0.0359  |
| rs61824308  | G | -0.0729 |
| rs12133081  | T | 0.0615  |
| rs2924456   | A | -0.0261 |
| rs17026048  | G | 0.1828  |
| rs282178    | A | 0.0349  |
| rs139210967 | G | -0.1593 |
| rs3766871   | A | -0.095  |
| rs1743842   | G | -0.0807 |
| rs12130951  | G | -0.0404 |
| rs116764071 | C | 0.1012  |
| rs145813721 | T | -0.1447 |
| rs4655606   | T | -0.0212 |
| rs6690136   | T | -0.0347 |
| rs1926262   | G | 0.0527  |
| rs74545064  | G | -0.1052 |

|             |   |         |
|-------------|---|---------|
| rs17445205  | A | 0.0483  |
| rs12042767  | A | 0.0997  |
| rs78087823  | T | 0.0484  |
| rs1776178   | A | -0.023  |
| rs12142026  | T | 0.0981  |
| rs12080411  | A | -0.0361 |
| rs75932388  | A | -0.0863 |
| rs10493766  | G | 0.0241  |
| rs60659753  | T | 0.0782  |
| rs41315701  | A | -0.0283 |
| rs6680840   | C | -0.0297 |
| rs114342223 | G | -0.1044 |
| rs114550772 | A | -0.0916 |
| rs112514855 | A | -0.0642 |
| rs12137389  | T | -0.1299 |
| rs148103167 | C | 0.0687  |
| rs112648975 | G | -0.0934 |
| rs6694077   | G | -0.0222 |
| rs115121347 | A | 0.0944  |
| rs112561474 | C | 0.0938  |
| rs145890632 | C | 0.1284  |
| rs12030607  | A | -0.0522 |
| rs6673400   | A | -0.0266 |
| rs7515592   | C | -0.0279 |
| rs116416309 | C | 0.0339  |
| rs112516688 | T | 0.142   |
| rs10864062  | G | -0.0214 |
| rs12755629  | T | 0.0324  |
| rs12123603  | T | -0.0341 |
| rs137947295 | T | -0.1211 |
| rs17377714  | T | -0.0245 |
| rs1058978   | C | 0.0529  |
| rs145838948 | A | 0.0636  |
| rs191535    | A | -0.0863 |
| rs139676481 | T | 0.1188  |
| rs7518834   | A | -0.0234 |
| rs76179257  | A | 0.0676  |
| rs74964626  | T | 0.0994  |
| rs78762164  | C | -0.0857 |
| rs72677566  | A | 0.0627  |
| rs1319001   | C | 0.0297  |
| rs138969391 | A | -0.0747 |
| rs6681647   | T | -0.0241 |
| rs148354985 | G | 0.1564  |
| rs116394212 | G | -0.1338 |
| rs41271503  | G | 0.0691  |
| rs13375475  | A | 0.1231  |



|             |   |         |
|-------------|---|---------|
| rs2175993   | T | -0.0662 |
| rs12133893  | C | 0.0225  |
| rs3904791   | T | -0.0317 |
| rs4846856   | A | 0.0234  |
| rs34244523  | C | -0.024  |
| rs115201237 | T | 0.068   |
| rs72679932  | G | -0.0353 |
| rs10913946  | C | -0.0243 |
| rs17049035  | A | 0.0588  |
| rs4658186   | A | 0.0214  |
| rs77441986  | A | -0.0589 |
| rs12128450  | T | 0.0757  |
| rs4658628   | T | -0.0252 |
| rs59798360  | A | -0.0965 |
| rs116612902 | G | -0.0414 |
| rs12048915  | C | -0.0238 |
| rs7519925   | T | 0.0242  |
| rs2789432   | A | -0.0215 |
| rs11576528  | G | -0.1034 |
| rs1370149   | A | 0.0324  |
| rs12035107  | C | 0.0646  |
| rs115898837 | C | -0.0701 |
| rs7515999   | G | -0.0448 |
| rs3753014   | C | -0.0427 |
| rs2703993   | G | -0.0226 |
| rs72697567  | T | -0.034  |
| rs75061683  | A | -0.0781 |
| rs75689151  | T | 0.0558  |
| rs4266869   | C | 0.0311  |
| rs61769757  | T | 0.0289  |
| rs11585117  | A | -0.0423 |
| rs1989307   | C | -0.0224 |
| rs9432168   | C | 0.0264  |
| rs6693754   | C | -0.0206 |
| rs7528727   | C | -0.0202 |
| rs2483229   | C | -0.0403 |
| rs17030044  | C | 0.0428  |
| rs3753232   | T | -0.0288 |
| rs2294191   | T | -0.0249 |
| rs1575176   | G | -0.0565 |
| rs7546898   | T | -0.0239 |
| rs59447555  | A | 0.0598  |
| rs12119981  | T | -0.0417 |
| rs488540    | G | 0.0243  |
| rs148720677 | T | -0.0665 |
| rs2798808   | G | -0.0378 |
| rs6685338   | C | 0.0451  |

|             |   |         |
|-------------|---|---------|
| rs149175760 | T | -0.1256 |
| rs61783754  | A | 0.158   |
| rs1857214   | T | 0.0409  |
| rs79271479  | G | -0.0725 |
| rs77515554  | T | -0.1377 |
| rs114306800 | T | -0.0435 |
| rs6663436   | A | 0.0365  |
| rs79942186  | A | 0.0731  |
| rs74785846  | T | -0.116  |
| rs61825506  | A | -0.0481 |
| rs11208492  | A | -0.0379 |
| rs1249816   | T | 0.0202  |
| rs76369903  | T | 0.0407  |
| rs12142756  | C | -0.0442 |
| rs17575309  | T | 0.084   |
| rs79203749  | G | 0.0749  |
| rs75176494  | T | 0.046   |
| rs3856210   | C | 0.042   |
| rs10925928  | G | -0.0461 |
| rs6660261   | A | 0.0436  |
| rs112185052 | G | 0.0964  |
| rs116392340 | A | 0.1363  |
| rs7537232   | T | -0.0237 |
| rs115704940 | T | -0.112  |
| rs113983937 | G | -0.1036 |
| rs76289665  | T | 0.1224  |
| rs10874195  | T | 0.0215  |
| rs12145115  | G | -0.0231 |
| rs78172467  | T | -0.0856 |
| rs61818156  | T | -0.0397 |
| rs17402096  | A | -0.0431 |
| rs319977    | G | 0.0918  |
| rs1288373   | C | 0.0556  |
| rs6588056   | G | -0.0951 |
| rs116007040 | C | 0.1115  |
| rs4971171   | A | 0.1318  |
| rs61800456  | T | 0.0436  |
| rs35643897  | A | 0.0317  |
| rs34127726  | A | 0.0516  |
| rs35922114  | A | -0.0262 |
| rs79669031  | A | 0.0925  |
| rs12124525  | T | -0.0451 |
| rs71664165  | A | 0.0546  |
| rs139188180 | A | -0.1012 |
| rs112532109 | A | -0.0973 |
| rs12133313  | C | -0.109  |
| rs77247064  | C | -0.1494 |

|             |   |         |
|-------------|---|---------|
| rs17688413  | C | 0.0272  |
| rs12733217  | G | 0.0673  |
| rs115609708 | G | 0.1125  |
| rs2818746   | G | -0.0226 |
| rs11205702  | A | -0.0295 |
| rs6701615   | A | 0.0567  |
| rs10489525  | A | 0.0223  |
| rs11804741  | T | -0.0628 |
| rs546605    | C | 0.1253  |
| rs11578062  | C | -0.0265 |
| rs10911817  | G | -0.0505 |
| rs2476564   | G | -0.0313 |
| rs1010560   | C | -0.0254 |
| rs112837938 | A | -0.0817 |
| rs115474009 | C | -0.0563 |
| rs16839668  | C | -0.0421 |
| rs17008307  | T | 0.0644  |
| rs1752025   | C | -0.04   |
| rs6672668   | T | -0.0226 |
| rs4970829   | A | -0.065  |
| rs3908957   | G | -0.02   |
| rs41264541  | T | -0.1193 |
| rs4987403   | A | 0.1058  |
| rs12028247  | A | -0.0249 |
| rs270857    | G | 0.0356  |
| rs59876019  | T | -0.0649 |
| rs1809823   | T | -0.0219 |
| rs113840196 | A | -0.0824 |
| rs141633787 | T | 0.1125  |
| rs114146577 | T | 0.0928  |
| rs59502179  | T | 0.1459  |
| rs6665850   | C | -0.0226 |
| rs113508195 | A | 0.0971  |
| rs75436543  | T | 0.2039  |
| rs12041451  | T | -0.0271 |
| rs77467872  | G | 0.1112  |
| rs1775417   | A | -0.0474 |
| rs10749691  | G | -0.0315 |
| rs17031645  | C | -0.0404 |
| rs114680042 | A | 0.1516  |
| rs512458    | T | -0.023  |
| rs114547228 | C | 0.1366  |
| rs114006305 | G | 0.0813  |
| rs58300372  | T | -0.0299 |
| rs78584417  | T | -0.0967 |
| rs76355932  | C | -0.1262 |
| rs74356559  | A | -0.055  |

|             |   |         |
|-------------|---|---------|
| rs16849286  | C | 0.0233  |
| rs76773158  | C | -0.078  |
| rs59626786  | T | -0.063  |
| rs76465352  | A | 0.0519  |
| rs12401573  | C | 0.0218  |
| rs7554186   | A | -0.0235 |
| rs2808506   | A | 0.0392  |
| rs4915852   | T | -0.1207 |
| rs61829999  | T | -0.203  |
| rs12117417  | T | -0.0536 |
| rs2992736   | G | -0.0212 |
| rs338935    | G | 0.0259  |
| rs76149749  | C | -0.1287 |
| rs10911027  | T | 0.0311  |
| rs4568808   | T | 0.0216  |
| rs2692010   | T | 0.0918  |
| rs1166861   | A | 0.0507  |
| rs139025382 | A | -0.0946 |
| rs12049002  | C | 0.0348  |
| rs2086210   | C | 0.0233  |
| rs12740413  | T | 0.0306  |
| rs1078110   | C | 0.0279  |
| rs963030    | C | -0.0248 |
| rs4659439   | G | -0.1175 |
| rs17418454  | A | -0.0427 |
| rs72696218  | G | 0.1653  |
| rs147715244 | G | 0.1611  |
| rs1458762   | C | 0.0268  |
| rs6702693   | C | -0.031  |
| rs77910017  | G | -0.117  |
| rs34845821  | T | 0.0233  |
| rs7513864   | T | -0.0219 |
| rs754174    | G | 0.0524  |
| rs76408018  | T | -0.066  |
| rs72725073  | T | -0.0293 |
| rs34179156  | A | 0.0294  |
| rs2456899   | C | 0.0279  |
| rs11119172  | T | 0.0396  |
| rs11591171  | C | -0.0518 |
| rs72651443  | A | 0.08    |
| rs115582694 | T | 0.1546  |
| rs113444041 | A | 0.0387  |
| rs138198361 | C | -0.1645 |
| rs147562396 | G | 0.1028  |
| rs35908994  | A | 0.0586  |
| rs116003781 | G | 0.0954  |
| rs12063102  | T | -0.1251 |

|             |   |         |
|-------------|---|---------|
| rs12026082  | T | 0.023   |
| rs956709    | C | 0.0534  |
| rs3768197   | C | 0.0981  |
| rs1215504   | A | 0.0214  |
| rs1744663   | C | 0.0211  |
| rs79522482  | C | 0.068   |
| rs72694751  | C | -0.086  |
| rs633846    | C | 0.0215  |
| rs2273166   | T | -0.0211 |
| rs72719958  | C | -0.0783 |
| rs112337787 | T | 0.1035  |
| rs73124687  | A | 0.064   |
| rs2457055   | A | 0.0245  |
| rs17258348  | G | 0.0308  |
| rs12725746  | A | -0.099  |
| rs55646662  | A | -0.1329 |
| rs111233095 | A | 0.0936  |
| rs74534527  | T | 0.0917  |
| rs115341694 | C | 0.0516  |
| rs612480    | C | -0.0354 |
| rs10903022  | T | 0.0217  |
| rs7523684   | T | 0.0201  |
| rs115267501 | T | -0.0513 |
| rs3001344   | A | 0.0411  |
| rs17364328  | A | 0.0251  |
| rs111519543 | G | 0.1342  |
| rs306318    | C | 0.0204  |
| rs17884259  | A | -0.112  |
| rs76553743  | T | 0.1164  |
| rs71636940  | C | 0.0831  |
| rs4654155   | T | 0.0254  |
| rs112332825 | T | 0.1129  |
| rs149460734 | A | 0.1458  |
| rs497705    | G | 0.0235  |
| rs12132233  | T | 0.0399  |
| rs115999808 | G | -0.1305 |
| rs7516612   | T | 0.0298  |
| rs147378920 | G | 0.1106  |
| rs2336639   | G | 0.2003  |
| rs111603283 | C | -0.0431 |
| rs2436985   | G | 0.0351  |
| rs114721921 | T | 0.0923  |
| rs73097472  | T | 0.0962  |
| rs34513138  | A | -0.0829 |
| rs139435626 | C | 0.1743  |
| rs4950055   | G | -0.0798 |
| rs77717813  | A | -0.0778 |

|             |   |         |
|-------------|---|---------|
| rs2009185   | T | 0.0228  |
| rs114644188 | C | 0.1152  |
| rs114834159 | T | 0.0826  |
| rs116185257 | G | -0.1016 |
| rs115093263 | T | -0.0901 |
| rs761429    | A | -0.0204 |
| rs72900172  | T | -0.0987 |
| rs7533902   | T | -0.0272 |
| rs4656748   | T | 0.0207  |
| rs10754011  | C | 0.0235  |
| rs77559973  | T | 0.1116  |
| rs12064099  | C | -0.0344 |
| rs77303590  | T | -0.1504 |
| rs57497799  | A | -0.046  |
| rs1172199   | C | -0.0227 |
| rs6669812   | C | -0.0218 |
| rs11572381  | T | -0.0306 |
| rs1233833   | A | 0.0465  |
| rs61762113  | G | -0.0848 |
| rs677769    | T | -0.021  |
| rs138142712 | G | 0.1822  |
| rs12407530  | C | -0.0222 |
| rs10920493  | T | 0.1553  |
| rs143209313 | C | -0.0863 |
| rs10926010  | G | 0.0287  |
| rs113352799 | A | 0.109   |
| rs144667432 | G | 0.0965  |
| rs72668061  | G | -0.0274 |
| rs142750936 | A | -0.0701 |
| rs7521983   | G | -0.0221 |
| rs145944302 | A | -0.1092 |
| rs11805966  | T | -0.0642 |
| rs150701948 | G | -0.0884 |
| rs9426275   | T | 0.0243  |
| rs114243062 | A | -0.1258 |
| rs78394305  | T | 0.0551  |
| rs4259658   | C | 0.0605  |
| rs72764013  | C | 0.0511  |
| rs12117229  | G | 0.0233  |
| rs148895247 | A | 0.1198  |
| rs140027741 | C | 0.0717  |
| rs6663477   | G | 0.1139  |
| rs4601641   | G | 0.0206  |
| rs7546646   | A | 0.0496  |
| rs2004702   | C | -0.0227 |
| rs34246968  | G | 0.0987  |
| rs17260126  | T | 0.0661  |

|             |   |         |
|-------------|---|---------|
| rs142276850 | A | 0.058   |
| rs113704226 | C | -0.0844 |
| rs4092257   | G | 0.0212  |
| rs3767139   | T | -0.0256 |
| rs78991787  | T | -0.087  |
| rs10789165  | G | 0.0228  |
| rs7552011   | T | -0.1293 |
| rs236280    | T | -0.0648 |
| rs60397524  | A | 0.0386  |
| rs34521329  | A | -0.0484 |
| rs143000345 | A | 0.1205  |
| rs71642648  | T | 0.0527  |
| rs41310120  | G | 0.0616  |
| rs138408575 | C | -0.0823 |
| rs2746352   | A | -0.0298 |
| rs1850245   | G | 0.0209  |
| rs4366346   | C | 0.0716  |
| rs78407318  | C | -0.0529 |
| rs79502485  | A | -0.1196 |
| rs61185659  | G | 0.0473  |
| rs75407637  | C | -0.1755 |
| rs12135659  | G | 0.0395  |
| rs185667    | A | 0.0284  |
| rs493970    | A | -0.0213 |
| rs10495243  | C | 0.0269  |
| rs4396160   | G | 0.0312  |
| rs41332551  | T | 0.065   |
| rs2786484   | C | 0.0631  |
| rs11576745  | T | -0.0211 |
| rs79015177  | C | -0.0502 |
| rs76805837  | T | -0.1296 |
| rs115346300 | T | -0.1314 |
| rs11263905  | A | -0.077  |
| rs150585294 | G | 0.149   |
| rs17371282  | T | -0.0891 |
| rs138737536 | T | -0.1095 |
| rs34015031  | C | -0.1073 |
| rs4951535   | T | 0.0297  |
| rs75395882  | A | -0.0405 |
| rs10909829  | T | 0.1384  |
| rs34186657  | A | 0.032   |
| rs6693176   | T | -0.0258 |
| rs149685951 | C | 0.2269  |
| rs272525    | T | 0.0498  |
| rs35505017  | T | 0.1173  |
| rs6426374   | A | 0.0233  |
| rs1295092   | T | 0.0216  |

|             |   |         |
|-------------|---|---------|
| rs3820594   | T | 0.0233  |
| rs12090875  | T | 0.0252  |
| rs16841037  | A | 0.0659  |
| rs112119900 | A | -0.0509 |
| rs7528422   | C | 0.024   |
| rs884277    | G | -0.0213 |
| rs17452121  | G | -0.035  |
| rs2391635   | T | 0.0218  |
| rs2297546   | G | -0.0269 |
| rs111660448 | T | 0.1282  |
| rs77109523  | T | -0.0775 |
| rs10926313  | G | -0.0465 |
| rs7547493   | G | 0.0274  |
| rs842024    | G | -0.0216 |
| rs145896802 | C | -0.1171 |
| rs12089406  | T | 0.0324  |
| rs3121763   | G | -0.0312 |
| rs11261247  | G | 0.0421  |
| rs138986324 | T | -0.0628 |
| rs7554193   | G | 0.0293  |
| rs3806355   | C | 0.1384  |
| rs72779219  | C | -0.1514 |
| rs34750348  | G | 0.1286  |
| rs17123542  | C | 0.0546  |
| rs6537664   | C | -0.0224 |
| rs1800947   | G | 0.0527  |
| rs16842662  | G | 0.0369  |
| rs78187776  | A | 0.0954  |
| rs115797248 | T | -0.1946 |
| rs77801326  | A | 0.0315  |
| rs12064119  | T | -0.0245 |
| rs6677719   | C | -0.0214 |
| rs12116982  | T | 0.0227  |
| rs2487668   | A | -0.0282 |
| rs1027897   | A | -0.0295 |
| rs6691859   | G | -0.0217 |
| rs4472729   | A | -0.1261 |
| rs138913389 | C | -0.1331 |
| rs28606391  | T | 0.1034  |
| rs16853649  | A | -0.06   |
| rs77817229  | C | -0.0757 |
| rs72750240  | A | -0.0353 |
| rs483525    | G | 0.0231  |
| rs2484245   | A | -0.0251 |
| rs35611585  | G | 0.0328  |
| rs114693663 | T | -0.0515 |
| rs2076232   | T | 0.066   |



|             |   |         |
|-------------|---|---------|
| rs7516729   | T | -0.029  |
| rs61766975  | G | 0.1472  |
| rs61771791  | C | -0.0812 |
| rs72755509  | A | 0.0256  |
| rs11240311  | T | -0.0245 |
| rs113915109 | T | 0.1011  |
| rs7514102   | A | 0.0201  |
| rs12023196  | C | 0.0234  |
| rs71635524  | A | 0.1058  |
| rs2601650   | C | -0.0209 |
| rs115078087 | T | -0.0844 |
| rs4907106   | A | 0.024   |
| rs114417808 | T | 0.1541  |
| rs72714918  | T | -0.0677 |
| rs17438786  | C | -0.107  |
| rs6680819   | G | -0.0336 |
| rs6681251   | T | -0.0211 |
| rs13373993  | T | -0.0258 |
| rs12026018  | C | 0.034   |
| rs77101383  | C | -0.0398 |
| rs10157600  | T | -0.0202 |
| rs148737350 | A | 0.1296  |
| rs7514841   | A | 0.0242  |
| rs12028620  | G | -0.0437 |
| rs61827156  | A | -0.0449 |
| rs4659797   | G | 0.051   |
| rs4908494   | A | 0.0757  |
| rs17543217  | A | 0.0344  |
| rs56242833  | C | -0.0695 |
| rs12754089  | T | -0.0283 |
| rs74877768  | C | -0.0739 |
| rs6686995   | A | 0.0361  |
| rs79155102  | A | 0.1474  |
| rs74436986  | T | 0.1808  |
| rs75500872  | T | -0.0942 |
| rs76396758  | A | 0.1783  |
| rs114732936 | A | 0.1434  |
| rs17729519  | C | 0.0485  |
| rs116687082 | T | -0.0607 |
| rs3007681   | T | 0.0205  |
| rs11119306  | A | -0.0227 |
| rs111491476 | T | -0.0907 |
| rs79811444  | T | -0.0843 |
| rs6696105   | T | -0.0234 |
| rs12139208  | T | 0.0207  |
| rs9727869   | G | 0.0531  |
| rs1021378   | A | -0.0199 |

|             |   |         |
|-------------|---|---------|
| rs12403407  | T | -0.0491 |
| rs9803636   | A | -0.0564 |
| rs61818071  | C | 0.0819  |
| rs74801802  | T | 0.1453  |
| rs708767    | C | 0.0207  |
| rs138040686 | A | 0.0723  |
| rs61786473  | A | 0.1169  |
| rs1759120   | G | 0.0355  |
| rs3795492   | T | 0.0555  |
| rs7537833   | C | -0.0219 |
| rs72683606  | C | 0.0308  |
| rs17458522  | G | -0.0359 |
| rs1822702   | T | -0.0831 |
| rs144839186 | A | -0.0645 |
| rs141970057 | T | -0.1337 |
| rs1223766   | C | 0.0416  |
| rs10737808  | G | 0.0221  |
| rs1832533   | T | 0.0395  |
| rs79908495  | T | -0.0751 |
| rs146931662 | C | -0.1248 |
| rs12042284  | C | -0.0354 |
| rs10917192  | G | -0.0244 |
| rs61777073  | A | -0.1066 |
| rs12122818  | C | 0.0618  |
| rs55686019  | C | -0.0438 |
| rs116807456 | G | -0.0709 |
| rs12027261  | A | 0.0649  |
| rs72709816  | T | 0.0896  |
| rs56259076  | T | -0.0948 |
| rs12139291  | C | 0.1484  |
| rs2884837   | A | 0.057   |
| rs12125725  | G | 0.0338  |
| rs16847812  | A | -0.0283 |
| rs11584330  | A | -0.0239 |
| rs7551615   | A | -0.0288 |
| rs1057301   | C | 0.0201  |
| rs61831560  | T | -0.0593 |
| rs10926256  | G | -0.0212 |
| rs2493283   | C | -0.0374 |
| rs6424106   | T | -0.0378 |
| rs4660941   | C | -0.0251 |
| rs12568375  | T | 0.0565  |
| rs11265416  | G | -0.1273 |
| rs61740826  | A | 0.1288  |
| rs113910879 | T | -0.0876 |
| rs61811419  | G | -0.0336 |
| rs6668240   | G | -0.0339 |

|             |   |         |
|-------------|---|---------|
| rs115755338 | C | -0.0977 |
| rs140656799 | A | 0.1136  |
| rs10917031  | G | -0.0307 |
| rs6659400   | A | 0.0222  |
| rs66715895  | A | 0.0243  |
| rs56214939  | C | -0.0648 |
| rs1288490   | T | 0.0941  |
| rs10874104  | A | -0.1256 |
| rs12758106  | C | 0.0383  |
| rs115570583 | A | -0.0786 |
| rs146351710 | G | 0.088   |
| rs74226128  | C | -0.0305 |
| rs12725239  | T | -0.07   |
| rs7515484   | G | -0.0504 |
| rs77869559  | C | -0.0238 |
| rs11588539  | C | 0.0283  |
| rs913426    | G | 0.0204  |
| rs9659595   | C | -0.1533 |
| rs6657188   | C | -0.1451 |
| rs61800631  | T | -0.1    |
| rs66778594  | T | -0.0399 |
| rs74487756  | T | 0.0255  |
| rs259593    | T | -0.0896 |
| rs116609924 | C | 0.1571  |
| rs72691491  | C | -0.0319 |
| rs146401699 | T | 0.0547  |
| rs4658371   | G | 0.0301  |
| rs142999283 | A | -0.1323 |
| rs2257749   | G | -0.0246 |
| rs6657499   | C | -0.0482 |
| rs74728441  | G | -0.0745 |
| rs7532686   | C | -0.0217 |
| rs2281164   | G | 0.0216  |
| rs319988    | T | 0.0206  |
| rs1454856   | A | 0.0448  |
| rs71673444  | T | -0.0891 |
| rs35792769  | T | -0.027  |
| rs10799844  | G | -0.0207 |
| rs4648883   | T | -0.0207 |
| rs9436797   | A | 0.0281  |
| rs3866238   | T | -0.0552 |
| rs7529857   | G | -0.0481 |
| rs11580195  | T | -0.0299 |
| rs17514537  | C | -0.0833 |
| rs35967808  | G | -0.0513 |
| rs12075799  | A | -0.0207 |
| rs75125778  | C | -0.167  |

|             |   |         |
|-------------|---|---------|
| rs3806199   | A | 0.0254  |
| rs75367843  | T | 0.1062  |
| rs138791347 | T | -0.1713 |
| rs11803234  | T | 0.0738  |
| rs115668283 | C | -0.0601 |
| rs111554564 | C | -0.1164 |
| rs77921921  | A | 0.0797  |
| rs12142526  | T | -0.0325 |
| rs4620530   | T | 0.0354  |
| rs116444243 | C | 0.1883  |
| rs11162487  | C | 0.0436  |
| rs11165453  | G | -0.0232 |
| rs55733430  | A | 0.0809  |
| rs145833654 | T | -0.1232 |
| rs2769272   | G | -0.0691 |
| rs1359289   | G | 0.0236  |
| rs35577946  | C | -0.0313 |
| rs12126185  | A | -0.0505 |
| rs72721068  | C | -0.1867 |
| rs540610    | C | -0.0767 |
| rs77875838  | A | 0.082   |
| rs78382310  | T | 0.0936  |
| rs72704277  | C | 0.0689  |
| rs560082    | C | 0.0202  |
| rs1343987   | T | -0.0278 |
| rs1534948   | T | -0.0269 |
| rs75379256  | T | 0.0511  |
| rs35512110  | A | -0.0628 |
| rs78066772  | G | 0.1052  |
| rs6702300   | A | -0.0269 |
| rs629807    | C | 0.029   |
| rs74400511  | T | -0.0601 |
| rs12407714  | C | 0.0338  |
| rs61766381  | T | -0.0301 |
| rs12135468  | A | -0.0376 |
| rs607355    | C | -0.0957 |
| rs67696801  | T | 0.0597  |
| rs115099008 | T | -0.0611 |
| rs144756435 | A | 0.1743  |
| rs12071970  | G | -0.0395 |
| rs147774007 | A | 0.0866  |
| rs78423469  | A | 0.1343  |
| rs116515973 | C | 0.0851  |
| rs7526719   | T | 0.1577  |
| rs76069988  | A | 0.0437  |
| rs72742537  | T | -0.0506 |
| rs7525450   | C | -0.0328 |

|             |   |         |
|-------------|---|---------|
| rs141112816 | G | -0.0869 |
| rs4949315   | A | 0.0285  |
| rs74900687  | C | -0.1082 |
| rs79537839  | T | -0.0525 |
| rs77545263  | T | 0.1144  |
| rs12040773  | A | 0.1109  |
| rs139415758 | C | -0.1917 |
| rs61804751  | A | 0.0482  |
| rs72735232  | G | 0.0819  |
| rs61781590  | G | -0.1034 |
| rs61821563  | C | -0.0675 |
| rs996936    | G | 0.0217  |
| rs116127417 | A | 0.0955  |
| rs12145831  | A | 0.0808  |
| rs74124210  | G | -0.0495 |
| rs12566096  | T | 0.0241  |
| rs9428844   | T | 0.0275  |
| rs10799705  | G | -0.0266 |
| rs115332211 | G | -0.1114 |
| rs1216903   | A | 0.0256  |
| rs77202239  | A | -0.0657 |
| rs77518985  | G | 0.0862  |
| rs1125952   | G | 0.0203  |
| rs11118658  | T | 0.0344  |
| rs3860315   | T | 0.032   |
| rs2456909   | T | 0.043   |
| rs114574226 | T | -0.1315 |
| rs715643    | T | -0.0658 |
| rs115824358 | A | -0.1754 |
| rs1556500   | T | 0.1232  |
| rs11121627  | C | 0.0264  |
| rs61787824  | C | 0.0328  |
| rs77915002  | G | -0.0452 |
| rs75757864  | T | 0.1457  |
| rs115362521 | T | -0.1051 |
| rs77421779  | A | -0.1557 |
| rs56142141  | A | 0.116   |
| rs41277624  | A | -0.062  |
| rs1039871   | C | -0.0279 |
| rs1490311   | A | 0.0272  |
| rs140026782 | A | -0.1055 |
| rs9730431   | A | 0.0344  |
| rs115104948 | A | -0.1196 |
| rs74973423  | C | 0.0451  |
| rs139650989 | G | -0.0768 |
| rs138648675 | G | 0.1147  |
| rs17533859  | T | 0.0539  |

|             |   |         |
|-------------|---|---------|
| rs145301188 | A | -0.1334 |
| rs144397599 | A | 0.0705  |
| rs61788416  | T | 0.0317  |
| rs78450863  | T | -0.1066 |
| rs12048515  | G | 0.0215  |
| rs78873558  | T | 0.0835  |
| rs1883576   | C | 0.0285  |
| rs76592192  | C | -0.0485 |
| rs114514211 | T | -0.1074 |
| rs114530864 | T | -0.106  |
| rs584158    | A | 0.0304  |
| rs883106    | G | 0.0695  |
| rs75293189  | A | 0.1339  |
| rs17013363  | G | -0.0302 |
| rs78358049  | C | -0.086  |
| rs4846194   | A | 0.0208  |
| rs532075    | T | -0.0223 |
| rs137898851 | A | 0.0844  |
| rs12747722  | G | -0.1007 |
| rs4648524   | G | -0.0241 |
| rs17107831  | T | -0.0492 |
| rs115790254 | T | 0.0554  |
| rs4522021   | C | -0.0299 |
| rs71670822  | C | 0.0451  |
| rs7540998   | C | 0.0207  |
| rs77061391  | C | 0.0496  |
| rs12031991  | C | -0.0573 |
| rs114909049 | A | 0.0649  |
| rs12729855  | C | 0.0619  |
| rs138026259 | C | -0.0915 |
| rs2228552   | G | -0.0212 |
| rs10875130  | T | -0.0317 |
| rs78278355  | C | -0.11   |
| rs75393128  | G | 0.0683  |
| rs61814887  | T | 0.1232  |
| rs9431945   | G | 0.0294  |
| rs112300525 | T | 0.0291  |
| rs10909822  | C | -0.0841 |
| rs78909375  | T | 0.0877  |
| rs113934920 | A | -0.0444 |
| rs17600871  | A | -0.1006 |
| rs115290200 | A | -0.0523 |
| rs9430369   | C | -0.0255 |
| rs61765796  | C | -0.021  |
| rs74616455  | T | -0.109  |
| rs150809075 | T | 0.1191  |
| rs2151567   | A | 0.0507  |

|             |   |         |
|-------------|---|---------|
| rs1217390   | C | -0.0213 |
| rs16844620  | T | -0.0335 |
| rs11806418  | C | 0.0364  |
| rs12407607  | G | -0.039  |
| rs76948530  | A | 0.0756  |
| rs4598489   | T | -0.0362 |
| rs144411880 | T | -0.1011 |
| rs138513508 | A | -0.1248 |
| rs10925436  | C | 0.0265  |
| rs11118029  | A | -0.0365 |
| rs41270153  | A | 0.0639  |
| rs2870447   | T | -0.056  |
| rs11588492  | T | -0.0523 |
| rs79338294  | A | -0.0571 |
| rs115783895 | T | 0.1516  |
| rs859119    | T | 0.1146  |
| rs7515000   | T | 0.0314  |
| rs41265179  | T | 0.0568  |
| rs3936939   | G | 0.0204  |
| rs112309063 | A | -0.0369 |
| rs17421120  | T | 0.0347  |
| rs7535953   | A | -0.0196 |
| rs4649424   | C | 0.0266  |
| rs11590465  | G | -0.0533 |
| rs116244409 | C | -0.0756 |
| rs78848221  | G | 0.0291  |
| rs6658411   | G | 0.0212  |
| rs115968559 | C | 0.0699  |
| rs12095445  | A | -0.0263 |
| rs72762889  | G | 0.0374  |
| rs12404746  | C | -0.1636 |
| rs114321214 | C | -0.1369 |
| rs7548834   | T | -0.0257 |
| rs41289749  | G | -0.0457 |
| rs1038980   | C | 0.0221  |
| rs12045298  | T | 0.0233  |
| rs12128325  | A | -0.0239 |
| rs9435825   | C | -0.0255 |
| rs80293392  | T | 0.0802  |
| rs116443093 | C | 0.1272  |
| rs75593213  | T | 0.0859  |
| rs7538066   | G | -0.0296 |
| rs1551332   | G | 0.1172  |
| rs61818270  | G | 0.0404  |
| rs72739408  | A | 0.1504  |
| rs12139117  | G | -0.0239 |
| rs77619748  | C | 0.0823  |

|             |   |         |
|-------------|---|---------|
| rs146431287 | A | 0.0977  |
| rs75482876  | G | 0.0721  |
| rs12126965  | C | 0.0444  |
| rs72629592  | A | 0.0442  |
| rs55842950  | C | -0.0234 |
| rs141586394 | G | -0.1064 |
| rs61825139  | A | -0.0296 |
| rs2618719   | A | -0.0612 |
| rs56396724  | A | 0.073   |
| rs11804707  | G | -0.0456 |
| rs11589038  | G | -0.0323 |
| rs142169857 | A | 0.1019  |
| rs6691760   | C | 0.037   |
| rs12405503  | G | -0.0659 |
| rs12119878  | G | 0.0215  |
| rs115345471 | T | 0.0748  |
| rs4143111   | A | 0.0431  |
| rs2232982   | T | -0.0832 |
| rs61783714  | A | -0.0595 |
| rs16851999  | A | 0.0285  |
| rs11590076  | A | -0.022  |
| rs12026577  | G | 0.1263  |
| rs6700550   | A | -0.0739 |
| rs78032581  | G | -0.1292 |
| rs113003311 | G | -0.042  |
| rs6426039   | G | -0.0215 |
| rs113485362 | A | -0.128  |
| rs147598739 | A | 0.0912  |
| rs6703183   | C | -0.0217 |
| rs6680892   | C | 0.112   |
| rs77692133  | T | 0.0927  |
| rs114978107 | A | 0.1498  |
| rs115162787 | C | 0.0983  |
| rs9628692   | A | -0.0286 |
| rs113042236 | A | 0.0602  |
| rs71644124  | C | -0.1162 |
| rs74644581  | T | 0.0874  |
| rs61825546  | C | -0.1046 |
| rs12139298  | C | 0.0209  |
| rs4411129   | C | 0.0288  |
| rs9333458   | C | -0.1049 |
| rs602009    | G | -0.0654 |
| rs12405218  | A | -0.0962 |
| rs10927028  | G | 0.0242  |
| rs34547005  | T | -0.1671 |
| rs111618302 | T | -0.0528 |
| rs6681586   | A | 0.0295  |



|             |   |         |
|-------------|---|---------|
| rs12033578  | C | 0.0616  |
| rs4660273   | T | -0.0611 |
| rs71652555  | T | -0.0652 |
| rs11207551  | G | 0.0514  |
| rs77137720  | A | -0.0879 |
| rs9660420   | T | -0.025  |
| rs472940    | C | -0.0214 |
| rs640714    | T | 0.079   |
| rs6680363   | C | 0.0273  |
| rs145187746 | A | -0.0688 |
| rs76577375  | C | 0.1257  |
| rs1151659   | T | 0.0289  |
| rs606980    | T | 0.0319  |
| rs141398519 | A | 0.1141  |
| rs61784826  | T | -0.0912 |
| rs35172229  | A | -0.0623 |
| rs144698733 | G | 0.1744  |
| rs61818933  | T | 0.0892  |
| rs115791494 | G | 0.0871  |
| rs74796905  | T | 0.0472  |
| rs11163648  | C | 0.0203  |
| rs4950341   | A | 0.0287  |
| rs75528265  | C | 0.1401  |
| rs148177109 | T | -0.0869 |
| rs115414536 | T | 0.0402  |
| rs72711758  | A | -0.0323 |
| rs74660142  | A | -0.1701 |
| rs10911100  | A | -0.0251 |
| rs115253739 | T | -0.0677 |
| rs114014717 | G | -0.0342 |
| rs61773743  | G | -0.0714 |
| rs12120086  | A | 0.0578  |
| rs75453572  | A | 0.0975  |
| rs1027422   | A | -0.0401 |
| rs7515558   | T | -0.0244 |
| rs115023814 | C | 0.1347  |
| rs17259450  | C | 0.0455  |
| rs116422505 | A | -0.1257 |
| rs7354947   | C | 0.02    |
| rs146501361 | C | 0.0684  |
| rs7541874   | A | -0.033  |
| rs11119159  | T | -0.0265 |
| rs523125    | G | 0.0235  |
| rs57719052  | G | 0.0757  |
| rs115018569 | A | 0.0464  |
| rs146177580 | A | 0.1123  |
| rs6687015   | T | 0.0208  |

|             |   |         |
|-------------|---|---------|
| rs12098170  | C | 0.0332  |
| rs77301916  | G | 0.0522  |
| rs11207129  | A | 0.0216  |
| rs66958136  | G | -0.0216 |
| rs1359180   | G | 0.0239  |
| rs114021317 | T | 0.1437  |
| rs17344593  | C | -0.0648 |
| rs1894654   | C | -0.0213 |
| rs2245743   | A | -0.0203 |
| rs9431654   | A | 0.0574  |
| rs10927745  | A | -0.024  |
| rs114941157 | T | 0.1192  |
| rs6673614   | T | -0.0258 |
| rs6664038   | T | -0.0702 |
| rs114428013 | T | -0.0806 |
| rs34568611  | T | 0.0412  |
| rs59864109  | A | 0.068   |
| rs112236778 | T | 0.1298  |
| rs2500286   | G | -0.0245 |
| rs6676840   | T | -0.0211 |
| rs12410081  | C | 0.0349  |
| rs75002530  | T | -0.0721 |
| rs2483246   | G | 0.0393  |
| rs2817594   | G | 0.0762  |
| rs114648887 | A | -0.0599 |
| rs6704130   | T | -0.0353 |
| rs60296374  | A | -0.0481 |
| rs75583932  | G | 0.0842  |
| rs114811055 | G | 0.1026  |
| rs10798419  | C | 0.0446  |
| rs72750647  | C | -0.0848 |
| rs139861931 | G | 0.0946  |
| rs12128770  | G | 0.0232  |
| rs2494470   | T | 0.02    |
| rs56396837  | C | -0.1266 |
| rs11586595  | T | 0.1318  |
| rs7554580   | A | -0.0286 |
| rs76355164  | A | 0.137   |
| rs7528786   | G | 0.0249  |
| rs114308493 | A | 0.1266  |
| rs71630621  | A | 0.1378  |
| rs12121068  | C | 0.1207  |
| rs11581627  | A | 0.0668  |
| rs2281167   | A | 0.1387  |
| rs72663193  | A | -0.0917 |
| rs7528517   | G | -0.0889 |
| rs145722541 | G | -0.1816 |

|             |   |         |
|-------------|---|---------|
| rs2255866   | G | -0.1068 |
| rs12141775  | G | -0.027  |
| rs17377079  | A | 0.0342  |
| rs56744813  | C | -0.0545 |
| rs76970780  | T | -0.0966 |
| rs116466831 | A | 0.1265  |
| rs1857070   | G | -0.0206 |
| rs6428945   | A | 0.024   |
| rs77962384  | G | -0.105  |
| rs114423152 | C | 0.0742  |
| rs6604129   | G | 0.0245  |
| rs6661974   | G | -0.0372 |
| rs2143808   | A | -0.0303 |
| rs148644936 | G | -0.069  |
| rs12026370  | A | 0.0322  |
| rs75570642  | T | 0.0718  |
| rs12085930  | G | 0.025   |
| rs149231934 | T | 0.0723  |
| rs112785647 | A | -0.1617 |
| rs1094361   | A | -0.0938 |
| rs60830083  | C | 0.0365  |
| rs12080004  | A | 0.0485  |
| rs7554273   | G | -0.0839 |
| rs76514451  | G | -0.0371 |
| rs112388174 | C | -0.1271 |
| rs28360422  | C | 0.1362  |
| rs34563685  | A | 0.05    |
| rs2799097   | A | 0.0303  |
| rs60016752  | A | 0.1082  |
| rs12405928  | C | -0.0231 |
| rs11576345  | G | -0.0418 |
| rs11165995  | A | 0.0208  |
| rs1325957   | C | -0.0426 |
| rs926551    | A | 0.0262  |
| rs115486753 | C | 0.062   |
| rs11585947  | T | 0.0399  |
| rs79114203  | T | 0.0768  |
| rs6677648   | T | 0.0252  |
| rs116218145 | G | -0.1731 |
| rs2039175   | A | 0.0246  |
| rs61771984  | G | 0.0503  |
| rs113672899 | A | 0.1162  |
| rs72689714  | A | 0.067   |
| rs1213767   | C | -0.0271 |
| rs2182604   | A | 0.0281  |
| rs11589473  | A | 0.1348  |
| rs9660931   | C | 0.063   |

|             |   |         |
|-------------|---|---------|
| rs1534962   | A | 0.0226  |
| rs112192342 | A | 0.0514  |
| rs271392    | T | -0.027  |
| rs147861184 | G | -0.0843 |
| rs2301488   | T | 0.0201  |
| rs143967904 | A | -0.0998 |
| rs6695915   | G | -0.0389 |
| rs114483936 | A | 0.0989  |
| rs3008206   | T | -0.0315 |
| rs4488081   | T | 0.0212  |
| rs111436817 | T | 0.0886  |
| rs12401540  | A | -0.0226 |
| rs115027058 | A | 0.1589  |
| rs28562774  | G | 0.0299  |
| rs61769176  | C | -0.0548 |
| rs11589373  | G | -0.0277 |
| rs1592072   | T | 0.0203  |
| rs74483561  | A | -0.0258 |
| rs7524749   | A | 0.0269  |
| rs7517008   | G | 0.1156  |
| rs41310138  | A | -0.0812 |
| rs116631146 | A | 0.0609  |
| rs11185283  | G | -0.0219 |
| rs10429882  | C | -0.0423 |
| rs80210845  | C | -0.0671 |
| rs10910081  | A | 0.0439  |
| rs1203704   | G | -0.0289 |
| rs10799076  | T | 0.0617  |
| rs12032616  | G | 0.023   |
| rs10736428  | C | 0.0315  |
| rs79184370  | T | -0.1032 |
| rs366912    | C | 0.1317  |
| rs16854559  | G | -0.0256 |
| rs13374255  | G | 0.0807  |
| rs74510493  | C | 0.0875  |
| rs11583893  | A | -0.0361 |
| rs55660334  | A | 0.1184  |
| rs4659911   | A | -0.0299 |
| rs12060780  | G | -0.0209 |
| rs12075109  | C | 0.033   |
| rs12724735  | C | -0.0838 |
| rs79138682  | G | 0.1327  |
| rs1341910   | C | 0.0438  |
| rs148345404 | C | 0.1055  |
| rs78807162  | T | -0.0991 |
| rs17105403  | A | 0.0293  |
| rs61766954  | C | 0.0936  |

|             |   |         |
|-------------|---|---------|
| rs74587404  | G | 0.0783  |
| rs72749732  | A | 0.1279  |
| rs4908733   | T | -0.0287 |
| rs56809328  | C | -0.0709 |
| rs34475455  | A | 0.0759  |
| rs17541875  | A | -0.0663 |
| rs10495392  | C | -0.0303 |
| rs138765843 | C | -0.147  |
| rs495937    | G | -0.0375 |
| rs1616083   | C | -0.0199 |
| rs60048327  | T | 0.0318  |
| rs12039225  | C | -0.0352 |
| rs146565683 | C | 0.0958  |
| rs77538350  | C | 0.1085  |
| rs78876846  | C | 0.1424  |
| rs145144709 | A | 0.0327  |
| rs709794    | A | -0.0194 |
| rs61815115  | G | -0.0446 |
| rs72895329  | A | -0.0281 |
| rs139828520 | G | -0.2256 |
| rs143266317 | C | 0.0534  |
| rs116255288 | C | 0.1771  |
| rs12141090  | G | 0.021   |
| rs72718500  | G | -0.037  |
| rs77972390  | A | -0.0884 |
| rs71636380  | A | -0.108  |
| rs12064907  | G | -0.0334 |
| rs10913929  | T | 0.0774  |
| rs16855093  | T | 0.0483  |
| rs923824    | T | 0.0238  |
| rs12025938  | G | -0.044  |
| rs12404457  | T | 0.0217  |
| rs28616647  | A | 0.0462  |
| rs75977446  | A | -0.0821 |
| rs74143247  | A | 0.0437  |
| rs12024106  | C | 0.1101  |
| rs2996295   | A | 0.0197  |
| rs34437895  | A | 0.0814  |
| rs147882514 | T | -0.1584 |
| rs2982847   | T | -0.0207 |
| rs3789411   | A | 0.0207  |
| rs757770    | T | -0.0367 |
| rs13313060  | T | 0.0657  |
| rs369427    | G | 0.02    |
| rs7530037   | T | -0.0251 |
| rs2808020   | T | -0.0248 |
| rs11808495  | A | 0.0273  |

|             |   |         |
|-------------|---|---------|
| rs75480123  | C | -0.169  |
| rs17665257  | G | -0.0597 |
| rs78132925  | C | -0.1193 |
| rs12117566  | T | -0.0313 |
| rs10915317  | C | -0.0216 |
| rs517993    | A | -0.0199 |
| rs1058276   | A | 0.0205  |
| rs78516619  | G | 0.093   |
| rs115174236 | A | 0.0991  |
| rs16845078  | C | 0.0493  |
| rs12059662  | T | -0.0788 |
| rs10863294  | A | 0.0505  |
| rs4920532   | G | -0.0381 |
| rs79915389  | G | 0.1084  |
| rs1795040   | G | 0.0197  |
| rs482697    | C | 0.0263  |
| rs138533256 | A | -0.0465 |
| rs72678824  | C | -0.0612 |
| rs78510461  | A | -0.1576 |
| rs61813265  | A | -0.0732 |
| rs10911496  | C | -0.0264 |
| rs12141421  | G | 0.0391  |
| rs11165439  | G | -0.0197 |
| rs78577673  | T | 0.1253  |
| rs11590819  | A | 0.0479  |
| rs116632796 | T | 0.082   |
| rs61818177  | T | 0.038   |
| rs12077177  | A | -0.0932 |
| rs7540760   | C | -0.0252 |
| rs114247478 | T | 0.0488  |
| rs6698308   | G | -0.0354 |
| rs34395095  | T | 0.0514  |
| rs17663538  | A | -0.0978 |
| rs7526117   | C | -0.0248 |
| rs878201    | A | -0.0225 |
| rs10492995  | C | -0.033  |
| rs7535074   | T | 0.0259  |
| rs34729766  | G | 0.0293  |
| rs6587382   | G | 0.0246  |
| rs115523211 | A | -0.1052 |
| rs72747335  | G | -0.0551 |
| rs35758554  | T | -0.0946 |
| rs712026    | C | 0.02    |
| rs151710    | A | 0.0216  |
| rs61815118  | C | -0.0223 |
| rs74085807  | A | 0.0312  |
| rs3123711   | C | 0.0246  |

|             |   |         |
|-------------|---|---------|
| rs1332957   | A | 0.0647  |
| rs147331394 | A | -0.1389 |
| rs6678044   | A | 0.0297  |
| rs6672745   | T | 0.0307  |
| rs1697621   | C | 0.0457  |
| rs141802054 | T | 0.1315  |
| rs2804694   | A | 0.0201  |
| rs77503684  | A | -0.1506 |
| rs4912301   | T | -0.0336 |
| rs6704270   | A | -0.0402 |
| rs1812389   | C | -0.0451 |
| rs80081023  | T | 0.0729  |
| rs114948074 | T | -0.0414 |
| rs113690547 | G | -0.0469 |
| rs145338054 | T | -0.1257 |
| rs11577388  | C | 0.0373  |
| rs115653819 | A | -0.1263 |
| rs148868307 | T | -0.11   |
| rs703805    | C | -0.0229 |
| rs74686417  | A | 0.0716  |
| rs2811208   | T | -0.1083 |
| rs79479105  | T | -0.0566 |
| rs61837881  | C | 0.0251  |
| rs115438646 | A | -0.0895 |
| rs143476351 | T | 0.1047  |
| rs146624379 | G | 0.1495  |
| rs6425203   | C | 0.0224  |
| rs138075061 | A | 0.1037  |
| rs2776747   | C | 0.0258  |
| rs6662915   | C | -0.0201 |
| rs72665659  | C | -0.0345 |
| rs17394875  | T | -0.0787 |
| rs12145396  | A | -0.0232 |
| rs17602889  | A | 0.0906  |
| rs34494178  | G | 0.0985  |
| rs148451576 | G | 0.1855  |
| rs116676629 | A | 0.0659  |
| rs2807863   | G | -0.0197 |
| rs76209575  | T | -0.143  |
| rs79785899  | G | 0.0722  |
| rs76335573  | T | -0.0745 |
| rs78421006  | G | -0.1362 |
| rs4460649   | G | 0.0194  |
| rs17427572  | T | 0.0394  |
| rs6664405   | T | -0.0447 |
| rs55681828  | T | 0.0452  |
| rs12035717  | T | -0.0192 |

|             |   |         |
|-------------|---|---------|
| rs10737335  | T | -0.0323 |
| rs144659965 | T | -0.1035 |
| rs79414984  | A | 0.1081  |
| rs6665962   | A | 0.0271  |
| rs139038638 | T | -0.0277 |
| rs6700575   | G | 0.0267  |
| rs1152832   | T | -0.0214 |
| rs12126746  | C | 0.1156  |
| rs114939198 | A | -0.074  |
| rs1475736   | C | -0.0424 |
| rs148031783 | A | 0.0742  |
| rs58064771  | A | -0.0358 |
| rs116832904 | T | 0.0984  |
| rs71652413  | C | -0.097  |
| rs41289402  | G | -0.0487 |
| rs1340689   | T | -0.0192 |
| rs7541956   | A | -0.0271 |
| rs77153384  | T | 0.064   |
| rs78506564  | A | 0.0768  |
| rs78452867  | A | 0.028   |
| rs61832410  | C | -0.1025 |
| rs1204875   | T | 0.0539  |
| rs1361818   | A | -0.1042 |
| rs6690144   | A | -0.0294 |
| rs1321156   | G | 0.028   |
| rs2799549   | T | 0.0197  |
| rs141235262 | A | 0.1593  |
| rs3766364   | G | -0.0368 |
| rs2076357   | T | 0.0216  |
| rs12727038  | C | -0.0287 |
| rs12725541  | A | 0.0924  |
| rs114077967 | G | -0.0511 |
| rs4845636   | A | -0.0253 |
| rs78411938  | A | 0.0943  |
| rs12733702  | A | 0.0669  |
| rs9661996   | A | -0.0264 |
| rs56163035  | T | 0.0385  |
| rs704842    | T | -0.0298 |
| rs12029460  | C | -0.0319 |
| rs115777381 | G | -0.0537 |
| rs565916    | A | 0.0238  |
| rs55807390  | A | 0.1306  |
| rs139813743 | A | -0.1027 |
| rs116598043 | A | 0.1772  |
| rs2249733   | T | -0.0303 |
| rs78583815  | G | 0.0598  |
| rs6676972   | T | 0.0236  |



|             |   |         |
|-------------|---|---------|
| rs75836442  | T | -0.0676 |
| rs61775147  | C | -0.1625 |
| rs1062445   | A | 0.0224  |
| rs12140724  | C | 0.0893  |
| rs1186685   | G | -0.0209 |
| rs72744493  | A | 0.0823  |
| rs80205519  | A | -0.0495 |
| rs115358214 | A | 0.054   |
| rs138551795 | G | -0.1905 |
| rs116733293 | G | 0.0919  |
| rs12033806  | T | 0.0235  |
| rs141714452 | G | 0.1498  |
| rs12133826  | A | 0.0796  |
| rs74574624  | A | 0.0334  |
| rs904064    | A | 0.0209  |
| rs77718802  | T | -0.0985 |
| rs7527716   | C | 0.0205  |
| rs61775127  | G | 0.0603  |
| rs74322246  | T | 0.0974  |
| rs140851668 | A | 0.0847  |
| rs144288008 | A | 0.0934  |
| rs12032041  | T | 0.0255  |
| rs12137551  | T | 0.1447  |
| rs7513957   | G | -0.038  |
| rs9730012   | C | 0.0242  |
| rs77459805  | T | 0.0368  |
| rs11119837  | G | 0.035   |
| rs139577932 | A | 0.0345  |
| rs4660121   | G | 0.0296  |
| rs144204001 | T | 0.0255  |
| rs116141616 | A | -0.1395 |
| rs4657017   | C | -0.0203 |
| rs12093904  | C | 0.0303  |
| rs79258751  | C | 0.0765  |
| rs4908837   | A | 0.0949  |
| rs2293915   | A | -0.0263 |
| rs77101419  | A | 0.0961  |
| rs142769687 | A | 0.131   |
| rs75148473  | C | 0.0608  |
| rs138361368 | A | 0.0956  |
| rs116332846 | A | 0.0964  |
| rs11572744  | C | 0.0682  |
| rs4317829   | C | -0.0224 |
| rs10888917  | C | 0.0204  |
| rs114461997 | C | 0.0779  |
| rs7547721   | A | -0.0578 |
| rs78403358  | C | 0.131   |

|             |   |         |
|-------------|---|---------|
| rs140094357 | C | -0.0561 |
| rs74150348  | C | -0.0497 |
| rs75462845  | C | -0.0792 |
| rs79916150  | T | -0.0568 |
| rs1331056   | C | -0.0221 |
| rs72657226  | T | -0.0427 |
| rs12031690  | T | -0.0225 |
| rs113154528 | C | -0.0881 |
| rs116319961 | G | 0.146   |
| rs111434655 | C | -0.0837 |
| rs2243198   | G | 0.1461  |
| rs2746558   | A | 0.0238  |
| rs12564969  | A | -0.0481 |
| rs6425143   | G | -0.0233 |
| rs141027609 | G | 0.0336  |
| rs9324187   | T | 0.0201  |
| rs72741789  | C | 0.0425  |
| rs114155758 | A | -0.0841 |
| rs74476754  | T | -0.0527 |
| rs79949009  | C | 0.0611  |
| rs2245116   | G | 0.0346  |
| rs35200459  | G | -0.022  |
| rs875326    | T | 0.0261  |
| rs116142120 | A | 0.1091  |
| rs1252131   | G | -0.0931 |
| rs148796891 | T | -0.0846 |
| rs12041053  | G | -0.1298 |
| rs115578936 | C | -0.0586 |
| rs77886791  | A | 0.0502  |
| rs72716971  | A | -0.1504 |
| rs9787289   | A | -0.0294 |
| rs17160059  | G | -0.1103 |
| rs144597972 | T | 0.0864  |
| rs61758105  | T | -0.0888 |
| rs115313790 | T | -0.1201 |
| rs74067906  | T | 0.0748  |
| rs17128732  | C | -0.1119 |
| rs75305802  | C | -0.1402 |
| rs61778188  | A | 0.0775  |
| rs2984691   | T | 0.0408  |
| rs41273521  | G | -0.0923 |
| rs112360961 | A | -0.0941 |
| rs116800975 | A | -0.0555 |
| rs657097    | C | 0.0359  |
| rs35171095  | G | 0.0303  |
| rs10927144  | T | -0.0205 |
| rs58713859  | G | -0.0413 |

|             |   |         |
|-------------|---|---------|
| rs56277150  | T | -0.0489 |
| rs10910394  | A | 0.0373  |
| rs12030995  | T | -0.0461 |
| rs115108347 | C | 0.0608  |
| rs61786528  | C | -0.074  |
| rs151060947 | A | 0.0907  |
| rs79056692  | T | 0.0638  |
| rs10908367  | C | 0.0268  |
| rs112440771 | T | 0.1636  |
| rs12069629  | A | 0.055   |
| rs2774281   | T | 0.0305  |
| rs12121608  | T | 0.0274  |
| rs115445222 | A | -0.0812 |
| rs12145555  | C | -0.0191 |
| rs144826988 | A | -0.0852 |
| rs7526959   | C | 0.0339  |
| rs17615698  | C | -0.0254 |
| rs144654999 | G | 0.0971  |
| rs145614126 | G | -0.1155 |
| rs114294944 | T | 0.1068  |
| rs7531057   | C | -0.0951 |
| rs3768393   | T | 0.0741  |
| rs57749080  | T | -0.0341 |
| rs75310321  | T | -0.1263 |
| rs114525110 | G | 0.1339  |
| rs76390929  | A | 0.0994  |
| rs41268769  | C | -0.0707 |
| rs71652521  | T | -0.1219 |
| rs2793675   | G | 0.024   |
| rs7539113   | C | 0.027   |
| rs75282098  | A | 0.0732  |
| rs72654834  | C | -0.1063 |
| rs55821293  | T | 0.0396  |
| rs75049182  | G | 0.1434  |
| rs10918700  | A | 0.0294  |
| rs77222254  | C | 0.0662  |
| rs113588001 | A | -0.1606 |
| rs114313858 | A | 0.1937  |
| rs58473580  | A | 0.1407  |
| rs9727651   | T | -0.0389 |
| rs111998519 | G | -0.033  |
| rs72718728  | C | 0.1064  |
| rs74652737  | A | -0.0965 |
| rs77779101  | T | -0.0469 |
| rs142623637 | T | -0.0917 |
| rs12123654  | G | -0.0969 |
| rs7544464   | T | 0.0274  |

|             |   |         |
|-------------|---|---------|
| rs34187779  | G | -0.0239 |
| rs12744444  | A | 0.0259  |
| rs56363622  | A | -0.027  |
| rs10911687  | G | -0.1098 |
| rs56013973  | C | 0.1245  |
| rs2503227   | G | -0.0939 |
| rs7544975   | G | 0.0271  |
| rs114746071 | G | -0.096  |
| rs11587163  | C | 0.1121  |
| rs12739671  | A | -0.04   |
| rs11582354  | A | -0.0716 |
| rs10915660  | C | -0.02   |
| rs113166744 | G | 0.0519  |
| rs1750810   | G | -0.0189 |
| rs150859230 | T | 0.0866  |
| rs60654223  | G | 0.027   |
| rs79258950  | G | 0.0783  |
| rs2818812   | G | -0.0207 |
| rs137946352 | G | -0.1353 |
| rs2992756   | T | 0.0187  |
| rs7522095   | T | -0.1026 |
| rs61782737  | A | 0.0233  |
| rs2070929   | C | 0.0214  |
| rs61802252  | T | -0.0999 |
| rs12735211  | A | -0.0552 |
| rs72736376  | T | 0.0448  |
| rs10495085  | T | -0.0424 |
| rs9729637   | T | 0.0389  |
| rs12139365  | T | -0.0905 |
| rs138202342 | T | 0.1111  |
| rs11209761  | T | -0.0187 |
| rs11583070  | G | -0.0369 |
| rs147370106 | A | -0.128  |
| rs111482076 | G | 0.0798  |
| rs111634660 | C | -0.0733 |
| rs12045693  | A | -0.0202 |
| rs78666072  | C | -0.0857 |
| rs78685491  | T | 0.0765  |
| rs11808963  | T | -0.039  |
| rs1180317   | A | 0.0221  |
| rs5744367   | T | -0.0327 |
| rs115137072 | A | 0.0802  |
| rs17353785  | T | 0.0861  |
| rs601139    | G | -0.024  |
| rs1690786   | G | 0.0778  |
| rs4653421   | A | 0.0268  |
| rs3905206   | T | -0.0208 |

|             |   |         |
|-------------|---|---------|
| rs77106390  | C | 0.1085  |
| rs10918196  | C | -0.0199 |
| rs6660116   | C | 0.0193  |
| rs78385509  | T | -0.0483 |
| rs74344091  | A | 0.0665  |
| rs6701721   | C | 0.0234  |
| rs12566144  | G | 0.0402  |
| rs145987851 | C | -0.1153 |
| rs113665318 | A | -0.0387 |
| rs78727537  | A | -0.0846 |
| rs78452454  | A | -0.03   |
| rs11804210  | C | -0.0538 |
| rs7529429   | C | -0.0477 |
| rs2788096   | T | -0.0375 |
| rs7418357   | A | 0.021   |
| rs11589934  | G | -0.0211 |
| rs11577907  | T | -0.0242 |
| rs144430042 | C | -0.1154 |
| rs79552656  | A | 0.132   |
| rs139054054 | C | 0.1555  |
| rs111228597 | T | -0.0874 |
| rs2275552   | T | -0.0214 |
| rs114028188 | C | 0.0963  |
| rs1568812   | A | -0.03   |
| rs28652656  | A | 0.0393  |
| rs164775    | A | 0.0201  |
| rs115435856 | G | 0.1323  |
| rs73097405  | A | -0.0647 |
| rs12411066  | C | -0.0367 |
| rs115008170 | A | -0.1187 |
| rs1997034   | T | 0.023   |
| rs1538472   | G | -0.0209 |
| rs1591425   | A | 0.0218  |
| rs12034064  | C | -0.0307 |
| rs11583958  | A | 0.0632  |
| rs12142410  | G | 0.0254  |
| rs7520090   | A | 0.0412  |
| rs116032601 | C | 0.1679  |
| rs11585386  | T | -0.0426 |
| rs4846032   | C | 0.0218  |
| rs116788756 | A | 0.1592  |
| rs34246004  | T | 0.061   |
| rs11120955  | G | -0.0205 |
| rs7527843   | G | 0.0284  |
| rs76716906  | A | 0.0522  |
| rs9428802   | G | 0.0247  |
| rs61765039  | A | 0.026   |

|             |   |         |
|-------------|---|---------|
| rs741994    | A | 0.0514  |
| rs116077122 | G | -0.095  |
| rs78990407  | G | -0.0631 |
| rs34352050  | T | 0.0604  |
| rs12143186  | C | 0.03    |
| rs151123467 | C | -0.0682 |
| rs12723730  | G | -0.0402 |
| rs115833204 | C | -0.0576 |
| rs149251635 | C | -0.0781 |
| rs2275490   | G | 0.0241  |
| rs343792    | C | 0.02    |
| rs113510546 | C | -0.1857 |
| rs56394573  | T | 0.0551  |
| rs77271825  | T | -0.1434 |
| rs150788125 | T | 0.1042  |
| rs76556961  | C | 0.1003  |
| rs72656078  | T | -0.127  |
| rs74353361  | A | -0.0293 |
| rs6428572   | C | 0.0439  |
| rs75015832  | G | -0.1322 |
| rs148701056 | T | 0.0772  |
| rs4659999   | T | -0.0278 |
| rs17319708  | G | -0.026  |
| rs74121213  | A | 0.08    |
| rs12130136  | A | -0.0224 |
| rs78204531  | T | 0.0497  |
| rs6429564   | T | 0.0242  |
| rs11807161  | T | -0.0266 |
| rs74690510  | T | 0.063   |
| rs147474835 | T | 0.053   |
| rs2784164   | C | 0.0225  |
| rs77631878  | A | -0.1395 |
| rs116401702 | T | 0.0709  |
| rs115822551 | A | 0.0939  |
| rs1442503   | T | 0.0195  |
| rs111940686 | T | 0.0774  |
| rs944925    | T | -0.0228 |
| rs17127877  | C | -0.0345 |
| rs3789398   | G | 0.0206  |
| rs17124513  | T | 0.0322  |
| rs2454228   | T | 0.022   |
| rs79958746  | A | -0.0469 |
| rs72745867  | A | 0.0832  |
| rs6703930   | C | -0.0218 |
| rs115648615 | T | 0.1493  |
| rs74798953  | G | -0.098  |
| rs72769805  | T | 0.024   |

|             |   |         |
|-------------|---|---------|
| rs12034261  | T | -0.0216 |
| rs2185282   | T | 0.0295  |
| rs12048158  | T | 0.0235  |
| rs139104615 | T | 0.127   |
| rs12758611  | G | -0.0288 |
| rs116375719 | A | 0.0959  |
| rs11209849  | G | 0.0996  |
| rs12130227  | A | 0.0857  |
| rs72745639  | A | 0.102   |
| rs78205142  | T | -0.0923 |
| rs115656545 | A | -0.1164 |
| rs139864331 | A | 0.1105  |
| rs1156845   | C | 0.0277  |
| rs944708    | A | 0.0268  |
| rs2794500   | T | 0.02    |
| rs6426897   | A | 0.0231  |
| rs114445863 | T | 0.1111  |
| rs16848158  | C | 0.0511  |
| rs114102876 | T | -0.1133 |
| rs35157790  | C | -0.0345 |
| rs76599916  | C | -0.043  |
| rs2118101   | G | 0.052   |
| rs12033923  | C | 0.0422  |
| rs12735246  | T | 0.0513  |
| rs12145607  | T | 0.0241  |
| rs7527268   | C | -0.0199 |
| rs598193    | A | -0.0283 |
| rs713322    | G | -0.0853 |
| rs74137004  | A | 0.0782  |
| rs74709547  | A | 0.0856  |
| rs12079493  | C | 0.0482  |
| rs1048773   | T | -0.05   |
| rs9442228   | T | -0.028  |
| rs2811850   | C | 0.0478  |
| rs1483784   | C | 0.0251  |
| rs74892130  | A | 0.1155  |
| rs6685692   | T | 0.1222  |
| rs143332381 | C | -0.0963 |
| rs115722628 | T | -0.0973 |
| rs696692    | T | -0.0201 |
| rs77134701  | C | 0.1191  |
| rs45614438  | T | 0.1402  |
| rs72938196  | T | 0.083   |
| rs10873845  | A | -0.0628 |
| rs146750376 | C | -0.0702 |
| rs12145764  | G | 0.0715  |
| rs59367185  | A | 0.0381  |

|             |   |         |
|-------------|---|---------|
| rs114728834 | C | 0.0633  |
| rs476153    | C | -0.0299 |
| rs61768878  | C | 0.1245  |
| rs72904848  | A | 0.0483  |
| rs61805604  | C | -0.0787 |
| rs79024265  | C | -0.0395 |
| rs2064075   | C | -0.024  |
| rs11803770  | T | 0.0268  |
| rs10913099  | A | -0.0193 |
| rs72744446  | C | 0.057   |
| rs11805033  | C | -0.0228 |
| rs320027    | T | -0.0277 |
| rs351598    | A | -0.0324 |
| rs10903024  | C | -0.0265 |
| rs116034016 | G | -0.15   |
| rs12142973  | C | -0.0731 |
| rs116060042 | T | 0.0973  |
| rs79108739  | A | 0.1481  |
| rs12130073  | A | 0.0573  |
| rs79571786  | A | 0.0998  |
| rs75303190  | C | -0.0897 |
| rs138132320 | A | -0.1337 |
| rs11120695  | T | -0.0196 |
| rs6667736   | G | -0.0212 |
| rs77674375  | C | -0.0821 |
| rs78814315  | T | -0.0547 |
| rs581878    | C | 0.0218  |
| rs625456    | T | -0.031  |
| rs12040674  | G | 0.0281  |
| rs12139096  | G | 0.051   |
| rs10158091  | T | -0.0665 |
| rs145243360 | T | 0.174   |
| rs75862910  | G | 0.0889  |
| rs112141534 | C | -0.0224 |
| rs75185976  | C | 0.1322  |
| rs150433480 | T | 0.1162  |
| rs138345018 | T | 0.0964  |
| rs841670    | A | 0.0226  |
| rs151028231 | T | -0.1782 |
| rs114952100 | T | 0.1073  |
| rs150179636 | G | 0.0724  |
| rs1245488   | C | -0.0447 |
| rs74353115  | T | -0.1187 |
| rs112662973 | T | -0.1593 |
| rs17456252  | C | 0.0198  |
| rs12138026  | C | -0.0358 |
| rs41312662  | G | -0.0785 |



|             |   |         |
|-------------|---|---------|
| rs75172480  | G | 0.0664  |
| rs78511939  | T | 0.0497  |
| rs112176562 | T | -0.0989 |
| rs115925348 | C | -0.1097 |
| rs72744305  | C | -0.0484 |
| rs75247924  | T | 0.0438  |
| rs6698827   | G | -0.0233 |
| rs11806607  | A | -0.0314 |
| rs75686747  | T | 0.0472  |
| rs859101    | T | 0.0198  |
| rs11264575  | A | 0.1032  |
| rs1229351   | T | 0.0249  |
| rs79644588  | A | 0.1152  |
| rs12139725  | A | -0.0231 |
| rs72683237  | A | -0.1658 |
| rs6695790   | G | 0.0201  |
| rs337139    | A | -0.0211 |
| rs9286977   | A | -0.0237 |
| rs4650590   | G | 0.0203  |
| rs77845029  | A | 0.0911  |
| rs74760869  | C | 0.0435  |
| rs1220394   | A | -0.0248 |
| rs4908329   | C | -0.0199 |
| rs114381381 | A | -0.0647 |
| rs1203657   | T | 0.0198  |
| rs12239499  | C | 0.0287  |
| rs60800969  | C | -0.0263 |
| rs117362208 | T | -0.0613 |
| rs11584720  | A | 0.0321  |
| rs3789712   | A | 0.0194  |
| rs6671964   | G | -0.0226 |
| rs61771949  | T | -0.0426 |
| rs67013011  | C | -0.0501 |
| rs111336761 | T | -0.0647 |
| rs115710272 | G | -0.0792 |
| rs108406    | C | 0.0246  |
| rs6577383   | T | -0.0207 |
| rs16849085  | A | -0.0335 |
| rs55716851  | G | -0.1384 |
| rs11121628  | A | 0.0887  |
| rs72884439  | C | 0.1099  |
| rs780573    | A | 0.0441  |
| rs74422919  | A | -0.1082 |
| rs80175630  | T | 0.1899  |
| rs1495238   | A | -0.1117 |
| rs75336495  | C | 0.0992  |
| rs12564010  | A | -0.1026 |

|             |   |         |
|-------------|---|---------|
| rs7519888   | G | -0.0776 |
| rs10489911  | T | -0.0356 |
| rs17429262  | T | 0.039   |
| rs72739668  | G | 0.0592  |
| rs17045019  | C | -0.062  |
| rs77972946  | T | -0.0261 |
| rs139696708 | A | 0.0772  |
| rs77440194  | T | -0.0976 |
| rs116763181 | T | -0.0859 |
| rs114968204 | T | -0.0557 |
| rs903540    | T | 0.0228  |
| rs2495491   | G | 0.022   |
| rs55679046  | G | -0.0295 |
| rs6588566   | C | -0.0194 |
| rs72698169  | C | -0.0279 |
| rs78465132  | A | 0.0816  |
| rs74142915  | T | 0.1183  |
| rs80322391  | A | 0.0903  |
| rs10218500  | T | 0.1639  |
| rs16861481  | A | -0.0387 |
| rs6600266   | C | 0.0319  |
| rs76149919  | C | -0.1108 |
| rs1266381   | G | 0.0282  |
| rs116190983 | C | -0.122  |
| rs696118    | G | -0.168  |
| rs4839434   | T | -0.0236 |
| rs145454327 | G | 0.1411  |
| rs114703587 | A | 0.0835  |
| rs11161833  | G | 0.0274  |
| rs79920297  | A | -0.0766 |
| rs6668579   | C | 0.1314  |
| rs56906051  | A | -0.0867 |
| rs11578211  | A | 0.0428  |
| rs1833049   | T | 0.0536  |
| rs35072903  | A | 0.0352  |
| rs114158224 | G | 0.0659  |
| rs116363232 | T | -0.1179 |
| rs10911540  | T | -0.0191 |
| rs4319292   | C | 0.0957  |
| rs11806776  | T | 0.1231  |
| rs72762094  | A | -0.0368 |
| rs4391636   | C | 0.0196  |
| rs4846094   | A | 0.1055  |
| rs139157913 | A | 0.0749  |
| rs10782748  | A | -0.0236 |
| rs4147831   | A | -0.0393 |
| rs17846714  | T | 0.0561  |

|             |   |         |
|-------------|---|---------|
| rs114717392 | T | -0.121  |
| rs11802039  | C | 0.0292  |
| rs35176668  | A | 0.0489  |
| rs74998084  | G | 0.0628  |
| rs12568997  | A | -0.0359 |
| rs115212907 | T | 0.0928  |
| rs7540455   | C | -0.026  |
| rs4654249   | G | 0.0983  |
| rs17369290  | A | 0.0291  |
| rs7531345   | T | -0.0225 |
| rs1444033   | C | 0.0198  |
| rs3941102   | T | -0.0197 |
| rs2788089   | G | 0.0463  |
| rs12409044  | T | 0.0819  |
| rs7534855   | T | -0.0217 |
| rs6678978   | T | -0.0216 |
| rs74657704  | T | -0.0673 |
| rs142029530 | C | -0.1516 |
| rs11577142  | C | 0.0208  |
| rs17534202  | G | -0.0198 |
| rs487974    | A | -0.0276 |
| rs75339918  | C | -0.0965 |
| rs6673027   | T | 0.0279  |
| rs73076596  | T | -0.0812 |
| rs77062243  | A | 0.0487  |
| rs61819968  | A | 0.0396  |
| rs75543606  | G | -0.0655 |
| rs2282319   | T | 0.0192  |
| rs114345109 | T | 0.1146  |
| rs10889865  | T | -0.0198 |
| rs1237370   | T | 0.0275  |
| rs114741713 | C | 0.0531  |
| rs12740377  | G | -0.0967 |
| rs1084483   | C | -0.0272 |
| rs77927560  | T | 0.075   |
| rs17099902  | C | 0.0717  |
| rs11121853  | G | 0.0235  |
| rs1149050   | G | 0.0266  |
| rs12121666  | A | 0.0247  |
| rs2501338   | T | 0.0247  |
| rs12075997  | T | -0.0365 |
| rs61815033  | T | -0.0664 |
| rs6662230   | C | -0.0191 |
| rs78862694  | G | 0.0906  |
| rs76373424  | A | -0.0859 |
| rs140742144 | T | -0.0437 |
| rs822838    | T | 0.055   |

|             |   |         |
|-------------|---|---------|
| rs10907185  | A | -0.0212 |
| rs12730752  | T | -0.0229 |
| rs16842420  | G | -0.0412 |
| rs761964    | T | 0.0293  |
| rs263469    | T | -0.0297 |
| rs145397710 | A | 0.1464  |
| rs72726344  | C | -0.0742 |
| rs4400663   | T | 0.0332  |
| rs1299682   | C | 0.0256  |
| rs1750824   | G | 0.0226  |
| rs1407122   | T | 0.0186  |
| rs12726652  | A | 0.0251  |
| rs2300566   | G | -0.0653 |
| rs78891890  | A | 0.0358  |
| rs75034120  | A | -0.0888 |
| rs76683466  | T | 0.0824  |
| rs114528479 | G | 0.0998  |
| rs55998423  | G | 0.0311  |
| rs12040632  | C | -0.0502 |
| rs77612379  | T | -0.0721 |
| rs4644448   | C | 0.0374  |
| rs72704586  | A | -0.1167 |
| rs72733118  | A | 0.0869  |
| rs78071622  | C | -0.1031 |
| rs41415450  | A | 0.0413  |
| rs16848493  | T | 0.0426  |
| rs6690233   | C | -0.0548 |
| rs12022311  | C | 0.0466  |
| rs76641503  | A | -0.0331 |
| rs35981899  | C | -0.0219 |
| rs35247258  | T | -0.0938 |
| rs78503503  | G | 0.0675  |
| rs115990210 | A | -0.1006 |
| rs72686270  | A | 0.0587  |
| rs141890185 | C | 0.0966  |
| rs28887329  | C | 0.0371  |
| rs1033867   | C | 0.0232  |
| rs116558532 | A | -0.1647 |
| rs12123823  | A | -0.0674 |
| rs74495156  | C | -0.1206 |
| rs76500697  | T | 0.0424  |
| rs58849746  | C | 0.0871  |
| rs12120335  | C | 0.1059  |
| rs77114688  | T | 0.0874  |
| rs114369699 | A | 0.0928  |
| rs113863763 | A | -0.1202 |
| rs149518661 | T | -0.1526 |

|             |   |         |
|-------------|---|---------|
| rs146384346 | T | 0.1102  |
| rs4274083   | G | -0.0191 |
| rs80262232  | G | -0.0717 |
| rs111570829 | A | 0.1065  |
| rs12117452  | A | 0.022   |
| rs115829737 | A | 0.1053  |
| rs115586911 | A | 0.0978  |
| rs12044183  | G | 0.0231  |
| rs10801493  | C | 0.0185  |
| rs72852607  | T | -0.0299 |
| rs11590135  | A | 0.0992  |
| rs114566776 | G | 0.1219  |
| rs905595    | G | 0.0224  |
| rs80242678  | T | -0.0672 |
| rs3862238   | T | -0.0616 |
| rs116462431 | G | 0.1217  |
| rs150945197 | T | 0.111   |
| rs12407394  | A | -0.0304 |
| rs613976    | A | -0.0191 |
| rs2060385   | T | -0.0195 |
| rs1497840   | A | -0.0205 |
| rs1778198   | G | 0.12    |
| rs138863615 | A | 0.0744  |
| rs7535757   | A | -0.0185 |
| rs146357000 | T | 0.1174  |
| rs910328    | C | 0.0292  |
| rs6684716   | T | -0.1115 |
| rs113484846 | G | 0.142   |
| rs79944397  | G | -0.0489 |
| rs78475749  | C | 0.0613  |
| rs7520737   | C | -0.0209 |
| rs71641080  | T | -0.043  |
| rs12129711  | T | 0.0359  |
| rs3818572   | C | -0.0251 |
| rs817972    | G | 0.0419  |
| rs76627391  | A | -0.068  |
| rs35241254  | T | 0.021   |
| rs149486658 | G | -0.1235 |
| rs115645029 | G | -0.1347 |
| rs1986455   | G | 0.0344  |
| rs59595054  | T | -0.0232 |
| rs12034981  | A | 0.0311  |
| rs114675436 | A | 0.0347  |
| rs79868274  | G | 0.0839  |
| rs4291556   | C | -0.0544 |
| rs115631260 | G | 0.059   |
| rs865387    | G | -0.0632 |

|             |   |         |
|-------------|---|---------|
| rs56346837  | T | -0.0323 |
| rs147321743 | T | 0.0819  |
| rs60970333  | T | 0.0826  |
| rs143129814 | T | 0.0913  |
| rs3176874   | G | -0.0287 |
| rs149706870 | A | 0.1475  |
| rs4653778   | T | -0.0215 |
| rs4658820   | G | 0.0258  |
| rs6677287   | T | 0.024   |
| rs9661800   | G | -0.0434 |
| rs116462451 | A | 0.0881  |
| rs3101217   | A | 0.0531  |
| rs115245089 | A | 0.0977  |
| rs150208264 | C | -0.088  |
| rs77712090  | T | 0.0701  |
| rs11184723  | G | -0.0308 |
| rs77210472  | C | 0.0412  |
| rs11582094  | T | 0.0286  |
| rs112766034 | A | -0.0303 |
| rs28359565  | A | 0.12    |
| rs3766176   | C | 0.0248  |
| rs12028226  | A | 0.0783  |
| rs17030589  | G | 0.0915  |
| rs35947490  | A | -0.1068 |
| rs140609555 | C | 0.0754  |
| rs6587571   | T | -0.0227 |
| rs111916854 | C | 0.153   |
| rs34342132  | A | -0.0435 |
| rs11240339  | A | -0.0199 |
| rs12116562  | T | -0.0308 |
| rs12041649  | T | -0.0561 |
| rs6695269   | T | -0.0504 |
| rs143332265 | C | -0.1078 |
| rs45615332  | T | 0.0217  |
| rs115895412 | A | -0.141  |
| rs1340772   | C | -0.0231 |
| rs11164946  | T | 0.0272  |
| rs116057917 | T | 0.0896  |
| rs76196955  | A | -0.0709 |
| rs17425700  | C | 0.0869  |
| rs77965356  | T | 0.0575  |
| rs1152987   | A | -0.0328 |
| rs76549849  | T | -0.0861 |
| rs74928819  | A | -0.0935 |
| rs142099588 | A | 0.0906  |
| rs78706263  | A | -0.0517 |
| rs11582071  | G | -0.0224 |

|             |   |         |
|-------------|---|---------|
| rs1213511   | T | 0.0186  |
| rs111964182 | A | -0.0969 |
| rs4839415   | C | 0.0746  |
| rs75524224  | C | 0.112   |
| rs1266384   | G | 0.0264  |
| rs78417594  | A | 0.0513  |
| rs9787299   | T | 0.0228  |
| rs61750909  | C | -0.1178 |
| rs116562982 | T | 0.0895  |
| rs144803643 | A | -0.0739 |
| rs61822049  | G | -0.068  |
| rs112509446 | A | 0.082   |
| rs145540899 | A | -0.0665 |
| rs432803    | A | -0.0245 |
| rs78848255  | T | 0.0579  |
| rs11264870  | T | 0.0209  |
| rs2843494   | C | -0.0478 |
| rs61760690  | T | 0.0199  |
| rs141314967 | T | 0.13    |
| rs145344221 | C | -0.0423 |
| rs482490    | A | -0.0477 |
| rs7536401   | C | 0.0376  |
| rs141931113 | A | -0.1238 |
| rs6604094   | G | 0.0901  |
| rs75782790  | A | 0.0907  |
| rs76891334  | G | 0.0703  |
| rs11578424  | C | 0.026   |
| rs78215810  | A | 0.0343  |
| rs67989253  | C | -0.0587 |
| rs79727468  | T | -0.0518 |
| rs142364095 | A | -0.1384 |
| rs766157    | A | 0.0971  |
| rs74885306  | A | 0.1067  |
| rs77917670  | C | -0.0499 |
| rs459852    | G | 0.0983  |
| rs17449243  | C | -0.0383 |
| rs150417082 | G | 0.1716  |
| rs114790946 | T | 0.119   |
| rs28651462  | A | -0.0343 |
| rs61774029  | T | -0.0407 |
| rs151252687 | A | 0.0847  |
| rs61804400  | G | 0.0708  |
| rs57644767  | C | -0.0308 |
| rs6697877   | G | -0.0232 |
| rs147841368 | A | -0.1225 |
| rs1029195   | G | -0.0268 |
| rs148414955 | T | -0.0899 |

|             |   |         |
|-------------|---|---------|
| rs1166331   | G | -0.0241 |
| rs74900924  | A | -0.0768 |
| rs12402220  | A | -0.0365 |
| rs41285708  | C | 0.0393  |
| rs114958511 | A | 0.0596  |
| rs7541034   | A | -0.0283 |
| rs144032627 | T | 0.0931  |
| rs190665477 | G | -0.0544 |
| rs3011925   | A | 0.0486  |
| rs118033571 | C | 0.0718  |
| rs77620733  | A | 0.0472  |
| rs150429349 | C | -0.0689 |
| rs144684443 | T | -0.1152 |
| rs11240507  | C | -0.0222 |
| rs10916718  | C | -0.0192 |
| rs143934143 | T | 0.0835  |
| rs75119704  | T | -0.056  |
| rs116411664 | G | 0.0737  |
| rs6661363   | C | 0.054   |
| rs12031184  | A | -0.0629 |
| rs142416877 | C | -0.16   |
| rs115593106 | G | 0.1126  |
| rs55950540  | G | 0.053   |
| rs149206910 | C | -0.1219 |
| rs79886306  | T | 0.1175  |
| rs71510759  | A | 0.0566  |
| rs10754915  | T | 0.0636  |
| rs17257252  | A | -0.0219 |
| rs78110118  | G | 0.103   |
| rs55662322  | T | -0.1055 |
| rs147414185 | T | 0.1729  |
| rs1925034   | G | 0.0216  |
| rs111849547 | G | 0.0323  |
| rs16856269  | C | -0.035  |
| rs140575492 | A | -0.0681 |
| rs72858521  | T | 0.0611  |
| rs61773681  | T | -0.0795 |
| rs12741964  | A | -0.0262 |
| rs35586449  | C | -0.0334 |
| rs72720201  | A | -0.0596 |
| rs12137063  | G | 0.0453  |
| rs78904869  | C | 0.0617  |
| rs114898368 | G | 0.0626  |
| rs4646999   | A | -0.0224 |
| rs4243808   | G | -0.0233 |
| rs4907992   | G | 0.0233  |
| rs115020582 | C | -0.1153 |



|             |   |         |
|-------------|---|---------|
| rs4568811   | T | 0.0185  |
| rs61820889  | C | 0.0404  |
| rs1875646   | C | -0.0209 |
| rs10925864  | G | 0.0467  |
| rs145488083 | G | -0.1111 |
| rs59861046  | A | -0.02   |
| rs77847499  | A | 0.0706  |
| rs16847970  | G | -0.0909 |
| rs61460475  | C | 0.0376  |
| rs17648708  | T | -0.0535 |
| rs2232646   | T | 0.0203  |
| rs74700387  | T | -0.0847 |
| rs77265073  | G | 0.0959  |
| rs4543864   | T | -0.019  |
| rs12063926  | C | -0.0937 |
| rs139269023 | A | 0.0831  |
| rs115946732 | A | 0.0482  |
| rs4648823   | A | -0.0306 |
| rs114275915 | A | -0.1076 |
| rs10874925  | T | 0.0273  |
| rs12752621  | C | 0.0198  |
| rs76015112  | G | -0.0326 |
| rs56018428  | T | 0.1662  |
| rs34847380  | A | 0.064   |
| rs6659582   | T | 0.0511  |
| rs147828851 | A | 0.0624  |
| rs12407492  | G | -0.0239 |
| rs76451042  | A | 0.1483  |
| rs7527958   | A | -0.0309 |
| rs61747558  | T | -0.085  |
| rs116010639 | A | 0.1057  |
| rs72882074  | G | -0.0269 |
| rs116479212 | T | 0.1225  |
| rs145374543 | T | 0.0975  |
| rs115401865 | T | -0.1216 |
| rs4844825   | G | 0.0275  |
| rs1340416   | A | 0.0227  |
| rs150603686 | C | -0.0678 |
| rs111533877 | C | 0.0893  |
| rs138061025 | C | -0.1191 |
| rs56122491  | A | -0.0198 |
| rs111837952 | G | -0.0611 |
| rs75957868  | G | -0.1557 |
| rs34191242  | C | 0.0313  |
| rs143557438 | A | -0.0953 |
| rs272534    | G | 0.0436  |
| rs10873964  | T | -0.0187 |

|             |   |         |
|-------------|---|---------|
| rs76038730  | G | 0.036   |
| rs1288503   | C | -0.0197 |
| rs55693740  | A | -0.0547 |
| rs111283329 | A | 0.0341  |
| rs12136999  | T | 0.0273  |
| rs111998934 | T | -0.1081 |
| rs1381525   | A | 0.0181  |
| rs34073035  | G | -0.0667 |
| rs1146723   | A | -0.0241 |
| rs1476061   | A | -0.027  |
| rs77961901  | C | -0.1333 |
| rs2246583   | C | 0.0213  |
| rs12410526  | A | -0.0311 |
| rs7528328   | C | -0.0249 |
| rs12082200  | T | 0.0248  |
| rs1572703   | G | -0.0196 |
| rs41301977  | C | -0.0681 |
| rs72716333  | A | 0.0532  |
| rs11584429  | A | -0.0557 |
| rs147683163 | A | 0.0559  |
| rs6588254   | T | 0.028   |
| rs75783875  | G | -0.0729 |
| rs75331080  | G | 0.088   |
| rs531651    | G | -0.0196 |
| rs2993620   | A | -0.0423 |
| rs3008538   | C | 0.0194  |
| rs68103143  | T | 0.042   |
| rs116373628 | A | -0.0887 |
| rs113741905 | A | 0.0297  |
| rs2279277   | G | 0.0403  |
| rs116631899 | C | -0.1368 |
| rs6695188   | C | -0.044  |
| rs3027067   | A | 0.072   |
| rs41265753  | A | -0.071  |
| rs4652230   | G | 0.0204  |
| rs116806635 | T | 0.0407  |
| rs116312665 | A | -0.1332 |
| rs12136365  | C | 0.0222  |
| rs111332470 | A | -0.0546 |
| rs17344804  | T | 0.0511  |
| rs2179505   | A | 0.0225  |
| rs141797333 | T | 0.065   |
| rs114387817 | A | 0.1425  |
| rs137984441 | A | 0.0967  |
| rs6664987   | T | -0.0276 |
| rs5746016   | T | 0.0432  |
| rs115948492 | A | 0.0964  |

|             |   |         |
|-------------|---|---------|
| rs2282726   | T | -0.0279 |
| rs75217056  | G | 0.1575  |
| rs12727833  | A | 0.0737  |
| rs142022126 | G | -0.0996 |
| rs12122300  | C | -0.0255 |
| rs74606620  | T | 0.0576  |
| rs77523282  | C | -0.0617 |
| rs1359309   | G | 0.0227  |
| rs3738754   | T | 0.0243  |
| rs74152706  | G | -0.0428 |
| rs78628465  | A | -0.0578 |
| rs150927354 | A | 0.1339  |
| rs78328845  | G | 0.0483  |
| rs2181418   | C | -0.0428 |
| rs79398624  | C | -0.0766 |
| rs78830348  | A | -0.089  |
| rs77849464  | C | 0.0884  |
| rs78247875  | C | 0.0316  |
| rs2185782   | A | 0.0619  |
| rs115322160 | A | 0.0889  |
| rs1755594   | C | 0.02    |
| rs141889898 | C | 0.0807  |
| rs16832058  | G | -0.0466 |
| rs147259032 | C | -0.1686 |
| rs12029417  | G | -0.0363 |
| rs11102757  | T | -0.0209 |
| rs116191230 | T | 0.1229  |
| rs7547507   | T | -0.0201 |
| rs2682368   | T | 0.0209  |
| rs4970639   | G | -0.0209 |
| rs72682578  | G | -0.0798 |
| rs116634410 | A | 0.0929  |
| rs114775238 | C | -0.0721 |
| rs12047309  | A | 0.0398  |
| rs2817169   | A | 0.0207  |
| rs12759312  | C | -0.027  |
| rs41308403  | T | 0.0355  |
| rs780252    | T | 0.0242  |
| rs144400555 | T | 0.1134  |
| rs1851250   | G | 0.0402  |
| rs4085412   | T | -0.0849 |
| rs80154343  | A | 0.0655  |
| rs7545200   | A | -0.0218 |
| rs12403521  | T | 0.0488  |
| rs115859878 | A | 0.1059  |
| rs77282599  | T | 0.0366  |
| rs75013383  | G | 0.0725  |

|             |   |         |
|-------------|---|---------|
| rs11805716  | C | 0.019   |
| rs72649499  | G | -0.0593 |
| rs4844432   | T | 0.0244  |
| rs56260599  | G | -0.0352 |
| rs72659845  | C | 0.103   |
| rs529412    | G | 0.021   |
| rs1507286   | G | -0.0189 |
| rs10917780  | G | 0.02    |
| rs3926107   | A | 0.019   |
| rs11121467  | A | 0.0441  |
| rs115006954 | T | -0.0537 |
| rs34360639  | A | -0.0629 |
| rs144256414 | A | -0.0552 |
| rs4654142   | A | 0.0269  |
| rs1334334   | A | 0.025   |
| rs4839432   | A | 0.0266  |
| rs114821234 | C | -0.0964 |
| rs77918055  | C | -0.1193 |
| rs111932000 | C | 0.0616  |
| rs73021053  | C | -0.0756 |
| rs79014179  | A | 0.055   |
| rs12122502  | A | 0.0292  |
| rs12738235  | A | -0.0331 |
| rs3806318   | G | 0.021   |
| rs7552904   | A | 0.0311  |
| rs4290047   | A | -0.0381 |
| rs309066    | G | -0.0328 |
| rs4660256   | G | 0.1649  |
| rs73118013  | T | -0.1116 |
| rs75665278  | T | -0.0526 |
| rs116640575 | C | 0.0919  |
| rs6675659   | T | -0.0201 |
| rs72641036  | T | -0.1087 |
| rs2026592   | T | 0.0639  |
| rs72747442  | T | -0.1028 |
| rs6429214   | G | 0.0222  |
| rs2994570   | A | 0.0325  |
| rs6658221   | T | 0.0183  |
| rs736202    | T | 0.0366  |
| rs2490423   | G | -0.0293 |
| rs78125354  | C | -0.092  |
| rs4551638   | C | 0.0204  |
| rs10494917  | G | 0.0293  |
| rs114478555 | C | 0.0609  |
| rs11264271  | C | -0.0345 |
| rs10754651  | T | 0.1062  |
| rs80092658  | G | 0.0693  |

|             |   |         |
|-------------|---|---------|
| rs10789239  | C | -0.0218 |
| rs10489390  | G | -0.0341 |
| rs111413818 | G | 0.1706  |
| rs113150953 | T | -0.0595 |
| rs67093630  | G | -0.0475 |
| rs877700    | G | -0.0224 |
| rs6670920   | T | -0.028  |
| rs150429950 | G | -0.1072 |
| rs149761171 | C | 0.1316  |
| rs12118814  | T | -0.0517 |
| rs2092412   | C | 0.0485  |
| rs77475843  | G | -0.0993 |
| rs2991348   | G | -0.0214 |
| rs12022146  | A | -0.0799 |
| rs501332    | A | -0.02   |
| rs113371026 | C | -0.0451 |
| rs61766729  | A | 0.0573  |
| rs72921778  | A | -0.0488 |
| rs66579530  | G | -0.0516 |
| rs10919619  | C | 0.0244  |
| rs12745887  | T | 0.0448  |
| rs3128446   | G | 0.0219  |
| rs149542747 | T | 0.1263  |
| rs6666558   | A | -0.104  |
| rs75321047  | A | -0.0452 |
| rs116606537 | A | 0.0873  |
| rs3924486   | G | -0.0186 |
| rs7513846   | A | 0.1148  |
| rs72720847  | T | 0.0704  |
| rs12074132  | T | -0.0484 |
| rs74356885  | C | 0.1399  |
| rs140877842 | G | -0.1127 |
| rs116217458 | T | -0.1241 |
| rs12730998  | A | -0.0449 |
| rs4846712   | T | 0.0182  |
| rs646535    | T | -0.02   |
| rs12127002  | A | 0.0287  |
| rs1931073   | T | -0.0263 |
| rs74548460  | G | -0.0432 |
| rs114338291 | T | -0.0952 |
| rs71664164  | G | -0.031  |
| rs115455842 | T | 0.0831  |
| rs61857492  | C | 0.0365  |
| rs10493475  | T | -0.0318 |
| rs150703173 | A | 0.0864  |
| rs7553934   | A | 0.0278  |
| rs59627767  | T | 0.0552  |

|             |   |         |
|-------------|---|---------|
| rs74676995  | G | 0.1218  |
| rs116084628 | C | 0.0989  |
| rs6659798   | C | 0.0455  |
| rs16839500  | T | -0.0379 |
| rs75909528  | T | 0.0617  |
| rs12082589  | A | 0.0526  |
| rs115207027 | G | 0.131   |
| rs115349513 | T | -0.1291 |
| rs138445831 | C | 0.0431  |
| rs12742658  | T | -0.0201 |
| rs2799671   | T | -0.0977 |
| rs1795033   | G | -0.0423 |
| rs4128865   | G | -0.0199 |
| rs10919022  | A | -0.0195 |
| rs114102236 | C | 0.101   |
| rs4657093   | C | -0.0264 |
| rs2136122   | A | -0.0349 |
| rs78012748  | G | 0.0789  |
| rs114650940 | C | 0.1248  |
| rs6676767   | G | -0.1139 |
| rs12724674  | A | -0.074  |
| rs61815562  | G | -0.0559 |
| rs2236413   | A | 0.0298  |
| rs17588024  | T | 0.0225  |
| rs1737350   | C | 0.021   |
| rs61764910  | A | -0.0901 |
| rs61784648  | T | -0.0633 |
| rs150628768 | G | -0.1032 |
| rs72748910  | C | 0.0393  |
| rs3991929   | C | -0.0263 |
| rs144567113 | T | -0.144  |
| rs6670160   | T | -0.0359 |
| rs146003341 | C | 0.0756  |
| rs2135756   | C | 0.018   |
| rs78083643  | C | 0.1077  |
| rs699232    | T | -0.0209 |
| rs11185026  | C | 0.0222  |
| rs78292574  | G | -0.0877 |
| rs3000752   | G | 0.0234  |
| rs3219080   | T | 0.0769  |
| rs144535853 | C | 0.1367  |
| rs72698561  | A | 0.074   |
| rs6702384   | A | 0.0195  |
| rs1534985   | G | -0.0578 |
| rs12045629  | A | 0.0816  |
| rs1553444   | C | -0.027  |
| rs2644551   | C | -0.0873 |

|             |   |         |
|-------------|---|---------|
| rs2130618   | C | -0.0297 |
| rs6669666   | T | -0.0259 |
| rs113467597 | C | 0.0989  |
| rs11579160  | A | -0.0411 |
| rs2235936   | A | -0.0292 |
| rs144999424 | A | 0.0923  |
| rs17120013  | A | -0.0341 |
| rs6582999   | A | 0.0254  |
| rs114217379 | T | -0.097  |
| rs7517349   | G | -0.0437 |
| rs145307130 | T | -0.1132 |
| rs76907983  | T | 0.0414  |
| rs114754123 | T | -0.0425 |
| rs1182964   | T | 0.019   |
| rs7522626   | A | 0.0198  |
| rs72739267  | A | 0.0261  |
| rs114787228 | A | -0.0699 |
| rs71638008  | C | -0.0679 |
| rs3108156   | G | 0.0285  |
| rs10494811  | C | -0.0463 |
| rs41274840  | A | 0.0712  |
| rs115709053 | T | 0.0916  |
| rs17396326  | C | 0.1053  |
| rs116170545 | A | 0.0854  |
| rs6660201   | T | -0.0418 |
| rs41279676  | T | 0.0789  |
| rs11581375  | C | 0.0865  |
| rs1890874   | C | -0.049  |
| rs72640038  | A | 0.0656  |
| rs623784    | G | -0.021  |
| rs72674130  | G | 0.082   |
| rs77010078  | A | 0.1438  |
| rs112458951 | G | -0.0363 |
| rs1961519   | A | 0.1023  |
| rs74969853  | C | -0.0662 |
| rs4652202   | C | 0.0208  |
| rs12755314  | A | -0.0212 |
| rs56132207  | T | 0.0491  |
| rs114966413 | A | 0.1188  |
| rs113715735 | A | 0.0349  |
| rs78876272  | G | 0.0367  |
| rs61819276  | C | 0.0764  |
| rs10864722  | A | 0.0189  |
| rs75259039  | C | 0.0435  |
| rs140679413 | G | 0.06    |
| rs17640830  | C | -0.0211 |
| rs10911483  | T | 0.0375  |

|             |   |         |
|-------------|---|---------|
| rs57192369  | C | 0.1229  |
| rs72751800  | T | -0.0264 |
| rs116339528 | A | -0.1244 |
| rs945322    | C | 0.0371  |
| rs145780346 | G | -0.0818 |
| rs73085637  | C | -0.0433 |
| rs4620567   | A | 0.0414  |
| rs10888607  | G | 0.0326  |
| rs12096993  | T | -0.0212 |
| rs12563821  | T | 0.0736  |
| rs923877    | G | 0.0264  |
| rs112157581 | C | -0.124  |
| rs112488402 | G | 0.101   |
| rs77734316  | G | -0.0916 |
| rs12409836  | G | 0.038   |
| rs205483    | C | 0.0332  |
| rs579035    | A | 0.019   |
| rs10779721  | G | 0.0214  |
| rs1181187   | C | 0.023   |
| rs79116493  | G | 0.1079  |
| rs12121907  | T | -0.0252 |
| rs150298425 | C | -0.1214 |
| rs73100799  | C | 0.1786  |
| rs7414168   | C | 0.0576  |
| rs61770867  | G | 0.0235  |
| rs113748140 | T | -0.0596 |
| rs10907228  | T | -0.0206 |
| rs35603261  | T | -0.0642 |
| rs12071801  | C | 0.0406  |
| rs12406363  | C | 0.0941  |
| rs59345760  | A | 0.0652  |
| rs4661444   | A | -0.032  |
| rs116001867 | T | 0.058   |
| rs2180421   | C | -0.0192 |
| rs6577245   | A | 0.0179  |
| rs77293822  | G | 0.0735  |
| rs2483242   | T | 0.0236  |
| rs10917219  | T | 0.0203  |
| rs77747774  | C | -0.0763 |
| rs857143    | C | 0.0253  |
| rs57050104  | C | -0.0455 |
| rs7555568   | A | 0.019   |
| rs577685    | A | 0.0247  |
| rs1979088   | T | -0.0179 |
| rs71651178  | T | 0.1231  |
| rs6693490   | A | -0.1147 |
| rs7548697   | A | 0.0264  |



|             |   |         |
|-------------|---|---------|
| rs113518918 | T | -0.0887 |
| rs2313600   | T | -0.0261 |
| rs16854957  | A | -0.0248 |
| rs12561890  | C | 0.0342  |
| rs10926541  | G | 0.0193  |
| rs2639652   | G | -0.0229 |
| rs76737325  | C | 0.1007  |
| rs72648512  | A | 0.1214  |
| rs74970701  | G | -0.0608 |
| rs116681484 | T | 0.112   |
| rs72651068  | A | 0.098   |
| rs112866107 | C | -0.0923 |
| rs80205678  | T | 0.0231  |
| rs141013975 | T | 0.0924  |
| rs142820687 | A | -0.0578 |
| rs168040    | A | -0.0881 |
| rs4266877   | A | -0.0229 |
| rs66825218  | T | 0.0283  |
| rs2312190   | T | 0.0571  |
| rs1195692   | G | 0.0178  |
| rs115908285 | C | 0.1477  |
| rs57489095  | T | -0.0371 |
| rs143672071 | T | -0.0771 |
| rs72740170  | T | 0.0805  |
| rs72768345  | G | 0.0243  |
| rs61781229  | A | 0.0321  |
| rs112239145 | C | -0.0843 |
| rs590156    | G | 0.0182  |
| rs142179296 | C | 0.0966  |
| rs74092738  | T | 0.0331  |
| rs74740448  | T | -0.1071 |
| rs79668872  | A | -0.1115 |
| rs11264255  | T | 0.0213  |
| rs17429774  | T | -0.0266 |
| rs41285910  | C | -0.1075 |
| rs2949659   | C | 0.0395  |
| rs77139147  | C | 0.0313  |
| rs114082880 | T | -0.0909 |
| rs6678885   | C | -0.0443 |
| rs61767869  | A | -0.0793 |
| rs511187    | G | 0.0215  |
| rs6702585   | G | -0.109  |
| rs857861    | C | 0.0318  |
| rs12037368  | A | -0.0276 |
| rs16826354  | A | 0.0892  |
| rs2494183   | G | -0.0179 |
| rs17606074  | G | -0.0508 |

|             |   |         |
|-------------|---|---------|
| rs72752893  | T | 0.1184  |
| rs76179027  | G | -0.068  |
| rs139150109 | G | 0.0202  |
| rs10926375  | T | -0.018  |
| rs12136062  | A | 0.0203  |
| rs6675309   | T | 0.0253  |
| rs111303174 | A | 0.0969  |
| rs151124378 | A | 0.0948  |
| rs61820459  | T | -0.0331 |
| rs6540527   | A | -0.0193 |
| rs79467427  | A | 0.0397  |
| rs74551524  | C | 0.0337  |
| rs61764941  | C | 0.0286  |
| rs72652023  | T | -0.0313 |
| rs16858933  | A | 0.0524  |
| rs12144132  | T | -0.0251 |
| rs142711479 | C | -0.087  |
| rs678476    | A | -0.0196 |
| rs333149    | C | -0.0206 |
| rs76372766  | A | 0.0661  |
| rs6600439   | T | -0.0295 |
| rs12567716  | C | -0.0305 |
| rs12073135  | C | 0.0568  |
| rs12038062  | A | 0.023   |
| rs17025049  | G | -0.0532 |
| rs139721163 | G | -0.1315 |
| rs2491276   | G | -0.0527 |
| rs115066852 | T | -0.1052 |
| rs750228    | T | 0.0233  |
| rs11810371  | A | -0.079  |
| rs66675624  | C | -0.0354 |
| rs115011797 | C | -0.0762 |
| rs858099    | A | 0.0197  |
| rs77308859  | G | 0.1433  |
| rs4950908   | G | -0.0215 |
| rs7522969   | T | 0.0354  |
| rs2920585   | A | 0.0206  |
| rs148769987 | G | 0.1082  |
| rs10047101  | A | 0.0933  |
| rs12042824  | T | -0.0424 |
| rs61800419  | C | 0.0266  |
| rs3767348   | A | -0.0303 |
| rs12568628  | A | 0.0269  |
| rs2404677   | T | 0.0244  |
| rs151174597 | T | -0.0914 |
| rs79077526  | C | -0.0809 |
| rs1938228   | T | -0.0385 |

|             |   |         |
|-------------|---|---------|
| rs78407183  | A | 0.0824  |
| rs144318973 | T | -0.084  |
| rs10776740  | A | 0.0181  |
| rs79992690  | T | -0.0647 |
| rs143759641 | G | -0.1103 |
| rs636747    | A | 0.0716  |
| rs6661873   | A | 0.061   |
| rs112488858 | T | -0.0385 |
| rs78259710  | A | -0.0862 |
| rs9726587   | T | 0.0243  |
| rs112122231 | G | 0.0222  |
| rs139312411 | A | -0.0713 |
| rs10907383  | T | -0.0185 |
| rs2843149   | G | -0.0247 |
| rs114553524 | A | 0.0583  |
| rs61808532  | T | -0.1196 |
| rs114634118 | A | 0.1194  |
| rs7515798   | G | -0.0181 |
| rs2486538   | T | 0.019   |
| rs114548259 | G | 0.1005  |
| rs2800060   | C | -0.0264 |
| rs1032185   | C | 0.0188  |
| rs61820073  | T | 0.0465  |
| rs78870904  | A | -0.0601 |
| rs72720297  | G | 0.0807  |
| rs11102749  | A | 0.0341  |
| rs138449089 | G | 0.1013  |
| rs12138269  | G | 0.0672  |
| rs512920    | C | -0.0553 |
| rs11585527  | C | -0.0736 |
| rs150056239 | C | 0.1473  |
| rs7542383   | T | -0.0184 |
| rs11119158  | T | -0.028  |
| rs116699056 | C | 0.0538  |
| rs61771181  | A | 0.0707  |
| rs78224377  | A | 0.1474  |
| rs12091871  | G | 0.08    |
| rs3811476   | A | -0.0629 |
| rs6659333   | C | -0.019  |
| rs3851270   | C | -0.0187 |
| rs139610741 | A | -0.108  |
| rs112923246 | T | 0.1042  |
| rs150023257 | T | 0.1283  |
| rs1133856   | T | 0.0528  |
| rs35534609  | A | 0.0636  |
| rs74138512  | T | -0.1067 |
| rs351381    | A | -0.0612 |

|             |   |         |
|-------------|---|---------|
| rs6425991   | A | -0.0299 |
| rs9659840   | A | 0.0198  |
| rs116326800 | T | 0.0799  |
| rs12117958  | C | 0.0209  |
| rs77497600  | T | -0.0314 |
| rs2031401   | C | 0.0478  |
| rs2168924   | A | 0.021   |
| rs2186220   | T | 0.0201  |
| rs78619109  | C | 0.0573  |
| rs76525086  | G | 0.0776  |
| rs75533331  | C | -0.0302 |
| rs3820108   | A | 0.0394  |
| rs12038587  | G | -0.0178 |
| rs12118614  | T | 0.0443  |
| rs1936069   | A | -0.027  |
| rs6660087   | C | 0.0222  |
| rs78383096  | A | 0.1312  |
| rs1475397   | T | 0.0198  |
| rs1329453   | T | 0.0199  |
| rs140372421 | A | 0.0943  |
| rs10858033  | A | 0.0186  |
| rs114894207 | A | -0.0981 |
| rs114989279 | T | -0.0243 |
| rs6605040   | A | -0.079  |
| rs149674052 | T | 0.0527  |
| rs12080233  | G | -0.0325 |
| rs3844054   | A | 0.0198  |
| rs17104522  | T | -0.0299 |
| rs7522157   | T | 0.0199  |
| rs4568885   | G | -0.0597 |
| rs6698779   | T | 0.0193  |
| rs3179690   | A | -0.0258 |
| rs77516059  | A | -0.0862 |
| rs12091301  | A | 0.0278  |
| rs139924195 | G | -0.0772 |
| rs41514144  | T | 0.0378  |
| rs78524462  | C | -0.1127 |
| rs58306714  | T | -0.0178 |
| rs149343174 | A | -0.149  |
| rs76383413  | T | -0.073  |
| rs7553968   | C | -0.0366 |
| rs116835779 | T | -0.1097 |
| rs17482903  | T | -0.0387 |
| rs10874387  | C | -0.0194 |
| rs11122564  | A | -0.0292 |
| rs7550276   | C | -0.021  |
| rs6669819   | A | -0.0212 |

|             |   |         |
|-------------|---|---------|
| rs148108408 | A | 0.0579  |
| rs75347120  | T | 0.0861  |
| rs12145658  | T | -0.0225 |
| rs145557898 | T | 0.0838  |
| rs116580760 | T | 0.0849  |
| rs6657113   | A | -0.0219 |
| rs11579610  | T | 0.0713  |
| rs116079587 | T | 0.1018  |
| rs1431989   | A | 0.1227  |
| rs17536944  | G | -0.0283 |
| rs115872989 | A | 0.0549  |
| rs114176506 | T | 0.1048  |
| rs143984829 | G | -0.1379 |
| rs6687321   | A | 0.0428  |
| rs3815226   | C | -0.0226 |
| rs75417115  | A | 0.1132  |
| rs13376078  | C | 0.0237  |
| rs147976281 | A | 0.1318  |
| rs624761    | C | -0.0274 |
| rs12130924  | A | -0.0176 |
| rs61814359  | T | -0.0845 |
| rs116416229 | C | 0.1056  |
| rs1418151   | T | -0.0485 |
| rs111336628 | G | -0.0599 |
| rs79256816  | A | -0.0802 |
| rs983915    | T | 0.0254  |
| rs78817283  | T | -0.0491 |
| rs2364545   | G | -0.0185 |
| rs9427274   | A | 0.0178  |
| rs12120957  | G | -0.0904 |
| rs78639974  | A | -0.0488 |
| rs2246917   | A | -0.02   |
| rs116185158 | T | -0.1032 |
| rs16832727  | T | 0.096   |
| rs12071822  | C | -0.0278 |
| rs72714293  | G | -0.0843 |
| rs71620823  | C | -0.2052 |
| rs79608714  | C | -0.1071 |
| rs7549242   | C | 0.0536  |
| rs6695185   | T | 0.0184  |
| rs113317869 | T | -0.1137 |
| rs11240735  | A | 0.0202  |
| rs116745941 | T | 0.057   |
| rs116010861 | A | 0.0901  |
| rs113498093 | C | -0.0886 |
| rs1568375   | T | 0.0184  |
| rs490765    | A | -0.0343 |

|             |   |         |
|-------------|---|---------|
| rs34586336  | G | -0.036  |
| rs347298    | A | -0.0183 |
| rs148621093 | G | -0.0938 |
| rs17372995  | T | 0.0504  |
| rs112876729 | A | 0.1048  |
| rs562244    | A | -0.0221 |
| rs6673349   | A | -0.033  |
| rs6686761   | A | -0.0225 |
| rs3118048   | G | 0.018   |
| rs6428174   | T | 0.0201  |
| rs79668519  | C | -0.0878 |
| rs10864286  | A | -0.019  |
| rs36087647  | G | -0.0423 |
| rs12076404  | T | 0.031   |
| rs12088541  | T | -0.0498 |
| rs116543750 | A | 0.07    |
| rs77873789  | G | 0.1061  |
| rs12032736  | C | 0.0225  |
| rs116739951 | C | 0.0901  |
| rs56181515  | T | -0.0584 |
| rs74151332  | T | 0.1148  |
| rs541978    | G | 0.0256  |
| rs544746    | C | 0.0195  |
| rs7525922   | C | 0.1077  |
| rs9727042   | C | 0.0252  |
| rs28730388  | A | -0.082  |
| rs4656441   | C | 0.0421  |
| rs35528888  | G | 0.0379  |
| rs115053966 | T | -0.0309 |
| rs79312341  | T | 0.0854  |
| rs115392857 | A | 0.0787  |
| rs12117480  | A | -0.0721 |
| rs2101196   | G | 0.0195  |
| rs12035908  | C | 0.0364  |
| rs404716    | A | 0.0262  |
| rs819028    | G | -0.0412 |
| rs11800992  | A | -0.0298 |
| rs138138154 | T | 0.1401  |
| rs11119758  | A | -0.0184 |
| rs12028269  | G | -0.0281 |
| rs116207243 | A | 0.0939  |
| rs77189102  | G | -0.075  |
| rs74788764  | G | 0.0855  |
| rs72747039  | C | 0.0181  |
| rs72763371  | G | -0.118  |
| rs113817060 | A | -0.1477 |
| rs74981444  | A | -0.0651 |

|             |   |         |
|-------------|---|---------|
| rs115619013 | C | 0.1112  |
| rs6702233   | T | -0.0474 |
| rs138483375 | C | 0.0806  |
| rs74660295  | C | 0.0395  |
| rs72699393  | C | -0.0659 |
| rs61820283  | T | -0.0801 |
| rs36004890  | T | -0.0425 |
| rs1285979   | C | 0.0234  |
| rs77422284  | A | -0.0459 |
| rs114899201 | C | -0.0808 |
| rs35949358  | C | 0.0799  |
| rs45587734  | A | 0.047   |
| rs116623814 | T | -0.0661 |
| rs17491407  | A | -0.0675 |
| rs17457455  | C | 0.0216  |
| rs56382483  | A | 0.0577  |
| rs11571534  | C | 0.0682  |
| rs7518804   | G | -0.0203 |
| rs1417398   | T | 0.0312  |
| rs10430272  | C | 0.0217  |
| rs109490    | A | 0.0204  |
| rs1350156   | G | 0.0179  |
| rs12747953  | G | -0.0456 |
| rs16859668  | G | 0.0383  |
| rs115361295 | G | -0.0928 |
| rs75641291  | T | -0.0855 |
| rs6677355   | G | -0.0193 |
| rs150110711 | T | 0.0478  |
| rs75287895  | G | -0.0672 |
| rs78508515  | G | 0.1272  |
| rs149277456 | C | 0.1162  |
| rs11583934  | G | -0.0328 |
| rs79072934  | T | -0.0852 |
| rs11572421  | T | -0.0214 |
| rs115639352 | T | 0.0665  |
| rs4306110   | G | 0.0185  |
| rs72715102  | G | 0.0583  |
| rs116582509 | T | 0.0882  |
| rs16837074  | C | 0.0831  |
| rs5003799   | T | 0.0213  |
| rs76247373  | T | 0.0818  |
| rs2272272   | A | -0.0611 |
| rs67100325  | G | 0.0515  |
| rs79748221  | A | -0.0667 |
| rs9660866   | T | 0.0664  |
| rs6701368   | C | -0.1272 |
| rs150073927 | C | -0.1636 |

|             |   |         |
|-------------|---|---------|
| rs78170630  | C | -0.1109 |
| rs2296384   | T | 0.0185  |
| rs12562115  | G | -0.0719 |
| rs61784491  | C | 0.0234  |
| rs141554723 | G | 0.1086  |
| rs114197993 | C | -0.0465 |
| rs17381406  | A | 0.0208  |
| rs140977378 | A | 0.0864  |
| rs3753723   | A | -0.0182 |
| rs12041395  | T | 0.0582  |
| rs7524683   | T | 0.038   |
| rs55656025  | T | -0.0238 |
| rs1200131   | A | -0.0196 |
| rs74919207  | T | 0.059   |
| rs12409563  | G | 0.0433  |
| rs4110906   | G | -0.0197 |
| rs12745339  | A | 0.0214  |
| rs114401404 | C | 0.1238  |
| rs144147320 | A | 0.083   |
| rs166612    | C | -0.0824 |
| rs2480692   | T | 0.0253  |
| rs142909400 | A | 0.1721  |
| rs116226676 | A | 0.1095  |
| rs72677685  | G | 0.0712  |
| rs142341481 | T | -0.0493 |
| rs117679244 | G | -0.1285 |
| rs78805001  | T | -0.0715 |
| rs116171175 | A | -0.1051 |
| rs3738505   | T | 0.0215  |
| rs12409375  | T | 0.0561  |
| rs150902752 | A | -0.0937 |
| rs11164839  | G | -0.0274 |
| rs4650675   | A | -0.0184 |
| rs113955603 | C | -0.0617 |
| rs140450534 | C | 0.086   |
| rs12026291  | T | -0.0399 |
| rs72714713  | T | -0.0291 |
| rs2998183   | A | 0.041   |
| rs10159052  | A | 0.0804  |
| rs2789952   | T | -0.0497 |
| rs34651353  | C | -0.0238 |
| rs11185251  | A | 0.0539  |
| rs4652106   | A | 0.0241  |
| rs9332693   | G | -0.065  |
| rs2993026   | T | 0.1033  |
| rs74548335  | C | -0.1504 |
| rs67769635  | A | 0.0276  |



|             |   |         |
|-------------|---|---------|
| rs58222615  | A | 0.048   |
| rs10493765  | A | 0.0205  |
| rs17431535  | G | -0.0232 |
| rs115736336 | T | 0.0807  |
| rs756199    | G | 0.0213  |
| rs2391383   | G | -0.0417 |
| rs12032360  | C | -0.0199 |
| rs12410344  | C | -0.0201 |
| rs7534690   | C | 0.022   |
| rs113844579 | A | -0.0262 |
| rs77243303  | T | 0.0892  |
| rs75437185  | G | 0.0493  |
| rs115726423 | C | -0.0916 |
| rs925292    | G | -0.0181 |
| rs12725975  | C | -0.0192 |
| rs116837404 | T | -0.095  |
| rs6673693   | T | -0.021  |
| rs77648095  | T | 0.0334  |
| rs61783150  | T | -0.0734 |
| rs61838398  | G | 0.0478  |
| rs115117311 | A | 0.1535  |
| rs11121157  | A | -0.0225 |
| rs12141588  | T | 0.0448  |
| rs631503    | C | 0.0753  |
| rs10783026  | A | 0.0289  |
| rs7544118   | T | 0.0227  |
| rs74874700  | A | -0.073  |
| rs3928803   | T | 0.0181  |
| rs7546121   | G | 0.0267  |
| rs12123554  | C | -0.0292 |
| rs80254921  | T | 0.1105  |
| rs114531477 | A | -0.0716 |
| rs7535044   | A | -0.1733 |
| rs4654678   | A | -0.0248 |
| rs72650548  | T | 0.0753  |
| rs603811    | A | 0.0231  |
| rs61774726  | A | 0.0249  |
| rs149493478 | A | 0.0731  |
| rs17684029  | C | 0.0472  |
| rs12117683  | T | 0.0191  |
| rs75829082  | C | -0.0598 |
| rs142527616 | T | 0.0668  |
| rs72678208  | A | 0.0345  |
| rs72749760  | C | 0.0291  |
| rs11579715  | C | -0.0948 |
| rs9438881   | A | 0.0237  |
| rs74137307  | C | -0.0506 |

|             |   |         |
|-------------|---|---------|
| rs116525694 | A | 0.1057  |
| rs12133700  | T | 0.0215  |
| rs2173346   | C | 0.0354  |
| rs114100233 | A | -0.0578 |
| rs41313904  | A | -0.0689 |
| rs17770286  | G | -0.0437 |
| rs34635329  | C | 0.0456  |
| rs66569828  | G | -0.0348 |
| rs142668818 | A | 0.0694  |
| rs1509865   | C | -0.0643 |
| rs77414674  | T | -0.064  |
| rs1867555   | C | 0.0193  |
| rs77988032  | C | 0.0226  |
| rs75855265  | C | 0.0523  |
| rs3753990   | A | -0.0334 |
| rs79125992  | A | -0.0866 |
| rs4659488   | C | 0.0212  |
| rs12407297  | T | -0.0361 |
| rs3789445   | G | -0.0203 |
| rs116735026 | A | 0.0929  |
| rs149780365 | A | 0.0611  |
| rs1415181   | C | -0.0192 |
| rs72638547  | T | 0.0217  |
| rs114843749 | T | -0.1436 |
| rs11577333  | G | -0.0336 |
| rs12120583  | A | 0.0675  |
| rs76817674  | C | -0.1116 |
| rs77589332  | T | -0.0368 |
| rs6577136   | C | -0.1082 |
| rs74151808  | T | 0.0649  |
| rs12759395  | G | -0.0215 |
| rs35495014  | G | 0.0206  |
| rs2518497   | A | -0.018  |
| rs72651392  | G | -0.1399 |
| rs7512417   | A | -0.0214 |
| rs115175854 | T | -0.1098 |
| rs7533306   | A | -0.0202 |
| rs7548128   | G | -0.1054 |
| rs138322676 | A | -0.1254 |
| rs9426455   | G | 0.0893  |
| rs11211005  | A | -0.0249 |
| rs61821998  | A | 0.1193  |
| rs11260678  | T | 0.022   |
| rs12140700  | T | 0.0318  |
| rs79907268  | C | 0.0323  |
| rs144502310 | G | -0.1072 |
| rs61288374  | G | -0.0255 |

|             |   |         |
|-------------|---|---------|
| rs75160340  | C | -0.1    |
| rs1276313   | A | -0.0191 |
| rs1535921   | A | -0.0186 |
| rs61804200  | T | -0.1231 |
| rs12088212  | A | -0.0292 |
| rs4660584   | T | 0.0289  |
| rs72691461  | C | 0.0389  |
| rs74498624  | A | 0.0498  |
| rs34098402  | T | 0.0717  |
| rs80144373  | C | 0.0503  |
| rs1125017   | C | 0.0178  |
| rs145971519 | C | -0.1336 |
| rs12406674  | A | -0.0278 |
| rs80242952  | T | -0.0718 |
| rs142211926 | T | 0.0784  |
| rs12734794  | T | 0.0421  |
| rs2274663   | A | -0.0339 |
| rs967528    | T | 0.0501  |
| rs138571700 | G | 0.057   |
| rs57850168  | T | -0.0628 |
| rs984747    | G | -0.027  |
| rs3796502   | A | -0.0224 |
| rs146674398 | T | 0.1462  |
| rs74853003  | A | 0.0774  |
| rs56353887  | T | -0.0298 |
| rs10753692  | C | 0.0251  |
| rs149344982 | A | 0.1646  |
| rs12068940  | C | 0.0285  |
| rs6685166   | G | 0.0802  |
| rs4970510   | A | 0.039   |
| rs7519287   | T | 0.0829  |
| rs139726000 | G | 0.0771  |
| rs147814097 | T | 0.0498  |
| rs319650    | C | -0.0656 |
| rs17131534  | T | -0.0304 |
| rs72700114  | C | 0.0391  |
| rs2377365   | A | 0.0234  |
| rs112838627 | C | 0.0465  |
| rs498382    | A | 0.032   |
| rs61760671  | T | -0.0939 |
| rs79546635  | A | 0.0936  |
| rs57169955  | C | 0.0939  |
| rs114072676 | A | -0.0377 |
| rs1198424   | G | -0.0334 |
| rs1408858   | T | -0.0215 |
| rs148808207 | T | -0.0804 |
| rs11119113  | T | 0.0174  |

|             |   |         |
|-------------|---|---------|
| rs143101044 | C | -0.0753 |
| rs6682475   | G | 0.0276  |
| rs141801789 | T | -0.0366 |
| rs602620    | T | -0.0197 |
| rs114066760 | T | 0.0988  |
| rs72702442  | T | 0.0498  |
| rs78527411  | G | 0.0585  |
| rs2582650   | G | 0.0214  |
| rs10802406  | G | 0.0217  |
| rs61771844  | A | -0.0196 |
| rs11586410  | G | 0.0367  |
| rs112504009 | G | -0.1156 |
| rs2919486   | C | 0.0409  |
| rs4990513   | T | 0.0432  |
| rs1121394   | T | 0.0552  |
| rs138465415 | T | -0.0909 |
| rs12564431  | T | -0.0312 |
| rs6694980   | C | 0.051   |
| rs143693596 | G | 0.1049  |
| rs74107128  | A | 0.0524  |
| rs11590656  | C | 0.0562  |
| rs17047983  | G | 0.0615  |
| rs114184662 | G | -0.0403 |
| rs115800677 | A | 0.0443  |
| rs205484    | C | -0.0376 |
| rs6662514   | A | 0.0254  |
| rs12409560  | T | 0.0627  |
| rs61773098  | A | -0.0248 |
| rs7534442   | T | 0.0185  |
| rs1289873   | T | -0.0181 |
| rs75405716  | A | 0.0937  |
| rs7551601   | C | -0.02   |
| rs8179370   | A | -0.0292 |
| rs115929754 | G | -0.1395 |
| rs115855653 | A | 0.0604  |
| rs56170974  | A | -0.0842 |
| rs12754642  | C | -0.0593 |
| rs12726355  | A | -0.0691 |
| rs12138074  | A | 0.0185  |
| rs3789494   | G | 0.0237  |
| rs75284175  | T | -0.057  |
| rs75745570  | T | -0.0617 |
| rs79173173  | G | -0.0522 |
| rs116537473 | A | 0.0671  |
| rs61797272  | C | -0.0456 |
| rs1891179   | T | 0.1494  |
| rs2236814   | T | -0.0273 |

|             |   |         |
|-------------|---|---------|
| rs2651407   | T | 0.0437  |
| rs78200448  | T | 0.0634  |
| rs80051878  | C | -0.0847 |
| rs11487867  | T | -0.0243 |
| rs76469727  | G | -0.093  |
| rs111352379 | A | 0.0484  |
| rs4301679   | T | -0.0238 |
| rs6672742   | G | -0.0228 |
| rs77464065  | C | 0.0303  |
| rs112369510 | T | -0.0491 |
| rs242054    | A | -0.0335 |
| rs2901175   | C | -0.019  |
| rs11163520  | G | -0.019  |
| rs1113069   | A | 0.0432  |
| rs1239492   | T | 0.0418  |
| rs56995611  | A | -0.0266 |
| rs2244529   | G | -0.019  |
| rs114708003 | A | -0.0713 |
| rs4660144   | T | 0.0192  |
| rs116752552 | C | -0.1472 |
| rs6679913   | T | -0.0189 |
| rs41269049  | A | 0.0672  |
| rs141556238 | A | 0.1469  |
| rs139755165 | A | 0.0516  |
| rs12743193  | G | -0.0289 |
| rs116213761 | G | -0.0668 |
| rs143742584 | C | -0.0514 |
| rs144647615 | C | -0.1106 |
| rs4300178   | C | 0.0177  |
| rs45626740  | G | -0.0455 |
| rs11117634  | T | 0.0213  |
| rs28359713  | C | -0.0555 |
| rs2999013   | A | 0.0658  |
| rs7515772   | T | 0.0555  |
| rs61765088  | T | 0.0631  |
| rs61296119  | C | -0.0226 |
| rs140828398 | A | 0.0499  |
| rs7522074   | G | 0.023   |
| rs116022364 | G | 0.0743  |
| rs1249090   | A | -0.018  |
| rs115921060 | G | 0.0851  |
| rs114482562 | C | 0.1134  |
| rs17561788  | T | -0.0313 |
| rs502382    | G | -0.0194 |
| rs12092660  | G | -0.0339 |
| rs3118183   | G | -0.0178 |
| rs75964678  | C | 0.0723  |

|             |   |         |
|-------------|---|---------|
| rs116586618 | T | 0.1236  |
| rs501525    | C | -0.0184 |
| rs12062137  | T | 0.0321  |
| rs114138095 | A | -0.055  |
| rs72747099  | T | 0.1046  |
| rs78773325  | T | -0.0301 |
| rs115584993 | C | 0.1223  |
| rs3737589   | G | -0.0178 |
| rs2055479   | C | 0.0233  |
| rs142150804 | C | -0.0996 |
| rs72767931  | T | 0.0576  |
| rs116671785 | A | 0.0695  |
| rs114890532 | T | 0.0761  |
| rs150441619 | T | 0.0798  |
| rs72713426  | G | -0.0704 |
| rs6703128   | T | 0.0324  |
| rs79812993  | T | -0.0286 |
| rs76113087  | T | -0.1767 |
| rs17162209  | A | -0.0188 |
| rs1015082   | T | -0.0431 |
| rs544038    | C | 0.0986  |
| rs138454974 | G | -0.1729 |
| rs518749    | T | 0.02    |
| rs340881    | A | -0.0239 |
| rs3844252   | A | -0.034  |
| rs441374    | A | 0.0234  |
| rs36065910  | A | -0.0239 |
| rs6703352   | T | -0.0235 |
| rs6426356   | T | -0.0176 |
| rs12120250  | A | -0.0219 |
| rs418213    | G | 0.0332  |
| rs114855879 | C | -0.1034 |
| rs16834831  | G | -0.0348 |
| rs61764040  | A | 0.1036  |
| rs143391587 | T | -0.1119 |
| rs11484703  | T | -0.0644 |
| rs1306158   | C | -0.0208 |
| rs78786925  | C | 0.0705  |
| rs146723987 | A | 0.1003  |
| rs41289234  | G | 0.0488  |
| rs75720617  | A | 0.1037  |
| rs56073564  | A | 0.0223  |
| rs12745827  | G | 0.0254  |
| rs78772049  | A | 0.1035  |
| rs76891611  | T | 0.0879  |
| rs12046720  | C | 0.0314  |
| rs115763005 | T | -0.0893 |

|             |   |         |
|-------------|---|---------|
| rs115433554 | A | -0.1157 |
| rs116406354 | G | 0.1197  |
| rs16827377  | G | -0.0269 |
| rs61765365  | C | -0.0223 |
| rs141778869 | T | 0.1215  |
| rs12738424  | C | 0.04    |
| rs78986800  | C | -0.1055 |
| rs2488773   | C | -0.0211 |
| rs78078630  | A | 0.077   |
| rs11811146  | A | -0.0466 |
| rs7556264   | A | 0.0787  |
| rs143254780 | T | -0.116  |
| rs148492635 | A | 0.0939  |
| rs61829246  | C | -0.058  |
| rs138748777 | A | -0.0754 |
| rs60408196  | A | 0.0227  |
| rs147101588 | A | -0.1167 |
| rs6664418   | G | 0.0634  |
| rs13376694  | T | 0.0512  |
| rs12144051  | T | -0.0623 |
| rs115245037 | G | -0.099  |
| rs113166554 | A | -0.1669 |
| rs679304    | C | 0.0265  |
| rs55756041  | G | -0.0831 |
| rs17163470  | C | -0.0253 |
| rs12124809  | T | 0.1122  |
| rs12071614  | A | 0.1073  |
| rs149629760 | G | 0.0895  |
| rs1294325   | C | -0.0203 |
| rs72687289  | T | -0.0613 |
| rs310177    | T | 0.026   |
| rs2985541   | G | -0.0195 |
| rs855852    | T | -0.0351 |
| rs2842871   | G | 0.0349  |
| rs7521083   | T | -0.0232 |
| rs80180612  | C | -0.0679 |
| rs115691431 | G | -0.0497 |
| rs116459721 | A | -0.0547 |
| rs115909701 | A | 0.0496  |
| rs111965288 | G | -0.0516 |
| rs72754822  | A | -0.0756 |
| rs34911851  | G | -0.1104 |
| rs80062353  | T | 0.1183  |
| rs10157378  | G | -0.019  |
| rs1752216   | T | 0.079   |
| rs61822020  | G | -0.0798 |
| rs2076591   | C | -0.0213 |

|             |   |         |
|-------------|---|---------|
| rs79833203  | A | 0.0508  |
| rs6656759   | A | 0.0386  |
| rs114721678 | A | 0.1254  |
| rs34452021  | A | 0.0218  |
| rs12118635  | C | 0.0251  |
| rs2494888   | T | 0.0187  |
| rs7552664   | A | 0.0222  |
| rs114162361 | T | 0.0818  |
| rs147394948 | G | -0.0582 |
| rs10157061  | C | -0.0179 |
| rs747896    | G | -0.0193 |
| rs6665585   | G | -0.0344 |
| rs114831989 | A | -0.1455 |
| rs11163367  | T | -0.0308 |
| rs75519758  | T | 0.0699  |
| rs2024815   | T | 0.0187  |
| rs61855665  | T | 0.1243  |
| rs115556063 | G | 0.0345  |
| rs72722821  | A | 0.0839  |
| rs79434380  | T | 0.0731  |
| rs114892178 | G | 0.0708  |
| rs344935    | G | -0.0189 |
| rs149679443 | T | -0.077  |
| rs59061093  | A | 0.1777  |
| rs12739143  | G | 0.12    |
| rs6661783   | A | -0.0294 |
| rs76490244  | C | -0.0506 |
| rs114525994 | A | -0.1059 |
| rs1341304   | C | 0.021   |
| rs76904385  | A | -0.0474 |
| rs144831406 | T | -0.131  |
| rs12401902  | T | -0.0861 |
| rs116496215 | T | -0.0675 |
| rs4658039   | A | -0.0173 |
| rs10920360  | T | -0.0303 |
| rs74057160  | G | -0.0219 |
| rs10789188  | A | -0.0185 |
| rs12561944  | G | -0.0333 |
| rs345252    | C | 0.0213  |
| rs4657868   | T | 0.021   |
| rs78982654  | A | 0.0568  |
| rs736665    | C | 0.0193  |
| rs61731118  | G | 0.0862  |
| rs116640816 | T | -0.0357 |
| rs9659229   | G | -0.0286 |
| rs112446756 | A | 0.0348  |
| rs139825237 | T | 0.0608  |



|             |   |         |
|-------------|---|---------|
| rs11590483  | T | 0.0895  |
| rs10800069  | A | -0.0186 |
| rs4357560   | T | -0.0735 |
| rs79164620  | A | 0.0494  |
| rs138705988 | T | 0.1141  |
| rs35049739  | T | -0.1069 |
| rs1688581   | T | -0.0265 |
| rs7528162   | C | -0.0779 |
| rs4518905   | T | -0.0261 |
| rs11209042  | C | -0.0239 |
| rs3738303   | A | 0.0231  |
| rs1416044   | G | -0.023  |
| rs10801449  | C | -0.0181 |
| rs56381870  | T | 0.0229  |
| rs17820909  | G | 0.0343  |
| rs28434445  | T | -0.0392 |
| rs71635405  | T | -0.0374 |
| rs4658437   | G | 0.0189  |
| rs140094847 | T | 0.0842  |
| rs78664422  | A | -0.0254 |
| rs74427709  | A | -0.0716 |
| rs12035457  | C | 0.0236  |
| rs79115527  | C | -0.0525 |
| rs75910078  | A | 0.04    |
| rs61767480  | C | -0.0357 |
| rs144273814 | T | 0.0649  |
| rs112369231 | C | 0.0234  |
| rs2815464   | T | 0.0367  |
| rs79045701  | G | -0.1336 |
| rs16861236  | C | 0.0243  |
| rs7545965   | G | 0.0316  |
| rs72728029  | A | -0.0176 |
| rs17686761  | C | 0.0692  |
| rs61805847  | C | 0.071   |
| rs66520205  | A | 0.0421  |
| rs12738690  | C | -0.0846 |
| rs845252    | C | 0.019   |
| rs12124894  | T | 0.0276  |
| rs72666996  | A | -0.0937 |
| rs7556513   | A | 0.0263  |
| rs146158664 | T | 0.0431  |
| rs114785386 | A | -0.0517 |
| rs148214217 | C | -0.1203 |
| rs142571648 | C | 0.1228  |
| rs150751448 | T | -0.0485 |
| rs1853965   | C | 0.0246  |
| rs112522538 | T | 0.0536  |

|             |   |         |
|-------------|---|---------|
| rs151074370 | C | -0.0679 |
| rs113793586 | G | 0.0939  |
| rs6656981   | T | 0.027   |
| rs78382361  | A | -0.0757 |
| rs4317763   | A | -0.1533 |
| rs61778186  | T | 0.0736  |
| rs7519017   | G | 0.1176  |
| rs10158765  | A | 0.0202  |
| rs12748591  | A | -0.0844 |
| rs1610320   | A | 0.0231  |
| rs1429700   | T | -0.0247 |
| rs11585348  | G | -0.0272 |
| rs7544606   | C | -0.0246 |
| rs11590808  | A | -0.045  |
| rs146309610 | T | 0.0671  |
| rs116516520 | G | 0.0872  |
| rs143746327 | T | 0.0571  |
| rs17453009  | G | 0.067   |
| rs3125825   | A | 0.0264  |
| rs75143729  | G | -0.073  |
| rs12729581  | A | 0.0229  |
| rs1377731   | A | -0.0173 |
| rs55676222  | T | 0.046   |
| rs10779571  | A | 0.0293  |
| rs555481    | G | 0.0394  |
| rs2227295   | A | -0.0202 |
| rs6675415   | A | -0.0185 |
| rs12120605  | T | -0.0336 |
| rs1773766   | A | -0.0683 |
| rs602122    | C | -0.0183 |
| rs75714434  | A | -0.0745 |
| rs116151692 | A | 0.1087  |
| rs75778210  | C | -0.0872 |
| rs79228805  | C | 0.0396  |
| rs12033263  | A | -0.0239 |
| rs116798874 | G | -0.0652 |
| rs61812700  | T | -0.061  |
| rs115613717 | C | -0.1055 |
| rs142103193 | A | -0.0891 |
| rs552096    | T | 0.0197  |
| rs139113250 | C | -0.0286 |
| rs11240698  | A | 0.0267  |
| rs72727927  | G | -0.0663 |
| rs12403919  | C | 0.0272  |
| rs80298631  | T | -0.0572 |
| rs4233115   | G | -0.0171 |
| rs117761602 | C | -0.0866 |

|             |   |         |
|-------------|---|---------|
| rs145755879 | A | 0.0535  |
| rs4258224   | A | 0.0209  |
| rs151267833 | T | -0.1185 |
| rs7531541   | A | 0.0278  |
| rs41285435  | A | -0.0794 |
| rs77554527  | T | -0.1021 |
| rs6700693   | C | 0.0232  |
| rs77739029  | G | -0.1447 |
| rs77490065  | A | 0.0663  |
| rs80101064  | G | 0.0653  |
| rs6586361   | T | 0.0173  |
| rs56378103  | T | -0.0177 |
| rs71644026  | C | 0.0764  |
| rs17129890  | G | 0.0329  |
| rs56267558  | T | -0.0334 |
| rs74677427  | T | -0.0256 |
| rs77904349  | A | -0.0396 |
| rs113187303 | A | 0.1197  |
| rs115014891 | A | -0.0785 |
| rs67854820  | C | 0.0242  |
| rs6662538   | A | -0.0676 |
| rs12141568  | C | -0.0189 |
| rs142472564 | T | 0.1056  |
| rs12065665  | T | 0.0171  |
| rs2791465   | G | 0.0211  |
| rs142350029 | A | -0.1062 |
| rs12117408  | C | 0.0558  |
| rs35391619  | G | -0.0416 |
| rs783052    | A | -0.0177 |
| rs10797460  | A | -0.0678 |
| rs11208307  | A | 0.0228  |
| rs1687108   | G | 0.0181  |
| rs2807556   | T | -0.0274 |
| rs78249366  | C | 0.0908  |
| rs61803761  | A | 0.0448  |
| rs2269244   | A | -0.018  |
| rs2797293   | G | -0.0465 |
| rs4845604   | A | -0.0248 |
| rs12759827  | G | 0.0217  |
| rs115489968 | A | -0.1101 |
| rs11584590  | C | 0.1067  |
| rs72681712  | G | 0.1196  |
| rs12090010  | T | 0.0566  |
| rs6689252   | A | 0.0267  |
| rs7523589   | G | 0.0197  |
| rs115515624 | T | -0.095  |
| rs9662936   | C | -0.0199 |

|             |   |         |
|-------------|---|---------|
| rs4652633   | C | -0.0176 |
| rs114181664 | A | 0.1135  |
| rs139770488 | G | 0.0783  |
| rs4472742   | C | 0.0201  |
| rs148408850 | A | -0.0502 |
| rs72654118  | A | 0.0279  |
| rs78032349  | G | 0.1296  |
| rs12038000  | G | -0.0181 |
| rs56158070  | G | 0.0352  |
| rs10482833  | A | 0.0402  |
| rs12130415  | G | 0.0757  |
| rs76084373  | A | -0.0678 |
| rs7540930   | G | 0.0174  |
| rs12752825  | G | -0.025  |
| rs2776778   | G | -0.0384 |
| rs17526199  | C | 0.0778  |
| rs72689449  | G | -0.0762 |
| rs3917739   | C | -0.0199 |
| rs12025616  | G | -0.0211 |
| rs78390928  | T | 0.0994  |
| rs141429903 | A | 0.1072  |
| rs7513309   | C | 0.0207  |
| rs2232648   | T | 0.0184  |
| rs834964    | G | -0.0189 |
| rs78478538  | T | -0.0581 |
| rs72739200  | G | -0.0347 |
| rs9651106   | C | -0.0255 |
| rs325886    | A | -0.0253 |
| rs992023    | C | -0.0457 |
| rs11117713  | G | -0.0275 |
| rs2891705   | T | -0.0658 |
| rs2075560   | T | 0.0772  |
| rs11209101  | A | -0.0189 |
| rs9793308   | G | -0.0642 |
| rs16850817  | C | -0.0734 |
| rs34782355  | G | -0.0988 |
| rs57012788  | T | 0.0181  |
| rs72735645  | G | -0.0716 |
| rs12132097  | G | -0.0289 |
| rs61818593  | T | -0.0682 |
| rs4233199   | C | -0.0174 |
| rs114737056 | A | 0.0273  |
| rs16843723  | G | -0.0365 |
| rs7512220   | A | -0.0195 |
| rs6671900   | T | 0.0294  |
| rs2798111   | C | -0.0189 |
| rs1145919   | T | 0.019   |

|             |   |         |
|-------------|---|---------|
| rs12078780  | T | -0.0242 |
| rs77361783  | T | 0.0514  |
| rs36015503  | G | -0.0263 |
| rs56968328  | G | -0.0268 |
| rs7531902   | A | -0.0186 |
| rs61807495  | T | -0.0604 |
| rs34406824  | C | 0.0449  |
| rs6683746   | T | -0.0369 |
| rs75793979  | C | -0.1041 |
| rs34701053  | C | -0.0539 |
| rs6690154   | C | 0.0336  |
| rs61766354  | A | -0.0351 |
| rs7541151   | T | -0.0721 |
| rs79624892  | C | 0.0617  |
| rs114941413 | C | 0.0633  |
| rs61807319  | T | 0.0985  |
| rs4646883   | C | -0.0524 |
| rs75455040  | A | 0.1289  |
| rs4253898   | A | -0.0759 |
| rs113437894 | A | 0.0602  |
| rs77037453  | G | 0.0633  |
| rs74907325  | T | 0.0302  |
| rs55835762  | A | -0.0184 |
| rs6701196   | G | 0.0206  |
| rs12044279  | T | 0.075   |
| rs78712938  | A | 0.0889  |
| rs4915768   | C | 0.0182  |
| rs4651465   | A | -0.0215 |
| rs2799685   | C | -0.0178 |
| rs10920460  | C | 0.0189  |
| rs79434990  | G | -0.1058 |
| rs34967753  | A | -0.0348 |
| rs2211324   | C | 0.0189  |
| rs78859255  | A | 0.0567  |
| rs114761090 | A | -0.0874 |
| rs115525176 | C | -0.1076 |
| rs1855894   | G | -0.0282 |
| rs4233248   | C | -0.0235 |
| rs1723000   | C | -0.0271 |
| rs10754016  | G | -0.0215 |
| rs61828749  | C | -0.0876 |
| rs68032203  | G | -0.0437 |
| rs11207095  | T | -0.0182 |
| rs72707307  | T | 0.0651  |
| rs57671051  | A | 0.0851  |
| rs584025    | T | 0.0391  |
| rs9439718   | A | 0.0488  |

|             |   |         |
|-------------|---|---------|
| rs72704962  | C | 0.0252  |
| rs12126035  | C | 0.0243  |
| rs114978139 | G | 0.0646  |
| rs114257119 | T | 0.1125  |
| rs17127327  | C | 0.0338  |
| rs138734850 | T | -0.1048 |
| rs74153145  | A | 0.0435  |
| rs1419104   | A | -0.0293 |
| rs2280474   | A | 0.026   |
| rs138630681 | G | 0.1393  |
| rs3008545   | A | -0.0314 |
| rs72745527  | T | 0.046   |
| rs16856400  | C | -0.0376 |
| rs12131209  | C | 0.0731  |
| rs6687095   | T | 0.0311  |
| rs78420914  | C | -0.0625 |
| rs72729736  | A | 0.049   |
| rs149181789 | C | 0.0602  |
| rs12749066  | C | -0.0808 |
| rs3820277   | G | -0.0174 |
| rs12085044  | G | 0.0285  |
| rs974856    | A | -0.0181 |
| rs17013650  | C | 0.0834  |
| rs10927937  | A | -0.0228 |
| rs6676941   | A | 0.02    |
| rs11118452  | T | -0.0189 |
| rs140562220 | T | -0.1023 |
| rs112263051 | A | -0.064  |
| rs112242951 | T | 0.0767  |
| rs17479667  | T | -0.0917 |
| rs61765937  | A | -0.0583 |
| rs75470247  | A | -0.0931 |
| rs12129123  | T | 0.0476  |
| rs115137567 | G | -0.0719 |
| rs6699542   | A | -0.0256 |
| rs17576615  | G | 0.0403  |
| rs17853180  | G | -0.0649 |
| rs147143078 | G | -0.1369 |
| rs114325919 | C | 0.1768  |
| rs4915085   | T | 0.017   |
| rs11542154  | A | -0.0678 |
| rs12035653  | C | -0.02   |
| rs269693    | T | 0.0296  |
| rs859478    | A | 0.0206  |
| rs11122355  | T | -0.0259 |
| rs35304562  | T | 0.0706  |
| rs79304392  | A | 0.1409  |

|             |   |         |
|-------------|---|---------|
| rs61822046  | T | -0.0553 |
| rs7537508   | T | -0.0206 |
| rs6426774   | C | -0.0204 |
| rs10914189  | T | -0.0204 |
| rs73033406  | G | -0.0734 |
| rs56183786  | T | -0.0242 |
| rs10799926  | T | 0.0168  |
| rs6694239   | C | 0.0367  |
| rs3767427   | C | -0.0216 |
| rs16853835  | G | 0.0409  |
| rs4149947   | G | 0.0904  |
| rs74346187  | A | -0.1041 |
| rs114911624 | T | -0.0795 |
| rs114013905 | G | 0.1111  |
| rs4844422   | A | -0.0559 |
| rs3008600   | T | 0.0554  |
| rs74950234  | T | 0.0373  |
| rs56011948  | A | -0.023  |
| rs828052    | T | 0.0174  |
| rs77289684  | T | 0.131   |
| rs6687221   | A | -0.0209 |
| rs35731590  | A | 0.0679  |
| rs34597031  | A | -0.0922 |
| rs12045323  | T | -0.0234 |
| rs76193350  | A | -0.0801 |
| rs9661504   | A | 0.0174  |
| rs9804104   | C | -0.0196 |
| rs113060992 | C | -0.0779 |
| rs2989946   | G | 0.019   |
| rs2506971   | A | 0.0298  |
| rs56154424  | A | 0.0238  |
| rs2566766   | G | -0.0429 |
| rs142945969 | T | -0.1308 |
| rs115453905 | A | 0.0905  |
| rs76488675  | G | -0.0808 |
| rs114537345 | T | -0.0688 |
| rs56260931  | C | 0.0182  |
| rs12135141  | A | -0.018  |
| rs77191080  | A | 0.0296  |
| rs6656271   | G | 0.0308  |
| rs6687401   | A | -0.0255 |
| rs144032901 | T | -0.0978 |
| rs79419456  | A | 0.0938  |
| rs12026895  | T | 0.0585  |
| rs35200825  | C | -0.1025 |
| rs4342800   | G | -0.0434 |
| rs72662069  | C | -0.0573 |

|             |   |         |
|-------------|---|---------|
| rs77892666  | T | 0.0651  |
| rs16832053  | A | 0.0524  |
| rs78679596  | T | 0.0642  |
| rs12135013  | G | -0.0247 |
| rs139464971 | C | 0.1169  |
| rs78850395  | A | 0.1111  |
| rs61819995  | A | 0.0826  |
| rs147486554 | A | -0.037  |
| rs6537673   | A | -0.0195 |
| rs74414495  | T | -0.0549 |
| rs12042712  | T | 0.0228  |
| rs12087212  | A | 0.0268  |
| rs79144732  | T | -0.0703 |
| rs76263057  | G | -0.0339 |
| rs1325274   | T | -0.0265 |
| rs11809743  | A | 0.0238  |
| rs4846350   | G | -0.0168 |
| rs77896756  | A | -0.0688 |
| rs78032946  | C | -0.0686 |
| rs79162295  | G | 0.0468  |
| rs11240404  | A | 0.0388  |
| rs17012649  | G | -0.111  |
| rs6680117   | T | 0.0248  |
| rs72751792  | G | 0.0437  |
| rs1578640   | A | -0.0294 |
| rs4372299   | T | 0.0202  |
| rs1889926   | G | -0.0195 |
| rs12406397  | G | 0.0676  |
| rs114469783 | G | 0.0722  |
| rs12023708  | A | 0.038   |
| rs12726611  | T | 0.0392  |
| rs17131313  | A | -0.0278 |
| rs17032907  | T | 0.0247  |
| rs113972838 | A | -0.0899 |
| rs34506456  | A | 0.042   |
| rs2904122   | C | 0.0167  |
| rs74445067  | C | 0.095   |
| rs177915    | C | 0.0193  |
| rs144466110 | C | -0.0744 |
| rs1509699   | A | 0.0278  |
| rs77155143  | A | 0.0325  |
| rs12063665  | G | -0.1044 |
| rs12563707  | G | 0.0191  |
| rs17396285  | T | 0.0848  |
| rs3010374   | T | -0.018  |
| rs34881484  | A | -0.0273 |
| rs112130630 | A | -0.0923 |



|             |   |         |
|-------------|---|---------|
| rs72665775  | G | 0.1466  |
| rs493227    | G | -0.0188 |
| rs12401816  | C | 0.0227  |
| rs16857041  | T | -0.039  |
| rs75572442  | T | -0.0861 |
| rs12128790  | C | 0.0383  |
| rs6674705   | C | -0.0465 |
| rs12090714  | A | -0.0411 |
| rs72642303  | G | -0.0437 |
| rs1426179   | T | -0.0195 |
| rs230607    | C | -0.0203 |
| rs146057445 | T | 0.1601  |
| rs141092331 | C | 0.0808  |
| rs72767406  | A | -0.0525 |
| rs74422925  | T | -0.0597 |
| rs870171    | T | 0.0196  |
| rs114656584 | T | 0.0689  |
| rs17626398  | C | 0.0428  |
| rs10925181  | G | 0.0358  |
| rs10803249  | T | -0.019  |
| rs2490385   | T | 0.0181  |
| rs72656592  | A | 0.1246  |
| rs17092167  | A | -0.1186 |
| rs116070955 | A | -0.0644 |
| rs116725158 | T | 0.064   |
| rs41264133  | G | -0.0594 |
| rs115883386 | T | -0.0642 |
| rs11207957  | T | 0.0203  |
| rs3748533   | C | -0.0246 |
| rs138970563 | T | -0.0689 |
| rs114197650 | A | 0.0753  |
| rs1266436   | G | -0.0499 |
| rs11119142  | G | -0.0668 |
| rs1961787   | G | -0.0175 |
| rs6666130   | T | -0.0579 |
| rs115624313 | A | -0.1289 |
| rs61780346  | A | -0.1338 |
| rs115008859 | A | -0.0687 |
| rs7520683   | C | 0.0217  |
| rs143790330 | T | -0.097  |
| rs1923946   | G | 0.0217  |
| rs7546483   | G | -0.0183 |
| rs141770917 | G | -0.0627 |
| rs6681346   | A | -0.1007 |
| rs3766497   | T | -0.0405 |
| rs57928348  | C | 0.0381  |
| rs141458461 | C | -0.1282 |

|             |   |         |
|-------------|---|---------|
| rs141651337 | A | -0.0777 |
| rs7540655   | T | -0.0318 |
| rs56220608  | C | 0.0834  |
| rs12753465  | T | -0.0205 |
| rs12146053  | A | 0.0418  |
| rs72720787  | C | 0.0624  |
| rs10920259  | T | 0.0166  |
| rs115246987 | T | -0.0863 |
| rs150490813 | A | -0.0827 |
| rs77909080  | A | 0.0792  |
| rs61819581  | C | 0.0909  |
| rs10754494  | A | -0.0244 |
| rs7354900   | G | -0.0329 |
| rs17403444  | A | 0.0582  |
| rs10800589  | A | -0.0182 |
| rs34665232  | C | 0.039   |
| rs3007722   | C | -0.0228 |
| rs145335104 | A | 0.0924  |
| rs78433503  | G | 0.0361  |
| rs74508171  | A | 0.0575  |
| rs116187530 | T | -0.0845 |
| rs10796978  | C | 0.0209  |
| rs114423553 | T | 0.0711  |
| rs111681429 | T | -0.0352 |
| rs79751956  | C | 0.0985  |
| rs78377116  | T | -0.091  |
| rs12081752  | T | 0.0497  |
| rs79769841  | G | 0.0579  |
| rs6687326   | A | -0.0964 |
| rs11810932  | T | 0.0178  |
| rs2842704   | G | -0.0249 |
| rs139802649 | A | -0.1016 |
| rs794240    | G | 0.0252  |
| rs10493214  | A | 0.0214  |
| rs3197233   | T | 0.0288  |
| rs3828129   | G | 0.0197  |
| rs114489742 | G | 0.1108  |
| rs6576771   | T | 0.0519  |
| rs12138359  | T | 0.0368  |
| rs114580425 | T | -0.0682 |
| rs11579020  | T | 0.0347  |
| rs80056181  | A | 0.0855  |
| rs78929567  | A | 0.1004  |
| rs9427061   | C | 0.0244  |
| rs74877853  | A | 0.0395  |
| rs56362902  | A | -0.0812 |
| rs16830671  | T | -0.0368 |

|             |   |         |
|-------------|---|---------|
| rs699537    | A | 0.0856  |
| rs114002121 | A | -0.0833 |
| rs76551780  | C | 0.0228  |
| rs77188784  | C | -0.0605 |
| rs79975321  | A | -0.1338 |
| rs3753263   | A | -0.0176 |
| rs56336130  | A | 0.0662  |
| rs2782549   | G | -0.0202 |
| rs147511825 | G | -0.077  |
| rs114221421 | A | -0.1636 |
| rs2847341   | A | 0.0192  |
| rs56053787  | C | 0.0234  |
| rs79370709  | T | -0.0417 |
| rs113869187 | G | 0.0762  |
| rs150461998 | T | 0.1055  |
| rs115759667 | A | 0.0841  |
| rs61802001  | T | 0.0761  |
| rs78709578  | A | 0.043   |
| rs12070915  | C | 0.0524  |
| rs111859922 | A | -0.0554 |
| rs76264713  | A | 0.028   |
| rs36180074  | A | 0.095   |
| rs2012686   | C | -0.019  |
| rs7549900   | T | -0.0173 |
| rs61827406  | T | 0.0598  |
| rs61836670  | G | -0.1294 |
| rs10864293  | G | -0.0263 |
| rs115466474 | A | -0.0932 |
| rs114568507 | T | -0.1075 |
| rs11240599  | A | -0.0257 |
| rs12402850  | C | 0.0401  |
| rs150596150 | C | -0.1257 |
| rs7527695   | T | -0.0296 |
| rs10737540  | T | -0.0304 |
| rs16845308  | T | -0.0195 |
| rs11119493  | G | 0.029   |
| rs115188743 | C | -0.1125 |
| rs147482671 | A | 0.1062  |
| rs145622947 | A | -0.0984 |
| rs17605344  | C | 0.0812  |
| rs114928223 | T | 0.0563  |
| rs17301006  | A | 0.0565  |
| rs111899841 | T | -0.2024 |
| rs12022618  | G | 0.0526  |
| rs75387019  | C | -0.0673 |
| rs10857911  | A | -0.0232 |
| rs1200082   | G | -0.0226 |

|             |   |         |
|-------------|---|---------|
| rs76320648  | T | 0.0594  |
| rs35198742  | C | -0.0549 |
| rs2799557   | T | 0.0566  |
| rs17163290  | G | -0.1035 |
| rs116455265 | A | -0.1159 |
| rs272537    | T | 0.0216  |
| rs116677466 | T | 0.0932  |
| rs17028042  | G | -0.0446 |
| rs56281124  | T | -0.0707 |
| rs76163850  | G | -0.0431 |
| rs114771621 | C | 0.1009  |
| rs34186915  | A | 0.0176  |
| rs12087645  | T | 0.0388  |
| rs76460815  | T | -0.0984 |
| rs6697303   | T | -0.0173 |
| rs78613699  | T | 0.0418  |
| rs1411775   | A | -0.0255 |
| rs12734239  | A | -0.0173 |
| rs76680432  | T | 0.0398  |
| rs12126684  | A | -0.0209 |
| rs12720667  | A | 0.0202  |
| rs11585904  | C | 0.0252  |
| rs11586557  | T | 0.0461  |
| rs7547430   | C | -0.0172 |
| rs149253918 | G | 0.0856  |
| rs138939756 | T | -0.06   |
| rs80264257  | T | -0.099  |
| rs1417102   | A | -0.019  |
| rs12733226  | A | 0.0486  |
| rs1316805   | G | -0.0214 |
| rs2149040   | A | -0.0395 |
| rs11578894  | C | 0.0816  |
| rs113303550 | A | 0.072   |
| rs78048452  | A | -0.1245 |
| rs55892625  | T | -0.0761 |
| rs112973563 | G | 0.1079  |
| rs832164    | T | -0.0211 |
| rs55795840  | G | 0.0332  |
| rs12136853  | T | 0.0262  |
| rs79502730  | T | -0.0659 |
| rs72679406  | A | 0.0619  |
| rs145340226 | A | 0.0523  |
| rs7512994   | C | -0.0252 |
| rs72692854  | T | -0.028  |
| rs856146    | C | -0.0188 |
| rs111779058 | T | 0.1285  |
| rs12123488  | T | -0.0965 |

|             |   |         |
|-------------|---|---------|
| rs116594341 | A | -0.0703 |
| rs141296897 | C | -0.0882 |
| rs34590307  | T | -0.0346 |
| rs9442467   | T | -0.0438 |
| rs116721219 | G | -0.0926 |
| rs61754125  | A | 0.1495  |
| rs72706360  | T | 0.0917  |
| rs2281355   | A | 0.0513  |
| rs148081940 | T | -0.1009 |
| rs77280407  | T | 0.0951  |
| rs2495088   | C | 0.0725  |
| rs115906406 | T | -0.0588 |
| rs72950069  | T | -0.0451 |
| rs11586465  | T | -0.0305 |
| rs142860569 | T | 0.0415  |
| rs142044529 | A | 0.095   |
| rs7513528   | A | -0.0339 |
| rs1133398   | G | 0.0178  |
| rs112114305 | A | 0.0525  |
| rs1395713   | G | -0.0232 |
| rs12127439  | A | 0.0184  |
| rs116645841 | C | 0.1138  |
| rs72658541  | T | 0.0318  |
| rs144876164 | T | -0.0728 |
| rs115225298 | G | -0.0705 |
| rs149505708 | C | -0.0989 |
| rs78322729  | T | -0.0241 |
| rs12122586  | T | -0.0815 |
| rs270851    | G | 0.0231  |
| rs41264137  | T | -0.0933 |
| rs12021653  | A | -0.0889 |
| rs11162161  | T | -0.0211 |
| rs76922702  | T | -0.0662 |
| rs140690731 | A | 0.1263  |
| rs147526998 | T | 0.1117  |
| rs138452894 | T | -0.1207 |
| rs10916034  | C | 0.0182  |
| rs12748241  | A | -0.0307 |
| rs111953828 | T | 0.0511  |
| rs11208996  | A | -0.0714 |
| rs12121123  | T | -0.0961 |
| rs7512479   | C | -0.0586 |
| rs79638111  | G | 0.1153  |
| rs72711827  | A | 0.0864  |
| rs11801025  | G | 0.0251  |
| rs80092239  | G | -0.0664 |
| rs12568591  | G | 0.0349  |

|             |   |         |
|-------------|---|---------|
| rs36041545  | G | -0.0606 |
| rs2025002   | G | -0.0225 |
| rs532042    | T | -0.0282 |
| rs143941771 | T | -0.0957 |
| rs79479969  | T | 0.0944  |
| rs10900550  | T | -0.0189 |
| rs12143545  | G | 0.0625  |
| rs12033297  | T | 0.0299  |
| rs761076    | T | 0.0172  |
| rs147114718 | A | -0.0588 |
| rs115509265 | A | -0.1052 |
| rs10863715  | C | -0.0195 |
| rs10863651  | A | -0.0165 |
| rs2802950   | A | 0.0173  |
| rs116826061 | A | 0.0497  |
| rs17542070  | G | 0.0735  |
| rs12142021  | G | -0.0662 |
| rs77335236  | G | 0.0636  |
| rs147051000 | C | 0.1167  |
| rs1016819   | G | -0.0191 |
| rs2760510   | A | 0.0198  |
| rs10925403  | T | 0.0584  |
| rs34579555  | A | 0.082   |
| rs58264851  | C | -0.0225 |
| rs2576268   | G | -0.0237 |
| rs77662416  | A | 0.0952  |
| rs139134807 | A | 0.0223  |
| rs13376006  | C | -0.0373 |
| rs34650980  | G | 0.0275  |
| rs72742398  | T | 0.0915  |
| rs819633    | T | -0.0541 |
| rs1294330   | G | -0.0163 |
| rs76297923  | A | -0.0436 |
| rs77339270  | T | -0.0694 |
| rs78125920  | T | -0.0328 |
| rs56126189  | G | -0.093  |
| rs61810738  | T | -0.1349 |
| rs6683407   | C | -0.0245 |
| rs4839179   | T | 0.0507  |
| rs6673837   | A | -0.0237 |
| rs114658321 | A | 0.0306  |
| rs34696266  | T | 0.0505  |
| rs17416088  | T | -0.0238 |
| rs2805446   | T | 0.0211  |
| rs116446316 | T | 0.1112  |
| rs12139634  | C | 0.0206  |
| rs1252145   | A | -0.0221 |

|             |   |         |
|-------------|---|---------|
| rs143686477 | T | 0.0868  |
| rs75767961  | A | 0.0289  |
| rs773580    | G | -0.1025 |
| rs12734652  | T | 0.0204  |
| rs12123190  | A | -0.0825 |
| rs6693446   | T | -0.0284 |
| rs149413568 | T | 0.1003  |
| rs79025227  | G | 0.0942  |
| rs6704355   | A | -0.0419 |
| rs79747087  | G | 0.0369  |
| rs1472563   | T | 0.0168  |
| rs111980810 | G | -0.0996 |
| rs1440487   | A | -0.0199 |
| rs145605082 | T | 0.08    |
| rs11578401  | C | -0.1058 |
| rs72735253  | T | 0.0256  |
| rs41303311  | A | -0.0807 |
| rs582666    | G | 0.0261  |
| rs12048081  | C | -0.0235 |
| rs6667397   | A | 0.0188  |
| rs79108918  | G | 0.0805  |
| rs6673178   | A | 0.0194  |
| rs114576151 | A | -0.0756 |
| rs17117850  | C | 0.0927  |
| rs3122547   | G | 0.0231  |
| rs12140760  | A | -0.0167 |
| rs72748642  | A | -0.0238 |
| rs72761211  | G | 0.1187  |
| rs12128783  | T | 0.0754  |
| rs1231819   | T | -0.0531 |
| rs10873824  | A | -0.0192 |
| rs9435445   | A | -0.0753 |
| rs4839115   | A | 0.017   |
| rs511918    | G | -0.0175 |
| rs74547610  | T | -0.0695 |
| rs112269378 | T | -0.0416 |
| rs12563014  | A | 0.0565  |
| rs6687647   | G | 0.0244  |
| rs56089133  | C | -0.0313 |
| rs151065194 | T | -0.0883 |
| rs77909294  | A | -0.0548 |
| rs115646183 | T | -0.0748 |
| rs997191    | G | -0.0259 |
| rs12089348  | T | 0.023   |
| rs7518401   | A | -0.0192 |
| rs75027444  | G | 0.11    |
| rs530565    | C | 0.0656  |

|             |   |         |
|-------------|---|---------|
| rs112442170 | T | -0.0586 |
| rs1392096   | A | 0.022   |
| rs79538232  | A | -0.136  |
| rs77042536  | A | 0.0516  |
| rs35006651  | T | 0.1327  |
| rs694660    | C | 0.0188  |
| rs749750    | C | 0.0188  |
| rs76463708  | A | -0.055  |
| rs116750416 | T | -0.112  |
| rs17162993  | T | 0.042   |
| rs12726813  | A | -0.037  |
| rs72672685  | A | -0.0361 |
| rs113443285 | A | -0.0397 |
| rs958996    | G | 0.0459  |
| rs11587945  | C | 0.0215  |
| rs55864112  | A | 0.0414  |
| rs2089796   | C | 0.0181  |
| rs6426395   | A | 0.0269  |
| rs35639613  | A | -0.0346 |
| rs12090282  | C | -0.0203 |
| rs7519591   | G | -0.0324 |
| rs115279672 | C | -0.089  |
| rs143257028 | C | -0.1103 |
| rs115432060 | A | -0.063  |
| rs77302871  | A | 0.1095  |
| rs12741971  | A | 0.0867  |
| rs17403661  | T | -0.1447 |
| rs113449567 | T | -0.0298 |
| rs10920909  | A | -0.0213 |
| rs34600721  | G | -0.019  |
| rs12074086  | T | 0.0214  |
| rs12737341  | T | 0.113   |
| rs1048007   | G | -0.0173 |
| rs17675964  | A | 0.0301  |
| rs12125240  | G | 0.029   |
| rs148086553 | A | 0.0723  |
| rs113716074 | A | 0.0795  |
| rs61821339  | T | -0.0198 |
| rs2737685   | C | -0.0257 |
| rs2819012   | A | 0.1097  |
| rs73135916  | G | 0.0203  |
| rs75676035  | C | -0.0923 |
| rs116125014 | A | -0.0869 |
| rs6667233   | G | 0.0226  |
| rs115524974 | G | 0.0615  |
| rs636706    | T | 0.0727  |
| rs75403711  | T | -0.0701 |



|             |   |         |
|-------------|---|---------|
| rs114371923 | C | 0.0657  |
| rs3820329   | A | -0.0339 |
| rs72641985  | T | -0.0419 |
| rs72942400  | A | -0.0226 |
| rs12756255  | T | 0.0752  |
| rs6537711   | T | 0.063   |
| rs10800904  | C | 0.0169  |
| rs79319121  | A | 0.0809  |
| rs115673012 | C | 0.1128  |
| rs4652486   | A | 0.0398  |
| rs12758297  | T | -0.0483 |
| rs75160593  | A | 0.0445  |
| rs61831260  | G | 0.0219  |
| rs72738024  | C | -0.0551 |
| rs117086422 | T | 0.0317  |
| rs17453664  | A | -0.0221 |
| rs17469946  | C | 0.0646  |
| rs112126817 | T | -0.0672 |
| rs548382    | A | 0.0293  |
| rs3010877   | T | 0.0233  |
| rs111753518 | G | -0.0792 |
| rs1278286   | T | -0.0464 |
| rs75625821  | T | -0.0638 |
| rs12083518  | G | -0.0177 |
| rs141628151 | C | -0.1423 |
| rs72671359  | T | -0.0633 |
| rs10927175  | T | 0.0185  |
| rs1281007   | A | 0.0448  |
| rs2096192   | C | -0.0357 |
| rs77133864  | G | -0.0475 |
| rs7534884   | A | -0.0228 |
| rs114189512 | T | 0.1147  |
| rs11576509  | T | 0.0813  |
| rs75614215  | G | -0.1059 |
| rs10800496  | C | -0.0163 |
| rs144865396 | C | 0.0401  |
| rs1251569   | T | 0.029   |
| rs116948887 | A | 0.1009  |
| rs2654863   | C | 0.0246  |
| rs146467886 | C | 0.1093  |
| rs41277154  | A | -0.0384 |
| rs34896470  | C | 0.0555  |
| rs5744321   | T | -0.0401 |
| rs2464458   | T | 0.0713  |
| rs1502361   | A | -0.047  |
| rs71638804  | A | -0.0903 |
| rs77731861  | A | -0.0805 |

|             |   |         |
|-------------|---|---------|
| rs17571116  | A | -0.0518 |
| rs79720359  | G | 0.0658  |
| rs12131622  | C | -0.0753 |
| rs6679093   | A | 0.0525  |
| rs1962771   | A | 0.0202  |
| rs72738902  | T | -0.0347 |
| rs76117971  | C | 0.1181  |
| rs34670710  | A | -0.0297 |
| rs145702246 | T | -0.0697 |
| rs230632    | T | 0.0169  |
| rs578816    | C | -0.0294 |
| rs60897542  | T | -0.0183 |
| rs2780746   | G | 0.0184  |
| rs897601    | A | 0.0287  |
| rs10465684  | A | -0.0167 |
| rs146374773 | A | 0.0546  |
| rs4595319   | C | 0.0163  |
| rs351621    | T | -0.0175 |
| rs855314    | G | -0.0243 |
| rs78416005  | C | -0.1057 |
| rs12145491  | A | -0.0169 |
| rs504988    | A | -0.0172 |
| rs148015871 | T | -0.0589 |
| rs140469720 | T | -0.0983 |
| rs115132002 | A | 0.0833  |
| rs3014564   | C | 0.085   |
| rs4908464   | C | 0.024   |
| rs4839240   | C | 0.0182  |
| rs77785986  | A | 0.1012  |
| rs335539    | T | 0.0163  |
| rs139784145 | T | -0.1323 |
| rs913858    | T | 0.0228  |
| rs79727816  | G | 0.0534  |
| rs115793643 | A | 0.0946  |
| rs79823009  | G | 0.0978  |
| rs10926515  | C | -0.0176 |
| rs650169    | T | 0.0648  |
| rs7553708   | T | -0.0204 |
| rs4073324   | C | 0.018   |
| rs11207205  | T | -0.0635 |
| rs148405995 | T | 0.0788  |
| rs6681714   | C | -0.0223 |
| rs61835577  | G | -0.0279 |
| rs55775299  | A | 0.1263  |
| rs2276401   | C | 0.0251  |
| rs149475289 | A | -0.1457 |
| rs35650616  | G | -0.0874 |

|             |   |         |
|-------------|---|---------|
| rs149870074 | A | 0.083   |
| rs71668681  | G | -0.0596 |
| rs114699405 | T | 0.1221  |
| rs12133505  | T | 0.0231  |
| rs78959810  | A | -0.0742 |
| rs7515690   | T | -0.0242 |
| rs61833528  | A | -0.0576 |
| rs227166    | T | 0.0175  |
| rs1151781   | A | 0.0299  |
| rs587874    | T | -0.027  |
| rs13302990  | C | 0.1115  |
| rs80013027  | A | -0.0448 |
| rs72669184  | G | -0.0547 |
| rs11800782  | A | -0.0415 |
| rs550733    | C | -0.0195 |
| rs1628364   | C | 0.0163  |
| rs1125969   | A | -0.0205 |
| rs5030772   | G | -0.0241 |
| rs4844629   | G | -0.0603 |
| rs28540714  | T | 0.0673  |
| rs1630259   | T | -0.0193 |
| rs57799846  | A | 0.017   |
| rs12751940  | A | 0.0526  |
| rs78197863  | A | 0.0774  |
| rs75641997  | G | -0.0404 |
| rs148650414 | G | -0.0801 |
| rs61797359  | C | 0.0324  |
| rs16840259  | G | 0.0283  |
| rs12144969  | C | 0.0291  |
| rs149914664 | T | 0.1202  |
| rs17516616  | G | -0.08   |
| rs41314019  | C | -0.0415 |
| rs7521883   | G | -0.0285 |
| rs72720695  | C | 0.0821  |
| rs114378731 | C | -0.0471 |
| rs10430444  | T | 0.0413  |
| rs140420618 | G | -0.081  |
| rs1966176   | A | -0.0187 |
| rs60579652  | G | 0.0569  |
| rs79045700  | A | 0.0722  |
| rs76606177  | A | -0.0251 |
| rs4951633   | T | 0.0272  |
| rs114011113 | C | 0.0373  |
| rs113136881 | G | 0.0953  |
| rs12723224  | A | -0.0375 |
| rs7546740   | A | -0.0286 |
| rs78553813  | C | -0.0906 |

|             |   |         |
|-------------|---|---------|
| rs77411382  | A | -0.0796 |
| rs11589075  | T | 0.0195  |
| rs138061857 | C | -0.0982 |
| rs141063647 | T | 0.051   |
| rs74874110  | A | -0.0586 |
| rs11207848  | T | 0.0183  |
| rs78937830  | A | -0.1342 |
| rs61798865  | A | 0.089   |
| rs1568009   | T | -0.0773 |
| rs56255103  | A | -0.0759 |
| rs6600275   | C | -0.0185 |
| rs111990    | A | -0.0171 |
| rs701212    | G | -0.0294 |
| rs787501    | T | 0.0335  |
| rs12731297  | C | -0.0178 |
| rs12117509  | A | 0.1028  |
| rs6702956   | G | 0.0242  |
| rs6682184   | G | -0.0172 |
| rs72716786  | G | 0.0778  |
| rs11265341  | C | -0.0226 |
| rs140332506 | T | 0.0658  |
| rs74939201  | A | 0.0977  |
| rs115583680 | T | 0.0595  |
| rs10927571  | G | 0.0243  |
| rs13376117  | T | 0.0899  |
| rs12022974  | A | 0.0165  |
| rs644690    | T | 0.0189  |
| rs1285672   | T | -0.0177 |
| rs350169    | A | -0.0347 |
| rs138690196 | T | 0.0919  |
| rs61779483  | G | -0.0671 |
| rs35037499  | A | -0.0874 |
| rs145453686 | G | -0.0904 |
| rs11580918  | T | -0.071  |
| rs1530887   | G | 0.0182  |
| rs116062274 | G | -0.1115 |
| rs12141537  | T | -0.0486 |
| rs7537675   | G | 0.0161  |
| rs7542624   | G | -0.0217 |
| rs145869910 | C | -0.0483 |
| rs141775713 | G | -0.1435 |
| rs7520743   | C | -0.0197 |
| rs72736518  | C | -0.148  |
| rs61770617  | C | 0.0605  |
| rs75607745  | C | -0.0752 |
| rs139078373 | T | -0.0535 |
| rs57572926  | A | -0.0362 |

|             |   |         |
|-------------|---|---------|
| rs75641209  | T | 0.055   |
| rs1813697   | C | 0.0349  |
| rs71659355  | G | -0.0763 |
| rs76908489  | T | 0.0355  |
| rs12060186  | T | 0.0491  |
| rs12125660  | A | 0.037   |
| rs148943421 | C | 0.0566  |
| rs6656361   | A | -0.0368 |
| rs114113183 | A | -0.1398 |
| rs111391080 | A | 0.0853  |
| rs12040132  | C | -0.0415 |
| rs1294248   | T | 0.0351  |
| rs34754258  | T | 0.076   |
| rs35588936  | T | 0.0322  |
| rs72675711  | T | 0.0292  |
| rs11184173  | T | -0.0261 |
| rs7516662   | A | -0.0588 |
| rs10753556  | A | -0.0257 |
| rs11805731  | C | 0.0666  |
| rs12404222  | A | -0.0248 |
| rs114495162 | T | -0.1236 |
| rs3986572   | A | -0.0294 |
| rs6426915   | G | -0.0227 |
| rs6657749   | T | 0.0276  |
| rs2799426   | C | 0.0401  |
| rs812490    | C | 0.0167  |
| rs149924720 | G | -0.0621 |
| rs112959040 | T | 0.0824  |
| rs151229393 | A | -0.1634 |
| rs147381469 | C | 0.0761  |
| rs116641250 | C | -0.0869 |
| rs146814892 | A | -0.0714 |
| rs17379552  | C | 0.0612  |
| rs4650979   | C | 0.0424  |
| rs115027336 | G | 0.0474  |
| rs72702797  | A | 0.0417  |
| rs147553833 | C | -0.0792 |
| rs55857911  | T | 0.0402  |
| rs780222    | G | 0.017   |
| rs12726264  | C | -0.0584 |
| rs11118763  | A | -0.0164 |
| rs61768448  | T | -0.056  |
| rs520899    | G | 0.0735  |
| rs1008044   | T | 0.0173  |
| rs3991201   | G | 0.0479  |
| rs688630    | G | 0.0161  |
| rs12023508  | A | -0.0296 |

|             |   |         |
|-------------|---|---------|
| rs6666749   | A | -0.0369 |
| rs7521278   | C | -0.0311 |
| rs80159087  | C | -0.0563 |
| rs12731608  | A | 0.0499  |
| rs10789062  | T | -0.0208 |
| rs12406766  | C | 0.0858  |
| rs72752632  | T | -0.071  |
| rs141579172 | C | 0.0571  |
| rs2840594   | C | 0.0195  |
| rs2284764   | C | 0.0621  |
| rs12145632  | C | -0.0249 |
| rs2501866   | C | 0.0182  |
| rs10881541  | C | -0.0189 |
| rs1218568   | C | 0.0162  |
| rs146898375 | G | 0.0729  |
| rs683259    | G | -0.0182 |
| rs12025700  | T | 0.0684  |
| rs268959    | G | 0.0233  |
| rs1332837   | C | 0.0394  |
| rs76222898  | A | 0.0487  |
| rs79692157  | G | -0.0673 |
| rs345318    | C | -0.0261 |
| rs115984622 | A | -0.0991 |
| rs112617645 | G | -0.1047 |
| rs11804365  | T | 0.0425  |
| rs113632346 | T | 0.124   |
| rs115568119 | T | -0.0485 |
| rs7354905   | G | -0.0568 |
| rs10754174  | G | -0.0351 |
| rs2998675   | C | -0.0313 |
| rs61776833  | A | 0.0484  |
| rs1572970   | G | 0.0175  |
| rs4658065   | C | -0.0553 |
| rs72741243  | C | 0.0693  |
| rs2221056   | C | 0.052   |
| rs1831386   | C | -0.0523 |
| rs167049    | G | 0.0188  |
| rs17033823  | C | 0.0251  |
| rs35359275  | G | -0.0816 |
| rs34619319  | G | -0.0628 |
| rs704335    | G | -0.0269 |
| rs7546054   | G | 0.02    |
| rs12073953  | A | -0.0577 |
| rs79541564  | T | 0.0905  |
| rs115917714 | T | -0.1315 |
| rs1124571   | C | 0.0217  |
| rs77216079  | A | -0.0277 |

|             |   |         |
|-------------|---|---------|
| rs115329703 | T | 0.0822  |
| rs72667240  | G | 0.0284  |
| rs116136153 | G | 0.0976  |
| rs6594013   | A | 0.019   |
| rs12717799  | T | -0.0566 |
| rs2818751   | A | -0.0497 |
| rs77821625  | A | 0.0918  |
| rs78752457  | C | 0.0596  |
| rs17370290  | G | -0.0195 |
| rs76353074  | G | -0.0468 |
| rs11207604  | A | 0.0185  |
| rs2365739   | A | 0.0886  |
| rs79722654  | A | -0.0625 |
| rs138191341 | C | 0.0607  |
| rs75429460  | A | 0.0675  |
| rs35737021  | T | 0.0317  |
| rs1294376   | C | -0.0167 |
| rs138397779 | G | 0.1036  |
| rs12131952  | C | -0.0582 |
| rs417688    | A | 0.086   |
| rs79528371  | C | -0.0787 |
| rs115820281 | A | 0.0873  |
| rs55752585  | T | 0.0249  |
| rs140307384 | A | -0.1761 |
| rs12032240  | T | -0.0247 |
| rs11800555  | A | -0.1287 |
| rs3753967   | T | -0.0169 |
| rs6695976   | T | 0.0305  |
| rs634378    | G | -0.0207 |
| rs74545127  | A | 0.0845  |
| rs140598062 | A | -0.0788 |
| rs61820453  | C | -0.0283 |
| rs4649391   | T | -0.0164 |
| rs4660045   | A | 0.0246  |
| rs2940669   | T | -0.0463 |
| rs75743096  | A | 0.1064  |
| rs12408872  | G | -0.0186 |
| rs72695624  | T | -0.0562 |
| rs75215783  | C | -0.1229 |
| rs1001450   | C | -0.0219 |
| rs6692022   | C | -0.0164 |
| rs142997609 | T | 0.0999  |
| rs35133994  | G | -0.0697 |
| rs12048709  | A | -0.0437 |
| rs11584646  | A | 0.0206  |
| rs78251402  | T | -0.0393 |
| rs75850462  | T | 0.0845  |

|             |   |         |
|-------------|---|---------|
| rs11576314  | T | 0.0242  |
| rs116429809 | T | -0.1047 |
| rs10918865  | A | -0.0796 |
| rs12126932  | T | 0.0324  |
| rs78947686  | A | 0.0627  |
| rs116536189 | A | -0.1105 |
| rs305450    | T | -0.018  |
| rs114297274 | A | -0.0844 |
| rs34932255  | T | -0.0668 |
| rs138091205 | A | -0.0674 |
| rs116458495 | T | 0.0708  |
| rs116174942 | T | -0.0641 |
| rs2783566   | T | -0.0208 |
| rs116266331 | A | -0.0815 |
| rs80150232  | C | 0.0891  |
| rs72692641  | C | -0.0798 |
| rs139676619 | C | 0.0994  |
| rs6690313   | C | -0.1552 |
| rs12023771  | G | 0.0814  |
| rs141544704 | G | 0.0664  |
| rs11580794  | G | -0.0319 |
| rs61800555  | A | -0.0204 |
| rs1570703   | A | 0.0207  |
| rs1826869   | A | 0.0257  |
| rs112472475 | T | 0.0759  |
| rs12048938  | A | 0.0161  |
| rs112643646 | A | -0.0318 |
| rs10493237  | T | 0.0464  |
| rs149089731 | G | -0.1376 |
| rs6686530   | G | -0.1053 |
| rs56017663  | T | 0.0325  |
| rs2494152   | T | -0.0773 |
| rs116527246 | A | 0.0807  |
| rs147250922 | T | -0.0849 |
| rs12742498  | A | 0.0186  |
| rs12724708  | T | -0.0185 |
| rs12744888  | C | -0.041  |
| rs12752623  | T | 0.0407  |
| rs10747505  | G | -0.0159 |
| rs140688760 | C | 0.0892  |
| rs515817    | G | 0.0308  |
| rs421581    | C | -0.0676 |
| rs72755429  | C | -0.1039 |
| rs76957020  | C | 0.0727  |
| rs35727106  | A | -0.0415 |
| rs6683363   | T | 0.0342  |
| rs10863394  | C | 0.0225  |



|             |   |         |
|-------------|---|---------|
| rs6587475   | C | -0.0326 |
| rs139378764 | A | 0.1145  |
| rs11210570  | A | 0.0185  |
| rs77949454  | A | 0.1237  |
| rs61596375  | A | 0.1038  |
| rs41268143  | C | -0.064  |
| rs75776714  | A | 0.0467  |
| rs2050631   | G | -0.0209 |
| rs6429165   | A | -0.0203 |
| rs144819745 | G | -0.0381 |
| rs116158959 | G | 0.1187  |
| rs12403637  | A | 0.0625  |
| rs116462983 | A | 0.0771  |
| rs7534009   | A | 0.032   |
| rs114477955 | T | -0.0574 |
| rs146621382 | A | -0.1256 |
| rs17696917  | C | 0.1032  |
| rs114937771 | A | 0.1496  |
| rs143270513 | C | -0.0775 |
| rs10492937  | A | -0.0413 |
| rs2165331   | G | -0.0174 |
| rs1537673   | G | 0.1151  |
| rs142559665 | T | 0.0831  |
| rs10888541  | G | -0.0202 |
| rs4657378   | G | 0.0167  |
| rs74143949  | T | -0.0419 |
| rs41309629  | C | -0.0967 |
| rs35923204  | T | 0.0292  |
| rs11580827  | G | -0.0618 |
| rs72733498  | G | -0.1174 |
| rs115484426 | G | 0.077   |
| rs6666753   | G | -0.0341 |
| rs1410588   | C | 0.0171  |
| rs112871648 | T | 0.0245  |
| rs114722632 | C | -0.0941 |
| rs112129321 | A | 0.0726  |
| rs12711523  | C | 0.0204  |
| rs139682738 | C | 0.1111  |
| rs12130305  | C | -0.0175 |
| rs5012557   | T | 0.0218  |
| rs61775685  | A | -0.025  |
| rs116364108 | A | 0.0572  |
| rs72755087  | A | -0.0562 |
| rs74365716  | T | -0.0566 |
| rs665404    | T | -0.0182 |
| rs72760712  | A | -0.0287 |
| rs2229346   | T | -0.0517 |

|             |   |         |
|-------------|---|---------|
| rs138876697 | G | -0.0704 |
| rs28709840  | T | -0.0628 |
| rs1933127   | G | 0.038   |
| rs34318293  | C | -0.0372 |
| rs12139592  | A | 0.017   |
| rs515994    | C | -0.0164 |
| rs472291    | C | -0.0198 |
| rs17646887  | A | -0.0417 |
| rs7521960   | A | -0.0318 |
| rs78608505  | A | 0.0692  |
| rs12026954  | A | 0.029   |
| rs60861070  | G | 0.0296  |
| rs157229    | C | 0.0296  |
| rs11211039  | C | 0.0384  |
| rs6424537   | C | 0.0178  |
| rs954131    | G | 0.053   |
| rs10912252  | G | 0.0168  |
| rs2992975   | A | -0.0228 |
| rs4622084   | C | -0.016  |
| rs10493552  | A | 0.0199  |
| rs139873722 | A | 0.1596  |
| rs143161050 | C | -0.0827 |
| rs115581212 | A | 0.0754  |
| rs61783659  | A | -0.0545 |
| rs79673968  | A | -0.0621 |
| rs6683544   | C | -0.0245 |
| rs1377185   | T | 0.0225  |
| rs4846093   | T | 0.0402  |
| rs4659580   | G | -0.0164 |
| rs71644143  | T | 0.0501  |
| rs12567607  | A | -0.029  |
| rs17009413  | A | -0.0752 |
| rs6678087   | C | 0.0189  |
| rs12138588  | C | -0.0243 |
| rs112967824 | G | 0.0624  |
| rs78243131  | T | -0.0805 |
| rs10924250  | G | 0.0173  |
| rs116216587 | T | -0.0812 |
| rs115340619 | T | 0.044   |
| rs72940624  | G | 0.053   |
| rs116612205 | T | 0.0517  |
| rs76603889  | A | -0.0426 |
| rs36119740  | T | 0.0355  |
| rs114305510 | T | -0.1293 |
| rs12567303  | C | 0.0417  |
| rs79714321  | T | 0.055   |
| rs113168578 | G | -0.1521 |

|             |   |         |
|-------------|---|---------|
| rs150043657 | A | -0.0595 |
| rs60363194  | C | -0.0214 |
| rs12754595  | T | 0.0235  |
| rs115284561 | T | 0.0935  |
| rs61820606  | G | 0.0182  |
| rs10864107  | C | 0.0193  |
| rs10924443  | C | -0.0829 |
| rs11120921  | T | 0.0257  |
| rs151201326 | A | -0.0934 |
| rs149036558 | C | -0.1453 |
| rs74747874  | T | -0.083  |
| rs10494786  | C | 0.0214  |
| rs78041605  | T | 0.0905  |
| rs72679370  | T | 0.0361  |
| rs1573103   | A | -0.0183 |
| rs114490061 | G | -0.117  |
| rs150660317 | A | 0.0773  |
| rs115951937 | A | -0.1136 |
| rs151236079 | T | 0.1022  |
| rs115514468 | G | 0.0602  |
| rs112053784 | A | -0.0845 |
| rs12410115  | C | 0.1262  |
| rs12025264  | C | 0.0685  |
| rs143604776 | C | -0.0683 |
| rs111870041 | A | -0.074  |
| rs112805060 | C | -0.116  |
| rs114192931 | C | 0.0635  |
| rs67270594  | T | 0.0439  |
| rs12723393  | G | 0.0239  |
| rs115182063 | T | -0.0641 |
| rs61776521  | G | 0.0168  |
| rs11586097  | T | 0.0646  |
| rs2622839   | C | 0.0687  |
| rs10494419  | G | 0.0354  |
| rs12404709  | A | -0.105  |
| rs148090961 | A | -0.0888 |
| rs113953590 | G | -0.07   |
| rs1253920   | T | -0.0167 |
| rs12033311  | T | -0.0666 |
| rs76811775  | A | 0.0391  |
| rs11588594  | G | 0.0289  |
| rs56322649  | G | -0.0654 |
| rs114733917 | C | 0.0587  |
| rs41265763  | A | -0.0247 |
| rs10800027  | G | 0.028   |
| rs4651259   | A | 0.0166  |
| rs114093725 | A | 0.0816  |

|             |   |         |
|-------------|---|---------|
| rs67671429  | A | 0.0666  |
| rs78949413  | C | -0.0454 |
| rs6682983   | A | 0.0198  |
| rs141803204 | A | 0.0838  |
| rs9287171   | G | -0.0201 |
| rs115557950 | T | 0.0729  |
| rs147105313 | C | -0.0554 |
| rs11206631  | T | 0.0177  |
| rs583567    | G | 0.0296  |
| rs77975395  | G | 0.0422  |
| rs12735075  | T | 0.107   |
| rs10888859  | A | -0.0274 |
| rs78203705  | A | 0.1082  |
| rs150736640 | T | 0.1214  |
| rs35239268  | C | -0.0343 |
| rs7340049   | C | -0.031  |
| rs10927415  | T | -0.0205 |
| rs75459718  | A | -0.0293 |
| rs75695038  | G | 0.0678  |
| rs74532357  | T | 0.0529  |
| rs7548404   | T | 0.0813  |
| rs10753189  | G | -0.0171 |
| rs57407828  | A | -0.0568 |
| rs116514749 | G | 0.0883  |
| rs72924725  | G | 0.0864  |
| rs114853178 | A | 0.0768  |
| rs75207638  | G | 0.0896  |
| rs476078    | T | 0.0175  |
| rs35380803  | A | 0.0358  |
| rs2984921   | A | 0.0185  |
| rs12141204  | T | 0.0243  |
| rs17462950  | T | -0.0305 |
| rs913380    | A | 0.023   |
| rs10493768  | A | 0.0166  |
| rs4390174   | G | 0.0194  |
| rs12036851  | A | -0.0267 |
| rs7523426   | A | 0.06    |
| rs143879176 | G | 0.1356  |
| rs41287896  | T | -0.0545 |
| rs149905240 | C | -0.0553 |
| rs418045    | T | -0.0402 |
| rs6704426   | C | -0.0167 |
| rs76229965  | C | 0.0401  |
| rs116596241 | T | -0.1165 |
| rs80117212  | T | 0.0222  |
| rs78143558  | A | 0.0472  |
| rs3124812   | C | 0.0791  |

|             |   |         |
|-------------|---|---------|
| rs2170336   | A | 0.0234  |
| rs72680142  | A | -0.087  |
| rs602721    | C | -0.0229 |
| rs11578811  | T | 0.0405  |
| rs12133324  | T | 0.017   |
| rs149092661 | G | 0.0761  |
| rs71642135  | T | -0.0398 |
| rs11801921  | A | 0.032   |
| rs76783193  | C | 0.0657  |
| rs149429937 | A | -0.0843 |
| rs17383726  | A | 0.0603  |
| rs41296702  | G | -0.0894 |
| rs2281951   | T | -0.0212 |
| rs16840459  | T | 0.0223  |
| rs12745526  | A | -0.0992 |
| rs61814539  | A | -0.058  |
| rs78312504  | A | 0.0717  |
| rs10802807  | A | 0.0205  |
| rs230176    | T | 0.0789  |
| rs12132423  | C | 0.1118  |
| rs149181078 | T | -0.1104 |
| rs12117337  | T | -0.1154 |
| rs11585170  | C | -0.0316 |
| rs11122463  | A | 0.0177  |
| rs7537892   | G | 0.0196  |
| rs74902178  | C | 0.0856  |
| rs115007802 | T | 0.0904  |
| rs72753840  | G | -0.09   |
| rs75978000  | T | 0.0435  |
| rs2817887   | G | -0.0188 |
| rs4912284   | A | -0.0304 |
| rs75814662  | G | -0.0779 |
| rs114809765 | A | 0.1208  |
| rs2419051   | T | 0.0463  |
| rs11162463  | A | -0.0223 |
| rs9332684   | C | -0.0711 |
| rs11119624  | T | 0.0163  |
| rs779969    | G | -0.0243 |
| rs74487713  | T | 0.0771  |
| rs76169194  | C | 0.034   |
| rs71645099  | A | 0.0884  |
| rs12568609  | A | 0.0193  |
| rs2997397   | A | 0.041   |
| rs585715    | T | -0.0417 |
| rs74137036  | C | 0.0332  |
| rs113070614 | G | -0.0963 |
| rs12083329  | G | 0.0174  |

|             |   |         |
|-------------|---|---------|
| rs6429459   | T | -0.0401 |
| rs145075169 | T | 0.0994  |
| rs55905275  | A | -0.1189 |
| rs1999522   | T | -0.0825 |
| rs6667659   | G | 0.0171  |
| rs61831336  | G | -0.0843 |
| rs6426942   | G | 0.0391  |
| rs79838635  | G | -0.0328 |
| rs821721    | T | 0.0176  |
| rs113834473 | C | -0.0919 |
| rs12116715  | T | 0.0535  |
| rs72758874  | T | -0.0196 |
| rs61627902  | A | -0.0321 |
| rs77604501  | T | 0.0634  |
| rs3754282   | A | -0.0257 |
| rs115491031 | A | 0.1087  |
| rs17609832  | G | 0.084   |
| rs145618164 | A | 0.085   |
| rs279784    | T | -0.0209 |
| rs113179718 | A | -0.1061 |
| rs113436563 | G | 0.0838  |
| rs2843023   | C | 0.024   |
| rs10918840  | C | -0.018  |
| rs41270961  | A | -0.0467 |
| rs11118526  | C | -0.0217 |
| rs12758566  | T | 0.0831  |
| rs41296181  | A | -0.08   |
| rs111846770 | A | -0.0547 |
| rs6702708   | C | -0.0315 |
| rs2153209   | C | 0.0469  |
| rs138980002 | C | 0.0829  |
| rs78000528  | T | 0.1492  |
| rs145119108 | G | -0.0775 |
| rs115923905 | C | 0.1071  |
| rs17429732  | C | -0.0301 |
| rs12738683  | T | 0.1321  |
| rs12740114  | A | 0.0394  |
| rs145731215 | G | 0.0476  |
| rs72722840  | G | -0.0547 |
| rs78075213  | G | 0.1358  |
| rs12405989  | A | -0.0211 |
| rs77955855  | A | 0.0569  |
| rs76789773  | G | -0.0575 |
| rs36062353  | C | -0.0488 |
| rs867541    | A | -0.0234 |
| rs55921142  | T | 0.0221  |
| rs7554292   | C | 0.0188  |

|             |   |         |
|-------------|---|---------|
| rs12401946  | C | 0.0548  |
| rs4083594   | A | -0.0503 |
| rs6699125   | G | -0.0269 |
| rs1041903   | G | -0.0159 |
| rs114513597 | A | 0.0793  |
| rs11264629  | T | 0.028   |
| rs2293914   | A | -0.0326 |
| rs138293109 | T | -0.034  |
| rs115399262 | T | -0.0664 |
| rs12045081  | C | -0.0597 |
| rs12406770  | T | 0.0349  |
| rs12026049  | C | -0.019  |
| rs438226    | C | 0.0187  |
| rs11206093  | C | 0.0198  |
| rs77606061  | A | 0.0619  |
| rs72662077  | A | 0.0329  |
| rs34179374  | T | -0.0528 |
| rs4511072   | T | -0.0541 |
| rs1005430   | G | -0.0282 |
| rs17419887  | T | -0.0453 |
| rs11585866  | A | 0.0272  |
| rs11163363  | G | -0.0399 |
| rs10800361  | C | -0.0158 |
| rs72743290  | T | 0.0436  |
| rs1807765   | T | 0.0206  |
| rs704784    | C | -0.0171 |
| rs76545972  | G | -0.0378 |
| rs3737801   | G | -0.0371 |
| rs79938519  | C | -0.0803 |
| rs1281400   | C | 0.0158  |
| rs78544649  | A | -0.1595 |
| rs141208413 | A | -0.0442 |
| rs56145051  | A | -0.0528 |
| rs72722290  | G | -0.0327 |
| rs72705320  | G | 0.1034  |
| rs142653990 | C | -0.0748 |
| rs12024644  | A | -0.0533 |
| rs2494875   | T | -0.0656 |
| rs1778194   | G | 0.0168  |
| rs146602127 | T | -0.0826 |
| rs72764634  | T | -0.0471 |
| rs2483272   | T | -0.0156 |
| rs583993    | C | -0.0196 |
| rs79510932  | A | 0.071   |
| rs115081814 | T | 0.0769  |
| rs115190140 | G | 0.0415  |
| rs113315424 | C | -0.0762 |

|             |   |         |
|-------------|---|---------|
| rs2977309   | G | -0.0312 |
| rs75458566  | C | -0.0765 |
| rs116426689 | C | 0.0857  |
| rs10908421  | T | -0.0184 |
| rs16831388  | G | 0.0212  |
| rs1800894   | T | -0.0459 |
| rs56118223  | A | 0.0558  |
| rs72653571  | T | -0.0444 |
| rs72690339  | A | -0.0672 |
| rs12144584  | A | -0.0235 |
| rs113360889 | T | 0.1186  |
| rs305439    | G | 0.1367  |
| rs147721231 | T | -0.0698 |
| rs146911246 | A | 0.0593  |
| rs150014952 | C | -0.0345 |
| rs11581365  | T | -0.0178 |
| rs11204519  | A | 0.0192  |
| rs147086118 | A | -0.0479 |
| rs144694424 | T | -0.0642 |
| rs112409607 | A | 0.0274  |
| rs1560854   | T | -0.0343 |
| rs954145    | G | 0.0165  |
| rs79372732  | T | -0.1085 |
| rs77204299  | A | 0.1672  |
| rs61832422  | G | -0.0289 |
| rs55767926  | C | 0.0297  |
| rs74103642  | G | -0.037  |
| rs2269340   | C | 0.031   |
| rs78297962  | A | -0.0282 |
| rs3737775   | C | -0.0173 |
| rs114278956 | T | 0.1029  |
| rs11208737  | A | 0.0753  |
| rs17482018  | C | -0.0225 |
| rs79666851  | A | -0.1638 |
| rs4384209   | A | -0.0193 |
| rs11184749  | C | -0.0229 |
| rs141794346 | T | 0.0359  |
| rs80042656  | T | 0.0766  |
| rs2181699   | T | -0.017  |
| rs80049208  | T | 0.0645  |
| rs80115265  | A | -0.1307 |
| rs142370431 | C | -0.081  |
| rs76642104  | T | -0.0375 |
| rs61772078  | A | -0.0288 |
| rs727146    | T | -0.0213 |
| rs10922599  | T | -0.018  |
| rs147555573 | A | 0.1059  |



|             |   |         |
|-------------|---|---------|
| rs61806253  | A | 0.0688  |
| rs9660066   | C | -0.0177 |
| rs17349327  | T | 0.0621  |
| rs10493888  | C | -0.0204 |
| rs60601257  | T | 0.0235  |
| rs116821865 | A | 0.0846  |
| rs9424466   | C | 0.019   |
| rs4258227   | T | -0.0901 |
| rs1203148   | G | -0.0224 |
| rs230275    | C | -0.022  |
| rs564691    | G | -0.0175 |
| rs17447254  | C | -0.0378 |
| rs143074967 | G | -0.1092 |
| rs4970781   | C | 0.0205  |
| rs12024897  | G | -0.0162 |
| rs483581    | A | -0.0254 |
| rs12034664  | C | -0.025  |
| rs7533665   | T | 0.018   |
| rs1180964   | A | -0.0219 |
| rs78599427  | A | -0.1527 |
| rs6672329   | C | -0.0871 |
| rs74467012  | G | 0.1206  |
| rs75238248  | G | 0.0442  |
| rs12117978  | A | 0.0464  |
| rs563978    | C | 0.0182  |
| rs77947184  | T | 0.0209  |
| rs112885097 | G | -0.064  |
| rs628894    | C | 0.0859  |
| rs115106543 | T | 0.0724  |
| rs35540647  | C | -0.0511 |
| rs12046293  | C | 0.0255  |
| rs150463431 | A | -0.0697 |
| rs78974779  | C | -0.0305 |
| rs114642111 | T | -0.089  |
| rs78307147  | C | -0.0756 |
| rs4585986   | T | 0.0356  |
| rs35163828  | G | -0.018  |
| rs17102234  | T | -0.0734 |
| rs61800495  | T | -0.0199 |
| rs61829929  | A | 0.0339  |
| rs2780623   | A | -0.0235 |
| rs2103843   | A | -0.0167 |
| rs11263901  | A | 0.0316  |
| rs17374740  | C | -0.0698 |
| rs72685053  | T | 0.0968  |
| rs144920577 | G | -0.0644 |
| rs78841916  | T | -0.0558 |

|             |   |         |
|-------------|---|---------|
| rs2495443   | C | 0.0213  |
| rs10518566  | G | 0.0262  |
| rs78876165  | T | 0.1157  |
| rs17380875  | G | -0.0216 |
| rs114291761 | C | -0.0663 |
| rs215794    | C | -0.0189 |
| rs116174973 | C | 0.0602  |
| rs76868233  | A | -0.0369 |
| rs72663617  | C | -0.0434 |
| rs114490184 | C | -0.0515 |
| rs113901921 | G | 0.0829  |
| rs141977389 | G | -0.0795 |
| rs115448989 | A | 0.0625  |
| rs4658701   | A | 0.0348  |
| rs114153944 | C | 0.1244  |
| rs148118904 | C | 0.0314  |
| rs59439337  | A | 0.0248  |
| rs3014716   | C | 0.0195  |
| rs146089630 | T | -0.1165 |
| rs68077262  | A | -0.0496 |
| rs77287353  | G | -0.0229 |
| rs112958864 | A | 0.0776  |
| rs11165877  | A | -0.0171 |
| rs116026144 | T | -0.0914 |
| rs61805740  | A | 0.0443  |
| rs111655686 | A | 0.0523  |
| rs860671    | C | 0.0892  |
| rs9659032   | T | 0.024   |
| rs75537824  | A | 0.0732  |
| rs116540250 | T | -0.0902 |
| rs7519071   | A | -0.0277 |
| rs116567825 | T | 0.1031  |
| rs140933147 | G | 0.0481  |
| rs6661827   | T | -0.0164 |
| rs113030568 | C | 0.1348  |
| rs12139478  | T | -0.0726 |
| rs140184639 | T | 0.104   |
| rs140736122 | A | 0.0703  |
| rs111379399 | G | 0.0422  |
| rs12030888  | T | 0.024   |
| rs4655315   | A | -0.0234 |
| rs138057118 | T | -0.1229 |
| rs74103109  | C | 0.068   |
| rs61811251  | A | 0.0888  |
| rs114256320 | C | -0.0834 |
| rs1340757   | G | 0.0191  |
| rs7530206   | G | 0.0153  |

|             |   |         |
|-------------|---|---------|
| rs2501907   | G | -0.0231 |
| rs148454078 | A | 0.0796  |
| rs10494197  | T | 0.0674  |
| rs1780589   | G | -0.0158 |
| rs12129427  | C | -0.019  |
| rs34115388  | T | 0.0236  |
| rs72665339  | A | 0.0218  |
| rs75220762  | T | 0.0598  |
| rs1517105   | G | 0.0265  |
| rs16837190  | A | -0.0344 |
| rs61837910  | G | 0.0346  |
| rs79089987  | A | -0.0443 |
| rs72720567  | A | -0.0892 |
| rs1885869   | T | -0.0539 |
| rs115737570 | A | 0.0813  |
| rs118074722 | G | -0.1489 |
| rs74357102  | C | 0.0756  |
| rs2798603   | A | 0.0173  |
| rs114860988 | T | 0.0764  |
| rs61801981  | T | 0.0391  |
| rs12034595  | A | -0.0491 |
| rs111479558 | T | 0.0459  |
| rs115621681 | A | -0.0978 |
| rs6683283   | G | -0.0214 |
| rs17368807  | A | -0.0593 |
| rs34148350  | A | -0.0362 |
| rs1898899   | G | -0.0444 |
| rs138694863 | C | -0.0419 |
| rs9440302   | G | 0.0156  |
| rs80301732  | A | 0.0531  |
| rs76619529  | T | -0.0695 |
| rs72669630  | A | 0.0584  |
| rs9442568   | T | -0.0819 |
| rs2777819   | T | -0.0172 |
| rs17494100  | C | 0.0282  |
| rs9012      | T | -0.0174 |
| rs77944585  | C | -0.0465 |
| rs3917740   | A | 0.0208  |
| rs4916227   | T | -0.0176 |
| rs591779    | A | 0.0724  |
| rs2689188   | T | 0.0228  |
| rs6678663   | G | -0.0768 |
| rs79055281  | G | -0.0696 |
| rs113880620 | G | -0.0932 |
| rs112574188 | T | 0.0582  |
| rs76564481  | A | 0.0568  |
| rs299885    | C | -0.0557 |

|             |   |         |
|-------------|---|---------|
| rs12074571  | T | 0.0324  |
| rs77883412  | A | 0.0396  |
| rs114102265 | T | -0.0873 |
| rs709781    | G | 0.0249  |
| rs6428465   | T | 0.0552  |
| rs149147748 | A | -0.0781 |
| rs12145590  | T | 0.0164  |
| rs78257557  | G | 0.0572  |
| rs114254129 | T | 0.1339  |
| rs1857067   | A | 0.0195  |
| rs2495052   | A | 0.0229  |
| rs9438898   | G | 0.0178  |
| rs12087924  | A | 0.0152  |
| rs28624077  | T | -0.1174 |
| rs7416240   | A | -0.0225 |
| rs4950869   | G | -0.0813 |
| rs11584892  | T | 0.1343  |
| rs2221513   | G | -0.0219 |
| rs72680029  | G | -0.0381 |
| rs143606474 | C | -0.0864 |
| rs145340493 | A | -0.0812 |
| rs112123396 | A | -0.0834 |
| rs76078802  | T | -0.0521 |
| rs16841495  | C | -0.047  |
| rs7544147   | C | -0.0324 |
| rs12746045  | T | -0.0232 |
| rs12117158  | T | 0.0595  |
| rs7527281   | A | 0.0206  |
| rs72708220  | A | 0.076   |
| rs12137641  | G | -0.0336 |
| rs77013051  | A | 0.0615  |
| rs12405527  | A | 0.0484  |
| rs72657253  | A | 0.0296  |
| rs79097692  | C | -0.0403 |
| rs627205    | T | 0.0251  |
| rs76520844  | A | -0.0431 |
| rs74445827  | T | -0.0501 |
| rs11539794  | T | -0.0318 |
| rs114901383 | A | 0.1038  |
| rs6600283   | G | 0.1134  |
| rs57522009  | A | 0.1156  |
| rs78452340  | C | -0.0449 |
| rs9435715   | A | 0.0308  |
| rs2772286   | C | 0.0252  |
| rs1856429   | T | 0.0555  |
| rs2644427   | C | -0.0184 |
| rs11581124  | A | -0.0679 |

|             |   |         |
|-------------|---|---------|
| rs112521404 | A | 0.0961  |
| rs535464    | A | -0.0191 |
| rs111378850 | T | -0.0703 |
| rs112739089 | G | 0.0754  |
| rs76851192  | C | 0.1109  |
| rs115400630 | C | 0.0866  |
| rs68128336  | G | -0.0353 |
| rs76866779  | T | -0.0573 |
| rs12135938  | C | 0.0241  |
| rs11120932  | A | 0.0261  |
| rs115309021 | T | -0.1316 |
| rs10735522  | A | -0.0286 |
| rs718223    | G | 0.0223  |
| rs1874805   | G | 0.0164  |
| rs56013092  | T | 0.0245  |
| rs116327143 | A | 0.0366  |
| rs139656107 | T | -0.1269 |
| rs10890322  | T | 0.0423  |
| rs7417514   | C | -0.0169 |
| rs71654463  | C | 0.0667  |
| rs1262460   | G | -0.0197 |
| rs7412716   | G | -0.054  |
| rs149311007 | G | -0.093  |
| rs142292664 | T | -0.1422 |
| rs12131523  | T | 0.0298  |
| rs28620204  | T | -0.0322 |
| rs11122585  | T | 0.0301  |
| rs12129679  | A | 0.0538  |
| rs61778891  | A | 0.0243  |
| rs114583798 | A | 0.1021  |
| rs79644349  | T | -0.0926 |
| rs149780363 | C | -0.0773 |
| rs112215814 | G | -0.102  |
| rs112476129 | A | -0.0773 |
| rs78227912  | A | 0.1003  |
| rs11211085  | A | 0.022   |
| rs13374908  | A | 0.0183  |
| rs3026821   | T | 0.0886  |
| rs34121458  | T | -0.0188 |
| rs57859589  | A | -0.0331 |
| rs114765344 | A | 0.0906  |
| rs78805221  | T | 0.0524  |
| rs77249372  | T | 0.1085  |
| rs3905242   | C | 0.0177  |
| rs143671446 | A | 0.1055  |
| rs1327609   | T | 0.0159  |
| rs147065028 | C | -0.0492 |

|             |   |         |
|-------------|---|---------|
| rs148619833 | T | 0.0808  |
| rs73103853  | C | 0.0754  |
| rs77098569  | T | -0.0497 |
| rs1411017   | C | -0.0502 |
| rs79946833  | T | 0.0497  |
| rs17489662  | G | -0.1144 |
| rs79130240  | T | -0.0656 |
| rs74511920  | G | 0.1133  |
| rs71673352  | T | 0.0918  |
| rs2486544   | A | -0.0357 |
| rs12057544  | T | 0.0338  |
| rs7542575   | C | 0.021   |
| rs72636606  | T | 0.1245  |
| rs149770901 | T | -0.0972 |
| rs142012823 | T | 0.1333  |
| rs2049374   | T | -0.0161 |
| rs36089872  | T | 0.0819  |
| rs12028512  | T | 0.0588  |
| rs11808748  | T | 0.0245  |
| rs6700245   | C | -0.0225 |
| rs77117253  | T | 0.0609  |
| rs72655825  | T | 0.0838  |
| rs115557213 | A | 0.0563  |
| rs2500124   | T | 0.0569  |
| rs141480431 | G | -0.1027 |
| rs10495394  | G | 0.0192  |
| rs115221504 | G | -0.0689 |
| rs682568    | G | -0.0191 |
| rs77798531  | A | 0.0684  |
| rs57731889  | T | -0.0392 |
| rs12406423  | C | -0.0339 |
| rs4920196   | A | 0.0459  |
| rs11584516  | A | 0.0707  |
| rs2419686   | A | 0.1015  |
| rs146415525 | A | 0.1156  |
| rs2379147   | A | -0.0299 |
| rs74060024  | C | 0.0614  |
| rs17129842  | G | 0.0662  |
| rs4950820   | A | 0.0641  |
| rs35131135  | C | 0.0176  |
| rs12094945  | G | -0.0174 |
| rs149125354 | A | 0.0888  |
| rs857833    | A | -0.0185 |
| rs141877812 | C | -0.0879 |
| rs116756988 | C | -0.0787 |
| rs12044721  | C | 0.0568  |
| rs78509280  | C | 0.0968  |

|             |   |         |
|-------------|---|---------|
| rs142919902 | T | 0.0936  |
| rs4844730   | C | 0.0256  |
| rs116229131 | C | -0.097  |
| rs4654589   | T | 0.0613  |
| rs6600331   | A | -0.0244 |
| rs9425454   | A | 0.0985  |
| rs1317950   | G | -0.017  |
| rs4660198   | G | -0.0317 |
| rs76159588  | C | -0.0795 |
| rs789987    | T | -0.055  |
| rs149060239 | A | -0.0858 |
| rs6682004   | T | -0.0344 |
| rs7550075   | G | -0.0202 |
| rs116203263 | A | -0.0858 |
| rs147143327 | C | -0.1302 |
| rs1775403   | G | -0.0169 |
| rs112507592 | A | -0.0713 |
| rs79815707  | G | 0.0301  |
| rs72976575  | G | -0.0295 |
| rs16830722  | A | -0.0548 |
| rs80062140  | G | 0.0583  |
| rs3762302   | C | -0.0564 |
| rs114379464 | C | -0.0628 |
| rs113909471 | T | 0.0766  |
| rs148974843 | G | 0.0464  |
| rs12756599  | T | 0.0381  |
| rs141727213 | T | -0.0596 |
| rs6700898   | C | 0.0545  |
| rs12129038  | T | -0.0259 |
| rs6670042   | G | -0.0272 |
| rs6672167   | A | -0.0226 |
| rs7516864   | A | 0.0917  |
| rs11585755  | T | -0.0818 |
| rs112254643 | A | -0.0221 |
| rs112911943 | T | -0.0294 |
| rs803314    | T | 0.0281  |
| rs115022189 | T | 0.0992  |
| rs143408971 | G | -0.0345 |
| rs74226456  | A | 0.0862  |
| rs114027441 | T | 0.0613  |
| rs72909349  | A | 0.1062  |
| rs115233556 | C | -0.0795 |
| rs150613020 | A | -0.0966 |
| rs79424330  | A | 0.0872  |
| rs1149143   | T | 0.025   |
| rs78770848  | G | -0.0781 |
| rs76535746  | C | -0.103  |

|             |   |         |
|-------------|---|---------|
| rs11102043  | T | -0.0206 |
| rs75238544  | A | -0.0763 |
| rs116650174 | A | -0.075  |
| rs11207770  | G | 0.0662  |
| rs2483060   | T | -0.0192 |
| rs115562318 | A | -0.0888 |
| rs115076274 | A | 0.0569  |
| rs114054677 | C | 0.098   |
| rs16839923  | A | 0.0436  |
| rs60610707  | G | -0.0975 |
| rs12068040  | C | -0.0292 |
| rs140812298 | C | -0.091  |
| rs72653570  | T | 0.0489  |
| rs11210840  | G | -0.0163 |
| rs139887902 | G | -0.0997 |
| rs12144799  | T | -0.0231 |
| rs316041    | C | -0.0183 |
| rs74654691  | C | -0.0709 |
| rs116228017 | A | -0.1074 |
| rs6657370   | G | 0.0177  |
| rs76025221  | T | -0.084  |
| rs12118224  | G | -0.0189 |
| rs76455346  | C | 0.0903  |
| rs57557070  | C | -0.0727 |
| rs143046899 | A | 0.0905  |
| rs74227539  | T | -0.0579 |
| rs12405504  | G | -0.0462 |
| rs12090091  | A | 0.0441  |
| rs112869322 | T | 0.055   |
| rs761191    | C | -0.0156 |
| rs78904702  | C | -0.0257 |
| rs35153588  | C | 0.0422  |
| rs6677930   | A | -0.0152 |
| rs6688960   | G | 0.0891  |
| rs4915686   | T | -0.0181 |
| rs116285028 | T | 0.1319  |
| rs4291550   | C | 0.0378  |
| rs77184573  | C | 0.0813  |
| rs34780349  | T | 0.0179  |
| rs1954655   | A | -0.0154 |
| rs2813866   | A | -0.0163 |
| rs12043211  | T | 0.0186  |
| rs4661591   | G | 0.083   |
| rs34757318  | C | 0.0693  |
| rs4633275   | C | 0.0801  |
| rs2365716   | G | -0.0246 |
| rs2791149   | C | 0.0355  |



|             |   |         |
|-------------|---|---------|
| rs149846278 | A | 0.0873  |
| rs12741740  | A | 0.0163  |
| rs10800197  | C | 0.0185  |
| rs111924481 | G | 0.0677  |
| rs2486946   | C | -0.0214 |
| rs16853565  | C | 0.0233  |
| rs61766491  | G | 0.048   |
| rs878149    | A | 0.0363  |
| rs78323113  | C | 0.0724  |
| rs12406508  | G | 0.0258  |
| rs72553940  | C | -0.1179 |
| rs12135820  | A | 0.0485  |
| rs16845661  | T | 0.0364  |
| rs12146097  | T | 0.026   |
| rs17485987  | C | 0.0992  |
| rs150876215 | A | -0.1045 |
| rs115977729 | C | -0.082  |
| rs144622813 | T | -0.0699 |
| rs17011636  | C | 0.0263  |
| rs116060508 | T | 0.0418  |
| rs6658879   | C | 0.0691  |
| rs7539303   | C | -0.0289 |
| rs75079782  | A | -0.0834 |
| rs57796953  | C | 0.023   |
| rs2499007   | A | -0.0561 |
| rs2348100   | C | -0.0156 |
| rs2665495   | T | -0.0303 |
| rs2661339   | T | -0.0363 |
| rs6664341   | C | -0.0193 |
| rs764784    | A | -0.0288 |
| rs138758802 | T | -0.074  |
| rs79233553  | A | -0.0582 |
| rs74412575  | T | -0.0794 |
| rs141941623 | G | 0.0513  |
| rs146197586 | A | -0.0974 |
| rs78154349  | G | -0.1041 |
| rs12410429  | C | 0.0163  |
| rs58991938  | T | 0.0322  |
| rs36105915  | T | 0.0523  |
| rs139249031 | T | 0.0884  |
| rs115870276 | A | 0.1053  |
| rs12140095  | T | 0.0779  |
| rs116806515 | C | 0.0991  |
| rs72993043  | T | 0.0739  |
| rs593398    | C | -0.0445 |
| rs115733833 | C | 0.0614  |
| rs115524967 | A | 0.0904  |

|             |   |         |
|-------------|---|---------|
| rs61766990  | T | 0.0422  |
| rs12732029  | A | 0.0262  |
| rs16848431  | T | 0.02    |
| rs115601228 | A | -0.1001 |
| rs79017607  | C | 0.0892  |
| rs12402825  | C | 0.0315  |
| rs77679825  | G | 0.0784  |
| rs6700210   | G | -0.0211 |
| rs1002485   | C | 0.0157  |
| rs499506    | A | -0.0204 |
| rs12134357  | C | -0.0174 |
| rs10917180  | C | 0.0477  |
| rs116332132 | G | -0.0614 |
| rs68022491  | G | -0.0396 |
| rs77931656  | A | -0.1001 |
| rs35612490  | T | 0.0505  |
| rs4916416   | C | 0.0163  |
| rs115340693 | A | -0.0658 |
| rs116241822 | G | -0.0872 |
| rs395145    | C | 0.0162  |
| rs6684654   | A | 0.0919  |
| rs11165236  | A | 0.0192  |
| rs141625499 | T | 0.0758  |
| rs61819466  | T | -0.0658 |
| rs116782275 | G | -0.088  |
| rs10754845  | C | -0.0171 |
| rs61830186  | A | 0.0757  |
| rs12751525  | G | -0.0153 |
| rs2640045   | T | -0.0206 |
| rs145599169 | G | 0.0828  |
| rs1892540   | A | 0.0199  |
| rs141795354 | G | -0.1592 |
| rs77338647  | A | -0.031  |
| rs12068094  | C | -0.1242 |
| rs57750866  | A | 0.0862  |
| rs79533696  | T | -0.051  |
| rs17540663  | C | 0.0383  |
| rs12735445  | G | -0.0175 |
| rs61824466  | A | -0.0379 |
| rs12082678  | A | 0.039   |
| rs144099387 | C | -0.0605 |
| rs140974316 | C | 0.0896  |
| rs74954327  | C | -0.0628 |
| rs146186906 | A | -0.0644 |
| rs72749335  | T | 0.0582  |
| rs829410    | G | -0.0522 |
| rs111332383 | A | -0.1201 |

|             |   |         |
|-------------|---|---------|
| rs17380775  | A | 0.0687  |
| rs80312623  | A | 0.0721  |
| rs58324836  | G | -0.0963 |
| rs2566754   | G | -0.0154 |
| rs4147828   | G | 0.0198  |
| rs1925429   | C | 0.0159  |
| rs77293842  | T | 0.0277  |
| rs4565750   | G | 0.0194  |
| rs150776326 | T | -0.0837 |
| rs12744552  | C | -0.023  |
| rs116621932 | T | 0.0797  |
| rs115841294 | T | 0.0443  |
| rs16864157  | T | -0.015  |
| rs228644    | A | 0.0153  |
| rs6684158   | G | 0.0169  |
| rs146720012 | C | 0.088   |
| rs3767339   | A | -0.0159 |
| rs34777555  | C | 0.1155  |
| rs61831339  | T | 0.0168  |
| rs58675256  | T | -0.0675 |
| rs2145419   | C | 0.0203  |
| rs72708352  | T | 0.0393  |
| rs74458710  | T | 0.0673  |
| rs2821320   | T | 0.0171  |
| rs12138511  | G | 0.0585  |
| rs74972820  | T | 0.043   |
| rs35373323  | A | -0.0476 |
| rs41265166  | C | -0.044  |
| rs12119587  | A | 0.0624  |
| rs4654337   | T | -0.0198 |
| rs10754240  | T | 0.0153  |
| rs76979993  | A | -0.0535 |
| rs72657943  | G | 0.032   |
| rs114468060 | A | 0.0576  |
| rs115072175 | T | 0.0437  |
| rs2462926   | C | -0.0284 |
| rs6422125   | T | 0.0391  |
| rs12031423  | T | -0.0182 |
| rs150548184 | T | 0.14    |
| rs75471648  | T | -0.0763 |
| rs12567200  | G | -0.0256 |
| rs16852778  | T | -0.0218 |
| rs79421271  | G | -0.0419 |
| rs41277640  | T | -0.1064 |
| rs12127009  | A | 0.0221  |
| rs60788429  | T | -0.0236 |
| rs11585798  | A | -0.0371 |

|             |   |         |
|-------------|---|---------|
| rs116239241 | T | 0.0677  |
| rs72752838  | A | -0.0482 |
| rs12120766  | G | -0.0498 |
| rs115048192 | T | -0.0638 |
| rs7546296   | T | 0.0156  |
| rs74443351  | A | 0.0886  |
| rs267745    | C | -0.0159 |
| rs4846362   | A | 0.03    |
| rs79432908  | T | 0.0358  |
| rs113574832 | T | -0.0711 |
| rs17491176  | A | -0.0225 |
| rs12060150  | G | -0.0187 |
| rs2813694   | C | -0.0265 |
| rs223192    | C | 0.0221  |
| rs11211073  | T | 0.0186  |
| rs75214981  | C | 0.0714  |
| rs9730423   | T | 0.025   |
| rs4246525   | C | 0.0169  |
| rs10494422  | C | 0.0271  |
| rs115913254 | T | 0.0501  |
| rs12091593  | C | 0.0239  |
| rs2803307   | A | 0.0237  |
| rs12034577  | A | -0.0184 |
| rs116836116 | A | 0.1282  |
| rs6661774   | G | 0.0252  |
| rs2132485   | G | 0.0159  |
| rs12566571  | T | 0.0244  |
| rs12048517  | G | -0.0491 |
| rs139362388 | C | 0.0762  |
| rs4951354   | G | 0.0199  |
| rs10864735  | T | -0.0171 |
| rs72693130  | A | 0.0378  |
| rs61820500  | A | -0.0375 |
| rs12141017  | A | 0.0524  |
| rs61760819  | G | -0.0191 |
| rs782655    | A | -0.1119 |
| rs17020572  | T | 0.0856  |
| rs7546733   | G | 0.0371  |
| rs9787098   | A | 0.0185  |
| rs773568    | A | 0.0168  |
| rs10779404  | C | 0.0201  |
| rs114120672 | G | 0.1075  |
| rs116166162 | G | -0.1144 |
| rs7531089   | C | -0.0159 |
| rs144716886 | A | 0.0842  |
| rs9662345   | C | -0.019  |
| rs10458411  | C | 0.0218  |

|             |   |         |
|-------------|---|---------|
| rs12126638  | C | -0.0188 |
| rs115730473 | C | -0.1586 |
| rs57414802  | G | 0.0681  |
| rs115558877 | G | -0.1745 |
| rs6682749   | A | -0.0158 |
| rs75679674  | T | -0.0499 |
| rs6679724   | A | 0.0222  |
| rs1517756   | C | -0.0503 |
| rs75272860  | A | -0.0813 |
| rs1408138   | T | 0.0271  |
| rs139310104 | G | -0.1312 |
| rs7546255   | C | -0.028  |
| rs7548522   | T | 0.039   |
| rs80131221  | C | 0.0368  |
| rs10429941  | C | 0.0176  |
| rs79066874  | G | -0.0423 |
| rs12726656  | A | -0.0369 |
| rs10921094  | G | 0.0219  |
| rs74103693  | T | -0.065  |
| rs3738226   | T | -0.0165 |
| rs73044273  | G | -0.0325 |
| rs17577296  | C | 0.0397  |
| rs74741649  | A | 0.0838  |
| rs112593694 | C | 0.0937  |
| rs113288136 | G | -0.0498 |
| rs12565489  | G | -0.0663 |
| rs141541045 | T | 0.1245  |
| rs12047249  | G | -0.0234 |
| rs75721924  | T | 0.05    |
| rs11465212  | A | -0.064  |
| rs12407294  | C | 0.0173  |
| rs2288990   | G | 0.0253  |
| rs139835511 | A | 0.1053  |
| rs79783208  | C | -0.0729 |
| rs2764916   | C | -0.0259 |
| rs1245036   | C | -0.0258 |
| rs73062478  | G | 0.048   |
| rs114989025 | T | -0.0672 |
| rs77903336  | T | 0.0402  |
| rs10782545  | T | 0.0193  |
| rs75656152  | A | -0.0626 |
| rs12408483  | A | 0.0755  |
| rs72684147  | C | -0.0468 |
| rs11102172  | A | -0.0158 |
| rs149015008 | T | 0.096   |
| rs61825848  | G | -0.0471 |
| rs7533579   | G | -0.0217 |

|             |   |         |
|-------------|---|---------|
| rs113490379 | G | 0.0666  |
| rs11810323  | T | -0.0688 |
| rs75521358  | T | 0.0787  |
| rs59927172  | C | 0.0224  |
| rs765344    | C | -0.0179 |
| rs80017627  | C | -0.0908 |
| rs4233038   | C | 0.0174  |
| rs2284447   | T | -0.0371 |
| rs10798206  | G | 0.0152  |
| rs11578819  | G | -0.0157 |
| rs80269166  | C | 0.056   |
| rs12133265  | A | -0.0399 |
| rs112258042 | A | 0.1444  |
| rs505585    | C | 0.0192  |
| rs696950    | C | -0.0214 |
| rs116200414 | C | -0.116  |
| rs845249    | G | -0.0354 |
| rs78010002  | T | -0.0797 |
| rs11803512  | T | 0.0407  |
| rs56202307  | G | 0.0247  |
| rs12141308  | G | -0.0525 |
| rs12044370  | T | 0.0199  |
| rs12127595  | A | 0.027   |
| rs2334007   | T | 0.0246  |
| rs151069054 | T | -0.091  |
| rs56353055  | G | 0.0295  |
| rs72703822  | G | -0.0249 |
| rs6700387   | A | -0.0269 |
| rs150031287 | G | 0.0835  |
| rs10911997  | C | 0.0251  |
| rs78372405  | G | -0.0402 |
| rs77517931  | C | -0.1082 |
| rs1032622   | C | 0.0214  |
| rs850598    | G | -0.0222 |
| rs912771    | A | -0.0893 |
| rs4654344   | C | -0.0168 |
| rs114970726 | G | 0.1383  |
| rs7539318   | C | -0.0189 |
| rs10492941  | A | -0.0269 |
| rs72694349  | T | -0.0348 |
| rs5744387   | T | -0.018  |
| rs114133233 | T | 0.0577  |
| rs78266728  | C | 0.0923  |
| rs354577    | C | 0.0598  |
| rs12081070  | A | 0.0154  |
| rs61782770  | G | 0.0368  |
| rs12404339  | G | -0.0171 |

|             |   |         |
|-------------|---|---------|
| rs114040979 | C | -0.0533 |
| rs12029987  | A | -0.036  |
| rs4951304   | C | -0.0158 |
| rs143847385 | A | -0.0655 |
| rs617352    | G | -0.0248 |
| rs7542908   | A | -0.0344 |
| rs17013505  | C | 0.0584  |
| rs114841368 | C | -0.043  |
| rs78092370  | G | 0.0404  |
| rs79657041  | G | -0.0708 |
| rs4140599   | C | -0.018  |
| rs12075454  | T | -0.0454 |
| rs2817160   | A | -0.0337 |
| rs114839960 | G | 0.0943  |
| rs72757982  | T | -0.0893 |
| rs9435502   | A | 0.0192  |
| rs4284259   | A | -0.0187 |
| rs12125927  | A | -0.0307 |
| rs10874584  | G | 0.1007  |
| rs72701115  | C | -0.0712 |
| rs113024100 | T | 0.037   |
| rs114803524 | G | 0.0549  |
| rs6656693   | A | -0.0194 |
| rs78230742  | C | 0.1064  |
| rs6660541   | A | -0.0151 |
| rs78136127  | A | -0.075  |
| rs235900    | T | 0.0203  |
| rs16851653  | A | 0.0238  |
| rs115567131 | T | -0.0978 |
| rs72701768  | C | 0.0379  |
| rs142872794 | C | -0.092  |
| rs3790506   | A | 0.0163  |
| rs7535067   | A | -0.024  |
| rs145149515 | G | -0.1258 |
| rs6540469   | T | 0.0158  |
| rs12407872  | A | -0.0471 |
| rs114595309 | A | 0.0706  |
| rs78561794  | C | 0.0437  |
| rs10924242  | A | 0.0208  |
| rs1287638   | C | 0.0163  |
| rs2235657   | T | 0.0163  |
| rs35375306  | G | -0.0191 |
| rs2821008   | G | -0.0276 |
| rs12749098  | T | -0.0168 |
| rs78534769  | A | 0.109   |
| rs1766862   | C | 0.0157  |
| rs17749164  | C | -0.0166 |

|             |   |         |
|-------------|---|---------|
| rs71636981  | A | -0.0451 |
| rs72739261  | G | -0.0936 |
| rs116144052 | T | 0.1025  |
| rs72711942  | G | 0.0338  |
| rs71628182  | T | 0.0819  |
| rs139327323 | A | 0.1258  |
| rs144847084 | G | -0.0666 |
| rs7539154   | G | 0.0152  |
| rs6686192   | C | -0.0155 |
| rs149420428 | G | -0.0557 |
| rs6696124   | G | -0.0205 |
| rs59836162  | G | 0.0337  |
| rs76461308  | G | 0.0676  |
| rs11119151  | G | 0.0214  |
| rs144645398 | C | 0.0669  |
| rs78497600  | T | -0.0347 |
| rs41265043  | T | -0.0638 |
| rs114081439 | T | -0.0685 |
| rs149429732 | T | -0.0686 |
| rs4075770   | C | -0.0195 |
| rs143022055 | G | 0.0518  |
| rs61814666  | G | 0.039   |
| rs55969443  | A | 0.0507  |
| rs12039019  | C | 0.018   |
| rs55899417  | A | 0.0395  |
| rs114086144 | A | -0.0482 |
| rs61784991  | A | 0.0442  |
| rs11587570  | A | -0.063  |
| rs61827145  | T | 0.0585  |
| rs76994094  | T | -0.1004 |
| rs72695737  | C | -0.0214 |
| rs61751618  | A | 0.0808  |
| rs4264045   | T | 0.0296  |
| rs140465460 | A | -0.1028 |
| rs6421774   | C | -0.0179 |
| rs10798814  | A | -0.0213 |
| rs114675732 | C | 0.0762  |
| rs75713973  | A | -0.0634 |
| rs7535528   | A | 0.016   |
| rs2764417   | T | -0.0163 |
| rs3767818   | A | 0.0391  |
| rs319469    | C | 0.0153  |
| rs10917734  | G | 0.0196  |
| rs10912414  | C | -0.0182 |
| rs1040071   | A | 0.0416  |
| rs77227444  | T | -0.0623 |
| rs142541602 | C | -0.0386 |



|             |   |         |
|-------------|---|---------|
| rs2642424   | T | -0.0198 |
| rs7529467   | T | 0.0505  |
| rs10911135  | C | 0.0213  |
| rs10924626  | C | -0.1075 |
| rs145407295 | T | -0.0616 |
| rs116035891 | A | 0.0282  |
| rs141582054 | A | 0.0906  |
| rs3737788   | C | 0.0281  |
| rs4636      | A | -0.0152 |
| rs12404082  | A | -0.1064 |
| rs145550811 | T | -0.0857 |
| rs114450555 | A | -0.0374 |
| rs55966412  | G | 0.0499  |
| rs78441269  | T | 0.0813  |
| rs77555104  | G | -0.0701 |
| rs147421968 | A | 0.0844  |
| rs148046521 | T | -0.0804 |
| rs4908186   | A | 0.0161  |
| rs506203    | C | -0.0319 |
| rs12751868  | G | 0.0316  |
| rs16839082  | C | 0.0683  |
| rs61765772  | T | -0.0222 |
| rs11209710  | C | 0.0158  |
| rs34122915  | C | -0.0178 |
| rs60417255  | T | 0.052   |
| rs72718226  | G | -0.0559 |
| rs61820280  | G | -0.0542 |
| rs115303481 | C | 0.0681  |
| rs16851396  | G | 0.0339  |
| rs112670465 | G | 0.0272  |
| rs10779709  | G | -0.0183 |
| rs61787116  | T | 0.1032  |
| rs111412492 | A | 0.0878  |
| rs7539874   | G | -0.0227 |
| rs7520762   | T | -0.0588 |
| rs12563995  | A | 0.0534  |
| rs12119793  | G | -0.0184 |
| rs7524016   | A | 0.0471  |
| rs12073092  | A | 0.0158  |
| rs6672392   | G | 0.0575  |
| rs141725222 | A | 0.0638  |
| rs147672681 | G | 0.0711  |
| rs74967992  | A | 0.0368  |
| rs76447136  | A | 0.0724  |
| rs12143879  | T | 0.0583  |
| rs2819018   | C | -0.0187 |
| rs114892127 | C | 0.0629  |

|             |   |         |
|-------------|---|---------|
| rs35162334  | G | -0.0856 |
| rs12726792  | A | -0.016  |
| rs7416504   | C | 0.0153  |
| rs61767170  | A | 0.0786  |
| rs5745497   | G | -0.1115 |
| rs4402131   | C | 0.0407  |
| rs662755    | A | 0.0182  |
| rs932523    | C | -0.0191 |
| rs36028110  | T | 0.0515  |
| rs116815646 | T | 0.0908  |
| rs78779556  | A | 0.0291  |
| rs114686747 | G | -0.0738 |
| rs34513293  | C | 0.0618  |
| rs1022553   | A | 0.0461  |
| rs112546370 | T | 0.0512  |
| rs55706919  | A | 0.0198  |
| rs78757699  | T | -0.0767 |
| rs142848033 | C | 0.0979  |
| rs150253154 | A | 0.0925  |
| rs74527697  | G | 0.0729  |
| rs74563610  | C | 0.057   |
| rs9424471   | T | -0.0386 |
| rs75186165  | C | 0.0576  |
| rs4550088   | C | -0.0173 |
| rs12026072  | A | -0.0391 |
| rs116553886 | A | -0.0835 |
| rs10918295  | G | -0.0209 |
| rs148417960 | C | -0.0523 |
| rs12131593  | T | 0.0229  |
| rs6427992   | G | 0.0151  |
| rs80156143  | A | 0.036   |
| rs116425548 | G | -0.0671 |
| rs138023510 | A | -0.1098 |
| rs10789303  | T | -0.0189 |
| rs115396324 | A | -0.0861 |
| rs114900352 | G | 0.0892  |
| rs2746495   | A | -0.1025 |
| rs72709975  | C | -0.1276 |
| rs630904    | A | -0.0216 |
| rs4908593   | A | 0.0158  |
| rs11203246  | T | 0.0252  |
| rs139367419 | T | -0.0869 |
| rs149952981 | A | 0.0481  |
| rs80336408  | T | 0.0244  |
| rs73111933  | G | -0.0435 |
| rs77889653  | G | -0.0423 |
| rs5009401   | A | -0.0149 |

|             |   |         |
|-------------|---|---------|
| rs72659446  | T | -0.0668 |
| rs67209740  | C | -0.0416 |
| rs4915495   | G | -0.0203 |
| rs12741831  | A | 0.1132  |
| rs4908493   | C | 0.0195  |
| rs150123494 | A | -0.1617 |
| rs641805    | T | -0.0149 |
| rs698275    | G | 0.027   |
| rs12122693  | T | 0.0209  |
| rs147493809 | T | -0.0482 |
| rs116245103 | A | -0.0459 |
| rs11162633  | T | 0.0186  |
| rs77854862  | A | 0.0507  |
| rs138263195 | C | 0.0633  |
| rs79345993  | G | -0.1243 |
| rs138321677 | T | -0.1075 |
| rs12089885  | C | 0.0238  |
| rs75302311  | T | 0.032   |
| rs12042664  | T | 0.076   |
| rs141511341 | T | 0.0841  |
| rs72725489  | C | 0.0869  |
| rs634828    | A | 0.0152  |
| rs78578141  | T | -0.1133 |
| rs9660372   | C | 0.0186  |
| rs72716040  | G | -0.0416 |
| rs76280784  | A | -0.0655 |
| rs75562159  | A | -0.0931 |
| rs74935805  | A | -0.0563 |
| rs11799687  | T | -0.0602 |
| rs6588488   | C | 0.0209  |
| rs116123503 | G | -0.1064 |
| rs4651380   | T | -0.1012 |
| rs13374832  | A | 0.0227  |
| rs113369305 | T | -0.1224 |
| rs12116497  | T | 0.0151  |
| rs146813894 | A | -0.0532 |
| rs2992032   | T | 0.1102  |
| rs58759025  | C | -0.0831 |
| rs4915724   | T | -0.0541 |
| rs74980615  | G | 0.0253  |
| rs34658635  | C | -0.0509 |
| rs71654213  | T | 0.0159  |
| rs72737543  | C | 0.0292  |
| rs12064625  | T | -0.0173 |
| rs10922050  | T | -0.0178 |
| rs56183947  | G | 0.0736  |
| rs72727446  | A | 0.0473  |

|             |   |         |
|-------------|---|---------|
| rs140415830 | T | 0.0584  |
| rs17643861  | A | 0.0149  |
| rs139346781 | C | -0.0723 |
| rs28546096  | A | 0.0248  |
| rs115289661 | T | 0.071   |
| rs2811608   | C | 0.019   |
| rs114628928 | G | -0.048  |
| rs6428113   | G | -0.0148 |
| rs72646001  | C | -0.0479 |
| rs67874885  | A | -0.0334 |
| rs17221756  | G | 0.07    |
| rs75924941  | A | 0.0458  |
| rs56118188  | G | -0.0501 |
| rs115003999 | C | -0.117  |
| rs61813572  | A | -0.0193 |
| rs10803154  | T | -0.0175 |
| rs12116433  | T | 0.0694  |
| rs2207028   | C | -0.0374 |
| rs114899232 | T | -0.0949 |
| rs78414263  | T | 0.0823  |
| rs3917695   | A | 0.0894  |
| rs114605216 | C | 0.0414  |
| rs150512411 | C | 0.0951  |
| rs114621346 | A | 0.0674  |
| rs145760339 | C | 0.0752  |
| rs1483197   | C | 0.0272  |
| rs2429625   | T | -0.0277 |
| rs12125028  | A | -0.0194 |
| rs72731241  | A | -0.0338 |
| rs72753780  | G | -0.0209 |
| rs114335025 | T | -0.0425 |
| rs147432670 | G | 0.0546  |
| rs113014636 | A | -0.0536 |
| rs4578256   | A | 0.0228  |
| rs74594097  | T | -0.0274 |
| rs11208400  | C | 0.1035  |
| rs11577681  | C | -0.0198 |
| rs56178715  | C | 0.0395  |
| rs78456148  | A | -0.0348 |
| rs74758891  | G | -0.0506 |
| rs12083048  | A | 0.0818  |
| rs74468888  | T | -0.0548 |
| rs7547666   | T | -0.0163 |
| rs74688418  | A | 0.0299  |
| rs3855976   | A | 0.1005  |
| rs116114858 | T | 0.1033  |
| rs17587619  | G | 0.0813  |

|             |   |         |
|-------------|---|---------|
| rs143107733 | C | -0.1122 |
| rs613836    | C | 0.0369  |
| rs79229877  | C | 0.0572  |
| rs77469034  | A | -0.0482 |
| rs11185444  | A | -0.0399 |
| rs4631763   | A | -0.031  |
| rs114028708 | G | 0.08    |
| rs7552825   | T | 0.0178  |
| rs1745384   | T | 0.0173  |
| rs2817139   | A | 0.0208  |
| rs12121018  | A | 0.0268  |
| rs72864351  | C | 0.0307  |
| rs78652364  | A | 0.0672  |
| rs36123104  | C | 0.0281  |
| rs75788809  | C | 0.0519  |
| rs35428538  | A | -0.0343 |
| rs1107685   | G | -0.0183 |
| rs115632294 | G | 0.0898  |
| rs77098383  | G | -0.0263 |
| rs72654114  | G | 0.0397  |
| rs59811057  | C | -0.0165 |
| rs11209549  | C | 0.0201  |
| rs34391119  | A | -0.0538 |
| rs61818287  | A | 0.0313  |
| rs28369914  | T | -0.0263 |
| rs148438722 | A | -0.0979 |
| rs1418283   | G | 0.0163  |
| rs141268288 | T | 0.0742  |
| rs140509334 | A | -0.091  |
| rs1509173   | G | -0.0197 |
| rs113877196 | G | -0.0612 |
| rs74884724  | T | -0.1023 |
| rs12037545  | T | 0.0151  |
| rs2151566   | A | 0.0182  |
| rs11208273  | T | 0.0188  |
| rs4915067   | T | 0.0207  |
| rs223183    | G | -0.0156 |
| rs34975537  | A | 0.0293  |
| rs6664007   | G | -0.0269 |
| rs2026604   | A | 0.0164  |
| rs12041859  | C | 0.0192  |
| rs115647720 | C | 0.0886  |
| rs142613066 | T | 0.0707  |
| rs2501799   | A | -0.1589 |
| rs112746841 | G | 0.0441  |
| rs12122674  | T | -0.0477 |
| rs3131326   | C | -0.0153 |

|             |   |         |
|-------------|---|---------|
| rs55652927  | T | 0.0499  |
| rs12069743  | A | -0.0451 |
| rs111773331 | G | 0.0529  |
| rs72758208  | T | 0.0395  |
| rs72661482  | G | -0.0493 |
| rs613854    | A | 0.0236  |
| rs71635176  | T | 0.0174  |
| rs61255339  | C | 0.0232  |
| rs114049885 | T | 0.0814  |
| rs115965909 | C | -0.0554 |
| rs2796431   | C | -0.0215 |
| rs145666315 | C | 0.0931  |
| rs114512207 | T | 0.0663  |
| rs59476089  | C | 0.0276  |
| rs2811218   | A | -0.0189 |
| rs115350169 | T | -0.0652 |
| rs77593501  | G | 0.0476  |
| rs4656873   | C | 0.0254  |
| rs10915437  | G | -0.0158 |
| rs77797159  | A | -0.1065 |
| rs143567913 | A | 0.0949  |
| rs11162963  | C | 0.0158  |
| rs115511493 | C | -0.0563 |
| rs78834501  | C | 0.0987  |
| rs12758792  | T | 0.0193  |
| rs11568025  | C | -0.0473 |
| rs1001451   | G | -0.0289 |
| rs9804150   | G | 0.0173  |
| rs117180039 | G | -0.1135 |
| rs55909245  | A | 0.0367  |
| rs10779772  | G | 0.0178  |
| rs12022874  | T | -0.0175 |
| rs115605566 | A | 0.0945  |
| rs57393000  | T | 0.0376  |
| rs79019045  | C | 0.109   |
| rs11590058  | T | 0.0393  |
| rs2618679   | G | 0.0193  |
| rs36020348  | T | -0.0265 |
| rs12077532  | G | -0.0208 |
| rs55794494  | T | 0.0447  |
| rs61777100  | A | -0.0201 |
| rs6696260   | C | -0.0164 |
| rs79832845  | T | 0.0308  |
| rs16848865  | A | 0.0185  |
| rs75491244  | G | 0.0445  |
| rs209618    | G | -0.0153 |
| rs114996892 | T | -0.0662 |

|             |   |         |
|-------------|---|---------|
| rs6686288   | G | 0.0165  |
| rs4376697   | T | 0.0326  |
| rs61778963  | A | 0.0718  |
| rs670318    | T | 0.0513  |
| rs12128285  | G | 0.0817  |
| rs137982506 | T | 0.0563  |
| rs75701038  | C | 0.0825  |
| rs77258168  | T | 0.1331  |
| rs72732426  | G | 0.0499  |
| rs77830010  | T | 0.0559  |
| rs116757305 | T | 0.0901  |
| rs2281165   | C | 0.0535  |
| rs115342503 | A | 0.0684  |
| rs2065585   | A | -0.015  |
| rs4504927   | G | 0.0449  |
| rs11577194  | T | -0.0154 |
| rs6604643   | G | 0.0154  |
| rs41299852  | C | -0.0709 |
| rs6687487   | A | 0.0268  |
| rs594631    | T | 0.0185  |
| rs3767511   | C | -0.0177 |
| rs4659713   | G | 0.0205  |
| rs2794606   | G | -0.0164 |
| rs113817032 | A | 0.0799  |
| rs1056426   | C | 0.0422  |
| rs639963    | C | -0.0256 |
| rs732168    | A | -0.0184 |
| rs11263922  | C | 0.0238  |
| rs11206783  | A | 0.0502  |
| rs146481179 | T | 0.0387  |
| rs76678788  | G | 0.0234  |
| rs12032929  | C | -0.0197 |
| rs12562285  | A | 0.0368  |
| rs112974377 | A | 0.0592  |
| rs11806845  | T | 0.0517  |
| rs1280998   | G | 0.0202  |
| rs55680611  | C | 0.0457  |
| rs72724331  | A | -0.0845 |
| rs34320811  | A | -0.0179 |
| rs7517630   | C | -0.0209 |
| rs116604235 | T | 0.102   |
| rs76890648  | G | 0.0975  |
| rs111632554 | C | -0.0846 |
| rs113734234 | T | 0.0457  |
| rs116388519 | A | -0.0584 |
| rs113194489 | A | 0.0592  |
| rs116096722 | A | -0.0776 |

|             |   |         |
|-------------|---|---------|
| rs17442177  | A | 0.0211  |
| rs6428670   | T | 0.0202  |
| rs72727763  | A | 0.0712  |
| rs77951540  | T | -0.1181 |
| rs61828476  | C | 0.0179  |
| rs11810574  | G | -0.0314 |
| rs10888916  | T | 0.0148  |
| rs2271657   | C | -0.0188 |
| rs11810035  | T | 0.0397  |
| rs12126945  | T | 0.0503  |
| rs78858434  | G | -0.0738 |
| rs114423198 | T | 0.0896  |
| rs72699082  | A | -0.1345 |
| rs16853843  | T | 0.0315  |
| rs60828658  | G | -0.0325 |
| rs2231602   | A | -0.1447 |
| rs4661157   | A | 0.0846  |
| rs2759345   | T | 0.0152  |
| rs11576577  | T | -0.0528 |
| rs139350729 | A | 0.0404  |
| rs7541465   | T | -0.0199 |
| rs115257678 | T | 0.0828  |
| rs140032488 | T | 0.0449  |
| rs4147822   | A | 0.0146  |
| rs3850626   | T | 0.0195  |
| rs76715026  | T | -0.0548 |
| rs76563474  | G | 0.0635  |
| rs17805885  | A | -0.0178 |
| rs114104906 | T | 0.0842  |
| rs902038    | A | 0.0182  |
| rs17045832  | T | 0.0715  |
| rs10797517  | C | 0.0382  |
| rs72949404  | C | 0.1029  |
| rs112428360 | A | 0.0929  |
| rs58269262  | A | 0.0377  |
| rs61823192  | T | -0.1049 |
| rs4027086   | C | 0.0792  |
| rs113027503 | T | 0.0662  |
| rs74829424  | T | -0.0379 |
| rs953559    | C | 0.0256  |
| rs142349238 | A | 0.0762  |
| rs543445    | A | -0.023  |
| rs945878    | C | -0.0146 |
| rs4926968   | A | 0.0272  |
| rs75532789  | T | -0.0256 |
| rs138592732 | T | 0.0401  |
| rs116799835 | T | -0.0952 |



|             |   |         |
|-------------|---|---------|
| rs113136288 | T | -0.0488 |
| rs75247039  | T | -0.0847 |
| rs6695232   | G | 0.0148  |
| rs146962891 | C | -0.104  |
| rs72732514  | A | 0.055   |
| rs35716316  | C | -0.0171 |
| rs7549212   | C | 0.0267  |
| rs2892671   | T | 0.0186  |
| rs78535247  | A | -0.0331 |
| rs61803116  | A | -0.1121 |
| rs2865210   | A | -0.018  |
| rs72676142  | G | 0.0462  |
| rs12141960  | A | -0.0757 |
| rs72945945  | G | 0.0548  |
| rs116543016 | T | -0.1025 |
| rs2485579   | A | -0.029  |
| rs12750493  | A | 0.0221  |
| rs10458421  | T | 0.1046  |
| rs74154617  | G | -0.0307 |
| rs75325675  | T | 0.0645  |
| rs7535761   | A | -0.0176 |
| rs113848213 | A | 0.1025  |
| rs149358156 | T | -0.0623 |
| rs701608    | G | -0.0155 |
| rs17416416  | C | -0.0677 |
| rs1780362   | G | 0.0326  |
| rs17629839  | T | -0.0263 |
| rs78228745  | T | 0.0296  |
| rs151067776 | G | 0.0522  |
| rs12025892  | T | -0.0487 |
| rs10799183  | C | -0.015  |
| rs535415    | T | -0.0201 |
| rs6682811   | T | -0.042  |
| rs112543484 | G | -0.0982 |
| rs75873223  | G | -0.0912 |
| rs146955465 | T | 0.0448  |
| rs12756328  | G | 0.0532  |
| rs115721876 | A | 0.0606  |
| rs61772167  | T | 0.0719  |
| rs146624176 | T | -0.0613 |
| rs143359046 | G | -0.1257 |
| rs6695241   | G | -0.0148 |
| rs115365666 | G | 0.0652  |
| rs4659769   | C | 0.0162  |
| rs11185100  | G | -0.0212 |
| rs12728345  | A | 0.0405  |
| rs74748843  | T | 0.0916  |

|             |   |         |
|-------------|---|---------|
| rs17387330  | A | 0.0155  |
| rs9437001   | A | 0.0201  |
| rs2995813   | G | -0.025  |
| rs12033446  | G | -0.0256 |
| rs12122623  | A | 0.0264  |
| rs12092793  | T | -0.083  |
| rs12731638  | T | -0.0607 |
| rs79672958  | A | 0.0438  |
| rs10927187  | C | -0.1073 |
| rs75330410  | A | 0.0326  |
| rs12404496  | C | -0.0169 |
| rs12752575  | C | 0.0151  |
| rs61832162  | A | -0.038  |
| rs115095750 | A | -0.0643 |
| rs146178037 | G | 0.0414  |
| rs4845843   | A | 0.0206  |
| rs143803812 | A | 0.0812  |
| rs4653207   | A | 0.0149  |
| rs76923822  | C | 0.0656  |
| rs10754434  | A | 0.0166  |
| rs56209138  | A | -0.0194 |
| rs78017377  | T | -0.0499 |
| rs6540739   | G | -0.0144 |
| rs4150005   | G | -0.02   |
| rs977325    | T | 0.0958  |
| rs12562739  | A | 0.0923  |
| rs2807546   | A | 0.0182  |
| rs72671567  | G | -0.1298 |
| rs116547213 | G | -0.0585 |
| rs115990677 | T | -0.0501 |
| rs6686615   | A | 0.0147  |
| rs12045355  | A | 0.0344  |
| rs72744520  | C | 0.0717  |
| rs115258215 | G | 0.0878  |
| rs4925661   | A | 0.0188  |
| rs841686    | A | -0.0148 |
| rs12040461  | A | -0.0236 |
| rs138641859 | T | 0.131   |
| rs7540853   | T | -0.0157 |
| rs3128441   | C | 0.0243  |
| rs4390217   | G | 0.0168  |
| rs112526376 | A | -0.0773 |
| rs79490472  | T | 0.0514  |
| rs3922650   | A | 0.0145  |
| rs75065567  | A | -0.0638 |
| rs10796884  | A | -0.0159 |
| rs149448699 | T | -0.0568 |

|             |   |         |
|-------------|---|---------|
| rs16829396  | T | -0.0265 |
| rs11121152  | C | 0.0166  |
| rs7515062   | A | 0.0482  |
| rs76525015  | C | 0.0729  |
| rs147817975 | A | -0.0999 |
| rs77463781  | C | -0.0724 |
| rs1900735   | A | -0.016  |
| rs16839662  | G | -0.0741 |
| rs3006024   | A | -0.0222 |
| rs114525519 | T | 0.0682  |
| rs12030256  | C | 0.0228  |
| rs72707744  | A | 0.0273  |
| rs12756904  | C | -0.0239 |
| rs116437674 | T | -0.0893 |
| rs6541014   | T | 0.0172  |
| rs116475498 | T | 0.0327  |
| rs10493807  | A | 0.0434  |
| rs354623    | A | 0.015   |
| rs55951001  | T | 0.0435  |
| rs472908    | G | -0.0144 |
| rs72695311  | A | 0.0262  |
| rs2269250   | T | -0.0175 |
| rs115189087 | A | 0.0861  |
| rs16838636  | A | -0.0698 |
| rs114742337 | A | 0.0661  |
| rs12047184  | T | 0.0194  |
| rs144823364 | G | -0.102  |
| rs79383964  | C | 0.1007  |
| rs818517    | A | -0.0173 |
| rs55909365  | C | 0.0211  |
| rs1046542   | G | 0.0205  |
| rs111704584 | A | -0.0778 |
| rs6696074   | C | -0.0155 |
| rs780257    | C | 0.08    |
| rs115716234 | T | 0.0733  |
| rs535099    | A | 0.085   |
| rs12078435  | A | -0.0505 |
| rs41265847  | T | 0.044   |
| rs115604259 | T | 0.0597  |
| rs7536825   | C | -0.0173 |
| rs76942916  | T | 0.1013  |
| rs12121117  | C | -0.0303 |
| rs16853625  | T | -0.0333 |
| rs12145454  | C | -0.12   |
| rs78923644  | C | -0.0473 |
| rs7415750   | G | 0.0338  |
| rs12758776  | T | 0.0191  |

|             |   |         |
|-------------|---|---------|
| rs75213051  | T | -0.0354 |
| rs12122803  | G | -0.0688 |
| rs12066034  | T | 0.0429  |
| rs113818148 | A | 0.0284  |
| rs147536482 | A | 0.0679  |
| rs509112    | G | 0.0328  |
| rs34474108  | T | -0.0776 |
| rs115477733 | C | 0.0971  |
| rs6703811   | G | 0.0163  |
| rs74081030  | G | 0.0423  |
| rs11572809  | G | 0.0481  |
| rs61788841  | G | -0.0627 |
| rs146807823 | G | -0.0675 |
| rs12027747  | T | -0.0242 |
| rs4847272   | G | 0.0902  |
| rs35381460  | G | 0.0233  |
| rs2494067   | T | -0.0148 |
| rs61801328  | A | 0.0207  |
| rs10799528  | G | -0.016  |
| rs79625502  | T | -0.0967 |
| rs6588101   | T | 0.0164  |
| rs61773544  | A | 0.0443  |
| rs4839553   | T | 0.0762  |
| rs7530127   | C | -0.0161 |
| rs751       | A | 0.0196  |
| rs979015    | G | 0.0142  |
| rs55667714  | A | 0.0229  |
| rs6702225   | C | 0.0549  |
| rs947107    | C | -0.0375 |
| rs12098076  | A | 0.0504  |
| rs770718    | T | -0.017  |
| rs11120923  | C | 0.0184  |
| rs6682256   | T | -0.0161 |
| rs115777446 | T | 0.0602  |
| rs10737332  | A | -0.0186 |
| rs72980803  | T | 0.0985  |
| rs116338092 | A | 0.0923  |
| rs72712712  | T | -0.0542 |
| rs78574812  | G | -0.0945 |
| rs1129332   | T | -0.0165 |
| rs79857662  | C | 0.0503  |
| rs17427732  | G | -0.0198 |
| rs72700639  | C | -0.0251 |
| rs77619225  | T | 0.0757  |
| rs1202824   | T | 0.015   |
| rs80045785  | T | -0.0298 |
| rs1837940   | C | -0.0182 |

|             |   |         |
|-------------|---|---------|
| rs140177778 | A | -0.0923 |
| rs6670470   | A | -0.0325 |
| rs1730728   | A | 0.0158  |
| rs12729235  | T | 0.0168  |
| rs4908313   | C | -0.0143 |
| rs10864074  | A | 0.0204  |
| rs41309643  | G | 0.0649  |
| rs540782    | C | 0.0142  |
| rs35609485  | T | 0.0285  |
| rs60790945  | T | 0.0906  |
| rs35608606  | T | 0.015   |
| rs77926587  | T | -0.0977 |
| rs79841513  | C | -0.0183 |
| rs2485655   | C | -0.0165 |
| rs12406377  | A | -0.0693 |
| rs6685370   | A | 0.0321  |
| rs75945417  | A | -0.0913 |
| rs34677828  | C | 0.0663  |
| rs116681683 | T | 0.0666  |
| rs115291886 | A | -0.1253 |
| rs114349410 | A | 0.0454  |
| rs115398764 | T | -0.0554 |
| rs79435028  | C | -0.1126 |
| rs11122385  | T | -0.0448 |
| rs12401924  | C | 0.0198  |
| rs195175    | G | -0.0185 |
| rs12118201  | T | 0.018   |
| rs61770398  | C | 0.0399  |
| rs111464272 | G | -0.0394 |
| rs115058239 | G | 0.0676  |
| rs7531516   | G | -0.0156 |
| rs6681186   | T | -0.0154 |
| rs942971    | A | 0.0144  |
| rs114373841 | A | -0.1138 |
| rs10875202  | C | -0.0204 |
| rs79707625  | A | 0.0546  |
| rs16861196  | C | 0.0187  |
| rs61818163  | A | 0.0231  |
| rs6692303   | A | -0.0144 |
| rs55642653  | A | -0.0262 |
| rs34935290  | T | -0.0175 |
| rs116638700 | C | 0.1224  |
| rs11578174  | T | -0.0509 |
| rs17188409  | C | 0.0574  |
| rs10917461  | A | -0.0171 |
| rs77319549  | A | -0.1035 |
| rs11590275  | C | 0.0171  |

|             |   |         |
|-------------|---|---------|
| rs144734498 | C | -0.0965 |
| rs1931059   | T | 0.02    |
| rs10754471  | T | -0.0143 |
| rs72661507  | C | -0.0573 |
| rs58966590  | G | -0.0281 |
| rs2764858   | T | 0.0261  |
| rs71638361  | A | 0.077   |
| rs78199000  | A | -0.0237 |
| rs12041948  | C | -0.037  |
| rs34824504  | A | 0.0596  |
| rs3125814   | A | 0.0156  |
| rs12038778  | T | -0.0161 |
| rs75023697  | G | -0.0222 |
| rs76964673  | T | 0.0737  |
| rs12078123  | T | 0.0169  |
| rs72734602  | G | 0.0747  |
| rs75146690  | T | 0.0724  |
| rs1210      | T | 0.0629  |
| rs5746063   | T | -0.062  |
| rs72718310  | A | 0.0628  |
| rs114806557 | T | 0.0432  |
| rs2343490   | G | 0.0162  |
| rs116379175 | G | 0.0611  |
| rs3120045   | G | -0.0165 |
| rs2797235   | T | 0.0194  |
| rs77630856  | A | 0.0358  |
| rs78125450  | C | 0.0414  |
| rs4658753   | T | 0.0325  |
| rs55770067  | C | -0.0742 |
| rs3768215   | T | -0.022  |
| rs2132999   | A | -0.0151 |
| rs144461010 | A | -0.0794 |
| rs116576652 | A | 0.078   |
| rs6682655   | C | -0.0147 |
| rs7521935   | G | -0.0184 |
| rs17045328  | G | 0.0511  |
| rs9434478   | C | -0.0263 |
| rs72694637  | C | -0.0226 |
| rs10920191  | A | 0.0526  |
| rs6691420   | T | -0.0158 |
| rs34192006  | C | -0.0201 |
| rs114398927 | C | 0.0965  |
| rs146779616 | T | -0.08   |
| rs80277149  | A | -0.0506 |
| rs114468901 | T | -0.0852 |
| rs7365902   | T | -0.042  |
| rs11581527  | T | -0.1266 |

|             |   |         |
|-------------|---|---------|
| rs79595270  | A | -0.0726 |
| rs143206145 | C | 0.0839  |
| rs1342785   | A | 0.0419  |
| rs112793779 | T | 0.1177  |
| rs12075724  | T | -0.0323 |
| rs688214    | C | -0.03   |
| rs150749096 | A | 0.1043  |
| rs78977847  | G | 0.0663  |
| rs112770611 | T | 0.0665  |
| rs10465832  | C | 0.0272  |
| rs77176956  | G | -0.1118 |
| rs17629536  | T | -0.0196 |
| rs72724655  | G | 0.0356  |
| rs61766107  | A | 0.0396  |
| rs16843777  | G | 0.0901  |
| rs148056887 | G | 0.08    |
| rs78540682  | A | 0.0739  |
| rs17417507  | T | 0.0345  |
| rs10928020  | G | -0.0563 |
| rs12117655  | G | -0.0172 |
| rs146704871 | C | 0.0705  |
| rs146109993 | A | 0.0769  |
| rs7419187   | T | 0.0183  |
| rs4846474   | T | 0.0196  |
| rs142917884 | A | 0.0739  |
| rs1617837   | A | -0.0141 |
| rs78346081  | G | 0.0706  |
| rs489442    | G | -0.0181 |
| rs57309012  | G | 0.026   |
| rs34034744  | G | 0.0255  |
| rs16830485  | C | 0.0742  |
| rs55765837  | C | 0.0657  |
| rs752626    | T | -0.0171 |
| rs116809818 | A | -0.0771 |
| rs861152    | T | 0.0169  |
| rs61825385  | C | 0.0627  |
| rs3795263   | A | 0.017   |
| rs7546735   | C | 0.0175  |
| rs260970    | G | 0.0194  |
| rs1962502   | A | 0.0629  |
| rs77675285  | G | 0.0245  |
| rs145721026 | T | 0.0658  |
| rs670738    | A | 0.0201  |
| rs72651115  | A | 0.0748  |
| rs142358687 | A | 0.0254  |
| rs141749416 | A | 0.0601  |
| rs1933544   | A | -0.0186 |

|             |   |         |
|-------------|---|---------|
| rs78879760  | A | -0.0773 |
| rs41264825  | T | 0.0658  |
| rs4652340   | A | 0.0288  |
| rs6695827   | A | 0.0523  |
| rs6659813   | A | -0.0166 |
| rs6669152   | T | -0.054  |
| rs2748081   | C | 0.0152  |
| rs17879938  | T | -0.071  |
| rs115169247 | T | -0.0479 |
| rs7533876   | A | -0.0395 |
| rs6682751   | C | -0.0148 |
| rs75958567  | C | 0.0888  |
| rs6672351   | C | 0.0144  |
| rs12734446  | A | 0.1178  |
| rs6682994   | T | 0.0373  |
| rs12043526  | T | 0.018   |
| rs115207794 | C | 0.0449  |
| rs34912197  | A | -0.0261 |
| rs4915948   | T | -0.1036 |
| rs35897072  | T | 0.0604  |
| rs144295508 | C | 0.0822  |
| rs35096239  | A | -0.0372 |
| rs79505458  | A | 0.0482  |
| rs12037424  | C | -0.0165 |
| rs80132111  | A | 0.0561  |
| rs77234267  | T | 0.0979  |
| rs61766404  | G | 0.0478  |
| rs61799805  | A | -0.0205 |
| rs12749012  | A | -0.0412 |
| rs74918834  | A | -0.0223 |
| rs4652869   | G | 0.0151  |
| rs115218708 | A | 0.0663  |
| rs141712476 | T | -0.1217 |
| rs11580776  | A | 0.0394  |
| rs115339415 | A | 0.0746  |
| rs61814762  | T | 0.0241  |
| rs11102634  | A | 0.0701  |
| rs115343763 | T | -0.1013 |
| rs79792719  | G | 0.05    |
| rs78523210  | T | 0.119   |
| rs56836278  | A | 0.0339  |
| rs6422258   | T | 0.0248  |
| rs11163062  | C | 0.0305  |
| rs11264452  | T | 0.0185  |
| rs10864705  | T | -0.0189 |
| rs12142481  | A | -0.0183 |
| rs115120148 | A | 0.052   |



|             |   |         |
|-------------|---|---------|
| rs75342056  | G | 0.0964  |
| rs662723    | A | -0.0143 |
| rs79546537  | T | 0.068   |
| rs11120310  | C | 0.0184  |
| rs4660190   | C | -0.0156 |
| rs1797052   | T | 0.0297  |
| rs1176070   | T | 0.0237  |
| rs76297118  | A | -0.0317 |
| rs76699248  | C | 0.0819  |
| rs481290    | T | -0.0259 |
| rs151044838 | G | -0.1223 |
| rs10789448  | A | 0.028   |
| rs41309187  | A | 0.0548  |
| rs1430738   | C | 0.0153  |
| rs11576723  | T | 0.0228  |
| rs7532698   | T | -0.0205 |
| rs114512992 | C | 0.0542  |
| rs112701077 | T | 0.0591  |
| rs116072938 | C | 0.0714  |
| rs146011743 | T | 0.1027  |
| rs61770064  | C | 0.0942  |
| rs141517482 | T | -0.0958 |
| rs272819    | A | -0.0619 |
| rs79218073  | G | 0.0447  |
| rs6692944   | G | 0.0147  |
| rs34019520  | C | 0.0146  |
| rs7550687   | A | -0.0735 |
| rs112890210 | T | -0.0583 |
| rs12749994  | C | -0.0796 |
| rs384396    | G | -0.019  |
| rs140024044 | C | -0.0724 |
| rs6692542   | A | 0.0159  |
| rs7549273   | A | -0.0237 |
| rs72667780  | A | 0.0812  |
| rs72657190  | A | 0.0567  |
| rs4582772   | T | 0.0278  |
| rs12739089  | C | 0.0158  |
| rs3886183   | T | -0.0517 |
| rs113411368 | A | -0.0858 |
| rs177601    | G | -0.0274 |
| rs11163488  | A | -0.0162 |
| rs139735748 | G | -0.064  |
| rs142123176 | T | 0.0769  |
| rs11208967  | T | -0.0199 |
| rs12131511  | T | 0.0502  |
| rs72724665  | A | 0.0732  |
| rs72691640  | G | 0.1074  |

|             |   |         |
|-------------|---|---------|
| rs75137290  | C | 0.0398  |
| rs504910    | G | -0.0236 |
| rs2473353   | A | -0.0259 |
| rs484677    | T | -0.0151 |
| rs79600844  | A | -0.0606 |
| rs9651118   | C | -0.0177 |
| rs2473356   | T | -0.0262 |
| rs148541431 | T | 0.0726  |
| rs904025    | C | 0.0451  |
| rs138738714 | T | 0.0778  |
| rs112393335 | A | 0.0595  |
| rs12569241  | A | 0.0581  |
| rs7536012   | A | 0.0641  |
| rs297788    | T | -0.016  |
| rs78473436  | G | -0.0436 |
| rs499688    | C | -0.0184 |
| rs6587855   | T | -0.0422 |
| rs7511997   | T | -0.019  |
| rs4259727   | A | 0.0158  |
| rs9430018   | T | 0.0147  |
| rs12024353  | A | 0.0162  |
| rs79457287  | G | 0.055   |
| rs71639066  | T | 0.0708  |
| rs12748863  | A | 0.0167  |
| rs77790438  | G | -0.0333 |
| rs6428789   | A | 0.0141  |
| rs114413447 | A | -0.0678 |
| rs1856635   | T | 0.0224  |
| rs2999876   | G | 0.0509  |
| rs12022554  | G | -0.0535 |
| rs75577157  | T | -0.0631 |
| rs80129005  | G | 0.0552  |
| rs61827869  | G | 0.0211  |
| rs12747304  | A | -0.0815 |
| rs4641349   | T | -0.016  |
| rs1288499   | A | 0.0834  |
| rs111235779 | C | -0.0772 |
| rs112249410 | T | -0.0671 |
| rs7544812   | C | 0.0273  |
| rs78788098  | T | -0.047  |
| rs72763447  | A | 0.0645  |
| rs16824948  | T | 0.0333  |
| rs72737833  | G | 0.0763  |
| rs138286710 | G | 0.0656  |
| rs60780169  | T | -0.036  |
| rs12073716  | A | -0.0299 |
| rs72692197  | T | -0.0622 |

|             |   |         |
|-------------|---|---------|
| rs72723906  | A | -0.1073 |
| rs17371998  | T | -0.0215 |
| rs78524924  | A | -0.0541 |
| rs1771539   | G | 0.017   |
| rs212290    | A | 0.0158  |
| rs56926353  | C | -0.0237 |
| rs139008239 | A | -0.116  |
| rs12756435  | A | 0.0356  |
| rs12749896  | A | 0.0155  |
| rs146554633 | G | -0.0586 |
| rs60332560  | A | -0.051  |
| rs75231615  | A | 0.0851  |
| rs10753495  | G | 0.0149  |
| rs115176171 | G | 0.0466  |
| rs1844534   | C | 0.0162  |
| rs617293    | A | 0.0174  |
| rs12132927  | C | 0.0285  |
| rs12117075  | C | 0.0138  |
| rs7548551   | A | -0.0601 |
| rs10158359  | C | 0.0158  |
| rs12733819  | T | -0.0209 |
| rs1322783   | A | -0.0195 |
| rs12025458  | T | 0.0296  |
| rs35949508  | C | 0.0415  |
| rs115179093 | C | 0.0896  |
| rs12123211  | G | 0.0151  |
| rs12729814  | T | -0.0326 |
| rs149069066 | C | -0.0517 |
| rs115864301 | T | 0.0734  |
| rs17187394  | A | -0.0414 |
| rs7533561   | A | 0.0251  |
| rs115954663 | T | 0.0262  |
| rs11578708  | T | -0.0206 |
| rs10751433  | A | -0.0155 |
| rs77943606  | G | 0.07    |
| rs2773174   | A | -0.0416 |
| rs4916354   | T | 0.0175  |
| rs6600355   | A | 0.0706  |
| rs7519940   | G | -0.0214 |
| rs56923458  | A | -0.05   |
| rs11808484  | G | 0.0196  |
| rs2816926   | C | 0.0653  |
| rs55774748  | G | 0.0383  |
| rs11586183  | T | 0.0576  |
| rs1674174   | G | -0.0158 |
| rs337601    | A | 0.0311  |
| rs17454870  | A | 0.0206  |

|             |   |         |
|-------------|---|---------|
| rs3816956   | T | 0.0146  |
| rs12068872  | T | -0.0606 |
| rs12030976  | G | -0.0198 |
| rs111669960 | A | 0.0272  |
| rs11588387  | T | 0.0363  |
| rs80119793  | T | 0.0394  |
| rs71630218  | A | 0.0648  |
| rs114783274 | A | 0.0811  |
| rs61777717  | T | -0.0248 |
| rs7553303   | G | 0.0147  |
| rs140464344 | G | 0.0563  |
| rs3729998   | T | -0.1112 |
| rs11118371  | T | 0.0155  |
| rs722371    | A | 0.0143  |
| rs1537802   | G | 0.0151  |
| rs60563481  | C | 0.0478  |
| rs57294471  | C | 0.024   |
| rs2780923   | A | -0.0215 |
| rs35301263  | A | -0.1024 |
| rs77259391  | G | 0.0499  |
| rs161821    | C | -0.0557 |
| rs150663218 | T | 0.1294  |
| rs2587535   | C | 0.0155  |
| rs114819452 | G | 0.0763  |
| rs10917221  | C | 0.0318  |
| rs149292743 | T | 0.1011  |
| rs77615512  | A | -0.0438 |
| rs2983714   | C | 0.0251  |
| rs10873986  | C | 0.0508  |
| rs3900770   | C | -0.0329 |
| rs148154148 | T | 0.101   |
| rs2479685   | A | -0.0196 |
| rs79522806  | T | -0.0599 |
| rs10800646  | G | -0.0141 |
| rs6673401   | G | -0.0412 |
| rs61820925  | T | 0.0465  |
| rs1776216   | T | -0.0449 |
| rs12136528  | A | 0.0553  |
| rs116130272 | A | -0.0808 |
| rs267855    | G | -0.0142 |
| rs76468397  | C | -0.0487 |
| rs75114228  | C | 0.0429  |
| rs6691012   | C | -0.0214 |
| rs9426672   | G | 0.024   |
| rs75367055  | G | -0.0949 |
| rs12023491  | A | 0.0334  |
| rs12061855  | C | -0.0667 |

|             |   |         |
|-------------|---|---------|
| rs75510616  | T | 0.0722  |
| rs61830283  | G | 0.0501  |
| rs75739968  | T | -0.0772 |
| rs3767574   | T | 0.0166  |
| rs72735860  | C | -0.052  |
| rs10910647  | G | 0.062   |
| rs77584558  | C | -0.0329 |
| rs57545574  | T | -0.0566 |
| rs115384920 | A | 0.0521  |
| rs9427403   | C | -0.0334 |
| rs1017982   | A | 0.0179  |
| rs10782881  | T | -0.0167 |
| rs12059389  | T | -0.039  |
| rs77932843  | G | 0.0909  |
| rs17130941  | C | 0.0566  |
| rs347010    | C | -0.0151 |
| rs6587728   | T | 0.0371  |
| rs10916407  | A | 0.0171  |
| rs115008385 | A | -0.0546 |
| rs35890901  | T | -0.0174 |
| rs114871024 | A | -0.0486 |
| rs12079484  | A | -0.016  |
| rs77317847  | A | 0.0464  |
| rs12726573  | C | -0.0935 |
| rs35564183  | A | 0.0494  |
| rs71642145  | C | -0.0299 |
| rs115872164 | G | 0.0764  |
| rs12728890  | T | 0.0286  |
| rs12760928  | G | -0.0772 |
| rs7554342   | G | 0.0249  |
| rs11120254  | T | 0.0253  |
| rs115286301 | G | 0.0622  |
| rs12746865  | T | -0.0196 |
| rs78906002  | A | -0.0428 |
| rs77886501  | G | 0.0545  |
| rs114755819 | C | -0.0695 |
| rs6593584   | G | 0.0139  |
| rs11207699  | G | 0.0602  |
| rs114177884 | T | 0.0701  |
| rs75738633  | T | 0.0967  |
| rs2389165   | G | 0.0225  |
| rs59477497  | T | -0.0802 |
| rs78683475  | C | -0.0694 |
| rs17433459  | C | 0.073   |
| rs143053084 | C | -0.0509 |
| rs61770437  | A | -0.0635 |
| rs6680670   | T | 0.0182  |

|             |   |         |
|-------------|---|---------|
| rs66460461  | C | -0.0328 |
| rs72727918  | A | 0.0344  |
| rs7525302   | T | -0.0144 |
| rs75021091  | T | 0.1141  |
| rs115615989 | G | -0.0958 |
| rs140120241 | A | 0.1092  |
| rs113548653 | T | -0.0645 |
| rs142607181 | C | -0.0931 |
| rs79709077  | G | 0.0707  |
| rs74866645  | C | -0.0533 |
| rs143168995 | T | 0.0488  |
| rs61810288  | G | 0.0519  |
| rs12739326  | T | -0.0342 |
| rs10916796  | T | -0.0176 |
| rs17131759  | C | -0.0613 |
| rs115478018 | A | 0.1021  |
| rs112461615 | C | -0.0829 |
| rs77174891  | G | 0.0413  |
| rs56910119  | A | -0.0141 |
| rs78362606  | T | -0.0592 |
| rs11805703  | C | -0.0204 |
| rs113663273 | G | 0.0275  |
| rs284199    | A | -0.0143 |
| rs79058138  | C | 0.1042  |
| rs61835065  | C | -0.0159 |
| rs77170111  | C | -0.0731 |
| rs9430006   | G | 0.0236  |
| rs12029632  | T | -0.0161 |
| rs549596    | C | 0.014   |
| rs7513120   | A | -0.0143 |
| rs17403625  | A | -0.0158 |
| rs4561043   | C | 0.0176  |
| rs547274    | G | -0.0146 |
| rs72724413  | A | 0.0302  |
| rs71620830  | A | 0.0275  |
| rs35797794  | A | -0.0782 |
| rs12118165  | G | 0.0557  |
| rs12740129  | T | -0.0784 |
| rs17029299  | T | -0.0676 |
| rs116279524 | G | 0.0963  |
| rs41315262  | T | -0.0305 |
| rs333666    | A | 0.0152  |
| rs2796215   | T | -0.0231 |
| rs72754328  | C | -0.0433 |
| rs116635555 | A | -0.0861 |
| rs72768054  | C | -0.0542 |
| rs72651550  | T | -0.0588 |

|             |   |         |
|-------------|---|---------|
| rs72652157  | A | 0.0707  |
| rs9436297   | C | 0.021   |
| rs666597    | G | 0.0139  |
| rs10737749  | A | 0.057   |
| rs78491951  | C | -0.0867 |
| rs548471    | C | 0.0625  |
| rs61813461  | C | 0.0339  |
| rs79142765  | C | 0.0261  |
| rs12088171  | T | 0.0153  |
| rs10915421  | C | -0.0181 |
| rs72665617  | C | -0.037  |
| rs12076106  | C | 0.0503  |
| rs77106738  | T | 0.0228  |
| rs72741610  | C | 0.046   |
| rs78806723  | A | -0.0841 |
| rs1316481   | T | 0.0332  |
| rs77721210  | C | -0.0881 |
| rs34720629  | T | 0.0386  |
| rs6540686   | T | 0.0144  |
| rs2029837   | A | -0.0231 |
| rs76510931  | T | 0.0439  |
| rs12081255  | A | 0.0369  |
| rs10925783  | T | -0.0215 |
| rs75747252  | T | 0.0868  |
| rs61782910  | A | -0.0356 |
| rs11583878  | C | 0.0385  |
| rs72729231  | C | -0.0277 |
| rs150986907 | C | 0.1006  |
| rs7540255   | C | 0.0276  |
| rs61772807  | T | 0.0207  |
| rs4495745   | A | -0.0249 |
| rs9429423   | T | -0.0143 |
| rs11465205  | T | 0.0669  |
| rs74700681  | T | 0.0468  |
| rs561191    | A | 0.0268  |
| rs12026694  | C | 0.0629  |
| rs4915501   | C | 0.0158  |
| rs7546233   | A | 0.0474  |
| rs12079373  | C | 0.0189  |
| rs10920283  | G | -0.0279 |
| rs9427477   | T | 0.0198  |
| rs11576449  | A | -0.1074 |
| rs76270624  | C | -0.0233 |
| rs78893977  | T | 0.1807  |
| rs114388517 | C | -0.0451 |
| rs16830039  | G | -0.0376 |
| rs114178464 | A | 0.0502  |

|             |   |         |
|-------------|---|---------|
| rs11587501  | T | -0.0446 |
| rs6603884   | G | 0.0351  |
| rs34455008  | A | 0.1048  |
| rs76901615  | A | -0.0357 |
| rs77573893  | T | -0.0502 |
| rs76178975  | T | 0.0561  |
| rs144973933 | T | 0.0692  |
| rs147216627 | A | -0.0763 |
| rs72711982  | C | 0.0193  |
| rs2383622   | C | -0.0159 |
| rs12744772  | T | -0.0488 |
| rs831752    | A | 0.0236  |
| rs616593    | C | -0.0173 |
| rs12117129  | G | 0.0278  |
| rs4287614   | G | -0.0175 |
| rs12042754  | T | -0.0287 |
| rs11801905  | A | 0.0176  |
| rs74147727  | T | -0.0497 |
| rs7533907   | C | -0.0286 |
| rs114330705 | C | 0.0455  |
| rs150888090 | T | 0.0223  |
| rs77747531  | C | 0.0657  |
| rs77804535  | A | -0.0848 |
| rs34897026  | G | -0.0479 |
| rs3945008   | A | 0.0298  |
| rs6692370   | A | 0.0138  |
| rs144139999 | A | 0.0521  |
| rs12058100  | T | 0.0587  |
| rs141456574 | C | 0.0717  |
| rs34959231  | T | -0.0376 |
| rs1391489   | T | 0.0192  |
| rs1935559   | A | 0.0145  |
| rs72919244  | C | 0.0545  |
| rs12136331  | C | 0.1092  |
| rs115482142 | C | 0.1152  |
| rs77602367  | T | 0.0457  |
| rs2820187   | G | -0.0153 |
| rs859467    | A | -0.0938 |
| rs4454504   | T | -0.0528 |
| rs77492457  | G | -0.0672 |
| rs12755340  | C | -0.0884 |
| rs145802692 | C | 0.1034  |
| rs1253607   | A | 0.04    |
| rs114936337 | T | -0.0653 |
| rs72714553  | T | -0.0934 |
| rs1782392   | A | -0.0358 |
| rs61254910  | C | -0.0942 |



|             |   |         |
|-------------|---|---------|
| rs6676257   | T | -0.0284 |
| rs2636270   | A | -0.0219 |
| rs6679425   | C | -0.0327 |
| rs78819698  | C | 0.0181  |
| rs72680163  | G | 0.0441  |
| rs141139662 | T | -0.0485 |
| rs12127086  | A | 0.1024  |
| rs2816043   | A | 0.0163  |
| rs114697041 | T | -0.0579 |
| rs78901522  | C | 0.0653  |
| rs72645984  | G | 0.0821  |
| rs145457479 | A | 0.1007  |
| rs1144251   | C | -0.0351 |
| rs77099847  | A | -0.0791 |
| rs4611001   | G | -0.0545 |
| rs12744105  | G | -0.0158 |
| rs869668    | G | -0.0434 |
| rs115234884 | T | -0.0765 |
| rs2039936   | C | 0.0403  |
| rs11585558  | A | -0.0736 |
| rs56066017  | C | 0.0191  |
| rs72685046  | A | -0.0794 |
| rs12073837  | T | -0.0159 |
| rs80299706  | A | -0.0379 |
| rs78183640  | G | -0.064  |
| rs1146312   | G | 0.0486  |
| rs116201986 | T | 0.0648  |
| rs72679398  | C | 0.0201  |
| rs116286541 | G | 0.0474  |
| rs17021229  | G | -0.0181 |
| rs75351123  | T | -0.0388 |
| rs114144199 | C | -0.0656 |
| rs72760593  | C | 0.0807  |
| rs75912348  | A | 0.0783  |
| rs78204256  | A | 0.0798  |
| rs143805917 | C | -0.0711 |
| rs79426015  | A | -0.0199 |
| rs115547585 | A | 0.0738  |
| rs115016696 | T | 0.0416  |
| rs17188499  | G | -0.0512 |
| rs10923883  | T | 0.0541  |
| rs141379461 | G | 0.0922  |
| rs56132422  | A | 0.0289  |
| rs60422367  | A | -0.0256 |
| rs80315105  | C | 0.087   |
| rs28592649  | G | 0.0493  |
| rs12129973  | T | 0.0614  |

|             |   |         |
|-------------|---|---------|
| rs72768378  | C | -0.0834 |
| rs7540595   | C | -0.0185 |
| rs144947067 | G | -0.0894 |
| rs72676132  | C | 0.0277  |
| rs113025752 | C | -0.0525 |
| rs56177040  | A | -0.0258 |
| rs6675117   | A | 0.0808  |
| rs113624334 | A | 0.0581  |
| rs72761152  | G | 0.0385  |
| rs140189591 | A | -0.0893 |
| rs138769023 | C | -0.0621 |
| rs116556794 | T | 0.0493  |
| rs2235176   | C | 0.0161  |
| rs6687683   | T | -0.0181 |
| rs12746276  | T | -0.0415 |
| rs760914    | G | -0.0161 |
| rs11588844  | T | 0.0242  |
| rs11582899  | G | -0.0545 |
| rs61782651  | C | -0.1253 |
| rs12735634  | G | -0.0191 |
| rs7519457   | G | 0.0245  |
| rs2131905   | T | 0.0337  |
| rs12074935  | C | -0.0451 |
| rs115960459 | C | 0.0781  |
| rs6540756   | T | -0.0447 |
| rs10874982  | G | 0.0738  |
| rs438228    | C | 0.0285  |
| rs1971858   | A | 0.0139  |
| rs4659986   | C | 0.0151  |
| rs113924313 | A | -0.0175 |
| rs116259466 | G | 0.0483  |
| rs299872    | C | -0.0167 |
| rs1481396   | G | 0.0195  |
| rs114534388 | C | 0.1351  |
| rs75992199  | T | -0.0305 |
| rs113083717 | T | 0.0771  |
| rs2842723   | A | 0.0162  |
| rs17014586  | C | 0.0294  |
| rs6700557   | T | 0.0161  |
| rs1926303   | C | 0.0217  |
| rs74928003  | A | 0.0794  |
| rs4073054   | C | 0.0139  |
| rs2430158   | A | 0.0338  |
| rs17628460  | G | 0.0525  |
| rs6704073   | T | -0.0765 |
| rs74867007  | C | -0.0313 |
| rs17131389  | G | -0.0577 |

|             |   |         |
|-------------|---|---------|
| rs139877807 | A | 0.0809  |
| rs143766704 | C | -0.0547 |
| rs140174679 | T | -0.0735 |
| rs111891077 | C | 0.1056  |
| rs2501808   | A | -0.0449 |
| rs6686484   | G | -0.0222 |
| rs11162086  | T | -0.0157 |
| rs114253848 | T | 0.0604  |
| rs7413466   | G | 0.0219  |
| rs12126772  | C | 0.0182  |
| rs113556489 | T | 0.037   |
| rs727149    | A | -0.0145 |
| rs72673960  | C | -0.0558 |
| rs6669672   | T | -0.0467 |
| rs72674680  | G | -0.0516 |
| rs7525349   | G | 0.0201  |
| rs10900500  | C | 0.0216  |
| rs115751804 | A | 0.0954  |
| rs111290972 | A | -0.0465 |
| rs3768541   | A | 0.02    |
| rs6698327   | A | 0.0316  |
| rs151087204 | T | 0.0713  |
| rs6683970   | A | -0.0183 |
| rs7522957   | T | 0.0212  |
| rs55734541  | T | 0.021   |
| rs10910399  | T | -0.0175 |
| rs115210607 | A | 0.0626  |
| rs2270002   | A | 0.0449  |
| rs76338702  | C | 0.1109  |
| rs12724212  | G | 0.0158  |
| rs36075193  | C | -0.0405 |
| rs4393118   | G | 0.0164  |
| rs41294772  | C | 0.0227  |
| rs77677350  | G | 0.0938  |
| rs3935295   | A | -0.0241 |
| rs144084866 | A | 0.0997  |
| rs10754390  | C | 0.0142  |
| rs12724312  | C | -0.0697 |
| rs111567759 | C | -0.0263 |
| rs11261290  | A | 0.0161  |
| rs72636907  | T | -0.0271 |
| rs4421636   | T | 0.014   |
| rs12564173  | T | -0.0146 |
| rs4659161   | T | 0.0636  |
| rs4951497   | C | -0.0147 |
| rs115304750 | G | 0.0491  |
| rs12562167  | A | -0.0374 |

|             |   |         |
|-------------|---|---------|
| rs6701234   | G | 0.0297  |
| rs76953890  | A | 0.1069  |
| rs17038177  | G | -0.0777 |
| rs7546762   | T | -0.0566 |
| rs6678237   | G | 0.0273  |
| rs7549710   | T | -0.0285 |
| rs12136136  | T | 0.0631  |
| rs522441    | G | -0.0163 |
| rs9436208   | C | -0.0338 |
| rs17026017  | A | 0.0438  |
| rs80149606  | T | -0.0756 |
| rs10889765  | C | 0.0191  |
| rs111914535 | G | -0.0205 |
| rs115550791 | A | -0.0795 |
| rs4081175   | A | 0.0227  |
| rs115514202 | T | 0.0567  |
| rs567480    | C | -0.0161 |
| rs76431122  | T | -0.0713 |
| rs4468146   | C | -0.057  |
| rs12130142  | A | -0.0225 |
| rs35110921  | A | -0.0362 |
| rs144883991 | C | -0.1395 |
| rs9436516   | G | 0.0311  |
| rs41300333  | C | -0.0731 |
| rs146677344 | A | 0.1059  |
| rs78053927  | G | 0.0259  |
| rs1077842   | G | 0.0145  |
| rs17116974  | C | -0.0671 |
| rs72714298  | T | -0.0754 |
| rs75963668  | T | -0.047  |
| rs2478544   | G | -0.0178 |
| rs1059218   | T | -0.0157 |
| rs61785460  | C | 0.1013  |
| rs1281581   | T | 0.0178  |
| rs114711577 | G | -0.0888 |
| rs75107720  | T | -0.0616 |
| rs41280764  | T | -0.0909 |
| rs113695619 | A | -0.0743 |
| rs12032393  | G | 0.0195  |
| rs12079103  | T | 0.0177  |
| rs1340414   | A | -0.0139 |
| rs12030859  | T | 0.0438  |
| rs1555390   | A | 0.0363  |
| rs115116237 | G | 0.0851  |
| rs12082725  | A | -0.0224 |
| rs71668613  | T | -0.0545 |
| rs4656896   | T | 0.0735  |

|             |   |         |
|-------------|---|---------|
| rs12121555  | G | 0.0449  |
| rs77509875  | T | 0.0665  |
| rs41463446  | T | 0.0231  |
| rs113000563 | A | -0.1103 |
| rs142352316 | C | 0.0444  |
| rs56153247  | G | -0.0237 |
| rs143560178 | A | 0.1155  |
| rs12064134  | C | -0.0342 |
| rs12131950  | T | 0.0401  |
| rs10889154  | G | 0.0196  |
| rs4650003   | A | -0.0142 |
| rs80122300  | A | -0.0286 |
| rs2797213   | G | -0.0426 |
| rs10910073  | A | -0.0254 |
| rs2927966   | G | 0.0197  |
| rs1334127   | C | -0.0195 |
| rs12119724  | T | -0.0152 |
| rs4656608   | A | -0.0188 |
| rs12409660  | C | -0.0166 |
| rs60355351  | G | 0.0375  |
| rs41301983  | A | 0.0334  |
| rs80178399  | A | 0.0851  |
| rs113734202 | T | -0.043  |
| rs61197512  | G | -0.0658 |
| rs12140390  | T | -0.017  |
| rs78142091  | A | 0.0683  |
| rs115228148 | T | -0.0609 |
| rs484649    | T | 0.072   |
| rs138874361 | C | 0.122   |
| rs36077494  | T | -0.0212 |
| rs115948697 | G | 0.0887  |
| rs956543    | A | 0.0155  |
| rs10922604  | C | -0.0209 |
| rs11587105  | A | -0.0255 |
| rs6684480   | G | -0.0241 |
| rs115347259 | A | -0.08   |
| rs150522174 | T | 0.0905  |
| rs17130097  | T | -0.0695 |
| rs143016850 | C | 0.0983  |
| rs72759021  | C | -0.093  |
| rs34652457  | T | 0.0423  |
| rs10495141  | C | 0.0921  |
| rs12725208  | G | -0.0221 |
| rs12127545  | C | -0.016  |
| rs16851665  | T | 0.0285  |
| rs56331467  | T | 0.0486  |
| rs35372116  | G | -0.0369 |

|             |   |         |
|-------------|---|---------|
| rs77782844  | C | 0.1078  |
| rs111952563 | A | 0.0299  |
| rs75192897  | G | 0.0545  |
| rs17552600  | T | -0.0177 |
| rs3766399   | T | -0.0143 |
| rs2235703   | T | -0.0342 |
| rs77884097  | T | 0.0746  |
| rs12125305  | C | -0.0434 |
| rs114912071 | A | -0.1113 |
| rs80328415  | C | -0.0259 |
| rs76645299  | A | -0.1024 |
| rs114472848 | T | 0.0811  |
| rs1055055   | T | 0.0151  |
| rs115145470 | A | 0.0421  |
| rs76614688  | T | 0.0636  |
| rs4320778   | A | 0.0183  |
| rs1652291   | C | 0.0192  |
| rs1389781   | A | -0.0394 |
| rs4653749   | G | -0.0136 |
| rs770701    | G | -0.0198 |
| rs114273974 | T | 0.0687  |
| rs4604656   | A | -0.0244 |
| rs77962274  | T | -0.0507 |
| rs113222548 | T | 0.0349  |
| rs2818870   | T | -0.0195 |
| rs150207602 | G | 0.0564  |
| rs112208574 | C | 0.1006  |
| rs6675756   | A | 0.0205  |
| rs116760359 | A | -0.0732 |
| rs147490122 | A | -0.0512 |
| rs12131838  | A | 0.0539  |
| rs4846837   | T | -0.0207 |
| rs10802905  | A | -0.0157 |
| rs2453198   | T | -0.0185 |
| rs2493305   | A | 0.033   |
| rs6427060   | T | -0.0461 |
| rs10926023  | C | -0.0304 |
| rs61838683  | A | -0.0284 |
| rs149776446 | C | -0.0363 |
| rs114383491 | T | -0.0784 |
| rs148697385 | T | 0.067   |
| rs142953452 | C | -0.1095 |
| rs115760117 | A | -0.0457 |
| rs145702155 | C | 0.0568  |
| rs66723524  | A | -0.0503 |
| rs11587070  | G | -0.0835 |
| rs1826977   | G | -0.0176 |

|             |   |         |
|-------------|---|---------|
| rs35586368  | C | -0.0147 |
| rs12141792  | A | -0.0925 |
| rs72701667  | T | 0.07    |
| rs1780360   | G | 0.0375  |
| rs114626239 | C | -0.0492 |
| rs4926641   | C | 0.0139  |
| rs164041    | C | 0.0202  |
| rs141115135 | T | 0.0678  |
| rs12143043  | A | -0.1121 |
| rs115150759 | C | -0.1137 |
| rs114530634 | T | 0.0537  |
| rs232811    | C | 0.0192  |
| rs11207862  | A | 0.0291  |
| rs73119105  | G | 0.0296  |
| rs56174820  | A | -0.0184 |
| rs4388738   | A | 0.067   |
| rs7364713   | C | -0.022  |
| rs12738277  | A | 0.0155  |
| rs11585329  | T | -0.0204 |
| rs116030158 | G | -0.0522 |
| rs3754206   | A | 0.0158  |
| rs59816523  | T | -0.0267 |
| rs11584037  | A | 0.0137  |
| rs2177065   | A | -0.0581 |
| rs12742294  | T | 0.0173  |
| rs567125    | C | 0.0307  |
| rs78286346  | C | 0.0442  |
| rs61799715  | C | -0.0982 |
| rs115048665 | T | 0.0501  |
| rs1294265   | G | 0.0555  |
| rs1404062   | C | -0.0391 |
| rs4912058   | G | -0.0207 |
| rs12744042  | T | 0.015   |
| rs77501009  | T | -0.1252 |
| rs2989472   | C | -0.0162 |
| rs75362862  | T | -0.0319 |
| rs11803470  | A | -0.0233 |
| rs12461     | A | 0.0135  |
| rs35397237  | A | 0.0209  |
| rs79486633  | C | -0.0319 |
| rs61776628  | G | 0.0341  |
| rs115299562 | C | 0.0615  |
| rs141225529 | G | 0.0667  |
| rs9429731   | A | -0.0392 |
| rs77928475  | G | -0.0492 |
| rs61811629  | G | -0.0158 |
| rs17441010  | G | 0.0362  |

|             |   |         |
|-------------|---|---------|
| rs55882531  | G | 0.0394  |
| rs114435079 | T | 0.0453  |
| rs35721361  | G | -0.0159 |
| rs11209030  | A | -0.016  |
| rs58997578  | A | -0.0677 |
| rs76405888  | A | -0.0242 |
| rs11572587  | A | 0.0378  |
| rs12736995  | C | -0.0359 |
| rs6541075   | A | 0.0183  |
| rs2457066   | C | -0.0469 |
| rs72732436  | C | -0.0618 |
| rs139298199 | G | -0.0708 |
| rs10495329  | C | -0.0175 |
| rs114622977 | T | -0.0738 |
| rs12031889  | C | 0.0337  |
| rs12129408  | C | -0.0151 |
| rs6656229   | G | -0.0164 |
| rs646380    | T | -0.0532 |
| rs951366    | C | 0.0137  |
| rs150114269 | C | 0.0975  |
| rs4660243   | T | 0.0783  |
| rs1358714   | G | -0.0139 |
| rs12735662  | A | 0.0202  |
| rs2298255   | A | 0.0166  |
| rs72758849  | T | 0.0485  |
| rs79270989  | C | 0.0296  |
| rs2202152   | G | 0.0201  |
| rs12120438  | T | 0.0674  |
| rs148631275 | C | -0.0525 |
| rs78363641  | C | -0.0551 |
| rs75462786  | A | 0.0597  |
| rs6686169   | G | -0.0598 |
| rs12025571  | C | -0.0205 |
| rs111383629 | G | -0.1364 |
| rs72658911  | T | -0.0158 |
| rs41296145  | C | -0.0454 |
| rs116088229 | T | -0.0652 |
| rs77342107  | T | -0.0288 |
| rs12092728  | A | 0.0302  |
| rs77622481  | T | 0.0484  |
| rs11165191  | C | 0.0147  |
| rs12036008  | C | -0.077  |
| rs161441    | G | 0.0326  |
| rs5744338   | T | 0.0428  |
| rs115707962 | T | 0.0956  |
| rs1938335   | A | -0.0142 |
| rs72771947  | A | 0.0202  |



|             |   |         |
|-------------|---|---------|
| rs58286202  | G | -0.014  |
| rs72938007  | C | 0.0579  |
| rs358694    | C | 0.0231  |
| rs11578517  | A | 0.0565  |
| rs3903999   | C | -0.0248 |
| rs12733358  | T | 0.0713  |
| rs10874393  | T | 0.0184  |
| rs76488166  | A | -0.0845 |
| rs141544731 | T | 0.0972  |
| rs72674873  | T | -0.0261 |
| rs76485554  | T | -0.034  |
| rs145999120 | T | 0.1034  |
| rs12123817  | A | -0.0413 |
| rs6660895   | C | -0.0158 |
| rs72724329  | C | 0.0823  |
| rs12116750  | T | -0.0671 |
| rs16827472  | G | -0.019  |
| rs145470488 | A | -0.0273 |
| rs78121350  | T | -0.0476 |
| rs116323536 | C | -0.0418 |
| rs61825456  | G | -0.0361 |
| rs138806741 | C | -0.0997 |
| rs6681341   | C | 0.0151  |
| rs2977272   | T | 0.0152  |
| rs294227    | A | -0.0634 |
| rs4653278   | T | -0.023  |
| rs1156085   | G | -0.0564 |
| rs16834530  | T | 0.037   |
| rs79701486  | T | 0.1134  |
| rs11802507  | G | -0.0275 |
| rs4659781   | C | 0.0244  |
| rs7528021   | A | -0.0383 |
| rs61790677  | T | 0.0633  |
| rs10910481  | C | 0.0197  |
| rs138128635 | C | 0.0401  |
| rs77757970  | T | -0.0607 |
| rs319660    | T | 0.0218  |
| rs4658147   | G | -0.016  |
| rs17372251  | C | 0.0407  |
| rs11577248  | C | -0.0142 |
| rs1416811   | T | 0.0451  |
| rs28488998  | C | 0.0222  |
| rs721052    | C | 0.0792  |
| rs74683788  | G | -0.044  |
| rs72760050  | A | 0.0947  |
| rs914941    | G | 0.0755  |
| rs41266401  | A | 0.0496  |

|             |   |         |
|-------------|---|---------|
| rs12406845  | A | -0.0154 |
| rs1245487   | A | 0.0192  |
| rs77578111  | A | 0.0633  |
| rs79900365  | A | 0.0871  |
| rs164410    | T | 0.0159  |
| rs12028579  | A | 0.0201  |
| rs11585366  | T | 0.0231  |
| rs35367501  | T | 0.0208  |
| rs112048428 | T | 0.0392  |
| rs67896405  | G | -0.0561 |
| rs11122515  | T | -0.026  |
| rs12142278  | G | 0.0261  |
| rs12022678  | G | -0.0351 |
| rs139922345 | G | 0.0377  |
| rs1436087   | T | 0.0198  |
| rs79939183  | A | 0.0549  |
| rs71515132  | C | 0.0887  |
| rs56268560  | T | 0.0299  |
| rs138745265 | T | -0.0419 |
| rs11590563  | C | -0.0167 |
| rs815738    | C | 0.0792  |
| rs12059522  | G | -0.0176 |
| rs4653385   | A | -0.0482 |
| rs79276415  | A | -0.103  |
| rs12129199  | G | 0.0183  |
| rs34457681  | T | -0.0485 |
| rs147699837 | A | 0.0684  |
| rs150848427 | A | -0.0703 |
| rs11120230  | A | 0.0425  |
| rs79556532  | C | 0.0286  |
| rs1999714   | T | -0.0142 |
| rs143975622 | T | 0.0552  |
| rs147310878 | G | 0.0496  |
| rs35523167  | A | 0.0295  |
| rs2800683   | G | 0.0287  |
| rs61769163  | T | -0.033  |
| rs79058625  | T | 0.0631  |
| rs112939272 | C | 0.0729  |
| rs7545105   | A | 0.0185  |
| rs6672972   | G | 0.0146  |
| rs17163777  | T | 0.0472  |
| rs78294649  | C | 0.0536  |
| rs6662789   | A | 0.0324  |
| rs149263573 | T | -0.1055 |
| rs528138    | T | -0.0998 |
| rs113628489 | C | 0.0204  |
| rs61769082  | A | -0.0307 |

|             |   |         |
|-------------|---|---------|
| rs17130632  | G | 0.0598  |
| rs77455553  | C | 0.0252  |
| rs12753811  | C | 0.0457  |
| rs923412    | A | 0.0269  |
| rs10737331  | A | -0.0152 |
| rs72727055  | C | -0.0324 |
| rs2230324   | T | -0.0491 |
| rs113686118 | G | -0.027  |
| rs75309041  | T | 0.0376  |
| rs10492992  | T | 0.0295  |
| rs113450850 | G | -0.0438 |
| rs115185731 | G | -0.0867 |
| rs147227020 | A | 0.0632  |
| rs12738367  | A | 0.015   |
| rs114746724 | A | 0.0281  |
| rs138764262 | T | 0.0545  |
| rs61776388  | T | 0.0285  |
| rs115215527 | A | -0.0794 |
| rs56284241  | A | 0.0813  |
| rs10753347  | C | 0.0233  |
| rs77944343  | G | 0.0616  |
| rs142822309 | G | -0.1148 |
| rs12561914  | T | -0.017  |
| rs4255423   | G | -0.0143 |
| rs12403251  | T | -0.0467 |
| rs80076657  | T | -0.101  |
| rs115456139 | A | 0.0637  |
| rs75241354  | T | -0.0445 |
| rs112227298 | G | 0.0834  |
| rs56158075  | C | -0.0238 |
| rs2185501   | A | -0.0268 |
| rs55756832  | A | 0.0606  |
| rs7514694   | A | 0.0142  |
| rs117454226 | A | 0.0897  |
| rs12029435  | T | -0.023  |
| rs3820201   | G | 0.014   |
| rs668824    | G | 0.0945  |
| rs1330229   | G | -0.0782 |
| rs76273607  | C | -0.0454 |
| rs12031629  | T | -0.0157 |
| rs12409542  | G | -0.0838 |
| rs115672876 | G | -0.0404 |
| rs77306313  | T | -0.046  |
| rs79310779  | T | 0.0491  |
| rs6685485   | T | -0.0136 |
| rs74622465  | A | -0.0571 |
| rs7521693   | G | 0.0141  |

|             |   |         |
|-------------|---|---------|
| rs61321900  | C | 0.0248  |
| rs2788121   | G | 0.0279  |
| rs75321555  | T | 0.0507  |
| rs115459520 | A | -0.063  |
| rs112354865 | C | 0.0803  |
| rs2179503   | A | -0.0346 |
| rs12088685  | A | -0.0577 |
| rs114102605 | A | 0.061   |
| rs4268356   | C | -0.0281 |
| rs12034856  | G | 0.0137  |
| rs3026897   | T | -0.0691 |
| rs146616763 | C | -0.0604 |
| rs9439068   | A | -0.0137 |
| rs139209915 | G | -0.1039 |
| rs6675174   | G | -0.072  |
| rs111804694 | T | 0.0531  |
| rs7519429   | C | -0.0141 |
| rs147902167 | C | 0.1149  |
| rs35399029  | T | -0.0215 |
| rs72694692  | C | 0.0611  |
| rs10494245  | T | 0.0167  |
| rs10157440  | G | -0.0775 |
| rs115276931 | G | 0.052   |
| rs10923217  | G | -0.0151 |
| rs75419131  | C | -0.0778 |
| rs10803341  | C | 0.0185  |
| rs140170023 | A | 0.0632  |
| rs6697036   | A | 0.0141  |
| rs17187310  | A | 0.0427  |
| rs12130892  | G | -0.0255 |
| rs1107550   | G | 0.0234  |
| rs72752250  | A | -0.0506 |
| rs115592326 | C | 0.0578  |
| rs72641442  | T | 0.0512  |
| rs1208992   | A | -0.0645 |
| rs12046015  | A | -0.0263 |
| rs17378282  | C | 0.0424  |
| rs61820724  | C | 0.0551  |
| rs7519473   | C | 0.029   |
| rs116001907 | A | 0.0541  |
| rs77295669  | A | -0.0668 |
| rs11485531  | C | 0.0331  |
| rs6661988   | C | -0.0155 |
| rs3820304   | G | -0.0143 |
| rs12137498  | T | -0.0212 |
| rs12403187  | T | -0.1266 |
| rs12410087  | C | -0.0262 |

|             |   |         |
|-------------|---|---------|
| rs10918342  | G | 0.0143  |
| rs75042003  | A | 0.0784  |
| rs72661510  | G | -0.0219 |
| rs6667985   | C | 0.0207  |
| rs4489608   | G | 0.0186  |
| rs16858733  | C | -0.0247 |
| rs58651344  | C | 0.019   |
| rs2982310   | T | 0.0442  |
| rs60469848  | T | 0.021   |
| rs798071    | G | 0.0158  |
| rs115757195 | C | 0.0552  |
| rs111876503 | G | 0.1116  |
| rs35479086  | G | 0.0433  |
| rs548038    | G | -0.0406 |
| rs7548666   | C | -0.0216 |
| rs41431546  | C | 0.0189  |
| rs6699579   | C | -0.0395 |
| rs77281025  | T | -0.0924 |
| rs947406    | C | 0.0145  |
| rs116613999 | G | 0.0542  |
| rs74936620  | A | 0.0307  |
| rs142472136 | C | -0.0909 |
| rs75510815  | A | -0.0594 |
| rs4081356   | T | -0.0138 |
| rs1781780   | T | -0.0185 |
| rs1426787   | G | -0.0153 |
| rs1111248   | A | 0.02    |
| rs116614403 | T | -0.0585 |
| rs72747173  | T | -0.0224 |
| rs4604741   | C | -0.0448 |
| rs6704077   | T | -0.0147 |
| rs10926199  | G | 0.0617  |
| rs706434    | C | -0.0133 |
| rs115635676 | T | 0.0702  |
| rs17646773  | G | 0.0218  |
| rs6671391   | T | 0.0199  |
| rs55752973  | T | -0.0444 |
| rs144748714 | G | -0.0607 |
| rs61835176  | A | -0.0332 |
| rs12062502  | G | 0.0168  |
| rs606823    | C | -0.0145 |
| rs147112588 | T | 0.1054  |
| rs140566229 | T | -0.023  |
| rs987074    | C | -0.0152 |
| rs10927795  | T | -0.0134 |
| rs34855306  | G | 0.0174  |
| rs10493064  | A | -0.0265 |

|             |   |         |
|-------------|---|---------|
| rs4658365   | A | 0.0155  |
| rs12722902  | G | -0.0147 |
| rs144569115 | A | -0.0848 |
| rs1074265   | T | -0.0377 |
| rs1385120   | A | 0.0328  |
| rs5020976   | T | -0.0223 |
| rs11580136  | A | -0.0442 |
| rs77576921  | A | -0.0571 |
| rs56387805  | A | 0.0636  |
| rs12092212  | A | -0.0301 |
| rs12025798  | A | 0.0146  |
| rs17119333  | G | 0.0377  |
| rs6666273   | A | -0.0147 |
| rs894848    | A | 0.0236  |
| rs58876387  | A | -0.0893 |
| rs41369246  | T | 0.0441  |
| rs4379633   | G | -0.0232 |
| rs116101844 | A | 0.0697  |
| rs3120835   | T | 0.014   |
| rs680024    | C | 0.0144  |
| rs78101827  | T | 0.0722  |
| rs77501996  | G | -0.0466 |
| rs883201    | C | -0.0167 |
| rs4233405   | G | -0.0168 |
| rs150143934 | T | 0.0595  |
| rs112542256 | A | -0.0805 |
| rs1218578   | A | 0.014   |
| rs75628010  | G | 0.0348  |
| rs17580122  | T | 0.0328  |
| rs36135923  | G | 0.0325  |
| rs116147001 | A | 0.0608  |
| rs113135024 | T | -0.0964 |
| rs139287238 | A | 0.1179  |
| rs116503257 | C | -0.0403 |
| rs4584437   | G | 0.0133  |
| rs2494523   | T | 0.0144  |
| rs11590329  | A | 0.0384  |
| rs11590545  | A | 0.0758  |
| rs1047840   | A | -0.014  |
| rs7524857   | T | -0.0185 |
| rs61768576  | T | 0.0296  |
| rs78365332  | T | -0.0477 |
| rs11589267  | T | -0.0155 |
| rs142863264 | A | 0.0951  |
| rs79018135  | G | 0.0354  |
| rs4661230   | A | -0.0248 |
| rs142115060 | T | 0.0545  |

|             |   |         |
|-------------|---|---------|
| rs114554434 | T | 0.0586  |
| rs76425534  | G | -0.053  |
| rs629071    | C | -0.0139 |
| rs35761940  | C | 0.0206  |
| rs72862657  | T | -0.0609 |
| rs146779090 | C | -0.0783 |
| rs11812055  | A | 0.0398  |
| rs12135338  | A | -0.0375 |
| rs12404699  | T | -0.0299 |
| rs56079238  | C | 0.0338  |
| rs138467738 | A | 0.0709  |
| rs9651107   | T | -0.0342 |
| rs7553648   | C | 0.0136  |
| rs74958477  | T | 0.0713  |
| rs114823437 | C | 0.0554  |
| rs77857229  | C | -0.047  |
| rs12569265  | C | -0.0259 |
| rs10919330  | C | -0.0651 |
| rs12082727  | T | 0.0145  |
| rs115770990 | C | 0.0985  |
| rs146545816 | A | 0.0663  |
| rs151031440 | T | 0.0644  |
| rs77226613  | T | 0.0669  |
| rs72732738  | T | 0.0849  |
| rs226081    | C | -0.0143 |
| rs75679358  | T | -0.0384 |
| rs7538565   | G | 0.0335  |
| rs61856396  | A | 0.0969  |
| rs12566637  | T | 0.0244  |
| rs7527437   | A | 0.0582  |
| rs76500281  | C | -0.0358 |
| rs71673415  | T | 0.0499  |
| rs35958798  | C | 0.0207  |
| rs17108270  | A | 0.0164  |
| rs115973967 | G | -0.0741 |
| rs4658301   | A | 0.0249  |
| rs77667226  | G | -0.0354 |
| rs72703687  | T | 0.0257  |
| rs79975643  | G | -0.0552 |
| rs6540871   | C | -0.0182 |
| rs150386203 | T | -0.0225 |
| rs72699443  | C | -0.088  |
| rs78084702  | A | 0.0674  |
| rs11240719  | C | -0.0171 |
| rs61824660  | C | 0.0135  |
| rs2145790   | A | -0.051  |
| rs209710    | A | 0.0157  |

|             |   |         |
|-------------|---|---------|
| rs2184016   | T | 0.0428  |
| rs146453953 | A | 0.0629  |
| rs72638614  | A | 0.0346  |
| rs12135022  | T | -0.0637 |
| rs7367132   | G | 0.0198  |
| rs76162469  | C | -0.0361 |
| rs10489341  | T | 0.0464  |
| rs1655281   | T | -0.0137 |
| rs79680393  | C | 0.0843  |
| rs114878469 | G | -0.0604 |
| rs12075570  | T | -0.0567 |
| rs611105    | C | -0.0163 |
| rs114002338 | T | -0.0835 |
| rs74946308  | T | -0.1084 |
| rs147902194 | A | -0.0883 |
| rs138847861 | T | 0.0842  |
| rs149842962 | T | 0.0717  |
| rs3795393   | C | -0.0271 |
| rs76850981  | T | -0.0775 |
| rs141517167 | T | 0.0671  |
| rs112251330 | A | 0.084   |
| rs80187479  | A | -0.0614 |
| rs3101216   | T | -0.0155 |
| rs76164182  | C | 0.0827  |
| rs144485091 | C | 0.0204  |
| rs79758581  | A | 0.0513  |
| rs71644735  | A | -0.0529 |
| rs10489142  | G | -0.015  |
| rs112965315 | G | -0.0364 |
| rs115519787 | A | 0.0758  |
| rs78299232  | T | 0.071   |
| rs115590943 | T | -0.1284 |
| rs114827644 | T | -0.0288 |
| rs113032380 | A | 0.0323  |
| rs113934221 | T | 0.0269  |
| rs34866970  | G | -0.0215 |
| rs11580249  | T | 0.0201  |
| rs114244315 | C | -0.0536 |
| rs1003741   | T | 0.015   |
| rs2795480   | A | 0.0175  |
| rs11811637  | C | 0.046   |
| rs12130546  | T | 0.0759  |
| rs12023160  | G | 0.0456  |
| rs77398773  | G | -0.0324 |
| rs142872139 | C | -0.0875 |
| rs148046906 | T | 0.0402  |
| rs74698898  | C | -0.0314 |



|             |   |         |
|-------------|---|---------|
| rs74522516  | A | -0.0249 |
| rs77270226  | C | 0.0322  |
| rs115959445 | A | 0.1221  |
| rs114446400 | G | 0.0467  |
| rs80045751  | A | 0.0403  |
| rs11207734  | A | -0.0168 |
| rs77506146  | A | -0.0601 |
| rs12023328  | A | -0.0262 |
| rs72752807  | A | 0.0603  |
| rs113323494 | C | -0.0285 |
| rs2819339   | T | -0.0167 |
| rs28366462  | T | 0.0265  |
| rs190770    | T | -0.0138 |
| rs74665711  | G | 0.0323  |
| rs79500154  | A | 0.0568  |
| rs11210356  | G | 0.0213  |
| rs2224810   | C | 0.0167  |
| rs546583    | C | 0.0134  |
| rs6670442   | A | -0.0512 |
| rs78012939  | G | 0.0546  |
| rs116509906 | A | -0.0443 |
| rs74664546  | G | -0.0176 |
| rs77945567  | T | 0.0604  |
| rs72675993  | G | 0.0526  |
| rs952812    | A | -0.0253 |
| rs16860221  | C | -0.0264 |
| rs3862045   | C | -0.0183 |
| rs1705295   | T | -0.0284 |
| rs72639058  | T | 0.0253  |
| rs1391802   | C | 0.0326  |
| rs59374747  | T | 0.0398  |
| rs75699461  | A | 0.0359  |
| rs537478    | C | 0.0135  |
| rs330728    | T | -0.0132 |
| rs59769528  | T | 0.0831  |
| rs6694570   | A | 0.0193  |
| rs80336923  | G | 0.0487  |
| rs41269672  | C | -0.0569 |
| rs72759229  | T | -0.0249 |
| rs7524444   | A | -0.0135 |
| rs116490929 | T | 0.053   |
| rs72718072  | G | -0.0274 |
| rs114530065 | A | 0.0534  |
| rs4626914   | G | 0.0167  |
| rs10802210  | C | -0.0178 |
| rs72651875  | A | 0.026   |
| rs146704243 | C | 0.049   |

|             |   |         |
|-------------|---|---------|
| rs462649    | C | 0.0317  |
| rs114787850 | C | 0.0388  |
| rs141161580 | T | 0.0547  |
| rs115076617 | A | 0.0652  |
| rs80341926  | C | -0.1033 |
| rs99382     | G | 0.0131  |
| rs77921522  | G | -0.0888 |
| rs74475701  | T | 0.1245  |
| rs7536719   | A | 0.0321  |
| rs900891    | C | 0.0251  |
| rs1773457   | T | -0.0148 |
| rs6658152   | T | -0.0172 |
| rs115555395 | C | 0.0852  |
| rs61813301  | G | -0.0197 |
| rs78269593  | C | -0.0786 |
| rs72775765  | C | -0.0878 |
| rs6428907   | G | 0.0147  |
| rs34476859  | A | 0.0207  |
| rs140610607 | T | 0.0793  |
| rs11210533  | A | 0.0136  |
| rs3856080   | T | 0.0283  |
| rs10914769  | G | -0.0148 |
| rs114639073 | A | 0.077   |
| rs6662919   | G | 0.0156  |
| rs11264431  | C | -0.0137 |
| rs11266740  | G | 0.0176  |
| rs141588538 | A | 0.079   |
| rs115181845 | T | -0.039  |
| rs3917865   | C | -0.0748 |
| rs3010039   | A | 0.0163  |
| rs137869943 | T | -0.0655 |
| rs11587760  | A | -0.0225 |
| rs72640608  | G | 0.0177  |
| rs116129852 | T | 0.0566  |
| rs111690686 | C | 0.0517  |
| rs79047429  | C | 0.0758  |
| rs76337193  | G | 0.0343  |
| rs149931499 | C | 0.0814  |
| rs116317369 | C | 0.0506  |
| rs3766023   | C | -0.0275 |
| rs12739679  | G | 0.014   |
| rs10754548  | A | -0.0362 |
| rs2421847   | G | -0.033  |
| rs75890392  | T | -0.06   |
| rs116119347 | T | 0.0438  |
| rs2494641   | T | -0.0179 |
| rs3765339   | T | 0.0162  |

|             |   |         |
|-------------|---|---------|
| rs7545266   | C | 0.0141  |
| rs11582017  | A | 0.0354  |
| rs10779598  | A | -0.0133 |
| rs57037382  | C | -0.0505 |
| rs12748953  | C | 0.0628  |
| rs72654517  | C | -0.0539 |
| rs72657713  | C | 0.078   |
| rs115865849 | T | -0.0996 |
| rs9660478   | A | 0.0704  |
| rs946577    | G | -0.0132 |
| rs75584439  | G | -0.0577 |
| rs10915323  | A | 0.0433  |
| rs4908565   | A | -0.0624 |
| rs2311972   | C | 0.0355  |
| rs645558    | T | -0.0172 |
| rs144653436 | A | -0.0779 |
| rs12046916  | C | -0.0152 |
| rs56235501  | C | -0.0775 |
| rs12029165  | A | 0.0554  |
| rs10925720  | T | 0.0215  |
| rs35264681  | A | -0.0774 |
| rs10900379  | G | -0.0221 |
| rs60108808  | G | -0.0379 |
| rs2473263   | A | 0.0127  |
| rs7537444   | G | 0.0178  |
| rs144365971 | A | 0.0718  |
| rs115985268 | A | -0.0997 |
| rs1932761   | C | -0.0177 |
| rs2635038   | T | 0.0139  |
| rs115209487 | G | 0.0573  |
| rs74587156  | G | 0.0718  |
| rs112976702 | A | -0.0485 |
| rs507288    | G | 0.0136  |
| rs112584306 | A | -0.0447 |
| rs12401347  | G | 0.0238  |
| rs150683278 | C | -0.0664 |
| rs150888292 | A | 0.0568  |
| rs6688746   | T | -0.0398 |
| rs16851444  | G | 0.0232  |
| rs147354517 | A | -0.0428 |
| rs61831335  | C | -0.0239 |
| rs61743136  | C | 0.0824  |
| rs6600373   | C | -0.0256 |
| rs2405593   | C | 0.0689  |
| rs11211579  | G | -0.0153 |
| rs2864123   | A | -0.0422 |
| rs487563    | G | 0.0598  |

|             |   |         |
|-------------|---|---------|
| rs11162044  | T | 0.0206  |
| rs115027839 | G | 0.0528  |
| rs150927933 | T | 0.0543  |
| rs77854138  | A | -0.0613 |
| rs12034054  | C | -0.0137 |
| rs4912037   | A | -0.0192 |
| rs41281352  | C | -0.0621 |
| rs115398529 | C | -0.06   |
| rs141105429 | C | -0.065  |
| rs12133737  | A | 0.0387  |
| rs116198613 | T | -0.0419 |
| rs116409805 | T | 0.0474  |
| rs71670901  | T | 0.0935  |
| rs6587735   | A | -0.0131 |
| rs10863859  | T | 0.013   |
| rs4926619   | C | 0.0136  |
| rs2207792   | G | 0.0136  |
| rs3176879   | G | -0.0397 |
| rs4998493   | C | 0.0146  |
| rs7524105   | T | -0.0209 |
| rs9662298   | A | 0.0519  |
| rs11579304  | A | 0.0323  |
| rs79642361  | A | -0.029  |
| rs36041141  | G | 0.0535  |
| rs470310    | T | 0.0218  |
| rs2800757   | G | 0.016   |
| rs78617262  | C | -0.0691 |
| rs10737373  | C | -0.0139 |
| rs7519086   | C | -0.02   |
| rs17623369  | T | 0.0255  |
| rs114776144 | T | -0.0926 |
| rs60359103  | C | -0.0375 |
| rs12565883  | C | -0.0153 |
| rs17130158  | C | 0.0473  |
| rs2819742   | A | 0.0131  |
| rs74974210  | C | -0.0566 |
| rs4073667   | A | 0.0134  |
| rs74980771  | C | 0.0455  |
| rs145986434 | T | 0.0813  |
| rs79365581  | C | 0.0823  |
| rs12735420  | G | 0.0399  |
| rs115418243 | G | 0.0557  |
| rs72646129  | T | 0.0712  |
| rs515511    | T | 0.0265  |
| rs73018969  | G | 0.0353  |
| rs12724659  | T | 0.0865  |
| rs78852232  | A | 0.0362  |

|             |   |         |
|-------------|---|---------|
| rs6694017   | C | -0.0175 |
| rs72661080  | T | -0.0534 |
| rs165286    | A | -0.0193 |
| rs56217471  | G | 0.0815  |
| rs76707687  | G | 0.0474  |
| rs6429678   | G | 0.0169  |
| rs140706260 | G | 0.0593  |
| rs10736844  | C | 0.02    |
| rs61764963  | A | -0.0507 |
| rs311475    | T | -0.0138 |
| rs72683082  | T | -0.0219 |
| rs116350475 | C | -0.0553 |
| rs77568758  | T | 0.0374  |
| rs142137537 | T | 0.0277  |
| rs116618855 | T | 0.0578  |
| rs927213    | A | -0.0208 |
| rs77646398  | C | -0.0493 |
| rs4915221   | G | 0.0127  |
| rs2842754   | C | 0.015   |
| rs141134940 | T | 0.0528  |
| rs2806876   | C | -0.0138 |
| rs72658397  | T | -0.0463 |
| rs1342862   | C | 0.0332  |
| rs75481609  | C | -0.0374 |
| rs145616941 | C | 0.0758  |
| rs115242692 | G | 0.0445  |
| rs144247265 | C | 0.0705  |
| rs1977737   | A | 0.0478  |
| rs7514474   | T | -0.0734 |
| rs77818303  | T | -0.0338 |
| rs144267792 | C | 0.099   |
| rs7523070   | C | -0.0139 |
| rs61787095  | G | 0.0677  |
| rs1961733   | A | -0.0743 |
| rs61848979  | C | 0.0432  |
| rs61823470  | C | 0.0454  |
| rs77415908  | A | -0.0903 |
| rs6425399   | T | 0.0128  |
| rs150353638 | T | -0.0865 |
| rs145512184 | T | 0.0549  |
| rs74377329  | G | 0.0421  |
| rs17685275  | A | 0.0611  |
| rs72761137  | T | 0.0194  |
| rs1265883   | C | 0.0278  |
| rs147591756 | C | 0.082   |
| rs6604997   | T | 0.0249  |
| rs11589612  | C | 0.0129  |

|             |   |         |
|-------------|---|---------|
| rs1381170   | G | -0.0157 |
| rs11583033  | G | 0.0213  |
| rs2072919   | G | 0.0972  |
| rs10803428  | G | -0.0157 |
| rs141472572 | A | 0.0736  |
| rs116643345 | T | 0.0575  |
| rs10800507  | G | 0.0129  |
| rs7545423   | G | -0.0285 |
| rs12067293  | A | -0.0156 |
| rs111346037 | T | -0.0275 |
| rs57034017  | G | -0.0174 |
| rs71644738  | C | 0.0206  |
| rs7516664   | G | -0.017  |
| rs34686496  | G | 0.019   |
| rs13294     | A | -0.0129 |
| rs815759    | A | -0.0288 |
| rs789651    | C | -0.0385 |
| rs72648412  | T | 0.051   |
| rs61818169  | A | -0.0441 |
| rs12125295  | A | -0.027  |
| rs12121482  | A | -0.0393 |
| rs72637878  | T | 0.1146  |
| rs7527595   | T | 0.0191  |
| rs72702267  | A | -0.0259 |
| rs113682159 | G | 0.0929  |
| rs12566472  | T | 0.0569  |
| rs1452628   | T | 0.0135  |
| rs4654912   | A | -0.0204 |
| rs79434746  | G | 0.0639  |
| rs1254213   | A | -0.0428 |
| rs6676215   | T | -0.0932 |
| rs142536635 | T | 0.1311  |
| rs41308339  | G | -0.0493 |
| rs78111816  | A | 0.0475  |
| rs61823959  | A | -0.038  |
| rs8179444   | G | 0.0212  |
| rs11579653  | A | 0.0667  |
| rs2273779   | T | -0.0136 |
| rs61780371  | T | -0.0452 |
| rs141624019 | A | -0.1011 |
| rs61807807  | A | 0.081   |
| rs72759252  | A | -0.0882 |
| rs61857794  | T | 0.0193  |
| rs72717038  | G | 0.0369  |
| rs17031111  | T | 0.0288  |
| rs12744460  | T | -0.0172 |
| rs112818818 | C | -0.0244 |

|             |   |         |
|-------------|---|---------|
| rs913724    | C | -0.0141 |
| rs2023631   | G | -0.0134 |
| rs17187009  | G | 0.0411  |
| rs114339418 | A | 0.0316  |
| rs707207    | G | -0.0401 |
| rs148411580 | G | 0.0533  |
| rs72751544  | G | -0.023  |
| rs17032912  | C | 0.0334  |
| rs12024207  | T | -0.0209 |
| rs113727493 | T | -0.054  |
| rs6537715   | T | -0.0469 |
| rs114829303 | T | 0.0541  |
| rs77365637  | A | -0.052  |
| rs704849    | C | -0.0181 |
| rs139479617 | A | -0.0891 |
| rs56331815  | T | 0.0363  |
| rs138549125 | T | -0.1084 |
| rs114605572 | C | 0.0339  |
| rs7513341   | G | -0.0177 |
| rs2153304   | G | -0.0131 |
| rs80276042  | A | -0.0584 |
| rs12128095  | G | -0.0449 |
| rs7522573   | G | -0.0291 |
| rs12141364  | C | 0.0385  |
| rs116712644 | A | -0.0329 |
| rs2072929   | C | -0.0153 |
| rs79246644  | T | 0.0589  |
| rs115277438 | T | -0.0494 |
| rs34210073  | G | 0.0177  |
| rs77979353  | C | 0.032   |
| rs74705099  | A | -0.0533 |
| rs10753344  | C | -0.0181 |
| rs58141689  | G | -0.0221 |
| rs16858845  | A | 0.0431  |
| rs74465185  | A | 0.0491  |
| rs77911157  | A | 0.0451  |
| rs77876775  | T | 0.0642  |
| rs117252047 | C | 0.0365  |
| rs12408850  | T | 0.0175  |
| rs17424885  | A | 0.0187  |
| rs1280984   | C | 0.0157  |
| rs79323415  | C | 0.0731  |
| rs59839028  | G | 0.0836  |
| rs6687736   | T | -0.0218 |
| rs77426366  | G | 0.0692  |
| rs17675018  | A | -0.0538 |
| rs114276562 | A | -0.0744 |

|             |   |         |
|-------------|---|---------|
| rs78045525  | A | -0.058  |
| rs12121802  | C | 0.0596  |
| rs3820690   | C | -0.0297 |
| rs113801949 | A | -0.0419 |
| rs72630531  | A | -0.0605 |
| rs12062451  | C | -0.0613 |
| rs909935    | C | -0.0145 |
| rs146767219 | T | 0.0235  |
| rs7414539   | T | 0.0226  |
| rs74748492  | C | -0.0356 |
| rs2803264   | G | -0.0197 |
| rs11162848  | T | 0.0165  |
| rs59688746  | A | 0.0297  |
| rs12023821  | G | -0.0402 |
| rs72671429  | T | -0.0914 |
| rs2185212   | A | 0.0146  |
| rs10918333  | A | 0.0144  |
| rs80179502  | A | -0.0398 |
| rs6702894   | G | -0.0155 |
| rs72664612  | C | -0.0256 |
| rs3795842   | C | 0.0139  |
| rs74091605  | A | 0.0622  |
| rs6586365   | G | 0.0161  |
| rs147249038 | A | -0.027  |
| rs74106088  | A | 0.0313  |
| rs79770737  | A | 0.0594  |
| rs116639022 | T | -0.0764 |
| rs12562210  | T | -0.0148 |
| rs56101609  | C | 0.0177  |
| rs115973973 | A | 0.0614  |
| rs10873878  | G | -0.0193 |
| rs12732056  | T | 0.0178  |
| rs7544710   | G | -0.0353 |
| rs75697875  | G | 0.0582  |
| rs150337031 | T | -0.0814 |
| rs16826302  | A | 0.0185  |
| rs2647282   | A | 0.016   |
| rs145404293 | G | 0.0593  |
| rs1416883   | A | 0.0138  |
| rs3820265   | G | 0.0228  |
| rs371782    | A | -0.0259 |
| rs57384594  | A | 0.1132  |
| rs138026635 | T | -0.0715 |
| rs10875357  | C | -0.0169 |
| rs61784921  | G | 0.0802  |
| rs141283108 | T | -0.0655 |
| rs2821391   | G | -0.0143 |



|             |   |         |
|-------------|---|---------|
| rs10047178  | C | 0.0331  |
| rs112901681 | A | -0.0619 |
| rs111918390 | C | 0.0479  |
| rs12402179  | T | -0.0308 |
| rs61819310  | G | 0.0298  |
| rs1192580   | C | -0.0135 |
| rs12062981  | A | -0.0772 |
| rs115981448 | C | -0.0877 |
| rs74455468  | A | -0.0876 |
| rs73117620  | C | 0.0413  |
| rs56822709  | G | 0.0406  |
| rs12122427  | A | -0.044  |
| rs2799672   | G | 0.0295  |
| rs138406635 | A | -0.0887 |
| rs75773618  | T | 0.0898  |
| rs12075439  | A | 0.0376  |
| rs6701583   | G | -0.0144 |
| rs115270699 | A | -0.0505 |
| rs12732334  | C | -0.018  |
| rs138843338 | A | 0.0939  |
| rs72756449  | T | 0.0625  |
| rs2878409   | G | 0.0336  |
| rs113652876 | A | 0.0388  |
| rs72755605  | G | 0.0762  |
| rs11207774  | G | 0.0152  |
| rs77473524  | T | -0.0449 |
| rs138700061 | A | -0.1009 |
| rs7539603   | G | -0.0565 |
| rs114537356 | A | 0.0884  |
| rs151182652 | A | 0.1036  |
| rs142443237 | G | 0.09    |
| rs4428953   | A | 0.0175  |
| rs72711380  | C | 0.045   |
| rs115227354 | G | -0.0652 |
| rs4288578   | T | 0.021   |
| rs34189398  | C | -0.0161 |
| rs1459764   | C | 0.0201  |
| rs115107994 | A | 0.0355  |
| rs76385115  | T | 0.0716  |
| rs6660834   | A | 0.0209  |
| rs78402505  | G | -0.0735 |
| rs9308410   | T | 0.018   |
| rs114234991 | T | -0.0531 |
| rs625127    | T | -0.0421 |
| rs139577070 | A | 0.0551  |
| rs72886692  | A | 0.0185  |
| rs115548223 | G | 0.0728  |

|             |   |         |
|-------------|---|---------|
| rs113173026 | T | 0.0253  |
| rs1555025   | T | -0.0137 |
| rs11580324  | C | 0.0232  |
| rs3898644   | T | 0.0707  |
| rs4285682   | A | -0.0132 |
| rs77360551  | A | 0.0569  |
| rs10910551  | T | -0.0175 |
| rs17112592  | G | 0.0225  |
| rs148819660 | T | 0.0788  |
| rs2369532   | A | -0.017  |
| rs12566468  | T | 0.0915  |
| rs57647632  | C | -0.014  |
| rs75510977  | T | 0.0335  |
| rs61766988  | A | -0.036  |
| rs79944482  | A | -0.045  |
| rs79805488  | T | 0.0304  |
| rs11569840  | G | 0.1074  |
| rs34554534  | G | 0.026   |
| rs114197810 | T | 0.0544  |
| rs79784462  | A | 0.0457  |
| rs79945534  | T | 0.0547  |
| rs77006921  | A | -0.0274 |
| rs116300103 | T | -0.0472 |
| rs144228077 | G | 0.0343  |
| rs114284617 | A | -0.0733 |
| rs115875359 | T | -0.0639 |
| rs10920207  | A | -0.0378 |
| rs603836    | T | 0.0149  |
| rs2576260   | G | 0.0132  |
| rs116043569 | A | 0.0584  |
| rs6666494   | T | -0.0144 |
| rs12034424  | A | 0.0135  |
| rs9425303   | A | 0.0158  |
| rs2796135   | C | -0.0175 |
| rs539308    | A | 0.042   |
| rs2635028   | G | 0.02    |
| rs147410718 | A | -0.0347 |
| rs111374838 | C | 0.0519  |
| rs114750761 | A | -0.0366 |
| rs76447954  | G | 0.0253  |
| rs116389218 | A | 0.1012  |
| rs12745738  | T | 0.0216  |
| rs1299726   | C | -0.0153 |
| rs61783250  | C | -0.0668 |
| rs148387282 | A | 0.0769  |
| rs12404741  | C | 0.0524  |
| rs115244343 | T | -0.0375 |

|             |   |         |
|-------------|---|---------|
| rs115527315 | G | -0.0998 |
| rs148148717 | T | -0.0717 |
| rs10863659  | T | 0.0223  |
| rs856090    | T | 0.0197  |
| rs16824967  | C | -0.0395 |
| rs72629680  | G | 0.0715  |
| rs1857144   | C | 0.0159  |
| rs74684994  | A | 0.0952  |
| rs74320604  | C | -0.0382 |
| rs6664492   | T | 0.0175  |
| rs146075105 | G | -0.0467 |
| rs139226224 | T | -0.0528 |
| rs1294044   | A | 0.0173  |
| rs115116431 | G | -0.0673 |
| rs4146496   | C | 0.0129  |
| rs150131635 | A | 0.0478  |
| rs1926879   | T | -0.0129 |
| rs1287637   | A | 0.0227  |
| rs6604914   | A | -0.0552 |
| rs11582616  | C | 0.022   |
| rs12045344  | G | -0.041  |
| rs11807860  | C | 0.0166  |
| rs4649396   | A | -0.0303 |
| rs58564605  | A | 0.0153  |
| rs12138108  | A | 0.0601  |
| rs76744373  | T | 0.0746  |
| rs11120130  | A | -0.0469 |
| rs75069476  | T | -0.0557 |
| rs143620501 | A | -0.0749 |
| rs910676    | A | -0.013  |
| rs3814018   | T | 0.0133  |
| rs141641704 | T | 0.0638  |
| rs12738201  | C | 0.0157  |
| rs3104464   | A | -0.0153 |
| rs113274990 | A | 0.0638  |
| rs115059985 | A | 0.0489  |
| rs56011044  | T | 0.024   |
| rs147779674 | A | 0.0261  |
| rs146022246 | T | 0.0631  |
| rs859079    | T | -0.0606 |
| rs114114968 | A | 0.0551  |
| rs12030710  | A | -0.0263 |
| rs71672736  | T | -0.0733 |
| rs10800081  | A | -0.0323 |
| rs145719422 | G | -0.0506 |
| rs61801283  | G | -0.0391 |
| rs6677198   | G | -0.0172 |

|             |   |         |
|-------------|---|---------|
| rs144146867 | C | -0.1085 |
| rs145997649 | T | 0.0335  |
| rs12135982  | T | -0.0213 |
| rs79013677  | C | -0.0267 |
| rs12217104  | A | 0.0547  |
| rs7555905   | C | -0.0129 |
| rs112827618 | A | 0.0519  |
| rs116628972 | A | -0.0725 |
| rs78458351  | T | -0.0858 |
| rs60998976  | T | -0.0167 |
| rs116024799 | T | -0.078  |
| rs80263368  | A | 0.0611  |
| rs115485927 | C | 0.063   |
| rs12732247  | C | 0.0401  |
| rs61766454  | A | 0.0176  |
| rs72747611  | A | -0.0798 |
| rs10493162  | G | 0.0702  |
| rs3121989   | C | -0.0139 |
| rs6670957   | T | 0.0285  |
| rs12144563  | G | 0.0169  |
| rs72721775  | C | 0.0311  |
| rs12133910  | C | 0.0195  |
| rs17110221  | C | 0.0237  |
| rs114957558 | C | 0.0786  |
| rs10926334  | C | 0.0343  |
| rs56049658  | G | -0.0441 |
| rs2807348   | A | -0.0148 |
| rs115030544 | G | 0.0764  |
| rs61768876  | A | -0.0207 |
| rs61806915  | T | 0.0804  |
| rs145232426 | G | -0.065  |
| rs76969758  | A | 0.0919  |
| rs1475694   | A | -0.0166 |
| rs2843018   | A | -0.0166 |
| rs79027022  | T | 0.0722  |
| rs10910502  | A | -0.0132 |
| rs12120947  | C | 0.0232  |
| rs77668549  | G | 0.0316  |
| rs6662274   | A | -0.0148 |
| rs1847382   | G | -0.0124 |
| rs148714124 | C | 0.073   |
| rs138351673 | T | 0.0616  |
| rs74833572  | C | 0.1017  |
| rs2001454   | A | -0.0201 |
| rs114935434 | T | -0.0502 |
| rs4915048   | G | 0.0431  |
| rs79906727  | C | 0.0207  |

|             |   |         |
|-------------|---|---------|
| rs72697797  | A | 0.0357  |
| rs145759918 | T | 0.0625  |
| rs1875449   | A | 0.0203  |
| rs17416550  | A | 0.0495  |
| rs4638158   | T | -0.0132 |
| rs12139327  | A | -0.0507 |
| rs79402045  | C | -0.1275 |
| rs12756353  | G | 0.0325  |
| rs67994022  | A | -0.0186 |
| rs77637803  | A | -0.0501 |
| rs1324716   | T | -0.0136 |
| rs12060818  | G | -0.0382 |
| rs140170258 | T | -0.0644 |
| rs115458454 | T | -0.0707 |
| rs72755815  | T | 0.0759  |
| rs6697721   | A | 0.0135  |
| rs141979134 | G | 0.0871  |
| rs75151214  | A | 0.0302  |
| rs76921255  | A | -0.0443 |
| rs79819038  | G | -0.0887 |
| rs7418883   | A | -0.0269 |
| rs79668487  | C | 0.0292  |
| rs150788366 | C | -0.0558 |
| rs3905158   | C | 0.04    |
| rs111397720 | T | 0.059   |
| rs111952347 | T | 0.0379  |
| rs76732756  | A | 0.0645  |
| rs10803002  | C | -0.0185 |
| rs79239274  | C | 0.025   |
| rs12066799  | A | 0.0125  |
| rs72666976  | G | -0.0298 |
| rs61766091  | A | -0.0503 |
| rs72724459  | T | -0.0494 |
| rs1412652   | G | -0.0174 |
| rs61837300  | C | 0.0329  |
| rs913392    | T | -0.0173 |
| rs74602076  | T | -0.0398 |
| rs12239132  | G | -0.0173 |
| rs116191619 | A | -0.0332 |
| rs74402898  | T | 0.0296  |
| rs17559127  | A | -0.0598 |
| rs12139093  | A | 0.0127  |
| rs36026049  | T | -0.0526 |
| rs113506320 | T | 0.0654  |
| rs112127176 | C | 0.0841  |
| rs9326011   | A | 0.0149  |
| rs2782792   | T | 0.0225  |

|             |   |         |
|-------------|---|---------|
| rs77430047  | A | 0.0564  |
| rs173207    | G | 0.0137  |
| rs141218523 | A | 0.0712  |
| rs10927613  | T | 0.0135  |
| rs12744530  | A | 0.049   |
| rs6697032   | A | 0.016   |
| rs72698610  | T | -0.0655 |
| rs16858953  | G | -0.0679 |
| rs1200610   | G | -0.0169 |
| rs7413155   | A | 0.0168  |
| rs7536331   | G | -0.0131 |
| rs10915960  | T | -0.0155 |
| rs870752    | T | 0.0215  |
| rs6588219   | T | 0.0129  |
| rs72676389  | C | -0.0456 |
| rs61434101  | C | 0.056   |
| rs17447274  | G | 0.0262  |
| rs113699762 | A | 0.0588  |
| rs989310    | G | -0.0206 |
| rs644592    | T | -0.0187 |
| rs35176344  | G | 0.0123  |
| rs116417861 | A | 0.0595  |
| rs10910052  | T | -0.0253 |
| rs12745589  | T | -0.0349 |
| rs76401668  | A | 0.0949  |
| rs116316949 | T | 0.051   |
| rs116331590 | A | -0.0881 |
| rs11590137  | A | 0.0657  |
| rs6668498   | A | 0.0128  |
| rs17506335  | T | -0.0265 |
| rs11117858  | G | -0.0163 |
| rs12060786  | C | 0.0202  |
| rs2893416   | C | -0.0275 |
| rs17124345  | T | -0.0167 |
| rs77561997  | C | -0.0182 |
| rs12756279  | C | 0.0599  |
| rs4656539   | G | 0.0227  |
| rs9988443   | A | 0.0129  |
| rs7526160   | A | 0.0198  |
| rs75821489  | A | 0.0424  |
| rs114766970 | G | -0.0733 |
| rs34196058  | T | -0.0848 |
| rs12024136  | C | -0.0285 |
| rs149450211 | G | 0.044   |
| rs41292256  | A | 0.0401  |
| rs112472418 | A | 0.1025  |
| rs4079531   | G | 0.0127  |

|             |   |         |
|-------------|---|---------|
| rs12131275  | A | 0.014   |
| rs34093838  | A | 0.0283  |
| rs80135590  | T | 0.0483  |
| rs151222547 | A | 0.0915  |
| rs1872477   | A | 0.0717  |
| rs150274298 | T | -0.0393 |
| rs74615644  | C | 0.0624  |
| rs114416960 | T | 0.0712  |
| rs12146078  | T | -0.0172 |
| rs6675584   | A | -0.0124 |
| rs75296423  | G | -0.0576 |
| rs116566410 | A | 0.0703  |
| rs72763467  | T | 0.0689  |
| rs147381693 | T | 0.1095  |
| rs17421734  | A | 0.0213  |
| rs12094880  | T | 0.0188  |
| rs12145826  | A | -0.0272 |
| rs114564514 | A | 0.0871  |
| rs1755304   | G | -0.0529 |
| rs706449    | A | 0.0162  |
| rs4647018   | C | -0.0798 |
| rs60513083  | C | 0.1195  |
| rs114931935 | A | -0.0392 |
| rs6678897   | T | -0.0836 |
| rs11204644  | A | 0.0235  |
| rs61777716  | A | -0.0338 |
| rs853017    | C | -0.0152 |
| rs145166052 | A | 0.0771  |
| rs140964443 | T | -0.0434 |
| rs115436486 | T | -0.0306 |
| rs12069483  | A | 0.024   |
| rs9430047   | T | 0.0495  |
| rs12735547  | A | 0.0499  |
| rs77892182  | C | -0.0342 |
| rs7548148   | T | 0.013   |
| rs149345807 | C | -0.0791 |
| rs115992086 | T | 0.0633  |
| rs78289536  | G | -0.0641 |
| rs139746203 | T | 0.0546  |
| rs61852451  | A | 0.0843  |
| rs642307    | C | -0.0123 |
| rs79696701  | G | -0.053  |
| rs151247940 | T | -0.0916 |
| rs71628264  | A | -0.0243 |
| rs7550049   | G | 0.0128  |
| rs142037963 | G | 0.0509  |
| rs148258693 | T | 0.0716  |

|             |   |         |
|-------------|---|---------|
| rs141491890 | C | -0.0587 |
| rs12126161  | G | 0.0748  |
| rs12034626  | A | -0.0219 |
| rs519370    | C | 0.0158  |
| rs2363874   | A | -0.029  |
| rs880037    | A | -0.0376 |
| rs79584705  | A | 0.0686  |
| rs79689786  | C | 0.0443  |
| rs78002479  | A | 0.0504  |
| rs76100656  | G | 0.0771  |
| rs111886619 | A | 0.0489  |
| rs3790715   | G | 0.0189  |
| rs41306193  | C | 0.0261  |
| rs12138977  | C | 0.0132  |
| rs149100    | G | 0.0228  |
| rs234105    | T | 0.0313  |
| rs75426550  | T | -0.0646 |
| rs1341447   | G | 0.0127  |
| rs114106347 | T | 0.0648  |
| rs11580428  | A | 0.021   |
| rs76494814  | A | -0.0491 |
| rs10889801  | A | -0.0202 |
| rs1552560   | C | 0.0153  |
| rs6694171   | A | 0.0884  |
| rs78980123  | A | 0.0611  |
| rs291590    | G | -0.0751 |
| rs114503904 | A | 0.0714  |
| rs79659484  | G | -0.0503 |
| rs61765555  | T | 0.0151  |
| rs146394863 | T | -0.0761 |
| rs12118941  | A | 0.0177  |
| rs61743290  | A | 0.0317  |
| rs11800344  | G | -0.0306 |
| rs76692899  | T | -0.0289 |
| rs61005382  | T | -0.0504 |
| rs12184324  | T | -0.0302 |
| rs113304176 | A | -0.0377 |
| rs55731534  | G | 0.018   |
| rs292006    | G | -0.0254 |
| rs138307608 | T | -0.0621 |
| rs2769689   | T | 0.0142  |
| rs7518369   | G | 0.0426  |
| rs17341127  | G | 0.093   |
| rs72745400  | C | 0.0799  |
| rs6674879   | T | 0.0173  |
| rs668224    | G | -0.0146 |
| rs12568998  | A | -0.0267 |



|             |   |         |
|-------------|---|---------|
| rs139786592 | A | -0.0389 |
| rs2945123   | A | 0.0169  |
| rs12083701  | A | 0.0157  |
| rs1417969   | A | 0.0139  |
| rs78748604  | T | 0.0581  |
| rs11585537  | G | 0.0187  |
| rs6600256   | C | 0.0566  |
| rs146632455 | A | -0.0888 |
| rs10888979  | T | -0.0276 |
| rs79504179  | G | -0.0511 |
| rs74889172  | T | -0.0534 |
| rs2506991   | A | -0.0135 |
| rs3766332   | T | -0.0271 |
| rs149616594 | T | 0.1009  |
| rs1281604   | A | -0.0203 |
| rs149809796 | A | -0.053  |
| rs79677464  | A | -0.0925 |
| rs982900    | T | 0.0287  |
| rs6425892   | A | 0.0132  |
| rs4660552   | A | -0.0203 |
| rs147100718 | C | 0.1062  |
| rs12127685  | A | 0.0203  |
| rs113352710 | C | -0.0524 |
| rs268779    | G | 0.0156  |
| rs77936709  | G | 0.0638  |
| rs1629928   | G | 0.0148  |
| rs77005890  | T | 0.0224  |
| rs56313125  | T | 0.0535  |
| rs79499349  | T | 0.0978  |
| rs1831704   | A | -0.0145 |
| rs12406882  | T | 0.0201  |
| rs115113183 | A | 0.0485  |
| rs76714282  | C | 0.0473  |
| rs75321354  | G | -0.0696 |
| rs72657758  | T | 0.0858  |
| rs7529360   | T | -0.014  |
| rs11102015  | T | 0.0229  |
| rs3913881   | C | -0.0886 |
| rs28927681  | G | 0.0252  |
| rs17091962  | C | 0.03    |
| rs79207650  | A | -0.0349 |
| rs12036386  | A | 0.0168  |
| rs79030973  | C | -0.0283 |
| rs41272727  | C | -0.088  |
| rs4661673   | C | -0.0198 |
| rs115518893 | A | 0.069   |
| rs114348127 | C | 0.1189  |

|             |   |         |
|-------------|---|---------|
| rs2935927   | A | 0.0129  |
| rs114868658 | C | -0.0882 |
| rs35968688  | C | 0.0482  |
| rs61816662  | A | -0.021  |
| rs78515728  | C | -0.0126 |
| rs147516474 | A | -0.0549 |
| rs841565    | C | 0.0204  |
| rs41286866  | G | 0.0395  |
| rs116184496 | T | -0.0282 |
| rs6428571   | T | 0.0163  |
| rs150543247 | T | -0.034  |
| rs859370    | T | 0.017   |
| rs55816489  | T | -0.0706 |
| rs11208065  | A | -0.0149 |
| rs6537665   | T | 0.0129  |
| rs115376640 | T | 0.0497  |
| rs12756373  | C | 0.0303  |
| rs2789730   | A | -0.015  |
| rs56172822  | G | 0.0725  |
| rs2177113   | C | -0.0239 |
| rs34491653  | A | 0.0268  |
| rs114566438 | T | -0.0535 |
| rs1165493   | A | -0.0175 |
| rs76035591  | T | 0.0431  |
| rs115993428 | C | -0.0576 |
| rs55995606  | A | -0.0183 |
| rs10802528  | T | -0.0125 |
| rs71645895  | A | -0.0731 |
| rs72748132  | A | 0.0351  |
| rs1202610   | A | 0.0134  |
| rs61771919  | C | 0.0738  |
| rs139194917 | A | 0.0932  |
| rs76227362  | A | -0.0533 |
| rs150451149 | T | 0.0447  |
| rs75300178  | T | 0.0566  |
| rs1441190   | G | -0.0361 |
| rs78306518  | A | 0.0668  |
| rs6676644   | C | -0.0208 |
| rs12404679  | T | -0.019  |
| rs115051474 | G | -0.0388 |
| rs284197    | A | -0.0168 |
| rs111962736 | G | -0.0612 |
| rs12028328  | C | 0.0826  |
| rs61809139  | T | 0.0346  |
| rs57427880  | T | 0.0508  |
| rs7541747   | C | -0.0157 |
| rs75056884  | T | -0.033  |

|             |   |         |
|-------------|---|---------|
| rs4651104   | T | -0.0509 |
| rs3767736   | C | 0.0237  |
| rs72761235  | G | -0.027  |
| rs34256649  | C | 0.098   |
| rs10492933  | A | 0.0281  |
| rs6425738   | T | -0.0121 |
| rs10918761  | T | -0.0238 |
| rs17591849  | C | 0.0354  |
| rs34343736  | A | 0.0216  |
| rs1849939   | A | -0.0262 |
| rs60525879  | C | 0.0185  |
| rs41292645  | T | 0.0847  |
| rs1933072   | A | 0.0135  |
| rs6682360   | G | 0.0698  |
| rs12402320  | T | 0.0149  |
| rs55818771  | T | -0.026  |
| rs12747565  | T | -0.0164 |
| rs4654861   | T | 0.0235  |
| rs1323278   | A | -0.0174 |
| rs12145678  | A | 0.0233  |
| rs11590626  | A | 0.0302  |
| rs55746260  | A | -0.0135 |
| rs67428837  | A | -0.0322 |
| rs4397661   | A | -0.0175 |
| rs12404434  | C | -0.0412 |
| rs67939704  | C | 0.0145  |
| rs141632501 | G | 0.0845  |
| rs35922787  | A | 0.0953  |
| rs16839142  | T | 0.0279  |
| rs28523801  | C | 0.022   |
| rs12562695  | C | -0.0341 |
| rs553882    | G | -0.0176 |
| rs143564815 | G | 0.0686  |
| rs75392909  | T | -0.0781 |
| rs2275560   | A | 0.0154  |
| rs2311047   | G | -0.0378 |
| rs1887053   | A | -0.0759 |
| rs6702924   | A | -0.0137 |
| rs10911620  | C | -0.0165 |
| rs112566114 | T | 0.0662  |
| rs78823214  | G | -0.0958 |
| rs3766614   | A | -0.0126 |
| rs35526053  | G | -0.1034 |
| rs148593418 | C | -0.0652 |
| rs2236601   | T | 0.0311  |
| rs12058422  | T | -0.0155 |
| rs55981420  | G | -0.0164 |

|             |   |         |
|-------------|---|---------|
| rs12123486  | G | 0.0149  |
| rs137914520 | T | -0.1108 |
| rs670431    | T | 0.0348  |
| rs12036147  | T | -0.0304 |
| rs2135601   | C | -0.0144 |
| rs6703004   | G | -0.0131 |
| rs4656787   | C | 0.0219  |
| rs12088020  | C | 0.0617  |
| rs7416861   | C | 0.0468  |
| rs55907663  | A | 0.0849  |
| rs12127370  | G | -0.0289 |
| rs3845609   | C | 0.0241  |
| rs115164254 | C | -0.04   |
| rs138747257 | T | 0.0939  |
| rs59272829  | A | -0.0188 |
| rs75880300  | A | 0.0363  |
| rs141234874 | T | 0.0804  |
| rs11585184  | T | -0.0227 |
| rs1539634   | C | 0.0243  |
| rs3103777   | A | -0.0333 |
| rs34101846  | C | -0.0254 |
| rs12136537  | A | -0.0169 |
| rs16851839  | G | 0.0855  |
| rs145109266 | G | 0.1167  |
| rs142225665 | A | 0.0653  |
| rs6429306   | C | 0.035   |
| rs2748975   | C | 0.019   |
| rs1581942   | T | 0.0715  |
| rs141331285 | A | -0.0843 |
| rs2764878   | T | -0.0158 |
| rs114779685 | T | -0.0438 |
| rs56785411  | A | 0.016   |
| rs75186794  | A | -0.0786 |
| rs77949920  | G | 0.0416  |
| rs34664982  | A | 0.0173  |
| rs17504880  | C | -0.0149 |
| rs11120596  | T | 0.0281  |
| rs619729    | C | 0.0129  |
| rs12563568  | T | 0.0157  |
| rs35437590  | C | 0.0155  |
| rs818960    | A | -0.0375 |
| rs543948    | T | 0.0587  |
| rs35953644  | T | -0.0189 |
| rs986874    | G | 0.0125  |
| rs139648314 | G | -0.0507 |
| rs11801181  | T | -0.0446 |
| rs75791969  | T | 0.0852  |

|             |   |         |
|-------------|---|---------|
| rs72733168  | T | 0.0608  |
| rs79554253  | C | -0.0471 |
| rs592726    | C | 0.0127  |
| rs114397232 | C | -0.0736 |
| rs78127936  | T | 0.0526  |
| rs114675388 | T | 0.0702  |
| rs61360507  | G | 0.0549  |
| rs681013    | T | 0.0166  |
| rs114139462 | T | 0.0353  |
| rs114960952 | T | 0.0805  |
| rs147853779 | A | 0.1027  |
| rs12567565  | A | -0.0648 |
| rs76657494  | A | -0.0632 |
| rs6662794   | A | 0.0358  |
| rs144337053 | T | 0.0724  |
| rs10800258  | G | -0.0247 |
| rs12119126  | A | 0.024   |
| rs60915721  | G | 0.0262  |
| rs75875099  | G | -0.0494 |
| rs55999465  | G | -0.024  |
| rs79197232  | C | 0.0849  |
| rs56410134  | G | -0.0756 |
| rs1288479   | C | 0.0156  |
| rs745526    | T | -0.02   |
| rs2232189   | C | -0.0121 |
| rs2076466   | G | -0.0147 |
| rs1202812   | T | -0.0135 |
| rs2647392   | A | -0.0131 |
| rs17578870  | A | -0.0184 |
| rs6685943   | A | -0.0149 |
| rs6684090   | T | -0.0317 |
| rs114757723 | G | -0.0844 |
| rs9308447   | T | -0.015  |
| rs78551960  | A | 0.0465  |
| rs10798294  | G | 0.024   |
| rs116257428 | G | 0.0437  |
| rs114739864 | A | 0.0615  |
| rs77068442  | G | -0.039  |
| rs74670312  | A | 0.0614  |
| rs55781948  | T | 0.0447  |
| rs41303881  | A | -0.0641 |
| rs6429539   | A | 0.0438  |
| rs114075730 | A | -0.0522 |
| rs6704011   | C | -0.0211 |
| rs12405458  | G | 0.0172  |
| rs79012980  | T | 0.0458  |
| rs1316855   | A | -0.0679 |

|             |   |         |
|-------------|---|---------|
| rs72715681  | C | 0.0169  |
| rs140321122 | C | 0.0527  |
| rs61815149  | T | 0.0722  |
| rs12138491  | G | -0.0185 |
| rs2089502   | T | -0.0488 |
| rs9970917   | T | 0.0379  |
| rs116222036 | A | 0.0495  |
| rs114399895 | A | -0.0578 |
| rs115293227 | T | 0.0737  |
| rs17100624  | T | -0.0211 |
| rs10918703  | A | 0.0259  |
| rs457397    | G | -0.0325 |
| rs76815725  | T | 0.0803  |
| rs235485    | G | -0.0136 |
| rs17483835  | A | -0.0253 |
| rs115535335 | C | 0.0585  |
| rs10864048  | G | -0.0131 |
| rs145363677 | G | 0.081   |
| rs9433437   | A | -0.0587 |
| rs1033974   | G | -0.0155 |
| rs78706749  | G | 0.0378  |
| rs6698436   | G | -0.012  |
| rs2243196   | A | -0.0695 |
| rs11203297  | A | -0.0177 |
| rs56086749  | T | 0.0467  |
| rs9428894   | A | -0.016  |
| rs35825966  | T | 0.0251  |
| rs12724413  | G | 0.0926  |
| rs672453    | A | -0.0219 |
| rs12091838  | T | 0.018   |
| rs4526656   | A | 0.0602  |
| rs1419290   | C | 0.0232  |
| rs2737635   | G | 0.0343  |
| rs9660182   | A | -0.0174 |
| rs61770531  | C | -0.0345 |
| rs114524105 | T | -0.0305 |
| rs56130347  | C | 0.0241  |
| rs72981843  | C | -0.0223 |
| rs75432001  | T | -0.0932 |
| rs55770461  | C | -0.0298 |
| rs7520823   | C | 0.0126  |
| rs144680281 | A | -0.0551 |
| rs75663797  | T | -0.091  |
| rs6685233   | G | -0.0198 |
| rs2491132   | T | -0.0174 |
| rs116232733 | T | 0.0377  |
| rs699265    | G | -0.0193 |

|             |   |         |
|-------------|---|---------|
| rs269131    | G | 0.0119  |
| rs140847740 | A | 0.039   |
| rs1126700   | G | 0.0253  |
| rs114291829 | A | -0.055  |
| rs11586165  | A | 0.0502  |
| rs56744585  | G | 0.0548  |
| rs61787552  | T | -0.0291 |
| rs146538713 | T | 0.0941  |
| rs7546000   | A | -0.0154 |
| rs139973042 | T | 0.062   |
| rs148852102 | T | -0.0541 |
| rs1415673   | A | -0.0203 |
| rs34612888  | G | -0.0833 |
| rs78254884  | T | -0.0786 |
| rs150715637 | G | -0.0312 |
| rs12085071  | A | 0.0136  |
| rs12118847  | G | 0.018   |
| rs12120212  | C | 0.0217  |
| rs1841241   | G | -0.0129 |
| rs12140661  | T | -0.0578 |
| rs11207844  | A | -0.0123 |
| rs777067    | G | -0.0758 |
| rs12030727  | C | 0.0177  |
| rs10737203  | A | 0.0147  |
| rs6666330   | G | 0.0172  |
| rs77840560  | A | -0.049  |
| rs11584485  | A | -0.0161 |
| rs149613791 | A | -0.0879 |
| rs79329147  | G | 0.0148  |
| rs10436974  | A | -0.018  |
| rs116560859 | T | -0.0456 |
| rs34358154  | T | 0.0434  |
| rs7528847   | T | -0.0233 |
| rs984913    | T | -0.0432 |
| rs6701589   | A | 0.0289  |
| rs72751752  | C | -0.0552 |
| rs115072105 | T | 0.0383  |
| rs12136403  | T | 0.0335  |
| rs78124358  | T | 0.0713  |
| rs2010667   | G | 0.019   |
| rs11261012  | A | -0.0378 |
| rs141179355 | G | -0.0387 |
| rs116232091 | A | -0.0782 |
| rs12184330  | T | 0.0219  |
| rs144645991 | T | -0.0608 |
| rs76884093  | A | 0.0283  |
| rs111841573 | A | -0.1052 |

|             |   |         |
|-------------|---|---------|
| rs114795409 | A | -0.0567 |
| rs143757916 | T | 0.053   |
| rs144688703 | T | -0.0449 |
| rs6677472   | A | 0.0636  |
| rs138656560 | A | -0.0928 |
| rs143055787 | T | -0.0513 |
| rs3806439   | A | 0.0271  |
| rs143553868 | A | -0.0712 |
| rs61762152  | C | 0.0182  |
| rs78886669  | C | -0.0342 |
| rs60159997  | G | 0.0487  |
| rs78133842  | A | -0.0814 |
| rs140799861 | C | 0.0668  |
| rs12724873  | T | -0.0569 |
| rs147324715 | G | -0.067  |
| rs284102    | G | -0.0502 |
| rs116662914 | C | -0.0456 |
| rs17130730  | A | 0.0577  |
| rs79475943  | T | 0.0658  |
| rs72703787  | A | -0.0287 |
| rs1318827   | A | -0.0204 |
| rs1928719   | T | 0.0174  |
| rs145331072 | C | -0.0925 |
| rs77721552  | T | -0.0407 |
| rs17497891  | G | -0.0324 |
| rs12856     | A | 0.0574  |
| rs17568930  | C | 0.0343  |
| rs72752868  | A | -0.0163 |
| rs4920544   | A | -0.0195 |
| rs79534627  | A | 0.0599  |
| rs6664577   | A | 0.0279  |
| rs34803769  | G | -0.0696 |
| rs72686800  | A | 0.0393  |
| rs115170498 | C | -0.0467 |
| rs12405103  | C | 0.0339  |
| rs112990768 | A | -0.0822 |
| rs114847946 | T | 0.0372  |
| rs41266431  | A | 0.0281  |
| rs144508035 | G | 0.0341  |
| rs80035784  | C | -0.0851 |
| rs946472    | G | -0.0173 |
| rs56248398  | T | 0.0183  |
| rs148527214 | G | 0.0534  |
| rs2841390   | G | -0.0139 |
| rs114730341 | T | -0.0626 |
| rs834993    | T | 0.0131  |
| rs10918770  | C | -0.0136 |



|             |   |         |
|-------------|---|---------|
| rs74632628  | A | -0.0784 |
| rs1832574   | G | 0.0136  |
| rs12040767  | A | 0.1081  |
| rs114397377 | A | -0.0724 |
| rs147534785 | C | 0.0954  |
| rs13447531  | T | -0.0362 |
| rs10923142  | T | -0.0192 |
| rs789648    | C | -0.0151 |
| rs75739164  | G | 0.0831  |
| rs2121953   | C | -0.0315 |
| rs112833176 | C | -0.0741 |
| rs76827034  | T | -0.0437 |
| rs61827096  | C | 0.0574  |
| rs61831578  | A | 0.0293  |
| rs79944122  | G | 0.0946  |
| rs75213339  | T | -0.0558 |
| rs56197340  | T | -0.0211 |
| rs1260836   | A | -0.0144 |
| rs76605622  | T | -0.048  |
| rs55798413  | G | 0.041   |
| rs116146827 | A | 0.0944  |
| rs16832929  | C | 0.0194  |
| rs61788767  | G | 0.0207  |
| rs78102851  | C | 0.0386  |
| rs41271497  | G | 0.0415  |
| rs138815434 | T | -0.0677 |
| rs79264639  | G | -0.0609 |
| rs74509058  | A | -0.0678 |
| rs78824865  | A | -0.0604 |
| rs75062020  | G | 0.0502  |
| rs113481045 | T | -0.0731 |
| rs75395203  | A | 0.0582  |
| rs72688299  | A | 0.073   |
| rs1633277   | A | -0.0188 |
| rs72713227  | C | -0.0576 |
| rs116468887 | A | -0.0917 |
| rs79861242  | T | 0.0708  |
| rs2645089   | A | 0.012   |
| rs2334259   | G | -0.0146 |
| rs144996040 | G | -0.07   |
| rs77550062  | G | -0.072  |
| rs12737522  | T | -0.0496 |
| rs6698055   | T | -0.0158 |
| rs4915930   | T | 0.0151  |
| rs67811337  | A | 0.0362  |
| rs448357    | A | 0.0123  |
| rs72673189  | A | 0.1079  |

|             |   |         |
|-------------|---|---------|
| rs347905    | G | 0.018   |
| rs115704247 | A | 0.085   |
| rs45550733  | T | 0.0582  |
| rs112275297 | A | 0.0413  |
| rs6697826   | C | -0.0179 |
| rs12752801  | T | 0.0182  |
| rs17345768  | G | 0.0508  |
| rs79016051  | C | -0.0244 |
| rs17507282  | A | 0.0243  |
| rs75839717  | A | 0.0471  |
| rs58351438  | C | -0.1081 |
| rs72734626  | A | -0.03   |
| rs12090159  | A | 0.0142  |
| rs73067363  | A | -0.0218 |
| rs114615663 | G | -0.0637 |
| rs144052318 | A | 0.11    |
| rs74554154  | T | -0.0757 |
| rs75164063  | A | 0.0703  |
| rs12097997  | G | 0.0126  |
| rs61824830  | T | 0.1038  |
| rs4920600   | A | 0.0132  |
| rs73088247  | G | -0.0466 |
| rs6695297   | C | -0.0153 |
| rs114985367 | T | 0.0421  |
| rs12049266  | G | 0.0172  |
| rs12744979  | T | 0.0682  |
| rs12026331  | A | 0.032   |
| rs6424550   | T | -0.0131 |
| rs79483504  | A | -0.1063 |
| rs147487225 | C | 0.1293  |
| rs1349866   | A | -0.0217 |
| rs74912511  | G | 0.0884  |
| rs6428558   | C | -0.0149 |
| rs6428595   | G | -0.0155 |
| rs4987332   | T | -0.0513 |
| rs114617974 | G | -0.0643 |
| rs77925514  | T | -0.0694 |
| rs79953278  | T | 0.0327  |
| rs80130874  | C | 0.0433  |
| rs78915394  | T | 0.0416  |
| rs72711793  | T | -0.033  |
| rs61846665  | A | 0.0263  |
| rs12076482  | A | -0.0441 |
| rs3819842   | T | 0.0154  |
| rs61776543  | C | 0.045   |
| rs72676333  | C | -0.0598 |
| rs17111811  | T | -0.0299 |

|             |   |         |
|-------------|---|---------|
| rs1327710   | T | -0.0158 |
| rs149961385 | T | 0.054   |
| rs116258744 | G | 0.0414  |
| rs2134837   | T | 0.0175  |
| rs10776724  | C | -0.0117 |
| rs12064734  | A | 0.0774  |
| rs17229396  | T | 0.0391  |
| rs4845532   | A | -0.0127 |
| rs12756720  | C | 0.0145  |
| rs1076624   | T | -0.0157 |
| rs924084    | A | -0.0166 |
| rs149969870 | A | -0.0801 |
| rs863006    | G | -0.0122 |
| rs79685733  | C | 0.105   |
| rs3003228   | G | -0.042  |
| rs79777328  | T | -0.0381 |
| rs79881117  | G | -0.022  |
| rs6690438   | T | -0.0143 |
| rs2815265   | A | 0.0216  |
| rs34573848  | A | -0.0212 |
| rs3903874   | G | 0.0434  |
| rs76855778  | G | -0.0623 |
| rs17025286  | A | -0.0249 |
| rs11588095  | G | 0.0365  |
| rs35856977  | G | -0.0287 |
| rs150819000 | T | 0.0578  |
| rs4845145   | A | 0.0189  |
| rs2854455   | C | 0.014   |
| rs71509032  | T | -0.0412 |
| rs74115334  | G | 0.0953  |
| rs12145542  | G | -0.0731 |
| rs114040007 | C | 0.0826  |
| rs12045570  | A | 0.0124  |
| rs141025430 | G | -0.0547 |
| rs11207651  | G | 0.0121  |
| rs12061504  | C | 0.0623  |
| rs72770309  | C | -0.0679 |
| rs2071494   | C | 0.0342  |
| rs137966606 | C | -0.0717 |
| rs117083672 | A | -0.0418 |
| rs80136977  | A | 0.0373  |
| rs76708001  | T | 0.0558  |
| rs12070488  | G | -0.0244 |
| rs78030874  | C | 0.0491  |
| rs144222752 | T | -0.0618 |
| rs72685824  | T | -0.032  |
| rs148328285 | G | 0.0323  |

|             |   |         |
|-------------|---|---------|
| rs10923887  | T | 0.0143  |
| rs12733747  | C | -0.0188 |
| rs140639826 | A | -0.0798 |
| rs17423764  | A | 0.0173  |
| rs142744318 | C | -0.0906 |
| rs6684738   | C | 0.0192  |
| rs1242758   | G | 0.0167  |
| rs114451071 | T | 0.0301  |
| rs12727135  | G | 0.0142  |
| rs11587044  | T | -0.0526 |
| rs2495494   | C | -0.0447 |
| rs6680231   | C | 0.0334  |
| rs2816022   | T | 0.0242  |
| rs2002847   | G | 0.0136  |
| rs657308    | A | -0.0148 |
| rs7530308   | T | 0.0195  |
| rs56275269  | A | -0.0481 |
| rs114709712 | G | 0.0397  |
| rs6704373   | G | -0.0131 |
| rs7549725   | C | 0.0465  |
| rs72631050  | A | -0.0315 |
| rs34355819  | T | -0.0129 |
| rs142257213 | A | 0.054   |
| rs57458129  | A | 0.0421  |
| rs56381569  | G | -0.0171 |
| rs114242718 | T | 0.0705  |
| rs6429665   | G | -0.0125 |
| rs75287840  | A | -0.0508 |
| rs215760    | C | 0.0171  |
| rs6427349   | C | 0.0151  |
| rs61848609  | A | -0.0243 |
| rs76597961  | A | -0.1129 |
| rs138761415 | A | 0.092   |
| rs55882046  | T | -0.0221 |
| rs115681289 | C | 0.0298  |
| rs12138919  | T | 0.0519  |
| rs80002687  | A | -0.037  |
| rs10903046  | C | 0.0133  |
| rs17368402  | A | 0.019   |
| rs149446638 | A | -0.0666 |
| rs1417366   | T | 0.0323  |
| rs1268524   | C | 0.0141  |
| rs36042660  | T | -0.0767 |
| rs138284250 | C | 0.0933  |
| rs12119517  | G | 0.0164  |
| rs6656902   | C | 0.022   |
| rs74609104  | T | -0.082  |

|             |   |         |
|-------------|---|---------|
| rs12116448  | C | 0.013   |
| rs115083479 | A | 0.0553  |
| rs61797368  | C | 0.0226  |
| rs4659583   | T | 0.0126  |
| rs79625712  | A | 0.0596  |
| rs112112837 | A | 0.0403  |
| rs886738    | T | 0.0151  |
| rs61816972  | A | -0.0235 |
| rs1262295   | A | 0.025   |
| rs150639603 | G | 0.0267  |
| rs115407872 | C | -0.063  |
| rs7529912   | C | -0.0165 |
| rs1980908   | A | 0.0222  |
| rs75982300  | G | 0.0264  |
| rs72721133  | C | 0.0399  |
| rs114328632 | T | -0.0455 |
| rs2236604   | A | 0.0179  |
| rs3008979   | G | 0.0213  |
| rs41290148  | G | -0.034  |
| rs145802019 | G | -0.0482 |
| rs11801161  | T | 0.0335  |
| rs117190487 | T | -0.0741 |
| rs115642218 | T | 0.064   |
| rs4920440   | A | 0.0122  |
| rs1228828   | T | -0.0143 |
| rs3918008   | A | 0.0445  |
| rs78483599  | C | -0.0237 |
| rs12126578  | C | -0.0132 |
| rs140044125 | T | 0.0943  |
| rs79042637  | A | -0.0661 |
| rs79864939  | A | -0.0542 |
| rs138958022 | C | -0.1104 |
| rs77009174  | A | 0.0154  |
| rs75932087  | G | 0.0645  |
| rs12097374  | G | 0.0404  |
| rs142079698 | A | 0.0585  |
| rs148381308 | G | -0.0414 |
| rs114021246 | C | -0.1106 |
| rs2500342   | A | 0.0144  |
| rs146806747 | T | -0.0683 |
| rs12745358  | A | -0.0142 |
| rs147038706 | T | -0.0615 |
| rs115627932 | C | -0.0472 |
| rs17012155  | T | 0.0255  |
| rs77741621  | T | 0.0506  |
| rs1619081   | C | -0.0245 |
| rs115059569 | A | 0.0602  |

|             |   |         |
|-------------|---|---------|
| rs111837618 | T | 0.0626  |
| rs17483462  | A | 0.0244  |
| rs9427727   | T | -0.0125 |
| rs6693220   | T | -0.0308 |
| rs12032216  | C | -0.0232 |
| rs114898159 | C | -0.0515 |
| rs115813856 | C | 0.0826  |
| rs138087096 | T | -0.0468 |
| rs2643897   | T | -0.0187 |
| rs3866642   | T | -0.013  |
| rs77841908  | T | 0.0533  |
| rs139826170 | T | 0.0586  |
| rs113955919 | T | 0.0627  |
| rs79613313  | T | -0.0615 |
| rs2152096   | G | -0.0164 |
| rs12138459  | A | 0.0129  |
| rs1288347   | A | 0.012   |
| rs11584681  | C | 0.0221  |
| rs77934262  | A | -0.0278 |
| rs4659193   | G | -0.0201 |
| rs76544063  | C | 0.0347  |
| rs12142699  | A | 0.0151  |
| rs6692281   | A | -0.0319 |
| rs111918627 | C | 0.1099  |
| rs17366292  | A | -0.0338 |
| rs116371640 | A | 0.0532  |
| rs7519887   | T | -0.0152 |
| rs116469189 | A | 0.0534  |
| rs76516194  | G | 0.0704  |
| rs1146539   | A | 0.0194  |
| rs17663177  | G | 0.0227  |
| rs61828366  | A | 0.0462  |
| rs1233789   | C | -0.0126 |
| rs112746922 | T | -0.044  |
| rs17407776  | G | -0.0349 |
| rs143489963 | C | -0.0234 |
| rs72709630  | G | -0.0316 |
| rs144578669 | T | -0.0537 |
| rs77190890  | T | -0.038  |
| rs6699367   | A | 0.0239  |
| rs77255787  | A | 0.0573  |
| rs36043030  | T | -0.0367 |
| rs78489670  | G | 0.0456  |
| rs77078116  | T | -0.0566 |
| rs6664021   | A | -0.0134 |
| rs2871869   | A | -0.0143 |
| rs12089762  | T | 0.0213  |

|             |   |         |
|-------------|---|---------|
| rs148404672 | T | 0.075   |
| rs11587579  | A | 0.0612  |
| rs16849156  | C | -0.091  |
| rs115614792 | G | 0.0376  |
| rs58033434  | C | -0.0879 |
| rs1832952   | T | -0.0438 |
| rs77743406  | A | -0.0774 |
| rs149134128 | G | -0.0831 |
| rs111376301 | T | 0.0191  |
| rs116307511 | G | 0.0581  |
| rs10873890  | G | -0.0138 |
| rs12404288  | T | 0.0368  |
| rs116774799 | A | -0.0425 |
| rs4655533   | A | -0.0652 |
| rs821403    | T | -0.0187 |
| rs72670315  | A | 0.052   |
| rs7550019   | A | -0.0122 |
| rs55962532  | G | -0.0128 |
| rs1004420   | T | 0.0167  |
| rs140603320 | A | 0.0535  |
| rs79726813  | A | 0.0302  |
| rs80194698  | A | 0.0657  |
| rs671485    | C | -0.0173 |
| rs77393839  | C | 0.0347  |
| rs407918    | A | 0.0131  |
| rs6697222   | T | 0.0475  |
| rs6666255   | A | 0.0279  |
| rs61788197  | A | 0.0135  |
| rs1406859   | A | -0.0114 |
| rs10482819  | A | -0.0386 |
| rs17425903  | C | 0.0262  |
| rs554445    | G | -0.0152 |
| rs113924375 | C | 0.0366  |
| rs72681629  | C | 0.0342  |
| rs78869074  | G | -0.0396 |
| rs12129639  | G | -0.0617 |
| rs79986660  | A | -0.0535 |
| rs12120031  | C | -0.0184 |
| rs139702993 | A | 0.0461  |
| rs1556922   | T | 0.0172  |
| rs77432395  | T | -0.0758 |
| rs3138156   | C | -0.0241 |
| rs114751860 | T | -0.0918 |
| rs61798047  | C | -0.0117 |
| rs11165974  | T | -0.0275 |
| rs2767339   | A | 0.0794  |
| rs41310367  | T | -0.0413 |

|             |   |         |
|-------------|---|---------|
| rs77687933  | T | 0.0503  |
| rs116278013 | C | -0.0448 |
| rs7535429   | T | -0.0737 |
| rs913390    | C | 0.0372  |
| rs116672467 | C | 0.0392  |
| rs114229971 | T | -0.0803 |
| rs7537605   | A | 0.0127  |
| rs75104261  | C | -0.0158 |
| rs3906403   | C | 0.0165  |
| rs77941263  | T | 0.0867  |
| rs12026494  | A | 0.0274  |
| rs80164815  | A | -0.0497 |
| rs149436017 | A | -0.0826 |
| rs12118997  | C | 0.0291  |
| rs4927181   | A | -0.0164 |
| rs76768738  | A | 0.0161  |
| rs61763721  | T | -0.0213 |
| rs2646813   | A | -0.0126 |
| rs149753436 | T | 0.037   |
| rs12127316  | A | 0.1052  |
| rs72678119  | C | 0.032   |
| rs7532958   | C | 0.0145  |
| rs113951378 | T | -0.0422 |
| rs10518665  | A | 0.0359  |
| rs76022336  | C | -0.0335 |
| rs72690243  | C | 0.0563  |
| rs561334    | C | -0.0143 |
| rs138190002 | C | -0.0398 |
| rs12127799  | A | -0.0125 |
| rs913993    | T | 0.0163  |
| rs4554761   | A | -0.0126 |
| rs76848891  | G | -0.0439 |
| rs354584    | T | -0.0298 |
| rs11582488  | A | 0.0527  |
| rs78294074  | T | -0.0723 |
| rs72768402  | T | -0.0419 |
| rs79608543  | G | -0.0575 |
| rs61662468  | C | -0.0677 |
| rs76934913  | A | 0.0224  |
| rs2798335   | A | 0.0121  |
| rs142373032 | G | -0.0637 |
| rs6674109   | C | 0.0586  |
| rs114623184 | A | 0.0491  |
| rs1536897   | G | -0.02   |
| rs59057707  | T | 0.0502  |
| rs75943066  | G | -0.0244 |
| rs114208632 | C | 0.0351  |



|             |   |         |
|-------------|---|---------|
| rs1534096   | A | 0.0116  |
| rs12129339  | T | 0.0241  |
| rs116706547 | A | -0.037  |
| rs12067325  | G | -0.0173 |
| rs1737616   | T | 0.0506  |
| rs114494463 | C | 0.0654  |
| rs79843591  | G | -0.025  |
| rs79675442  | A | -0.0621 |
| rs115076681 | G | -0.1022 |
| rs17426576  | T | -0.0263 |
| rs12022448  | T | 0.0133  |
| rs3748752   | A | -0.0123 |
| rs12748139  | G | -0.035  |
| rs111542815 | A | 0.0354  |
| rs1281340   | G | 0.0117  |
| rs76077101  | C | -0.0508 |
| rs116182432 | T | 0.0515  |
| rs75796628  | A | 0.0466  |
| rs61765286  | A | -0.0399 |
| rs114667304 | G | 0.0537  |
| rs1619903   | T | -0.0122 |
| rs77259877  | A | 0.0766  |
| rs7536479   | A | 0.0211  |
| rs61799667  | C | 0.0767  |
| rs7528586   | A | 0.0544  |
| rs114049819 | T | 0.0717  |
| rs12410914  | G | 0.0155  |
| rs10926230  | C | 0.0227  |
| rs41305136  | A | 0.0664  |
| rs10910498  | T | -0.0143 |
| rs7551717   | C | -0.0245 |
| rs115570987 | A | 0.046   |
| rs74141849  | A | -0.0309 |
| rs17097193  | C | -0.045  |
| rs71637267  | A | -0.0254 |
| rs12116542  | C | 0.0137  |
| rs12121887  | T | -0.0128 |
| rs10888949  | A | 0.0166  |
| rs6540614   | C | -0.016  |
| rs12031056  | T | -0.0169 |
| rs3768045   | T | -0.055  |
| rs72761845  | T | -0.1037 |
| rs11161438  | G | 0.0249  |
| rs1546161   | A | -0.0153 |
| rs79106388  | G | 0.0429  |
| rs115230336 | T | 0.0474  |
| rs12074078  | T | -0.0336 |

|             |   |         |
|-------------|---|---------|
| rs72675173  | T | -0.0643 |
| rs72716360  | G | -0.0249 |
| rs56035601  | T | 0.0213  |
| rs96501     | C | 0.0155  |
| rs115741871 | C | 0.0449  |
| rs143149394 | A | -0.04   |
| rs75012901  | T | -0.049  |
| rs74434223  | G | 0.0579  |
| rs141306582 | G | 0.0428  |
| rs11809762  | G | 0.0183  |
| rs12755958  | T | 0.0181  |
| rs72764632  | T | -0.0246 |
| rs12072315  | G | -0.0117 |
| rs6663292   | A | 0.0118  |
| rs61828128  | T | 0.0549  |
| rs61763346  | G | 0.0384  |
| rs10890225  | C | 0.0128  |
| rs2582067   | G | 0.0242  |
| rs80275384  | A | -0.0728 |
| rs7516986   | C | 0.0833  |
| rs150630360 | G | 0.1065  |
| rs10798402  | G | 0.0176  |
| rs10747362  | C | -0.0401 |
| rs115971149 | T | 0.0758  |
| rs7549894   | T | -0.0467 |
| rs112663365 | A | 0.0317  |
| rs113752743 | T | -0.1316 |
| rs61799489  | A | -0.0431 |
| rs4847396   | G | -0.045  |
| rs116105185 | C | -0.0327 |
| rs699221    | T | 0.028   |
| rs78079451  | T | -0.0142 |
| rs145423750 | T | 0.0538  |
| rs11210982  | A | -0.0122 |
| rs12408853  | T | -0.0557 |
| rs147109226 | C | 0.0729  |
| rs72712347  | A | 0.0408  |
| rs1436779   | G | 0.0248  |
| rs17010009  | T | 0.0449  |
| rs2790655   | C | 0.041   |
| rs12027950  | G | 0.0137  |
| rs61781838  | C | -0.0608 |
| rs17402942  | C | 0.0191  |
| rs10489945  | T | 0.0275  |
| rs6425438   | C | 0.0151  |
| rs149651391 | T | 0.0616  |
| rs75916386  | A | -0.0337 |

|             |   |         |
|-------------|---|---------|
| rs2985849   | A | -0.0151 |
| rs3791092   | G | -0.019  |
| rs6693660   | G | -0.0121 |
| rs1288919   | A | 0.0133  |
| rs12096975  | A | -0.0619 |
| rs12138240  | A | 0.059   |
| rs142041262 | T | 0.0594  |
| rs78828075  | A | -0.0458 |
| rs35764813  | A | 0.045   |
| rs146875287 | T | 0.0605  |
| rs114307971 | A | 0.0798  |
| rs61821630  | C | -0.059  |
| rs146437101 | A | 0.0293  |
| rs12409165  | G | 0.0211  |
| rs9329417   | C | -0.0123 |
| rs115561880 | G | 0.091   |
| rs1214608   | T | -0.0115 |
| rs6686515   | G | -0.0196 |
| rs111304886 | A | 0.0455  |
| rs12731373  | G | -0.0114 |
| rs12137337  | A | 0.0556  |
| rs144426966 | T | -0.0355 |
| rs12093097  | T | 0.0225  |
| rs3753340   | A | 0.0575  |
| rs11210992  | T | 0.0144  |
| rs3136706   | T | -0.0134 |
| rs61826691  | T | 0.0508  |
| rs114408769 | T | 0.0511  |
| rs11247599  | T | 0.0117  |
| rs76486004  | T | -0.0331 |
| rs142468208 | A | 0.0585  |
| rs12239526  | A | 0.024   |
| rs2274941   | G | -0.0125 |
| rs72744055  | C | 0.0927  |
| rs9651260   | C | -0.0251 |
| rs6669278   | T | -0.0171 |
| rs12562733  | G | -0.0155 |
| rs79723051  | A | 0.0641  |
| rs12033288  | C | -0.0231 |
| rs75466781  | G | -0.0454 |
| rs1577139   | T | 0.0113  |
| rs76806606  | T | -0.0405 |
| rs114709165 | A | 0.0476  |
| rs116147147 | A | 0.0627  |
| rs79265084  | G | -0.0435 |
| rs2997336   | G | -0.012  |
| rs2986554   | C | -0.0135 |

|             |   |         |
|-------------|---|---------|
| rs17711569  | A | 0.0294  |
| rs79005703  | G | -0.0458 |
| rs113642194 | C | 0.0445  |
| rs11582938  | G | 0.0132  |
| rs76700654  | T | 0.0322  |
| rs4915725   | C | 0.0203  |
| rs1765626   | A | 0.0122  |
| rs79399729  | T | 0.0405  |
| rs111850598 | G | -0.0494 |
| rs143584985 | C | -0.0524 |
| rs7542399   | C | 0.0113  |
| rs7555317   | A | 0.0132  |
| rs12743075  | T | -0.0411 |
| rs1413584   | T | -0.0356 |
| rs28505213  | A | 0.0202  |
| rs1571983   | G | 0.0122  |
| rs1553456   | A | 0.0143  |
| rs7415289   | C | -0.0141 |
| rs1769847   | T | 0.0129  |
| rs6669253   | A | 0.016   |
| rs13375636  | A | 0.0625  |
| rs61765105  | T | -0.0487 |
| rs2499851   | C | 0.0123  |
| rs546481    | A | 0.024   |
| rs4559484   | T | 0.0139  |
| rs114860759 | A | 0.065   |
| rs74459805  | G | -0.126  |
| rs77722267  | T | -0.0523 |
| rs116072155 | A | 0.0869  |
| rs114675425 | C | 0.0682  |
| rs77743041  | T | -0.0663 |
| rs116071213 | G | 0.0352  |
| rs113736242 | C | 0.0329  |
| rs141694244 | A | -0.0597 |
| rs11572405  | C | 0.0449  |
| rs147301885 | C | 0.0731  |
| rs218422    | T | 0.0135  |
| rs148402734 | T | -0.0705 |
| rs835345    | G | -0.0118 |
| rs12747689  | T | -0.0905 |
| rs142451395 | T | 0.095   |
| rs12750026  | G | -0.0215 |
| rs56408286  | T | 0.0243  |
| rs67607949  | G | -0.0211 |
| rs72746210  | G | 0.0521  |
| rs72765078  | C | -0.0676 |
| rs2387415   | G | 0.0229  |

|             |   |         |
|-------------|---|---------|
| rs61825717  | G | 0.1006  |
| rs12565114  | A | 0.0178  |
| rs1663171   | A | -0.0124 |
| rs151287243 | C | -0.0548 |
| rs11583867  | A | 0.0124  |
| rs11584308  | G | -0.0197 |
| rs79020296  | T | -0.0454 |
| rs17652870  | G | 0.0217  |
| rs7542241   | T | 0.0625  |
| rs144917782 | T | 0.0437  |
| rs12083086  | T | 0.0468  |
| rs955115    | A | 0.0193  |
| rs10923040  | C | 0.0117  |
| rs4915462   | C | -0.02   |
| rs1316637   | G | 0.0145  |
| rs2799676   | T | -0.0121 |
| rs4915715   | C | 0.0164  |
| rs114901635 | C | 0.0512  |
| rs72700445  | T | -0.0297 |
| rs17534341  | A | -0.0183 |
| rs7552980   | C | -0.0297 |
| rs7520160   | T | -0.015  |
| rs2781080   | C | -0.0184 |
| rs115492669 | T | 0.0785  |
| rs79709445  | T | 0.0475  |
| rs115001841 | A | 0.0419  |
| rs12045994  | C | 0.0113  |
| rs79691280  | T | 0.0491  |
| rs115320601 | G | -0.0752 |
| rs115803871 | T | -0.0609 |
| rs115677866 | A | -0.0535 |
| rs114132950 | G | 0.0598  |
| rs61821466  | C | -0.0665 |
| rs68052659  | A | 0.0115  |
| rs1770010   | C | 0.0163  |
| rs299870    | A | -0.0188 |
| rs74575161  | T | 0.0813  |
| rs12096215  | C | 0.0157  |
| rs113204626 | C | 0.0587  |
| rs139387352 | A | -0.0618 |
| rs111364974 | T | -0.0851 |
| rs76102976  | A | 0.0166  |
| rs7549904   | G | 0.0146  |
| rs116297556 | T | -0.0514 |
| rs1318468   | C | -0.0133 |
| rs4303046   | C | -0.0118 |
| rs599565    | G | -0.012  |

|             |   |         |
|-------------|---|---------|
| rs12077761  | G | -0.0186 |
| rs112676096 | G | 0.0703  |
| rs79179503  | A | -0.0193 |
| rs72667621  | G | -0.0512 |
| rs11580295  | C | 0.0133  |
| rs72666316  | G | 0.0515  |
| rs17232167  | A | 0.0189  |
| rs118094992 | C | 0.0255  |
| rs35439138  | T | 0.0492  |
| rs115426632 | C | 0.0613  |
| rs78806897  | T | -0.0605 |
| rs145019086 | T | 0.0466  |
| rs114540418 | A | -0.0892 |
| rs4951380   | A | -0.0527 |
| rs10429940  | C | -0.0355 |
| rs146463668 | C | -0.1028 |
| rs4656474   | T | -0.0296 |
| rs6681527   | C | 0.0115  |
| rs35751717  | T | -0.0235 |
| rs12089655  | A | -0.0128 |
| rs56321125  | C | -0.0155 |
| rs6675014   | T | 0.0701  |
| rs1579514   | T | -0.0244 |
| rs112604044 | T | 0.0341  |
| rs7532974   | A | -0.0118 |
| rs61829403  | T | -0.0154 |
| rs116012130 | A | 0.0364  |
| rs2457067   | G | -0.0185 |
| rs9435005   | C | -0.0332 |
| rs3941534   | C | 0.0198  |
| rs76215597  | T | 0.0633  |
| rs149026539 | T | 0.0334  |
| rs115864893 | T | -0.0437 |
| rs139349378 | C | 0.048   |
| rs4622086   | G | 0.0335  |
| rs112964130 | G | 0.0444  |
| rs75219100  | C | 0.0687  |
| rs111240674 | A | -0.0658 |
| rs10779838  | A | 0.0367  |
| rs10914204  | C | -0.0147 |
| rs78708666  | T | 0.0407  |
| rs116763322 | T | -0.086  |
| rs76289500  | A | -0.0533 |
| rs2038118   | G | 0.0166  |
| rs11121332  | C | -0.012  |
| rs115911980 | C | 0.0545  |
| rs78682437  | T | -0.0181 |

|             |   |         |
|-------------|---|---------|
| rs76326780  | A | -0.0539 |
| rs853010    | T | 0.0134  |
| rs77182926  | T | 0.0484  |
| rs34048040  | T | -0.0499 |
| rs74568378  | A | -0.0475 |
| rs701209    | A | -0.0141 |
| rs12059715  | C | -0.0447 |
| rs12040971  | T | 0.0139  |
| rs6600269   | A | 0.0164  |
| rs10493715  | T | 0.0526  |
| rs366214    | C | 0.0131  |
| rs144781241 | A | -0.0732 |
| rs607007    | G | -0.0115 |
| rs10803031  | C | -0.012  |
| rs77384844  | A | 0.0174  |
| rs991191    | C | -0.012  |
| rs28360395  | G | 0.0358  |
| rs10920324  | T | -0.0123 |
| rs11117898  | G | -0.0584 |
| rs4528124   | T | -0.0121 |
| rs12745755  | C | -0.0603 |
| rs115310997 | T | -0.0443 |
| rs72752243  | T | -0.0444 |
| rs113608503 | T | 0.0124  |
| rs3738746   | A | 0.012   |
| rs79763481  | G | 0.0979  |
| rs6537859   | G | 0.0212  |
| rs7544107   | C | 0.0558  |
| rs139546222 | C | 0.0405  |
| rs140311650 | T | 0.0605  |
| rs143630849 | C | -0.0469 |
| rs73115633  | G | 0.0581  |
| rs309065    | C | -0.0122 |
| rs59161060  | T | -0.0126 |
| rs2689130   | T | -0.0124 |
| rs7528549   | T | -0.0159 |
| rs35909386  | T | 0.0286  |
| rs149736899 | G | 0.0674  |
| rs12144762  | G | -0.0295 |
| rs11806248  | A | -0.0165 |
| rs12123492  | A | 0.0139  |
| rs17604243  | T | 0.0495  |
| rs12737405  | C | 0.0404  |
| rs4659083   | A | -0.0173 |
| rs71642898  | C | 0.0332  |
| rs1715780   | C | 0.014   |
| rs142546586 | T | 0.074   |

|             |   |         |
|-------------|---|---------|
| rs72763502  | T | -0.0192 |
| rs76533014  | C | -0.0414 |
| rs16831518  | C | 0.0164  |
| rs115615035 | A | 0.0615  |
| rs1123879   | A | 0.027   |
| rs76940784  | A | 0.0235  |
| rs149585205 | A | -0.0342 |
| rs6686007   | C | 0.012   |
| rs4656754   | A | -0.0486 |
| rs6687591   | T | 0.0303  |
| rs114437616 | T | 0.0149  |
| rs74779882  | T | -0.0535 |
| rs76511966  | T | -0.0441 |
| rs116483235 | T | -0.0632 |
| rs79662043  | A | -0.0386 |
| rs139606725 | C | -0.1151 |
| rs72678422  | T | 0.0604  |
| rs140216090 | T | -0.0523 |
| rs1016378   | G | -0.0266 |
| rs114200864 | A | -0.0651 |
| rs17345754  | C | -0.0159 |
| rs75523559  | T | 0.0692  |
| rs146764072 | G | 0.042   |
| rs72677404  | T | 0.0478  |
| rs205485    | T | 0.0226  |
| rs2902199   | T | 0.0124  |
| rs16859441  | A | -0.0513 |
| rs4128841   | T | 0.0114  |
| rs149687465 | A | -0.0539 |
| rs79010292  | C | 0.0257  |
| rs78734103  | G | -0.0451 |
| rs821422    | A | 0.0194  |
| rs857703    | A | 0.0113  |
| rs17527889  | G | -0.064  |
| rs149992240 | C | 0.0558  |
| rs17626669  | A | -0.0623 |
| rs142972392 | T | 0.0825  |
| rs77260368  | A | -0.0672 |
| rs4845053   | C | 0.0392  |
| rs10799459  | G | -0.0162 |
| rs79309487  | A | -0.0509 |
| rs3006864   | G | 0.0578  |
| rs56040584  | G | -0.0186 |
| rs55931709  | A | 0.035   |
| rs3001349   | C | -0.0127 |
| rs951919    | G | 0.0517  |
| rs17126889  | C | 0.0207  |



|             |   |         |
|-------------|---|---------|
| rs17381113  | A | 0.0255  |
| rs72853528  | T | 0.014   |
| rs141762616 | A | 0.0315  |
| rs145862713 | G | 0.0741  |
| rs77250285  | A | -0.0404 |
| rs4661470   | T | 0.0154  |
| rs74950823  | T | 0.0373  |
| rs6698760   | A | 0.0116  |
| rs55983724  | G | 0.0294  |
| rs6696976   | G | -0.0122 |
| rs11807372  | C | 0.018   |
| rs798066    | G | 0.0114  |
| rs116120919 | T | 0.046   |
| rs61602600  | C | 0.0279  |
| rs2236851   | T | -0.0201 |
| rs6671919   | A | 0.0239  |
| rs75226603  | C | 0.065   |
| rs16849413  | T | -0.0342 |
| rs10157691  | G | 0.012   |
| rs16850310  | A | -0.0658 |
| rs12121710  | C | -0.0329 |
| rs142720533 | A | -0.043  |
| rs72716132  | G | 0.0377  |
| rs114218159 | A | 0.0403  |
| rs7822      | T | -0.0141 |
| rs149309891 | G | 0.0623  |
| rs114517250 | C | 0.0773  |
| rs139076435 | G | -0.0606 |
| rs12737042  | T | -0.0237 |
| rs140075266 | A | -0.0779 |
| rs139686286 | T | 0.0886  |
| rs2772122   | C | -0.0141 |
| rs74619055  | A | 0.0532  |
| rs12238999  | A | 0.0306  |
| rs527327    | A | 0.0517  |
| rs2136685   | A | 0.0208  |
| rs679836    | G | -0.0335 |
| rs6537784   | T | -0.0216 |
| rs11805919  | T | -0.016  |
| rs10797350  | T | 0.0286  |
| rs139383293 | G | -0.0375 |
| rs115053070 | A | -0.0632 |
| rs77477863  | C | 0.0354  |
| rs12239339  | G | 0.0767  |
| rs76308796  | T | -0.043  |
| rs61737289  | A | 0.0307  |
| rs3001283   | T | 0.028   |

|             |   |         |
|-------------|---|---------|
| rs11572496  | G | -0.0209 |
| rs12726598  | T | -0.0225 |
| rs10927624  | A | 0.0149  |
| rs79305706  | A | -0.0647 |
| rs17018773  | T | 0.0129  |
| rs6664618   | T | 0.0114  |
| rs11579260  | G | 0.0465  |
| rs115869038 | T | -0.0503 |
| rs2794354   | T | -0.0265 |
| rs79853887  | G | 0.066   |
| rs112549775 | G | -0.0478 |
| rs664623    | A | 0.04    |
| rs71628161  | T | 0.0462  |
| rs9661734   | A | -0.0258 |
| rs144993607 | C | -0.0533 |
| rs72676587  | G | 0.0456  |
| rs56003965  | A | 0.0575  |
| rs146869815 | G | -0.0305 |
| rs116375168 | G | 0.0382  |
| rs2492493   | G | 0.0323  |
| rs10863981  | A | 0.0157  |
| rs144530198 | T | -0.0526 |
| rs148298575 | C | 0.0695  |
| rs146621714 | G | -0.0513 |
| rs61809482  | C | -0.0174 |
| rs34484539  | T | 0.0385  |
| rs75250942  | A | -0.0353 |
| rs72745398  | A | -0.0565 |
| rs1764697   | C | -0.0232 |
| rs141759582 | A | 0.1078  |
| rs76713253  | C | 0.0497  |
| rs2982465   | T | -0.0128 |
| rs11579040  | T | 0.0277  |
| rs11206471  | A | 0.0581  |
| rs12085547  | A | -0.0131 |
| rs6424748   | C | -0.0413 |
| rs72769473  | C | -0.0295 |
| rs1535919   | C | -0.0149 |
| rs12083561  | C | -0.083  |
| rs10801440  | C | 0.034   |
| rs791542    | A | -0.0611 |
| rs79539742  | G | -0.053  |
| rs4607882   | G | 0.0123  |
| rs7533662   | A | 0.0114  |
| rs12123860  | A | -0.0116 |
| rs12119476  | G | -0.0153 |
| rs944085    | C | -0.0688 |

|             |   |         |
|-------------|---|---------|
| rs139027743 | A | 0.0574  |
| rs113050070 | T | -0.0829 |
| rs56270137  | A | 0.0804  |
| rs55740189  | T | -0.0349 |
| rs61818340  | T | 0.054   |
| rs62541951  | G | -0.0658 |
| rs149872924 | A | -0.0592 |
| rs144165442 | T | -0.057  |
| rs35507313  | T | 0.0343  |
| rs35315513  | A | 0.0272  |
| rs73065401  | G | -0.084  |
| rs77757284  | A | -0.099  |
| rs10482796  | C | -0.0136 |
| rs79254264  | T | 0.0482  |
| rs74731712  | C | 0.0237  |
| rs1772635   | C | 0.0128  |
| rs61773227  | G | 0.0316  |
| rs11578785  | G | 0.0424  |
| rs75980023  | T | -0.03   |
| rs11240240  | C | 0.0309  |
| rs12738927  | C | -0.0662 |
| rs2501776   | C | 0.0135  |
| rs116079353 | G | -0.053  |
| rs1383397   | T | -0.0552 |
| rs34422364  | A | 0.0429  |
| rs76425404  | A | 0.0704  |
| rs115136021 | A | -0.0571 |
| rs1811695   | C | 0.0221  |
| rs61772308  | A | -0.0513 |
| rs12122188  | A | -0.0269 |
| rs144464734 | T | 0.0694  |
| rs11582590  | A | -0.0211 |
| rs111546041 | A | 0.0214  |
| rs716222    | C | -0.011  |
| rs75247983  | T | 0.0644  |
| rs147802074 | T | 0.0434  |
| rs114407573 | A | 0.0521  |
| rs1892259   | T | 0.0129  |
| rs12079180  | C | -0.0174 |
| rs12137505  | G | 0.0125  |
| rs2213735   | T | -0.0222 |
| rs4656737   | T | 0.017   |
| rs12564791  | T | -0.0187 |
| rs12134185  | C | -0.0147 |
| rs34630424  | A | -0.0347 |
| rs80348030  | G | 0.02    |
| rs1776045   | T | 0.0233  |

|             |   |         |
|-------------|---|---------|
| rs7534092   | A | 0.0398  |
| rs12080989  | T | -0.0157 |
| rs76213402  | C | 0.0599  |
| rs77419199  | A | 0.0483  |
| rs116330534 | A | -0.0598 |
| rs142871247 | C | 0.0527  |
| rs2132392   | C | 0.0181  |
| rs115268873 | T | 0.1019  |
| rs3001069   | C | -0.0159 |
| rs150131945 | T | 0.0315  |
| rs74320375  | G | -0.0765 |
| rs147963986 | T | -0.0557 |
| rs17422551  | T | -0.0242 |
| rs697693    | A | -0.0147 |
| rs61788981  | C | 0.061   |
| rs140021977 | A | -0.0988 |
| rs80028889  | G | 0.0413  |
| rs872129    | G | 0.019   |
| rs114125931 | C | 0.0303  |
| rs61836886  | C | -0.0224 |
| rs17259359  | C | 0.1011  |
| rs12141644  | T | 0.0259  |
| rs55931093  | A | -0.0362 |
| rs72753585  | G | 0.0433  |
| rs10801638  | T | 0.0113  |
| rs71644606  | A | -0.0439 |
| rs12758184  | G | 0.0124  |
| rs35645368  | A | 0.0283  |
| rs1338574   | A | 0.052   |
| rs423125    | C | -0.0261 |
| rs41307650  | T | 0.0722  |
| rs35300422  | G | 0.0208  |
| rs61803308  | T | 0.0331  |
| rs1295972   | G | 0.032   |
| rs6692418   | C | -0.0122 |
| rs141009981 | T | 0.0495  |
| rs3814341   | G | 0.017   |
| rs112392511 | C | 0.0612  |
| rs75559594  | C | 0.0518  |
| rs144965917 | A | -0.0406 |
| rs116009361 | C | -0.0854 |
| rs4494160   | T | 0.0129  |
| rs6425986   | A | 0.0326  |
| rs55786092  | G | -0.0116 |
| rs12123186  | T | 0.017   |
| rs78080497  | G | -0.0346 |
| rs148832003 | G | 0.0499  |

|             |   |         |
|-------------|---|---------|
| rs11165186  | C | -0.0161 |
| rs114674915 | G | 0.0721  |
| rs4011943   | C | 0.0144  |
| rs145299164 | A | -0.0563 |
| rs75671091  | A | 0.0448  |
| rs77632059  | A | 0.0237  |
| rs17412543  | T | 0.0187  |
| rs112345326 | A | -0.077  |
| rs55686211  | G | 0.0331  |
| rs114939803 | C | -0.0379 |
| rs114254341 | C | -0.0376 |
| rs10919120  | G | 0.0145  |
| rs926581    | T | 0.0113  |
| rs6678932   | A | -0.0135 |
| rs138422991 | A | -0.0698 |
| rs73052301  | G | 0.0781  |
| rs67596352  | A | 0.0225  |
| rs41263973  | A | 0.0515  |
| rs114326965 | G | 0.0595  |
| rs12406448  | C | 0.0652  |
| rs1328828   | A | -0.0178 |
| rs858568    | A | 0.0165  |
| rs912773    | A | 0.0112  |
| rs147275129 | A | -0.073  |
| rs6675905   | A | -0.0126 |
| rs10920106  | T | -0.0169 |
| rs7536162   | C | -0.0149 |
| rs12139827  | A | -0.0517 |
| rs12074422  | C | 0.0452  |
| rs79999655  | A | -0.0391 |
| rs61826080  | C | 0.0857  |
| rs79896940  | C | 0.0654  |
| rs77464110  | A | -0.0339 |
| rs115898261 | A | -0.0876 |
| rs945951    | C | 0.0233  |
| rs72720301  | C | -0.0656 |
| rs12143620  | A | 0.0304  |
| rs167662    | T | -0.0369 |
| rs4658785   | G | 0.015   |
| rs4912147   | T | 0.0188  |
| rs67450509  | G | -0.0129 |
| rs11800148  | T | -0.0677 |
| rs75553093  | T | 0.0256  |
| rs11240661  | C | 0.0144  |
| rs61765575  | G | -0.0367 |
| rs76921361  | G | 0.0602  |
| rs10922339  | G | -0.0111 |

|             |   |         |
|-------------|---|---------|
| rs61823478  | A | -0.0191 |
| rs12094804  | G | -0.0348 |
| rs114484970 | C | 0.0677  |
| rs35145699  | T | 0.0292  |
| rs6684005   | T | -0.0192 |
| rs2411778   | A | -0.0748 |
| rs61774167  | G | -0.0259 |
| rs76846298  | G | 0.0503  |
| rs3027016   | G | 0.0153  |
| rs148912569 | T | 0.065   |
| rs859106    | G | -0.0175 |
| rs7550315   | C | -0.0367 |
| rs6429243   | C | 0.012   |
| rs79548558  | A | 0.0408  |
| rs4920180   | A | 0.0197  |
| rs10802430  | T | -0.0466 |
| rs143953201 | T | 0.0337  |
| rs1937139   | C | -0.0437 |
| rs75631561  | A | 0.056   |
| rs6666748   | G | -0.0227 |
| rs6687629   | A | 0.0108  |
| rs72659938  | A | 0.0734  |
| rs622212    | A | -0.0246 |
| rs79158230  | T | 0.0973  |
| rs76396851  | G | 0.0166  |
| rs12129802  | G | -0.0708 |
| rs974584    | G | 0.0189  |
| rs12406473  | G | 0.0147  |
| rs114409429 | T | -0.0726 |
| rs113819087 | T | 0.0149  |
| rs10918271  | T | -0.0122 |
| rs61776064  | G | 0.0371  |
| rs10857824  | A | 0.0124  |
| rs12128613  | A | -0.0283 |
| rs61814809  | T | -0.0132 |
| rs116139728 | T | 0.075   |
| rs12409583  | G | -0.0418 |
| rs143316922 | T | -0.0579 |
| rs77492815  | T | -0.0331 |
| rs41453448  | A | 0.0211  |
| rs72716236  | G | -0.0754 |
| rs1481148   | C | 0.0468  |
| rs12752868  | T | -0.0211 |
| rs115171857 | T | 0.0318  |
| rs115660612 | A | -0.0308 |
| rs7533146   | C | 0.0135  |
| rs116224866 | C | 0.0577  |

|             |   |         |
|-------------|---|---------|
| rs6662088   | A | 0.0186  |
| rs9426466   | A | 0.0198  |
| rs76956202  | A | 0.0351  |
| rs1448392   | C | -0.0193 |
| rs77867567  | A | 0.0367  |
| rs115899229 | G | -0.0424 |
| rs1187802   | A | 0.0232  |
| rs12082553  | C | -0.0356 |
| rs60623103  | C | -0.0172 |
| rs114765928 | A | -0.0599 |
| rs10494472  | G | -0.0135 |
| rs113907995 | C | 0.0586  |
| rs72638823  | A | 0.0359  |
| rs17120901  | G | -0.0174 |
| rs72681885  | G | 0.045   |
| rs2149038   | T | 0.0114  |
| rs11264633  | C | 0.027   |
| rs150846737 | A | 0.1052  |
| rs146313379 | A | -0.0686 |
| rs116102681 | C | 0.0638  |
| rs2066405   | A | 0.0119  |
| rs77043134  | A | -0.0914 |
| rs2222748   | C | -0.014  |
| rs78804608  | A | -0.0583 |
| rs35115189  | C | 0.0194  |
| rs10159279  | A | -0.0128 |
| rs115593700 | G | -0.069  |
| rs1202578   | T | 0.0114  |
| rs3818883   | T | 0.0373  |
| rs75927768  | T | 0.062   |
| rs1507288   | T | 0.0315  |
| rs61785179  | A | 0.02    |
| rs6685009   | A | -0.0993 |
| rs114562407 | G | 0.0646  |
| rs2796432   | T | 0.0247  |
| rs142479092 | A | 0.0441  |
| rs797265    | C | -0.014  |
| rs112303425 | A | -0.0628 |
| rs73068228  | G | 0.0361  |
| rs56376502  | T | 0.0539  |
| rs112583952 | G | -0.0921 |
| rs116434634 | A | 0.0504  |
| rs10902671  | C | 0.0248  |
| rs56197205  | G | -0.0299 |
| rs12120495  | T | 0.0815  |
| rs7537800   | G | 0.0417  |
| rs4653745   | C | -0.0114 |

|             |   |         |
|-------------|---|---------|
| rs116524141 | G | 0.0618  |
| rs150453095 | T | 0.0618  |
| rs753389    | G | -0.0149 |
| rs954785    | G | -0.0142 |
| rs145665100 | G | 0.0394  |
| rs72659137  | G | 0.0649  |
| rs12043872  | T | -0.0317 |
| rs112318463 | A | -0.0787 |
| rs115392052 | G | 0.0513  |
| rs12034457  | G | 0.0402  |
| rs72688938  | G | 0.0485  |
| rs835662    | C | 0.0138  |
| rs115540904 | A | 0.0685  |
| rs112918746 | T | 0.0587  |
| rs115951766 | G | 0.0471  |
| rs77060188  | T | -0.0319 |
| rs4025956   | T | -0.0125 |
| rs61814772  | A | 0.0302  |
| rs17681327  | G | 0.0418  |
| rs10910890  | C | -0.0194 |
| rs685550    | G | -0.0141 |
| rs12024141  | A | 0.0226  |
| rs41436349  | G | -0.0127 |
| rs12119503  | C | 0.0228  |
| rs3818508   | T | 0.0201  |
| rs150555777 | T | -0.0539 |
| rs72675071  | T | 0.0351  |
| rs333949    | C | -0.0133 |
| rs61789115  | A | -0.0305 |
| rs111616349 | A | 0.0602  |
| rs564043    | C | 0.0354  |
| rs579995    | G | -0.0191 |
| rs149957719 | G | -0.0421 |
| rs114892569 | G | -0.0759 |
| rs116538608 | G | 0.0641  |
| rs811485    | A | -0.0564 |
| rs12239946  | C | -0.0199 |
| rs12038300  | A | -0.0198 |
| rs78152260  | G | -0.0278 |
| rs116819020 | T | -0.0858 |
| rs12082204  | A | 0.013   |
| rs6024      | C | -0.022  |
| rs77698002  | T | 0.0458  |
| rs1811517   | A | -0.0148 |
| rs61819222  | T | -0.0243 |
| rs72735212  | A | 0.0154  |
| rs2811937   | G | -0.0119 |



|             |   |         |
|-------------|---|---------|
| rs320473    | T | 0.0116  |
| rs12127642  | G | -0.0469 |
| rs11122415  | T | -0.0261 |
| rs10495355  | T | 0.0147  |
| rs17464829  | T | 0.04    |
| rs114541088 | G | 0.0504  |
| rs114104995 | A | -0.0866 |
| rs146956430 | T | -0.09   |
| rs76244802  | G | -0.0726 |
| rs1887816   | T | -0.0114 |
| rs11111366  | A | -0.0108 |
| rs10799058  | A | 0.0111  |
| rs72678988  | T | 0.0667  |
| rs111672099 | A | -0.062  |
| rs61834659  | T | 0.0163  |
| rs10909831  | T | 0.0125  |
| rs34569656  | G | -0.0368 |
| rs7512903   | A | -0.0401 |
| rs78519632  | T | 0.0601  |
| rs73132422  | T | -0.0276 |
| rs338230    | G | 0.0105  |
| rs76323858  | A | -0.0277 |
| rs3753558   | G | -0.0162 |
| rs12144416  | C | -0.014  |
| rs79057783  | C | -0.0389 |
| rs11800276  | T | 0.0263  |
| rs307340    | A | 0.023   |
| rs874613    | A | 0.016   |
| rs10928015  | G | 0.0128  |
| rs11576793  | C | 0.049   |
| rs72664403  | C | -0.0435 |
| rs147767541 | C | 0.0527  |
| rs78990331  | A | -0.0593 |
| rs11162715  | C | 0.0465  |
| rs77953932  | A | -0.0856 |
| rs1776179   | T | -0.0137 |
| rs112674132 | T | 0.0485  |
| rs55700160  | T | -0.0631 |
| rs61828285  | A | 0.0289  |
| rs56117572  | C | -0.0247 |
| rs6701371   | C | 0.0106  |
| rs76245232  | C | 0.0818  |
| rs2209957   | G | 0.0136  |
| rs140813840 | A | 0.0597  |
| rs1808973   | C | -0.0108 |
| rs112034844 | T | -0.0247 |
| rs11162476  | G | 0.012   |

|             |   |         |
|-------------|---|---------|
| rs3886600   | T | -0.0545 |
| rs4297354   | G | 0.0119  |
| rs2802990   | G | -0.0674 |
| rs114451930 | T | -0.0363 |
| rs36049190  | G | 0.023   |
| rs114969636 | T | -0.0715 |
| rs12127775  | T | 0.0477  |
| rs75745024  | T | -0.0708 |
| rs12044583  | T | 0.0214  |
| rs28649433  | G | -0.0243 |
| rs16852432  | G | -0.055  |
| rs78825349  | C | -0.0394 |
| rs2072659   | G | -0.0228 |
| rs12410485  | C | 0.0209  |
| rs76724913  | T | -0.0225 |
| rs79697822  | T | 0.0394  |
| rs146088956 | G | 0.0345  |
| rs1925419   | G | -0.0199 |
| rs72672552  | C | -0.0677 |
| rs112478702 | A | -0.0555 |
| rs12563036  | A | 0.0266  |
| rs77798075  | A | -0.0774 |
| rs113746622 | A | -0.0267 |
| rs35909914  | A | -0.0311 |
| rs12404797  | T | 0.0528  |
| rs1538370   | G | 0.0147  |
| rs140648031 | G | -0.0733 |
| rs79116364  | G | 0.0361  |
| rs111248205 | A | -0.0438 |
| rs116594761 | A | 0.0327  |
| rs4517378   | A | 0.0108  |
| rs4648490   | C | -0.0127 |
| rs45512194  | C | 0.0246  |
| rs4920514   | A | -0.0285 |
| rs523864    | G | 0.0146  |
| rs115638831 | T | -0.0643 |
| rs115239068 | A | 0.0429  |
| rs6664461   | T | 0.0111  |
| rs7520329   | A | 0.0115  |
| rs28540065  | T | -0.0549 |
| rs41327447  | G | -0.0723 |
| rs10442692  | T | -0.0739 |
| rs12751556  | T | 0.0496  |
| rs16824603  | G | -0.0274 |
| rs10442674  | A | 0.0125  |
| rs12027104  | T | 0.0264  |
| rs41266011  | T | 0.0746  |

|             |   |         |
|-------------|---|---------|
| rs77945679  | T | -0.0548 |
| rs12119733  | C | 0.0423  |
| rs77953182  | A | 0.0873  |
| rs41268476  | C | 0.0319  |
| rs144798766 | A | -0.0283 |
| rs35871579  | A | -0.0183 |
| rs12726358  | T | 0.0157  |
| rs111962633 | A | 0.0341  |
| rs34964610  | A | 0.0364  |
| rs146924383 | G | 0.0846  |
| rs2481669   | A | 0.0115  |
| rs55724535  | T | -0.0391 |
| rs114868486 | A | 0.0526  |
| rs147482072 | A | -0.0679 |
| rs114459202 | T | 0.0349  |
| rs4648873   | G | 0.0124  |
| rs75361747  | T | 0.0582  |
| rs115315429 | T | 0.0482  |
| rs116829517 | G | 0.0561  |
| rs77409183  | C | -0.0327 |
| rs12118700  | A | -0.0219 |
| rs76563384  | G | -0.0535 |
| rs79681455  | G | 0.0867  |
| rs58103028  | T | -0.0359 |
| rs147567103 | T | 0.0693  |
| rs72705411  | A | -0.0243 |
| rs74049161  | T | -0.0378 |
| rs2235255   | A | 0.0178  |
| rs306301    | T | 0.0203  |
| rs116474332 | A | -0.0543 |
| rs3753190   | G | -0.015  |
| rs6702844   | A | 0.012   |
| rs80240240  | T | -0.0185 |
| rs12132539  | A | -0.016  |
| rs115983000 | G | -0.0655 |
| rs1466520   | A | 0.0199  |
| rs111959219 | T | 0.0412  |
| rs11207703  | C | 0.0152  |
| rs61778165  | C | -0.0592 |
| rs76390325  | A | 0.0798  |
| rs1542703   | G | 0.0115  |
| rs79357907  | G | -0.0129 |
| rs115610777 | T | -0.0551 |
| rs6587999   | A | 0.0113  |
| rs75087110  | G | 0.0121  |
| rs28757216  | G | -0.0312 |
| rs35343892  | T | 0.0315  |

|             |   |         |
|-------------|---|---------|
| rs4526588   | G | -0.0114 |
| rs6667041   | C | 0.0319  |
| rs1542728   | G | -0.0114 |
| rs512589    | A | 0.0193  |
| rs34014645  | A | -0.0153 |
| rs2391154   | C | -0.0118 |
| rs55840925  | A | -0.0225 |
| rs1570812   | T | 0.0601  |
| rs34571850  | T | -0.0246 |
| rs11211537  | G | 0.0119  |
| rs76044462  | T | 0.0443  |
| rs14137     | G | 0.0111  |
| rs80309618  | T | -0.0454 |
| rs76834158  | T | 0.0291  |
| rs111729818 | T | -0.0438 |
| rs112901772 | T | -0.0506 |
| rs76902466  | A | 0.048   |
| rs113993287 | A | 0.083   |
| rs76102002  | C | 0.067   |
| rs112733249 | A | -0.0504 |
| rs1176168   | G | -0.0175 |
| rs10927547  | A | 0.0122  |
| rs1165485   | A | 0.0111  |
| rs863002    | T | 0.0112  |
| rs7516483   | G | -0.0107 |
| rs17534481  | T | 0.016   |
| rs12048284  | C | -0.0289 |
| rs1007248   | G | 0.0118  |
| rs12144183  | T | -0.0116 |
| rs74071914  | A | -0.0699 |
| rs4484960   | T | -0.016  |
| rs138609264 | G | 0.0197  |
| rs7518015   | G | -0.0188 |
| rs9661447   | C | 0.0231  |
| rs12069569  | C | -0.0234 |
| rs1411773   | A | -0.0108 |
| rs10914660  | G | -0.0179 |
| rs144889622 | T | 0.0368  |
| rs41292993  | C | 0.0725  |
| rs139784897 | A | -0.0527 |
| rs460489    | C | -0.0164 |
| rs10914466  | T | -0.0148 |
| rs7520666   | T | 0.0449  |
| rs12119250  | A | 0.0224  |
| rs141065056 | C | 0.0468  |
| rs4657670   | T | -0.013  |
| rs55856911  | G | -0.0156 |

|             |   |         |
|-------------|---|---------|
| rs1979171   | C | -0.0114 |
| rs4654523   | T | -0.017  |
| rs17187037  | C | -0.0382 |
| rs145752531 | A | -0.0459 |
| rs60999980  | A | 0.0198  |
| rs72708833  | A | -0.0279 |
| rs823157    | T | 0.0172  |
| rs149842241 | C | 0.0547  |
| rs2340777   | G | 0.0136  |
| rs4663105   | C | 0.1837  |
| rs12617835  | C | 0.1264  |
| rs10929006  | A | 0.1113  |
| rs10929007  | A | -0.1112 |
| rs6743470   | T | -0.1129 |
| rs12052600  | G | 0.0869  |
| rs10933431  | G | -0.1025 |
| rs858952    | C | 0.0834  |
| rs6715234   | G | 0.2027  |
| rs55636820  | A | 0.1359  |
| rs13000695  | A | 0.1003  |
| rs77434175  | T | 0.5253  |
| rs55996099  | A | -0.0814 |
| rs10208858  | A | -0.0638 |
| rs12714315  | G | 0.0745  |
| rs61208496  | T | 0.0916  |
| rs6760748   | C | 0.0759  |
| rs111729906 | T | -0.1355 |
| rs73942838  | G | -0.118  |
| rs34273705  | G | 0.2562  |
| rs111779203 | T | -0.2999 |
| rs80279103  | C | 0.1369  |
| rs1969256   | A | -0.0629 |
| rs6744142   | G | 0.0627  |
| rs35349669  | T | 0.0663  |
| rs222482    | T | 0.0627  |
| rs4971708   | T | 0.0859  |
| rs6719458   | T | 0.1196  |
| rs78485485  | C | 0.1962  |
| rs79472591  | C | -0.2782 |
| rs6722642   | T | -0.0758 |
| rs55993148  | G | 0.0893  |
| rs17485056  | G | 0.0624  |
| rs13404304  | A | 0.0661  |
| rs13415138  | T | -0.0673 |
| rs72803319  | G | 0.2421  |
| rs75141812  | T | -0.07   |
| rs11124077  | C | -0.0597 |

|             |   |         |
|-------------|---|---------|
| rs73940343  | G | 0.1191  |
| rs62183820  | A | 0.1658  |
| rs10200743  | C | 0.0694  |
| rs112077221 | C | 0.0916  |
| rs2587660   | C | 0.066   |
| rs145037602 | G | -0.225  |
| rs77808188  | T | -0.3589 |
| rs6720306   | C | -0.0741 |
| rs75764781  | C | 0.339   |
| rs112333439 | A | -0.5079 |
| rs115545415 | A | 0.2336  |
| rs493875    | G | 0.1203  |
| rs1400944   | A | -0.175  |
| rs7607348   | A | -0.0903 |
| rs1866235   | T | -0.0705 |
| rs150124034 | G | -0.2586 |
| rs1705129   | T | 0.0822  |
| rs12475176  | A | -0.1894 |
| rs76568407  | T | 0.2851  |
| rs722268    | C | 0.0891  |
| rs4954801   | G | 0.0926  |
| rs7573439   | C | 0.194   |
| rs4077467   | A | 0.12    |
| rs11695516  | A | 0.07    |
| rs10929639  | C | -0.0694 |
| rs72829766  | T | 0.1662  |
| rs12992087  | T | 0.0833  |
| rs72804374  | A | 0.1433  |
| rs732076    | A | 0.0623  |
| rs1126260   | G | -0.0555 |
| rs12469086  | T | -0.0622 |
| rs840580    | C | -0.0566 |
| rs7595930   | A | -0.0562 |
| rs141810856 | G | 0.354   |
| rs12988570  | T | 0.0618  |
| rs61180415  | T | 0.0894  |
| rs13008763  | T | 0.0602  |
| rs6726234   | A | -0.2402 |
| rs114947464 | A | -0.1675 |
| rs13017008  | T | -0.0806 |
| rs4671992   | T | -0.0549 |
| rs3770013   | G | 0.0721  |
| rs111949393 | C | -0.2437 |
| rs12987039  | A | 0.0608  |
| rs72838205  | A | 0.2602  |
| rs4674638   | A | -0.074  |
| rs76900548  | C | 0.279   |

|             |   |         |
|-------------|---|---------|
| rs197277    | T | -0.0598 |
| rs3796078   | T | 0.0572  |
| rs75620859  | T | -0.0956 |
| rs41457248  | C | 0.0811  |
| rs13011184  | G | 0.2263  |
| rs1250269   | A | 0.1835  |
| rs116686133 | A | 0.2694  |
| rs113517069 | G | 0.2801  |
| rs11676185  | T | 0.056   |
| rs6710142   | A | -0.0622 |
| rs113769663 | T | -0.2771 |
| rs12712299  | G | 0.0779  |
| rs56126070  | A | 0.0698  |
| rs4640402   | C | -0.054  |
| rs2419778   | A | -0.0521 |
| rs4664792   | G | 0.0544  |
| rs72796734  | T | -0.1279 |
| rs34451302  | T | -0.1181 |
| rs1041938   | T | 0.1184  |
| rs7591030   | A | 0.1682  |
| rs67696936  | T | 0.0813  |
| rs1153740   | T | -0.0606 |
| rs76507972  | T | -0.0937 |
| rs76222305  | T | 0.2161  |
| rs3893927   | C | 0.0595  |
| rs4444500   | C | 0.0551  |
| rs11676043  | T | 0.0546  |
| rs142640084 | C | -0.2667 |
| rs16858111  | C | 0.2795  |
| rs12990047  | G | 0.0748  |
| rs28638111  | T | 0.0818  |
| rs6720535   | G | 0.088   |
| rs6430068   | A | 0.0818  |
| rs144170143 | T | 0.2103  |
| rs77981966  | T | -0.1043 |
| rs11679901  | T | 0.2583  |
| rs1919420   | A | -0.0707 |
| rs79092501  | G | 0.2741  |
| rs71414747  | T | 0.1659  |
| rs1922366   | T | -0.0862 |
| rs115918791 | T | 0.2202  |
| rs1912185   | T | 0.0865  |
| rs11683433  | G | -0.215  |
| rs12996871  | G | 0.0677  |
| rs6542368   | A | -0.0512 |
| rs12622654  | A | 0.1189  |
| rs2279015   | A | 0.0541  |

|             |   |         |
|-------------|---|---------|
| rs111445006 | G | -0.0827 |
| rs11686862  | C | 0.0725  |
| rs73977671  | A | 0.1474  |
| rs7577270   | C | 0.0695  |
| rs1374724   | G | 0.1542  |
| rs76377200  | A | 0.2306  |
| rs60514756  | C | 0.1942  |
| rs6434506   | G | -0.0625 |
| rs13383613  | C | -0.0538 |
| rs12464563  | C | -0.0528 |
| rs72954616  | A | 0.2457  |
| rs7578892   | C | -0.0518 |
| rs74953884  | T | -0.2436 |
| rs114981209 | G | 0.1982  |
| rs78787893  | C | 0.2254  |
| rs7557618   | T | -0.2294 |
| rs395943    | A | -0.0749 |
| rs79144889  | A | 0.2768  |
| rs111723110 | T | -0.2331 |
| rs2396006   | T | 0.1026  |
| rs72841761  | C | 0.1457  |
| rs138560302 | A | -0.3001 |
| rs72804469  | T | -0.11   |
| rs9288396   | T | 0.0616  |
| rs6731095   | G | 0.0769  |
| rs62127825  | A | -0.055  |
| rs16867366  | C | 0.2156  |
| rs785245    | A | -0.0885 |
| rs2287521   | A | 0.1097  |
| rs818159    | G | -0.0639 |
| rs907165    | A | -0.0522 |
| rs144230231 | A | 0.2674  |
| rs6746368   | T | -0.0531 |
| rs111322052 | G | -0.1418 |
| rs699549    | T | 0.0656  |
| rs7602285   | G | 0.0592  |
| rs698844    | G | 0.058   |
| rs7588230   | C | 0.0513  |
| rs3210400   | A | -0.0498 |
| rs7600128   | G | -0.1019 |
| rs74883678  | A | 0.0709  |
| rs415974    | T | -0.1169 |
| rs17653501  | C | 0.1426  |
| rs112975202 | C | 0.2     |
| rs12994639  | G | -0.059  |
| rs114737372 | T | 0.2769  |
| rs56012184  | C | 0.1559  |



|             |   |         |
|-------------|---|---------|
| rs10171162  | G | -0.0832 |
| rs1985388   | A | -0.0517 |
| rs74878690  | T | 0.2158  |
| rs2008597   | A | 0.3781  |
| rs72823364  | T | -0.1073 |
| rs78715436  | C | -0.357  |
| rs116705505 | G | 0.2702  |
| rs16865927  | G | 0.2504  |
| rs6437200   | G | 0.0654  |
| rs11694399  | C | -0.067  |
| rs10931831  | T | 0.0519  |
| rs6738922   | T | 0.1218  |
| rs7565215   | C | 0.1353  |
| rs36143107  | A | 0.0753  |
| rs116577770 | A | -0.1437 |
| rs76562260  | T | -0.3039 |
| rs17255781  | C | -0.0917 |
| rs4435421   | T | 0.0544  |
| rs6546163   | G | 0.2504  |
| rs6708346   | A | -0.2082 |
| rs6542573   | T | 0.0523  |
| rs140059119 | C | 0.2513  |
| rs61748243  | T | 0.2765  |
| rs6759673   | C | 0.0808  |
| rs116344507 | A | -0.2666 |
| rs75982380  | C | -0.1657 |
| rs148964011 | A | 0.2308  |
| rs76026092  | C | -0.1624 |
| rs13031812  | A | 0.0516  |
| rs145415357 | G | -0.44   |
| rs1251203   | T | -0.1163 |
| rs10445975  | T | -0.0625 |
| rs147609855 | T | 0.2003  |
| rs151264015 | C | 0.1019  |
| rs17530524  | A | -0.2589 |
| rs2044243   | C | -0.0488 |
| rs800961    | G | 0.1095  |
| rs144665708 | A | 0.1441  |
| rs3806537   | A | -0.119  |
| rs2193909   | C | -0.074  |
| rs62130610  | C | 0.1232  |
| rs113777099 | C | 0.0874  |
| rs35766238  | A | 0.155   |
| rs35622580  | A | 0.0777  |
| rs2117363   | T | 0.0719  |
| rs151313142 | T | -0.1745 |
| rs80286877  | T | 0.2754  |

|             |   |         |
|-------------|---|---------|
| rs7578051   | C | 0.1808  |
| rs78286207  | C | -0.1223 |
| rs17453235  | C | 0.0751  |
| rs116587088 | A | 0.1567  |
| rs58991966  | G | -0.0662 |
| rs78382024  | A | -0.2299 |
| rs1721782   | T | 0.0499  |
| rs80022528  | A | -0.1546 |
| rs79195550  | T | 0.2512  |
| rs1833350   | T | -0.0591 |
| rs2016394   | A | -0.0492 |
| rs4666834   | A | -0.4518 |
| rs34774407  | T | -0.1286 |
| rs12233173  | A | 0.0626  |
| rs80350423  | T | -0.102  |
| rs71440693  | A | 0.1132  |
| rs10931663  | T | 0.0631  |
| rs62105523  | T | 0.353   |
| rs4669297   | T | 0.207   |
| rs115922134 | G | -0.3157 |
| rs114698458 | G | 0.101   |
| rs62183773  | T | 0.0519  |
| rs4854353   | C | 0.091   |
| rs56284069  | T | 0.3738  |
| rs55797133  | T | 0.4462  |
| rs13032771  | A | 0.0524  |
| rs72997884  | T | 0.1219  |
| rs13020113  | T | 0.0602  |
| rs12620362  | C | 0.0884  |
| rs2670721   | T | 0.0697  |
| rs11686726  | G | 0.1533  |
| rs79453057  | T | 0.2426  |
| rs12474602  | A | 0.1544  |
| rs150824899 | C | 0.1519  |
| rs115138585 | T | 0.2476  |
| rs114921768 | T | -0.3152 |
| rs75186734  | T | 0.1811  |
| rs13421854  | G | -0.0957 |
| rs74659343  | G | -0.2037 |
| rs17504635  | T | 0.0842  |
| rs3952793   | A | 0.1053  |
| rs72955491  | G | -0.2459 |
| rs72613753  | G | 0.1667  |
| rs11126974  | C | 0.0545  |
| rs80034716  | T | 0.2041  |
| rs11689555  | T | 0.0909  |
| rs112413942 | C | 0.3295  |

|             |   |         |
|-------------|---|---------|
| rs11677105  | C | 0.0475  |
| rs12477275  | T | -0.0573 |
| rs9677441   | C | -0.0705 |
| rs116419041 | T | 0.3263  |
| rs2727889   | T | -0.06   |
| rs919933    | G | 0.0638  |
| rs79835683  | T | 0.1317  |
| rs148101102 | G | 0.0835  |
| rs77807748  | A | 0.1996  |
| rs28657808  | A | 0.0898  |
| rs6731165   | T | -0.0493 |
| rs11695978  | T | 0.0962  |
| rs353129    | C | -0.0522 |
| rs144902780 | C | 0.3296  |
| rs115567698 | C | -0.1447 |
| rs13394752  | T | 0.0772  |
| rs150126153 | T | 0.2034  |
| rs13386519  | G | 0.0908  |
| rs34505188  | A | -0.0896 |
| rs140606214 | C | -0.0806 |
| rs113112754 | C | 0.2084  |
| rs144343667 | T | -0.0997 |
| rs12476779  | G | -0.0513 |
| rs10189431  | A | 0.0802  |
| rs4673382   | A | -0.0498 |
| rs35242609  | A | -0.2276 |
| rs112001467 | T | 0.0899  |
| rs72879621  | T | -0.1086 |
| rs56836833  | T | 0.1839  |
| rs62153500  | T | 0.0743  |
| rs56353829  | A | -0.0986 |
| rs7596454   | C | 0.1983  |
| rs142004230 | C | 0.1597  |
| rs10202670  | G | -0.073  |
| rs4675701   | C | 0.0497  |
| rs77078272  | T | 0.0702  |
| rs2276575   | C | 0.0645  |
| rs56390581  | T | -0.1544 |
| rs62153960  | A | -0.1025 |
| rs1513829   | C | -0.0467 |
| rs112312485 | T | 0.1406  |
| rs115147035 | T | 0.3353  |
| rs113311956 | T | 0.2184  |
| rs75353785  | T | 0.0852  |
| rs72876891  | A | 0.2187  |
| rs72998586  | A | -0.0462 |
| rs66493939  | C | -0.1276 |

|             |   |         |
|-------------|---|---------|
| rs111917100 | T | 0.1537  |
| rs2310750   | T | -0.0981 |
| rs561264    | G | 0.0522  |
| rs6728120   | T | 0.0491  |
| rs3795958   | G | -0.0596 |
| rs74646958  | A | -0.199  |
| rs111729053 | C | 0.1786  |
| rs6746364   | T | -0.0508 |
| rs28823392  | G | -0.0502 |
| rs6712315   | T | 0.0713  |
| rs76841908  | G | 0.0756  |
| rs72956628  | G | -0.2475 |
| rs12988399  | T | 0.0631  |
| rs13021392  | T | -0.0821 |
| rs62193105  | G | 0.2277  |
| rs12613780  | G | -0.0966 |
| rs78840502  | C | 0.2694  |
| rs73096936  | C | 0.1644  |
| rs6745843   | T | 0.0529  |
| rs73007693  | T | 0.1944  |
| rs78717848  | T | 0.1012  |
| rs7589678   | C | 0.1556  |
| rs10172082  | T | 0.0539  |
| rs114020538 | A | 0.2557  |
| rs62132991  | G | -0.1501 |
| rs7566627   | T | 0.0534  |
| rs116377942 | G | -0.3038 |
| rs77376485  | T | 0.3823  |
| rs56219224  | G | 0.2445  |
| rs4668156   | A | -0.0649 |
| rs35307726  | T | -0.0565 |
| rs11897199  | C | 0.1408  |
| rs1835161   | C | 0.2361  |
| rs146161535 | T | -0.2436 |
| rs147089209 | C | 0.2797  |
| rs4850614   | G | 0.0668  |
| rs4667368   | A | 0.3063  |
| rs76290635  | C | 0.1016  |
| rs4513317   | T | -0.0513 |
| rs77775761  | G | 0.0962  |
| rs113965812 | A | -0.1529 |
| rs79314712  | G | -0.1245 |
| rs2697806   | C | 0.0592  |
| rs4972362   | A | -0.056  |
| rs17224360  | C | -0.2674 |
| rs114633179 | T | 0.1379  |
| rs580448    | G | 0.0637  |

|             |   |         |
|-------------|---|---------|
| rs2084182   | C | 0.0475  |
| rs116096146 | T | 0.3574  |
| rs7593070   | G | 0.0495  |
| rs6708738   | A | 0.0574  |
| rs350764    | T | -0.0475 |
| rs2339975   | G | -0.0464 |
| rs28913020  | G | 0.0477  |
| rs17267465  | G | 0.3     |
| rs7608734   | A | -0.0628 |
| rs12464952  | T | -0.055  |
| rs77396974  | A | -0.1318 |
| rs10167496  | T | -0.0556 |
| rs149485490 | T | -0.3295 |
| rs6542889   | T | -0.0469 |
| rs116190837 | T | 0.1652  |
| rs34165507  | T | 0.2118  |
| rs115036255 | C | -0.2936 |
| rs11689437  | G | 0.0962  |
| rs111675405 | C | 0.0734  |
| rs72862208  | C | 0.1197  |
| rs13017044  | A | 0.0556  |
| rs79990317  | C | -0.2417 |
| rs56250958  | G | -0.0844 |
| rs73975771  | A | 0.1658  |
| rs4500996   | T | -0.0701 |
| rs13004776  | A | -0.069  |
| rs15994     | G | 0.052   |
| rs145058491 | T | 0.238   |
| rs6732000   | A | 0.0469  |
| rs17271442  | C | 0.2069  |
| rs1528028   | C | 0.2315  |
| rs76614509  | A | 0.2325  |
| rs2887171   | C | 0.0565  |
| rs340348    | T | 0.052   |
| rs75718724  | G | -0.2345 |
| rs7568849   | C | 0.051   |
| rs75041170  | C | -0.0983 |
| rs4973095   | A | 0.0629  |
| rs6713633   | C | 0.0465  |
| rs72772302  | G | 0.1728  |
| rs4142761   | T | 0.075   |
| rs150293354 | G | -0.3194 |
| rs78311736  | C | -0.2741 |
| rs28583740  | C | 0.055   |
| rs12474530  | A | 0.0789  |
| rs6430468   | A | 0.0459  |
| rs867535    | T | 0.05    |

|             |   |         |
|-------------|---|---------|
| rs62152138  | G | 0.1148  |
| rs4953038   | A | -0.0644 |
| rs7576786   | C | -0.0559 |
| rs4583415   | T | -0.0534 |
| rs6435647   | G | 0.1948  |
| rs35298928  | C | 0.1732  |
| rs78898772  | G | 0.0813  |
| rs12615806  | T | 0.0505  |
| rs12618337  | C | -0.0865 |
| rs72799192  | T | -0.0926 |
| rs144483781 | G | 0.2892  |
| rs13001547  | C | 0.0499  |
| rs72861366  | T | 0.2466  |
| rs10192722  | T | -0.0511 |
| rs149057293 | C | -0.4176 |
| rs116657655 | C | -0.392  |
| rs148486889 | A | -0.2347 |
| rs116082003 | A | 0.2394  |
| rs41291177  | G | -0.0661 |
| rs1375341   | T | 0.0495  |
| rs4907254   | G | 0.049   |
| rs13401230  | C | 0.0923  |
| rs113325442 | T | 0.2865  |
| rs114911383 | A | 0.1543  |
| rs76225308  | A | -0.1024 |
| rs720541    | T | -0.0542 |
| rs111378714 | C | -0.0747 |
| rs9287914   | A | 0.0538  |
| rs1517487   | C | -0.0456 |
| rs115531956 | C | 0.2777  |
| rs7355659   | T | 0.0498  |
| rs72836550  | A | -0.3068 |
| rs77737892  | A | 0.2048  |
| rs13389312  | T | 0.0882  |
| rs77659592  | G | 0.0864  |
| rs10184726  | T | 0.0996  |
| rs6745114   | C | 0.0731  |
| rs4241293   | G | 0.052   |
| rs16845255  | C | -0.1611 |
| rs6643      | C | -0.108  |
| rs71415174  | T | 0.173   |
| rs149004900 | T | 0.1503  |
| rs10200528  | A | 0.0581  |
| rs3806493   | T | 0.1548  |
| rs144699438 | T | -0.255  |
| rs815807    | G | 0.0663  |
| rs10194091  | C | 0.0619  |

|             |   |         |
|-------------|---|---------|
| rs79467488  | G | 0.0947  |
| rs13004048  | T | 0.0691  |
| rs6738800   | A | -0.0747 |
| rs55878132  | G | -0.084  |
| rs141476650 | G | 0.2394  |
| rs3769044   | G | 0.0662  |
| rs6708041   | A | 0.0499  |
| rs11901548  | A | 0.317   |
| rs113700137 | C | 0.0534  |
| rs59701449  | G | -0.096  |
| rs113620481 | A | -0.151  |
| rs2302925   | G | -0.0463 |
| rs6414160   | T | 0.11    |
| rs13427680  | A | -0.0491 |
| rs1530046   | T | 0.1415  |
| rs75187430  | A | -0.1048 |
| rs747590    | A | 0.221   |
| rs62150290  | A | 0.2539  |
| rs13409209  | A | -0.2419 |
| rs76911842  | G | 0.2809  |
| rs60952640  | A | -0.2318 |
| rs139471712 | G | 0.0611  |
| rs1466935   | C | 0.1447  |
| rs2160384   | C | 0.0457  |
| rs1434146   | A | 0.0452  |
| rs6754629   | C | 0.046   |
| rs13402643  | T | 0.0504  |
| rs62154115  | A | -0.0474 |
| rs62124871  | T | 0.1178  |
| rs658602    | A | -0.0437 |
| rs13028801  | A | 0.134   |
| rs7562869   | G | 0.0468  |
| rs4672587   | G | -0.0499 |
| rs12328656  | C | -0.0709 |
| rs72892108  | G | 0.0956  |
| rs111766340 | T | 0.2349  |
| rs11693150  | C | 0.0444  |
| rs3976244   | C | 0.0715  |
| rs75454372  | T | 0.1     |
| rs4349325   | G | 0.044   |
| rs4359651   | G | 0.0516  |
| rs41272659  | A | -0.1756 |
| rs72883838  | T | 0.0994  |
| rs150583545 | A | 0.1449  |
| rs6436525   | A | -0.0586 |
| rs6734104   | A | 0.1368  |
| rs36100105  | C | 0.1434  |

|             |   |         |
|-------------|---|---------|
| rs12472723  | G | -0.0558 |
| rs7579484   | T | -0.0689 |
| rs114003574 | C | 0.2396  |
| rs11675535  | A | -0.0795 |
| rs13017953  | T | 0.0852  |
| rs10932037  | T | 0.0767  |
| rs12471215  | A | 0.093   |
| rs145060496 | G | 0.1896  |
| rs55779490  | A | 0.1983  |
| rs4341950   | C | 0.065   |
| rs55679014  | G | -0.1611 |
| rs116758986 | G | 0.1503  |
| rs7593836   | A | 0.129   |
| rs12713162  | C | -0.0485 |
| rs62175496  | T | 0.2504  |
| rs17636359  | C | -0.0661 |
| rs7586812   | G | 0.057   |
| rs56337508  | T | 0.0662  |
| rs4503982   | C | 0.0472  |
| rs115789906 | G | 0.2435  |
| rs1397399   | G | 0.0731  |
| rs12473883  | T | 0.0528  |
| rs2693870   | A | -0.0467 |
| rs74863114  | T | -0.2173 |
| rs147699753 | G | 0.1174  |
| rs74183412  | G | 0.1628  |
| rs143165055 | T | 0.1214  |
| rs72900975  | A | 0.0643  |
| rs7598172   | G | 0.0444  |
| rs72917826  | A | 0.1512  |
| rs72973871  | C | 0.0892  |
| rs4992637   | G | 0.0559  |
| rs11897635  | T | -0.1704 |
| rs3923303   | A | -0.076  |
| rs10779947  | A | 0.0573  |
| rs1986260   | G | -0.1988 |
| rs6714111   | T | -0.0577 |
| rs900369    | A | 0.0428  |
| rs79296158  | G | 0.1147  |
| rs1516920   | G | 0.0469  |
| rs11684252  | T | 0.1842  |
| rs34080071  | T | 0.0651  |
| rs79257260  | T | -0.1084 |
| rs3754862   | A | 0.1837  |
| rs7574514   | G | 0.0679  |
| rs7584589   | C | 0.0695  |
| rs11096709  | G | -0.0869 |



|             |   |         |
|-------------|---|---------|
| rs12475850  | T | -0.0431 |
| rs4852074   | G | -0.0557 |
| rs4233618   | T | 0.0489  |
| rs13426484  | C | 0.0485  |
| rs146973928 | A | 0.1447  |
| rs116299010 | G | -0.1762 |
| rs4854417   | A | -0.0571 |
| rs17439558  | C | 0.0648  |
| rs12623181  | G | 0.044   |
| rs12691817  | G | -0.0573 |
| rs676210    | A | -0.0521 |
| rs17505250  | G | -0.0632 |
| rs6756200   | T | -0.046  |
| rs10170322  | C | -0.0619 |
| rs74502059  | G | 0.1582  |
| rs139439368 | G | 0.3183  |
| rs75345231  | T | 0.2652  |
| rs72853872  | A | -0.1218 |
| rs145463035 | T | 0.1996  |
| rs116679348 | C | -0.2923 |
| rs6430847   | A | 0.0467  |
| rs7346      | A | -0.0574 |
| rs10202005  | T | 0.1507  |
| rs149757420 | C | 0.2751  |
| rs10185030  | A | -0.1663 |
| rs116402250 | C | -0.152  |
| rs28382916  | T | 0.2788  |
| rs4556941   | G | -0.0786 |
| rs116042562 | G | 0.2547  |
| rs12477687  | T | -0.0442 |
| rs72880119  | T | -0.079  |
| rs74513263  | C | 0.2521  |
| rs137982701 | A | -0.2913 |
| rs115113051 | T | 0.2888  |
| rs13405698  | C | 0.0862  |
| rs2011347   | T | 0.0446  |
| rs62181239  | A | 0.3717  |
| rs721250    | C | -0.044  |
| rs4663517   | G | 0.0474  |
| rs56761675  | G | 0.0945  |
| rs6719595   | T | 0.1023  |
| rs7606446   | A | -0.0562 |
| rs4433965   | G | -0.0533 |
| rs705719    | T | 0.0829  |
| rs115559499 | T | 0.1849  |
| rs6431344   | G | 0.0711  |
| rs72972259  | C | 0.0695  |

|             |   |         |
|-------------|---|---------|
| rs13402129  | G | 0.0863  |
| rs146667026 | C | -0.1141 |
| rs10206445  | T | 0.0535  |
| rs74330892  | G | 0.0908  |
| rs113599644 | A | -0.3148 |
| rs62165193  | T | 0.0832  |
| rs72985950  | G | -0.1579 |
| rs72901211  | C | -0.0614 |
| rs13382562  | C | 0.0741  |
| rs6723495   | T | 0.0672  |
| rs56822620  | C | 0.0715  |
| rs140518065 | G | 0.3261  |
| rs79503443  | T | 0.1434  |
| rs13027920  | G | -0.0656 |
| rs71419571  | T | 0.0811  |
| rs74477734  | A | -0.1282 |
| rs7425056   | T | -0.0451 |
| rs3919758   | C | 0.0499  |
| rs10930303  | G | -0.0582 |
| rs10197384  | G | 0.1607  |
| rs62157404  | T | 0.1297  |
| rs2042492   | A | 0.049   |
| rs67246458  | A | -0.0583 |
| rs1456520   | C | 0.1179  |
| rs34884977  | T | 0.0761  |
| rs1545230   | A | 0.2062  |
| rs116330672 | G | 0.174   |
| rs68136760  | A | -0.0568 |
| rs72945414  | A | -0.0841 |
| rs2373859   | C | 0.0461  |
| rs7604239   | G | 0.0485  |
| rs112832827 | T | -0.2354 |
| rs62148814  | T | 0.0666  |
| rs67753410  | T | 0.1556  |
| rs7557877   | A | -0.0806 |
| rs2371271   | C | 0.0452  |
| rs116368066 | C | -0.1857 |
| rs58284297  | G | 0.0509  |
| rs78847868  | T | -0.0981 |
| rs62136520  | G | 0.1495  |
| rs111680616 | A | 0.186   |
| rs73180648  | G | 0.1922  |
| rs148684416 | G | 0.2126  |
| rs519025    | T | 0.1302  |
| rs75547264  | T | 0.1648  |
| rs114222105 | C | -0.1734 |
| rs10445742  | G | 0.0448  |

|             |   |         |
|-------------|---|---------|
| rs7569000   | C | -0.0566 |
| rs4302168   | T | 0.2238  |
| rs12998622  | C | 0.1506  |
| rs112054958 | C | 0.0982  |
| rs141151482 | C | 0.2388  |
| rs11899350  | A | -0.0542 |
| rs7590204   | A | -0.0448 |
| rs7585571   | G | -0.0421 |
| rs1921808   | A | -0.0814 |
| rs73943180  | A | 0.2202  |
| rs6738076   | G | -0.0729 |
| rs13019236  | A | 0.0548  |
| rs930019    | T | 0.0459  |
| rs56087245  | G | 0.1528  |
| rs12464789  | T | 0.185   |
| rs4666290   | G | -0.1982 |
| rs10185213  | C | 0.0499  |
| rs10490049  | G | 0.1045  |
| rs16840882  | C | -0.1618 |
| rs1213956   | C | -0.0478 |
| rs116130384 | A | -0.2191 |
| rs7584487   | C | 0.0423  |
| rs72775213  | G | 0.0974  |
| rs62135453  | T | -0.0537 |
| rs9679752   | G | -0.0591 |
| rs55989952  | C | 0.0468  |
| rs12998088  | T | 0.0813  |
| rs9646707   | T | 0.0686  |
| rs17047480  | C | -0.1799 |
| rs71428140  | C | 0.1382  |
| rs72879603  | G | 0.0982  |
| rs11123269  | A | 0.0467  |
| rs10496629  | T | 0.045   |
| rs11679483  | G | 0.0556  |
| rs268134    | A | 0.0482  |
| rs147054593 | C | -0.0536 |
| rs16844079  | C | -0.1069 |
| rs112017087 | A | 0.0674  |
| rs6543337   | G | 0.0549  |
| rs150548543 | T | 0.1939  |
| rs140768105 | G | -0.2607 |
| rs62189445  | A | -0.0575 |
| rs16842863  | C | -0.0454 |
| rs7576465   | C | -0.1843 |
| rs16834749  | C | -0.3103 |
| rs11679410  | G | -0.047  |
| rs77723031  | C | -0.2555 |

|             |   |         |
|-------------|---|---------|
| rs115660178 | T | 0.0939  |
| rs1562275   | T | -0.0569 |
| rs10211320  | C | 0.1278  |
| rs114440250 | A | 0.2602  |
| rs561525    | C | -0.1551 |
| rs138353274 | C | 0.1723  |
| rs12471741  | A | 0.0475  |
| rs62187831  | A | 0.1893  |
| rs28507253  | A | 0.2103  |
| rs17279532  | T | -0.0532 |
| rs7607618   | C | 0.0699  |
| rs13397921  | A | 0.1449  |
| rs62167763  | G | 0.1734  |
| rs76172264  | C | -0.1266 |
| rs12478405  | T | 0.0477  |
| rs12999658  | A | 0.1482  |
| rs76241635  | G | -0.1888 |
| rs72786976  | T | -0.1838 |
| rs79988351  | A | -0.1051 |
| rs12464787  | A | -0.0461 |
| rs10205399  | T | -0.0452 |
| rs4952307   | T | 0.0462  |
| rs28507739  | G | 0.3239  |
| rs78118051  | G | 0.1747  |
| rs78709244  | A | -0.1647 |
| rs72956283  | A | 0.0627  |
| rs34442850  | A | 0.2302  |
| rs7575752   | T | 0.0544  |
| rs2079538   | T | -0.0446 |
| rs1001296   | C | -0.0903 |
| rs2543593   | C | -0.0472 |
| rs72896779  | G | -0.084  |
| rs2171795   | A | -0.0428 |
| rs55690448  | T | 0.1741  |
| rs2971920   | C | 0.0446  |
| rs2293079   | T | -0.0637 |
| rs7586437   | C | -0.0486 |
| rs114218165 | C | -0.2333 |
| rs13390631  | A | -0.0997 |
| rs113315982 | T | -0.1885 |
| rs13418466  | T | -0.1374 |
| rs10498148  | A | 0.2165  |
| rs151141421 | G | -0.3065 |
| rs34903494  | T | -0.0673 |
| rs16837889  | A | 0.175   |
| rs7584034   | G | -0.0526 |
| rs72957171  | T | -0.1431 |

|             |   |         |
|-------------|---|---------|
| rs17048789  | A | 0.1138  |
| rs79266538  | C | 0.1815  |
| rs3789117   | C | -0.0672 |
| rs142078597 | A | 0.1392  |
| rs11674490  | A | -0.0764 |
| rs115485820 | A | 0.147   |
| rs1201451   | T | -0.0478 |
| rs72789113  | A | -0.0462 |
| rs7578356   | C | 0.1074  |
| rs13018109  | G | -0.0474 |
| rs74598255  | T | -0.0796 |
| rs2113838   | C | 0.3158  |
| rs9646808   | C | -0.0604 |
| rs2074834   | A | -0.0451 |
| rs79270856  | A | 0.1794  |
| rs2091788   | A | -0.0521 |
| rs12474613  | T | 0.0471  |
| rs2278884   | T | 0.0498  |
| rs116038530 | A | 0.224   |
| rs144404312 | G | 0.1485  |
| rs13012186  | T | 0.059   |
| rs13019978  | C | -0.0508 |
| rs141636047 | A | 0.3141  |
| rs17509413  | C | -0.0469 |
| rs115802436 | A | 0.1103  |
| rs10179912  | C | -0.0579 |
| rs78226938  | A | 0.1081  |
| rs1430203   | G | 0.0434  |
| rs112538822 | C | 0.1979  |
| rs72793548  | A | 0.0619  |
| rs4407186   | C | -0.0614 |
| rs11901716  | A | 0.0568  |
| rs42836     | A | 0.0583  |
| rs6707658   | C | -0.0474 |
| rs17398392  | T | 0.0838  |
| rs17119859  | T | 0.1091  |
| rs114375510 | C | 0.1007  |
| rs77259433  | C | -0.1467 |
| rs113406649 | C | -0.1069 |
| rs75015369  | T | 0.4255  |
| rs76585807  | A | 0.2783  |
| rs6545832   | T | 0.0425  |
| rs78530932  | A | -0.2775 |
| rs1979082   | C | -0.0773 |
| rs4300842   | C | 0.043   |
| rs72828338  | T | 0.1687  |
| rs76355564  | T | -0.1448 |

|             |   |         |
|-------------|---|---------|
| rs6746142   | A | 0.0441  |
| rs111954920 | C | 0.2133  |
| rs72876449  | T | -0.1071 |
| rs7571891   | T | 0.1194  |
| rs62181301  | A | 0.2452  |
| rs114196169 | A | -0.154  |
| rs60529541  | G | -0.1566 |
| rs34796043  | T | -0.0512 |
| rs1025333   | A | -0.1338 |
| rs10195618  | G | 0.0714  |
| rs10198461  | C | 0.0922  |
| rs111532237 | G | 0.2157  |
| rs56092011  | C | 0.2126  |
| rs1396972   | G | -0.0752 |
| rs10179185  | A | 0.178   |
| rs149817006 | C | 0.242   |
| rs12471645  | T | 0.0712  |
| rs55704707  | A | 0.0528  |
| rs13420950  | G | 0.0583  |
| rs6754686   | G | -0.077  |
| rs6709217   | C | -0.3737 |
| rs62116279  | T | -0.0582 |
| rs7559848   | T | 0.0468  |
| rs72999530  | A | 0.0824  |
| rs2058724   | G | 0.0444  |
| rs7349333   | T | -0.1688 |
| rs116201957 | C | -0.2108 |
| rs28689194  | C | -0.0496 |
| rs7582595   | G | 0.0427  |
| rs73194588  | C | 0.139   |
| rs17315381  | T | 0.1404  |
| rs12328437  | T | -0.0756 |
| rs1012078   | G | -0.0765 |
| rs13020247  | A | -0.0432 |
| rs139838282 | G | 0.2804  |
| rs115937674 | C | -0.342  |
| rs9808547   | C | -0.0455 |
| rs79516834  | G | 0.2801  |
| rs1878566   | G | -0.0624 |
| rs996684    | G | -0.0467 |
| rs6713340   | C | -0.0646 |
| rs143225607 | A | 0.2761  |
| rs35207704  | G | -0.0611 |
| rs10192753  | C | 0.0982  |
| rs116369872 | G | -0.1452 |
| rs6707935   | G | -0.0427 |
| rs75114790  | G | -0.1616 |

|             |   |         |
|-------------|---|---------|
| rs58754091  | G | 0.0533  |
| rs115530211 | C | 0.2968  |
| rs10185721  | T | -0.1698 |
| rs75732384  | G | -0.0965 |
| rs144489350 | A | -0.1756 |
| rs75390308  | A | -0.1082 |
| rs78948883  | T | 0.1049  |
| rs147265146 | C | -0.25   |
| rs114462241 | A | -0.2345 |
| rs6730126   | A | 0.2543  |
| rs10201681  | T | -0.0528 |
| rs72872409  | T | -0.0484 |
| rs10176388  | A | -0.2117 |
| rs1529402   | G | -0.0713 |
| rs78632873  | A | -0.2383 |
| rs10170242  | G | -0.0451 |
| rs7579151   | G | -0.0445 |
| rs72771537  | T | 0.195   |
| rs145392638 | A | 0.157   |
| rs4853822   | A | 0.092   |
| rs7562239   | A | 0.1275  |
| rs114835036 | T | 0.1283  |
| rs10175794  | A | -0.056  |
| rs10189857  | G | 0.0428  |
| rs11677428  | A | -0.0651 |
| rs76283237  | G | -0.2763 |
| rs72885631  | G | -0.0579 |
| rs62177246  | C | 0.0656  |
| rs145284115 | T | 0.103   |
| rs113511512 | T | 0.1403  |
| rs880505    | G | 0.0516  |
| rs115549202 | T | 0.2347  |
| rs77175200  | G | 0.2217  |
| rs79121254  | G | -0.1386 |
| rs4952867   | C | 0.11    |
| rs114206023 | G | 0.1662  |
| rs13033349  | A | -0.2472 |
| rs13022762  | C | 0.2266  |
| rs72769568  | T | 0.0783  |
| rs144365140 | T | -0.0498 |
| rs62189273  | A | -0.1681 |
| rs897097    | A | -0.044  |
| rs6419610   | A | -0.0421 |
| rs17182117  | A | 0.167   |
| rs12616150  | A | 0.0462  |
| rs79094099  | A | 0.1412  |
| rs114252098 | G | 0.1639  |

|             |   |         |
|-------------|---|---------|
| rs77296070  | T | 0.0969  |
| rs1878973   | G | 0.0681  |
| rs78232564  | A | 0.2106  |
| rs75701028  | C | -0.233  |
| rs79421283  | C | 0.1465  |
| rs4614940   | C | 0.0625  |
| rs35883154  | T | 0.1654  |
| rs72853127  | T | -0.1751 |
| rs778354    | G | 0.0491  |
| rs13033616  | A | 0.0498  |
| rs73968924  | T | 0.1518  |
| rs4673933   | G | -0.1326 |
| rs35310085  | C | 0.0711  |
| rs62127249  | A | -0.1153 |
| rs17257172  | C | 0.2413  |
| rs114751994 | C | 0.2449  |
| rs12465373  | T | -0.049  |
| rs142081036 | C | -0.2206 |
| rs1579599   | G | -0.0432 |
| rs72847709  | C | -0.1048 |
| rs74585562  | T | 0.1189  |
| rs3109947   | A | 0.051   |
| rs62170035  | A | -0.239  |
| rs1863671   | C | 0.0547  |
| rs111492766 | C | 0.1255  |
| rs4143116   | A | -0.0504 |
| rs6734302   | G | 0.0424  |
| rs2741035   | G | -0.0493 |
| rs12617166  | G | 0.0509  |
| rs12465574  | G | 0.1828  |
| rs78462826  | G | -0.11   |
| rs1473101   | G | 0.0413  |
| rs652923    | C | 0.0425  |
| rs13390246  | T | 0.092   |
| rs2674502   | G | -0.0432 |
| rs1072975   | T | 0.1664  |
| rs17425473  | C | -0.0463 |
| rs62185189  | C | 0.0878  |
| rs3213749   | T | 0.0937  |
| rs74636295  | G | 0.1113  |
| rs113990992 | A | 0.3744  |
| rs113172947 | G | -0.2204 |
| rs75184749  | T | 0.1314  |
| rs75322814  | C | 0.1131  |
| rs115360631 | A | 0.1752  |
| rs541921    | C | 0.1723  |
| rs1430170   | C | -0.0467 |



|             |   |         |
|-------------|---|---------|
| rs7603265   | T | -0.0514 |
| rs73914178  | T | 0.1099  |
| rs2595221   | T | -0.0578 |
| rs77335316  | C | 0.0751  |
| rs17723364  | T | -0.1281 |
| rs2626385   | A | 0.0484  |
| rs72830492  | A | -0.1339 |
| rs6544952   | T | 0.0522  |
| rs6726484   | T | 0.1347  |
| rs7562072   | T | -0.0637 |
| rs12694255  | T | 0.0416  |
| rs12476344  | A | -0.0818 |
| rs75166367  | A | -0.1114 |
| rs62186792  | T | -0.3094 |
| rs116398833 | A | 0.1689  |
| rs1678155   | A | 0.0724  |
| rs11887288  | C | -0.0945 |
| rs59316967  | T | 0.0416  |
| rs139647410 | A | 0.2899  |
| rs7564107   | A | -0.0501 |
| rs75035796  | T | -0.2423 |
| rs4953202   | C | -0.0423 |
| rs10174499  | G | -0.1482 |
| rs79655626  | C | -0.0664 |
| rs6730083   | G | 0.0664  |
| rs6749843   | C | -0.0444 |
| rs79701540  | G | -0.1579 |
| rs11676307  | G | 0.2021  |
| rs1453407   | A | -0.0726 |
| rs6431582   | C | -0.0564 |
| rs1995172   | C | 0.0417  |
| rs17812739  | A | 0.1792  |
| rs12994108  | T | 0.1733  |
| rs72924768  | G | 0.2097  |
| rs13029337  | T | -0.0421 |
| rs74965813  | G | 0.2398  |
| rs3134646   | G | 0.0433  |
| rs115628062 | A | -0.1667 |
| rs116660806 | C | 0.2134  |
| rs1453162   | A | -0.0522 |
| rs17428634  | G | 0.1269  |
| rs12104987  | C | -0.0615 |
| rs75147057  | T | 0.1076  |
| rs7576377   | A | 0.1413  |
| rs6750210   | C | 0.0541  |
| rs9677835   | G | 0.0574  |
| rs140171789 | T | 0.1636  |

|             |   |         |
|-------------|---|---------|
| rs6727328   | T | 0.0433  |
| rs77207484  | A | 0.091   |
| rs833775    | G | -0.1644 |
| rs6737430   | A | 0.0394  |
| rs11554549  | A | 0.0968  |
| rs55751114  | A | 0.0772  |
| rs72785889  | G | 0.1961  |
| rs10933426  | T | -0.0452 |
| rs13422798  | C | -0.0933 |
| rs36044396  | C | 0.2729  |
| rs7588582   | G | 0.0433  |
| rs13025486  | G | -0.1184 |
| rs3770336   | G | -0.0415 |
| rs111291912 | A | 0.2495  |
| rs17471268  | A | -0.17   |
| rs6732140   | A | 0.1296  |
| rs112844396 | A | 0.1289  |
| rs146442573 | T | -0.194  |
| rs141470761 | A | -0.1657 |
| rs1426711   | C | -0.0458 |
| rs79261505  | T | 0.1171  |
| rs77721642  | G | -0.2013 |
| rs75613258  | A | -0.264  |
| rs115561702 | A | -0.1564 |
| rs1318523   | C | 0.0558  |
| rs145085075 | G | -0.1069 |
| rs72813103  | T | 0.1098  |
| rs113625721 | G | -0.145  |
| rs6576989   | C | 0.0728  |
| rs10172461  | C | 0.0423  |
| rs16855489  | T | -0.0519 |
| rs139382469 | G | -0.2961 |
| rs79931442  | A | 0.1554  |
| rs34569325  | T | -0.0641 |
| rs145899809 | T | -0.2719 |
| rs17009506  | G | 0.0908  |
| rs1901836   | T | 0.1416  |
| rs77503460  | A | -0.1017 |
| rs1448829   | C | 0.0423  |
| rs116386037 | A | -0.2131 |
| rs71414861  | A | 0.09    |
| rs56368231  | A | 0.0792  |
| rs116836909 | C | -0.243  |
| rs72617176  | A | 0.0907  |
| rs34870009  | C | 0.2511  |
| rs10182077  | T | 0.2432  |
| rs10169891  | A | -0.0398 |

|             |   |         |
|-------------|---|---------|
| rs112550224 | A | 0.3006  |
| rs78875968  | G | 0.2693  |
| rs2011896   | G | 0.0572  |
| rs12472922  | G | -0.0937 |
| rs80135602  | T | 0.1965  |
| rs143315623 | T | -0.3006 |
| rs11126785  | C | 0.0415  |
| rs12612324  | A | -0.0674 |
| rs76033073  | C | 0.0713  |
| rs13421997  | A | 0.0481  |
| rs62150782  | T | 0.1051  |
| rs74684089  | T | 0.0604  |
| rs150328518 | T | 0.198   |
| rs149306552 | T | -0.3337 |
| rs114113867 | G | 0.1805  |
| rs76300941  | G | 0.1579  |
| rs149408336 | T | 0.1457  |
| rs115846581 | A | -0.0875 |
| rs75761779  | G | 0.1593  |
| rs2305485   | C | -0.054  |
| rs115801322 | A | -0.1748 |
| rs7608304   | T | -0.0577 |
| rs7585754   | G | 0.3556  |
| rs7608940   | G | 0.0603  |
| rs4952098   | G | -0.0569 |
| rs139571885 | G | -0.1823 |
| rs13015046  | A | 0.0739  |
| rs1647769   | G | -0.0988 |
| rs71420970  | C | 0.1268  |
| rs62124021  | A | 0.1562  |
| rs12619755  | A | 0.0527  |
| rs10451638  | C | -0.0599 |
| rs138818016 | T | -0.2132 |
| rs113288858 | T | -0.088  |
| rs62139573  | T | 0.1707  |
| rs17011828  | C | 0.1764  |
| rs10167810  | C | -0.0426 |
| rs150212157 | A | -0.0721 |
| rs72848643  | G | 0.1985  |
| rs146230851 | G | 0.1153  |
| rs114139318 | T | -0.2606 |
| rs6434842   | T | 0.0908  |
| rs810148    | A | 0.0589  |
| rs76910834  | A | 0.2045  |
| rs7608611   | G | -0.0401 |
| rs10201022  | C | 0.1425  |
| rs6546896   | T | 0.0432  |

|             |   |         |
|-------------|---|---------|
| rs114808334 | C | 0.2015  |
| rs3754669   | T | 0.0586  |
| rs117485139 | G | 0.1916  |
| rs13404352  | T | 0.2855  |
| rs62184962  | C | 0.063   |
| rs79315867  | A | -0.2899 |
| rs115406455 | G | 0.2544  |
| rs114054940 | G | 0.1303  |
| rs10166358  | A | 0.0616  |
| rs115317416 | G | -0.1489 |
| rs74390086  | C | 0.1079  |
| rs115511239 | T | 0.1534  |
| rs7558381   | T | -0.0423 |
| rs140248604 | T | 0.228   |
| rs17031287  | T | 0.0662  |
| rs7581802   | C | -0.0478 |
| rs17428209  | A | 0.1686  |
| rs7582778   | A | 0.0631  |
| rs41309096  | A | -0.0517 |
| rs144830609 | T | -0.3087 |
| rs62131721  | T | -0.0564 |
| rs6744754   | C | -0.0448 |
| rs116393758 | C | 0.1034  |
| rs6760406   | T | -0.0488 |
| rs75307648  | G | -0.2482 |
| rs139146617 | G | 0.3336  |
| rs312047    | A | 0.1277  |
| rs151233325 | A | -0.113  |
| rs3889200   | C | -0.0393 |
| rs10171979  | C | 0.044   |
| rs17042362  | G | 0.0516  |
| rs114674388 | C | 0.4707  |
| rs55863731  | A | 0.0787  |
| rs900436    | T | -0.0726 |
| rs7568613   | C | 0.0586  |
| rs11679676  | T | 0.0546  |
| rs924209    | T | -0.0616 |
| rs6755777   | T | 0.0421  |
| rs111335054 | C | 0.2301  |
| rs1498807   | T | 0.0516  |
| rs74781316  | G | -0.179  |
| rs62172408  | T | -0.0702 |
| rs144632411 | G | 0.2313  |
| rs72813866  | A | 0.0867  |
| rs16866877  | G | 0.0633  |
| rs6712163   | C | -0.04   |
| rs920249    | A | 0.0645  |

|             |   |         |
|-------------|---|---------|
| rs1667034   | C | 0.0564  |
| rs4674214   | T | 0.0875  |
| rs115426074 | A | -0.1774 |
| rs147030877 | A | 0.1748  |
| rs778366    | A | 0.1154  |
| rs73017057  | A | 0.055   |
| rs77810740  | T | -0.0861 |
| rs55921336  | C | 0.2468  |
| rs11894682  | G | 0.1532  |
| rs71413428  | A | 0.1499  |
| rs62133200  | A | 0.0539  |
| rs11675932  | G | 0.2417  |
| rs72940476  | G | 0.0637  |
| rs10490422  | T | 0.1651  |
| rs71412001  | T | 0.1295  |
| rs72922934  | A | 0.0881  |
| rs115972949 | T | 0.1479  |
| rs12477354  | T | -0.0403 |
| rs12475734  | G | -0.1521 |
| rs13002706  | A | -0.051  |
| rs1358696   | G | -0.0716 |
| rs62167943  | T | -0.0488 |
| rs115242081 | G | -0.2144 |
| rs61746487  | G | 0.1028  |
| rs73164226  | T | -0.1187 |
| rs1374126   | T | 0.0813  |
| rs7591518   | C | -0.0434 |
| rs28576623  | C | -0.2283 |
| rs10210630  | T | 0.0486  |
| rs114145365 | G | 0.2223  |
| rs115111187 | T | 0.1337  |
| rs35124821  | G | -0.1293 |
| rs144444624 | A | -0.1728 |
| rs11889798  | T | 0.0831  |
| rs56186131  | A | -0.0386 |
| rs7588717   | G | 0.0729  |
| rs147491334 | T | 0.1174  |
| rs7593289   | T | -0.0442 |
| rs1358283   | G | 0.053   |
| rs73989605  | A | -0.1366 |
| rs114909269 | G | -0.2244 |
| rs4851794   | C | 0.0438  |
| rs57344108  | A | 0.0496  |
| rs35548551  | T | 0.0684  |
| rs28363004  | G | 0.1636  |
| rs112505882 | A | 0.0847  |
| rs13019171  | T | 0.0985  |

|             |   |         |
|-------------|---|---------|
| rs72815287  | A | 0.0618  |
| rs56251904  | A | -0.2786 |
| rs142301257 | T | 0.1745  |
| rs113602890 | T | 0.295   |
| rs17008658  | A | 0.1309  |
| rs13422275  | T | -0.0437 |
| rs13031049  | A | 0.0404  |
| rs6435735   | C | -0.0404 |
| rs3769411   | G | -0.0408 |
| rs77558957  | G | 0.0623  |
| rs143173314 | T | 0.244   |
| rs72974350  | A | -0.1097 |
| rs4852090   | A | -0.0488 |
| rs7569837   | C | -0.0476 |
| rs11680705  | A | 0.1488  |
| rs79082192  | C | -0.3013 |
| rs79527490  | T | -0.0627 |
| rs55797113  | T | 0.0597  |
| rs114228699 | T | 0.2063  |
| rs2674225   | C | -0.0502 |
| rs75225657  | C | -0.2429 |
| rs76547514  | G | 0.2148  |
| rs1343822   | T | 0.042   |
| rs116378534 | C | 0.2092  |
| rs7599724   | G | 0.0509  |
| rs72777248  | G | 0.2344  |
| rs2130117   | T | -0.0559 |
| rs72828257  | T | 0.1225  |
| rs13009806  | A | -0.0464 |
| rs11124221  | A | 0.1213  |
| rs3789727   | A | 0.0495  |
| rs138139274 | T | -0.2308 |
| rs17619943  | G | 0.0833  |
| rs3769883   | T | -0.0545 |
| rs10184985  | C | 0.0403  |
| rs75779721  | C | -0.1419 |
| rs2551914   | A | -0.0515 |
| rs7559813   | T | -0.0453 |
| rs67128474  | G | -0.062  |
| rs79008625  | T | -0.1277 |
| rs16830825  | A | 0.1494  |
| rs1914656   | T | -0.0669 |
| rs77917627  | A | 0.1958  |
| rs80288557  | G | 0.2457  |
| rs12472895  | C | 0.1013  |
| rs57016298  | G | 0.2424  |
| rs1861268   | A | -0.109  |

|             |   |         |
|-------------|---|---------|
| rs4605416   | T | 0.0604  |
| rs116790355 | T | 0.2223  |
| rs1530558   | C | 0.0686  |
| rs114773244 | A | 0.1933  |
| rs41280609  | T | -0.1354 |
| rs72802808  | G | 0.1372  |
| rs72989555  | A | -0.048  |
| rs140500963 | C | 0.242   |
| rs2953163   | T | 0.0899  |
| rs28712487  | G | 0.0655  |
| rs114523260 | A | -0.1296 |
| rs2111077   | G | 0.0585  |
| rs4629179   | G | -0.042  |
| rs11690791  | C | -0.0395 |
| rs77111364  | A | -0.2759 |
| rs115376840 | C | -0.1845 |
| rs10210490  | C | 0.0956  |
| rs62178664  | T | 0.0795  |
| rs113154588 | C | 0.1367  |
| rs745109    | A | -0.0821 |
| rs4853119   | C | 0.046   |
| rs147764287 | C | -0.119  |
| rs113660456 | C | 0.15    |
| rs7562901   | G | 0.0513  |
| rs142672852 | G | -0.1293 |
| rs3100724   | G | 0.0393  |
| rs7594377   | C | -0.0599 |
| rs115236939 | A | 0.1246  |
| rs11688000  | G | -0.0405 |
| rs144769245 | G | 0.2138  |
| rs72994110  | T | 0.1414  |
| rs73230484  | C | -0.1902 |
| rs148619574 | A | -0.1524 |
| rs76417110  | T | -0.2446 |
| rs17753758  | C | -0.0941 |
| rs1346747   | A | -0.0484 |
| rs12052840  | C | 0.1873  |
| rs2713247   | A | -0.1266 |
| rs2241680   | T | -0.0813 |
| rs115341221 | T | -0.2418 |
| rs12995017  | T | 0.0605  |
| rs142762371 | T | -0.1617 |
| rs17199494  | T | 0.1475  |
| rs11695604  | C | -0.1076 |
| rs28449400  | A | 0.2162  |
| rs1085204   | G | -0.0644 |
| rs76345052  | G | -0.0985 |

|             |   |         |
|-------------|---|---------|
| rs35086610  | T | 0.0636  |
| rs147934358 | G | 0.2327  |
| rs17563966  | T | -0.0423 |
| rs111640871 | T | 0.2124  |
| rs17418633  | C | 0.0877  |
| rs35610308  | G | -0.0488 |
| rs984903    | A | -0.0558 |
| rs79856406  | G | 0.0853  |
| rs72821549  | C | -0.0691 |
| rs62166602  | G | 0.064   |
| rs139981827 | T | -0.2114 |
| rs1433203   | C | 0.052   |
| rs4401164   | A | -0.0781 |
| rs116478736 | G | 0.1708  |
| rs3845732   | T | -0.0509 |
| rs1595742   | T | 0.0691  |
| rs142712798 | A | -0.1655 |
| rs17015156  | A | -0.0581 |
| rs10865404  | T | -0.0418 |
| rs11466209  | C | -0.4211 |
| rs2193921   | C | 0.0583  |
| rs11885271  | T | -0.0389 |
| rs142182199 | T | -0.0734 |
| rs1526902   | A | -0.0797 |
| rs677746    | A | 0.0649  |
| rs75689244  | T | -0.1263 |
| rs111945524 | T | 0.1343  |
| rs10490014  | G | 0.0535  |
| rs76164379  | T | -0.0687 |
| rs10180522  | C | -0.0417 |
| rs6731425   | G | 0.0455  |
| rs3791476   | T | 0.073   |
| rs62193226  | G | 0.0762  |
| rs72879560  | T | 0.1675  |
| rs7576601   | A | 0.1697  |
| rs114704749 | G | 0.1135  |
| rs1968295   | T | -0.0512 |
| rs72917083  | G | 0.1038  |
| rs733810    | G | 0.0926  |
| rs72900713  | C | -0.0443 |
| rs7565667   | C | 0.0427  |
| rs10200317  | T | 0.0445  |
| rs143690036 | C | -0.1814 |
| rs6743478   | G | -0.1052 |
| rs114699226 | G | 0.2447  |
| rs138425548 | T | -0.1592 |
| rs4849696   | T | -0.0622 |



|             |   |         |
|-------------|---|---------|
| rs113822397 | G | 0.2697  |
| rs113509703 | T | 0.1752  |
| rs7596513   | C | -0.0392 |
| rs72783477  | G | -0.0556 |
| rs3771047   | G | 0.0685  |
| rs143627674 | A | -0.2783 |
| rs55770142  | A | 0.1386  |
| rs11883557  | G | 0.0445  |
| rs116263038 | A | -0.1775 |
| rs77721472  | G | 0.0934  |
| rs34009797  | T | -0.2934 |
| rs7569163   | G | 0.0414  |
| rs34638626  | G | -0.0846 |
| rs7559899   | T | -0.174  |
| rs12052377  | T | 0.2542  |
| rs79408952  | T | -0.1534 |
| rs77617793  | C | -0.1267 |
| rs11687309  | C | 0.0449  |
| rs1530537   | G | -0.0387 |
| rs10211083  | C | 0.0434  |
| rs7423356   | G | 0.0865  |
| rs11685252  | A | -0.0683 |
| rs188856    | T | 0.0432  |
| rs74942677  | G | 0.0467  |
| rs13002771  | G | 0.0451  |
| rs12694055  | T | -0.0472 |
| rs116321783 | C | 0.2458  |
| rs10189159  | C | 0.0387  |
| rs79846007  | A | 0.1921  |
| rs17036137  | G | -0.0783 |
| rs10166990  | A | 0.1053  |
| rs13015861  | A | -0.113  |
| rs58133589  | T | 0.1972  |
| rs77569809  | T | 0.2059  |
| rs17807135  | C | 0.0664  |
| rs6735305   | T | -0.0468 |
| rs78623817  | G | 0.2315  |
| rs4850432   | A | -0.0518 |
| rs144118728 | T | 0.1647  |
| rs6750525   | C | 0.0501  |
| rs11899758  | A | 0.163   |
| rs12475974  | G | 0.045   |
| rs61742338  | A | 0.1382  |
| rs11897280  | C | -0.069  |
| rs114750858 | C | 0.3545  |
| rs11124306  | G | -0.0398 |
| rs77842551  | C | -0.1368 |

|             |   |         |
|-------------|---|---------|
| rs71423678  | C | -0.0962 |
| rs13401901  | G | 0.0379  |
| rs62178008  | T | -0.1611 |
| rs13022963  | T | 0.2383  |
| rs11684436  | G | -0.0932 |
| rs115670465 | C | 0.1346  |
| rs2365310   | C | 0.0546  |
| rs11899846  | C | 0.0525  |
| rs115089923 | A | 0.1759  |
| rs7572685   | T | 0.072   |
| rs116330637 | T | 0.1932  |
| rs56253077  | C | -0.0374 |
| rs77331883  | C | -0.2324 |
| rs115597560 | T | -0.1399 |
| rs149975435 | G | -0.1666 |
| rs112631126 | A | 0.2103  |
| rs1518284   | A | 0.0405  |
| rs72775645  | A | 0.1205  |
| rs975330    | C | 0.1508  |
| rs13019414  | C | 0.0381  |
| rs6754090   | G | 0.0868  |
| rs79960757  | A | -0.1162 |
| rs6544694   | A | 0.1205  |
| rs6744829   | C | -0.0603 |
| rs112250266 | T | -0.1361 |
| rs2407007   | T | 0.1019  |
| rs77048485  | T | -0.1185 |
| rs7599180   | A | 0.0383  |
| rs2276635   | C | -0.0673 |
| rs60002412  | A | 0.0795  |
| rs79890910  | T | -0.1132 |
| rs72890654  | A | -0.0921 |
| rs114417823 | C | 0.1219  |
| rs2677468   | A | 0.0384  |
| rs116601444 | A | 0.1834  |
| rs10496356  | G | -0.0694 |
| rs4669941   | T | -0.0588 |
| rs872277    | T | 0.1069  |
| rs207825    | G | -0.0432 |
| rs4283428   | C | -0.0515 |
| rs7567326   | G | 0.0404  |
| rs76483652  | T | 0.0822  |
| rs79519922  | T | 0.1511  |
| rs115848945 | T | 0.1808  |
| rs112716584 | A | 0.2089  |
| rs310784    | T | -0.1445 |
| rs6750710   | C | 0.1918  |

|             |   |         |
|-------------|---|---------|
| rs35764799  | C | 0.155   |
| rs72767364  | A | 0.0924  |
| rs17036089  | T | 0.1498  |
| rs10167291  | A | -0.1057 |
| rs17420138  | T | 0.0853  |
| rs62178913  | G | 0.1353  |
| rs2878043   | T | 0.0371  |
| rs356991    | T | -0.0422 |
| rs114384560 | T | -0.1214 |
| rs62131214  | A | -0.1689 |
| rs2056716   | A | 0.0455  |
| rs10929076  | G | -0.04   |
| rs78213050  | C | 0.1587  |
| rs55775331  | T | -0.1818 |
| rs6715771   | C | -0.0523 |
| rs74511722  | A | -0.1328 |
| rs72899454  | A | 0.0747  |
| rs12692411  | G | 0.0397  |
| rs6732227   | C | 0.1108  |
| rs62185371  | A | -0.1315 |
| rs4673101   | G | -0.0398 |
| rs72808082  | T | 0.2093  |
| rs35589443  | C | 0.3319  |
| rs3955308   | T | 0.1041  |
| rs11695196  | A | 0.0983  |
| rs116750727 | C | 0.303   |
| rs1859707   | A | -0.0378 |
| rs116531303 | C | -0.1201 |
| rs13028883  | G | -0.0372 |
| rs137942246 | G | 0.2027  |
| rs149536028 | T | 0.1023  |
| rs62142615  | C | 0.1226  |
| rs115222096 | A | 0.1977  |
| rs1972313   | G | -0.0386 |
| rs7573787   | T | 0.039   |
| rs11902648  | T | 0.0378  |
| rs79769012  | G | -0.1501 |
| rs6542346   | A | -0.0392 |
| rs114054520 | A | 0.1912  |
| rs77212015  | T | 0.2877  |
| rs6715941   | C | 0.0637  |
| rs13414166  | T | 0.0406  |
| rs78253098  | A | 0.0728  |
| rs12694773  | C | 0.0449  |
| rs72941847  | C | 0.0753  |
| rs4270393   | A | 0.0855  |
| rs114612855 | C | -0.3003 |

|             |   |         |
|-------------|---|---------|
| rs13015200  | C | 0.0663  |
| rs75284693  | T | 0.1941  |
| rs115290120 | A | 0.1849  |
| rs143871337 | G | 0.233   |
| rs116820932 | C | 0.1117  |
| rs72820069  | T | -0.1235 |
| rs13015088  | A | 0.0954  |
| rs10168838  | T | -0.1503 |
| rs115434757 | T | 0.1502  |
| rs67114804  | G | -0.0691 |
| rs1837188   | C | -0.043  |
| rs147187373 | G | -0.2541 |
| rs12151448  | A | 0.0416  |
| rs115295484 | A | -0.0731 |
| rs3769450   | G | -0.0386 |
| rs115564204 | G | 0.1224  |
| rs4832471   | C | -0.0439 |
| rs41270225  | G | 0.1129  |
| rs113874964 | T | -0.0583 |
| rs60607850  | C | -0.0728 |
| rs6712203   | T | -0.0401 |
| rs16867120  | A | 0.0954  |
| rs72969231  | C | 0.0598  |
| rs352873    | A | 0.0617  |
| rs75323655  | A | 0.4115  |
| rs62107413  | C | 0.1463  |
| rs6432366   | G | 0.0388  |
| rs150692729 | C | -0.2215 |
| rs79037643  | T | -0.0593 |
| rs1902049   | A | 0.0448  |
| rs2160187   | A | 0.0966  |
| rs10195662  | T | -0.0453 |
| rs317304    | T | -0.0856 |
| rs35537724  | A | 0.0404  |
| rs12712263  | A | 0.0425  |
| rs12997025  | T | 0.0431  |
| rs72958692  | A | -0.1377 |
| rs4676278   | A | -0.0386 |
| rs10185201  | A | -0.0479 |
| rs16860683  | A | -0.1698 |
| rs1728147   | A | 0.0461  |
| rs11687036  | A | -0.0366 |
| rs72999539  | T | -0.0486 |
| rs145324063 | A | 0.1879  |
| rs78398516  | C | -0.0777 |
| rs142981046 | T | -0.2674 |
| rs2359961   | A | 0.0388  |

|             |   |         |
|-------------|---|---------|
| rs11686250  | G | -0.0407 |
| rs78983129  | T | 0.1354  |
| rs1124649   | A | -0.0395 |
| rs72871104  | G | 0.0976  |
| rs6728759   | A | 0.0413  |
| rs78998918  | T | -0.1145 |
| rs4303668   | G | -0.0621 |
| rs2711288   | A | -0.0373 |
| rs62178223  | A | -0.0829 |
| rs114984909 | T | -0.233  |
| rs138159891 | G | -0.1542 |
| rs6714741   | C | 0.0398  |
| rs78469867  | C | 0.1981  |
| rs10187486  | C | -0.0423 |
| rs197089    | G | 0.1947  |
| rs7559210   | G | 0.1205  |
| rs115772949 | G | -0.1235 |
| rs10497052  | A | -0.0563 |
| rs3849361   | C | -0.1537 |
| rs58183473  | C | -0.0766 |
| rs7565716   | G | -0.0368 |
| rs79055742  | A | -0.0528 |
| rs75986646  | T | -0.1015 |
| rs6730025   | G | 0.0409  |
| rs13431263  | G | -0.0589 |
| rs7582977   | C | 0.0703  |
| rs74473662  | G | 0.1866  |
| rs142152048 | C | -0.1362 |
| rs703323    | A | -0.0627 |
| rs622593    | A | -0.0857 |
| rs35183691  | A | 0.1108  |
| rs67890423  | G | 0.1351  |
| rs142428532 | T | -0.2129 |
| rs16844058  | G | 0.1766  |
| rs16858543  | A | -0.0471 |
| rs11124067  | G | -0.0483 |
| rs73013902  | T | -0.2487 |
| rs7564084   | A | 0.0932  |
| rs7576817   | C | -0.0455 |
| rs71541914  | A | -0.2456 |
| rs4538213   | A | -0.0497 |
| rs12470531  | G | -0.1578 |
| rs138068770 | G | -0.1764 |
| rs17712682  | A | 0.0392  |
| rs113535547 | A | -0.0659 |
| rs2083246   | A | 0.0439  |
| rs76197763  | G | 0.1089  |

|             |   |         |
|-------------|---|---------|
| rs34590157  | A | 0.1336  |
| rs10048706  | G | 0.0383  |
| rs72808507  | T | -0.105  |
| rs146235201 | C | 0.1522  |
| rs113007212 | T | 0.0702  |
| rs145259153 | T | -0.2163 |
| rs112732388 | G | -0.1373 |
| rs79188536  | T | 0.0809  |
| rs67337720  | T | 0.1085  |
| rs2218027   | T | 0.0408  |
| rs75667392  | C | -0.1228 |
| rs12617536  | T | -0.0375 |
| rs3980420   | C | 0.0805  |
| rs148197886 | A | 0.2562  |
| rs138405014 | A | -0.2345 |
| rs1478643   | A | -0.1381 |
| rs9753098   | C | -0.052  |
| rs60661952  | C | -0.1426 |
| rs10204749  | G | 0.0528  |
| rs11675486  | C | 0.0516  |
| rs116775843 | C | 0.2191  |
| rs13421030  | T | -0.0447 |
| rs896498    | A | 0.0784  |
| rs112411073 | C | 0.2762  |
| rs6751399   | T | 0.1736  |
| rs62163295  | T | 0.086   |
| rs10182692  | T | -0.0997 |
| rs77774701  | C | 0.1347  |
| rs10206394  | A | -0.2295 |
| rs59730423  | G | -0.1372 |
| rs11122946  | T | 0.2238  |
| rs7558696   | T | 0.0557  |
| rs727477    | G | 0.0407  |
| rs76088173  | T | 0.0898  |
| rs1993102   | C | 0.0757  |
| rs13423805  | T | -0.0456 |
| rs11684126  | C | 0.2039  |
| rs16847056  | C | 0.1709  |
| rs115391763 | T | 0.1794  |
| rs78025623  | C | 0.1975  |
| rs112890651 | T | 0.2637  |
| rs74269109  | A | 0.1431  |
| rs4666478   | G | -0.2132 |
| rs4438439   | A | 0.0369  |
| rs4952110   | C | 0.0382  |
| rs62189676  | T | 0.2056  |
| rs78153994  | C | -0.1626 |

|             |   |         |
|-------------|---|---------|
| rs62162010  | C | 0.124   |
| rs7425810   | G | -0.0394 |
| rs57871280  | T | 0.0488  |
| rs115340198 | G | -0.254  |
| rs75097001  | T | 0.2308  |
| rs56214637  | A | -0.0727 |
| rs79747818  | T | -0.1789 |
| rs56274225  | T | 0.1837  |
| rs138374561 | A | 0.111   |
| rs76498954  | C | -0.2303 |
| rs114525017 | A | 0.1515  |
| rs114444970 | G | 0.2128  |
| rs11681014  | A | 0.0387  |
| rs116419863 | T | 0.1472  |
| rs72851822  | G | -0.1719 |
| rs35945199  | T | 0.2433  |
| rs4952492   | C | 0.0559  |
| rs1486188   | A | 0.0543  |
| rs61733547  | A | 0.1039  |
| rs112901563 | C | 0.2139  |
| rs60180892  | C | 0.2121  |
| rs7600462   | T | 0.0788  |
| rs78263208  | A | 0.1669  |
| rs10427302  | A | 0.0762  |
| rs56369521  | T | -0.0385 |
| rs112588445 | G | -0.0388 |
| rs112188040 | T | 0.2254  |
| rs17630293  | G | -0.0879 |
| rs2166475   | C | 0.0429  |
| rs6734058   | G | 0.0411  |
| rs3940585   | T | 0.1817  |
| rs3791659   | G | 0.1091  |
| rs146984411 | G | -0.1307 |
| rs116757529 | A | 0.1051  |
| rs2194795   | G | -0.0377 |
| rs80197951  | C | -0.2504 |
| rs62196189  | C | 0.1307  |
| rs142472324 | T | 0.1636  |
| rs13388143  | C | 0.2659  |
| rs74338595  | C | -0.0404 |
| rs6735189   | A | 0.1396  |
| rs9752126   | T | -0.0493 |
| rs11890344  | A | 0.0648  |
| rs17010698  | T | 0.0595  |
| rs116362362 | C | 0.1449  |
| rs12463904  | T | 0.102   |
| rs72814366  | G | 0.1835  |

|             |   |         |
|-------------|---|---------|
| rs17495366  | C | -0.0418 |
| rs1368048   | C | 0.0424  |
| rs72917769  | T | 0.1178  |
| rs144507376 | C | -0.1265 |
| rs10191680  | A | -0.0474 |
| rs17035565  | G | -0.0699 |
| rs55997245  | G | 0.1378  |
| rs150009019 | A | 0.2744  |
| rs45560933  | T | -0.1678 |
| rs79253368  | C | -0.0943 |
| rs10865099  | T | 0.0383  |
| rs7580749   | A | -0.0376 |
| rs72920373  | A | 0.1095  |
| rs6751077   | C | 0.0369  |
| rs315920    | T | -0.0475 |
| rs138276906 | C | 0.2507  |
| rs78203360  | C | -0.1092 |
| rs12999923  | A | 0.0366  |
| rs17028957  | A | -0.0769 |
| rs59968229  | T | -0.0599 |
| rs1424977   | G | -0.0546 |
| rs300768    | T | 0.0546  |
| rs77569859  | C | -0.0913 |
| rs35784054  | A | -0.1202 |
| rs1976127   | A | 0.0397  |
| rs4670256   | A | -0.0573 |
| rs72840133  | C | 0.2203  |
| rs55736270  | T | 0.1623  |
| rs145463604 | A | -0.2287 |
| rs877739    | C | -0.1685 |
| rs7578712   | A | 0.0394  |
| rs116297596 | G | -0.2829 |
| rs62120043  | T | 0.0665  |
| rs72976586  | G | 0.127   |
| rs4667575   | C | 0.0379  |
| rs35171778  | A | -0.0372 |
| rs72944931  | G | 0.1974  |
| rs7578390   | G | 0.0382  |
| rs142968225 | C | 0.2113  |
| rs16860922  | C | 0.2676  |
| rs11680994  | G | -0.0475 |
| rs3755227   | C | -0.0574 |
| rs10196138  | G | 0.0441  |
| rs10209921  | G | 0.0642  |
| rs6745864   | T | 0.0529  |
| rs7578467   | T | -0.0418 |
| rs35794292  | G | 0.0693  |



|             |   |         |
|-------------|---|---------|
| rs116769299 | T | -0.1067 |
| rs12464873  | C | 0.0632  |
| rs62176345  | C | -0.0476 |
| rs17320082  | A | 0.162   |
| rs16854662  | A | 0.074   |
| rs11888178  | G | 0.1528  |
| rs143008397 | C | 0.1655  |
| rs3106078   | G | -0.0389 |
| rs2005507   | T | 0.0396  |
| rs59528203  | A | 0.1107  |
| rs6753575   | G | 0.168   |
| rs10930522  | A | 0.0857  |
| rs4668061   | A | 0.0846  |
| rs11673837  | G | 0.0367  |
| rs1961360   | G | 0.0475  |
| rs1871230   | T | -0.0366 |
| rs78183773  | T | -0.2738 |
| rs9710693   | T | -0.043  |
| rs60208270  | T | 0.1717  |
| rs7595360   | G | 0.1544  |
| rs7585701   | A | 0.0549  |
| rs77195785  | C | 0.1136  |
| rs56307673  | G | -0.2282 |
| rs80314069  | C | -0.1881 |
| rs59873377  | A | 0.2588  |
| rs35840262  | T | 0.0426  |
| rs77447960  | C | -0.1134 |
| rs1275986   | C | 0.0372  |
| rs600020    | G | 0.0376  |
| rs1005213   | G | 0.0407  |
| rs4663110   | T | 0.0384  |
| rs80210826  | C | 0.1229  |
| rs6754240   | A | 0.0426  |
| rs78955270  | C | -0.246  |
| rs17862831  | A | -0.0673 |
| rs1906037   | A | 0.0602  |
| rs10165324  | A | -0.0637 |
| rs73921185  | G | -0.0875 |
| rs114454786 | A | -0.181  |
| rs115231975 | G | -0.1616 |
| rs16864968  | G | 0.1296  |
| rs2610698   | C | -0.3243 |
| rs77951679  | C | -0.2678 |
| rs2176185   | T | -0.0526 |
| rs112534266 | A | -0.2355 |
| rs114192589 | A | -0.1849 |
| rs58149954  | T | 0.0864  |

|             |   |         |
|-------------|---|---------|
| rs1543082   | A | -0.047  |
| rs6737595   | A | 0.1137  |
| rs61756871  | C | 0.0991  |
| rs11690809  | T | 0.0707  |
| rs62151594  | A | 0.0794  |
| rs10182789  | G | -0.0708 |
| rs11123411  | A | -0.0367 |
| rs6753472   | T | -0.0544 |
| rs17033164  | A | 0.0976  |
| rs1882162   | T | -0.1089 |
| rs11466249  | T | 0.105   |
| rs56220105  | C | 0.0549  |
| rs6758725   | C | 0.0476  |
| rs116207709 | C | 0.1516  |
| rs62148831  | C | 0.1845  |
| rs79041516  | T | 0.248   |
| rs149235906 | T | 0.2062  |
| rs10201021  | T | -0.1913 |
| rs13397603  | T | -0.0923 |
| rs16855305  | T | -0.0364 |
| rs78460580  | G | -0.122  |
| rs1013940   | G | 0.0668  |
| rs114714303 | A | 0.1655  |
| rs2371967   | C | 0.1951  |
| rs146156614 | G | 0.2697  |
| rs2216925   | C | 0.0379  |
| rs7581350   | T | -0.1962 |
| rs72914638  | C | -0.1488 |
| rs17033398  | C | 0.0524  |
| rs114057403 | T | 0.1394  |
| rs17016951  | T | -0.1403 |
| rs830958    | G | -0.0635 |
| rs11681679  | C | -0.0382 |
| rs138239740 | T | 0.2402  |
| rs10929808  | G | 0.0546  |
| rs12616956  | A | 0.0583  |
| rs605588    | G | 0.0456  |
| rs4952441   | G | 0.044   |
| rs113376667 | A | 0.158   |
| rs61152410  | A | 0.0484  |
| rs12713850  | G | -0.0384 |
| rs114595862 | C | 0.1351  |
| rs74598386  | A | 0.1162  |
| rs2437892   | C | 0.0391  |
| rs6743888   | C | -0.0387 |
| rs76808502  | C | 0.1654  |
| rs74611748  | G | 0.1915  |

|             |   |         |
|-------------|---|---------|
| rs138795397 | A | 0.1569  |
| rs7606354   | G | 0.0423  |
| rs117260282 | T | -0.1834 |
| rs7424822   | G | -0.0656 |
| rs75926279  | C | -0.0922 |
| rs11688394  | A | 0.0711  |
| rs2075117   | G | -0.0521 |
| rs6715260   | G | 0.0443  |
| rs62131079  | T | 0.1308  |
| rs111633532 | A | 0.1578  |
| rs114540452 | G | -0.1248 |
| rs895506    | G | -0.0388 |
| rs1503232   | A | -0.0405 |
| rs11674855  | T | -0.0651 |
| rs74343567  | A | -0.2484 |
| rs6754001   | G | 0.053   |
| rs79840079  | C | -0.1084 |
| rs139899816 | C | -0.1613 |
| rs1940266   | C | -0.0423 |
| rs7578545   | G | 0.037   |
| rs11677901  | A | 0.0942  |
| rs77334397  | A | 0.1917  |
| rs2697996   | G | -0.0375 |
| rs75536586  | A | 0.1142  |
| rs34895457  | T | 0.1174  |
| rs79882146  | A | -0.1858 |
| rs2053901   | T | -0.0396 |
| rs6543374   | G | -0.0372 |
| rs149439436 | A | 0.2133  |
| rs1002353   | C | 0.0471  |
| rs10929834  | C | 0.0487  |
| rs79517470  | A | 0.0782  |
| rs114100829 | C | 0.066   |
| rs10210665  | C | 0.0993  |
| rs61764797  | C | -0.1683 |
| rs76612184  | G | 0.2631  |
| rs35870159  | C | 0.0484  |
| rs148418000 | T | 0.1516  |
| rs77091857  | A | 0.3046  |
| rs150477745 | G | 0.1832  |
| rs114075818 | A | -0.1322 |
| rs4643526   | A | 0.0466  |
| rs115950722 | A | -0.148  |
| rs1406576   | T | -0.0377 |
| rs114690225 | C | -0.084  |
| rs41305590  | G | 0.2221  |
| rs3096735   | G | -0.0378 |

|             |   |         |
|-------------|---|---------|
| rs74317667  | G | -0.1236 |
| rs79649083  | A | -0.1248 |
| rs115745193 | C | 0.1774  |
| rs144704610 | C | -0.3234 |
| rs114537394 | T | -0.1306 |
| rs114134737 | G | 0.1613  |
| rs7567991   | C | -0.0368 |
| rs13401312  | C | -0.0746 |
| rs72961106  | G | 0.0806  |
| rs1829267   | A | -0.1193 |
| rs10432499  | G | 0.0462  |
| rs10930427  | A | 0.0402  |
| rs13389482  | T | 0.1169  |
| rs77013318  | G | 0.1341  |
| rs10432447  | C | 0.0478  |
| rs142084763 | T | -0.0886 |
| rs79555884  | G | -0.144  |
| rs1035583   | G | 0.0373  |
| rs76810663  | A | -0.2839 |
| rs55828414  | T | -0.1413 |
| rs12474879  | G | -0.0454 |
| rs74898419  | C | 0.1231  |
| rs13023729  | A | 0.0904  |
| rs10176710  | A | 0.057   |
| rs2049026   | A | 0.0399  |
| rs78761467  | A | -0.137  |
| rs7588701   | C | 0.0481  |
| rs35163601  | C | 0.0837  |
| rs4353640   | A | 0.0523  |
| rs140067958 | C | 0.1324  |
| rs74610151  | G | -0.1016 |
| rs72993088  | C | -0.0373 |
| rs111799220 | C | 0.1022  |
| rs7578870   | C | 0.0899  |
| rs4675495   | G | 0.0371  |
| rs11692858  | T | -0.1011 |
| rs993588    | G | 0.0555  |
| rs2380709   | T | 0.0665  |
| rs10205301  | C | 0.1184  |
| rs72790953  | C | 0.2804  |
| rs139799009 | C | 0.1215  |
| rs80051420  | A | 0.2584  |
| rs145584015 | A | 0.275   |
| rs731003    | A | 0.2891  |
| rs62165731  | T | 0.1287  |
| rs35927779  | T | 0.1914  |
| rs16823156  | A | 0.2609  |

|             |   |         |
|-------------|---|---------|
| rs11891119  | A | 0.2063  |
| rs114497851 | A | -0.1275 |
| rs34487239  | A | 0.1244  |
| rs59552259  | C | -0.1699 |
| rs77121599  | G | 0.2355  |
| rs116221011 | T | 0.1412  |
| rs13401462  | C | -0.0364 |
| rs11123953  | C | 0.1144  |
| rs72617002  | C | 0.1228  |
| rs28417756  | C | 0.1249  |
| rs115000653 | T | -0.1436 |
| rs149442214 | G | -0.2909 |
| rs10929714  | T | 0.0376  |
| rs6748341   | G | 0.0386  |
| rs340727    | T | 0.0543  |
| rs1869795   | T | 0.1213  |
| rs11679150  | G | 0.0445  |
| rs7560149   | A | -0.036  |
| rs34715806  | A | -0.0843 |
| rs72830025  | A | 0.0375  |
| rs75842337  | C | -0.0793 |
| rs828701    | C | 0.0362  |
| rs6436689   | T | 0.0481  |
| rs144370600 | C | 0.2052  |
| rs74850033  | C | -0.0698 |
| rs1447496   | C | -0.0537 |
| rs114295720 | T | -0.1587 |
| rs115814806 | C | 0.2     |
| rs139069444 | G | 0.0978  |
| rs71411525  | G | 0.0569  |
| rs13382244  | G | 0.0613  |
| rs13409029  | A | 0.0972  |
| rs67417731  | A | -0.0696 |
| rs145483551 | C | 0.1205  |
| rs1343845   | T | 0.0361  |
| rs11681714  | G | 0.0484  |
| rs11691585  | G | 0.0487  |
| rs56393552  | T | 0.2681  |
| rs13432072  | T | 0.1332  |
| rs4973535   | T | -0.0622 |
| rs4674994   | G | 0.0395  |
| rs75932133  | C | 0.0402  |
| rs3099942   | C | -0.0404 |
| rs62153392  | A | 0.0627  |
| rs149471676 | T | -0.2191 |
| rs1400726   | T | -0.1911 |
| rs6719028   | T | 0.0436  |

|             |   |         |
|-------------|---|---------|
| rs56145937  | G | -0.0421 |
| rs150851376 | A | -0.2143 |
| rs10169928  | A | 0.042   |
| rs75935339  | T | -0.0704 |
| rs9308876   | T | -0.0764 |
| rs60948292  | C | -0.0488 |
| rs116775359 | A | -0.1693 |
| rs55679053  | G | 0.0685  |
| rs56317378  | T | 0.0388  |
| rs7579447   | G | 0.0359  |
| rs115543782 | T | -0.1128 |
| rs17261510  | C | 0.0582  |
| rs116069749 | A | -0.1552 |
| rs12995009  | C | 0.037   |
| rs4853778   | T | -0.0481 |
| rs10167468  | A | 0.0555  |
| rs17392162  | A | 0.1949  |
| rs1515185   | T | -0.0499 |
| rs79800468  | T | 0.0863  |
| rs7596948   | T | 0.0362  |
| rs28697220  | A | 0.045   |
| rs55720215  | T | 0.147   |
| rs140650919 | C | 0.3027  |
| rs10200033  | A | 0.0451  |
| rs62150760  | T | -0.144  |
| rs115035212 | T | -0.1878 |
| rs111616123 | T | -0.2082 |
| rs116044731 | T | -0.0967 |
| rs10208771  | A | -0.0447 |
| rs798421    | C | 0.0617  |
| rs114392216 | C | 0.1191  |
| rs11691653  | T | 0.0992  |
| rs10182524  | G | -0.0525 |
| rs4149422   | C | 0.0375  |
| rs76617263  | T | 0.2454  |
| rs10179379  | C | 0.0404  |
| rs17675656  | C | 0.0571  |
| rs113260293 | G | -0.1317 |
| rs12999807  | A | 0.07    |
| rs75206917  | A | -0.1263 |
| rs79702183  | C | 0.121   |
| rs116096687 | T | -0.1122 |
| rs72900576  | C | -0.0905 |
| rs113855049 | C | -0.1096 |
| rs75498574  | T | -0.0814 |
| rs17739099  | T | 0.0434  |
| rs76252708  | A | -0.0725 |

|             |   |         |
|-------------|---|---------|
| rs11677791  | A | 0.0361  |
| rs116686417 | A | -0.1312 |
| rs71439172  | A | -0.0558 |
| rs11125130  | G | -0.0738 |
| rs6739040   | G | 0.0673  |
| rs113323354 | C | 0.1121  |
| rs144505709 | A | -0.0987 |
| rs56011431  | C | 0.1715  |
| rs78198082  | C | 0.2386  |
| rs76043754  | G | 0.1153  |
| rs62191515  | A | 0.2367  |
| rs12469277  | G | -0.0418 |
| rs13003174  | A | 0.0412  |
| rs10179855  | C | -0.0606 |
| rs10208141  | T | 0.038   |
| rs55842451  | T | 0.0401  |
| rs2165061   | A | -0.0351 |
| rs57306640  | A | 0.1938  |
| rs13024457  | A | 0.0683  |
| rs75322863  | T | 0.1301  |
| rs61743531  | T | 0.1069  |
| rs140617324 | T | 0.1298  |
| rs74570312  | C | -0.2138 |
| rs16866991  | G | 0.0591  |
| rs1921246   | C | 0.0507  |
| rs115026059 | G | -0.0888 |
| rs116677169 | A | 0.1606  |
| rs7556997   | G | -0.0415 |
| rs115583825 | T | -0.065  |
| rs16844253  | G | -0.1606 |
| rs142152301 | T | -0.1849 |
| rs80033509  | T | 0.1197  |
| rs140021111 | C | -0.201  |
| rs62156545  | C | -0.1501 |
| rs62155139  | G | 0.0473  |
| rs6741942   | T | 0.0371  |
| rs3791996   | C | 0.0445  |
| rs13431590  | G | -0.0445 |
| rs115118962 | C | 0.2145  |
| rs111934361 | G | -0.1791 |
| rs13028633  | C | -0.0542 |
| rs10184594  | C | -0.0382 |
| rs12615585  | A | 0.0732  |
| rs6759076   | A | 0.0369  |
| rs1348863   | T | -0.0377 |
| rs143687132 | T | -0.2289 |
| rs11886956  | G | 0.0679  |

|             |   |         |
|-------------|---|---------|
| rs57165465  | T | 0.0623  |
| rs78135595  | A | -0.2882 |
| rs34355843  | A | 0.0576  |
| rs10177210  | T | -0.0439 |
| rs78276908  | C | -0.0679 |
| rs57240446  | A | 0.0379  |
| rs79874767  | A | 0.2723  |
| rs13010136  | G | 0.0823  |
| rs1963424   | A | 0.0728  |
| rs12470226  | G | 0.1525  |
| rs12993260  | T | 0.0359  |
| rs4485568   | A | 0.0464  |
| rs10496504  | G | 0.0385  |
| rs13403353  | T | -0.0783 |
| rs752123    | T | 0.1254  |
| rs6725657   | A | 0.0365  |
| rs3821174   | C | -0.2354 |
| rs10865045  | A | 0.0364  |
| rs11680183  | C | 0.0369  |
| rs56097129  | C | -0.0478 |
| rs13410702  | C | 0.1409  |
| rs12617346  | G | 0.1729  |
| rs16836913  | C | 0.1778  |
| rs13000558  | T | 0.0932  |
| rs2028674   | A | -0.0541 |
| rs114529675 | T | -0.1506 |
| rs77025187  | A | -0.1625 |
| rs116457856 | A | -0.168  |
| rs1320335   | A | -0.0359 |
| rs141396546 | C | 0.1993  |
| rs12053563  | G | -0.0462 |
| rs6735071   | C | -0.0601 |
| rs12613322  | C | 0.0447  |
| rs10189395  | G | -0.0368 |
| rs73222121  | T | -0.0478 |
| rs116545800 | A | 0.1944  |
| rs150892246 | T | 0.2071  |
| rs144941777 | T | -0.1572 |
| rs72867972  | A | 0.0419  |
| rs1367876   | G | -0.0427 |
| rs74503226  | T | -0.1946 |
| rs1317808   | G | -0.0379 |
| rs115138061 | T | 0.2646  |
| rs56290513  | T | -0.0615 |
| rs1447555   | A | -0.0431 |
| rs6753577   | G | 0.0416  |
| rs146672754 | A | -0.0735 |



|             |   |         |
|-------------|---|---------|
| rs1470590   | T | 0.0362  |
| rs334129    | A | 0.0894  |
| rs62193416  | C | 0.1267  |
| rs147496996 | C | -0.189  |
| rs56200841  | T | -0.2095 |
| rs148268516 | G | 0.0912  |
| rs10929289  | T | 0.1197  |
| rs144624733 | A | -0.2637 |
| rs4341949   | T | -0.0412 |
| rs12622488  | T | -0.0508 |
| rs6728741   | C | 0.0357  |
| rs7586960   | A | -0.0558 |
| rs6433448   | C | 0.0352  |
| rs62188631  | A | -0.1566 |
| rs13004636  | T | 0.1922  |
| rs6744029   | A | 0.0432  |
| rs79632946  | A | 0.0849  |
| rs111727538 | A | -0.1784 |
| rs141075556 | G | 0.1794  |
| rs142188745 | T | 0.1329  |
| rs11124043  | A | -0.0387 |
| rs16837192  | A | 0.0527  |
| rs6714844   | G | -0.2703 |
| rs147783428 | C | 0.1997  |
| rs151040967 | C | 0.1684  |
| rs78170603  | C | -0.1577 |
| rs3103289   | A | 0.0748  |
| rs73921309  | A | 0.0493  |
| rs77609099  | A | -0.1619 |
| rs13427623  | T | 0.0367  |
| rs2953153   | G | -0.0389 |
| rs12623384  | T | 0.173   |
| rs72799937  | C | -0.0455 |
| rs115110689 | A | 0.1212  |
| rs16841580  | T | 0.0591  |
| rs10184104  | C | 0.0402  |
| rs117932442 | T | 0.146   |
| rs36055100  | T | 0.0344  |
| rs56102567  | T | 0.1081  |
| rs11683344  | C | -0.0398 |
| rs13012637  | A | -0.0458 |
| rs1530934   | T | 0.0495  |
| rs3792065   | T | 0.2804  |
| rs11676688  | G | -0.1146 |
| rs10176914  | G | 0.0372  |
| rs80064280  | G | 0.1886  |
| rs1443711   | G | 0.0391  |

|             |   |         |
|-------------|---|---------|
| rs73941158  | C | 0.2036  |
| rs116052691 | G | 0.1572  |
| rs11885032  | C | -0.0783 |
| rs116255105 | T | 0.1639  |
| rs2364236   | T | -0.08   |
| rs111459369 | T | 0.2467  |
| rs7559663   | C | 0.0793  |
| rs57905270  | T | 0.057   |
| rs72852574  | T | 0.0991  |
| rs2334801   | C | -0.1213 |
| rs11675363  | A | -0.0517 |
| rs12613221  | T | -0.2512 |
| rs1862098   | T | -0.039  |
| rs2138985   | C | 0.0372  |
| rs72966663  | A | -0.1221 |
| rs7609465   | T | 0.0422  |
| rs13001925  | G | 0.0533  |
| rs1907423   | G | 0.0433  |
| rs62180957  | C | 0.0949  |
| rs28595695  | A | -0.0511 |
| rs73021848  | T | -0.0502 |
| rs114921228 | T | 0.1209  |
| rs11884504  | A | 0.1052  |
| rs77783663  | A | 0.1402  |
| rs116292849 | C | -0.2545 |
| rs111409244 | C | 0.0927  |
| rs17268847  | C | 0.0498  |
| rs76457823  | G | 0.2797  |
| rs78733047  | T | -0.2628 |
| rs62122117  | C | -0.0556 |
| rs76152237  | G | 0.1459  |
| rs140272071 | A | -0.1595 |
| rs7556885   | A | 0.038   |
| rs114532880 | T | 0.1836  |
| rs56783582  | A | 0.0615  |
| rs76639298  | C | -0.2523 |
| rs11904182  | A | -0.0961 |
| rs10184205  | C | 0.0366  |
| rs12694029  | A | 0.0364  |
| rs62195015  | T | -0.0502 |
| rs80177718  | G | 0.317   |
| rs115234285 | A | 0.1221  |
| rs72896204  | A | -0.198  |
| rs75667857  | T | 0.2138  |
| rs55700308  | A | 0.1301  |
| rs11898870  | G | 0.0849  |
| rs74908415  | G | -0.2079 |

|             |   |         |
|-------------|---|---------|
| rs1377444   | A | -0.0457 |
| rs62157051  | C | -0.0719 |
| rs62166594  | G | -0.1941 |
| rs74464113  | A | -0.2043 |
| rs79568916  | A | -0.0615 |
| rs114819910 | T | -0.0891 |
| rs12470990  | C | 0.0477  |
| rs10184074  | C | -0.0432 |
| rs2305174   | A | -0.0508 |
| rs12712887  | G | 0.0374  |
| rs16863775  | T | 0.0453  |
| rs4089742   | C | -0.0965 |
| rs140879453 | C | 0.2244  |
| rs713385    | A | 0.0463  |
| rs11689803  | A | 0.0407  |
| rs72935863  | T | -0.1214 |
| rs298294    | A | 0.0405  |
| rs72832526  | A | 0.2742  |
| rs79262929  | T | -0.2003 |
| rs76908707  | T | 0.1036  |
| rs74404582  | G | -0.1265 |
| rs838086    | C | 0.04    |
| rs12714011  | A | -0.0457 |
| rs2222224   | G | 0.0712  |
| rs2609939   | C | 0.0352  |
| rs77245180  | T | -0.1258 |
| rs111502844 | A | 0.1198  |
| rs114440310 | G | 0.198   |
| rs1345916   | C | 0.0677  |
| rs150701292 | T | 0.1348  |
| rs4381801   | C | 0.0384  |
| rs56156306  | T | -0.2479 |
| rs3731895   | T | 0.1653  |
| rs61660254  | T | -0.0452 |
| rs3867336   | C | -0.045  |
| rs72773099  | A | 0.1475  |
| rs116284270 | T | 0.1187  |
| rs115035197 | G | 0.1571  |
| rs6728183   | C | 0.0464  |
| rs112166244 | C | -0.1365 |
| rs2166505   | T | 0.0394  |
| rs113787127 | C | 0.0518  |
| rs140743618 | C | 0.155   |
| rs114623706 | T | 0.1756  |
| rs116550295 | T | -0.3019 |
| rs17503541  | T | 0.0656  |
| rs13021001  | G | 0.0532  |

|             |   |         |
|-------------|---|---------|
| rs13016877  | A | 0.0761  |
| rs12620790  | T | -0.0444 |
| rs10207374  | C | -0.167  |
| rs13411786  | A | 0.0886  |
| rs55922892  | C | 0.1619  |
| rs7591219   | C | -0.2396 |
| rs10445818  | G | -0.0486 |
| rs6725040   | T | 0.1868  |
| rs62136786  | T | 0.0344  |
| rs10865085  | A | -0.0536 |
| rs72801877  | A | 0.1193  |
| rs80241810  | C | -0.2467 |
| rs989176    | T | -0.035  |
| rs1370692   | T | -0.0788 |
| rs11126024  | A | 0.043   |
| rs13390632  | C | -0.0349 |
| rs10184214  | C | 0.0407  |
| rs6707918   | A | -0.0949 |
| rs13411151  | T | 0.2092  |
| rs36122237  | A | -0.0599 |
| rs7557477   | C | -0.0443 |
| rs139742748 | C | 0.2346  |
| rs142329507 | A | 0.1508  |
| rs72870422  | G | 0.0764  |
| rs12617054  | A | 0.0665  |
| rs7596391   | A | -0.1392 |
| rs4663268   | A | -0.037  |
| rs115754252 | C | -0.1591 |
| rs2359318   | G | 0.0423  |
| rs7370700   | T | -0.0419 |
| rs67473340  | A | -0.0637 |
| rs2272109   | A | 0.0975  |
| rs750783    | G | -0.0341 |
| rs13006423  | T | -0.0362 |
| rs77602596  | C | 0.1198  |
| rs1371020   | T | -0.0379 |
| rs72934385  | T | -0.0874 |
| rs115288207 | T | -0.134  |
| rs140068078 | T | 0.177   |
| rs57503539  | A | -0.0436 |
| rs6758189   | G | 0.0462  |
| rs72907642  | T | 0.2194  |
| rs147718908 | G | 0.2819  |
| rs12052304  | G | -0.0462 |
| rs140908358 | C | 0.218   |
| rs114010635 | T | -0.2055 |
| rs12465819  | C | 0.0344  |

|             |   |         |
|-------------|---|---------|
| rs10497941  | A | -0.0408 |
| rs6748631   | C | -0.0586 |
| rs13006877  | C | -0.0355 |
| rs58642128  | G | -0.0757 |
| rs72856145  | C | -0.054  |
| rs10451562  | A | -0.0346 |
| rs219214    | G | 0.2095  |
| rs1010279   | A | 0.0716  |
| rs6709309   | T | -0.1968 |
| rs809482    | G | 0.0404  |
| rs878539    | G | -0.0362 |
| rs11684742  | C | 0.0344  |
| rs2166088   | C | 0.0545  |
| rs146829947 | C | -0.1023 |
| rs11678550  | A | 0.046   |
| rs2567601   | G | 0.0519  |
| rs13414055  | C | 0.215   |
| rs76498942  | T | -0.1133 |
| rs3792121   | C | 0.0445  |
| rs2042089   | C | 0.0355  |
| rs13004435  | A | -0.0618 |
| rs6542644   | T | 0.035   |
| rs11884437  | A | -0.1665 |
| rs113548635 | A | -0.0752 |
| rs116457097 | A | 0.1383  |
| rs114369437 | G | 0.3102  |
| rs4497843   | A | -0.0814 |
| rs17432681  | A | 0.048   |
| rs10177986  | C | -0.0617 |
| rs74992086  | C | -0.0834 |
| rs115420636 | T | 0.2508  |
| rs78251516  | A | 0.1199  |
| rs10170011  | A | 0.1135  |
| rs7607908   | A | 0.0483  |
| rs1367165   | C | -0.0469 |
| rs10175539  | G | 0.0367  |
| rs72826200  | T | -0.145  |
| rs114991178 | A | -0.2613 |
| rs13008133  | G | 0.0932  |
| rs61739291  | C | 0.1701  |
| rs75841477  | C | 0.0683  |
| rs11679282  | T | 0.0397  |
| rs80261926  | T | -0.2343 |
| rs75843407  | T | 0.0899  |
| rs6747567   | C | -0.0456 |
| rs2292650   | G | 0.0494  |
| rs73935982  | C | 0.0966  |

|             |   |         |
|-------------|---|---------|
| rs147904468 | A | -0.2746 |
| rs10184643  | G | -0.0723 |
| rs13393125  | C | 0.0563  |
| rs55662405  | T | 0.0431  |
| rs6740082   | C | -0.0734 |
| rs13012615  | A | -0.0386 |
| rs10169002  | G | 0.0342  |
| rs62135100  | A | 0.0627  |
| rs11681576  | A | -0.0338 |
| rs114508399 | T | -0.2439 |
| rs77228795  | C | 0.1836  |
| rs971821    | A | 0.1014  |
| rs139265466 | T | -0.2401 |
| rs72818239  | G | 0.2622  |
| rs16859921  | C | -0.0549 |
| rs6718243   | G | 0.1469  |
| rs11681637  | G | -0.1122 |
| rs113331531 | T | 0.192   |
| rs13388733  | T | 0.0425  |
| rs79782936  | G | -0.064  |
| rs138940193 | A | -0.1907 |
| rs6755552   | G | -0.0387 |
| rs7600157   | T | 0.0589  |
| rs71425956  | C | 0.1632  |
| rs36067752  | G | 0.1232  |
| rs148835629 | G | 0.183   |
| rs17705978  | G | 0.0717  |
| rs79615211  | G | 0.3125  |
| rs73975658  | T | 0.0804  |
| rs6547848   | C | -0.0894 |
| rs35208898  | T | -0.2043 |
| rs16983064  | T | -0.1217 |
| rs12710751  | T | -0.0354 |
| rs77425000  | A | -0.1402 |
| rs72613870  | C | -0.0769 |
| rs78123638  | A | 0.2288  |
| rs13002600  | C | 0.0453  |
| rs72788537  | C | 0.1269  |
| rs1828474   | T | -0.0697 |
| rs149783744 | G | 0.2519  |
| rs60887428  | C | -0.1155 |
| rs13390760  | C | 0.222   |
| rs146669699 | T | 0.255   |
| rs2005791   | C | 0.0518  |
| rs55833068  | C | -0.0407 |
| rs6708562   | A | 0.0711  |
| rs141483103 | T | 0.2122  |

|             |   |         |
|-------------|---|---------|
| rs147442711 | T | 0.319   |
| rs10177723  | G | 0.0393  |
| rs4953681   | A | 0.0345  |
| rs78542645  | G | -0.0924 |
| rs7568807   | G | -0.0368 |
| rs142911649 | A | -0.0905 |
| rs13016810  | C | 0.0613  |
| rs1430083   | T | 0.0797  |
| rs61046720  | A | 0.0515  |
| rs6748470   | G | 0.0366  |
| rs17794168  | G | 0.1523  |
| rs4854311   | A | 0.1612  |
| rs78229678  | G | 0.1129  |
| rs78196400  | C | 0.1359  |
| rs11884584  | C | 0.0455  |
| rs12692585  | G | 0.0409  |
| rs1485076   | A | -0.0363 |
| rs75000702  | G | -0.0693 |
| rs6718516   | G | 0.0369  |
| rs6436390   | A | -0.038  |
| rs17700553  | C | 0.0664  |
| rs138155270 | G | -0.4128 |
| rs67773315  | A | 0.1008  |
| rs13389882  | G | -0.0341 |
| rs116617099 | C | -0.2167 |
| rs78916581  | G | 0.1826  |
| rs77920735  | T | 0.2249  |
| rs114575458 | C | 0.1186  |
| rs76972021  | T | -0.0873 |
| rs12692031  | A | -0.0344 |
| rs72771794  | C | 0.0582  |
| rs2592579   | T | 0.0529  |
| rs75331188  | T | 0.1342  |
| rs4352232   | G | 0.0361  |
| rs73063880  | T | 0.0754  |
| rs116112767 | T | -0.1922 |
| rs79074603  | A | -0.097  |
| rs7589542   | A | -0.0342 |
| rs71413165  | A | 0.1231  |
| rs12474921  | T | 0.1386  |
| rs72940418  | T | 0.256   |
| rs76102347  | G | -0.0883 |
| rs6745031   | A | 0.036   |
| rs843690    | C | -0.073  |
| rs11887190  | T | -0.0498 |
| rs115943707 | A | -0.1999 |
| rs6750752   | C | 0.0433  |

|             |   |         |
|-------------|---|---------|
| rs11887282  | C | 0.0401  |
| rs78371816  | T | 0.1078  |
| rs297122    | T | 0.0767  |
| rs7609497   | T | -0.0671 |
| rs114491331 | G | 0.2735  |
| rs62156643  | A | 0.1625  |
| rs114298039 | A | 0.1747  |
| rs1705131   | A | -0.0335 |
| rs114407648 | T | 0.1118  |
| rs11690284  | T | -0.0351 |
| rs115158014 | A | 0.0981  |
| rs7601262   | C | -0.0367 |
| rs115965468 | G | 0.135   |
| rs17389100  | G | -0.0585 |
| rs11896440  | C | 0.0766  |
| rs75612290  | A | 0.1804  |
| rs5547      | G | 0.1545  |
| rs79062410  | A | -0.257  |
| rs115477629 | C | -0.0362 |
| rs759456    | G | 0.0358  |
| rs79550435  | C | 0.1928  |
| rs6718282   | A | -0.0814 |
| rs11901629  | A | 0.0861  |
| rs700940    | C | -0.0352 |
| rs35509529  | G | 0.0861  |
| rs6748465   | T | 0.073   |
| rs112327851 | C | 0.1192  |
| rs149667020 | G | 0.261   |
| rs75797365  | A | -0.2249 |
| rs13429451  | A | 0.1316  |
| rs6727351   | C | 0.0684  |
| rs116692963 | C | 0.2213  |
| rs7592363   | T | -0.0574 |
| rs4662260   | A | -0.0443 |
| rs138328973 | G | 0.1405  |
| rs12614365  | A | 0.2024  |
| rs6744174   | C | -0.0386 |
| rs72836107  | T | 0.1231  |
| rs12463670  | T | 0.0493  |
| rs116651432 | C | -0.2065 |
| rs56284247  | C | -0.039  |
| rs148470447 | T | -0.2288 |
| rs1514682   | T | -0.0409 |
| rs12994932  | G | -0.0345 |
| rs116420297 | T | 0.1654  |
| rs17325656  | C | 0.1362  |
| rs77248865  | G | -0.3474 |



|             |   |         |
|-------------|---|---------|
| rs138888189 | A | 0.2279  |
| rs145759133 | G | -0.3235 |
| rs4851349   | A | -0.0571 |
| rs218217    | G | -0.0559 |
| rs75808972  | G | -0.2668 |
| rs151130090 | A | 0.1111  |
| rs1424919   | T | -0.0918 |
| rs12471567  | T | -0.0347 |
| rs6707843   | T | 0.062   |
| rs12478509  | C | 0.0515  |
| rs13004784  | G | 0.0474  |
| rs140001576 | T | 0.2658  |
| rs4488642   | G | -0.0381 |
| rs1835804   | G | 0.0341  |
| rs35085748  | C | 0.3624  |
| rs12623281  | C | -0.0472 |
| rs4558539   | T | 0.1681  |
| rs748014    | T | 0.0617  |
| rs114188570 | G | -0.2311 |
| rs7592593   | T | -0.0614 |
| rs74711038  | G | -0.2066 |
| rs114514101 | T | 0.1616  |
| rs36118164  | T | 0.0395  |
| rs34351215  | A | -0.1327 |
| rs16828857  | A | -0.061  |
| rs115974370 | C | -0.0697 |
| rs10170714  | A | 0.0522  |
| rs10779931  | G | -0.036  |
| rs140968288 | C | -0.1736 |
| rs116753168 | T | 0.1336  |
| rs112575691 | T | 0.2319  |
| rs16827735  | T | 0.0637  |
| rs34888661  | G | -0.0769 |
| rs55695415  | T | -0.0514 |
| rs17198353  | G | 0.166   |
| rs6755845   | C | 0.052   |
| rs17554529  | G | -0.1076 |
| rs2178740   | G | 0.0383  |
| rs1471641   | C | -0.0469 |
| rs115791493 | A | 0.1036  |
| rs62105573  | G | -0.0416 |
| rs75252677  | A | -0.1146 |
| rs16841114  | C | 0.0619  |
| rs143164414 | C | -0.2272 |
| rs72806602  | T | 0.0902  |
| rs11124602  | T | 0.0369  |
| rs1521753   | C | -0.0359 |

|             |   |         |
|-------------|---|---------|
| rs62140822  | G | 0.0933  |
| rs114099224 | A | -0.1336 |
| rs4952918   | T | -0.0577 |
| rs78518576  | T | -0.0958 |
| rs56084025  | C | -0.099  |
| rs148885277 | G | 0.1933  |
| rs16864141  | C | 0.2384  |
| rs10180866  | C | 0.0361  |
| rs114102568 | A | -0.1215 |
| rs7595796   | A | 0.0659  |
| rs34558350  | A | 0.0689  |
| rs72823122  | G | -0.0384 |
| rs2029043   | T | -0.149  |
| rs11691205  | A | 0.1878  |
| rs12620511  | A | 0.0514  |
| rs2568224   | C | 0.0351  |
| rs6731322   | T | 0.0548  |
| rs55683694  | C | 0.0588  |
| rs116219058 | A | -0.1159 |
| rs2860779   | A | 0.0346  |
| rs1397482   | G | -0.0349 |
| rs67615483  | T | 0.1111  |
| rs17400505  | G | 0.0348  |
| rs79316184  | T | 0.2415  |
| rs34210468  | G | -0.1062 |
| rs272114    | T | 0.0878  |
| rs116492934 | C | 0.1857  |
| rs13034472  | G | -0.0363 |
| rs11898823  | T | 0.0912  |
| rs17761169  | A | -0.0338 |
| rs982214    | G | 0.0358  |
| rs115808795 | C | -0.2097 |
| rs56734517  | C | 0.0619  |
| rs138383852 | C | -0.1094 |
| rs77134521  | T | -0.0651 |
| rs11127165  | T | 0.0336  |
| rs74686050  | A | -0.2051 |
| rs6729983   | G | 0.0733  |
| rs2099732   | A | 0.037   |
| rs62180920  | A | -0.0393 |
| rs72777025  | T | 0.0801  |
| rs11125625  | C | 0.0368  |
| rs75973085  | A | -0.111  |
| rs72827483  | T | 0.2221  |
| rs116134683 | A | -0.2343 |
| rs12990638  | A | -0.0422 |
| rs115332860 | C | 0.2187  |

|             |   |         |
|-------------|---|---------|
| rs77684026  | A | 0.1664  |
| rs1560872   | A | 0.0745  |
| rs17742537  | C | 0.1114  |
| rs76773051  | A | -0.2526 |
| rs10194172  | C | 0.0569  |
| rs149509277 | T | 0.1981  |
| rs115364330 | G | 0.134   |
| rs72485525  | T | 0.108   |
| rs2024455   | T | 0.052   |
| rs871530    | A | 0.0373  |
| rs12476410  | T | -0.0413 |
| rs76003961  | A | 0.0854  |
| rs11692979  | G | 0.0484  |
| rs10171967  | C | -0.042  |
| rs2098279   | C | 0.0433  |
| rs2371409   | C | 0.1924  |
| rs6547000   | T | 0.0485  |
| rs34334212  | C | 0.0731  |
| rs75588529  | C | 0.2189  |
| rs13414599  | A | 0.056   |
| rs78227970  | C | -0.0967 |
| rs12465524  | A | -0.1845 |
| rs10203476  | A | 0.0526  |
| rs34683823  | T | 0.0826  |
| rs114752694 | T | -0.1263 |
| rs586253    | G | 0.1218  |
| rs2139200   | C | 0.0354  |
| rs11888898  | C | 0.0571  |
| rs41368446  | G | -0.0828 |
| rs56296788  | C | 0.1565  |
| rs149366503 | G | -0.2094 |
| rs13011042  | G | -0.0363 |
| rs3749054   | T | 0.2556  |
| rs2037161   | C | -0.0436 |
| rs6541743   | A | 0.0407  |
| rs6738560   | G | 0.0371  |
| rs7600564   | A | 0.0715  |
| rs79053861  | T | 0.2104  |
| rs111242163 | G | -0.1193 |
| rs3764917   | C | -0.0609 |
| rs17533070  | A | -0.1068 |
| rs4595964   | T | -0.0642 |
| rs6431993   | A | 0.0333  |
| rs72991317  | A | 0.064   |
| rs4669674   | G | -0.0644 |
| rs3843861   | T | 0.0491  |
| rs34641834  | T | -0.083  |

|             |   |         |
|-------------|---|---------|
| rs11687183  | G | 0.0519  |
| rs12998516  | A | -0.0443 |
| rs72838749  | T | -0.1289 |
| rs1025544   | T | -0.0357 |
| rs34376380  | A | 0.1727  |
| rs4534992   | A | 0.0357  |
| rs6761582   | C | -0.0787 |
| rs72887646  | T | 0.0762  |
| rs11692215  | T | -0.0405 |
| rs58429799  | G | -0.211  |
| rs75169789  | T | 0.1287  |
| rs10497518  | G | 0.0861  |
| rs77829012  | T | 0.087   |
| rs35762680  | C | -0.1092 |
| rs16856130  | C | 0.0377  |
| rs77203928  | T | 0.0736  |
| rs147109071 | A | 0.2887  |
| rs75122855  | A | 0.1569  |
| rs114368393 | T | 0.1651  |
| rs111522891 | G | -0.1091 |
| rs13427443  | T | -0.0544 |
| rs4519553   | C | -0.0776 |
| rs34828730  | A | -0.1213 |
| rs12621602  | C | 0.0585  |
| rs73082431  | C | -0.0583 |
| rs145792627 | G | -0.2321 |
| rs1554902   | A | -0.0371 |
| rs1454320   | T | 0.0557  |
| rs28684585  | T | 0.0831  |
| rs10184501  | A | 0.0711  |
| rs115099029 | A | -0.2    |
| rs13033268  | C | -0.1514 |
| rs76914416  | T | -0.1908 |
| rs114024816 | A | 0.131   |
| rs2272528   | C | 0.0646  |
| rs13398110  | T | 0.0799  |
| rs72799044  | A | 0.1365  |
| rs7423708   | G | -0.0357 |
| rs13432997  | A | -0.0521 |
| rs12995380  | T | 0.0436  |
| rs115850844 | T | 0.1236  |
| rs16866575  | G | -0.0598 |
| rs12619069  | T | 0.0527  |
| rs72813766  | T | -0.1916 |
| rs2970988   | G | 0.054   |
| rs115587953 | T | -0.1582 |
| rs113221477 | T | 0.0706  |

|             |   |         |
|-------------|---|---------|
| rs75040266  | A | 0.1203  |
| rs115463434 | A | 0.1502  |
| rs60246501  | T | 0.1404  |
| rs2371573   | G | 0.0331  |
| rs150758300 | T | -0.1411 |
| rs75322540  | C | -0.1188 |
| rs72806141  | G | 0.185   |
| rs2056209   | G | 0.0352  |
| rs115927606 | A | -0.1996 |
| rs918292    | T | 0.0495  |
| rs12617019  | C | 0.0446  |
| rs12712612  | T | 0.0639  |
| rs77507477  | A | 0.12    |
| rs116163699 | G | -0.0697 |
| rs13001453  | T | -0.1821 |
| rs17783977  | A | -0.2288 |
| rs6710715   | A | -0.0404 |
| rs142333882 | A | 0.143   |
| rs4670786   | C | 0.0524  |
| rs2685712   | G | -0.0969 |
| rs7599326   | A | -0.0374 |
| rs11679716  | T | 0.0383  |
| rs2372681   | G | 0.0498  |
| rs11563208  | T | -0.0379 |
| rs12468688  | A | 0.0558  |
| rs10198480  | G | 0.0549  |
| rs6751552   | G | 0.0404  |
| rs113614214 | G | -0.0711 |
| rs35542306  | A | -0.0647 |
| rs2705775   | T | -0.0457 |
| rs2421820   | T | 0.0356  |
| rs79533427  | C | 0.087   |
| rs6737347   | A | 0.0421  |
| rs62148373  | A | 0.1411  |
| rs16830412  | G | -0.0842 |
| rs75519659  | T | 0.1298  |
| rs3792074   | C | 0.0389  |
| rs6718825   | G | 0.0955  |
| rs1561296   | T | 0.0338  |
| rs73016461  | C | -0.1071 |
| rs62176980  | G | 0.235   |
| rs17025611  | C | 0.149   |
| rs72617143  | A | 0.1667  |
| rs4894196   | C | 0.0364  |
| rs78669070  | T | -0.1599 |
| rs72979746  | T | 0.1813  |
| rs10439314  | T | 0.0947  |

|             |   |         |
|-------------|---|---------|
| rs116337306 | G | 0.2376  |
| rs140104536 | G | 0.1756  |
| rs8179521   | A | -0.0719 |
| rs17783638  | C | -0.0689 |
| rs34050218  | C | -0.0878 |
| rs17043136  | T | 0.1022  |
| rs11902050  | A | -0.0618 |
| rs36120431  | T | 0.0569  |
| rs2118673   | T | -0.0512 |
| rs12618928  | T | 0.0337  |
| rs72772215  | T | -0.1215 |
| rs79859940  | A | -0.0537 |
| rs4671986   | G | 0.0521  |
| rs56191000  | T | 0.1097  |
| rs58710201  | A | -0.1044 |
| rs80317127  | G | -0.123  |
| rs13031106  | G | -0.0913 |
| rs114394148 | G | 0.2122  |
| rs114799444 | T | 0.1852  |
| rs1476328   | A | -0.0527 |
| rs149053867 | G | -0.1923 |
| rs72866046  | A | 0.0569  |
| rs7604116   | A | -0.0562 |
| rs6753208   | A | 0.0493  |
| rs12993852  | A | -0.0506 |
| rs80244487  | T | -0.0544 |
| rs76943985  | C | 0.1156  |
| rs115650712 | G | -0.2149 |
| rs114684155 | C | -0.1307 |
| rs6737854   | A | -0.0374 |
| rs115073275 | T | -0.1649 |
| rs112858342 | A | 0.1994  |
| rs62124270  | T | -0.0768 |
| rs2020203   | A | 0.0421  |
| rs80294774  | C | 0.1375  |
| rs75049520  | C | 0.1469  |
| rs77861537  | T | 0.0738  |
| rs143578876 | A | 0.0932  |
| rs17532603  | A | -0.0333 |
| rs144811082 | T | -0.1399 |
| rs139301855 | T | 0.0804  |
| rs77090925  | A | -0.0514 |
| rs2309651   | C | -0.0524 |
| rs77506056  | T | -0.0883 |
| rs56056319  | A | -0.0618 |
| rs10210065  | A | -0.0352 |
| rs142562157 | C | -0.1052 |

|             |   |         |
|-------------|---|---------|
| rs72862254  | G | 0.1296  |
| rs56026054  | G | 0.0562  |
| rs13394352  | T | 0.0449  |
| rs116420012 | T | 0.1404  |
| rs77402353  | C | -0.0736 |
| rs72988447  | T | 0.0575  |
| rs76432967  | G | -0.138  |
| rs17404836  | T | -0.0338 |
| rs10930627  | G | -0.0331 |
| rs982928    | C | -0.0492 |
| rs78854156  | A | 0.1624  |
| rs115607671 | C | 0.1471  |
| rs115811834 | G | 0.216   |
| rs16863206  | A | -0.0852 |
| rs6706539   | G | -0.049  |
| rs356652    | G | -0.0584 |
| rs1867857   | C | 0.0732  |
| rs10168288  | T | 0.0509  |
| rs151192710 | A | 0.1904  |
| rs77528201  | G | -0.1109 |
| rs141861155 | A | 0.1723  |
| rs6761941   | T | -0.2484 |
| rs16865292  | C | 0.0957  |
| rs7591627   | T | 0.097   |
| rs62175776  | C | -0.1653 |
| rs72881895  | G | 0.0912  |
| rs111746180 | G | 0.1493  |
| rs72876024  | T | -0.1287 |
| rs114734735 | A | -0.2243 |
| rs112798965 | T | -0.1746 |
| rs77197977  | C | -0.105  |
| rs147555768 | C | -0.1777 |
| rs796275    | C | 0.1018  |
| rs12614977  | A | -0.0645 |
| rs76945823  | C | 0.0383  |
| rs113378684 | T | -0.1836 |
| rs10200535  | T | 0.0493  |
| rs11125070  | T | -0.0389 |
| rs6724753   | T | 0.0345  |
| rs113203861 | T | -0.0663 |
| rs16823003  | A | 0.0975  |
| rs72889733  | A | 0.213   |
| rs7419832   | T | 0.0575  |
| rs146333093 | A | 0.2078  |
| rs4371338   | A | 0.0332  |
| rs78009369  | G | 0.1741  |
| rs77334461  | G | 0.0922  |

|             |   |         |
|-------------|---|---------|
| rs149419791 | A | 0.1658  |
| rs1669538   | T | 0.1336  |
| rs74482614  | G | 0.0776  |
| rs76952690  | T | -0.1185 |
| rs2080399   | T | -0.0338 |
| rs17185987  | T | 0.1335  |
| rs72951770  | C | -0.0797 |
| rs11680350  | G | 0.0392  |
| rs115785384 | C | 0.2584  |
| rs56040128  | C | -0.0532 |
| rs78213796  | G | 0.2121  |
| rs34043785  | T | 0.0477  |
| rs6728227   | G | -0.0324 |
| rs761111108 | A | -0.1986 |
| rs55668942  | C | 0.055   |
| rs114064782 | T | -0.1995 |
| rs116732687 | C | -0.2377 |
| rs116373304 | G | 0.3273  |
| rs12713753  | G | 0.0339  |
| rs13427705  | C | 0.063   |
| rs871688    | A | -0.0373 |
| rs58738000  | G | 0.0615  |
| rs111363322 | A | 0.1671  |
| rs77738981  | T | -0.0721 |
| rs4952479   | A | 0.0329  |
| rs77737294  | C | 0.1548  |
| rs72973070  | A | 0.251   |
| rs116603603 | C | 0.1552  |
| rs78062761  | A | -0.1536 |
| rs78571808  | G | 0.2545  |
| rs116739842 | T | -0.1156 |
| rs35632511  | C | 0.0801  |
| rs146003514 | T | -0.2316 |
| rs78853258  | C | -0.1726 |
| rs12478424  | T | -0.1309 |
| rs10210489  | T | 0.033   |
| rs765788    | G | 0.1061  |
| rs79577315  | T | -0.0513 |
| rs75777360  | A | 0.0806  |
| rs17469240  | C | -0.0807 |
| rs76285585  | T | 0.1111  |
| rs150895953 | C | -0.1663 |
| rs1826411   | C | 0.1553  |
| rs114255299 | G | 0.1394  |
| rs1401063   | A | 0.0361  |
| rs16861216  | A | 0.1049  |
| rs75127636  | G | 0.1506  |



|             |   |         |
|-------------|---|---------|
| rs4635466   | G | 0.0505  |
| rs10198718  | A | -0.037  |
| rs62109395  | T | 0.1806  |
| rs895761    | A | 0.0386  |
| rs1454234   | C | -0.034  |
| rs113208637 | T | -0.0623 |
| rs138115320 | A | -0.1648 |
| rs13005452  | C | 0.049   |
| rs72989291  | G | -0.1494 |
| rs11676736  | A | 0.0512  |
| rs4669862   | T | -0.0607 |
| rs116616126 | G | 0.2331  |
| rs4953204   | T | 0.0627  |
| rs10933613  | A | 0.0505  |
| rs143808352 | G | 0.0977  |
| rs62184656  | A | 0.213   |
| rs17496827  | A | 0.0344  |
| rs734693    | C | 0.038   |
| rs2059340   | T | -0.098  |
| rs115619158 | A | 0.1362  |
| rs140052025 | G | -0.2302 |
| rs2193075   | T | -0.035  |
| rs34591511  | A | 0.1024  |
| rs4854348   | A | 0.0419  |
| rs11685603  | T | 0.0741  |
| rs34556076  | G | -0.0532 |
| rs4560084   | T | -0.0706 |
| rs12151421  | G | -0.0332 |
| rs2975752   | T | -0.0395 |
| rs2944254   | T | -0.0403 |
| rs937387    | C | 0.0519  |
| rs13018621  | T | 0.1557  |
| rs78636564  | C | -0.0651 |
| rs13029145  | T | -0.0718 |
| rs58533146  | T | 0.0917  |
| rs58520674  | C | 0.0678  |
| rs145827072 | A | -0.1856 |
| rs342105    | C | -0.0358 |
| rs79733148  | C | 0.1797  |
| rs11674826  | A | -0.0851 |
| rs12478736  | C | -0.0513 |
| rs12466968  | T | -0.1198 |
| rs79200749  | G | -0.0652 |
| rs114808243 | A | -0.1312 |
| rs62188065  | T | 0.2321  |
| rs4972506   | A | 0.0397  |
| rs117629891 | G | -0.1493 |

|             |   |         |
|-------------|---|---------|
| rs72791158  | G | 0.0987  |
| rs4583473   | T | -0.0387 |
| rs77049643  | G | -0.1077 |
| rs112349273 | C | -0.0446 |
| rs114653250 | G | 0.1651  |
| rs11675694  | G | -0.1208 |
| rs2204903   | G | 0.0335  |
| rs77093505  | A | 0.1261  |
| rs143518517 | A | -0.1243 |
| rs55809209  | C | 0.1722  |
| rs146744492 | G | 0.1327  |
| rs62154068  | A | 0.0826  |
| rs10187705  | C | -0.0356 |
| rs62121466  | A | 0.1207  |
| rs72810434  | C | 0.1451  |
| rs13030445  | A | 0.053   |
| rs142677852 | T | 0.1123  |
| rs11689258  | T | -0.1452 |
| rs62154889  | T | -0.1631 |
| rs4851073   | T | -0.0523 |
| rs34330745  | T | 0.2313  |
| rs58511420  | C | -0.0526 |
| rs78774671  | G | -0.1967 |
| rs887844    | G | 0.0437  |
| rs72880441  | T | -0.0752 |
| rs13015254  | T | -0.0322 |
| rs17647806  | T | 0.0792  |
| rs820985    | C | -0.0359 |
| rs67008211  | C | -0.0732 |
| rs112464067 | T | 0.1678  |
| rs7589562   | C | 0.0392  |
| rs114071479 | C | 0.1529  |
| rs145866533 | A | 0.189   |
| rs17539109  | G | -0.0376 |
| rs77529890  | G | 0.1286  |
| rs2863960   | A | -0.036  |
| rs114511494 | T | 0.2188  |
| rs115134924 | C | -0.1095 |
| rs17037195  | C | -0.0633 |
| rs11895413  | C | -0.0393 |
| rs34527161  | A | 0.0988  |
| rs7576450   | A | -0.2198 |
| rs72832997  | A | 0.111   |
| rs77895161  | A | 0.1398  |
| rs1606963   | C | -0.1169 |
| rs11688851  | A | -0.0322 |
| rs116375331 | C | 0.2023  |

|             |   |         |
|-------------|---|---------|
| rs2167568   | G | 0.0334  |
| rs77444672  | T | 0.0493  |
| rs13407501  | T | -0.1207 |
| rs150357509 | C | 0.1312  |
| rs12695019  | A | -0.0419 |
| rs77095247  | T | 0.0612  |
| rs114836922 | C | 0.077   |
| rs72835846  | T | 0.1364  |
| rs78928041  | T | 0.1552  |
| rs78122413  | G | -0.1137 |
| rs16838864  | T | 0.076   |
| rs112418978 | A | -0.0481 |
| rs12467887  | T | -0.0369 |
| rs17387431  | T | -0.0823 |
| rs62191164  | C | 0.0788  |
| rs17745230  | T | -0.0462 |
| rs72874058  | G | -0.1677 |
| rs7590733   | T | 0.0555  |
| rs2577264   | A | -0.0328 |
| rs72773268  | A | 0.2309  |
| rs114010776 | T | -0.1157 |
| rs4420713   | C | 0.0354  |
| rs41279754  | T | 0.1321  |
| rs146836463 | G | 0.1422  |
| rs57283582  | C | -0.1026 |
| rs115126995 | T | -0.1925 |
| rs6741594   | T | -0.0607 |
| rs2305152   | C | 0.0342  |
| rs1511192   | C | 0.0534  |
| rs79594066  | C | 0.1487  |
| rs16830840  | A | 0.0646  |
| rs16866740  | T | 0.051   |
| rs145156209 | G | -0.2127 |
| rs116422516 | G | 0.3136  |
| rs7582472   | C | 0.0408  |
| rs138625013 | A | -0.2173 |
| rs10166721  | T | -0.0868 |
| rs62182407  | T | -0.1574 |
| rs6730964   | G | 0.1353  |
| rs6753019   | G | 0.0476  |
| rs12994634  | G | -0.0355 |
| rs67254543  | T | -0.0407 |
| rs12477945  | A | 0.0994  |
| rs77630721  | G | 0.1078  |
| rs60006979  | C | 0.0705  |
| rs719596    | C | 0.0772  |
| rs10496566  | T | -0.0333 |

|             |   |         |
|-------------|---|---------|
| rs2163025   | T | -0.0349 |
| rs147233723 | A | 0.1431  |
| rs2193805   | C | 0.0323  |
| rs28625455  | T | 0.0407  |
| rs17431708  | A | 0.2594  |
| rs76683099  | A | 0.1742  |
| rs116631620 | T | -0.1246 |
| rs2303597   | T | 0.0381  |
| rs12474359  | T | -0.0466 |
| rs115195099 | C | 0.265   |
| rs139368290 | G | -0.2069 |
| rs75874885  | G | 0.0874  |
| rs1122869   | A | 0.0339  |
| rs74506368  | A | -0.0687 |
| rs7577895   | C | 0.0786  |
| rs11693340  | C | 0.0669  |
| rs55780490  | C | -0.3225 |
| rs4953344   | C | 0.0471  |
| rs56194420  | T | 0.0432  |
| rs143499126 | T | 0.1402  |
| rs1835432   | C | 0.0346  |
| rs1867856   | T | -0.0339 |
| rs2582998   | T | -0.0559 |
| rs7585360   | T | 0.1655  |
| rs6546277   | A | -0.0506 |
| rs3931851   | T | -0.1448 |
| rs6435221   | G | 0.0605  |
| rs5010732   | A | 0.0396  |
| rs10197049  | C | -0.0618 |
| rs73045343  | A | 0.0439  |
| rs112001448 | C | 0.0793  |
| rs6430802   | T | 0.0367  |
| rs3112147   | G | 0.1186  |
| rs79036155  | G | 0.1237  |
| rs150759843 | T | 0.261   |
| rs79289917  | T | -0.1068 |
| rs34226559  | C | 0.2114  |
| rs824518    | T | -0.0378 |
| rs115222640 | T | -0.2501 |
| rs4675693   | A | 0.0413  |
| rs16863649  | T | -0.0486 |
| rs7560953   | A | 0.034   |
| rs11691856  | T | -0.0517 |
| rs16849846  | C | 0.041   |
| rs72810052  | A | 0.2037  |
| rs6706577   | A | -0.0319 |
| rs75022801  | A | 0.116   |

|             |   |         |
|-------------|---|---------|
| rs34701755  | T | -0.0474 |
| rs11680333  | C | -0.0343 |
| rs13424593  | G | 0.0485  |
| rs62132336  | A | -0.0655 |
| rs116080292 | T | -0.2362 |
| rs16865299  | A | 0.0334  |
| rs78214833  | A | 0.066   |
| rs4972391   | A | -0.0425 |
| rs12714404  | T | 0.0359  |
| rs113112296 | A | 0.0629  |
| rs13021573  | G | 0.0597  |
| rs35265092  | A | 0.0355  |
| rs10177236  | A | -0.252  |
| rs7572959   | G | -0.124  |
| rs61703970  | G | -0.0612 |
| rs112077565 | A | -0.1222 |
| rs4952800   | A | -0.0369 |
| rs10210193  | C | -0.0363 |
| rs12711856  | C | -0.0334 |
| rs111420737 | A | 0.0437  |
| rs72793147  | T | 0.0587  |
| rs11904093  | C | -0.0371 |
| rs72775091  | G | 0.1353  |
| rs7567391   | G | -0.0555 |
| rs6709978   | C | -0.0354 |
| rs13413674  | A | 0.0428  |
| rs147673267 | C | 0.155   |
| rs116420011 | A | 0.1129  |
| rs13015246  | A | 0.0327  |
| rs58000571  | A | 0.0492  |
| rs12470262  | C | 0.0473  |
| rs3820780   | T | 0.0565  |
| rs4848992   | A | -0.0431 |
| rs6714764   | C | 0.0493  |
| rs79636654  | A | 0.1629  |
| rs114667864 | G | 0.1971  |
| rs1505758   | A | 0.0329  |
| rs113814087 | A | 0.0723  |
| rs10496659  | C | 0.1247  |
| rs115818183 | T | 0.2209  |
| rs35386792  | G | -0.0959 |
| rs77159514  | G | -0.1244 |
| rs114831627 | T | 0.0956  |
| rs150793705 | C | 0.1408  |
| rs76300915  | T | -0.1131 |
| rs4491715   | G | 0.2473  |
| rs66849943  | C | -0.033  |

|             |   |         |
|-------------|---|---------|
| rs1518739   | C | 0.0464  |
| rs10928331  | C | 0.0419  |
| rs77223344  | C | 0.134   |
| rs113362201 | T | -0.1852 |
| rs116519842 | C | -0.1211 |
| rs146484336 | A | -0.14   |
| rs11694294  | T | 0.0331  |
| rs13384114  | A | 0.1923  |
| rs141928084 | A | 0.1513  |
| rs141743682 | T | 0.2247  |
| rs2654557   | T | -0.0391 |
| rs75281353  | T | 0.1393  |
| rs12712290  | C | -0.0362 |
| rs13424211  | C | 0.0451  |
| rs13030844  | T | 0.0329  |
| rs73934204  | A | 0.0827  |
| rs151206625 | T | 0.1779  |
| rs143041568 | A | -0.1916 |
| rs2579394   | G | -0.0395 |
| rs74525778  | T | -0.2113 |
| rs79068361  | A | -0.0786 |
| rs12469968  | G | -0.0327 |
| rs116040461 | A | 0.138   |
| rs71424901  | A | 0.0555  |
| rs13410209  | C | -0.0624 |
| rs6545465   | T | -0.0404 |
| rs55810333  | T | 0.1125  |
| rs2697789   | A | -0.062  |
| rs58567728  | A | -0.0415 |
| rs114692895 | C | 0.1029  |
| rs1345354   | C | -0.0455 |
| rs6751810   | C | -0.0568 |
| rs142518430 | A | -0.1824 |
| rs13019984  | T | 0.0331  |
| rs116628265 | A | -0.0513 |
| rs12994131  | G | 0.0394  |
| rs113090095 | C | -0.2951 |
| rs76093583  | T | 0.0658  |
| rs13028997  | G | 0.0318  |
| rs4668254   | G | -0.0913 |
| rs2084746   | G | 0.0539  |
| rs151088233 | C | 0.1837  |
| rs12694656  | G | 0.0975  |
| rs3739064   | G | -0.039  |
| rs73025875  | G | 0.1566  |
| rs1451831   | T | 0.2821  |
| rs116806864 | A | 0.116   |

|             |   |         |
|-------------|---|---------|
| rs2916522   | C | -0.0345 |
| rs1994254   | T | -0.0866 |
| rs150088671 | A | 0.2797  |
| rs10178070  | C | 0.0467  |
| rs13425586  | A | 0.1241  |
| rs1862886   | T | 0.0321  |
| rs75263328  | C | -0.0828 |
| rs2278740   | T | -0.0505 |
| rs141326394 | G | -0.1286 |
| rs7559185   | G | -0.0424 |
| rs11683582  | A | -0.1784 |
| rs4386288   | A | -0.0451 |
| rs2709468   | C | -0.0812 |
| rs62148376  | C | 0.054   |
| rs114291296 | T | 0.1435  |
| rs36042961  | A | 0.0527  |
| rs4972939   | T | 0.0354  |
| rs11692757  | A | -0.0402 |
| rs75844590  | A | 0.2205  |
| rs3755192   | T | -0.1425 |
| rs4672416   | T | 0.0814  |
| rs4260212   | A | -0.1107 |
| rs72922893  | T | 0.1825  |
| rs17869087  | A | -0.1193 |
| rs76572748  | A | 0.1378  |
| rs143253551 | C | 0.0329  |
| rs115059870 | C | -0.2035 |
| rs4450624   | T | -0.0689 |
| rs10490247  | C | 0.0323  |
| rs62167123  | A | -0.1738 |
| rs115678465 | A | 0.0932  |
| rs112625182 | G | -0.1835 |
| rs79815126  | A | 0.0595  |
| rs6739948   | A | 0.1245  |
| rs57785053  | T | -0.0403 |
| rs78732603  | T | 0.0575  |
| rs72913654  | T | -0.1902 |
| rs6722353   | A | -0.0388 |
| rs7572088   | C | 0.0361  |
| rs6755332   | A | 0.0464  |
| rs34400200  | G | 0.0806  |
| rs6435166   | T | 0.0369  |
| rs151104168 | T | 0.0923  |
| rs113856711 | A | 0.2325  |
| rs10184337  | A | -0.1526 |
| rs72831039  | T | -0.1638 |
| rs76349487  | C | 0.1686  |

|             |   |         |
|-------------|---|---------|
| rs11125991  | G | 0.0323  |
| rs72778227  | A | -0.0518 |
| rs36043647  | C | 0.1101  |
| rs76018285  | G | 0.1015  |
| rs79235506  | C | 0.1601  |
| rs72915205  | C | 0.1274  |
| rs116539609 | A | 0.12    |
| rs73985808  | A | 0.0998  |
| rs17017611  | G | 0.0434  |
| rs10193022  | G | 0.032   |
| rs1453205   | C | 0.0322  |
| rs35172078  | T | -0.1343 |
| rs116281177 | C | 0.2645  |
| rs75563574  | A | -0.1313 |
| rs4670382   | C | -0.0437 |
| rs11677956  | T | 0.0649  |
| rs17432754  | T | 0.0341  |
| rs76937430  | G | 0.1134  |
| rs74565349  | C | -0.1599 |
| rs12612635  | T | 0.0351  |
| rs116102549 | C | 0.2402  |
| rs62164558  | A | -0.099  |
| rs17862794  | G | 0.0396  |
| rs10177221  | C | -0.0509 |
| rs7572873   | A | 0.039   |
| rs10930185  | C | -0.0334 |
| rs17176535  | G | -0.1368 |
| rs116560958 | A | 0.21    |
| rs75747642  | T | -0.1288 |
| rs76109429  | G | -0.1087 |
| rs145077544 | C | -0.2089 |
| rs113105398 | A | 0.1538  |
| rs77104817  | C | 0.1922  |
| rs10165384  | G | -0.1487 |
| rs74497072  | T | 0.1068  |
| rs150123742 | C | -0.0413 |
| rs77093276  | G | 0.152   |
| rs56046520  | A | -0.0382 |
| rs17676048  | T | -0.1672 |
| rs10184118  | C | -0.0693 |
| rs10173790  | A | -0.0364 |
| rs68124119  | G | 0.0474  |
| rs114302919 | T | 0.1611  |
| rs116326420 | C | -0.1321 |
| rs112191637 | T | -0.1223 |
| rs72837949  | T | 0.1932  |
| rs3116517   | A | -0.0688 |



|             |   |         |
|-------------|---|---------|
| rs113219669 | T | 0.06    |
| rs34699488  | C | 0.0835  |
| rs72815898  | G | 0.0743  |
| rs2117932   | C | 0.0407  |
| rs116660829 | G | -0.2304 |
| rs6761048   | A | 0.034   |
| rs13417386  | T | 0.0977  |
| rs141523077 | A | 0.0684  |
| rs11684259  | T | -0.0371 |
| rs11902312  | A | 0.0326  |
| rs62190868  | C | -0.2255 |
| rs111715355 | C | -0.2018 |
| rs116219786 | T | 0.1174  |
| rs11125665  | T | 0.0323  |
| rs12693169  | G | 0.0351  |
| rs3856411   | A | -0.1206 |
| rs141757296 | T | -0.1962 |
| rs848562    | G | 0.0774  |
| rs112733978 | G | 0.1726  |
| rs17025157  | A | -0.049  |
| rs150013310 | C | -0.1803 |
| rs1476195   | C | -0.0333 |
| rs13023975  | C | 0.0451  |
| rs114037276 | G | 0.145   |
| rs55809808  | C | 0.121   |
| rs17585993  | A | 0.1254  |
| rs113339430 | T | -0.0778 |
| rs436990    | A | 0.0352  |
| rs76700026  | T | -0.0732 |
| rs35147280  | G | -0.0711 |
| rs1261234   | G | 0.0509  |
| rs2971874   | G | 0.037   |
| rs114824294 | G | -0.1181 |
| rs1098155   | A | 0.0349  |
| rs75356126  | A | -0.0969 |
| rs114330571 | A | -0.1028 |
| rs4396745   | A | -0.0562 |
| rs149128224 | G | -0.2735 |
| rs148218194 | C | 0.1687  |
| rs115496195 | T | -0.2223 |
| rs2580855   | C | 0.0765  |
| rs78369858  | C | 0.1312  |
| rs17271504  | C | 0.1545  |
| rs13397475  | G | -0.1449 |
| rs78798345  | C | -0.1426 |
| rs13014102  | C | -0.0547 |
| rs6435673   | C | 0.0376  |

|             |   |         |
|-------------|---|---------|
| rs77646727  | G | -0.1063 |
| rs2540061   | G | 0.0314  |
| rs6720307   | C | 0.096   |
| rs72940460  | C | -0.1746 |
| rs145059730 | A | 0.1512  |
| rs4954375   | T | -0.0576 |
| rs115765073 | A | -0.0817 |
| rs77870186  | T | 0.1215  |
| rs73003332  | G | -0.0769 |
| rs2178519   | T | -0.0329 |
| rs143514156 | A | 0.1278  |
| rs1438145   | T | -0.0373 |
| rs76640858  | G | 0.1091  |
| rs76029548  | T | 0.1031  |
| rs10165160  | G | 0.035   |
| rs62188969  | C | 0.1086  |
| rs698601    | A | -0.0777 |
| rs73125875  | A | 0.0399  |
| rs76475175  | A | -0.0751 |
| rs76639410  | T | -0.1643 |
| rs13426809  | A | -0.0576 |
| rs661500    | A | -0.0438 |
| rs2860875   | T | 0.0409  |
| rs56095559  | C | -0.0406 |
| rs72826738  | G | 0.0689  |
| rs35091831  | G | 0.1482  |
| rs62172805  | A | 0.0676  |
| rs56371976  | G | -0.0882 |
| rs3738907   | G | -0.0893 |
| rs4848370   | T | -0.0357 |
| rs13427961  | A | 0.0337  |
| rs76405473  | T | -0.1228 |
| rs114498712 | G | -0.1591 |
| rs112729234 | A | 0.0602  |
| rs78113513  | A | -0.0823 |
| rs55992496  | A | 0.052   |
| rs13313741  | T | 0.0459  |
| rs72832352  | T | -0.1765 |
| rs35167836  | T | 0.1198  |
| rs72783281  | A | 0.057   |
| rs62179632  | C | -0.1233 |
| rs78093519  | T | 0.0926  |
| rs7584650   | G | -0.0337 |
| rs34118383  | T | -0.0383 |
| rs72809285  | G | 0.083   |
| rs1836731   | G | -0.0336 |
| rs140609298 | A | 0.181   |

|             |   |         |
|-------------|---|---------|
| rs1467275   | A | 0.0707  |
| rs12995082  | C | 0.0375  |
| rs75703046  | C | 0.1799  |
| rs78597444  | A | 0.1317  |
| rs76836762  | G | -0.0823 |
| rs861770    | C | 0.0926  |
| rs76397621  | G | -0.0867 |
| rs148744186 | T | 0.1761  |
| rs10497537  | T | 0.069   |
| rs139295615 | C | -0.1572 |
| rs80293728  | C | -0.1206 |
| rs72958119  | A | 0.1719  |
| rs77504944  | A | -0.1481 |
| rs77332993  | T | 0.211   |
| rs17757520  | A | 0.1331  |
| rs13006543  | C | 0.078   |
| rs113096648 | G | 0.0822  |
| rs72888055  | A | 0.21    |
| rs2176263   | G | 0.0318  |
| rs13395150  | C | 0.0543  |
| rs55969678  | A | 0.062   |
| rs144262298 | C | -0.1906 |
| rs11124081  | A | -0.0339 |
| rs146394439 | A | 0.1311  |
| rs115746860 | T | -0.1925 |
| rs148436209 | T | -0.111  |
| rs12994122  | C | -0.0635 |
| rs115176763 | C | 0.18    |
| rs17863623  | G | -0.0951 |
| rs12621351  | A | -0.2629 |
| rs11890942  | T | -0.0466 |
| rs1641478   | A | 0.0801  |
| rs72878276  | G | 0.2048  |
| rs115344435 | T | 0.1795  |
| rs2860383   | G | 0.0395  |
| rs114988503 | A | 0.2175  |
| rs11688637  | G | 0.0333  |
| rs114263638 | G | 0.1021  |
| rs17563935  | C | -0.0425 |
| rs6720565   | A | 0.0368  |
| rs147925682 | T | -0.1504 |
| rs308020    | T | 0.0321  |
| rs115534276 | T | 0.1083  |
| rs10179767  | T | -0.0848 |
| rs62201162  | G | 0.1963  |
| rs12617620  | A | 0.039   |
| rs79095123  | T | 0.1591  |

|             |   |         |
|-------------|---|---------|
| rs62189527  | T | 0.1123  |
| rs17864686  | A | -0.04   |
| rs6731663   | T | 0.0342  |
| rs115220505 | T | 0.1215  |
| rs11892072  | T | 0.0521  |
| rs10930482  | A | -0.0337 |
| rs62165759  | G | 0.046   |
| rs77199945  | A | 0.1078  |
| rs146065688 | C | 0.1757  |
| rs13010063  | A | 0.073   |
| rs2848120   | C | -0.0571 |
| rs113407538 | G | 0.176   |
| rs11685457  | A | -0.1853 |
| rs78799748  | T | 0.1672  |
| rs1524080   | T | 0.0322  |
| rs74942702  | A | 0.0433  |
| rs149436759 | T | 0.2408  |
| rs6746505   | A | -0.042  |
| rs77529550  | C | 0.1316  |
| rs114007252 | G | -0.1343 |
| rs78162624  | T | 0.202   |
| rs399327    | A | -0.0533 |
| rs80012003  | T | 0.0974  |
| rs4541241   | A | -0.1123 |
| rs11894865  | T | -0.141  |
| rs1996590   | T | -0.0541 |
| rs1460669   | G | 0.0321  |
| rs79890038  | C | 0.1709  |
| rs1380696   | T | -0.302  |
| rs12467059  | A | 0.0411  |
| rs6750041   | T | -0.0711 |
| rs115993808 | A | -0.2565 |
| rs6717794   | G | 0.0391  |
| rs13410472  | A | 0.0558  |
| rs58081231  | T | 0.1247  |
| rs115243061 | T | -0.0945 |
| rs62195041  | C | 0.0498  |
| rs79303419  | C | -0.0999 |
| rs10194245  | A | -0.0516 |
| rs2062964   | A | -0.0339 |
| rs3923755   | C | -0.0361 |
| rs77736461  | T | -0.0344 |
| rs4854182   | T | 0.0634  |
| rs11897526  | T | -0.1094 |
| rs116164358 | G | 0.2731  |
| rs111433075 | G | -0.11   |
| rs12622085  | G | -0.0402 |

|             |   |         |
|-------------|---|---------|
| rs6750650   | A | -0.0475 |
| rs35012832  | A | 0.0463  |
| rs75921449  | C | 0.0776  |
| rs145495632 | T | 0.2382  |
| rs151153025 | A | 0.2603  |
| rs16858622  | A | 0.0376  |
| rs149632984 | G | -0.0984 |
| rs62146214  | T | 0.0577  |
| rs71418781  | A | 0.072   |
| rs6719427   | G | 0.0309  |
| rs10165615  | G | 0.0312  |
| rs147306472 | C | 0.2633  |
| rs17482096  | C | 0.1969  |
| rs4670736   | C | 0.0342  |
| rs73955737  | A | 0.1055  |
| rs17199221  | A | 0.0774  |
| rs823245    | C | -0.1466 |
| rs74259065  | C | -0.0658 |
| rs72811724  | A | -0.0943 |
| rs13382412  | T | 0.1014  |
| rs55793821  | C | 0.2492  |
| rs145529681 | G | 0.0995  |
| rs78613160  | A | 0.0655  |
| rs16861701  | A | 0.0721  |
| rs72822219  | C | 0.0679  |
| rs10211382  | T | -0.0717 |
| rs60621447  | A | 0.1176  |
| rs4355091   | G | 0.1334  |
| rs1908971   | A | 0.0351  |
| rs10198153  | C | -0.0347 |
| rs74708230  | G | -0.1279 |
| rs115362550 | T | -0.1704 |
| rs4953088   | A | 0.0364  |
| rs72801047  | G | 0.044   |
| rs2709437   | C | 0.0334  |
| rs115299366 | A | -0.1331 |
| rs13410514  | G | -0.0421 |
| rs12467328  | T | -0.1416 |
| rs62175999  | G | -0.0466 |
| rs147928235 | A | 0.202   |
| rs3113506   | A | -0.0481 |
| rs1509099   | C | 0.0416  |
| rs2702068   | A | 0.0476  |
| rs62130261  | G | 0.147   |
| rs7580869   | A | 0.0481  |
| rs6746662   | C | -0.0549 |
| rs116675889 | G | 0.1047  |

|             |   |         |
|-------------|---|---------|
| rs4474852   | A | -0.062  |
| rs72806468  | G | -0.128  |
| rs141377771 | A | -0.1159 |
| rs139765462 | A | 0.228   |
| rs6746537   | T | 0.0316  |
| rs893400    | G | 0.0315  |
| rs7422799   | A | -0.1878 |
| rs143194510 | G | 0.1532  |
| rs12469987  | G | -0.049  |
| rs12714409  | T | -0.0519 |
| rs76949688  | C | 0.2075  |
| rs13386423  | A | 0.0783  |
| rs2053365   | A | 0.1265  |
| rs34929342  | T | -0.0437 |
| rs6756828   | T | 0.0372  |
| rs114014715 | A | 0.0487  |
| rs144066102 | A | 0.1705  |
| rs162330    | C | 0.0309  |
| rs2139311   | A | 0.0322  |
| rs10187235  | A | 0.032   |
| rs16851928  | G | -0.2197 |
| rs4520974   | G | -0.041  |
| rs116673937 | A | -0.1206 |
| rs12617667  | G | 0.0853  |
| rs4386305   | G | 0.0606  |
| rs2580329   | T | -0.0597 |
| rs76387374  | C | 0.2053  |
| rs143114242 | G | -0.2459 |
| rs114329117 | T | -0.1109 |
| rs72861074  | G | 0.1605  |
| rs116411438 | G | 0.1563  |
| rs6754954   | A | 0.1006  |
| rs77601801  | G | 0.1754  |
| rs141085349 | T | 0.2209  |
| rs143227416 | G | 0.1874  |
| rs80051453  | T | -0.1067 |
| rs115566654 | G | 0.1441  |
| rs74646943  | G | 0.1854  |
| rs78497371  | G | 0.1518  |
| rs75758489  | C | -0.0689 |
| rs13005516  | C | 0.0333  |
| rs55827398  | C | 0.1939  |
| rs79048985  | T | 0.0919  |
| rs6718129   | A | 0.0339  |
| rs11686697  | A | 0.1211  |
| rs142093991 | T | -0.0986 |
| rs3791327   | G | 0.0506  |

|             |   |         |
|-------------|---|---------|
| rs149826889 | C | -0.1223 |
| rs72789119  | T | -0.0985 |
| rs116362644 | T | 0.1173  |
| rs9989774   | T | -0.155  |
| rs767538    | A | -0.0743 |
| rs116315854 | C | 0.1432  |
| rs10186572  | C | 0.0381  |
| rs76466844  | C | 0.1744  |
| rs548794    | C | -0.0343 |
| rs6723548   | C | 0.0355  |
| rs1863813   | C | -0.2635 |
| rs75947593  | T | -0.1103 |
| rs114164202 | G | 0.1181  |
| rs1117020   | T | 0.1634  |
| rs62142026  | A | -0.0535 |
| rs1368897   | T | -0.0349 |
| rs116362479 | C | -0.1628 |
| rs873625    | G | -0.033  |
| rs10209034  | C | 0.0394  |
| rs2448981   | A | -0.0326 |
| rs145335733 | G | 0.2389  |
| rs1371826   | T | 0.0524  |
| rs6541725   | A | -0.0321 |
| rs7608511   | A | 0.0308  |
| rs6730316   | C | -0.0334 |
| rs116471510 | C | -0.1634 |
| rs1863803   | T | -0.0335 |
| rs149221462 | T | 0.116   |
| rs965721    | A | 0.0381  |
| rs995565    | C | 0.0444  |
| rs74561615  | A | 0.0646  |
| rs78954638  | A | 0.1948  |
| rs543944    | T | 0.0321  |
| rs139544135 | T | 0.2006  |
| rs111938177 | T | 0.2976  |
| rs6721990   | T | 0.0315  |
| rs78680570  | T | 0.121   |
| rs7606151   | C | 0.0343  |
| rs1622980   | C | 0.0442  |
| rs11684751  | C | 0.0318  |
| rs139918676 | G | -0.1155 |
| rs17789111  | G | 0.0903  |
| rs2292871   | G | 0.0329  |
| rs2655455   | A | 0.0338  |
| rs57696969  | G | 0.1667  |
| rs2161020   | G | 0.0452  |
| rs143005966 | G | 0.1457  |

|             |   |         |
|-------------|---|---------|
| rs139417058 | A | 0.1351  |
| rs140673361 | C | -0.0936 |
| rs6734343   | T | -0.0746 |
| rs2972139   | A | 0.0381  |
| rs1947309   | T | 0.0368  |
| rs62191855  | C | -0.0368 |
| rs111749976 | G | 0.073   |
| rs17468723  | C | -0.2039 |
| rs115763818 | T | -0.1311 |
| rs4663289   | T | 0.04    |
| rs1290975   | T | 0.084   |
| rs605008    | C | -0.0377 |
| rs77421561  | C | 0.184   |
| rs6432104   | A | -0.0478 |
| rs11694862  | G | -0.2513 |
| rs13032788  | A | -0.0587 |
| rs4346446   | T | 0.0409  |
| rs111830266 | C | 0.1786  |
| rs150657962 | A | 0.1407  |
| rs62194827  | G | -0.0414 |
| rs149140415 | A | -0.1878 |
| rs62136185  | A | 0.0596  |
| rs115006485 | T | -0.2677 |
| rs147957045 | T | -0.0701 |
| rs877635    | A | 0.031   |
| rs7564089   | A | -0.034  |
| rs7349418   | C | -0.0317 |
| rs77673675  | T | -0.0762 |
| rs13019217  | T | -0.1003 |
| rs79477224  | G | 0.1745  |
| rs1437401   | G | 0.0379  |
| rs4954485   | G | 0.0335  |
| rs74468017  | A | 0.1477  |
| rs79847257  | T | -0.0695 |
| rs72878862  | C | 0.1511  |
| rs1120927   | T | -0.0353 |
| rs74843596  | A | -0.091  |
| rs10177615  | A | -0.0387 |
| rs7568376   | G | 0.107   |
| rs10172221  | C | 0.0438  |
| rs6719287   | A | 0.2604  |
| rs72993680  | G | 0.1721  |
| rs3769851   | A | 0.0479  |
| rs151304312 | G | -0.18   |
| rs116783256 | T | 0.0696  |
| rs35190664  | T | 0.0717  |
| rs12463477  | T | -0.0315 |



|             |   |         |
|-------------|---|---------|
| rs11096667  | T | -0.0446 |
| rs115093260 | A | 0.1788  |
| rs75185226  | G | 0.0927  |
| rs62178606  | C | 0.058   |
| rs785313    | A | 0.1045  |
| rs114783033 | C | -0.1248 |
| rs72783861  | A | -0.0381 |
| rs77856583  | G | 0.0636  |
| rs147970557 | G | 0.2282  |
| rs114957532 | G | -0.0404 |
| rs4637173   | G | -0.0418 |
| rs1430713   | T | -0.0365 |
| rs13007894  | C | 0.0929  |
| rs143227262 | C | 0.125   |
| rs1880746   | A | 0.0558  |
| rs1821178   | T | 0.0554  |
| rs35758221  | A | 0.0348  |
| rs229335    | T | 0.0316  |
| rs10490016  | C | 0.0751  |
| rs2278778   | G | -0.0347 |
| rs113296452 | T | -0.1856 |
| rs7580181   | T | -0.0425 |
| rs13396189  | G | 0.1811  |
| rs305163    | A | -0.0348 |
| rs72838890  | C | 0.2258  |
| rs144978264 | A | 0.2165  |
| rs11677737  | C | 0.1525  |
| rs4954347   | A | -0.0325 |
| rs17039278  | A | 0.0706  |
| rs4848758   | G | -0.0449 |
| rs11693676  | G | 0.0371  |
| rs10932673  | T | -0.0522 |
| rs17013652  | G | 0.1426  |
| rs80060933  | T | -0.0954 |
| rs113767806 | T | 0.1212  |
| rs71424874  | C | -0.157  |
| rs6709419   | T | -0.0398 |
| rs34025957  | C | 0.1425  |
| rs4671113   | A | 0.0682  |
| rs34195041  | A | 0.039   |
| rs34051935  | G | -0.0444 |
| rs112043850 | G | -0.2895 |
| rs11675757  | T | 0.0387  |
| rs55826337  | T | 0.1637  |
| rs76336171  | T | 0.0728  |
| rs6741445   | G | -0.0357 |
| rs10164896  | C | 0.2516  |

|             |   |         |
|-------------|---|---------|
| rs4667702   | C | 0.0479  |
| rs76594908  | T | -0.1025 |
| rs4669091   | T | 0.0562  |
| rs2190386   | G | -0.037  |
| rs6750194   | T | 0.0906  |
| rs62197661  | T | -0.0701 |
| rs114192440 | A | 0.1636  |
| rs76803230  | G | -0.1126 |
| rs1596274   | C | 0.0466  |
| rs9309731   | A | 0.0644  |
| rs117213441 | A | 0.1421  |
| rs62176382  | C | 0.1134  |
| rs115460256 | G | 0.2613  |
| rs77946397  | T | 0.1032  |
| rs10865511  | C | 0.0343  |
| rs74612796  | A | 0.1204  |
| rs1009221   | G | -0.0311 |
| rs17577904  | A | 0.2473  |
| rs6721866   | T | -0.1117 |
| rs56042265  | G | 0.0617  |
| rs939817    | T | -0.0342 |
| rs7608333   | A | -0.0343 |
| rs2041666   | T | 0.043   |
| rs143919387 | T | -0.0352 |
| rs114045501 | T | -0.1296 |
| rs74768681  | T | 0.1512  |
| rs11675256  | G | 0.0589  |
| rs12463897  | T | 0.0682  |
| rs56881368  | A | -0.037  |
| rs146301561 | G | 0.1435  |
| rs1445656   | A | 0.0534  |
| rs10202682  | C | -0.037  |
| rs10183143  | C | -0.0761 |
| rs77015125  | A | -0.1541 |
| rs17443878  | G | 0.0554  |
| rs17390927  | A | -0.0369 |
| rs114212270 | C | -0.078  |
| rs7577695   | T | 0.0344  |
| rs77047697  | T | 0.0896  |
| rs1250076   | G | 0.0334  |
| rs116421027 | A | 0.0771  |
| rs115728862 | T | 0.1066  |
| rs144935066 | T | -0.2614 |
| rs6706043   | G | -0.0326 |
| rs79644533  | A | 0.0653  |
| rs4330124   | T | 0.1032  |
| rs847150    | A | 0.0422  |

|             |   |         |
|-------------|---|---------|
| rs147396890 | T | 0.1858  |
| rs72843723  | T | 0.1411  |
| rs75664785  | C | -0.2444 |
| rs2666996   | T | 0.036   |
| rs113141792 | C | -0.1976 |
| rs62139521  | A | -0.0444 |
| rs3768864   | T | 0.0384  |
| rs116515439 | C | 0.0693  |
| rs12464651  | G | 0.038   |
| rs77114471  | A | 0.118   |
| rs925790    | T | 0.0965  |
| rs116595834 | A | 0.2522  |
| rs142251057 | T | 0.1887  |
| rs17466455  | A | -0.2541 |
| rs1734440   | T | 0.0348  |
| rs115180767 | A | 0.1544  |
| rs115682423 | C | 0.1247  |
| rs6749721   | T | -0.0618 |
| rs114631583 | A | 0.1203  |
| rs114868618 | G | -0.167  |
| rs2704361   | G | 0.0311  |
| rs732734    | T | 0.05    |
| rs77875309  | T | -0.0974 |
| rs78218397  | A | -0.3119 |
| rs146350898 | T | -0.0859 |
| rs34369500  | T | 0.0585  |
| rs72838509  | C | 0.0813  |
| rs6709633   | C | 0.0498  |
| rs72787143  | A | 0.0484  |
| rs2242079   | G | 0.068   |
| rs4676275   | T | 0.0449  |
| rs12466155  | C | -0.0327 |
| rs55975430  | C | 0.1092  |
| rs145197146 | C | -0.1007 |
| rs2058952   | G | 0.0484  |
| rs72853313  | T | -0.069  |
| rs72841604  | G | 0.1316  |
| rs13398226  | T | 0.0351  |
| rs145639259 | A | -0.2483 |
| rs143283302 | G | 0.0858  |
| rs116320474 | T | 0.1435  |
| rs151215234 | A | -0.2409 |
| rs13009406  | A | -0.0311 |
| rs148465423 | A | 0.0342  |
| rs283822    | G | 0.0332  |
| rs12624159  | T | 0.1327  |
| rs642472    | C | 0.0322  |

|             |   |         |
|-------------|---|---------|
| rs12694932  | C | -0.0523 |
| rs12617588  | G | 0.0557  |
| rs6747038   | T | -0.1104 |
| rs62135612  | C | 0.137   |
| rs116343952 | T | -0.0823 |
| rs11895321  | G | -0.0435 |
| rs62158587  | A | -0.0941 |
| rs13425819  | A | -0.1959 |
| rs1435847   | T | 0.0316  |
| rs150064991 | T | 0.2108  |
| rs11901070  | C | 0.0404  |
| rs79394460  | C | 0.0827  |
| rs10496399  | C | -0.0374 |
| rs45551438  | C | -0.1822 |
| rs147657701 | C | 0.1214  |
| rs111551884 | G | -0.1749 |
| rs76568065  | T | -0.1444 |
| rs78780122  | A | 0.1105  |
| rs6727480   | G | 0.0369  |
| rs60471431  | T | 0.1608  |
| rs140255045 | T | -0.1575 |
| rs115509052 | C | 0.1311  |
| rs114248375 | T | -0.1676 |
| rs13396705  | T | 0.0399  |
| rs140373851 | G | 0.2026  |
| rs6710339   | C | -0.0342 |
| rs114729885 | G | 0.096   |
| rs75768577  | C | -0.144  |
| rs116985851 | A | 0.0992  |
| rs72844537  | G | 0.1598  |
| rs1368087   | G | 0.0332  |
| rs143486401 | C | -0.1659 |
| rs12617206  | G | -0.106  |
| rs56801221  | C | 0.1853  |
| rs6739620   | T | -0.0422 |
| rs115829485 | A | -0.1176 |
| rs56119811  | T | 0.0435  |
| rs78417668  | C | -0.0666 |
| rs146856352 | G | -0.1179 |
| rs1913428   | A | 0.0379  |
| rs10196185  | G | 0.0333  |
| rs73974137  | T | 0.0513  |
| rs146485080 | G | 0.2172  |
| rs78859824  | A | 0.2105  |
| rs114323931 | C | -0.1599 |
| rs72831808  | C | -0.1147 |
| rs10176037  | G | -0.0308 |

|             |   |         |
|-------------|---|---------|
| rs114705158 | T | 0.1769  |
| rs72816329  | C | 0.0452  |
| rs1478645   | G | 0.0391  |
| rs1975554   | T | 0.0391  |
| rs1729888   | T | -0.0505 |
| rs116655365 | C | 0.1451  |
| rs13000757  | T | -0.0311 |
| rs10928169  | G | -0.0315 |
| rs72963855  | G | 0.1641  |
| rs4591389   | G | -0.0431 |
| rs4429412   | A | 0.0744  |
| rs7572753   | C | -0.0348 |
| rs28483093  | G | 0.0519  |
| rs4952901   | T | 0.0308  |
| rs114875666 | T | 0.0816  |
| rs62188077  | T | 0.0532  |
| rs77605217  | G | 0.0902  |
| rs7562462   | T | -0.0313 |
| rs13421222  | A | -0.0421 |
| rs17364234  | A | -0.0696 |
| rs78564420  | A | -0.0841 |
| rs79279261  | C | 0.0738  |
| rs138041649 | A | -0.1076 |
| rs34186074  | C | 0.0319  |
| rs36089022  | C | -0.058  |
| rs113735819 | C | -0.1027 |
| rs35584480  | A | 0.1455  |
| rs281469    | C | -0.0418 |
| rs17041196  | C | -0.069  |
| rs2528588   | A | -0.0372 |
| rs35151979  | G | -0.0559 |
| rs13407074  | T | -0.0437 |
| rs4630742   | T | 0.0314  |
| rs6731439   | A | 0.076   |
| rs142177921 | G | -0.1521 |
| rs79900522  | C | 0.1442  |
| rs6705480   | C | 0.0589  |
| rs72802167  | A | 0.093   |
| rs35555322  | T | 0.1412  |
| rs114885431 | T | 0.1756  |
| rs77928678  | G | 0.24    |
| rs58540116  | T | -0.0948 |
| rs72862397  | C | -0.0441 |
| rs145282699 | A | 0.211   |
| rs11693929  | T | 0.044   |
| rs62176909  | T | -0.0581 |
| rs72810176  | A | 0.2024  |

|             |   |         |
|-------------|---|---------|
| rs4854507   | T | 0.0331  |
| rs79514776  | G | 0.1016  |
| rs115973548 | T | -0.0932 |
| rs146968465 | T | 0.2149  |
| rs80193301  | G | 0.1322  |
| rs9967803   | G | 0.0518  |
| rs116154690 | A | 0.1252  |
| rs373857    | A | 0.0311  |
| rs6739873   | G | 0.0496  |
| rs56040758  | C | 0.0401  |
| rs74662398  | A | 0.0943  |
| rs4971744   | T | 0.0336  |
| rs78368718  | C | -0.1763 |
| rs11684993  | T | 0.0316  |
| rs55784685  | G | -0.0925 |
| rs733501    | C | 0.1591  |
| rs72840619  | T | -0.2063 |
| rs357736    | C | 0.0474  |
| rs113075902 | T | 0.1259  |
| rs55886356  | G | -0.184  |
| rs10182928  | A | 0.0336  |
| rs138699480 | C | 0.0948  |
| rs17247006  | A | 0.0478  |
| rs113096863 | C | -0.233  |
| rs115117372 | G | 0.1429  |
| rs111514227 | A | -0.0985 |
| rs2966383   | A | 0.0566  |
| rs11888820  | G | 0.0382  |
| rs7593100   | T | 0.0579  |
| rs1146038   | A | -0.0557 |
| rs10201978  | C | 0.0516  |
| rs10184391  | C | 0.0752  |
| rs112056971 | T | -0.1633 |
| rs4241282   | T | 0.0485  |
| rs79716367  | A | -0.1425 |
| rs28387159  | T | 0.0567  |
| rs11685813  | G | -0.0332 |
| rs10192995  | T | -0.0438 |
| rs16840302  | C | -0.0569 |
| rs79369060  | T | 0.2914  |
| rs114044328 | C | 0.1802  |
| rs140059347 | T | -0.1264 |
| rs2765934   | A | -0.0668 |
| rs35863506  | A | 0.0489  |
| rs6746026   | C | -0.0406 |
| rs7568580   | T | -0.052  |
| rs6759409   | T | 0.0816  |

|             |   |         |
|-------------|---|---------|
| rs1820924   | T | -0.0405 |
| rs72858284  | A | -0.1395 |
| rs76652761  | C | -0.0479 |
| rs76876403  | G | 0.11    |
| rs4672007   | C | 0.0567  |
| rs4594412   | T | 0.0375  |
| rs115732783 | A | 0.1233  |
| rs149646413 | G | -0.1517 |
| rs79864165  | G | 0.1474  |
| rs77391586  | A | 0.0746  |
| rs4953620   | C | 0.035   |
| rs77932832  | A | 0.207   |
| rs7579531   | T | -0.0928 |
| rs7609362   | C | 0.0404  |
| rs6746771   | G | 0.0515  |
| rs78263562  | A | 0.1778  |
| rs149266292 | A | -0.1289 |
| rs71411843  | C | 0.0611  |
| rs12466995  | G | 0.0349  |
| rs62153600  | T | 0.1001  |
| rs77293341  | C | 0.118   |
| rs72773013  | T | 0.0695  |
| rs114355204 | C | 0.1093  |
| rs1519802   | A | 0.0421  |
| rs429340    | A | -0.0341 |
| rs2034259   | C | -0.0442 |
| rs967725    | A | 0.1031  |
| rs1024688   | G | 0.0537  |
| rs114797027 | C | -0.1189 |
| rs4332915   | A | 0.0397  |
| rs2652450   | G | 0.0311  |
| rs6711659   | A | -0.1003 |
| rs114252768 | C | 0.1534  |
| rs74417427  | A | 0.103   |
| rs17536092  | C | 0.1868  |
| rs114230884 | A | 0.1942  |
| rs13019159  | A | 0.1228  |
| rs4673802   | G | -0.0338 |
| rs147544339 | G | 0.1241  |
| rs311998    | T | -0.0501 |
| rs145324131 | G | -0.2532 |
| rs78544823  | C | -0.0846 |
| rs13427499  | C | 0.0402  |
| rs114746803 | C | 0.2794  |
| rs142926639 | C | -0.1406 |
| rs62148679  | T | 0.2088  |
| rs76877923  | G | 0.0667  |

|             |   |         |
|-------------|---|---------|
| rs115344996 | T | 0.205   |
| rs114409718 | G | -0.1509 |
| rs1990703   | A | -0.0972 |
| rs116840679 | C | 0.2068  |
| rs4539784   | C | -0.0326 |
| rs79098878  | T | -0.1885 |
| rs113457375 | A | 0.1457  |
| rs12714397  | A | 0.0531  |
| rs3789085   | G | 0.0302  |
| rs6743107   | T | 0.0339  |
| rs114752964 | T | -0.1672 |
| rs13019502  | C | 0.1625  |
| rs76964577  | C | 0.1136  |
| rs2044959   | T | 0.0375  |
| rs62183700  | C | 0.0335  |
| rs145760237 | C | -0.0902 |
| rs74350038  | G | 0.0911  |
| rs16829231  | C | -0.039  |
| rs80029047  | A | 0.0833  |
| rs55814236  | T | -0.0802 |
| rs115049412 | T | -0.0752 |
| rs16839552  | A | 0.1508  |
| rs147460545 | A | 0.1642  |
| rs6545450   | C | 0.0361  |
| rs60261016  | A | 0.1011  |
| rs17397220  | A | -0.0804 |
| rs12616495  | G | 0.0344  |
| rs11696044  | A | 0.0584  |
| rs16853723  | C | -0.0453 |
| rs111663132 | A | 0.1733  |
| rs145169831 | A | -0.2017 |
| rs62178643  | T | 0.0836  |
| rs12994923  | G | 0.0575  |
| rs77917748  | A | 0.129   |
| rs13024256  | G | 0.0352  |
| rs6541990   | C | 0.033   |
| rs114956296 | A | 0.1369  |
| rs148620871 | T | 0.1587  |
| rs77686960  | C | 0.0726  |
| rs6732624   | G | -0.0475 |
| rs74755467  | G | 0.0916  |
| rs7740      | T | 0.0647  |
| rs6718366   | A | 0.142   |
| rs77159903  | C | 0.1526  |
| rs1159593   | C | -0.0347 |
| rs13009600  | A | -0.0312 |
| rs115880776 | T | 0.165   |



|             |   |         |
|-------------|---|---------|
| rs7609289   | C | -0.0958 |
| rs12476100  | T | 0.0326  |
| rs113317209 | T | -0.1051 |
| rs75982532  | A | 0.1365  |
| rs1878280   | G | -0.0301 |
| rs2303428   | C | -0.053  |
| rs10164555  | G | 0.0315  |
| rs78881066  | T | 0.0951  |
| rs72792598  | A | -0.1022 |
| rs7592956   | T | -0.0401 |
| rs73954985  | T | 0.1395  |
| rs10179662  | T | -0.0325 |
| rs111432326 | T | 0.0805  |
| rs4459724   | A | 0.0517  |
| rs141797136 | G | 0.1819  |
| rs72837842  | A | -0.0476 |
| rs141857239 | A | -0.1393 |
| rs115312698 | C | -0.077  |
| rs7585751   | T | -0.0596 |
| rs17044985  | G | 0.048   |
| rs12999908  | C | -0.0576 |
| rs12994520  | T | 0.0753  |
| rs2167433   | G | -0.0335 |
| rs75751262  | A | 0.0567  |
| rs138793796 | T | 0.172   |
| rs1550380   | T | 0.0478  |
| rs72985795  | G | 0.1168  |
| rs77363583  | G | 0.0444  |
| rs1030295   | T | -0.0322 |
| rs114620309 | C | 0.1132  |
| rs6761891   | C | 0.0377  |
| rs139265447 | T | 0.1347  |
| rs1542271   | G | 0.0294  |
| rs76822172  | G | -0.115  |
| rs116573894 | T | 0.1129  |
| rs71407540  | A | -0.0754 |
| rs114483067 | T | 0.1593  |
| rs72879536  | C | -0.0435 |
| rs116707100 | C | -0.0916 |
| rs13415790  | C | -0.043  |
| rs13432204  | A | 0.0391  |
| rs71422591  | G | 0.0565  |
| rs116691208 | A | -0.146  |
| rs77112071  | A | -0.0659 |
| rs77449817  | T | -0.046  |
| rs16866559  | G | 0.1201  |
| rs2056642   | C | -0.0313 |

|             |   |         |
|-------------|---|---------|
| rs2577261   | T | 0.0978  |
| rs4848490   | T | -0.0374 |
| rs4953885   | T | 0.1602  |
| rs2009741   | A | 0.1266  |
| rs17031432  | G | -0.047  |
| rs4453701   | C | -0.0459 |
| rs6429855   | T | 0.036   |
| rs306188    | T | -0.0341 |
| rs114763203 | T | -0.079  |
| rs16860965  | G | -0.0473 |
| rs34629660  | G | 0.1295  |
| rs116196860 | G | 0.0994  |
| rs76045288  | A | 0.0685  |
| rs17036890  | T | 0.066   |
| rs11674098  | T | 0.1076  |
| rs77234474  | C | 0.196   |
| rs146722146 | T | 0.0992  |
| rs78485872  | T | -0.1174 |
| rs12693022  | G | -0.0523 |
| rs72875851  | T | 0.1223  |
| rs2541004   | T | 0.03    |
| rs72905384  | C | -0.1326 |
| rs1430195   | G | 0.0337  |
| rs12994442  | C | 0.032   |
| rs80223913  | G | -0.0971 |
| rs10169255  | T | 0.0466  |
| rs371825    | G | -0.0632 |
| rs114041668 | C | 0.1089  |
| rs138598377 | G | 0.1467  |
| rs76224264  | C | -0.0653 |
| rs2954802   | T | -0.0753 |
| rs10193788  | A | -0.0762 |
| rs1437908   | C | 0.072   |
| rs76128162  | G | 0.1069  |
| rs56194624  | A | -0.0954 |
| rs112954812 | G | 0.1056  |
| rs140823096 | C | 0.0629  |
| rs7601811   | G | -0.0546 |
| rs1714950   | C | -0.0371 |
| rs114854005 | T | -0.0859 |
| rs62106294  | A | 0.1037  |
| rs77901164  | A | -0.0748 |
| rs1430214   | A | -0.0523 |
| rs143359612 | A | -0.1427 |
| rs145158510 | T | 0.0961  |
| rs139279144 | C | 0.2123  |
| rs10187793  | C | -0.1113 |

|             |   |         |
|-------------|---|---------|
| rs7588601   | T | 0.0393  |
| rs1808718   | T | 0.0453  |
| rs1869088   | T | -0.0493 |
| rs35444703  | A | 0.0296  |
| rs9941545   | C | 0.1132  |
| rs796283    | T | -0.0303 |
| rs62162701  | T | -0.0441 |
| rs60484335  | C | -0.0349 |
| rs2194725   | C | 0.1217  |
| rs10183121  | A | 0.0298  |
| rs144257616 | G | -0.3257 |
| rs11686658  | T | -0.0376 |
| rs142305054 | G | 0.2415  |
| rs56411018  | C | 0.1045  |
| rs4927574   | G | 0.1557  |
| rs1400891   | A | 0.0339  |
| rs57647685  | G | 0.0457  |
| rs76564933  | A | 0.1178  |
| rs115426627 | A | -0.2306 |
| rs148152058 | A | 0.2312  |
| rs139570728 | A | 0.2089  |
| rs2193218   | A | 0.0356  |
| rs6734321   | T | 0.0331  |
| rs11895305  | C | 0.0455  |
| rs13419195  | T | -0.0494 |
| rs73006300  | A | -0.0732 |
| rs2218495   | T | 0.0449  |
| rs16982725  | T | -0.0924 |
| rs35064954  | T | -0.164  |
| rs550619    | G | 0.0506  |
| rs2553634   | A | -0.0307 |
| rs72983571  | T | 0.1591  |
| rs116500860 | A | -0.1129 |
| rs13390788  | G | -0.0477 |
| rs56069757  | A | 0.0365  |
| rs3992945   | A | 0.0948  |
| rs1601506   | G | 0.0406  |
| rs55851898  | G | 0.0499  |
| rs6709363   | G | -0.0645 |
| rs79669124  | A | 0.2347  |
| rs148408558 | A | -0.1603 |
| rs950920    | T | 0.0822  |
| rs138851573 | C | 0.1305  |
| rs116156044 | T | 0.2696  |
| rs10208946  | A | -0.047  |
| rs114721669 | A | -0.1471 |
| rs111444533 | G | -0.1841 |

|             |   |         |
|-------------|---|---------|
| rs73008605  | T | 0.089   |
| rs75675489  | C | -0.2049 |
| rs4355112   | A | -0.0626 |
| rs434276    | A | -0.0303 |
| rs139634475 | C | 0.1255  |
| rs7420144   | G | -0.0337 |
| rs10803744  | G | 0.0446  |
| rs12470677  | T | 0.0805  |
| rs7578482   | C | 0.0384  |
| rs80224102  | A | -0.052  |
| rs55694679  | T | 0.09    |
| rs703297    | T | 0.0304  |
| rs76846090  | A | -0.1707 |
| rs142839583 | C | 0.1455  |
| rs62173715  | G | -0.1909 |
| rs112268502 | A | 0.1758  |
| rs59483741  | C | -0.0405 |
| rs115191045 | A | 0.1332  |
| rs1947571   | A | -0.0293 |
| rs62195309  | A | 0.0751  |
| rs6736604   | A | 0.0416  |
| rs6722220   | C | 0.0307  |
| rs150780055 | T | 0.1165  |
| rs78746803  | T | 0.2214  |
| rs6731582   | T | -0.0297 |
| rs72781953  | A | -0.0745 |
| rs72985720  | G | -0.17   |
| rs77671873  | G | -0.1197 |
| rs1597418   | A | 0.0315  |
| rs116357370 | G | -0.1458 |
| rs1729087   | C | -0.0518 |
| rs10460291  | A | 0.0705  |
| rs147260256 | G | 0.113   |
| rs62133665  | A | 0.1314  |
| rs55925656  | C | 0.0569  |
| rs2018434   | C | -0.1253 |
| rs139204957 | A | 0.2337  |
| rs79953241  | C | 0.3566  |
| rs56008709  | C | -0.1257 |
| rs934241    | A | 0.0431  |
| rs144939129 | T | 0.0919  |
| rs78705243  | A | 0.1431  |
| rs78572502  | A | -0.122  |
| rs78849092  | T | 0.0756  |
| rs62176487  | T | 0.0499  |
| rs71417433  | A | 0.1145  |
| rs7605769   | C | 0.0299  |

|             |   |         |
|-------------|---|---------|
| rs116696338 | A | -0.1581 |
| rs79424275  | G | -0.1734 |
| rs4848692   | G | 0.0293  |
| rs75192573  | G | -0.0841 |
| rs79821144  | T | 0.085   |
| rs10174165  | T | 0.0594  |
| rs6543760   | C | 0.0331  |
| rs114142302 | A | -0.137  |
| rs76609466  | T | -0.2007 |
| rs116136826 | T | -0.1069 |
| rs1022121   | C | -0.0591 |
| rs6734226   | G | -0.0306 |
| rs79058899  | G | 0.1     |
| rs113229104 | G | -0.164  |
| rs13417230  | A | 0.041   |
| rs7420474   | T | 0.1026  |
| rs75965153  | G | 0.2246  |
| rs4442955   | G | 0.0346  |
| rs12987929  | G | -0.0807 |
| rs10933379  | C | 0.0307  |
| rs58527121  | C | -0.0836 |
| rs115969757 | C | 0.0984  |
| rs275414    | G | -0.0342 |
| rs145471583 | G | 0.2298  |
| rs4353696   | C | -0.0669 |
| rs7603408   | C | -0.0603 |
| rs56215822  | T | -0.1133 |
| rs80335304  | T | 0.2139  |
| rs10179702  | G | -0.0509 |
| rs77736861  | G | 0.0402  |
| rs13408772  | T | -0.0322 |
| rs139141063 | C | 0.1469  |
| rs6548077   | T | -0.0587 |
| rs79103577  | T | 0.1587  |
| rs6721141   | G | 0.0366  |
| rs7608315   | C | -0.0299 |
| rs72824567  | G | 0.0651  |
| rs139649350 | T | 0.1532  |
| rs1439804   | T | 0.0402  |
| rs78035344  | G | 0.1925  |
| rs7570678   | C | 0.0519  |
| rs1435578   | T | -0.03   |
| rs75878478  | T | -0.1027 |
| rs10498001  | T | -0.0451 |
| rs111666258 | C | -0.1315 |
| rs28758503  | A | 0.0438  |
| rs62187973  | C | 0.0568  |

|             |   |         |
|-------------|---|---------|
| rs6706030   | G | -0.0306 |
| rs78256138  | A | 0.2497  |
| rs4674231   | A | -0.188  |
| rs6430796   | G | -0.0313 |
| rs149616149 | A | 0.163   |
| rs754330    | A | -0.1047 |
| rs2381575   | C | 0.0347  |
| rs79038462  | A | 0.1021  |
| rs1151800   | G | -0.0365 |
| rs11887797  | G | 0.06    |
| rs1250062   | G | -0.0557 |
| rs79333284  | G | 0.1483  |
| rs996740    | T | 0.1212  |
| rs74660700  | T | 0.1637  |
| rs13419959  | C | -0.0357 |
| rs115770602 | T | -0.112  |
| rs78555083  | A | -0.1272 |
| rs72834462  | G | -0.0645 |
| rs2052626   | G | -0.0456 |
| rs62126416  | T | -0.0871 |
| rs145162712 | T | 0.1305  |
| rs7599466   | A | 0.0302  |
| rs11675026  | C | 0.0385  |
| rs16863312  | T | 0.0909  |
| rs78623688  | C | 0.1649  |
| rs7568939   | T | 0.2242  |
| rs2043876   | A | 0.0604  |
| rs72920507  | G | -0.0793 |
| rs4330060   | A | 0.0312  |
| rs114717333 | G | 0.149   |
| rs114881906 | C | 0.2632  |
| rs13421437  | T | -0.0848 |
| rs949674    | A | -0.1704 |
| rs114170957 | T | 0.1579  |
| rs855047    | T | 0.0339  |
| rs11903043  | A | 0.0761  |
| rs61261636  | G | 0.0299  |
| rs116657049 | T | -0.131  |
| rs138381224 | C | -0.2161 |
| rs17445680  | T | 0.0465  |
| rs115853211 | T | -0.1386 |
| rs36193600  | A | -0.0352 |
| rs698779    | G | -0.0567 |
| rs1465820   | G | 0.0316  |
| rs79665267  | C | 0.1766  |
| rs778188    | G | 0.0428  |
| rs118004979 | T | -0.1578 |

|             |   |         |
|-------------|---|---------|
| rs142901511 | C | -0.1451 |
| rs6756937   | T | 0.041   |
| rs57577926  | T | 0.0703  |
| rs10933329  | C | -0.0307 |
| rs114233918 | A | 0.2281  |
| rs72798919  | G | 0.0772  |
| rs77304930  | A | 0.0607  |
| rs55770141  | C | -0.0758 |
| rs13382285  | G | -0.0338 |
| rs116438652 | A | -0.1198 |
| rs150612228 | C | -0.1007 |
| rs10176121  | C | 0.0301  |
| rs114462772 | A | 0.1499  |
| rs150796625 | A | 0.1966  |
| rs13384101  | A | -0.0482 |
| rs75601536  | G | 0.2487  |
| rs72941844  | C | -0.0882 |
| rs13033389  | T | 0.0497  |
| rs72877304  | T | 0.2808  |
| rs149436423 | T | 0.146   |
| rs4024576   | C | -0.0308 |
| rs13005428  | G | -0.0871 |
| rs35407683  | A | 0.1075  |
| rs4450661   | G | 0.0315  |
| rs142171507 | T | 0.1553  |
| rs143964780 | T | 0.2089  |
| rs35290835  | T | 0.0897  |
| rs17014803  | T | -0.0538 |
| rs7601054   | T | -0.0457 |
| rs34467783  | C | -0.0744 |
| rs72963262  | C | -0.1218 |
| rs111358020 | A | 0.1076  |
| rs7590896   | C | -0.0307 |
| rs7567269   | A | -0.0663 |
| rs72805598  | A | 0.1694  |
| rs62161541  | T | -0.1108 |
| rs55833866  | G | 0.1653  |
| rs80287741  | G | 0.0493  |
| rs6437301   | C | 0.0567  |
| rs4851075   | T | -0.0311 |
| rs6726699   | A | -0.0592 |
| rs4852887   | A | 0.2117  |
| rs56343802  | T | -0.0331 |
| rs10188533  | C | 0.0306  |
| rs113461569 | C | 0.16    |
| rs6716872   | A | 0.0341  |
| rs10207573  | C | 0.0566  |

|             |   |         |
|-------------|---|---------|
| rs115111670 | T | 0.1354  |
| rs141237068 | A | 0.1348  |
| rs61628485  | C | 0.0562  |
| rs79469928  | C | -0.149  |
| rs6742549   | A | 0.0296  |
| rs6708787   | G | 0.0833  |
| rs2192568   | C | 0.109   |
| rs72992575  | G | 0.0973  |
| rs13033168  | A | 0.0538  |
| rs112444624 | C | -0.1091 |
| rs79313284  | A | -0.112  |
| rs115178827 | A | -0.1189 |
| rs137957682 | C | 0.1043  |
| rs4670571   | C | -0.0502 |
| rs72895351  | G | 0.0899  |
| rs4670047   | T | 0.0377  |
| rs62120004  | G | 0.1276  |
| rs34412180  | C | -0.0403 |
| rs76464725  | C | -0.2625 |
| rs11124762  | G | 0.0305  |
| rs7600002   | A | -0.031  |
| rs17744573  | G | -0.0706 |
| rs13020404  | C | -0.0446 |
| rs74381984  | A | 0.192   |
| rs143440184 | C | 0.2846  |
| rs114743196 | T | 0.143   |
| rs4971588   | C | 0.0301  |
| rs60048610  | A | 0.0517  |
| rs114045461 | A | -0.0991 |
| rs4303682   | T | -0.0762 |
| rs146445345 | C | -0.1594 |
| rs13022783  | T | -0.1387 |
| rs74505060  | G | -0.0629 |
| rs10175765  | G | -0.03   |
| rs116168933 | A | -0.1208 |
| rs146936425 | C | 0.188   |
| rs35432564  | A | 0.1244  |
| rs76351148  | A | 0.0766  |
| rs34185798  | A | 0.1918  |
| rs116726148 | G | -0.1023 |
| rs76790403  | T | 0.1495  |
| rs1978346   | G | 0.0309  |
| rs72796940  | G | 0.0628  |
| rs7421353   | T | -0.03   |
| rs146063074 | C | 0.1099  |
| rs62175494  | C | 0.0644  |
| rs7600998   | G | 0.0547  |



|             |   |         |
|-------------|---|---------|
| rs4668632   | A | -0.0395 |
| rs114198076 | T | 0.1332  |
| rs6733533   | A | -0.0318 |
| rs12104609  | T | -0.2158 |
| rs12464184  | A | -0.0572 |
| rs151160320 | G | -0.1995 |
| rs116290954 | G | -0.1595 |
| rs74375764  | A | 0.0865  |
| rs78612521  | T | -0.1631 |
| rs79684655  | C | -0.1794 |
| rs7584267   | G | 0.039   |
| rs1404773   | A | -0.0625 |
| rs6712413   | G | -0.0291 |
| rs150519328 | C | 0.1022  |
| rs784554    | T | -0.0541 |
| rs112586403 | T | 0.1565  |
| rs72793701  | A | -0.0925 |
| rs138678216 | G | -0.0394 |
| rs1427695   | A | -0.0879 |
| rs62140510  | A | 0.1325  |
| rs13002138  | G | 0.0541  |
| rs113780495 | A | -0.1222 |
| rs28730854  | T | 0.1078  |
| rs144958291 | T | -0.1573 |
| rs58025064  | G | 0.0659  |
| rs114992737 | G | 0.1506  |
| rs17188518  | C | -0.0402 |
| rs6433145   | G | 0.1974  |
| rs12614900  | C | 0.2013  |
| rs11898648  | A | 0.0321  |
| rs4332965   | A | 0.0344  |
| rs144588296 | A | 0.14    |
| rs75663443  | A | -0.2128 |
| rs75991765  | T | -0.1139 |
| rs111731674 | C | 0.1118  |
| rs116494708 | C | 0.1567  |
| rs72980095  | T | 0.1041  |
| rs73964022  | A | 0.0398  |
| rs6716290   | G | 0.0357  |
| rs13383793  | C | 0.0489  |
| rs1484483   | C | 0.0469  |
| rs1406665   | C | -0.0353 |
| rs2192719   | G | 0.1574  |
| rs4848941   | A | -0.041  |
| rs4405778   | C | -0.043  |
| rs11681215  | G | -0.1027 |
| rs111447601 | T | 0.1287  |

|             |   |         |
|-------------|---|---------|
| rs76020680  | T | -0.0595 |
| rs591606    | G | 0.0443  |
| rs78571755  | G | 0.1193  |
| rs6726947   | G | 0.0391  |
| rs113486169 | T | 0.1952  |
| rs77655283  | G | 0.0587  |
| rs115146761 | G | -0.1553 |
| rs112968872 | G | 0.1006  |
| rs3980660   | T | 0.0311  |
| rs2356963   | C | 0.1087  |
| rs56349594  | G | 0.1254  |
| rs76716846  | A | -0.1247 |
| rs77709788  | T | -0.1327 |
| rs62201158  | G | -0.0737 |
| rs11902457  | C | 0.1406  |
| rs732170    | G | -0.0796 |
| rs1559644   | T | 0.0311  |
| rs16828712  | T | 0.0424  |
| rs7596575   | G | 0.0535  |
| rs111976017 | T | -0.1082 |
| rs1036294   | C | 0.0336  |
| rs10932935  | C | 0.0345  |
| rs4671716   | C | 0.0668  |
| rs2161981   | C | 0.2149  |
| rs4952740   | T | 0.0289  |
| rs144834600 | G | -0.1496 |
| rs1199033   | T | 0.0313  |
| rs143344891 | G | -0.1711 |
| rs147939542 | G | 0.158   |
| rs140416918 | C | 0.1472  |
| rs12619209  | C | 0.1079  |
| rs116760026 | G | 0.1565  |
| rs72924581  | C | 0.1416  |
| rs2356350   | G | 0.0295  |
| rs13417802  | G | -0.0343 |
| rs150199180 | A | -0.1466 |
| rs7368874   | T | -0.1519 |
| rs10197959  | A | -0.0303 |
| rs76859228  | C | -0.0397 |
| rs17835248  | A | -0.1595 |
| rs16830706  | T | 0.1907  |
| rs58717749  | T | 0.0322  |
| rs75377488  | C | 0.1826  |
| rs62178755  | A | 0.0367  |
| rs4438434   | A | 0.1394  |
| rs1179713   | G | 0.0339  |
| rs1155886   | A | 0.1015  |

|             |   |         |
|-------------|---|---------|
| rs1440075   | G | -0.0344 |
| rs11676879  | G | 0.0677  |
| rs62279335  | T | -0.0821 |
| rs73000657  | C | -0.0815 |
| rs16863226  | G | 0.0391  |
| rs62170669  | A | 0.0447  |
| rs141747508 | T | 0.1213  |
| rs144614914 | T | 0.1034  |
| rs34732772  | T | 0.0795  |
| rs76697759  | A | -0.1356 |
| rs147287512 | A | -0.1982 |
| rs72783126  | C | 0.0433  |
| rs72916033  | C | -0.0595 |
| rs114597327 | G | 0.1191  |
| rs116868306 | G | 0.099   |
| rs4851524   | T | 0.1851  |
| rs1362256   | T | -0.0299 |
| rs76925832  | T | 0.2617  |
| rs262498    | A | 0.034   |
| rs6435548   | T | 0.0332  |
| rs115545257 | G | -0.1132 |
| rs6749840   | A | -0.1116 |
| rs1866568   | T | -0.1356 |
| rs28635091  | C | 0.031   |
| rs3897999   | G | 0.081   |
| rs76472139  | A | 0.1816  |
| rs59655971  | A | -0.0456 |
| rs75739412  | T | 0.0634  |
| rs78750321  | A | -0.1458 |
| rs1672095   | G | -0.0532 |
| rs13012647  | C | -0.0977 |
| rs138926754 | C | -0.187  |
| rs13415017  | C | -0.0389 |
| rs10187595  | T | 0.217   |
| rs12988938  | G | 0.0428  |
| rs6731916   | T | 0.0336  |
| rs116123210 | T | 0.1275  |
| rs4487117   | C | -0.0452 |
| rs11127439  | C | 0.0471  |
| rs58011443  | T | 0.0907  |
| rs7572289   | A | 0.0429  |
| rs148238549 | A | 0.1316  |
| rs6433221   | G | -0.0432 |
| rs11678658  | G | 0.032   |
| rs116048425 | T | 0.1609  |
| rs17869088  | G | -0.074  |
| rs76837624  | T | -0.1174 |

|             |   |         |
|-------------|---|---------|
| rs13391772  | A | 0.047   |
| rs142498165 | A | -0.2062 |
| rs12988127  | T | 0.0404  |
| rs66638761  | A | 0.041   |
| rs6710236   | G | 0.0322  |
| rs12470484  | A | -0.0326 |
| rs71421685  | T | 0.1018  |
| rs114729494 | G | 0.1013  |
| rs147102115 | A | 0.1058  |
| rs1553032   | C | 0.0324  |
| rs78004032  | C | -0.1746 |
| rs11897825  | G | -0.0407 |
| rs114891547 | C | -0.198  |
| rs6431004   | C | 0.0409  |
| rs78387517  | C | 0.0437  |
| rs35785175  | C | -0.251  |
| rs4852371   | G | -0.0314 |
| rs61265305  | T | 0.0635  |
| rs58927410  | A | -0.0652 |
| rs35972532  | A | 0.0743  |
| rs78473941  | T | -0.1598 |
| rs144957047 | G | -0.2162 |
| rs2090035   | A | 0.029   |
| rs10204443  | T | -0.103  |
| rs55720389  | G | 0.1981  |
| rs116783643 | C | 0.2384  |
| rs1517645   | C | 0.0408  |
| rs10514649  | A | -0.0506 |
| rs10198209  | T | 0.1238  |
| rs78246538  | G | 0.0534  |
| rs75814252  | G | -0.1849 |
| rs823543    | T | -0.029  |
| rs72617008  | A | 0.0364  |
| rs72826026  | T | -0.1308 |
| rs112176960 | T | 0.1316  |
| rs112949160 | T | 0.1833  |
| rs75428935  | T | -0.0663 |
| rs73992621  | A | 0.0602  |
| rs62131028  | T | -0.1796 |
| rs114124763 | G | -0.0751 |
| rs6750400   | C | 0.0339  |
| rs810854    | G | -0.0344 |
| rs114413253 | C | -0.1855 |
| rs6704919   | A | 0.055   |
| rs76681498  | T | -0.0477 |
| rs138570410 | A | -0.3129 |
| rs4672391   | A | -0.038  |

|             |   |         |
|-------------|---|---------|
| rs563763    | T | -0.038  |
| rs13384679  | A | -0.0343 |
| rs2247030   | T | -0.0368 |
| rs79518018  | T | -0.1352 |
| rs60900435  | T | -0.0318 |
| rs73955839  | G | 0.0926  |
| rs146120572 | C | -0.1212 |
| rs143341504 | A | 0.1136  |
| rs1864806   | A | -0.0508 |
| rs76562458  | A | 0.1041  |
| rs114300376 | T | 0.1214  |
| rs10185414  | C | 0.1359  |
| rs17538082  | C | -0.0336 |
| rs35759356  | A | 0.1468  |
| rs74588987  | T | -0.1897 |
| rs10460331  | T | -0.2106 |
| rs10190396  | A | -0.029  |
| rs13013882  | G | -0.0381 |
| rs144135071 | T | 0.1043  |
| rs77828008  | C | -0.1286 |
| rs114952970 | T | -0.1452 |
| rs12612050  | A | -0.0286 |
| rs13027617  | C | 0.0471  |
| rs10208323  | T | -0.1464 |
| rs80093030  | G | 0.1269  |
| rs12617218  | A | 0.0328  |
| rs12986742  | C | 0.0292  |
| rs1349515   | G | 0.03    |
| rs35131486  | A | -0.0365 |
| rs76847828  | G | 0.0888  |
| rs72621677  | A | 0.1704  |
| rs114098256 | T | 0.1856  |
| rs62153265  | C | -0.0339 |
| rs72807157  | C | -0.0773 |
| rs75155963  | G | -0.2352 |
| rs12998674  | T | 0.0937  |
| rs6757800   | G | 0.0551  |
| rs77549334  | G | -0.0942 |
| rs115466729 | C | 0.1281  |
| rs62164103  | C | 0.0941  |
| rs34626524  | C | -0.1737 |
| rs113614968 | T | 0.1086  |
| rs6735427   | T | 0.0423  |
| rs10188887  | T | -0.0424 |
| rs16858811  | C | 0.0804  |
| rs6713533   | C | 0.0377  |
| rs55841309  | G | 0.0474  |

|             |   |         |
|-------------|---|---------|
| rs4669458   | C | -0.0348 |
| rs146190379 | T | 0.2342  |
| rs7593535   | C | 0.0365  |
| rs74778108  | G | 0.185   |
| rs113214666 | C | -0.1139 |
| rs13403269  | G | 0.1188  |
| rs73019330  | G | 0.1376  |
| rs113553580 | T | 0.1791  |
| rs137858828 | T | 0.1606  |
| rs12615565  | A | 0.0307  |
| rs76114360  | T | -0.2413 |
| rs2412047   | T | -0.0365 |
| rs150699    | A | -0.082  |
| rs72983211  | T | -0.1662 |
| rs77191956  | T | 0.0461  |
| rs1659704   | T | -0.0486 |
| rs831002    | T | 0.0374  |
| rs1528219   | C | -0.0388 |
| rs78384255  | G | 0.1071  |
| rs17478779  | C | 0.1301  |
| rs11682064  | C | -0.0376 |
| rs869162    | G | -0.0735 |
| rs77671962  | A | -0.2325 |
| rs13417860  | A | -0.0843 |
| rs35811890  | T | -0.172  |
| rs147809461 | G | -0.0847 |
| rs142619521 | T | -0.097  |
| rs1394793   | T | 0.0319  |
| rs617222    | G | 0.035   |
| rs115561420 | C | 0.1956  |
| rs113560393 | T | 0.1038  |
| rs13033112  | C | -0.178  |
| rs62178290  | T | 0.0787  |
| rs6737235   | T | 0.3028  |
| rs75548305  | C | 0.0791  |
| rs78836221  | T | 0.0739  |
| rs75558284  | T | -0.0536 |
| rs75576950  | T | -0.0542 |
| rs17041596  | C | -0.1114 |
| rs150576224 | T | -0.1639 |
| rs727412    | T | 0.033   |
| rs10930354  | A | 0.044   |
| rs4080622   | A | -0.1023 |
| rs116556698 | C | 0.1863  |
| rs114451627 | C | -0.0833 |
| rs17835319  | A | 0.0502  |
| rs74961705  | T | 0.0801  |

|             |   |         |
|-------------|---|---------|
| rs7605105   | T | 0.0523  |
| rs17640676  | T | -0.0319 |
| rs35677782  | A | 0.1015  |
| rs3849328   | A | -0.0473 |
| rs10168524  | C | 0.0833  |
| rs352892    | A | 0.0293  |
| rs72774591  | T | 0.1601  |
| rs4852259   | G | -0.0316 |
| rs116676902 | A | -0.0752 |
| rs75084759  | C | 0.1244  |
| rs333213    | G | 0.0312  |
| rs115550173 | A | 0.178   |
| rs76999641  | C | -0.0744 |
| rs6717866   | A | -0.0389 |
| rs2159728   | T | -0.0598 |
| rs112093980 | A | 0.1151  |
| rs74728835  | A | -0.1468 |
| rs12105764  | A | -0.0387 |
| rs1372256   | T | 0.0359  |
| rs4664332   | G | 0.0319  |
| rs138900118 | A | 0.1686  |
| rs4672617   | G | -0.0348 |
| rs74899875  | T | 0.0852  |
| rs3770545   | C | -0.0392 |
| rs61634079  | A | 0.065   |
| rs79510662  | A | -0.2095 |
| rs36073549  | A | -0.117  |
| rs841452    | C | -0.0578 |
| rs140946803 | A | -0.1101 |
| rs73023570  | A | 0.0445  |
| rs115163465 | G | 0.1622  |
| rs74558093  | G | -0.0864 |
| rs4851953   | G | -0.0665 |
| rs72797391  | A | -0.0689 |
| rs12621960  | T | 0.0379  |
| rs78173854  | G | 0.112   |
| rs35449917  | A | -0.2645 |
| rs138657410 | G | 0.1583  |
| rs77675827  | C | -0.1111 |
| rs10172114  | C | 0.1429  |
| rs7597056   | T | 0.0352  |
| rs148131090 | A | -0.1339 |
| rs76543431  | G | 0.0398  |
| rs116725837 | G | 0.0866  |
| rs10170496  | T | 0.046   |
| rs72960468  | A | -0.0388 |
| rs77459445  | T | 0.0484  |

|             |   |         |
|-------------|---|---------|
| rs111971492 | A | -0.0714 |
| rs890622    | C | 0.0628  |
| rs138957964 | G | 0.2339  |
| rs113226732 | A | -0.1104 |
| rs72816180  | G | -0.1234 |
| rs36065273  | T | 0.0864  |
| rs72884055  | T | 0.1155  |
| rs3771832   | A | 0.0285  |
| rs115567723 | T | -0.1455 |
| rs4078026   | C | -0.0611 |
| rs35104020  | A | -0.0308 |
| rs114725815 | A | 0.0949  |
| rs1019293   | A | 0.0924  |
| rs7584105   | C | -0.0324 |
| rs34168317  | T | -0.097  |
| rs7608411   | A | 0.0526  |
| rs144467472 | A | -0.1728 |
| rs145667268 | C | 0.1906  |
| rs10205089  | C | 0.036   |
| rs4233633   | C | -0.0423 |
| rs78348143  | A | -0.1522 |
| rs6741552   | A | 0.053   |
| rs79484021  | A | 0.058   |
| rs13424351  | G | 0.0324  |
| rs268077    | A | 0.0289  |
| rs1564935   | C | -0.03   |
| rs6741353   | T | 0.0394  |
| rs6749598   | T | 0.0347  |
| rs79423523  | C | -0.1187 |
| rs11903824  | G | -0.0333 |
| rs75732982  | A | -0.1504 |
| rs111298753 | A | 0.0859  |
| rs11887744  | T | 0.0548  |
| rs6719442   | A | -0.0325 |
| rs7572357   | T | -0.0947 |
| rs142986248 | A | -0.104  |
| rs6746255   | A | -0.0303 |
| rs74447281  | A | 0.1082  |
| rs7570821   | T | -0.0663 |
| rs10929021  | T | -0.0348 |
| rs62173044  | C | 0.0339  |
| rs78366677  | A | -0.1012 |
| rs77196557  | A | 0.1343  |
| rs116573706 | T | -0.1149 |
| rs59425012  | G | -0.0402 |
| rs3771099   | G | -0.0293 |
| rs77527063  | T | 0.236   |



|             |   |         |
|-------------|---|---------|
| rs79708797  | A | -0.1178 |
| rs11695545  | C | 0.0538  |
| rs77947590  | C | 0.0839  |
| rs114306362 | C | 0.1652  |
| rs75230902  | T | 0.0544  |
| rs17829022  | G | -0.0291 |
| rs78484696  | G | 0.1573  |
| rs72824093  | C | -0.1737 |
| rs73184868  | C | 0.0882  |
| rs6745936   | G | 0.0438  |
| rs114361423 | C | 0.1569  |
| rs10208992  | G | -0.05   |
| rs74833228  | C | 0.1237  |
| rs76903795  | A | 0.2099  |
| rs79918115  | G | 0.1155  |
| rs7589322   | A | -0.0483 |
| rs79898112  | T | 0.09    |
| rs6758513   | C | 0.1406  |
| rs77418820  | A | 0.0735  |
| rs13003401  | G | 0.0408  |
| rs72625284  | A | 0.0537  |
| rs3754899   | C | -0.0291 |
| rs35716625  | A | -0.0937 |
| rs34116096  | A | 0.0358  |
| rs7578086   | A | 0.0597  |
| rs7575071   | C | 0.0309  |
| rs12477128  | A | -0.037  |
| rs145321633 | C | -0.151  |
| rs75693491  | A | -0.1871 |
| rs80299373  | T | 0.0693  |
| rs72549460  | G | -0.1207 |
| rs10166800  | G | -0.0414 |
| rs76710549  | T | -0.0322 |
| rs114652940 | C | 0.1723  |
| rs78863322  | G | 0.1384  |
| rs13421785  | G | 0.0364  |
| rs149819966 | T | -0.1552 |
| rs12620067  | C | 0.0408  |
| rs11125112  | T | -0.0823 |
| rs7563120   | A | 0.0911  |
| rs74339509  | G | 0.082   |
| rs80077633  | C | 0.2411  |
| rs149786140 | C | 0.0795  |
| rs74595239  | T | -0.1199 |
| rs10182781  | T | -0.0329 |
| rs114523980 | C | 0.1377  |
| rs74789260  | A | -0.1389 |

|             |   |         |
|-------------|---|---------|
| rs148558595 | G | 0.2265  |
| rs116348414 | G | -0.1242 |
| rs115824720 | C | 0.1693  |
| rs1565853   | C | 0.0295  |
| rs4462764   | G | 0.0326  |
| rs115090963 | G | 0.1894  |
| rs2587658   | A | 0.0421  |
| rs2177484   | G | -0.0306 |
| rs35942723  | C | 0.1238  |
| rs1447197   | T | 0.1147  |
| rs1734411   | T | 0.0317  |
| rs13393559  | C | 0.0348  |
| rs77506587  | T | 0.0812  |
| rs75911234  | G | -0.0963 |
| rs921533    | A | 0.0311  |
| rs75808943  | G | 0.0853  |
| rs34158890  | A | -0.0948 |
| rs76740047  | T | -0.1307 |
| rs59425790  | C | 0.2131  |
| rs114618992 | A | -0.1464 |
| rs71413184  | G | 0.1051  |
| rs80332292  | T | 0.1252  |
| rs3770560   | A | 0.0442  |
| rs34648452  | G | -0.0366 |
| rs77037167  | A | 0.1539  |
| rs1486957   | G | 0.0297  |
| rs75891557  | A | -0.1635 |
| rs55960424  | C | -0.1318 |
| rs1147117   | T | 0.0315  |
| rs6728245   | T | -0.0348 |
| rs77062971  | T | -0.1864 |
| rs17027306  | C | -0.1612 |
| rs115261631 | C | -0.1468 |
| rs4440020   | G | -0.0435 |
| rs35742507  | G | -0.0404 |
| rs12470997  | G | 0.0324  |
| rs74629925  | C | 0.1549  |
| rs115144885 | A | 0.1367  |
| rs11897595  | T | 0.0361  |
| rs16838219  | C | -0.0345 |
| rs112290343 | G | -0.1532 |
| rs34419969  | A | 0.0325  |
| rs2114750   | G | -0.0533 |
| rs10170575  | T | -0.0478 |
| rs76708051  | G | 0.1376  |
| rs79869035  | A | -0.1814 |
| rs78125971  | C | 0.1015  |

|             |   |         |
|-------------|---|---------|
| rs145358400 | T | -0.2277 |
| rs7583792   | C | 0.0284  |
| rs115126367 | A | -0.115  |
| rs115039172 | T | 0.1938  |
| rs1219690   | T | -0.0636 |
| rs4853066   | A | 0.0357  |
| rs17232021  | A | 0.0317  |
| rs116357373 | G | 0.096   |
| rs34704586  | G | 0.0374  |
| rs76260295  | A | -0.1524 |
| rs1400733   | G | 0.0314  |
| rs10176282  | G | 0.0293  |
| rs4662370   | T | 0.031   |
| rs35256947  | C | 0.0328  |
| rs140509085 | C | 0.2501  |
| rs62106600  | C | -0.0429 |
| rs2338545   | G | 0.0367  |
| rs9679173   | T | 0.0478  |
| rs12465531  | C | 0.0306  |
| rs144820102 | C | -0.1419 |
| rs2009834   | A | -0.0472 |
| rs115845300 | T | 0.1217  |
| rs13032406  | G | 0.0514  |
| rs13016567  | A | 0.0354  |
| rs4663085   | G | -0.045  |
| rs79694723  | T | -0.0813 |
| rs138336475 | G | -0.1811 |
| rs17377128  | T | 0.0418  |
| rs79527782  | A | 0.1523  |
| rs13005432  | A | -0.1545 |
| rs4850452   | T | -0.0354 |
| rs4575712   | C | -0.0477 |
| rs72846803  | T | 0.0594  |
| rs62184818  | T | 0.1491  |
| rs11893829  | A | -0.1006 |
| rs72835697  | C | 0.0423  |
| rs17576630  | A | 0.117   |
| rs35704069  | C | 0.0591  |
| rs6746107   | G | 0.0382  |
| rs11694919  | T | 0.0295  |
| rs6734883   | T | 0.093   |
| rs116602555 | C | 0.1256  |
| rs6740686   | T | 0.0351  |
| rs907109    | T | -0.0377 |
| rs16839849  | T | 0.128   |
| rs12990396  | G | 0.0848  |
| rs55881154  | T | 0.0335  |

|             |   |         |
|-------------|---|---------|
| rs4852514   | C | 0.0715  |
| rs2884142   | T | -0.0391 |
| rs4665122   | C | 0.037   |
| rs72796509  | T | 0.1041  |
| rs72835599  | A | 0.1287  |
| rs78222562  | T | 0.2284  |
| rs76169138  | T | 0.0948  |
| rs2278739   | G | 0.056   |
| rs62182625  | C | 0.0327  |
| rs6752576   | G | 0.0429  |
| rs113203338 | G | -0.1402 |
| rs2110937   | T | -0.0331 |
| rs11695991  | C | 0.0958  |
| rs6717303   | C | -0.0421 |
| rs7579295   | G | 0.0676  |
| rs79796331  | A | 0.0753  |
| rs79781626  | C | -0.0675 |
| rs137937826 | C | -0.1676 |
| rs116472230 | G | 0.1062  |
| rs1898986   | C | 0.0281  |
| rs145384639 | A | -0.1806 |
| rs4491719   | C | -0.152  |
| rs13397476  | T | -0.0397 |
| rs4662867   | A | 0.075   |
| rs74393709  | G | -0.0693 |
| rs114839650 | A | 0.1594  |
| rs12991423  | G | 0.0524  |
| rs895519    | C | -0.043  |
| rs115148588 | G | 0.1835  |
| rs13397689  | C | -0.0419 |
| rs146118130 | T | -0.0921 |
| rs55819851  | A | -0.0409 |
| rs147736972 | G | 0.2265  |
| rs111816095 | C | -0.1088 |
| rs11684803  | A | -0.0388 |
| rs12464436  | A | 0.066   |
| rs17863775  | G | 0.1551  |
| rs79664978  | A | 0.036   |
| rs72893458  | C | 0.0546  |
| rs13008894  | C | 0.0497  |
| rs113945820 | A | -0.0934 |
| rs2950606   | T | 0.029   |
| rs335127    | C | 0.0542  |
| rs13389243  | T | 0.154   |
| rs7595584   | G | -0.133  |
| rs11676002  | A | 0.0791  |
| rs17197765  | G | 0.1035  |

|             |   |         |
|-------------|---|---------|
| rs58015847  | T | 0.0456  |
| rs751371    | C | -0.0383 |
| rs4074201   | G | -0.031  |
| rs7556983   | A | 0.0506  |
| rs12052809  | T | 0.0443  |
| rs10198073  | T | -0.0309 |
| rs34779620  | C | 0.057   |
| rs4496301   | C | 0.0287  |
| rs115959059 | T | 0.132   |
| rs34730642  | T | -0.1912 |
| rs12986972  | A | 0.0846  |
| rs13392366  | C | 0.0494  |
| rs74715197  | T | 0.1245  |
| rs114734412 | C | 0.2551  |
| rs72972863  | G | 0.1434  |
| rs511773    | T | 0.0381  |
| rs3731725   | C | -0.0356 |
| rs1109447   | C | -0.0295 |
| rs9973809   | G | 0.0419  |
| rs1524082   | A | 0.0309  |
| rs13015314  | G | 0.0323  |
| rs79414898  | C | 0.1522  |
| rs2001863   | T | 0.0362  |
| rs1476945   | T | -0.0284 |
| rs12465622  | A | -0.1025 |
| rs934227    | G | 0.0369  |
| rs114114265 | A | -0.0621 |
| rs10184123  | C | -0.0308 |
| rs13410508  | T | 0.0664  |
| rs112982561 | A | -0.1141 |
| rs6719711   | G | 0.0368  |
| rs7562738   | G | -0.0281 |
| rs149693750 | A | 0.0925  |
| rs3115237   | G | -0.0281 |
| rs144262164 | T | 0.0935  |
| rs74409004  | A | 0.1254  |
| rs75053133  | T | 0.2248  |
| rs58816641  | C | -0.0486 |
| rs13410259  | C | 0.0278  |
| rs143172859 | A | 0.1352  |
| rs2082875   | A | -0.0291 |
| rs76104073  | G | 0.1198  |
| rs77659393  | G | -0.1131 |
| rs59274072  | T | 0.0979  |
| rs79070892  | G | 0.2302  |
| rs148965572 | G | 0.1353  |
| rs146700156 | C | 0.2419  |

|             |   |         |
|-------------|---|---------|
| rs115794490 | C | 0.0932  |
| rs115307528 | G | 0.2089  |
| rs78837123  | G | -0.273  |
| rs74505224  | A | 0.161   |
| rs13013975  | G | -0.0347 |
| rs1434219   | T | 0.0326  |
| rs78468298  | T | -0.0471 |
| rs75709763  | T | 0.1496  |
| rs147185153 | T | -0.0538 |
| rs9941550   | T | 0.0378  |
| rs3112997   | G | 0.0328  |
| rs4589746   | A | 0.0485  |
| rs76939959  | T | -0.1105 |
| rs12986453  | G | -0.0307 |
| rs112394245 | A | 0.0419  |
| rs13413284  | C | -0.1465 |
| rs12470203  | C | 0.1782  |
| rs12615243  | G | 0.0936  |
| rs4148202   | G | -0.0288 |
| rs1404774   | A | 0.0587  |
| rs4853849   | T | -0.0482 |
| rs13034682  | C | -0.0931 |
| rs13412907  | T | 0.0776  |
| rs144134651 | T | 0.1552  |
| rs786246    | G | 0.0766  |
| rs10183688  | C | -0.0461 |
| rs10932181  | T | -0.0458 |
| rs114803602 | C | 0.2245  |
| rs80343082  | A | -0.1179 |
| rs57716909  | A | 0.0854  |
| rs113880824 | C | -0.232  |
| rs72899882  | C | 0.1033  |
| rs78742107  | A | -0.0948 |
| rs4613315   | T | -0.1033 |
| rs6714576   | C | 0.1833  |
| rs10201581  | G | 0.1443  |
| rs601325    | C | -0.0465 |
| rs280690    | A | -0.072  |
| rs75054803  | G | 0.0816  |
| rs16828274  | G | -0.0638 |
| rs10207387  | A | 0.028   |
| rs115424579 | T | 0.0978  |
| rs138004999 | A | -0.1083 |
| rs34779565  | A | 0.0287  |
| rs76252344  | A | -0.1721 |
| rs113071838 | T | 0.0971  |
| rs75328250  | C | -0.0777 |

|             |   |         |
|-------------|---|---------|
| rs72829969  | G | -0.1743 |
| rs10184376  | T | -0.0581 |
| rs143855279 | T | -0.0778 |
| rs2342756   | T | 0.0438  |
| rs10208883  | A | -0.0327 |
| rs145713236 | A | 0.2162  |
| rs73948831  | C | -0.0489 |
| rs10200467  | T | -0.0343 |
| rs6728595   | A | -0.0908 |
| rs876647    | T | -0.0403 |
| rs3111034   | A | 0.221   |
| rs13003390  | G | -0.0282 |
| rs115700203 | C | -0.1122 |
| rs79745765  | A | 0.1313  |
| rs80224159  | C | 0.1498  |
| rs3762613   | C | 0.0295  |
| rs13017275  | C | 0.0499  |
| rs115207385 | T | 0.1952  |
| rs138391076 | G | 0.1282  |
| rs323648    | A | 0.0474  |
| rs78186493  | A | 0.0925  |
| rs62159010  | T | 0.1956  |
| rs79217565  | C | 0.1458  |
| rs16832601  | T | 0.094   |
| rs4952447   | C | 0.0292  |
| rs4667601   | A | 0.0397  |
| rs77203965  | C | 0.0915  |
| rs1559964   | G | 0.0414  |
| rs59392224  | C | -0.0544 |
| rs72861730  | T | -0.0501 |
| rs143249514 | G | -0.1066 |
| rs9917168   | G | 0.0294  |
| rs2117737   | A | 0.03    |
| rs115348070 | A | 0.0968  |
| rs13033499  | T | 0.1285  |
| rs11886531  | C | 0.1183  |
| rs113744423 | C | -0.071  |
| rs1476321   | T | 0.0384  |
| rs10497583  | A | 0.0389  |
| rs4851991   | A | 0.0989  |
| rs79284922  | T | -0.1923 |
| rs2765936   | T | 0.0666  |
| rs62191729  | A | -0.077  |
| rs76812735  | T | -0.1042 |
| rs75399658  | C | -0.0825 |
| rs144914039 | G | 0.113   |
| rs10173732  | A | -0.0535 |

|             |   |         |
|-------------|---|---------|
| rs114460790 | A | 0.1111  |
| rs75569294  | T | -0.1067 |
| rs10490297  | T | 0.0488  |
| rs10176230  | G | -0.07   |
| rs1234415   | T | -0.0398 |
| rs206366    | A | 0.0991  |
| rs10164434  | C | 0.1406  |
| rs79734214  | A | -0.1101 |
| rs116128731 | A | 0.1668  |
| rs149996355 | T | 0.2397  |
| rs13426621  | A | -0.062  |
| rs7593048   | A | 0.034   |
| rs55916478  | C | 0.0818  |
| rs11676357  | G | 0.0278  |
| rs13031158  | G | 0.0641  |
| rs72869853  | G | -0.2523 |
| rs9752022   | C | 0.0497  |
| rs56135231  | T | -0.0402 |
| rs2597321   | A | -0.0308 |
| rs116011045 | C | -0.096  |
| rs148975491 | G | -0.0541 |
| rs10153880  | G | -0.0317 |
| rs1519772   | T | 0.0363  |
| rs79040408  | T | -0.2515 |
| rs72888962  | C | 0.0456  |
| rs144466032 | T | -0.0398 |
| rs138190341 | G | 0.1122  |
| rs13030960  | A | -0.0289 |
| rs115271034 | A | -0.1506 |
| rs59185208  | T | 0.1145  |
| rs140645333 | G | -0.0569 |
| rs1160039   | G | 0.0744  |
| rs6729666   | A | 0.035   |
| rs148958049 | T | -0.2063 |
| rs141461216 | A | -0.1914 |
| rs115343392 | T | 0.2033  |
| rs72998201  | T | -0.1847 |
| rs115355014 | C | 0.0887  |
| rs80173746  | G | -0.0634 |
| rs72823869  | G | -0.1547 |
| rs61617605  | T | 0.0648  |
| rs11898699  | G | -0.032  |
| rs2542557   | A | 0.1455  |
| rs62175769  | C | 0.0858  |
| rs149233846 | A | 0.0321  |
| rs114806053 | C | 0.1329  |
| rs1814457   | A | -0.0558 |



|             |   |         |
|-------------|---|---------|
| rs112969780 | G | 0.077   |
| rs10490069  | C | 0.1008  |
| rs62172524  | A | 0.0282  |
| rs114516952 | T | -0.1564 |
| rs17269279  | G | -0.0867 |
| rs11899634  | A | 0.0668  |
| rs35044342  | T | 0.0306  |
| rs57178144  | C | -0.0543 |
| rs6720285   | A | -0.0298 |
| rs113352505 | G | 0.1858  |
| rs72850271  | T | -0.1746 |
| rs2355344   | T | 0.0563  |
| rs114207391 | G | -0.0958 |
| rs10190427  | A | 0.0382  |
| rs35273766  | G | 0.0708  |
| rs72882144  | C | 0.0503  |
| rs7556886   | T | -0.0361 |
| rs6731238   | T | 0.0303  |
| rs13036218  | A | 0.0276  |
| rs10930261  | A | 0.0874  |
| rs80089451  | T | 0.0997  |
| rs12476743  | G | 0.0885  |
| rs147489018 | C | -0.1585 |
| rs114500571 | T | 0.1848  |
| rs219074    | T | -0.0371 |
| rs7574241   | A | -0.0285 |
| rs10204220  | T | -0.0307 |
| rs4665190   | G | 0.0319  |
| rs71426798  | T | 0.1915  |
| rs6749903   | G | -0.0275 |
| rs141853622 | A | 0.1046  |
| rs72795313  | A | 0.06    |
| rs2862590   | G | -0.0284 |
| rs2288192   | T | -0.0354 |
| rs7605373   | T | -0.0597 |
| rs145291673 | A | 0.1338  |
| rs59948559  | T | -0.0639 |
| rs34394073  | C | 0.0335  |
| rs114588038 | C | 0.084   |
| rs78362750  | T | 0.0796  |
| rs11124204  | T | 0.0457  |
| rs6436960   | C | 0.0538  |
| rs2176178   | G | 0.0276  |
| rs10200219  | A | 0.0457  |
| rs11126184  | C | 0.0297  |
| rs6736352   | G | -0.0384 |
| rs78683264  | C | -0.0453 |

|             |   |         |
|-------------|---|---------|
| rs818011    | A | 0.0289  |
| rs4602260   | C | 0.0514  |
| rs72855230  | G | -0.1183 |
| rs78977721  | A | 0.0962  |
| rs79042203  | A | 0.069   |
| rs144219456 | T | 0.0628  |
| rs11539983  | C | 0.1099  |
| rs114947643 | A | 0.0853  |
| rs62168271  | A | 0.1155  |
| rs2528626   | A | -0.0277 |
| rs11675401  | T | -0.1443 |
| rs77756874  | A | -0.1022 |
| rs13029494  | A | -0.0617 |
| rs145255386 | C | -0.1423 |
| rs115296466 | T | -0.087  |
| rs10929648  | A | -0.0349 |
| rs2053562   | T | -0.0333 |
| rs143665340 | G | 0.0728  |
| rs115171141 | C | 0.1581  |
| rs13409229  | C | -0.0339 |
| rs114551604 | A | -0.0552 |
| rs62137565  | A | -0.0365 |
| rs72617057  | C | 0.1071  |
| rs62184542  | T | 0.0875  |
| rs143751517 | G | -0.07   |
| rs111455833 | C | 0.0563  |
| rs72914627  | T | -0.0476 |
| rs930140    | C | -0.0283 |
| rs149732399 | G | 0.1697  |
| rs10211611  | C | 0.0471  |
| rs76842987  | G | -0.0998 |
| rs116447066 | C | 0.1186  |
| rs72889755  | T | -0.0925 |
| rs75827079  | C | 0.0573  |
| rs12623165  | C | -0.0446 |
| rs35832625  | G | 0.0655  |
| rs1421607   | G | -0.0315 |
| rs72777060  | G | 0.0373  |
| rs78357872  | G | -0.1527 |
| rs62155018  | A | 0.046   |
| rs12465204  | T | 0.0287  |
| rs11893243  | A | 0.0303  |
| rs2579611   | A | 0.144   |
| rs75236282  | A | -0.1207 |
| rs113385432 | T | 0.1453  |
| rs114594222 | T | 0.1068  |
| rs72980032  | C | 0.1302  |

|             |   |         |
|-------------|---|---------|
| rs148019540 | T | -0.1067 |
| rs73006498  | A | -0.0989 |
| rs28524736  | A | 0.1091  |
| rs11887008  | T | 0.0353  |
| rs13036096  | G | 0.0293  |
| rs4606879   | A | 0.0278  |
| rs4241136   | G | -0.0517 |
| rs6758805   | A | -0.0552 |
| rs79180677  | T | -0.0579 |
| rs9808149   | T | 0.1198  |
| rs149878660 | G | -0.1309 |
| rs77831079  | T | 0.1573  |
| rs7566976   | C | 0.0313  |
| rs6744412   | T | 0.095   |
| rs77897259  | T | 0.092   |
| rs13024007  | G | -0.0579 |
| rs145637152 | C | -0.2286 |
| rs2345887   | C | 0.0351  |
| rs6725722   | A | -0.1031 |
| rs111814212 | T | 0.1132  |
| rs16833406  | T | 0.055   |
| rs9653236   | T | -0.0519 |
| rs142388670 | G | -0.1163 |
| rs62133870  | G | 0.1381  |
| rs111761163 | T | 0.0658  |
| rs11127161  | C | -0.057  |
| rs115573509 | C | 0.1237  |
| rs7605048   | C | -0.0316 |
| rs4668527   | T | -0.0278 |
| rs1665160   | G | -0.0279 |
| rs7601503   | T | -0.0339 |
| rs16863956  | C | 0.1282  |
| rs6745602   | A | -0.0361 |
| rs114358189 | C | -0.1668 |
| rs1364666   | A | -0.0284 |
| rs75261146  | A | -0.1509 |
| rs139833947 | C | 0.0925  |
| rs2363581   | A | 0.0318  |
| rs72835369  | C | 0.1166  |
| rs62145365  | C | -0.1419 |
| rs62165685  | A | -0.2101 |
| rs16841465  | A | -0.2236 |
| rs11685839  | G | 0.1873  |
| rs11888408  | T | -0.0421 |
| rs13013435  | C | 0.0275  |
| rs74723760  | C | 0.184   |
| rs115914307 | C | -0.085  |

|             |   |         |
|-------------|---|---------|
| rs62203007  | T | -0.1255 |
| rs142949618 | T | 0.1152  |
| rs142136351 | T | 0.0971  |
| rs2193460   | A | -0.0297 |
| rs12997564  | G | -0.0548 |
| rs11903208  | A | -0.0613 |
| rs3814042   | T | 0.0378  |
| rs113841295 | C | 0.121   |
| rs11694985  | C | 0.0643  |
| rs76919813  | A | -0.1063 |
| rs112029069 | A | -0.1152 |
| rs113982268 | T | 0.1596  |
| rs114681337 | C | -0.161  |
| rs13414612  | C | 0.0311  |
| rs13011957  | T | 0.084   |
| rs115755339 | C | -0.1579 |
| rs72610717  | C | -0.059  |
| rs2372715   | A | -0.0316 |
| rs250928    | G | -0.0277 |
| rs6734305   | T | 0.0287  |
| rs12613185  | A | -0.0339 |
| rs486310    | A | 0.0513  |
| rs62127218  | T | -0.1236 |
| rs13014738  | T | -0.0333 |
| rs115208866 | G | 0.142   |
| rs80152995  | A | 0.0688  |
| rs6733438   | T | -0.0874 |
| rs6711272   | G | -0.0395 |
| rs13018231  | A | -0.1817 |
| rs75193084  | T | 0.1577  |
| rs1059313   | T | 0.1287  |
| rs7599296   | A | -0.0432 |
| rs10498067  | G | -0.0282 |
| rs6726887   | G | -0.0707 |
| rs142009056 | T | 0.2074  |
| rs145968361 | T | -0.2683 |
| rs9646964   | A | 0.037   |
| rs80071386  | A | 0.2273  |
| rs114098377 | T | 0.1749  |
| rs62129120  | A | 0.0614  |
| rs12614147  | C | 0.0397  |
| rs13383973  | C | -0.0309 |
| rs116459249 | T | 0.2313  |
| rs13023082  | G | 0.0334  |
| rs12473334  | T | 0.0289  |
| rs818155    | G | -0.0274 |
| rs9287480   | G | 0.0913  |

|             |   |         |
|-------------|---|---------|
| rs112977440 | C | 0.0505  |
| rs72890074  | T | -0.059  |
| rs72889903  | T | 0.0623  |
| rs13405419  | C | 0.0292  |
| rs78216128  | A | 0.0764  |
| rs139755986 | G | -0.1916 |
| rs446086    | A | -0.0343 |
| rs72787964  | T | -0.0507 |
| rs145063037 | A | -0.1489 |
| rs10164524  | G | 0.0294  |
| rs2355807   | T | -0.0286 |
| rs111615741 | G | 0.1667  |
| rs35751771  | A | -0.1413 |
| rs77883415  | G | 0.129   |
| rs6744981   | A | 0.1715  |
| rs114247763 | A | 0.1551  |
| rs7606125   | C | 0.08    |
| rs12469481  | G | 0.033   |
| rs6748934   | T | 0.0771  |
| rs1015378   | A | -0.0403 |
| rs36084110  | T | 0.1084  |
| rs62159008  | T | -0.1035 |
| rs77256758  | A | 0.1033  |
| rs114892431 | T | 0.1816  |
| rs72938827  | A | -0.1928 |
| rs76662860  | G | -0.1467 |
| rs78967661  | T | 0.1452  |
| rs1304007   | C | -0.0688 |
| rs111337576 | G | -0.0741 |
| rs77275462  | T | -0.1023 |
| rs72975223  | A | -0.0291 |
| rs7595538   | G | 0.1338  |
| rs2048774   | G | -0.0318 |
| rs11124656  | G | 0.0385  |
| rs74181221  | T | 0.1397  |
| rs10929085  | A | -0.0403 |
| rs55896260  | A | 0.0859  |
| rs13421680  | G | 0.0317  |
| rs78960801  | A | -0.0847 |
| rs59045478  | T | -0.0869 |
| rs139612503 | T | 0.1132  |
| rs78165294  | A | 0.1813  |
| rs115936535 | A | -0.2047 |
| rs6715640   | C | 0.1849  |
| rs3936232   | C | -0.0305 |
| rs111534389 | A | 0.135   |
| rs849268    | G | -0.195  |

|             |   |         |
|-------------|---|---------|
| rs62194728  | A | 0.0888  |
| rs726506    | C | -0.0313 |
| rs72872282  | T | 0.2358  |
| rs113734836 | A | -0.1615 |
| rs2247282   | C | 0.0401  |
| rs72804987  | C | 0.0765  |
| rs62183161  | T | -0.032  |
| rs76333264  | T | -0.0763 |
| rs28454304  | A | -0.0331 |
| rs283897    | C | 0.0295  |
| rs75377405  | A | 0.1476  |
| rs76201162  | A | 0.0609  |
| rs141566415 | G | 0.0892  |
| rs4676377   | C | 0.0437  |
| rs75796629  | C | 0.1996  |
| rs11886925  | G | -0.0758 |
| rs72814715  | A | -0.1257 |
| rs72978081  | G | -0.0896 |
| rs76439322  | G | 0.063   |
| rs77650045  | A | 0.0535  |
| rs72831593  | G | 0.1401  |
| rs7599256   | G | -0.0317 |
| rs114570576 | A | 0.1812  |
| rs138195440 | T | 0.0892  |
| rs7355314   | G | 0.088   |
| rs11693900  | A | -0.0352 |
| rs113695676 | C | 0.1232  |
| rs115753229 | G | 0.0949  |
| rs2023409   | T | -0.0284 |
| rs71420370  | G | -0.1812 |
| rs17222613  | T | 0.0535  |
| rs4971538   | G | 0.0443  |
| rs79467785  | G | 0.1058  |
| rs116767841 | T | -0.0947 |
| rs115244396 | C | 0.1669  |
| rs78113658  | A | 0.1132  |
| rs28623294  | C | 0.0348  |
| rs264664    | G | 0.0305  |
| rs12233176  | A | 0.0995  |
| rs9287693   | T | -0.0304 |
| rs4462818   | G | 0.0339  |
| rs12694697  | T | 0.0284  |
| rs58120926  | A | -0.07   |
| rs4552208   | C | -0.0301 |
| rs115120319 | T | 0.1088  |
| rs1111281   | C | -0.03   |
| rs78862952  | C | -0.077  |

|             |   |         |
|-------------|---|---------|
| rs2974255   | A | 0.0332  |
| rs2738280   | T | 0.0889  |
| rs13430099  | A | 0.0775  |
| rs7423015   | T | -0.0612 |
| rs115715426 | C | -0.1665 |
| rs77332934  | T | 0.1217  |
| rs150002635 | G | 0.0866  |
| rs75495651  | G | 0.1185  |
| rs11125778  | A | -0.0284 |
| rs4319920   | T | 0.0516  |
| rs2263240   | G | 0.1551  |
| rs1349792   | T | 0.0506  |
| rs10189632  | C | 0.079   |
| rs74610990  | G | 0.1796  |
| rs76998736  | A | 0.1159  |
| rs116056142 | T | 0.142   |
| rs77130186  | G | 0.073   |
| rs115384308 | C | 0.1453  |
| rs751150    | C | -0.0321 |
| rs74839937  | C | 0.0477  |
| rs10208223  | C | 0.0287  |
| rs76546985  | G | -0.0922 |
| rs6742924   | C | -0.0567 |
| rs11892705  | T | 0.0713  |
| rs115938642 | T | -0.0838 |
| rs533617    | C | -0.0805 |
| rs148810092 | T | -0.1555 |
| rs10490745  | T | -0.0478 |
| rs1509377   | C | 0.0284  |
| rs13032924  | A | -0.0506 |
| rs72934089  | T | 0.0354  |
| rs61070383  | A | 0.1222  |
| rs3769074   | G | 0.0999  |
| rs11695782  | A | -0.034  |
| rs1157516   | A | 0.0482  |
| rs12477149  | G | -0.0457 |
| rs143210169 | G | -0.2512 |
| rs12713000  | G | 0.0411  |
| rs6751378   | C | -0.0308 |
| rs1107234   | G | -0.0577 |
| rs72986569  | T | 0.0996  |
| rs73920169  | A | 0.0715  |
| rs115434637 | G | 0.1751  |
| rs114346955 | G | 0.0994  |
| rs10199437  | G | -0.0613 |
| rs58803641  | G | 0.0553  |
| rs1930      | T | 0.028   |

|             |   |         |
|-------------|---|---------|
| rs71541915  | G | -0.0728 |
| rs11124597  | C | 0.0339  |
| rs62131460  | T | 0.1635  |
| rs2347605   | A | 0.0403  |
| rs140915399 | T | 0.1746  |
| rs4331462   | G | 0.0462  |
| rs6755935   | C | 0.0688  |
| rs114059272 | C | 0.1253  |
| rs17568979  | G | 0.0507  |
| rs9678476   | G | 0.1163  |
| rs72817797  | A | 0.1166  |
| rs10201699  | G | -0.0456 |
| rs35706639  | G | -0.0458 |
| rs112091936 | G | 0.0764  |
| rs6756053   | G | -0.0283 |
| rs3845679   | C | 0.0569  |
| rs7604412   | T | 0.0321  |
| rs79748197  | G | 0.147   |
| rs17863688  | G | 0.0319  |
| rs16825626  | C | 0.0564  |
| rs7601729   | A | -0.0314 |
| rs6747372   | T | -0.0942 |
| rs13034966  | C | 0.0377  |
| rs140717798 | C | -0.2362 |
| rs4953227   | T | 0.0289  |
| rs72963411  | A | -0.0417 |
| rs7573071   | T | 0.0448  |
| rs7592750   | T | -0.0455 |
| rs80293263  | C | -0.0855 |
| rs34615756  | T | -0.0477 |
| rs140719154 | T | -0.121  |
| rs62179793  | G | -0.0364 |
| rs1464023   | A | -0.0295 |
| rs34570617  | C | -0.1293 |
| rs3732075   | A | -0.0314 |
| rs675792    | A | 0.1012  |
| rs115259510 | A | -0.0878 |
| rs10194877  | G | -0.0457 |
| rs114904351 | C | 0.1716  |
| rs148699787 | A | 0.1381  |
| rs707082    | T | -0.047  |
| rs3754842   | T | -0.0345 |
| rs4849176   | T | -0.027  |
| rs138844305 | T | 0.1299  |
| rs13384662  | A | 0.0749  |
| rs114945171 | G | 0.2183  |
| rs79841596  | T | -0.1291 |



|             |   |         |
|-------------|---|---------|
| rs150794247 | T | 0.1718  |
| rs139029494 | A | 0.1262  |
| rs36011695  | C | -0.0725 |
| rs754664    | T | 0.0285  |
| rs13401521  | G | 0.0315  |
| rs12998401  | G | 0.0564  |
| rs74653785  | G | 0.0557  |
| rs13400988  | T | -0.0471 |
| rs76169189  | A | 0.1718  |
| rs62116593  | A | 0.094   |
| rs72829603  | T | 0.0749  |
| rs2171326   | C | 0.0359  |
| rs6723229   | A | -0.0318 |
| rs139656963 | A | 0.1714  |
| rs78567867  | A | 0.1148  |
| rs1678156   | G | 0.0273  |
| rs72859883  | T | 0.062   |
| rs340755    | G | -0.04   |
| rs112542772 | A | -0.0811 |
| rs55748932  | G | 0.1133  |
| rs149251515 | T | -0.149  |
| rs77211051  | A | 0.0963  |
| rs116079449 | C | 0.1965  |
| rs73071355  | G | 0.034   |
| rs115309987 | T | -0.1823 |
| rs10180540  | A | -0.0564 |
| rs4671301   | G | -0.0342 |
| rs76675988  | G | -0.1386 |
| rs115119940 | T | 0.1742  |
| rs11123858  | G | 0.0513  |
| rs139170694 | T | 0.154   |
| rs61589050  | T | -0.0509 |
| rs13017823  | A | 0.1045  |
| rs75982342  | T | -0.1719 |
| rs62147109  | C | 0.1247  |
| rs2044456   | G | -0.0294 |
| rs72933352  | T | 0.1531  |
| rs7562693   | C | 0.0356  |
| rs114170270 | A | 0.0711  |
| rs113278513 | C | 0.1084  |
| rs72941907  | C | -0.0716 |
| rs112149919 | T | 0.1683  |
| rs28419261  | G | -0.0415 |
| rs142325720 | T | -0.178  |
| rs115593938 | G | -0.1253 |
| rs13017302  | T | 0.0409  |
| rs114676760 | C | 0.1521  |

|             |   |         |
|-------------|---|---------|
| rs1868382   | A | -0.0344 |
| rs150074775 | C | 0.229   |
| rs113835459 | A | 0.1234  |
| rs13430302  | C | -0.0469 |
| rs3791336   | C | 0.0302  |
| rs62197504  | C | 0.18    |
| rs144959869 | C | 0.1995  |
| rs139205342 | A | 0.1213  |
| rs79183934  | T | 0.0994  |
| rs7559015   | T | 0.0517  |
| rs6754709   | C | 0.0325  |
| rs72834718  | A | -0.1162 |
| rs12713246  | G | -0.0399 |
| rs58843956  | T | -0.0629 |
| rs147366673 | A | -0.1804 |
| rs12151475  | C | 0.0284  |
| rs34563416  | A | 0.0319  |
| rs138457478 | C | 0.2572  |
| rs72991937  | G | 0.0358  |
| rs115208840 | A | -0.1716 |
| rs140821073 | A | 0.1106  |
| rs141070815 | A | 0.0599  |
| rs13397505  | C | 0.0308  |
| rs11123159  | C | 0.051   |
| rs141227567 | A | 0.0741  |
| rs73177236  | T | 0.1337  |
| rs13424874  | A | -0.027  |
| rs76384728  | T | -0.1481 |
| rs72965055  | A | 0.1054  |
| rs1997458   | C | -0.0364 |
| rs115473779 | C | 0.2262  |
| rs78757232  | G | 0.067   |
| rs75434519  | C | -0.2145 |
| rs193603    | C | 0.0603  |
| rs7568133   | A | 0.0325  |
| rs76042283  | A | 0.1364  |
| rs62137492  | A | -0.0437 |
| rs79756779  | C | -0.1401 |
| rs1441091   | G | 0.0458  |
| rs76344611  | C | -0.0506 |
| rs11126710  | T | -0.0542 |
| rs72866502  | A | 0.111   |
| rs71439144  | T | -0.0932 |
| rs141553624 | G | 0.2209  |
| rs150728791 | T | 0.1948  |
| rs115609736 | A | -0.0968 |
| rs149437477 | C | 0.0936  |

|             |   |         |
|-------------|---|---------|
| rs72840868  | G | -0.0421 |
| rs12611733  | T | 0.0351  |
| rs115721779 | T | -0.1944 |
| rs4407260   | T | 0.0706  |
| rs77675280  | T | -0.223  |
| rs116232553 | T | -0.1718 |
| rs4674838   | C | 0.17    |
| rs115150465 | T | 0.1122  |
| rs74404783  | C | -0.1796 |
| rs7599272   | T | -0.0619 |
| rs11682402  | C | 0.0569  |
| rs74590219  | G | 0.1458  |
| rs1000159   | A | 0.0313  |
| rs10180390  | G | -0.0336 |
| rs62188978  | T | -0.1192 |
| rs934312    | C | 0.0335  |
| rs141784867 | T | -0.1257 |
| rs2679861   | C | -0.0294 |
| rs7573720   | T | -0.0316 |
| rs116629722 | T | 0.2414  |
| rs116404810 | G | -0.143  |
| rs17677434  | A | -0.0525 |
| rs7568140   | C | 0.0325  |
| rs143612935 | A | 0.1674  |
| rs113519601 | G | 0.0599  |
| rs76952883  | C | -0.1673 |
| rs145058511 | T | 0.1414  |
| rs35531487  | G | -0.0519 |
| rs116735440 | G | -0.1011 |
| rs17194017  | G | 0.0592  |
| rs17036909  | A | 0.1877  |
| rs115054729 | T | 0.1896  |
| rs79208193  | T | 0.0677  |
| rs4340507   | T | 0.044   |
| rs4556923   | T | 0.0417  |
| rs11683430  | T | -0.0317 |
| rs76470191  | C | 0.1801  |
| rs111664974 | A | 0.038   |
| rs149630102 | T | -0.0827 |
| rs139375746 | A | -0.1153 |
| rs1446439   | T | -0.0421 |
| rs145491985 | T | -0.1898 |
| rs77328283  | C | -0.0922 |
| rs2536215   | T | -0.0281 |
| rs6757948   | T | -0.032  |
| rs11679204  | A | 0.1855  |
| rs12470270  | T | 0.0314  |

|             |   |         |
|-------------|---|---------|
| rs10175784  | G | 0.0473  |
| rs4575698   | T | -0.0421 |
| rs62105868  | A | 0.0501  |
| rs146930498 | T | 0.175   |
| rs10490316  | C | -0.0307 |
| rs1863332   | G | 0.0506  |
| rs115903444 | A | 0.1122  |
| rs74490354  | G | -0.0512 |
| rs77954084  | T | 0.1421  |
| rs1563494   | C | 0.1419  |
| rs149799050 | A | 0.1121  |
| rs115837610 | G | 0.0963  |
| rs17530177  | G | 0.1181  |
| rs13007621  | A | -0.0427 |
| rs1541864   | C | 0.034   |
| rs13033779  | T | 0.0679  |
| rs72971798  | G | 0.0863  |
| rs114496633 | T | -0.2519 |
| rs150879050 | T | 0.1404  |
| rs6726413   | T | 0.1592  |
| rs16838151  | G | -0.0701 |
| rs6719822   | T | -0.0415 |
| rs6431307   | A | 0.1806  |
| rs2099305   | T | -0.035  |
| rs4849052   | T | -0.0665 |
| rs13412102  | T | -0.0282 |
| rs78843514  | G | 0.0658  |
| rs1914779   | T | 0.0607  |
| rs7601137   | C | 0.0411  |
| rs10207242  | G | -0.0323 |
| rs71419072  | G | 0.1402  |
| rs9677265   | G | 0.0282  |
| rs2176569   | G | -0.032  |
| rs6433403   | G | 0.0296  |
| rs115044618 | C | -0.0607 |
| rs72812231  | T | -0.1161 |
| rs76459177  | A | 0.0572  |
| rs12711936  | G | 0.031   |
| rs76630323  | A | -0.105  |
| rs138818969 | A | -0.1121 |
| rs79610954  | T | -0.1366 |
| rs1658238   | A | 0.0294  |
| rs115343199 | T | 0.0815  |
| rs112389269 | C | -0.0781 |
| rs13419955  | A | -0.0354 |
| rs9712143   | C | 0.0327  |
| rs10496561  | T | -0.0554 |

|             |   |         |
|-------------|---|---------|
| rs12989978  | A | -0.0348 |
| rs7557399   | A | 0.1867  |
| rs10206730  | C | 0.1874  |
| rs76334742  | C | 0.0951  |
| rs12986974  | A | -0.0426 |
| rs114015331 | T | 0.191   |
| rs74850962  | C | -0.112  |
| rs78857843  | C | 0.1091  |
| rs115798622 | A | 0.1041  |
| rs35943349  | C | -0.057  |
| rs6739912   | T | 0.0401  |
| rs7578095   | C | -0.047  |
| rs116177469 | T | -0.1244 |
| rs75873717  | T | -0.0568 |
| rs141561244 | C | -0.1036 |
| rs72822987  | C | 0.0629  |
| rs34279514  | C | -0.0296 |
| rs73995854  | C | -0.0657 |
| rs72769288  | C | 0.0627  |
| rs2378312   | G | 0.0273  |
| rs35568023  | T | -0.027  |
| rs840873    | C | 0.0828  |
| rs115854464 | A | 0.1101  |
| rs58850453  | T | 0.0709  |
| rs12052585  | C | -0.0397 |
| rs10198533  | A | 0.0286  |
| rs80010258  | C | 0.0864  |
| rs78111655  | C | -0.1499 |
| rs72784176  | G | 0.0662  |
| rs6752823   | C | -0.0492 |
| rs114095260 | T | 0.1679  |
| rs72869691  | A | 0.0918  |
| rs4953711   | C | 0.0294  |
| rs4356610   | A | -0.0821 |
| rs6747288   | A | -0.0304 |
| rs62181023  | G | 0.0544  |
| rs79830305  | A | 0.0856  |
| rs76264930  | C | 0.1826  |
| rs12997287  | G | 0.027   |
| rs114356618 | C | 0.1838  |
| rs113600679 | T | 0.0746  |
| rs35406633  | A | -0.0367 |
| rs75851588  | A | 0.0681  |
| rs74775676  | G | -0.0472 |
| rs139226678 | G | -0.1176 |
| rs4851820   | C | -0.0269 |
| rs4516414   | T | -0.0271 |

|             |   |         |
|-------------|---|---------|
| rs115770474 | G | -0.1403 |
| rs142949257 | A | -0.1298 |
| rs11674660  | T | -0.0412 |
| rs1016338   | C | 0.0354  |
| rs3770957   | A | -0.0358 |
| rs35709696  | T | 0.1153  |
| rs12466974  | C | 0.0322  |
| rs72812393  | T | -0.1437 |
| rs11683509  | G | -0.0521 |
| rs977171    | T | 0.0439  |
| rs116704728 | T | -0.0984 |
| rs62194946  | T | -0.0318 |
| rs1653771   | G | -0.0275 |
| rs147296766 | C | 0.1438  |
| rs2301296   | A | -0.1519 |
| rs116207716 | A | 0.1216  |
| rs56003443  | A | -0.0337 |
| rs116066210 | A | 0.1706  |
| rs6758325   | G | -0.0456 |
| rs114774112 | C | -0.1475 |
| rs74870974  | A | 0.0695  |
| rs12474482  | G | 0.068   |
| rs150772414 | A | -0.0986 |
| rs3755326   | A | 0.0502  |
| rs12611869  | T | -0.03   |
| rs142310390 | A | 0.0981  |
| rs115836471 | A | 0.0984  |
| rs76139069  | G | -0.1012 |
| rs76539498  | G | -0.1118 |
| rs1377760   | G | -0.0541 |
| rs79998767  | A | 0.1331  |
| rs7563482   | G | 0.0313  |
| rs59059406  | C | 0.0527  |
| rs76958186  | A | 0.117   |
| rs3731795   | G | 0.1276  |
| rs7355381   | G | -0.1248 |
| rs72865128  | C | 0.1601  |
| rs4455118   | C | 0.0388  |
| rs28434191  | T | 0.0526  |
| rs7579373   | G | 0.0357  |
| rs114743292 | G | -0.1323 |
| rs114085047 | C | 0.1331  |
| rs62182406  | A | 0.032   |
| rs145926181 | T | -0.1828 |
| rs1567951   | C | -0.0313 |
| rs140678134 | A | -0.1109 |
| rs10432345  | T | 0.0292  |

|             |   |         |
|-------------|---|---------|
| rs4665656   | T | -0.0273 |
| rs77060677  | A | 0.1157  |
| rs73157873  | C | 0.1113  |
| rs12475379  | G | 0.1555  |
| rs12105873  | A | 0.0473  |
| rs7575107   | G | 0.0403  |
| rs77627276  | G | 0.0559  |
| rs1864271   | C | -0.0349 |
| rs72796530  | T | -0.0528 |
| rs2724860   | A | 0.0266  |
| rs115589257 | T | -0.1808 |
| rs6729208   | A | 0.0639  |
| rs12475288  | C | -0.0422 |
| rs72929769  | G | -0.1475 |
| rs111577671 | A | 0.0405  |
| rs10175749  | G | 0.0321  |
| rs16839389  | G | -0.1336 |
| rs112458694 | A | 0.1505  |
| rs116347759 | T | -0.1422 |
| rs75294799  | T | 0.1793  |
| rs62160379  | G | -0.1228 |
| rs138524651 | T | -0.2298 |
| rs2048982   | T | -0.0289 |
| rs79945452  | G | 0.1812  |
| rs115695800 | C | -0.2484 |
| rs308919    | C | 0.1325  |
| rs13396779  | T | -0.1445 |
| rs12691832  | C | -0.0275 |
| rs10490031  | T | -0.0334 |
| rs17651078  | C | -0.0394 |
| rs4148791   | T | 0.0286  |
| rs141869119 | A | -0.1513 |
| rs2090862   | T | 0.0267  |
| rs12464514  | G | -0.1944 |
| rs144049425 | T | 0.1516  |
| rs262292    | C | 0.0282  |
| rs1318479   | A | 0.0287  |
| rs13427124  | C | 0.0504  |
| rs115330488 | C | -0.131  |
| rs12691694  | G | 0.0315  |
| rs10184557  | T | 0.1318  |
| rs10168790  | C | 0.0276  |
| rs72787721  | T | 0.0344  |
| rs17017356  | G | 0.055   |
| rs1371110   | G | -0.0267 |
| rs10202335  | T | 0.0384  |
| rs12621317  | A | -0.0376 |

|             |   |         |
|-------------|---|---------|
| rs7579684   | G | 0.0458  |
| rs114391777 | T | -0.1877 |
| rs11891752  | C | 0.1002  |
| rs16824598  | T | 0.1099  |
| rs1143627   | G | 0.0281  |
| rs62150670  | A | 0.0808  |
| rs6759731   | T | -0.0329 |
| rs4327214   | G | -0.0292 |
| rs6704655   | T | 0.0713  |
| rs2345516   | A | 0.0623  |
| rs1124076   | G | 0.0303  |
| rs1364578   | T | 0.169   |
| rs55981605  | C | 0.0325  |
| rs16848941  | C | 0.0402  |
| rs113628715 | G | 0.0679  |
| rs116475210 | C | 0.1229  |
| rs4674441   | C | -0.0298 |
| rs72806335  | T | 0.0484  |
| rs145381302 | A | -0.1321 |
| rs56154062  | T | -0.1123 |
| rs1503241   | T | 0.0276  |
| rs116142506 | T | 0.1734  |
| rs7422605   | C | 0.0518  |
| rs79997166  | C | 0.077   |
| rs1448120   | A | 0.0418  |
| rs80046096  | A | -0.1563 |
| rs72831402  | A | -0.126  |
| rs10181451  | T | -0.0609 |
| rs168604    | C | 0.0398  |
| rs114429048 | G | 0.1036  |
| rs6705008   | A | 0.0294  |
| rs12185655  | G | 0.028   |
| rs6546637   | T | -0.0275 |
| rs76012939  | A | 0.0619  |
| rs73044269  | T | -0.0563 |
| rs4668884   | C | 0.1148  |
| rs78327163  | A | 0.1657  |
| rs113175322 | C | 0.157   |
| rs6742278   | G | 0.0527  |
| rs34900587  | T | -0.0435 |
| rs114527775 | T | -0.0842 |
| rs77507940  | A | 0.0524  |
| rs35435253  | T | 0.0461  |
| rs12466531  | A | 0.0352  |
| rs75495375  | A | 0.1074  |
| rs80156065  | C | 0.09    |
| rs144516452 | C | -0.0871 |



|             |   |         |
|-------------|---|---------|
| rs17270387  | C | -0.2002 |
| rs10178990  | C | 0.0388  |
| rs112574033 | T | 0.2325  |
| rs6546073   | G | 0.0284  |
| rs77557717  | G | -0.0911 |
| rs7561207   | A | -0.0832 |
| rs146636065 | C | -0.1111 |
| rs4090783   | A | -0.0763 |
| rs78035622  | T | -0.0875 |
| rs897065    | A | 0.0367  |
| rs2121272   | C | 0.0264  |
| rs1394145   | C | 0.034   |
| rs148500367 | A | 0.1822  |
| rs6707566   | A | 0.0275  |
| rs1840328   | A | 0.0261  |
| rs62148939  | G | 0.0742  |
| rs17400589  | A | 0.079   |
| rs1519104   | G | -0.0283 |
| rs116402031 | A | 0.1647  |
| rs56018609  | G | 0.0796  |
| rs2381907   | A | -0.0761 |
| rs138409775 | G | -0.1271 |
| rs10168700  | C | -0.0338 |
| rs11681509  | A | -0.0379 |
| rs34768603  | T | -0.031  |
| rs78382051  | C | -0.1302 |
| rs112724917 | A | 0.0719  |
| rs80221856  | T | -0.0527 |
| rs12475560  | T | -0.0283 |
| rs71426615  | C | 0.0805  |
| rs143444367 | C | -0.2395 |
| rs116755303 | A | -0.1346 |
| rs78068100  | C | 0.0793  |
| rs72826667  | A | -0.1132 |
| rs62194530  | C | 0.0388  |
| rs1474082   | G | -0.0287 |
| rs17476501  | C | -0.0439 |
| rs138033122 | C | -0.1376 |
| rs6704994   | T | -0.034  |
| rs12991495  | C | -0.0313 |
| rs114016928 | G | -0.1167 |
| rs114889031 | G | -0.1925 |
| rs76167996  | G | 0.039   |
| rs76661162  | A | -0.2286 |
| rs145433408 | C | 0.1683  |
| rs75093411  | G | 0.1977  |
| rs56763740  | G | 0.1685  |

|             |   |         |
|-------------|---|---------|
| rs115527507 | A | 0.1695  |
| rs12469738  | T | -0.0687 |
| rs4669402   | C | -0.0568 |
| rs13404451  | C | -0.1562 |
| rs4337522   | T | 0.0264  |
| rs116694104 | G | -0.0761 |
| rs272137    | T | -0.0292 |
| rs74659577  | G | 0.0989  |
| rs146634767 | T | 0.1606  |
| rs2600791   | T | -0.0424 |
| rs11690796  | A | 0.0695  |
| rs55760610  | G | -0.0839 |
| rs116274859 | G | 0.1309  |
| rs77467299  | C | 0.0874  |
| rs79148874  | T | 0.1588  |
| rs4972659   | A | 0.0323  |
| rs8179610   | T | 0.027   |
| rs71421080  | A | -0.1166 |
| rs1551256   | T | 0.0266  |
| rs10930621  | G | -0.0323 |
| rs62196144  | C | -0.1436 |
| rs1020430   | A | 0.0463  |
| rs13383853  | A | 0.0293  |
| rs11890551  | G | 0.0321  |
| rs16859137  | C | -0.0456 |
| rs78816665  | C | 0.0692  |
| rs78513395  | T | 0.1165  |
| rs10184596  | G | 0.1081  |
| rs13431299  | G | 0.0763  |
| rs111482823 | A | 0.0838  |
| rs56128223  | C | -0.0921 |
| rs139182782 | C | 0.3141  |
| rs111254306 | A | -0.1515 |
| rs35048252  | T | 0.0301  |
| rs35497618  | T | -0.1114 |
| rs72796867  | C | 0.0899  |
| rs13401439  | G | 0.1538  |
| rs78276228  | G | -0.138  |
| rs56260752  | A | -0.0597 |
| rs75813557  | T | -0.0644 |
| rs62177324  | A | -0.0895 |
| rs5005622   | T | -0.1013 |
| rs1560877   | G | -0.041  |
| rs115709567 | C | 0.0764  |
| rs13431293  | C | -0.0414 |
| rs6720296   | A | -0.0276 |
| rs6749807   | A | 0.0411  |

|             |   |         |
|-------------|---|---------|
| rs12612470  | T | -0.0594 |
| rs11124368  | C | 0.0292  |
| rs1518655   | A | -0.0486 |
| rs76758027  | A | -0.1949 |
| rs71417252  | C | -0.119  |
| rs763867    | T | 0.0312  |
| rs858653    | T | 0.1248  |
| rs2280142   | A | -0.0278 |
| rs7569066   | T | 0.0377  |
| rs12989255  | T | -0.0349 |
| rs115519082 | T | -0.0835 |
| rs35915131  | G | -0.0364 |
| rs72826602  | C | -0.1195 |
| rs115698687 | A | 0.1013  |
| rs146606392 | T | 0.1131  |
| rs62119332  | A | 0.1162  |
| rs987071    | C | -0.0322 |
| rs77014201  | T | 0.0658  |
| rs143938003 | C | 0.1475  |
| rs141945375 | C | 0.1027  |
| rs113380140 | A | 0.1931  |
| rs13421607  | T | 0.0289  |
| rs10194179  | G | -0.0629 |
| rs13399115  | C | 0.071   |
| rs75524242  | T | 0.056   |
| rs77921083  | G | -0.0876 |
| rs72935964  | C | -0.0344 |
| rs62152061  | T | 0.0609  |
| rs114053497 | A | 0.1015  |
| rs10496904  | A | -0.0713 |
| rs62135471  | C | -0.0681 |
| rs72878362  | T | 0.0475  |
| rs10184062  | G | 0.031   |
| rs78569611  | T | -0.0854 |
| rs2880095   | T | 0.0395  |
| rs11679046  | T | -0.0266 |
| rs76413923  | A | 0.0612  |
| rs7572721   | T | -0.0296 |
| rs6543526   | A | -0.0715 |
| rs79907084  | A | 0.1627  |
| rs2708933   | C | -0.0289 |
| rs4669271   | A | 0.0773  |
| rs142404090 | C | 0.1306  |
| rs10164567  | T | 0.059   |
| rs6713554   | G | -0.0267 |
| rs13020081  | A | -0.0371 |
| rs72882854  | A | 0.0441  |

|             |   |         |
|-------------|---|---------|
| rs75482642  | T | -0.1043 |
| rs76706117  | C | -0.1133 |
| rs1476986   | G | -0.0303 |
| rs7573090   | G | 0.1087  |
| rs35598970  | G | -0.0759 |
| rs2174353   | A | -0.0304 |
| rs141524548 | T | -0.0685 |
| rs74524274  | T | 0.1642  |
| rs11902680  | A | -0.031  |
| rs137940622 | A | 0.1391  |
| rs17447933  | G | -0.0385 |
| rs76746434  | T | 0.1064  |
| rs79625940  | T | -0.0695 |
| rs9917190   | T | -0.0301 |
| rs60831985  | C | -0.0751 |
| rs115084619 | A | -0.0945 |
| rs4355166   | T | 0.0643  |
| rs77120290  | T | -0.0857 |
| rs17026350  | T | 0.0455  |
| rs76329157  | G | -0.1388 |
| rs143576847 | C | 0.1056  |
| rs166464    | T | -0.0285 |
| rs12613561  | C | -0.1069 |
| rs72991049  | C | -0.1116 |
| rs74498685  | C | -0.0535 |
| rs11125786  | C | -0.0277 |
| rs147977761 | G | -0.1707 |
| rs114958915 | C | -0.131  |
| rs17388373  | G | 0.0311  |
| rs6722820   | A | 0.1218  |
| rs10932737  | G | -0.0281 |
| rs7560771   | T | -0.0279 |
| rs2043193   | A | -0.0285 |
| rs1464002   | A | -0.0355 |
| rs9306901   | C | 0.0278  |
| rs3811544   | A | -0.159  |
| rs12621939  | C | 0.0283  |
| rs114364251 | A | -0.1842 |
| rs72843117  | G | 0.1064  |
| rs16864922  | C | 0.0689  |
| rs143394287 | A | -0.1378 |
| rs1562020   | T | 0.0439  |
| rs980525    | T | 0.0327  |
| rs77836756  | G | -0.0713 |
| rs12468324  | A | 0.0375  |
| rs10930045  | G | -0.1525 |
| rs4832593   | G | -0.0344 |

|             |   |         |
|-------------|---|---------|
| rs79803114  | A | -0.2    |
| rs7599408   | C | -0.0515 |
| rs112470880 | G | 0.0434  |
| rs144820346 | A | 0.086   |
| rs72831162  | T | -0.1247 |
| rs10460409  | T | -0.1957 |
| rs75737416  | G | 0.0898  |
| rs4894023   | T | 0.0981  |
| rs1901437   | A | -0.0328 |
| rs6761397   | T | 0.0454  |
| rs112930248 | G | 0.066   |
| rs6742939   | G | 0.0708  |
| rs1448969   | A | 0.1191  |
| rs10183613  | A | 0.0348  |
| rs74629952  | A | 0.0652  |
| rs77292499  | T | 0.1431  |
| rs75445316  | T | -0.1218 |
| rs78472103  | A | 0.0396  |
| rs13023233  | C | -0.0278 |
| rs113253577 | A | -0.0624 |
| rs17588199  | T | -0.0673 |
| rs16988099  | G | 0.1151  |
| rs116513329 | C | 0.1309  |
| rs7606369   | A | -0.0272 |
| rs114543323 | A | 0.0985  |
| rs13018075  | T | -0.0377 |
| rs79234962  | T | 0.0951  |
| rs75266247  | T | 0.0954  |
| rs62175772  | C | 0.134   |
| rs4674112   | A | -0.0361 |
| rs58968710  | A | -0.112  |
| rs147347781 | G | -0.1493 |
| rs114723832 | T | -0.1076 |
| rs111277591 | C | -0.1449 |
| rs76225597  | C | 0.1731  |
| rs115940048 | A | 0.2053  |
| rs11691111  | G | -0.0303 |
| rs17033132  | G | -0.0495 |
| rs10520158  | T | 0.1414  |
| rs80112647  | A | -0.1377 |
| rs79162575  | A | 0.0807  |
| rs114956128 | A | -0.1288 |
| rs75631277  | C | -0.1086 |
| rs6718441   | A | -0.0554 |
| rs9646781   | T | -0.058  |
| rs116196961 | A | -0.0496 |
| rs59045998  | T | 0.0481  |

|             |   |         |
|-------------|---|---------|
| rs76092755  | T | -0.158  |
| rs12621079  | C | 0.0352  |
| rs75961839  | C | -0.0705 |
| rs71417217  | C | -0.0458 |
| rs35158137  | C | 0.1239  |
| rs6547591   | A | 0.0263  |
| rs13015390  | T | -0.067  |
| rs148536659 | A | 0.1284  |
| rs35130554  | A | -0.0757 |
| rs114675574 | A | -0.2194 |
| rs13383477  | C | 0.0284  |
| rs112557992 | T | 0.1062  |
| rs60000556  | A | 0.0504  |
| rs116357019 | G | -0.0767 |
| rs149465607 | T | 0.1087  |
| rs1534611   | C | 0.0278  |
| rs72774117  | G | -0.0534 |
| rs10169256  | G | 0.0435  |
| rs111337675 | T | 0.0908  |
| rs75825259  | A | -0.1785 |
| rs7592831   | T | -0.0298 |
| rs60590175  | G | 0.0672  |
| rs7579648   | T | 0.0414  |
| rs3772010   | C | 0.0454  |
| rs144942331 | T | 0.144   |
| rs56278882  | C | 0.091   |
| rs6728063   | C | 0.1005  |
| rs6432854   | A | 0.0373  |
| rs16863421  | T | 0.0949  |
| rs78294645  | T | -0.0817 |
| rs1374252   | G | 0.027   |
| rs79791052  | T | 0.0604  |
| rs116827840 | C | 0.0955  |
| rs3109131   | T | 0.0786  |
| rs114921223 | T | 0.2284  |
| rs2568465   | T | 0.0293  |
| rs13408738  | T | 0.0347  |
| rs139764150 | G | -0.2381 |
| rs7607574   | G | -0.0277 |
| rs11674181  | T | -0.0323 |
| rs12611689  | T | -0.0665 |
| rs12478448  | T | 0.0526  |
| rs78221269  | G | 0.0766  |
| rs115433106 | C | -0.1154 |
| rs35942888  | C | -0.1877 |
| rs16864304  | T | -0.0656 |
| rs55691530  | A | -0.0307 |

|             |   |         |
|-------------|---|---------|
| rs6730703   | C | -0.055  |
| rs62117005  | A | 0.0763  |
| rs1344913   | A | -0.1456 |
| rs113567959 | A | 0.1559  |
| rs74666227  | T | 0.0887  |
| rs115094730 | A | 0.0906  |
| rs72930467  | A | 0.119   |
| rs139984752 | A | -0.1755 |
| rs13030015  | A | 0.0334  |
| rs999888    | G | -0.027  |
| rs343936    | C | -0.0359 |
| rs147225533 | T | 0.1285  |
| rs10206822  | A | 0.0291  |
| rs62179979  | T | -0.1711 |
| rs61515305  | G | -0.0763 |
| rs116161839 | C | -0.1037 |
| rs11674716  | A | -0.081  |
| rs72987280  | T | 0.0589  |
| rs7560055   | C | 0.2147  |
| rs4666392   | T | 0.0428  |
| rs7583071   | C | -0.108  |
| rs281494    | C | -0.026  |
| rs145011693 | C | -0.1707 |
| rs12620079  | G | 0.1121  |
| rs2901066   | C | 0.0452  |
| rs113821499 | T | 0.0551  |
| rs1044710   | A | 0.0443  |
| rs17339625  | A | 0.0446  |
| rs148868792 | T | -0.1182 |
| rs734541    | A | -0.0306 |
| rs76567140  | T | -0.0644 |
| rs79111771  | T | 0.1149  |
| rs79236308  | G | -0.1338 |
| rs13026299  | C | -0.0509 |
| rs116204316 | T | 0.2224  |
| rs151032991 | T | -0.0929 |
| rs149427550 | T | 0.123   |
| rs78711824  | A | 0.083   |
| rs76490699  | A | -0.054  |
| rs11124191  | A | -0.0297 |
| rs72789429  | A | 0.1345  |
| rs2373191   | C | 0.0306  |
| rs72620855  | C | -0.0817 |
| rs145976248 | A | -0.0977 |
| rs10208418  | A | -0.0539 |
| rs35710916  | C | 0.0436  |
| rs137946923 | C | 0.1303  |

|             |   |         |
|-------------|---|---------|
| rs78803761  | T | -0.0776 |
| rs11122819  | G | 0.0335  |
| rs1519308   | G | -0.0477 |
| rs72828433  | A | 0.0824  |
| rs7597330   | G | 0.1242  |
| rs116092280 | C | -0.0846 |
| rs849532    | A | -0.0545 |
| rs62114679  | T | -0.1042 |
| rs34540479  | G | 0.0294  |
| rs11682946  | A | 0.0502  |
| rs41309094  | T | -0.11   |
| rs77352129  | G | -0.0808 |
| rs6713596   | T | 0.0772  |
| rs10932328  | C | 0.0308  |
| rs72830519  | T | -0.1416 |
| rs16830021  | A | -0.098  |
| rs67922751  | G | 0.0346  |
| rs7570761   | T | 0.1869  |
| rs6704719   | T | 0.1728  |
| rs6753886   | A | -0.0263 |
| rs6735613   | T | 0.0267  |
| rs34721824  | A | -0.073  |
| rs12476712  | T | -0.0414 |
| rs112831396 | T | -0.169  |
| rs13017192  | G | 0.0391  |
| rs6717128   | G | 0.0322  |
| rs13007300  | A | 0.0849  |
| rs79734773  | G | -0.0649 |
| rs11895210  | T | -0.0262 |
| rs12617134  | T | -0.1267 |
| rs34743088  | T | 0.0963  |
| rs13401909  | C | 0.0889  |
| rs114938027 | A | -0.1426 |
| rs17006817  | A | 0.05    |
| rs4972493   | G | 0.0285  |
| rs140327786 | T | -0.1772 |
| rs62170084  | A | -0.1473 |
| rs77307792  | A | -0.1162 |
| rs10515940  | A | -0.0366 |
| rs72828694  | A | 0.0497  |
| rs59367072  | G | 0.1138  |
| rs6709199   | A | 0.0713  |
| rs62124481  | T | 0.1082  |
| rs1257179   | T | 0.051   |
| rs35481605  | C | 0.1235  |
| rs72953391  | C | -0.1109 |
| rs12613873  | T | 0.0739  |



|             |   |         |
|-------------|---|---------|
| rs62128483  | T | 0.0329  |
| rs55836999  | T | 0.0394  |
| rs72625274  | G | 0.0477  |
| rs11563059  | T | 0.1248  |
| rs146212455 | G | -0.081  |
| rs114947920 | A | 0.0511  |
| rs55686299  | G | 0.0394  |
| rs2570476   | C | 0.0266  |
| rs116540696 | T | 0.1189  |
| rs76338368  | A | 0.0351  |
| rs114970452 | A | 0.144   |
| rs6726468   | T | 0.0613  |
| rs4669360   | A | 0.0281  |
| rs78654239  | T | 0.0884  |
| rs62173264  | T | -0.0521 |
| rs13023015  | C | -0.0279 |
| rs2551896   | C | 0.1558  |
| rs56393750  | C | 0.0336  |
| rs115067939 | T | 0.1375  |
| rs4852244   | A | -0.0338 |
| rs77487847  | G | -0.1146 |
| rs35522481  | C | 0.0378  |
| rs114154239 | T | -0.0648 |
| rs17835456  | G | 0.1193  |
| rs139415604 | T | -0.0822 |
| rs75621383  | C | 0.0546  |
| rs116449111 | G | 0.0958  |
| rs112608234 | C | -0.205  |
| rs74398408  | A | -0.0473 |
| rs1667315   | G | 0.0261  |
| rs80300968  | A | 0.1008  |
| rs77361423  | A | -0.1431 |
| rs764011    | T | 0.0352  |
| rs2680921   | C | -0.0437 |
| rs13392301  | A | 0.031   |
| rs138491076 | A | 0.0814  |
| rs77483364  | T | -0.1177 |
| rs76005083  | G | 0.04    |
| rs145173507 | A | -0.1224 |
| rs12464912  | C | 0.0356  |
| rs11688221  | A | -0.0328 |
| rs11679298  | A | -0.0695 |
| rs78463361  | T | 0.0988  |
| rs75820995  | G | 0.0964  |
| rs10202222  | A | 0.031   |
| rs76960797  | G | 0.1955  |
| rs75401925  | A | 0.1307  |

|             |   |         |
|-------------|---|---------|
| rs74887827  | G | -0.0734 |
| rs34939560  | T | 0.2104  |
| rs62157777  | A | -0.1179 |
| rs62152141  | T | 0.0289  |
| rs10469959  | C | -0.0403 |
| rs17043077  | G | 0.1878  |
| rs113782373 | G | 0.1602  |
| rs6712179   | T | -0.1256 |
| rs80000081  | T | -0.1211 |
| rs72801743  | T | 0.1067  |
| rs374640    | C | 0.0338  |
| rs114835699 | T | 0.1939  |
| rs7597307   | C | -0.0443 |
| rs72808493  | A | -0.0827 |
| rs10929507  | C | 0.0303  |
| rs76655680  | G | -0.1838 |
| rs75129331  | C | -0.0962 |
| rs34735497  | A | 0.1453  |
| rs17786990  | A | -0.0964 |
| rs342079    | A | -0.0858 |
| rs76118941  | T | -0.1278 |
| rs4832625   | G | -0.0456 |
| rs76636608  | G | 0.1562  |
| rs798378    | T | 0.0336  |
| rs10931651  | A | -0.0332 |
| rs11685615  | T | 0.037   |
| rs2010704   | A | 0.0287  |
| rs6544504   | C | 0.0406  |
| rs826009    | C | 0.0313  |
| rs4952175   | G | -0.0319 |
| rs59666082  | T | -0.0269 |
| rs2577850   | C | -0.0281 |
| rs138163071 | T | -0.163  |
| rs7425172   | C | 0.0541  |
| rs141148365 | G | 0.1163  |
| rs114025615 | A | 0.154   |
| rs6736639   | G | 0.0275  |
| rs62168274  | A | -0.0821 |
| rs12986656  | G | -0.0324 |
| rs113300136 | C | -0.1774 |
| rs16826737  | A | 0.1122  |
| rs7607878   | T | 0.1159  |
| rs1899018   | A | 0.032   |
| rs17023526  | C | 0.0287  |
| rs11673851  | C | -0.044  |
| rs7594890   | A | -0.0303 |
| rs144383176 | C | 0.1103  |

|             |   |         |
|-------------|---|---------|
| rs17425321  | G | 0.0521  |
| rs11884872  | C | 0.0365  |
| rs2196697   | T | 0.0975  |
| rs212377    | T | 0.0327  |
| rs75056559  | A | 0.0827  |
| rs1402720   | G | -0.039  |
| rs76295688  | G | -0.0761 |
| rs77484009  | C | -0.1214 |
| rs10192541  | G | -0.033  |
| rs76176553  | C | 0.1887  |
| rs140981129 | A | 0.1624  |
| rs12621248  | A | 0.0298  |
| rs11901125  | T | -0.045  |
| rs10203166  | T | 0.098   |
| rs4667570   | C | 0.029   |
| rs76072482  | C | 0.1555  |
| rs4107579   | C | -0.0457 |
| rs4129947   | A | -0.0689 |
| rs80127108  | T | 0.0889  |
| rs13010217  | T | 0.0331  |
| rs3755527   | G | -0.0275 |
| rs13388868  | G | 0.0279  |
| rs77936131  | G | -0.1959 |
| rs28479544  | A | -0.0273 |
| rs17013551  | C | 0.033   |
| rs1524553   | T | 0.0738  |
| rs12615002  | T | -0.0363 |
| rs13401606  | C | -0.0367 |
| rs7558150   | T | -0.0563 |
| rs57761982  | T | 0.2275  |
| rs6758758   | A | -0.0414 |
| rs17240222  | C | -0.065  |
| rs150889512 | A | -0.1609 |
| rs10930476  | C | 0.0258  |
| rs2466157   | G | -0.0313 |
| rs35323943  | C | -0.0863 |
| rs10185490  | A | 0.0258  |
| rs116240242 | C | -0.1154 |
| rs79616469  | A | -0.1508 |
| rs77267681  | T | -0.1525 |
| rs72985033  | G | 0.0893  |
| rs13023588  | A | -0.0394 |
| rs62169069  | A | 0.0844  |
| rs55681572  | A | 0.0429  |
| rs77469505  | T | 0.0998  |
| rs114781131 | A | -0.0914 |
| rs17862746  | G | 0.1693  |

|             |   |         |
|-------------|---|---------|
| rs142346733 | A | 0.179   |
| rs2588498   | T | 0.0351  |
| rs62144749  | T | -0.0665 |
| rs6708742   | C | 0.0476  |
| rs1453842   | A | -0.0335 |
| rs10495673  | G | -0.0269 |
| rs144964625 | C | -0.1928 |
| rs13034749  | G | 0.0317  |
| rs75505824  | G | 0.0522  |
| rs11902436  | A | -0.073  |
| rs72777612  | C | -0.0614 |
| rs144595012 | T | 0.0917  |
| rs11679911  | A | -0.0282 |
| rs58491675  | G | -0.04   |
| rs113124687 | A | -0.1919 |
| rs80148950  | G | -0.1098 |
| rs78908124  | C | -0.0759 |
| rs138157808 | T | 0.1581  |
| rs79936301  | C | -0.1724 |
| rs10929285  | T | 0.034   |
| rs13422460  | G | -0.0266 |
| rs114899291 | C | 0.1208  |
| rs12611717  | A | 0.0294  |
| rs3923229   | C | 0.0296  |
| rs11688097  | A | -0.2223 |
| rs6711456   | C | 0.0375  |
| rs17334044  | T | -0.0729 |
| rs77802918  | T | 0.0383  |
| rs4535036   | C | 0.0349  |
| rs10932140  | C | 0.0281  |
| rs139212756 | A | 0.1954  |
| rs114475771 | T | -0.0892 |
| rs146824684 | A | -0.1054 |
| rs11677722  | A | 0.0317  |
| rs2741023   | A | 0.026   |
| rs13432799  | G | -0.0457 |
| rs151168935 | A | 0.1108  |
| rs75133691  | A | 0.1297  |
| rs113216332 | A | -0.0725 |
| rs13013872  | A | -0.03   |
| rs34514028  | G | -0.0312 |
| rs76924924  | A | 0.0831  |
| rs78176700  | T | 0.1092  |
| rs145643268 | A | 0.0898  |
| rs79257390  | A | 0.0827  |
| rs2072460   | G | -0.0268 |
| rs74673522  | G | 0.0752  |

|             |   |         |
|-------------|---|---------|
| rs72978660  | A | -0.032  |
| rs79439110  | T | 0.1014  |
| rs72771403  | G | -0.0316 |
| rs115570081 | A | 0.0592  |
| rs115822583 | G | 0.158   |
| rs1013363   | C | 0.0272  |
| rs145540433 | A | 0.2385  |
| rs116035675 | T | 0.1595  |
| rs11883682  | A | 0.0327  |
| rs11676186  | T | -0.048  |
| rs72770146  | T | 0.0912  |
| rs709275    | G | 0.0323  |
| rs3729956   | C | 0.1513  |
| rs1474396   | A | 0.0265  |
| rs1176789   | A | 0.1442  |
| rs10929160  | T | -0.0262 |
| rs11690976  | T | 0.0387  |
| rs17014748  | A | 0.0396  |
| rs12105185  | G | -0.0355 |
| rs2881165   | C | 0.0367  |
| rs296046    | A | -0.0337 |
| rs76997098  | C | 0.0768  |
| rs6716989   | T | -0.0262 |
| rs10497652  | T | -0.0401 |
| rs115636836 | C | -0.1672 |
| rs56330236  | G | 0.1328  |
| rs77965445  | A | 0.0718  |
| rs11900527  | C | 0.0432  |
| rs28464850  | A | -0.0945 |
| rs115286255 | G | 0.1338  |
| rs72836176  | C | 0.1271  |
| rs116363583 | G | -0.0756 |
| rs1517793   | T | -0.0432 |
| rs11686178  | C | 0.0745  |
| rs4665955   | A | 0.0269  |
| rs114468456 | C | 0.0896  |
| rs115376326 | T | 0.0911  |
| rs1964466   | T | -0.0633 |
| rs77127892  | T | -0.0766 |
| rs12990097  | C | 0.0275  |
| rs67840335  | G | -0.0386 |
| rs13006906  | T | 0.0865  |
| rs4850537   | C | 0.2132  |
| rs72784566  | C | -0.0331 |
| rs4267532   | A | -0.098  |
| rs72926244  | A | 0.0544  |
| rs35612887  | C | 0.0398  |

|             |   |         |
|-------------|---|---------|
| rs12473173  | A | 0.0509  |
| rs79305596  | T | 0.0937  |
| rs10194171  | T | -0.1891 |
| rs7580764   | C | 0.0321  |
| rs116173719 | A | 0.107   |
| rs72822600  | A | 0.1902  |
| rs111539349 | C | 0.0666  |
| rs7559216   | A | -0.0262 |
| rs77471068  | T | -0.1519 |
| rs144221244 | A | 0.1119  |
| rs72865932  | T | -0.0427 |
| rs114482477 | A | 0.1233  |
| rs1470053   | T | 0.0348  |
| rs11674141  | T | 0.0264  |
| rs76390245  | T | 0.0423  |
| rs11890333  | T | 0.1059  |
| rs934601    | C | 0.0273  |
| rs6738297   | A | -0.0285 |
| rs510026    | T | 0.0268  |
| rs77215525  | A | 0.2053  |
| rs13004430  | C | -0.0306 |
| rs149470999 | A | 0.0785  |
| rs4852113   | G | -0.0312 |
| rs7584315   | T | 0.0525  |
| rs62117979  | T | 0.049   |
| rs146618761 | G | 0.1333  |
| rs78361257  | T | 0.1432  |
| rs61479933  | T | 0.1482  |
| rs112002581 | A | -0.1047 |
| rs6734498   | A | 0.0606  |
| rs72973159  | A | 0.0826  |
| rs7594267   | G | 0.0251  |
| rs140278746 | G | 0.1558  |
| rs6758019   | G | -0.0398 |
| rs12622622  | T | 0.0696  |
| rs6716870   | A | 0.1825  |
| rs17783218  | A | 0.0508  |
| rs149685773 | T | 0.0393  |
| rs999939    | C | -0.0391 |
| rs11888255  | A | 0.073   |
| rs13002028  | C | -0.0408 |
| rs35878118  | C | -0.0641 |
| rs13426706  | C | 0.0389  |
| rs61419985  | C | -0.1775 |
| rs10196155  | G | -0.0285 |
| rs115407041 | A | 0.0935  |
| rs79217476  | C | 0.0638  |

|             |   |         |
|-------------|---|---------|
| rs3755285   | C | -0.0288 |
| rs75015257  | T | 0.2014  |
| rs16837641  | A | -0.0277 |
| rs11694318  | C | 0.03    |
| rs72947598  | G | 0.0571  |
| rs60906755  | T | 0.0556  |
| rs1275993   | A | 0.0405  |
| rs143907457 | C | 0.2034  |
| rs1438158   | C | 0.2122  |
| rs116764385 | C | 0.085   |
| rs2341849   | T | 0.0396  |
| rs62185196  | C | 0.1134  |
| rs13029188  | C | 0.0303  |
| rs78829820  | A | 0.0493  |
| rs10190930  | G | 0.0716  |
| rs137893682 | A | 0.1518  |
| rs622274    | T | 0.0317  |
| rs17336946  | T | 0.1369  |
| rs12993069  | A | -0.0862 |
| rs62187824  | A | 0.0338  |
| rs62115929  | G | 0.1557  |
| rs62139473  | C | 0.1779  |
| rs79416200  | A | 0.0971  |
| rs35371811  | C | -0.0954 |
| rs13014333  | C | -0.1456 |
| rs10931542  | G | 0.0587  |
| rs112956467 | T | -0.0478 |
| rs2123514   | G | 0.0325  |
| rs75686610  | T | -0.1534 |
| rs2191595   | A | -0.0254 |
| rs75219990  | C | 0.2047  |
| rs1430261   | G | -0.0443 |
| rs11676719  | A | 0.0412  |
| rs73908745  | T | -0.0519 |
| rs2090163   | C | -0.029  |
| rs59825965  | T | -0.1478 |
| rs6543855   | A | -0.0411 |
| rs2122126   | C | -0.0312 |
| rs62158500  | T | -0.0526 |
| rs10172207  | G | 0.0796  |
| rs112605456 | A | -0.0429 |
| rs6719956   | T | -0.1538 |
| rs7420143   | G | -0.0371 |
| rs6714173   | A | -0.0313 |
| rs4470324   | G | -0.0313 |
| rs141289009 | A | 0.123   |
| rs2881064   | C | -0.0391 |

|             |   |         |
|-------------|---|---------|
| rs13032979  | C | 0.0469  |
| rs113132439 | A | -0.0672 |
| rs13423716  | T | 0.1365  |
| rs12622977  | G | -0.0259 |
| rs7592623   | C | 0.0335  |
| rs6433931   | C | 0.0258  |
| rs62176864  | C | -0.1372 |
| rs35468920  | T | 0.1351  |
| rs77179208  | T | -0.193  |
| rs2042476   | A | 0.0424  |
| rs76556205  | C | 0.1116  |
| rs62179314  | C | -0.0327 |
| rs11126083  | C | 0.0563  |
| rs1002016   | A | 0.037   |
| rs12622722  | G | 0.026   |
| rs35387219  | G | 0.0402  |
| rs62157031  | A | -0.0333 |
| rs16829786  | G | -0.0539 |
| rs11694175  | T | 0.0267  |
| rs113487189 | A | -0.065  |
| rs2697336   | G | -0.0283 |
| rs114954655 | T | -0.1055 |
| rs62130807  | T | 0.0864  |
| rs117646530 | T | -0.0484 |
| rs138977995 | A | 0.1371  |
| rs71417320  | C | 0.0693  |
| rs72837540  | G | -0.1012 |
| rs4638741   | T | -0.0266 |
| rs6721691   | C | 0.0427  |
| rs77903214  | C | -0.1282 |
| rs115375784 | T | 0.1314  |
| rs116348530 | G | -0.1423 |
| rs13431427  | A | 0.0329  |
| rs12473939  | T | -0.0359 |
| rs6749492   | C | -0.0381 |
| rs142399637 | A | -0.1083 |
| rs150689604 | T | 0.2211  |
| rs12476340  | T | 0.0308  |
| rs4665865   | C | -0.0485 |
| rs11689235  | C | -0.1082 |
| rs115894633 | T | -0.1468 |
| rs116034983 | C | 0.1074  |
| rs17306869  | A | 0.1298  |
| rs113210994 | C | 0.1293  |
| rs116362573 | G | 0.094   |
| rs150510425 | A | -0.1551 |
| rs7581227   | A | 0.0367  |



|             |   |         |
|-------------|---|---------|
| rs114667261 | C | 0.1002  |
| rs6710203   | C | 0.1504  |
| rs141331815 | T | 0.169   |
| rs75145182  | A | 0.035   |
| rs150807985 | A | -0.052  |
| rs2371441   | A | 0.071   |
| rs73916568  | A | -0.0964 |
| rs73926175  | G | 0.1057  |
| rs77128525  | T | 0.1129  |
| rs112690137 | G | -0.0834 |
| rs4380175   | G | -0.0312 |
| rs72794334  | T | -0.0974 |
| rs145398538 | T | -0.1353 |
| rs10432425  | T | -0.0297 |
| rs76225725  | T | 0.2492  |
| rs140898460 | T | 0.1044  |
| rs72769625  | G | 0.1014  |
| rs12105972  | C | 0.0433  |
| rs139656829 | G | 0.1026  |
| rs56067158  | C | -0.0807 |
| rs113663297 | T | 0.083   |
| rs75174597  | A | 0.0559  |
| rs725806    | G | 0.0292  |
| rs10174126  | T | 0.0284  |
| rs10929485  | T | -0.0251 |
| rs10172084  | A | 0.1359  |
| rs4832402   | A | -0.0348 |
| rs113348003 | A | -0.0495 |
| rs111381744 | A | 0.1104  |
| rs17338700  | T | -0.0372 |
| rs56017189  | C | 0.1556  |
| rs147550827 | A | -0.1281 |
| rs148271038 | A | 0.119   |
| rs62183592  | T | 0.0768  |
| rs146570292 | C | 0.1228  |
| rs140512671 | A | 0.1159  |
| rs114859154 | C | 0.1338  |
| rs114654007 | A | 0.0937  |
| rs1372254   | G | 0.1108  |
| rs1882638   | C | 0.0446  |
| rs140380858 | G | 0.1003  |
| rs138337475 | T | 0.1458  |
| rs78229753  | T | -0.0722 |
| rs56028422  | G | -0.2127 |
| rs13001654  | T | 0.0439  |
| rs72964640  | G | 0.2011  |
| rs16824211  | G | -0.0487 |

|             |   |         |
|-------------|---|---------|
| rs115643426 | C | 0.0697  |
| rs114389152 | T | 0.1179  |
| rs78817214  | A | -0.1089 |
| rs79785546  | T | 0.1282  |
| rs78083195  | G | 0.0635  |
| rs1866153   | T | -0.0517 |
| rs35459600  | T | 0.0596  |
| rs138762487 | T | 0.1479  |
| rs59023728  | G | -0.0811 |
| rs66590348  | C | -0.0712 |
| rs140795300 | C | -0.1909 |
| rs12615526  | G | 0.0335  |
| rs4852433   | A | -0.0285 |
| rs114047142 | T | 0.157   |
| rs62173684  | T | 0.0866  |
| rs10497056  | A | -0.1566 |
| rs60864032  | C | -0.1508 |
| rs3096869   | T | -0.043  |
| rs138329786 | C | 0.0758  |
| rs4675826   | G | 0.1089  |
| rs13399085  | A | -0.0396 |
| rs79275685  | A | 0.1334  |
| rs62144527  | G | 0.1775  |
| rs1549761   | C | -0.03   |
| rs62149681  | G | -0.1348 |
| rs115998826 | A | -0.1978 |
| rs236843    | C | -0.0262 |
| rs148492530 | G | -0.1215 |
| rs61752234  | C | -0.1171 |
| rs11548393  | T | 0.0278  |
| rs16864788  | A | 0.0481  |
| rs62103938  | T | -0.0277 |
| rs61383769  | A | -0.175  |
| rs13425630  | G | 0.0294  |
| rs77982803  | A | 0.0725  |
| rs149337696 | T | 0.102   |
| rs114643732 | A | 0.0863  |
| rs11679833  | A | 0.0551  |
| rs76215319  | A | 0.1113  |
| rs72904814  | C | -0.1157 |
| rs34105579  | C | 0.0632  |
| rs139887827 | A | 0.0889  |
| rs115417046 | T | 0.1077  |
| rs12713729  | T | -0.026  |
| rs80309587  | A | -0.2152 |
| rs77048730  | C | 0.0717  |
| rs62148957  | C | -0.1709 |

|             |   |         |
|-------------|---|---------|
| rs74865323  | C | 0.0874  |
| rs74169403  | G | 0.1443  |
| rs4402757   | C | 0.0497  |
| rs4266057   | C | 0.0267  |
| rs13027636  | G | 0.0944  |
| rs144214643 | G | -0.0995 |
| rs7574150   | G | 0.0332  |
| rs115981557 | T | 0.1339  |
| rs2407072   | T | -0.043  |
| rs6719409   | C | -0.06   |
| rs72886086  | G | -0.0832 |
| rs114497674 | T | 0.0851  |
| rs114980141 | A | 0.0956  |
| rs41331849  | T | 0.0499  |
| rs114707968 | G | 0.1359  |
| rs500432    | G | -0.0253 |
| rs74337404  | T | 0.1337  |
| rs77531254  | A | -0.0815 |
| rs72960492  | G | -0.0487 |
| rs2972132   | A | -0.0262 |
| rs137997545 | C | 0.166   |
| rs72866461  | G | 0.1736  |
| rs4953028   | A | -0.0267 |
| rs13384513  | A | 0.0343  |
| rs114260059 | A | -0.142  |
| rs77615523  | T | 0.0742  |
| rs17397533  | G | 0.0305  |
| rs74860296  | C | 0.0793  |
| rs4851551   | A | -0.0496 |
| rs74981420  | C | 0.105   |
| rs116743625 | A | 0.1428  |
| rs6759940   | T | 0.0283  |
| rs9752615   | A | 0.0742  |
| rs34457673  | C | -0.1173 |
| rs147923627 | G | -0.1354 |
| rs10185649  | T | 0.0961  |
| rs2116398   | G | -0.0489 |
| rs72774091  | A | -0.0905 |
| rs6752849   | G | 0.1043  |
| rs938733    | C | -0.026  |
| rs1920978   | A | 0.0257  |
| rs56337824  | A | -0.1007 |
| rs76832333  | G | 0.1572  |
| rs41286594  | T | -0.1121 |
| rs73007522  | C | -0.0649 |
| rs74449980  | G | 0.0414  |
| rs72983327  | A | 0.0444  |

|             |   |         |
|-------------|---|---------|
| rs149897418 | T | 0.1613  |
| rs2305150   | C | -0.026  |
| rs4622658   | A | -0.0282 |
| rs115759381 | T | 0.1052  |
| rs73022314  | A | -0.0411 |
| rs11684050  | A | 0.0265  |
| rs10929770  | G | -0.03   |
| rs7605753   | A | 0.0249  |
| rs12615463  | A | -0.0478 |
| rs143991396 | G | -0.2057 |
| rs12105903  | T | -0.0349 |
| rs74853297  | T | 0.0766  |
| rs13012902  | T | 0.0638  |
| rs11676234  | C | 0.0436  |
| rs17034666  | A | 0.0663  |
| rs2216851   | A | -0.0264 |
| rs62623452  | T | 0.1574  |
| rs6711842   | A | -0.0402 |
| rs114514079 | G | 0.1289  |
| rs111976243 | T | 0.0826  |
| rs2723204   | C | 0.0491  |
| rs1352043   | T | -0.0394 |
| rs11486515  | T | -0.1123 |
| rs3731640   | A | 0.0444  |
| rs6712896   | A | 0.0267  |
| rs1834789   | G | -0.0416 |
| rs1399691   | T | 0.0414  |
| rs56004826  | G | 0.1333  |
| rs16822986  | C | -0.0374 |
| rs35664993  | T | -0.0277 |
| rs6724149   | A | 0.0753  |
| rs11901520  | T | 0.0338  |
| rs143991444 | T | -0.1548 |
| rs11887857  | G | -0.0375 |
| rs2117274   | T | -0.0266 |
| rs72818730  | A | -0.1192 |
| rs62159099  | C | 0.0904  |
| rs62168211  | C | 0.032   |
| rs1058261   | T | -0.0267 |
| rs2716619   | C | -0.0267 |
| rs149520386 | T | 0.1975  |
| rs79934459  | T | -0.1019 |
| rs114954125 | G | -0.0942 |
| rs80121990  | A | 0.0697  |
| rs1036525   | G | -0.0411 |
| rs140076940 | G | -0.2362 |
| rs76391590  | A | -0.1255 |

|             |   |         |
|-------------|---|---------|
| rs10804366  | T | 0.0265  |
| rs147702818 | T | -0.1076 |
| rs144768913 | G | 0.0897  |
| rs35961282  | T | -0.0604 |
| rs4674537   | T | 0.0259  |
| rs79550635  | T | 0.0764  |
| rs2630726   | G | -0.0339 |
| rs72811637  | A | 0.1322  |
| rs79382414  | A | -0.1151 |
| rs59588536  | C | 0.0806  |
| rs75503111  | T | -0.098  |
| rs2176060   | A | 0.1161  |
| rs10206716  | C | -0.0319 |
| rs12614604  | G | 0.029   |
| rs148028867 | C | 0.1135  |
| rs115836140 | G | 0.1624  |
| rs17811019  | C | 0.1233  |
| rs2463637   | G | 0.0311  |
| rs4852063   | A | -0.0347 |
| rs148105550 | A | -0.0899 |
| rs78693586  | G | 0.1352  |
| rs869213    | G | -0.0547 |
| rs150526935 | A | 0.0907  |
| rs116767053 | G | -0.2325 |
| rs58436644  | C | -0.0871 |
| rs74564262  | T | 0.0818  |
| rs115974890 | T | 0.2018  |
| rs115452246 | A | 0.1238  |
| rs295120    | T | 0.0436  |
| rs13024194  | C | -0.0334 |
| rs74842664  | G | 0.0707  |
| rs146231992 | T | -0.1341 |
| rs7575231   | G | -0.0265 |
| rs115419401 | G | 0.1156  |
| rs6711708   | A | 0.0479  |
| rs76595551  | G | -0.2117 |
| rs1559948   | G | 0.0536  |
| rs72822171  | T | 0.1124  |
| rs1434098   | A | -0.0367 |
| rs13382969  | G | 0.0566  |
| rs17328734  | G | -0.025  |
| rs62189761  | A | -0.0778 |
| rs115511390 | G | 0.1846  |
| rs115084984 | A | 0.1515  |
| rs12712785  | T | -0.0315 |
| rs146231926 | T | 0.1506  |
| rs2118484   | C | 0.0326  |

|             |   |         |
|-------------|---|---------|
| rs12987887  | T | 0.0248  |
| rs62145400  | T | -0.1834 |
| rs3099951   | T | 0.1044  |
| rs111344957 | T | 0.145   |
| rs1434109   | G | -0.0296 |
| rs55729358  | C | 0.0288  |
| rs1518068   | T | -0.0325 |
| rs114524163 | G | 0.1723  |
| rs214043    | T | -0.0353 |
| rs11677679  | T | 0.0898  |
| rs58625231  | C | 0.0399  |
| rs12990522  | A | 0.0881  |
| rs10451583  | A | -0.0262 |
| rs9341133   | C | 0.2237  |
| rs11681353  | G | -0.0278 |
| rs75908074  | T | -0.054  |
| rs11902021  | T | -0.0275 |
| rs13026015  | G | -0.1879 |
| rs3754699   | G | -0.0367 |
| rs10172530  | G | -0.057  |
| rs2342546   | C | 0.0307  |
| rs75000263  | T | -0.0865 |
| rs116718164 | C | 0.0861  |
| rs6723579   | T | 0.0256  |
| rs114452593 | A | 0.0754  |
| rs17601183  | T | 0.1165  |
| rs13422446  | T | 0.084   |
| rs1402477   | G | 0.0259  |
| rs77882267  | T | 0.1453  |
| rs58406898  | G | 0.0258  |
| rs6546673   | T | 0.0439  |
| rs6758001   | C | -0.0776 |
| rs1002826   | C | 0.0261  |
| rs1014173   | A | 0.0696  |
| rs2592120   | T | -0.0271 |
| rs2088225   | T | -0.0409 |
| rs16864562  | A | -0.1091 |
| rs970896    | A | -0.0278 |
| rs17021968  | C | 0.0682  |
| rs147739993 | C | 0.1204  |
| rs2358443   | T | 0.0262  |
| rs281525    | C | 0.0261  |
| rs57918209  | A | 0.0278  |
| rs76713355  | G | -0.0857 |
| rs144624577 | C | 0.1435  |
| rs10174120  | C | 0.0506  |
| rs72831319  | T | 0.0933  |

|             |   |         |
|-------------|---|---------|
| rs115891290 | A | 0.1171  |
| rs229314    | C | -0.0324 |
| rs147014818 | A | 0.0468  |
| rs62119777  | A | 0.046   |
| rs36068173  | T | 0.1737  |
| rs75362017  | A | -0.0307 |
| rs144070072 | C | -0.0762 |
| rs4672798   | T | -0.0281 |
| rs1812218   | A | -0.0446 |
| rs77023051  | G | 0.1662  |
| rs2630739   | T | 0.0255  |
| rs11127192  | G | 0.0276  |
| rs143967660 | A | 0.1646  |
| rs72831122  | A | -0.0637 |
| rs4528784   | G | 0.026   |
| rs56800383  | G | -0.0894 |
| rs4853597   | A | 0.1028  |
| rs77216900  | C | -0.0595 |
| rs4519571   | A | -0.0256 |
| rs114464549 | C | 0.0438  |
| rs10864871  | A | -0.0276 |
| rs10169752  | A | -0.0262 |
| rs260641    | T | -0.0593 |
| rs113015046 | C | -0.2053 |
| rs932176    | A | 0.0422  |
| rs6431934   | A | 0.081   |
| rs3771863   | T | -0.0345 |
| rs113684955 | G | 0.129   |
| rs10188733  | T | -0.0346 |
| rs140115312 | T | 0.0823  |
| rs1542022   | C | 0.0334  |
| rs34199256  | A | 0.0999  |
| rs76234767  | T | -0.0935 |
| rs267993    | T | -0.0275 |
| rs34547318  | C | 0.0843  |
| rs77797566  | T | 0.0964  |
| rs116767299 | T | 0.1422  |
| rs113542308 | T | -0.038  |
| rs10199537  | T | 0.0266  |
| rs28716827  | A | 0.0648  |
| rs477229    | G | 0.0255  |
| rs115356436 | G | 0.1156  |
| rs13398038  | T | -0.0503 |
| rs115536310 | A | -0.1656 |
| rs114471389 | A | 0.1945  |
| rs78304365  | G | 0.0878  |
| rs62154324  | C | 0.1592  |

|             |   |         |
|-------------|---|---------|
| rs141677123 | C | 0.1652  |
| rs76715926  | C | -0.1142 |
| rs78038820  | C | 0.0395  |
| rs62140714  | G | 0.108   |
| rs76004592  | A | 0.0688  |
| rs114935942 | A | 0.1196  |
| rs13029754  | G | -0.0391 |
| rs1451197   | G | -0.0244 |
| rs1812211   | T | 0.0332  |
| rs1347889   | T | -0.0439 |
| rs144163183 | A | 0.0287  |
| rs139956359 | A | 0.1677  |
| rs11673972  | G | 0.1143  |
| rs112278700 | C | -0.1551 |
| rs17324389  | T | 0.037   |
| rs4567878   | A | 0.0396  |
| rs11683668  | C | 0.026   |
| rs75266946  | C | 0.0902  |
| rs62184481  | T | 0.029   |
| rs6746775   | G | -0.0267 |
| rs62187816  | C | -0.1242 |
| rs2712033   | G | -0.0307 |
| rs77092459  | G | 0.0601  |
| rs62149402  | A | -0.0876 |
| rs62150115  | C | 0.1115  |
| rs55753337  | G | -0.0453 |
| rs74987949  | G | 0.0722  |
| rs11693284  | T | -0.0877 |
| rs34582399  | G | -0.0532 |
| rs74560042  | C | 0.081   |
| rs1217436   | G | -0.0283 |
| rs80007503  | T | 0.068   |
| rs16855199  | A | -0.1598 |
| rs17428283  | T | -0.0982 |
| rs6719507   | A | 0.0244  |
| rs116734638 | G | -0.1675 |
| rs116265454 | A | 0.1798  |
| rs116052376 | A | -0.2058 |
| rs2046795   | A | -0.0268 |
| rs72874305  | T | -0.0788 |
| rs76256303  | C | 0.0755  |
| rs114275882 | C | 0.0928  |
| rs139452761 | A | 0.1585  |
| rs17738968  | G | -0.1122 |
| rs10864891  | C | 0.0378  |
| rs4644972   | T | -0.0266 |
| rs12463519  | A | -0.0437 |



|             |   |         |
|-------------|---|---------|
| rs115852305 | T | 0.1825  |
| rs7566737   | A | -0.0735 |
| rs72900359  | G | -0.121  |
| rs2584195   | T | 0.0569  |
| rs77186612  | T | 0.0583  |
| rs17045690  | G | 0.0787  |
| rs61654086  | T | -0.17   |
| rs115681727 | C | 0.1227  |
| rs1010456   | A | -0.0312 |
| rs11682719  | G | -0.0723 |
| rs111802447 | A | 0.0947  |
| rs115769742 | G | 0.1295  |
| rs147552857 | A | -0.092  |
| rs115252619 | A | -0.2752 |
| rs4669176   | A | 0.0309  |
| rs6734895   | C | 0.0379  |
| rs13425566  | C | -0.0281 |
| rs34829620  | A | -0.052  |
| rs17523693  | C | 0.0514  |
| rs61013045  | A | -0.0365 |
| rs115106147 | G | -0.12   |
| rs142113949 | C | -0.0842 |
| rs16835520  | G | -0.0883 |
| rs9287848   | T | 0.0272  |
| rs72942684  | A | -0.0536 |
| rs111382435 | C | -0.0785 |
| rs6545445   | G | 0.0304  |
| rs17392197  | G | -0.0707 |
| rs150349821 | A | -0.1094 |
| rs6435979   | C | -0.0297 |
| rs1869098   | T | -0.1061 |
| rs305165    | C | 0.0592  |
| rs3770817   | A | -0.1351 |
| rs77823106  | C | 0.1405  |
| rs6715969   | C | 0.0375  |
| rs115766449 | A | 0.133   |
| rs1355607   | A | 0.112   |
| rs113263454 | C | 0.1214  |
| rs9287915   | G | 0.0312  |
| rs1406262   | C | 0.0296  |
| rs74551156  | G | 0.0801  |
| rs11679697  | G | -0.0263 |
| rs55721077  | G | 0.0404  |
| rs78211247  | A | 0.1128  |
| rs249113    | A | -0.0375 |
| rs115167550 | G | 0.1391  |
| rs2625051   | T | 0.0412  |

|             |   |         |
|-------------|---|---------|
| rs778185    | C | -0.0254 |
| rs116566770 | G | 0.0912  |
| rs78011041  | G | 0.0686  |
| rs1403654   | A | 0.0387  |
| rs148095607 | G | 0.0838  |
| rs1550861   | T | 0.0274  |
| rs2344660   | T | 0.097   |
| rs114476148 | C | 0.0782  |
| rs115084550 | T | -0.1276 |
| rs76904623  | A | -0.0732 |
| rs1554611   | G | 0.0935  |
| rs1991387   | G | -0.0247 |
| rs56403843  | T | 0.0399  |
| rs75577399  | C | -0.0582 |
| rs3732331   | C | -0.0352 |
| rs61179776  | T | 0.0647  |
| rs141689120 | T | -0.1382 |
| rs59200720  | G | -0.0673 |
| rs115241009 | T | 0.1029  |
| rs6746555   | C | -0.0259 |
| rs7588909   | A | 0.0367  |
| rs75949659  | A | 0.0592  |
| rs62178231  | C | -0.0697 |
| rs11674432  | A | -0.0371 |
| rs76400169  | C | 0.0534  |
| rs4953409   | A | -0.0268 |
| rs56196061  | A | 0.0392  |
| rs74612943  | A | -0.0325 |
| rs77887250  | T | 0.1302  |
| rs16838686  | T | 0.0969  |
| rs713396    | G | 0.035   |
| rs1971193   | G | -0.0482 |
| rs6711507   | C | 0.0311  |
| rs17777903  | C | -0.1014 |
| rs41285977  | T | -0.055  |
| rs115549846 | T | 0.0936  |
| rs115829084 | C | 0.1066  |
| rs1159964   | C | 0.0257  |
| rs6719855   | A | -0.0379 |
| rs62186113  | C | 0.1699  |
| rs13034503  | A | 0.1434  |
| rs143098296 | A | 0.0682  |
| rs71416732  | A | -0.0439 |
| rs116725280 | C | 0.1116  |
| rs11683312  | A | 0.0246  |
| rs139249831 | A | -0.129  |
| rs62182083  | A | 0.0407  |

|             |   |         |
|-------------|---|---------|
| rs9808308   | G | -0.0249 |
| rs4441495   | A | 0.0252  |
| rs147380992 | T | -0.1564 |
| rs149966778 | A | -0.1469 |
| rs6548160   | A | 0.035   |
| rs55884773  | G | 0.0358  |
| rs4832427   | T | 0.0836  |
| rs17044074  | G | 0.0577  |
| rs55915927  | A | -0.1336 |
| rs150619540 | G | -0.1064 |
| rs114087606 | A | 0.0839  |
| rs4577309   | A | 0.0247  |
| rs34723916  | T | 0.1413  |
| rs1868844   | A | -0.0255 |
| rs13403828  | T | 0.0315  |
| rs115642588 | G | 0.1861  |
| rs720844    | A | 0.0321  |
| rs2219224   | G | 0.0244  |
| rs112932070 | T | -0.0947 |
| rs115086420 | A | -0.1885 |
| rs74620937  | T | 0.1225  |
| rs114550204 | A | 0.0647  |
| rs114513206 | T | 0.0931  |
| rs115021340 | A | -0.1175 |
| rs72830567  | C | 0.1137  |
| rs1026290   | A | 0.0246  |
| rs1472929   | A | 0.0459  |
| rs4352253   | T | -0.028  |
| rs12614131  | C | 0.0596  |
| rs17180890  | C | 0.029   |
| rs17629007  | C | -0.0818 |
| rs62194793  | G | 0.038   |
| rs62189313  | A | -0.0637 |
| rs9636390   | T | -0.0363 |
| rs10173784  | C | 0.0539  |
| rs144718573 | A | 0.0787  |
| rs79385266  | A | -0.1642 |
| rs35612417  | A | 0.0929  |
| rs74402763  | A | -0.151  |
| rs6434686   | T | 0.0462  |
| rs3770607   | T | -0.1016 |
| rs10166234  | G | -0.0274 |
| rs149925013 | G | -0.1298 |
| rs10198408  | C | 0.0451  |
| rs113144578 | T | 0.1384  |
| rs114759265 | C | -0.0993 |
| rs115907696 | T | -0.0853 |

|             |   |         |
|-------------|---|---------|
| rs112413063 | C | -0.0577 |
| rs114842254 | G | 0.1416  |
| rs4666558   | A | -0.0295 |
| rs140227948 | A | 0.0987  |
| rs71432657  | G | 0.1351  |
| rs4145833   | G | -0.0295 |
| rs112464017 | C | -0.0434 |
| rs16859405  | A | 0.0757  |
| rs2113399   | C | -0.0703 |
| rs848511    | C | 0.0263  |
| rs13017437  | A | 0.0742  |
| rs12478886  | T | 0.0741  |
| rs35795625  | A | -0.0288 |
| rs62107891  | T | -0.0367 |
| rs72884054  | G | -0.1068 |
| rs13422733  | T | 0.0388  |
| rs452204    | A | 0.0251  |
| rs142433324 | C | -0.1458 |
| rs147154333 | A | -0.2626 |
| rs10206089  | A | -0.0296 |
| rs73950840  | C | 0.0464  |
| rs115902509 | A | 0.1186  |
| rs4383300   | C | 0.0381  |
| rs13426482  | G | -0.048  |
| rs12988934  | T | 0.0688  |
| rs13416126  | C | 0.056   |
| rs10184968  | T | 0.0753  |
| rs7591169   | G | -0.0497 |
| rs72803081  | T | 0.0378  |
| rs143335233 | T | 0.1353  |
| rs73026043  | C | 0.1012  |
| rs115502644 | T | -0.0637 |
| rs142364427 | A | -0.1182 |
| rs116008029 | G | 0.1554  |
| rs7591287   | G | -0.0243 |
| rs77146202  | C | -0.1159 |
| rs13026718  | T | -0.027  |
| rs4669416   | T | -0.0321 |
| rs72621540  | C | 0.0519  |
| rs150160102 | T | -0.109  |
| rs114782495 | A | 0.1048  |
| rs1561014   | G | 0.0269  |
| rs906816    | C | 0.0944  |
| rs1595448   | A | -0.1291 |
| rs1583110   | T | -0.0697 |
| rs150622507 | A | -0.0845 |
| rs74939155  | C | 0.0903  |

|             |   |         |
|-------------|---|---------|
| rs72985264  | G | 0.0377  |
| rs114793746 | G | 0.1476  |
| rs72947019  | C | -0.0987 |
| rs77066628  | C | 0.0716  |
| rs6735873   | C | -0.0638 |
| rs13400876  | A | -0.0613 |
| rs114831224 | G | -0.0679 |
| rs976555    | A | -0.0249 |
| rs10183894  | C | 0.0262  |
| rs3755155   | T | -0.0286 |
| rs116303587 | A | 0.0842  |
| rs1167450   | T | -0.0254 |
| rs11886502  | C | 0.0253  |
| rs34162299  | A | 0.071   |
| rs138101526 | A | 0.1843  |
| rs62183786  | G | -0.1342 |
| rs13001834  | C | -0.0334 |
| rs10190663  | G | -0.0251 |
| rs142571427 | C | 0.1412  |
| rs35687660  | C | -0.085  |
| rs6740202   | A | -0.031  |
| rs72788345  | T | -0.0581 |
| rs77337726  | C | 0.0431  |
| rs114562719 | A | -0.0846 |
| rs16856345  | T | 0.0317  |
| rs111960941 | G | 0.0686  |
| rs114810987 | C | 0.0869  |
| rs115586831 | C | -0.0974 |
| rs55953425  | T | -0.091  |
| rs62122039  | T | -0.059  |
| rs62130544  | T | -0.1071 |
| rs78471818  | C | 0.0601  |
| rs13031336  | T | -0.0554 |
| rs11901813  | T | 0.0355  |
| rs72837907  | A | 0.0676  |
| rs140529332 | T | 0.1259  |
| rs150229424 | A | -0.1927 |
| rs143637959 | C | -0.1229 |
| rs114813252 | T | 0.0947  |
| rs72883953  | T | 0.0928  |
| rs139831897 | G | -0.1608 |
| rs10197467  | A | -0.0246 |
| rs116796390 | A | -0.2326 |
| rs10497585  | C | -0.0277 |
| rs116540083 | G | 0.122   |
| rs79721654  | A | 0.0692  |
| rs114733828 | T | 0.1201  |

|             |   |         |
|-------------|---|---------|
| rs141287300 | C | -0.1418 |
| rs74262063  | T | 0.0349  |
| rs72941591  | A | -0.0713 |
| rs2043546   | T | 0.1555  |
| rs75422306  | A | -0.0852 |
| rs7604720   | A | 0.0292  |
| rs60693991  | A | -0.0383 |
| rs12473469  | G | 0.0334  |
| rs116446784 | A | 0.1769  |
| rs143343315 | T | 0.1278  |
| rs4396694   | T | 0.0311  |
| rs9752577   | T | -0.0295 |
| rs114811598 | T | 0.1225  |
| rs79596314  | G | 0.043   |
| rs77066739  | A | 0.0984  |
| rs784555    | G | 0.0337  |
| rs56354394  | A | -0.0388 |
| rs6730787   | T | 0.0433  |
| rs11890167  | C | -0.0451 |
| rs2702060   | G | -0.1142 |
| rs908571    | G | 0.0275  |
| rs76910203  | A | 0.08    |
| rs144258837 | G | 0.114   |
| rs1519981   | T | -0.0272 |
| rs6716617   | A | -0.0358 |
| rs142772049 | T | 0.1357  |
| rs877832    | T | -0.0289 |
| rs4662738   | A | 0.0515  |
| rs56161088  | A | -0.2272 |
| rs73143446  | T | 0.0901  |
| rs74655783  | T | 0.0507  |
| rs72832013  | A | 0.097   |
| rs2411923   | T | 0.041   |
| rs13412404  | A | -0.0411 |
| rs17464387  | T | 0.1383  |
| rs112270032 | G | 0.1259  |
| rs79563068  | G | -0.1883 |
| rs2078507   | C | -0.0366 |
| rs4973372   | G | 0.0278  |
| rs76637275  | G | -0.1334 |
| rs71442324  | A | -0.0599 |
| rs74973881  | T | 0.1592  |
| rs72842930  | C | -0.0999 |
| rs1550836   | G | 0.0384  |
| rs28700142  | G | 0.0616  |
| rs116768218 | C | 0.1199  |
| rs57306830  | A | -0.036  |

|             |   |         |
|-------------|---|---------|
| rs3771157   | A | -0.083  |
| rs74409621  | C | -0.0451 |
| rs76886327  | C | 0.1758  |
| rs12712922  | T | -0.0925 |
| rs10427213  | A | 0.1158  |
| rs72986812  | T | -0.1884 |
| rs113396042 | G | 0.082   |
| rs74533897  | G | 0.118   |
| rs17463266  | T | 0.0476  |
| rs75021121  | A | -0.112  |
| rs56394355  | A | -0.0786 |
| rs74585014  | T | -0.099  |
| rs72817243  | A | -0.1345 |
| rs13025118  | A | 0.0331  |
| rs75565610  | T | -0.208  |
| rs139056609 | C | 0.0601  |
| rs1880210   | T | -0.073  |
| rs4365418   | T | 0.097   |
| rs77528072  | T | 0.0422  |
| rs13023991  | C | 0.0276  |
| rs116204358 | C | -0.1535 |
| rs3115744   | C | -0.0434 |
| rs7561081   | G | -0.0298 |
| rs75611426  | G | -0.1082 |
| rs2646255   | C | -0.0271 |
| rs150305200 | A | 0.0922  |
| rs935403    | C | -0.0278 |
| rs72804480  | G | 0.0509  |
| rs11125377  | T | -0.0275 |
| rs78074325  | C | -0.1273 |
| rs143710448 | G | -0.1004 |
| rs116715250 | G | 0.0801  |
| rs12619819  | A | 0.0364  |
| rs58311735  | C | 0.0652  |
| rs68006534  | T | -0.0312 |
| rs112222161 | T | -0.0995 |
| rs10489998  | C | 0.0492  |
| rs12479292  | T | -0.0251 |
| rs150338592 | T | -0.1901 |
| rs6723201   | C | -0.0423 |
| rs79893166  | A | -0.0574 |
| rs1447524   | A | -0.0506 |
| rs9308990   | G | -0.0356 |
| rs116185880 | C | -0.139  |
| rs150955377 | T | -0.1282 |
| rs75717864  | G | -0.142  |
| rs2086643   | A | -0.0435 |

|             |   |         |
|-------------|---|---------|
| rs6716014   | T | 0.0351  |
| rs60866940  | G | 0.0293  |
| rs35466766  | T | 0.0682  |
| rs143026942 | T | -0.1144 |
| rs149205836 | T | 0.0852  |
| rs1037054   | G | -0.0406 |
| rs11681310  | T | 0.0613  |
| rs16856890  | T | -0.0254 |
| rs1961966   | T | 0.0335  |
| rs6724521   | G | 0.0332  |
| rs62187506  | G | -0.0409 |
| rs75734666  | T | 0.1444  |
| rs10176470  | G | 0.0602  |
| rs17687727  | A | 0.0346  |
| rs34713734  | A | -0.0381 |
| rs73005340  | T | 0.041   |
| rs771174    | C | -0.0598 |
| rs12988456  | G | -0.0303 |
| rs62133335  | G | -0.0652 |
| rs9459      | T | 0.0859  |
| rs116813976 | A | -0.0866 |
| rs1421614   | T | 0.0287  |
| rs62133575  | G | 0.1198  |
| rs77856692  | T | -0.0912 |
| rs140633103 | C | -0.1075 |
| rs113923232 | G | -0.0987 |
| rs6720396   | T | 0.0337  |
| rs1582413   | T | 0.0278  |
| rs4632277   | C | 0.0405  |
| rs4665072   | T | -0.0299 |
| rs74602155  | T | -0.0473 |
| rs62186613  | G | 0.0418  |
| rs66943530  | C | 0.0367  |
| rs4674575   | T | -0.0253 |
| rs591700    | C | 0.1656  |
| rs17033785  | T | 0.0588  |
| rs76242225  | T | 0.0782  |
| rs1447224   | A | 0.0241  |
| rs1205400   | A | -0.0461 |
| rs78476550  | A | -0.0714 |
| rs72843198  | T | -0.0635 |
| rs116045044 | G | -0.145  |
| rs79065997  | C | 0.1486  |
| rs72841471  | C | 0.0767  |
| rs78048373  | A | -0.0614 |
| rs145390535 | T | -0.1352 |
| rs1487036   | A | -0.043  |



|             |   |         |
|-------------|---|---------|
| rs116583721 | G | -0.1469 |
| rs34897061  | C | -0.0555 |
| rs11903139  | T | 0.1268  |
| rs2630754   | G | -0.0315 |
| rs72775385  | C | 0.1383  |
| rs146575157 | G | -0.1434 |
| rs116748637 | C | 0.1084  |
| rs140743574 | A | 0.1571  |
| rs113759432 | A | -0.0927 |
| rs11680715  | C | -0.0338 |
| rs2675895   | A | 0.0291  |
| rs79344062  | A | -0.0584 |
| rs116202885 | G | -0.1352 |
| rs145785560 | G | -0.1374 |
| rs17814767  | C | -0.0782 |
| rs17191752  | G | -0.0255 |
| rs78727829  | G | 0.1327  |
| rs1848607   | G | 0.0298  |
| rs872241    | G | 0.0245  |
| rs140688077 | C | 0.0752  |
| rs1032833   | C | 0.0451  |
| rs77264883  | T | -0.1485 |
| rs13011946  | T | -0.0639 |
| rs75111677  | A | -0.129  |
| rs585156    | C | 0.0265  |
| rs2881321   | A | -0.0252 |
| rs116439883 | T | 0.0513  |
| rs13408434  | G | 0.0369  |
| rs112857432 | G | -0.1581 |
| rs113013023 | T | -0.1536 |
| rs34996358  | T | 0.0269  |
| rs115043642 | A | 0.072   |
| rs62139973  | G | 0.0534  |
| rs11689970  | G | -0.0396 |
| rs10208924  | C | -0.19   |
| rs12105527  | C | -0.1089 |
| rs13028147  | T | -0.1228 |
| rs2342758   | G | 0.0244  |
| rs2229629   | A | 0.1213  |
| rs11900501  | T | 0.0445  |
| rs2311305   | G | -0.0279 |
| rs77541682  | G | -0.1682 |
| rs6752957   | C | -0.0353 |
| rs140468350 | T | 0.1576  |
| rs1476896   | G | 0.0264  |
| rs116241067 | G | 0.1018  |
| rs62104935  | C | 0.0246  |

|             |   |         |
|-------------|---|---------|
| rs72784348  | T | -0.0374 |
| rs149727539 | A | -0.1093 |
| rs76847779  | A | 0.1208  |
| rs4241117   | C | -0.0247 |
| rs74839818  | T | -0.1014 |
| rs147595449 | A | 0.1092  |
| rs72919314  | A | 0.0448  |
| rs77486247  | A | -0.0621 |
| rs79891251  | A | -0.0809 |
| rs7597693   | T | -0.0376 |
| rs1882448   | T | 0.0434  |
| rs72868903  | C | -0.0798 |
| rs12185620  | G | -0.1168 |
| rs1821851   | T | 0.0247  |
| rs17378615  | T | 0.0757  |
| rs79303787  | C | 0.0742  |
| rs72819957  | A | 0.0797  |
| rs6746308   | G | 0.0271  |
| rs2287632   | C | -0.0429 |
| rs12469320  | T | -0.0296 |
| rs7601299   | A | 0.0315  |
| rs57374461  | C | 0.0415  |
| rs147201770 | T | 0.156   |
| rs12713200  | A | 0.0737  |
| rs78389382  | G | -0.0433 |
| rs17596919  | A | -0.0501 |
| rs77975315  | T | -0.0461 |
| rs62169905  | C | 0.0886  |
| rs116692731 | C | 0.2656  |
| rs77373313  | C | 0.0944  |
| rs1543900   | A | -0.0249 |
| rs1098916   | G | 0.031   |
| rs13395993  | T | 0.0264  |
| rs78070942  | T | 0.1548  |
| rs16866224  | A | 0.0356  |
| rs11894481  | G | -0.0398 |
| rs6544999   | G | 0.1175  |
| rs143468394 | C | -0.1059 |
| rs62149649  | C | -0.118  |
| rs116302973 | T | 0.1775  |
| rs6746691   | C | -0.0291 |
| rs112503103 | G | 0.0794  |
| rs12476917  | A | 0.0497  |
| rs77492508  | T | -0.1654 |
| rs1429411   | G | -0.0246 |
| rs80197077  | A | -0.1414 |
| rs62134093  | C | -0.0241 |

|             |   |         |
|-------------|---|---------|
| rs62164543  | T | 0.0643  |
| rs17401272  | G | -0.0495 |
| rs138661419 | G | -0.1995 |
| rs140757509 | T | 0.1114  |
| rs11692800  | A | -0.0577 |
| rs76732432  | A | 0.0324  |
| rs78351736  | T | 0.1182  |
| rs141557259 | T | -0.1452 |
| rs2918738   | G | 0.1462  |
| rs13034345  | C | 0.1789  |
| rs146035845 | T | -0.1386 |
| rs10187040  | C | 0.0378  |
| rs142144398 | G | 0.1354  |
| rs74845404  | C | -0.1384 |
| rs34429569  | C | -0.0394 |
| rs11123788  | A | -0.0258 |
| rs62152919  | A | -0.0408 |
| rs116006207 | C | -0.1127 |
| rs12614527  | G | 0.0271  |
| rs17864759  | T | 0.0525  |
| rs7577993   | C | -0.0518 |
| rs17729272  | T | 0.0645  |
| rs75712735  | G | -0.1165 |
| rs34030157  | T | 0.0564  |
| rs4283390   | G | -0.0717 |
| rs13391640  | T | -0.032  |
| rs16861856  | C | 0.1359  |
| rs74534482  | G | 0.0901  |
| rs141376456 | A | 0.1736  |
| rs231814    | G | 0.0749  |
| rs2270669   | C | 0.0288  |
| rs72781224  | T | 0.1691  |
| rs114359846 | A | -0.1533 |
| rs12052610  | G | -0.037  |
| rs114012175 | T | -0.0992 |
| rs116440885 | A | 0.1425  |
| rs16840781  | T | 0.0352  |
| rs74580656  | T | 0.0325  |
| rs111537365 | G | 0.1154  |
| rs60060369  | T | 0.0948  |
| rs114739585 | G | 0.1214  |
| rs17346093  | C | 0.1521  |
| rs74851621  | C | 0.1843  |
| rs72849577  | G | 0.1888  |
| rs78862202  | T | -0.1124 |
| rs10204910  | A | 0.0357  |
| rs146744645 | T | 0.0433  |

|             |   |         |
|-------------|---|---------|
| rs2121603   | C | 0.0342  |
| rs2043192   | G | -0.0268 |
| rs7586280   | A | 0.0352  |
| rs146800143 | C | -0.1405 |
| rs116332535 | T | 0.18    |
| rs4471866   | T | 0.0486  |
| rs146489205 | G | 0.0722  |
| rs145741754 | T | -0.0434 |
| rs10203596  | T | -0.0246 |
| rs75998917  | T | -0.185  |
| rs79625246  | G | 0.2474  |
| rs116651932 | A | 0.0867  |
| rs17609914  | G | 0.035   |
| rs75531141  | G | -0.0997 |
| rs72798673  | A | 0.0601  |
| rs2310127   | G | -0.0264 |
| rs4849682   | T | 0.0364  |
| rs6747861   | C | 0.0722  |
| rs1658999   | G | -0.0334 |
| rs10208562  | A | 0.0275  |
| rs4671376   | T | -0.0372 |
| rs78867645  | T | 0.1178  |
| rs115632481 | A | -0.137  |
| rs4618088   | A | 0.0236  |
| rs79976614  | G | -0.081  |
| rs78225340  | A | -0.0497 |
| rs114112085 | C | 0.0591  |
| rs73021369  | C | -0.0775 |
| rs11675772  | A | -0.0307 |
| rs148557380 | T | -0.0632 |
| rs79186871  | C | 0.0856  |
| rs79239171  | T | 0.1309  |
| rs76958697  | T | 0.0937  |
| rs74423094  | A | -0.1048 |
| rs72870114  | G | 0.036   |
| rs114882731 | C | 0.1517  |
| rs77437276  | C | -0.125  |
| rs79714046  | G | -0.0703 |
| rs72838127  | A | -0.0952 |
| rs6751157   | A | -0.0383 |
| rs76450144  | T | 0.098   |
| rs80034781  | G | 0.0759  |
| rs10490109  | G | -0.0248 |
| rs2229957   | A | 0.0538  |
| rs3736341   | C | 0.1019  |
| rs114555592 | T | 0.0975  |
| rs150051446 | T | -0.1823 |

|             |   |         |
|-------------|---|---------|
| rs58012439  | T | 0.0384  |
| rs13432304  | T | -0.0357 |
| rs72971695  | G | 0.0468  |
| rs13028921  | C | -0.0308 |
| rs138703264 | T | 0.1327  |
| rs1840117   | C | 0.0435  |
| rs13024079  | T | 0.1015  |
| rs75720375  | C | -0.128  |
| rs75360780  | A | -0.0523 |
| rs75360562  | G | 0.0799  |
| rs17868348  | C | -0.126  |
| rs143074818 | C | 0.1038  |
| rs7566244   | T | 0.0278  |
| rs80065735  | A | 0.1105  |
| rs12468887  | T | 0.0304  |
| rs7568490   | C | -0.0295 |
| rs7564117   | G | 0.072   |
| rs113975202 | A | -0.1905 |
| rs72876680  | T | -0.1159 |
| rs1914675   | C | 0.0393  |
| rs11683405  | C | 0.0288  |
| rs77602566  | C | -0.1253 |
| rs1907781   | C | -0.024  |
| rs4662686   | C | -0.0338 |
| rs114217138 | T | -0.1068 |
| rs148016638 | T | 0.1588  |
| rs58549655  | C | 0.0366  |
| rs567897    | G | -0.0249 |
| rs55680571  | C | -0.1649 |
| rs116618086 | A | 0.2237  |
| rs115764034 | T | -0.1732 |
| rs114609132 | G | -0.116  |
| rs77128061  | G | 0.0622  |
| rs4402762   | T | 0.0256  |
| rs75112382  | C | 0.09    |
| rs79447049  | C | 0.1021  |
| rs72798451  | T | -0.1274 |
| rs34406766  | A | -0.0265 |
| rs2160783   | G | 0.0256  |
| rs111428256 | T | 0.175   |
| rs74775893  | G | -0.1055 |
| rs280755    | T | 0.0236  |
| rs80305169  | C | -0.0331 |
| rs58465803  | A | 0.0291  |
| rs7587171   | G | -0.0247 |
| rs72963831  | C | 0.1873  |
| rs4852108   | C | 0.0319  |

|             |   |         |
|-------------|---|---------|
| rs17091682  | G | 0.0719  |
| rs13417081  | A | -0.0333 |
| rs9306878   | G | 0.0379  |
| rs1131351   | G | -0.027  |
| rs13404168  | C | 0.0482  |
| rs56295032  | C | 0.1257  |
| rs13013898  | T | 0.0332  |
| rs72918994  | A | 0.0826  |
| rs11679710  | G | 0.1909  |
| rs1030147   | T | 0.0259  |
| rs116461909 | C | 0.1357  |
| rs4854318   | A | -0.026  |
| rs219147    | C | -0.0263 |
| rs12466419  | G | -0.0289 |
| rs146600012 | G | -0.1529 |
| rs4349315   | T | 0.0323  |
| rs1047889   | C | -0.0286 |
| rs34449727  | T | 0.0266  |
| rs17575198  | T | -0.0316 |
| rs72923573  | A | 0.0645  |
| rs10932123  | T | 0.0256  |
| rs115226509 | T | 0.104   |
| rs11884445  | A | -0.0693 |
| rs13431976  | T | 0.0448  |
| rs11674270  | A | 0.0766  |
| rs6717087   | A | 0.0292  |
| rs6726280   | A | 0.0325  |
| rs114382978 | G | 0.1402  |
| rs10153698  | A | -0.0599 |
| rs78606181  | A | -0.1033 |
| rs3729565   | G | 0.0247  |
| rs145537608 | G | 0.1523  |
| rs13390818  | C | -0.0876 |
| rs13011788  | A | 0.0266  |
| rs115518163 | A | 0.1866  |
| rs34242711  | A | 0.0487  |
| rs2160188   | G | -0.0489 |
| rs72846822  | C | -0.1322 |
| rs6742393   | A | 0.041   |
| rs6740623   | G | -0.0442 |
| rs7607346   | G | 0.0446  |
| rs139281807 | A | -0.1314 |
| rs10193131  | T | 0.0298  |
| rs10933014  | A | 0.0249  |
| rs117332229 | G | -0.1536 |
| rs968756    | T | 0.0363  |
| rs4325703   | T | 0.0395  |

|             |   |         |
|-------------|---|---------|
| rs13386247  | G | -0.0279 |
| rs3889716   | T | -0.0396 |
| rs232570    | T | 0.0249  |
| rs2902577   | T | 0.0273  |
| rs72842447  | A | 0.0554  |
| rs36091636  | T | -0.1569 |
| rs6735761   | G | -0.0336 |
| rs7592907   | A | 0.0399  |
| rs3731714   | T | -0.0262 |
| rs4430922   | T | 0.0244  |
| rs16984748  | A | 0.0619  |
| rs6717002   | C | 0.0247  |
| rs74999639  | A | -0.0701 |
| rs72763535  | A | 0.0316  |
| rs76121979  | G | -0.0886 |
| rs6739504   | A | 0.1024  |
| rs17745893  | C | 0.0399  |
| rs2971657   | T | -0.0298 |
| rs10196703  | C | 0.025   |
| rs7605740   | T | -0.1159 |
| rs4849926   | A | 0.0277  |
| rs77508728  | T | 0.1388  |
| rs113486875 | G | 0.0672  |
| rs7570380   | T | -0.0653 |
| rs2060194   | A | -0.0366 |
| rs75408517  | T | 0.0883  |
| rs34924458  | G | 0.0509  |
| rs139658144 | A | -0.1276 |
| rs114823685 | T | -0.1503 |
| rs2710638   | A | -0.0327 |
| rs66486466  | G | 0.0473  |
| rs115367827 | T | -0.1005 |
| rs58619418  | G | 0.1346  |
| rs149973466 | G | -0.1168 |
| rs146637646 | C | 0.1271  |
| rs4315487   | C | 0.1386  |
| rs13417485  | T | 0.0274  |
| rs142914705 | C | -0.1587 |
| rs2544371   | G | -0.0235 |
| rs6758626   | G | -0.0295 |
| rs80168875  | T | -0.0453 |
| rs861078    | C | -0.026  |
| rs888426    | C | 0.0284  |
| rs76012660  | A | 0.1461  |
| rs9679543   | T | -0.0294 |
| rs10209966  | A | -0.0321 |
| rs16858783  | T | -0.0686 |

|             |   |         |
|-------------|---|---------|
| rs114607054 | T | 0.0969  |
| rs146547239 | C | 0.1039  |
| rs604159    | C | -0.0246 |
| rs62177713  | A | -0.0825 |
| rs140570814 | C | 0.08    |
| rs10804070  | T | -0.0286 |
| rs6720189   | C | -0.0245 |
| rs12617270  | A | 0.0418  |
| rs138977618 | T | -0.122  |
| rs73149126  | A | 0.1075  |
| rs12474671  | C | -0.0245 |
| rs12478685  | T | 0.0338  |
| rs72940468  | T | -0.1027 |
| rs62191161  | A | 0.061   |
| rs17499335  | T | 0.1338  |
| rs17025283  | C | 0.1499  |
| rs4296429   | T | 0.0279  |
| rs705066    | A | -0.0259 |
| rs7570293   | C | -0.0238 |
| rs76923064  | C | -0.1073 |
| rs12623975  | C | 0.0485  |
| rs6757717   | C | -0.0249 |
| rs144351673 | C | 0.1194  |
| rs114110541 | A | -0.1482 |
| rs114671056 | C | 0.133   |
| rs55871716  | A | 0.065   |
| rs149709681 | G | 0.1304  |
| rs143445645 | C | 0.1057  |
| rs10932738  | T | -0.0305 |
| rs61734806  | C | -0.1161 |
| rs76445583  | C | -0.073  |
| rs606089    | C | -0.0344 |
| rs843671    | G | 0.0246  |
| rs1429368   | C | 0.0253  |
| rs2396663   | C | -0.0334 |
| rs11675607  | A | 0.0393  |
| rs13385571  | C | 0.0414  |
| rs73943282  | T | 0.055   |
| rs56164523  | A | -0.0511 |
| rs148304943 | A | 0.214   |
| rs34466929  | A | -0.0774 |
| rs6726093   | C | -0.0295 |
| rs80009615  | T | -0.1448 |
| rs72775044  | A | -0.0854 |
| rs80165747  | A | -0.0733 |
| rs72787178  | T | 0.1006  |
| rs11694697  | T | 0.0388  |



|             |   |         |
|-------------|---|---------|
| rs67002817  | A | 0.0272  |
| rs115452935 | A | 0.2538  |
| rs74901184  | A | 0.1086  |
| rs6709527   | A | 0.0323  |
| rs13015978  | T | 0.0654  |
| rs114722476 | T | -0.1238 |
| rs112667120 | A | -0.0585 |
| rs1446548   | C | 0.0374  |
| rs148463457 | T | -0.1516 |
| rs114908767 | A | -0.1134 |
| rs76278437  | A | 0.1612  |
| rs115649123 | G | -0.0903 |
| rs80227929  | C | 0.0682  |
| rs4972551   | T | -0.0306 |
| rs116048162 | T | 0.0697  |
| rs6723682   | T | -0.042  |
| rs72780272  | T | 0.046   |
| rs4953180   | G | -0.0244 |
| rs75496407  | T | -0.1215 |
| rs34189737  | G | 0.0531  |
| rs1573989   | T | 0.0431  |
| rs78254452  | G | -0.2262 |
| rs4671709   | C | 0.0272  |
| rs3024791   | T | 0.0401  |
| rs4560123   | G | -0.0399 |
| rs61592606  | C | 0.0754  |
| rs17599328  | G | -0.0392 |
| rs77381037  | A | -0.04   |
| rs143168397 | T | -0.1443 |
| rs115086514 | T | -0.0879 |
| rs76966017  | T | 0.0775  |
| rs146340105 | G | -0.1405 |
| rs6436661   | C | -0.0555 |
| rs73008276  | T | 0.0905  |
| rs72542787  | A | 0.1054  |
| rs78089526  | A | 0.142   |
| rs144051692 | T | 0.1063  |
| rs4467205   | T | 0.0555  |
| rs74377131  | A | 0.1538  |
| rs60881025  | C | 0.0243  |
| rs142267276 | G | 0.1265  |
| rs11688878  | G | 0.0281  |
| rs115839239 | T | -0.0441 |
| rs10210050  | A | -0.0237 |
| rs11902342  | G | 0.0259  |
| rs55849091  | G | -0.0398 |
| rs62163264  | A | -0.0631 |

|             |   |         |
|-------------|---|---------|
| rs150500054 | C | -0.1125 |
| rs113474038 | G | -0.1858 |
| rs75096966  | T | -0.1325 |
| rs147084229 | A | 0.1591  |
| rs4668659   | T | 0.0404  |
| rs141516862 | A | -0.2137 |
| rs72840781  | G | 0.0808  |
| rs73006987  | G | -0.0409 |
| rs140739205 | A | -0.1861 |
| rs34610594  | A | -0.063  |
| rs76786057  | C | 0.1136  |
| rs62162853  | T | -0.047  |
| rs6758958   | T | -0.0253 |
| rs140405890 | A | 0.1341  |
| rs849266    | A | -0.057  |
| rs6708454   | C | -0.0277 |
| rs12991755  | C | 0.0298  |
| rs9653477   | C | -0.0253 |
| rs79329452  | G | -0.0765 |
| rs62151826  | T | 0.1503  |
| rs79496535  | T | 0.1012  |
| rs11679897  | A | 0.043   |
| rs147513955 | G | -0.0943 |
| rs72900905  | G | 0.1725  |
| rs79083667  | T | -0.1612 |
| rs7580611   | C | 0.0349  |
| rs11674223  | T | 0.025   |
| rs138967169 | G | 0.0698  |
| rs10191710  | A | -0.0315 |
| rs17576726  | A | 0.1008  |
| rs114982800 | A | -0.0885 |
| rs10153782  | T | 0.1317  |
| rs13023674  | C | 0.0267  |
| rs10048745  | A | -0.0292 |
| rs4461268   | C | -0.1105 |
| rs13014223  | T | 0.0398  |
| rs142549381 | A | 0.0913  |
| rs4849730   | A | -0.0253 |
| rs115513310 | A | 0.095   |
| rs72961173  | A | 0.0299  |
| rs12475189  | T | -0.1908 |
| rs17653058  | T | -0.0318 |
| rs6705567   | C | 0.0245  |
| rs17584369  | C | 0.0924  |
| rs116596490 | C | -0.0943 |
| rs16830277  | T | 0.0486  |
| rs138753236 | G | 0.0975  |

|             |   |         |
|-------------|---|---------|
| rs35728391  | G | -0.1041 |
| rs115253974 | G | 0.1144  |
| rs1439964   | A | 0.0311  |
| rs10179954  | G | 0.0253  |
| rs35880035  | T | 0.0426  |
| rs111923008 | A | -0.031  |
| rs41509447  | C | -0.0407 |
| rs116448034 | A | -0.0975 |
| rs12328587  | A | -0.0647 |
| rs11899039  | A | -0.0449 |
| rs140143853 | A | 0.142   |
| rs144813229 | G | 0.1701  |
| rs7595688   | T | -0.0268 |
| rs79219122  | T | -0.1239 |
| rs75401518  | A | -0.0645 |
| rs2438172   | T | -0.0405 |
| rs36112528  | A | 0.1441  |
| rs139313400 | A | 0.0334  |
| rs7596830   | A | 0.0282  |
| rs2889869   | T | -0.1663 |
| rs13428951  | T | -0.0296 |
| rs75299797  | G | 0.0845  |
| rs113108715 | G | 0.0443  |
| rs10185364  | C | 0.0378  |
| rs16849473  | C | -0.1824 |
| rs6752233   | A | 0.0644  |
| rs114817548 | A | 0.1274  |
| rs79186350  | C | -0.1262 |
| rs78361200  | A | 0.0555  |
| rs13403956  | A | 0.0365  |
| rs511792    | T | -0.0518 |
| rs7599723   | T | 0.1009  |
| rs7562182   | T | -0.0434 |
| rs938326    | C | 0.0241  |
| rs75167970  | T | 0.0489  |
| rs114694834 | A | -0.1848 |
| rs62157546  | A | 0.0741  |
| rs7584645   | C | -0.0336 |
| rs17031779  | C | -0.0914 |
| rs79321128  | A | 0.1866  |
| rs34310978  | T | 0.0628  |
| rs114818876 | T | 0.0691  |
| rs1579872   | G | -0.047  |
| rs57492979  | T | -0.1099 |
| rs76930264  | G | -0.0574 |
| rs115608804 | A | -0.1099 |
| rs140245912 | G | -0.1741 |

|             |   |         |
|-------------|---|---------|
| rs2571460   | T | -0.0244 |
| rs4953161   | T | -0.0249 |
| rs72627458  | G | -0.1116 |
| rs17197688  | C | 0.049   |
| rs785209    | T | 0.0344  |
| rs17772131  | C | 0.0724  |
| rs55642596  | T | 0.1193  |
| rs3770857   | G | -0.0263 |
| rs10932050  | T | -0.0239 |
| rs4972443   | C | -0.0381 |
| rs56362104  | T | -0.0812 |
| rs78850110  | A | -0.0761 |
| rs55882109  | C | 0.0705  |
| rs140031904 | G | -0.1469 |
| rs892447    | G | -0.0254 |
| rs111705308 | A | 0.1218  |
| rs435852    | A | 0.0251  |
| rs12620816  | C | -0.0784 |
| rs12617190  | G | -0.1159 |
| rs10171938  | A | 0.0299  |
| rs115734869 | T | 0.1331  |
| rs12617093  | T | 0.0297  |
| rs116502639 | A | 0.0571  |
| rs7558863   | C | 0.0297  |
| rs116387149 | G | 0.1999  |
| rs10164631  | G | -0.0312 |
| rs45556843  | G | -0.0674 |
| rs146479514 | A | 0.0677  |
| rs10497614  | G | -0.0653 |
| rs7607242   | T | -0.0285 |
| rs13021550  | T | 0.0918  |
| rs78959765  | A | -0.142  |
| rs76143177  | T | 0.0693  |
| rs80324398  | A | 0.195   |
| rs72881035  | C | -0.1051 |
| rs115040473 | T | -0.1111 |
| rs74838781  | G | 0.0264  |
| rs16833322  | T | 0.0533  |
| rs13409256  | G | 0.0298  |
| rs114056577 | A | 0.1021  |
| rs116041256 | T | -0.1189 |
| rs1438872   | C | -0.0521 |
| rs147882661 | C | -0.1709 |
| rs35850242  | A | 0.0384  |
| rs8911      | G | -0.0281 |
| rs1560588   | C | -0.1074 |
| rs3731801   | G | -0.0259 |

|             |   |         |
|-------------|---|---------|
| rs17862823  | G | 0.1164  |
| rs114362251 | A | -0.0965 |
| rs76552416  | A | -0.1362 |
| rs6754159   | A | -0.0464 |
| rs78114196  | T | 0.1043  |
| rs6542588   | G | -0.0489 |
| rs67264085  | C | -0.0341 |
| rs3769794   | G | 0.0304  |
| rs115499558 | G | -0.1007 |
| rs140060213 | T | -0.1388 |
| rs151117086 | T | 0.197   |
| rs17678182  | A | -0.0789 |
| rs2231896   | A | 0.1053  |
| rs114094341 | G | 0.1421  |
| rs77775770  | C | 0.0599  |
| rs4973479   | T | 0.0615  |
| rs73131797  | G | -0.0503 |
| rs2861051   | T | -0.0799 |
| rs149253915 | T | -0.1759 |
| rs148313239 | C | -0.1334 |
| rs2573215   | G | 0.0364  |
| rs306142    | G | -0.0422 |
| rs79046562  | C | -0.1868 |
| rs12616287  | T | 0.1142  |
| rs35180231  | A | 0.0886  |
| rs72996400  | A | 0.1067  |
| rs75956714  | C | 0.0947  |
| rs146492148 | A | -0.1354 |
| rs74733001  | T | 0.2173  |
| rs6739740   | T | 0.0246  |
| rs71429274  | A | -0.0952 |
| rs62127528  | G | 0.0274  |
| rs6710295   | G | 0.0247  |
| rs116191748 | C | 0.0507  |
| rs80319994  | G | 0.1675  |
| rs1550322   | A | 0.0341  |
| rs8176627   | C | 0.0515  |
| rs72857003  | A | 0.0511  |
| rs74964391  | G | 0.0665  |
| rs1796447   | G | -0.0698 |
| rs67734159  | T | 0.1073  |
| rs114880698 | C | -0.0613 |
| rs78977478  | G | -0.1186 |
| rs77957237  | T | 0.1021  |
| rs66726478  | A | 0.0322  |
| rs11683451  | C | 0.0352  |
| rs34497831  | T | 0.1455  |

|             |   |         |
|-------------|---|---------|
| rs11886653  | A | -0.0254 |
| rs72777199  | G | -0.026  |
| rs1076459   | A | 0.0333  |
| rs1878584   | A | 0.0315  |
| rs76615208  | T | -0.1114 |
| rs76915994  | A | -0.1007 |
| rs72984691  | T | -0.0665 |
| rs150129385 | C | 0.2149  |
| rs12623932  | C | -0.0256 |
| rs78706379  | C | 0.0559  |
| rs145402411 | T | 0.1891  |
| rs36181338  | G | 0.0271  |
| rs62112212  | T | -0.0666 |
| rs114684886 | A | -0.0663 |
| rs11683205  | G | -0.0407 |
| rs1801184   | C | 0.0265  |
| rs140847806 | G | -0.0924 |
| rs142409155 | A | 0.1355  |
| rs1019972   | T | -0.0599 |
| rs6705974   | G | 0.0282  |
| rs146705805 | C | 0.1553  |
| rs16838854  | A | -0.0259 |
| rs16863159  | G | 0.0486  |
| rs7568769   | T | -0.0418 |
| rs141951094 | A | 0.1274  |
| rs4563167   | G | -0.0353 |
| rs143495115 | T | -0.1581 |
| rs10172644  | G | -0.0799 |
| rs145607070 | C | 0.1386  |
| rs6755576   | G | 0.0301  |
| rs114449980 | C | 0.1271  |
| rs11680644  | C | 0.0244  |
| rs80118223  | G | -0.0883 |
| rs10930293  | C | 0.037   |
| rs6748358   | C | 0.0232  |
| rs3791581   | G | 0.0351  |
| rs11125054  | T | 0.0235  |
| rs72804062  | C | 0.0897  |
| rs117631712 | C | 0.1166  |
| rs67628658  | G | 0.0352  |
| rs7562028   | G | -0.0532 |
| rs72838242  | A | 0.0707  |
| rs78305390  | A | 0.1226  |
| rs72789619  | G | 0.067   |
| rs62148934  | A | -0.0953 |
| rs13430744  | T | 0.0245  |
| rs4667749   | A | 0.0556  |

|             |   |         |
|-------------|---|---------|
| rs6730831   | T | 0.0615  |
| rs1949297   | G | -0.0242 |
| rs1035122   | G | -0.0274 |
| rs2380671   | G | 0.0268  |
| rs112558248 | T | 0.0525  |
| rs4462823   | A | -0.0584 |
| rs76863546  | T | 0.1419  |
| rs354210    | A | -0.1245 |
| rs150465452 | G | -0.1242 |
| rs55939412  | T | 0.0495  |
| rs7586962   | A | -0.0266 |
| rs140149383 | C | 0.1732  |
| rs11891024  | T | 0.0267  |
| rs148459559 | C | 0.1229  |
| rs35476833  | A | -0.0242 |
| rs7608658   | G | -0.0266 |
| rs12620653  | T | -0.0382 |
| rs6729975   | G | 0.0249  |
| rs6729108   | T | -0.0365 |
| rs16864022  | G | 0.0628  |
| rs6752837   | A | -0.0259 |
| rs1961080   | T | -0.0264 |
| rs80060332  | G | -0.1574 |
| rs12479127  | G | -0.0235 |
| rs62169103  | A | -0.136  |
| rs79203683  | A | 0.1141  |
| rs62174268  | T | -0.1838 |
| rs78818336  | G | -0.1274 |
| rs57455455  | G | -0.0439 |
| rs143222562 | T | -0.0343 |
| rs115479892 | T | -0.1116 |
| rs13019744  | T | -0.0434 |
| rs12619418  | C | -0.0877 |
| rs12996185  | C | 0.1773  |
| rs10210612  | T | 0.0239  |
| rs4414631   | G | 0.0739  |
| rs140180927 | T | 0.1051  |
| rs7558951   | G | 0.0519  |
| rs114774514 | A | 0.1659  |
| rs11677810  | A | 0.0298  |
| rs72838311  | T | 0.0418  |
| rs72842454  | C | 0.095   |
| rs17731968  | A | 0.1007  |
| rs78231049  | A | 0.1244  |
| rs312027    | C | -0.038  |
| rs10210091  | C | -0.0443 |
| rs1036668   | G | 0.0279  |

|             |   |         |
|-------------|---|---------|
| rs6752044   | T | 0.0435  |
| rs6750077   | C | 0.027   |
| rs62105548  | T | 0.0546  |
| rs78626094  | C | 0.0577  |
| rs72842623  | T | -0.169  |
| rs79153420  | G | -0.1411 |
| rs79401981  | T | -0.0301 |
| rs72981305  | G | -0.1055 |
| rs13004318  | T | -0.0257 |
| rs71449699  | G | -0.1051 |
| rs143718379 | T | -0.1301 |
| rs79250171  | T | -0.11   |
| rs73003616  | A | 0.0593  |
| rs1371479   | G | -0.0245 |
| rs7580699   | A | -0.024  |
| rs11687754  | G | 0.024   |
| rs12475643  | T | -0.0645 |
| rs60202978  | G | 0.0403  |
| rs16861605  | A | 0.0391  |
| rs7561527   | C | -0.0291 |
| rs6546339   | C | -0.0331 |
| rs80306247  | A | 0.036   |
| rs12989057  | A | -0.0346 |
| rs10496179  | T | 0.0367  |
| rs13386398  | T | 0.0738  |
| rs116494168 | T | -0.0905 |
| rs144282232 | G | -0.1215 |
| rs72910521  | G | 0.1167  |
| rs6548154   | T | -0.026  |
| rs79200887  | G | 0.1005  |
| rs6545338   | T | -0.0525 |
| rs115691382 | C | 0.1487  |
| rs144746598 | A | -0.1469 |
| rs79545486  | T | 0.1326  |
| rs80240257  | A | 0.0613  |
| rs7596135   | T | -0.0261 |
| rs4241160   | T | -0.0342 |
| rs77210125  | A | 0.1172  |
| rs77268291  | T | -0.1807 |
| rs72905066  | T | 0.0572  |
| rs148331067 | A | -0.129  |
| rs16848668  | A | 0.027   |
| rs16824131  | G | 0.0475  |
| rs151160166 | G | 0.14    |
| rs13398519  | G | -0.0504 |
| rs138834866 | A | -0.1867 |
| rs112471374 | T | 0.0874  |



|             |   |         |
|-------------|---|---------|
| rs79630470  | G | 0.0772  |
| rs145975625 | T | 0.1158  |
| rs9678007   | A | 0.0676  |
| rs16850016  | G | -0.0494 |
| rs140829024 | A | -0.1218 |
| rs11680328  | T | 0.0347  |
| rs145410617 | T | 0.1605  |
| rs7599237   | G | 0.0244  |
| rs143863469 | T | -0.0811 |
| rs6711875   | C | 0.0283  |
| rs34238109  | G | -0.0407 |
| rs62193601  | C | 0.0943  |
| rs80087574  | C | -0.1199 |
| rs139352485 | A | 0.1108  |
| rs75661010  | G | -0.0701 |
| rs75349010  | T | 0.1143  |
| rs12053503  | G | 0.0343  |
| rs77770634  | C | -0.1876 |
| rs4233897   | C | 0.0347  |
| rs139700457 | T | 0.0935  |
| rs62177670  | T | -0.0284 |
| rs140804902 | C | 0.0429  |
| rs4972793   | A | -0.024  |
| rs13399951  | T | -0.0457 |
| rs17393065  | A | 0.0277  |
| rs12616518  | T | 0.0355  |
| rs74182885  | A | -0.0282 |
| rs71413692  | C | 0.0932  |
| rs6718262   | T | -0.0298 |
| rs1522989   | A | -0.0874 |
| rs138233508 | T | 0.072   |
| rs78719682  | G | -0.0758 |
| rs141175641 | T | 0.17    |
| rs12475663  | A | -0.0239 |
| rs881952    | C | 0.0246  |
| rs56380109  | T | -0.063  |
| rs10210797  | T | 0.1167  |
| rs11678740  | C | 0.028   |
| rs13424534  | A | 0.0249  |
| rs3770910   | A | 0.0361  |
| rs62140398  | T | 0.0347  |
| rs113004657 | A | -0.1424 |
| rs13024217  | T | 0.0511  |
| rs4442966   | G | -0.0261 |
| rs6722586   | C | -0.0235 |
| rs4850932   | G | -0.0388 |
| rs12619710  | C | 0.028   |

|             |   |         |
|-------------|---|---------|
| rs75679026  | T | 0.1402  |
| rs55738905  | A | -0.0725 |
| rs2160333   | T | 0.0292  |
| rs143823698 | A | 0.1634  |
| rs17543960  | G | 0.0485  |
| rs17739093  | C | -0.0989 |
| rs74655208  | A | -0.2327 |
| rs78690924  | G | -0.0862 |
| rs16844887  | G | 0.1678  |
| rs146929875 | T | 0.1505  |
| rs114787504 | T | -0.111  |
| rs80130556  | G | -0.0803 |
| rs13416658  | T | 0.1021  |
| rs10460358  | G | -0.0233 |
| rs10930565  | G | -0.0309 |
| rs4853611   | A | -0.024  |
| rs61055709  | A | 0.0251  |
| rs6748359   | C | -0.0238 |
| rs72777300  | T | 0.0757  |
| rs143166447 | C | -0.0768 |
| rs7577500   | T | 0.0265  |
| rs13411648  | G | 0.0692  |
| rs55882327  | A | -0.0394 |
| rs6705961   | T | 0.0241  |
| rs333234    | C | -0.0262 |
| rs13401678  | T | 0.0298  |
| rs75455672  | A | 0.1156  |
| rs16863630  | T | 0.0474  |
| rs1728143   | A | -0.0544 |
| rs115306445 | A | 0.0966  |
| rs6705111   | A | -0.062  |
| rs34024596  | C | 0.0545  |
| rs13425658  | T | 0.0262  |
| rs1569118   | A | 0.0491  |
| rs4672533   | C | -0.0242 |
| rs115516386 | G | -0.1767 |
| rs111886250 | T | -0.111  |
| rs6736298   | G | -0.049  |
| rs151185342 | A | -0.1298 |
| rs1494072   | A | 0.0285  |
| rs55729852  | G | 0.129   |
| rs112917582 | A | 0.0968  |
| rs143045827 | A | 0.0699  |
| rs12615003  | C | 0.0309  |
| rs56236017  | A | 0.0943  |
| rs114878057 | C | 0.1494  |
| rs2539861   | C | 0.0427  |

|             |   |         |
|-------------|---|---------|
| rs73077389  | G | -0.1104 |
| rs62186463  | T | 0.0356  |
| rs6431932   | G | 0.0587  |
| rs77921873  | A | -0.0905 |
| rs36028403  | A | -0.1127 |
| rs78058603  | G | -0.1073 |
| rs4674108   | A | -0.0284 |
| rs13034681  | C | 0.0345  |
| rs13405641  | A | -0.0309 |
| rs115878088 | A | 0.1051  |
| rs4145831   | C | 0.0335  |
| rs10190802  | A | -0.1137 |
| rs17244080  | G | 0.0512  |
| rs76596993  | G | -0.065  |
| rs2119488   | A | -0.0409 |
| rs62154921  | T | 0.0506  |
| rs114172653 | C | -0.0733 |
| rs79143829  | A | 0.1617  |
| rs111989261 | C | 0.1606  |
| rs7601768   | A | 0.0255  |
| rs58155073  | C | 0.0954  |
| rs10498048  | C | 0.0693  |
| rs2971837   | C | 0.0323  |
| rs2556101   | A | 0.0587  |
| rs116496970 | T | -0.0731 |
| rs787182    | T | -0.024  |
| rs16863873  | T | -0.0382 |
| rs6716468   | G | 0.1435  |
| rs11124960  | C | 0.042   |
| rs11125027  | T | 0.0261  |
| rs113736031 | A | -0.1326 |
| rs10205036  | C | 0.0339  |
| rs16838934  | A | 0.0433  |
| rs1437896   | C | -0.0241 |
| rs7572261   | G | 0.0383  |
| rs17575302  | A | 0.0369  |
| rs148343035 | C | 0.1144  |
| rs60585869  | A | -0.1124 |
| rs10169719  | T | -0.0657 |
| rs56405671  | T | 0.026   |
| rs3791524   | T | -0.0354 |
| rs115660256 | A | -0.1866 |
| rs114033319 | G | 0.1239  |
| rs76055190  | T | 0.142   |
| rs879665    | A | -0.0328 |
| rs17700588  | C | -0.0309 |
| rs72835696  | A | 0.1246  |

|             |   |         |
|-------------|---|---------|
| rs111964522 | C | -0.2324 |
| rs80052570  | T | 0.0748  |
| rs2114811   | C | -0.0341 |
| rs149724409 | G | -0.0603 |
| rs34167430  | C | -0.0328 |
| rs10172220  | G | -0.0363 |
| rs16843382  | G | -0.0452 |
| rs74983045  | G | 0.0802  |
| rs6436677   | T | 0.0968  |
| rs112674017 | A | -0.0845 |
| rs113135111 | C | 0.057   |
| rs17036075  | G | 0.0989  |
| rs12714271  | A | 0.0236  |
| rs76496206  | T | -0.094  |
| rs77905082  | C | 0.1614  |
| rs77146167  | T | -0.1366 |
| rs3816191   | T | -0.0233 |
| rs138689886 | G | 0.1368  |
| rs77851289  | T | 0.0396  |
| rs56739127  | T | -0.0252 |
| rs114743094 | G | -0.0845 |
| rs918345    | C | 0.0293  |
| rs139259227 | T | 0.0931  |
| rs7562476   | A | 0.0317  |
| rs10196406  | A | 0.0379  |
| rs117182865 | C | -0.1668 |
| rs115036383 | A | -0.1749 |
| rs74725755  | G | 0.1463  |
| rs149512256 | G | -0.1054 |
| rs6729448   | G | -0.0412 |
| rs79766217  | A | 0.1775  |
| rs11676697  | G | 0.0365  |
| rs4015584   | T | -0.0271 |
| rs78225547  | A | -0.1135 |
| rs1459162   | T | -0.0234 |
| rs12992114  | G | 0.0542  |
| rs74957225  | C | 0.1788  |
| rs113396325 | A | -0.0499 |
| rs57195340  | A | 0.1692  |
| rs6750314   | G | -0.0565 |
| rs328636    | A | 0.0377  |
| rs72814192  | C | -0.0424 |
| rs35041815  | T | 0.0386  |
| rs36120543  | C | -0.1739 |
| rs77760823  | G | 0.0824  |
| rs13412855  | G | 0.057   |
| rs35680433  | G | 0.2102  |

|             |   |         |
|-------------|---|---------|
| rs2028137   | T | -0.0327 |
| rs2564046   | A | -0.0324 |
| rs1453084   | A | -0.0353 |
| rs116333240 | C | -0.0943 |
| rs3791997   | A | -0.0231 |
| rs141231918 | C | -0.0893 |
| rs115282281 | C | 0.1394  |
| rs145728549 | G | 0.0851  |
| rs12470009  | C | 0.0906  |
| rs62179990  | A | -0.0547 |
| rs4669569   | C | -0.0297 |
| rs143872434 | T | -0.1115 |
| rs77879044  | C | 0.1159  |
| rs6542736   | A | 0.0237  |
| rs76544975  | T | -0.0971 |
| rs150785831 | A | -0.0825 |
| rs16861736  | T | 0.1087  |
| rs75845517  | C | 0.0257  |
| rs79500119  | G | 0.0771  |
| rs77043830  | A | -0.0403 |
| rs17014308  | A | 0.0251  |
| rs150706051 | C | -0.1025 |
| rs146016505 | A | 0.1076  |
| rs55853619  | C | 0.0264  |
| rs3769273   | C | -0.0272 |
| rs74264799  | A | -0.0369 |
| rs74720634  | T | 0.1097  |
| rs62186782  | A | -0.0911 |
| rs3935483   | T | -0.0239 |
| rs17013200  | C | 0.0341  |
| rs10193950  | G | -0.0238 |
| rs115137957 | T | 0.1027  |
| rs72954511  | C | -0.1057 |
| rs7568725   | T | -0.0303 |
| rs58932504  | A | 0.0308  |
| rs10929962  | C | 0.0338  |
| rs4640333   | G | 0.0246  |
| rs139920327 | T | 0.0684  |
| rs115345187 | T | -0.1301 |
| rs116146320 | T | -0.1178 |
| rs7576413   | T | -0.0417 |
| rs73045729  | C | 0.0494  |
| rs7594181   | T | 0.0274  |
| rs151262927 | A | 0.1681  |
| rs150170238 | C | 0.1038  |
| rs4629176   | T | 0.0261  |
| rs116650168 | A | 0.0579  |

|             |   |         |
|-------------|---|---------|
| rs16829858  | G | 0.0647  |
| rs979052    | T | 0.0494  |
| rs806592    | A | -0.0307 |
| rs2216125   | A | 0.0452  |
| rs11126738  | G | 0.0256  |
| rs6432674   | T | -0.0227 |
| rs4972394   | C | 0.0491  |
| rs280643    | G | -0.1396 |
| rs79170872  | T | 0.0478  |
| rs74354753  | C | -0.0786 |
| rs116750435 | C | 0.1352  |
| rs4954148   | C | -0.0315 |
| rs116818056 | T | 0.1516  |
| rs13409347  | G | 0.0231  |
| rs13431698  | C | -0.095  |
| rs4848645   | G | 0.0317  |
| rs76316987  | C | -0.0433 |
| rs62112219  | T | -0.0347 |
| rs75679231  | C | 0.1331  |
| rs1869686   | A | -0.0297 |
| rs115009322 | G | 0.1349  |
| rs12692704  | G | -0.0578 |
| rs71419096  | C | -0.1433 |
| rs79577277  | A | 0.0866  |
| rs828919    | A | 0.0609  |
| rs6756903   | C | 0.0232  |
| rs73111445  | T | -0.0613 |
| rs62132706  | A | -0.055  |
| rs116630057 | T | 0.0708  |
| rs2961956   | T | 0.0235  |
| rs10498102  | A | -0.0225 |
| rs13004889  | T | 0.0274  |
| rs11125163  | C | -0.0239 |
| rs55682778  | C | 0.0618  |
| rs142452305 | C | 0.0656  |
| rs140092424 | G | 0.1465  |
| rs55668382  | T | 0.0253  |
| rs334044    | T | 0.0243  |
| rs72963614  | G | 0.0615  |
| rs73005547  | T | 0.0963  |
| rs62109015  | T | -0.0282 |
| rs12713124  | A | -0.0226 |
| rs626501    | A | 0.0304  |
| rs10498059  | C | 0.0991  |
| rs138797054 | A | -0.1429 |
| rs149230509 | G | -0.139  |
| rs62176728  | T | 0.0349  |

|             |   |         |
|-------------|---|---------|
| rs75883798  | C | 0.09    |
| rs141955552 | A | -0.1527 |
| rs137963630 | A | -0.1266 |
| rs17526687  | T | 0.0886  |
| rs75077901  | T | 0.052   |
| rs55890343  | T | 0.0469  |
| rs17862703  | C | 0.0749  |
| rs117902111 | G | 0.0704  |
| rs17025128  | T | 0.0727  |
| rs13034102  | A | 0.1208  |
| rs11892190  | G | 0.0316  |
| rs55805871  | A | -0.1743 |
| rs72812030  | C | 0.2088  |
| rs34923683  | A | -0.1051 |
| rs74536684  | A | -0.0943 |
| rs6755604   | G | -0.0611 |
| rs17449032  | C | -0.0888 |
| rs6760920   | T | -0.03   |
| rs36065188  | T | -0.0315 |
| rs851411    | A | -0.0266 |
| rs72826883  | A | 0.0917  |
| rs72944765  | G | 0.097   |
| rs12467854  | G | 0.0277  |
| rs1495925   | A | 0.0246  |
| rs75588438  | T | -0.0952 |
| rs4383346   | G | -0.0321 |
| rs3845821   | C | 0.0532  |
| rs112552398 | A | 0.0897  |
| rs2255378   | A | 0.0825  |
| rs4674556   | T | -0.0259 |
| rs1427407   | T | -0.0319 |
| rs7599323   | T | -0.0303 |
| rs150515970 | G | 0.116   |
| rs72617027  | C | 0.0717  |
| rs72852711  | A | -0.0354 |
| rs16866834  | G | 0.04    |
| rs74679066  | A | -0.1817 |
| rs72970608  | T | 0.1013  |
| rs75758114  | C | -0.1522 |
| rs7600992   | T | -0.0238 |
| rs57037842  | T | -0.0243 |
| rs7575284   | T | -0.0255 |
| rs13405938  | A | 0.0786  |
| rs72933728  | T | 0.1706  |
| rs2579980   | A | 0.0405  |
| rs7574418   | T | 0.0918  |
| rs77738767  | T | 0.0332  |

|             |   |         |
|-------------|---|---------|
| rs116590871 | G | -0.0849 |
| rs114283841 | A | -0.1119 |
| rs140247653 | C | -0.1595 |
| rs698251    | G | -0.1067 |
| rs112474766 | C | 0.1386  |
| rs12463741  | G | 0.0332  |
| rs138316413 | G | -0.1393 |
| rs1016288   | G | 0.0866  |
| rs76267457  | A | 0.0964  |
| rs115373009 | A | 0.1391  |
| rs80153284  | A | 0.1337  |
| rs62115717  | A | -0.059  |
| rs6713116   | T | 0.0471  |
| rs10187644  | T | -0.0239 |
| rs79669128  | T | -0.0787 |
| rs77426442  | A | 0.0719  |
| rs17211162  | C | -0.037  |
| rs76820615  | G | 0.1448  |
| rs72940951  | G | -0.0895 |
| rs113951544 | T | -0.1091 |
| rs116575376 | A | -0.1122 |
| rs35875128  | A | 0.0376  |
| rs303045    | G | -0.0451 |
| rs73107452  | G | -0.0283 |
| rs2002685   | A | -0.0309 |
| rs74789872  | A | -0.1674 |
| rs10202408  | A | 0.0315  |
| rs114662165 | G | 0.0777  |
| rs17043744  | C | -0.0892 |
| rs7419903   | C | -0.0267 |
| rs2707537   | C | 0.0232  |
| rs2919058   | A | -0.0277 |
| rs12694256  | C | 0.0346  |
| rs114863531 | G | 0.1614  |
| rs114151942 | A | 0.1209  |
| rs78411421  | G | -0.1062 |
| rs6742829   | G | -0.0718 |
| rs62172126  | A | -0.0592 |
| rs143937792 | A | -0.1631 |
| rs115184850 | A | 0.0782  |
| rs74327180  | A | -0.151  |
| rs78110705  | T | 0.0846  |
| rs76975412  | T | -0.1329 |
| rs10193073  | C | -0.0491 |
| rs10928925  | C | 0.0258  |
| rs150523289 | A | -0.1067 |
| rs13390613  | G | 0.0278  |



|             |   |         |
|-------------|---|---------|
| rs138229691 | C | 0.1562  |
| rs79050539  | A | -0.1485 |
| rs73092640  | A | 0.1462  |
| rs4665543   | A | 0.0277  |
| rs62128425  | A | 0.0446  |
| rs79230362  | A | 0.0715  |
| rs62192052  | T | 0.1172  |
| rs10167668  | G | 0.0413  |
| rs10490094  | G | 0.0417  |
| rs116511118 | T | -0.2021 |
| rs78070774  | G | -0.0855 |
| rs16822786  | C | 0.0945  |
| rs11126312  | A | 0.0353  |
| rs34321632  | A | -0.1538 |
| rs41326844  | C | 0.1254  |
| rs13424780  | C | 0.0383  |
| rs114434229 | A | -0.1078 |
| rs34005975  | T | -0.1373 |
| rs116490791 | C | -0.1422 |
| rs141290974 | C | 0.1062  |
| rs12466101  | A | 0.0277  |
| rs895804    | T | -0.0328 |
| rs2411925   | C | 0.0377  |
| rs146432363 | A | -0.0493 |
| rs17321271  | G | 0.0722  |
| rs148031063 | A | -0.067  |
| rs10804193  | G | 0.0245  |
| rs12692531  | A | -0.0232 |
| rs11687763  | A | -0.0318 |
| rs4854479   | C | 0.0339  |
| rs2119507   | T | -0.0347 |
| rs7564432   | T | 0.0302  |
| rs71413676  | A | -0.1023 |
| rs80060693  | C | -0.0504 |
| rs34274023  | A | 0.0332  |
| rs7565942   | G | 0.101   |
| rs6717102   | C | 0.045   |
| rs2396718   | C | 0.0447  |
| rs12478806  | A | 0.0711  |
| rs10185930  | G | 0.0269  |
| rs17862801  | C | -0.0276 |
| rs116426656 | G | -0.0949 |
| rs10176300  | A | 0.0623  |
| rs115081617 | C | -0.1022 |
| rs76768922  | G | -0.1835 |
| rs13421086  | A | 0.0424  |
| rs115162189 | G | -0.1518 |

|             |   |         |
|-------------|---|---------|
| rs74001301  | A | 0.0819  |
| rs111521135 | G | 0.1284  |
| rs13391781  | G | 0.0703  |
| rs34150606  | A | 0.0277  |
| rs1462524   | A | -0.0502 |
| rs12464454  | A | 0.0256  |
| rs11466297  | G | -0.0444 |
| rs80098689  | T | 0.1226  |
| rs77219619  | T | 0.063   |
| rs2589058   | T | 0.0386  |
| rs60724372  | A | 0.0453  |
| rs112483073 | C | 0.1089  |
| rs111607693 | T | 0.1179  |
| rs76116224  | T | -0.0468 |
| rs45579331  | G | 0.163   |
| rs57041989  | C | 0.0294  |
| rs147781239 | G | 0.0951  |
| rs10183196  | A | 0.0317  |
| rs1434978   | C | 0.0283  |
| rs77476283  | A | 0.0762  |
| rs148188642 | A | -0.1274 |
| rs72796256  | T | 0.0581  |
| rs12373638  | T | -0.0233 |
| rs11687839  | G | 0.026   |
| rs116635504 | A | 0.1014  |
| rs34703500  | C | -0.0384 |
| rs74940968  | A | -0.0763 |
| rs141941143 | G | 0.176   |
| rs1877871   | G | 0.0273  |
| rs11694155  | T | 0.0366  |
| rs111505623 | T | 0.0318  |
| rs11692121  | G | 0.0349  |
| rs11675762  | C | 0.0319  |
| rs2058904   | G | -0.0262 |
| rs6760922   | A | 0.0248  |
| rs16843320  | G | 0.0281  |
| rs115512949 | G | 0.1533  |
| rs75752977  | A | 0.0855  |
| rs11889278  | G | 0.0427  |
| rs77575195  | C | -0.0244 |
| rs3171985   | A | -0.0621 |
| rs141609887 | G | 0.132   |
| rs139161130 | G | 0.1278  |
| rs62180897  | G | 0.0802  |
| rs114122614 | G | 0.0732  |
| rs13418347  | C | 0.0794  |
| rs3311      | A | -0.0616 |

|             |   |         |
|-------------|---|---------|
| rs11685236  | T | -0.0553 |
| rs6719779   | C | -0.0246 |
| rs76587541  | T | -0.0822 |
| rs4349367   | G | 0.1488  |
| rs11695190  | T | -0.0319 |
| rs72960342  | A | 0.071   |
| rs72969371  | T | 0.1423  |
| rs144320781 | T | 0.1146  |
| rs72778436  | C | -0.0918 |
| rs141781625 | G | 0.1282  |
| rs6758709   | C | -0.0594 |
| rs28658028  | G | -0.038  |
| rs73992720  | A | -0.1146 |
| rs12467977  | C | 0.0696  |
| rs6747176   | A | 0.1079  |
| rs13432974  | G | -0.0923 |
| rs1357435   | A | 0.057   |
| rs36008703  | T | 0.0908  |
| rs1975382   | G | -0.0369 |
| rs12479030  | C | -0.0225 |
| rs16824240  | C | -0.0529 |
| rs11677647  | T | 0.0229  |
| rs7574120   | T | -0.0308 |
| rs1996511   | T | -0.0291 |
| rs115922586 | G | -0.1108 |
| rs219547    | G | -0.0385 |
| rs62149740  | A | -0.0722 |
| rs6432831   | A | -0.0237 |
| rs35491011  | G | -0.0225 |
| rs55807941  | G | 0.0957  |
| rs138138986 | A | 0.1033  |
| rs12469092  | G | 0.0232  |
| rs76260025  | G | -0.0594 |
| rs10519519  | A | -0.0331 |
| rs76457206  | A | -0.0737 |
| rs79691964  | A | -0.0353 |
| rs11125845  | T | -0.035  |
| rs6721986   | A | 0.0802  |
| rs6713044   | T | -0.117  |
| rs1226900   | C | -0.0322 |
| rs16865645  | T | 0.0319  |
| rs138394898 | A | 0.1244  |
| rs62199036  | A | 0.0329  |
| rs11692732  | G | -0.1028 |
| rs114834499 | A | 0.0931  |
| rs146047620 | G | 0.1302  |
| rs7576864   | T | 0.0238  |

|             |   |         |
|-------------|---|---------|
| rs80068792  | A | 0.0899  |
| rs59450988  | T | -0.0732 |
| rs11123318  | G | -0.0335 |
| rs10165543  | A | 0.0797  |
| rs62174867  | T | -0.0341 |
| rs73042128  | T | 0.0546  |
| rs56884177  | T | 0.026   |
| rs10174050  | C | -0.0354 |
| rs78424901  | C | 0.1104  |
| rs13027682  | T | 0.0251  |
| rs115772765 | C | -0.1425 |
| rs144397116 | A | 0.1371  |
| rs78340965  | A | -0.0705 |
| rs7575244   | T | 0.0236  |
| rs11678489  | C | -0.0313 |
| rs113343298 | A | -0.072  |
| rs35674887  | A | -0.0477 |
| rs1505727   | C | -0.0469 |
| rs115257668 | G | -0.0897 |
| rs691066    | C | -0.0305 |
| rs4675851   | G | 0.1413  |
| rs62130613  | C | -0.1725 |
| rs111859325 | C | 0.1033  |
| rs6706275   | T | 0.0259  |
| rs3888023   | C | 0.035   |
| rs71435446  | T | 0.1553  |
| rs149783071 | A | 0.0534  |
| rs139738466 | A | -0.0831 |
| rs142010238 | T | -0.0472 |
| rs11571290  | A | 0.0753  |
| rs17599910  | C | -0.0678 |
| rs139120802 | T | -0.1149 |
| rs12713247  | C | -0.0293 |
| rs57982650  | C | -0.0517 |
| rs9287793   | T | 0.1317  |
| rs2381151   | C | -0.0243 |
| rs79634544  | G | -0.0895 |
| rs12714116  | A | -0.0255 |
| rs17779981  | G | 0.0621  |
| rs7575767   | C | -0.0228 |
| rs116486098 | A | 0.1107  |
| rs62189014  | G | -0.0804 |
| rs7604307   | C | -0.0328 |
| rs68081993  | A | 0.0277  |
| rs12994142  | T | -0.0794 |
| rs2889603   | A | -0.0352 |
| rs10928761  | T | 0.0229  |

|             |   |         |
|-------------|---|---------|
| rs13003114  | C | 0.0247  |
| rs138286070 | C | -0.1653 |
| rs73958638  | G | 0.0461  |
| rs79264884  | T | 0.1436  |
| rs11695633  | T | 0.1082  |
| rs72814783  | A | -0.0589 |
| rs67777852  | G | -0.0236 |
| rs75048997  | A | 0.0854  |
| rs6746096   | G | 0.0909  |
| rs62123760  | A | -0.0233 |
| rs2699187   | A | -0.022  |
| rs111809385 | A | 0.1078  |
| rs115674477 | G | -0.1321 |
| rs4581881   | G | 0.0249  |
| rs143099052 | T | 0.1154  |
| rs78262251  | C | -0.0404 |
| rs17530371  | T | -0.0454 |
| rs62176351  | A | -0.0632 |
| rs10202997  | A | 0.1037  |
| rs921605    | C | -0.0243 |
| rs35849680  | A | 0.0776  |
| rs3105489   | T | -0.0421 |
| rs12477399  | T | -0.1106 |
| rs6758890   | T | -0.0759 |
| rs6738940   | A | -0.0298 |
| rs140985243 | T | -0.0877 |
| rs149568009 | G | -0.1228 |
| rs61619378  | A | 0.0311  |
| rs3761712   | A | 0.023   |
| rs11127340  | C | -0.0303 |
| rs11685487  | T | -0.0568 |
| rs138503904 | G | 0.0894  |
| rs115397098 | G | -0.1994 |
| rs2239596   | C | 0.0244  |
| rs6749594   | T | -0.0555 |
| rs42794     | G | -0.0247 |
| rs2003337   | T | -0.0504 |
| rs76759803  | A | -0.0978 |
| rs825709    | T | -0.0238 |
| rs77672086  | C | -0.0668 |
| rs16830467  | A | -0.0926 |
| rs76188912  | T | -0.0523 |
| rs58644770  | G | -0.0225 |
| rs114712853 | A | 0.0744  |
| rs78536225  | A | 0.052   |
| rs13403875  | A | 0.0439  |
| rs12620608  | T | -0.0273 |

|             |   |         |
|-------------|---|---------|
| rs3732341   | A | -0.0242 |
| rs140231851 | C | 0.1842  |
| rs10209091  | A | 0.0565  |
| rs3132031   | C | -0.0408 |
| rs62193679  | T | 0.0738  |
| rs2675123   | A | 0.0276  |
| rs75511952  | T | -0.1012 |
| rs4848909   | A | 0.0246  |
| rs112584955 | T | 0.0466  |
| rs79463214  | C | -0.0832 |
| rs13395496  | C | 0.0409  |
| rs10175391  | T | 0.0245  |
| rs111862769 | T | -0.1404 |
| rs76209008  | T | -0.0804 |
| rs149491538 | A | -0.0718 |
| rs45473292  | A | 0.108   |
| rs4542840   | C | 0.0245  |
| rs143696461 | C | 0.1243  |
| rs7562894   | A | 0.0366  |
| rs16839080  | C | 0.0949  |
| rs1221528   | A | -0.0524 |
| rs111491230 | C | -0.1091 |
| rs10175340  | G | 0.0256  |
| rs55897987  | A | 0.0648  |
| rs17412126  | G | -0.0614 |
| rs935673    | G | -0.0239 |
| rs71416710  | T | 0.0704  |
| rs602622    | C | -0.0385 |
| rs112402825 | A | -0.0801 |
| rs112918104 | T | 0.0502  |
| rs75743445  | A | 0.0956  |
| rs62196722  | A | -0.1134 |
| rs13010009  | G | 0.0332  |
| rs76394241  | C | 0.0469  |
| rs78098999  | T | 0.0688  |
| rs116241232 | C | -0.1381 |
| rs114476347 | C | 0.085   |
| rs150285041 | A | 0.0284  |
| rs10208256  | G | -0.149  |
| rs1721263   | A | 0.0285  |
| rs12693960  | G | -0.0235 |
| rs13387070  | A | 0.0551  |
| rs75963244  | A | -0.0811 |
| rs13006240  | T | 0.0278  |
| rs114480465 | G | 0.0925  |
| rs76309724  | A | 0.0659  |
| rs68060408  | T | -0.0652 |

|             |   |         |
|-------------|---|---------|
| rs2317018   | T | 0.0228  |
| rs148306512 | T | 0.0472  |
| rs111731167 | A | 0.1013  |
| rs6545718   | C | 0.0224  |
| rs115542699 | G | 0.0993  |
| rs28651164  | T | 0.0345  |
| rs1371548   | A | 0.027   |
| rs116369887 | T | -0.1769 |
| rs149710760 | A | -0.1718 |
| rs72799074  | T | 0.0587  |
| rs7593512   | G | 0.0324  |
| rs10168193  | A | -0.0272 |
| rs35434412  | T | 0.0311  |
| rs4670993   | T | 0.0308  |
| rs115136161 | A | 0.216   |
| rs4521021   | C | 0.034   |
| rs74562911  | G | -0.0376 |
| rs74765439  | T | 0.1148  |
| rs2602388   | C | 0.1287  |
| rs114342890 | T | 0.0583  |
| rs4627631   | C | -0.0263 |
| rs148648415 | C | -0.106  |
| rs114491382 | G | -0.1127 |
| rs114630113 | G | -0.1181 |
| rs2380793   | T | 0.0347  |
| rs10196343  | G | 0.0363  |
| rs79937508  | C | -0.0958 |
| rs2178649   | G | -0.0341 |
| rs147977599 | C | 0.0765  |
| rs58157008  | T | 0.0399  |
| rs1448971   | C | -0.043  |
| rs4671816   | T | -0.1234 |
| rs75420377  | A | 0.0417  |
| rs7592007   | G | 0.1113  |
| rs12233107  | T | 0.0229  |
| rs76038920  | A | -0.0962 |
| rs111701692 | G | 0.1114  |
| rs4146045   | A | -0.0496 |
| rs13382463  | A | 0.0968  |
| rs76022760  | G | -0.1023 |
| rs2229267   | G | -0.0288 |
| rs1521654   | T | 0.0393  |
| rs4377332   | C | 0.023   |
| rs115510684 | A | 0.1369  |
| rs72793762  | G | -0.0838 |
| rs77495340  | G | 0.0532  |
| rs11695048  | T | 0.0244  |

|             |   |         |
|-------------|---|---------|
| rs141090407 | C | 0.1473  |
| rs11686487  | G | 0.0288  |
| rs113389172 | G | -0.0449 |
| rs4567998   | A | -0.025  |
| rs35705591  | A | -0.1667 |
| rs79060470  | C | -0.1399 |
| rs34454465  | A | 0.1059  |
| rs113277456 | C | 0.1242  |
| rs45622435  | T | 0.0963  |
| rs74586563  | A | 0.0449  |
| rs10200963  | T | -0.0471 |
| rs79838602  | A | -0.047  |
| rs10496142  | C | -0.0353 |
| rs1495924   | G | -0.0277 |
| rs3845787   | A | 0.0245  |
| rs79732586  | C | -0.1114 |
| rs11891141  | T | 0.0225  |
| rs77573229  | G | -0.0781 |
| rs10205815  | C | 0.028   |
| rs115965349 | C | -0.1171 |
| rs76653729  | C | 0.0304  |
| rs140034878 | T | -0.1536 |
| rs12465498  | T | 0.024   |
| rs34295653  | C | 0.1045  |
| rs76820011  | A | 0.1123  |
| rs117768367 | T | 0.0902  |
| rs12475510  | A | -0.0395 |
| rs115710773 | A | 0.0545  |
| rs7558378   | C | 0.0241  |
| rs139186535 | C | 0.0773  |
| rs146927599 | T | 0.1083  |
| rs11690204  | G | -0.0263 |
| rs41523751  | T | 0.0764  |
| rs78760355  | C | 0.1239  |
| rs1594526   | C | 0.0237  |
| rs13402018  | A | 0.128   |
| rs72789091  | C | -0.1353 |
| rs55876157  | T | -0.0642 |
| rs13416221  | C | -0.1208 |
| rs62179609  | A | 0.0276  |
| rs142260602 | C | -0.1593 |
| rs145943687 | T | 0.0964  |
| rs114631227 | T | 0.1945  |
| rs116284769 | G | -0.2023 |
| rs76264326  | G | 0.1148  |
| rs2110875   | A | 0.0229  |
| rs3796115   | C | 0.0735  |



|             |   |         |
|-------------|---|---------|
| rs2556376   | C | -0.0309 |
| rs75143008  | C | -0.064  |
| rs77909168  | G | -0.1425 |
| rs112486205 | A | 0.0682  |
| rs4666369   | A | -0.0282 |
| rs10199008  | T | 0.0278  |
| rs77918110  | A | 0.0985  |
| rs11692398  | C | -0.0433 |
| rs12986792  | G | 0.0286  |
| rs6745237   | T | -0.0312 |
| rs78636227  | C | 0.1102  |
| rs113445950 | T | -0.1187 |
| rs113999516 | G | -0.064  |
| rs78536716  | C | -0.1272 |
| rs114092277 | C | -0.0523 |
| rs17586912  | C | 0.0408  |
| rs76837121  | G | 0.1252  |
| rs72785892  | T | -0.073  |
| rs75809819  | T | -0.0521 |
| rs35134372  | T | 0.1617  |
| rs114516902 | A | -0.133  |
| rs34306396  | A | 0.0291  |
| rs2969341   | C | -0.0344 |
| rs1609871   | G | -0.0278 |
| rs78884017  | T | -0.0428 |
| rs10185675  | G | -0.0888 |
| rs34733670  | A | -0.0575 |
| rs6734270   | G | -0.0266 |
| rs142489828 | T | 0.1741  |
| rs76378576  | C | 0.1142  |
| rs144402809 | A | 0.1782  |
| rs76286743  | T | -0.0262 |
| rs35097402  | A | 0.043   |
| rs4429487   | G | -0.0269 |
| rs7574592   | T | 0.0243  |
| rs1829226   | G | -0.0262 |
| rs35341582  | G | 0.0756  |
| rs76455880  | C | -0.0657 |
| rs72776607  | A | -0.0482 |
| rs62173981  | G | -0.0316 |
| rs144068276 | C | 0.1634  |
| rs4894010   | A | 0.0734  |
| rs147756836 | T | -0.1034 |
| rs56121122  | T | 0.0379  |
| rs7605367   | C | 0.0269  |
| rs116211145 | C | 0.089   |
| rs58079571  | T | -0.0515 |

|             |   |         |
|-------------|---|---------|
| rs6730476   | A | 0.0295  |
| rs72857200  | G | 0.1531  |
| rs80277234  | A | 0.1026  |
| rs77597484  | A | 0.1703  |
| rs2049060   | A | 0.0226  |
| rs6720438   | A | -0.0271 |
| rs113183336 | A | 0.1247  |
| rs2679891   | T | 0.0448  |
| rs6730911   | G | -0.0236 |
| rs114594765 | A | 0.1612  |
| rs16867179  | T | 0.038   |
| rs72836401  | T | -0.0552 |
| rs2863020   | G | -0.0258 |
| rs72865037  | T | 0.0349  |
| rs111244756 | T | -0.126  |
| rs115348282 | A | 0.151   |
| rs11127182  | G | -0.0265 |
| rs2008535   | A | -0.0274 |
| rs72797274  | C | -0.0658 |
| rs2160092   | A | -0.0223 |
| rs114812438 | T | 0.1063  |
| rs143331518 | A | -0.1522 |
| rs6719504   | T | 0.0494  |
| rs1438901   | C | 0.0517  |
| rs1401743   | G | -0.022  |
| rs10170160  | C | -0.0292 |
| rs11096624  | C | -0.0261 |
| rs11123856  | G | 0.0234  |
| rs72969941  | C | -0.1356 |
| rs12623425  | T | 0.046   |
| rs6722161   | G | 0.0776  |
| rs114911264 | G | -0.1108 |
| rs79954602  | T | 0.0936  |
| rs115397433 | A | 0.09    |
| rs483932    | T | 0.1783  |
| rs10497616  | T | -0.0287 |
| rs6758272   | C | 0.0404  |
| rs2110639   | A | -0.0256 |
| rs11902458  | C | -0.0242 |
| rs17044971  | T | -0.0401 |
| rs144809228 | A | 0.1192  |
| rs114033894 | G | -0.1238 |
| rs77115620  | A | 0.0847  |
| rs13430964  | A | -0.0448 |
| rs1715826   | G | -0.0217 |
| rs17439452  | T | 0.0223  |
| rs62131819  | A | -0.0237 |

|             |   |         |
|-------------|---|---------|
| rs12474354  | A | -0.0259 |
| rs13404170  | A | -0.0236 |
| rs12693093  | C | 0.023   |
| rs62168097  | G | 0.0319  |
| rs55668938  | T | -0.1156 |
| rs76720471  | T | -0.1509 |
| rs2288356   | C | 0.0227  |
| rs75086379  | A | 0.1315  |
| rs7557483   | G | -0.0321 |
| rs146398275 | A | -0.1456 |
| rs76040960  | T | 0.1057  |
| rs13390934  | A | 0.023   |
| rs6531137   | A | -0.0259 |
| rs6739981   | G | -0.0326 |
| rs77334374  | A | 0.1208  |
| rs79327184  | T | -0.1622 |
| rs72826114  | C | 0.0396  |
| rs80104025  | A | 0.1077  |
| rs1533964   | T | -0.025  |
| rs6719521   | C | 0.0238  |
| rs75922635  | A | 0.1599  |
| rs11898334  | T | -0.024  |
| rs115706734 | G | -0.0793 |
| rs77421087  | T | -0.1595 |
| rs112040137 | T | -0.0596 |
| rs10496984  | A | 0.1066  |
| rs56178109  | T | -0.0455 |
| rs1483566   | A | 0.108   |
| rs11889528  | A | -0.053  |
| rs116051031 | A | 0.0901  |
| rs12469273  | G | 0.0284  |
| rs146039931 | A | 0.1495  |
| rs824939    | G | -0.0323 |
| rs13313750  | C | -0.0241 |
| rs13410516  | G | -0.1288 |
| rs12469577  | A | -0.0296 |
| rs13012171  | G | 0.0311  |
| rs150230841 | G | -0.142  |
| rs35404608  | A | 0.0377  |
| rs62167793  | C | -0.078  |
| rs16867427  | G | 0.1139  |
| rs148966033 | C | 0.1015  |
| rs896988    | A | 0.0221  |
| rs139826876 | T | 0.101   |
| rs144436018 | A | -0.0331 |
| rs77377333  | A | 0.1809  |
| rs62129923  | A | 0.0338  |

|             |   |         |
|-------------|---|---------|
| rs147680059 | A | -0.1587 |
| rs112075523 | A | -0.1501 |
| rs74959981  | A | -0.0371 |
| rs17515225  | T | -0.0224 |
| rs16846465  | C | 0.0506  |
| rs6437363   | T | 0.0298  |
| rs11693953  | T | 0.0514  |
| rs143446353 | C | -0.1382 |
| rs35971357  | A | 0.0616  |
| rs12463789  | C | -0.0251 |
| rs10176318  | A | -0.1044 |
| rs6756581   | C | -0.0251 |
| rs12052252  | T | 0.0332  |
| rs112275848 | G | -0.0408 |
| rs62167396  | A | -0.0723 |
| rs6757026   | T | 0.046   |
| rs12105001  | A | 0.0475  |
| rs78089797  | A | 0.0467  |
| rs75850227  | T | 0.0811  |
| rs74849582  | T | -0.0609 |
| rs903756    | G | 0.0269  |
| rs143658977 | T | 0.0838  |
| rs79466292  | C | -0.1282 |
| rs75543844  | A | -0.1598 |
| rs4072407   | A | 0.0288  |
| rs92303     | T | 0.0333  |
| rs142560902 | C | 0.055   |
| rs112601589 | C | -0.1491 |
| rs112458837 | A | 0.1385  |
| rs60325421  | T | 0.0321  |
| rs115171553 | T | 0.1076  |
| rs144078270 | C | 0.1863  |
| rs62146340  | C | 0.0437  |
| rs144280520 | A | 0.0867  |
| rs115424510 | G | -0.0968 |
| rs116263522 | C | 0.0785  |
| rs3024921   | T | -0.1057 |
| rs10210219  | T | 0.0391  |
| rs116571993 | A | 0.1148  |
| rs78962129  | T | -0.1311 |
| rs17033387  | T | -0.0587 |
| rs112627904 | C | 0.1734  |
| rs2218306   | C | 0.0245  |
| rs62171234  | T | -0.0369 |
| rs76751024  | G | -0.0523 |
| rs34551046  | C | -0.0339 |
| rs1814826   | G | 0.03    |

|             |   |         |
|-------------|---|---------|
| rs115240906 | C | 0.1296  |
| rs1368202   | T | 0.0585  |
| rs143601671 | G | 0.1125  |
| rs13027902  | A | -0.1677 |
| rs6728695   | A | 0.0481  |
| rs72815308  | G | -0.1097 |
| rs73121385  | C | 0.0801  |
| rs4668516   | C | 0.0265  |
| rs55740273  | T | -0.0638 |
| rs6722101   | A | 0.0231  |
| rs7590460   | A | -0.0445 |
| rs7557431   | G | 0.0332  |
| rs9710744   | A | -0.0292 |
| rs112147394 | A | 0.05    |
| rs61085921  | T | -0.0234 |
| rs1460216   | A | -0.0395 |
| rs6722662   | C | -0.0394 |
| rs17262136  | A | -0.0948 |
| rs145966524 | T | 0.0643  |
| rs79246357  | A | 0.1663  |
| rs75379044  | T | -0.1031 |
| rs115749105 | T | -0.1651 |
| rs62181736  | C | 0.0263  |
| rs138124326 | T | 0.1306  |
| rs75350585  | G | -0.1403 |
| rs77983764  | T | 0.1122  |
| rs10203950  | G | 0.0233  |
| rs3670      | C | 0.0788  |
| rs1456598   | A | -0.04   |
| rs78338182  | T | 0.0682  |
| rs116356813 | C | -0.1157 |
| rs77055211  | T | -0.1173 |
| rs707105    | T | 0.0219  |
| rs115819426 | A | -0.1138 |
| rs35751842  | G | -0.1607 |
| rs142778894 | T | -0.2101 |
| rs144521304 | A | -0.1155 |
| rs78235891  | C | -0.0352 |
| rs4493277   | T | 0.0247  |
| rs13007737  | A | -0.0652 |
| rs116555297 | T | -0.0463 |
| rs11896089  | A | -0.04   |
| rs150630394 | T | 0.1562  |
| rs113182506 | A | -0.1523 |
| rs35855182  | T | -0.0585 |
| rs60491550  | C | -0.0356 |
| rs72992728  | A | 0.1208  |

|             |   |         |
|-------------|---|---------|
| rs111760575 | C | -0.0863 |
| rs11687715  | G | 0.0261  |
| rs17267998  | G | 0.1007  |
| rs78761016  | A | -0.1171 |
| rs77504762  | T | -0.1501 |
| rs34548898  | G | 0.0241  |
| rs13397060  | T | -0.035  |
| rs786271    | G | 0.0229  |
| rs7575757   | C | 0.0283  |
| rs76237886  | A | -0.0914 |
| rs6735382   | C | -0.0226 |
| rs147319035 | G | -0.1085 |
| rs1159582   | C | -0.0228 |
| rs12993953  | A | 0.0573  |
| rs1372934   | G | 0.074   |
| rs7562748   | G | 0.0263  |
| rs6731670   | C | -0.0259 |
| rs905965    | A | 0.0251  |
| rs142423383 | G | -0.0371 |
| rs72841887  | C | 0.0791  |
| rs74760651  | T | -0.047  |
| rs10153655  | C | -0.0611 |
| rs13024549  | T | -0.0306 |
| rs73104100  | A | 0.0248  |
| rs115092121 | C | -0.1494 |
| rs78052409  | C | -0.0964 |
| rs6542388   | C | -0.1078 |
| rs66794250  | A | 0.0326  |
| rs3771963   | A | -0.0687 |
| rs7593751   | T | 0.023   |
| rs114767946 | A | -0.1689 |
| rs13397696  | A | -0.0989 |
| rs77715330  | C | -0.0428 |
| rs4973475   | C | 0.0243  |
| rs1607657   | T | 0.0539  |
| rs4662987   | C | 0.0536  |
| rs113863947 | G | -0.0818 |
| rs2138194   | G | -0.0278 |
| rs62198889  | A | -0.0872 |
| rs76802683  | A | 0.106   |
| rs114432550 | C | -0.0851 |
| rs4674599   | A | 0.0216  |
| rs2024484   | A | -0.0564 |
| rs114996394 | G | 0.1057  |
| rs75452341  | C | 0.1513  |
| rs62144522  | T | 0.028   |
| rs16828078  | G | 0.1323  |

|             |   |         |
|-------------|---|---------|
| rs2358485   | T | 0.0305  |
| rs138228871 | T | 0.1505  |
| rs112760880 | A | 0.0747  |
| rs115327596 | C | 0.0839  |
| rs139589755 | A | -0.1052 |
| rs11126471  | A | -0.0226 |
| rs2396327   | A | 0.0224  |
| rs17024021  | G | 0.087   |
| rs141479796 | G | 0.133   |
| rs73996240  | T | 0.075   |
| rs6725953   | T | 0.0242  |
| rs11682365  | A | -0.0284 |
| rs113753169 | T | 0.0551  |
| rs79583301  | A | -0.0447 |
| rs72807067  | A | -0.0315 |
| rs35047785  | G | 0.1125  |
| rs2355053   | T | 0.077   |
| rs79384831  | C | 0.0497  |
| rs6546068   | A | 0.043   |
| rs72832101  | A | 0.0437  |
| rs116786648 | C | 0.0779  |
| rs138850720 | C | 0.1056  |
| rs62187021  | G | 0.102   |
| rs34210417  | G | 0.1856  |
| rs4299382   | C | -0.025  |
| rs112190002 | T | 0.0479  |
| rs111539854 | C | -0.1019 |
| rs114267378 | C | 0.0666  |
| rs74830532  | G | -0.0811 |
| rs6743025   | A | -0.0276 |
| rs79388923  | G | -0.1092 |
| rs55981830  | A | -0.0991 |
| rs6435639   | G | -0.023  |
| rs115811757 | C | -0.1519 |
| rs114441305 | C | 0.0881  |
| rs77540486  | T | -0.1154 |
| rs9677271   | C | 0.0309  |
| rs7587151   | T | -0.0392 |
| rs10188439  | G | -0.0275 |
| rs62140507  | G | 0.0286  |
| rs116275410 | T | -0.1334 |
| rs11126695  | C | -0.0272 |
| rs72921068  | T | 0.1346  |
| rs62157396  | G | -0.0793 |
| rs4973400   | G | -0.0258 |
| rs72771124  | G | 0.0812  |
| rs6733372   | C | 0.0225  |

|             |   |         |
|-------------|---|---------|
| rs74708644  | G | 0.0597  |
| rs12694470  | C | 0.0513  |
| rs10180986  | A | -0.049  |
| rs34039606  | A | -0.0273 |
| rs938869    | T | 0.0227  |
| rs12185584  | G | -0.0222 |
| rs116643358 | C | 0.119   |
| rs116749104 | T | 0.1312  |
| rs34954316  | G | 0.0911  |
| rs2233375   | T | -0.0361 |
| rs12476895  | A | -0.0251 |
| rs192634    | G | 0.0239  |
| rs4851627   | C | -0.0226 |
| rs75619505  | T | 0.0961  |
| rs66930684  | A | -0.0283 |
| rs115757844 | G | -0.1431 |
| rs113076479 | A | 0.1039  |
| rs891501    | G | -0.05   |
| rs112727897 | C | 0.1037  |
| rs115811802 | A | -0.1305 |
| rs10186133  | G | -0.0228 |
| rs2007857   | G | 0.0265  |
| rs12694491  | C | 0.0266  |
| rs11681493  | G | -0.0393 |
| rs6543734   | A | -0.0329 |
| rs7355232   | C | 0.027   |
| rs143774878 | A | 0.109   |
| rs72828510  | T | -0.169  |
| rs1437433   | A | -0.0231 |
| rs13412199  | T | -0.0324 |
| rs9789547   | T | -0.0223 |
| rs13392710  | G | 0.0426  |
| rs111268911 | A | 0.1237  |
| rs72992896  | T | -0.0316 |
| rs13384395  | G | 0.1139  |
| rs17023961  | G | 0.1043  |
| rs78793106  | A | 0.0847  |
| rs17689809  | T | -0.0302 |
| rs12617720  | T | 0.0331  |
| rs7588022   | C | -0.0231 |
| rs13417895  | G | -0.0387 |
| rs17762734  | C | -0.0252 |
| rs112771813 | A | -0.1749 |
| rs4854548   | C | 0.0231  |
| rs112089416 | T | -0.0448 |
| rs79590139  | A | 0.0611  |
| rs16865301  | T | -0.0354 |



|             |   |         |
|-------------|---|---------|
| rs77483185  | T | 0.0633  |
| rs7608692   | A | -0.0276 |
| rs11681965  | C | 0.0559  |
| rs2567195   | G | 0.023   |
| rs13425400  | C | -0.0661 |
| rs6720823   | T | 0.0549  |
| rs850882    | C | -0.0222 |
| rs140144213 | T | -0.1477 |
| rs13022785  | C | -0.0264 |
| rs115508753 | C | 0.1237  |
| rs11675151  | G | 0.0314  |
| rs142270101 | A | 0.0961  |
| rs62128481  | T | 0.1046  |
| rs116337162 | A | 0.1267  |
| rs1159139   | G | 0.0356  |
| rs114966811 | C | -0.0487 |
| rs16863437  | G | 0.0428  |
| rs846653    | T | 0.0297  |
| rs12465669  | A | 0.0361  |
| rs12477688  | G | -0.035  |
| rs72865375  | A | 0.1213  |
| rs4399766   | T | -0.0292 |
| rs62152251  | C | 0.0635  |
| rs3898882   | A | 0.0227  |
| rs113861989 | A | 0.092   |
| rs2422459   | T | -0.0288 |
| rs72884870  | G | 0.1238  |
| rs2732928   | G | 0.05    |
| rs6721330   | C | -0.022  |
| rs112897181 | A | 0.0648  |
| rs36098281  | C | -0.03   |
| rs11680623  | G | -0.0297 |
| rs72846338  | A | 0.0951  |
| rs73200768  | C | -0.0753 |
| rs12104896  | T | -0.0333 |
| rs12997750  | T | 0.0284  |
| rs114883151 | T | -0.0792 |
| rs2540428   | C | 0.0338  |
| rs79213411  | T | -0.0615 |
| rs10929290  | C | 0.0243  |
| rs13389838  | A | 0.035   |
| rs77825803  | T | -0.095  |
| rs34118374  | T | 0.0368  |
| rs7607482   | A | -0.0422 |
| rs11694834  | T | -0.0254 |
| rs3791474   | T | 0.0281  |
| rs78730844  | G | -0.0668 |

|             |   |         |
|-------------|---|---------|
| rs116340739 | C | 0.0835  |
| rs72989415  | C | 0.0404  |
| rs6432237   | T | -0.0516 |
| rs147404514 | A | 0.1331  |
| rs142890689 | A | -0.1302 |
| rs9973394   | G | -0.0287 |
| rs62138795  | T | -0.0599 |
| rs34115245  | C | 0.0311  |
| rs80098667  | A | 0.0661  |
| rs2161977   | T | 0.0319  |
| rs10174559  | A | 0.0305  |
| rs13015037  | G | -0.0242 |
| rs56163146  | C | 0.06    |
| rs2110488   | T | 0.1861  |
| rs148180456 | A | 0.1505  |
| rs115254818 | C | 0.0594  |
| rs12618564  | C | -0.0249 |
| rs115352749 | T | -0.08   |
| rs11684748  | T | 0.0448  |
| rs34484247  | C | 0.0585  |
| rs12987614  | C | 0.025   |
| rs75193523  | G | 0.0796  |
| rs114082096 | A | 0.139   |
| rs74550043  | T | 0.0506  |
| rs6745705   | A | 0.0274  |
| rs147147640 | T | 0.0576  |
| rs10206568  | G | 0.0243  |
| rs77877914  | A | -0.0778 |
| rs11126295  | C | -0.0355 |
| rs2907904   | C | -0.0546 |
| rs4973455   | G | -0.1022 |
| rs1017461   | T | -0.0518 |
| rs77627266  | T | 0.1084  |
| rs145874168 | G | 0.166   |
| rs116568054 | A | 0.1302  |
| rs9989761   | G | -0.0265 |
| rs12987460  | T | -0.0234 |
| rs114206626 | G | -0.1082 |
| rs114556021 | T | 0.1314  |
| rs138091776 | T | -0.0857 |
| rs112302296 | T | -0.1493 |
| rs4972232   | C | -0.0259 |
| rs72981451  | A | 0.0629  |
| rs116041355 | T | -0.2417 |
| rs10204190  | A | -0.0223 |
| rs78124934  | A | 0.1206  |
| rs113451578 | T | -0.0584 |

|             |   |         |
|-------------|---|---------|
| rs116071652 | C | 0.1288  |
| rs62106225  | C | 0.0344  |
| rs11693786  | G | -0.1135 |
| rs10208474  | A | -0.0301 |
| rs145903188 | C | 0.0886  |
| rs116449647 | C | 0.0785  |
| rs72918519  | G | -0.0465 |
| rs114292551 | T | 0.0876  |
| rs72828839  | T | 0.0291  |
| rs1994245   | C | -0.024  |
| rs111531455 | C | -0.05   |
| rs116245096 | A | -0.1172 |
| rs13393465  | C | -0.0376 |
| rs35409636  | T | -0.1151 |
| rs113008010 | A | -0.0863 |
| rs13403116  | T | 0.0715  |
| rs114602223 | C | 0.1006  |
| rs78679019  | T | -0.1026 |
| rs113537676 | A | 0.1549  |
| rs147987331 | A | -0.1968 |
| rs76419373  | A | -0.065  |
| rs75333885  | A | 0.0466  |
| rs116104605 | T | -0.1376 |
| rs74941609  | C | -0.1015 |
| rs13021608  | C | 0.0297  |
| rs4973352   | T | 0.1036  |
| rs115137225 | G | -0.0642 |
| rs116761907 | G | -0.0649 |
| rs62194209  | T | -0.0579 |
| rs62181006  | T | -0.0448 |
| rs62193947  | A | 0.0426  |
| rs12621192  | T | -0.0231 |
| rs74521447  | A | 0.0657  |
| rs116525386 | A | 0.0638  |
| rs13396866  | C | -0.1339 |
| rs17267730  | A | -0.1033 |
| rs76975941  | T | -0.0859 |
| rs116738066 | A | 0.145   |
| rs114544193 | T | 0.0612  |
| rs59239560  | T | 0.0677  |
| rs336508    | C | -0.0433 |
| rs6733811   | T | 0.0286  |
| rs146438452 | G | 0.1216  |
| rs55855371  | A | -0.1125 |
| rs4849909   | A | 0.0273  |
| rs2014199   | C | 0.0231  |
| rs12693881  | G | 0.0219  |

|             |   |         |
|-------------|---|---------|
| rs17050100  | G | -0.0572 |
| rs142223221 | T | 0.0951  |
| rs17356755  | G | -0.0434 |
| rs11890704  | C | -0.043  |
| rs149641338 | A | -0.1374 |
| rs147678811 | G | -0.0783 |
| rs72802826  | G | 0.0638  |
| rs12616389  | A | -0.0246 |
| rs77203685  | A | -0.108  |
| rs77773290  | T | -0.0538 |
| rs115272722 | T | 0.0862  |
| rs7566408   | G | 0.0236  |
| rs1554067   | A | -0.0248 |
| rs144946736 | A | -0.1005 |
| rs115026036 | C | 0.1111  |
| rs72852239  | G | 0.0465  |
| rs146225382 | G | -0.0627 |
| rs1715143   | T | 0.1008  |
| rs7592254   | A | 0.047   |
| rs77078489  | G | 0.102   |
| rs72790273  | T | 0.0935  |
| rs4571018   | T | 0.0266  |
| rs17014194  | G | -0.0566 |
| rs76272623  | A | 0.0715  |
| rs60965411  | A | 0.0366  |
| rs71413860  | G | -0.0643 |
| rs17386813  | C | 0.0225  |
| rs3115361   | C | 0.0313  |
| rs62183665  | A | -0.0236 |
| rs12473952  | T | -0.0242 |
| rs75618272  | T | 0.0959  |
| rs11891607  | G | -0.1036 |
| rs148594907 | G | -0.1095 |
| rs959734    | G | -0.0266 |
| rs10202376  | C | 0.0328  |
| rs115076920 | C | 0.0754  |
| rs16836399  | C | 0.0961  |
| rs13010494  | G | -0.0696 |
| rs35753624  | T | -0.092  |
| rs78780615  | A | 0.0765  |
| rs116808077 | T | 0.1673  |
| rs66566840  | G | 0.0603  |
| rs115537973 | C | 0.1366  |
| rs6711815   | C | -0.0342 |
| rs12989670  | G | 0.0304  |
| rs6436611   | T | -0.0298 |
| rs17487695  | A | -0.0505 |

|             |   |         |
|-------------|---|---------|
| rs4952043   | A | 0.0234  |
| rs16830446  | T | -0.0471 |
| rs77579497  | G | -0.0989 |
| rs13425200  | G | 0.0433  |
| rs10209708  | A | -0.0422 |
| rs6728582   | G | 0.0442  |
| rs72995911  | G | 0.0453  |
| rs3755160   | T | 0.0237  |
| rs75705067  | G | 0.1247  |
| rs6732223   | T | -0.0222 |
| rs75515717  | A | -0.1209 |
| rs10176989  | A | 0.0472  |
| rs7586878   | T | -0.0617 |
| rs116282374 | T | 0.0826  |
| rs72767355  | A | -0.0735 |
| rs75338526  | A | 0.0419  |
| rs62151054  | T | -0.1583 |
| rs1232802   | C | 0.0278  |
| rs1464021   | A | 0.0648  |
| rs36153168  | A | -0.111  |
| rs16823287  | A | 0.0473  |
| rs79844775  | C | -0.0915 |
| rs60030539  | T | -0.0423 |
| rs7587470   | T | -0.0299 |
| rs75426781  | T | 0.1231  |
| rs6742772   | G | 0.0288  |
| rs6707113   | G | 0.0256  |
| rs72821832  | C | 0.1121  |
| rs115701464 | T | 0.1157  |
| rs76283588  | G | -0.0674 |
| rs114254378 | T | 0.1051  |
| rs4458241   | C | -0.0217 |
| rs147446180 | T | 0.0599  |
| rs116266836 | G | -0.0598 |
| rs10176613  | T | -0.064  |
| rs114015867 | T | 0.186   |
| rs4848187   | A | 0.129   |
| rs7594921   | A | 0.022   |
| rs7597380   | G | 0.0373  |
| rs34339850  | T | -0.0319 |
| rs144031259 | A | 0.123   |
| rs61240006  | G | -0.1039 |
| rs12624277  | G | -0.0215 |
| rs146025294 | A | -0.2112 |
| rs2386499   | T | -0.0416 |
| rs72779781  | T | 0.0491  |
| rs12710694  | C | -0.0231 |

|             |   |         |
|-------------|---|---------|
| rs78133788  | A | 0.041   |
| rs79730594  | T | 0.0449  |
| rs10865203  | T | 0.0222  |
| rs151226195 | A | -0.1391 |
| rs75578634  | G | -0.1503 |
| rs113840062 | G | 0.0367  |
| rs78145219  | C | 0.0304  |
| rs11686033  | T | -0.0254 |
| rs16864190  | T | 0.1164  |
| rs77668471  | A | -0.1026 |
| rs77255099  | T | -0.0303 |
| rs1191972   | G | -0.0216 |
| rs76473692  | G | 0.1572  |
| rs11678990  | A | -0.1022 |
| rs75115837  | T | -0.0827 |
| rs7581217   | T | 0.0252  |
| rs6716255   | T | -0.0232 |
| rs78121195  | C | 0.0569  |
| rs77934268  | C | 0.0545  |
| rs55715994  | C | -0.0915 |
| rs72946355  | A | -0.0463 |
| rs56124251  | T | 0.0255  |
| rs114030247 | A | 0.1124  |
| rs139442060 | G | 0.0768  |
| rs4831984   | A | -0.0279 |
| rs10454125  | A | -0.0815 |
| rs114551760 | C | -0.1116 |
| rs3754895   | G | -0.0347 |
| rs72856131  | T | -0.0962 |
| rs7596116   | C | -0.0228 |
| rs10221776  | C | 0.0253  |
| rs452005    | G | -0.0423 |
| rs11673789  | G | 0.0959  |
| rs16852104  | A | 0.0351  |
| rs77629314  | G | 0.0647  |
| rs116132039 | T | -0.0967 |
| rs58934961  | T | 0.0566  |
| rs11126225  | T | -0.0221 |
| rs62193435  | T | -0.0429 |
| rs114808769 | G | -0.101  |
| rs75072792  | T | -0.029  |
| rs11896479  | C | 0.025   |
| rs10495790  | T | 0.0423  |
| rs11677712  | C | 0.0247  |
| rs882502    | T | -0.0226 |
| rs11681200  | T | 0.023   |
| rs79646138  | T | 0.1501  |

|             |   |         |
|-------------|---|---------|
| rs13031418  | C | -0.0212 |
| rs11125653  | A | -0.0337 |
| rs72813330  | C | 0.0306  |
| rs6759901   | C | -0.0226 |
| rs112485711 | A | -0.0679 |
| rs6724905   | G | 0.1135  |
| rs4525721   | G | -0.0238 |
| rs76408431  | A | 0.0643  |
| rs648112    | G | -0.0764 |
| rs13025724  | T | -0.0223 |
| rs146189240 | T | 0.1353  |
| rs111661445 | G | -0.0892 |
| rs930365    | C | 0.0282  |
| rs11681534  | G | 0.0621  |
| rs57069714  | A | 0.1007  |
| rs115600173 | T | 0.1791  |
| rs12620178  | G | 0.029   |
| rs141498344 | C | 0.0939  |
| rs1394129   | C | 0.0857  |
| rs116757139 | A | 0.1057  |
| rs1522857   | A | 0.0259  |
| rs825272    | A | -0.0423 |
| rs151037530 | C | 0.1055  |
| rs73914243  | T | 0.0326  |
| rs12999768  | T | -0.0238 |
| rs75628003  | A | 0.0937  |
| rs150886680 | T | -0.107  |
| rs1468816   | C | 0.0276  |
| rs72811059  | G | 0.0921  |
| rs17435105  | A | -0.034  |
| rs34706577  | A | 0.0367  |
| rs114303520 | T | 0.0976  |
| rs2369088   | C | 0.0244  |
| rs79907224  | T | 0.0325  |
| rs146825997 | C | 0.1318  |
| rs13403813  | T | 0.0548  |
| rs113542870 | A | -0.0966 |
| rs13012179  | A | -0.0277 |
| rs72824830  | G | 0.0732  |
| rs2203895   | G | -0.0227 |
| rs79676909  | T | -0.0691 |
| rs894201    | G | 0.0261  |
| rs115431288 | G | 0.0714  |
| rs73956526  | C | 0.0896  |
| rs1430356   | A | -0.0235 |
| rs77538926  | T | -0.1299 |
| rs12469365  | A | -0.0212 |

|             |   |         |
|-------------|---|---------|
| rs10928104  | T | -0.0276 |
| rs143302207 | A | 0.1428  |
| rs2009699   | G | 0.0224  |
| rs3181100   | G | -0.0217 |
| rs16856821  | G | 0.1121  |
| rs17048451  | C | -0.0751 |
| rs56020886  | T | 0.0407  |
| rs13425066  | A | 0.0422  |
| rs17367794  | T | 0.0967  |
| rs35459643  | T | 0.0289  |
| rs10169953  | G | -0.0236 |
| rs4852727   | A | -0.0217 |
| rs7595007   | G | -0.0233 |
| rs72858408  | A | 0.1395  |
| rs66489909  | G | -0.0293 |
| rs145032111 | A | 0.0995  |
| rs78116692  | C | 0.0681  |
| rs114565349 | C | 0.1195  |
| rs13384913  | T | 0.0325  |
| rs2140778   | C | 0.0385  |
| rs6729167   | A | 0.1129  |
| rs114184828 | T | -0.1381 |
| rs72819861  | T | 0.0639  |
| rs80273058  | G | 0.0684  |
| rs73220327  | A | 0.0657  |
| rs115469071 | A | 0.1972  |
| rs1250203   | G | 0.0345  |
| rs6436295   | A | -0.0219 |
| rs36043001  | A | 0.1505  |
| rs111472038 | T | 0.0575  |
| rs6714206   | A | -0.0309 |
| rs75072119  | C | 0.0732  |
| rs77450972  | G | -0.0323 |
| rs4669561   | C | -0.0256 |
| rs62126679  | A | -0.1131 |
| rs62171293  | C | 0.0943  |
| rs115468664 | T | -0.1196 |
| rs62104411  | A | -0.1155 |
| rs74554978  | A | -0.0708 |
| rs72860773  | A | 0.1163  |
| rs112583623 | A | -0.086  |
| rs116821194 | C | 0.0892  |
| rs2880426   | T | -0.03   |
| rs1214118   | A | 0.0685  |
| rs150729386 | A | 0.0844  |
| rs13392817  | T | -0.0499 |
| rs79664419  | C | -0.0795 |



|             |   |         |
|-------------|---|---------|
| rs72832845  | A | 0.0598  |
| rs114495161 | T | 0.166   |
| rs74501061  | G | 0.0306  |
| rs80240143  | C | -0.0625 |
| rs74688098  | A | 0.0505  |
| rs6710702   | T | -0.0241 |
| rs150834112 | C | -0.0922 |
| rs394528    | T | -0.0743 |
| rs72955395  | C | 0.097   |
| rs3791303   | G | 0.0352  |
| rs12615626  | A | 0.0547  |
| rs4503959   | G | 0.0257  |
| rs57475118  | T | 0.0286  |
| rs2113807   | A | 0.0245  |
| rs78475488  | T | -0.0504 |
| rs75423430  | G | -0.0483 |
| rs4669319   | G | 0.0404  |
| rs17692899  | T | -0.0268 |
| rs74864951  | G | -0.0681 |
| rs72845103  | T | 0.0933  |
| rs115657018 | C | 0.103   |
| rs115465851 | A | 0.1338  |
| rs12617863  | T | -0.0232 |
| rs62151017  | G | 0.0356  |
| rs72992668  | A | 0.0533  |
| rs76519894  | G | 0.0931  |
| rs41333947  | C | -0.1067 |
| rs34071867  | G | -0.054  |
| rs113950544 | T | -0.0655 |
| rs62158785  | C | 0.0598  |
| rs6727037   | A | 0.0288  |
| rs79572522  | T | -0.0259 |
| rs74668446  | A | 0.0882  |
| rs77669244  | C | -0.0507 |
| rs34058965  | T | 0.0438  |
| rs7605487   | A | 0.022   |
| rs11127438  | C | 0.0228  |
| rs2305258   | T | -0.0343 |
| rs62139634  | A | -0.0309 |
| rs62151723  | A | 0.1202  |
| rs4432509   | C | 0.0235  |
| rs11900409  | G | 0.0223  |
| rs12712929  | T | 0.0334  |
| rs13394012  | C | 0.1419  |
| rs74705889  | T | -0.0362 |
| rs11893164  | A | 0.0845  |
| rs1552589   | A | -0.0226 |

|             |   |         |
|-------------|---|---------|
| rs77380142  | G | 0.0864  |
| rs4672102   | C | 0.1043  |
| rs12619496  | G | -0.0291 |
| rs56103924  | A | -0.1183 |
| rs112841839 | G | 0.0946  |
| rs144148815 | A | 0.0869  |
| rs13412612  | G | 0.0306  |
| rs1516094   | T | -0.043  |
| rs149745161 | C | -0.0851 |
| rs142017699 | C | 0.1025  |
| rs6733501   | C | 0.0489  |
| rs148708717 | A | 0.0914  |
| rs79235541  | T | -0.1291 |
| rs11885414  | T | -0.064  |
| rs111293120 | A | 0.0815  |
| rs17513791  | C | -0.1018 |
| rs2221337   | T | 0.0234  |
| rs12998928  | T | -0.1117 |
| rs79883004  | G | 0.0875  |
| rs11889273  | A | -0.0302 |
| rs77990273  | A | 0.0828  |
| rs115260138 | G | -0.031  |
| rs76318329  | T | 0.0874  |
| rs114329447 | G | 0.1313  |
| rs144912099 | A | 0.1418  |
| rs13017871  | T | -0.0214 |
| rs7599506   | C | -0.0215 |
| rs4663423   | T | 0.0396  |
| rs149687542 | T | 0.1078  |
| rs76554193  | C | -0.0635 |
| rs74387927  | G | 0.0437  |
| rs147252363 | C | 0.0841  |
| rs4001103   | A | -0.0411 |
| rs116406065 | C | -0.072  |
| rs66851850  | A | 0.0463  |
| rs1581040   | A | 0.0299  |
| rs34344855  | A | 0.0244  |
| rs1589192   | C | -0.0234 |
| rs78735357  | A | 0.0518  |
| rs11123843  | A | 0.022   |
| rs74939991  | A | -0.1151 |
| rs113435754 | T | -0.0689 |
| rs67996343  | A | -0.1304 |
| rs73079673  | A | -0.1152 |
| rs75276198  | T | -0.0998 |
| rs13410982  | G | 0.0326  |
| rs79349911  | T | 0.0692  |

|             |   |         |
|-------------|---|---------|
| rs73980979  | C | 0.1485  |
| rs72936552  | T | 0.0873  |
| rs6720107   | T | 0.0238  |
| rs35437504  | G | -0.0762 |
| rs17025737  | T | -0.0559 |
| rs6735846   | G | -0.043  |
| rs1437799   | C | -0.0234 |
| rs148021134 | A | -0.1303 |
| rs115612850 | T | 0.1154  |
| rs62114564  | T | 0.0254  |
| rs75511317  | C | 0.144   |
| rs16984355  | C | -0.1272 |
| rs10520405  | G | 0.0399  |
| rs77118439  | C | 0.0487  |
| rs79808400  | A | 0.0455  |
| rs111566789 | C | -0.0225 |
| rs28902194  | A | 0.092   |
| rs12470871  | T | 0.0307  |
| rs116441370 | C | 0.1203  |
| rs34705324  | T | 0.0256  |
| rs140079311 | T | 0.0567  |
| rs144701790 | C | 0.1741  |
| rs80229140  | T | 0.1082  |
| rs76380314  | A | -0.1178 |
| rs77108300  | C | 0.1121  |
| rs116463262 | T | -0.0567 |
| rs13409592  | C | 0.0299  |
| rs55666577  | T | 0.1119  |
| rs4832137   | G | -0.0236 |
| rs4972261   | G | -0.0228 |
| rs35801397  | T | 0.0296  |
| rs3738952   | T | -0.037  |
| rs10495516  | A | -0.0223 |
| rs13397493  | T | 0.0317  |
| rs72805952  | C | -0.0699 |
| rs79563212  | T | -0.0855 |
| rs61260277  | A | -0.0232 |
| rs116555541 | T | -0.0954 |
| rs60037796  | A | -0.0804 |
| rs146085058 | C | 0.149   |
| rs76777644  | T | 0.1805  |
| rs74825899  | C | -0.1018 |
| rs17040168  | G | -0.0475 |
| rs116345087 | G | 0.0673  |
| rs76705436  | G | 0.1293  |
| rs12621407  | T | 0.0528  |
| rs2252736   | T | -0.0223 |

|             |   |         |
|-------------|---|---------|
| rs3789082   | A | 0.0295  |
| rs10177101  | G | 0.0244  |
| rs34055141  | A | 0.0723  |
| rs116311611 | C | -0.0972 |
| rs138529893 | A | 0.1011  |
| rs17344426  | T | 0.0342  |
| rs4848974   | A | -0.1256 |
| rs145081090 | G | -0.1705 |
| rs13014860  | A | 0.0236  |
| rs143272127 | C | -0.1004 |
| rs10496133  | T | -0.0483 |
| rs77690178  | T | 0.075   |
| rs115783409 | A | -0.1033 |
| rs74793558  | A | 0.0892  |
| rs341598    | T | -0.058  |
| rs62113357  | T | 0.0376  |
| rs114135308 | A | 0.1256  |
| rs17752211  | T | 0.0762  |
| rs78305888  | T | 0.0412  |
| rs6706093   | G | -0.0219 |
| rs6757272   | G | 0.0226  |
| rs56336934  | G | -0.0474 |
| rs4633867   | T | 0.0298  |
| rs72993122  | A | -0.027  |
| rs11894982  | A | 0.0235  |
| rs115277819 | T | 0.053   |
| rs149423833 | T | 0.0751  |
| rs114475692 | G | -0.0705 |
| rs115336635 | A | -0.1256 |
| rs10445738  | T | 0.0257  |
| rs10174511  | T | 0.0214  |
| rs149904027 | C | 0.0905  |
| rs2551211   | C | 0.032   |
| rs1581370   | T | -0.0219 |
| rs34932338  | T | 0.1358  |
| rs113393266 | C | -0.0545 |
| rs114553296 | A | -0.0739 |
| rs75861461  | A | 0.1262  |
| rs77440817  | T | 0.1035  |
| rs11889562  | G | -0.0449 |
| rs12474390  | G | -0.0595 |
| rs74562445  | A | 0.0865  |
| rs114667441 | A | -0.0936 |
| rs79931554  | A | 0.065   |
| rs13414758  | T | -0.0243 |
| rs62193734  | G | 0.0328  |
| rs1277459   | A | -0.0272 |

|             |   |         |
|-------------|---|---------|
| rs205614    | G | 0.0291  |
| rs62165192  | G | -0.0385 |
| rs73948896  | A | 0.1901  |
| rs144774724 | A | 0.15    |
| rs2244655   | C | -0.0667 |
| rs77026779  | C | 0.0754  |
| rs4850355   | G | 0.047   |
| rs3768745   | G | -0.0468 |
| rs58844971  | T | 0.0292  |
| rs1817147   | C | 0.0325  |
| rs79447264  | C | 0.0455  |
| rs13013080  | A | 0.0494  |
| rs6735279   | T | -0.0825 |
| rs769965    | C | -0.0758 |
| rs4302206   | A | 0.0224  |
| rs114292261 | A | -0.1685 |
| rs17037193  | C | -0.0278 |
| rs1921236   | A | -0.0249 |
| rs1471649   | A | -0.0213 |
| rs77832981  | T | 0.0574  |
| rs4278919   | A | 0.0745  |
| rs147676239 | C | -0.0916 |
| rs4643530   | T | 0.0224  |
| rs4953634   | C | 0.0471  |
| rs116700919 | A | 0.0861  |
| rs4665406   | T | 0.0223  |
| rs113817729 | A | 0.0505  |
| rs72804692  | T | -0.0653 |
| rs6546898   | A | -0.0448 |
| rs77149029  | A | 0.0939  |
| rs6761777   | A | -0.0224 |
| rs71435466  | G | 0.0428  |
| rs111546182 | A | -0.1038 |
| rs13032602  | G | -0.0323 |
| rs147433043 | T | -0.1637 |
| rs6720918   | A | -0.0209 |
| rs71430643  | T | -0.0669 |
| rs74748096  | C | -0.1726 |
| rs1375220   | G | -0.0238 |
| rs6545067   | G | 0.0607  |
| rs12621847  | T | -0.025  |
| rs116738036 | A | 0.0558  |
| rs11889881  | T | 0.1122  |
| rs149313659 | C | 0.0797  |
| rs114392893 | C | 0.1174  |
| rs113838364 | C | 0.1224  |
| rs7604265   | G | -0.0495 |

|             |   |         |
|-------------|---|---------|
| rs11678086  | T | 0.1458  |
| rs13012485  | T | 0.0995  |
| rs72864133  | C | -0.0596 |
| rs115829460 | A | -0.119  |
| rs283483    | A | -0.085  |
| rs17616433  | C | -0.0868 |
| rs10198567  | C | 0.0743  |
| rs11899600  | G | -0.0498 |
| rs144128751 | T | -0.0994 |
| rs35400498  | T | 0.0242  |
| rs78421578  | G | -0.1116 |
| rs73048467  | G | -0.1212 |
| rs10932956  | G | -0.0232 |
| rs115187598 | C | 0.1215  |
| rs77606282  | C | -0.0999 |
| rs114644934 | A | 0.171   |
| rs72808455  | T | -0.056  |
| rs13432282  | T | 0.0339  |
| rs78451253  | T | 0.0761  |
| rs146546507 | C | -0.0836 |
| rs7601397   | G | 0.0503  |
| rs17035715  | C | 0.0364  |
| rs956986    | A | 0.0228  |
| rs115659708 | T | 0.0728  |
| rs6756843   | T | 0.0209  |
| rs115229018 | C | 0.0538  |
| rs115203841 | A | 0.0468  |
| rs116730979 | G | 0.0818  |
| rs78166900  | G | -0.0685 |
| rs2034526   | A | -0.0309 |
| rs6544340   | T | -0.0215 |
| rs116826171 | T | -0.0615 |
| rs141708688 | G | -0.1089 |
| rs1455609   | C | 0.0255  |
| rs77240277  | G | -0.0501 |
| rs79618953  | C | 0.1135  |
| rs6729986   | G | -0.0372 |
| rs17010554  | A | 0.1491  |
| rs150089781 | T | -0.1383 |
| rs72834274  | C | 0.1452  |
| rs147375897 | A | 0.1459  |
| rs72813137  | A | -0.084  |
| rs7572636   | T | 0.0407  |
| rs1370661   | C | 0.0223  |
| rs76302586  | G | -0.0324 |
| rs71437702  | G | 0.144   |
| rs72775166  | T | -0.1386 |

|             |   |         |
|-------------|---|---------|
| rs75558256  | T | 0.1322  |
| rs6737773   | G | -0.0608 |
| rs17421736  | A | -0.088  |
| rs73111292  | C | 0.0633  |
| rs6731129   | C | -0.0268 |
| rs10496125  | A | 0.047   |
| rs7600319   | G | -0.1039 |
| rs35739581  | C | 0.0686  |
| rs10490302  | T | 0.0231  |
| rs149248826 | A | -0.1013 |
| rs1972956   | C | 0.0249  |
| rs78344253  | C | -0.0526 |
| rs79529699  | A | 0.0563  |
| rs58456579  | G | 0.0304  |
| rs17864498  | T | 0.152   |
| rs10178516  | A | -0.0212 |
| rs10178686  | G | -0.0302 |
| rs111430664 | A | -0.148  |
| rs10170712  | T | 0.0418  |
| rs6710055   | G | 0.0233  |
| rs74488572  | A | -0.0598 |
| rs114582851 | A | 0.0645  |
| rs141360250 | A | -0.1392 |
| rs116351528 | G | 0.1162  |
| rs146519813 | G | -0.1269 |
| rs62172657  | G | -0.0714 |
| rs75415533  | G | 0.0703  |
| rs112421598 | G | -0.1345 |
| rs12711798  | T | -0.0274 |
| rs16837613  | C | 0.1189  |
| rs10933266  | C | 0.12    |
| rs116160757 | T | 0.102   |
| rs7598986   | A | 0.0213  |
| rs6720701   | G | -0.03   |
| rs403085    | A | 0.0512  |
| rs61743118  | G | -0.0899 |
| rs72825612  | T | 0.0652  |
| rs62174288  | A | -0.0939 |
| rs76522735  | G | 0.0765  |
| rs1190413   | A | -0.0253 |
| rs138650555 | G | 0.134   |
| rs10210744  | G | -0.0233 |
| rs13387210  | A | 0.057   |
| rs115423819 | T | 0.1272  |
| rs6731641   | A | -0.0215 |
| rs115015285 | T | 0.1117  |
| rs111319970 | T | 0.0935  |

|             |   |         |
|-------------|---|---------|
| rs12468914  | T | -0.0222 |
| rs1565064   | G | 0.0271  |
| rs149285648 | C | -0.0663 |
| rs140686026 | A | -0.1098 |
| rs12476932  | C | -0.0382 |
| rs6739901   | C | 0.0211  |
| rs4665625   | G | 0.0266  |
| rs77748335  | G | -0.1344 |
| rs73928842  | C | 0.0945  |
| rs11900604  | G | 0.0929  |
| rs114632698 | G | -0.0982 |
| rs6735023   | G | 0.0285  |
| rs77301527  | A | -0.0739 |
| rs13420757  | A | -0.1232 |
| rs116076752 | C | 0.0902  |
| rs77209289  | C | 0.0422  |
| rs10200626  | A | 0.0492  |
| rs57376529  | T | 0.0883  |
| rs78338686  | A | -0.0384 |
| rs6710867   | C | 0.048   |
| rs76901367  | T | 0.0917  |
| rs10164655  | G | -0.0212 |
| rs55658158  | G | 0.1061  |
| rs4292125   | T | 0.0484  |
| rs13384290  | T | -0.04   |
| rs56319647  | T | 0.0351  |
| rs11678235  | A | -0.041  |
| rs114014321 | G | 0.0603  |
| rs76407366  | G | 0.0968  |
| rs71426535  | G | 0.1418  |
| rs72833716  | C | -0.0361 |
| rs114888402 | T | 0.1156  |
| rs147116541 | T | 0.088   |
| rs16842052  | T | 0.1108  |
| rs13406522  | T | 0.0327  |
| rs74346691  | C | -0.031  |
| rs4594500   | G | 0.0287  |
| rs17191185  | G | 0.0655  |
| rs1374276   | C | 0.0244  |
| rs10205707  | C | 0.115   |
| rs145093560 | T | 0.1372  |
| rs79724327  | A | -0.1559 |
| rs10181998  | T | -0.0225 |
| rs7577700   | G | -0.0499 |
| rs35596414  | T | -0.0475 |
| rs13402798  | C | -0.0694 |
| rs17868380  | T | 0.0935  |



|             |   |         |
|-------------|---|---------|
| rs149503508 | A | 0.1693  |
| rs11675266  | T | 0.0258  |
| rs1881182   | A | -0.0231 |
| rs28425740  | C | 0.0413  |
| rs12621139  | A | -0.0301 |
| rs16832019  | A | -0.0364 |
| rs75294216  | A | 0.1298  |
| rs72896367  | T | -0.0693 |
| rs116799343 | C | 0.1578  |
| rs1594142   | A | 0.0256  |
| rs116720681 | C | 0.1036  |
| rs77145902  | T | -0.1572 |
| rs115834294 | G | 0.1157  |
| rs6748679   | G | -0.0211 |
| rs59078170  | C | 0.0624  |
| rs3951105   | G | 0.0276  |
| rs74348947  | G | -0.0541 |
| rs78552982  | G | 0.0361  |
| rs146138090 | T | -0.1517 |
| rs76860205  | C | -0.0797 |
| rs61479424  | T | -0.0375 |
| rs12991253  | G | -0.0541 |
| rs76404466  | G | 0.0947  |
| rs2592779   | C | -0.0271 |
| rs13026918  | A | 0.0218  |
| rs77854803  | C | 0.0937  |
| rs79040187  | G | 0.0485  |
| rs17037389  | A | 0.0495  |
| rs45511992  | G | 0.1158  |
| rs12991856  | A | 0.0208  |
| rs61029386  | T | 0.0426  |
| rs72812398  | G | -0.1546 |
| rs145115817 | C | 0.2141  |
| rs150813670 | A | 0.1361  |
| rs144763946 | C | -0.1591 |
| rs17434723  | T | 0.064   |
| rs115365410 | G | 0.0603  |
| rs72919090  | C | -0.0484 |
| rs13004554  | T | 0.0287  |
| rs12713721  | C | 0.0279  |
| rs16825286  | T | 0.0323  |
| rs4953130   | T | -0.0263 |
| rs6761329   | T | 0.026   |
| rs72914649  | A | 0.1069  |
| rs111420539 | C | 0.1513  |
| rs34717472  | C | 0.0332  |
| rs77909902  | T | 0.0339  |

|             |   |         |
|-------------|---|---------|
| rs2193407   | A | -0.0389 |
| rs72862771  | A | -0.0577 |
| rs12988243  | C | 0.0224  |
| rs79498700  | T | -0.0738 |
| rs1862986   | T | -0.036  |
| rs138449027 | G | -0.1032 |
| rs35089301  | T | -0.0375 |
| rs115823533 | A | -0.1601 |
| rs41280619  | A | 0.1109  |
| rs3111391   | G | -0.1343 |
| rs114411849 | T | 0.084   |
| rs62171217  | G | 0.0537  |
| rs11677584  | T | 0.0272  |
| rs17357652  | C | 0.0235  |
| rs75100004  | C | 0.0985  |
| rs71439213  | C | 0.0495  |
| rs76086743  | C | 0.1414  |
| rs17336511  | G | -0.0259 |
| rs76994241  | C | 0.1247  |
| rs116140871 | C | -0.0429 |
| rs115826319 | G | -0.15   |
| rs11891782  | A | 0.0257  |
| rs12692762  | A | 0.0297  |
| rs116712758 | C | 0.096   |
| rs1005932   | G | 0.0224  |
| rs72904488  | T | -0.0372 |
| rs116023276 | A | 0.1016  |
| rs11125512  | G | -0.0221 |
| rs76120224  | T | 0.0702  |
| rs73035634  | C | -0.0425 |
| rs7579063   | C | -0.0303 |
| rs58793539  | G | -0.0459 |
| rs10190878  | G | 0.0228  |
| rs77855501  | T | 0.0733  |
| rs11900990  | G | -0.0637 |
| rs140958592 | A | 0.162   |
| rs76823747  | A | -0.0581 |
| rs115810049 | C | 0.0913  |
| rs12987092  | G | 0.0308  |
| rs7559920   | T | -0.0247 |
| rs34693334  | G | -0.0671 |
| rs34509078  | G | 0.1022  |
| rs10496299  | C | 0.0236  |
| rs57649890  | C | 0.1228  |
| rs11096690  | T | 0.0294  |
| rs1529408   | G | 0.0609  |
| rs13432274  | T | 0.1004  |

|             |   |         |
|-------------|---|---------|
| rs4531872   | A | -0.0523 |
| rs140960895 | C | -0.1481 |
| rs11889121  | T | -0.0223 |
| rs115419104 | G | 0.1293  |
| rs58331126  | A | -0.0928 |
| rs62191690  | T | -0.1524 |
| rs7575969   | G | 0.0684  |
| rs390514    | C | 0.0231  |
| rs146183197 | C | 0.0625  |
| rs17644183  | G | 0.0211  |
| rs6748302   | T | -0.0457 |
| rs71427870  | C | -0.1432 |
| rs116133333 | G | -0.0515 |
| rs72938044  | C | -0.1112 |
| rs7595190   | A | -0.0351 |
| rs6749418   | C | 0.0272  |
| rs75791147  | C | 0.05    |
| rs144114919 | C | -0.1127 |
| rs4671740   | A | 0.0227  |
| rs16823732  | A | 0.0455  |
| rs78605952  | A | -0.0716 |
| rs9752771   | A | -0.0293 |
| rs13406269  | A | -0.0243 |
| rs116700426 | G | -0.0639 |
| rs1155983   | T | -0.0215 |
| rs2030248   | C | -0.0221 |
| rs6546119   | T | 0.0236  |
| rs9308860   | G | 0.0248  |
| rs116075241 | A | 0.1277  |
| rs80193236  | T | -0.0722 |
| rs6727303   | C | -0.0461 |
| rs1878526   | A | -0.0254 |
| rs13397471  | T | 0.0481  |
| rs1562708   | C | 0.0341  |
| rs115825989 | A | 0.1582  |
| rs843748    | A | -0.0206 |
| rs6708563   | T | 0.0228  |
| rs60483917  | T | -0.0319 |
| rs142488129 | A | 0.0919  |
| rs17863844  | T | -0.0926 |
| rs62133300  | T | -0.0828 |
| rs113530244 | T | -0.0417 |
| rs77926070  | A | 0.0785  |
| rs79172861  | A | 0.0623  |
| rs12694109  | T | -0.0993 |
| rs77478555  | G | 0.2     |
| rs75333824  | C | 0.1172  |

|             |   |         |
|-------------|---|---------|
| rs72822515  | T | -0.0455 |
| rs57373914  | A | 0.0465  |
| rs6710279   | C | 0.0229  |
| rs2222153   | A | 0.0376  |
| rs7426116   | G | 0.0305  |
| rs10172688  | T | 0.0686  |
| rs7579823   | T | -0.1315 |
| rs41288799  | C | 0.0526  |
| rs141577009 | A | -0.1222 |
| rs72851691  | T | -0.1364 |
| rs75957308  | G | -0.1082 |
| rs876801    | T | 0.0206  |
| rs141020703 | A | -0.0983 |
| rs17007005  | C | -0.0649 |
| rs4670745   | C | 0.0231  |
| rs141659853 | C | -0.1154 |
| rs17811284  | G | 0.1968  |
| rs16864468  | T | 0.0545  |
| rs2217471   | T | -0.0234 |
| rs10191326  | C | 0.0249  |
| rs148641284 | G | 0.1001  |
| rs57529474  | C | 0.0397  |
| rs62192074  | G | 0.1523  |
| rs972229    | G | 0.0251  |
| rs75250772  | C | 0.0776  |
| rs45563532  | C | 0.1784  |
| rs112915216 | T | 0.1369  |
| rs115139752 | A | -0.1424 |
| rs144978940 | T | -0.0978 |
| rs62187181  | G | 0.0266  |
| rs112886482 | C | 0.0512  |
| rs1823122   | A | -0.0242 |
| rs114430593 | A | 0.1053  |
| rs34092649  | T | 0.1049  |
| rs116277319 | T | -0.1071 |
| rs34706082  | A | 0.0415  |
| rs16866883  | C | -0.1308 |
| rs4973469   | T | 0.0367  |
| rs147524950 | G | -0.1088 |
| rs6744712   | G | 0.0214  |
| rs2420165   | T | -0.0365 |
| rs115934460 | A | 0.1038  |
| rs59980912  | T | -0.0289 |
| rs138485073 | C | 0.1297  |
| rs13412079  | C | 0.0532  |
| rs79653603  | T | -0.1066 |
| rs72957882  | T | 0.128   |

|             |   |         |
|-------------|---|---------|
| rs6719934   | T | -0.0248 |
| rs62172322  | T | 0.0924  |
| rs11686899  | G | 0.0228  |
| rs116253872 | A | 0.1426  |
| rs79024572  | T | 0.0523  |
| rs2033351   | C | -0.0225 |
| rs76074685  | T | -0.0893 |
| rs4482477   | C | -0.0349 |
| rs6755367   | T | -0.0429 |
| rs141512504 | A | -0.1499 |
| rs149895919 | A | 0.0845  |
| rs13415528  | C | 0.0335  |
| rs150827114 | C | 0.0499  |
| rs79501627  | A | 0.1356  |
| rs16827098  | A | 0.0796  |
| rs17384775  | T | 0.1042  |
| rs231749    | G | -0.0467 |
| rs77088148  | T | -0.109  |
| rs145844682 | A | -0.1185 |
| rs141952209 | A | -0.1035 |
| rs4671857   | C | 0.0626  |
| rs1721262   | G | 0.0216  |
| rs12693570  | A | -0.0378 |
| rs78505295  | T | -0.0987 |
| rs77303438  | A | 0.1131  |
| rs1560620   | A | 0.0334  |
| rs6706221   | T | -0.0273 |
| rs151288703 | A | -0.0534 |
| rs114212503 | C | -0.0782 |
| rs13407431  | T | 0.0317  |
| rs77807906  | T | 0.0814  |
| rs2695414   | C | -0.0403 |
| rs77590808  | A | -0.1122 |
| rs13390015  | C | 0.0358  |
| rs10176947  | C | -0.05   |
| rs79516954  | A | -0.0893 |
| rs2630728   | A | 0.0348  |
| rs56201616  | T | -0.0299 |
| rs6730778   | T | 0.0385  |
| rs34641033  | A | -0.0337 |
| rs116121306 | T | 0.1578  |
| rs7609389   | G | 0.0708  |
| rs11563256  | G | -0.038  |
| rs142919952 | A | -0.1924 |
| rs72801638  | C | 0.0895  |
| rs78753033  | A | 0.0452  |
| rs2857390   | T | 0.0634  |

|             |   |         |
|-------------|---|---------|
| rs2288170   | T | 0.0369  |
| rs115291645 | G | 0.0448  |
| rs143174243 | A | -0.079  |
| rs74704786  | T | 0.1197  |
| rs142713596 | T | 0.052   |
| rs115231009 | G | 0.14    |
| rs115318849 | T | 0.104   |
| rs7593608   | G | -0.1131 |
| rs116567155 | C | -0.1052 |
| rs62103907  | G | -0.0352 |
| rs75853925  | C | -0.0666 |
| rs114706231 | T | -0.0907 |
| rs12479404  | T | -0.0342 |
| rs75721367  | G | 0.1327  |
| rs7586754   | C | -0.0886 |
| rs112146977 | C | 0.1182  |
| rs60235642  | G | 0.0646  |
| rs2579656   | A | -0.0224 |
| rs145634973 | C | -0.0718 |
| rs12466724  | C | -0.0301 |
| rs62167287  | T | 0.0473  |
| rs76747322  | T | -0.0808 |
| rs62128419  | A | 0.0539  |
| rs72787549  | G | -0.0418 |
| rs17764044  | G | -0.059  |
| rs79873076  | T | 0.0975  |
| rs78980081  | C | 0.1154  |
| rs142403305 | G | -0.1319 |
| rs77378499  | C | 0.044   |
| rs17796019  | T | -0.0628 |
| rs12469149  | G | 0.0377  |
| rs73985540  | T | -0.0561 |
| rs111256505 | A | 0.0535  |
| rs35855322  | C | 0.0528  |
| rs72856717  | G | 0.0814  |
| rs78708581  | C | -0.1181 |
| rs7424784   | T | 0.0393  |
| rs116353665 | A | -0.0928 |
| rs77639683  | G | 0.0433  |
| rs73002180  | C | 0.0574  |
| rs76037969  | C | -0.0977 |
| rs6716939   | C | -0.0477 |
| rs79262574  | A | 0.0643  |
| rs116565935 | C | 0.1112  |
| rs1157372   | G | -0.0288 |
| rs16832404  | C | 0.0417  |
| rs6708345   | C | 0.021   |

|             |   |         |
|-------------|---|---------|
| rs17441946  | G | 0.0556  |
| rs4672498   | G | -0.0226 |
| rs2114431   | T | 0.0661  |
| rs10178782  | A | -0.0213 |
| rs75674890  | T | -0.0706 |
| rs62171493  | T | -0.0477 |
| rs113739335 | C | -0.0871 |
| rs1446881   | A | -0.0214 |
| rs56185433  | T | -0.1707 |
| rs12694184  | A | -0.1217 |
| rs114031463 | T | -0.0982 |
| rs115524370 | C | -0.0453 |
| rs6748001   | A | -0.0304 |
| rs877508    | A | 0.0304  |
| rs113615269 | T | 0.168   |
| rs112396729 | G | 0.15    |
| rs79703331  | G | 0.1573  |
| rs141193440 | T | -0.0941 |
| rs28513973  | G | 0.0227  |
| rs112467943 | T | -0.1132 |
| rs10497240  | T | 0.0359  |
| rs10191449  | C | 0.0264  |
| rs10166842  | A | 0.0231  |
| rs114225782 | A | -0.0539 |
| rs7591064   | C | 0.0269  |
| rs4671616   | A | -0.1336 |
| rs139703103 | G | -0.103  |
| rs67678493  | G | 0.0245  |
| rs80076906  | C | -0.1005 |
| rs150619545 | A | 0.0909  |
| rs7598551   | C | -0.0701 |
| rs12478861  | A | -0.0323 |
| rs114516378 | A | -0.1784 |
| rs72810089  | C | 0.0709  |
| rs76182509  | A | 0.0876  |
| rs542413    | G | 0.0216  |
| rs150934117 | A | -0.1117 |
| rs114261124 | T | 0.1334  |
| rs11682196  | A | -0.0274 |
| rs6708292   | A | -0.0604 |
| rs11883480  | T | 0.0337  |
| rs11887149  | G | -0.0219 |
| rs13026316  | G | -0.0411 |
| rs817092    | T | 0.0395  |
| rs76800570  | C | -0.0962 |
| rs148476652 | C | 0.1028  |
| rs112210712 | A | 0.1477  |

|             |   |         |
|-------------|---|---------|
| rs72775864  | A | -0.0407 |
| rs6544718   | T | 0.0261  |
| rs72800736  | T | -0.0808 |
| rs7422221   | G | -0.0241 |
| rs12477235  | T | 0.025   |
| rs6732028   | G | -0.0226 |
| rs72888959  | A | 0.1141  |
| rs113598357 | A | 0.055   |
| rs79092915  | A | 0.0604  |
| rs62172781  | C | 0.0781  |
| rs78471964  | A | 0.0466  |
| rs13024685  | G | -0.0494 |
| rs114048278 | A | 0.0788  |
| rs10929320  | T | -0.0226 |
| rs6705659   | T | 0.142   |
| rs76400051  | C | -0.0392 |
| rs55866385  | G | -0.0308 |
| rs6710015   | C | -0.0229 |
| rs115467250 | A | -0.1351 |
| rs4346320   | A | -0.0756 |
| rs2166528   | T | 0.0281  |
| rs75015877  | C | 0.1174  |
| rs6735205   | C | 0.023   |
| rs16827400  | A | 0.025   |
| rs10169749  | C | 0.0643  |
| rs4850013   | T | 0.0477  |
| rs79930226  | A | 0.1609  |
| rs11124395  | T | 0.065   |
| rs147673630 | G | -0.12   |
| rs3732126   | C | -0.0357 |
| rs62277906  | G | 0.1912  |
| rs114070348 | G | -0.0901 |
| rs144544673 | A | 0.0902  |
| rs62193014  | A | -0.0473 |
| rs142585344 | A | -0.1036 |
| rs2916490   | A | 0.0222  |
| rs78169473  | A | 0.0531  |
| rs114683322 | G | 0.0507  |
| rs143455486 | T | -0.1644 |
| rs13011030  | A | -0.0237 |
| rs10929692  | T | -0.0213 |
| rs10495765  | G | 0.1179  |
| rs1550249   | G | -0.0343 |
| rs116174578 | A | 0.1307  |
| rs78137712  | G | -0.1239 |
| rs73913648  | C | 0.0692  |
| rs1881713   | T | 0.0298  |



|             |   |         |
|-------------|---|---------|
| rs2720095   | C | -0.0247 |
| rs141643602 | A | 0.0995  |
| rs1198853   | T | 0.0352  |
| rs75922210  | A | 0.1254  |
| rs11899010  | G | -0.0754 |
| rs148117679 | A | 0.1051  |
| rs112375759 | T | 0.0681  |
| rs140515674 | T | 0.095   |
| rs11681641  | G | 0.0719  |
| rs114078957 | T | 0.0787  |
| rs78237708  | T | -0.1244 |
| rs17459745  | T | 0.0463  |
| rs6544145   | C | -0.0312 |
| rs17033691  | C | -0.0514 |
| rs79962411  | T | -0.0664 |
| rs114006333 | T | -0.1335 |
| rs150743672 | G | -0.0912 |
| rs832325    | T | 0.0684  |
| rs115408665 | T | 0.1091  |
| rs62177707  | T | -0.0499 |
| rs10803975  | G | -0.1282 |
| rs116118836 | A | 0.1724  |
| rs142232646 | A | -0.1081 |
| rs12463631  | T | 0.0525  |
| rs6715551   | C | 0.0223  |
| rs16824981  | G | -0.0431 |
| rs1524145   | T | -0.0346 |
| rs3771514   | A | -0.0245 |
| rs664373    | A | -0.0263 |
| rs17329506  | T | 0.0374  |
| rs11692771  | A | 0.1046  |
| rs13408761  | G | 0.0341  |
| rs112468702 | T | 0.0794  |
| rs141024520 | G | 0.1099  |
| rs79981041  | C | 0.0633  |
| rs148973700 | T | -0.1473 |
| rs10202342  | T | 0.0238  |
| rs62126502  | T | 0.0701  |
| rs79594098  | A | 0.1166  |
| rs79708734  | C | 0.148   |
| rs4952816   | C | 0.0498  |
| rs116247157 | G | 0.0573  |
| rs10496107  | A | -0.0202 |
| rs6716627   | G | 0.0528  |
| rs1518628   | C | -0.0406 |
| rs2445234   | A | 0.0356  |
| rs78786680  | A | -0.0951 |

|             |   |         |
|-------------|---|---------|
| rs11682444  | T | 0.0309  |
| rs143056340 | T | -0.0815 |
| rs6719666   | G | -0.0281 |
| rs75556288  | C | 0.0496  |
| rs140078725 | T | -0.0577 |
| rs62106660  | G | -0.0244 |
| rs74879831  | T | -0.1019 |
| rs148388712 | G | -0.1097 |
| rs141592633 | C | 0.0308  |
| rs75981534  | G | -0.0627 |
| rs60016948  | T | 0.0296  |
| rs35209986  | T | 0.1736  |
| rs147530480 | T | -0.114  |
| rs7560451   | G | 0.035   |
| rs74327938  | A | -0.1291 |
| rs112820306 | A | -0.0515 |
| rs116208823 | A | 0.1023  |
| rs4027356   | T | -0.0619 |
| rs287303    | A | 0.0803  |
| rs75285437  | A | -0.1255 |
| rs79595058  | T | -0.0786 |
| rs117049701 | T | -0.0694 |
| rs11676422  | C | 0.0345  |
| rs35604956  | G | -0.0288 |
| rs58188788  | A | -0.0243 |
| rs880565    | A | -0.0213 |
| rs145294406 | T | -0.1142 |
| rs4068868   | T | -0.0218 |
| rs1446596   | T | -0.0208 |
| rs737453    | C | -0.023  |
| rs145375937 | A | -0.1385 |
| rs2034731   | A | 0.0207  |
| rs72807782  | A | -0.0351 |
| rs116380106 | A | -0.1281 |
| rs72833718  | T | -0.0621 |
| rs76113061  | C | 0.0709  |
| rs12692694  | T | 0.0236  |
| rs17524446  | C | 0.1058  |
| rs75970058  | C | 0.1178  |
| rs6761323   | T | -0.0354 |
| rs7604275   | G | 0.0516  |
| rs34098459  | C | -0.0582 |
| rs33957851  | C | 0.0287  |
| rs71415110  | T | -0.0831 |
| rs719645    | C | -0.025  |
| rs67764531  | T | -0.0245 |
| rs56665235  | A | 0.094   |

|             |   |         |
|-------------|---|---------|
| rs150619150 | G | 0.0951  |
| rs72860168  | T | 0.0439  |
| rs114460246 | A | 0.0912  |
| rs116854723 | G | 0.1088  |
| rs113693433 | A | -0.0291 |
| rs115213259 | G | -0.1055 |
| rs115912854 | A | 0.0598  |
| rs17266006  | A | -0.0311 |
| rs6759697   | T | -0.0242 |
| rs72978172  | G | -0.0736 |
| rs7599555   | T | 0.0289  |
| rs2083418   | T | 0.0243  |
| rs150322237 | C | -0.1141 |
| rs2543659   | C | 0.0269  |
| rs62126492  | T | -0.059  |
| rs6750539   | T | -0.0222 |
| rs28394891  | G | 0.0271  |
| rs4672305   | C | -0.0275 |
| rs76814801  | T | -0.0794 |
| rs139850365 | T | -0.1139 |
| rs113829840 | G | 0.0781  |
| rs114325391 | T | 0.0844  |
| rs62121505  | T | 0.096   |
| rs79746082  | G | -0.0777 |
| rs140193110 | G | -0.1308 |
| rs112521908 | G | -0.0576 |
| rs2190648   | A | 0.0269  |
| rs138094456 | T | 0.0879  |
| rs114668113 | A | 0.2252  |
| rs6710332   | A | 0.0624  |
| rs148837573 | G | -0.1327 |
| rs17868163  | A | -0.0741 |
| rs7560516   | G | 0.0871  |
| rs7574483   | G | 0.0374  |
| rs1046139   | C | -0.0225 |
| rs79372848  | C | -0.0632 |
| rs10207081  | T | -0.0276 |
| rs75821453  | C | 0.0922  |
| rs11694379  | G | -0.05   |
| rs113718717 | G | 0.1294  |
| rs145729308 | T | 0.1088  |
| rs62127500  | C | -0.0292 |
| rs113706590 | G | 0.0323  |
| rs78040619  | A | -0.0547 |
| rs62188193  | A | 0.141   |
| rs13031940  | T | 0.0541  |
| rs10198843  | C | -0.1389 |

|             |   |         |
|-------------|---|---------|
| rs78310677  | G | 0.0669  |
| rs75952598  | A | -0.1039 |
| rs6431876   | A | -0.0428 |
| rs114938028 | C | 0.1221  |
| rs4358176   | T | 0.0203  |
| rs75948686  | C | -0.0891 |
| rs6736857   | C | 0.0247  |
| rs150261359 | A | 0.0232  |
| rs12616045  | C | 0.0784  |
| rs146262745 | G | 0.1057  |
| rs4853038   | C | -0.0222 |
| rs146845351 | T | -0.1211 |
| rs149084184 | T | 0.1369  |
| rs17537366  | A | -0.0643 |
| rs941009    | C | 0.0243  |
| rs76708690  | T | -0.0456 |
| rs7578132   | T | 0.0213  |
| rs145820163 | C | -0.1964 |
| rs10209571  | T | -0.0889 |
| rs115545121 | C | -0.1323 |
| rs114970061 | T | 0.1144  |
| rs204832    | A | -0.0267 |
| rs10930471  | C | -0.0282 |
| rs10497187  | G | 0.0306  |
| rs10804129  | C | 0.0208  |
| rs78985020  | A | -0.0992 |
| rs7587932   | A | -0.0274 |
| rs114198555 | A | 0.1041  |
| rs72951565  | A | 0.0732  |
| rs138864222 | T | -0.0754 |
| rs114714028 | C | -0.1434 |
| rs11674493  | C | 0.0497  |
| rs11684723  | T | -0.027  |
| rs6761067   | T | 0.0708  |
| rs112104313 | A | 0.106   |
| rs6740617   | G | -0.043  |
| rs1402440   | T | 0.0218  |
| rs10203656  | A | -0.0319 |
| rs143836606 | C | -0.1152 |
| rs146475871 | A | -0.1717 |
| rs115660836 | T | -0.1007 |
| rs111464224 | A | 0.0893  |
| rs76404906  | G | 0.0882  |
| rs150484216 | G | 0.1171  |
| rs140866896 | C | 0.1035  |
| rs10206851  | T | 0.0225  |
| rs143508381 | G | -0.0434 |

|             |   |         |
|-------------|---|---------|
| rs79866666  | G | 0.1005  |
| rs115684625 | G | -0.1074 |
| rs16866253  | T | -0.0444 |
| rs2972052   | G | -0.0223 |
| rs114309639 | T | -0.2268 |
| rs3821107   | C | -0.0246 |
| rs929925    | T | 0.0227  |
| rs77127481  | C | -0.0364 |
| rs144837206 | A | 0.1071  |
| rs11903416  | C | -0.0227 |
| rs58719298  | T | -0.1155 |
| rs35394967  | T | -0.0267 |
| rs57676750  | G | 0.078   |
| rs28828676  | T | 0.0238  |
| rs114062893 | T | 0.0718  |
| rs74369863  | T | 0.0544  |
| rs142506960 | A | -0.1225 |
| rs36151450  | A | 0.0257  |
| rs78218998  | T | 0.0646  |
| rs79086805  | A | 0.1081  |
| rs115449389 | C | -0.0554 |
| rs74486594  | A | 0.0602  |
| rs72964008  | T | -0.0621 |
| rs144424979 | T | -0.0864 |
| rs10497361  | A | -0.0378 |
| rs72914595  | C | 0.1006  |
| rs72784012  | G | -0.0954 |
| rs2361177   | T | -0.0308 |
| rs78324111  | G | 0.0953  |
| rs2215598   | T | -0.0446 |
| rs35914057  | A | -0.1118 |
| rs75872399  | G | -0.061  |
| rs7573219   | A | -0.039  |
| rs113560213 | C | -0.0762 |
| rs11690871  | G | 0.0825  |
| rs114030162 | G | 0.0884  |
| rs7592281   | T | -0.085  |
| rs35202394  | G | -0.0456 |
| rs1379026   | A | -0.1039 |
| rs4331524   | T | -0.0203 |
| rs115512534 | T | 0.2034  |
| rs115770789 | T | 0.0504  |
| rs2697288   | T | -0.023  |
| rs114731265 | A | -0.0957 |
| rs141166993 | T | 0.1519  |
| rs11689662  | A | 0.0499  |
| rs1026629   | C | -0.0444 |

|             |   |         |
|-------------|---|---------|
| rs73091785  | C | -0.0281 |
| rs56401073  | A | 0.132   |
| rs79333016  | G | -0.1126 |
| rs11690334  | C | 0.0265  |
| rs79856802  | G | -0.0986 |
| rs2115591   | T | -0.0213 |
| rs1530145   | A | 0.0203  |
| rs62145369  | G | -0.0286 |
| rs7599457   | T | -0.0473 |
| rs1898562   | C | -0.0319 |
| rs80208078  | A | 0.0797  |
| rs114632529 | T | -0.079  |
| rs13392604  | C | 0.0231  |
| rs757978    | T | -0.0356 |
| rs10181341  | A | 0.0375  |
| rs16841477  | T | 0.029   |
| rs114421136 | T | 0.0608  |
| rs111986486 | A | -0.1491 |
| rs113936336 | T | -0.1083 |
| rs7425641   | T | -0.0349 |
| rs12469147  | A | -0.0956 |
| rs7567530   | A | 0.032   |
| rs1609150   | C | 0.0348  |
| rs115072423 | G | -0.091  |
| rs10174877  | G | -0.0236 |
| rs11552767  | A | -0.0352 |
| rs16857280  | A | -0.0366 |
| rs17665998  | A | -0.0226 |
| rs34313680  | G | -0.0495 |
| rs4371360   | C | 0.0908  |
| rs193599    | T | 0.0359  |
| rs13383197  | A | 0.094   |
| rs17494521  | C | -0.0296 |
| rs10173409  | C | -0.0649 |
| rs10192465  | G | -0.0363 |
| rs6742366   | C | 0.1497  |
| rs4533442   | C | -0.0227 |
| rs56409308  | A | 0.0917  |
| rs748188    | C | -0.0467 |
| rs2879454   | C | 0.0199  |
| rs115885935 | T | 0.0751  |
| rs76801329  | T | -0.1548 |
| rs111649530 | T | -0.0683 |
| rs7605328   | G | -0.0802 |
| rs142035128 | C | 0.1219  |
| rs71404175  | A | -0.0718 |
| rs12617761  | T | -0.0411 |

|             |   |         |
|-------------|---|---------|
| rs62133925  | G | -0.0295 |
| rs2861060   | T | 0.0545  |
| rs6716762   | G | 0.0291  |
| rs13431934  | A | -0.0321 |
| rs142727486 | A | 0.1613  |
| rs114254392 | C | 0.0589  |
| rs4852842   | C | 0.0239  |
| rs4848347   | C | -0.0268 |
| rs504611    | A | -0.0323 |
| rs1363048   | T | 0.0223  |
| rs17044204  | C | -0.0363 |
| rs2717009   | T | -0.0474 |
| rs2086175   | T | -0.029  |
| rs2219691   | T | 0.0217  |
| rs6732230   | T | 0.0797  |
| rs116795015 | T | 0.0915  |
| rs11682097  | G | -0.0804 |
| rs78366066  | G | -0.0685 |
| rs16865577  | A | 0.0261  |
| rs13392218  | C | -0.1064 |
| rs114239306 | A | 0.0575  |
| rs7369408   | A | -0.0344 |
| rs71420083  | A | -0.1111 |
| rs13405491  | C | -0.0289 |
| rs71426273  | C | 0.1064  |
| rs76988023  | G | 0.0799  |
| rs7609000   | A | -0.0348 |
| rs7595952   | G | -0.02   |
| rs150263643 | T | 0.1028  |
| rs11677145  | G | 0.0205  |
| rs3947633   | G | 0.0255  |
| rs2197602   | T | 0.031   |
| rs17030342  | A | -0.0342 |
| rs13423237  | G | 0.0221  |
| rs111813608 | G | 0.1139  |
| rs10188552  | A | -0.0219 |
| rs112334733 | T | -0.1933 |
| rs11465677  | A | -0.1108 |
| rs60534777  | C | 0.0276  |
| rs73004491  | A | -0.0999 |
| rs72802899  | C | -0.1042 |
| rs78261234  | C | -0.1163 |
| rs6715061   | A | -0.0212 |
| rs4848183   | T | 0.0959  |
| rs78891243  | C | 0.0695  |
| rs116386038 | A | -0.1491 |
| rs847201    | A | 0.0222  |

|             |   |         |
|-------------|---|---------|
| rs6710705   | T | 0.0644  |
| rs62188032  | T | -0.0302 |
| rs115560270 | C | 0.0893  |
| rs67595504  | C | 0.0384  |
| rs72798433  | A | 0.0613  |
| rs12470769  | C | -0.1    |
| rs34185490  | C | 0.0406  |
| rs78826781  | C | -0.0924 |
| rs13416425  | T | 0.0609  |
| rs12464358  | G | 0.0204  |
| rs59901914  | A | -0.1248 |
| rs115723959 | G | -0.145  |
| rs12104709  | C | 0.0367  |
| rs309283    | T | -0.0202 |
| rs80327617  | C | 0.1576  |
| rs116272095 | C | 0.0938  |
| rs116615125 | C | -0.0936 |
| rs79383821  | A | 0.137   |
| rs138510546 | A | -0.1468 |
| rs11126303  | G | -0.0825 |
| rs72622637  | A | 0.0899  |
| rs17202631  | T | -0.0647 |
| rs115626769 | C | -0.062  |
| rs116169023 | G | 0.0621  |
| rs4668724   | T | 0.0286  |
| rs111589435 | G | 0.1347  |
| rs62167182  | T | 0.0355  |
| rs28578546  | C | -0.0271 |
| rs11688889  | T | 0.0256  |
| rs72825169  | A | -0.0585 |
| rs77552793  | A | -0.1032 |
| rs13398962  | C | -0.0258 |
| rs145600243 | C | -0.0881 |
| rs150141956 | A | 0.0766  |
| rs75838950  | A | -0.0427 |
| rs17826666  | T | -0.0369 |
| rs140077647 | T | -0.0545 |
| rs115030499 | T | 0.1362  |
| rs115885826 | T | 0.1144  |
| rs149470481 | T | 0.1397  |
| rs115394387 | T | 0.0678  |
| rs150408866 | G | 0.0842  |
| rs33976811  | T | 0.1091  |
| rs74998707  | T | -0.0411 |
| rs79931708  | C | -0.0464 |
| rs75598375  | C | 0.0419  |
| rs28675022  | T | -0.0238 |



|             |   |         |
|-------------|---|---------|
| rs12623921  | T | -0.0379 |
| rs143232883 | C | -0.1667 |
| rs12104638  | T | -0.0793 |
| rs62145631  | A | 0.1152  |
| rs10185924  | A | -0.0234 |
| rs72869902  | C | -0.0969 |
| rs581692    | C | 0.021   |
| rs3100229   | A | 0.036   |
| rs17575282  | A | 0.0667  |
| rs78331915  | C | 0.0548  |
| rs75914191  | G | 0.0672  |
| rs74998078  | A | -0.0426 |
| rs62161326  | C | -0.054  |
| rs142079107 | C | -0.0845 |
| rs115077345 | G | 0.0751  |
| rs78787528  | C | -0.1143 |
| rs1020599   | G | 0.0238  |
| rs76399693  | C | 0.049   |
| rs6547846   | T | 0.0205  |
| rs6743650   | C | -0.0251 |
| rs146355726 | T | 0.0889  |
| rs62186182  | A | 0.031   |
| rs11126214  | T | -0.0353 |
| rs75299648  | A | -0.1239 |
| rs75493060  | C | -0.145  |
| rs116229258 | A | 0.1269  |
| rs67694908  | G | -0.0294 |
| rs2360099   | C | 0.0808  |
| rs143248168 | G | 0.0867  |
| rs12151744  | A | -0.024  |
| rs17747975  | C | 0.107   |
| rs77068372  | T | 0.1181  |
| rs74987538  | G | -0.0689 |
| rs34490170  | C | 0.064   |
| rs61275598  | A | -0.024  |
| rs147580324 | G | 0.0883  |
| rs76155979  | C | 0.0872  |
| rs1568997   | G | -0.0293 |
| rs13032162  | A | -0.0615 |
| rs76351474  | A | 0.1288  |
| rs11894892  | A | -0.0348 |
| rs35421249  | G | -0.0212 |
| rs2313691   | G | 0.0323  |
| rs78060548  | A | -0.0406 |
| rs17402278  | C | 0.0865  |
| rs6739351   | C | -0.0581 |
| rs10174149  | C | 0.0276  |

|             |   |         |
|-------------|---|---------|
| rs2160643   | C | -0.0257 |
| rs78165974  | A | -0.0435 |
| rs7568123   | A | -0.022  |
| rs2197956   | A | 0.031   |
| rs77123533  | A | -0.1002 |
| rs75253721  | A | -0.0986 |
| rs112992405 | G | -0.1258 |
| rs1426700   | A | 0.0225  |
| rs116108200 | T | -0.1833 |
| rs116352569 | A | 0.0556  |
| rs34469654  | G | 0.0277  |
| rs80255866  | A | 0.167   |
| rs146744821 | G | -0.127  |
| rs724566    | C | -0.0653 |
| rs13398585  | A | 0.0224  |
| rs72927105  | A | 0.0371  |
| rs56991181  | G | -0.0264 |
| rs10169022  | T | -0.0216 |
| rs7576835   | C | -0.0235 |
| rs111594981 | C | -0.0695 |
| rs56388072  | T | -0.1436 |
| rs17218383  | C | -0.0617 |
| rs75276028  | C | -0.0522 |
| rs11686651  | C | 0.021   |
| rs17049243  | C | 0.0352  |
| rs6726538   | T | 0.0237  |
| rs150306938 | T | -0.0542 |
| rs146051987 | A | -0.1711 |
| rs940339    | T | -0.0215 |
| rs79819819  | T | 0.0676  |
| rs2113820   | G | -0.0322 |
| rs116301574 | G | -0.128  |
| rs4672503   | T | -0.0231 |
| rs72837545  | T | 0.1172  |
| rs2141384   | T | -0.111  |
| rs12473258  | T | 0.0214  |
| rs74002926  | A | 0.0833  |
| rs11127296  | T | 0.0375  |
| rs148257462 | C | 0.1104  |
| rs11676457  | G | 0.0812  |
| rs62168442  | A | 0.0333  |
| rs77248111  | A | 0.0818  |
| rs7584018   | T | -0.0299 |
| rs12386162  | G | -0.0204 |
| rs17041717  | C | -0.0357 |
| rs55636453  | A | -0.0383 |
| rs77707648  | C | 0.1021  |

|             |   |         |
|-------------|---|---------|
| rs6761219   | A | 0.0873  |
| rs59190957  | A | -0.0241 |
| rs17050156  | G | -0.0601 |
| rs115943802 | A | -0.0664 |
| rs56083407  | C | -0.0359 |
| rs62186066  | T | 0.0527  |
| rs13393228  | C | -0.0249 |
| rs79625878  | C | -0.0451 |
| rs959054    | T | 0.0232  |
| rs17667100  | C | -0.0232 |
| rs35645906  | A | -0.0983 |
| rs116821968 | C | 0.0487  |
| rs12621011  | T | 0.0898  |
| rs2271526   | C | -0.0372 |
| rs2278481   | G | 0.0405  |
| rs13424925  | C | -0.0862 |
| rs62172388  | A | -0.0544 |
| rs138028559 | C | 0.1413  |
| rs1077071   | C | 0.0364  |
| rs6735125   | A | 0.043   |
| rs143797605 | A | 0.1475  |
| rs12469692  | A | 0.0296  |
| rs149153670 | C | 0.1187  |
| rs34600314  | C | -0.0217 |
| rs62118025  | T | 0.0316  |
| rs114132967 | A | 0.1067  |
| rs114818184 | G | 0.0976  |
| rs388276    | A | -0.0224 |
| rs2194409   | A | 0.0219  |
| rs6728994   | C | -0.0227 |
| rs74441910  | A | -0.1039 |
| rs6437144   | T | -0.0841 |
| rs76123309  | T | 0.1005  |
| rs73144896  | T | 0.0706  |
| rs141367077 | A | -0.0336 |
| rs1454043   | T | 0.0216  |
| rs17814334  | C | 0.0227  |
| rs13399517  | A | 0.1548  |
| rs115297001 | T | 0.1193  |
| rs55837939  | T | 0.0538  |
| rs2680837   | A | -0.0368 |
| rs4074423   | T | -0.1093 |
| rs11673766  | G | 0.0229  |
| rs114949804 | C | -0.1502 |
| rs72781959  | T | 0.0961  |
| rs144709501 | T | -0.0822 |
| rs116824536 | T | 0.1068  |

|             |   |         |
|-------------|---|---------|
| rs75201431  | C | 0.0981  |
| rs11694776  | A | -0.0586 |
| rs71422776  | C | -0.053  |
| rs114754256 | A | -0.1176 |
| rs76453331  | T | 0.0979  |
| rs7593879   | A | -0.0656 |
| rs138958646 | T | 0.0631  |
| rs78655335  | T | 0.1144  |
| rs79868883  | G | 0.0888  |
| rs2368210   | G | -0.0523 |
| rs1562393   | T | 0.0251  |
| rs78711778  | A | 0.0592  |
| rs9973363   | T | 0.0211  |
| rs2315523   | T | -0.0229 |
| rs138678326 | A | -0.1098 |
| rs11693209  | C | -0.0801 |
| rs76951753  | G | -0.1378 |
| rs112850878 | C | -0.0569 |
| rs12467836  | A | -0.021  |
| rs13416785  | G | -0.0288 |
| rs75486975  | T | 0.0895  |
| rs17046412  | A | -0.0505 |
| rs34758754  | C | -0.0355 |
| rs10175035  | T | 0.0213  |
| rs62166262  | A | 0.0328  |
| rs612078    | A | 0.1309  |
| rs1315402   | C | -0.0352 |
| rs13407138  | T | -0.0198 |
| rs7605617   | G | -0.0465 |
| rs931947    | T | -0.0399 |
| rs78307551  | A | 0.0971  |
| rs77160386  | A | -0.0602 |
| rs34496958  | G | 0.1516  |
| rs7564183   | G | -0.0276 |
| rs115284905 | A | -0.131  |
| rs76053175  | C | -0.0603 |
| rs75911205  | C | 0.0863  |
| rs78645537  | C | -0.0635 |
| rs146226549 | C | 0.1644  |
| rs116097161 | T | 0.0836  |
| rs145825647 | C | 0.0345  |
| rs80271190  | T | 0.1401  |
| rs6435265   | T | 0.0211  |
| rs13417766  | T | 0.0272  |
| rs12693084  | G | -0.0237 |
| rs72781898  | T | -0.1508 |
| rs35941079  | C | 0.0243  |

|             |   |         |
|-------------|---|---------|
| rs6732529   | G | 0.0208  |
| rs112602611 | G | -0.0655 |
| rs1843136   | G | 0.0238  |
| rs2215827   | A | 0.0768  |
| rs77726068  | A | 0.068   |
| rs4849605   | C | 0.022   |
| rs4594385   | C | -0.027  |
| rs1731252   | T | -0.0223 |
| rs115566126 | C | 0.2117  |
| rs16856997  | T | 0.039   |
| rs9789458   | T | 0.035   |
| rs11889963  | A | -0.0307 |
| rs77761373  | A | -0.1193 |
| rs4971638   | G | -0.0364 |
| rs76568364  | T | 0.2207  |
| rs384761    | C | 0.0229  |
| rs7587040   | C | 0.0246  |
| rs55640723  | C | -0.1286 |
| rs11690866  | A | 0.0682  |
| rs75286181  | A | -0.09   |
| rs6431555   | T | 0.0827  |
| rs3934763   | G | -0.0292 |
| rs62108835  | A | -0.052  |
| rs2059983   | T | -0.028  |
| rs72790718  | T | 0.0847  |
| rs17802242  | T | -0.0505 |
| rs72824713  | A | -0.0397 |
| rs77787820  | G | 0.0808  |
| rs115020282 | T | -0.0987 |
| rs116716472 | C | 0.066   |
| rs115672153 | A | 0.0995  |
| rs78094021  | A | -0.0385 |
| rs4848942   | A | 0.0197  |
| rs11675971  | G | -0.0221 |
| rs2568380   | A | -0.041  |
| rs71422183  | T | -0.1257 |
| rs116112808 | A | 0.102   |
| rs2102771   | C | -0.0335 |
| rs74875172  | G | -0.0362 |
| rs10497242  | T | -0.0336 |
| rs74465551  | G | 0.0367  |
| rs72948349  | A | -0.1182 |
| rs1014509   | C | -0.0223 |
| rs72997683  | T | -0.0415 |
| rs147957291 | T | 0.0656  |
| rs12712230  | T | 0.0351  |
| rs73073183  | A | 0.0396  |

|             |   |         |
|-------------|---|---------|
| rs10208960  | T | -0.0666 |
| rs11125358  | T | 0.1022  |
| rs112172786 | G | 0.1123  |
| rs10194443  | A | 0.0437  |
| rs35105445  | T | -0.026  |
| rs60641214  | T | -0.0279 |
| rs115370791 | T | 0.079   |
| rs11683103  | G | -0.0216 |
| rs6745324   | C | 0.1035  |
| rs12618570  | A | 0.0409  |
| rs1469816   | A | 0.0752  |
| rs16848321  | C | 0.0374  |
| rs138981964 | C | -0.1573 |
| rs35973810  | A | 0.0606  |
| rs148504406 | C | 0.0616  |
| rs67493481  | C | -0.0301 |
| rs62192460  | C | 0.1144  |
| rs34742991  | G | 0.0238  |
| rs4344930   | T | 0.0336  |
| rs149178666 | T | 0.0861  |
| rs13002296  | C | -0.022  |
| rs138979704 | T | -0.1418 |
| rs116292637 | C | 0.1006  |
| rs3768969   | T | 0.0229  |
| rs78425477  | T | 0.078   |
| rs12477549  | C | -0.023  |
| rs138795540 | T | 0.0867  |
| rs78652209  | G | -0.0932 |
| rs1358192   | T | -0.0228 |
| rs16855760  | G | 0.0272  |
| rs2063418   | C | -0.0202 |
| rs16857595  | G | 0.026   |
| rs78199970  | C | 0.1009  |
| rs17387557  | G | -0.0676 |
| rs17198764  | G | 0.0318  |
| rs115158842 | A | 0.0577  |
| rs114239239 | G | 0.1226  |
| rs75916553  | C | -0.082  |
| rs116308859 | G | -0.0413 |
| rs67150475  | C | 0.0518  |
| rs73021619  | A | 0.0211  |
| rs36029722  | G | 0.0882  |
| rs13383368  | C | -0.0359 |
| rs6729993   | G | -0.0231 |
| rs10164458  | G | -0.0204 |
| rs60148853  | C | 0.0248  |
| rs78385405  | C | -0.1066 |

|             |   |         |
|-------------|---|---------|
| rs13413866  | T | -0.0858 |
| rs79278053  | G | 0.0333  |
| rs2248895   | T | 0.0206  |
| rs60327045  | T | 0.0484  |
| rs75899082  | C | -0.2009 |
| rs744429    | A | -0.023  |
| rs6544259   | G | -0.0418 |
| rs76034825  | C | 0.0894  |
| rs143796734 | T | -0.0826 |
| rs6436921   | G | 0.0232  |
| rs74813103  | G | 0.1023  |
| rs13032805  | A | -0.0421 |
| rs142947818 | A | 0.1734  |
| rs45593635  | A | -0.0331 |
| rs11897665  | A | -0.0285 |
| rs72863908  | C | 0.1107  |
| rs62178209  | G | 0.0461  |
| rs17046968  | G | -0.1232 |
| rs75562827  | C | -0.0874 |
| rs150423572 | C | 0.0806  |
| rs17497441  | A | 0.0396  |
| rs112826830 | A | 0.1059  |
| rs17175745  | T | 0.0805  |
| rs115499813 | T | 0.0839  |
| rs76673176  | T | -0.0671 |
| rs114368153 | T | 0.094   |
| rs112855749 | T | -0.0766 |
| rs4439992   | C | 0.0219  |
| rs13392025  | T | -0.0482 |
| rs17532294  | G | -0.0217 |
| rs2371787   | T | 0.0196  |
| rs151110148 | T | -0.0763 |
| rs12469622  | G | 0.0435  |
| rs12621152  | T | -0.0301 |
| rs72870956  | G | -0.0354 |
| rs148457109 | T | 0.159   |
| rs114859818 | A | 0.0704  |
| rs7561632   | G | 0.0511  |
| rs139808240 | A | 0.1338  |
| rs138469114 | C | -0.1431 |
| rs116222054 | A | -0.1581 |
| rs35366794  | A | 0.0511  |
| rs11690969  | T | 0.0348  |
| rs145923469 | T | 0.1744  |
| rs77742795  | A | 0.0796  |
| rs72804704  | C | 0.0445  |
| rs113423754 | C | 0.0987  |

|             |   |         |
|-------------|---|---------|
| rs77458940  | A | 0.1086  |
| rs148350919 | C | -0.0745 |
| rs115107001 | A | -0.146  |
| rs74895278  | G | -0.1107 |
| rs74696452  | T | 0.0773  |
| rs74671599  | T | 0.0614  |
| rs115867359 | A | 0.0426  |
| rs13382950  | C | -0.0212 |
| rs80092504  | G | 0.0682  |
| rs35104270  | T | -0.031  |
| rs2161776   | A | 0.0231  |
| rs75535795  | T | 0.1256  |
| rs150917826 | C | -0.1546 |
| rs4662571   | G | 0.0462  |
| rs4973555   | G | 0.0217  |
| rs77358714  | C | 0.081   |
| rs66567073  | T | -0.037  |
| rs6716036   | A | -0.0418 |
| rs114554332 | A | 0.0784  |
| rs115676681 | A | -0.0925 |
| rs6734493   | G | -0.0217 |
| rs73094328  | T | 0.0586  |
| rs58289687  | A | 0.08    |
| rs17819028  | G | -0.0606 |
| rs41272673  | G | 0.0639  |
| rs112937432 | T | 0.0704  |
| rs79778756  | C | 0.0612  |
| rs11690361  | T | 0.0235  |
| rs73917220  | G | -0.1154 |
| rs72956526  | C | 0.1284  |
| rs80189034  | G | 0.1316  |
| rs62119433  | T | -0.0274 |
| rs11688709  | T | 0.0203  |
| rs62171672  | G | -0.0614 |
| rs76692359  | A | -0.1198 |
| rs116448782 | A | -0.0977 |
| rs11677276  | A | -0.0201 |
| rs75545182  | C | 0.1134  |
| rs142342650 | T | -0.0651 |
| rs72835396  | C | -0.1239 |
| rs149471804 | A | 0.121   |
| rs149766249 | A | -0.1713 |
| rs115184829 | T | 0.0796  |
| rs79870295  | T | 0.1165  |
| rs6760129   | T | 0.0207  |
| rs72839794  | C | -0.0573 |
| rs150241249 | T | 0.0694  |



|             |   |         |
|-------------|---|---------|
| rs7561970   | G | 0.0259  |
| rs745155    | G | 0.0214  |
| rs72906970  | C | 0.0536  |
| rs72797617  | T | 0.0881  |
| rs10172437  | A | 0.0528  |
| rs12617182  | T | 0.0833  |
| rs79756876  | C | 0.1115  |
| rs57612792  | A | 0.0377  |
| rs76130683  | G | -0.0476 |
| rs6715495   | A | 0.0264  |
| rs79653267  | A | 0.0708  |
| rs707115    | G | -0.0257 |
| rs4528776   | C | -0.0414 |
| rs115114218 | C | -0.123  |
| rs115392650 | A | 0.091   |
| rs62165687  | T | -0.0516 |
| rs114225850 | G | -0.137  |
| rs62161394  | G | -0.0335 |
| rs148725369 | A | 0.1217  |
| rs139599109 | C | -0.1424 |
| rs79584412  | G | -0.0291 |
| rs12712339  | G | 0.042   |
| rs7583727   | T | 0.065   |
| rs115926795 | A | -0.1094 |
| rs2652437   | A | 0.0255  |
| rs72886134  | A | -0.0616 |
| rs55803818  | G | 0.0268  |
| rs56987422  | T | -0.0407 |
| rs140935876 | C | -0.0815 |
| rs13421980  | A | 0.0638  |
| rs138232906 | C | -0.0805 |
| rs62186909  | A | -0.0215 |
| rs4670222   | C | 0.0205  |
| rs113591624 | G | -0.1385 |
| rs12475941  | A | -0.0629 |
| rs147310674 | A | -0.1318 |
| rs114931159 | C | 0.0572  |
| rs6739594   | C | 0.0315  |
| rs2711305   | G | 0.0216  |
| rs17030786  | C | 0.045   |
| rs4851384   | A | 0.0409  |
| rs13405075  | C | 0.04    |
| rs7559976   | C | 0.0213  |
| rs10206871  | T | 0.0415  |
| rs973100    | G | -0.1006 |
| rs6754071   | T | -0.0274 |
| rs12473095  | T | 0.0426  |

|             |   |         |
|-------------|---|---------|
| rs11563055  | G | -0.102  |
| rs77399959  | T | 0.09    |
| rs6748687   | A | -0.0757 |
| rs75013540  | T | -0.1373 |
| rs11677911  | T | -0.0231 |
| rs112548587 | T | -0.0583 |
| rs67927957  | C | -0.0357 |
| rs2053332   | C | -0.0256 |
| rs76341128  | T | -0.1178 |
| rs62143032  | T | 0.0387  |
| rs139128290 | A | -0.1568 |
| rs4832194   | C | 0.0196  |
| rs2191582   | A | -0.0633 |
| rs12469969  | T | -0.0204 |
| rs41311599  | C | -0.0896 |
| rs146209210 | T | -0.1012 |
| rs1402903   | T | 0.0205  |
| rs114952111 | T | 0.1214  |
| rs6760851   | A | -0.0287 |
| rs1868849   | C | 0.0278  |
| rs144054402 | G | -0.0986 |
| rs2304402   | G | -0.0197 |
| rs13391574  | A | 0.0196  |
| rs114193126 | C | 0.0844  |
| rs56143025  | A | -0.1494 |
| rs75179550  | A | -0.0372 |
| rs72875464  | T | 0.0685  |
| rs145788871 | G | -0.0713 |
| rs148802637 | C | -0.0868 |
| rs13398940  | G | 0.0995  |
| rs1922531   | G | -0.022  |
| rs116570070 | C | -0.1728 |
| rs116253345 | C | 0.1041  |
| rs72830151  | A | -0.0853 |
| rs4563214   | T | 0.0566  |
| rs62139274  | A | 0.0794  |
| rs80171191  | T | 0.0528  |
| rs2345835   | T | -0.02   |
| rs4666412   | C | -0.0276 |
| rs2577182   | T | -0.0203 |
| rs11687793  | A | 0.0217  |
| rs2160702   | A | 0.0979  |
| rs1508116   | T | -0.023  |
| rs12468281  | G | -0.0883 |
| rs16830390  | C | 0.1231  |
| rs10183422  | T | -0.0748 |
| rs12993807  | A | 0.0495  |

|             |   |         |
|-------------|---|---------|
| rs9973762   | C | -0.0897 |
| rs72833046  | T | -0.0472 |
| rs80249215  | A | 0.105   |
| rs62188993  | C | 0.0427  |
| rs115286052 | A | 0.0956  |
| rs138817493 | A | -0.0713 |
| rs1082392   | C | 0.0742  |
| rs72920644  | C | -0.0261 |
| rs10520215  | T | -0.0355 |
| rs72842642  | T | -0.0446 |
| rs6745407   | G | -0.0478 |
| rs75150831  | C | -0.0604 |
| rs115399800 | T | 0.1218  |
| rs62113703  | A | -0.02   |
| rs79669781  | C | -0.1227 |
| rs74937212  | G | 0.0439  |
| rs11682325  | T | 0.0357  |
| rs11674635  | G | 0.1303  |
| rs55915972  | A | 0.052   |
| rs78367884  | G | 0.0873  |
| rs34486643  | A | -0.071  |
| rs3772025   | A | -0.0474 |
| rs967618    | A | -0.0241 |
| rs138400153 | A | -0.166  |
| rs17045684  | C | -0.0815 |
| rs2971850   | G | -0.0201 |
| rs17035178  | T | -0.0569 |
| rs13428494  | T | -0.0905 |
| rs56382025  | T | 0.1448  |
| rs141767464 | A | 0.0895  |
| rs72771706  | A | 0.0807  |
| rs141741938 | T | 0.139   |
| rs4075494   | C | -0.0206 |
| rs62120317  | T | 0.0777  |
| rs74106     | T | -0.0213 |
| rs3024879   | A | 0.0528  |
| rs36057115  | G | -0.0817 |
| rs114593068 | T | -0.0733 |
| rs13384120  | C | -0.021  |
| rs75017343  | A | 0.1294  |
| rs73077937  | T | 0.0476  |
| rs55767331  | T | 0.0359  |
| rs76847114  | C | -0.1162 |
| rs116056922 | T | 0.0738  |
| rs76154042  | A | 0.0467  |
| rs115046237 | G | -0.0771 |
| rs61068452  | G | -0.0572 |

|             |   |         |
|-------------|---|---------|
| rs28494956  | T | -0.0665 |
| rs56231986  | A | 0.1181  |
| rs140268081 | A | 0.1599  |
| rs76661670  | T | -0.0266 |
| rs141369603 | T | 0.0708  |
| rs77841798  | G | 0.0789  |
| rs150628086 | T | 0.1208  |
| rs79770637  | T | -0.042  |
| rs147677712 | A | -0.1564 |
| rs73197684  | G | -0.0277 |
| rs7564010   | C | -0.0251 |
| rs116357822 | T | -0.1108 |
| rs9917399   | A | 0.0506  |
| rs4640417   | G | -0.02   |
| rs2166445   | C | 0.0235  |
| rs140023721 | A | 0.1385  |
| rs17863658  | G | -0.0664 |
| rs1843499   | A | 0.0251  |
| rs142192362 | G | 0.0808  |
| rs4664145   | G | -0.0398 |
| rs150257762 | T | 0.1069  |
| rs143255492 | A | -0.1453 |
| rs146349717 | T | -0.0916 |
| rs149149318 | T | -0.0699 |
| rs6738981   | T | 0.0602  |
| rs4669514   | T | -0.1239 |
| rs115437116 | A | 0.0867  |
| rs829580    | A | 0.0768  |
| rs35973614  | A | -0.0477 |
| rs59771434  | C | -0.031  |
| rs62136397  | G | -0.0628 |
| rs7426213   | A | -0.0255 |
| rs13427614  | C | -0.1311 |
| rs148371857 | A | -0.2001 |
| rs77868248  | T | 0.0813  |
| rs149244410 | C | 0.1166  |
| rs115570612 | T | 0.1199  |
| rs76575616  | C | -0.1226 |
| rs72910425  | C | -0.1034 |
| rs79075073  | C | -0.0253 |
| rs7566973   | T | -0.0319 |
| rs114423306 | C | 0.1342  |
| rs115781991 | T | -0.0946 |
| rs114367368 | A | 0.0634  |
| rs1975716   | A | 0.0323  |
| rs146810285 | G | -0.1    |
| rs72622677  | C | 0.0322  |

|             |   |         |
|-------------|---|---------|
| rs12712861  | T | -0.022  |
| rs7561121   | G | 0.0198  |
| rs16862246  | A | 0.0409  |
| rs4371332   | T | 0.025   |
| rs7565773   | G | -0.0253 |
| rs77460168  | G | -0.0331 |
| rs867851    | C | 0.0195  |
| rs2395841   | T | -0.0262 |
| rs2981371   | A | -0.0511 |
| rs17406264  | T | 0.0861  |
| rs6730196   | T | 0.0224  |
| rs73975052  | G | 0.0647  |
| rs7597961   | T | 0.0316  |
| rs111531737 | G | -0.1122 |
| rs147356297 | A | 0.1967  |
| rs141001074 | A | 0.0977  |
| rs57557801  | T | 0.0461  |
| rs144022547 | G | -0.0716 |
| rs72966898  | A | -0.0268 |
| rs114018081 | C | -0.1352 |
| rs72791839  | C | -0.0592 |
| rs78956414  | C | 0.0407  |
| rs6707835   | C | 0.0196  |
| rs34118161  | C | 0.0303  |
| rs12615983  | A | -0.0247 |
| rs146972460 | T | 0.1404  |
| rs28363003  | A | 0.0539  |
| rs4851024   | A | -0.0672 |
| rs76661877  | C | -0.0988 |
| rs6545385   | C | -0.0199 |
| rs79998990  | T | -0.0961 |
| rs111479130 | A | 0.0244  |
| rs78158772  | G | 0.0312  |
| rs79011677  | G | -0.1138 |
| rs80228170  | A | -0.0872 |
| rs11690963  | C | 0.0216  |
| rs4848931   | C | -0.0203 |
| rs116448128 | C | -0.1449 |
| rs75180451  | T | -0.0738 |
| rs10204624  | T | -0.027  |
| rs1120688   | G | -0.03   |
| rs79401534  | C | -0.1002 |
| rs74805861  | A | -0.0593 |
| rs10169804  | T | 0.1247  |
| rs58066895  | A | -0.0269 |
| rs143571404 | C | -0.1398 |
| rs147904885 | C | -0.0256 |

|             |   |         |
|-------------|---|---------|
| rs113492626 | T | -0.1381 |
| rs12711711  | G | 0.022   |
| rs140554891 | G | 0.1295  |
| rs75923973  | G | 0.0995  |
| rs76385904  | C | 0.1114  |
| rs13414868  | T | -0.0279 |
| rs2293271   | A | -0.0199 |
| rs28363022  | G | 0.1506  |
| rs60347157  | T | 0.0429  |
| rs66963661  | C | 0.0321  |
| rs1530075   | T | 0.0194  |
| rs11897502  | T | 0.062   |
| rs72844424  | A | 0.0399  |
| rs62170820  | C | -0.1449 |
| rs145935504 | C | -0.1509 |
| rs12470842  | A | -0.025  |
| rs56366979  | G | 0.0751  |
| rs13012143  | T | 0.0243  |
| rs77202299  | T | 0.0631  |
| rs6726265   | C | 0.0202  |
| rs148810046 | T | 0.0842  |
| rs144096044 | G | -0.0789 |
| rs76134872  | A | -0.1651 |
| rs6707126   | A | 0.0303  |
| rs6731722   | C | 0.0213  |
| rs1947144   | A | 0.0223  |
| rs76540331  | A | -0.0566 |
| rs114358059 | T | 0.1087  |
| rs1469366   | A | 0.0333  |
| rs10208683  | G | 0.0294  |
| rs75127909  | T | 0.0541  |
| rs72801799  | A | -0.0285 |
| rs356996    | T | 0.0199  |
| rs959538    | T | -0.0196 |
| rs72811812  | C | 0.0383  |
| rs78677453  | A | 0.1257  |
| rs62166722  | T | 0.0356  |
| rs144407148 | C | 0.0892  |
| rs75100542  | C | 0.1108  |
| rs3821160   | G | -0.0213 |
| rs139755308 | T | -0.026  |
| rs6731308   | C | 0.0199  |
| rs10201566  | G | 0.0232  |
| rs75034508  | T | 0.1154  |
| rs2138385   | T | 0.0307  |
| rs7565464   | A | 0.0377  |
| rs2059981   | C | -0.0222 |

|             |   |         |
|-------------|---|---------|
| rs6707000   | A | 0.0234  |
| rs41288829  | T | -0.0954 |
| rs76811732  | G | 0.0908  |
| rs11893097  | G | 0.1623  |
| rs114015466 | G | -0.1121 |
| rs75957031  | T | 0.0695  |
| rs78674114  | C | -0.093  |
| rs56115718  | T | -0.0361 |
| rs75257258  | T | 0.0825  |
| rs113221597 | A | 0.0377  |
| rs114141294 | A | -0.0908 |
| rs140669980 | T | 0.0545  |
| rs4608525   | T | 0.0259  |
| rs114640303 | T | 0.1631  |
| rs116572752 | A | -0.0938 |
| rs34646141  | G | -0.0854 |
| rs16985335  | C | -0.1213 |
| rs13020943  | C | 0.0218  |
| rs17049335  | G | 0.0606  |
| rs2083162   | C | 0.0199  |
| rs78670690  | A | 0.0348  |
| rs145882555 | G | 0.0713  |
| rs13005775  | A | 0.0349  |
| rs72794644  | C | -0.0499 |
| rs7561366   | G | -0.0359 |
| rs2142488   | T | 0.0333  |
| rs17228733  | G | 0.0267  |
| rs3806500   | T | -0.027  |
| rs13415684  | G | -0.0223 |
| rs114099383 | C | -0.0903 |
| rs1549343   | G | 0.0196  |
| rs4668841   | C | 0.0204  |
| rs75325457  | T | -0.105  |
| rs1921640   | T | 0.0216  |
| rs11674945  | A | -0.0485 |
| rs17330228  | T | 0.068   |
| rs74517650  | A | -0.0711 |
| rs1866238   | G | -0.0215 |
| rs7597137   | G | 0.1142  |
| rs114158523 | A | 0.108   |
| rs13401026  | T | 0.0318  |
| rs62129547  | T | 0.0565  |
| rs114838872 | T | 0.0488  |
| rs115328509 | T | -0.139  |
| rs114522959 | G | 0.111   |
| rs114384812 | G | -0.1089 |
| rs1372299   | T | -0.0252 |

|             |   |         |
|-------------|---|---------|
| rs80225883  | G | 0.0842  |
| rs75365842  | A | -0.0732 |
| rs1871241   | A | -0.0196 |
| rs74704434  | T | -0.0755 |
| rs114363006 | C | 0.0843  |
| rs17270248  | T | 0.0467  |
| rs115561812 | C | 0.1025  |
| rs142334643 | C | -0.0808 |
| rs3943552   | T | 0.0407  |
| rs1374110   | C | -0.0273 |
| rs79736375  | T | -0.0557 |
| rs72971948  | C | 0.0331  |
| rs113912792 | C | 0.0662  |
| rs79930085  | G | 0.0774  |
| rs71407588  | T | -0.0958 |
| rs114641757 | A | 0.1475  |
| rs2341697   | C | -0.0231 |
| rs115331905 | A | 0.0807  |
| rs62163273  | T | -0.0778 |
| rs76414281  | G | 0.032   |
| rs16823182  | G | 0.0607  |
| rs78882810  | T | -0.0688 |
| rs4673989   | G | 0.0203  |
| rs6729160   | T | 0.046   |
| rs10198791  | T | -0.0202 |
| rs6725206   | C | -0.0748 |
| rs145202972 | T | 0.0823  |
| rs10194607  | T | -0.048  |
| rs114574084 | T | -0.0727 |
| rs72845608  | G | 0.1052  |
| rs11687010  | A | 0.02    |
| rs111879519 | T | -0.0498 |
| rs139318806 | T | 0.0841  |
| rs78488656  | T | -0.0983 |
| rs9973503   | T | -0.0222 |
| rs1659914   | C | -0.0317 |
| rs115911005 | A | -0.1798 |
| rs41265109  | A | 0.0953  |
| rs12612797  | A | -0.019  |
| rs503105    | C | 0.0241  |
| rs1367230   | G | 0.0251  |
| rs114712363 | G | -0.1201 |
| rs72828968  | T | 0.0343  |
| rs7603916   | C | 0.02    |
| rs62172012  | C | -0.0728 |
| rs11884183  | C | -0.0372 |
| rs3115359   | C | 0.0377  |



|             |   |         |
|-------------|---|---------|
| rs78313842  | T | -0.0769 |
| rs115666140 | G | 0.1358  |
| rs13008498  | C | -0.0237 |
| rs78473264  | A | -0.0541 |
| rs2042830   | C | -0.0367 |
| rs1045234   | C | -0.0358 |
| rs12469218  | A | 0.0247  |
| rs3845844   | G | 0.027   |
| rs144544027 | T | 0.1023  |
| rs62188737  | A | -0.0354 |
| rs76013654  | T | 0.1153  |
| rs13009964  | G | -0.0247 |
| rs72851626  | G | 0.1438  |
| rs16826995  | A | -0.0834 |
| rs306184    | T | -0.0206 |
| rs145057466 | T | 0.1075  |
| rs148288353 | A | 0.1052  |
| rs114412394 | T | -0.0955 |
| rs148043321 | C | -0.0751 |
| rs78012678  | G | 0.08    |
| rs1542176   | T | 0.0196  |
| rs144114648 | A | -0.1182 |
| rs10519894  | A | -0.0304 |
| rs7578637   | A | -0.0858 |
| rs143607339 | C | 0.1344  |
| rs10171896  | C | -0.0352 |
| rs11675006  | T | -0.0329 |
| rs116503253 | C | -0.0909 |
| rs9677359   | T | -0.0403 |
| rs12990312  | T | -0.0299 |
| rs116627794 | G | 0.1403  |
| rs79643968  | T | 0.0459  |
| rs141918496 | C | 0.1512  |
| rs35071341  | G | 0.0519  |
| rs114056721 | C | 0.0598  |
| rs138276747 | G | -0.1162 |
| rs6757025   | A | 0.0273  |
| rs139277594 | G | -0.1044 |
| rs113012893 | G | -0.0286 |
| rs6436824   | A | 0.0204  |
| rs116731399 | G | 0.0811  |
| rs28479667  | A | -0.0323 |
| rs111972749 | A | 0.0616  |
| rs7581794   | G | -0.1752 |
| rs2119667   | A | 0.0192  |
| rs146181180 | T | 0.1203  |
| rs116385543 | C | 0.0546  |

|             |   |         |
|-------------|---|---------|
| rs11127469  | G | 0.0202  |
| rs13018589  | T | 0.0258  |
| rs62176064  | G | 0.059   |
| rs115123842 | T | -0.0874 |
| rs79395623  | T | 0.0535  |
| rs76002034  | C | 0.1094  |
| rs702877    | C | -0.0267 |
| rs34901603  | A | 0.0272  |
| rs112858007 | G | -0.1677 |
| rs6732660   | A | -0.0562 |
| rs4971381   | A | -0.0192 |
| rs4669335   | C | 0.1235  |
| rs145408031 | T | 0.0609  |
| rs1541579   | G | 0.0201  |
| rs62134403  | T | 0.112   |
| rs13019679  | A | -0.0366 |
| rs61059676  | T | -0.0245 |
| rs11679088  | A | 0.0318  |
| rs77581324  | G | -0.0834 |
| rs62182229  | C | 0.1608  |
| rs11692556  | T | -0.022  |
| rs13025138  | T | 0.0239  |
| rs71430264  | T | 0.0674  |
| rs111795552 | A | -0.056  |
| rs78046225  | G | 0.0593  |
| rs17722778  | C | -0.1063 |
| rs74645345  | C | 0.1235  |
| rs79944176  | A | -0.0707 |
| rs145265872 | T | 0.0523  |
| rs17550379  | C | -0.0354 |
| rs713611    | C | -0.0245 |
| rs78767729  | C | -0.0748 |
| rs114466198 | A | 0.1285  |
| rs665650    | A | -0.0207 |
| rs600578    | G | 0.0233  |
| rs4954106   | A | -0.0334 |
| rs10187732  | C | 0.0232  |
| rs10165823  | A | 0.0259  |
| rs67469828  | A | -0.0219 |
| rs10803649  | C | 0.0206  |
| rs57121275  | G | -0.0574 |
| rs71430071  | T | 0.1286  |
| rs75667030  | C | -0.0762 |
| rs17497213  | C | -0.0425 |
| rs1364649   | T | -0.0355 |
| rs10153948  | T | 0.0439  |
| rs3893111   | G | 0.0237  |

|             |   |         |
|-------------|---|---------|
| rs75671089  | T | -0.0719 |
| rs6743675   | G | -0.042  |
| rs11691660  | G | 0.0203  |
| rs940674    | A | -0.1157 |
| rs116128631 | C | 0.0778  |
| rs205650    | G | 0.0303  |
| rs72820944  | C | 0.0496  |
| rs79895937  | C | 0.0816  |
| rs11679471  | G | 0.0307  |
| rs75251015  | C | 0.0933  |
| rs116452736 | A | 0.0652  |
| rs143447975 | T | 0.1441  |
| rs77217587  | A | 0.105   |
| rs9288042   | A | -0.0273 |
| rs12052411  | G | -0.0341 |
| rs17242280  | C | 0.0673  |
| rs1987783   | C | 0.0197  |
| rs113364873 | C | 0.0864  |
| rs114334177 | C | 0.1086  |
| rs788163    | C | -0.0213 |
| rs77104864  | T | 0.0341  |
| rs12994845  | C | 0.0289  |
| rs76765684  | C | 0.1153  |
| rs12619185  | A | 0.0191  |
| rs1608215   | C | 0.0215  |
| rs56381872  | A | -0.1228 |
| rs75687555  | A | 0.0332  |
| rs112204301 | A | 0.1003  |
| rs16826387  | A | 0.0397  |
| rs78532622  | A | -0.1284 |
| rs17398620  | A | -0.1076 |
| rs79601458  | C | 0.0488  |
| rs72841122  | T | 0.0359  |
| rs76460503  | A | -0.1235 |
| rs75773760  | G | -0.0964 |
| rs17779587  | T | -0.0607 |
| rs13410020  | A | -0.0277 |
| rs13010695  | T | 0.0246  |
| rs75932120  | C | -0.0297 |
| rs147284805 | A | 0.0649  |
| rs114356956 | C | 0.1765  |
| rs112478633 | A | 0.0707  |
| rs11096592  | A | -0.021  |
| rs10182679  | C | 0.0251  |
| rs17034628  | T | -0.1194 |
| rs7590480   | C | 0.0203  |
| rs4670034   | C | 0.0234  |

|             |   |         |
|-------------|---|---------|
| rs72811236  | T | 0.0314  |
| rs116398283 | C | 0.0588  |
| rs114808435 | T | 0.0857  |
| rs57540835  | G | 0.0291  |
| rs80179607  | C | 0.0802  |
| rs10929811  | G | 0.0251  |
| rs148544523 | A | 0.0965  |
| rs7608259   | G | 0.0338  |
| rs13384583  | T | -0.0207 |
| rs116425635 | T | -0.136  |
| rs11684741  | T | -0.0228 |
| rs11124451  | G | 0.0197  |
| rs13032486  | A | -0.0815 |
| rs72784396  | T | -0.0594 |
| rs13424954  | A | -0.0265 |
| rs138291552 | G | 0.0877  |
| rs1630418   | A | 0.0244  |
| rs6710260   | G | -0.0262 |
| rs78482419  | T | 0.0601  |
| rs146749612 | T | -0.126  |
| rs7558981   | G | 0.0306  |
| rs77385917  | G | -0.064  |
| rs72784331  | A | 0.0315  |
| rs17033001  | T | 0.0545  |
| rs148399683 | T | -0.1258 |
| rs11679384  | C | -0.0286 |
| rs111900973 | G | 0.1279  |
| rs17581008  | C | -0.1199 |
| rs7581367   | T | -0.1314 |
| rs4321359   | T | 0.0231  |
| rs115408880 | T | 0.1526  |
| rs4850004   | T | -0.0191 |
| rs10173279  | G | 0.0343  |
| rs114820593 | A | 0.0493  |
| rs7572574   | T | -0.0907 |
| rs78484886  | G | 0.0453  |
| rs17190583  | G | -0.0292 |
| rs11682687  | G | 0.0264  |
| rs6751505   | T | -0.0204 |
| rs76888561  | G | -0.072  |
| rs77559408  | C | 0.0526  |
| rs78656754  | A | -0.0808 |
| rs12151728  | G | 0.0443  |
| rs11690100  | T | 0.029   |
| rs28687     | C | 0.0265  |
| rs71430206  | T | 0.1217  |
| rs62126477  | A | -0.0329 |

|             |   |         |
|-------------|---|---------|
| rs28652706  | T | 0.031   |
| rs12465874  | C | 0.0268  |
| rs10175587  | A | -0.0356 |
| rs17278890  | C | 0.0465  |
| rs6546174   | C | -0.0204 |
| rs4848590   | T | -0.0368 |
| rs62175483  | G | -0.0265 |
| rs34847903  | G | -0.0229 |
| rs10203157  | T | 0.0686  |
| rs56303140  | A | -0.0987 |
| rs776488    | C | -0.0209 |
| rs139324988 | T | 0.1796  |
| rs1511189   | G | 0.0203  |
| rs7582575   | T | 0.0295  |
| rs12466549  | A | 0.0211  |
| rs141698678 | A | -0.0674 |
| rs138854492 | G | 0.0736  |
| rs116450169 | T | -0.1139 |
| rs7579949   | T | 0.0232  |
| rs115065086 | C | -0.1346 |
| rs115016140 | A | -0.0733 |
| rs72902105  | G | 0.0322  |
| rs78384382  | T | 0.1201  |
| rs6741465   | A | 0.0748  |
| rs114051455 | C | -0.1078 |
| rs78670869  | T | 0.1339  |
| rs79512050  | A | -0.0929 |
| rs1078819   | C | 0.0255  |
| rs1007793   | G | 0.0255  |
| rs10183229  | C | 0.0853  |
| rs116547781 | C | -0.1588 |
| rs115641582 | A | -0.075  |
| rs1978414   | C | -0.0533 |
| rs7604173   | T | 0.0197  |
| rs1838254   | G | -0.1417 |
| rs75880069  | C | 0.0524  |
| rs34856387  | A | -0.0774 |
| rs147141540 | A | 0.0423  |
| rs2697794   | C | -0.0238 |
| rs11692723  | C | 0.0235  |
| rs72975178  | A | -0.0368 |
| rs11126005  | A | -0.0204 |
| rs72813768  | A | -0.0918 |
| rs79753400  | T | 0.1217  |
| rs6722347   | A | 0.0199  |
| rs11687280  | C | -0.0665 |
| rs4622679   | G | -0.0831 |

|             |   |         |
|-------------|---|---------|
| rs35812040  | A | 0.0951  |
| rs13385804  | C | -0.0205 |
| rs72775824  | C | -0.0298 |
| rs12465125  | G | 0.0198  |
| rs334112    | T | -0.0275 |
| rs72909967  | G | -0.1529 |
| rs4973393   | T | -0.0202 |
| rs12989737  | C | 0.0334  |
| rs72992248  | G | 0.0468  |
| rs74812680  | C | -0.0794 |
| rs6733784   | C | -0.0268 |
| rs1913987   | G | -0.0302 |
| rs35920137  | A | 0.0895  |
| rs72972981  | C | 0.0369  |
| rs57577079  | G | -0.0498 |
| rs17025319  | A | -0.0693 |
| rs10182590  | C | -0.0308 |
| rs11687717  | C | 0.0866  |
| rs72946763  | T | -0.1134 |
| rs74270368  | T | -0.0329 |
| rs73109439  | G | 0.0267  |
| rs35921314  | A | -0.0234 |
| rs11684931  | T | 0.0696  |
| rs6743961   | T | -0.0189 |
| rs10167611  | C | -0.0989 |
| rs75145714  | C | -0.0875 |
| rs143639561 | C | -0.0326 |
| rs4240225   | T | -0.0267 |
| rs148631221 | T | 0.1484  |
| rs1878320   | C | 0.0393  |
| rs76615398  | G | 0.0798  |
| rs12622387  | T | -0.0271 |
| rs111414553 | G | 0.0282  |
| rs17040682  | G | -0.0268 |
| rs17024692  | G | 0.032   |
| rs72888791  | T | -0.1009 |
| rs116747369 | T | -0.1259 |
| rs11690865  | T | 0.0225  |
| rs76539557  | G | 0.0792  |
| rs77701107  | A | 0.1572  |
| rs6436223   | T | 0.0302  |
| rs7584620   | C | -0.0229 |
| rs140471606 | A | 0.0952  |
| rs118093256 | C | 0.0687  |
| rs118145919 | A | 0.1     |
| rs72971243  | T | -0.0738 |
| rs62140955  | G | 0.1101  |

|             |   |         |
|-------------|---|---------|
| rs1350065   | T | -0.0262 |
| rs62193497  | A | -0.0281 |
| rs6708573   | T | 0.0971  |
| rs11897518  | G | 0.0966  |
| rs7606993   | C | -0.038  |
| rs72804536  | C | 0.2471  |
| rs13002180  | T | -0.1564 |
| rs72780399  | A | 0.0302  |
| rs79543997  | A | -0.1222 |
| rs148290164 | C | 0.0973  |
| rs6759955   | C | -0.0596 |
| rs79663649  | G | -0.0855 |
| rs141966351 | T | -0.1087 |
| rs7583476   | T | 0.0193  |
| rs80215023  | C | -0.0765 |
| rs74359780  | A | -0.0387 |
| rs112000033 | C | 0.0966  |
| rs115885095 | A | -0.0707 |
| rs13412887  | G | -0.0255 |
| rs138901584 | A | 0.1156  |
| rs113274709 | A | 0.1018  |
| rs4240223   | A | -0.0188 |
| rs759429    | T | -0.0323 |
| rs79572412  | C | 0.1274  |
| rs17753351  | G | -0.0572 |
| rs114447902 | T | 0.0813  |
| rs3796114   | T | 0.041   |
| rs112871534 | T | -0.128  |
| rs17265885  | G | -0.1628 |
| rs72781267  | T | 0.0954  |
| rs77618023  | A | 0.1032  |
| rs77919687  | A | -0.078  |
| rs60651819  | C | 0.0196  |
| rs114491565 | T | -0.1151 |
| rs62127988  | G | -0.1055 |
| rs11902459  | G | 0.0206  |
| rs72924846  | C | -0.0495 |
| rs13001068  | G | -0.0381 |
| rs78032425  | C | 0.0397  |
| rs115799626 | T | -0.0593 |
| rs78326416  | C | -0.0537 |
| rs177762    | T | 0.0237  |
| rs1862650   | C | 0.0842  |
| rs6546997   | T | 0.0265  |
| rs10209895  | T | -0.0362 |
| rs113351888 | G | -0.0838 |
| rs4630783   | G | -0.046  |

|             |   |         |
|-------------|---|---------|
| rs77581049  | T | -0.0665 |
| rs12619261  | C | 0.0745  |
| rs147007805 | A | 0.0485  |
| rs11883769  | C | -0.0457 |
| rs139009690 | G | 0.063   |
| rs9679572   | G | 0.0389  |
| rs330639    | C | -0.021  |
| rs2975779   | C | 0.0294  |
| rs78071089  | G | 0.0646  |
| rs6758254   | A | -0.0193 |
| rs79891745  | G | 0.0525  |
| rs150324364 | T | 0.0832  |
| rs115196919 | C | -0.0859 |
| rs12991226  | T | 0.0454  |
| rs150975450 | T | 0.0677  |
| rs28489364  | A | 0.036   |
| rs116694085 | T | -0.1323 |
| rs114109566 | A | -0.1034 |
| rs116581753 | A | -0.0802 |
| rs1897616   | T | -0.02   |
| rs12990795  | C | -0.0314 |
| rs13401133  | A | -0.0566 |
| rs16856834  | T | -0.0576 |
| rs62149913  | A | 0.0579  |
| rs7567336   | C | 0.1317  |
| rs74591894  | A | 0.0492  |
| rs10182640  | A | 0.0696  |
| rs4953332   | T | -0.0286 |
| rs113360850 | A | 0.1228  |
| rs78504695  | A | 0.0669  |
| rs6735788   | C | 0.0577  |
| rs141950315 | A | -0.0781 |
| rs113149120 | C | -0.1384 |
| rs112478356 | C | 0.0894  |
| rs1721333   | G | 0.0219  |
| rs4669423   | G | -0.0277 |
| rs71413531  | A | -0.1558 |
| rs28829079  | T | -0.027  |
| rs72874584  | G | 0.0748  |
| rs6721128   | G | -0.0213 |
| rs112913451 | C | 0.0908  |
| rs17388897  | T | -0.0203 |
| rs141207482 | T | -0.0478 |
| rs76502998  | G | -0.0575 |
| rs140614198 | A | -0.0325 |
| rs79015754  | A | -0.0553 |
| rs111311948 | C | 0.1302  |



|             |   |         |
|-------------|---|---------|
| rs114712118 | G | -0.1019 |
| rs75792391  | A | 0.1151  |
| rs12989704  | G | 0.0217  |
| rs62146773  | C | 0.0438  |
| rs1546642   | T | -0.0197 |
| rs6729015   | T | -0.0196 |
| rs216639    | T | -0.1026 |
| rs72838530  | A | 0.0508  |
| rs141068763 | C | 0.1394  |
| rs6712500   | A | -0.0327 |
| rs80094848  | C | 0.1789  |
| rs75483949  | G | -0.0471 |
| rs138305858 | T | 0.0767  |
| rs891816    | G | 0.0187  |
| rs11902010  | G | -0.04   |
| rs72784367  | G | 0.1079  |
| rs62140628  | C | -0.0936 |
| rs10931311  | T | -0.0195 |
| rs7584026   | T | -0.0244 |
| rs2100172   | C | -0.0261 |
| rs72613837  | A | -0.0775 |
| rs35138616  | A | 0.0491  |
| rs72804015  | T | -0.1243 |
| rs6755434   | C | -0.0406 |
| rs13020225  | T | -0.1709 |
| rs79010246  | G | 0.1158  |
| rs62181780  | G | 0.0378  |
| rs918954    | G | 0.0795  |
| rs75017804  | C | -0.0785 |
| rs116474894 | A | 0.1201  |
| rs146118312 | G | 0.0823  |
| rs115694607 | T | 0.096   |
| rs1877342   | G | -0.0274 |
| rs115418330 | A | 0.079   |
| rs148885901 | A | -0.0673 |
| rs114514826 | G | 0.0982  |
| rs112385344 | T | 0.0358  |
| rs17737841  | G | -0.0307 |
| rs2390165   | A | 0.0189  |
| rs72949839  | G | -0.0599 |
| rs17293732  | C | -0.0243 |
| rs2595167   | G | 0.0626  |
| rs535200    | A | -0.0641 |
| rs72835810  | C | 0.0414  |
| rs116425213 | A | -0.0938 |
| rs13418394  | A | -0.0685 |
| rs1439141   | G | 0.0261  |

|             |   |         |
|-------------|---|---------|
| rs78807414  | A | 0.1221  |
| rs4673785   | T | -0.0605 |
| rs148480043 | T | 0.1139  |
| rs12621187  | C | -0.0191 |
| rs4627616   | A | 0.0206  |
| rs13004452  | G | 0.0592  |
| rs115072749 | T | 0.0972  |
| rs4953904   | C | -0.0221 |
| rs71415218  | A | 0.0281  |
| rs17220217  | A | 0.0458  |
| rs9789344   | A | 0.0189  |
| rs4405810   | C | -0.0222 |
| rs4141819   | C | -0.0208 |
| rs6711920   | T | 0.0229  |
| rs114584432 | C | 0.0621  |
| rs145908786 | T | 0.0745  |
| rs4667196   | T | 0.0211  |
| rs72788755  | A | -0.0548 |
| rs6718838   | G | 0.0256  |
| rs116200042 | G | 0.0674  |
| rs78493201  | C | 0.0619  |
| rs116333681 | G | -0.0515 |
| rs72818098  | G | -0.1116 |
| rs79675564  | A | 0.0567  |
| rs17474432  | G | -0.0505 |
| rs2123508   | A | 0.0253  |
| rs4676230   | A | 0.0519  |
| rs1551485   | T | 0.0197  |
| rs13386446  | C | -0.0427 |
| rs12471301  | A | 0.0199  |
| rs57753199  | G | -0.0556 |
| rs72773102  | T | -0.0472 |
| rs144475939 | T | -0.1063 |
| rs114599333 | G | 0.123   |
| rs116271486 | C | 0.0963  |
| rs10865223  | G | 0.0186  |
| rs114641579 | G | -0.0964 |
| rs12473705  | T | -0.0422 |
| rs114257015 | C | -0.1275 |
| rs6710321   | T | -0.1613 |
| rs71435439  | A | -0.0449 |
| rs78471655  | G | 0.0445  |
| rs10191908  | A | -0.0193 |
| rs79849855  | C | -0.1172 |
| rs1347504   | A | -0.0248 |
| rs75257451  | T | 0.053   |
| rs56123531  | T | -0.0461 |

|             |   |         |
|-------------|---|---------|
| rs74259153  | T | 0.061   |
| rs72771229  | C | -0.0701 |
| rs4669582   | T | 0.0758  |
| rs13403558  | C | -0.0441 |
| rs6738983   | T | 0.0215  |
| rs2170604   | A | 0.022   |
| rs78907431  | A | 0.0623  |
| rs17022634  | C | -0.0283 |
| rs146409171 | G | 0.0707  |
| rs4676160   | G | 0.1251  |
| rs313273    | A | 0.0759  |
| rs72781778  | A | -0.0517 |
| rs60833098  | C | -0.0436 |
| rs56890545  | T | -0.0243 |
| rs72944716  | T | -0.0561 |
| rs55903351  | A | 0.0412  |
| rs72948544  | C | -0.0465 |
| rs6543997   | T | -0.1224 |
| rs150894318 | C | 0.1643  |
| rs12463788  | T | -0.0212 |
| rs73042858  | A | 0.0824  |
| rs116289242 | C | -0.0613 |
| rs17409451  | T | -0.0278 |
| rs74263479  | G | 0.025   |
| rs76958496  | G | -0.0226 |
| rs114787333 | T | 0.1056  |
| rs72785578  | A | -0.0703 |
| rs62149405  | T | 0.0543  |
| rs73029720  | C | -0.0497 |
| rs73997595  | G | -0.0833 |
| rs6541977   | G | 0.0263  |
| rs243034    | C | 0.0196  |
| rs114428457 | G | -0.0627 |
| rs809949    | T | 0.0608  |
| rs2162019   | T | -0.0347 |
| rs62156605  | T | -0.1348 |
| rs112329893 | T | -0.1396 |
| rs851066    | T | 0.0337  |
| rs35896480  | C | 0.1699  |
| rs12613955  | G | -0.0187 |
| rs6431769   | A | 0.0206  |
| rs4669891   | T | -0.1291 |
| rs6759049   | A | 0.0535  |
| rs79568142  | A | 0.1504  |
| rs141558775 | C | -0.1351 |
| rs1946894   | A | -0.0458 |
| rs7573025   | C | 0.0353  |

|             |   |         |
|-------------|---|---------|
| rs115763137 | T | 0.1157  |
| rs72862763  | C | 0.1133  |
| rs11678115  | C | -0.0194 |
| rs7571208   | A | 0.0189  |
| rs16824990  | G | 0.0308  |
| rs72792408  | C | 0.0496  |
| rs72794463  | A | 0.0892  |
| rs56410650  | G | 0.0863  |
| rs77700608  | A | -0.0433 |
| rs115983264 | G | 0.0951  |
| rs56326655  | A | -0.0465 |
| rs76324948  | C | 0.1703  |
| rs72915110  | T | -0.1164 |
| rs111333330 | C | -0.0354 |
| rs1220228   | C | 0.0223  |
| rs4953260   | T | -0.0229 |
| rs17553445  | T | 0.0524  |
| rs7589870   | C | 0.0193  |
| rs34663098  | C | -0.0946 |
| rs28597693  | C | 0.0355  |
| rs145311111 | A | 0.1138  |
| rs901225    | A | 0.0336  |
| rs148199835 | T | 0.0863  |
| rs13009455  | A | 0.0213  |
| rs114749634 | G | -0.0965 |
| rs2303496   | T | 0.0269  |
| rs2008776   | T | -0.0189 |
| rs9288373   | A | 0.0231  |
| rs73177685  | T | 0.1021  |
| rs4407290   | A | -0.0523 |
| rs2282743   | A | -0.0307 |
| rs10170054  | A | -0.0333 |
| rs10203099  | A | -0.0837 |
| rs75281882  | G | -0.0852 |
| rs17528324  | A | -0.0414 |
| rs7607447   | T | -0.0273 |
| rs2053671   | G | 0.0363  |
| rs16865795  | T | 0.1142  |
| rs10169617  | C | -0.021  |
| rs12988170  | C | 0.0571  |
| rs77666804  | A | -0.055  |
| rs7578769   | G | -0.0237 |
| rs1425005   | A | -0.0241 |
| rs144796762 | C | -0.102  |
| rs77040483  | T | 0.0436  |
| rs17178608  | C | -0.0599 |
| rs111948214 | A | -0.0794 |

|             |   |         |
|-------------|---|---------|
| rs74717611  | G | -0.058  |
| rs78672879  | G | -0.0834 |
| rs77549335  | T | -0.1744 |
| rs62185323  | G | -0.1145 |
| rs115770141 | C | -0.0878 |
| rs56369254  | G | -0.0506 |
| rs72878695  | T | -0.0249 |
| rs139053856 | C | 0.0969  |
| rs72765587  | C | -0.0322 |
| rs999401    | T | 0.0259  |
| rs6433074   | A | 0.0185  |
| rs34296762  | A | -0.0559 |
| rs1814553   | G | 0.065   |
| rs144601530 | G | 0.1368  |
| rs28545614  | T | 0.0273  |
| rs11681775  | A | -0.0301 |
| rs72892648  | G | -0.1319 |
| rs78867891  | C | -0.0357 |
| rs6708476   | T | 0.0191  |
| rs62173587  | C | 0.1143  |
| rs72953337  | T | -0.0646 |
| rs116272295 | A | 0.1633  |
| rs76804142  | T | 0.1651  |
| rs62171727  | A | -0.0365 |
| rs16864025  | T | -0.0566 |
| rs10164684  | T | -0.0346 |
| rs13409808  | A | 0.0704  |
| rs112801589 | C | 0.0582  |
| rs71446459  | A | -0.0603 |
| rs72817037  | A | 0.0848  |
| rs2867911   | A | 0.0324  |
| rs13026618  | C | -0.0383 |
| rs62110858  | G | 0.0743  |
| rs114259577 | C | -0.1442 |
| rs1320122   | T | -0.0769 |
| rs6717329   | C | -0.019  |
| rs78855203  | T | 0.0472  |
| rs41459254  | C | 0.0198  |
| rs6711300   | G | -0.0551 |
| rs75818618  | C | 0.1392  |
| rs111763616 | A | -0.0797 |
| rs932007    | A | -0.0189 |
| rs10175460  | C | -0.0324 |
| rs62114476  | G | 0.0423  |
| rs12465259  | C | 0.0376  |
| rs13013188  | A | -0.1161 |
| rs58509795  | T | 0.0816  |

|             |   |         |
|-------------|---|---------|
| rs111652057 | A | 0.0616  |
| rs62184386  | T | -0.019  |
| rs67213524  | C | 0.0339  |
| rs4665192   | T | -0.0199 |
| rs74698080  | A | 0.0686  |
| rs72886055  | G | 0.0469  |
| rs13005511  | C | 0.0408  |
| rs7570921   | A | -0.0299 |
| rs145818883 | T | 0.0951  |
| rs76668775  | T | -0.095  |
| rs6431951   | T | -0.0343 |
| rs2193883   | A | -0.0336 |
| rs148192276 | T | 0.1347  |
| rs35114992  | T | -0.0413 |
| rs6747194   | A | -0.0627 |
| rs2159725   | T | 0.0545  |
| rs77445304  | T | 0.0485  |
| rs10169949  | G | 0.0295  |
| rs11889588  | T | -0.0193 |
| rs148816176 | C | 0.0909  |
| rs77076070  | G | -0.0349 |
| rs2139478   | T | -0.0255 |
| rs114779495 | A | 0.1186  |
| rs7355681   | G | -0.0192 |
| rs74935128  | G | 0.0441  |
| rs142730360 | A | 0.1511  |
| rs57070266  | C | -0.0418 |
| rs62174445  | G | -0.0366 |
| rs36117252  | C | 0.0248  |
| rs75767242  | G | 0.1376  |
| rs115383481 | G | -0.1102 |
| rs2007056   | A | 0.0471  |
| rs115890861 | T | -0.1573 |
| rs2419081   | G | 0.0225  |
| rs34745251  | A | 0.0769  |
| rs10469688  | G | -0.0657 |
| rs1540379   | T | -0.0194 |
| rs10189542  | G | 0.04    |
| rs9308992   | A | 0.0206  |
| rs114073612 | A | 0.1302  |
| rs149167927 | G | 0.0983  |
| rs11687437  | G | -0.0251 |
| rs114865519 | G | 0.0769  |
| rs77567457  | A | -0.07   |
| rs77106038  | C | 0.0569  |
| rs35585141  | T | -0.0631 |
| rs12470458  | A | 0.03    |

|             |   |         |
|-------------|---|---------|
| rs10196397  | A | 0.0396  |
| rs79622081  | T | 0.0926  |
| rs76791741  | T | 0.064   |
| rs72856008  | A | -0.0908 |
| rs61752170  | T | -0.1455 |
| rs4675465   | C | -0.0836 |
| rs72829367  | T | 0.0469  |
| rs114081176 | T | -0.0593 |
| rs77679138  | C | -0.0535 |
| rs12995360  | G | 0.0687  |
| rs77963006  | A | 0.0784  |
| rs78059876  | G | -0.0619 |
| rs75338021  | T | -0.0423 |
| rs11884299  | C | -0.0538 |
| rs4972463   | C | 0.0383  |
| rs7578176   | A | 0.0772  |
| rs12620743  | C | -0.03   |
| rs71424808  | G | -0.1229 |
| rs78991270  | A | 0.0445  |
| rs3108980   | A | 0.019   |
| rs11682431  | C | -0.064  |
| rs6756839   | C | 0.0197  |
| rs112786949 | A | 0.0991  |
| rs12996082  | T | -0.0267 |
| rs148430001 | A | -0.1208 |
| rs35041113  | C | -0.0566 |
| rs72840446  | C | 0.0445  |
| rs139270199 | G | -0.1012 |
| rs56382684  | G | -0.0408 |
| rs4312541   | G | 0.0623  |
| rs17864570  | G | -0.063  |
| rs1447194   | A | -0.0313 |
| rs7589392   | T | 0.111   |
| rs55653632  | T | -0.0772 |
| rs4583488   | A | -0.104  |
| rs4473326   | T | -0.0221 |
| rs62127435  | C | 0.0701  |
| rs72932499  | T | -0.034  |
| rs2385536   | G | -0.0342 |
| rs74761554  | C | 0.0495  |
| rs114219826 | A | 0.0846  |
| rs57532747  | A | 0.0674  |
| rs142486983 | C | 0.046   |
| rs111502433 | T | 0.1468  |
| rs4245791   | C | -0.02   |
| rs55821509  | A | 0.0321  |
| rs78117254  | C | 0.1417  |

|             |   |         |
|-------------|---|---------|
| rs994286    | A | -0.0787 |
| rs7594954   | G | 0.0242  |
| rs2901720   | C | 0.0295  |
| rs2464779   | A | -0.0191 |
| rs115661085 | T | -0.0499 |
| rs6717731   | C | 0.0288  |
| rs146765895 | C | 0.058   |
| rs1175865   | T | 0.0286  |
| rs7594257   | A | 0.041   |
| rs10469868  | G | -0.0259 |
| rs13021203  | T | 0.1332  |
| rs140095200 | C | 0.05    |
| rs76889085  | A | 0.0503  |
| rs13005734  | A | -0.0354 |
| rs60797055  | G | 0.0417  |
| rs7588991   | A | -0.029  |
| rs10168327  | A | 0.0598  |
| rs13002439  | T | 0.0669  |
| rs71429137  | A | 0.1328  |
| rs75812932  | T | 0.0796  |
| rs79634932  | G | -0.0384 |
| rs74937873  | C | 0.0932  |
| rs10203779  | T | 0.0235  |
| rs7569513   | C | -0.0494 |
| rs6709509   | A | -0.0471 |
| rs74444079  | A | 0.0646  |
| rs10929518  | G | 0.0196  |
| rs12990483  | C | 0.0205  |
| rs12997129  | C | -0.1238 |
| rs13401572  | A | -0.0337 |
| rs16858880  | A | 0.0472  |
| rs87545     | A | 0.0272  |
| rs12618858  | A | 0.0564  |
| rs35073249  | T | -0.0948 |
| rs80272242  | C | 0.0458  |
| rs114938639 | C | 0.0894  |
| rs2193690   | G | 0.0188  |
| rs75266949  | C | 0.0846  |
| rs76796029  | T | 0.1304  |
| rs35216182  | G | 0.0233  |
| rs62151273  | G | -0.0784 |
| rs72854986  | G | 0.0841  |
| rs114451115 | G | -0.1065 |
| rs115496810 | T | -0.1198 |
| rs6436981   | T | 0.0907  |
| rs72834799  | C | -0.0862 |
| rs12615813  | C | -0.0406 |



|             |   |         |
|-------------|---|---------|
| rs150885521 | G | 0.0664  |
| rs138446931 | A | -0.0798 |
| rs3132026   | C | -0.0544 |
| rs138053377 | A | -0.1603 |
| rs2564051   | T | 0.0189  |
| rs11689433  | T | 0.0295  |
| rs75191025  | A | -0.0667 |
| rs115067970 | C | 0.0626  |
| rs12613889  | C | -0.0759 |
| rs12612138  | G | -0.0243 |
| rs1653798   | C | -0.0218 |
| rs6745822   | T | -0.0753 |
| rs78628219  | T | -0.1045 |
| rs10928420  | G | -0.0292 |
| rs13402721  | T | 0.0375  |
| rs77175858  | C | 0.1051  |
| rs79819857  | A | 0.0604  |
| rs11688022  | C | 0.1201  |
| rs17398191  | T | -0.0454 |
| rs13017759  | A | 0.0842  |
| rs78837821  | T | 0.0298  |
| rs2241757   | A | 0.0206  |
| rs77970431  | A | 0.1334  |
| rs9309204   | A | -0.0726 |
| rs146551537 | A | -0.1181 |
| rs1252062   | C | -0.0393 |
| rs116406494 | A | -0.1398 |
| rs16846571  | G | -0.0357 |
| rs1549346   | A | 0.0653  |
| rs17366322  | G | 0.0189  |
| rs13429054  | C | 0.043   |
| rs148571314 | C | 0.1342  |
| rs142387923 | T | 0.1185  |
| rs994815    | G | -0.0263 |
| rs115137434 | G | 0.0653  |
| rs36062515  | C | 0.0569  |
| rs4667985   | G | -0.0286 |
| rs114529564 | G | -0.1131 |
| rs114884472 | C | -0.0627 |
| rs7582843   | C | 0.023   |
| rs115164546 | G | 0.1235  |
| rs17429154  | G | -0.1162 |
| rs6707988   | A | 0.0209  |
| rs16853022  | T | 0.0733  |
| rs147333484 | A | -0.1056 |
| rs78216223  | C | 0.0584  |
| rs28615318  | G | -0.0767 |

|             |   |         |
|-------------|---|---------|
| rs112839019 | T | 0.0726  |
| rs115844716 | G | 0.0603  |
| rs72871830  | G | -0.0762 |
| rs62177063  | G | 0.0402  |
| rs62204770  | C | 0.079   |
| rs1991966   | C | -0.0367 |
| rs6751789   | G | -0.0347 |
| rs13392409  | G | 0.1084  |
| rs10184543  | T | 0.0727  |
| rs7565180   | C | -0.0248 |
| rs726715    | T | -0.0411 |
| rs17306785  | T | 0.0185  |
| rs849523    | A | 0.0208  |
| rs80234830  | G | -0.1165 |
| rs12986852  | T | -0.0269 |
| rs79413151  | G | 0.0476  |
| rs57310477  | T | 0.0284  |
| rs12465641  | A | 0.0248  |
| rs78615312  | A | 0.0332  |
| rs10171226  | G | 0.0873  |
| rs78514045  | T | 0.1217  |
| rs17647232  | T | -0.0246 |
| rs6715454   | T | 0.019   |
| rs13015456  | C | 0.0201  |
| rs13392400  | C | -0.0607 |
| rs3732339   | A | -0.0964 |
| rs144723707 | A | -0.1426 |
| rs11693327  | C | -0.0277 |
| rs12471396  | T | -0.039  |
| rs114791017 | T | -0.0802 |
| rs79923778  | G | 0.0417  |
| rs35049717  | A | 0.027   |
| rs78163226  | T | 0.0424  |
| rs2675106   | C | 0.0232  |
| rs2082186   | T | -0.0369 |
| rs10185800  | T | -0.0194 |
| rs62124825  | T | 0.0559  |
| rs12162334  | G | 0.0413  |
| rs151249305 | C | 0.0799  |
| rs7597412   | C | 0.0188  |
| rs4849726   | A | -0.0255 |
| rs12997069  | T | 0.0225  |
| rs17019667  | A | 0.098   |
| rs144335740 | C | 0.0739  |
| rs17392134  | G | -0.0245 |
| rs56009510  | C | 0.0658  |
| rs1669469   | T | 0.0973  |

|             |   |         |
|-------------|---|---------|
| rs35694600  | G | -0.0379 |
| rs113477056 | A | 0.0894  |
| rs28363041  | A | 0.1219  |
| rs73949637  | G | 0.0746  |
| rs13017392  | A | 0.0426  |
| rs149591899 | C | 0.1223  |
| rs6735357   | G | 0.0956  |
| rs145805984 | T | 0.0551  |
| rs116469910 | T | 0.1138  |
| rs75706540  | T | 0.1389  |
| rs13432616  | G | 0.0863  |
| rs12998692  | A | 0.0242  |
| rs17190429  | C | 0.0435  |
| rs148112341 | C | -0.129  |
| rs72923811  | C | -0.1097 |
| rs1500998   | C | 0.0205  |
| rs2612699   | T | -0.022  |
| rs872124    | A | -0.0695 |
| rs141578046 | C | 0.1351  |
| rs1530532   | G | 0.0219  |
| rs76486599  | A | 0.039   |
| rs13431915  | T | 0.1004  |
| rs79160692  | A | 0.0862  |
| rs2075285   | T | 0.0294  |
| rs36142576  | C | 0.0636  |
| rs2193615   | G | 0.0183  |
| rs73042206  | G | -0.0583 |
| rs6430813   | A | 0.032   |
| rs3845743   | A | -0.0211 |
| rs12618079  | G | -0.0201 |
| rs11676473  | A | 0.023   |
| rs2041689   | A | -0.0224 |
| rs75639043  | T | -0.0813 |
| rs6708782   | C | -0.0606 |
| rs12995201  | G | 0.0342  |
| rs11680058  | G | 0.0399  |
| rs10930883  | T | 0.0385  |
| rs116564382 | G | 0.0711  |
| rs34186479  | T | -0.0272 |
| rs148051983 | T | 0.0978  |
| rs950817    | G | 0.037   |
| rs112420801 | G | -0.1042 |
| rs7592793   | T | -0.0419 |
| rs7587139   | G | 0.0196  |
| rs10929771  | G | -0.021  |
| rs164942    | G | 0.0222  |
| rs116656703 | A | -0.0898 |

|             |   |         |
|-------------|---|---------|
| rs77248260  | C | -0.0446 |
| rs2099213   | G | -0.0344 |
| rs143194853 | C | -0.049  |
| rs116380454 | C | 0.0339  |
| rs968051    | G | 0.0275  |
| rs115666273 | T | -0.0965 |
| rs115173405 | T | -0.077  |
| rs76812243  | G | 0.0508  |
| rs10175878  | T | 0.0899  |
| rs77019621  | A | 0.0597  |
| rs72823503  | C | 0.1254  |
| rs6740689   | C | 0.0799  |
| rs10177149  | G | -0.0248 |
| rs141127519 | A | -0.1309 |
| rs79456370  | C | -0.056  |
| rs4246586   | G | 0.1143  |
| rs144577796 | A | 0.0757  |
| rs1545523   | A | -0.0186 |
| rs80010668  | C | -0.1122 |
| rs752280    | C | -0.0316 |
| rs2114805   | C | 0.0203  |
| rs58177404  | T | 0.0442  |
| rs56215660  | T | 0.0219  |
| rs11687356  | C | -0.0332 |
| rs149939730 | T | 0.0805  |
| rs62135776  | T | 0.0713  |
| rs1156052   | A | -0.0243 |
| rs144937746 | G | -0.1213 |
| rs7589146   | C | -0.1025 |
| rs62168978  | G | 0.1177  |
| rs10469668  | G | -0.0194 |
| rs116676140 | A | -0.1399 |
| rs139966869 | C | 0.1375  |
| rs13416072  | G | -0.0345 |
| rs148158051 | G | 0.0997  |
| rs7557175   | C | -0.0212 |
| rs138531673 | T | 0.1429  |
| rs7588234   | C | 0.0194  |
| rs72922851  | A | -0.0355 |
| rs62104934  | C | 0.0333  |
| rs1317614   | G | -0.0275 |
| rs7590831   | T | -0.085  |
| rs78540684  | A | 0.0654  |
| rs147256425 | G | -0.1482 |
| rs145710839 | T | 0.0672  |
| rs2116540   | C | 0.0377  |
| rs115032822 | A | 0.0444  |

|             |   |         |
|-------------|---|---------|
| rs116346115 | A | 0.0991  |
| rs6754757   | G | 0.019   |
| rs13399720  | A | 0.1074  |
| rs143496320 | T | -0.033  |
| rs140159630 | C | -0.1173 |
| rs79633423  | A | -0.116  |
| rs143558633 | A | -0.085  |
| rs848625    | A | 0.0316  |
| rs139247563 | A | 0.1017  |
| rs71420890  | G | 0.054   |
| rs7420153   | C | -0.0225 |
| rs10498133  | T | -0.0385 |
| rs115970928 | C | -0.1538 |
| rs78325321  | C | -0.0958 |
| rs116369776 | T | 0.1223  |
| rs72830568  | G | -0.0428 |
| rs10496863  | A | 0.064   |
| rs4392207   | G | -0.0342 |
| rs72796743  | A | 0.131   |
| rs2276588   | A | -0.022  |
| rs2193870   | T | 0.0224  |
| rs35205948  | G | -0.0442 |
| rs75954314  | T | 0.0703  |
| rs78073003  | T | -0.0633 |
| rs111916845 | A | -0.133  |
| rs17860416  | A | 0.0534  |
| rs72948526  | C | 0.0954  |
| rs115123253 | A | -0.1603 |
| rs115288824 | A | 0.0852  |
| rs4952394   | T | -0.0216 |
| rs6748607   | G | 0.0196  |
| rs72878665  | C | -0.0646 |
| rs116651559 | G | 0.0742  |
| rs12694126  | C | 0.0211  |
| rs11682564  | G | -0.0285 |
| rs7605148   | T | -0.0347 |
| rs17758259  | A | -0.0665 |
| rs17769570  | T | -0.0186 |
| rs11904223  | T | 0.0197  |
| rs7558020   | G | -0.0279 |
| rs79585232  | T | -0.1468 |
| rs11681246  | G | 0.0202  |
| rs62181407  | A | -0.0304 |
| rs1441642   | G | 0.0188  |
| rs13032220  | G | 0.0233  |
| rs2288102   | C | -0.0503 |
| rs4662668   | G | -0.023  |

|             |   |         |
|-------------|---|---------|
| rs73942226  | C | 0.0818  |
| rs1518851   | C | 0.1218  |
| rs923453    | A | -0.0282 |
| rs74893382  | C | 0.0478  |
| rs12987759  | T | 0.0268  |
| rs76942133  | A | 0.0745  |
| rs62139606  | C | 0.0893  |
| rs62146072  | C | 0.0988  |
| rs112259539 | A | 0.0787  |
| rs16830312  | A | 0.0579  |
| rs4674131   | G | 0.0555  |
| rs823553    | A | -0.0233 |
| rs7571270   | G | 0.0205  |
| rs114854968 | T | -0.1393 |
| rs13421737  | T | 0.0194  |
| rs6751890   | A | -0.0181 |
| rs68128257  | G | 0.0231  |
| rs16866778  | T | 0.0319  |
| rs145118035 | G | -0.0399 |
| rs10202049  | C | -0.0564 |
| rs11125531  | G | 0.024   |
| rs74936631  | G | 0.143   |
| rs6737025   | A | 0.0244  |
| rs112056738 | C | 0.0649  |
| rs7585164   | T | -0.0391 |
| rs71437701  | G | -0.039  |
| rs114188747 | T | -0.1366 |
| rs74529054  | T | 0.028   |
| rs935866    | G | 0.0183  |
| rs10206629  | C | -0.0247 |
| rs7586592   | C | -0.0264 |
| rs112825379 | T | 0.0644  |
| rs113036274 | C | 0.0912  |
| rs1510733   | G | -0.0231 |
| rs763860    | C | -0.0201 |
| rs112572394 | T | -0.0378 |
| rs11892050  | A | -0.0309 |
| rs10165977  | G | 0.0252  |
| rs13419154  | T | -0.0221 |
| rs114587090 | T | 0.1101  |
| rs10930421  | C | 0.0764  |
| rs140981326 | A | -0.08   |
| rs12476402  | T | -0.0838 |
| rs2941874   | G | -0.0225 |
| rs1563121   | T | 0.0288  |
| rs72774252  | C | 0.0415  |
| rs2451289   | G | -0.0215 |

|             |   |         |
|-------------|---|---------|
| rs78550355  | T | 0.1712  |
| rs75683675  | G | -0.0573 |
| rs62149754  | A | -0.0444 |
| rs7557405   | C | -0.0215 |
| rs75766689  | A | 0.1281  |
| rs73181319  | G | 0.0346  |
| rs113640395 | G | 0.0514  |
| rs77521613  | A | 0.081   |
| rs7564145   | T | 0.0321  |
| rs114843806 | T | -0.0572 |
| rs112459214 | C | -0.0889 |
| rs7581442   | A | -0.0184 |
| rs76209860  | T | -0.045  |
| rs13033669  | A | 0.0464  |
| rs12996040  | T | 0.0291  |
| rs113179456 | T | -0.113  |
| rs2902048   | T | -0.0272 |
| rs9646922   | A | -0.0409 |
| rs74413203  | C | 0.0608  |
| rs17808065  | C | -0.051  |
| rs11686966  | G | 0.0994  |
| rs78702988  | A | 0.0365  |
| rs141220716 | C | 0.1223  |
| rs7581710   | G | -0.033  |
| rs2432940   | A | -0.0201 |
| rs62197904  | A | 0.0266  |
| rs149045575 | G | 0.1108  |
| rs72782805  | G | 0.0728  |
| rs12053034  | A | 0.0181  |
| rs62154025  | A | -0.0344 |
| rs116558660 | C | -0.0757 |
| rs34753100  | T | 0.06    |
| rs6545363   | C | 0.0195  |
| rs17656058  | T | 0.0199  |
| rs10173377  | A | -0.0182 |
| rs35525595  | T | -0.0914 |
| rs75184257  | T | -0.1334 |
| rs2603146   | G | 0.0187  |
| rs114299426 | A | -0.0606 |
| rs116658180 | A | -0.1333 |
| rs113508356 | A | -0.1034 |
| rs41288839  | T | 0.0784  |
| rs1213940   | T | 0.0287  |
| rs72930448  | G | 0.0219  |
| rs7340415   | C | -0.0217 |
| rs7577537   | A | -0.0203 |
| rs61695765  | A | 0.0267  |

|             |   |         |
|-------------|---|---------|
| rs143827828 | G | -0.0824 |
| rs77566478  | A | 0.042   |
| rs6713115   | A | 0.0486  |
| rs76949068  | A | 0.1352  |
| rs113494018 | C | 0.1341  |
| rs61376549  | T | -0.0647 |
| rs75237621  | T | -0.0649 |
| rs62144586  | T | -0.0454 |
| rs148721366 | T | 0.0856  |
| rs10933363  | A | 0.0184  |
| rs116151766 | T | 0.1245  |
| rs4953704   | G | -0.018  |
| rs11903583  | A | 0.0191  |
| rs114105406 | G | 0.0792  |
| rs67232877  | C | -0.05   |
| rs115093807 | G | -0.0844 |
| rs35648980  | A | -0.1044 |
| rs2316145   | T | -0.0217 |
| rs62140668  | A | -0.1649 |
| rs73969722  | C | -0.0814 |
| rs77045036  | G | -0.0281 |
| rs79925773  | T | 0.1201  |
| rs724158    | A | 0.0182  |
| rs1453485   | C | -0.0253 |
| rs75687949  | G | -0.0568 |
| rs77233361  | A | -0.0446 |
| rs6730917   | A | -0.0178 |
| rs9808411   | A | -0.0955 |
| rs72868004  | A | 0.076   |
| rs35639117  | T | 0.024   |
| rs143435618 | A | 0.0975  |
| rs115038454 | A | -0.1476 |
| rs11686584  | G | -0.077  |
| rs17721404  | C | -0.0189 |
| rs74760448  | C | 0.0472  |
| rs707062    | C | -0.0232 |
| rs148923422 | C | -0.1732 |
| rs1562417   | T | 0.0191  |
| rs377892    | T | 0.0189  |
| rs75963148  | T | -0.0704 |
| rs76099009  | T | 0.0286  |
| rs17389324  | T | 0.0208  |
| rs58845751  | G | -0.0303 |
| rs62194975  | G | -0.0236 |
| rs76183383  | T | 0.0432  |
| rs139719008 | C | 0.0926  |
| rs112472602 | T | -0.1393 |



|             |   |         |
|-------------|---|---------|
| rs144013060 | T | 0.0804  |
| rs34888761  | T | -0.0919 |
| rs4521025   | G | 0.019   |
| rs142408201 | A | -0.0746 |
| rs79583214  | C | -0.055  |
| rs2916529   | G | 0.0271  |
| rs111427835 | T | -0.0489 |
| rs10199627  | T | 0.0997  |
| rs958153    | T | 0.0663  |
| rs7586540   | G | 0.0252  |
| rs114197606 | A | 0.0765  |
| rs1174934   | T | -0.0238 |
| rs13409334  | C | 0.0888  |
| rs78570595  | G | -0.0375 |
| rs4894088   | A | -0.0346 |
| rs114941566 | G | -0.1146 |
| rs112121164 | A | -0.0825 |
| rs6760704   | G | -0.0266 |
| rs4663808   | C | 0.0231  |
| rs114846446 | A | 0.0871  |
| rs141626674 | A | 0.1121  |
| rs115444459 | T | 0.1048  |
| rs78361463  | C | -0.0351 |
| rs76959316  | A | -0.0646 |
| rs116682373 | C | -0.0609 |
| rs141941612 | C | -0.13   |
| rs62130330  | A | -0.0712 |
| rs142227921 | G | -0.1445 |
| rs55916505  | C | -0.0738 |
| rs1031091   | G | 0.0189  |
| rs144521506 | G | 0.1045  |
| rs76982332  | T | 0.0751  |
| rs56403886  | T | 0.0181  |
| rs7592342   | T | 0.0193  |
| rs116104592 | C | -0.0779 |
| rs1159673   | C | -0.0234 |
| rs115736862 | A | 0.0687  |
| rs58102695  | C | -0.0404 |
| rs2583004   | G | 0.0899  |
| rs1896287   | T | 0.084   |
| rs80050069  | A | 0.0362  |
| rs74637005  | A | -0.0612 |
| rs74328999  | A | 0.1093  |
| rs17050155  | T | 0.0607  |
| rs144798268 | C | 0.1313  |
| rs7574651   | T | -0.0213 |
| rs476837    | C | -0.028  |

|             |   |         |
|-------------|---|---------|
| rs78859591  | T | 0.1441  |
| rs4669026   | T | -0.0405 |
| rs3912011   | C | -0.0544 |
| rs10932015  | T | -0.0222 |
| rs76954991  | A | -0.1136 |
| rs7573573   | A | 0.0291  |
| rs112756920 | G | 0.0735  |
| rs11681024  | T | -0.052  |
| rs4852091   | C | 0.0291  |
| rs145096174 | T | 0.1472  |
| rs116638260 | T | 0.0684  |
| rs12620484  | A | 0.0179  |
| rs149512659 | A | -0.1209 |
| rs116373412 | C | -0.0997 |
| rs138390012 | C | -0.1087 |
| rs7601087   | A | 0.0447  |
| rs114686809 | T | -0.0968 |
| rs80192418  | A | -0.0665 |
| rs3914723   | T | -0.0244 |
| rs115106058 | C | 0.075   |
| rs74988179  | G | -0.1064 |
| rs4952070   | C | 0.0211  |
| rs72827423  | C | 0.0691  |
| rs144796740 | C | -0.0817 |
| rs75769797  | A | -0.0804 |
| rs115860689 | T | -0.0977 |
| rs11686319  | A | -0.0228 |
| rs2172951   | A | -0.0764 |
| rs4270338   | T | 0.0358  |
| rs17643147  | A | 0.0232  |
| rs7581157   | C | 0.0216  |
| rs72959031  | A | -0.0652 |
| rs12465265  | A | 0.0419  |
| rs111411460 | T | 0.081   |
| rs77678686  | G | -0.0695 |
| rs72771165  | G | -0.0571 |
| rs78582941  | T | 0.1219  |
| rs2034045   | A | 0.0425  |
| rs6434777   | C | 0.0336  |
| rs6714786   | G | 0.0198  |
| rs2681017   | A | 0.0202  |
| rs300784    | C | 0.0824  |
| rs7421942   | T | -0.032  |
| rs79221481  | T | 0.0795  |
| rs138414903 | G | -0.0763 |
| rs243023    | T | -0.0306 |
| rs11886424  | T | -0.0287 |

|             |   |         |
|-------------|---|---------|
| rs74506105  | C | -0.0316 |
| rs140772000 | C | 0.0903  |
| rs10201809  | T | -0.0301 |
| rs72930808  | C | -0.0486 |
| rs35155396  | T | -0.0636 |
| rs137888130 | G | 0.0829  |
| rs115299511 | T | 0.0688  |
| rs146675384 | T | -0.1165 |
| rs1870446   | G | 0.1108  |
| rs79333225  | G | -0.1362 |
| rs825935    | A | -0.077  |
| rs78219496  | A | -0.0523 |
| rs7425201   | T | -0.0208 |
| rs4674390   | G | 0.1256  |
| rs13424110  | T | 0.034   |
| rs11885538  | T | 0.0312  |
| rs35593236  | G | 0.0261  |
| rs12470929  | T | -0.0183 |
| rs11676534  | C | -0.0199 |
| rs141365625 | T | 0.149   |
| rs148934517 | A | -0.0899 |
| rs772436    | C | -0.019  |
| rs138120656 | T | -0.1823 |
| rs142774760 | A | -0.1102 |
| rs142774676 | A | 0.0513  |
| rs7581135   | G | -0.0654 |
| rs73135023  | C | -0.0461 |
| rs80198649  | T | 0.0839  |
| rs76557351  | C | -0.0736 |
| rs72826079  | G | 0.093   |
| rs35641553  | A | 0.0851  |
| rs146981565 | T | -0.0626 |
| rs4664674   | T | -0.0207 |
| rs1522493   | G | -0.0302 |
| rs360278    | A | 0.0635  |
| rs4669467   | T | -0.0275 |
| rs1470524   | A | 0.0218  |
| rs73981468  | G | 0.0487  |
| rs115954444 | A | -0.1143 |
| rs111317159 | G | -0.1059 |
| rs116804012 | A | -0.053  |
| rs116611807 | T | -0.0577 |
| rs7566286   | A | -0.0277 |
| rs143181729 | C | -0.1216 |
| rs11684782  | G | -0.0177 |
| rs7608684   | G | -0.0343 |
| rs236828    | C | -0.032  |

|             |   |         |
|-------------|---|---------|
| rs140100979 | A | 0.1854  |
| rs2171169   | T | -0.0263 |
| rs72780369  | G | 0.1032  |
| rs61283909  | A | 0.021   |
| rs62105848  | A | -0.0373 |
| rs76749969  | G | 0.1313  |
| rs12621443  | G | -0.0205 |
| rs74907227  | A | 0.0797  |
| rs2695412   | A | -0.0474 |
| rs2710630   | T | 0.0185  |
| rs6737886   | A | -0.0205 |
| rs6706807   | A | -0.0385 |
| rs11126491  | A | 0.0277  |
| rs78064179  | T | 0.086   |
| rs115083048 | T | 0.0648  |
| rs144441178 | C | 0.077   |
| rs7603744   | G | 0.0393  |
| rs72782339  | A | 0.0712  |
| rs72780214  | G | -0.0585 |
| rs36088622  | G | 0.1054  |
| rs143300559 | A | -0.0685 |
| rs12712608  | C | 0.0257  |
| rs79374648  | G | -0.0662 |
| rs80340785  | C | 0.0949  |
| rs139810606 | T | 0.0863  |
| rs6739025   | A | 0.0446  |
| rs11684249  | G | 0.0389  |
| rs1851767   | C | -0.0607 |
| rs75421235  | G | -0.0496 |
| rs871458    | A | 0.018   |
| rs116003349 | T | -0.0792 |
| rs35635794  | A | 0.0727  |
| rs77598446  | G | 0.0334  |
| rs112097186 | A | -0.0647 |
| rs78003139  | T | -0.1184 |
| rs7596167   | T | 0.0205  |
| rs17770072  | G | 0.0912  |
| rs149025191 | G | 0.1225  |
| rs17189964  | G | 0.0352  |
| rs8330      | G | -0.0212 |
| rs75366292  | G | -0.1403 |
| rs4665793   | C | -0.0203 |
| rs62132751  | T | 0.0518  |
| rs1083485   | T | -0.0184 |
| rs35576045  | G | -0.1108 |
| rs141758168 | G | 0.098   |
| rs115799947 | T | 0.0942  |

|             |   |         |
|-------------|---|---------|
| rs4633963   | A | -0.0243 |
| rs7564458   | T | -0.0664 |
| rs74968530  | T | -0.0736 |
| rs149754807 | G | -0.0562 |
| rs62159558  | A | 0.0185  |
| rs41347752  | G | 0.1501  |
| rs10929421  | C | 0.0191  |
| rs77429485  | A | -0.134  |
| rs78486947  | A | 0.0873  |
| rs72933317  | T | 0.0323  |
| rs116003305 | A | -0.0638 |
| rs6718248   | G | -0.0222 |
| rs4851791   | A | -0.0204 |
| rs79141900  | C | 0.0468  |
| rs41553213  | A | -0.115  |
| rs62186916  | G | 0.0377  |
| rs74772554  | T | -0.0914 |
| rs74261335  | T | 0.0971  |
| rs3935582   | T | 0.0282  |
| rs116297908 | G | 0.0759  |
| rs1562344   | C | -0.1133 |
| rs116408284 | T | -0.0858 |
| rs143124738 | A | -0.1667 |
| rs79467428  | T | 0.0821  |
| rs11096676  | G | 0.0246  |
| rs17032742  | C | 0.0233  |
| rs77112608  | T | -0.0629 |
| rs62174863  | G | 0.0345  |
| rs2113707   | G | -0.0295 |
| rs116092272 | C | 0.0688  |
| rs4640388   | A | -0.0778 |
| rs111571778 | A | -0.0863 |
| rs3821270   | T | -0.0178 |
| rs77787138  | C | -0.1318 |
| rs6545246   | G | 0.0211  |
| rs112905357 | A | -0.1056 |
| rs10930571  | T | -0.0438 |
| rs111706164 | G | 0.0645  |
| rs4505569   | T | 0.0209  |
| rs12992518  | T | 0.0401  |
| rs144961538 | A | 0.1397  |
| rs11892220  | T | -0.0224 |
| rs111441701 | A | -0.0375 |
| rs139276163 | T | -0.1265 |
| rs114434720 | T | 0.0926  |
| rs860992    | T | 0.0317  |
| rs147233538 | A | -0.1272 |

|             |   |         |
|-------------|---|---------|
| rs1106037   | T | -0.0291 |
| rs115738318 | C | -0.0542 |
| rs75601073  | G | -0.1472 |
| rs6705569   | G | -0.0482 |
| rs57484600  | A | 0.0533  |
| rs115512564 | G | -0.0967 |
| rs114949392 | T | 0.0973  |
| rs1526300   | A | 0.0554  |
| rs78097068  | A | -0.0934 |
| rs75436175  | A | -0.1132 |
| rs17399773  | G | 0.0219  |
| rs74572676  | T | 0.0503  |
| rs72911508  | G | -0.0332 |
| rs4670392   | C | 0.0239  |
| rs80012186  | T | 0.0914  |
| rs77203757  | G | -0.0745 |
| rs115325518 | T | 0.0782  |
| rs79559932  | C | -0.1002 |
| rs3918349   | T | -0.0181 |
| rs11690666  | C | -0.0203 |
| rs12473590  | T | -0.0853 |
| rs7573109   | A | -0.0179 |
| rs35222811  | G | -0.0767 |
| rs116245080 | A | 0.0884  |
| rs115113259 | C | -0.0749 |
| rs840782    | G | -0.1233 |
| rs115579928 | C | 0.0589  |
| rs12616130  | C | -0.0866 |
| rs10169436  | A | 0.0888  |
| rs6739881   | C | 0.0193  |
| rs74635159  | T | 0.0636  |
| rs116514211 | T | -0.0661 |
| rs12993293  | T | -0.0244 |
| rs113565693 | T | -0.075  |
| rs143986343 | T | 0.1152  |
| rs146612138 | C | -0.1286 |
| rs73914230  | G | 0.0747  |
| rs540156    | T | -0.0301 |
| rs17015792  | C | 0.0847  |
| rs62163217  | A | -0.0412 |
| rs35600620  | T | 0.0237  |
| rs75877538  | T | 0.067   |
| rs7566886   | A | 0.0251  |
| rs6759238   | G | 0.0191  |
| rs113292416 | T | 0.0805  |
| rs150604160 | C | -0.088  |
| rs12612386  | A | 0.0566  |

|             |   |         |
|-------------|---|---------|
| rs116089164 | A | 0.0768  |
| rs6739472   | A | -0.02   |
| rs79015600  | A | 0.1321  |
| rs73913009  | G | -0.0632 |
| rs115535976 | G | -0.1022 |
| rs12994269  | A | 0.0279  |
| rs113391101 | G | -0.0433 |
| rs6714469   | G | 0.0353  |
| rs116548607 | A | 0.1058  |
| rs77252721  | A | 0.0517  |
| rs4675247   | C | 0.0182  |
| rs10201420  | G | 0.0285  |
| rs111529517 | A | 0.0881  |
| rs10490327  | A | 0.0241  |
| rs12988529  | C | -0.0306 |
| rs79600925  | G | -0.0558 |
| rs6737677   | G | -0.035  |
| rs149484138 | A | 0.038   |
| rs13016205  | G | 0.024   |
| rs12468549  | A | -0.02   |
| rs76147470  | T | -0.0764 |
| rs62170380  | A | 0.1051  |
| rs33921199  | A | 0.0951  |
| rs13420929  | A | 0.0414  |
| rs62135509  | T | 0.0357  |
| rs148734242 | C | 0.1046  |
| rs74779263  | T | -0.11   |
| rs4663439   | C | -0.0232 |
| rs78317016  | T | 0.112   |
| rs114792701 | T | 0.0984  |
| rs76459791  | G | 0.0716  |
| rs4832492   | A | -0.0336 |
| rs67169505  | C | 0.0267  |
| rs342094    | T | 0.0212  |
| rs114722802 | T | -0.0688 |
| rs74259757  | T | -0.0252 |
| rs1545361   | T | -0.0272 |
| rs145713565 | A | 0.071   |
| rs78199422  | T | -0.0896 |
| rs35678376  | A | -0.0779 |
| rs6761767   | C | 0.0252  |
| rs67254537  | A | -0.1281 |
| rs16866551  | A | -0.0257 |
| rs1875407   | T | -0.0187 |
| rs1430064   | C | -0.0535 |
| rs16830321  | A | 0.1212  |
| rs11685404  | G | 0.0394  |

|             |   |         |
|-------------|---|---------|
| rs72893121  | T | -0.0842 |
| rs2529672   | C | 0.0249  |
| rs10932253  | G | 0.025   |
| rs4672663   | A | 0.0768  |
| rs62188361  | G | 0.1541  |
| rs77426475  | A | 0.1138  |
| rs148261534 | C | 0.0276  |
| rs9798063   | A | -0.0193 |
| rs13023358  | C | -0.0658 |
| rs150128644 | T | -0.1203 |
| rs35540299  | C | 0.0596  |
| rs17046706  | A | 0.0793  |
| rs10175237  | G | 0.1007  |
| rs75928968  | G | -0.0345 |
| rs113803613 | G | -0.1225 |
| rs147398252 | T | 0.0819  |
| rs115448074 | C | -0.1066 |
| rs13030056  | T | -0.021  |
| rs7599508   | T | -0.0249 |
| rs72846187  | C | 0.0797  |
| rs9288697   | T | 0.063   |
| rs113022159 | A | -0.1077 |
| rs17486311  | G | -0.0295 |
| rs13421114  | A | 0.0359  |
| rs116767171 | C | 0.0773  |
| rs2366815   | T | 0.0615  |
| rs12472530  | T | -0.0215 |
| rs10199376  | C | -0.0236 |
| rs6717451   | T | 0.0209  |
| rs996409    | T | -0.0204 |
| rs17443836  | A | -0.0176 |
| rs4233891   | T | 0.0223  |
| rs12621331  | G | 0.0247  |
| rs149962669 | A | 0.0631  |
| rs149162860 | A | 0.0751  |
| rs72864884  | A | 0.1838  |
| rs4516411   | G | 0.0349  |
| rs13023404  | T | 0.1178  |
| rs12694724  | A | 0.0272  |
| rs115170316 | A | 0.1272  |
| rs4670725   | G | 0.0377  |
| rs72807080  | G | -0.1225 |
| rs13400180  | T | 0.1052  |
| rs72836335  | A | 0.039   |
| rs76228387  | C | 0.0548  |
| rs12622156  | A | -0.0254 |
| rs12624314  | T | 0.0313  |



|             |   |         |
|-------------|---|---------|
| rs142564661 | T | -0.1129 |
| rs163512    | A | 0.0354  |
| rs114273606 | A | -0.0942 |
| rs77101307  | T | -0.0766 |
| rs114255478 | G | 0.0815  |
| rs78476823  | A | 0.1354  |
| rs113311818 | G | -0.0869 |
| rs113303245 | A | 0.038   |
| rs759437    | A | -0.0245 |
| rs11125981  | A | -0.0222 |
| rs78144564  | G | -0.043  |
| rs55999637  | C | 0.0253  |
| rs72849133  | G | -0.0832 |
| rs6432616   | C | 0.018   |
| rs9917212   | G | 0.0445  |
| rs115560404 | C | 0.0869  |
| rs6740991   | G | 0.0211  |
| rs62189553  | T | -0.0852 |
| rs3861566   | C | -0.0206 |
| rs35440638  | T | -0.148  |
| rs75292120  | A | -0.0551 |
| rs72809577  | C | 0.1829  |
| rs146809504 | C | -0.0737 |
| rs57596395  | G | 0.0389  |
| rs77590241  | A | 0.0868  |
| rs139240210 | C | 0.0407  |
| rs6711018   | G | -0.0217 |
| rs13016931  | G | -0.0223 |
| rs10183654  | T | 0.0352  |
| rs2008412   | C | 0.0228  |
| rs116399284 | T | 0.0933  |
| rs1965134   | T | 0.0843  |
| rs78923181  | C | 0.0666  |
| rs62145993  | A | 0.0698  |
| rs112904177 | A | -0.0476 |
| rs114040198 | A | -0.1172 |
| rs75660939  | C | 0.0942  |
| rs79874846  | G | 0.0577  |
| rs76484003  | G | 0.0442  |
| rs35187885  | T | 0.1024  |
| rs13030720  | T | -0.0701 |
| rs115491188 | G | -0.0781 |
| rs12476966  | C | -0.0897 |
| rs6737276   | A | -0.0351 |
| rs7573581   | A | -0.0319 |
| rs116386796 | A | 0.0851  |
| rs1246015   | A | 0.0549  |

|             |   |         |
|-------------|---|---------|
| rs1190434   | C | 0.0331  |
| rs66625329  | A | -0.0187 |
| rs34864496  | T | 0.0346  |
| rs72820641  | A | 0.0625  |
| rs116803649 | A | -0.1081 |
| rs13031615  | C | 0.0188  |
| rs4668381   | C | -0.0293 |
| rs12329201  | C | 0.0316  |
| rs12468025  | T | 0.0204  |
| rs3771871   | T | -0.0307 |
| rs78893788  | A | -0.0799 |
| rs13385237  | T | 0.0332  |
| rs113855709 | T | -0.092  |
| rs34660574  | A | -0.0962 |
| rs62139969  | A | 0.102   |
| rs56413330  | A | 0.1517  |
| rs543727    | T | -0.0228 |
| rs77829440  | T | 0.0845  |
| rs78512930  | T | -0.0893 |
| rs11123646  | C | 0.02    |
| rs35459674  | C | 0.0346  |
| rs11900260  | A | -0.1497 |
| rs10177861  | A | 0.02    |
| rs34593440  | T | 0.0383  |
| rs139965814 | T | -0.103  |
| rs1179722   | T | 0.0201  |
| rs141291681 | G | 0.129   |
| rs112138355 | C | -0.1224 |
| rs115209209 | A | 0.1037  |
| rs35278637  | G | 0.073   |
| rs138839892 | T | -0.1652 |
| rs12328204  | C | -0.0181 |
| rs115718260 | C | 0.069   |
| rs843661    | C | -0.0321 |
| rs11684560  | A | 0.022   |
| rs10206316  | G | -0.0252 |
| rs3739116   | G | -0.0236 |
| rs1836721   | T | 0.0346  |
| rs1135791   | A | -0.0173 |
| rs34862026  | G | 0.0539  |
| rs34816465  | C | -0.0581 |
| rs77506483  | G | 0.078   |
| rs138254801 | G | 0.065   |
| rs17608242  | G | -0.101  |
| rs72951600  | A | -0.0308 |
| rs35879921  | T | 0.0423  |
| rs6722480   | A | 0.0484  |

|             |   |         |
|-------------|---|---------|
| rs74920878  | A | 0.0823  |
| rs146766284 | G | -0.0943 |
| rs148565219 | G | 0.1098  |
| rs139266972 | T | -0.0766 |
| rs141214846 | A | 0.166   |
| rs2118906   | G | 0.0314  |
| rs72833852  | C | -0.0334 |
| rs77291452  | C | 0.0601  |
| rs142820032 | C | -0.0993 |
| rs75356866  | T | -0.0754 |
| rs13394647  | G | -0.0922 |
| rs139854978 | C | 0.074   |
| rs59540391  | T | -0.0715 |
| rs10209954  | C | -0.0207 |
| rs76845405  | T | 0.0477  |
| rs2001872   | G | -0.0241 |
| rs75386488  | G | 0.1224  |
| rs79973203  | C | 0.1154  |
| rs116457567 | C | 0.0741  |
| rs1112611   | A | 0.0247  |
| rs114674167 | A | -0.1323 |
| rs111305583 | T | 0.0606  |
| rs66706988  | G | -0.0872 |
| rs74444355  | T | 0.0849  |
| rs75845312  | T | -0.0312 |
| rs147807540 | C | 0.1146  |
| rs2672107   | A | 0.0439  |
| rs140881457 | C | 0.0809  |
| rs145159244 | T | 0.1134  |
| rs116794726 | C | 0.0419  |
| rs6746395   | T | 0.0196  |
| rs6712575   | C | -0.0245 |
| rs1821698   | T | 0.039   |
| rs12465689  | T | -0.0221 |
| rs11895936  | A | 0.0193  |
| rs62190900  | T | 0.0264  |
| rs4671977   | C | 0.018   |
| rs62167042  | A | 0.0361  |
| rs16843304  | C | 0.0506  |
| rs11895509  | A | 0.0309  |
| rs78058370  | T | -0.0568 |
| rs1053807   | A | -0.0171 |
| rs12464342  | G | 0.0185  |
| rs16862062  | G | 0.0194  |
| rs7558365   | A | 0.022   |
| rs72910744  | G | -0.0732 |
| rs115122012 | T | -0.094  |

|             |   |         |
|-------------|---|---------|
| rs17270407  | C | 0.0288  |
| rs4675467   | C | -0.0215 |
| rs291334    | A | 0.0201  |
| rs13029274  | A | -0.0351 |
| rs115430077 | G | 0.1241  |
| rs4646334   | A | -0.0641 |
| rs72939915  | A | -0.036  |
| rs144335135 | T | -0.0663 |
| rs11694498  | A | 0.0187  |
| rs61405503  | T | 0.0378  |
| rs62173526  | G | -0.0406 |
| rs10929053  | C | -0.0363 |
| rs11676103  | A | -0.038  |
| rs67418057  | A | -0.0458 |
| rs116573286 | C | -0.0924 |
| rs56310582  | A | -0.0184 |
| rs6719103   | A | 0.0713  |
| rs146901930 | A | 0.1236  |
| rs79832257  | C | 0.0602  |
| rs71429764  | A | -0.0561 |
| rs1518662   | A | -0.0424 |
| rs76142591  | C | -0.0834 |
| rs17366146  | A | 0.0625  |
| rs4669027   | T | -0.0293 |
| rs75441806  | G | -0.064  |
| rs147933438 | T | 0.1209  |
| rs79785694  | T | -0.1133 |
| rs6761374   | G | -0.0255 |
| rs12328191  | T | -0.0651 |
| rs76846591  | A | 0.0826  |
| rs76034921  | C | -0.1035 |
| rs34823620  | C | 0.0246  |
| rs13023828  | G | 0.0204  |
| rs138148855 | A | 0.1013  |
| rs6724274   | G | 0.0217  |
| rs55767232  | G | -0.0309 |
| rs76605966  | C | -0.0924 |
| rs72831697  | C | 0.0421  |
| rs3213891   | G | -0.0802 |
| rs11889580  | C | -0.018  |
| rs1991108   | T | 0.0246  |
| rs2066946   | T | 0.0195  |
| rs149839961 | A | 0.101   |
| rs908613    | T | -0.0679 |
| rs114816804 | G | -0.1456 |
| rs17032271  | G | -0.0588 |
| rs6722082   | T | 0.0636  |

|             |   |         |
|-------------|---|---------|
| rs62128611  | A | 0.0182  |
| rs80168430  | T | -0.0915 |
| rs7597314   | A | 0.0269  |
| rs17645700  | C | -0.0224 |
| rs9808399   | G | 0.0426  |
| rs111911523 | T | 0.1015  |
| rs77677395  | T | -0.0869 |
| rs13032367  | C | 0.0301  |
| rs10196150  | C | -0.0214 |
| rs1608992   | T | 0.02    |
| rs113488924 | A | -0.0346 |
| rs147404285 | A | -0.0256 |
| rs13426177  | C | 0.0208  |
| rs2244166   | A | -0.0232 |
| rs146420876 | T | 0.1272  |
| rs12620572  | T | -0.0262 |
| rs79457011  | G | -0.1143 |
| rs72958352  | T | -0.096  |
| rs13385093  | C | 0.0239  |
| rs112873448 | G | -0.0988 |
| rs78064456  | A | -0.0653 |
| rs71424176  | A | 0.0551  |
| rs34234933  | T | -0.0438 |
| rs78088381  | G | 0.1346  |
| rs2884241   | C | 0.033   |
| rs80228335  | A | 0.0925  |
| rs1527986   | G | 0.0236  |
| rs11690456  | G | 0.0279  |
| rs140631586 | T | -0.0685 |
| rs80286886  | C | -0.1289 |
| rs11890306  | T | 0.0178  |
| rs77431197  | G | 0.0758  |
| rs13411455  | A | -0.027  |
| rs35031440  | T | -0.06   |
| rs17437573  | C | -0.0592 |
| rs114995875 | G | 0.0935  |
| rs12476892  | A | -0.0262 |
| rs13009589  | T | 0.0604  |
| rs56032614  | T | 0.0458  |
| rs12475029  | T | 0.0223  |
| rs112918095 | A | -0.1286 |
| rs35241844  | C | -0.0845 |
| rs7565887   | T | -0.0174 |
| rs7595691   | G | -0.0338 |
| rs74822488  | G | -0.0412 |
| rs6725845   | C | 0.1042  |
| rs114337548 | T | -0.0595 |

|             |   |         |
|-------------|---|---------|
| rs17019581  | C | 0.0273  |
| rs148611436 | C | 0.109   |
| rs9789668   | T | 0.0207  |
| rs10165788  | G | -0.0244 |
| rs6723028   | C | -0.0331 |
| rs581667    | C | 0.0525  |
| rs1613177   | A | -0.0243 |
| rs61619469  | C | 0.0232  |
| rs113681266 | G | -0.0343 |
| rs55654888  | A | -0.0424 |
| rs16858115  | C | -0.0422 |
| rs79656435  | C | -0.0451 |
| rs114488020 | T | 0.1079  |
| rs28615562  | T | -0.0204 |
| rs80277185  | C | -0.1019 |
| rs884401    | C | -0.0183 |
| rs143025457 | A | 0.0961  |
| rs16850062  | G | 0.1038  |
| rs4664833   | T | 0.0172  |
| rs1967279   | A | -0.058  |
| rs1818750   | C | -0.1273 |
| rs28497374  | G | 0.1253  |
| rs114905448 | T | -0.0871 |
| rs1920526   | G | 0.0174  |
| rs12473256  | C | 0.0831  |
| rs139546911 | G | -0.0818 |
| rs34986597  | C | -0.0327 |
| rs11690499  | A | 0.0257  |
| rs112949671 | G | 0.1186  |
| rs250906    | A | 0.0725  |
| rs149974747 | T | -0.046  |
| rs7422681   | C | -0.053  |
| rs3087621   | A | -0.0564 |
| rs34838955  | T | 0.0275  |
| rs72813606  | T | 0.0943  |
| rs112953586 | A | -0.1477 |
| rs930976    | T | -0.0228 |
| rs114564130 | C | -0.0668 |
| rs2361503   | A | 0.0176  |
| rs116780213 | T | -0.0631 |
| rs12993942  | G | -0.0193 |
| rs1448574   | T | 0.0219  |
| rs10208199  | A | -0.0172 |
| rs116584359 | C | -0.0694 |
| rs10211170  | A | -0.0202 |
| rs62169038  | A | -0.0952 |
| rs13034699  | T | -0.0717 |

|             |   |         |
|-------------|---|---------|
| rs145281736 | C | 0.1098  |
| rs142004676 | T | -0.0683 |
| rs114422749 | C | -0.0957 |
| rs17011719  | G | -0.051  |
| rs4676431   | G | -0.0279 |
| rs62104203  | T | -0.029  |
| rs62156351  | T | -0.0381 |
| rs77954592  | T | 0.1339  |
| rs11688164  | C | -0.0278 |
| rs7583682   | C | 0.0269  |
| rs6727913   | G | 0.0193  |
| rs116144080 | T | 0.0644  |
| rs340764    | G | 0.0179  |
| rs74706501  | A | -0.0554 |
| rs77718084  | C | -0.1101 |
| rs10197216  | T | 0.0352  |
| rs114530458 | C | -0.0556 |
| rs115433021 | G | -0.0641 |
| rs17019163  | C | 0.0539  |
| rs1595774   | G | -0.0182 |
| rs11685144  | C | 0.0418  |
| rs4611657   | C | 0.0215  |
| rs6733209   | A | 0.0312  |
| rs6435658   | T | 0.0182  |
| rs56325852  | A | -0.0849 |
| rs6436723   | T | 0.0243  |
| rs13035396  | A | 0.0176  |
| rs77813971  | A | 0.0646  |
| rs145747631 | A | 0.0991  |
| rs74324298  | A | -0.0753 |
| rs115229041 | C | -0.1374 |
| rs71430665  | C | -0.1168 |
| rs112889166 | A | -0.0787 |
| rs79684656  | G | -0.0946 |
| rs75495619  | C | 0.075   |
| rs17033360  | C | 0.076   |
| rs13411322  | T | -0.0271 |
| rs62139990  | A | 0.1146  |
| rs4430998   | G | 0.0216  |
| rs7589120   | T | 0.0187  |
| rs12473835  | A | -0.0459 |
| rs145116513 | C | 0.126   |
| rs2627775   | T | -0.0177 |
| rs56146083  | G | -0.0294 |
| rs13398525  | A | 0.0454  |
| rs74717561  | C | 0.1359  |
| rs114558467 | C | 0.0694  |

|             |   |         |
|-------------|---|---------|
| rs113428475 | G | 0.07    |
| rs112129162 | T | 0.0361  |
| rs1344696   | T | -0.023  |
| rs2345720   | A | -0.1408 |
| rs57832934  | G | -0.0969 |
| rs7605995   | A | -0.0197 |
| rs74861521  | A | -0.1295 |
| rs74553688  | T | 0.0796  |
| rs17197695  | C | 0.099   |
| rs114431440 | T | -0.1194 |
| rs114965479 | T | 0.0939  |
| rs11127228  | T | -0.0188 |
| rs6728356   | A | 0.0171  |
| rs7582886   | C | 0.1076  |
| rs77431084  | G | -0.0255 |
| rs72916864  | C | 0.0548  |
| rs6713480   | G | 0.0198  |
| rs77746969  | C | -0.0976 |
| rs11688735  | C | 0.0479  |
| rs1430100   | G | -0.0176 |
| rs13007666  | A | 0.0219  |
| rs78403134  | A | -0.0558 |
| rs10197393  | T | 0.0178  |
| rs56319212  | G | -0.0285 |
| rs7608196   | T | -0.0209 |
| rs145150446 | T | -0.1352 |
| rs6722057   | A | -0.0328 |
| rs818010    | G | 0.0981  |
| rs111745445 | C | -0.02   |
| rs112547779 | A | -0.05   |
| rs17363260  | C | 0.029   |
| rs144460868 | T | -0.1727 |
| rs12613960  | A | 0.0196  |
| rs114674704 | A | -0.0903 |
| rs113764134 | A | -0.0277 |
| rs74535603  | C | 0.1145  |
| rs1250083   | G | 0.1448  |
| rs116037646 | C | 0.0827  |
| rs17012004  | C | -0.0206 |
| rs146895410 | A | -0.0824 |
| rs13413624  | A | -0.0568 |
| rs141820015 | A | -0.0762 |
| rs74603953  | A | 0.0903  |
| rs79222455  | G | 0.1107  |
| rs113389790 | A | 0.1272  |
| rs115653473 | G | -0.0682 |
| rs11902652  | G | -0.0274 |



|             |   |         |
|-------------|---|---------|
| rs35527763  | G | -0.0743 |
| rs13388785  | T | -0.0404 |
| rs114221830 | A | 0.072   |
| rs6725430   | G | -0.0791 |
| rs1477517   | G | 0.0181  |
| rs75889529  | C | -0.0627 |
| rs16864498  | A | -0.0446 |
| rs10170009  | T | -0.0232 |
| rs6722666   | A | 0.118   |
| rs4246608   | T | 0.0315  |
| rs34269923  | G | 0.0377  |
| rs13015442  | T | -0.0743 |
| rs78819760  | G | 0.0995  |
| rs1355419   | C | -0.0382 |
| rs714616    | C | -0.0208 |
| rs62195964  | T | 0.0923  |
| rs923889    | G | -0.0217 |
| rs78882783  | C | 0.0672  |
| rs12712112  | A | -0.0173 |
| rs115732536 | A | 0.0531  |
| rs7604908   | G | -0.0197 |
| rs62137397  | C | -0.0937 |
| rs17038027  | T | -0.0579 |
| rs147922397 | T | 0.0567  |
| rs71415405  | A | 0.0919  |
| rs73003595  | T | -0.0737 |
| rs6741790   | C | -0.0172 |
| rs148393549 | C | 0.1261  |
| rs4500936   | T | 0.0196  |
| rs11677870  | A | -0.0438 |
| rs138465819 | G | -0.079  |
| rs72833860  | C | 0.1603  |
| rs4668229   | T | -0.0751 |
| rs7592453   | C | 0.0201  |
| rs3731789   | T | 0.0294  |
| rs9283513   | C | 0.0191  |
| rs72800426  | T | -0.0681 |
| rs79126431  | T | -0.0533 |
| rs3111777   | A | -0.0286 |
| rs62124787  | C | -0.0308 |
| rs6704630   | C | -0.0298 |
| rs2580343   | A | 0.0179  |
| rs7566632   | G | 0.0239  |
| rs61613914  | A | 0.061   |
| rs141216273 | A | -0.0468 |
| rs45611940  | C | -0.0255 |
| rs11692611  | G | -0.0821 |

|             |   |         |
|-------------|---|---------|
| rs111894716 | T | -0.0568 |
| rs148895303 | G | 0.1562  |
| rs137900675 | C | -0.1407 |
| rs6431485   | T | 0.0192  |
| rs116732878 | A | 0.1002  |
| rs138095198 | G | 0.0968  |
| rs4074806   | C | -0.0236 |
| rs17504249  | A | 0.0233  |
| rs17764739  | A | 0.0519  |
| rs6548149   | C | 0.0253  |
| rs10197142  | C | 0.0273  |
| rs41272653  | C | 0.0475  |
| rs116346698 | C | -0.0568 |
| rs114793167 | A | 0.0604  |
| rs1723487   | T | 0.0232  |
| rs115834716 | A | -0.1259 |
| rs7579595   | G | 0.0292  |
| rs147442295 | T | 0.0647  |
| rs143567124 | T | -0.0363 |
| rs150114273 | G | -0.145  |
| rs6419588   | C | -0.0227 |
| rs10181064  | T | 0.0204  |
| rs111844372 | C | -0.1758 |
| rs72795609  | C | -0.1247 |
| rs6708920   | A | -0.0173 |
| rs66476363  | G | 0.0565  |
| rs72855110  | A | -0.0762 |
| rs921683    | C | 0.0184  |
| rs13415352  | G | -0.0803 |
| rs115986116 | T | 0.1078  |
| rs6712439   | A | -0.029  |
| rs13405086  | A | -0.0205 |
| rs77775343  | A | -0.0286 |
| rs17210341  | T | 0.0457  |
| rs148970274 | T | -0.0835 |
| rs13417499  | T | -0.0238 |
| rs17251700  | A | 0.0678  |
| rs115548066 | C | -0.0925 |
| rs35283549  | T | -0.051  |
| rs903760    | C | 0.0333  |
| rs6751458   | A | -0.0215 |
| rs62126860  | G | 0.0609  |
| rs11903474  | T | 0.0987  |
| rs7569072   | T | 0.0763  |
| rs150990131 | T | 0.1084  |
| rs55928538  | C | 0.0532  |
| rs13406562  | T | -0.0407 |

|             |   |         |
|-------------|---|---------|
| rs113093975 | T | 0.0264  |
| rs114008673 | T | -0.0845 |
| rs1296528   | A | 0.0263  |
| rs6743274   | A | 0.0325  |
| rs66663409  | A | 0.0544  |
| rs116058562 | A | 0.0869  |
| rs13023804  | G | 0.0731  |
| rs3791399   | A | -0.0181 |
| rs116603385 | G | -0.0719 |
| rs79838727  | T | 0.1334  |
| rs77146183  | A | -0.0426 |
| rs74653572  | T | 0.0963  |
| rs4511663   | T | 0.0182  |
| rs6724138   | A | -0.023  |
| rs72823384  | A | -0.0961 |
| rs79400510  | T | 0.0733  |
| rs6755608   | T | 0.0303  |
| rs72835177  | C | -0.1002 |
| rs74847383  | G | -0.0287 |
| rs1485980   | G | 0.0341  |
| rs72956062  | A | -0.132  |
| rs938907    | A | 0.0214  |
| rs181129    | G | 0.0201  |
| rs74445599  | C | 0.0232  |
| rs62185679  | A | -0.036  |
| rs34528309  | T | 0.0265  |
| rs10177915  | G | 0.0715  |
| rs115502690 | A | 0.0443  |
| rs10179718  | T | -0.0183 |
| rs12472710  | G | 0.0313  |
| rs72845873  | A | -0.0471 |
| rs113633963 | G | 0.129   |
| rs114574662 | G | 0.1176  |
| rs79680225  | A | 0.1274  |
| rs147689030 | T | -0.1258 |
| rs76424400  | C | 0.1308  |
| rs10166817  | C | -0.0453 |
| rs306155    | A | -0.0254 |
| rs10189862  | A | 0.0239  |
| rs17323117  | G | 0.0334  |
| rs79094107  | A | 0.0972  |
| rs11677927  | A | 0.0197  |
| rs17033787  | T | 0.0202  |
| rs10496552  | A | -0.0255 |
| rs141869884 | C | 0.1245  |
| rs115152764 | A | -0.0518 |
| rs76755282  | C | 0.0354  |

|             |   |         |
|-------------|---|---------|
| rs17817547  | C | 0.041   |
| rs10175273  | C | 0.0191  |
| rs6761555   | A | 0.0227  |
| rs6713187   | G | 0.0531  |
| rs144340094 | T | 0.0634  |
| rs75103862  | G | 0.073   |
| rs72813868  | A | -0.0585 |
| rs13015144  | T | -0.0177 |
| rs2968828   | A | -0.0322 |
| rs10928453  | G | 0.0227  |
| rs16860330  | T | 0.0607  |
| rs13426447  | G | 0.0238  |
| rs72968368  | A | -0.0724 |
| rs113493391 | T | 0.1218  |
| rs77723314  | T | -0.0667 |
| rs112280995 | T | 0.1205  |
| rs111339122 | T | -0.0306 |
| rs115647240 | C | -0.0476 |
| rs80303428  | G | -0.1081 |
| rs953044    | G | 0.0179  |
| rs62150814  | A | 0.0713  |
| rs150863183 | G | 0.0907  |
| rs7577929   | C | 0.0269  |
| rs34337994  | T | -0.0591 |
| rs11904274  | T | 0.0842  |
| rs34930495  | G | -0.0483 |
| rs72806760  | A | 0.0247  |
| rs11690621  | T | -0.0237 |
| rs6714416   | G | -0.0309 |
| rs72960910  | G | 0.0908  |
| rs6752450   | G | 0.0199  |
| rs76657301  | A | -0.063  |
| rs17023236  | C | 0.0234  |
| rs6726305   | G | -0.0172 |
| rs113164179 | T | -0.0635 |
| rs143737839 | G | -0.0674 |
| rs111779814 | C | 0.05    |
| rs78654231  | C | -0.057  |
| rs17015772  | T | 0.0697  |
| rs7604243   | A | 0.02    |
| rs6757173   | C | -0.0322 |
| rs6750513   | G | 0.0458  |
| rs12477831  | G | 0.0195  |
| rs11124002  | T | -0.0213 |
| rs13417480  | C | 0.0216  |
| rs62185204  | C | 0.0557  |
| rs2139163   | A | -0.0269 |

|             |   |         |
|-------------|---|---------|
| rs1991869   | C | 0.0317  |
| rs11896326  | C | 0.0375  |
| rs34188084  | A | -0.033  |
| rs148210140 | G | -0.1446 |
| rs80226914  | T | 0.1123  |
| rs147300311 | T | -0.1468 |
| rs6433504   | G | -0.0711 |
| rs13414787  | T | -0.0225 |
| rs116091962 | A | -0.1002 |
| rs6753358   | T | 0.0236  |
| rs2218084   | T | -0.0229 |
| rs76771408  | A | -0.06   |
| rs150932778 | A | -0.1172 |
| rs78127689  | T | 0.0676  |
| rs141531336 | A | -0.0396 |
| rs4952611   | C | -0.0197 |
| rs58569264  | C | -0.0367 |
| rs11685096  | T | 0.0525  |
| rs144637666 | G | 0.0731  |
| rs11675092  | A | -0.0321 |
| rs6732006   | A | 0.0346  |
| rs113652195 | T | 0.0931  |
| rs996899    | T | -0.0176 |
| rs12478175  | T | 0.0238  |
| rs4673695   | G | -0.0291 |
| rs72974552  | A | 0.1008  |
| rs149023903 | A | 0.0686  |
| rs7606197   | A | 0.0192  |
| rs4416268   | C | -0.0185 |
| rs62139718  | A | 0.0265  |
| rs74497800  | A | -0.0512 |
| rs13002354  | C | -0.066  |
| rs6743511   | C | -0.0951 |
| rs154962    | A | -0.0211 |
| rs17272806  | G | 0.0296  |
| rs10200259  | A | -0.0188 |
| rs2377910   | T | -0.018  |
| rs79943846  | T | 0.0371  |
| rs34991391  | C | -0.0822 |
| rs11688702  | G | -0.0233 |
| rs56725436  | T | 0.0351  |
| rs2406603   | T | -0.0861 |
| rs58563434  | A | -0.0892 |
| rs62171092  | G | -0.0591 |
| rs12693068  | C | 0.0183  |
| rs1559592   | T | 0.0206  |
| rs72955832  | G | 0.0504  |

|             |   |         |
|-------------|---|---------|
| rs149686248 | C | 0.0204  |
| rs62195521  | T | 0.0715  |
| rs144765519 | T | -0.0485 |
| rs10188830  | C | 0.0934  |
| rs62135622  | C | 0.0627  |
| rs13426682  | G | 0.0549  |
| rs62171547  | A | -0.0253 |
| rs7561960   | A | 0.0345  |
| rs4854382   | T | -0.0222 |
| rs72770569  | C | -0.1151 |
| rs116663214 | G | -0.047  |
| rs141315299 | A | -0.0853 |
| rs147356598 | T | 0.1149  |
| rs13414400  | A | 0.0295  |
| rs76648889  | A | 0.0613  |
| rs76572765  | C | 0.052   |
| rs75133708  | C | 0.0497  |
| rs59244579  | G | 0.0289  |
| rs62188661  | A | 0.0519  |
| rs116264366 | A | 0.0447  |
| rs4670536   | C | -0.0364 |
| rs114700502 | G | -0.0529 |
| rs17039907  | A | 0.049   |
| rs62118154  | T | -0.0551 |
| rs75225945  | T | -0.0261 |
| rs218203    | C | 0.0377  |
| rs7571171   | A | 0.0333  |
| rs6734627   | G | 0.0183  |
| rs72864893  | C | -0.0514 |
| rs28378381  | G | 0.017   |
| rs115623760 | T | 0.1117  |
| rs78436706  | A | -0.0454 |
| rs4530296   | T | 0.0175  |
| rs35041786  | C | -0.0407 |
| rs10192683  | C | 0.0347  |
| rs11693138  | A | 0.0368  |
| rs72771242  | C | 0.1145  |
| rs34050034  | G | 0.0298  |
| rs115321343 | C | 0.1402  |
| rs7557554   | T | -0.0203 |
| rs74577509  | T | 0.0688  |
| rs114063308 | G | 0.0527  |
| rs34388729  | A | -0.0701 |
| rs1424662   | T | 0.1127  |
| rs10176635  | G | 0.0338  |
| rs116421069 | A | 0.0711  |
| rs6734008   | T | -0.0239 |

|             |   |         |
|-------------|---|---------|
| rs78629082  | C | 0.0302  |
| rs78467190  | A | 0.0884  |
| rs2924796   | G | 0.0423  |
| rs3732063   | G | 0.03    |
| rs16865274  | T | -0.0265 |
| rs7607740   | C | 0.0171  |
| rs10181967  | C | 0.0196  |
| rs11686267  | A | 0.0463  |
| rs13423088  | A | -0.0186 |
| rs72801497  | G | -0.0709 |
| rs12611664  | C | 0.0793  |
| rs1900769   | A | 0.02    |
| rs10184437  | A | -0.0198 |
| rs3821261   | C | 0.0326  |
| rs77989798  | C | -0.0812 |
| rs1283773   | G | 0.0242  |
| rs73013478  | T | 0.0306  |
| rs74635032  | G | 0.0437  |
| rs12052795  | G | 0.0302  |
| rs6543806   | A | 0.0326  |
| rs115459692 | A | -0.0782 |
| rs116555100 | T | 0.066   |
| rs12987785  | A | 0.0939  |
| rs76624346  | C | -0.0754 |
| rs114554135 | G | -0.0716 |
| rs2053708   | C | 0.0342  |
| rs138671324 | A | 0.0951  |
| rs2609945   | A | 0.0226  |
| rs11674929  | T | 0.041   |
| rs75362272  | G | 0.0896  |
| rs4851944   | C | -0.0227 |
| rs142437693 | A | 0.0968  |
| rs55955386  | T | 0.0706  |
| rs6760182   | C | -0.0616 |
| rs144651094 | G | 0.057   |
| rs16844724  | A | -0.0392 |
| rs12621276  | A | -0.0192 |
| rs75258431  | C | -0.1285 |
| rs13382533  | A | 0.0501  |
| rs114039047 | T | 0.0731  |
| rs112551030 | T | 0.1103  |
| rs34096890  | T | 0.0171  |
| rs11894671  | T | 0.0207  |
| rs12999055  | T | 0.0241  |
| rs74648924  | C | -0.0488 |
| rs831372    | A | -0.0177 |
| rs149049970 | A | -0.1107 |

|             |   |         |
|-------------|---|---------|
| rs12613145  | G | 0.0251  |
| rs3769897   | A | -0.0321 |
| rs114021369 | G | 0.0557  |
| rs12471894  | C | 0.0199  |
| rs72857009  | T | 0.0768  |
| rs113201891 | T | 0.0636  |
| rs17199452  | A | 0.0477  |
| rs76780618  | A | -0.0432 |
| rs111790137 | T | -0.0368 |
| rs143785024 | C | 0.115   |
| rs78599345  | A | 0.0732  |
| rs72895559  | T | 0.0933  |
| rs148189208 | T | 0.102   |
| rs891275    | G | 0.0173  |
| rs114591063 | G | -0.0571 |
| rs11124995  | C | 0.023   |
| rs74604245  | G | -0.1075 |
| rs12713051  | A | -0.0292 |
| rs79260196  | G | 0.046   |
| rs72864080  | T | -0.07   |
| rs115037360 | T | -0.0693 |
| rs56147664  | T | 0.0437  |
| rs12471058  | G | -0.0724 |
| rs144052040 | T | -0.1321 |
| rs12477914  | G | 0.0252  |
| rs17040523  | T | -0.0288 |
| rs283869    | A | -0.031  |
| rs820016    | C | 0.0342  |
| rs114194352 | T | -0.1243 |
| rs74708459  | C | 0.0536  |
| rs79518483  | C | 0.0517  |
| rs6433018   | A | -0.0325 |
| rs33971253  | A | -0.104  |
| rs57535438  | T | -0.0482 |
| rs116559310 | T | -0.0739 |
| rs6757543   | C | -0.028  |
| rs7583520   | C | 0.0192  |
| rs6430004   | A | -0.023  |
| rs146968973 | A | 0.0518  |
| rs73005516  | A | 0.0872  |
| rs1453594   | G | 0.0174  |
| rs112969225 | T | 0.1122  |
| rs12612868  | C | 0.0181  |
| rs10186734  | T | 0.0273  |
| rs149932755 | C | -0.0992 |
| rs76984383  | T | 0.1106  |
| rs56282598  | G | 0.0526  |



|             |   |         |
|-------------|---|---------|
| rs16865987  | A | -0.0275 |
| rs11893219  | G | 0.0184  |
| rs74915698  | T | 0.0887  |
| rs115830012 | G | -0.1115 |
| rs1435887   | A | -0.0185 |
| rs72981075  | C | -0.0365 |
| rs76530310  | C | 0.127   |
| rs76941740  | A | 0.085   |
| rs79053104  | C | 0.1109  |
| rs151100232 | A | 0.0432  |
| rs115444754 | A | -0.1408 |
| rs79825678  | C | -0.059  |
| rs62168074  | A | -0.072  |
| rs79657718  | A | 0.0946  |
| rs115526507 | C | 0.1271  |
| rs142838435 | T | 0.1136  |
| rs2137733   | G | 0.0328  |
| rs77347651  | A | -0.0535 |
| rs812810    | C | -0.0307 |
| rs76353964  | A | 0.1412  |
| rs6707538   | C | -0.0903 |
| rs34738815  | G | -0.0339 |
| rs114886527 | T | -0.0786 |
| rs72794554  | C | -0.0565 |
| rs784553    | T | 0.022   |
| rs62109386  | A | -0.0209 |
| rs9287323   | T | -0.017  |
| rs3845727   | C | 0.0177  |
| rs58927072  | T | -0.0392 |
| rs78909033  | A | 0.033   |
| rs6722031   | G | -0.0353 |
| rs79449496  | A | 0.0785  |
| rs62167560  | C | 0.0602  |
| rs11890273  | C | -0.0291 |
| rs74349633  | T | -0.0753 |
| rs73935352  | G | 0.035   |
| rs138953280 | A | 0.0717  |
| rs6715333   | T | 0.0201  |
| rs11126800  | G | 0.0194  |
| rs7590026   | C | -0.0937 |
| rs74405668  | A | 0.0433  |
| rs2543660   | G | -0.0536 |
| rs751456    | T | -0.023  |
| rs77990844  | C | -0.0778 |
| rs115240729 | G | -0.0296 |
| rs1047589   | C | 0.0331  |
| rs138289375 | A | -0.0727 |

|             |   |         |
|-------------|---|---------|
| rs116797607 | G | -0.2085 |
| rs59044177  | C | 0.0798  |
| rs10497712  | G | 0.0784  |
| rs9308912   | A | 0.0718  |
| rs1990535   | A | -0.0341 |
| rs77856899  | G | -0.0455 |
| rs142314560 | T | 0.1768  |
| rs1897940   | A | 0.0212  |
| rs75750075  | T | 0.0409  |
| rs869633    | T | -0.0223 |
| rs116475690 | A | -0.0688 |
| rs903227    | T | 0.0212  |
| rs4848683   | C | -0.0202 |
| rs840872    | T | -0.0555 |
| rs13431367  | A | -0.0216 |
| rs76365433  | G | -0.0825 |
| rs4485539   | C | 0.0236  |
| rs72804080  | G | 0.025   |
| rs17009632  | C | -0.0725 |
| rs77316079  | G | -0.0816 |
| rs62183543  | A | -0.0371 |
| rs115108236 | A | 0.069   |
| rs4668690   | A | 0.0324  |
| rs35222763  | T | -0.0289 |
| rs72839332  | G | 0.0945  |
| rs116344918 | C | 0.0805  |
| rs114336965 | G | 0.0808  |
| rs34456212  | T | 0.1454  |
| rs17410156  | A | 0.0469  |
| rs3087731   | T | -0.0208 |
| rs78711653  | T | 0.0926  |
| rs13023050  | G | -0.0236 |
| rs148374241 | A | -0.0936 |
| rs79679725  | G | 0.0513  |
| rs113034001 | A | -0.0787 |
| rs13389023  | C | 0.0507  |
| rs11899549  | C | 0.0347  |
| rs7586340   | T | -0.0265 |
| rs11695329  | A | -0.0315 |
| rs62136969  | C | 0.0568  |
| rs75629843  | T | 0.0713  |
| rs78989991  | G | 0.0473  |
| rs75973823  | T | 0.0516  |
| rs147516350 | G | 0.1189  |
| rs10179303  | G | -0.0271 |
| rs13414528  | A | -0.0329 |
| rs112621452 | T | -0.0619 |

|             |   |         |
|-------------|---|---------|
| rs78250854  | T | -0.0754 |
| rs11685045  | G | 0.0651  |
| rs147416917 | T | 0.0876  |
| rs2190379   | C | 0.025   |
| rs62192054  | T | -0.0464 |
| rs4952734   | T | -0.0385 |
| rs114990615 | C | 0.1608  |
| rs7582426   | G | 0.0185  |
| rs145485666 | T | -0.0742 |
| rs12329039  | G | 0.0179  |
| rs6704759   | T | 0.0477  |
| rs148575792 | A | -0.0533 |
| rs78018799  | G | -0.105  |
| rs12464947  | T | 0.077   |
| rs75876041  | C | -0.0468 |
| rs11690954  | T | -0.0214 |
| rs77985135  | C | 0.0483  |
| rs1427667   | C | -0.0261 |
| rs115629945 | A | -0.105  |
| rs1370497   | G | -0.0242 |
| rs62148994  | G | -0.0267 |
| rs72869677  | A | 0.022   |
| rs149851322 | G | 0.0674  |
| rs138417724 | T | 0.0731  |
| rs77387956  | T | 0.0711  |
| rs79280918  | T | -0.0676 |
| rs74589890  | C | 0.0547  |
| rs7582312   | T | -0.0321 |
| rs60544951  | A | 0.0728  |
| rs72842523  | T | -0.0743 |
| rs79847970  | A | -0.0392 |
| rs62140117  | T | 0.1158  |
| rs17025744  | C | 0.0358  |
| rs34816041  | A | 0.147   |
| rs11691255  | C | 0.068   |
| rs896842    | C | -0.0219 |
| rs145595328 | T | 0.0825  |
| rs7593887   | T | -0.042  |
| rs4254475   | C | -0.019  |
| rs12465821  | C | 0.0214  |
| rs9309208   | G | 0.017   |
| rs17446920  | C | 0.0277  |
| rs13015484  | T | -0.1243 |
| rs12994401  | T | 0.0217  |
| rs6434204   | G | 0.0368  |
| rs7582064   | G | -0.045  |
| rs114305738 | T | -0.0868 |

|             |   |         |
|-------------|---|---------|
| rs16839725  | C | 0.0249  |
| rs2592799   | C | 0.0225  |
| rs908756    | A | -0.0164 |
| rs11689313  | G | 0.02    |
| rs150837537 | C | 0.0622  |
| rs11893161  | A | -0.0189 |
| rs66496255  | C | 0.0508  |
| rs115452135 | T | 0.0901  |
| rs851327    | C | -0.0618 |
| rs17028322  | T | -0.076  |
| rs146993112 | T | -0.153  |
| rs79343815  | T | 0.1252  |
| rs1357769   | C | -0.0177 |
| rs59002111  | C | 0.0205  |
| rs112325268 | C | 0.0358  |
| rs79510029  | G | -0.1346 |
| rs13031504  | T | 0.075   |
| rs73991514  | C | -0.1327 |
| rs116283450 | G | -0.1104 |
| rs115832815 | T | -0.0988 |
| rs4319952   | C | -0.0237 |
| rs4662981   | G | 0.0172  |
| rs11687134  | C | 0.0192  |
| rs893359    | A | 0.033   |
| rs72962484  | G | -0.0485 |
| rs116654721 | C | 0.0708  |
| rs3770783   | A | 0.0489  |
| rs72841301  | C | -0.0443 |
| rs1036404   | T | 0.022   |
| rs882275    | C | -0.0167 |
| rs111478747 | G | -0.1453 |
| rs719873    | T | 0.039   |
| rs55701660  | T | -0.0375 |
| rs1864548   | C | 0.0189  |
| rs1965801   | G | 0.0174  |
| rs13005619  | C | -0.0397 |
| rs11685843  | T | -0.0169 |
| rs34286013  | C | 0.0401  |
| rs147310134 | T | 0.1365  |
| rs115302515 | A | 0.0943  |
| rs10170080  | G | 0.056   |
| rs13025975  | T | 0.0357  |
| rs150400138 | C | 0.071   |
| rs139747219 | T | -0.0832 |
| rs17026724  | C | -0.0276 |
| rs115452662 | T | 0.1048  |
| rs78997040  | G | 0.0707  |

|             |   |         |
|-------------|---|---------|
| rs111714951 | T | 0.0926  |
| rs144548186 | G | 0.1219  |
| rs4588185   | A | 0.0264  |
| rs711868    | A | -0.0178 |
| rs17030337  | T | -0.0238 |
| rs57650132  | C | -0.0784 |
| rs7572441   | C | 0.0411  |
| rs17018319  | T | 0.0225  |
| rs66572984  | G | -0.0277 |
| rs2432679   | C | -0.0167 |
| rs9798466   | C | -0.0459 |
| rs77786254  | A | 0.044   |
| rs114238932 | G | -0.1083 |
| rs908546    | C | -0.0175 |
| rs72844789  | T | 0.0973  |
| rs77820291  | A | -0.0633 |
| rs1544846   | T | -0.018  |
| rs3927971   | C | -0.019  |
| rs74790248  | C | -0.02   |
| rs876614    | T | -0.0186 |
| rs6731569   | C | 0.0257  |
| rs35876328  | C | 0.0314  |
| rs140091351 | T | 0.1308  |
| rs114378644 | G | 0.0802  |
| rs112460407 | A | -0.082  |
| rs34491830  | A | 0.0197  |
| rs13021769  | C | 0.0255  |
| rs6759692   | T | -0.0181 |
| rs17010829  | G | 0.0473  |
| rs17479071  | G | -0.0183 |
| rs10169879  | T | -0.0188 |
| rs115443079 | T | 0.0822  |
| rs139173833 | A | 0.0788  |
| rs13032372  | C | 0.0443  |
| rs4972600   | G | -0.0183 |
| rs10206572  | A | -0.0274 |
| rs6746075   | A | 0.0244  |
| rs6543233   | G | 0.017   |
| rs72871163  | T | 0.0485  |
| rs72885781  | A | 0.0413  |
| rs62200577  | C | 0.1336  |
| rs78284147  | C | 0.0421  |
| rs2083415   | A | -0.0294 |
| rs77867272  | C | -0.0766 |
| rs143610726 | T | 0.101   |
| rs7573301   | T | 0.0208  |
| rs55748469  | C | -0.0179 |

|             |   |         |
|-------------|---|---------|
| rs72782589  | G | -0.0921 |
| rs62127216  | C | -0.1191 |
| rs6739127   | G | -0.0947 |
| rs7581133   | G | 0.017   |
| rs12463769  | T | 0.0304  |
| rs76242095  | C | 0.0273  |
| rs4972412   | A | -0.0263 |
| rs141588204 | C | 0.1137  |
| rs6435312   | A | -0.0217 |
| rs72841394  | A | -0.0221 |
| rs76185508  | C | -0.0394 |
| rs308003    | G | -0.0204 |
| rs72831322  | A | -0.0997 |
| rs62147242  | T | 0.0658  |
| rs72904907  | T | -0.0261 |
| rs10203899  | C | -0.0403 |
| rs7605336   | C | -0.0307 |
| rs113074337 | C | -0.033  |
| rs12618219  | A | -0.0168 |
| rs138360241 | T | 0.1499  |
| rs78842260  | G | 0.051   |
| rs1349497   | C | 0.0479  |
| rs3770144   | T | 0.0322  |
| rs79898688  | T | 0.0494  |
| rs2920966   | T | -0.029  |
| rs10194772  | A | -0.0422 |
| rs10207034  | A | -0.0379 |
| rs76628704  | C | 0.0661  |
| rs10170120  | T | -0.0443 |
| rs79301979  | T | 0.0351  |
| rs10929105  | T | 0.0172  |
| rs4853779   | G | -0.0203 |
| rs113789543 | T | -0.0475 |
| rs1580058   | G | -0.0228 |
| rs62149637  | A | -0.0728 |
| rs17014809  | C | 0.0598  |
| rs61366770  | T | 0.0561  |
| rs13015747  | T | 0.083   |
| rs79491256  | T | -0.0715 |
| rs7558445   | T | -0.026  |
| rs1901464   | A | -0.0279 |
| rs78632758  | G | 0.0564  |
| rs58903916  | T | -0.0524 |
| rs74349649  | G | -0.0677 |
| rs62154179  | T | -0.0402 |
| rs62174566  | T | 0.0723  |
| rs116258072 | A | 0.1443  |

|             |   |         |
|-------------|---|---------|
| rs10206277  | T | 0.0423  |
| rs10169278  | C | 0.0226  |
| rs10192429  | C | -0.0382 |
| rs1437337   | C | 0.0279  |
| rs79230304  | T | 0.0609  |
| rs114114722 | A | 0.0824  |
| rs59738902  | C | -0.0203 |
| rs56080211  | C | -0.0626 |
| rs77721657  | C | 0.072   |
| rs115093812 | A | 0.1132  |
| rs114516148 | T | -0.1357 |
| rs79718437  | A | -0.0868 |
| rs72862738  | T | -0.0192 |
| rs79335806  | G | -0.0927 |
| rs13410536  | A | -0.0371 |
| rs78235482  | G | 0.0567  |
| rs17363613  | A | 0.027   |
| rs2860851   | C | -0.0919 |
| rs112786626 | T | 0.0663  |
| rs72851035  | G | -0.1034 |
| rs77915004  | A | 0.0551  |
| rs4672910   | T | 0.0183  |
| rs114255614 | C | -0.1264 |
| rs76043455  | C | -0.0538 |
| rs116284193 | G | -0.0974 |
| rs62156616  | C | -0.0786 |
| rs11688898  | T | -0.0516 |
| rs138501564 | C | 0.0764  |
| rs62133407  | A | 0.0393  |
| rs116330645 | C | -0.064  |
| rs6704697   | G | -0.0423 |
| rs62132117  | T | 0.0213  |
| rs3109156   | C | -0.02   |
| rs116627784 | T | 0.0478  |
| rs116563716 | G | 0.0342  |
| rs12614872  | G | 0.0172  |
| rs114078244 | C | 0.0767  |
| rs57386372  | T | 0.0337  |
| rs76211985  | A | -0.1259 |
| rs79217846  | T | 0.0949  |
| rs76204553  | C | -0.0958 |
| rs28396413  | A | 0.0792  |
| rs56048271  | A | 0.0886  |
| rs73945638  | C | 0.0345  |
| rs147074648 | C | -0.0931 |
| rs111454781 | T | 0.0704  |
| rs147186444 | C | -0.0644 |

|             |   |         |
|-------------|---|---------|
| rs62187583  | G | -0.032  |
| rs79030355  | G | -0.0557 |
| rs7594864   | A | 0.0167  |
| rs139163034 | G | -0.0511 |
| rs10201629  | A | 0.018   |
| rs1822616   | G | -0.0167 |
| rs28499034  | T | 0.0181  |
| rs6704918   | T | -0.0219 |
| rs7587269   | G | 0.0183  |
| rs17028715  | A | 0.0493  |
| rs76717070  | A | 0.0346  |
| rs2251692   | A | -0.019  |
| rs111918016 | G | 0.0409  |
| rs1283780   | A | -0.0209 |
| rs149551873 | T | -0.0838 |
| rs12693085  | C | 0.02    |
| rs12053345  | C | 0.0202  |
| rs77990719  | C | -0.0729 |
| rs4854545   | G | 0.0644  |
| rs72832291  | C | 0.05    |
| rs305682    | G | -0.024  |
| rs112987621 | A | -0.0492 |
| rs28439229  | A | 0.0274  |
| rs150877115 | T | -0.047  |
| rs62155996  | A | 0.053   |
| rs77078698  | G | 0.0717  |
| rs17591276  | A | -0.0677 |
| rs74547226  | G | -0.0446 |
| rs150272938 | T | -0.1185 |
| rs72979684  | A | 0.0545  |
| rs116436485 | T | 0.0364  |
| rs79534225  | T | 0.0513  |
| rs80118023  | T | 0.0281  |
| rs116392720 | C | 0.0929  |
| rs11678218  | G | 0.0184  |
| rs77504589  | C | 0.074   |
| rs1400866   | C | 0.0197  |
| rs150828483 | T | 0.0526  |
| rs79125586  | A | 0.0695  |
| rs11887214  | G | -0.0334 |
| rs11695620  | A | -0.0293 |
| rs114694405 | C | 0.0436  |
| rs1898773   | A | -0.0237 |
| rs6760934   | C | 0.0626  |
| rs7565740   | G | 0.0187  |
| rs11688237  | A | 0.0167  |
| rs77945037  | G | 0.0372  |



|             |   |         |
|-------------|---|---------|
| rs57370006  | G | 0.0794  |
| rs10496557  | T | 0.0175  |
| rs7562987   | G | -0.0189 |
| rs17331933  | C | -0.0199 |
| rs114129789 | T | 0.0369  |
| rs72767199  | A | 0.0551  |
| rs6712291   | C | 0.028   |
| rs12987270  | C | -0.0262 |
| rs62180789  | A | -0.0668 |
| rs7578592   | T | 0.0333  |
| rs72787414  | C | -0.0551 |
| rs76297499  | A | 0.0801  |
| rs62166955  | G | -0.0185 |
| rs2056281   | G | 0.0168  |
| rs143195145 | C | -0.0427 |
| rs56324895  | G | 0.0288  |
| rs79765644  | T | 0.0385  |
| rs3769611   | A | -0.0209 |
| rs77674510  | T | -0.1043 |
| rs10198080  | A | 0.0166  |
| rs113279002 | C | 0.0203  |
| rs62177466  | A | -0.0806 |
| rs7598170   | A | -0.1211 |
| rs10197274  | G | 0.0329  |
| rs73918625  | T | -0.0843 |
| rs115847767 | T | -0.1163 |
| rs7575740   | G | -0.0654 |
| rs56308911  | T | -0.0456 |
| rs17715987  | T | 0.0842  |
| rs2396465   | G | -0.0301 |
| rs149908400 | G | -0.1    |
| rs16830596  | A | 0.0351  |
| rs9288711   | T | 0.0177  |
| rs41383244  | G | 0.0183  |
| rs79475637  | G | -0.0756 |
| rs148530270 | A | 0.0599  |
| rs79188173  | A | 0.1148  |
| rs62169778  | T | -0.1027 |
| rs115533288 | A | -0.0913 |
| rs6705199   | G | 0.0167  |
| rs114766289 | C | -0.0804 |
| rs7561715   | A | 0.067   |
| rs115282255 | A | 0.1183  |
| rs11888247  | T | -0.02   |
| rs78930443  | A | 0.0352  |
| rs112313056 | G | -0.0714 |
| rs145198352 | C | 0.0637  |

|             |   |         |
|-------------|---|---------|
| rs114260905 | T | -0.1264 |
| rs73019411  | A | 0.1141  |
| rs1365975   | T | 0.0186  |
| rs10194142  | A | 0.0303  |
| rs12712518  | C | 0.029   |
| rs12623447  | C | -0.031  |
| rs6710235   | T | -0.0262 |
| rs115607263 | T | -0.1178 |
| rs114548299 | A | 0.1523  |
| rs77227574  | C | -0.0333 |
| rs115657360 | G | 0.1619  |
| rs62190593  | T | 0.0688  |
| rs148787692 | T | 0.0699  |
| rs820962    | T | -0.0762 |
| rs143776691 | G | 0.1235  |
| rs150178556 | T | 0.1449  |
| rs6715568   | G | 0.033   |
| rs11675425  | C | -0.0698 |
| rs13032230  | T | -0.0219 |
| rs113978672 | G | 0.1101  |
| rs13023047  | T | 0.0277  |
| rs113980024 | T | 0.0552  |
| rs116781632 | A | -0.1373 |
| rs78003764  | G | 0.081   |
| rs62181310  | C | -0.0551 |
| rs11679983  | A | -0.0221 |
| rs9798303   | G | -0.0196 |
| rs73956086  | T | 0.0387  |
| rs12991732  | C | 0.0185  |
| rs7596891   | T | -0.0394 |
| rs75285567  | G | 0.0929  |
| rs72895642  | A | -0.1076 |
| rs12478253  | A | -0.018  |
| rs2693887   | T | -0.0291 |
| rs11692083  | G | -0.0178 |
| rs10864942  | G | 0.0251  |
| rs58138741  | C | -0.0437 |
| rs75187534  | A | -0.1185 |
| rs150741828 | T | 0.1245  |
| rs2254387   | T | 0.0367  |
| rs116386607 | T | 0.1236  |
| rs116445294 | T | 0.1075  |
| rs13411510  | C | -0.0242 |
| rs10153926  | A | 0.0235  |
| rs72812335  | C | -0.0297 |
| rs1561328   | A | 0.042   |
| rs10204717  | T | 0.0266  |

|             |   |         |
|-------------|---|---------|
| rs137960636 | T | 0.0813  |
| rs6727210   | T | 0.0194  |
| rs9309083   | A | -0.0515 |
| rs151200531 | C | 0.0914  |
| rs72852559  | G | 0.06    |
| rs58134402  | T | -0.0243 |
| rs9636338   | G | -0.0216 |
| rs58027731  | T | 0.0639  |
| rs72777258  | T | -0.0551 |
| rs150038329 | G | -0.077  |
| rs76401013  | A | -0.0411 |
| rs77954779  | A | -0.0924 |
| rs11888222  | T | 0.0523  |
| rs35424315  | T | 0.0447  |
| rs79593449  | T | 0.0952  |
| rs76063469  | G | -0.111  |
| rs10497398  | C | 0.0292  |
| rs35404949  | G | 0.037   |
| rs10460412  | A | 0.0249  |
| rs59605575  | G | -0.095  |
| rs4668469   | A | 0.0244  |
| rs11678193  | T | -0.0755 |
| rs11890526  | T | -0.0319 |
| rs10209276  | C | 0.0248  |
| rs11687629  | C | 0.129   |
| rs342137    | C | -0.0181 |
| rs72967101  | C | -0.0608 |
| rs1834271   | T | 0.021   |
| rs9989875   | A | 0.0487  |
| rs76499710  | T | 0.092   |
| rs10174898  | A | 0.035   |
| rs115470159 | T | 0.0949  |
| rs62177060  | A | 0.1025  |
| rs13385753  | T | 0.0355  |
| rs17535450  | A | -0.0735 |
| rs28696005  | G | 0.0264  |
| rs10198370  | G | -0.0328 |
| rs4953303   | T | -0.0305 |
| rs72905566  | G | -0.0436 |
| rs11127091  | A | -0.0207 |
| rs148904587 | T | 0.0761  |
| rs116660528 | T | 0.111   |
| rs73000049  | C | -0.0196 |
| rs77165542  | T | 0.0975  |
| rs111738935 | T | -0.0332 |
| rs115955098 | C | -0.0722 |
| rs56026736  | G | 0.0354  |

|             |   |         |
|-------------|---|---------|
| rs2698189   | C | -0.0276 |
| rs143875002 | C | 0.0784  |
| rs73985529  | C | -0.1415 |
| rs76141084  | A | -0.1615 |
| rs7587317   | T | 0.0216  |
| rs11890494  | A | 0.0169  |
| rs141846144 | A | -0.0647 |
| rs148610783 | T | -0.0766 |
| rs36010570  | C | 0.0375  |
| rs1261226   | T | 0.0168  |
| rs1355414   | G | 0.0172  |
| rs72978885  | C | -0.0499 |
| rs7576280   | G | -0.021  |
| rs57002188  | T | 0.0185  |
| rs562786    | T | -0.0167 |
| rs116434716 | A | -0.04   |
| rs146079506 | G | 0.1082  |
| rs359241    | A | -0.0165 |
| rs5029272   | A | 0.0231  |
| rs13382194  | G | 0.0234  |
| rs1025369   | C | -0.0212 |
| rs112217276 | C | 0.0681  |
| rs60941903  | G | 0.0269  |
| rs719545    | G | -0.0287 |
| rs80028351  | T | -0.0262 |
| rs11677172  | T | -0.0238 |
| rs17496232  | C | -0.0241 |
| rs138404306 | G | -0.0998 |
| rs115133152 | C | 0.1146  |
| rs12616969  | G | 0.0236  |
| rs144459183 | C | 0.1399  |
| rs113999073 | T | 0.0638  |
| rs75092921  | G | -0.0553 |
| rs55792064  | T | -0.1555 |
| rs10167383  | C | 0.0769  |
| rs146385922 | C | 0.0972  |
| rs72881804  | G | -0.0687 |
| rs56994242  | G | -0.0176 |
| rs2116978   | T | -0.0461 |
| rs78430062  | A | 0.1247  |
| rs72931413  | C | -0.072  |
| rs111769261 | T | 0.1094  |
| rs78293417  | G | 0.0486  |
| rs28588507  | T | 0.0183  |
| rs13010012  | A | -0.0411 |
| rs13010453  | A | 0.0607  |
| rs7596942   | T | 0.025   |

|             |   |         |
|-------------|---|---------|
| rs80042531  | A | 0.1213  |
| rs3933621   | A | -0.0289 |
| rs79770498  | G | 0.065   |
| rs10208096  | T | 0.021   |
| rs13403267  | C | 0.0777  |
| rs112542230 | C | -0.0456 |
| rs80169943  | A | -0.0791 |
| rs28519523  | G | -0.0433 |
| rs36034714  | A | -0.0302 |
| rs73006350  | A | -0.124  |
| rs116021398 | T | -0.0667 |
| rs80240062  | A | 0.0369  |
| rs12988482  | A | -0.0227 |
| rs6739491   | G | -0.1383 |
| rs80220329  | C | 0.0768  |
| rs115496320 | A | 0.0767  |
| rs72785893  | A | 0.0287  |
| rs75090601  | A | 0.0528  |
| rs113996109 | A | -0.0631 |
| rs114128341 | A | -0.066  |
| rs116803005 | A | -0.0743 |
| rs67664213  | T | -0.0198 |
| rs2163453   | C | 0.0248  |
| rs72839362  | C | 0.0589  |
| rs11684725  | T | -0.0224 |
| rs16841663  | A | 0.0973  |
| rs115700531 | C | -0.1062 |
| rs2100267   | G | 0.0756  |
| rs62165906  | T | 0.0269  |
| rs115577728 | T | -0.0807 |
| rs2581862   | G | -0.0271 |
| rs10173275  | C | 0.0338  |
| rs10207134  | T | 0.0171  |
| rs75569007  | T | -0.0942 |
| rs61081423  | A | 0.075   |
| rs150366970 | A | -0.0823 |
| rs2710161   | A | 0.0859  |
| rs144954751 | C | 0.0821  |
| rs12476094  | A | -0.0257 |
| rs12615309  | T | 0.0221  |
| rs72948081  | G | 0.0732  |
| rs113549935 | A | 0.0976  |
| rs4075018   | A | -0.0224 |
| rs12619255  | G | 0.0928  |
| rs1026044   | A | -0.0169 |
| rs111967076 | T | -0.069  |
| rs138452094 | A | -0.0772 |

|             |   |         |
|-------------|---|---------|
| rs79651645  | G | -0.0286 |
| rs56161233  | T | -0.0798 |
| rs11898078  | G | 0.0187  |
| rs149501012 | T | 0.0876  |
| rs112614343 | C | 0.103   |
| rs11688538  | T | -0.0205 |
| rs78783187  | T | -0.056  |
| rs13390062  | C | 0.0806  |
| rs116359803 | A | -0.1169 |
| rs4233617   | T | 0.0235  |
| rs2380674   | C | 0.0177  |
| rs140567652 | T | -0.1044 |
| rs113753479 | A | 0.1572  |
| rs80018307  | C | 0.0448  |
| rs77222774  | G | -0.0702 |
| rs4392253   | A | 0.0343  |
| rs62105809  | G | -0.0207 |
| rs149269918 | G | -0.1183 |
| rs114092452 | T | 0.0506  |
| rs145383023 | C | 0.1081  |
| rs57795328  | C | 0.0392  |
| rs779379    | A | -0.0247 |
| rs34858703  | G | 0.0444  |
| rs1440037   | T | 0.0164  |
| rs62156481  | T | 0.1367  |
| rs72835690  | A | 0.0938  |
| rs77816037  | C | 0.0745  |
| rs77549035  | T | 0.0442  |
| rs1250232   | C | -0.0195 |
| rs79354970  | G | -0.0503 |
| rs79731311  | G | -0.0616 |
| rs13405209  | A | -0.0186 |
| rs11680171  | G | -0.0204 |
| rs55860288  | T | 0.0836  |
| rs76818085  | C | -0.0435 |
| rs7589419   | C | -0.0369 |
| rs35581933  | A | -0.0538 |
| rs55942719  | A | 0.02    |
| rs72899353  | G | 0.026   |
| rs35589678  | A | 0.0489  |
| rs1534349   | C | -0.1002 |
| rs79272390  | T | -0.0307 |
| rs115812877 | C | 0.0717  |
| rs77900340  | A | -0.1036 |
| rs114307679 | T | 0.1467  |
| rs16837439  | C | 0.0428  |
| rs12478077  | T | -0.0182 |

|             |   |         |
|-------------|---|---------|
| rs78903504  | A | -0.0719 |
| rs1946534   | G | 0.0284  |
| rs56114626  | C | -0.0668 |
| rs145991676 | A | 0.102   |
| rs146993487 | A | -0.1175 |
| rs2103286   | C | 0.052   |
| rs62142680  | T | 0.047   |
| rs147632902 | A | 0.0956  |
| rs76190916  | C | 0.0639  |
| rs28548727  | A | 0.0963  |
| rs7588195   | A | -0.0168 |
| rs59432163  | G | 0.0512  |
| rs74758299  | C | -0.0497 |
| rs146665118 | G | 0.1281  |
| rs873611    | A | -0.0794 |
| rs886812    | C | 0.1248  |
| rs10520221  | C | 0.0175  |
| rs79785323  | G | -0.1067 |
| rs17798043  | T | 0.0387  |
| rs13003774  | A | -0.0956 |
| rs3862976   | A | -0.0245 |
| rs148243876 | T | -0.0853 |
| rs76872150  | G | -0.0442 |
| rs6747014   | C | 0.0274  |
| rs75579212  | T | -0.0212 |
| rs9309395   | T | -0.0242 |
| rs2371438   | G | 0.0338  |
| rs151198786 | G | 0.1116  |
| rs2007574   | A | -0.0167 |
| rs57825153  | C | -0.0185 |
| rs116548758 | A | 0.0982  |
| rs1990649   | G | 0.0197  |
| rs721173    | C | -0.0628 |
| rs150005136 | A | 0.1163  |
| rs4672523   | G | -0.0171 |
| rs17693414  | G | -0.0279 |
| rs4664198   | T | -0.0177 |
| rs17480400  | G | 0.0604  |
| rs150978348 | C | -0.1063 |
| rs62124831  | T | -0.0359 |
| rs147284830 | A | 0.1245  |
| rs6724922   | T | 0.0254  |
| rs77115856  | T | 0.0714  |
| rs779925    | T | -0.0191 |
| rs213551    | G | 0.0171  |
| rs680564    | T | 0.0177  |
| rs3792223   | T | 0.036   |

|             |   |         |
|-------------|---|---------|
| rs72826503  | A | 0.0261  |
| rs62184051  | G | -0.0625 |
| rs10169129  | C | 0.0271  |
| rs792076    | T | -0.0184 |
| rs139368583 | C | 0.0601  |
| rs76139343  | A | 0.0486  |
| rs113937021 | T | -0.059  |
| rs12623444  | G | -0.0198 |
| rs77157592  | A | 0.064   |
| rs111676052 | T | 0.0745  |
| rs17007740  | T | 0.0259  |
| rs147748332 | A | 0.0613  |
| rs12105460  | G | -0.0258 |
| rs4972563   | T | 0.0438  |
| rs17405731  | G | 0.0648  |
| rs13018396  | C | 0.051   |
| rs55763212  | G | -0.0308 |
| rs56243710  | C | 0.0208  |
| rs13421966  | C | -0.0269 |
| rs6722129   | C | 0.0221  |
| rs10188643  | C | -0.0336 |
| rs72775167  | A | 0.049   |
| rs115178209 | G | 0.0458  |
| rs116207456 | T | 0.0616  |
| rs117207561 | A | 0.0576  |
| rs56317754  | T | -0.1376 |
| rs13421064  | G | 0.05    |
| rs115951192 | G | -0.1194 |
| rs151172954 | T | -0.0386 |
| rs72873866  | G | -0.0612 |
| rs56084609  | A | -0.0484 |
| rs114958488 | G | 0.0629  |
| rs142560404 | A | 0.0351  |
| rs78051676  | C | 0.0473  |
| rs35505604  | C | -0.0173 |
| rs6717260   | T | 0.0519  |
| rs4663308   | G | 0.0271  |
| rs145323301 | G | 0.0902  |
| rs771176    | A | -0.034  |
| rs4952966   | A | -0.0268 |
| rs4671764   | A | 0.017   |
| rs17187895  | G | -0.037  |
| rs10175782  | A | 0.0174  |
| rs2697743   | C | -0.0766 |
| rs116611928 | T | 0.058   |
| rs61053602  | A | 0.0375  |
| rs115270434 | C | 0.1318  |



|             |   |         |
|-------------|---|---------|
| rs2376070   | T | 0.0213  |
| rs57790472  | A | 0.1013  |
| rs17036504  | A | 0.0221  |
| rs112517198 | T | -0.0726 |
| rs72838587  | A | -0.0267 |
| rs72876167  | A | 0.0871  |
| rs114249312 | T | 0.1175  |
| rs78905335  | G | 0.0613  |
| rs139160558 | A | 0.065   |
| rs2066526   | T | 0.0996  |
| rs6740015   | G | -0.1212 |
| rs78814577  | G | 0.0347  |
| rs10184889  | G | 0.0206  |
| rs114403666 | G | 0.0483  |
| rs72909717  | T | -0.0382 |
| rs10206665  | T | 0.0253  |
| rs2034274   | T | -0.0182 |
| rs13036193  | G | -0.025  |
| rs80062726  | T | 0.0498  |
| rs114589771 | A | 0.0707  |
| rs79258844  | T | -0.0497 |
| rs150243597 | G | -0.1174 |
| rs4477955   | G | 0.0201  |
| rs72821555  | G | -0.0645 |
| rs2081296   | A | 0.0282  |
| rs114839988 | A | -0.0558 |
| rs148510181 | A | 0.0665  |
| rs78198970  | T | 0.0673  |
| rs12473331  | T | -0.0295 |
| rs77876490  | T | -0.0554 |
| rs79163228  | C | 0.0711  |
| rs115392325 | A | 0.0513  |
| rs116272660 | A | 0.109   |
| rs77121714  | A | 0.0918  |
| rs10175419  | G | -0.0166 |
| rs62149087  | C | -0.0212 |
| rs116098507 | A | 0.0837  |
| rs13020375  | A | -0.0166 |
| rs11126998  | G | 0.0246  |
| rs141187638 | A | 0.1205  |
| rs922927    | T | 0.0195  |
| rs12473479  | T | 0.0926  |
| rs17702245  | T | -0.0545 |
| rs72993325  | A | 0.0433  |
| rs9967903   | A | 0.0273  |
| rs6716194   | T | -0.0228 |
| rs145642308 | A | 0.0915  |

|             |   |         |
|-------------|---|---------|
| rs72785162  | C | 0.0482  |
| rs80172616  | G | 0.0186  |
| rs138556537 | T | 0.0779  |
| rs76791701  | C | 0.062   |
| rs4675971   | A | 0.0236  |
| rs2552010   | G | 0.0163  |
| rs17704088  | A | 0.0408  |
| rs72845835  | A | 0.132   |
| rs111648045 | T | -0.0792 |
| rs12991426  | A | -0.0174 |
| rs6431733   | G | 0.0253  |
| rs13026905  | T | -0.0549 |
| rs7684      | G | 0.018   |
| rs75554083  | T | 0.0757  |
| rs1257362   | C | -0.0599 |
| rs11676565  | T | 0.1662  |
| rs115664091 | A | 0.0777  |
| rs150488642 | A | -0.1144 |
| rs116502385 | T | -0.052  |
| rs13013488  | T | -0.0221 |
| rs1519787   | T | 0.1105  |
| rs35994273  | G | 0.0588  |
| rs34669828  | T | 0.0386  |
| rs35752423  | T | 0.0306  |
| rs4297877   | A | 0.0172  |
| rs6708366   | C | -0.1209 |
| rs114907179 | A | -0.0738 |
| rs56212956  | G | -0.0325 |
| rs11695313  | A | -0.0216 |
| rs55879811  | C | 0.052   |
| rs114154960 | C | 0.0566  |
| rs4280509   | C | -0.0302 |
| rs114974979 | T | -0.0551 |
| rs76477272  | G | -0.0371 |
| rs60417954  | G | 0.0284  |
| rs10167951  | T | 0.0508  |
| rs7595292   | G | 0.0193  |
| rs62178611  | G | 0.0892  |
| rs3769118   | G | -0.0235 |
| rs2043453   | A | -0.0284 |
| rs144367036 | A | 0.106   |
| rs114266154 | G | 0.0749  |
| rs114564448 | G | 0.06    |
| rs150989430 | G | -0.0672 |
| rs16825450  | G | 0.0281  |
| rs138990410 | G | 0.138   |
| rs148533468 | A | 0.0714  |

|             |   |         |
|-------------|---|---------|
| rs11571300  | G | -0.0246 |
| rs143903315 | A | 0.063   |
| rs2013250   | C | 0.022   |
| rs74384734  | C | 0.099   |
| rs722559    | G | -0.0342 |
| rs6736805   | A | 0.0249  |
| rs72886699  | G | 0.0804  |
| rs62142763  | C | -0.036  |
| rs7582030   | A | 0.0251  |
| rs77173884  | T | -0.1017 |
| rs10206503  | A | 0.016   |
| rs115931810 | A | 0.027   |
| rs116681266 | A | -0.0805 |
| rs147331343 | A | -0.0793 |
| rs56384121  | T | 0.019   |
| rs111736174 | A | 0.0635  |
| rs7592084   | A | 0.0925  |
| rs7572930   | G | -0.0393 |
| rs72911358  | C | -0.0317 |
| rs16849118  | T | -0.0252 |
| rs1447547   | T | 0.0845  |
| rs115818124 | G | -0.1147 |
| rs77278000  | T | -0.0792 |
| rs3108794   | C | -0.0293 |
| rs148746268 | G | 0.0739  |
| rs181680    | T | -0.0169 |
| rs80044367  | G | -0.1289 |
| rs6738001   | A | 0.0181  |
| rs11900388  | A | 0.0166  |
| rs112581290 | G | 0.0743  |
| rs13422546  | T | -0.0818 |
| rs75844594  | T | -0.0608 |
| rs75529430  | C | 0.0888  |
| rs17030689  | C | -0.017  |
| rs74581471  | T | -0.0705 |
| rs148318506 | T | 0.0925  |
| rs76781244  | G | 0.081   |
| rs17013129  | C | 0.0278  |
| rs116625721 | C | -0.0674 |
| rs115233901 | C | 0.0744  |
| rs138144113 | G | -0.1044 |
| rs7419450   | A | 0.0212  |
| rs62131768  | C | 0.034   |
| rs35112988  | T | -0.0633 |
| rs115772674 | G | -0.1102 |
| rs609682    | T | -0.0167 |
| rs10202050  | C | 0.0242  |

|             |   |         |
|-------------|---|---------|
| rs56131922  | G | -0.0877 |
| rs10178716  | C | 0.0176  |
| rs16982946  | C | 0.0351  |
| rs35881616  | T | 0.0381  |
| rs55828728  | G | -0.0199 |
| rs74510093  | T | -0.0314 |
| rs17313318  | T | 0.0804  |
| rs142209274 | C | 0.0544  |
| rs1349884   | A | 0.0518  |
| rs6711594   | A | -0.0173 |
| rs3769442   | T | -0.0505 |
| rs115050764 | C | 0.068   |
| rs1446554   | G | -0.0231 |
| rs138163371 | T | -0.1144 |
| rs1969376   | G | -0.0265 |
| rs72803864  | A | 0.0532  |
| rs115630475 | T | 0.085   |
| rs11690450  | C | -0.0918 |
| rs2710501   | C | -0.0167 |
| rs1261364   | T | -0.0165 |
| rs62158559  | G | -0.1203 |
| rs17683574  | G | -0.0222 |
| rs2682865   | G | 0.0293  |
| rs77480047  | T | 0.0779  |
| rs13019811  | T | 0.0169  |
| rs140352918 | G | 0.1289  |
| rs80042330  | G | -0.1151 |
| rs78375983  | A | -0.0553 |
| rs140865187 | A | 0.0785  |
| rs7607358   | C | 0.0182  |
| rs59660078  | A | -0.0173 |
| rs72933255  | T | -0.0314 |
| rs115804757 | T | -0.0564 |
| rs13033787  | C | -0.0166 |
| rs11885153  | G | 0.0302  |
| rs17703620  | C | -0.0865 |
| rs72764904  | C | 0.0203  |
| rs62124612  | C | -0.0164 |
| rs11676528  | T | 0.0255  |
| rs4848510   | A | -0.0159 |
| rs16832040  | C | 0.0226  |
| rs111715478 | A | -0.1115 |
| rs114726334 | C | 0.0686  |
| rs138668920 | C | 0.1159  |
| rs146948660 | A | 0.129   |
| rs115336604 | G | -0.0787 |
| rs115344241 | T | -0.0733 |

|             |   |         |
|-------------|---|---------|
| rs76745677  | C | 0.0655  |
| rs2882276   | G | -0.0286 |
| rs147941839 | A | -0.0593 |
| rs75251291  | A | 0.1492  |
| rs1729084   | A | 0.0196  |
| rs62145167  | C | -0.0189 |
| rs71413612  | T | -0.044  |
| rs6736532   | C | -0.0181 |
| rs10191697  | G | -0.0183 |
| rs61029882  | T | 0.0421  |
| rs114938350 | A | -0.0876 |
| rs12464290  | T | 0.0717  |
| rs13424231  | A | -0.0675 |
| rs141579127 | C | 0.0792  |
| rs56329707  | T | 0.1558  |
| rs59711647  | G | 0.03    |
| rs77217059  | A | -0.0225 |
| rs12477412  | G | -0.0186 |
| rs11682412  | C | 0.0181  |
| rs113783663 | T | 0.0568  |
| rs113669190 | A | -0.061  |
| rs79323701  | A | -0.0859 |
| rs149555449 | T | 0.0652  |
| rs79048654  | A | 0.0983  |
| rs76427130  | C | -0.0593 |
| rs76615648  | A | 0.0248  |
| rs10176243  | A | 0.0304  |
| rs7601943   | C | -0.0236 |
| rs140922354 | A | 0.124   |
| rs35761487  | C | -0.0245 |
| rs114729480 | A | -0.1102 |
| rs16830261  | G | -0.0992 |
| rs7576251   | G | -0.034  |
| rs112791380 | C | 0.0383  |
| rs114364156 | C | -0.1144 |
| rs1484687   | A | -0.0179 |
| rs72835977  | A | -0.0215 |
| rs62168895  | T | 0.0484  |
| rs16826599  | A | -0.0285 |
| rs6543324   | A | 0.018   |
| rs2287619   | C | 0.0303  |
| rs13032794  | G | 0.0367  |
| rs13392269  | G | -0.0241 |
| rs112546052 | C | -0.0594 |
| rs6740354   | G | 0.02    |
| rs62185309  | T | 0.089   |
| rs13014174  | C | -0.0286 |

|             |   |         |
|-------------|---|---------|
| rs77234141  | C | -0.0653 |
| rs114964940 | T | 0.0936  |
| rs62164660  | A | 0.1004  |
| rs78125482  | C | 0.0665  |
| rs62184485  | C | -0.1131 |
| rs17320193  | T | -0.0994 |
| rs55716572  | A | 0.0814  |
| rs2164720   | G | 0.0214  |
| rs11125066  | T | -0.0187 |
| rs141661922 | G | 0.075   |
| rs141808720 | C | 0.1423  |
| rs2888507   | G | -0.0212 |
| rs114275999 | A | 0.1207  |
| rs141620754 | A | 0.0792  |
| rs59752552  | C | 0.0691  |
| rs6713072   | T | 0.0166  |
| rs12478622  | A | 0.0271  |
| rs11127359  | T | 0.0272  |
| rs11889265  | T | -0.0581 |
| rs7581378   | G | -0.0657 |
| rs62156283  | T | 0.1105  |
| rs72933190  | A | -0.0828 |
| rs7598134   | G | -0.0166 |
| rs78806356  | A | 0.0766  |
| rs80212734  | A | -0.056  |
| rs479909    | A | 0.0252  |
| rs75558818  | T | 0.0295  |
| rs55846912  | A | -0.0317 |
| rs79110505  | C | 0.0566  |
| rs6736297   | T | -0.1381 |
| rs73051837  | A | 0.0381  |
| rs67654583  | C | -0.0223 |
| rs147988230 | C | 0.0572  |
| rs57946708  | C | 0.0412  |
| rs709273    | T | 0.0198  |
| rs11680770  | T | -0.088  |
| rs28503620  | A | 0.0252  |
| rs56121394  | T | 0.0192  |
| rs72834658  | T | -0.0175 |
| rs146202351 | G | 0.0564  |
| rs67844640  | G | 0.0606  |
| rs77592957  | C | -0.0369 |
| rs111719264 | T | 0.0974  |
| rs114167601 | C | 0.0637  |
| rs13016472  | T | -0.017  |
| rs289933    | A | -0.0167 |
| rs1400819   | A | 0.0306  |

|             |   |         |
|-------------|---|---------|
| rs2679180   | C | 0.0174  |
| rs6759392   | A | -0.0164 |
| rs4673287   | G | -0.017  |
| rs10199419  | G | 0.0192  |
| rs1107849   | T | -0.022  |
| rs113453443 | C | -0.054  |
| rs879861    | A | 0.0672  |
| rs6718666   | T | -0.0182 |
| rs149544129 | T | -0.1044 |
| rs113785172 | A | -0.0181 |
| rs112252195 | T | 0.0557  |
| rs150887499 | C | 0.0674  |
| rs143454607 | T | -0.0997 |
| rs34230008  | C | -0.1288 |
| rs116198816 | C | -0.0336 |
| rs62145949  | A | -0.0881 |
| rs75594689  | T | -0.0478 |
| rs77775547  | C | -0.0957 |
| rs56699826  | T | 0.0258  |
| rs1517007   | G | -0.0169 |
| rs6546180   | C | 0.017   |
| rs141860312 | A | -0.1196 |
| rs4850382   | T | -0.0215 |
| rs12993885  | G | 0.0412  |
| rs34976441  | A | 0.0768  |
| rs114833245 | T | -0.079  |
| rs139986265 | G | 0.1105  |
| rs140242638 | A | 0.0974  |
| rs12993855  | T | -0.0262 |
| rs115246881 | A | 0.0496  |
| rs1320340   | G | 0.0585  |
| rs60567606  | G | 0.034   |
| rs6712816   | G | -0.0698 |
| rs72835446  | T | -0.0457 |
| rs74991697  | A | -0.1046 |
| rs76739627  | A | -0.0525 |
| rs114879758 | A | -0.0586 |
| rs1008835   | G | 0.0248  |
| rs77283376  | T | 0.0333  |
| rs6741535   | T | -0.0398 |
| rs138239305 | G | 0.1237  |
| rs13028201  | A | 0.0183  |
| rs72779532  | A | -0.0664 |
| rs342101    | C | -0.0239 |
| rs34693277  | G | -0.0193 |
| rs1877189   | A | -0.1008 |
| rs13027838  | T | -0.0217 |

|             |   |         |
|-------------|---|---------|
| rs12987022  | T | 0.0164  |
| rs13429710  | T | 0.0382  |
| rs1035100   | C | -0.0288 |
| rs141804708 | A | 0.0943  |
| rs143135402 | C | 0.0836  |
| rs10164831  | A | 0.0332  |
| rs74995919  | G | 0.0473  |
| rs11903143  | G | 0.0179  |
| rs72800215  | A | -0.0629 |
| rs17535596  | G | -0.0478 |
| rs12989211  | A | 0.1044  |
| rs77108750  | T | 0.0732  |
| rs2679833   | C | -0.0475 |
| rs12479247  | T | -0.0302 |
| rs16865649  | T | 0.0389  |
| rs2422113   | G | 0.0451  |
| rs6713974   | G | 0.0174  |
| rs6437145   | C | 0.0376  |
| rs116975860 | A | 0.0772  |
| rs72993796  | C | 0.029   |
| rs113812189 | A | 0.1063  |
| rs72855562  | C | -0.0702 |
| rs12471646  | G | 0.0164  |
| rs79816368  | G | -0.0352 |
| rs2195072   | C | 0.0173  |
| rs17534724  | A | 0.078   |
| rs67638275  | T | 0.0366  |
| rs112882421 | A | 0.0865  |
| rs4675854   | G | 0.0308  |
| rs76866386  | C | 0.032   |
| rs746776    | A | 0.0247  |
| rs6760073   | C | 0.0416  |
| rs78555567  | A | 0.0369  |
| rs9749801   | G | 0.017   |
| rs72770599  | C | -0.0391 |
| rs73220131  | G | 0.0678  |
| rs72933750  | C | 0.0526  |
| rs2167534   | A | -0.0225 |
| rs62157787  | G | 0.0597  |
| rs77027514  | C | 0.0923  |
| rs72948225  | C | -0.1501 |
| rs11678849  | A | 0.0212  |
| rs111896978 | T | 0.0245  |
| rs113008956 | T | 0.099   |
| rs112058555 | T | 0.0608  |
| rs62132793  | G | 0.0519  |
| rs6751256   | C | 0.0315  |



|             |   |         |
|-------------|---|---------|
| rs736096    | C | 0.0177  |
| rs4853401   | A | 0.0171  |
| rs80048379  | A | 0.0429  |
| rs2234675   | T | -0.046  |
| rs2109820   | G | -0.0239 |
| rs7566988   | G | 0.0173  |
| rs6531084   | G | 0.0291  |
| rs79587161  | C | 0.0976  |
| rs77863845  | A | -0.0656 |
| rs76917316  | G | 0.0483  |
| rs143115032 | A | 0.1512  |
| rs112057345 | A | 0.0442  |
| rs6753091   | A | 0.02    |
| rs6746098   | G | 0.0207  |
| rs3893079   | G | 0.0369  |
| rs76198282  | A | 0.0753  |
| rs115323792 | A | 0.1044  |
| rs17586186  | A | 0.0575  |
| rs75894859  | G | -0.0389 |
| rs139163929 | A | -0.0822 |
| rs147712762 | C | 0.1207  |
| rs72832112  | A | 0.0522  |
| rs9789420   | T | -0.0165 |
| rs116761234 | T | 0.0741  |
| rs148016691 | A | -0.085  |
| rs112382383 | G | 0.0648  |
| rs11124907  | T | 0.0267  |
| rs62164526  | A | 0.0619  |
| rs2199886   | G | -0.0515 |
| rs4848175   | T | -0.0548 |
| rs144673206 | T | 0.1102  |
| rs2348094   | A | 0.0231  |
| rs145197658 | A | -0.094  |
| rs34379959  | C | -0.0387 |
| rs700859    | A | -0.0782 |
| rs13017259  | T | 0.0227  |
| rs139231177 | G | 0.0705  |
| rs114981537 | C | 0.1137  |
| rs62175457  | T | -0.0415 |
| rs1914259   | G | 0.0171  |
| rs147534394 | C | -0.0986 |
| rs335136    | C | -0.0235 |
| rs10164847  | A | -0.0272 |
| rs10180067  | T | -0.0525 |
| rs74650819  | A | -0.051  |
| rs4666184   | A | -0.017  |
| rs114215383 | C | 0.0848  |

|             |   |         |
|-------------|---|---------|
| rs13021727  | C | -0.0347 |
| rs115601493 | T | -0.0818 |
| rs75770873  | C | -0.0912 |
| rs80103591  | A | 0.1054  |
| rs114724940 | T | -0.1061 |
| rs12611441  | A | -0.0257 |
| rs143647955 | A | 0.1263  |
| rs62165240  | A | 0.0369  |
| rs10185027  | A | -0.0159 |
| rs16841750  | G | -0.0663 |
| rs72816652  | T | -0.0577 |
| rs16823014  | A | 0.036   |
| rs9309423   | G | 0.0177  |
| rs2562834   | C | 0.0216  |
| rs12472309  | T | -0.0731 |
| rs2060041   | C | -0.0177 |
| rs4676406   | G | -0.0178 |
| rs16987112  | G | 0.0311  |
| rs1877908   | G | -0.0158 |
| rs3181213   | T | 0.0308  |
| rs116590637 | A | -0.0675 |
| rs79241028  | G | 0.042   |
| rs17817559  | G | 0.0218  |
| rs56193318  | A | 0.1027  |
| rs116837092 | C | 0.0854  |
| rs17243975  | G | 0.0346  |
| rs34529492  | G | 0.0199  |
| rs150363479 | C | -0.0594 |
| rs138797186 | G | 0.0556  |
| rs13023497  | C | -0.0195 |
| rs114015194 | C | -0.0636 |
| rs72621552  | A | 0.0662  |
| rs80255003  | T | 0.0814  |
| rs10208405  | A | -0.0188 |
| rs79867154  | C | 0.0815  |
| rs13387991  | G | 0.056   |
| rs1173175   | T | -0.0216 |
| rs56026079  | A | -0.0181 |
| rs114485796 | G | -0.0657 |
| rs78568131  | G | -0.102  |
| rs111699481 | T | -0.1334 |
| rs72847328  | G | 0.0608  |
| rs110522    | C | -0.0207 |
| rs6709622   | G | -0.0171 |
| rs11904702  | T | 0.0211  |
| rs2881878   | C | 0.069   |
| rs10170852  | G | -0.0406 |

|             |   |         |
|-------------|---|---------|
| rs140981178 | C | 0.0711  |
| rs149388918 | A | 0.0992  |
| rs76958562  | A | 0.054   |
| rs6708982   | A | -0.0647 |
| rs11674430  | C | 0.0193  |
| rs148867344 | T | 0.051   |
| rs34151019  | T | -0.0285 |
| rs6760258   | T | 0.0451  |
| rs141805263 | G | 0.0723  |
| rs11681847  | G | 0.0208  |
| rs112134695 | G | 0.0831  |
| rs72829507  | A | -0.0878 |
| rs72817090  | T | 0.0592  |
| rs115695160 | A | 0.0882  |
| rs59953882  | G | 0.0189  |
| rs1686475   | G | -0.0223 |
| rs115839356 | A | 0.0824  |
| rs75859075  | T | 0.0334  |
| rs112211517 | T | 0.0271  |
| rs114165112 | G | 0.0786  |
| rs13413530  | G | -0.0224 |
| rs1868024   | C | -0.0202 |
| rs80079689  | C | -0.0578 |
| rs150077291 | G | -0.0801 |
| rs72921148  | G | 0.0267  |
| rs115669327 | T | -0.1233 |
| rs77203067  | T | -0.0853 |
| rs62143881  | A | 0.0923  |
| rs35812538  | T | -0.0194 |
| rs111685059 | A | 0.1366  |
| rs114224796 | T | 0.0893  |
| rs17014022  | T | -0.0783 |
| rs3792195   | G | -0.0241 |
| rs11690793  | A | -0.0173 |
| rs11688084  | G | -0.0566 |
| rs2881047   | G | -0.0345 |
| rs2600663   | G | 0.0159  |
| rs147834742 | A | 0.1116  |
| rs10496465  | G | -0.0219 |
| rs142072272 | T | -0.1111 |
| rs115389311 | T | 0.0794  |
| rs11690746  | C | -0.0304 |
| rs77699096  | T | 0.1091  |
| rs34961552  | G | -0.0582 |
| rs6753881   | G | 0.0278  |
| rs17686549  | G | -0.0189 |
| rs17186256  | T | 0.0188  |

|             |   |         |
|-------------|---|---------|
| rs72878439  | T | 0.1054  |
| rs78914419  | G | 0.0334  |
| rs17703039  | G | 0.0905  |
| rs147978504 | A | -0.0708 |
| rs143786942 | C | 0.1149  |
| rs77484248  | T | -0.0975 |
| rs116169130 | A | 0.0777  |
| rs4670788   | T | 0.0371  |
| rs73924601  | T | 0.044   |
| rs829953    | T | 0.0571  |
| rs75391293  | G | 0.0559  |
| rs113096986 | A | 0.1122  |
| rs11123168  | T | -0.0193 |
| rs155613    | C | -0.0444 |
| rs12053164  | G | -0.024  |
| rs115469485 | G | -0.0552 |
| rs149066214 | A | 0.064   |
| rs57887593  | C | 0.0305  |
| rs34645708  | A | 0.0805  |
| rs13020930  | A | -0.0215 |
| rs4372900   | C | 0.022   |
| rs955414    | C | 0.0336  |
| rs78102676  | G | 0.0689  |
| rs76394402  | C | 0.1038  |
| rs116072963 | T | -0.0806 |
| rs75254704  | T | 0.081   |
| rs34084428  | T | -0.0578 |
| rs115887834 | G | 0.0778  |
| rs1035671   | T | 0.0334  |
| rs116051828 | A | 0.0605  |
| rs11897407  | A | 0.0338  |
| rs874594    | C | 0.0221  |
| rs28577916  | A | 0.0212  |
| rs76984568  | T | 0.0285  |
| rs72781621  | A | 0.0904  |
| rs115208774 | T | 0.073   |
| rs72895512  | G | -0.047  |
| rs669749    | G | -0.0468 |
| rs76379517  | T | -0.0849 |
| rs17050128  | T | 0.0463  |
| rs3821224   | G | -0.0164 |
| rs17009204  | A | -0.0554 |
| rs10193137  | T | 0.0164  |
| rs138392697 | T | 0.0257  |
| rs79813315  | A | -0.0271 |
| rs77798223  | G | -0.0359 |
| rs77297268  | C | -0.0347 |

|             |   |         |
|-------------|---|---------|
| rs138927239 | C | -0.0932 |
| rs6753378   | G | -0.0162 |
| rs71420698  | A | -0.1118 |
| rs116435353 | T | -0.0558 |
| rs79175580  | G | -0.0209 |
| rs116780676 | T | 0.0576  |
| rs144655564 | A | 0.1224  |
| rs4663609   | T | 0.0183  |
| rs55682394  | C | 0.0187  |
| rs6712358   | C | 0.037   |
| rs375807    | G | 0.0291  |
| rs62277809  | A | 0.032   |
| rs6754030   | C | -0.019  |
| rs116710415 | G | 0.0786  |
| rs17490770  | A | -0.0347 |
| rs16828294  | C | -0.052  |
| rs112379020 | C | -0.0541 |
| rs75129798  | T | -0.0345 |
| rs13015195  | C | 0.0304  |
| rs1145069   | T | -0.0421 |
| rs891502    | C | 0.0261  |
| rs72779551  | T | -0.0262 |
| rs67863733  | A | 0.0529  |
| rs17014960  | G | 0.0844  |
| rs150628830 | G | 0.1314  |
| rs13388988  | G | -0.02   |
| rs4973512   | A | -0.0366 |
| rs141976901 | T | -0.1071 |
| rs2683815   | T | -0.0266 |
| rs851320    | G | -0.0185 |
| rs62137605  | G | -0.0973 |
| rs6711037   | G | -0.0193 |
| rs17026994  | T | 0.0546  |
| rs72822518  | A | 0.0544  |
| rs11124068  | T | 0.0255  |
| rs7421254   | A | -0.0159 |
| rs138506205 | A | -0.0932 |
| rs16858164  | G | -0.065  |
| rs74938873  | T | 0.0677  |
| rs76622265  | T | 0.0678  |
| rs4672662   | T | -0.0457 |
| rs62193802  | C | -0.0511 |
| rs7355380   | T | -0.0241 |
| rs79548417  | C | 0.0296  |
| rs78183251  | A | -0.1004 |
| rs6747728   | G | 0.0192  |
| rs866995    | G | 0.0197  |

|             |   |         |
|-------------|---|---------|
| rs115409144 | A | -0.0642 |
| rs35749198  | C | 0.0895  |
| rs115342053 | C | -0.0897 |
| rs4337503   | T | 0.0211  |
| rs62182434  | A | -0.0931 |
| rs1551838   | T | -0.0163 |
| rs16839837  | T | 0.0317  |
| rs147691555 | T | 0.089   |
| rs7586298   | T | -0.0199 |
| rs111751080 | G | -0.0985 |
| rs17199893  | G | 0.0976  |
| rs16794     | G | 0.0196  |
| rs74681955  | G | -0.0472 |
| rs2116436   | G | 0.0159  |
| rs2576742   | T | -0.0182 |
| rs143243305 | A | 0.0559  |
| rs144973556 | G | -0.0462 |
| rs2125925   | A | 0.0158  |
| rs114616387 | T | -0.1024 |
| rs34059016  | A | -0.0462 |
| rs3791297   | A | 0.034   |
| rs79285735  | G | 0.0273  |
| rs17349602  | A | 0.0687  |
| rs112089824 | A | -0.0424 |
| rs35599654  | A | 0.0202  |
| rs142146280 | G | -0.0612 |
| rs4331484   | A | 0.0184  |
| rs28551035  | G | 0.0487  |
| rs1615827   | C | -0.0165 |
| rs10204810  | G | 0.0211  |
| rs10175054  | C | -0.0174 |
| rs4549036   | T | -0.0453 |
| rs149176123 | C | 0.1273  |
| rs2110740   | C | 0.0172  |
| rs422702    | C | 0.0437  |
| rs59043440  | T | -0.1118 |
| rs61619102  | G | -0.0206 |
| rs1739555   | C | 0.0478  |
| rs115954472 | T | 0.0754  |
| rs17752904  | G | 0.0344  |
| rs112851823 | G | -0.0957 |
| rs3101043   | T | -0.0173 |
| rs56204139  | C | 0.0746  |
| rs78180997  | T | -0.1386 |
| rs11676303  | C | 0.0173  |
| rs7560379   | G | 0.0452  |
| rs115669155 | T | -0.0751 |

|             |   |         |
|-------------|---|---------|
| rs142857402 | T | -0.0847 |
| rs1825430   | G | -0.063  |
| rs17729194  | A | -0.138  |
| rs76913840  | A | 0.0323  |
| rs6757304   | T | 0.0169  |
| rs6710481   | C | -0.0292 |
| rs114719776 | T | 0.1204  |
| rs77186080  | G | 0.1383  |
| rs1896826   | G | -0.0164 |
| rs148952606 | C | 0.0892  |
| rs2471403   | G | 0.0153  |
| rs55991763  | C | 0.0236  |
| rs11900892  | A | 0.0368  |
| rs2204204   | C | -0.0188 |
| rs6724542   | C | 0.0226  |
| rs114097040 | G | -0.0944 |
| rs1815998   | T | 0.0482  |
| rs72978910  | C | -0.0393 |
| rs1995496   | A | 0.018   |
| rs2197078   | G | -0.0157 |
| rs28529023  | C | -0.0333 |
| rs141911268 | T | -0.0913 |
| rs6709104   | A | -0.0179 |
| rs4390791   | G | 0.0181  |
| rs146102356 | T | 0.0598  |
| rs12691642  | G | 0.0157  |
| rs115566746 | A | -0.1045 |
| rs114650778 | G | 0.0549  |
| rs61605988  | C | -0.0671 |
| rs16864598  | T | 0.0597  |
| rs148966068 | A | -0.0937 |
| rs1862981   | T | -0.0158 |
| rs77771533  | A | -0.1185 |
| rs6753302   | C | 0.0355  |
| rs76685595  | T | 0.0748  |
| rs1463990   | G | -0.0187 |
| rs35521319  | T | 0.0196  |
| rs426128    | C | 0.0159  |
| rs115816134 | A | 0.1055  |
| rs4849999   | T | 0.03    |
| rs1105751   | C | -0.045  |
| rs13427205  | A | 0.0225  |
| rs6712934   | C | 0.0163  |
| rs143210754 | T | -0.0534 |
| rs35437121  | T | 0.0402  |
| rs67082009  | A | 0.0218  |
| rs111317887 | G | -0.0661 |

|             |   |         |
|-------------|---|---------|
| rs77810098  | A | -0.0363 |
| rs150874273 | T | -0.0788 |
| rs2192941   | T | 0.0249  |
| rs140406176 | T | 0.1032  |
| rs3102948   | C | -0.021  |
| rs72821293  | G | -0.0963 |
| rs11885052  | A | -0.0175 |
| rs75505519  | A | 0.0534  |
| rs6741049   | T | 0.0173  |
| rs116090981 | G | 0.0932  |
| rs149282521 | A | 0.0534  |
| rs11679070  | T | -0.0437 |
| rs62184409  | A | 0.0419  |
| rs56331748  | A | 0.0233  |
| rs2087172   | C | -0.0186 |
| rs35890916  | A | 0.0275  |
| rs4558548   | C | -0.0174 |
| rs72611930  | C | 0.0305  |
| rs147147061 | G | -0.1146 |
| rs13023611  | A | -0.07   |
| rs17027464  | A | -0.0306 |
| rs72847333  | C | 0.0294  |
| rs713397    | G | 0.0241  |
| rs76433480  | C | -0.0334 |
| rs76302776  | C | 0.0236  |
| rs141987304 | T | -0.0678 |
| rs114625002 | A | -0.0934 |
| rs6723790   | C | -0.0173 |
| rs6708842   | G | 0.0254  |
| rs987320    | C | -0.0373 |
| rs140199701 | C | -0.0741 |
| rs72836111  | C | -0.0551 |
| rs114148903 | A | -0.0649 |
| rs4325692   | A | -0.0312 |
| rs2373224   | C | 0.0188  |
| rs71446081  | G | -0.0571 |
| rs4328661   | C | -0.022  |
| rs148038430 | A | -0.1136 |
| rs4672251   | A | -0.0169 |
| rs10205836  | A | 0.0343  |
| rs34759639  | C | 0.0787  |
| rs55637672  | T | 0.0536  |
| rs2264234   | T | 0.0724  |
| rs617005    | C | 0.0728  |
| rs2971834   | G | -0.0161 |
| rs79410067  | T | 0.0868  |
| rs77897962  | G | -0.0361 |



|             |   |         |
|-------------|---|---------|
| rs4849103   | A | 0.1192  |
| rs72901987  | C | -0.0845 |
| rs78711641  | C | -0.0563 |
| rs6753682   | T | -0.0636 |
| rs12464046  | A | -0.0534 |
| rs35199127  | A | -0.0638 |
| rs1358421   | A | -0.0179 |
| rs111299588 | A | 0.0326  |
| rs72833001  | T | -0.044  |
| rs262278    | G | -0.0177 |
| rs55674327  | T | -0.0267 |
| rs11680923  | G | 0.0342  |
| rs74618834  | T | 0.1095  |
| rs35882341  | T | -0.0462 |
| rs13405257  | T | -0.0356 |
| rs6709236   | A | 0.0371  |
| rs62165919  | A | 0.0256  |
| rs139093225 | T | -0.059  |
| rs7583326   | T | -0.0172 |
| rs1112113   | G | -0.0482 |
| rs78272924  | C | -0.0401 |
| rs62145430  | T | 0.0213  |
| rs114158285 | T | 0.0917  |
| rs2059420   | A | 0.1096  |
| rs41268649  | T | 0.0433  |
| rs11691693  | A | 0.0209  |
| rs13429334  | T | -0.0246 |
| rs4258805   | T | 0.0322  |
| rs2595169   | A | 0.0246  |
| rs116780452 | G | 0.0609  |
| rs2028405   | G | 0.0251  |
| rs77050888  | T | 0.079   |
| rs57725791  | T | -0.0247 |
| rs36112213  | G | 0.0979  |
| rs76042679  | G | 0.0813  |
| rs143258681 | T | -0.1254 |
| rs139753397 | G | 0.0569  |
| rs143825529 | A | -0.0769 |
| rs10203842  | G | 0.085   |
| rs7605095   | G | 0.0266  |
| rs4972941   | A | 0.0235  |
| rs62105781  | C | -0.0385 |
| rs139562447 | G | 0.0648  |
| rs112959636 | A | -0.0982 |
| rs77465035  | T | 0.0304  |
| rs4674579   | T | -0.0211 |
| rs1447562   | T | -0.0239 |

|             |   |         |
|-------------|---|---------|
| rs6546535   | T | 0.018   |
| rs7575040   | G | -0.0727 |
| rs76508757  | G | 0.0614  |
| rs13410002  | G | -0.0686 |
| rs1629655   | G | -0.0258 |
| rs809538    | G | 0.0313  |
| rs74639782  | T | -0.0321 |
| rs80355192  | A | -0.112  |
| rs72638286  | G | -0.106  |
| rs17846971  | T | -0.0547 |
| rs141645791 | T | -0.073  |
| rs1992902   | G | -0.0267 |
| rs7592591   | C | 0.0205  |
| rs79455276  | T | 0.0909  |
| rs7585179   | A | -0.0283 |
| rs77571598  | A | -0.0855 |
| rs149241255 | G | 0.1075  |
| rs114859965 | A | -0.0616 |
| rs114694922 | C | 0.0503  |
| rs116091104 | C | -0.0618 |
| rs6714675   | T | 0.0219  |
| rs77413154  | G | 0.0718  |
| rs72951983  | T | 0.0862  |
| rs139037225 | A | 0.0998  |
| rs138449147 | G | 0.0621  |
| rs13400033  | T | -0.0402 |
| rs1868022   | A | 0.0271  |
| rs61712770  | T | -0.0321 |
| rs151046388 | A | -0.068  |
| rs727327    | T | 0.0185  |
| rs115953836 | G | 0.0862  |
| rs72631569  | G | -0.066  |
| rs116521223 | T | 0.0575  |
| rs115995068 | A | 0.0794  |
| rs4458167   | A | -0.0159 |
| rs74889651  | C | -0.1059 |
| rs139890152 | T | 0.0933  |
| rs139022746 | G | 0.0807  |
| rs72844718  | A | -0.0834 |
| rs74539420  | A | 0.1012  |
| rs151015912 | T | 0.0624  |
| rs62153161  | T | 0.077   |
| rs71428585  | T | -0.0763 |
| rs75176694  | A | -0.0561 |
| rs140372015 | G | -0.0953 |
| rs116496030 | T | -0.0916 |
| rs12993395  | G | 0.0177  |

|             |   |         |
|-------------|---|---------|
| rs115464068 | A | -0.0516 |
| rs78370222  | A | 0.1182  |
| rs6707976   | A | 0.0706  |
| rs2011559   | G | 0.0215  |
| rs149327539 | A | -0.1081 |
| rs4669802   | A | 0.0175  |
| rs17009143  | G | 0.0284  |
| rs114720639 | T | 0.0439  |
| rs2966379   | C | -0.0193 |
| rs56197037  | C | 0.0279  |
| rs4386286   | A | -0.0212 |
| rs62174263  | C | 0.0451  |
| rs55846340  | A | -0.017  |
| rs12477385  | T | 0.0187  |
| rs80179742  | C | 0.0383  |
| rs11892764  | G | -0.0175 |
| rs11893991  | A | -0.0165 |
| rs78057555  | A | 0.0574  |
| rs4907304   | T | 0.0193  |
| rs72847897  | G | 0.0475  |
| rs7561224   | G | -0.0199 |
| rs145888255 | A | 0.0878  |
| rs10192046  | T | -0.0667 |
| rs17764121  | C | 0.0475  |
| rs12993602  | T | 0.134   |
| rs2241134   | T | 0.0751  |
| rs115947028 | G | 0.0737  |
| rs116266883 | G | -0.1144 |
| rs140886561 | T | -0.0385 |
| rs72783713  | C | 0.053   |
| rs16840578  | C | -0.034  |
| rs114568333 | T | 0.0479  |
| rs115198554 | G | -0.0738 |
| rs150750442 | T | 0.1076  |
| rs4671852   | G | -0.017  |
| rs72836503  | C | -0.0683 |
| rs79981595  | C | -0.1157 |
| rs74970907  | A | 0.0486  |
| rs2083103   | A | -0.0399 |
| rs17710829  | C | 0.0476  |
| rs76402238  | A | -0.083  |
| rs78271145  | A | 0.1009  |
| rs80332201  | G | -0.0415 |
| rs6431234   | C | -0.037  |
| rs60026782  | A | 0.0234  |
| rs72910161  | A | -0.0431 |
| rs6739494   | C | -0.0154 |

|             |   |         |
|-------------|---|---------|
| rs35964210  | A | 0.069   |
| rs1561516   | C | 0.0217  |
| rs142891989 | G | 0.129   |
| rs10166254  | G | 0.0154  |
| rs4530357   | C | -0.0162 |
| rs4832469   | A | -0.0231 |
| rs12995458  | C | -0.0691 |
| rs148359689 | G | 0.1225  |
| rs72947754  | T | 0.0706  |
| rs1446925   | T | 0.1378  |
| rs10179555  | A | 0.04    |
| rs113230662 | A | 0.04    |
| rs36111269  | G | 0.0219  |
| rs76276203  | T | 0.0466  |
| rs881922    | A | -0.0178 |
| rs111240328 | T | -0.1392 |
| rs78029512  | C | -0.0751 |
| rs7578528   | T | -0.0436 |
| rs17365432  | G | 0.0175  |
| rs114800861 | A | -0.0823 |
| rs11888704  | T | 0.048   |
| rs115229923 | C | -0.0978 |
| rs116381290 | C | 0.1221  |
| rs75243596  | T | -0.0552 |
| rs76873063  | A | -0.0712 |
| rs6754924   | T | 0.0152  |
| rs16866746  | G | -0.0555 |
| rs74987308  | T | -0.0488 |
| rs112605502 | T | -0.0699 |
| rs2528624   | C | 0.0216  |
| rs149326209 | A | 0.0731  |
| rs114953486 | T | 0.0894  |
| rs4149506   | G | 0.0637  |
| rs7591129   | T | 0.0434  |
| rs115154050 | A | 0.0637  |
| rs4973677   | A | 0.096   |
| rs77774334  | G | -0.0614 |
| rs77724191  | T | 0.1252  |
| rs76114856  | T | -0.0513 |
| rs78093095  | A | 0.0371  |
| rs71418752  | T | -0.0487 |
| rs7600644   | T | 0.0565  |
| rs6760091   | A | 0.0889  |
| rs111838684 | G | 0.0913  |
| rs16835810  | C | 0.0392  |
| rs34540379  | T | 0.0534  |
| rs77723303  | A | -0.0338 |

|             |   |         |
|-------------|---|---------|
| rs150522933 | G | 0.1178  |
| rs1011221   | C | -0.0203 |
| rs17346504  | T | -0.0285 |
| rs10221718  | A | 0.0169  |
| rs78427088  | A | -0.1022 |
| rs1250223   | T | 0.0225  |
| rs10932669  | T | 0.023   |
| rs113849934 | A | 0.0477  |
| rs61419309  | T | -0.0292 |
| rs74517425  | C | -0.0487 |
| rs12992833  | G | -0.0777 |
| rs17010436  | C | -0.038  |
| rs144104066 | T | -0.0737 |
| rs72889272  | A | -0.1117 |
| rs80164076  | A | -0.1221 |
| rs79616804  | T | -0.0603 |
| rs2044645   | T | 0.0528  |
| rs17403205  | G | 0.0801  |
| rs79749124  | C | -0.0391 |
| rs4234032   | C | 0.0172  |
| rs12710674  | T | -0.0328 |
| rs62129522  | T | 0.0405  |
| rs2457659   | A | -0.0229 |
| rs114577616 | C | -0.0457 |
| rs4668271   | C | 0.0195  |
| rs113562394 | G | 0.0681  |
| rs62178847  | A | -0.0617 |
| rs145582277 | A | 0.084   |
| rs9711675   | A | 0.0156  |
| rs56083959  | T | 0.064   |
| rs115662282 | C | -0.0981 |
| rs55696118  | T | 0.0476  |
| rs7588567   | C | -0.0256 |
| rs79182818  | A | 0.0691  |
| rs62161861  | A | -0.0203 |
| rs75747757  | C | 0.0257  |
| rs1522896   | T | 0.0177  |
| rs72899655  | T | 0.0432  |
| rs55891312  | A | -0.0493 |
| rs6730397   | A | -0.0475 |
| rs6733260   | G | 0.0345  |
| rs10197694  | T | -0.0155 |
| rs7586412   | T | 0.0172  |
| rs77684348  | G | 0.0852  |
| rs113358131 | T | -0.0465 |
| rs2287135   | C | -0.0203 |
| rs56130427  | A | -0.0318 |

|             |   |         |
|-------------|---|---------|
| rs17775134  | A | -0.0175 |
| rs116495042 | T | -0.1368 |
| rs78908445  | C | -0.0405 |
| rs4854350   | A | -0.0164 |
| rs62160576  | T | -0.0229 |
| rs28685161  | T | 0.0186  |
| rs114524133 | A | 0.1229  |
| rs74772048  | C | 0.0802  |
| rs287305    | G | -0.0174 |
| rs1448193   | T | 0.0218  |
| rs142597754 | C | 0.0962  |
| rs11690756  | T | -0.0513 |
| rs116659710 | G | 0.107   |
| rs6436018   | A | -0.0425 |
| rs12476880  | G | -0.0172 |
| rs6732639   | C | 0.0311  |
| rs7583550   | G | -0.0251 |
| rs2541999   | T | 0.0158  |
| rs112676728 | T | 0.0414  |
| rs2365207   | A | 0.0311  |
| rs147888096 | C | 0.0497  |
| rs115448318 | G | 0.0926  |
| rs57971073  | T | -0.0527 |
| rs55786137  | G | -0.0201 |
| rs72769634  | A | -0.1088 |
| rs1517026   | C | 0.0156  |
| rs11695927  | G | 0.0248  |
| rs78774123  | G | -0.0355 |
| rs142005574 | G | -0.0803 |
| rs13395092  | C | 0.0543  |
| rs73960916  | C | 0.0796  |
| rs62176515  | A | -0.0166 |
| rs78332132  | A | -0.0601 |
| rs72617009  | A | 0.0242  |
| rs72860358  | C | -0.0595 |
| rs115265723 | G | -0.0654 |
| rs138619274 | G | -0.0681 |
| rs13018474  | A | -0.0519 |
| rs72808853  | T | 0.0285  |
| rs145853876 | A | -0.083  |
| rs12988787  | G | -0.0163 |
| rs6744396   | T | 0.0186  |
| rs77964329  | A | -0.149  |
| rs1901905   | C | -0.0579 |
| rs62127490  | G | 0.0396  |
| rs1863146   | G | 0.0153  |
| rs78220722  | A | 0.0522  |

|             |   |         |
|-------------|---|---------|
| rs13005939  | T | -0.0212 |
| rs114072954 | T | 0.066   |
| rs17413812  | C | 0.0595  |
| rs9288531   | C | 0.0761  |
| rs72776443  | T | -0.053  |
| rs72893852  | G | 0.1051  |
| rs72827303  | A | -0.0515 |
| rs73003626  | T | 0.0289  |
| rs4459688   | A | -0.0216 |
| rs34787802  | G | -0.0332 |
| rs112325614 | A | -0.0423 |
| rs114531894 | C | 0.0794  |
| rs62138449  | A | 0.021   |
| rs9679402   | C | 0.0157  |
| rs17585471  | T | 0.0186  |
| rs79029350  | C | -0.0532 |
| rs10191741  | A | -0.101  |
| rs62192317  | T | 0.1133  |
| rs214040    | C | -0.0176 |
| rs139851206 | C | 0.0664  |
| rs72894233  | G | 0.0409  |
| rs115384524 | C | -0.1019 |
| rs1594399   | C | 0.0158  |
| rs66805082  | G | -0.0565 |
| rs17715426  | A | -0.0253 |
| rs10173791  | C | 0.0397  |
| rs76206055  | A | 0.0646  |
| rs12990417  | A | -0.0207 |
| rs79102875  | C | 0.0616  |
| rs116113646 | A | -0.065  |
| rs6708587   | T | -0.0252 |
| rs79533304  | C | 0.0524  |
| rs150982663 | T | -0.0692 |
| rs149228495 | T | -0.1842 |
| rs28690266  | T | -0.019  |
| rs141646433 | G | 0.088   |
| rs1371551   | T | -0.0173 |
| rs73005174  | A | 0.071   |
| rs11678427  | A | -0.0291 |
| rs12712960  | G | 0.0196  |
| rs17618119  | A | -0.0214 |
| rs11680582  | T | 0.0203  |
| rs146335121 | G | 0.1132  |
| rs144399071 | A | 0.1044  |
| rs72812449  | G | 0.0681  |
| rs17026339  | G | -0.0223 |
| rs6546072   | A | -0.0163 |

|             |   |         |
|-------------|---|---------|
| rs62161465  | T | 0.0619  |
| rs10210468  | C | 0.0163  |
| rs148938091 | T | 0.0926  |
| rs974694    | G | -0.0173 |
| rs112046031 | G | 0.0352  |
| rs72932552  | T | -0.0522 |
| rs146330614 | C | -0.0783 |
| rs7604487   | G | 0.0169  |
| rs72809864  | C | 0.0442  |
| rs76272480  | T | -0.0587 |
| rs56237297  | T | -0.0391 |
| rs2595199   | T | -0.0311 |
| rs1607639   | A | 0.0169  |
| rs72827243  | G | 0.0478  |
| rs6755004   | A | -0.0182 |
| rs75210644  | G | -0.0675 |
| rs4611605   | T | -0.0195 |
| rs13406739  | A | -0.0309 |
| rs72936907  | A | 0.0742  |
| rs80062637  | T | -0.0489 |
| rs11900351  | A | 0.1004  |
| rs115116987 | T | 0.0555  |
| rs73960213  | A | 0.0756  |
| rs13031139  | A | -0.0307 |
| rs60580226  | G | 0.0717  |
| rs149381797 | T | 0.0829  |
| rs10184742  | A | 0.0261  |
| rs13415131  | A | 0.0717  |
| rs11685214  | A | -0.0225 |
| rs10496176  | C | 0.0212  |
| rs72820275  | A | 0.0934  |
| rs2166524   | G | -0.0381 |
| rs62195000  | C | -0.0225 |
| rs111358402 | C | -0.0613 |
| rs11563199  | T | -0.0207 |
| rs77442798  | G | 0.0627  |
| rs7597992   | G | 0.0212  |
| rs17831311  | A | 0.0922  |
| rs112360708 | A | -0.024  |
| rs2711304   | T | -0.1095 |
| rs6723080   | T | 0.0207  |
| rs113310242 | C | 0.097   |
| rs4849908   | T | 0.0188  |
| rs62190577  | A | -0.1389 |
| rs116327131 | G | 0.0746  |
| rs6758313   | T | 0.0194  |
| rs72773952  | C | 0.0451  |



|             |   |         |
|-------------|---|---------|
| rs114233317 | G | -0.0338 |
| rs115969163 | T | 0.0656  |
| rs6723988   | C | -0.0156 |
| rs17415586  | A | 0.058   |
| rs77431001  | A | 0.0806  |
| rs113006258 | C | 0.0829  |
| rs34380107  | A | -0.0593 |
| rs3771229   | C | -0.0162 |
| rs78158108  | C | 0.0514  |
| rs934374    | A | -0.0413 |
| rs17571374  | C | 0.0176  |
| rs111990681 | T | -0.1071 |
| rs72621683  | A | -0.0198 |
| rs6746605   | T | 0.0403  |
| rs35497509  | G | 0.029   |
| rs75171459  | C | 0.0856  |
| rs74376971  | T | 0.0713  |
| rs12987873  | T | 0.1142  |
| rs12464913  | G | 0.0401  |
| rs59663338  | A | 0.0555  |
| rs141790703 | G | 0.0768  |
| rs13383201  | T | 0.0223  |
| rs12467989  | C | -0.0183 |
| rs10928913  | A | 0.0187  |
| rs1369542   | A | -0.015  |
| rs144131734 | A | -0.0725 |
| rs62170448  | G | -0.0195 |
| rs57628258  | A | 0.0428  |
| rs111445005 | T | -0.0674 |
| rs6756764   | A | -0.0171 |
| rs148177092 | C | -0.0693 |
| rs150659083 | G | -0.0642 |
| rs74914777  | A | 0.1341  |
| rs4527163   | T | 0.0231  |
| rs1478124   | A | 0.0154  |
| rs7558873   | A | -0.0268 |
| rs80304186  | A | 0.0302  |
| rs114347906 | T | 0.1026  |
| rs112454332 | G | 0.0351  |
| rs3102943   | C | -0.0371 |
| rs80015575  | A | 0.0626  |
| rs17037730  | G | -0.0214 |
| rs34347386  | T | -0.0487 |
| rs75066451  | T | 0.0564  |
| rs11126426  | T | 0.0155  |
| rs150748406 | C | -0.0726 |
| rs55948744  | G | 0.062   |

|             |   |         |
|-------------|---|---------|
| rs12717787  | A | 0.0226  |
| rs2165434   | C | 0.0186  |
| rs62158158  | T | -0.0401 |
| rs6750949   | C | -0.0516 |
| rs6712295   | G | 0.0176  |
| rs16840003  | A | 0.0221  |
| rs115320422 | A | -0.0375 |
| rs112301616 | G | -0.0446 |
| rs898239    | G | 0.018   |
| rs7556915   | G | -0.0152 |
| rs62130881  | A | 0.0419  |
| rs6434786   | T | 0.0229  |
| rs12472678  | T | -0.0221 |
| rs35119500  | C | -0.0252 |
| rs4853164   | A | -0.0402 |
| rs12469683  | G | -0.0153 |
| rs17819831  | C | 0.0886  |
| rs13011795  | G | -0.0151 |
| rs13025677  | A | -0.0362 |
| rs4669292   | A | 0.0213  |
| rs76595988  | A | -0.0431 |
| rs115279203 | A | -0.085  |
| rs6761635   | G | -0.0185 |
| rs12999094  | G | 0.0195  |
| rs11683855  | C | 0.0276  |
| rs12998601  | C | -0.0202 |
| rs11683290  | T | -0.0449 |
| rs6761221   | T | -0.018  |
| rs3811523   | G | -0.0316 |
| rs10172378  | A | -0.0206 |
| rs2421679   | T | -0.036  |
| rs1992149   | C | -0.0477 |
| rs17271239  | G | -0.0947 |
| rs11902592  | G | -0.1205 |
| rs1484686   | G | 0.027   |
| rs10928627  | A | 0.035   |
| rs76844946  | C | 0.0409  |
| rs35605432  | A | -0.0458 |
| rs140515222 | T | 0.0591  |
| rs1529096   | C | -0.0151 |
| rs6743595   | G | -0.0155 |
| rs140799004 | A | -0.0373 |
| rs13021269  | T | 0.0848  |
| rs4497887   | T | -0.0292 |
| rs79382642  | A | 0.0539  |
| rs11898663  | G | 0.0253  |
| rs62186806  | C | 0.0332  |

|             |   |         |
|-------------|---|---------|
| rs114684499 | T | 0.0503  |
| rs78224901  | A | 0.1041  |
| rs77359499  | A | 0.0535  |
| rs11688562  | T | -0.0202 |
| rs12711860  | C | 0.0252  |
| rs13023348  | T | 0.0326  |
| rs16856278  | G | -0.0549 |
| rs7583475   | C | -0.0193 |
| rs150595656 | C | -0.0715 |
| rs78198285  | A | -0.0423 |
| rs12618485  | T | -0.0261 |
| rs149904851 | T | 0.1397  |
| rs1447525   | A | 0.0166  |
| rs56007461  | G | 0.023   |
| rs72870583  | G | 0.0612  |
| rs13423567  | T | 0.0217  |
| rs145628344 | C | 0.0748  |
| rs144271405 | T | 0.0803  |
| rs35964219  | G | -0.0565 |
| rs7570893   | T | 0.0311  |
| rs115481878 | A | -0.0946 |
| rs72901598  | T | 0.1051  |
| rs13412035  | G | -0.0202 |
| rs1157164   | C | 0.0506  |
| rs2033649   | G | 0.016   |
| rs1469943   | G | 0.0245  |
| rs12990129  | G | -0.0168 |
| rs55755327  | A | -0.1051 |
| rs146144581 | T | 0.0815  |
| rs35927294  | A | -0.0222 |
| rs1430191   | C | 0.0152  |
| rs75812350  | G | -0.0477 |
| rs12468920  | G | -0.0164 |
| rs140651007 | T | -0.0871 |
| rs836653    | A | 0.0284  |
| rs72889619  | T | 0.0786  |
| rs115760396 | T | 0.0682  |
| rs11895557  | A | -0.0244 |
| rs13014551  | C | -0.0419 |
| rs72821214  | G | 0.0974  |
| rs7580205   | C | 0.0403  |
| rs993557    | A | 0.0153  |
| rs79589346  | A | 0.1496  |
| rs35079578  | A | 0.0292  |
| rs150032491 | A | -0.0835 |
| rs4072464   | A | -0.0229 |
| rs138283138 | G | -0.0427 |

|             |   |         |
|-------------|---|---------|
| rs76211426  | T | -0.0664 |
| rs6436445   | T | 0.0178  |
| rs116522853 | C | 0.0938  |
| rs76260822  | T | -0.079  |
| rs4669441   | A | -0.0167 |
| rs1997485   | T | -0.0182 |
| rs2034762   | A | -0.0161 |
| rs72779777  | T | 0.0718  |
| rs1823870   | C | 0.0767  |
| rs12612822  | T | 0.0253  |
| rs144626131 | A | 0.0839  |
| rs17242672  | T | 0.0813  |
| rs111964567 | T | -0.0729 |
| rs72943456  | A | -0.023  |
| rs7582960   | G | -0.0278 |
| rs10204755  | C | -0.0419 |
| rs17501532  | A | -0.0486 |
| rs114932088 | A | -0.0862 |
| rs72935115  | T | 0.1049  |
| rs413056    | C | 0.0166  |
| rs7588461   | G | 0.0255  |
| rs116685289 | C | 0.0679  |
| rs77219548  | A | 0.0513  |
| rs72945310  | T | -0.0477 |
| rs12694617  | G | -0.0175 |
| rs72831021  | A | 0.0521  |
| rs17197856  | C | -0.0472 |
| rs116526743 | C | 0.0971  |
| rs138488381 | C | -0.1115 |
| rs4078939   | T | 0.0384  |
| rs17578007  | C | 0.0213  |
| rs75302986  | A | -0.0816 |
| rs114127880 | T | 0.0527  |
| rs13408032  | T | 0.0271  |
| rs74754711  | G | 0.0657  |
| rs75976189  | C | 0.0709  |
| rs138541092 | A | -0.0616 |
| rs12475313  | A | -0.0302 |
| rs143814114 | T | -0.0871 |
| rs78608057  | A | 0.0475  |
| rs34300349  | A | 0.0711  |
| rs75751703  | T | -0.0583 |
| rs9288094   | T | -0.0155 |
| rs72990613  | C | 0.0361  |
| rs1913371   | C | -0.0162 |
| rs12694762  | T | -0.0244 |
| rs114087108 | G | -0.0561 |

|             |   |         |
|-------------|---|---------|
| rs115548877 | C | -0.0499 |
| rs116506968 | A | -0.0342 |
| rs75210465  | C | 0.0831  |
| rs76890523  | T | 0.0923  |
| rs7592323   | A | -0.0169 |
| rs150392003 | A | 0.1092  |
| rs147448188 | T | -0.1013 |
| rs139127662 | A | 0.0553  |
| rs441327    | A | -0.016  |
| rs35310143  | G | 0.0381  |
| rs62167082  | G | -0.0298 |
| rs112036828 | A | -0.0607 |
| rs142361103 | C | -0.0821 |
| rs7567984   | T | -0.0202 |
| rs28736442  | G | 0.0201  |
| rs77516439  | T | 0.049   |
| rs78696878  | A | -0.0269 |
| rs332103    | A | 0.0165  |
| rs3749124   | C | -0.0658 |
| rs78912583  | A | -0.1133 |
| rs3209790   | T | 0.033   |
| rs17768583  | C | -0.0405 |
| rs10194516  | G | 0.0155  |
| rs7569764   | A | -0.0166 |
| rs145781247 | G | 0.0505  |
| rs77327933  | T | -0.069  |
| rs4516432   | C | 0.0182  |
| rs71424358  | G | -0.0544 |
| rs72935095  | C | -0.0802 |
| rs115279622 | A | -0.0262 |
| rs76814826  | A | 0.0685  |
| rs61558368  | T | -0.0173 |
| rs6714869   | A | 0.017   |
| rs139820190 | T | 0.123   |
| rs79021468  | C | -0.038  |
| rs72829229  | A | -0.0467 |
| rs13018533  | C | -0.0432 |
| rs114105809 | C | -0.0421 |
| rs72983194  | G | 0.1087  |
| rs9710709   | G | 0.0198  |
| rs6433789   | G | -0.0168 |
| rs1996946   | A | 0.0637  |
| rs56986500  | T | 0.1102  |
| rs62162928  | A | 0.1241  |
| rs115903344 | A | -0.0715 |
| rs35129131  | T | -0.0507 |
| rs2871578   | G | -0.0248 |

|             |   |         |
|-------------|---|---------|
| rs72838523  | A | -0.0615 |
| rs3106690   | A | 0.0301  |
| rs72959512  | T | -0.0768 |
| rs72779695  | T | 0.0231  |
| rs114858021 | T | 0.0754  |
| rs934822    | A | -0.0186 |
| rs139771256 | C | 0.0837  |
| rs11096508  | A | -0.016  |
| rs1517347   | C | 0.0163  |
| rs62191582  | C | -0.0795 |
| rs79763165  | A | 0.0687  |
| rs11126811  | T | -0.018  |
| rs75822005  | C | 0.0769  |
| rs73048581  | T | 0.0507  |
| rs138186690 | T | 0.082   |
| rs57585099  | G | 0.0379  |
| rs150393357 | G | 0.0888  |
| rs113201217 | T | -0.0623 |
| rs10779906  | G | 0.0176  |
| rs7370078   | A | -0.0204 |
| rs59260995  | C | 0.0157  |
| rs6747920   | A | 0.0587  |
| rs7569578   | A | 0.034   |
| rs4832376   | T | -0.0204 |
| rs4851593   | G | -0.0164 |
| rs734054    | T | 0.0479  |
| rs10195813  | C | -0.0271 |
| rs1876832   | A | 0.0211  |
| rs77198231  | T | -0.0446 |
| rs72777690  | A | 0.0301  |
| rs116002372 | T | -0.1037 |
| rs13029552  | C | -0.0261 |
| rs17012963  | A | -0.0284 |
| rs62140299  | T | 0.0269  |
| rs10451617  | T | 0.0171  |
| rs77643703  | T | -0.0351 |
| rs141791768 | A | 0.0743  |
| rs115591786 | A | 0.0365  |
| rs28727492  | G | 0.0421  |
| rs9789689   | G | -0.0557 |
| rs115023505 | A | 0.0721  |
| rs75418345  | G | 0.057   |
| rs147992705 | T | 0.1454  |
| rs13008235  | C | -0.0159 |
| rs28369979  | C | 0.0525  |
| rs10185841  | T | -0.0167 |
| rs77145485  | G | -0.0334 |

|             |   |         |
|-------------|---|---------|
| rs75732007  | C | 0.0465  |
| rs7583207   | C | 0.0403  |
| rs28966405  | G | 0.0557  |
| rs830031    | T | -0.0162 |
| rs113192850 | T | 0.0759  |
| rs7422672   | A | 0.025   |
| rs879072    | C | 0.0622  |
| rs17619532  | G | -0.0249 |
| rs115556223 | C | -0.1015 |
| rs6750708   | G | 0.0562  |
| rs143015493 | A | -0.1291 |
| rs17537701  | A | -0.0193 |
| rs1448835   | A | -0.1272 |
| rs55829163  | T | -0.0663 |
| rs74796687  | C | -0.1153 |
| rs7602088   | G | 0.0158  |
| rs2337382   | A | 0.0146  |
| rs17535346  | A | -0.0873 |
| rs114838449 | G | -0.0413 |
| rs79591770  | G | 0.045   |
| rs16866027  | C | 0.046   |
| rs79361825  | C | 0.1063  |
| rs116093037 | G | -0.0437 |
| rs4971621   | T | 0.0151  |
| rs13005050  | C | 0.0262  |
| rs2377844   | A | 0.0181  |
| rs79497180  | A | 0.0452  |
| rs11904322  | G | 0.0195  |
| rs35145369  | C | 0.0699  |
| rs112472704 | T | 0.0487  |
| rs143508793 | A | -0.1095 |
| rs4148770   | G | 0.0515  |
| rs12052345  | G | -0.0217 |
| rs17602324  | G | 0.0296  |
| rs78005148  | C | -0.0375 |
| rs17349763  | T | 0.0327  |
| rs72816668  | T | 0.083   |
| rs140009341 | A | -0.0661 |
| rs114110185 | T | -0.1046 |
| rs3770211   | T | 0.0179  |
| rs79467393  | T | -0.0836 |
| rs144402881 | T | -0.099  |
| rs76364775  | T | -0.0404 |
| rs77553496  | G | -0.0282 |
| rs7420527   | A | 0.0379  |
| rs848534    | T | 0.0173  |
| rs4296402   | A | 0.0333  |

|             |   |         |
|-------------|---|---------|
| rs116532679 | T | -0.1449 |
| rs62189226  | C | -0.0667 |
| rs72964922  | A | 0.0482  |
| rs17039351  | T | -0.0788 |
| rs13394266  | T | 0.0198  |
| rs6717904   | A | 0.0179  |
| rs165049    | T | -0.0253 |
| rs2553636   | A | 0.0347  |
| rs147503209 | T | -0.1074 |
| rs17453375  | T | 0.0391  |
| rs112111607 | A | 0.0319  |
| rs6740668   | T | 0.0274  |
| rs520102    | C | 0.0191  |
| rs2192669   | T | -0.0163 |
| rs61762247  | A | -0.0811 |
| rs34035427  | A | 0.0448  |
| rs615415    | A | -0.0183 |
| rs111611730 | T | 0.027   |
| rs112991277 | T | -0.0491 |
| rs1344833   | T | 0.054   |
| rs114173446 | A | 0.0616  |
| rs76468096  | T | -0.0248 |
| rs13021676  | G | 0.0264  |
| rs77290723  | G | 0.0741  |
| rs12994538  | A | 0.0722  |
| rs72979490  | A | 0.0339  |
| rs4663434   | A | -0.0184 |
| rs11691365  | A | -0.0182 |
| rs74648934  | A | 0.0934  |
| rs7588859   | T | 0.0387  |
| rs116136262 | T | 0.1098  |
| rs11684463  | T | -0.0163 |
| rs77647703  | G | 0.0895  |
| rs139504409 | C | -0.0947 |
| rs1866240   | T | 0.0196  |
| rs111376368 | A | 0.0698  |
| rs62193866  | A | -0.0168 |
| rs10490680  | G | 0.0935  |
| rs75529147  | A | -0.0781 |
| rs10165831  | C | 0.0181  |
| rs138648456 | T | 0.086   |
| rs17010638  | G | 0.0656  |
| rs1982411   | A | 0.0265  |
| rs6738051   | A | 0.0805  |
| rs78329337  | G | 0.0682  |
| rs10497121  | T | 0.0557  |
| rs115854633 | T | 0.081   |



|             |   |         |
|-------------|---|---------|
| rs17306023  | C | -0.0776 |
| rs13393316  | G | 0.0235  |
| rs13382449  | C | -0.0167 |
| rs148995428 | A | 0.0493  |
| rs17781671  | A | -0.0276 |
| rs2365300   | G | -0.0197 |
| rs114054556 | C | 0.1112  |
| rs11466191  | G | 0.0182  |
| rs58129446  | T | -0.0743 |
| rs75499957  | A | 0.1292  |
| rs1004651   | A | 0.0191  |
| rs4487082   | G | -0.0279 |
| rs142470101 | T | 0.0921  |
| rs80090710  | C | 0.0298  |
| rs113128473 | C | 0.0189  |
| rs10190119  | T | -0.0612 |
| rs17217753  | G | 0.0498  |
| rs73106559  | G | 0.0642  |
| rs10184564  | A | 0.0175  |
| rs72777977  | T | 0.0906  |
| rs145946489 | A | 0.0927  |
| rs16823360  | C | 0.0226  |
| rs6544382   | G | 0.0301  |
| rs72862947  | G | -0.0898 |
| rs7595633   | G | -0.0156 |
| rs3755295   | G | -0.0153 |
| rs12475774  | T | 0.0553  |
| rs1438014   | G | -0.0185 |
| rs13386875  | C | 0.0185  |
| rs140844120 | G | 0.0754  |
| rs17829933  | A | -0.0165 |
| rs77490311  | G | -0.0506 |
| rs139273311 | T | -0.0808 |
| rs1989717   | G | -0.0183 |
| rs1882675   | A | -0.0413 |
| rs7573804   | C | -0.0418 |
| rs115117705 | C | -0.0752 |
| rs116211957 | G | 0.0463  |
| rs79349128  | T | 0.0768  |
| rs10439377  | C | -0.0149 |
| rs4670906   | G | -0.0155 |
| rs7576760   | C | -0.0165 |
| rs77283732  | C | 0.0862  |
| rs1003187   | A | -0.0162 |
| rs112754343 | G | -0.0509 |
| rs72887783  | G | 0.0563  |
| rs145019985 | A | -0.0744 |

|             |   |         |
|-------------|---|---------|
| rs72790985  | G | -0.0189 |
| rs62127483  | C | 0.0787  |
| rs2447476   | C | 0.0195  |
| rs57550849  | A | -0.108  |
| rs13413726  | T | 0.0151  |
| rs6713264   | A | -0.0241 |
| rs6731881   | A | -0.0193 |
| rs140284176 | A | -0.0522 |
| rs10185344  | G | 0.0239  |
| rs149349301 | T | -0.058  |
| rs112803623 | T | -0.0192 |
| rs76932926  | T | 0.0312  |
| rs75990977  | A | 0.0357  |
| rs72933863  | A | 0.0912  |
| rs75898590  | G | -0.0808 |
| rs6747687   | T | 0.0162  |
| rs114262379 | T | 0.0523  |
| rs146201961 | C | 0.0438  |
| rs76408913  | A | 0.0391  |
| rs13007476  | A | 0.0148  |
| rs35272517  | G | 0.0492  |
| rs112407528 | A | 0.1019  |
| rs10928827  | A | -0.0164 |
| rs75251337  | T | 0.0236  |
| rs78712069  | G | -0.0845 |
| rs79762920  | A | 0.0734  |
| rs56076952  | T | 0.0281  |
| rs12693203  | T | 0.0156  |
| rs4853550   | G | 0.0238  |
| rs7585540   | C | -0.0784 |
| rs13402702  | G | -0.0194 |
| rs6545073   | A | -0.015  |
| rs12987402  | C | -0.0158 |
| rs62132110  | A | 0.0455  |
| rs75475960  | G | 0.0448  |
| rs4852839   | T | -0.0175 |
| rs67274598  | C | -0.0163 |
| rs2231898   | T | 0.0158  |
| rs6745077   | A | -0.0287 |
| rs141185830 | A | 0.081   |
| rs79229635  | A | 0.039   |
| rs147457567 | G | -0.0507 |
| rs60686863  | T | -0.0166 |
| rs115567527 | C | -0.0814 |
| rs62129879  | A | -0.0366 |
| rs62142469  | C | -0.0334 |
| rs75690432  | A | -0.0743 |

|             |   |         |
|-------------|---|---------|
| rs76849103  | G | -0.1004 |
| rs115892947 | A | 0.0749  |
| rs138729905 | A | 0.072   |
| rs13384232  | A | 0.0334  |
| rs33998921  | C | -0.0232 |
| rs6433199   | C | -0.016  |
| rs6723231   | G | -0.0455 |
| rs75290983  | A | 0.0762  |
| rs35052538  | G | -0.0472 |
| rs149515078 | G | 0.0761  |
| rs114003282 | A | 0.0629  |
| rs79186150  | A | 0.041   |
| rs302678    | G | 0.0166  |
| rs72839903  | C | -0.0471 |
| rs76903598  | G | -0.0628 |
| rs143142190 | G | -0.0579 |
| rs144343870 | A | -0.0996 |
| rs2442086   | T | -0.0148 |
| rs115185046 | T | -0.0821 |
| rs115948672 | C | 0.0558  |
| rs55917643  | C | -0.0243 |
| rs13007920  | T | 0.0326  |
| rs12712655  | C | -0.0247 |
| rs76710528  | C | 0.0338  |
| rs6715913   | C | 0.0618  |
| rs72985705  | T | 0.0866  |
| rs72780329  | A | -0.0389 |
| rs6546920   | A | 0.0212  |
| rs115852609 | A | 0.0649  |
| rs74479109  | G | -0.0512 |
| rs11096675  | A | -0.0172 |
| rs116442776 | G | -0.0889 |
| rs75952703  | G | 0.0857  |
| rs314700    | C | 0.0151  |
| rs74818338  | A | 0.0406  |
| rs62191712  | C | -0.0584 |
| rs73914199  | C | 0.0267  |
| rs77923242  | T | 0.0465  |
| rs2351634   | C | 0.0405  |
| rs116670745 | G | 0.0173  |
| rs16866293  | A | -0.0662 |
| rs6756207   | C | 0.0219  |
| rs77342590  | C | -0.0478 |
| rs13418294  | C | 0.0429  |
| rs72852553  | T | -0.0357 |
| rs13416583  | C | 0.0825  |
| rs77964171  | C | 0.0569  |

|             |   |         |
|-------------|---|---------|
| rs13007910  | T | 0.0153  |
| rs2121914   | T | -0.019  |
| rs78346616  | A | 0.0651  |
| rs1349827   | T | 0.0157  |
| rs10175646  | T | -0.077  |
| rs12467018  | A | -0.0464 |
| rs115133869 | A | 0.0732  |
| rs7576107   | C | -0.0865 |
| rs62147111  | T | 0.0776  |
| rs1486836   | C | -0.0226 |
| rs115548934 | G | -0.0754 |
| rs72899245  | G | 0.0361  |
| rs148098417 | C | -0.0793 |
| rs11127328  | A | -0.035  |
| rs720388    | T | 0.0266  |
| rs138203263 | G | 0.0608  |
| rs72983702  | A | 0.0509  |
| rs6711742   | G | -0.0404 |
| rs6705531   | T | 0.0616  |
| rs7558238   | G | -0.0416 |
| rs114639172 | T | -0.08   |
| rs114961474 | G | 0.097   |
| rs146282631 | C | 0.1412  |
| rs13415013  | A | 0.0791  |
| rs7582528   | A | -0.0307 |
| rs77027797  | G | -0.0511 |
| rs6729286   | G | -0.0162 |
| rs144594717 | A | 0.0773  |
| rs77322648  | C | -0.0744 |
| rs10190571  | G | -0.0145 |
| rs2176228   | A | -0.0152 |
| rs999246    | A | 0.0159  |
| rs55872560  | G | 0.0632  |
| rs10496413  | T | -0.0362 |
| rs4666577   | C | 0.0152  |
| rs76108210  | G | 0.0473  |
| rs142897541 | T | -0.0526 |
| rs6711405   | T | 0.0193  |
| rs2382043   | C | 0.0153  |
| rs772790    | C | -0.0181 |
| rs6543587   | G | -0.0287 |
| rs77344942  | T | 0.1268  |
| rs112883448 | A | 0.0673  |
| rs10928666  | T | -0.017  |
| rs78494415  | T | -0.0256 |
| rs7566009   | G | 0.0168  |
| rs919535    | A | 0.0155  |

|             |   |         |
|-------------|---|---------|
| rs13392665  | G | -0.0667 |
| rs6730327   | G | 0.0144  |
| rs72809811  | A | -0.0674 |
| rs79787684  | T | 0.0616  |
| rs4233908   | A | 0.0169  |
| rs9308861   | T | -0.0208 |
| rs72625241  | C | -0.0281 |
| rs309327    | A | -0.015  |
| rs13003111  | T | -0.0192 |
| rs77455461  | A | 0.0471  |
| rs6759998   | C | 0.0153  |
| rs62159191  | C | 0.0636  |
| rs76007931  | G | 0.037   |
| rs76816286  | C | -0.0871 |
| rs11890004  | A | -0.0509 |
| rs34997129  | T | 0.0582  |
| rs13027651  | T | -0.0213 |
| rs146474933 | T | -0.0412 |
| rs115441283 | C | -0.131  |
| rs10180437  | T | 0.022   |
| rs71426591  | G | 0.1155  |
| rs11680869  | G | 0.0224  |
| rs74412370  | G | -0.0386 |
| rs144439503 | A | 0.134   |
| rs11901926  | C | 0.0171  |
| rs2342706   | C | -0.0164 |
| rs13428296  | C | -0.0604 |
| rs17050219  | T | -0.0275 |
| rs72975543  | T | -0.0469 |
| rs114968772 | G | 0.0365  |
| rs148851054 | A | -0.0704 |
| rs115916025 | G | -0.0851 |
| rs141351623 | T | -0.1309 |
| rs13033907  | G | -0.0329 |
| rs13025670  | C | -0.0217 |
| rs13002746  | C | 0.0629  |
| rs13415927  | G | -0.0388 |
| rs62168438  | A | 0.0703  |
| rs13011865  | G | 0.0274  |
| rs76362592  | A | 0.0453  |
| rs74383932  | C | -0.0401 |
| rs76135609  | G | -0.0379 |
| rs35289156  | A | -0.0233 |
| rs72927232  | T | 0.0802  |
| rs4674409   | G | -0.0202 |
| rs1491128   | A | 0.032   |
| rs2974154   | G | 0.0192  |

|             |   |         |
|-------------|---|---------|
| rs72843240  | G | -0.0577 |
| rs144860491 | T | 0.1013  |
| rs10856801  | C | -0.0268 |
| rs4308087   | C | 0.0147  |
| rs78986177  | A | -0.0849 |
| rs116189493 | G | 0.0791  |
| rs13405986  | G | 0.0149  |
| rs113666430 | A | -0.0571 |
| rs10933605  | A | 0.0392  |
| rs72813343  | A | 0.0824  |
| rs55717499  | C | -0.0166 |
| rs11891948  | C | 0.0242  |
| rs1397318   | G | 0.0229  |
| rs138762416 | T | 0.0466  |
| rs141073248 | C | 0.1272  |
| rs114548828 | C | -0.0569 |
| rs935411    | T | 0.026   |
| rs1971117   | G | -0.0155 |
| rs1908252   | G | -0.0145 |
| rs147763767 | A | -0.1082 |
| rs111826817 | C | -0.0453 |
| rs12465885  | C | -0.0421 |
| rs142340021 | C | 0.07    |
| rs7584777   | C | -0.0158 |
| rs77981388  | G | -0.0835 |
| rs13031097  | G | -0.0207 |
| rs115081283 | T | -0.0637 |
| rs16835570  | A | 0.0648  |
| rs139793806 | T | -0.1307 |
| rs143402705 | A | 0.0358  |
| rs115033910 | T | 0.071   |
| rs12469388  | T | 0.0617  |
| rs6717745   | T | 0.038   |
| rs148004485 | G | 0.1093  |
| rs72814195  | T | 0.0878  |
| rs78184124  | C | 0.0597  |
| rs13406809  | A | -0.0256 |
| rs1012320   | T | 0.0737  |
| rs77072321  | T | -0.0391 |
| rs1345149   | A | -0.0166 |
| rs148508068 | A | -0.0976 |
| rs9288698   | T | 0.0159  |
| rs11691574  | T | -0.0152 |
| rs1625487   | T | 0.0234  |
| rs79623051  | A | -0.0868 |
| rs73226533  | T | 0.0369  |
| rs10173687  | A | 0.0185  |

|             |   |         |
|-------------|---|---------|
| rs142938430 | G | 0.0538  |
| rs7583630   | C | 0.0171  |
| rs17017985  | T | -0.0825 |
| rs10181499  | C | -0.0965 |
| rs73062866  | A | -0.0563 |
| rs150980929 | C | -0.1344 |
| rs3845781   | T | -0.02   |
| rs72792867  | G | -0.0232 |
| rs116713005 | T | 0.0424  |
| rs75953596  | G | -0.016  |
| rs4673155   | T | 0.0467  |
| rs16864841  | C | 0.0311  |
| rs73928554  | T | 0.0272  |
| rs142278698 | T | -0.0757 |
| rs6759102   | A | -0.0376 |
| rs72777839  | T | 0.0586  |
| rs114489334 | A | -0.0735 |
| rs11096470  | A | -0.0559 |
| rs147868328 | C | 0.0677  |
| rs72818981  | G | -0.1211 |
| rs78096816  | C | 0.0575  |
| rs76975690  | A | 0.0429  |
| rs10210606  | A | -0.0873 |
| rs113142991 | A | 0.1079  |
| rs163509    | A | 0.0951  |
| rs9807927   | A | -0.0328 |
| rs150040826 | C | -0.0794 |
| rs13009499  | G | 0.0146  |
| rs12468729  | G | -0.025  |
| rs77689531  | T | 0.0427  |
| rs79201384  | A | 0.0531  |
| rs17268903  | G | -0.0374 |
| rs148647599 | T | 0.0545  |
| rs17020192  | C | -0.0444 |
| rs1562347   | T | 0.0558  |
| rs12994794  | G | 0.0189  |
| rs72994308  | C | 0.0156  |
| rs116553900 | T | 0.1178  |
| rs115612984 | G | 0.1031  |
| rs2118376   | G | -0.0197 |
| rs145810281 | T | 0.0876  |
| rs1729413   | G | 0.0148  |
| rs10153704  | C | -0.0396 |
| rs17504565  | A | 0.0424  |
| rs112131971 | A | -0.0905 |
| rs17023820  | G | 0.028   |
| rs149896637 | A | -0.0982 |

|             |   |         |
|-------------|---|---------|
| rs74698584  | C | 0.081   |
| rs4663588   | A | 0.0148  |
| rs1869450   | A | 0.0189  |
| rs13031797  | T | -0.0503 |
| rs874028    | G | -0.026  |
| rs10182687  | A | 0.0253  |
| rs114526735 | T | 0.0508  |
| rs56119801  | C | -0.0291 |
| rs112351029 | G | 0.0244  |
| rs6720636   | G | 0.0238  |
| rs79020795  | A | -0.0697 |
| rs144467701 | C | 0.1216  |
| rs72760970  | G | 0.0466  |
| rs116360084 | G | 0.0383  |
| rs113979743 | C | 0.091   |
| rs888242    | C | 0.0148  |
| rs113773309 | G | 0.0609  |
| rs17702023  | G | -0.0272 |
| rs76358867  | C | -0.0266 |
| rs111428492 | T | -0.0402 |
| rs56186884  | G | 0.0918  |
| rs11892116  | A | -0.0167 |
| rs77798601  | A | -0.0847 |
| rs13419074  | G | 0.0401  |
| rs150793223 | T | -0.1067 |
| rs114757903 | G | 0.0654  |
| rs148108351 | T | 0.0823  |
| rs3770148   | A | 0.0179  |
| rs75094393  | A | 0.0617  |
| rs67887179  | C | -0.058  |
| rs74890443  | G | -0.0729 |
| rs12620259  | T | 0.0207  |
| rs1356066   | A | -0.0297 |
| rs62178591  | T | 0.0406  |
| rs4006355   | C | -0.0363 |
| rs72784664  | T | 0.0261  |
| rs72802106  | A | 0.0639  |
| rs56698253  | C | 0.0338  |
| rs4664519   | A | -0.0241 |
| rs10930737  | T | 0.0248  |
| rs1349844   | A | -0.026  |
| rs7596735   | T | -0.0151 |
| rs929388    | C | -0.0177 |
| rs4663449   | A | 0.0145  |
| rs2609118   | A | -0.0432 |
| rs2300486   | T | 0.0164  |
| rs12473446  | C | -0.0146 |



|             |   |         |
|-------------|---|---------|
| rs79310677  | T | 0.0485  |
| rs2376061   | G | -0.1061 |
| rs4953852   | G | 0.0581  |
| rs11894546  | A | -0.0143 |
| rs140502491 | T | 0.0829  |
| rs75997349  | A | 0.0288  |
| rs139449778 | A | -0.0937 |
| rs12469999  | G | -0.0477 |
| rs34206771  | A | -0.017  |
| rs114238370 | T | 0.0862  |
| rs138577488 | C | 0.074   |
| rs62161791  | G | -0.068  |
| rs6545371   | T | 0.0172  |
| rs17745737  | T | 0.0849  |
| rs12612989  | C | -0.0444 |
| rs77595542  | G | -0.0634 |
| rs35718630  | T | 0.0419  |
| rs79921412  | C | -0.0277 |
| rs6741486   | G | 0.015   |
| rs74778477  | C | 0.0406  |
| rs74663856  | T | 0.045   |
| rs114990710 | C | 0.1013  |
| rs13396096  | A | 0.0175  |
| rs6708684   | A | 0.0216  |
| rs55663001  | A | -0.022  |
| rs7603604   | T | -0.0804 |
| rs4853151   | T | 0.0262  |
| rs112926105 | T | 0.0342  |
| rs142404086 | C | 0.0923  |
| rs138790500 | T | 0.0638  |
| rs80268774  | C | -0.0706 |
| rs142140049 | A | 0.0781  |
| rs7561240   | T | 0.0369  |
| rs77644812  | A | -0.0709 |
| rs111684081 | A | 0.0875  |
| rs17727482  | G | 0.019   |
| rs1579143   | T | 0.0212  |
| rs148252187 | T | 0.0519  |
| rs4907262   | A | -0.0254 |
| rs76663303  | A | -0.0359 |
| rs56318108  | G | -0.0309 |
| rs41296384  | G | -0.1168 |
| rs4429424   | A | 0.0236  |
| rs74659446  | T | 0.0808  |
| rs78273753  | A | 0.113   |
| rs74673038  | A | 0.0465  |
| rs114512293 | A | -0.0661 |

|             |   |         |
|-------------|---|---------|
| rs11684743  | C | 0.105   |
| rs143776017 | A | 0.0791  |
| rs72771519  | T | 0.108   |
| rs747196    | C | 0.0237  |
| rs116393845 | T | 0.0773  |
| rs76368307  | C | 0.0271  |
| rs76941706  | A | 0.0554  |
| rs2719098   | T | -0.0156 |
| rs17545022  | A | 0.02    |
| rs140713692 | G | -0.0821 |
| rs2338437   | C | 0.0236  |
| rs78457699  | A | 0.0246  |
| rs62174995  | T | 0.0478  |
| rs28453315  | T | 0.0336  |
| rs72841718  | T | 0.0983  |
| rs149056530 | G | 0.0451  |
| rs76307697  | T | 0.0781  |
| rs13430530  | A | -0.0147 |
| rs55691606  | C | -0.0314 |
| rs7369739   | A | -0.0173 |
| rs62169409  | G | -0.0173 |
| rs116656616 | T | -0.079  |
| rs62163362  | C | -0.0942 |
| rs112864076 | T | -0.1238 |
| rs74387423  | G | -0.0678 |
| rs11676278  | T | -0.0281 |
| rs11681653  | G | -0.0165 |
| rs115975996 | G | -0.0458 |
| rs17247498  | T | -0.0694 |
| rs35636556  | G | 0.0437  |
| rs62147567  | G | 0.0229  |
| rs2374569   | T | 0.0155  |
| rs73926235  | T | -0.079  |
| rs6748646   | A | -0.0201 |
| rs138642928 | G | -0.0364 |
| rs11884632  | C | -0.0167 |
| rs76545024  | A | -0.1231 |
| rs149918952 | T | -0.0554 |
| rs888055    | G | -0.0175 |
| rs1374408   | C | 0.1278  |
| rs1997287   | T | 0.0278  |
| rs114405016 | A | -0.0939 |
| rs113635309 | A | 0.0548  |
| rs114183085 | T | -0.0661 |
| rs7572097   | T | 0.0237  |
| rs142070089 | T | 0.1126  |
| rs80261165  | A | 0.0877  |

|             |   |         |
|-------------|---|---------|
| rs77210631  | C | 0.0248  |
| rs10209353  | T | 0.0165  |
| rs6709393   | G | 0.0157  |
| rs13000432  | G | -0.0146 |
| rs4245780   | C | 0.016   |
| rs17388806  | C | -0.0519 |
| rs115744026 | C | 0.0923  |
| rs11124185  | C | -0.0164 |
| rs116612773 | A | 0.11    |
| rs12617467  | C | -0.0238 |
| rs72818965  | T | -0.039  |
| rs79673074  | G | -0.0802 |
| rs10175670  | T | -0.0234 |
| rs17541660  | T | 0.0169  |
| rs13424348  | C | -0.0224 |
| rs1462530   | T | 0.0148  |
| rs1431793   | C | -0.0163 |
| rs72815134  | A | 0.1326  |
| rs77311382  | G | 0.0188  |
| rs12464248  | T | 0.0661  |
| rs11674344  | A | -0.0198 |
| rs753775    | T | 0.0697  |
| rs788159    | T | -0.0175 |
| rs36119304  | C | 0.0424  |
| rs74818647  | T | -0.0388 |
| rs78102257  | A | -0.0197 |
| rs111546612 | C | 0.0613  |
| rs17332290  | C | -0.0206 |
| rs17315702  | T | 0.0969  |
| rs7570733   | C | -0.0397 |
| rs143283380 | G | 0.0719  |
| rs74820857  | T | 0.0987  |
| rs114714256 | T | 0.0691  |
| rs114503498 | A | 0.0495  |
| rs17629451  | G | 0.018   |
| rs146452383 | C | -0.0911 |
| rs79489551  | T | 0.0686  |
| rs35265179  | C | 0.018   |
| rs4289208   | C | -0.0295 |
| rs6715263   | C | -0.0375 |
| rs115453743 | T | -0.0749 |
| rs145164074 | G | -0.1152 |
| rs6707050   | A | 0.0166  |
| rs10182291  | G | -0.0203 |
| rs17008506  | T | 0.0501  |
| rs12995771  | A | 0.0153  |
| rs4588246   | T | -0.0367 |

|             |   |         |
|-------------|---|---------|
| rs13418767  | T | -0.0238 |
| rs148802857 | T | 0.0816  |
| rs76290868  | A | -0.1018 |
| rs79083320  | G | 0.0412  |
| rs6752810   | C | 0.0249  |
| rs17657434  | G | -0.0203 |
| rs72875820  | T | 0.0787  |
| rs4535078   | A | 0.0525  |
| rs6749736   | A | -0.0161 |
| rs76517583  | A | 0.0746  |
| rs10865071  | G | 0.0253  |
| rs7586707   | A | 0.0156  |
| rs72801353  | G | -0.0501 |
| rs58162497  | A | -0.0643 |
| rs34275856  | T | 0.0243  |
| rs7608588   | A | -0.1013 |
| rs79273618  | T | 0.0473  |
| rs10202230  | C | -0.0613 |
| rs988481    | T | -0.0162 |
| rs117929703 | T | 0.0874  |
| rs13030537  | G | 0.0213  |
| rs76600995  | T | 0.0328  |
| rs114826753 | T | -0.0327 |
| rs6730847   | A | -0.0172 |
| rs13389079  | A | -0.0172 |
| rs78758343  | G | -0.0502 |
| rs6710307   | G | 0.0143  |
| rs116768467 | G | 0.0778  |
| rs1504260   | A | 0.0171  |
| rs6720907   | G | 0.0351  |
| rs114242638 | G | 0.0384  |
| rs78606517  | C | 0.0648  |
| rs6545815   | C | -0.0246 |
| rs116320833 | A | 0.0476  |
| rs71423010  | G | 0.0362  |
| rs16857871  | C | 0.0422  |
| rs144860167 | T | -0.0602 |
| rs4850055   | T | -0.0177 |
| rs17821546  | G | 0.0424  |
| rs72915420  | T | 0.1106  |
| rs2421097   | G | 0.0159  |
| rs2919871   | A | -0.0187 |
| rs13387840  | A | -0.0279 |
| rs35917372  | G | -0.0626 |
| rs74362905  | G | -0.0992 |
| rs79167099  | A | -0.1107 |
| rs74696736  | C | -0.0242 |

|             |   |         |
|-------------|---|---------|
| rs12619437  | G | 0.016   |
| rs6716998   | C | 0.0208  |
| rs7573807   | A | 0.0176  |
| rs148482297 | T | 0.0583  |
| rs72884252  | C | -0.0181 |
| rs10168975  | T | -0.0596 |
| rs7556946   | C | 0.0412  |
| rs13006352  | T | 0.0418  |
| rs79977480  | C | 0.0438  |
| rs17043146  | A | -0.0424 |
| rs2553625   | A | -0.0166 |
| rs72790077  | G | 0.0877  |
| rs13386932  | G | -0.0376 |
| rs77930638  | T | 0.0446  |
| rs2584922   | T | -0.0152 |
| rs13403889  | C | 0.1099  |
| rs62118161  | A | 0.0289  |
| rs149664358 | G | 0.0528  |
| rs77396923  | C | 0.0431  |
| rs1814590   | C | -0.0432 |
| rs13411680  | G | 0.015   |
| rs724997    | A | -0.0568 |
| rs17044829  | C | -0.0449 |
| rs145470373 | C | 0.0837  |
| rs74394129  | A | -0.0655 |
| rs12616988  | T | 0.0582  |
| rs72888197  | T | -0.0269 |
| rs17785026  | A | 0.014   |
| rs12471302  | G | -0.0533 |
| rs116623057 | A | 0.0667  |
| rs72888051  | C | -0.0714 |
| rs6729205   | C | 0.0144  |
| rs78407523  | A | -0.0376 |
| rs4133879   | T | 0.0152  |
| rs76671216  | A | 0.0995  |
| rs78039535  | T | 0.0339  |
| rs74579450  | C | -0.049  |
| rs10197912  | A | 0.0251  |
| rs13002606  | C | 0.0146  |
| rs139412485 | T | 0.1134  |
| rs74570832  | T | -0.0536 |
| rs76546748  | C | -0.099  |
| rs72928729  | C | 0.0643  |
| rs12464205  | C | -0.0161 |
| rs59537171  | G | -0.0261 |
| rs148307075 | G | -0.0629 |
| rs74335824  | T | 0.021   |

|             |   |         |
|-------------|---|---------|
| rs72770149  | G | 0.0856  |
| rs140250527 | T | -0.0804 |
| rs114827591 | T | -0.0825 |
| rs114472057 | C | 0.0937  |
| rs17362909  | G | 0.0241  |
| rs7590898   | T | -0.0359 |
| rs141625665 | T | -0.0515 |
| rs79248360  | T | 0.0581  |
| rs10929756  | C | -0.0147 |
| rs7558018   | G | 0.0144  |
| rs12467348  | T | -0.0265 |
| rs75505984  | T | 0.0524  |
| rs7607036   | T | -0.0166 |
| rs3748986   | T | -0.0914 |
| rs76006320  | A | 0.0283  |
| rs17664519  | G | -0.0171 |
| rs2971644   | A | -0.0156 |
| rs75022505  | G | -0.1209 |
| rs72610734  | A | -0.0236 |
| rs6714489   | A | 0.0225  |
| rs12469115  | G | 0.0224  |
| rs13029062  | A | -0.0163 |
| rs111291133 | C | -0.0821 |
| rs6749551   | T | -0.0179 |
| rs74886317  | C | 0.0797  |
| rs79907420  | G | -0.0293 |
| rs62180368  | T | 0.0699  |
| rs12713386  | T | 0.0166  |
| rs116038161 | G | 0.1037  |
| rs6723745   | T | 0.0168  |
| rs2916502   | A | -0.0627 |
| rs4663784   | T | 0.0172  |
| rs11124850  | C | 0.0144  |
| rs116249990 | G | 0.0702  |
| rs76608211  | T | 0.0942  |
| rs2583555   | T | 0.0288  |
| rs115505899 | A | -0.0497 |
| rs6714328   | C | 0.0152  |
| rs646445    | T | -0.0153 |
| rs1517397   | T | -0.0147 |
| rs35718992  | C | 0.0218  |
| rs150615995 | G | 0.1037  |
| rs3910522   | A | -0.0178 |
| rs13019482  | G | 0.0262  |
| rs114352628 | A | -0.0545 |
| rs76894741  | G | -0.0437 |
| rs76931445  | T | 0.0571  |

|             |   |         |
|-------------|---|---------|
| rs79822000  | T | -0.0413 |
| rs75612460  | T | -0.0622 |
| rs7586899   | A | -0.0277 |
| rs1611796   | C | 0.0142  |
| rs4853872   | A | -0.0731 |
| rs80245481  | T | 0.0587  |
| rs78813269  | T | -0.0541 |
| rs75499178  | T | -0.0522 |
| rs72843577  | A | 0.0452  |
| rs116535301 | C | -0.0288 |
| rs116780072 | C | -0.075  |
| rs1394237   | A | -0.0414 |
| rs144763548 | A | 0.1035  |
| rs62167432  | A | 0.0272  |
| rs60436390  | G | 0.0311  |
| rs140208599 | A | -0.0409 |
| rs4952517   | C | 0.0729  |
| rs7605749   | A | 0.0639  |
| rs74885636  | C | -0.0549 |
| rs2678305   | C | -0.0187 |
| rs13021351  | C | 0.0674  |
| rs4476344   | G | 0.0175  |
| rs114117770 | T | -0.0588 |
| rs283874    | A | -0.0354 |
| rs13015186  | G | 0.0145  |
| rs72955878  | A | -0.0394 |
| rs78793602  | C | 0.1079  |
| rs6750970   | T | -0.0494 |
| rs75275454  | C | 0.0494  |
| rs17481584  | G | 0.0646  |
| rs142990394 | T | -0.0801 |
| rs1177299   | T | -0.0191 |
| rs62130916  | G | 0.0375  |
| rs56402123  | A | -0.1014 |
| rs4668059   | C | 0.0228  |
| rs627973    | C | -0.0184 |
| rs72789359  | T | 0.0313  |
| rs142730039 | G | -0.0811 |
| rs4952523   | T | 0.0266  |
| rs74765442  | A | 0.1077  |
| rs76102134  | C | -0.065  |
| rs146760682 | A | -0.0787 |
| rs6728107   | C | -0.018  |
| rs72904572  | A | -0.1413 |
| rs74332053  | C | 0.0594  |
| rs4669519   | A | -0.0178 |
| rs6432062   | A | -0.0164 |

|             |   |         |
|-------------|---|---------|
| rs17024618  | T | 0.0204  |
| rs17024874  | A | -0.0549 |
| rs115439129 | G | 0.0649  |
| rs792064    | T | -0.0147 |
| rs115176131 | C | 0.0839  |
| rs11894674  | C | 0.0581  |
| rs1818925   | G | -0.0172 |
| rs145509712 | A | -0.067  |
| rs11686738  | T | 0.0181  |
| rs77471991  | A | -0.03   |
| rs115525809 | A | -0.0527 |
| rs72930715  | C | 0.0738  |
| rs2289266   | G | -0.0338 |
| rs11899001  | T | -0.0154 |
| rs17047151  | A | 0.0321  |
| rs12474229  | G | 0.055   |
| rs13026048  | A | -0.0204 |
| rs7588841   | A | 0.0202  |
| rs11884463  | T | -0.0567 |
| rs1379385   | T | 0.0834  |
| rs35065263  | A | 0.0181  |
| rs116786183 | T | -0.0537 |
| rs116216275 | C | 0.0799  |
| rs10181539  | T | 0.0193  |
| rs116838404 | T | 0.0817  |
| rs78163663  | A | -0.0316 |
| rs17736503  | T | 0.0342  |
| rs6544770   | T | 0.0145  |
| rs141998607 | A | 0.092   |
| rs6756968   | C | -0.0674 |
| rs72821929  | T | 0.0457  |
| rs60354056  | C | -0.0185 |
| rs9917264   | A | -0.018  |
| rs140867983 | G | -0.084  |
| rs17608438  | G | 0.0414  |
| rs148346115 | T | 0.0613  |
| rs138866512 | A | -0.0746 |
| rs824586    | T | -0.0183 |
| rs1990545   | A | -0.0194 |
| rs58189699  | T | 0.0615  |
| rs11677091  | T | -0.0486 |
| rs2666992   | T | 0.0195  |
| rs140949831 | T | -0.0621 |
| rs4675981   | G | -0.0177 |
| rs56852412  | C | 0.022   |
| rs77528770  | T | -0.1055 |
| rs79567947  | A | -0.0592 |



|             |   |         |
|-------------|---|---------|
| rs76304485  | T | -0.0731 |
| rs77225037  | C | -0.0529 |
| rs59638376  | A | 0.1007  |
| rs7609147   | G | -0.0162 |
| rs1861403   | A | 0.0411  |
| rs6735930   | C | 0.0313  |
| rs6711658   | G | 0.0464  |
| rs62171717  | C | 0.0843  |
| rs57277472  | C | -0.0248 |
| rs72875021  | A | -0.0584 |
| rs72881379  | C | 0.0191  |
| rs113715501 | T | 0.0661  |
| rs34417335  | G | 0.0223  |
| rs17363735  | A | 0.0424  |
| rs34652362  | A | -0.0176 |
| rs77022564  | A | -0.024  |
| rs4353691   | G | 0.0152  |
| rs79095095  | T | 0.0219  |
| rs17632157  | T | -0.0489 |
| rs71423274  | A | -0.0666 |
| rs80072603  | A | -0.0277 |
| rs113569596 | A | -0.1139 |
| rs76317098  | T | 0.028   |
| rs6544973   | T | 0.015   |
| rs6729523   | G | 0.0527  |
| rs991000    | A | 0.0168  |
| rs114616461 | T | -0.0749 |
| rs6432904   | A | 0.0147  |
| rs112796415 | T | 0.0415  |
| rs146215655 | C | -0.0666 |
| rs74793846  | T | 0.0709  |
| rs10183640  | A | 0.0156  |
| rs148727329 | A | -0.029  |
| rs115030306 | C | 0.0756  |
| rs77337053  | C | -0.08   |
| rs17508302  | T | -0.0516 |
| rs149371326 | C | 0.0582  |
| rs11889334  | T | -0.0266 |
| rs79043936  | C | 0.0765  |
| rs6430066   | C | 0.0165  |
| rs13390038  | A | -0.0164 |
| rs34942306  | G | 0.056   |
| rs116169858 | C | -0.0515 |
| rs114737105 | T | -0.0865 |
| rs78127380  | C | 0.0303  |
| rs1113669   | C | 0.016   |
| rs150492422 | T | 0.0584  |

|             |   |         |
|-------------|---|---------|
| rs934314    | C | 0.0585  |
| rs112406524 | C | 0.0741  |
| rs142541141 | G | -0.0925 |
| rs76796053  | T | 0.0874  |
| rs16863310  | G | 0.0398  |
| rs76566138  | G | 0.0576  |
| rs10173331  | G | 0.0143  |
| rs114982910 | T | -0.0469 |
| rs79293431  | T | -0.0425 |
| rs115968335 | T | -0.0642 |
| rs4671695   | T | 0.0839  |
| rs13420259  | T | 0.0148  |
| rs112957920 | T | -0.0438 |
| rs113826523 | T | 0.0543  |
| rs72884735  | T | 0.058   |
| rs138210188 | C | 0.0377  |
| rs11688557  | G | 0.0456  |
| rs113478000 | A | 0.0736  |
| rs143059615 | G | -0.088  |
| rs840952    | A | 0.0139  |
| rs115626828 | C | 0.0911  |
| rs76987643  | A | 0.0979  |
| rs75547292  | A | -0.0665 |
| rs724149    | C | 0.0139  |
| rs72763707  | T | -0.0326 |
| rs74685640  | C | -0.0669 |
| rs17042273  | A | 0.0325  |
| rs6717253   | A | -0.0141 |
| rs9677367   | G | -0.0181 |
| rs72872945  | T | 0.0657  |
| rs7589954   | A | -0.0607 |
| rs78199974  | G | -0.0411 |
| rs17324662  | T | -0.0227 |
| rs12475081  | C | 0.0246  |
| rs78957928  | T | -0.0295 |
| rs12990593  | T | 0.1268  |
| rs2902017   | C | 0.0144  |
| rs77159567  | A | 0.0321  |
| rs146239315 | G | -0.0928 |
| rs114317533 | A | -0.0397 |
| rs13393058  | C | 0.0238  |
| rs4952976   | T | -0.0269 |
| rs114208895 | T | -0.0701 |
| rs28387164  | T | -0.0834 |
| rs12616455  | G | 0.0168  |
| rs55900616  | T | 0.0664  |
| rs6739008   | T | 0.0164  |

|             |   |         |
|-------------|---|---------|
| rs142135226 | T | 0.0955  |
| rs114121342 | G | 0.0512  |
| rs143147658 | A | 0.0374  |
| rs77679016  | A | -0.0323 |
| rs790024    | T | 0.0169  |
| rs4971418   | G | 0.0144  |
| rs62162299  | T | 0.0706  |
| rs75041978  | T | -0.0437 |
| rs7576904   | A | 0.0204  |
| rs28910602  | T | -0.0559 |
| rs11885421  | G | 0.0152  |
| rs13003732  | T | 0.0299  |
| rs13006477  | T | -0.0232 |
| rs7566261   | G | 0.0178  |
| rs12621242  | A | -0.0536 |
| rs147622721 | T | 0.0826  |
| rs17268639  | C | 0.087   |
| rs10931466  | T | 0.0614  |
| rs34011855  | A | -0.0429 |
| rs116643408 | T | 0.1349  |
| rs62125316  | G | 0.0336  |
| rs114815439 | T | 0.135   |
| rs3791948   | T | -0.0144 |
| rs115864860 | G | 0.0562  |
| rs2722606   | G | 0.0153  |
| rs11686153  | T | -0.0148 |
| rs72879528  | C | 0.0223  |
| rs2356762   | G | 0.0531  |
| rs115820038 | T | -0.1046 |
| rs170810    | T | -0.0183 |
| rs76639733  | A | -0.0445 |
| rs9653475   | T | -0.0169 |
| rs75001869  | G | 0.0314  |
| rs74419956  | A | -0.0295 |
| rs138601245 | A | 0.0764  |
| rs74436253  | G | -0.0527 |
| rs2663863   | T | -0.0193 |
| rs145300731 | T | 0.0465  |
| rs138385137 | A | 0.0889  |
| rs11693332  | T | -0.0173 |
| rs74857060  | G | 0.0639  |
| rs4663908   | G | 0.0248  |
| rs115385669 | A | -0.0647 |
| rs11679650  | C | -0.1296 |
| rs150847166 | T | 0.0963  |
| rs10174228  | T | 0.0552  |
| rs11126616  | C | 0.0148  |

|             |   |         |
|-------------|---|---------|
| rs4849876   | G | 0.017   |
| rs114336938 | C | 0.0749  |
| rs2163227   | C | -0.0165 |
| rs11677759  | T | -0.0327 |
| rs76519408  | T | 0.0794  |
| rs62187201  | C | -0.0691 |
| rs16866631  | G | -0.0635 |
| rs13413372  | G | -0.0237 |
| rs35919794  | T | -0.0376 |
| rs145438467 | G | -0.0579 |
| rs35935079  | A | -0.0168 |
| rs12464823  | C | -0.0228 |
| rs843238    | G | 0.0139  |
| rs10165875  | T | -0.0176 |
| rs116502619 | T | 0.0833  |
| rs151009279 | A | -0.0699 |
| rs144366500 | G | -0.0599 |
| rs17868358  | T | -0.0576 |
| rs142381389 | A | -0.0707 |
| rs76310698  | A | -0.0297 |
| rs150927923 | T | -0.1249 |
| rs75048671  | A | -0.0572 |
| rs72884732  | T | 0.0428  |
| rs7604446   | T | -0.0141 |
| rs151131568 | T | 0.0983  |
| rs34229466  | G | 0.0166  |
| rs74688338  | T | 0.057   |
| rs4852531   | C | 0.0154  |
| rs116493897 | T | -0.082  |
| rs112413721 | A | 0.0418  |
| rs9309709   | C | -0.0179 |
| rs16865581  | C | -0.0329 |
| rs35948376  | G | -0.0454 |
| rs71420759  | A | -0.0746 |
| rs13001329  | G | -0.0266 |
| rs75101785  | C | -0.036  |
| rs1534480   | T | 0.0274  |
| rs7608448   | T | -0.0137 |
| rs72809414  | T | -0.0345 |
| rs12993825  | T | -0.0222 |
| rs4853491   | G | -0.0287 |
| rs1550379   | T | -0.0518 |
| rs4849971   | A | -0.0265 |
| rs12999544  | C | -0.0226 |
| rs12995076  | T | 0.0334  |
| rs10469763  | C | 0.0163  |
| rs12993893  | A | -0.088  |

|             |   |         |
|-------------|---|---------|
| rs10168196  | G | -0.0293 |
| rs56401439  | G | 0.0318  |
| rs140692014 | T | -0.0843 |
| rs4355090   | G | -0.0242 |
| rs11889770  | G | -0.0153 |
| rs76855379  | C | 0.0478  |
| rs115204740 | T | 0.0637  |
| rs35253870  | G | -0.0184 |
| rs71441136  | A | 0.0573  |
| rs72804612  | A | -0.0327 |
| rs896372    | A | -0.018  |
| rs79270453  | C | 0.0739  |
| rs143404142 | A | -0.0711 |
| rs79708063  | T | 0.0464  |
| rs79200770  | C | 0.0321  |
| rs13004732  | G | 0.06    |
| rs10445673  | T | 0.0448  |
| rs830963    | A | 0.0321  |
| rs114123014 | T | 0.1087  |
| rs79910924  | C | 0.0873  |
| rs80033018  | T | 0.0435  |
| rs115718152 | C | -0.0619 |
| rs80322853  | G | -0.0406 |
| rs2384235   | T | -0.0154 |
| rs9287545   | A | -0.0855 |
| rs7586173   | T | 0.0144  |
| rs34976350  | A | -0.0153 |
| rs56270562  | A | 0.0478  |
| rs11677163  | C | -0.0286 |
| rs17439328  | T | -0.015  |
| rs9287637   | T | -0.0326 |
| rs56027456  | A | -0.0299 |
| rs80096122  | T | -0.0532 |
| rs76291845  | G | 0.099   |
| rs79708974  | C | 0.1297  |
| rs79514548  | T | -0.0617 |
| rs13022793  | G | 0.084   |
| rs482602    | T | 0.0196  |
| rs6716953   | T | 0.0852  |
| rs141421036 | A | -0.1203 |
| rs13429913  | T | -0.0166 |
| rs4669203   | C | -0.0149 |
| rs150078009 | C | -0.0846 |
| rs114842604 | A | -0.0524 |
| rs79102871  | T | 0.0651  |
| rs13010473  | T | -0.015  |
| rs146121660 | T | 0.0856  |

|             |   |         |
|-------------|---|---------|
| rs75423978  | G | -0.0566 |
| rs138350899 | C | 0.056   |
| rs74903639  | G | 0.0901  |
| rs78606425  | T | 0.0178  |
| rs78181492  | G | -0.0351 |
| rs6431635   | G | 0.0142  |
| rs12988142  | T | -0.0161 |
| rs73058380  | G | 0.0284  |
| rs10165649  | T | 0.0352  |
| rs11896724  | A | -0.0534 |
| rs114556331 | A | -0.1031 |
| rs2127036   | A | 0.0171  |
| rs56153296  | G | 0.0326  |
| rs56160392  | G | 0.0168  |
| rs72842634  | G | -0.0829 |
| rs7608505   | A | -0.0931 |
| rs116782599 | A | -0.077  |
| rs74715517  | A | 0.0646  |
| rs76678114  | G | 0.0601  |
| rs114783442 | T | 0.0321  |
| rs34557395  | T | -0.0289 |
| rs62166785  | A | -0.023  |
| rs62182470  | G | 0.0625  |
| rs112431897 | C | 0.0792  |
| rs114516108 | T | 0.0653  |
| rs111637714 | G | 0.0419  |
| rs10208486  | C | -0.0512 |
| rs115402366 | G | 0.0538  |
| rs34349040  | A | 0.0549  |
| rs115674974 | C | 0.0809  |
| rs13407457  | T | 0.0198  |
| rs79226909  | T | -0.0778 |
| rs2194367   | A | 0.0144  |
| rs72869234  | T | -0.0204 |
| rs148619402 | A | 0.0579  |
| rs57588437  | T | 0.0511  |
| rs79251390  | T | 0.0178  |
| rs78680953  | G | -0.0212 |
| rs140684405 | G | 0.0691  |
| rs35093460  | G | -0.0541 |
| rs12478204  | A | 0.026   |
| rs6735530   | C | 0.0212  |
| rs13424202  | T | 0.0662  |
| rs12621715  | C | -0.027  |
| rs74779167  | G | 0.0371  |
| rs62135442  | A | 0.0231  |
| rs77134676  | C | 0.0189  |

|             |   |         |
|-------------|---|---------|
| rs76199652  | C | -0.0293 |
| rs3769963   | G | 0.0228  |
| rs12996816  | T | -0.0216 |
| rs12467958  | T | -0.0179 |
| rs79566441  | T | 0.0839  |
| rs13029602  | C | -0.0143 |
| rs4591366   | T | 0.0213  |
| rs6730731   | A | 0.0687  |
| rs62143293  | C | -0.0703 |
| rs148370113 | A | 0.0792  |
| rs77340900  | C | 0.0679  |
| rs7560587   | C | 0.0159  |
| rs6748811   | C | 0.0253  |
| rs139699679 | C | -0.0329 |
| rs114444843 | G | 0.0983  |
| rs2356081   | T | -0.0154 |
| rs35605986  | G | 0.0314  |
| rs13402438  | A | -0.0155 |
| rs34433526  | G | 0.037   |
| rs111516524 | C | -0.0791 |
| rs6714171   | C | 0.0208  |
| rs115080817 | T | -0.1031 |
| rs10203979  | C | -0.0164 |
| rs34796501  | G | 0.0405  |
| rs79461894  | T | 0.0429  |
| rs114012375 | G | 0.0704  |
| rs143553996 | A | -0.1052 |
| rs115172254 | T | -0.0581 |
| rs1562622   | T | -0.0144 |
| rs67455413  | C | -0.0407 |
| rs8192506   | G | 0.0362  |
| rs72864010  | T | 0.0469  |
| rs72769220  | A | 0.1455  |
| rs13423910  | C | -0.0221 |
| rs114526052 | G | -0.0688 |
| rs72846365  | G | -0.0535 |
| rs74630432  | T | 0.0563  |
| rs75216904  | C | 0.0497  |
| rs2011529   | A | 0.0176  |
| rs111678461 | G | -0.0742 |
| rs2343408   | A | 0.014   |
| rs79856873  | T | -0.0812 |
| rs72847738  | C | 0.0333  |
| rs141261594 | T | 0.0757  |
| rs115604196 | G | 0.0649  |
| rs16826912  | C | -0.0288 |
| rs12993275  | A | 0.0213  |

|             |   |         |
|-------------|---|---------|
| rs79624346  | G | 0.0798  |
| rs12995369  | G | 0.0187  |
| rs145815762 | C | 0.11    |
| rs75246333  | G | 0.0277  |
| rs13408347  | G | 0.0583  |
| rs62140938  | G | -0.055  |
| rs116423209 | G | -0.0607 |
| rs1509739   | C | -0.0173 |
| rs732732    | T | -0.0149 |
| rs744333    | C | 0.0302  |
| rs7606113   | G | 0.0578  |
| rs838077    | G | 0.0263  |
| rs140610312 | A | -0.0713 |
| rs62180913  | A | 0.019   |
| rs72775341  | T | 0.0599  |
| rs62123446  | C | 0.0386  |
| rs144511297 | A | 0.0509  |
| rs67566358  | T | -0.0228 |
| rs16845744  | G | -0.0925 |
| rs13015532  | A | 0.0155  |
| rs75308901  | A | -0.0239 |
| rs13022388  | T | 0.0364  |
| rs11888040  | C | 0.0551  |
| rs10803925  | T | -0.0152 |
| rs62173189  | G | 0.0711  |
| rs6747820   | T | -0.0159 |
| rs7575586   | T | -0.0166 |
| rs115676341 | A | -0.0699 |
| rs2339701   | G | -0.0143 |
| rs75805638  | A | -0.134  |
| rs148315610 | T | -0.0676 |
| rs150476935 | G | 0.0638  |
| rs150305868 | C | -0.0604 |
| rs7566479   | C | 0.0141  |
| rs77652639  | C | 0.0917  |
| rs12692487  | C | -0.0174 |
| rs11676008  | A | 0.0217  |
| rs78779723  | T | 0.0647  |
| rs2460385   | T | -0.0769 |
| rs72884471  | G | 0.0967  |
| rs150736035 | T | 0.0436  |
| rs71407585  | G | 0.0443  |
| rs72859283  | A | 0.0195  |
| rs13006985  | A | -0.0212 |
| rs79202550  | C | -0.0265 |
| rs17025994  | C | 0.0223  |
| rs115891984 | T | 0.0814  |



|             |   |         |
|-------------|---|---------|
| rs2311301   | A | -0.0504 |
| rs112678878 | T | -0.0926 |
| rs150562507 | A | 0.0876  |
| rs79112004  | A | -0.0572 |
| rs72970361  | T | 0.037   |
| rs76531755  | C | 0.0594  |
| rs36006481  | T | -0.0325 |
| rs10153831  | T | -0.0175 |
| rs7587311   | A | 0.0221  |
| rs11886026  | A | -0.0231 |
| rs28750069  | A | 0.0546  |
| rs76153797  | T | 0.0472  |
| rs116732550 | A | 0.079   |
| rs78296822  | C | -0.0349 |
| rs62175889  | A | 0.0343  |
| rs61208216  | A | 0.1052  |
| rs1529093   | T | -0.014  |
| rs7599528   | G | 0.0328  |
| rs6747951   | G | 0.0175  |
| rs2541027   | A | 0.0188  |
| rs35494936  | A | 0.0481  |
| rs113747242 | C | -0.0983 |
| rs116664233 | C | 0.036   |
| rs7563276   | A | 0.0267  |
| rs7591632   | T | 0.0155  |
| rs17025097  | G | 0.0199  |
| rs148592107 | A | 0.0648  |
| rs17353465  | C | 0.0521  |
| rs114703948 | A | 0.0417  |
| rs807570    | T | -0.0135 |
| rs13406291  | C | -0.0165 |
| rs55674404  | A | -0.0339 |
| rs149560089 | A | -0.0645 |
| rs34749914  | C | -0.0168 |
| rs996135    | A | 0.0152  |
| rs77216981  | T | -0.0499 |
| rs79908663  | G | -0.0521 |
| rs72878691  | C | -0.0756 |
| rs9808008   | A | 0.0146  |
| rs4894008   | C | -0.0191 |
| rs72918550  | C | 0.052   |
| rs72924348  | A | -0.0344 |
| rs11682928  | A | -0.0168 |
| rs76068631  | C | -0.0765 |
| rs3771798   | C | -0.0157 |
| rs144707161 | A | -0.0808 |
| rs6729054   | G | -0.021  |

|             |   |         |
|-------------|---|---------|
| rs892454    | G | -0.0134 |
| rs145210893 | G | 0.034   |
| rs1876812   | G | -0.0158 |
| rs144802185 | T | 0.0577  |
| rs111449422 | T | 0.066   |
| rs13006009  | C | 0.0276  |
| rs114544424 | A | -0.0693 |
| rs4851620   | A | -0.0192 |
| rs13424032  | A | 0.0269  |
| rs76086418  | A | 0.0519  |
| rs3732140   | C | -0.0137 |
| rs35624252  | G | -0.0667 |
| rs887987    | T | 0.0462  |
| rs1119384   | C | 0.0135  |
| rs72855186  | T | 0.0323  |
| rs142981763 | A | 0.0576  |
| rs34522563  | G | -0.0166 |
| rs72814013  | A | 0.0325  |
| rs114790411 | A | -0.0897 |
| rs11465726  | A | 0.0715  |
| rs7575898   | G | 0.016   |
| rs111519052 | A | -0.0711 |
| rs77960964  | C | 0.0394  |
| rs55651236  | A | -0.0653 |
| rs114417398 | A | 0.1142  |
| rs55900433  | T | 0.1024  |
| rs2552531   | G | 0.0356  |
| rs2916482   | G | -0.0252 |
| rs148403198 | G | 0.093   |
| rs114131805 | C | -0.0678 |
| rs4665429   | C | -0.0154 |
| rs11689341  | C | -0.0174 |
| rs77148839  | T | 0.0279  |
| rs114222106 | T | 0.0626  |
| rs57988266  | G | 0.0152  |
| rs113998983 | T | 0.0387  |
| rs13013000  | T | -0.034  |
| rs77479326  | T | -0.079  |
| rs80297339  | C | -0.0457 |
| rs6735600   | T | -0.0157 |
| rs62133408  | T | 0.0825  |
| rs78938732  | A | -0.0455 |
| rs79966882  | A | -0.0518 |
| rs74717592  | T | 0.0704  |
| rs76673257  | C | -0.0331 |
| rs4972753   | C | -0.0186 |
| rs77619125  | T | -0.0275 |

|             |   |         |
|-------------|---|---------|
| rs79715244  | A | 0.0498  |
| rs79784973  | A | -0.0405 |
| rs62115055  | A | 0.022   |
| rs144777495 | A | -0.0627 |
| rs139307982 | A | 0.0589  |
| rs72862355  | A | -0.0308 |
| rs207427    | A | -0.0304 |
| rs10176080  | A | -0.0208 |
| rs79555371  | A | 0.057   |
| rs77111681  | T | 0.0425  |
| rs67169769  | C | 0.0165  |
| rs4665216   | G | -0.0162 |
| rs13017571  | C | -0.0146 |
| rs12467529  | A | -0.0221 |
| rs148216722 | T | 0.0418  |
| rs13027423  | C | 0.0154  |
| rs78478619  | C | -0.1156 |
| rs72985163  | A | 0.0426  |
| rs114522954 | A | -0.0835 |
| rs72781576  | C | -0.0482 |
| rs76511998  | T | -0.0304 |
| rs11892590  | A | -0.0149 |
| rs13406328  | G | -0.0683 |
| rs35208610  | C | -0.1138 |
| rs11692640  | G | -0.0212 |
| rs114459154 | T | -0.1127 |
| rs114091668 | G | 0.0779  |
| rs11694037  | G | 0.0138  |
| rs141801111 | T | 0.0692  |
| rs2241526   | C | 0.0161  |
| rs143986788 | G | 0.0657  |
| rs6544001   | A | 0.0247  |
| rs61695679  | T | -0.0314 |
| rs28541574  | T | 0.045   |
| rs7566798   | T | 0.0264  |
| rs80216234  | T | 0.0365  |
| rs2121393   | C | 0.0142  |
| rs2882974   | T | 0.0137  |
| rs2193192   | A | 0.0365  |
| rs2219086   | G | -0.0207 |
| rs62123836  | A | 0.0375  |
| rs77769834  | C | -0.0792 |
| rs2197542   | T | -0.0211 |
| rs13005998  | A | -0.0431 |
| rs6755582   | C | -0.0422 |
| rs17793878  | A | 0.0256  |
| rs114137055 | A | -0.0444 |

|             |   |         |
|-------------|---|---------|
| rs76784634  | T | -0.0321 |
| rs17396090  | G | 0.1101  |
| rs2029088   | T | 0.0219  |
| rs150399160 | A | -0.0793 |
| rs7573877   | G | 0.0148  |
| rs34848618  | C | 0.0154  |
| rs28545273  | A | 0.0914  |
| rs116029714 | G | 0.0844  |
| rs62171795  | A | 0.1027  |
| rs13403020  | A | -0.0196 |
| rs62172869  | T | -0.0144 |
| rs2350817   | T | -0.0149 |
| rs35525119  | G | 0.1089  |
| rs116128716 | T | 0.0573  |
| rs56169654  | T | -0.0453 |
| rs115028376 | A | 0.1075  |
| rs114249801 | T | 0.0544  |
| rs112023242 | C | 0.0904  |
| rs114285023 | C | -0.0407 |
| rs11899873  | T | 0.0225  |
| rs58723182  | C | 0.0314  |
| rs6742629   | G | 0.0346  |
| rs114698213 | T | 0.1175  |
| rs2919878   | T | -0.0198 |
| rs72772201  | T | -0.0655 |
| rs148650026 | A | -0.0338 |
| rs13032621  | A | 0.0415  |
| rs12986467  | A | 0.0372  |
| rs17385479  | A | 0.0202  |
| rs67041405  | A | -0.1189 |
| rs72931013  | C | -0.0755 |
| rs76892855  | A | 0.0484  |
| rs142505578 | A | 0.0553  |
| rs4852262   | T | 0.0263  |
| rs113883634 | T | 0.0705  |
| rs11887953  | C | 0.0165  |
| rs114882057 | G | 0.0522  |
| rs72817639  | T | 0.0453  |
| rs116613673 | A | -0.0627 |
| rs4337431   | T | 0.026   |
| rs116220564 | G | -0.0597 |
| rs77415428  | T | -0.0556 |
| rs148113723 | A | 0.0531  |
| rs114124859 | G | 0.1188  |
| rs2346135   | T | 0.0142  |
| rs672080    | C | 0.0523  |
| rs73005333  | C | -0.0581 |

|             |   |         |
|-------------|---|---------|
| rs10490185  | T | -0.0221 |
| rs78790389  | A | 0.0497  |
| rs11125049  | A | -0.0156 |
| rs2969615   | C | -0.0147 |
| rs142489095 | T | -0.0859 |
| rs75611064  | T | 0.0662  |
| rs11678026  | T | -0.0213 |
| rs79175194  | A | 0.038   |
| rs116045119 | C | 0.06    |
| rs78752740  | G | 0.034   |
| rs72773291  | A | 0.0231  |
| rs71418774  | G | -0.0835 |
| rs75088951  | G | -0.0389 |
| rs10208904  | T | -0.0165 |
| rs4852787   | A | -0.0137 |
| rs55953511  | A | 0.05    |
| rs72838440  | C | 0.081   |
| rs16847639  | G | 0.0475  |
| rs968098    | C | 0.0249  |
| rs75334345  | T | 0.0542  |
| rs4625932   | G | 0.0302  |
| rs12614484  | C | 0.0184  |
| rs57553177  | A | 0.0201  |
| rs13029421  | T | 0.0348  |
| rs6718437   | G | -0.0201 |
| rs12989780  | A | 0.0265  |
| rs138830545 | A | -0.1029 |
| rs78723764  | A | 0.0887  |
| rs77182426  | C | -0.0455 |
| rs115759284 | G | 0.0716  |
| rs17006436  | A | 0.0313  |
| rs4524131   | T | -0.0348 |
| rs78328042  | C | -0.0592 |
| rs116250443 | C | -0.0762 |
| rs72949165  | G | 0.0859  |
| rs7604613   | C | -0.0164 |
| rs145466849 | A | -0.0642 |
| rs6724996   | G | 0.032   |
| rs116434328 | C | -0.0531 |
| rs6436796   | T | -0.0199 |
| rs10210475  | C | 0.0254  |
| rs55813796  | T | -0.0376 |
| rs62114615  | C | -0.0268 |
| rs56035453  | G | -0.0302 |
| rs12052213  | G | -0.0294 |
| rs11691445  | C | 0.0887  |
| rs3917386   | C | 0.0693  |

|             |   |         |
|-------------|---|---------|
| rs74454061  | G | 0.0878  |
| rs10179973  | C | -0.0136 |
| rs79779973  | G | -0.0462 |
| rs114081538 | T | 0.0439  |
| rs72782736  | T | -0.056  |
| rs35528068  | A | 0.0505  |
| rs78072984  | C | 0.0597  |
| rs59017654  | G | 0.0484  |
| rs6752945   | C | 0.0268  |
| rs72813046  | G | -0.1295 |
| rs113631405 | T | 0.051   |
| rs75346744  | G | 0.0466  |
| rs68069354  | G | 0.0301  |
| rs13422541  | G | -0.0211 |
| rs76617154  | T | 0.0619  |
| rs17788997  | C | -0.0512 |
| rs74612536  | A | 0.0445  |
| rs10186957  | C | 0.0183  |
| rs150910797 | T | 0.0994  |
| rs55802452  | T | -0.1197 |
| rs12470008  | G | 0.0253  |
| rs16841529  | T | -0.0509 |
| rs116190745 | T | 0.1106  |
| rs2008002   | T | 0.0758  |
| rs113052370 | C | -0.1119 |
| rs10201403  | A | 0.0842  |
| rs147745261 | A | -0.0852 |
| rs16867384  | C | -0.0171 |
| rs4953258   | T | -0.0238 |
| rs112869501 | T | 0.0418  |
| rs62179787  | A | 0.1327  |
| rs17210439  | T | -0.0857 |
| rs1649569   | T | 0.0144  |
| rs115654908 | G | -0.0613 |
| rs115281428 | T | -0.0602 |
| rs35909082  | T | 0.0174  |
| rs10210371  | T | 0.0588  |
| rs78933364  | G | -0.0471 |
| rs17503548  | A | -0.0325 |
| rs62164282  | C | -0.0198 |
| rs140736199 | A | 0.0629  |
| rs56321223  | A | 0.0992  |
| rs116123759 | T | 0.0491  |
| rs2029998   | G | 0.0149  |
| rs4666069   | T | -0.0473 |
| rs78299278  | A | 0.0623  |
| rs72791279  | T | 0.0255  |

|             |   |         |
|-------------|---|---------|
| rs75635408  | C | 0.0594  |
| rs1595575   | T | -0.0428 |
| rs80308779  | C | -0.0312 |
| rs13427136  | C | -0.0311 |
| rs10496306  | C | 0.0163  |
| rs74618416  | A | 0.0338  |
| rs74748900  | C | 0.061   |
| rs17557755  | T | 0.0318  |
| rs10932789  | A | 0.0198  |
| rs6728781   | T | 0.0369  |
| rs1866658   | A | 0.0149  |
| rs7564218   | T | -0.032  |
| rs115312544 | A | -0.0603 |
| rs4384784   | G | 0.0291  |
| rs147641351 | C | -0.0667 |
| rs9636264   | A | 0.0168  |
| rs78957829  | A | -0.0566 |
| rs17385012  | T | 0.0342  |
| rs78655618  | A | -0.0833 |
| rs114395131 | T | 0.0913  |
| rs149068729 | T | 0.0437  |
| rs13428755  | C | -0.0157 |
| rs895635    | C | 0.0148  |
| rs72769355  | C | -0.037  |
| rs144104716 | A | -0.058  |
| rs146726981 | T | -0.0692 |
| rs7570849   | T | -0.0134 |
| rs149769995 | G | -0.0701 |
| rs755817    | T | 0.035   |
| rs78291325  | C | 0.0881  |
| rs6740301   | T | 0.0225  |
| rs13019199  | A | 0.0141  |
| rs6742062   | C | 0.0153  |
| rs61560333  | G | 0.0168  |
| rs78891445  | C | -0.0415 |
| rs75178377  | T | -0.0684 |
| rs13428669  | A | -0.0142 |
| rs6761955   | G | 0.0156  |
| rs7599875   | A | 0.0132  |
| rs3887578   | A | 0.0161  |
| rs79198669  | T | 0.0442  |
| rs6547908   | C | 0.0387  |
| rs75074012  | G | 0.0731  |
| rs145262087 | C | -0.0506 |
| rs77438590  | C | 0.0775  |
| rs6723519   | C | 0.0428  |
| rs7572175   | G | 0.0284  |

|             |   |         |
|-------------|---|---------|
| rs114216338 | A | 0.0552  |
| rs35488249  | C | -0.0168 |
| rs148013191 | G | 0.0696  |
| rs330584    | C | -0.0181 |
| rs116573705 | T | 0.065   |
| rs4621133   | A | 0.0188  |
| rs4546005   | C | 0.0365  |
| rs140496024 | A | 0.0404  |
| rs1369242   | C | -0.0304 |
| rs74993073  | G | -0.0515 |
| rs6705667   | A | 0.0132  |
| rs13430085  | A | -0.0254 |
| rs79889307  | C | 0.0727  |
| rs4667186   | T | 0.0243  |
| rs140224155 | C | -0.1235 |
| rs6748809   | C | 0.015   |
| rs4368280   | G | -0.0167 |
| rs13021768  | T | 0.0768  |
| rs60307773  | A | -0.0356 |
| rs59098932  | T | 0.0558  |
| rs17394359  | A | -0.0134 |
| rs149148283 | A | -0.0573 |
| rs17467483  | G | 0.0264  |
| rs1882605   | T | -0.0881 |
| rs55910082  | C | 0.0906  |
| rs1441099   | G | -0.0146 |
| rs146458680 | T | 0.0401  |
| rs13407724  | T | -0.0373 |
| rs6544079   | T | -0.0154 |
| rs77637988  | C | 0.0167  |
| rs6752610   | T | 0.0144  |
| rs147789832 | G | 0.0771  |
| rs114122139 | T | -0.1114 |
| rs34936178  | C | 0.0185  |
| rs75395645  | T | 0.0808  |
| rs10203538  | C | -0.0256 |
| rs4233725   | A | -0.041  |
| rs58824895  | T | -0.0243 |
| rs17660913  | G | 0.0197  |
| rs3845669   | T | 0.0196  |
| rs1962142   | A | -0.0223 |
| rs57831924  | T | 0.0921  |
| rs6725841   | T | -0.021  |
| rs72812472  | A | 0.023   |
| rs35268716  | C | -0.0174 |
| rs115901379 | G | -0.0688 |
| rs73955579  | T | 0.023   |



|             |   |         |
|-------------|---|---------|
| rs114086261 | A | -0.0559 |
| rs114428146 | T | -0.046  |
| rs80283800  | A | 0.0314  |
| rs73918455  | G | -0.0272 |
| rs13029485  | T | 0.0202  |
| rs147326848 | A | 0.0839  |
| rs145885528 | A | -0.0458 |
| rs62195414  | T | -0.0756 |
| rs10495481  | C | 0.0197  |
| rs1257177   | C | 0.0183  |
| rs72984229  | C | 0.0469  |
| rs3860432   | C | 0.0145  |
| rs35120913  | C | 0.0169  |
| rs2130309   | A | 0.0497  |
| rs75739351  | T | -0.0342 |
| rs62110541  | T | 0.0527  |
| rs115960293 | T | 0.0682  |
| rs10930870  | C | 0.0142  |
| rs147224383 | C | -0.0981 |
| rs115754674 | G | 0.037   |
| rs57055790  | A | 0.0525  |
| rs7597008   | A | 0.0565  |
| rs1861441   | G | 0.0184  |
| rs2163203   | C | 0.014   |
| rs150722257 | A | 0.028   |
| rs77883685  | C | -0.0384 |
| rs1192386   | G | -0.02   |
| rs74414776  | A | 0.1073  |
| rs143175669 | C | 0.0736  |
| rs78033088  | A | 0.0609  |
| rs1546669   | C | 0.047   |
| rs112383848 | C | -0.0738 |
| rs1969503   | A | -0.0137 |
| rs61671894  | T | -0.0449 |
| rs10199477  | C | 0.0363  |
| rs12612463  | T | -0.0159 |
| rs71417307  | G | 0.0591  |
| rs4953882   | A | 0.0174  |
| rs115363563 | A | -0.0869 |
| rs499476    | G | -0.0193 |
| rs34732144  | T | -0.02   |
| rs16856793  | G | -0.0512 |
| rs116061443 | G | -0.063  |
| rs6546060   | C | 0.0184  |
| rs4480978   | G | 0.0213  |
| rs10198958  | A | -0.0206 |
| rs55649028  | A | -0.0542 |

|             |   |         |
|-------------|---|---------|
| rs116216182 | G | -0.0306 |
| rs3997877   | C | -0.0241 |
| rs17367549  | G | 0.0327  |
| rs6707939   | A | -0.0177 |
| rs11678951  | C | 0.014   |
| rs62189530  | A | 0.0199  |
| rs55732095  | T | -0.0318 |
| rs6433859   | A | 0.0624  |
| rs62176017  | T | -0.0318 |
| rs771323    | T | -0.0186 |
| rs62150740  | A | 0.0311  |
| rs114179847 | T | 0.1095  |
| rs13026098  | C | 0.0867  |
| rs75989971  | G | 0.0656  |
| rs12611837  | A | 0.0135  |
| rs113444801 | T | 0.0196  |
| rs11674253  | C | -0.0141 |
| rs73917739  | A | -0.0525 |
| rs145719816 | A | -0.0389 |
| rs112134674 | G | -0.1123 |
| rs17319199  | A | -0.0433 |
| rs146077968 | T | -0.0618 |
| rs79345897  | C | 0.0442  |
| rs17015378  | A | -0.0329 |
| rs992920    | G | -0.0836 |
| rs1114121   | T | 0.0276  |
| rs150028852 | T | 0.0875  |
| rs144393013 | A | -0.0427 |
| rs1968758   | T | 0.0192  |
| rs77440716  | G | 0.0604  |
| rs62106977  | T | -0.0473 |
| rs1404256   | A | -0.0156 |
| rs848596    | T | 0.0133  |
| rs141108260 | G | 0.0204  |
| rs79861226  | G | 0.0522  |
| rs35896030  | C | 0.0248  |
| rs138490701 | C | 0.0637  |
| rs6748118   | C | -0.0363 |
| rs72831078  | G | -0.0206 |
| rs6433229   | G | 0.131   |
| rs147381394 | C | 0.0623  |
| rs12619373  | T | -0.0164 |
| rs16849936  | C | -0.0417 |
| rs28635012  | G | 0.0151  |
| rs7592223   | G | -0.0145 |
| rs4669179   | T | -0.0196 |
| rs12471179  | C | 0.0244  |

|             |   |         |
|-------------|---|---------|
| rs6717032   | T | -0.0187 |
| rs149742455 | G | -0.0427 |
| rs73007205  | C | -0.026  |
| rs12473406  | C | 0.0456  |
| rs57430651  | C | 0.0251  |
| rs57325148  | T | 0.0541  |
| rs10172357  | A | 0.0133  |
| rs140919227 | T | 0.0714  |
| rs139391351 | C | 0.0647  |
| rs78989095  | A | 0.0369  |
| rs139101953 | A | -0.0349 |
| rs143716658 | A | 0.0841  |
| rs1850138   | A | 0.0145  |
| rs141687622 | G | -0.0752 |
| rs113314762 | G | -0.1092 |
| rs7597795   | G | -0.0176 |
| rs80276827  | T | 0.0505  |
| rs10169988  | G | -0.0174 |
| rs76468191  | C | -0.0465 |
| rs60019207  | C | 0.0372  |
| rs112804331 | A | -0.0659 |
| rs35267817  | C | 0.0573  |
| rs7608119   | C | 0.0498  |
| rs4832175   | T | -0.0136 |
| rs2034219   | G | 0.0268  |
| rs72815890  | A | -0.0224 |
| rs17034798  | C | 0.0447  |
| rs114899169 | T | -0.0675 |
| rs3821129   | C | -0.0587 |
| rs11902101  | G | 0.016   |
| rs10166236  | A | 0.0207  |
| rs13408170  | G | -0.0254 |
| rs72838535  | G | -0.1071 |
| rs62174281  | C | 0.0224  |
| rs16823012  | T | -0.0214 |
| rs62180440  | G | 0.0453  |
| rs138877763 | T | -0.025  |
| rs72774955  | G | 0.0517  |
| rs139539754 | A | 0.0492  |
| rs17202778  | C | 0.0171  |
| rs72766412  | T | -0.0167 |
| rs74725642  | A | -0.0503 |
| rs76138743  | T | 0.0861  |
| rs11686290  | A | 0.0134  |
| rs80291098  | A | -0.0508 |
| rs7605442   | A | -0.0248 |
| rs11126327  | G | 0.0193  |

|             |   |         |
|-------------|---|---------|
| rs76397081  | G | 0.0556  |
| rs78840026  | A | 0.0924  |
| rs10180401  | G | -0.0158 |
| rs115595309 | A | 0.0385  |
| rs71437604  | C | 0.0679  |
| rs62186450  | A | -0.0217 |
| rs849575    | G | 0.0196  |
| rs1861616   | A | 0.0142  |
| rs72977629  | A | -0.019  |
| rs72766378  | C | -0.058  |
| rs74468475  | C | 0.0374  |
| rs11695422  | A | -0.0843 |
| rs114827188 | T | -0.0453 |
| rs13431055  | G | -0.0396 |
| rs78512212  | T | -0.0841 |
| rs62184739  | A | -0.0166 |
| rs7605546   | T | 0.0197  |
| rs12465117  | G | -0.0141 |
| rs145716327 | T | 0.0939  |
| rs114579880 | G | -0.0546 |
| rs7562380   | A | -0.0168 |
| rs16856415  | A | 0.0237  |
| rs2602629   | A | -0.0131 |
| rs139815878 | C | 0.0501  |
| rs974599    | T | 0.0135  |
| rs62617140  | A | -0.0324 |
| rs4605309   | C | -0.0228 |
| rs6715589   | T | 0.0139  |
| rs17275498  | C | -0.0209 |
| rs115906044 | T | 0.0613  |
| rs4670651   | A | 0.0237  |
| rs72816381  | C | 0.0717  |
| rs13022440  | G | 0.0283  |
| rs6756244   | G | -0.0396 |
| rs17655204  | A | 0.023   |
| rs41385048  | A | 0.0178  |
| rs2541391   | A | 0.0396  |
| rs75137111  | T | 0.0767  |
| rs6436530   | C | 0.0742  |
| rs2359732   | C | 0.0281  |
| rs140676258 | T | -0.103  |
| rs75933553  | T | -0.0543 |
| rs73938420  | A | -0.0185 |
| rs114051586 | C | 0.0468  |
| rs77011221  | C | 0.0907  |
| rs4553824   | G | -0.0207 |
| rs17323740  | G | -0.0487 |

|             |   |         |
|-------------|---|---------|
| rs11692350  | C | 0.0506  |
| rs142257622 | C | 0.0476  |
| rs62188071  | A | 0.0209  |
| rs6755995   | G | -0.021  |
| rs2371275   | C | 0.0152  |
| rs2217160   | A | -0.0149 |
| rs74855351  | C | 0.0249  |
| rs75944971  | T | -0.0516 |
| rs138452194 | T | 0.0579  |
| rs80332816  | A | -0.0354 |
| rs146367186 | T | -0.0547 |
| rs75711712  | T | -0.1222 |
| rs17568679  | T | 0.018   |
| rs1733575   | C | -0.0128 |
| rs112684431 | C | -0.0742 |
| rs4952771   | T | 0.0141  |
| rs116664677 | T | -0.06   |
| rs10497718  | A | -0.0499 |
| rs75374194  | T | 0.0787  |
| rs111764425 | A | 0.069   |
| rs60874312  | T | 0.0312  |
| rs11901615  | T | -0.014  |
| rs2577198   | C | 0.0388  |
| rs61681975  | A | 0.0241  |
| rs116391057 | A | -0.061  |
| rs4665107   | C | 0.0773  |
| rs78677419  | T | -0.0532 |
| rs4375813   | C | 0.0135  |
| rs75774557  | A | -0.0492 |
| rs78998266  | T | -0.0475 |
| rs78804199  | T | 0.0803  |
| rs61598202  | G | -0.0168 |
| rs3138112   | A | 0.0164  |
| rs116466388 | G | -0.0489 |
| rs10518819  | T | 0.0145  |
| rs12616005  | T | 0.0142  |
| rs113726161 | C | -0.0372 |
| rs12988353  | C | -0.0238 |
| rs79640770  | G | -0.0812 |
| rs6740197   | G | -0.0152 |
| rs12998246  | C | 0.015   |
| rs74659389  | C | -0.0299 |
| rs151271221 | T | -0.0878 |
| rs79234480  | A | -0.0332 |
| rs76190951  | C | 0.0305  |
| rs62193414  | T | -0.0632 |
| rs4972254   | T | 0.0985  |

|             |   |         |
|-------------|---|---------|
| rs72898917  | G | -0.0691 |
| rs79285470  | A | -0.0349 |
| rs6743428   | A | 0.0338  |
| rs79134909  | T | 0.1168  |
| rs4851052   | A | -0.015  |
| rs73157318  | T | -0.0579 |
| rs13427957  | T | 0.014   |
| rs16855357  | T | -0.0223 |
| rs56233210  | C | 0.0397  |
| rs1454540   | C | -0.0407 |
| rs75583513  | A | 0.0534  |
| rs116779159 | A | 0.0585  |
| rs56329445  | T | -0.0222 |
| rs113446766 | C | 0.0937  |
| rs114335617 | T | 0.0892  |
| rs116197353 | T | 0.0704  |
| rs112553534 | T | -0.0655 |
| rs1025109   | C | 0.0248  |
| rs138255475 | C | 0.0722  |
| rs17823305  | C | -0.0615 |
| rs143312481 | T | -0.0599 |
| rs142026456 | G | -0.0483 |
| rs13412953  | C | 0.0689  |
| rs72968586  | T | 0.0362  |
| rs2013672   | C | -0.0225 |
| rs6715671   | C | 0.0237  |
| rs72842104  | A | 0.0225  |
| rs17479253  | A | -0.0626 |
| rs114934306 | C | -0.0516 |
| rs12995036  | T | 0.0202  |
| rs10189473  | C | 0.0464  |
| rs77710985  | G | 0.0998  |
| rs849509    | A | 0.0557  |
| rs13018322  | A | -0.0318 |
| rs116422160 | T | 0.0539  |
| rs62175885  | C | 0.0319  |
| rs145843061 | A | 0.0707  |
| rs7585001   | C | 0.0248  |
| rs148463193 | C | 0.0636  |
| rs17714601  | G | 0.023   |
| rs11684016  | T | 0.0438  |
| rs74888291  | G | -0.1216 |
| rs114138631 | A | -0.0849 |
| rs73089529  | C | -0.0282 |
| rs80111393  | A | 0.028   |
| rs4663749   | G | 0.0169  |
| rs13397527  | C | 0.036   |

|             |   |         |
|-------------|---|---------|
| rs74470658  | T | -0.0416 |
| rs111546039 | C | -0.0767 |
| rs2681021   | C | 0.019   |
| rs2247662   | T | -0.0157 |
| rs75440878  | C | -0.0681 |
| rs77695439  | T | 0.073   |
| rs76079223  | T | -0.0496 |
| rs72843921  | T | 0.0373  |
| rs28910007  | C | 0.0198  |
| rs55815151  | T | -0.014  |
| rs115385423 | C | 0.0288  |
| rs7607360   | G | 0.0143  |
| rs78064189  | C | 0.0255  |
| rs6707739   | A | 0.0161  |
| rs149739676 | G | -0.0766 |
| rs76980943  | A | 0.0555  |
| rs111829457 | T | -0.0869 |
| rs2953083   | A | 0.0134  |
| rs145376304 | A | 0.0938  |
| rs72800975  | C | 0.0289  |
| rs28967894  | C | 0.0456  |
| rs10207672  | C | -0.014  |
| rs10930176  | T | -0.0211 |
| rs263305    | A | -0.0395 |
| rs2256358   | C | 0.0232  |
| rs12611914  | T | -0.0866 |
| rs13426913  | C | 0.0172  |
| rs62184311  | C | 0.0173  |
| rs61636628  | G | 0.0816  |
| rs13416843  | C | -0.0185 |
| rs12373769  | T | -0.0163 |
| rs75570423  | A | -0.0753 |
| rs35197592  | A | 0.0223  |
| rs115938241 | A | -0.0602 |
| rs7573645   | C | 0.0136  |
| rs141248610 | T | -0.0343 |
| rs4672621   | A | 0.0131  |
| rs62118400  | A | -0.0329 |
| rs76863653  | T | -0.0375 |
| rs12463859  | G | -0.0474 |
| rs74668856  | G | 0.0412  |
| rs11676181  | T | -0.0297 |
| rs250921    | C | 0.0151  |
| rs111454083 | T | -0.1011 |
| rs114548389 | T | 0.0931  |
| rs143236447 | G | 0.0679  |
| rs17033000  | C | 0.051   |

|             |   |         |
|-------------|---|---------|
| rs145693741 | A | 0.051   |
| rs115252496 | A | 0.0682  |
| rs1008725   | A | 0.0141  |
| rs112382273 | T | -0.0649 |
| rs6747003   | A | 0.0157  |
| rs80087929  | T | 0.0466  |
| rs72795165  | G | 0.0378  |
| rs77310760  | G | -0.0359 |
| rs17712582  | T | 0.0284  |
| rs16856918  | A | 0.0636  |
| rs12619615  | C | -0.0185 |
| rs34992020  | C | 0.0225  |
| rs58933792  | C | -0.0306 |
| rs13006411  | C | -0.0233 |
| rs5024713   | A | 0.0161  |
| rs77065176  | A | -0.038  |
| rs10490591  | G | -0.0233 |
| rs111729922 | C | -0.049  |
| rs111291408 | A | -0.0167 |
| rs17378713  | C | -0.0321 |
| rs2594505   | T | 0.0175  |
| rs1356067   | G | 0.0138  |
| rs1949571   | A | -0.0662 |
| rs1506564   | T | 0.0186  |
| rs72793615  | C | -0.0412 |
| rs10221828  | G | -0.0465 |
| rs10172034  | C | 0.0152  |
| rs893410    | A | 0.0184  |
| rs12473851  | T | 0.0149  |
| rs113955454 | G | -0.0361 |
| rs1404139   | A | 0.0438  |
| rs72832366  | A | 0.0447  |
| rs148389640 | T | 0.0879  |
| rs1112069   | C | -0.0304 |
| rs57299379  | A | -0.0339 |
| rs13347170  | A | -0.0152 |
| rs79582078  | A | 0.0681  |
| rs72974957  | C | -0.0321 |
| rs115803108 | C | 0.0708  |
| rs62179383  | T | 0.0813  |
| rs72977886  | G | 0.06    |
| rs77611446  | T | 0.0644  |
| rs13009495  | A | -0.0204 |
| rs144585885 | T | -0.0725 |
| rs12470523  | T | 0.0572  |
| rs75286889  | A | -0.0811 |
| rs116554316 | A | -0.0524 |



|             |   |         |
|-------------|---|---------|
| rs113837129 | T | 0.0255  |
| rs56289152  | C | 0.0604  |
| rs115211622 | T | 0.0725  |
| rs17419343  | T | -0.0271 |
| rs72771806  | T | 0.0265  |
| rs72854266  | G | -0.0204 |
| rs146463941 | A | 0.0934  |
| rs831021    | T | 0.014   |
| rs17448436  | T | 0.0483  |
| rs114835598 | C | -0.0474 |
| rs6723526   | C | 0.0228  |
| rs73072140  | C | 0.0684  |
| rs72784218  | A | -0.0894 |
| rs72801966  | C | -0.0261 |
| rs115317473 | A | -0.0384 |
| rs17454872  | T | 0.0194  |
| rs139509357 | G | -0.0633 |
| rs112676177 | A | 0.0731  |
| rs115035921 | A | 0.0726  |
| rs2595216   | T | 0.0507  |
| rs115156451 | A | 0.0569  |
| rs7424363   | G | -0.0283 |
| rs72873854  | G | 0.033   |
| rs143132751 | A | 0.0176  |
| rs115619116 | A | -0.0435 |
| rs343156    | T | 0.0176  |
| rs72782374  | T | 0.0556  |
| rs10195571  | T | 0.0691  |
| rs12993676  | C | -0.1163 |
| rs4665554   | T | 0.0142  |
| rs1860767   | T | -0.0278 |
| rs13035744  | C | -0.0152 |
| rs7578780   | G | 0.0129  |
| rs11127426  | A | -0.0199 |
| rs61656332  | G | -0.0207 |
| rs1437734   | T | 0.022   |
| rs115255501 | T | -0.0902 |
| rs3908093   | G | -0.0137 |
| rs12465619  | G | -0.0328 |
| rs116464331 | G | 0.0389  |
| rs76394127  | T | -0.0576 |
| rs6437106   | T | -0.0452 |
| rs75546378  | A | -0.0394 |
| rs143859108 | G | 0.0623  |
| rs7570440   | A | 0.0446  |
| rs12479161  | C | -0.0165 |
| rs6543296   | T | -0.0144 |

|             |   |         |
|-------------|---|---------|
| rs137872499 | C | -0.0643 |
| rs78218896  | T | 0.0625  |
| rs148628056 | G | 0.0513  |
| rs111920801 | A | 0.0685  |
| rs116262786 | C | 0.0683  |
| rs148004386 | A | 0.0635  |
| rs4953874   | T | -0.023  |
| rs115123837 | A | -0.0323 |
| rs78365770  | C | -0.061  |
| rs71413688  | G | 0.0429  |
| rs146518178 | C | -0.0672 |
| rs11688269  | C | -0.0148 |
| rs2461773   | A | -0.0652 |
| rs3915887   | C | 0.0133  |
| rs115818735 | A | -0.0758 |
| rs73952184  | T | -0.0416 |
| rs3791328   | T | 0.0553  |
| rs16854499  | T | -0.051  |
| rs72872826  | A | -0.0658 |
| rs72809030  | T | -0.0359 |
| rs62186144  | C | 0.1248  |
| rs13428470  | A | 0.0206  |
| rs72962580  | C | -0.0655 |
| rs56120917  | A | -0.0222 |
| rs12470754  | C | 0.0283  |
| rs10495705  | T | -0.013  |
| rs62148410  | T | 0.0186  |
| rs115996250 | A | -0.0337 |
| rs76148698  | A | -0.0608 |
| rs75384632  | T | -0.0398 |
| rs150826150 | A | 0.0464  |
| rs76874460  | C | -0.0831 |
| rs77585871  | A | -0.0286 |
| rs72815128  | C | 0.0562  |
| rs16861891  | T | 0.0297  |
| rs2034411   | T | -0.0139 |
| rs72787255  | G | -0.0394 |
| rs72853679  | C | 0.0695  |
| rs149456251 | G | 0.0719  |
| rs75840527  | A | -0.0611 |
| rs75448123  | C | 0.0405  |
| rs2197697   | A | -0.0704 |
| rs150214694 | A | 0.0577  |
| rs57501745  | G | -0.0157 |
| rs1134119   | C | -0.029  |
| rs74640443  | A | -0.0673 |
| rs115282287 | A | 0.0345  |

|             |   |         |
|-------------|---|---------|
| rs113181818 | A | -0.1004 |
| rs11684654  | A | 0.0745  |
| rs6740930   | G | -0.0177 |
| rs10193345  | G | -0.0939 |
| rs1814414   | A | 0.0157  |
| rs17320179  | T | -0.1006 |
| rs59650755  | A | 0.0218  |
| rs17267869  | C | -0.0189 |
| rs59913800  | G | -0.0157 |
| rs75412682  | G | 0.0382  |
| rs1521939   | G | 0.0177  |
| rs13407916  | A | -0.0164 |
| rs2216326   | G | 0.0129  |
| rs116486031 | T | -0.0413 |
| rs35135518  | C | -0.0248 |
| rs13012044  | C | -0.0193 |
| rs6739657   | G | -0.0671 |
| rs78999631  | T | 0.0418  |
| rs6432765   | C | 0.0136  |
| rs114240574 | G | -0.021  |
| rs11680323  | G | 0.0237  |
| rs139875164 | A | 0.0679  |
| rs77686931  | T | 0.0838  |
| rs112805541 | G | -0.0243 |
| rs7590649   | T | -0.0165 |
| rs825288    | C | 0.0363  |
| rs76623151  | A | 0.0564  |
| rs115308256 | C | 0.0409  |
| rs145631003 | C | -0.0577 |
| rs4671622   | C | 0.0198  |
| rs12991894  | T | -0.0198 |
| rs72769303  | A | -0.0906 |
| rs7601924   | A | -0.0149 |
| rs112013417 | G | -0.0576 |
| rs77712319  | G | 0.0403  |
| rs13422623  | T | 0.0307  |
| rs56143011  | G | -0.0351 |
| rs1148953   | A | -0.0519 |
| rs116702219 | T | -0.0579 |
| rs143942231 | A | -0.0506 |
| rs115658569 | A | 0.0861  |
| rs116547836 | T | -0.0547 |
| rs6724398   | C | 0.0695  |
| rs17233255  | G | 0.0419  |
| rs16856949  | C | 0.0639  |
| rs6729915   | G | -0.0141 |
| rs115365287 | C | -0.0321 |

|             |   |         |
|-------------|---|---------|
| rs10170312  | C | 0.0164  |
| rs140748105 | C | 0.0829  |
| rs759433    | A | -0.0127 |
| rs3917335   | T | 0.0324  |
| rs4632361   | G | -0.013  |
| rs7600457   | G | 0.0128  |
| rs779988    | T | 0.0135  |
| rs17324515  | T | 0.0139  |
| rs115916649 | G | -0.0363 |
| rs6712996   | C | 0.0163  |
| rs17463173  | A | -0.0177 |
| rs75648604  | T | 0.0578  |
| rs3795877   | G | -0.0154 |
| rs1869091   | C | -0.0164 |
| rs72988200  | G | 0.0632  |
| rs71422163  | A | 0.0459  |
| rs6542401   | C | 0.0777  |
| rs79030113  | G | -0.0617 |
| rs116600021 | T | -0.0438 |
| rs6745675   | T | 0.0145  |
| rs80350499  | A | -0.0942 |
| rs78952266  | A | -0.036  |
| rs79891133  | A | 0.0594  |
| rs1900234   | C | -0.0162 |
| rs12692206  | C | 0.0163  |
| rs78654962  | A | 0.061   |
| rs17044109  | G | 0.0264  |
| rs10184676  | G | 0.0261  |
| rs77352982  | A | -0.0327 |
| rs72846730  | T | -0.0383 |
| rs73053723  | C | 0.0592  |
| rs77680559  | C | -0.0291 |
| rs143823497 | C | -0.0627 |
| rs13386098  | T | 0.0477  |
| rs13004793  | A | -0.0405 |
| rs11688774  | C | -0.0238 |
| rs116480340 | G | -0.0718 |
| rs55758238  | A | 0.0684  |
| rs114013221 | C | 0.0589  |
| rs60430757  | A | -0.0201 |
| rs114704198 | T | 0.0293  |
| rs7577931   | T | 0.0164  |
| rs138652415 | T | 0.0754  |
| rs116518256 | T | -0.0288 |
| rs11899341  | G | -0.0165 |
| rs1865235   | G | -0.0161 |
| rs75876447  | C | 0.0379  |

|             |   |         |
|-------------|---|---------|
| rs6544017   | T | -0.0151 |
| rs6547153   | G | -0.0158 |
| rs11683762  | T | 0.0135  |
| rs79057543  | A | 0.0799  |
| rs144468596 | G | -0.0557 |
| rs13011162  | A | 0.0419  |
| rs143919480 | C | 0.0153  |
| rs77341182  | A | 0.0214  |
| rs55752248  | A | -0.0688 |
| rs111838682 | C | 0.0586  |
| rs9653196   | A | 0.0289  |
| rs113289465 | C | 0.0847  |
| rs145560233 | C | 0.0323  |
| rs77882592  | T | 0.0507  |
| rs6750149   | G | -0.0174 |
| rs149939228 | A | -0.0709 |
| rs12329123  | A | 0.0147  |
| rs58645709  | T | -0.0173 |
| rs1921613   | T | 0.0352  |
| rs72812146  | C | 0.0234  |
| rs11694161  | C | 0.0815  |
| rs4407237   | T | -0.0251 |
| rs12474381  | G | -0.0337 |
| rs76362302  | A | -0.0704 |
| rs12476958  | A | 0.0286  |
| rs72782596  | C | 0.072   |
| rs2121926   | G | 0.0415  |
| rs16865364  | G | 0.0708  |
| rs1588402   | A | 0.0184  |
| rs72798617  | C | -0.0666 |
| rs72935399  | A | 0.1124  |
| rs16863831  | C | -0.0172 |
| rs7594102   | C | 0.014   |
| rs76535759  | A | -0.0424 |
| rs55659243  | A | 0.0503  |
| rs74754283  | A | -0.0661 |
| rs587139    | C | -0.0208 |
| rs72973275  | T | -0.1138 |
| rs10182066  | G | -0.0287 |
| rs114477554 | A | -0.0782 |
| rs62153464  | C | -0.041  |
| rs12991354  | A | 0.0459  |
| rs11125059  | T | 0.0182  |
| rs77960721  | A | -0.0606 |
| rs116826288 | A | 0.0291  |
| rs6732302   | T | 0.0142  |
| rs13031438  | T | -0.0698 |

|             |   |         |
|-------------|---|---------|
| rs72851476  | C | -0.0275 |
| rs116351802 | T | -0.0942 |
| rs7579191   | A | -0.0152 |
| rs45596438  | A | 0.0702  |
| rs4339012   | G | 0.0481  |
| rs718850    | T | -0.0126 |
| rs78012012  | G | 0.0659  |
| rs12617194  | T | 0.0496  |
| rs41265549  | G | -0.0898 |
| rs149278148 | C | 0.0514  |
| rs1861773   | C | -0.0145 |
| rs6741206   | G | 0.0892  |
| rs115127645 | C | -0.0544 |
| rs4490174   | A | 0.0177  |
| rs11679312  | T | -0.039  |
| rs62171895  | T | -0.0181 |
| rs34790028  | C | 0.0156  |
| rs3816096   | G | 0.0146  |
| rs116054627 | A | 0.0214  |
| rs79917820  | T | -0.0553 |
| rs112926802 | G | 0.0332  |
| rs80166380  | C | 0.0229  |
| rs13402456  | T | 0.0383  |
| rs1464033   | T | 0.0145  |
| rs28763879  | C | 0.0615  |
| rs4663185   | A | 0.0138  |
| rs28439459  | T | 0.0351  |
| rs45472492  | T | 0.0449  |
| rs2288100   | T | -0.0171 |
| rs79709502  | G | -0.0209 |
| rs57565563  | T | -0.0233 |
| rs62168391  | T | -0.0657 |
| rs150931967 | A | 0.087   |
| rs13418118  | C | 0.0169  |
| rs67756598  | T | -0.0307 |
| rs58644007  | G | 0.0953  |
| rs35654639  | T | 0.0259  |
| rs146139372 | T | 0.0813  |
| rs7605298   | T | -0.058  |
| rs74640748  | T | -0.0742 |
| rs115007759 | T | -0.0358 |
| rs72845872  | A | 0.0439  |
| rs3956512   | A | 0.0132  |
| rs114246516 | C | -0.0716 |
| rs6713945   | G | 0.02    |
| rs6751590   | A | -0.0132 |
| rs111423051 | T | -0.0839 |

|             |   |         |
|-------------|---|---------|
| rs1554704   | T | -0.0132 |
| rs75302181  | G | -0.0321 |
| rs113700204 | A | -0.0938 |
| rs147910101 | T | -0.036  |
| rs151185316 | T | -0.0557 |
| rs71417238  | T | 0.0494  |
| rs12473577  | G | -0.0134 |
| rs10496597  | T | -0.0227 |
| rs13022350  | A | 0.0612  |
| rs34820210  | G | -0.0573 |
| rs78718201  | T | 0.0469  |
| rs112711136 | T | 0.0788  |
| rs4299339   | G | 0.0141  |
| rs17874950  | A | -0.0263 |
| rs6754193   | T | 0.0618  |
| rs73958924  | A | 0.0323  |
| rs62151282  | A | 0.0443  |
| rs73074634  | G | 0.052   |
| rs80042511  | C | 0.0671  |
| rs1509521   | A | 0.0173  |
| rs16843303  | A | -0.0198 |
| rs12471222  | G | 0.0208  |
| rs115802547 | T | 0.0542  |
| rs76702147  | T | 0.0552  |
| rs116345518 | T | 0.0544  |
| rs721491    | G | -0.0859 |
| rs1178      | C | -0.0552 |
| rs79122914  | C | 0.046   |
| rs111825872 | A | 0.0688  |
| rs113701518 | A | 0.0311  |
| rs10185229  | C | 0.0151  |
| rs11127094  | T | -0.0136 |
| rs298915    | G | -0.014  |
| rs79553538  | C | 0.0251  |
| rs6433233   | A | 0.1011  |
| rs4676426   | C | 0.0157  |
| rs75750532  | A | -0.021  |
| rs1492550   | T | 0.0863  |
| rs2919872   | T | 0.013   |
| rs13423600  | T | 0.0147  |
| rs10191189  | T | 0.0395  |
| rs10207133  | A | -0.0139 |
| rs148021266 | G | 0.0541  |
| rs145837005 | A | -0.0793 |
| rs114299468 | A | 0.1202  |
| rs74469198  | A | -0.0769 |
| rs80281747  | A | -0.0844 |

|             |   |         |
|-------------|---|---------|
| rs6749371   | T | 0.0265  |
| rs12472632  | C | -0.0168 |
| rs12468517  | G | 0.0196  |
| rs78297861  | A | -0.0444 |
| rs77656785  | G | 0.055   |
| rs113941644 | C | 0.0231  |
| rs11693629  | T | 0.0137  |
| rs12151596  | A | -0.0327 |
| rs149139909 | A | -0.0882 |
| rs142648815 | T | -0.0734 |
| rs140589636 | A | 0.0362  |
| rs10210720  | T | 0.0634  |
| rs145280522 | G | 0.0614  |
| rs13018626  | T | 0.0255  |
| rs114291542 | G | -0.1026 |
| rs79363547  | G | 0.0418  |
| rs80349864  | C | 0.0802  |
| rs12999858  | T | 0.024   |
| rs112831787 | T | 0.0713  |
| rs11884807  | T | -0.0478 |
| rs78473089  | C | -0.0566 |
| rs13007944  | G | 0.0386  |
| rs75275413  | T | -0.0461 |
| rs10865447  | C | 0.0146  |
| rs10929814  | A | 0.0223  |
| rs10185075  | A | 0.0493  |
| rs143654179 | C | 0.0429  |
| rs6760980   | G | 0.0491  |
| rs59555562  | T | 0.0466  |
| rs72793564  | T | -0.0132 |
| rs140730450 | C | 0.077   |
| rs4849305   | T | -0.0172 |
| rs73996035  | C | -0.0337 |
| rs141110508 | T | 0.0443  |
| rs12104489  | T | 0.014   |
| rs75287083  | T | -0.033  |
| rs115676477 | T | 0.0659  |
| rs16985807  | A | 0.0351  |
| rs77327606  | T | 0.0451  |
| rs77987410  | A | 0.048   |
| rs66938001  | A | -0.0164 |
| rs12471713  | C | -0.0249 |
| rs28427244  | T | -0.0186 |
| rs75986540  | T | -0.0453 |
| rs6705691   | A | -0.0209 |
| rs115342582 | G | -0.0513 |
| rs75894560  | T | -0.0783 |



|             |   |         |
|-------------|---|---------|
| rs7587206   | T | -0.0208 |
| rs4630793   | T | 0.0294  |
| rs75777969  | C | 0.1003  |
| rs142630710 | A | 0.0488  |
| rs73998881  | T | 0.0607  |
| rs1836670   | T | 0.0313  |
| rs11695756  | G | 0.0415  |
| rs142924842 | G | 0.0422  |
| rs35464053  | G | 0.0293  |
| rs17691980  | A | -0.0261 |
| rs72887544  | G | -0.0203 |
| rs115728924 | A | -0.0896 |
| rs10928126  | T | -0.0209 |
| rs78367654  | A | 0.0326  |
| rs143072897 | T | 0.0619  |
| rs7574767   | G | -0.0411 |
| rs55865386  | T | -0.0553 |
| rs62188701  | T | 0.0429  |
| rs11686069  | T | -0.0175 |
| rs12474000  | T | 0.0371  |
| rs702879    | T | -0.0492 |
| rs150802141 | G | 0.0525  |
| rs9808246   | T | 0.0145  |
| rs147673371 | C | 0.0413  |
| rs10202567  | C | -0.0126 |
| rs1250905   | G | 0.0202  |
| rs17441578  | T | -0.0333 |
| rs141000655 | A | -0.0695 |
| rs12052354  | G | 0.0388  |
| rs55694696  | C | -0.0534 |
| rs4952997   | G | 0.015   |
| rs12992088  | T | 0.0488  |
| rs72789480  | T | 0.0199  |
| rs71436153  | A | -0.1129 |
| rs72823234  | T | 0.0363  |
| rs55941552  | A | -0.0451 |
| rs7585355   | T | 0.0214  |
| rs1439669   | G | -0.0128 |
| rs143741539 | A | 0.0886  |
| rs71429718  | T | -0.0172 |
| rs2047875   | C | -0.0128 |
| rs75877460  | C | 0.0274  |
| rs114073162 | T | 0.0851  |
| rs76554691  | G | 0.0245  |
| rs72828033  | C | -0.0241 |
| rs17375180  | T | 0.0175  |
| rs35127434  | C | -0.0352 |

|             |   |         |
|-------------|---|---------|
| rs114284848 | G | 0.0567  |
| rs75691120  | G | -0.0492 |
| rs62132338  | G | -0.0137 |
| rs143085567 | C | -0.0629 |
| rs115805563 | G | -0.033  |
| rs13421628  | C | 0.0259  |
| rs116181878 | A | 0.0667  |
| rs12472650  | T | -0.0274 |
| rs10186509  | G | -0.02   |
| rs62142360  | C | 0.0546  |
| rs785033    | C | 0.0162  |
| rs1438021   | C | 0.0193  |
| rs113447564 | T | -0.0184 |
| rs115408525 | A | -0.0504 |
| rs785242    | A | 0.0132  |
| rs11686233  | G | 0.0202  |
| rs76097880  | T | -0.0362 |
| rs78265967  | A | 0.0364  |
| rs139403330 | A | -0.0695 |
| rs6739742   | T | -0.0202 |
| rs11686690  | T | 0.0148  |
| rs356651    | C | 0.0168  |
| rs17798163  | A | -0.0538 |
| rs6752297   | T | 0.0133  |
| rs2163050   | A | 0.0177  |
| rs78631551  | G | 0.0557  |
| rs72944531  | A | -0.0172 |
| rs79558071  | C | 0.0387  |
| rs114617574 | C | 0.0645  |
| rs71439124  | A | 0.0523  |
| rs79843355  | C | 0.0462  |
| rs78583246  | C | -0.0636 |
| rs113442587 | C | -0.0605 |
| rs17802099  | A | -0.0201 |
| rs79184043  | T | -0.058  |
| rs2705579   | C | 0.0128  |
| rs147412692 | G | -0.0483 |
| rs6718291   | A | -0.0132 |
| rs6704667   | G | 0.0213  |
| rs56271447  | C | 0.0379  |
| rs6750912   | T | -0.0256 |
| rs6716522   | A | -0.0256 |
| rs11693028  | T | 0.0215  |
| rs116825000 | A | 0.0486  |
| rs10490417  | A | 0.0156  |
| rs143492748 | T | 0.0605  |
| rs6744310   | G | -0.0211 |

|             |   |         |
|-------------|---|---------|
| rs4954048   | T | 0.0132  |
| rs74659040  | G | -0.0496 |
| rs74812585  | G | 0.0952  |
| rs79706376  | T | -0.0639 |
| rs62127653  | T | 0.0189  |
| rs79117589  | T | -0.0535 |
| rs62167013  | A | -0.0174 |
| rs6713324   | C | 0.0126  |
| rs12692251  | C | -0.0402 |
| rs921136    | C | 0.0445  |
| rs140612152 | C | -0.0601 |
| rs75893073  | T | 0.0709  |
| rs929676    | A | 0.0126  |
| rs73096796  | A | 0.0412  |
| rs75738600  | G | -0.1033 |
| rs17028085  | T | 0.0222  |
| rs1918086   | A | -0.0235 |
| rs115928410 | T | 0.0735  |
| rs115946875 | T | 0.0457  |
| rs11689337  | C | 0.0135  |
| rs149186112 | G | -0.0699 |
| rs1347502   | C | -0.0215 |
| rs11695507  | G | 0.0255  |
| rs6706981   | G | -0.0124 |
| rs115981083 | C | 0.097   |
| rs11683371  | T | -0.0206 |
| rs13404286  | A | -0.0129 |
| rs115344330 | G | 0.045   |
| rs56717103  | A | 0.1237  |
| rs45591431  | C | 0.0433  |
| rs72818509  | T | 0.0448  |
| rs62179945  | C | 0.054   |
| rs115327370 | A | 0.0625  |
| rs16856807  | A | 0.0195  |
| rs10432547  | C | 0.0738  |
| rs13006279  | G | 0.0131  |
| rs1869415   | C | 0.013   |
| rs140344793 | A | -0.0561 |
| rs11694911  | T | 0.0205  |
| rs4662751   | C | -0.0139 |
| rs35365948  | C | -0.025  |
| rs6730348   | C | 0.0374  |
| rs115295797 | T | -0.0542 |
| rs2944661   | A | 0.0178  |
| rs6542256   | C | -0.0207 |
| rs6741251   | T | -0.0363 |
| rs56344680  | C | 0.0557  |

|             |   |         |
|-------------|---|---------|
| rs148805042 | T | 0.0983  |
| rs28434042  | T | 0.0208  |
| rs62167300  | A | 0.0688  |
| rs72985806  | A | -0.0326 |
| rs79532872  | G | -0.0721 |
| rs7581382   | C | -0.0171 |
| rs3791372   | T | 0.0146  |
| rs11890865  | T | 0.0289  |
| rs6435321   | A | 0.0155  |
| rs115737463 | A | 0.0813  |
| rs147920850 | A | -0.0579 |
| rs58912751  | A | 0.07    |
| rs75918851  | C | -0.0693 |
| rs35463408  | C | -0.0238 |
| rs142660176 | T | -0.0483 |
| rs1947667   | T | 0.0282  |
| rs78778421  | T | 0.0606  |
| rs62168185  | G | 0.0479  |
| rs17014128  | C | -0.0162 |
| rs116104814 | T | -0.1426 |
| rs79754244  | A | 0.0194  |
| rs12988630  | T | -0.0162 |
| rs116442483 | A | 0.1202  |
| rs60687675  | A | 0.0272  |
| rs1606266   | G | -0.0123 |
| rs13007173  | G | 0.029   |
| rs11891318  | G | 0.0189  |
| rs148588565 | A | 0.096   |
| rs111580190 | A | -0.0372 |
| rs143821381 | G | 0.0682  |
| rs34559328  | C | -0.0273 |
| rs113499356 | G | 0.0354  |
| rs17868178  | T | 0.0256  |
| rs72842176  | A | -0.0279 |
| rs72791004  | C | -0.0285 |
| rs75557511  | A | -0.0766 |
| rs138772924 | T | 0.1044  |
| rs62188582  | C | -0.04   |
| rs75893719  | G | -0.0754 |
| rs79857088  | A | 0.0744  |
| rs62193703  | T | 0.0398  |
| rs62151968  | G | -0.0689 |
| rs855023    | C | 0.0138  |
| rs12692516  | T | -0.014  |
| rs12997981  | T | -0.0372 |
| rs78802652  | A | 0.0651  |
| rs114964353 | A | 0.0817  |

|             |   |         |
|-------------|---|---------|
| rs76500598  | A | -0.0833 |
| rs143731626 | T | -0.082  |
| rs62181866  | A | -0.0733 |
| rs4663143   | A | 0.0145  |
| rs72776823  | A | -0.0784 |
| rs77802161  | A | -0.0509 |
| rs6546474   | T | 0.0587  |
| rs6755697   | T | -0.0402 |
| rs79001548  | C | 0.0703  |
| rs114989643 | T | 0.0679  |
| rs12712221  | A | 0.0125  |
| rs73996642  | T | -0.0643 |
| rs61754180  | C | -0.0229 |
| rs75276619  | T | -0.1301 |
| rs17631680  | C | 0.0218  |
| rs76069668  | C | -0.065  |
| rs79390884  | A | -0.044  |
| rs115661111 | A | -0.0385 |
| rs34205881  | G | -0.0253 |
| rs896605    | A | 0.0519  |
| rs35650193  | C | -0.018  |
| rs78980244  | G | 0.038   |
| rs72830876  | T | 0.0173  |
| rs17305247  | T | -0.0199 |
| rs35182736  | A | 0.0444  |
| rs72868667  | C | 0.0509  |
| rs79723032  | T | -0.0591 |
| rs79020359  | A | -0.0308 |
| rs12471644  | A | 0.0292  |
| rs150504004 | T | -0.0677 |
| rs34583316  | G | -0.0501 |
| rs79565137  | A | -0.0347 |
| rs58077938  | G | 0.0939  |
| rs144505935 | C | -0.1157 |
| rs113300433 | T | -0.0708 |
| rs836595    | C | 0.0127  |
| rs67332877  | A | -0.024  |
| rs72813316  | C | -0.0453 |
| rs150429403 | T | -0.045  |
| rs2406574   | C | 0.0178  |
| rs151183543 | C | 0.0564  |
| rs13016963  | A | 0.0125  |
| rs79917868  | T | 0.0642  |
| rs56276855  | T | -0.0452 |
| rs115081778 | A | -0.0505 |
| rs116000510 | A | -0.0514 |
| rs62170435  | T | -0.0281 |

|             |   |         |
|-------------|---|---------|
| rs2381406   | G | 0.0136  |
| rs77531866  | T | 0.0649  |
| rs17726971  | C | -0.0514 |
| rs1526288   | G | 0.0124  |
| rs17248088  | C | 0.0167  |
| rs115232088 | G | -0.0613 |
| rs11902122  | G | -0.0176 |
| rs35548636  | C | 0.0167  |
| rs6543626   | T | 0.0179  |
| rs6543717   | C | 0.0138  |
| rs79468790  | A | 0.0257  |
| rs115207228 | T | 0.0846  |
| rs1124787   | C | -0.0125 |
| rs72820917  | C | -0.073  |
| rs2375937   | T | -0.0157 |
| rs34021475  | T | -0.0131 |
| rs6414077   | G | 0.0136  |
| rs13027284  | A | -0.0652 |
| rs1225101   | A | -0.0167 |
| rs148408744 | C | 0.0685  |
| rs116384721 | G | -0.0537 |
| rs79850677  | A | -0.0273 |
| rs146816757 | C | -0.071  |
| rs72979183  | A | -0.0413 |
| rs6727093   | C | 0.0159  |
| rs7601836   | A | 0.0121  |
| rs113070302 | T | -0.0555 |
| rs76119111  | T | 0.0452  |
| rs12105920  | T | 0.0452  |
| rs34872955  | T | -0.0165 |
| rs79600712  | G | 0.0501  |
| rs78955417  | G | -0.0335 |
| rs59850878  | G | -0.0337 |
| rs137906029 | C | 0.0739  |
| rs114126349 | G | -0.0481 |
| rs80031519  | G | -0.0699 |
| rs115737054 | G | 0.0339  |
| rs72977156  | A | 0.0189  |
| rs78920093  | G | -0.0354 |
| rs114996083 | A | 0.074   |
| rs58729508  | A | 0.0197  |
| rs10181773  | A | -0.0321 |
| rs62158417  | T | -0.0609 |
| rs16828700  | G | 0.0351  |
| rs114138678 | A | -0.0957 |
| rs74968020  | C | 0.0553  |
| rs78717642  | C | 0.0396  |

|             |   |         |
|-------------|---|---------|
| rs264591    | C | 0.0128  |
| rs10460432  | T | -0.0557 |
| rs36146170  | G | -0.0204 |
| rs6735549   | A | 0.0214  |
| rs13015813  | T | -0.0139 |
| rs141858735 | T | -0.0686 |
| rs17224487  | G | -0.0246 |
| rs13016089  | G | 0.0185  |
| rs11465732  | T | -0.0252 |
| rs35859027  | T | 0.0403  |
| rs2043573   | G | 0.0219  |
| rs115630801 | A | -0.1294 |
| rs10865488  | C | -0.0124 |
| rs7425164   | T | -0.0136 |
| rs57739605  | C | -0.037  |
| rs10176315  | C | 0.0173  |
| rs6743458   | A | -0.0308 |
| rs7583963   | C | 0.0219  |
| rs75012447  | T | 0.0599  |
| rs115211457 | C | 0.0639  |
| rs1965201   | G | -0.0175 |
| rs112823895 | T | 0.0702  |
| rs2122250   | C | 0.0251  |
| rs1865580   | A | -0.049  |
| rs57542943  | C | 0.0216  |
| rs66492046  | A | 0.0126  |
| rs144574504 | T | -0.0596 |
| rs77915599  | C | -0.037  |
| rs34124418  | C | -0.0192 |
| rs74887896  | A | 0.0461  |
| rs77156645  | C | -0.0752 |
| rs56188815  | A | -0.0145 |
| rs78620068  | A | -0.0241 |
| rs12019160  | C | 0.0309  |
| rs62139385  | A | 0.057   |
| rs139679762 | G | -0.076  |
| rs112066730 | A | 0.0337  |
| rs10929581  | T | 0.0126  |
| rs76787598  | C | 0.0749  |
| rs78945335  | T | 0.0205  |
| rs35432737  | A | 0.0215  |
| rs16831235  | A | 0.0166  |
| rs12611562  | C | 0.0296  |
| rs35643506  | C | 0.0668  |
| rs2372594   | A | -0.0583 |
| rs35114671  | A | 0.0566  |
| rs149355505 | T | -0.0445 |

|             |   |         |
|-------------|---|---------|
| rs62116906  | G | -0.038  |
| rs2720123   | T | -0.0157 |
| rs11883723  | A | 0.014   |
| rs115037585 | A | 0.0661  |
| rs79410072  | G | -0.0451 |
| rs35019687  | T | 0.0299  |
| rs4669089   | G | 0.0125  |
| rs34147598  | T | -0.093  |
| rs62110553  | A | -0.0253 |
| rs406334    | A | 0.0152  |
| rs10520062  | A | 0.0199  |
| rs55727411  | T | 0.0183  |
| rs115828243 | C | 0.0563  |
| rs80285087  | T | 0.025   |
| rs143573165 | G | -0.1048 |
| rs1434106   | T | -0.0135 |
| rs62129134  | C | 0.0279  |
| rs56023102  | T | 0.068   |
| rs145167155 | C | -0.1091 |
| rs75263017  | T | -0.145  |
| rs78521107  | T | 0.0351  |
| rs113774217 | T | -0.0627 |
| rs2922343   | T | -0.0165 |
| rs34256085  | G | -0.0326 |
| rs115138392 | T | 0.0872  |
| rs12617309  | A | 0.0529  |
| rs146307120 | A | 0.0572  |
| rs72966386  | C | -0.0317 |
| rs11504907  | T | 0.0303  |
| rs13005618  | T | -0.0629 |
| rs62163606  | T | -0.0348 |
| rs146449425 | G | -0.1148 |
| rs72921086  | C | 0.0192  |
| rs113734444 | T | 0.0659  |
| rs115642713 | T | -0.065  |
| rs2646205   | A | -0.0228 |
| rs17742270  | T | 0.0505  |
| rs2033750   | T | -0.0124 |
| rs77858359  | A | 0.0289  |
| rs10497562  | T | 0.0239  |
| rs60877678  | T | 0.0589  |
| rs11683782  | C | -0.0129 |
| rs74670719  | T | -0.0923 |
| rs112793749 | T | 0.0451  |
| rs4663033   | G | 0.0123  |
| rs34437788  | T | -0.0613 |
| rs112232911 | C | -0.052  |



|             |   |         |
|-------------|---|---------|
| rs13001645  | C | 0.0157  |
| rs146354180 | A | -0.0709 |
| rs111320956 | A | 0.0265  |
| rs147077410 | C | 0.0738  |
| rs74853748  | A | 0.0473  |
| rs142215557 | C | -0.0465 |
| rs114246968 | A | 0.0502  |
| rs1824602   | C | 0.0216  |
| rs114116138 | T | 0.062   |
| rs78604845  | T | 0.0402  |
| rs79519304  | C | -0.0523 |
| rs148004734 | G | -0.0463 |
| rs4673071   | C | 0.013   |
| rs42539     | T | 0.0213  |
| rs114885757 | T | -0.0297 |
| rs140128145 | T | 0.0478  |
| rs77537682  | T | 0.0387  |
| rs57764132  | T | 0.069   |
| rs74435267  | G | 0.0765  |
| rs12998514  | A | 0.0127  |
| rs6731866   | C | -0.0145 |
| rs114006816 | T | 0.0449  |
| rs2353179   | G | -0.057  |
| rs1649379   | C | -0.0148 |
| rs12373683  | A | -0.0638 |
| rs741283    | A | -0.0173 |
| rs74657534  | C | 0.0347  |
| rs79727950  | G | 0.0346  |
| rs62109681  | T | 0.038   |
| rs4953406   | G | 0.0134  |
| rs143660831 | A | 0.0855  |
| rs10179521  | C | -0.0235 |
| rs79950062  | C | -0.0189 |
| rs6751578   | A | 0.0161  |
| rs115605049 | T | -0.0717 |
| rs7599190   | G | -0.0141 |
| rs113672242 | T | -0.0226 |
| rs1993173   | G | 0.0134  |
| rs13026308  | A | -0.018  |
| rs10195407  | T | 0.0169  |
| rs116172923 | T | 0.0411  |
| rs10211365  | T | -0.0207 |
| rs7580970   | T | 0.0397  |
| rs6746530   | T | 0.0128  |
| rs62149757  | C | -0.0758 |
| rs62179538  | C | -0.0699 |
| rs76223101  | A | -0.0484 |

|             |   |         |
|-------------|---|---------|
| rs116101156 | T | 0.0599  |
| rs9917188   | A | -0.0251 |
| rs114157860 | C | -0.0688 |
| rs10185549  | A | -0.0124 |
| rs6432084   | A | 0.0161  |
| rs11690767  | T | 0.0302  |
| rs59517491  | T | 0.019   |
| rs76426109  | C | 0.0375  |
| rs138219453 | A | 0.0778  |
| rs2357551   | T | 0.0159  |
| rs112971066 | T | -0.0886 |
| rs13385578  | G | -0.0134 |
| rs72859307  | G | -0.0861 |
| rs114874038 | C | 0.0612  |
| rs113028182 | A | -0.0513 |
| rs143570693 | G | 0.0478  |
| rs6714273   | T | 0.0128  |
| rs7585046   | G | 0.0123  |
| rs116382491 | T | -0.0539 |
| rs74393287  | A | -0.1105 |
| rs56679604  | G | -0.0173 |
| rs78764741  | T | -0.0554 |
| rs13030456  | C | -0.0135 |
| rs4241258   | T | -0.0175 |
| rs116480433 | G | -0.0394 |
| rs10933552  | C | -0.0143 |
| rs17026089  | G | -0.0686 |
| rs138870941 | T | -0.0379 |
| rs7571700   | A | -0.0184 |
| rs13028164  | A | 0.0148  |
| rs357708    | G | 0.0176  |
| rs78068565  | C | -0.0254 |
| rs72901215  | G | -0.0443 |
| rs6709809   | A | -0.0349 |
| rs112259037 | C | 0.0695  |
| rs6731223   | C | -0.0197 |
| rs6732735   | A | 0.0149  |
| rs143143523 | T | -0.0675 |
| rs820769    | T | -0.0195 |
| rs72816251  | A | 0.0261  |
| rs10167259  | G | 0.0139  |
| rs13407334  | C | 0.0379  |
| rs13010707  | T | -0.0205 |
| rs73119041  | C | 0.0703  |
| rs77108739  | G | 0.0663  |
| rs11673742  | T | -0.0236 |
| rs2067992   | C | 0.0134  |

|             |   |         |
|-------------|---|---------|
| rs72837990  | C | -0.042  |
| rs16860437  | A | 0.0733  |
| rs140008930 | A | 0.1074  |
| rs72983323  | C | -0.0872 |
| rs76881458  | G | 0.0576  |
| rs2111873   | T | 0.0159  |
| rs13393833  | T | -0.0342 |
| rs72867985  | T | -0.0297 |
| rs1427283   | T | -0.0199 |
| rs145488973 | G | 0.1081  |
| rs12617685  | C | -0.0156 |
| rs116078872 | T | -0.0414 |
| rs58581494  | T | -0.0252 |
| rs1876770   | G | -0.0295 |
| rs139395990 | C | 0.0946  |
| rs72774821  | C | -0.046  |
| rs13430329  | T | 0.0368  |
| rs10183933  | A | 0.0431  |
| rs2916526   | T | -0.013  |
| rs17047088  | A | -0.019  |
| rs11692868  | C | -0.0265 |
| rs145334845 | C | 0.0988  |
| rs138308945 | A | -0.0695 |
| rs28584067  | C | 0.0228  |
| rs4669133   | A | -0.0129 |
| rs62167839  | C | 0.0134  |
| rs10929516  | T | -0.021  |
| rs1073981   | A | 0.0603  |
| rs35206511  | C | 0.0185  |
| rs79053665  | C | -0.04   |
| rs75960565  | G | 0.1012  |
| rs75696207  | T | 0.0842  |
| rs78723642  | A | 0.0657  |
| rs138005298 | C | 0.034   |
| rs2351292   | G | 0.0176  |
| rs116021026 | T | -0.0642 |
| rs113300329 | G | 0.06    |
| rs114432835 | T | 0.0336  |
| rs10177722  | G | -0.0275 |
| rs114688727 | T | 0.0896  |
| rs76738773  | C | 0.024   |
| rs7557984   | G | 0.0148  |
| rs112559538 | T | 0.0616  |
| rs17583955  | A | -0.025  |
| rs34751932  | A | -0.0221 |
| rs114155051 | T | 0.1028  |
| rs76940936  | A | -0.0511 |

|             |   |         |
|-------------|---|---------|
| rs71417407  | A | -0.0479 |
| rs13004043  | C | -0.0144 |
| rs10490193  | A | 0.0153  |
| rs2579602   | T | 0.026   |
| rs690249    | A | -0.0118 |
| rs72827713  | A | 0.0458  |
| rs144599691 | A | -0.0821 |
| rs139921354 | T | 0.0694  |
| rs2219064   | C | 0.0132  |
| rs1158466   | T | 0.0141  |
| rs13002243  | G | -0.0276 |
| rs681148    | C | 0.012   |
| rs6734055   | G | -0.0152 |
| rs4074080   | C | -0.0139 |
| rs62170670  | C | -0.0492 |
| rs12692861  | G | -0.0145 |
| rs12328610  | C | -0.021  |
| rs148311809 | A | 0.0856  |
| rs360484    | T | 0.0152  |
| rs72646841  | G | 0.0345  |
| rs10200549  | A | 0.0217  |
| rs72975234  | A | 0.0778  |
| rs1464004   | G | 0.0219  |
| rs139241566 | C | -0.0575 |
| rs12053365  | A | 0.0121  |
| rs7603708   | A | -0.0307 |
| rs13003266  | G | 0.0355  |
| rs114336823 | G | -0.0465 |
| rs6741776   | C | -0.0176 |
| rs35808216  | C | 0.024   |
| rs143819734 | A | 0.0623  |
| rs12621067  | C | -0.0261 |
| rs6724050   | T | 0.0229  |
| rs58153578  | G | -0.0344 |
| rs6731499   | G | -0.0157 |
| rs145268423 | T | 0.1068  |
| rs141080715 | G | -0.06   |
| rs73042910  | T | 0.0836  |
| rs16982679  | C | 0.0489  |
| rs58941962  | T | 0.0167  |
| rs137927826 | G | 0.0509  |
| rs62110461  | G | -0.0403 |
| rs56142049  | G | 0.0236  |
| rs116001967 | A | -0.1127 |
| rs140793821 | C | 0.0565  |
| rs72808770  | A | -0.0158 |
| rs35704829  | T | 0.0162  |

|             |   |         |
|-------------|---|---------|
| rs72812619  | A | 0.0195  |
| rs145459609 | G | -0.058  |
| rs139882432 | C | 0.0654  |
| rs4670102   | G | -0.023  |
| rs35696517  | G | -0.0146 |
| rs112889379 | C | 0.057   |
| rs72909381  | T | -0.0398 |
| rs2055761   | T | -0.0505 |
| rs10199285  | G | -0.0156 |
| rs41268683  | C | -0.0339 |
| rs2723070   | G | -0.0289 |
| rs142793248 | A | 0.0824  |
| rs116640500 | C | -0.0526 |
| rs6735743   | G | 0.0224  |
| rs55811660  | G | -0.0232 |
| rs78020827  | T | 0.0345  |
| rs62188206  | T | 0.0256  |
| rs6730504   | A | 0.0209  |
| rs2242097   | C | -0.0415 |
| rs115428418 | T | -0.0582 |
| rs67499383  | T | -0.026  |
| rs75697493  | A | 0.0551  |
| rs34548621  | A | -0.0725 |
| rs12466407  | C | 0.0376  |
| rs12469675  | G | -0.0399 |
| rs4849723   | T | -0.0125 |
| rs72771200  | T | -0.032  |
| rs35903706  | G | -0.0122 |
| rs12474299  | C | 0.0395  |
| rs115326161 | A | -0.0496 |
| rs11682204  | C | 0.0265  |
| rs76415299  | T | -0.0758 |
| rs2961955   | G | 0.0659  |
| rs13424249  | T | -0.0135 |
| rs62120544  | A | -0.0264 |
| rs10496116  | G | 0.0164  |
| rs3770364   | G | 0.0232  |
| rs13389945  | A | 0.0307  |
| rs57719599  | T | -0.0759 |
| rs13401599  | G | 0.0133  |
| rs115682245 | T | 0.0694  |
| rs115543383 | A | 0.0359  |
| rs1921788   | T | 0.0129  |
| rs62128973  | A | -0.0705 |
| rs6740022   | T | 0.0151  |
| rs72818462  | A | 0.0231  |
| rs115084606 | A | -0.0371 |

|             |   |         |
|-------------|---|---------|
| rs67492294  | T | -0.0281 |
| rs113090919 | C | 0.0898  |
| rs12619535  | G | 0.017   |
| rs2244229   | A | 0.0129  |
| rs76439922  | A | 0.1032  |
| rs858934    | G | -0.0707 |
| rs60035770  | G | -0.0583 |
| rs76090815  | T | 0.0575  |
| rs72860139  | T | 0.0727  |
| rs141959312 | T | -0.0854 |
| rs830970    | T | -0.0149 |
| rs934564    | C | 0.0637  |
| rs11692525  | A | -0.037  |
| rs112072798 | G | -0.0207 |
| rs16866222  | T | -0.0758 |
| rs140302523 | A | -0.0603 |
| rs146229028 | G | -0.0694 |
| rs72839801  | G | -0.029  |
| rs62167606  | T | -0.0787 |
| rs34637644  | G | 0.0235  |
| rs7421179   | T | -0.0256 |
| rs62161223  | C | -0.0344 |
| rs13027676  | G | 0.0216  |
| rs6718834   | A | 0.0183  |
| rs57732685  | C | 0.03    |
| rs111779078 | A | -0.0585 |
| rs34422458  | A | 0.0718  |
| rs55680582  | T | -0.0305 |
| rs2289912   | A | 0.0426  |
| rs436385    | C | -0.0266 |
| rs75002848  | T | -0.0347 |
| rs17044296  | A | -0.0357 |
| rs62191570  | T | 0.0254  |
| rs7595697   | T | -0.0126 |
| rs114038359 | C | -0.0445 |
| rs142063051 | C | -0.078  |
| rs7584375   | G | 0.0121  |
| rs817036    | C | -0.0192 |
| rs115315383 | A | -0.0819 |
| rs62147969  | G | 0.021   |
| rs75703305  | A | -0.062  |
| rs10185647  | C | 0.0278  |
| rs1346730   | T | 0.0124  |
| rs72777942  | G | 0.0466  |
| rs143192656 | C | -0.0491 |
| rs11893982  | G | -0.0282 |
| rs111502255 | A | 0.0723  |

|             |   |         |
|-------------|---|---------|
| rs62141082  | C | 0.0295  |
| rs74561461  | C | 0.043   |
| rs75410485  | C | -0.058  |
| rs115570295 | C | 0.0827  |
| rs11686712  | T | -0.0131 |
| rs13025811  | T | -0.0417 |
| rs115104820 | T | 0.0305  |
| rs10180728  | G | 0.0375  |
| rs150705791 | C | 0.0665  |
| rs72768905  | C | 0.0262  |
| rs12477845  | A | -0.0557 |
| rs6741661   | G | 0.0162  |
| rs13419915  | G | -0.0946 |
| rs73989464  | G | 0.0173  |
| rs17540733  | T | -0.0495 |
| rs12691825  | A | 0.0171  |
| rs79679670  | A | -0.0385 |
| rs74424443  | C | 0.0267  |
| rs1838878   | T | 0.0245  |
| rs76982273  | A | 0.0591  |
| rs72922012  | C | 0.0338  |
| rs149151020 | T | -0.0441 |
| rs56345907  | T | 0.0368  |
| rs1198823   | G | 0.0131  |
| rs9751031   | T | 0.0448  |
| rs4670940   | G | -0.021  |
| rs62144707  | A | -0.015  |
| rs72834180  | C | -0.0191 |
| rs77194274  | T | -0.0507 |
| rs1594385   | C | 0.017   |
| rs808846    | A | -0.0153 |
| rs75809673  | T | 0.0982  |
| rs11126423  | C | 0.0297  |
| rs149084906 | G | 0.0447  |
| rs17339010  | A | 0.051   |
| rs113149840 | T | 0.0183  |
| rs7565919   | T | -0.0513 |
| rs114645481 | T | 0.0596  |
| rs116142821 | C | -0.0504 |
| rs72916630  | C | -0.0577 |
| rs115818571 | T | -0.0718 |
| rs116112766 | A | -0.0354 |
| rs115148602 | C | 0.0481  |
| rs7596107   | C | -0.0121 |
| rs6717053   | C | -0.0137 |
| rs6743474   | T | 0.0148  |
| rs12618856  | T | -0.0141 |

|             |   |         |
|-------------|---|---------|
| rs75306265  | A | -0.0799 |
| rs62154716  | G | 0.0171  |
| rs17200181  | T | 0.0917  |
| rs56400726  | G | 0.0122  |
| rs115879651 | A | -0.08   |
| rs6754661   | A | -0.024  |
| rs34128838  | G | -0.022  |
| rs10490557  | C | 0.0133  |
| rs35274952  | T | 0.0366  |
| rs12477779  | A | 0.0139  |
| rs111332525 | T | -0.0409 |
| rs2034250   | A | 0.0148  |
| rs1838841   | T | -0.0461 |
| rs146668566 | A | -0.0823 |
| rs10929332  | C | -0.0608 |
| rs1006422   | G | 0.0184  |
| rs11125767  | C | 0.0131  |
| rs116627548 | C | 0.0339  |
| rs72790115  | C | -0.0701 |
| rs10779944  | C | -0.0163 |
| rs55953045  | T | 0.0414  |
| rs3098431   | C | 0.0189  |
| rs62151093  | A | 0.0511  |
| rs116161741 | G | 0.0375  |
| rs68114411  | G | -0.0191 |
| rs10188049  | G | 0.0132  |
| rs138208141 | C | 0.0526  |
| rs1881494   | C | -0.0159 |
| rs4852538   | A | 0.0573  |
| rs146983393 | A | 0.0515  |
| rs2279990   | G | -0.0126 |
| rs7608543   | G | 0.0127  |
| rs62144237  | T | -0.0329 |
| rs115262238 | T | -0.0595 |
| rs13383473  | T | 0.0252  |
| rs114039293 | C | 0.1157  |
| rs77682577  | T | 0.1015  |
| rs75711222  | C | -0.0415 |
| rs2975766   | A | -0.0503 |
| rs2009562   | T | 0.0165  |
| rs76407654  | T | -0.0577 |
| rs59298278  | G | 0.0354  |
| rs74391551  | G | -0.0364 |
| rs66589853  | G | -0.023  |
| rs79538696  | A | 0.0222  |
| rs78038889  | C | -0.1    |
| rs12623446  | C | -0.0321 |



|             |   |         |
|-------------|---|---------|
| rs79798057  | G | 0.0412  |
| rs148766104 | A | -0.0527 |
| rs990208    | C | 0.091   |
| rs41449651  | A | -0.0435 |
| rs149903174 | T | -0.0427 |
| rs79489486  | G | -0.0361 |
| rs114378836 | T | 0.0487  |
| rs146171344 | A | 0.086   |
| rs1560585   | T | -0.0255 |
| rs77862408  | T | 0.0296  |
| rs2540068   | A | -0.0149 |
| rs1900792   | T | 0.0487  |
| rs11124925  | G | -0.0258 |
| rs77643089  | T | -0.0373 |
| rs73973246  | T | -0.0308 |
| rs17560791  | G | 0.0131  |
| rs328034    | A | -0.0147 |
| rs113671037 | G | -0.0372 |
| rs6716214   | A | 0.0647  |
| rs78640509  | C | 0.0818  |
| rs79721034  | A | -0.0964 |
| rs79239729  | A | -0.0304 |
| rs79786002  | A | -0.0463 |
| rs56151293  | C | 0.0426  |
| rs4347808   | G | 0.0203  |
| rs1019294   | C | -0.0126 |
| rs56270677  | C | -0.0382 |
| rs80155808  | C | 0.0683  |
| rs78869015  | G | -0.0719 |
| rs115222492 | C | 0.0718  |
| rs116247240 | C | -0.1206 |
| rs13022027  | C | 0.048   |
| rs76259623  | C | 0.0302  |
| rs143491613 | T | 0.0395  |
| rs62146078  | T | 0.0775  |
| rs113055397 | T | -0.0837 |
| rs10496565  | G | -0.0197 |
| rs144094720 | A | -0.046  |
| rs76176491  | T | -0.0932 |
| rs6709507   | A | -0.0265 |
| rs115210404 | T | -0.0591 |
| rs34305900  | G | -0.0266 |
| rs13410657  | A | 0.0131  |
| rs142848890 | T | 0.0486  |
| rs12469398  | C | -0.0265 |
| rs73933391  | A | -0.0256 |
| rs2290106   | T | -0.0393 |

|             |   |         |
|-------------|---|---------|
| rs10171943  | T | 0.0612  |
| rs11897429  | G | -0.0157 |
| rs28415615  | G | -0.0131 |
| rs115860797 | G | 0.0349  |
| rs62186680  | G | -0.0322 |
| rs818146    | A | 0.0566  |
| rs77854668  | A | 0.0231  |
| rs17396281  | T | 0.0199  |
| rs6545795   | T | 0.0123  |
| rs74511965  | T | -0.0416 |
| rs116343838 | T | 0.0479  |
| rs10191997  | T | -0.0292 |
| rs74481488  | A | -0.0211 |
| rs116202264 | A | 0.0517  |
| rs114965420 | G | -0.038  |
| rs11125988  | C | -0.0234 |
| rs7602215   | C | -0.0172 |
| rs115294243 | A | 0.0605  |
| rs17336335  | G | 0.0573  |
| rs62183695  | T | 0.0218  |
| rs13035763  | A | 0.0226  |
| rs116683155 | A | -0.0715 |
| rs78445224  | C | 0.0423  |
| rs10170558  | C | 0.0143  |
| rs138239674 | A | -0.0547 |
| rs74599280  | G | -0.0382 |
| rs114362104 | G | 0.0431  |
| rs56806432  | T | 0.0297  |
| rs139372334 | T | 0.0633  |
| rs146262891 | A | 0.0563  |
| rs16836058  | G | -0.0269 |
| rs12620952  | A | 0.0446  |
| rs148127418 | A | 0.0708  |
| rs73206540  | T | -0.0189 |
| rs72927804  | C | 0.0886  |
| rs11675197  | C | -0.0159 |
| rs11681667  | A | -0.0431 |
| rs147900845 | A | -0.0795 |
| rs72903737  | T | -0.0325 |
| rs78212733  | A | -0.0218 |
| rs9636254   | C | -0.0126 |
| rs76944807  | C | 0.0755  |
| rs7605799   | A | 0.0336  |
| rs2251461   | A | 0.0177  |
| rs4549022   | T | 0.0874  |
| rs115807548 | C | 0.0416  |
| rs62141904  | C | -0.0232 |

|             |   |         |
|-------------|---|---------|
| rs1316320   | C | 0.0125  |
| rs79875283  | C | 0.0513  |
| rs4666452   | T | -0.0269 |
| rs78534197  | T | 0.0494  |
| rs62167112  | T | 0.0134  |
| rs115700152 | G | -0.04   |
| rs2052937   | C | -0.0132 |
| rs289911    | T | -0.0427 |
| rs3768882   | T | -0.0118 |
| rs66707417  | G | 0.0146  |
| rs6756368   | T | 0.0396  |
| rs74398778  | T | 0.0399  |
| rs62113474  | A | -0.0549 |
| rs55807102  | T | 0.0562  |
| rs150282481 | C | 0.0569  |
| rs79674346  | A | -0.0544 |
| rs72812056  | T | -0.0759 |
| rs1840641   | G | -0.012  |
| rs12465233  | G | 0.0119  |
| rs6544557   | C | 0.0193  |
| rs7589027   | A | -0.0129 |
| rs1600882   | T | -0.0369 |
| rs141483387 | C | 0.0594  |
| rs144159112 | T | 0.0589  |
| rs116829802 | C | 0.0575  |
| rs114429976 | T | -0.059  |
| rs13414698  | T | 0.0138  |
| rs10175478  | A | 0.0164  |
| rs148544725 | A | -0.0579 |
| rs1437988   | G | -0.0364 |
| rs62189346  | C | 0.0254  |
| rs888099    | A | -0.0288 |
| rs114176192 | C | 0.045   |
| rs79912359  | T | 0.0355  |
| rs148354814 | G | 0.0542  |
| rs74925708  | C | 0.0598  |
| rs115220448 | T | -0.0728 |
| rs76881182  | T | 0.052   |
| rs142460917 | T | 0.0531  |
| rs74376588  | C | 0.0382  |
| rs114641665 | G | -0.0326 |
| rs62177978  | T | -0.0347 |
| rs114255585 | A | -0.0469 |
| rs142261176 | G | 0.0536  |
| rs13018069  | T | 0.0135  |
| rs9309089   | A | -0.0145 |
| rs6543408   | C | -0.0151 |

|             |   |         |
|-------------|---|---------|
| rs149932749 | A | -0.1092 |
| rs72891049  | G | 0.0409  |
| rs72942423  | C | 0.0793  |
| rs72959275  | C | 0.0893  |
| rs4852266   | C | 0.038   |
| rs147220509 | A | 0.0783  |
| rs114974308 | G | 0.0699  |
| rs79208822  | A | 0.0437  |
| rs116672114 | A | -0.0775 |
| rs62184398  | C | 0.0421  |
| rs12615661  | T | -0.0278 |
| rs547773    | A | -0.0174 |
| rs2135996   | G | -0.0128 |
| rs10184524  | T | 0.024   |
| rs35787487  | A | 0.0167  |
| rs141717849 | G | 0.0613  |
| rs72996298  | A | -0.0266 |
| rs116315732 | T | -0.0516 |
| rs76756619  | C | 0.0518  |
| rs13024532  | G | -0.0134 |
| rs12478042  | A | -0.0245 |
| rs72829957  | C | 0.0128  |
| rs114315593 | A | 0.0444  |
| rs71443025  | T | 0.0303  |
| rs13399675  | A | -0.0361 |
| rs61472481  | G | 0.0209  |
| rs79682814  | G | 0.0677  |
| rs116504360 | C | 0.0777  |
| rs16827650  | C | 0.0257  |
| rs193925    | A | 0.0174  |
| rs72881759  | C | 0.024   |
| rs77200527  | A | -0.0559 |
| rs4669664   | T | -0.0152 |
| rs12613279  | C | 0.0202  |
| rs4035887   | G | 0.0119  |
| rs17050416  | C | 0.0522  |
| rs115540952 | T | -0.0983 |
| rs73970223  | A | 0.1137  |
| rs78724595  | C | -0.0406 |
| rs75176771  | T | 0.084   |
| rs896754    | C | -0.0127 |
| rs72854914  | A | 0.0513  |
| rs13393801  | G | -0.0213 |
| rs112623310 | C | -0.0876 |
| rs150545864 | G | 0.0573  |
| rs141292586 | T | -0.057  |
| rs12478755  | A | 0.0726  |

|             |   |         |
|-------------|---|---------|
| rs55836196  | T | 0.0124  |
| rs77243163  | A | -0.0424 |
| rs80141707  | A | -0.036  |
| rs148164516 | G | 0.082   |
| rs142081527 | T | -0.0374 |
| rs72940213  | T | 0.0249  |
| rs115645653 | G | -0.0891 |
| rs116130903 | G | 0.06    |
| rs112894931 | G | 0.0502  |
| rs67819420  | T | 0.0151  |
| rs75059841  | C | -0.0281 |
| rs3755103   | T | 0.0292  |
| rs9287475   | G | 0.0117  |
| rs115731128 | A | -0.0516 |
| rs72827512  | C | -0.0371 |
| rs116487921 | T | 0.0405  |
| rs41268703  | T | 0.0392  |
| rs17829861  | A | 0.0178  |
| rs6433597   | C | -0.0177 |
| rs72898976  | G | -0.0244 |
| rs7596519   | G | 0.0138  |
| rs12470245  | A | 0.0237  |
| rs116343555 | A | 0.0541  |
| rs12466938  | G | -0.0183 |
| rs55678164  | T | -0.049  |
| rs77121011  | A | -0.0734 |
| rs144793531 | C | 0.0293  |
| rs11688133  | A | -0.0237 |
| rs72835089  | T | -0.0456 |
| rs55790299  | C | -0.0576 |
| rs116263177 | C | 0.0678  |
| rs115732111 | T | 0.0745  |
| rs12622386  | A | 0.0192  |
| rs7602124   | A | -0.0211 |
| rs16823761  | T | -0.0391 |
| rs13033306  | T | 0.0259  |
| rs12996533  | G | 0.025   |
| rs6748779   | G | -0.0594 |
| rs17013020  | G | -0.0222 |
| rs35748618  | T | 0.0157  |
| rs80298096  | T | -0.0774 |
| rs4971760   | T | -0.0311 |
| rs34619872  | T | 0.0178  |
| rs6732896   | G | -0.0129 |
| rs60037207  | C | 0.0187  |
| rs114869558 | A | -0.0656 |
| rs79539652  | G | 0.0416  |

|             |   |         |
|-------------|---|---------|
| rs72982131  | C | -0.0281 |
| rs12986801  | C | 0.0123  |
| rs79788480  | T | 0.0304  |
| rs112081043 | G | 0.0553  |
| rs75129762  | C | -0.0351 |
| rs12615462  | G | -0.0163 |
| rs150181825 | A | -0.084  |
| rs142954099 | T | -0.073  |
| rs10210295  | T | -0.0527 |
| rs114315112 | G | 0.0701  |
| rs1991608   | T | -0.0135 |
| rs62112208  | G | 0.0414  |
| rs111434856 | T | -0.0574 |
| rs62167259  | A | 0.0397  |
| rs147931586 | G | -0.0917 |
| rs11692799  | A | 0.0158  |
| rs12617848  | T | 0.019   |
| rs115706318 | C | -0.0601 |
| rs75673698  | C | -0.0717 |
| rs79870518  | T | 0.0456  |
| rs10496905  | G | -0.0203 |
| rs72933185  | C | -0.0615 |
| rs359982    | G | 0.0364  |
| rs72836243  | T | -0.049  |
| rs78467785  | G | 0.0691  |
| rs6436243   | G | 0.0539  |
| rs78135710  | C | -0.0583 |
| rs80236868  | T | 0.0405  |
| rs264621    | G | 0.0664  |
| rs72964195  | T | 0.027   |
| rs115155486 | G | -0.0523 |
| rs11884056  | T | -0.0204 |
| rs1367416   | C | 0.017   |
| rs62157625  | T | 0.0206  |
| rs58506841  | A | 0.0382  |
| rs115210694 | A | 0.021   |
| rs13031576  | G | -0.0128 |
| rs78034869  | G | 0.0502  |
| rs11884233  | A | -0.0149 |
| rs59454075  | A | -0.0334 |
| rs55914566  | T | -0.0177 |
| rs2276598   | T | -0.016  |
| rs2970900   | C | 0.0412  |
| rs76276938  | T | -0.0504 |
| rs6430462   | A | -0.0115 |
| rs13392999  | G | -0.0186 |
| rs1993073   | C | -0.0173 |

|             |   |         |
|-------------|---|---------|
| rs12477625  | T | -0.0143 |
| rs12465529  | C | -0.0432 |
| rs76387576  | C | -0.0307 |
| rs62150620  | T | 0.0541  |
| rs141319387 | C | 0.0825  |
| rs1922482   | A | 0.0156  |
| rs117359649 | C | -0.067  |
| rs2083386   | T | -0.0565 |
| rs6718234   | C | -0.0216 |
| rs76480788  | T | -0.0424 |
| rs7589253   | G | -0.014  |
| rs72849547  | A | 0.035   |
| rs17862779  | G | 0.0667  |
| rs115337124 | A | -0.1154 |
| rs79055624  | C | -0.0656 |
| rs145980539 | C | -0.0548 |
| rs2278479   | T | 0.0676  |
| rs62121767  | C | 0.0624  |
| rs34298173  | A | 0.0526  |
| rs150709393 | G | -0.0668 |
| rs112729575 | G | 0.037   |
| rs11897882  | C | -0.0134 |
| rs72779155  | T | 0.0119  |
| rs80241656  | G | -0.0601 |
| rs13417602  | T | 0.0234  |
| rs73909760  | C | -0.026  |
| rs6734190   | T | -0.016  |
| rs17687974  | A | 0.061   |
| rs116680426 | T | -0.0696 |
| rs146178269 | C | -0.0231 |
| rs72866027  | G | 0.0787  |
| rs6718232   | C | 0.0386  |
| rs13021622  | A | -0.0217 |
| rs13395056  | C | -0.081  |
| rs75943041  | G | 0.03    |
| rs9308627   | C | 0.0149  |
| rs113072342 | A | 0.0675  |
| rs4664594   | C | -0.0283 |
| rs76321875  | A | -0.0713 |
| rs35143837  | T | 0.0371  |
| rs79685083  | G | -0.027  |
| rs10183165  | T | -0.0573 |
| rs144765990 | A | 0.0787  |
| rs726832    | G | 0.0222  |
| rs6720448   | C | -0.0134 |
| rs112224651 | G | 0.0426  |
| rs10191798  | G | -0.0147 |

|             |   |         |
|-------------|---|---------|
| rs116411187 | G | 0.0474  |
| rs113696648 | C | 0.0522  |
| rs59223645  | T | -0.1096 |
| rs114215774 | A | -0.0546 |
| rs114055510 | T | -0.0676 |
| rs13024922  | A | -0.0146 |
| rs79183627  | A | -0.0363 |
| rs7600602   | T | 0.0124  |
| rs115848953 | T | 0.0306  |
| rs72763602  | T | -0.0346 |
| rs3754551   | G | 0.0309  |
| rs10490699  | T | 0.0283  |
| rs10497192  | C | -0.0134 |
| rs75943254  | C | 0.0511  |
| rs17630981  | A | 0.0176  |
| rs13035983  | C | -0.015  |
| rs116207854 | T | -0.0623 |
| rs74466195  | C | -0.1205 |
| rs7603396   | C | 0.0404  |
| rs62137423  | T | -0.0411 |
| rs77637671  | A | -0.0465 |
| rs74487014  | C | 0.0369  |
| rs1013437   | T | -0.0133 |
| rs61478222  | A | -0.0203 |
| rs12469648  | T | -0.0264 |
| rs74807729  | A | -0.0609 |
| rs17815605  | A | -0.017  |
| rs76158330  | A | -0.0643 |
| rs137879195 | A | -0.0677 |
| rs76778776  | G | 0.0186  |
| rs11897760  | C | -0.0198 |
| rs79352108  | T | -0.0527 |
| rs62183624  | A | 0.0803  |
| rs114931810 | T | -0.0718 |
| rs3814382   | A | -0.0125 |
| rs62172502  | C | -0.0431 |
| rs4851885   | C | 0.0126  |
| rs138202451 | A | -0.0624 |
| rs76793380  | C | -0.0535 |
| rs116152527 | T | 0.0467  |
| rs149091908 | T | -0.0819 |
| rs140385423 | C | -0.094  |
| rs10187118  | G | -0.0137 |
| rs4853800   | T | 0.0135  |
| rs66851446  | G | -0.0142 |
| rs78576568  | G | 0.0309  |
| rs75823349  | G | -0.0663 |



|             |   |         |
|-------------|---|---------|
| rs115763588 | C | 0.049   |
| rs6749901   | C | -0.0121 |
| rs72936558  | A | 0.0757  |
| rs625842    | C | -0.0113 |
| rs6711321   | G | 0.015   |
| rs140171536 | C | 0.0156  |
| rs12467081  | A | 0.0146  |
| rs7582461   | C | 0.0143  |
| rs3912255   | A | 0.0144  |
| rs115725756 | A | -0.1025 |
| rs1680590   | C | 0.0224  |
| rs72876800  | T | -0.0492 |
| rs7572278   | A | -0.0196 |
| rs72798390  | G | 0.0534  |
| rs33915308  | C | 0.0134  |
| rs116108157 | G | 0.0465  |
| rs10175793  | C | 0.0152  |
| rs13413119  | T | -0.0129 |
| rs13405244  | A | 0.0121  |
| rs141892738 | C | -0.0807 |
| rs76728631  | T | -0.0488 |
| rs114282227 | T | -0.051  |
| rs17773686  | A | 0.0186  |
| rs13015261  | C | 0.063   |
| rs77109772  | T | -0.0569 |
| rs13424792  | T | -0.0501 |
| rs35181910  | G | 0.0383  |
| rs72799962  | A | 0.0311  |
| rs62177231  | A | 0.0146  |
| rs9784075   | A | 0.0154  |
| rs74442120  | A | 0.0482  |
| rs1520457   | G | 0.0733  |
| rs10170828  | G | 0.065   |
| rs72805325  | G | -0.0474 |
| rs72829445  | C | 0.0939  |
| rs12052843  | C | -0.0134 |
| rs759382    | G | 0.0137  |
| rs6758364   | C | -0.0122 |
| rs74509822  | C | 0.0573  |
| rs2442033   | A | 0.0161  |
| rs1123849   | C | -0.0284 |
| rs163505    | G | -0.0134 |
| rs80029529  | G | 0.035   |
| rs116834941 | T | 0.0872  |
| rs115968154 | A | -0.1132 |
| rs10172094  | T | 0.0592  |
| rs114056647 | A | 0.0427  |

|             |   |         |
|-------------|---|---------|
| rs10174331  | A | 0.0136  |
| rs76005150  | T | 0.0395  |
| rs17030670  | T | -0.0201 |
| rs141375632 | T | 0.0253  |
| rs7579747   | A | -0.0113 |
| rs116390597 | T | 0.0572  |
| rs139746815 | A | -0.053  |
| rs34606546  | T | 0.0393  |
| rs146106284 | G | 0.1036  |
| rs145524138 | G | 0.0305  |
| rs148401727 | G | -0.0832 |
| rs148997608 | A | 0.0886  |
| rs16984987  | G | -0.0351 |
| rs6720101   | T | 0.0199  |
| rs62139588  | A | -0.0196 |
| rs11681450  | A | -0.0209 |
| rs1372166   | C | -0.013  |
| rs141867072 | A | 0.0525  |
| rs143191816 | A | 0.086   |
| rs2466150   | T | 0.0139  |
| rs4668668   | T | 0.0531  |
| rs76985128  | T | -0.0605 |
| rs4483984   | T | -0.0124 |
| rs115824507 | A | 0.0311  |
| rs145516378 | T | 0.098   |
| rs60827017  | T | -0.0637 |
| rs953214    | G | -0.0812 |
| rs116497883 | T | 0.026   |
| rs11693021  | C | -0.0335 |
| rs75973520  | C | -0.0632 |
| rs10186642  | A | -0.0338 |
| rs58879150  | A | -0.0622 |
| rs10932641  | C | -0.0146 |
| rs13409153  | C | 0.0503  |
| rs150150078 | C | -0.0645 |
| rs7585506   | G | -0.0318 |
| rs76158117  | A | 0.0381  |
| rs331124    | C | 0.0228  |
| rs111686260 | A | 0.0517  |
| rs17049085  | C | -0.0176 |
| rs6731253   | T | -0.0128 |
| rs74348010  | A | -0.0409 |
| rs76897351  | A | 0.0669  |
| rs115811539 | T | 0.0747  |
| rs12692520  | A | 0.012   |
| rs115415056 | G | 0.0352  |
| rs4849766   | G | -0.0142 |

|             |   |         |
|-------------|---|---------|
| rs17049981  | T | 0.0293  |
| rs147894289 | A | 0.0296  |
| rs55634528  | C | 0.0385  |
| rs56379027  | G | 0.0204  |
| rs11125177  | T | -0.0444 |
| rs62172541  | C | -0.07   |
| rs76820456  | C | 0.0675  |
| rs1546717   | A | 0.0171  |
| rs7581457   | G | -0.0127 |
| rs4665662   | G | 0.0117  |
| rs112539238 | T | 0.0515  |
| rs17034641  | A | -0.0157 |
| rs17659323  | A | 0.0564  |
| rs76848636  | A | 0.0652  |
| rs7602511   | C | -0.0176 |
| rs77524462  | A | -0.0884 |
| rs138508418 | G | 0.0893  |
| rs75119761  | T | 0.0849  |
| rs4670458   | G | -0.0353 |
| rs146469053 | A | 0.109   |
| rs79717154  | A | -0.0231 |
| rs150860755 | C | 0.0617  |
| rs79303959  | A | 0.0527  |
| rs7585307   | C | -0.0117 |
| rs13409330  | A | 0.012   |
| rs76188315  | A | 0.0356  |
| rs11675832  | T | -0.0328 |
| rs11692900  | T | -0.0185 |
| rs16831993  | C | -0.015  |
| rs36010116  | A | 0.0511  |
| rs4674043   | G | 0.0231  |
| rs13018551  | T | 0.0119  |
| rs114897231 | T | 0.0674  |
| rs4600681   | C | 0.0292  |
| rs59072247  | T | 0.0347  |
| rs7608969   | T | -0.0121 |
| rs77997596  | T | -0.0508 |
| rs10803702  | A | 0.0178  |
| rs16847064  | G | 0.0214  |
| rs76275613  | T | 0.0372  |
| rs940794    | G | 0.012   |
| rs116203109 | A | 0.0643  |
| rs140142985 | T | -0.0546 |
| rs77257150  | G | -0.028  |
| rs72782823  | T | -0.066  |
| rs62124557  | T | -0.0139 |
| rs62131067  | G | 0.0421  |

|             |   |         |
|-------------|---|---------|
| rs11688926  | A | 0.0155  |
| rs141376332 | C | -0.0376 |
| rs72809307  | T | -0.0308 |
| rs144553597 | G | -0.0543 |
| rs138100510 | A | 0.062   |
| rs12052753  | C | -0.0197 |
| rs146898250 | T | 0.0581  |
| rs112709301 | T | -0.0528 |
| rs78737639  | G | 0.0518  |
| rs7583121   | G | -0.0116 |
| rs6733907   | G | -0.0129 |
| rs71420817  | T | 0.0409  |
| rs6735741   | G | 0.026   |
| rs71435586  | A | -0.0305 |
| rs7557987   | T | 0.0116  |
| rs77976895  | G | -0.0683 |
| rs17026163  | T | 0.0361  |
| rs35240971  | C | -0.0158 |
| rs12996684  | C | 0.0115  |
| rs114053513 | G | 0.0811  |
| rs1653749   | C | -0.0126 |
| rs6542504   | T | -0.0118 |
| rs148408321 | T | 0.0521  |
| rs74382204  | T | 0.0826  |
| rs115686241 | G | -0.0776 |
| rs148340933 | G | 0.0495  |
| rs17347226  | T | 0.0503  |
| rs35218194  | T | 0.0138  |
| rs115823221 | T | 0.0552  |
| rs148416129 | G | 0.07    |
| rs288326    | A | 0.0176  |
| rs11686243  | A | 0.0127  |
| rs78404560  | T | -0.0554 |
| rs41272693  | A | -0.036  |
| rs17221493  | C | -0.0568 |
| rs6436214   | A | -0.012  |
| rs77761724  | A | 0.0612  |
| rs6706652   | T | 0.0756  |
| rs77816630  | C | 0.0282  |
| rs12617706  | T | 0.0131  |
| rs124771    | G | 0.0833  |
| rs116490957 | C | -0.0863 |
| rs792072    | G | -0.0156 |
| rs1523879   | G | -0.0189 |
| rs78573756  | C | -0.0477 |
| rs114558674 | A | 0.0681  |
| rs921279    | G | 0.0492  |

|             |   |         |
|-------------|---|---------|
| rs113994282 | G | 0.0394  |
| rs61016860  | A | 0.0449  |
| rs72951482  | T | 0.0164  |
| rs62279208  | T | 0.0307  |
| rs147990121 | G | -0.0511 |
| rs62186495  | T | 0.0446  |
| rs115025199 | G | 0.0629  |
| rs145106692 | A | -0.0494 |
| rs75071938  | C | 0.0322  |
| rs11123171  | A | 0.0239  |
| rs13389863  | C | 0.0189  |
| rs71427779  | C | 0.0523  |
| rs11888616  | T | -0.0173 |
| rs56389338  | A | 0.0486  |
| rs78309028  | C | -0.0457 |
| rs10439524  | A | 0.0246  |
| rs115600445 | T | -0.0539 |
| rs149542615 | G | 0.0169  |
| rs72915621  | A | -0.0533 |
| rs13019160  | A | 0.0127  |
| rs1614091   | C | -0.0145 |
| rs75841521  | A | 0.0686  |
| rs12986873  | T | -0.0123 |
| rs1921912   | A | -0.0226 |
| rs1521878   | G | 0.0207  |
| rs4663419   | G | 0.0115  |
| rs11688175  | T | -0.0285 |
| rs113021058 | T | -0.0415 |
| rs1470078   | C | 0.0147  |
| rs113139946 | T | -0.1069 |
| rs144053184 | T | -0.1175 |
| rs2193689   | A | -0.0146 |
| rs482435    | G | 0.0123  |
| rs6433388   | A | 0.0203  |
| rs73072385  | T | -0.0304 |
| rs111717031 | A | -0.0481 |
| rs17546344  | T | -0.0562 |
| rs34719932  | G | -0.0468 |
| rs114022440 | G | 0.0565  |
| rs112936153 | T | 0.0491  |
| rs7370633   | C | -0.0116 |
| rs34080475  | G | 0.0125  |
| rs35717017  | T | 0.0151  |
| rs12987510  | T | 0.0238  |
| rs139119965 | G | 0.0461  |
| rs435931    | G | 0.0429  |
| rs141329842 | T | -0.0765 |

|             |   |         |
|-------------|---|---------|
| rs80272104  | A | -0.0178 |
| rs62187510  | A | 0.0605  |
| rs11688493  | G | 0.0142  |
| rs72916612  | C | 0.0199  |
| rs142218650 | T | 0.0421  |
| rs115321897 | C | -0.0486 |
| rs1869381   | A | -0.0115 |
| rs143939019 | G | 0.0637  |
| rs114587946 | A | -0.072  |
| rs72809341  | A | -0.0533 |
| rs145410026 | A | -0.0723 |
| rs77101654  | C | 0.0496  |
| rs7593398   | C | 0.0125  |
| rs10190580  | C | -0.053  |
| rs76954175  | T | 0.041   |
| rs138958133 | G | -0.084  |
| rs78435708  | T | 0.0613  |
| rs142526162 | T | 0.0656  |
| rs10185553  | C | 0.0344  |
| rs75395690  | A | 0.0598  |
| rs13411845  | T | 0.0137  |
| rs2356975   | A | -0.0366 |
| rs116296225 | T | -0.0523 |
| rs6737678   | C | 0.0153  |
| rs75126815  | T | -0.0161 |
| rs140702435 | C | 0.0594  |
| rs16828053  | C | 0.019   |
| rs4464232   | C | 0.0314  |
| rs113875143 | A | -0.0497 |
| rs1547476   | A | -0.0157 |
| rs1864556   | T | 0.0134  |
| rs115052632 | A | -0.0697 |
| rs114830277 | G | 0.0473  |
| rs12473663  | T | -0.0132 |
| rs116091965 | T | 0.0807  |
| rs77774427  | T | 0.0772  |
| rs77694727  | T | -0.0489 |
| rs12989107  | T | 0.0253  |
| rs111921060 | A | -0.0598 |
| rs59663174  | C | -0.0168 |
| rs115539274 | C | -0.0389 |
| rs75742019  | G | 0.0589  |
| rs17864662  | T | 0.0296  |
| rs12479214  | G | -0.0213 |
| rs148216278 | A | -0.0714 |
| rs189816    | G | 0.0115  |
| rs11682099  | G | -0.0124 |

|             |   |         |
|-------------|---|---------|
| rs74347152  | A | 0.0761  |
| rs138786316 | C | 0.0669  |
| rs17194489  | G | -0.0778 |
| rs56402352  | A | 0.0716  |
| rs785247    | A | -0.0229 |
| rs7596627   | T | -0.0119 |
| rs4952281   | C | -0.0116 |
| rs116317427 | A | 0.068   |
| rs73993858  | A | 0.0407  |
| rs72994447  | T | -0.0391 |
| rs74378191  | T | -0.075  |
| rs7591180   | T | 0.0279  |
| rs13002022  | G | 0.0127  |
| rs79278095  | G | -0.0372 |
| rs150102706 | A | 0.0612  |
| rs76924309  | A | -0.0776 |
| rs6730351   | G | -0.0118 |
| rs114834773 | C | -0.0679 |
| rs77727917  | T | 0.0518  |
| rs1427295   | T | -0.0162 |
| rs77900625  | A | 0.0437  |
| rs4292120   | C | 0.0124  |
| rs7557701   | A | -0.0146 |
| rs140056023 | A | 0.0658  |
| rs16848716  | T | -0.0385 |
| rs75197405  | G | 0.0602  |
| rs10933137  | T | -0.0118 |
| rs6704807   | C | -0.0135 |
| rs114538927 | A | 0.0493  |
| rs7602035   | C | -0.0361 |
| rs72780181  | G | 0.0297  |
| rs13407708  | C | 0.0248  |
| rs4852550   | T | -0.0124 |
| rs56220862  | G | -0.0649 |
| rs13383716  | C | -0.0136 |
| rs80162433  | G | 0.0395  |
| rs2551104   | C | -0.0123 |
| rs62143061  | T | 0.0207  |
| rs6744522   | G | 0.0112  |
| rs116007752 | A | -0.0513 |
| rs35142506  | C | -0.0451 |
| rs11693682  | C | -0.0255 |
| rs76780209  | T | 0.0416  |
| rs13427736  | A | 0.0223  |
| rs62171875  | T | -0.066  |
| rs13427697  | C | -0.0127 |
| rs13006262  | T | -0.0192 |

|             |   |         |
|-------------|---|---------|
| rs148116461 | T | -0.0863 |
| rs115052657 | G | -0.0373 |
| rs75685392  | C | 0.0621  |
| rs13022886  | G | -0.031  |
| rs74679486  | G | 0.0308  |
| rs138200485 | C | 0.0544  |
| rs36091791  | T | -0.0829 |
| rs141119604 | C | -0.0521 |
| rs75622501  | A | -0.0376 |
| rs10186268  | C | -0.0115 |
| rs1176783   | T | 0.0191  |
| rs115588007 | T | 0.0467  |
| rs4419244   | G | 0.0133  |
| rs75801379  | T | 0.0589  |
| rs3755232   | C | -0.0128 |
| rs4669869   | C | 0.0113  |
| rs72824136  | A | -0.0193 |
| rs76749137  | A | -0.0565 |
| rs146495798 | C | -0.0389 |
| rs10199446  | G | -0.0441 |
| rs11896903  | A | -0.0194 |
| rs272144    | A | -0.0586 |
| rs111281274 | A | -0.0811 |
| rs73143249  | A | -0.0252 |
| rs6751055   | G | -0.0151 |
| rs12997609  | T | 0.0316  |
| rs6711885   | C | 0.0114  |
| rs72995899  | T | -0.0461 |
| rs72784099  | A | -0.0377 |
| rs12463943  | T | 0.0232  |
| rs79435361  | C | 0.0671  |
| rs4321319   | G | 0.0216  |
| rs10165893  | G | -0.0215 |
| rs114396904 | C | -0.0515 |
| rs1683546   | C | -0.0199 |
| rs114998307 | C | 0.0544  |
| rs16987836  | C | 0.0136  |
| rs11680810  | T | -0.0149 |
| rs13009719  | A | 0.0135  |
| rs1010415   | A | 0.0121  |
| rs75870946  | G | 0.0305  |
| rs707079    | A | -0.011  |
| rs78967512  | G | -0.0405 |
| rs10754948  | C | 0.0131  |
| rs1861248   | C | 0.0125  |
| rs62169264  | A | -0.0225 |
| rs146879924 | A | 0.0577  |



|             |   |         |
|-------------|---|---------|
| rs13409247  | T | 0.0235  |
| rs77780515  | T | 0.0591  |
| rs149607617 | A | 0.0708  |
| rs9309555   | G | 0.0455  |
| rs13411360  | C | 0.0191  |
| rs35806149  | G | 0.0641  |
| rs148007130 | C | -0.0488 |
| rs12151786  | C | 0.0487  |
| rs17862899  | C | 0.0143  |
| rs7593350   | T | 0.0226  |
| rs1921226   | C | 0.011   |
| rs148224585 | A | 0.0657  |
| rs75895173  | T | -0.0585 |
| rs143730861 | T | -0.0691 |
| rs12053530  | G | -0.0125 |
| rs140284189 | A | 0.0381  |
| rs1530560   | T | 0.0128  |
| rs77033730  | G | -0.0344 |
| rs13022668  | G | 0.0112  |
| rs115485585 | A | -0.0534 |
| rs138585555 | C | 0.0515  |
| rs113017795 | C | 0.0614  |
| rs112562035 | C | -0.0255 |
| rs76903843  | G | -0.0523 |
| rs28766052  | T | 0.0116  |
| rs139811984 | T | -0.0459 |
| rs113892452 | C | -0.0662 |
| rs76766754  | T | -0.0516 |
| rs62138455  | A | 0.0648  |
| rs11125144  | G | 0.0196  |
| rs115403106 | G | 0.0826  |
| rs1530875   | T | -0.0251 |
| rs6547775   | C | -0.0574 |
| rs149479714 | T | 0.0983  |
| rs76806435  | C | 0.0443  |
| rs114889183 | G | 0.0921  |
| rs72800769  | C | -0.0208 |
| rs72832624  | C | 0.0579  |
| rs76473116  | G | 0.0265  |
| rs72971474  | T | -0.0326 |
| rs56834703  | C | 0.0196  |
| rs114628239 | A | 0.038   |
| rs112322375 | A | 0.0735  |
| rs145902666 | T | 0.0709  |
| rs74660072  | C | 0.0375  |
| rs3791943   | G | 0.0192  |
| rs79780042  | A | -0.0632 |

|             |   |         |
|-------------|---|---------|
| rs72804043  | C | -0.0424 |
| rs75472943  | C | 0.0505  |
| rs113244337 | G | -0.053  |
| rs143764316 | C | -0.0613 |
| rs7568570   | A | -0.0505 |
| rs79568996  | C | -0.022  |
| rs114682497 | A | -0.0534 |
| rs13024800  | A | 0.0133  |
| rs10206961  | T | 0.0114  |
| rs1521047   | G | -0.0131 |
| rs142348138 | C | 0.0678  |
| rs4999367   | T | 0.04    |
| rs79713769  | A | 0.0785  |
| rs13015020  | A | -0.0496 |
| rs11894866  | G | -0.0127 |
| rs116182333 | C | 0.1221  |
| rs7578949   | T | 0.0208  |
| rs76787017  | C | -0.0182 |
| rs116300349 | A | -0.0672 |
| rs34934741  | G | -0.0828 |
| rs115140208 | A | 0.0618  |
| rs72874142  | A | -0.0146 |
| rs28604473  | T | -0.012  |
| rs72786604  | T | -0.0189 |
| rs137882076 | T | 0.063   |
| rs13014366  | T | -0.033  |
| rs17776208  | C | -0.0152 |
| rs12692173  | A | -0.0186 |
| rs142519493 | A | -0.0485 |
| rs12989872  | G | -0.0229 |
| rs61651559  | G | -0.0259 |
| rs76683621  | A | 0.0473  |
| rs35230864  | G | 0.0133  |
| rs13388476  | A | 0.0233  |
| rs77443394  | G | -0.0322 |
| rs114342051 | A | 0.0529  |
| rs80328132  | G | -0.0559 |
| rs13393928  | A | 0.0144  |
| rs10167257  | G | 0.0216  |
| rs36006786  | A | -0.02   |
| rs41288779  | T | 0.0224  |
| rs6546798   | T | -0.0812 |
| rs35551076  | T | 0.0218  |
| rs2311420   | A | -0.0109 |
| rs1528429   | A | 0.0119  |
| rs79950615  | T | -0.0452 |
| rs10185199  | A | -0.0125 |

|             |   |         |
|-------------|---|---------|
| rs74669305  | G | 0.0422  |
| rs4311015   | A | -0.0207 |
| rs12465325  | G | 0.027   |
| rs77340858  | G | 0.051   |
| rs72952151  | C | -0.0239 |
| rs3769053   | C | 0.0218  |
| rs80275554  | A | -0.0475 |
| rs143359015 | A | 0.0446  |
| rs17388135  | C | 0.0166  |
| rs115550539 | T | 0.0509  |
| rs115629217 | A | -0.0749 |
| rs149274786 | G | -0.0516 |
| rs150609735 | T | -0.0889 |
| rs113521793 | C | 0.0501  |
| rs76451871  | C | 0.0456  |
| rs35212219  | T | 0.035   |
| rs11688385  | C | 0.0238  |
| rs6747163   | G | -0.0195 |
| rs10177115  | A | 0.0168  |
| rs12995720  | C | 0.0729  |
| rs78165640  | C | 0.0491  |
| rs7565132   | C | 0.04    |
| rs12612923  | A | 0.0378  |
| rs13415349  | C | -0.0201 |
| rs13418802  | T | -0.0109 |
| rs72769243  | C | 0.0331  |
| rs75770717  | C | -0.0437 |
| rs13425218  | C | -0.0161 |
| rs73914504  | T | -0.04   |
| rs6749328   | T | -0.0203 |
| rs6750637   | A | -0.0163 |
| rs139567480 | T | 0.0694  |
| rs56038954  | G | -0.0292 |
| rs7567408   | A | -0.0267 |
| rs45535736  | T | 0.0482  |
| rs72924939  | A | -0.0169 |
| rs78431358  | C | -0.0656 |
| rs12472018  | G | 0.025   |
| rs112316144 | T | 0.0975  |
| rs72937685  | G | 0.0182  |
| rs6545179   | T | 0.0118  |
| rs1519543   | G | -0.0467 |
| rs138675395 | A | -0.057  |
| rs143721713 | A | -0.0647 |
| rs7583300   | A | 0.0245  |
| rs143819707 | T | -0.0272 |
| rs10190041  | T | 0.016   |

|             |   |         |
|-------------|---|---------|
| rs78828757  | G | -0.0595 |
| rs58060279  | C | 0.0197  |
| rs10203607  | C | -0.0567 |
| rs76413714  | T | 0.0997  |
| rs7425346   | A | -0.0283 |
| rs62186281  | T | -0.0389 |
| rs7563053   | C | 0.0253  |
| rs11692659  | A | 0.025   |
| rs145759750 | C | -0.0661 |
| rs2002133   | C | 0.0134  |
| rs76789272  | T | -0.04   |
| rs76104567  | A | 0.0652  |
| rs3821353   | T | 0.0138  |
| rs11892323  | C | -0.0118 |
| rs10191324  | T | 0.0328  |
| rs41464547  | G | 0.0339  |
| rs2720097   | G | 0.0194  |
| rs78870267  | A | -0.028  |
| rs72795287  | T | 0.0589  |
| rs147046929 | C | -0.0453 |
| rs75756437  | T | -0.0261 |
| rs1468757   | C | -0.015  |
| rs114258821 | A | 0.0389  |
| rs115084740 | T | -0.0574 |
| rs10167952  | G | 0.0215  |
| rs62159898  | A | 0.0149  |
| rs12618690  | A | -0.0457 |
| rs12995711  | G | -0.0126 |
| rs11897775  | C | -0.0132 |
| rs72850811  | T | -0.0699 |
| rs56213791  | C | -0.0125 |
| rs11684361  | G | 0.0801  |
| rs17679678  | A | 0.031   |
| rs6740639   | T | -0.0112 |
| rs77381651  | A | 0.0404  |
| rs111488479 | T | -0.0349 |
| rs58219717  | G | -0.0267 |
| rs4413121   | A | 0.0111  |
| rs78777204  | A | 0.0558  |
| rs2192817   | C | -0.0451 |
| rs4664234   | G | 0.0447  |
| rs11687160  | A | -0.0601 |
| rs78616260  | A | 0.0604  |
| rs10194784  | G | -0.0122 |
| rs10178582  | G | -0.0253 |
| rs144603356 | A | -0.0363 |
| rs72958961  | G | 0.0114  |

|             |   |         |
|-------------|---|---------|
| rs67757198  | T | -0.0173 |
| rs4671413   | A | 0.0109  |
| rs13417654  | T | -0.0221 |
| rs71446010  | C | -0.0236 |
| rs10932127  | T | 0.0126  |
| rs75031836  | A | -0.0427 |
| rs55889142  | T | 0.0836  |
| rs77311527  | C | -0.049  |
| rs680603    | C | 0.0218  |
| rs10183317  | T | 0.0303  |
| rs76529516  | G | 0.0566  |
| rs12619252  | A | -0.0618 |
| rs72824920  | C | 0.0313  |
| rs6714411   | G | -0.0192 |
| rs114853782 | C | -0.0766 |
| rs72815640  | A | 0.0364  |
| rs35515443  | C | -0.0119 |
| rs28607844  | G | 0.0168  |
| rs142436764 | G | 0.0528  |
| rs10199294  | G | 0.0214  |
| rs149485231 | T | -0.0513 |
| rs114496169 | T | 0.0399  |
| rs4443010   | C | -0.0131 |
| rs76967573  | C | 0.0699  |
| rs7609130   | G | 0.012   |
| rs2314934   | G | 0.0616  |
| rs71437484  | T | 0.0424  |
| rs114004001 | G | -0.0277 |
| rs1108288   | G | -0.013  |
| rs3752777   | A | 0.0148  |
| rs7585881   | G | 0.0124  |
| rs72925159  | G | -0.0626 |
| rs72919712  | C | -0.0496 |
| rs115150336 | C | -0.0691 |
| rs11890420  | T | 0.0204  |
| rs74704220  | G | -0.0165 |
| rs1430091   | A | 0.0183  |
| rs146598480 | G | -0.0696 |
| rs6544956   | T | 0.0327  |
| rs1607666   | A | -0.0108 |
| rs114779276 | A | -0.0451 |
| rs35499832  | A | 0.0112  |
| rs10495736  | A | -0.0126 |
| rs62148492  | T | 0.0428  |
| rs6732834   | T | -0.0221 |
| rs2021376   | T | -0.0121 |
| rs13423078  | A | 0.0902  |

|             |   |         |
|-------------|---|---------|
| rs7607678   | G | -0.0117 |
| rs138096439 | G | -0.0596 |
| rs1879651   | C | 0.0525  |
| rs115357774 | G | -0.0498 |
| rs113665565 | A | 0.0466  |
| rs78112233  | A | 0.0883  |
| rs7578006   | A | -0.0154 |
| rs114167446 | C | 0.0577  |
| rs3098336   | G | -0.0133 |
| rs72986482  | A | 0.0399  |
| rs59376528  | T | 0.0674  |
| rs114785338 | C | -0.0637 |
| rs75414752  | A | 0.0554  |
| rs12997707  | T | 0.0136  |
| rs78125639  | C | -0.0274 |
| rs7424885   | A | -0.0136 |
| rs6753129   | G | 0.0117  |
| rs111905890 | T | -0.0463 |
| rs12991467  | A | -0.0231 |
| rs74406592  | A | -0.0296 |
| rs115958402 | T | 0.0921  |
| rs78457227  | A | -0.0448 |
| rs6436094   | G | -0.0126 |
| rs446861    | T | -0.0117 |
| rs75479781  | A | -0.0409 |
| rs72800463  | G | -0.0469 |
| rs72833275  | G | 0.0217  |
| rs1500480   | T | 0.0152  |
| rs114233140 | T | -0.0577 |
| rs71422169  | T | 0.0714  |
| rs56329260  | C | -0.0178 |
| rs78051255  | C | 0.015   |
| rs13031154  | T | -0.0127 |
| rs75856432  | T | 0.0617  |
| rs114451169 | C | -0.0619 |
| rs16865111  | C | -0.0183 |
| rs7608251   | T | -0.0147 |
| rs76687770  | C | 0.0275  |
| rs10193202  | C | -0.0125 |
| rs212352    | C | -0.0196 |
| rs75520438  | A | -0.0568 |
| rs934049    | G | 0.0145  |
| rs78046349  | T | 0.0452  |
| rs75496036  | T | 0.0215  |
| rs113488211 | A | 0.0372  |
| rs4675601   | G | 0.0181  |
| rs142040433 | A | 0.0582  |

|             |   |         |
|-------------|---|---------|
| rs4353644   | T | 0.0186  |
| rs72813988  | A | -0.0133 |
| rs75557232  | A | -0.0591 |
| rs111475364 | C | -0.0737 |
| rs11679458  | C | -0.011  |
| rs62122522  | T | -0.0339 |
| rs115897328 | C | 0.0807  |
| rs140641029 | T | -0.0296 |
| rs12616214  | C | -0.0345 |
| rs72785314  | A | 0.0431  |
| rs7608659   | C | -0.0117 |
| rs145513895 | C | -0.0844 |
| rs17399617  | G | -0.0359 |
| rs10168620  | A | 0.0121  |
| rs1032034   | T | 0.0142  |
| rs2652438   | T | -0.0116 |
| rs4853648   | C | 0.0144  |
| rs114165857 | A | 0.0977  |
| rs78750325  | G | -0.0756 |
| rs113379188 | C | 0.0791  |
| rs1027003   | C | -0.0167 |
| rs114845433 | A | -0.0733 |
| rs2047868   | G | -0.0193 |
| rs58362367  | G | 0.0565  |
| rs75395248  | T | 0.0427  |
| rs1528840   | C | -0.0706 |
| rs149252251 | T | 0.0576  |
| rs145433814 | A | -0.0435 |
| rs112739847 | T | -0.0259 |
| rs2569909   | C | 0.0606  |
| rs150568976 | G | 0.064   |
| rs113404955 | T | 0.046   |
| rs75349333  | A | 0.0478  |
| rs140780602 | T | 0.0953  |
| rs57652981  | A | -0.0301 |
| rs79936217  | A | 0.0785  |
| rs13420256  | T | -0.0233 |
| rs116465484 | A | 0.0518  |
| rs702946    | A | 0.0204  |
| rs13031965  | A | -0.0188 |
| rs116481941 | T | 0.0495  |
| rs10175743  | G | 0.0486  |
| rs115069731 | T | 0.0755  |
| rs17028994  | T | 0.0195  |
| rs10153727  | A | -0.0173 |
| rs78536210  | C | 0.047   |
| rs62107648  | C | 0.0173  |

|             |   |         |
|-------------|---|---------|
| rs6741747   | C | -0.0451 |
| rs72844706  | A | -0.014  |
| rs7580788   | G | 0.0157  |
| rs11675821  | C | -0.0142 |
| rs116837565 | G | -0.0437 |
| rs1006538   | C | 0.0112  |
| rs1666772   | C | -0.0115 |
| rs34224221  | T | 0.0326  |
| rs10192439  | C | 0.011   |
| rs115641410 | T | -0.0539 |
| rs6761956   | A | -0.0414 |
| rs79851893  | A | 0.0246  |
| rs59337708  | A | -0.0312 |
| rs6713642   | G | 0.0261  |
| rs12991898  | A | 0.022   |
| rs74693843  | G | -0.0496 |
| rs116793776 | A | 0.0455  |
| rs114937579 | G | -0.0729 |
| rs10183022  | A | 0.0107  |
| rs116454964 | T | 0.0471  |
| rs150655407 | A | 0.075   |
| rs72935012  | T | 0.0181  |
| rs113564893 | C | 0.0443  |
| rs142845387 | A | 0.0496  |
| rs66821625  | G | 0.0495  |
| rs10514812  | A | 0.0181  |
| rs78946786  | C | -0.0254 |
| rs78565343  | C | -0.0341 |
| rs13006395  | T | 0.0123  |
| rs17319464  | T | 0.0171  |
| rs6544644   | G | 0.0123  |
| rs115455902 | A | 0.0344  |
| rs150425835 | T | -0.0724 |
| rs13022853  | T | 0.0143  |
| rs1427593   | T | 0.0118  |
| rs726034    | C | 0.0116  |
| rs74435737  | G | -0.0237 |
| rs143001374 | C | 0.0621  |
| rs145107825 | C | 0.0622  |
| rs11674021  | C | -0.0122 |
| rs7571619   | A | 0.0133  |
| rs71414676  | T | -0.0581 |
| rs868180    | A | -0.0164 |
| rs6753456   | G | 0.0115  |
| rs280224    | C | -0.0125 |
| rs79463826  | C | -0.0398 |
| rs78162071  | C | -0.0473 |



|             |   |         |
|-------------|---|---------|
| rs34688342  | A | -0.0222 |
| rs62121973  | A | 0.0577  |
| rs114194282 | G | -0.0173 |
| rs4387782   | G | 0.0155  |
| rs116681462 | G | -0.0639 |
| rs73011543  | A | 0.0155  |
| rs6721411   | A | -0.0273 |
| rs13026784  | A | 0.0118  |
| rs74586440  | T | 0.0829  |
| rs76945513  | G | 0.0272  |
| rs60646609  | G | 0.0491  |
| rs11886804  | G | -0.0266 |
| rs116519267 | C | 0.0638  |
| rs2045129   | C | 0.0168  |
| rs138474395 | A | -0.0436 |
| rs34507042  | T | -0.018  |
| rs78577619  | T | 0.0311  |
| rs114175063 | T | 0.0682  |
| rs4971389   | A | 0.0128  |
| rs11127371  | G | 0.0236  |
| rs150455821 | T | -0.0587 |
| rs2357174   | C | -0.0209 |
| rs60021757  | T | 0.0444  |
| rs62190912  | T | -0.0294 |
| rs151117033 | T | 0.0374  |
| rs140660909 | T | 0.072   |
| rs62167164  | C | -0.0743 |
| rs34910168  | T | 0.0209  |
| rs114202641 | G | -0.0419 |
| rs79689108  | A | -0.0296 |
| rs62186668  | T | 0.0341  |
| rs77679407  | T | -0.0478 |
| rs2176651   | G | 0.0119  |
| rs75234385  | A | 0.0467  |
| rs115368730 | G | 0.0384  |
| rs1368965   | C | 0.0111  |
| rs78699986  | T | -0.1032 |
| rs111504464 | T | 0.0156  |
| rs2193619   | C | -0.0161 |
| rs34049772  | A | -0.0167 |
| rs2715893   | C | 0.028   |
| rs114512015 | T | -0.0746 |
| rs115211109 | G | -0.0714 |
| rs114140406 | A | 0.0667  |
| rs115796462 | A | 0.0317  |
| rs10928881  | T | -0.0267 |
| rs76246979  | G | -0.0683 |

|             |   |         |
|-------------|---|---------|
| rs12618440  | A | 0.1123  |
| rs7567094   | C | 0.0128  |
| rs111294150 | G | 0.0763  |
| rs12478004  | T | 0.0109  |
| rs114814336 | T | 0.021   |
| rs62176383  | T | -0.04   |
| rs1126241   | T | 0.0141  |
| rs78902234  | T | -0.0537 |
| rs149242696 | G | 0.0723  |
| rs115791902 | A | 0.0611  |
| rs7584323   | T | 0.0141  |
| rs75973692  | G | -0.0323 |
| rs10932348  | G | 0.0362  |
| rs72783911  | A | 0.034   |
| rs1545552   | A | -0.0117 |
| rs112383535 | C | -0.0638 |
| rs114360276 | A | -0.0558 |
| rs12615223  | T | -0.0106 |
| rs77101510  | G | 0.0702  |
| rs74798810  | C | 0.0561  |
| rs114129353 | T | -0.074  |
| rs75915527  | T | -0.0589 |
| rs12329206  | A | 0.012   |
| rs80065244  | G | -0.0722 |
| rs4256004   | C | -0.0163 |
| rs840362    | G | -0.0276 |
| rs11690125  | A | 0.0153  |
| rs11893135  | C | 0.0467  |
| rs1821571   | A | -0.062  |
| rs79229528  | G | 0.047   |
| rs13002287  | T | -0.0329 |
| rs6544797   | C | 0.0308  |
| rs13414132  | T | -0.0235 |
| rs6430373   | C | -0.0109 |
| rs115699185 | A | -0.0647 |
| rs76804326  | C | 0.069   |
| rs11904059  | G | 0.0114  |
| rs116469098 | A | -0.0468 |
| rs10178726  | T | 0.0332  |
| rs72835359  | C | -0.0352 |
| rs150383119 | C | 0.0876  |
| rs13386273  | A | 0.0209  |
| rs149243557 | G | -0.0538 |
| rs74782114  | A | 0.0628  |
| rs114965064 | G | -0.049  |
| rs2163550   | C | 0.0292  |
| rs143391536 | G | -0.0405 |

|             |   |         |
|-------------|---|---------|
| rs55879737  | C | 0.0122  |
| rs76979977  | A | 0.0561  |
| rs78483293  | C | 0.0568  |
| rs2916491   | T | -0.0163 |
| rs16844933  | C | 0.0299  |
| rs10490605  | T | -0.0132 |
| rs12712741  | G | 0.0127  |
| rs34383629  | T | -0.0229 |
| rs116731956 | T | -0.0518 |
| rs74662857  | G | -0.0785 |
| rs10194023  | C | -0.0108 |
| rs4143271   | A | -0.0187 |
| rs56820531  | A | 0.037   |
| rs62273237  | T | 0.0748  |
| rs114433238 | T | 0.3221  |
| rs9840250   | G | -0.095  |
| rs7647531   | A | 0.1851  |
| rs77103435  | T | -0.2089 |
| rs75468783  | A | 0.2744  |
| rs114865682 | T | 0.2457  |
| rs62245327  | G | 0.2336  |
| rs114773661 | T | 0.3031  |
| rs138377943 | G | 0.3007  |
| rs1344003   | A | 0.0669  |
| rs34879081  | A | 0.083   |
| rs9815951   | G | 0.3704  |
| rs7618668   | A | -0.1111 |
| rs13081253  | A | -0.1865 |
| rs4682992   | A | -0.1592 |
| rs4955289   | T | 0.0699  |
| rs61758192  | T | -0.2334 |
| rs75006927  | A | -0.1602 |
| rs75039174  | A | -0.2621 |
| rs11927033  | G | 0.0597  |
| rs62243579  | C | 0.1937  |
| rs7618206   | A | 0.0653  |
| rs9821048   | C | -0.0576 |
| rs2218042   | G | 0.0893  |
| rs35778374  | C | 0.1117  |
| rs1874388   | T | -0.0687 |
| rs9826487   | G | -0.091  |
| rs1356248   | T | 0.0858  |
| rs62259847  | A | -0.4149 |
| rs55812136  | C | -0.1909 |
| rs13314819  | C | 0.0796  |
| rs6792291   | T | 0.0967  |
| rs61537817  | T | 0.104   |

|             |   |         |
|-------------|---|---------|
| rs1806522   | T | -0.0746 |
| rs75625345  | G | 0.2583  |
| rs73079516  | C | 0.1085  |
| rs73071530  | A | -0.282  |
| rs953781    | C | -0.0621 |
| rs3908139   | A | -0.0585 |
| rs140635531 | C | 0.1417  |
| rs9817228   | C | 0.1489  |
| rs7627621   | C | 0.1072  |
| rs16854503  | C | 0.2464  |
| rs116215485 | A | 0.1847  |
| rs74796042  | C | 0.1224  |
| rs79388887  | C | -0.181  |
| rs6773936   | G | 0.075   |
| rs11130575  | G | -0.0584 |
| rs11922641  | A | 0.1629  |
| rs75527149  | A | 0.1573  |
| rs75655606  | C | 0.3254  |
| rs75296663  | T | -0.2384 |
| rs1600350   | T | 0.065   |
| rs1441040   | G | -0.0822 |
| rs7643651   | A | 0.0842  |
| rs116341973 | G | 0.1795  |
| rs57476258  | A | 0.073   |
| rs17685928  | G | 0.0995  |
| rs74535587  | A | -0.1856 |
| rs341844    | A | -0.056  |
| rs16853074  | A | 0.0894  |
| rs73857305  | A | 0.2223  |
| rs79054374  | C | -0.275  |
| rs13092147  | A | 0.0731  |
| rs148589045 | A | -0.254  |
| rs77481052  | G | 0.1793  |
| rs2165518   | T | -0.0545 |
| rs78829414  | T | -0.3225 |
| rs35318795  | A | 0.1555  |
| rs13325675  | G | 0.0962  |
| rs11711001  | A | -0.1013 |
| rs13099357  | C | 0.0956  |
| rs7621152   | A | -0.2451 |
| rs3856709   | C | 0.0545  |
| rs61798164  | C | -0.0998 |
| rs12637177  | A | -0.1618 |
| rs56356701  | T | 0.0836  |
| rs2596931   | G | -0.1323 |
| rs1483836   | G | -0.0543 |
| rs140525853 | G | 0.2291  |

|             |   |         |
|-------------|---|---------|
| rs62246296  | G | 0.1057  |
| rs56377849  | A | -0.0615 |
| rs115959858 | A | -0.2465 |
| rs1426384   | A | -0.0585 |
| rs1299704   | C | -0.0532 |
| rs2639264   | T | 0.0579  |
| rs114113354 | G | 0.063   |
| rs77105498  | G | -0.0845 |
| rs34187390  | A | -0.0539 |
| rs690388    | C | -0.0624 |
| rs113617155 | G | 0.1258  |
| rs73814965  | G | -0.1149 |
| rs6764279   | A | -0.0576 |
| rs79487968  | T | 0.2971  |
| rs9878648   | T | 0.0558  |
| rs111677060 | T | 0.2713  |
| rs7628968   | A | -0.0704 |
| rs79544071  | C | -0.1824 |
| rs36193161  | C | 0.2719  |
| rs10510488  | C | -0.057  |
| rs142335292 | T | -0.3603 |
| rs11917202  | A | -0.0688 |
| rs9873066   | G | 0.0889  |
| rs74734236  | G | -0.1969 |
| rs74715168  | A | -0.1609 |
| rs111432844 | C | 0.2415  |
| rs267514    | A | -0.0688 |
| rs58962325  | C | 0.2217  |
| rs17044643  | G | 0.0716  |
| rs58819808  | T | -0.1197 |
| rs114273040 | G | -0.2479 |
| rs35581265  | A | 0.2139  |
| rs73135713  | C | 0.1875  |
| rs9810389   | G | 0.063   |
| rs71327602  | G | 0.3181  |
| rs3917132   | G | 0.2971  |
| rs12496919  | C | 0.2087  |
| rs66665035  | T | 0.0721  |
| rs10510844  | G | 0.1338  |
| rs73020728  | A | -0.1681 |
| rs71310424  | A | -0.1171 |
| rs12493771  | A | 0.3836  |
| rs7639580   | G | 0.0617  |
| rs61763238  | C | 0.1018  |
| rs113653473 | A | -0.3382 |
| rs34993306  | A | 0.0511  |
| rs9863257   | T | -0.2636 |

|             |   |         |
|-------------|---|---------|
| rs9852998   | T | 0.0549  |
| rs76386065  | G | 0.17    |
| rs1404550   | G | 0.0695  |
| rs147307389 | A | -0.2691 |
| rs10935086  | C | -0.1539 |
| rs80017031  | C | 0.2306  |
| rs7648091   | T | -0.067  |
| rs140842300 | T | 0.275   |
| rs34266684  | C | -0.1266 |
| rs10937003  | T | 0.06    |
| rs2596933   | G | -0.0587 |
| rs77709628  | C | -0.1097 |
| rs1971222   | T | -0.0962 |
| rs62251079  | C | 0.0698  |
| rs144915585 | A | 0.1408  |
| rs73132870  | G | 0.2169  |
| rs2613936   | T | 0.0672  |
| rs73866681  | A | 0.1631  |
| rs10510985  | T | -0.05   |
| rs13100290  | A | -0.0613 |
| rs71308122  | A | -0.0786 |
| rs793617    | A | 0.074   |
| rs2590435   | T | 0.1033  |
| rs690343    | C | -0.051  |
| rs2008299   | G | -0.0493 |
| rs75817065  | C | 0.1278  |
| rs11719120  | C | 0.072   |
| rs78041783  | C | -0.1393 |
| rs74442715  | G | 0.178   |
| rs138186017 | T | 0.1905  |
| rs71325396  | A | -0.0877 |
| rs11708474  | C | -0.2701 |
| rs358053    | A | 0.0607  |
| rs144244084 | C | 0.3369  |
| rs17216347  | A | 0.2668  |
| rs237855    | C | 0.0499  |
| rs77569578  | G | -0.1392 |
| rs79076265  | A | 0.1349  |
| rs7427663   | G | -0.1016 |
| rs904267    | A | -0.0506 |
| rs6805718   | A | 0.0762  |
| rs16848155  | A | -0.1077 |
| rs76140425  | T | 0.2954  |
| rs144924146 | A | -0.0558 |
| rs11708449  | G | 0.2404  |
| rs4527404   | C | -0.0492 |
| rs4552314   | A | -0.0488 |

|             |   |         |
|-------------|---|---------|
| rs76538807  | T | -0.1675 |
| rs4452305   | G | 0.1811  |
| rs7618431   | T | -0.0772 |
| rs17041710  | C | -0.0588 |
| rs9874156   | C | -0.0917 |
| rs62251993  | A | 0.0629  |
| rs12638326  | C | 0.2664  |
| rs77815341  | T | 0.1157  |
| rs6781192   | A | -0.223  |
| rs139069443 | C | -0.3371 |
| rs79207242  | C | -0.1522 |
| rs112105914 | C | 0.1752  |
| rs77993828  | T | 0.1854  |
| rs4635681   | G | 0.0639  |
| rs17370322  | T | 0.1651  |
| rs148582579 | A | 0.2245  |
| rs1680777   | A | 0.0585  |
| rs4411878   | T | -0.0566 |
| rs709510    | T | -0.0484 |
| rs34520988  | T | 0.1705  |
| rs12054332  | C | 0.0693  |
| rs77349313  | C | 0.1517  |
| rs59967356  | C | 0.0973  |
| rs62262994  | T | 0.1528  |
| rs1554119   | A | -0.0716 |
| rs9855771   | T | 0.0819  |
| rs9860747   | T | 0.0811  |
| rs73135588  | G | -0.0976 |
| rs62272588  | G | 0.1227  |
| rs116337039 | T | 0.3028  |
| rs13090325  | A | -0.0986 |
| rs112070301 | A | 0.0785  |
| rs146847101 | T | -0.3077 |
| rs2461821   | T | 0.0502  |
| rs2611612   | C | 0.0527  |
| rs7650733   | G | 0.3228  |
| rs2844405   | G | 0.0702  |
| rs62391971  | A | -0.0869 |
| rs12491309  | T | -0.0933 |
| rs6762200   | T | -0.0512 |
| rs4677055   | A | 0.0753  |
| rs12639143  | G | 0.1032  |
| rs12494517  | C | 0.0621  |
| rs6765457   | A | -0.0489 |
| rs71323476  | T | 0.1785  |
| rs77692530  | C | 0.3014  |
| rs6775305   | G | -0.0487 |

|             |   |         |
|-------------|---|---------|
| rs16858780  | C | -0.087  |
| rs10212569  | A | 0.0836  |
| rs62263763  | T | 0.1042  |
| rs278391    | C | -0.065  |
| rs4683495   | C | -0.0471 |
| rs114137525 | C | 0.1296  |
| rs9876756   | A | 0.1792  |
| rs1400197   | T | -0.2344 |
| rs74782113  | C | -0.1067 |
| rs146176633 | C | -0.2906 |
| rs12107950  | A | -0.0543 |
| rs116810064 | A | 0.1879  |
| rs146692264 | A | 0.2386  |
| rs73022613  | A | 0.1388  |
| rs17033194  | C | 0.0598  |
| rs147703165 | A | 0.1791  |
| rs6809908   | G | -0.0662 |
| rs729208    | C | -0.0567 |
| rs116034739 | A | -0.1881 |
| rs62232772  | A | 0.1005  |
| rs7615524   | T | -0.0517 |
| rs147073284 | A | 0.2907  |
| rs1450097   | C | -0.0493 |
| rs62246333  | T | 0.1314  |
| rs78645744  | A | -0.0544 |
| rs144747720 | T | -0.2267 |
| rs1354196   | G | 0.0499  |
| rs62246314  | A | 0.1084  |
| rs9833988   | G | 0.2049  |
| rs2043549   | T | 0.0753  |
| rs7650629   | A | 0.048   |
| rs143085768 | A | 0.0832  |
| rs62249278  | T | 0.1379  |
| rs114087565 | T | -0.0712 |
| rs116056608 | T | -0.1124 |
| rs80060485  | C | -0.1979 |
| rs11925220  | C | -0.0482 |
| rs7636726   | T | 0.0641  |
| rs7634075   | G | 0.2225  |
| rs72494889  | T | 0.1276  |
| rs2347106   | T | 0.1655  |
| rs4683306   | C | 0.2406  |
| rs1357499   | G | 0.0807  |
| rs75940184  | C | -0.2258 |
| rs116460380 | A | -0.2351 |
| rs13065485  | G | -0.0485 |
| rs10513840  | C | -0.0578 |



|             |   |         |
|-------------|---|---------|
| rs151136239 | A | -0.205  |
| rs59314816  | C | -0.0901 |
| rs76343649  | T | 0.2197  |
| rs6779792   | C | 0.0473  |
| rs4331703   | T | 0.054   |
| rs9879467   | T | -0.0811 |
| rs7635895   | G | 0.0956  |
| rs74918516  | C | 0.1196  |
| rs7611388   | A | 0.1071  |
| rs2700263   | T | 0.0855  |
| rs12494857  | C | 0.0969  |
| rs11721241  | A | -0.0463 |
| rs35373020  | T | 0.1617  |
| rs13081455  | C | -0.1727 |
| rs9864435   | T | -0.0864 |
| rs1387125   | A | 0.1095  |
| rs115869027 | A | 0.3063  |
| rs74458302  | C | -0.053  |
| rs116531071 | C | -0.1431 |
| rs4858348   | G | -0.0472 |
| rs62247683  | T | 0.0622  |
| rs1499992   | G | 0.0769  |
| rs13083060  | A | -0.05   |
| rs76960635  | G | 0.1481  |
| rs62283811  | T | 0.1164  |
| rs72631215  | A | -0.1131 |
| rs1398065   | T | 0.0516  |
| rs144517239 | T | 0.1748  |
| rs452792    | A | 0.073   |
| rs12486302  | G | -0.0566 |
| rs17063578  | C | -0.1468 |
| rs1374871   | T | 0.1638  |
| rs17605534  | A | -0.1327 |
| rs4459895   | A | 0.0651  |
| rs10446282  | A | 0.0723  |
| rs12492409  | G | 0.0483  |
| rs58595842  | C | -0.0852 |
| rs35333734  | C | 0.0493  |
| rs641035    | A | 0.0502  |
| rs11918276  | A | 0.1185  |
| rs3849498   | C | -0.0451 |
| rs114779440 | T | -0.1102 |
| rs77553634  | G | -0.1481 |
| rs113832838 | A | 0.135   |
| rs2012023   | C | 0.0556  |
| rs147919220 | A | -0.142  |
| rs1158265   | C | -0.0508 |

|             |   |         |
|-------------|---|---------|
| rs115955563 | A | 0.1334  |
| rs115352114 | T | -0.1156 |
| rs5003534   | T | 0.2128  |
| rs9882853   | C | -0.2289 |
| rs9835506   | G | -0.0464 |
| rs60184902  | T | -0.1291 |
| rs9878307   | A | 0.0795  |
| rs17057718  | T | -0.062  |
| rs2891885   | T | 0.0565  |
| rs34755664  | T | -0.1921 |
| rs73053248  | C | 0.1418  |
| rs62266958  | T | -0.1229 |
| rs35126902  | C | -0.0503 |
| rs12498138  | A | 0.0856  |
| rs73163203  | A | 0.0781  |
| rs6771506   | T | -0.0634 |
| rs77644199  | A | 0.2354  |
| rs6422142   | C | 0.0521  |
| rs4855608   | T | 0.048   |
| rs116598269 | T | 0.2373  |
| rs1844886   | G | -0.2121 |
| rs147179468 | T | 0.3014  |
| rs144407327 | G | 0.1513  |
| rs6769094   | T | -0.0552 |
| rs114688004 | C | 0.3641  |
| rs76717940  | T | 0.1024  |
| rs74908880  | T | 0.073   |
| rs11709145  | A | 0.1487  |
| rs78257320  | T | 0.3068  |
| rs73185334  | T | 0.1263  |
| rs62258974  | A | 0.1668  |
| rs114915450 | G | 0.3023  |
| rs36050527  | A | -0.2292 |
| rs2164365   | A | -0.0522 |
| rs7621311   | A | 0.0619  |
| rs111772375 | T | 0.1805  |
| rs1033237   | T | 0.094   |
| rs115760101 | T | 0.1979  |
| rs146552851 | A | 0.3721  |
| rs73103257  | C | 0.0814  |
| rs4974147   | T | 0.0543  |
| rs9882898   | G | 0.0632  |
| rs139633474 | T | 0.2142  |
| rs2555242   | T | 0.077   |
| rs13089585  | C | -0.0977 |
| rs9845966   | T | -0.0459 |
| rs73226916  | T | 0.0689  |

|             |   |         |
|-------------|---|---------|
| rs146569999 | A | 0.368   |
| rs2363942   | G | 0.046   |
| rs13088089  | C | -0.0506 |
| rs76984319  | A | -0.2621 |
| rs142460090 | T | 0.316   |
| rs9839187   | G | -0.048  |
| rs13087696  | A | 0.145   |
| rs639690    | C | 0.0779  |
| rs4437183   | A | -0.0705 |
| rs6776600   | G | 0.0596  |
| rs17037357  | T | 0.0693  |
| rs75134207  | T | 0.2027  |
| rs282858    | T | -0.1465 |
| rs143914112 | C | 0.1725  |
| rs11709702  | T | 0.0656  |
| rs62410768  | A | 0.1178  |
| rs6438994   | A | -0.0486 |
| rs74408089  | C | -0.1829 |
| rs186892    | C | 0.0999  |
| rs2130996   | C | 0.0514  |
| rs116142826 | C | 0.2147  |
| rs77486676  | C | 0.2289  |
| rs146584221 | T | 0.2658  |
| rs35417265  | T | 0.105   |
| rs17076001  | A | 0.1163  |
| rs9290142   | G | -0.0873 |
| rs75513699  | A | -0.1274 |
| rs9884013   | A | 0.0553  |
| rs2644217   | T | 0.0652  |
| rs6778424   | T | -0.0615 |
| rs9842417   | C | 0.1449  |
| rs977224    | G | 0.0495  |
| rs57050685  | G | -0.0658 |
| rs57925479  | A | 0.0593  |
| rs3849427   | T | -0.1181 |
| rs16863015  | C | 0.0945  |
| rs7612076   | C | 0.0748  |
| rs13077697  | A | 0.045   |
| rs73035885  | A | 0.2162  |
| rs62234242  | G | 0.0606  |
| rs1017348   | A | -0.0549 |
| rs12485763  | A | 0.1691  |
| rs1588965   | T | -0.0601 |
| rs71317757  | G | 0.1265  |
| rs7643827   | G | 0.1081  |
| rs784499    | G | 0.1262  |
| rs9870507   | C | 0.1798  |

|             |   |         |
|-------------|---|---------|
| rs113571749 | G | 0.0835  |
| rs73080339  | G | 0.1203  |
| rs9816487   | G | 0.0742  |
| rs76931802  | A | 0.111   |
| rs2268495   | A | 0.0588  |
| rs4682491   | A | 0.0567  |
| rs1403069   | A | 0.0434  |
| rs56247459  | T | 0.5128  |
| rs116136194 | T | 0.2641  |
| rs4389439   | T | 0.1072  |
| rs141378653 | A | 0.1208  |
| rs73053833  | A | 0.1536  |
| rs6810383   | A | -0.0611 |
| rs12629379  | T | 0.1171  |
| rs74809616  | A | 0.2322  |
| rs17067154  | G | -0.0484 |
| rs197769    | G | -0.0453 |
| rs13065055  | G | 0.2762  |
| rs80003331  | A | 0.1396  |
| rs76799183  | A | -0.0941 |
| rs546587    | C | 0.1272  |
| rs12486024  | C | 0.11    |
| rs10511101  | C | 0.0455  |
| rs6798239   | C | 0.0659  |
| rs72947774  | A | 0.1153  |
| rs7642727   | A | 0.051   |
| rs79598068  | C | 0.1416  |
| rs56047778  | G | -0.0528 |
| rs16854445  | T | -0.0822 |
| rs138475432 | G | 0.2584  |
| rs6789262   | G | 0.057   |
| rs13060819  | C | -0.0504 |
| rs73182806  | C | -0.1248 |
| rs11706014  | A | 0.0972  |
| rs33965905  | T | 0.0558  |
| rs11705769  | C | -0.1482 |
| rs112069050 | A | -0.2105 |
| rs9809328   | G | -0.0678 |
| rs151303018 | T | -0.2018 |
| rs6440166   | T | 0.0549  |
| rs77230198  | A | -0.2065 |
| rs189372    | T | -0.0452 |
| rs9852933   | A | -0.0759 |
| rs4145120   | A | 0.0511  |
| rs2639220   | T | 0.0425  |
| rs139428813 | T | 0.3554  |
| rs17445306  | T | -0.1868 |

|             |   |         |
|-------------|---|---------|
| rs6446117   | T | 0.0538  |
| rs9883205   | T | -0.0674 |
| rs17634785  | G | 0.0978  |
| rs9832021   | A | 0.1043  |
| rs76472654  | C | 0.0947  |
| rs12635919  | T | 0.0449  |
| rs11916157  | T | 0.2275  |
| rs73162915  | A | -0.0798 |
| rs76041641  | G | -0.1541 |
| rs11713732  | T | 0.0643  |
| rs7611943   | T | 0.1164  |
| rs116732219 | A | 0.1413  |
| rs1730226   | A | 0.0443  |
| rs13087915  | G | -0.046  |
| rs73031373  | G | 0.2391  |
| rs62285856  | T | 0.0608  |
| rs6774841   | T | -0.0451 |
| rs13079424  | A | 0.0448  |
| rs16859140  | C | -0.0549 |
| rs6762261   | T | -0.0592 |
| rs62246340  | T | 0.1263  |
| rs2029118   | A | 0.0885  |
| rs10937335  | T | -0.0605 |
| rs62271362  | G | -0.3302 |
| rs4684712   | C | -0.05   |
| rs7426860   | C | -0.1497 |
| rs9810362   | C | 0.1282  |
| rs78524774  | C | 0.1007  |
| rs114391376 | C | 0.1652  |
| rs113238975 | T | -0.193  |
| rs73176831  | T | 0.1789  |
| rs78867322  | G | 0.0765  |
| rs4680228   | T | 0.0484  |
| rs56117409  | A | -0.1133 |
| rs36123465  | G | 0.0946  |
| rs59102783  | C | 0.2721  |
| rs1440386   | G | 0.0495  |
| rs36149609  | A | 0.0706  |
| rs148528159 | G | 0.2641  |
| rs9681597   | T | -0.0442 |
| rs115220981 | G | 0.1852  |
| rs9833373   | T | 0.0493  |
| rs55735243  | C | 0.0618  |
| rs76446891  | G | 0.3155  |
| rs1917098   | C | -0.0479 |
| rs12633811  | T | 0.0445  |
| rs7374197   | A | 0.0454  |

|             |   |         |
|-------------|---|---------|
| rs1979946   | G | -0.0422 |
| rs73161387  | T | 0.2331  |
| rs146588248 | G | 0.1503  |
| rs1773242   | G | 0.048   |
| rs9874228   | A | 0.1625  |
| rs138123661 | T | 0.2002  |
| rs12630452  | T | -0.1313 |
| rs1449295   | G | 0.1222  |
| rs56016701  | T | 0.1791  |
| rs35254701  | C | 0.0475  |
| rs139628827 | G | 0.3506  |
| rs35492261  | A | 0.2814  |
| rs138066009 | T | -0.3188 |
| rs2197942   | A | 0.0479  |
| rs11915742  | C | -0.0798 |
| rs3806662   | A | -0.1072 |
| rs114514695 | G | 0.1191  |
| rs12632648  | A | 0.0432  |
| rs3845869   | T | -0.0562 |
| rs12491094  | A | 0.0508  |
| rs1767087   | T | -0.1021 |
| rs13082945  | A | -0.2849 |
| rs6444973   | T | 0.045   |
| rs113498618 | C | -0.2883 |
| rs11707739  | C | 0.0532  |
| rs116591658 | C | -0.2983 |
| rs17712481  | A | 0.2079  |
| rs9829238   | G | 0.0606  |
| rs55755405  | T | 0.1112  |
| rs4677887   | G | 0.0443  |
| rs9864422   | T | 0.0616  |
| rs6804570   | T | -0.0435 |
| rs9876068   | G | -0.1137 |
| rs9863821   | C | -0.0522 |
| rs62231826  | C | 0.1366  |
| rs1286752   | T | 0.0515  |
| rs13074343  | C | -0.0503 |
| rs148485863 | T | 0.1422  |
| rs529304    | C | 0.1622  |
| rs17826234  | G | -0.1594 |
| rs3773779   | C | -0.0821 |
| rs147346832 | G | 0.2199  |
| rs61797633  | C | 0.0609  |
| rs9759127   | A | 0.0547  |
| rs137997826 | T | 0.2173  |
| rs78132719  | T | 0.1772  |
| rs73026855  | C | -0.1518 |

|             |   |         |
|-------------|---|---------|
| rs115266396 | A | 0.1715  |
| rs213326    | G | -0.0429 |
| rs12488600  | T | 0.0781  |
| rs11715636  | C | 0.0749  |
| rs28592895  | A | 0.0713  |
| rs55633978  | A | 0.0751  |
| rs4305451   | C | -0.0493 |
| rs9657912   | C | -0.145  |
| rs73220502  | G | 0.1224  |
| rs13061724  | G | -0.0992 |
| rs1868143   | T | -0.0588 |
| rs78371224  | A | 0.1949  |
| rs111865820 | C | 0.2978  |
| rs55952036  | T | 0.1245  |
| rs73111385  | G | -0.1622 |
| rs150174229 | A | 0.318   |
| rs1877564   | C | -0.0551 |
| rs56201973  | A | -0.0723 |
| rs984596    | T | 0.1083  |
| rs16823941  | C | 0.0534  |
| rs73075635  | A | 0.3042  |
| rs74506478  | G | -0.2482 |
| rs12715524  | C | 0.0652  |
| rs139803153 | A | -0.207  |
| rs2201582   | A | 0.0412  |
| rs13094095  | A | -0.1502 |
| rs163479    | T | 0.0561  |
| rs115305136 | T | 0.1827  |
| rs1352658   | C | -0.0438 |
| rs9847341   | T | -0.0691 |
| rs9917656   | C | 0.0518  |
| rs11712103  | C | 0.0708  |
| rs55909963  | T | -0.0634 |
| rs1021675   | C | 0.1397  |
| rs6803358   | G | -0.043  |
| rs113969232 | C | -0.1225 |
| rs113269651 | G | 0.0793  |
| rs73093756  | T | 0.1776  |
| rs9880801   | A | 0.0431  |
| rs10513861  | T | -0.08   |
| rs76972811  | G | 0.1055  |
| rs9798912   | A | -0.0678 |
| rs13082812  | C | -0.0554 |
| rs2055359   | T | -0.0467 |
| rs16829121  | C | 0.0843  |
| rs1392702   | T | -0.0439 |
| rs13089350  | G | -0.0954 |

|             |   |         |
|-------------|---|---------|
| rs79134551  | A | 0.1496  |
| rs3913578   | G | 0.0552  |
| rs13093343  | C | 0.0573  |
| rs35466234  | G | -0.0708 |
| rs77794222  | T | 0.1306  |
| rs78880177  | C | 0.2315  |
| rs79464259  | A | 0.1644  |
| rs62637653  | A | 0.2709  |
| rs73082914  | T | -0.0949 |
| rs114305493 | T | 0.1862  |
| rs75361937  | T | -0.1507 |
| rs115888441 | C | 0.2193  |
| rs73203451  | A | -0.1116 |
| rs17346869  | C | 0.1649  |
| rs111568528 | C | 0.2405  |
| rs115881710 | G | -0.3041 |
| rs17043526  | C | 0.1985  |
| rs6550702   | A | -0.0494 |
| rs9866764   | C | 0.0753  |
| rs2729281   | C | -0.0452 |
| rs17261458  | G | -0.1794 |
| rs62244630  | G | 0.0971  |
| rs575444    | A | -0.0795 |
| rs141381133 | A | 0.3055  |
| rs73180996  | A | -0.1754 |
| rs79019536  | T | 0.1394  |
| rs4679909   | T | 0.0451  |
| rs6763266   | C | 0.0425  |
| rs9826148   | T | 0.0677  |
| rs74622624  | G | 0.2989  |
| rs1147736   | G | 0.0421  |
| rs13091783  | A | 0.1885  |
| rs396426    | T | -0.05   |
| rs73174773  | C | -0.1745 |
| rs55714477  | A | -0.0824 |
| rs4642149   | A | 0.1592  |
| rs1597466   | T | -0.0664 |
| rs13059981  | G | -0.0587 |
| rs1607226   | T | 0.0642  |
| rs35361210  | G | 0.0834  |
| rs2961210   | A | 0.0425  |
| rs79878861  | C | -0.2631 |
| rs2639573   | A | 0.0913  |
| rs968385    | C | 0.0988  |
| rs138457487 | G | 0.1826  |
| rs6771869   | C | 0.2241  |
| rs1286728   | T | 0.0562  |



|             |   |         |
|-------------|---|---------|
| rs9843322   | T | -0.0673 |
| rs114658092 | A | -0.2714 |
| rs75242343  | G | 0.0629  |
| rs76915385  | G | -0.1494 |
| rs35935954  | T | -0.1089 |
| rs73138464  | G | 0.1568  |
| rs113958768 | G | -0.2605 |
| rs114488144 | T | -0.176  |
| rs77154990  | G | -0.3075 |
| rs2015160   | A | 0.0616  |
| rs12495035  | T | -0.0747 |
| rs2637984   | A | -0.0921 |
| rs141108143 | A | 0.218   |
| rs1352856   | T | -0.0605 |
| rs73892122  | C | 0.0624  |
| rs2218152   | T | -0.0472 |
| rs6796696   | C | -0.0486 |
| rs275685    | A | -0.0615 |
| rs62273385  | G | 0.0737  |
| rs7633534   | A | 0.2148  |
| rs140059073 | A | -0.1803 |
| rs6787874   | A | 0.0473  |
| rs6776822   | T | 0.0599  |
| rs9844477   | G | 0.165   |
| rs2613994   | C | 0.0422  |
| rs116520489 | A | 0.1675  |
| rs7632727   | C | -0.0639 |
| rs151179131 | G | -0.2201 |
| rs6762738   | C | 0.0464  |
| rs3846114   | G | -0.0613 |
| rs9858600   | A | -0.1089 |
| rs4676734   | T | 0.0505  |
| rs150195233 | G | -0.2649 |
| rs13070952  | T | -0.0441 |
| rs79704531  | T | 0.147   |
| rs7635516   | C | -0.0434 |
| rs1991442   | A | -0.0409 |
| rs6792768   | A | -0.0906 |
| rs74320765  | T | -0.0986 |
| rs76298748  | A | 0.1345  |
| rs2289211   | G | -0.0424 |
| rs6800220   | T | 0.0438  |
| rs6441795   | T | -0.0724 |
| rs9840932   | T | -0.041  |
| rs4856009   | T | 0.1484  |
| rs6808653   | A | 0.0686  |
| rs708570    | G | -0.048  |

|             |   |         |
|-------------|---|---------|
| rs977951    | T | 0.074   |
| rs11918047  | C | 0.0521  |
| rs1391861   | T | -0.115  |
| rs139098407 | A | -0.2646 |
| rs62266460  | T | 0.0714  |
| rs114788742 | G | 0.3405  |
| rs72917500  | A | 0.1364  |
| rs6773302   | T | -0.0615 |
| rs140263829 | T | 0.2105  |
| rs7616825   | T | -0.0731 |
| rs78813904  | A | 0.092   |
| rs112759394 | T | -0.1039 |
| rs2197397   | T | -0.1793 |
| rs17063054  | G | -0.2848 |
| rs779325    | C | -0.0522 |
| rs12186082  | G | 0.049   |
| rs72874557  | T | -0.1066 |
| rs7642056   | G | -0.0453 |
| rs78108845  | G | 0.2215  |
| rs141684426 | A | -0.2745 |
| rs9872086   | C | -0.0587 |
| rs17685252  | G | 0.0859  |
| rs149926740 | C | 0.4216  |
| rs4677120   | A | 0.0419  |
| rs2168423   | C | -0.1469 |
| rs114443133 | T | -0.3443 |
| rs112186056 | A | 0.1814  |
| rs11709621  | T | 0.0522  |
| rs6783293   | C | 0.0615  |
| rs6809621   | T | 0.05    |
| rs78861874  | T | -0.1132 |
| rs78358670  | T | -0.2339 |
| rs9811213   | T | 0.1091  |
| rs143827255 | A | 0.3777  |
| rs957501    | T | 0.0437  |
| rs6795094   | C | 0.045   |
| rs115082619 | A | -0.1326 |
| rs60637290  | C | 0.1381  |
| rs34811355  | A | 0.048   |
| rs7630043   | A | -0.0683 |
| rs77264317  | A | 0.0815  |
| rs9862750   | G | -0.1985 |
| rs542352    | A | -0.0443 |
| rs6807670   | G | 0.0428  |
| rs11716222  | A | -0.0403 |
| rs9832539   | G | 0.0417  |
| rs6583185   | T | 0.1606  |

|             |   |         |
|-------------|---|---------|
| rs357144    | A | -0.046  |
| rs4352402   | T | -0.1366 |
| rs115510291 | G | 0.1143  |
| rs16851531  | A | 0.1606  |
| rs9811896   | T | 0.0438  |
| rs79899520  | C | 0.2625  |
| rs17035778  | T | 0.0695  |
| rs2133887   | A | -0.0417 |
| rs76595911  | T | -0.1823 |
| rs6801784   | A | 0.1412  |
| rs2676370   | T | -0.0452 |
| rs73060441  | T | -0.067  |
| rs6785028   | T | 0.0492  |
| rs34706715  | G | -0.0945 |
| rs3772498   | G | -0.065  |
| rs58722376  | A | 0.0428  |
| rs57425298  | T | -0.0525 |
| rs79916071  | A | 0.0929  |
| rs7644388   | T | 0.0484  |
| rs150393797 | G | 0.3502  |
| rs73238880  | A | 0.1037  |
| rs10936847  | G | -0.0405 |
| rs73058397  | G | 0.2913  |
| rs75424974  | T | 0.0999  |
| rs77264078  | C | 0.1803  |
| rs13067021  | A | 0.0419  |
| rs9846205   | A | -0.0878 |
| rs2625288   | G | 0.049   |
| rs115100027 | C | 0.2134  |
| rs17695525  | A | 0.1985  |
| rs1463626   | A | -0.0748 |
| rs112791328 | G | -0.1582 |
| rs62270979  | A | 0.0878  |
| rs80168360  | G | 0.075   |
| rs114251672 | C | -0.1308 |
| rs7629779   | G | -0.0431 |
| rs1587586   | T | -0.2734 |
| rs9816693   | C | 0.0547  |
| rs144636523 | G | -0.126  |
| rs13097225  | A | -0.0572 |
| rs74638248  | A | -0.3145 |
| rs73026506  | C | -0.0491 |
| rs9838516   | C | 0.0707  |
| rs79745167  | T | 0.2407  |
| rs11919563  | C | -0.0487 |
| rs938416    | G | 0.0431  |
| rs9289953   | T | -0.0584 |

|             |   |         |
|-------------|---|---------|
| rs11706293  | A | -0.0462 |
| rs11916731  | A | -0.0704 |
| rs7651016   | T | -0.0539 |
| rs115963864 | A | 0.1532  |
| rs77587247  | T | 0.183   |
| rs142699346 | G | -0.3095 |
| rs6799673   | A | -0.0633 |
| rs62257177  | T | -0.072  |
| rs35860574  | G | 0.347   |
| rs4410406   | A | -0.0488 |
| rs355097    | T | -0.0683 |
| rs76928387  | T | -0.0661 |
| rs4577409   | G | -0.0427 |
| rs6762024   | G | 0.1696  |
| rs12486149  | C | 0.0409  |
| rs17030584  | G | 0.066   |
| rs17283708  | T | 0.0621  |
| rs145935047 | G | -0.2218 |
| rs34579902  | A | 0.2193  |
| rs17397601  | A | 0.1619  |
| rs9819166   | C | -0.046  |
| rs9862486   | G | 0.0618  |
| rs7650713   | C | 0.1196  |
| rs150628303 | G | 0.1432  |
| rs4306855   | A | -0.0498 |
| rs62269503  | C | -0.3635 |
| rs78404583  | C | 0.18    |
| rs5030003   | G | 0.0404  |
| rs71328481  | A | -0.0811 |
| rs11130916  | G | 0.0472  |
| rs1723545   | C | 0.0464  |
| rs76380315  | C | -0.178  |
| rs2863009   | G | -0.0412 |
| rs1506206   | C | 0.041   |
| rs150356445 | T | -0.2127 |
| rs16856329  | G | 0.0612  |
| rs73229917  | C | 0.0669  |
| rs78364302  | C | 0.2127  |
| rs78223054  | G | 0.2753  |
| rs77792500  | G | 0.2689  |
| rs7637862   | G | 0.0557  |
| rs2293198   | G | 0.0412  |
| rs6794758   | T | -0.0507 |
| rs79586264  | C | 0.2099  |
| rs55922157  | T | -0.0694 |
| rs111339344 | T | 0.1998  |
| rs4241360   | T | 0.0426  |

|             |   |         |
|-------------|---|---------|
| rs62322826  | A | -0.0657 |
| rs79885616  | T | 0.0812  |
| rs62265991  | C | -0.0487 |
| rs12493389  | G | 0.0431  |
| rs74945894  | A | 0.1296  |
| rs7635478   | A | 0.2162  |
| rs137869707 | C | -0.3145 |
| rs12107202  | T | -0.0546 |
| rs6789464   | G | 0.0562  |
| rs10513491  | T | 0.0471  |
| rs111283696 | T | 0.1827  |
| rs116026478 | C | 0.0993  |
| rs6805870   | T | 0.0736  |
| rs116662327 | C | -0.227  |
| rs187002    | T | -0.0478 |
| rs574769    | C | -0.0756 |
| rs13067663  | A | 0.0547  |
| rs76652641  | C | -0.1313 |
| rs10936575  | C | 0.0426  |
| rs1687863   | G | -0.0473 |
| rs17034099  | A | 0.1984  |
| rs9814439   | G | 0.1893  |
| rs116901012 | C | -0.1906 |
| rs10935448  | A | 0.1489  |
| rs2518796   | C | 0.0411  |
| rs62245560  | A | 0.2106  |
| rs9873418   | T | -0.0469 |
| rs75126986  | G | -0.1514 |
| rs56353153  | C | -0.1194 |
| rs6782591   | G | 0.0484  |
| rs4677722   | C | 0.0408  |
| rs78091835  | T | -0.0751 |
| rs12491742  | G | 0.1273  |
| rs140422101 | A | 0.3778  |
| rs62259941  | A | 0.1403  |
| rs11918995  | T | 0.1508  |
| rs59461214  | G | 0.0406  |
| rs114134662 | C | 0.1163  |
| rs3887373   | G | -0.043  |
| rs114448982 | T | 0.3899  |
| rs6765356   | C | -0.3453 |
| rs3773980   | A | 0.0556  |
| rs2633781   | A | 0.0404  |
| rs115608264 | T | -0.132  |
| rs17636599  | T | 0.1784  |
| rs59052470  | T | 0.051   |
| rs9868401   | T | 0.0904  |

|             |   |         |
|-------------|---|---------|
| rs146156291 | A | 0.3308  |
| rs80028515  | T | -0.1272 |
| rs79103482  | A | 0.1395  |
| rs7638015   | T | -0.0609 |
| rs73824424  | T | 0.1018  |
| rs114302311 | C | 0.1179  |
| rs13316251  | T | -0.1186 |
| rs4258927   | G | -0.0721 |
| rs301963    | C | 0.0438  |
| rs836344    | T | 0.0669  |
| rs159148    | G | 0.0532  |
| rs9878950   | C | -0.127  |
| rs4353770   | A | -0.0429 |
| rs61315835  | A | -0.0416 |
| rs144838207 | T | 0.1642  |
| rs76860349  | T | 0.1518  |
| rs71304474  | C | -0.0791 |
| rs4494863   | G | 0.0778  |
| rs62292379  | C | 0.0737  |
| rs73146729  | C | -0.2582 |
| rs56205912  | C | 0.3323  |
| rs2359207   | G | -0.0443 |
| rs11922053  | G | -0.1939 |
| rs725898    | C | 0.0772  |
| rs7629234   | A | 0.0747  |
| rs78547391  | A | 0.1339  |
| rs77833543  | G | -0.1949 |
| rs548933    | C | -0.045  |
| rs13096221  | T | -0.0506 |
| rs6792022   | G | 0.0789  |
| rs10154891  | A | -0.2148 |
| rs6801434   | A | 0.0446  |
| rs16864381  | C | 0.044   |
| rs62234892  | G | 0.0863  |
| rs9845763   | A | 0.0512  |
| rs2090713   | G | 0.0818  |
| rs17710899  | T | -0.1329 |
| rs3773308   | A | 0.0497  |
| rs9824029   | T | 0.0475  |
| rs9879393   | T | -0.0424 |
| rs80220499  | G | 0.0924  |
| rs6789827   | C | -0.0521 |
| rs62267915  | T | -0.0765 |
| rs74922912  | C | 0.0834  |
| rs62236292  | T | 0.1865  |
| rs2013773   | T | 0.041   |
| rs76963961  | A | -0.1722 |

|             |   |         |
|-------------|---|---------|
| rs28685745  | C | 0.09    |
| rs78513233  | A | -0.0748 |
| rs7634942   | C | -0.0407 |
| rs73154239  | T | 0.0794  |
| rs67852905  | G | -0.0411 |
| rs13080562  | A | 0.0454  |
| rs76918659  | A | 0.1882  |
| rs12495353  | G | 0.0943  |
| rs114658183 | A | 0.2815  |
| rs9869689   | T | 0.0652  |
| rs2977561   | C | 0.0472  |
| rs13094421  | G | 0.0668  |
| rs12488443  | A | 0.1441  |
| rs4308265   | A | -0.0953 |
| rs342040    | G | 0.0618  |
| rs13091846  | A | -0.1807 |
| rs1946424   | T | -0.0393 |
| rs7613077   | T | 0.0893  |
| rs151162094 | G | 0.2785  |
| rs1403066   | C | 0.0586  |
| rs7649422   | C | 0.0868  |
| rs4677754   | G | 0.0594  |
| rs7615378   | G | -0.0661 |
| rs324035    | A | -0.0508 |
| rs115296518 | A | 0.0768  |
| rs56659503  | G | 0.1515  |
| rs79280105  | G | -0.2321 |
| rs2700452   | C | -0.0483 |
| rs79172782  | G | -0.0434 |
| rs115212159 | C | 0.1347  |
| rs73156958  | T | -0.1787 |
| rs17044147  | C | -0.2413 |
| rs11717408  | G | -0.0848 |
| rs11715118  | C | 0.0546  |
| rs7355875   | T | 0.0445  |
| rs35537946  | A | -0.0488 |
| rs56284874  | A | -0.0514 |
| rs72867150  | A | 0.1241  |
| rs6768275   | A | 0.0977  |
| rs116339150 | T | 0.2436  |
| rs80043755  | C | 0.2756  |
| rs2197912   | T | -0.041  |
| rs2886524   | A | -0.0393 |
| rs71309848  | G | 0.064   |
| rs11714154  | T | -0.1806 |
| rs79793423  | C | 0.1543  |
| rs12634802  | C | 0.0481  |

|             |   |         |
|-------------|---|---------|
| rs59704791  | A | -0.0429 |
| rs147831570 | T | 0.2934  |
| rs114805750 | T | 0.0746  |
| rs826378    | T | -0.0409 |
| rs73185617  | A | -0.0927 |
| rs17043972  | T | 0.0604  |
| rs115860648 | A | -0.2162 |
| rs4547730   | A | -0.1223 |
| rs73164929  | T | -0.0754 |
| rs144424957 | T | -0.1313 |
| rs9839849   | C | -0.041  |
| rs6445368   | A | -0.0534 |
| rs2075360   | T | 0.0452  |
| rs10935092  | A | 0.2461  |
| rs116617769 | A | -0.153  |
| rs4677244   | G | 0.0388  |
| rs116260182 | C | 0.2886  |
| rs7617462   | G | -0.0527 |
| rs6770457   | A | 0.2046  |
| rs2648522   | G | 0.0682  |
| rs77502793  | A | 0.1705  |
| rs6789983   | G | 0.0568  |
| rs62292470  | A | -0.0537 |
| rs60170583  | C | 0.1498  |
| rs56841747  | T | -0.0451 |
| rs111593175 | A | 0.2455  |
| rs1795158   | A | 0.0543  |
| rs9829507   | G | -0.0419 |
| rs115392774 | A | 0.2144  |
| rs34840169  | A | 0.0757  |
| rs149372563 | G | 0.2752  |
| rs17008124  | A | -0.0886 |
| rs9845566   | C | 0.2586  |
| rs1389794   | C | 0.0516  |
| rs80300536  | A | -0.082  |
| rs2373255   | A | 0.0407  |
| rs78989496  | G | -0.076  |
| rs75818596  | G | -0.0787 |
| rs9829944   | C | -0.0435 |
| rs4053780   | A | 0.0409  |
| rs62262296  | A | -0.1145 |
| rs115815643 | G | 0.1508  |
| rs74936769  | T | -0.2155 |
| rs67883066  | T | 0.2344  |
| rs9814713   | G | -0.1922 |
| rs73213742  | T | -0.0956 |
| rs13072136  | G | -0.0581 |



|             |   |         |
|-------------|---|---------|
| rs11718935  | T | 0.0579  |
| rs77909997  | G | -0.1896 |
| rs60429130  | G | 0.0854  |
| rs2100959   | G | -0.0519 |
| rs67822626  | C | -0.0607 |
| rs138686984 | A | -0.2218 |
| rs11707721  | A | 0.0619  |
| rs1132200   | T | 0.0528  |
| rs79141242  | C | -0.1199 |
| rs17353162  | T | 0.0608  |
| rs9852128   | G | 0.0465  |
| rs76681827  | G | 0.1801  |
| rs2048284   | G | 0.0448  |
| rs7640010   | T | 0.3142  |
| rs115562274 | A | -0.4047 |
| rs618115    | T | 0.0758  |
| rs6809777   | T | -0.044  |
| rs1992991   | T | -0.0709 |
| rs79737535  | A | 0.1135  |
| rs34710626  | A | -0.0631 |
| rs1554564   | T | -0.0394 |
| rs2880208   | G | -0.0501 |
| rs2943306   | C | -0.0492 |
| rs78256289  | C | -0.1851 |
| rs138645055 | C | 0.2367  |
| rs146705060 | T | -0.1983 |
| rs139789136 | A | -0.2276 |
| rs73118351  | T | 0.0713  |
| rs79747569  | G | 0.081   |
| rs567713    | T | -0.0698 |
| rs9863981   | G | -0.0431 |
| rs77655717  | C | -0.1526 |
| rs28645947  | A | 0.0806  |
| rs115889321 | C | 0.1667  |
| rs79294353  | C | -0.0881 |
| rs17550007  | T | -0.0403 |
| rs9878539   | A | 0.0621  |
| rs12495625  | G | 0.0471  |
| rs1288688   | C | -0.0514 |
| rs114804117 | T | 0.2198  |
| rs73890509  | A | -0.0625 |
| rs71319117  | T | 0.1766  |
| rs113372365 | T | -0.1669 |
| rs73154558  | G | -0.1706 |
| rs7617742   | A | -0.0542 |
| rs116647953 | T | 0.0848  |
| rs80257350  | T | -0.0707 |

|             |   |         |
|-------------|---|---------|
| rs75374576  | T | -0.069  |
| rs17784095  | C | -0.0873 |
| rs9850293   | A | -0.0674 |
| rs58805118  | G | 0.0612  |
| rs62286275  | T | -0.0593 |
| rs75624799  | A | -0.0432 |
| rs34713498  | A | -0.1433 |
| rs111897872 | T | 0.1565  |
| rs73203519  | A | -0.1698 |
| rs76771597  | T | 0.1377  |
| rs6795172   | A | 0.0391  |
| rs6549939   | T | 0.0555  |
| rs7643746   | C | -0.0397 |
| rs16857644  | G | -0.0615 |
| rs34978319  | T | 0.0578  |
| rs12489389  | G | 0.0912  |
| rs1603981   | A | -0.0496 |
| rs9876329   | T | 0.0479  |
| rs820439    | C | -0.2053 |
| rs4685749   | C | 0.0899  |
| rs9814450   | A | 0.1434  |
| rs9832111   | A | 0.0406  |
| rs73209818  | T | 0.0885  |
| rs12494852  | A | 0.0805  |
| rs77296047  | A | -0.1146 |
| rs12637047  | T | -0.0393 |
| rs7610923   | G | -0.0507 |
| rs59335168  | A | 0.0524  |
| rs76808456  | C | -0.111  |
| rs62409181  | T | -0.0644 |
| rs28832316  | C | -0.0933 |
| rs115056521 | C | -0.1012 |
| rs578077    | C | -0.0515 |
| rs74788215  | T | -0.102  |
| rs79554866  | T | -0.1847 |
| rs78670157  | C | -0.133  |
| rs75653059  | T | 0.1471  |
| rs57079699  | A | -0.069  |
| rs9859223   | T | -0.0923 |
| rs74653960  | G | -0.1981 |
| rs10510936  | C | -0.0682 |
| rs9842594   | A | 0.0593  |
| rs34659356  | G | 0.1046  |
| rs139451424 | G | -0.2742 |
| rs73169255  | C | 0.0579  |
| rs35341774  | C | -0.0726 |
| rs114247943 | T | 0.173   |

|             |   |         |
|-------------|---|---------|
| rs6443127   | G | 0.0412  |
| rs9835911   | T | -0.0439 |
| rs17205124  | T | -0.2747 |
| rs9851413   | C | -0.0454 |
| rs79485915  | G | 0.0571  |
| rs7629687   | A | -0.0384 |
| rs72622932  | G | 0.2221  |
| rs66500746  | A | -0.088  |
| rs17191222  | G | 0.136   |
| rs112636967 | C | -0.2448 |
| rs11928790  | A | -0.0648 |
| rs9866694   | T | -0.1346 |
| rs147052249 | A | -0.3482 |
| rs4955893   | G | 0.0762  |
| rs9834560   | A | -0.0386 |
| rs157285    | A | -0.0475 |
| rs75649340  | A | -0.1366 |
| rs77968928  | A | -0.0958 |
| rs5025389   | C | 0.0408  |
| rs77749519  | A | 0.1561  |
| rs76873573  | T | 0.1145  |
| rs358076    | G | 0.0439  |
| rs34973765  | T | -0.186  |
| rs112655660 | A | 0.159   |
| rs148501630 | C | -0.216  |
| rs10222673  | T | 0.0388  |
| rs9985347   | A | -0.1744 |
| rs12489083  | C | 0.0448  |
| rs75854629  | C | -0.187  |
| rs147325616 | A | -0.2814 |
| rs11129948  | A | 0.0427  |
| rs146524231 | A | 0.1897  |
| rs2400300   | A | -0.0473 |
| rs9843443   | T | 0.0468  |
| rs74618645  | A | -0.2329 |
| rs114511906 | T | -0.2446 |
| rs2675185   | T | 0.0433  |
| rs73072664  | A | -0.2045 |
| rs3845896   | A | 0.0439  |
| rs73872446  | C | -0.1262 |
| rs5028132   | G | 0.0553  |
| rs35588117  | G | -0.1052 |
| rs62247530  | A | 0.3102  |
| rs141466167 | A | 0.1866  |
| rs11719667  | A | 0.0403  |
| rs358497    | A | 0.0398  |
| rs80102840  | A | -0.1609 |

|             |   |         |
|-------------|---|---------|
| rs148485910 | C | -0.1425 |
| rs73101398  | A | 0.0999  |
| rs17662573  | C | -0.043  |
| rs9864562   | C | 0.0704  |
| rs2712342   | G | -0.0856 |
| rs9842908   | C | -0.0566 |
| rs6781534   | T | 0.1623  |
| rs149770531 | A | 0.259   |
| rs9836876   | A | 0.0657  |
| rs62245827  | T | 0.0663  |
| rs145076656 | C | -0.2554 |
| rs2728973   | T | -0.0427 |
| rs56291289  | A | -0.0603 |
| rs2310165   | A | 0.135   |
| rs9815453   | G | -0.0409 |
| rs143288647 | A | -0.1749 |
| rs7625403   | C | 0.0991  |
| rs62292800  | A | -0.0917 |
| rs6785222   | A | -0.0373 |
| rs56175736  | C | 0.1201  |
| rs9822449   | A | 0.0635  |
| rs7652259   | T | 0.1787  |
| rs75652043  | G | 0.0581  |
| rs148104705 | A | -0.1063 |
| rs9830198   | C | 0.077   |
| rs34667500  | A | -0.0598 |
| rs9822789   | T | -0.0521 |
| rs498494    | G | -0.0702 |
| rs55940238  | T | 0.2001  |
| rs76463200  | T | -0.1909 |
| rs113817396 | C | 0.2494  |
| rs67608474  | G | 0.045   |
| rs12715662  | G | 0.04    |
| rs6794881   | T | -0.1362 |
| rs72877337  | G | -0.0585 |
| rs7641285   | C | 0.0436  |
| rs6599125   | C | 0.3172  |
| rs76329456  | T | 0.1695  |
| rs74787358  | T | 0.2025  |
| rs1454152   | A | 0.0438  |
| rs17618955  | C | 0.2109  |
| rs11707555  | T | 0.0725  |
| rs115124101 | G | 0.1947  |
| rs17604578  | G | -0.1021 |
| rs7632287   | A | 0.0436  |
| rs74727107  | A | 0.1972  |
| rs143617551 | A | 0.3269  |

|             |   |         |
|-------------|---|---------|
| rs13067161  | A | 0.1109  |
| rs113420566 | G | 0.1394  |
| rs59650272  | T | 0.0925  |
| rs586820    | G | 0.0486  |
| rs11718549  | G | 0.0507  |
| rs113890152 | G | -0.1539 |
| rs3772290   | A | 0.0372  |
| rs62268867  | T | 0.0671  |
| rs11923130  | G | -0.0509 |
| rs17601486  | C | 0.0748  |
| rs55894551  | A | -0.0617 |
| rs9818025   | G | 0.0444  |
| rs73867384  | C | 0.0516  |
| rs155892    | A | -0.1041 |
| rs6772253   | A | -0.103  |
| rs931504    | G | 0.0973  |
| rs34709234  | A | -0.0837 |
| rs9784384   | T | 0.0449  |
| rs3774538   | T | 0.3101  |
| rs1528906   | G | -0.0588 |
| rs78125088  | A | -0.1278 |
| rs61173309  | T | 0.2802  |
| rs1077953   | T | -0.0802 |
| rs62256398  | C | 0.2006  |
| rs61790791  | C | 0.0981  |
| rs73025396  | A | 0.12    |
| rs4855927   | T | 0.0385  |
| rs16861598  | T | -0.1811 |
| rs62244508  | C | -0.1449 |
| rs56750460  | T | -0.0629 |
| rs6803914   | G | 0.0398  |
| rs34631799  | C | 0.2628  |
| rs55717817  | T | -0.181  |
| rs142246680 | A | -0.1498 |
| rs7638558   | C | 0.1314  |
| rs17766647  | G | 0.0471  |
| rs13066093  | T | 0.0504  |
| rs79440877  | A | 0.1177  |
| rs13080804  | T | -0.2312 |
| rs1962071   | C | -0.0412 |
| rs9848466   | A | -0.055  |
| rs146231021 | A | 0.254   |
| rs12491740  | A | -0.0882 |
| rs9829900   | C | -0.0491 |
| rs2872006   | C | -0.0384 |
| rs2323692   | A | 0.2094  |
| rs139142317 | A | 0.1504  |

|             |   |         |
|-------------|---|---------|
| rs6802408   | A | 0.0609  |
| rs73155980  | C | 0.2212  |
| rs79038354  | A | 0.1282  |
| rs1604500   | T | 0.0937  |
| rs6766556   | C | -0.09   |
| rs9809932   | A | 0.0831  |
| rs74611968  | G | -0.1713 |
| rs73037288  | A | -0.0922 |
| rs657079    | T | -0.0437 |
| rs6778069   | G | 0.1006  |
| rs6795270   | A | -0.1478 |
| rs77544771  | A | 0.0709  |
| rs114466680 | C | -0.1484 |
| rs149918759 | G | 0.1887  |
| rs1735460   | T | -0.1676 |
| rs145598922 | C | 0.2389  |
| rs62278033  | G | 0.0463  |
| rs4450782   | C | 0.0551  |
| rs80134103  | A | 0.1941  |
| rs1499813   | C | 0.0475  |
| rs1501875   | C | -0.0518 |
| rs17235719  | G | -0.0979 |
| rs6551135   | T | -0.0471 |
| rs35357207  | A | 0.1661  |
| rs74656315  | T | -0.2301 |
| rs12695430  | G | 0.0483  |
| rs148642134 | T | 0.2033  |
| rs139718640 | T | 0.2593  |
| rs73865891  | G | 0.0816  |
| rs11706409  | T | -0.0772 |
| rs13060898  | G | 0.0625  |
| rs6442020   | G | -0.0426 |
| rs816151    | C | 0.0601  |
| rs62265199  | A | 0.1766  |
| rs9815188   | C | 0.1245  |
| rs55640705  | C | 0.049   |
| rs139380619 | T | 0.3453  |
| rs4683698   | G | 0.042   |
| rs9861970   | G | -0.0415 |
| rs114845633 | T | 0.3786  |
| rs138064320 | T | -0.2432 |
| rs75101150  | C | -0.1647 |
| rs28567888  | T | 0.0428  |
| rs6767057   | A | 0.0726  |
| rs1024217   | A | 0.0465  |
| rs146064643 | C | -0.0816 |
| rs1402232   | G | 0.124   |

|             |   |         |
|-------------|---|---------|
| rs75331333  | G | -0.0744 |
| rs6799880   | C | 0.0704  |
| rs56703338  | C | 0.0862  |
| rs77250196  | G | 0.096   |
| rs7643666   | G | 0.1592  |
| rs79060776  | T | -0.3308 |
| rs16859909  | C | 0.1666  |
| rs6550981   | G | 0.0465  |
| rs116776770 | G | 0.1799  |
| rs13066837  | T | 0.043   |
| rs6445339   | A | -0.0469 |
| rs6549290   | G | 0.0619  |
| rs140183460 | T | -0.1259 |
| rs13093384  | A | -0.0459 |
| rs150750498 | G | 0.2352  |
| rs73043199  | C | 0.0851  |
| rs116182625 | T | -0.28   |
| rs9810735   | T | 0.2084  |
| rs7615155   | A | -0.0363 |
| rs62243223  | A | 0.0467  |
| rs11713435  | G | 0.0458  |
| rs80189613  | C | 0.1831  |
| rs60854967  | G | 0.3094  |
| rs6791866   | C | -0.0434 |
| rs4688442   | T | 0.1534  |
| rs9866572   | G | -0.0384 |
| rs2103079   | C | -0.0482 |
| rs4365631   | T | -0.0391 |
| rs77906443  | C | 0.1879  |
| rs1523284   | T | 0.0379  |
| rs73111541  | A | 0.051   |
| rs145034325 | T | -0.2527 |
| rs9844464   | T | 0.1139  |
| rs712869    | A | 0.0462  |
| rs112690011 | A | -0.1229 |
| rs116685902 | A | -0.2114 |
| rs12107927  | A | 0.1098  |
| rs71319268  | C | 0.065   |
| rs73203913  | C | 0.2097  |
| rs7650010   | T | 0.0607  |
| rs17029405  | A | -0.0635 |
| rs114447288 | A | 0.1642  |
| rs12487825  | A | -0.04   |
| rs16822875  | G | 0.1172  |
| rs76763654  | G | 0.0775  |
| rs4680212   | C | -0.0415 |
| rs76647397  | C | 0.0676  |

|             |   |         |
|-------------|---|---------|
| rs113894996 | A | -0.2034 |
| rs144692709 | G | 0.1953  |
| rs116021394 | T | -0.1234 |
| rs7619327   | A | -0.0633 |
| rs17755207  | A | -0.0509 |
| rs10936537  | G | 0.0511  |
| rs79914706  | A | 0.1212  |
| rs879634    | A | -0.04   |
| rs1530653   | T | 0.1157  |
| rs4677794   | T | 0.0409  |
| rs34764164  | T | -0.219  |
| rs114184526 | T | -0.1238 |
| rs2201918   | C | 0.0399  |
| rs35158456  | T | 0.0612  |
| rs11926147  | T | -0.0421 |
| rs9861303   | T | -0.0367 |
| rs77957173  | C | 0.1213  |
| rs78666139  | G | -0.1874 |
| rs112725464 | C | -0.3326 |
| rs79437217  | C | 0.17    |
| rs79483157  | A | 0.1718  |
| rs9818544   | T | -0.1048 |
| rs3765063   | C | 0.0469  |
| rs80272668  | C | 0.2177  |
| rs906379    | T | 0.1092  |
| rs58052436  | C | 0.0527  |
| rs34588634  | C | -0.2144 |
| rs143649960 | C | -0.1296 |
| rs3805015   | G | 0.0371  |
| rs11720428  | T | 0.1014  |
| rs28489326  | C | 0.0511  |
| rs1992998   | A | 0.0401  |
| rs114731273 | G | 0.1404  |
| rs11714254  | G | -0.047  |
| rs113979955 | T | 0.0761  |
| rs1356537   | G | -0.0442 |
| rs79339645  | A | 0.1639  |
| rs2933303   | T | 0.0519  |
| rs4685201   | G | -0.0376 |
| rs6789143   | G | -0.0422 |
| rs77088216  | G | -0.1952 |
| rs17013710  | T | 0.215   |
| rs17384987  | C | -0.1508 |
| rs9883287   | C | -0.3242 |
| rs2083463   | A | 0.0701  |
| rs61732466  | A | 0.208   |
| rs34045576  | C | 0.0382  |



|             |   |         |
|-------------|---|---------|
| rs1004687   | T | 0.0471  |
| rs9846671   | A | 0.0976  |
| rs9883929   | C | 0.0939  |
| rs62249306  | A | -0.0377 |
| rs62276911  | T | -0.0825 |
| rs115928528 | T | 0.1347  |
| rs17478516  | T | -0.2862 |
| rs35609540  | C | 0.0992  |
| rs62231854  | A | 0.0474  |
| rs9831544   | A | 0.0407  |
| rs874130    | G | 0.0441  |
| rs155863    | G | 0.0381  |
| rs16847145  | T | 0.0594  |
| rs4522794   | A | 0.1668  |
| rs2365740   | C | -0.0542 |
| rs116834668 | A | 0.1928  |
| rs73207211  | G | -0.0642 |
| rs146994962 | G | -0.201  |
| rs115777315 | T | 0.3228  |
| rs6802666   | A | -0.0665 |
| rs6440789   | T | -0.038  |
| rs9878206   | C | 0.0453  |
| rs17694803  | T | -0.2509 |
| rs1710891   | T | 0.0381  |
| rs6776479   | C | 0.0865  |
| rs12631017  | A | 0.0533  |
| rs76887750  | A | -0.081  |
| rs62253755  | G | -0.0429 |
| rs1451763   | A | -0.0446 |
| rs3755733   | G | -0.069  |
| rs73004874  | T | -0.1471 |
| rs4549242   | T | 0.0364  |
| rs1498723   | A | 0.3275  |
| rs2254913   | A | 0.037   |
| rs116790689 | G | -0.245  |
| rs2290538   | G | -0.0407 |
| rs9815093   | A | -0.0429 |
| rs12631264  | T | -0.0703 |
| rs4487199   | A | 0.0421  |
| rs4855962   | C | 0.0441  |
| rs2886124   | G | 0.056   |
| rs6792816   | C | 0.062   |
| rs28581710  | A | 0.0366  |
| rs13090597  | T | -0.0711 |
| rs115007415 | G | -0.314  |
| rs11918186  | C | 0.0694  |
| rs16830076  | T | 0.0646  |

|             |   |         |
|-------------|---|---------|
| rs6438208   | A | 0.0491  |
| rs147363142 | G | -0.1683 |
| rs17033257  | T | 0.0775  |
| rs146523205 | G | 0.2548  |
| rs9845885   | C | -0.2437 |
| rs139899183 | G | 0.1733  |
| rs66637842  | G | -0.0679 |
| rs114643280 | G | -0.0843 |
| rs114855772 | T | -0.1788 |
| rs75439200  | C | -0.1888 |
| rs62268898  | G | 0.0726  |
| rs1512524   | G | 0.0638  |
| rs2378246   | A | 0.089   |
| rs7744      | G | -0.0503 |
| rs113095953 | G | -0.1475 |
| rs267131    | C | 0.0471  |
| rs1357270   | A | 0.1132  |
| rs17033267  | C | 0.1052  |
| rs2606770   | G | 0.0452  |
| rs13434050  | A | -0.1567 |
| rs34859143  | A | -0.0696 |
| rs144416066 | G | 0.1844  |
| rs74980790  | A | 0.1043  |
| rs73219637  | C | -0.0781 |
| rs78720113  | A | 0.1074  |
| rs7635608   | T | 0.0707  |
| rs78702932  | C | 0.1877  |
| rs116779318 | G | 0.2344  |
| rs144954155 | T | 0.2933  |
| rs9841720   | T | 0.241   |
| rs34760424  | T | -0.0983 |
| rs143243012 | A | 0.1631  |
| rs34242890  | A | 0.2204  |
| rs6793025   | A | -0.0615 |
| rs12635839  | T | -0.1072 |
| rs6548418   | T | 0.0462  |
| rs77543338  | T | -0.2024 |
| rs6769801   | T | 0.0415  |
| rs11525734  | C | 0.1564  |
| rs4894929   | T | 0.1628  |
| rs12639486  | G | -0.0545 |
| rs12233587  | G | -0.0454 |
| rs6419799   | G | 0.0603  |
| rs78291380  | G | 0.1568  |
| rs149803860 | A | 0.1973  |
| rs78257733  | T | 0.1813  |
| rs6787951   | A | 0.0446  |

|             |   |         |
|-------------|---|---------|
| rs1983020   | G | 0.0611  |
| rs4677867   | G | 0.0414  |
| rs9821457   | A | -0.0503 |
| rs13075814  | A | -0.1848 |
| rs6550685   | T | 0.0644  |
| rs140127629 | G | -0.2631 |
| rs140906137 | C | -0.1778 |
| rs59784454  | A | 0.2163  |
| rs114061918 | A | -0.1632 |
| rs113893466 | C | 0.157   |
| rs79742203  | A | -0.2048 |
| rs6785855   | A | 0.1753  |
| rs60863173  | A | 0.0975  |
| rs59684271  | A | 0.2567  |
| rs79553964  | T | 0.0741  |
| rs13321908  | G | -0.0375 |
| rs148477662 | C | -0.1012 |
| rs74376630  | C | 0.1455  |
| rs115745844 | T | -0.2102 |
| rs16831670  | T | 0.0444  |
| rs73201921  | T | 0.0749  |
| rs6796108   | G | 0.0424  |
| rs111478609 | G | 0.1092  |
| rs112150019 | G | -0.1362 |
| rs115472261 | T | -0.461  |
| rs146731186 | C | -0.2276 |
| rs78054005  | A | -0.0892 |
| rs76097536  | A | 0.1575  |
| rs73232537  | G | -0.2196 |
| rs2620534   | A | -0.037  |
| rs146764812 | T | 0.3386  |
| rs115554649 | C | 0.2175  |
| rs73044526  | T | 0.0434  |
| rs373953    | C | 0.0603  |
| rs6799240   | A | -0.0572 |
| rs1819017   | G | 0.0487  |
| rs647882    | T | -0.0454 |
| rs9824450   | G | -0.0447 |
| rs73012878  | G | 0.06    |
| rs6786723   | T | 0.0392  |
| rs56245184  | T | -0.0496 |
| rs11720531  | C | 0.127   |
| rs75475686  | C | -0.1582 |
| rs148789338 | T | 0.2038  |
| rs140691254 | A | -0.1808 |
| rs60464413  | G | 0.12    |
| rs17470684  | T | 0.069   |

|             |   |         |
|-------------|---|---------|
| rs146190944 | C | 0.3208  |
| rs62280718  | T | 0.0451  |
| rs78577626  | C | 0.133   |
| rs415424    | T | -0.2561 |
| rs3846012   | A | -0.0453 |
| rs7634525   | C | 0.0722  |
| rs4955876   | T | 0.0573  |
| rs1516399   | A | 0.0446  |
| rs72945445  | G | 0.1898  |
| rs2875494   | C | -0.0446 |
| rs62277699  | G | 0.0933  |
| rs73046645  | T | -0.1572 |
| rs9810857   | A | 0.0358  |
| rs75479668  | T | 0.0454  |
| rs1394260   | G | -0.0366 |
| rs9817094   | G | -0.159  |
| rs116245641 | T | 0.2189  |
| rs10511050  | G | 0.1181  |
| rs114584454 | G | -0.0471 |
| rs116060432 | A | 0.1545  |
| rs79508309  | T | 0.1922  |
| rs17072704  | T | 0.1193  |
| rs66714223  | T | 0.0543  |
| rs9812902   | C | 0.0355  |
| rs35234406  | A | 0.0668  |
| rs954658    | T | 0.0481  |
| rs142018345 | A | -0.1585 |
| rs11923362  | G | 0.0792  |
| rs9844098   | C | 0.0457  |
| rs139815377 | T | 0.1847  |
| rs2082981   | C | -0.0361 |
| rs71326471  | C | -0.0966 |
| rs11711018  | G | 0.0576  |
| rs979970    | T | 0.0956  |
| rs13068331  | G | -0.0402 |
| rs79449076  | T | 0.08    |
| rs13083456  | C | -0.0566 |
| rs1356292   | C | -0.0467 |
| rs79984615  | G | 0.1252  |
| rs787191    | C | 0.0429  |
| rs4443219   | T | -0.0398 |
| rs146013590 | C | -0.1635 |
| rs114398824 | A | 0.1461  |
| rs1714407   | G | 0.0993  |
| rs28641034  | T | -0.0368 |
| rs115583860 | C | -0.1496 |
| rs62235050  | T | -0.0467 |

|             |   |         |
|-------------|---|---------|
| rs1485385   | G | 0.0385  |
| rs10084764  | A | 0.0618  |
| rs7643334   | C | -0.0874 |
| rs140318636 | G | -0.2172 |
| rs879465    | G | 0.0613  |
| rs76889083  | T | -0.1928 |
| rs74801337  | A | -0.1069 |
| rs75728908  | T | 0.0886  |
| rs138694134 | G | -0.0631 |
| rs143825760 | T | 0.3306  |
| rs2082852   | A | -0.0399 |
| rs72886019  | T | -0.0558 |
| rs1701687   | T | 0.0364  |
| rs76805530  | A | 0.1014  |
| rs62277129  | C | 0.0592  |
| rs112013007 | A | 0.1886  |
| rs7634782   | T | 0.0416  |
| rs35603558  | C | -0.0574 |
| rs664012    | A | 0.2285  |
| rs9809781   | C | -0.0582 |
| rs2634130   | C | 0.0439  |
| rs76167251  | G | -0.1276 |
| rs9818151   | C | 0.0444  |
| rs2316896   | C | 0.0862  |
| rs3773376   | C | 0.0513  |
| rs9853662   | G | 0.0919  |
| rs61795612  | T | 0.0692  |
| rs73231215  | T | -0.0914 |
| rs77482810  | G | 0.209   |
| rs6800609   | C | -0.0952 |
| rs9814623   | G | 0.0384  |
| rs78589773  | A | 0.1405  |
| rs71323655  | T | 0.1065  |
| rs55929306  | C | -0.0422 |
| rs139625365 | T | 0.1522  |
| rs4505744   | A | -0.0569 |
| rs13092015  | G | 0.1429  |
| rs7612558   | T | 0.0462  |
| rs9882906   | T | 0.0402  |
| rs28595523  | T | -0.0459 |
| rs75858051  | T | -0.2393 |
| rs6583222   | G | 0.06    |
| rs114666388 | C | -0.2331 |
| rs114294685 | T | 0.1374  |
| rs12487997  | T | 0.0354  |
| rs72624405  | G | 0.071   |
| rs9826420   | C | 0.1344  |

|             |   |         |
|-------------|---|---------|
| rs2942792   | G | 0.0439  |
| rs112958152 | T | -0.1687 |
| rs150345548 | G | 0.2153  |
| rs1278110   | T | 0.0382  |
| rs138671100 | C | 0.2535  |
| rs6785182   | G | -0.0423 |
| rs62270219  | C | 0.1201  |
| rs13063508  | T | -0.0574 |
| rs28544124  | A | 0.0538  |
| rs779736    | G | -0.1087 |
| rs141152183 | A | 0.1676  |
| rs17045009  | A | 0.1889  |
| rs7647526   | G | -0.0961 |
| rs78193513  | A | 0.1782  |
| rs111544941 | T | -0.2498 |
| rs1374798   | G | -0.0467 |
| rs115687608 | C | 0.3014  |
| rs11707810  | T | -0.0535 |
| rs79978198  | T | -0.1384 |
| rs9819997   | G | 0.0376  |
| rs77583130  | A | 0.0715  |
| rs9858427   | T | -0.0662 |
| rs11709428  | G | 0.0874  |
| rs5028175   | A | -0.0432 |
| rs9814200   | T | 0.0453  |
| rs55991801  | G | 0.1335  |
| rs17313732  | A | 0.0403  |
| rs77425010  | T | 0.3272  |
| rs9869958   | T | 0.1     |
| rs1478311   | G | -0.0523 |
| rs1803446   | C | 0.1431  |
| rs11921763  | C | 0.0573  |
| rs1488410   | A | 0.0555  |
| rs75934124  | C | 0.0945  |
| rs111754034 | T | -0.0949 |
| rs4234594   | T | -0.0466 |
| rs279579    | T | -0.0438 |
| rs17727418  | T | -0.2398 |
| rs2863063   | A | 0.054   |
| rs77028530  | A | -0.1202 |
| rs75442160  | A | -0.0822 |
| rs2116295   | T | -0.0389 |
| rs113969369 | A | -0.1148 |
| rs517107    | C | 0.0509  |
| rs55682715  | A | 0.1217  |
| rs73156502  | T | 0.153   |
| rs116786613 | C | 0.1221  |

|             |   |         |
|-------------|---|---------|
| rs1290661   | T | -0.0489 |
| rs78104902  | A | -0.29   |
| rs6809535   | A | -0.0387 |
| rs78836365  | G | -0.1913 |
| rs62280821  | G | 0.0594  |
| rs112930676 | G | -0.1323 |
| rs9289881   | G | 0.04    |
| rs13073584  | T | 0.2012  |
| rs113042345 | G | -0.1518 |
| rs11716166  | T | -0.0368 |
| rs9860062   | C | 0.0533  |
| rs115240066 | A | -0.1688 |
| rs148087178 | G | 0.2472  |
| rs59905479  | A | 0.0516  |
| rs2862637   | G | 0.0434  |
| rs35913820  | T | -0.0659 |
| rs142210440 | G | 0.1642  |
| rs9860734   | G | -0.0531 |
| rs138496752 | C | 0.2087  |
| rs17399163  | G | -0.234  |
| rs6599127   | T | 0.0429  |
| rs600011    | C | 0.0391  |
| rs35816397  | A | 0.1313  |
| rs115890749 | T | 0.1556  |
| rs28559637  | T | 0.0758  |
| rs116108084 | A | 0.1389  |
| rs62270163  | A | 0.238   |
| rs73151970  | G | 0.0809  |
| rs114355147 | T | 0.199   |
| rs11920066  | C | -0.0723 |
| rs6795861   | G | 0.0376  |
| rs78720589  | C | 0.1403  |
| rs12487188  | G | 0.0419  |
| rs6763121   | A | -0.0505 |
| rs111657570 | T | 0.1742  |
| rs113468293 | A | 0.1565  |
| rs35796394  | C | -0.0659 |
| rs7633022   | C | -0.0355 |
| rs75547694  | T | -0.1601 |
| rs116293986 | G | 0.2704  |
| rs114485203 | G | -0.2881 |
| rs13098806  | C | 0.0952  |
| rs80237502  | G | 0.1474  |
| rs77635253  | A | 0.065   |
| rs72619963  | A | 0.0792  |
| rs112952273 | C | 0.245   |
| rs16850051  | G | 0.0601  |

|             |   |         |
|-------------|---|---------|
| rs80155956  | A | -0.1666 |
| rs6764193   | A | -0.0456 |
| rs79457566  | G | 0.1565  |
| rs73187946  | T | -0.1821 |
| rs76126337  | G | 0.134   |
| rs111849424 | A | -0.113  |
| rs819857    | C | -0.0515 |
| rs62274025  | T | 0.2028  |
| rs113840251 | A | -0.0483 |
| rs10433502  | T | -0.045  |
| rs6802143   | A | 0.085   |
| rs11708273  | A | -0.2266 |
| rs73144705  | G | 0.0561  |
| rs115044240 | A | -0.1379 |
| rs77661121  | A | 0.167   |
| rs811870    | G | 0.1747  |
| rs9819523   | T | 0.2244  |
| rs17711047  | G | -0.0829 |
| rs2202971   | A | -0.0366 |
| rs12487897  | T | -0.0531 |
| rs143852786 | T | 0.1937  |
| rs58890170  | C | 0.1017  |
| rs9874976   | C | -0.0783 |
| rs76513220  | T | -0.2479 |
| rs75708494  | T | -0.3191 |
| rs342731    | A | 0.0409  |
| rs62242465  | T | -0.0823 |
| rs62235992  | C | 0.1017  |
| rs77168651  | G | -0.0425 |
| rs6793784   | T | -0.0677 |
| rs111250554 | T | 0.074   |
| rs3931191   | T | 0.0421  |
| rs6805903   | T | 0.1202  |
| rs2600318   | A | 0.0809  |
| rs114034838 | G | 0.1634  |
| rs77646852  | T | 0.104   |
| rs80163631  | G | 0.2735  |
| rs75187470  | C | 0.1252  |
| rs13064673  | T | 0.3232  |
| rs2173763   | G | 0.0694  |
| rs6789834   | C | 0.1442  |
| rs62279461  | G | -0.1115 |
| rs12632229  | A | -0.0426 |
| rs711542    | C | -0.0706 |
| rs114866491 | C | 0.2695  |
| rs137911417 | A | 0.2281  |
| rs2687893   | T | 0.1901  |



|             |   |         |
|-------------|---|---------|
| rs113243652 | A | -0.1952 |
| rs79117168  | T | 0.1237  |
| rs56370139  | C | -0.0882 |
| rs6776617   | A | 0.1583  |
| rs10936604  | G | 0.0447  |
| rs9860802   | T | 0.0431  |
| rs115414339 | G | -0.2216 |
| rs114044808 | C | 0.1624  |
| rs3804594   | T | 0.0674  |
| rs890348    | G | -0.0474 |
| rs73188647  | A | 0.1002  |
| rs11707422  | C | -0.1008 |
| rs62257533  | G | 0.2751  |
| rs75200713  | C | 0.079   |
| rs6773185   | C | 0.2142  |
| rs116138016 | T | 0.1592  |
| rs17047825  | A | 0.1062  |
| rs35583056  | T | -0.139  |
| rs17195365  | T | 0.0704  |
| rs4271909   | T | -0.0961 |
| rs9831937   | C | -0.0682 |
| rs1567778   | T | 0.0398  |
| rs75671746  | A | 0.1191  |
| rs62243790  | A | -0.2323 |
| rs905569    | T | -0.0429 |
| rs62233883  | C | -0.111  |
| rs62276422  | T | 0.0633  |
| rs34746516  | G | -0.0402 |
| rs73139985  | G | -0.0762 |
| rs9310622   | G | 0.0682  |
| rs141148456 | G | -0.1436 |
| rs4858785   | A | 0.0398  |
| rs9851598   | A | 0.0383  |
| rs9824602   | A | 0.0356  |
| rs55998114  | A | 0.1941  |
| rs11928059  | A | -0.0552 |
| rs4282087   | A | 0.0469  |
| rs76502391  | T | -0.2002 |
| rs17451920  | C | -0.0745 |
| rs6794081   | A | 0.1246  |
| rs4330247   | C | 0.1429  |
| rs115960078 | T | -0.0657 |
| rs147708550 | T | 0.063   |
| rs6440392   | G | 0.0409  |
| rs6442209   | C | -0.0872 |
| rs62245715  | T | 0.1073  |
| rs147073231 | T | -0.2074 |

|             |   |         |
|-------------|---|---------|
| rs62238534  | C | -0.1486 |
| rs113399128 | A | -0.2514 |
| rs144160540 | C | -0.05   |
| rs7629803   | A | 0.0369  |
| rs56092942  | A | -0.0656 |
| rs111857386 | A | 0.1374  |
| rs74514825  | T | -0.2664 |
| rs150604764 | A | -0.2473 |
| rs75495843  | A | 0.1983  |
| rs66667187  | G | 0.1831  |
| rs4856002   | A | 0.0453  |
| rs150958116 | T | 0.1752  |
| rs116460339 | A | -0.1462 |
| rs76658350  | T | 0.1591  |
| rs17761157  | A | -0.1702 |
| rs9855431   | G | -0.1101 |
| rs6785093   | T | 0.0483  |
| rs9846599   | T | -0.0358 |
| rs55676903  | A | 0.1066  |
| rs1507429   | G | 0.0377  |
| rs138421205 | G | -0.1284 |
| rs12485912  | C | -0.0967 |
| rs301930    | A | 0.1917  |
| rs2364931   | A | 0.0371  |
| rs7612217   | T | 0.1738  |
| rs17594058  | T | -0.0411 |
| rs12495599  | T | -0.035  |
| rs73188687  | A | -0.3185 |
| rs58694197  | C | 0.185   |
| rs12493391  | G | -0.0515 |
| rs56015891  | G | 0.2459  |
| rs115453286 | G | 0.1405  |
| rs4687038   | C | -0.0528 |
| rs116569363 | T | 0.1801  |
| rs73191158  | T | 0.11    |
| rs34618555  | T | 0.0728  |
| rs115151472 | C | 0.1596  |
| rs17742502  | A | 0.0374  |
| rs10866075  | C | -0.0352 |
| rs12485253  | G | 0.1609  |
| rs116512622 | A | 0.2166  |
| rs113248969 | A | -0.0647 |
| rs145714624 | G | -0.1831 |
| rs73176975  | A | 0.1209  |
| rs73150819  | C | 0.1766  |
| rs78534375  | T | -0.065  |
| rs62251261  | T | -0.0505 |

|             |   |         |
|-------------|---|---------|
| rs77447077  | A | 0.2305  |
| rs17620998  | A | -0.1542 |
| rs664910    | G | 0.0389  |
| rs148828946 | A | -0.1028 |
| rs76646538  | C | 0.1208  |
| rs53576     | A | -0.0418 |
| rs6775104   | T | -0.0343 |
| rs13325137  | G | 0.037   |
| rs4684731   | C | -0.0707 |
| rs17433672  | T | 0.0713  |
| rs112263758 | C | 0.1765  |
| rs342524    | T | 0.0394  |
| rs1353395   | C | 0.0506  |
| rs11926242  | A | 0.0966  |
| rs9310128   | A | -0.114  |
| rs142360709 | T | 0.1495  |
| rs166541    | G | 0.0345  |
| rs139930246 | A | 0.1681  |
| rs62266291  | T | -0.0842 |
| rs77624473  | C | 0.0838  |
| rs115100827 | G | 0.2114  |
| rs74916682  | C | 0.1539  |
| rs16861205  | A | 0.0689  |
| rs7611991   | A | -0.0386 |
| rs7637857   | A | -0.0619 |
| rs1396422   | C | -0.0493 |
| rs35539469  | A | 0.1785  |
| rs60452950  | G | 0.1194  |
| rs4688128   | C | 0.0403  |
| rs6772040   | T | 0.0674  |
| rs10513664  | C | -0.0708 |
| rs13062616  | G | -0.05   |
| rs13060801  | A | -0.0375 |
| rs146309004 | C | 0.2027  |
| rs77774774  | C | 0.0984  |
| rs7612910   | A | 0.0429  |
| rs146862064 | A | 0.2546  |
| rs139847324 | C | -0.0534 |
| rs7616999   | C | -0.0499 |
| rs34373965  | G | -0.0384 |
| rs62282054  | T | -0.0881 |
| rs144169903 | T | 0.1278  |
| rs73079506  | T | 0.0581  |
| rs1113808   | A | -0.0356 |
| rs74415209  | G | 0.1921  |
| rs72625020  | T | 0.0499  |
| rs71306779  | C | 0.1096  |

|             |   |         |
|-------------|---|---------|
| rs690636    | T | -0.0364 |
| rs11925403  | G | -0.055  |
| rs115938931 | T | -0.1935 |
| rs13060481  | T | 0.0554  |
| rs733786    | A | -0.0377 |
| rs116669158 | T | 0.1671  |
| rs7431241   | A | 0.0514  |
| rs78804961  | C | 0.1348  |
| rs9833164   | T | -0.1814 |
| rs4575885   | G | 0.0483  |
| rs113299346 | C | 0.1788  |
| rs9866784   | C | 0.0574  |
| rs73185515  | T | 0.0635  |
| rs2880209   | C | 0.05    |
| rs17437928  | A | 0.0498  |
| rs979000    | A | 0.0373  |
| rs77026447  | G | -0.1389 |
| rs7610820   | C | -0.0682 |
| rs6784543   | A | -0.0389 |
| rs146267695 | T | 0.2288  |
| rs16852712  | T | 0.1004  |
| rs11917518  | T | -0.0495 |
| rs114099306 | T | 0.1633  |
| rs732686    | G | 0.0457  |
| rs12635080  | T | 0.0406  |
| rs143969976 | T | -0.1765 |
| rs116130586 | A | 0.1986  |
| rs73029135  | A | 0.0904  |
| rs142117504 | A | 0.1239  |
| rs6782105   | C | 0.0608  |
| rs116630628 | T | 0.1423  |
| rs9758298   | A | 0.0404  |
| rs79213557  | C | -0.0898 |
| rs56273725  | T | -0.0361 |
| rs41272643  | T | -0.0414 |
| rs73223698  | A | -0.0725 |
| rs78747802  | T | 0.154   |
| rs12632506  | C | -0.0396 |
| rs13100436  | G | 0.0802  |
| rs79892466  | A | 0.1993  |
| rs17689331  | C | 0.034   |
| rs80293440  | C | -0.0895 |
| rs3773555   | T | -0.0472 |
| rs74941675  | A | -0.2169 |
| rs6779866   | T | 0.0933  |
| rs1027345   | C | -0.0358 |
| rs74477839  | A | 0.1373  |

|             |   |         |
|-------------|---|---------|
| rs6762278   | C | -0.0354 |
| rs4682143   | T | -0.0412 |
| rs41271381  | A | -0.0774 |
| rs61791506  | G | 0.0988  |
| rs114809543 | T | 0.1737  |
| rs140362223 | A | -0.1844 |
| rs79738420  | G | 0.1484  |
| rs709097    | C | -0.0354 |
| rs55685357  | A | -0.0679 |
| rs35201360  | A | 0.0536  |
| rs16842845  | C | 0.0389  |
| rs116711172 | G | -0.1612 |
| rs60027671  | G | 0.0602  |
| rs148545587 | C | 0.1304  |
| rs1656941   | C | -0.0422 |
| rs601991    | G | 0.0669  |
| rs58284370  | A | 0.0547  |
| rs7428702   | T | 0.051   |
| rs6444660   | C | 0.0383  |
| rs114208556 | G | -0.1093 |
| rs62265346  | A | -0.1509 |
| rs11712341  | A | 0.0491  |
| rs78394449  | C | 0.1113  |
| rs73067333  | T | 0.1177  |
| rs448244    | A | 0.0392  |
| rs2280382   | C | -0.0519 |
| rs4283566   | T | 0.1223  |
| rs2116136   | G | 0.0412  |
| rs206274    | G | 0.0376  |
| rs11718494  | T | 0.035   |
| rs147399932 | A | 0.0912  |
| rs4432624   | C | 0.0342  |
| rs3860505   | A | -0.0338 |
| rs34771595  | G | 0.1425  |
| rs116311729 | A | 0.1184  |
| rs116204967 | T | 0.2192  |
| rs34512111  | G | 0.0662  |
| rs79092132  | C | -0.0962 |
| rs1355724   | T | 0.0613  |
| rs72991344  | T | -0.173  |
| rs9846166   | C | 0.0915  |
| rs4143127   | C | 0.0409  |
| rs1032377   | T | -0.0512 |
| rs12489534  | G | -0.0357 |
| rs9816485   | A | 0.0693  |
| rs17881827  | T | -0.2992 |
| rs923576    | C | 0.0501  |

|             |   |         |
|-------------|---|---------|
| rs59287596  | G | -0.0375 |
| rs73039358  | G | -0.1499 |
| rs6790933   | C | 0.0404  |
| rs13063446  | A | 0.0683  |
| rs55871006  | G | -0.083  |
| rs115440818 | T | -0.0906 |
| rs9288996   | G | -0.0452 |
| rs75787711  | G | -0.2688 |
| rs80234457  | C | 0.302   |
| rs860112    | A | -0.052  |
| rs7632285   | T | -0.0394 |
| rs7355798   | T | -0.0377 |
| rs76655899  | G | 0.2045  |
| rs1133035   | T | -0.0504 |
| rs111590479 | C | -0.1043 |
| rs76785587  | A | -0.1036 |
| rs60060223  | T | 0.1166  |
| rs7645395   | C | 0.0455  |
| rs55676943  | G | 0.1322  |
| rs76827244  | G | 0.2301  |
| rs4680324   | C | -0.0634 |
| rs62244323  | T | 0.0981  |
| rs143493818 | G | -0.1328 |
| rs16889     | A | -0.0337 |
| rs140404597 | G | 0.113   |
| rs61367695  | C | 0.1716  |
| rs9835097   | C | -0.1248 |
| rs112346815 | T | 0.1521  |
| rs2938387   | C | 0.0353  |
| rs77276392  | T | -0.129  |
| rs6438809   | G | 0.0592  |
| rs6763374   | C | 0.0656  |
| rs9833233   | T | -0.0342 |
| rs113602630 | C | 0.0852  |
| rs1281456   | C | -0.0798 |
| rs9832424   | T | 0.0759  |
| rs75529866  | A | 0.054   |
| rs1529513   | T | 0.0486  |
| rs1404577   | A | -0.0377 |
| rs114066335 | T | -0.2421 |
| rs6791836   | T | 0.0843  |
| rs6774181   | G | -0.0344 |
| rs78462613  | A | -0.1985 |
| rs9757554   | A | -0.0363 |
| rs116550686 | T | 0.131   |
| rs12632248  | A | -0.1079 |
| rs2070491   | A | -0.0361 |

|             |   |         |
|-------------|---|---------|
| rs9985228   | T | 0.0348  |
| rs112187715 | C | 0.1368  |
| rs13087526  | T | -0.0417 |
| rs115687126 | A | 0.2729  |
| rs6782354   | A | -0.0543 |
| rs73095464  | T | 0.2386  |
| rs6445854   | C | 0.0418  |
| rs111422544 | T | 0.1157  |
| rs1873628   | G | 0.0535  |
| rs116202873 | A | 0.1441  |
| rs708485    | A | -0.0342 |
| rs893166    | T | -0.0569 |
| rs147420772 | G | 0.3314  |
| rs116750623 | T | 0.2155  |
| rs62247381  | T | -0.0379 |
| rs11715948  | G | 0.0371  |
| rs3796228   | C | -0.0658 |
| rs2061668   | C | -0.0343 |
| rs237886    | T | -0.0368 |
| rs150155549 | A | 0.3578  |
| rs62285798  | A | 0.1229  |
| rs55711236  | T | -0.0836 |
| rs4425237   | C | 0.0528  |
| rs138768696 | T | 0.125   |
| rs75194168  | C | 0.1882  |
| rs148708219 | T | -0.1578 |
| rs77346063  | T | 0.0748  |
| rs73019148  | A | 0.3175  |
| rs1482384   | C | 0.0347  |
| rs139465227 | C | 0.1814  |
| rs78384     | T | 0.0379  |
| rs4522761   | C | 0.0816  |
| rs2979344   | A | 0.0372  |
| rs6766422   | C | -0.0685 |
| rs6792014   | A | 0.044   |
| rs115774657 | T | 0.1845  |
| rs2686582   | C | -0.0369 |
| rs76461174  | G | 0.1212  |
| rs115501814 | A | 0.1962  |
| rs57962060  | T | 0.0472  |
| rs9823609   | G | 0.0589  |
| rs9310283   | T | 0.0345  |
| rs1821595   | A | -0.1312 |
| rs9821153   | A | 0.144   |
| rs1473285   | T | 0.0552  |
| rs2091955   | G | -0.0391 |
| rs1392255   | T | 0.1157  |

|             |   |         |
|-------------|---|---------|
| rs76565279  | C | -0.1618 |
| rs112572317 | C | 0.1447  |
| rs9810250   | C | 0.0347  |
| rs144261083 | T | 0.1238  |
| rs34253984  | G | 0.1517  |
| rs1628424   | A | -0.0511 |
| rs17497215  | T | 0.0936  |
| rs374264    | A | -0.0342 |
| rs113917422 | G | -0.087  |
| rs6765864   | C | -0.1297 |
| rs79417519  | A | 0.2107  |
| rs56396516  | A | -0.1672 |
| rs73226607  | G | 0.1297  |
| rs148213825 | T | 0.1716  |
| rs779055    | C | -0.1294 |
| rs116260412 | A | -0.216  |
| rs9810320   | A | -0.0338 |
| rs35291321  | T | 0.0619  |
| rs2169642   | C | -0.0363 |
| rs2131127   | A | -0.0368 |
| rs6803771   | A | 0.0342  |
| rs74278894  | A | 0.1003  |
| rs114736149 | T | 0.1284  |
| rs115150042 | T | 0.1516  |
| rs114716208 | G | -0.1636 |
| rs7426971   | T | 0.049   |
| rs11714377  | A | -0.1793 |
| rs7614451   | C | -0.0472 |
| rs13316505  | T | -0.0708 |
| rs78057716  | C | 0.0537  |
| rs138253515 | T | 0.1702  |
| rs4686188   | G | -0.0334 |
| rs295309    | T | 0.0375  |
| rs9813956   | G | -0.1041 |
| rs9845569   | C | -0.034  |
| rs116530139 | T | -0.1377 |
| rs78385730  | C | 0.0737  |
| rs6765487   | T | -0.0374 |
| rs150495105 | A | 0.1255  |
| rs9851949   | C | 0.1238  |
| rs148909372 | A | -0.1014 |
| rs56353289  | A | 0.0496  |
| rs78620573  | C | -0.0546 |
| rs113554334 | A | 0.1132  |
| rs116293860 | C | -0.1541 |
| rs138462283 | G | -0.3222 |
| rs2650067   | T | 0.2436  |



|             |   |         |
|-------------|---|---------|
| rs139244373 | A | 0.1589  |
| rs11719278  | T | 0.0469  |
| rs147894199 | A | 0.2104  |
| rs17827807  | C | 0.0564  |
| rs73220525  | T | -0.117  |
| rs6801987   | A | 0.0439  |
| rs13076452  | C | -0.0742 |
| rs148021735 | G | 0.1751  |
| rs1273882   | T | 0.1208  |
| rs150030086 | T | 0.0548  |
| rs6795243   | T | -0.0467 |
| rs35081575  | G | -0.1462 |
| rs9814571   | G | 0.0498  |
| rs62276399  | T | -0.0606 |
| rs76183949  | T | -0.1292 |
| rs147269634 | T | -0.1103 |
| rs59241261  | G | -0.0668 |
| rs9883160   | C | -0.0699 |
| rs7622638   | T | 0.0595  |
| rs34574005  | G | -0.0564 |
| rs114151045 | G | 0.1088  |
| rs114013411 | T | -0.1234 |
| rs712531    | A | 0.0358  |
| rs36088159  | C | 0.0453  |
| rs146166446 | G | -0.2199 |
| rs79246293  | C | 0.1412  |
| rs73050946  | C | 0.1978  |
| rs17624249  | A | -0.1381 |
| rs1479392   | G | 0.0442  |
| rs2343791   | T | 0.0421  |
| rs144758269 | C | -0.1595 |
| rs6795869   | G | -0.0685 |
| rs1665982   | A | -0.0379 |
| rs115398309 | A | 0.1551  |
| rs57490395  | G | -0.141  |
| rs2399133   | C | 0.0388  |
| rs28470684  | G | 0.0497  |
| rs746953    | G | 0.0457  |
| rs79115503  | A | -0.2254 |
| rs55943050  | G | -0.0938 |
| rs74636426  | C | 0.0538  |
| rs2616521   | T | -0.0704 |
| rs62259075  | T | 0.0385  |
| rs60952715  | A | 0.2322  |
| rs929701    | A | -0.0533 |
| rs17474854  | T | -0.0438 |
| rs4680899   | T | -0.0366 |

|             |   |         |
|-------------|---|---------|
| rs72983076  | A | 0.0769  |
| rs6770235   | G | -0.0781 |
| rs79548524  | T | 0.2116  |
| rs2889922   | T | -0.0827 |
| rs79520018  | T | -0.1395 |
| rs78193714  | A | -0.1801 |
| rs13322149  | T | 0.066   |
| rs17824544  | G | 0.0396  |
| rs9823737   | A | -0.0622 |
| rs114018507 | T | 0.0928  |
| rs114298628 | A | 0.1496  |
| rs9879754   | T | -0.0445 |
| rs79268097  | A | 0.1394  |
| rs73069790  | G | -0.0804 |
| rs13060400  | A | 0.0472  |
| rs9942106   | C | -0.037  |
| rs1845434   | C | 0.0364  |
| rs75607755  | A | 0.1519  |
| rs148706090 | T | 0.1596  |
| rs113979005 | G | 0.1941  |
| rs7431912   | G | -0.0591 |
| rs7633088   | T | 0.2186  |
| rs7643490   | T | -0.1222 |
| rs76143899  | C | 0.1097  |
| rs7433787   | A | -0.0506 |
| rs2178808   | T | 0.0512  |
| rs73135899  | T | -0.1772 |
| rs114092494 | T | 0.0911  |
| rs148928969 | G | 0.1771  |
| rs61447765  | A | -0.0364 |
| rs9811480   | A | -0.0365 |
| rs115725483 | A | -0.1925 |
| rs80019555  | C | -0.1026 |
| rs113897212 | A | -0.1127 |
| rs4016738   | C | -0.0412 |
| rs7630322   | A | -0.0344 |
| rs28845800  | C | 0.1669  |
| rs55940287  | T | 0.2371  |
| rs4688917   | A | -0.0345 |
| rs78565710  | A | 0.0689  |
| rs116046028 | T | -0.1497 |
| rs7633537   | A | 0.0394  |
| rs2568856   | G | 0.0357  |
| rs10865922  | G | 0.0329  |
| rs115916587 | T | -0.17   |
| rs17029209  | C | -0.0565 |
| rs148628016 | G | -0.1341 |

|             |   |         |
|-------------|---|---------|
| rs72888680  | G | 0.0806  |
| rs144402477 | C | -0.1903 |
| rs113513511 | T | 0.0931  |
| rs3796295   | G | 0.039   |
| rs7644123   | A | -0.037  |
| rs111539971 | A | 0.0984  |
| rs58924008  | C | 0.0854  |
| rs62262887  | T | 0.0772  |
| rs75225498  | C | -0.1192 |
| rs115459366 | T | -0.1217 |
| rs62277568  | C | 0.1046  |
| rs77657183  | T | 0.1941  |
| rs28752078  | T | -0.0335 |
| rs6787526   | T | 0.0362  |
| rs17413016  | C | -0.1556 |
| rs6549454   | A | -0.0884 |
| rs6778281   | A | 0.0604  |
| rs150744734 | T | -0.1997 |
| rs116507758 | A | -0.248  |
| rs114030788 | G | -0.1748 |
| rs1718705   | C | -0.0363 |
| rs75002986  | A | 0.1354  |
| rs11708350  | G | 0.0374  |
| rs77886066  | T | 0.2233  |
| rs952982    | T | -0.1446 |
| rs844026    | A | -0.0339 |
| rs73173664  | C | -0.0859 |
| rs11720065  | C | -0.0358 |
| rs112734559 | G | 0.1464  |
| rs75809599  | G | 0.1983  |
| rs16850266  | A | -0.0344 |
| rs6786150   | C | 0.0547  |
| rs12635226  | G | 0.0797  |
| rs55727543  | T | 0.2003  |
| rs2289205   | T | -0.0362 |
| rs9854140   | A | 0.1355  |
| rs12633003  | C | -0.0354 |
| rs114598325 | A | 0.2013  |
| rs4683695   | T | 0.0966  |
| rs73103460  | G | -0.0817 |
| rs6772006   | G | 0.0639  |
| rs78803227  | G | -0.0933 |
| rs113998810 | C | 0.27    |
| rs112018646 | A | -0.212  |
| rs73083221  | C | 0.123   |
| rs6802262   | C | -0.0993 |
| rs75749098  | A | 0.0727  |

|             |   |         |
|-------------|---|---------|
| rs72611192  | C | 0.0721  |
| rs79882518  | G | -0.1232 |
| rs115909634 | C | 0.1345  |
| rs115969187 | C | 0.0912  |
| rs144782734 | A | 0.0497  |
| rs77070333  | T | -0.1481 |
| rs142455046 | C | -0.2294 |
| rs16865627  | C | 0.0615  |
| rs75333068  | A | -0.1003 |
| rs77706129  | G | -0.1268 |
| rs266410    | T | 0.0596  |
| rs142166919 | A | -0.1749 |
| rs62255556  | G | 0.0798  |
| rs112688554 | A | -0.1813 |
| rs11714638  | G | -0.0409 |
| rs3803      | A | -0.0411 |
| rs144521581 | G | -0.1973 |
| rs12497538  | G | 0.0795  |
| rs13087643  | A | 0.0424  |
| rs1083825   | T | -0.0368 |
| rs112502118 | C | 0.0964  |
| rs2877584   | A | 0.0391  |
| rs78198440  | A | 0.0417  |
| rs116651498 | C | 0.163   |
| rs77230755  | G | -0.0925 |
| rs9869078   | A | 0.0542  |
| rs116320259 | T | -0.2927 |
| rs115974143 | A | 0.0987  |
| rs73009751  | C | -0.0622 |
| rs7432504   | T | -0.0377 |
| rs10865823  | T | -0.0378 |
| rs11719741  | T | 0.0329  |
| rs73094738  | G | 0.1806  |
| rs56109170  | A | 0.1044  |
| rs10510566  | T | 0.0407  |
| rs111695116 | T | 0.1107  |
| rs76959956  | A | 0.2712  |
| rs41320253  | T | -0.1259 |
| rs28448293  | C | -0.0373 |
| rs111427967 | C | -0.0846 |
| rs9654018   | A | 0.0595  |
| rs56856071  | A | 0.0676  |
| rs73142842  | G | 0.1831  |
| rs34642857  | C | -0.0399 |
| rs140803382 | C | -0.1603 |
| rs9845242   | C | -0.0498 |
| rs73106214  | A | -0.1172 |

|             |   |         |
|-------------|---|---------|
| rs142166823 | A | -0.2938 |
| rs62246169  | A | 0.1623  |
| rs7630352   | A | 0.0331  |
| rs291531    | C | 0.0371  |
| rs73185687  | T | 0.06    |
| rs41152     | T | 0.0326  |
| rs116760666 | A | -0.2621 |
| rs4857842   | A | 0.2216  |
| rs6803351   | G | 0.132   |
| rs13086440  | T | -0.121  |
| rs73046695  | T | -0.052  |
| rs13096030  | A | 0.0396  |
| rs112872798 | G | 0.158   |
| rs115874570 | T | 0.0961  |
| rs9810464   | A | 0.0336  |
| rs5030107   | T | 0.1768  |
| rs6788810   | C | -0.0377 |
| rs57075871  | T | 0.1143  |
| rs114541076 | G | -0.1565 |
| rs9868933   | C | -0.2764 |
| rs62285309  | C | -0.1034 |
| rs10513818  | G | -0.0528 |
| rs11921888  | A | -0.0409 |
| rs6549115   | A | 0.0397  |
| rs77112271  | A | 0.0873  |
| rs2062514   | G | 0.0946  |
| rs6773052   | A | 0.0518  |
| rs1388005   | G | 0.0341  |
| rs75286979  | C | -0.2054 |
| rs149849750 | A | 0.2019  |
| rs6805101   | A | 0.1017  |
| rs9872573   | A | 0.0617  |
| rs115964768 | T | 0.2316  |
| rs76522113  | G | 0.0727  |
| rs36143960  | G | 0.2032  |
| rs74992852  | C | -0.0843 |
| rs142023071 | A | 0.1607  |
| rs777477    | T | 0.0386  |
| rs7629407   | C | -0.0611 |
| rs13061591  | A | -0.0356 |
| rs4855421   | T | 0.0383  |
| rs78635560  | A | -0.0811 |
| rs34183566  | T | 0.0331  |
| rs3856918   | T | 0.0343  |
| rs17265703  | G | -0.0456 |
| rs113457158 | A | -0.0873 |
| rs9844617   | A | -0.0549 |

|             |   |         |
|-------------|---|---------|
| rs9842837   | G | 0.1252  |
| rs7648915   | T | 0.1636  |
| rs11709511  | A | 0.2677  |
| rs9682283   | C | 0.0382  |
| rs6787043   | G | -0.0398 |
| rs9838930   | C | 0.0333  |
| rs4234562   | A | -0.0471 |
| rs2063895   | A | -0.0487 |
| rs893117    | C | 0.0502  |
| rs150836919 | C | -0.228  |
| rs4858115   | C | -0.034  |
| rs61138285  | C | 0.0657  |
| rs9823508   | A | 0.1549  |
| rs563892    | C | -0.0445 |
| rs9834412   | A | 0.0393  |
| rs74955143  | T | -0.0863 |
| rs73042239  | G | 0.038   |
| rs62273512  | T | 0.1222  |
| rs11920280  | G | -0.0323 |
| rs6769832   | G | 0.0392  |
| rs2669989   | T | -0.0514 |
| rs79640236  | C | 0.0812  |
| rs323881    | C | 0.0704  |
| rs149358595 | G | 0.2143  |
| rs145498151 | T | 0.2722  |
| rs1567788   | T | -0.0621 |
| rs7612794   | A | 0.0912  |
| rs73107679  | A | 0.1445  |
| rs3846202   | T | -0.0461 |
| rs111491544 | C | -0.0677 |
| rs4306894   | T | 0.055   |
| rs142910443 | C | -0.0432 |
| rs73201490  | T | 0.1071  |
| rs12488824  | A | 0.0382  |
| rs115725885 | T | 0.1591  |
| rs75012616  | T | -0.1328 |
| rs925821    | G | 0.1955  |
| rs72862374  | C | -0.1548 |
| rs137985590 | T | 0.1285  |
| rs73057533  | C | 0.1702  |
| rs2537811   | T | -0.0325 |
| rs76039768  | C | -0.0365 |
| rs62274810  | A | 0.1469  |
| rs9873800   | T | 0.0343  |
| rs62245493  | A | 0.0754  |
| rs6439844   | A | -0.039  |
| rs4286456   | G | -0.0545 |

|             |   |         |
|-------------|---|---------|
| rs73088913  | A | 0.1334  |
| rs34524792  | G | -0.0891 |
| rs2686277   | A | 0.0507  |
| rs9832710   | A | 0.239   |
| rs750735    | C | 0.0916  |
| rs62245879  | A | 0.1369  |
| rs35740443  | A | 0.0689  |
| rs2322168   | G | 0.0321  |
| rs76056813  | T | 0.1469  |
| rs11129843  | A | 0.037   |
| rs10935129  | A | 0.0477  |
| rs75591772  | C | 0.1432  |
| rs75158737  | C | 0.223   |
| rs17288483  | T | 0.1241  |
| rs11129515  | G | 0.0328  |
| rs73824678  | C | 0.2242  |
| rs11919168  | G | 0.0333  |
| rs115771849 | G | -0.1467 |
| rs77068319  | C | -0.1142 |
| rs35259508  | G | 0.1511  |
| rs13072407  | A | -0.0361 |
| rs839248    | T | -0.0343 |
| rs113399317 | G | 0.1631  |
| rs13060401  | G | 0.3391  |
| rs75684928  | T | -0.249  |
| rs114987152 | A | -0.14   |
| rs111315673 | G | -0.1018 |
| rs139125037 | T | 0.1101  |
| rs4894570   | G | 0.0484  |
| rs74987738  | A | 0.1599  |
| rs75349211  | A | 0.1224  |
| rs112528681 | C | -0.1099 |
| rs67795055  | A | 0.0448  |
| rs76675021  | A | -0.1256 |
| rs35283189  | C | -0.0568 |
| rs6443176   | T | 0.0345  |
| rs2885598   | C | 0.1493  |
| rs62279613  | C | -0.0585 |
| rs13091816  | T | -0.0626 |
| rs74736071  | G | 0.2035  |
| rs6775122   | T | 0.072   |
| rs78357774  | C | 0.1075  |
| rs73016868  | G | 0.069   |
| rs143332279 | C | -0.2135 |
| rs1881972   | G | 0.0455  |
| rs74567655  | G | -0.1364 |
| rs141324883 | G | 0.1771  |

|             |   |         |
|-------------|---|---------|
| rs7648629   | A | 0.0508  |
| rs140973255 | T | 0.117   |
| rs115278533 | T | 0.138   |
| rs7372937   | A | -0.0446 |
| rs11707609  | G | 0.0462  |
| rs79043437  | T | -0.1453 |
| rs2542361   | A | -0.0505 |
| rs138860394 | T | 0.1325  |
| rs62266923  | C | -0.0716 |
| rs9289775   | T | -0.0394 |
| rs74980526  | A | -0.2729 |
| rs12490065  | A | 0.0403  |
| rs4686447   | T | -0.0344 |
| rs6807340   | A | -0.0856 |
| rs60487358  | T | -0.095  |
| rs13072049  | A | 0.0611  |
| rs55853690  | C | 0.0918  |
| rs6795523   | A | -0.0999 |
| rs67573460  | A | 0.0504  |
| rs62274837  | T | -0.0683 |
| rs112261734 | T | -0.3242 |
| rs1877965   | T | 0.0554  |
| rs148137669 | A | -0.1172 |
| rs78151629  | A | 0.1041  |
| rs9822368   | G | 0.0347  |
| rs78989824  | G | 0.0649  |
| rs11130082  | T | -0.0338 |
| rs3792491   | A | 0.0506  |
| rs62248264  | A | 0.0584  |
| rs55820146  | G | -0.0381 |
| rs16847804  | G | 0.1075  |
| rs2859683   | G | 0.0562  |
| rs1348251   | A | 0.035   |
| rs71314568  | A | 0.1096  |
| rs11718258  | T | 0.0332  |
| rs7428824   | T | -0.0319 |
| rs76977588  | G | 0.0589  |
| rs36128     | A | -0.0333 |
| rs13083225  | C | 0.0498  |
| rs77904682  | C | 0.1044  |
| rs73176582  | C | -0.1283 |
| rs67651386  | C | -0.0707 |
| rs115445518 | G | -0.2926 |
| rs141541940 | A | 0.1163  |
| rs115183384 | T | 0.247   |
| rs76879712  | T | 0.1136  |
| rs3870336   | A | -0.0597 |



|             |   |         |
|-------------|---|---------|
| rs16854712  | G | 0.2303  |
| rs78561425  | G | 0.0812  |
| rs75334972  | A | 0.2344  |
| rs4680793   | A | -0.0742 |
| rs6790267   | A | -0.1375 |
| rs73043695  | A | -0.0444 |
| rs76640470  | G | 0.1057  |
| rs9310253   | G | -0.0379 |
| rs4682051   | T | -0.0425 |
| rs149468    | G | -0.033  |
| rs6794558   | T | 0.0323  |
| rs144582715 | C | -0.0784 |
| rs13326054  | G | 0.0739  |
| rs114824041 | T | -0.0797 |
| rs9835358   | A | -0.0573 |
| rs6771276   | G | -0.0651 |
| rs17073394  | C | 0.1154  |
| rs62279672  | G | -0.0671 |
| rs71310549  | G | -0.0735 |
| rs60918491  | A | -0.0614 |
| rs76779869  | T | -0.054  |
| rs62289625  | A | 0.1557  |
| rs62249945  | G | -0.0453 |
| rs2859818   | A | -0.041  |
| rs11715516  | G | 0.0447  |
| rs11714886  | G | 0.0386  |
| rs78043937  | C | -0.1807 |
| rs73016672  | C | -0.1979 |
| rs114431834 | T | 0.1409  |
| rs12107794  | T | -0.1395 |
| rs7431143   | T | 0.0584  |
| rs167436    | G | -0.0558 |
| rs112833384 | T | 0.0974  |
| rs9852938   | A | -0.0458 |
| rs2129997   | A | 0.0325  |
| rs4687122   | T | 0.1791  |
| rs148103294 | T | -0.2633 |
| rs6779154   | C | -0.0396 |
| rs112263041 | T | 0.062   |
| rs17264020  | A | 0.1095  |
| rs12495615  | A | 0.0341  |
| rs67670470  | A | 0.0334  |
| rs79591343  | G | -0.092  |
| rs115997803 | A | 0.318   |
| rs115912685 | A | -0.1373 |
| rs115660521 | G | 0.1911  |
| rs12495887  | C | 0.0972  |

|             |   |         |
|-------------|---|---------|
| rs149335293 | C | 0.1983  |
| rs10510963  | C | 0.0844  |
| rs76361249  | G | 0.071   |
| rs9841585   | C | 0.0416  |
| rs9756026   | T | -0.1411 |
| rs76234760  | A | 0.0383  |
| rs13081978  | T | -0.0334 |
| rs7643602   | C | 0.0351  |
| rs141051328 | G | -0.2429 |
| rs62262452  | T | 0.1072  |
| rs11714208  | G | -0.035  |
| rs62279896  | C | 0.0604  |
| rs77050352  | T | 0.0776  |
| rs4396824   | G | 0.0409  |
| rs76421108  | C | 0.1457  |
| rs2677421   | A | -0.0323 |
| rs2577884   | T | 0.0392  |
| rs140958125 | A | -0.1206 |
| rs76323431  | C | -0.1102 |
| rs9811548   | G | 0.0346  |
| rs7638099   | A | 0.193   |
| rs139947624 | A | 0.2513  |
| rs55699636  | T | 0.0992  |
| rs75966640  | T | 0.1609  |
| rs28580577  | G | 0.0455  |
| rs17803128  | C | 0.0404  |
| rs80009018  | G | -0.2145 |
| rs17016957  | G | -0.0582 |
| rs11131055  | G | -0.0343 |
| rs116022592 | C | -0.1925 |
| rs6775476   | A | -0.0334 |
| rs71317815  | T | 0.0872  |
| rs1515585   | T | -0.0349 |
| rs1398668   | T | 0.1559  |
| rs7633876   | T | 0.1554  |
| rs114847867 | A | 0.1964  |
| rs13082214  | C | -0.0331 |
| rs73171553  | A | -0.0815 |
| rs78708961  | T | 0.1709  |
| rs2403349   | A | 0.0447  |
| rs1627606   | T | 0.0841  |
| rs71316447  | T | 0.1616  |
| rs77542745  | T | 0.2195  |
| rs1123686   | T | 0.0349  |
| rs115833737 | C | -0.1952 |
| rs56172009  | G | -0.1132 |
| rs78658294  | A | 0.1501  |

|             |   |         |
|-------------|---|---------|
| rs74511408  | G | 0.1196  |
| rs11922336  | A | 0.0557  |
| rs2550240   | C | -0.0366 |
| rs76499153  | C | 0.0382  |
| rs143020507 | T | -0.2736 |
| rs1983079   | A | 0.0425  |
| rs114669595 | T | 0.1775  |
| rs75880138  | G | 0.1415  |
| rs145935299 | G | 0.1015  |
| rs66519019  | T | -0.08   |
| rs60030089  | T | 0.0439  |
| rs113090931 | T | 0.0596  |
| rs35819363  | C | 0.1734  |
| rs4362728   | A | -0.0437 |
| rs11929675  | A | 0.0455  |
| rs113319239 | G | 0.0617  |
| rs13076872  | C | -0.084  |
| rs139903458 | T | 0.123   |
| rs76443334  | C | 0.0994  |
| rs4470477   | A | 0.065   |
| rs58629339  | C | -0.0463 |
| rs138633591 | G | 0.2127  |
| rs62278050  | A | -0.3057 |
| rs6780869   | A | -0.0361 |
| rs358805    | T | -0.0334 |
| rs13321536  | T | -0.0407 |
| rs76261092  | T | 0.1605  |
| rs34443342  | G | 0.2808  |
| rs141844248 | C | -0.1324 |
| rs114402588 | A | -0.0833 |
| rs6786243   | G | -0.052  |
| rs7622568   | T | 0.1918  |
| rs1387001   | T | 0.1448  |
| rs213373    | T | -0.0355 |
| rs1502464   | G | 0.0666  |
| rs139862066 | G | -0.2421 |
| rs55656104  | A | 0.1276  |
| rs7609783   | G | -0.0361 |
| rs113858504 | G | -0.1364 |
| rs1921547   | C | -0.0329 |
| rs141315568 | G | -0.171  |
| rs4560291   | G | -0.0368 |
| rs143089440 | T | 0.2371  |
| rs78213875  | G | 0.1261  |
| rs3101055   | A | -0.0678 |
| rs7618691   | C | -0.1006 |
| rs75388137  | A | -0.1385 |

|             |   |         |
|-------------|---|---------|
| rs73863461  | G | 0.0846  |
| rs1197306   | C | 0.0315  |
| rs73059479  | G | 0.0948  |
| rs77233951  | C | 0.0656  |
| rs16824337  | A | 0.1684  |
| rs77501994  | A | 0.1078  |
| rs115656500 | G | -0.1657 |
| rs34520051  | T | -0.0666 |
| rs13073428  | G | 0.0367  |
| rs146673037 | A | 0.1064  |
| rs28665850  | C | 0.0534  |
| rs17334011  | T | 0.0733  |
| rs79977687  | T | 0.2766  |
| rs874590    | G | 0.0368  |
| rs7613237   | C | -0.0476 |
| rs140524143 | C | -0.203  |
| rs57287736  | A | 0.0382  |
| rs7618692   | C | -0.0357 |
| rs58312266  | C | 0.0396  |
| rs146359521 | C | 0.1179  |
| rs17077726  | G | 0.079   |
| rs138690040 | A | 0.1087  |
| rs9868155   | A | -0.035  |
| rs113792104 | C | 0.0946  |
| rs146961340 | G | 0.1623  |
| rs141490313 | G | 0.1444  |
| rs78024218  | C | 0.1096  |
| rs12486990  | C | 0.0628  |
| rs7653173   | A | 0.0743  |
| rs75322640  | C | -0.1851 |
| rs13073971  | T | -0.0325 |
| rs77009309  | T | 0.1747  |
| rs56352907  | G | -0.0564 |
| rs7628984   | T | 0.0627  |
| rs73205733  | G | 0.0582  |
| rs9863084   | G | 0.0529  |
| rs11927009  | T | 0.0327  |
| rs79680238  | T | 0.1002  |
| rs12498005  | A | 0.0651  |
| rs4437137   | A | 0.0328  |
| rs58325949  | C | -0.0356 |
| rs76224081  | A | 0.1698  |
| rs7614538   | A | -0.0438 |
| rs1513167   | G | -0.0313 |
| rs10512945  | A | 0.042   |
| rs74356132  | T | -0.1343 |
| rs116810994 | C | -0.0959 |

|             |   |         |
|-------------|---|---------|
| rs113885569 | A | -0.1806 |
| rs8363      | T | 0.1755  |
| rs9861008   | G | 0.1508  |
| rs75444237  | A | -0.1404 |
| rs4682639   | C | -0.044  |
| rs34786772  | T | 0.12    |
| rs9821630   | G | 0.0355  |
| rs116469219 | C | 0.0987  |
| rs139832701 | G | -0.0517 |
| rs17585084  | A | 0.0552  |
| rs2599547   | C | 0.0611  |
| rs73198264  | G | 0.076   |
| rs9839355   | A | 0.1135  |
| rs150264436 | G | -0.1548 |
| rs3914755   | C | -0.0398 |
| rs73094016  | G | 0.1064  |
| rs79583407  | C | 0.1579  |
| rs78363676  | G | -0.0679 |
| rs77497884  | C | 0.1995  |
| rs115819799 | T | -0.1119 |
| rs6794734   | C | 0.0348  |
| rs115607356 | C | 0.2261  |
| rs2624156   | C | 0.1022  |
| rs1699347   | G | 0.0519  |
| rs727763    | G | 0.0341  |
| rs150454844 | A | -0.1602 |
| rs517545    | T | -0.0324 |
| rs35796142  | T | -0.0601 |
| rs9882688   | G | -0.0695 |
| rs71310335  | A | 0.076   |
| rs62287717  | C | -0.0744 |
| rs7632172   | A | -0.0767 |
| rs9837372   | G | -0.0325 |
| rs78961970  | T | 0.1893  |
| rs75358596  | A | 0.1012  |
| rs6444926   | T | -0.0483 |
| rs147978123 | A | 0.1786  |
| rs17021771  | T | -0.0856 |
| rs116086497 | A | -0.1811 |
| rs57751578  | C | 0.0635  |
| rs62283840  | G | 0.0665  |
| rs3856909   | A | -0.0513 |
| rs72957362  | A | -0.1191 |
| rs73095548  | A | 0.1423  |
| rs494409    | A | 0.1311  |
| rs139965404 | T | 0.2592  |
| rs17204781  | T | 0.1202  |

|             |   |         |
|-------------|---|---------|
| rs667986    | G | 0.0704  |
| rs12152522  | A | -0.0792 |
| rs13319222  | G | 0.0947  |
| rs78334123  | T | -0.1567 |
| rs11929483  | C | 0.0354  |
| rs73058936  | A | -0.1184 |
| rs139796141 | G | 0.1964  |
| rs62274193  | A | -0.1002 |
| rs56368217  | C | 0.0421  |
| rs79240721  | T | -0.0895 |
| rs62270280  | T | 0.0958  |
| rs6772794   | C | -0.0386 |
| rs115083972 | G | -0.23   |
| rs56148802  | T | 0.0642  |
| rs9852292   | A | 0.0768  |
| rs7649524   | G | -0.0325 |
| rs79012612  | A | 0.1189  |
| rs114273582 | A | -0.1417 |
| rs140494728 | C | 0.162   |
| rs112768742 | A | 0.1544  |
| rs116575747 | T | -0.1845 |
| rs76469337  | A | 0.2727  |
| rs77863599  | A | -0.1256 |
| rs4687998   | G | 0.036   |
| rs925860    | T | 0.0452  |
| rs75159273  | A | -0.1402 |
| rs6444483   | T | -0.0632 |
| rs11716437  | G | 0.1334  |
| rs11927367  | A | -0.0708 |
| rs73225461  | G | -0.1083 |
| rs7637081   | C | 0.057   |
| rs7651474   | G | -0.0343 |
| rs115580120 | C | 0.0872  |
| rs11708538  | A | -0.0732 |
| rs56092129  | A | -0.0592 |
| rs2336721   | T | 0.0342  |
| rs1346945   | C | -0.0562 |
| rs4462906   | G | 0.0332  |
| rs13075549  | A | 0.0381  |
| rs17415691  | T | 0.1444  |
| rs7636783   | G | 0.1114  |
| rs1178485   | T | -0.1134 |
| rs114283620 | T | -0.1289 |
| rs6764628   | G | 0.0354  |
| rs75140349  | C | 0.108   |
| rs116743262 | A | 0.2082  |
| rs9844633   | C | 0.0537  |

|             |   |         |
|-------------|---|---------|
| rs78335516  | C | 0.1808  |
| rs4677073   | C | -0.046  |
| rs36191604  | G | 0.0849  |
| rs9876113   | G | -0.0361 |
| rs927537    | G | -0.0327 |
| rs114160042 | G | 0.12    |
| rs73099859  | G | 0.1169  |
| rs36037886  | G | 0.1046  |
| rs13084657  | A | -0.0355 |
| rs9288900   | G | 0.1774  |
| rs62260606  | G | -0.0445 |
| rs111916630 | G | 0.1873  |
| rs1178530   | T | -0.0715 |
| rs12489001  | A | -0.0534 |
| rs62268801  | G | 0.0979  |
| rs6802544   | G | 0.0459  |
| rs2713600   | C | 0.0432  |
| rs361236    | T | -0.1186 |
| rs2080199   | T | 0.0334  |
| rs78729145  | G | -0.2316 |
| rs140715330 | G | 0.1653  |
| rs145107078 | T | 0.2549  |
| rs34368478  | T | 0.0529  |
| rs9813961   | A | -0.0362 |
| rs115797410 | C | 0.1444  |
| rs11709388  | G | -0.05   |
| rs80207804  | C | 0.1469  |
| rs67454795  | A | 0.0365  |
| rs9814526   | G | -0.0496 |
| rs4684078   | A | 0.031   |
| rs67434912  | C | -0.1078 |
| rs13069216  | G | -0.0407 |
| rs902417    | T | -0.0373 |
| rs73051956  | G | 0.0539  |
| rs11719550  | T | -0.0319 |
| rs1523075   | C | -0.1568 |
| rs696322    | C | -0.0635 |
| rs73177613  | T | -0.0707 |
| rs9863593   | A | -0.0632 |
| rs9310552   | T | -0.0329 |
| rs114994509 | T | -0.1103 |
| rs291930    | T | 0.0638  |
| rs1011375   | C | -0.1234 |
| rs56044740  | T | 0.1501  |
| rs13318330  | C | -0.1391 |
| rs11719026  | G | 0.087   |
| rs9865163   | T | 0.0344  |

|             |   |         |
|-------------|---|---------|
| rs304006    | G | -0.0322 |
| rs9827309   | G | -0.036  |
| rs116679349 | A | 0.1529  |
| rs75911081  | G | 0.1987  |
| rs4610188   | G | -0.04   |
| rs62260749  | A | -0.0685 |
| rs76304216  | C | -0.0844 |
| rs1453628   | T | 0.0314  |
| rs10512665  | C | -0.0365 |
| rs7427238   | A | -0.1283 |
| rs112643750 | T | 0.2475  |
| rs115218387 | A | 0.2346  |
| rs74505680  | T | 0.151   |
| rs7629208   | C | -0.0414 |
| rs78466592  | C | -0.1393 |
| rs115094888 | G | -0.0853 |
| rs77964166  | T | -0.1214 |
| rs77318594  | C | 0.0654  |
| rs138493226 | G | -0.1909 |
| rs1110866   | C | -0.0338 |
| rs13324313  | A | -0.0531 |
| rs35790733  | T | -0.1376 |
| rs140384187 | C | 0.2202  |
| rs147723444 | G | 0.2041  |
| rs75481736  | G | -0.1109 |
| rs6795922   | T | 0.0566  |
| rs12107274  | T | -0.0337 |
| rs7644080   | G | 0.04    |
| rs6786725   | G | -0.1016 |
| rs35171227  | C | -0.0751 |
| rs13324388  | T | 0.0677  |
| rs112171651 | A | 0.2534  |
| rs9837624   | T | -0.0333 |
| rs6438276   | A | 0.0371  |
| rs13066612  | C | -0.0584 |
| rs60845666  | A | -0.0317 |
| rs13066503  | A | 0.0502  |
| rs115377115 | T | 0.1494  |
| rs147697706 | A | 0.2269  |
| rs79762230  | T | 0.1696  |
| rs17053478  | A | 0.1312  |
| rs73182233  | T | -0.0696 |
| rs35350641  | A | -0.1566 |
| rs237890    | G | -0.0438 |
| rs62275470  | A | -0.1504 |
| rs17008972  | A | 0.0478  |
| rs11708994  | C | -0.0475 |



|             |   |         |
|-------------|---|---------|
| rs114746017 | C | 0.1823  |
| rs151078915 | T | -0.227  |
| rs2405738   | C | -0.0761 |
| rs13321149  | T | 0.0353  |
| rs79567970  | G | -0.2389 |
| rs73172442  | C | -0.1532 |
| rs62295768  | G | -0.1531 |
| rs79462083  | G | -0.1158 |
| rs150581960 | T | 0.1761  |
| rs78762628  | C | -0.0962 |
| rs2040377   | G | 0.0747  |
| rs2344825   | A | -0.0336 |
| rs9654001   | C | 0.0351  |
| rs13072919  | C | -0.106  |
| rs112716032 | T | -0.2929 |
| rs9813698   | C | -0.1005 |
| rs116665032 | A | -0.1933 |
| rs73107723  | G | -0.0347 |
| rs1803489   | T | -0.2375 |
| rs76095814  | G | -0.2588 |
| rs147610761 | C | 0.2178  |
| rs324556    | T | 0.0348  |
| rs7645995   | T | 0.0447  |
| rs6780917   | C | -0.0494 |
| rs34430099  | A | 0.0664  |
| rs4467476   | T | -0.0576 |
| rs55792428  | T | 0.0919  |
| rs79960161  | G | 0.0757  |
| rs11130546  | C | -0.0545 |
| rs4686832   | C | 0.0374  |
| rs112904892 | A | -0.0594 |
| rs7627960   | A | 0.0503  |
| rs6798065   | T | 0.0336  |
| rs62232621  | A | 0.0565  |
| rs16859655  | A | 0.0373  |
| rs17047149  | C | -0.1688 |
| rs116204929 | C | 0.183   |
| rs1648717   | T | 0.0451  |
| rs12496610  | G | -0.0881 |
| rs2054945   | C | -0.0324 |
| rs11716930  | A | -0.0541 |
| rs145222437 | A | 0.0771  |
| rs112848089 | C | 0.0504  |
| rs147056630 | C | 0.1291  |
| rs10935045  | A | -0.0437 |
| rs75071032  | G | 0.1377  |
| rs114332399 | A | 0.1962  |

|             |   |         |
|-------------|---|---------|
| rs35928300  | G | -0.0896 |
| rs11571864  | A | 0.0329  |
| rs12493968  | T | -0.115  |
| rs7614663   | A | -0.0352 |
| rs917934    | C | -0.0351 |
| rs35396706  | T | 0.08    |
| rs6765754   | G | 0.0956  |
| rs640072    | T | 0.0537  |
| rs73193818  | T | 0.0886  |
| rs111305188 | T | -0.0617 |
| rs1684882   | A | 0.0352  |
| rs142145055 | T | -0.2285 |
| rs6791955   | A | 0.1002  |
| rs2715689   | G | 0.0571  |
| rs116070652 | G | 0.1724  |
| rs28634436  | T | -0.1053 |
| rs114235813 | T | 0.1432  |
| rs80286986  | A | 0.1261  |
| rs28280     | A | 0.0326  |
| rs9866486   | A | 0.2689  |
| rs71326454  | A | -0.1125 |
| rs115268738 | T | -0.1902 |
| rs79177799  | C | -0.1903 |
| rs35388448  | T | 0.032   |
| rs1391795   | C | 0.0656  |
| rs147692413 | G | 0.1546  |
| rs13093483  | G | 0.0473  |
| rs17377867  | A | 0.0567  |
| rs73002695  | C | -0.0761 |
| rs73154632  | C | -0.2563 |
| rs115452333 | C | 0.1548  |
| rs17189823  | A | -0.044  |
| rs6780681   | C | 0.0332  |
| rs6810155   | T | 0.1323  |
| rs2163724   | C | 0.0408  |
| rs11130047  | A | 0.1469  |
| rs58157593  | G | -0.0869 |
| rs113657421 | G | -0.0859 |
| rs17670991  | T | 0.0471  |
| rs72499684  | A | 0.1163  |
| rs57826302  | T | -0.1732 |
| rs115693007 | A | -0.0601 |
| rs11712516  | C | -0.0881 |
| rs79064702  | T | -0.0379 |
| rs11127596  | T | 0.0357  |
| rs139615328 | G | 0.1385  |
| rs59305446  | G | -0.0668 |

|             |   |         |
|-------------|---|---------|
| rs9813488   | A | -0.0971 |
| rs113049068 | A | -0.123  |
| rs144711968 | T | -0.0529 |
| rs1166047   | C | -0.063  |
| rs79050834  | A | 0.0694  |
| rs80188465  | A | 0.1397  |
| rs9848131   | C | -0.0692 |
| rs73137360  | T | -0.096  |
| rs55789955  | G | 0.166   |
| rs12107986  | A | 0.0495  |
| rs78734089  | A | -0.0744 |
| rs1087302   | G | -0.0937 |
| rs73206650  | G | 0.0568  |
| rs9814895   | A | 0.032   |
| rs114812825 | A | 0.1476  |
| rs35170554  | C | 0.0351  |
| rs13072329  | C | -0.0383 |
| rs3732764   | C | -0.0347 |
| rs73010303  | T | 0.1376  |
| rs451242    | A | 0.0412  |
| rs7637793   | T | -0.0317 |
| rs4646719   | A | -0.0671 |
| rs55649252  | G | 0.052   |
| rs704430    | C | 0.0315  |
| rs146191493 | T | 0.1452  |
| rs4686388   | G | -0.0337 |
| rs7648806   | T | -0.0525 |
| rs7643811   | C | 0.0355  |
| rs114260157 | A | -0.0963 |
| rs34419360  | C | -0.1202 |
| rs12629466  | T | 0.0444  |
| rs78461132  | C | 0.1831  |
| rs114450172 | T | 0.135   |
| rs76336757  | G | -0.0992 |
| rs35332218  | C | -0.0325 |
| rs141434932 | T | 0.128   |
| rs13090916  | G | 0.0397  |
| rs6779209   | C | 0.1775  |
| rs11711905  | G | 0.0833  |
| rs17622222  | A | 0.0663  |
| rs73202346  | T | 0.2139  |
| rs115285374 | G | -0.1435 |
| rs1354833   | G | 0.0343  |
| rs6800123   | C | -0.0399 |
| rs6788075   | T | -0.0324 |
| rs11927181  | T | -0.1981 |
| rs144191378 | T | 0.194   |

|             |   |         |
|-------------|---|---------|
| rs35960     | G | 0.0596  |
| rs13100953  | A | 0.0442  |
| rs168156    | G | -0.0542 |
| rs6549269   | G | 0.0312  |
| rs1377417   | T | 0.0843  |
| rs56871370  | C | 0.0459  |
| rs7628302   | A | 0.0791  |
| rs11714279  | A | -0.0487 |
| rs78548233  | T | 0.041   |
| rs116694575 | G | -0.0932 |
| rs12636835  | G | 0.0625  |
| rs75746712  | T | 0.2217  |
| rs1994876   | C | -0.0314 |
| rs73102054  | A | -0.2579 |
| rs9810444   | C | -0.0312 |
| rs13065274  | G | 0.0518  |
| rs4927701   | G | 0.0638  |
| rs113655509 | T | -0.2027 |
| rs6803454   | G | 0.0854  |
| rs663018    | G | -0.0795 |
| rs9830178   | T | 0.1339  |
| rs9858504   | A | 0.0561  |
| rs116329905 | T | -0.1536 |
| rs16864111  | A | -0.0504 |
| rs1521803   | C | -0.1655 |
| rs61110202  | G | -0.0424 |
| rs17656083  | A | 0.0305  |
| rs113751806 | A | -0.0753 |
| rs77452956  | C | 0.0624  |
| rs1438182   | T | -0.0542 |
| rs80119162  | A | 0.1413  |
| rs262985    | T | 0.0609  |
| rs16826980  | C | -0.1127 |
| rs67830620  | A | -0.0596 |
| rs79639458  | G | -0.1171 |
| rs73069121  | T | 0.1657  |
| rs78177650  | T | 0.0688  |
| rs79448636  | G | -0.1296 |
| rs114273732 | T | -0.2125 |
| rs62251536  | T | 0.1468  |
| rs76929866  | C | -0.0373 |
| rs4687503   | T | 0.1406  |
| rs115465666 | C | -0.0924 |
| rs112911495 | A | 0.0925  |
| rs2736793   | C | -0.0324 |
| rs78165376  | C | -0.0994 |
| rs2729013   | A | -0.1559 |

|             |   |         |
|-------------|---|---------|
| rs660224    | T | -0.173  |
| rs279591    | G | -0.0377 |
| rs6789451   | C | -0.0382 |
| rs4640543   | G | -0.13   |
| rs79755983  | G | -0.0715 |
| rs114548801 | C | 0.1413  |
| rs17021477  | C | -0.0435 |
| rs2135374   | C | -0.0394 |
| rs13315893  | A | 0.1785  |
| rs6779067   | G | -0.0352 |
| rs144961978 | C | -0.2324 |
| rs823302    | T | 0.0338  |
| rs150272031 | A | -0.1886 |
| rs140827361 | G | -0.0656 |
| rs12494105  | C | -0.0309 |
| rs9809050   | C | -0.0351 |
| rs9852744   | G | 0.0333  |
| rs9841080   | G | -0.0319 |
| rs148237296 | T | 0.1723  |
| rs73038214  | A | 0.0496  |
| rs4234345   | G | 0.1332  |
| rs61791710  | A | 0.0662  |
| rs139040976 | A | 0.255   |
| rs869585    | A | 0.1668  |
| rs6806321   | G | 0.0479  |
| rs1504068   | G | 0.0639  |
| rs73163484  | T | 0.1874  |
| rs151279114 | A | 0.2239  |
| rs7613419   | T | -0.0344 |
| rs148606103 | T | 0.2199  |
| rs4955287   | T | -0.0328 |
| rs7648681   | A | -0.0308 |
| rs141352577 | T | -0.1236 |
| rs2700429   | T | -0.034  |
| rs1710236   | C | 0.0324  |
| rs141871585 | A | 0.1373  |
| rs72970333  | C | 0.0982  |
| rs7634552   | C | -0.0309 |
| rs1387091   | G | -0.0387 |
| rs4494951   | A | -0.2017 |
| rs147050545 | C | 0.1321  |
| rs12495260  | T | -0.0339 |
| rs144943025 | G | -0.1918 |
| rs7650959   | T | -0.1651 |
| rs140059336 | A | 0.1842  |
| rs549560    | G | 0.034   |
| rs2131366   | G | -0.0315 |

|             |   |         |
|-------------|---|---------|
| rs832083    | A | 0.055   |
| rs73165300  | A | 0.1414  |
| rs9856661   | C | 0.0694  |
| rs7609682   | C | 0.0337  |
| rs414907    | G | -0.0317 |
| rs115182912 | A | 0.1031  |
| rs9822730   | A | 0.0379  |
| rs115483179 | G | -0.1861 |
| rs79523464  | T | -0.1028 |
| rs114732500 | G | -0.1398 |
| rs145965425 | G | 0.192   |
| rs75936562  | A | -0.1755 |
| rs13092161  | T | -0.1128 |
| rs116119809 | T | 0.2377  |
| rs115308273 | A | 0.1742  |
| rs78989726  | G | 0.1282  |
| rs145898680 | T | -0.1849 |
| rs9309738   | G | 0.0387  |
| rs13317009  | C | 0.0318  |
| rs115433431 | G | -0.0584 |
| rs35452476  | G | 0.1796  |
| rs74512449  | A | -0.2389 |
| rs17711446  | A | -0.0456 |
| rs9868994   | T | -0.0403 |
| rs12490293  | C | 0.0314  |
| rs60239556  | G | 0.033   |
| rs111979456 | A | -0.1313 |
| rs62240976  | G | -0.0554 |
| rs144501632 | A | 0.1842  |
| rs73205853  | A | -0.0558 |
| rs4131837   | C | 0.0705  |
| rs6443303   | A | -0.0387 |
| rs34955659  | T | 0.1219  |
| rs34794754  | G | -0.0472 |
| rs141735510 | A | -0.17   |
| rs6789720   | A | -0.0305 |
| rs4678376   | C | -0.0482 |
| rs72849826  | T | 0.1107  |
| rs9855648   | G | 0.1207  |
| rs7622739   | G | 0.0378  |
| rs78583732  | C | -0.1472 |
| rs116116529 | A | -0.16   |
| rs147466990 | C | -0.1249 |
| rs16864115  | T | -0.1228 |
| rs125700    | C | -0.052  |
| rs13433875  | G | 0.1161  |
| rs78019248  | G | -0.1025 |

|             |   |         |
|-------------|---|---------|
| rs35296558  | G | 0.0568  |
| rs11921986  | C | 0.0323  |
| rs11111990  | T | 0.0363  |
| rs62234200  | T | -0.0579 |
| rs12637527  | G | 0.1261  |
| rs17393779  | G | -0.1632 |
| rs113229392 | C | -0.0493 |
| rs242201    | G | -0.0654 |
| rs113939484 | G | 0.0882  |
| rs36083964  | A | -0.033  |
| rs62283836  | C | -0.1333 |
| rs73057656  | G | -0.1022 |
| rs2736760   | T | -0.0353 |
| rs140648152 | G | 0.2719  |
| rs1521398   | A | 0.0353  |
| rs115406765 | C | -0.1908 |
| rs62245749  | C | -0.0805 |
| rs6787724   | C | 0.0351  |
| rs722472    | C | 0.0441  |
| rs9862876   | G | -0.0382 |
| rs6795344   | G | 0.043   |
| rs56784629  | C | -0.0801 |
| rs142079098 | A | -0.2039 |
| rs1283002   | G | -0.0598 |
| rs75997980  | G | -0.1051 |
| rs34340414  | G | -0.1186 |
| rs116051595 | T | 0.1482  |
| rs2811469   | A | -0.0371 |
| rs779910    | C | -0.0307 |
| rs114674235 | A | -0.1879 |
| rs73112405  | A | -0.0724 |
| rs7634756   | G | 0.1399  |
| rs4333046   | T | -0.0537 |
| rs35326724  | C | -0.033  |
| rs58307102  | C | -0.0403 |
| rs58190475  | C | -0.1662 |
| rs1553136   | T | 0.0375  |
| rs28575453  | T | 0.0801  |
| rs4991950   | C | 0.0363  |
| rs12631530  | G | 0.1719  |
| rs144971222 | T | 0.181   |
| rs115844121 | T | -0.1596 |
| rs6783947   | A | 0.112   |
| rs2581885   | A | 0.0436  |
| rs58888051  | A | 0.069   |
| rs55991591  | T | 0.094   |
| rs7646600   | C | -0.0399 |

|             |   |         |
|-------------|---|---------|
| rs6780853   | T | 0.0395  |
| rs74792597  | T | 0.0858  |
| rs6789979   | A | 0.1233  |
| rs62275025  | T | -0.11   |
| rs112652416 | A | -0.0554 |
| rs80219068  | A | -0.1235 |
| rs115066682 | C | 0.1767  |
| rs76806035  | T | -0.0496 |
| rs9817180   | A | 0.1015  |
| rs75077798  | A | 0.149   |
| rs116243518 | G | 0.0882  |
| rs264114    | G | 0.0302  |
| rs112648376 | T | 0.1492  |
| rs370126    | G | 0.0496  |
| rs55839702  | A | -0.0336 |
| rs34609174  | C | -0.0855 |
| rs76821671  | A | 0.0521  |
| rs62236282  | T | -0.037  |
| rs9832974   | T | -0.0857 |
| rs9814104   | A | -0.0422 |
| rs17573676  | G | -0.0817 |
| rs111662185 | G | 0.087   |
| rs12491939  | T | -0.0476 |
| rs74886441  | T | -0.1326 |
| rs116659265 | C | -0.1575 |
| rs1707574   | A | 0.0381  |
| rs9842031   | C | 0.0844  |
| rs77072693  | G | 0.1835  |
| rs9809316   | A | -0.0336 |
| rs1350785   | A | 0.0322  |
| rs3821680   | G | 0.0348  |
| rs17046245  | T | 0.0892  |
| rs62234566  | A | -0.0333 |
| rs73103666  | G | 0.1467  |
| rs78625025  | T | -0.2491 |
| rs34856718  | A | -0.0917 |
| rs11710748  | T | -0.0747 |
| rs17042807  | C | 0.1192  |
| rs11714383  | T | -0.1044 |
| rs62261522  | A | 0.0824  |
| rs35521434  | T | 0.1158  |
| rs75375420  | C | -0.06   |
| rs1596505   | T | 0.0848  |
| rs139820027 | C | 0.0852  |
| rs145962629 | A | 0.2443  |
| rs76176112  | C | -0.1603 |
| rs72619971  | C | 0.095   |



|             |   |         |
|-------------|---|---------|
| rs7429323   | T | 0.1045  |
| rs6804187   | G | 0.0514  |
| rs73808494  | G | 0.0605  |
| rs2607953   | A | -0.0521 |
| rs9847990   | C | -0.1001 |
| rs62232625  | A | 0.0538  |
| rs73059403  | T | 0.0473  |
| rs73178164  | T | 0.1025  |
| rs7431119   | A | -0.0307 |
| rs149493310 | C | 0.1207  |
| rs150169803 | A | -0.1148 |
| rs11713153  | C | -0.036  |
| rs1882010   | T | -0.0686 |
| rs6769543   | T | 0.0516  |
| rs4410416   | G | -0.046  |
| rs116307917 | T | -0.179  |
| rs2121742   | C | 0.0305  |
| rs17843841  | A | 0.0991  |
| rs149200202 | A | -0.1973 |
| rs264152    | C | 0.0968  |
| rs149934301 | T | -0.1797 |
| rs114621892 | G | -0.1132 |
| rs3110915   | C | 0.0347  |
| rs12106863  | A | 0.0668  |
| rs73110381  | C | -0.2998 |
| rs9829421   | T | -0.0373 |
| rs114697212 | G | -0.1144 |
| rs9836764   | A | 0.0395  |
| rs78008395  | G | 0.1429  |
| rs7618256   | T | 0.0343  |
| rs79391370  | C | -0.0801 |
| rs145410058 | G | -0.1189 |
| rs76301341  | G | 0.1874  |
| rs73221384  | T | 0.0686  |
| rs842243    | A | -0.0334 |
| rs57203572  | T | 0.1355  |
| rs13095517  | T | 0.0422  |
| rs79068380  | T | -0.1231 |
| rs62298254  | G | 0.0628  |
| rs111772738 | G | -0.0998 |
| rs116177353 | C | -0.2728 |
| rs73140777  | A | 0.104   |
| rs12639432  | T | -0.0334 |
| rs1038485   | T | -0.032  |
| rs10212156  | T | -0.0347 |
| rs77996743  | G | -0.0673 |
| rs77462412  | G | 0.0594  |

|             |   |         |
|-------------|---|---------|
| rs73106816  | T | -0.0521 |
| rs2575996   | C | 0.0305  |
| rs2248029   | C | 0.0357  |
| rs55890339  | T | 0.0464  |
| rs275360    | T | -0.0603 |
| rs358377    | A | -0.0307 |
| rs75481539  | A | -0.0752 |
| rs115238032 | A | 0.1079  |
| rs144256579 | G | 0.3567  |
| rs6795437   | C | -0.0413 |
| rs79864813  | G | 0.163   |
| rs17220361  | A | -0.0589 |
| rs1521395   | A | -0.0742 |
| rs7634338   | C | -0.0965 |
| rs17648404  | C | 0.0727  |
| rs116329340 | T | 0.0901  |
| rs151108212 | T | 0.0879  |
| rs1731634   | T | 0.043   |
| rs655620    | A | 0.0426  |
| rs73015155  | C | -0.0775 |
| rs78772143  | A | -0.105  |
| rs13097498  | C | 0.0524  |
| rs77584387  | A | 0.2734  |
| rs9864515   | G | -0.0815 |
| rs62244324  | G | 0.0356  |
| rs13059525  | T | 0.0307  |
| rs73859030  | T | 0.0902  |
| rs471259    | T | 0.0586  |
| rs77288015  | G | 0.2327  |
| rs9869572   | C | -0.0647 |
| rs115245935 | C | 0.0531  |
| rs115311767 | A | 0.1168  |
| rs79943835  | G | 0.1329  |
| rs9289584   | T | 0.0379  |
| rs713372    | A | -0.0339 |
| rs144046585 | G | -0.1237 |
| rs17049660  | A | 0.1044  |
| rs2731934   | T | -0.1235 |
| rs3913495   | C | -0.0318 |
| rs114228231 | C | 0.1152  |
| rs1836577   | G | -0.0357 |
| rs35041149  | A | -0.101  |
| rs62286865  | A | -0.0662 |
| rs142114012 | A | 0.1499  |
| rs62242579  | G | -0.0662 |
| rs77852319  | C | 0.1706  |
| rs16854291  | G | 0.0413  |

|             |   |         |
|-------------|---|---------|
| rs146276373 | C | 0.2091  |
| rs513007    | C | -0.0421 |
| rs79353171  | C | -0.0636 |
| rs142863646 | T | -0.1296 |
| rs2717285   | G | 0.0345  |
| rs1584861   | G | -0.031  |
| rs79860386  | A | 0.1467  |
| rs75450462  | T | 0.146   |
| rs116147799 | T | 0.0731  |
| rs1518878   | C | -0.0301 |
| rs17029505  | A | 0.0997  |
| rs9882944   | G | 0.1338  |
| rs6779789   | A | -0.0598 |
| rs74852239  | A | -0.0964 |
| rs115909957 | A | 0.1583  |
| rs116833665 | C | 0.1127  |
| rs76386345  | C | 0.1869  |
| rs114379416 | T | 0.0592  |
| rs144197627 | T | -0.2211 |
| rs116065186 | T | 0.0534  |
| rs7625593   | C | 0.0357  |
| rs71327077  | A | 0.1195  |
| rs115897719 | G | -0.1426 |
| rs55672338  | T | -0.0314 |
| rs111791619 | C | -0.0982 |
| rs1350285   | C | -0.0652 |
| rs75740542  | A | 0.0656  |
| rs6794675   | A | 0.1316  |
| rs6764636   | T | 0.1096  |
| rs2291511   | T | -0.0376 |
| rs73205200  | T | -0.049  |
| rs9874742   | G | 0.0359  |
| rs11129771  | C | 0.0373  |
| rs6764100   | T | 0.0429  |
| rs13097795  | T | -0.0939 |
| rs13079876  | C | 0.0312  |
| rs114152799 | T | 0.1933  |
| rs197770    | G | 0.0427  |
| rs62228396  | T | 0.0691  |
| rs1403699   | T | 0.031   |
| rs940040    | T | -0.0408 |
| rs4686949   | A | -0.0474 |
| rs36060962  | T | 0.0575  |
| rs151326312 | G | 0.2407  |
| rs116478762 | A | 0.1791  |
| rs74535412  | A | -0.1186 |
| rs4504191   | T | 0.0352  |

|             |   |         |
|-------------|---|---------|
| rs187448    | T | 0.0345  |
| rs11129096  | A | -0.0318 |
| rs74566441  | T | 0.0723  |
| rs140345545 | A | 0.291   |
| rs79361856  | G | -0.1902 |
| rs7614051   | G | 0.0439  |
| rs900234    | C | -0.031  |
| rs77703956  | A | 0.28    |
| rs77032884  | C | 0.2031  |
| rs9867030   | C | 0.0811  |
| rs12152359  | A | 0.0613  |
| rs9838432   | A | -0.0331 |
| rs73076330  | G | 0.1548  |
| rs35277053  | T | 0.1523  |
| rs144864608 | T | 0.2411  |
| rs1426266   | T | -0.0347 |
| rs11712108  | C | 0.0307  |
| rs73014132  | G | -0.1106 |
| rs62244658  | C | 0.0402  |
| rs344671    | G | 0.0334  |
| rs6805236   | C | -0.0396 |
| rs7643342   | A | -0.0447 |
| rs113759988 | G | 0.1596  |
| rs2164552   | C | -0.0331 |
| rs76596041  | G | 0.1317  |
| rs55847435  | T | -0.1382 |
| rs11943     | T | 0.1575  |
| rs1511592   | C | 0.0453  |
| rs11922887  | T | 0.0304  |
| rs73085698  | T | 0.1044  |
| rs672784    | C | 0.0348  |
| rs511194    | T | 0.0762  |
| rs12492805  | G | -0.1058 |
| rs116347024 | C | -0.1015 |
| rs73152841  | C | -0.1343 |
| rs115969198 | C | 0.1671  |
| rs68049226  | G | -0.0604 |
| rs55852242  | G | 0.0413  |
| rs9868714   | A | -0.0614 |
| rs1842840   | T | -0.0318 |
| rs78999832  | T | -0.1585 |
| rs62251773  | C | 0.0918  |
| rs13066381  | T | -0.0313 |
| rs4386433   | G | -0.0686 |
| rs61269418  | A | -0.0888 |
| rs28862368  | A | 0.054   |
| rs2270969   | G | -0.0927 |

|             |   |         |
|-------------|---|---------|
| rs6802701   | C | -0.0305 |
| rs73071855  | A | -0.0788 |
| rs6808109   | A | 0.0324  |
| rs79525171  | G | 0.0894  |
| rs2664101   | A | -0.0302 |
| rs115190709 | T | 0.2576  |
| rs34974178  | C | 0.0511  |
| rs78386217  | T | 0.0771  |
| rs61206862  | G | -0.0381 |
| rs12638409  | T | -0.0347 |
| rs72994689  | G | -0.0483 |
| rs140199765 | C | 0.1799  |
| rs12496463  | A | 0.0426  |
| rs41264649  | T | 0.174   |
| rs9290826   | A | -0.0883 |
| rs1523475   | T | 0.0385  |
| rs13059920  | G | 0.057   |
| rs112610962 | C | -0.1256 |
| rs114350286 | G | 0.174   |
| rs17195442  | A | -0.0373 |
| rs73178228  | C | -0.1095 |
| rs112433884 | T | 0.1393  |
| rs114267888 | A | -0.0967 |
| rs62259306  | A | 0.1888  |
| rs55987749  | G | -0.1178 |
| rs2313182   | C | 0.0327  |
| rs303849    | C | 0.0361  |
| rs9861723   | G | -0.093  |
| rs3856667   | A | 0.0383  |
| rs1585082   | C | -0.0299 |
| rs13066616  | G | 0.0439  |
| rs62276421  | G | 0.2223  |
| rs17178976  | A | 0.0356  |
| rs11129122  | G | 0.0372  |
| rs9310736   | A | 0.0306  |
| rs2624655   | A | 0.0605  |
| rs148691207 | A | -0.1628 |
| rs12488055  | G | -0.1178 |
| rs17545117  | T | -0.1158 |
| rs13090556  | C | -0.0336 |
| rs6777822   | T | 0.0703  |
| rs75765994  | T | -0.0759 |
| rs148524572 | C | -0.1914 |
| rs114766353 | A | -0.2044 |
| rs76811617  | A | -0.0652 |
| rs13090497  | A | 0.0516  |
| rs112253290 | A | -0.2189 |

|             |   |         |
|-------------|---|---------|
| rs17399651  | T | 0.0805  |
| rs17201989  | T | 0.0805  |
| rs138957003 | G | 0.1299  |
| rs17010401  | C | -0.0636 |
| rs17038701  | G | 0.1142  |
| rs2282485   | C | -0.0383 |
| rs2691678   | G | -0.0398 |
| rs4839678   | A | 0.0447  |
| rs71308439  | C | -0.1766 |
| rs7616299   | A | 0.0419  |
| rs56124129  | G | -0.0851 |
| rs73100273  | A | -0.0356 |
| rs6782248   | G | 0.0439  |
| rs6767127   | A | -0.0471 |
| rs4679879   | A | 0.1264  |
| rs1851353   | A | 0.034   |
| rs9874855   | T | 0.0308  |
| rs9844083   | G | 0.0482  |
| rs2268484   | C | -0.0372 |
| rs13062287  | C | 0.0517  |
| rs62227352  | T | -0.0581 |
| rs6785305   | A | 0.0319  |
| rs111227523 | C | -0.1691 |
| rs6438761   | G | -0.0387 |
| rs9827757   | C | -0.0696 |
| rs73134424  | A | -0.0549 |
| rs1402211   | A | 0.0297  |
| rs2733585   | A | -0.0447 |
| rs2222484   | G | 0.0335  |
| rs10222347  | A | 0.0309  |
| rs55943141  | A | -0.0745 |
| rs10510881  | G | 0.0302  |
| rs155399    | C | -0.0348 |
| rs146784760 | A | 0.1981  |
| rs71308960  | T | -0.1039 |
| rs150269355 | G | 0.1742  |
| rs1419972   | G | 0.081   |
| rs148530992 | A | 0.1652  |
| rs13095937  | A | -0.2467 |
| rs58677846  | G | -0.0311 |
| rs62261544  | T | 0.0439  |
| rs141133219 | A | -0.2015 |
| rs17749903  | T | 0.0819  |
| rs62229796  | G | -0.2044 |
| rs6776129   | A | 0.032   |
| rs6444912   | T | 0.0335  |
| rs1387212   | C | -0.0673 |

|             |   |         |
|-------------|---|---------|
| rs9854603   | G | 0.0401  |
| rs12490360  | A | -0.1782 |
| rs62272715  | G | 0.0522  |
| rs76797172  | A | -0.221  |
| rs138182428 | T | 0.1288  |
| rs55839145  | C | -0.0315 |
| rs58891801  | G | 0.0773  |
| rs114242315 | T | 0.1529  |
| rs75349820  | C | 0.1159  |
| rs11129780  | A | -0.0441 |
| rs1356013   | T | 0.0307  |
| rs116234029 | C | -0.2416 |
| rs56070853  | C | 0.0971  |
| rs9836671   | T | -0.0766 |
| rs77269597  | T | 0.1025  |
| rs17804181  | T | 0.031   |
| rs11129407  | T | 0.0361  |
| rs116640572 | C | -0.1936 |
| rs113491905 | C | 0.109   |
| rs2679523   | G | 0.0392  |
| rs12485415  | T | 0.0927  |
| rs76367593  | G | -0.0679 |
| rs12632793  | A | -0.0812 |
| rs6769509   | A | 0.0317  |
| rs2083818   | A | 0.0344  |
| rs75636155  | C | 0.1453  |
| rs7625392   | C | 0.0344  |
| rs114172927 | C | -0.1631 |
| rs11708537  | A | 0.0435  |
| rs79498085  | C | 0.0837  |
| rs2649747   | G | -0.03   |
| rs10804856  | G | 0.0464  |
| rs2811366   | G | -0.0296 |
| rs3844271   | G | -0.0339 |
| rs114539921 | G | -0.1945 |
| rs13069924  | A | 0.0561  |
| rs76546281  | A | 0.0476  |
| rs62254366  | C | 0.2718  |
| rs77085148  | T | 0.1074  |
| rs80280502  | T | -0.1557 |
| rs7633997   | G | -0.0352 |
| rs720699    | A | 0.0404  |
| rs73091517  | G | 0.1236  |
| rs11709913  | A | -0.0429 |
| rs115665604 | T | 0.1283  |
| rs6766082   | T | 0.0629  |
| rs143489819 | T | -0.2753 |

|             |   |         |
|-------------|---|---------|
| rs116068125 | A | -0.0895 |
| rs115847948 | A | 0.2522  |
| rs143350743 | A | 0.1222  |
| rs143219752 | T | 0.1692  |
| rs112132062 | C | -0.1081 |
| rs11130880  | T | 0.0361  |
| rs78883514  | C | 0.102   |
| rs111894058 | G | -0.0627 |
| rs75118450  | C | -0.1089 |
| rs831082    | G | 0.0379  |
| rs114902230 | G | -0.1725 |
| rs59076737  | T | 0.0462  |
| rs12497495  | C | -0.0377 |
| rs62274632  | C | -0.1408 |
| rs721086    | T | -0.0302 |
| rs884237    | C | -0.0519 |
| rs4618222   | T | 0.0402  |
| rs60982615  | T | 0.0344  |
| rs116455903 | T | 0.168   |
| rs1152112   | C | 0.0441  |
| rs2633794   | T | 0.0372  |
| rs62232792  | T | 0.0497  |
| rs73060416  | G | -0.1038 |
| rs73042603  | A | 0.1455  |
| rs12634548  | G | 0.06    |
| rs75945388  | C | 0.1173  |
| rs6797867   | C | 0.1263  |
| rs150678010 | T | 0.2139  |
| rs11719619  | A | -0.0652 |
| rs78298496  | G | -0.1135 |
| rs28698751  | A | -0.0399 |
| rs114313362 | G | 0.1222  |
| rs34982190  | T | 0.105   |
| rs74813944  | T | -0.0874 |
| rs59263954  | T | -0.0347 |
| rs73163210  | T | -0.0595 |
| rs6780902   | C | -0.1039 |
| rs9836872   | T | 0.2129  |
| rs6444516   | T | 0.032   |
| rs145947492 | T | 0.197   |
| rs1026966   | A | 0.0392  |
| rs7644512   | C | -0.0517 |
| rs150663447 | G | 0.194   |
| rs114457714 | A | 0.1138  |
| rs2347322   | G | -0.0568 |
| rs112179339 | A | -0.075  |
| rs2042705   | A | -0.0357 |



|             |   |         |
|-------------|---|---------|
| rs143838063 | G | 0.1483  |
| rs144860824 | A | -0.145  |
| rs9866168   | T | 0.041   |
| rs10935368  | C | 0.0471  |
| rs10937260  | C | 0.0314  |
| rs76874136  | G | 0.1668  |
| rs4000279   | T | -0.0973 |
| rs11928083  | G | 0.0314  |
| rs9917735   | G | 0.0592  |
| rs6806982   | C | 0.0659  |
| rs71310373  | C | 0.0988  |
| rs4955212   | A | 0.0345  |
| rs3811645   | A | -0.0337 |
| rs1516336   | C | 0.0309  |
| rs116479850 | T | 0.2328  |
| rs360759    | T | -0.0297 |
| rs74440625  | T | -0.2711 |
| rs10936190  | T | 0.1005  |
| rs4955253   | A | -0.0426 |
| rs9222      | A | 0.0613  |
| rs73186237  | G | -0.0902 |
| rs112661445 | T | -0.1478 |
| rs35902618  | A | -0.0298 |
| rs66808961  | A | -0.0335 |
| rs149097065 | C | -0.2612 |
| rs62284463  | G | 0.151   |
| rs76046459  | G | -0.163  |
| rs114264167 | A | 0.092   |
| rs78283980  | A | 0.113   |
| rs116667804 | T | -0.2071 |
| rs76288086  | T | -0.1082 |
| rs114916951 | A | -0.0996 |
| rs113296022 | A | 0.0797  |
| rs73019382  | C | 0.0707  |
| rs115572925 | C | 0.2333  |
| rs9837661   | T | 0.0663  |
| rs146024196 | T | -0.2026 |
| rs661798    | G | 0.0292  |
| rs149867524 | G | -0.2492 |
| rs115894276 | A | 0.0967  |
| rs6790387   | C | 0.0588  |
| rs112772993 | C | 0.0987  |
| rs9850621   | T | 0.0312  |
| rs74642451  | G | 0.0987  |
| rs35477260  | G | -0.0741 |
| rs7374825   | T | -0.0305 |
| rs7612026   | A | -0.0753 |

|             |   |         |
|-------------|---|---------|
| rs7631029   | T | 0.0375  |
| rs116514399 | G | -0.1227 |
| rs56099243  | T | 0.1342  |
| rs73089625  | A | 0.1812  |
| rs78019734  | G | 0.1852  |
| rs73163271  | C | 0.0693  |
| rs73186336  | T | -0.1368 |
| rs62271842  | G | 0.0559  |
| rs77046785  | A | 0.0971  |
| rs4685447   | C | 0.0521  |
| rs6550664   | A | -0.0356 |
| rs6796342   | G | 0.0477  |
| rs2167470   | T | 0.047   |
| rs9820319   | T | 0.0309  |
| rs116227233 | A | -0.0717 |
| rs4974227   | G | -0.0362 |
| rs6437416   | C | -0.0472 |
| rs73154098  | C | 0.1912  |
| rs80218881  | G | 0.1453  |
| rs9826899   | A | -0.1737 |
| rs80011412  | A | -0.1515 |
| rs113115523 | G | 0.2647  |
| rs115429191 | C | -0.1503 |
| rs35595276  | A | -0.1493 |
| rs1464118   | C | 0.0401  |
| rs112400052 | C | 0.1423  |
| rs13094395  | T | -0.062  |
| rs72950361  | G | 0.0573  |
| rs475147    | T | -0.043  |
| rs4687936   | C | -0.0334 |
| rs621369    | A | 0.0353  |
| rs138202179 | T | 0.1149  |
| rs11707593  | T | 0.0379  |
| rs78834471  | G | 0.1246  |
| rs16859234  | C | -0.0464 |
| rs74710481  | A | -0.0684 |
| rs35311416  | T | -0.0406 |
| rs73097363  | C | -0.1479 |
| rs75074405  | G | -0.0824 |
| rs73084391  | A | -0.1224 |
| rs17280110  | C | 0.1181  |
| rs17181079  | G | 0.029   |
| rs80140734  | C | 0.1506  |
| rs113856485 | A | 0.1094  |
| rs76005926  | A | 0.1447  |
| rs6779672   | A | -0.0411 |
| rs9840718   | T | 0.048   |

|             |   |         |
|-------------|---|---------|
| rs777219    | C | -0.0491 |
| rs139426119 | A | -0.097  |
| rs76956850  | A | 0.136   |
| rs74696315  | T | -0.1233 |
| rs56196280  | T | 0.0494  |
| rs882089    | T | 0.0351  |
| rs76012677  | A | -0.1459 |
| rs73131858  | G | -0.1718 |
| rs111361147 | C | -0.2056 |
| rs148958688 | G | 0.1362  |
| rs41292858  | T | 0.0877  |
| rs587555    | A | 0.0309  |
| rs6782633   | A | 0.0955  |
| rs1442583   | A | -0.0641 |
| rs4677118   | T | -0.0356 |
| rs138936411 | T | -0.0923 |
| rs7626990   | A | -0.0365 |
| rs58581200  | G | -0.1158 |
| rs143481077 | A | 0.1664  |
| rs17574486  | A | -0.0651 |
| rs4855485   | G | 0.0286  |
| rs1878267   | C | 0.0304  |
| rs75413172  | C | -0.2234 |
| rs115361754 | A | -0.1573 |
| rs111389344 | C | 0.1487  |
| rs76471139  | C | -0.0497 |
| rs9861421   | A | 0.1751  |
| rs12106789  | G | -0.0286 |
| rs7340622   | C | -0.0301 |
| rs28811415  | T | -0.092  |
| rs7639940   | C | -0.1257 |
| rs79607848  | T | 0.1712  |
| rs9814447   | C | 0.0402  |
| rs34507081  | G | 0.1165  |
| rs17059503  | C | -0.1382 |
| rs6766488   | T | -0.0475 |
| rs2003216   | T | -0.0314 |
| rs7610516   | C | 0.0309  |
| rs12491878  | T | -0.1642 |
| rs4955352   | C | 0.0516  |
| rs11917524  | G | 0.0678  |
| rs12635549  | A | -0.0425 |
| rs72993567  | A | -0.0854 |
| rs138668112 | A | -0.2547 |
| rs73164637  | C | 0.1407  |
| rs79025618  | T | -0.2475 |
| rs4679981   | C | -0.038  |

|             |   |         |
|-------------|---|---------|
| rs74399066  | A | -0.2074 |
| rs56111657  | C | 0.1129  |
| rs116654741 | T | 0.1859  |
| rs73154036  | A | 0.047   |
| rs116618694 | G | 0.2397  |
| rs35365684  | C | 0.0786  |
| rs7625843   | T | 0.0305  |
| rs80275930  | A | 0.0623  |
| rs77286176  | T | 0.126   |
| rs17732588  | C | -0.2269 |
| rs28575470  | T | 0.0605  |
| rs139875843 | A | 0.1108  |
| rs6549824   | C | 0.0458  |
| rs77318135  | C | 0.2362  |
| rs11721055  | G | 0.0472  |
| rs139125439 | G | 0.0613  |
| rs147538869 | A | 0.2375  |
| rs56663890  | C | 0.0502  |
| rs114833772 | A | 0.1479  |
| rs871652    | A | 0.0359  |
| rs17272271  | C | -0.0423 |
| rs111455604 | A | -0.0798 |
| rs55682808  | G | -0.1766 |
| rs12496272  | G | -0.0957 |
| rs79850821  | A | -0.0676 |
| rs59143878  | T | 0.1178  |
| rs148969183 | A | -0.1543 |
| rs116209355 | G | -0.245  |
| rs1909582   | G | 0.0351  |
| rs2630248   | C | 0.0924  |
| rs67182448  | C | 0.0569  |
| rs9860180   | G | -0.0488 |
| rs77305066  | A | 0.0865  |
| rs146824053 | A | 0.0974  |
| rs73233389  | T | -0.0662 |
| rs67867674  | A | 0.1015  |
| rs79696607  | T | 0.1136  |
| rs56408216  | C | 0.1613  |
| rs7622430   | G | 0.0288  |
| rs9872244   | G | -0.0354 |
| rs328050    | G | -0.0286 |
| rs9839511   | C | -0.0834 |
| rs112708555 | T | 0.2471  |
| rs11915705  | C | -0.0671 |
| rs56108752  | G | 0.1078  |
| rs1881669   | A | 0.0395  |
| rs4501086   | A | 0.0313  |

|             |   |         |
|-------------|---|---------|
| rs77590009  | G | -0.0797 |
| rs34416524  | T | 0.073   |
| rs4855112   | A | -0.0312 |
| rs113797233 | T | -0.0443 |
| rs342913    | A | 0.0296  |
| rs17005789  | G | 0.0843  |
| rs13064472  | A | -0.0377 |
| rs1461124   | T | 0.0335  |
| rs112675210 | A | -0.0783 |
| rs7613553   | A | 0.0293  |
| rs12491477  | G | 0.136   |
| rs138525276 | G | -0.2089 |
| rs56298543  | C | -0.03   |
| rs13078041  | C | 0.0298  |
| rs111817793 | T | 0.159   |
| rs13075577  | A | 0.1113  |
| rs34034750  | A | -0.0406 |
| rs13093726  | T | 0.1528  |
| rs7617388   | A | -0.0499 |
| rs148369035 | T | -0.14   |
| rs114158393 | T | 0.1204  |
| rs73873136  | C | 0.048   |
| rs79548068  | A | 0.1412  |
| rs147707050 | C | 0.1046  |
| rs115082146 | A | -0.1465 |
| rs62266506  | T | 0.0498  |
| rs113610340 | G | 0.2134  |
| rs75221584  | T | -0.0969 |
| rs75659374  | C | 0.1376  |
| rs4685554   | T | -0.0493 |
| rs78775848  | T | -0.091  |
| rs72549251  | C | -0.2581 |
| rs62236260  | C | 0.0555  |
| rs9877782   | C | -0.0488 |
| rs77839347  | T | -0.1167 |
| rs1994727   | T | 0.0456  |
| rs6441794   | C | -0.0711 |
| rs17068597  | C | -0.0471 |
| rs147766289 | T | -0.2324 |
| rs13065964  | G | -0.0297 |
| rs113338448 | G | -0.0639 |
| rs115394351 | G | 0.079   |
| rs142604803 | A | 0.2529  |
| rs1490508   | G | -0.155  |
| rs73205778  | A | -0.0675 |
| rs714435    | G | -0.033  |
| rs114334995 | T | 0.067   |

|             |   |         |
|-------------|---|---------|
| rs77775212  | A | -0.086  |
| rs114752509 | T | -0.2236 |
| rs4683491   | G | -0.0313 |
| rs1350286   | C | -0.0311 |
| rs115306644 | T | -0.1278 |
| rs7652157   | T | 0.0288  |
| rs13326405  | C | 0.0588  |
| rs1452079   | C | 0.1372  |
| rs7619002   | C | -0.1075 |
| rs6796475   | C | 0.0399  |
| rs2111990   | G | -0.1096 |
| rs2163907   | A | -0.0344 |
| rs9811203   | C | 0.0309  |
| rs379945    | G | 0.1261  |
| rs10513451  | T | 0.038   |
| rs76951511  | C | 0.1329  |
| rs11719131  | G | -0.0527 |
| rs2306507   | G | -0.0352 |
| rs76729135  | A | -0.125  |
| rs17416597  | A | 0.0314  |
| rs56189177  | T | -0.1131 |
| rs938242    | G | -0.0293 |
| rs73156654  | A | 0.0419  |
| rs6775598   | C | 0.1591  |
| rs17294121  | G | 0.0651  |
| rs73181940  | C | -0.0912 |
| rs9823028   | A | -0.0301 |
| rs1078398   | G | -0.0333 |
| rs1354316   | A | -0.0288 |
| rs4831100   | G | 0.0389  |
| rs10470540  | T | 0.0294  |
| rs75516811  | T | -0.1101 |
| rs73160751  | C | 0.1663  |
| rs73203065  | A | 0.2066  |
| rs73038344  | G | 0.0431  |
| rs2399013   | G | -0.1344 |
| rs11928946  | T | 0.0392  |
| rs73127329  | T | 0.1577  |
| rs9834600   | T | 0.1368  |
| rs1248842   | G | 0.0695  |
| rs75324353  | T | -0.1439 |
| rs62273352  | G | 0.206   |
| rs2712402   | G | 0.0889  |
| rs4688562   | T | 0.0579  |
| rs116643249 | A | -0.0561 |
| rs684237    | T | 0.0291  |
| rs116210781 | T | 0.2101  |

|             |   |         |
|-------------|---|---------|
| rs76336715  | A | 0.0928  |
| rs12492229  | C | 0.0308  |
| rs13076906  | A | -0.0393 |
| rs115937474 | T | -0.226  |
| rs162212    | G | 0.0308  |
| rs149861735 | G | 0.1283  |
| rs151184105 | T | 0.169   |
| rs11716322  | C | 0.1308  |
| rs9833049   | G | 0.0397  |
| rs1157514   | C | -0.0319 |
| rs79057419  | A | 0.1336  |
| rs9870027   | T | 0.0287  |
| rs17061792  | T | -0.0446 |
| rs116185214 | G | -0.1217 |
| rs73066129  | A | 0.0581  |
| rs116688965 | T | -0.1224 |
| rs139840344 | G | 0.1899  |
| rs74648194  | G | 0.0954  |
| rs115923832 | C | 0.1578  |
| rs9850047   | T | -0.0484 |
| rs11925648  | C | -0.0849 |
| rs143255403 | A | 0.2883  |
| rs6762925   | A | 0.0288  |
| rs17606778  | A | 0.0372  |
| rs1983163   | A | 0.0326  |
| rs62267141  | T | -0.0457 |
| rs143502374 | A | 0.2089  |
| rs17665280  | C | -0.0319 |
| rs4615118   | G | 0.034   |
| rs4618190   | G | -0.1865 |
| rs9871913   | C | -0.0473 |
| rs1495371   | T | 0.0658  |
| rs144871917 | A | -0.1525 |
| rs79854121  | C | -0.1244 |
| rs9848438   | C | -0.1584 |
| rs79110283  | A | 0.1152  |
| rs138980014 | A | 0.1999  |
| rs4527343   | A | -0.0312 |
| rs62253587  | T | 0.0588  |
| rs115367214 | G | -0.2203 |
| rs9829072   | C | 0.0294  |
| rs11921448  | T | -0.0367 |
| rs138979721 | T | -0.1535 |
| rs709451    | G | -0.0321 |
| rs77926536  | A | -0.0818 |
| rs1405034   | A | 0.042   |
| rs72552102  | C | 0.1677  |

|             |   |         |
|-------------|---|---------|
| rs4683795   | G | 0.031   |
| rs62234404  | T | 0.0468  |
| rs111287925 | T | 0.1249  |
| rs9835061   | A | -0.0573 |
| rs112499048 | G | 0.1303  |
| rs1918101   | T | 0.0447  |
| rs13065768  | C | -0.1057 |
| rs13100376  | A | -0.0457 |
| rs6549387   | C | -0.0576 |
| rs139648587 | T | 0.0781  |
| rs56171809  | C | 0.1696  |
| rs116248771 | G | 0.0366  |
| rs34286389  | C | -0.0366 |
| rs4916482   | G | -0.0422 |
| rs137996956 | G | -0.0375 |
| rs997245    | T | -0.0837 |
| rs3772840   | T | -0.0284 |
| rs62294696  | G | -0.0655 |
| rs115771670 | A | -0.1068 |
| rs73136796  | C | -0.1014 |
| rs17314168  | C | 0.0291  |
| rs74339032  | T | 0.1444  |
| rs115235164 | T | -0.1348 |
| rs113072288 | G | 0.1605  |
| rs112714621 | G | 0.1028  |
| rs139081176 | T | -0.0519 |
| rs72628640  | G | -0.1025 |
| rs55955702  | A | 0.1586  |
| rs9823939   | G | -0.0781 |
| rs9815203   | A | 0.0331  |
| rs71625013  | G | -0.0545 |
| rs2219702   | A | 0.0769  |
| rs78849004  | A | -0.0924 |
| rs138329319 | C | -0.1283 |
| rs147413792 | A | 0.1995  |
| rs4331657   | A | 0.0355  |
| rs9839930   | A | 0.0298  |
| rs77893146  | G | 0.172   |
| rs9683303   | T | 0.0375  |
| rs13097229  | T | -0.0499 |
| rs1602698   | G | -0.0832 |
| rs75602844  | C | 0.1436  |
| rs9843602   | G | 0.029   |
| rs16864145  | C | 0.1064  |
| rs2241308   | A | -0.0375 |
| rs144172216 | T | 0.0755  |
| rs149008249 | A | -0.066  |



|             |   |         |
|-------------|---|---------|
| rs35931046  | C | -0.0313 |
| rs9871754   | G | 0.1556  |
| rs724450    | T | -0.0374 |
| rs9865485   | T | 0.044   |
| rs55703247  | C | 0.0753  |
| rs62285971  | G | -0.0388 |
| rs1532244   | G | -0.0489 |
| rs34707595  | G | -0.054  |
| rs34874227  | T | -0.1421 |
| rs36212516  | A | -0.0714 |
| rs2029665   | A | 0.0286  |
| rs76601653  | C | -0.0499 |
| rs1552392   | T | -0.1096 |
| rs62252356  | T | -0.1933 |
| rs68082651  | C | -0.1275 |
| rs12486772  | G | 0.0367  |
| rs55750769  | C | 0.0918  |
| rs77235099  | T | -0.1679 |
| rs13315414  | T | -0.1253 |
| rs75483758  | T | 0.0691  |
| rs9852547   | A | 0.1117  |
| rs3774667   | G | -0.047  |
| rs56764514  | T | -0.033  |
| rs12639029  | C | 0.046   |
| rs1009965   | A | 0.0693  |
| rs114389312 | C | -0.2255 |
| rs150845241 | T | -0.1587 |
| rs138546425 | G | -0.1518 |
| rs79796809  | C | 0.1779  |
| rs73090039  | C | 0.0847  |
| rs115356575 | A | 0.2347  |
| rs116794612 | A | -0.0792 |
| rs9820768   | T | -0.0944 |
| rs1551424   | G | 0.0294  |
| rs114283497 | A | 0.1032  |
| rs13070122  | G | -0.0284 |
| rs7640178   | T | 0.0839  |
| rs114572156 | T | 0.1408  |
| rs149747526 | A | -0.1996 |
| rs6801039   | G | 0.03    |
| rs4102412   | A | -0.0301 |
| rs114171886 | A | -0.2142 |
| rs112257251 | A | 0.0399  |
| rs754808    | T | -0.032  |
| rs75507658  | T | 0.1426  |
| rs2720233   | G | 0.1006  |
| rs116506401 | G | -0.1815 |

|             |   |         |
|-------------|---|---------|
| rs12491429  | C | -0.0291 |
| rs151216277 | A | 0.1453  |
| rs6782933   | A | -0.0733 |
| rs169045    | C | -0.0298 |
| rs16851803  | A | 0.1132  |
| rs11709896  | T | -0.0579 |
| rs11928049  | C | 0.0301  |
| rs67801338  | T | -0.0323 |
| rs78057804  | G | 0.1036  |
| rs76934798  | A | 0.1093  |
| rs6800495   | T | 0.0321  |
| rs55820630  | T | -0.0402 |
| rs6784338   | A | -0.0524 |
| rs4241437   | G | 0.0322  |
| rs1460929   | C | 0.1236  |
| rs4419341   | T | -0.0432 |
| rs6765728   | T | 0.0491  |
| rs111344882 | T | -0.1756 |
| rs1516301   | T | -0.1209 |
| rs2728033   | G | 0.0299  |
| rs6773960   | T | 0.0829  |
| rs73136067  | G | -0.0433 |
| rs17200285  | A | 0.1526  |
| rs78172939  | G | -0.118  |
| rs112514171 | T | -0.1356 |
| rs74434165  | C | 0.0357  |
| rs7426504   | G | 0.176   |
| rs73037016  | T | -0.1841 |
| rs34558120  | A | -0.135  |
| rs2174233   | G | 0.0441  |
| rs1137832   | G | 0.0684  |
| rs349549    | C | 0.0304  |
| rs114390445 | A | 0.2113  |
| rs62242550  | A | -0.0739 |
| rs141811025 | A | -0.2441 |
| rs301569    | A | 0.0917  |
| rs1880838   | A | 0.0287  |
| rs164958    | T | -0.0421 |
| rs7431346   | T | 0.0423  |
| rs13075932  | C | 0.0503  |
| rs111431419 | C | 0.1766  |
| rs2372758   | A | 0.0299  |
| rs116135711 | C | 0.0884  |
| rs150736272 | C | 0.1636  |
| rs73153705  | C | 0.1398  |
| rs75467744  | G | 0.0662  |
| rs76212525  | C | -0.1029 |

|             |   |         |
|-------------|---|---------|
| rs115590399 | T | -0.1283 |
| rs12631973  | T | -0.0438 |
| rs79896173  | T | 0.1196  |
| rs11715332  | T | 0.1186  |
| rs6803101   | G | 0.03    |
| rs6776791   | T | 0.0283  |
| rs28450867  | A | -0.0691 |
| rs142616038 | G | 0.2536  |
| rs4320030   | C | -0.033  |
| rs115609961 | A | 0.1701  |
| rs79943910  | T | 0.1368  |
| rs17021139  | C | 0.0718  |
| rs74601350  | G | 0.2924  |
| rs79567885  | C | -0.1545 |
| rs113125447 | A | -0.1546 |
| rs111901475 | A | 0.0909  |
| rs13100723  | T | 0.0721  |
| rs116470303 | C | -0.1331 |
| rs10470296  | C | -0.0673 |
| rs76757190  | T | 0.0404  |
| rs115431673 | C | 0.1803  |
| rs4470556   | T | -0.0347 |
| rs11717042  | A | 0.0333  |
| rs7632447   | G | -0.0346 |
| rs115985985 | C | -0.1623 |
| rs1369403   | T | -0.0561 |
| rs77153881  | T | 0.1294  |
| rs79335355  | T | 0.1092  |
| rs79369891  | A | -0.0676 |
| rs2134779   | G | 0.0292  |
| rs76732393  | G | 0.1529  |
| rs1014695   | C | -0.0408 |
| rs62232083  | A | 0.0662  |
| rs76292232  | T | -0.1284 |
| rs74720080  | G | -0.1377 |
| rs6778750   | C | -0.0286 |
| rs815703    | A | -0.0397 |
| rs7637089   | A | -0.0487 |
| rs150111985 | C | -0.0963 |
| rs73075350  | T | 0.1261  |
| rs12633737  | A | -0.0338 |
| rs4476462   | C | 0.0541  |
| rs114441975 | C | -0.0877 |
| rs75597442  | G | 0.1106  |
| rs111483048 | A | -0.0419 |
| rs79395311  | T | 0.1334  |
| rs2140502   | G | 0.0298  |

|             |   |         |
|-------------|---|---------|
| rs138772828 | A | 0.2117  |
| rs1508207   | T | 0.0313  |
| rs2772449   | G | 0.0552  |
| rs112082601 | A | 0.1537  |
| rs62278761  | G | -0.0307 |
| rs142018417 | G | 0.1519  |
| rs4676847   | C | 0.0584  |
| rs9844004   | C | 0.0397  |
| rs3864102   | T | -0.0365 |
| rs115970758 | T | 0.1143  |
| rs113685228 | C | -0.1484 |
| rs140754245 | A | 0.1604  |
| rs79424406  | A | -0.0633 |
| rs34078176  | A | 0.098   |
| rs10490856  | T | -0.1201 |
| rs138697802 | A | -0.1725 |
| rs2953795   | C | 0.0848  |
| rs13086568  | T | -0.0964 |
| rs1351627   | A | 0.0411  |
| rs34548393  | A | -0.06   |
| rs73190999  | A | -0.2028 |
| rs73156871  | A | 0.0696  |
| rs73153961  | C | 0.0732  |
| rs2553942   | T | 0.0375  |
| rs139497458 | T | 0.1665  |
| rs62258017  | G | 0.0529  |
| rs139611313 | C | 0.177   |
| rs116285080 | C | -0.1237 |
| rs75274102  | A | -0.0688 |
| rs13067579  | T | -0.0446 |
| rs630040    | G | -0.0394 |
| rs112878393 | A | -0.0653 |
| rs112525336 | G | 0.1006  |
| rs6419757   | C | 0.0635  |
| rs10933732  | A | 0.0809  |
| rs73187205  | G | 0.1532  |
| rs150494180 | A | 0.1504  |
| rs148308106 | A | 0.1781  |
| rs111340281 | A | 0.18    |
| rs150140500 | A | 0.1511  |
| rs114599195 | C | 0.1219  |
| rs75393787  | T | -0.1392 |
| rs13087036  | A | 0.1879  |
| rs9873983   | C | 0.0286  |
| rs13097253  | G | -0.0586 |
| rs112265751 | A | 0.0542  |
| rs56361229  | T | -0.0435 |

|             |   |         |
|-------------|---|---------|
| rs77730862  | G | 0.2072  |
| rs75492537  | C | -0.1295 |
| rs114756562 | G | 0.0979  |
| rs12494438  | A | 0.04    |
| rs79991466  | G | 0.063   |
| rs77964125  | T | 0.0688  |
| rs113631936 | C | -0.1645 |
| rs12494203  | A | -0.0345 |
| rs73049914  | A | 0.0887  |
| rs7636205   | C | -0.0489 |
| rs62282494  | T | -0.1183 |
| rs79161645  | C | -0.2019 |
| rs73809835  | T | 0.1157  |
| rs13075358  | T | -0.0297 |
| rs7641385   | G | 0.0648  |
| rs11715696  | G | 0.1011  |
| rs62270486  | A | 0.0539  |
| rs7613476   | T | -0.2022 |
| rs11717482  | C | -0.0361 |
| rs139374929 | G | 0.1678  |
| rs114467488 | G | -0.1728 |
| rs4571268   | C | -0.0564 |
| rs115028961 | G | 0.0992  |
| rs9843503   | G | 0.0641  |
| rs75835511  | G | -0.127  |
| rs115246616 | G | 0.1859  |
| rs7640327   | T | 0.0312  |
| rs150798508 | G | 0.2519  |
| rs73171528  | A | -0.0348 |
| rs72883802  | C | 0.1153  |
| rs4687032   | G | 0.0378  |
| rs17635521  | G | -0.0999 |
| rs150351509 | A | 0.1876  |
| rs11927834  | A | -0.104  |
| rs9823183   | C | -0.0421 |
| rs1281461   | A | -0.0334 |
| rs7647341   | T | -0.0386 |
| rs62257287  | T | 0.1097  |
| rs1167241   | C | -0.0285 |
| rs1373612   | G | -0.0568 |
| rs13084916  | A | 0.0493  |
| rs111785173 | C | -0.1316 |
| rs3773404   | T | 0.0363  |
| rs80076841  | A | -0.1266 |
| rs12695072  | A | 0.0326  |
| rs149402393 | T | -0.1173 |
| rs12695510  | T | 0.0342  |

|             |   |         |
|-------------|---|---------|
| rs80244473  | G | -0.112  |
| rs148894145 | C | 0.2986  |
| rs9848484   | A | -0.0389 |
| rs114671462 | T | -0.1198 |
| rs9860076   | A | 0.0505  |
| rs545517    | A | -0.0349 |
| rs56144226  | C | -0.0298 |
| rs330245    | C | -0.0393 |
| rs76582976  | T | 0.1092  |
| rs57801260  | A | 0.0371  |
| rs2685112   | A | 0.0329  |
| rs140124868 | T | 0.1608  |
| rs641320    | A | 0.0708  |
| rs4683684   | T | -0.0291 |
| rs690085    | T | -0.0286 |
| rs11929443  | A | -0.1706 |
| rs55725726  | A | 0.0379  |
| rs73170100  | G | 0.0799  |
| rs874404    | T | 0.0319  |
| rs112693682 | T | -0.2112 |
| rs1078247   | A | 0.0311  |
| rs55657445  | C | 0.046   |
| rs145304669 | C | 0.0396  |
| rs138873724 | T | -0.1596 |
| rs57063234  | A | 0.0738  |
| rs6778691   | G | -0.0614 |
| rs4111592   | C | 0.0361  |
| rs76629804  | C | 0.0751  |
| rs59881561  | A | 0.0399  |
| rs10933678  | A | 0.0564  |
| rs3774533   | G | -0.0275 |
| rs74597036  | T | 0.0535  |
| rs73190072  | T | -0.1034 |
| rs116170953 | G | 0.1227  |
| rs9825965   | C | -0.0287 |
| rs73051577  | T | 0.0415  |
| rs3749223   | A | 0.037   |
| rs111286424 | G | -0.1172 |
| rs76395576  | A | -0.1833 |
| rs9859399   | T | 0.0329  |
| rs74834856  | A | 0.0664  |
| rs78912167  | T | -0.0801 |
| rs75571852  | A | 0.0783  |
| rs13094642  | G | 0.0699  |
| rs80055578  | T | 0.0816  |
| rs79176931  | C | -0.0552 |
| rs77781643  | C | -0.1438 |

|             |   |         |
|-------------|---|---------|
| rs80308945  | C | -0.1251 |
| rs2720268   | C | -0.0393 |
| rs12490481  | C | -0.0297 |
| rs116068929 | G | -0.1227 |
| rs77009800  | A | -0.0756 |
| rs1845130   | G | 0.0393  |
| rs79523263  | G | -0.0901 |
| rs76859987  | T | -0.1285 |
| rs6782714   | T | 0.0289  |
| rs163542    | G | -0.2036 |
| rs77662473  | C | 0.0746  |
| rs13091309  | C | 0.0643  |
| rs9864446   | C | 0.0296  |
| rs55791224  | A | 0.0577  |
| rs57381447  | G | 0.1073  |
| rs58310271  | C | -0.0399 |
| rs13061652  | A | 0.0285  |
| rs145343927 | G | 0.1409  |
| rs76418455  | T | 0.0683  |
| rs1444764   | A | 0.0325  |
| rs35501665  | G | -0.0383 |
| rs1344869   | A | 0.0771  |
| rs34320859  | A | -0.1322 |
| rs75490820  | A | 0.0601  |
| rs115523307 | A | 0.1675  |
| rs9845045   | C | -0.1449 |
| rs116659860 | G | -0.0909 |
| rs73066381  | T | 0.0492  |
| rs116105069 | G | 0.1473  |
| rs143172940 | C | 0.0705  |
| rs139020405 | A | 0.1666  |
| rs954494    | A | 0.0314  |
| rs1055690   | C | 0.0458  |
| rs59222753  | A | 0.0978  |
| rs73024225  | A | -0.1491 |
| rs149229124 | T | -0.1675 |
| rs112716031 | T | 0.1731  |
| rs72622565  | T | -0.0878 |
| rs58628781  | T | -0.1079 |
| rs12638681  | C | -0.0507 |
| rs779905    | T | 0.0406  |
| rs632776    | C | -0.048  |
| rs10513210  | T | 0.0548  |
| rs7640430   | A | -0.0577 |
| rs4476497   | G | -0.1254 |
| rs62271756  | G | -0.0957 |
| rs73157093  | C | 0.0391  |

|             |   |         |
|-------------|---|---------|
| rs4497978   | C | -0.0297 |
| rs73009420  | G | 0.2019  |
| rs62255818  | G | 0.0863  |
| rs13068772  | G | -0.0368 |
| rs140565493 | T | -0.0814 |
| rs6788586   | G | 0.0781  |
| rs2370987   | T | -0.1202 |
| rs62250526  | T | -0.0607 |
| rs7637558   | G | -0.0316 |
| rs12497639  | A | 0.0289  |
| rs139709912 | G | -0.1327 |
| rs75102918  | T | 0.1546  |
| rs80132504  | C | -0.1157 |
| rs114440527 | C | 0.184   |
| rs6780959   | G | -0.0467 |
| rs1488795   | C | 0.0323  |
| rs6800181   | G | 0.0377  |
| rs7627919   | C | -0.1872 |
| rs9873095   | G | 0.1048  |
| rs1881309   | G | -0.0322 |
| rs73052629  | G | 0.1967  |
| rs34517609  | C | 0.0799  |
| rs62244094  | T | -0.0462 |
| rs16854538  | A | 0.1029  |
| rs1798631   | C | -0.0801 |
| rs36158264  | G | -0.0797 |
| rs13098278  | G | -0.2381 |
| rs150966305 | T | -0.1251 |
| rs75544784  | T | -0.1601 |
| rs78176024  | C | 0.0768  |
| rs4955761   | T | -0.0341 |
| rs1458004   | A | -0.114  |
| rs1948158   | A | 0.0314  |
| rs116781165 | A | 0.1675  |
| rs76664127  | G | 0.1913  |
| rs13065629  | C | 0.0393  |
| rs73210099  | A | 0.1699  |
| rs10935065  | A | 0.0311  |
| rs113462615 | C | 0.1117  |
| rs342051    | C | 0.0292  |
| rs75948640  | T | 0.1632  |
| rs1838141   | G | -0.0309 |
| rs116222707 | T | -0.1969 |
| rs7647187   | T | 0.0512  |
| rs6764280   | C | -0.0896 |
| rs6796055   | T | -0.1106 |
| rs4642136   | T | 0.0337  |



|             |   |         |
|-------------|---|---------|
| rs2090909   | C | -0.0921 |
| rs1471271   | T | 0.029   |
| rs28584761  | A | 0.0362  |
| rs9846099   | T | 0.0376  |
| rs1504069   | C | -0.0326 |
| rs115798409 | G | 0.0731  |
| rs34354268  | G | -0.037  |
| rs76102129  | G | -0.1861 |
| rs56309502  | G | 0.0377  |
| rs149190516 | A | 0.129   |
| rs148551429 | G | -0.165  |
| rs7621998   | G | -0.1203 |
| rs77520374  | T | 0.1481  |
| rs2063125   | G | -0.0319 |
| rs115600064 | C | 0.0437  |
| rs10510826  | T | 0.0493  |
| rs62251919  | C | -0.1485 |
| rs77012640  | G | -0.1275 |
| rs636277    | A | 0.0319  |
| rs6763099   | C | 0.0351  |
| rs73191713  | G | 0.087   |
| rs62408946  | A | 0.0346  |
| rs79149846  | A | 0.1555  |
| rs2875528   | T | -0.0465 |
| rs75698059  | G | -0.1973 |
| rs524360    | C | 0.029   |
| rs111594743 | T | -0.181  |
| rs149758650 | T | -0.1216 |
| rs115088345 | T | 0.0645  |
| rs76810682  | G | -0.1513 |
| rs2122324   | G | 0.1131  |
| rs9311980   | T | 0.0369  |
| rs6765629   | A | 0.0288  |
| rs12152251  | C | 0.0682  |
| rs7621589   | C | 0.0293  |
| rs263002    | T | 0.0917  |
| rs115010343 | C | -0.1372 |
| rs112579976 | G | 0.0573  |
| rs2712996   | G | 0.0603  |
| rs9867418   | T | -0.0509 |
| rs12152459  | G | 0.0414  |
| rs4855961   | A | 0.0582  |
| rs1994077   | G | -0.0483 |
| rs62242380  | C | -0.0337 |
| rs9310707   | A | 0.0293  |
| rs4687148   | G | 0.0517  |
| rs116288386 | A | -0.0675 |

|             |   |         |
|-------------|---|---------|
| rs148994788 | A | 0.1285  |
| rs7613235   | G | 0.0405  |
| rs74691141  | T | -0.0569 |
| rs4362694   | T | -0.1483 |
| rs112556722 | T | 0.1138  |
| rs11708125  | C | 0.0726  |
| rs4146784   | A | -0.039  |
| rs116643716 | A | 0.1578  |
| rs77822820  | T | 0.0578  |
| rs78724197  | A | -0.0617 |
| rs6797526   | T | 0.03    |
| rs62246178  | A | -0.0554 |
| rs9838891   | C | -0.0354 |
| rs112906612 | G | 0.2171  |
| rs62234268  | G | 0.1095  |
| rs116478481 | T | 0.2159  |
| rs1503738   | A | -0.0289 |
| rs7630621   | G | -0.0312 |
| rs1817615   | T | -0.043  |
| rs56390626  | G | 0.0821  |
| rs7649028   | T | 0.0317  |
| rs36006255  | A | -0.0533 |
| rs2247173   | A | 0.1113  |
| rs73173796  | G | 0.048   |
| rs28674898  | A | -0.0289 |
| rs56040546  | A | 0.0349  |
| rs6786629   | A | -0.0898 |
| rs13092095  | T | 0.0475  |
| rs17732368  | A | 0.0852  |
| rs13082398  | A | 0.0287  |
| rs67948137  | T | -0.1224 |
| rs4381930   | T | 0.0323  |
| rs114319347 | G | -0.1255 |
| rs7635013   | C | -0.0342 |
| rs77942621  | G | 0.0525  |
| rs149522284 | T | 0.1423  |
| rs79087781  | A | 0.0697  |
| rs3773309   | C | -0.0435 |
| rs73163876  | G | -0.1811 |
| rs114205521 | G | -0.2174 |
| rs78341897  | G | -0.0468 |
| rs115260148 | T | -0.1167 |
| rs336614    | T | 0.0275  |
| rs6800179   | G | 0.0415  |
| rs138332050 | A | 0.1078  |
| rs11535078  | T | -0.1376 |
| rs77505126  | T | -0.0877 |

|             |   |         |
|-------------|---|---------|
| rs116333189 | T | 0.1893  |
| rs144733839 | C | 0.1688  |
| rs73193048  | C | 0.0879  |
| rs146413863 | T | 0.1235  |
| rs11717186  | A | 0.0663  |
| rs4458401   | T | -0.0339 |
| rs17013665  | T | -0.0334 |
| rs12487333  | T | -0.0342 |
| rs4686816   | C | -0.0571 |
| rs1406559   | G | 0.0286  |
| rs13059137  | T | -0.0327 |
| rs73162374  | T | 0.1283  |
| rs112451160 | C | 0.0937  |
| rs115797300 | G | -0.0818 |
| rs968628    | G | 0.0278  |
| rs146312506 | G | -0.1457 |
| rs143610214 | T | 0.2236  |
| rs9817697   | A | 0.0916  |
| rs13078176  | T | -0.1851 |
| rs11719588  | G | -0.0304 |
| rs17033991  | A | 0.0606  |
| rs73044208  | T | 0.1793  |
| rs6808442   | C | 0.0745  |
| rs34881495  | T | -0.0321 |
| rs6798351   | T | 0.0434  |
| rs500910    | T | -0.0315 |
| rs2699848   | T | 0.0292  |
| rs6789038   | C | 0.0443  |
| rs61269136  | T | -0.0521 |
| rs13075686  | C | -0.0299 |
| rs115000530 | T | 0.0611  |
| rs115730807 | G | -0.1217 |
| rs116831965 | A | 0.1438  |
| rs116044014 | A | 0.1028  |
| rs77046304  | G | -0.1791 |
| rs12495901  | G | 0.0741  |
| rs7636091   | G | 0.0563  |
| rs7615620   | A | -0.0293 |
| rs115318218 | G | 0.1865  |
| rs79303302  | A | -0.1188 |
| rs6445346   | C | -0.0715 |
| rs55660709  | T | 0.0501  |
| rs80062084  | T | -0.161  |
| rs901089    | C | -0.0351 |
| rs9819786   | T | 0.0276  |
| rs822776    | G | -0.028  |
| rs75491849  | C | -0.1342 |

|             |   |         |
|-------------|---|---------|
| rs9839427   | G | -0.0296 |
| rs115558792 | C | -0.1495 |
| rs60863236  | C | -0.0451 |
| rs11709614  | A | -0.0303 |
| rs139758330 | T | -0.0938 |
| rs1449873   | C | -0.0411 |
| rs2203071   | T | -0.0458 |
| rs9861329   | T | -0.0282 |
| rs12633892  | G | -0.0361 |
| rs13083634  | T | -0.0329 |
| rs114739542 | C | -0.0964 |
| rs1299752   | C | -0.0418 |
| rs10934354  | A | 0.0297  |
| rs113806621 | T | 0.0724  |
| rs111528470 | G | -0.1309 |
| rs13100089  | A | -0.0775 |
| rs6801017   | G | -0.0344 |
| rs1443531   | A | 0.1363  |
| rs873685    | T | 0.044   |
| rs113516983 | T | 0.1553  |
| rs9883363   | A | 0.0358  |
| rs111751790 | G | -0.1706 |
| rs9836754   | C | -0.0282 |
| rs34622313  | T | 0.0488  |
| rs630743    | A | -0.0311 |
| rs115167222 | A | -0.1618 |
| rs76675952  | A | -0.1766 |
| rs9848415   | A | -0.0313 |
| rs4680931   | G | -0.0277 |
| rs78076163  | C | 0.1355  |
| rs4858182   | A | 0.0322  |
| rs73147258  | G | 0.0613  |
| rs7612622   | C | 0.0282  |
| rs17050220  | A | 0.0424  |
| rs28535738  | G | -0.0449 |
| rs4312691   | C | 0.0276  |
| rs4384918   | C | -0.0362 |
| rs114154970 | T | 0.1824  |
| rs2455891   | T | 0.0308  |
| rs1274226   | T | 0.0327  |
| rs78331870  | T | -0.0904 |
| rs9836934   | T | -0.036  |
| rs9816312   | T | -0.0438 |
| rs79967534  | C | 0.087   |
| rs13063766  | T | 0.0818  |
| rs28471083  | T | 0.0916  |
| rs35238780  | C | -0.0494 |

|             |   |         |
|-------------|---|---------|
| rs144443161 | T | -0.1105 |
| rs66596975  | T | 0.0339  |
| rs17817202  | T | -0.1436 |
| rs115220619 | A | 0.1364  |
| rs55934314  | A | 0.2136  |
| rs13097864  | T | -0.1024 |
| rs77152734  | C | -0.1318 |
| rs116444076 | G | -0.0761 |
| rs1608592   | A | 0.0317  |
| rs145053545 | C | 0.2013  |
| rs28621708  | T | 0.0458  |
| rs9828620   | A | 0.0286  |
| rs41289618  | C | -0.0831 |
| rs56118570  | T | 0.0405  |
| rs138681403 | A | 0.1469  |
| rs41397044  | T | 0.0325  |
| rs114031221 | G | -0.056  |
| rs1179911   | G | 0.0293  |
| rs12485991  | A | -0.0872 |
| rs61523196  | A | 0.032   |
| rs6802719   | T | -0.085  |
| rs62245883  | T | -0.1392 |
| rs35385164  | A | -0.1149 |
| rs77264412  | G | 0.0504  |
| rs34443195  | A | 0.0734  |
| rs1021813   | C | -0.0313 |
| rs62287422  | A | -0.032  |
| rs4101507   | C | 0.0402  |
| rs4682259   | T | -0.0364 |
| rs6764703   | G | 0.1644  |
| rs75639774  | A | 0.0664  |
| rs142723723 | A | 0.1     |
| rs7653048   | T | 0.0481  |
| rs75902409  | C | 0.1297  |
| rs140321477 | A | -0.1805 |
| rs1242059   | G | -0.0668 |
| rs9867525   | T | 0.0299  |
| rs111524946 | A | 0.1052  |
| rs115904595 | A | -0.1614 |
| rs6437847   | G | -0.0276 |
| rs1452193   | T | -0.0276 |
| rs80113949  | A | 0.1066  |
| rs116606614 | T | 0.1129  |
| rs9811139   | C | -0.0499 |
| rs13060811  | G | 0.0397  |
| rs533962    | C | 0.0337  |
| rs146735513 | T | 0.1004  |

|             |   |         |
|-------------|---|---------|
| rs146561190 | C | -0.1409 |
| rs113409576 | T | -0.1016 |
| rs3100792   | C | 0.054   |
| rs74977272  | C | 0.1223  |
| rs62292974  | C | 0.0436  |
| rs56078722  | T | 0.0373  |
| rs62245173  | T | -0.0359 |
| rs78556275  | A | -0.0559 |
| rs4597661   | T | -0.0351 |
| rs75089886  | T | 0.2218  |
| rs77266339  | C | 0.0857  |
| rs7610565   | C | 0.0817  |
| rs144742004 | A | 0.1473  |
| rs114424605 | A | -0.0987 |
| rs77247159  | C | -0.1069 |
| rs6770055   | G | -0.0371 |
| rs115002295 | G | -0.1912 |
| rs10937312  | A | -0.0387 |
| rs73152545  | G | -0.088  |
| rs6786557   | A | -0.0732 |
| rs6801821   | C | -0.0296 |
| rs17049639  | T | -0.0485 |
| rs1390765   | G | 0.0413  |
| rs76049046  | T | -0.0863 |
| rs4684235   | A | 0.037   |
| rs17331109  | G | 0.0929  |
| rs7623781   | T | 0.032   |
| rs2100415   | C | 0.0293  |
| rs13094301  | T | -0.0348 |
| rs12107402  | T | 0.0716  |
| rs155886    | T | 0.0497  |
| rs79056381  | C | -0.1393 |
| rs114589557 | T | 0.1923  |
| rs35452994  | A | 0.0597  |
| rs73118141  | C | -0.0362 |
| rs150543756 | C | -0.1168 |
| rs73021628  | G | 0.1682  |
| rs1454144   | C | 0.042   |
| rs1383844   | C | 0.0339  |
| rs150285548 | C | -0.1489 |
| rs143767101 | A | 0.1516  |
| rs13068975  | G | 0.0443  |
| rs76461688  | A | 0.0898  |
| rs112582032 | A | 0.1127  |
| rs6785709   | G | 0.0517  |
| rs1259445   | A | -0.0315 |
| rs28625915  | C | -0.1786 |

|             |   |         |
|-------------|---|---------|
| rs6785296   | G | -0.029  |
| rs11922147  | C | 0.0728  |
| rs6808180   | G | 0.0849  |
| rs75196513  | A | -0.1608 |
| rs112306592 | A | 0.0634  |
| rs11922517  | C | -0.1276 |
| rs882059    | C | -0.0285 |
| rs7622437   | C | 0.0297  |
| rs62238222  | T | -0.0605 |
| rs13433995  | T | -0.0722 |
| rs35862     | T | -0.0278 |
| rs78140886  | T | -0.1835 |
| rs115868793 | A | -0.1769 |
| rs141177552 | A | -0.1935 |
| rs17050246  | C | 0.207   |
| rs62252188  | A | -0.1165 |
| rs115800210 | A | 0.1401  |
| rs150784298 | A | 0.1964  |
| rs76016233  | G | 0.13    |
| rs10513681  | C | 0.2463  |
| rs35451838  | C | -0.1279 |
| rs67505222  | A | 0.0468  |
| rs2285370   | A | -0.0734 |
| rs117875661 | A | -0.1218 |
| rs1842306   | C | -0.0311 |
| rs7625872   | A | 0.0387  |
| rs774752    | A | -0.0512 |
| rs77588818  | C | -0.1407 |
| rs76962277  | T | -0.122  |
| rs76752908  | T | -0.1577 |
| rs142780281 | C | 0.1451  |
| rs115307266 | A | 0.1529  |
| rs3773704   | C | -0.0909 |
| rs1458985   | G | -0.1086 |
| rs150418951 | C | 0.1425  |
| rs115379936 | G | -0.0932 |
| rs13063547  | T | -0.0339 |
| rs140254252 | T | 0.2112  |
| rs115237507 | G | 0.0827  |
| rs141989211 | G | -0.2237 |
| rs115820436 | A | 0.1966  |
| rs17656685  | A | -0.1505 |
| rs74852705  | T | -0.0649 |
| rs73048443  | G | 0.0364  |
| rs6808341   | C | 0.0313  |
| rs17042373  | T | 0.1043  |
| rs114260391 | T | 0.2002  |

|             |   |         |
|-------------|---|---------|
| rs73139077  | C | -0.0355 |
| rs7433834   | C | 0.0481  |
| rs71623470  | A | 0.054   |
| rs872715    | A | -0.1422 |
| rs144664464 | G | -0.1743 |
| rs141539008 | A | 0.1192  |
| rs62285624  | T | -0.1173 |
| rs62245763  | G | -0.1573 |
| rs12107887  | C | 0.0286  |
| rs17607135  | C | 0.0439  |
| rs7617340   | T | 0.0289  |
| rs138413693 | A | 0.1124  |
| rs77578567  | T | 0.0561  |
| rs76069261  | T | 0.0645  |
| rs213423    | C | -0.0772 |
| rs140132140 | T | 0.1564  |
| rs112862339 | A | 0.1128  |
| rs73812500  | T | 0.1166  |
| rs35674510  | T | 0.0723  |
| rs34022279  | A | 0.0364  |
| rs76154719  | A | -0.1148 |
| rs149014436 | T | -0.1869 |
| rs115988344 | T | -0.1553 |
| rs417390    | C | 0.0367  |
| rs7374385   | C | 0.1051  |
| rs1828013   | G | 0.0408  |
| rs66875251  | T | 0.0373  |
| rs2133590   | G | -0.0302 |
| rs4246662   | A | -0.0451 |
| rs74927835  | A | -0.213  |
| rs112203331 | T | 0.1155  |
| rs114203552 | A | 0.1586  |
| rs6793039   | A | -0.0915 |
| rs75060708  | A | -0.1195 |
| rs800370    | A | 0.1469  |
| rs6798308   | T | -0.0277 |
| rs1992426   | G | 0.0353  |
| rs115013686 | C | 0.1896  |
| rs7628305   | C | 0.181   |
| rs114550349 | G | 0.1814  |
| rs73215928  | G | 0.1514  |
| rs73068693  | G | -0.1037 |
| rs78143315  | A | 0.0565  |
| rs3772611   | C | 0.0744  |
| rs13099630  | T | -0.2159 |
| rs7611607   | G | 0.1639  |
| rs6802358   | G | -0.0371 |



|             |   |         |
|-------------|---|---------|
| rs111663299 | A | 0.0491  |
| rs80281183  | T | 0.1556  |
| rs7373459   | C | 0.0422  |
| rs144968109 | G | -0.1681 |
| rs6804034   | T | 0.0314  |
| rs334790    | G | 0.0653  |
| rs114836705 | G | -0.1106 |
| rs114574351 | A | 0.1269  |
| rs73228935  | C | -0.0623 |
| rs74678274  | T | 0.11    |
| rs9828115   | G | -0.0905 |
| rs73013380  | T | 0.1433  |
| rs115495818 | G | 0.1161  |
| rs4685012   | G | -0.0298 |
| rs115443587 | A | 0.1079  |
| rs73186680  | A | -0.1628 |
| rs117307338 | A | -0.0801 |
| rs9875310   | G | -0.0311 |
| rs1426810   | G | 0.0272  |
| rs115957508 | T | -0.2484 |
| rs2369467   | C | 0.2153  |
| rs80255683  | T | 0.0861  |
| rs77982189  | A | 0.0876  |
| rs73110374  | C | 0.0531  |
| rs11929332  | C | -0.032  |
| rs112260902 | T | 0.0863  |
| rs9844438   | A | 0.1308  |
| rs6768569   | A | -0.0279 |
| rs4245878   | A | -0.033  |
| rs62271130  | C | 0.0456  |
| rs11927311  | C | 0.0581  |
| rs4591460   | A | -0.0345 |
| rs34797365  | C | 0.0574  |
| rs7651400   | A | -0.1658 |
| rs28545218  | A | -0.1263 |
| rs116448228 | C | 0.0864  |
| rs1495839   | A | 0.0282  |
| rs9838622   | A | -0.0324 |
| rs13080750  | T | 0.0489  |
| rs116423614 | A | -0.1564 |
| rs6550889   | T | -0.0295 |
| rs11466480  | G | 0.1053  |
| rs113753629 | A | 0.0756  |
| rs35561956  | T | -0.0392 |
| rs358810    | T | 0.0405  |
| rs144571735 | A | -0.114  |
| rs9855092   | G | -0.0338 |

|             |   |         |
|-------------|---|---------|
| rs13087154  | A | -0.0927 |
| rs16860245  | C | 0.0715  |
| rs634393    | T | 0.0518  |
| rs143792336 | A | 0.2213  |
| rs77650712  | G | -0.1805 |
| rs6414610   | G | -0.0439 |
| rs150420119 | T | -0.2099 |
| rs7652831   | G | -0.1646 |
| rs144768092 | C | 0.1632  |
| rs73026543  | A | 0.1214  |
| rs9865044   | G | -0.0365 |
| rs145974115 | C | 0.1315  |
| rs2087598   | G | 0.0882  |
| rs13317259  | A | 0.205   |
| rs74733487  | C | -0.1939 |
| rs13093417  | G | -0.0492 |
| rs7630416   | C | 0.0333  |
| rs112565655 | A | 0.1668  |
| rs78398630  | G | -0.1035 |
| rs77639519  | G | 0.1966  |
| rs1710885   | C | 0.0375  |
| rs1568576   | T | 0.0342  |
| rs142622180 | A | 0.1467  |
| rs403412    | A | -0.0335 |
| rs74964350  | A | 0.1513  |
| rs34654030  | A | 0.039   |
| rs145822740 | C | -0.208  |
| rs140804061 | C | -0.1533 |
| rs17512378  | C | 0.121   |
| rs146039893 | A | 0.1591  |
| rs9873853   | A | 0.0799  |
| rs4347968   | T | -0.1345 |
| rs62275090  | A | 0.049   |
| rs9872564   | G | -0.0287 |
| rs115664155 | T | -0.1814 |
| rs78114319  | C | 0.0751  |
| rs11919684  | C | -0.0664 |
| rs73014607  | T | -0.2763 |
| rs74600029  | G | -0.0618 |
| rs17366568  | A | 0.0588  |
| rs6800130   | T | -0.0321 |
| rs116528491 | T | 0.1057  |
| rs79589055  | A | 0.0395  |
| rs7639622   | T | 0.0298  |
| rs62242587  | A | 0.0683  |
| rs7641924   | T | -0.095  |
| rs15205     | T | 0.1091  |

|             |   |         |
|-------------|---|---------|
| rs293915    | A | -0.0272 |
| rs75415798  | A | -0.1569 |
| rs115515893 | A | -0.1158 |
| rs1712542   | T | 0.1509  |
| rs4688101   | A | -0.027  |
| rs4678075   | T | 0.0312  |
| rs1483628   | C | 0.0415  |
| rs13325698  | C | 0.0333  |
| rs115318818 | A | -0.1056 |
| rs12630204  | T | 0.0986  |
| rs151198918 | C | -0.1807 |
| rs76180343  | G | 0.1954  |
| rs4677872   | A | -0.0326 |
| rs36130730  | T | -0.0494 |
| rs7635642   | C | -0.0287 |
| rs5011096   | T | -0.0591 |
| rs76775688  | A | 0.0715  |
| rs7626500   | A | -0.0332 |
| rs154238    | G | 0.0317  |
| rs7644694   | A | 0.1173  |
| rs77811673  | C | -0.0668 |
| rs9837161   | T | -0.0275 |
| rs6808530   | T | -0.0436 |
| rs9827849   | G | -0.0275 |
| rs62236331  | A | -0.082  |
| rs62233948  | T | 0.0993  |
| rs113013633 | G | 0.178   |
| rs1518993   | A | 0.0778  |
| rs7633354   | G | -0.0266 |
| rs17681207  | T | -0.0726 |
| rs114932447 | A | 0.1151  |
| rs142638552 | C | 0.1291  |
| rs73140300  | T | -0.077  |
| rs7614393   | G | 0.0984  |
| rs13073229  | A | 0.1338  |
| rs4974050   | C | -0.0948 |
| rs111387211 | G | -0.0645 |
| rs4470441   | C | 0.0366  |
| rs73023211  | A | -0.1991 |
| rs76448299  | T | -0.1907 |
| rs73204273  | C | 0.0832  |
| rs59016477  | C | -0.0492 |
| rs1055161   | A | 0.0279  |
| rs17033143  | A | 0.0531  |
| rs79868543  | C | -0.1065 |
| rs4277628   | T | 0.0271  |
| rs6783043   | A | 0.0274  |

|             |   |         |
|-------------|---|---------|
| rs9861019   | C | -0.0918 |
| rs2596837   | C | 0.0307  |
| rs79729546  | T | -0.1177 |
| rs116329575 | T | -0.1643 |
| rs3828372   | G | 0.0316  |
| rs1400673   | G | -0.0522 |
| rs2289272   | A | 0.0832  |
| rs11717750  | C | 0.0273  |
| rs140392762 | A | -0.128  |
| rs9836743   | T | -0.0384 |
| rs73811005  | A | 0.0492  |
| rs9847463   | G | -0.0272 |
| rs6443966   | T | -0.0604 |
| rs4257538   | C | 0.0366  |
| rs13353416  | C | 0.1147  |
| rs78131070  | T | 0.1403  |
| rs115470842 | A | 0.3022  |
| rs72998676  | T | 0.0909  |
| rs17045263  | C | 0.1718  |
| rs3732797   | A | -0.0503 |
| rs148874751 | C | 0.1973  |
| rs12631772  | T | -0.0877 |
| rs6772267   | C | -0.0525 |
| rs1707601   | T | 0.0277  |
| rs12330361  | G | 0.0933  |
| rs73047624  | T | -0.1353 |
| rs6766779   | T | 0.0859  |
| rs1910236   | A | -0.0272 |
| rs73160185  | G | 0.0361  |
| rs74868079  | A | -0.1039 |
| rs7647338   | C | 0.0653  |
| rs77219309  | A | -0.0925 |
| rs146668686 | T | -0.049  |
| rs1391049   | C | 0.1135  |
| rs143913465 | G | -0.2547 |
| rs56015012  | A | -0.1371 |
| rs478250    | A | -0.0346 |
| rs78628794  | C | 0.1254  |
| rs80076187  | G | -0.0577 |
| rs150235784 | G | 0.2266  |
| rs75678022  | G | -0.1383 |
| rs13069941  | C | 0.0342  |
| rs184813    | T | -0.1504 |
| rs66524784  | C | -0.0404 |
| rs79057241  | A | -0.043  |
| rs146336781 | C | -0.1673 |
| rs114781589 | T | -0.2123 |

|             |   |         |
|-------------|---|---------|
| rs9815273   | C | -0.1088 |
| rs2372346   | A | 0.1113  |
| rs34924380  | G | -0.038  |
| rs78319620  | G | -0.1111 |
| rs2372069   | A | -0.0493 |
| rs73184735  | C | -0.1099 |
| rs10513518  | T | -0.1141 |
| rs143446671 | T | 0.1771  |
| rs13063977  | T | 0.0278  |
| rs115179602 | G | 0.098   |
| rs57190742  | A | 0.1649  |
| rs111819048 | C | -0.2248 |
| rs28436583  | T | -0.0539 |
| rs4677689   | T | -0.0681 |
| rs4684618   | T | -0.0739 |
| rs74529217  | C | -0.0993 |
| rs114714788 | G | 0.16    |
| rs35993532  | G | -0.0359 |
| rs268657    | C | -0.052  |
| rs11185541  | T | -0.032  |
| rs12152400  | C | -0.0354 |
| rs115562294 | A | 0.1591  |
| rs17039234  | G | -0.0279 |
| rs9828937   | C | 0.0446  |
| rs72615614  | G | 0.0811  |
| rs62273799  | G | 0.1604  |
| rs9682960   | C | -0.0438 |
| rs56088529  | G | -0.042  |
| rs34753558  | A | 0.0544  |
| rs3903765   | C | -0.0294 |
| rs79947265  | T | 0.0642  |
| rs2567324   | A | -0.084  |
| rs7638504   | C | 0.0393  |
| rs114704235 | T | -0.1057 |
| rs111748235 | T | -0.1405 |
| rs116083364 | A | -0.0673 |
| rs35694819  | G | 0.0372  |
| rs55999829  | A | -0.0393 |
| rs13083450  | T | 0.0307  |
| rs7645327   | A | 0.0506  |
| rs1559977   | A | -0.069  |
| rs6772933   | G | -0.0515 |
| rs4321507   | T | 0.1231  |
| rs148993502 | T | 0.106   |
| rs13094783  | A | -0.0284 |
| rs79617360  | A | 0.122   |
| rs28787005  | T | 0.0595  |

|             |   |         |
|-------------|---|---------|
| rs141435070 | A | -0.1094 |
| rs140890911 | C | -0.2086 |
| rs983154    | T | -0.0275 |
| rs79698118  | G | 0.154   |
| rs62256233  | G | 0.0427  |
| rs75541019  | T | 0.1167  |
| rs36064261  | A | -0.092  |
| rs76998170  | T | -0.1218 |
| rs116890561 | T | -0.1245 |
| rs62280764  | G | -0.1389 |
| rs72986121  | G | -0.1205 |
| rs35487831  | G | -0.0403 |
| rs2568851   | G | 0.0282  |
| rs4955279   | G | 0.0488  |
| rs304230    | G | -0.0298 |
| rs13078310  | C | -0.0309 |
| rs7640149   | A | 0.0359  |
| rs114446141 | T | 0.1136  |
| rs7433454   | T | 0.1797  |
| rs4688483   | T | -0.104  |
| rs4955187   | C | 0.0631  |
| rs79251239  | T | -0.0359 |
| rs12496459  | T | -0.1438 |
| rs139920519 | A | -0.2003 |
| rs139868003 | C | -0.1362 |
| rs35322917  | G | 0.0769  |
| rs61072144  | A | 0.0429  |
| rs113558962 | G | -0.117  |
| rs2304577   | A | 0.0373  |
| rs115635577 | C | 0.1221  |
| rs4955931   | C | -0.0317 |
| rs116623860 | G | -0.1489 |
| rs6781958   | A | -0.0442 |
| rs4685042   | G | -0.0294 |
| rs73037023  | G | -0.1935 |
| rs66752951  | T | 0.1001  |
| rs7650157   | A | 0.1827  |
| rs937406    | A | -0.0358 |
| rs74318378  | T | 0.1564  |
| rs61791208  | C | 0.1289  |
| rs55931430  | C | -0.0393 |
| rs76758413  | A | 0.1252  |
| rs11709973  | C | -0.03   |
| rs114435865 | A | -0.1241 |
| rs6442487   | G | -0.0305 |
| rs35565301  | A | 0.0817  |
| rs112218621 | T | -0.1026 |

|             |   |         |
|-------------|---|---------|
| rs34107440  | A | 0.034   |
| rs6788452   | A | -0.145  |
| rs9841975   | G | -0.03   |
| rs17012751  | C | 0.0421  |
| rs6762507   | T | 0.0582  |
| rs7623067   | A | -0.0267 |
| rs78010658  | G | -0.1347 |
| rs792128    | C | 0.0306  |
| rs2325855   | C | 0.0357  |
| rs79153799  | A | 0.1842  |
| rs1455331   | A | 0.0337  |
| rs141185577 | A | 0.1351  |
| rs75035362  | A | -0.1063 |
| rs6442883   | A | 0.1513  |
| rs9861238   | A | -0.027  |
| rs150236966 | C | -0.1894 |
| rs62252618  | A | -0.0283 |
| rs11707190  | G | -0.1815 |
| rs2611621   | G | -0.0571 |
| rs17733561  | C | -0.1244 |
| rs36112205  | C | 0.0511  |
| rs116753784 | T | -0.1171 |
| rs9846383   | G | 0.0664  |
| rs112074858 | A | 0.0433  |
| rs112166883 | A | 0.0477  |
| rs77014261  | T | 0.1517  |
| rs56022756  | A | 0.1568  |
| rs144483183 | T | 0.1029  |
| rs262956    | T | 0.0275  |
| rs78795981  | C | -0.0436 |
| rs74697015  | T | 0.1426  |
| rs6769409   | T | 0.1212  |
| rs74548059  | A | 0.1296  |
| rs830653    | T | 0.046   |
| rs73120663  | A | -0.1887 |
| rs72927806  | T | 0.2237  |
| rs62232956  | T | -0.0859 |
| rs13086093  | C | 0.0325  |
| rs4916589   | C | 0.0297  |
| rs9844658   | A | 0.0679  |
| rs74684476  | C | -0.1494 |
| rs17050174  | C | -0.0958 |
| rs1817442   | C | 0.0315  |
| rs7626291   | C | 0.1431  |
| rs12485491  | T | 0.0719  |
| rs115397503 | T | -0.1821 |
| rs16850948  | A | 0.0626  |

|             |   |         |
|-------------|---|---------|
| rs6437408   | C | 0.0809  |
| rs145510349 | C | -0.055  |
| rs116383062 | G | 0.1116  |
| rs73172046  | G | -0.0755 |
| rs4434167   | T | -0.11   |
| rs112548942 | T | -0.1521 |
| rs3804898   | C | -0.0297 |
| rs116270586 | G | -0.153  |
| rs76549714  | A | 0.1163  |
| rs57444720  | C | -0.0292 |
| rs72999843  | T | 0.1331  |
| rs78622784  | G | 0.1098  |
| rs9827536   | C | 0.0277  |
| rs2692671   | C | 0.0341  |
| rs146396508 | A | -0.1495 |
| rs17189202  | A | -0.0535 |
| rs73121931  | A | 0.161   |
| rs114170924 | A | 0.0869  |
| rs291958    | A | 0.0698  |
| rs115835130 | C | -0.1833 |
| rs13081043  | A | 0.0311  |
| rs11928306  | T | 0.0471  |
| rs3863113   | A | -0.0284 |
| rs62288873  | A | 0.0776  |
| rs138306480 | T | -0.1432 |
| rs6810204   | T | -0.0471 |
| rs78565082  | A | 0.065   |
| rs11707430  | C | 0.0328  |
| rs2293246   | G | 0.039   |
| rs75943132  | T | -0.068  |
| rs11708355  | A | -0.0854 |
| rs1504057   | C | 0.0267  |
| rs143262485 | A | -0.0959 |
| rs112478776 | T | 0.1841  |
| rs17187699  | A | -0.0359 |
| rs12630740  | A | 0.0389  |
| rs2619507   | G | 0.0358  |
| rs34740816  | A | 0.0628  |
| rs7621057   | C | -0.0603 |
| rs71304016  | A | -0.1351 |
| rs1910854   | C | 0.0372  |
| rs9809313   | T | -0.0427 |
| rs73220435  | C | -0.0451 |
| rs16839221  | C | -0.0538 |
| rs79695092  | A | 0.0781  |
| rs1687312   | C | 0.0964  |
| rs2350276   | G | 0.0378  |



|             |   |         |
|-------------|---|---------|
| rs145501308 | A | 0.105   |
| rs145587561 | C | 0.1285  |
| rs2608071   | G | -0.0305 |
| rs75301623  | A | 0.101   |
| rs11129846  | T | 0.041   |
| rs116466454 | C | -0.1871 |
| rs34096808  | T | -0.0902 |
| rs62261828  | C | 0.0425  |
| rs3912493   | C | 0.0278  |
| rs7611631   | G | 0.0325  |
| rs56310892  | T | -0.0644 |
| rs140781726 | A | 0.1581  |
| rs142829516 | A | 0.1154  |
| rs76584681  | A | 0.0797  |
| rs115526223 | T | 0.1355  |
| rs116565456 | C | 0.1429  |
| rs74467414  | A | 0.115   |
| rs111480446 | T | 0.1577  |
| rs705026    | A | -0.0404 |
| rs62248553  | A | -0.0515 |
| rs144664826 | G | 0.0694  |
| rs12632952  | A | 0.0596  |
| rs621353    | C | -0.0293 |
| rs62266362  | A | 0.1343  |
| rs11128692  | G | -0.0338 |
| rs35057747  | G | -0.147  |
| rs113568512 | T | 0.2107  |
| rs1902539   | T | 0.0297  |
| rs6797159   | A | 0.0318  |
| rs13071536  | C | 0.0437  |
| rs4687662   | C | -0.0316 |
| rs2334911   | A | 0.0474  |
| rs56131973  | T | -0.0486 |
| rs6805083   | T | -0.0279 |
| rs114967477 | A | 0.0915  |
| rs11130950  | T | 0.0275  |
| rs1405331   | T | -0.0342 |
| rs6786528   | A | 0.1349  |
| rs115104551 | C | -0.1889 |
| rs807190    | T | -0.0277 |
| rs41540016  | T | 0.1589  |
| rs11710433  | C | -0.0304 |
| rs112367068 | A | -0.1248 |
| rs115905567 | A | 0.1105  |
| rs12631623  | A | 0.1421  |
| rs78452672  | C | -0.1364 |
| rs138015906 | T | -0.1866 |

|             |   |         |
|-------------|---|---------|
| rs2324617   | A | 0.0317  |
| rs9878758   | G | -0.026  |
| rs12491069  | T | -0.0426 |
| rs148051620 | G | 0.1796  |
| rs76700461  | C | 0.06    |
| rs12491835  | C | -0.0301 |
| rs73159713  | C | 0.0353  |
| rs113052901 | G | -0.0609 |
| rs7647537   | C | 0.0556  |
| rs111245842 | G | -0.0851 |
| rs149002698 | A | -0.1222 |
| rs113784264 | C | 0.0523  |
| rs62285718  | C | 0.0658  |
| rs17487338  | A | 0.0472  |
| rs9872869   | G | 0.0304  |
| rs73105846  | A | 0.1022  |
| rs75081433  | T | 0.0629  |
| rs115021368 | G | 0.0812  |
| rs7615495   | G | 0.0496  |
| rs111432063 | A | 0.123   |
| rs143877165 | G | -0.245  |
| rs1512014   | T | -0.0381 |
| rs9868589   | G | -0.0312 |
| rs3732785   | C | -0.03   |
| rs9880253   | T | 0.0397  |
| rs111665976 | T | -0.1089 |
| rs9852371   | T | -0.1565 |
| rs113838079 | T | 0.1708  |
| rs13070334  | G | -0.0474 |
| rs112105516 | A | -0.1166 |
| rs7653787   | C | -0.0461 |
| rs13095274  | T | -0.0268 |
| rs1490075   | T | 0.0588  |
| rs843521    | C | 0.0496  |
| rs55942652  | A | -0.0807 |
| rs1901004   | C | 0.0267  |
| rs113779571 | A | 0.1024  |
| rs35723425  | C | -0.0435 |
| rs9828445   | G | -0.1251 |
| rs114439616 | C | -0.1309 |
| rs55965546  | T | -0.0487 |
| rs4686131   | A | 0.0413  |
| rs12490643  | G | -0.1018 |
| rs790099    | A | 0.0523  |
| rs1573818   | C | -0.0524 |
| rs931244    | T | 0.0379  |
| rs112829528 | C | 0.3046  |

|             |   |         |
|-------------|---|---------|
| rs78561329  | T | 0.1176  |
| rs114814824 | T | -0.0601 |
| rs4687517   | A | 0.0741  |
| rs62271469  | A | 0.0704  |
| rs6794531   | T | -0.0345 |
| rs115075431 | G | -0.0548 |
| rs115786637 | C | 0.1428  |
| rs11919248  | A | -0.0308 |
| rs79534856  | G | -0.1743 |
| rs6804214   | C | 0.0288  |
| rs112216455 | A | 0.0322  |
| rs11925688  | A | 0.0313  |
| rs12632959  | G | 0.044   |
| rs75475270  | T | 0.1019  |
| rs114664110 | T | 0.1171  |
| rs60785803  | T | -0.0341 |
| rs55983424  | T | 0.0275  |
| rs6785867   | T | 0.0369  |
| rs143332413 | G | -0.1993 |
| rs7622290   | C | 0.1233  |
| rs13083304  | T | 0.1103  |
| rs77619232  | C | 0.096   |
| rs1390244   | C | -0.0388 |
| rs6769055   | C | -0.037  |
| rs9820607   | C | -0.0414 |
| rs116730347 | A | -0.1091 |
| rs73046531  | A | 0.027   |
| rs1544702   | T | 0.0426  |
| rs6809161   | A | 0.0327  |
| rs75466201  | G | 0.0988  |
| rs11706849  | G | -0.0267 |
| rs4241384   | C | 0.141   |
| rs11707391  | A | 0.0675  |
| rs13322838  | T | 0.0378  |
| rs10935496  | A | -0.0493 |
| rs9810816   | G | -0.0383 |
| rs12633154  | G | 0.0945  |
| rs61739284  | T | 0.1148  |
| rs60456906  | T | -0.0459 |
| rs55949665  | C | 0.0789  |
| rs76617142  | G | 0.103   |
| rs143591977 | G | 0.1336  |
| rs6794250   | A | -0.0686 |
| rs76245616  | C | 0.1342  |
| rs73181128  | T | -0.1402 |
| rs6806666   | T | -0.0406 |
| rs76707566  | A | 0.1845  |

|             |   |         |
|-------------|---|---------|
| rs73210512  | C | 0.1874  |
| rs73169092  | A | -0.0514 |
| rs73076937  | A | 0.084   |
| rs62272144  | T | 0.1477  |
| rs114629195 | C | 0.1317  |
| rs111700330 | C | -0.1101 |
| rs142937308 | T | 0.1335  |
| rs147168913 | C | -0.0955 |
| rs77127496  | T | 0.0394  |
| rs11717963  | G | 0.0275  |
| rs1991745   | A | 0.039   |
| rs35639049  | C | -0.048  |
| rs147836538 | C | 0.1272  |
| rs9878787   | A | -0.0437 |
| rs28399383  | A | 0.0699  |
| rs148134910 | G | 0.1715  |
| rs10511030  | G | 0.1218  |
| rs73154726  | T | 0.1407  |
| rs149558717 | G | 0.09    |
| rs35996183  | G | 0.1681  |
| rs62292466  | C | -0.114  |
| rs78622065  | A | 0.1465  |
| rs7620657   | C | 0.0284  |
| rs6779865   | A | -0.0283 |
| rs138675605 | G | 0.1518  |
| rs76824808  | C | 0.0914  |
| rs16826288  | A | 0.0598  |
| rs17758536  | A | -0.1538 |
| rs55812956  | G | 0.0295  |
| rs62259144  | A | 0.0737  |
| rs6802592   | A | 0.035   |
| rs259547    | G | -0.0377 |
| rs115236778 | A | -0.1195 |
| rs73120853  | G | 0.0803  |
| rs71325048  | G | 0.1475  |
| rs9681643   | C | -0.0367 |
| rs16827323  | T | 0.0344  |
| rs77253421  | C | 0.0717  |
| rs6443571   | G | -0.0271 |
| rs77405610  | T | 0.1257  |
| rs73211517  | T | -0.2029 |
| rs73166869  | A | 0.0524  |
| rs73185468  | A | -0.1403 |
| rs1875306   | C | 0.1752  |
| rs115836020 | T | 0.0929  |
| rs61461660  | G | -0.0928 |
| rs114809722 | T | -0.1559 |

|             |   |         |
|-------------|---|---------|
| rs116618625 | C | -0.1199 |
| rs2730311   | T | 0.0997  |
| rs116024052 | T | 0.0658  |
| rs12636891  | G | -0.033  |
| rs79911510  | T | -0.0832 |
| rs75326868  | A | 0.1348  |
| rs112592445 | T | 0.0767  |
| rs60537870  | T | -0.0613 |
| rs62255437  | C | -0.0549 |
| rs6446037   | C | -0.0409 |
| rs62274298  | C | -0.0403 |
| rs146007013 | T | -0.1472 |
| rs9854461   | C | -0.0262 |
| rs237837    | G | 0.0332  |
| rs16838532  | A | -0.0873 |
| rs965035    | C | -0.026  |
| rs11719408  | C | 0.0277  |
| rs1501605   | G | 0.036   |
| rs115891268 | A | -0.2055 |
| rs73104261  | T | 0.0951  |
| rs9859821   | A | -0.1517 |
| rs76072024  | C | 0.0857  |
| rs28851811  | T | -0.1638 |
| rs360746    | G | -0.0318 |
| rs7632605   | T | -0.0285 |
| rs77537566  | G | 0.109   |
| rs59729164  | A | -0.0302 |
| rs9829949   | C | -0.0289 |
| rs78501979  | T | 0.0897  |
| rs11709305  | C | -0.0396 |
| rs149148964 | T | 0.2185  |
| rs72877430  | G | -0.0492 |
| rs11712754  | G | -0.0675 |
| rs113124982 | C | 0.1332  |
| rs55990224  | C | -0.1614 |
| rs151084931 | C | 0.0313  |
| rs2372860   | C | -0.099  |
| rs340238    | G | 0.0258  |
| rs9942039   | T | -0.0841 |
| rs17884458  | G | -0.0397 |
| rs73050391  | C | 0.1911  |
| rs67634405  | C | -0.0469 |
| rs115134238 | C | -0.1326 |
| rs79401911  | C | 0.1029  |
| rs6797423   | G | -0.0327 |
| rs7649327   | A | -0.0561 |
| rs113595520 | G | 0.0835  |

|             |   |         |
|-------------|---|---------|
| rs73001112  | T | 0.1922  |
| rs9310931   | C | -0.0943 |
| rs11718532  | C | 0.0577  |
| rs114256235 | C | -0.1233 |
| rs1356122   | C | 0.0355  |
| rs77986608  | G | -0.0449 |
| rs13322140  | A | 0.0591  |
| rs114613518 | C | 0.0508  |
| rs115485876 | A | -0.1532 |
| rs113051270 | G | -0.1082 |
| rs77609197  | C | 0.0845  |
| rs13084366  | G | -0.0395 |
| rs7623466   | G | -0.0341 |
| rs60804270  | C | -0.0302 |
| rs17669377  | G | 0.1496  |
| rs1867427   | C | -0.0282 |
| rs71623015  | G | -0.0885 |
| rs73021900  | C | 0.0304  |
| rs6442831   | T | -0.0268 |
| rs73109978  | G | 0.0514  |
| rs6763785   | G | -0.0661 |
| rs11130504  | G | 0.0308  |
| rs7645760   | T | -0.0402 |
| rs6789261   | G | -0.0333 |
| rs11720524  | G | -0.0269 |
| rs149584140 | C | -0.1105 |
| rs34332506  | C | 0.0298  |
| rs74834758  | G | 0.2234  |
| rs471342    | G | 0.0487  |
| rs75316710  | G | -0.1569 |
| rs9850064   | T | 0.0547  |
| rs13091101  | G | 0.0391  |
| rs9850575   | C | -0.0286 |
| rs62244777  | T | 0.0524  |
| rs936363    | A | -0.1337 |
| rs782441    | T | -0.0382 |
| rs7633912   | A | 0.0579  |
| rs260568    | A | 0.0263  |
| rs73020358  | C | -0.0815 |
| rs6792656   | A | -0.0371 |
| rs62290868  | G | 0.1047  |
| rs73208232  | T | 0.0522  |
| rs11925504  | G | 0.0257  |
| rs34793819  | A | -0.0339 |
| rs56319538  | A | -0.2038 |
| rs35330701  | T | 0.0385  |
| rs73193582  | G | 0.0507  |

|             |   |         |
|-------------|---|---------|
| rs116587173 | A | -0.1498 |
| rs7622230   | G | -0.0278 |
| rs7612862   | C | 0.0406  |
| rs139835972 | T | -0.1187 |
| rs11711730  | A | -0.0364 |
| rs79449249  | C | -0.0611 |
| rs17804246  | T | -0.0582 |
| rs2280160   | G | -0.0279 |
| rs62263801  | T | -0.1665 |
| rs34457487  | G | 0.0281  |
| rs79321595  | T | -0.1557 |
| rs76300032  | G | 0.05    |
| rs79611955  | G | 0.0906  |
| rs143922122 | C | 0.1269  |
| rs13071945  | T | -0.0337 |
| rs6771695   | C | -0.0362 |
| rs13073335  | A | 0.0281  |
| rs6800292   | A | 0.0263  |
| rs1990676   | A | 0.0436  |
| rs260575    | C | 0.0518  |
| rs80047480  | G | -0.0819 |
| rs6775832   | A | -0.0453 |
| rs2174546   | A | 0.0263  |
| rs73226932  | G | 0.1149  |
| rs144288881 | G | -0.1362 |
| rs143216098 | G | 0.1691  |
| rs116630764 | A | -0.0716 |
| rs75010589  | T | 0.0878  |
| rs139718704 | T | -0.0962 |
| rs10934571  | G | 0.1263  |
| rs3817076   | A | -0.0373 |
| rs6802341   | A | -0.057  |
| rs113853986 | T | -0.1381 |
| rs79832634  | G | -0.2511 |
| rs2686314   | C | -0.0339 |
| rs11705878  | C | 0.0433  |
| rs78104326  | T | -0.1663 |
| rs10511330  | C | 0.0403  |
| rs2867833   | G | 0.0296  |
| rs79682267  | C | -0.0904 |
| rs76456047  | A | 0.1718  |
| rs144345686 | A | 0.183   |
| rs59295686  | G | -0.0343 |
| rs10934856  | T | 0.0401  |
| rs9876658   | G | 0.0272  |
| rs148833306 | A | 0.1484  |
| rs114345531 | C | 0.1042  |

|             |   |         |
|-------------|---|---------|
| rs13076915  | T | -0.0521 |
| rs1499631   | A | -0.1091 |
| rs112558827 | T | -0.1496 |
| rs149757216 | T | 0.0778  |
| rs13070936  | T | 0.0302  |
| rs13324080  | T | -0.114  |
| rs6802151   | T | 0.0435  |
| rs10049242  | G | -0.0381 |
| rs115853847 | A | -0.0525 |
| rs116515437 | C | -0.1228 |
| rs74533879  | T | 0.0912  |
| rs880402    | A | -0.0357 |
| rs2120825   | G | -0.0432 |
| rs10510718  | T | 0.091   |
| rs2856027   | T | 0.0265  |
| rs12629628  | T | -0.0658 |
| rs78099229  | T | 0.1684  |
| rs6776994   | C | -0.0393 |
| rs11711459  | G | 0.1084  |
| rs2036584   | T | 0.0276  |
| rs34660509  | A | 0.1476  |
| rs4688127   | T | -0.1278 |
| rs73187869  | A | -0.0426 |
| rs7635116   | G | -0.0993 |
| rs77190659  | G | 0.1187  |
| rs141352122 | G | 0.1269  |
| rs114750576 | A | -0.0987 |
| rs149653338 | A | -0.1485 |
| rs115731893 | C | -0.0941 |
| rs6438069   | C | 0.0738  |
| rs748072    | A | -0.0419 |
| rs79899358  | T | -0.1081 |
| rs115259947 | G | 0.1181  |
| rs11927864  | G | -0.0772 |
| rs62254520  | A | 0.1425  |
| rs142716799 | T | -0.1406 |
| rs6803009   | A | -0.0275 |
| rs56024570  | C | 0.0361  |
| rs2319305   | A | 0.0295  |
| rs77951253  | G | 0.117   |
| rs138156880 | A | 0.1073  |
| rs75680406  | C | 0.1055  |
| rs141752824 | C | 0.1834  |
| rs6785386   | A | 0.0882  |
| rs116519284 | A | -0.0882 |
| rs613519    | T | 0.0573  |
| rs2581623   | C | 0.0254  |



|             |   |         |
|-------------|---|---------|
| rs9881228   | T | 0.0331  |
| rs6802386   | G | -0.1031 |
| rs6768226   | C | 0.0317  |
| rs6777448   | A | 0.144   |
| rs1872037   | C | -0.0285 |
| rs9822563   | A | -0.0257 |
| rs71323294  | A | -0.1575 |
| rs78140086  | T | 0.0439  |
| rs10511352  | C | -0.0543 |
| rs150427873 | T | 0.2585  |
| rs4682635   | G | 0.0579  |
| rs4685405   | T | 0.0336  |
| rs139668803 | T | -0.1273 |
| rs62242359  | T | -0.0339 |
| rs13096936  | G | -0.033  |
| rs150360848 | C | -0.1848 |
| rs2981514   | G | 0.0351  |
| rs113235087 | C | 0.0697  |
| rs4678492   | C | 0.0261  |
| rs10510831  | C | 0.0267  |
| rs73115475  | C | -0.0741 |
| rs141374423 | T | -0.1522 |
| rs6789854   | G | 0.0898  |
| rs7640608   | G | -0.0572 |
| rs149932126 | G | -0.2388 |
| rs6793222   | T | -0.0566 |
| rs62240188  | G | 0.0806  |
| rs78985966  | T | 0.0632  |
| rs13099626  | T | 0.033   |
| rs35025659  | G | 0.112   |
| rs144233911 | T | 0.2083  |
| rs149775904 | G | 0.1995  |
| rs2972473   | C | 0.0541  |
| rs11708053  | C | 0.0262  |
| rs143916354 | G | 0.1452  |
| rs7624426   | T | 0.0464  |
| rs4635666   | G | 0.0358  |
| rs72893671  | A | -0.0495 |
| rs147208391 | G | -0.1007 |
| rs6806906   | T | -0.1093 |
| rs9288811   | A | 0.0371  |
| rs295495    | T | -0.0787 |
| rs73169134  | G | 0.0483  |
| rs6805482   | A | -0.0432 |
| rs114648962 | G | 0.1721  |
| rs13093533  | G | -0.0266 |
| rs144542030 | A | -0.1422 |

|             |   |         |
|-------------|---|---------|
| rs4686530   | T | 0.0362  |
| rs138148127 | C | 0.2162  |
| rs2133420   | C | -0.0342 |
| rs7628938   | G | 0.0445  |
| rs116354475 | A | -0.2206 |
| rs11923502  | G | 0.1205  |
| rs12492383  | A | -0.0297 |
| rs4681044   | G | -0.0264 |
| rs6801131   | G | 0.1216  |
| rs1534245   | G | -0.029  |
| rs73147624  | C | 0.0417  |
| rs78821833  | T | 0.1781  |
| rs7626890   | T | 0.0288  |
| rs41265444  | A | -0.1983 |
| rs114171663 | G | -0.2041 |
| rs2371260   | C | -0.031  |
| rs2676875   | A | -0.0638 |
| rs6442773   | G | -0.0252 |
| rs114922885 | A | 0.0939  |
| rs4685143   | C | -0.1031 |
| rs17054144  | A | 0.0999  |
| rs141368780 | G | 0.1333  |
| rs77437445  | C | -0.0688 |
| rs1147238   | G | 0.054   |
| rs73046473  | G | -0.1526 |
| rs4016640   | T | -0.0439 |
| rs13074575  | G | -0.0447 |
| rs9865118   | C | -0.0252 |
| rs150296776 | T | 0.251   |
| rs2659690   | A | 0.0264  |
| rs12488048  | T | 0.0274  |
| rs112354136 | C | 0.1506  |
| rs9838069   | C | 0.1002  |
| rs547596    | A | -0.0294 |
| rs76797881  | T | -0.0605 |
| rs13067167  | T | 0.0847  |
| rs73107805  | T | -0.1045 |
| rs9873530   | C | -0.0412 |
| rs114558200 | G | 0.1129  |
| rs73156841  | C | -0.1197 |
| rs11714981  | G | -0.0308 |
| rs73092217  | G | 0.0563  |
| rs75406833  | A | 0.1058  |
| rs146754175 | T | 0.139   |
| rs71306595  | G | -0.0935 |
| rs61763242  | A | -0.218  |
| rs7643568   | G | 0.0828  |

|             |   |         |
|-------------|---|---------|
| rs4955919   | A | 0.0876  |
| rs1962532   | T | -0.0259 |
| rs35832508  | T | 0.0369  |
| rs61791025  | A | 0.026   |
| rs9843163   | G | 0.074   |
| rs11706161  | C | -0.0413 |
| rs9852134   | G | 0.0482  |
| rs2029510   | G | 0.0302  |
| rs145786974 | T | 0.1189  |
| rs6778909   | T | 0.0396  |
| rs34486185  | G | -0.0651 |
| rs360738    | G | -0.0341 |
| rs17288922  | A | 0.0346  |
| rs73012624  | A | -0.1431 |
| rs137943402 | G | -0.1213 |
| rs144082753 | T | -0.1335 |
| rs10934255  | T | 0.0255  |
| rs73155096  | G | -0.0693 |
| rs11921835  | A | 0.089   |
| rs80271139  | C | 0.0533  |
| rs6599154   | G | 0.0285  |
| rs11708840  | T | -0.03   |
| rs2444226   | A | -0.0253 |
| rs116103337 | C | -0.1554 |
| rs116395186 | G | 0.0926  |
| rs111406654 | G | -0.119  |
| rs76185987  | T | 0.0735  |
| rs9819539   | G | 0.0486  |
| rs7650307   | C | -0.0795 |
| rs41323844  | C | 0.1254  |
| rs7630386   | C | 0.0561  |
| rs146768141 | T | 0.1606  |
| rs79380790  | A | 0.0694  |
| rs61085539  | A | -0.0628 |
| rs9827275   | G | -0.0844 |
| rs79801362  | C | -0.0699 |
| rs143817518 | A | 0.2276  |
| rs73102339  | A | -0.1129 |
| rs3967208   | T | -0.036  |
| rs3773905   | G | -0.0453 |
| rs115424747 | A | 0.1024  |
| rs4894814   | A | 0.0811  |
| rs150607244 | A | -0.1804 |
| rs13075326  | A | 0.1185  |
| rs7645507   | T | 0.0543  |
| rs78477723  | C | -0.0549 |
| rs77104037  | A | -0.1355 |

|             |   |         |
|-------------|---|---------|
| rs4857898   | A | 0.0351  |
| rs11706045  | A | -0.0525 |
| rs6439525   | T | -0.116  |
| rs115540915 | C | -0.142  |
| rs74937902  | G | 0.1394  |
| rs144840322 | A | 0.0973  |
| rs11920363  | C | 0.0504  |
| rs61582035  | A | -0.0896 |
| rs6791787   | T | 0.1218  |
| rs78952539  | T | 0.0756  |
| rs7610310   | G | 0.1509  |
| rs17293515  | T | -0.0846 |
| rs349175    | C | -0.0348 |
| rs62273478  | A | -0.1759 |
| rs2009626   | A | -0.026  |
| rs17040698  | C | -0.0928 |
| rs9877763   | A | 0.0324  |
| rs1032398   | G | -0.042  |
| rs6440646   | A | -0.0504 |
| rs142344717 | T | 0.0983  |
| rs2708308   | G | -0.0476 |
| rs62257493  | A | 0.0613  |
| rs74446005  | C | -0.1239 |
| rs13076862  | G | 0.1415  |
| rs865350    | T | 0.0325  |
| rs71319075  | G | -0.1079 |
| rs6777248   | G | 0.0377  |
| rs2240920   | T | -0.0269 |
| rs145765705 | C | -0.1474 |
| rs116424052 | C | 0.2127  |
| rs78890112  | T | -0.1403 |
| rs145418910 | C | 0.0814  |
| rs1568293   | A | 0.0257  |
| rs62250553  | G | 0.1043  |
| rs116363771 | A | -0.0745 |
| rs141183564 | A | 0.1085  |
| rs115229193 | A | -0.0794 |
| rs147699059 | C | -0.12   |
| rs2724712   | T | -0.0278 |
| rs12629779  | A | 0.1298  |
| rs76716779  | C | 0.1675  |
| rs6766482   | G | 0.0343  |
| rs150913009 | G | -0.1557 |
| rs79410750  | A | -0.1668 |
| rs4686468   | G | 0.0283  |
| rs58954984  | A | -0.1944 |
| rs6780468   | C | 0.0346  |

|             |   |         |
|-------------|---|---------|
| rs145017422 | T | 0.2231  |
| rs16854598  | T | 0.0955  |
| rs142188220 | T | 0.0622  |
| rs9862712   | T | 0.0297  |
| rs147463219 | A | 0.189   |
| rs35402322  | A | 0.0424  |
| rs2118599   | A | 0.0708  |
| rs62259529  | A | 0.1897  |
| rs6766396   | C | 0.0268  |
| rs16839633  | T | 0.0437  |
| rs114905131 | G | -0.1629 |
| rs62282400  | C | 0.0369  |
| rs73216899  | C | 0.1891  |
| rs13325666  | T | -0.0272 |
| rs62263087  | T | 0.1015  |
| rs10935911  | C | -0.0258 |
| rs6765571   | G | 0.0284  |
| rs73101478  | A | 0.0407  |
| rs4271916   | C | 0.1397  |
| rs138719601 | C | -0.2108 |
| rs78806962  | T | -0.1866 |
| rs115595028 | G | 0.0898  |
| rs116033073 | G | -0.1037 |
| rs12493003  | A | 0.0542  |
| rs72930255  | A | 0.047   |
| rs78501160  | A | 0.0701  |
| rs115988557 | T | -0.0973 |
| rs9310865   | C | -0.0327 |
| rs73079014  | T | 0.047   |
| rs138585571 | T | -0.1124 |
| rs1426030   | T | -0.0282 |
| rs79797284  | T | 0.0808  |
| rs2648455   | C | 0.0405  |
| rs34283957  | T | -0.0267 |
| rs9850930   | G | -0.0371 |
| rs833633    | A | 0.0541  |
| rs62264594  | G | 0.0545  |
| rs9819273   | C | -0.0451 |
| rs13082046  | A | -0.0727 |
| rs17679796  | G | 0.0571  |
| rs12635014  | A | 0.1532  |
| rs9861880   | T | -0.0348 |
| rs2305619   | A | -0.0246 |
| rs990397    | C | -0.0285 |
| rs13075121  | C | -0.027  |
| rs56656149  | A | -0.0317 |
| rs791445    | C | -0.0309 |

|             |   |         |
|-------------|---|---------|
| rs75652790  | G | 0.1573  |
| rs78617851  | A | 0.1313  |
| rs149652134 | T | -0.119  |
| rs114160887 | C | -0.1917 |
| rs4677130   | T | 0.0278  |
| rs116790940 | C | 0.1308  |
| rs2867834   | A | 0.0784  |
| rs116366069 | C | -0.1496 |
| rs137963507 | G | -0.0383 |
| rs1605435   | C | -0.0282 |
| rs114585605 | T | 0.1469  |
| rs9832697   | T | -0.0329 |
| rs147892875 | G | -0.2219 |
| rs11546878  | T | -0.0378 |
| rs6773019   | G | -0.0645 |
| rs143127158 | T | -0.1171 |
| rs5014208   | C | -0.0308 |
| rs147512507 | C | 0.1019  |
| rs350658    | G | -0.0344 |
| rs2630813   | C | -0.0622 |
| rs4955389   | G | 0.0449  |
| rs41355450  | G | 0.0343  |
| rs6767953   | C | 0.0295  |
| rs16853703  | C | -0.0383 |
| rs74890363  | T | -0.0281 |
| rs2442815   | C | -0.0967 |
| rs77868922  | C | -0.0608 |
| rs6771147   | G | 0.0301  |
| rs500429    | A | -0.0258 |
| rs150457619 | T | -0.1351 |
| rs116071103 | A | -0.1508 |
| rs113688735 | A | 0.1358  |
| rs17507954  | A | -0.0473 |
| rs35740922  | A | 0.12    |
| rs13088184  | C | -0.03   |
| rs12495030  | C | -0.0852 |
| rs80329442  | C | -0.1326 |
| rs114156968 | A | 0.0906  |
| rs113976840 | A | 0.1631  |
| rs12638156  | G | 0.0445  |
| rs13059398  | T | 0.0875  |
| rs62254562  | T | -0.0294 |
| rs2290954   | G | 0.0319  |
| rs67659273  | C | -0.0978 |
| rs116644619 | A | 0.1881  |
| rs76804915  | T | -0.069  |
| rs1453744   | T | 0.0387  |

|             |   |         |
|-------------|---|---------|
| rs1900645   | A | -0.0261 |
| rs111385829 | G | 0.1135  |
| rs3774268   | A | 0.0369  |
| rs2729140   | A | -0.0269 |
| rs73041495  | T | 0.0674  |
| rs78721489  | T | -0.1732 |
| rs9864635   | T | -0.1563 |
| rs17043869  | G | 0.121   |
| rs72873061  | C | -0.1384 |
| rs78692937  | G | 0.2231  |
| rs1400014   | A | -0.0366 |
| rs583579    | G | 0.0702  |
| rs3796330   | C | 0.0628  |
| rs141479093 | A | 0.1051  |
| rs3915039   | C | 0.035   |
| rs7643131   | G | 0.083   |
| rs402297    | G | -0.048  |
| rs35432477  | A | -0.0346 |
| rs143540231 | T | -0.118  |
| rs2317201   | C | 0.0251  |
| rs6807433   | A | 0.0559  |
| rs779693    | C | 0.0301  |
| rs6784345   | A | -0.0546 |
| rs115085066 | T | -0.079  |
| rs12639500  | G | -0.0283 |
| rs115972643 | A | -0.0783 |
| rs6802900   | A | -0.0252 |
| rs75030118  | T | -0.0804 |
| rs75928987  | C | -0.0505 |
| rs147802990 | G | -0.1863 |
| rs7645844   | A | 0.0755  |
| rs9867498   | T | 0.0359  |
| rs145412470 | A | 0.0922  |
| rs59904672  | C | -0.1373 |
| rs112697885 | C | 0.1769  |
| rs78758478  | T | 0.1126  |
| rs147164127 | G | 0.0916  |
| rs58684021  | A | -0.0459 |
| rs452056    | C | -0.082  |
| rs74387111  | T | -0.0559 |
| rs114346519 | A | 0.2329  |
| rs76291226  | A | 0.0568  |
| rs73097523  | G | -0.0369 |
| rs66640216  | A | 0.0576  |
| rs6799758   | G | 0.0664  |
| rs56064643  | A | -0.0543 |
| rs66524059  | G | -0.0402 |

|             |   |         |
|-------------|---|---------|
| rs6794702   | T | -0.0407 |
| rs11927079  | A | 0.033   |
| rs55892323  | C | -0.0536 |
| rs12487535  | T | -0.0436 |
| rs55829878  | T | -0.0775 |
| rs73169369  | T | -0.0576 |
| rs10513705  | C | -0.026  |
| rs17038640  | C | 0.0286  |
| rs2302815   | G | -0.0418 |
| rs355123    | G | -0.0318 |
| rs140286992 | A | 0.1404  |
| rs7432690   | T | -0.0269 |
| rs12497153  | G | 0.0507  |
| rs73154503  | C | -0.0988 |
| rs115929714 | A | 0.1105  |
| rs1505293   | T | 0.1079  |
| rs74653390  | C | 0.0592  |
| rs58638041  | T | -0.0613 |
| rs56333453  | T | -0.0392 |
| rs62234217  | A | 0.0656  |
| rs77124901  | T | -0.1166 |
| rs12630939  | T | 0.0409  |
| rs73121892  | A | -0.1274 |
| rs17020617  | A | 0.0849  |
| rs9878494   | C | -0.0262 |
| rs113303220 | C | -0.0375 |
| rs12185911  | G | 0.111   |
| rs111811098 | T | 0.0829  |
| rs149151315 | C | -0.1523 |
| rs9879338   | A | -0.026  |
| rs79432054  | T | 0.0748  |
| rs76127545  | A | 0.0882  |
| rs9866826   | T | -0.042  |
| rs6807028   | C | -0.0265 |
| rs704257    | T | 0.0306  |
| rs140890510 | T | 0.1105  |
| rs669376    | T | 0.03    |
| rs266741    | A | -0.0308 |
| rs62228849  | T | 0.1658  |
| rs75286353  | A | -0.1475 |
| rs138674384 | C | -0.0991 |
| rs111490052 | G | 0.0629  |
| rs80048009  | G | -0.1792 |
| rs143929781 | A | 0.2154  |
| rs16828316  | A | 0.0781  |
| rs2212036   | T | -0.1866 |
| rs13080729  | T | -0.0665 |



|             |   |         |
|-------------|---|---------|
| rs57048357  | A | -0.1682 |
| rs73882973  | G | -0.0581 |
| rs116470646 | T | -0.1751 |
| rs149584538 | T | 0.1962  |
| rs147892962 | G | -0.1154 |
| rs62232959  | T | -0.0554 |
| rs12492265  | G | -0.0802 |
| rs139258714 | C | 0.1659  |
| rs35173249  | G | -0.0254 |
| rs145162908 | C | 0.1186  |
| rs13064845  | A | 0.0329  |
| rs9842906   | C | 0.1506  |
| rs116203688 | T | -0.1742 |
| rs78486673  | A | -0.0547 |
| rs11929530  | G | 0.0253  |
| rs74335469  | A | 0.088   |
| rs34366577  | A | -0.0349 |
| rs73013249  | C | -0.0978 |
| rs9832167   | G | 0.0501  |
| rs6763386   | G | 0.0429  |
| rs11705932  | T | -0.0314 |
| rs10937192  | C | 0.042   |
| rs3860587   | C | 0.0271  |
| rs10433528  | T | 0.1024  |
| rs3765005   | G | -0.0793 |
| rs118088412 | A | -0.1182 |
| rs76893678  | A | -0.0793 |
| rs907336    | A | 0.0273  |
| rs62267818  | T | 0.0573  |
| rs3100149   | T | 0.0356  |
| rs2729256   | G | -0.0642 |
| rs79357042  | A | -0.0893 |
| rs12635015  | A | 0.0378  |
| rs3845944   | G | 0.0278  |
| rs6766081   | C | 0.1818  |
| rs9990006   | A | 0.0309  |
| rs150357401 | C | 0.187   |
| rs76937985  | T | 0.1148  |
| rs1513325   | A | 0.0406  |
| rs78544167  | T | -0.1493 |
| rs75352071  | C | -0.1109 |
| rs9872757   | C | 0.0347  |
| rs114769195 | A | 0.1252  |
| rs13065339  | T | 0.0301  |
| rs1513253   | T | -0.0545 |
| rs9841109   | A | -0.028  |
| rs113371717 | A | -0.0408 |

|             |   |         |
|-------------|---|---------|
| rs6801491   | T | 0.0706  |
| rs76254034  | T | -0.0845 |
| rs2507948   | A | -0.0249 |
| rs34310576  | T | 0.0578  |
| rs35573093  | A | 0.1086  |
| rs149600284 | T | -0.1014 |
| rs2574713   | G | 0.0283  |
| rs62242409  | T | 0.0295  |
| rs73119116  | T | -0.0839 |
| rs35970     | C | -0.0314 |
| rs2634538   | G | -0.0301 |
| rs17204376  | T | 0.0488  |
| rs7650724   | T | 0.027   |
| rs73146107  | A | -0.0634 |
| rs73177772  | A | -0.1051 |
| rs12635775  | A | -0.0529 |
| rs139479451 | T | -0.1729 |
| rs73153376  | T | -0.0353 |
| rs79220247  | C | 0.1965  |
| rs13073793  | T | 0.1228  |
| rs112138222 | A | 0.101   |
| rs13082801  | T | -0.0568 |
| rs4681929   | A | -0.0329 |
| rs231997    | T | 0.0407  |
| rs73206330  | G | -0.143  |
| rs2670264   | A | -0.0407 |
| rs13075567  | C | -0.0314 |
| rs28434743  | C | 0.1123  |
| rs73139563  | G | -0.1066 |
| rs78673564  | C | 0.129   |
| rs147897715 | A | -0.0908 |
| rs11919151  | T | 0.0382  |
| rs144554744 | A | 0.1054  |
| rs2127012   | C | -0.0281 |
| rs147581581 | G | -0.21   |
| rs78672676  | T | -0.0988 |
| rs34759774  | A | 0.082   |
| rs113891228 | A | -0.1327 |
| rs72967571  | A | 0.0557  |
| rs9844829   | T | 0.0375  |
| rs1400241   | T | 0.11    |
| rs11714952  | G | -0.0435 |
| rs13081899  | T | 0.0256  |
| rs9826149   | T | 0.0249  |
| rs73871882  | T | 0.0545  |
| rs11708473  | T | 0.0278  |
| rs6799669   | A | 0.0346  |

|             |   |         |
|-------------|---|---------|
| rs17367084  | C | 0.028   |
| rs9843798   | A | 0.0657  |
| rs76686721  | G | -0.0669 |
| rs12374133  | G | 0.0406  |
| rs1602321   | G | 0.0311  |
| rs780935    | A | -0.0391 |
| rs113227379 | C | 0.1596  |
| rs10936019  | T | 0.0295  |
| rs73188915  | C | 0.0322  |
| rs2724535   | T | 0.0362  |
| rs139885889 | A | 0.0854  |
| rs78950992  | A | 0.1032  |
| rs3774028   | T | 0.0276  |
| rs113019446 | T | -0.1717 |
| rs80164234  | T | -0.2059 |
| rs75626359  | A | 0.1188  |
| rs6443022   | G | -0.0272 |
| rs10934486  | A | 0.0361  |
| rs114569472 | C | -0.1584 |
| rs78524490  | G | -0.0554 |
| rs147648392 | C | -0.0626 |
| rs73835951  | C | 0.1651  |
| rs6441715   | G | 0.0255  |
| rs12494418  | A | -0.0974 |
| rs115728296 | T | 0.1509  |
| rs9864478   | G | 0.097   |
| rs138970809 | G | -0.0949 |
| rs7647391   | T | 0.0776  |
| rs16845806  | A | 0.0341  |
| rs9841125   | G | 0.04    |
| rs116497297 | A | -0.1687 |
| rs139505918 | T | 0.1151  |
| rs78021657  | A | 0.0775  |
| rs2333034   | T | 0.0298  |
| rs6789562   | G | 0.0629  |
| rs4681885   | T | 0.0275  |
| rs36129553  | A | 0.157   |
| rs78703726  | C | -0.0533 |
| rs115891099 | A | -0.1639 |
| rs1707689   | A | -0.0736 |
| rs115182101 | C | -0.0792 |
| rs77662845  | G | 0.0832  |
| rs115083322 | C | 0.0959  |
| rs115089338 | A | 0.0933  |
| rs112796097 | A | -0.1208 |
| rs74731230  | T | 0.0784  |
| rs76828671  | T | -0.1184 |

|             |   |         |
|-------------|---|---------|
| rs150592910 | G | 0.1784  |
| rs116296734 | T | 0.1056  |
| rs1445359   | C | 0.0495  |
| rs75595927  | A | -0.1284 |
| rs2169305   | C | -0.0262 |
| rs75257046  | A | 0.075   |
| rs55894800  | A | 0.033   |
| rs3774160   | G | 0.026   |
| rs4858017   | G | 0.0242  |
| rs7640607   | G | -0.1485 |
| rs35855737  | C | -0.0323 |
| rs145887278 | A | 0.2141  |
| rs142504439 | G | 0.1833  |
| rs769616    | C | -0.0348 |
| rs556368    | C | 0.0274  |
| rs62249089  | C | -0.07   |
| rs77311899  | A | -0.0631 |
| rs78078035  | G | -0.0922 |
| rs7652098   | A | -0.041  |
| rs2669996   | T | 0.0437  |
| rs138256022 | T | 0.0931  |
| rs55709557  | C | -0.041  |
| rs67360645  | G | -0.045  |
| rs9853225   | A | 0.0349  |
| rs115958367 | G | 0.1081  |
| rs11710365  | C | -0.0599 |
| rs77723733  | A | -0.0579 |
| rs76997656  | T | -0.0851 |
| rs13064530  | A | -0.0289 |
| rs74875182  | A | 0.0553  |
| rs57685602  | T | -0.0327 |
| rs148077946 | A | -0.1923 |
| rs116400181 | G | 0.1606  |
| rs2542387   | A | 0.1321  |
| rs73193417  | T | -0.0496 |
| rs960516    | G | -0.0779 |
| rs9872196   | A | -0.0662 |
| rs13059257  | T | 0.1137  |
| rs9847518   | A | -0.0491 |
| rs77821844  | G | 0.0501  |
| rs13079989  | G | 0.0784  |
| rs71326907  | A | -0.1148 |
| rs1837609   | A | -0.0967 |
| rs149361019 | C | 0.0907  |
| rs2718789   | A | -0.0285 |
| rs55809361  | C | 0.0336  |
| rs146748550 | T | 0.0998  |

|             |   |         |
|-------------|---|---------|
| rs78776087  | G | 0.1134  |
| rs610909    | G | -0.1789 |
| rs113104147 | G | -0.1138 |
| rs9809760   | C | -0.0254 |
| rs9870268   | A | 0.1001  |
| rs1122143   | G | -0.0279 |
| rs10433529  | T | -0.0277 |
| rs151070067 | T | 0.1426  |
| rs1594320   | G | -0.0289 |
| rs400737    | A | -0.0288 |
| rs143768411 | A | 0.0876  |
| rs809764    | G | -0.0281 |
| rs36043324  | A | -0.0263 |
| rs66498237  | C | -0.0311 |
| rs2699968   | C | 0.1025  |
| rs73186171  | G | 0.0561  |
| rs1479150   | C | 0.0307  |
| rs17801085  | A | 0.0369  |
| rs115661076 | G | 0.1656  |
| rs62287203  | C | -0.1265 |
| rs79515753  | G | -0.0453 |
| rs4646766   | A | 0.025   |
| rs3774104   | T | -0.0395 |
| rs13084153  | T | 0.0295  |
| rs76542321  | A | 0.182   |
| rs71323454  | T | -0.0516 |
| rs34152629  | C | 0.0528  |
| rs75524356  | C | 0.1212  |
| rs62269109  | A | -0.0768 |
| rs2084883   | C | 0.0938  |
| rs11718811  | A | 0.0309  |
| rs148730389 | A | 0.0939  |
| rs4574309   | C | -0.0249 |
| rs35405199  | A | 0.1303  |
| rs4858163   | C | 0.1133  |
| rs60987254  | T | -0.0548 |
| rs13313998  | G | -0.0393 |
| rs148202903 | T | 0.1294  |
| rs7632752   | A | 0.059   |
| rs78318047  | T | -0.0479 |
| rs149738877 | T | -0.1164 |
| rs1443532   | C | -0.0258 |
| rs147453093 | T | -0.1054 |
| rs2712469   | G | 0.0281  |
| rs116223864 | C | -0.1111 |
| rs62272809  | C | 0.0698  |
| rs4688129   | C | 0.0356  |

|             |   |         |
|-------------|---|---------|
| rs79670797  | T | 0.0881  |
| rs80104155  | A | -0.0783 |
| rs2738921   | C | 0.0249  |
| rs73175029  | T | 0.0323  |
| rs78225662  | T | 0.0524  |
| rs77155007  | A | -0.1165 |
| rs114058810 | T | -0.1304 |
| rs9864196   | G | 0.0462  |
| rs62261385  | A | -0.0315 |
| rs1529187   | C | -0.0282 |
| rs75179467  | G | 0.1993  |
| rs73193531  | G | 0.0561  |
| rs9823776   | A | 0.0298  |
| rs9879522   | C | -0.0786 |
| rs6797410   | T | 0.0267  |
| rs77860557  | G | -0.0422 |
| rs112035807 | C | 0.1381  |
| rs34095724  | T | -0.109  |
| rs17012248  | G | 0.138   |
| rs2470814   | A | 0.025   |
| rs77278249  | A | -0.1134 |
| rs9310638   | A | -0.0378 |
| rs892414    | T | 0.0518  |
| rs804412    | T | -0.0623 |
| rs9854816   | G | 0.0247  |
| rs11927649  | T | 0.0348  |
| rs9835351   | C | -0.0366 |
| rs2312318   | G | 0.0287  |
| rs9870623   | T | -0.0419 |
| rs62282714  | C | -0.0599 |
| rs344944    | G | -0.03   |
| rs113667753 | A | -0.0776 |
| rs74685783  | T | 0.0617  |
| rs34561146  | A | 0.0473  |
| rs793299    | A | -0.0456 |
| rs72972551  | A | 0.1237  |
| rs75130505  | C | -0.0788 |
| rs115638601 | T | 0.0831  |
| rs112921263 | A | -0.0905 |
| rs9814925   | T | -0.026  |
| rs113471228 | A | 0.096   |
| rs62248409  | G | -0.0568 |
| rs112426115 | A | -0.1257 |
| rs114377874 | T | -0.1281 |
| rs4927711   | T | -0.0399 |
| rs11924839  | C | -0.0409 |
| rs146580644 | A | -0.0713 |

|             |   |         |
|-------------|---|---------|
| rs149560924 | C | -0.1447 |
| rs76971415  | A | -0.1971 |
| rs4858060   | C | -0.026  |
| rs17838729  | A | -0.0997 |
| rs12496184  | G | 0.025   |
| rs1131598   | C | 0.0309  |
| rs35342900  | C | -0.0243 |
| rs71314346  | G | -0.0335 |
| rs7639405   | G | 0.1141  |
| rs4683596   | C | -0.0462 |
| rs116031788 | C | -0.1094 |
| rs6793219   | T | -0.0276 |
| rs114566691 | C | 0.0809  |
| rs114833464 | T | 0.1294  |
| rs113367140 | A | 0.0756  |
| rs3792526   | G | 0.0317  |
| rs144987121 | T | 0.1992  |
| rs11712700  | C | -0.1577 |
| rs35182640  | G | 0.0261  |
| rs62291478  | C | 0.1973  |
| rs114440384 | A | -0.1683 |
| rs75573601  | A | 0.1422  |
| rs6784494   | T | 0.0874  |
| rs6764345   | C | -0.0383 |
| rs113615561 | A | -0.1181 |
| rs34427445  | T | -0.1175 |
| rs17651822  | T | -0.0352 |
| rs4678363   | C | -0.0251 |
| rs6785014   | A | -0.0244 |
| rs9873601   | G | 0.0528  |
| rs79252206  | G | 0.1399  |
| rs7433696   | C | 0.0632  |
| rs75684805  | G | -0.1239 |
| rs12054311  | G | 0.0539  |
| rs73169510  | C | -0.0575 |
| rs7635218   | G | 0.0306  |
| rs11128636  | T | 0.0281  |
| rs62257238  | T | 0.1169  |
| rs73811969  | C | 0.0735  |
| rs4681688   | G | -0.0281 |
| rs11921628  | G | -0.0411 |
| rs115074222 | A | -0.1272 |
| rs11714519  | C | 0.1902  |
| rs13081035  | T | 0.0594  |
| rs17047183  | T | -0.041  |
| rs114846683 | T | 0.0724  |
| rs6803980   | G | -0.0249 |

|             |   |         |
|-------------|---|---------|
| rs79499275  | T | -0.1186 |
| rs114578806 | A | 0.1002  |
| rs148079681 | G | -0.1753 |
| rs57940787  | G | -0.0381 |
| rs17777883  | A | -0.0471 |
| rs75736693  | T | -0.0603 |
| rs12493340  | T | -0.2038 |
| rs1393752   | T | 0.0249  |
| rs6778359   | T | 0.0244  |
| rs1996809   | C | -0.035  |
| rs114367698 | C | -0.0772 |
| rs56152721  | G | -0.0616 |
| rs1965832   | A | 0.0264  |
| rs147144398 | T | 0.0844  |
| rs1875282   | C | 0.0444  |
| rs13074712  | T | 0.1376  |
| rs11718649  | G | 0.1504  |
| rs9814774   | G | -0.1264 |
| rs78790183  | C | 0.0843  |
| rs140770767 | A | 0.1794  |
| rs76204361  | C | -0.0938 |
| rs12486791  | C | -0.0249 |
| rs9850499   | C | -0.0257 |
| rs115687142 | C | 0.0838  |
| rs9827853   | C | 0.2096  |
| rs9836710   | G | 0.046   |
| rs4522762   | C | 0.0271  |
| rs12496940  | C | -0.1246 |
| rs7618426   | A | 0.0256  |
| rs2542384   | A | 0.0382  |
| rs11915085  | C | 0.0468  |
| rs71624937  | A | 0.0358  |
| rs9878858   | A | -0.0366 |
| rs347965    | T | -0.0308 |
| rs112351419 | C | 0.1115  |
| rs6775039   | G | -0.0261 |
| rs4839680   | C | -0.0768 |
| rs112440650 | A | 0.1587  |
| rs17470330  | T | -0.0823 |
| rs201726    | C | 0.0592  |
| rs76490431  | A | -0.095  |
| rs75605718  | C | 0.0878  |
| rs75682621  | G | -0.0375 |
| rs115943255 | T | -0.1682 |
| rs13090918  | C | 0.0977  |
| rs178982    | G | -0.04   |
| rs2007488   | G | 0.0304  |



|             |   |         |
|-------------|---|---------|
| rs13315406  | T | -0.0881 |
| rs7637116   | T | -0.0703 |
| rs56376585  | T | 0.0412  |
| rs78920560  | C | 0.0542  |
| rs62287308  | C | -0.1762 |
| rs823530    | T | 0.0415  |
| rs115147679 | A | -0.2319 |
| rs72990191  | A | -0.1478 |
| rs143351118 | T | 0.1012  |
| rs141918248 | T | 0.0872  |
| rs75231008  | A | 0.0916  |
| rs6797520   | C | -0.0725 |
| rs95867     | C | 0.0409  |
| rs62240756  | T | -0.1302 |
| rs141943748 | G | -0.1302 |
| rs11714897  | C | 0.0261  |
| rs140704003 | C | -0.1468 |
| rs4927947   | C | -0.0908 |
| rs13099619  | C | 0.0874  |
| rs150573432 | T | 0.1782  |
| rs115713929 | T | -0.1248 |
| rs62281790  | A | -0.0528 |
| rs115451822 | G | 0.0755  |
| rs11716699  | A | 0.1176  |
| rs77393157  | G | 0.1726  |
| rs9863749   | T | -0.0474 |
| rs62243779  | A | 0.0407  |
| rs17377811  | A | -0.1012 |
| rs116495988 | T | 0.1301  |
| rs12107831  | C | 0.1987  |
| rs13096859  | A | 0.1317  |
| rs6788172   | G | -0.0252 |
| rs151139981 | A | 0.1615  |
| rs114619640 | C | -0.1145 |
| rs3905754   | T | 0.0277  |
| rs76446049  | A | 0.1301  |
| rs115316619 | A | 0.1162  |
| rs112567253 | T | 0.0511  |
| rs171405    | C | -0.0329 |
| rs6803765   | A | -0.0253 |
| rs79050626  | C | -0.0558 |
| rs74617794  | T | -0.0847 |
| rs75389142  | C | 0.0869  |
| rs17046486  | G | 0.1195  |
| rs77217322  | C | -0.0881 |
| rs61231332  | A | -0.039  |
| rs75601904  | C | -0.1079 |

|             |   |         |
|-------------|---|---------|
| rs616788    | G | 0.0319  |
| rs4679748   | T | -0.0706 |
| rs114471916 | T | -0.0829 |
| rs112517560 | G | 0.1189  |
| rs6446055   | C | 0.0348  |
| rs7611878   | C | -0.0309 |
| rs13060966  | T | -0.0841 |
| rs4839641   | T | 0.0248  |
| rs79879183  | C | 0.1262  |
| rs36046822  | G | 0.0443  |
| rs7624621   | T | -0.0303 |
| rs145124164 | T | 0.0664  |
| rs16826996  | C | 0.1826  |
| rs2577123   | T | 0.0286  |
| rs6762842   | A | 0.0452  |
| rs73220963  | T | 0.098   |
| rs75622279  | A | -0.072  |
| rs7626720   | A | 0.0288  |
| rs75459136  | A | -0.102  |
| rs34718456  | T | 0.1561  |
| rs17016192  | G | -0.0489 |
| rs4688317   | G | 0.0312  |
| rs62274099  | T | -0.0256 |
| rs75515534  | A | 0.0322  |
| rs13091044  | C | 0.0993  |
| rs2201910   | T | 0.0259  |
| rs861303    | C | -0.0275 |
| rs150338565 | C | -0.1805 |
| rs398518    | G | -0.0576 |
| rs78447016  | A | 0.105   |
| rs6795193   | T | -0.0264 |
| rs74944167  | G | 0.0918  |
| rs11918204  | G | -0.0647 |
| rs55686393  | C | 0.0913  |
| rs73182224  | A | 0.039   |
| rs7640373   | G | 0.0525  |
| rs7637880   | C | 0.0243  |
| rs28537678  | A | -0.1058 |
| rs17808417  | T | -0.0449 |
| rs114413805 | G | -0.1531 |
| rs111605556 | C | 0.0375  |
| rs2321536   | T | 0.0325  |
| rs344411    | A | -0.0296 |
| rs79167837  | A | 0.0891  |
| rs67286952  | A | 0.0622  |
| rs2593419   | G | 0.0327  |
| rs56102198  | C | -0.0952 |

|             |   |         |
|-------------|---|---------|
| rs73143009  | A | -0.2255 |
| rs1473624   | G | -0.0312 |
| rs6788064   | A | 0.0243  |
| rs140356962 | G | 0.115   |
| rs11715246  | T | 0.063   |
| rs10433641  | A | -0.0391 |
| rs111366190 | A | 0.1097  |
| rs141432505 | T | -0.1419 |
| rs7636774   | A | 0.0511  |
| rs142258889 | A | -0.0917 |
| rs116119310 | A | 0.1486  |
| rs6445475   | A | 0.0283  |
| rs114425897 | T | 0.134   |
| rs114230130 | T | -0.1104 |
| rs9839254   | T | -0.0329 |
| rs7627111   | T | -0.0331 |
| rs62247474  | A | -0.062  |
| rs114576917 | C | 0.1159  |
| rs6764070   | C | 0.0355  |
| rs114460079 | T | 0.1141  |
| rs9837318   | A | 0.0302  |
| rs784287    | T | 0.1274  |
| rs1403525   | G | 0.0308  |
| rs7610394   | A | -0.1288 |
| rs34998132  | A | -0.0272 |
| rs9876977   | A | 0.1651  |
| rs1847156   | G | -0.0462 |
| rs4859237   | T | -0.0248 |
| rs113703194 | C | 0.1371  |
| rs62298868  | T | -0.1049 |
| rs7618049   | C | -0.0272 |
| rs13068104  | A | 0.1779  |
| rs75019560  | G | -0.127  |
| rs148255536 | C | 0.0931  |
| rs3772977   | C | -0.1    |
| rs2316967   | T | -0.146  |
| rs77225082  | C | -0.0973 |
| rs113974704 | T | -0.1659 |
| rs4413261   | G | 0.0385  |
| rs77115046  | G | 0.0523  |
| rs7622750   | T | 0.0332  |
| rs111814399 | A | -0.087  |
| rs35894324  | G | 0.0349  |
| rs62245242  | A | 0.0259  |
| rs3732916   | G | 0.0373  |
| rs62262434  | A | 0.1308  |
| rs7645614   | T | 0.0348  |

|             |   |         |
|-------------|---|---------|
| rs237867    | T | 0.0895  |
| rs145181907 | T | -0.1613 |
| rs13097833  | G | 0.0354  |
| rs139661190 | G | 0.0993  |
| rs143712471 | C | 0.1845  |
| rs506791    | T | -0.0252 |
| rs138723162 | T | -0.1043 |
| rs9861858   | T | -0.128  |
| rs1545917   | C | -0.0279 |
| rs80099440  | A | -0.1005 |
| rs6800659   | A | 0.0247  |
| rs12493243  | G | 0.0625  |
| rs114926299 | A | 0.0715  |
| rs149768230 | G | -0.1804 |
| rs9846066   | G | -0.0257 |
| rs146521768 | T | -0.0994 |
| rs9834342   | C | 0.025   |
| rs582111    | C | -0.0295 |
| rs9861945   | T | -0.026  |
| rs2885851   | C | 0.1411  |
| rs114663380 | A | 0.066   |
| rs12633225  | C | -0.0298 |
| rs6773900   | G | 0.0248  |
| rs55776085  | T | 0.0333  |
| rs6442718   | T | -0.0249 |
| rs12714855  | A | -0.0381 |
| rs114878641 | C | 0.0864  |
| rs4678116   | C | 0.0276  |
| rs62288170  | T | -0.1097 |
| rs12495017  | C | 0.0428  |
| rs76032986  | A | 0.0389  |
| rs116163437 | A | -0.1329 |
| rs9857254   | G | -0.0252 |
| rs35934867  | G | -0.0514 |
| rs67111729  | C | 0.0333  |
| rs112683471 | C | -0.0599 |
| rs143428599 | A | 0.1302  |
| rs492028    | C | 0.0277  |
| rs74513941  | G | 0.0881  |
| rs1522936   | C | 0.0305  |
| rs9861217   | C | -0.0668 |
| rs77943865  | A | 0.083   |
| rs147855539 | T | 0.1869  |
| rs17699268  | C | -0.0701 |
| rs61192976  | G | -0.0245 |
| rs9289557   | T | 0.0352  |
| rs138518359 | T | -0.1431 |

|             |   |         |
|-------------|---|---------|
| rs1158561   | C | 0.0454  |
| rs9862119   | G | -0.0276 |
| rs280529    | A | -0.0264 |
| rs1318216   | A | -0.0318 |
| rs115741960 | A | -0.135  |
| rs142176219 | G | -0.1036 |
| rs6791817   | T | -0.0289 |
| rs6788268   | G | 0.0687  |
| rs74669399  | G | -0.0846 |
| rs11916226  | A | -0.0273 |
| rs13060680  | G | -0.0278 |
| rs4525892   | C | 0.0646  |
| rs56044505  | A | 0.1     |
| rs4560283   | G | -0.038  |
| rs34017791  | C | 0.1079  |
| rs62264810  | T | -0.0402 |
| rs1799852   | T | -0.0373 |
| rs75772119  | C | -0.0803 |
| rs75430462  | A | 0.0723  |
| rs115821245 | A | -0.1336 |
| rs139921722 | T | -0.1637 |
| rs13065128  | G | 0.0699  |
| rs9828566   | T | -0.029  |
| rs2624847   | G | 0.0289  |
| rs7624695   | G | -0.107  |
| rs115593711 | T | 0.0722  |
| rs143437510 | C | 0.1805  |
| rs9834622   | G | 0.0238  |
| rs62246612  | G | 0.0273  |
| rs2888127   | T | 0.067   |
| rs4680735   | G | 0.0338  |
| rs116487659 | T | -0.0552 |
| rs896904    | T | 0.0271  |
| rs9817493   | G | 0.025   |
| rs4063468   | C | 0.0287  |
| rs73056058  | A | 0.1798  |
| rs113230472 | G | 0.0663  |
| rs720320    | G | 0.0902  |
| rs71310858  | G | -0.137  |
| rs3843386   | A | 0.025   |
| rs6440671   | G | 0.0273  |
| rs4855082   | G | -0.0325 |
| rs62259853  | G | 0.0812  |
| rs35789999  | G | -0.1583 |
| rs139120873 | A | -0.1054 |
| rs7614929   | T | -0.0388 |
| rs6778810   | A | -0.0247 |

|             |   |         |
|-------------|---|---------|
| rs56366604  | T | 0.0484  |
| rs79513139  | C | 0.1186  |
| rs4470565   | C | -0.0882 |
| rs149877638 | C | -0.0925 |
| rs113360963 | T | -0.0812 |
| rs11128542  | G | -0.0328 |
| rs10470322  | C | 0.029   |
| rs34792178  | A | 0.0306  |
| rs62245802  | T | 0.0471  |
| rs138315672 | T | 0.2988  |
| rs301924    | G | -0.0272 |
| rs820360    | G | 0.0248  |
| rs2140301   | A | -0.0236 |
| rs78230667  | T | 0.0707  |
| rs77215642  | A | 0.0606  |
| rs13084889  | A | 0.0317  |
| rs72856606  | T | 0.1081  |
| rs76992221  | A | -0.1058 |
| rs79169774  | A | -0.1683 |
| rs9816734   | T | -0.0443 |
| rs115206686 | T | 0.1619  |
| rs360752    | A | -0.0413 |
| rs56350826  | G | 0.0736  |
| rs4511910   | C | -0.0249 |
| rs1520216   | C | -0.0583 |
| rs7637467   | C | 0.0241  |
| rs56162907  | G | -0.1177 |
| rs75521577  | A | 0.1124  |
| rs62291286  | G | -0.0445 |
| rs17621108  | C | -0.0968 |
| rs17235445  | C | 0.1044  |
| rs4589927   | A | 0.0324  |
| rs9883249   | C | 0.0247  |
| rs75022642  | C | -0.1454 |
| rs73110651  | G | -0.1262 |
| rs13070465  | A | -0.0247 |
| rs371046    | T | -0.0305 |
| rs9846163   | C | 0.1052  |
| rs34834971  | C | 0.0792  |
| rs9288968   | C | -0.0258 |
| rs115952616 | A | 0.1263  |
| rs114250366 | C | 0.1635  |
| rs13090563  | T | -0.0438 |
| rs12632856  | G | -0.0308 |
| rs1875110   | C | 0.0567  |
| rs144639902 | A | -0.126  |
| rs114428834 | G | -0.0968 |

|             |   |         |
|-------------|---|---------|
| rs12633522  | T | 0.0312  |
| rs6799028   | T | 0.0412  |
| rs585021    | T | -0.0485 |
| rs76577457  | C | -0.1221 |
| rs6790264   | G | -0.0238 |
| rs114423995 | T | -0.0817 |
| rs73093317  | C | 0.0775  |
| rs73140501  | C | 0.0451  |
| rs7623203   | A | 0.0348  |
| rs1018109   | A | 0.0243  |
| rs73050248  | C | 0.033   |
| rs2251878   | T | 0.0555  |
| rs77203258  | C | 0.0757  |
| rs113100219 | T | 0.0591  |
| rs13083449  | T | -0.0521 |
| rs142523790 | T | 0.1456  |
| rs13080042  | A | -0.0424 |
| rs57588952  | C | 0.0329  |
| rs149517005 | A | 0.1315  |
| rs16851872  | A | 0.1049  |
| rs16863078  | G | -0.0401 |
| rs79030193  | T | -0.1222 |
| rs2728060   | G | 0.0805  |
| rs62271124  | A | 0.0816  |
| rs6807284   | C | -0.0311 |
| rs73044355  | C | 0.083   |
| rs116081721 | C | 0.0789  |
| rs2116706   | T | -0.0315 |
| rs73073755  | T | -0.0731 |
| rs80297923  | C | -0.03   |
| rs74956157  | G | -0.054  |
| rs1543208   | G | -0.0303 |
| rs7629632   | G | 0.0251  |
| rs74423505  | A | 0.0753  |
| rs73013199  | A | -0.0527 |
| rs17787898  | G | -0.0307 |
| rs74900716  | T | -0.0607 |
| rs74441671  | A | 0.1042  |
| rs148147814 | T | 0.1411  |
| rs407484    | A | -0.0546 |
| rs9817573   | T | -0.0244 |
| rs115473330 | C | 0.0809  |
| rs2169580   | G | -0.0414 |
| rs62267968  | T | 0.0845  |
| rs9862821   | G | 0.0327  |
| rs968345    | A | 0.0302  |
| rs7643747   | G | -0.0435 |

|             |   |         |
|-------------|---|---------|
| rs430312    | G | -0.0409 |
| rs16845358  | A | -0.1204 |
| rs114774257 | C | 0.1399  |
| rs149237622 | T | 0.1446  |
| rs56811148  | A | 0.0468  |
| rs80223421  | T | -0.161  |
| rs62295684  | C | -0.0927 |
| rs73012446  | T | 0.0598  |
| rs115176719 | A | 0.0983  |
| rs6788848   | C | 0.0309  |
| rs114590561 | A | 0.177   |
| rs149720422 | G | 0.1783  |
| rs35397574  | G | -0.0307 |
| rs1531641   | C | -0.0291 |
| rs7634540   | A | -0.0852 |
| rs117218172 | A | 0.1122  |
| rs79868347  | T | -0.1076 |
| rs7636509   | T | -0.0283 |
| rs13076592  | T | -0.0288 |
| rs11714895  | C | 0.0707  |
| rs7635970   | C | -0.0469 |
| rs10510429  | A | 0.0394  |
| rs7428183   | G | 0.0971  |
| rs17047832  | C | -0.1304 |
| rs7645739   | T | 0.1053  |
| rs71310398  | C | -0.0652 |
| rs12330425  | A | 0.123   |
| rs17022891  | T | 0.036   |
| rs6807519   | G | 0.025   |
| rs17057321  | C | -0.0438 |
| rs79055056  | G | -0.0577 |
| rs1857290   | A | -0.0247 |
| rs12490932  | G | 0.0449  |
| rs2173795   | T | 0.0957  |
| rs62242513  | A | -0.0327 |
| rs77781936  | T | 0.0701  |
| rs13074694  | G | -0.0281 |
| rs111818828 | T | 0.1533  |
| rs140176242 | A | -0.119  |
| rs61571840  | G | 0.0413  |
| rs2597516   | G | -0.0267 |
| rs114234361 | C | -0.1037 |
| rs150589870 | G | 0.0406  |
| rs114598766 | G | -0.1477 |
| rs62237780  | G | 0.0533  |
| rs7616274   | A | 0.0297  |
| rs17193638  | T | -0.0513 |



|             |   |         |
|-------------|---|---------|
| rs12496702  | C | -0.0242 |
| rs11917241  | C | -0.0409 |
| rs6441188   | C | 0.0234  |
| rs17032984  | T | -0.042  |
| rs2002218   | T | 0.0808  |
| rs1382413   | C | -0.0409 |
| rs13077577  | A | -0.0511 |
| rs17237090  | G | -0.029  |
| rs149583842 | A | 0.0838  |
| rs12633440  | T | 0.0259  |
| rs9289071   | C | 0.0242  |
| rs141971737 | A | 0.1781  |
| rs73232724  | T | 0.0735  |
| rs151183556 | C | 0.1437  |
| rs163566    | T | -0.0242 |
| rs1991419   | C | -0.0398 |
| rs79434039  | C | -0.0781 |
| rs9812699   | A | -0.0246 |
| rs9863476   | A | 0.0646  |
| rs141429701 | T | -0.122  |
| rs77288692  | C | 0.1745  |
| rs62279446  | T | 0.0894  |
| rs997334    | G | 0.027   |
| rs147033376 | A | 0.1653  |
| rs6445118   | G | 0.0672  |
| rs2344719   | T | -0.0373 |
| rs58227348  | T | 0.1409  |
| rs4683085   | G | 0.0493  |
| rs9859911   | A | -0.04   |
| rs9856616   | A | 0.0258  |
| rs149267702 | C | 0.08    |
| rs12496220  | G | -0.0886 |
| rs116589706 | T | -0.0833 |
| rs148614065 | T | -0.1233 |
| rs114155637 | A | -0.0963 |
| rs9848511   | T | -0.0306 |
| rs75879003  | G | 0.1253  |
| rs115378114 | G | -0.1648 |
| rs6443863   | A | -0.0294 |
| rs138961357 | A | 0.1812  |
| rs115435548 | T | 0.1176  |
| rs114640099 | G | 0.0845  |
| rs79934416  | G | 0.1575  |
| rs147984619 | A | -0.1637 |
| rs62285698  | C | 0.0486  |
| rs11916843  | G | -0.0345 |
| rs61123573  | C | -0.0759 |

|             |   |         |
|-------------|---|---------|
| rs3856785   | G | -0.0262 |
| rs142472641 | A | -0.1829 |
| rs79318544  | G | 0.0938  |
| rs9880736   | C | -0.0231 |
| rs4682066   | A | 0.0234  |
| rs80037747  | T | -0.0609 |
| rs62255924  | A | -0.0776 |
| rs115512544 | C | -0.1323 |
| rs76847464  | G | -0.1805 |
| rs13322126  | G | -0.0523 |
| rs3805026   | C | -0.0299 |
| rs75053345  | C | -0.0708 |
| rs2885139   | C | 0.0241  |
| rs28749208  | G | 0.1581  |
| rs114622070 | T | 0.2028  |
| rs114716394 | A | 0.1016  |
| rs819085    | G | 0.0505  |
| rs142131106 | T | -0.1031 |
| rs9838720   | A | 0.0387  |
| rs4974402   | A | -0.0326 |
| rs13100965  | A | 0.0273  |
| rs13080388  | A | -0.0268 |
| rs79009804  | T | 0.0476  |
| rs72625844  | C | 0.167   |
| rs34202344  | T | 0.0289  |
| rs77502241  | T | -0.1756 |
| rs115672334 | A | 0.2038  |
| rs161924    | A | 0.0248  |
| rs785163    | C | 0.0821  |
| rs1585859   | T | -0.1056 |
| rs62281635  | A | 0.0963  |
| rs9830406   | A | -0.0349 |
| rs552413    | G | -0.0275 |
| rs76388971  | T | -0.0309 |
| rs294790    | G | -0.0236 |
| rs62274619  | C | 0.0366  |
| rs73183233  | C | 0.0566  |
| rs2091599   | G | 0.0406  |
| rs4637234   | T | 0.0479  |
| rs2280030   | G | 0.0235  |
| rs144819517 | G | 0.0851  |
| rs78401766  | G | 0.1243  |
| rs115131752 | A | -0.0867 |
| rs9814590   | C | -0.0397 |
| rs143492879 | A | 0.0688  |
| rs6808421   | T | 0.1154  |
| rs13082282  | A | -0.0926 |

|             |   |         |
|-------------|---|---------|
| rs9822701   | G | -0.0579 |
| rs2342881   | C | 0.0372  |
| rs73043633  | G | -0.0924 |
| rs114600526 | A | -0.1115 |
| rs17195435  | G | 0.0671  |
| rs141273453 | G | 0.2084  |
| rs59876383  | C | 0.0888  |
| rs1566365   | T | 0.0253  |
| rs114147721 | A | 0.0452  |
| rs2570008   | T | -0.0246 |
| rs629967    | A | 0.0523  |
| rs138412414 | T | -0.0944 |
| rs138633763 | G | -0.0641 |
| rs115665381 | C | -0.2451 |
| rs2028088   | T | -0.0397 |
| rs78746084  | A | 0.133   |
| rs114302444 | G | 0.1231  |
| rs9853221   | T | 0.0322  |
| rs114436995 | C | -0.0573 |
| rs137974684 | A | -0.2131 |
| rs141706751 | T | -0.1698 |
| rs1392230   | T | -0.0314 |
| rs115788331 | A | 0.09    |
| rs139675005 | T | 0.1287  |
| rs66562666  | C | 0.0304  |
| rs3773019   | G | -0.0242 |
| rs73102415  | A | 0.1008  |
| rs141228953 | G | -0.0887 |
| rs234055    | G | -0.0266 |
| rs58501137  | G | 0.1104  |
| rs10511318  | G | 0.028   |
| rs673514    | G | 0.0792  |
| rs6799129   | A | -0.0368 |
| rs17826464  | G | -0.033  |
| rs960001    | A | -0.0232 |
| rs1435652   | A | 0.0885  |
| rs9882339   | G | -0.1101 |
| rs74910419  | C | -0.0823 |
| rs111473988 | A | 0.1839  |
| rs9814256   | T | 0.0274  |
| rs74376515  | A | 0.0694  |
| rs146098337 | C | 0.0774  |
| rs78378377  | G | 0.0923  |
| rs75512404  | A | -0.0684 |
| rs115713729 | G | 0.0895  |
| rs7623495   | T | 0.0505  |
| rs79959140  | T | 0.0907  |

|             |   |         |
|-------------|---|---------|
| rs77870582  | C | -0.1635 |
| rs925566    | C | -0.0247 |
| rs112724944 | A | -0.1575 |
| rs17066699  | A | 0.0551  |
| rs1525868   | T | -0.0559 |
| rs56052505  | C | -0.0455 |
| rs6784395   | C | -0.0276 |
| rs6763970   | G | -0.0247 |
| rs114750214 | C | 0.1147  |
| rs17034952  | C | -0.025  |
| rs34977800  | A | 0.0313  |
| rs11720057  | T | 0.0821  |
| rs62243394  | A | 0.0406  |
| rs73109024  | C | 0.0432  |
| rs4856554   | A | -0.0237 |
| rs658132    | G | 0.0275  |
| rs5030062   | C | -0.0238 |
| rs9861864   | A | 0.0325  |
| rs113373124 | A | -0.1593 |
| rs13434030  | A | 0.0713  |
| rs6805004   | T | -0.0248 |
| rs4683742   | T | 0.0257  |
| rs73149849  | A | -0.1267 |
| rs149315186 | G | 0.0902  |
| rs11707306  | T | 0.0333  |
| rs28513296  | A | -0.0823 |
| rs74847791  | G | -0.1172 |
| rs6785497   | G | 0.1008  |
| rs17023766  | A | -0.0388 |
| rs35955626  | G | 0.0242  |
| rs11131167  | A | 0.0821  |
| rs79371617  | G | -0.1183 |
| rs264078    | A | 0.0333  |
| rs111885060 | C | 0.074   |
| rs76322799  | A | -0.0723 |
| rs9827823   | C | 0.032   |
| rs114919333 | C | -0.138  |
| rs73227391  | C | -0.0486 |
| rs12485473  | T | -0.025  |
| rs139046348 | T | -0.1124 |
| rs75572438  | A | -0.0833 |
| rs76274510  | A | -0.06   |
| rs908608    | T | -0.0252 |
| rs1695563   | T | -0.0263 |
| rs11917590  | A | -0.1121 |
| rs78365122  | T | 0.1413  |
| rs116829293 | A | -0.0858 |

|             |   |         |
|-------------|---|---------|
| rs11129505  | T | -0.0449 |
| rs140466003 | C | 0.1676  |
| rs13085101  | A | 0.187   |
| rs78788842  | C | 0.0637  |
| rs17184316  | C | 0.1191  |
| rs9857946   | A | 0.0452  |
| rs4912540   | A | 0.045   |
| rs73018761  | T | -0.0531 |
| rs3774255   | C | -0.0263 |
| rs2168155   | T | 0.0285  |
| rs75898076  | A | 0.0724  |
| rs10446288  | G | -0.0644 |
| rs56868633  | G | -0.1137 |
| rs72954800  | T | -0.0419 |
| rs342911    | A | -0.0297 |
| rs9877450   | A | 0.0938  |
| rs34173268  | T | -0.04   |
| rs838694    | C | 0.032   |
| rs7624166   | T | 0.0539  |
| rs1515464   | A | -0.025  |
| rs4568134   | G | 0.0244  |
| rs76378251  | A | 0.0944  |
| rs115182278 | C | -0.1025 |
| rs73217276  | G | 0.08    |
| rs55685195  | C | 0.127   |
| rs7637137   | A | 0.0272  |
| rs77317022  | C | 0.0972  |
| rs78987399  | T | -0.091  |
| rs11715184  | T | 0.0324  |
| rs73853005  | T | 0.0325  |
| rs12494689  | A | -0.124  |
| rs811198    | C | -0.0349 |
| rs76709916  | A | -0.098  |
| rs16832560  | C | -0.0391 |
| rs76368894  | T | -0.1204 |
| rs5030102   | G | -0.041  |
| rs79186472  | G | 0.0804  |
| rs137920921 | C | -0.1065 |
| rs1816960   | C | -0.0249 |
| rs143383796 | T | -0.1288 |
| rs141570183 | T | 0.0905  |
| rs78904050  | C | 0.1567  |
| rs75885951  | C | -0.0558 |
| rs73190763  | C | -0.048  |
| rs111834631 | T | 0.0641  |
| rs77966806  | C | 0.1298  |
| rs66463451  | A | 0.1015  |

|             |   |         |
|-------------|---|---------|
| rs34569540  | C | 0.0285  |
| rs13078149  | T | 0.0278  |
| rs56353352  | T | 0.0453  |
| rs115803446 | G | -0.0648 |
| rs16864109  | A | 0.056   |
| rs34918261  | C | 0.0983  |
| rs6771083   | C | -0.0943 |
| rs73139449  | T | 0.1249  |
| rs12023     | T | 0.0267  |
| rs114102083 | T | -0.0438 |
| rs9865634   | T | 0.0428  |
| rs35746395  | A | -0.0545 |
| rs6795999   | A | 0.0726  |
| rs17037891  | G | 0.0594  |
| rs45458298  | C | 0.0993  |
| rs150916351 | T | 0.0884  |
| rs73016643  | A | -0.0419 |
| rs9878478   | G | 0.0246  |
| rs144988207 | G | -0.0854 |
| rs55968350  | T | 0.1219  |
| rs77894277  | G | 0.0372  |
| rs13076178  | A | -0.0311 |
| rs137935834 | G | 0.1106  |
| rs77255589  | T | -0.0636 |
| rs142411579 | C | 0.1496  |
| rs73157378  | A | 0.0579  |
| rs10937177  | G | 0.0404  |
| rs9882964   | T | -0.0294 |
| rs1449993   | G | -0.0243 |
| rs9310219   | A | 0.0322  |
| rs9883384   | C | 0.1072  |
| rs4541356   | G | 0.0332  |
| rs2856017   | T | 0.045   |
| rs7625990   | A | 0.0432  |
| rs2061336   | G | 0.0471  |
| rs73181145  | G | 0.0313  |
| rs884309    | T | -0.0438 |
| rs62275870  | C | 0.1213  |
| rs75833696  | T | -0.1318 |
| rs138265519 | C | 0.1559  |
| rs156495    | G | 0.0261  |
| rs56720497  | C | -0.1399 |
| rs9813353   | T | 0.0287  |
| rs80098348  | T | -0.1222 |
| rs35241008  | A | 0.1203  |
| rs78692994  | A | 0.0798  |
| rs112874144 | G | -0.065  |

|             |   |         |
|-------------|---|---------|
| rs78346104  | A | 0.1147  |
| rs13084878  | T | -0.0787 |
| rs9821964   | T | 0.0433  |
| rs2688672   | G | 0.0299  |
| rs7624490   | A | 0.0427  |
| rs2713682   | G | 0.0797  |
| rs6780224   | T | -0.0259 |
| rs112373118 | G | -0.11   |
| rs1355767   | A | 0.0254  |
| rs9862402   | A | 0.0649  |
| rs3863065   | G | -0.0461 |
| rs872014    | A | -0.0353 |
| rs13060320  | T | -0.0552 |
| rs77287780  | T | 0.2059  |
| rs2700405   | T | 0.0289  |
| rs78634212  | A | 0.1032  |
| rs13088870  | C | 0.0522  |
| rs73000233  | G | 0.0977  |
| rs79280497  | C | -0.2223 |
| rs116253347 | A | 0.1666  |
| rs62290342  | G | 0.0781  |
| rs9814889   | C | 0.0365  |
| rs62246622  | T | -0.1397 |
| rs61753287  | T | -0.1766 |
| rs77061181  | C | 0.2046  |
| rs138739763 | T | -0.0859 |
| rs17037117  | T | 0.0346  |
| rs349557    | A | 0.0435  |
| rs76932985  | T | 0.1157  |
| rs61352267  | C | -0.1811 |
| rs6768189   | A | 0.0275  |
| rs560831    | T | -0.0335 |
| rs113311507 | C | 0.1172  |
| rs79928518  | A | -0.1275 |
| rs12486608  | T | -0.0727 |
| rs9811354   | C | -0.0314 |
| rs13072719  | C | 0.042   |
| rs6549885   | T | 0.0442  |
| rs6442112   | A | 0.0274  |
| rs150143368 | C | -0.1216 |
| rs114651321 | T | 0.1454  |
| rs74534463  | T | 0.0576  |
| rs78895054  | T | 0.1237  |
| rs79770675  | A | 0.0799  |
| rs62244901  | A | -0.1219 |
| rs1375717   | T | -0.026  |
| rs11714098  | A | -0.0921 |

|             |   |         |
|-------------|---|---------|
| rs9843696   | A | 0.0548  |
| rs73018002  | C | 0.1026  |
| rs78176890  | T | 0.0563  |
| rs11928869  | G | -0.0302 |
| rs9837819   | C | 0.0301  |
| rs36109479  | A | -0.1506 |
| rs144923269 | T | 0.1075  |
| rs115710751 | T | 0.1153  |
| rs75087456  | A | 0.0341  |
| rs7625711   | C | -0.0314 |
| rs78841401  | A | -0.0539 |
| rs4678222   | A | -0.0236 |
| rs59707234  | G | 0.0266  |
| rs4955291   | T | 0.0545  |
| rs115881833 | T | -0.0766 |
| rs79735841  | G | 0.0458  |
| rs10936921  | G | -0.0643 |
| rs6804331   | G | 0.0239  |
| rs1869149   | A | 0.0243  |
| rs73171592  | C | -0.0478 |
| rs34723067  | T | 0.0983  |
| rs1992352   | A | -0.0328 |
| rs62281165  | A | -0.0383 |
| rs76349067  | C | 0.0516  |
| rs2042689   | G | 0.06    |
| rs147717221 | A | 0.103   |
| rs17317624  | T | -0.078  |
| rs9311836   | C | -0.0263 |
| rs1533269   | A | 0.0255  |
| rs112914618 | A | -0.1517 |
| rs55687235  | G | -0.0585 |
| rs2083266   | C | 0.0361  |
| rs13317681  | G | 0.1351  |
| rs62239680  | T | -0.0419 |
| rs17033650  | C | 0.1357  |
| rs111609798 | G | -0.0761 |
| rs141130934 | A | 0.0894  |
| rs9841073   | A | -0.0357 |
| rs116117628 | T | 0.067   |
| rs79402659  | T | -0.0552 |
| rs9878632   | A | 0.0814  |
| rs7646819   | G | -0.034  |
| rs7635739   | T | -0.0312 |
| rs10510682  | G | 0.048   |
| rs73825422  | C | 0.1221  |
| rs79187869  | A | -0.0968 |
| rs73205063  | C | 0.123   |



|             |   |         |
|-------------|---|---------|
| rs71304667  | A | -0.0951 |
| rs6769454   | A | 0.0759  |
| rs424044    | T | -0.0454 |
| rs9868330   | T | -0.0923 |
| rs78336224  | T | -0.165  |
| rs9833930   | G | 0.0239  |
| rs59992807  | T | 0.0407  |
| rs149962864 | A | 0.0771  |
| rs73203281  | T | -0.1206 |
| rs145305944 | T | 0.058   |
| rs73174803  | T | 0.0314  |
| rs2410890   | T | 0.0693  |
| rs114865499 | T | -0.1004 |
| rs55686146  | A | -0.0372 |
| rs2038670   | T | 0.0346  |
| rs9835398   | A | 0.0281  |
| rs113426664 | A | -0.0734 |
| rs1522383   | T | 0.0248  |
| rs114296683 | T | 0.102   |
| rs77791546  | A | 0.1265  |
| rs112271984 | C | -0.043  |
| rs6796629   | C | -0.1447 |
| rs34880143  | T | 0.0477  |
| rs4857632   | T | 0.0351  |
| rs61741899  | A | -0.084  |
| rs116491613 | T | -0.1297 |
| rs35063381  | G | -0.0233 |
| rs77886985  | A | 0.0643  |
| rs1515443   | A | 0.0283  |
| rs6806448   | A | 0.1203  |
| rs73161829  | C | 0.1234  |
| rs116461478 | G | -0.1139 |
| rs148335373 | T | -0.1009 |
| rs9837945   | C | -0.0474 |
| rs9290367   | T | -0.0377 |
| rs111877123 | G | 0.1551  |
| rs139809549 | T | 0.1891  |
| rs13324570  | A | 0.0323  |
| rs12152349  | T | -0.0273 |
| rs78337313  | G | 0.0681  |
| rs61587801  | A | -0.0436 |
| rs4687458   | G | 0.0234  |
| rs465692    | G | -0.0299 |
| rs832198    | G | -0.029  |
| rs76998438  | T | 0.1544  |
| rs28465321  | C | -0.0254 |
| rs73141158  | C | -0.0388 |

|             |   |         |
|-------------|---|---------|
| rs116099245 | T | -0.0912 |
| rs13070843  | C | -0.0295 |
| rs73182532  | C | -0.0782 |
| rs150114864 | G | 0.083   |
| rs57163864  | T | -0.024  |
| rs13087705  | A | 0.0575  |
| rs113944329 | A | 0.0813  |
| rs12635957  | A | 0.0245  |
| rs541653    | T | 0.0237  |
| rs62273278  | A | 0.0779  |
| rs112755476 | T | -0.1283 |
| rs358002    | T | -0.0262 |
| rs11130919  | A | -0.0291 |
| rs115955461 | T | 0.0897  |
| rs76329892  | A | 0.1412  |
| rs62286313  | C | -0.0463 |
| rs11720237  | G | -0.0316 |
| rs116093729 | T | -0.0886 |
| rs56107907  | A | 0.0986  |
| rs116587920 | A | 0.1071  |
| rs2421774   | A | -0.0464 |
| rs710533    | G | 0.0343  |
| rs17032728  | G | -0.0897 |
| rs113935914 | C | 0.226   |
| rs13071891  | A | -0.0972 |
| rs11916000  | C | 0.0456  |
| rs1558991   | G | 0.0319  |
| rs79364534  | C | 0.0528  |
| rs34094694  | T | 0.0761  |
| rs13323410  | T | 0.0301  |
| rs4535168   | A | 0.0324  |
| rs76081980  | T | -0.0807 |
| rs16845879  | C | 0.0809  |
| rs73064426  | C | 0.0697  |
| rs2651311   | A | 0.023   |
| rs77130522  | G | 0.072   |
| rs116506657 | A | 0.121   |
| rs503616    | T | -0.0364 |
| rs139465968 | C | 0.1175  |
| rs141267872 | T | 0.1072  |
| rs143954523 | C | -0.1638 |
| rs78360844  | A | -0.0681 |
| rs74329169  | C | -0.0787 |
| rs145123386 | A | 0.122   |
| rs73118763  | T | -0.0449 |
| rs4894970   | C | -0.0288 |
| rs115267208 | A | -0.1903 |

|             |   |         |
|-------------|---|---------|
| rs6787362   | G | -0.039  |
| rs9860731   | C | 0.0266  |
| rs140932041 | A | 0.1434  |
| rs4679493   | T | 0.0275  |
| rs17062350  | T | 0.0261  |
| rs16861582  | G | -0.0262 |
| rs1435643   | T | 0.0235  |
| rs9812739   | A | -0.0358 |
| rs10222530  | T | 0.0672  |
| rs2162261   | T | -0.025  |
| rs145963304 | T | 0.1213  |
| rs1972455   | G | 0.0397  |
| rs75035704  | T | 0.0884  |
| rs11131047  | A | 0.046   |
| rs62230270  | A | -0.0512 |
| rs4688173   | T | -0.0274 |
| rs4688557   | T | -0.0644 |
| rs16846545  | A | 0.048   |
| rs72619600  | C | 0.0367  |
| rs74596715  | C | -0.0828 |
| rs8177257   | T | 0.0683  |
| rs115031090 | T | 0.1048  |
| rs73041764  | T | 0.0315  |
| rs12494280  | T | 0.0339  |
| rs72626922  | C | -0.0455 |
| rs62266220  | G | 0.0937  |
| rs11712878  | C | 0.1287  |
| rs74346049  | T | -0.0592 |
| rs7637788   | T | -0.0445 |
| rs6437651   | A | 0.0856  |
| rs146535407 | T | 0.1187  |
| rs6444180   | G | 0.0655  |
| rs62234246  | T | 0.0393  |
| rs6798664   | G | 0.025   |
| rs62242092  | G | 0.0643  |
| rs577763    | A | 0.0277  |
| rs6764623   | C | -0.0283 |
| rs73016163  | A | -0.0688 |
| rs62252607  | C | -0.0375 |
| rs141842868 | C | 0.0877  |
| rs10511049  | C | 0.0509  |
| rs11715757  | A | 0.127   |
| rs2641725   | A | -0.0617 |
| rs7647134   | A | -0.0267 |
| rs116259259 | C | -0.1469 |
| rs34947017  | A | -0.0712 |
| rs115093658 | C | -0.1566 |

|             |   |         |
|-------------|---|---------|
| rs62259041  | A | -0.0468 |
| rs73168972  | G | -0.0577 |
| rs139893232 | A | 0.088   |
| rs111852894 | A | 0.0859  |
| rs4688284   | G | -0.0338 |
| rs114549216 | T | -0.18   |
| rs147686427 | T | 0.1193  |
| rs79244773  | A | -0.0966 |
| rs17307972  | T | 0.1159  |
| rs116686527 | A | 0.1436  |
| rs1877267   | T | -0.0232 |
| rs4583633   | G | 0.0227  |
| rs6772692   | G | -0.0605 |
| rs114405951 | A | -0.0585 |
| rs146352352 | A | 0.0507  |
| rs34118601  | G | 0.0465  |
| rs79273964  | A | 0.0901  |
| rs59500180  | T | 0.0369  |
| rs11928162  | T | -0.024  |
| rs11720370  | C | 0.0255  |
| rs1230286   | G | 0.0286  |
| rs17530219  | C | 0.037   |
| rs13064821  | A | 0.0306  |
| rs2925859   | T | 0.0662  |
| rs7644745   | C | 0.0238  |
| rs11712248  | T | 0.0293  |
| rs9811004   | G | 0.0783  |
| rs73196871  | A | 0.0682  |
| rs4686251   | T | -0.0446 |
| rs3843985   | G | 0.029   |
| rs62254486  | C | -0.0452 |
| rs73099340  | C | 0.0831  |
| rs67087807  | T | 0.0409  |
| rs17340282  | A | 0.0316  |
| rs4530563   | G | 0.0235  |
| rs4467426   | A | 0.0233  |
| rs6801278   | C | -0.031  |
| rs12492564  | A | -0.0287 |
| rs114910887 | A | 0.0898  |
| rs6767457   | A | 0.0284  |
| rs492878    | T | -0.0275 |
| rs6785414   | G | 0.1438  |
| rs140359403 | C | -0.0993 |
| rs75502682  | G | -0.0817 |
| rs141767265 | A | -0.145  |
| rs142944390 | T | -0.1088 |
| rs74784867  | A | 0.0633  |

|             |   |         |
|-------------|---|---------|
| rs114990779 | G | 0.1548  |
| rs113952110 | T | -0.0893 |
| rs145410386 | C | -0.1696 |
| rs6807897   | A | 0.0383  |
| rs9654034   | T | 0.0293  |
| rs9819381   | A | 0.0299  |
| rs6809852   | A | -0.0833 |
| rs114518666 | T | 0.0601  |
| rs114362684 | T | 0.0792  |
| rs6783575   | C | -0.0242 |
| rs73197812  | T | 0.0308  |
| rs146720468 | A | -0.0541 |
| rs7641785   | T | -0.0233 |
| rs2320474   | C | -0.0276 |
| rs3772601   | C | -0.0528 |
| rs73878467  | T | 0.1111  |
| rs6442493   | A | 0.0483  |
| rs1495189   | C | -0.0265 |
| rs6788721   | A | 0.0398  |
| rs6444136   | T | -0.0254 |
| rs4839608   | C | 0.0277  |
| rs17236480  | A | -0.1614 |
| rs147154500 | A | 0.1158  |
| rs79048842  | T | -0.1596 |
| rs56247516  | G | 0.0835  |
| rs115557325 | A | -0.0534 |
| rs116139504 | A | 0.0534  |
| rs140879182 | T | -0.137  |
| rs76081380  | A | 0.155   |
| rs115532219 | T | -0.1239 |
| rs76451569  | C | -0.0658 |
| rs116212920 | T | 0.1558  |
| rs7609843   | G | 0.1579  |
| rs9820844   | C | 0.0278  |
| rs12491324  | T | 0.1074  |
| rs12495576  | A | -0.1233 |
| rs114181817 | G | 0.1112  |
| rs111743848 | A | -0.0365 |
| rs113234727 | T | -0.1444 |
| rs73097837  | T | 0.0748  |
| rs74919225  | G | -0.082  |
| rs145721069 | A | 0.1322  |
| rs4855068   | C | 0.0293  |
| rs115310313 | A | -0.2385 |
| rs115111854 | T | -0.112  |
| rs149305791 | A | 0.0507  |
| rs114051704 | C | 0.0989  |

|             |   |         |
|-------------|---|---------|
| rs2268533   | C | -0.0246 |
| rs11715813  | G | -0.033  |
| rs9882217   | A | -0.032  |
| rs78994284  | G | 0.0828  |
| rs73085865  | T | -0.108  |
| rs58485349  | T | -0.0244 |
| rs9849624   | G | 0.0286  |
| rs13077495  | C | 0.0449  |
| rs79820484  | C | 0.0723  |
| rs1163747   | A | -0.0414 |
| rs76992138  | A | -0.0822 |
| rs9883470   | G | 0.0287  |
| rs301567    | G | -0.0272 |
| rs2196427   | G | -0.0253 |
| rs1389155   | G | 0.0262  |
| rs4679530   | A | 0.0608  |
| rs13072319  | A | 0.0277  |
| rs9867980   | T | 0.0286  |
| rs155528    | C | 0.0329  |
| rs77443164  | T | 0.1478  |
| rs77998028  | T | -0.0882 |
| rs79919760  | T | 0.0797  |
| rs9830928   | G | 0.0826  |
| rs9874252   | G | -0.0429 |
| rs35976104  | A | -0.034  |
| rs1420476   | T | 0.0567  |
| rs115421854 | C | 0.1019  |
| rs55807227  | C | 0.0302  |
| rs62293556  | A | 0.096   |
| rs62234768  | T | -0.1017 |
| rs144983377 | T | -0.1348 |
| rs141046933 | A | 0.1131  |
| rs2216368   | G | -0.0269 |
| rs13322091  | C | 0.0529  |
| rs9824089   | G | 0.0326  |
| rs2728057   | A | 0.0238  |
| rs74901955  | T | 0.0305  |
| rs79120070  | A | -0.0567 |
| rs12695349  | T | -0.0288 |
| rs9821532   | G | -0.0234 |
| rs17612927  | C | -0.0418 |
| rs73048232  | A | -0.1267 |
| rs12638206  | T | -0.0625 |
| rs111665055 | C | 0.0309  |
| rs9968134   | G | -0.026  |
| rs6789584   | T | 0.0237  |
| rs35832957  | T | -0.0647 |

|             |   |         |
|-------------|---|---------|
| rs6792568   | G | -0.0393 |
| rs149607448 | C | 0.1753  |
| rs62239894  | A | 0.0494  |
| rs62252991  | T | -0.0392 |
| rs34726474  | T | -0.0349 |
| rs993071    | C | -0.0226 |
| rs12488961  | A | 0.0504  |
| rs77649978  | G | -0.177  |
| rs967846    | C | -0.0323 |
| rs35714628  | G | 0.0563  |
| rs1274167   | G | -0.0645 |
| rs114518300 | T | -0.095  |
| rs71314333  | A | -0.1358 |
| rs59104996  | G | 0.049   |
| rs79071687  | G | -0.0901 |
| rs74592091  | A | 0.0823  |
| rs12494765  | G | -0.0324 |
| rs1163748   | G | -0.0228 |
| rs275364    | C | -0.0274 |
| rs116028368 | A | 0.106   |
| rs7428988   | A | 0.0348  |
| rs112440881 | C | 0.1232  |
| rs79669574  | A | -0.034  |
| rs142779502 | A | -0.06   |
| rs55685201  | T | -0.1238 |
| rs58896668  | G | -0.0236 |
| rs74886831  | A | 0.087   |
| rs79247896  | T | 0.0756  |
| rs113769727 | A | -0.0483 |
| rs55695623  | G | 0.0329  |
| rs9839165   | A | -0.0327 |
| rs4034944   | A | -0.0238 |
| rs55973834  | T | 0.131   |
| rs7632890   | G | 0.0789  |
| rs10881569  | A | -0.0314 |
| rs115270391 | T | 0.1553  |
| rs358007    | C | 0.025   |
| rs2886670   | T | -0.0929 |
| rs6809736   | G | 0.0408  |
| rs62265091  | G | 0.0639  |
| rs1618357   | G | -0.0242 |
| rs67259733  | T | -0.0327 |
| rs1599389   | A | 0.0223  |
| rs78045710  | G | -0.0653 |
| rs75909755  | T | -0.1251 |
| rs9828514   | G | 0.0279  |
| rs7614010   | A | 0.1145  |

|             |   |         |
|-------------|---|---------|
| rs9842726   | G | 0.1731  |
| rs115636614 | C | 0.0766  |
| rs4428188   | T | -0.0328 |
| rs2687684   | C | -0.0619 |
| rs113313530 | T | 0.0411  |
| rs4955262   | G | -0.0257 |
| rs146209256 | A | 0.123   |
| rs6801870   | C | -0.0456 |
| rs78525508  | T | -0.1218 |
| rs6798875   | A | -0.0235 |
| rs76515977  | T | -0.1139 |
| rs6772069   | T | -0.0821 |
| rs9310419   | A | 0.0233  |
| rs4419359   | A | -0.0239 |
| rs142622662 | T | 0.1092  |
| rs74744678  | T | -0.1415 |
| rs34245420  | G | -0.0398 |
| rs76069245  | C | 0.0526  |
| rs77992421  | G | -0.0457 |
| rs45449196  | A | 0.0841  |
| rs4687593   | C | -0.0828 |
| rs11706970  | T | -0.0316 |
| rs80244852  | A | 0.0837  |
| rs7610725   | G | 0.14    |
| rs615326    | T | -0.1286 |
| rs78252169  | T | -0.0866 |
| rs73001949  | C | 0.0458  |
| rs115124081 | T | 0.1205  |
| rs17727113  | G | -0.1292 |
| rs80345926  | A | -0.1645 |
| rs112252545 | T | -0.1732 |
| rs115447998 | T | 0.0896  |
| rs4685251   | G | 0.0241  |
| rs839223    | G | 0.0454  |
| rs1900639   | G | -0.0371 |
| rs16853205  | C | -0.1081 |
| rs7643344   | A | -0.084  |
| rs4681269   | G | -0.0246 |
| rs116791802 | T | 0.1196  |
| rs4582032   | T | 0.0271  |
| rs78145487  | A | 0.0425  |
| rs79924966  | A | -0.0795 |
| rs75738161  | C | -0.1448 |
| rs2172839   | G | 0.0308  |
| rs1400166   | A | -0.0249 |
| rs814499    | T | 0.0455  |
| rs73043871  | T | 0.1456  |



|             |   |         |
|-------------|---|---------|
| rs115159912 | T | 0.1305  |
| rs3755833   | G | -0.0945 |
| rs923786    | G | 0.023   |
| rs2139950   | A | -0.0358 |
| rs9833056   | A | 0.061   |
| rs77006306  | T | 0.0767  |
| rs74661194  | C | -0.0817 |
| rs9858813   | A | 0.0561  |
| rs1699346   | C | -0.0239 |
| rs7612223   | C | -0.0309 |
| rs12491245  | C | 0.0296  |
| rs114835717 | G | 0.1074  |
| rs151267419 | G | 0.1027  |
| rs146002024 | A | -0.1424 |
| rs9839753   | T | 0.0239  |
| rs1554455   | C | -0.0258 |
| rs114435896 | A | 0.1158  |
| rs145201955 | A | 0.193   |
| rs301548    | A | -0.0271 |
| rs9813310   | T | 0.0283  |
| rs6443636   | C | 0.0228  |
| rs2944424   | C | 0.0342  |
| rs77216017  | C | -0.0738 |
| rs79809726  | C | 0.1722  |
| rs150853292 | G | -0.1161 |
| rs7633034   | G | -0.0303 |
| rs73891322  | A | 0.079   |
| rs62246014  | A | 0.0585  |
| rs73164855  | T | -0.199  |
| rs114273055 | A | -0.0875 |
| rs116693190 | G | -0.0433 |
| rs28646228  | G | -0.0392 |
| rs7642576   | G | -0.0593 |
| rs73216976  | C | -0.0269 |
| rs4325967   | C | -0.0232 |
| rs13074054  | G | -0.0286 |
| rs113435624 | C | -0.063  |
| rs112849770 | G | 0.1514  |
| rs9862019   | C | -0.0522 |
| rs7638857   | C | -0.0248 |
| rs116289863 | C | 0.0836  |
| rs77973423  | G | -0.0296 |
| rs77363436  | C | 0.1193  |
| rs114162307 | G | -0.0667 |
| rs73817629  | T | -0.0928 |
| rs74923473  | C | -0.0337 |
| rs2903688   | T | -0.0413 |

|             |   |         |
|-------------|---|---------|
| rs2322156   | T | 0.0302  |
| rs7636081   | C | -0.0537 |
| rs113751603 | C | 0.0482  |
| rs6801737   | A | 0.038   |
| rs78277832  | C | 0.077   |
| rs113072575 | A | -0.0302 |
| rs2720320   | T | 0.0358  |
| rs4677799   | C | -0.0441 |
| rs114196628 | G | -0.1491 |
| rs920474    | T | -0.026  |
| rs62276206  | G | 0.0426  |
| rs76130809  | C | 0.1311  |
| rs78153984  | C | 0.0562  |
| rs13085687  | A | 0.0236  |
| rs2929387   | C | 0.0366  |
| rs143293287 | A | -0.1855 |
| rs138033243 | T | 0.1293  |
| rs16855946  | G | 0.1041  |
| rs78302681  | A | -0.1796 |
| rs140310048 | A | 0.1976  |
| rs73176760  | T | 0.0535  |
| rs9870051   | C | -0.0286 |
| rs336631    | C | 0.026   |
| rs144603882 | C | 0.076   |
| rs116057717 | G | 0.0955  |
| rs13085772  | T | 0.0776  |
| rs62288019  | T | 0.0617  |
| rs80073230  | T | -0.1108 |
| rs75778245  | C | -0.0829 |
| rs73067573  | T | 0.1566  |
| rs11926416  | T | -0.1724 |
| rs34188648  | A | -0.042  |
| rs4132331   | T | -0.028  |
| rs6790803   | C | 0.0237  |
| rs138106981 | C | 0.1227  |
| rs9826263   | A | -0.0316 |
| rs9288761   | A | -0.0256 |
| rs75348318  | A | 0.0833  |
| rs75468549  | G | -0.0997 |
| rs139512391 | T | 0.0892  |
| rs11720799  | C | 0.0293  |
| rs1869998   | T | -0.024  |
| rs35521337  | C | -0.0353 |
| rs55737847  | T | -0.0411 |
| rs76460752  | G | 0.0627  |
| rs9310191   | G | 0.0308  |
| rs2323405   | C | -0.0226 |

|             |   |         |
|-------------|---|---------|
| rs4544628   | A | -0.0348 |
| rs9820297   | T | -0.0254 |
| rs75818089  | G | -0.1146 |
| rs114470991 | T | -0.1816 |
| rs7634506   | A | -0.0758 |
| rs112197403 | A | 0.1355  |
| rs113345139 | C | -0.0482 |
| rs642284    | T | -0.0453 |
| rs145215854 | C | 0.1022  |
| rs9869249   | A | -0.0357 |
| rs6772523   | G | -0.0677 |
| rs2053014   | G | -0.0251 |
| rs41272627  | T | 0.0378  |
| rs11714599  | G | -0.0355 |
| rs11713606  | C | 0.0281  |
| rs115685731 | C | 0.12    |
| rs9873504   | T | 0.0541  |
| rs73866285  | T | -0.0717 |
| rs9850088   | G | -0.0858 |
| rs77474288  | C | 0.0502  |
| rs11707530  | G | -0.1148 |
| rs56105402  | G | 0.1129  |
| rs17071079  | C | -0.0314 |
| rs76878306  | T | 0.0548  |
| rs73230157  | G | 0.114   |
| rs60490049  | T | 0.0548  |
| rs13090977  | T | 0.0647  |
| rs114704911 | C | -0.1469 |
| rs6442155   | C | -0.027  |
| rs6786663   | T | 0.0251  |
| rs35172844  | G | 0.0797  |
| rs80340077  | T | -0.0545 |
| rs6786705   | C | -0.1295 |
| rs66890203  | G | 0.0345  |
| rs1442602   | C | -0.0275 |
| rs146208711 | A | 0.1208  |
| rs140927854 | G | -0.1361 |
| rs6775724   | T | 0.0229  |
| rs115632241 | T | -0.1222 |
| rs78232502  | T | -0.1297 |
| rs148597291 | G | -0.1523 |
| rs2140092   | A | -0.064  |
| rs62251072  | C | 0.1172  |
| rs75486840  | A | -0.063  |
| rs56138756  | G | -0.0431 |
| rs3942859   | C | 0.0232  |
| rs73129695  | C | -0.0306 |

|             |   |         |
|-------------|---|---------|
| rs9858485   | T | -0.0348 |
| rs111439402 | G | -0.0964 |
| rs66518460  | G | -0.0338 |
| rs9882541   | T | 0.0948  |
| rs114608783 | A | -0.1131 |
| rs55743135  | C | 0.1677  |
| rs11709512  | T | 0.0261  |
| rs78999165  | A | 0.0709  |
| rs116249776 | G | 0.1652  |
| rs77197342  | T | -0.0867 |
| rs79831182  | A | 0.0942  |
| rs113569457 | G | 0.1406  |
| rs34214074  | G | 0.0613  |
| rs114351630 | C | -0.1278 |
| rs11917662  | T | -0.0323 |
| rs4583573   | C | -0.0227 |
| rs114598794 | A | -0.0939 |
| rs11706821  | T | -0.0265 |
| rs636936    | C | -0.0688 |
| rs4858302   | G | 0.0245  |
| rs78370229  | A | 0.0432  |
| rs59598133  | C | 0.0648  |
| rs116632797 | C | 0.1415  |
| rs75962218  | C | 0.0729  |
| rs77146833  | C | 0.0831  |
| rs114292844 | A | -0.1247 |
| rs6800891   | A | -0.1808 |
| rs115623380 | G | -0.1797 |
| rs35565315  | G | -0.1592 |
| rs10460813  | C | -0.0305 |
| rs62263402  | C | 0.078   |
| rs11718316  | T | 0.0301  |
| rs11926889  | A | -0.0448 |
| rs17301106  | A | 0.0252  |
| rs360418    | A | 0.053   |
| rs75192295  | C | 0.1015  |
| rs7624815   | T | 0.0257  |
| rs76242500  | C | -0.134  |
| rs143373301 | T | -0.0298 |
| rs79161303  | T | 0.1192  |
| rs115976517 | T | -0.0426 |
| rs62260223  | A | 0.0494  |
| rs4831153   | T | -0.0323 |
| rs11709363  | C | -0.0562 |
| rs28439990  | C | -0.1141 |
| rs116315013 | T | -0.1052 |
| rs2272078   | A | -0.0225 |

|             |   |         |
|-------------|---|---------|
| rs9830208   | T | 0.0302  |
| rs79166198  | G | 0.126   |
| rs1177320   | T | 0.0368  |
| rs71323879  | G | -0.0639 |
| rs80060601  | A | -0.1782 |
| rs16845868  | C | 0.0414  |
| rs114951812 | A | 0.105   |
| rs4676816   | T | -0.0412 |
| rs1812958   | G | 0.0299  |
| rs2567349   | A | 0.0811  |
| rs75402957  | G | 0.0834  |
| rs145745446 | C | 0.0845  |
| rs4679210   | G | -0.0224 |
| rs146097466 | T | -0.0813 |
| rs11706956  | C | -0.029  |
| rs11713865  | C | 0.1348  |
| rs1733528   | G | 0.0245  |
| rs73003094  | G | 0.1131  |
| rs7618381   | C | -0.0241 |
| rs113411114 | A | 0.097   |
| rs9810097   | G | -0.0269 |
| rs2961353   | C | 0.0285  |
| rs1485140   | T | 0.0814  |
| rs73014648  | T | -0.0818 |
| rs78188031  | A | -0.048  |
| rs149060726 | C | -0.1414 |
| rs9757097   | T | -0.0254 |
| rs113378478 | G | -0.1629 |
| rs73178138  | T | 0.0379  |
| rs4505685   | T | -0.0307 |
| rs2371864   | G | 0.0288  |
| rs146713712 | G | 0.2092  |
| rs16830507  | T | 0.0861  |
| rs4894442   | G | -0.0475 |
| rs35034250  | T | -0.1042 |
| rs1281465   | G | -0.0219 |
| rs4276197   | A | 0.0291  |
| rs2059002   | A | 0.0287  |
| rs145963181 | A | 0.0479  |
| rs78803966  | T | -0.0974 |
| rs41517648  | A | -0.0458 |
| rs79451633  | C | 0.0625  |
| rs62252808  | T | -0.0633 |
| rs149937593 | G | -0.0672 |
| rs17314998  | A | -0.1059 |
| rs143654950 | A | -0.1211 |
| rs139719145 | T | -0.1281 |

|             |   |         |
|-------------|---|---------|
| rs2844379   | G | -0.0222 |
| rs74283776  | A | 0.1061  |
| rs6763591   | C | 0.0246  |
| rs7649547   | A | -0.0414 |
| rs76532098  | T | -0.152  |
| rs1903216   | A | 0.0223  |
| rs149687872 | A | 0.092   |
| rs149765298 | C | -0.1297 |
| rs2313285   | C | -0.0245 |
| rs6793348   | C | -0.0268 |
| rs115555155 | T | 0.1136  |
| rs73214194  | A | -0.0697 |
| rs7615026   | T | 0.0241  |
| rs7621252   | T | 0.031   |
| rs62230966  | A | -0.0507 |
| rs140297971 | G | 0.0811  |
| rs74763655  | T | 0.1368  |
| rs76909671  | T | 0.1187  |
| rs79590202  | T | 0.0622  |
| rs986687    | G | -0.046  |
| rs11720128  | T | -0.0237 |
| rs78439715  | A | -0.0728 |
| rs13086347  | A | -0.0379 |
| rs1857876   | C | 0.0278  |
| rs7373248   | T | 0.0326  |
| rs139442946 | C | -0.0952 |
| rs58407484  | T | 0.0517  |
| rs113134458 | T | -0.117  |
| rs9859654   | G | 0.0233  |
| rs6779253   | C | -0.0301 |
| rs7634361   | A | 0.0979  |
| rs149270846 | T | -0.096  |
| rs145716766 | A | 0.1496  |
| rs11129517  | T | -0.0257 |
| rs1851817   | A | 0.0235  |
| rs3792452   | T | -0.0287 |
| rs80104935  | A | -0.0892 |
| rs76237031  | G | -0.0737 |
| rs112233245 | A | -0.0692 |
| rs73153540  | T | 0.05    |
| rs34598718  | G | 0.0372  |
| rs6803682   | G | -0.0829 |
| rs4686383   | T | -0.0342 |
| rs74795708  | G | -0.0791 |
| rs59647999  | T | 0.0263  |
| rs74968393  | G | -0.0559 |
| rs6784735   | T | -0.0256 |

|             |   |         |
|-------------|---|---------|
| rs114857131 | A | -0.0693 |
| rs1844066   | G | -0.0847 |
| rs4365590   | T | 0.0237  |
| rs4677342   | C | 0.0288  |
| rs77209576  | T | 0.1038  |
| rs113663416 | T | -0.0634 |
| rs7651736   | G | -0.0227 |
| rs149319533 | A | -0.0921 |
| rs116820371 | A | -0.1885 |
| rs143941154 | G | -0.0877 |
| rs112768898 | T | 0.0312  |
| rs76491719  | T | -0.07   |
| rs115778847 | C | -0.0603 |
| rs7642344   | G | -0.0225 |
| rs7634366   | A | 0.0568  |
| rs149475546 | T | 0.111   |
| rs4680565   | A | 0.0245  |
| rs55842217  | G | -0.1326 |
| rs7649756   | G | -0.028  |
| rs2692682   | T | 0.0366  |
| rs77567348  | A | -0.187  |
| rs17400084  | T | -0.0356 |
| rs6443297   | C | 0.0833  |
| rs9862263   | C | 0.0244  |
| rs60862189  | T | 0.0414  |
| rs62235517  | A | -0.0387 |
| rs141768480 | A | -0.1257 |
| rs149020688 | T | 0.1134  |
| rs9755665   | T | -0.0358 |
| rs111682647 | T | -0.0982 |
| rs11719802  | T | 0.0871  |
| rs111478163 | T | -0.0324 |
| rs11719404  | T | -0.0529 |
| rs145756887 | T | -0.1098 |
| rs76121550  | G | -0.0933 |
| rs6775823   | G | -0.0311 |
| rs11131034  | G | 0.0368  |
| rs144945189 | A | 0.1215  |
| rs1824242   | C | 0.0321  |
| rs3860499   | G | -0.0224 |
| rs147034544 | A | 0.1317  |
| rs73019633  | A | 0.0374  |
| rs116803764 | C | -0.0536 |
| rs144320001 | C | 0.2027  |
| rs6775511   | G | 0.0312  |
| rs145089992 | A | -0.1394 |
| rs4547720   | C | 0.023   |

|             |   |         |
|-------------|---|---------|
| rs9847715   | G | 0.0829  |
| rs75143096  | T | 0.1632  |
| rs6802509   | C | -0.0251 |
| rs3935623   | C | -0.0369 |
| rs73023796  | C | -0.052  |
| rs138523256 | C | 0.112   |
| rs6795676   | G | 0.0903  |
| rs902954    | T | 0.0248  |
| rs62291682  | C | 0.0411  |
| rs139984586 | A | -0.0621 |
| rs73060584  | T | 0.0503  |
| rs3816396   | T | 0.0246  |
| rs115821957 | A | -0.1233 |
| rs6785592   | C | 0.0897  |
| rs34230332  | G | -0.0501 |
| rs77508421  | T | 0.051   |
| rs148619625 | T | -0.1905 |
| rs56097380  | T | 0.0898  |
| rs10936433  | G | 0.0252  |
| rs1828193   | G | 0.0603  |
| rs115587089 | G | 0.0621  |
| rs71324982  | A | -0.0297 |
| rs9816926   | T | 0.0262  |
| rs141455035 | T | -0.1253 |
| rs6781089   | A | -0.0294 |
| rs76933969  | G | 0.0721  |
| rs16863499  | G | 0.0696  |
| rs79142795  | G | -0.0917 |
| rs6802286   | T | 0.0239  |
| rs58530194  | A | 0.0515  |
| rs16863398  | G | 0.1262  |
| rs114462402 | A | -0.1184 |
| rs116095368 | T | -0.1599 |
| rs147574152 | G | -0.0928 |
| rs12485901  | C | 0.1242  |
| rs57184972  | A | -0.097  |
| rs114474479 | G | -0.1316 |
| rs149398132 | T | -0.1157 |
| rs709545    | C | -0.0309 |
| rs6775095   | T | -0.0905 |
| rs843511    | C | 0.0442  |
| rs73069836  | A | -0.0582 |
| rs13079572  | C | 0.0254  |
| rs146771374 | T | -0.128  |
| rs74725445  | A | 0.1728  |
| rs9290340   | G | -0.0275 |
| rs114910518 | A | 0.0952  |



|             |   |         |
|-------------|---|---------|
| rs35123682  | C | 0.0421  |
| rs73163572  | G | 0.1309  |
| rs34423355  | G | 0.0328  |
| rs1525869   | C | 0.0657  |
| rs115749714 | T | 0.1654  |
| rs139734554 | T | 0.0793  |
| rs147380501 | G | 0.0831  |
| rs13099887  | G | 0.0392  |
| rs75727747  | G | 0.0697  |
| rs114201009 | C | -0.1461 |
| rs73162834  | G | 0.0806  |
| rs13327383  | A | 0.0666  |
| rs704275    | G | 0.0258  |
| rs9818213   | T | -0.0343 |
| rs79134101  | T | -0.0691 |
| rs77113029  | C | 0.0558  |
| rs73166645  | C | -0.0389 |
| rs114312346 | A | -0.0913 |
| rs57781126  | A | 0.0262  |
| rs78117651  | A | -0.0439 |
| rs2461514   | T | 0.025   |
| rs114513504 | A | 0.2221  |
| rs144041673 | A | -0.1711 |
| rs3088097   | G | 0.0234  |
| rs80217925  | C | -0.2387 |
| rs141084079 | C | -0.1342 |
| rs80286902  | C | -0.1447 |
| rs78518449  | C | 0.0652  |
| rs12494801  | T | -0.0362 |
| rs115648687 | T | 0.1646  |
| rs2271744   | C | -0.0235 |
| rs11917509  | T | -0.1084 |
| rs138031129 | A | -0.1249 |
| rs522554    | A | -0.0535 |
| rs77538636  | G | -0.0788 |
| rs73173688  | A | -0.0885 |
| rs115643521 | C | 0.1571  |
| rs11706200  | A | -0.0289 |
| rs73028233  | A | -0.0702 |
| rs163472    | T | 0.0388  |
| rs74905766  | C | -0.101  |
| rs9871064   | T | -0.045  |
| rs114689709 | A | 0.0986  |
| rs6445264   | G | -0.0385 |
| rs13072871  | A | -0.0218 |
| rs9818987   | T | 0.0235  |
| rs9835207   | A | -0.0232 |

|             |   |         |
|-------------|---|---------|
| rs114780266 | A | 0.1138  |
| rs7634629   | A | 0.0275  |
| rs62260776  | T | 0.027   |
| rs9862138   | T | -0.0326 |
| rs112449182 | T | -0.1152 |
| rs144835446 | T | 0.1285  |
| rs114906337 | A | -0.1827 |
| rs17023487  | A | 0.043   |
| rs62249135  | A | 0.2234  |
| rs115192887 | A | 0.0851  |
| rs2251347   | C | -0.0534 |
| rs146600709 | C | -0.1627 |
| rs77112989  | A | 0.0352  |
| rs12496700  | T | 0.0226  |
| rs13072145  | T | 0.0355  |
| rs13060981  | T | -0.0972 |
| rs78503522  | T | -0.094  |
| rs73217008  | T | 0.0356  |
| rs6805378   | T | -0.0223 |
| rs111971266 | C | -0.1629 |
| rs35724111  | C | 0.1152  |
| rs79202519  | A | 0.1282  |
| rs12635384  | T | 0.0381  |
| rs17005366  | A | 0.1233  |
| rs138650469 | C | 0.1316  |
| rs6778616   | G | 0.0234  |
| rs36193     | C | 0.0256  |
| rs78686036  | T | 0.0522  |
| rs34306909  | C | -0.0392 |
| rs77354079  | A | -0.1183 |
| rs73129816  | G | -0.1172 |
| rs150885913 | C | 0.1329  |
| rs76613107  | A | 0.1021  |
| rs76679541  | A | -0.1075 |
| rs112145227 | T | -0.1318 |
| rs9835997   | T | 0.0226  |
| rs936154    | G | 0.0233  |
| rs55814436  | T | -0.0268 |
| rs9826268   | C | -0.0254 |
| rs79540343  | G | 0.1345  |
| rs12630728  | T | -0.0313 |
| rs7629402   | T | -0.0332 |
| rs72995037  | C | 0.0298  |
| rs9830122   | C | -0.0231 |
| rs74594121  | T | 0.0836  |
| rs991818    | T | 0.0236  |
| rs62261842  | C | -0.0807 |

|             |   |         |
|-------------|---|---------|
| rs11718458  | C | -0.0253 |
| rs28439875  | C | 0.0268  |
| rs41413246  | T | 0.0567  |
| rs9865195   | C | -0.025  |
| rs4646703   | T | 0.0374  |
| rs4298035   | G | -0.0299 |
| rs7433873   | T | -0.027  |
| rs662959    | A | 0.0308  |
| rs78616784  | A | -0.0995 |
| rs112537955 | A | 0.0856  |
| rs55853504  | G | 0.092   |
| rs4859155   | A | 0.0679  |
| rs78760206  | G | -0.0935 |
| rs11130204  | A | 0.0245  |
| rs62249310  | G | -0.1076 |
| rs73190064  | G | -0.0331 |
| rs74858867  | C | 0.0879  |
| rs71329291  | C | -0.0888 |
| rs80189250  | C | 0.0967  |
| rs75297007  | C | -0.1267 |
| rs4602438   | A | 0.023   |
| rs75801738  | A | 0.096   |
| rs795730    | C | 0.0373  |
| rs79316338  | A | -0.1105 |
| rs17594178  | C | 0.0338  |
| rs77869272  | T | 0.0525  |
| rs9310624   | T | 0.0322  |
| rs111755095 | T | -0.0582 |
| rs276104    | C | 0.0224  |
| rs62265176  | T | 0.0404  |
| rs2270354   | C | 0.0278  |
| rs11717532  | T | -0.0431 |
| rs62256516  | G | 0.0371  |
| rs143193551 | G | -0.153  |
| rs6795156   | T | 0.051   |
| rs74705738  | A | -0.0514 |
| rs17049256  | C | 0.036   |
| rs9839389   | C | 0.0223  |
| rs428582    | G | -0.0342 |
| rs79424503  | A | -0.1601 |
| rs149205793 | G | -0.0895 |
| rs79710698  | G | 0.1093  |
| rs620165    | T | -0.0385 |
| rs6808314   | A | 0.0233  |
| rs17672589  | G | 0.0448  |
| rs112044799 | G | 0.1132  |
| rs6789212   | C | 0.0231  |

|             |   |         |
|-------------|---|---------|
| rs4342095   | G | -0.0526 |
| rs79360106  | A | -0.1549 |
| rs77587865  | T | 0.0415  |
| rs116277134 | T | -0.0388 |
| rs34229140  | G | 0.1596  |
| rs3856841   | G | 0.0247  |
| rs9821664   | A | 0.0266  |
| rs143311285 | G | 0.1356  |
| rs997935    | C | 0.1102  |
| rs12638795  | A | 0.0428  |
| rs75547978  | A | -0.2016 |
| rs7635934   | G | 0.028   |
| rs112120201 | T | -0.1373 |
| rs7631066   | A | 0.0258  |
| rs62259966  | T | 0.0885  |
| rs10865655  | G | 0.103   |
| rs73819447  | C | -0.0536 |
| rs9855463   | A | -0.0388 |
| rs6770177   | G | -0.0269 |
| rs12486939  | G | -0.0304 |
| rs113835632 | T | 0.073   |
| rs6768901   | T | 0.0785  |
| rs2606786   | A | -0.0305 |
| rs13093364  | A | -0.0563 |
| rs13319066  | T | -0.142  |
| rs12107990  | T | 0.04    |
| rs115169634 | A | 0.1442  |
| rs73141574  | T | 0.0795  |
| rs115098473 | A | -0.1768 |
| rs113064746 | C | -0.0952 |
| rs115179940 | T | 0.0825  |
| rs17820136  | T | -0.2466 |
| rs114237070 | C | 0.1422  |
| rs155517    | T | -0.0671 |
| rs125698    | T | 0.0291  |
| rs74480927  | G | 0.1333  |
| rs12485248  | G | -0.0212 |
| rs73891238  | T | 0.0356  |
| rs9860846   | G | 0.0213  |
| rs114607711 | G | -0.0874 |
| rs6763224   | T | -0.0649 |
| rs73120751  | G | 0.0576  |
| rs76111818  | C | -0.045  |
| rs34809223  | C | 0.0838  |
| rs7642354   | G | -0.0269 |
| rs13095170  | T | 0.0431  |
| rs115481470 | G | 0.1501  |

|             |   |         |
|-------------|---|---------|
| rs113226079 | G | -0.0664 |
| rs76533900  | C | -0.0804 |
| rs34546204  | T | 0.1135  |
| rs73139329  | C | 0.067   |
| rs2306856   | G | 0.1325  |
| rs137858301 | C | -0.0391 |
| rs1495598   | A | 0.0249  |
| rs2961351   | A | 0.0273  |
| rs78216978  | G | 0.1016  |
| rs62235724  | T | -0.075  |
| rs113265714 | A | -0.047  |
| rs13092766  | G | -0.0233 |
| rs111321891 | T | 0.1455  |
| rs1499079   | T | -0.0758 |
| rs1492163   | T | 0.0632  |
| rs13076059  | C | -0.0351 |
| rs2171544   | A | -0.0317 |
| rs76332105  | C | 0.1147  |
| rs1353315   | T | 0.0319  |
| rs7610606   | G | -0.0851 |
| rs76780463  | G | 0.1593  |
| rs34580376  | C | 0.1366  |
| rs75841558  | T | 0.0498  |
| rs9844950   | C | 0.0297  |
| rs6774902   | A | 0.0519  |
| rs13065941  | T | 0.0308  |
| rs113412489 | A | 0.0747  |
| rs472246    | G | -0.0553 |
| rs145156089 | C | 0.1608  |
| rs73122262  | T | 0.1046  |
| rs11705944  | C | 0.0312  |
| rs73228985  | C | -0.0506 |
| rs73869610  | T | 0.0394  |
| rs116103298 | T | -0.0865 |
| rs114502775 | A | -0.1443 |
| rs2972166   | A | -0.0255 |
| rs2060530   | C | 0.0695  |
| rs1449892   | G | 0.0388  |
| rs114802767 | G | -0.1095 |
| rs115098560 | G | 0.0627  |
| rs74538690  | G | 0.1526  |
| rs12696674  | T | -0.0221 |
| rs78300415  | T | 0.0721  |
| rs76080356  | T | -0.0834 |
| rs1696200   | T | -0.0245 |
| rs7632256   | C | 0.0227  |
| rs74330453  | C | 0.1046  |

|             |   |         |
|-------------|---|---------|
| rs4688283   | A | 0.0281  |
| rs76397707  | A | -0.085  |
| rs7653339   | T | -0.0456 |
| rs11130651  | T | 0.0254  |
| rs17008195  | T | 0.0406  |
| rs145936202 | G | 0.0883  |
| rs76653128  | C | 0.0716  |
| rs17028112  | C | 0.1135  |
| rs6793710   | A | 0.0243  |
| rs55702045  | T | -0.0251 |
| rs9812611   | A | -0.0267 |
| rs6808615   | A | -0.0216 |
| rs73064834  | G | 0.0663  |
| rs62280798  | A | 0.1369  |
| rs111255247 | C | -0.0372 |
| rs146929843 | G | -0.0901 |
| rs114205064 | G | -0.1566 |
| rs9818148   | G | 0.0267  |
| rs627998    | C | 0.0247  |
| rs2175849   | A | -0.0324 |
| rs116293550 | G | 0.0832  |
| rs13087679  | G | -0.0287 |
| rs834172    | G | -0.0592 |
| rs80116725  | A | -0.1561 |
| rs113138774 | C | -0.1942 |
| rs78702810  | T | 0.0629  |
| rs139342121 | T | -0.0845 |
| rs2176817   | C | 0.0416  |
| rs148538908 | A | 0.1148  |
| rs17689311  | C | -0.0415 |
| rs2332284   | C | 0.097   |
| rs34598459  | A | 0.0238  |
| rs1450048   | A | 0.0263  |
| rs7645589   | T | 0.0283  |
| rs9857269   | C | -0.0234 |
| rs721213    | C | 0.0245  |
| rs143305380 | A | -0.191  |
| rs3856598   | C | 0.0687  |
| rs114970689 | G | -0.1706 |
| rs9682963   | A | -0.0404 |
| rs142201809 | T | -0.1776 |
| rs12633014  | C | 0.0527  |
| rs75741022  | T | 0.0282  |
| rs66973003  | T | 0.0294  |
| rs2720917   | T | -0.0398 |
| rs114749351 | A | -0.1443 |
| rs13093404  | A | -0.0389 |

|             |   |         |
|-------------|---|---------|
| rs12497777  | A | -0.0331 |
| rs115257093 | A | 0.1835  |
| rs7642878   | G | -0.0216 |
| rs62283096  | A | -0.097  |
| rs59880825  | T | 0.0243  |
| rs113479806 | T | 0.1242  |
| rs12497772  | C | 0.0367  |
| rs114101818 | T | 0.118   |
| rs59217188  | A | 0.1366  |
| rs114603528 | T | 0.1332  |
| rs28438045  | G | -0.0755 |
| rs74875558  | C | -0.143  |
| rs1595022   | A | 0.036   |
| rs7640386   | C | 0.0253  |
| rs4472004   | G | 0.0331  |
| rs4557104   | G | 0.0213  |
| rs28660624  | T | -0.035  |
| rs717734    | G | 0.0249  |
| rs76289056  | A | -0.0417 |
| rs6792266   | C | -0.0366 |
| rs11128398  | C | -0.027  |
| rs78726321  | C | 0.0552  |
| rs78623776  | A | 0.0876  |
| rs111408485 | G | 0.0781  |
| rs6792677   | G | -0.0242 |
| rs116743996 | C | 0.1119  |
| rs115357747 | G | 0.1135  |
| rs11717908  | C | 0.0443  |
| rs2091065   | A | -0.0332 |
| rs1488794   | A | -0.0224 |
| rs34399839  | T | -0.028  |
| rs77070546  | G | -0.0989 |
| rs139888627 | T | 0.0885  |
| rs73150828  | G | 0.0974  |
| rs149718392 | C | 0.2404  |
| rs56276619  | C | -0.0576 |
| rs115301087 | G | 0.0568  |
| rs62287918  | A | -0.0301 |
| rs146996760 | A | 0.0994  |
| rs3912603   | G | -0.0524 |
| rs7629132   | T | -0.0283 |
| rs9854045   | A | -0.0321 |
| rs42456     | C | -0.0223 |
| rs1596707   | C | -0.0225 |
| rs7634954   | A | 0.024   |
| rs79715699  | G | 0.0329  |
| rs303871    | C | -0.0283 |

|             |   |         |
|-------------|---|---------|
| rs149804519 | T | -0.1044 |
| rs11710705  | G | 0.0219  |
| rs12488137  | A | -0.0304 |
| rs117951190 | G | 0.166   |
| rs137969530 | A | 0.1076  |
| rs75068127  | A | -0.0512 |
| rs7620623   | C | -0.0215 |
| rs12636475  | A | 0.0437  |
| rs148462884 | C | 0.121   |
| rs115313152 | T | 0.0578  |
| rs77641430  | A | 0.0482  |
| rs113862008 | T | 0.0373  |
| rs12152299  | T | -0.0589 |
| rs34080048  | T | 0.0933  |
| rs11719634  | C | 0.0246  |
| rs4613424   | C | -0.0219 |
| rs12490836  | A | -0.1056 |
| rs75250698  | A | 0.1288  |
| rs79708722  | T | -0.1437 |
| rs16853999  | C | 0.0394  |
| rs17222466  | A | 0.0915  |
| rs115984612 | T | -0.1717 |
| rs16863564  | A | -0.0504 |
| rs11916501  | T | 0.0331  |
| rs138381592 | C | -0.154  |
| rs62242667  | A | -0.1707 |
| rs7650972   | C | -0.0608 |
| rs2044592   | C | -0.0292 |
| rs78378310  | G | -0.0397 |
| rs6549452   | A | -0.0221 |
| rs17034956  | C | 0.0522  |
| rs35652087  | A | -0.0385 |
| rs13064161  | G | -0.0307 |
| rs13089829  | C | -0.0713 |
| rs77985532  | G | -0.1639 |
| rs7613341   | G | 0.0214  |
| rs76732615  | A | -0.0564 |
| rs80148480  | A | -0.0953 |
| rs78679848  | A | 0.178   |
| rs78956048  | A | -0.0961 |
| rs4685271   | T | 0.0267  |
| rs114854018 | T | 0.0632  |
| rs74704429  | T | 0.1726  |
| rs114186975 | A | 0.0996  |
| rs73152542  | G | -0.0502 |
| rs115908800 | T | 0.0793  |
| rs141836564 | A | -0.084  |



|             |   |         |
|-------------|---|---------|
| rs142649488 | C | -0.133  |
| rs13062193  | G | -0.0235 |
| rs1110226   | C | -0.0621 |
| rs7612139   | C | 0.0234  |
| rs75259217  | T | 0.114   |
| rs35631173  | A | 0.0836  |
| rs7640782   | A | -0.1076 |
| rs75943573  | T | 0.0423  |
| rs1485179   | T | -0.0222 |
| rs79752752  | A | 0.1012  |
| rs41285121  | G | -0.1454 |
| rs7631549   | G | 0.0234  |
| rs17073575  | C | 0.0308  |
| rs79016669  | C | -0.0816 |
| rs1666556   | G | -0.0271 |
| rs9835273   | G | 0.0281  |
| rs11712332  | C | 0.0892  |
| rs60659132  | T | 0.0394  |
| rs9284890   | C | -0.0238 |
| rs145945561 | A | -0.1823 |
| rs62255463  | C | 0.0492  |
| rs114124435 | G | 0.1128  |
| rs147006247 | G | 0.0834  |
| rs35041525  | C | 0.0364  |
| rs140942783 | C | 0.1337  |
| rs79400782  | C | 0.127   |
| rs138277632 | T | -0.1714 |
| rs6781507   | G | 0.1605  |
| rs73173948  | A | 0.0332  |
| rs116826435 | A | -0.1052 |
| rs77505408  | A | -0.0404 |
| rs115733010 | T | -0.1306 |
| rs74280232  | A | 0.0751  |
| rs28796018  | A | -0.0631 |
| rs6793917   | A | 0.0233  |
| rs115056662 | C | 0.1399  |
| rs2676904   | T | 0.0263  |
| rs113195050 | A | 0.0975  |
| rs355062    | G | -0.0457 |
| rs78153065  | A | 0.0959  |
| rs75143094  | T | -0.0797 |
| rs7636999   | G | -0.0243 |
| rs113875153 | G | 0.1492  |
| rs78973668  | A | -0.1364 |
| rs3864019   | G | -0.1033 |
| rs9809942   | A | -0.0605 |
| rs78694022  | A | -0.0833 |

|             |   |         |
|-------------|---|---------|
| rs4544611   | T | -0.0259 |
| rs62281611  | A | 0.0282  |
| rs4549300   | A | 0.0269  |
| rs9853620   | C | -0.0322 |
| rs6437453   | A | 0.0279  |
| rs9713929   | C | -0.0235 |
| rs35686664  | A | -0.0437 |
| rs10804630  | C | 0.038   |
| rs7649416   | A | 0.0257  |
| rs34009828  | A | 0.0328  |
| rs2630165   | T | 0.0342  |
| rs141634749 | T | -0.074  |
| rs149626401 | G | 0.0711  |
| rs71316222  | A | 0.098   |
| rs60303224  | T | -0.0246 |
| rs56006348  | A | 0.0971  |
| rs7639909   | G | 0.0608  |
| rs35325832  | T | -0.0574 |
| rs9881174   | T | -0.0288 |
| rs77839014  | A | 0.1483  |
| rs114036870 | A | -0.0674 |
| rs74524901  | A | 0.1176  |
| rs1399272   | C | 0.0224  |
| rs116090765 | T | 0.0701  |
| rs73069896  | T | -0.0363 |
| rs145685609 | A | 0.1121  |
| rs57350553  | C | 0.0219  |
| rs149189079 | T | 0.1682  |
| rs143050865 | T | -0.0903 |
| rs563528    | C | -0.0393 |
| rs12695915  | T | -0.0414 |
| rs17706635  | T | 0.0254  |
| rs111854254 | T | -0.0825 |
| rs80081963  | A | -0.121  |
| rs74826788  | C | -0.0749 |
| rs150137858 | G | -0.1127 |
| rs73035823  | G | -0.0736 |
| rs2213215   | C | 0.0266  |
| rs2167121   | G | 0.0524  |
| rs77773789  | A | 0.1381  |
| rs148077724 | G | -0.094  |
| rs11918660  | T | -0.1153 |
| rs2198020   | C | -0.0255 |
| rs74973715  | A | -0.0836 |
| rs4688533   | T | -0.0453 |
| rs75221465  | G | -0.0755 |
| rs6776772   | C | -0.022  |

|             |   |         |
|-------------|---|---------|
| rs17062633  | G | 0.0765  |
| rs1905176   | C | -0.0345 |
| rs4831211   | T | -0.0264 |
| rs34220450  | G | 0.0566  |
| rs9858487   | G | -0.046  |
| rs114775147 | A | 0.1256  |
| rs10510273  | A | 0.045   |
| rs13073703  | A | -0.1061 |
| rs114518924 | T | -0.1276 |
| rs34351313  | G | -0.0239 |
| rs3755777   | G | -0.0252 |
| rs1124480   | C | 0.0256  |
| rs113982787 | T | 0.1018  |
| rs77063779  | G | 0.0709  |
| rs79202503  | A | 0.0645  |
| rs115831010 | T | 0.1272  |
| rs114089158 | T | -0.1349 |
| rs75285679  | A | -0.1091 |
| rs17398428  | C | 0.066   |
| rs79689400  | C | -0.0868 |
| rs147135024 | C | -0.1099 |
| rs41470150  | A | -0.0623 |
| rs145241094 | G | 0.173   |
| rs75763670  | A | 0.0696  |
| rs143776776 | T | -0.1287 |
| rs11708483  | A | -0.0337 |
| rs17553695  | G | 0.0453  |
| rs9311742   | A | -0.0215 |
| rs111708382 | G | 0.0547  |
| rs36002025  | T | 0.025   |
| rs2587946   | C | -0.0212 |
| rs145057733 | A | 0.1086  |
| rs8179969   | G | -0.0643 |
| rs114035379 | T | 0.1242  |
| rs1356914   | C | -0.0942 |
| rs75061884  | A | -0.0897 |
| rs144184445 | A | 0.113   |
| rs71310259  | A | 0.0691  |
| rs1948400   | T | 0.0231  |
| rs10513102  | G | 0.0289  |
| rs141621973 | T | -0.108  |
| rs78752290  | T | 0.1096  |
| rs74682631  | G | -0.0381 |
| rs77992606  | A | -0.073  |
| rs34474865  | C | 0.0732  |
| rs73054716  | T | 0.1762  |
| rs77598680  | T | -0.0766 |

|             |   |         |
|-------------|---|---------|
| rs9851806   | C | -0.0494 |
| rs7652239   | T | 0.0257  |
| rs73159881  | T | 0.1087  |
| rs779755    | G | 0.0617  |
| rs9868896   | T | 0.0263  |
| rs77160084  | T | -0.1008 |
| rs61247682  | C | 0.166   |
| rs155394    | G | 0.0372  |
| rs145758330 | G | -0.0572 |
| rs143321489 | A | -0.0425 |
| rs141340377 | T | -0.1226 |
| rs17593458  | G | 0.0335  |
| rs72993633  | G | 0.0675  |
| rs61043032  | G | -0.025  |
| rs11720326  | T | -0.1355 |
| rs4640604   | G | 0.0323  |
| rs1955336   | T | -0.0247 |
| rs114514472 | G | 0.1209  |
| rs62283158  | T | 0.0735  |
| rs6787246   | T | 0.0216  |
| rs12635500  | T | -0.037  |
| rs73004688  | C | -0.0572 |
| rs147402973 | C | -0.1855 |
| rs1400240   | C | -0.0252 |
| rs74395004  | T | 0.0896  |
| rs62283828  | C | 0.0818  |
| rs113643840 | T | 0.0847  |
| rs77362317  | G | -0.0445 |
| rs4261911   | A | 0.0288  |
| rs11929260  | C | -0.0415 |
| rs77198763  | A | 0.0428  |
| rs7632928   | C | 0.0862  |
| rs9856089   | G | 0.0235  |
| rs116337191 | A | 0.1029  |
| rs6782678   | T | -0.0227 |
| rs73195909  | G | -0.1817 |
| rs62290378  | A | 0.07    |
| rs113726337 | G | 0.074   |
| rs2047888   | T | 0.0276  |
| rs78988587  | A | -0.0437 |
| rs6420998   | G | -0.0441 |
| rs4856204   | G | 0.0232  |
| rs113384211 | A | -0.1377 |
| rs1608521   | G | 0.0449  |
| rs67922609  | T | 0.0661  |
| rs10454220  | T | -0.0213 |
| rs6809392   | A | -0.0263 |

|             |   |         |
|-------------|---|---------|
| rs16863577  | C | -0.0313 |
| rs7629766   | T | -0.0566 |
| rs147921786 | T | 0.1565  |
| rs74683410  | C | 0.0758  |
| rs11713439  | A | -0.0239 |
| rs11920510  | T | -0.0235 |
| rs9829503   | T | 0.0224  |
| rs673693    | T | 0.0226  |
| rs9810872   | C | 0.0224  |
| rs114088848 | G | -0.0752 |
| rs146071128 | T | -0.1011 |
| rs1999586   | C | 0.0265  |
| rs78479288  | C | -0.0603 |
| rs7624187   | T | 0.0309  |
| rs7632519   | A | 0.0258  |
| rs4684427   | C | 0.0211  |
| rs4686339   | T | -0.0239 |
| rs13058809  | C | -0.0325 |
| rs115249247 | T | 0.1038  |
| rs62263011  | T | 0.0452  |
| rs116824040 | A | 0.1328  |
| rs56339040  | T | 0.1475  |
| rs7613571   | T | -0.027  |
| rs7617588   | C | -0.0313 |
| rs9820655   | C | -0.0223 |
| rs142727809 | G | -0.199  |
| rs114111032 | T | -0.0806 |
| rs4543060   | C | 0.0355  |
| rs9831559   | C | 0.0255  |
| rs3773663   | A | 0.0214  |
| rs55985991  | A | 0.0422  |
| rs9857032   | G | -0.0618 |
| rs76450801  | A | 0.0541  |
| rs149722530 | A | 0.1664  |
| rs9864504   | A | -0.0287 |
| rs13094083  | A | 0.0818  |
| rs7622538   | G | 0.0624  |
| rs62277429  | A | -0.0788 |
| rs114688777 | A | 0.1124  |
| rs13071719  | C | 0.0382  |
| rs17552044  | G | -0.0306 |
| rs6766557   | G | -0.0325 |
| rs73074922  | G | -0.0993 |
| rs78284477  | T | 0.0582  |
| rs2007192   | G | -0.0241 |
| rs11712660  | C | -0.0231 |
| rs1350959   | T | -0.0301 |

|             |   |         |
|-------------|---|---------|
| rs17029694  | A | -0.0504 |
| rs140298817 | A | -0.131  |
| rs73824414  | A | 0.0332  |
| rs35134407  | A | -0.0221 |
| rs2100691   | C | 0.0264  |
| rs75150068  | C | -0.1116 |
| rs60019437  | C | -0.0339 |
| rs17061377  | A | -0.0352 |
| rs16863529  | T | -0.0395 |
| rs11129793  | T | -0.0936 |
| rs78087473  | C | -0.1497 |
| rs116030249 | A | -0.0622 |
| rs17189922  | T | 0.0482  |
| rs116276044 | C | -0.0863 |
| rs13074637  | C | -0.027  |
| rs17073603  | A | 0.0488  |
| rs80080104  | A | 0.0529  |
| rs739983    | G | -0.0222 |
| rs72622382  | C | 0.0581  |
| rs61797640  | T | -0.094  |
| rs7622807   | A | -0.058  |
| rs73890328  | A | 0.076   |
| rs62243306  | C | -0.1182 |
| rs2028994   | G | -0.0208 |
| rs13079348  | G | -0.0227 |
| rs79728310  | T | -0.1365 |
| rs6786408   | C | -0.0213 |
| rs148875564 | T | -0.1121 |
| rs6779726   | A | 0.0307  |
| rs74439297  | A | -0.1018 |
| rs11717259  | G | 0.0217  |
| rs141502191 | T | 0.1497  |
| rs56209070  | A | 0.0316  |
| rs6805462   | A | 0.0276  |
| rs113327762 | G | -0.138  |
| rs146420996 | C | 0.1848  |
| rs2953121   | C | 0.0267  |
| rs77413707  | T | 0.0327  |
| rs76255606  | C | -0.1431 |
| rs73068934  | A | 0.057   |
| rs6793913   | C | 0.0219  |
| rs16829028  | A | 0.0578  |
| rs2002583   | C | 0.0541  |
| rs17620655  | G | -0.0403 |
| rs113644704 | T | 0.1032  |
| rs114395245 | A | 0.059   |
| rs60973911  | A | -0.0242 |

|             |   |         |
|-------------|---|---------|
| rs141534656 | T | 0.1125  |
| rs150675027 | A | -0.1128 |
| rs116840192 | T | -0.1642 |
| rs74988522  | A | -0.102  |
| rs1401509   | T | 0.0248  |
| rs17759085  | T | -0.0279 |
| rs76078276  | C | -0.0363 |
| rs79847183  | C | 0.1236  |
| rs7627615   | G | 0.0209  |
| rs13325786  | T | 0.0669  |
| rs62254926  | G | -0.0924 |
| rs17206555  | G | -0.0885 |
| rs11719718  | G | 0.0814  |
| rs755098    | T | 0.1241  |
| rs77533244  | C | 0.1075  |
| rs111532100 | A | 0.1434  |
| rs147313414 | A | 0.0912  |
| rs4491856   | G | 0.0231  |
| rs67815226  | A | -0.0273 |
| rs6779888   | G | 0.0213  |
| rs9882792   | T | 0.0269  |
| rs6766999   | A | -0.0544 |
| rs78978593  | T | 0.1884  |
| rs57263969  | T | -0.0793 |
| rs2884755   | C | -0.0954 |
| rs9873188   | A | -0.047  |
| rs114121192 | T | -0.1228 |
| rs72995389  | C | 0.077   |
| rs17009327  | T | 0.0682  |
| rs73056975  | T | -0.0644 |
| rs138106469 | A | 0.0648  |
| rs6444869   | G | 0.0275  |
| rs114737457 | T | -0.0971 |
| rs6764352   | G | 0.0754  |
| rs62294413  | C | -0.0355 |
| rs7434191   | G | -0.0207 |
| rs12490729  | C | 0.043   |
| rs4083003   | C | 0.0495  |
| rs6442596   | C | -0.033  |
| rs78263660  | T | 0.0492  |
| rs71324636  | C | -0.089  |
| rs115535331 | T | 0.101   |
| rs78850870  | A | 0.0911  |
| rs61793109  | T | -0.065  |
| rs112133325 | T | 0.0508  |
| rs879595    | G | 0.0238  |
| rs923512    | G | -0.0287 |

|             |   |         |
|-------------|---|---------|
| rs71300530  | T | -0.0577 |
| rs75410931  | C | 0.1217  |
| rs60883709  | C | -0.0509 |
| rs62270980  | A | -0.0282 |
| rs4257505   | T | 0.0415  |
| rs74856200  | C | 0.1522  |
| rs172705    | A | 0.0641  |
| rs115795986 | G | -0.0662 |
| rs79599271  | A | 0.0406  |
| rs6767590   | A | -0.0208 |
| rs73153250  | A | -0.094  |
| rs2729009   | A | 0.0215  |
| rs141372166 | A | 0.0544  |
| rs9840594   | G | 0.0225  |
| rs147183227 | C | 0.0861  |
| rs78999570  | G | -0.0481 |
| rs59841453  | A | -0.0414 |
| rs4687004   | C | 0.0827  |
| rs793293    | C | -0.0216 |
| rs116105029 | C | -0.0584 |
| rs7628344   | A | 0.1957  |
| rs7614563   | G | 0.028   |
| rs9288927   | A | 0.0758  |
| rs111897878 | T | 0.0696  |
| rs9860826   | T | -0.0345 |
| rs9818694   | T | 0.0247  |
| rs141997256 | A | -0.1466 |
| rs148316965 | A | 0.0841  |
| rs7622825   | G | 0.0289  |
| rs113168095 | T | -0.0303 |
| rs78444390  | G | 0.1165  |
| rs12632178  | C | 0.0501  |
| rs59702256  | G | 0.1371  |
| rs73149937  | A | 0.1017  |
| rs4894688   | T | 0.0214  |
| rs74282562  | T | -0.0655 |
| rs145456601 | A | 0.1004  |
| rs111307699 | T | 0.1335  |
| rs10490874  | T | 0.0382  |
| rs34561018  | T | 0.039   |
| rs147682877 | T | 0.1272  |
| rs147914433 | C | -0.0816 |
| rs77003737  | A | 0.0791  |
| rs10937522  | A | 0.053   |
| rs6808378   | T | 0.0291  |
| rs9868273   | C | -0.0217 |
| rs3846042   | T | 0.0215  |



|             |   |         |
|-------------|---|---------|
| rs79882942  | T | -0.1167 |
| rs2256225   | C | 0.0338  |
| rs6802572   | G | -0.026  |
| rs71318670  | T | -0.0915 |
| rs73056293  | T | 0.0304  |
| rs9309968   | T | -0.0307 |
| rs4677391   | C | -0.03   |
| rs57663669  | C | -0.0549 |
| rs55942292  | G | -0.1207 |
| rs565842    | T | 0.0436  |
| rs78594215  | G | 0.0352  |
| rs9866394   | A | -0.0216 |
| rs12637836  | G | -0.0955 |
| rs2811411   | T | 0.0607  |
| rs149038960 | T | 0.122   |
| rs76567139  | G | 0.1263  |
| rs78241983  | C | -0.1109 |
| rs12493119  | G | 0.0216  |
| rs115657945 | T | 0.072   |
| rs73176346  | A | 0.1137  |
| rs237888    | C | 0.0487  |
| rs150022286 | T | 0.1133  |
| rs140629302 | T | 0.0825  |
| rs140816021 | T | 0.1743  |
| rs12152423  | G | -0.0594 |
| rs76495785  | G | 0.1083  |
| rs7643571   | T | 0.0505  |
| rs78681159  | C | 0.097   |
| rs4618188   | T | -0.0216 |
| rs57843971  | G | 0.0337  |
| rs77747748  | T | -0.0657 |
| rs17808919  | G | 0.0414  |
| rs2930079   | A | -0.1583 |
| rs114739244 | C | -0.1106 |
| rs147937667 | C | -0.1034 |
| rs76900858  | T | -0.0898 |
| rs7610323   | A | 0.023   |
| rs586444    | G | 0.0367  |
| rs13062350  | A | 0.0224  |
| rs3773989   | A | -0.0209 |
| rs12493766  | C | 0.1034  |
| rs149996849 | A | 0.135   |
| rs142419102 | T | -0.0996 |
| rs74458605  | C | -0.0622 |
| rs75005790  | G | -0.03   |
| rs114412657 | A | -0.1588 |
| rs62228946  | G | -0.0287 |

|             |   |         |
|-------------|---|---------|
| rs73015939  | T | -0.0493 |
| rs142738647 | G | -0.0781 |
| rs1172255   | T | 0.0237  |
| rs12636445  | A | 0.0482  |
| rs73884708  | A | 0.0479  |
| rs11718867  | G | -0.0224 |
| rs62242191  | T | -0.0502 |
| rs340143    | T | 0.0236  |
| rs55643417  | G | -0.0704 |
| rs1828669   | T | 0.0234  |
| rs6803288   | G | 0.1225  |
| rs114364126 | T | 0.0615  |
| rs6780558   | A | 0.025   |
| rs4686510   | G | -0.0237 |
| rs11713041  | C | 0.0465  |
| rs59535065  | C | 0.056   |
| rs60174932  | T | 0.0483  |
| rs9863597   | A | -0.151  |
| rs9815088   | C | -0.0212 |
| rs114642883 | T | -0.0615 |
| rs717323    | A | -0.0377 |
| rs11923189  | G | 0.0407  |
| rs2895280   | G | -0.0684 |
| rs112746731 | C | -0.1097 |
| rs56076790  | G | -0.0315 |
| rs12495152  | G | 0.0229  |
| rs73022755  | C | 0.0599  |
| rs13076200  | C | -0.0284 |
| rs1241287   | T | -0.0239 |
| rs9289302   | T | 0.0208  |
| rs10935268  | A | 0.0307  |
| rs17044424  | C | 0.0441  |
| rs116767920 | A | 0.1064  |
| rs6778639   | T | 0.0281  |
| rs78386582  | C | 0.065   |
| rs75718495  | A | -0.1056 |
| rs1451522   | A | 0.1149  |
| rs2399415   | T | -0.0214 |
| rs73224623  | T | -0.122  |
| rs144064574 | A | -0.1781 |
| rs9877183   | A | -0.0216 |
| rs2655293   | C | -0.105  |
| rs112363034 | T | -0.1733 |
| rs2084370   | T | -0.0269 |
| rs116338533 | T | 0.058   |
| rs138219405 | A | 0.1047  |
| rs78515051  | G | -0.0996 |

|             |   |         |
|-------------|---|---------|
| rs73180340  | T | 0.0346  |
| rs35897219  | T | -0.0234 |
| rs114495074 | C | 0.0483  |
| rs12492788  | G | 0.0942  |
| rs79109393  | T | -0.0555 |
| rs76082446  | A | 0.0299  |
| rs7646282   | C | -0.0425 |
| rs146093757 | T | 0.0961  |
| rs17047590  | T | 0.0334  |
| rs113548225 | A | 0.1145  |
| rs34788499  | A | -0.1126 |
| rs73880564  | C | 0.0405  |
| rs1473977   | A | -0.0275 |
| rs62249295  | G | 0.1     |
| rs79879205  | G | 0.0432  |
| rs9288753   | A | 0.0562  |
| rs78236840  | G | -0.1268 |
| rs75244566  | A | 0.0516  |
| rs17054879  | C | -0.0254 |
| rs355101    | G | -0.0362 |
| rs7612792   | A | 0.0597  |
| rs78693890  | C | -0.0321 |
| rs115004276 | T | 0.0762  |
| rs62245277  | T | 0.0348  |
| rs7644528   | C | -0.0216 |
| rs6792170   | G | 0.0208  |
| rs2172402   | A | -0.0235 |
| rs73017097  | G | 0.0706  |
| rs6442235   | T | 0.0294  |
| rs9818654   | G | -0.0232 |
| rs1398610   | C | -0.025  |
| rs11706809  | G | 0.0253  |
| rs72850665  | C | 0.082   |
| rs62255077  | A | -0.0328 |
| rs114933955 | G | -0.1176 |
| rs17681249  | C | 0.0547  |
| rs114866451 | T | 0.108   |
| rs343340    | A | 0.0255  |
| rs78299971  | G | -0.0542 |
| rs9310934   | C | 0.0762  |
| rs11914617  | A | 0.0893  |
| rs78393792  | T | 0.1181  |
| rs115608296 | A | 0.1637  |
| rs12492447  | G | -0.1236 |
| rs17456373  | A | 0.0906  |
| rs141430106 | A | -0.1063 |
| rs62253176  | G | 0.0269  |

|             |   |         |
|-------------|---|---------|
| rs73141981  | C | -0.0656 |
| rs1879782   | C | 0.0612  |
| rs78344582  | C | -0.0239 |
| rs75804175  | C | -0.0872 |
| rs116191474 | C | 0.1046  |
| rs4452368   | T | 0.0204  |
| rs77398565  | G | -0.0306 |
| rs112019257 | G | -0.1475 |
| rs17699988  | C | 0.0247  |
| rs4234170   | T | 0.0218  |
| rs4599251   | T | -0.0329 |
| rs2071387   | G | -0.0266 |
| rs139705239 | A | -0.0436 |
| rs78819165  | G | -0.1105 |
| rs440746    | T | 0.0212  |
| rs150758768 | T | -0.1173 |
| rs9831104   | A | -0.0693 |
| rs143059105 | C | -0.1354 |
| rs1534024   | T | 0.0229  |
| rs1010226   | C | -0.0329 |
| rs35704209  | A | -0.1436 |
| rs114630697 | A | 0.1528  |
| rs9836799   | A | -0.0239 |
| rs16854733  | C | 0.0246  |
| rs76428887  | A | 0.1085  |
| rs1973033   | T | -0.0576 |
| rs62267050  | T | -0.031  |
| rs479594    | G | 0.0252  |
| rs3755697   | A | -0.0445 |
| rs11924836  | T | -0.0233 |
| rs80314091  | T | 0.145   |
| rs893084    | A | -0.0255 |
| rs11129158  | C | 0.0267  |
| rs73145387  | G | -0.0692 |
| rs78109607  | A | 0.0691  |
| rs6773310   | T | 0.0255  |
| rs7633054   | G | -0.114  |
| rs73031426  | A | 0.0733  |
| rs4676466   | A | -0.0236 |
| rs13080791  | C | -0.0334 |
| rs62265001  | G | -0.0662 |
| rs76749064  | T | -0.1467 |
| rs116487127 | G | 0.083   |
| rs142051946 | G | 0.1545  |
| rs111928601 | G | 0.0482  |
| rs17194003  | G | 0.0262  |
| rs382679    | T | 0.0318  |

|             |   |         |
|-------------|---|---------|
| rs17564364  | A | 0.032   |
| rs55689538  | T | -0.0672 |
| rs146387724 | A | -0.1672 |
| rs67028381  | G | -0.0217 |
| rs76182248  | C | 0.1564  |
| rs73073671  | T | 0.0455  |
| rs12634720  | C | 0.0339  |
| rs1553681   | C | 0.0218  |
| rs74452406  | T | -0.0872 |
| rs138000236 | T | 0.1714  |
| rs79479785  | A | -0.0486 |
| rs10510739  | T | -0.0539 |
| rs1898031   | C | 0.0213  |
| rs141437800 | T | -0.0785 |
| rs62273334  | G | 0.1094  |
| rs4688219   | C | -0.0211 |
| rs1836918   | C | 0.0233  |
| rs62283142  | T | -0.0295 |
| rs79466891  | C | -0.0752 |
| rs56032805  | G | -0.021  |
| rs9990174   | T | -0.0236 |
| rs62250172  | A | 0.0572  |
| rs114299101 | C | 0.043   |
| rs497383    | G | -0.0241 |
| rs114951998 | C | 0.0504  |
| rs3792402   | C | 0.0215  |
| rs853865    | A | 0.1643  |
| rs78830667  | G | -0.12   |
| rs149305434 | T | 0.1569  |
| rs232007    | T | 0.0275  |
| rs76822811  | A | -0.0667 |
| rs78704469  | T | 0.1335  |
| rs74642963  | A | -0.0327 |
| rs79352523  | T | 0.1325  |
| rs77008769  | T | -0.114  |
| rs17018781  | G | 0.0634  |
| rs115602477 | C | 0.0966  |
| rs147725879 | G | -0.0898 |
| rs62270362  | G | -0.066  |
| rs78380995  | C | 0.129   |
| rs2365078   | A | -0.0985 |
| rs6773417   | T | 0.0258  |
| rs4857690   | G | 0.0298  |
| rs61752081  | A | -0.0679 |
| rs6785214   | G | 0.0339  |
| rs112150069 | A | 0.0816  |
| rs13062783  | A | 0.0436  |

|             |   |         |
|-------------|---|---------|
| rs2596832   | T | 0.0254  |
| rs4305372   | A | 0.0365  |
| rs75667606  | T | 0.1565  |
| rs9856565   | T | 0.0209  |
| rs4680536   | G | 0.0214  |
| rs4292218   | G | 0.0229  |
| rs56212486  | A | 0.0673  |
| rs115831239 | C | 0.0884  |
| rs13069363  | A | 0.0296  |
| rs148705564 | T | 0.1374  |
| rs117399974 | C | 0.1476  |
| rs55684978  | T | -0.1549 |
| rs2160807   | A | 0.0439  |
| rs2676851   | C | 0.0479  |
| rs2570016   | T | 0.0232  |
| rs74839021  | G | 0.0571  |
| rs75578493  | G | -0.0979 |
| rs9853098   | G | 0.0392  |
| rs340659    | C | -0.0795 |
| rs79961055  | A | -0.0311 |
| rs58171576  | A | 0.0337  |
| rs138344256 | T | 0.0927  |
| rs526005    | G | 0.0205  |
| rs76413760  | C | 0.0597  |
| rs34889534  | C | 0.0298  |
| rs9873817   | T | 0.0484  |
| rs1386979   | A | -0.0301 |
| rs159147    | A | -0.022  |
| rs78353633  | A | -0.1033 |
| rs76367421  | A | -0.1046 |
| rs9814518   | C | -0.0213 |
| rs138810058 | A | -0.1602 |
| rs6764556   | T | 0.027   |
| rs9841045   | G | -0.0966 |
| rs716588    | T | 0.0265  |
| rs17584100  | T | -0.1039 |
| rs197729    | G | -0.0277 |
| rs115039948 | G | -0.1295 |
| rs145143509 | A | -0.1135 |
| rs35703936  | T | -0.056  |
| rs76077252  | A | 0.0366  |
| rs10937573  | G | 0.0388  |
| rs34333692  | T | 0.1191  |
| rs62273803  | A | 0.0387  |
| rs17743103  | C | -0.0238 |
| rs77951762  | G | -0.0282 |
| rs1521263   | G | 0.0221  |

|             |   |         |
|-------------|---|---------|
| rs77952659  | T | -0.1029 |
| rs75025367  | T | -0.1379 |
| rs4552392   | C | 0.0268  |
| rs145166297 | A | -0.1102 |
| rs7615285   | C | -0.0878 |
| rs11708133  | G | -0.0206 |
| rs704381    | G | 0.0205  |
| rs7627021   | G | -0.022  |
| rs11712636  | G | 0.0372  |
| rs115025911 | A | -0.1119 |
| rs6442990   | G | -0.0318 |
| rs4129088   | A | 0.0541  |
| rs112736555 | T | -0.0563 |
| rs115228220 | T | -0.1331 |
| rs66918208  | G | 0.072   |
| rs73062608  | T | 0.0641  |
| rs56210075  | T | 0.0764  |
| rs76148681  | T | 0.0278  |
| rs114234062 | T | 0.1288  |
| rs9968195   | G | 0.0215  |
| rs2879588   | T | 0.0332  |
| rs76881494  | A | 0.1166  |
| rs751396    | T | 0.0209  |
| rs74747603  | T | 0.0833  |
| rs73015488  | G | 0.0419  |
| rs73232569  | G | 0.1823  |
| rs77798485  | A | -0.1689 |
| rs74388535  | A | 0.0558  |
| rs34085363  | C | 0.0768  |
| rs13094374  | A | 0.0239  |
| rs147172850 | T | -0.0303 |
| rs2035741   | A | -0.0275 |
| rs2287447   | G | 0.0222  |
| rs430353    | G | 0.0208  |
| rs35816825  | G | 0.0552  |
| rs9814591   | G | -0.022  |
| rs78145313  | G | 0.0833  |
| rs576387    | T | -0.0552 |
| rs74629391  | A | 0.1331  |
| rs62290775  | A | -0.039  |
| rs11129848  | A | -0.027  |
| rs9809448   | G | -0.0282 |
| rs73177975  | T | -0.085  |
| rs7653108   | C | -0.0276 |
| rs13089058  | A | -0.0458 |
| rs62255892  | G | -0.1274 |
| rs150125391 | C | -0.1305 |

|             |   |         |
|-------------|---|---------|
| rs3772920   | G | 0.0332  |
| rs6763566   | G | 0.1063  |
| rs7618980   | G | 0.0282  |
| rs62258934  | A | 0.0433  |
| rs149479983 | C | 0.0506  |
| rs35533293  | G | -0.121  |
| rs78282398  | A | -0.0618 |
| rs75913877  | A | -0.0241 |
| rs146331109 | G | 0.1376  |
| rs12494934  | T | 0.1146  |
| rs73162917  | T | -0.0243 |
| rs34027151  | G | 0.0789  |
| rs7373930   | A | 0.0219  |
| rs78753351  | C | -0.116  |
| rs80292958  | T | 0.0721  |
| rs7429493   | G | 0.0211  |
| rs7649356   | T | -0.0234 |
| rs7650950   | G | 0.0315  |
| rs6790269   | A | 0.0441  |
| rs2664109   | C | -0.0216 |
| rs145328479 | G | 0.1089  |
| rs7427948   | G | 0.0427  |
| rs6770100   | T | 0.0253  |
| rs73150250  | T | -0.1522 |
| rs6804820   | A | -0.0348 |
| rs9837007   | G | -0.0256 |
| rs35187993  | A | -0.0868 |
| rs17067533  | G | 0.0637  |
| rs56079118  | G | 0.1576  |
| rs7630034   | A | 0.0248  |
| rs73816909  | C | -0.0356 |
| rs41438545  | G | -0.1251 |
| rs2365485   | T | -0.028  |
| rs6781078   | T | -0.029  |
| rs6784978   | G | -0.0307 |
| rs34468236  | G | -0.0299 |
| rs75964684  | C | 0.041   |
| rs13098006  | T | 0.069   |
| rs9875177   | A | 0.0226  |
| rs77809569  | G | 0.1496  |
| rs79450798  | T | 0.0581  |
| rs17760241  | C | 0.1598  |
| rs1522249   | C | -0.0256 |
| rs73118623  | C | -0.1277 |
| rs79229736  | T | 0.0644  |
| rs138863834 | A | -0.1226 |
| rs998394    | A | -0.02   |



|             |   |         |
|-------------|---|---------|
| rs115258185 | A | 0.1365  |
| rs150709271 | A | 0.0903  |
| rs13088200  | A | -0.0218 |
| rs78114034  | A | -0.0569 |
| rs139606878 | C | -0.0855 |
| rs73884650  | G | -0.0467 |
| rs13074573  | T | -0.0634 |
| rs13324185  | T | -0.1623 |
| rs17738430  | A | 0.0373  |
| rs116720232 | G | -0.1109 |
| rs11719968  | T | -0.0246 |
| rs11915298  | G | -0.0667 |
| rs67962917  | C | 0.0597  |
| rs4858361   | G | -0.0218 |
| rs264676    | C | -0.0317 |
| rs143474052 | C | 0.0313  |
| rs72847480  | C | 0.1332  |
| rs148944137 | T | -0.0832 |
| rs13320904  | G | -0.0487 |
| rs57650353  | G | -0.0515 |
| rs7640324   | G | 0.035   |
| rs12637646  | C | -0.0356 |
| rs56404698  | C | 0.0566  |
| rs113748893 | T | -0.1022 |
| rs9863629   | C | -0.0299 |
| rs140300255 | C | -0.0733 |
| rs7431820   | G | -0.0313 |
| rs2317751   | T | 0.0209  |
| rs4021851   | C | -0.0202 |
| rs2492286   | T | -0.0293 |
| rs10935254  | G | 0.0244  |
| rs115547032 | C | -0.125  |
| rs9878523   | C | 0.0319  |
| rs79456490  | C | -0.1256 |
| rs7634246   | C | -0.0291 |
| rs3111849   | C | 0.0231  |
| rs6444192   | T | 0.0208  |
| rs13319998  | A | -0.082  |
| rs3732677   | T | 0.0561  |
| rs145277886 | T | 0.096   |
| rs304007    | G | -0.0351 |
| rs4362686   | T | 0.0324  |
| rs13077474  | T | 0.0235  |
| rs1287467   | A | 0.0262  |
| rs116287650 | G | 0.0512  |
| rs1546830   | A | 0.0226  |
| rs77312611  | C | 0.0523  |

|             |   |         |
|-------------|---|---------|
| rs115189538 | G | -0.1382 |
| rs9858146   | A | 0.0405  |
| rs148640058 | G | -0.0504 |
| rs80084298  | G | 0.0908  |
| rs6809573   | G | 0.0413  |
| rs71308144  | A | -0.0965 |
| rs140058440 | A | 0.0967  |
| rs1825370   | A | -0.0862 |
| rs140104795 | A | 0.0644  |
| rs73144817  | A | 0.0738  |
| rs4831195   | T | -0.0236 |
| rs115416408 | G | -0.103  |
| rs112276683 | G | -0.077  |
| rs1479940   | A | -0.0208 |
| rs73095477  | C | 0.0403  |
| rs75888088  | C | -0.0472 |
| rs2251272   | T | 0.0227  |
| rs116541333 | G | 0.0515  |
| rs7622941   | A | -0.0286 |
| rs58491518  | C | 0.0939  |
| rs11708737  | C | 0.0281  |
| rs7650381   | A | 0.1219  |
| rs4684997   | T | 0.055   |
| rs78537085  | T | 0.0803  |
| rs141180322 | A | -0.1276 |
| rs78441381  | G | -0.0435 |
| rs80080509  | A | 0.0686  |
| rs114769847 | T | 0.1088  |
| rs111763942 | C | -0.0755 |
| rs4857414   | T | -0.0211 |
| rs6780844   | A | -0.0827 |
| rs12494152  | C | -0.077  |
| rs10937459  | T | 0.0219  |
| rs80315169  | A | -0.1487 |
| rs781386    | C | -0.0247 |
| rs26310     | C | -0.0219 |
| rs62257243  | T | 0.0386  |
| rs764177    | C | 0.0214  |
| rs16852674  | T | 0.0771  |
| rs769456    | C | 0.0236  |
| rs7622749   | T | -0.029  |
| rs73145266  | G | 0.0616  |
| rs163558    | T | -0.0276 |
| rs114431844 | T | -0.0994 |
| rs114307189 | T | 0.0824  |
| rs62278920  | A | 0.0904  |
| rs11927361  | T | -0.0544 |

|             |   |         |
|-------------|---|---------|
| rs112628152 | G | -0.1218 |
| rs11714840  | C | 0.0217  |
| rs4894955   | G | -0.0244 |
| rs73215959  | T | 0.0894  |
| rs6767095   | T | -0.0203 |
| rs75886401  | C | -0.0256 |
| rs77839359  | T | -0.0446 |
| rs4680816   | T | -0.0261 |
| rs75357977  | T | -0.0656 |
| rs75924860  | C | 0.0204  |
| rs148714047 | T | -0.1451 |
| rs7614680   | A | -0.0245 |
| rs62255837  | A | 0.041   |
| rs147757902 | C | 0.183   |
| rs115295459 | G | -0.135  |
| rs12636119  | T | 0.1546  |
| rs143355952 | G | 0.1311  |
| rs56896305  | T | 0.0235  |
| rs11924039  | A | -0.0213 |
| rs4301004   | C | 0.025   |
| rs13089458  | G | 0.0413  |
| rs16848159  | A | -0.1401 |
| rs115900329 | A | -0.1277 |
| rs147255374 | G | -0.1976 |
| rs4678681   | G | 0.0205  |
| rs138909188 | C | 0.094   |
| rs9863676   | A | 0.0296  |
| rs114339410 | G | -0.0845 |
| rs6771672   | G | 0.0291  |
| rs1991787   | T | 0.0263  |
| rs6788035   | T | 0.0236  |
| rs9817701   | G | -0.1089 |
| rs17037086  | C | 0.0513  |
| rs115160537 | C | -0.0622 |
| rs144340223 | G | -0.1334 |
| rs28606069  | G | 0.0219  |
| rs9833657   | T | -0.0611 |
| rs78272627  | A | 0.0587  |
| rs73124959  | A | -0.0489 |
| rs17829608  | C | 0.0405  |
| rs79982201  | G | 0.06    |
| rs6776374   | A | -0.0225 |
| rs34172339  | G | 0.0906  |
| rs76043599  | G | -0.1165 |
| rs142993754 | G | 0.1283  |
| rs33449     | C | 0.08    |
| rs2372155   | T | 0.0662  |

|             |   |         |
|-------------|---|---------|
| rs6782829   | A | -0.0423 |
| rs115873096 | T | 0.1229  |
| rs534324    | G | 0.0207  |
| rs60315345  | C | -0.062  |
| rs142494582 | G | 0.1077  |
| rs114298924 | C | 0.1086  |
| rs62269767  | A | 0.0278  |
| rs72859978  | G | -0.1002 |
| rs9876660   | C | 0.0285  |
| rs4855678   | C | -0.0386 |
| rs35450976  | T | 0.0822  |
| rs833271    | G | 0.0311  |
| rs115034677 | G | 0.0875  |
| rs2640003   | G | 0.1466  |
| rs10222367  | G | 0.0204  |
| rs75882530  | C | -0.0755 |
| rs112879191 | T | 0.1037  |
| rs73057255  | C | 0.1525  |
| rs111882023 | A | -0.0565 |
| rs147282350 | T | 0.1208  |
| rs3935183   | G | -0.0243 |
| rs71296717  | A | -0.098  |
| rs56398459  | G | 0.0213  |
| rs1602187   | A | 0.0962  |
| rs16853287  | G | 0.0806  |
| rs143803117 | T | 0.1049  |
| rs7643134   | G | 0.0482  |
| rs3755771   | A | -0.0316 |
| rs3942629   | A | -0.0227 |
| rs16824819  | A | -0.1093 |
| rs62229805  | G | -0.1053 |
| rs7429600   | A | 0.0236  |
| rs1827451   | A | 0.0269  |
| rs73224196  | C | -0.0784 |
| rs77110820  | G | 0.0627  |
| rs80311713  | T | 0.0806  |
| rs9818640   | G | 0.0441  |
| rs13059114  | C | -0.0266 |
| rs6787010   | T | 0.0526  |
| rs141325965 | A | 0.0988  |
| rs1920337   | A | 0.0249  |
| rs35555380  | A | -0.0334 |
| rs34736466  | A | 0.0304  |
| rs76040352  | A | -0.0721 |
| rs16863993  | A | 0.0343  |
| rs16822529  | C | 0.0273  |
| rs6766501   | C | 0.0437  |

|             |   |         |
|-------------|---|---------|
| rs140198717 | T | 0.1412  |
| rs12488667  | T | -0.0291 |
| rs115217115 | T | 0.0735  |
| rs73168622  | A | -0.0469 |
| rs6770096   | T | -0.036  |
| rs67078110  | T | 0.024   |
| rs11709217  | G | -0.1211 |
| rs11717811  | A | 0.022   |
| rs74876506  | T | 0.0964  |
| rs62257336  | T | 0.0581  |
| rs4677048   | G | 0.021   |
| rs56291902  | T | 0.023   |
| rs4640557   | C | -0.0221 |
| rs73192044  | G | -0.0593 |
| rs1147695   | C | -0.0324 |
| rs147246231 | C | 0.1152  |
| rs269358    | A | 0.0355  |
| rs142187279 | A | -0.108  |
| rs12633778  | C | -0.1133 |
| rs116265484 | G | -0.0811 |
| rs80045238  | T | -0.1022 |
| rs74357524  | C | 0.0879  |
| rs73158568  | G | -0.0671 |
| rs78275858  | A | 0.0535  |
| rs1564074   | A | 0.0252  |
| rs1106680   | G | 0.0573  |
| rs141010068 | A | 0.1207  |
| rs749993    | C | 0.0248  |
| rs77443246  | T | -0.0975 |
| rs77150292  | G | -0.0586 |
| rs4472053   | T | 0.0227  |
| rs380210    | A | -0.0221 |
| rs11720349  | A | 0.0819  |
| rs73160464  | T | 0.0894  |
| rs115297220 | T | -0.0644 |
| rs148211308 | A | 0.0594  |
| rs114040582 | C | 0.1002  |
| rs526100    | C | -0.0223 |
| rs75959875  | T | 0.0316  |
| rs146853178 | C | -0.0889 |
| rs1561075   | G | 0.0278  |
| rs113733970 | T | 0.0918  |
| rs643658    | A | 0.032   |
| rs303859    | T | -0.0254 |
| rs75366665  | T | 0.0426  |
| rs2142305   | A | 0.022   |
| rs34542764  | A | 0.0355  |

|             |   |         |
|-------------|---|---------|
| rs146046685 | T | -0.1268 |
| rs140924680 | A | 0.1494  |
| rs77059052  | A | 0.1004  |
| rs142516208 | A | -0.1066 |
| rs62276278  | A | -0.0253 |
| rs114189593 | T | 0.0977  |
| rs4684714   | T | -0.0694 |
| rs75071342  | T | -0.0698 |
| rs12631707  | C | 0.0227  |
| rs978485    | A | -0.0246 |
| rs13093165  | T | -0.0212 |
| rs148070728 | T | 0.1779  |
| rs76183962  | C | 0.0918  |
| rs149580589 | C | 0.168   |
| rs9647358   | A | 0.0284  |
| rs11707626  | T | 0.0253  |
| rs78164781  | C | 0.0618  |
| rs77310961  | T | 0.0817  |
| rs6780358   | A | -0.053  |
| rs13068401  | A | 0.063   |
| rs116706255 | C | 0.1334  |
| rs55844438  | T | 0.0208  |
| rs7641541   | T | -0.0202 |
| rs73163875  | A | -0.0835 |
| rs143084303 | C | 0.0728  |
| rs9812062   | C | 0.0239  |
| rs4630925   | T | 0.0398  |
| rs3755809   | C | -0.0278 |
| rs34078221  | G | 0.0202  |
| rs13316798  | G | -0.0275 |
| rs9815234   | C | -0.0646 |
| rs73075024  | T | 0.0835  |
| rs9827233   | A | -0.0211 |
| rs17667362  | A | 0.0716  |
| rs7635561   | C | -0.0295 |
| rs111556241 | T | 0.0709  |
| rs144132908 | G | -0.0908 |
| rs59542269  | A | -0.0261 |
| rs7615835   | G | -0.0221 |
| rs1030812   | C | -0.0217 |
| rs73081903  | C | 0.1004  |
| rs17194629  | G | 0.0313  |
| rs579296    | A | 0.0765  |
| rs75887143  | T | 0.1245  |
| rs7628218   | T | 0.0278  |
| rs62234212  | A | 0.0408  |
| rs115564711 | G | 0.0602  |

|             |   |         |
|-------------|---|---------|
| rs626364    | A | -0.0198 |
| rs2271630   | T | 0.0593  |
| rs17755563  | T | 0.1035  |
| rs78416983  | T | 0.1069  |
| rs148059821 | G | 0.0797  |
| rs116813887 | T | 0.0565  |
| rs4856390   | T | 0.0378  |
| rs35943371  | T | 0.0358  |
| rs4684962   | T | -0.0429 |
| rs141993568 | C | 0.0788  |
| rs76772613  | A | -0.1011 |
| rs58552849  | A | -0.0274 |
| rs9865092   | T | 0.0265  |
| rs9865860   | T | 0.1333  |
| rs11706635  | G | 0.092   |
| rs17286876  | G | 0.0379  |
| rs3860612   | G | -0.0274 |
| rs11719008  | C | 0.0447  |
| rs73074963  | C | 0.1184  |
| rs59307720  | G | -0.0348 |
| rs11922996  | T | -0.0204 |
| rs62245014  | T | -0.0649 |
| rs13092025  | A | 0.0238  |
| rs78456010  | C | -0.0569 |
| rs8180079   | G | -0.0388 |
| rs72847499  | C | -0.1187 |
| rs72996335  | T | -0.0371 |
| rs115579647 | T | -0.095  |
| rs9874058   | A | 0.0664  |
| rs35602991  | A | -0.1311 |
| rs150861230 | G | 0.092   |
| rs111299411 | C | 0.0411  |
| rs115882251 | T | -0.0911 |
| rs148948979 | A | 0.204   |
| rs12639201  | A | -0.0283 |
| rs11130136  | G | -0.032  |
| rs4955304   | A | -0.0418 |
| rs9822254   | T | -0.0308 |
| rs60706027  | G | 0.0566  |
| rs3889250   | T | -0.0909 |
| rs10511124  | G | 0.05    |
| rs1453261   | A | 0.0986  |
| rs1842149   | T | -0.0295 |
| rs875012    | C | -0.0792 |
| rs9809799   | C | 0.0325  |
| rs9876566   | C | 0.1528  |
| rs111286886 | A | 0.1693  |

|             |   |         |
|-------------|---|---------|
| rs73187748  | T | 0.0667  |
| rs80103166  | G | -0.1192 |
| rs116528747 | T | 0.0819  |
| rs745588    | C | 0.0369  |
| rs699322    | A | 0.0308  |
| rs62229298  | A | -0.0399 |
| rs115450390 | T | -0.1105 |
| rs141350419 | A | 0.1099  |
| rs7615501   | G | 0.0223  |
| rs112826946 | C | -0.0921 |
| rs35971320  | G | -0.1335 |
| rs2567347   | A | 0.0271  |
| rs11922616  | A | -0.0208 |
| rs61611742  | T | 0.0287  |
| rs17016408  | C | -0.0379 |
| rs12632326  | G | -0.0489 |
| rs4855248   | T | -0.0294 |
| rs116644880 | T | 0.1327  |
| rs60095187  | T | 0.0223  |
| rs4685205   | C | -0.0224 |
| rs1680397   | A | -0.0282 |
| rs45519135  | A | -0.0852 |
| rs6551483   | C | 0.021   |
| rs13068566  | G | -0.0197 |
| rs113902353 | C | -0.0366 |
| rs115984416 | G | -0.0974 |
| rs147018795 | T | 0.1846  |
| rs551595    | G | 0.0218  |
| rs16826656  | G | 0.0621  |
| rs148838269 | G | 0.0755  |
| rs116291110 | C | -0.1575 |
| rs78216756  | G | 0.0282  |
| rs113706892 | C | -0.0927 |
| rs4687087   | T | 0.0224  |
| rs62267320  | C | 0.1052  |
| rs62271074  | G | 0.0279  |
| rs115123378 | T | -0.0837 |
| rs143007764 | T | -0.0545 |
| rs62274288  | G | 0.0714  |
| rs1114430   | T | 0.0276  |
| rs7629978   | C | 0.0236  |
| rs74427960  | T | 0.0405  |
| rs12633146  | C | -0.0206 |
| rs150451129 | A | 0.15    |
| rs115633174 | G | 0.096   |
| rs6414394   | G | 0.0965  |
| rs73177456  | T | -0.0627 |



|             |   |         |
|-------------|---|---------|
| rs112054730 | G | 0.0703  |
| rs17027372  | T | 0.0549  |
| rs79364206  | G | 0.1683  |
| rs1979528   | G | 0.0861  |
| rs62273264  | T | -0.0872 |
| rs115460615 | T | 0.0936  |
| rs142836448 | A | -0.032  |
| rs6788676   | G | 0.0204  |
| rs79342888  | G | 0.0513  |
| rs9863866   | G | 0.0208  |
| rs146914370 | C | -0.0574 |
| rs7647995   | A | 0.0212  |
| rs73106741  | A | 0.1439  |
| rs13066839  | G | 0.1353  |
| rs28865905  | A | 0.0285  |
| rs13077873  | T | 0.0779  |
| rs79822473  | A | -0.1063 |
| rs71312506  | A | 0.0488  |
| rs73187733  | G | 0.0432  |
| rs6808668   | A | -0.0969 |
| rs7615996   | G | -0.0209 |
| rs2682964   | G | 0.0372  |
| rs1491707   | T | -0.052  |
| rs62232876  | T | -0.0368 |
| rs11719717  | G | 0.0212  |
| rs13315963  | A | -0.0463 |
| rs17431517  | A | 0.0241  |
| rs1666131   | A | 0.0198  |
| rs2595913   | C | 0.0434  |
| rs6809420   | T | 0.0267  |
| rs4679178   | A | -0.0269 |
| rs35787589  | A | 0.0262  |
| rs116603984 | A | 0.0677  |
| rs35957531  | G | -0.0484 |
| rs2135320   | A | 0.0344  |
| rs13317981  | G | 0.0419  |
| rs111593718 | C | 0.0709  |
| rs115986145 | T | -0.1246 |
| rs73074130  | C | -0.1278 |
| rs75643703  | A | -0.0998 |
| rs115945420 | G | 0.1271  |
| rs145688596 | T | 0.1029  |
| rs114463497 | G | 0.0556  |
| rs511731    | A | 0.063   |
| rs62242214  | T | -0.1799 |
| rs114584570 | C | -0.0854 |
| rs62289654  | T | 0.0533  |

|             |   |         |
|-------------|---|---------|
| rs934453    | C | 0.0315  |
| rs75937173  | C | -0.0503 |
| rs77587230  | T | 0.0624  |
| rs73061424  | T | -0.0346 |
| rs62261792  | G | -0.0642 |
| rs9809827   | T | -0.0546 |
| rs79015570  | A | 0.0796  |
| rs11718209  | A | -0.0275 |
| rs987741    | A | 0.0201  |
| rs7432727   | T | -0.0198 |
| rs11720581  | A | 0.0394  |
| rs146175899 | G | -0.0424 |
| rs4928058   | G | -0.0278 |
| rs1450110   | A | -0.065  |
| rs114591299 | T | 0.0484  |
| rs76212105  | A | 0.0734  |
| rs12636078  | A | -0.0215 |
| rs9882615   | A | 0.0256  |
| rs73087080  | C | -0.0735 |
| rs2221892   | T | -0.0244 |
| rs78873807  | T | -0.0532 |
| rs114195985 | A | -0.1479 |
| rs148748710 | C | -0.11   |
| rs77650626  | T | 0.1034  |
| rs1995649   | C | 0.0627  |
| rs116635601 | T | -0.1064 |
| rs2372950   | A | -0.0263 |
| rs151024527 | A | 0.0555  |
| rs9876487   | G | 0.0215  |
| rs76802013  | C | 0.094   |
| rs56931274  | T | 0.0244  |
| rs147677919 | A | -0.0959 |
| rs6765154   | C | 0.0232  |
| rs73049041  | A | -0.0947 |
| rs76048373  | G | 0.0598  |
| rs140059862 | G | 0.0845  |
| rs75626132  | T | -0.1152 |
| rs11925376  | C | 0.0244  |
| rs78159718  | T | -0.0612 |
| rs4287876   | C | -0.0322 |
| rs35397711  | T | 0.0656  |
| rs78644208  | G | -0.116  |
| rs115025341 | T | 0.0722  |
| rs370230    | A | 0.0743  |
| rs12485290  | A | 0.0645  |
| rs75790563  | T | 0.1041  |
| rs35292389  | A | -0.1048 |

|             |   |         |
|-------------|---|---------|
| rs13079095  | G | 0.0532  |
| rs73160454  | G | 0.1007  |
| rs143030598 | C | 0.142   |
| rs36074614  | A | -0.0479 |
| rs11919820  | A | 0.0471  |
| rs141079209 | C | -0.1228 |
| rs1978396   | G | -0.0323 |
| rs17709148  | A | -0.0283 |
| rs9833157   | G | 0.0258  |
| rs6802330   | C | -0.0266 |
| rs6774778   | A | 0.0285  |
| rs3773490   | T | 0.0205  |
| rs55725503  | A | -0.0741 |
| rs17009723  | C | -0.0279 |
| rs73232771  | T | 0.1274  |
| rs115036029 | T | -0.0828 |
| rs1653974   | A | 0.0241  |
| rs79441429  | C | 0.1177  |
| rs16841332  | G | 0.0648  |
| rs6786185   | G | 0.0595  |
| rs116686378 | A | 0.0816  |
| rs116570455 | T | 0.0401  |
| rs142731603 | A | 0.057   |
| rs711567    | T | 0.0321  |
| rs7638186   | C | -0.0357 |
| rs13073884  | A | 0.1492  |
| rs7430821   | A | -0.0799 |
| rs16837605  | T | 0.1091  |
| rs77617609  | T | 0.0729  |
| rs117331964 | A | -0.195  |
| rs4419356   | G | 0.0464  |
| rs34394958  | G | -0.0775 |
| rs11927321  | G | -0.0277 |
| rs114176069 | A | 0.0805  |
| rs141884234 | G | 0.2016  |
| rs114266560 | T | 0.0904  |
| rs140323454 | T | 0.0927  |
| rs80067603  | A | -0.0268 |
| rs4293665   | T | -0.0534 |
| rs11922879  | A | 0.0717  |
| rs34516249  | T | -0.0258 |
| rs7356015   | G | -0.0211 |
| rs7615624   | G | -0.0515 |
| rs727778    | G | -0.0216 |
| rs17302126  | C | 0.0579  |
| rs114711393 | T | -0.1693 |
| rs79095079  | C | 0.0723  |

|             |   |         |
|-------------|---|---------|
| rs75465451  | C | -0.0742 |
| rs10510341  | T | 0.0431  |
| rs13063919  | C | -0.0247 |
| rs62281961  | A | -0.0839 |
| rs115671879 | C | 0.0583  |
| rs73040331  | C | -0.0584 |
| rs150587987 | G | -0.0696 |
| rs9853543   | C | -0.0575 |
| rs79242383  | G | 0.082   |
| rs112873049 | T | 0.0846  |
| rs6437962   | T | 0.0329  |
| rs4678540   | C | -0.0357 |
| rs138657362 | G | 0.1308  |
| rs9865221   | A | 0.0432  |
| rs1155108   | C | 0.1705  |
| rs115348722 | A | 0.1495  |
| rs7630294   | T | 0.0809  |
| rs41301375  | A | -0.0799 |
| rs62242502  | G | 0.0287  |
| rs34985305  | G | -0.0318 |
| rs9826331   | C | -0.0214 |
| rs4533614   | A | 0.0588  |
| rs62274107  | T | 0.0623  |
| rs78015423  | G | -0.0515 |
| rs115526833 | C | 0.13    |
| rs4499648   | A | -0.0254 |
| rs6767797   | G | 0.0335  |
| rs4855995   | C | -0.0236 |
| rs138031869 | C | 0.1205  |
| rs77258407  | G | -0.0318 |
| rs77489858  | G | -0.1213 |
| rs113293193 | A | -0.0729 |
| rs4855475   | A | 0.0197  |
| rs77203826  | T | 0.0341  |
| rs115760592 | C | 0.073   |
| rs4916441   | T | 0.0227  |
| rs13068785  | T | 0.0753  |
| rs6794137   | G | -0.0242 |
| rs112371827 | A | 0.1292  |
| rs1606370   | A | 0.0273  |
| rs4894532   | T | 0.0202  |
| rs141054301 | C | -0.1388 |
| rs17737239  | T | 0.0556  |
| rs4684220   | A | 0.0228  |
| rs138040538 | A | 0.1182  |
| rs12486542  | A | -0.0201 |
| rs67674136  | C | 0.0369  |

|             |   |         |
|-------------|---|---------|
| rs116617515 | T | 0.105   |
| rs13095651  | A | 0.0221  |
| rs73050928  | C | 0.037   |
| rs13060497  | A | -0.1031 |
| rs73837738  | A | -0.0477 |
| rs7638124   | A | 0.0335  |
| rs12106939  | T | -0.0207 |
| rs7646640   | G | 0.0787  |
| rs78620115  | A | -0.0885 |
| rs149330618 | A | 0.1186  |
| rs2116151   | G | 0.0211  |
| rs4401392   | T | -0.0263 |
| rs12186041  | T | 0.0223  |
| rs73100435  | T | -0.0483 |
| rs78008966  | T | -0.0924 |
| rs74814358  | C | 0.1567  |
| rs72624883  | A | -0.0358 |
| rs144742329 | G | -0.1662 |
| rs1808883   | G | 0.0241  |
| rs148393806 | A | 0.1235  |
| rs62242350  | C | -0.0305 |
| rs76841282  | T | -0.0768 |
| rs7616413   | T | 0.0205  |
| rs114658648 | A | 0.0977  |
| rs77907593  | G | 0.1258  |
| rs4894815   | A | -0.0255 |
| rs76585683  | G | 0.0572  |
| rs7431638   | G | -0.0207 |
| rs115392377 | A | -0.1479 |
| rs4144706   | T | -0.0298 |
| rs13072195  | T | 0.0328  |
| rs35946401  | A | -0.0232 |
| rs6768160   | C | 0.0196  |
| rs139811613 | C | 0.1402  |
| rs144749521 | C | -0.0258 |
| rs4686417   | C | 0.024   |
| rs6797462   | T | -0.0235 |
| rs55792486  | T | 0.1063  |
| rs6788334   | T | -0.0269 |
| rs9852266   | A | 0.0497  |
| rs11712154  | T | 0.0324  |
| rs115320396 | T | 0.0437  |
| rs304175    | C | -0.0341 |
| rs73105051  | A | 0.1647  |
| rs75374400  | T | -0.0472 |
| rs35769963  | T | 0.0337  |
| rs78728103  | A | -0.0252 |

|             |   |         |
|-------------|---|---------|
| rs280481    | A | -0.0215 |
| rs9863850   | G | 0.0222  |
| rs1846473   | C | -0.1519 |
| rs4683042   | G | 0.0248  |
| rs115909465 | A | 0.0883  |
| rs260580    | T | 0.0195  |
| rs75624705  | T | -0.0426 |
| rs116103318 | G | 0.1056  |
| rs80053956  | T | 0.0614  |
| rs62282728  | C | -0.0802 |
| rs77735023  | G | 0.1449  |
| rs1021701   | G | 0.0224  |
| rs2132127   | A | 0.0728  |
| rs75990093  | A | -0.0516 |
| rs112735233 | T | -0.034  |
| rs78949515  | G | -0.1078 |
| rs1144113   | G | -0.1132 |
| rs2593932   | C | -0.0201 |
| rs6444798   | A | -0.0206 |
| rs77297137  | A | -0.0835 |
| rs412508    | A | -0.023  |
| rs11707215  | C | 0.0313  |
| rs78560906  | C | -0.1461 |
| rs79609584  | A | 0.0961  |
| rs79124479  | T | -0.0534 |
| rs6763437   | A | 0.0599  |
| rs2600030   | C | 0.0212  |
| rs4468973   | T | -0.0583 |
| rs116489699 | G | 0.0694  |
| rs4423748   | A | -0.0195 |
| rs73137667  | A | -0.0554 |
| rs73228968  | T | -0.0505 |
| rs4686880   | T | 0.0408  |
| rs79636452  | A | 0.061   |
| rs75122591  | C | -0.0394 |
| rs79505759  | C | -0.0607 |
| rs2136233   | T | -0.0355 |
| rs11713167  | A | 0.0208  |
| rs79199464  | C | -0.0747 |
| rs112546389 | A | 0.1369  |
| rs6803548   | C | -0.0214 |
| rs829182    | G | 0.0213  |
| rs145781246 | A | -0.1083 |
| rs6789200   | G | 0.1442  |
| rs71325366  | T | -0.1031 |
| rs74952600  | A | -0.0783 |
| rs3773162   | T | 0.0244  |

|             |   |         |
|-------------|---|---------|
| rs116051060 | A | 0.0824  |
| rs62254740  | G | -0.1045 |
| rs13059642  | G | 0.0703  |
| rs10511405  | T | -0.0247 |
| rs62267134  | T | 0.1098  |
| rs75915465  | C | 0.0203  |
| rs73109612  | A | 0.0453  |
| rs114749200 | A | 0.1006  |
| rs145007810 | C | 0.1362  |
| rs73193925  | G | 0.0559  |
| rs1353248   | T | -0.022  |
| rs62245950  | T | -0.0639 |
| rs149182753 | T | 0.1476  |
| rs147771852 | G | 0.0663  |
| rs34904379  | C | 0.0823  |
| rs9849141   | T | 0.07    |
| rs80350379  | T | -0.1371 |
| rs111635254 | C | -0.0773 |
| rs9875048   | G | 0.024   |
| rs12488473  | T | -0.0263 |
| rs112655119 | C | 0.0543  |
| rs73190802  | A | 0.0927  |
| rs80320573  | A | 0.0863  |
| rs35073826  | G | -0.0269 |
| rs3853720   | T | 0.0214  |
| rs13070215  | G | 0.0508  |
| rs115506977 | A | 0.1064  |
| rs139790369 | G | -0.0901 |
| rs114614876 | T | -0.136  |
| rs234011    | T | -0.0204 |
| rs6444072   | C | 0.0321  |
| rs73034177  | T | 0.0394  |
| rs13061420  | A | 0.1102  |
| rs1994111   | A | -0.0253 |
| rs11916328  | T | -0.0846 |
| rs144398114 | A | -0.1576 |
| rs139900133 | C | 0.1354  |
| rs116195682 | C | -0.0728 |
| rs116308449 | A | -0.156  |
| rs12487658  | C | 0.0244  |
| rs113994668 | T | 0.0877  |
| rs2304551   | G | 0.0321  |
| rs146558744 | T | -0.0692 |
| rs78262020  | C | -0.0368 |
| rs9821651   | A | -0.1304 |
| rs78605803  | A | 0.0561  |
| rs6777734   | G | 0.0955  |

|             |   |         |
|-------------|---|---------|
| rs79715307  | A | -0.0915 |
| rs116328362 | T | 0.0756  |
| rs80341091  | T | -0.0411 |
| rs2875002   | T | -0.0221 |
| rs115578093 | T | 0.0591  |
| rs78187400  | G | 0.0523  |
| rs75054859  | T | -0.1207 |
| rs505974    | C | 0.022   |
| rs75527220  | T | 0.0338  |
| rs12107009  | T | 0.0463  |
| rs112730820 | A | 0.093   |
| rs6440616   | T | 0.1112  |
| rs80096938  | C | -0.0518 |
| rs4686842   | A | -0.0232 |
| rs9854809   | A | 0.0351  |
| rs141389116 | A | 0.1839  |
| rs34192173  | T | -0.1177 |
| rs74795512  | A | 0.0717  |
| rs114354482 | G | 0.0851  |
| rs34589717  | G | -0.0462 |
| rs80046999  | C | -0.0772 |
| rs12634894  | G | -0.0324 |
| rs6809558   | C | -0.0242 |
| rs62227239  | T | -0.0296 |
| rs17049673  | T | -0.0457 |
| rs62235716  | T | 0.0465  |
| rs9864994   | A | -0.0277 |
| rs35835286  | T | 0.0355  |
| rs113140243 | A | 0.1852  |
| rs157301    | A | -0.0216 |
| rs116671965 | A | -0.0522 |
| rs112406716 | T | 0.0802  |
| rs13082198  | A | -0.0252 |
| rs72622598  | T | -0.0618 |
| rs111342743 | T | -0.0914 |
| rs78278834  | C | 0.0559  |
| rs112800374 | C | 0.0446  |
| rs73056224  | G | 0.0286  |
| rs73116764  | T | 0.0605  |
| rs62232683  | A | 0.0226  |
| rs11706153  | T | -0.0908 |
| rs34570230  | G | -0.0793 |
| rs115003473 | C | 0.1231  |
| rs56857418  | T | 0.025   |
| rs378535    | C | 0.0205  |
| rs78937449  | G | -0.1008 |
| rs79330620  | T | -0.0783 |



|             |   |         |
|-------------|---|---------|
| rs113776280 | A | 0.1098  |
| rs115599816 | A | 0.1369  |
| rs74979207  | A | -0.0773 |
| rs73003243  | T | 0.0482  |
| rs17625449  | T | -0.0696 |
| rs111888216 | A | 0.126   |
| rs77412796  | G | -0.0445 |
| rs61242619  | G | -0.0402 |
| rs2929371   | G | -0.0206 |
| rs149695517 | A | -0.0481 |
| rs3924817   | T | 0.0203  |
| rs116071306 | T | 0.0743  |
| rs62260481  | T | 0.1095  |
| rs1447150   | C | 0.0446  |
| rs11706487  | C | -0.0291 |
| rs140466642 | G | 0.0811  |
| rs73182611  | C | 0.0414  |
| rs78180666  | C | -0.0723 |
| rs12497297  | C | 0.0552  |
| rs12636077  | A | 0.0612  |
| rs2634554   | A | -0.0413 |
| rs114919538 | G | 0.1767  |
| rs140875643 | A | -0.0778 |
| rs16853481  | T | -0.0348 |
| rs116784021 | C | -0.0883 |
| rs11923377  | T | -0.042  |
| rs9883144   | G | -0.0409 |
| rs6792725   | A | -0.0209 |
| rs7652291   | T | -0.0276 |
| rs9841363   | T | -0.0288 |
| rs114771232 | T | -0.0855 |
| rs9827210   | T | -0.0246 |
| rs4686145   | T | -0.0612 |
| rs73037907  | A | 0.0627  |
| rs79906072  | A | 0.107   |
| rs73101070  | C | -0.1636 |
| rs35355131  | T | -0.0475 |
| rs11708278  | C | -0.0292 |
| rs140423815 | A | -0.1655 |
| rs2304510   | C | 0.0269  |
| rs79058794  | G | -0.0818 |
| rs149495345 | C | -0.1157 |
| rs73052325  | A | -0.1427 |
| rs4234246   | T | 0.021   |
| rs17237042  | C | 0.0441  |
| rs2664098   | G | -0.0244 |
| rs73085878  | A | 0.1275  |

|             |   |         |
|-------------|---|---------|
| rs9834018   | G | -0.0279 |
| rs60746884  | A | -0.04   |
| rs113606656 | G | 0.0372  |
| rs115084868 | A | -0.0684 |
| rs919113    | G | -0.0195 |
| rs73093395  | G | 0.0511  |
| rs115904361 | G | 0.0649  |
| rs116586640 | G | 0.0725  |
| rs62275331  | A | 0.1561  |
| rs72995970  | C | -0.0847 |
| rs7614618   | T | 0.0211  |
| rs73197605  | T | -0.0921 |
| rs4857446   | A | -0.022  |
| rs12494771  | G | -0.0214 |
| rs7651051   | T | 0.0491  |
| rs13092691  | A | -0.0778 |
| rs116127393 | G | -0.0547 |
| rs56326727  | C | 0.1047  |
| rs116704890 | A | 0.1429  |
| rs144895316 | T | -0.1059 |
| rs150657427 | G | -0.0506 |
| rs116358733 | A | 0.0595  |
| rs116763791 | A | -0.0788 |
| rs6444635   | A | 0.0697  |
| rs117769407 | C | -0.0833 |
| rs77831368  | G | -0.101  |
| rs11129308  | A | -0.035  |
| rs62243577  | T | 0.0258  |
| rs550043    | G | 0.0325  |
| rs73173317  | C | -0.0566 |
| rs9831376   | C | -0.0596 |
| rs115024943 | T | 0.0687  |
| rs73067652  | A | 0.1288  |
| rs4894942   | G | -0.0212 |
| rs9831991   | G | 0.0413  |
| rs75119553  | C | 0.0737  |
| rs13086640  | G | 0.0301  |
| rs796882    | C | 0.023   |
| rs62252074  | A | 0.0512  |
| rs75815149  | C | -0.0797 |
| rs75176809  | T | 0.0454  |
| rs358046    | T | -0.0201 |
| rs80105905  | T | 0.0844  |
| rs73828631  | T | 0.116   |
| rs111951314 | C | -0.0872 |
| rs62275802  | A | 0.0589  |
| rs75686607  | A | -0.1345 |

|             |   |         |
|-------------|---|---------|
| rs3816731   | A | 0.0825  |
| rs114797615 | A | -0.1104 |
| rs73194538  | A | 0.0451  |
| rs11129469  | T | -0.0205 |
| rs75055053  | T | 0.1308  |
| rs1608904   | C | -0.0194 |
| rs73167054  | G | -0.0682 |
| rs716616    | T | 0.0951  |
| rs62236516  | T | -0.043  |
| rs9843925   | C | 0.083   |
| rs17642880  | C | 0.0391  |
| rs73170523  | C | 0.0803  |
| rs114262082 | T | -0.0987 |
| rs55786533  | A | 0.0461  |
| rs1367142   | A | -0.0538 |
| rs115222685 | A | -0.0727 |
| rs12495736  | A | -0.025  |
| rs9821406   | A | -0.0257 |
| rs12330646  | T | -0.036  |
| rs116240632 | C | -0.1012 |
| rs11717583  | G | 0.0197  |
| rs115886681 | A | -0.1046 |
| rs1441884   | T | 0.0215  |
| rs789853    | T | -0.0328 |
| rs443316    | C | 0.0198  |
| rs668271    | G | 0.0745  |
| rs4241442   | A | -0.0217 |
| rs10935819  | C | 0.023   |
| rs2669178   | G | -0.0308 |
| rs75258856  | T | 0.0726  |
| rs74378360  | C | 0.0459  |
| rs76067171  | G | -0.0266 |
| rs77322398  | G | -0.0882 |
| rs4683045   | G | -0.0234 |
| rs113019654 | A | -0.0399 |
| rs55847551  | G | 0.0338  |
| rs116607355 | A | 0.184   |
| rs79154524  | T | -0.0522 |
| rs12491101  | G | 0.0201  |
| rs114533319 | A | 0.111   |
| rs11717245  | A | -0.0319 |
| rs79325457  | C | 0.0716  |
| rs11719950  | C | -0.0525 |
| rs17761103  | C | -0.0214 |
| rs74750469  | A | 0.0811  |
| rs2128027   | T | -0.0399 |
| rs139300233 | A | -0.0743 |

|             |   |         |
|-------------|---|---------|
| rs78796384  | C | -0.0521 |
| rs79823334  | T | 0.0776  |
| rs73812875  | C | -0.045  |
| rs13090226  | C | -0.0213 |
| rs79101229  | T | 0.0906  |
| rs114407637 | A | 0.0837  |
| rs8478      | T | 0.0247  |
| rs76055474  | T | 0.0768  |
| rs73163267  | T | -0.1202 |
| rs6779858   | A | 0.0239  |
| rs4624555   | C | 0.023   |
| rs115906433 | A | -0.1062 |
| rs114385168 | G | 0.0735  |
| rs7619473   | A | -0.0471 |
| rs34975545  | G | 0.0323  |
| rs17635326  | T | 0.094   |
| rs9861729   | G | -0.0235 |
| rs73189612  | T | -0.0487 |
| rs12489723  | A | -0.0681 |
| rs3856788   | T | 0.1261  |
| rs114178683 | A | -0.0998 |
| rs9325413   | T | 0.0441  |
| rs139978079 | G | 0.1112  |
| rs115866903 | C | 0.0996  |
| rs831070    | A | -0.0211 |
| rs139373717 | T | 0.1089  |
| rs116068717 | G | -0.0678 |
| rs58881566  | A | 0.1311  |
| rs13072023  | T | -0.0439 |
| rs549255    | C | 0.0243  |
| rs115254613 | A | 0.0847  |
| rs7631073   | G | 0.0251  |
| rs114193360 | C | -0.1314 |
| rs13090721  | A | 0.0935  |
| rs57566465  | C | 0.0275  |
| rs4856892   | A | 0.0316  |
| rs148566065 | A | -0.1175 |
| rs6804171   | A | 0.034   |
| rs73066799  | G | -0.0773 |
| rs11706376  | T | 0.0692  |
| rs80284522  | C | 0.0366  |
| rs11716115  | G | -0.0253 |
| rs62283302  | A | 0.0299  |
| rs111747345 | T | -0.0465 |
| rs6419792   | G | -0.0706 |
| rs7624041   | G | -0.0383 |
| rs1398732   | T | -0.0234 |

|             |   |         |
|-------------|---|---------|
| rs2154762   | A | 0.0234  |
| rs6790368   | G | 0.0558  |
| rs74935976  | A | 0.0809  |
| rs9854006   | T | 0.0214  |
| rs11707507  | G | -0.02   |
| rs9820306   | C | 0.0631  |
| rs55937326  | G | 0.0365  |
| rs12715202  | A | -0.0409 |
| rs140519113 | G | -0.0822 |
| rs71328493  | G | 0.0389  |
| rs1609969   | A | 0.0321  |
| rs73188538  | T | -0.0601 |
| rs143571073 | C | -0.1134 |
| rs79045129  | C | 0.0425  |
| rs73034788  | C | 0.0605  |
| rs71309999  | T | 0.0318  |
| rs78643374  | A | -0.0651 |
| rs149521671 | C | -0.1176 |
| rs7632131   | A | 0.0262  |
| rs4679514   | A | -0.0751 |
| rs873132    | T | -0.0578 |
| rs62275346  | A | -0.0255 |
| rs483352    | T | -0.0351 |
| rs116809139 | T | 0.0916  |
| rs13473     | A | 0.0461  |
| rs79777156  | T | 0.0693  |
| rs141915642 | G | 0.0725  |
| rs13077540  | G | 0.086   |
| rs35970229  | T | 0.0655  |
| rs13066810  | A | -0.0253 |
| rs71296734  | A | 0.0487  |
| rs113827536 | G | 0.1348  |
| rs78284557  | T | -0.1426 |
| rs1524966   | C | 0.0324  |
| rs6790455   | A | 0.0309  |
| rs72622926  | C | 0.0252  |
| rs7637085   | A | -0.0341 |
| rs147120836 | A | 0.1743  |
| rs295306    | A | -0.0751 |
| rs115364817 | A | -0.0353 |
| rs142019862 | A | 0.0473  |
| rs12374181  | G | -0.029  |
| rs62298247  | T | 0.053   |
| rs9879802   | T | 0.0423  |
| rs111849903 | A | -0.0596 |
| rs34892     | G | -0.0413 |
| rs4270467   | G | 0.0242  |

|             |   |         |
|-------------|---|---------|
| rs17057325  | C | -0.1012 |
| rs6792822   | C | -0.0198 |
| rs78922417  | A | -0.1077 |
| rs12630403  | G | 0.0292  |
| rs10511282  | T | -0.0339 |
| rs3817425   | C | -0.0372 |
| rs6771360   | T | 0.0284  |
| rs76097935  | C | -0.0801 |
| rs16849514  | G | -0.0326 |
| rs74589404  | G | 0.0458  |
| rs112680718 | A | 0.1681  |
| rs77314873  | A | -0.0351 |
| rs9028      | C | -0.0195 |
| rs4688256   | C | -0.0193 |
| rs4855305   | T | 0.0208  |
| rs80331307  | A | 0.0461  |
| rs4676924   | T | 0.0199  |
| rs7610693   | A | -0.0219 |
| rs73095474  | C | 0.1324  |
| rs138779380 | G | 0.1169  |
| rs13074345  | C | -0.0204 |
| rs76939051  | A | -0.0914 |
| rs14360     | G | -0.0233 |
| rs114084583 | A | -0.1148 |
| rs114418190 | G | 0.0837  |
| rs115408539 | G | 0.1029  |
| rs11719294  | T | 0.0709  |
| rs149022385 | C | 0.0857  |
| rs6796582   | C | -0.0358 |
| rs142568691 | A | 0.168   |
| rs789       | A | -0.0202 |
| rs73205316  | A | -0.0222 |
| rs7648977   | A | 0.0256  |
| rs113171477 | T | -0.0661 |
| rs115901088 | A | -0.0422 |
| rs9867279   | T | -0.0375 |
| rs76240414  | T | -0.0432 |
| rs111491953 | T | 0.0401  |
| rs9876033   | C | 0.0256  |
| rs80026423  | T | -0.1295 |
| rs7619356   | G | -0.0294 |
| rs116247186 | T | 0.0611  |
| rs79939979  | T | -0.0445 |
| rs115287183 | C | -0.082  |
| rs74338908  | A | 0.0826  |
| rs75015919  | A | -0.0737 |
| rs7427741   | G | -0.118  |

|             |   |         |
|-------------|---|---------|
| rs114352678 | A | -0.1379 |
| rs9819189   | C | 0.052   |
| rs115904276 | G | -0.1553 |
| rs144762852 | G | -0.1033 |
| rs62252529  | A | 0.0681  |
| rs7614031   | A | 0.0191  |
| rs115789874 | A | -0.1125 |
| rs79726092  | G | 0.0606  |
| rs77932053  | A | 0.0712  |
| rs10934388  | C | 0.0243  |
| rs4684822   | T | 0.0291  |
| rs76040007  | A | -0.0791 |
| rs140683240 | T | 0.0731  |
| rs145200170 | C | -0.1054 |
| rs769794    | A | 0.0195  |
| rs114541441 | G | -0.1095 |
| rs2268817   | T | -0.0208 |
| rs6414520   | G | -0.021  |
| rs76666620  | T | -0.0466 |
| rs67955459  | C | 0.0568  |
| rs28705234  | T | 0.0835  |
| rs164460    | A | -0.025  |
| rs76870071  | C | 0.0428  |
| rs1878861   | G | 0.0212  |
| rs150988725 | T | -0.0621 |
| rs4637302   | G | 0.0194  |
| rs56149550  | A | 0.022   |
| rs73178271  | G | -0.0785 |
| rs347628    | A | 0.0215  |
| rs6808864   | A | -0.0222 |
| rs749948    | T | 0.02    |
| rs77815064  | A | -0.0306 |
| rs6664      | T | 0.0212  |
| rs147801175 | A | -0.0855 |
| rs4686320   | A | -0.021  |
| rs116172643 | G | 0.1336  |
| rs68121286  | A | -0.0273 |
| rs7632962   | G | 0.0376  |
| rs1696007   | T | -0.0243 |
| rs141904854 | G | 0.0545  |
| rs4146796   | C | -0.0342 |
| rs2649751   | A | 0.0194  |
| rs7620109   | A | 0.0341  |
| rs79913146  | C | 0.0399  |
| rs7613112   | T | 0.037   |
| rs4955813   | C | -0.0208 |
| rs2366429   | T | 0.0371  |

|             |   |         |
|-------------|---|---------|
| rs4856940   | G | 0.0346  |
| rs9873991   | A | -0.0283 |
| rs1259308   | A | 0.0324  |
| rs66531443  | T | -0.0473 |
| rs72902586  | G | -0.0639 |
| rs146325969 | G | 0.0544  |
| rs7643190   | G | 0.0765  |
| rs6440479   | A | -0.1048 |
| rs76503731  | T | 0.1223  |
| rs237878    | C | 0.0211  |
| rs12637393  | A | -0.0189 |
| rs71312315  | G | 0.0587  |
| rs11928471  | T | 0.0603  |
| rs7616828   | G | -0.0331 |
| rs112965404 | C | -0.1256 |
| rs78456674  | G | 0.0394  |
| rs78750869  | T | -0.0453 |
| rs4624523   | A | -0.021  |
| rs78629619  | A | -0.0448 |
| rs114971518 | T | 0.0969  |
| rs80263018  | C | 0.0595  |
| rs4437081   | A | 0.0837  |
| rs62230179  | T | -0.0437 |
| rs7433660   | G | -0.0251 |
| rs73086610  | A | -0.0612 |
| rs278480    | A | -0.1962 |
| rs13072061  | T | -0.022  |
| rs62276876  | T | 0.0253  |
| rs66771135  | A | -0.1014 |
| rs73054270  | T | 0.0662  |
| rs62253672  | C | -0.0296 |
| rs115192138 | C | 0.1474  |
| rs7649653   | C | -0.033  |
| rs696513    | G | 0.0205  |
| rs59919518  | A | 0.0232  |
| rs78836321  | T | -0.0528 |
| rs16823858  | A | -0.0458 |
| rs35262984  | A | 0.0225  |
| rs113444227 | A | -0.0282 |
| rs6798592   | C | 0.0244  |
| rs343311    | G | -0.0198 |
| rs1396423   | T | 0.019   |
| rs10510866  | C | -0.0297 |
| rs114203770 | T | -0.084  |
| rs17141074  | C | 0.135   |
| rs9860982   | C | 0.04    |
| rs1399748   | G | -0.0188 |



|             |   |         |
|-------------|---|---------|
| rs145730412 | A | 0.0882  |
| rs147011375 | G | 0.079   |
| rs13095368  | C | -0.0885 |
| rs9861567   | A | -0.0245 |
| rs9871288   | T | -0.0214 |
| rs10513359  | A | 0.0221  |
| rs11919648  | A | -0.0529 |
| rs76230201  | T | 0.116   |
| rs111494834 | T | 0.0662  |
| rs76126926  | A | -0.0348 |
| rs61795253  | G | -0.1575 |
| rs1195727   | A | -0.1299 |
| rs147864333 | G | 0.1722  |
| rs7637468   | G | -0.0398 |
| rs79310980  | C | 0.0516  |
| rs16826240  | T | 0.0574  |
| rs56075763  | A | -0.0261 |
| rs9875732   | C | 0.0197  |
| rs77607932  | A | 0.067   |
| rs79350376  | C | 0.0253  |
| rs464392    | G | -0.0258 |
| rs3762770   | T | -0.028  |
| rs115716895 | A | 0.0656  |
| rs75765795  | A | 0.0917  |
| rs141428795 | A | -0.1089 |
| rs73161314  | C | 0.1661  |
| rs115621759 | A | 0.1198  |
| rs141062962 | T | 0.1139  |
| rs1868118   | C | -0.0221 |
| rs113726690 | A | -0.1547 |
| rs79337583  | A | 0.1137  |
| rs78498684  | A | -0.0441 |
| rs12490555  | T | 0.0223  |
| rs11718927  | T | -0.0254 |
| rs7649049   | A | 0.0304  |
| rs79737764  | C | -0.107  |
| rs72984188  | T | 0.1515  |
| rs13094489  | A | -0.0226 |
| rs139580368 | T | -0.0882 |
| rs77510786  | A | -0.168  |
| rs17662968  | A | 0.0521  |
| rs7652799   | T | -0.0742 |
| rs544716    | T | -0.114  |
| rs115448740 | T | -0.088  |
| rs62243863  | T | 0.0343  |
| rs78416627  | A | 0.0196  |
| rs9860279   | T | -0.024  |

|             |   |         |
|-------------|---|---------|
| rs147399709 | T | 0.1032  |
| rs4605505   | A | -0.0274 |
| rs112826663 | C | -0.086  |
| rs73097598  | A | -0.0321 |
| rs79399341  | T | 0.0667  |
| rs331855    | G | 0.0192  |
| rs13070526  | C | -0.0214 |
| rs7651755   | A | -0.027  |
| rs150550873 | T | -0.1441 |
| rs3772958   | T | 0.0226  |
| rs62268439  | G | -0.0899 |
| rs80182049  | G | 0.0896  |
| rs6766287   | A | -0.0236 |
| rs790103    | C | 0.0207  |
| rs73238093  | A | -0.0404 |
| rs111787032 | T | -0.0816 |
| rs804488    | G | 0.0404  |
| rs6781075   | C | -0.0201 |
| rs1463581   | T | -0.0882 |
| rs77492401  | C | 0.0535  |
| rs140514639 | A | 0.105   |
| rs6439029   | G | -0.0203 |
| rs355748    | T | 0.0196  |
| rs79668694  | G | -0.0358 |
| rs74701911  | A | -0.0701 |
| rs57526667  | A | 0.0747  |
| rs6800812   | G | -0.0196 |
| rs6789500   | C | -0.0243 |
| rs74428138  | C | 0.1507  |
| rs12632158  | A | 0.0231  |
| rs2650158   | C | 0.02    |
| rs74499969  | T | -0.1098 |
| rs2715272   | G | -0.0194 |
| rs61135440  | G | 0.02    |
| rs62256366  | G | 0.0465  |
| rs1554536   | G | -0.0289 |
| rs11128331  | G | 0.051   |
| rs114243006 | G | 0.0992  |
| rs114583430 | A | -0.0593 |
| rs147829835 | A | -0.0743 |
| rs17250983  | C | 0.1104  |
| rs73084153  | C | -0.1316 |
| rs139232605 | G | -0.0894 |
| rs77323078  | T | 0.0709  |
| rs9833932   | T | -0.0203 |
| rs12496107  | G | 0.0424  |
| rs9883652   | A | 0.0307  |

|             |   |         |
|-------------|---|---------|
| rs35804158  | G | -0.0956 |
| rs78122882  | C | -0.0879 |
| rs62291419  | A | -0.0645 |
| rs145189161 | T | -0.1115 |
| rs79149481  | T | 0.0841  |
| rs116530281 | A | 0.101   |
| rs2680649   | T | -0.0243 |
| rs1441443   | C | 0.0221  |
| rs4429628   | C | -0.0307 |
| rs114741909 | T | 0.081   |
| rs35117404  | T | -0.0281 |
| rs13068745  | C | -0.0658 |
| rs72615630  | C | 0.019   |
| rs114888023 | T | 0.08    |
| rs11129420  | T | 0.0188  |
| rs959177    | A | -0.0205 |
| rs141495304 | T | -0.1053 |
| rs62249335  | A | -0.0306 |
| rs17204365  | C | -0.0607 |
| rs74868179  | A | -0.091  |
| rs148073401 | A | 0.0567  |
| rs62263288  | G | 0.0233  |
| rs75711833  | T | -0.1141 |
| rs78128847  | T | 0.086   |
| rs11926588  | T | -0.0211 |
| rs138558381 | C | 0.091   |
| rs9812218   | G | -0.0231 |
| rs2633846   | T | -0.0199 |
| rs35814051  | A | 0.0828  |
| rs73161445  | A | -0.0583 |
| rs73062597  | T | -0.0513 |
| rs115829709 | G | -0.1037 |
| rs17727500  | G | -0.056  |
| rs115301775 | A | -0.1246 |
| rs9682806   | A | -0.0363 |
| rs59494509  | T | -0.0829 |
| rs75166659  | C | 0.0726  |
| rs10049198  | C | -0.0186 |
| rs115336875 | G | 0.0336  |
| rs77590261  | T | 0.0585  |
| rs33767     | A | -0.0188 |
| rs6766190   | A | 0.0319  |
| rs55743308  | T | 0.0747  |
| rs13321431  | G | 0.02    |
| rs7627909   | C | -0.0219 |
| rs111607270 | G | 0.1088  |
| rs73875930  | T | 0.172   |

|             |   |         |
|-------------|---|---------|
| rs79048174  | A | 0.0283  |
| rs12637917  | T | -0.0445 |
| rs75714699  | A | 0.0949  |
| rs9842495   | A | 0.0252  |
| rs79740996  | A | 0.0781  |
| rs13059139  | T | 0.0231  |
| rs35966844  | G | 0.0326  |
| rs146375978 | A | 0.0889  |
| rs77493871  | A | -0.0895 |
| rs7649792   | A | -0.0311 |
| rs62274119  | C | -0.0217 |
| rs6774413   | T | 0.0317  |
| rs34776313  | G | -0.0196 |
| rs112051664 | G | 0.0393  |
| rs9867361   | G | 0.0204  |
| rs73074420  | C | 0.1077  |
| rs4539958   | A | 0.0217  |
| rs114210742 | C | 0.0651  |
| rs9815386   | C | -0.0424 |
| rs148449821 | A | 0.0939  |
| rs4894318   | A | -0.059  |
| rs62283594  | C | -0.1496 |
| rs710451    | C | 0.0186  |
| rs3852040   | A | 0.0198  |
| rs9756548   | C | -0.0206 |
| rs6766804   | A | -0.0217 |
| rs816324    | A | 0.0222  |
| rs9861775   | T | 0.035   |
| rs113469042 | A | 0.1008  |
| rs62295977  | T | 0.0714  |
| rs140898798 | A | 0.0798  |
| rs6444531   | C | 0.0188  |
| rs73812291  | A | -0.0673 |
| rs4073766   | C | -0.0269 |
| rs112550467 | T | 0.1214  |
| rs115416861 | T | 0.1018  |
| rs61109008  | G | 0.1392  |
| rs28420890  | T | 0.0293  |
| rs76021552  | T | 0.0548  |
| rs11716311  | T | -0.0425 |
| rs138136835 | T | -0.0867 |
| rs79070428  | A | 0.1551  |
| rs4129030   | A | -0.093  |
| rs7372419   | T | -0.0193 |
| rs9877409   | G | 0.0392  |
| rs2087760   | A | -0.0209 |
| rs143839898 | T | -0.1531 |

|             |   |         |
|-------------|---|---------|
| rs9829939   | C | 0.1354  |
| rs12632227  | G | 0.0289  |
| rs9864809   | T | 0.026   |
| rs9879115   | A | -0.0536 |
| rs6796653   | G | 0.0207  |
| rs111245771 | C | 0.0809  |
| rs2728054   | G | -0.0211 |
| rs73189518  | A | -0.0399 |
| rs78653114  | C | -0.0678 |
| rs9818754   | T | -0.0692 |
| rs6769575   | T | 0.0311  |
| rs1185783   | A | -0.0314 |
| rs360835    | C | 0.067   |
| rs28708759  | A | -0.0266 |
| rs116040676 | T | 0.1408  |
| rs76841323  | T | -0.0369 |
| rs62231952  | A | 0.085   |
| rs2948096   | A | 0.0258  |
| rs116706185 | G | 0.0627  |
| rs6776854   | C | 0.023   |
| rs115864368 | A | 0.1562  |
| rs73058090  | G | 0.0278  |
| rs201733    | A | -0.038  |
| rs55829669  | A | -0.0321 |
| rs73172100  | T | 0.1356  |
| rs56147262  | T | 0.0303  |
| rs6790714   | C | 0.0779  |
| rs57108027  | T | -0.0407 |
| rs73046116  | T | -0.0316 |
| rs77179554  | A | 0.1388  |
| rs6786428   | G | 0.0197  |
| rs35537505  | C | -0.0258 |
| rs3917109   | A | 0.0216  |
| rs4630922   | T | 0.0209  |
| rs12629626  | G | 0.1262  |
| rs34302291  | G | 0.0213  |
| rs4858654   | T | 0.0393  |
| rs11706688  | G | 0.022   |
| rs9882272   | G | 0.1034  |
| rs1388554   | C | -0.0237 |
| rs17324031  | A | -0.0559 |
| rs79925236  | A | 0.0906  |
| rs7649794   | C | -0.0217 |
| rs138925884 | A | -0.069  |
| rs147196130 | A | -0.0378 |
| rs73226618  | A | -0.0229 |
| rs4681529   | T | -0.0247 |

|             |   |         |
|-------------|---|---------|
| rs117191275 | A | 0.0994  |
| rs9877241   | A | -0.0257 |
| rs2676850   | G | 0.0317  |
| rs74344033  | T | -0.0374 |
| rs11920026  | G | -0.0522 |
| rs115729594 | A | 0.0641  |
| rs11710505  | A | 0.044   |
| rs73226617  | A | 0.0397  |
| rs77416692  | T | 0.1045  |
| rs73023699  | A | -0.0291 |
| rs76161750  | A | 0.1022  |
| rs17040736  | T | -0.0308 |
| rs62244491  | T | 0.0709  |
| rs78129605  | G | -0.0529 |
| rs80150118  | C | -0.0519 |
| rs79547297  | A | 0.078   |
| rs111420768 | C | 0.0538  |
| rs116591211 | A | 0.0864  |
| rs9818236   | C | -0.0241 |
| rs114660873 | A | -0.0794 |
| rs1972454   | G | 0.0242  |
| rs16829268  | C | 0.0294  |
| rs143830892 | T | -0.0775 |
| rs17050538  | C | 0.0905  |
| rs7649924   | G | -0.0405 |
| rs139713831 | C | -0.0826 |
| rs1843307   | A | -0.0943 |
| rs10935999  | T | -0.0375 |
| rs9815361   | C | -0.0331 |
| rs58816423  | C | 0.0278  |
| rs114818993 | T | -0.1546 |
| rs75000016  | T | 0.1115  |
| rs76950963  | C | -0.0616 |
| rs769773    | T | -0.0364 |
| rs35499009  | G | -0.0782 |
| rs111481173 | T | 0.0904  |
| rs1154398   | G | 0.0241  |
| rs73170809  | A | 0.0468  |
| rs112129485 | T | -0.0321 |
| rs35471660  | G | -0.0662 |
| rs115900970 | C | -0.145  |
| rs13320859  | A | -0.0744 |
| rs115681675 | G | -0.0568 |
| rs146655308 | A | 0.0698  |
| rs147819398 | C | -0.1525 |
| rs150062338 | T | 0.1043  |
| rs7623367   | C | 0.0366  |

|             |   |         |
|-------------|---|---------|
| rs73209296  | T | -0.0214 |
| rs1106333   | A | -0.0441 |
| rs55905671  | G | 0.1255  |
| rs56234550  | C | -0.0431 |
| rs5850552   | G | 0.1087  |
| rs112495258 | G | 0.0314  |
| rs9311855   | T | 0.0193  |
| rs13089213  | T | -0.0795 |
| rs72947888  | T | -0.0419 |
| rs62265759  | C | -0.0411 |
| rs1355467   | T | 0.0189  |
| rs6771733   | G | 0.0738  |
| rs17680962  | A | 0.0867  |
| rs17535700  | T | 0.1533  |
| rs704408    | A | 0.0359  |
| rs62275088  | T | -0.0345 |
| rs57491367  | C | 0.0624  |
| rs11709562  | T | 0.0233  |
| rs79621767  | T | 0.0628  |
| rs4927995   | T | 0.0196  |
| rs73147837  | C | -0.0337 |
| rs6444082   | T | 0.0227  |
| rs6764719   | G | 0.0395  |
| rs3923401   | A | -0.0311 |
| rs4974114   | A | 0.0196  |
| rs1447974   | T | 0.0186  |
| rs7636400   | G | 0.0274  |
| rs62231805  | A | -0.0311 |
| rs1121335   | A | 0.0323  |
| rs114474422 | G | -0.0501 |
| rs1552321   | T | 0.0224  |
| rs77637329  | A | 0.0778  |
| rs141222704 | C | -0.0766 |
| rs115799471 | A | 0.0648  |
| rs79223249  | G | -0.1235 |
| rs9847700   | T | -0.0296 |
| rs142461293 | A | -0.0927 |
| rs61796041  | G | -0.0476 |
| rs116129564 | G | 0.0653  |
| rs114368564 | A | -0.0983 |
| rs113516490 | A | 0.0736  |
| rs75133071  | A | -0.035  |
| rs13066695  | C | -0.0197 |
| rs112699056 | T | 0.0841  |
| rs113357574 | C | -0.0695 |
| rs145045934 | C | -0.0869 |
| rs6768234   | T | -0.0413 |

|             |   |         |
|-------------|---|---------|
| rs115206457 | A | -0.0969 |
| rs115655066 | G | -0.0728 |
| rs11707482  | A | 0.021   |
| rs13071625  | G | 0.0184  |
| rs78747978  | G | 0.0965  |
| rs115402043 | G | -0.113  |
| rs6583203   | C | -0.0226 |
| rs41289640  | T | 0.0755  |
| rs78134574  | T | 0.1083  |
| rs149879249 | A | 0.1166  |
| rs73061461  | C | -0.0487 |
| rs56207885  | G | -0.1295 |
| rs17703851  | C | -0.0306 |
| rs115097097 | A | 0.1292  |
| rs149939949 | G | 0.1117  |
| rs115129510 | A | -0.104  |
| rs79747308  | T | 0.1317  |
| rs73210702  | A | 0.1051  |
| rs2271077   | T | -0.039  |
| rs77446650  | G | -0.0626 |
| rs1983164   | A | 0.0805  |
| rs4496490   | G | 0.0182  |
| rs74905890  | G | 0.0605  |
| rs4677652   | T | -0.0191 |
| rs4680722   | T | 0.0352  |
| rs1711560   | G | -0.0192 |
| rs80001589  | T | 0.0215  |
| rs1456921   | A | 0.0523  |
| rs57697772  | A | -0.0274 |
| rs62269634  | G | -0.1293 |
| rs12487782  | C | 0.0342  |
| rs1708460   | A | 0.1033  |
| rs6439127   | A | 0.0312  |
| rs149473233 | A | -0.1147 |
| rs78057845  | C | -0.1271 |
| rs75213881  | C | 0.0745  |
| rs3796336   | C | -0.0227 |
| rs17037831  | T | 0.0343  |
| rs77324926  | G | 0.0655  |
| rs12487032  | A | -0.0184 |
| rs76254503  | C | -0.0358 |
| rs56035217  | A | -0.0515 |
| rs73048524  | C | 0.0767  |
| rs77521636  | C | 0.1013  |
| rs2162616   | T | 0.0207  |
| rs114508675 | G | -0.0801 |
| rs116187795 | T | 0.1069  |



|             |   |         |
|-------------|---|---------|
| rs35650984  | G | 0.0291  |
| rs11711094  | T | -0.1715 |
| rs4955865   | T | -0.0201 |
| rs10511003  | C | 0.0211  |
| rs56828191  | T | 0.0444  |
| rs7649081   | G | 0.0339  |
| rs56176071  | G | -0.049  |
| rs816545    | T | -0.1334 |
| rs13080850  | A | 0.027   |
| rs13314141  | G | -0.0359 |
| rs56344891  | C | 0.0534  |
| rs71322413  | T | 0.0475  |
| rs114937292 | C | 0.1698  |
| rs992431    | A | -0.0205 |
| rs2895421   | T | -0.0211 |
| rs9851154   | G | -0.0209 |
| rs115413962 | C | 0.0726  |
| rs78990902  | A | -0.0551 |
| rs35295365  | C | -0.0971 |
| rs73082667  | A | 0.0688  |
| rs1147707   | T | -0.0235 |
| rs62288210  | C | -0.0787 |
| rs145932805 | A | 0.08    |
| rs12629160  | T | 0.0927  |
| rs55734371  | C | -0.0388 |
| rs213330    | G | 0.0323  |
| rs76719063  | A | 0.0556  |
| rs112356039 | T | 0.0783  |
| rs146075396 | C | -0.1184 |
| rs1928564   | A | 0.0185  |
| rs145112344 | G | -0.098  |
| rs111536330 | A | 0.1351  |
| rs4143286   | A | -0.0521 |
| rs78748807  | G | 0.1471  |
| rs150149890 | T | -0.0795 |
| rs73183615  | A | -0.0363 |
| rs112846979 | T | -0.0699 |
| rs140127989 | A | 0.0683  |
| rs17042797  | G | 0.0351  |
| rs116425116 | G | -0.0908 |
| rs12633677  | T | -0.0415 |
| rs2339726   | C | 0.0572  |
| rs787837    | C | 0.0227  |
| rs80077930  | A | 0.0743  |
| rs6801896   | C | 0.0203  |
| rs73027471  | A | -0.0555 |
| rs143891133 | G | -0.0628 |

|             |   |         |
|-------------|---|---------|
| rs148546313 | C | 0.0524  |
| rs7625511   | A | -0.0221 |
| rs17203666  | T | -0.0339 |
| rs75173336  | A | 0.0763  |
| rs4370047   | T | -0.0187 |
| rs76900383  | C | -0.075  |
| rs78543060  | T | 0.0436  |
| rs6771583   | A | 0.0324  |
| rs116555012 | T | -0.0759 |
| rs12489418  | G | 0.0269  |
| rs76516803  | T | 0.0813  |
| rs61305390  | G | -0.0985 |
| rs55976752  | G | -0.0388 |
| rs76156048  | G | 0.098   |
| rs815444    | T | -0.0213 |
| rs11130871  | C | 0.0344  |
| rs137984314 | G | -0.1076 |
| rs145053049 | G | 0.0803  |
| rs73018780  | C | -0.0203 |
| rs11712654  | G | 0.024   |
| rs80016009  | G | -0.0879 |
| rs11129355  | C | -0.0187 |
| rs72976474  | T | 0.0406  |
| rs79738020  | G | 0.0652  |
| rs17029848  | T | 0.0389  |
| rs115521448 | T | 0.0792  |
| rs58341809  | T | -0.0393 |
| rs6767154   | T | 0.0655  |
| rs704440    | A | -0.0348 |
| rs9837363   | T | -0.021  |
| rs148696302 | A | -0.0791 |
| rs114895876 | G | 0.1049  |
| rs17066673  | T | -0.0509 |
| rs114389071 | G | -0.061  |
| rs41465652  | G | 0.0287  |
| rs1198109   | A | -0.0272 |
| rs116748097 | T | -0.1044 |
| rs9859731   | A | 0.0197  |
| rs6779099   | T | 0.0321  |
| rs869889    | A | 0.0306  |
| rs9852609   | T | 0.0206  |
| rs73098536  | G | 0.0347  |
| rs78271199  | G | -0.0476 |
| rs112940717 | G | 0.0869  |
| rs6806401   | G | 0.038   |
| rs7631720   | C | -0.0201 |
| rs774764    | A | 0.0184  |

|             |   |         |
|-------------|---|---------|
| rs58071899  | A | -0.0252 |
| rs71323881  | T | -0.1636 |
| rs28467468  | C | -0.0199 |
| rs60596776  | A | 0.0954  |
| rs116776798 | G | 0.0606  |
| rs9849175   | A | -0.0248 |
| rs138271381 | A | 0.0685  |
| rs184653    | C | -0.0208 |
| rs148728755 | T | -0.0506 |
| rs62241189  | A | 0.0264  |
| rs11130764  | A | 0.0668  |
| rs62266490  | G | 0.1041  |
| rs142522854 | C | -0.1358 |
| rs114171977 | C | 0.09    |
| rs34969227  | T | -0.0515 |
| rs11928846  | G | -0.0289 |
| rs112137479 | A | -0.0799 |
| rs112416390 | T | 0.0686  |
| rs147405323 | C | 0.1035  |
| rs114377420 | C | -0.1564 |
| rs6779518   | A | -0.0194 |
| rs7626608   | G | 0.0279  |
| rs74901453  | G | -0.0511 |
| rs148170026 | C | -0.1184 |
| rs148267697 | A | 0.1815  |
| rs138834731 | C | -0.1142 |
| rs6438472   | A | 0.0228  |
| rs6766361   | A | 0.0214  |
| rs9647370   | A | 0.0601  |
| rs823521    | C | -0.0234 |
| rs342005    | T | 0.0298  |
| rs237861    | G | 0.03    |
| rs62252602  | T | 0.0231  |
| rs74551788  | T | -0.0524 |
| rs35590815  | T | -0.0672 |
| rs16842233  | C | -0.0376 |
| rs9845578   | C | 0.0956  |
| rs138104140 | A | -0.0486 |
| rs78111618  | A | -0.025  |
| rs7372391   | C | 0.0265  |
| rs76467849  | T | 0.0832  |
| rs115877989 | A | -0.0304 |
| rs62239494  | A | -0.0569 |
| rs780372    | T | 0.0202  |
| rs147411617 | G | 0.1378  |
| rs2934085   | G | -0.0182 |
| rs4857241   | T | -0.0229 |

|             |   |         |
|-------------|---|---------|
| rs7622522   | G | 0.0277  |
| rs115927408 | A | 0.1257  |
| rs79786780  | G | 0.0744  |
| rs116706309 | G | 0.0599  |
| rs115231355 | G | -0.0965 |
| rs6783724   | T | 0.0416  |
| rs597437    | C | 0.0196  |
| rs60759545  | C | 0.0809  |
| rs4928008   | G | -0.0813 |
| rs11712577  | C | 0.0189  |
| rs10460829  | T | -0.0245 |
| rs1551274   | A | 0.0448  |
| rs115480358 | A | 0.0784  |
| rs141547385 | C | -0.0995 |
| rs9883556   | C | 0.0202  |
| rs6781149   | G | 0.0353  |
| rs74783361  | G | -0.1286 |
| rs73211607  | A | 0.1284  |
| rs9809098   | A | 0.048   |
| rs75319570  | T | -0.195  |
| rs56885324  | T | 0.0396  |
| rs62250268  | T | 0.053   |
| rs80058470  | A | -0.0899 |
| rs6770630   | C | -0.0192 |
| rs72916513  | T | -0.0647 |
| rs144357130 | G | -0.0628 |
| rs146170086 | T | 0.1369  |
| rs78872616  | A | 0.1134  |
| rs116768603 | G | 0.0902  |
| rs3851985   | G | 0.0774  |
| rs113881914 | A | -0.0508 |
| rs144474247 | G | -0.1167 |
| rs147141057 | T | 0.1389  |
| rs1515653   | A | -0.0259 |
| rs9871810   | C | 0.1543  |
| rs113054451 | C | 0.0944  |
| rs74738376  | G | -0.0664 |
| rs1242076   | T | 0.0181  |
| rs138692866 | G | 0.103   |
| rs1516364   | C | -0.034  |
| rs72920940  | G | 0.0799  |
| rs34089258  | G | 0.0762  |
| rs9839534   | A | 0.0272  |
| rs4680471   | T | -0.0182 |
| rs17060799  | G | 0.0682  |
| rs115604299 | G | -0.1116 |
| rs6780122   | A | -0.0211 |

|             |   |         |
|-------------|---|---------|
| rs80155909  | C | 0.0904  |
| rs112707083 | T | 0.0763  |
| rs13077076  | A | -0.022  |
| rs62244111  | G | 0.0192  |
| rs12490038  | T | 0.0678  |
| rs76762478  | A | -0.0824 |
| rs73229935  | T | -0.0363 |
| rs4245899   | C | -0.0493 |
| rs76889032  | G | 0.1313  |
| rs4974389   | G | 0.0179  |
| rs73022370  | G | 0.0541  |
| rs75665702  | T | 0.0693  |
| rs7651722   | G | 0.054   |
| rs62286620  | A | -0.0502 |
| rs114906327 | A | -0.0643 |
| rs2455806   | A | -0.0212 |
| rs10934067  | C | 0.0245  |
| rs73147840  | T | -0.0426 |
| rs58824769  | G | 0.0414  |
| rs114288504 | G | -0.1072 |
| rs78038776  | T | -0.1046 |
| rs34884284  | G | 0.0242  |
| rs77745942  | T | 0.0418  |
| rs145619263 | A | 0.0712  |
| rs41291189  | G | 0.0559  |
| rs150028486 | T | -0.0997 |
| rs339012    | T | 0.0223  |
| rs6443192   | T | -0.0191 |
| rs6808313   | G | 0.0978  |
| rs80158512  | G | -0.0774 |
| rs4855044   | A | -0.0303 |
| rs62297188  | T | 0.0221  |
| rs1059380   | C | 0.0211  |
| rs377521    | A | 0.0187  |
| rs56321196  | A | 0.0638  |
| rs9837753   | T | 0.0347  |
| rs144276312 | T | 0.0903  |
| rs9855624   | A | -0.0179 |
| rs76154223  | C | -0.0939 |
| rs59191645  | A | -0.1531 |
| rs138741635 | A | -0.0873 |
| rs35206740  | T | 0.0234  |
| rs113269748 | C | 0.1122  |
| rs114252913 | C | 0.0998  |
| rs4420807   | C | 0.0226  |
| rs2350489   | T | 0.0546  |
| rs113789865 | C | 0.0445  |

|             |   |         |
|-------------|---|---------|
| rs12496659  | T | -0.0229 |
| rs3930233   | C | 0.0192  |
| rs78846587  | G | 0.0668  |
| rs815468    | C | 0.0258  |
| rs1996107   | G | 0.0509  |
| rs17204079  | C | -0.0376 |
| rs75710075  | C | -0.0674 |
| rs17778109  | T | -0.0206 |
| rs12494289  | T | 0.0729  |
| rs115827020 | G | -0.098  |
| rs1688397   | C | 0.1301  |
| rs144137599 | T | 0.1402  |
| rs1491730   | G | -0.0326 |
| rs7626041   | A | -0.1306 |
| rs344405    | G | -0.018  |
| rs146404484 | A | -0.0222 |
| rs71310508  | A | -0.0539 |
| rs10510491  | G | 0.0312  |
| rs1156513   | G | -0.0224 |
| rs4505693   | G | -0.019  |
| rs9878692   | A | 0.0182  |
| rs79287178  | A | -0.1109 |
| rs34856687  | C | -0.0516 |
| rs146631317 | T | -0.1095 |
| rs148675784 | C | -0.0976 |
| rs10934184  | C | 0.044   |
| rs11538698  | T | 0.0564  |
| rs75071200  | A | 0.0877  |
| rs378079    | C | -0.0713 |
| rs1505820   | A | -0.0196 |
| rs62239207  | C | 0.0323  |
| rs79013507  | T | 0.0564  |
| rs115607472 | A | -0.121  |
| rs142424113 | A | -0.127  |
| rs13065557  | T | -0.0335 |
| rs141573407 | A | -0.1237 |
| rs62265979  | T | 0.0822  |
| rs76549827  | T | 0.0458  |
| rs116571183 | G | -0.1118 |
| rs73016903  | C | -0.076  |
| rs113653490 | T | -0.1309 |
| rs149136248 | G | 0.1257  |
| rs73044589  | G | -0.0742 |
| rs13070678  | T | -0.0258 |
| rs1374868   | A | -0.0271 |
| rs1445076   | C | 0.0191  |
| rs78884727  | A | -0.0766 |

|             |   |         |
|-------------|---|---------|
| rs7633952   | C | -0.0201 |
| rs34827295  | G | -0.0366 |
| rs13089359  | T | 0.0461  |
| rs6806851   | C | 0.0238  |
| rs7644984   | C | 0.0781  |
| rs2728051   | G | 0.0648  |
| rs13091434  | C | -0.0239 |
| rs73184698  | A | -0.0366 |
| rs443824    | A | -0.0329 |
| rs971866    | A | -0.0274 |
| rs73175287  | A | 0.0824  |
| rs266747    | A | -0.0799 |
| rs7611182   | T | 0.0285  |
| rs139747470 | C | 0.1351  |
| rs6763648   | C | 0.0183  |
| rs9838676   | A | -0.1523 |
| rs12493388  | A | 0.0412  |
| rs12494660  | T | -0.0201 |
| rs4498004   | A | -0.0194 |
| rs79233583  | A | -0.0858 |
| rs77386419  | A | 0.1111  |
| rs9854083   | G | -0.0219 |
| rs7617321   | G | -0.0366 |
| rs140691187 | A | 0.1392  |
| rs12494287  | T | -0.0421 |
| rs7611336   | A | -0.0237 |
| rs7640436   | T | 0.0191  |
| rs4894305   | A | 0.0444  |
| rs6788836   | G | -0.0256 |
| rs112674696 | A | -0.0794 |
| rs1427782   | A | 0.0255  |
| rs79724978  | T | -0.092  |
| rs114692464 | G | -0.0916 |
| rs1123429   | A | -0.0237 |
| rs75337882  | G | 0.0465  |
| rs2581210   | C | 0.0186  |
| rs6550309   | G | -0.052  |
| rs61401139  | A | -0.0248 |
| rs59746567  | G | 0.075   |
| rs7426777   | G | 0.0306  |
| rs1355547   | T | -0.0224 |
| rs116612986 | A | 0.0777  |
| rs116509368 | G | -0.075  |
| rs34251104  | G | 0.0344  |
| rs73168804  | C | 0.1432  |
| rs79592528  | T | -0.0283 |
| rs76008532  | G | 0.0861  |

|             |   |         |
|-------------|---|---------|
| rs114947633 | G | 0.1285  |
| rs57854291  | C | -0.0841 |
| rs6792514   | C | 0.0183  |
| rs111614603 | C | -0.1092 |
| rs1402457   | A | -0.0458 |
| rs72977016  | T | 0.1225  |
| rs12054078  | A | -0.0216 |
| rs2472676   | T | -0.0466 |
| rs9852711   | T | -0.1295 |
| rs34960505  | A | 0.1102  |
| rs2686065   | G | 0.0208  |
| rs5013265   | C | -0.0234 |
| rs11709534  | A | -0.0182 |
| rs114134610 | A | -0.1153 |
| rs7638055   | G | -0.0242 |
| rs113317860 | G | 0.0597  |
| rs111704353 | T | 0.1276  |
| rs75925276  | A | -0.0913 |
| rs71626840  | A | 0.0318  |
| rs74564767  | A | -0.071  |
| rs75285408  | T | -0.0315 |
| rs13075345  | G | -0.1676 |
| rs304820    | T | -0.0203 |
| rs77266689  | T | 0.1003  |
| rs3731143   | G | -0.0372 |
| rs79125687  | G | -0.0921 |
| rs4677869   | T | -0.0289 |
| rs237865    | C | -0.0219 |
| rs13095267  | G | 0.0319  |
| rs13078402  | A | -0.0424 |
| rs17634797  | A | 0.0269  |
| rs62243788  | A | 0.0465  |
| rs142316462 | G | 0.0731  |
| rs12631460  | C | 0.0192  |
| rs13068514  | C | 0.0429  |
| rs112587347 | G | -0.0334 |
| rs9839015   | T | 0.0361  |
| rs150521660 | T | -0.0853 |
| rs75329743  | T | -0.1152 |
| rs79835389  | A | -0.0425 |
| rs11923454  | T | -0.0232 |
| rs13082403  | T | -0.0185 |
| rs6577596   | C | -0.0199 |
| rs73192201  | A | 0.1083  |
| rs76038936  | G | 0.1153  |
| rs74716230  | G | -0.0554 |
| rs116790264 | T | 0.0777  |



|             |   |         |
|-------------|---|---------|
| rs77000951  | T | -0.169  |
| rs75352249  | A | 0.0272  |
| rs6783721   | T | 0.0287  |
| rs13071462  | C | -0.0182 |
| rs17034765  | T | -0.0478 |
| rs137909131 | G | -0.096  |
| rs112131612 | T | 0.0643  |
| rs12491987  | T | 0.0427  |
| rs75740746  | T | 0.1218  |
| rs6808750   | G | -0.0179 |
| rs114452734 | G | -0.1539 |
| rs74839185  | C | -0.0504 |
| rs4393871   | T | 0.0219  |
| rs7630650   | T | -0.0213 |
| rs73039703  | G | 0.0761  |
| rs78008228  | T | -0.082  |
| rs116055215 | G | -0.1405 |
| rs35228125  | A | -0.0178 |
| rs9851897   | C | -0.0309 |
| rs150594815 | T | 0.08    |
| rs116535222 | T | -0.0959 |
| rs4677809   | C | -0.0204 |
| rs13064158  | G | 0.0224  |
| rs140491427 | C | -0.0721 |
| rs6442790   | A | -0.0195 |
| rs4687301   | T | -0.0332 |
| rs41380744  | G | -0.0728 |
| rs149198439 | C | 0.1096  |
| rs17734184  | G | -0.0253 |
| rs62282423  | G | 0.0999  |
| rs34322765  | T | -0.0961 |
| rs35760758  | G | -0.035  |
| rs114300800 | A | -0.1069 |
| rs6549431   | A | -0.0347 |
| rs62276234  | T | 0.0536  |
| rs79502143  | A | 0.065   |
| rs4431608   | G | 0.1097  |
| rs62242806  | C | 0.0471  |
| rs17807531  | C | -0.0337 |
| rs73858413  | A | -0.0334 |
| rs75004845  | T | -0.1249 |
| rs4856681   | A | -0.0744 |
| rs9842024   | A | -0.0339 |
| rs56889675  | G | -0.0274 |
| rs13321577  | T | -0.0186 |
| rs115806593 | T | 0.0797  |
| rs62278926  | T | 0.0191  |

|             |   |         |
|-------------|---|---------|
| rs76983141  | C | 0.0809  |
| rs28569266  | T | 0.033   |
| rs75559589  | T | -0.0474 |
| rs6773857   | T | 0.0454  |
| rs16829102  | C | 0.0348  |
| rs719775    | T | 0.0228  |
| rs78452316  | G | 0.093   |
| rs73163839  | T | 0.0672  |
| rs62281933  | A | -0.066  |
| rs16833234  | T | -0.0241 |
| rs74700678  | T | 0.0727  |
| rs17200503  | T | 0.0666  |
| rs73174347  | C | 0.0288  |
| rs6784363   | G | 0.0183  |
| rs7618485   | C | 0.0554  |
| rs77499851  | T | -0.1013 |
| rs139008567 | T | -0.0976 |
| rs992844    | C | 0.0199  |
| rs145290654 | A | 0.1092  |
| rs59231345  | T | -0.0342 |
| rs59511233  | G | 0.0305  |
| rs72624879  | C | 0.043   |
| rs73149969  | C | -0.0956 |
| rs113714999 | G | 0.0883  |
| rs62233870  | C | -0.1014 |
| rs114839533 | G | 0.1634  |
| rs13068339  | T | 0.0184  |
| rs73238856  | C | -0.0274 |
| rs116356943 | A | 0.0966  |
| rs140612159 | A | 0.072   |
| rs112150943 | G | 0.1069  |
| rs9869341   | G | -0.0181 |
| rs9881656   | C | 0.0228  |
| rs7639794   | C | 0.0181  |
| rs142764252 | C | 0.1058  |
| rs59219532  | T | -0.0645 |
| rs71310560  | G | -0.0725 |
| rs67649290  | A | 0.1252  |
| rs148515221 | T | -0.1898 |
| rs6797518   | T | -0.0256 |
| rs141269676 | C | -0.1627 |
| rs4955867   | C | 0.0235  |
| rs9849387   | A | -0.0199 |
| rs163469    | A | -0.0182 |
| rs73099883  | G | -0.0886 |
| rs4681624   | A | 0.0181  |
| rs139890615 | G | 0.1097  |

|             |   |         |
|-------------|---|---------|
| rs140791381 | C | 0.0749  |
| rs2887961   | T | 0.0186  |
| rs79150283  | T | 0.0373  |
| rs17061302  | G | -0.0592 |
| rs77997898  | C | -0.0428 |
| rs2634111   | G | -0.0759 |
| rs114445681 | A | -0.0751 |
| rs7624325   | T | -0.1353 |
| rs79892952  | G | 0.1377  |
| rs793298    | T | -0.0283 |
| rs114921308 | G | -0.0678 |
| rs10511193  | T | 0.0375  |
| rs114996702 | T | 0.108   |
| rs2569944   | C | -0.0182 |
| rs115494841 | T | 0.122   |
| rs73153271  | G | 0.1363  |
| rs112004568 | G | -0.1108 |
| rs7429362   | G | -0.0289 |
| rs145711121 | A | 0.1053  |
| rs116327242 | C | -0.0544 |
| rs11714577  | A | -0.0317 |
| rs9866044   | C | -0.0811 |
| rs79187427  | G | 0.0709  |
| rs7640061   | A | -0.0322 |
| rs79992044  | T | -0.0971 |
| rs114276596 | T | -0.1791 |
| rs79319818  | T | 0.0871  |
| rs4478056   | T | -0.0532 |
| rs76998319  | G | 0.0601  |
| rs16888     | C | -0.0188 |
| rs75975944  | A | 0.0394  |
| rs16844073  | T | 0.0542  |
| rs9857590   | C | 0.0785  |
| rs6804527   | C | -0.0204 |
| rs17068286  | G | 0.0632  |
| rs73104113  | T | -0.027  |
| rs10934066  | A | 0.0243  |
| rs9848900   | G | 0.0198  |
| rs112578364 | A | 0.0627  |
| rs2862805   | C | -0.0249 |
| rs141902157 | G | 0.0679  |
| rs56177825  | A | -0.0539 |
| rs4508741   | T | 0.0781  |
| rs149555448 | T | 0.0669  |
| rs34431729  | G | -0.1213 |
| rs10511162  | C | -0.0303 |
| rs2177298   | G | -0.0177 |

|             |   |         |
|-------------|---|---------|
| rs12630921  | G | 0.0184  |
| rs62254528  | A | 0.0862  |
| rs73125942  | A | -0.0832 |
| rs7619728   | T | 0.0409  |
| rs75874426  | G | 0.1165  |
| rs71324613  | A | 0.0769  |
| rs9832075   | T | 0.0291  |
| rs140423875 | A | 0.0978  |
| rs12635649  | A | 0.0203  |
| rs115700017 | A | 0.0663  |
| rs6801640   | C | -0.0269 |
| rs16863390  | C | 0.0882  |
| rs1499626   | G | -0.0259 |
| rs9883288   | A | -0.0356 |
| rs9851131   | G | 0.0908  |
| rs7430785   | A | -0.0195 |
| rs340298    | A | -0.0331 |
| rs58175598  | C | -0.0431 |
| rs115530719 | G | 0.0923  |
| rs143023208 | T | 0.0379  |
| rs1038828   | G | 0.0195  |
| rs6799146   | C | 0.0242  |
| rs143732198 | A | -0.0999 |
| rs143748949 | G | -0.0997 |
| rs114522993 | A | -0.0724 |
| rs78825283  | A | -0.0715 |
| rs77866941  | T | -0.0947 |
| rs150740149 | G | 0.0583  |
| rs772904    | T | 0.0593  |
| rs73066088  | A | -0.0317 |
| rs115365864 | C | -0.0779 |
| rs148214971 | C | 0.0836  |
| rs147721442 | C | -0.0902 |
| rs9862745   | T | 0.0269  |
| rs76486833  | A | 0.0865  |
| rs141235065 | T | -0.1401 |
| rs76990202  | A | 0.0777  |
| rs4679393   | T | -0.019  |
| rs12491608  | T | 0.0336  |
| rs147302846 | A | -0.0837 |
| rs72975185  | C | -0.0516 |
| rs7613691   | G | -0.0367 |
| rs10513446  | T | -0.0938 |
| rs9852850   | A | 0.0182  |
| rs73207258  | T | 0.0534  |
| rs17497424  | C | -0.0734 |
| rs34318769  | T | -0.0292 |

|             |   |         |
|-------------|---|---------|
| rs149086678 | T | -0.077  |
| rs808887    | T | 0.0243  |
| rs143772853 | G | -0.1006 |
| rs74564367  | C | 0.0589  |
| rs7617620   | C | 0.0192  |
| rs116456017 | A | 0.1055  |
| rs73057530  | C | 0.0378  |
| rs73118209  | C | 0.026   |
| rs1880666   | T | -0.0241 |
| rs1145133   | A | -0.019  |
| rs113249344 | T | -0.1274 |
| rs144928561 | T | 0.1707  |
| rs75698572  | G | -0.0489 |
| rs62261240  | G | -0.0414 |
| rs6771393   | T | -0.0258 |
| rs6443183   | C | -0.0231 |
| rs114528255 | T | -0.1243 |
| rs115427393 | A | 0.0835  |
| rs17200418  | T | 0.0286  |
| rs78555585  | G | 0.0973  |
| rs1154352   | A | -0.0204 |
| rs12487562  | C | 0.0198  |
| rs61045247  | G | -0.0237 |
| rs147866258 | A | 0.0791  |
| rs113146162 | A | -0.0263 |
| rs56390388  | T | -0.0363 |
| rs73186274  | A | -0.0583 |
| rs78110506  | T | -0.067  |
| rs6802119   | C | -0.0209 |
| rs111837653 | T | -0.0493 |
| rs13316722  | A | 0.0554  |
| rs77584659  | C | 0.0348  |
| rs114170084 | T | 0.0921  |
| rs5012306   | C | -0.0241 |
| rs2933293   | A | 0.019   |
| rs75787223  | A | 0.056   |
| rs114161027 | T | -0.0709 |
| rs1195354   | G | 0.0264  |
| rs144250644 | C | -0.0698 |
| rs141760472 | T | 0.1391  |
| rs1370807   | T | -0.0198 |
| rs73190535  | G | 0.0737  |
| rs73043824  | A | -0.1116 |
| rs6802103   | T | -0.0222 |
| rs28377166  | T | -0.0178 |
| rs12490823  | T | 0.0194  |
| rs62251632  | C | 0.0485  |

|             |   |         |
|-------------|---|---------|
| rs2466367   | T | -0.02   |
| rs7618000   | T | 0.0735  |
| rs11128329  | T | -0.0268 |
| rs116314079 | T | 0.0713  |
| rs78229792  | A | -0.0595 |
| rs3755784   | T | -0.018  |
| rs149298961 | G | -0.0823 |
| rs13070749  | A | 0.0679  |
| rs114594532 | G | -0.0558 |
| rs79720404  | T | -0.0602 |
| rs6771976   | C | -0.0211 |
| rs35838222  | C | -0.0485 |
| rs142245870 | C | 0.0445  |
| rs115345454 | C | -0.0884 |
| rs75237561  | G | -0.1124 |
| rs78523115  | G | -0.044  |
| rs79623967  | T | -0.1029 |
| rs4858856   | G | 0.0184  |
| rs62275048  | T | -0.032  |
| rs111314352 | A | -0.0966 |
| rs1426268   | C | -0.0522 |
| rs4688384   | C | 0.019   |
| rs112579309 | A | 0.0893  |
| rs115195218 | G | -0.0894 |
| rs2043172   | C | -0.0201 |
| rs115565242 | A | 0.0503  |
| rs75172644  | G | 0.0577  |
| rs16833059  | A | 0.0894  |
| rs62232724  | G | 0.1106  |
| rs11714779  | A | -0.0514 |
| rs142962560 | A | 0.0779  |
| rs138304930 | A | 0.0729  |
| rs9848225   | C | -0.0948 |
| rs9845292   | A | 0.0235  |
| rs17017332  | G | 0.0195  |
| rs60509885  | A | -0.075  |
| rs9758910   | T | 0.0418  |
| rs7648184   | A | -0.0242 |
| rs355091    | A | -0.0203 |
| rs11927566  | G | -0.0286 |
| rs73066579  | A | -0.0405 |
| rs115697668 | C | -0.1117 |
| rs6776639   | T | -0.0728 |
| rs80002357  | A | 0.0463  |
| rs11716652  | T | 0.0333  |
| rs7639915   | T | 0.0405  |
| rs73001422  | C | -0.0547 |

|             |   |         |
|-------------|---|---------|
| rs79551368  | G | -0.06   |
| rs510600    | A | 0.0201  |
| rs144206648 | A | -0.1084 |
| rs4684697   | G | 0.0206  |
| rs78253573  | A | 0.0491  |
| rs9846537   | G | 0.0787  |
| rs78870998  | C | -0.0347 |
| rs148674854 | C | -0.1019 |
| rs80259846  | A | -0.0287 |
| rs147300463 | A | -0.0829 |
| rs74827276  | C | -0.031  |
| rs140617877 | T | -0.0959 |
| rs74714043  | A | 0.0414  |
| rs9821235   | T | -0.0215 |
| rs13100619  | C | -0.0475 |
| rs2937667   | C | 0.0197  |
| rs79391931  | G | 0.0919  |
| rs76453411  | A | 0.0402  |
| rs62281888  | T | 0.0712  |
| rs79739277  | T | 0.0632  |
| rs4686007   | G | -0.022  |
| rs55991482  | A | -0.0331 |
| rs74980488  | T | 0.0627  |
| rs35516940  | G | 0.0183  |
| rs113226979 | G | 0.0583  |
| rs7634161   | C | 0.0508  |
| rs61224739  | A | -0.0235 |
| rs76879083  | A | -0.0715 |
| rs57625566  | T | -0.065  |
| rs4989600   | T | -0.0254 |
| rs9867896   | A | -0.0185 |
| rs13065105  | T | 0.0618  |
| rs2102600   | G | -0.07   |
| rs116612716 | A | -0.0884 |
| rs55914222  | C | 0.1058  |
| rs116071321 | G | 0.082   |
| rs11129334  | T | 0.0189  |
| rs7646323   | G | 0.0331  |
| rs78508766  | C | 0.1542  |
| rs6807272   | T | -0.0217 |
| rs115755006 | A | -0.0768 |
| rs112853131 | C | -0.1504 |
| rs11718656  | C | 0.022   |
| rs922939    | C | 0.0186  |
| rs74663623  | A | -0.0767 |
| rs9823333   | T | 0.0193  |
| rs6809232   | G | -0.0219 |

|             |   |         |
|-------------|---|---------|
| rs116096620 | C | 0.0543  |
| rs79300081  | A | -0.0525 |
| rs2600303   | T | -0.0233 |
| rs79392008  | A | -0.0595 |
| rs35952860  | T | -0.0237 |
| rs57196392  | T | -0.077  |
| rs148108928 | A | 0.101   |
| rs11709095  | A | 0.0472  |
| rs9840529   | C | 0.0197  |
| rs62254553  | C | -0.0727 |
| rs116224712 | C | 0.0336  |
| rs1525907   | T | -0.0205 |
| rs66470677  | A | -0.0959 |
| rs150803229 | A | -0.0525 |
| rs149027411 | G | 0.0444  |
| rs139286069 | T | 0.1137  |
| rs115893269 | G | 0.1116  |
| rs7634510   | T | 0.0244  |
| rs34967585  | C | -0.0684 |
| rs16850685  | T | -0.0294 |
| rs4683189   | A | 0.018   |
| rs56222080  | T | 0.031   |
| rs78561610  | A | -0.0579 |
| rs145543541 | G | -0.0945 |
| rs35972249  | A | 0.0592  |
| rs16829751  | A | -0.1496 |
| rs2037477   | T | -0.0346 |
| rs1568790   | G | 0.0345  |
| rs55648835  | G | -0.0227 |
| rs1879784   | A | -0.0174 |
| rs77420664  | G | 0.0565  |
| rs3087463   | T | -0.0798 |
| rs112331282 | A | 0.0403  |
| rs6767919   | A | 0.0278  |
| rs6782275   | C | -0.0214 |
| rs2856034   | G | 0.0217  |
| rs114763134 | A | 0.1768  |
| rs141677042 | G | -0.1178 |
| rs3864079   | A | -0.0187 |
| rs9819003   | T | 0.0539  |
| rs139641211 | T | -0.0655 |
| rs936030    | C | 0.0241  |
| rs79355580  | G | 0.0378  |
| rs77419569  | T | 0.0764  |
| rs7640098   | A | 0.0233  |
| rs79246107  | C | -0.0529 |
| rs4058489   | A | 0.0695  |



|             |   |         |
|-------------|---|---------|
| rs139171320 | T | 0.0891  |
| rs4608738   | C | -0.0192 |
| rs76928788  | A | -0.118  |
| rs485395    | T | 0.0569  |
| rs10154918  | G | -0.019  |
| rs77265432  | C | -0.0399 |
| rs79138126  | G | -0.0963 |
| rs9832895   | T | 0.0181  |
| rs1105359   | T | 0.0216  |
| rs6801947   | C | 0.0683  |
| rs78906135  | G | 0.0489  |
| rs140476751 | G | 0.0559  |
| rs73035842  | C | -0.0423 |
| rs11720041  | T | 0.0245  |
| rs62260961  | A | -0.0414 |
| rs79677314  | T | -0.0739 |
| rs147227930 | A | -0.1311 |
| rs144329748 | A | -0.1102 |
| rs55764448  | T | -0.0234 |
| rs73026435  | C | 0.0975  |
| rs7653671   | A | 0.0403  |
| rs9873606   | G | 0.0236  |
| rs6792262   | G | 0.0575  |
| rs2461613   | A | -0.0223 |
| rs60277726  | T | -0.0374 |
| rs148790587 | C | 0.1057  |
| rs9882545   | G | -0.1082 |
| rs72928498  | A | 0.0384  |
| rs7646320   | A | -0.0572 |
| rs140761371 | A | -0.0935 |
| rs115763240 | T | -0.098  |
| rs73110408  | G | -0.161  |
| rs13065639  | G | 0.0641  |
| rs7650946   | A | 0.0221  |
| rs145269153 | A | 0.0887  |
| rs62230485  | T | 0.066   |
| rs113019214 | A | -0.0994 |
| rs73094641  | A | -0.0453 |
| rs55832201  | T | 0.0274  |
| rs3116549   | T | 0.021   |
| rs1812652   | A | 0.0336  |
| rs113920520 | T | -0.041  |
| rs2200233   | C | 0.0233  |
| rs73160194  | T | -0.0731 |
| rs113663906 | C | 0.0329  |
| rs12492706  | T | 0.1378  |
| rs150302038 | G | 0.1237  |

|             |   |         |
|-------------|---|---------|
| rs9830523   | C | -0.0518 |
| rs56151962  | C | 0.0494  |
| rs13086855  | T | -0.0238 |
| rs4686762   | C | 0.0214  |
| rs4012249   | A | 0.0182  |
| rs2005184   | G | 0.0195  |
| rs3732909   | C | -0.0414 |
| rs77159779  | G | 0.0714  |
| rs73105339  | T | 0.0793  |
| rs113164183 | C | -0.0452 |
| rs145604495 | A | -0.0664 |
| rs6781211   | G | 0.0413  |
| rs150868988 | C | 0.0733  |
| rs114248155 | G | 0.1158  |
| rs74482203  | C | 0.0991  |
| rs3867380   | G | -0.0197 |
| rs116267566 | G | 0.119   |
| rs79302089  | T | -0.1208 |
| rs73174345  | G | -0.0363 |
| rs74814345  | A | 0.0529  |
| rs1495364   | A | -0.0173 |
| rs75870922  | A | -0.0761 |
| rs1362959   | C | 0.0259  |
| rs142793717 | C | 0.0764  |
| rs56310584  | G | 0.0762  |
| rs28713505  | A | 0.034   |
| rs7641521   | T | 0.0192  |
| rs62284994  | A | 0.043   |
| rs4470496   | T | -0.0391 |
| rs148471600 | T | -0.082  |
| rs36096720  | A | -0.0775 |
| rs17245086  | A | -0.0195 |
| rs17756079  | G | 0.1072  |
| rs114812824 | G | 0.0904  |
| rs11918713  | A | 0.0896  |
| rs12491957  | T | 0.0467  |
| rs2708309   | T | -0.0193 |
| rs16863501  | C | 0.0201  |
| rs9819421   | C | 0.024   |
| rs62270321  | C | -0.0261 |
| rs55877951  | A | 0.1054  |
| rs115056875 | T | 0.0826  |
| rs390151    | T | 0.0194  |
| rs6800278   | G | 0.0213  |
| rs115005013 | C | -0.1027 |
| rs524772    | G | -0.0605 |
| rs79423178  | T | 0.0413  |

|             |   |         |
|-------------|---|---------|
| rs7615767   | G | -0.0252 |
| rs149071552 | G | 0.1046  |
| rs17195470  | A | 0.0468  |
| rs79464363  | G | -0.0602 |
| rs718451    | T | -0.0198 |
| rs150264635 | T | 0.0924  |
| rs62275111  | C | -0.0312 |
| rs7629505   | A | -0.0189 |
| rs78692972  | C | 0.1186  |
| rs143515510 | T | -0.0894 |
| rs73054265  | C | -0.0194 |
| rs150468541 | G | 0.1352  |
| rs4955714   | G | 0.0415  |
| rs73059296  | G | 0.0535  |
| rs149501796 | G | -0.0843 |
| rs266732    | T | -0.0605 |
| rs78331405  | A | -0.1278 |
| rs148030177 | A | -0.1128 |
| rs78489084  | A | -0.0865 |
| rs147076680 | T | 0.1466  |
| rs141167217 | A | -0.093  |
| rs149616715 | T | 0.0867  |
| rs755066    | A | 0.0183  |
| rs62263341  | G | -0.0593 |
| rs140897025 | G | -0.0818 |
| rs1873077   | C | 0.0223  |
| rs116456130 | C | 0.0734  |
| rs112373756 | T | -0.1485 |
| rs80081808  | C | 0.0976  |
| rs62273205  | C | -0.0253 |
| rs62265382  | C | -0.1366 |
| rs9862376   | T | 0.12    |
| rs35744784  | A | -0.0443 |
| rs11920349  | A | 0.0492  |
| rs13061321  | G | 0.0209  |
| rs139661145 | T | -0.1403 |
| rs62234562  | A | -0.1234 |
| rs3936110   | G | -0.024  |
| rs28659972  | A | 0.0658  |
| rs111789943 | T | 0.0833  |
| rs7613139   | T | -0.0266 |
| rs79102210  | T | -0.0408 |
| rs62238309  | T | -0.0174 |
| rs1553309   | G | 0.0173  |
| rs73111355  | A | -0.0499 |
| rs6789965   | A | 0.0712  |
| rs11718524  | C | 0.0756  |

|             |   |         |
|-------------|---|---------|
| rs115388973 | C | 0.0642  |
| rs9815931   | A | -0.0182 |
| rs79075526  | A | -0.1284 |
| rs73100528  | T | 0.031   |
| rs1908324   | T | 0.0193  |
| rs149336143 | A | 0.0948  |
| rs73008633  | A | 0.0656  |
| rs60207050  | A | -0.0909 |
| rs150066664 | T | 0.0672  |
| rs79435363  | C | -0.0777 |
| rs34488868  | A | 0.073   |
| rs76298913  | A | 0.1112  |
| rs2461807   | G | 0.0468  |
| rs146267620 | C | 0.1103  |
| rs213358    | T | 0.0308  |
| rs2653317   | G | -0.0359 |
| rs78065923  | C | 0.0388  |
| rs62244051  | G | 0.0882  |
| rs116370741 | T | 0.077   |
| rs73178166  | A | 0.0829  |
| rs2306879   | G | 0.019   |
| rs9861301   | G | -0.065  |
| rs4685713   | C | -0.0239 |
| rs2730350   | C | 0.019   |
| rs79264518  | A | -0.0703 |
| rs78524752  | A | -0.0584 |
| rs74745679  | C | 0.0264  |
| rs9863207   | A | 0.0245  |
| rs3755768   | A | 0.0289  |
| rs149530731 | A | -0.1505 |
| rs78278382  | C | 0.0779  |
| rs62255683  | A | 0.0804  |
| rs75383699  | T | 0.1223  |
| rs8177325   | C | -0.0949 |
| rs17035509  | A | 0.0294  |
| rs12636868  | T | 0.0179  |
| rs80273873  | C | -0.127  |
| rs57591288  | C | 0.0207  |
| rs113719672 | A | -0.0919 |
| rs745939    | G | -0.0769 |
| rs73040220  | G | -0.104  |
| rs17777828  | G | -0.0369 |
| rs76667849  | T | 0.0844  |
| rs9847000   | G | -0.0191 |
| rs2399118   | A | -0.0547 |
| rs76481129  | C | -0.0901 |
| rs1347059   | C | 0.0359  |

|             |   |         |
|-------------|---|---------|
| rs9865774   | G | -0.0191 |
| rs17273013  | T | -0.1129 |
| rs2242494   | A | 0.0306  |
| rs115894449 | T | -0.0687 |
| rs77021151  | A | -0.0682 |
| rs596828    | G | 0.1344  |
| rs115686967 | T | -0.0934 |
| rs701109    | T | -0.0182 |
| rs4688266   | C | 0.0209  |
| rs151178105 | T | 0.0515  |
| rs139923004 | T | -0.0768 |
| rs144504429 | T | 0.0889  |
| rs79833176  | A | 0.0432  |
| rs149725220 | T | -0.0862 |
| rs79814304  | A | -0.0409 |
| rs9812948   | C | 0.0176  |
| rs1512902   | T | 0.0248  |
| rs61286411  | C | 0.0239  |
| rs78433190  | A | 0.0761  |
| rs1390084   | G | 0.0213  |
| rs4679593   | A | 0.0186  |
| rs9870116   | C | -0.0464 |
| rs11923571  | T | -0.018  |
| rs140430605 | G | -0.1128 |
| rs1967220   | A | 0.0407  |
| rs13315070  | T | 0.1046  |
| rs213305    | T | 0.0361  |
| rs34259319  | A | -0.0395 |
| rs77449426  | A | -0.0588 |
| rs112738626 | A | -0.0197 |
| rs74196451  | G | 0.0488  |
| rs140044176 | A | -0.0734 |
| rs12493413  | A | -0.0196 |
| rs145161122 | T | -0.0772 |
| rs116256340 | T | -0.0465 |
| rs9863869   | A | -0.0488 |
| rs73879051  | C | -0.0635 |
| rs146159581 | C | 0.0461  |
| rs794202    | A | -0.0172 |
| rs116011193 | C | 0.144   |
| rs111471490 | T | -0.0923 |
| rs145761688 | A | -0.1125 |
| rs144989003 | G | 0.0818  |
| rs35725699  | A | 0.0931  |
| rs75116972  | G | -0.1345 |
| rs2271386   | A | -0.0234 |
| rs10936701  | T | 0.0314  |

|             |   |         |
|-------------|---|---------|
| rs4347959   | G | 0.0283  |
| rs1026775   | T | 0.0174  |
| rs113093117 | T | 0.085   |
| rs114873194 | C | 0.1132  |
| rs17259117  | A | 0.037   |
| rs142822678 | A | 0.0982  |
| rs727212    | A | 0.0212  |
| rs2677244   | A | 0.0235  |
| rs13066480  | A | -0.0507 |
| rs11707918  | C | 0.0221  |
| rs115842578 | A | -0.0909 |
| rs116702229 | G | 0.0473  |
| rs114133157 | T | 0.031   |
| rs116009468 | A | -0.0706 |
| rs6786400   | C | 0.0214  |
| rs7633164   | A | -0.0269 |
| rs170836    | T | -0.0182 |
| rs9820385   | A | 0.0204  |
| rs9811308   | A | -0.0202 |
| rs504414    | G | 0.0246  |
| rs4280618   | C | 0.0209  |
| rs6802854   | A | 0.0218  |
| rs9864892   | T | -0.0347 |
| rs142116093 | G | 0.1267  |
| rs1201296   | G | -0.0169 |
| rs13064967  | T | 0.0919  |
| rs262806    | T | -0.0194 |
| rs76647408  | T | 0.0868  |
| rs114397936 | G | -0.0703 |
| rs77014913  | G | -0.099  |
| rs145044895 | A | -0.057  |
| rs116108524 | G | 0.1308  |
| rs145760243 | C | -0.0788 |
| rs80287752  | C | 0.1085  |
| rs62243935  | A | 0.0378  |
| rs140789447 | T | -0.0879 |
| rs75644697  | T | -0.0687 |
| rs62257194  | A | -0.0871 |
| rs74433221  | C | 0.0691  |
| rs13085258  | T | 0.0197  |
| rs112755642 | A | -0.0847 |
| rs147879868 | C | -0.0837 |
| rs79184435  | T | -0.0709 |
| rs115679341 | T | -0.1207 |
| rs6804119   | T | 0.0505  |
| rs61629686  | A | 0.0319  |
| rs9830572   | T | 0.0258  |

|             |   |         |
|-------------|---|---------|
| rs113654239 | C | 0.1057  |
| rs6800131   | G | 0.0239  |
| rs12633893  | G | -0.0385 |
| rs9870102   | C | 0.0265  |
| rs34605596  | G | -0.0689 |
| rs114905716 | C | 0.107   |
| rs75704261  | A | -0.0588 |
| rs114019898 | C | 0.0959  |
| rs76287450  | T | 0.1516  |
| rs34440282  | T | -0.0192 |
| rs6772443   | G | 0.0309  |
| rs73069549  | C | 0.0309  |
| rs4024134   | C | -0.0323 |
| rs142060044 | A | 0.0998  |
| rs73101631  | A | -0.0405 |
| rs79991185  | C | -0.0533 |
| rs62247959  | T | -0.0477 |
| rs79152648  | T | -0.0632 |
| rs269380    | A | 0.0298  |
| rs140945523 | A | -0.1139 |
| rs62271979  | A | 0.0293  |
| rs4680276   | A | 0.0259  |
| rs2082224   | A | 0.0202  |
| rs77087792  | T | 0.0699  |
| rs4857302   | A | 0.0168  |
| rs156262    | A | -0.0641 |
| rs139230563 | A | -0.0565 |
| rs76021676  | T | 0.1247  |
| rs1374771   | A | -0.0354 |
| rs62287318  | A | 0.085   |
| rs6782447   | A | -0.0255 |
| rs34569458  | G | -0.0274 |
| rs79375470  | T | 0.0706  |
| rs28827588  | T | -0.0466 |
| rs9823973   | G | -0.023  |
| rs115291099 | T | 0.0898  |
| rs114496946 | C | 0.0846  |
| rs13085157  | G | -0.0238 |
| rs17077267  | T | 0.0256  |
| rs6805053   | A | -0.0418 |
| rs144933728 | C | 0.0945  |
| rs56082428  | C | -0.035  |
| rs113169096 | T | -0.0605 |
| rs2323169   | A | 0.0195  |
| rs76604555  | A | 0.0282  |
| rs13095213  | C | 0.0362  |
| rs1972968   | T | 0.0267  |

|             |   |         |
|-------------|---|---------|
| rs17231705  | A | -0.0282 |
| rs71306770  | T | 0.061   |
| rs709448    | G | -0.044  |
| rs28768428  | T | -0.116  |
| rs535686    | C | 0.0453  |
| rs11128517  | T | 0.0326  |
| rs530922    | A | 0.0227  |
| rs13082319  | A | -0.0467 |
| rs9822093   | T | 0.0386  |
| rs6437452   | C | 0.0284  |
| rs4591529   | G | -0.0615 |
| rs11718773  | G | -0.026  |
| rs1158454   | C | 0.0218  |
| rs2363981   | A | 0.0176  |
| rs13098920  | A | -0.109  |
| rs11925026  | G | 0.079   |
| rs2642375   | C | 0.0208  |
| rs536510    | T | 0.035   |
| rs6768161   | A | -0.0289 |
| rs115585583 | A | -0.1082 |
| rs76332694  | A | 0.0575  |
| rs635787    | A | -0.0184 |
| rs142445939 | G | 0.0786  |
| rs75153161  | G | 0.0664  |
| rs13434036  | T | 0.0441  |
| rs113889556 | T | -0.0511 |
| rs75685405  | T | -0.0237 |
| rs140036940 | G | -0.0935 |
| rs62254928  | C | 0.0747  |
| rs76405079  | C | 0.0298  |
| rs3732908   | C | 0.0372  |
| rs115041550 | T | -0.1067 |
| rs9847255   | T | -0.0179 |
| rs247412    | G | 0.0204  |
| rs149108789 | T | -0.089  |
| rs1355571   | T | -0.0745 |
| rs259461    | G | -0.0185 |
| rs75816802  | T | 0.1001  |
| rs41276485  | C | 0.0266  |
| rs1469570   | C | -0.0723 |
| rs114232165 | C | 0.0373  |
| rs73024433  | T | -0.0671 |
| rs142281013 | G | -0.1011 |
| rs4683691   | A | -0.0171 |
| rs1193517   | T | -0.0501 |
| rs62228584  | T | 0.0313  |
| rs143396396 | A | 0.0968  |



|             |   |         |
|-------------|---|---------|
| rs75169289  | A | 0.0806  |
| rs73180435  | G | -0.0816 |
| rs10865789  | G | -0.0441 |
| rs72957873  | T | 0.0594  |
| rs150590045 | C | 0.1151  |
| rs35146724  | C | -0.1317 |
| rs7635333   | A | -0.021  |
| rs145658144 | A | 0.0896  |
| rs11708096  | G | -0.0176 |
| rs174653    | T | 0.0303  |
| rs10513780  | T | 0.0264  |
| rs56144003  | T | -0.057  |
| rs115310227 | T | 0.0773  |
| rs76279402  | A | 0.0699  |
| rs74674764  | A | -0.032  |
| rs17606712  | C | 0.0614  |
| rs76114919  | T | -0.0459 |
| rs2036899   | A | -0.0961 |
| rs10428125  | C | -0.018  |
| rs78532171  | T | 0.0441  |
| rs939892    | T | 0.0285  |
| rs56130228  | C | -0.0637 |
| rs115996780 | G | -0.0858 |
| rs62287823  | A | -0.0449 |
| rs78434909  | A | 0.0782  |
| rs17041507  | C | 0.0885  |
| rs4608636   | T | 0.0511  |
| rs148539361 | C | 0.1385  |
| rs9836145   | A | 0.0767  |
| rs6795614   | C | -0.0314 |
| rs116564469 | T | 0.0721  |
| rs115248708 | C | 0.1023  |
| rs73153726  | A | -0.1348 |
| rs113717160 | C | -0.0842 |
| rs12486183  | G | -0.0213 |
| rs150815341 | G | 0.0693  |
| rs76312425  | C | 0.1745  |
| rs143927388 | A | -0.1946 |
| rs59611359  | A | -0.0388 |
| rs1032304   | C | -0.017  |
| rs11711637  | G | -0.0204 |
| rs4273345   | G | -0.0359 |
| rs73104689  | G | -0.0642 |
| rs79808844  | T | -0.0885 |
| rs2320376   | A | 0.0186  |
| rs9854898   | T | -0.1415 |
| rs6808554   | T | 0.046   |

|             |   |         |
|-------------|---|---------|
| rs2137597   | T | 0.0287  |
| rs76318622  | A | -0.0406 |
| rs76910778  | T | -0.0577 |
| rs13096775  | C | -0.0444 |
| rs77536115  | A | -0.1463 |
| rs951114    | G | 0.0167  |
| rs12486061  | G | -0.052  |
| rs2276737   | G | 0.0174  |
| rs13082218  | T | -0.1212 |
| rs115178675 | G | 0.1246  |
| rs3846061   | C | -0.0653 |
| rs35108414  | A | 0.0451  |
| rs74714235  | A | -0.0735 |
| rs73186478  | T | 0.078   |
| rs74712762  | T | 0.0714  |
| rs33450     | T | -0.1044 |
| rs147884767 | T | 0.0767  |
| rs149681855 | A | 0.1108  |
| rs7647903   | A | 0.0214  |
| rs1435209   | T | 0.0378  |
| rs17500781  | C | 0.0879  |
| rs17050210  | T | 0.018   |
| rs277651    | G | 0.0415  |
| rs9842389   | A | -0.0185 |
| rs11717759  | G | -0.0933 |
| rs35026322  | G | 0.0494  |
| rs34004789  | A | 0.0276  |
| rs2327896   | G | -0.0405 |
| rs7650009   | A | 0.0173  |
| rs62257516  | A | -0.1119 |
| rs76611117  | A | 0.0742  |
| rs4678910   | G | -0.0178 |
| rs893977    | C | 0.0188  |
| rs13094512  | G | -0.0238 |
| rs115869055 | G | 0.0737  |
| rs55825764  | T | -0.049  |
| rs77230224  | C | 0.0581  |
| rs1710028   | G | -0.02   |
| rs115307627 | G | -0.0346 |
| rs356423    | T | 0.0671  |
| rs148875449 | A | 0.1513  |
| rs114327077 | T | 0.0753  |
| rs114501281 | A | 0.0621  |
| rs1799390   | T | -0.0214 |
| rs73218217  | A | 0.0786  |
| rs76547298  | G | -0.0494 |
| rs62238646  | G | -0.1024 |

|             |   |         |
|-------------|---|---------|
| rs138978150 | T | -0.1471 |
| rs113404820 | A | -0.0704 |
| rs4831117   | A | 0.0201  |
| rs6780684   | T | -0.0172 |
| rs893294    | T | -0.0195 |
| rs62279612  | C | -0.0377 |
| rs62293048  | T | -0.0236 |
| rs115219530 | A | 0.0394  |
| rs1495888   | A | 0.0225  |
| rs115475243 | A | 0.0317  |
| rs62280812  | A | 0.063   |
| rs4683628   | T | -0.0207 |
| rs2042713   | C | -0.0181 |
| rs140905618 | A | -0.0391 |
| rs74381694  | G | -0.0721 |
| rs12637967  | G | -0.0293 |
| rs77564805  | C | -0.0631 |
| rs7610107   | A | -0.0271 |
| rs75387644  | C | 0.1046  |
| rs4974444   | G | -0.0271 |
| rs4431086   | G | -0.0333 |
| rs9856284   | A | 0.0372  |
| rs62274661  | T | 0.0583  |
| rs7617945   | C | 0.0224  |
| rs6795556   | T | 0.0208  |
| rs111352680 | A | -0.021  |
| rs115243280 | C | -0.1104 |
| rs141652734 | C | -0.078  |
| rs62256368  | G | 0.0261  |
| rs17236979  | G | -0.0657 |
| rs13078086  | G | 0.0229  |
| rs77050360  | C | -0.0822 |
| rs35256087  | G | 0.0489  |
| rs12489228  | G | -0.0455 |
| rs73050203  | A | 0.0666  |
| rs79363700  | T | 0.0548  |
| rs9311745   | C | 0.0435  |
| rs9837853   | A | 0.02    |
| rs12714592  | C | -0.0189 |
| rs1355685   | A | -0.017  |
| rs57877925  | T | 0.0386  |
| rs1873179   | A | 0.0294  |
| rs4688221   | C | -0.045  |
| rs148134520 | G | 0.0441  |
| rs116042525 | T | -0.0622 |
| rs77009607  | T | -0.055  |
| rs7642418   | T | 0.0437  |

|             |   |         |
|-------------|---|---------|
| rs72863994  | G | -0.1048 |
| rs231979    | T | -0.0249 |
| rs13092263  | A | -0.0476 |
| rs77502006  | T | -0.0311 |
| rs77891096  | C | 0.0463  |
| rs3846050   | T | -0.038  |
| rs151321866 | T | -0.0674 |
| rs7619699   | G | 0.0216  |
| rs2087603   | G | 0.0258  |
| rs73020271  | C | 0.0174  |
| rs112782162 | G | 0.0962  |
| rs74954805  | G | -0.0381 |
| rs78312719  | A | -0.0607 |
| rs79401842  | A | 0.0499  |
| rs1845640   | A | 0.0219  |
| rs74814856  | A | -0.0505 |
| rs114536705 | T | -0.0712 |
| rs75713399  | T | 0.079   |
| rs6808867   | G | -0.028  |
| rs77040122  | A | -0.1227 |
| rs76866456  | G | -0.0958 |
| rs9814412   | T | 0.0194  |
| rs73184369  | T | 0.046   |
| rs80311210  | C | -0.0199 |
| rs2630236   | A | 0.0254  |
| rs1167252   | T | -0.0191 |
| rs116467803 | A | 0.0588  |
| rs6774123   | T | -0.0173 |
| rs140275658 | T | -0.0798 |
| rs3796161   | T | -0.0471 |
| rs77761372  | G | -0.072  |
| rs9834960   | A | -0.0184 |
| rs6445918   | T | 0.0204  |
| rs74994159  | C | -0.1526 |
| rs7648378   | A | -0.0251 |
| rs35430217  | G | -0.0274 |
| rs73151983  | A | -0.0461 |
| rs6802152   | C | 0.0185  |
| rs141718886 | G | 0.107   |
| rs115943776 | A | 0.051   |
| rs75200133  | T | 0.0746  |
| rs114331674 | A | -0.1379 |
| rs60191631  | A | -0.0296 |
| rs73231609  | T | -0.0177 |
| rs114348008 | C | 0.0844  |
| rs7648704   | G | 0.0181  |
| rs13077328  | G | 0.023   |

|             |   |         |
|-------------|---|---------|
| rs4345034   | C | -0.0175 |
| rs115221073 | A | -0.0776 |
| rs2648543   | T | -0.0173 |
| rs9842135   | A | -0.0185 |
| rs111733986 | A | -0.0798 |
| rs4603925   | G | 0.0188  |
| rs73082091  | A | -0.027  |
| rs9836249   | G | 0.0419  |
| rs11918743  | A | -0.0176 |
| rs579328    | T | 0.0179  |
| rs34916750  | G | -0.0512 |
| rs76207641  | T | -0.0249 |
| rs151009442 | T | 0.1237  |
| rs78051678  | A | -0.0613 |
| rs74929314  | C | 0.0619  |
| rs78184114  | A | -0.0651 |
| rs895075    | G | -0.0245 |
| rs55861407  | T | -0.0328 |
| rs35395448  | T | 0.0361  |
| rs11926963  | T | -0.0225 |
| rs35819415  | A | -0.0432 |
| rs938922    | A | -0.0168 |
| rs9839401   | T | -0.0266 |
| rs115900535 | G | 0.1048  |
| rs2063640   | A | -0.0297 |
| rs5023601   | A | -0.104  |
| rs3851384   | A | 0.0347  |
| rs332455    | A | 0.0669  |
| rs6791080   | T | -0.0179 |
| rs4640498   | T | 0.0777  |
| rs56103847  | T | 0.0381  |
| rs2222795   | A | 0.0184  |
| rs77156057  | A | -0.0798 |
| rs9810845   | T | -0.0172 |
| rs360830    | T | -0.029  |
| rs9812742   | A | 0.0179  |
| rs17040710  | G | 0.0654  |
| rs75596138  | T | 0.0567  |
| rs17706836  | T | 0.0356  |
| rs79754219  | T | 0.0941  |
| rs115538881 | A | 0.0503  |
| rs826423    | A | -0.0178 |
| rs137926842 | C | -0.1406 |
| rs7634533   | A | 0.0177  |
| rs73233837  | A | 0.0261  |
| rs77483261  | G | -0.0903 |
| rs1450342   | A | -0.0244 |

|             |   |         |
|-------------|---|---------|
| rs2565610   | A | 0.0183  |
| rs76303214  | C | 0.0292  |
| rs11707334  | T | -0.0306 |
| rs7431223   | T | -0.0237 |
| rs1169534   | A | 0.0206  |
| rs9872721   | G | 0.0336  |
| rs116290266 | T | 0.0501  |
| rs76508111  | C | -0.0436 |
| rs74983930  | T | 0.067   |
| rs55755764  | T | 0.0422  |
| rs1516570   | A | 0.0206  |
| rs6768492   | G | 0.0901  |
| rs11714960  | G | -0.0179 |
| rs115605156 | C | -0.0446 |
| rs58793706  | G | -0.0262 |
| rs1495903   | A | 0.0722  |
| rs6773564   | G | -0.0174 |
| rs80246216  | G | -0.0285 |
| rs115558631 | A | -0.0306 |
| rs35247476  | A | -0.0448 |
| rs75242561  | T | -0.0535 |
| rs293603    | C | 0.1212  |
| rs74549072  | T | 0.0811  |
| rs148878163 | A | 0.0666  |
| rs4358295   | T | 0.0221  |
| rs9821907   | C | -0.031  |
| rs115092550 | C | 0.0726  |
| rs35509918  | G | 0.0722  |
| rs2600049   | T | -0.0234 |
| rs9310683   | G | 0.0182  |
| rs75014354  | C | 0.029   |
| rs112434070 | A | -0.0599 |
| rs2290194   | T | -0.021  |
| rs1565594   | C | -0.0166 |
| rs77506262  | A | -0.0456 |
| rs75606910  | G | 0.0611  |
| rs2167036   | A | 0.1341  |
| rs139381324 | C | 0.0623  |
| rs77722857  | A | -0.1098 |
| rs13088562  | C | 0.0235  |
| rs59298747  | G | -0.0237 |
| rs75713014  | C | -0.1553 |
| rs151609    | A | 0.0177  |
| rs147864064 | A | 0.0989  |
| rs6444767   | T | -0.0248 |
| rs1032671   | G | -0.0166 |
| rs41283996  | A | 0.037   |

|             |   |         |
|-------------|---|---------|
| rs1513297   | G | 0.0298  |
| rs144993718 | T | -0.0577 |
| rs74360022  | T | 0.0851  |
| rs77309900  | A | 0.0652  |
| rs6806089   | A | 0.0169  |
| rs6784175   | C | 0.0214  |
| rs445938    | G | 0.0172  |
| rs73859194  | C | 0.0669  |
| rs76568618  | T | -0.0566 |
| rs16845008  | C | 0.0232  |
| rs77987320  | T | 0.0662  |
| rs73125607  | T | 0.0675  |
| rs56296254  | A | 0.0893  |
| rs35065127  | G | 0.0297  |
| rs76933575  | A | 0.0467  |
| rs9311779   | T | -0.0171 |
| rs1532593   | G | 0.0195  |
| rs7646637   | A | -0.0396 |
| rs56060538  | T | 0.0805  |
| rs74869494  | T | 0.0441  |
| rs6796067   | G | 0.0709  |
| rs9841945   | T | 0.0176  |
| rs9847221   | C | 0.0167  |
| rs77008315  | G | 0.0795  |
| rs13079464  | C | 0.0184  |
| rs112991001 | G | -0.1062 |
| rs13095949  | C | -0.0314 |
| rs116012596 | C | -0.1166 |
| rs7636518   | C | 0.0183  |
| rs11571863  | C | 0.0266  |
| rs55725165  | T | 0.0175  |
| rs71301894  | G | -0.0816 |
| rs56393413  | G | 0.0215  |
| rs3749260   | A | -0.0267 |
| rs78445218  | G | 0.0608  |
| rs755202    | G | -0.0689 |
| rs78297673  | C | -0.036  |
| rs167140    | A | 0.0242  |
| rs73216682  | T | 0.0293  |
| rs59885053  | T | 0.073   |
| rs11707113  | A | 0.0228  |
| rs142339610 | A | 0.148   |
| rs80330208  | A | -0.0724 |
| rs139539926 | T | -0.1077 |
| rs711718    | C | -0.017  |
| rs73131496  | A | 0.051   |
| rs7639579   | T | 0.0271  |

|             |   |         |
|-------------|---|---------|
| rs6768672   | G | -0.0215 |
| rs13081184  | A | -0.019  |
| rs146120664 | G | 0.1073  |
| rs139710544 | A | -0.0587 |
| rs17010728  | T | -0.0244 |
| rs12493456  | G | 0.0343  |
| rs9872675   | T | 0.0274  |
| rs6778128   | A | 0.0793  |
| rs114829982 | A | 0.0411  |
| rs73063961  | G | -0.0833 |
| rs140218513 | T | 0.0524  |
| rs9870821   | C | -0.0191 |
| rs6548756   | C | 0.022   |
| rs7628249   | G | -0.0195 |
| rs76999295  | C | 0.0937  |
| rs116045427 | C | 0.0909  |
| rs1995665   | C | -0.0248 |
| rs2322420   | T | 0.108   |
| rs4246670   | T | 0.0246  |
| rs73857777  | T | 0.0865  |
| rs4683805   | T | 0.0185  |
| rs77720903  | G | 0.039   |
| rs79367696  | A | 0.0352  |
| rs4677758   | T | 0.0213  |
| rs59499323  | A | 0.0206  |
| rs115330301 | A | 0.0708  |
| rs74809533  | G | -0.0346 |
| rs146464058 | A | 0.0921  |
| rs1711079   | A | 0.0293  |
| rs16832753  | T | -0.1488 |
| rs4858339   | G | 0.018   |
| rs114397673 | C | -0.0805 |
| rs76036670  | T | -0.0333 |
| rs13072477  | C | -0.0188 |
| rs75952724  | T | -0.102  |
| rs146492840 | G | -0.095  |
| rs7431832   | A | 0.0197  |
| rs73099117  | C | 0.0577  |
| rs73110476  | T | 0.0506  |
| rs115781473 | G | -0.0942 |
| rs143093087 | A | -0.1124 |
| rs2036428   | T | -0.0209 |
| rs12497559  | C | 0.0265  |
| rs9857084   | G | -0.0203 |
| rs6789787   | G | -0.0249 |
| rs147057858 | C | -0.0934 |
| rs2648630   | G | 0.0171  |



|             |   |         |
|-------------|---|---------|
| rs9310999   | A | 0.0192  |
| rs77827932  | G | -0.0474 |
| rs4274731   | A | 0.0303  |
| rs7638413   | A | 0.0219  |
| rs150874014 | G | -0.0525 |
| rs13100343  | T | 0.0231  |
| rs78231629  | A | 0.063   |
| rs9832940   | T | 0.0199  |
| rs34973632  | T | -0.0191 |
| rs76127220  | G | -0.1202 |
| rs58073255  | A | -0.0225 |
| rs13067016  | A | 0.053   |
| rs6796880   | G | 0.0178  |
| rs6443370   | A | 0.0251  |
| rs115453808 | T | -0.0621 |
| rs115457429 | G | 0.0865  |
| rs11714093  | G | -0.1445 |
| rs76730429  | G | 0.0627  |
| rs77989862  | A | 0.0244  |
| rs73205386  | G | -0.0224 |
| rs112313169 | G | -0.1014 |
| rs13324412  | T | 0.0337  |
| rs116623643 | T | -0.0517 |
| rs7373890   | T | 0.0276  |
| rs17182659  | T | 0.0457  |
| rs17025795  | T | 0.0372  |
| rs111833465 | C | 0.1396  |
| rs72881630  | A | 0.1252  |
| rs75777379  | T | 0.0628  |
| rs1024852   | C | -0.0182 |
| rs297368    | A | 0.0365  |
| rs150964209 | C | 0.1028  |
| rs1580572   | T | -0.0198 |
| rs78394925  | G | -0.0514 |
| rs12496946  | A | 0.0165  |
| rs62255251  | A | -0.0871 |
| rs62276624  | G | 0.0615  |
| rs73024230  | A | -0.0782 |
| rs41389051  | A | -0.0281 |
| rs12054307  | C | 0.0432  |
| rs78731672  | A | 0.0912  |
| rs9858049   | T | 0.0257  |
| rs116453362 | G | -0.1368 |
| rs6786581   | G | 0.0182  |
| rs13074942  | T | -0.0183 |
| rs78788133  | T | 0.0688  |
| rs76788668  | A | 0.0418  |

|             |   |         |
|-------------|---|---------|
| rs115333410 | T | 0.1144  |
| rs62242183  | A | 0.0283  |
| rs860562    | G | -0.0231 |
| rs4955214   | A | -0.0482 |
| rs107342    | A | -0.0315 |
| rs73151462  | A | 0.0668  |
| rs1456133   | G | 0.0176  |
| rs409152    | T | 0.0591  |
| rs78083599  | G | 0.0312  |
| rs114837926 | G | 0.0855  |
| rs62249240  | T | 0.0753  |
| rs11716867  | T | 0.0181  |
| rs144249579 | T | 0.0818  |
| rs6795711   | G | 0.0452  |
| rs147768063 | A | 0.1289  |
| rs111553982 | T | 0.0513  |
| rs6445029   | G | -0.0167 |
| rs9878028   | C | 0.0878  |
| rs9843942   | A | -0.0184 |
| rs753698    | C | -0.0719 |
| rs115185358 | T | 0.0788  |
| rs34867216  | G | -0.0171 |
| rs294460    | T | 0.0628  |
| rs146916751 | T | 0.0865  |
| rs114608506 | T | -0.0948 |
| rs1994909   | T | -0.0339 |
| rs76260728  | C | 0.0705  |
| rs57251581  | C | -0.0606 |
| rs343321    | A | -0.0293 |
| rs35590369  | A | 0.0231  |
| rs13099035  | C | -0.0518 |
| rs1812417   | G | 0.0167  |
| rs9878528   | C | 0.033   |
| rs72980612  | C | -0.0386 |
| rs59623261  | T | 0.0317  |
| rs60422318  | C | -0.03   |
| rs73832528  | A | 0.0867  |
| rs7430737   | C | -0.0887 |
| rs6767250   | T | -0.0276 |
| rs73146550  | C | -0.0715 |
| rs6769326   | T | 0.0253  |
| rs114313617 | G | -0.1034 |
| rs11720885  | A | -0.0548 |
| rs7617394   | T | -0.0232 |
| rs148200370 | T | -0.1417 |
| rs4855656   | A | -0.1371 |
| rs34837013  | C | 0.0219  |

|             |   |         |
|-------------|---|---------|
| rs74936063  | G | -0.0566 |
| rs78362371  | C | -0.0407 |
| rs73045437  | A | 0.0524  |
| rs669354    | G | -0.0241 |
| rs115073064 | C | 0.0659  |
| rs138919782 | C | 0.084   |
| rs13066926  | T | -0.046  |
| rs2121724   | T | -0.017  |
| rs485118    | A | 0.0416  |
| rs62249273  | C | 0.0221  |
| rs995830    | A | -0.0919 |
| rs6766627   | T | -0.0174 |
| rs113541025 | G | -0.0519 |
| rs71621122  | C | 0.0243  |
| rs57006157  | G | -0.0402 |
| rs142002902 | T | 0.0849  |
| rs2431      | G | -0.0423 |
| rs414657    | C | 0.0206  |
| rs9832681   | G | 0.0231  |
| rs1461824   | G | 0.0177  |
| rs141909071 | C | 0.0813  |
| rs138674962 | T | 0.0759  |
| rs62265231  | T | 0.0322  |
| rs75793140  | G | -0.023  |
| rs7611391   | T | -0.0226 |
| rs34364196  | G | -0.0297 |
| rs35348074  | C | -0.0348 |
| rs139439348 | A | 0.1161  |
| rs28708630  | C | -0.0953 |
| rs7613093   | A | 0.0475  |
| rs11129480  | G | 0.0411  |
| rs112206659 | G | 0.0833  |
| rs55978704  | C | -0.0426 |
| rs116914791 | G | 0.066   |
| rs13340122  | T | -0.0372 |
| rs2568870   | C | -0.03   |
| rs4685989   | C | -0.0246 |
| rs116355948 | G | 0.0762  |
| rs832040    | G | 0.0203  |
| rs2306211   | A | -0.0736 |
| rs6776536   | T | 0.0275  |
| rs75695541  | A | -0.058  |
| rs12494815  | T | 0.0514  |
| rs111778894 | A | -0.0966 |
| rs75273700  | T | -0.0482 |
| rs73160976  | G | -0.0595 |
| rs77143021  | A | 0.0705  |

|             |   |         |
|-------------|---|---------|
| rs138286734 | A | 0.1136  |
| rs12632718  | A | -0.0259 |
| rs9851547   | G | -0.0242 |
| rs140204807 | C | -0.12   |
| rs116000514 | C | -0.1331 |
| rs75817202  | C | -0.0723 |
| rs17588879  | A | -0.0166 |
| rs4582031   | C | 0.0171  |
| rs146441264 | G | 0.0822  |
| rs116198125 | C | 0.053   |
| rs4681845   | T | 0.0184  |
| rs36076080  | T | 0.0693  |
| rs6792159   | A | 0.0708  |
| rs111819704 | T | 0.0548  |
| rs9864760   | A | 0.0191  |
| rs1502172   | A | -0.0185 |
| rs74838592  | C | -0.0489 |
| rs115042155 | G | -0.0664 |
| rs148946005 | T | 0.0781  |
| rs114751465 | A | -0.0495 |
| rs114658749 | T | -0.0715 |
| rs116260990 | A | -0.0668 |
| rs59167005  | G | -0.0586 |
| rs114995322 | T | 0.099   |
| rs11720372  | G | 0.0249  |
| rs114307462 | T | 0.0811  |
| rs74544922  | C | 0.0527  |
| rs78884818  | C | -0.0601 |
| rs73096257  | A | -0.0363 |
| rs58882316  | T | -0.0181 |
| rs76878776  | G | 0.047   |
| rs75412445  | A | -0.1078 |
| rs79146843  | A | -0.1178 |
| rs75950008  | G | 0.1145  |
| rs73818861  | C | 0.0807  |
| rs140878501 | T | -0.0759 |
| rs146976466 | C | -0.1036 |
| rs74811040  | C | -0.0991 |
| rs148532133 | C | -0.0467 |
| rs12491104  | C | -0.0191 |
| rs9882017   | G | -0.0193 |
| rs73082899  | C | -0.0201 |
| rs2124532   | T | -0.019  |
| rs62254859  | T | 0.0445  |
| rs77116303  | A | 0.1291  |
| rs12494723  | G | 0.031   |
| rs62292505  | A | -0.0431 |

|             |   |         |
|-------------|---|---------|
| rs115175600 | T | 0.1103  |
| rs9818763   | A | -0.0227 |
| rs2077904   | A | -0.0173 |
| rs1560418   | G | -0.0199 |
| rs12632822  | A | 0.0793  |
| rs112621847 | A | 0.017   |
| rs17769504  | A | -0.0238 |
| rs4369992   | A | 0.021   |
| rs74395591  | C | -0.0721 |
| rs113551689 | A | 0.0401  |
| rs113328104 | A | -0.0563 |
| rs111434653 | A | 0.1202  |
| rs6781128   | T | 0.0252  |
| rs11916890  | A | 0.0609  |
| rs76781225  | T | 0.0733  |
| rs4399913   | A | 0.0656  |
| rs11929195  | A | 0.0176  |
| rs74463989  | G | 0.0674  |
| rs6784537   | G | 0.0227  |
| rs6796131   | C | -0.0208 |
| rs10212284  | G | -0.0919 |
| rs116816033 | C | -0.1513 |
| rs13095597  | A | 0.1271  |
| rs114217298 | A | -0.074  |
| rs145018778 | T | -0.1238 |
| rs114959814 | A | 0.067   |
| rs144529904 | C | -0.0851 |
| rs116081646 | G | -0.0902 |
| rs142977426 | T | 0.0472  |
| rs73853788  | T | -0.1113 |
| rs2886760   | T | 0.0265  |
| rs12635539  | C | -0.0328 |
| rs73016531  | T | -0.0917 |
| rs12492872  | G | -0.0168 |
| rs72924568  | C | -0.0262 |
| rs147685579 | T | -0.0624 |
| rs77859280  | C | -0.0557 |
| rs77757295  | G | -0.1042 |
| rs114630624 | C | -0.1298 |
| rs77725598  | T | -0.0843 |
| rs144338897 | A | 0.084   |
| rs79488532  | A | -0.0507 |
| rs1488746   | C | -0.0706 |
| rs140538115 | C | 0.0253  |
| rs1823906   | T | -0.0608 |
| rs9852752   | G | 0.0207  |
| rs116037000 | A | -0.0838 |

|             |   |         |
|-------------|---|---------|
| rs73069401  | T | 0.059   |
| rs116310782 | A | -0.106  |
| rs75104824  | A | -0.1336 |
| rs114942347 | A | 0.0422  |
| rs114086498 | G | -0.0794 |
| rs62263390  | A | 0.0702  |
| rs17006410  | A | 0.0644  |
| rs73223840  | C | 0.0374  |
| rs61617377  | C | -0.0879 |
| rs75025102  | C | -0.0612 |
| rs73207148  | T | -0.0468 |
| rs4679354   | A | -0.0163 |
| rs111428583 | A | 0.0709  |
| rs11716788  | T | 0.0202  |
| rs75518802  | T | -0.0437 |
| rs4472043   | G | -0.0283 |
| rs78767989  | A | -0.0631 |
| rs73179598  | G | -0.0681 |
| rs116496287 | C | -0.0891 |
| rs11916207  | T | 0.0388  |
| rs6799929   | A | -0.0328 |
| rs1874125   | C | -0.0508 |
| rs11926806  | T | 0.061   |
| rs1814917   | A | -0.0248 |
| rs76626861  | A | -0.0511 |
| rs115337712 | T | 0.1065  |
| rs115226672 | T | 0.0371  |
| rs73149951  | T | 0.0344  |
| rs2572656   | T | 0.0185  |
| rs11926654  | A | 0.0222  |
| rs17072119  | A | -0.0341 |
| rs16857652  | A | -0.0246 |
| rs62288218  | T | 0.0489  |
| rs35866627  | C | 0.0801  |
| rs116154831 | G | -0.0744 |
| rs9832682   | G | -0.0219 |
| rs116816970 | G | -0.0963 |
| rs34669416  | G | -0.085  |
| rs116493637 | A | 0.1055  |
| rs6799514   | C | -0.0216 |
| rs141444554 | T | -0.0937 |
| rs114014284 | A | -0.1336 |
| rs113868599 | A | 0.0485  |
| rs58118434  | G | 0.1203  |
| rs4928021   | T | 0.0628  |
| rs150011848 | A | 0.0883  |
| rs2670320   | C | 0.018   |

|             |   |         |
|-------------|---|---------|
| rs2877602   | T | 0.0228  |
| rs12495652  | A | -0.064  |
| rs67293537  | A | 0.0251  |
| rs1979331   | T | 0.0334  |
| rs62242078  | G | -0.0225 |
| rs113302708 | T | -0.1016 |
| rs73101489  | A | -0.1314 |
| rs77723681  | T | 0.036   |
| rs115493778 | T | 0.0691  |
| rs141732401 | G | 0.1151  |
| rs13074328  | T | -0.0308 |
| rs77538396  | C | -0.0636 |
| rs72959089  | A | 0.0384  |
| rs6443579   | C | 0.0184  |
| rs116825638 | G | 0.0965  |
| rs62276769  | A | 0.0319  |
| rs151256428 | A | 0.0807  |
| rs9866274   | A | -0.018  |
| rs1642755   | C | 0.0397  |
| rs78156458  | A | 0.0919  |
| rs1062197   | A | -0.107  |
| rs145805463 | T | -0.1276 |
| rs9865196   | G | -0.028  |
| rs56299491  | T | -0.0794 |
| rs1921494   | G | 0.0281  |
| rs60242800  | T | -0.0424 |
| rs73068126  | G | -0.0401 |
| rs62243179  | T | 0.0615  |
| rs139907910 | C | 0.0941  |
| rs74526599  | G | 0.0894  |
| rs11923086  | A | 0.073   |
| rs114212047 | T | -0.0867 |
| rs11923546  | G | -0.0978 |
| rs2002582   | A | 0.0209  |
| rs4912585   | T | 0.022   |
| rs149777798 | T | -0.0711 |
| rs11130013  | T | -0.0247 |
| rs116134751 | C | 0.0679  |
| rs6779852   | A | -0.0296 |
| rs73148095  | G | 0.0838  |
| rs73055959  | C | 0.0866  |
| rs3772338   | T | 0.0396  |
| rs10490839  | A | -0.0262 |
| rs115110602 | C | 0.0711  |
| rs111226678 | C | -0.1487 |
| rs4686581   | G | -0.0545 |
| rs2121817   | G | -0.0211 |

|             |   |         |
|-------------|---|---------|
| rs71327705  | A | 0.0328  |
| rs146234686 | T | 0.1043  |
| rs116792332 | A | 0.0847  |
| rs4317137   | A | 0.0216  |
| rs80266493  | A | -0.0267 |
| rs4684803   | G | 0.0174  |
| rs1040336   | C | 0.0225  |
| rs10511019  | C | -0.0201 |
| rs56265325  | A | 0.0567  |
| rs9876965   | A | 0.0297  |
| rs73176772  | A | -0.0462 |
| rs77615507  | A | 0.0453  |
| rs147341467 | T | 0.0439  |
| rs112896046 | T | -0.0948 |
| rs4854621   | A | 0.0192  |
| rs77674027  | C | -0.066  |
| rs140424053 | C | -0.0717 |
| rs77679907  | T | -0.0885 |
| rs7616613   | A | 0.0234  |
| rs114065737 | T | -0.0631 |
| rs9850564   | T | -0.0165 |
| rs76643989  | T | -0.0435 |
| rs146576816 | T | 0.1071  |
| rs467345    | T | -0.0523 |
| rs80019885  | A | 0.0297  |
| rs78320249  | G | -0.0748 |
| rs114095805 | A | 0.0712  |
| rs146650353 | T | 0.0788  |
| rs9818383   | T | 0.168   |
| rs9831750   | G | -0.0166 |
| rs11711045  | G | 0.0201  |
| rs17319     | G | 0.0478  |
| rs77597982  | A | -0.047  |
| rs2023537   | G | -0.0175 |
| rs116673726 | G | 0.0886  |
| rs73057481  | T | 0.0172  |
| rs116600355 | A | 0.122   |
| rs116829176 | T | -0.1253 |
| rs13076840  | A | 0.1062  |
| rs17028298  | T | -0.0185 |
| rs116419363 | G | 0.0847  |
| rs2052368   | G | -0.0491 |
| rs1716743   | A | 0.0179  |
| rs6810278   | T | 0.0249  |
| rs16841638  | C | 0.0273  |
| rs116778817 | A | -0.0522 |
| rs7618014   | G | 0.0239  |



|             |   |         |
|-------------|---|---------|
| rs144552504 | T | 0.0809  |
| rs7622400   | G | 0.0182  |
| rs779727    | T | -0.0173 |
| rs79837477  | T | 0.0293  |
| rs73056186  | T | -0.0503 |
| rs76273477  | G | 0.0584  |
| rs13089097  | A | -0.0171 |
| rs12496351  | C | -0.0343 |
| rs12635864  | G | 0.0231  |
| rs114534799 | C | 0.0484  |
| rs6775099   | C | 0.0399  |
| rs34004101  | T | -0.031  |
| rs79149678  | T | 0.0638  |
| rs62272427  | A | -0.0236 |
| rs113866113 | T | -0.0232 |
| rs7640667   | T | 0.0263  |
| rs17194238  | C | 0.025   |
| rs11709800  | T | 0.0392  |
| rs1533671   | G | -0.0173 |
| rs17733682  | G | -0.0994 |
| rs9880315   | A | -0.0161 |
| rs76358145  | A | 0.0184  |
| rs115296782 | G | -0.1056 |
| rs4686541   | T | -0.0172 |
| rs2035580   | G | 0.017   |
| rs6766130   | T | -0.0222 |
| rs57526802  | C | 0.0444  |
| rs2201946   | G | -0.0197 |
| rs1485138   | C | 0.0301  |
| rs78316259  | A | -0.0471 |
| rs9837267   | C | -0.0473 |
| rs16858840  | T | -0.0513 |
| rs78890599  | T | 0.0235  |
| rs3920477   | T | 0.0168  |
| rs78723673  | G | -0.1226 |
| rs150855431 | G | 0.0401  |
| rs6769638   | C | 0.0199  |
| rs6789097   | A | -0.0751 |
| rs9836287   | C | -0.0482 |
| rs2555500   | T | 0.0185  |
| rs61519740  | G | 0.0695  |
| rs73181158  | C | -0.0313 |
| rs2704806   | T | -0.0165 |
| rs115953529 | G | 0.0505  |
| rs1349283   | C | -0.0197 |
| rs6550083   | G | 0.0805  |
| rs73114355  | G | -0.0609 |

|             |   |         |
|-------------|---|---------|
| rs4677053   | T | 0.0194  |
| rs73854913  | A | -0.0743 |
| rs35902417  | T | -0.0303 |
| rs2673046   | T | 0.0739  |
| rs729660    | T | -0.0599 |
| rs9862144   | A | -0.0238 |
| rs115972075 | T | 0.1057  |
| rs144734458 | G | -0.0735 |
| rs75259612  | T | 0.0273  |
| rs7648437   | G | -0.0311 |
| rs9841902   | A | -0.0794 |
| rs76067709  | C | -0.107  |
| rs62257624  | T | -0.0527 |
| rs114909995 | T | -0.0823 |
| rs9311874   | C | 0.0451  |
| rs73053599  | C | -0.0246 |
| rs12185996  | T | 0.0381  |
| rs80077107  | C | -0.0904 |
| rs78677724  | C | 0.0905  |
| rs9852469   | G | 0.1205  |
| rs16827628  | T | 0.0396  |
| rs73104799  | C | 0.0852  |
| rs13098474  | T | 0.0341  |
| rs73202445  | A | 0.0488  |
| rs112279310 | G | 0.109   |
| rs11721061  | G | -0.0164 |
| rs17272376  | A | -0.0346 |
| rs77013418  | A | 0.0467  |
| rs139671165 | T | -0.0716 |
| rs114304068 | T | -0.0602 |
| rs147722460 | C | 0.0364  |
| rs7614885   | C | 0.0347  |
| rs4686933   | G | -0.0312 |
| rs73043056  | T | 0.0511  |
| rs9844564   | A | 0.0297  |
| rs12490016  | C | 0.0461  |
| rs1907482   | G | -0.0191 |
| rs73062504  | A | -0.0438 |
| rs2717402   | A | -0.023  |
| rs62299663  | T | 0.0737  |
| rs9848952   | T | -0.0304 |
| rs118096804 | A | 0.0732  |
| rs114280794 | A | 0.0825  |
| rs35131513  | T | 0.0219  |
| rs115618002 | G | 0.0921  |
| rs9875582   | C | 0.0192  |
| rs183811    | C | 0.019   |

|             |   |         |
|-------------|---|---------|
| rs114611342 | G | 0.0838  |
| rs75165224  | G | -0.0846 |
| rs13088500  | G | -0.0678 |
| rs67666825  | T | -0.0231 |
| rs2178321   | G | -0.0241 |
| rs76572768  | C | -0.0488 |
| rs73102002  | A | 0.1104  |
| rs12637406  | G | 0.083   |
| rs77908862  | C | 0.0284  |
| rs114306209 | A | -0.0671 |
| rs78249918  | G | 0.1203  |
| rs79267267  | A | -0.0737 |
| rs114342323 | T | -0.0315 |
| rs74564178  | T | -0.1102 |
| rs4678516   | C | -0.0164 |
| rs17389893  | T | -0.0325 |
| rs2076993   | C | -0.0163 |
| rs13322269  | A | 0.017   |
| rs116537435 | G | 0.0641  |
| rs78034611  | C | 0.1     |
| rs115286538 | C | 0.1066  |
| rs116614945 | G | 0.0466  |
| rs59280673  | A | -0.0261 |
| rs2600976   | A | -0.0305 |
| rs161890    | T | 0.0192  |
| rs58324221  | C | -0.0527 |
| rs254857    | G | 0.0168  |
| rs9825836   | A | -0.0171 |
| rs60939402  | C | -0.0478 |
| rs140421196 | G | -0.0867 |
| rs73154121  | T | 0.1309  |
| rs2184207   | G | 0.02    |
| rs2371904   | G | -0.0745 |
| rs116836584 | T | -0.091  |
| rs145989179 | T | -0.0627 |
| rs74937010  | T | -0.046  |
| rs144880932 | T | 0.128   |
| rs62253727  | T | -0.0363 |
| rs142344283 | A | 0.0634  |
| rs11922072  | G | 0.0334  |
| rs75352334  | A | -0.0436 |
| rs1438328   | A | 0.0251  |
| rs115704620 | C | 0.0441  |
| rs73169269  | A | 0.0385  |
| rs2017926   | G | 0.0189  |
| rs139544003 | A | -0.1235 |
| rs142497871 | T | -0.1063 |

|             |   |         |
|-------------|---|---------|
| rs1553693   | G | -0.0168 |
| rs73161075  | T | -0.0367 |
| rs12106713  | A | 0.0466  |
| rs8499      | A | 0.0737  |
| rs138812654 | A | -0.0687 |
| rs9845374   | G | -0.0214 |
| rs73132394  | C | -0.0243 |
| rs4269034   | C | -0.019  |
| rs77005543  | T | -0.0474 |
| rs62237492  | G | 0.0605  |
| rs75380719  | T | 0.0228  |
| rs4677213   | A | 0.0188  |
| rs11921030  | A | 0.07    |
| rs73119835  | A | -0.1029 |
| rs13063829  | C | 0.1054  |
| rs9883046   | G | -0.0236 |
| rs6798316   | C | -0.0242 |
| rs2044889   | T | -0.0311 |
| rs16863651  | G | -0.0331 |
| rs35535279  | C | -0.0494 |
| rs6771586   | G | -0.0168 |
| rs78015268  | C | -0.03   |
| rs6762587   | T | -0.0202 |
| rs55768751  | A | 0.0845  |
| rs115442282 | A | 0.0607  |
| rs62233289  | T | 0.0309  |
| rs116517469 | C | -0.0922 |
| rs1497506   | A | -0.0316 |
| rs4287888   | G | 0.0159  |
| rs73215904  | G | 0.0292  |
| rs9843969   | G | 0.1034  |
| rs80243673  | G | 0.1257  |
| rs115873486 | G | -0.0439 |
| rs1376474   | G | 0.0498  |
| rs939885    | A | -0.0181 |
| rs6807858   | T | 0.0165  |
| rs115078599 | C | -0.0551 |
| rs7615841   | T | -0.0174 |
| rs111356164 | A | -0.0338 |
| rs6799987   | G | -0.0169 |
| rs116110361 | A | 0.0686  |
| rs792359    | G | -0.0323 |
| rs10490772  | T | 0.0217  |
| rs115145358 | C | -0.072  |
| rs138504606 | C | 0.108   |
| rs115832671 | G | 0.0807  |
| rs76303628  | A | -0.1088 |

|             |   |         |
|-------------|---|---------|
| rs73161318  | C | 0.0447  |
| rs12631510  | C | -0.0179 |
| rs9869668   | T | 0.0478  |
| rs305492    | C | -0.0199 |
| rs116762529 | G | 0.0952  |
| rs114450832 | G | -0.0888 |
| rs115975672 | T | -0.0608 |
| rs13088114  | C | 0.048   |
| rs7618383   | A | 0.07    |
| rs9818087   | C | 0.0197  |
| rs71325223  | A | 0.0902  |
| rs149830606 | T | 0.0746  |
| rs139395426 | C | 0.1094  |
| rs1405332   | G | -0.0193 |
| rs115173886 | A | 0.1075  |
| rs11915101  | G | 0.0385  |
| rs4679351   | G | 0.022   |
| rs143676215 | T | -0.0696 |
| rs75090365  | T | -0.026  |
| rs114750653 | A | 0.081   |
| rs74598195  | G | 0.1205  |
| rs116346135 | T | -0.1367 |
| rs138521782 | A | -0.0829 |
| rs903305    | C | 0.0254  |
| rs116650468 | A | -0.1169 |
| rs17013865  | T | 0.1087  |
| rs280540    | C | 0.0423  |
| rs79250676  | T | 0.06    |
| rs113958461 | C | 0.1192  |
| rs114202043 | T | 0.0775  |
| rs73108747  | C | -0.1053 |
| rs7626282   | C | -0.0281 |
| rs11130328  | G | -0.039  |
| rs2036236   | C | 0.0175  |
| rs80355946  | T | -0.0634 |
| rs74670539  | C | 0.0567  |
| rs149961221 | G | -0.0877 |
| rs73039615  | G | 0.0574  |
| rs80199750  | C | 0.0974  |
| rs6444871   | G | 0.0569  |
| rs115668638 | T | -0.0551 |
| rs73058889  | C | 0.032   |
| rs17664076  | G | 0.0231  |
| rs4676727   | A | 0.0318  |
| rs11914567  | T | 0.0184  |
| rs116737477 | A | -0.1259 |
| rs146292131 | G | -0.1073 |

|             |   |         |
|-------------|---|---------|
| rs291485    | G | -0.0156 |
| rs10433415  | G | 0.0165  |
| rs77267418  | T | 0.0577  |
| rs151307504 | C | -0.1241 |
| rs56283092  | A | 0.0416  |
| rs17029080  | G | 0.0409  |
| rs78257698  | C | -0.0749 |
| rs78113844  | G | -0.0162 |
| rs79923247  | C | 0.0378  |
| rs11712335  | C | 0.0183  |
| rs2174510   | G | -0.0172 |
| rs114164890 | C | -0.0441 |
| rs112887034 | A | -0.0566 |
| rs76628103  | G | -0.0249 |
| rs79887258  | G | 0.0535  |
| rs76203777  | C | 0.052   |
| rs7628784   | G | -0.0312 |
| rs6792298   | T | 0.039   |
| rs144069878 | C | 0.0721  |
| rs145096404 | C | -0.0956 |
| rs112762680 | A | -0.0964 |
| rs6781196   | G | 0.0464  |
| rs67841719  | T | -0.0353 |
| rs34635393  | G | -0.0421 |
| rs62272401  | G | 0.1028  |
| rs12488262  | C | 0.0176  |
| rs78028162  | T | -0.0225 |
| rs60268336  | C | -0.0437 |
| rs4478116   | C | 0.0284  |
| rs73139199  | A | -0.1462 |
| rs4501068   | C | 0.0682  |
| rs11712456  | C | 0.0641  |
| rs6798119   | C | -0.0443 |
| rs2278599   | G | -0.0215 |
| rs114460548 | A | 0.09    |
| rs162794    | G | 0.0443  |
| rs6790991   | G | -0.0535 |
| rs17828523  | C | 0.0253  |
| rs2622726   | C | 0.0237  |
| rs56134008  | T | -0.0637 |
| rs139029896 | A | -0.0906 |
| rs62298251  | A | 0.0773  |
| rs4508721   | T | 0.0222  |
| rs116695884 | A | 0.0715  |
| rs259439    | A | 0.0198  |
| rs113901108 | T | 0.1301  |
| rs76191472  | A | -0.1056 |

|             |   |         |
|-------------|---|---------|
| rs74808375  | T | 0.0617  |
| rs114157713 | T | -0.0761 |
| rs115692265 | A | 0.0327  |
| rs56302621  | G | -0.0183 |
| rs964851    | C | 0.0169  |
| rs35310526  | A | -0.0422 |
| rs4912586   | T | 0.0455  |
| rs13066791  | A | 0.0191  |
| rs62274739  | C | 0.1065  |
| rs113469132 | G | -0.0829 |
| rs3773688   | A | -0.0195 |
| rs6783742   | G | -0.0191 |
| rs145829545 | A | 0.0906  |
| rs59710766  | C | 0.0455  |
| rs113180077 | C | 0.0661  |
| rs4688116   | G | 0.0163  |
| rs76243229  | T | -0.0774 |
| rs76707595  | T | 0.0826  |
| rs4314181   | C | 0.017   |
| rs13061453  | A | 0.017   |
| rs73072446  | T | 0.085   |
| rs41334246  | T | 0.0822  |
| rs114381868 | T | -0.0694 |
| rs17033961  | G | 0.0242  |
| rs80260483  | A | -0.0815 |
| rs62284715  | G | 0.0364  |
| rs140131218 | A | -0.0573 |
| rs6789699   | C | 0.0195  |
| rs59912200  | T | -0.0318 |
| rs62236903  | T | -0.0523 |
| rs34603222  | T | -0.0187 |
| rs75193453  | T | -0.1225 |
| rs75739050  | C | -0.069  |
| rs78994155  | C | 0.0644  |
| rs6782547   | G | 0.052   |
| rs76756609  | A | 0.0382  |
| rs842279    | T | 0.0568  |
| rs78725470  | C | -0.079  |
| rs76367758  | T | 0.079   |
| rs13083656  | G | -0.0255 |
| rs4855642   | C | -0.0411 |
| rs2052994   | T | 0.0166  |
| rs1499962   | C | -0.0199 |
| rs9875303   | C | -0.0165 |
| rs73095826  | T | 0.0403  |
| rs73113524  | T | 0.0698  |
| rs4646721   | C | 0.0155  |

|             |   |         |
|-------------|---|---------|
| rs4680551   | G | 0.019   |
| rs1720568   | C | -0.016  |
| rs62251087  | A | -0.0306 |
| rs115258527 | G | 0.11    |
| rs2196552   | C | 0.0579  |
| rs2163417   | T | -0.0335 |
| rs115210980 | T | 0.0775  |
| rs74387803  | A | -0.1311 |
| rs6800370   | A | 0.0362  |
| rs4831149   | T | 0.0176  |
| rs79116293  | G | 0.1023  |
| rs12496508  | C | -0.0271 |
| rs72983028  | A | -0.0941 |
| rs12107159  | G | -0.0672 |
| rs11927366  | T | 0.0681  |
| rs114608760 | T | -0.0773 |
| rs142052146 | C | 0.0666  |
| rs60447162  | A | 0.0464  |
| rs2878598   | A | -0.1158 |
| rs937780    | T | -0.0209 |
| rs13098118  | G | -0.0302 |
| rs13081811  | C | -0.0518 |
| rs62244278  | T | 0.0769  |
| rs16853475  | T | -0.0423 |
| rs79127573  | A | 0.1002  |
| rs9869653   | C | 0.0343  |
| rs115093392 | A | 0.1226  |
| rs1105977   | T | -0.0188 |
| rs17072107  | G | -0.0229 |
| rs2886046   | C | 0.0162  |
| rs16849809  | T | -0.0238 |
| rs2341234   | G | -0.0221 |
| rs35529725  | A | 0.035   |
| rs17695565  | C | 0.0683  |
| rs145121554 | A | -0.0971 |
| rs17359152  | T | 0.0549  |
| rs115583178 | T | 0.0847  |
| rs9756135   | A | -0.0274 |
| rs115865189 | T | 0.0776  |
| rs7643587   | C | -0.0169 |
| rs115660200 | A | -0.0824 |
| rs17789915  | C | -0.0238 |
| rs77012989  | C | 0.0908  |
| rs79493244  | A | -0.0879 |
| rs9852880   | G | -0.0169 |
| rs34021426  | A | 0.0624  |
| rs11710268  | A | 0.0261  |



|             |   |         |
|-------------|---|---------|
| rs56190625  | T | 0.0613  |
| rs12491786  | G | -0.0196 |
| rs113365437 | T | 0.0637  |
| rs59658964  | C | 0.0244  |
| rs17352616  | T | -0.0762 |
| rs635407    | T | 0.0192  |
| rs60985059  | T | 0.0361  |
| rs80116324  | T | 0.0313  |
| rs9310820   | A | 0.0231  |
| rs74784044  | G | -0.0614 |
| rs73156907  | A | -0.0204 |
| rs56056756  | T | -0.0319 |
| rs7644423   | G | -0.0364 |
| rs115449345 | A | 0.0905  |
| rs9843615   | C | 0.0809  |
| rs17556428  | A | 0.0739  |
| rs7618979   | T | -0.0266 |
| rs146428789 | T | 0.0823  |
| rs74877363  | G | -0.0447 |
| rs150068843 | T | 0.0503  |
| rs138319975 | C | 0.1021  |
| rs79019912  | T | 0.0622  |
| rs115252620 | A | -0.0684 |
| rs17677553  | T | 0.0888  |
| rs17040626  | C | 0.0724  |
| rs138207768 | T | -0.0637 |
| rs17378833  | A | 0.0351  |
| rs62267817  | T | -0.0214 |
| rs1978558   | T | -0.0427 |
| rs1994263   | C | 0.0583  |
| rs62266492  | T | -0.0253 |
| rs9869536   | C | -0.0795 |
| rs62264700  | C | -0.0482 |
| rs55637970  | C | -0.0216 |
| rs112338684 | G | 0.0236  |
| rs78535035  | A | 0.0891  |
| rs73099605  | A | -0.0282 |
| rs11128275  | G | 0.0154  |
| rs115632343 | A | 0.0496  |
| rs9848060   | G | -0.0162 |
| rs150107745 | A | 0.0852  |
| rs696375    | A | -0.0177 |
| rs113845448 | A | 0.0332  |
| rs73132113  | A | -0.0607 |
| rs2399526   | C | 0.0169  |
| rs741481    | C | -0.0168 |
| rs12634248  | T | 0.0169  |

|             |   |         |
|-------------|---|---------|
| rs11714142  | T | -0.0412 |
| rs73005403  | G | 0.0311  |
| rs75480352  | A | -0.0388 |
| rs112190531 | A | 0.0705  |
| rs116239321 | A | 0.1289  |
| rs114714143 | C | 0.0277  |
| rs75972128  | C | 0.0608  |
| rs76573459  | T | 0.0901  |
| rs28685760  | T | -0.0394 |
| rs9822432   | G | 0.0311  |
| rs56367303  | C | -0.0747 |
| rs755004    | A | 0.0222  |
| rs149543195 | A | -0.0971 |
| rs77037737  | A | -0.0361 |
| rs60312022  | A | 0.0319  |
| rs62268427  | C | -0.0468 |
| rs114950712 | G | -0.0628 |
| rs79605285  | G | 0.0535  |
| rs266761    | G | 0.0165  |
| rs35718383  | G | 0.0268  |
| rs6770849   | T | -0.018  |
| rs75957956  | C | -0.0463 |
| rs7647846   | C | 0.0158  |
| rs151109287 | C | -0.0907 |
| rs4855431   | C | -0.0179 |
| rs6770134   | A | 0.0171  |
| rs11925837  | G | 0.037   |
| rs3828357   | C | -0.0235 |
| rs142056856 | A | 0.0744  |
| rs74702276  | C | -0.0802 |
| rs7638369   | T | -0.0173 |
| rs62276452  | C | -0.111  |
| rs13090107  | G | -0.0284 |
| rs1498994   | G | -0.0157 |
| rs9881930   | A | 0.0202  |
| rs79442992  | G | -0.0366 |
| rs11715557  | C | 0.045   |
| rs115369566 | T | -0.0831 |
| rs140647181 | C | 0.0964  |
| rs35678417  | A | -0.0217 |
| rs13096036  | G | 0.0321  |
| rs117574903 | T | 0.0605  |
| rs303874    | T | 0.0198  |
| rs74760638  | T | 0.0698  |
| rs35896828  | A | -0.0659 |
| rs115613078 | C | 0.0553  |
| rs114659622 | T | -0.1081 |

|             |   |         |
|-------------|---|---------|
| rs73118060  | T | -0.0202 |
| rs71327767  | T | 0.0771  |
| rs1403724   | G | -0.0199 |
| rs115772962 | T | -0.0554 |
| rs2320172   | G | 0.0325  |
| rs144685275 | C | 0.1442  |
| rs114269520 | G | -0.1041 |
| rs56992354  | A | 0.0856  |
| rs9866412   | C | 0.0639  |
| rs115988694 | A | 0.0683  |
| rs138019554 | C | 0.0476  |
| rs34120318  | A | 0.0556  |
| rs11923261  | T | -0.0856 |
| rs78081797  | T | 0.0775  |
| rs13092031  | C | 0.0162  |
| rs1393522   | A | -0.019  |
| rs79556998  | A | 0.0904  |
| rs76620897  | G | -0.1011 |
| rs28732370  | A | -0.0157 |
| rs13080304  | T | 0.0162  |
| rs34105180  | T | -0.0253 |
| rs7432940   | T | -0.0172 |
| rs73085903  | T | 0.0424  |
| rs17061232  | C | -0.0338 |
| rs112809766 | T | -0.06   |
| rs73120636  | C | -0.1272 |
| rs17826507  | G | 0.0266  |
| rs114434473 | C | 0.07    |
| rs4894714   | G | 0.0195  |
| rs6794561   | A | -0.0345 |
| rs2675264   | T | 0.0441  |
| rs76108231  | A | 0.0443  |
| rs150027262 | G | 0.1035  |
| rs12638121  | C | 0.0729  |
| rs12636581  | A | -0.0164 |
| rs35147577  | G | -0.0211 |
| rs140131416 | G | -0.0999 |
| rs6779176   | C | 0.0264  |
| rs3821525   | G | 0.0171  |
| rs148340429 | T | 0.0852  |
| rs143747560 | G | 0.0929  |
| rs6798535   | T | 0.0965  |
| rs62270787  | A | -0.0238 |
| rs4927710   | T | -0.0252 |
| rs111651962 | C | 0.0818  |
| rs1469997   | T | 0.0614  |
| rs117078876 | T | -0.0606 |

|             |   |         |
|-------------|---|---------|
| rs9824025   | C | -0.0217 |
| rs77197642  | T | 0.0245  |
| rs80074340  | C | -0.0788 |
| rs76591916  | G | -0.0861 |
| rs73052844  | T | 0.0849  |
| rs138628404 | C | -0.0215 |
| rs17236529  | T | -0.0548 |
| rs1899400   | T | -0.0197 |
| rs79139223  | A | -0.0554 |
| rs34484694  | A | -0.0634 |
| rs2255401   | T | -0.0203 |
| rs16832271  | T | -0.0333 |
| rs73178438  | G | -0.0206 |
| rs1819870   | A | 0.018   |
| rs75770022  | C | -0.0692 |
| rs138343917 | C | 0.0912  |
| rs9637471   | G | -0.0362 |
| rs13062415  | T | 0.0258  |
| rs114363577 | A | -0.0769 |
| rs13070665  | T | 0.0491  |
| rs826245    | A | -0.0205 |
| rs11130106  | G | 0.0156  |
| rs116151773 | A | -0.0906 |
| rs79598599  | C | -0.1493 |
| rs1454689   | A | 0.0335  |
| rs6810302   | A | -0.018  |
| rs13094348  | G | 0.1155  |
| rs146277059 | A | -0.0929 |
| rs13325550  | C | -0.0243 |
| rs147533560 | C | 0.0567  |
| rs72986629  | T | 0.0506  |
| rs9755013   | A | 0.0332  |
| rs11709135  | C | -0.0818 |
| rs9840597   | A | 0.0175  |
| rs4858682   | C | -0.0165 |
| rs79744438  | T | 0.0762  |
| rs111390177 | T | -0.0538 |
| rs7644010   | T | 0.1138  |
| rs146063569 | T | 0.0702  |
| rs115941814 | T | 0.0752  |
| rs6549439   | C | 0.0157  |
| rs6800159   | G | -0.0953 |
| rs144384657 | G | -0.062  |
| rs11715893  | A | 0.0181  |
| rs10513621  | G | 0.0242  |
| rs7618021   | T | -0.0172 |
| rs73827203  | C | -0.0466 |

|             |   |         |
|-------------|---|---------|
| rs113814367 | C | 0.0418  |
| rs6446039   | G | -0.0166 |
| rs17272985  | G | 0.0738  |
| rs141070605 | A | 0.0363  |
| rs115033885 | A | -0.0479 |
| rs344958    | T | -0.0641 |
| rs72996583  | A | -0.043  |
| rs78813693  | A | -0.1161 |
| rs7432768   | G | -0.0162 |
| rs9828655   | C | -0.0306 |
| rs9825587   | C | -0.0184 |
| rs116221877 | A | 0.0414  |
| rs73016630  | T | -0.0399 |
| rs79283181  | C | 0.0972  |
| rs13100090  | T | 0.0178  |
| rs7613069   | G | -0.0509 |
| rs1430012   | T | 0.0207  |
| rs55822198  | C | 0.0293  |
| rs1516316   | G | 0.0194  |
| rs80131629  | G | 0.0345  |
| rs9815958   | T | 0.024   |
| rs75815271  | C | 0.0308  |
| rs2016933   | C | 0.0172  |
| rs73114649  | T | 0.0963  |
| rs75235835  | C | -0.0615 |
| rs142565766 | A | 0.1762  |
| rs115765203 | C | 0.0787  |
| rs149668593 | A | -0.0931 |
| rs73071205  | T | -0.0297 |
| rs1905866   | A | 0.0162  |
| rs114022824 | G | 0.1472  |
| rs114730185 | A | -0.1031 |
| rs59918529  | C | -0.0195 |
| rs10510241  | A | -0.0182 |
| rs13068024  | A | 0.0203  |
| rs144152938 | A | -0.0621 |
| rs77777350  | A | 0.0311  |
| rs1996242   | G | 0.0153  |
| rs116735974 | T | 0.062   |
| rs75368803  | C | 0.1003  |
| rs17618257  | C | 0.0304  |
| rs77516487  | A | -0.0317 |
| rs9835822   | C | -0.0199 |
| rs7652214   | C | 0.1039  |
| rs11706483  | A | -0.0234 |
| rs114467970 | A | 0.1211  |
| rs138897503 | T | 0.0642  |

|             |   |         |
|-------------|---|---------|
| rs148260249 | G | -0.1028 |
| rs9809000   | G | 0.0265  |
| rs1516383   | A | -0.0222 |
| rs78242787  | C | -0.078  |
| rs111851986 | T | -0.0302 |
| rs61489040  | T | -0.049  |
| rs71326458  | G | 0.0912  |
| rs151244741 | A | -0.0338 |
| rs35307231  | T | 0.0563  |
| rs2410877   | A | 0.0291  |
| rs6442646   | C | 0.0269  |
| rs995829    | A | -0.0181 |
| rs10934806  | A | 0.0161  |
| rs144871671 | G | 0.1278  |
| rs62276820  | C | -0.0824 |
| rs73180861  | A | -0.0265 |
| rs144161168 | T | 0.0755  |
| rs143143236 | C | 0.1106  |
| rs112094634 | T | 0.0655  |
| rs4679232   | C | 0.0272  |
| rs114488160 | A | 0.07    |
| rs76889109  | A | -0.0252 |
| rs4679533   | C | 0.0737  |
| rs113196742 | T | -0.1067 |
| rs116140498 | C | 0.0478  |
| rs9310688   | A | 0.0373  |
| rs12495740  | G | 0.0827  |
| rs76185500  | C | -0.116  |
| rs78647604  | A | 0.0439  |
| rs165500    | C | 0.0272  |
| rs34874055  | G | -0.0178 |
| rs142616192 | C | 0.1136  |
| rs77927585  | C | -0.0815 |
| rs334562    | C | -0.0715 |
| rs141718232 | C | -0.1335 |
| rs11922092  | C | -0.0814 |
| rs12630390  | A | -0.0436 |
| rs6780233   | G | -0.0216 |
| rs147534383 | A | 0.0674  |
| rs112645538 | C | -0.0988 |
| rs13077432  | T | 0.0227  |
| rs76920837  | G | -0.0345 |
| rs73826337  | A | 0.0219  |
| rs144046302 | T | 0.0985  |
| rs34196703  | G | 0.0533  |
| rs116820199 | A | -0.0864 |
| rs74363313  | G | 0.1147  |

|             |   |         |
|-------------|---|---------|
| rs115837935 | G | 0.1234  |
| rs114715691 | A | -0.079  |
| rs12330175  | G | -0.058  |
| rs17663718  | C | 0.0815  |
| rs73077437  | C | 0.0506  |
| rs683403    | A | -0.0169 |
| rs115498810 | C | 0.0833  |
| rs9837132   | A | 0.0223  |
| rs1503729   | G | 0.0161  |
| rs7633949   | G | -0.0184 |
| rs145193710 | C | 0.0884  |
| rs73035015  | G | -0.0447 |
| rs75323244  | A | 0.0684  |
| rs6792761   | C | 0.0478  |
| rs138598521 | G | -0.0851 |
| rs1290498   | G | -0.062  |
| rs115148262 | T | 0.0683  |
| rs12492854  | A | 0.0655  |
| rs73146123  | C | 0.0253  |
| rs9875401   | T | -0.028  |
| rs75892991  | G | -0.0606 |
| rs6443666   | C | 0.0173  |
| rs9841328   | A | -0.0363 |
| rs115635388 | T | 0.0785  |
| rs113278096 | A | -0.0238 |
| rs62273807  | A | 0.0485  |
| rs9859771   | G | -0.0181 |
| rs116527836 | A | -0.053  |
| rs12496658  | T | -0.0307 |
| rs116116485 | T | 0.0843  |
| rs12495632  | T | -0.082  |
| rs166345    | T | 0.0237  |
| rs62247694  | T | -0.0462 |
| rs141897944 | A | 0.1     |
| rs28640943  | G | -0.019  |
| rs78136603  | T | 0.0732  |
| rs73095514  | T | 0.0776  |
| rs7647632   | C | -0.0215 |
| rs4686395   | A | -0.0183 |
| rs2111101   | T | -0.028  |
| rs3805032   | A | 0.0203  |
| rs17039443  | C | 0.0189  |
| rs111428221 | T | 0.0632  |
| rs113259616 | G | -0.0784 |
| rs1469676   | A | -0.0222 |
| rs138899599 | T | 0.0721  |
| rs1351277   | T | -0.0195 |

|             |   |         |
|-------------|---|---------|
| rs13088735  | T | 0.0972  |
| rs17065626  | T | -0.0405 |
| rs62250771  | A | 0.0293  |
| rs13087500  | A | 0.0194  |
| rs2569958   | T | -0.0308 |
| rs1830044   | A | -0.0258 |
| rs116146610 | C | 0.0646  |
| rs76454878  | A | 0.0723  |
| rs4369974   | G | 0.0483  |
| rs78219896  | A | -0.0523 |
| rs41527949  | A | -0.0386 |
| rs7644005   | T | 0.0182  |
| rs237891    | C | 0.0271  |
| rs74853590  | T | 0.0232  |
| rs113333370 | G | 0.0642  |
| rs79864241  | T | 0.1188  |
| rs75614272  | T | -0.0666 |
| rs76844162  | C | 0.0807  |
| rs3843358   | C | 0.0178  |
| rs144888160 | T | -0.0612 |
| rs147793174 | A | 0.0849  |
| rs149192064 | A | 0.0873  |
| rs28679522  | A | 0.0256  |
| rs147683133 | T | 0.0466  |
| rs9861201   | C | 0.0272  |
| rs150096124 | G | -0.0824 |
| rs115725838 | A | -0.071  |
| rs34673573  | T | -0.0258 |
| rs711986    | G | 0.0179  |
| rs116070509 | G | 0.0797  |
| rs77580539  | T | -0.0363 |
| rs58758610  | T | 0.0182  |
| rs111735227 | T | 0.0259  |
| rs73096824  | T | 0.06    |
| rs75671719  | A | -0.079  |
| rs75181814  | A | -0.0597 |
| rs77761268  | T | -0.1012 |
| rs114103767 | C | 0.0418  |
| rs13076152  | T | -0.0431 |
| rs113873718 | G | 0.0822  |
| rs6444931   | G | -0.0287 |
| rs2687799   | G | -0.0216 |
| rs79144911  | A | -0.0329 |
| rs1276085   | C | -0.036  |
| rs6442435   | T | -0.016  |
| rs4602360   | C | -0.0191 |
| rs3936484   | G | -0.0159 |



|             |   |         |
|-------------|---|---------|
| rs73098044  | G | -0.0669 |
| rs71325385  | A | 0.0825  |
| rs143935512 | C | -0.076  |
| rs71313754  | G | -0.0678 |
| rs77728640  | C | -0.0336 |
| rs143030618 | T | 0.12    |
| rs79533079  | G | 0.061   |
| rs4677966   | A | 0.0229  |
| rs6439452   | G | -0.0182 |
| rs116385210 | T | 0.0979  |
| rs2700464   | T | -0.0175 |
| rs17013681  | A | -0.0246 |
| rs62278987  | A | 0.0555  |
| rs7632187   | C | -0.0165 |
| rs2648690   | G | 0.0275  |
| rs11706397  | C | -0.0266 |
| rs76391385  | G | 0.0745  |
| rs16842962  | A | 0.0872  |
| rs7635672   | T | 0.0297  |
| rs2642913   | G | 0.0246  |
| rs1881973   | C | -0.017  |
| rs156164    | T | 0.0236  |
| rs146891289 | A | -0.1132 |
| rs139269328 | G | 0.1094  |
| rs6774800   | A | 0.0285  |
| rs145369694 | A | 0.1213  |
| rs114923591 | A | 0.0645  |
| rs1512044   | A | 0.0274  |
| rs9847944   | T | -0.0351 |
| rs62234671  | A | 0.0532  |
| rs138665823 | C | -0.0971 |
| rs6443784   | A | 0.0173  |
| rs116812399 | C | 0.0701  |
| rs74837207  | G | -0.0295 |
| rs114221001 | G | -0.0482 |
| rs2422084   | G | -0.0186 |
| rs78418844  | C | -0.0616 |
| rs77645324  | T | 0.0414  |
| rs114345548 | A | -0.0459 |
| rs1370717   | A | -0.0172 |
| rs77326121  | T | -0.0546 |
| rs73165972  | C | -0.1098 |
| rs7627231   | A | -0.0205 |
| rs7372767   | G | 0.0152  |
| rs2089249   | T | -0.0187 |
| rs115793590 | T | 0.0459  |
| rs115719130 | C | 0.0653  |

|             |   |         |
|-------------|---|---------|
| rs76760705  | A | 0.051   |
| rs9872123   | C | 0.0385  |
| rs11710358  | T | -0.0192 |
| rs10084679  | C | 0.0372  |
| rs76439121  | G | 0.0982  |
| rs115392523 | C | 0.1091  |
| rs12633166  | C | -0.0181 |
| rs9846977   | G | -0.0154 |
| rs73152633  | T | -0.0547 |
| rs73091661  | G | -0.0357 |
| rs3772509   | G | 0.0394  |
| rs77740647  | C | 0.0426  |
| rs114280516 | T | -0.0672 |
| rs13318505  | G | -0.0256 |
| rs7430875   | G | -0.0542 |
| rs7622631   | C | 0.0216  |
| rs161894    | G | 0.0156  |
| rs4858571   | T | 0.0272  |
| rs78389144  | C | 0.1093  |
| rs75441434  | A | 0.0936  |
| rs1947074   | C | -0.0158 |
| rs75628241  | C | -0.0295 |
| rs3792424   | G | 0.0293  |
| rs151141581 | A | 0.0795  |
| rs7627131   | A | 0.0161  |
| rs73054681  | A | -0.0302 |
| rs71311332  | A | 0.0412  |
| rs147987466 | A | 0.0265  |
| rs59741456  | A | 0.0365  |
| rs12497207  | G | -0.0335 |
| rs12490840  | T | -0.0506 |
| rs7643518   | G | 0.0155  |
| rs1563668   | G | -0.0161 |
| rs116818072 | G | -0.064  |
| rs74691904  | T | 0.0636  |
| rs73014353  | G | -0.0417 |
| rs148376582 | T | 0.1166  |
| rs114979064 | G | 0.0442  |
| rs12108081  | T | 0.0191  |
| rs924247    | T | -0.0156 |
| rs62250742  | G | 0.0169  |
| rs6775013   | G | -0.0191 |
| rs139170500 | A | 0.1103  |
| rs1449023   | T | 0.0656  |
| rs79768569  | G | -0.057  |
| rs4681901   | C | 0.0178  |
| rs115509883 | A | -0.0989 |

|             |   |         |
|-------------|---|---------|
| rs114473533 | G | 0.0556  |
| rs76080408  | T | 0.1104  |
| rs77221433  | A | -0.061  |
| rs150253196 | G | 0.0531  |
| rs111801554 | G | 0.0802  |
| rs115153300 | A | -0.0839 |
| rs77539153  | T | 0.0756  |
| rs73046698  | T | 0.0301  |
| rs73094937  | A | -0.0455 |
| rs79232832  | C | 0.1208  |
| rs12637885  | T | -0.0153 |
| rs77401774  | T | 0.1181  |
| rs9874863   | T | 0.0286  |
| rs12631413  | T | -0.0331 |
| rs6802476   | G | -0.03   |
| rs3821719   | A | 0.024   |
| rs1626374   | G | -0.0268 |
| rs34618276  | A | 0.0157  |
| rs13062075  | T | -0.0561 |
| rs1552749   | C | -0.0248 |
| rs115607096 | G | 0.0672  |
| rs75125432  | G | 0.0331  |
| rs73005793  | T | -0.1408 |
| rs334782    | C | -0.0156 |
| rs12490375  | T | -0.0161 |
| rs12637132  | A | 0.0436  |
| rs77043939  | T | -0.0393 |
| rs6787984   | T | 0.041   |
| rs12635046  | C | 0.0233  |
| rs11915837  | A | -0.0435 |
| rs138298531 | G | -0.1034 |
| rs62242337  | A | 0.0188  |
| rs13065761  | A | 0.0162  |
| rs115460306 | C | 0.077   |
| rs148066668 | T | 0.1016  |
| rs78721717  | T | -0.0452 |
| rs3772232   | T | 0.0408  |
| rs342002    | A | -0.0708 |
| rs116465523 | A | 0.0339  |
| rs116427902 | T | -0.1122 |
| rs34241264  | A | 0.0846  |
| rs62292580  | G | 0.0276  |
| rs9871963   | G | -0.0169 |
| rs9882205   | A | 0.0217  |
| rs13060787  | A | 0.0626  |
| rs9880138   | C | 0.0279  |
| rs76199597  | G | -0.1204 |

|             |   |         |
|-------------|---|---------|
| rs17201153  | G | 0.0425  |
| rs148488115 | A | -0.1378 |
| rs697331    | T | 0.0313  |
| rs301937    | T | -0.0298 |
| rs9836686   | T | 0.0207  |
| rs145303131 | G | 0.1228  |
| rs13098026  | G | -0.0807 |
| rs9823052   | G | 0.0167  |
| rs114701498 | T | -0.0413 |
| rs6795706   | T | -0.0867 |
| rs62294304  | A | 0.0491  |
| rs213408    | A | 0.0157  |
| rs116437296 | A | 0.0815  |
| rs13061678  | A | -0.0159 |
| rs7648094   | A | 0.0166  |
| rs9867350   | A | 0.0271  |
| rs144547103 | G | 0.0746  |
| rs79181427  | G | 0.0376  |
| rs73203429  | A | 0.0563  |
| rs1731642   | G | 0.021   |
| rs78874456  | T | 0.0393  |
| rs62247397  | A | -0.0492 |
| rs77150136  | T | 0.0541  |
| rs72871313  | G | 0.0293  |
| rs35593073  | A | -0.0519 |
| rs9830042   | T | -0.079  |
| rs114858443 | C | 0.0997  |
| rs139640439 | A | -0.0673 |
| rs116888908 | G | 0.1133  |
| rs9812836   | G | 0.0232  |
| rs56316904  | T | 0.037   |
| rs115384618 | T | -0.0704 |
| rs13319612  | A | -0.0746 |
| rs34423364  | T | -0.0251 |
| rs6776053   | G | 0.0654  |
| rs113454949 | G | -0.0342 |
| rs149736097 | G | 0.0718  |
| rs12634229  | C | -0.0483 |
| rs73023242  | T | -0.0298 |
| rs114838475 | G | -0.0859 |
| rs139416121 | C | 0.0462  |
| rs149938465 | T | -0.109  |
| rs7631422   | A | 0.0349  |
| rs4461463   | A | -0.0774 |
| rs146240329 | A | -0.0963 |
| rs112054747 | G | -0.0725 |
| rs73019738  | T | -0.0766 |

|             |   |         |
|-------------|---|---------|
| rs7634462   | C | -0.0415 |
| rs2062957   | T | -0.0148 |
| rs17014561  | C | 0.0571  |
| rs116824346 | C | -0.0882 |
| rs2072583   | A | 0.0198  |
| rs74709436  | C | 0.0193  |
| rs2859580   | G | -0.0251 |
| rs142641622 | C | 0.0558  |
| rs147467842 | A | 0.0304  |
| rs17266628  | G | -0.019  |
| rs74604578  | A | -0.0697 |
| rs6440961   | T | -0.0251 |
| rs115955514 | A | -0.0785 |
| rs138328210 | T | 0.0865  |
| rs1845752   | A | -0.0218 |
| rs10510405  | T | 0.0252  |
| rs842281    | A | 0.0162  |
| rs11713583  | C | -0.0189 |
| rs3914757   | T | 0.0169  |
| rs148629058 | A | 0.0915  |
| rs66720638  | T | 0.0614  |
| rs146935990 | T | -0.0552 |
| rs114222445 | A | -0.0538 |
| rs6786255   | G | -0.081  |
| rs143949778 | A | 0.0709  |
| rs79884683  | T | -0.0199 |
| rs113690293 | T | -0.0352 |
| rs56686813  | T | 0.0536  |
| rs80052905  | C | -0.1011 |
| rs115452975 | T | 0.0698  |
| rs77194240  | A | 0.1021  |
| rs9290612   | T | -0.0184 |
| rs16866432  | G | -0.0531 |
| rs6808753   | C | -0.0314 |
| rs77073442  | G | -0.0915 |
| rs114375560 | T | 0.0518  |
| rs232006    | T | -0.0282 |
| rs140151257 | C | 0.0521  |
| rs850307    | T | -0.0171 |
| rs28607119  | T | -0.1039 |
| rs79810251  | C | 0.0509  |
| rs73230620  | A | 0.0237  |
| rs28688286  | C | -0.0376 |
| rs146690599 | A | -0.0775 |
| rs114625105 | G | -0.0979 |
| rs10513285  | C | -0.0224 |
| rs6778994   | C | 0.0201  |

|             |   |         |
|-------------|---|---------|
| rs62283267  | C | -0.0474 |
| rs148556385 | A | -0.0647 |
| rs73017948  | T | -0.0392 |
| rs34729239  | G | 0.0431  |
| rs58844841  | C | 0.0484  |
| rs3773155   | G | -0.022  |
| rs114286528 | A | -0.0787 |
| rs75819130  | T | -0.0765 |
| rs7652142   | T | 0.0154  |
| rs117348492 | C | -0.1014 |
| rs72995342  | T | 0.0796  |
| rs6790614   | G | -0.0304 |
| rs76966321  | C | -0.0605 |
| rs112209345 | T | 0.0597  |
| rs59007063  | T | 0.0419  |
| rs115091509 | A | 0.0751  |
| rs13095863  | T | 0.0169  |
| rs80268278  | G | 0.0345  |
| rs2196550   | A | -0.022  |
| rs17075984  | T | -0.0347 |
| rs6775128   | G | 0.0409  |
| rs144500246 | A | -0.0664 |
| rs74778621  | G | -0.0362 |
| rs150768287 | G | 0.0955  |
| rs9309797   | C | 0.0162  |
| rs79558064  | A | 0.0266  |
| rs116360965 | A | -0.0786 |
| rs12634543  | T | 0.0267  |
| rs17662627  | C | -0.0176 |
| rs7610357   | T | 0.0348  |
| rs141855957 | A | 0.0609  |
| rs150803637 | T | 0.079   |
| rs116243895 | G | -0.0928 |
| rs112167791 | A | 0.0259  |
| rs3732588   | A | -0.0245 |
| rs62279940  | A | -0.0174 |
| rs9816262   | G | 0.019   |
| rs7643177   | C | 0.039   |
| rs9291015   | T | 0.0347  |
| rs7644352   | G | 0.0292  |
| rs140593494 | A | -0.1036 |
| rs1672766   | G | 0.0191  |
| rs75581639  | T | -0.091  |
| rs2231217   | A | 0.0312  |
| rs71314347  | G | 0.0428  |
| rs6780554   | A | -0.0762 |
| rs35863     | T | -0.0152 |

|             |   |         |
|-------------|---|---------|
| rs73042746  | C | 0.0254  |
| rs2437205   | C | 0.0251  |
| rs76498346  | G | 0.0372  |
| rs62236341  | A | 0.0252  |
| rs80019884  | T | -0.0374 |
| rs114719645 | C | 0.0811  |
| rs6765017   | T | 0.0508  |
| rs147713188 | A | 0.0636  |
| rs79935822  | A | 0.0501  |
| rs60382153  | T | -0.0193 |
| rs13071725  | A | 0.0596  |
| rs3772315   | G | 0.0171  |
| rs12233463  | G | 0.0189  |
| rs546852    | T | -0.0299 |
| rs151228879 | G | 0.0358  |
| rs78112934  | T | -0.0531 |
| rs13068625  | G | 0.0155  |
| rs13099553  | C | -0.0181 |
| rs62391970  | G | 0.0492  |
| rs78578057  | A | 0.0671  |
| rs76225460  | A | -0.0773 |
| rs6785595   | G | 0.0922  |
| rs9814761   | T | -0.0188 |
| rs9831413   | C | 0.0239  |
| rs79947800  | T | 0.0547  |
| rs294461    | A | 0.0205  |
| rs33080     | A | 0.0172  |
| rs2971926   | C | -0.0277 |
| rs73845635  | T | 0.0919  |
| rs2630803   | A | -0.0166 |
| rs62252596  | G | -0.0296 |
| rs116207251 | G | -0.047  |
| rs146029109 | C | 0.0199  |
| rs116250628 | G | -0.1171 |
| rs79408317  | G | 0.0519  |
| rs78188075  | T | -0.0417 |
| rs62253038  | A | -0.0679 |
| rs71300737  | C | 0.0664  |
| rs13064839  | A | 0.0807  |
| rs2350497   | A | -0.0292 |
| rs62293358  | G | -0.0335 |
| rs2861590   | G | 0.0238  |
| rs6805647   | T | -0.0864 |
| rs17038334  | G | 0.0237  |
| rs71322817  | A | 0.0815  |
| rs71304466  | A | -0.0312 |
| rs148663560 | A | 0.0837  |

|             |   |         |
|-------------|---|---------|
| rs143305571 | A | -0.0356 |
| rs75141803  | C | -0.0646 |
| rs484479    | G | 0.0161  |
| rs74866853  | T | -0.0501 |
| rs9818262   | A | 0.1126  |
| rs7652649   | G | -0.0205 |
| rs2898596   | A | 0.0391  |
| rs116565681 | A | -0.0834 |
| rs6782157   | C | -0.0185 |
| rs9815975   | A | 0.0172  |
| rs11721191  | A | -0.0381 |
| rs115183960 | G | 0.0601  |
| rs150394119 | A | 0.055   |
| rs73035929  | G | -0.0262 |
| rs56359415  | C | -0.0782 |
| rs2306774   | C | -0.0164 |
| rs114275672 | G | 0.0312  |
| rs77506163  | C | -0.1001 |
| rs11712735  | A | -0.0187 |
| rs16831406  | A | -0.0182 |
| rs11917489  | G | -0.0161 |
| rs9990287   | A | -0.017  |
| rs147463852 | T | 0.0754  |
| rs994148    | G | 0.0199  |
| rs9810713   | T | -0.0217 |
| rs2218266   | A | -0.018  |
| rs71313528  | A | -0.0575 |
| rs115344509 | G | 0.0561  |
| rs79612183  | A | 0.0518  |
| rs16863016  | G | -0.1256 |
| rs2655035   | T | 0.0174  |
| rs114513147 | A | -0.0508 |
| rs60183750  | A | 0.035   |
| rs693430    | A | -0.0777 |
| rs137883664 | C | 0.0329  |
| rs147873949 | T | 0.052   |
| rs3968917   | T | 0.0163  |
| rs58008947  | T | 0.0244  |
| rs77843863  | G | 0.0508  |
| rs150320381 | G | 0.0945  |
| rs115259458 | A | -0.0741 |
| rs146560215 | T | 0.0652  |
| rs73214574  | T | -0.1204 |
| rs10936099  | C | -0.0149 |
| rs41427850  | A | -0.0271 |
| rs872526    | C | -0.0149 |
| rs6782512   | A | 0.0242  |



|             |   |         |
|-------------|---|---------|
| rs1399754   | A | -0.0153 |
| rs114258659 | G | 0.0639  |
| rs9870148   | A | 0.0184  |
| rs6444674   | G | 0.0616  |
| rs11707491  | A | -0.0577 |
| rs73227574  | G | -0.0672 |
| rs71314086  | G | -0.0535 |
| rs9810214   | T | 0.0249  |
| rs35550194  | A | 0.0414  |
| rs118167294 | G | 0.0677  |
| rs78752729  | T | 0.0361  |
| rs80111399  | G | 0.0321  |
| rs79315078  | T | 0.0873  |
| rs113605468 | A | -0.0683 |
| rs78140870  | A | 0.0908  |
| rs149748299 | A | 0.0583  |
| rs7623295   | A | -0.0351 |
| rs116707007 | T | 0.1484  |
| rs114038549 | C | -0.052  |
| rs12493430  | C | 0.0163  |
| rs7630380   | A | -0.0508 |
| rs115454458 | C | 0.063   |
| rs11710139  | A | -0.0169 |
| rs4586843   | G | 0.0147  |
| rs16834952  | C | 0.1167  |
| rs35440513  | T | -0.0616 |
| rs9874671   | G | -0.0151 |
| rs6440943   | G | -0.0266 |
| rs115070789 | A | 0.0896  |
| rs181001    | A | 0.0147  |
| rs79091188  | T | 0.0268  |
| rs11923417  | G | 0.0238  |
| rs310712    | C | 0.0227  |
| rs6809935   | G | 0.0148  |
| rs4894825   | G | 0.019   |
| rs76804510  | C | -0.0619 |
| rs144851158 | G | -0.101  |
| rs3821656   | G | 0.0292  |
| rs80043347  | T | -0.0769 |
| rs9865775   | T | -0.0631 |
| rs1873023   | G | 0.0222  |
| rs78507783  | T | -0.0941 |
| rs78957160  | C | 0.0884  |
| rs941350    | A | -0.0522 |
| rs11717214  | C | -0.0416 |
| rs11712088  | A | 0.1104  |
| rs73232933  | T | 0.0256  |

|             |   |         |
|-------------|---|---------|
| rs60128854  | A | -0.0292 |
| rs11710768  | C | 0.0867  |
| rs72549154  | A | 0.0467  |
| rs730901    | A | -0.0345 |
| rs72915159  | T | -0.0782 |
| rs62276938  | C | -0.031  |
| rs1667743   | C | -0.0146 |
| rs114998209 | T | -0.1378 |
| rs114592942 | T | 0.0705  |
| rs115853016 | T | -0.0607 |
| rs78910108  | A | -0.0475 |
| rs116583650 | C | 0.0536  |
| rs2694108   | A | 0.0371  |
| rs116735998 | A | -0.0647 |
| rs28625100  | T | 0.0214  |
| rs340828    | A | -0.0157 |
| rs17037697  | A | -0.078  |
| rs4684966   | T | -0.0163 |
| rs78161983  | T | 0.0865  |
| rs12152344  | C | 0.0229  |
| rs75825320  | C | -0.1018 |
| rs10511409  | T | -0.0166 |
| rs114420416 | T | -0.0539 |
| rs73035453  | T | 0.0566  |
| rs73885749  | T | 0.0221  |
| rs2675172   | C | 0.0276  |
| rs116201978 | C | 0.0979  |
| rs150965318 | C | 0.0787  |
| rs11917821  | T | -0.0355 |
| rs58453365  | C | -0.0393 |
| rs6789927   | T | 0.0254  |
| rs112351294 | C | 0.0413  |
| rs55747911  | G | -0.0241 |
| rs115099184 | A | 0.0913  |
| rs71298382  | G | -0.0831 |
| rs4685610   | G | -0.0176 |
| rs6549450   | C | -0.022  |
| rs72620088  | A | 0.026   |
| rs12634673  | C | 0.0243  |
| rs114742494 | C | 0.0442  |
| rs116149390 | A | 0.0645  |
| rs9836679   | G | 0.0557  |
| rs4533620   | C | -0.046  |
| rs34947345  | G | 0.0347  |
| rs35267290  | T | -0.0468 |
| rs114057116 | A | 0.0502  |
| rs1260471   | A | 0.0158  |

|             |   |         |
|-------------|---|---------|
| rs4677096   | C | -0.0243 |
| rs4677146   | A | 0.0418  |
| rs73045324  | T | -0.0487 |
| rs114132409 | A | 0.056   |
| rs6776487   | T | 0.0175  |
| rs6439260   | T | 0.0161  |
| rs6793670   | T | 0.0164  |
| rs73189564  | G | 0.0207  |
| rs116052626 | T | 0.1514  |
| rs4142774   | G | 0.0218  |
| rs140721362 | C | -0.1072 |
| rs76163529  | A | 0.0295  |
| rs115469849 | A | 0.0775  |
| rs10084734  | T | 0.0304  |
| rs111841306 | C | -0.0904 |
| rs17302746  | A | 0.0435  |
| rs6803911   | A | 0.0258  |
| rs116445336 | T | 0.1127  |
| rs6788904   | A | -0.0214 |
| rs141035288 | G | -0.0927 |
| rs76424398  | A | 0.0367  |
| rs9830908   | C | 0.0591  |
| rs79858942  | C | -0.0314 |
| rs77691291  | A | 0.037   |
| rs7652887   | T | 0.1136  |
| rs13095201  | G | 0.0156  |
| rs11706684  | T | 0.0447  |
| rs76993956  | T | 0.0343  |
| rs941084    | T | -0.0163 |
| rs139589566 | G | 0.0809  |
| rs145422885 | G | 0.0869  |
| rs113589215 | A | -0.0528 |
| rs1507417   | G | 0.0187  |
| rs75681394  | C | 0.0526  |
| rs1381463   | T | 0.0164  |
| rs234030    | A | -0.0251 |
| rs7634170   | G | -0.0279 |
| rs9862761   | T | -0.0184 |
| rs769781    | T | 0.0154  |
| rs62258265  | C | 0.0948  |
| rs3849561   | G | -0.0166 |
| rs76545032  | C | -0.1149 |
| rs114266320 | A | 0.0515  |
| rs62270112  | G | 0.0523  |
| rs4404438   | C | -0.0186 |
| rs73173166  | T | 0.0236  |
| rs55935215  | A | -0.0222 |

|             |   |         |
|-------------|---|---------|
| rs77254991  | A | 0.0473  |
| rs76658907  | G | 0.0763  |
| rs74791416  | A | 0.0266  |
| rs143874763 | C | 0.0649  |
| rs115651324 | C | -0.0842 |
| rs57126329  | A | 0.0228  |
| rs113068739 | C | 0.0882  |
| rs9877171   | G | 0.017   |
| rs148998648 | A | -0.0361 |
| rs112164618 | A | -0.0822 |
| rs142780504 | A | 0.0449  |
| rs10513846  | A | 0.0209  |
| rs2062582   | A | 0.0325  |
| rs73185984  | T | 0.0563  |
| rs114608591 | T | -0.083  |
| rs1358200   | A | 0.0155  |
| rs55718118  | T | -0.0214 |
| rs147157791 | T | -0.0746 |
| rs7621555   | C | 0.015   |
| rs73181584  | C | -0.0217 |
| rs114392312 | A | 0.0644  |
| rs79296608  | T | -0.0543 |
| rs4677289   | G | -0.0459 |
| rs116516051 | G | -0.0749 |
| rs34201812  | C | -0.0144 |
| rs147228107 | T | -0.1068 |
| rs78365187  | C | 0.0644  |
| rs12488345  | G | -0.0199 |
| rs9883259   | C | 0.0218  |
| rs3755753   | T | -0.0185 |
| rs114771496 | G | -0.0675 |
| rs17768194  | G | -0.0706 |
| rs55801212  | G | 0.051   |
| rs7643896   | A | 0.0161  |
| rs56411806  | T | -0.0444 |
| rs147047373 | A | -0.1276 |
| rs112405649 | A | -0.0632 |
| rs12494778  | A | 0.0359  |
| rs17358923  | G | -0.0191 |
| rs11466531  | G | -0.038  |
| rs116169240 | A | 0.0697  |
| rs6808316   | T | 0.0146  |
| rs74467064  | A | -0.0347 |
| rs73093718  | A | 0.0268  |
| rs73162992  | A | 0.0382  |
| rs4686912   | G | -0.0146 |
| rs13070253  | G | -0.0266 |

|             |   |         |
|-------------|---|---------|
| rs80205879  | T | 0.0888  |
| rs7613196   | A | -0.0406 |
| rs80006435  | G | 0.0725  |
| rs34469426  | C | 0.0497  |
| rs148005005 | T | 0.0375  |
| rs116209851 | C | -0.0827 |
| rs79271887  | A | -0.021  |
| rs55780974  | A | 0.0288  |
| rs61741434  | C | -0.0603 |
| rs144137185 | T | -0.0726 |
| rs13325114  | A | 0.0388  |
| rs35693695  | T | 0.0215  |
| rs4067991   | C | 0.0244  |
| rs11714986  | T | 0.0462  |
| rs73219960  | C | 0.0654  |
| rs6659      | C | 0.0315  |
| rs116687907 | A | -0.1181 |
| rs34517314  | G | 0.0631  |
| rs73157065  | C | -0.0771 |
| rs73176703  | T | -0.0422 |
| rs116253218 | T | 0.0485  |
| rs76125211  | T | -0.0899 |
| rs75685021  | A | 0.0749  |
| rs12185944  | T | 0.0148  |
| rs41272339  | T | -0.0746 |
| rs71306049  | T | 0.053   |
| rs9863755   | G | -0.0151 |
| rs75976391  | T | 0.027   |
| rs1900633   | T | -0.0184 |
| rs17705912  | G | 0.033   |
| rs73166878  | G | -0.0811 |
| rs13073430  | G | 0.0892  |
| rs1498992   | G | 0.0156  |
| rs7633543   | T | 0.0188  |
| rs56407581  | C | -0.095  |
| rs9820421   | G | -0.0175 |
| rs2728067   | G | -0.0217 |
| rs7613458   | C | 0.0225  |
| rs1356268   | G | -0.0365 |
| rs2060025   | A | -0.0703 |
| rs147370035 | T | -0.0821 |
| rs114394645 | T | 0.0909  |
| rs323621    | T | -0.1134 |
| rs3843981   | T | 0.0154  |
| rs62234580  | A | -0.017  |
| rs115725716 | A | 0.0745  |
| rs2201965   | G | -0.0159 |

|             |   |         |
|-------------|---|---------|
| rs7635362   | C | -0.0148 |
| rs7650306   | C | -0.0253 |
| rs34985183  | A | 0.0443  |
| rs6805577   | G | 0.019   |
| rs145967715 | C | 0.1025  |
| rs13313901  | G | -0.023  |
| rs111551954 | A | 0.0234  |
| rs7340748   | A | -0.0366 |
| rs6774177   | T | 0.0226  |
| rs2729145   | C | -0.0201 |
| rs74844540  | A | 0.1078  |
| rs148055642 | C | 0.0577  |
| rs115445641 | T | -0.049  |
| rs114693999 | G | -0.0453 |
| rs13086717  | G | 0.0236  |
| rs1042201   | G | 0.0139  |
| rs1728802   | T | 0.0261  |
| rs74977375  | A | -0.0647 |
| rs114048391 | G | 0.1429  |
| rs13078961  | C | -0.0641 |
| rs114393626 | A | -0.0582 |
| rs77649285  | G | 0.0417  |
| rs149887527 | A | 0.0766  |
| rs10937189  | A | -0.0176 |
| rs79918248  | A | -0.0399 |
| rs6807490   | C | -0.0248 |
| rs111419882 | T | -0.0528 |
| rs1384953   | C | 0.0156  |
| rs13087106  | T | 0.15    |
| rs20568     | T | -0.0371 |
| rs12493126  | G | 0.0379  |
| rs73012810  | G | -0.0363 |
| rs148207681 | T | -0.1292 |
| rs10780010  | G | -0.0166 |
| rs78270487  | A | -0.035  |
| rs146399471 | T | 0.1088  |
| rs2324434   | A | -0.0144 |
| rs144418982 | G | -0.1057 |
| rs146658086 | A | -0.0691 |
| rs7612333   | G | -0.0247 |
| rs73166213  | G | -0.0763 |
| rs68172259  | A | 0.0321  |
| rs114246902 | C | -0.0657 |
| rs17774065  | A | -0.0169 |
| rs138785768 | C | 0.1118  |
| rs78348819  | T | 0.0553  |
| rs1716139   | T | -0.0173 |

|             |   |         |
|-------------|---|---------|
| rs13097392  | A | -0.076  |
| rs115415985 | T | -0.0666 |
| rs115846353 | T | 0.1312  |
| rs111488304 | A | 0.0516  |
| rs116836850 | T | -0.0983 |
| rs41264655  | A | -0.0229 |
| rs2729191   | A | 0.0177  |
| rs3749191   | T | -0.0153 |
| rs114787893 | T | -0.1145 |
| rs6769442   | A | 0.0183  |
| rs9852161   | C | 0.0325  |
| rs62248535  | T | -0.026  |
| rs2335661   | T | 0.0344  |
| rs11715936  | T | 0.016   |
| rs12495139  | G | 0.0833  |
| rs75723481  | G | -0.0778 |
| rs73045926  | A | 0.0207  |
| rs72852937  | T | -0.047  |
| rs79267898  | A | 0.0483  |
| rs79794265  | T | -0.0762 |
| rs9861357   | C | -0.0315 |
| rs79087982  | C | 0.1447  |
| rs16851341  | A | 0.1055  |
| rs148738908 | T | -0.0689 |
| rs34634423  | T | 0.0557  |
| rs10510913  | C | 0.0172  |
| rs76472490  | G | -0.0377 |
| rs73041033  | C | 0.0281  |
| rs114755348 | A | -0.082  |
| rs114497207 | A | -0.0419 |
| rs11706775  | C | -0.0154 |
| rs12496086  | T | -0.0613 |
| rs151311781 | C | -0.0867 |
| rs112933337 | C | -0.0506 |
| rs34068710  | G | 0.0848  |
| rs114376132 | T | 0.1173  |
| rs1541989   | C | 0.0148  |
| rs13086952  | G | -0.1312 |
| rs138829006 | A | 0.1203  |
| rs116815544 | C | 0.0854  |
| rs9290392   | A | -0.0281 |
| rs73892867  | T | -0.0689 |
| rs77342217  | C | -0.0422 |
| rs17431345  | C | 0.0325  |
| rs67623005  | T | -0.0245 |
| rs115998608 | A | 0.0411  |
| rs73194174  | C | -0.0351 |

|             |   |         |
|-------------|---|---------|
| rs76155232  | C | 0.0869  |
| rs140746311 | G | -0.093  |
| rs9822161   | G | -0.0183 |
| rs2729117   | A | -0.0166 |
| rs144103261 | T | -0.0805 |
| rs34850738  | A | -0.0486 |
| rs115015959 | T | -0.0614 |
| rs1287302   | T | 0.0262  |
| rs77431062  | A | -0.039  |
| rs146499703 | C | 0.0946  |
| rs55777822  | G | -0.0207 |
| rs3773269   | G | 0.0483  |
| rs116035855 | G | 0.0437  |
| rs138376200 | A | -0.1084 |
| rs35296932  | G | 0.0187  |
| rs116368402 | T | -0.0687 |
| rs1471966   | A | 0.0206  |
| rs76718747  | T | -0.0889 |
| rs62284841  | C | 0.0417  |
| rs79768138  | C | -0.0949 |
| rs6800992   | C | -0.0885 |
| rs62279645  | T | -0.114  |
| rs116599176 | A | 0.0544  |
| rs75186047  | T | 0.0166  |
| rs71302597  | A | -0.1004 |
| rs73187258  | G | 0.0865  |
| rs73173513  | C | 0.058   |
| rs145586341 | A | 0.0548  |
| rs9841477   | C | 0.0153  |
| rs72876039  | T | 0.0219  |
| rs9864835   | A | -0.0203 |
| rs74967875  | T | -0.063  |
| rs114588841 | A | -0.0396 |
| rs77829475  | A | 0.0274  |
| rs17293894  | G | -0.0382 |
| rs12489488  | G | 0.0457  |
| rs117292774 | T | -0.0639 |
| rs56383340  | A | 0.016   |
| rs9859495   | A | 0.0198  |
| rs28986275  | T | -0.02   |
| rs138964671 | C | -0.0629 |
| rs4066492   | G | 0.0149  |
| rs6768606   | C | 0.0218  |
| rs142882569 | T | -0.1105 |
| rs7630971   | T | -0.0208 |
| rs1716746   | G | -0.0371 |
| rs803335    | G | -0.0534 |



|             |   |         |
|-------------|---|---------|
| rs585058    | G | 0.0165  |
| rs6803186   | G | 0.0151  |
| rs1972703   | A | 0.0208  |
| rs4685851   | A | -0.0279 |
| rs62265355  | T | -0.093  |
| rs17062415  | G | 0.0343  |
| rs114627273 | G | -0.0483 |
| rs13088768  | G | -0.0143 |
| rs149593672 | T | 0.0842  |
| rs10513653  | A | 0.0161  |
| rs11718740  | T | -0.0265 |
| rs17221925  | C | 0.0236  |
| rs422712    | A | 0.0196  |
| rs9825203   | C | -0.0573 |
| rs16848688  | G | 0.0214  |
| rs115795878 | T | -0.0512 |
| rs6763057   | A | 0.0153  |
| rs115796960 | A | -0.0799 |
| rs2350512   | T | -0.0148 |
| rs9872797   | G | 0.0143  |
| rs140588887 | C | -0.0662 |
| rs79050813  | C | -0.0357 |
| rs139271671 | A | -0.122  |
| rs6775986   | G | 0.0167  |
| rs74768531  | A | 0.0305  |
| rs116785660 | T | 0.0871  |
| rs79877613  | T | 0.0383  |
| rs12492808  | T | 0.015   |
| rs62267710  | C | 0.0487  |
| rs114708452 | T | 0.0385  |
| rs116670279 | T | 0.0421  |
| rs6805457   | A | 0.0272  |
| rs457120    | C | -0.0148 |
| rs2115176   | C | -0.0145 |
| rs10936719  | G | 0.0167  |
| rs12715353  | T | -0.0586 |
| rs73227072  | C | 0.038   |
| rs73227593  | G | -0.0459 |
| rs4615090   | G | 0.0274  |
| rs12490841  | T | -0.0429 |
| rs79245491  | T | 0.0523  |
| rs7644398   | G | -0.0278 |
| rs2675163   | C | 0.0198  |
| rs9875258   | A | -0.0327 |
| rs62286167  | T | -0.0288 |
| rs62238359  | A | -0.0542 |
| rs139590708 | T | -0.0589 |

|             |   |         |
|-------------|---|---------|
| rs115375116 | A | 0.0675  |
| rs6439096   | A | 0.0267  |
| rs16826376  | A | 0.0277  |
| rs57785011  | G | 0.0268  |
| rs73006341  | T | -0.0596 |
| rs2933288   | G | -0.0333 |
| rs62270453  | T | -0.0902 |
| rs1710887   | T | 0.0152  |
| rs76461365  | A | 0.0741  |
| rs74280921  | T | 0.0798  |
| rs9852133   | T | 0.0214  |
| rs72625040  | A | 0.068   |
| rs78219465  | A | -0.0324 |
| rs9810290   | C | -0.0148 |
| rs12330851  | T | -0.0502 |
| rs74715472  | T | -0.0292 |
| rs80193626  | G | -0.0919 |
| rs75815659  | A | 0.0231  |
| rs115073686 | T | -0.0868 |
| rs12632633  | C | 0.0343  |
| rs33979049  | T | -0.0549 |
| rs9839020   | T | 0.0149  |
| rs6766344   | A | 0.0347  |
| rs75930588  | A | -0.0403 |
| rs146968032 | C | -0.0413 |
| rs9290692   | T | -0.0275 |
| rs73059650  | G | 0.0326  |
| rs4857314   | T | -0.0214 |
| rs12487840  | A | 0.0517  |
| rs62249090  | G | -0.0262 |
| rs114684225 | G | 0.0887  |
| rs75529847  | T | -0.1303 |
| rs75477339  | A | 0.0643  |
| rs7630485   | C | 0.0423  |
| rs17647013  | T | -0.0282 |
| rs17538596  | T | -0.0502 |
| rs372795    | G | -0.0142 |
| rs6796579   | C | 0.0192  |
| rs113979496 | T | -0.0734 |
| rs73074437  | G | 0.0178  |
| rs13096657  | T | -0.0215 |
| rs9831273   | T | -0.0152 |
| rs876349    | G | 0.0197  |
| rs7642426   | A | -0.0524 |
| rs141820680 | C | 0.0958  |
| rs112765799 | G | 0.0741  |
| rs147250948 | T | 0.05    |

|             |   |         |
|-------------|---|---------|
| rs77772212  | G | 0.0824  |
| rs78361845  | T | 0.1288  |
| rs148265295 | T | 0.0574  |
| rs9310163   | A | 0.023   |
| rs1912874   | T | 0.0681  |
| rs116205678 | A | -0.0427 |
| rs6801060   | A | 0.0147  |
| rs150738712 | T | -0.119  |
| rs114588714 | A | 0.057   |
| rs12495981  | A | 0.0198  |
| rs7516      | T | -0.0382 |
| rs6440031   | A | -0.0272 |
| rs114978396 | T | -0.0961 |
| rs112500125 | A | 0.0611  |
| rs1718443   | C | 0.0319  |
| rs112001105 | T | 0.0469  |
| rs150188940 | G | -0.0936 |
| rs17129227  | A | 0.038   |
| rs77122115  | A | 0.0406  |
| rs4054764   | G | 0.0495  |
| rs4528965   | A | -0.0317 |
| rs150187513 | C | 0.085   |
| rs146694498 | A | 0.0425  |
| rs113356596 | T | -0.0493 |
| rs80063325  | T | 0.0544  |
| rs114884226 | A | 0.0667  |
| rs35933350  | C | 0.0885  |
| rs76984960  | A | 0.0452  |
| rs115136982 | G | -0.0372 |
| rs6810039   | A | -0.0144 |
| rs7615407   | C | 0.0339  |
| rs115639912 | T | 0.0515  |
| rs4234565   | A | 0.0257  |
| rs10446459  | C | 0.0585  |
| rs13319577  | T | 0.0163  |
| rs139734526 | C | 0.0348  |
| rs11716173  | T | -0.0322 |
| rs11711032  | G | -0.0182 |
| rs12639400  | G | -0.0367 |
| rs56249407  | T | -0.0294 |
| rs73138420  | A | 0.0571  |
| rs12186010  | T | 0.0209  |
| rs73138311  | G | 0.031   |
| rs115991597 | C | -0.0438 |
| rs75342892  | A | 0.0396  |
| rs74399234  | G | -0.0593 |
| rs116580021 | G | 0.0522  |

|             |   |         |
|-------------|---|---------|
| rs16828386  | C | -0.026  |
| rs116792921 | T | -0.0654 |
| rs141362250 | G | 0.0559  |
| rs73176961  | G | -0.0317 |
| rs28616691  | A | 0.0217  |
| rs148281043 | A | 0.0607  |
| rs6777322   | T | -0.0509 |
| rs13434082  | T | 0.0223  |
| rs6765151   | G | 0.0303  |
| rs697253    | T | -0.0188 |
| rs10804628  | T | -0.0808 |
| rs78847625  | T | 0.0827  |
| rs6780036   | A | -0.0378 |
| rs146656140 | G | 0.0412  |
| rs116449860 | A | -0.0689 |
| rs114093475 | T | 0.0621  |
| rs75100224  | A | -0.0332 |
| rs6770384   | A | 0.0314  |
| rs2270768   | G | 0.0201  |
| rs9814382   | A | 0.0148  |
| rs114724532 | A | 0.0646  |
| rs1456674   | C | -0.0717 |
| rs35611996  | T | 0.0212  |
| rs13061804  | G | 0.0692  |
| rs151009998 | A | -0.0506 |
| rs73171647  | A | 0.0295  |
| rs704268    | C | -0.0329 |
| rs9284844   | A | 0.0184  |
| rs34916986  | C | -0.0542 |
| rs7622979   | G | -0.0361 |
| rs62254563  | T | -0.0459 |
| rs1453750   | G | 0.0169  |
| rs774757    | C | -0.0153 |
| rs114166024 | T | 0.0931  |
| rs75442482  | T | -0.0419 |
| rs114600294 | C | 0.035   |
| rs4916486   | T | 0.0659  |
| rs7634478   | C | -0.0149 |
| rs148159579 | G | -0.0884 |
| rs11714263  | G | 0.0165  |
| rs58034705  | C | 0.0546  |
| rs73149024  | C | 0.0382  |
| rs73854706  | C | 0.018   |
| rs9861773   | C | -0.0168 |
| rs116400272 | C | -0.0628 |
| rs831691    | G | 0.0193  |
| rs74612036  | G | 0.042   |

|             |   |         |
|-------------|---|---------|
| rs139549328 | T | -0.0963 |
| rs9866961   | A | -0.0165 |
| rs116560608 | G | 0.069   |
| rs59641265  | A | -0.0154 |
| rs6768776   | A | -0.0181 |
| rs78390099  | A | -0.0437 |
| rs79810760  | G | -0.1308 |
| rs17711530  | T | 0.0138  |
| rs111439685 | G | 0.0869  |
| rs16863691  | G | -0.0158 |
| rs1380991   | C | 0.0163  |
| rs78003520  | G | -0.0497 |
| rs7630724   | T | -0.0248 |
| rs144737686 | G | -0.1134 |
| rs2700879   | T | -0.017  |
| rs3926944   | T | 0.028   |
| rs12631268  | A | 0.0222  |
| rs6767579   | T | 0.0787  |
| rs115454548 | C | -0.1412 |
| rs9866371   | C | 0.0347  |
| rs6780836   | T | 0.0144  |
| rs73179535  | A | -0.0394 |
| rs74681714  | A | 0.0727  |
| rs7628362   | G | 0.0176  |
| rs116659054 | G | 0.1102  |
| rs697356    | C | -0.0147 |
| rs79389688  | C | 0.08    |
| rs34000391  | C | -0.0167 |
| rs6445057   | G | 0.0174  |
| rs75332600  | C | -0.0382 |
| rs11709676  | C | 0.0301  |
| rs74809138  | C | 0.0569  |
| rs9846027   | C | -0.024  |
| rs9810478   | T | 0.0427  |
| rs116006278 | G | 0.0405  |
| rs11719284  | A | 0.0174  |
| rs75136052  | G | -0.0431 |
| rs2138246   | C | 0.0954  |
| rs2724545   | C | -0.0456 |
| rs61092465  | G | 0.0539  |
| rs62238262  | G | 0.028   |
| rs143055361 | T | -0.0563 |
| rs2268494   | A | -0.0296 |
| rs358960    | C | 0.0164  |
| rs6799820   | G | 0.018   |
| rs114893435 | T | 0.0602  |
| rs115429581 | G | 0.0944  |

|             |   |         |
|-------------|---|---------|
| rs78302214  | T | 0.0328  |
| rs113058575 | G | -0.051  |
| rs62241483  | A | -0.0362 |
| rs78893247  | T | -0.0942 |
| rs116110194 | A | -0.1047 |
| rs146472614 | A | -0.0717 |
| rs62284829  | T | -0.0534 |
| rs62292966  | A | 0.0479  |
| rs72655937  | G | -0.0933 |
| rs78863180  | T | -0.1193 |
| rs116179639 | C | 0.1194  |
| rs112100664 | A | 0.0634  |
| rs151086880 | T | -0.1093 |
| rs77089269  | A | 0.0642  |
| rs116138985 | C | -0.0345 |
| rs72962279  | A | -0.0522 |
| rs10510951  | T | -0.0228 |
| rs114167462 | T | -0.032  |
| rs78119965  | T | -0.0332 |
| rs58747812  | A | -0.0151 |
| rs116792050 | T | -0.0828 |
| rs111975914 | C | -0.0819 |
| rs58999789  | G | -0.027  |
| rs9883824   | G | 0.0355  |
| rs13094242  | G | -0.0606 |
| rs111371008 | T | -0.0358 |
| rs140545274 | C | -0.0936 |
| rs17562245  | T | 0.0183  |
| rs17886680  | A | 0.0305  |
| rs79122504  | G | -0.0315 |
| rs150096672 | T | 0.0631  |
| rs16862727  | A | 0.021   |
| rs116722100 | T | -0.1046 |
| rs2371997   | C | 0.0144  |
| rs143688221 | C | -0.0668 |
| rs3773179   | T | -0.0444 |
| rs6766934   | G | -0.0418 |
| rs7625875   | C | -0.0229 |
| rs62282595  | A | -0.0394 |
| rs1881366   | C | -0.0148 |
| rs62239967  | A | -0.0474 |
| rs138675987 | T | 0.0829  |
| rs12489455  | C | -0.0267 |
| rs7650668   | G | 0.0859  |
| rs116003456 | A | 0.0867  |
| rs6772187   | A | -0.0241 |
| rs2930784   | A | -0.0167 |

|             |   |         |
|-------------|---|---------|
| rs112780355 | T | 0.0338  |
| rs13064196  | T | 0.0149  |
| rs112844822 | T | -0.0702 |
| rs140048838 | T | -0.0334 |
| rs75052790  | G | 0.0677  |
| rs74872230  | A | 0.0697  |
| rs75138586  | T | -0.024  |
| rs73059632  | T | -0.0187 |
| rs7429055   | T | -0.0256 |
| rs114211978 | G | 0.0712  |
| rs57505763  | A | 0.0171  |
| rs9861876   | G | -0.102  |
| rs7627964   | T | -0.0158 |
| rs114005859 | C | 0.0718  |
| rs77757471  | G | 0.0637  |
| rs141203577 | A | -0.1158 |
| rs9828854   | A | 0.0537  |
| rs11707120  | T | 0.0246  |
| rs77811193  | G | -0.0224 |
| rs6798381   | T | 0.0246  |
| rs72998917  | G | 0.072   |
| rs113399998 | C | 0.0851  |
| rs77707280  | A | -0.0341 |
| rs35451870  | A | -0.0146 |
| rs17240621  | A | 0.0666  |
| rs13093685  | G | 0.0361  |
| rs9825756   | A | -0.0268 |
| rs144669333 | G | -0.0598 |
| rs74374980  | T | -0.0419 |
| rs17036721  | G | 0.0204  |
| rs62253169  | G | 0.0249  |
| rs3856946   | A | -0.0145 |
| rs12634280  | A | 0.0987  |
| rs2200749   | A | 0.048   |
| rs6444188   | G | 0.0153  |
| rs2697151   | A | -0.0145 |
| rs116147398 | T | -0.087  |
| rs114036928 | A | 0.0487  |
| rs6763039   | T | 0.0175  |
| rs11712409  | A | 0.0569  |
| rs147102545 | G | -0.0449 |
| rs62281569  | T | 0.0629  |
| rs11719059  | T | 0.023   |
| rs74926959  | T | 0.035   |
| rs112347425 | T | -0.0289 |
| rs147001882 | C | 0.0677  |
| rs1003780   | A | 0.0363  |

|             |   |         |
|-------------|---|---------|
| rs139468944 | A | 0.0648  |
| rs62248294  | T | -0.08   |
| rs35533080  | C | -0.0223 |
| rs80086264  | A | 0.053   |
| rs74822631  | G | -0.0308 |
| rs7617692   | C | 0.0517  |
| rs3773785   | T | 0.0162  |
| rs148575149 | G | 0.0911  |
| rs73215985  | T | 0.0337  |
| rs9813685   | C | 0.0201  |
| rs78557421  | T | -0.0323 |
| rs148327427 | T | 0.0698  |
| rs6804013   | C | 0.0439  |
| rs115060444 | C | 0.0785  |
| rs430063    | A | -0.0272 |
| rs56162831  | G | -0.0252 |
| rs9861395   | C | 0.0232  |
| rs114338253 | C | -0.0539 |
| rs17029420  | C | 0.0164  |
| rs17885088  | A | 0.0238  |
| rs62275667  | T | 0.0356  |
| rs6810386   | G | 0.0418  |
| rs142086239 | A | 0.0583  |
| rs62243315  | T | 0.0288  |
| rs74688523  | A | -0.043  |
| rs12492713  | T | -0.0452 |
| rs17582553  | A | 0.0877  |
| rs73814753  | A | 0.0579  |
| rs67977616  | G | -0.0324 |
| rs9880945   | G | 0.0177  |
| rs76446876  | C | -0.022  |
| rs115720115 | T | 0.0572  |
| rs77819038  | A | 0.061   |
| rs74912492  | T | 0.1142  |
| rs9821454   | C | 0.0345  |
| rs111641617 | G | 0.0176  |
| rs76387646  | G | 0.0713  |
| rs145944834 | A | -0.084  |
| rs10804698  | C | -0.0297 |
| rs114771681 | T | -0.0733 |
| rs73180265  | T | -0.0438 |
| rs12639611  | A | 0.0218  |
| rs76514956  | T | -0.0482 |
| rs11708379  | G | -0.0575 |
| rs34403201  | G | 0.0202  |
| rs2700237   | A | 0.0163  |
| rs6773500   | C | -0.0147 |



|             |   |         |
|-------------|---|---------|
| rs6442356   | T | -0.0287 |
| rs9311300   | G | 0.0153  |
| rs35558532  | C | -0.0459 |
| rs114502819 | C | -0.0647 |
| rs76861239  | C | 0.0196  |
| rs112604702 | C | 0.0673  |
| rs142175001 | G | 0.0598  |
| rs114632007 | G | 0.0367  |
| rs1522555   | T | 0.0878  |
| rs78207527  | C | 0.0855  |
| rs79504386  | T | 0.094   |
| rs2920505   | G | -0.0147 |
| rs77849140  | T | -0.0383 |
| rs79979132  | C | -0.0306 |
| rs41495746  | A | -0.0567 |
| rs78121499  | T | -0.1133 |
| rs11711879  | G | -0.0154 |
| rs6550921   | A | -0.0201 |
| rs12495039  | G | -0.0236 |
| rs62285885  | A | 0.0466  |
| rs73891106  | G | -0.0177 |
| rs115664447 | T | 0.0893  |
| rs422377    | T | -0.0141 |
| rs143686974 | G | 0.0707  |
| rs138606311 | A | 0.0941  |
| rs7627296   | G | -0.0662 |
| rs4688500   | T | 0.0144  |
| rs9873527   | T | 0.0261  |
| rs141394006 | G | 0.0783  |
| rs56755560  | A | 0.0362  |
| rs115300242 | G | -0.0388 |
| rs6549194   | T | 0.0189  |
| rs146202993 | A | 0.0699  |
| rs2300709   | C | -0.0163 |
| rs112849057 | A | 0.0579  |
| rs148000909 | A | 0.0957  |
| rs113885444 | T | -0.0181 |
| rs138955536 | T | -0.0826 |
| rs6808449   | A | 0.015   |
| rs148193768 | A | -0.0524 |
| rs73195165  | C | -0.1029 |
| rs11721184  | T | 0.0409  |
| rs62270221  | T | -0.0569 |
| rs55779496  | T | -0.0357 |
| rs9828379   | C | -0.034  |
| rs147390374 | T | -0.1144 |
| rs1066602   | A | 0.0155  |

|             |   |         |
|-------------|---|---------|
| rs4683633   | T | -0.0573 |
| rs76135652  | T | 0.0435  |
| rs150633606 | A | 0.0623  |
| rs113499276 | T | 0.0911  |
| rs6801602   | G | 0.0171  |
| rs78310455  | A | -0.0313 |
| rs146705572 | C | 0.0499  |
| rs2293137   | T | -0.0212 |
| rs9842835   | A | -0.1001 |
| rs116255359 | C | 0.0577  |
| rs16830298  | A | -0.0496 |
| rs1681652   | T | 0.0449  |
| rs113119965 | G | 0.0307  |
| rs114024728 | A | -0.0918 |
| rs146477898 | T | 0.0634  |
| rs1403617   | G | -0.016  |
| rs13082522  | C | -0.0854 |
| rs9847564   | G | -0.0265 |
| rs79891732  | A | -0.0371 |
| rs2121950   | A | -0.0152 |
| rs1443078   | C | -0.0232 |
| rs902793    | A | -0.014  |
| rs2715670   | C | 0.0169  |
| rs116540038 | G | 0.0558  |
| rs13093592  | T | -0.0181 |
| rs9866185   | G | -0.0146 |
| rs349547    | G | 0.0494  |
| rs79104843  | A | 0.062   |
| rs141522275 | T | 0.1129  |
| rs114113385 | A | 0.0989  |
| rs6808822   | A | -0.0578 |
| rs1438637   | C | 0.0257  |
| rs62264867  | C | -0.0615 |
| rs17302293  | T | 0.043   |
| rs59171591  | C | -0.0211 |
| rs34911574  | C | -0.0162 |
| rs73825705  | C | 0.0278  |
| rs67297245  | A | -0.0327 |
| rs141849086 | A | -0.0877 |
| rs78032396  | A | 0.046   |
| rs9811767   | G | 0.0166  |
| rs6767300   | T | 0.0768  |
| rs13067800  | C | 0.0301  |
| rs16829730  | C | 0.0221  |
| rs2662088   | T | -0.0148 |
| rs73076120  | T | 0.0575  |
| rs6781863   | T | -0.032  |

|             |   |         |
|-------------|---|---------|
| rs7611808   | G | 0.0348  |
| rs1491688   | A | -0.0156 |
| rs2918224   | T | -0.0191 |
| rs73148876  | A | -0.0254 |
| rs112072019 | A | 0.0542  |
| rs12374138  | A | 0.0139  |
| rs73065198  | T | -0.0185 |
| rs2623882   | A | -0.0209 |
| rs35907941  | C | -0.0274 |
| rs74470634  | A | -0.1191 |
| rs148714254 | A | 0.0922  |
| rs73088970  | C | -0.0229 |
| rs77251970  | T | -0.0965 |
| rs116717837 | G | -0.0687 |
| rs141338478 | T | 0.0447  |
| rs115143556 | T | -0.1017 |
| rs79192426  | C | -0.0419 |
| rs9311507   | T | 0.0296  |
| rs67325724  | T | 0.0204  |
| rs75165592  | G | 0.0607  |
| rs60993292  | A | 0.0576  |
| rs114832029 | T | 0.0836  |
| rs2377110   | C | -0.0144 |
| rs11917658  | T | -0.0425 |
| rs9840114   | T | 0.0503  |
| rs56047677  | T | 0.0462  |
| rs55867032  | C | 0.0201  |
| rs9853726   | C | -0.0198 |
| rs13090113  | A | 0.0433  |
| rs73045826  | T | -0.0453 |
| rs2111825   | T | -0.0395 |
| rs62252978  | C | 0.0399  |
| rs4615068   | T | -0.0216 |
| rs117518401 | T | -0.0235 |
| rs116793744 | A | -0.0417 |
| rs437206    | A | -0.0206 |
| rs2114773   | C | 0.0141  |
| rs1980247   | A | -0.0185 |
| rs143251989 | C | 0.0703  |
| rs868238    | G | -0.0183 |
| rs55802591  | G | 0.055   |
| rs144832162 | C | 0.0498  |
| rs73170652  | T | -0.0884 |
| rs4686976   | A | -0.017  |
| rs10934627  | T | -0.0175 |
| rs56089248  | T | -0.0427 |
| rs114504244 | A | 0.058   |

|             |   |         |
|-------------|---|---------|
| rs4681364   | T | 0.0148  |
| rs111989619 | C | 0.0603  |
| rs13073050  | G | 0.0163  |
| rs55960336  | G | 0.0728  |
| rs75674681  | T | 0.0563  |
| rs112494805 | A | 0.101   |
| rs139414816 | T | -0.0487 |
| rs115602621 | A | 0.0725  |
| rs115789269 | G | -0.0661 |
| rs75542127  | T | 0.0994  |
| rs7631585   | C | -0.0153 |
| rs4328842   | A | -0.0177 |
| rs62248906  | T | 0.0612  |
| rs35649569  | A | -0.0176 |
| rs150664099 | A | -0.1104 |
| rs35962838  | G | 0.0329  |
| rs75680983  | T | -0.0575 |
| rs2712308   | G | -0.0146 |
| rs57961316  | T | 0.0328  |
| rs3828391   | C | 0.0589  |
| rs112725189 | A | -0.059  |
| rs145073743 | C | -0.0736 |
| rs6766621   | G | 0.0177  |
| rs670335    | G | -0.0135 |
| rs9310356   | G | -0.0243 |
| rs115241590 | C | 0.0508  |
| rs150498814 | C | -0.0663 |
| rs114532148 | A | 0.0682  |
| rs62244997  | C | -0.0159 |
| rs116336623 | A | -0.0563 |
| rs6775357   | C | -0.027  |
| rs9836491   | A | 0.0366  |
| rs73018963  | G | -0.0275 |
| rs28698458  | G | 0.0463  |
| rs9856907   | T | -0.1178 |
| rs146812434 | T | 0.0426  |
| rs10933676  | T | -0.0209 |
| rs9824715   | T | -0.0212 |
| rs9829202   | G | 0.017   |
| rs147819787 | C | -0.0685 |
| rs75630625  | T | 0.0943  |
| rs79019069  | G | -0.0546 |
| rs7649009   | T | 0.0258  |
| rs6807962   | G | -0.0145 |
| rs62296626  | A | 0.0144  |
| rs78185914  | G | -0.0425 |
| rs74530871  | G | -0.0625 |

|             |   |         |
|-------------|---|---------|
| rs4858503   | C | 0.0177  |
| rs9311039   | T | 0.0158  |
| rs7642285   | G | -0.0138 |
| rs12107142  | G | 0.0283  |
| rs9853115   | T | -0.0142 |
| rs58088149  | G | -0.12   |
| rs986408    | T | -0.0195 |
| rs74976394  | A | -0.077  |
| rs141180697 | T | -0.0554 |
| rs113956060 | G | 0.0382  |
| rs114435581 | C | 0.084   |
| rs77218395  | A | -0.0758 |
| rs115391697 | C | 0.0668  |
| rs9810801   | C | -0.0769 |
| rs76010586  | G | 0.0175  |
| rs114100194 | G | -0.0557 |
| rs75841640  | C | 0.1207  |
| rs13076468  | C | -0.0169 |
| rs76397727  | T | 0.0638  |
| rs62282538  | T | 0.0675  |
| rs1211480   | G | -0.0323 |
| rs6771922   | C | -0.0712 |
| rs56137334  | T | 0.0829  |
| rs13070417  | A | 0.0142  |
| rs114608651 | G | 0.0462  |
| rs114885965 | A | -0.0835 |
| rs10936943  | A | -0.016  |
| rs4493410   | T | -0.0164 |
| rs115570574 | A | -0.05   |
| rs4135286   | G | -0.0178 |
| rs79135721  | T | 0.0814  |
| rs4446190   | G | 0.0172  |
| rs142772159 | C | -0.0691 |
| rs753833    | C | -0.0227 |
| rs112915981 | A | 0.0947  |
| rs11716084  | A | -0.1047 |
| rs1112186   | C | -0.0156 |
| rs142218743 | C | -0.0806 |
| rs4293718   | A | 0.0152  |
| rs79786599  | G | 0.037   |
| rs12631757  | T | 0.0199  |
| rs67000521  | T | 0.0208  |
| rs12491856  | A | 0.0293  |
| rs115641987 | A | -0.0888 |
| rs4377471   | T | 0.0151  |
| rs71298360  | G | -0.1017 |
| rs143340312 | T | 0.1388  |

|             |   |         |
|-------------|---|---------|
| rs73195318  | C | 0.0299  |
| rs151269509 | A | -0.0546 |
| rs142194693 | A | -0.0838 |
| rs79332788  | T | -0.032  |
| rs73155070  | G | 0.0615  |
| rs59451012  | A | 0.0144  |
| rs114953773 | T | -0.0542 |
| rs114480134 | T | -0.0654 |
| rs1533559   | C | -0.0227 |
| rs7610941   | T | 0.0346  |
| rs115587257 | G | 0.0537  |
| rs79674896  | A | -0.0313 |
| rs72908732  | T | -0.0521 |
| rs2111581   | C | 0.0195  |
| rs58065739  | C | 0.0185  |
| rs7653226   | C | 0.0148  |
| rs111875879 | G | -0.0596 |
| rs62244904  | T | -0.0201 |
| rs116122674 | T | -0.0832 |
| rs2698370   | T | -0.0246 |
| rs17399415  | C | -0.0431 |
| rs4990333   | T | 0.0221  |
| rs3792390   | C | -0.0183 |
| rs78720911  | T | -0.0643 |
| rs74665354  | A | -0.0622 |
| rs13085136  | T | -0.0302 |
| rs79834759  | A | 0.1005  |
| rs116831432 | A | -0.072  |
| rs79659544  | A | -0.0621 |
| rs116544023 | G | 0.05    |
| rs148248648 | A | 0.0465  |
| rs9311907   | T | -0.0331 |
| rs146919254 | T | 0.0521  |
| rs935619    | A | 0.0139  |
| rs115636343 | A | -0.0854 |
| rs2880340   | T | -0.0753 |
| rs114337112 | T | -0.1134 |
| rs9853538   | T | -0.0541 |
| rs62238264  | A | -0.0744 |
| rs79198115  | C | 0.0291  |
| rs78748921  | C | 0.0572  |
| rs62249834  | A | -0.0264 |
| rs75620952  | A | 0.0254  |
| rs142630191 | C | 0.074   |
| rs35590414  | G | 0.0893  |
| rs1875455   | C | -0.0183 |
| rs7620760   | A | -0.0531 |

|             |   |         |
|-------------|---|---------|
| rs2001647   | C | 0.0836  |
| rs7649576   | G | -0.0197 |
| rs9812220   | A | 0.0144  |
| rs2728055   | C | -0.0167 |
| rs146439446 | T | -0.0539 |
| rs34692573  | A | -0.0141 |
| rs79330665  | T | -0.0747 |
| rs73134261  | T | 0.0702  |
| rs144718080 | A | -0.0759 |
| rs77819491  | G | 0.0617  |
| rs140074067 | C | -0.057  |
| rs6784144   | G | -0.0305 |
| rs137922971 | G | 0.125   |
| rs74414190  | A | 0.0451  |
| rs115373965 | A | -0.051  |
| rs2968171   | G | 0.0298  |
| rs115348855 | T | 0.0741  |
| rs76262942  | T | -0.0696 |
| rs163552    | T | -0.0223 |
| rs77258575  | T | 0.0307  |
| rs113260398 | G | 0.0445  |
| rs6762462   | A | 0.0156  |
| rs115303429 | G | -0.0659 |
| rs6775152   | A | 0.0143  |
| rs79153099  | C | 0.0742  |
| rs111317713 | T | -0.0457 |
| rs149801460 | T | 0.1108  |
| rs115478491 | A | -0.0355 |
| rs115522807 | G | 0.0942  |
| rs6549922   | T | -0.0238 |
| rs13069145  | A | -0.0164 |
| rs113537973 | G | -0.0937 |
| rs41290652  | C | 0.0828  |
| rs139005499 | G | -0.0323 |
| rs283379    | C | 0.0264  |
| rs9833583   | C | -0.0229 |
| rs141723513 | C | -0.0627 |
| rs80222871  | T | 0.0831  |
| rs6445792   | G | -0.0163 |
| rs186154    | G | -0.0148 |
| rs1510328   | G | -0.014  |
| rs9817266   | C | 0.0187  |
| rs1478072   | G | -0.0138 |
| rs1823454   | A | -0.019  |
| rs56848495  | A | 0.0287  |
| rs6767743   | A | 0.0198  |
| rs115129464 | C | 0.0484  |

|             |   |         |
|-------------|---|---------|
| rs60294829  | G | 0.0306  |
| rs9876152   | T | -0.0305 |
| rs80156931  | C | 0.0806  |
| rs17187851  | T | -0.0196 |
| rs75005410  | T | -0.0463 |
| rs371214    | C | -0.0141 |
| rs79710601  | A | -0.0266 |
| rs16855088  | T | -0.0193 |
| rs17826029  | G | 0.0152  |
| rs12631339  | T | 0.0388  |
| rs9812440   | C | 0.017   |
| rs13086327  | G | 0.0154  |
| rs6421306   | A | -0.0627 |
| rs140562548 | A | 0.0853  |
| rs149998130 | G | -0.1011 |
| rs78651767  | T | 0.0529  |
| rs149712815 | A | -0.0771 |
| rs73177168  | T | -0.0488 |
| rs79075046  | C | -0.04   |
| rs115558260 | A | -0.1128 |
| rs114265622 | A | 0.0761  |
| rs67542515  | T | -0.0236 |
| rs150608280 | C | 0.0606  |
| rs7433085   | C | -0.0175 |
| rs116512112 | A | -0.0949 |
| rs74736276  | T | -0.0408 |
| rs792354    | T | 0.0153  |
| rs79866321  | T | 0.0341  |
| rs62288981  | A | -0.034  |
| rs77170624  | C | 0.0575  |
| rs2172393   | C | 0.0407  |
| rs2974388   | T | -0.0175 |
| rs9871181   | G | 0.0138  |
| rs10510829  | G | 0.0155  |
| rs76923453  | T | -0.1313 |
| rs9848505   | C | 0.0137  |
| rs12696452  | A | 0.0187  |
| rs116716353 | C | -0.05   |
| rs674628    | A | 0.0132  |
| rs75764054  | C | 0.0786  |
| rs111772732 | T | -0.0727 |
| rs7647441   | T | 0.0159  |
| rs62288767  | C | -0.0445 |
| rs62293420  | A | 0.0261  |
| rs6796315   | A | 0.0225  |
| rs143640685 | C | -0.0501 |
| rs111457122 | T | -0.08   |



|             |   |         |
|-------------|---|---------|
| rs16862782  | A | 0.0177  |
| rs837776    | A | 0.0143  |
| rs2056154   | A | 0.0142  |
| rs344403    | T | -0.0225 |
| rs71315262  | A | 0.0457  |
| rs146108055 | C | 0.0661  |
| rs871570    | C | -0.0236 |
| rs115488172 | G | -0.0823 |
| rs1472653   | A | -0.0134 |
| rs75149813  | C | -0.0588 |
| rs7427774   | G | 0.0136  |
| rs6599240   | A | 0.0132  |
| rs9877717   | C | 0.0701  |
| rs116124122 | T | 0.0327  |
| rs143435814 | G | -0.1034 |
| rs28710988  | A | -0.0395 |
| rs151127062 | A | 0.0733  |
| rs150041206 | A | -0.0474 |
| rs115043814 | C | 0.0385  |
| rs9878980   | C | 0.0139  |
| rs1355533   | T | 0.0146  |
| rs62246232  | G | 0.0276  |
| rs114202462 | A | -0.101  |
| rs2268824   | C | -0.0141 |
| rs79026482  | A | 0.034   |
| rs116325107 | C | -0.0336 |
| rs73164347  | C | -0.0504 |
| rs75611353  | G | 0.0473  |
| rs10934634  | G | -0.017  |
| rs13068831  | A | -0.0295 |
| rs820298    | T | -0.0288 |
| rs9880789   | C | 0.0221  |
| rs141171376 | G | 0.0677  |
| rs149636734 | T | -0.0504 |
| rs115410069 | A | 0.0735  |
| rs73074688  | T | 0.0336  |
| rs116212717 | A | -0.1108 |
| rs116172748 | A | -0.0663 |
| rs141758611 | T | -0.0241 |
| rs74282370  | A | -0.0259 |
| rs146749654 | T | 0.0872  |
| rs73030520  | C | 0.0468  |
| rs9843883   | T | 0.0199  |
| rs1449282   | A | 0.0216  |
| rs4681862   | A | -0.0278 |
| rs113094721 | A | -0.0461 |
| rs150303385 | T | 0.0208  |

|             |   |         |
|-------------|---|---------|
| rs7372629   | C | -0.0253 |
| rs9842519   | G | -0.0417 |
| rs905461    | A | -0.0157 |
| rs148243882 | G | -0.0801 |
| rs2444219   | T | 0.0611  |
| rs112821280 | T | -0.0763 |
| rs150819613 | A | -0.1183 |
| rs62243194  | C | -0.0814 |
| rs72912793  | A | -0.0384 |
| rs6787411   | T | -0.0145 |
| rs4678954   | G | 0.014   |
| rs115336241 | C | -0.0436 |
| rs6442362   | G | 0.0211  |
| rs13064732  | A | 0.0323  |
| rs113245519 | T | 0.0807  |
| rs6443653   | G | 0.0183  |
| rs4311165   | C | 0.0154  |
| rs76674160  | G | 0.0561  |
| rs140095659 | G | -0.0538 |
| rs143335617 | A | 0.062   |
| rs11127693  | G | -0.0288 |
| rs67563294  | G | -0.0189 |
| rs73102949  | T | -0.0545 |
| rs73129157  | A | -0.0607 |
| rs56233911  | T | 0.028   |
| rs9862307   | C | -0.0162 |
| rs75073487  | C | -0.0793 |
| rs293777    | G | 0.0218  |
| rs116596112 | G | 0.0943  |
| rs9810949   | G | -0.0165 |
| rs55892153  | A | 0.0745  |
| rs2053223   | A | 0.0243  |
| rs11714449  | C | -0.0225 |
| rs17253133  | G | -0.0546 |
| rs4459876   | A | -0.0171 |
| rs75167426  | T | 0.0899  |
| rs112750402 | C | -0.0526 |
| rs138087692 | C | -0.0624 |
| rs80209023  | T | -0.0757 |
| rs2055705   | T | -0.0242 |
| rs145405038 | A | 0.0412  |
| rs57346379  | G | 0.0173  |
| rs6762722   | G | 0.0865  |
| rs17370212  | C | 0.0545  |
| rs62246969  | T | 0.0758  |
| rs76089301  | C | 0.0828  |
| rs67266941  | T | 0.0488  |

|             |   |         |
|-------------|---|---------|
| rs115165801 | T | 0.0966  |
| rs73097039  | A | -0.0551 |
| rs2590705   | C | 0.016   |
| rs163574    | A | -0.0259 |
| rs28673456  | G | 0.0789  |
| rs114773112 | A | -0.0423 |
| rs2886726   | A | 0.0161  |
| rs150906254 | T | -0.0599 |
| rs1529045   | C | -0.0197 |
| rs6764768   | T | -0.0157 |
| rs6770739   | C | 0.0217  |
| rs4688537   | A | -0.0598 |
| rs114067580 | G | 0.0543  |
| rs6786757   | G | -0.0233 |
| rs4686394   | G | -0.0168 |
| rs73210568  | A | -0.0958 |
| rs57177489  | T | 0.022   |
| rs1121660   | C | 0.0133  |
| rs12633691  | T | -0.0178 |
| rs62261658  | A | 0.0443  |
| rs113708449 | A | 0.0599  |
| rs75412913  | G | 0.0478  |
| rs9812375   | T | -0.0267 |
| rs831449    | C | -0.0253 |
| rs112148671 | C | 0.0796  |
| rs7629539   | G | 0.0167  |
| rs72996796  | C | 0.0704  |
| rs11927266  | C | 0.0168  |
| rs35551988  | A | -0.0919 |
| rs1523281   | A | 0.0234  |
| rs76862687  | T | 0.0731  |
| rs11713343  | A | -0.018  |
| rs164965    | C | 0.0137  |
| rs11721051  | C | 0.0181  |
| rs1965346   | A | 0.0265  |
| rs4686434   | G | 0.0138  |
| rs4440157   | A | -0.0236 |
| rs56332721  | C | 0.054   |
| rs73081689  | C | 0.0307  |
| rs144458748 | T | 0.0524  |
| rs941214    | T | 0.0219  |
| rs76552096  | A | 0.0658  |
| rs2669928   | T | 0.018   |
| rs1384413   | C | -0.016  |
| rs73133989  | A | -0.0855 |
| rs12495950  | A | -0.0403 |
| rs142662785 | G | -0.0954 |

|             |   |         |
|-------------|---|---------|
| rs13091831  | T | -0.0461 |
| rs113862627 | C | -0.0767 |
| rs6444147   | C | 0.0203  |
| rs13070344  | G | 0.0526  |
| rs138109292 | T | 0.0808  |
| rs4498076   | T | -0.014  |
| rs77925048  | T | 0.0833  |
| rs10888     | A | 0.0211  |
| rs41511748  | A | 0.0512  |
| rs13092137  | T | 0.0672  |
| rs6806945   | C | -0.0234 |
| rs71315868  | A | -0.1105 |
| rs4677990   | A | -0.042  |
| rs58684123  | T | -0.0401 |
| rs140732241 | T | -0.0467 |
| rs62252811  | A | 0.0254  |
| rs9882977   | A | -0.0166 |
| rs73027101  | T | -0.0368 |
| rs74735379  | C | -0.0559 |
| rs116077328 | A | 0.0721  |
| rs74795956  | T | 0.0752  |
| rs6443758   | A | 0.0259  |
| rs115728474 | T | -0.0684 |
| rs114955564 | T | -0.1228 |
| rs10460913  | A | -0.0355 |
| rs55903849  | C | 0.0507  |
| rs10935295  | T | 0.0202  |
| rs9814562   | C | -0.0215 |
| rs73181911  | A | -0.0263 |
| rs141874133 | T | 0.0696  |
| rs28546820  | C | -0.0437 |
| rs83615     | G | 0.0176  |
| rs3845936   | T | 0.0149  |
| rs116228500 | A | 0.0536  |
| rs28444511  | C | 0.0241  |
| rs78537082  | A | -0.0315 |
| rs73168999  | G | -0.0301 |
| rs73874832  | C | 0.0798  |
| rs73039691  | T | 0.0148  |
| rs58362656  | T | 0.0172  |
| rs7624436   | C | 0.0179  |
| rs73045692  | A | 0.0149  |
| rs1083801   | G | -0.0161 |
| rs9816984   | T | -0.0266 |
| rs163579    | T | -0.0147 |
| rs7613763   | A | -0.0165 |
| rs11919318  | T | -0.0203 |

|             |   |         |
|-------------|---|---------|
| rs112662069 | T | -0.0369 |
| rs114515234 | G | 0.1182  |
| rs56287321  | G | -0.0163 |
| rs114533006 | T | -0.0557 |
| rs1685511   | G | -0.0134 |
| rs76491615  | A | 0.0449  |
| rs12631637  | G | -0.0149 |
| rs79292354  | T | 0.0402  |
| rs3772320   | A | 0.0139  |
| rs114748333 | T | -0.0758 |
| rs116106741 | G | -0.0639 |
| rs79731151  | T | 0.0528  |
| rs6780332   | C | -0.0148 |
| rs6799372   | A | -0.0162 |
| rs4680524   | C | -0.0477 |
| rs17033607  | A | 0.0393  |
| rs138551217 | T | 0.0923  |
| rs13091299  | C | 0.0142  |
| rs140158231 | G | -0.0537 |
| rs6774399   | T | 0.0161  |
| rs114696169 | A | 0.1154  |
| rs73132700  | T | -0.0599 |
| rs72950600  | T | -0.054  |
| rs9872433   | G | 0.0157  |
| rs62272472  | A | -0.0675 |
| rs77935235  | G | 0.0683  |
| rs4894320   | A | -0.0152 |
| rs73074316  | G | -0.034  |
| rs144051815 | A | 0.0874  |
| rs75913374  | T | 0.0621  |
| rs73175579  | A | -0.0694 |
| rs1488226   | T | -0.0225 |
| rs140737291 | T | -0.018  |
| rs6549418   | A | 0.0219  |
| rs17712202  | A | -0.0728 |
| rs13066550  | A | -0.0757 |
| rs115270079 | G | 0.0771  |
| rs78930232  | T | 0.0533  |
| rs147393618 | A | 0.0493  |
| rs1167253   | G | -0.0192 |
| rs146749265 | C | 0.0766  |
| rs140305856 | A | 0.078   |
| rs77174761  | G | 0.0854  |
| rs113773770 | T | 0.0592  |
| rs73177355  | C | -0.0504 |
| rs77947617  | A | -0.0293 |
| rs116356446 | T | -0.0876 |

|             |   |         |
|-------------|---|---------|
| rs73235929  | A | 0.0297  |
| rs4485751   | G | -0.0187 |
| rs139155664 | C | -0.0856 |
| rs1622607   | A | 0.0141  |
| rs74952110  | A | 0.046   |
| rs147682725 | T | 0.0922  |
| rs116733545 | A | 0.0708  |
| rs1391796   | A | 0.0145  |
| rs113501379 | C | -0.0421 |
| rs73111304  | C | 0.0429  |
| rs6550793   | T | 0.0187  |
| rs1457640   | G | -0.0175 |
| rs7374124   | G | 0.0156  |
| rs9311726   | G | -0.0164 |
| rs116489725 | A | -0.0908 |
| rs66830358  | T | 0.0154  |
| rs7641526   | T | -0.0233 |
| rs73128952  | G | 0.0789  |
| rs1122790   | C | -0.0162 |
| rs7633231   | T | 0.0269  |
| rs17050516  | T | -0.041  |
| rs80282904  | G | 0.0259  |
| rs3774475   | A | 0.0133  |
| rs76088353  | G | -0.0612 |
| rs16849953  | C | 0.0265  |
| rs9289352   | T | 0.0183  |
| rs72874641  | G | -0.0817 |
| rs39687     | G | -0.0176 |
| rs13433785  | G | 0.016   |
| rs2531743   | G | 0.0179  |
| rs74341791  | A | 0.1008  |
| rs77674795  | A | -0.0441 |
| rs13100333  | T | 0.0747  |
| rs13074826  | A | 0.015   |
| rs17239701  | C | 0.0278  |
| rs151743    | T | 0.0149  |
| rs13099775  | G | 0.0189  |
| rs12494893  | G | 0.0139  |
| rs34926152  | T | -0.0498 |
| rs17739897  | A | -0.0764 |
| rs709096    | T | 0.0513  |
| rs144794251 | A | -0.0347 |
| rs3956142   | G | -0.0149 |
| rs78589336  | G | -0.0865 |
| rs12493913  | C | 0.0185  |
| rs140114101 | C | 0.0985  |
| rs73093854  | T | 0.0619  |

|             |   |         |
|-------------|---|---------|
| rs139206205 | T | -0.0576 |
| rs73122169  | C | 0.0393  |
| rs35359910  | A | 0.0244  |
| rs2247665   | A | 0.0156  |
| rs115249341 | T | 0.0863  |
| rs17536147  | C | -0.0334 |
| rs3772503   | C | 0.0171  |
| rs112270634 | C | 0.0399  |
| rs185822    | A | -0.0149 |
| rs7646105   | G | -0.0137 |
| rs1087083   | T | -0.0137 |
| rs73153465  | C | -0.0557 |
| rs112473072 | T | 0.0864  |
| rs75376661  | C | 0.0568  |
| rs35103091  | C | -0.051  |
| rs62294269  | A | -0.0862 |
| rs748334    | A | 0.054   |
| rs76691257  | T | -0.0861 |
| rs78338216  | C | 0.0725  |
| rs17059602  | G | -0.0209 |
| rs150374744 | C | -0.0477 |
| rs73169565  | G | -0.0258 |
| rs112448395 | A | 0.0647  |
| rs56030157  | T | 0.0204  |
| rs138122613 | G | -0.0776 |
| rs79972243  | A | 0.058   |
| rs143147640 | C | 0.0419  |
| rs6787360   | G | 0.0304  |
| rs4571187   | A | -0.0153 |
| rs9828495   | G | -0.0138 |
| rs73202720  | T | -0.0413 |
| rs6787896   | T | 0.0279  |
| rs9856161   | C | 0.0184  |
| rs145154012 | T | -0.0401 |
| rs6444258   | C | 0.0185  |
| rs62241773  | G | 0.0163  |
| rs77654481  | C | -0.1029 |
| rs9288978   | A | 0.0217  |
| rs34618910  | T | 0.1082  |
| rs876520    | C | -0.023  |
| rs13324680  | C | 0.0233  |
| rs139224470 | C | 0.0785  |
| rs145145850 | T | 0.0699  |
| rs17200164  | T | -0.0422 |
| rs78732842  | C | 0.0547  |
| rs9876256   | T | -0.0389 |
| rs73145656  | C | -0.0325 |

|             |   |         |
|-------------|---|---------|
| rs138727888 | C | 0.0719  |
| rs113847287 | C | 0.0373  |
| rs2053500   | C | 0.0285  |
| rs7640284   | T | 0.0235  |
| rs114008021 | A | 0.0495  |
| rs342008    | A | -0.0276 |
| rs71325836  | T | -0.0482 |
| rs114432254 | G | -0.0616 |
| rs73890213  | T | -0.0262 |
| rs1566364   | G | 0.016   |
| rs338610    | A | 0.0151  |
| rs4677177   | G | -0.0159 |
| rs77495869  | A | -0.0769 |
| rs1798620   | G | -0.0464 |
| rs17063482  | G | 0.0302  |
| rs144069245 | T | 0.0719  |
| rs62275033  | A | 0.0463  |
| rs16830368  | G | -0.0147 |
| rs73050577  | G | 0.1073  |
| rs862246    | G | 0.0662  |
| rs62267081  | A | -0.0569 |
| rs4682223   | T | 0.0173  |
| rs62279646  | C | -0.0622 |
| rs7610002   | T | -0.0153 |
| rs6764916   | A | 0.0309  |
| rs73032132  | C | 0.053   |
| rs75354481  | G | 0.054   |
| rs115550324 | C | -0.0532 |
| rs4678191   | G | 0.0133  |
| rs7630919   | G | 0.0486  |
| rs6793593   | A | 0.0192  |
| rs80041286  | G | -0.0239 |
| rs57283060  | G | -0.022  |
| rs148058994 | C | -0.0334 |
| rs73234730  | C | 0.0197  |
| rs11917028  | C | -0.0216 |
| rs28658351  | G | -0.0158 |
| rs114896480 | C | -0.0698 |
| rs13091963  | A | -0.0141 |
| rs73226671  | G | -0.0805 |
| rs79327112  | G | 0.0693  |
| rs13067134  | T | 0.0389  |
| rs17749509  | G | 0.0213  |
| rs115177319 | A | -0.0561 |
| rs114566646 | T | 0.1056  |
| rs148448787 | A | 0.0532  |
| rs7640911   | C | 0.0166  |



|             |   |         |
|-------------|---|---------|
| rs150059398 | A | 0.0717  |
| rs9823271   | A | 0.0291  |
| rs6783755   | C | 0.089   |
| rs145898045 | A | 0.0558  |
| rs140474979 | A | 0.0623  |
| rs112091039 | T | 0.057   |
| rs16853920  | C | -0.017  |
| rs62272468  | A | 0.0278  |
| rs79101022  | G | -0.0604 |
| rs114665847 | T | 0.096   |
| rs13081927  | T | -0.0226 |
| rs17773769  | G | -0.037  |
| rs115590848 | T | -0.0667 |
| rs13064371  | G | -0.019  |
| rs77889039  | G | 0.0344  |
| rs880337    | T | 0.0642  |
| rs114226107 | G | -0.0795 |
| rs73159639  | C | 0.0746  |
| rs10937534  | T | 0.0149  |
| rs116780938 | G | 0.0578  |
| rs6549355   | T | 0.0421  |
| rs114426402 | C | 0.02    |
| rs10935745  | T | -0.0262 |
| rs114472761 | A | 0.0398  |
| rs79986775  | A | -0.0563 |
| rs142013556 | C | -0.0858 |
| rs9846480   | A | -0.0132 |
| rs115827652 | T | 0.0775  |
| rs58690195  | A | -0.0508 |
| rs6791044   | C | -0.0149 |
| rs28642913  | A | 0.0133  |
| rs73085303  | A | -0.0512 |
| rs16861097  | C | 0.0209  |
| rs73203412  | A | -0.0196 |
| rs10510631  | A | -0.0154 |
| rs7612549   | C | 0.0209  |
| rs114707650 | A | 0.0452  |
| rs9821910   | G | 0.013   |
| rs13080154  | T | -0.0139 |
| rs143173721 | A | -0.0412 |
| rs76116557  | A | 0.0527  |
| rs2639207   | A | -0.0157 |
| rs1351043   | C | 0.0139  |
| rs4681171   | C | 0.0294  |
| rs116478896 | G | -0.0632 |
| rs7639788   | C | 0.0523  |
| rs12486539  | C | 0.0143  |

|             |   |         |
|-------------|---|---------|
| rs9855058   | A | 0.0178  |
| rs12496632  | C | -0.0704 |
| rs114351247 | T | 0.0541  |
| rs114050142 | A | 0.0642  |
| rs28704857  | C | 0.0395  |
| rs73158510  | A | -0.0321 |
| rs111742789 | A | -0.0639 |
| rs61224228  | C | -0.0335 |
| rs34359806  | G | -0.0505 |
| rs1402964   | A | -0.0306 |
| rs142480772 | C | 0.0175  |
| rs62284726  | G | 0.0585  |
| rs360858    | T | 0.015   |
| rs146323663 | T | 0.03    |
| rs4074283   | A | -0.014  |
| rs1391390   | A | 0.0642  |
| rs9860150   | A | -0.015  |
| rs2618317   | T | -0.0197 |
| rs12487149  | G | 0.018   |
| rs9838089   | C | 0.0453  |
| rs76451049  | T | -0.0744 |
| rs78906313  | G | 0.0559  |
| rs75314027  | A | 0.053   |
| rs74325946  | A | -0.0477 |
| rs77111433  | T | -0.023  |
| rs76937118  | T | 0.0626  |
| rs115221324 | A | 0.0606  |
| rs11710867  | C | -0.0234 |
| rs36088027  | A | -0.0158 |
| rs116158532 | G | -0.0698 |
| rs75943000  | C | 0.0191  |
| rs79146252  | A | 0.0859  |
| rs4687001   | C | 0.0339  |
| rs9810841   | A | 0.0717  |
| rs7633927   | C | -0.0517 |
| rs4685841   | T | -0.0143 |
| rs115495700 | A | -0.0966 |
| rs115170526 | G | 0.0466  |
| rs75374112  | A | -0.0482 |
| rs73186710  | C | 0.0267  |
| rs6794543   | A | -0.0151 |
| rs62290326  | C | -0.0452 |
| rs1599270   | G | -0.072  |
| rs75745815  | T | -0.0646 |
| rs140126782 | T | 0.0536  |
| rs4381887   | C | -0.0164 |
| rs77922306  | T | -0.0579 |

|             |   |         |
|-------------|---|---------|
| rs881604    | C | -0.0147 |
| rs146446901 | A | 0.0755  |
| rs4393879   | A | -0.0147 |
| rs12495944  | T | 0.0232  |
| rs115235632 | A | 0.0803  |
| rs113901109 | G | 0.0603  |
| rs11708041  | G | -0.0182 |
| rs11710590  | T | -0.0139 |
| rs73163541  | C | 0.0475  |
| rs114211523 | T | -0.0389 |
| rs56366004  | T | 0.107   |
| rs1040337   | C | 0.0175  |
| rs75098087  | A | 0.0356  |
| rs9830571   | G | 0.0248  |
| rs78953713  | T | -0.05   |
| rs78168683  | T | 0.0419  |
| rs139626712 | G | 0.105   |
| rs75193123  | C | 0.0926  |
| rs146485976 | T | 0.1081  |
| rs76934568  | G | -0.0604 |
| rs147307123 | A | 0.0787  |
| rs80337773  | T | 0.0671  |
| rs143295143 | T | -0.069  |
| rs76829785  | A | 0.0705  |
| rs12637835  | G | 0.0193  |
| rs73073606  | C | -0.0202 |
| rs9853732   | G | 0.0201  |
| rs11925770  | T | 0.082   |
| rs111612664 | G | 0.052   |
| rs17029710  | T | -0.0431 |
| rs924933    | A | 0.0235  |
| rs139632291 | G | 0.0803  |
| rs113169847 | T | 0.0731  |
| rs55742124  | T | 0.0318  |
| rs150519986 | A | -0.0906 |
| rs146176369 | C | 0.054   |
| rs1528193   | A | -0.0176 |
| rs115322304 | G | 0.0524  |
| rs147864310 | C | -0.0498 |
| rs114055581 | T | -0.058  |
| rs2056163   | G | -0.0135 |
| rs115535040 | A | -0.0874 |
| rs6776327   | G | -0.0148 |
| rs145040445 | A | -0.0536 |
| rs62269572  | G | 0.0221  |
| rs148195883 | C | 0.0254  |
| rs145638408 | G | 0.0573  |

|             |   |         |
|-------------|---|---------|
| rs73078180  | C | 0.0874  |
| rs17038415  | A | -0.0566 |
| rs11716058  | T | -0.0322 |
| rs34125616  | A | 0.0711  |
| rs114753512 | A | 0.0205  |
| rs11920548  | A | -0.0168 |
| rs143117537 | G | -0.063  |
| rs116469777 | C | -0.098  |
| rs2282663   | C | -0.0372 |
| rs77978145  | T | 0.0343  |
| rs77548798  | A | -0.0197 |
| rs80014124  | C | 0.033   |
| rs10049315  | A | 0.0175  |
| rs144349215 | A | -0.0551 |
| rs2175734   | T | -0.0315 |
| rs144400904 | T | 0.0852  |
| rs2367833   | T | 0.031   |
| rs74319395  | G | 0.0385  |
| rs62650088  | A | -0.0183 |
| rs147389783 | A | -0.0676 |
| rs78091849  | T | -0.0898 |
| rs112680469 | G | 0.0888  |
| rs75248043  | C | 0.0346  |
| rs17354112  | T | 0.0673  |
| rs77144945  | G | -0.0997 |
| rs4525889   | C | -0.0139 |
| rs9879974   | G | -0.035  |
| rs4859026   | G | -0.0154 |
| rs73159037  | G | -0.0267 |
| rs73045600  | C | -0.0599 |
| rs484332    | A | 0.0126  |
| rs114692331 | C | -0.0286 |
| rs143556684 | T | -0.0487 |
| rs2007700   | G | -0.0229 |
| rs138522974 | A | -0.0415 |
| rs34470830  | A | -0.088  |
| rs150683357 | G | 0.0958  |
| rs138279734 | C | -0.0621 |
| rs76191452  | C | -0.0681 |
| rs7631711   | G | -0.0233 |
| rs1588867   | T | 0.0556  |
| rs6786585   | A | 0.0358  |
| rs11715578  | T | 0.0269  |
| rs115065911 | C | 0.0645  |
| rs73066424  | C | 0.047   |
| rs4679815   | C | 0.017   |
| rs80024363  | A | -0.0295 |

|             |   |         |
|-------------|---|---------|
| rs2292006   | T | 0.0147  |
| rs115570771 | C | -0.0555 |
| rs139593500 | A | -0.0594 |
| rs111725276 | C | -0.1034 |
| rs73196659  | C | -0.0288 |
| rs10937447  | G | 0.0352  |
| rs12488630  | G | 0.0434  |
| rs6794253   | A | 0.0151  |
| rs111626815 | G | 0.0796  |
| rs9870439   | T | -0.0135 |
| rs112033271 | G | -0.0255 |
| rs6783960   | G | -0.0142 |
| rs17791200  | A | 0.0485  |
| rs139275504 | T | 0.0508  |
| rs41526948  | G | 0.0901  |
| rs149044598 | G | 0.0461  |
| rs34685652  | C | -0.0183 |
| rs143401079 | T | -0.0452 |
| rs9284877   | T | -0.0377 |
| rs79761491  | C | -0.0778 |
| rs10933721  | C | -0.0195 |
| rs79314602  | A | 0.0524  |
| rs3901920   | C | -0.0132 |
| rs17308756  | T | -0.0583 |
| rs111458120 | C | 0.0798  |
| rs6783998   | C | 0.014   |
| rs11713241  | C | 0.0727  |
| rs74470022  | C | 0.0617  |
| rs36014692  | A | 0.0231  |
| rs9827119   | G | -0.0155 |
| rs2371114   | T | 0.0165  |
| rs28701767  | T | -0.1043 |
| rs213402    | T | 0.0159  |
| rs4432598   | G | -0.0398 |
| rs13063494  | C | -0.0171 |
| rs147835369 | C | 0.0928  |
| rs13068631  | C | 0.0248  |
| rs10937436  | C | 0.017   |
| rs74198942  | A | 0.0981  |
| rs9883326   | G | -0.0163 |
| rs34734727  | T | 0.0157  |
| rs73840466  | G | 0.03    |
| rs115213554 | T | 0.0267  |
| rs116152646 | A | -0.0589 |
| rs149532609 | A | 0.0543  |
| rs13095322  | A | -0.0341 |
| rs146657098 | A | 0.0692  |

|             |   |         |
|-------------|---|---------|
| rs13085353  | T | -0.0267 |
| rs9833666   | T | -0.0142 |
| rs1450982   | T | -0.0134 |
| rs2121787   | G | -0.0398 |
| rs73166280  | G | -0.0692 |
| rs114031124 | G | 0.029   |
| rs147029111 | T | -0.0621 |
| rs11716727  | T | -0.015  |
| rs56359817  | A | -0.0187 |
| rs6773782   | T | 0.0181  |
| rs149534744 | A | 0.065   |
| rs142622388 | C | 0.1287  |
| rs3796144   | C | 0.0132  |
| rs151224143 | T | 0.066   |
| rs9310857   | T | -0.0308 |
| rs73003759  | T | 0.0854  |
| rs115455970 | T | 0.0826  |
| rs36033442  | G | 0.0162  |
| rs11711259  | T | 0.0202  |
| rs114079175 | T | -0.0404 |
| rs143731943 | T | 0.0454  |
| rs115290893 | G | 0.072   |
| rs73209081  | C | 0.0897  |
| rs62258666  | A | 0.0694  |
| rs73094877  | C | -0.02   |
| rs883896    | T | 0.0392  |
| rs142933951 | T | 0.0602  |
| rs7616054   | A | 0.0277  |
| rs116382190 | A | 0.0765  |
| rs34802992  | C | -0.0422 |
| rs142160881 | A | -0.0555 |
| rs41271385  | A | -0.0187 |
| rs76158329  | A | -0.0444 |
| rs9848371   | A | 0.022   |
| rs11721092  | T | -0.0336 |
| rs73826357  | G | -0.0201 |
| rs76646629  | T | -0.0288 |
| rs938521    | C | -0.0197 |
| rs147244465 | A | -0.0199 |
| rs148393877 | A | -0.1123 |
| rs711682    | T | -0.0171 |
| rs137971004 | G | 0.0461  |
| rs34896415  | C | 0.0248  |
| rs9879786   | G | -0.0185 |
| rs7635429   | T | 0.0205  |
| rs361052    | A | 0.0161  |
| rs6794456   | T | 0.0171  |

|             |   |         |
|-------------|---|---------|
| rs149837389 | T | -0.0672 |
| rs11711516  | G | -0.0128 |
| rs116544703 | T | 0.0675  |
| rs148646926 | A | 0.078   |
| rs11707804  | C | -0.0141 |
| rs9809005   | T | 0.0357  |
| rs114417353 | C | -0.0467 |
| rs17040803  | G | 0.0547  |
| rs1385521   | A | -0.0413 |
| rs1046706   | G | 0.0138  |
| rs78637250  | A | 0.0642  |
| rs116314084 | T | 0.0763  |
| rs6798312   | C | -0.0143 |
| rs6773119   | C | 0.0142  |
| rs7640319   | T | -0.0139 |
| rs77763204  | A | 0.0677  |
| rs114108011 | C | -0.1008 |
| rs73152895  | A | 0.0335  |
| rs1489630   | C | 0.0131  |
| rs4054834   | A | -0.1082 |
| rs114877031 | C | 0.0313  |
| rs151044295 | A | -0.0516 |
| rs6769291   | T | 0.0457  |
| rs9311893   | T | 0.0344  |
| rs868534    | T | 0.0184  |
| rs4361276   | T | -0.0303 |
| rs704425    | T | -0.024  |
| rs2688252   | G | 0.0133  |
| rs2048611   | C | -0.0146 |
| rs142718910 | G | 0.0751  |
| rs116229196 | G | 0.0901  |
| rs16828415  | C | -0.0264 |
| rs17584783  | T | -0.017  |
| rs71310323  | G | -0.0194 |
| rs155882    | G | -0.0256 |
| rs9880802   | A | -0.0381 |
| rs34953611  | T | 0.0429  |
| rs138570905 | A | 0.0673  |
| rs112191520 | G | 0.0407  |
| rs112981728 | A | -0.0559 |
| rs62274185  | G | 0.0769  |
| rs71308055  | G | -0.0248 |
| rs116029574 | C | -0.0692 |
| rs4687381   | G | 0.0135  |
| rs11711404  | T | 0.0586  |
| rs75540869  | A | 0.0624  |
| rs140115640 | A | 0.0713  |

|             |   |         |
|-------------|---|---------|
| rs112252875 | A | -0.0415 |
| rs7649045   | T | -0.0158 |
| rs1450348   | A | -0.0142 |
| rs116644047 | C | -0.0582 |
| rs77678215  | T | -0.0551 |
| rs17634308  | T | -0.0189 |
| rs6782695   | T | 0.0496  |
| rs57886087  | G | -0.0142 |
| rs139381504 | T | -0.0256 |
| rs35972277  | A | 0.0633  |
| rs28673824  | C | 0.0132  |
| rs6440611   | A | 0.0223  |
| rs77732258  | T | -0.0842 |
| rs2679805   | T | -0.0351 |
| rs116673758 | A | 0.0566  |
| rs116339315 | T | 0.0622  |
| rs1873915   | A | -0.0211 |
| rs79036275  | G | -0.1021 |
| rs639447    | G | -0.1009 |
| rs1387775   | C | 0.0241  |
| rs140391506 | T | -0.0498 |
| rs73083869  | T | -0.0253 |
| rs7630982   | A | -0.0214 |
| rs9798878   | T | 0.0235  |
| rs11720498  | T | -0.0128 |
| rs62277565  | C | 0.0138  |
| rs112960603 | G | 0.0283  |
| rs1799864   | A | -0.0254 |
| rs16862731  | C | -0.0268 |
| rs112922016 | G | 0.019   |
| rs111807267 | T | 0.0452  |
| rs115160890 | A | -0.0442 |
| rs62267235  | G | 0.029   |
| rs6441868   | T | -0.0723 |
| rs73173629  | A | 0.063   |
| rs1387774   | G | -0.0164 |
| rs73025918  | A | 0.1043  |
| rs4687253   | C | 0.0184  |
| rs62255068  | C | -0.0148 |
| rs115864545 | G | 0.0549  |
| rs9860274   | A | 0.0131  |
| rs34519069  | G | 0.0457  |
| rs981994    | G | 0.0129  |
| rs113544140 | C | -0.0723 |
| rs4678006   | T | -0.0387 |
| rs11918397  | T | -0.0171 |
| rs112103481 | T | -0.0249 |



|             |   |         |
|-------------|---|---------|
| rs78412809  | A | -0.0716 |
| rs57689046  | A | -0.0375 |
| rs6778495   | C | -0.0313 |
| rs145288874 | T | -0.0675 |
| rs113068570 | C | -0.083  |
| rs73131591  | G | -0.0219 |
| rs150851658 | C | -0.1127 |
| rs7621596   | G | 0.0362  |
| rs9869067   | T | 0.0281  |
| rs72622533  | C | 0.0223  |
| rs6795093   | G | 0.0135  |
| rs76193944  | T | 0.065   |
| rs17275273  | C | -0.0228 |
| rs115081357 | T | -0.068  |
| rs13317628  | T | 0.021   |
| rs78490546  | G | 0.0263  |
| rs62251512  | T | -0.0233 |
| rs824357    | T | 0.0174  |
| rs6792808   | A | -0.0291 |
| rs75378468  | T | 0.0569  |
| rs56162158  | G | -0.0488 |
| rs142052523 | T | -0.0556 |
| rs6419844   | C | 0.014   |
| rs9812558   | T | 0.0237  |
| rs116598225 | T | -0.0605 |
| rs2218935   | A | 0.0124  |
| rs7610387   | G | -0.0368 |
| rs77533202  | C | 0.0456  |
| rs4687529   | C | 0.0198  |
| rs9790240   | G | -0.0266 |
| rs6439602   | T | 0.0162  |
| rs9842404   | T | 0.0486  |
| rs139897613 | C | 0.0743  |
| rs3773581   | A | -0.0149 |
| rs140589003 | C | 0.1086  |
| rs17378875  | C | 0.0225  |
| rs4858477   | C | -0.0124 |
| rs79468183  | A | -0.0393 |
| rs73888090  | A | -0.0426 |
| rs17690433  | T | -0.0316 |
| rs77397392  | A | 0.0886  |
| rs77231470  | T | -0.0355 |
| rs7373102   | T | 0.0125  |
| rs40494     | C | 0.0239  |
| rs9758492   | A | 0.0162  |
| rs6764699   | G | 0.077   |
| rs73199664  | G | -0.0334 |

|             |   |         |
|-------------|---|---------|
| rs114914069 | T | -0.0446 |
| rs115551689 | T | 0.0367  |
| rs6445588   | T | -0.0196 |
| rs141462995 | T | 0.088   |
| rs111857778 | G | -0.0272 |
| rs34108453  | A | 0.0359  |
| rs148832389 | G | -0.0642 |
| rs114885120 | C | 0.0856  |
| rs77128245  | A | -0.1032 |
| rs13322173  | T | -0.0572 |
| rs16828176  | G | 0.0346  |
| rs147921476 | A | 0.0987  |
| rs2080515   | A | -0.0158 |
| rs16851936  | G | 0.064   |
| rs113519931 | C | -0.0301 |
| rs11923997  | T | 0.0154  |
| rs9853187   | G | -0.015  |
| rs62232847  | T | -0.0162 |
| rs11921749  | T | -0.015  |
| rs79200107  | C | -0.0411 |
| rs1075354   | A | -0.013  |
| rs144793126 | G | 0.0573  |
| rs116054265 | C | -0.0714 |
| rs6790199   | T | 0.0434  |
| rs140779938 | G | 0.0472  |
| rs17071885  | C | 0.0419  |
| rs955109    | C | 0.0391  |
| rs9858541   | T | -0.0766 |
| rs34704767  | A | 0.0315  |
| rs60442340  | A | -0.0251 |
| rs145345252 | C | 0.0835  |
| rs113199582 | C | 0.0715  |
| rs115461290 | C | -0.0642 |
| rs13066553  | A | 0.0155  |
| rs76446868  | T | 0.0521  |
| rs13079516  | A | -0.0175 |
| rs75842631  | T | 0.0782  |
| rs78165607  | G | -0.0195 |
| rs13064690  | G | 0.0732  |
| rs151154746 | A | 0.0811  |
| rs7643329   | C | -0.0138 |
| rs78662551  | A | 0.0714  |
| rs937911    | G | -0.0134 |
| rs73058336  | G | 0.0592  |
| rs76998755  | T | 0.0775  |
| rs9821711   | A | 0.0125  |
| rs73182746  | G | -0.0471 |

|             |   |         |
|-------------|---|---------|
| rs61630848  | G | 0.02    |
| rs41482946  | A | -0.1132 |
| rs6767785   | T | -0.0128 |
| rs114815223 | T | 0.0819  |
| rs115327627 | C | -0.0704 |
| rs11711929  | G | 0.0695  |
| rs13059924  | A | 0.0148  |
| rs71325178  | G | 0.0272  |
| rs75911197  | T | -0.0323 |
| rs13081430  | T | -0.0973 |
| rs62243514  | A | 0.0334  |
| rs10428219  | A | 0.0708  |
| rs2947659   | T | 0.0178  |
| rs11718021  | G | 0.0367  |
| rs995904    | G | -0.0184 |
| rs115751100 | G | -0.106  |
| rs79559516  | G | 0.0743  |
| rs77977778  | A | -0.0688 |
| rs140702199 | G | -0.0405 |
| rs9840713   | T | 0.0221  |
| rs114381599 | G | -0.0538 |
| rs138916715 | G | -0.1264 |
| rs73038590  | C | -0.0714 |
| rs73052112  | G | 0.0757  |
| rs56243409  | C | -0.0207 |
| rs2089986   | A | -0.0186 |
| rs9852464   | T | 0.0144  |
| rs115923062 | A | -0.059  |
| rs11718890  | T | 0.0538  |
| rs75692541  | C | 0.0292  |
| rs140068736 | A | -0.0963 |
| rs57958053  | G | -0.0154 |
| rs55748802  | T | -0.0126 |
| rs150454906 | T | 0.0649  |
| rs114690037 | C | 0.054   |
| rs28750121  | A | -0.0641 |
| rs12715574  | A | 0.0151  |
| rs139180157 | A | 0.0857  |
| rs9876525   | T | 0.0408  |
| rs11720279  | G | -0.0174 |
| rs12631561  | G | 0.0165  |
| rs1495906   | T | 0.091   |
| rs73009664  | C | 0.0456  |
| rs34031379  | T | 0.0337  |
| rs113434141 | A | 0.0831  |
| rs77016384  | G | 0.0596  |
| rs9852799   | C | 0.0737  |

|             |   |         |
|-------------|---|---------|
| rs116407709 | T | -0.0545 |
| rs1399731   | T | -0.0125 |
| rs75315881  | T | 0.0602  |
| rs76329653  | G | 0.0151  |
| rs115302123 | C | -0.0675 |
| rs73035077  | C | -0.0528 |
| rs77590858  | A | -0.0355 |
| rs112667192 | A | -0.0952 |
| rs115774037 | C | 0.064   |
| rs111805470 | G | -0.0794 |
| rs13082052  | C | -0.0185 |
| rs77511234  | A | 0.0759  |
| rs76044692  | C | 0.0745  |
| rs147911667 | C | 0.0514  |
| rs147808408 | A | -0.1044 |
| rs115976269 | G | -0.079  |
| rs145314078 | A | -0.0694 |
| rs77458651  | A | -0.0221 |
| rs77553912  | G | 0.0892  |
| rs17340601  | T | 0.0387  |
| rs62284549  | C | 0.0701  |
| rs2121807   | A | 0.0224  |
| rs138885696 | A | 0.0736  |
| rs6439362   | C | -0.0187 |
| rs138070394 | C | -0.0569 |
| rs17607268  | C | 0.0126  |
| rs79634405  | A | -0.0554 |
| rs114186094 | T | -0.0507 |
| rs78216849  | T | 0.0688  |
| rs142811740 | C | 0.0624  |
| rs13064745  | G | 0.018   |
| rs6438175   | C | 0.027   |
| rs4973721   | T | -0.0217 |
| rs78769543  | G | 0.0619  |
| rs553878    | A | 0.0157  |
| rs12054399  | C | -0.025  |
| rs4356766   | G | 0.019   |
| rs9823702   | T | -0.0272 |
| rs1166987   | C | -0.0157 |
| rs9824945   | G | 0.0281  |
| rs73046428  | T | 0.0353  |
| rs58261696  | G | -0.0137 |
| rs149646757 | T | 0.0408  |
| rs7374177   | G | -0.0158 |
| rs75871431  | A | -0.0272 |
| rs2970115   | G | -0.0137 |
| rs74669781  | T | -0.0783 |

|             |   |         |
|-------------|---|---------|
| rs4077973   | T | 0.0162  |
| rs13088007  | T | 0.0134  |
| rs79858132  | T | 0.0579  |
| rs17256369  | C | 0.027   |
| rs76680026  | G | 0.0611  |
| rs1523594   | A | -0.0657 |
| rs6785704   | G | 0.019   |
| rs113164762 | C | 0.1     |
| rs145118300 | T | 0.0403  |
| rs13096917  | G | -0.0473 |
| rs1876395   | T | -0.018  |
| rs79248577  | T | -0.0537 |
| rs113947971 | T | -0.0846 |
| rs76593891  | A | -0.0685 |
| rs139100872 | C | -0.0278 |
| rs10512647  | C | 0.0186  |
| rs115276309 | T | 0.128   |
| rs13070899  | A | -0.0475 |
| rs9843698   | C | 0.0172  |
| rs2102914   | G | 0.0494  |
| rs17036407  | C | 0.043   |
| rs2109181   | G | -0.019  |
| rs113678240 | C | 0.0612  |
| rs6440613   | A | 0.018   |
| rs76950868  | C | 0.0282  |
| rs75298582  | C | -0.0635 |
| rs115096488 | G | 0.0391  |
| rs141619467 | A | -0.0618 |
| rs9875609   | A | 0.021   |
| rs62236463  | A | 0.0719  |
| rs76318817  | C | -0.0262 |
| rs17038848  | C | -0.0185 |
| rs114999110 | T | -0.0648 |
| rs77865900  | G | 0.043   |
| rs75650450  | G | 0.0832  |
| rs35434664  | T | 0.0142  |
| rs79973495  | A | 0.0665  |
| rs73001914  | G | -0.0181 |
| rs76730871  | T | 0.0918  |
| rs9819816   | C | 0.068   |
| rs62267997  | G | 0.0543  |
| rs7631192   | T | 0.0188  |
| rs13069069  | A | -0.0193 |
| rs7618632   | A | -0.0237 |
| rs114857906 | A | -0.0314 |
| rs1800276   | T | -0.0285 |
| rs10460972  | A | -0.0203 |

|             |   |         |
|-------------|---|---------|
| rs76411268  | G | 0.0683  |
| rs12490001  | G | 0.0396  |
| rs74493139  | A | 0.0815  |
| rs80135946  | T | -0.0272 |
| rs7639982   | C | 0.0152  |
| rs73003041  | G | -0.0378 |
| rs62255071  | A | 0.0208  |
| rs146861759 | T | -0.0477 |
| rs9881805   | T | 0.0179  |
| rs147806019 | A | 0.0907  |
| rs62272938  | G | 0.019   |
| rs3732356   | G | 0.031   |
| rs73039738  | A | 0.1076  |
| rs73171633  | A | 0.0166  |
| rs13070317  | G | 0.0527  |
| rs1818118   | T | -0.0261 |
| rs62247713  | G | -0.0497 |
| rs115033088 | G | 0.0618  |
| rs141100758 | T | -0.0906 |
| rs2594216   | T | -0.0269 |
| rs17020283  | C | 0.0138  |
| rs1521582   | T | 0.0183  |
| rs78624309  | C | -0.0184 |
| rs12630816  | T | -0.0251 |
| rs11716758  | A | -0.0186 |
| rs1438632   | A | 0.0188  |
| rs2673388   | A | 0.0146  |
| rs79822419  | A | -0.0396 |
| rs9868509   | T | 0.0556  |
| rs74388175  | T | -0.0169 |
| rs137960049 | T | -0.0586 |
| rs140703386 | G | -0.0649 |
| rs111850602 | G | 0.1     |
| rs6793681   | A | -0.0245 |
| rs140058085 | A | 0.0395  |
| rs9290987   | C | 0.0247  |
| rs28542587  | A | 0.0506  |
| rs112325223 | T | -0.0884 |
| rs144255175 | A | -0.1065 |
| rs9825725   | C | 0.0228  |
| rs62260881  | T | -0.0142 |
| rs141938718 | T | -0.0535 |
| rs80236973  | T | -0.0193 |
| rs141974532 | C | 0.1027  |
| rs114236202 | G | -0.0702 |
| rs17484792  | T | 0.0619  |
| rs74792285  | G | -0.0486 |

|             |   |         |
|-------------|---|---------|
| rs10510564  | G | -0.0317 |
| rs73187513  | A | -0.0318 |
| rs150089740 | A | 0.0827  |
| rs1328542   | C | -0.0144 |
| rs34254689  | T | -0.0596 |
| rs114236033 | G | 0.0206  |
| rs6438096   | G | -0.0331 |
| rs941045    | C | 0.0122  |
| rs77456182  | C | -0.0903 |
| rs12634056  | A | 0.0164  |
| rs139675453 | A | 0.0532  |
| rs2669920   | G | 0.0374  |
| rs13083588  | C | 0.0365  |
| rs778471    | T | -0.0138 |
| rs73069293  | C | -0.0453 |
| rs150608807 | T | 0.0898  |
| rs12486097  | C | 0.0249  |
| rs6801639   | G | -0.0128 |
| rs9860663   | C | -0.0276 |
| rs73232059  | T | 0.028   |
| rs139117574 | T | -0.1277 |
| rs4681493   | T | 0.0201  |
| rs62262279  | G | 0.0175  |
| rs6793949   | G | 0.0237  |
| rs6792846   | T | 0.0194  |
| rs140570684 | G | -0.0639 |
| rs7629471   | T | -0.0197 |
| rs78839304  | A | -0.0181 |
| rs164954    | A | 0.0148  |
| rs73060918  | C | -0.074  |
| rs16824191  | C | 0.0414  |
| rs1317293   | A | -0.0474 |
| rs6767520   | C | 0.024   |
| rs114922951 | A | -0.0278 |
| rs74487985  | G | -0.0401 |
| rs115832404 | C | -0.0593 |
| rs61442893  | A | 0.0425  |
| rs13072734  | A | -0.0529 |
| rs73117337  | C | 0.0595  |
| rs73098067  | G | 0.0173  |
| rs7636998   | C | -0.033  |
| rs17462085  | G | 0.0124  |
| rs77544601  | A | 0.0349  |
| rs76793684  | T | 0.0522  |
| rs7621135   | A | -0.0305 |
| rs7433156   | C | 0.0531  |
| rs9848067   | A | -0.0127 |

|             |   |         |
|-------------|---|---------|
| rs77091855  | C | -0.0556 |
| rs17826483  | A | 0.0315  |
| rs2676903   | G | 0.0276  |
| rs983153    | T | -0.0213 |
| rs34737125  | G | -0.0226 |
| rs73192142  | A | -0.0445 |
| rs145360440 | G | 0.0555  |
| rs143635090 | A | -0.0561 |
| rs62244097  | G | 0.081   |
| rs77292313  | T | -0.0707 |
| rs12487318  | A | -0.0157 |
| rs9857959   | C | 0.0186  |
| rs78592189  | G | -0.1081 |
| rs116801682 | C | 0.0581  |
| rs11715015  | T | -0.0146 |
| rs9842956   | G | 0.0236  |
| rs9815073   | A | 0.0149  |
| rs142307462 | A | -0.072  |
| rs9843972   | T | 0.0147  |
| rs76403863  | T | -0.027  |
| rs3026192   | A | 0.0671  |
| rs11922362  | T | -0.0122 |
| rs12374070  | C | -0.0157 |
| rs6548526   | C | -0.0142 |
| rs4683524   | G | -0.0132 |
| rs116690880 | C | 0.0668  |
| rs141905721 | A | 0.0514  |
| rs114381173 | T | 0.0508  |
| rs57214428  | C | 0.0368  |
| rs17661673  | C | -0.0166 |
| rs2638150   | T | 0.0128  |
| rs4688267   | A | 0.0127  |
| rs61436251  | G | -0.0202 |
| rs2230493   | C | -0.017  |
| rs116180761 | C | 0.0706  |
| rs80213311  | A | 0.0366  |
| rs1906992   | C | 0.0436  |
| rs74633812  | A | 0.0701  |
| rs142957335 | T | -0.1097 |
| rs168122    | A | 0.0146  |
| rs1495904   | G | -0.0189 |
| rs13091365  | C | -0.0775 |
| rs77152758  | A | 0.0956  |
| rs78157678  | C | 0.028   |
| rs78539539  | G | 0.0679  |
| rs1491879   | A | 0.0796  |
| rs150363876 | T | -0.048  |



|             |   |         |
|-------------|---|---------|
| rs9844484   | C | 0.0141  |
| rs115120815 | A | 0.0864  |
| rs1468946   | A | -0.0129 |
| rs116811287 | T | -0.064  |
| rs137905035 | G | 0.0542  |
| rs146607488 | A | 0.0217  |
| rs13062635  | C | 0.0122  |
| rs1317639   | C | 0.0148  |
| rs62246814  | C | -0.027  |
| rs2342696   | G | 0.0162  |
| rs79872544  | A | 0.0364  |
| rs6794548   | G | -0.0142 |
| rs148397490 | G | 0.0573  |
| rs143745091 | A | -0.0851 |
| rs11718661  | C | -0.0216 |
| rs6764273   | G | 0.0188  |
| rs62242709  | G | -0.0171 |
| rs73029528  | C | -0.0147 |
| rs4254653   | A | -0.0126 |
| rs74934310  | A | -0.0963 |
| rs78154025  | A | 0.0704  |
| rs16866496  | C | -0.0154 |
| rs145570999 | G | -0.0788 |
| rs73228933  | A | 0.034   |
| rs79667807  | A | -0.0343 |
| rs76122750  | A | -0.0309 |
| rs9839425   | G | 0.019   |
| rs1520604   | A | -0.0251 |
| rs79273001  | T | 0.0214  |
| rs141769766 | T | 0.0422  |
| rs12630820  | T | 0.0184  |
| rs61696081  | T | -0.0217 |
| rs147333020 | A | 0.0591  |
| rs57539357  | T | -0.0852 |
| rs9874037   | T | 0.0203  |
| rs57264279  | T | 0.0563  |
| rs6777554   | A | 0.0593  |
| rs62263125  | A | -0.0198 |
| rs111695649 | A | -0.0772 |
| rs1866997   | T | 0.0208  |
| rs6779690   | C | 0.0173  |
| rs79916350  | A | -0.0742 |
| rs4955213   | C | -0.015  |
| rs9819617   | C | 0.0131  |
| rs6790153   | T | -0.0124 |
| rs79667768  | T | 0.0169  |
| rs79862559  | C | 0.0248  |

|             |   |         |
|-------------|---|---------|
| rs78790546  | C | 0.0701  |
| rs1441878   | C | 0.0183  |
| rs1367140   | C | 0.0131  |
| rs116139282 | G | 0.0436  |
| rs72881257  | A | 0.0246  |
| rs28403454  | A | 0.0482  |
| rs77905880  | C | -0.0544 |
| rs139852779 | G | -0.0775 |
| rs147395615 | T | -0.0354 |
| rs17488841  | T | -0.0175 |
| rs55954416  | G | 0.0429  |
| rs586414    | T | 0.0125  |
| rs1836292   | A | 0.0166  |
| rs12634883  | T | -0.0151 |
| rs73124702  | A | 0.0846  |
| rs1282731   | A | 0.0213  |
| rs6438966   | T | -0.0131 |
| rs116274748 | T | 0.0381  |
| rs114791712 | C | -0.056  |
| rs35086063  | C | 0.0761  |
| rs114071219 | C | 0.0264  |
| rs1069510   | C | 0.0119  |
| rs78296174  | A | -0.027  |
| rs75298702  | C | -0.0655 |
| rs11706660  | G | -0.0616 |
| rs111449819 | C | -0.0475 |
| rs59764966  | A | -0.0356 |
| rs12490351  | C | 0.0292  |
| rs115899006 | A | 0.0708  |
| rs1521294   | A | 0.0289  |
| rs4679172   | C | 0.0129  |
| rs13076634  | T | 0.013   |
| rs3932247   | G | -0.0759 |
| rs72622560  | A | -0.0296 |
| rs11713212  | A | 0.0131  |
| rs709551    | G | 0.0553  |
| rs1105598   | C | 0.0729  |
| rs17019079  | C | 0.0143  |
| rs73069574  | G | 0.0328  |
| rs13062357  | A | 0.0127  |
| rs35622787  | T | 0.0694  |
| rs147501096 | C | 0.026   |
| rs113569738 | C | 0.0747  |
| rs2008984   | A | 0.0264  |
| rs73125910  | G | 0.0179  |
| rs75739793  | A | -0.0535 |
| rs73224316  | T | 0.0151  |

|             |   |         |
|-------------|---|---------|
| rs114307512 | C | -0.0801 |
| rs4679556   | G | 0.0299  |
| rs72625039  | T | 0.0902  |
| rs271063    | G | 0.0179  |
| rs114470262 | A | 0.0334  |
| rs73125157  | C | -0.0568 |
| rs194594    | C | 0.0121  |
| rs933135    | T | 0.0732  |
| rs961280    | A | 0.0261  |
| rs79276228  | C | 0.0725  |
| rs9839910   | C | -0.0155 |
| rs143784182 | A | -0.0474 |
| rs116198731 | C | -0.0814 |
| rs115966306 | C | -0.086  |
| rs117317298 | A | -0.039  |
| rs9862209   | A | 0.0292  |
| rs9818320   | C | 0.0185  |
| rs78292402  | G | 0.0438  |
| rs77472241  | T | -0.0617 |
| rs78062413  | A | 0.0498  |
| rs11128873  | T | 0.0504  |
| rs17564259  | T | -0.0322 |
| rs80274379  | T | 0.08    |
| rs4685572   | A | -0.0206 |
| rs74851954  | T | -0.0642 |
| rs934587    | G | 0.0134  |
| rs35104449  | G | -0.0695 |
| rs2346070   | G | -0.0129 |
| rs34168894  | T | 0.0292  |
| rs73057751  | A | 0.0315  |
| rs75067708  | C | -0.0629 |
| rs7431671   | T | -0.0234 |
| rs115056838 | G | -0.0954 |
| rs259432    | C | -0.0197 |
| rs7620066   | T | 0.013   |
| rs11918667  | T | -0.0124 |
| rs114616194 | G | 0.0379  |
| rs12495177  | A | 0.0538  |
| rs11709529  | C | -0.0222 |
| rs58708244  | C | -0.013  |
| rs77375711  | A | 0.0407  |
| rs112802622 | A | -0.0366 |
| rs145192672 | A | 0.0808  |
| rs146289991 | T | -0.0381 |
| rs115770542 | G | 0.0633  |
| rs62278565  | A | -0.0679 |
| rs7432070   | T | -0.0132 |

|             |   |         |
|-------------|---|---------|
| rs4856953   | C | 0.0224  |
| rs3774300   | C | 0.0173  |
| rs7638887   | T | 0.0243  |
| rs6789319   | A | 0.052   |
| rs115852238 | G | -0.0904 |
| rs6599224   | C | 0.0165  |
| rs76113229  | G | -0.0274 |
| rs2162260   | G | 0.0139  |
| rs2280305   | C | 0.0191  |
| rs77524295  | T | 0.0637  |
| rs9917763   | T | 0.0288  |
| rs76526654  | A | 0.0291  |
| rs9834921   | G | -0.0442 |
| rs115190532 | C | 0.0734  |
| rs11922345  | C | -0.0203 |
| rs148865105 | C | 0.0532  |
| rs55963705  | C | -0.0541 |
| rs7621633   | C | -0.0227 |
| rs9814244   | C | 0.0263  |
| rs4680707   | C | -0.0543 |
| rs141196999 | G | 0.1107  |
| rs80311075  | G | 0.038   |
| rs140813787 | A | -0.0535 |
| rs7428715   | A | 0.035   |
| rs73075999  | T | -0.0279 |
| rs13067354  | T | -0.0333 |
| rs139044703 | A | -0.0754 |
| rs116805582 | T | -0.0905 |
| rs79505419  | G | -0.0373 |
| rs13081180  | T | 0.0463  |
| rs77601270  | C | 0.0708  |
| rs79593029  | G | -0.0697 |
| rs73075443  | T | -0.0373 |
| rs116047188 | T | 0.0751  |
| rs72971611  | T | -0.0367 |
| rs752078    | G | -0.0136 |
| rs62276165  | C | -0.0404 |
| rs79500944  | T | 0.0434  |
| rs34966346  | C | -0.0532 |
| rs76181182  | C | -0.0334 |
| rs116700990 | A | -0.0743 |
| rs13085155  | A | 0.0623  |
| rs73033212  | G | 0.0321  |
| rs17706162  | G | 0.0397  |
| rs1456922   | A | -0.0466 |
| rs76984993  | A | -0.037  |
| rs9858242   | G | -0.0209 |

|             |   |         |
|-------------|---|---------|
| rs77768492  | A | -0.0803 |
| rs113857640 | T | 0.0541  |
| rs112545773 | A | 0.0501  |
| rs77190159  | C | -0.0372 |
| rs1881364   | T | 0.0134  |
| rs17281995  | C | 0.0198  |
| rs4681219   | A | -0.0207 |
| rs115213116 | G | 0.0683  |
| rs78199411  | C | 0.0648  |
| rs13065304  | T | -0.0134 |
| rs1550158   | C | -0.0125 |
| rs116323842 | A | 0.0986  |
| rs138169253 | T | 0.044   |
| rs79240332  | T | 0.0651  |
| rs148624727 | G | 0.0407  |
| rs142673074 | C | 0.0882  |
| rs56074871  | G | -0.0222 |
| rs115235018 | T | -0.0543 |
| rs9755346   | G | 0.0326  |
| rs145714718 | T | -0.0654 |
| rs73166605  | A | -0.0535 |
| rs13085449  | G | -0.0119 |
| rs1153459   | T | 0.0126  |
| rs6781092   | A | -0.0179 |
| rs112519729 | T | -0.0392 |
| rs157463    | A | -0.0326 |
| rs68103932  | T | 0.0164  |
| rs75584896  | T | -0.0535 |
| rs144304640 | T | -0.0584 |
| rs144695745 | C | -0.085  |
| rs2371358   | T | -0.0125 |
| rs116521283 | T | 0.0507  |
| rs137923858 | T | -0.0849 |
| rs62292376  | A | -0.036  |
| rs12490310  | A | -0.0219 |
| rs115923007 | G | -0.0619 |
| rs79823384  | G | 0.0446  |
| rs78402627  | C | 0.0811  |
| rs13324793  | G | 0.0164  |
| rs62228926  | A | 0.0482  |
| rs9814875   | A | 0.066   |
| rs113262106 | A | 0.0298  |
| rs28411332  | G | 0.0297  |
| rs2576384   | G | -0.0125 |
| rs114564188 | T | 0.0656  |
| rs56321066  | A | 0.0556  |
| rs62292785  | T | 0.0369  |

|             |   |         |
|-------------|---|---------|
| rs73094585  | T | 0.0348  |
| rs56666787  | T | 0.0251  |
| rs74429833  | A | 0.0735  |
| rs7427984   | G | -0.0119 |
| rs11128501  | T | 0.0404  |
| rs78080260  | A | 0.0753  |
| rs6805745   | T | -0.0125 |
| rs147996057 | G | -0.0861 |
| rs3846147   | A | -0.1144 |
| rs9862351   | C | -0.0157 |
| rs9841300   | A | 0.0244  |
| rs115140824 | G | 0.0646  |
| rs116649841 | A | 0.0346  |
| rs73057393  | T | -0.1068 |
| rs995633    | C | -0.0137 |
| rs62244317  | A | 0.0157  |
| rs6764398   | C | 0.0134  |
| rs7349517   | A | 0.0168  |
| rs35181962  | C | -0.0467 |
| rs78030993  | T | -0.0813 |
| rs1983204   | G | 0.0149  |
| rs2365401   | C | 0.0119  |
| rs13086909  | T | 0.0531  |
| rs732190    | T | 0.0344  |
| rs2122407   | A | -0.0525 |
| rs1402579   | G | -0.0118 |
| rs6443360   | T | 0.0149  |
| rs7428045   | G | -0.0133 |
| rs114905830 | T | -0.0504 |
| rs73017558  | T | 0.0252  |
| rs9917623   | T | 0.0303  |
| rs1828684   | C | -0.0129 |
| rs1037633   | G | 0.0256  |
| rs78036014  | G | 0.0753  |
| rs6804987   | C | -0.0136 |
| rs1462650   | G | -0.0358 |
| rs13088746  | G | -0.014  |
| rs9871413   | G | -0.0344 |
| rs731221    | G | 0.0223  |
| rs12493890  | A | 0.0491  |
| rs355098    | A | -0.0134 |
| rs1030842   | T | 0.0122  |
| rs34894010  | G | 0.0489  |
| rs62283662  | A | -0.0432 |
| rs931389    | T | 0.0123  |
| rs829185    | T | 0.015   |
| rs144969948 | C | 0.1307  |

|             |   |         |
|-------------|---|---------|
| rs79019422  | G | 0.0479  |
| rs137892683 | C | 0.058   |
| rs62282631  | T | -0.0779 |
| rs73047091  | C | -0.0369 |
| rs2368048   | C | -0.0136 |
| rs4678778   | G | 0.0203  |
| rs17458693  | A | 0.0418  |
| rs139340593 | C | -0.0566 |
| rs77796269  | A | -0.0505 |
| rs1514422   | A | -0.0269 |
| rs73188318  | C | -0.0957 |
| rs62294766  | G | 0.0496  |
| rs4686545   | T | -0.0161 |
| rs237879    | T | 0.0554  |
| rs16846845  | G | -0.0383 |
| rs9871431   | A | 0.0372  |
| rs34494004  | T | -0.0184 |
| rs6772908   | T | 0.0153  |
| rs73835884  | A | 0.0219  |
| rs9880598   | T | 0.036   |
| rs74622822  | G | 0.0525  |
| rs693190    | G | -0.0689 |
| rs148599930 | A | 0.0714  |
| rs149035072 | G | -0.0633 |
| rs76364878  | T | 0.0766  |
| rs1806429   | A | 0.017   |
| rs73137219  | T | -0.0349 |
| rs7636546   | G | 0.0177  |
| rs74603684  | T | 0.0499  |
| rs34408786  | T | 0.0284  |
| rs116375677 | T | 0.0538  |
| rs902190    | T | -0.024  |
| rs3774157   | C | 0.0369  |
| rs481976    | C | 0.0426  |
| rs939647    | C | 0.0139  |
| rs7618765   | G | 0.0528  |
| rs116222267 | G | -0.1036 |
| rs56400746  | A | 0.0139  |
| rs111972607 | C | -0.0347 |
| rs80160274  | T | -0.0722 |
| rs6444269   | G | -0.0119 |
| rs2587028   | T | 0.0174  |
| rs6781008   | G | -0.0155 |
| rs56177789  | T | 0.0194  |
| rs9824043   | T | -0.0134 |
| rs146206748 | G | -0.0688 |
| rs1381089   | C | 0.0181  |

|             |   |         |
|-------------|---|---------|
| rs67263780  | T | 0.0273  |
| rs76065606  | T | 0.0301  |
| rs17704846  | A | -0.0412 |
| rs115696555 | T | -0.0892 |
| rs141773398 | T | 0.0304  |
| rs74787834  | A | -0.0538 |
| rs75500917  | T | 0.036   |
| rs7641734   | C | 0.1027  |
| rs76389233  | C | -0.0553 |
| rs73175485  | C | 0.0252  |
| rs112231008 | C | -0.0685 |
| rs58449430  | T | -0.0344 |
| rs35593371  | A | -0.028  |
| rs151747    | A | -0.0314 |
| rs76441245  | T | -0.0444 |
| rs9859433   | A | 0.0123  |
| rs6551410   | A | -0.0127 |
| rs72962889  | G | 0.0162  |
| rs1168711   | T | -0.0409 |
| rs73177867  | C | -0.0227 |
| rs62274114  | G | 0.0188  |
| rs146793106 | A | 0.0773  |
| rs45473193  | A | 0.0264  |
| rs35268823  | T | 0.027   |
| rs76572256  | C | 0.0596  |
| rs150636387 | T | -0.0727 |
| rs142886848 | G | 0.021   |
| rs9880646   | A | -0.0125 |
| rs79917056  | A | -0.0673 |
| rs73001038  | G | -0.0143 |
| rs77377439  | A | 0.0489  |
| rs9851753   | T | 0.0749  |
| rs115167426 | G | 0.0915  |
| rs73114142  | G | 0.0553  |
| rs1584139   | C | -0.0716 |
| rs73148814  | T | 0.0335  |
| rs78030652  | G | -0.0425 |
| rs141958982 | C | 0.0609  |
| rs7646856   | A | -0.0122 |
| rs76937096  | T | -0.0459 |
| rs73006921  | A | -0.0283 |
| rs7614599   | T | -0.0585 |
| rs941216    | T | 0.0296  |
| rs9865402   | C | 0.0412  |
| rs338223    | A | 0.0144  |
| rs137913735 | A | 0.0484  |
| rs72959428  | T | 0.0601  |



|             |   |         |
|-------------|---|---------|
| rs144367414 | T | 0.05    |
| rs80132993  | A | 0.0479  |
| rs35635764  | C | -0.0428 |
| rs11714607  | C | 0.017   |
| rs142701590 | G | 0.0943  |
| rs79687523  | A | -0.0646 |
| rs139109079 | T | 0.0577  |
| rs3909578   | G | -0.0194 |
| rs79112443  | C | -0.0179 |
| rs116024643 | C | 0.0456  |
| rs9854229   | G | -0.0129 |
| rs145655381 | G | -0.0685 |
| rs11720620  | C | -0.0463 |
| rs79457325  | A | -0.0697 |
| rs2649185   | A | -0.021  |
| rs115702357 | G | -0.0647 |
| rs7649832   | T | 0.0235  |
| rs75246080  | C | -0.0623 |
| rs112836900 | T | -0.0548 |
| rs74978024  | A | 0.0321  |
| rs17188103  | T | 0.0201  |
| rs6805030   | A | 0.0419  |
| rs79229627  | G | -0.0377 |
| rs13079652  | A | 0.0215  |
| rs62238740  | G | -0.0162 |
| rs424601    | A | 0.0197  |
| rs56201901  | T | 0.0641  |
| rs73003298  | T | 0.0633  |
| rs6771019   | G | 0.016   |
| rs1448332   | A | 0.0158  |
| rs75565015  | T | 0.0292  |
| rs34944729  | G | 0.0383  |
| rs73176929  | T | -0.0681 |
| rs4684732   | G | 0.0649  |
| rs112744402 | A | -0.0512 |
| rs115968285 | T | -0.047  |
| rs9871350   | T | -0.0117 |
| rs61620092  | G | 0.0128  |
| rs12494609  | C | -0.0197 |
| rs2931394   | G | 0.0151  |
| rs138487119 | A | -0.0392 |
| rs4955470   | G | -0.0151 |
| rs4686787   | C | -0.0419 |
| rs56178612  | A | 0.024   |
| rs1493091   | T | -0.013  |
| rs62250931  | G | 0.0241  |
| rs1127343   | G | -0.0119 |

|             |   |         |
|-------------|---|---------|
| rs820325    | G | 0.0211  |
| rs16839907  | G | -0.0173 |
| rs9865620   | A | 0.0134  |
| rs166117    | G | -0.015  |
| rs11914388  | C | -0.069  |
| rs2885596   | G | 0.0164  |
| rs116296586 | A | 0.0634  |
| rs73048541  | A | 0.0367  |
| rs112899026 | A | 0.0857  |
| rs12492361  | G | -0.0137 |
| rs112325369 | C | -0.0155 |
| rs142026525 | G | -0.0643 |
| rs145869885 | C | -0.0685 |
| rs80113154  | G | 0.058   |
| rs114592020 | A | 0.0477  |
| rs150937171 | A | -0.0534 |
| rs75359638  | T | 0.0672  |
| rs35731565  | T | 0.0153  |
| rs13092721  | A | 0.0533  |
| rs62272010  | G | 0.0188  |
| rs79998880  | C | 0.0629  |
| rs114407718 | A | 0.0233  |
| rs17511582  | T | 0.0486  |
| rs9865609   | T | -0.0236 |
| rs75610361  | G | 0.0468  |
| rs147408433 | T | -0.0787 |
| rs17030343  | C | 0.0602  |
| rs28408755  | G | -0.0581 |
| rs4684938   | A | 0.0166  |
| rs76753694  | G | -0.0414 |
| rs79777082  | C | -0.0617 |
| rs16832803  | A | 0.0516  |
| rs7636962   | C | -0.0148 |
| rs143089321 | T | -0.075  |
| rs7647787   | G | -0.0122 |
| rs28372947  | C | 0.0518  |
| rs9813239   | C | 0.0261  |
| rs13094843  | T | 0.0117  |
| rs11720274  | G | 0.0214  |
| rs1455867   | C | -0.0142 |
| rs61055421  | G | 0.0202  |
| rs75897266  | A | -0.0214 |
| rs13065417  | A | 0.0175  |
| rs7433648   | T | -0.0139 |
| rs7634751   | C | 0.0141  |
| rs1051772   | C | -0.0202 |
| rs147887942 | G | -0.0632 |

|             |   |         |
|-------------|---|---------|
| rs62268771  | A | 0.0513  |
| rs35260299  | A | 0.0381  |
| rs9878942   | C | 0.0196  |
| rs1345417   | C | -0.0183 |
| rs79846341  | A | -0.0352 |
| rs62238351  | T | -0.0207 |
| rs144424878 | A | 0.0497  |
| rs73204230  | C | 0.0205  |
| rs73153759  | T | -0.0459 |
| rs141045350 | A | -0.1037 |
| rs12721607  | A | -0.039  |
| rs9864733   | G | -0.0149 |
| rs17041201  | T | -0.0834 |
| rs9813915   | G | 0.0615  |
| rs13321260  | A | -0.0295 |
| rs34931595  | T | -0.0211 |
| rs6779310   | T | 0.0128  |
| rs868598    | G | 0.0201  |
| rs4679645   | C | -0.0145 |
| rs74882249  | G | 0.0305  |
| rs79462602  | G | 0.0434  |
| rs11927005  | C | -0.0193 |
| rs11718353  | T | 0.0284  |
| rs9856906   | A | -0.0204 |
| rs116215663 | C | -0.0417 |
| rs77917987  | G | 0.0253  |
| rs17012611  | G | 0.0455  |
| rs9879176   | C | -0.014  |
| rs80353886  | T | 0.0561  |
| rs13082430  | T | -0.0239 |
| rs66626713  | A | -0.0123 |
| rs77559692  | C | -0.0438 |
| rs147289374 | A | -0.0653 |
| rs113922548 | T | -0.0952 |
| rs74543347  | T | 0.0544  |
| rs1574982   | G | 0.0137  |
| rs113799517 | A | 0.0591  |
| rs76057861  | A | 0.0456  |
| rs149844392 | C | 0.0643  |
| rs116497138 | T | 0.0426  |
| rs142564687 | A | 0.0794  |
| rs9877642   | A | -0.0128 |
| rs6800511   | A | -0.0176 |
| rs114316039 | G | 0.0767  |
| rs7630400   | C | -0.0613 |
| rs114553356 | C | -0.0589 |
| rs56777451  | T | -0.0222 |

|             |   |         |
|-------------|---|---------|
| rs56665316  | A | -0.0339 |
| rs76890575  | C | 0.0295  |
| rs112773183 | A | 0.0848  |
| rs114152342 | A | 0.0705  |
| rs4401335   | G | -0.0185 |
| rs164959    | T | 0.014   |
| rs114072268 | C | 0.1     |
| rs112011333 | G | -0.0459 |
| rs7632000   | T | -0.069  |
| rs17024608  | G | 0.0222  |
| rs17702257  | T | -0.0685 |
| rs75515044  | G | 0.0568  |
| rs115770113 | T | 0.064   |
| rs2675433   | C | -0.0131 |
| rs35098116  | G | 0.0156  |
| rs115900404 | A | -0.0753 |
| rs4955827   | A | 0.0659  |
| rs151323241 | T | -0.04   |
| rs114248368 | G | -0.0596 |
| rs2029019   | T | -0.0139 |
| rs55809196  | A | -0.0269 |
| rs10510182  | A | 0.0126  |
| rs146761680 | C | -0.0519 |
| rs77177316  | C | -0.05   |
| rs143731825 | C | -0.0693 |
| rs77700423  | T | -0.061  |
| rs144400591 | C | -0.0583 |
| rs62232884  | G | -0.015  |
| rs16854373  | A | -0.0372 |
| rs7613480   | C | -0.0128 |
| rs1873666   | A | -0.019  |
| rs75231449  | A | 0.0203  |
| rs138400832 | A | 0.05    |
| rs114331030 | A | 0.0637  |
| rs7611685   | G | -0.0126 |
| rs6802439   | C | 0.0123  |
| rs2033447   | G | -0.0191 |
| rs116906503 | G | 0.1011  |
| rs12631732  | C | -0.0659 |
| rs13066749  | T | -0.0124 |
| rs7621032   | T | 0.0123  |
| rs1568101   | C | -0.0221 |
| rs1552193   | G | 0.015   |
| rs73002363  | G | 0.0422  |
| rs7631762   | A | 0.0137  |
| rs7432858   | C | 0.0327  |
| rs11717857  | C | -0.0463 |

|             |   |         |
|-------------|---|---------|
| rs17438524  | C | -0.016  |
| rs2169986   | T | -0.0147 |
| rs116195369 | A | 0.0334  |
| rs62246965  | C | -0.0139 |
| rs34566348  | T | 0.0202  |
| rs56822123  | T | -0.0214 |
| rs115484172 | C | -0.0796 |
| rs1877257   | G | 0.0169  |
| rs347325    | C | -0.013  |
| rs148381189 | T | 0.0663  |
| rs74996973  | A | 0.0375  |
| rs142148872 | T | 0.0361  |
| rs7612467   | T | -0.0137 |
| rs2886378   | A | 0.0675  |
| rs6808547   | A | -0.0152 |
| rs358952    | G | 0.0709  |
| rs7616425   | T | 0.0115  |
| rs77005291  | G | 0.0193  |
| rs73226933  | T | -0.0491 |
| rs67436303  | A | 0.0198  |
| rs7627702   | G | 0.0187  |
| rs1837611   | C | -0.0352 |
| rs13063286  | T | -0.0134 |
| rs1087734   | C | -0.076  |
| rs3821900   | G | 0.0248  |
| rs56258317  | C | -0.0428 |
| rs12233420  | G | -0.04   |
| rs139997183 | T | 0.0687  |
| rs56124025  | T | -0.1186 |
| rs9874670   | T | -0.0175 |
| rs116508500 | C | 0.0563  |
| rs113035410 | T | -0.0774 |
| rs1273878   | G | 0.0389  |
| rs1876463   | T | -0.0267 |
| rs114247414 | T | -0.0427 |
| rs115778536 | T | 0.0522  |
| rs115925588 | T | 0.0455  |
| rs141822432 | C | 0.0142  |
| rs4839620   | T | -0.013  |
| rs115357776 | C | -0.0584 |
| rs6777671   | C | 0.026   |
| rs73105221  | A | -0.0487 |
| rs7639856   | A | -0.0258 |
| rs1875099   | A | -0.0187 |
| rs116232131 | T | -0.0884 |
| rs143362725 | A | -0.0434 |
| rs6770557   | G | -0.0213 |

|             |   |         |
|-------------|---|---------|
| rs2728097   | A | -0.038  |
| rs111434411 | C | -0.0468 |
| rs2030534   | G | 0.0141  |
| rs149907681 | T | 0.0499  |
| rs113401135 | A | 0.0413  |
| rs150867876 | A | -0.0248 |
| rs114419096 | A | 0.0233  |
| rs9311803   | A | 0.0778  |
| rs80013054  | C | -0.035  |
| rs76212606  | A | 0.077   |
| rs6796823   | C | -0.0144 |
| rs4683630   | A | 0.0117  |
| rs1961672   | G | -0.0127 |
| rs138779621 | C | -0.035  |
| rs6779730   | A | 0.015   |
| rs62246874  | G | 0.0621  |
| rs9828692   | C | -0.0143 |
| rs77252121  | C | -0.0837 |
| rs2648507   | C | 0.029   |
| rs79632928  | G | 0.0744  |
| rs6806690   | C | 0.0142  |
| rs9838353   | A | 0.0271  |
| rs3915008   | G | 0.0363  |
| rs17042078  | G | 0.0176  |
| rs750784    | A | 0.0542  |
| rs73050546  | A | -0.0492 |
| rs112050992 | T | -0.0665 |
| rs73174805  | A | 0.0375  |
| rs1876617   | G | 0.0157  |
| rs114398546 | A | -0.0682 |
| rs77985439  | T | -0.0286 |
| rs60479698  | G | -0.0355 |
| rs144678967 | T | -0.0557 |
| rs1343839   | A | 0.0282  |
| rs75186760  | A | 0.0388  |
| rs61797806  | A | 0.0216  |
| rs138263306 | G | 0.0354  |
| rs75775175  | A | -0.064  |
| rs114017030 | A | 0.0838  |
| rs17010556  | G | 0.019   |
| rs2578337   | G | -0.0117 |
| rs62265386  | C | 0.0677  |
| rs77958041  | T | -0.0372 |
| rs78649577  | C | 0.0431  |
| rs146501639 | G | 0.0751  |
| rs145245390 | T | -0.0478 |
| rs1546007   | C | -0.0118 |

|             |   |         |
|-------------|---|---------|
| rs555455    | G | -0.0116 |
| rs73157671  | C | 0.0595  |
| rs115547681 | A | 0.0591  |
| rs12632216  | G | -0.0217 |
| rs6804165   | T | -0.063  |
| rs74874672  | A | 0.0743  |
| rs148526820 | A | -0.0399 |
| rs148341748 | C | 0.0324  |
| rs17430709  | G | -0.0262 |
| rs116135937 | A | 0.0547  |
| rs4687478   | G | -0.0118 |
| rs145925345 | C | 0.027   |
| rs112234391 | G | -0.0444 |
| rs77198087  | A | 0.0324  |
| rs6800246   | G | -0.0223 |
| rs1285080   | C | 0.0238  |
| rs6763141   | T | 0.0268  |
| rs74691982  | G | -0.0514 |
| rs116609681 | A | -0.073  |
| rs149557795 | A | 0.0434  |
| rs4327417   | C | 0.0131  |
| rs2594145   | A | -0.0211 |
| rs13061134  | C | 0.0189  |
| rs80019387  | C | 0.0603  |
| rs113120545 | C | 0.0155  |
| rs55941794  | A | 0.0426  |
| rs143719176 | A | 0.0275  |
| rs11927552  | T | 0.0161  |
| rs769520    | A | -0.0143 |
| rs116125965 | T | -0.0553 |
| rs13074189  | G | -0.0916 |
| rs78173819  | C | -0.0525 |
| rs1126662   | C | 0.0161  |
| rs116827288 | A | 0.052   |
| rs75074340  | G | -0.0393 |
| rs9860117   | T | -0.0247 |
| rs9848464   | C | 0.0133  |
| rs897       | T | 0.0121  |
| rs9877057   | T | -0.0701 |
| rs116200560 | T | 0.0595  |
| rs111679842 | C | 0.0569  |
| rs17513810  | C | -0.0636 |
| rs116028447 | T | 0.0734  |
| rs79654547  | G | 0.0353  |
| rs151196731 | A | -0.0552 |
| rs114340854 | A | -0.0508 |
| rs1106759   | C | -0.0129 |

|             |   |         |
|-------------|---|---------|
| rs116752249 | C | -0.0473 |
| rs6802914   | T | -0.0133 |
| rs11713375  | C | -0.0359 |
| rs147872149 | A | -0.0936 |
| rs74372372  | C | -0.0753 |
| rs139297692 | T | -0.0468 |
| rs34283537  | T | -0.0153 |
| rs4855985   | T | -0.0127 |
| rs34888942  | C | 0.044   |
| rs237883    | T | -0.0339 |
| rs13086220  | T | -0.0119 |
| rs112979139 | C | -0.0756 |
| rs73093091  | A | 0.0132  |
| rs71302192  | A | -0.0332 |
| rs2568859   | G | -0.0194 |
| rs11713769  | C | -0.0232 |
| rs114807731 | A | -0.0553 |
| rs115224174 | C | -0.0736 |
| rs113675467 | C | -0.035  |
| rs6795630   | A | -0.0203 |
| rs35745151  | T | -0.0408 |
| rs115802426 | A | 0.037   |
| rs34182093  | C | 0.0533  |
| rs1464099   | T | -0.0178 |
| rs388647    | A | -0.0141 |
| rs2461818   | T | 0.0205  |
| rs986492    | G | -0.0275 |
| rs6550895   | A | 0.0141  |
| rs77423155  | T | -0.0554 |
| rs112046574 | C | 0.038   |
| rs9839912   | T | -0.0205 |
| rs78393224  | T | 0.0541  |
| rs62276226  | A | 0.0118  |
| rs6788067   | C | -0.0295 |
| rs17711100  | A | 0.0673  |
| rs16864783  | A | -0.0232 |
| rs10510827  | C | 0.0147  |
| rs148877991 | T | -0.083  |
| rs73117040  | G | 0.05    |
| rs55973831  | G | 0.0627  |
| rs59068983  | C | -0.0158 |
| rs115243431 | A | 0.1081  |
| rs9850541   | C | -0.0693 |
| rs6794448   | T | 0.0313  |
| rs73081294  | C | 0.056   |
| rs12695769  | G | -0.0118 |
| rs7642336   | G | 0.0227  |



|             |   |         |
|-------------|---|---------|
| rs6783517   | G | -0.0503 |
| rs113060529 | A | 0.0517  |
| rs12491076  | C | -0.0157 |
| rs77080042  | C | 0.0305  |
| rs73861718  | A | -0.0413 |
| rs140296553 | C | -0.0127 |
| rs1813503   | C | -0.049  |
| rs13100372  | C | -0.0431 |
| rs79696596  | C | -0.0412 |
| rs17402503  | T | 0.0882  |
| rs138460184 | A | -0.0483 |
| rs115103798 | A | -0.0298 |
| rs147953588 | G | -0.0675 |
| rs4685218   | T | -0.0191 |
| rs73211879  | C | 0.0294  |
| rs7629364   | A | 0.0125  |
| rs2935037   | T | 0.018   |
| rs72876010  | A | -0.0974 |
| rs114501010 | A | 0.0476  |
| rs73153693  | T | -0.0352 |
| rs11922741  | A | -0.0118 |
| rs10510541  | C | -0.0323 |
| rs660866    | T | -0.0153 |
| rs1666555   | A | -0.024  |
| rs1813197   | A | -0.0222 |
| rs981896    | A | -0.0323 |
| rs13090225  | T | 0.0244  |
| rs75719992  | G | 0.0358  |
| rs148644807 | C | 0.0971  |
| rs77686022  | A | -0.0868 |
| rs9789947   | C | -0.0244 |
| rs4684267   | G | -0.0143 |
| rs113753586 | A | -0.0372 |
| rs55711729  | G | 0.059   |
| rs138462902 | T | 0.0433  |
| rs143455756 | G | -0.0573 |
| rs62257923  | A | -0.0298 |
| rs115018538 | G | 0.054   |
| rs78911756  | T | -0.0479 |
| rs1159474   | G | 0.0123  |
| rs62270466  | T | -0.0702 |
| rs7645734   | T | 0.017   |
| rs78166695  | T | -0.0332 |
| rs12639016  | A | 0.0598  |
| rs3846030   | T | 0.0121  |
| rs79449206  | A | -0.0455 |
| rs13072739  | C | 0.0127  |

|             |   |         |
|-------------|---|---------|
| rs7616692   | T | 0.0441  |
| rs4894427   | C | 0.0137  |
| rs9880062   | A | 0.0504  |
| rs75400343  | A | -0.0596 |
| rs116157562 | C | -0.0632 |
| rs7612949   | A | 0.0119  |
| rs116243094 | G | -0.0925 |
| rs7611519   | A | 0.0177  |
| rs138251242 | G | 0.0388  |
| rs56169648  | T | 0.0439  |
| rs116753077 | T | 0.0963  |
| rs12152537  | C | -0.0193 |
| rs4858417   | A | -0.0162 |
| rs17417412  | G | 0.049   |
| rs112807790 | G | 0.0475  |
| rs9857063   | G | 0.017   |
| rs77503967  | G | 0.0319  |
| rs115392722 | C | -0.0644 |
| rs41264651  | T | -0.0134 |
| rs10049358  | C | 0.0114  |
| rs9814627   | G | -0.0133 |
| rs1631876   | T | 0.024   |
| rs78117189  | T | -0.0458 |
| rs76630570  | G | -0.0537 |
| rs55661359  | C | 0.0122  |
| rs60447179  | G | -0.0172 |
| rs35842958  | C | -0.0117 |
| rs3773648   | C | -0.0693 |
| rs113302466 | C | 0.0954  |
| rs73199529  | T | 0.0414  |
| rs7646338   | A | -0.0177 |
| rs56108136  | C | -0.0295 |
| rs13094163  | C | 0.021   |
| rs2887947   | A | 0.0129  |
| rs112896695 | A | 0.0453  |
| rs138767622 | C | -0.0619 |
| rs73119481  | C | 0.0253  |
| rs7650098   | A | 0.0192  |
| rs61221121  | A | -0.0431 |
| rs72619595  | C | -0.0125 |
| rs80250679  | A | -0.0318 |
| rs6790912   | C | -0.0191 |
| rs34866203  | T | -0.0197 |
| rs11706677  | T | -0.0185 |
| rs11929438  | G | -0.0146 |
| rs113098497 | A | 0.0661  |
| rs79221769  | T | 0.0293  |

|             |   |         |
|-------------|---|---------|
| rs138126299 | C | 0.0471  |
| rs116727107 | C | 0.0536  |
| rs147567154 | T | 0.0562  |
| rs2122498   | T | 0.0436  |
| rs144024635 | C | 0.0601  |
| rs2016895   | G | 0.0141  |
| rs146788750 | G | -0.0613 |
| rs61162364  | C | -0.0274 |
| rs74938863  | C | 0.0659  |
| rs13094294  | T | 0.0218  |
| rs114708413 | C | 0.0662  |
| rs147683487 | T | -0.0455 |
| rs12630349  | T | 0.0181  |
| rs2613962   | T | 0.0123  |
| rs7372166   | C | 0.0126  |
| rs75927140  | G | -0.0659 |
| rs139905310 | G | -0.1237 |
| rs3774541   | A | -0.0116 |
| rs4285014   | C | 0.0233  |
| rs2633246   | A | -0.0875 |
| rs67894239  | A | -0.0189 |
| rs114742393 | G | 0.0493  |
| rs113047359 | A | 0.0265  |
| rs4515081   | G | 0.0148  |
| rs115704087 | T | -0.0398 |
| rs114300555 | C | 0.0619  |
| rs11918111  | G | -0.0449 |
| rs62229386  | T | 0.02    |
| rs58894173  | G | 0.0422  |
| rs36086638  | C | -0.0642 |
| rs9871173   | A | 0.055   |
| rs7638958   | T | -0.0457 |
| rs79786215  | A | 0.0754  |
| rs58954593  | T | -0.0155 |
| rs59496751  | G | 0.0555  |
| rs115165713 | T | -0.0655 |
| rs884467    | G | -0.0159 |
| rs12485363  | G | 0.016   |
| rs4634080   | C | -0.0143 |
| rs7610368   | T | 0.0481  |
| rs73175857  | A | -0.0747 |
| rs115234463 | T | -0.0668 |
| rs80315299  | C | -0.0567 |
| rs12490914  | C | -0.0203 |
| rs11127653  | T | -0.0127 |
| rs1316482   | T | 0.0148  |
| rs76107896  | C | -0.0409 |

|             |   |         |
|-------------|---|---------|
| rs55885820  | T | 0.0177  |
| rs113101672 | T | -0.0665 |
| rs149046260 | A | 0.0565  |
| rs9869672   | G | -0.0655 |
| rs1874864   | C | 0.013   |
| rs116273246 | G | -0.0535 |
| rs112871524 | C | 0.0336  |
| rs78335305  | A | -0.0532 |
| rs2633784   | A | -0.0197 |
| rs13065831  | T | -0.0186 |
| rs13095577  | G | 0.0197  |
| rs146274118 | G | -0.0731 |
| rs73012178  | A | 0.0689  |
| rs78213829  | G | 0.0697  |
| rs2035531   | C | 0.0245  |
| rs114172274 | C | -0.0407 |
| rs150727807 | C | 0.0531  |
| rs144364409 | T | -0.0593 |
| rs115324892 | T | 0.0484  |
| rs142664566 | A | 0.0605  |
| rs77662794  | T | -0.0217 |
| rs16826489  | T | -0.018  |
| rs9812393   | G | 0.0127  |
| rs57473053  | T | -0.0188 |
| rs113133986 | T | -0.0409 |
| rs2618104   | C | -0.0117 |
| rs34758081  | T | 0.0295  |
| rs12630172  | G | 0.0833  |
| rs11719454  | G | -0.0122 |
| rs77229004  | G | 0.029   |
| rs1166950   | C | 0.0115  |
| rs7620426   | C | -0.013  |
| rs1153451   | C | 0.0158  |
| rs9853437   | A | 0.034   |
| rs55908433  | T | -0.0198 |
| rs75795560  | C | -0.0417 |
| rs79240769  | A | -0.0418 |
| rs73157936  | A | 0.0826  |
| rs35226739  | G | 0.0596  |
| rs60602014  | T | -0.0142 |
| rs71312161  | G | 0.0172  |
| rs149173613 | C | 0.0988  |
| rs9831974   | A | 0.0156  |
| rs78711060  | C | 0.0315  |
| rs7634198   | C | -0.039  |
| rs76957034  | G | 0.0324  |
| rs6444721   | T | 0.0216  |

|             |   |         |
|-------------|---|---------|
| rs78769706  | G | -0.079  |
| rs6784632   | T | -0.0123 |
| rs6775716   | T | -0.0115 |
| rs358800    | G | -0.0133 |
| rs116410584 | G | 0.0349  |
| rs78283911  | G | 0.0307  |
| rs73178525  | C | -0.0626 |
| rs72626367  | G | 0.0427  |
| rs340313    | G | 0.0122  |
| rs74825069  | A | 0.0394  |
| rs73032236  | C | -0.0354 |
| rs12054151  | T | 0.0247  |
| rs61612306  | A | -0.0211 |
| rs13325109  | C | 0.0215  |
| rs7615776   | A | 0.0119  |
| rs7648312   | T | -0.0671 |
| rs62408947  | A | -0.0307 |
| rs116557290 | A | 0.0576  |
| rs6788405   | G | 0.0252  |
| rs12492385  | T | 0.0123  |
| rs4685846   | G | 0.0111  |
| rs776122    | A | 0.0157  |
| rs1877648   | G | -0.0222 |
| rs76017802  | G | -0.0376 |
| rs112899574 | T | 0.0573  |
| rs4386494   | C | -0.0283 |
| rs73131561  | A | -0.0815 |
| rs145583594 | G | 0.093   |
| rs113685194 | G | 0.0447  |
| rs77527655  | A | -0.0469 |
| rs1879903   | A | 0.018   |
| rs11711065  | T | -0.0657 |
| rs149520044 | A | 0.0575  |
| rs73153862  | G | 0.0656  |
| rs13086069  | C | -0.0342 |
| rs551936    | C | -0.0165 |
| rs73111927  | C | 0.0529  |
| rs17016781  | G | -0.0151 |
| rs74427322  | T | -0.0756 |
| rs6802153   | C | -0.0125 |
| rs1376124   | C | -0.0109 |
| rs77376802  | T | -0.037  |
| rs147357622 | C | -0.0794 |
| rs75742992  | A | 0.0461  |
| rs35156804  | A | -0.0175 |
| rs76287951  | A | -0.0269 |
| rs389993    | C | 0.0132  |

|             |   |         |
|-------------|---|---------|
| rs2199412   | T | 0.0657  |
| rs76361117  | A | 0.0182  |
| rs844447    | G | 0.0159  |
| rs113405452 | A | 0.0241  |
| rs9883703   | A | 0.0176  |
| rs78869026  | A | -0.0629 |
| rs1464938   | A | -0.0134 |
| rs17816056  | C | -0.0165 |
| rs75338613  | T | 0.0758  |
| rs74909672  | G | -0.0403 |
| rs13314468  | G | -0.0155 |
| rs6782875   | T | -0.0128 |
| rs13325320  | A | -0.0251 |
| rs72497194  | T | -0.0837 |
| rs9836150   | A | 0.0294  |
| rs116089341 | C | -0.0291 |
| rs146965269 | A | -0.0741 |
| rs4303904   | T | -0.0215 |
| rs73069684  | A | 0.014   |
| rs75470348  | G | -0.044  |
| rs78541080  | A | 0.0217  |
| rs34164333  | T | 0.0281  |
| rs111858057 | A | 0.0232  |
| rs187250    | T | 0.0146  |
| rs115985027 | C | -0.0561 |
| rs67744100  | T | 0.0686  |
| rs73159611  | T | -0.0304 |
| rs6771606   | C | 0.0147  |
| rs138629559 | A | -0.0519 |
| rs74368926  | G | -0.0463 |
| rs4434114   | G | -0.0128 |
| rs2640543   | A | -0.0115 |
| rs75124746  | A | -0.0482 |
| rs6803149   | A | 0.0216  |
| rs74503053  | A | 0.0373  |
| rs17352589  | C | -0.0157 |
| rs78853938  | T | 0.0909  |
| rs145051920 | T | 0.0528  |
| rs141605774 | G | -0.0336 |
| rs62270461  | T | 0.0189  |
| rs55736258  | A | 0.0461  |
| rs78394456  | T | -0.0368 |
| rs12488317  | T | 0.0121  |
| rs6781364   | A | 0.016   |
| rs78741023  | A | -0.0317 |
| rs62287432  | A | -0.0472 |
| rs73184213  | A | 0.0407  |

|             |   |         |
|-------------|---|---------|
| rs1564072   | A | -0.015  |
| rs919183    | T | -0.0232 |
| rs4467418   | A | 0.0167  |
| rs77390939  | T | -0.0288 |
| rs2971207   | C | 0.0135  |
| rs62269564  | T | 0.0507  |
| rs13059435  | C | 0.0116  |
| rs73029995  | A | -0.0387 |
| rs7612021   | A | -0.0226 |
| rs79742281  | G | 0.0336  |
| rs17195449  | T | -0.029  |
| rs113786857 | A | -0.0994 |
| rs10865821  | C | -0.0115 |
| rs11719970  | A | 0.0174  |
| rs12495816  | G | -0.0117 |
| rs116753589 | A | -0.0133 |
| rs1498034   | T | -0.0147 |
| rs114739953 | C | 0.0775  |
| rs1687319   | A | 0.0141  |
| rs58527891  | T | -0.0286 |
| rs28884187  | C | -0.0128 |
| rs149976599 | T | 0.0429  |
| rs17799480  | G | 0.0211  |
| rs28535693  | A | -0.0433 |
| rs78650300  | T | -0.0343 |
| rs115033741 | G | 0.0732  |
| rs11929381  | A | 0.0162  |
| rs56177558  | C | -0.0655 |
| rs66585630  | C | 0.0164  |
| rs114108536 | G | 0.0745  |
| rs62265457  | G | -0.0346 |
| rs36038     | A | -0.028  |
| rs140970198 | A | -0.0585 |
| rs16839790  | G | -0.0456 |
| rs832069    | G | 0.0156  |
| rs62245824  | C | 0.0227  |
| rs6783091   | T | -0.012  |
| rs74778200  | C | 0.06    |
| rs142361244 | G | 0.039   |
| rs9809043   | T | 0.0243  |
| rs55683368  | C | -0.0205 |
| rs3912513   | C | -0.0136 |
| rs149202809 | T | 0.0742  |
| rs79375727  | T | 0.0287  |
| rs79386545  | C | 0.0272  |
| rs73124089  | T | -0.0563 |
| rs4487235   | A | -0.0125 |

|             |   |         |
|-------------|---|---------|
| rs145344806 | T | 0.05    |
| rs111497512 | C | -0.0526 |
| rs2717297   | T | 0.0112  |
| rs9877709   | C | 0.0164  |
| rs9861956   | A | -0.0146 |
| rs13062556  | G | 0.048   |
| rs77806233  | A | 0.0527  |
| rs74450239  | T | 0.0131  |
| rs59274440  | A | -0.0286 |
| rs62269252  | G | -0.025  |
| rs17023712  | G | 0.0266  |
| rs115978216 | C | -0.058  |
| rs79213821  | G | 0.0611  |
| rs73079247  | A | 0.0955  |
| rs1456095   | T | -0.0114 |
| rs2339463   | A | -0.0114 |
| rs78681606  | A | 0.022   |
| rs1431500   | C | 0.0138  |
| rs55939259  | T | 0.0187  |
| rs71323484  | A | -0.014  |
| rs148112249 | A | 0.0598  |
| rs13100275  | G | -0.0147 |
| rs1152110   | C | 0.0603  |
| rs145583309 | C | -0.0908 |
| rs1397219   | C | 0.0113  |
| rs55824267  | A | 0.022   |
| rs62233326  | G | 0.0744  |
| rs79931595  | A | 0.0453  |
| rs143419918 | A | -0.032  |
| rs114429998 | G | -0.0598 |
| rs7340588   | A | -0.0152 |
| rs4894609   | G | 0.0116  |
| rs116323329 | A | 0.0221  |
| rs2245381   | T | -0.0312 |
| rs116320309 | A | -0.0376 |
| rs114593471 | T | -0.0884 |
| rs71304457  | A | 0.0199  |
| rs74280180  | G | 0.0277  |
| rs7647302   | A | -0.0427 |
| rs267157    | C | 0.0165  |
| rs114356993 | T | 0.0428  |
| rs2571210   | G | -0.0236 |
| rs9829327   | C | 0.0171  |
| rs116753621 | A | 0.0642  |
| rs111419354 | C | -0.0184 |
| rs142068622 | T | -0.081  |
| rs34782628  | T | 0.0311  |



|             |   |         |
|-------------|---|---------|
| rs139636264 | T | 0.0687  |
| rs9841269   | C | 0.0134  |
| rs17590394  | G | 0.0146  |
| rs1355069   | C | 0.0166  |
| rs74442140  | C | -0.05   |
| rs11916734  | T | -0.0217 |
| rs112741036 | A | 0.0823  |
| rs139725688 | C | -0.0485 |
| rs60753809  | T | 0.0481  |
| rs74763677  | G | 0.0321  |
| rs11716046  | G | 0.0836  |
| rs115667335 | A | -0.057  |
| rs9882126   | T | -0.0132 |
| rs12497995  | A | 0.0157  |
| rs74844010  | T | 0.0614  |
| rs79004621  | A | 0.0596  |
| rs13064868  | A | -0.0415 |
| rs77879935  | G | -0.0216 |
| rs782438    | T | 0.0114  |
| rs77716533  | A | 0.0505  |
| rs2734354   | G | 0.0116  |
| rs73877152  | A | 0.0344  |
| rs77693286  | A | 0.0467  |
| rs76490952  | T | -0.0333 |
| rs62251411  | A | 0.0178  |
| rs34785844  | A | -0.015  |
| rs1499214   | T | -0.0126 |
| rs3755573   | T | -0.0124 |
| rs114361022 | C | 0.0435  |
| rs7639975   | A | 0.0239  |
| rs75734107  | G | 0.0357  |
| rs6805118   | T | -0.0235 |
| rs13059508  | G | -0.0152 |
| rs9851357   | T | -0.0176 |
| rs17259367  | T | -0.0133 |
| rs62287663  | C | 0.03    |
| rs77057073  | T | 0.0247  |
| rs80253929  | T | 0.0262  |
| rs13078231  | C | -0.0322 |
| rs115404863 | T | -0.0851 |
| rs115119783 | A | 0.0681  |
| rs115376593 | A | 0.0588  |
| rs114337452 | A | -0.0506 |
| rs3184121   | A | -0.0137 |
| rs77685961  | C | 0.0577  |
| rs7619771   | T | -0.0214 |
| rs9840486   | G | -0.0147 |

|             |   |         |
|-------------|---|---------|
| rs79510319  | C | 0.0537  |
| rs4613486   | T | 0.0137  |
| rs6804349   | A | -0.0269 |
| rs73000224  | A | -0.0212 |
| rs13078169  | A | -0.078  |
| rs74892476  | C | 0.0477  |
| rs113173893 | A | -0.0608 |
| rs75956134  | T | -0.0389 |
| rs41515644  | G | -0.0162 |
| rs2049219   | C | -0.0112 |
| rs13095792  | A | 0.0427  |
| rs148147782 | A | 0.032   |
| rs141766416 | A | -0.0754 |
| rs78459863  | T | -0.0513 |
| rs2378359   | G | -0.0154 |
| rs75446952  | G | 0.059   |
| rs115108451 | T | -0.034  |
| rs57861026  | G | 0.0255  |
| rs16864343  | G | 0.0594  |
| rs34128130  | T | -0.0243 |
| rs143171922 | T | -0.047  |
| rs13093426  | T | -0.0235 |
| rs115392189 | A | -0.0234 |
| rs77620099  | G | -0.065  |
| rs11708298  | A | -0.0385 |
| rs12696232  | G | -0.0112 |
| rs77900383  | C | 0.0285  |
| rs6800942   | C | 0.0121  |
| rs149149399 | T | -0.0659 |
| rs76269177  | G | -0.0216 |
| rs77051567  | A | -0.0206 |
| rs113381224 | T | 0.0309  |
| rs2319337   | G | -0.0387 |
| rs79216713  | C | 0.0407  |
| rs34232332  | G | -0.0135 |
| rs114930548 | A | -0.03   |
| rs17047630  | A | -0.0143 |
| rs28367184  | C | 0.0133  |
| rs73166106  | G | 0.0568  |
| rs730171    | T | 0.0637  |
| rs4679721   | A | 0.011   |
| rs115076594 | T | 0.0756  |
| rs9637504   | A | 0.0354  |
| rs12489454  | C | 0.015   |
| rs4677010   | G | -0.0785 |
| rs62276870  | A | 0.0254  |
| rs116617473 | C | -0.0718 |

|             |   |         |
|-------------|---|---------|
| rs116794503 | A | 0.0795  |
| rs704270    | C | 0.0169  |
| rs822713    | G | -0.0122 |
| rs2648487   | G | -0.0124 |
| rs145032064 | T | 0.0686  |
| rs3773406   | A | -0.0174 |
| rs10865894  | G | -0.0124 |
| rs9828020   | G | 0.0304  |
| rs2103293   | A | 0.0191  |
| rs7626095   | T | -0.0138 |
| rs76033971  | C | -0.0661 |
| rs140085135 | A | -0.0519 |
| rs6810025   | C | 0.0217  |
| rs62272764  | T | -0.0703 |
| rs62287502  | T | 0.0433  |
| rs11719628  | T | -0.0185 |
| rs6766913   | A | 0.0543  |
| rs113814406 | C | 0.0292  |
| rs9844021   | T | 0.0172  |
| rs709567    | A | -0.0189 |
| rs1469372   | G | 0.0189  |
| rs58760436  | T | -0.0106 |
| rs73021822  | T | -0.0343 |
| rs7371783   | G | -0.0406 |
| rs73055545  | G | -0.0211 |
| rs73071076  | A | -0.05   |
| rs116804123 | T | 0.0436  |
| rs78348953  | A | 0.0393  |
| rs144941662 | T | 0.0504  |
| rs112691091 | T | 0.0213  |
| rs115847652 | A | 0.0645  |
| rs55745281  | A | -0.0289 |
| rs6804929   | A | 0.0188  |
| rs112536401 | T | -0.0504 |
| rs5007171   | G | 0.0143  |
| rs138296220 | C | -0.0526 |
| rs1386948   | A | 0.0131  |
| rs4579052   | T | -0.0141 |
| rs75851137  | A | -0.0462 |
| rs317529    | G | -0.0121 |
| rs77403403  | C | 0.0296  |
| rs56226860  | A | -0.0493 |
| rs114639184 | T | 0.1087  |
| rs80167298  | T | 0.0365  |
| rs4515095   | T | -0.0129 |
| rs114457250 | A | 0.0953  |
| rs143747357 | T | 0.0425  |

|             |   |         |
|-------------|---|---------|
| rs9825129   | C | 0.0124  |
| rs116459664 | A | -0.0553 |
| rs116602499 | G | -0.0806 |
| rs62253592  | A | 0.0461  |
| rs1006156   | G | 0.011   |
| rs116466550 | T | 0.0584  |
| rs113994674 | T | -0.0552 |
| rs140946213 | A | -0.0637 |
| rs147223563 | G | 0.0798  |
| rs6803348   | G | -0.0114 |
| rs149257838 | A | 0.0631  |
| rs13090381  | T | -0.0111 |
| rs9831802   | A | -0.0108 |
| rs11130767  | A | -0.0292 |
| rs6796507   | G | 0.0109  |
| rs144017450 | C | -0.0478 |
| rs17047784  | T | -0.0729 |
| rs147454794 | A | 0.0199  |
| rs17236137  | T | -0.059  |
| rs146171840 | T | -0.0719 |
| rs35094837  | G | -0.0246 |
| rs9036      | G | 0.0132  |
| rs147476356 | A | -0.048  |
| rs116213326 | A | -0.0507 |
| rs17026370  | T | -0.0435 |
| rs6779227   | A | 0.0892  |
| rs61108932  | A | -0.0198 |
| rs7611810   | G | -0.031  |
| rs76954700  | C | 0.0318  |
| rs115210252 | C | -0.029  |
| rs2422223   | C | 0.0287  |
| rs9824424   | A | 0.0222  |
| rs2056038   | T | 0.0276  |
| rs148641607 | C | -0.0659 |
| rs16852197  | T | -0.051  |
| rs9864169   | G | -0.011  |
| rs13077633  | T | -0.022  |
| rs11718221  | C | 0.0152  |
| rs114347360 | C | -0.057  |
| rs73009546  | G | 0.0134  |
| rs329037    | A | 0.0109  |
| rs6783427   | G | -0.0586 |
| rs16856725  | G | -0.016  |
| rs115881877 | T | -0.0645 |
| rs35218232  | G | 0.0148  |
| rs75065084  | A | 0.0952  |
| rs112944799 | C | 0.0655  |

|             |   |         |
|-------------|---|---------|
| rs74907090  | T | -0.0562 |
| rs147303110 | C | 0.0613  |
| rs443562    | G | 0.0114  |
| rs8177326   | A | -0.0462 |
| rs77894231  | C | 0.0522  |
| rs1031300   | G | -0.0114 |
| rs111986655 | T | 0.0507  |
| rs9873946   | A | -0.0196 |
| rs7640796   | G | -0.0131 |
| rs13321581  | C | 0.013   |
| rs113349704 | A | 0.0557  |
| rs9829985   | A | -0.0123 |
| rs12639224  | T | -0.0124 |
| rs73061150  | G | -0.0406 |
| rs1488496   | T | 0.0228  |
| rs4685432   | G | -0.0219 |
| rs60523596  | A | 0.0491  |
| rs57908499  | G | 0.0311  |
| rs76404759  | C | 0.0531  |
| rs9855778   | T | 0.0237  |
| rs78961196  | T | 0.0769  |
| rs112305106 | C | -0.051  |
| rs72989093  | G | -0.0184 |
| rs975259    | C | 0.0987  |
| rs13100244  | T | -0.0169 |
| rs10513807  | G | 0.0106  |
| rs1992965   | A | 0.0174  |
| rs153734    | C | -0.0133 |
| rs9825904   | A | -0.0167 |
| rs35071030  | G | -0.0178 |
| rs140645146 | T | -0.0661 |
| rs17040868  | A | -0.0216 |
| rs62254669  | A | -0.0162 |
| rs116047988 | G | -0.0451 |
| rs78639069  | C | 0.0254  |
| rs114216740 | G | 0.0354  |
| rs71323744  | A | 0.0142  |
| rs1505584   | T | -0.0111 |
| rs2633607   | C | 0.0295  |
| rs7642896   | C | 0.0364  |
| rs13079125  | A | 0.0416  |
| rs10934397  | C | 0.0239  |
| rs6798466   | A | 0.0195  |
| rs115441718 | T | -0.042  |
| rs80040950  | C | -0.0731 |
| rs116127418 | C | -0.0347 |
| rs9848889   | G | -0.0211 |

|             |   |         |
|-------------|---|---------|
| rs75404488  | A | 0.0406  |
| rs35867042  | G | 0.0543  |
| rs11718906  | A | 0.0165  |
| rs34871     | G | -0.0127 |
| rs57620259  | T | 0.0483  |
| rs4425256   | T | -0.0396 |
| rs77079130  | T | 0.0632  |
| rs78349086  | G | -0.0339 |
| rs111773804 | C | -0.0821 |
| rs74653517  | A | 0.0485  |
| rs78838783  | A | 0.0566  |
| rs11707645  | C | 0.0171  |
| rs4685153   | G | 0.0132  |
| rs73058958  | A | -0.0623 |
| rs35688133  | T | -0.0611 |
| rs11717545  | G | -0.0161 |
| rs116513697 | T | 0.0632  |
| rs112336345 | G | -0.0293 |
| rs28495131  | G | -0.0148 |
| rs139828053 | C | -0.062  |
| rs4688132   | T | 0.0236  |
| rs74795896  | A | -0.043  |
| rs113438058 | T | -0.031  |
| rs7649446   | G | -0.0118 |
| rs7615652   | A | -0.0123 |
| rs4101508   | C | -0.0158 |
| rs9883447   | G | -0.0247 |
| rs546190    | G | 0.0105  |
| rs1107655   | A | -0.0153 |
| rs9810037   | C | 0.034   |
| rs138547057 | G | 0.0518  |
| rs113906695 | A | -0.0239 |
| rs116362763 | G | 0.0357  |
| rs73818331  | T | -0.0362 |
| rs141972463 | T | -0.0167 |
| rs77365271  | A | 0.0454  |
| rs17007897  | T | 0.0144  |
| rs7657553   | A | 0.083   |
| rs76565346  | A | 0.1047  |
| rs75191269  | A | -0.1746 |
| rs115692550 | T | -0.1531 |
| rs11736110  | T | -0.1527 |
| rs17225222  | C | 0.1515  |
| rs10022344  | T | -0.1247 |
| rs6553385   | T | 0.0872  |
| rs9992489   | G | -0.0759 |
| rs4286594   | G | -0.0667 |

|             |   |         |
|-------------|---|---------|
| rs76858577  | A | -0.232  |
| rs2704101   | T | 0.1611  |
| rs28670348  | G | 0.1173  |
| rs75916282  | A | 0.1758  |
| rs13144400  | T | 0.0628  |
| rs1852791   | T | 0.0693  |
| rs74726847  | T | 0.3936  |
| rs115235226 | A | 0.1746  |
| rs11725488  | T | -0.0792 |
| rs6848864   | G | 0.0937  |
| rs2419533   | A | -0.0745 |
| rs13138250  | C | -0.0927 |
| rs3913624   | G | -0.0576 |
| rs115639603 | T | 0.2757  |
| rs151024602 | C | 0.2494  |
| rs899385    | A | -0.1227 |
| rs2677003   | C | 0.0884  |
| rs1838973   | A | 0.1452  |
| rs6552175   | T | 0.0691  |
| rs147032728 | A | 0.3511  |
| rs28741982  | C | -0.0575 |
| rs6834759   | C | -0.0603 |
| rs6537481   | G | -0.0651 |
| rs3113685   | G | -0.0703 |
| rs16850078  | C | 0.114   |
| rs11097017  | A | 0.0697  |
| rs6852075   | G | -0.0597 |
| rs28417530  | G | 0.073   |
| rs72671970  | T | 0.3873  |
| rs34992898  | G | -0.1136 |
| rs17781348  | A | 0.0954  |
| rs7663602   | G | -0.0638 |
| rs1609045   | T | -0.1625 |
| rs11944518  | G | -0.1967 |
| rs62312621  | T | -0.3157 |
| rs28713731  | G | -0.0564 |
| rs1448445   | T | 0.064   |
| rs59776273  | T | -0.0761 |
| rs11935530  | T | -0.0557 |
| rs17828156  | G | -0.0962 |
| rs17430167  | G | -0.0941 |
| rs151254907 | A | 0.2814  |
| rs34454034  | T | 0.1849  |
| rs116392847 | T | 0.123   |
| rs2070897   | G | 0.0572  |
| rs7440299   | A | 0.0548  |
| rs13114818  | C | 0.0744  |

|             |   |         |
|-------------|---|---------|
| rs4276313   | C | 0.1797  |
| rs4580644   | T | 0.0535  |
| rs28638233  | T | 0.1442  |
| rs112963641 | A | 0.1876  |
| rs17226314  | C | 0.21    |
| rs12646768  | T | -0.0753 |
| rs2664202   | T | 0.0939  |
| rs4695155   | T | -0.067  |
| rs1490874   | C | 0.1059  |
| rs3814419   | A | 0.0679  |
| rs139230370 | T | 0.0998  |
| rs141628886 | G | 0.3409  |
| rs137952751 | A | 0.2974  |
| rs12647784  | C | 0.0599  |
| rs80070755  | G | -0.212  |
| rs12648110  | T | 0.0756  |
| rs76747600  | A | -0.1274 |
| rs78520965  | A | 0.2483  |
| rs116550968 | A | -0.3607 |
| rs62342246  | C | -0.1358 |
| rs532070    | A | 0.0645  |
| rs17443616  | A | -0.1034 |
| rs72685160  | C | -0.2397 |
| rs73155595  | T | 0.0975  |
| rs2136987   | C | 0.4517  |
| rs59405699  | C | -0.4438 |
| rs56323501  | C | -0.1818 |
| rs1598770   | A | 0.1056  |
| rs115321366 | C | -0.3684 |
| rs17818679  | C | -0.067  |
| rs35816121  | C | 0.0854  |
| rs10009630  | G | 0.2151  |
| rs17444455  | C | -0.0668 |
| rs4530607   | T | -0.0592 |
| rs12649638  | G | 0.1165  |
| rs140434726 | G | 0.4888  |
| rs149999202 | G | 0.1813  |
| rs139939915 | G | -0.3444 |
| rs35393701  | G | -0.329  |
| rs13137601  | G | -0.0616 |
| rs12648451  | A | 0.1259  |
| rs3815191   | G | 0.1008  |
| rs1910387   | A | 0.2948  |
| rs74534982  | C | 0.3185  |
| rs4859461   | C | 0.1004  |
| rs78061235  | T | 0.1726  |
| rs11097547  | G | 0.0704  |



|             |   |         |
|-------------|---|---------|
| rs74383303  | C | 0.3734  |
| rs1439483   | C | 0.0545  |
| rs115815527 | T | 0.2237  |
| rs10012882  | C | 0.177   |
| rs7655894   | T | -0.1504 |
| rs12510683  | G | 0.067   |
| rs75315331  | A | -0.2319 |
| rs79376038  | C | -0.1399 |
| rs7655606   | T | -0.0712 |
| rs56241474  | T | 0.0554  |
| rs4697814   | G | 0.0516  |
| rs6857521   | C | 0.0548  |
| rs78781045  | T | -0.1527 |
| rs62328349  | G | 0.1338  |
| rs115626206 | T | 0.1876  |
| rs7687486   | A | 0.0561  |
| rs6449111   | G | -0.2759 |
| rs2618964   | C | 0.0663  |
| rs77864316  | G | 0.2124  |
| rs2875344   | A | -0.0571 |
| rs77360201  | C | 0.3288  |
| rs78052401  | A | -0.163  |
| rs1005595   | A | -0.0628 |
| rs61793184  | G | -0.0919 |
| rs116253673 | A | -0.2079 |
| rs112175284 | C | 0.0829  |
| rs117521076 | C | 0.292   |
| rs4374611   | G | 0.0733  |
| rs147212363 | G | 0.1563  |
| rs11724259  | T | 0.0691  |
| rs356182    | G | -0.0557 |
| rs79861056  | A | -0.1887 |
| rs896122    | C | -0.0578 |
| rs4256192   | G | 0.0527  |
| rs6820522   | C | -0.0552 |
| rs1406674   | T | 0.0513  |
| rs80255678  | T | 0.0819  |
| rs6815519   | T | -0.0511 |
| rs11725679  | T | 0.0506  |
| rs112282407 | G | 0.1919  |
| rs75273905  | C | 0.069   |
| rs77824785  | T | 0.1521  |
| rs78728668  | T | 0.1484  |
| rs7687303   | C | 0.0916  |
| rs11734408  | G | -0.0561 |
| rs17724191  | C | 0.1754  |
| rs10005650  | G | 0.1264  |

|             |   |         |
|-------------|---|---------|
| rs79369874  | C | -0.14   |
| rs16998851  | T | -0.0833 |
| rs151290292 | A | -0.2832 |
| rs3857196   | C | -0.1792 |
| rs111321131 | A | -0.0796 |
| rs7687666   | A | 0.0523  |
| rs73007848  | C | -0.1485 |
| rs12647430  | C | 0.0554  |
| rs7689725   | G | 0.0521  |
| rs28583538  | C | 0.089   |
| rs73233729  | T | 0.2458  |
| rs115229355 | A | -0.2359 |
| rs1039053   | A | 0.0525  |
| rs887522    | C | -0.0793 |
| rs28473478  | A | 0.0568  |
| rs77722436  | G | -0.1106 |
| rs74624126  | T | -0.2537 |
| rs13138294  | G | -0.0572 |
| rs80071135  | T | 0.1888  |
| rs4698806   | G | 0.0535  |
| rs2602098   | G | 0.0674  |
| rs34386539  | A | -0.1791 |
| rs79669500  | T | 0.1105  |
| rs10032712  | G | -0.1102 |
| rs13113470  | G | 0.0826  |
| rs6841198   | C | 0.067   |
| rs6532049   | T | -0.0631 |
| rs147898638 | C | 0.1971  |
| rs35022883  | G | 0.0599  |
| rs73247939  | T | -0.2648 |
| rs12504318  | A | -0.1296 |
| rs112189487 | G | 0.052   |
| rs13152034  | A | -0.1285 |
| rs1447330   | T | 0.0715  |
| rs79629461  | A | 0.0661  |
| rs10517783  | C | 0.0509  |
| rs1493130   | G | 0.0881  |
| rs7690142   | G | 0.0812  |
| rs1026873   | T | -0.0502 |
| rs17068140  | G | -0.093  |
| rs74727167  | G | 0.2376  |
| rs12641639  | C | 0.1201  |
| rs62333243  | A | 0.2312  |
| rs355483    | A | -0.0507 |
| rs11096896  | C | 0.0827  |
| rs72679678  | T | 0.1174  |
| rs16893097  | T | -0.077  |

|             |   |         |
|-------------|---|---------|
| rs150224478 | G | 0.2746  |
| rs1509948   | T | -0.0493 |
| rs140859298 | G | -0.3069 |
| rs73237701  | G | -0.2319 |
| rs56220736  | T | -0.2532 |
| rs1040122   | C | -0.1095 |
| rs2717532   | C | -0.0805 |
| rs1123943   | C | -0.051  |
| rs17632695  | C | -0.2209 |
| rs35098345  | T | -0.0634 |
| rs13114723  | G | 0.0593  |
| rs150172324 | A | 0.1382  |
| rs4401458   | G | -0.0488 |
| rs1383182   | G | -0.0503 |
| rs10488827  | A | -0.0864 |
| rs75272931  | C | 0.2249  |
| rs7690184   | A | 0.0826  |
| rs72674460  | T | 0.1827  |
| rs114487846 | C | -0.195  |
| rs11930433  | G | -0.0635 |
| rs12374332  | G | -0.0531 |
| rs74617719  | C | -0.2104 |
| rs3108402   | T | -0.0571 |
| rs61208990  | G | 0.0775  |
| rs72679391  | T | 0.1587  |
| rs6830249   | T | 0.1469  |
| rs62324212  | A | -0.0513 |
| rs17420773  | G | -0.0661 |
| rs77842115  | G | -0.3094 |
| rs28660029  | A | 0.0537  |
| rs149816153 | A | 0.2088  |
| rs74710018  | A | -0.1814 |
| rs76440260  | A | 0.1015  |
| rs11731491  | A | 0.0935  |
| rs2627658   | G | 0.0584  |
| rs62345156  | T | 0.2117  |
| rs78040608  | A | -0.305  |
| rs4144862   | G | 0.0602  |
| rs75763941  | G | 0.2966  |
| rs58202742  | A | 0.134   |
| rs28754692  | C | 0.0681  |
| rs72698567  | T | -0.1299 |
| rs139617966 | T | 0.2761  |
| rs17029766  | C | 0.0818  |
| rs6448444   | A | 0.0552  |
| rs9990563   | C | 0.066   |
| rs2709815   | T | 0.0478  |

|             |   |         |
|-------------|---|---------|
| rs7682322   | C | 0.0485  |
| rs78736235  | G | 0.1932  |
| rs62322612  | T | -0.3149 |
| rs6830918   | C | -0.0528 |
| rs10022720  | C | -0.0493 |
| rs1596480   | A | -0.0594 |
| rs11947781  | G | 0.0591  |
| rs76384789  | C | 0.2962  |
| rs1500488   | G | -0.0492 |
| rs7662017   | C | -0.05   |
| rs4505759   | T | -0.0552 |
| rs78565744  | T | -0.2479 |
| rs139166969 | A | -0.1456 |
| rs13434757  | G | 0.1768  |
| rs78404370  | C | -0.323  |
| rs77243209  | A | 0.199   |
| rs6447641   | C | -0.053  |
| rs10014562  | G | 0.0654  |
| rs114975256 | G | 0.427   |
| rs62311657  | A | 0.0658  |
| rs2661525   | C | -0.0517 |
| rs112831077 | G | 0.2507  |
| rs6839041   | G | -0.0588 |
| rs62284507  | T | 0.088   |
| rs11930711  | A | 0.09    |
| rs145236946 | G | 0.2457  |
| rs72693904  | A | 0.0856  |
| rs57581623  | G | 0.057   |
| rs1547578   | T | -0.0615 |
| rs59848484  | A | -0.0598 |
| rs4484253   | C | -0.0491 |
| rs13145913  | T | -0.0486 |
| rs79444700  | C | 0.1802  |
| rs75363979  | C | 0.2632  |
| rs13110718  | A | -0.0572 |
| rs113022439 | T | 0.1967  |
| rs10033590  | C | -0.205  |
| rs57431211  | T | 0.1743  |
| rs11930481  | C | 0.331   |
| rs11938536  | A | 0.0463  |
| rs12642873  | C | -0.0704 |
| rs115770011 | T | 0.1539  |
| rs78538083  | C | 0.1343  |
| rs11131363  | G | 0.0569  |
| rs4697157   | G | -0.0559 |
| rs113954392 | A | 0.1503  |
| rs148578549 | G | 0.1782  |

|             |   |         |
|-------------|---|---------|
| rs75123767  | G | 0.1374  |
| rs111741377 | G | 0.1647  |
| rs10517082  | T | -0.088  |
| rs13123947  | G | -0.1334 |
| rs79053555  | A | 0.3271  |
| rs72981427  | G | 0.2114  |
| rs4689239   | G | -0.0475 |
| rs11930322  | G | -0.0697 |
| rs113423134 | T | 0.0647  |
| rs74854626  | A | -0.2481 |
| rs145177661 | T | 0.2733  |
| rs67406644  | A | 0.3551  |
| rs3136534   | G | -0.0507 |
| rs17382351  | G | -0.0498 |
| rs9715777   | C | -0.0583 |
| rs151095241 | G | 0.1427  |
| rs3756048   | C | 0.1323  |
| rs4956401   | T | 0.1133  |
| rs17462867  | C | -0.1497 |
| rs4697595   | G | -0.0584 |
| rs6838254   | A | 0.2429  |
| rs147413574 | C | 0.3324  |
| rs908645    | A | -0.0698 |
| rs2662692   | T | -0.0517 |
| rs72671336  | G | 0.0608  |
| rs13151384  | A | -0.1177 |
| rs1824456   | A | 0.1554  |
| rs7677200   | G | -0.0459 |
| rs1505463   | G | 0.0497  |
| rs9997457   | C | 0.272   |
| rs116514866 | C | 0.1184  |
| rs12650045  | G | 0.1643  |
| rs149297013 | C | 0.1334  |
| rs114335822 | T | -0.221  |
| rs6532200   | A | 0.1779  |
| rs111987991 | G | 0.2019  |
| rs71596039  | G | 0.0776  |
| rs4590055   | A | -0.1704 |
| rs147698510 | G | 0.3924  |
| rs4862165   | A | 0.1056  |
| rs73230755  | A | 0.1523  |
| rs2114534   | G | -0.0465 |
| rs1442162   | T | -0.0458 |
| rs76834656  | C | 0.2559  |
| rs35554355  | G | -0.3771 |
| rs17059398  | T | 0.3074  |
| rs140920376 | T | 0.2631  |

|             |   |         |
|-------------|---|---------|
| rs2391118   | C | 0.1723  |
| rs80348846  | G | -0.0898 |
| rs1585405   | C | 0.0563  |
| rs116499964 | G | -0.3109 |
| rs71607688  | C | -0.3276 |
| rs1465041   | C | 0.0562  |
| rs13125185  | G | 0.1101  |
| rs34328158  | G | -0.1996 |
| rs76529253  | G | 0.1929  |
| rs77344927  | A | -0.0561 |
| rs77628853  | A | 0.0741  |
| rs75618599  | T | 0.0995  |
| rs6447580   | A | -0.0499 |
| rs2939714   | G | 0.0462  |
| rs114811716 | A | 0.2382  |
| rs114503963 | G | -0.2187 |
| rs6810820   | G | 0.0588  |
| rs17036750  | C | 0.1642  |
| rs62283039  | T | -0.1152 |
| rs13109759  | G | 0.0754  |
| rs2579328   | G | 0.2153  |
| rs4860285   | T | -0.0566 |
| rs1455283   | C | 0.1787  |
| rs6811047   | A | -0.0597 |
| rs138031449 | T | -0.1264 |
| rs57263875  | A | -0.1232 |
| rs145802912 | A | -0.0752 |
| rs11930217  | C | -0.1648 |
| rs113030184 | T | -0.2656 |
| rs72684592  | C | 0.1525  |
| rs114769693 | G | 0.3342  |
| rs6814204   | T | -0.0577 |
| rs72642336  | A | -0.0538 |
| rs58512609  | C | -0.0775 |
| rs28877724  | T | 0.0459  |
| rs10027066  | C | -0.0653 |
| rs177767    | G | 0.0608  |
| rs114761705 | C | -0.0824 |
| rs78097866  | T | 0.2086  |
| rs77297476  | T | 0.2207  |
| rs17277050  | T | 0.1333  |
| rs62321870  | A | 0.1608  |
| rs1655062   | A | 0.089   |
| rs115488754 | T | -0.2519 |
| rs1512154   | C | -0.1051 |
| rs6838596   | C | 0.0515  |
| rs11942403  | A | -0.1124 |

|             |   |         |
|-------------|---|---------|
| rs75786576  | A | 0.4203  |
| rs402681    | T | -0.0532 |
| rs72723546  | C | -0.2249 |
| rs77528533  | T | 0.1234  |
| rs67178898  | C | -0.104  |
| rs3113662   | C | -0.0549 |
| rs114032269 | C | 0.2836  |
| rs58496125  | G | 0.1676  |
| rs114863055 | G | 0.2042  |
| rs151133831 | A | -0.1111 |
| rs62293621  | T | -0.2959 |
| rs2320728   | C | 0.0465  |
| rs78235053  | C | 0.0776  |
| rs2739536   | T | -0.0941 |
| rs57919830  | G | 0.0471  |
| rs1380000   | T | -0.0496 |
| rs7699651   | T | 0.0559  |
| rs17576943  | T | 0.0611  |
| rs41371952  | G | 0.0594  |
| rs4359979   | C | -0.0509 |
| rs10023405  | G | 0.051   |
| rs11133239  | C | 0.0634  |
| rs3796741   | A | -0.1138 |
| rs7697153   | T | -0.0619 |
| rs10007447  | G | -0.0497 |
| rs1456340   | C | -0.1683 |
| rs10938911  | G | 0.0468  |
| rs2319658   | C | -0.0598 |
| rs4289472   | G | 0.1918  |
| rs76922518  | A | 0.1538  |
| rs7667911   | A | 0.0684  |
| rs28426978  | A | -0.079  |
| rs12639626  | T | -0.0565 |
| rs4696309   | T | -0.0515 |
| rs1358234   | C | -0.0616 |
| rs17011645  | G | -0.0799 |
| rs6810676   | A | 0.0481  |
| rs17186704  | C | 0.0715  |
| rs76871243  | C | -0.2288 |
| rs4690512   | A | 0.0612  |
| rs17262792  | C | -0.0671 |
| rs1946860   | G | 0.1117  |
| rs28470526  | T | -0.0891 |
| rs77483735  | T | -0.2459 |
| rs2995922   | C | -0.045  |
| rs10003548  | G | 0.2766  |
| rs6829079   | A | 0.12    |

|             |   |         |
|-------------|---|---------|
| rs16875252  | A | 0.0592  |
| rs76278076  | A | 0.2207  |
| rs7694408   | T | 0.0994  |
| rs76835230  | G | -0.2613 |
| rs11941770  | T | -0.0439 |
| rs75536648  | G | 0.2629  |
| rs72955251  | A | 0.114   |
| rs150679576 | T | 0.1592  |
| rs16876921  | A | 0.2692  |
| rs1077767   | C | 0.0486  |
| rs10518177  | T | 0.0643  |
| rs76677238  | T | -0.0797 |
| rs2354938   | A | 0.0458  |
| rs115680354 | A | 0.29    |
| rs4690055   | A | 0.0433  |
| rs6822805   | A | -0.0456 |
| rs3749538   | T | 0.067   |
| rs9684886   | A | 0.0444  |
| rs17586246  | C | -0.0624 |
| rs17432139  | C | -0.0748 |
| rs116108144 | G | 0.1167  |
| rs67658331  | C | -0.0476 |
| rs10001817  | G | -0.0471 |
| rs57597075  | C | -0.0862 |
| rs3929512   | T | 0.0763  |
| rs116177267 | C | 0.2075  |
| rs13122826  | A | -0.0835 |
| rs17863009  | A | -0.0777 |
| rs143316061 | A | -0.1196 |
| rs34342932  | A | 0.139   |
| rs76028164  | A | 0.2009  |
| rs28637562  | C | -0.0813 |
| rs7700116   | T | -0.0684 |
| rs41275731  | A | 0.2203  |
| rs72695036  | T | 0.2818  |
| rs13126916  | T | -0.0468 |
| rs114151420 | C | 0.2392  |
| rs6532560   | A | 0.057   |
| rs3850480   | T | -0.0526 |
| rs77501371  | A | -0.0922 |
| rs112874360 | T | -0.3126 |
| rs10031262  | C | 0.203   |
| rs17069165  | G | 0.0858  |
| rs10440393  | C | -0.0842 |
| rs34577864  | C | 0.0472  |
| rs6835814   | A | 0.0454  |
| rs115329298 | A | -0.1633 |



|             |   |         |
|-------------|---|---------|
| rs7695146   | A | -0.0648 |
| rs6551706   | C | 0.0592  |
| rs28435566  | C | 0.1844  |
| rs77957753  | G | -0.2557 |
| rs1317220   | T | -0.049  |
| rs62310762  | G | -0.3365 |
| rs79144278  | T | 0.3926  |
| rs35934078  | C | 0.0505  |
| rs143372373 | A | -0.0996 |
| rs7685740   | C | -0.0859 |
| rs72673784  | C | -0.2812 |
| rs9992791   | A | 0.0507  |
| rs2222309   | T | 0.0632  |
| rs1389166   | C | -0.0422 |
| rs140629140 | C | 0.3213  |
| rs76800291  | G | -0.2179 |
| rs11942888  | C | 0.0555  |
| rs58143459  | C | 0.0664  |
| rs999634    | C | -0.0433 |
| rs1053504   | G | -0.0795 |
| rs2612171   | A | 0.0567  |
| rs17010884  | C | -0.0879 |
| rs12511848  | T | -0.0685 |
| rs11934522  | G | 0.1286  |
| rs7660946   | A | -0.062  |
| rs7679058   | T | 0.0453  |
| rs77170725  | G | -0.2519 |
| rs13150771  | G | -0.061  |
| rs6817108   | C | 0.0815  |
| rs6851150   | C | -0.0694 |
| rs10012610  | T | -0.0434 |
| rs75251702  | T | 0.063   |
| rs10009783  | A | -0.0619 |
| rs13108563  | T | 0.0904  |
| rs316697    | T | 0.1054  |
| rs112629155 | C | 0.191   |
| rs151401    | G | 0.0498  |
| rs17176423  | A | 0.1246  |
| rs4342163   | T | -0.0426 |
| rs13133645  | T | 0.2863  |
| rs1491393   | C | -0.0793 |
| rs4269165   | C | 0.0524  |
| rs6833131   | A | 0.0489  |
| rs4697329   | C | -0.08   |
| rs12498329  | T | 0.0601  |
| rs141461785 | T | -0.1938 |
| rs73800650  | A | -0.2151 |

|             |   |         |
|-------------|---|---------|
| rs66466366  | A | -0.1087 |
| rs58398513  | G | -0.089  |
| rs17021334  | G | -0.08   |
| rs78821115  | T | 0.1989  |
| rs62299248  | C | 0.1128  |
| rs147581635 | A | -0.1475 |
| rs76407342  | C | 0.1589  |
| rs11132763  | G | 0.0634  |
| rs6822185   | T | -0.1496 |
| rs6537319   | T | 0.0918  |
| rs17008558  | C | -0.1837 |
| rs114895170 | A | -0.2449 |
| rs6836201   | C | -0.0661 |
| rs62315779  | C | -0.0557 |
| rs71621627  | C | 0.0827  |
| rs13124636  | G | 0.0865  |
| rs13110341  | A | 0.0635  |
| rs12501467  | G | -0.1108 |
| rs10034064  | T | 0.1152  |
| rs11098157  | A | 0.055   |
| rs2048960   | C | 0.1019  |
| rs17050782  | G | -0.0542 |
| rs149301549 | A | 0.1505  |
| rs72669577  | C | 0.1767  |
| rs72672196  | G | -0.0549 |
| rs72679354  | A | -0.1018 |
| rs7665110   | T | -0.0621 |
| rs6531526   | A | -0.0602 |
| rs11940331  | G | 0.0416  |
| rs114060627 | A | 0.1243  |
| rs10018255  | A | -0.0586 |
| rs36037754  | A | -0.0726 |
| rs62289343  | A | 0.1792  |
| rs9685392   | G | -0.0511 |
| rs114067868 | A | 0.2412  |
| rs150918745 | G | 0.2779  |
| rs13148685  | C | -0.182  |
| rs2865447   | T | -0.0549 |
| rs28590643  | G | -0.1444 |
| rs143820389 | T | 0.2558  |
| rs17339087  | A | 0.046   |
| rs2748788   | C | -0.0704 |
| rs146153110 | T | 0.2151  |
| rs75016210  | T | 0.0928  |
| rs17264946  | A | 0.1246  |
| rs79381098  | G | -0.1684 |
| rs35555785  | C | -0.0579 |

|             |   |         |
|-------------|---|---------|
| rs72718908  | G | 0.0779  |
| rs116443016 | A | -0.22   |
| rs13119558  | C | -0.043  |
| rs306379    | A | 0.0523  |
| rs142015926 | A | 0.1969  |
| rs151298711 | G | -0.074  |
| rs6553120   | G | -0.0526 |
| rs114787950 | G | -0.2076 |
| rs78766060  | T | 0.0773  |
| rs9996114   | T | 0.0529  |
| rs17587936  | C | -0.219  |
| rs1158673   | T | -0.0983 |
| rs73214476  | C | -0.2867 |
| rs62308486  | C | 0.3205  |
| rs62323718  | A | 0.0637  |
| rs28695808  | C | -0.0457 |
| rs78867635  | T | 0.3388  |
| rs4833450   | C | -0.0445 |
| rs142583257 | T | -0.2371 |
| rs35522890  | T | -0.044  |
| rs76603455  | T | 0.2357  |
| rs7697688   | T | -0.0637 |
| rs28405058  | G | 0.0449  |
| rs1554668   | A | 0.0686  |
| rs4549469   | T | -0.2415 |
| rs148721509 | G | -0.271  |
| rs75524817  | T | 0.1317  |
| rs142628910 | A | -0.1715 |
| rs10011957  | T | 0.0777  |
| rs147592138 | A | -0.2136 |
| rs77294559  | C | 0.1129  |
| rs6815376   | T | -0.0855 |
| rs72624139  | T | -0.1201 |
| rs6828532   | T | 0.3141  |
| rs6842598   | C | 0.049   |
| rs150213911 | A | 0.1864  |
| rs10015409  | C | 0.0474  |
| rs6828071   | C | 0.0446  |
| rs57965291  | G | -0.0972 |
| rs73220401  | A | 0.1246  |
| rs409415    | C | 0.042   |
| rs75688495  | A | 0.1352  |
| rs28438980  | A | -0.1209 |
| rs4408958   | G | 0.0554  |
| rs115634774 | A | -0.3427 |
| rs13146524  | C | -0.0984 |
| rs1564896   | C | 0.0438  |

|             |   |         |
|-------------|---|---------|
| rs2163170   | C | -0.0415 |
| rs62312482  | G | -0.0457 |
| rs76886108  | G | 0.1331  |
| rs28436241  | A | 0.0824  |
| rs115769758 | T | -0.2652 |
| rs7665453   | G | -0.0605 |
| rs147168099 | A | -0.1939 |
| rs73207355  | A | 0.1068  |
| rs34400800  | T | 0.0428  |
| rs76535386  | T | -0.1544 |
| rs142008817 | T | 0.2171  |
| rs115318947 | G | 0.2364  |
| rs3095966   | G | 0.0435  |
| rs4234951   | C | 0.0522  |
| rs1588310   | T | -0.0424 |
| rs79441297  | A | 0.2876  |
| rs12498965  | C | 0.1257  |
| rs79818828  | G | -0.138  |
| rs13117159  | G | 0.0473  |
| rs41278607  | A | -0.2459 |
| rs6838718   | C | -0.0502 |
| rs75968456  | A | -0.1513 |
| rs62320810  | C | 0.0803  |
| rs17222142  | T | 0.1189  |
| rs117702061 | A | 0.2328  |
| rs78966623  | A | 0.192   |
| rs13143173  | T | 0.0648  |
| rs62353165  | T | 0.0814  |
| rs971074    | T | -0.0611 |
| rs74322795  | C | 0.2532  |
| rs60029443  | G | 0.056   |
| rs1593331   | C | 0.0414  |
| rs147979361 | C | -0.2169 |
| rs60369176  | A | -0.0761 |
| rs72675906  | C | 0.0603  |
| rs111430375 | G | 0.1736  |
| rs72667596  | A | -0.1368 |
| rs4458491   | A | -0.0491 |
| rs139539281 | A | -0.1639 |
| rs142459631 | T | 0.1349  |
| rs10029875  | C | 0.2423  |
| rs74335650  | G | 0.1247  |
| rs55975608  | G | 0.0591  |
| rs77784915  | A | -0.2661 |
| rs10032150  | G | -0.0461 |
| rs114804393 | C | 0.1968  |
| rs1844654   | A | 0.0525  |

|             |   |         |
|-------------|---|---------|
| rs7659392   | C | 0.0454  |
| rs6841362   | A | 0.1668  |
| rs76610913  | G | 0.2512  |
| rs12331575  | T | 0.1448  |
| rs4696887   | A | -0.067  |
| rs1405688   | C | -0.0609 |
| rs78715845  | C | -0.1568 |
| rs80257338  | A | 0.1934  |
| rs115239568 | G | 0.1132  |
| rs6531684   | G | -0.0477 |
| rs140932707 | C | 0.1354  |
| rs114849549 | T | 0.1176  |
| rs28826999  | C | 0.0575  |
| rs62329630  | C | 0.1245  |
| rs2320289   | C | -0.0505 |
| rs1506604   | T | -0.0722 |
| rs34477647  | C | -0.0506 |
| rs1372490   | C | 0.0408  |
| rs2251997   | T | -0.0489 |
| rs75938851  | T | 0.2062  |
| rs6830971   | G | 0.058   |
| rs114490173 | T | -0.3016 |
| rs116104732 | G | 0.0871  |
| rs72670366  | T | -0.1875 |
| rs3896032   | C | 0.0636  |
| rs149206917 | G | 0.23    |
| rs78401789  | A | -0.0943 |
| rs114344625 | A | 0.4092  |
| rs73207315  | G | 0.2584  |
| rs62308322  | G | -0.0596 |
| rs4425326   | T | -0.0426 |
| rs4356969   | C | -0.0548 |
| rs17002781  | A | 0.0861  |
| rs139456087 | G | 0.23    |
| rs11100877  | C | -0.0468 |
| rs12508223  | A | 0.0405  |
| rs11724319  | G | -0.0535 |
| rs80285085  | T | -0.1656 |
| rs9992624   | C | 0.251   |
| rs11736026  | C | 0.1931  |
| rs72665779  | C | -0.2683 |
| rs7696360   | G | 0.0414  |
| rs1395229   | C | 0.0484  |
| rs62335686  | A | 0.0594  |
| rs6823343   | C | 0.3046  |
| rs76890549  | A | 0.2751  |
| rs77638379  | G | 0.1679  |

|             |   |         |
|-------------|---|---------|
| rs7692604   | T | -0.0505 |
| rs12510602  | C | -0.0754 |
| rs10520485  | C | -0.042  |
| rs74640801  | A | -0.1647 |
| rs9647414   | G | 0.1247  |
| rs141874320 | G | 0.275   |
| rs80288919  | A | -0.1673 |
| rs12648167  | T | 0.0488  |
| rs116027502 | A | -0.1273 |
| rs13150392  | A | 0.1094  |
| rs116831839 | A | 0.1361  |
| rs75735311  | T | 0.0712  |
| rs16877099  | A | 0.2184  |
| rs114611744 | A | 0.182   |
| rs9884679   | C | 0.0632  |
| rs62353629  | A | 0.0552  |
| rs72705773  | A | 0.0635  |
| rs11723216  | C | -0.042  |
| rs2341733   | T | 0.0436  |
| rs6819771   | A | 0.0514  |
| rs1554467   | A | -0.0791 |
| rs28759823  | T | -0.0456 |
| rs115458394 | A | -0.2627 |
| rs75830473  | G | 0.1258  |
| rs13150272  | A | 0.0452  |
| rs6835453   | A | -0.0756 |
| rs75696133  | T | -0.2139 |
| rs139331652 | C | -0.1846 |
| rs13144931  | G | -0.1978 |
| rs800478    | C | -0.0497 |
| rs144797230 | C | -0.2613 |
| rs115793947 | C | 0.3384  |
| rs4689471   | C | -0.0491 |
| rs73833002  | T | 0.1654  |
| rs62334719  | G | -0.1544 |
| rs149906084 | T | 0.3014  |
| rs6536559   | A | 0.0557  |
| rs7438250   | G | 0.0543  |
| rs73814199  | A | -0.1255 |
| rs74907629  | A | -0.186  |
| rs2158470   | G | 0.06    |
| rs28657527  | C | -0.0671 |
| rs919052    | C | -0.0402 |
| rs28735544  | A | 0.0458  |
| rs16989912  | T | -0.0693 |
| rs6843979   | A | -0.0505 |
| rs17609318  | G | 0.0571  |

|             |   |         |
|-------------|---|---------|
| rs16889049  | T | 0.0469  |
| rs115542123 | T | 0.1717  |
| rs143963233 | A | -0.2308 |
| rs1521758   | G | 0.053   |
| rs76133703  | C | -0.1547 |
| rs72659078  | A | 0.0862  |
| rs13109075  | C | -0.0488 |
| rs1317547   | A | -0.0473 |
| rs77216888  | T | 0.177   |
| rs976717    | T | -0.0478 |
| rs11931287  | C | 0.0397  |
| rs57021447  | A | 0.0477  |
| rs11573051  | T | 0.0565  |
| rs58217691  | G | 0.0564  |
| rs75875587  | G | -0.1027 |
| rs7664457   | T | -0.0429 |
| rs74704084  | A | 0.1817  |
| rs75120420  | T | -0.1705 |
| rs9291475   | A | 0.0416  |
| rs12650979  | G | -0.0412 |
| rs34639512  | G | -0.1718 |
| rs2725268   | G | 0.0414  |
| rs4859868   | A | -0.0448 |
| rs74702064  | G | -0.1485 |
| rs62309251  | T | -0.0422 |
| rs72645597  | G | -0.1719 |
| rs4326010   | G | -0.0457 |
| rs140882113 | G | 0.1803  |
| rs115394378 | G | 0.1732  |
| rs35178647  | G | -0.0866 |
| rs13116846  | C | 0.0459  |
| rs140837897 | T | -0.2863 |
| rs17022406  | C | 0.1525  |
| rs147015469 | T | -0.0717 |
| rs337618    | G | 0.0593  |
| rs145761320 | G | -0.2175 |
| rs145267999 | T | -0.3762 |
| rs7673366   | A | 0.1632  |
| rs80111022  | T | -0.2136 |
| rs1369378   | A | -0.0544 |
| rs12509587  | C | -0.0698 |
| rs77396391  | T | 0.0804  |
| rs62328226  | G | 0.1612  |
| rs117489396 | A | -0.0987 |
| rs6828606   | C | 0.0485  |
| rs79235335  | A | -0.0535 |
| rs112914164 | A | 0.0891  |

|             |   |         |
|-------------|---|---------|
| rs17034585  | C | -0.0651 |
| rs148321555 | T | -0.3102 |
| rs13126049  | G | 0.0554  |
| rs148050226 | A | 0.2925  |
| rs73245383  | C | -0.1678 |
| rs35280329  | G | -0.2409 |
| rs147897758 | C | 0.1733  |
| rs1014238   | G | -0.05   |
| rs6827052   | T | -0.0881 |
| rs74323350  | C | 0.2174  |
| rs35108408  | A | 0.0823  |
| rs11932557  | T | 0.0724  |
| rs74567889  | A | 0.3017  |
| rs150715924 | C | -0.192  |
| rs80337694  | T | -0.1898 |
| rs2870326   | G | -0.226  |
| rs6842319   | C | 0.0431  |
| rs111451617 | T | 0.1139  |
| rs673099    | C | 0.1486  |
| rs11724920  | C | 0.0448  |
| rs41264685  | C | -0.1724 |
| rs6822004   | C | 0.0708  |
| rs3884608   | C | 0.0402  |
| rs11735413  | T | -0.3028 |
| rs28705815  | G | 0.0973  |
| rs115348904 | T | -0.1275 |
| rs2726802   | C | -0.075  |
| rs13102909  | A | -0.0436 |
| rs17050661  | T | 0.2143  |
| rs62409648  | A | -0.1547 |
| rs79779548  | A | -0.0862 |
| rs139725681 | A | 0.0653  |
| rs6533279   | A | 0.0431  |
| rs145846805 | T | 0.2097  |
| rs73225538  | G | 0.2453  |
| rs62320484  | A | 0.2323  |
| rs6836400   | T | -0.0685 |
| rs74618463  | T | 0.3656  |
| rs28813082  | T | -0.1741 |
| rs62324262  | A | 0.0634  |
| rs1451117   | T | -0.0543 |
| rs7677529   | A | -0.0506 |
| rs10516182  | C | 0.0441  |
| rs2191611   | C | -0.0613 |
| rs2176787   | C | -0.0491 |
| rs77041456  | T | -0.1411 |
| rs2255355   | C | 0.0782  |



|             |   |         |
|-------------|---|---------|
| rs62309352  | G | 0.1593  |
| rs143632449 | T | -0.2036 |
| rs4694536   | G | -0.0436 |
| rs62327006  | G | 0.0625  |
| rs11737088  | G | -0.2289 |
| rs80325045  | T | -0.3159 |
| rs1490463   | T | -0.086  |
| rs17327389  | G | -0.2611 |
| rs13118107  | G | 0.0391  |
| rs3828486   | G | -0.0591 |
| rs442224    | A | -0.0578 |
| rs115687569 | A | 0.1188  |
| rs139922558 | T | -0.2102 |
| rs4001775   | G | -0.0497 |
| rs73079699  | T | 0.1048  |
| rs17463278  | C | 0.0465  |
| rs1406077   | C | 0.0418  |
| rs80179122  | C | 0.1687  |
| rs74393135  | A | 0.2557  |
| rs144106045 | G | 0.1579  |
| rs1516700   | A | 0.0452  |
| rs76540178  | A | -0.1008 |
| rs115366323 | T | -0.3744 |
| rs6849033   | C | -0.0491 |
| rs12647978  | A | 0.0884  |
| rs17779945  | A | 0.1892  |
| rs115401423 | G | 0.2257  |
| rs10012100  | C | 0.0613  |
| rs8192033   | T | 0.1393  |
| rs971472    | T | -0.0585 |
| rs11734206  | A | 0.1557  |
| rs17000106  | G | -0.0905 |
| rs67809936  | C | -0.061  |
| rs12507758  | C | -0.0405 |
| rs13119847  | A | 0.0449  |
| rs12507078  | A | 0.0712  |
| rs71607073  | C | -0.2001 |
| rs147562678 | G | 0.2118  |
| rs115567535 | A | 0.1506  |
| rs13121109  | G | -0.0643 |
| rs115896344 | A | 0.179   |
| rs7673594   | T | -0.0688 |
| rs1962230   | A | -0.0938 |
| rs139826977 | G | -0.2167 |
| rs6814136   | T | -0.0487 |
| rs10103     | C | -0.0578 |
| rs949765    | T | 0.0422  |

|             |   |         |
|-------------|---|---------|
| rs4512054   | G | 0.1138  |
| rs13143169  | C | 0.0517  |
| rs11733278  | A | -0.0515 |
| rs8732      | G | -0.065  |
| rs62334793  | G | -0.0455 |
| rs4833127   | C | -0.0925 |
| rs4693274   | T | -0.0562 |
| rs28373185  | C | 0.1035  |
| rs11725478  | G | -0.0642 |
| rs7692071   | C | 0.0779  |
| rs71614563  | G | -0.2377 |
| rs639194    | C | 0.0423  |
| rs843603    | T | -0.0619 |
| rs73236592  | T | -0.1487 |
| rs1376535   | T | -0.0697 |
| rs956469    | T | -0.0407 |
| rs68074578  | C | -0.0787 |
| rs1439381   | C | -0.0402 |
| rs78723763  | T | -0.2092 |
| rs2313360   | A | -0.0548 |
| rs1378914   | T | -0.1863 |
| rs141784116 | T | -0.075  |
| rs17014050  | C | -0.0765 |
| rs141274311 | G | 0.3077  |
| rs4607271   | A | 0.0426  |
| rs62312398  | T | -0.1708 |
| rs80036690  | G | 0.2192  |
| rs7436241   | G | -0.3176 |
| rs10428466  | G | -0.0503 |
| rs1154431   | G | 0.1325  |
| rs12505159  | G | 0.0457  |
| rs5020094   | C | -0.0519 |
| rs114662270 | G | -0.1361 |
| rs11730564  | T | -0.0668 |
| rs79030744  | C | 0.1339  |
| rs10007444  | T | 0.0409  |
| rs2196985   | C | 0.0403  |
| rs7661467   | A | -0.0488 |
| rs11946340  | T | -0.0608 |
| rs72710259  | T | -0.0884 |
| rs71613287  | G | 0.1794  |
| rs12499461  | C | 0.0454  |
| rs11933374  | G | 0.0481  |
| rs62354059  | G | -0.0646 |
| rs4863510   | A | -0.0471 |
| rs6551601   | T | -0.0602 |
| rs6533086   | T | -0.0833 |

|             |   |         |
|-------------|---|---------|
| rs79281504  | T | -0.0983 |
| rs116131612 | C | -0.1923 |
| rs7675903   | A | -0.0411 |
| rs11725460  | G | -0.046  |
| rs2570731   | C | 0.0432  |
| rs4859453   | A | 0.0464  |
| rs140992313 | T | -0.1184 |
| rs2080213   | A | 0.0741  |
| rs1975275   | C | 0.1533  |
| rs62318370  | T | 0.186   |
| rs13147656  | G | 0.0488  |
| rs78009493  | A | 0.1813  |
| rs78116835  | A | -0.1034 |
| rs115798843 | G | 0.1928  |
| rs28733166  | T | 0.0574  |
| rs111100483 | A | 0.056   |
| rs148413146 | T | 0.2483  |
| rs58429763  | A | -0.0623 |
| rs74708851  | T | 0.0964  |
| rs1909910   | G | 0.0964  |
| rs74884267  | A | -0.2276 |
| rs147277890 | A | -0.1814 |
| rs2170742   | G | -0.0409 |
| rs1369657   | A | -0.16   |
| rs35694135  | G | 0.0652  |
| rs56020774  | A | -0.0605 |
| rs114564114 | A | -0.2085 |
| rs75783278  | T | -0.214  |
| rs7660775   | C | -0.0549 |
| rs76261691  | A | -0.2731 |
| rs73242681  | T | 0.0944  |
| rs13135493  | C | -0.0554 |
| rs6847236   | A | -0.0578 |
| rs16839667  | G | 0.0618  |
| rs114839257 | A | 0.2981  |
| rs13149752  | C | 0.0412  |
| rs62320158  | A | -0.1024 |
| rs6845142   | A | 0.1315  |
| rs4317240   | A | 0.0484  |
| rs13143223  | T | -0.0982 |
| rs10050115  | G | -0.0419 |
| rs35176842  | A | 0.0674  |
| rs73243402  | A | -0.0461 |
| rs76747862  | T | -0.1161 |
| rs73077177  | T | 0.1292  |
| rs73130814  | A | 0.1431  |
| rs6829825   | A | 0.1438  |

|             |   |         |
|-------------|---|---------|
| rs61793498  | T | -0.2298 |
| rs62315556  | T | -0.189  |
| rs6813566   | C | -0.0709 |
| rs9759686   | A | -0.0446 |
| rs62329161  | A | 0.0586  |
| rs11722710  | C | 0.1394  |
| rs627001    | A | 0.0423  |
| rs4697255   | T | 0.0491  |
| rs112042647 | T | -0.1032 |
| rs146643212 | C | 0.1935  |
| rs1947473   | C | 0.0475  |
| rs7654142   | A | -0.0764 |
| rs10018274  | A | -0.0538 |
| rs6828566   | G | 0.1733  |
| rs17329373  | G | -0.118  |
| rs6838700   | A | -0.0412 |
| rs112951213 | A | -0.1717 |
| rs143778384 | G | 0.163   |
| rs116170870 | T | 0.078   |
| rs10001483  | G | 0.0687  |
| rs115491410 | G | 0.2154  |
| rs147560904 | C | -0.1276 |
| rs141298892 | A | 0.2077  |
| rs13112750  | T | 0.0479  |
| rs1203119   | A | -0.0828 |
| rs75751562  | G | -0.0639 |
| rs1458663   | A | 0.0402  |
| rs140340926 | G | 0.2401  |
| rs115130258 | G | 0.1869  |
| rs34301983  | C | -0.0449 |
| rs10488898  | A | 0.0755  |
| rs3922934   | A | -0.0759 |
| rs6833190   | C | 0.057   |
| rs4693715   | G | 0.0722  |
| rs7437246   | T | 0.0398  |
| rs35027894  | T | -0.2803 |
| rs115116901 | G | 0.0939  |
| rs1398927   | A | -0.0443 |
| rs115154524 | A | 0.2953  |
| rs77902310  | C | 0.1043  |
| rs150306271 | T | -0.0673 |
| rs2878123   | G | -0.064  |
| rs10003457  | A | 0.1278  |
| rs17084447  | C | 0.2321  |
| rs35725685  | G | -0.0557 |
| rs116094982 | T | -0.1375 |
| rs28691029  | G | 0.1914  |

|             |   |         |
|-------------|---|---------|
| rs1973457   | T | 0.0623  |
| rs72656257  | C | 0.0708  |
| rs112650923 | A | 0.0567  |
| rs115266002 | G | -0.1202 |
| rs116476130 | G | 0.1911  |
| rs4466078   | T | 0.2846  |
| rs1824951   | C | 0.105   |
| rs116746847 | G | -0.183  |
| rs7377964   | A | 0.0393  |
| rs77120326  | T | 0.1884  |
| rs34126804  | T | 0.0471  |
| rs1713998   | G | 0.0399  |
| rs6815102   | C | 0.0471  |
| rs6835621   | A | -0.05   |
| rs17314566  | A | -0.0804 |
| rs78748122  | T | -0.1184 |
| rs56051818  | T | 0.07    |
| rs28813081  | A | 0.0885  |
| rs72735979  | A | -0.1733 |
| rs7664875   | A | -0.0777 |
| rs1552805   | G | 0.0509  |
| rs114982877 | A | 0.2956  |
| rs2537928   | C | -0.1082 |
| rs139213496 | C | 0.0998  |
| rs116425665 | A | 0.1341  |
| rs74865203  | G | 0.2073  |
| rs7672481   | G | 0.0467  |
| rs74878464  | T | -0.0819 |
| rs112817626 | A | 0.1772  |
| rs6845206   | T | 0.0425  |
| rs13102364  | A | 0.0911  |
| rs11944032  | C | 0.0477  |
| rs59243509  | C | 0.0991  |
| rs12649891  | T | 0.0811  |
| rs1704156   | T | -0.0486 |
| rs72708376  | G | 0.0801  |
| rs149687634 | T | 0.1291  |
| rs6824711   | T | 0.1365  |
| rs78244682  | A | 0.1713  |
| rs4418043   | G | 0.0862  |
| rs76367363  | C | 0.1228  |
| rs140265360 | A | -0.2155 |
| rs71607370  | A | 0.074   |
| rs12641239  | C | -0.041  |
| rs144769710 | A | 0.1074  |
| rs34322227  | G | -0.2747 |
| rs13116938  | T | 0.2151  |

|             |   |         |
|-------------|---|---------|
| rs13150227  | A | -0.1531 |
| rs713508    | T | 0.0392  |
| rs11734067  | A | 0.0701  |
| rs77934282  | C | -0.0829 |
| rs34055610  | T | 0.0397  |
| rs7665284   | G | 0.042   |
| rs113472276 | G | -0.0446 |
| rs297302    | C | -0.0433 |
| rs1459807   | G | -0.0409 |
| rs11938470  | T | -0.0564 |
| rs2114532   | T | 0.1436  |
| rs13138555  | A | -0.0443 |
| rs965586    | A | -0.1022 |
| rs6849636   | C | 0.1304  |
| rs28667193  | T | -0.2765 |
| rs72681007  | C | 0.0973  |
| rs114975118 | T | 0.2003  |
| rs148689802 | G | 0.2105  |
| rs972311    | T | 0.0389  |
| rs113999871 | C | -0.1513 |
| rs11724402  | A | 0.091   |
| rs150996093 | A | -0.1922 |
| rs75271724  | G | -0.4444 |
| rs17627325  | A | 0.3023  |
| rs11936454  | A | 0.0506  |
| rs62312577  | A | 0.2797  |
| rs60013386  | A | -0.0829 |
| rs34205168  | C | -0.0398 |
| rs62317577  | A | -0.3532 |
| rs114256598 | T | -0.2315 |
| rs73107308  | A | 0.2646  |
| rs80345023  | A | -0.1227 |
| rs148790048 | A | -0.2139 |
| rs73253663  | T | -0.0993 |
| rs146963500 | G | -0.189  |
| rs7696474   | C | 0.0403  |
| rs77866269  | A | -0.143  |
| rs34780681  | T | 0.229   |
| rs2130908   | T | -0.0507 |
| rs6820936   | T | 0.0412  |
| rs115668064 | T | -0.1877 |
| rs4835479   | T | -0.0887 |
| rs143544103 | T | 0.1969  |
| rs76236210  | A | 0.1155  |
| rs732129    | G | -0.1761 |
| rs28924077  | T | 0.0758  |
| rs343178    | C | -0.0383 |

|             |   |         |
|-------------|---|---------|
| rs72617714  | T | 0.1056  |
| rs13126318  | A | 0.066   |
| rs111760427 | T | -0.0407 |
| rs2681355   | A | 0.1991  |
| rs115758507 | C | 0.138   |
| rs7439122   | C | 0.2424  |
| rs72682223  | A | -0.1755 |
| rs17866009  | G | 0.0916  |
| rs1380347   | A | 0.038   |
| rs35689501  | A | 0.091   |
| rs4698436   | T | 0.2345  |
| rs114928387 | T | 0.1755  |
| rs2904396   | T | 0.0584  |
| rs4234850   | T | -0.0531 |
| rs9990699   | C | 0.0466  |
| rs62296375  | A | 0.0687  |
| rs77381980  | T | 0.1617  |
| rs359485    | G | 0.2024  |
| rs73128950  | C | 0.1165  |
| rs73230513  | A | 0.0583  |
| rs116799441 | A | 0.2345  |
| rs62305643  | T | 0.1695  |
| rs35783932  | G | -0.0634 |
| rs72676982  | A | 0.0891  |
| rs72664700  | G | -0.1717 |
| rs79087124  | C | 0.1073  |
| rs114053001 | A | -0.2385 |
| rs80234081  | C | -0.1143 |
| rs74778730  | G | -0.1683 |
| rs116626258 | A | -0.2751 |
| rs55851362  | T | 0.041   |
| rs2060670   | T | 0.0385  |
| rs9995191   | G | -0.0378 |
| rs10517450  | C | 0.0449  |
| rs149877145 | C | 0.2828  |
| rs79904956  | C | -0.1137 |
| rs72726369  | T | 0.0709  |
| rs1463793   | G | -0.0392 |
| rs74765783  | A | -0.2714 |
| rs114147029 | G | 0.0893  |
| rs78003947  | A | 0.1484  |
| rs72686502  | G | 0.0791  |
| rs9714626   | T | 0.1631  |
| rs113228127 | G | 0.195   |
| rs11725123  | A | 0.0532  |
| rs6811075   | A | -0.0399 |
| rs78521367  | A | -0.1026 |

|             |   |         |
|-------------|---|---------|
| rs111992470 | T | 0.196   |
| rs75412472  | A | -0.1398 |
| rs55761002  | T | 0.1816  |
| rs11734825  | G | 0.154   |
| rs78313453  | T | -0.1849 |
| rs17724678  | G | -0.1928 |
| rs11777     | C | 0.0654  |
| rs4863186   | C | 0.0557  |
| rs72662058  | C | 0.1415  |
| rs2604585   | C | -0.0508 |
| rs79282394  | A | -0.2176 |
| rs7686499   | C | -0.0505 |
| rs6816536   | A | 0.1731  |
| rs10006776  | C | 0.038   |
| rs56822412  | A | 0.1658  |
| rs77605486  | C | -0.2413 |
| rs73248645  | T | 0.0603  |
| rs750695    | G | 0.0379  |
| rs9991737   | C | 0.041   |
| rs2075633   | C | -0.0418 |
| rs78963196  | A | 0.1679  |
| rs62282754  | G | -0.0531 |
| rs6834451   | A | 0.0685  |
| rs116102386 | C | -0.2305 |
| rs28415558  | G | -0.0613 |
| rs11724321  | T | -0.1273 |
| rs11725795  | C | 0.1124  |
| rs79684617  | A | -0.1544 |
| rs62321561  | A | -0.174  |
| rs62346549  | A | -0.1104 |
| rs4632699   | G | 0.1325  |
| rs72689009  | G | 0.1848  |
| rs13117351  | A | -0.0443 |
| rs13152636  | A | -0.2711 |
| rs6822272   | C | 0.0461  |
| rs72687755  | T | -0.0823 |
| rs4691306   | T | 0.0415  |
| rs9884312   | G | 0.0376  |
| rs35723722  | A | 0.0438  |
| rs76911856  | T | -0.2781 |
| rs62312825  | T | 0.0514  |
| rs1994313   | A | -0.0379 |
| rs16874090  | C | -0.0445 |
| rs10937712  | A | 0.0377  |
| rs2234765   | A | -0.1944 |
| rs112885115 | C | 0.0889  |
| rs34693895  | G | 0.115   |



|             |   |         |
|-------------|---|---------|
| rs57402852  | G | 0.1582  |
| rs112406116 | T | 0.1243  |
| rs11132268  | A | 0.0617  |
| rs12509266  | A | 0.0516  |
| rs400883    | G | -0.0457 |
| rs1349340   | T | -0.2321 |
| rs1826394   | C | 0.0392  |
| rs4538532   | C | 0.0629  |
| rs6833089   | T | 0.0567  |
| rs79513984  | G | -0.158  |
| rs74897975  | C | 0.0959  |
| rs149163272 | A | 0.1712  |
| rs12642595  | G | 0.0634  |
| rs2520492   | A | 0.0384  |
| rs76845687  | C | 0.057   |
| rs116417665 | T | 0.2334  |
| rs78426596  | C | -0.24   |
| rs147621988 | C | -0.1942 |
| rs35421067  | T | 0.0769  |
| rs115239556 | C | 0.1958  |
| rs77349502  | T | 0.0589  |
| rs7697091   | C | 0.0388  |
| rs9684506   | C | 0.0369  |
| rs1457912   | T | 0.0386  |
| rs116423064 | G | -0.1989 |
| rs62305557  | T | -0.0783 |
| rs116816598 | G | 0.2291  |
| rs78730002  | C | 0.2905  |
| rs17009114  | T | 0.0466  |
| rs142185450 | T | -0.2401 |
| rs12510236  | A | 0.0368  |
| rs1992479   | A | 0.0411  |
| rs6841620   | C | 0.0617  |
| rs13110208  | C | 0.0457  |
| rs7696676   | A | -0.0474 |
| rs7654400   | A | 0.0446  |
| rs71605214  | G | -0.1288 |
| rs4861717   | G | -0.0418 |
| rs116004238 | A | 0.1716  |
| rs12649387  | C | -0.0666 |
| rs115637997 | T | -0.2275 |
| rs78093789  | T | 0.1482  |
| rs111472973 | A | -0.1419 |
| rs7684667   | G | -0.0643 |
| rs1568225   | C | 0.061   |
| rs13112000  | T | -0.3595 |
| rs10002315  | T | 0.0418  |

|             |   |         |
|-------------|---|---------|
| rs17343362  | A | 0.0447  |
| rs11947424  | T | 0.0447  |
| rs11132400  | T | 0.0412  |
| rs75624237  | T | -0.2054 |
| rs73826242  | C | 0.0938  |
| rs114288572 | T | -0.1685 |
| rs72654103  | A | 0.1268  |
| rs78758510  | T | 0.1069  |
| rs12649569  | G | 0.0644  |
| rs77235684  | T | -0.2268 |
| rs10019020  | G | 0.0374  |
| rs12641941  | T | 0.1654  |
| rs6841903   | T | 0.0553  |
| rs76634848  | T | -0.2178 |
| rs6851510   | A | 0.1742  |
| rs11944108  | T | 0.1129  |
| rs72660383  | C | 0.0741  |
| rs149725992 | C | -0.2231 |
| rs116074910 | G | 0.1943  |
| rs11941153  | C | 0.1204  |
| rs114593505 | T | 0.1765  |
| rs12499099  | A | -0.0533 |
| rs10866125  | A | 0.0429  |
| rs138822442 | C | -0.1525 |
| rs10018379  | G | -0.0494 |
| rs56131062  | T | -0.1895 |
| rs77422573  | C | -0.249  |
| rs11944800  | A | -0.0377 |
| rs144129216 | A | 0.2618  |
| rs1155422   | G | -0.0374 |
| rs78627246  | T | 0.2027  |
| rs4561913   | A | -0.0425 |
| rs10938314  | G | -0.0513 |
| rs62317615  | G | -0.0786 |
| rs113183277 | T | 0.1111  |
| rs1125228   | T | 0.0427  |
| rs77029919  | G | -0.1294 |
| rs10516247  | C | 0.088   |
| rs2881988   | T | 0.0882  |
| rs76164240  | A | 0.2784  |
| rs59632837  | A | 0.0469  |
| rs6812995   | A | 0.0544  |
| rs146442295 | C | 0.0882  |
| rs12644719  | G | 0.0849  |
| rs151108267 | G | -0.2531 |
| rs191711    | A | 0.056   |
| rs13139329  | A | 0.1148  |

|             |   |         |
|-------------|---|---------|
| rs292037    | C | -0.0831 |
| rs11943887  | T | -0.0716 |
| rs4865131   | C | -0.0389 |
| rs11131923  | C | 0.0424  |
| rs144050025 | C | 0.2704  |
| rs114315862 | T | 0.0796  |
| rs35862730  | T | -0.0851 |
| rs62311871  | A | 0.2586  |
| rs55836615  | T | 0.0573  |
| rs11931592  | A | -0.0583 |
| rs78169234  | A | 0.0677  |
| rs73212620  | G | -0.0818 |
| rs72712015  | A | -0.1184 |
| rs2231146   | C | 0.2031  |
| rs17474362  | G | 0.2233  |
| rs4460076   | G | -0.0388 |
| rs112269475 | C | 0.1196  |
| rs75234932  | T | -0.119  |
| rs11734496  | C | 0.0384  |
| rs1463842   | G | -0.0433 |
| rs61486204  | G | -0.0647 |
| rs3796848   | C | 0.038   |
| rs4299631   | T | -0.0453 |
| rs12508636  | G | 0.0432  |
| rs6811070   | A | -0.0368 |
| rs114767061 | T | -0.164  |
| rs4697178   | A | 0.0359  |
| rs56362174  | G | 0.1271  |
| rs62331125  | A | 0.1389  |
| rs10002477  | G | -0.0375 |
| rs4546266   | T | -0.0381 |
| rs7666113   | T | 0.046   |
| rs141135105 | T | -0.2059 |
| rs28739273  | C | 0.0437  |
| rs2711279   | G | 0.044   |
| rs80201042  | C | 0.2632  |
| rs4861645   | A | 0.2014  |
| rs2952880   | C | 0.2301  |
| rs75549733  | G | -0.1968 |
| rs143526738 | A | 0.2183  |
| rs76576914  | C | 0.2598  |
| rs80062859  | A | -0.0989 |
| rs76697929  | C | 0.161   |
| rs1294670   | T | 0.0439  |
| rs1518186   | C | 0.0407  |
| rs12498346  | C | -0.0559 |
| rs7686601   | G | -0.0377 |

|             |   |         |
|-------------|---|---------|
| rs61566868  | G | 0.1503  |
| rs72675560  | C | -0.0583 |
| rs1483668   | A | 0.0459  |
| rs11728590  | G | 0.042   |
| rs4833753   | A | 0.0356  |
| rs139160696 | G | 0.2364  |
| rs13114324  | C | 0.0405  |
| rs28835900  | G | -0.0422 |
| rs75545200  | C | -0.196  |
| rs10031688  | A | -0.1378 |
| rs72711222  | A | 0.1014  |
| rs17006980  | C | 0.0395  |
| rs145557968 | A | -0.1835 |
| rs4543074   | G | -0.0502 |
| rs1447288   | T | -0.0378 |
| rs28687091  | G | 0.1892  |
| rs7659011   | G | 0.0366  |
| rs4862028   | T | 0.0598  |
| rs72735924  | C | -0.0392 |
| rs6815857   | T | 0.1224  |
| rs1039238   | T | -0.0449 |
| rs139074267 | T | 0.2184  |
| rs603998    | G | -0.0534 |
| rs147642831 | A | 0.1805  |
| rs140650794 | G | 0.1425  |
| rs6830998   | G | -0.039  |
| rs9996766   | A | 0.0435  |
| rs116837625 | T | -0.1913 |
| rs141351712 | T | 0.2211  |
| rs10804977  | G | 0.0763  |
| rs113048637 | A | 0.1724  |
| rs7693115   | A | -0.2071 |
| rs78621434  | A | -0.1844 |
| rs116649215 | G | 0.1859  |
| rs12501018  | G | -0.0438 |
| rs9985817   | T | 0.1543  |
| rs72724618  | C | -0.0656 |
| rs1405484   | T | -0.0394 |
| rs7660423   | G | 0.0891  |
| rs77480328  | A | -0.2608 |
| rs1425655   | C | -0.0363 |
| rs10023791  | G | 0.0377  |
| rs17292528  | C | -0.2584 |
| rs6858128   | C | -0.0502 |
| rs2654508   | T | -0.0399 |
| rs6844495   | A | 0.0566  |
| rs12643070  | A | -0.0387 |

|             |   |         |
|-------------|---|---------|
| rs145570936 | T | 0.1937  |
| rs41279519  | C | -0.1357 |
| rs114497630 | C | -0.1064 |
| rs117477647 | T | 0.0814  |
| rs6818432   | G | 0.0611  |
| rs72663963  | G | -0.0957 |
| rs13113521  | G | 0.0452  |
| rs147080263 | T | 0.089   |
| rs6855546   | C | 0.0657  |
| rs62312082  | A | 0.1666  |
| rs142302047 | G | 0.1811  |
| rs11947112  | A | -0.0497 |
| rs62286150  | C | 0.0731  |
| rs116289002 | A | -0.1639 |
| rs13107432  | A | 0.0376  |
| rs6834598   | A | -0.0558 |
| rs4689621   | C | 0.1527  |
| rs9647486   | A | 0.0441  |
| rs1603584   | G | 0.0741  |
| rs114735513 | T | 0.2171  |
| rs116571424 | C | 0.1428  |
| rs13107066  | G | -0.0373 |
| rs77408245  | G | -0.215  |
| rs6857724   | A | -0.0588 |
| rs4470654   | G | 0.0601  |
| rs17233311  | A | -0.0434 |
| rs9683858   | C | -0.0551 |
| rs4697695   | A | 0.037   |
| rs76488193  | A | 0.1835  |
| rs2665881   | C | 0.0606  |
| rs75913999  | A | -0.2792 |
| rs4865141   | T | -0.0493 |
| rs10027490  | T | 0.2523  |
| rs115979701 | A | 0.1373  |
| rs4862275   | G | 0.2218  |
| rs354935    | C | -0.0357 |
| rs11729356  | A | -0.0454 |
| rs75024493  | A | 0.199   |
| rs75304153  | C | 0.1946  |
| rs1713972   | T | -0.076  |
| rs74631384  | A | -0.1819 |
| rs3775116   | A | -0.0463 |
| rs12501084  | A | 0.2217  |
| rs2412776   | G | -0.0458 |
| rs57139204  | A | 0.0535  |
| rs35886821  | G | -0.1216 |
| rs423093    | C | 0.0609  |

|             |   |         |
|-------------|---|---------|
| rs76530295  | A | -0.2015 |
| rs74752509  | C | -0.0906 |
| rs6838913   | T | -0.0421 |
| rs75870355  | C | 0.1135  |
| rs78005215  | T | -0.1977 |
| rs10014437  | T | -0.255  |
| rs142693691 | A | -0.0896 |
| rs10516472  | C | 0.0538  |
| rs17748291  | A | 0.0849  |
| rs77700977  | C | 0.1118  |
| rs4557210   | A | 0.0381  |
| rs1454705   | G | 0.1733  |
| rs114245879 | T | -0.1437 |
| rs145681168 | G | -0.2203 |
| rs17647300  | G | 0.0399  |
| rs145141894 | T | 0.3322  |
| rs114702374 | C | 0.1397  |
| rs6837754   | T | 0.0702  |
| rs72723348  | T | 0.1508  |
| rs114417900 | C | 0.1218  |
| rs34007466  | A | -0.2411 |
| rs59184276  | C | -0.0414 |
| rs72640056  | T | -0.1717 |
| rs28717041  | A | -0.1409 |
| rs17012830  | T | -0.0578 |
| rs116779568 | T | 0.1834  |
| rs2412866   | C | -0.1072 |
| rs7689225   | A | 0.0353  |
| rs1812361   | C | -0.1018 |
| rs1962459   | G | -0.0576 |
| rs73248479  | A | 0.1369  |
| rs6813766   | T | -0.0393 |
| rs60824130  | A | 0.105   |
| rs2646009   | C | 0.0431  |
| rs79499416  | T | 0.0814  |
| rs13130164  | C | 0.0378  |
| rs2012962   | T | 0.0442  |
| rs72725650  | C | 0.0555  |
| rs72671776  | C | 0.0904  |
| rs74792759  | T | -0.0606 |
| rs2636735   | G | -0.0356 |
| rs62311103  | T | -0.0376 |
| rs1394846   | A | -0.1801 |
| rs73122923  | T | 0.1806  |
| rs6838905   | G | -0.0525 |
| rs13139006  | G | 0.0985  |
| rs79801055  | C | 0.1307  |

|             |   |         |
|-------------|---|---------|
| rs10014039  | G | 0.0378  |
| rs115540977 | G | 0.3262  |
| rs79925656  | A | 0.1534  |
| rs13123954  | A | 0.0392  |
| rs142933336 | A | 0.1702  |
| rs138616217 | T | -0.1908 |
| rs78104021  | A | 0.0686  |
| rs78790440  | G | 0.0765  |
| rs1454701   | A | 0.0453  |
| rs115491229 | A | -0.1389 |
| rs79832182  | A | 0.1155  |
| rs956137    | T | 0.0745  |
| rs72640802  | A | -0.1233 |
| rs17082777  | A | 0.0568  |
| rs73229288  | A | 0.1065  |
| rs13121942  | A | -0.0641 |
| rs6838024   | A | 0.0367  |
| rs34203539  | C | 0.0657  |
| rs2973275   | A | 0.0412  |
| rs4285070   | C | 0.0528  |
| rs11942391  | A | 0.0552  |
| rs11723565  | A | 0.0381  |
| rs28669811  | T | 0.0973  |
| rs13148390  | T | 0.2759  |
| rs11931603  | T | 0.0731  |
| rs79987245  | C | -0.1164 |
| rs13150301  | G | 0.0413  |
| rs55697933  | A | 0.0435  |
| rs2240053   | T | 0.0655  |
| rs116595668 | T | 0.2421  |
| rs115889983 | A | -0.1283 |
| rs11932853  | C | 0.0417  |
| rs145222784 | G | 0.1897  |
| rs6553006   | A | 0.0821  |
| rs115927727 | T | 0.1997  |
| rs2891927   | G | -0.051  |
| rs116601605 | A | 0.1618  |
| rs113599182 | G | 0.1114  |
| rs4605665   | G | 0.0647  |
| rs73237200  | A | -0.1448 |
| rs66785096  | A | 0.049   |
| rs11133460  | T | -0.058  |
| rs17610088  | T | 0.1341  |
| rs11733617  | T | -0.0526 |
| rs147916539 | G | 0.1783  |
| rs1841022   | G | -0.0644 |
| rs114456802 | G | 0.1579  |

|             |   |         |
|-------------|---|---------|
| rs937944    | C | -0.0407 |
| rs140759071 | G | 0.1581  |
| rs144368912 | C | 0.2451  |
| rs145269819 | A | 0.257   |
| rs12640782  | G | 0.2568  |
| rs4305509   | C | -0.0377 |
| rs62408493  | G | 0.2006  |
| rs77249653  | T | 0.1538  |
| rs2215639   | C | 0.0607  |
| rs72978427  | C | -0.0623 |
| rs1501134   | T | 0.0564  |
| rs6848166   | T | 0.0457  |
| rs34942995  | C | -0.186  |
| rs79745840  | T | -0.1911 |
| rs6855903   | C | -0.1197 |
| rs11934107  | A | 0.0576  |
| rs139410821 | G | 0.298   |
| rs12108398  | A | -0.2031 |
| rs971556    | A | 0.1796  |
| rs75394799  | T | 0.222   |
| rs35673210  | A | -0.2321 |
| rs77516035  | A | -0.1266 |
| rs11936302  | C | 0.0486  |
| rs7657264   | T | 0.0356  |
| rs4348103   | G | 0.0387  |
| rs13101337  | G | 0.1588  |
| rs6857225   | A | 0.0373  |
| rs78706048  | G | -0.1699 |
| rs77855915  | A | 0.2101  |
| rs116193062 | C | 0.1775  |
| rs6849136   | C | 0.0569  |
| rs112258083 | T | 0.087   |
| rs116038616 | G | 0.2153  |
| rs28416969  | C | 0.0897  |
| rs141906793 | G | 0.1278  |
| rs34556087  | T | 0.0704  |
| rs113297275 | A | 0.1858  |
| rs3113689   | T | 0.059   |
| rs75007521  | G | -0.2027 |
| rs115268096 | T | -0.3051 |
| rs11722219  | A | -0.0486 |
| rs10517415  | C | 0.067   |
| rs80234115  | T | 0.136   |
| rs79542288  | A | -0.1442 |
| rs17628883  | A | -0.0633 |
| rs17037430  | A | 0.191   |
| rs13102102  | C | 0.0417  |



|             |   |         |
|-------------|---|---------|
| rs113799780 | A | 0.1858  |
| rs74495224  | G | 0.1435  |
| rs76975177  | G | 0.2675  |
| rs7692171   | C | -0.0351 |
| rs114050867 | C | -0.1073 |
| rs59390779  | T | 0.0608  |
| rs72665951  | T | -0.0368 |
| rs13103714  | A | 0.0362  |
| rs3796698   | A | 0.1169  |
| rs111977633 | C | 0.1201  |
| rs35128915  | G | 0.036   |
| rs114047414 | C | -0.1403 |
| rs2175431   | T | -0.0365 |
| rs7659780   | T | 0.2485  |
| rs111408447 | C | 0.2431  |
| rs28501372  | G | 0.0749  |
| rs77119644  | A | -0.0678 |
| rs149447470 | A | 0.201   |
| rs115436441 | G | 0.126   |
| rs12504251  | T | 0.1719  |
| rs144903675 | A | 0.1946  |
| rs11730191  | G | 0.2324  |
| rs34038106  | G | 0.1675  |
| rs141235331 | T | 0.2618  |
| rs78944036  | T | 0.1518  |
| rs59712936  | A | 0.0813  |
| rs62298654  | T | 0.1342  |
| rs1160283   | G | -0.148  |
| rs2716826   | C | 0.0492  |
| rs1456488   | C | 0.1192  |
| rs7664225   | G | -0.0419 |
| rs62335329  | T | 0.0818  |
| rs146070826 | C | 0.1599  |
| rs113827632 | C | 0.1707  |
| rs72705325  | T | 0.1783  |
| rs17484474  | G | 0.1449  |
| rs77192844  | A | 0.125   |
| rs145137878 | T | -0.172  |
| rs148060888 | T | 0.0995  |
| rs7669094   | G | 0.047   |
| rs35872664  | G | 0.2434  |
| rs10012862  | A | 0.2277  |
| rs17005607  | C | 0.2615  |
| rs34448816  | A | -0.059  |
| rs28505859  | G | -0.0665 |
| rs2668536   | A | -0.0361 |
| rs10001896  | G | 0.0454  |

|             |   |         |
|-------------|---|---------|
| rs76739072  | G | -0.0735 |
| rs4429685   | A | -0.0387 |
| rs111646157 | T | 0.141   |
| rs149747910 | A | -0.0875 |
| rs72707587  | C | -0.169  |
| rs6828529   | C | -0.0381 |
| rs80011774  | G | -0.1232 |
| rs354326    | A | -0.2206 |
| rs6532127   | G | -0.055  |
| rs1579627   | A | -0.0557 |
| rs55907205  | A | -0.0454 |
| rs72685129  | G | 0.1374  |
| rs17387847  | T | 0.0453  |
| rs7657496   | C | -0.0525 |
| rs116018930 | T | 0.1969  |
| rs115205122 | G | -0.1938 |
| rs10009031  | C | -0.061  |
| rs10016033  | T | 0.0863  |
| rs1711397   | A | 0.2697  |
| rs6812758   | A | 0.0385  |
| rs12643346  | T | -0.0381 |
| rs72685905  | A | -0.1205 |
| rs62340346  | C | 0.045   |
| rs6824348   | T | 0.0374  |
| rs72660065  | C | 0.1064  |
| rs78836533  | G | 0.1195  |
| rs17747662  | T | -0.0463 |
| rs149736864 | A | 0.0963  |
| rs4865143   | T | 0.0414  |
| rs13138175  | C | -0.1459 |
| rs115889349 | T | 0.1356  |
| rs62303860  | C | 0.0752  |
| rs72863150  | C | 0.0949  |
| rs114934678 | A | 0.2928  |
| rs337607    | C | 0.0459  |
| rs114248858 | A | -0.0607 |
| rs113716749 | A | 0.2275  |
| rs143714548 | G | 0.2336  |
| rs75350028  | T | -0.2986 |
| rs67121809  | C | 0.0411  |
| rs28560222  | C | -0.1913 |
| rs2279026   | C | 0.0436  |
| rs56271124  | T | 0.0426  |
| rs147193185 | A | -0.3017 |
| rs140646234 | C | -0.1634 |
| rs3096471   | G | 0.0366  |
| rs62315971  | T | 0.1708  |

|             |   |         |
|-------------|---|---------|
| rs72708344  | A | 0.1005  |
| rs7689028   | A | -0.0365 |
| rs73251781  | G | -0.0605 |
| rs62306284  | G | 0.0776  |
| rs114103495 | A | 0.1778  |
| rs57872182  | A | 0.1662  |
| rs1277273   | A | -0.0374 |
| rs2595082   | T | 0.0715  |
| rs17373588  | T | 0.0503  |
| rs115913426 | A | 0.1885  |
| rs12509730  | A | 0.0743  |
| rs74720418  | T | -0.0655 |
| rs114991240 | C | -0.1683 |
| rs145310320 | C | -0.2076 |
| rs35866828  | T | -0.1348 |
| rs6854438   | G | 0.0777  |
| rs371397    | T | -0.0365 |
| rs141355042 | T | 0.139   |
| rs116492301 | C | 0.1521  |
| rs10024268  | A | -0.0686 |
| rs13152538  | A | -0.061  |
| rs6826374   | T | -0.0947 |
| rs7675331   | T | -0.2068 |
| rs116695447 | C | -0.1768 |
| rs146817014 | T | 0.1456  |
| rs4374681   | T | -0.0632 |
| rs6534113   | A | -0.0424 |
| rs988386    | T | 0.1566  |
| rs10857037  | C | 0.036   |
| rs7698515   | A | 0.0838  |
| rs76442818  | G | -0.1089 |
| rs13120856  | C | -0.0578 |
| rs77630789  | C | -0.1587 |
| rs13149657  | C | -0.0492 |
| rs10018028  | A | -0.079  |
| rs79009721  | C | 0.0978  |
| rs145535796 | A | -0.2336 |
| rs35500274  | G | 0.0465  |
| rs141884753 | G | -0.0915 |
| rs12643941  | A | 0.0519  |
| rs56087495  | C | 0.0878  |
| rs3916114   | T | 0.0531  |
| rs115468670 | C | -0.1119 |
| rs148787263 | T | 0.1828  |
| rs2200126   | T | -0.128  |
| rs150598970 | A | -0.1949 |
| rs4865447   | G | 0.0516  |

|             |   |         |
|-------------|---|---------|
| rs17073447  | T | 0.1257  |
| rs7666152   | C | -0.051  |
| rs1426540   | T | 0.037   |
| rs62314684  | T | 0.0622  |
| rs12647577  | G | 0.0356  |
| rs62357988  | A | -0.0599 |
| rs16892557  | T | 0.1221  |
| rs2663295   | T | 0.0344  |
| rs17007783  | G | -0.0606 |
| rs62322495  | A | -0.2665 |
| rs11938940  | G | 0.0762  |
| rs10016938  | C | 0.0892  |
| rs11733896  | G | -0.0369 |
| rs28877301  | G | 0.0902  |
| rs2289319   | G | 0.037   |
| rs28534727  | T | -0.0732 |
| rs78018671  | A | 0.19    |
| rs146157979 | T | -0.1379 |
| rs142399765 | T | -0.2446 |
| rs115275736 | C | -0.2231 |
| rs1534578   | C | 0.0429  |
| rs17080793  | C | -0.0853 |
| rs72684701  | T | -0.0831 |
| rs9637544   | A | 0.0497  |
| rs13120961  | G | -0.0396 |
| rs1397660   | G | 0.0517  |
| rs6848979   | G | 0.3242  |
| rs34512791  | T | 0.123   |
| rs75346538  | C | 0.0858  |
| rs4833813   | T | 0.0379  |
| rs13103075  | A | -0.0504 |
| rs116143458 | A | -0.1463 |
| rs6813066   | G | 0.0581  |
| rs17597883  | T | 0.1906  |
| rs10015594  | A | 0.0579  |
| rs12501151  | T | 0.0545  |
| rs114425160 | G | -0.0984 |
| rs75321713  | G | 0.1411  |
| rs17014474  | A | 0.0592  |
| rs78014153  | T | -0.0598 |
| rs17419220  | T | -0.0598 |
| rs116548806 | T | 0.2047  |
| rs9307528   | C | -0.0354 |
| rs17854507  | A | 0.1277  |
| rs9994659   | A | 0.0553  |
| rs11724004  | T | -0.0361 |
| rs2675520   | G | -0.0946 |

|             |   |         |
|-------------|---|---------|
| rs28570219  | T | 0.1451  |
| rs9968400   | C | -0.1594 |
| rs12647131  | G | 0.0741  |
| rs150176216 | G | 0.254   |
| rs73843583  | G | -0.1527 |
| rs12645474  | A | 0.038   |
| rs72701630  | A | 0.0745  |
| rs113234054 | T | 0.1931  |
| rs11935520  | C | 0.242   |
| rs1405670   | G | 0.0361  |
| rs71606952  | T | 0.0966  |
| rs115984523 | A | -0.1178 |
| rs2344626   | T | -0.0457 |
| rs56889116  | A | -0.0533 |
| rs77762143  | A | 0.0991  |
| rs62297230  | T | -0.0592 |
| rs6449015   | T | -0.0352 |
| rs13142669  | T | 0.1007  |
| rs114903646 | A | 0.112   |
| rs34902074  | A | -0.0806 |
| rs35665596  | C | -0.0531 |
| rs17000620  | G | 0.0944  |
| rs9884187   | T | 0.0356  |
| rs2611233   | C | -0.0529 |
| rs114207424 | C | 0.2078  |
| rs144895016 | T | -0.294  |
| rs6831221   | A | 0.0881  |
| rs2196712   | G | 0.0341  |
| rs74799204  | A | -0.0559 |
| rs115172241 | A | -0.2401 |
| rs116784822 | C | -0.1634 |
| rs77584237  | G | -0.1282 |
| rs62342645  | C | -0.051  |
| rs114408140 | T | -0.1481 |
| rs79130647  | G | 0.1078  |
| rs17072702  | C | -0.0529 |
| rs13122405  | C | -0.0708 |
| rs116197295 | T | 0.1202  |
| rs2071657   | G | -0.0475 |
| rs139307550 | G | 0.1936  |
| rs2608834   | C | 0.0424  |
| rs67238347  | C | 0.0566  |
| rs76719646  | C | -0.1658 |
| rs114612307 | T | 0.1591  |
| rs13132611  | T | 0.0681  |
| rs77938353  | T | 0.1939  |
| rs115434366 | C | -0.2146 |

|             |   |         |
|-------------|---|---------|
| rs148403377 | G | -0.1916 |
| rs876292    | T | 0.1496  |
| rs114262734 | C | -0.1352 |
| rs78124369  | T | 0.2251  |
| rs79787395  | G | 0.0776  |
| rs13148500  | A | -0.0694 |
| rs79208454  | A | -0.1511 |
| rs17367997  | A | 0.1266  |
| rs78340384  | C | -0.0912 |
| rs7680427   | G | 0.1142  |
| rs75628665  | A | -0.0881 |
| rs12643503  | C | -0.0383 |
| rs59808752  | A | 0.0443  |
| rs28681630  | C | -0.0555 |
| rs2117065   | C | 0.0403  |
| rs1978777   | A | -0.0373 |
| rs12507777  | T | 0.1658  |
| rs11724147  | A | -0.0442 |
| rs17090416  | G | 0.039   |
| rs115805235 | T | -0.1319 |
| rs9998674   | T | 0.0385  |
| rs114824089 | A | -0.1517 |
| rs79052028  | G | 0.1384  |
| rs77516337  | G | 0.1055  |
| rs111370486 | A | 0.123   |
| rs2044852   | C | -0.0393 |
| rs7665170   | T | -0.0365 |
| rs7695623   | C | -0.0983 |
| rs10516519  | G | 0.0425  |
| rs7659091   | C | 0.0362  |
| rs4481224   | G | -0.0386 |
| rs6552660   | C | -0.0665 |
| rs74943275  | T | -0.1335 |
| rs78997928  | T | -0.0615 |
| rs56061714  | A | 0.055   |
| rs4241704   | A | 0.0387  |
| rs35815555  | T | -0.0425 |
| rs17082225  | A | -0.0376 |
| rs80343897  | C | 0.0934  |
| rs2612655   | C | 0.0347  |
| rs150703314 | C | 0.136   |
| rs1351212   | G | 0.0393  |
| rs111444695 | A | 0.0426  |
| rs4697186   | G | 0.0431  |
| rs10034284  | T | 0.0422  |
| rs145473965 | A | 0.1632  |
| rs145915689 | A | 0.1812  |

|             |   |         |
|-------------|---|---------|
| rs6855048   | A | 0.0462  |
| rs114107798 | A | -0.1963 |
| rs6827302   | G | -0.0867 |
| rs77077471  | C | 0.0816  |
| rs2946390   | T | 0.037   |
| rs6838335   | C | 0.0374  |
| rs17686080  | C | -0.0679 |
| rs13142918  | T | 0.1006  |
| rs4864234   | A | -0.0808 |
| rs79910679  | T | -0.1066 |
| rs61748739  | G | 0.1216  |
| rs112030503 | G | -0.053  |
| rs34784043  | T | 0.1308  |
| rs7340889   | G | -0.039  |
| rs60157266  | A | 0.1634  |
| rs969948    | C | 0.0344  |
| rs2014472   | G | 0.0568  |
| rs62324580  | T | -0.1234 |
| rs75537420  | T | -0.1463 |
| rs113469311 | A | 0.0941  |
| rs73199996  | G | 0.1517  |
| rs34073891  | G | 0.176   |
| rs13118171  | C | 0.0343  |
| rs13142392  | G | 0.0449  |
| rs72702433  | G | -0.0728 |
| rs149979034 | G | 0.0907  |
| rs72684675  | A | 0.0727  |
| rs150894436 | A | 0.2634  |
| rs13127967  | A | 0.0727  |
| rs13126958  | A | 0.051   |
| rs6447958   | A | -0.0561 |
| rs28636048  | G | 0.0478  |
| rs116801833 | C | 0.1227  |
| rs1369092   | G | -0.1229 |
| rs116477286 | A | 0.227   |
| rs79775244  | T | 0.1749  |
| rs11727484  | T | -0.0636 |
| rs4611904   | T | 0.2243  |
| rs1380874   | T | 0.0458  |
| rs13118866  | C | 0.0855  |
| rs17015890  | A | -0.0436 |
| rs77532962  | C | 0.113   |
| rs4861524   | C | 0.0525  |
| rs6819442   | T | 0.0369  |
| rs55782748  | A | 0.1229  |
| rs3762909   | C | -0.0909 |
| rs150195892 | A | -0.1241 |

|             |   |         |
|-------------|---|---------|
| rs6855292   | A | -0.05   |
| rs114269228 | T | 0.2264  |
| rs10019646  | T | -0.0381 |
| rs58887272  | A | -0.1159 |
| rs114948904 | A | 0.22    |
| rs2855770   | T | -0.0353 |
| rs111457321 | G | 0.1568  |
| rs115814386 | G | 0.2581  |
| rs60478641  | C | 0.0934  |
| rs13106853  | G | 0.0571  |
| rs143664788 | T | -0.1507 |
| rs139675526 | C | 0.23    |
| rs11131312  | A | 0.0398  |
| rs17339671  | G | -0.054  |
| rs28818309  | C | -0.0379 |
| rs112476212 | A | 0.0868  |
| rs13135244  | C | 0.0376  |
| rs114209939 | T | 0.2317  |
| rs55764504  | A | -0.0404 |
| rs10213095  | A | -0.0422 |
| rs989262    | T | -0.1016 |
| rs11947063  | C | 0.0907  |
| rs7665254   | A | -0.0388 |
| rs115026624 | T | 0.3485  |
| rs142553926 | T | 0.0611  |
| rs6850349   | T | 0.046   |
| rs75836515  | G | 0.0831  |
| rs4864568   | G | -0.0511 |
| rs12510768  | C | -0.0454 |
| rs10015260  | C | 0.1476  |
| rs10015914  | C | -0.1065 |
| rs78132716  | C | -0.1477 |
| rs1393851   | A | 0.0752  |
| rs114698167 | A | 0.1639  |
| rs78817394  | T | 0.0609  |
| rs526009    | A | -0.0583 |
| rs112094135 | A | 0.1546  |
| rs1518485   | C | 0.0347  |
| rs4456952   | T | 0.1332  |
| rs57689542  | A | 0.0366  |
| rs7667756   | C | 0.0368  |
| rs1876068   | C | 0.0479  |
| rs13107721  | C | 0.0478  |
| rs145830261 | A | -0.2973 |
| rs143701736 | A | -0.1132 |
| rs270242    | C | -0.0384 |
| rs113195855 | C | 0.1321  |



|             |   |         |
|-------------|---|---------|
| rs150849866 | T | 0.1681  |
| rs17211183  | A | 0.0913  |
| rs111417966 | C | -0.0829 |
| rs113313224 | A | -0.2243 |
| rs4501276   | T | -0.0519 |
| rs146976943 | G | -0.0964 |
| rs1551589   | T | -0.1328 |
| rs11099339  | G | 0.034   |
| rs6852656   | C | 0.0424  |
| rs327068    | A | -0.0722 |
| rs4865148   | G | -0.045  |
| rs62350388  | T | -0.1661 |
| rs60717229  | C | -0.0514 |
| rs2627735   | T | -0.0502 |
| rs111669964 | G | -0.0366 |
| rs72640556  | A | 0.0744  |
| rs73248470  | A | -0.137  |
| rs143295761 | A | -0.182  |
| rs149029915 | C | 0.2098  |
| rs79173154  | A | -0.1175 |
| rs140964716 | T | -0.2584 |
| rs62317092  | A | -0.0569 |
| rs6854685   | G | -0.0412 |
| rs1912030   | G | 0.0396  |
| rs137942970 | C | 0.0875  |
| rs13117555  | G | -0.0874 |
| rs62296002  | T | 0.12    |
| rs6824464   | A | 0.0367  |
| rs4835620   | T | 0.131   |
| rs80233897  | A | 0.1359  |
| rs2131287   | A | 0.0336  |
| rs17313835  | C | -0.0559 |
| rs6838358   | A | -0.0482 |
| rs4975229   | T | 0.1005  |
| rs2389955   | C | 0.0427  |
| rs11133046  | A | -0.0405 |
| rs315683    | C | 0.0478  |
| rs12643046  | A | 0.0522  |
| rs807779    | C | -0.0376 |
| rs79995822  | G | 0.0858  |
| rs4862571   | A | -0.0424 |
| rs59063244  | A | 0.0873  |
| rs116061213 | C | 0.165   |
| rs1946695   | T | 0.0344  |
| rs115917299 | G | -0.26   |
| rs73215478  | T | 0.0902  |
| rs28869249  | G | 0.1255  |

|             |   |         |
|-------------|---|---------|
| rs141079390 | A | 0.2547  |
| rs114477463 | C | -0.2462 |
| rs56874625  | T | 0.047   |
| rs283419    | A | 0.114   |
| rs6446452   | C | -0.0581 |
| rs71602099  | C | 0.2945  |
| rs17448631  | T | 0.0556  |
| rs4863106   | C | 0.0469  |
| rs73808419  | C | 0.077   |
| rs112973688 | T | 0.0841  |
| rs149934686 | A | -0.1854 |
| rs17182201  | T | -0.0421 |
| rs2080013   | C | -0.0712 |
| rs76850548  | T | -0.0936 |
| rs74890775  | T | -0.1663 |
| rs72616386  | T | -0.2406 |
| rs141800235 | A | -0.0655 |
| rs147256125 | A | -0.2896 |
| rs114946141 | A | 0.142   |
| rs3733570   | T | 0.1422  |
| rs150699492 | T | 0.139   |
| rs11944321  | A | 0.1179  |
| rs7662800   | T | 0.0488  |
| rs10034594  | A | -0.1274 |
| rs77688384  | C | 0.1647  |
| rs10434432  | G | -0.0473 |
| rs112155111 | C | 0.097   |
| rs4557253   | A | -0.0352 |
| rs57433915  | T | -0.1932 |
| rs6448440   | T | -0.0483 |
| rs2705979   | C | 0.0449  |
| rs28649197  | G | 0.2634  |
| rs72709786  | C | 0.0558  |
| rs6446401   | G | 0.0388  |
| rs141285070 | G | 0.0919  |
| rs13106353  | A | -0.1845 |
| rs4697474   | G | -0.0678 |
| rs7434671   | G | 0.0473  |
| rs7679873   | A | 0.0564  |
| rs17027756  | C | -0.0376 |
| rs6849361   | C | -0.0331 |
| rs10516503  | C | -0.0513 |
| rs6830034   | A | -0.0352 |
| rs7700038   | C | 0.0334  |
| rs6821432   | T | -0.043  |
| rs2911901   | T | 0.0551  |
| rs7671985   | G | 0.0412  |

|             |   |         |
|-------------|---|---------|
| rs114481996 | C | -0.1417 |
| rs13110620  | G | 0.0395  |
| rs116110112 | T | 0.2015  |
| rs12504589  | T | -0.0538 |
| rs115551546 | T | 0.1709  |
| rs62338259  | C | 0.0528  |
| rs75071679  | G | 0.065   |
| rs75841131  | A | 0.1168  |
| rs1489442   | A | 0.0417  |
| rs73223391  | T | -0.2472 |
| rs62337162  | A | 0.0958  |
| rs7674172   | T | 0.127   |
| rs79938737  | C | 0.0725  |
| rs11721405  | C | -0.0554 |
| rs147028193 | A | -0.1987 |
| rs12649845  | A | -0.0606 |
| rs6843297   | A | 0.0377  |
| rs4689038   | T | 0.0414  |
| rs1437274   | T | 0.1725  |
| rs115756618 | A | 0.085   |
| rs62306895  | T | -0.182  |
| rs72714734  | G | -0.0712 |
| rs7659911   | C | -0.0543 |
| rs6853832   | T | 0.0358  |
| rs6841762   | T | 0.0385  |
| rs139378580 | A | 0.1615  |
| rs62318846  | A | -0.0575 |
| rs116792462 | C | -0.083  |
| rs34704090  | T | 0.1695  |
| rs1017559   | G | 0.0395  |
| rs6812175   | T | 0.1795  |
| rs2357080   | G | -0.0401 |
| rs112296390 | A | 0.2359  |
| rs12501673  | A | 0.0385  |
| rs2867683   | A | 0.0341  |
| rs72721819  | A | -0.057  |
| rs113347613 | T | 0.0621  |
| rs2899056   | G | -0.0378 |
| rs140555291 | C | 0.2446  |
| rs113161073 | C | -0.2761 |
| rs2098854   | G | -0.0335 |
| rs9647416   | A | 0.04    |
| rs76026170  | A | 0.1459  |
| rs1530459   | A | 0.1005  |
| rs17497978  | C | 0.0765  |
| rs17546340  | C | 0.0841  |
| rs12647118  | C | 0.2994  |

|             |   |         |
|-------------|---|---------|
| rs143607815 | T | 0.2543  |
| rs76003590  | C | 0.2192  |
| rs76498162  | G | 0.1454  |
| rs116223001 | T | -0.1886 |
| rs1383178   | G | -0.0496 |
| rs77279317  | T | -0.2383 |
| rs116760019 | A | 0.2605  |
| rs6829378   | T | 0.0424  |
| rs4535393   | T | 0.1241  |
| rs4102920   | G | -0.0344 |
| rs4377608   | C | -0.064  |
| rs17494938  | C | 0.0398  |
| rs11732273  | T | -0.0654 |
| rs2276923   | G | 0.0493  |
| rs596619    | G | -0.1907 |
| rs76511949  | T | 0.0498  |
| rs113889026 | C | 0.1237  |
| rs115418204 | A | -0.1723 |
| rs62279108  | A | -0.0546 |
| rs949862    | C | 0.168   |
| rs10021714  | C | 0.0571  |
| rs16875100  | G | -0.0435 |
| rs11727469  | A | 0.044   |
| rs7685758   | T | -0.0515 |
| rs67949518  | T | -0.0684 |
| rs244039    | C | 0.0396  |
| rs75155198  | A | -0.2078 |
| rs72686788  | A | 0.2651  |
| rs75707561  | A | 0.1685  |
| rs74556036  | T | -0.0596 |
| rs143332055 | C | 0.2618  |
| rs78309800  | G | 0.1141  |
| rs77846216  | T | 0.211   |
| rs75564460  | G | 0.2017  |
| rs56019717  | A | -0.147  |
| rs149951077 | T | -0.1296 |
| rs28507765  | T | 0.0634  |
| rs55983440  | C | 0.095   |
| rs7679066   | G | -0.0377 |
| rs10938718  | A | 0.0347  |
| rs7693047   | A | 0.1701  |
| rs149029898 | A | 0.1106  |
| rs7688806   | C | 0.0349  |
| rs80064466  | C | 0.084   |
| rs13116637  | T | 0.061   |
| rs62310031  | T | 0.0593  |
| rs13128459  | A | -0.0895 |

|             |   |         |
|-------------|---|---------|
| rs60282733  | G | 0.0437  |
| rs7674655   | T | -0.097  |
| rs80134014  | T | 0.0982  |
| rs6821699   | A | -0.0332 |
| rs11733760  | A | 0.0842  |
| rs13102349  | T | -0.091  |
| rs66476971  | T | 0.0445  |
| rs41494044  | C | -0.0448 |
| rs146643088 | A | 0.2385  |
| rs13102714  | G | -0.0582 |
| rs4383569   | G | 0.07    |
| rs138191461 | C | 0.1613  |
| rs2869342   | T | -0.0375 |
| rs12512906  | T | -0.0476 |
| rs77426461  | C | 0.3043  |
| rs1028212   | T | 0.0464  |
| rs28788806  | A | 0.0588  |
| rs13146236  | T | -0.0694 |
| rs13110983  | A | 0.0491  |
| rs80243011  | G | -0.2135 |
| rs112445369 | T | -0.1929 |
| rs17040904  | T | 0.0877  |
| rs112241999 | T | 0.1403  |
| rs77067406  | C | 0.0617  |
| rs71617017  | A | 0.1003  |
| rs77238815  | G | 0.1925  |
| rs62324760  | T | -0.0987 |
| rs74862475  | G | 0.1955  |
| rs145137442 | T | -0.1434 |
| rs1566999   | A | 0.0405  |
| rs148687985 | A | 0.1986  |
| rs4860488   | C | 0.1143  |
| rs71601064  | C | 0.2035  |
| rs6854110   | T | -0.0692 |
| rs72640649  | A | 0.2659  |
| rs139558329 | T | -0.1971 |
| rs16878581  | A | 0.0605  |
| rs73078644  | G | 0.1372  |
| rs17083521  | C | -0.0666 |
| rs4593182   | G | 0.0411  |
| rs62295350  | A | -0.0487 |
| rs4691871   | G | 0.1811  |
| rs28622988  | A | 0.0833  |
| rs114969629 | T | 0.1446  |
| rs17050774  | A | -0.0725 |
| rs6852895   | G | -0.0439 |
| rs73819581  | T | 0.1101  |

|             |   |         |
|-------------|---|---------|
| rs36048565  | A | 0.0696  |
| rs78472565  | A | 0.2559  |
| rs150352835 | A | 0.159   |
| rs17277344  | T | 0.0784  |
| rs116763752 | T | 0.186   |
| rs35777265  | A | 0.0484  |
| rs2407416   | T | -0.0355 |
| rs80280052  | C | 0.0681  |
| rs28432001  | T | 0.0449  |
| rs2132631   | C | 0.0371  |
| rs10034553  | T | 0.0649  |
| rs11736574  | A | 0.049   |
| rs71605224  | C | -0.1371 |
| rs12331066  | A | -0.1055 |
| rs62300914  | T | -0.177  |
| rs78533478  | C | 0.0952  |
| rs56240513  | A | -0.0706 |
| rs62320114  | C | 0.1269  |
| rs140150236 | C | -0.0407 |
| rs4257615   | T | -0.0478 |
| rs79248089  | T | 0.0936  |
| rs148279973 | G | -0.0464 |
| rs6836088   | A | 0.0322  |
| rs62350399  | T | -0.069  |
| rs141490047 | A | -0.2219 |
| rs6830238   | T | 0.1793  |
| rs75827018  | C | -0.0659 |
| rs28877092  | T | 0.055   |
| rs78167787  | G | -0.0567 |
| rs2391515   | T | 0.0347  |
| rs75806529  | G | 0.221   |
| rs57417084  | T | 0.0546  |
| rs12643474  | C | -0.0324 |
| rs75138535  | T | 0.071   |
| rs165580    | T | 0.0885  |
| rs885797    | A | 0.0333  |
| rs10025996  | C | -0.0572 |
| rs12647662  | T | 0.0863  |
| rs11937883  | C | 0.0399  |
| rs1967263   | A | 0.1134  |
| rs13138340  | G | 0.0813  |
| rs75298521  | G | 0.0732  |
| rs13129746  | A | -0.0973 |
| rs778937    | G | -0.0386 |
| rs111333099 | G | 0.1331  |
| rs68135984  | G | -0.0544 |
| rs1021956   | G | -0.045  |

|             |   |         |
|-------------|---|---------|
| rs6847782   | T | 0.036   |
| rs4461545   | A | -0.0323 |
| rs71619088  | C | -0.0538 |
| rs7669660   | C | -0.0486 |
| rs149109664 | C | -0.1149 |
| rs331489    | A | -0.2209 |
| rs4698174   | A | -0.0677 |
| rs138530333 | G | 0.1073  |
| rs72663153  | A | 0.1687  |
| rs7680024   | A | -0.0324 |
| rs4863638   | A | -0.0627 |
| rs142522284 | A | 0.2576  |
| rs139379969 | G | -0.2631 |
| rs139627056 | T | -0.2076 |
| rs77690315  | T | 0.116   |
| rs11736485  | C | 0.0938  |
| rs75820331  | T | -0.1466 |
| rs73209735  | A | -0.1476 |
| rs4697603   | T | -0.0512 |
| rs17615017  | G | -0.0484 |
| rs115668559 | C | -0.0688 |
| rs1603184   | G | -0.0385 |
| rs73241848  | C | 0.1519  |
| rs13129939  | G | -0.2235 |
| rs35852935  | C | 0.1105  |
| rs75394685  | T | 0.0766  |
| rs10013269  | C | -0.0624 |
| rs62309398  | A | 0.0705  |
| rs79779022  | G | 0.0728  |
| rs117251263 | G | -0.224  |
| rs66575730  | A | 0.0565  |
| rs17504079  | A | 0.1091  |
| rs142130611 | T | -0.1974 |
| rs62301413  | A | 0.1078  |
| rs13435699  | G | -0.0445 |
| rs138589894 | A | 0.1631  |
| rs1307      | A | -0.0539 |
| rs10030391  | T | 0.0394  |
| rs2928312   | T | -0.0354 |
| rs12504144  | T | -0.0928 |
| rs34195017  | A | 0.1716  |
| rs115555717 | T | 0.1363  |
| rs79399931  | A | 0.1462  |
| rs139556348 | T | -0.1307 |
| rs12644201  | C | 0.0548  |
| rs72701009  | T | -0.266  |
| rs74329460  | C | 0.1958  |

|             |   |         |
|-------------|---|---------|
| rs35372902  | A | 0.0799  |
| rs309375    | C | -0.0332 |
| rs3892041   | A | 0.0332  |
| rs138532435 | T | -0.1625 |
| rs2654831   | G | -0.0369 |
| rs17013144  | T | 0.1377  |
| rs114399381 | C | 0.1801  |
| rs353152    | A | 0.0357  |
| rs72657741  | T | 0.1884  |
| rs75705608  | G | -0.1024 |
| rs144046932 | A | -0.0617 |
| rs6852609   | G | -0.0347 |
| rs1867924   | A | -0.0331 |
| rs4689937   | T | 0.0339  |
| rs61034963  | A | -0.1585 |
| rs76735468  | A | -0.169  |
| rs111651905 | T | 0.2051  |
| rs16875318  | T | 0.0926  |
| rs17181631  | T | -0.0392 |
| rs112439859 | A | 0.1674  |
| rs12498407  | T | -0.0333 |
| rs17581070  | T | 0.1409  |
| rs139916173 | C | 0.262   |
| rs34864228  | C | 0.2095  |
| rs73800339  | G | -0.1481 |
| rs143841150 | T | 0.2043  |
| rs28637501  | A | -0.0401 |
| rs115318995 | A | -0.1662 |
| rs75838890  | C | -0.059  |
| rs146097200 | G | 0.1958  |
| rs149050476 | A | 0.215   |
| rs76851380  | A | -0.0749 |
| rs139839453 | T | 0.1031  |
| rs13108164  | G | 0.0332  |
| rs78223062  | A | -0.0948 |
| rs3135071   | A | -0.0711 |
| rs1395821   | C | -0.0432 |
| rs9790537   | A | 0.0374  |
| rs73240094  | G | -0.0489 |
| rs11723027  | A | 0.0445  |
| rs1006113   | A | -0.0405 |
| rs2127863   | T | -0.0422 |
| rs76676224  | A | 0.147   |
| rs79080212  | A | -0.0782 |
| rs139222509 | C | 0.1508  |
| rs115094441 | C | -0.1291 |
| rs56102039  | T | -0.0502 |



|             |   |         |
|-------------|---|---------|
| rs6536199   | C | 0.0429  |
| rs6833174   | T | -0.0323 |
| rs114373121 | G | 0.0875  |
| rs11734892  | G | 0.0485  |
| rs61795366  | C | 0.0457  |
| rs73246488  | G | 0.0592  |
| rs6531620   | C | -0.0879 |
| rs11935305  | T | -0.0414 |
| rs11931880  | G | 0.148   |
| rs73248605  | C | 0.0686  |
| rs1717072   | G | 0.032   |
| rs4513549   | T | 0.0452  |
| rs62343124  | T | -0.1226 |
| rs11735349  | T | 0.0675  |
| rs77420303  | G | -0.101  |
| rs6814799   | A | 0.0848  |
| rs79711690  | A | 0.1563  |
| rs112221854 | A | 0.1419  |
| rs116696256 | A | 0.2698  |
| rs3910144   | A | 0.0368  |
| rs7696313   | A | 0.219   |
| rs34400726  | A | 0.0344  |
| rs868653    | A | 0.0583  |
| rs77606619  | T | -0.1137 |
| rs28444171  | T | -0.0364 |
| rs6841821   | A | 0.0382  |
| rs385146    | A | -0.042  |
| rs11727564  | G | -0.0354 |
| rs17819511  | G | 0.0461  |
| rs115898311 | A | -0.1908 |
| rs6821871   | A | -0.0438 |
| rs77772537  | T | 0.2136  |
| rs72659522  | C | 0.1048  |
| rs4690377   | A | 0.0548  |
| rs68116688  | G | -0.0497 |
| rs77249395  | T | -0.1216 |
| rs116727883 | T | 0.1188  |
| rs78436531  | G | 0.0679  |
| rs13144494  | C | 0.063   |
| rs35768502  | G | -0.0336 |
| rs56168021  | A | 0.0964  |
| rs114711316 | G | -0.0495 |
| rs116158897 | T | -0.075  |
| rs72978185  | C | -0.0361 |
| rs62326106  | T | -0.156  |
| rs72674487  | T | -0.0441 |
| rs115352527 | A | -0.0966 |

|             |   |         |
|-------------|---|---------|
| rs12641003  | G | -0.0354 |
| rs74915990  | A | -0.0841 |
| rs16880317  | G | 0.0676  |
| rs72660958  | A | -0.1187 |
| rs62353224  | C | -0.0334 |
| rs115062993 | C | -0.1443 |
| rs11722255  | G | 0.0643  |
| rs4508906   | G | 0.0686  |
| rs12501287  | C | 0.0332  |
| rs6835693   | C | -0.0623 |
| rs72682615  | G | 0.0972  |
| rs74337827  | G | -0.1189 |
| rs78840710  | T | 0.1452  |
| rs795386    | G | -0.0344 |
| rs3864203   | G | 0.0394  |
| rs17861916  | C | 0.1992  |
| rs78506853  | C | -0.0891 |
| rs115021067 | A | -0.1057 |
| rs140824725 | A | 0.253   |
| rs12502563  | T | 0.0337  |
| rs74518507  | A | -0.1862 |
| rs12509715  | C | -0.13   |
| rs147809179 | T | 0.1226  |
| rs17017659  | A | -0.112  |
| rs954368    | C | 0.0512  |
| rs78329488  | A | -0.1248 |
| rs2309332   | T | -0.0505 |
| rs75965154  | G | 0.1552  |
| rs2883930   | G | -0.0444 |
| rs56291825  | A | -0.1073 |
| rs11947910  | C | 0.0417  |
| rs138941976 | C | -0.1217 |
| rs6821839   | T | -0.1217 |
| rs5012553   | G | -0.0365 |
| rs12641017  | T | -0.0768 |
| rs139556686 | G | 0.1601  |
| rs77118240  | A | 0.2296  |
| rs10520262  | C | -0.0323 |
| rs79511076  | C | -0.1298 |
| rs10031343  | G | 0.057   |
| rs80090844  | G | 0.0518  |
| rs10034833  | A | 0.1641  |
| rs35845927  | G | 0.1279  |
| rs56992060  | T | -0.1444 |
| rs11735186  | G | -0.1584 |
| rs116361123 | G | 0.1433  |
| rs13103052  | C | 0.0438  |

|             |   |         |
|-------------|---|---------|
| rs72680237  | T | 0.1024  |
| rs2724587   | A | 0.0481  |
| rs6814032   | A | 0.1958  |
| rs149650942 | A | 0.1801  |
| rs1872043   | A | 0.1186  |
| rs7657578   | C | -0.0363 |
| rs7678288   | G | 0.1634  |
| rs114195509 | G | 0.1609  |
| rs403543    | T | -0.18   |
| rs7660323   | C | -0.0383 |
| rs17861762  | A | 0.2291  |
| rs1386226   | T | -0.0384 |
| rs80020058  | T | -0.1092 |
| rs617914    | T | 0.0434  |
| rs35497699  | A | -0.0392 |
| rs13145607  | T | -0.1093 |
| rs17640064  | C | 0.037   |
| rs2580069   | G | -0.0329 |
| rs115691060 | T | 0.1227  |
| rs73854351  | G | 0.0692  |
| rs72686766  | G | -0.107  |
| rs4516763   | C | 0.063   |
| rs73244029  | C | 0.0877  |
| rs13125482  | C | 0.0426  |
| rs142539868 | T | 0.196   |
| rs11946406  | G | -0.0421 |
| rs999319    | G | -0.033  |
| rs13142045  | C | -0.0418 |
| rs74570194  | A | 0.0578  |
| rs13141819  | A | -0.126  |
| rs62331260  | C | 0.0811  |
| rs2904262   | T | -0.0317 |
| rs2189572   | C | -0.0551 |
| rs6822794   | A | -0.034  |
| rs13131758  | G | 0.0371  |
| rs17627637  | C | -0.0587 |
| rs13139269  | C | -0.0326 |
| rs112646682 | A | 0.1797  |
| rs17000069  | T | -0.0484 |
| rs146540521 | T | -0.155  |
| rs28510433  | C | -0.0463 |
| rs67506035  | C | -0.0533 |
| rs7665919   | C | 0.0325  |
| rs17050588  | T | 0.0398  |
| rs13114473  | T | 0.0702  |
| rs159761    | G | 0.05    |
| rs62320884  | G | -0.0375 |

|             |   |         |
|-------------|---|---------|
| rs56762644  | T | 0.0591  |
| rs13128785  | A | -0.0351 |
| rs7694575   | A | 0.0336  |
| rs116146530 | T | -0.2584 |
| rs11941912  | A | 0.2389  |
| rs4861091   | A | 0.0377  |
| rs71616586  | A | 0.1412  |
| rs28581468  | T | 0.0645  |
| rs62339115  | T | -0.0369 |
| rs36028675  | C | 0.0426  |
| rs73865376  | C | 0.0668  |
| rs1812618   | T | 0.0541  |
| rs140619010 | G | 0.0844  |
| rs142499172 | A | 0.0976  |
| rs73795010  | T | 0.1062  |
| rs62321231  | A | 0.1633  |
| rs11736243  | T | -0.181  |
| rs150635999 | C | -0.1866 |
| rs13115107  | G | 0.0362  |
| rs141918148 | C | 0.117   |
| rs115377687 | A | -0.2255 |
| rs115419263 | T | -0.1371 |
| rs139162808 | A | 0.2613  |
| rs114882649 | A | -0.0923 |
| rs17184412  | C | -0.0902 |
| rs115008872 | G | -0.1102 |
| rs6824131   | T | 0.0602  |
| rs11728250  | G | -0.0715 |
| rs62411118  | T | -0.0428 |
| rs77087558  | A | 0.2121  |
| rs12503618  | T | -0.0392 |
| rs116751353 | T | -0.1528 |
| rs146139597 | T | -0.2072 |
| rs10222987  | G | -0.0347 |
| rs116957173 | T | -0.1579 |
| rs72653549  | A | -0.0715 |
| rs59523261  | A | 0.0693  |
| rs1550014   | T | 0.0569  |
| rs13108320  | A | -0.0563 |
| rs17587861  | C | 0.1299  |
| rs28688222  | T | 0.0555  |
| rs17828324  | C | -0.0345 |
| rs4698613   | G | 0.048   |
| rs72681516  | C | -0.088  |
| rs12640862  | T | 0.1287  |
| rs17423099  | T | -0.0744 |
| rs149102060 | A | 0.2563  |

|             |   |         |
|-------------|---|---------|
| rs4861722   | G | -0.0343 |
| rs28786233  | C | 0.0536  |
| rs145234634 | G | 0.1965  |
| rs57745205  | G | -0.0328 |
| rs76550303  | A | -0.2735 |
| rs7440305   | G | 0.0524  |
| rs72716917  | G | -0.149  |
| rs1820626   | G | 0.0592  |
| rs2488804   | T | -0.0322 |
| rs1484186   | T | 0.0326  |
| rs116354046 | T | 0.1565  |
| rs62331134  | A | 0.0462  |
| rs17596382  | C | 0.0768  |
| rs12644722  | T | 0.0816  |
| rs6832524   | G | 0.0583  |
| rs17051188  | C | -0.0704 |
| rs147541565 | T | -0.264  |
| rs294939    | A | -0.0837 |
| rs9991869   | A | -0.0383 |
| rs77245970  | G | 0.2426  |
| rs4079694   | C | 0.033   |
| rs143394231 | C | -0.1839 |
| rs2942220   | C | -0.0671 |
| rs73235576  | G | 0.1801  |
| rs144932649 | G | -0.1569 |
| rs10009369  | T | -0.2297 |
| rs28376053  | C | 0.0499  |
| rs113748679 | G | 0.1948  |
| rs13152023  | G | -0.0547 |
| rs6848087   | C | 0.0364  |
| rs142280000 | G | 0.162   |
| rs7691637   | T | 0.0653  |
| rs17297619  | G | 0.0524  |
| rs28762207  | C | 0.1446  |
| rs1875844   | G | 0.0358  |
| rs17050341  | C | 0.0506  |
| rs10938747  | G | -0.0634 |
| rs78730070  | G | -0.1575 |
| rs146329210 | T | 0.1372  |
| rs73245231  | A | 0.0713  |
| rs72716986  | G | 0.109   |
| rs28479395  | G | 0.1362  |
| rs78665194  | C | -0.14   |
| rs144552150 | G | 0.2598  |
| rs111971731 | C | -0.0891 |
| rs78592572  | G | 0.1302  |
| rs6845577   | G | -0.0453 |

|             |   |         |
|-------------|---|---------|
| rs78559075  | A | 0.1451  |
| rs3775552   | A | -0.0565 |
| rs78060189  | C | 0.1439  |
| rs72691669  | A | -0.219  |
| rs72616096  | G | -0.0605 |
| rs140908238 | A | -0.1837 |
| rs12513211  | C | 0.0655  |
| rs7691949   | G | 0.033   |
| rs2120690   | A | -0.0403 |
| rs59422146  | A | 0.0452  |
| rs72659569  | A | 0.0541  |
| rs17509845  | A | 0.0857  |
| rs75735610  | T | 0.1161  |
| rs75325369  | T | -0.1299 |
| rs80220208  | T | 0.0913  |
| rs1032940   | A | -0.0799 |
| rs72699416  | T | 0.062   |
| rs73236189  | A | 0.1236  |
| rs4370173   | T | -0.0313 |
| rs146898658 | G | 0.097   |
| rs1812645   | T | 0.0413  |
| rs62337253  | A | 0.1475  |
| rs75465972  | T | -0.1311 |
| rs116703653 | T | 0.1304  |
| rs10024968  | A | -0.0354 |
| rs13149835  | C | 0.0468  |
| rs16881495  | C | 0.0595  |
| rs1380873   | T | -0.0328 |
| rs11131284  | G | 0.0447  |
| rs72704553  | G | 0.2089  |
| rs343199    | A | -0.0801 |
| rs28617588  | G | -0.0487 |
| rs140906725 | A | 0.2143  |
| rs150564016 | C | 0.2067  |
| rs6835851   | C | -0.0317 |
| rs115280991 | T | -0.0947 |
| rs148380653 | A | -0.194  |
| rs3822002   | C | 0.1107  |
| rs7678866   | A | -0.0413 |
| rs62342902  | G | 0.093   |
| rs80105759  | G | -0.1344 |
| rs115539054 | G | 0.2028  |
| rs55984129  | C | -0.0562 |
| rs17369400  | G | 0.0582  |
| rs10010758  | C | 0.0352  |
| rs76570925  | T | -0.1939 |
| rs7685613   | T | -0.1165 |

|             |   |         |
|-------------|---|---------|
| rs138278552 | G | 0.2153  |
| rs17013680  | A | 0.1025  |
| rs78152193  | G | 0.0646  |
| rs145811432 | G | 0.1279  |
| rs4861924   | C | -0.0373 |
| rs17203976  | G | -0.1234 |
| rs2172893   | A | 0.0673  |
| rs4865192   | A | 0.0523  |
| rs1993958   | G | -0.0458 |
| rs11727565  | A | 0.0673  |
| rs28522618  | G | -0.0472 |
| rs4389531   | T | -0.0341 |
| rs78443773  | T | -0.1132 |
| rs114168151 | C | -0.1542 |
| rs72674452  | T | 0.1346  |
| rs4861764   | A | 0.1306  |
| rs73795774  | T | -0.1456 |
| rs116812380 | C | 0.1544  |
| rs10000959  | C | -0.0562 |
| rs72642820  | T | -0.0779 |
| rs76369354  | G | -0.0607 |
| rs114723682 | C | 0.0893  |
| rs145598146 | C | 0.2616  |
| rs75899377  | C | -0.2901 |
| rs34850283  | T | -0.1789 |
| rs80099445  | T | 0.309   |
| rs79108729  | G | -0.2339 |
| rs2872072   | C | -0.0341 |
| rs80011651  | C | 0.0703  |
| rs115560557 | T | 0.1193  |
| rs56387698  | C | -0.058  |
| rs115954414 | T | 0.1694  |
| rs75198983  | C | -0.1862 |
| rs72716709  | C | 0.0456  |
| rs13117944  | C | -0.0482 |
| rs113560990 | A | -0.0736 |
| rs17024598  | C | 0.0944  |
| rs1838703   | C | 0.1     |
| rs62339970  | A | 0.0647  |
| rs11730104  | G | 0.0334  |
| rs79486795  | G | -0.0885 |
| rs6854408   | A | 0.0623  |
| rs11936259  | G | -0.0322 |
| rs4689408   | T | -0.0396 |
| rs35669832  | T | 0.1021  |
| rs7692520   | A | 0.033   |
| rs147224197 | T | 0.1721  |

|             |   |         |
|-------------|---|---------|
| rs502620    | T | 0.0467  |
| rs79886153  | T | -0.0882 |
| rs11723753  | G | 0.0478  |
| rs57890722  | C | -0.0451 |
| rs116030866 | G | 0.1127  |
| rs4695853   | T | -0.0649 |
| rs142768014 | T | -0.2064 |
| rs72554037  | A | -0.1003 |
| rs11249481  | A | 0.0722  |
| rs3112913   | G | 0.0458  |
| rs13105002  | C | 0.0379  |
| rs72634679  | C | 0.1622  |
| rs2269834   | A | 0.042   |
| rs13133366  | A | 0.08    |
| rs28710383  | G | -0.0643 |
| rs111257884 | C | -0.1559 |
| rs116530600 | A | 0.2118  |
| rs62323692  | G | -0.1058 |
| rs12502677  | C | -0.0311 |
| rs73182407  | C | 0.0662  |
| rs35152007  | T | 0.1142  |
| rs12648931  | C | 0.0788  |
| rs12643604  | G | 0.0763  |
| rs16849274  | T | 0.1174  |
| rs79488265  | A | 0.1595  |
| rs77109040  | A | -0.0774 |
| rs28580400  | G | 0.0549  |
| rs143001927 | T | 0.0812  |
| rs12645899  | T | -0.0717 |
| rs112232729 | T | -0.1265 |
| rs11727641  | T | 0.0358  |
| rs72708328  | A | 0.0368  |
| rs3114045   | T | 0.0446  |
| rs73239649  | G | 0.14    |
| rs13129687  | C | 0.0352  |
| rs2197676   | G | 0.112   |
| rs6851880   | T | -0.0442 |
| rs10517220  | C | -0.0486 |
| rs74759170  | T | 0.1242  |
| rs62304711  | A | -0.1507 |
| rs62348819  | T | 0.0658  |
| rs113527399 | G | 0.2185  |
| rs114429915 | T | 0.221   |
| rs7682576   | T | -0.0658 |
| rs78251120  | G | -0.1457 |
| rs146147762 | G | -0.2247 |
| rs11946572  | G | -0.0341 |



|             |   |         |
|-------------|---|---------|
| rs58766355  | C | 0.1724  |
| rs75918658  | C | 0.0489  |
| rs116547404 | C | -0.1163 |
| rs6828265   | C | -0.0455 |
| rs115858093 | C | 0.098   |
| rs10022530  | A | 0.0495  |
| rs2164383   | G | -0.051  |
| rs6856663   | A | -0.0433 |
| rs566482    | T | -0.04   |
| rs68106519  | G | 0.1076  |
| rs3775117   | G | -0.0714 |
| rs56057798  | C | 0.0732  |
| rs7689468   | T | -0.0684 |
| rs113348924 | G | -0.1402 |
| rs11932290  | T | 0.0807  |
| rs116161355 | T | -0.2216 |
| rs16886803  | T | -0.0508 |
| rs71620920  | A | 0.1441  |
| rs17013450  | A | -0.1436 |
| rs35457385  | A | 0.0316  |
| rs75992675  | T | 0.1985  |
| rs1450940   | A | -0.0338 |
| rs74572146  | G | 0.0849  |
| rs10516430  | T | 0.0353  |
| rs112281237 | G | -0.2317 |
| rs13146372  | T | -0.0369 |
| rs6554431   | T | 0.035   |
| rs10002424  | C | 0.0378  |
| rs9998202   | G | -0.1031 |
| rs17003749  | G | -0.0372 |
| rs116258325 | G | 0.1141  |
| rs6840290   | C | 0.0695  |
| rs75835128  | T | -0.1846 |
| rs114529085 | A | -0.1047 |
| rs28578243  | C | -0.0502 |
| rs139543337 | A | -0.2687 |
| rs11723260  | T | -0.19   |
| rs28654755  | A | 0.0566  |
| rs4429751   | G | -0.0402 |
| rs11731631  | C | -0.0536 |
| rs114464731 | T | -0.0691 |
| rs144156257 | A | -0.1534 |
| rs75478265  | G | -0.1063 |
| rs59742217  | T | 0.0732  |
| rs12640554  | T | 0.1047  |
| rs28815831  | C | 0.0995  |
| rs72688315  | G | -0.0316 |

|             |   |         |
|-------------|---|---------|
| rs80153043  | T | 0.2302  |
| rs148934688 | A | 0.161   |
| rs2276916   | G | -0.0366 |
| rs12504728  | A | -0.0309 |
| rs10031087  | T | 0.0425  |
| rs113208253 | C | 0.1809  |
| rs62314070  | T | 0.075   |
| rs79030829  | T | 0.0937  |
| rs147396763 | A | 0.2028  |
| rs11941079  | G | 0.0557  |
| rs10027575  | C | 0.079   |
| rs73088575  | A | -0.0563 |
| rs62318052  | T | 0.0371  |
| rs71604101  | A | 0.1349  |
| rs28514589  | T | -0.1506 |
| rs62314794  | C | -0.0511 |
| rs115498626 | T | 0.0438  |
| rs11938282  | A | 0.046   |
| rs17614822  | G | 0.0393  |
| rs11737096  | A | -0.0496 |
| rs11941670  | A | 0.0703  |
| rs13119653  | T | 0.0911  |
| rs2051559   | C | 0.0475  |
| rs9799659   | C | -0.0873 |
| rs614457    | T | 0.033   |
| rs142190556 | A | 0.1277  |
| rs73067748  | T | -0.1153 |
| rs62304383  | C | -0.1767 |
| rs2918080   | G | 0.041   |
| rs78697741  | C | 0.0497  |
| rs72652531  | A | -0.0428 |
| rs113989139 | A | 0.2236  |
| rs16892131  | C | 0.1998  |
| rs62319036  | G | -0.0309 |
| rs11132441  | A | 0.0339  |
| rs35788979  | A | 0.0429  |
| rs114626215 | T | -0.126  |
| rs55778872  | T | -0.1759 |
| rs62410274  | G | 0.0457  |
| rs9996732   | A | 0.0741  |
| rs7686453   | C | 0.0527  |
| rs57857640  | C | -0.0352 |
| rs150211887 | G | 0.1764  |
| rs77193101  | A | 0.0376  |
| rs141792413 | T | 0.154   |
| rs143149286 | G | 0.143   |
| rs144175144 | A | 0.1742  |

|             |   |         |
|-------------|---|---------|
| rs55690045  | T | 0.1195  |
| rs17270032  | C | 0.1255  |
| rs17324297  | A | 0.0867  |
| rs148491829 | A | 0.1674  |
| rs6823258   | G | -0.0336 |
| rs139373241 | T | 0.1285  |
| rs4861067   | T | 0.0314  |
| rs62321082  | G | 0.0913  |
| rs1365129   | G | 0.0712  |
| rs7691464   | C | -0.0341 |
| rs143863614 | A | -0.0397 |
| rs114212348 | A | -0.1914 |
| rs7667783   | T | -0.0313 |
| rs141186406 | A | -0.0434 |
| rs11098185  | T | -0.0384 |
| rs34224229  | T | 0.0419  |
| rs73205493  | T | 0.0356  |
| rs114749067 | T | -0.16   |
| rs13112475  | G | -0.0425 |
| rs4832855   | C | 0.0492  |
| rs76589225  | C | 0.0843  |
| rs146175767 | T | 0.1105  |
| rs62340899  | A | 0.0345  |
| rs2061147   | A | -0.0338 |
| rs4864690   | A | -0.0374 |
| rs34355774  | A | 0.0514  |
| rs4485840   | T | 0.0589  |
| rs59347561  | T | 0.1522  |
| rs144656979 | C | 0.1724  |
| rs147628143 | C | 0.1521  |
| rs313125    | A | -0.0393 |
| rs1995598   | T | 0.0349  |
| rs6842183   | T | 0.0357  |
| rs6824078   | G | 0.039   |
| rs17068096  | G | 0.0502  |
| rs145915923 | A | 0.0797  |
| rs67138036  | T | 0.054   |
| rs79745941  | A | 0.0765  |
| rs72678797  | C | 0.1323  |
| rs10006577  | G | -0.0376 |
| rs4832977   | G | 0.0551  |
| rs6841154   | G | -0.113  |
| rs75808441  | T | -0.0661 |
| rs80297655  | A | -0.0918 |
| rs1111981   | C | -0.0404 |
| rs144541128 | T | 0.1697  |
| rs73208484  | A | 0.1026  |

|             |   |         |
|-------------|---|---------|
| rs11731411  | C | -0.0924 |
| rs4698816   | A | -0.0324 |
| rs79673169  | A | 0.1526  |
| rs141470875 | C | 0.1559  |
| rs17544269  | C | -0.2471 |
| rs147816509 | T | -0.1495 |
| rs79507763  | C | 0.083   |
| rs1512315   | T | 0.0467  |
| rs2349584   | T | -0.05   |
| rs144713667 | A | -0.1115 |
| rs144705205 | T | -0.1718 |
| rs142899040 | C | 0.2113  |
| rs76045741  | A | -0.1414 |
| rs9990698   | C | -0.0465 |
| rs13117458  | T | -0.0439 |
| rs115601219 | G | 0.1591  |
| rs141715934 | A | 0.1788  |
| rs13145333  | T | -0.0369 |
| rs113995045 | C | 0.1282  |
| rs114126290 | T | 0.0913  |
| rs6831193   | T | 0.0339  |
| rs2271570   | T | 0.0411  |
| rs35840024  | C | 0.2244  |
| rs79332728  | A | -0.2094 |
| rs62321828  | C | 0.2282  |
| rs4697648   | A | 0.0464  |
| rs1426108   | C | -0.0362 |
| rs142318144 | T | -0.2245 |
| rs12504082  | G | 0.0361  |
| rs72654065  | G | -0.0684 |
| rs140671747 | T | 0.2361  |
| rs62319698  | C | 0.0814  |
| rs62312780  | A | 0.1234  |
| rs7663789   | T | -0.048  |
| rs149984690 | G | -0.0958 |
| rs75234854  | G | 0.1227  |
| rs143262811 | A | 0.0859  |
| rs11937052  | G | 0.106   |
| rs62316012  | A | 0.1092  |
| rs10007184  | T | -0.0732 |
| rs1039352   | G | 0.0516  |
| rs6844267   | A | 0.0493  |
| rs1485325   | C | -0.0505 |
| rs11733080  | C | -0.0564 |
| rs150130303 | T | 0.2331  |
| rs77588882  | T | -0.094  |
| rs17297964  | G | 0.08    |

|             |   |         |
|-------------|---|---------|
| rs116408790 | C | 0.1189  |
| rs72652919  | A | -0.1725 |
| rs41518644  | G | 0.0446  |
| rs72682805  | G | 0.0634  |
| rs74361638  | T | -0.104  |
| rs77390848  | G | 0.0714  |
| rs78215118  | C | -0.0857 |
| rs17577020  | T | -0.0704 |
| rs7375584   | A | 0.0357  |
| rs13144730  | G | 0.0381  |
| rs76383188  | C | -0.1096 |
| rs2227408   | T | 0.1197  |
| rs6446587   | A | 0.0481  |
| rs114434632 | A | 0.2109  |
| rs34574253  | T | 0.0318  |
| rs111832426 | A | -0.2731 |
| rs1607241   | C | 0.0312  |
| rs142787990 | C | 0.1161  |
| rs2251099   | T | -0.0453 |
| rs75736068  | C | -0.0581 |
| rs56103251  | T | 0.0659  |
| rs10446669  | A | -0.0854 |
| rs13130765  | C | 0.0349  |
| rs75946678  | G | -0.2509 |
| rs1263337   | A | 0.063   |
| rs35845870  | T | 0.0543  |
| rs149577601 | G | 0.1161  |
| rs77275720  | C | 0.0642  |
| rs10027928  | G | -0.0313 |
| rs4631066   | G | 0.0435  |
| rs6531768   | C | -0.0383 |
| rs114786142 | T | -0.1777 |
| rs4605628   | C | -0.1217 |
| rs76153510  | C | -0.1089 |
| rs12649161  | T | 0.1721  |
| rs34205157  | G | -0.1279 |
| rs115177547 | T | 0.1044  |
| rs404662    | C | -0.0343 |
| rs4558823   | A | -0.0482 |
| rs149976368 | C | -0.1414 |
| rs16850039  | T | 0.0814  |
| rs116783077 | T | -0.1968 |
| rs3805171   | T | 0.0909  |
| rs6849194   | T | 0.0521  |
| rs11132535  | T | -0.0598 |
| rs28734060  | A | 0.0445  |
| rs74541380  | G | 0.189   |

|             |   |         |
|-------------|---|---------|
| rs73244486  | A | -0.2102 |
| rs12642329  | C | 0.0411  |
| rs4861981   | T | -0.0332 |
| rs115163516 | T | 0.1289  |
| rs148269029 | C | 0.3279  |
| rs78460035  | C | 0.2135  |
| rs77625956  | T | 0.1727  |
| rs78368938  | T | -0.0806 |
| rs75337800  | T | 0.1835  |
| rs10520394  | T | -0.0411 |
| rs62318548  | A | -0.0579 |
| rs13124866  | A | -0.0333 |
| rs4234980   | T | 0.0477  |
| rs148134512 | C | -0.184  |
| rs7695309   | C | -0.0339 |
| rs12511496  | T | -0.0686 |
| rs79162787  | T | 0.1379  |
| rs7700002   | T | 0.0332  |
| rs12512100  | A | -0.0316 |
| rs2405425   | T | -0.2199 |
| rs17445526  | G | 0.0354  |
| rs141058814 | C | -0.0368 |
| rs7661045   | G | 0.2168  |
| rs78514608  | C | 0.1212  |
| rs2123277   | T | 0.0379  |
| rs13152134  | T | -0.1492 |
| rs72701782  | A | 0.0866  |
| rs13104183  | G | 0.0337  |
| rs72867388  | C | -0.0663 |
| rs73243613  | A | -0.0341 |
| rs71620279  | T | -0.1063 |
| rs144210713 | A | 0.2516  |
| rs986971    | A | -0.0357 |
| rs74658513  | A | 0.0785  |
| rs13130705  | A | 0.1789  |
| rs36044661  | T | 0.033   |
| rs114427505 | T | 0.116   |
| rs12500437  | G | 0.0558  |
| rs115371503 | A | -0.2399 |
| rs142107563 | T | -0.0939 |
| rs2285783   | G | -0.0471 |
| rs10006700  | A | -0.1555 |
| rs6843558   | A | 0.1112  |
| rs17355550  | C | 0.0999  |
| rs12648971  | A | 0.189   |
| rs12648898  | A | 0.1084  |
| rs6834313   | A | 0.079   |

|             |   |         |
|-------------|---|---------|
| rs12108469  | G | 0.2339  |
| rs115885137 | T | 0.1853  |
| rs9992199   | A | 0.0375  |
| rs1875718   | A | 0.1268  |
| rs145846000 | A | -0.1208 |
| rs79570476  | A | -0.1098 |
| rs1525005   | T | 0.0351  |
| rs317010    | G | -0.0325 |
| rs79852196  | G | -0.237  |
| rs114599822 | T | -0.1768 |
| rs9884549   | G | 0.0371  |
| rs17238911  | T | 0.0703  |
| rs77456746  | G | 0.0762  |
| rs7434968   | C | 0.0408  |
| rs74825593  | T | -0.0685 |
| rs73238581  | A | 0.0333  |
| rs73250981  | A | 0.0511  |
| rs6826807   | T | -0.2762 |
| rs28392704  | T | -0.0825 |
| rs62316519  | T | 0.0418  |
| rs17021340  | G | 0.0644  |
| rs7674020   | C | 0.0312  |
| rs114225957 | G | -0.1698 |
| rs76261900  | G | -0.1252 |
| rs62334390  | T | 0.1265  |
| rs10805089  | C | 0.0345  |
| rs9999126   | G | -0.1472 |
| rs12512822  | G | -0.0676 |
| rs146700568 | A | -0.2747 |
| rs7667358   | A | -0.0417 |
| rs111296035 | C | 0.0981  |
| rs1562429   | A | 0.0337  |
| rs28727477  | C | 0.0883  |
| rs113904074 | G | 0.2061  |
| rs17503535  | T | 0.0954  |
| rs11727746  | T | -0.0802 |
| rs78304440  | C | 0.093   |
| rs10939075  | T | 0.0748  |
| rs77349274  | C | -0.0518 |
| rs67192700  | A | 0.2114  |
| rs11931996  | C | -0.0773 |
| rs1873719   | A | 0.0454  |
| rs7690324   | T | -0.0707 |
| rs148935932 | A | 0.1294  |
| rs79823037  | C | 0.2133  |
| rs77132022  | T | 0.25    |
| rs16841530  | C | -0.0579 |

|             |   |         |
|-------------|---|---------|
| rs138481116 | C | 0.1142  |
| rs4298137   | T | 0.0381  |
| rs75979813  | C | -0.098  |
| rs4698754   | G | 0.0308  |
| rs7664212   | G | 0.0497  |
| rs13119078  | T | -0.034  |
| rs77476800  | A | -0.126  |
| rs140247800 | T | 0.1085  |
| rs6841445   | C | -0.0412 |
| rs17253665  | C | 0.0561  |
| rs143157347 | C | 0.1576  |
| rs1836895   | T | -0.0397 |
| rs114257644 | T | -0.2088 |
| rs59905332  | G | -0.1135 |
| rs7668325   | T | 0.0467  |
| rs73218964  | G | 0.1847  |
| rs61364971  | A | -0.1373 |
| rs115842053 | G | 0.1719  |
| rs11724896  | T | 0.0612  |
| rs6810857   | G | 0.0317  |
| rs7663233   | A | -0.0434 |
| rs144188302 | T | -0.2697 |
| rs62298554  | T | -0.0397 |
| rs10018789  | A | 0.0772  |
| rs885262    | G | -0.032  |
| rs4395504   | C | -0.0341 |
| rs353175    | A | -0.0385 |
| rs113407937 | C | -0.0356 |
| rs115410868 | A | 0.106   |
| rs729239    | A | 0.0566  |
| rs60155769  | A | -0.1241 |
| rs1834346   | G | 0.0479  |
| rs7672494   | T | 0.0532  |
| rs13122307  | C | -0.0876 |
| rs9991203   | G | -0.0485 |
| rs16873749  | T | -0.0499 |
| rs1484266   | G | 0.0442  |
| rs116411397 | A | 0.1654  |
| rs115679961 | A | -0.0483 |
| rs75723112  | T | -0.1992 |
| rs75153669  | T | 0.0839  |
| rs17004812  | A | -0.0644 |
| rs78630132  | T | -0.0685 |
| rs11936171  | A | -0.0434 |
| rs11931538  | A | 0.1177  |
| rs114110930 | G | -0.1587 |
| rs2627652   | G | 0.0313  |



|             |   |         |
|-------------|---|---------|
| rs7677300   | G | -0.0913 |
| rs115655163 | A | -0.1131 |
| rs58432100  | A | -0.1424 |
| rs9307721   | C | 0.0605  |
| rs17186264  | T | 0.1047  |
| rs67402191  | G | -0.0339 |
| rs4597899   | T | 0.0314  |
| rs80157196  | C | 0.0419  |
| rs3960769   | T | 0.0426  |
| rs111236443 | C | 0.1536  |
| rs6855587   | A | 0.1545  |
| rs962225    | A | 0.0334  |
| rs114216011 | A | -0.1551 |
| rs2352767   | A | -0.0628 |
| rs1381744   | A | -0.0363 |
| rs139007517 | A | -0.2472 |
| rs62315335  | T | 0.0439  |
| rs13143659  | A | 0.0328  |
| rs28368663  | T | -0.0771 |
| rs17818225  | G | 0.1717  |
| rs4242008   | G | 0.0575  |
| rs17237560  | C | 0.0649  |
| rs72712629  | C | 0.0645  |
| rs6447533   | A | 0.0501  |
| rs1388022   | A | -0.0913 |
| rs11938388  | C | -0.0439 |
| rs76951951  | C | -0.0742 |
| rs61357237  | T | -0.0528 |
| rs140036323 | C | -0.1926 |
| rs34714780  | G | 0.0616  |
| rs77218667  | A | 0.1091  |
| rs72706953  | T | -0.1287 |
| rs56172500  | T | 0.1296  |
| rs62309500  | G | 0.0462  |
| rs7698253   | G | 0.0297  |
| rs148468735 | T | 0.2086  |
| rs7661203   | T | -0.0317 |
| rs10516222  | G | -0.0384 |
| rs7439032   | T | -0.0469 |
| rs7670839   | C | 0.0781  |
| rs2158275   | A | 0.0322  |
| rs6841149   | T | 0.0357  |
| rs10006314  | C | -0.0324 |
| rs661862    | G | 0.0323  |
| rs114105483 | A | 0.1724  |
| rs2355619   | T | -0.0508 |
| rs1426064   | T | 0.0358  |

|             |   |         |
|-------------|---|---------|
| rs1821189   | A | 0.0565  |
| rs115302993 | C | 0.1148  |
| rs10446717  | A | -0.0657 |
| rs3135878   | G | -0.0668 |
| rs34077189  | T | 0.1352  |
| rs76256808  | A | 0.0778  |
| rs78349454  | G | -0.0729 |
| rs116585463 | A | -0.1848 |
| rs28555153  | A | 0.2185  |
| rs13144325  | C | -0.0308 |
| rs4694477   | A | -0.0346 |
| rs114905473 | C | 0.1029  |
| rs72629578  | G | 0.0792  |
| rs77967371  | A | 0.0884  |
| rs55897988  | G | -0.0735 |
| rs12512863  | T | 0.0351  |
| rs6849178   | G | 0.0392  |
| rs11933464  | T | -0.0483 |
| rs6856880   | G | -0.0372 |
| rs1995126   | G | -0.034  |
| rs79456883  | A | 0.0969  |
| rs149801259 | A | 0.0988  |
| rs80220956  | C | 0.0643  |
| rs115097430 | A | -0.1674 |
| rs74636735  | A | 0.0809  |
| rs116149024 | T | 0.113   |
| rs60874996  | A | -0.0412 |
| rs35201057  | T | -0.1522 |
| rs77822621  | T | -0.0852 |
| rs5522      | C | 0.0473  |
| rs4407452   | G | 0.0422  |
| rs17089860  | G | -0.0498 |
| rs657510    | T | 0.0339  |
| rs115495116 | A | 0.0901  |
| rs6839543   | C | 0.0313  |
| rs74217030  | C | 0.0423  |
| rs75608748  | T | -0.0511 |
| rs62306163  | A | 0.0746  |
| rs2451032   | C | -0.0317 |
| rs10024613  | T | 0.0428  |
| rs2087365   | A | 0.031   |
| rs78662560  | T | 0.2007  |
| rs12513158  | A | -0.0556 |
| rs148333605 | A | 0.1218  |
| rs35727557  | G | -0.2233 |
| rs71606285  | T | 0.0783  |
| rs115211834 | T | -0.2249 |

|             |   |         |
|-------------|---|---------|
| rs80348513  | A | 0.1676  |
| rs77738348  | G | 0.0678  |
| rs147311791 | C | 0.1436  |
| rs75411249  | C | 0.0976  |
| rs114795447 | T | -0.1267 |
| rs4399959   | T | -0.1378 |
| rs1402499   | C | 0.0352  |
| rs73234125  | A | -0.0913 |
| rs34995775  | G | -0.0479 |
| rs115157774 | T | 0.0843  |
| rs6851905   | A | 0.0487  |
| rs17072729  | T | 0.0523  |
| rs72969175  | A | 0.0553  |
| rs62305026  | T | 0.0566  |
| rs869570    | T | -0.0464 |
| rs115645177 | G | 0.1735  |
| rs75462887  | G | -0.0315 |
| rs13119011  | T | 0.0731  |
| rs10032556  | T | -0.0413 |
| rs7662597   | C | 0.0464  |
| rs75544992  | G | 0.1064  |
| rs146982722 | C | -0.1291 |
| rs7687342   | C | 0.1139  |
| rs2613193   | G | 0.1371  |
| rs147170567 | T | -0.2025 |
| rs62328061  | G | -0.0833 |
| rs115168070 | A | 0.1727  |
| rs79243194  | G | -0.0928 |
| rs115217139 | T | 0.1439  |
| rs4698485   | G | -0.0371 |
| rs10031256  | A | 0.0734  |
| rs67848407  | T | -0.0395 |
| rs6826517   | C | 0.035   |
| rs35215500  | G | -0.0374 |
| rs149502648 | T | 0.1609  |
| rs11930209  | T | -0.0383 |
| rs566737    | C | 0.0348  |
| rs150500594 | T | -0.2825 |
| rs4691719   | G | 0.0299  |
| rs146468284 | A | 0.2094  |
| rs144894629 | C | -0.1365 |
| rs55824910  | A | -0.0545 |
| rs4694636   | G | 0.0306  |
| rs1320061   | T | 0.0371  |
| rs2018601   | C | 0.0305  |
| rs75053054  | C | -0.063  |
| rs57427671  | A | 0.0571  |

|             |   |         |
|-------------|---|---------|
| rs78490980  | A | -0.0708 |
| rs1823483   | G | -0.1918 |
| rs115070063 | G | 0.1049  |
| rs6812357   | C | -0.1246 |
| rs1353296   | C | -0.1    |
| rs146015261 | G | 0.1791  |
| rs56271575  | C | -0.0483 |
| rs59814996  | C | 0.0879  |
| rs6815221   | A | 0.0379  |
| rs17199134  | G | -0.0401 |
| rs28406416  | C | 0.0544  |
| rs1283034   | A | -0.0318 |
| rs111745213 | A | 0.0945  |
| rs11734543  | C | -0.0309 |
| rs58217059  | A | -0.0474 |
| rs35075923  | T | 0.0374  |
| rs7690964   | T | -0.052  |
| rs12643404  | G | 0.0528  |
| rs78573490  | G | 0.0395  |
| rs78485843  | C | 0.1939  |
| rs116272873 | T | 0.0956  |
| rs150073054 | T | -0.2028 |
| rs77370698  | C | -0.1727 |
| rs7658638   | T | 0.0365  |
| rs114371571 | A | -0.15   |
| rs13150465  | G | -0.0397 |
| rs141210731 | A | 0.1186  |
| rs17037759  | C | -0.0817 |
| rs62344507  | A | 0.1021  |
| rs4358385   | T | 0.0558  |
| rs74642353  | T | 0.1332  |
| rs1898889   | C | 0.044   |
| rs35021556  | A | -0.0918 |
| rs74353346  | T | -0.0792 |
| rs11724027  | T | -0.1374 |
| rs4397011   | T | -0.1137 |
| rs10517791  | C | 0.04    |
| rs1380877   | G | 0.0431  |
| rs6843851   | C | 0.1387  |
| rs144140684 | G | 0.1269  |
| rs115768865 | A | 0.1909  |
| rs62304673  | C | 0.1626  |
| rs75363641  | C | -0.0561 |
| rs143271754 | C | -0.1432 |
| rs113869989 | A | -0.0575 |
| rs17002607  | C | -0.1258 |
| rs10006983  | G | 0.1437  |

|             |   |         |
|-------------|---|---------|
| rs10033677  | T | -0.0315 |
| rs116752372 | C | 0.1796  |
| rs149565239 | T | -0.1976 |
| rs79543311  | C | 0.0729  |
| rs1951769   | C | 0.0851  |
| rs62352888  | A | 0.1639  |
| rs11722614  | T | 0.1045  |
| rs74826969  | A | -0.1706 |
| rs145578853 | A | 0.1862  |
| rs28454196  | G | 0.2141  |
| rs62324936  | G | -0.0696 |
| rs2309337   | G | -0.036  |
| rs138583861 | C | 0.2119  |
| rs7678412   | C | 0.1379  |
| rs9997251   | C | -0.0363 |
| rs115650346 | C | -0.0934 |
| rs77387662  | G | 0.172   |
| rs7660353   | G | -0.0711 |
| rs236775    | T | -0.0399 |
| rs113141588 | T | 0.1093  |
| rs114779067 | T | 0.1476  |
| rs72693677  | A | 0.0457  |
| rs76772112  | G | 0.1356  |
| rs11931842  | G | -0.0306 |
| rs34658403  | T | -0.0505 |
| rs56033606  | T | 0.1831  |
| rs4241999   | A | -0.031  |
| rs148500626 | A | 0.159   |
| rs72723690  | A | 0.2063  |
| rs73018027  | C | -0.1054 |
| rs1843922   | A | -0.0418 |
| rs7661584   | C | -0.056  |
| rs72673080  | T | 0.2203  |
| rs114869572 | A | 0.14    |
| rs4833862   | C | -0.0373 |
| rs17656123  | C | 0.0704  |
| rs61406778  | C | 0.1406  |
| rs115393731 | G | 0.14    |
| rs13144640  | G | -0.2455 |
| rs2312941   | C | -0.0315 |
| rs17368977  | C | 0.0365  |
| rs12504418  | C | 0.046   |
| rs79195557  | G | 0.1145  |
| rs140838106 | A | 0.0301  |
| rs16887918  | A | 0.1224  |
| rs138754690 | C | 0.057   |
| rs931033    | T | -0.0291 |

|             |   |         |
|-------------|---|---------|
| rs4861681   | T | 0.0615  |
| rs149435611 | A | 0.2519  |
| rs2715373   | G | -0.04   |
| rs13132002  | C | -0.0617 |
| rs28488258  | A | 0.0397  |
| rs4693702   | T | -0.0336 |
| rs74769668  | A | -0.0753 |
| rs113872392 | A | 0.1312  |
| rs732037    | A | 0.0557  |
| rs13132229  | T | -0.1269 |
| rs6822283   | C | 0.0349  |
| rs6850707   | A | 0.0357  |
| rs77764362  | G | -0.1862 |
| rs6821558   | T | 0.0394  |
| rs78103129  | T | 0.1656  |
| rs60433598  | A | 0.0505  |
| rs62326002  | C | -0.0474 |
| rs4864154   | A | -0.0373 |
| rs79554255  | A | -0.1295 |
| rs115966008 | G | -0.1226 |
| rs72700052  | T | 0.1268  |
| rs34493244  | G | -0.0443 |
| rs74777937  | A | 0.1291  |
| rs1585136   | T | 0.0736  |
| rs79409148  | C | 0.0722  |
| rs72659273  | G | 0.0582  |
| rs148527456 | G | 0.1918  |
| rs6844679   | C | 0.04    |
| rs11937335  | T | -0.1832 |
| rs11943813  | C | 0.0336  |
| rs10006869  | G | -0.0354 |
| rs210788    | T | 0.0538  |
| rs72696545  | T | 0.0568  |
| rs7681153   | A | -0.031  |
| rs2205      | T | 0.0741  |
| rs61685325  | A | -0.1148 |
| rs148635370 | G | 0.1089  |
| rs13115486  | T | -0.1172 |
| rs6847235   | A | 0.0295  |
| rs6826500   | C | 0.0495  |
| rs56048545  | T | -0.1301 |
| rs34223888  | T | -0.1299 |
| rs11097247  | G | -0.03   |
| rs75608233  | G | -0.153  |
| rs111346925 | A | 0.1412  |
| rs2276875   | A | -0.0424 |
| rs58514563  | T | 0.0355  |

|             |   |         |
|-------------|---|---------|
| rs77627125  | G | 0.1436  |
| rs7438872   | T | 0.0499  |
| rs7688709   | A | -0.03   |
| rs10030901  | C | 0.0774  |
| rs9307224   | T | 0.0295  |
| rs72727823  | T | -0.1187 |
| rs1827888   | A | -0.0641 |
| rs7439420   | G | 0.2185  |
| rs35102682  | A | 0.0572  |
| rs77963846  | C | -0.0486 |
| rs6533178   | C | 0.03    |
| rs12641557  | T | 0.031   |
| rs116754103 | A | 0.2266  |
| rs7659695   | C | -0.0377 |
| rs142743586 | G | -0.0681 |
| rs61791481  | C | 0.0999  |
| rs28599691  | T | 0.0495  |
| rs112142689 | T | -0.1958 |
| rs17072515  | G | -0.0421 |
| rs13110154  | C | 0.1217  |
| rs2866625   | T | 0.0535  |
| rs75348807  | A | 0.1099  |
| rs17394353  | A | -0.1929 |
| rs4864420   | T | -0.0305 |
| rs79677873  | A | -0.1313 |
| rs142058210 | T | -0.2131 |
| rs11941629  | C | -0.0512 |
| rs2119183   | A | 0.0489  |
| rs113210138 | T | -0.1314 |
| rs12508083  | G | -0.0572 |
| rs71601634  | A | 0.1808  |
| rs6823068   | T | -0.0318 |
| rs7676702   | C | 0.0922  |
| rs13129205  | T | 0.0476  |
| rs1711391   | T | -0.0446 |
| rs13132687  | A | -0.0336 |
| rs10009648  | G | -0.032  |
| rs115996053 | G | -0.1766 |
| rs11724858  | C | 0.0891  |
| rs7699978   | A | 0.0429  |
| rs72676412  | T | 0.1158  |
| rs17644018  | C | 0.0325  |
| rs150850446 | C | -0.1078 |
| rs10031347  | T | -0.033  |
| rs1822633   | A | -0.074  |
| rs17074047  | A | -0.0515 |
| rs10010932  | C | -0.1266 |

|             |   |         |
|-------------|---|---------|
| rs12331376  | T | -0.0314 |
| rs116386357 | G | -0.0609 |
| rs2903065   | T | -0.1791 |
| rs114777181 | A | 0.1926  |
| rs10004137  | T | -0.0576 |
| rs2635228   | T | -0.0665 |
| rs61792671  | T | -0.0715 |
| rs75328672  | G | 0.0946  |
| rs78599329  | G | 0.1257  |
| rs9918014   | C | -0.0809 |
| rs17015446  | T | -0.0984 |
| rs77101509  | A | -0.1162 |
| rs11723508  | T | 0.1363  |
| rs6821007   | C | 0.1174  |
| rs17515340  | G | 0.0636  |
| rs115289270 | T | 0.0529  |
| rs16839120  | A | 0.1511  |
| rs147540015 | C | -0.1796 |
| rs78831509  | T | 0.1386  |
| rs17072249  | G | -0.0612 |
| rs17835379  | C | -0.1597 |
| rs2352939   | C | -0.034  |
| rs2637736   | G | -0.0288 |
| rs6819345   | C | 0.1384  |
| rs145138404 | T | -0.1364 |
| rs79431086  | T | -0.0786 |
| rs1665840   | G | -0.0754 |
| rs6853837   | A | -0.0336 |
| rs150354723 | A | -0.1681 |
| rs993091    | T | -0.0674 |
| rs72700228  | A | 0.1168  |
| rs1009241   | C | 0.0317  |
| rs61025875  | C | 0.0724  |
| rs6552937   | C | -0.0388 |
| rs1000222   | A | 0.0303  |
| rs2452495   | C | 0.0543  |
| rs76438434  | C | 0.0693  |
| rs7683488   | A | 0.0443  |
| rs4488961   | C | 0.2118  |
| rs11724292  | C | 0.0363  |
| rs3025839   | G | 0.1469  |
| rs34555087  | T | -0.0678 |
| rs142544972 | C | -0.2746 |
| rs62302537  | T | -0.1655 |
| rs6533068   | C | -0.0375 |
| rs1821544   | T | -0.0407 |
| rs3934005   | C | -0.0316 |



|             |   |         |
|-------------|---|---------|
| rs13135549  | T | -0.0329 |
| rs116496635 | T | -0.171  |
| rs116367050 | A | -0.0373 |
| rs11728021  | G | -0.0371 |
| rs80115527  | C | -0.1919 |
| rs6533422   | G | 0.0305  |
| rs11930055  | A | -0.0501 |
| rs716974    | C | 0.1889  |
| rs35431377  | G | 0.038   |
| rs72707915  | C | 0.0517  |
| rs73244487  | T | 0.1079  |
| rs11723284  | G | 0.0369  |
| rs6826070   | C | -0.0316 |
| rs11944371  | C | -0.0563 |
| rs1493509   | G | 0.0346  |
| rs146771569 | C | 0.0951  |
| rs76216193  | T | 0.2145  |
| rs79922932  | C | -0.0714 |
| rs72641095  | T | -0.3014 |
| rs353306    | A | 0.0607  |
| rs56179190  | C | 0.1369  |
| rs7699269   | A | 0.0603  |
| rs61428210  | G | 0.0287  |
| rs114715177 | T | -0.0742 |
| rs78983122  | G | -0.2522 |
| rs13128982  | T | 0.1916  |
| rs61168613  | A | 0.196   |
| rs76302094  | C | -0.2121 |
| rs74560179  | C | 0.1793  |
| rs725030    | G | 0.0412  |
| rs17060970  | C | 0.048   |
| rs4129749   | G | -0.033  |
| rs4697037   | T | -0.1111 |
| rs77348370  | G | 0.1478  |
| rs72722706  | A | -0.0867 |
| rs12640734  | G | 0.0299  |
| rs28383653  | T | 0.2112  |
| rs138867056 | C | 0.1807  |
| rs75690698  | A | 0.1058  |
| rs76123678  | C | -0.055  |
| rs115474583 | G | -0.162  |
| rs12642297  | A | 0.2368  |
| rs79481582  | C | 0.0737  |
| rs12643519  | T | 0.1668  |
| rs57207472  | C | 0.2074  |
| rs116562980 | T | -0.0966 |
| rs35699617  | A | 0.0548  |

|             |   |         |
|-------------|---|---------|
| rs4525961   | A | 0.029   |
| rs143639368 | C | -0.1246 |
| rs74641442  | T | -0.171  |
| rs9884172   | G | -0.0503 |
| rs35117198  | G | 0.153   |
| rs72656163  | T | -0.1022 |
| rs62409210  | A | 0.1347  |
| rs62344858  | G | 0.0375  |
| rs115358702 | C | -0.216  |
| rs1922838   | C | -0.0415 |
| rs62335982  | T | -0.0625 |
| rs72685400  | A | -0.242  |
| rs13120150  | A | 0.0287  |
| rs151173918 | T | -0.1822 |
| rs12640584  | A | -0.1693 |
| rs72636366  | G | 0.1907  |
| rs10031572  | T | 0.054   |
| rs34765519  | A | -0.1353 |
| rs17621450  | G | -0.0992 |
| rs10011147  | G | -0.0353 |
| rs112876916 | T | 0.1389  |
| rs2605277   | C | 0.0931  |
| rs116859576 | G | 0.121   |
| rs57866193  | A | 0.0343  |
| rs4234999   | C | -0.0313 |
| rs12511321  | T | 0.0555  |
| rs4610291   | A | 0.0905  |
| rs79040780  | T | 0.1913  |
| rs146602103 | G | 0.172   |
| rs79559860  | A | 0.1724  |
| rs28424132  | G | -0.0402 |
| rs7688534   | C | -0.0344 |
| rs13120209  | C | -0.0368 |
| rs6820444   | C | 0.0333  |
| rs115558832 | G | -0.1395 |
| rs6831001   | C | 0.1052  |
| rs116509604 | C | -0.0763 |
| rs2712108   | A | 0.0328  |
| rs76160590  | G | 0.0998  |
| rs79030004  | G | 0.1825  |
| rs222014    | T | -0.0496 |
| rs11724087  | T | -0.0288 |
| rs76544327  | T | 0.115   |
| rs112564816 | T | 0.133   |
| rs115616818 | G | -0.1389 |
| rs73856893  | T | -0.0384 |
| rs75876552  | T | -0.1311 |

|             |   |         |
|-------------|---|---------|
| rs76234810  | G | -0.2038 |
| rs2215880   | C | -0.0363 |
| rs4696734   | A | -0.0321 |
| rs10027997  | A | -0.033  |
| rs78546705  | A | 0.073   |
| rs4414958   | T | 0.0448  |
| rs3893808   | A | 0.0289  |
| rs11939755  | A | -0.1697 |
| rs74990232  | A | 0.1183  |
| rs6826887   | T | 0.04    |
| rs149585823 | G | -0.125  |
| rs7655560   | A | -0.0695 |
| rs62348503  | C | 0.159   |
| rs720257    | A | -0.0337 |
| rs1158073   | G | 0.1039  |
| rs116558900 | A | -0.1359 |
| rs148358927 | C | 0.1582  |
| rs3109950   | T | -0.0804 |
| rs77997628  | T | -0.0706 |
| rs11097128  | A | 0.0656  |
| rs28534958  | G | 0.0544  |
| rs140461291 | A | -0.1649 |
| rs150787032 | C | 0.2158  |
| rs2219744   | T | 0.1091  |
| rs4407556   | A | 0.1074  |
| rs13123361  | C | 0.0856  |
| rs75545045  | C | -0.0608 |
| rs80290497  | C | -0.122  |
| rs13112218  | C | -0.0296 |
| rs13129987  | C | -0.0464 |
| rs78683542  | T | 0.1549  |
| rs111634284 | C | 0.2387  |
| rs17557691  | A | -0.0453 |
| rs17466028  | C | 0.0465  |
| rs138021680 | T | -0.1968 |
| rs11734604  | A | 0.0453  |
| rs17008522  | G | -0.0307 |
| rs62331165  | A | -0.0313 |
| rs73225312  | T | 0.1455  |
| rs62325468  | C | 0.0799  |
| rs113990425 | C | 0.0457  |
| rs1964691   | A | 0.1044  |
| rs7663479   | T | -0.2462 |
| rs138124618 | T | -0.0858 |
| rs138885390 | C | 0.2158  |
| rs2126526   | A | -0.0285 |
| rs115788968 | A | -0.1207 |

|             |   |         |
|-------------|---|---------|
| rs142189356 | A | -0.2285 |
| rs7690911   | G | 0.0521  |
| rs79742289  | G | 0.055   |
| rs7691016   | C | -0.0335 |
| rs76316142  | G | -0.1477 |
| rs35055952  | A | 0.0663  |
| rs7684096   | C | 0.0443  |
| rs1969531   | A | 0.0291  |
| rs149864906 | A | -0.1822 |
| rs79135172  | G | 0.1211  |
| rs144348470 | G | 0.2757  |
| rs1448812   | C | 0.0342  |
| rs148287940 | T | -0.1932 |
| rs10026512  | T | 0.0814  |
| rs78044674  | C | 0.1912  |
| rs79373522  | A | -0.2295 |
| rs4689583   | A | -0.0729 |
| rs77746906  | T | -0.1105 |
| rs73245208  | A | -0.274  |
| rs76058677  | T | -0.1408 |
| rs2719342   | A | 0.0743  |
| rs2220178   | G | -0.0327 |
| rs150190345 | G | 0.1206  |
| rs73801827  | G | -0.0802 |
| rs57472485  | G | 0.1968  |
| rs4400038   | A | -0.03   |
| rs77474778  | C | -0.0767 |
| rs6817377   | G | -0.0498 |
| rs113807131 | T | 0.1106  |
| rs114178816 | G | 0.1139  |
| rs17749766  | C | -0.1012 |
| rs28412049  | T | 0.0329  |
| rs28726676  | C | 0.0614  |
| rs1317234   | A | 0.0404  |
| rs1718840   | A | 0.1223  |
| rs62316653  | A | 0.1411  |
| rs115260833 | A | 0.2411  |
| rs59742458  | T | 0.2138  |
| rs144001125 | T | -0.0707 |
| rs111881515 | G | -0.1598 |
| rs6446605   | C | 0.0583  |
| rs115252668 | G | 0.0984  |
| rs28378767  | G | 0.1245  |
| rs115022093 | A | 0.1192  |
| rs17541343  | A | -0.202  |
| rs11098882  | C | -0.0518 |
| rs1605322   | G | 0.1342  |

|             |   |         |
|-------------|---|---------|
| rs57122673  | C | 0.036   |
| rs78153733  | C | 0.1359  |
| rs76759082  | T | 0.1292  |
| rs113429221 | C | -0.0966 |
| rs72724615  | T | -0.0417 |
| rs12511195  | T | -0.0447 |
| rs4577620   | A | 0.052   |
| rs28505678  | T | 0.0991  |
| rs1263329   | C | -0.0341 |
| rs79421241  | G | 0.0784  |
| rs6838387   | G | -0.0446 |
| rs7691607   | A | 0.0364  |
| rs74396259  | G | 0.0522  |
| rs9784422   | C | -0.0326 |
| rs1386625   | A | -0.0516 |
| rs6532168   | G | -0.049  |
| rs10014076  | G | -0.0304 |
| rs11729698  | T | 0.0306  |
| rs2309499   | T | 0.0389  |
| rs7674921   | A | 0.0405  |
| rs62315972  | G | -0.04   |
| rs2175494   | T | -0.0355 |
| rs60148981  | C | -0.038  |
| rs79519460  | G | 0.1857  |
| rs115154815 | T | -0.089  |
| rs35023169  | A | -0.039  |
| rs73827421  | C | -0.1457 |
| rs72715421  | T | -0.0939 |
| rs74896913  | A | -0.0806 |
| rs79541346  | T | 0.1669  |
| rs74432460  | A | 0.0974  |
| rs116787332 | A | -0.1686 |
| rs2710837   | T | 0.0287  |
| rs55894917  | A | 0.0454  |
| rs7669395   | A | -0.0366 |
| rs2618931   | T | 0.0531  |
| rs951787    | T | -0.2028 |
| rs77792955  | C | 0.1564  |
| rs7693278   | G | 0.0507  |
| rs66935367  | C | 0.034   |
| rs203437    | G | 0.0313  |
| rs116581805 | T | -0.1654 |
| rs28622224  | T | 0.0317  |
| rs62299068  | C | 0.1041  |
| rs62411618  | G | -0.1336 |
| rs143695455 | G | -0.1467 |
| rs1502740   | T | -0.0408 |

|             |   |         |
|-------------|---|---------|
| rs147852955 | A | 0.0518  |
| rs74347547  | A | 0.1806  |
| rs147502765 | A | 0.1731  |
| rs11728787  | T | -0.0383 |
| rs114698074 | A | 0.105   |
| rs143867338 | A | -0.1956 |
| rs62358469  | G | -0.0579 |
| rs76546208  | T | 0.1286  |
| rs16885718  | C | 0.1061  |
| rs2034704   | T | 0.1827  |
| rs75847579  | T | -0.1165 |
| rs7661726   | A | -0.1992 |
| rs13102480  | A | -0.0576 |
| rs62305413  | C | -0.0494 |
| rs62353544  | T | -0.0389 |
| rs12498874  | A | -0.0452 |
| rs56324706  | T | -0.0327 |
| rs12506090  | A | 0.0337  |
| rs150057400 | C | 0.1511  |
| rs1588514   | A | -0.0322 |
| rs6811602   | C | -0.0634 |
| rs12499410  | C | 0.0301  |
| rs10013873  | A | 0.1831  |
| rs144419150 | C | 0.1815  |
| rs56211328  | T | -0.228  |
| rs11723917  | T | -0.1248 |
| rs28651956  | G | -0.0544 |
| rs1873516   | A | 0.0301  |
| rs75831172  | T | -0.0889 |
| rs28888738  | T | -0.0565 |
| rs113077411 | A | 0.1252  |
| rs10007590  | G | 0.0363  |
| rs6552757   | A | 0.1885  |
| rs28633268  | C | 0.1024  |
| rs2102690   | T | 0.0346  |
| rs57491817  | C | -0.0628 |
| rs75641942  | A | 0.1417  |
| rs60373060  | A | 0.101   |
| rs56905341  | C | 0.0532  |
| rs116728888 | A | -0.1968 |
| rs111403188 | C | 0.0778  |
| rs17005319  | C | -0.1623 |
| rs76679495  | A | -0.1793 |
| rs13130975  | T | -0.0512 |
| rs142341862 | C | -0.2408 |
| rs4423831   | G | -0.0436 |
| rs143606481 | C | 0.1831  |

|             |   |         |
|-------------|---|---------|
| rs4864763   | G | 0.159   |
| rs60218442  | C | 0.0468  |
| rs13131479  | G | 0.0327  |
| rs12643638  | C | 0.0577  |
| rs77661998  | G | 0.2471  |
| rs7669848   | T | 0.0311  |
| rs17058978  | T | 0.0651  |
| rs150957872 | C | 0.2381  |
| rs78231556  | G | 0.0897  |
| rs10012223  | C | -0.13   |
| rs78245217  | G | -0.1691 |
| rs76221487  | A | -0.1516 |
| rs4699359   | A | 0.0823  |
| rs73223492  | G | 0.1     |
| rs28538980  | G | -0.1102 |
| rs28438616  | G | 0.0607  |
| rs56288661  | C | 0.1653  |
| rs80071555  | C | 0.116   |
| rs12498415  | T | -0.0391 |
| rs11938310  | T | -0.033  |
| rs17448536  | C | 0.0448  |
| rs11725734  | C | 0.029   |
| rs114114507 | T | -0.2302 |
| rs138416405 | C | 0.0966  |
| rs76069658  | C | -0.1967 |
| rs4691990   | T | 0.0434  |
| rs114520851 | A | 0.0577  |
| rs115151306 | A | -0.1332 |
| rs17023940  | A | 0.0361  |
| rs147157781 | G | 0.182   |
| rs1501135   | T | -0.0297 |
| rs116568893 | A | 0.182   |
| rs17291829  | G | -0.0403 |
| rs78855915  | A | -0.0592 |
| rs2061988   | T | -0.0294 |
| rs78970116  | T | 0.0744  |
| rs141543039 | A | 0.1344  |
| rs17586996  | T | -0.062  |
| rs924158    | C | 0.0537  |
| rs68103088  | C | -0.1017 |
| rs62409913  | G | 0.0645  |
| rs11730826  | T | -0.0356 |
| rs73148104  | A | 0.0462  |
| rs74670562  | T | -0.1429 |
| rs4835020   | A | -0.1025 |
| rs2010544   | T | -0.0588 |
| rs77950877  | T | -0.1327 |

|             |   |         |
|-------------|---|---------|
| rs9998321   | G | -0.0374 |
| rs17051351  | C | 0.0706  |
| rs56317495  | G | -0.0946 |
| rs80024052  | C | -0.1079 |
| rs75718978  | T | 0.1585  |
| rs144312618 | A | 0.1005  |
| rs145677708 | G | 0.1948  |
| rs2583221   | C | -0.0438 |
| rs74842870  | C | -0.097  |
| rs76417970  | C | 0.0606  |
| rs62314648  | A | -0.0381 |
| rs28715114  | T | 0.0303  |
| rs56407627  | C | 0.0281  |
| rs62306729  | A | 0.1494  |
| rs6830250   | C | -0.0358 |
| rs115886866 | A | 0.1077  |
| rs12647908  | T | -0.035  |
| rs111353210 | G | 0.0814  |
| rs116694123 | C | 0.0687  |
| rs62321510  | T | -0.2213 |
| rs74603876  | A | 0.0662  |
| rs111772667 | A | -0.0868 |
| rs78030545  | C | -0.1256 |
| rs7667073   | A | 0.0347  |
| rs28384378  | A | 0.1775  |
| rs6815059   | A | 0.0356  |
| rs223931    | T | 0.0292  |
| rs111716847 | T | 0.1315  |
| rs142096220 | A | 0.1432  |
| rs28726088  | A | 0.0774  |
| rs76587822  | A | -0.1472 |
| rs7672966   | A | -0.0487 |
| rs10004411  | G | 0.0434  |
| rs113636723 | C | 0.1648  |
| rs77298253  | C | 0.093   |
| rs61618883  | T | 0.0463  |
| rs73240544  | G | -0.0955 |
| rs10023816  | G | 0.1021  |
| rs2702455   | G | 0.0658  |
| rs9998733   | G | 0.0317  |
| rs116749719 | G | 0.162   |
| rs4373194   | C | 0.0362  |
| rs141124657 | T | -0.1267 |
| rs140528804 | A | -0.1537 |
| rs2866782   | C | -0.0638 |
| rs13105903  | T | -0.0537 |
| rs13133116  | G | 0.0379  |



|             |   |         |
|-------------|---|---------|
| rs72729818  | C | 0.0587  |
| rs244014    | A | 0.0304  |
| rs76700574  | A | 0.1534  |
| rs6849348   | T | 0.0449  |
| rs115193584 | A | -0.1133 |
| rs3109834   | T | -0.0839 |
| rs10050034  | C | 0.0458  |
| rs13148796  | T | 0.0349  |
| rs13101726  | T | 0.0385  |
| rs1080154   | A | -0.0728 |
| rs2345759   | T | 0.0316  |
| rs7434698   | T | 0.1308  |
| rs115650116 | A | 0.1205  |
| rs143194158 | G | 0.1361  |
| rs142501619 | T | -0.1603 |
| rs72658333  | T | -0.0472 |
| rs722123    | T | -0.1008 |
| rs114381990 | A | -0.2069 |
| rs78600292  | G | 0.0484  |
| rs78234724  | T | 0.1354  |
| rs284779    | G | 0.0372  |
| rs150661101 | T | 0.1157  |
| rs2376393   | A | 0.0432  |
| rs11931740  | A | -0.0355 |
| rs13104189  | T | -0.0505 |
| rs114129019 | T | 0.2675  |
| rs2581984   | G | 0.0282  |
| rs1473070   | C | -0.034  |
| rs72641531  | T | 0.1869  |
| rs3775777   | G | -0.03   |
| rs116078739 | C | -0.2547 |
| rs149038650 | C | 0.1414  |
| rs16996087  | C | -0.1752 |
| rs111722219 | T | -0.0362 |
| rs149382687 | C | 0.2287  |
| rs17089959  | A | 0.0353  |
| rs4455451   | C | -0.0667 |
| rs972313    | A | -0.0283 |
| rs7683982   | C | 0.0313  |
| rs6841164   | G | 0.0332  |
| rs141999434 | A | 0.1678  |
| rs77862673  | A | 0.1392  |
| rs145531718 | A | 0.2054  |
| rs2130872   | C | 0.0506  |
| rs142030053 | A | -0.2022 |
| rs77230143  | T | 0.0803  |
| rs114129619 | A | 0.2063  |

|             |   |         |
|-------------|---|---------|
| rs73241814  | A | 0.188   |
| rs2345476   | C | -0.0365 |
| rs116740990 | C | -0.179  |
| rs13112157  | T | 0.0612  |
| rs114597517 | A | 0.1117  |
| rs6832994   | G | -0.0775 |
| rs78711588  | T | -0.1379 |
| rs117332971 | T | -0.1019 |
| rs77232146  | C | 0.0799  |
| rs12639670  | A | -0.0458 |
| rs55956278  | A | -0.0304 |
| rs79057463  | G | -0.1441 |
| rs17306815  | G | -0.0564 |
| rs6552517   | C | -0.031  |
| rs112648965 | G | 0.0834  |
| rs2947408   | A | -0.1147 |
| rs75172189  | G | 0.2012  |
| rs1500382   | A | -0.0516 |
| rs62337919  | G | -0.1992 |
| rs62326588  | G | -0.036  |
| rs75453787  | C | 0.0805  |
| rs34124188  | C | -0.0316 |
| rs11727064  | T | -0.1999 |
| rs35363119  | C | -0.0343 |
| rs74681387  | A | 0.1849  |
| rs62352005  | A | 0.0861  |
| rs4861312   | T | 0.1253  |
| rs9917873   | A | -0.116  |
| rs17055345  | C | 0.0485  |
| rs13128392  | T | -0.0318 |
| rs16897644  | G | 0.0408  |
| rs147569112 | G | 0.1883  |
| rs2170551   | T | -0.0587 |
| rs2341216   | G | 0.0783  |
| rs1013510   | G | -0.0443 |
| rs1983112   | C | 0.049   |
| rs13135735  | T | -0.0305 |
| rs72968010  | C | 0.1274  |
| rs12501485  | G | 0.0323  |
| rs10026647  | A | 0.0516  |
| rs17431991  | T | 0.0859  |
| rs74327278  | C | -0.108  |
| rs17525667  | G | -0.2512 |
| rs114022292 | T | -0.0975 |
| rs2061516   | T | -0.0776 |
| rs116822161 | C | -0.171  |
| rs78993076  | A | 0.2814  |

|             |   |         |
|-------------|---|---------|
| rs34541023  | T | -0.0583 |
| rs67808462  | T | -0.0308 |
| rs113038550 | C | -0.2367 |
| rs11733194  | C | 0.1297  |
| rs13117737  | C | 0.0284  |
| rs11938225  | C | 0.039   |
| rs6833679   | T | 0.1159  |
| rs6823516   | T | -0.0534 |
| rs145197114 | C | 0.1597  |
| rs13103965  | A | 0.0447  |
| rs17862068  | T | 0.2475  |
| rs113463146 | T | 0.1039  |
| rs4352484   | A | 0.0382  |
| rs1490576   | C | 0.0278  |
| rs1453045   | G | 0.0491  |
| rs16878958  | T | 0.0764  |
| rs74386594  | G | -0.2003 |
| rs57810789  | T | 0.0432  |
| rs9997599   | T | -0.1031 |
| rs1471483   | T | -0.0286 |
| rs114683994 | A | 0.218   |
| rs12504895  | A | 0.0773  |
| rs13136820  | C | -0.0325 |
| rs6838129   | A | 0.029   |
| rs79008894  | T | -0.1267 |
| rs1405682   | A | 0.1058  |
| rs62311835  | C | -0.1766 |
| rs147391728 | A | 0.1038  |
| rs3828550   | A | 0.0321  |
| rs12502456  | G | -0.0955 |
| rs2421267   | T | 0.0373  |
| rs4577569   | G | 0.1096  |
| rs34879386  | T | -0.05   |
| rs73258353  | C | -0.1356 |
| rs34627176  | A | 0.0438  |
| rs76060705  | A | 0.1553  |
| rs1552974   | T | -0.0283 |
| rs114135564 | T | 0.159   |
| rs141864363 | A | -0.1072 |
| rs1388320   | A | -0.0308 |
| rs7669647   | A | -0.0399 |
| rs4698811   | A | -0.0326 |
| rs72715998  | G | -0.111  |
| rs56852457  | G | 0.1477  |
| rs11725082  | C | 0.03    |
| rs76917347  | A | -0.1803 |
| rs79164348  | A | 0.188   |

|             |   |         |
|-------------|---|---------|
| rs57699692  | C | -0.035  |
| rs114184943 | T | -0.1561 |
| rs35117586  | G | 0.032   |
| rs4859528   | A | 0.0479  |
| rs34967228  | C | 0.0391  |
| rs58034070  | A | -0.0648 |
| rs144689627 | G | 0.1807  |
| rs17032291  | T | -0.0675 |
| rs4078180   | G | -0.0507 |
| rs17074362  | G | 0.0361  |
| rs148808310 | C | -0.2145 |
| rs13111393  | T | 0.0319  |
| rs4415001   | A | 0.0359  |
| rs2903896   | T | -0.0379 |
| rs6854083   | G | 0.0628  |
| rs4547796   | C | 0.0356  |
| rs10034750  | G | -0.0311 |
| rs12503539  | A | -0.0422 |
| rs80197926  | C | -0.05   |
| rs77411647  | G | -0.1144 |
| rs7698090   | C | -0.103  |
| rs814390    | G | 0.028   |
| rs4956082   | G | 0.0344  |
| rs61796111  | G | 0.1687  |
| rs78017389  | T | -0.1027 |
| rs35006789  | A | 0.0346  |
| rs9307071   | A | -0.0319 |
| rs79442957  | A | 0.1066  |
| rs13136187  | A | -0.136  |
| rs77380431  | A | -0.0996 |
| rs1724557   | C | -0.0325 |
| rs9998401   | G | 0.0928  |
| rs11722846  | A | 0.0358  |
| rs72652795  | T | 0.1811  |
| rs138159921 | C | 0.1335  |
| rs10005706  | T | -0.089  |
| rs7687066   | G | 0.0685  |
| rs114782514 | G | 0.2107  |
| rs116058722 | G | -0.1937 |
| rs77885998  | A | 0.0958  |
| rs17582143  | A | -0.1177 |
| rs146365485 | G | 0.1053  |
| rs116094176 | T | 0.1584  |
| rs11735311  | T | -0.0976 |
| rs74669921  | C | 0.1184  |
| rs35197617  | T | 0.0304  |
| rs78420507  | A | 0.0921  |

|             |   |         |
|-------------|---|---------|
| rs77949878  | G | 0.0811  |
| rs146778139 | A | 0.1758  |
| rs13152434  | C | -0.1775 |
| rs114321141 | C | 0.0981  |
| rs2019908   | G | -0.0365 |
| rs62295421  | C | 0.1417  |
| rs138803617 | A | -0.1766 |
| rs62289284  | G | -0.0922 |
| rs11941122  | T | 0.029   |
| rs2590822   | T | -0.0358 |
| rs62350593  | C | -0.0534 |
| rs111840470 | A | -0.1784 |
| rs17384915  | G | 0.0293  |
| rs115559424 | A | -0.1643 |
| rs147122280 | T | 0.1285  |
| rs114596400 | A | 0.1299  |
| rs74848057  | C | 0.0904  |
| rs13151519  | A | 0.108   |
| rs114152358 | C | -0.1685 |
| rs76200782  | G | -0.1804 |
| rs4425335   | G | 0.0308  |
| rs13126013  | G | -0.0675 |
| rs13149268  | C | -0.0299 |
| rs140864384 | T | -0.0894 |
| rs12645631  | A | 0.0401  |
| rs55728547  | C | -0.0412 |
| rs1468545   | A | -0.0318 |
| rs72953046  | A | 0.0872  |
| rs57657064  | A | 0.0632  |
| rs10434298  | T | 0.0625  |
| rs116737061 | A | -0.0417 |
| rs80090500  | T | -0.054  |
| rs10018687  | T | -0.0376 |
| rs6834591   | T | -0.1833 |
| rs76355532  | G | 0.1228  |
| rs114590378 | T | 0.1475  |
| rs6835929   | G | -0.0458 |
| rs57514407  | C | 0.0381  |
| rs526304    | C | -0.0374 |
| rs79669236  | T | 0.148   |
| rs114967689 | G | -0.2283 |
| rs34023270  | T | 0.087   |
| rs71606108  | T | -0.0898 |
| rs61795421  | G | -0.0413 |
| rs61700497  | G | 0.0465  |
| rs73807457  | A | 0.1239  |
| rs72667493  | A | 0.111   |

|             |   |         |
|-------------|---|---------|
| rs17712401  | A | 0.0745  |
| rs80304248  | T | -0.0921 |
| rs4635780   | G | 0.0287  |
| rs62316233  | T | 0.1363  |
| rs17327410  | G | -0.1504 |
| rs62316190  | G | -0.0838 |
| rs12504254  | C | 0.063   |
| rs114025208 | T | -0.1457 |
| rs78599785  | T | -0.0493 |
| rs114715859 | G | -0.1605 |
| rs75440178  | C | -0.072  |
| rs6551723   | T | 0.0801  |
| rs149379082 | C | 0.2074  |
| rs76259364  | A | 0.0969  |
| rs4333219   | T | -0.183  |
| rs11726281  | C | -0.0585 |
| rs62410180  | C | -0.1471 |
| rs34490049  | A | 0.029   |
| rs79818218  | A | 0.0425  |
| rs12651252  | C | 0.1433  |
| rs13132098  | G | 0.0294  |
| rs2622612   | T | -0.0689 |
| rs76509691  | T | 0.2167  |
| rs10022955  | A | 0.0281  |
| rs62318668  | C | 0.1442  |
| rs1757922   | T | 0.1497  |
| rs72644723  | C | 0.1086  |
| rs17471212  | G | 0.0861  |
| rs76337973  | C | -0.1259 |
| rs71603927  | G | 0.0648  |
| rs12511735  | C | -0.0336 |
| rs1281143   | G | -0.0444 |
| rs4865171   | G | -0.0413 |
| rs28453834  | T | 0.1389  |
| rs28452418  | T | 0.039   |
| rs7693824   | T | -0.0532 |
| rs9999325   | C | 0.1158  |
| rs116513979 | G | 0.1413  |
| rs7698851   | A | -0.0419 |
| rs166777    | C | 0.0459  |
| rs6847172   | G | 0.0287  |
| rs78020180  | T | -0.1081 |
| rs116614155 | A | 0.1497  |
| rs2059117   | G | 0.0317  |
| rs17527016  | T | 0.0537  |
| rs149293287 | G | 0.0333  |
| rs61688021  | A | 0.0604  |

|             |   |         |
|-------------|---|---------|
| rs114126723 | G | 0.0911  |
| rs78743592  | T | 0.0585  |
| rs28718811  | C | -0.0298 |
| rs1157023   | T | 0.0315  |
| rs4623093   | T | -0.0478 |
| rs62309857  | G | 0.1094  |
| rs77667837  | T | 0.1331  |
| rs73240047  | G | -0.1127 |
| rs4694381   | G | 0.0344  |
| rs13137688  | C | -0.0342 |
| rs112425218 | T | -0.1059 |
| rs145557762 | T | 0.1742  |
| rs1318884   | C | -0.0307 |
| rs12163869  | A | -0.0374 |
| rs2319907   | C | 0.0453  |
| rs138194142 | A | 0.246   |
| rs111373050 | G | -0.1734 |
| rs114262253 | C | 0.093   |
| rs115613784 | T | -0.1759 |
| rs114927960 | G | -0.1443 |
| rs141308127 | G | 0.1155  |
| rs4956414   | A | 0.0994  |
| rs79539766  | G | -0.1576 |
| rs72685405  | G | -0.1334 |
| rs10050232  | A | 0.0314  |
| rs2705978   | G | -0.0434 |
| rs12508028  | C | -0.029  |
| rs480450    | T | 0.0276  |
| rs114491684 | T | -0.0853 |
| rs952726    | T | -0.0278 |
| rs148257484 | G | -0.138  |
| rs17006462  | T | 0.1931  |
| rs11733059  | A | 0.0498  |
| rs114266518 | A | 0.1832  |
| rs75038714  | C | 0.0875  |
| rs34335503  | T | -0.0857 |
| rs72690430  | A | 0.1029  |
| rs56805755  | T | 0.0779  |
| rs6534991   | C | 0.0293  |
| rs55914648  | T | -0.0326 |
| rs17271582  | T | 0.0676  |
| rs28426993  | T | -0.0762 |
| rs12500666  | G | -0.0305 |
| rs114130949 | T | 0.1862  |
| rs9998470   | C | 0.0322  |
| rs28567730  | A | 0.0529  |
| rs77186738  | C | -0.1157 |

|             |   |         |
|-------------|---|---------|
| rs115710205 | C | 0.1231  |
| rs2866023   | C | -0.0288 |
| rs716948    | T | 0.0436  |
| rs71620245  | A | -0.062  |
| rs4235123   | C | -0.0317 |
| rs9291290   | T | 0.0306  |
| rs73113216  | A | 0.0757  |
| rs73232185  | G | 0.0327  |
| rs13152477  | T | -0.1648 |
| rs76596643  | A | 0.2513  |
| rs140939800 | A | 0.1265  |
| rs17011169  | G | -0.1618 |
| rs118182494 | T | 0.1598  |
| rs9307834   | C | 0.0283  |
| rs55702612  | A | -0.1326 |
| rs146663912 | C | 0.1663  |
| rs75010774  | C | 0.1088  |
| rs72651558  | T | -0.1097 |
| rs4264889   | C | -0.0292 |
| rs12508067  | A | 0.0388  |
| rs10013817  | A | 0.0273  |
| rs138774387 | C | 0.163   |
| rs2099606   | G | 0.1057  |
| rs988717    | A | -0.1012 |
| rs6824600   | C | -0.0861 |
| rs17789584  | C | 0.149   |
| rs4257646   | A | 0.0459  |
| rs62307874  | T | -0.0558 |
| rs72732119  | T | -0.0543 |
| rs139096821 | A | 0.0632  |
| rs144710076 | T | -0.0703 |
| rs7657530   | G | -0.0314 |
| rs71607244  | T | 0.0953  |
| rs77535344  | T | 0.1263  |
| rs115328341 | G | 0.1301  |
| rs17821431  | C | 0.0567  |
| rs9714756   | T | -0.0893 |
| rs570799    | G | 0.091   |
| rs4235441   | A | 0.1369  |
| rs1484185   | T | -0.0867 |
| rs17422624  | A | 0.061   |
| rs1395483   | T | -0.0281 |
| rs4473617   | G | 0.0336  |
| rs2621243   | C | -0.0617 |
| rs148665009 | C | -0.03   |
| rs138255000 | A | 0.096   |
| rs10213366  | T | 0.0703  |



|             |   |         |
|-------------|---|---------|
| rs6814839   | G | 0.0531  |
| rs71611904  | A | -0.0975 |
| rs114664020 | T | -0.091  |
| rs73250370  | A | 0.0521  |
| rs2126021   | G | 0.07    |
| rs13137603  | T | -0.0527 |
| rs2279894   | G | -0.0287 |
| rs115827593 | T | 0.1352  |
| rs11729565  | C | 0.0535  |
| rs13145224  | G | 0.0383  |
| rs715070    | A | 0.028   |
| rs6820980   | G | -0.0325 |
| rs11100873  | A | -0.0505 |
| rs72646389  | T | -0.1358 |
| rs1988029   | C | 0.0447  |
| rs9684777   | A | 0.0961  |
| rs113754426 | C | 0.1026  |
| rs13146310  | A | -0.1121 |
| rs115808046 | G | 0.1071  |
| rs116797506 | A | 0.0999  |
| rs73163103  | T | 0.1775  |
| rs77898182  | C | 0.138   |
| rs6536201   | G | -0.064  |
| rs79276117  | T | -0.1166 |
| rs6822594   | A | 0.1571  |
| rs71609917  | T | -0.1928 |
| rs79644512  | A | 0.0567  |
| rs113599936 | A | 0.0847  |
| rs7681164   | G | -0.0309 |
| rs4631015   | A | 0.0444  |
| rs150116088 | A | -0.1364 |
| rs6533371   | T | 0.0278  |
| rs12645842  | G | 0.0274  |
| rs80047303  | G | 0.1377  |
| rs55842816  | T | -0.1517 |
| rs13151601  | A | 0.0293  |
| rs61795295  | T | -0.1588 |
| rs1358235   | T | 0.0336  |
| rs41266531  | G | 0.0521  |
| rs7676531   | C | 0.0879  |
| rs62305968  | T | -0.0479 |
| rs13143266  | A | -0.0281 |
| rs75472494  | T | -0.0812 |
| rs6857300   | A | 0.028   |
| rs11725447  | A | -0.0386 |
| rs144452756 | T | -0.2656 |
| rs17043355  | C | -0.0441 |

|             |   |         |
|-------------|---|---------|
| rs4691706   | C | 0.0601  |
| rs11724382  | T | -0.0473 |
| rs116630353 | A | -0.1067 |
| rs115421600 | A | -0.0748 |
| rs76518241  | T | -0.0373 |
| rs11133134  | T | -0.1085 |
| rs720393    | A | -0.0756 |
| rs77461338  | A | 0.2192  |
| rs12639689  | G | -0.0486 |
| rs72664574  | A | 0.0481  |
| rs59347188  | G | 0.0382  |
| rs75752296  | A | 0.0701  |
| rs137989690 | A | 0.1079  |
| rs79626750  | C | 0.0783  |
| rs2222412   | T | 0.0546  |
| rs62315548  | C | 0.2492  |
| rs2582038   | A | 0.0526  |
| rs11728279  | T | 0.031   |
| rs57799941  | A | -0.0564 |
| rs113155751 | A | 0.0981  |
| rs79318996  | A | -0.0466 |
| rs72708708  | A | -0.1069 |
| rs78292477  | A | -0.1427 |
| rs2353314   | G | 0.027   |
| rs67500096  | C | 0.0485  |
| rs35924119  | A | -0.0363 |
| rs73221004  | A | -0.0406 |
| rs11722208  | A | -0.0314 |
| rs113479564 | A | 0.0833  |
| rs10012412  | C | 0.1734  |
| rs73090925  | G | -0.114  |
| rs111334123 | T | 0.0604  |
| rs4695992   | A | 0.0339  |
| rs75605345  | G | 0.1264  |
| rs142053468 | T | -0.1465 |
| rs4690542   | T | -0.0305 |
| rs112050683 | T | 0.1467  |
| rs80052463  | T | 0.0822  |
| rs207397    | T | 0.0398  |
| rs147763441 | A | -0.1254 |
| rs4693739   | C | -0.0282 |
| rs111803265 | G | 0.0703  |
| rs114506178 | A | 0.1031  |
| rs11733163  | T | 0.0318  |
| rs111695016 | A | 0.0858  |
| rs77506232  | G | -0.115  |
| rs6532064   | T | 0.0611  |

|             |   |         |
|-------------|---|---------|
| rs115270146 | G | -0.1033 |
| rs112838775 | T | -0.152  |
| rs150012826 | T | -0.1846 |
| rs76915287  | T | 0.1496  |
| rs114112160 | G | -0.1316 |
| rs77916140  | T | -0.1287 |
| rs72682261  | T | -0.0917 |
| rs78215194  | C | 0.036   |
| rs139182978 | T | -0.0731 |
| rs137976799 | A | -0.1463 |
| rs143615652 | T | -0.0959 |
| rs512590    | T | 0.0956  |
| rs78766975  | C | -0.1446 |
| rs62294694  | G | -0.035  |
| rs6831390   | A | 0.0315  |
| rs62328001  | T | -0.0889 |
| rs6836241   | T | 0.0617  |
| rs145267967 | T | -0.2332 |
| rs13136434  | G | -0.0524 |
| rs71613831  | A | -0.2256 |
| rs6553671   | A | -0.0326 |
| rs10212851  | C | -0.0347 |
| rs12510474  | G | 0.0422  |
| rs34413108  | G | -0.0483 |
| rs6848595   | G | 0.0349  |
| rs73093812  | C | -0.1322 |
| rs12513279  | A | -0.0271 |
| rs113686172 | A | 0.2654  |
| rs7681989   | T | -0.032  |
| rs4832876   | T | -0.0321 |
| rs10213527  | G | -0.043  |
| rs142101248 | T | -0.1892 |
| rs10939033  | G | -0.0279 |
| rs61792235  | G | -0.1175 |
| rs111259417 | G | 0.16    |
| rs34842178  | C | 0.1782  |
| rs60035268  | A | -0.0566 |
| rs150922434 | G | -0.1372 |
| rs144342117 | T | -0.1834 |
| rs17580740  | C | 0.0353  |
| rs62324030  | A | -0.1352 |
| rs7671216   | T | 0.0318  |
| rs1510808   | A | 0.0439  |
| rs77424907  | T | -0.0821 |
| rs72637883  | C | 0.1604  |
| rs6824430   | C | 0.0391  |
| rs7663213   | A | 0.1091  |

|             |   |         |
|-------------|---|---------|
| rs2130642   | T | -0.0271 |
| rs146526206 | C | 0.2284  |
| rs74808541  | T | 0.1678  |
| rs3733510   | A | -0.0828 |
| rs9994348   | A | 0.0369  |
| rs278988    | G | 0.0321  |
| rs75075977  | G | 0.067   |
| rs17228485  | A | 0.0325  |
| rs114578848 | A | -0.2    |
| rs7664238   | C | -0.0269 |
| rs139199874 | G | 0.2081  |
| rs3775869   | C | 0.0267  |
| rs13106791  | T | 0.073   |
| rs149247824 | A | -0.2124 |
| rs12503726  | T | 0.176   |
| rs138772678 | G | -0.1707 |
| rs13116567  | T | -0.0272 |
| rs6823492   | A | 0.0492  |
| rs138477272 | C | -0.049  |
| rs1392896   | T | -0.0295 |
| rs6835806   | C | 0.0385  |
| rs62309614  | G | 0.1071  |
| rs2221782   | C | -0.0916 |
| rs1388311   | A | -0.0574 |
| rs13127195  | T | -0.0318 |
| rs76558028  | A | 0.0986  |
| rs114426427 | A | 0.2058  |
| rs115559698 | G | 0.147   |
| rs2710818   | C | -0.0313 |
| rs33978842  | C | -0.0945 |
| rs116700186 | T | -0.1073 |
| rs4698085   | A | -0.1    |
| rs80112164  | A | 0.0792  |
| rs2946398   | T | 0.0281  |
| rs969010    | G | -0.0282 |
| rs34850839  | G | 0.088   |
| rs143698358 | C | -0.1401 |
| rs17028116  | T | -0.0461 |
| rs62302274  | T | 0.2146  |
| rs203723    | C | 0.0461  |
| rs7669710   | A | 0.0292  |
| rs4864540   | T | -0.0305 |
| rs138419263 | C | -0.0785 |
| rs12650215  | A | 0.0493  |
| rs36021809  | A | -0.0274 |
| rs7441166   | C | -0.0801 |
| rs9992693   | T | -0.0303 |

|             |   |         |
|-------------|---|---------|
| rs12646375  | C | 0.057   |
| rs73873392  | A | -0.1309 |
| rs17029345  | A | 0.043   |
| rs1718824   | A | -0.0321 |
| rs12506925  | C | 0.0284  |
| rs72855283  | A | 0.1087  |
| rs1878401   | G | 0.0303  |
| rs111412575 | T | 0.157   |
| rs7691428   | C | -0.0476 |
| rs115164983 | G | -0.1856 |
| rs6851110   | A | -0.031  |
| rs78315406  | G | -0.2238 |
| rs58466439  | A | 0.0382  |
| rs6820021   | C | 0.0345  |
| rs35454701  | T | -0.055  |
| rs142901283 | C | -0.1048 |
| rs72666542  | G | 0.0734  |
| rs78016224  | A | 0.1556  |
| rs115520993 | G | 0.0776  |
| rs13146660  | G | 0.0439  |
| rs116445469 | T | 0.0945  |
| rs1491313   | T | -0.0381 |
| rs10008867  | A | -0.0319 |
| rs6851178   | T | -0.0312 |
| rs36045894  | C | 0.0354  |
| rs13143875  | T | -0.1    |
| rs13122144  | T | -0.0475 |
| rs908013    | G | -0.0449 |
| rs139488523 | G | 0.1613  |
| rs112020430 | T | 0.1127  |
| rs13120429  | G | 0.0986  |
| rs3924180   | T | 0.0524  |
| rs756516    | G | 0.055   |
| rs2247831   | T | -0.0836 |
| rs78673751  | T | 0.091   |
| rs62354298  | T | -0.0539 |
| rs141388771 | C | 0.1511  |
| rs72655714  | T | -0.0507 |
| rs140616291 | T | 0.0716  |
| rs76850474  | A | -0.0883 |
| rs6448473   | G | -0.0286 |
| rs144912307 | C | 0.1846  |
| rs139505552 | C | -0.1633 |
| rs4396998   | C | 0.035   |
| rs113903022 | C | -0.0668 |
| rs149410181 | T | 0.1607  |
| rs4371590   | A | -0.0614 |

|             |   |         |
|-------------|---|---------|
| rs2174656   | A | -0.0417 |
| rs71607920  | G | -0.0899 |
| rs111227042 | T | 0.1034  |
| rs6855153   | A | 0.1107  |
| rs75969857  | G | 0.0462  |
| rs35210059  | A | -0.1224 |
| rs6833202   | A | -0.0459 |
| rs7695418   | T | -0.0501 |
| rs13125685  | A | -0.1153 |
| rs35389354  | T | -0.0346 |
| rs114781471 | A | 0.0542  |
| rs55888429  | T | -0.0407 |
| rs6848976   | C | 0.0976  |
| rs114876348 | C | 0.1806  |
| rs80353184  | A | -0.1875 |
| rs11942146  | G | -0.035  |
| rs72661932  | G | -0.1415 |
| rs80136695  | G | -0.0543 |
| rs145382868 | G | -0.2412 |
| rs115854294 | G | -0.1362 |
| rs10014757  | G | -0.0857 |
| rs4246697   | C | -0.0497 |
| rs140448422 | C | 0.1321  |
| rs950950    | T | 0.0281  |
| rs146866664 | G | -0.1244 |
| rs28629414  | T | 0.0493  |
| rs78619534  | T | 0.0641  |
| rs7679296   | T | -0.0869 |
| rs4271997   | G | -0.1242 |
| rs6533389   | T | -0.0278 |
| rs76964101  | A | 0.2215  |
| rs13107059  | C | -0.0652 |
| rs59595610  | A | -0.0867 |
| rs116328935 | A | 0.1244  |
| rs13136794  | C | 0.028   |
| rs116171193 | G | 0.117   |
| rs6848178   | T | -0.0288 |
| rs1916112   | G | -0.0293 |
| rs12510033  | C | 0.0544  |
| rs11932677  | C | -0.0504 |
| rs6447189   | C | -0.115  |
| rs74506398  | A | 0.145   |
| rs4359951   | A | -0.0828 |
| rs116349060 | A | 0.1216  |
| rs116306905 | G | 0.1928  |
| rs28708419  | T | 0.2266  |
| rs150487132 | A | -0.116  |

|             |   |         |
|-------------|---|---------|
| rs73011536  | G | -0.0549 |
| rs74539743  | G | -0.062  |
| rs62322736  | C | -0.2075 |
| rs12498613  | A | 0.1077  |
| rs56169775  | A | -0.0354 |
| rs62331464  | C | 0.0984  |
| rs13124387  | G | -0.0286 |
| rs72654047  | A | -0.0383 |
| rs62617788  | T | 0.1997  |
| rs12643755  | G | 0.0307  |
| rs111923510 | T | -0.0842 |
| rs11735162  | G | 0.0516  |
| rs11727964  | A | -0.1787 |
| rs114602388 | C | -0.1919 |
| rs72705934  | C | 0.1618  |
| rs4835272   | C | -0.0275 |
| rs10023386  | A | 0.0332  |
| rs751240    | T | 0.0477  |
| rs114527888 | G | -0.0598 |
| rs75866404  | T | -0.0553 |
| rs33969229  | A | 0.0368  |
| rs1651207   | C | -0.0282 |
| rs6534330   | T | 0.0268  |
| rs73200156  | A | 0.056   |
| rs77686042  | C | 0.0985  |
| rs72716281  | G | 0.1196  |
| rs17028449  | G | 0.0422  |
| rs231704    | T | -0.0332 |
| rs9996645   | C | -0.037  |
| rs55985235  | T | 0.0925  |
| rs78258339  | C | -0.1379 |
| rs10005563  | G | 0.0333  |
| rs28729447  | C | 0.0345  |
| rs114128538 | C | 0.1258  |
| rs114205782 | A | -0.1796 |
| rs1031619   | G | 0.0463  |
| rs142556011 | C | 0.2406  |
| rs13136271  | C | 0.0723  |
| rs10002310  | T | -0.0468 |
| rs56314964  | C | -0.1538 |
| rs1580397   | A | -0.0337 |
| rs138401876 | A | 0.0789  |
| rs778959    | A | 0.0448  |
| rs74320175  | G | 0.0513  |
| rs10021224  | A | 0.0425  |
| rs79294206  | A | 0.0468  |
| rs56168679  | G | 0.0341  |

|             |   |         |
|-------------|---|---------|
| rs62302027  | C | -0.0554 |
| rs13101536  | C | 0.0678  |
| rs79572918  | C | -0.0676 |
| rs78304486  | A | 0.1086  |
| rs116433539 | C | -0.1642 |
| rs9991734   | C | -0.0465 |
| rs35695401  | A | 0.0988  |
| rs115896737 | A | -0.1385 |
| rs981707    | C | -0.0271 |
| rs114573235 | A | -0.0934 |
| rs62297306  | A | -0.0648 |
| rs62272671  | A | -0.1112 |
| rs17609388  | G | -0.0642 |
| rs10027713  | C | 0.0426  |
| rs6828374   | A | 0.0392  |
| rs72699366  | T | 0.1491  |
| rs75749513  | T | -0.0918 |
| rs114651112 | A | -0.0935 |
| rs7676808   | A | -0.0353 |
| rs10939019  | A | -0.0388 |
| rs17414502  | G | 0.0886  |
| rs13139483  | T | 0.1503  |
| rs114586006 | G | 0.0947  |
| rs114893847 | A | -0.1335 |
| rs2309551   | T | -0.0499 |
| rs113386281 | T | 0.1131  |
| rs78558879  | G | 0.2164  |
| rs17238258  | C | -0.0735 |
| rs4362858   | T | 0.0306  |
| rs11939384  | T | -0.1192 |
| rs142155220 | A | 0.0884  |
| rs4863372   | T | -0.0363 |
| rs73170287  | T | -0.0323 |
| rs11728165  | T | 0.0641  |
| rs6828436   | C | 0.027   |
| rs74965117  | A | 0.2106  |
| rs11731779  | T | -0.139  |
| rs6838099   | T | -0.0358 |
| rs75702808  | C | -0.1094 |
| rs140167976 | G | 0.0393  |
| rs74882681  | T | -0.1462 |
| rs114887545 | T | 0.2258  |
| rs72668897  | A | -0.0861 |
| rs4146951   | A | 0.1268  |
| rs72636437  | C | 0.1502  |
| rs2380962   | G | 0.0285  |
| rs6447438   | A | 0.0311  |



|             |   |         |
|-------------|---|---------|
| rs17294646  | T | 0.0594  |
| rs3733513   | G | 0.0267  |
| rs6534603   | T | 0.0809  |
| rs77884628  | G | 0.1532  |
| rs141457331 | A | 0.0864  |
| rs985955    | G | 0.0284  |
| rs78173711  | C | 0.1358  |
| rs1863320   | G | 0.1968  |
| rs114017271 | C | 0.1582  |
| rs6827328   | C | 0.0785  |
| rs151185599 | A | -0.056  |
| rs2710550   | C | -0.0619 |
| rs11097961  | A | 0.0278  |
| rs787370    | G | 0.0766  |
| rs13130144  | G | 0.0285  |
| rs11934112  | T | -0.0271 |
| rs1711386   | C | -0.0294 |
| rs116526639 | T | 0.1124  |
| rs76429428  | C | 0.1652  |
| rs114643994 | C | -0.1169 |
| rs7668879   | T | -0.0801 |
| rs13102975  | C | 0.0276  |
| rs78688224  | T | -0.0699 |
| rs75350957  | G | -0.0956 |
| rs7356245   | T | -0.1407 |
| rs77342086  | C | -0.0863 |
| rs80147085  | T | 0.0974  |
| rs143288105 | A | 0.1954  |
| rs6837348   | A | -0.0286 |
| rs6446801   | A | -0.0844 |
| rs1920966   | G | 0.0369  |
| rs75495461  | C | -0.1721 |
| rs10002644  | G | -0.0392 |
| rs6841800   | C | 0.0339  |
| rs77528541  | T | 0.0542  |
| rs2237015   | T | -0.1269 |
| rs116499607 | C | 0.178   |
| rs12504885  | A | -0.0524 |
| rs77246319  | C | 0.0757  |
| rs150530659 | C | -0.216  |
| rs77640252  | A | 0.1019  |
| rs72638535  | C | -0.1826 |
| rs78339212  | C | -0.0386 |
| rs191795    | A | 0.0284  |
| rs4540090   | G | -0.1661 |
| rs76107328  | C | 0.1362  |
| rs77996123  | A | -0.0942 |

|             |   |         |
|-------------|---|---------|
| rs13113474  | G | 0.0286  |
| rs77626308  | G | 0.1308  |
| rs6823540   | T | 0.0323  |
| rs3860070   | C | 0.0569  |
| rs1597471   | G | -0.0797 |
| rs313983    | T | -0.0489 |
| rs10027079  | C | 0.0306  |
| rs6844585   | T | -0.0363 |
| rs36167152  | A | -0.0409 |
| rs111651776 | C | -0.0938 |
| rs115239043 | T | 0.1749  |
| rs2171516   | T | 0.0522  |
| rs79789270  | G | 0.0643  |
| rs72682405  | C | -0.067  |
| rs10520304  | T | 0.0438  |
| rs78848214  | C | 0.0693  |
| rs57560615  | G | 0.1371  |
| rs1425354   | A | -0.112  |
| rs515219    | T | 0.0398  |
| rs1353310   | G | -0.0278 |
| rs4302525   | T | 0.04    |
| rs2874977   | G | -0.0306 |
| rs763922    | A | -0.0449 |
| rs2868355   | G | 0.0262  |
| rs7689997   | T | -0.0624 |
| rs138455423 | A | -0.1475 |
| rs11734105  | G | -0.0279 |
| rs112340277 | C | 0.1172  |
| rs12502464  | G | -0.0274 |
| rs6857041   | A | -0.0943 |
| rs4549391   | G | 0.0337  |
| rs6816705   | G | -0.0267 |
| rs61797824  | A | -0.1168 |
| rs62343123  | T | -0.0346 |
| rs1522206   | A | 0.0503  |
| rs28525617  | T | 0.0562  |
| rs77452890  | A | 0.0883  |
| rs114048445 | C | -0.1561 |
| rs114432967 | G | -0.0938 |
| rs7687139   | C | 0.0297  |
| rs145483892 | A | 0.1627  |
| rs17007272  | C | -0.1244 |
| rs559767    | G | 0.0268  |
| rs62327891  | T | 0.0366  |
| rs116738606 | C | 0.1032  |
| rs11944172  | G | 0.0811  |
| rs11734412  | T | -0.0298 |

|             |   |         |
|-------------|---|---------|
| rs72731595  | A | -0.1578 |
| rs619259    | A | -0.0297 |
| rs59596441  | T | -0.0534 |
| rs114927941 | T | 0.0767  |
| rs1295449   | C | -0.0377 |
| rs11098878  | A | -0.0508 |
| rs79299538  | A | -0.0459 |
| rs4689357   | A | 0.0442  |
| rs138579830 | C | -0.0512 |
| rs112692398 | T | -0.1898 |
| rs116044186 | T | -0.119  |
| rs61351267  | A | -0.0464 |
| rs112402181 | C | -0.1567 |
| rs115048659 | T | -0.1994 |
| rs74890840  | T | 0.0519  |
| rs74408795  | G | -0.0777 |
| rs116382245 | T | 0.0695  |
| rs72706190  | C | 0.1405  |
| rs75965940  | T | 0.1875  |
| rs10023790  | C | -0.0331 |
| rs3775576   | C | -0.046  |
| rs73230928  | G | -0.1271 |
| rs12642097  | A | -0.0442 |
| rs113792372 | T | -0.0564 |
| rs73218390  | C | 0.1434  |
| rs7657936   | A | 0.0359  |
| rs55959947  | C | 0.0665  |
| rs66580531  | T | -0.0355 |
| rs74444372  | T | 0.0758  |
| rs77477491  | T | 0.0993  |
| rs7689036   | A | 0.0268  |
| rs1456863   | G | -0.0475 |
| rs77780334  | G | 0.1044  |
| rs612428    | T | 0.0428  |
| rs11934523  | A | 0.03    |
| rs146999456 | G | 0.0529  |
| rs6448607   | C | -0.041  |
| rs115393805 | C | 0.1099  |
| rs13145229  | C | 0.1033  |
| rs76436572  | T | -0.1128 |
| rs74690445  | C | 0.1945  |
| rs77345082  | G | 0.0544  |
| rs62321952  | T | -0.0639 |
| rs79981133  | G | -0.1371 |
| rs35992292  | T | 0.0336  |
| rs77963311  | C | 0.0488  |
| rs2699023   | G | 0.0531  |

|             |   |         |
|-------------|---|---------|
| rs78918240  | C | -0.23   |
| rs79861743  | G | 0.0514  |
| rs6857538   | A | 0.0282  |
| rs17804930  | G | -0.033  |
| rs114578432 | G | -0.1601 |
| rs144989385 | C | 0.1119  |
| rs112726113 | A | -0.18   |
| rs11736034  | G | 0.0569  |
| rs7686062   | A | -0.1019 |
| rs28544467  | G | -0.0372 |
| rs3796407   | A | 0.0302  |
| rs2068783   | A | -0.0293 |
| rs112728585 | C | 0.2554  |
| rs28496947  | T | -0.0292 |
| rs142949225 | A | -0.1502 |
| rs142935718 | A | -0.1281 |
| rs17476251  | A | -0.1259 |
| rs6833271   | C | -0.0781 |
| rs78289860  | A | -0.1892 |
| rs12639692  | T | -0.0819 |
| rs66977519  | T | -0.034  |
| rs67234558  | G | -0.0659 |
| rs36094464  | T | 0.0591  |
| rs62327565  | A | 0.0849  |
| rs72660311  | T | 0.1132  |
| rs4286488   | G | -0.0304 |
| rs143043385 | G | 0.144   |
| rs72715829  | T | -0.0719 |
| rs113563431 | A | 0.089   |
| rs62335662  | C | 0.0579  |
| rs139336960 | T | -0.1504 |
| rs150274678 | A | 0.131   |
| rs2203396   | T | -0.0267 |
| rs66476814  | G | -0.0281 |
| rs113016299 | G | 0.0599  |
| rs634599    | G | 0.0853  |
| rs13434569  | A | -0.0322 |
| rs114043680 | T | -0.0817 |
| rs112408086 | T | 0.1853  |
| rs11729882  | C | 0.0492  |
| rs61792881  | C | 0.0678  |
| rs7679746   | G | 0.0348  |
| rs2875012   | G | -0.036  |
| rs1477603   | C | 0.0296  |
| rs75841407  | G | 0.2562  |
| rs6827993   | C | -0.1721 |
| rs112901146 | C | 0.1075  |

|             |   |         |
|-------------|---|---------|
| rs74639043  | C | -0.0376 |
| rs6832948   | T | -0.0493 |
| rs78718037  | C | 0.1465  |
| rs6840983   | A | -0.0588 |
| rs3737495   | A | -0.0505 |
| rs73214046  | T | 0.1503  |
| rs78287386  | T | 0.1319  |
| rs116417249 | C | 0.0994  |
| rs17541573  | C | -0.0877 |
| rs2874112   | T | -0.0301 |
| rs138055321 | G | 0.1414  |
| rs2857969   | A | -0.0266 |
| rs139414652 | T | 0.0778  |
| rs7697942   | C | 0.1373  |
| rs78021843  | T | 0.151   |
| rs62298521  | A | -0.0977 |
| rs2127571   | A | 0.0365  |
| rs56165143  | G | -0.1366 |
| rs13132156  | A | -0.0274 |
| rs75931273  | G | -0.1071 |
| rs78982419  | G | 0.1047  |
| rs6827479   | T | -0.0816 |
| rs1486774   | T | 0.0566  |
| rs6826054   | T | 0.0291  |
| rs141638975 | C | -0.2216 |
| rs4493584   | T | 0.0746  |
| rs78782961  | C | 0.0839  |
| rs2555627   | G | -0.0342 |
| rs9790405   | C | 0.0281  |
| rs284788    | C | -0.0483 |
| rs34360731  | C | 0.029   |
| rs10517829  | T | 0.0266  |
| rs6814024   | G | -0.0283 |
| rs2673422   | A | 0.0291  |
| rs6823864   | G | 0.1493  |
| rs7662210   | T | -0.1316 |
| rs13143827  | A | -0.1764 |
| rs3890174   | G | 0.0589  |
| rs2271338   | A | -0.0317 |
| rs35648466  | C | -0.0684 |
| rs62279105  | T | -0.0614 |
| rs13434734  | C | -0.0446 |
| rs4292288   | C | -0.0295 |
| rs61789446  | T | -0.0788 |
| rs149008728 | G | 0.1958  |
| rs115744257 | T | 0.0936  |
| rs143748564 | A | -0.1247 |

|             |   |         |
|-------------|---|---------|
| rs4467576   | C | -0.028  |
| rs73198057  | A | -0.0527 |
| rs72719126  | C | -0.1414 |
| rs13136858  | G | 0.0542  |
| rs9998561   | G | -0.0549 |
| rs1478235   | T | 0.0549  |
| rs1993431   | T | 0.1615  |
| rs73198062  | G | -0.0459 |
| rs140141076 | T | 0.1348  |
| rs73106224  | G | -0.0752 |
| rs142844081 | A | -0.0972 |
| rs113521945 | G | 0.0535  |
| rs62311163  | T | 0.1051  |
| rs115919827 | A | -0.0769 |
| rs6817403   | C | 0.1073  |
| rs17251102  | G | -0.0261 |
| rs17324961  | G | 0.0313  |
| rs12639962  | G | 0.0468  |
| rs145625743 | A | 0.1069  |
| rs144072273 | C | -0.1779 |
| rs79429065  | T | 0.1231  |
| rs73242545  | T | 0.1378  |
| rs12711068  | G | 0.0292  |
| rs80131790  | T | 0.0614  |
| rs114777877 | A | -0.0837 |
| rs4263388   | A | 0.0285  |
| rs79739161  | G | 0.0722  |
| rs72720354  | G | -0.0633 |
| rs71610012  | T | -0.1433 |
| rs13131339  | T | -0.1416 |
| rs77111605  | T | 0.1226  |
| rs76511478  | G | 0.0928  |
| rs572260    | A | -0.0332 |
| rs7684087   | C | -0.0601 |
| rs4290922   | T | 0.0545  |
| rs62310036  | C | -0.087  |
| rs62340733  | G | 0.0667  |
| rs4235084   | G | 0.071   |
| rs72714221  | T | 0.092   |
| rs743682    | A | -0.044  |
| rs77436111  | A | 0.1466  |
| rs17051051  | G | -0.0328 |
| rs28547010  | T | -0.0284 |
| rs74672078  | C | -0.1613 |
| rs116505731 | A | 0.1197  |
| rs7683159   | T | -0.0356 |
| rs7674021   | T | 0.0869  |

|             |   |         |
|-------------|---|---------|
| rs144941129 | T | 0.1835  |
| rs12501593  | G | 0.068   |
| rs7681673   | T | 0.0317  |
| rs6839304   | G | -0.0282 |
| rs73244708  | T | 0.2055  |
| rs114757879 | C | -0.1173 |
| rs112427496 | G | -0.2068 |
| rs11940356  | T | 0.0762  |
| rs76733331  | C | -0.1547 |
| rs73856798  | C | 0.0869  |
| rs4131396   | T | -0.0302 |
| rs13144899  | T | -0.0646 |
| rs35535904  | T | -0.0338 |
| rs146354205 | A | -0.0726 |
| rs17067     | G | -0.0533 |
| rs13113250  | G | -0.0852 |
| rs113960247 | A | 0.1279  |
| rs10866267  | A | -0.0338 |
| rs11098138  | G | 0.1058  |
| rs111410331 | C | 0.0665  |
| rs4234736   | A | 0.2183  |
| rs17278834  | G | 0.0314  |
| rs12648336  | A | -0.037  |
| rs72900885  | T | 0.0837  |
| rs2391033   | C | -0.029  |
| rs75757244  | T | -0.0782 |
| rs78485379  | A | 0.1396  |
| rs13108353  | T | 0.0269  |
| rs13109282  | A | 0.0314  |
| rs12499601  | G | -0.0428 |
| rs73240697  | G | 0.0292  |
| rs2131463   | A | -0.0274 |
| rs115452512 | C | 0.142   |
| rs73848981  | C | 0.0403  |
| rs116482553 | A | -0.1166 |
| rs140112948 | T | -0.1204 |
| rs4859540   | T | -0.0295 |
| rs73105314  | C | -0.0512 |
| rs35122085  | A | -0.0751 |
| rs13114343  | G | -0.0262 |
| rs71607605  | T | -0.1295 |
| rs77508820  | T | -0.0739 |
| rs148456659 | C | 0.1195  |
| rs10516635  | A | 0.0426  |
| rs115740167 | A | 0.0708  |
| rs17699715  | C | -0.0973 |
| rs6535885   | G | 0.0438  |

|             |   |         |
|-------------|---|---------|
| rs75870531  | T | -0.1078 |
| rs115707729 | T | 0.1996  |
| rs147598607 | G | -0.195  |
| rs965938    | A | 0.0325  |
| rs62308767  | C | -0.0267 |
| rs13147683  | A | -0.0973 |
| rs6449412   | G | -0.03   |
| rs34557252  | C | -0.0704 |
| rs6837786   | G | -0.0319 |
| rs36058944  | C | -0.0483 |
| rs147748783 | T | -0.0459 |
| rs7687530   | A | -0.0702 |
| rs72697060  | C | -0.0366 |
| rs11733578  | T | -0.0976 |
| rs116763111 | C | 0.1565  |
| rs78356119  | C | 0.0683  |
| rs9994493   | G | 0.0294  |
| rs2390584   | A | 0.0263  |
| rs6447195   | T | -0.0386 |
| rs16887512  | T | 0.0699  |
| rs147492978 | T | 0.1959  |
| rs75686472  | T | 0.0978  |
| rs142333807 | G | 0.1407  |
| rs10023237  | C | 0.0382  |
| rs6840135   | T | -0.0308 |
| rs1589579   | T | 0.0316  |
| rs13143702  | C | -0.0282 |
| rs116822304 | A | 0.1101  |
| rs6856616   | C | 0.0537  |
| rs148403034 | A | 0.0879  |
| rs150125124 | C | 0.1754  |
| rs2189165   | G | -0.1071 |
| rs73849303  | A | -0.0463 |
| rs17031708  | C | 0.0447  |
| rs147768625 | T | 0.2079  |
| rs74325803  | G | 0.0768  |
| rs10517431  | C | -0.034  |
| rs115599565 | A | 0.1748  |
| rs138401923 | A | -0.1141 |
| rs76365623  | A | 0.2211  |
| rs77667160  | T | 0.1     |
| rs13144944  | A | -0.0282 |
| rs115458536 | G | -0.1324 |
| rs116144895 | T | -0.2092 |
| rs76215072  | G | 0.0912  |
| rs55774002  | G | -0.0898 |
| rs17521607  | C | 0.0638  |



|             |   |         |
|-------------|---|---------|
| rs2920212   | A | -0.0343 |
| rs41489646  | G | 0.0655  |
| rs73198090  | C | 0.1283  |
| rs12502613  | A | 0.1417  |
| rs62318947  | A | -0.0735 |
| rs10011942  | G | -0.0386 |
| rs6824580   | G | -0.0377 |
| rs80290814  | G | -0.0979 |
| rs2003463   | G | 0.1614  |
| rs2705994   | C | 0.0911  |
| rs12639973  | T | 0.0383  |
| rs116294735 | A | 0.1154  |
| rs2613018   | T | -0.0274 |
| rs72709008  | A | -0.0488 |
| rs61747002  | A | -0.1121 |
| rs28493560  | G | 0.0354  |
| rs34442834  | G | 0.129   |
| rs17047495  | T | 0.0323  |
| rs57168672  | T | 0.031   |
| rs6554322   | C | -0.0287 |
| rs781570    | A | -0.0505 |
| rs72717750  | G | -0.0915 |
| rs143686469 | T | 0.1238  |
| rs4690927   | T | 0.082   |
| rs6833557   | T | 0.027   |
| rs143099210 | C | 0.0978  |
| rs10012345  | T | -0.1871 |
| rs115722425 | C | -0.2357 |
| rs35769558  | T | 0.095   |
| rs10223021  | C | 0.0329  |
| rs115627559 | C | 0.1867  |
| rs17672637  | A | -0.0986 |
| rs13133104  | A | -0.0491 |
| rs78791726  | G | -0.1838 |
| rs75861987  | T | 0.0639  |
| rs77224638  | A | 0.0446  |
| rs28549178  | A | 0.0935  |
| rs142374514 | T | 0.1493  |
| rs76241216  | T | 0.0841  |
| rs17631193  | G | 0.057   |
| rs71638125  | A | -0.0334 |
| rs843569    | T | 0.0331  |
| rs62331529  | C | 0.0444  |
| rs77500691  | G | -0.1552 |
| rs116150042 | C | 0.106   |
| rs6848315   | A | -0.0259 |
| rs138134962 | T | -0.0683 |

|             |   |         |
|-------------|---|---------|
| rs1377066   | T | -0.0316 |
| rs79285251  | A | -0.0305 |
| rs77789529  | G | 0.1437  |
| rs73793938  | A | 0.2146  |
| rs7691901   | G | -0.0351 |
| rs11939479  | A | -0.0354 |
| rs2893041   | T | -0.0925 |
| rs4293747   | T | 0.0354  |
| rs7675954   | C | 0.0271  |
| rs79247450  | T | 0.0464  |
| rs77580963  | G | 0.0824  |
| rs56243504  | C | 0.1551  |
| rs55884183  | T | -0.0614 |
| rs116769988 | C | 0.0945  |
| rs79548669  | A | 0.1161  |
| rs13131153  | T | 0.0416  |
| rs34076515  | C | -0.0282 |
| rs113152354 | T | -0.1362 |
| rs115224232 | G | 0.1863  |
| rs7676217   | A | -0.0897 |
| rs41286653  | T | 0.1267  |
| rs143201452 | T | -0.1213 |
| rs28491471  | T | -0.0403 |
| rs150179047 | A | 0.2353  |
| rs72907908  | G | -0.1651 |
| rs112927915 | T | 0.0671  |
| rs72651362  | T | -0.0896 |
| rs62289470  | G | 0.0561  |
| rs112439078 | A | 0.0824  |
| rs2589843   | C | -0.0293 |
| rs147555092 | A | 0.0995  |
| rs1466351   | G | -0.0291 |
| rs116687516 | G | -0.1694 |
| rs77830041  | C | -0.132  |
| rs9999119   | T | 0.0668  |
| rs4362851   | A | 0.0744  |
| rs9990991   | T | 0.0396  |
| rs17064824  | G | -0.0438 |
| rs115243720 | G | 0.1085  |
| rs12643625  | G | 0.0418  |
| rs2955258   | G | -0.062  |
| rs116027564 | T | 0.1269  |
| rs149594813 | C | -0.1708 |
| rs74789674  | C | -0.0764 |
| rs11935292  | G | 0.1192  |
| rs144514018 | C | 0.1582  |
| rs7655340   | T | 0.0831  |

|             |   |         |
|-------------|---|---------|
| rs74660489  | A | 0.0893  |
| rs17073291  | C | 0.0277  |
| rs137926545 | G | 0.0645  |
| rs10008839  | C | -0.0263 |
| rs77881553  | C | 0.0373  |
| rs1466475   | G | 0.0346  |
| rs7654748   | T | 0.0432  |
| rs56305437  | A | -0.0328 |
| rs10924     | T | -0.0413 |
| rs141977172 | C | 0.1578  |
| rs6834483   | C | 0.0926  |
| rs6531872   | G | 0.0372  |
| rs147280206 | A | 0.1628  |
| rs10023435  | A | -0.037  |
| rs80095830  | T | -0.0382 |
| rs145078033 | A | -0.0792 |
| rs116169375 | A | -0.1748 |
| rs11730521  | C | 0.1054  |
| rs2587160   | A | 0.0517  |
| rs115983354 | A | 0.1088  |
| rs115782434 | C | -0.1664 |
| rs116407253 | C | -0.1146 |
| rs114003391 | G | 0.1364  |
| rs75058616  | A | -0.2089 |
| rs115246206 | A | 0.0832  |
| rs3935569   | C | -0.0292 |
| rs2909805   | A | 0.0597  |
| rs10009492  | C | 0.0382  |
| rs78803437  | T | -0.1773 |
| rs75325969  | A | 0.2598  |
| rs74507030  | A | 0.1154  |
| rs116338760 | T | 0.1765  |
| rs113575403 | A | -0.1977 |
| rs114839377 | A | -0.1719 |
| rs76119417  | C | 0.1561  |
| rs113158977 | C | 0.1385  |
| rs116658801 | A | -0.1277 |
| rs28629400  | A | -0.0762 |
| rs231706    | G | 0.0739  |
| rs28562306  | C | -0.1027 |
| rs111704153 | T | 0.1166  |
| rs139474506 | G | -0.1263 |
| rs7673767   | G | -0.0271 |
| rs140317017 | A | 0.1681  |
| rs113839682 | G | -0.1309 |
| rs113686978 | T | -0.0767 |
| rs55901432  | G | 0.0442  |

|             |   |         |
|-------------|---|---------|
| rs114093561 | T | 0.1905  |
| rs754471    | T | -0.0278 |
| rs34992007  | G | 0.0394  |
| rs17395755  | G | 0.0977  |
| rs62345616  | T | 0.0735  |
| rs62343693  | C | -0.1023 |
| rs13130915  | T | -0.0287 |
| rs143939374 | C | 0.0753  |
| rs114962708 | G | 0.1369  |
| rs114511071 | C | 0.1153  |
| rs117177902 | G | -0.2095 |
| rs13111888  | A | -0.0363 |
| rs6830895   | T | 0.0264  |
| rs6825727   | G | 0.0329  |
| rs56124033  | T | 0.0916  |
| rs73229786  | T | -0.0317 |
| rs77856789  | C | -0.0559 |
| rs1545681   | T | -0.0282 |
| rs79953743  | T | 0.0954  |
| rs6833798   | A | -0.0691 |
| rs2055942   | C | -0.0293 |
| rs62304390  | A | -0.1684 |
| rs13137981  | T | -0.0549 |
| rs16876553  | A | 0.1105  |
| rs13109414  | T | -0.0446 |
| rs77521819  | G | 0.0682  |
| rs111773038 | C | 0.0607  |
| rs80164141  | A | -0.046  |
| rs144000478 | A | 0.1756  |
| rs116311821 | A | 0.071   |
| rs80312225  | A | 0.1922  |
| rs115271983 | T | 0.1963  |
| rs13107201  | C | -0.0284 |
| rs76568960  | A | -0.0791 |
| rs7686009   | A | -0.0274 |
| rs7682566   | T | 0.0747  |
| rs12502223  | T | 0.0344  |
| rs17254933  | A | 0.096   |
| rs113366811 | G | -0.1728 |
| rs4861918   | A | -0.0291 |
| rs9994588   | C | -0.0521 |
| rs17628227  | C | -0.0441 |
| rs6845935   | C | 0.0329  |
| rs4289393   | A | -0.0302 |
| rs17615499  | T | -0.0899 |
| rs56205771  | T | 0.0369  |
| rs1519312   | G | -0.0258 |

|             |   |         |
|-------------|---|---------|
| rs7699669   | A | -0.0287 |
| rs79185684  | C | 0.1024  |
| rs147817404 | T | -0.0271 |
| rs143028623 | A | 0.0971  |
| rs6822371   | A | 0.0266  |
| rs72722892  | A | 0.1305  |
| rs76258280  | T | -0.1399 |
| rs74535773  | T | 0.1736  |
| rs72692488  | T | 0.0717  |
| rs112083795 | C | 0.0717  |
| rs17578820  | T | 0.0472  |
| rs35079346  | A | -0.0494 |
| rs1014262   | C | -0.046  |
| rs113426701 | A | -0.1695 |
| rs140135372 | T | 0.1292  |
| rs145731140 | A | -0.1461 |
| rs140921951 | T | -0.1937 |
| rs6536915   | C | -0.0292 |
| rs10012431  | T | -0.0509 |
| rs2553380   | T | 0.0697  |
| rs115623104 | A | -0.118  |
| rs28624853  | G | 0.1267  |
| rs4295296   | G | -0.0305 |
| rs6844921   | C | 0.0528  |
| rs115042267 | A | -0.0348 |
| rs6831430   | G | 0.0272  |
| rs62334762  | C | -0.0855 |
| rs60600422  | T | 0.0428  |
| rs55727341  | C | 0.0404  |
| rs6833561   | T | 0.03    |
| rs7663553   | T | 0.0255  |
| rs13108434  | T | -0.0272 |
| rs2272743   | T | 0.0973  |
| rs6842248   | A | -0.0266 |
| rs4916646   | A | -0.0281 |
| rs148071168 | A | -0.1522 |
| rs10049840  | A | 0.028   |
| rs1433646   | T | -0.0413 |
| rs28867708  | C | 0.0587  |
| rs79324875  | C | 0.112   |
| rs10516652  | T | 0.0428  |
| rs72663413  | T | 0.0563  |
| rs115630106 | C | 0.1856  |
| rs7671847   | G | -0.0288 |
| rs3860677   | C | 0.0319  |
| rs73247119  | T | -0.1173 |
| rs61790879  | G | 0.0385  |

|             |   |         |
|-------------|---|---------|
| rs10018581  | C | 0.038   |
| rs59831391  | G | -0.0308 |
| rs2390034   | T | -0.0302 |
| rs116142559 | A | 0.2039  |
| rs76905564  | G | -0.0844 |
| rs1350594   | A | -0.0283 |
| rs231702    | T | -0.0519 |
| rs10019129  | G | 0.04    |
| rs1073320   | T | -0.0273 |
| rs74318588  | A | 0.1581  |
| rs10857007  | T | 0.0729  |
| rs1350521   | T | -0.0294 |
| rs4696526   | G | 0.0371  |
| rs1648403   | C | -0.0252 |
| rs114408428 | T | -0.0685 |
| rs143100743 | G | 0.1424  |
| rs1979427   | A | -0.0276 |
| rs2707454   | T | -0.0302 |
| rs873931    | C | 0.0515  |
| rs79083944  | C | -0.1842 |
| rs2221232   | T | -0.0304 |
| rs1447316   | T | 0.0571  |
| rs4629469   | G | -0.026  |
| rs144080932 | G | 0.1548  |
| rs35201853  | A | 0.061   |
| rs17628268  | C | 0.049   |
| rs1869947   | G | 0.0659  |
| rs72697340  | C | 0.119   |
| rs4861970   | T | 0.0278  |
| rs3115398   | T | -0.0316 |
| rs79934775  | G | 0.1108  |
| rs75001169  | T | -0.0853 |
| rs4292376   | C | -0.0256 |
| rs76121344  | T | 0.1696  |
| rs2120834   | G | -0.0458 |
| rs150111099 | T | 0.1808  |
| rs72700293  | A | 0.0686  |
| rs7678786   | T | -0.0278 |
| rs116329020 | T | -0.237  |
| rs2579910   | G | 0.026   |
| rs56826859  | T | 0.0999  |
| rs115170884 | T | 0.1811  |
| rs17630169  | T | -0.0931 |
| rs73211334  | T | 0.0869  |
| rs6855677   | G | -0.0274 |
| rs76576472  | G | 0.1242  |
| rs75575884  | C | 0.099   |

|             |   |         |
|-------------|---|---------|
| rs115581720 | G | 0.2359  |
| rs76129449  | A | 0.1648  |
| rs62295304  | T | 0.1554  |
| rs2713956   | A | -0.1086 |
| rs7694300   | G | 0.1508  |
| rs12642303  | G | 0.1143  |
| rs1281114   | T | -0.1902 |
| rs56211462  | A | -0.0371 |
| rs75993384  | C | 0.1591  |
| rs62336239  | T | 0.0477  |
| rs2583177   | A | -0.026  |
| rs116001690 | C | 0.1451  |
| rs6816857   | G | -0.0564 |
| rs114886116 | A | -0.1014 |
| rs117507779 | C | -0.0573 |
| rs7377975   | A | -0.0457 |
| rs78442683  | A | -0.1331 |
| rs12504124  | A | -0.0772 |
| rs10019790  | T | 0.0249  |
| rs139885990 | G | 0.1296  |
| rs116207554 | T | 0.1749  |
| rs6815712   | G | -0.0859 |
| rs141175520 | G | 0.2102  |
| rs113239498 | C | -0.059  |
| rs114214377 | T | -0.1741 |
| rs34553896  | A | -0.1477 |
| rs9307326   | A | -0.0418 |
| rs6822651   | A | 0.0315  |
| rs34426408  | A | -0.0294 |
| rs17585823  | A | -0.1271 |
| rs11732927  | T | -0.0405 |
| rs2203860   | G | 0.0435  |
| rs72634749  | T | 0.1157  |
| rs76750048  | G | -0.0531 |
| rs7668053   | T | -0.0709 |
| rs4235009   | G | -0.0633 |
| rs115295184 | A | -0.1179 |
| rs10023164  | C | -0.0254 |
| rs7439493   | A | -0.0254 |
| rs56037640  | G | -0.0317 |
| rs1865181   | C | -0.0318 |
| rs2173550   | G | -0.0565 |
| rs6811007   | A | 0.0348  |
| rs61200372  | G | 0.0849  |
| rs114887409 | G | -0.1571 |
| rs4697205   | C | -0.0259 |
| rs997407    | T | 0.0333  |

|             |   |         |
|-------------|---|---------|
| rs10019243  | A | -0.0265 |
| rs1430360   | C | 0.0287  |
| rs7679199   | G | -0.0276 |
| rs114605048 | A | 0.1964  |
| rs11735609  | A | -0.026  |
| rs62334894  | A | 0.0755  |
| rs61510564  | T | 0.0581  |
| rs41434448  | G | 0.0399  |
| rs76961561  | G | -0.0423 |
| rs7685902   | G | -0.0602 |
| rs75834546  | C | 0.0384  |
| rs115011601 | A | 0.0805  |
| rs35229343  | G | 0.0739  |
| rs6826695   | C | 0.0252  |
| rs2309560   | T | -0.0824 |
| rs17590064  | A | 0.1072  |
| rs7670348   | T | 0.0369  |
| rs116368651 | A | 0.0678  |
| rs34106002  | C | 0.0334  |
| rs1320070   | G | 0.0256  |
| rs139818301 | T | -0.1516 |
| rs62313009  | C | 0.1016  |
| rs6852154   | G | -0.0591 |
| rs7699349   | T | 0.0319  |
| rs76919012  | G | 0.1653  |
| rs11736959  | C | -0.0255 |
| rs17783479  | C | 0.0804  |
| rs6822667   | A | 0.0414  |
| rs1580550   | T | 0.1158  |
| rs10003076  | A | -0.0267 |
| rs1533151   | C | 0.0427  |
| rs76753816  | C | -0.0582 |
| rs113399470 | C | 0.1334  |
| rs78076252  | G | 0.0583  |
| rs747224    | C | -0.0283 |
| rs80199349  | C | 0.0841  |
| rs13152003  | A | -0.0405 |
| rs1435788   | G | 0.027   |
| rs4863994   | T | 0.1504  |
| rs78852050  | T | 0.0751  |
| rs115042663 | C | -0.1544 |
| rs12645435  | G | -0.0826 |
| rs62301404  | G | 0.0261  |
| rs1519243   | A | 0.0358  |
| rs41369548  | T | 0.0586  |
| rs2126218   | C | 0.0421  |
| rs1480276   | T | -0.0371 |



|             |   |         |
|-------------|---|---------|
| rs116038771 | A | 0.1309  |
| rs10938377  | A | 0.0268  |
| rs2036940   | G | 0.0436  |
| rs6855653   | C | -0.1435 |
| rs7664131   | C | 0.0402  |
| rs73250952  | T | 0.0724  |
| rs55787917  | A | 0.0713  |
| rs13108099  | C | -0.0256 |
| rs143272282 | G | -0.1107 |
| rs115439199 | C | -0.0551 |
| rs139232574 | A | -0.1611 |
| rs146246694 | T | 0.1097  |
| rs11723721  | A | -0.0318 |
| rs12508214  | C | 0.0316  |
| rs9654104   | T | 0.0394  |
| rs80069531  | T | 0.0991  |
| rs6849557   | T | 0.153   |
| rs12505900  | T | -0.0654 |
| rs10019908  | C | -0.0271 |
| rs326878    | A | 0.0344  |
| rs34135934  | A | 0.0459  |
| rs147498282 | T | -0.1474 |
| rs74398144  | T | 0.1453  |
| rs78506972  | C | -0.0783 |
| rs74424601  | T | 0.0515  |
| rs60376798  | T | 0.1487  |
| rs11722418  | C | 0.0552  |
| rs13124707  | G | -0.0319 |
| rs78057450  | G | -0.1057 |
| rs7659119   | G | -0.0626 |
| rs114713677 | G | -0.0985 |
| rs17064578  | C | -0.068  |
| rs74993165  | T | -0.1277 |
| rs13116652  | G | 0.0519  |
| rs77595468  | C | -0.2201 |
| rs62303915  | G | -0.0689 |
| rs115440869 | G | 0.1343  |
| rs11732860  | T | 0.0347  |
| rs147502935 | C | -0.1176 |
| rs62301402  | C | 0.036   |
| rs147681638 | T | -0.0456 |
| rs28519542  | C | -0.2066 |
| rs71609505  | G | -0.1608 |
| rs34296853  | C | 0.0288  |
| rs10937651  | A | 0.0578  |
| rs1800908   | A | 0.0945  |
| rs115119228 | T | -0.1373 |

|             |   |         |
|-------------|---|---------|
| rs73243322  | A | 0.0477  |
| rs78036919  | A | -0.0996 |
| rs34265201  | A | -0.0316 |
| rs77753610  | T | -0.0881 |
| rs9996577   | A | -0.0414 |
| rs12649186  | C | 0.0509  |
| rs13122075  | A | -0.1098 |
| rs3775363   | T | -0.0471 |
| rs78034795  | T | 0.0543  |
| rs11099976  | T | -0.027  |
| rs1203860   | T | -0.0305 |
| rs111799153 | T | -0.1378 |
| rs114348738 | A | 0.0947  |
| rs6847460   | C | 0.0253  |
| rs12710996  | T | -0.0481 |
| rs6839704   | T | -0.0302 |
| rs4589976   | A | -0.0328 |
| rs17524987  | C | -0.0732 |
| rs2263115   | C | -0.0379 |
| rs79912910  | C | -0.0423 |
| rs1378965   | G | -0.0263 |
| rs7672786   | C | -0.0319 |
| rs4501161   | A | -0.0931 |
| rs2034966   | T | -0.0583 |
| rs62316113  | T | -0.041  |
| rs1550344   | G | -0.0283 |
| rs62335898  | T | 0.1791  |
| rs12512696  | G | 0.0393  |
| rs11731377  | G | 0.0469  |
| rs145003598 | A | 0.1262  |
| rs6834750   | T | -0.0285 |
| rs4459987   | G | 0.039   |
| rs1479762   | C | -0.036  |
| rs10517185  | A | 0.0597  |
| rs76454985  | A | -0.0837 |
| rs79812382  | C | 0.0577  |
| rs72727915  | G | 0.1102  |
| rs77761429  | C | -0.1065 |
| rs17059115  | G | -0.1152 |
| rs114882466 | G | -0.0654 |
| rs6844302   | A | 0.0277  |
| rs2608837   | G | -0.0256 |
| rs4623038   | G | 0.0283  |
| rs10029510  | C | -0.0638 |
| rs114146922 | T | 0.1017  |
| rs72683963  | T | 0.2112  |
| rs1500795   | C | 0.0398  |

|             |   |         |
|-------------|---|---------|
| rs112129556 | T | 0.0825  |
| rs10519374  | C | -0.0638 |
| rs34084581  | T | 0.094   |
| rs73218377  | G | -0.0698 |
| rs145694604 | A | -0.066  |
| rs80186340  | G | 0.0903  |
| rs57631850  | G | 0.1256  |
| rs2108939   | A | 0.0255  |
| rs11097892  | C | -0.0268 |
| rs150483924 | C | 0.1481  |
| rs150269495 | T | 0.217   |
| rs116002746 | T | -0.1568 |
| rs9996905   | G | 0.0372  |
| rs12508237  | T | -0.028  |
| rs62306194  | T | -0.0806 |
| rs12511439  | A | -0.1471 |
| rs6535384   | A | 0.0249  |
| rs12509108  | T | -0.0285 |
| rs138211739 | T | -0.1179 |
| rs62330429  | T | -0.1368 |
| rs13107151  | T | 0.0454  |
| rs115044918 | A | -0.1301 |
| rs11097840  | C | -0.0372 |
| rs116612085 | A | 0.1965  |
| rs117698751 | A | -0.1297 |
| rs10033490  | G | 0.0517  |
| rs62341129  | C | 0.0513  |
| rs4270576   | A | 0.0546  |
| rs13147094  | A | 0.0394  |
| rs4863543   | G | 0.0329  |
| rs74650251  | C | -0.1035 |
| rs77019974  | A | 0.1139  |
| rs58615073  | A | 0.0344  |
| rs10520401  | T | 0.0432  |
| rs10001230  | A | 0.0318  |
| rs9994244   | C | -0.0258 |
| rs72905186  | G | 0.031   |
| rs79630021  | A | 0.0466  |
| rs11944262  | T | 0.0266  |
| rs6826155   | A | 0.0357  |
| rs34453582  | C | 0.0365  |
| rs4312828   | A | 0.0411  |
| rs17862038  | T | 0.0726  |
| rs75965692  | G | -0.0896 |
| rs17584238  | C | -0.0612 |
| rs111573841 | G | 0.1503  |
| rs41268395  | A | -0.0796 |

|             |   |         |
|-------------|---|---------|
| rs72642697  | G | 0.0878  |
| rs76456533  | G | -0.0909 |
| rs116432256 | C | -0.135  |
| rs114122488 | G | 0.087   |
| rs28868891  | A | 0.035   |
| rs4331786   | T | 0.0266  |
| rs74768455  | G | 0.0925  |
| rs112438745 | A | -0.1536 |
| rs76717423  | G | 0.1615  |
| rs138080691 | T | 0.0708  |
| rs17089569  | G | -0.0382 |
| rs79333739  | G | -0.1336 |
| rs73221796  | A | -0.0577 |
| rs77830103  | C | -0.1773 |
| rs645193    | T | 0.0498  |
| rs78063977  | C | 0.1234  |
| rs139105296 | G | -0.1775 |
| rs116000177 | T | 0.1519  |
| rs3860700   | T | -0.0434 |
| rs140088247 | A | 0.0981  |
| rs17083324  | A | 0.1084  |
| rs78281224  | C | -0.12   |
| rs28375794  | C | 0.1214  |
| rs150517895 | C | 0.1174  |
| rs11725957  | A | 0.0825  |
| rs72633075  | C | -0.0771 |
| rs77281994  | T | -0.2276 |
| rs79544959  | A | -0.0746 |
| rs17288391  | G | 0.1255  |
| rs2608821   | T | 0.0425  |
| rs6449370   | A | -0.0796 |
| rs6817993   | A | 0.0296  |
| rs78317477  | A | 0.0553  |
| rs72668189  | G | -0.0287 |
| rs75263278  | A | -0.0767 |
| rs114401872 | A | 0.1096  |
| rs112309814 | G | 0.094   |
| rs73874606  | C | 0.0747  |
| rs868256    | G | 0.0376  |
| rs74715172  | C | -0.0651 |
| rs78472985  | T | 0.0682  |
| rs61791021  | A | 0.1301  |
| rs146500536 | T | -0.1774 |
| rs11132246  | C | -0.0282 |
| rs116740048 | G | 0.0527  |
| rs12642159  | A | -0.0543 |
| rs13123379  | A | -0.0295 |

|             |   |         |
|-------------|---|---------|
| rs6846641   | C | -0.1662 |
| rs144083490 | C | -0.169  |
| rs79736638  | T | -0.0881 |
| rs58700731  | T | -0.0801 |
| rs11723384  | G | 0.1174  |
| rs116323891 | A | 0.118   |
| rs72728681  | T | -0.0276 |
| rs4691748   | A | 0.0266  |
| rs28427278  | T | 0.0981  |
| rs2189162   | G | 0.0366  |
| rs4833838   | G | 0.0679  |
| rs4241855   | A | 0.0251  |
| rs62303508  | A | 0.0371  |
| rs4860080   | C | 0.1472  |
| rs72734443  | G | 0.1085  |
| rs113202780 | G | 0.0834  |
| rs10026458  | A | -0.0297 |
| rs7682267   | C | -0.0262 |
| rs35810155  | C | -0.0408 |
| rs7674034   | G | 0.0275  |
| rs147472551 | T | -0.1258 |
| rs12643534  | T | -0.0252 |
| rs73182759  | G | 0.0614  |
| rs77128481  | T | -0.09   |
| rs74887225  | A | -0.1728 |
| rs113679968 | A | 0.0443  |
| rs114449373 | C | 0.2104  |
| rs142544663 | T | 0.1772  |
| rs78336146  | T | -0.0517 |
| rs76920484  | A | 0.2019  |
| rs6824106   | G | 0.0262  |
| rs9999145   | A | -0.0278 |
| rs143650380 | G | -0.1514 |
| rs150287943 | T | 0.1969  |
| rs12503481  | C | 0.025   |
| rs11724582  | G | 0.0272  |
| rs57320929  | T | 0.0997  |
| rs10518640  | T | -0.0559 |
| rs11724549  | G | -0.0419 |
| rs75804203  | G | -0.0822 |
| rs604785    | A | 0.0246  |
| rs16839196  | C | 0.0346  |
| rs141387306 | T | -0.2572 |
| rs1713518   | T | 0.0361  |
| rs72711041  | A | -0.0652 |
| rs16889979  | G | 0.1108  |
| rs2168466   | G | -0.0285 |

|             |   |         |
|-------------|---|---------|
| rs115191328 | A | 0.125   |
| rs61510736  | T | -0.0496 |
| rs74508678  | T | 0.0468  |
| rs61762932  | T | 0.0833  |
| rs34956352  | G | 0.027   |
| rs73840986  | G | 0.044   |
| rs76266423  | T | 0.1176  |
| rs57682390  | A | -0.1782 |
| rs145729367 | C | 0.1149  |
| rs79655964  | C | -0.045  |
| rs143294332 | T | 0.0498  |
| rs71608436  | T | -0.0737 |
| rs34427831  | C | -0.0574 |
| rs6852979   | C | 0.0263  |
| rs1468250   | T | 0.0271  |
| rs4555630   | A | 0.0483  |
| rs78898331  | C | -0.0452 |
| rs6845251   | T | 0.0326  |
| rs72667587  | A | -0.1248 |
| rs13139571  | A | -0.0283 |
| rs2581753   | C | 0.0548  |
| rs145427773 | C | 0.1553  |
| rs73105853  | A | -0.0687 |
| rs1982591   | A | -0.0623 |
| rs6840496   | A | 0.0339  |
| rs115035056 | A | 0.1148  |
| rs6818266   | T | 0.0971  |
| rs79139000  | A | 0.04    |
| rs73249443  | C | -0.1804 |
| rs72681619  | G | 0.0599  |
| rs10011187  | G | -0.0361 |
| rs17620124  | C | 0.1383  |
| rs4055777   | C | 0.0297  |
| rs113506120 | C | -0.0681 |
| rs114059850 | T | 0.1671  |
| rs4441740   | C | 0.0707  |
| rs73011740  | G | 0.0506  |
| rs111916484 | A | -0.1056 |
| rs55633136  | A | -0.031  |
| rs73250765  | C | -0.0904 |
| rs35100666  | C | 0.0599  |
| rs114526977 | A | 0.1211  |
| rs13148155  | T | 0.1259  |
| rs113771572 | T | 0.0403  |
| rs6446301   | C | -0.0335 |
| rs12640125  | G | 0.098   |
| rs4696166   | A | 0.0247  |

|             |   |         |
|-------------|---|---------|
| rs149373955 | G | 0.1771  |
| rs138932321 | A | -0.1697 |
| rs116110496 | A | 0.1553  |
| rs148614408 | A | -0.0532 |
| rs77298415  | A | -0.1458 |
| rs16836654  | A | -0.0335 |
| rs17749484  | A | 0.0346  |
| rs115755352 | T | 0.0564  |
| rs12640505  | G | 0.0257  |
| rs116766896 | A | -0.12   |
| rs77782255  | G | 0.1388  |
| rs758946    | C | 0.0469  |
| rs12499815  | G | -0.0459 |
| rs1874337   | T | 0.1078  |
| rs115355840 | G | -0.0551 |
| rs4698371   | T | -0.0362 |
| rs3860616   | T | -0.0386 |
| rs34955446  | C | 0.0864  |
| rs62311382  | A | 0.0305  |
| rs6823688   | G | -0.0256 |
| rs55949737  | T | 0.052   |
| rs2071415   | G | 0.0368  |
| rs145456237 | T | 0.1043  |
| rs11736558  | A | -0.0359 |
| rs11727613  | T | 0.0993  |
| rs55974657  | A | -0.0728 |
| rs4234804   | A | -0.0746 |
| rs56012859  | G | 0.0328  |
| rs79858500  | T | 0.0438  |
| rs6831955   | T | -0.0436 |
| rs36012347  | A | 0.0525  |
| rs10518533  | T | -0.0271 |
| rs12651152  | G | -0.0255 |
| rs78226098  | C | -0.1015 |
| rs76621735  | G | 0.0781  |
| rs59295053  | C | -0.1156 |
| rs6852989   | G | -0.0789 |
| rs4692564   | G | -0.0712 |
| rs72698943  | T | -0.1559 |
| rs3934547   | C | -0.0387 |
| rs12511211  | G | 0.0262  |
| rs72676905  | G | -0.064  |
| rs11943753  | A | -0.054  |
| rs72720389  | A | -0.0796 |
| rs12330937  | G | -0.1547 |
| rs74321467  | A | 0.0396  |
| rs13131313  | G | -0.0398 |

|             |   |         |
|-------------|---|---------|
| rs111227412 | A | -0.1952 |
| rs4364247   | G | -0.0436 |
| rs28377667  | C | 0.0514  |
| rs6832951   | G | 0.0367  |
| rs56205955  | T | 0.0656  |
| rs78861855  | G | -0.048  |
| rs4306918   | G | -0.0932 |
| rs149948773 | A | -0.2262 |
| rs4835205   | T | 0.085   |
| rs9291137   | T | -0.0616 |
| rs4696765   | C | -0.0261 |
| rs28405589  | G | 0.025   |
| rs59601906  | C | -0.0419 |
| rs1565932   | T | -0.0474 |
| rs28392724  | A | 0.0509  |
| rs28694130  | A | -0.0481 |
| rs76889429  | A | -0.0655 |
| rs4423896   | C | -0.0256 |
| rs114393635 | C | -0.1951 |
| rs1425979   | T | 0.0254  |
| rs137944617 | T | 0.2     |
| rs141070732 | C | 0.1392  |
| rs150129355 | C | 0.1646  |
| rs112314288 | T | 0.0643  |
| rs16836215  | G | 0.0358  |
| rs78687864  | G | 0.0462  |
| rs139432545 | G | -0.1392 |
| rs13148726  | C | -0.0365 |
| rs112178936 | G | -0.0697 |
| rs2555639   | C | 0.0256  |
| rs6531716   | T | -0.029  |
| rs144846508 | A | 0.1135  |
| rs1508976   | C | 0.0258  |
| rs6814961   | G | 0.0378  |
| rs13148378  | G | -0.0691 |
| rs4253422   | G | 0.0308  |
| rs66513147  | G | -0.0536 |
| rs80188542  | G | -0.0616 |
| rs111757556 | T | -0.0568 |
| rs79307229  | A | 0.1666  |
| rs4235200   | C | -0.0281 |
| rs4590089   | T | -0.0364 |
| rs114015617 | A | 0.1745  |
| rs114967750 | A | 0.1195  |
| rs79948648  | T | 0.0421  |
| rs148254499 | G | 0.083   |
| rs2882660   | T | 0.0267  |



|             |   |         |
|-------------|---|---------|
| rs115135245 | T | -0.0772 |
| rs62410646  | A | 0.0662  |
| rs55871235  | G | -0.0718 |
| rs148161341 | A | -0.175  |
| rs6531611   | A | 0.0336  |
| rs4487368   | C | 0.0403  |
| rs2352927   | T | -0.0285 |
| rs6837528   | A | 0.0296  |
| rs114836738 | T | -0.1909 |
| rs74922649  | C | 0.1007  |
| rs72695199  | T | -0.0353 |
| rs62340317  | A | -0.0335 |
| rs77755413  | A | -0.0606 |
| rs13106618  | A | -0.04   |
| rs17013502  | T | 0.0348  |
| rs62299965  | A | 0.0678  |
| rs79309998  | A | 0.0607  |
| rs13137634  | G | 0.0418  |
| rs12509791  | G | 0.1071  |
| rs142508461 | C | -0.0256 |
| rs76657740  | A | -0.0405 |
| rs16850991  | T | -0.0859 |
| rs7692135   | C | -0.0256 |
| rs79306815  | T | 0.0456  |
| rs79424816  | G | -0.0756 |
| rs13127907  | A | -0.0343 |
| rs145670457 | G | -0.0869 |
| rs143424675 | T | -0.1404 |
| rs62306475  | T | 0.0302  |
| rs62314476  | T | -0.0316 |
| rs13140735  | C | -0.026  |
| rs11733360  | C | -0.0328 |
| rs73223978  | C | -0.107  |
| rs72728588  | G | -0.0794 |
| rs56080549  | G | -0.0478 |
| rs13130258  | C | 0.0517  |
| rs115109825 | C | 0.1182  |
| rs115829977 | T | 0.1849  |
| rs148755900 | G | 0.1288  |
| rs72718919  | T | 0.0421  |
| rs116484707 | A | 0.1391  |
| rs9995250   | T | -0.026  |
| rs77199339  | T | 0.1276  |
| rs4639046   | C | 0.0306  |
| rs74830015  | C | -0.1108 |
| rs114165281 | T | 0.1767  |
| rs2047359   | C | -0.0268 |

|             |   |         |
|-------------|---|---------|
| rs11934833  | G | 0.0275  |
| rs10516726  | C | 0.065   |
| rs141521424 | C | 0.0796  |
| rs79789081  | C | 0.0855  |
| rs116695698 | T | 0.1034  |
| rs11937696  | C | -0.0324 |
| rs68005815  | C | -0.0514 |
| rs140661832 | T | -0.1656 |
| rs10004626  | C | -0.0321 |
| rs12510416  | C | 0.0248  |
| rs138714453 | C | -0.1347 |
| rs2130209   | A | -0.1077 |
| rs6826328   | T | 0.032   |
| rs78737263  | C | -0.0874 |
| rs62321740  | G | 0.1055  |
| rs9307870   | G | 0.048   |
| rs11727688  | C | -0.0339 |
| rs12507593  | C | 0.0462  |
| rs75946500  | A | 0.0274  |
| rs114903467 | A | 0.1386  |
| rs11935505  | A | -0.0581 |
| rs71643120  | G | 0.0841  |
| rs72722187  | C | -0.0888 |
| rs150973222 | G | 0.1321  |
| rs141625328 | C | -0.1326 |
| rs79627379  | A | 0.1629  |
| rs114015678 | G | -0.1349 |
| rs7687106   | G | 0.0405  |
| rs4260583   | T | -0.0776 |
| rs10516712  | C | -0.0328 |
| rs17402559  | C | -0.0359 |
| rs4406081   | T | 0.028   |
| rs77793744  | G | -0.1101 |
| rs115570285 | C | -0.0672 |
| rs138437320 | A | 0.1146  |
| rs11737127  | C | 0.0446  |
| rs10004852  | A | 0.0334  |
| rs439863    | G | -0.0257 |
| rs1846161   | G | -0.0305 |
| rs1401588   | G | 0.0736  |
| rs17052672  | T | 0.1761  |
| rs565824    | G | -0.1037 |
| rs11131973  | T | -0.0255 |
| rs10517862  | A | -0.0458 |
| rs146934494 | A | -0.1202 |
| rs13139935  | A | 0.0711  |
| rs72711244  | C | -0.1159 |

|             |   |         |
|-------------|---|---------|
| rs11131862  | T | -0.0257 |
| rs73234705  | T | 0.0715  |
| rs113706736 | T | -0.1735 |
| rs9993840   | A | 0.0246  |
| rs35919942  | T | 0.0555  |
| rs17216887  | G | -0.1293 |
| rs142659084 | C | -0.1098 |
| rs2915268   | C | 0.0871  |
| rs12643421  | A | -0.046  |
| rs78758201  | T | 0.138   |
| rs76184330  | A | 0.0897  |
| rs143583107 | C | 0.1032  |
| rs139196377 | G | -0.1466 |
| rs57178718  | A | 0.0717  |
| rs141034142 | A | 0.1618  |
| rs149316491 | A | -0.2664 |
| rs58134223  | T | -0.0333 |
| rs4343713   | A | 0.044   |
| rs7663336   | G | 0.0249  |
| rs62284891  | G | -0.0774 |
| rs62312441  | G | 0.0495  |
| rs143561588 | G | 0.1458  |
| rs145653583 | A | 0.178   |
| rs112798642 | C | -0.1654 |
| rs58781882  | T | -0.0623 |
| rs72708353  | A | 0.0516  |
| rs12510054  | G | -0.0509 |
| rs2857961   | A | 0.0346  |
| rs34699139  | A | 0.0287  |
| rs75567319  | A | 0.0423  |
| rs7670538   | T | 0.0514  |
| rs74897415  | A | -0.1124 |
| rs4256226   | A | -0.025  |
| rs10013833  | C | -0.0471 |
| rs2178655   | G | -0.1816 |
| rs75020740  | G | -0.1685 |
| rs142971463 | C | -0.0829 |
| rs1960849   | C | -0.0246 |
| rs62331533  | G | 0.0693  |
| rs1500801   | A | -0.0327 |
| rs28550490  | C | 0.0759  |
| rs73246378  | T | -0.138  |
| rs1442694   | G | 0.1353  |
| rs284793    | A | 0.0262  |
| rs10011378  | G | 0.0303  |
| rs12641658  | C | -0.0244 |
| rs36087017  | C | 0.038   |

|             |   |         |
|-------------|---|---------|
| rs13131765  | A | -0.0253 |
| rs35663654  | T | 0.0372  |
| rs28432950  | C | -0.0905 |
| rs3775194   | C | 0.0275  |
| rs17073432  | A | -0.0736 |
| rs145763229 | T | -0.1288 |
| rs34278822  | A | -0.1054 |
| rs76800037  | T | 0.0849  |
| rs60384816  | C | 0.1158  |
| rs17069081  | A | 0.0356  |
| rs28490410  | T | 0.0243  |
| rs62300911  | T | 0.1051  |
| rs12640894  | G | -0.036  |
| rs144396153 | T | 0.1104  |
| rs72679481  | T | -0.2026 |
| rs11723237  | C | 0.0265  |
| rs10033119  | G | -0.0805 |
| rs17021151  | C | 0.1413  |
| rs79980710  | T | -0.1821 |
| rs62325691  | C | 0.2165  |
| rs66859544  | A | -0.0267 |
| rs116044365 | G | -0.102  |
| rs2537879   | G | 0.0379  |
| rs11097469  | A | -0.1362 |
| rs56410818  | C | 0.1095  |
| rs72725710  | C | -0.0433 |
| rs66533303  | A | 0.082   |
| rs6813442   | C | -0.162  |
| rs115352612 | T | 0.126   |
| rs11131661  | T | -0.1095 |
| rs62345666  | C | 0.0483  |
| rs76273417  | C | 0.0718  |
| rs10019567  | C | 0.0292  |
| rs2615590   | G | 0.0364  |
| rs13144148  | C | 0.0277  |
| rs13152325  | C | 0.0567  |
| rs115114534 | A | 0.0545  |
| rs72712020  | G | 0.0864  |
| rs61574382  | A | 0.1014  |
| rs11940243  | C | -0.0625 |
| rs72644490  | C | 0.0489  |
| rs115872867 | A | -0.0943 |
| rs2350039   | T | 0.0247  |
| rs71604621  | T | 0.0529  |
| rs2471342   | T | -0.044  |
| rs114090173 | A | 0.0869  |
| rs59064182  | A | 0.0342  |

|             |   |         |
|-------------|---|---------|
| rs62320962  | C | 0.0294  |
| rs138195426 | A | 0.1171  |
| rs147567568 | A | -0.2053 |
| rs28373229  | G | 0.1281  |
| rs422846    | G | -0.0289 |
| rs66484213  | C | 0.0518  |
| rs72661497  | T | -0.1113 |
| rs1837644   | G | -0.1537 |
| rs114642262 | T | -0.08   |
| rs36086852  | A | 0.1063  |
| rs73234139  | T | -0.0866 |
| rs55843822  | T | 0.0318  |
| rs4691477   | G | -0.0299 |
| rs6846245   | C | 0.0327  |
| rs2875040   | T | -0.0274 |
| rs4397031   | G | 0.0369  |
| rs1506365   | A | -0.0266 |
| rs882004    | A | 0.0247  |
| rs6552971   | G | 0.0244  |
| rs10488830  | G | -0.0441 |
| rs1396531   | C | -0.0466 |
| rs4241744   | G | -0.0559 |
| rs10517371  | C | 0.0725  |
| rs144835819 | A | -0.0853 |
| rs4283687   | G | -0.0261 |
| rs7663660   | G | -0.0246 |
| rs61793418  | G | 0.0407  |
| rs4276254   | A | 0.0687  |
| rs57016000  | T | -0.0543 |
| rs13115242  | T | -0.0239 |
| rs6849956   | A | 0.0353  |
| rs78675529  | T | -0.038  |
| rs2611209   | T | -0.0249 |
| rs76707556  | C | -0.0834 |
| rs13144109  | T | -0.1256 |
| rs62304075  | T | -0.1308 |
| rs6823794   | T | 0.0583  |
| rs75680645  | C | 0.0571  |
| rs13122401  | T | 0.0297  |
| rs34363716  | G | -0.0475 |
| rs116105292 | C | 0.2369  |
| rs13136841  | A | 0.0263  |
| rs73222920  | G | 0.0536  |
| rs140817363 | A | 0.1169  |
| rs6816775   | G | -0.059  |
| rs114313359 | T | 0.1613  |
| rs28565500  | C | 0.0739  |

|             |   |         |
|-------------|---|---------|
| rs13132807  | A | 0.0307  |
| rs17613956  | T | -0.0434 |
| rs12511879  | C | 0.025   |
| rs10019768  | C | 0.0265  |
| rs35584776  | C | 0.0851  |
| rs116192688 | C | 0.1087  |
| rs146482218 | A | 0.1552  |
| rs62290598  | T | 0.0481  |
| rs13102241  | A | -0.0652 |
| rs114528805 | G | 0.1196  |
| rs143663668 | C | 0.1513  |
| rs61792035  | A | -0.1269 |
| rs34405197  | G | -0.1709 |
| rs56232603  | T | 0.0608  |
| rs116654708 | A | 0.0701  |
| rs147855306 | G | -0.1688 |
| rs13130758  | C | 0.0783  |
| rs6849439   | G | 0.0375  |
| rs28479766  | A | 0.026   |
| rs647640    | A | -0.0264 |
| rs11943911  | A | -0.081  |
| rs72684443  | A | -0.1086 |
| rs11940709  | A | 0.035   |
| rs114369038 | A | 0.0592  |
| rs7700147   | C | 0.0302  |
| rs62409683  | G | -0.0594 |
| rs1848116   | G | 0.0314  |
| rs11939380  | T | -0.0255 |
| rs13119273  | T | -0.1721 |
| rs71606705  | T | -0.1245 |
| rs6840086   | T | 0.0349  |
| rs11934011  | A | 0.0491  |
| rs75198084  | C | -0.1758 |
| rs74541752  | G | -0.1157 |
| rs12643171  | A | -0.0949 |
| rs79763915  | G | -0.0505 |
| rs73793560  | T | -0.0893 |
| rs6537339   | T | 0.0256  |
| rs76571763  | A | -0.1168 |
| rs9997142   | T | 0.0273  |
| rs6823177   | G | -0.035  |
| rs11573795  | T | -0.2133 |
| rs75506791  | T | 0.0567  |
| rs4861707   | G | -0.026  |
| rs7699968   | G | -0.0434 |
| rs59351057  | G | 0.0391  |
| rs146328031 | A | 0.1907  |

|             |   |         |
|-------------|---|---------|
| rs2052347   | A | -0.0443 |
| rs6832485   | A | -0.0511 |
| rs75881086  | T | 0.176   |
| rs78037998  | A | 0.0629  |
| rs572770    | G | -0.0329 |
| rs79406814  | A | 0.0557  |
| rs2851011   | T | 0.03    |
| rs4260493   | C | 0.1371  |
| rs79922417  | A | 0.0858  |
| rs72665870  | G | 0.0879  |
| rs17431105  | T | 0.1642  |
| rs116368825 | G | -0.1082 |
| rs112280508 | A | -0.0613 |
| rs78968521  | G | 0.0774  |
| rs6843930   | G | 0.0356  |
| rs77275467  | T | 0.1198  |
| rs115421436 | C | -0.0963 |
| rs80173428  | A | 0.1365  |
| rs78916220  | C | -0.0462 |
| rs73242640  | A | -0.0927 |
| rs112873639 | T | -0.065  |
| rs1910874   | C | -0.0556 |
| rs10011412  | G | -0.0524 |
| rs1708772   | G | 0.0315  |
| rs79509022  | A | 0.2175  |
| rs147217826 | A | 0.1638  |
| rs57030948  | C | 0.1044  |
| rs73132722  | C | -0.0317 |
| rs2067626   | A | 0.085   |
| rs2342455   | C | 0.0242  |
| rs10013884  | G | -0.0276 |
| rs113090697 | G | -0.0421 |
| rs13122895  | T | 0.0448  |
| rs3811804   | A | -0.062  |
| rs55743418  | G | 0.071   |
| rs78828420  | T | 0.0674  |
| rs4698376   | C | 0.0453  |
| rs4861269   | C | -0.0442 |
| rs10005352  | G | -0.0265 |
| rs11737687  | A | -0.0417 |
| rs62333197  | C | -0.0823 |
| rs116620800 | T | 0.165   |
| rs142989750 | G | 0.1371  |
| rs147635922 | A | 0.087   |
| rs116298640 | T | -0.1454 |
| rs4607268   | A | 0.0318  |
| rs139265620 | G | 0.1611  |

|             |   |         |
|-------------|---|---------|
| rs115157994 | G | 0.1026  |
| rs116263133 | C | 0.0607  |
| rs114132895 | C | 0.1318  |
| rs113054722 | T | 0.1268  |
| rs80169926  | A | 0.1506  |
| rs2404651   | T | 0.027   |
| rs74724656  | T | 0.0968  |
| rs79006309  | A | 0.0763  |
| rs115517170 | T | 0.1924  |
| rs114875438 | A | 0.2102  |
| rs56689030  | A | -0.0488 |
| rs74628535  | A | -0.1224 |
| rs62326809  | T | 0.0849  |
| rs114649879 | A | 0.1548  |
| rs2285785   | G | -0.0256 |
| rs2531147   | A | 0.0485  |
| rs10939689  | T | 0.1153  |
| rs74466801  | T | -0.076  |
| rs114244865 | T | -0.0889 |
| rs62330416  | T | -0.0866 |
| rs79171002  | C | -0.0717 |
| rs360109    | A | 0.1058  |
| rs62312966  | A | 0.1087  |
| rs148834674 | A | 0.1337  |
| rs150062168 | T | -0.0983 |
| rs10020924  | T | -0.1194 |
| rs4696667   | G | 0.1474  |
| rs116534051 | A | -0.1382 |
| rs111263975 | T | 0.0945  |
| rs76373323  | T | 0.0547  |
| rs144236308 | C | -0.0902 |
| rs72701219  | C | -0.1022 |
| rs73229764  | G | 0.0313  |
| rs79339154  | A | 0.1057  |
| rs6856600   | C | 0.059   |
| rs72703911  | T | 0.1182  |
| rs17717410  | G | 0.0553  |
| rs236748    | T | -0.0277 |
| rs79327368  | G | 0.0841  |
| rs13115307  | A | 0.0296  |
| rs79074180  | G | 0.0578  |
| rs10857185  | G | -0.0674 |
| rs114006065 | G | 0.1324  |
| rs1246927   | C | -0.0339 |
| rs1455660   | G | 0.0305  |
| rs78062665  | A | 0.1421  |
| rs144479148 | T | 0.073   |



|             |   |         |
|-------------|---|---------|
| rs7655209   | A | -0.0311 |
| rs17074066  | T | -0.048  |
| rs114335457 | C | 0.1407  |
| rs115843001 | T | 0.1432  |
| rs76405115  | C | -0.0858 |
| rs6846199   | G | -0.0362 |
| rs112964230 | A | 0.1574  |
| rs73234782  | G | -0.0998 |
| rs78538637  | A | 0.0857  |
| rs55644236  | A | -0.0282 |
| rs17623554  | A | 0.0452  |
| rs17253722  | A | -0.0245 |
| rs11735191  | A | -0.0839 |
| rs149366366 | G | 0.0795  |
| rs1479760   | A | 0.0254  |
| rs12511756  | G | 0.0262  |
| rs1063143   | G | 0.0353  |
| rs12647179  | G | 0.0265  |
| rs79057574  | T | -0.1509 |
| rs78363976  | G | 0.1287  |
| rs9997520   | G | -0.0582 |
| rs78851528  | G | -0.1021 |
| rs72702892  | T | 0.069   |
| rs10520287  | A | 0.0254  |
| rs79235481  | A | -0.1886 |
| rs113563399 | C | -0.1485 |
| rs16893800  | T | -0.071  |
| rs112669229 | A | -0.1489 |
| rs79159041  | G | -0.184  |
| rs71602022  | T | -0.166  |
| rs67254207  | A | 0.0354  |
| rs113036911 | C | -0.0722 |
| rs62328696  | T | -0.1125 |
| rs4481204   | C | 0.025   |
| rs13108227  | G | -0.028  |
| rs2716006   | C | 0.0967  |
| rs13138979  | T | -0.0447 |
| rs12510573  | T | 0.0424  |
| rs35537262  | A | -0.1336 |
| rs62300810  | A | 0.1247  |
| rs72638316  | A | -0.0877 |
| rs147288553 | A | -0.1699 |
| rs4241943   | A | 0.1117  |
| rs12502610  | T | -0.0877 |
| rs144213982 | A | 0.1621  |
| rs6814920   | A | -0.0276 |
| rs150113594 | T | 0.0863  |

|             |   |         |
|-------------|---|---------|
| rs35687075  | C | 0.0421  |
| rs151298649 | C | -0.0927 |
| rs7375766   | A | 0.0294  |
| rs62315973  | G | 0.0479  |
| rs13123916  | A | 0.0287  |
| rs72674365  | A | -0.0729 |
| rs74360804  | A | -0.0867 |
| rs265040    | C | 0.0395  |
| rs11723765  | T | -0.0273 |
| rs12647728  | A | -0.1181 |
| rs2624881   | C | 0.0419  |
| rs36193772  | A | -0.0257 |
| rs115697119 | A | -0.2013 |
| rs2174245   | G | 0.028   |
| rs6825948   | T | -0.0253 |
| rs9998637   | G | -0.0803 |
| rs6829107   | A | -0.135  |
| rs72710015  | C | 0.0446  |
| rs73235357  | T | 0.0652  |
| rs55723863  | T | -0.074  |
| rs73244705  | A | -0.128  |
| rs141895108 | A | -0.1952 |
| rs73825110  | A | 0.1817  |
| rs80244121  | T | -0.1224 |
| rs62289816  | G | 0.098   |
| rs6815361   | T | -0.0551 |
| rs147197429 | T | -0.1159 |
| rs7686404   | C | 0.0363  |
| rs113923073 | C | 0.0672  |
| rs76896679  | T | -0.0844 |
| rs78310264  | A | -0.066  |
| rs4569704   | T | -0.0266 |
| rs79180043  | A | 0.068   |
| rs62298342  | A | 0.1808  |
| rs115020522 | T | 0.0926  |
| rs79443490  | T | -0.0655 |
| rs56239136  | C | -0.0278 |
| rs76359106  | G | -0.056  |
| rs71614623  | C | -0.0484 |
| rs142891828 | A | -0.0845 |
| rs6827667   | A | -0.0587 |
| rs2071674   | T | -0.064  |
| rs138286495 | T | 0.1658  |
| rs113020953 | G | -0.1261 |
| rs75577425  | A | 0.1137  |
| rs56145446  | T | 0.1468  |
| rs11726343  | G | 0.0267  |

|             |   |         |
|-------------|---|---------|
| rs4583752   | G | -0.0252 |
| rs4235427   | T | 0.0247  |
| rs145257552 | T | -0.2063 |
| rs148868997 | A | 0.1396  |
| rs73229439  | C | 0.0848  |
| rs4412019   | C | -0.0406 |
| rs429453    | A | 0.04    |
| rs148315211 | T | -0.1446 |
| rs2369285   | T | 0.0264  |
| rs73239689  | G | -0.1389 |
| rs36148609  | C | -0.076  |
| rs2575551   | T | 0.0249  |
| rs116097238 | G | -0.0716 |
| rs149365049 | A | -0.0947 |
| rs72996629  | A | 0.071   |
| rs55782166  | G | -0.0467 |
| rs76288546  | G | 0.0643  |
| rs62337621  | A | 0.0823  |
| rs3775146   | C | 0.0278  |
| rs114316083 | C | -0.1224 |
| rs74375227  | T | 0.0893  |
| rs112392298 | T | 0.0372  |
| rs150383126 | A | 0.2029  |
| rs1382989   | C | 0.0346  |
| rs114306027 | A | 0.1651  |
| rs112994267 | A | 0.086   |
| rs145017770 | A | -0.1675 |
| rs9685956   | C | 0.0252  |
| rs138047105 | A | 0.1577  |
| rs35964387  | G | -0.1844 |
| rs116560018 | C | -0.1148 |
| rs6810814   | G | 0.0308  |
| rs2604554   | A | -0.0239 |
| rs141142097 | G | 0.1546  |
| rs112860604 | T | 0.0381  |
| rs10518385  | T | -0.0283 |
| rs76444875  | T | 0.0768  |
| rs72712823  | A | -0.1555 |
| rs73261719  | T | -0.1794 |
| rs13115113  | A | -0.0658 |
| rs13116667  | A | 0.0473  |
| rs28826134  | C | 0.0578  |
| rs3103200   | C | 0.0329  |
| rs28557027  | T | -0.1044 |
| rs73007554  | A | 0.1087  |
| rs10866288  | T | -0.036  |
| rs113766716 | C | -0.0341 |

|             |   |         |
|-------------|---|---------|
| rs67407638  | T | -0.0642 |
| rs7663683   | A | 0.0239  |
| rs10005159  | C | -0.0446 |
| rs13104353  | C | -0.0254 |
| rs353150    | T | -0.0394 |
| rs72659707  | A | 0.0612  |
| rs6840169   | G | -0.0354 |
| rs77070750  | C | -0.0824 |
| rs72704149  | G | 0.0371  |
| rs3821923   | A | 0.0423  |
| rs62317178  | T | 0.0816  |
| rs77698409  | C | 0.0462  |
| rs4859332   | G | 0.0247  |
| rs4862082   | C | -0.0253 |
| rs114562869 | G | 0.077   |
| rs146839304 | T | 0.0824  |
| rs4234829   | C | 0.0472  |
| rs114232396 | C | 0.1116  |
| rs7697966   | G | 0.027   |
| rs75000105  | C | -0.0693 |
| rs17085840  | G | -0.1099 |
| rs150241543 | A | 0.1549  |
| rs10470896  | C | -0.0764 |
| rs12498159  | T | -0.0357 |
| rs115836379 | C | 0.0864  |
| rs80101391  | T | -0.1813 |
| rs59336384  | T | 0.1225  |
| rs13147776  | G | 0.0542  |
| rs2136809   | G | 0.1006  |
| rs28633100  | A | -0.2541 |
| rs114157131 | T | -0.1425 |
| rs78153814  | T | 0.0671  |
| rs6854430   | T | -0.0578 |
| rs12639963  | T | -0.1063 |
| rs6825440   | A | 0.0287  |
| rs2381494   | T | -0.0609 |
| rs73138583  | A | 0.0401  |
| rs77194242  | T | 0.0354  |
| rs139979022 | A | 0.1354  |
| rs4429770   | A | -0.0241 |
| rs76702503  | G | -0.1406 |
| rs115490812 | C | 0.1657  |
| rs78364465  | A | -0.0648 |
| rs80256172  | G | 0.1189  |
| rs79565887  | G | -0.121  |
| rs145223683 | T | -0.128  |
| rs114457031 | C | 0.186   |

|             |   |         |
|-------------|---|---------|
| rs142590173 | G | 0.059   |
| rs2301795   | G | 0.0238  |
| rs62302868  | A | -0.0678 |
| rs10023408  | A | 0.0602  |
| rs4694149   | C | 0.0357  |
| rs6849931   | C | 0.0523  |
| rs74322059  | A | -0.0545 |
| rs114676921 | C | 0.2237  |
| rs3109799   | A | -0.0354 |
| rs74522810  | T | -0.0324 |
| rs12512109  | C | -0.024  |
| rs77082869  | A | 0.0777  |
| rs77402488  | A | 0.0986  |
| rs113207137 | T | 0.1151  |
| rs17368333  | G | 0.031   |
| rs62295406  | C | -0.0389 |
| rs73236133  | G | 0.0704  |
| rs58015788  | A | 0.0327  |
| rs61203029  | A | 0.0361  |
| rs146542634 | G | -0.2229 |
| rs11932347  | A | 0.0308  |
| rs2603732   | C | -0.031  |
| rs1530297   | A | 0.0234  |
| rs2949631   | G | -0.0237 |
| rs73843739  | A | -0.0512 |
| rs13102642  | G | -0.0894 |
| rs1105059   | C | -0.0283 |
| rs4862424   | T | 0.0511  |
| rs4574484   | C | 0.0305  |
| rs16991470  | C | 0.1143  |
| rs6535447   | C | -0.0425 |
| rs72730358  | C | 0.0417  |
| rs11133338  | C | 0.0276  |
| rs6532562   | G | 0.0383  |
| rs115172153 | A | -0.1483 |
| rs17005223  | A | -0.0262 |
| rs6858268   | T | -0.0252 |
| rs114494162 | A | 0.0898  |
| rs62305809  | A | 0.073   |
| rs2310000   | T | 0.0313  |
| rs76546029  | G | 0.0248  |
| rs75060237  | T | -0.0831 |
| rs72721333  | T | 0.0897  |
| rs148742938 | A | -0.2192 |
| rs78975978  | A | -0.0965 |
| rs62336658  | A | 0.0825  |
| rs10031070  | G | -0.0241 |

|             |   |         |
|-------------|---|---------|
| rs1485604   | G | -0.0242 |
| rs17208561  | C | 0.1244  |
| rs11937241  | A | 0.0916  |
| rs78071834  | C | 0.049   |
| rs73238577  | C | 0.0547  |
| rs231250    | G | -0.0245 |
| rs79438295  | T | -0.0594 |
| rs62336880  | A | -0.043  |
| rs11736563  | C | 0.0293  |
| rs151240950 | G | 0.1544  |
| rs34265043  | T | 0.063   |
| rs28544471  | G | -0.0638 |
| rs114916776 | A | 0.2077  |
| rs115129802 | G | -0.1507 |
| rs985770    | C | -0.034  |
| rs140612949 | T | -0.1212 |
| rs75772677  | A | 0.188   |
| rs17369876  | T | 0.1523  |
| rs4696608   | A | -0.0338 |
| rs28601269  | A | -0.093  |
| rs143142559 | G | -0.1187 |
| rs6850501   | G | -0.0261 |
| rs6851077   | C | 0.0923  |
| rs60658782  | T | -0.0339 |
| rs115630401 | C | -0.1062 |
| rs2570070   | G | -0.0257 |
| rs71610205  | A | -0.0535 |
| rs1851480   | C | -0.035  |
| rs144335984 | T | -0.0954 |
| rs144883505 | A | 0.1301  |
| rs10519522  | T | 0.0966  |
| rs11736872  | A | 0.0256  |
| rs59357667  | G | -0.0339 |
| rs2389954   | C | -0.0253 |
| rs7682426   | C | 0.0283  |
| rs7665593   | T | -0.0394 |
| rs7695170   | G | -0.0249 |
| rs11097396  | G | 0.0401  |
| rs12649083  | C | -0.0328 |
| rs1505474   | G | 0.0257  |
| rs113424120 | T | 0.0817  |
| rs10937680  | T | 0.0464  |
| rs6814050   | A | 0.0329  |
| rs3849022   | A | 0.1477  |
| rs62303704  | T | 0.0961  |
| rs6811286   | A | -0.0255 |
| rs6554338   | G | 0.0891  |

|             |   |         |
|-------------|---|---------|
| rs12645925  | C | 0.072   |
| rs142938987 | C | -0.1294 |
| rs75377707  | C | 0.0511  |
| rs62295332  | C | -0.0247 |
| rs141617349 | T | -0.1884 |
| rs72677060  | T | -0.0866 |
| rs115455721 | A | -0.0937 |
| rs12500633  | C | -0.0382 |
| rs11731936  | G | -0.0313 |
| rs436935    | T | 0.0338  |
| rs9994685   | G | -0.0691 |
| rs4689300   | G | 0.0286  |
| rs6838183   | G | -0.0313 |
| rs147642072 | C | -0.1464 |
| rs116027423 | G | 0.1545  |
| rs17543916  | T | 0.0563  |
| rs7687239   | A | 0.0349  |
| rs35101164  | T | -0.025  |
| rs13138213  | G | 0.0272  |
| rs113240716 | G | 0.0771  |
| rs1455223   | C | -0.0322 |
| rs72689038  | C | 0.1091  |
| rs77751927  | T | -0.0832 |
| rs1229981   | A | 0.0743  |
| rs6837589   | T | -0.0322 |
| rs62293647  | A | 0.0969  |
| rs4359974   | A | 0.0241  |
| rs114091891 | C | 0.1725  |
| rs1378547   | C | 0.0923  |
| rs116837982 | T | 0.0552  |
| rs72619124  | A | 0.0561  |
| rs9761925   | T | -0.0754 |
| rs72674621  | A | 0.0444  |
| rs10031399  | T | 0.0544  |
| rs145441645 | A | 0.1408  |
| rs73145090  | A | 0.0354  |
| rs60912832  | A | 0.0749  |
| rs9994438   | C | 0.0382  |
| rs78499724  | G | 0.1303  |
| rs115020311 | G | 0.0709  |
| rs141241576 | C | -0.1624 |
| rs76926228  | C | 0.1056  |
| rs149035545 | T | 0.1754  |
| rs7670452   | C | 0.0332  |
| rs12647263  | T | -0.0861 |
| rs140774565 | G | 0.1388  |
| rs150200322 | G | 0.1472  |

|             |   |         |
|-------------|---|---------|
| rs76206226  | T | 0.1356  |
| rs6534883   | C | -0.025  |
| rs9995134   | G | 0.0308  |
| rs35462523  | G | 0.0456  |
| rs79413714  | T | -0.1707 |
| rs73137021  | T | 0.0466  |
| rs72669101  | T | 0.0542  |
| rs62355813  | C | -0.0292 |
| rs74749763  | A | -0.0572 |
| rs72712062  | A | 0.0646  |
| rs6600766   | A | -0.0256 |
| rs113061712 | G | -0.1046 |
| rs74822363  | G | 0.1073  |
| rs11729485  | C | -0.0367 |
| rs62329301  | T | 0.0299  |
| rs7684549   | G | -0.0312 |
| rs7663580   | T | 0.0247  |
| rs116155783 | C | 0.1302  |
| rs2657799   | T | 0.0299  |
| rs73142478  | G | 0.0499  |
| rs2126854   | T | -0.0283 |
| rs13109579  | G | 0.0826  |
| rs12512717  | G | -0.04   |
| rs11727130  | G | 0.0321  |
| rs35527510  | C | 0.0278  |
| rs115006769 | A | 0.1513  |
| rs55905800  | G | -0.1236 |
| rs73801400  | T | 0.1031  |
| rs147330975 | T | 0.1169  |
| rs80058550  | C | -0.1661 |
| rs114016886 | A | -0.048  |
| rs56218993  | G | 0.0468  |
| rs72641745  | C | 0.0587  |
| rs2748789   | A | 0.029   |
| rs72732472  | A | -0.1199 |
| rs7439067   | A | -0.0291 |
| rs61798581  | C | -0.172  |
| rs6851986   | G | -0.0853 |
| rs1159022   | G | -0.0243 |
| rs72675809  | A | -0.069  |
| rs62320269  | C | -0.1177 |
| rs6833783   | C | 0.0246  |
| rs115251654 | A | -0.0526 |
| rs34611197  | A | 0.1367  |
| rs12642172  | A | -0.0279 |
| rs115256020 | C | 0.1216  |
| rs4692875   | A | 0.0383  |



|             |   |         |
|-------------|---|---------|
| rs112834483 | A | -0.0727 |
| rs10019172  | G | 0.0327  |
| rs150937943 | C | 0.0918  |
| rs17000202  | T | 0.1298  |
| rs2525799   | C | -0.1164 |
| rs79626900  | T | -0.0737 |
| rs12499924  | T | -0.0256 |
| rs66668845  | T | 0.0632  |
| rs6854335   | A | -0.038  |
| rs4691994   | A | 0.0562  |
| rs11726943  | G | 0.0273  |
| rs145822055 | A | 0.1548  |
| rs16890755  | G | -0.05   |
| rs73250663  | T | -0.1017 |
| rs151000509 | T | 0.0322  |
| rs1438787   | C | 0.023   |
| rs77869248  | A | 0.0356  |
| rs34970125  | T | -0.1149 |
| rs4274861   | G | 0.0508  |
| rs147940249 | A | 0.1023  |
| rs3775902   | C | 0.0873  |
| rs6829390   | A | -0.0437 |
| rs6846335   | T | 0.1765  |
| rs17679777  | C | -0.0278 |
| rs35983057  | G | 0.0436  |
| rs79916448  | C | -0.1334 |
| rs13140453  | A | 0.0375  |
| rs144132138 | A | 0.1953  |
| rs13144628  | T | -0.0396 |
| rs75036914  | C | -0.131  |
| rs12502096  | A | 0.0262  |
| rs72700046  | T | 0.0945  |
| rs75372311  | G | -0.0473 |
| rs74655765  | C | 0.1663  |
| rs4388031   | C | 0.0888  |
| rs78953254  | C | 0.1465  |
| rs57762516  | G | 0.0975  |
| rs10005545  | T | 0.0239  |
| rs13124167  | C | -0.0392 |
| rs79725422  | C | -0.1466 |
| rs72616169  | T | 0.1172  |
| rs1811810   | A | -0.0307 |
| rs6854397   | A | -0.0289 |
| rs6815104   | A | 0.0336  |
| rs80117745  | A | 0.102   |
| rs2085103   | G | 0.0663  |
| rs4697282   | T | -0.0246 |

|             |   |         |
|-------------|---|---------|
| rs4860463   | A | -0.0475 |
| rs78710178  | A | -0.1007 |
| rs74432445  | A | -0.0997 |
| rs6815168   | C | -0.0443 |
| rs145867884 | A | 0.1552  |
| rs56103227  | G | -0.0261 |
| rs6842156   | G | 0.0773  |
| rs72701715  | T | 0.0759  |
| rs113908270 | C | 0.0916  |
| rs115123477 | A | -0.1436 |
| rs112018598 | T | 0.1132  |
| rs1277294   | C | -0.0555 |
| rs13107100  | G | -0.0274 |
| rs79180556  | C | 0.0619  |
| rs73240356  | C | 0.0273  |
| rs71603021  | T | 0.1423  |
| rs36227916  | A | -0.1364 |
| rs55722066  | A | -0.0349 |
| rs17025247  | T | 0.1317  |
| rs114569767 | A | 0.1301  |
| rs7681499   | T | -0.0378 |
| rs9790437   | A | -0.0275 |
| rs62315071  | G | 0.0421  |
| rs11936429  | T | -0.0699 |
| rs60675726  | C | 0.068   |
| rs78571983  | G | 0.1003  |
| rs6818138   | A | 0.0686  |
| rs7681369   | G | 0.0311  |
| rs12642476  | T | 0.0276  |
| rs2589511   | A | 0.0245  |
| rs10010623  | A | 0.0238  |
| rs1948054   | C | -0.0232 |
| rs114123242 | G | 0.1031  |
| rs10003004  | T | 0.0907  |
| rs60492907  | C | 0.0899  |
| rs4425430   | G | -0.0353 |
| rs35258629  | T | 0.0442  |
| rs35401612  | A | -0.0279 |
| rs2667403   | A | -0.231  |
| rs940576    | C | -0.0282 |
| rs28576398  | A | -0.0423 |
| rs79463031  | A | -0.0813 |
| rs28437437  | G | -0.0366 |
| rs2011687   | A | -0.0267 |
| rs115593069 | T | -0.0993 |
| rs4235307   | G | 0.1146  |
| rs115449198 | T | 0.117   |

|             |   |         |
|-------------|---|---------|
| rs76470327  | T | -0.1231 |
| rs78701012  | A | -0.0444 |
| rs4834275   | C | 0.0429  |
| rs1510683   | T | 0.0255  |
| rs10030922  | C | 0.0261  |
| rs11937314  | T | -0.0266 |
| rs12647208  | T | 0.1415  |
| rs112038313 | G | -0.0836 |
| rs72673962  | T | 0.132   |
| rs701779    | G | -0.0329 |
| rs148145242 | A | -0.1484 |
| rs116188877 | T | -0.0728 |
| rs73240539  | T | -0.0755 |
| rs74880236  | A | -0.1069 |
| rs138793666 | G | -0.1014 |
| rs13124946  | T | -0.0725 |
| rs13146055  | T | -0.0393 |
| rs116516720 | T | -0.0754 |
| rs115458629 | T | 0.0942  |
| rs115881918 | T | 0.0831  |
| rs6844871   | C | 0.0229  |
| rs11730989  | G | -0.1957 |
| rs2518641   | C | 0.0293  |
| rs140649451 | T | 0.1199  |
| rs2276911   | T | -0.0408 |
| rs1112139   | A | -0.0433 |
| rs76647387  | A | 0.0734  |
| rs147819885 | A | -0.0979 |
| rs17433092  | T | -0.0384 |
| rs147985280 | T | -0.1418 |
| rs11934265  | A | -0.0384 |
| rs1993616   | A | -0.0303 |
| rs7660990   | T | 0.0261  |
| rs12510760  | T | -0.0929 |
| rs11735976  | C | 0.0275  |
| rs1622680   | C | -0.0246 |
| rs76818510  | A | 0.0342  |
| rs77441059  | T | 0.0853  |
| rs62323095  | C | -0.0274 |
| rs111481989 | C | 0.1062  |
| rs7669089   | C | 0.0323  |
| rs6820443   | G | 0.0258  |
| rs75831158  | A | -0.043  |
| rs4863606   | T | 0.0345  |
| rs59370290  | T | 0.0541  |
| rs73240597  | G | -0.0642 |
| rs13138258  | A | -0.056  |

|             |   |         |
|-------------|---|---------|
| rs146386212 | C | -0.1034 |
| rs72622769  | C | 0.0588  |
| rs7670511   | A | 0.2086  |
| rs4610401   | G | 0.0963  |
| rs4314297   | G | -0.0827 |
| rs35764021  | T | -0.0901 |
| rs9328765   | G | 0.0729  |
| rs147516468 | T | 0.1314  |
| rs61793450  | T | 0.0972  |
| rs79179219  | A | -0.0849 |
| rs114956680 | C | -0.1271 |
| rs73020782  | T | -0.0408 |
| rs114469538 | G | -0.0879 |
| rs62345033  | G | 0.0694  |
| rs7437393   | T | 0.0524  |
| rs141451794 | A | 0.1329  |
| rs140317665 | G | 0.1775  |
| rs78480135  | T | 0.0651  |
| rs73234790  | G | -0.1524 |
| rs312368    | A | 0.0232  |
| rs6851778   | G | -0.1338 |
| rs77566893  | A | 0.0931  |
| rs79244643  | T | -0.0769 |
| rs17387271  | T | -0.0327 |
| rs116831324 | C | -0.1109 |
| rs114397078 | C | -0.1566 |
| rs3468      | A | -0.0236 |
| rs10517052  | T | 0.0238  |
| rs75029292  | A | 0.1714  |
| rs1470696   | T | -0.0251 |
| rs12501414  | C | -0.0751 |
| rs9291090   | C | 0.0682  |
| rs2973306   | A | -0.0284 |
| rs75107971  | A | -0.1497 |
| rs17050863  | G | 0.1104  |
| rs72725976  | T | 0.1076  |
| rs72955106  | T | 0.0789  |
| rs78478611  | T | -0.1566 |
| rs11132418  | C | 0.055   |
| rs10011142  | T | -0.0346 |
| rs4385148   | C | 0.0685  |
| rs16876637  | G | 0.0389  |
| rs7668303   | G | 0.0312  |
| rs76978235  | T | -0.05   |
| rs71612784  | T | 0.1214  |
| rs28813095  | T | -0.0285 |
| rs71614509  | A | 0.1339  |

|             |   |         |
|-------------|---|---------|
| rs72693205  | C | 0.112   |
| rs76204410  | T | -0.146  |
| rs62304003  | T | -0.0555 |
| rs2061223   | A | -0.0304 |
| rs871384    | T | -0.0231 |
| rs1823537   | C | -0.0271 |
| rs79925658  | G | -0.1757 |
| rs1585537   | T | -0.0249 |
| rs35791045  | G | -0.0363 |
| rs28611319  | C | 0.0348  |
| rs1919222   | T | -0.0382 |
| rs115932793 | T | -0.0741 |
| rs79163533  | G | -0.0546 |
| rs73226810  | A | -0.0306 |
| rs75375798  | T | -0.0849 |
| rs4692810   | C | 0.031   |
| rs12639826  | G | 0.0338  |
| rs115130241 | T | -0.1296 |
| rs114906338 | A | 0.0772  |
| rs13143468  | T | 0.0458  |
| rs10745246  | C | 0.0249  |
| rs144979441 | T | -0.1622 |
| rs77715613  | A | 0.1246  |
| rs115899592 | T | 0.0829  |
| rs10005933  | C | 0.0286  |
| rs62352866  | A | 0.0277  |
| rs17382358  | A | -0.0237 |
| rs34414295  | A | -0.1977 |
| rs35760852  | C | -0.1794 |
| rs10516869  | A | -0.0606 |
| rs17028153  | A | -0.0884 |
| rs115509410 | A | -0.1218 |
| rs75319281  | A | -0.1285 |
| rs7698649   | T | -0.0418 |
| rs13130561  | G | -0.0232 |
| rs72650477  | T | -0.1029 |
| rs114104850 | A | -0.0627 |
| rs10007196  | T | -0.0415 |
| rs72691827  | C | -0.0892 |
| rs16994179  | G | 0.0973  |
| rs28462029  | T | -0.1106 |
| rs11133012  | A | 0.0227  |
| rs62310124  | A | -0.1157 |
| rs59471514  | G | 0.0441  |
| rs6842962   | G | 0.0254  |
| rs17477246  | C | -0.0881 |
| rs13104748  | A | 0.0462  |

|             |   |         |
|-------------|---|---------|
| rs74488642  | A | -0.0784 |
| rs78541353  | C | -0.099  |
| rs17861926  | T | -0.031  |
| rs4441716   | G | 0.0403  |
| rs2570727   | C | 0.0342  |
| rs75725360  | C | 0.07    |
| rs77363910  | C | 0.0673  |
| rs62297507  | C | 0.0442  |
| rs6837978   | T | -0.1207 |
| rs77476952  | G | 0.121   |
| rs34916197  | C | 0.1103  |
| rs116060894 | C | -0.0962 |
| rs114941723 | G | 0.1224  |
| rs6816973   | C | 0.027   |
| rs77176409  | A | -0.0865 |
| rs4333235   | A | -0.0682 |
| rs116644885 | T | -0.0862 |
| rs142502295 | C | 0.1562  |
| rs62329624  | C | 0.0402  |
| rs4076749   | T | 0.0488  |
| rs1513562   | C | -0.0516 |
| rs11133424  | C | 0.0382  |
| rs56351826  | T | -0.0804 |
| rs233989    | T | 0.0246  |
| rs76795791  | C | 0.0648  |
| rs77193150  | C | -0.135  |
| rs9985782   | A | -0.0372 |
| rs80041328  | A | 0.053   |
| rs143969579 | A | -0.1016 |
| rs11934067  | A | 0.1134  |
| rs115853108 | C | 0.1134  |
| rs139555340 | A | 0.0988  |
| rs716399    | G | 0.0333  |
| rs116720878 | A | 0.0884  |
| rs1526691   | C | 0.0346  |
| rs6830263   | A | 0.0234  |
| rs1518005   | C | 0.0265  |
| rs34813139  | A | 0.1664  |
| rs112983872 | G | 0.1203  |
| rs80049982  | A | 0.0599  |
| rs1005656   | A | -0.0289 |
| rs116658415 | G | 0.1459  |
| rs113532468 | A | -0.0633 |
| rs6448616   | A | 0.1006  |
| rs2911926   | T | 0.1427  |
| rs76754439  | G | 0.0742  |
| rs74372725  | G | -0.1507 |

|             |   |         |
|-------------|---|---------|
| rs111331920 | C | -0.0762 |
| rs34186864  | A | 0.0671  |
| rs115974442 | A | -0.0769 |
| rs4832752   | A | -0.0243 |
| rs79577060  | C | -0.0762 |
| rs115298790 | A | 0.0945  |
| rs12054490  | G | 0.0246  |
| rs146460810 | C | -0.1178 |
| rs10029919  | T | 0.0661  |
| rs956998    | G | -0.0437 |
| rs150059988 | A | -0.1655 |
| rs114145925 | T | -0.0987 |
| rs79738680  | A | 0.0856  |
| rs138450563 | A | 0.068   |
| rs75772141  | C | 0.0921  |
| rs115154512 | C | 0.1155  |
| rs75606542  | C | -0.1067 |
| rs60132386  | A | -0.0277 |
| rs146604442 | A | 0.1356  |
| rs116008692 | A | 0.0679  |
| rs141926629 | A | 0.06    |
| rs75391803  | C | 0.147   |
| rs10857425  | A | 0.0269  |
| rs2063060   | C | 0.0343  |
| rs138249008 | A | -0.0972 |
| rs4974665   | A | -0.0236 |
| rs28861725  | G | 0.0315  |
| rs115995047 | T | 0.0752  |
| rs35951376  | T | 0.1193  |
| rs76165306  | T | 0.0925  |
| rs2130909   | A | 0.0303  |
| rs10003973  | T | 0.0262  |
| rs115342389 | C | -0.1942 |
| rs2798221   | T | 0.0237  |
| rs1996175   | G | -0.0242 |
| rs137876187 | T | 0.1254  |
| rs79478591  | A | 0.0808  |
| rs11100365  | A | -0.0247 |
| rs28564799  | T | -0.0576 |
| rs1501140   | A | -0.0245 |
| rs77559517  | A | 0.0573  |
| rs143715705 | G | -0.1219 |
| rs17492813  | T | -0.0355 |
| rs499905    | T | -0.1014 |
| rs78776824  | T | 0.1718  |
| rs148656324 | A | -0.1045 |
| rs62299301  | C | 0.1316  |

|             |   |         |
|-------------|---|---------|
| rs1297942   | T | 0.0322  |
| rs116429401 | G | -0.0821 |
| rs9307898   | G | -0.034  |
| rs80082768  | C | 0.0721  |
| rs148888977 | C | -0.1624 |
| rs78040705  | A | 0.1088  |
| rs114835340 | T | 0.0607  |
| rs56343583  | A | -0.093  |
| rs392075    | A | 0.0272  |
| rs72680118  | C | -0.0784 |
| rs35850287  | C | 0.0225  |
| rs60692355  | A | -0.0406 |
| rs73208603  | C | -0.0454 |
| rs6813176   | G | -0.0281 |
| rs76656260  | A | 0.0994  |
| rs115052686 | G | 0.1289  |
| rs4697158   | A | 0.0331  |
| rs11930830  | T | -0.0385 |
| rs148536062 | C | 0.222   |
| rs4607255   | T | 0.0521  |
| rs10937985  | A | 0.0471  |
| rs1711375   | T | 0.0269  |
| rs2309553   | A | 0.0242  |
| rs148234663 | G | -0.1228 |
| rs116012319 | T | -0.2019 |
| rs56296536  | A | 0.079   |
| rs60019655  | T | -0.0463 |
| rs79908057  | T | 0.1604  |
| rs141760758 | T | 0.1799  |
| rs144368459 | A | -0.1135 |
| rs13122443  | T | 0.0236  |
| rs76442102  | C | 0.0509  |
| rs72708368  | G | -0.0358 |
| rs115601581 | G | -0.2057 |
| rs2535505   | A | 0.0225  |
| rs138164428 | A | 0.1674  |
| rs593371    | G | 0.0266  |
| rs13142224  | C | -0.0311 |
| rs16878186  | A | -0.0524 |
| rs62305569  | A | 0.0421  |
| rs73231130  | T | 0.0919  |
| rs76373296  | C | 0.0571  |
| rs4323141   | A | -0.0288 |
| rs62409100  | T | 0.0362  |
| rs60354128  | G | 0.0304  |
| rs116273844 | A | 0.1839  |
| rs78195358  | A | -0.1174 |



|             |   |         |
|-------------|---|---------|
| rs62312434  | T | 0.0304  |
| rs7659765   | T | -0.0508 |
| rs6823939   | T | 0.0972  |
| rs6553576   | A | 0.0297  |
| rs4863428   | G | -0.0298 |
| rs113625218 | G | 0.0371  |
| rs17633816  | G | 0.0327  |
| rs75138976  | A | 0.0385  |
| rs114882252 | G | -0.154  |
| rs145335378 | A | 0.1023  |
| rs17055732  | C | 0.0628  |
| rs10939271  | A | -0.0225 |
| rs115718732 | G | 0.0696  |
| rs1493226   | C | -0.0476 |
| rs10520296  | A | -0.0259 |
| rs7675077   | G | 0.0272  |
| rs114749240 | C | 0.1162  |
| rs4692288   | G | -0.0468 |
| rs13135933  | C | 0.1126  |
| rs138851411 | T | -0.1232 |
| rs11939062  | A | -0.0227 |
| rs148654854 | A | 0.1535  |
| rs1595693   | C | -0.0245 |
| rs1867937   | C | -0.0327 |
| rs116621455 | C | 0.0889  |
| rs116742725 | T | -0.0792 |
| rs13105189  | C | 0.0577  |
| rs114260201 | T | 0.0813  |
| rs13131814  | C | 0.0863  |
| rs13130370  | C | -0.0553 |
| rs75070628  | C | -0.0934 |
| rs10001566  | G | 0.027   |
| rs13108823  | T | -0.0232 |
| rs17688156  | G | -0.1077 |
| rs34099741  | C | -0.0392 |
| rs75253557  | A | -0.1127 |
| rs59443039  | T | 0.049   |
| rs62305520  | A | 0.1168  |
| rs2355617   | T | 0.0249  |
| rs74525503  | C | 0.1177  |
| rs72624155  | G | 0.0503  |
| rs77747926  | A | -0.0453 |
| rs145352168 | G | 0.2252  |
| rs76160459  | T | 0.0771  |
| rs1996600   | A | -0.0815 |
| rs17405651  | C | 0.0948  |
| rs4863055   | T | -0.0378 |

|             |   |         |
|-------------|---|---------|
| rs2903353   | G | -0.0502 |
| rs12504297  | T | -0.0248 |
| rs35724905  | C | 0.058   |
| rs80162610  | T | -0.0631 |
| rs71597222  | C | -0.1353 |
| rs115434106 | G | 0.0891  |
| rs77327784  | C | 0.048   |
| rs73225149  | G | 0.075   |
| rs114197079 | C | -0.0471 |
| rs142843827 | T | 0.0365  |
| rs79534359  | G | 0.0377  |
| rs2309943   | C | 0.0348  |
| rs2180259   | A | -0.0484 |
| rs150319632 | C | 0.1384  |
| rs72728485  | T | -0.0812 |
| rs7656451   | G | 0.0406  |
| rs75923648  | C | 0.0808  |
| rs78428986  | T | 0.1042  |
| rs17611968  | G | 0.1129  |
| rs76644421  | C | -0.1673 |
| rs113608145 | G | 0.0737  |
| rs77222710  | A | 0.1334  |
| rs76072681  | T | 0.1516  |
| rs71610864  | A | 0.0848  |
| rs73239396  | G | 0.0651  |
| rs145753478 | C | 0.165   |
| rs114210524 | T | 0.1371  |
| rs1316749   | G | -0.0355 |
| rs1387328   | T | 0.0763  |
| rs62341787  | T | 0.0444  |
| rs4689007   | G | -0.0231 |
| rs112161338 | G | 0.1057  |
| rs7671039   | T | 0.0289  |
| rs140567400 | T | 0.0532  |
| rs11724710  | G | 0.0413  |
| rs111790581 | A | -0.0527 |
| rs79967967  | C | -0.0696 |
| rs10027097  | A | 0.0251  |
| rs4403031   | T | -0.1126 |
| rs17802985  | G | 0.0707  |
| rs7697973   | A | -0.0282 |
| rs6847086   | A | 0.0238  |
| rs13150650  | T | 0.0406  |
| rs115447305 | C | 0.0905  |
| rs2118051   | A | -0.0562 |
| rs4482766   | C | -0.025  |
| rs7674224   | A | 0.0229  |

|             |   |         |
|-------------|---|---------|
| rs7699815   | C | -0.0391 |
| rs77089539  | G | 0.129   |
| rs115578854 | T | -0.1172 |
| rs304332    | A | -0.023  |
| rs145391269 | T | -0.1404 |
| rs13110242  | A | -0.0648 |
| rs73232788  | C | -0.0315 |
| rs12502497  | A | -0.0264 |
| rs139492259 | A | 0.1059  |
| rs116009868 | T | -0.1737 |
| rs13150052  | C | -0.064  |
| rs149490983 | T | -0.1357 |
| rs2322014   | C | 0.0265  |
| rs6855199   | C | 0.024   |
| rs6816854   | T | 0.0235  |
| rs114468107 | T | 0.0938  |
| rs73246497  | A | 0.0946  |
| rs12332077  | A | 0.1372  |
| rs75590594  | C | 0.1706  |
| rs7657066   | G | -0.1046 |
| rs116034216 | T | -0.161  |
| rs35217331  | T | 0.1681  |
| rs12512633  | T | 0.0307  |
| rs7674571   | A | 0.0775  |
| rs34181499  | T | 0.0569  |
| rs6533403   | G | -0.049  |
| rs12386464  | G | 0.0298  |
| rs61796265  | G | 0.0309  |
| rs1483292   | T | -0.0232 |
| rs2343815   | A | 0.0869  |
| rs17749453  | A | 0.1193  |
| rs113728151 | A | 0.0498  |
| rs1873932   | A | 0.0394  |
| rs2614644   | C | 0.0267  |
| rs62302166  | G | 0.058   |
| rs1481013   | T | 0.0244  |
| rs926163    | T | -0.0511 |
| rs114424731 | T | 0.0665  |
| rs78978925  | A | 0.0454  |
| rs149427938 | G | -0.0297 |
| rs969176    | G | -0.0544 |
| rs78096627  | G | 0.125   |
| rs7356166   | G | -0.0351 |
| rs139301468 | C | -0.0746 |
| rs77345374  | G | 0.1818  |
| rs35407495  | T | -0.0314 |
| rs13111111  | T | 0.0327  |

|             |   |         |
|-------------|---|---------|
| rs72649644  | A | 0.0824  |
| rs138440177 | A | 0.0919  |
| rs76220451  | C | 0.0935  |
| rs4696308   | G | -0.1023 |
| rs7442092   | G | -0.0283 |
| rs115089992 | A | 0.09    |
| rs4864589   | G | -0.0368 |
| rs2390804   | T | -0.0253 |
| rs7680750   | G | -0.0238 |
| rs12511440  | C | -0.0256 |
| rs112161979 | A | 0.1141  |
| rs77206416  | T | 0.063   |
| rs143246322 | C | -0.0512 |
| rs7655151   | A | -0.0924 |
| rs17751499  | T | 0.0844  |
| rs7654423   | T | 0.1054  |
| rs144884417 | T | 0.1393  |
| rs114211074 | T | -0.1066 |
| rs113949435 | T | 0.1243  |
| rs17368018  | C | 0.1662  |
| rs62314882  | A | 0.0227  |
| rs79602551  | C | 0.0904  |
| rs114323863 | C | 0.1027  |
| rs35227023  | A | -0.0231 |
| rs73223476  | T | 0.0448  |
| rs58320487  | G | -0.0271 |
| rs7664769   | G | -0.0473 |
| rs114973253 | T | -0.1392 |
| rs6831973   | T | -0.023  |
| rs2043384   | G | 0.0302  |
| rs13145997  | A | 0.0234  |
| rs2642842   | G | 0.025   |
| rs7695401   | G | 0.0342  |
| rs62304665  | T | -0.1377 |
| rs17444689  | G | 0.0814  |
| rs111235040 | T | 0.1324  |
| rs75826615  | G | -0.1003 |
| rs146427431 | G | 0.157   |
| rs77528291  | T | 0.1455  |
| rs10519782  | G | -0.028  |
| rs72726172  | G | 0.0673  |
| rs12507701  | C | -0.1287 |
| rs62300577  | T | 0.1028  |
| rs35330085  | T | -0.097  |
| rs7673823   | A | -0.05   |
| rs78123199  | A | 0.0671  |
| rs61661577  | G | 0.0498  |

|             |   |         |
|-------------|---|---------|
| rs78123185  | C | 0.0879  |
| rs55692829  | C | 0.0823  |
| rs1547512   | C | 0.0229  |
| rs111246180 | C | 0.1416  |
| rs12648807  | A | 0.0977  |
| rs17002331  | T | 0.0412  |
| rs78653799  | C | 0.0636  |
| rs7673888   | C | 0.059   |
| rs7677648   | T | -0.0416 |
| rs56855447  | G | 0.0495  |
| rs17034606  | A | -0.0404 |
| rs76049826  | A | -0.0901 |
| rs141028763 | T | 0.0798  |
| rs1079736   | T | -0.0242 |
| rs73147231  | G | 0.0518  |
| rs34860490  | C | 0.0259  |
| rs77955054  | A | 0.0704  |
| rs35408398  | A | -0.1003 |
| rs13146879  | T | -0.1106 |
| rs11132574  | C | -0.0525 |
| rs11944293  | T | -0.0536 |
| rs16891537  | T | -0.1285 |
| rs12501547  | A | -0.0368 |
| rs3924924   | G | 0.0543  |
| rs3805376   | T | -0.0316 |
| rs10856812  | G | -0.1044 |
| rs78936115  | A | -0.1233 |
| rs13150290  | T | 0.0233  |
| rs114277473 | A | 0.2005  |
| rs141991857 | G | 0.1976  |
| rs72656419  | C | 0.0366  |
| rs9917954   | G | -0.042  |
| rs28833210  | C | 0.0894  |
| rs10013607  | C | 0.0221  |
| rs75878167  | C | 0.1011  |
| rs17174961  | A | -0.0244 |
| rs4956254   | A | 0.0632  |
| rs77511901  | C | 0.0973  |
| rs74836812  | G | -0.0865 |
| rs115146996 | A | -0.165  |
| rs7676189   | C | 0.0242  |
| rs1513704   | A | 0.0434  |
| rs2136811   | A | 0.0357  |
| rs6826634   | G | 0.0812  |
| rs72673298  | A | 0.0342  |
| rs75264531  | G | 0.1318  |
| rs1554849   | A | 0.0312  |

|             |   |         |
|-------------|---|---------|
| rs7676749   | A | -0.0234 |
| rs112642572 | T | -0.1659 |
| rs78840317  | T | -0.0822 |
| rs17033230  | A | 0.1352  |
| rs10805166  | G | -0.0283 |
| rs6811041   | C | -0.0281 |
| rs72706967  | T | 0.1452  |
| rs67210740  | C | 0.0328  |
| rs11728689  | T | 0.1391  |
| rs13151189  | G | -0.048  |
| rs45625131  | A | 0.1245  |
| rs4479753   | G | 0.1344  |
| rs76006838  | A | 0.1317  |
| rs73864693  | T | -0.0912 |
| rs77066025  | T | 0.0663  |
| rs1472782   | G | 0.0338  |
| rs4566695   | G | 0.0415  |
| rs13136306  | G | -0.0347 |
| rs67037690  | G | 0.0294  |
| rs76057780  | G | 0.1067  |
| rs17363597  | G | -0.0304 |
| rs17675063  | G | 0.0399  |
| rs79912795  | T | 0.0945  |
| rs78044793  | A | 0.0316  |
| rs12508259  | C | -0.0251 |
| rs6853143   | C | 0.0274  |
| rs6815830   | C | 0.0369  |
| rs141722519 | C | -0.1451 |
| rs145929635 | A | 0.171   |
| rs960665    | T | -0.0239 |
| rs114529567 | C | 0.1024  |
| rs11734382  | C | -0.0308 |
| rs7440806   | G | -0.0356 |
| rs75724491  | A | -0.0903 |
| rs139982926 | G | 0.1145  |
| rs17013584  | A | 0.0319  |
| rs114755574 | A | -0.0667 |
| rs17045462  | C | 0.0484  |
| rs1469485   | G | 0.0812  |
| rs61790831  | A | 0.0389  |
| rs62310578  | G | 0.0707  |
| rs138820856 | T | 0.0749  |
| rs4272070   | G | 0.0331  |
| rs35187774  | T | -0.0979 |
| rs72690810  | T | -0.1004 |
| rs3108398   | C | -0.0557 |
| rs7676022   | G | 0.0491  |

|             |   |         |
|-------------|---|---------|
| rs11132125  | C | -0.0379 |
| rs62335741  | T | 0.0399  |
| rs113251292 | T | 0.08    |
| rs72660039  | G | -0.0238 |
| rs6829089   | C | 0.0461  |
| rs114543684 | C | 0.0524  |
| rs4635856   | T | 0.0285  |
| rs57984253  | G | -0.0369 |
| rs76032079  | G | -0.0817 |
| rs1388845   | G | -0.0331 |
| rs114995586 | G | 0.1499  |
| rs113183793 | A | -0.065  |
| rs116040607 | T | -0.1261 |
| rs6856821   | G | 0.1253  |
| rs34536459  | G | -0.1064 |
| rs72660483  | T | -0.0702 |
| rs17374883  | C | 0.0253  |
| rs35625046  | T | 0.0546  |
| rs74890182  | C | 0.0774  |
| rs75526488  | G | -0.1051 |
| rs6833029   | T | -0.0344 |
| rs2123274   | T | 0.0892  |
| rs7340979   | T | 0.0405  |
| rs140191040 | T | 0.1028  |
| rs79706621  | T | -0.0792 |
| rs6847280   | G | 0.0412  |
| rs12646973  | A | -0.1139 |
| rs7686486   | G | -0.0855 |
| rs116032855 | G | 0.0768  |
| rs114617092 | C | -0.0645 |
| rs10029536  | T | 0.0991  |
| rs4382019   | C | -0.024  |
| rs6449020   | T | 0.0365  |
| rs12508002  | T | -0.149  |
| rs140481405 | T | -0.096  |
| rs140009185 | A | -0.1008 |
| rs75125328  | T | 0.0602  |
| rs11727334  | A | -0.0255 |
| rs4689928   | T | 0.0249  |
| rs1530610   | C | 0.0223  |
| rs77950603  | C | 0.0949  |
| rs112132883 | T | 0.0813  |
| rs659673    | G | 0.0497  |
| rs11733579  | T | 0.0228  |
| rs9992347   | A | 0.0347  |
| rs1154466   | C | -0.0792 |
| rs144101584 | C | 0.096   |

|             |   |         |
|-------------|---|---------|
| rs1846195   | C | 0.0237  |
| rs2606320   | C | -0.0288 |
| rs79254083  | G | -0.1723 |
| rs17406380  | C | -0.1432 |
| rs116186861 | G | -0.1654 |
| rs76472087  | C | -0.0375 |
| rs2358900   | T | 0.0299  |
| rs7676646   | C | 0.0922  |
| rs75523675  | T | 0.1103  |
| rs73225973  | C | 0.1353  |
| rs115981290 | A | -0.1369 |
| rs10017774  | T | -0.0449 |
| rs72723420  | T | -0.0996 |
| rs13116185  | T | -0.1768 |
| rs3912477   | C | -0.0299 |
| rs141558983 | T | 0.1539  |
| rs57327548  | T | -0.0472 |
| rs1849459   | A | -0.026  |
| rs11732788  | T | 0.025   |
| rs148193353 | G | 0.1296  |
| rs7680222   | G | 0.0229  |
| rs2406242   | T | 0.1178  |
| rs55692904  | A | 0.0315  |
| rs12506138  | T | 0.0285  |
| rs139805344 | A | 0.1163  |
| rs73126760  | T | -0.1592 |
| rs77888735  | C | -0.1256 |
| rs3890624   | G | -0.0256 |
| rs61452340  | A | -0.0473 |
| rs113323314 | T | -0.2075 |
| rs150835236 | T | 0.1481  |
| rs17021212  | T | 0.1554  |
| rs58404214  | T | -0.0476 |
| rs78600125  | C | -0.0898 |
| rs7668486   | C | -0.037  |
| rs115746414 | A | -0.1531 |
| rs147357226 | G | 0.1935  |
| rs117247081 | G | 0.1078  |
| rs77975608  | C | -0.1049 |
| rs2707726   | A | 0.031   |
| rs35612442  | T | -0.0228 |
| rs6857167   | C | 0.0535  |
| rs2075132   | T | 0.0262  |
| rs73248618  | C | 0.049   |
| rs2060674   | C | 0.032   |
| rs12501259  | C | 0.03    |
| rs13123467  | A | 0.0887  |



|             |   |         |
|-------------|---|---------|
| rs115012662 | C | 0.106   |
| rs62333032  | C | 0.0472  |
| rs72996612  | C | 0.1465  |
| rs73873774  | C | 0.13    |
| rs79304136  | G | -0.0703 |
| rs115977161 | A | 0.0922  |
| rs62334241  | T | 0.079   |
| rs28822774  | T | 0.065   |
| rs16841552  | T | 0.0605  |
| rs2903158   | T | 0.032   |
| rs150161785 | C | -0.0994 |
| rs77449545  | T | -0.1    |
| rs115931175 | C | -0.1157 |
| rs6831655   | G | -0.0254 |
| rs6449262   | G | -0.0307 |
| rs16994360  | T | 0.1032  |
| rs13111343  | C | 0.0252  |
| rs74664616  | T | 0.0928  |
| rs62323622  | G | 0.065   |
| rs17071183  | A | 0.0493  |
| rs80083602  | G | -0.0967 |
| rs115571325 | A | 0.15    |
| rs10000038  | G | 0.0244  |
| rs75328738  | T | 0.0892  |
| rs7661936   | T | -0.0309 |
| rs61595312  | G | -0.0267 |
| rs1846039   | C | 0.0252  |
| rs80190275  | A | -0.144  |
| rs76185030  | C | -0.1937 |
| rs4234872   | A | -0.0271 |
| rs10034991  | C | 0.0229  |
| rs114333026 | C | -0.0527 |
| rs72653954  | C | -0.1808 |
| rs12505998  | G | 0.035   |
| rs72702240  | T | 0.103   |
| rs6448687   | G | -0.0334 |
| rs73132534  | A | -0.1681 |
| rs6554267   | G | -0.1055 |
| rs6838533   | A | 0.04    |
| rs62318942  | A | -0.0755 |
| rs80109638  | G | -0.0951 |
| rs6845332   | A | 0.0293  |
| rs6446640   | A | -0.0356 |
| rs12641092  | A | 0.0317  |
| rs62337627  | A | -0.1936 |
| rs17046921  | C | -0.0275 |
| rs78694116  | A | -0.0781 |

|             |   |         |
|-------------|---|---------|
| rs9996048   | G | 0.0727  |
| rs138241280 | A | -0.1448 |
| rs73863005  | C | -0.1225 |
| rs76914786  | G | -0.05   |
| rs141409423 | C | -0.0656 |
| rs150791352 | C | -0.1423 |
| rs74968389  | G | 0.1235  |
| rs12643997  | G | 0.0367  |
| rs67576664  | T | 0.0628  |
| rs1648094   | C | 0.0872  |
| rs116670568 | G | -0.0732 |
| rs34160589  | C | 0.1243  |
| rs111852066 | C | -0.1822 |
| rs11725182  | A | 0.0256  |
| rs113293893 | T | -0.1216 |
| rs114615656 | A | -0.0829 |
| rs72941677  | T | 0.0592  |
| rs116048740 | A | 0.0935  |
| rs10049597  | C | 0.0943  |
| rs4861898   | G | 0.0541  |
| rs17491802  | A | -0.1254 |
| rs17421420  | T | -0.0312 |
| rs9307169   | T | 0.1614  |
| rs115023888 | T | -0.1276 |
| rs116531539 | A | -0.1258 |
| rs78576712  | T | 0.1027  |
| rs10212850  | C | -0.0474 |
| rs112309940 | T | -0.0319 |
| rs138809460 | T | 0.1171  |
| rs10010101  | G | 0.0471  |
| rs141523353 | A | -0.0908 |
| rs114948919 | T | -0.1732 |
| rs28676794  | A | 0.0743  |
| rs10004667  | A | -0.038  |
| rs772491    | G | 0.0217  |
| rs112777738 | T | 0.1005  |
| rs113961197 | G | -0.0312 |
| rs77385303  | C | -0.0412 |
| rs10005350  | A | -0.0608 |
| rs16999017  | A | 0.0975  |
| rs363144    | G | 0.0949  |
| rs16890497  | C | 0.0784  |
| rs114096978 | T | -0.1478 |
| rs62319037  | A | 0.1098  |
| rs115009357 | C | -0.0903 |
| rs12502898  | C | -0.0325 |
| rs73215103  | C | 0.039   |

|             |   |         |
|-------------|---|---------|
| rs114075855 | C | 0.0953  |
| rs13117803  | A | -0.0281 |
| rs13127653  | A | -0.0576 |
| rs11934976  | C | -0.0307 |
| rs35821797  | C | 0.0266  |
| rs3806773   | C | -0.0307 |
| rs72707737  | T | 0.0743  |
| rs76233110  | A | 0.1073  |
| rs6845375   | C | -0.0961 |
| rs113546193 | T | 0.1714  |
| rs11933778  | T | 0.0298  |
| rs4555590   | A | -0.0472 |
| rs10516451  | A | -0.0227 |
| rs75379382  | A | 0.059   |
| rs28605220  | T | 0.0293  |
| rs147346465 | T | -0.1038 |
| rs1718877   | G | -0.023  |
| rs62295138  | T | 0.0731  |
| rs114349921 | A | -0.0791 |
| rs7683632   | C | 0.1162  |
| rs6854129   | C | -0.0348 |
| rs62333120  | T | 0.1061  |
| rs61793809  | G | -0.0521 |
| rs1483749   | T | 0.0242  |
| rs114319265 | G | 0.2559  |
| rs68063814  | A | 0.0732  |
| rs113970209 | A | 0.0484  |
| rs16994199  | T | -0.0531 |
| rs72732171  | T | -0.0695 |
| rs11938373  | C | -0.046  |
| rs17828403  | T | -0.0531 |
| rs17328152  | C | -0.0956 |
| rs57455487  | G | 0.0934  |
| rs114997599 | T | 0.1133  |
| rs114053389 | C | -0.086  |
| rs140848247 | A | 0.0607  |
| rs10024182  | G | -0.0708 |
| rs2132845   | T | -0.0478 |
| rs150315740 | G | 0.1202  |
| rs12643032  | C | -0.0243 |
| rs7679475   | A | -0.0218 |
| rs3814415   | G | -0.03   |
| rs77124047  | A | -0.1099 |
| rs1372531   | C | 0.0338  |
| rs150722407 | T | 0.0704  |
| rs73812261  | T | -0.1008 |
| rs2404325   | A | -0.1185 |

|             |   |         |
|-------------|---|---------|
| rs150263484 | A | 0.1036  |
| rs112592966 | T | -0.0711 |
| rs56290506  | A | 0.0248  |
| rs28405067  | A | -0.0234 |
| rs115946071 | A | 0.1051  |
| rs4334746   | G | 0.0228  |
| rs113586587 | A | 0.0556  |
| rs72723312  | T | 0.1181  |
| rs72690525  | A | 0.0364  |
| rs75314260  | T | 0.0873  |
| rs145743567 | C | 0.038   |
| rs35199603  | A | -0.112  |
| rs7659514   | A | 0.0689  |
| rs13142373  | T | 0.0229  |
| rs16876798  | C | 0.0257  |
| rs56027818  | C | -0.0216 |
| rs2727427   | C | 0.0311  |
| rs115117256 | G | 0.0612  |
| rs73227153  | A | -0.048  |
| rs62322142  | G | 0.027   |
| rs72688691  | T | -0.028  |
| rs61742285  | G | 0.1182  |
| rs142517958 | T | -0.0706 |
| rs116094667 | T | 0.123   |
| rs17777756  | C | -0.0508 |
| rs140554040 | T | 0.1922  |
| rs10030562  | C | -0.0242 |
| rs113047857 | A | 0.0758  |
| rs72683333  | A | -0.0443 |
| rs56311185  | T | -0.0741 |
| rs11727066  | T | 0.0955  |
| rs74863511  | C | -0.0941 |
| rs10471098  | G | 0.0587  |
| rs9999847   | T | 0.0307  |
| rs56047649  | T | -0.115  |
| rs4308354   | T | -0.0354 |
| rs6855632   | A | -0.0569 |
| rs13121382  | T | 0.0732  |
| rs13104269  | G | -0.0519 |
| rs11723100  | C | 0.0379  |
| rs11132234  | G | -0.0469 |
| rs6834109   | C | 0.1156  |
| rs145446435 | A | -0.152  |
| rs142583401 | G | -0.0476 |
| rs78952727  | G | -0.0956 |
| rs72677406  | G | 0.0975  |
| rs111381501 | G | -0.1097 |

|             |   |         |
|-------------|---|---------|
| rs114045645 | G | 0.0938  |
| rs6838667   | T | -0.0332 |
| rs138715450 | T | -0.1378 |
| rs75579410  | C | -0.0787 |
| rs79264052  | A | -0.0391 |
| rs116424148 | C | -0.1535 |
| rs6840979   | G | -0.0722 |
| rs73209461  | C | -0.073  |
| rs6842071   | G | -0.0604 |
| rs6857517   | A | -0.0282 |
| rs71599018  | T | -0.0882 |
| rs62411791  | A | -0.0386 |
| rs17618813  | T | 0.0327  |
| rs10019109  | A | 0.0237  |
| rs2321689   | C | 0.0222  |
| rs11132117  | G | 0.0299  |
| rs28537375  | G | 0.0314  |
| rs2004973   | T | 0.0222  |
| rs4410529   | G | -0.0247 |
| rs10516834  | T | 0.0395  |
| rs6830606   | C | 0.0511  |
| rs1354681   | C | -0.0335 |
| rs140833205 | T | 0.1791  |
| rs13435455  | A | 0.0495  |
| rs13110927  | T | 0.0224  |
| rs142335058 | C | 0.0596  |
| rs115563119 | T | -0.1209 |
| rs10028293  | C | 0.0258  |
| rs7665250   | C | -0.0222 |
| rs74289057  | A | -0.0683 |
| rs77224316  | A | -0.0891 |
| rs2857962   | C | 0.0455  |
| rs113999983 | A | 0.1242  |
| rs114018574 | C | 0.1352  |
| rs4473632   | T | 0.0309  |
| rs1009523   | C | 0.0562  |
| rs1994428   | C | -0.0669 |
| rs11937669  | G | 0.0257  |
| rs56134488  | T | -0.0614 |
| rs78900265  | A | 0.0577  |
| rs9312376   | C | -0.0333 |
| rs76139754  | A | -0.0788 |
| rs114590304 | C | 0.0957  |
| rs7689120   | C | 0.0228  |
| rs56884460  | T | -0.0495 |
| rs62311277  | C | -0.0876 |
| rs4693083   | T | -0.0265 |

|             |   |         |
|-------------|---|---------|
| rs72917055  | G | 0.0287  |
| rs7660401   | T | 0.0301  |
| rs17644794  | G | 0.0369  |
| rs7699748   | G | 0.023   |
| rs1480974   | G | 0.0253  |
| rs76271330  | T | 0.1353  |
| rs74365493  | T | -0.0494 |
| rs17546853  | C | 0.1129  |
| rs2194931   | G | -0.0362 |
| rs79029727  | G | -0.0947 |
| rs1584783   | T | 0.0225  |
| rs77325017  | A | 0.0782  |
| rs17003554  | A | 0.0236  |
| rs10005312  | A | 0.1353  |
| rs2739534   | G | 0.0295  |
| rs75699360  | G | 0.1097  |
| rs73225186  | T | -0.0854 |
| rs149908782 | A | 0.0958  |
| rs9996998   | C | -0.0285 |
| rs147707963 | T | 0.1123  |
| rs6843562   | A | 0.0263  |
| rs72694140  | C | 0.0764  |
| rs4076765   | C | 0.0235  |
| rs359144    | C | -0.0296 |
| rs6851870   | A | 0.0225  |
| rs6825412   | A | -0.026  |
| rs116508381 | C | 0.0736  |
| rs149213442 | C | 0.0639  |
| rs115446883 | A | 0.0547  |
| rs4392572   | T | 0.1675  |
| rs7692454   | C | 0.0345  |
| rs114032169 | G | 0.1367  |
| rs146728092 | A | 0.114   |
| rs79899824  | C | -0.0703 |
| rs147722241 | G | 0.0999  |
| rs116111989 | A | 0.0608  |
| rs116086762 | C | 0.0555  |
| rs12646438  | C | 0.0748  |
| rs13116797  | T | -0.1877 |
| rs73230204  | A | -0.1228 |
| rs10938331  | C | -0.024  |
| rs7679734   | A | 0.0269  |
| rs79409868  | A | -0.1764 |
| rs116642388 | G | 0.1687  |
| rs3775147   | C | -0.0268 |
| rs150282631 | A | 0.1133  |
| rs57455594  | A | 0.0428  |

|             |   |         |
|-------------|---|---------|
| rs1425438   | C | -0.0267 |
| rs77656097  | A | -0.0861 |
| rs78770585  | C | 0.0296  |
| rs17330230  | A | 0.0393  |
| rs112894106 | T | -0.1084 |
| rs16898171  | T | 0.0393  |
| rs12640735  | C | -0.1591 |
| rs7663232   | G | -0.0429 |
| rs62318054  | C | -0.026  |
| rs9307928   | T | 0.0907  |
| rs4389590   | A | 0.0242  |
| rs73151544  | T | -0.156  |
| rs6447849   | T | -0.0227 |
| rs142387174 | C | -0.1025 |
| rs142637215 | C | -0.0709 |
| rs56403473  | T | 0.0442  |
| rs2214409   | T | 0.0221  |
| rs72668372  | C | 0.0525  |
| rs113387899 | T | 0.0561  |
| rs4689004   | C | 0.0389  |
| rs55916346  | G | 0.0334  |
| rs5015586   | A | -0.0312 |
| rs77600083  | T | 0.1158  |
| rs62332317  | T | 0.0357  |
| rs114053876 | G | -0.1163 |
| rs78203303  | C | 0.0991  |
| rs62410905  | T | 0.1343  |
| rs78224171  | T | 0.1827  |
| rs144873436 | G | -0.1543 |
| rs114097391 | C | -0.1517 |
| rs11099603  | C | 0.0774  |
| rs116670613 | A | 0.0971  |
| rs75949830  | T | -0.1319 |
| rs13110248  | G | 0.0417  |
| rs7682727   | A | 0.0593  |
| rs724749    | A | 0.0226  |
| rs7691321   | A | 0.0293  |
| rs146569323 | A | 0.1756  |
| rs115751970 | A | -0.0748 |
| rs10000843  | T | -0.0345 |
| rs72713283  | T | 0.1398  |
| rs76888592  | T | -0.0848 |
| rs10937620  | C | -0.0231 |
| rs141562092 | T | 0.0767  |
| rs72660093  | T | -0.1003 |
| rs6535910   | A | 0.0216  |
| rs1426730   | T | -0.0239 |

|             |   |         |
|-------------|---|---------|
| rs141728129 | G | 0.088   |
| rs116068050 | G | -0.1463 |
| rs9996120   | A | -0.0537 |
| rs56845943  | T | -0.0869 |
| rs143287124 | T | -0.1479 |
| rs114704088 | C | -0.0685 |
| rs74802360  | G | -0.1197 |
| rs34607675  | T | 0.0745  |
| rs2907370   | G | 0.0226  |
| rs12499618  | T | -0.0397 |
| rs7661062   | G | 0.0492  |
| rs113200685 | A | 0.0806  |
| rs79915290  | C | -0.0488 |
| rs114512767 | T | -0.1835 |
| rs76901773  | T | 0.0964  |
| rs116773609 | T | 0.0329  |
| rs398418    | T | 0.0899  |
| rs6843222   | T | -0.1088 |
| rs10026251  | G | -0.0351 |
| rs9997678   | G | 0.0264  |
| rs10011691  | T | -0.0574 |
| rs72989768  | T | -0.0364 |
| rs11731771  | G | -0.0343 |
| rs144556850 | A | 0.1306  |
| rs16994919  | G | -0.042  |
| rs145661408 | C | -0.0941 |
| rs41473648  | A | -0.0228 |
| rs115447780 | A | -0.0802 |
| rs78252817  | T | 0.1181  |
| rs72876500  | T | -0.0812 |
| rs7684162   | T | -0.0873 |
| rs28764847  | G | 0.0439  |
| rs558201    | G | -0.0231 |
| rs34478629  | A | 0.027   |
| rs4864806   | A | 0.0406  |
| rs13106125  | C | 0.1315  |
| rs74344544  | C | -0.1257 |
| rs762861    | C | 0.027   |
| rs13140741  | T | -0.0319 |
| rs12508561  | G | 0.0324  |
| rs113652956 | A | 0.1505  |
| rs10213058  | G | 0.0391  |
| rs6856738   | G | -0.0787 |
| rs62332683  | T | -0.0665 |
| rs140325971 | T | -0.189  |
| rs7681798   | A | 0.0222  |
| rs7698265   | A | -0.0367 |



|             |   |         |
|-------------|---|---------|
| rs62410019  | C | 0.0533  |
| rs4690544   | A | 0.1179  |
| rs1905843   | G | 0.0362  |
| rs148452197 | G | 0.1265  |
| rs1878284   | A | -0.0217 |
| rs113927692 | T | 0.0728  |
| rs76691679  | A | 0.0865  |
| rs114695159 | C | 0.1248  |
| rs55820787  | C | 0.0307  |
| rs72691304  | A | 0.0739  |
| rs17071208  | G | 0.0272  |
| rs10516282  | G | -0.0554 |
| rs1038443   | A | -0.0218 |
| rs72699952  | A | 0.061   |
| rs4696856   | T | 0.0319  |
| rs13128633  | G | -0.0494 |
| rs149775976 | G | 0.087   |
| rs139614575 | A | -0.1602 |
| rs72716673  | T | -0.0284 |
| rs733155    | T | -0.1156 |
| rs62286765  | G | 0.0382  |
| rs73096186  | T | 0.0875  |
| rs28705987  | T | 0.0524  |
| rs78073233  | T | -0.1132 |
| rs114158905 | T | 0.1401  |
| rs76290867  | A | 0.088   |
| rs13133418  | G | -0.0411 |
| rs4693618   | G | 0.0295  |
| rs114022802 | T | 0.1285  |
| rs9685393   | T | 0.0277  |
| rs149283588 | T | -0.1268 |
| rs10010202  | T | -0.0611 |
| rs76815269  | T | 0.0505  |
| rs142396055 | A | -0.1545 |
| rs139037058 | A | 0.1344  |
| rs144133371 | A | -0.1008 |
| rs72710859  | A | 0.1293  |
| rs7377363   | G | 0.0243  |
| rs6836207   | C | 0.1112  |
| rs6823800   | C | 0.0248  |
| rs116648918 | T | -0.0634 |
| rs35602947  | G | -0.0292 |
| rs137876375 | G | 0.1241  |
| rs17308825  | T | 0.0379  |
| rs114506980 | A | 0.0503  |
| rs74822576  | G | -0.051  |
| rs17575547  | A | -0.0778 |

|             |   |         |
|-------------|---|---------|
| rs17396534  | T | 0.025   |
| rs2245120   | C | 0.0947  |
| rs2309119   | C | -0.0271 |
| rs12501313  | C | -0.0375 |
| rs62286326  | A | 0.0272  |
| rs7698605   | C | 0.0291  |
| rs114393448 | A | 0.1577  |
| rs3101279   | A | 0.0291  |
| rs2133051   | G | 0.0224  |
| rs6552231   | C | -0.0669 |
| rs141593760 | A | -0.1044 |
| rs4576036   | T | 0.0226  |
| rs2029886   | T | -0.0285 |
| rs6837737   | C | -0.089  |
| rs80061574  | G | 0.0367  |
| rs6837550   | A | 0.0781  |
| rs72691844  | G | -0.1718 |
| rs73189450  | A | 0.1096  |
| rs4473649   | C | 0.0249  |
| rs35538111  | G | 0.026   |
| rs76653180  | A | 0.0952  |
| rs10016172  | A | -0.0295 |
| rs11722825  | C | 0.0302  |
| rs10018327  | G | -0.0332 |
| rs79073302  | T | -0.0552 |
| rs138733295 | T | -0.2061 |
| rs17740191  | A | 0.0806  |
| rs79233167  | A | 0.0655  |
| rs73245753  | T | -0.0392 |
| rs12500591  | A | -0.1164 |
| rs1288572   | C | -0.0276 |
| rs317898    | C | -0.0213 |
| rs1390738   | T | -0.0273 |
| rs78334756  | T | 0.0306  |
| rs10027384  | G | 0.0407  |
| rs150114690 | G | -0.0545 |
| rs73835757  | T | -0.0877 |
| rs114344361 | G | 0.1728  |
| rs115628998 | C | -0.1408 |
| rs75221478  | C | 0.0541  |
| rs117182038 | A | 0.0982  |
| rs9998709   | G | 0.0241  |
| rs34740679  | A | 0.0379  |
| rs76153207  | C | -0.0693 |
| rs12510055  | A | 0.0887  |
| rs77203265  | C | 0.1033  |
| rs4692955   | T | 0.0372  |

|             |   |         |
|-------------|---|---------|
| rs113674276 | G | -0.0692 |
| rs72664679  | C | -0.0552 |
| rs1216368   | A | 0.0328  |
| rs76287781  | A | -0.1579 |
| rs115366635 | G | -0.0639 |
| rs112362418 | C | 0.0531  |
| rs138852608 | T | 0.1644  |
| rs7684313   | A | -0.0307 |
| rs2374204   | A | 0.0444  |
| rs72686385  | A | 0.222   |
| rs77228652  | C | 0.0702  |
| rs58182093  | A | -0.0628 |
| rs112020973 | A | -0.0473 |
| rs116716724 | T | -0.054  |
| rs112309959 | C | -0.1293 |
| rs36022449  | A | 0.0422  |
| rs10034033  | A | -0.0278 |
| rs72634735  | T | -0.0899 |
| rs72690081  | C | 0.0804  |
| rs145249080 | A | -0.1823 |
| rs10027934  | G | -0.0558 |
| rs4864171   | C | -0.0393 |
| rs73229052  | T | 0.0614  |
| rs2865384   | G | 0.0219  |
| rs149477553 | T | -0.0503 |
| rs72618099  | A | -0.0675 |
| rs72728411  | G | 0.119   |
| rs17069894  | A | -0.0736 |
| rs113758487 | G | 0.0705  |
| rs73232303  | A | 0.1085  |
| rs72685627  | A | -0.0431 |
| rs309800    | A | 0.0259  |
| rs116106413 | A | 0.0565  |
| rs6554207   | T | 0.0228  |
| rs282241    | A | 0.0539  |
| rs114942943 | A | 0.12    |
| rs7667167   | C | 0.0211  |
| rs78697264  | T | 0.0727  |
| rs116304657 | C | -0.1193 |
| rs10003686  | G | -0.0217 |
| rs75407449  | C | -0.1018 |
| rs11133284  | T | 0.0295  |
| rs111621971 | A | 0.1489  |
| rs72734243  | G | -0.0436 |
| rs60393798  | A | 0.0489  |
| rs77408613  | T | -0.0421 |
| rs76444143  | A | 0.0755  |

|             |   |         |
|-------------|---|---------|
| rs138669488 | C | 0.1122  |
| rs77403848  | G | -0.0442 |
| rs12054522  | C | 0.0329  |
| rs7681372   | A | 0.0275  |
| rs41280493  | G | -0.083  |
| rs77377363  | A | 0.1076  |
| rs79123989  | A | 0.042   |
| rs345327    | A | 0.0603  |
| rs77388851  | C | -0.0609 |
| rs142013157 | G | 0.0899  |
| rs17069770  | A | 0.0337  |
| rs148964088 | T | -0.1153 |
| rs72659467  | G | -0.0853 |
| rs7376873   | A | 0.0241  |
| rs4693958   | G | -0.0327 |
| rs34474852  | T | -0.0215 |
| rs116466244 | C | -0.0403 |
| rs113548502 | C | -0.0861 |
| rs114278721 | A | 0.15    |
| rs13120089  | T | -0.031  |
| rs72737555  | C | 0.0219  |
| rs74907093  | C | -0.0758 |
| rs116522651 | C | -0.0846 |
| rs35057233  | G | 0.1021  |
| rs35037628  | C | -0.1168 |
| rs6840028   | T | 0.0248  |
| rs12506176  | G | -0.0371 |
| rs11732885  | C | -0.0216 |
| rs115176625 | G | -0.1446 |
| rs115973778 | C | -0.0752 |
| rs113988512 | T | 0.0826  |
| rs2625248   | T | 0.0245  |
| rs147221974 | C | -0.0788 |
| rs112000575 | T | 0.1189  |
| rs6818203   | C | -0.0294 |
| rs60725195  | C | 0.028   |
| rs75253942  | C | -0.1104 |
| rs13102284  | T | -0.022  |
| rs4693400   | G | 0.051   |
| rs142156725 | T | 0.084   |
| rs61791482  | T | 0.032   |
| rs2797507   | T | 0.0234  |
| rs35963898  | T | -0.0315 |
| rs115062940 | G | -0.0924 |
| rs75709740  | A | -0.0916 |
| rs4863761   | T | 0.021   |
| rs114035285 | C | -0.0907 |

|             |   |         |
|-------------|---|---------|
| rs80082492  | T | -0.1678 |
| rs113210349 | T | 0.1095  |
| rs57474973  | G | 0.027   |
| rs34058514  | C | 0.0527  |
| rs56022000  | C | 0.035   |
| rs13150653  | A | 0.0261  |
| rs2532098   | T | -0.0227 |
| rs4697106   | T | -0.0241 |
| rs116077039 | C | 0.0846  |
| rs77565900  | T | 0.0454  |
| rs13130709  | T | 0.0249  |
| rs6853097   | G | 0.043   |
| rs4698458   | T | -0.0211 |
| rs59664098  | A | -0.0465 |
| rs9992266   | A | 0.0282  |
| rs13101870  | G | 0.0248  |
| rs116002426 | T | 0.0625  |
| rs80208298  | A | 0.0956  |
| rs41354944  | C | 0.0888  |
| rs28870188  | A | 0.0975  |
| rs4308334   | G | -0.0293 |
| rs115044017 | G | -0.1361 |
| rs13127640  | G | 0.0247  |
| rs223482    | G | 0.0293  |
| rs75889352  | G | -0.0521 |
| rs62326125  | T | -0.067  |
| rs10520475  | C | 0.0406  |
| rs10030693  | G | -0.0327 |
| rs28649750  | T | 0.023   |
| rs2587146   | A | 0.0232  |
| rs75158161  | C | 0.0513  |
| rs62330094  | A | -0.0745 |
| rs4640657   | A | 0.0446  |
| rs76239529  | T | 0.0951  |
| rs77707113  | G | 0.0918  |
| rs76708531  | T | 0.1166  |
| rs140518777 | G | 0.1621  |
| rs1533236   | T | 0.0218  |
| rs72698385  | G | 0.1171  |
| rs6837230   | C | -0.0232 |
| rs12644153  | C | 0.0225  |
| rs78486102  | G | 0.0735  |
| rs6414773   | A | 0.0889  |
| rs56363411  | A | -0.1403 |
| rs17530357  | A | 0.0368  |
| rs142849884 | C | 0.1119  |
| rs79418213  | A | 0.1297  |

|             |   |         |
|-------------|---|---------|
| rs2976481   | T | 0.024   |
| rs151267021 | T | -0.1784 |
| rs78118430  | T | -0.0557 |
| rs112016588 | A | 0.0892  |
| rs3828483   | C | 0.0218  |
| rs13103206  | A | -0.0605 |
| rs73225138  | A | 0.031   |
| rs7661910   | T | -0.0282 |
| rs4440167   | T | 0.0268  |
| rs7684006   | A | 0.0211  |
| rs76505722  | T | 0.1138  |
| rs115436187 | C | -0.0877 |
| rs13129072  | T | 0.1167  |
| rs149399928 | A | 0.1034  |
| rs73198070  | T | -0.0374 |
| rs138158522 | A | -0.0977 |
| rs116082882 | A | 0.1453  |
| rs7670510   | T | -0.0871 |
| rs80158426  | A | 0.0883  |
| rs4547833   | T | -0.0279 |
| rs115530908 | C | 0.0861  |
| rs3733437   | T | -0.0222 |
| rs75978715  | G | -0.0534 |
| rs144707798 | C | -0.1183 |
| rs10028021  | T | -0.0569 |
| rs10029904  | T | 0.057   |
| rs74287730  | A | -0.0579 |
| rs77046733  | T | 0.0673  |
| rs1353382   | C | -0.0233 |
| rs4314235   | G | 0.0352  |
| rs72706351  | A | -0.0904 |
| rs1380093   | A | 0.0271  |
| rs56010433  | C | -0.0466 |
| rs991645    | G | 0.0262  |
| rs67722464  | A | 0.1295  |
| rs77729330  | C | -0.108  |
| rs2132665   | A | 0.0253  |
| rs59184766  | G | -0.052  |
| rs72709988  | G | -0.0524 |
| rs78638527  | G | 0.0721  |
| rs79684948  | T | -0.2022 |
| rs139374614 | A | 0.1792  |
| rs10028316  | T | 0.117   |
| rs74463863  | A | -0.1878 |
| rs12645193  | G | -0.0251 |
| rs139872407 | C | 0.1411  |
| rs114621981 | T | -0.0725 |

|             |   |         |
|-------------|---|---------|
| rs56114130  | A | -0.0249 |
| rs11931595  | C | -0.0277 |
| rs114015399 | C | -0.0781 |
| rs56021550  | C | -0.1267 |
| rs12508201  | T | 0.0581  |
| rs4235311   | C | 0.0253  |
| rs17861930  | G | 0.0996  |
| rs10050229  | G | 0.0226  |
| rs433445    | A | 0.0449  |
| rs112849285 | A | 0.0806  |
| rs6850200   | A | 0.0221  |
| rs2212966   | A | -0.034  |
| rs116491840 | T | 0.0993  |
| rs6840953   | T | -0.0249 |
| rs72619202  | A | 0.1322  |
| rs116780001 | A | 0.1135  |
| rs115532078 | G | 0.0591  |
| rs41268413  | T | -0.1964 |
| rs2390626   | C | -0.0245 |
| rs71616752  | T | 0.175   |
| rs924199    | T | 0.0396  |
| rs56008228  | A | 0.0726  |
| rs13143361  | C | 0.0286  |
| rs143764498 | T | 0.0382  |
| rs17041421  | A | 0.028   |
| rs114543518 | G | 0.1345  |
| rs6536296   | T | 0.026   |
| rs7665552   | C | 0.0218  |
| rs7692859   | A | 0.0276  |
| rs78330174  | T | 0.0965  |
| rs1976518   | C | -0.1132 |
| rs115921329 | G | -0.0632 |
| rs72726618  | C | -0.095  |
| rs12503581  | C | -0.0356 |
| rs79295975  | G | 0.114   |
| rs76304709  | A | -0.0836 |
| rs76823570  | T | 0.0502  |
| rs116478855 | A | 0.1437  |
| rs4862645   | A | 0.049   |
| rs139004419 | C | -0.1356 |
| rs146331446 | C | -0.1029 |
| rs7672380   | C | 0.0262  |
| rs114682420 | A | 0.0825  |
| rs111446335 | T | 0.0669  |
| rs78645115  | A | -0.07   |
| rs13146366  | G | -0.0245 |
| rs115512566 | A | 0.117   |

|             |   |         |
|-------------|---|---------|
| rs34292644  | T | -0.0654 |
| rs10939525  | T | -0.0478 |
| rs140791246 | A | 0.165   |
| rs2566131   | C | -0.0251 |
| rs6447145   | G | -0.0218 |
| rs1432319   | T | -0.0326 |
| rs17001357  | T | -0.0228 |
| rs74852202  | C | 0.079   |
| rs2391037   | C | 0.0252  |
| rs10003910  | A | 0.0259  |
| rs74777082  | G | 0.1556  |
| rs4600889   | A | 0.0582  |
| rs74510548  | T | 0.0406  |
| rs62336030  | T | 0.0847  |
| rs4241675   | G | -0.0263 |
| rs72657281  | T | 0.1334  |
| rs140505011 | G | -0.1425 |
| rs114934575 | A | 0.1243  |
| rs73106937  | T | 0.0918  |
| rs2221857   | G | -0.0205 |
| rs62307749  | T | -0.0329 |
| rs147248540 | G | -0.1623 |
| rs74901820  | A | -0.0978 |
| rs923445    | G | 0.0284  |
| rs56144685  | A | 0.0989  |
| rs11097755  | C | 0.0232  |
| rs79037288  | T | 0.0842  |
| rs13135667  | C | 0.0756  |
| rs3860063   | A | 0.0248  |
| rs13128709  | C | 0.0317  |
| rs2034002   | A | 0.0435  |
| rs535707    | T | -0.0245 |
| rs6810708   | C | 0.025   |
| rs2581496   | A | -0.0355 |
| rs1600320   | G | 0.022   |
| rs116619396 | T | 0.0816  |
| rs79738270  | T | -0.1093 |
| rs12513123  | A | 0.1478  |
| rs73139114  | T | 0.0692  |
| rs62311741  | A | 0.0974  |
| rs72722726  | A | 0.0406  |
| rs4450883   | A | -0.0337 |
| rs78928820  | A | -0.1224 |
| rs75453134  | T | -0.0454 |
| rs6839509   | C | 0.0209  |
| rs111836839 | C | -0.1626 |
| rs28442140  | T | 0.0682  |



|             |   |         |
|-------------|---|---------|
| rs2170780   | G | 0.0213  |
| rs75185271  | G | 0.0699  |
| rs78876299  | C | -0.066  |
| rs7682471   | T | -0.0235 |
| rs112933929 | T | -0.0778 |
| rs114687670 | T | -0.0664 |
| rs17766148  | T | -0.1269 |
| rs2597897   | T | 0.1113  |
| rs114947575 | G | -0.0849 |
| rs4833925   | T | 0.0242  |
| rs11943336  | G | -0.0308 |
| rs114640614 | A | -0.1556 |
| rs116001402 | A | 0.0699  |
| rs114274056 | C | -0.1046 |
| rs116520032 | C | -0.1718 |
| rs13132667  | G | -0.0308 |
| rs6850368   | G | 0.0242  |
| rs11934631  | A | -0.0274 |
| rs113312467 | G | -0.0878 |
| rs17811079  | G | -0.1402 |
| rs28537771  | A | 0.0294  |
| rs61209374  | C | -0.0519 |
| rs113754178 | G | -0.0983 |
| rs150561455 | T | 0.0699  |
| rs12645232  | A | 0.0399  |
| rs74989581  | T | 0.0416  |
| rs2319250   | A | 0.0283  |
| rs148485847 | C | 0.1863  |
| rs13116213  | A | -0.0274 |
| rs71603328  | G | 0.0823  |
| rs2553382   | C | 0.0281  |
| rs16894847  | T | 0.0276  |
| rs79738363  | T | -0.1094 |
| rs79768097  | G | 0.1203  |
| rs1506806   | C | -0.0299 |
| rs7680999   | C | -0.0505 |
| rs79691359  | T | 0.0437  |
| rs72659636  | G | 0.0631  |
| rs4414935   | T | -0.0353 |
| rs143159715 | T | -0.192  |
| rs55725814  | G | 0.0397  |
| rs2850384   | A | -0.0326 |
| rs17165126  | C | -0.0664 |
| rs28735796  | G | 0.023   |
| rs74946669  | G | -0.0533 |
| rs147660910 | T | 0.0378  |
| rs10939393  | C | -0.0242 |

|             |   |         |
|-------------|---|---------|
| rs114421583 | G | -0.0812 |
| rs144345591 | A | 0.028   |
| rs2171745   | C | 0.0228  |
| rs77761344  | T | 0.1388  |
| rs6448784   | C | 0.0399  |
| rs6854439   | C | 0.0298  |
| rs79924292  | C | -0.0933 |
| rs7669774   | A | -0.0828 |
| rs34820217  | A | -0.0845 |
| rs13121768  | G | 0.0786  |
| rs1468248   | G | -0.0443 |
| rs114541092 | T | 0.1861  |
| rs79634129  | C | -0.1264 |
| rs148827733 | T | -0.0957 |
| rs983071    | G | 0.0414  |
| rs77671810  | G | -0.1179 |
| rs10028987  | C | -0.1236 |
| rs6834136   | A | -0.0254 |
| rs6554508   | C | 0.0332  |
| rs55787570  | G | -0.1066 |
| rs17022027  | T | -0.0442 |
| rs55736332  | T | 0.0732  |
| rs1808714   | A | -0.0409 |
| rs116128373 | A | 0.1214  |
| rs148302083 | T | 0.1064  |
| rs147988737 | C | -0.1623 |
| rs80184588  | G | 0.1615  |
| rs75457564  | T | 0.136   |
| rs7677501   | C | 0.0264  |
| rs2048915   | T | 0.032   |
| rs2703459   | G | 0.0226  |
| rs34539638  | A | 0.1246  |
| rs35653747  | C | 0.0978  |
| rs10013054  | G | 0.0279  |
| rs55649620  | A | -0.0244 |
| rs148187930 | T | -0.0573 |
| rs150425857 | T | -0.0675 |
| rs60339366  | T | -0.0735 |
| rs6817415   | T | 0.0253  |
| rs80245890  | A | 0.0664  |
| rs78648801  | C | 0.0898  |
| rs72901601  | T | -0.0576 |
| rs10519483  | G | -0.0914 |
| rs72958286  | A | -0.1142 |
| rs6552561   | A | -0.0234 |
| rs148571375 | A | 0.1264  |
| rs1501086   | A | -0.03   |

|             |   |         |
|-------------|---|---------|
| rs147077034 | G | -0.1548 |
| rs59592436  | A | 0.067   |
| rs7659426   | T | 0.0238  |
| rs77807862  | G | -0.0834 |
| rs147294163 | A | 0.1218  |
| rs72621806  | C | 0.0359  |
| rs114348423 | A | -0.1293 |
| rs10520216  | T | 0.0433  |
| rs17264104  | A | -0.0541 |
| rs77587648  | T | 0.0916  |
| rs77801134  | C | 0.0405  |
| rs142479956 | T | -0.0371 |
| rs79859100  | C | -0.0754 |
| rs75874484  | T | -0.0832 |
| rs79047903  | G | -0.1129 |
| rs113838839 | G | -0.075  |
| rs60247484  | T | 0.0302  |
| rs28602543  | G | -0.0323 |
| rs74784139  | A | 0.0432  |
| rs17725337  | T | -0.0815 |
| rs74354031  | C | -0.1064 |
| rs894810    | G | 0.0283  |
| rs139106504 | T | 0.1378  |
| rs111807012 | A | 0.0277  |
| rs13110230  | G | 0.0324  |
| rs9997134   | C | 0.0272  |
| rs35698683  | G | 0.0982  |
| rs13136313  | G | 0.0434  |
| rs35334356  | T | -0.0526 |
| rs13103639  | T | -0.0418 |
| rs2955270   | A | -0.0789 |
| rs144952196 | T | 0.1507  |
| rs78476393  | G | 0.1336  |
| rs72637571  | A | -0.0297 |
| rs144090815 | A | -0.1507 |
| rs10516469  | T | 0.0356  |
| rs72672365  | A | 0.1251  |
| rs6818888   | C | -0.0224 |
| rs113196123 | G | -0.1123 |
| rs13145928  | A | 0.0361  |
| rs358227    | A | 0.0284  |
| rs12512079  | C | -0.1592 |
| rs6836874   | G | 0.028   |
| rs115515906 | G | 0.1131  |
| rs79153824  | T | -0.1283 |
| rs77518584  | T | 0.1355  |
| rs10805350  | A | -0.027  |

|             |   |         |
|-------------|---|---------|
| rs116550044 | T | -0.115  |
| rs146571586 | C | 0.027   |
| rs2880381   | T | 0.0335  |
| rs145019520 | A | 0.0852  |
| rs11562911  | C | 0.1223  |
| rs73228866  | T | -0.0292 |
| rs146176151 | C | 0.1152  |
| rs7660017   | A | -0.0225 |
| rs74956020  | G | 0.0897  |
| rs9992390   | G | -0.1395 |
| rs1119525   | C | -0.0291 |
| rs148617106 | A | -0.1458 |
| rs72656271  | T | -0.0546 |
| rs28552421  | G | 0.0223  |
| rs115407826 | C | 0.0664  |
| rs3846318   | G | -0.0205 |
| rs113366937 | A | -0.0611 |
| rs149074485 | T | -0.1221 |
| rs11099589  | T | -0.0815 |
| rs77051794  | C | -0.1512 |
| rs7675918   | C | 0.022   |
| rs116358589 | A | 0.143   |
| rs7665939   | T | 0.037   |
| rs111465388 | T | 0.0531  |
| rs35563234  | A | -0.0596 |
| rs73849886  | G | 0.0492  |
| rs6553136   | A | 0.0246  |
| rs6850840   | G | 0.0203  |
| rs13121020  | T | -0.0229 |
| rs1662845   | T | 0.0213  |
| rs142615564 | A | -0.1151 |
| rs60493511  | A | 0.0635  |
| rs66760518  | T | 0.0431  |
| rs77185189  | T | 0.0417  |
| rs6834438   | A | 0.0403  |
| rs72715579  | A | -0.1204 |
| rs10008902  | C | 0.0309  |
| rs144594101 | A | 0.1206  |
| rs6840589   | A | -0.0971 |
| rs78378042  | T | -0.1141 |
| rs314043    | A | 0.0372  |
| rs10022520  | T | 0.0264  |
| rs62303998  | A | 0.0614  |
| rs13110067  | A | 0.0343  |
| rs11731310  | A | -0.1602 |
| rs61792242  | C | -0.0945 |
| rs4697373   | C | 0.0255  |

|             |   |         |
|-------------|---|---------|
| rs77088618  | T | -0.1211 |
| rs150967238 | A | -0.0688 |
| rs4861960   | T | 0.0311  |
| rs6812943   | G | -0.0212 |
| rs6537027   | A | -0.0286 |
| rs13115204  | T | 0.0272  |
| rs114024482 | T | 0.1536  |
| rs115396163 | C | 0.0841  |
| rs115344018 | T | 0.0742  |
| rs28367197  | C | -0.0347 |
| rs9291516   | C | 0.0218  |
| rs1978674   | T | -0.0244 |
| rs4456976   | T | 0.1306  |
| rs28558827  | T | -0.0386 |
| rs74783965  | G | 0.1146  |
| rs79882885  | A | 0.0916  |
| rs11725444  | T | 0.0309  |
| rs114201485 | T | -0.0569 |
| rs28505426  | A | -0.1163 |
| rs7663183   | A | 0.0269  |
| rs1353381   | G | 0.043   |
| rs6414629   | T | -0.0206 |
| rs116591402 | T | -0.0999 |
| rs112484641 | A | 0.0513  |
| rs28548870  | C | 0.0312  |
| rs17014505  | C | -0.0315 |
| rs150035597 | T | -0.0892 |
| rs79062020  | T | -0.1079 |
| rs2221199   | A | 0.0257  |
| rs142259646 | A | 0.0294  |
| rs145174524 | T | -0.1122 |
| rs163185    | C | 0.0325  |
| rs76398199  | C | 0.0697  |
| rs146806829 | A | -0.102  |
| rs62340534  | T | 0.1005  |
| rs13109005  | G | -0.0217 |
| rs6852974   | T | -0.0349 |
| rs12510203  | C | -0.022  |
| rs146945876 | A | -0.131  |
| rs4691096   | G | -0.0295 |
| rs13135404  | G | 0.0276  |
| rs115436854 | C | -0.1468 |
| rs111290616 | C | -0.1202 |
| rs112074936 | T | -0.0644 |
| rs13137001  | G | -0.0531 |
| rs16853     | G | -0.0597 |
| rs35475114  | T | 0.0998  |

|             |   |         |
|-------------|---|---------|
| rs28410605  | A | -0.0273 |
| rs114473192 | A | 0.0808  |
| rs78116227  | C | -0.1529 |
| rs116642424 | A | -0.1926 |
| rs77804965  | T | -0.0405 |
| rs4507392   | T | 0.0296  |
| rs13143486  | T | 0.0725  |
| rs1533547   | G | 0.0202  |
| rs56150726  | A | -0.0601 |
| rs62412698  | T | 0.0722  |
| rs16878270  | G | 0.1363  |
| rs891367    | C | 0.0698  |
| rs35835656  | C | 0.1041  |
| rs2041216   | T | 0.021   |
| rs145283653 | T | 0.0824  |
| rs77347553  | T | 0.0279  |
| rs116438078 | T | -0.0805 |
| rs75750709  | C | 0.0929  |
| rs55652249  | A | -0.0756 |
| rs11930568  | C | 0.0479  |
| rs66921474  | T | 0.0322  |
| rs2139591   | C | -0.0209 |
| rs141145245 | A | 0.1185  |
| rs6535231   | G | 0.0575  |
| rs1511455   | A | -0.0284 |
| rs148811459 | G | -0.1487 |
| rs113124981 | G | 0.0903  |
| rs114499202 | A | 0.0672  |
| rs12507599  | T | 0.0265  |
| rs7678843   | T | 0.0267  |
| rs10461214  | C | 0.0266  |
| rs12648994  | A | 0.0774  |
| rs143378562 | A | 0.1101  |
| rs139042212 | T | 0.1632  |
| rs74881503  | G | -0.0796 |
| rs145343218 | T | -0.1468 |
| rs142114867 | A | -0.1037 |
| rs11100364  | C | -0.0412 |
| rs1298472   | A | -0.0329 |
| rs72699503  | T | 0.0679  |
| rs35991414  | A | 0.0523  |
| rs76041572  | T | 0.1085  |
| rs79753954  | C | 0.1345  |
| rs77167505  | G | 0.0899  |
| rs41286651  | C | 0.0684  |
| rs3936616   | A | -0.0516 |
| rs77813712  | C | -0.1723 |

|             |   |         |
|-------------|---|---------|
| rs59408526  | T | -0.0212 |
| rs4382082   | G | 0.0229  |
| rs114179219 | T | 0.0688  |
| rs7664538   | C | -0.1763 |
| rs147042557 | T | -0.0877 |
| rs11099805  | T | 0.0258  |
| rs12644276  | G | 0.0501  |
| rs73251818  | G | 0.0497  |
| rs1846066   | A | 0.0496  |
| rs11724732  | T | -0.0425 |
| rs13136413  | C | -0.0314 |
| rs62338196  | T | -0.0948 |
| rs10014263  | A | -0.0333 |
| rs139181782 | A | -0.1504 |
| rs76182190  | A | 0.0761  |
| rs71620934  | G | 0.1164  |
| rs145088193 | A | -0.1096 |
| rs10029917  | T | 0.0296  |
| rs1459856   | C | 0.0209  |
| rs115048444 | T | -0.124  |
| rs3912538   | A | -0.0255 |
| rs76520774  | C | 0.0683  |
| rs4308381   | A | 0.0328  |
| rs863620    | G | 0.027   |
| rs4299571   | G | -0.0212 |
| rs12374272  | A | -0.0692 |
| rs726428    | C | -0.0344 |
| rs78933486  | T | 0.035   |
| rs13122358  | G | -0.0213 |
| rs72727617  | C | -0.0493 |
| rs1582707   | T | 0.0895  |
| rs924232    | T | 0.0216  |
| rs75658243  | T | 0.1413  |
| rs10517406  | C | 0.0885  |
| rs62308490  | T | 0.1098  |
| rs6810528   | G | -0.0253 |
| rs4443226   | A | -0.0212 |
| rs11935381  | A | 0.0325  |
| rs140030777 | A | -0.0797 |
| rs56358101  | A | 0.0791  |
| rs4689066   | C | 0.0223  |
| rs10002809  | A | 0.0261  |
| rs7699886   | A | -0.1557 |
| rs147582285 | G | 0.1106  |
| rs57588120  | T | 0.0313  |
| rs17040042  | T | 0.1271  |
| rs2102974   | A | 0.0765  |

|             |   |         |
|-------------|---|---------|
| rs10050328  | T | -0.0233 |
| rs1544985   | G | -0.0333 |
| rs4835173   | G | -0.0308 |
| rs72689983  | A | 0.1392  |
| rs114944710 | A | -0.1158 |
| rs74665019  | C | -0.1267 |
| rs76094691  | T | 0.1201  |
| rs13107458  | T | 0.0214  |
| rs77217416  | G | 0.0742  |
| rs144467530 | A | 0.1684  |
| rs79498056  | C | 0.0425  |
| rs10023548  | C | 0.0275  |
| rs62313477  | G | -0.0573 |
| rs2712119   | A | -0.0221 |
| rs13108713  | A | -0.1637 |
| rs6825670   | G | -0.026  |
| rs17025335  | A | 0.0225  |
| rs75810559  | A | 0.0328  |
| rs11133052  | A | -0.0259 |
| rs80041146  | A | -0.0672 |
| rs4088545   | T | 0.063   |
| rs16839310  | C | 0.0323  |
| rs149973757 | T | 0.1014  |
| rs45555838  | C | -0.1572 |
| rs11727868  | T | 0.0244  |
| rs115259932 | T | -0.0774 |
| rs3810766   | C | 0.0258  |
| rs112577862 | A | 0.043   |
| rs75724417  | T | -0.047  |
| rs6842940   | C | 0.0213  |
| rs76354207  | G | -0.1123 |
| rs4330397   | G | 0.026   |
| rs144222038 | T | 0.1177  |
| rs72712245  | G | -0.0462 |
| rs10015877  | C | -0.0286 |
| rs9683795   | C | 0.0207  |
| rs141686285 | C | 0.0877  |
| rs13144390  | A | -0.0233 |
| rs142960935 | A | 0.0276  |
| rs55662073  | T | -0.1079 |
| rs79129663  | C | 0.0902  |
| rs76421864  | C | -0.0606 |
| rs72675581  | T | 0.0832  |
| rs2877985   | G | 0.0364  |
| rs116114077 | A | -0.0526 |
| rs4699835   | A | 0.0232  |
| rs112397745 | A | -0.1353 |



|             |   |         |
|-------------|---|---------|
| rs116818602 | C | 0.1321  |
| rs7697652   | A | 0.0213  |
| rs77488576  | T | -0.0926 |
| rs17081987  | T | 0.0326  |
| rs58096728  | T | 0.0944  |
| rs115837492 | T | -0.0783 |
| rs12503147  | A | -0.1231 |
| rs7435446   | A | -0.0666 |
| rs35186028  | T | 0.1383  |
| rs10569     | T | 0.0338  |
| rs7697686   | A | 0.1133  |
| rs114617809 | C | 0.0795  |
| rs80067274  | T | 0.0746  |
| rs4337742   | G | -0.0202 |
| rs147212410 | T | -0.0988 |
| rs35631652  | G | -0.043  |
| rs116561189 | A | 0.0634  |
| rs72661058  | G | 0.1156  |
| rs6536946   | T | 0.0263  |
| rs2412693   | G | -0.024  |
| rs12502597  | C | -0.0325 |
| rs62332989  | T | -0.1494 |
| rs6812773   | T | -0.0352 |
| rs148573108 | A | 0.0876  |
| rs9307772   | C | -0.0227 |
| rs36050273  | G | 0.0822  |
| rs62289382  | T | 0.0564  |
| rs140350101 | C | -0.0592 |
| rs72702070  | C | -0.0654 |
| rs114418055 | A | 0.1794  |
| rs148742823 | A | -0.0884 |
| rs115125297 | A | -0.144  |
| rs7438194   | A | -0.1138 |
| rs78533151  | C | 0.0681  |
| rs141255152 | A | -0.1267 |
| rs7687577   | A | 0.0326  |
| rs143793031 | C | 0.1127  |
| rs76541820  | A | 0.1058  |
| rs13137151  | A | -0.0776 |
| rs13144759  | G | 0.0355  |
| rs10022034  | A | 0.0318  |
| rs6841316   | A | -0.0271 |
| rs147833826 | C | 0.0681  |
| rs11731030  | T | 0.0321  |
| rs114046738 | A | 0.1214  |
| rs12646332  | T | -0.0276 |
| rs2715452   | A | -0.0251 |

|             |   |         |
|-------------|---|---------|
| rs4519837   | T | -0.0248 |
| rs11728437  | C | 0.0241  |
| rs2465548   | A | -0.0244 |
| rs13137850  | C | -0.0496 |
| rs10002887  | A | 0.0255  |
| rs3924194   | G | -0.058  |
| rs4302527   | C | -0.0298 |
| rs13119905  | A | 0.048   |
| rs115344423 | A | 0.0917  |
| rs79986694  | C | 0.0438  |
| rs10518120  | G | 0.0298  |
| rs485909    | G | -0.0219 |
| rs35469294  | C | 0.0262  |
| rs2871408   | T | -0.0255 |
| rs79135384  | A | -0.0359 |
| rs35712539  | T | 0.0488  |
| rs72670353  | G | 0.1216  |
| rs6832058   | C | -0.0358 |
| rs141498097 | C | -0.1145 |
| rs73226759  | T | -0.0971 |
| rs142595091 | A | 0.0688  |
| rs3796564   | C | -0.021  |
| rs13132409  | C | 0.1223  |
| rs62352006  | C | -0.1309 |
| rs13132136  | T | 0.0245  |
| rs6841386   | C | 0.0288  |
| rs28378546  | A | 0.028   |
| rs149026516 | T | -0.1676 |
| rs138741677 | A | 0.0768  |
| rs115637671 | A | 0.1195  |
| rs79207827  | A | -0.0812 |
| rs17676844  | G | 0.0546  |
| rs114261344 | G | 0.1347  |
| rs148259940 | A | 0.0919  |
| rs115567673 | T | -0.1043 |
| rs77679015  | T | 0.062   |
| rs115771644 | C | -0.1364 |
| rs73212951  | A | -0.1184 |
| rs9991098   | T | 0.1052  |
| rs115235425 | T | -0.0807 |
| rs10516927  | A | -0.0302 |
| rs13109351  | T | -0.0712 |
| rs116272279 | C | 0.0953  |
| rs6822888   | C | -0.0248 |
| rs78788026  | T | -0.1081 |
| rs35745038  | T | -0.0626 |
| rs72723489  | T | -0.0793 |

|             |   |         |
|-------------|---|---------|
| rs12048875  | G | -0.0534 |
| rs72673270  | C | 0.0289  |
| rs11736677  | C | 0.0584  |
| rs11736367  | T | 0.0235  |
| rs116834442 | G | 0.1075  |
| rs116772677 | G | 0.0292  |
| rs80312223  | G | 0.0522  |
| rs80222007  | C | 0.0529  |
| rs1450148   | C | -0.0239 |
| rs11728248  | A | 0.0255  |
| rs78834619  | C | -0.0381 |
| rs74737896  | T | -0.0322 |
| rs115416014 | C | -0.06   |
| rs35936802  | G | -0.097  |
| rs13102584  | G | 0.0225  |
| rs73249005  | A | -0.1958 |
| rs141256607 | T | -0.1019 |
| rs1154454   | G | 0.0286  |
| rs115383239 | A | 0.104   |
| rs62321860  | A | 0.0314  |
| rs7685303   | C | -0.0317 |
| rs17621384  | G | 0.0251  |
| rs6827155   | C | 0.0327  |
| rs13136650  | A | 0.0797  |
| rs17503645  | C | -0.0696 |
| rs149737053 | A | 0.1939  |
| rs77824584  | T | -0.1202 |
| rs113421127 | G | -0.0436 |
| rs115886502 | C | 0.1813  |
| rs13120807  | A | 0.0295  |
| rs35894004  | C | 0.0833  |
| rs79629830  | C | -0.0819 |
| rs17484713  | G | -0.0839 |
| rs7440245   | T | -0.0307 |
| rs1399002   | A | 0.0207  |
| rs17588403  | A | -0.0271 |
| rs75096508  | A | 0.0956  |
| rs78298490  | T | 0.1449  |
| rs11727143  | T | 0.021   |
| rs75602246  | C | 0.0627  |
| rs2867918   | A | 0.0294  |
| rs114494410 | A | -0.138  |
| rs79062778  | C | -0.0395 |
| rs115079329 | T | 0.1399  |
| rs72715000  | C | -0.0628 |
| rs116064001 | T | -0.1108 |
| rs77389176  | T | 0.1527  |

|             |   |         |
|-------------|---|---------|
| rs76115371  | A | -0.1666 |
| rs75151310  | G | -0.0581 |
| rs7695766   | G | 0.0205  |
| rs80035353  | A | 0.1244  |
| rs11550170  | G | -0.0328 |
| rs4549381   | G | -0.0437 |
| rs144522260 | A | 0.1535  |
| rs7692676   | G | -0.0214 |
| rs79261165  | A | 0.0994  |
| rs13123050  | A | -0.0225 |
| rs2686289   | G | -0.0263 |
| rs151023064 | G | -0.1542 |
| rs6536707   | G | -0.0227 |
| rs6828248   | A | -0.021  |
| rs7672656   | C | -0.0346 |
| rs115745075 | T | 0.0661  |
| rs9917909   | A | 0.0206  |
| rs7688472   | G | 0.0215  |
| rs6447059   | G | 0.0572  |
| rs140487392 | A | 0.0898  |
| rs13151409  | A | -0.0233 |
| rs71610440  | A | 0.0532  |
| rs35651496  | T | -0.0615 |
| rs76382189  | A | 0.0699  |
| rs28394458  | C | 0.0525  |
| rs71601699  | G | -0.0329 |
| rs6816732   | C | 0.0214  |
| rs62311660  | T | -0.0295 |
| rs113346670 | A | -0.0412 |
| rs1435385   | C | 0.0376  |
| rs62305126  | G | 0.1057  |
| rs112318743 | T | 0.0573  |
| rs78771853  | T | -0.1581 |
| rs28597731  | C | -0.0311 |
| rs114307200 | A | 0.0502  |
| rs336327    | C | 0.0883  |
| rs4315753   | A | -0.0222 |
| rs142624645 | T | -0.1038 |
| rs62304088  | T | 0.0348  |
| rs115595592 | C | -0.1154 |
| rs4446405   | T | 0.1022  |
| rs78098754  | T | 0.1004  |
| rs2240264   | T | 0.0243  |
| rs35936134  | T | -0.0394 |
| rs149150073 | C | -0.2179 |
| rs72678532  | A | 0.1134  |
| rs6841366   | G | -0.0295 |

|             |   |         |
|-------------|---|---------|
| rs112874628 | A | 0.1062  |
| rs116305646 | T | -0.0592 |
| rs35991587  | C | 0.0636  |
| rs6813221   | A | 0.02    |
| rs1156670   | A | -0.158  |
| rs10020117  | T | 0.0278  |
| rs78219745  | C | 0.0461  |
| rs475680    | T | 0.0254  |
| rs78402506  | T | 0.0696  |
| rs77865056  | C | -0.0805 |
| rs13114204  | C | -0.0505 |
| rs17443013  | C | 0.0199  |
| rs147582986 | T | -0.1206 |
| rs10008691  | T | 0.0674  |
| rs116387606 | G | 0.0631  |
| rs1459054   | G | 0.025   |
| rs13147458  | A | -0.0217 |
| rs115779765 | C | -0.1123 |
| rs71599856  | C | -0.0394 |
| rs114972589 | T | 0.1035  |
| rs116645196 | T | -0.0853 |
| rs149019706 | T | 0.1675  |
| rs4975260   | G | -0.0351 |
| rs17051353  | A | -0.033  |
| rs4613526   | C | 0.0215  |
| rs7684910   | A | 0.0308  |
| rs11721820  | A | -0.0289 |
| rs7656327   | C | 0.0262  |
| rs78048732  | C | -0.084  |
| rs1388154   | T | 0.0322  |
| rs71602637  | G | -0.1527 |
| rs62346060  | A | 0.0359  |
| rs146432692 | T | -0.1011 |
| rs1105616   | C | 0.0257  |
| rs72728729  | T | -0.0395 |
| rs4835349   | C | 0.0222  |
| rs11727186  | T | 0.0265  |
| rs76121705  | C | -0.1309 |
| rs149155994 | C | 0.0906  |
| rs76717363  | T | 0.1193  |
| rs148740163 | T | 0.1978  |
| rs1897765   | G | -0.0303 |
| rs17549478  | G | -0.1216 |
| rs11941046  | T | -0.0288 |
| rs6447139   | G | -0.0312 |
| rs11723946  | T | -0.0952 |
| rs28722993  | T | -0.0305 |

|             |   |         |
|-------------|---|---------|
| rs13125043  | C | 0.0478  |
| rs6815422   | C | 0.0219  |
| rs4861622   | T | 0.0789  |
| rs6599290   | T | 0.0357  |
| rs2605257   | C | 0.0198  |
| rs320762    | C | 0.0223  |
| rs140438152 | A | 0.0964  |
| rs621740    | T | -0.0247 |
| rs4274892   | C | -0.1495 |
| rs9637693   | T | -0.0704 |
| rs2683408   | C | -0.0943 |
| rs72728433  | C | 0.1037  |
| rs11132235  | T | 0.0699  |
| rs7694715   | A | 0.0392  |
| rs7695374   | G | 0.0202  |
| rs148844125 | C | 0.0841  |
| rs79936066  | A | 0.063   |
| rs6838471   | G | 0.0404  |
| rs79824064  | C | 0.0351  |
| rs113912535 | T | -0.2485 |
| rs72716369  | C | 0.0593  |
| rs56413951  | G | -0.0215 |
| rs115703708 | T | -0.0852 |
| rs10027610  | A | -0.0367 |
| rs76482367  | A | 0.0942  |
| rs149998250 | T | 0.1394  |
| rs116821091 | T | -0.1506 |
| rs78927340  | A | 0.0747  |
| rs61793035  | C | -0.0208 |
| rs7699259   | A | 0.02    |
| rs16839631  | C | -0.0568 |
| rs6814291   | C | 0.0361  |
| rs115150418 | C | 0.0986  |
| rs35283643  | C | 0.0212  |
| rs739970    | A | -0.0635 |
| rs115278203 | A | 0.0609  |
| rs111302962 | T | 0.0865  |
| rs55655023  | T | -0.0445 |
| rs35087987  | A | -0.092  |
| rs7435037   | T | 0.0453  |
| rs74408565  | G | 0.0515  |
| rs145493914 | A | -0.0861 |
| rs144064387 | G | 0.0865  |
| rs4501246   | T | -0.0204 |
| rs115549840 | C | 0.0599  |
| rs79594274  | G | -0.07   |
| rs12715964  | G | 0.0495  |

|             |   |         |
|-------------|---|---------|
| rs6835852   | T | -0.0282 |
| rs11735754  | T | -0.0322 |
| rs114437510 | A | 0.1207  |
| rs116288623 | A | 0.0701  |
| rs62295063  | A | -0.0214 |
| rs76775127  | A | -0.0907 |
| rs72699997  | A | -0.1256 |
| rs61261762  | A | 0.0877  |
| rs115934707 | G | 0.0559  |
| rs112650341 | T | 0.0317  |
| rs7683390   | T | -0.0306 |
| rs143799351 | A | -0.1539 |
| rs3846453   | G | -0.0203 |
| rs140858580 | G | 0.1577  |
| rs77004544  | G | -0.1189 |
| rs56401517  | A | -0.0262 |
| rs114222098 | C | 0.1209  |
| rs4235452   | G | -0.0278 |
| rs140149394 | G | -0.1428 |
| rs114567622 | C | 0.0895  |
| rs56118204  | G | -0.0328 |
| rs4129319   | T | 0.0214  |
| rs71673458  | T | -0.0862 |
| rs72983165  | T | 0.1111  |
| rs1869618   | C | 0.0278  |
| rs115811482 | A | -0.074  |
| rs62409676  | T | 0.1134  |
| rs11733800  | C | 0.0834  |
| rs6840060   | G | -0.0845 |
| rs114600853 | C | 0.0878  |
| rs10018318  | C | -0.023  |
| rs73252913  | G | -0.0624 |
| rs115583550 | G | -0.0615 |
| rs75389891  | T | -0.0673 |
| rs77883801  | A | -0.0951 |
| rs138892678 | G | -0.0633 |
| rs79949654  | A | 0.0439  |
| rs78470908  | T | -0.0555 |
| rs112361045 | A | 0.0565  |
| rs114726205 | G | 0.0796  |
| rs359217    | T | -0.0359 |
| rs138286624 | A | -0.1116 |
| rs4637360   | G | 0.0383  |
| rs73852834  | A | 0.0807  |
| rs150262613 | A | -0.0781 |
| rs144304186 | T | -0.0989 |
| rs115349299 | T | 0.1023  |

|             |   |         |
|-------------|---|---------|
| rs28703260  | A | -0.0425 |
| rs115776522 | T | -0.1278 |
| rs142771453 | A | -0.1361 |
| rs17828318  | T | -0.0579 |
| rs114092637 | C | 0.1     |
| rs76867927  | T | -0.0473 |
| rs7667835   | T | 0.0488  |
| rs113817573 | A | -0.0803 |
| rs9999992   | A | 0.0388  |
| rs72638370  | G | -0.0251 |
| rs10517592  | G | 0.0582  |
| rs77104355  | G | -0.0549 |
| rs114899411 | A | -0.0917 |
| rs11100601  | T | 0.0316  |
| rs6810614   | G | 0.0374  |
| rs116128409 | C | -0.0708 |
| rs2117259   | A | 0.0854  |
| rs77066075  | C | 0.035   |
| rs58512740  | A | -0.1003 |
| rs115744319 | T | 0.0948  |
| rs34448072  | C | -0.028  |
| rs72664074  | C | 0.0402  |
| rs145426199 | A | -0.0989 |
| rs138036270 | A | -0.0975 |
| rs73864570  | G | 0.1123  |
| rs752984    | A | -0.0745 |
| rs2292414   | G | -0.022  |
| rs13128324  | A | 0.0223  |
| rs17709359  | G | 0.0619  |
| rs4461530   | A | 0.0364  |
| rs12646676  | A | 0.0745  |
| rs34054626  | T | 0.0492  |
| rs4861445   | A | -0.0427 |
| rs146687269 | A | -0.1416 |
| rs34591636  | G | 0.0585  |
| rs11734199  | C | 0.0675  |
| rs141777326 | A | -0.1201 |
| rs74809883  | G | 0.0615  |
| rs9637619   | A | 0.0282  |
| rs10013423  | T | 0.0689  |
| rs116507381 | T | -0.0739 |
| rs11503014  | G | -0.0267 |
| rs74387408  | A | 0.0749  |
| rs73865414  | C | 0.1075  |
| rs115538795 | G | 0.0875  |
| rs141072707 | C | 0.112   |
| rs114135520 | T | 0.1132  |



|             |   |         |
|-------------|---|---------|
| rs71610835  | A | 0.1082  |
| rs1560330   | C | -0.0267 |
| rs13120638  | G | -0.043  |
| rs72883367  | T | 0.0872  |
| rs144114895 | T | -0.0667 |
| rs115592177 | A | 0.094   |
| rs115864073 | G | 0.1095  |
| rs79055888  | A | -0.1517 |
| rs924722    | T | -0.0248 |
| rs11737194  | G | 0.022   |
| rs13138803  | A | -0.0216 |
| rs568752    | C | -0.0203 |
| rs13115781  | G | -0.044  |
| rs114216071 | A | 0.1025  |
| rs62317872  | A | -0.0375 |
| rs7662802   | A | 0.0203  |
| rs72721193  | A | -0.1264 |
| rs13110318  | A | -0.034  |
| rs149587586 | G | 0.1169  |
| rs77958035  | A | -0.1389 |
| rs73065573  | T | -0.1084 |
| rs7666445   | G | 0.021   |
| rs17050215  | A | -0.0272 |
| rs67488659  | A | 0.0837  |
| rs72660841  | T | 0.0592  |
| rs17214066  | T | -0.051  |
| rs10009239  | A | -0.0247 |
| rs115566451 | C | 0.1183  |
| rs148388002 | T | -0.1834 |
| rs62310565  | T | -0.0765 |
| rs28434736  | A | -0.0265 |
| rs17480997  | T | 0.0639  |
| rs115345981 | A | -0.0907 |
| rs2320767   | A | 0.0196  |
| rs56214703  | G | -0.0599 |
| rs12641881  | T | 0.0233  |
| rs17402907  | A | 0.1611  |
| rs115880843 | G | 0.107   |
| rs7669546   | A | -0.0266 |
| rs35778605  | T | 0.0733  |
| rs13151054  | T | 0.0281  |
| rs317903    | T | -0.0206 |
| rs148495156 | C | -0.1494 |
| rs13125262  | C | 0.0731  |
| rs66583380  | G | 0.0524  |
| rs11943099  | A | 0.0237  |
| rs10213384  | T | -0.0421 |

|             |   |         |
|-------------|---|---------|
| rs113134467 | C | 0.1052  |
| rs76045431  | A | 0.0429  |
| rs74574464  | A | 0.0436  |
| rs115062083 | C | -0.1636 |
| rs1010540   | G | -0.0932 |
| rs10012592  | A | -0.0759 |
| rs34812996  | G | -0.022  |
| rs6855724   | C | 0.0213  |
| rs7655537   | G | 0.0958  |
| rs79486195  | C | 0.1016  |
| rs7442007   | T | -0.0356 |
| rs72679051  | T | -0.066  |
| rs4863587   | T | 0.0368  |
| rs828163    | A | -0.0221 |
| rs13123331  | A | -0.028  |
| rs11728305  | G | 0.0234  |
| rs139290666 | C | 0.0748  |
| rs62324666  | A | 0.0891  |
| rs113189296 | A | -0.0431 |
| rs13149889  | T | -0.0227 |
| rs114524279 | A | 0.1304  |
| rs17051348  | C | 0.0452  |
| rs17361009  | T | 0.037   |
| rs13115286  | G | -0.0263 |
| rs78941140  | G | -0.1329 |
| rs72670274  | G | 0.1323  |
| rs2009469   | A | 0.024   |
| rs17014685  | C | 0.077   |
| rs145984670 | G | -0.1033 |
| rs116663429 | A | -0.0889 |
| rs10517064  | C | -0.0242 |
| rs138967120 | G | 0.1094  |
| rs79000823  | G | 0.1364  |
| rs73214843  | T | 0.0368  |
| rs35850368  | T | 0.0346  |
| rs13150809  | T | -0.0235 |
| rs138858857 | T | 0.1085  |
| rs13112057  | A | -0.049  |
| rs139516106 | G | 0.104   |
| rs148573755 | A | 0.1149  |
| rs74906897  | A | -0.0694 |
| rs6852589   | A | 0.0477  |
| rs580769    | T | -0.0308 |
| rs147543510 | T | 0.087   |
| rs116168679 | G | -0.0663 |
| rs114334436 | G | -0.084  |
| rs17048646  | A | 0.0221  |

|             |   |         |
|-------------|---|---------|
| rs2289340   | G | 0.022   |
| rs113296113 | T | 0.1366  |
| rs72639797  | T | 0.0413  |
| rs9993229   | G | -0.0194 |
| rs10010321  | G | 0.0391  |
| rs2871272   | A | 0.0339  |
| rs12649665  | G | -0.0638 |
| rs111482326 | A | 0.0426  |
| rs79922110  | G | 0.1875  |
| rs75415230  | G | 0.0519  |
| rs72677717  | G | -0.0653 |
| rs10017061  | A | -0.1006 |
| rs2634971   | C | 0.029   |
| rs28611030  | G | 0.0273  |
| rs61791743  | A | 0.0275  |
| rs72689110  | G | -0.0772 |
| rs79555315  | T | -0.0447 |
| rs34751092  | A | 0.022   |
| rs7697381   | T | -0.0278 |
| rs144383546 | G | 0.1322  |
| rs4527483   | C | 0.0233  |
| rs1459556   | T | 0.03    |
| rs9996103   | G | -0.0227 |
| rs75536008  | A | -0.0458 |
| rs7665776   | C | -0.0573 |
| rs1878491   | T | -0.1067 |
| rs114298925 | T | 0.1579  |
| rs143728661 | C | -0.0888 |
| rs72718122  | T | 0.0455  |
| rs115895037 | A | -0.0937 |
| rs17539130  | G | -0.0508 |
| rs10519900  | A | 0.0741  |
| rs148834962 | T | 0.0855  |
| rs112722102 | G | -0.131  |
| rs4956041   | C | -0.0213 |
| rs75219232  | C | -0.0866 |
| rs116682779 | G | 0.1272  |
| rs876598    | G | 0.021   |
| rs10017077  | C | -0.0291 |
| rs6818066   | C | 0.0285  |
| rs75010467  | G | 0.1613  |
| rs74411689  | G | -0.1042 |
| rs79154754  | T | -0.0738 |
| rs79194401  | A | 0.0713  |
| rs7699951   | T | 0.0856  |
| rs76676934  | A | 0.1001  |
| rs10011717  | A | 0.0239  |

|             |   |         |
|-------------|---|---------|
| rs79942602  | T | -0.0575 |
| rs79165245  | A | 0.0494  |
| rs7658410   | T | 0.0275  |
| rs7690087   | T | 0.0217  |
| rs56128684  | T | 0.098   |
| rs7657197   | G | 0.0289  |
| rs76169160  | T | -0.0381 |
| rs79075835  | C | -0.0963 |
| rs141952433 | C | -0.0405 |
| rs2290755   | C | -0.0239 |
| rs10857207  | C | -0.0306 |
| rs4410574   | G | -0.0239 |
| rs114334266 | C | 0.0739  |
| rs73202837  | T | -0.0493 |
| rs17537997  | A | 0.0262  |
| rs150859547 | A | 0.093   |
| rs17866967  | A | -0.1238 |
| rs78167655  | T | 0.0723  |
| rs76410970  | A | 0.1066  |
| rs113880057 | A | 0.0609  |
| rs17488695  | A | -0.0266 |
| rs75381155  | C | -0.1144 |
| rs144696509 | G | 0.1694  |
| rs17768776  | T | -0.0448 |
| rs35955650  | T | 0.0257  |
| rs3775816   | C | -0.0207 |
| rs6535896   | C | 0.0213  |
| rs278973    | A | 0.0203  |
| rs7340876   | T | 0.0355  |
| rs13133717  | C | 0.0509  |
| rs2621452   | G | -0.0277 |
| rs12648311  | T | 0.0545  |
| rs4695237   | C | 0.0267  |
| rs2172496   | A | -0.0219 |
| rs74543784  | T | 0.0612  |
| rs11725700  | A | -0.0413 |
| rs3805144   | G | 0.0207  |
| rs79031013  | C | -0.0667 |
| rs114555129 | C | 0.1677  |
| rs78181645  | C | 0.1016  |
| rs1994298   | T | 0.0637  |
| rs72618075  | A | 0.0846  |
| rs116488883 | A | 0.0993  |
| rs4916632   | G | -0.0214 |
| rs62341409  | T | 0.0931  |
| rs112832158 | G | -0.1089 |
| rs2592978   | G | 0.0557  |

|             |   |         |
|-------------|---|---------|
| rs114328866 | T | -0.0964 |
| rs148861690 | G | 0.0978  |
| rs270480    | C | 0.0208  |
| rs1560486   | G | 0.025   |
| rs113561697 | T | 0.0471  |
| rs76357449  | A | 0.1104  |
| rs75472032  | G | 0.0781  |
| rs28634811  | T | -0.1365 |
| rs116239383 | A | -0.0996 |
| rs17026534  | C | 0.0202  |
| rs73854812  | C | 0.1073  |
| rs73800224  | A | 0.1391  |
| rs55722939  | C | 0.1145  |
| rs35433024  | G | -0.0254 |
| rs13121688  | G | -0.03   |
| rs7654426   | T | 0.134   |
| rs17024264  | C | 0.0583  |
| rs28515935  | T | -0.0239 |
| rs2686295   | C | 0.0199  |
| rs11735554  | A | 0.0243  |
| rs28463480  | G | -0.0905 |
| rs11726336  | A | 0.0291  |
| rs12501856  | C | 0.0226  |
| rs4301148   | T | -0.0226 |
| rs116029279 | C | 0.1093  |
| rs488400    | T | 0.0233  |
| rs79024417  | A | -0.0583 |
| rs114570140 | T | -0.1582 |
| rs67975415  | G | 0.0377  |
| rs12645488  | A | 0.0625  |
| rs148296440 | G | -0.1379 |
| rs11735172  | T | 0.0282  |
| rs144574165 | T | 0.0753  |
| rs55738732  | G | -0.0274 |
| rs79385086  | C | -0.0958 |
| rs1112686   | A | -0.0221 |
| rs6814709   | C | -0.0202 |
| rs80143944  | A | -0.0692 |
| rs28379256  | G | 0.1389  |
| rs76717729  | T | -0.1459 |
| rs62313799  | C | -0.1062 |
| rs2292433   | T | -0.0288 |
| rs6820417   | A | 0.0225  |
| rs11939375  | A | -0.0239 |
| rs71604908  | A | 0.0494  |
| rs146803717 | T | -0.0711 |
| rs17084540  | C | 0.1013  |

|             |   |         |
|-------------|---|---------|
| rs116338908 | A | -0.0988 |
| rs115339319 | C | -0.0546 |
| rs73217587  | T | 0.0343  |
| rs17051183  | C | 0.0225  |
| rs61429592  | C | 0.0748  |
| rs62351242  | T | -0.0349 |
| rs55661521  | G | 0.1488  |
| rs12498245  | A | -0.0426 |
| rs4580631   | T | -0.0206 |
| rs149382633 | T | 0.0259  |
| rs13110156  | G | -0.038  |
| rs62409277  | A | 0.0289  |
| rs17640453  | A | -0.0866 |
| rs74497724  | C | -0.1006 |
| rs74557126  | T | -0.033  |
| rs11723420  | C | -0.0212 |
| rs13106683  | T | 0.0318  |
| rs76243762  | G | -0.0549 |
| rs9999757   | G | -0.0311 |
| rs76788546  | G | 0.0838  |
| rs2256587   | A | 0.0448  |
| rs148554776 | T | -0.1333 |
| rs55687548  | A | 0.1121  |
| rs62313243  | G | 0.053   |
| rs923677    | C | 0.033   |
| rs6842064   | C | 0.1266  |
| rs10026490  | G | 0.0351  |
| rs116227439 | A | 0.0619  |
| rs116510109 | T | -0.0574 |
| rs79845237  | C | 0.09    |
| rs148981445 | T | -0.0964 |
| rs34162576  | A | 0.0755  |
| rs76193829  | A | 0.0851  |
| rs1040084   | A | 0.0233  |
| rs11721332  | C | -0.0537 |
| rs113166733 | A | -0.1261 |
| rs11573780  | T | 0.1021  |
| rs72874818  | G | 0.0657  |
| rs114578009 | A | 0.0943  |
| rs76752285  | G | -0.0394 |
| rs115479403 | T | 0.0853  |
| rs77431381  | A | -0.0985 |
| rs4689807   | A | 0.0212  |
| rs111997729 | T | -0.085  |
| rs6840150   | A | -0.0377 |
| rs11725171  | A | -0.1218 |
| rs73240569  | T | -0.0423 |

|             |   |         |
|-------------|---|---------|
| rs7695403   | A | -0.0271 |
| rs58604533  | A | 0.0539  |
| rs11730648  | G | -0.0265 |
| rs62318569  | C | -0.0958 |
| rs115936402 | A | 0.1155  |
| rs2279891   | C | 0.0251  |
| rs899131    | T | -0.036  |
| rs11722554  | A | -0.0541 |
| rs115576150 | G | 0.0518  |
| rs58901893  | T | -0.0444 |
| rs58629261  | C | -0.0274 |
| rs78318602  | T | 0.1615  |
| rs79399769  | T | -0.0933 |
| rs28360741  | A | -0.0844 |
| rs11939274  | T | -0.1134 |
| rs111474331 | T | 0.1517  |
| rs116428317 | C | 0.0912  |
| rs2049156   | A | 0.02    |
| rs146662821 | A | -0.1574 |
| rs13107698  | T | 0.0222  |
| rs56223002  | A | 0.0587  |
| rs28513339  | T | 0.0208  |
| rs17165032  | A | -0.0831 |
| rs115593582 | A | 0.0659  |
| rs28634779  | A | -0.0291 |
| rs57045379  | C | 0.0425  |
| rs143829468 | A | 0.1693  |
| rs75173924  | C | 0.0488  |
| rs75759744  | C | 0.0655  |
| rs17809148  | C | -0.0489 |
| rs111339102 | T | 0.0782  |
| rs140467022 | C | -0.1191 |
| rs114443862 | A | -0.1235 |
| rs1447011   | G | 0.0329  |
| rs72687497  | G | 0.0422  |
| rs72698438  | T | -0.0778 |
| rs7672196   | A | 0.0651  |
| rs34644612  | A | -0.0716 |
| rs115788768 | A | 0.0715  |
| rs978429    | A | 0.0366  |
| rs12509966  | T | 0.0803  |
| rs62334857  | G | 0.0315  |
| rs1846731   | T | 0.0302  |
| rs61240636  | A | -0.037  |
| rs6853814   | T | -0.0386 |
| rs74504099  | T | -0.0679 |
| rs4147477   | C | 0.0201  |

|             |   |         |
|-------------|---|---------|
| rs77943388  | T | 0.1029  |
| rs17068988  | T | 0.0636  |
| rs62280087  | C | -0.0323 |
| rs4496542   | T | -0.0193 |
| rs12502465  | A | 0.0378  |
| rs114503621 | C | -0.0257 |
| rs6532073   | A | 0.1257  |
| rs61477625  | G | 0.0626  |
| rs72693034  | C | 0.131   |
| rs13111566  | T | -0.0203 |
| rs10006203  | A | -0.0863 |
| rs2585968   | G | 0.0841  |
| rs908530    | T | -0.0236 |
| rs114684116 | A | -0.1026 |
| rs73237688  | T | 0.0878  |
| rs4577595   | G | 0.0753  |
| rs112908964 | A | -0.0603 |
| rs10017991  | C | -0.0421 |
| rs78865857  | A | 0.0825  |
| rs62342222  | A | -0.0797 |
| rs2702530   | C | 0.0289  |
| rs141237956 | G | 0.0801  |
| rs71602313  | T | -0.0722 |
| rs75862319  | C | -0.0544 |
| rs13145274  | C | 0.0814  |
| rs13133220  | G | 0.0212  |
| rs2276893   | C | 0.0529  |
| rs149606689 | T | -0.0673 |
| rs7673572   | T | -0.0364 |
| rs11735701  | G | -0.053  |
| rs73222935  | C | -0.0702 |
| rs11938809  | T | -0.0628 |
| rs11929962  | A | -0.0565 |
| rs2130298   | A | -0.0874 |
| rs59225705  | T | -0.0309 |
| rs61794076  | A | 0.0434  |
| rs62319649  | C | 0.0227  |
| rs76610628  | T | 0.058   |
| rs55791713  | C | 0.0209  |
| rs116464498 | T | 0.0802  |
| rs77892408  | G | -0.0759 |
| rs74574391  | C | -0.0662 |
| rs7675053   | G | 0.1063  |
| rs144440622 | A | 0.1276  |
| rs7694506   | T | 0.0841  |
| rs35398217  | C | 0.1651  |
| rs148411509 | T | -0.071  |



|             |   |         |
|-------------|---|---------|
| rs115290590 | A | 0.0836  |
| rs6414635   | T | -0.0226 |
| rs13147693  | A | -0.0224 |
| rs34051606  | G | -0.074  |
| rs4833935   | A | 0.0314  |
| rs17063303  | C | -0.0191 |
| rs77378548  | A | 0.1069  |
| rs113305976 | A | 0.0218  |
| rs68117725  | G | 0.0234  |
| rs114204163 | A | -0.1191 |
| rs62351599  | T | -0.091  |
| rs62311671  | G | 0.0854  |
| rs115533789 | A | -0.081  |
| rs78235511  | G | 0.0391  |
| rs28523636  | A | 0.0224  |
| rs28445114  | T | 0.0651  |
| rs79738733  | C | -0.0631 |
| rs62320574  | G | 0.0491  |
| rs142998600 | G | 0.1581  |
| rs6851039   | G | -0.0534 |
| rs11737158  | T | -0.0196 |
| rs6536874   | T | 0.0258  |
| rs116738717 | C | -0.083  |
| rs55811686  | T | -0.0324 |
| rs74880145  | G | -0.0395 |
| rs73223935  | G | 0.0552  |
| rs62325460  | C | 0.0523  |
| rs17048650  | G | -0.0331 |
| rs10034421  | C | 0.0528  |
| rs142277984 | T | 0.0769  |
| rs113728459 | T | 0.096   |
| rs140573464 | A | -0.1691 |
| rs78851425  | G | 0.1009  |
| rs114897129 | A | -0.0783 |
| rs4693611   | T | -0.0301 |
| rs150527235 | T | 0.051   |
| rs113358295 | A | 0.1622  |
| rs116102662 | T | 0.0687  |
| rs111937132 | C | 0.0863  |
| rs75011800  | C | -0.0525 |
| rs62301119  | A | -0.0669 |
| rs2404921   | A | -0.0255 |
| rs4234968   | A | 0.0264  |
| rs78455940  | T | -0.0664 |
| rs116556352 | T | 0.0773  |
| rs13128267  | T | 0.0215  |
| rs62342965  | T | -0.098  |

|             |   |         |
|-------------|---|---------|
| rs113222712 | T | -0.0897 |
| rs11941657  | G | 0.0244  |
| rs60006639  | A | 0.0428  |
| rs115686988 | C | -0.0835 |
| rs147159109 | A | 0.0793  |
| rs116642292 | C | -0.1351 |
| rs12505611  | G | 0.0225  |
| rs17258682  | G | -0.0615 |
| rs11133152  | A | -0.0315 |
| rs17468940  | A | 0.0514  |
| rs12644119  | A | 0.0313  |
| rs114373632 | T | -0.135  |
| rs7654671   | A | -0.0199 |
| rs60537365  | A | 0.0588  |
| rs73022081  | A | 0.0264  |
| rs111536741 | A | -0.0842 |
| rs283410    | A | -0.0925 |
| rs115097844 | C | 0.1172  |
| rs9994862   | T | -0.0222 |
| rs74579510  | C | 0.0566  |
| rs72663830  | A | -0.054  |
| rs2033613   | G | 0.0427  |
| rs77454966  | G | -0.124  |
| rs12647559  | G | 0.0224  |
| rs3792681   | C | 0.072   |
| rs79651301  | A | -0.0281 |
| rs58827685  | A | 0.0367  |
| rs76991849  | A | 0.0686  |
| rs62295001  | A | 0.0506  |
| rs76285360  | G | 0.0573  |
| rs28673515  | G | -0.0481 |
| rs1514728   | G | 0.0204  |
| rs6447118   | G | -0.0263 |
| rs62310886  | A | -0.0385 |
| rs2659510   | A | -0.0204 |
| rs1406641   | C | -0.0233 |
| rs10050337  | G | -0.0422 |
| rs56196411  | T | 0.0309  |
| rs4539990   | T | -0.0261 |
| rs116208287 | T | 0.0448  |
| rs142756762 | G | 0.1197  |
| rs1542261   | A | -0.0285 |
| rs75429792  | A | -0.0878 |
| rs12501010  | C | 0.0385  |
| rs149824934 | T | -0.0574 |
| rs73258060  | A | 0.0278  |
| rs17441627  | G | 0.0725  |

|             |   |         |
|-------------|---|---------|
| rs13108270  | A | -0.0288 |
| rs1573843   | T | -0.0319 |
| rs28736332  | C | 0.0573  |
| rs115594767 | G | -0.1481 |
| rs2165619   | G | 0.0664  |
| rs13101559  | A | 0.022   |
| rs12503379  | A | -0.0215 |
| rs76098644  | C | -0.1023 |
| rs4150035   | C | 0.0499  |
| rs62312007  | C | 0.1101  |
| rs13125812  | T | 0.0845  |
| rs111537910 | C | 0.0891  |
| rs7688139   | T | 0.0315  |
| rs142734630 | A | 0.0908  |
| rs55931011  | A | 0.0623  |
| rs2120498   | T | -0.0288 |
| rs335286    | G | -0.0201 |
| rs114449462 | A | -0.0624 |
| rs6836143   | A | -0.0551 |
| rs115573588 | G | -0.0709 |
| rs62314599  | G | 0.0533  |
| rs114212585 | T | 0.0366  |
| rs7667432   | C | -0.0297 |
| rs79342946  | T | -0.114  |
| rs147484344 | A | -0.0784 |
| rs36000990  | C | -0.0192 |
| rs35206168  | T | 0.0543  |
| rs1002439   | T | -0.0205 |
| rs79338780  | C | 0.1536  |
| rs114170780 | T | 0.0896  |
| rs74963858  | G | -0.1241 |
| rs17448633  | A | -0.042  |
| rs149409780 | G | 0.0779  |
| rs111439066 | C | -0.0438 |
| rs142080341 | A | -0.1457 |
| rs28568288  | C | 0.0606  |
| rs7680036   | T | -0.0468 |
| rs115034852 | C | 0.0899  |
| rs17048542  | C | -0.1248 |
| rs6849337   | C | -0.0281 |
| rs6851647   | C | 0.0193  |
| rs111571602 | T | -0.0609 |
| rs1492470   | C | -0.024  |
| rs76565407  | T | 0.0691  |
| rs116801458 | A | 0.1139  |
| rs115630250 | A | -0.1289 |
| rs4472157   | C | -0.0199 |

|             |   |         |
|-------------|---|---------|
| rs10804987  | C | -0.0407 |
| rs78833821  | T | 0.1394  |
| rs1039146   | C | 0.0267  |
| rs17255303  | C | -0.0644 |
| rs17191048  | A | -0.0918 |
| rs149199270 | C | 0.1641  |
| rs139653785 | C | 0.1061  |
| rs6829128   | T | -0.0206 |
| rs76957229  | T | 0.0344  |
| rs313564    | T | -0.0223 |
| rs56169308  | T | -0.0576 |
| rs149493374 | T | 0.0977  |
| rs10002594  | C | 0.0228  |
| rs147316988 | T | -0.1035 |
| rs77619131  | G | 0.079   |
| rs75419995  | C | 0.0812  |
| rs4689158   | C | 0.0207  |
| rs76073468  | C | -0.0525 |
| rs144315424 | A | 0.0386  |
| rs144252811 | G | 0.0923  |
| rs55837486  | T | -0.0546 |
| rs17630216  | A | 0.0828  |
| rs58529169  | T | 0.03    |
| rs72976105  | G | -0.1721 |
| rs76458631  | T | -0.0874 |
| rs77326503  | T | 0.1043  |
| rs72680497  | G | -0.0507 |
| rs10026451  | A | 0.021   |
| rs78110169  | C | 0.0463  |
| rs72691202  | C | 0.0663  |
| rs62303610  | A | 0.0398  |
| rs2443057   | G | 0.0212  |
| rs79819583  | A | -0.1482 |
| rs147755990 | A | 0.0577  |
| rs79394195  | G | 0.0343  |
| rs7670648   | A | 0.0202  |
| rs433201    | A | 0.0193  |
| rs76945877  | G | 0.0878  |
| rs76671931  | T | -0.1175 |
| rs1376086   | G | -0.0318 |
| rs1602667   | C | -0.0434 |
| rs150652586 | G | 0.1435  |
| rs9998052   | C | 0.0372  |
| rs11937871  | T | 0.0307  |
| rs13120409  | G | 0.0222  |
| rs148969132 | T | 0.1725  |
| rs17487930  | C | 0.0461  |

|             |   |         |
|-------------|---|---------|
| rs17065565  | T | 0.0742  |
| rs114539339 | A | -0.0888 |
| rs10516460  | C | -0.065  |
| rs6851558   | A | 0.0213  |
| rs11733230  | C | 0.0205  |
| rs145709019 | A | 0.1638  |
| rs148765881 | C | 0.0941  |
| rs6553097   | T | -0.0538 |
| rs2928304   | C | -0.0194 |
| rs147637599 | T | -0.0876 |
| rs4834119   | A | 0.0223  |
| rs114694736 | C | 0.0804  |
| rs72656974  | T | 0.0901  |
| rs1552105   | C | -0.0319 |
| rs2194926   | C | -0.0203 |
| rs72690658  | G | 0.0764  |
| rs34341188  | C | 0.025   |
| rs116652834 | T | -0.1584 |
| rs56061958  | A | 0.035   |
| rs2214402   | G | 0.0256  |
| rs3864210   | T | 0.021   |
| rs4438746   | C | 0.0223  |
| rs9992412   | G | -0.0252 |
| rs17697588  | C | 0.0264  |
| rs45616931  | C | -0.0798 |
| rs115664599 | C | 0.0511  |
| rs74829079  | G | -0.124  |
| rs11941740  | A | 0.023   |
| rs11721770  | A | 0.0785  |
| rs7654297   | A | -0.0297 |
| rs13124650  | A | 0.1379  |
| rs878956    | G | -0.0198 |
| rs35337326  | T | 0.095   |
| rs11730263  | T | -0.0812 |
| rs11723499  | G | 0.1121  |
| rs4540088   | A | -0.0904 |
| rs56795574  | G | -0.0966 |
| rs72678502  | A | -0.0811 |
| rs28687882  | A | 0.031   |
| rs11728371  | G | -0.1414 |
| rs7693503   | A | 0.08    |
| rs62317760  | A | -0.1046 |
| rs4444795   | T | 0.0271  |
| rs13127143  | G | 0.0209  |
| rs11939608  | T | -0.0941 |
| rs17463708  | A | 0.0283  |
| rs13148902  | G | -0.0454 |

|             |   |         |
|-------------|---|---------|
| rs74352298  | G | 0.0779  |
| rs9997988   | C | 0.054   |
| rs114572590 | C | -0.1203 |
| rs78832495  | A | 0.158   |
| rs16891379  | A | 0.0527  |
| rs34569114  | C | -0.04   |
| rs13144676  | A | 0.0254  |
| rs113239086 | A | 0.1047  |
| rs6848660   | A | 0.0229  |
| rs76856084  | T | -0.0694 |
| rs79824697  | G | -0.0276 |
| rs1006003   | G | 0.0192  |
| rs184285    | G | -0.0232 |
| rs13136502  | G | -0.1145 |
| rs116703833 | G | -0.0868 |
| rs115125317 | C | 0.1458  |
| rs2306412   | T | -0.0589 |
| rs74855200  | A | -0.067  |
| rs112075780 | T | -0.029  |
| rs76574743  | T | -0.0605 |
| rs75426732  | G | 0.1288  |
| rs2175443   | A | -0.0347 |
| rs17733721  | C | 0.0489  |
| rs111843653 | A | 0.0921  |
| rs28428833  | C | 0.0268  |
| rs77771245  | C | 0.1159  |
| rs4352485   | A | 0.0429  |
| rs116011926 | T | 0.0814  |
| rs11099389  | A | 0.0197  |
| rs10029573  | G | -0.0222 |
| rs60232025  | C | -0.0344 |
| rs13101579  | A | -0.0208 |
| rs17351899  | C | 0.0336  |
| rs72728208  | G | 0.0631  |
| rs7663614   | T | -0.0228 |
| rs1470059   | T | 0.1382  |
| rs55887857  | C | -0.0227 |
| rs12500557  | A | -0.0216 |
| rs148097984 | A | 0.0825  |
| rs7684209   | A | 0.05    |
| rs115405295 | T | -0.1068 |
| rs61796125  | C | 0.0211  |
| rs2309342   | A | 0.0266  |
| rs7656381   | A | 0.0229  |
| rs1905564   | A | 0.0265  |
| rs1099248   | C | -0.1526 |
| rs66526131  | G | 0.0486  |

|             |   |         |
|-------------|---|---------|
| rs6815754   | T | 0.0374  |
| rs3135070   | C | -0.0311 |
| rs79062386  | A | -0.0999 |
| rs10938521  | G | 0.0402  |
| rs67435512  | T | 0.0377  |
| rs6819619   | A | -0.026  |
| rs13137269  | A | 0.0206  |
| rs9070      | C | -0.0252 |
| rs58830700  | G | -0.0693 |
| rs954218    | C | -0.0221 |
| rs11941461  | C | -0.0218 |
| rs4132177   | A | 0.0494  |
| rs13120287  | C | -0.0221 |
| rs115598515 | T | 0.1767  |
| rs115189707 | G | -0.1155 |
| rs144523688 | C | -0.0652 |
| rs75371420  | G | -0.0321 |
| rs113399256 | G | 0.1359  |
| rs9999681   | T | 0.0265  |
| rs6825883   | C | 0.0449  |
| rs4693450   | C | 0.0283  |
| rs114539384 | G | 0.0755  |
| rs112840733 | G | -0.0446 |
| rs115118552 | G | 0.0897  |
| rs115910289 | G | 0.0828  |
| rs76219047  | T | -0.0627 |
| rs13146588  | A | 0.0194  |
| rs78230277  | T | 0.0917  |
| rs116135781 | T | 0.1412  |
| rs76535349  | T | 0.0502  |
| rs62307373  | T | 0.0615  |
| rs114679574 | G | 0.0946  |
| rs72724337  | G | -0.0786 |
| rs62351244  | G | 0.0276  |
| rs6817806   | A | -0.0445 |
| rs114388261 | A | -0.1472 |
| rs139749098 | G | -0.0857 |
| rs61744098  | A | -0.0654 |
| rs79534273  | C | 0.079   |
| rs114784004 | C | 0.0997  |
| rs3849604   | T | 0.0216  |
| rs139498223 | C | -0.0379 |
| rs115472447 | A | 0.0667  |
| rs79939782  | C | -0.122  |
| rs60731737  | A | -0.0829 |
| rs2412757   | A | 0.0204  |
| rs4862228   | A | -0.0295 |

|             |   |         |
|-------------|---|---------|
| rs77376871  | A | -0.1024 |
| rs62410023  | T | 0.1083  |
| rs13110912  | G | -0.0214 |
| rs140183343 | T | 0.0763  |
| rs75425028  | G | 0.0513  |
| rs13109916  | C | -0.0903 |
| rs151145637 | A | 0.0708  |
| rs10452248  | C | -0.075  |
| rs17635986  | G | -0.0203 |
| rs12646854  | C | 0.0189  |
| rs115627470 | A | 0.1621  |
| rs62314184  | T | -0.0238 |
| rs150079894 | T | 0.1046  |
| rs113511672 | T | 0.1074  |
| rs62311395  | G | -0.0916 |
| rs116308992 | C | 0.117   |
| rs11097740  | C | 0.024   |
| rs114286952 | T | -0.0715 |
| rs150778071 | T | 0.0822  |
| rs115688564 | C | 0.0983  |
| rs12644930  | T | 0.0787  |
| rs1387050   | C | -0.0193 |
| rs79610715  | A | 0.0941  |
| rs11724431  | G | -0.0207 |
| rs72722196  | G | 0.1362  |
| rs4388064   | T | 0.0371  |
| rs17668899  | G | -0.0923 |
| rs113400800 | A | 0.122   |
| rs1985164   | T | -0.0197 |
| rs147353725 | G | -0.1355 |
| rs115556111 | A | -0.0651 |
| rs2590784   | T | -0.0203 |
| rs17767510  | C | 0.0281  |
| rs73845391  | A | 0.0354  |
| rs925656    | C | 0.0358  |
| rs78079118  | G | 0.0582  |
| rs35366068  | C | 0.1719  |
| rs57991282  | G | -0.0287 |
| rs115782399 | C | 0.0697  |
| rs12507537  | A | 0.0192  |
| rs62318543  | T | -0.0229 |
| rs115227367 | G | -0.0865 |
| rs36061064  | G | -0.0382 |
| rs294505    | A | -0.0268 |
| rs10014767  | C | 0.0292  |
| rs7662489   | G | -0.0198 |
| rs73223499  | T | -0.0435 |



|             |   |         |
|-------------|---|---------|
| rs55789843  | G | 0.1035  |
| rs56181973  | C | 0.0411  |
| rs4466014   | A | 0.039   |
| rs62410228  | A | 0.0341  |
| rs115298919 | C | -0.1507 |
| rs75175161  | A | -0.0733 |
| rs35975487  | G | -0.0566 |
| rs11721353  | C | -0.0204 |
| rs112427340 | G | 0.1227  |
| rs9986027   | G | -0.1359 |
| rs72737849  | T | 0.094   |
| rs138929936 | G | -0.0782 |
| rs4405991   | T | 0.0306  |
| rs13110250  | C | 0.0316  |
| rs4974629   | A | 0.0201  |
| rs13130854  | G | -0.0206 |
| rs7674887   | G | -0.0694 |
| rs145205764 | G | -0.1099 |
| rs28421288  | A | 0.0727  |
| rs73225136  | T | -0.0545 |
| rs6820506   | T | -0.0424 |
| rs80324510  | G | -0.0992 |
| rs72639034  | A | -0.1279 |
| rs147171067 | C | -0.0606 |
| rs76587757  | G | 0.0575  |
| rs6448196   | G | -0.0192 |
| rs114334287 | A | -0.0681 |
| rs78464538  | A | -0.0537 |
| rs265025    | G | -0.0234 |
| rs2726683   | T | 0.0327  |
| rs4314247   | G | -0.0187 |
| rs10008238  | C | 0.0196  |
| rs79029397  | G | -0.0333 |
| rs114359918 | A | 0.0569  |
| rs10012492  | T | -0.0261 |
| rs706343    | G | 0.021   |
| rs150523422 | C | -0.0982 |
| rs1465751   | G | 0.0637  |
| rs71602035  | T | -0.0328 |
| rs10026631  | C | -0.0639 |
| rs79633596  | C | -0.1205 |
| rs55956757  | C | 0.0441  |
| rs76699618  | C | -0.1043 |
| rs115070893 | C | 0.1497  |
| rs10489083  | T | -0.0193 |
| rs77591659  | A | 0.0748  |
| rs150065949 | G | 0.1667  |

|             |   |         |
|-------------|---|---------|
| rs2079894   | G | -0.0242 |
| rs2602120   | T | 0.0814  |
| rs116118699 | A | 0.1137  |
| rs977860    | C | 0.0827  |
| rs62337940  | T | 0.0317  |
| rs4689835   | T | -0.0297 |
| rs6821735   | A | -0.0235 |
| rs142565226 | A | -0.093  |
| rs150656544 | T | 0.1009  |
| rs77264189  | T | 0.1458  |
| rs11939583  | A | 0.0734  |
| rs72646070  | T | -0.0651 |
| rs113480437 | G | -0.1068 |
| rs74939728  | G | 0.1335  |
| rs7667177   | T | -0.0192 |
| rs1356514   | G | 0.0211  |
| rs335084    | G | -0.051  |
| rs142757949 | C | -0.08   |
| rs1513952   | A | -0.0258 |
| rs1031595   | A | -0.0237 |
| rs56194147  | G | -0.0446 |
| rs67822064  | T | 0.0607  |
| rs149522083 | G | -0.0846 |
| rs111655452 | C | -0.0791 |
| rs74874270  | G | 0.0443  |
| rs6830891   | T | -0.0306 |
| rs74327628  | G | -0.0568 |
| rs1383228   | C | -0.0357 |
| rs151236880 | T | -0.0637 |
| rs77108213  | T | -0.0355 |
| rs10084886  | C | 0.0301  |
| rs115470680 | C | 0.1152  |
| rs2001305   | G | 0.019   |
| rs6833514   | C | 0.0206  |
| rs17013421  | G | 0.0226  |
| rs72681338  | A | -0.1103 |
| rs6857550   | G | 0.0463  |
| rs73214348  | C | -0.0758 |
| rs13115025  | A | 0.0515  |
| rs72636959  | G | -0.1277 |
| rs72666942  | A | -0.0566 |
| rs2613170   | T | 0.0447  |
| rs77159257  | A | 0.0526  |
| rs17026700  | C | 0.044   |
| rs12647431  | C | -0.02   |
| rs75592724  | T | -0.0793 |
| rs35612407  | T | -0.1176 |

|             |   |         |
|-------------|---|---------|
| rs115374528 | A | 0.1502  |
| rs75788323  | T | 0.1079  |
| rs115507989 | G | 0.0331  |
| rs35739496  | A | -0.0522 |
| rs62284812  | T | -0.0248 |
| rs113104877 | C | 0.096   |
| rs73246011  | A | -0.1481 |
| rs77605772  | G | 0.0535  |
| rs114111953 | C | 0.0635  |
| rs17027526  | C | 0.1155  |
| rs72726298  | C | 0.0347  |
| rs78284674  | A | 0.0346  |
| rs62332969  | T | 0.0995  |
| rs62321885  | T | 0.033   |
| rs1588967   | G | -0.1108 |
| rs7698689   | G | -0.0203 |
| rs59960817  | G | -0.0742 |
| rs6820133   | C | -0.0993 |
| rs159444    | C | 0.0817  |
| rs55825558  | A | -0.0308 |
| rs149127210 | A | -0.1057 |
| rs112435957 | A | 0.0251  |
| rs34067585  | C | 0.0258  |
| rs1898324   | C | 0.0189  |
| rs17075113  | C | 0.031   |
| rs13119689  | T | 0.0186  |
| rs12645554  | T | 0.0822  |
| rs11546450  | A | -0.0348 |
| rs114143863 | G | -0.0987 |
| rs11946873  | A | -0.1181 |
| rs12498508  | C | 0.0212  |
| rs35591475  | A | 0.0563  |
| rs114083491 | A | 0.051   |
| rs400763    | T | -0.0196 |
| rs77962265  | T | 0.0708  |
| rs115080606 | C | 0.0417  |
| rs78253905  | A | -0.0477 |
| rs2309626   | A | -0.0239 |
| rs141010832 | C | 0.053   |
| rs139152418 | A | -0.1379 |
| rs62339737  | A | 0.0891  |
| rs141982888 | C | -0.1311 |
| rs150193248 | T | 0.0859  |
| rs62312884  | G | 0.0694  |
| rs2452591   | A | -0.0195 |
| rs12509586  | G | -0.0195 |
| rs148890855 | C | 0.1608  |

|             |   |         |
|-------------|---|---------|
| rs139406136 | C | 0.1179  |
| rs36059446  | A | 0.0199  |
| rs74677647  | G | 0.0686  |
| rs72653680  | T | 0.0955  |
| rs10004557  | A | 0.0261  |
| rs142429521 | T | -0.1688 |
| rs146861222 | C | 0.102   |
| rs12498241  | T | 0.0668  |
| rs7671704   | A | 0.0207  |
| rs10022407  | C | -0.02   |
| rs35200430  | G | 0.0424  |
| rs13151867  | C | -0.0273 |
| rs36014714  | C | 0.1337  |
| rs2389690   | T | 0.0212  |
| rs72713861  | T | 0.0394  |
| rs78680256  | G | 0.0987  |
| rs2068488   | T | 0.0943  |
| rs61762849  | A | -0.0521 |
| rs9631774   | G | -0.0199 |
| rs2442019   | C | 0.1009  |
| rs76508184  | T | -0.0537 |
| rs10034263  | A | 0.0244  |
| rs116018132 | G | 0.162   |
| rs17529000  | T | 0.0516  |
| rs61796603  | A | -0.0602 |
| rs4426779   | T | -0.0365 |
| rs56289879  | T | 0.0803  |
| rs1689004   | C | 0.0254  |
| rs56229154  | A | -0.1369 |
| rs62334591  | T | 0.0223  |
| rs12650051  | A | 0.0288  |
| rs80145476  | A | -0.0331 |
| rs75221831  | A | 0.0816  |
| rs16878217  | G | 0.0282  |
| rs28495769  | G | -0.0273 |
| rs116171705 | T | -0.114  |
| rs75584663  | T | 0.0281  |
| rs7677465   | T | -0.0419 |
| rs2276904   | A | -0.0507 |
| rs73818240  | T | 0.0558  |
| rs4326075   | C | 0.0623  |
| rs13140751  | T | 0.0688  |
| rs13136010  | T | 0.0296  |
| rs2612656   | G | -0.0224 |
| rs116313084 | T | 0.1084  |
| rs71612840  | A | 0.0302  |
| rs437530    | T | 0.0243  |

|             |   |         |
|-------------|---|---------|
| rs73249418  | A | 0.1447  |
| rs13141296  | G | 0.0193  |
| rs62314429  | T | 0.0235  |
| rs80273141  | A | 0.102   |
| rs115158632 | C | -0.0956 |
| rs76758848  | C | 0.1193  |
| rs112196632 | A | -0.0769 |
| rs28804207  | C | 0.0485  |
| rs1806768   | T | 0.0224  |
| rs17652582  | T | 0.0224  |
| rs17686351  | C | 0.0307  |
| rs11132580  | C | -0.0239 |
| rs73259721  | C | -0.0896 |
| rs149501708 | C | -0.1198 |
| rs139975221 | T | -0.1252 |
| rs17739332  | A | -0.034  |
| rs13132531  | T | -0.0246 |
| rs79716344  | C | 0.0928  |
| rs114965574 | T | -0.1014 |
| rs12506197  | C | 0.0262  |
| rs150395797 | G | 0.051   |
| rs112604509 | T | -0.0907 |
| rs6834791   | A | 0.0204  |
| rs116058622 | A | 0.0937  |
| rs34512170  | C | -0.0309 |
| rs62308410  | A | -0.019  |
| rs7669474   | A | -0.0184 |
| rs77349018  | T | 0.0354  |
| rs6536017   | A | -0.0199 |
| rs78260306  | T | 0.1335  |
| rs73818103  | T | -0.0685 |
| rs72710446  | C | -0.044  |
| rs74872429  | T | 0.0941  |
| rs1460567   | C | 0.0198  |
| rs62336600  | C | -0.1063 |
| rs4302509   | G | -0.0409 |
| rs116023377 | C | 0.1066  |
| rs78472635  | T | 0.0469  |
| rs75976015  | A | 0.1004  |
| rs7692035   | G | -0.0202 |
| rs79166577  | G | 0.0325  |
| rs56296558  | T | 0.0338  |
| rs17012787  | A | 0.0813  |
| rs10032622  | T | -0.0416 |
| rs55852247  | T | 0.0487  |
| rs80091208  | A | 0.0478  |
| rs113740646 | A | 0.0931  |

|             |   |         |
|-------------|---|---------|
| rs116585088 | G | 0.0669  |
| rs74424014  | C | 0.0744  |
| rs114177088 | C | 0.0925  |
| rs79672884  | T | 0.1091  |
| rs75760865  | A | 0.0516  |
| rs12500841  | A | 0.0234  |
| rs297292    | G | 0.0206  |
| rs115235264 | C | 0.0421  |
| rs28364609  | C | -0.0346 |
| rs3857113   | T | 0.023   |
| rs114883936 | G | -0.1432 |
| rs73250791  | G | 0.1136  |
| rs4519784   | T | 0.0298  |
| rs114405827 | G | 0.0265  |
| rs111819881 | T | 0.0751  |
| rs4490471   | G | -0.0309 |
| rs11100616  | T | 0.0205  |
| rs11731456  | A | -0.0278 |
| rs114327695 | A | 0.128   |
| rs3846332   | A | 0.0586  |
| rs75195573  | C | 0.0448  |
| rs61686664  | T | 0.031   |
| rs77038092  | T | 0.032   |
| rs74652279  | A | -0.0354 |
| rs13145465  | G | -0.0291 |
| rs144742792 | G | 0.0857  |
| rs3796846   | C | -0.0224 |
| rs116190319 | G | 0.1255  |
| rs6831853   | A | -0.0248 |
| rs58961640  | C | 0.0199  |
| rs17471302  | T | -0.019  |
| rs79106744  | T | -0.0743 |
| rs3822215   | G | -0.0241 |
| rs114173284 | T | 0.1358  |
| rs114897951 | A | 0.1173  |
| rs55787585  | T | 0.0312  |
| rs16882260  | A | 0.0678  |
| rs17814784  | T | 0.0732  |
| rs74852132  | A | -0.0853 |
| rs115539961 | A | 0.0922  |
| rs10517001  | G | -0.0664 |
| rs116629750 | A | -0.095  |
| rs77313982  | A | 0.0446  |
| rs10005711  | C | 0.0311  |
| rs73193399  | C | -0.0525 |
| rs116082064 | T | 0.1665  |
| rs76646425  | G | -0.112  |

|             |   |         |
|-------------|---|---------|
| rs114887765 | A | -0.1304 |
| rs10031186  | C | -0.0422 |
| rs9784538   | A | 0.0593  |
| rs72697975  | A | 0.1039  |
| rs2262359   | T | -0.0194 |
| rs7668986   | T | 0.0209  |
| rs116159813 | G | -0.0993 |
| rs13143783  | T | 0.0328  |
| rs9312388   | G | -0.0484 |
| rs112407985 | A | 0.1487  |
| rs144998665 | G | 0.1385  |
| rs7440933   | G | 0.0248  |
| rs114256882 | A | -0.1651 |
| rs10011362  | T | 0.0429  |
| rs34188989  | T | 0.0313  |
| rs146662793 | A | -0.0949 |
| rs80271938  | C | 0.0746  |
| rs116247853 | G | -0.1209 |
| rs11934907  | T | -0.0201 |
| rs78175781  | T | -0.075  |
| rs2704110   | C | -0.0198 |
| rs73856228  | G | 0.0731  |
| rs28610389  | T | -0.0254 |
| rs67061931  | G | 0.0219  |
| rs75309216  | T | 0.0582  |
| rs11729269  | G | 0.0192  |
| rs34007533  | G | -0.0496 |
| rs11099869  | A | 0.0291  |
| rs35665609  | G | -0.0201 |
| rs6818751   | G | 0.0195  |
| rs60618071  | G | -0.0343 |
| rs10009977  | T | -0.1037 |
| rs61660610  | C | -0.0373 |
| rs11937197  | T | -0.0402 |
| rs76111883  | G | 0.0786  |
| rs10016210  | G | -0.0563 |
| rs6837148   | G | -0.0746 |
| rs3113012   | G | 0.099   |
| rs1994412   | G | -0.0251 |
| rs7654046   | G | 0.0251  |
| rs12646256  | C | 0.0937  |
| rs74693356  | T | -0.103  |
| rs62317677  | T | 0.0643  |
| rs80049894  | T | 0.0557  |
| rs7672621   | C | 0.0421  |
| rs13144120  | T | -0.0961 |
| rs13102404  | C | -0.0188 |

|             |   |         |
|-------------|---|---------|
| rs12648146  | T | -0.0213 |
| rs4339281   | G | -0.0269 |
| rs4513513   | A | 0.0786  |
| rs6836701   | C | -0.0512 |
| rs143523400 | G | 0.0837  |
| rs11727052  | G | 0.0254  |
| rs10010561  | A | -0.0196 |
| rs501522    | T | 0.058   |
| rs151330944 | A | -0.0706 |
| rs17632423  | A | -0.0219 |
| rs16889667  | A | 0.0731  |
| rs56149013  | C | 0.1265  |
| rs16995383  | G | -0.1244 |
| rs79547910  | G | 0.1353  |
| rs78490893  | T | 0.0869  |
| rs6447569   | G | 0.0185  |
| rs76676745  | A | 0.0466  |
| rs116385953 | T | 0.0625  |
| rs28705190  | A | 0.0218  |
| rs76394528  | A | -0.0719 |
| rs141080507 | T | -0.117  |
| rs74737033  | A | 0.081   |
| rs72888281  | G | -0.0617 |
| rs77059080  | G | 0.1204  |
| rs77783363  | G | -0.0575 |
| rs11727977  | T | -0.0292 |
| rs4558873   | G | 0.0197  |
| rs6811144   | G | -0.0199 |
| rs6848772   | A | -0.0335 |
| rs1060693   | A | 0.0187  |
| rs10012401  | T | -0.0616 |
| rs146551863 | C | 0.1025  |
| rs74666678  | C | -0.1009 |
| rs62282997  | A | -0.0928 |
| rs79266385  | C | 0.0743  |
| rs4558863   | C | -0.0238 |
| rs76680208  | T | 0.1034  |
| rs6448517   | C | 0.0751  |
| rs10015266  | G | 0.036   |
| rs17737016  | A | 0.1039  |
| rs74371508  | A | 0.1291  |
| rs7683957   | A | 0.022   |
| rs12647572  | T | 0.0834  |
| rs17351666  | T | 0.1256  |
| rs308424    | A | -0.0404 |
| rs1025555   | C | 0.0225  |
| rs66802818  | C | 0.0294  |



|             |   |         |
|-------------|---|---------|
| rs12504475  | T | 0.0209  |
| rs17814234  | G | 0.0777  |
| rs145233543 | C | -0.0767 |
| rs142769834 | C | 0.0693  |
| rs11100492  | C | 0.0314  |
| rs7664501   | C | -0.0292 |
| rs1458889   | T | 0.0503  |
| rs870197    | C | 0.0212  |
| rs139386137 | G | -0.1526 |
| rs12651562  | G | 0.0201  |
| rs997412    | G | 0.0315  |
| rs17490304  | C | 0.0686  |
| rs72669682  | A | 0.1147  |
| rs17010902  | G | 0.0416  |
| rs77154235  | T | 0.1083  |
| rs72697365  | G | 0.0772  |
| rs146823227 | T | -0.1606 |
| rs11737062  | G | -0.0233 |
| rs143585449 | C | 0.0793  |
| rs13112698  | C | 0.0371  |
| rs145984873 | C | -0.1351 |
| rs72654623  | C | 0.1617  |
| rs1508422   | T | 0.0219  |
| rs28760520  | C | -0.0265 |
| rs6554190   | A | 0.0182  |
| rs114961371 | T | -0.0922 |
| rs77152719  | T | 0.066   |
| rs34372017  | C | -0.0554 |
| rs13127104  | A | 0.0567  |
| rs2903395   | A | 0.036   |
| rs72722173  | G | -0.0718 |
| rs72687725  | T | -0.0959 |
| rs10939031  | A | 0.0232  |
| rs2704389   | T | 0.0487  |
| rs7661051   | A | 0.0392  |
| rs2128097   | T | -0.0516 |
| rs71604691  | T | -0.0849 |
| rs34838042  | C | 0.0802  |
| rs7688580   | T | 0.0242  |
| rs55944207  | C | 0.0753  |
| rs139931400 | A | 0.135   |
| rs1470716   | G | 0.0261  |
| rs11099418  | A | 0.0199  |
| rs906125    | A | -0.0269 |
| rs4306906   | G | 0.0188  |
| rs2546577   | A | 0.0615  |
| rs72712094  | A | 0.1156  |

|             |   |         |
|-------------|---|---------|
| rs6846731   | G | -0.0475 |
| rs78672340  | A | 0.059   |
| rs72917659  | T | -0.0476 |
| rs80266665  | T | -0.0766 |
| rs939207    | T | -0.0305 |
| rs71603488  | G | -0.0765 |
| rs112748093 | A | -0.2037 |
| rs2648124   | A | 0.073   |
| rs145975026 | T | 0.0807  |
| rs743693    | A | -0.0318 |
| rs28580519  | A | -0.0642 |
| rs4835418   | C | 0.0396  |
| rs34312804  | T | 0.085   |
| rs1542554   | A | -0.0407 |
| rs80302652  | C | 0.0624  |
| rs149029090 | T | -0.1263 |
| rs34400487  | T | 0.0212  |
| rs77231062  | C | -0.0399 |
| rs62302033  | A | 0.0183  |
| rs7674113   | C | -0.0202 |
| rs6823927   | T | -0.0462 |
| rs1518183   | A | 0.0208  |
| rs72621833  | G | -0.0247 |
| rs1510799   | T | -0.0262 |
| rs143967042 | C | 0.0517  |
| rs116050037 | T | 0.0937  |
| rs10001641  | T | -0.0665 |
| rs10938299  | T | -0.0205 |
| rs11098760  | C | 0.0509  |
| rs11099004  | A | 0.0197  |
| rs1364836   | T | 0.0197  |
| rs2197167   | G | 0.0262  |
| rs80061841  | T | 0.026   |
| rs140276522 | T | 0.0504  |
| rs76263289  | T | -0.0891 |
| rs1863294   | A | 0.0318  |
| rs115368227 | A | -0.0528 |
| rs115485579 | T | 0.0587  |
| rs115540604 | G | 0.1038  |
| rs73846082  | T | -0.0358 |
| rs114873615 | C | 0.0948  |
| rs381765    | T | 0.0571  |
| rs112370754 | T | 0.1219  |
| rs138230556 | A | 0.0901  |
| rs141891798 | G | -0.1207 |
| rs73072136  | G | -0.0367 |
| rs7659865   | C | -0.0186 |

|             |   |         |
|-------------|---|---------|
| rs13133845  | G | -0.0309 |
| rs7440402   | T | -0.022  |
| rs73119784  | C | -0.0477 |
| rs111735386 | C | 0.0359  |
| rs78529961  | A | -0.0596 |
| rs115889524 | C | -0.0912 |
| rs149954560 | A | 0.1355  |
| rs28507886  | T | 0.0768  |
| rs68068529  | T | -0.0541 |
| rs2121883   | T | 0.0327  |
| rs16998228  | C | 0.0265  |
| rs28525675  | A | 0.0185  |
| rs1522569   | G | -0.0236 |
| rs13145427  | T | 0.027   |
| rs142256529 | G | 0.0785  |
| rs140166943 | G | -0.1151 |
| rs116146172 | A | 0.0655  |
| rs73835043  | A | 0.1516  |
| rs62350517  | C | 0.0423  |
| rs28452425  | A | -0.021  |
| rs114948464 | A | -0.0703 |
| rs115572153 | A | 0.0899  |
| rs76516682  | G | 0.0715  |
| rs17505658  | C | -0.0339 |
| rs73017551  | T | 0.037   |
| rs2074975   | G | -0.0222 |
| rs4634256   | T | -0.0247 |
| rs56997372  | A | 0.033   |
| rs17280896  | G | 0.0342  |
| rs17593172  | G | 0.0755  |
| rs116245607 | T | 0.0554  |
| rs3756153   | C | -0.0281 |
| rs4863172   | A | -0.0195 |
| rs80136556  | T | 0.0453  |
| rs77580088  | T | -0.0358 |
| rs13136031  | A | 0.1316  |
| rs2597788   | A | -0.062  |
| rs79901266  | G | -0.057  |
| rs11573039  | G | 0.0731  |
| rs7676863   | T | 0.0254  |
| rs116416850 | T | 0.0928  |
| rs72726543  | G | 0.031   |
| rs78139714  | A | -0.0652 |
| rs116099691 | G | 0.0966  |
| rs11723487  | T | -0.1551 |
| rs4861499   | G | -0.0208 |
| rs72670626  | C | -0.0439 |

|             |   |         |
|-------------|---|---------|
| rs9997120   | T | -0.0218 |
| rs116001704 | A | 0.1143  |
| rs79132059  | T | -0.0191 |
| rs74844327  | C | 0.0474  |
| rs111597024 | G | 0.1187  |
| rs11940862  | G | -0.0195 |
| rs4519836   | G | 0.0204  |
| rs2613179   | C | -0.0289 |
| rs78297632  | T | -0.084  |
| rs7684288   | C | -0.0673 |
| rs4241901   | A | -0.0268 |
| rs116262642 | T | 0.0804  |
| rs12499191  | G | 0.0691  |
| rs35099627  | A | -0.0993 |
| rs138485834 | A | -0.0999 |
| rs7682016   | A | 0.0705  |
| rs2714545   | T | -0.0485 |
| rs4689676   | A | -0.0194 |
| rs116732595 | C | 0.0606  |
| rs10007897  | G | 0.0209  |
| rs72636148  | G | 0.0263  |
| rs115156636 | T | -0.0987 |
| rs145133191 | A | -0.1084 |
| rs12512161  | C | 0.0818  |
| rs7654792   | C | -0.0198 |
| rs12711088  | A | 0.021   |
| rs115411470 | A | -0.046  |
| rs10034715  | C | -0.0206 |
| rs78325462  | G | -0.07   |
| rs9994177   | A | 0.0179  |
| rs17069255  | A | 0.0827  |
| rs140918687 | C | -0.0581 |
| rs35003803  | G | -0.131  |
| rs79400499  | G | 0.0748  |
| rs1230163   | G | 0.0213  |
| rs150062779 | T | 0.075   |
| rs6834861   | T | 0.0588  |
| rs1131140   | T | -0.023  |
| rs10517126  | C | 0.0514  |
| rs111849203 | A | 0.0587  |
| rs7671290   | A | -0.0811 |
| rs4697475   | T | 0.0256  |
| rs13111963  | A | 0.0196  |
| rs12641675  | T | 0.0192  |
| rs10026174  | T | -0.0634 |
| rs1024035   | A | 0.0617  |
| rs7675653   | T | -0.0242 |

|             |   |         |
|-------------|---|---------|
| rs11942278  | T | -0.0653 |
| rs7683422   | C | 0.0832  |
| rs149110644 | A | -0.1034 |
| rs114433610 | T | -0.1474 |
| rs12641680  | T | 0.021   |
| rs72639825  | C | 0.1172  |
| rs10019642  | G | 0.0205  |
| rs10520453  | C | -0.1269 |
| rs10019253  | A | 0.0184  |
| rs12512983  | A | -0.0659 |
| rs34276979  | A | 0.0211  |
| rs7690556   | A | -0.0358 |
| rs6853859   | T | 0.0291  |
| rs4697012   | G | 0.0201  |
| rs1381966   | T | 0.0211  |
| rs2280501   | C | 0.0309  |
| rs80184316  | T | -0.1354 |
| rs62338059  | T | 0.0287  |
| rs114871983 | A | -0.0551 |
| rs73222946  | T | 0.055   |
| rs11131681  | C | -0.0339 |
| rs4694362   | C | 0.0192  |
| rs28810485  | T | 0.1142  |
| rs3853438   | G | -0.0198 |
| rs74702750  | T | 0.1215  |
| rs16894737  | C | 0.0487  |
| rs80137092  | C | -0.0405 |
| rs7695171   | G | -0.0181 |
| rs114144144 | A | -0.0525 |
| rs116642714 | A | 0.095   |
| rs17600554  | A | -0.0403 |
| rs3113747   | A | 0.0209  |
| rs13151287  | C | 0.0564  |
| rs11724123  | C | -0.0892 |
| rs9762482   | C | 0.0459  |
| rs35380414  | A | -0.0282 |
| rs11939842  | C | -0.0309 |
| rs34127101  | T | 0.0354  |
| rs138951080 | A | -0.0938 |
| rs149782300 | G | 0.1007  |
| rs114314740 | T | 0.0619  |
| rs78927743  | C | 0.0246  |
| rs6830757   | T | 0.0381  |
| rs62351642  | G | -0.0469 |
| rs77316427  | T | -0.0765 |
| rs73245550  | T | -0.0832 |
| rs13102282  | C | 0.0472  |

|             |   |         |
|-------------|---|---------|
| rs115609102 | A | -0.0691 |
| rs17828794  | C | 0.0963  |
| rs13118207  | C | -0.115  |
| rs12507263  | A | 0.0614  |
| rs116536232 | G | -0.1513 |
| rs62315037  | C | 0.0448  |
| rs6851803   | G | -0.0265 |
| rs150692493 | C | 0.1181  |
| rs148237995 | G | 0.0869  |
| rs6838517   | A | -0.0212 |
| rs145800431 | A | -0.0996 |
| rs73192310  | G | 0.0321  |
| rs141568002 | G | 0.0483  |
| rs73113838  | A | -0.0342 |
| rs76921091  | A | -0.0593 |
| rs7679527   | G | -0.0183 |
| rs151034609 | A | 0.0819  |
| rs7656736   | A | -0.0514 |
| rs62336857  | G | -0.0755 |
| rs143124695 | T | 0.128   |
| rs2618961   | A | -0.0334 |
| rs150989209 | T | -0.0823 |
| rs139859855 | G | 0.055   |
| rs142403039 | G | -0.0644 |
| rs72673079  | C | -0.1012 |
| rs6846587   | T | 0.0264  |
| rs4460045   | G | -0.0294 |
| rs78759284  | C | 0.062   |
| rs17083558  | G | -0.0184 |
| rs145762985 | G | -0.1293 |
| rs17625509  | G | -0.0624 |
| rs473695    | T | 0.0189  |
| rs35940422  | T | 0.0238  |
| rs6821455   | T | -0.0325 |
| rs4862199   | T | 0.0347  |
| rs79869486  | T | 0.0629  |
| rs76423981  | C | -0.0301 |
| rs144583793 | G | 0.0802  |
| rs143195050 | T | 0.0732  |
| rs149830730 | T | 0.0689  |
| rs149294670 | T | 0.0732  |
| rs61795017  | T | -0.0192 |
| rs79185536  | A | -0.0804 |
| rs73240475  | T | -0.0905 |
| rs11097498  | T | -0.0199 |
| rs4694020   | T | -0.0744 |
| rs12642413  | G | 0.0306  |

|             |   |         |
|-------------|---|---------|
| rs57638087  | T | 0.0395  |
| rs75114477  | C | -0.1036 |
| rs2079134   | G | 0.0207  |
| rs73088582  | G | -0.0641 |
| rs12648141  | G | 0.0602  |
| rs2127818   | C | 0.0202  |
| rs80127881  | G | -0.0683 |
| rs115116065 | C | 0.081   |
| rs73240521  | A | -0.0921 |
| rs75358352  | A | -0.0331 |
| rs7658572   | A | 0.0237  |
| rs77091916  | A | 0.1068  |
| rs73808637  | C | -0.1272 |
| rs6536942   | G | 0.0275  |
| rs10520448  | T | -0.0598 |
| rs10939653  | C | -0.0189 |
| rs280100    | C | 0.0851  |
| rs114125108 | A | -0.0695 |
| rs2703133   | G | 0.0255  |
| rs62316215  | A | -0.0251 |
| rs1871584   | A | -0.0175 |
| rs56013305  | T | -0.0453 |
| rs9307787   | C | -0.0206 |
| rs116651700 | G | -0.1129 |
| rs35496730  | T | -0.0253 |
| rs73237930  | G | 0.0329  |
| rs71622956  | G | -0.0672 |
| rs116757365 | T | -0.0894 |
| rs17861849  | T | 0.0202  |
| rs11736725  | A | 0.0182  |
| rs4862782   | C | -0.0244 |
| rs73232531  | T | -0.0618 |
| rs2687963   | G | 0.0195  |
| rs62299383  | G | 0.0948  |
| rs7688268   | A | 0.0204  |
| rs3756186   | T | 0.0181  |
| rs75748700  | G | -0.069  |
| rs67253259  | A | -0.0308 |
| rs146650933 | T | 0.043   |
| rs140937983 | A | 0.161   |
| rs116785739 | A | -0.1329 |
| rs4032983   | T | -0.1387 |
| rs17231034  | A | 0.0852  |
| rs116160883 | T | -0.0949 |
| rs115568656 | T | 0.0719  |
| rs56302455  | T | 0.0821  |
| rs115144945 | T | 0.0813  |

|             |   |         |
|-------------|---|---------|
| rs115380427 | G | 0.0387  |
| rs13128336  | G | 0.0193  |
| rs34129881  | G | 0.1067  |
| rs28368392  | A | 0.0208  |
| rs137979949 | G | 0.1263  |
| rs4688973   | G | -0.0322 |
| rs139469223 | T | 0.0773  |
| rs74933352  | C | 0.051   |
| rs13111872  | A | 0.0338  |
| rs78346275  | C | -0.1268 |
| rs115791512 | A | -0.0727 |
| rs7661725   | C | 0.0202  |
| rs17609346  | C | 0.0456  |
| rs28512482  | C | 0.0275  |
| rs35532933  | G | 0.031   |
| rs1567594   | A | -0.0261 |
| rs72716820  | A | 0.1502  |
| rs62297681  | T | 0.0339  |
| rs115615318 | A | -0.0722 |
| rs115976420 | T | 0.0539  |
| rs114776539 | A | 0.1007  |
| rs4295221   | T | 0.0197  |
| rs4432699   | T | 0.0227  |
| rs79703485  | A | 0.1102  |
| rs17009618  | C | -0.0276 |
| rs2068079   | T | -0.0284 |
| rs11732711  | C | -0.0194 |
| rs74288926  | T | 0.0467  |
| rs72694103  | A | -0.0454 |
| rs77319576  | G | 0.0675  |
| rs79474847  | C | 0.0488  |
| rs79772731  | T | -0.0471 |
| rs56042973  | T | -0.1587 |
| rs2688225   | G | -0.0567 |
| rs56748807  | A | 0.1257  |
| rs142858132 | A | 0.0757  |
| rs116470534 | A | -0.1456 |
| rs13151215  | C | 0.0214  |
| rs17081300  | G | 0.0623  |
| rs72702424  | C | 0.0282  |
| rs35097334  | C | 0.031   |
| rs1364831   | G | -0.0214 |
| rs146161385 | A | 0.0757  |
| rs59090726  | G | 0.0679  |
| rs72668798  | A | -0.1091 |
| rs116804077 | C | 0.081   |
| rs56323618  | A | -0.0215 |



|             |   |         |
|-------------|---|---------|
| rs7660793   | C | 0.0177  |
| rs72633395  | T | -0.1121 |
| rs11728128  | A | -0.0857 |
| rs430976    | C | 0.0251  |
| rs13109974  | T | 0.0485  |
| rs139896966 | T | -0.0986 |
| rs1604737   | C | 0.0899  |
| rs145216621 | A | -0.0758 |
| rs977574    | G | -0.0346 |
| rs56123507  | C | 0.1273  |
| rs4450884   | T | 0.0186  |
| rs3133176   | T | 0.0197  |
| rs5344      | G | 0.0797  |
| rs114083773 | A | 0.0599  |
| rs12642775  | T | -0.0652 |
| rs6536996   | T | 0.0233  |
| rs72696745  | T | -0.025  |
| rs11732815  | G | 0.0342  |
| rs114017765 | A | -0.0288 |
| rs2611829   | G | -0.0186 |
| rs116371099 | T | -0.1199 |
| rs56840580  | C | 0.0312  |
| rs146774422 | T | 0.1034  |
| rs149514363 | A | 0.0664  |
| rs143183114 | T | 0.1191  |
| rs17481647  | C | 0.0323  |
| rs72870136  | T | -0.0315 |
| rs75702439  | C | 0.0701  |
| rs73878293  | C | 0.0803  |
| rs116069820 | A | 0.0987  |
| rs60669431  | T | -0.0385 |
| rs34465541  | C | 0.0316  |
| rs144242331 | A | -0.0874 |
| rs6821326   | C | 0.1386  |
| rs140355511 | T | -0.0691 |
| rs78149732  | C | 0.0852  |
| rs75260424  | A | -0.0302 |
| rs73833889  | T | 0.0198  |
| rs139216210 | A | 0.0919  |
| rs146538798 | C | 0.0566  |
| rs7679998   | G | 0.0558  |
| rs113322707 | A | 0.0923  |
| rs3775375   | T | -0.0512 |
| rs7669745   | T | 0.023   |
| rs146541178 | A | -0.1243 |
| rs6850637   | G | -0.0177 |
| rs7660832   | G | -0.0223 |

|             |   |         |
|-------------|---|---------|
| rs150070267 | T | 0.0898  |
| rs111345550 | G | 0.0384  |
| rs4692457   | G | 0.0316  |
| rs28412182  | G | 0.0569  |
| rs4252935   | A | -0.0556 |
| rs4272001   | T | 0.0331  |
| rs10000249  | T | -0.0224 |
| rs113787602 | C | 0.0177  |
| rs145561667 | A | 0.0849  |
| rs7663958   | C | 0.0317  |
| rs115784968 | G | -0.0756 |
| rs141441692 | T | -0.0629 |
| rs2535515   | T | 0.0492  |
| rs7655783   | C | -0.0327 |
| rs111642982 | T | -0.0263 |
| rs148339769 | G | 0.117   |
| rs6448326   | G | 0.0237  |
| rs1548186   | C | 0.0277  |
| rs114628823 | G | -0.1068 |
| rs80221109  | A | 0.0302  |
| rs10023075  | T | 0.0184  |
| rs9312672   | C | 0.0202  |
| rs13130398  | A | 0.0216  |
| rs77163726  | C | -0.062  |
| rs17732955  | T | 0.0195  |
| rs12233744  | T | 0.0194  |
| rs115389548 | G | 0.0574  |
| rs7677147   | C | 0.0239  |
| rs7697733   | T | 0.0377  |
| rs76613613  | A | -0.0552 |
| rs6822552   | T | 0.0282  |
| rs62318544  | C | 0.0814  |
| rs314102    | A | 0.0205  |
| rs77343051  | A | 0.0931  |
| rs113147951 | C | 0.1163  |
| rs17286011  | T | 0.0821  |
| rs7672922   | G | -0.0276 |
| rs150495363 | C | -0.0878 |
| rs78172209  | A | -0.0368 |
| rs11939588  | A | 0.0204  |
| rs62323974  | T | 0.1153  |
| rs28515689  | G | 0.0437  |
| rs2575625   | T | 0.0208  |
| rs147291386 | A | -0.0632 |
| rs2090384   | G | 0.0684  |
| rs6842325   | T | 0.0272  |
| rs75244067  | T | -0.0689 |

|             |   |         |
|-------------|---|---------|
| rs72697823  | G | 0.0479  |
| rs13143455  | T | -0.0567 |
| rs11936468  | C | 0.0191  |
| rs116740572 | C | -0.139  |
| rs60373266  | C | 0.0758  |
| rs75339726  | C | 0.0844  |
| rs62289317  | T | 0.0219  |
| rs2048961   | T | -0.0177 |
| rs34096868  | C | 0.0698  |
| rs79730842  | G | 0.0889  |
| rs149797950 | G | 0.0766  |
| rs35642757  | C | -0.0254 |
| rs72681098  | C | 0.099   |
| rs143636453 | C | 0.0889  |
| rs11721883  | A | 0.0226  |
| rs113869900 | A | -0.1655 |
| rs150354141 | C | 0.0787  |
| rs6446645   | C | -0.0212 |
| rs116679185 | A | -0.1028 |
| rs17700324  | T | -0.0504 |
| rs57028884  | C | -0.0269 |
| rs9312512   | G | 0.0426  |
| rs13111701  | C | -0.0555 |
| rs12647309  | T | -0.1024 |
| rs77028321  | G | -0.0369 |
| rs116003576 | T | 0.0547  |
| rs2375873   | A | -0.0296 |
| rs79206055  | A | -0.1022 |
| rs12641147  | G | 0.0904  |
| rs28472816  | C | -0.0241 |
| rs56013138  | C | -0.1022 |
| rs140824487 | C | -0.1154 |
| rs111561412 | T | 0.0395  |
| rs73126887  | C | -0.074  |
| rs17637290  | G | 0.0217  |
| rs72662278  | A | 0.0287  |
| rs139605181 | T | 0.0829  |
| rs111914227 | C | -0.1304 |
| rs2333084   | T | -0.0303 |
| rs76898677  | A | 0.1014  |
| rs12502812  | T | 0.0409  |
| rs17083254  | T | 0.0393  |
| rs7659406   | C | -0.0208 |
| rs147482715 | G | 0.1001  |
| rs12152620  | T | -0.0278 |
| rs138912720 | G | 0.1131  |
| rs11942536  | A | -0.0233 |

|             |   |         |
|-------------|---|---------|
| rs4864332   | C | -0.0798 |
| rs11735275  | C | -0.0345 |
| rs78850833  | A | 0.0539  |
| rs148268602 | G | -0.0283 |
| rs9998677   | C | -0.0207 |
| rs17697515  | T | 0.0378  |
| rs114086305 | G | 0.1373  |
| rs1473193   | G | -0.0186 |
| rs56092627  | G | 0.0221  |
| rs72922850  | G | 0.0742  |
| rs115215018 | T | 0.0876  |
| rs76242882  | G | -0.0388 |
| rs75562398  | T | -0.0797 |
| rs17830325  | A | 0.0303  |
| rs17018291  | C | 0.096   |
| rs72705626  | T | 0.0585  |
| rs2322183   | T | 0.0199  |
| rs2877951   | A | 0.0231  |
| rs150601513 | A | 0.1185  |
| rs75399632  | C | 0.0748  |
| rs12503941  | A | -0.0196 |
| rs17029494  | A | -0.0279 |
| rs72997294  | A | 0.0769  |
| rs114467450 | C | 0.0673  |
| rs56298023  | T | 0.0611  |
| rs76946739  | G | 0.0793  |
| rs73814056  | G | -0.0829 |
| rs34094094  | A | 0.0398  |
| rs2012275   | T | 0.0213  |
| rs317873    | G | 0.0212  |
| rs116050889 | A | 0.0681  |
| rs75748353  | G | -0.0758 |
| rs62328291  | T | -0.0603 |
| rs58725309  | G | -0.061  |
| rs71605957  | A | -0.0976 |
| rs73124766  | C | 0.0317  |
| rs117111501 | G | -0.0964 |
| rs975065    | A | -0.0275 |
| rs62291197  | T | 0.0413  |
| rs12330929  | T | 0.0539  |
| rs60360952  | C | 0.0394  |
| rs116785665 | A | -0.0729 |
| rs72714115  | C | 0.0267  |
| rs62287840  | G | -0.0296 |
| rs150902126 | A | 0.0916  |
| rs11938823  | G | 0.0246  |
| rs10017416  | G | 0.0377  |

|             |   |         |
|-------------|---|---------|
| rs78936067  | G | 0.1455  |
| rs4689545   | T | 0.0188  |
| rs115633395 | G | 0.0908  |
| rs76239570  | C | 0.1205  |
| rs10002528  | T | -0.0173 |
| rs72895785  | T | -0.0285 |
| rs62322676  | G | -0.0448 |
| rs4101100   | A | 0.0321  |
| rs146005304 | A | 0.0726  |
| rs6846375   | C | -0.1005 |
| rs138855450 | A | -0.1112 |
| rs17451271  | C | -0.0389 |
| rs79677726  | G | -0.0904 |
| rs6836982   | A | -0.0204 |
| rs77409755  | C | -0.0573 |
| rs59126959  | A | 0.139   |
| rs17011286  | G | 0.0509  |
| rs28787443  | C | -0.0328 |
| rs76210949  | T | -0.0709 |
| rs1037149   | T | -0.0201 |
| rs4975307   | C | -0.0424 |
| rs78943600  | G | 0.0243  |
| rs116433705 | T | -0.1115 |
| rs56395606  | G | 0.0839  |
| rs28378398  | A | -0.0326 |
| rs7664005   | T | -0.0209 |
| rs72663597  | G | -0.109  |
| rs2866892   | C | 0.035   |
| rs17510384  | C | -0.0365 |
| rs2595110   | G | 0.0196  |
| rs34561353  | T | 0.0394  |
| rs7693913   | T | 0.02    |
| rs2169648   | T | 0.0581  |
| rs76236753  | T | -0.0934 |
| rs6824640   | C | 0.0188  |
| rs75576785  | T | 0.0483  |
| rs2405180   | C | -0.019  |
| rs77673305  | C | 0.107   |
| rs3774878   | C | -0.0629 |
| rs1864363   | C | 0.0228  |
| rs11723277  | T | -0.1019 |
| rs17676882  | A | -0.0207 |
| rs115516128 | G | -0.0579 |
| rs77267045  | G | 0.029   |
| rs149700458 | A | -0.0741 |
| rs1713957   | A | -0.018  |
| rs140341503 | C | 0.0819  |

|             |   |         |
|-------------|---|---------|
| rs144792458 | A | 0.0877  |
| rs79607337  | T | -0.0619 |
| rs78721623  | A | 0.0586  |
| rs111430944 | G | -0.0639 |
| rs17258176  | G | -0.0258 |
| rs75839546  | A | 0.0869  |
| rs143803349 | A | -0.1295 |
| rs17862021  | G | -0.0855 |
| rs114025797 | C | 0.0733  |
| rs114285349 | C | -0.0815 |
| rs73189445  | A | 0.0231  |
| rs79393737  | C | 0.0822  |
| rs4253400   | T | -0.0779 |
| rs11729970  | C | -0.0184 |
| rs146371515 | A | -0.1206 |
| rs76593009  | A | -0.0911 |
| rs10010171  | G | -0.0517 |
| rs75643149  | G | -0.1483 |
| rs7682949   | G | 0.0202  |
| rs116262290 | T | 0.0495  |
| rs150449035 | A | -0.0914 |
| rs12506810  | A | -0.0187 |
| rs13110022  | G | 0.0229  |
| rs77634709  | C | 0.0537  |
| rs150032127 | T | 0.0643  |
| rs56218836  | C | -0.0219 |
| rs7688327   | T | 0.0438  |
| rs115088666 | T | -0.1426 |
| rs115304316 | A | -0.0743 |
| rs629782    | A | 0.0238  |
| rs13148597  | T | -0.0403 |
| rs73083544  | T | 0.0405  |
| rs57940528  | A | -0.0353 |
| rs115638934 | G | 0.0518  |
| rs112329387 | G | 0.065   |
| rs4833962   | C | -0.0173 |
| rs62320240  | T | 0.0472  |
| rs146087803 | A | -0.0294 |
| rs11736883  | G | -0.0299 |
| rs111753421 | C | -0.1235 |
| rs13111238  | T | -0.0683 |
| rs114918353 | A | 0.1257  |
| rs1026884   | C | -0.0195 |
| rs62300832  | G | 0.0573  |
| rs115480587 | G | 0.0688  |
| rs13135477  | T | 0.0443  |
| rs11099205  | A | 0.0175  |

|             |   |         |
|-------------|---|---------|
| rs28891714  | G | -0.0213 |
| rs142806363 | G | 0.1155  |
| rs243976    | C | 0.0181  |
| rs115275192 | C | 0.0762  |
| rs4861652   | T | -0.1126 |
| rs28758694  | C | -0.0305 |
| rs1817186   | A | -0.0322 |
| rs9306924   | C | -0.021  |
| rs111284823 | T | 0.0758  |
| rs28528979  | G | -0.0362 |
| rs72862090  | T | -0.0352 |
| rs75448331  | C | 0.1145  |
| rs10033034  | A | 0.0187  |
| rs114769288 | T | 0.0795  |
| rs4956065   | A | 0.1655  |
| rs74729461  | T | -0.168  |
| rs73872908  | G | 0.0257  |
| rs75629180  | T | -0.0247 |
| rs16870534  | G | -0.0258 |
| rs56167410  | T | 0.0497  |
| rs17045555  | G | 0.0291  |
| rs1610224   | A | 0.0223  |
| rs115832704 | T | 0.0675  |
| rs72706655  | A | 0.0601  |
| rs146874816 | A | -0.0573 |
| rs116075308 | A | -0.1722 |
| rs2728146   | T | 0.0918  |
| rs12512132  | C | -0.0477 |
| rs4420983   | A | 0.021   |
| rs2324649   | T | 0.0204  |
| rs3864227   | C | 0.0235  |
| rs111763110 | T | 0.0518  |
| rs118191652 | C | 0.0873  |
| rs408058    | T | 0.0236  |
| rs6832084   | C | 0.1431  |
| rs140046747 | A | -0.0498 |
| rs112157295 | C | -0.0219 |
| rs145963457 | A | 0.0599  |
| rs142384551 | G | 0.0619  |
| rs6447512   | G | -0.0202 |
| rs75229785  | A | 0.0747  |
| rs4696925   | G | 0.0213  |
| rs72665551  | G | 0.0387  |
| rs116280476 | T | 0.0515  |
| rs13101397  | T | 0.1193  |
| rs75306532  | G | -0.1238 |
| rs4690104   | T | -0.0216 |

|             |   |         |
|-------------|---|---------|
| rs1492767   | C | 0.0177  |
| rs148180009 | T | 0.1207  |
| rs116727571 | T | 0.0995  |
| rs1277305   | G | 0.0183  |
| rs57152879  | A | 0.0536  |
| rs13127137  | G | -0.0261 |
| rs114277196 | G | -0.0925 |
| rs13123702  | G | 0.0198  |
| rs2723296   | G | 0.0185  |
| rs17051003  | A | 0.0182  |
| rs9799697   | A | 0.0514  |
| rs115957254 | G | -0.0969 |
| rs11722580  | C | 0.0215  |
| rs73200137  | T | -0.0343 |
| rs17237364  | T | 0.0519  |
| rs17041245  | T | 0.0191  |
| rs3796891   | G | -0.0218 |
| rs6814097   | G | 0.0206  |
| rs6446747   | T | 0.0904  |
| rs73242635  | A | -0.0518 |
| rs73204734  | T | -0.1084 |
| rs7698838   | C | -0.0416 |
| rs114744942 | T | -0.2027 |
| rs7671099   | T | -0.0369 |
| rs7695352   | T | -0.0238 |
| rs62298210  | T | -0.0402 |
| rs1875743   | G | 0.0431  |
| rs11942054  | A | 0.0277  |
| rs76630903  | T | -0.0345 |
| rs80121626  | T | 0.1098  |
| rs139338449 | A | 0.1141  |
| rs114460528 | A | 0.0555  |
| rs72673193  | A | 0.0264  |
| rs116246190 | G | 0.077   |
| rs28470306  | T | -0.0211 |
| rs114275837 | T | 0.0364  |
| rs17472994  | G | -0.0264 |
| rs62334071  | T | -0.057  |
| rs4862695   | G | -0.0184 |
| rs75678017  | T | 0.0913  |
| rs35139430  | G | 0.0231  |
| rs62331150  | T | 0.0221  |
| rs77227790  | C | 0.1469  |
| rs73845745  | G | 0.0269  |
| rs56104194  | G | -0.035  |
| rs76854428  | T | 0.1186  |
| rs1375737   | C | -0.0553 |



|             |   |         |
|-------------|---|---------|
| rs9999140   | T | 0.067   |
| rs1914900   | A | -0.0578 |
| rs681601    | C | -0.073  |
| rs11729442  | C | -0.0486 |
| rs1709422   | C | 0.0181  |
| rs12642505  | C | -0.027  |
| rs17192483  | T | 0.0184  |
| rs150109896 | A | -0.1138 |
| rs111860188 | C | -0.0621 |
| rs150424338 | C | -0.0803 |
| rs78448286  | A | -0.0744 |
| rs146568741 | T | -0.1067 |
| rs141835762 | G | 0.0945  |
| rs115874876 | T | -0.1695 |
| rs76932175  | A | 0.1062  |
| rs147317244 | G | -0.0299 |
| rs79336842  | A | 0.0918  |
| rs28537204  | C | 0.0364  |
| rs112056750 | G | -0.0965 |
| rs28635242  | C | 0.1191  |
| rs7694906   | G | 0.0183  |
| rs66540772  | T | -0.118  |
| rs144751590 | G | 0.0582  |
| rs34022607  | G | 0.074   |
| rs112637855 | T | -0.1114 |
| rs35951443  | A | -0.0177 |
| rs148731967 | G | 0.0606  |
| rs1849074   | G | 0.024   |
| rs706332    | A | -0.058  |
| rs12645396  | A | 0.1119  |
| rs80303897  | T | -0.1043 |
| rs6824103   | G | -0.0238 |
| rs62335336  | T | 0.0201  |
| rs10018540  | A | -0.0214 |
| rs28545420  | T | 0.065   |
| rs7661552   | A | 0.0312  |
| rs73805625  | A | 0.0905  |
| rs12648727  | G | -0.0436 |
| rs12508444  | C | -0.0231 |
| rs76238520  | C | -0.1194 |
| rs72731873  | A | 0.0728  |
| rs115856539 | G | 0.1606  |
| rs72645845  | G | -0.1276 |
| rs116022152 | C | 0.1676  |
| rs74811444  | A | 0.1321  |
| rs9790805   | G | 0.0243  |
| rs57907287  | C | 0.0259  |

|             |   |         |
|-------------|---|---------|
| rs3806777   | T | -0.0218 |
| rs12500125  | A | 0.0179  |
| rs2675526   | T | 0.0828  |
| rs62289947  | T | -0.1101 |
| rs143595293 | C | 0.0241  |
| rs1508421   | T | 0.0199  |
| rs9993383   | C | -0.0173 |
| rs143868258 | A | 0.0906  |
| rs78318043  | G | -0.0809 |
| rs2973285   | C | -0.0208 |
| rs80291325  | C | 0.0321  |
| rs116832617 | G | 0.0813  |
| rs151229257 | C | 0.0776  |
| rs28406249  | G | 0.019   |
| rs116264298 | C | 0.1235  |
| rs114761399 | G | -0.1091 |
| rs73854504  | T | -0.0308 |
| rs75493120  | A | -0.0375 |
| rs56803036  | T | -0.02   |
| rs114899964 | G | -0.0617 |
| rs1504869   | A | 0.0179  |
| rs62292093  | C | 0.0909  |
| rs61762827  | A | -0.1337 |
| rs1304931   | C | -0.0672 |
| rs17005518  | C | 0.0278  |
| rs78993314  | G | -0.1072 |
| rs72727923  | A | 0.1117  |
| rs113488298 | T | -0.0398 |
| rs149233886 | G | 0.1515  |
| rs4543192   | A | 0.018   |
| rs115698220 | A | -0.0635 |
| rs62334712  | G | -0.0448 |
| rs71615241  | A | -0.0339 |
| rs17487246  | A | 0.041   |
| rs4340826   | G | 0.0289  |
| rs150583629 | C | 0.0911  |
| rs143328170 | A | 0.0718  |
| rs62312998  | T | -0.0185 |
| rs78234133  | C | -0.0989 |
| rs6845230   | C | -0.019  |
| rs340185    | G | 0.018   |
| rs115743223 | T | -0.1154 |
| rs113719637 | G | 0.0808  |
| rs116032528 | T | -0.0946 |
| rs17766393  | G | -0.0676 |
| rs114798554 | G | 0.1299  |
| rs13120956  | T | -0.0451 |

|             |   |         |
|-------------|---|---------|
| rs17007366  | A | 0.0318  |
| rs72687164  | G | -0.0263 |
| rs7682765   | C | -0.0399 |
| rs116452293 | C | 0.052   |
| rs6823628   | G | -0.0222 |
| rs77673752  | G | 0.0675  |
| rs2612988   | A | 0.0195  |
| rs17509136  | A | -0.0265 |
| rs13150058  | T | 0.0183  |
| rs1558511   | A | 0.0175  |
| rs149732478 | T | -0.089  |
| rs646863    | A | -0.0262 |
| rs11947262  | G | 0.0233  |
| rs77285144  | T | -0.0901 |
| rs114113030 | A | 0.1609  |
| rs968600    | G | 0.03    |
| rs80141833  | G | 0.0388  |
| rs6813035   | G | -0.047  |
| rs13148220  | A | -0.0208 |
| rs34369701  | A | -0.0391 |
| rs72956780  | T | 0.0438  |
| rs72637529  | C | 0.1276  |
| rs76955036  | C | -0.0802 |
| rs11944679  | C | 0.027   |
| rs115463680 | C | -0.0423 |
| rs17053742  | A | 0.0211  |
| rs75655568  | C | -0.0618 |
| rs146153406 | T | -0.1141 |
| rs4563558   | C | -0.0295 |
| rs13434505  | G | -0.0709 |
| rs2071679   | T | 0.0221  |
| rs10938323  | A | 0.0257  |
| rs35378577  | T | 0.0787  |
| rs4631046   | G | 0.0468  |
| rs149336784 | C | -0.0949 |
| rs72693446  | A | -0.0572 |
| rs35926907  | A | 0.035   |
| rs4401489   | G | 0.0174  |
| rs74521532  | A | 0.0386  |
| rs76620764  | C | -0.078  |
| rs59151896  | A | 0.022   |
| rs76183118  | A | 0.0653  |
| rs143058113 | A | -0.1195 |
| rs147098026 | A | -0.1287 |
| rs112789007 | G | -0.1184 |
| rs4580643   | C | -0.0191 |
| rs76795226  | A | 0.0901  |

|             |   |         |
|-------------|---|---------|
| rs10000006  | C | -0.0507 |
| rs10002028  | T | 0.0176  |
| rs115110546 | G | 0.0623  |
| rs76509948  | C | -0.0712 |
| rs7694466   | T | -0.0487 |
| rs41280471  | G | 0.0406  |
| rs55833593  | A | -0.073  |
| rs62295967  | A | -0.1191 |
| rs13103728  | T | 0.0258  |
| rs138869479 | A | 0.0953  |
| rs6825057   | T | -0.0252 |
| rs10008912  | G | -0.0318 |
| rs114393161 | G | 0.0795  |
| rs80027700  | T | -0.063  |
| rs76562134  | A | 0.0895  |
| rs35423634  | C | -0.0397 |
| rs4698147   | G | -0.0337 |
| rs72681452  | C | -0.1343 |
| rs146946301 | G | -0.0676 |
| rs6822222   | T | 0.028   |
| rs35467587  | T | -0.0897 |
| rs2359010   | A | -0.0293 |
| rs10517441  | T | 0.0339  |
| rs62308204  | T | 0.0607  |
| rs80110005  | G | -0.0933 |
| rs11732224  | T | -0.0485 |
| rs13137121  | G | -0.0195 |
| rs35309849  | T | -0.024  |
| rs73198536  | A | 0.0695  |
| rs61650368  | T | -0.0434 |
| rs10000235  | A | -0.033  |
| rs58905377  | T | -0.0737 |
| rs12502686  | T | 0.0307  |
| rs10009243  | T | 0.0442  |
| rs17418297  | C | 0.025   |
| rs77807961  | A | -0.1438 |
| rs75653107  | T | -0.0597 |
| rs28643370  | T | -0.0651 |
| rs72706347  | G | 0.0338  |
| rs79705638  | T | 0.0884  |
| rs150364158 | T | -0.0319 |
| rs4283724   | G | 0.0513  |
| rs76050674  | A | 0.0347  |
| rs7660424   | G | 0.0454  |
| rs59070594  | C | 0.0563  |
| rs2904163   | G | -0.0408 |
| rs4861752   | T | -0.0319 |

|             |   |         |
|-------------|---|---------|
| rs113749424 | T | 0.0795  |
| rs80073197  | A | -0.029  |
| rs77995509  | T | 0.0258  |
| rs74324359  | C | 0.0467  |
| rs138286308 | C | 0.1079  |
| rs17813612  | C | -0.0183 |
| rs75367164  | G | -0.0387 |
| rs11930897  | A | 0.0524  |
| rs2000814   | T | 0.0389  |
| rs313938    | C | 0.0497  |
| rs72709781  | C | 0.0466  |
| rs6840383   | A | -0.0176 |
| rs207338    | A | -0.0167 |
| rs1867610   | A | 0.0288  |
| rs10029176  | T | -0.0176 |
| rs77115848  | T | 0.0976  |
| rs2090869   | G | -0.0263 |
| rs7663214   | T | 0.0228  |
| rs2635336   | A | 0.0431  |
| rs13151207  | A | -0.0805 |
| rs223973    | G | 0.0359  |
| rs141890514 | G | -0.0716 |
| rs4464630   | T | -0.0376 |
| rs17037525  | C | -0.0222 |
| rs74716047  | A | 0.069   |
| rs112460500 | G | 0.0367  |
| rs13120754  | C | -0.0764 |
| rs1216405   | C | 0.0176  |
| rs6845302   | G | -0.0172 |
| rs342313    | A | -0.0233 |
| rs116800166 | T | -0.089  |
| rs116712890 | A | 0.1124  |
| rs2125489   | A | -0.0284 |
| rs12513266  | A | -0.0403 |
| rs2970853   | A | 0.019   |
| rs10020711  | A | -0.0206 |
| rs2313431   | A | 0.0628  |
| rs62321988  | C | -0.0547 |
| rs13108149  | G | 0.0269  |
| rs59066743  | A | -0.0268 |
| rs144178893 | G | 0.1699  |
| rs77903199  | T | -0.0964 |
| rs149889062 | C | 0.0898  |
| rs111352675 | A | 0.0755  |
| rs57331171  | T | 0.019   |
| rs141144853 | A | 0.0957  |
| rs7675302   | T | 0.0177  |

|             |   |         |
|-------------|---|---------|
| rs8192096   | A | -0.092  |
| rs73198000  | C | -0.0865 |
| rs114367588 | A | 0.0963  |
| rs73252562  | T | 0.1238  |
| rs116720817 | T | 0.0634  |
| rs12503711  | C | -0.0175 |
| rs17263910  | T | -0.0201 |
| rs139271815 | T | -0.1014 |
| rs146229939 | T | 0.0774  |
| rs4642308   | G | -0.0233 |
| rs139511855 | G | 0.1338  |
| rs9998000   | C | -0.0711 |
| rs2292091   | A | 0.0185  |
| rs79386983  | G | -0.0951 |
| rs7683606   | G | 0.0381  |
| rs143249802 | C | 0.0327  |
| rs56169343  | T | 0.0291  |
| rs62324465  | C | -0.0265 |
| rs13139663  | T | 0.0229  |
| rs75974304  | A | -0.0564 |
| rs77022574  | G | -0.0515 |
| rs4129565   | T | 0.0219  |
| rs62409685  | T | -0.0512 |
| rs1355512   | A | -0.0227 |
| rs17085830  | A | -0.0429 |
| rs12499903  | A | -0.032  |
| rs115465492 | T | -0.0845 |
| rs12500586  | G | -0.0168 |
| rs116410397 | T | 0.1023  |
| rs2126271   | C | 0.0225  |
| rs1485453   | G | -0.0221 |
| rs327083    | T | -0.0391 |
| rs2333653   | C | -0.0242 |
| rs114885209 | G | 0.079   |
| rs17041965  | A | -0.0176 |
| rs12647353  | C | 0.0922  |
| rs11132033  | T | 0.0324  |
| rs17487517  | G | -0.0404 |
| rs112324560 | T | 0.133   |
| rs114728265 | A | 0.0817  |
| rs147184699 | C | -0.1023 |
| rs8191998   | T | -0.0267 |
| rs144591835 | G | 0.0645  |
| rs116536885 | C | -0.073  |
| rs9790534   | T | 0.0318  |
| rs76814271  | T | -0.0936 |
| rs1072389   | T | 0.0182  |

|             |   |         |
|-------------|---|---------|
| rs145314090 | G | -0.0736 |
| rs6448303   | T | -0.0197 |
| rs4862267   | A | 0.0233  |
| rs10461118  | A | -0.0316 |
| rs77811360  | G | 0.1223  |
| rs6532473   | C | 0.0216  |
| rs1380631   | T | 0.0173  |
| rs28594115  | A | 0.0256  |
| rs145536823 | A | -0.0707 |
| rs149272296 | C | 0.0669  |
| rs114663572 | T | -0.0811 |
| rs7663604   | G | -0.0599 |
| rs6821801   | G | -0.0275 |
| rs114383878 | A | -0.0751 |
| rs6821967   | A | -0.0288 |
| rs9312664   | G | 0.0177  |
| rs112230012 | T | -0.0395 |
| rs149752652 | G | 0.0483  |
| rs2462871   | A | -0.0234 |
| rs77541701  | T | 0.0768  |
| rs966553    | T | -0.0206 |
| rs34684846  | A | 0.0357  |
| rs55798019  | C | 0.0548  |
| rs11723493  | C | 0.0171  |
| rs7655200   | T | 0.0239  |
| rs4458420   | T | -0.0178 |
| rs4699481   | A | -0.0167 |
| rs13115934  | C | 0.0178  |
| rs12650992  | T | 0.0207  |
| rs10517653  | T | 0.0244  |
| rs11730865  | T | 0.0281  |
| rs116185915 | G | -0.0986 |
| rs115339871 | G | -0.0824 |
| rs6841856   | G | 0.0809  |
| rs150491299 | G | -0.1165 |
| rs1982498   | C | 0.021   |
| rs138841332 | C | -0.0957 |
| rs75238012  | A | -0.0977 |
| rs114125695 | C | -0.0698 |
| rs4833239   | T | -0.0185 |
| rs78072618  | C | 0.1015  |
| rs6824565   | A | 0.0756  |
| rs75764336  | G | 0.0466  |
| rs62305806  | T | 0.1332  |
| rs1507497   | C | 0.0242  |
| rs73146318  | T | 0.0207  |
| rs12641457  | A | -0.0188 |

|             |   |         |
|-------------|---|---------|
| rs142828929 | A | 0.0825  |
| rs4075071   | G | -0.0259 |
| rs6813949   | T | 0.0373  |
| rs1389331   | C | 0.0176  |
| rs72724400  | G | -0.0805 |
| rs144404539 | A | 0.0938  |
| rs4536962   | G | 0.025   |
| rs13133011  | C | -0.0712 |
| rs28855728  | A | -0.024  |
| rs794019    | G | -0.0169 |
| rs244018    | C | 0.0217  |
| rs296996    | A | -0.0888 |
| rs17445088  | C | 0.0498  |
| rs13106243  | C | 0.0272  |
| rs60685333  | A | -0.017  |
| rs13134207  | T | 0.0172  |
| rs17050634  | C | 0.0494  |
| rs35884817  | C | -0.0192 |
| rs1877095   | T | 0.0209  |
| rs17577083  | T | 0.0798  |
| rs75853019  | A | -0.0771 |
| rs6824182   | C | 0.0296  |
| rs78905541  | A | -0.0976 |
| rs12645433  | C | 0.0217  |
| rs11728554  | C | -0.0203 |
| rs6852071   | T | 0.0214  |
| rs9291207   | C | 0.0176  |
| rs55714210  | T | 0.1221  |
| rs62321069  | G | -0.0353 |
| rs74641048  | C | 0.0596  |
| rs79345521  | C | 0.0571  |
| rs116212522 | T | 0.0898  |
| rs13126470  | T | 0.0204  |
| rs62298328  | C | -0.0167 |
| rs75294740  | A | 0.0818  |
| rs72681428  | T | 0.04    |
| rs4864279   | G | 0.0172  |
| rs28592051  | T | -0.0484 |
| rs72704807  | T | 0.094   |
| rs142660304 | G | -0.1081 |
| rs112625208 | A | 0.0589  |
| rs17465339  | T | 0.117   |
| rs114258356 | T | -0.0851 |
| rs1878538   | A | 0.0376  |
| rs76560246  | A | 0.051   |
| rs10488937  | T | 0.0278  |
| rs11096914  | C | 0.0199  |



|             |   |         |
|-------------|---|---------|
| rs147846394 | G | 0.1049  |
| rs11099694  | G | 0.0176  |
| rs7687999   | G | 0.0169  |
| rs71601479  | T | -0.0587 |
| rs113035999 | A | -0.0266 |
| rs6832192   | A | -0.1204 |
| rs114868487 | A | -0.1145 |
| rs113996260 | C | 0.0634  |
| rs141774358 | A | -0.1698 |
| rs140246206 | C | -0.067  |
| rs55945634  | T | -0.0721 |
| rs72664491  | C | -0.0751 |
| rs78936351  | T | 0.12    |
| rs78944699  | A | 0.0419  |
| rs9996831   | G | -0.0271 |
| rs57628190  | G | 0.0779  |
| rs6824234   | C | 0.0221  |
| rs2120817   | A | 0.0174  |
| rs62304746  | A | 0.0461  |
| rs13147248  | T | 0.0329  |
| rs73818118  | A | 0.036   |
| rs17238590  | C | 0.0493  |
| rs74898157  | C | -0.0716 |
| rs74422246  | G | -0.0346 |
| rs114167846 | G | 0.1458  |
| rs986452    | T | 0.0281  |
| rs74594157  | T | -0.0418 |
| rs6840096   | A | 0.0542  |
| rs79879504  | A | -0.1469 |
| rs72640353  | A | -0.0689 |
| rs116083615 | G | 0.0566  |
| rs11133305  | C | 0.0225  |
| rs730194    | T | 0.0575  |
| rs7685501   | T | 0.0254  |
| rs142840112 | G | -0.1059 |
| rs793901    | G | 0.0187  |
| rs116547685 | T | 0.0795  |
| rs79141075  | G | 0.0474  |
| rs75554842  | T | -0.0767 |
| rs7659671   | T | 0.0252  |
| rs140869696 | A | -0.0629 |
| rs139430600 | C | 0.0851  |
| rs77678091  | C | 0.0682  |
| rs115959527 | T | 0.0332  |
| rs10026635  | T | 0.0222  |
| rs116216151 | G | 0.0559  |
| rs138631897 | T | 0.0901  |

|             |   |         |
|-------------|---|---------|
| rs2358905   | A | -0.0269 |
| rs2699414   | T | -0.0284 |
| rs78819881  | G | 0.0482  |
| rs17008274  | A | 0.046   |
| rs115573135 | A | -0.1341 |
| rs111452815 | T | 0.09    |
| rs170227    | A | 0.0573  |
| rs13119223  | T | -0.0198 |
| rs140915571 | C | 0.0618  |
| rs146818345 | C | -0.0851 |
| rs114809646 | A | 0.0667  |
| rs145613659 | G | -0.1014 |
| rs79920064  | A | -0.0575 |
| rs79481196  | T | 0.1452  |
| rs4698923   | G | -0.0178 |
| rs35212452  | G | -0.1194 |
| rs11932160  | T | 0.0183  |
| rs1533294   | C | 0.017   |
| rs79464272  | T | -0.0692 |
| rs7662138   | C | 0.0259  |
| rs57016099  | T | -0.0653 |
| rs79940617  | C | -0.0622 |
| rs62294090  | T | 0.0597  |
| rs1371299   | G | 0.0209  |
| rs56066207  | A | -0.0372 |
| rs7688336   | A | -0.0295 |
| rs10001932  | A | -0.0176 |
| rs116329818 | G | 0.1283  |
| rs36169772  | C | 0.0189  |
| rs62308725  | T | -0.0399 |
| rs9997907   | C | -0.0172 |
| rs34081702  | C | 0.0857  |
| rs77635208  | C | -0.1096 |
| rs10001845  | T | 0.0242  |
| rs6833580   | T | -0.0216 |
| rs17282964  | C | 0.0559  |
| rs595012    | G | -0.0746 |
| rs35173341  | G | -0.1033 |
| rs115163226 | T | 0.0825  |
| rs67304008  | C | -0.0793 |
| rs752970    | T | -0.0344 |
| rs12648577  | T | 0.0453  |
| rs112727960 | G | 0.0649  |
| rs4695885   | A | 0.0179  |
| rs79715203  | T | -0.1186 |
| rs4533716   | A | 0.0265  |
| rs13111643  | G | 0.0174  |

|             |   |         |
|-------------|---|---------|
| rs4370074   | C | 0.0209  |
| rs114986991 | G | -0.0843 |
| rs116591759 | G | -0.1126 |
| rs16879832  | G | 0.0362  |
| rs57165958  | G | -0.0345 |
| rs139855281 | A | -0.1066 |
| rs75594494  | T | -0.0214 |
| rs4862166   | G | 0.0191  |
| rs148556036 | G | -0.1075 |
| rs34412794  | T | 0.0385  |
| rs116292327 | C | -0.0715 |
| rs74711174  | G | -0.0594 |
| rs34874154  | C | -0.0975 |
| rs6853019   | A | -0.115  |
| rs17082470  | T | -0.0692 |
| rs56204638  | T | -0.0334 |
| rs9685753   | A | 0.0268  |
| rs2897074   | G | 0.017   |
| rs6844391   | C | -0.0168 |
| rs73237824  | C | -0.1062 |
| rs77994600  | A | 0.0393  |
| rs4697757   | G | 0.0335  |
| rs114380090 | G | 0.0824  |
| rs28776623  | G | 0.0296  |
| rs75426518  | T | -0.0239 |
| rs115014768 | T | 0.0887  |
| rs13107233  | A | 0.056   |
| rs3821990   | G | 0.0591  |
| rs12649626  | A | 0.0463  |
| rs147421037 | G | -0.1313 |
| rs115162663 | T | 0.1375  |
| rs77498860  | C | 0.1028  |
| rs34721481  | T | 0.0216  |
| rs73213083  | G | 0.0339  |
| rs75926582  | T | -0.0918 |
| rs6834848   | A | -0.026  |
| rs7439014   | G | -0.021  |
| rs77417159  | A | -0.112  |
| rs11737517  | G | -0.0398 |
| rs74472301  | G | 0.0526  |
| rs1250091   | T | -0.0181 |
| rs116283677 | G | 0.0974  |
| rs1960724   | C | -0.0215 |
| rs141273868 | A | -0.0606 |
| rs17148547  | G | -0.0422 |
| rs142368696 | C | 0.0741  |
| rs1495552   | T | -0.017  |

|             |   |         |
|-------------|---|---------|
| rs10015635  | G | -0.0487 |
| rs72890272  | G | -0.0743 |
| rs146786036 | C | 0.0574  |
| rs116526788 | A | -0.0781 |
| rs13133783  | C | 0.0304  |
| rs76917479  | C | -0.0513 |
| rs142609156 | T | 0.0792  |
| rs62333466  | G | 0.0772  |
| rs17575895  | A | 0.0642  |
| rs114208627 | C | 0.0825  |
| rs13149584  | C | -0.0183 |
| rs137883211 | A | -0.111  |
| rs10489025  | A | -0.0188 |
| rs114340811 | T | -0.0539 |
| rs10937657  | A | 0.0211  |
| rs11721617  | A | 0.1063  |
| rs11931107  | T | -0.036  |
| rs6446308   | T | 0.0241  |
| rs72727930  | T | -0.041  |
| rs5008341   | A | -0.0216 |
| rs143979147 | T | 0.1169  |
| rs149834426 | C | 0.1221  |
| rs145239518 | A | 0.0585  |
| rs58403633  | A | -0.0784 |
| rs17502832  | C | -0.0405 |
| rs17007089  | T | -0.0439 |
| rs146660977 | A | 0.1124  |
| rs7437091   | G | 0.0246  |
| rs2867013   | T | -0.0408 |
| rs13145946  | C | 0.0219  |
| rs10001353  | T | 0.0341  |
| rs115093422 | T | -0.0751 |
| rs116126387 | A | -0.0546 |
| rs10004636  | T | -0.0263 |
| rs79843594  | A | 0.1066  |
| rs115354241 | A | 0.0823  |
| rs74544665  | A | 0.1042  |
| rs116843683 | T | -0.0271 |
| rs4443343   | T | 0.0206  |
| rs34245097  | A | -0.099  |
| rs76427683  | G | 0.0676  |
| rs79650207  | T | 0.0523  |
| rs4863784   | T | 0.0266  |
| rs72713915  | T | -0.0197 |
| rs61795273  | A | 0.0504  |
| rs1426401   | C | 0.0175  |
| rs139317643 | A | -0.0515 |

|             |   |         |
|-------------|---|---------|
| rs28421868  | G | -0.0506 |
| rs114221066 | A | -0.1105 |
| rs148323267 | T | -0.1254 |
| rs4974984   | C | 0.031   |
| rs17443637  | T | 0.0615  |
| rs114489562 | A | 0.0462  |
| rs62341821  | C | 0.029   |
| rs115770777 | T | -0.0588 |
| rs147858118 | T | 0.0262  |
| rs141049376 | T | 0.0627  |
| rs60459568  | G | -0.0355 |
| rs79520728  | A | 0.1487  |
| rs58175672  | A | -0.1094 |
| rs11731237  | T | 0.018   |
| rs150012481 | T | 0.1523  |
| rs78745430  | C | 0.0408  |
| rs116830484 | T | 0.0788  |
| rs2320823   | T | -0.0685 |
| rs10022572  | G | -0.0515 |
| rs28595442  | T | 0.115   |
| rs11729973  | G | 0.0721  |
| rs151245087 | A | -0.1243 |
| rs77948545  | G | -0.1218 |
| rs6552540   | G | 0.02    |
| rs1823945   | C | 0.081   |
| rs74373157  | C | -0.077  |
| rs116040293 | G | 0.1137  |
| rs1955405   | T | -0.0178 |
| rs17019056  | A | 0.0254  |
| rs28615500  | C | -0.0315 |
| rs150863490 | G | -0.061  |
| rs13141320  | A | 0.0806  |
| rs145719351 | G | -0.1183 |
| rs10517471  | A | 0.036   |
| rs78363131  | G | 0.097   |
| rs76749908  | G | 0.1107  |
| rs141995259 | A | -0.1002 |
| rs77318915  | T | 0.0834  |
| rs6833684   | C | 0.0476  |
| rs148610509 | A | -0.1106 |
| rs3774902   | A | 0.0387  |
| rs1497482   | G | 0.0164  |
| rs1730784   | C | -0.0318 |
| rs10461053  | G | -0.0196 |
| rs11947379  | G | -0.0186 |
| rs28809916  | T | 0.0546  |
| rs79014644  | A | -0.0633 |

|             |   |         |
|-------------|---|---------|
| rs13118333  | G | 0.0228  |
| rs80349278  | G | -0.0246 |
| rs73245250  | T | -0.0412 |
| rs62341525  | A | -0.1083 |
| rs115793364 | T | -0.0494 |
| rs72679156  | C | -0.0301 |
| rs111341027 | A | 0.0885  |
| rs150285739 | G | -0.0912 |
| rs55803709  | T | 0.1126  |
| rs114764767 | C | -0.1106 |
| rs72700733  | T | -0.0806 |
| rs2531149   | A | 0.0166  |
| rs147454864 | A | 0.0783  |
| rs4428305   | A | -0.0195 |
| rs72721177  | G | -0.0351 |
| rs34682744  | G | -0.0281 |
| rs58242728  | C | 0.0309  |
| rs6824757   | G | -0.0291 |
| rs11735828  | G | -0.0215 |
| rs144686749 | T | -0.0967 |
| rs4435757   | C | 0.0333  |
| rs6833232   | C | -0.0165 |
| rs146047085 | A | -0.0533 |
| rs114888012 | G | 0.1604  |
| rs72678898  | G | -0.0485 |
| rs11725215  | A | -0.0944 |
| rs56141537  | A | 0.0608  |
| rs6533603   | T | -0.0172 |
| rs10050023  | C | -0.0189 |
| rs1229984   | T | 0.0444  |
| rs139342832 | T | -0.0968 |
| rs17063948  | C | -0.0274 |
| rs9715156   | C | -0.031  |
| rs114859421 | T | -0.1076 |
| rs77846652  | T | 0.0871  |
| rs112491451 | T | 0.127   |
| rs12645356  | T | 0.0178  |
| rs4862365   | T | -0.0282 |
| rs77796414  | G | 0.0669  |
| rs11945115  | A | -0.1294 |
| rs6841059   | C | 0.016   |
| rs3775233   | T | 0.0325  |
| rs150303149 | A | 0.1027  |
| rs12640833  | G | 0.019   |
| rs77252379  | G | -0.1015 |
| rs62311725  | C | -0.0721 |
| rs116483655 | C | -0.0653 |

|             |   |         |
|-------------|---|---------|
| rs11931914  | C | 0.0313  |
| rs11726550  | A | -0.0745 |
| rs62308686  | G | 0.0985  |
| rs4861544   | A | -0.02   |
| rs11724601  | T | 0.0209  |
| rs28402770  | G | -0.0542 |
| rs12511373  | T | 0.0441  |
| rs138051853 | A | -0.0979 |
| rs66461448  | A | 0.0223  |
| rs111618269 | T | 0.0744  |
| rs6824777   | T | 0.0412  |
| rs76037733  | T | -0.0702 |
| rs10007626  | A | -0.0197 |
| rs76038799  | G | -0.0376 |
| rs11733358  | C | -0.1131 |
| rs2126456   | C | -0.0167 |
| rs6813602   | T | -0.0214 |
| rs276166    | T | -0.0452 |
| rs62310823  | A | -0.0307 |
| rs116098516 | G | -0.1091 |
| rs75363655  | G | -0.1574 |
| rs79292931  | A | -0.0825 |
| rs111904914 | T | 0.0715  |
| rs79896627  | C | -0.0669 |
| rs147764575 | A | 0.0307  |
| rs7688070   | T | 0.0368  |
| rs4698803   | A | -0.0297 |
| rs78317995  | A | -0.02   |
| rs2703467   | A | 0.0239  |
| rs61180901  | C | -0.1094 |
| rs138317224 | A | -0.0865 |
| rs73839571  | C | 0.0933  |
| rs72724556  | C | 0.066   |
| rs4688946   | A | -0.0175 |
| rs80321443  | A | 0.1032  |
| rs77386411  | C | 0.0518  |
| rs79053394  | A | 0.0335  |
| rs62299412  | T | 0.0641  |
| rs17824458  | T | -0.0445 |
| rs207696    | C | 0.0307  |
| rs146997424 | A | -0.0873 |
| rs10520477  | C | -0.0214 |
| rs4077991   | A | -0.0253 |
| rs145427459 | C | -0.0576 |
| rs10010272  | G | -0.05   |
| rs34165410  | T | 0.1331  |
| rs35061296  | G | 0.0198  |

|             |   |         |
|-------------|---|---------|
| rs34342790  | G | 0.0316  |
| rs143547862 | T | -0.0753 |
| rs150013055 | A | -0.097  |
| rs35196902  | T | -0.1053 |
| rs57648619  | A | -0.0323 |
| rs72716730  | G | -0.0432 |
| rs141266043 | T | -0.0636 |
| rs145249335 | T | -0.0693 |
| rs116767708 | G | -0.0404 |
| rs11722892  | A | 0.0222  |
| rs140861352 | G | 0.0525  |
| rs77324318  | G | 0.0811  |
| rs11725691  | C | -0.0229 |
| rs11936543  | G | -0.0982 |
| rs62328002  | C | -0.0295 |
| rs17738946  | C | -0.0533 |
| rs79159507  | T | -0.0326 |
| rs75942748  | T | 0.0497  |
| rs13129484  | C | -0.0435 |
| rs75597811  | T | -0.1205 |
| rs1567647   | A | 0.0625  |
| rs72660830  | A | 0.0261  |
| rs114954144 | C | -0.0808 |
| rs75068831  | G | 0.0915  |
| rs997185    | T | 0.0221  |
| rs79477870  | T | -0.0823 |
| rs1794425   | T | -0.1306 |
| rs4698151   | T | 0.0168  |
| rs116239823 | A | 0.0738  |
| rs9991187   | A | -0.0257 |
| rs10489091  | A | -0.024  |
| rs76224655  | C | 0.0737  |
| rs75292314  | A | 0.0524  |
| rs78564825  | G | 0.083   |
| rs2172877   | A | 0.0675  |
| rs141990444 | T | -0.1048 |
| rs62328526  | G | -0.0418 |
| rs1563212   | G | -0.0186 |
| rs28405896  | A | -0.1692 |
| rs72676868  | G | -0.017  |
| rs74497555  | T | 0.0913  |
| rs35798615  | A | 0.0267  |
| rs112525409 | T | 0.0496  |
| rs148901604 | G | 0.0845  |
| rs74539737  | A | 0.067   |
| rs4974756   | C | -0.0307 |
| rs224463    | A | -0.0185 |



|             |   |         |
|-------------|---|---------|
| rs2007140   | C | 0.0193  |
| rs13146525  | A | -0.0484 |
| rs7697168   | A | 0.0263  |
| rs6822599   | T | 0.0689  |
| rs13125349  | G | 0.0478  |
| rs7658880   | C | -0.0836 |
| rs58579163  | C | 0.018   |
| rs36055662  | C | 0.0411  |
| rs79722809  | A | 0.0251  |
| rs11131355  | A | -0.1124 |
| rs843604    | T | 0.0271  |
| rs113068613 | A | 0.0236  |
| rs116244268 | T | -0.0652 |
| rs4865029   | G | 0.0189  |
| rs114780248 | C | -0.0805 |
| rs34637277  | C | -0.032  |
| rs75309133  | T | -0.071  |
| rs148719694 | C | 0.1077  |
| rs1364874   | T | -0.0174 |
| rs2871491   | A | -0.0227 |
| rs17577550  | A | -0.0318 |
| rs17238226  | C | 0.1168  |
| rs72663034  | A | 0.0629  |
| rs6832560   | C | 0.0446  |
| rs79235229  | G | -0.048  |
| rs6848513   | C | -0.0176 |
| rs112039573 | G | -0.0464 |
| rs7668956   | G | 0.0261  |
| rs60257697  | C | 0.0541  |
| rs62314642  | C | -0.0319 |
| rs77586003  | G | 0.1253  |
| rs71605308  | A | 0.0886  |
| rs78996167  | A | -0.0667 |
| rs4833641   | G | -0.0218 |
| rs116189043 | A | -0.047  |
| rs75828032  | A | -0.0897 |
| rs148918425 | G | -0.0876 |
| rs78397321  | A | -0.0393 |
| rs4645182   | A | 0.0255  |
| rs72961472  | C | 0.0744  |
| rs115740096 | A | -0.0674 |
| rs11726591  | C | 0.036   |
| rs76105562  | C | -0.0803 |
| rs76183895  | T | -0.0941 |
| rs62346946  | A | 0.0747  |
| rs115619697 | T | 0.0699  |
| rs62348798  | A | 0.0758  |

|             |   |         |
|-------------|---|---------|
| rs12641352  | A | 0.0178  |
| rs10517227  | C | 0.0195  |
| rs75547752  | A | 0.0277  |
| rs6816321   | C | 0.024   |
| rs144771285 | C | -0.1691 |
| rs150619981 | A | 0.0871  |
| rs2555629   | G | -0.0174 |
| rs62341337  | C | -0.0251 |
| rs73089656  | T | -0.034  |
| rs34365710  | C | 0.0165  |
| rs62297949  | T | 0.0784  |
| rs113316405 | G | -0.0238 |
| rs116237354 | G | 0.1016  |
| rs10213580  | G | 0.0304  |
| rs34565159  | T | -0.0248 |
| rs62317340  | G | 0.07    |
| rs73194752  | T | -0.0232 |
| rs116250197 | T | 0.0916  |
| rs77039262  | T | 0.0865  |
| rs7669425   | C | 0.0192  |
| rs3749232   | C | -0.0182 |
| rs2866455   | A | -0.0503 |
| rs35616512  | T | 0.0202  |
| rs1598974   | G | 0.0178  |
| rs4859936   | T | 0.0188  |
| rs58103057  | A | 0.0435  |
| rs73245306  | A | 0.0246  |
| rs144743947 | A | 0.0792  |
| rs2725759   | G | 0.0177  |
| rs116825487 | G | -0.0915 |
| rs4691752   | G | 0.0162  |
| rs116498616 | C | 0.0824  |
| rs78596127  | C | 0.1428  |
| rs144584013 | T | 0.0756  |
| rs116521001 | A | 0.041   |
| rs116683839 | T | -0.1135 |
| rs4399970   | T | 0.0162  |
| rs73241631  | G | -0.0642 |
| rs4860392   | C | -0.0169 |
| rs1957069   | C | 0.0361  |
| rs10856905  | G | 0.0171  |
| rs80142100  | C | -0.0545 |
| rs74537232  | C | 0.0326  |
| rs62352774  | A | 0.0458  |
| rs138633179 | G | 0.1058  |
| rs139852772 | C | 0.0963  |
| rs72614730  | G | 0.0273  |

|             |   |         |
|-------------|---|---------|
| rs284780    | A | -0.0307 |
| rs11133466  | T | -0.0226 |
| rs76711108  | C | 0.0736  |
| rs13131354  | C | -0.1326 |
| rs10011993  | C | -0.0164 |
| rs78097873  | A | 0.0658  |
| rs11734602  | G | 0.0188  |
| rs112298621 | A | -0.0857 |
| rs72700446  | C | -0.0637 |
| rs73228900  | C | -0.1155 |
| rs11727007  | T | 0.0317  |
| rs4574391   | C | -0.0194 |
| rs11734573  | A | 0.0199  |
| rs62332029  | A | -0.024  |
| rs62308189  | T | 0.0618  |
| rs79154318  | A | -0.0608 |
| rs80125012  | T | 0.0689  |
| rs6858582   | T | 0.0569  |
| rs6818419   | C | -0.0704 |
| rs116681114 | A | 0.0695  |
| rs145573614 | T | 0.0487  |
| rs35211869  | G | 0.0338  |
| rs138145101 | A | 0.0655  |
| rs62324492  | T | -0.0652 |
| rs72665248  | A | -0.0547 |
| rs13152404  | G | 0.0461  |
| rs4691917   | A | 0.0415  |
| rs138109321 | G | 0.0916  |
| rs17789699  | G | 0.0241  |
| rs4441758   | T | 0.0365  |
| rs2420157   | T | -0.0332 |
| rs11726998  | G | 0.0378  |
| rs10018660  | C | -0.0194 |
| rs113317947 | T | 0.0455  |
| rs150909276 | G | 0.0625  |
| rs12643546  | T | 0.0397  |
| rs114164739 | T | -0.0873 |
| rs55932214  | G | 0.0895  |
| rs28422163  | C | 0.0747  |
| rs77491667  | C | 0.066   |
| rs116224087 | A | 0.0378  |
| rs35300779  | C | 0.0377  |
| rs140369979 | G | -0.0771 |
| rs9999545   | C | 0.0181  |
| rs4699547   | A | 0.092   |
| rs72660520  | A | 0.1138  |
| rs71620944  | T | 0.0697  |

|             |   |         |
|-------------|---|---------|
| rs149072734 | A | -0.0997 |
| rs62617790  | C | 0.0355  |
| rs6830558   | T | -0.0354 |
| rs112927438 | G | 0.0582  |
| rs111363501 | C | -0.0737 |
| rs13130146  | A | -0.0202 |
| rs114870032 | C | 0.0937  |
| rs116658723 | C | 0.066   |
| rs77582838  | A | -0.0469 |
| rs10021616  | C | 0.0187  |
| rs34013824  | G | 0.0229  |
| rs28647319  | T | -0.0258 |
| rs10014930  | C | 0.0699  |
| rs147865848 | G | 0.1066  |
| rs16851505  | G | 0.0424  |
| rs34510106  | C | 0.0208  |
| rs28567982  | C | 0.0199  |
| rs77717386  | T | 0.0546  |
| rs77982677  | T | 0.0699  |
| rs76000301  | A | 0.0715  |
| rs74446577  | C | -0.0461 |
| rs10021082  | C | 0.0313  |
| rs58317417  | T | 0.0566  |
| rs112001650 | G | -0.1202 |
| rs2240997   | A | 0.0274  |
| rs55833204  | T | -0.0172 |
| rs12645509  | A | 0.0185  |
| rs13149451  | T | 0.0183  |
| rs56258626  | A | -0.0176 |
| rs113104037 | A | -0.0229 |
| rs72717619  | G | -0.0472 |
| rs73234456  | G | 0.1095  |
| rs6844120   | T | 0.0168  |
| rs13147867  | G | -0.0169 |
| rs145483865 | G | -0.1008 |
| rs149837253 | A | -0.1361 |
| rs79424581  | C | 0.1258  |
| rs58436453  | T | 0.054   |
| rs78411036  | C | 0.1448  |
| rs7665173   | T | 0.0209  |
| rs1027692   | G | -0.0259 |
| rs114189671 | G | -0.061  |
| rs4527535   | A | 0.0179  |
| rs1130169   | C | -0.0162 |
| rs74921668  | G | -0.1025 |
| rs115401095 | T | 0.0753  |
| rs149429085 | A | -0.0374 |

|             |   |         |
|-------------|---|---------|
| rs75654980  | C | 0.0564  |
| rs10026600  | A | -0.0302 |
| rs72692464  | G | 0.0275  |
| rs75320418  | C | 0.0337  |
| rs62287056  | T | -0.1217 |
| rs116058674 | A | -0.0793 |
| rs34560425  | G | 0.037   |
| rs58617544  | C | 0.0272  |
| rs28410501  | C | 0.0641  |
| rs145837455 | A | 0.1069  |
| rs10517472  | T | 0.0167  |
| rs115633464 | C | -0.076  |
| rs76984010  | A | 0.0373  |
| rs143803772 | C | 0.1544  |
| rs325031    | C | 0.0227  |
| rs144763553 | G | 0.0969  |
| rs114736549 | C | 0.0855  |
| rs113994995 | A | -0.1059 |
| rs12508886  | A | -0.0222 |
| rs143885947 | G | 0.0268  |
| rs55919921  | G | 0.0341  |
| rs76755887  | C | 0.1009  |
| rs116309027 | G | -0.0538 |
| rs114142442 | T | 0.088   |
| rs1062677   | C | -0.0202 |
| rs116744559 | A | 0.0909  |
| rs62324672  | A | -0.0513 |
| rs73817446  | G | -0.0298 |
| rs4438790   | C | 0.0195  |
| rs62335910  | T | 0.0503  |
| rs2088193   | C | 0.02    |
| rs56207029  | T | 0.0344  |
| rs13115966  | T | -0.1007 |
| rs2705984   | A | -0.021  |
| rs116737722 | A | -0.1114 |
| rs56243848  | C | 0.035   |
| rs151215159 | A | -0.1057 |
| rs34563894  | T | -0.0596 |
| rs143577243 | G | -0.0711 |
| rs149097994 | A | -0.0683 |
| rs61792295  | G | 0.1086  |
| rs66509466  | T | 0.0208  |
| rs75899169  | T | 0.0794  |
| rs7687506   | G | -0.0619 |
| rs1509249   | C | 0.0315  |
| rs12646907  | C | 0.0332  |
| rs10520344  | C | 0.0251  |

|             |   |         |
|-------------|---|---------|
| rs74695107  | T | 0.0234  |
| rs28416749  | C | 0.0324  |
| rs17238660  | T | 0.1079  |
| rs17828330  | C | 0.0492  |
| rs58545578  | C | -0.0375 |
| rs11132534  | G | -0.0239 |
| rs1007044   | A | 0.0208  |
| rs36109710  | A | -0.0377 |
| rs6821962   | T | -0.0229 |
| rs116296131 | T | -0.0864 |
| rs7678705   | G | 0.0163  |
| rs116272755 | T | -0.0764 |
| rs1913702   | C | 0.016   |
| rs7685614   | G | -0.0294 |
| rs7688034   | G | -0.0253 |
| rs112217936 | G | 0.0987  |
| rs115267070 | G | 0.0976  |
| rs72674876  | T | 0.052   |
| rs35510515  | G | 0.0201  |
| rs17861903  | C | -0.0397 |
| rs4696758   | G | 0.0159  |
| rs2121929   | A | 0.0166  |
| rs12506711  | A | -0.016  |
| rs56080887  | T | 0.0244  |
| rs67841848  | C | -0.0213 |
| rs75397252  | A | -0.063  |
| rs17321615  | G | 0.0445  |
| rs74404038  | A | -0.1198 |
| rs116125427 | A | -0.0522 |
| rs114363879 | A | -0.137  |
| rs138491176 | T | -0.1211 |
| rs4860655   | G | -0.0168 |
| rs6831498   | A | -0.018  |
| rs11939600  | C | -0.0164 |
| rs145493848 | A | 0.0834  |
| rs4860821   | T | -0.0171 |
| rs150764175 | A | -0.06   |
| rs7671666   | C | -0.0169 |
| rs13435364  | T | 0.0916  |
| rs11727886  | G | -0.0272 |
| rs80119741  | C | -0.0665 |
| rs144553035 | A | -0.1068 |
| rs17060573  | C | 0.0178  |
| rs149159097 | T | 0.0571  |
| rs4691933   | G | 0.0244  |
| rs148455776 | G | 0.0631  |
| rs13110865  | T | -0.0518 |

|             |   |         |
|-------------|---|---------|
| rs116068372 | A | 0.1185  |
| rs77079705  | C | -0.0749 |
| rs145538667 | G | 0.1055  |
| rs57904792  | A | -0.0315 |
| rs2218827   | T | 0.0166  |
| rs10022198  | A | -0.0222 |
| rs75675425  | G | 0.1008  |
| rs1474039   | A | -0.0181 |
| rs34828165  | A | 0.0303  |
| rs11722093  | C | 0.03    |
| rs16882050  | T | -0.0196 |
| rs62344779  | C | 0.0363  |
| rs6843531   | T | -0.0572 |
| rs115732123 | A | 0.0813  |
| rs115176202 | T | -0.0299 |
| rs77019759  | A | -0.054  |
| rs114853489 | G | 0.1254  |
| rs17046034  | T | -0.028  |
| rs74848455  | G | 0.0318  |
| rs16888072  | A | 0.0288  |
| rs79190329  | C | -0.0447 |
| rs73151321  | C | -0.0479 |
| rs4691323   | A | -0.0773 |
| rs12647438  | T | 0.0204  |
| rs76244195  | T | -0.0421 |
| rs75661332  | A | 0.0837  |
| rs72998173  | G | 0.0877  |
| rs17064661  | T | 0.0253  |
| rs4689332   | T | -0.0334 |
| rs12510565  | T | 0.0493  |
| rs72682423  | C | 0.1157  |
| rs143324467 | T | -0.1224 |
| rs7676234   | G | -0.0381 |
| rs6818365   | A | 0.0321  |
| rs141990773 | T | 0.0716  |
| rs79577276  | T | 0.0734  |
| rs148491859 | A | -0.0493 |
| rs114188639 | C | 0.0615  |
| rs13126426  | C | 0.0596  |
| rs988446    | T | 0.021   |
| rs10004661  | A | -0.0185 |
| rs75336006  | G | -0.0554 |
| rs13104869  | T | 0.0449  |
| rs55990550  | T | -0.0267 |
| rs115488939 | T | -0.0349 |
| rs80267048  | G | 0.0774  |
| rs11731545  | T | 0.0194  |

|             |   |         |
|-------------|---|---------|
| rs71603306  | T | -0.0569 |
| rs62330363  | C | 0.0251  |
| rs149688947 | A | -0.1449 |
| rs12512782  | A | 0.0243  |
| rs34016136  | C | -0.0506 |
| rs4696773   | T | 0.0473  |
| rs78254357  | G | -0.0772 |
| rs17586314  | C | -0.0254 |
| rs75124382  | A | -0.0433 |
| rs6836195   | T | 0.0656  |
| rs61473420  | C | -0.0346 |
| rs116830158 | G | -0.092  |
| rs56406343  | G | 0.0223  |
| rs145263952 | G | 0.0688  |
| rs55743726  | G | -0.076  |
| rs1907766   | T | -0.0313 |
| rs74418880  | A | 0.0538  |
| rs55976204  | T | 0.0204  |
| rs56167872  | C | 0.0247  |
| rs1503976   | A | -0.0167 |
| rs112974210 | G | -0.0869 |
| rs219459    | G | -0.0172 |
| rs4317243   | A | -0.0509 |
| rs1994983   | A | -0.0291 |
| rs11131614  | G | 0.016   |
| rs1563831   | G | -0.0252 |
| rs997696    | C | -0.0206 |
| rs3905842   | C | -0.1338 |
| rs73230528  | G | 0.0319  |
| rs148204233 | T | -0.1109 |
| rs79363033  | T | 0.1223  |
| rs76272262  | T | 0.0539  |
| rs7699623   | T | -0.0414 |
| rs10033110  | T | 0.0199  |
| rs424048    | C | -0.0176 |
| rs13144752  | C | -0.0189 |
| rs13109274  | T | 0.0242  |
| rs1114199   | C | -0.0288 |
| rs72634772  | G | -0.0303 |
| rs13110461  | C | 0.0167  |
| rs75102953  | A | 0.1066  |
| rs10034773  | A | 0.0596  |
| rs147257858 | T | 0.044   |
| rs113353176 | G | -0.0433 |
| rs75651979  | A | 0.0925  |
| rs6447524   | G | 0.0189  |
| rs17237812  | G | 0.0755  |



|             |   |         |
|-------------|---|---------|
| rs77363123  | A | 0.0744  |
| rs4862322   | C | 0.0327  |
| rs114686972 | A | 0.0884  |
| rs113297399 | G | -0.1027 |
| rs1863319   | A | 0.017   |
| rs7684980   | G | 0.0689  |
| rs115811945 | C | -0.0683 |
| rs17746947  | G | -0.0726 |
| rs73234182  | G | -0.0736 |
| rs13138870  | C | -0.0305 |
| rs116787387 | T | 0.0657  |
| rs116511571 | A | -0.033  |
| rs12511010  | A | 0.0156  |
| rs17861892  | C | 0.0317  |
| rs115379847 | G | -0.123  |
| rs9999406   | T | -0.0169 |
| rs77401960  | C | 0.0874  |
| rs138235168 | G | 0.0838  |
| rs62337034  | A | 0.0173  |
| rs67774213  | A | -0.0209 |
| rs146112429 | A | -0.0479 |
| rs114551356 | T | 0.0939  |
| rs6832739   | G | -0.0409 |
| rs62312559  | G | -0.0339 |
| rs80065961  | G | 0.0689  |
| rs79344845  | A | 0.1388  |
| rs11722205  | T | 0.0918  |
| rs28548913  | C | 0.021   |
| rs145322874 | C | 0.0777  |
| rs80179272  | G | 0.0333  |
| rs6535031   | A | 0.0283  |
| rs71620929  | A | -0.0519 |
| rs76027158  | C | 0.0347  |
| rs10005564  | A | -0.0204 |
| rs908102    | G | 0.0163  |
| rs75775085  | G | -0.0806 |
| rs114959988 | T | -0.0617 |
| rs1845571   | T | 0.0665  |
| rs4129578   | T | -0.043  |
| rs75718332  | C | -0.0524 |
| rs2933566   | G | 0.0162  |
| rs79562309  | A | 0.0559  |
| rs75111191  | G | -0.0234 |
| rs11943985  | T | 0.0175  |
| rs2869951   | G | -0.0214 |
| rs17562666  | C | -0.0198 |
| rs6553139   | A | 0.0185  |

|             |   |         |
|-------------|---|---------|
| rs2588717   | G | 0.0161  |
| rs72708802  | T | -0.0187 |
| rs13151655  | A | 0.031   |
| rs71608155  | G | 0.0556  |
| rs13115500  | A | 0.0165  |
| rs11724768  | T | -0.0202 |
| rs6829907   | T | 0.0295  |
| rs76013158  | C | 0.0543  |
| rs4328889   | A | 0.0182  |
| rs76525099  | T | 0.0479  |
| rs34211583  | C | -0.0515 |
| rs2531143   | A | 0.0503  |
| rs348729    | A | -0.0319 |
| rs114334859 | A | 0.1042  |
| rs4689294   | A | -0.0299 |
| rs28889381  | G | 0.026   |
| rs112483299 | T | 0.0257  |
| rs4861238   | T | 0.0194  |
| rs13142315  | G | 0.0295  |
| rs11131347  | T | 0.0157  |
| rs77069221  | T | 0.0452  |
| rs77345261  | C | -0.0565 |
| rs7665507   | C | -0.0167 |
| rs140769223 | C | 0.1269  |
| rs13136900  | T | 0.0174  |
| rs139740631 | G | -0.1319 |
| rs142988510 | G | 0.105   |
| rs59506976  | T | -0.041  |
| rs34363883  | A | 0.0849  |
| rs72712041  | T | -0.0254 |
| rs73226776  | A | -0.064  |
| rs6827251   | G | -0.042  |
| rs12508378  | T | -0.0177 |
| rs72713278  | A | -0.0715 |
| rs55922009  | G | 0.0787  |
| rs75112608  | A | 0.06    |
| rs62346188  | T | 0.0993  |
| rs138530467 | A | 0.0757  |
| rs56110139  | T | -0.0452 |
| rs10016276  | G | 0.0465  |
| rs77286773  | A | 0.0443  |
| rs28459701  | A | 0.0196  |
| rs139567782 | T | -0.0676 |
| rs17662974  | T | 0.0416  |
| rs11942057  | T | 0.0165  |
| rs10029546  | A | 0.0241  |
| rs466548    | G | 0.0363  |

|             |   |         |
|-------------|---|---------|
| rs62331196  | A | 0.0498  |
| rs35344142  | G | -0.0648 |
| rs115664110 | G | 0.0796  |
| rs7668096   | A | 0.0417  |
| rs115588494 | T | 0.0573  |
| rs3212153   | A | -0.0228 |
| rs113959646 | T | 0.0763  |
| rs74841564  | C | 0.0575  |
| rs140226484 | A | -0.0421 |
| rs6600813   | T | 0.0193  |
| rs35145497  | G | -0.0295 |
| rs74883111  | C | 0.1169  |
| rs2017189   | G | 0.0165  |
| rs147400137 | T | -0.0632 |
| rs115755247 | A | -0.0342 |
| rs148473968 | G | 0.0705  |
| rs114352620 | T | 0.1348  |
| rs149267295 | T | -0.0949 |
| rs6536115   | C | 0.0756  |
| rs77713690  | T | -0.0423 |
| rs113296691 | G | 0.0469  |
| rs77611868  | C | 0.0489  |
| rs1797590   | G | -0.016  |
| rs71611792  | C | -0.0208 |
| rs6840461   | A | -0.0215 |
| rs73247586  | G | -0.0739 |
| rs115386517 | G | 0.0828  |
| rs72720506  | G | 0.0629  |
| rs17069650  | G | -0.054  |
| rs10012330  | A | 0.0259  |
| rs1048506   | A | -0.0516 |
| rs114456403 | G | -0.1172 |
| rs143208171 | C | 0.1503  |
| rs72655183  | T | -0.0653 |
| rs62320849  | C | 0.1089  |
| rs28449611  | G | -0.0802 |
| rs76044515  | A | -0.0415 |
| rs76063921  | C | 0.0388  |
| rs1485452   | C | 0.0162  |
| rs147627531 | T | 0.0786  |
| rs75971568  | A | 0.0785  |
| rs115270875 | C | 0.0645  |
| rs116175105 | C | -0.0413 |
| rs77880214  | A | 0.0665  |
| rs4069729   | G | -0.017  |
| rs28709733  | G | -0.0323 |
| rs138410067 | C | -0.1321 |

|             |   |         |
|-------------|---|---------|
| rs55780042  | A | 0.0316  |
| rs4696209   | C | 0.0188  |
| rs144705097 | A | 0.1019  |
| rs62290713  | T | 0.0579  |
| rs78217044  | A | -0.0745 |
| rs6852649   | C | 0.0177  |
| rs17617811  | T | 0.0194  |
| rs13112903  | C | 0.0184  |
| rs13125836  | T | 0.0405  |
| rs11729330  | A | 0.0487  |
| rs17625455  | T | -0.0654 |
| rs78308053  | T | 0.1385  |
| rs62312889  | G | 0.0606  |
| rs76556993  | C | -0.1271 |
| rs142991989 | A | 0.0634  |
| rs75067904  | A | 0.0636  |
| rs72676112  | G | -0.0873 |
| rs11725338  | A | -0.0265 |
| rs4691145   | A | -0.0382 |
| rs58299329  | G | 0.0493  |
| rs10937808  | C | -0.0273 |
| rs28433701  | C | -0.0175 |
| rs28481276  | G | 0.0359  |
| rs2904221   | T | -0.0173 |
| rs2314104   | A | 0.0222  |
| rs72705427  | G | 0.0965  |
| rs72706620  | T | -0.086  |
| rs77438259  | A | -0.0728 |
| rs28582892  | A | -0.0328 |
| rs80342389  | T | 0.0854  |
| rs56046812  | G | -0.0448 |
| rs62300880  | A | -0.0691 |
| rs115863261 | G | 0.0821  |
| rs150892912 | A | -0.1101 |
| rs969086    | C | 0.0154  |
| rs145673753 | T | 0.0839  |
| rs7680337   | G | 0.0455  |
| rs139549016 | A | 0.0489  |
| rs10856967  | C | 0.0164  |
| rs13129093  | A | 0.1027  |
| rs147879419 | G | 0.1604  |
| rs34284109  | T | -0.0533 |
| rs7441672   | A | 0.0482  |
| rs4834921   | C | 0.0306  |
| rs116528199 | C | 0.0681  |
| rs115011405 | A | -0.1401 |
| rs80325712  | T | -0.0341 |

|             |   |         |
|-------------|---|---------|
| rs4863078   | G | -0.0279 |
| rs306350    | G | -0.0463 |
| rs34933960  | C | -0.0258 |
| rs6839753   | A | -0.0187 |
| rs76965362  | A | 0.0745  |
| rs111483359 | A | -0.0954 |
| rs1498014   | C | 0.0178  |
| rs149679161 | A | -0.0959 |
| rs11932737  | C | -0.036  |
| rs6819113   | C | -0.041  |
| rs4314310   | A | 0.0427  |
| rs78207313  | T | 0.0302  |
| rs76035805  | T | 0.042   |
| rs72695279  | A | 0.0686  |
| rs4585328   | T | 0.0177  |
| rs75886809  | G | 0.0544  |
| rs57420558  | T | -0.089  |
| rs1425433   | A | -0.0164 |
| rs62343461  | T | 0.0584  |
| rs17650892  | A | 0.0273  |
| rs12152668  | G | 0.0332  |
| rs113061026 | T | 0.0754  |
| rs1369998   | G | 0.034   |
| rs112390897 | T | 0.1192  |
| rs116783184 | C | 0.0429  |
| rs7666646   | T | 0.0205  |
| rs115001479 | T | 0.0421  |
| rs142617717 | C | 0.1219  |
| rs1031691   | T | 0.017   |
| rs6447062   | C | 0.0436  |
| rs17861832  | T | -0.0524 |
| rs149013587 | G | -0.1067 |
| rs10012533  | G | -0.0169 |
| rs150019215 | C | -0.0961 |
| rs2173827   | C | 0.021   |
| rs115962496 | T | -0.0401 |
| rs140674515 | G | 0.098   |
| rs35478734  | T | 0.0562  |
| rs116776191 | T | -0.07   |
| rs75375230  | T | 0.0409  |
| rs148813863 | A | 0.0533  |
| rs7683276   | A | 0.0197  |
| rs115523765 | A | 0.068   |
| rs13110123  | G | 0.0515  |
| rs7655527   | T | 0.0194  |
| rs74733050  | C | -0.114  |
| rs10025210  | T | -0.0252 |

|             |   |         |
|-------------|---|---------|
| rs11729287  | T | 0.0224  |
| rs79659488  | T | -0.047  |
| rs74612435  | T | 0.0615  |
| rs10012925  | A | -0.0486 |
| rs3913450   | T | -0.0196 |
| rs7683247   | T | -0.0322 |
| rs77602237  | C | -0.0705 |
| rs79629161  | C | 0.0674  |
| rs749493    | A | 0.0291  |
| rs6821522   | T | -0.017  |
| rs55873241  | T | 0.0195  |
| rs16837865  | C | -0.0189 |
| rs6531981   | A | 0.0165  |
| rs145159066 | T | -0.1028 |
| rs62331844  | G | 0.0384  |
| rs11735666  | G | 0.0175  |
| rs735225    | T | -0.0367 |
| rs28866186  | T | -0.0585 |
| rs141084446 | T | 0.0979  |
| rs62337957  | T | 0.0175  |
| rs56052134  | T | 0.039   |
| rs114827616 | T | 0.1087  |
| rs150729425 | T | 0.1038  |
| rs17370238  | G | -0.0172 |
| rs13114710  | T | 0.0457  |
| rs139312766 | G | -0.0857 |
| rs12504168  | T | -0.0261 |
| rs4689728   | C | 0.0177  |
| rs138025226 | C | -0.114  |
| rs148601174 | A | -0.1445 |
| rs10008710  | T | -0.0229 |
| rs35705473  | T | 0.0166  |
| rs6836721   | G | -0.0187 |
| rs55888103  | A | 0.0215  |
| rs73234595  | A | 0.0351  |
| rs58839001  | C | -0.0441 |
| rs3846243   | A | 0.0176  |
| rs112405253 | T | 0.0659  |
| rs80331575  | T | -0.067  |
| rs142104112 | A | 0.109   |
| rs72711382  | T | -0.0817 |
| rs114309505 | G | 0.0538  |
| rs151150638 | C | 0.0884  |
| rs115283523 | G | 0.0224  |
| rs116121916 | G | -0.0689 |
| rs73824735  | T | 0.0377  |
| rs114418709 | A | -0.0621 |

|             |   |         |
|-------------|---|---------|
| rs6814936   | A | 0.0479  |
| rs76236231  | A | -0.071  |
| rs67760352  | T | -0.1376 |
| rs2074378   | T | 0.0167  |
| rs116456155 | A | 0.0549  |
| rs80303354  | G | 0.03    |
| rs2867613   | C | 0.0206  |
| rs111273795 | T | 0.0349  |
| rs11723977  | C | 0.027   |
| rs74516217  | A | 0.1235  |
| rs142602250 | A | 0.0256  |
| rs67282080  | A | -0.0224 |
| rs9968342   | C | 0.0195  |
| rs10022595  | G | 0.0473  |
| rs144725987 | G | 0.0805  |
| rs676592    | G | 0.0163  |
| rs956973    | T | 0.0709  |
| rs75660249  | G | -0.0377 |
| rs2178603   | G | 0.0185  |
| rs34711204  | T | 0.0313  |
| rs4314344   | A | -0.0365 |
| rs749286    | C | -0.0203 |
| rs11726698  | G | -0.0281 |
| rs143965247 | G | -0.059  |
| rs142349011 | A | 0.0774  |
| rs10939380  | G | -0.0191 |
| rs559283    | C | -0.0177 |
| rs7377788   | A | 0.0183  |
| rs10025312  | A | 0.0163  |
| rs79129646  | A | 0.0591  |
| rs140769429 | A | -0.1045 |
| rs13435715  | G | 0.0243  |
| rs55683433  | A | -0.0609 |
| rs76032479  | T | 0.1664  |
| rs11723256  | G | -0.0233 |
| rs17008807  | G | 0.0513  |
| rs17321497  | A | 0.0902  |
| rs12646682  | T | -0.0888 |
| rs12507470  | A | -0.0206 |
| rs78766545  | G | 0.0869  |
| rs115549649 | G | -0.0427 |
| rs56198714  | A | -0.0334 |
| rs6846882   | T | -0.0282 |
| rs28729978  | T | -0.0965 |
| rs67932668  | A | 0.027   |
| rs74420163  | T | -0.0858 |
| rs2903081   | T | 0.0227  |

|             |   |         |
|-------------|---|---------|
| rs72721418  | C | -0.0412 |
| rs56095494  | A | -0.0823 |
| rs80215628  | C | 0.0617  |
| rs73188348  | T | -0.0958 |
| rs7676745   | A | -0.0613 |
| rs2727439   | A | -0.0158 |
| rs17027947  | T | 0.0552  |
| rs73243451  | C | 0.0688  |
| rs72856622  | C | 0.0591  |
| rs4484280   | T | -0.0175 |
| rs7664630   | G | 0.0871  |
| rs151022986 | G | 0.0829  |
| rs62334185  | C | 0.0164  |
| rs34416159  | C | -0.0885 |
| rs6448564   | T | 0.035   |
| rs138274650 | C | -0.0904 |
| rs7688011   | A | 0.0899  |
| rs78838548  | A | -0.0205 |
| rs2995923   | A | -0.0612 |
| rs114372103 | T | -0.0516 |
| rs78320926  | C | 0.0588  |
| rs112990806 | G | -0.1234 |
| rs188513    | G | 0.0166  |
| rs78391805  | A | 0.0272  |
| rs17034632  | T | -0.0214 |
| rs112235362 | T | -0.0165 |
| rs962305    | G | -0.081  |
| rs73852386  | A | -0.0695 |
| rs2314133   | A | -0.0202 |
| rs7684138   | A | 0.0242  |
| rs73229074  | T | -0.0792 |
| rs72636634  | C | 0.0585  |
| rs116531175 | G | 0.0513  |
| rs143359893 | A | -0.0663 |
| rs79097104  | C | 0.0703  |
| rs115665670 | T | -0.0652 |
| rs11724240  | C | -0.0722 |
| rs16851141  | C | 0.0188  |
| rs17315705  | G | 0.0233  |
| rs62326110  | A | -0.0251 |
| rs112437255 | C | 0.1218  |
| rs74961580  | T | -0.0643 |
| rs7674496   | T | 0.024   |
| rs77830043  | A | 0.0239  |
| rs7697837   | T | 0.0157  |
| rs2319135   | C | 0.0163  |
| rs62313723  | T | -0.028  |



|             |   |         |
|-------------|---|---------|
| rs17300456  | A | 0.0355  |
| rs6535499   | T | 0.045   |
| rs473534    | G | 0.0196  |
| rs10520278  | A | -0.0195 |
| rs11731345  | G | -0.0323 |
| rs114442729 | T | 0.0701  |
| rs2575679   | C | 0.0617  |
| rs79180504  | A | 0.0742  |
| rs78512969  | G | 0.0475  |
| rs6536030   | G | 0.0171  |
| rs7669740   | C | 0.017   |
| rs56117627  | G | 0.0322  |
| rs34184877  | A | -0.0282 |
| rs79438107  | A | -0.028  |
| rs9991845   | C | -0.035  |
| rs144080212 | A | 0.0993  |
| rs28455789  | A | -0.0224 |
| rs79301534  | A | -0.0558 |
| rs12643247  | T | -0.0853 |
| rs62353287  | A | -0.0251 |
| rs147622320 | C | -0.0994 |
| rs114129887 | T | -0.1053 |
| rs112607356 | T | 0.0898  |
| rs57892861  | C | 0.07    |
| rs10013495  | T | 0.0206  |
| rs4697428   | C | 0.0276  |
| rs11725684  | T | 0.017   |
| rs16854033  | T | -0.0618 |
| rs34820474  | C | -0.031  |
| rs116377963 | C | 0.0857  |
| rs116044889 | G | 0.107   |
| rs9990522   | A | 0.0156  |
| rs3756049   | A | 0.0193  |
| rs143713301 | C | -0.1019 |
| rs139021470 | C | 0.1768  |
| rs28520840  | T | -0.0442 |
| rs76561109  | G | -0.0511 |
| rs169950    | T | -0.0449 |
| rs150535325 | T | 0.0635  |
| rs73245205  | C | -0.0733 |
| rs76425228  | C | 0.0668  |
| rs17017275  | T | 0.0784  |
| rs143677390 | G | -0.0782 |
| rs4696757   | T | 0.0537  |
| rs147619389 | T | 0.0608  |
| rs7680049   | G | -0.0239 |
| rs74619480  | A | -0.0603 |

|             |   |         |
|-------------|---|---------|
| rs79201245  | C | -0.0762 |
| rs10022628  | C | -0.0334 |
| rs62351241  | A | 0.02    |
| rs10021404  | G | 0.025   |
| rs72648546  | C | 0.0594  |
| rs6827213   | T | -0.0201 |
| rs74431256  | T | -0.0518 |
| rs79921277  | C | 0.0718  |
| rs115636029 | G | 0.0824  |
| rs10434411  | C | -0.0224 |
| rs115732889 | T | -0.0964 |
| rs74626753  | G | -0.1056 |
| rs76353822  | T | 0.0239  |
| rs6813353   | A | 0.0525  |
| rs11722528  | T | 0.0199  |
| rs28433958  | A | -0.0401 |
| rs74773481  | A | 0.1019  |
| rs10001241  | T | -0.0157 |
| rs76981518  | T | 0.075   |
| rs150328344 | C | 0.0581  |
| rs112585066 | C | 0.1205  |
| rs72716973  | A | -0.0833 |
| rs139121939 | T | 0.1171  |
| rs28830489  | C | 0.0236  |
| rs11938815  | T | 0.023   |
| rs147036324 | C | -0.0871 |
| rs61794787  | G | 0.0332  |
| rs146833150 | C | -0.1322 |
| rs114649582 | T | -0.0871 |
| rs147020139 | A | -0.0925 |
| rs13120253  | C | -0.0185 |
| rs34813411  | T | -0.0887 |
| rs6831181   | A | 0.0247  |
| rs4689838   | T | 0.0165  |
| rs4128784   | A | -0.0246 |
| rs116580741 | T | -0.0776 |
| rs6823392   | A | 0.015   |
| rs13119903  | G | -0.0153 |
| rs12651036  | T | -0.043  |
| rs62284845  | A | -0.0154 |
| rs7375281   | T | -0.0425 |
| rs59852237  | A | 0.1064  |
| rs6825684   | A | -0.0223 |
| rs61552360  | G | -0.0166 |
| rs73205406  | T | -0.0793 |
| rs72710779  | A | -0.101  |
| rs1465496   | A | -0.0239 |

|             |   |         |
|-------------|---|---------|
| rs116591162 | T | 0.0802  |
| rs146525491 | T | 0.1112  |
| rs17069320  | C | -0.0573 |
| rs4466043   | A | -0.0355 |
| rs10001300  | T | 0.0471  |
| rs116094209 | C | 0.0889  |
| rs79290064  | A | -0.1028 |
| rs74627202  | C | 0.0882  |
| rs7689113   | T | -0.0345 |
| rs56292957  | A | 0.0345  |
| rs60358470  | T | -0.0229 |
| rs34524103  | A | -0.0543 |
| rs10002111  | A | 0.0188  |
| rs2381290   | A | -0.0151 |
| rs9307039   | A | 0.0173  |
| rs10014832  | C | 0.0257  |
| rs6533673   | G | 0.0152  |
| rs115246500 | G | -0.0989 |
| rs142088891 | A | 0.0731  |
| rs140425919 | C | -0.0621 |
| rs142597227 | G | 0.0781  |
| rs11728660  | C | 0.0237  |
| rs10003136  | A | 0.0669  |
| rs114128348 | C | 0.0513  |
| rs73140753  | T | -0.0738 |
| rs4864872   | T | 0.0221  |
| rs62306262  | T | 0.041   |
| rs11733013  | G | 0.0242  |
| rs10516252  | A | -0.0158 |
| rs113576788 | G | 0.0999  |
| rs4543130   | G | 0.0149  |
| rs151152806 | T | -0.1145 |
| rs1460070   | G | -0.0165 |
| rs10028586  | A | -0.0781 |
| rs77473599  | C | -0.093  |
| rs114735501 | C | 0.1178  |
| rs2189367   | G | -0.0172 |
| rs77952890  | C | 0.1068  |
| rs4862242   | T | 0.0211  |
| rs6837041   | G | 0.0961  |
| rs4342207   | A | 0.0426  |
| rs28613583  | C | 0.038   |
| rs1279616   | G | 0.0586  |
| rs2714888   | T | 0.0211  |
| rs76041461  | T | -0.0445 |
| rs12108337  | T | -0.1141 |
| rs6532176   | C | 0.0244  |

|             |   |         |
|-------------|---|---------|
| rs10016093  | A | -0.0191 |
| rs75219499  | C | -0.0574 |
| rs114788560 | A | -0.0647 |
| rs1963908   | C | -0.0181 |
| rs6532726   | G | 0.0158  |
| rs147735184 | T | 0.0717  |
| rs80260203  | A | -0.0489 |
| rs17147677  | C | 0.0442  |
| rs1980187   | G | -0.0153 |
| rs115027596 | G | -0.1306 |
| rs13108638  | T | 0.0232  |
| rs12648767  | A | 0.0177  |
| rs71607314  | T | 0.0651  |
| rs1903558   | T | 0.0236  |
| rs76089654  | T | -0.0587 |
| rs76273810  | A | -0.0895 |
| rs146415707 | G | -0.0786 |
| rs11099119  | G | 0.0164  |
| rs113320263 | G | -0.055  |
| rs13109093  | C | 0.0156  |
| rs7671270   | T | 0.052   |
| rs75109566  | A | -0.0639 |
| rs62335667  | C | -0.0626 |
| rs6845915   | C | 0.0174  |
| rs6822461   | G | 0.0495  |
| rs3115390   | A | 0.0179  |
| rs78864896  | A | 0.0296  |
| rs62302452  | G | 0.0608  |
| rs138055267 | C | 0.1213  |
| rs224488    | A | 0.0154  |
| rs138087021 | T | -0.1183 |
| rs76384591  | G | -0.0602 |
| rs57644708  | T | -0.039  |
| rs77143212  | C | 0.11    |
| rs62283037  | T | -0.0488 |
| rs17674114  | G | 0.0609  |
| rs7670489   | C | -0.0442 |
| rs11724890  | A | 0.0369  |
| rs115534071 | T | 0.0932  |
| rs73795164  | C | 0.0236  |
| rs114241456 | C | 0.1071  |
| rs116341484 | T | 0.043   |
| rs77239326  | T | 0.0533  |
| rs76125375  | A | 0.0347  |
| rs78308384  | A | -0.0732 |
| rs79887891  | A | 0.0761  |
| rs114631757 | T | 0.0917  |

|             |   |         |
|-------------|---|---------|
| rs114314198 | G | -0.0581 |
| rs35490338  | T | 0.0475  |
| rs138168195 | G | -0.039  |
| rs116027606 | C | -0.0592 |
| rs140970547 | T | 0.0763  |
| rs1443171   | A | 0.018   |
| rs35135458  | T | -0.0482 |
| rs147661088 | T | -0.0691 |
| rs76995815  | T | -0.0532 |
| rs12642662  | T | -0.0196 |
| rs6838382   | C | -0.0182 |
| rs1563456   | T | -0.0181 |
| rs6553430   | C | 0.02    |
| rs6856780   | T | -0.0211 |
| rs6837566   | G | -0.0259 |
| rs62309591  | G | -0.106  |
| rs62304123  | A | 0.0344  |
| rs4865043   | G | -0.0189 |
| rs34358666  | T | -0.0708 |
| rs62298060  | A | 0.0475  |
| rs78963321  | G | -0.1308 |
| rs72681859  | C | -0.036  |
| rs62410785  | A | 0.0208  |
| rs112974357 | A | 0.0302  |
| rs79513556  | T | 0.0405  |
| rs115546079 | T | 0.0712  |
| rs35503308  | C | 0.0235  |
| rs10015033  | C | 0.0484  |
| rs6854985   | A | -0.0205 |
| rs80146983  | C | 0.0556  |
| rs6553037   | C | -0.026  |
| rs116454669 | T | -0.0728 |
| rs41292305  | A | 0.0618  |
| rs11942220  | C | -0.0172 |
| rs77649214  | T | -0.064  |
| rs145802033 | G | 0.0819  |
| rs2290399   | G | 0.0414  |
| rs4859467   | C | -0.0152 |
| rs76795866  | G | 0.0659  |
| rs28689523  | C | -0.0164 |
| rs807420    | C | -0.0156 |
| rs114822604 | T | -0.0479 |
| rs11724739  | C | -0.0153 |
| rs1674340   | C | 0.0216  |
| rs114866995 | C | 0.0582  |
| rs73225150  | C | 0.0818  |
| rs2703458   | A | 0.074   |

|             |   |         |
|-------------|---|---------|
| rs142895113 | T | 0.0771  |
| rs13117075  | G | 0.0169  |
| rs757171    | C | -0.043  |
| rs115364286 | A | 0.0882  |
| rs80316388  | A | -0.0533 |
| rs72675422  | T | -0.0389 |
| rs55705546  | T | -0.0276 |
| rs116762567 | T | 0.0741  |
| rs148595711 | G | 0.0864  |
| rs71618583  | C | -0.073  |
| rs17471740  | A | 0.0156  |
| rs79317522  | T | 0.0434  |
| rs17149007  | T | 0.0264  |
| rs7668598   | G | -0.032  |
| rs113432391 | T | 0.04    |
| rs12512258  | C | 0.0162  |
| rs11721520  | G | 0.0376  |
| rs10007476  | T | 0.0254  |
| rs10516564  | G | 0.0174  |
| rs11132404  | T | 0.0211  |
| rs116360305 | A | 0.0655  |
| rs6856755   | G | 0.0191  |
| rs151244651 | A | 0.1173  |
| rs73230219  | C | -0.034  |
| rs11732166  | T | -0.0201 |
| rs71603011  | T | 0.0303  |
| rs6842964   | G | 0.0481  |
| rs34838840  | T | -0.021  |
| rs72695633  | T | 0.1309  |
| rs1451177   | G | -0.0158 |
| rs2128427   | T | -0.0273 |
| rs78620582  | T | -0.0778 |
| rs41461646  | A | 0.0575  |
| rs78256295  | T | 0.1104  |
| rs74887020  | C | 0.049   |
| rs76136889  | C | -0.0443 |
| rs148716072 | C | 0.0676  |
| rs13107165  | C | 0.0159  |
| rs3113399   | A | -0.0162 |
| rs72683828  | C | 0.0363  |
| rs80038513  | A | 0.063   |
| rs150646284 | T | 0.0964  |
| rs28649372  | G | -0.0266 |
| rs77672332  | A | 0.0998  |
| rs116787754 | A | 0.0688  |
| rs843577    | G | -0.0152 |
| rs78369804  | T | -0.0895 |

|             |   |         |
|-------------|---|---------|
| rs11731607  | A | -0.0172 |
| rs150411367 | A | -0.1043 |
| rs7672040   | A | 0.0388  |
| rs145959833 | C | -0.0775 |
| rs144604658 | A | 0.0714  |
| rs73249328  | T | 0.1831  |
| rs146366724 | T | -0.049  |
| rs1797044   | C | -0.0467 |
| rs72685615  | G | 0.1245  |
| rs114708821 | T | 0.0668  |
| rs10516487  | A | 0.016   |
| rs3851433   | T | 0.0282  |
| rs11730953  | T | 0.0154  |
| rs4241745   | T | -0.0184 |
| rs147653998 | C | 0.088   |
| rs34024080  | A | -0.0499 |
| rs71606881  | T | -0.043  |
| rs140009389 | A | -0.0368 |
| rs113112297 | T | 0.0267  |
| rs7657299   | A | 0.017   |
| rs10428385  | T | -0.0175 |
| rs142748251 | A | 0.094   |
| rs146799012 | G | -0.0687 |
| rs74786684  | G | 0.0189  |
| rs115718334 | T | -0.0756 |
| rs73243681  | T | -0.0257 |
| rs78981540  | T | 0.0609  |
| rs56263098  | A | 0.0259  |
| rs17360789  | C | 0.0322  |
| rs72736293  | C | 0.0401  |
| rs139030080 | C | -0.0775 |
| rs116251765 | C | -0.0731 |
| rs62318109  | T | 0.1077  |
| rs80047629  | T | 0.0683  |
| rs78251187  | T | -0.0692 |
| rs78396000  | T | -0.1415 |
| rs9997336   | A | 0.0159  |
| rs1609993   | T | -0.0357 |
| rs116064932 | T | -0.0745 |
| rs115895048 | T | 0.0581  |
| rs13104334  | G | 0.0155  |
| rs11723764  | T | 0.0573  |
| rs74525716  | T | 0.0727  |
| rs6849656   | G | -0.0219 |
| rs80292856  | T | -0.0289 |
| rs1858150   | T | 0.0182  |
| rs62338224  | G | -0.0437 |

|             |   |         |
|-------------|---|---------|
| rs73246829  | C | 0.0319  |
| rs13152055  | A | -0.0618 |
| rs142054730 | T | -0.102  |
| rs6852894   | A | 0.0564  |
| rs78927895  | G | -0.0337 |
| rs116812346 | A | 0.0529  |
| rs12502308  | C | 0.035   |
| rs7699077   | T | 0.0171  |
| rs72694490  | A | -0.0229 |
| rs55760674  | T | -0.0368 |
| rs6828163   | T | 0.0173  |
| rs147440049 | C | 0.0861  |
| rs75687749  | A | 0.0499  |
| rs7666347   | T | -0.0377 |
| rs115979062 | T | -0.0909 |
| rs6552826   | C | -0.0619 |
| rs328438    | A | 0.0255  |
| rs2725313   | C | -0.0149 |
| rs1589803   | C | 0.0256  |
| rs62312609  | A | 0.0774  |
| rs11929731  | G | 0.0369  |
| rs71612002  | G | -0.0547 |
| rs79374535  | T | 0.062   |
| rs75652853  | T | 0.0716  |
| rs7376707   | A | -0.0997 |
| rs78611340  | A | 0.0661  |
| rs62340867  | G | 0.1174  |
| rs2219567   | A | 0.0283  |
| rs12651499  | A | 0.0327  |
| rs1506464   | T | -0.015  |
| rs4429748   | T | -0.0183 |
| rs72883000  | G | 0.1057  |
| rs13114734  | T | -0.0328 |
| rs75172464  | A | -0.1009 |
| rs115713845 | A | 0.0394  |
| rs4370115   | G | -0.0376 |
| rs143013965 | A | 0.0442  |
| rs28636000  | G | -0.0323 |
| rs1203808   | T | -0.0173 |
| rs112854888 | A | -0.0586 |
| rs76817066  | T | -0.0482 |
| rs4865443   | A | -0.017  |
| rs17132647  | A | -0.0408 |
| rs10049992  | G | -0.0226 |
| rs143444996 | T | 0.1122  |
| rs76096238  | G | 0.0365  |
| rs11733009  | T | -0.0205 |



|             |   |         |
|-------------|---|---------|
| rs142013654 | T | 0.0155  |
| rs13116412  | C | 0.0898  |
| rs76181037  | T | 0.0353  |
| rs142046067 | A | -0.0698 |
| rs34229861  | C | -0.0446 |
| rs4699384   | A | -0.0188 |
| rs7667423   | C | -0.0186 |
| rs58346872  | G | -0.0456 |
| rs78849484  | A | -0.0664 |
| rs74419594  | C | 0.0532  |
| rs6812682   | G | 0.0228  |
| rs72697521  | G | -0.0307 |
| rs76776133  | A | -0.0711 |
| rs79908138  | C | -0.0827 |
| rs116193747 | T | -0.0705 |
| rs138665640 | C | -0.0811 |
| rs73258089  | C | -0.075  |
| rs57433133  | G | 0.0167  |
| rs13144624  | G | 0.0245  |
| rs79280712  | G | 0.0167  |
| rs11732592  | C | -0.0404 |
| rs138779566 | T | -0.106  |
| rs76419999  | G | -0.0985 |
| rs71596140  | C | -0.0585 |
| rs13127165  | T | 0.0156  |
| rs78244049  | A | -0.0554 |
| rs4834199   | A | -0.0163 |
| rs10939721  | T | -0.0515 |
| rs78585685  | G | 0.0819  |
| rs78324804  | T | 0.1164  |
| rs74930648  | T | 0.1382  |
| rs28393921  | T | 0.0452  |
| rs77636098  | G | 0.0695  |
| rs35146799  | T | 0.1071  |
| rs6854828   | T | 0.0733  |
| rs17809580  | T | -0.081  |
| rs116147709 | T | 0.0733  |
| rs114205482 | G | -0.1009 |
| rs6810509   | T | 0.0188  |
| rs7699010   | A | -0.0302 |
| rs80346163  | C | -0.0777 |
| rs10016042  | A | 0.0195  |
| rs11132350  | G | 0.0157  |
| rs1904931   | A | 0.0346  |
| rs115529236 | T | 0.0738  |
| rs116039112 | A | 0.0783  |
| rs13434493  | C | 0.0195  |

|             |   |         |
|-------------|---|---------|
| rs114353106 | A | -0.0621 |
| rs35119141  | T | -0.0171 |
| rs111557858 | T | -0.0452 |
| rs6534515   | A | -0.0148 |
| rs35867715  | C | -0.0266 |
| rs142813707 | T | 0.0456  |
| rs59165713  | T | 0.039   |
| rs34079764  | G | 0.052   |
| rs6850019   | A | 0.0218  |
| rs114639430 | T | 0.0391  |
| rs139538102 | T | -0.0672 |
| rs56163224  | A | 0.0322  |
| rs114058054 | C | -0.0634 |
| rs78428374  | C | -0.0309 |
| rs11735406  | G | 0.0188  |
| rs12642948  | T | 0.0273  |
| rs4975045   | A | 0.0281  |
| rs6851694   | T | -0.0262 |
| rs78568537  | A | -0.0526 |
| rs112146137 | T | -0.0783 |
| rs67793297  | C | 0.03    |
| rs114144551 | C | 0.0612  |
| rs62340140  | T | -0.1209 |
| rs10440505  | G | 0.0305  |
| rs78730835  | T | 0.0336  |
| rs114456163 | C | -0.0435 |
| rs17362542  | A | 0.0315  |
| rs10008980  | A | -0.0221 |
| rs61793262  | A | 0.0784  |
| rs17443392  | T | 0.025   |
| rs35865138  | A | 0.0938  |
| rs72723428  | C | 0.0631  |
| rs17165026  | T | 0.0262  |
| rs34175445  | A | 0.038   |
| rs75259950  | C | 0.0792  |
| rs115806760 | A | 0.0851  |
| rs80187345  | C | -0.0714 |
| rs56378913  | T | 0.0192  |
| rs74869447  | A | 0.0806  |
| rs1072630   | C | 0.0321  |
| rs68094691  | C | 0.0183  |
| rs4859458   | T | 0.019   |
| rs78017626  | A | 0.1125  |
| rs9312682   | T | -0.0167 |
| rs72659565  | A | -0.0238 |
| rs1343754   | A | 0.0145  |
| rs113861753 | T | 0.0817  |

|             |   |         |
|-------------|---|---------|
| rs59217811  | A | 0.0494  |
| rs114026520 | C | -0.0788 |
| rs72642347  | C | -0.0792 |
| rs6845803   | C | -0.0359 |
| rs28407543  | A | 0.0198  |
| rs72693276  | A | 0.0511  |
| rs2059113   | C | 0.0369  |
| rs115000271 | T | 0.072   |
| rs77911137  | T | 0.0783  |
| rs115199375 | T | 0.0571  |
| rs28622301  | G | 0.0296  |
| rs77317568  | C | -0.0242 |
| rs72684096  | C | 0.0368  |
| rs17587295  | G | 0.0333  |
| rs3895619   | T | 0.0398  |
| rs6829649   | G | -0.024  |
| rs9991482   | C | 0.0669  |
| rs28784603  | A | 0.0154  |
| rs13149068  | T | -0.0216 |
| rs1745336   | A | -0.0219 |
| rs112699835 | G | -0.1132 |
| rs62316563  | A | -0.0535 |
| rs13126668  | G | 0.0675  |
| rs4693344   | C | -0.0207 |
| rs77187207  | A | 0.1097  |
| rs4865335   | G | -0.0153 |
| rs115196632 | G | -0.0739 |
| rs144871530 | T | -0.094  |
| rs73105129  | A | -0.0544 |
| rs75427108  | G | -0.0523 |
| rs58694068  | A | -0.0196 |
| rs78167335  | A | -0.0432 |
| rs60044461  | T | 0.017   |
| rs111463596 | C | 0.0528  |
| rs10001751  | C | 0.0398  |
| rs9631551   | C | 0.0692  |
| rs114342023 | G | 0.0573  |
| rs2278137   | C | 0.0171  |
| rs149284464 | A | -0.1167 |
| rs1967284   | T | -0.0156 |
| rs75962446  | A | -0.0654 |
| rs12504331  | C | -0.0362 |
| rs115092198 | T | 0.0567  |
| rs79515396  | C | -0.0318 |
| rs114161076 | A | -0.1059 |
| rs9991724   | G | 0.023   |
| rs75846462  | T | 0.0713  |

|             |   |         |
|-------------|---|---------|
| rs16889955  | A | -0.0226 |
| rs113752074 | A | -0.118  |
| rs80222710  | T | 0.0598  |
| rs3775297   | T | 0.0158  |
| rs1981640   | T | 0.0177  |
| rs79012230  | T | -0.0309 |
| rs62315298  | T | 0.0323  |
| rs77992219  | T | -0.0906 |
| rs67124905  | G | 0.0361  |
| rs140088438 | T | -0.0606 |
| rs71609620  | T | -0.0917 |
| rs150723268 | A | 0.1     |
| rs11098790  | G | -0.0497 |
| rs75294800  | A | -0.0443 |
| rs112050340 | G | -0.0492 |
| rs114350137 | C | 0.0496  |
| rs28568927  | G | 0.0159  |
| rs75423796  | C | -0.0637 |
| rs72681507  | C | -0.052  |
| rs62338031  | A | -0.019  |
| rs78349863  | A | 0.0262  |
| rs13131485  | C | 0.0226  |
| rs72667982  | G | -0.0239 |
| rs7436249   | G | 0.0147  |
| rs10014818  | A | -0.0191 |
| rs3775292   | C | -0.0213 |
| rs10000747  | A | 0.0334  |
| rs11725153  | G | -0.0202 |
| rs35910858  | C | 0.0793  |
| rs4860411   | G | -0.0163 |
| rs139194686 | T | -0.0815 |
| rs2612406   | T | 0.0203  |
| rs1396817   | T | -0.0192 |
| rs72872315  | C | -0.0349 |
| rs17573212  | C | -0.0826 |
| rs77792846  | A | 0.0247  |
| rs76685358  | A | -0.0707 |
| rs147661987 | G | 0.1348  |
| rs35719671  | G | 0.0741  |
| rs76664507  | A | -0.0603 |
| rs114283910 | T | -0.0656 |
| rs116830176 | T | -0.0475 |
| rs72673255  | A | -0.0686 |
| rs13114950  | T | 0.0211  |
| rs12511946  | T | -0.1    |
| rs115311130 | G | -0.0643 |
| rs2577872   | A | -0.0177 |

|             |   |         |
|-------------|---|---------|
| rs13434476  | T | -0.026  |
| rs4690801   | C | 0.0181  |
| rs36110167  | G | -0.0282 |
| rs35469359  | G | 0.0164  |
| rs11132180  | T | 0.02    |
| rs11722388  | T | -0.0172 |
| rs79160671  | C | 0.0265  |
| rs115766457 | A | -0.0578 |
| rs4861621   | A | -0.0217 |
| rs57810985  | A | -0.027  |
| rs6849847   | C | 0.0146  |
| rs17008504  | A | -0.0596 |
| rs78491208  | A | 0.0485  |
| rs112016613 | T | 0.0306  |
| rs114407241 | T | -0.1232 |
| rs72691572  | T | 0.0266  |
| rs145316684 | A | -0.0679 |
| rs147562308 | C | 0.0627  |
| rs74919849  | T | -0.0679 |
| rs6827806   | T | 0.0453  |
| rs12499741  | T | -0.0923 |
| rs147257251 | G | 0.1113  |
| rs61017450  | A | -0.0271 |
| rs115167285 | T | 0.0833  |
| rs34940579  | A | -0.0182 |
| rs4860664   | C | -0.0216 |
| rs141120064 | A | -0.0769 |
| rs114524482 | C | -0.0682 |
| rs9307065   | C | -0.0189 |
| rs6553690   | C | 0.0651  |
| rs13116738  | A | 0.0178  |
| rs6448402   | T | 0.0152  |
| rs62336604  | G | -0.0285 |
| rs6852302   | G | 0.0244  |
| rs800434    | T | 0.0629  |
| rs9995192   | T | 0.1006  |
| rs7678119   | A | -0.0167 |
| rs1441429   | C | -0.0223 |
| rs72671473  | C | 0.0888  |
| rs75100498  | C | -0.0634 |
| rs144295512 | A | 0.0602  |
| rs79427373  | T | -0.0523 |
| rs78453182  | A | -0.0678 |
| rs1364968   | T | 0.018   |
| rs113327459 | T | -0.0514 |
| rs17776097  | T | -0.0311 |
| rs28524137  | T | 0.0633  |

|             |   |         |
|-------------|---|---------|
| rs146735869 | A | 0.0513  |
| rs77542818  | C | -0.0642 |
| rs7670831   | T | 0.0285  |
| rs335088    | C | -0.0157 |
| rs76428007  | G | -0.0579 |
| rs116287535 | C | 0.0615  |
| rs147163298 | A | -0.131  |
| rs62315318  | C | -0.0985 |
| rs3733498   | A | -0.0417 |
| rs17082227  | T | -0.0839 |
| rs17033239  | C | -0.0571 |
| rs1996184   | T | 0.0282  |
| rs76021460  | A | 0.0392  |
| rs9999900   | T | -0.0864 |
| rs62327974  | T | -0.0472 |
| rs79544357  | A | -0.055  |
| rs2048374   | G | -0.0192 |
| rs7435137   | C | -0.0182 |
| rs736577    | A | -0.0772 |
| rs17360368  | T | -0.0689 |
| rs34680259  | T | 0.0439  |
| rs58480999  | T | 0.0195  |
| rs4069925   | A | 0.0383  |
| rs11942970  | C | 0.0363  |
| rs116034758 | A | 0.0664  |
| rs114316804 | A | 0.0826  |
| rs2872575   | T | 0.0294  |
| rs73229273  | A | -0.0705 |
| rs75313768  | C | 0.0802  |
| rs60684776  | A | -0.0227 |
| rs146388084 | A | 0.0741  |
| rs6846262   | A | 0.0298  |
| rs75184587  | G | -0.0615 |
| rs76317854  | T | 0.1006  |
| rs527726    | G | -0.0443 |
| rs28652800  | T | -0.0215 |
| rs34956353  | C | 0.0316  |
| rs73845281  | C | -0.0293 |
| rs28412493  | T | -0.0454 |
| rs67910635  | C | -0.0195 |
| rs142762744 | G | 0.117   |
| rs1903028   | G | 0.053   |
| rs1020993   | T | 0.0213  |
| rs73873572  | C | 0.0265  |
| rs148786903 | C | 0.0744  |
| rs6819998   | A | 0.0192  |
| rs76665567  | C | -0.0436 |

|             |   |         |
|-------------|---|---------|
| rs73243700  | G | -0.0702 |
| rs114188086 | A | 0.0619  |
| rs17471663  | C | 0.0423  |
| rs506643    | A | 0.1234  |
| rs4956424   | A | 0.0206  |
| rs7659375   | A | 0.0207  |
| rs1457917   | A | 0.0144  |
| rs1816005   | A | 0.0603  |
| rs6536850   | A | 0.0168  |
| rs73216242  | G | -0.0352 |
| rs114233970 | G | 0.1124  |
| rs6819405   | C | -0.0784 |
| rs4299635   | C | 0.0176  |
| rs79737037  | G | -0.0753 |
| rs116121424 | C | -0.0941 |
| rs62327978  | G | 0.0355  |
| rs78834343  | G | -0.0848 |
| rs17661998  | G | -0.0391 |
| rs114252785 | C | -0.0717 |
| rs6839835   | A | 0.0293  |
| rs17042053  | T | -0.0748 |
| rs143153777 | A | 0.0941  |
| rs111833150 | A | -0.101  |
| rs766686    | C | 0.0295  |
| rs6854572   | G | -0.0371 |
| rs75847243  | C | 0.1207  |
| rs76150854  | A | -0.0634 |
| rs2725231   | A | -0.0172 |
| rs115723993 | T | 0.0714  |
| rs79949615  | G | 0.0346  |
| rs7665135   | A | -0.0146 |
| rs116675928 | A | 0.0875  |
| rs13145131  | C | -0.0155 |
| rs17622580  | T | -0.0209 |
| rs114549961 | G | 0.0828  |
| rs7656356   | T | -0.0301 |
| rs17488073  | G | 0.0271  |
| rs115863428 | A | -0.0935 |
| rs13142165  | C | 0.0955  |
| rs6819231   | C | 0.0195  |
| rs75522131  | A | -0.0277 |
| rs17721716  | C | -0.0687 |
| rs79130196  | T | 0.0609  |
| rs78681144  | T | 0.0646  |
| rs2860055   | A | 0.0493  |
| rs1463960   | C | 0.0308  |
| rs17060465  | T | -0.023  |

|             |   |         |
|-------------|---|---------|
| rs148589526 | A | 0.0815  |
| rs116755534 | C | 0.0312  |
| rs73204522  | T | 0.0282  |
| rs73220098  | C | -0.0984 |
| rs79968684  | C | -0.0711 |
| rs116515212 | T | -0.0717 |
| rs2145613   | C | 0.0737  |
| rs60304697  | C | 0.0172  |
| rs6852549   | C | -0.0463 |
| rs78285101  | A | 0.0659  |
| rs80354015  | C | 0.0185  |
| rs144983228 | T | 0.0897  |
| rs112565097 | T | -0.0939 |
| rs116084903 | T | -0.0932 |
| rs150667984 | T | -0.0582 |
| rs4254723   | T | 0.0237  |
| rs4691383   | A | 0.0162  |
| rs758877    | C | 0.0149  |
| rs11728612  | C | 0.0284  |
| rs146172806 | T | -0.0872 |
| rs56371097  | G | -0.0192 |
| rs72708351  | G | 0.0186  |
| rs75396101  | C | -0.0395 |
| rs116224684 | G | -0.0741 |
| rs13118234  | T | 0.0684  |
| rs76926475  | T | 0.05    |
| rs73088390  | A | -0.0308 |
| rs75630404  | A | 0.0761  |
| rs72662083  | T | 0.0628  |
| rs76215107  | G | -0.0295 |
| rs1499269   | G | 0.0606  |
| rs115333560 | C | 0.0536  |
| rs114633655 | T | -0.06   |
| rs17614459  | T | 0.0687  |
| rs113024690 | G | -0.0366 |
| rs76743685  | C | 0.042   |
| rs35132891  | C | 0.0164  |
| rs74491819  | T | 0.076   |
| rs7677486   | T | -0.0154 |
| rs13124801  | T | 0.0645  |
| rs6535497   | A | 0.0192  |
| rs147430666 | A | -0.0781 |
| rs114853892 | T | 0.0852  |
| rs72674750  | T | -0.0595 |
| rs76630000  | T | -0.0685 |
| rs115891882 | C | 0.0581  |
| rs114037322 | G | -0.1307 |



|             |   |         |
|-------------|---|---------|
| rs7654106   | C | 0.015   |
| rs137963638 | G | 0.0546  |
| rs116379968 | G | 0.0922  |
| rs28711183  | A | -0.0423 |
| rs79425426  | T | 0.0568  |
| rs12509669  | A | -0.016  |
| rs114392119 | A | -0.0862 |
| rs34699840  | A | 0.0243  |
| rs61793503  | A | 0.0649  |
| rs116614426 | T | 0.0849  |
| rs17843924  | A | 0.0634  |
| rs62340718  | C | 0.0288  |
| rs7666419   | C | -0.0973 |
| rs11133030  | A | -0.028  |
| rs75531492  | G | -0.0821 |
| rs13107539  | A | -0.0173 |
| rs11733819  | T | 0.0203  |
| rs12646941  | C | -0.0222 |
| rs7673107   | A | 0.0171  |
| rs140871240 | C | 0.0942  |
| rs116304874 | T | 0.0939  |
| rs6824719   | T | 0.0145  |
| rs12499330  | A | -0.0424 |
| rs62283034  | C | 0.0244  |
| rs1830378   | C | -0.0171 |
| rs55672924  | T | 0.0142  |
| rs35669236  | A | 0.0273  |
| rs7665648   | C | -0.0712 |
| rs1105207   | C | -0.0176 |
| rs161707    | G | -0.0191 |
| rs12505231  | A | 0.0504  |
| rs17502687  | A | 0.0756  |
| rs71609934  | T | 0.0939  |
| rs73064387  | T | -0.0411 |
| rs79832740  | C | 0.0515  |
| rs59366456  | T | -0.0395 |
| rs2060849   | C | 0.0144  |
| rs114543570 | C | 0.0458  |
| rs76200381  | A | -0.0772 |
| rs77588489  | G | 0.0259  |
| rs142164130 | C | -0.0628 |
| rs115561489 | G | 0.0586  |
| rs61795502  | G | -0.0632 |
| rs17009347  | C | -0.1082 |
| rs11937125  | T | 0.0155  |
| rs76709571  | C | -0.0682 |
| rs301096    | T | -0.0407 |

|             |   |         |
|-------------|---|---------|
| rs12054508  | C | 0.0166  |
| rs3775835   | T | 0.0243  |
| rs35635710  | T | 0.1151  |
| rs6834299   | T | 0.0163  |
| rs2386052   | C | -0.0158 |
| rs6820019   | G | -0.0236 |
| rs7655870   | C | -0.0189 |
| rs142888543 | G | -0.0769 |
| rs4241780   | T | -0.0222 |
| rs73260010  | A | 0.0826  |
| rs7689103   | G | 0.0261  |
| rs77876519  | G | 0.1134  |
| rs361100    | T | -0.0158 |
| rs17274854  | A | 0.0213  |
| rs115663059 | C | 0.069   |
| rs4392464   | A | 0.0178  |
| rs6554138   | G | -0.0141 |
| rs35668098  | G | -0.0181 |
| rs1982147   | G | -0.0158 |
| rs4583815   | T | -0.0147 |
| rs78195414  | A | 0.0379  |
| rs116635699 | A | -0.0953 |
| rs7656116   | T | 0.0167  |
| rs77645453  | G | -0.08   |
| rs114424433 | A | -0.0635 |
| rs17321762  | T | 0.0401  |
| rs114797768 | T | -0.0796 |
| rs7699816   | T | -0.0157 |
| rs10461331  | C | -0.0447 |
| rs1368614   | A | 0.0174  |
| rs142607916 | T | -0.1102 |
| rs113267425 | G | 0.0424  |
| rs75732120  | A | 0.0907  |
| rs74992536  | C | -0.0456 |
| rs75300794  | C | 0.1194  |
| rs62286917  | C | -0.0181 |
| rs6820379   | G | 0.0459  |
| rs79418087  | T | -0.0599 |
| rs456738    | T | 0.0233  |
| rs74716803  | A | -0.0263 |
| rs11733487  | C | 0.0153  |
| rs4103860   | C | 0.0161  |
| rs12505251  | T | 0.0523  |
| rs71622911  | C | 0.0608  |
| rs113688513 | G | 0.0781  |
| rs116209813 | T | -0.0638 |
| rs77243540  | T | 0.0487  |

|             |   |         |
|-------------|---|---------|
| rs71605211  | C | 0.0843  |
| rs62316174  | T | -0.0886 |
| rs28631553  | T | -0.0466 |
| rs893024    | A | -0.0221 |
| rs17659305  | C | 0.0338  |
| rs55973591  | T | -0.0228 |
| rs4695954   | G | 0.0164  |
| rs77736441  | A | -0.0287 |
| rs147623029 | A | -0.0915 |
| rs4285123   | T | -0.0311 |
| rs12509799  | G | 0.0188  |
| rs10032353  | A | 0.0503  |
| rs62353211  | A | 0.0461  |
| rs144700323 | A | 0.0964  |
| rs1976989   | T | -0.0772 |
| rs75219974  | A | -0.0488 |
| rs7694562   | T | 0.0156  |
| rs144298204 | G | 0.102   |
| rs76222188  | G | -0.0921 |
| rs72684973  | G | 0.0769  |
| rs59481268  | C | 0.0176  |
| rs71604688  | C | -0.0409 |
| rs13135557  | A | -0.095  |
| rs58107746  | G | -0.0192 |
| rs13134529  | G | 0.0152  |
| rs9312691   | T | -0.0161 |
| rs75683528  | A | 0.0455  |
| rs4860771   | A | -0.0173 |
| rs72718347  | G | 0.0301  |
| rs6819808   | T | -0.0505 |
| rs17047075  | C | 0.0512  |
| rs79073584  | C | -0.0969 |
| rs113579008 | A | 0.0958  |
| rs2132668   | T | 0.021   |
| rs16888876  | T | 0.0475  |
| rs114850334 | A | -0.046  |
| rs17624115  | A | 0.0452  |
| rs116414853 | G | 0.093   |
| rs1836779   | C | -0.0196 |
| rs80302127  | C | -0.0449 |
| rs548172    | C | 0.0185  |
| rs10018538  | T | 0.0218  |
| rs72700423  | G | -0.0786 |
| rs28493402  | G | -0.0642 |
| rs62351956  | G | 0.044   |
| rs114008651 | T | -0.0387 |
| rs141498384 | C | 0.0951  |

|             |   |         |
|-------------|---|---------|
| rs7671124   | G | 0.0179  |
| rs145657266 | G | 0.104   |
| rs10856959  | G | 0.0944  |
| rs79192180  | A | 0.0467  |
| rs74411789  | G | 0.0334  |
| rs77489186  | T | 0.0713  |
| rs4863065   | G | -0.0176 |
| rs9991091   | A | -0.015  |
| rs6820028   | C | -0.0169 |
| rs116631274 | C | -0.0855 |
| rs4565113   | T | 0.0603  |
| rs1902436   | C | 0.052   |
| rs150713979 | C | -0.0464 |
| rs72946892  | T | 0.0333  |
| rs36038893  | T | 0.1019  |
| rs13129383  | A | -0.0248 |
| rs151326237 | C | -0.0823 |
| rs10026213  | C | 0.0144  |
| rs62311427  | T | -0.0331 |
| rs79796698  | A | -0.0383 |
| rs114843802 | T | -0.0708 |
| rs13110414  | C | -0.018  |
| rs73225371  | T | 0.0837  |
| rs57403214  | T | 0.0249  |
| rs111307443 | A | -0.0675 |
| rs17453783  | A | -0.0387 |
| rs13110787  | T | -0.016  |
| rs4560459   | A | -0.0181 |
| rs12505556  | A | 0.0235  |
| rs115420830 | C | -0.0705 |
| rs13435503  | T | -0.0144 |
| rs116461890 | T | -0.0746 |
| rs72708298  | T | 0.1285  |
| rs10000732  | C | 0.0153  |
| rs72728519  | T | -0.0381 |
| rs73229217  | G | 0.0301  |
| rs7684402   | C | 0.0163  |
| rs60065730  | G | -0.0243 |
| rs112613787 | C | 0.0388  |
| rs142002718 | A | -0.0967 |
| rs4440297   | A | -0.0239 |
| rs1596550   | T | 0.0219  |
| rs149079418 | T | 0.0735  |
| rs11734276  | T | 0.0166  |
| rs13116823  | T | 0.0229  |
| rs278952    | G | -0.0177 |
| rs62314728  | C | -0.0219 |

|             |   |         |
|-------------|---|---------|
| rs145147928 | A | 0.0878  |
| rs34402391  | A | 0.015   |
| rs112058520 | C | 0.0848  |
| rs114791252 | A | -0.068  |
| rs115959938 | C | 0.0959  |
| rs7690846   | T | -0.0151 |
| rs76463367  | C | -0.0371 |
| rs12331482  | G | -0.0245 |
| rs76763432  | T | 0.0233  |
| rs28402691  | T | 0.022   |
| rs75116120  | T | -0.1141 |
| rs141442571 | A | -0.0297 |
| rs1901131   | A | 0.0147  |
| rs10434100  | T | 0.0223  |
| rs28472769  | T | -0.014  |
| rs13104628  | G | -0.0585 |
| rs115705299 | T | -0.0834 |
| rs55870840  | G | 0.0177  |
| rs2202311   | G | -0.0407 |
| rs144780305 | T | 0.0623  |
| rs1450782   | T | 0.0146  |
| rs149437918 | A | 0.1053  |
| rs7698800   | A | 0.0214  |
| rs34273630  | C | 0.0845  |
| rs4608852   | A | 0.0303  |
| rs1522071   | C | -0.0693 |
| rs77748102  | G | -0.0784 |
| rs113321904 | G | -0.0764 |
| rs72696483  | C | -0.0348 |
| rs115683692 | C | -0.1059 |
| rs76045134  | A | -0.0984 |
| rs74338143  | A | 0.0632  |
| rs4563469   | C | -0.0312 |
| rs72675694  | C | -0.1016 |
| rs116227968 | T | 0.0785  |
| rs60451663  | T | -0.0212 |
| rs4253259   | T | -0.0364 |
| rs10009786  | T | -0.0343 |
| rs1514891   | C | -0.0462 |
| rs79061177  | A | 0.0754  |
| rs114364597 | A | 0.0548  |
| rs76796995  | A | -0.0787 |
| rs1508984   | T | -0.0236 |
| rs612973    | A | -0.015  |
| rs62277500  | G | 0.0544  |
| rs4447877   | A | -0.0163 |
| rs12647958  | G | -0.051  |

|             |   |         |
|-------------|---|---------|
| rs149579475 | A | 0.0656  |
| rs2169541   | T | -0.026  |
| rs1838176   | A | 0.0317  |
| rs58056025  | G | -0.0316 |
| rs12641622  | C | -0.112  |
| rs114634328 | C | 0.0399  |
| rs71609079  | G | 0.0588  |
| rs78314264  | A | -0.0889 |
| rs2135557   | T | 0.0227  |
| rs79334416  | A | 0.1268  |
| rs1317368   | C | 0.0276  |
| rs1872069   | C | -0.0317 |
| rs76859976  | A | -0.0927 |
| rs148549151 | A | 0.0905  |
| rs4689425   | G | 0.0153  |
| rs111382190 | G | -0.0585 |
| rs7670475   | T | 0.0221  |
| rs72636183  | T | 0.032   |
| rs114227803 | A | 0.0588  |
| rs10025992  | G | -0.016  |
| rs74783758  | T | -0.0229 |
| rs72703247  | A | -0.1228 |
| rs147497572 | A | 0.1043  |
| rs2127495   | A | -0.0203 |
| rs77151821  | G | 0.0882  |
| rs5030552   | C | 0.0249  |
| rs145915079 | A | 0.1049  |
| rs5030566   | C | -0.1045 |
| rs17002700  | G | -0.0195 |
| rs13141545  | C | 0.0266  |
| rs75623845  | A | -0.0262 |
| rs2055957   | A | -0.0176 |
| rs12499703  | T | -0.0329 |
| rs116423847 | T | -0.066  |
| rs10000365  | G | -0.015  |
| rs34592043  | C | -0.0523 |
| rs142953371 | C | 0.0514  |
| rs79136947  | A | 0.1122  |
| rs2619372   | A | 0.0154  |
| rs72648876  | T | -0.0535 |
| rs80334788  | C | 0.0592  |
| rs73843557  | T | -0.0465 |
| rs12640459  | G | 0.0337  |
| rs111447118 | A | 0.0461  |
| rs1922856   | T | 0.0207  |
| rs58422197  | A | -0.0166 |
| rs75925769  | A | 0.0291  |

|             |   |         |
|-------------|---|---------|
| rs17183233  | G | 0.0752  |
| rs112054388 | G | -0.0219 |
| rs79365683  | C | 0.0591  |
| rs74766404  | G | -0.069  |
| rs4591618   | T | -0.0176 |
| rs115015316 | T | 0.0985  |
| rs2660596   | G | -0.0267 |
| rs145050901 | T | -0.0673 |
| rs114721815 | A | -0.0821 |
| rs6829877   | C | 0.0198  |
| rs74337460  | A | -0.0285 |
| rs116203923 | C | 0.074   |
| rs62344915  | G | 0.0172  |
| rs3935709   | T | -0.0159 |
| rs72715425  | A | -0.0249 |
| rs79013764  | T | -0.0626 |
| rs4859816   | A | -0.0321 |
| rs68051033  | T | -0.0267 |
| rs73204515  | G | 0.0171  |
| rs115529069 | G | 0.0634  |
| rs78694980  | C | -0.0769 |
| rs139273098 | G | 0.0587  |
| rs6846129   | A | 0.0342  |
| rs75055633  | T | 0.0438  |
| rs11722039  | T | 0.0174  |
| rs143596909 | A | -0.0986 |
| rs75470414  | G | -0.0553 |
| rs72638343  | C | -0.06   |
| rs79263065  | A | 0.0588  |
| rs17051077  | G | 0.0289  |
| rs28558464  | G | -0.0276 |
| rs358234    | A | 0.0557  |
| rs72643024  | T | 0.0769  |
| rs149697018 | G | -0.0729 |
| rs147713367 | C | -0.0318 |
| rs16894289  | T | -0.0504 |
| rs12647067  | C | -0.0155 |
| rs77253715  | T | -0.0319 |
| rs7660821   | T | -0.0193 |
| rs147126418 | A | 0.0687  |
| rs72717881  | G | -0.0214 |
| rs4496651   | A | 0.0928  |
| rs73077114  | T | -0.033  |
| rs13127352  | C | -0.0189 |
| rs6534907   | C | -0.0162 |
| rs114376452 | A | -0.0547 |
| rs77587947  | C | 0.1083  |

|             |   |         |
|-------------|---|---------|
| rs140123392 | C | -0.0829 |
| rs73245728  | C | -0.0297 |
| rs17583808  | C | 0.0147  |
| rs66827576  | A | -0.0203 |
| rs116065372 | G | -0.0725 |
| rs74554983  | A | -0.0598 |
| rs13149410  | C | 0.0399  |
| rs34318255  | A | 0.0286  |
| rs76127201  | T | -0.0291 |
| rs17024631  | C | -0.0318 |
| rs3806809   | C | -0.0162 |
| rs13112410  | T | 0.0172  |
| rs115194212 | C | -0.092  |
| rs11947929  | G | 0.0964  |
| rs7699358   | C | 0.0142  |
| rs28627228  | T | -0.053  |
| rs80353077  | A | 0.0437  |
| rs11932016  | T | 0.0499  |
| rs79552264  | C | -0.0672 |
| rs41352748  | C | -0.0381 |
| rs115135211 | T | -0.0783 |
| rs72725720  | C | -0.0589 |
| rs6854808   | C | 0.0462  |
| rs74908697  | G | -0.0834 |
| rs4599440   | T | -0.0182 |
| rs111474620 | C | -0.064  |
| rs1203118   | A | 0.0449  |
| rs116498059 | G | -0.0597 |
| rs13118504  | A | 0.1021  |
| rs114885083 | G | -0.0749 |
| rs17046372  | C | 0.0214  |
| rs10938681  | A | -0.0291 |
| rs80230107  | A | -0.0485 |
| rs62320772  | A | -0.0607 |
| rs4560348   | T | 0.0538  |
| rs76086463  | G | -0.0715 |
| rs36224852  | T | -0.1087 |
| rs12640626  | G | -0.014  |
| rs6854239   | C | 0.0207  |
| rs2097748   | G | -0.014  |
| rs10023774  | C | -0.0449 |
| rs2171423   | A | -0.0146 |
| rs11735659  | A | 0.08    |
| rs72681430  | G | -0.0788 |
| rs75544156  | C | 0.0898  |
| rs34851410  | T | 0.0568  |
| rs6838294   | C | -0.0591 |



|             |   |         |
|-------------|---|---------|
| rs144428077 | A | -0.0447 |
| rs144306599 | C | -0.0779 |
| rs11573119  | T | 0.0439  |
| rs1115988   | A | -0.0158 |
| rs4476584   | A | -0.0494 |
| rs13105625  | C | -0.0167 |
| rs10434441  | T | 0.0802  |
| rs139905841 | A | -0.0932 |
| rs59487467  | A | 0.0184  |
| rs4689750   | G | 0.0163  |
| rs116495919 | T | -0.1121 |
| rs3017715   | T | -0.0155 |
| rs149038375 | A | 0.0201  |
| rs6839707   | A | -0.0217 |
| rs10866283  | G | 0.0344  |
| rs62310539  | G | 0.0467  |
| rs56263548  | T | 0.0373  |
| rs2736467   | A | 0.0143  |
| rs75912324  | G | -0.1075 |
| rs75337032  | C | 0.0541  |
| rs113207889 | A | 0.0207  |
| rs113358781 | T | -0.1047 |
| rs13151216  | T | 0.0895  |
| rs77405693  | T | 0.0159  |
| rs73212023  | A | 0.075   |
| rs59950280  | A | -0.0173 |
| rs667886    | A | -0.0184 |
| rs13103741  | A | 0.0292  |
| rs62314109  | G | 0.0142  |
| rs58618716  | C | -0.1062 |
| rs1902019   | G | 0.0208  |
| rs58744377  | A | -0.0574 |
| rs62323196  | G | -0.0242 |
| rs4343683   | G | 0.0314  |
| rs80134603  | T | 0.0355  |
| rs115859957 | A | -0.0712 |
| rs113435925 | A | 0.0837  |
| rs62305119  | T | 0.0275  |
| rs11722283  | A | 0.0162  |
| rs17005758  | A | 0.0289  |
| rs6826507   | G | 0.0216  |
| rs2220231   | A | 0.0244  |
| rs2046814   | G | 0.0147  |
| rs1033082   | C | -0.0241 |
| rs113754873 | T | 0.0375  |
| rs78057048  | T | -0.0939 |
| rs9724      | G | 0.0272  |

|             |   |         |
|-------------|---|---------|
| rs115970969 | A | 0.0468  |
| rs17050793  | C | -0.0362 |
| rs6814533   | G | 0.0195  |
| rs116181457 | G | -0.0759 |
| rs138496355 | G | 0.1032  |
| rs7693832   | C | 0.0491  |
| rs147484990 | A | 0.0847  |
| rs3846247   | A | 0.0163  |
| rs76290640  | C | 0.0569  |
| rs113814392 | C | -0.0423 |
| rs17613361  | G | 0.0182  |
| rs78845634  | G | -0.0354 |
| rs150395993 | A | 0.0758  |
| rs35564002  | T | 0.1266  |
| rs76844659  | T | -0.0903 |
| rs1034665   | A | 0.0244  |
| rs4835565   | G | 0.0164  |
| rs907362    | C | -0.0153 |
| rs116603788 | A | 0.07    |
| rs78143974  | A | -0.0353 |
| rs74556411  | G | -0.0902 |
| rs17044419  | A | 0.0599  |
| rs1032672   | T | 0.0174  |
| rs149347019 | C | -0.1071 |
| rs57052738  | G | -0.0448 |
| rs139756456 | G | 0.0788  |
| rs28377155  | T | -0.0598 |
| rs13145850  | C | 0.0183  |
| rs3113032   | G | 0.0164  |
| rs73819933  | T | -0.0308 |
| rs10805066  | G | 0.0311  |
| rs13107662  | C | -0.0154 |
| rs6831871   | G | 0.0251  |
| rs75656360  | G | -0.0403 |
| rs76138997  | G | -0.0888 |
| rs73221896  | C | 0.0212  |
| rs72642888  | C | 0.0206  |
| rs35661211  | T | 0.0554  |
| rs73245178  | A | 0.0362  |
| rs10014574  | G | 0.0188  |
| rs148164248 | G | -0.1194 |
| rs36058112  | T | -0.0265 |
| rs6851432   | G | -0.0167 |
| rs71606104  | C | 0.018   |
| rs72725430  | G | -0.0304 |
| rs13122111  | C | 0.0148  |
| rs13146108  | A | 0.0221  |

|             |   |         |
|-------------|---|---------|
| rs55710909  | A | 0.0413  |
| rs71597552  | G | -0.0504 |
| rs62411611  | G | 0.0143  |
| rs17434286  | G | -0.0373 |
| rs28890246  | G | 0.0495  |
| rs72689202  | T | 0.1147  |
| rs145097063 | T | 0.084   |
| rs116175659 | C | 0.0437  |
| rs76229059  | G | -0.0218 |
| rs66945341  | A | -0.0275 |
| rs4383619   | T | -0.0183 |
| rs1585747   | T | -0.0303 |
| rs10008933  | A | 0.0152  |
| rs1470055   | A | 0.0386  |
| rs17019863  | C | -0.0595 |
| rs114152679 | G | -0.0748 |
| rs80307789  | A | 0.0522  |
| rs36113334  | G | 0.0171  |
| rs142356704 | C | -0.1    |
| rs145258331 | T | 0.1204  |
| rs28729088  | G | 0.019   |
| rs6835653   | G | -0.0267 |
| rs7661671   | A | -0.0517 |
| rs78804775  | A | 0.0732  |
| rs115549615 | A | -0.0849 |
| rs35585039  | G | 0.0786  |
| rs62342250  | C | -0.0301 |
| rs11723806  | C | 0.0171  |
| rs7679999   | T | 0.0148  |
| rs79742905  | C | -0.0552 |
| rs17423177  | A | -0.0196 |
| rs116080928 | C | 0.0812  |
| rs75896383  | A | 0.0324  |
| rs79474672  | A | 0.0641  |
| rs114092125 | G | -0.0477 |
| rs115710039 | G | -0.0755 |
| rs62351616  | G | -0.0402 |
| rs6834019   | A | 0.0319  |
| rs139485531 | A | -0.0695 |
| rs7435724   | G | -0.0259 |
| rs4696910   | G | 0.0324  |
| rs34956656  | C | 0.0168  |
| rs35424487  | T | -0.0656 |
| rs78319065  | C | -0.0935 |
| rs73865835  | C | -0.05   |
| rs149696899 | C | -0.0739 |
| rs2175292   | C | -0.0283 |

|             |   |         |
|-------------|---|---------|
| rs115352720 | C | 0.0979  |
| rs111777582 | C | -0.0422 |
| rs17353301  | G | -0.0201 |
| rs116174228 | C | -0.0516 |
| rs16898036  | A | -0.0158 |
| rs6857876   | G | -0.0145 |
| rs75458142  | A | -0.0655 |
| rs73240477  | A | -0.0501 |
| rs75059400  | T | 0.0407  |
| rs116423952 | C | -0.0271 |
| rs75810815  | C | 0.0443  |
| rs34265628  | T | -0.0179 |
| rs75244699  | T | -0.0372 |
| rs9917890   | A | 0.0404  |
| rs112480767 | T | -0.0566 |
| rs55707627  | A | 0.0435  |
| rs114271203 | T | -0.1073 |
| rs79594119  | T | 0.0409  |
| rs146871575 | G | -0.0363 |
| rs116149802 | A | 0.0826  |
| rs11098250  | T | 0.0168  |
| rs73256142  | T | 0.0796  |
| rs144901292 | C | -0.107  |
| rs77605146  | T | 0.0577  |
| rs4253334   | G | -0.0407 |
| rs76345771  | A | -0.0315 |
| rs973031    | T | 0.0266  |
| rs74729107  | T | 0.053   |
| rs140497411 | C | 0.0987  |
| rs113703703 | T | -0.0794 |
| rs6826168   | A | -0.0705 |
| rs77865054  | C | -0.0867 |
| rs7688791   | T | 0.038   |
| rs75739948  | T | 0.0281  |
| rs78838181  | C | 0.0253  |
| rs6843219   | T | -0.0555 |
| rs4698081   | A | -0.0141 |
| rs2219484   | T | -0.0358 |
| rs142722384 | C | 0.1022  |
| rs77410668  | A | -0.0974 |
| rs114321713 | G | -0.06   |
| rs111726701 | T | 0.0575  |
| rs149872435 | G | -0.0956 |
| rs10024876  | C | 0.0141  |
| rs114472957 | G | -0.0721 |
| rs113162129 | A | -0.1111 |
| rs13131786  | A | 0.0823  |

|             |   |         |
|-------------|---|---------|
| rs151127936 | T | 0.0912  |
| rs1317488   | C | 0.0239  |
| rs7684843   | A | -0.0192 |
| rs78182509  | G | 0.0655  |
| rs72674623  | A | 0.0487  |
| rs6842533   | C | 0.0349  |
| rs17472015  | C | 0.0844  |
| rs116452724 | C | -0.0698 |
| rs13136879  | A | 0.0859  |
| rs74414173  | G | -0.1466 |
| rs114138397 | T | -0.0485 |
| rs79940692  | T | -0.016  |
| rs1458256   | T | 0.0378  |
| rs76108219  | G | 0.0587  |
| rs6811464   | G | 0.0431  |
| rs77989489  | G | -0.1054 |
| rs10000337  | C | 0.0208  |
| rs147714297 | G | 0.0741  |
| rs147370082 | C | 0.0668  |
| rs362295    | T | -0.0269 |
| rs77387316  | A | 0.0655  |
| rs139107289 | T | -0.0262 |
| rs17220803  | G | 0.0387  |
| rs870254    | T | -0.0179 |
| rs114695288 | A | -0.0453 |
| rs76925111  | T | -0.0314 |
| rs35262760  | G | -0.0627 |
| rs10866375  | C | -0.0222 |
| rs10016781  | C | 0.0297  |
| rs61796366  | T | 0.0477  |
| rs138642083 | G | 0.0865  |
| rs34282295  | C | -0.014  |
| rs75885633  | G | -0.0386 |
| rs867901    | A | 0.0136  |
| rs114259703 | C | 0.086   |
| rs4834645   | A | 0.0464  |
| rs80001358  | G | 0.0873  |
| rs115305208 | A | -0.0903 |
| rs112525754 | T | 0.0309  |
| rs75730666  | A | -0.0555 |
| rs4150050   | G | 0.0967  |
| rs74809004  | A | 0.0528  |
| rs75351311  | G | 0.045   |
| rs11723911  | C | 0.0144  |
| rs115633834 | T | -0.0351 |
| rs7696751   | G | -0.0449 |
| rs17866055  | T | 0.0742  |

|             |   |         |
|-------------|---|---------|
| rs140148069 | G | 0.0919  |
| rs76317969  | T | 0.0633  |
| rs55954642  | G | -0.0301 |
| rs6810826   | C | -0.0179 |
| rs6534199   | C | -0.015  |
| rs115023710 | G | -0.0575 |
| rs2377343   | T | 0.0162  |
| rs149006708 | A | 0.1071  |
| rs73254187  | A | -0.0535 |
| rs72863289  | C | 0.0383  |
| rs17051393  | T | 0.0637  |
| rs112004717 | T | 0.0282  |
| rs908519    | A | -0.0262 |
| rs1532111   | G | -0.0162 |
| rs115473383 | A | -0.0714 |
| rs76664089  | A | 0.0555  |
| rs143372969 | G | 0.0326  |
| rs150936720 | T | -0.0891 |
| rs9684033   | A | 0.0171  |
| rs1014107   | T | 0.0165  |
| rs114722171 | T | 0.0478  |
| rs62352444  | C | 0.0681  |
| rs4463046   | G | 0.0399  |
| rs79761604  | T | -0.0622 |
| rs77870399  | A | 0.0831  |
| rs2546265   | C | 0.0149  |
| rs62309457  | C | -0.1234 |
| rs115239504 | G | -0.0428 |
| rs2715502   | C | -0.0166 |
| rs2199864   | G | 0.0382  |
| rs140033802 | T | -0.0714 |
| rs17769247  | T | -0.0881 |
| rs10029608  | A | -0.0203 |
| rs56752646  | C | 0.027   |
| rs6854845   | T | -0.0333 |
| rs116591243 | G | 0.0995  |
| rs10004241  | G | -0.0289 |
| rs4392536   | T | 0.0223  |
| rs115994051 | A | -0.0806 |
| rs77309928  | T | 0.0537  |
| rs116122817 | C | -0.042  |
| rs1542378   | C | -0.0145 |
| rs58298942  | A | -0.0173 |
| rs2655618   | G | -0.0152 |
| rs6834832   | A | -0.0175 |
| rs75491619  | T | -0.0557 |
| rs11943475  | C | 0.0153  |

|             |   |         |
|-------------|---|---------|
| rs17574371  | C | 0.0142  |
| rs57261722  | T | -0.0554 |
| rs6851797   | T | 0.0139  |
| rs4698852   | C | 0.0424  |
| rs78863713  | C | -0.0603 |
| rs11726260  | A | 0.0149  |
| rs145661760 | A | 0.0799  |
| rs76582963  | T | -0.0341 |
| rs62308735  | C | -0.0216 |
| rs115970217 | G | 0.0171  |
| rs9993336   | A | -0.0714 |
| rs1063151   | T | -0.0248 |
| rs13108616  | A | -0.0205 |
| rs59355699  | C | -0.0249 |
| rs6827843   | C | 0.0134  |
| rs736674    | G | -0.0349 |
| rs36078840  | G | -0.0793 |
| rs400678    | G | -0.0181 |
| rs147299832 | G | -0.071  |
| rs17032387  | T | 0.0196  |
| rs74856260  | T | 0.0263  |
| rs6816649   | G | 0.0191  |
| rs13104420  | G | 0.0244  |
| rs72693406  | T | 0.0176  |
| rs2685866   | T | -0.074  |
| rs17670799  | A | -0.0503 |
| rs139672104 | T | 0.0597  |
| rs34898499  | A | 0.0651  |
| rs80067741  | T | 0.0249  |
| rs75901901  | G | -0.0769 |
| rs73239370  | A | -0.1081 |
| rs116065624 | T | 0.0791  |
| rs116691759 | C | 0.0675  |
| rs78005365  | A | 0.022   |
| rs151010222 | T | -0.0849 |
| rs7666233   | G | 0.0294  |
| rs9684529   | A | 0.0271  |
| rs57984829  | T | -0.051  |
| rs55702485  | A | -0.0518 |
| rs78407842  | C | -0.0226 |
| rs1108601   | G | -0.0295 |
| rs62307778  | C | 0.0241  |
| rs79691651  | T | 0.0595  |
| rs114641211 | T | -0.0988 |
| rs115921702 | A | 0.0963  |
| rs6835474   | A | -0.0336 |
| rs148924932 | A | 0.0505  |

|             |   |         |
|-------------|---|---------|
| rs4323082   | A | -0.0142 |
| rs35750280  | C | 0.0196  |
| rs145384171 | G | 0.0582  |
| rs10032416  | G | 0.017   |
| rs62319078  | C | -0.0881 |
| rs141836460 | C | -0.1085 |
| rs6448325   | G | -0.0186 |
| rs13101249  | A | 0.0156  |
| rs73221022  | T | -0.0819 |
| rs73244158  | T | -0.0378 |
| rs143917378 | A | -0.0937 |
| rs4413432   | G | -0.0134 |
| rs35904132  | T | 0.0411  |
| rs34396693  | T | -0.0351 |
| rs140095952 | G | 0.0288  |
| rs75637866  | A | -0.1054 |
| rs115594004 | G | -0.0843 |
| rs170933    | A | -0.0199 |
| rs76327739  | C | -0.0673 |
| rs9991331   | A | -0.015  |
| rs17013067  | C | 0.0599  |
| rs74427837  | C | -0.0296 |
| rs6829590   | A | -0.0137 |
| rs151058672 | T | 0.0776  |
| rs13133325  | G | -0.0165 |
| rs56073057  | G | 0.0169  |
| rs13141808  | T | -0.0361 |
| rs74998579  | T | -0.0616 |
| rs150546616 | A | -0.0958 |
| rs73240512  | A | -0.0337 |
| rs28836302  | C | 0.018   |
| rs17033484  | T | 0.0361  |
| rs34859034  | C | -0.021  |
| rs2871416   | A | -0.0185 |
| rs140496301 | A | -0.1022 |
| rs62286511  | T | -0.0191 |
| rs6535769   | C | 0.0487  |
| rs11099970  | T | -0.0136 |
| rs12502083  | A | -0.0616 |
| rs12643206  | A | 0.0237  |
| rs11929786  | A | -0.0162 |
| rs115755640 | C | 0.0319  |
| rs41482647  | A | 0.0384  |
| rs57379050  | A | 0.0161  |
| rs416532    | T | -0.0144 |
| rs77457861  | G | 0.0186  |
| rs144851554 | G | 0.0656  |



|             |   |         |
|-------------|---|---------|
| rs12507011  | T | 0.0198  |
| rs112920510 | A | -0.0501 |
| rs4862321   | C | -0.015  |
| rs11732997  | A | 0.014   |
| rs12644729  | T | -0.0589 |
| rs9998842   | A | 0.0136  |
| rs721093    | T | -0.048  |
| rs79783864  | C | -0.0613 |
| rs148245389 | T | -0.045  |
| rs75626473  | A | -0.0675 |
| rs114528633 | G | -0.0923 |
| rs116513718 | C | -0.0845 |
| rs904140    | T | -0.0439 |
| rs115803013 | C | -0.0897 |
| rs17806047  | G | 0.0199  |
| rs57571700  | G | -0.0197 |
| rs7356467   | C | -0.0166 |
| rs72651422  | C | -0.0525 |
| rs143681418 | G | -0.0529 |
| rs72687556  | C | -0.0864 |
| rs116613191 | G | 0.0373  |
| rs6817509   | T | 0.0142  |
| rs115269046 | T | -0.1045 |
| rs149399211 | C | -0.082  |
| rs17216857  | C | -0.1047 |
| rs61792749  | C | 0.0657  |
| rs529548    | A | -0.0666 |
| rs146907981 | A | 0.0971  |
| rs72690577  | A | 0.0371  |
| rs78441639  | G | 0.0276  |
| rs75903066  | C | -0.038  |
| rs79209825  | C | 0.0753  |
| rs1247657   | T | 0.0428  |
| rs138346015 | A | 0.0679  |
| rs76860403  | A | -0.0155 |
| rs2343337   | T | 0.0486  |
| rs138325014 | A | -0.0666 |
| rs2046911   | T | -0.0152 |
| rs116506677 | A | 0.0738  |
| rs4956225   | T | 0.0156  |
| rs139345681 | T | 0.0704  |
| rs72703281  | T | 0.042   |
| rs881821    | T | 0.0159  |
| rs987761    | T | -0.0517 |
| rs7676241   | T | -0.0215 |
| rs115719909 | A | 0.0895  |
| rs6830207   | T | -0.04   |

|             |   |         |
|-------------|---|---------|
| rs116100609 | C | 0.0579  |
| rs77951541  | G | -0.0571 |
| rs16994165  | A | 0.0266  |
| rs116459142 | G | 0.0419  |
| rs140020432 | T | -0.0602 |
| rs13125853  | A | 0.0136  |
| rs10018596  | C | -0.022  |
| rs4568226   | C | 0.0198  |
| rs62296167  | A | -0.0341 |
| rs1495604   | G | 0.0145  |
| rs62337393  | A | 0.0451  |
| rs115866142 | A | -0.0709 |
| rs2925949   | A | 0.0156  |
| rs6832419   | C | 0.0304  |
| rs62314594  | G | 0.0471  |
| rs2635300   | G | -0.0138 |
| rs77425374  | T | -0.0395 |
| rs1493494   | A | -0.0139 |
| rs6823459   | T | -0.0301 |
| rs28404065  | T | -0.0514 |
| rs6856337   | T | 0.1048  |
| rs72688873  | C | -0.0777 |
| rs79189251  | A | 0.0923  |
| rs75641776  | C | -0.0732 |
| rs117159611 | G | 0.0773  |
| rs2130910   | C | -0.0136 |
| rs115052993 | A | -0.0638 |
| rs7670208   | A | -0.0134 |
| rs4586959   | A | 0.0132  |
| rs80345003  | T | -0.0269 |
| rs4647673   | A | 0.0604  |
| rs7668703   | C | -0.017  |
| rs12502291  | A | 0.0143  |
| rs71607084  | G | 0.058   |
| rs12507282  | T | -0.0416 |
| rs60064743  | T | -0.0363 |
| rs60658182  | T | -0.0259 |
| rs142261894 | G | 0.0883  |
| rs73079836  | C | 0.0916  |
| rs3857127   | G | 0.0654  |
| rs80102378  | A | 0.0589  |
| rs115707275 | G | -0.0208 |
| rs79786561  | T | 0.0311  |
| rs76511751  | G | -0.0343 |
| rs7698394   | A | 0.0153  |
| rs6816601   | C | -0.0289 |
| rs74440608  | T | -0.0265 |

|             |   |         |
|-------------|---|---------|
| rs73240004  | A | -0.0505 |
| rs77524927  | A | 0.0373  |
| rs72731813  | C | -0.0283 |
| rs60921750  | A | -0.0522 |
| rs147750317 | C | 0.0862  |
| rs115049627 | T | -0.0538 |
| rs7356322   | C | -0.0146 |
| rs56870995  | G | -0.0459 |
| rs55749130  | A | -0.0181 |
| rs74469534  | G | -0.0732 |
| rs143221278 | A | -0.0971 |
| rs7688569   | G | 0.0133  |
| rs72860945  | T | 0.0638  |
| rs7661902   | T | 0.0218  |
| rs150479353 | T | -0.0467 |
| rs71605278  | G | 0.0406  |
| rs3755930   | C | -0.0172 |
| rs6837163   | G | 0.0147  |
| rs1501088   | T | -0.0176 |
| rs6850210   | G | 0.0386  |
| rs75319944  | G | -0.1231 |
| rs17005477  | T | -0.1094 |
| rs75045209  | A | 0.0589  |
| rs140196194 | T | -0.0905 |
| rs2130710   | C | -0.0144 |
| rs116147980 | C | 0.0967  |
| rs10022893  | T | -0.0353 |
| rs9993867   | C | 0.04    |
| rs77530859  | A | -0.0519 |
| rs12644253  | C | 0.0214  |
| rs11737742  | C | -0.027  |
| rs1490514   | T | -0.0139 |
| rs2136836   | C | 0.0153  |
| rs143872378 | C | -0.0741 |
| rs17007428  | A | 0.0238  |
| rs34130053  | T | 0.0155  |
| rs115917706 | A | 0.0703  |
| rs2723703   | G | -0.0209 |
| rs143345300 | T | 0.0655  |
| rs73225904  | C | 0.0179  |
| rs11733577  | C | 0.0151  |
| rs73212839  | A | -0.0521 |
| rs265044    | C | -0.0231 |
| rs7677315   | G | -0.0152 |
| rs138744563 | A | 0.1117  |
| rs80275242  | T | -0.0456 |
| rs10012103  | A | 0.0148  |

|             |   |         |
|-------------|---|---------|
| rs141854516 | C | 0.0592  |
| rs9312338   | G | -0.0151 |
| rs11930659  | G | -0.0144 |
| rs34303262  | C | -0.0137 |
| rs17026425  | A | -0.0323 |
| rs76929596  | T | -0.0545 |
| rs9647502   | A | 0.0599  |
| rs11734663  | T | -0.0135 |
| rs28532756  | G | -0.0482 |
| rs13142026  | G | -0.0181 |
| rs2925955   | G | -0.0155 |
| rs79504425  | A | 0.0202  |
| rs36058391  | C | 0.0139  |
| rs67162091  | A | 0.1085  |
| rs113879390 | A | -0.0888 |
| rs2089273   | T | 0.0221  |
| rs539981    | T | 0.0233  |
| rs4689083   | C | -0.0166 |
| rs16877538  | T | -0.014  |
| rs11731595  | C | 0.0133  |
| rs17474982  | A | -0.1066 |
| rs73001082  | A | -0.0231 |
| rs145615979 | A | -0.0812 |
| rs62412479  | A | -0.0311 |
| rs2388933   | G | 0.0133  |
| rs9997607   | C | 0.0263  |
| rs11098639  | C | -0.0188 |
| rs72728315  | T | -0.0693 |
| rs1467069   | T | 0.0162  |
| rs114591387 | T | -0.1118 |
| rs1055582   | C | 0.0135  |
| rs11725808  | C | -0.0173 |
| rs115709780 | T | -0.0853 |
| rs1554242   | A | -0.0165 |
| rs12696795  | G | -0.016  |
| rs1120962   | A | -0.0158 |
| rs7657521   | C | 0.0148  |
| rs72704711  | C | 0.0162  |
| rs11248043  | A | -0.0168 |
| rs7688836   | A | 0.0192  |
| rs79100322  | T | -0.0992 |
| rs28886635  | T | -0.0142 |
| rs75325658  | A | 0.0686  |
| rs34229152  | C | -0.0143 |
| rs77123256  | A | -0.0421 |
| rs78954448  | C | -0.0462 |
| rs12643033  | G | -0.0226 |

|             |   |         |
|-------------|---|---------|
| rs12647542  | T | -0.0178 |
| rs433030    | G | -0.0145 |
| rs115787965 | A | 0.0401  |
| rs1425353   | C | -0.0201 |
| rs9332472   | A | -0.0134 |
| rs75333659  | C | 0.0344  |
| rs143124643 | A | -0.1114 |
| rs148838662 | T | 0.1089  |
| rs79608299  | C | 0.0341  |
| rs2668076   | A | 0.0236  |
| rs146184956 | G | -0.0579 |
| rs78892287  | A | -0.0742 |
| rs28440053  | C | 0.0164  |
| rs116535121 | A | -0.074  |
| rs77053085  | A | -0.0985 |
| rs6853485   | A | 0.0184  |
| rs73247924  | A | -0.0259 |
| rs4001511   | C | 0.0428  |
| rs7698475   | A | 0.0293  |
| rs604612    | G | 0.0149  |
| rs7669704   | T | -0.0669 |
| rs2227432   | C | -0.0659 |
| rs115976359 | A | -0.0715 |
| rs79577513  | T | 0.0651  |
| rs35444370  | G | 0.1008  |
| rs74935246  | C | -0.0595 |
| rs1511812   | G | 0.0145  |
| rs75835097  | T | 0.068   |
| rs4864744   | A | -0.0646 |
| rs62312124  | C | 0.0717  |
| rs115354345 | T | 0.0445  |
| rs74603265  | T | -0.0665 |
| rs113403372 | C | -0.0271 |
| rs79753543  | C | -0.0253 |
| rs6848626   | C | -0.0279 |
| rs140869774 | T | -0.0826 |
| rs116774593 | T | 0.0811  |
| rs78715035  | A | -0.0865 |
| rs115503346 | G | -0.0703 |
| rs141838667 | C | 0.0656  |
| rs115088286 | T | -0.0929 |
| rs11937375  | G | 0.024   |
| rs35854135  | A | 0.0263  |
| rs138065239 | T | -0.0711 |
| rs17009332  | C | -0.0181 |
| rs116162225 | C | 0.0757  |
| rs10008011  | A | 0.0144  |

|             |   |         |
|-------------|---|---------|
| rs145651706 | T | 0.0997  |
| rs144145326 | T | -0.0803 |
| rs115869963 | A | 0.0961  |
| rs78022159  | A | 0.0304  |
| rs73250989  | C | 0.0475  |
| rs7684253   | C | 0.0133  |
| rs7675461   | C | -0.0574 |
| rs76173688  | C | -0.0654 |
| rs72691128  | A | -0.0739 |
| rs13146346  | T | 0.0173  |
| rs140023275 | G | -0.0706 |
| rs76738301  | A | 0.065   |
| rs6839554   | C | -0.0147 |
| rs149053795 | G | 0.0751  |
| rs6849755   | C | -0.0994 |
| rs17069804  | A | 0.0206  |
| rs66772971  | A | 0.0219  |
| rs72703848  | C | 0.0211  |
| rs114484584 | T | -0.0524 |
| rs112802429 | C | 0.0877  |
| rs116208837 | A | -0.0612 |
| rs75247713  | A | 0.0414  |
| rs72721463  | A | 0.0235  |
| rs75188535  | A | 0.0611  |
| rs138836712 | C | -0.0584 |
| rs7681078   | G | -0.0141 |
| rs17708700  | C | -0.0529 |
| rs143905860 | T | -0.0666 |
| rs55728583  | C | -0.048  |
| rs10012735  | G | 0.0245  |
| rs6854437   | G | 0.0143  |
| rs12642347  | C | 0.0136  |
| rs9997683   | C | -0.014  |
| rs728313    | A | -0.023  |
| rs1402035   | A | 0.0191  |
| rs142322223 | T | 0.0634  |
| rs34538074  | T | 0.0349  |
| rs75103631  | A | -0.0637 |
| rs77462780  | A | 0.0182  |
| rs2716828   | C | 0.0516  |
| rs61428787  | C | 0.032   |
| rs142181349 | T | 0.0676  |
| rs10009186  | T | 0.0337  |
| rs74752780  | T | -0.0319 |
| rs1355330   | A | -0.0494 |
| rs17460302  | T | -0.0145 |
| rs75532445  | A | 0.0293  |

|             |   |         |
|-------------|---|---------|
| rs17028947  | T | -0.0521 |
| rs79352743  | A | -0.0779 |
| rs79408599  | G | 0.1145  |
| rs16841879  | C | 0.0529  |
| rs146443761 | T | -0.096  |
| rs77924538  | A | 0.0595  |
| rs2369286   | A | -0.0148 |
| rs79766815  | T | 0.0713  |
| rs144671353 | T | -0.0459 |
| rs74738251  | A | -0.0439 |
| rs76191253  | G | 0.0778  |
| rs28451202  | C | 0.0714  |
| rs2279180   | G | -0.0301 |
| rs145145930 | G | -0.0874 |
| rs143697415 | T | 0.0735  |
| rs6847625   | A | -0.037  |
| rs77800329  | A | 0.0179  |
| rs13142018  | G | 0.0137  |
| rs76562867  | G | 0.0967  |
| rs114147201 | G | 0.0915  |
| rs13137046  | G | 0.0149  |
| rs143701692 | A | 0.0706  |
| rs113741360 | T | 0.0607  |
| rs28548978  | G | -0.05   |
| rs12504307  | C | 0.0142  |
| rs114179515 | G | 0.0744  |
| rs141185216 | C | -0.0831 |
| rs973972    | T | 0.0337  |
| rs28612633  | T | -0.0276 |
| rs73875751  | A | -0.0703 |
| rs143627680 | A | -0.0569 |
| rs6836284   | T | -0.0168 |
| rs4240327   | C | -0.0133 |
| rs56133353  | T | -0.0256 |
| rs3775883   | G | 0.0159  |
| rs1154475   | G | 0.0138  |
| rs35049336  | G | -0.031  |
| rs112204462 | G | -0.0272 |
| rs17033763  | A | 0.025   |
| rs7671363   | A | 0.0192  |
| rs10034919  | A | 0.0134  |
| rs10517575  | G | 0.0269  |
| rs13110001  | A | -0.0329 |
| rs55844913  | T | 0.0291  |
| rs807765    | G | -0.0174 |
| rs75976865  | T | -0.0389 |
| rs895982    | A | 0.0131  |

|             |   |         |
|-------------|---|---------|
| rs72713365  | T | -0.0649 |
| rs150068135 | T | 0.0769  |
| rs4234876   | C | -0.0234 |
| rs6826089   | T | -0.0244 |
| rs72657270  | T | -0.0288 |
| rs6838448   | T | -0.0587 |
| rs11729652  | C | 0.023   |
| rs62321802  | G | -0.031  |
| rs61792587  | A | 0.0265  |
| rs142876008 | A | -0.0826 |
| rs12331264  | C | 0.0166  |
| rs2877886   | C | 0.015   |
| rs17251949  | G | -0.046  |
| rs73218392  | T | 0.044   |
| rs115963760 | G | 0.0805  |
| rs4546230   | T | 0.0165  |
| rs10517076  | G | -0.058  |
| rs13125340  | C | 0.0131  |
| rs62320820  | G | 0.033   |
| rs1922869   | G | 0.0147  |
| rs17474390  | C | -0.0874 |
| rs3088349   | C | 0.0162  |
| rs73125566  | C | 0.029   |
| rs79962849  | T | 0.0223  |
| rs142587822 | A | -0.0515 |
| rs62312799  | T | -0.013  |
| rs115211562 | C | -0.0478 |
| rs138310084 | C | 0.0746  |
| rs16888411  | G | 0.0567  |
| rs72737511  | T | 0.0519  |
| rs10027990  | A | 0.0749  |
| rs313946    | C | -0.0405 |
| rs10050011  | C | 0.0135  |
| rs4431237   | A | 0.0502  |
| rs56287001  | C | 0.0552  |
| rs147797782 | C | -0.0765 |
| rs115003607 | G | 0.1009  |
| rs13122589  | C | 0.0164  |
| rs6831797   | A | 0.0228  |
| rs6839293   | T | 0.0288  |
| rs1046325   | G | -0.0346 |
| rs1154578   | C | 0.014   |
| rs35707094  | T | 0.0144  |
| rs16844280  | T | 0.0352  |
| rs12640449  | G | 0.0227  |
| rs34188526  | A | 0.065   |
| rs79916008  | A | -0.0623 |



|             |   |         |
|-------------|---|---------|
| rs16884306  | G | -0.0821 |
| rs115413543 | A | 0.101   |
| rs425656    | T | 0.0131  |
| rs75536561  | A | 0.097   |
| rs13136603  | T | 0.0275  |
| rs12498793  | C | 0.0142  |
| rs4637418   | A | -0.0549 |
| rs78768431  | A | -0.065  |
| rs75743840  | C | 0.0324  |
| rs12500986  | A | -0.0143 |
| rs11724912  | T | -0.021  |
| rs34454379  | T | 0.0137  |
| rs2289252   | T | -0.0139 |
| rs62293769  | C | 0.0294  |
| rs1031711   | C | -0.0128 |
| rs72613137  | T | -0.0303 |
| rs116540606 | C | 0.0424  |
| rs6840010   | C | 0.0703  |
| rs2390030   | G | -0.062  |
| rs17039177  | A | 0.0313  |
| rs13105944  | C | 0.0194  |
| rs115630926 | G | 0.0809  |
| rs78878049  | A | -0.0374 |
| rs17488527  | T | -0.0426 |
| rs79715194  | T | 0.0746  |
| rs12642689  | C | -0.0303 |
| rs79620921  | T | 0.0313  |
| rs6845023   | A | -0.03   |
| rs62310625  | T | -0.0256 |
| rs80260421  | T | 0.0416  |
| rs114261960 | C | 0.0436  |
| rs1449599   | G | 0.0473  |
| rs78752199  | A | 0.0328  |
| rs116829905 | C | -0.0799 |
| rs72715410  | T | 0.0889  |
| rs62308567  | G | -0.0264 |
| rs146796998 | T | 0.0627  |
| rs10470884  | A | 0.0158  |
| rs55638042  | T | 0.0752  |
| rs10014967  | A | 0.0638  |
| rs11724207  | C | -0.0138 |
| rs75021526  | A | -0.0501 |
| rs55734007  | A | 0.031   |
| rs335105    | T | 0.0312  |
| rs16841848  | T | 0.0234  |
| rs4635813   | A | -0.0728 |
| rs116140273 | C | -0.0725 |

|             |   |         |
|-------------|---|---------|
| rs28475461  | G | -0.0622 |
| rs4367173   | G | 0.0253  |
| rs7672143   | C | 0.016   |
| rs2874396   | T | 0.0158  |
| rs10002006  | T | 0.0145  |
| rs72725284  | C | -0.0299 |
| rs62294100  | G | 0.0334  |
| rs890178    | C | -0.0147 |
| rs6852113   | T | -0.0143 |
| rs59787036  | T | 0.0498  |
| rs34234572  | A | 0.0514  |
| rs73266363  | C | -0.1011 |
| rs144975842 | G | 0.0417  |
| rs28374330  | T | 0.0696  |
| rs77271124  | T | -0.0448 |
| rs66597501  | C | -0.0361 |
| rs10517942  | C | -0.0141 |
| rs61128722  | G | 0.0758  |
| rs77960594  | G | 0.0431  |
| rs1111272   | G | 0.0146  |
| rs56382002  | T | -0.1037 |
| rs466395    | T | -0.0382 |
| rs148096819 | A | 0.0412  |
| rs28722480  | A | -0.0155 |
| rs723647    | C | -0.0177 |
| rs79452118  | G | 0.0235  |
| rs114116421 | G | 0.0532  |
| rs150198051 | G | 0.0534  |
| rs142301317 | T | -0.0279 |
| rs74842465  | A | -0.0357 |
| rs76950940  | A | -0.0402 |
| rs77270660  | G | 0.058   |
| rs35021387  | C | -0.0308 |
| rs62313603  | A | 0.018   |
| rs13124830  | C | 0.0219  |
| rs78918869  | T | 0.1148  |
| rs116062141 | C | -0.0795 |
| rs3775369   | A | -0.073  |
| rs140266471 | T | -0.1203 |
| rs10013347  | T | 0.013   |
| rs113687011 | T | -0.0377 |
| rs13114867  | G | 0.0142  |
| rs4833353   | C | 0.0134  |
| rs116403890 | T | -0.0419 |
| rs79472317  | T | -0.0852 |
| rs62299613  | T | 0.0232  |
| rs72673849  | G | 0.0234  |

|             |   |         |
|-------------|---|---------|
| rs72719667  | G | 0.0779  |
| rs62344606  | C | 0.0575  |
| rs77457225  | C | 0.1072  |
| rs114282014 | G | -0.1134 |
| rs77819578  | G | -0.0738 |
| rs1473907   | T | 0.0421  |
| rs17478392  | T | 0.0621  |
| rs114485481 | G | 0.0808  |
| rs111624656 | T | 0.0814  |
| rs114927221 | C | 0.0405  |
| rs35051700  | C | 0.0127  |
| rs7668648   | G | 0.0968  |
| rs77023729  | T | -0.0815 |
| rs72721099  | T | -0.0884 |
| rs79078975  | A | 0.0404  |
| rs72698777  | C | -0.0278 |
| rs62304077  | C | 0.0488  |
| rs12642597  | T | 0.0145  |
| rs146205279 | C | 0.0781  |
| rs72899287  | G | -0.023  |
| rs111738580 | T | 0.0342  |
| rs62325673  | C | 0.0488  |
| rs114855292 | T | 0.0265  |
| rs17443969  | A | -0.02   |
| rs12498542  | A | 0.0145  |
| rs79505443  | A | -0.0683 |
| rs6822582   | T | -0.0134 |
| rs2077835   | C | -0.0497 |
| rs150244948 | C | -0.0719 |
| rs72693469  | A | 0.0323  |
| rs115378596 | T | 0.0832  |
| rs62300678  | T | -0.087  |
| rs7664177   | C | 0.0302  |
| rs76004976  | T | 0.0472  |
| rs116324087 | A | -0.1214 |
| rs77412989  | G | 0.0326  |
| rs61794860  | A | -0.0145 |
| rs7672928   | G | -0.0651 |
| rs72672266  | G | 0.0905  |
| rs12643143  | G | 0.0216  |
| rs961358    | A | 0.0325  |
| rs72703209  | A | -0.0719 |
| rs58484893  | C | -0.0539 |
| rs114142560 | T | 0.055   |
| rs139242754 | G | 0.0584  |
| rs13130104  | G | -0.0936 |
| rs72708739  | G | -0.0319 |

|             |   |         |
|-------------|---|---------|
| rs111387761 | A | 0.0559  |
| rs78726293  | A | 0.0709  |
| rs141621039 | T | -0.0755 |
| rs79716815  | C | 0.1161  |
| rs116199825 | G | 0.0817  |
| rs55768613  | T | 0.0148  |
| rs72726362  | C | -0.0544 |
| rs10017643  | G | -0.0132 |
| rs112724664 | C | -0.0754 |
| rs149149491 | T | 0.0616  |
| rs79323634  | C | -0.0501 |
| rs13148228  | A | 0.0216  |
| rs17485687  | T | -0.0145 |
| rs55773312  | C | -0.0155 |
| rs11728803  | T | -0.0175 |
| rs150636375 | C | 0.0565  |
| rs75085493  | A | 0.1     |
| rs1380281   | T | 0.0274  |
| rs17658599  | C | 0.0513  |
| rs6552755   | G | -0.0243 |
| rs111739744 | A | -0.0647 |
| rs113058073 | C | 0.0443  |
| rs6838575   | G | -0.035  |
| rs2114014   | G | 0.0155  |
| rs4469110   | C | 0.0163  |
| rs28568466  | G | 0.047   |
| rs140916640 | A | -0.066  |
| rs76841154  | T | 0.0987  |
| rs62304120  | T | -0.0435 |
| rs78666449  | C | -0.0299 |
| rs74760563  | G | -0.0478 |
| rs72720861  | T | -0.0959 |
| rs145674006 | C | 0.0585  |
| rs2710572   | G | -0.0181 |
| rs4269201   | G | 0.0159  |
| rs17030148  | T | 0.0155  |
| rs62343174  | A | 0.0502  |
| rs1021873   | A | -0.0131 |
| rs79491066  | G | -0.0242 |
| rs148180305 | A | -0.1088 |
| rs756418    | A | -0.0215 |
| rs115986273 | A | -0.0276 |
| rs113281235 | A | -0.0849 |
| rs74717094  | T | 0.0369  |
| rs115860026 | A | 0.1169  |
| rs74904203  | A | 0.0383  |
| rs145390754 | C | -0.059  |

|             |   |         |
|-------------|---|---------|
| rs2134852   | A | -0.0136 |
| rs139601548 | A | -0.0989 |
| rs13109624  | G | -0.0268 |
| rs77487358  | C | 0.0372  |
| rs2663277   | C | 0.0137  |
| rs7665974   | A | 0.0367  |
| rs13113415  | T | -0.0167 |
| rs112384946 | C | 0.0473  |
| rs59333969  | C | -0.017  |
| rs2532068   | G | 0.0394  |
| rs10489024  | G | -0.0157 |
| rs6850567   | T | 0.0126  |
| rs2625269   | G | 0.0127  |
| rs2303004   | A | -0.0262 |
| rs113050373 | T | -0.0425 |
| rs145435267 | G | -0.0775 |
| rs13106127  | T | -0.0317 |
| rs34705431  | C | -0.0151 |
| rs60542698  | A | 0.0348  |
| rs55896550  | A | 0.0236  |
| rs3750025   | A | 0.0472  |
| rs17009989  | T | 0.0858  |
| rs139793780 | A | 0.0388  |
| rs80339789  | G | -0.0301 |
| rs10006251  | C | -0.0179 |
| rs2904259   | C | 0.0124  |
| rs11734500  | C | 0.0213  |
| rs116633162 | T | 0.0551  |
| rs72634969  | G | 0.0502  |
| rs113976141 | C | -0.0567 |
| rs28414232  | G | -0.0135 |
| rs2200062   | A | 0.0157  |
| rs17041096  | C | -0.0153 |
| rs17090609  | T | -0.0133 |
| rs4266295   | G | 0.0226  |
| rs116400085 | G | -0.0629 |
| rs2066860   | T | 0.037   |
| rs145303625 | T | 0.0687  |
| rs7654810   | C | 0.0193  |
| rs7683088   | G | 0.015   |
| rs3105213   | T | 0.0211  |
| rs12503847  | T | -0.0348 |
| rs6815832   | T | -0.0173 |
| rs147333267 | A | -0.0711 |
| rs72713887  | T | 0.058   |
| rs16892822  | G | 0.0228  |
| rs56336207  | A | -0.0636 |

|             |   |         |
|-------------|---|---------|
| rs74600125  | C | -0.0421 |
| rs112782367 | T | -0.0576 |
| rs7667992   | G | -0.0133 |
| rs34145586  | T | -0.0128 |
| rs13103812  | C | -0.0126 |
| rs75667356  | A | -0.053  |
| rs297316    | A | -0.0518 |
| rs1351999   | T | 0.0164  |
| rs4689502   | T | 0.0152  |
| rs4498191   | T | -0.0756 |
| rs7663315   | C | -0.0125 |
| rs2645373   | G | 0.0176  |
| rs114333376 | G | 0.0567  |
| rs151041244 | T | 0.1114  |
| rs149789986 | A | -0.0819 |
| rs2874701   | T | 0.0679  |
| rs6814470   | C | -0.0141 |
| rs6814537   | G | -0.0258 |
| rs16836608  | G | 0.0281  |
| rs6820227   | A | -0.0147 |
| rs62327845  | A | 0.0157  |
| rs80055363  | T | -0.0681 |
| rs7685250   | A | 0.0145  |
| rs115604459 | T | 0.0273  |
| rs75320067  | C | -0.0514 |
| rs72653996  | C | 0.0384  |
| rs28361346  | G | -0.0509 |
| rs149152281 | G | 0.0662  |
| rs73807455  | C | 0.0862  |
| rs28709645  | A | 0.0143  |
| rs75177232  | C | 0.0183  |
| rs12512990  | C | 0.0293  |
| rs142698789 | A | 0.0405  |
| rs35920302  | A | -0.0632 |
| rs75716135  | T | 0.0287  |
| rs17600994  | G | 0.0874  |
| rs79827153  | A | -0.0502 |
| rs2197997   | A | -0.02   |
| rs1445517   | C | 0.0127  |
| rs1280103   | A | 0.0185  |
| rs72688115  | C | 0.0325  |
| rs13118559  | T | -0.0297 |
| rs72688378  | T | 0.0447  |
| rs2579320   | C | -0.0162 |
| rs111381852 | C | 0.065   |
| rs111972211 | A | -0.0526 |
| rs114920802 | A | 0.0892  |

|             |   |         |
|-------------|---|---------|
| rs78581805  | C | 0.0295  |
| rs143541907 | A | 0.0597  |
| rs144326497 | T | -0.1093 |
| rs10517257  | G | -0.0222 |
| rs75260233  | T | -0.0952 |
| rs60145083  | A | -0.0145 |
| rs10030227  | T | -0.0246 |
| rs278981    | T | 0.017   |
| rs73825872  | T | 0.0579  |
| rs13108370  | C | 0.013   |
| rs78412343  | C | 0.0545  |
| rs9999052   | G | -0.0176 |
| rs7698802   | G | -0.0208 |
| rs2465564   | G | -0.0134 |
| rs144250889 | C | 0.0791  |
| rs17073038  | T | 0.0293  |
| rs72705293  | T | 0.0243  |
| rs77671372  | T | 0.0368  |
| rs2518649   | G | -0.0129 |
| rs13132424  | A | -0.0274 |
| rs2726811   | T | 0.0138  |
| rs28452978  | C | -0.0573 |
| rs6841725   | C | 0.0201  |
| rs147838724 | T | 0.0843  |
| rs1847      | C | -0.0192 |
| rs17187034  | C | 0.0259  |
| rs74552152  | A | 0.0624  |
| rs115254302 | T | -0.0956 |
| rs115834320 | C | 0.0903  |
| rs62302162  | A | 0.0484  |
| rs7664469   | A | 0.0214  |
| rs11731138  | T | -0.0203 |
| rs79758596  | G | 0.048   |
| rs77308532  | A | 0.0936  |
| rs115661801 | T | -0.1204 |
| rs76981581  | G | 0.0345  |
| rs143654149 | G | 0.1173  |
| rs17734810  | C | 0.0439  |
| rs10007997  | G | -0.0259 |
| rs116547082 | A | -0.0597 |
| rs72689395  | A | 0.0566  |
| rs2053146   | A | -0.0213 |
| rs4261944   | G | 0.0134  |
| rs138460610 | G | 0.0644  |
| rs58501865  | A | -0.0206 |
| rs28416022  | G | -0.0194 |
| rs10428352  | C | -0.0131 |

|             |   |         |
|-------------|---|---------|
| rs113042507 | A | -0.0363 |
| rs75306802  | G | 0.0811  |
| rs144910306 | A | -0.122  |
| rs78828258  | G | 0.0936  |
| rs6820691   | T | -0.0159 |
| rs113505106 | A | 0.0476  |
| rs13142719  | A | -0.0133 |
| rs116311386 | C | -0.0438 |
| rs73196068  | T | -0.0299 |
| rs6448412   | T | -0.0632 |
| rs116538600 | T | -0.059  |
| rs17088983  | A | -0.0207 |
| rs17315667  | A | -0.1304 |
| rs308443    | A | -0.0391 |
| rs142039667 | T | 0.0716  |
| rs11097187  | G | 0.0313  |
| rs144326363 | C | -0.0555 |
| rs139832172 | A | -0.0428 |
| rs80325518  | C | -0.0962 |
| rs76048093  | C | 0.0278  |
| rs1453461   | T | -0.0192 |
| rs140954576 | A | -0.1208 |
| rs17061992  | G | 0.02    |
| rs11941003  | A | -0.0141 |
| rs5974      | G | -0.0183 |
| rs4323098   | G | -0.0213 |
| rs4133191   | T | 0.0264  |
| rs79952106  | A | -0.1074 |
| rs7669582   | G | 0.0274  |
| rs77831141  | C | -0.0528 |
| rs146981106 | C | -0.0706 |
| rs1568356   | G | -0.0158 |
| rs28647985  | A | -0.0192 |
| rs28679395  | T | -0.0367 |
| rs149447365 | C | -0.0587 |
| rs75686099  | C | 0.0657  |
| rs77013599  | C | -0.0228 |
| rs114697781 | G | 0.0634  |
| rs6532189   | T | -0.0146 |
| rs2623763   | T | 0.0149  |
| rs1907108   | G | -0.0177 |
| rs7665843   | A | 0.035   |
| rs75289776  | A | 0.0198  |
| rs146789916 | C | -0.0625 |
| rs115061835 | A | -0.082  |
| rs6840197   | T | -0.0326 |
| rs72706237  | G | -0.0525 |



|             |   |         |
|-------------|---|---------|
| rs7688051   | C | 0.0131  |
| rs62315632  | G | -0.0337 |
| rs61758899  | G | 0.0245  |
| rs148932443 | A | 0.069   |
| rs13102235  | G | -0.0129 |
| rs115843218 | C | 0.0511  |
| rs335335    | A | 0.0422  |
| rs113079469 | C | 0.0764  |
| rs1384866   | C | -0.0186 |
| rs11930336  | A | -0.0174 |
| rs6848311   | T | -0.0161 |
| rs2646358   | C | 0.0154  |
| rs9995518   | C | -0.0525 |
| rs13136693  | T | -0.0326 |
| rs6833324   | G | -0.0147 |
| rs139243562 | T | -0.0158 |
| rs116825255 | C | -0.0532 |
| rs77082848  | G | 0.0548  |
| rs144143121 | A | 0.0393  |
| rs16875194  | C | 0.0272  |
| rs35463994  | T | -0.1134 |
| rs12646290  | C | 0.0185  |
| rs143701489 | T | 0.1184  |
| rs3894769   | T | -0.0195 |
| rs112678111 | T | 0.0342  |
| rs7664091   | A | 0.0122  |
| rs17479428  | G | 0.0435  |
| rs115583847 | C | 0.0732  |
| rs1054627   | A | -0.0132 |
| rs13104450  | T | -0.0169 |
| rs79181060  | A | 0.0321  |
| rs57887870  | A | 0.0358  |
| rs75337177  | T | -0.0693 |
| rs28368871  | C | -0.0447 |
| rs77149392  | A | 0.0456  |
| rs17053820  | C | -0.0376 |
| rs16874043  | C | 0.0319  |
| rs71602049  | G | 0.0835  |
| rs75599161  | G | 0.0955  |
| rs77831819  | G | -0.0948 |
| rs79709405  | C | -0.0307 |
| rs6448478   | C | 0.0165  |
| rs58914557  | A | 0.0174  |
| rs148023127 | A | -0.094  |
| rs75444407  | T | 0.0666  |
| rs9307943   | A | 0.0791  |
| rs60389307  | A | -0.0191 |

|             |   |         |
|-------------|---|---------|
| rs74632674  | C | 0.0485  |
| rs113163889 | A | -0.0403 |
| rs114081993 | T | -0.0435 |
| rs148761977 | C | -0.1072 |
| rs77067327  | C | -0.0259 |
| rs7660783   | T | -0.0196 |
| rs17387362  | C | 0.0229  |
| rs76895873  | G | 0.0295  |
| rs115284084 | G | -0.1082 |
| rs28373940  | T | -0.0896 |
| rs10016064  | C | -0.0153 |
| rs11725375  | A | 0.0176  |
| rs11723878  | C | 0.0257  |
| rs116204264 | T | 0.079   |
| rs112360366 | G | -0.1067 |
| rs72682604  | G | 0.0595  |
| rs6844264   | T | -0.0411 |
| rs148074478 | G | -0.0582 |
| rs795992    | G | 0.0142  |
| rs145819477 | C | 0.0524  |
| rs116669388 | A | 0.0546  |
| rs17019342  | G | 0.0626  |
| rs146783327 | A | -0.0804 |
| rs17007461  | G | -0.019  |
| rs115119194 | G | 0.0882  |
| rs9685258   | G | -0.0164 |
| rs10031975  | T | -0.0476 |
| rs75515823  | C | 0.0719  |
| rs10470990  | T | 0.0299  |
| rs13124097  | A | -0.067  |
| rs78605761  | C | 0.0688  |
| rs2916474   | T | 0.0327  |
| rs55692517  | A | 0.038   |
| rs144547388 | T | 0.0771  |
| rs72695229  | C | -0.0262 |
| rs114189985 | A | 0.0374  |
| rs61692318  | A | -0.0193 |
| rs116118130 | A | -0.0818 |
| rs7686012   | T | -0.0285 |
| rs73242347  | T | 0.0202  |
| rs79922886  | C | -0.0557 |
| rs16880035  | G | -0.0282 |
| rs112065591 | G | -0.0443 |
| rs10001500  | T | 0.0602  |
| rs17861774  | C | -0.013  |
| rs114648143 | C | 0.0854  |
| rs2970849   | C | -0.0132 |

|             |   |         |
|-------------|---|---------|
| rs34729939  | T | 0.0247  |
| rs11943623  | A | -0.0175 |
| rs138077980 | C | 0.0579  |
| rs56358761  | G | -0.0498 |
| rs10005147  | G | -0.0549 |
| rs74368616  | A | -0.0771 |
| rs976001    | G | -0.0188 |
| rs6536751   | C | 0.0232  |
| rs35023653  | C | -0.0169 |
| rs77227545  | A | -0.0396 |
| rs35102978  | A | -0.0445 |
| rs141449612 | A | 0.0553  |
| rs10518224  | A | 0.0153  |
| rs72680801  | C | 0.0343  |
| rs74561860  | T | 0.0835  |
| rs12643150  | G | -0.0139 |
| rs112024750 | T | 0.0476  |
| rs1866504   | C | -0.0767 |
| rs2249919   | C | 0.0294  |
| rs17000205  | C | 0.0198  |
| rs60260163  | G | 0.0412  |
| rs111758279 | C | 0.0635  |
| rs5022521   | C | -0.0279 |
| rs146374540 | A | 0.0444  |
| rs6531600   | A | -0.0178 |
| rs11573041  | T | -0.0662 |
| rs113238949 | G | 0.0562  |
| rs156499    | G | -0.0157 |
| rs73079782  | A | -0.0892 |
| rs10006241  | A | 0.0588  |
| rs114749606 | A | -0.0775 |
| rs10939067  | G | 0.0129  |
| rs7700026   | T | -0.0768 |
| rs34985265  | T | 0.0259  |
| rs16839778  | T | 0.0377  |
| rs7673532   | G | 0.0246  |
| rs4450973   | T | 0.0154  |
| rs7660988   | C | 0.0179  |
| rs74968498  | C | 0.0641  |
| rs77331508  | C | -0.0647 |
| rs10516362  | G | 0.0129  |
| rs115299211 | T | 0.047   |
| rs35553871  | T | -0.072  |
| rs112183105 | A | -0.0495 |
| rs144453403 | T | 0.1036  |
| rs114690495 | A | 0.0879  |
| rs6828524   | A | -0.0233 |

|             |   |         |
|-------------|---|---------|
| rs80042470  | A | 0.0483  |
| rs11727783  | A | -0.0164 |
| rs114263002 | C | -0.046  |
| rs143117497 | C | -0.0733 |
| rs76305126  | T | -0.0422 |
| rs112410436 | T | 0.0553  |
| rs141259832 | C | -0.109  |
| rs72704717  | C | -0.0945 |
| rs17032377  | A | -0.0244 |
| rs9784544   | A | -0.0426 |
| rs137880278 | A | 0.0487  |
| rs116611691 | A | -0.0471 |
| rs111603381 | A | -0.0506 |
| rs113503559 | T | -0.0401 |
| rs147209087 | T | 0.057   |
| rs141788353 | T | -0.0915 |
| rs12650660  | G | -0.0235 |
| rs35865772  | A | -0.024  |
| rs61257777  | A | 0.0212  |
| rs139946262 | G | 0.0505  |
| rs76481189  | A | 0.0526  |
| rs116831417 | T | 0.0544  |
| rs73204282  | T | -0.0185 |
| rs77914920  | A | 0.0341  |
| rs1715064   | G | -0.0155 |
| rs62299190  | C | -0.0229 |
| rs72633572  | G | 0.0159  |
| rs747971    | G | 0.0172  |
| rs45437095  | G | 0.0536  |
| rs74493537  | T | 0.0398  |
| rs73216485  | A | 0.0872  |
| rs114619705 | A | 0.0432  |
| rs80295807  | G | -0.0853 |
| rs35206598  | C | -0.0137 |
| rs115367447 | A | -0.061  |
| rs116229255 | T | 0.0983  |
| rs72997620  | C | -0.0288 |
| rs4380567   | A | 0.0123  |
| rs80228165  | A | -0.0496 |
| rs145543860 | A | 0.1362  |
| rs9996614   | T | -0.0914 |
| rs146815286 | A | -0.0683 |
| rs112075037 | G | 0.0433  |
| rs10006036  | A | 0.0362  |
| rs7688320   | A | 0.0125  |
| rs114152620 | A | 0.0334  |
| rs141697485 | T | 0.0742  |

|             |   |         |
|-------------|---|---------|
| rs28424591  | A | -0.0609 |
| rs55784741  | T | 0.0813  |
| rs72673933  | T | 0.0221  |
| rs62353178  | A | 0.042   |
| rs4860389   | T | 0.0154  |
| rs2218313   | A | -0.0158 |
| rs11933277  | T | -0.0132 |
| rs13137823  | G | -0.015  |
| rs75646154  | G | 0.0276  |
| rs115450811 | C | 0.0657  |
| rs111300070 | T | 0.0353  |
| rs111866232 | C | 0.0797  |
| rs113966581 | G | -0.0625 |
| rs78114505  | C | 0.0258  |
| rs147546210 | T | -0.0225 |
| rs62311785  | G | 0.0214  |
| rs75979407  | T | -0.0969 |
| rs73208967  | T | -0.0131 |
| rs3805284   | A | 0.0243  |
| rs4993359   | G | -0.0243 |
| rs2390564   | G | -0.0166 |
| rs1546635   | G | 0.0141  |
| rs73235595  | C | 0.054   |
| rs114610893 | T | 0.0691  |
| rs7375793   | G | 0.0319  |
| rs149766174 | C | -0.0701 |
| rs77455573  | T | -0.0482 |
| rs73236848  | C | 0.0534  |
| rs111440858 | A | -0.0282 |
| rs138050085 | T | 0.0581  |
| rs143491682 | C | 0.074   |
| rs567947    | G | -0.0159 |
| rs72668988  | A | 0.0307  |
| rs17206751  | G | -0.0467 |
| rs7658620   | A | 0.0225  |
| rs2322638   | A | -0.013  |
| rs13134845  | G | 0.0131  |
| rs35534616  | T | -0.0124 |
| rs3135134   | T | -0.0146 |
| rs41265695  | C | 0.0658  |
| rs34127201  | A | 0.0481  |
| rs62299362  | T | 0.0147  |
| rs17473132  | A | 0.0238  |
| rs112904351 | T | -0.0219 |
| rs62320150  | C | 0.0189  |
| rs6847703   | C | -0.0442 |
| rs78424422  | C | 0.0352  |

|             |   |         |
|-------------|---|---------|
| rs114231476 | T | -0.0576 |
| rs12647760  | A | 0.0515  |
| rs61796102  | T | -0.0441 |
| rs79013856  | T | -0.0398 |
| rs13112818  | G | 0.023   |
| rs143396379 | T | 0.1028  |
| rs4241969   | A | 0.0124  |
| rs148719175 | G | 0.0577  |
| rs4861972   | C | -0.0129 |
| rs150743878 | T | -0.0759 |
| rs6831434   | G | -0.0132 |
| rs55821538  | A | 0.0414  |
| rs114791756 | T | 0.0521  |
| rs56072709  | G | -0.0389 |
| rs62322606  | A | 0.0375  |
| rs12511226  | T | 0.0293  |
| rs73242617  | C | 0.0405  |
| rs28451557  | A | 0.0605  |
| rs28843091  | T | -0.026  |
| rs148742479 | A | 0.0638  |
| rs114220378 | C | 0.0812  |
| rs113411340 | T | 0.0466  |
| rs149806701 | A | -0.047  |
| rs78963552  | G | 0.0495  |
| rs6533613   | T | 0.0122  |
| rs111922458 | A | -0.0754 |
| rs73217429  | C | 0.0818  |
| rs147921627 | G | 0.0405  |
| rs144498486 | C | 0.0653  |
| rs10939169  | T | -0.0379 |
| rs1991343   | C | -0.0179 |
| rs75421328  | G | 0.0443  |
| rs2091593   | C | -0.0143 |
| rs12513036  | A | -0.019  |
| rs35089837  | T | 0.0128  |
| rs72634884  | T | -0.0192 |
| rs13134055  | A | -0.0636 |
| rs35312595  | G | -0.0246 |
| rs77415466  | A | 0.0293  |
| rs162182    | C | -0.0176 |
| rs45586132  | C | 0.0316  |
| rs7435060   | T | 0.0273  |
| rs4690222   | G | -0.0187 |
| rs78814145  | A | 0.0204  |
| rs34267163  | T | 0.0177  |
| rs145709309 | A | 0.1108  |
| rs114721923 | C | -0.0708 |

|             |   |         |
|-------------|---|---------|
| rs79602184  | G | -0.0518 |
| rs145601035 | G | -0.0623 |
| rs17611679  | G | 0.0896  |
| rs35776876  | G | 0.0628  |
| rs6846208   | T | 0.0129  |
| rs77017980  | A | -0.0318 |
| rs36000833  | A | -0.0173 |
| rs12507081  | T | 0.0171  |
| rs2359333   | C | -0.0123 |
| rs4429772   | G | -0.0158 |
| rs75251367  | T | 0.0276  |
| rs76030962  | T | 0.0357  |
| rs76771487  | G | 0.056   |
| rs114314900 | T | 0.0297  |
| rs1159937   | C | 0.0147  |
| rs17033903  | C | 0.015   |
| rs142637156 | A | 0.0778  |
| rs982136    | A | 0.013   |
| rs2375995   | C | 0.0241  |
| rs79816038  | A | 0.0413  |
| rs146247451 | C | 0.0729  |
| rs62301581  | C | -0.0142 |
| rs79092780  | C | 0.0991  |
| rs144563685 | C | 0.0171  |
| rs12511782  | A | 0.0283  |
| rs76531629  | C | 0.0642  |
| rs1809331   | C | 0.0134  |
| rs116175833 | G | -0.1028 |
| rs75492219  | A | 0.0686  |
| rs115015366 | G | 0.0285  |
| rs6840869   | C | 0.0341  |
| rs79922310  | T | -0.0203 |
| rs114178353 | C | -0.0606 |
| rs2575657   | C | -0.0158 |
| rs1618748   | A | 0.0148  |
| rs79047498  | C | 0.0296  |
| rs17579878  | G | -0.0161 |
| rs138599125 | A | -0.0138 |
| rs13104338  | T | 0.0279  |
| rs73237014  | A | 0.0259  |
| rs6843116   | C | -0.0147 |
| rs142175911 | G | 0.0941  |
| rs62334032  | T | 0.0719  |
| rs72696047  | T | -0.0401 |
| rs746643    | T | 0.0136  |
| rs79166410  | C | -0.0522 |
| rs72696034  | T | 0.0236  |

|             |   |         |
|-------------|---|---------|
| rs1401910   | C | -0.0147 |
| rs4241602   | A | 0.0227  |
| rs12500198  | A | -0.0169 |
| rs62306887  | G | 0.0126  |
| rs67252769  | G | -0.0206 |
| rs11466657  | G | -0.0324 |
| rs115251023 | A | -0.0776 |
| rs1863291   | C | 0.0203  |
| rs17302938  | G | 0.0601  |
| rs17499632  | T | 0.028   |
| rs57287943  | A | 0.0146  |
| rs113068204 | T | 0.021   |
| rs11097199  | G | 0.0543  |
| rs61056663  | C | 0.0531  |
| rs72693089  | A | 0.0681  |
| rs138475412 | G | -0.0824 |
| rs147170079 | G | 0.0644  |
| rs10021112  | G | 0.0358  |
| rs114676069 | T | 0.073   |
| rs4621502   | C | -0.0284 |
| rs72899911  | A | -0.0629 |
| rs17603996  | T | 0.0279  |
| rs13104794  | C | 0.0157  |
| rs1448802   | A | -0.0202 |
| rs73841244  | C | 0.0552  |
| rs115505607 | G | -0.0556 |
| rs11944616  | G | -0.0257 |
| rs144727066 | G | 0.0646  |
| rs17178078  | G | -0.0121 |
| rs150960094 | G | 0.0643  |
| rs3118617   | C | -0.0123 |
| rs4689126   | T | 0.0141  |
| rs115401881 | A | 0.042   |
| rs77458593  | G | 0.0886  |
| rs10034327  | T | 0.0285  |
| rs12715778  | A | 0.0137  |
| rs112494819 | A | -0.0272 |
| rs78200420  | C | 0.0532  |
| rs1544891   | T | -0.013  |
| rs6533621   | A | -0.0145 |
| rs71614803  | A | 0.0477  |
| rs75901184  | A | 0.0836  |
| rs11736449  | C | 0.0123  |
| rs141363149 | A | 0.0594  |
| rs6854615   | G | -0.0136 |
| rs115600749 | A | -0.0608 |
| rs144870922 | A | -0.0914 |



|             |   |         |
|-------------|---|---------|
| rs10035051  | G | -0.0353 |
| rs6829704   | T | 0.0236  |
| rs10776532  | C | 0.0144  |
| rs7694661   | A | -0.0136 |
| rs62310258  | T | -0.0325 |
| rs141935888 | A | 0.0677  |
| rs116535882 | C | -0.0907 |
| rs78992326  | G | 0.0342  |
| rs72703797  | T | 0.0447  |
| rs2200224   | G | -0.0355 |
| rs72641295  | T | -0.0422 |
| rs17069404  | A | -0.0164 |
| rs1549458   | C | 0.0118  |
| rs60131146  | T | 0.0278  |
| rs13107382  | G | 0.0182  |
| rs115172214 | T | -0.0451 |
| rs6813810   | T | -0.0151 |
| rs112477645 | A | 0.0197  |
| rs11737732  | C | -0.0863 |
| rs17807493  | T | 0.0489  |
| rs71611994  | G | -0.0335 |
| rs72729599  | A | 0.0677  |
| rs12498262  | C | 0.0711  |
| rs79160322  | A | 0.0362  |
| rs75317105  | C | -0.0732 |
| rs7696128   | T | 0.0124  |
| rs1842468   | T | 0.0293  |
| rs17410566  | T | 0.0307  |
| rs34239342  | A | 0.013   |
| rs75628340  | A | 0.0736  |
| rs73219843  | G | -0.0717 |
| rs1038882   | G | -0.012  |
| rs114912171 | A | 0.0763  |
| rs145670883 | C | 0.0951  |
| rs114000600 | T | 0.0863  |
| rs72875042  | G | 0.0207  |
| rs57121318  | C | -0.0187 |
| rs111683450 | G | -0.0952 |
| rs74330559  | A | -0.0753 |
| rs78503489  | G | -0.0645 |
| rs116256903 | A | -0.0618 |
| rs78105870  | G | 0.1157  |
| rs2164380   | G | -0.0138 |
| rs10520454  | A | -0.0392 |
| rs79425579  | A | 0.0562  |
| rs116196541 | C | -0.0674 |
| rs143316237 | T | 0.0835  |

|             |   |         |
|-------------|---|---------|
| rs138244919 | T | -0.0612 |
| rs77669429  | C | 0.1036  |
| rs77374418  | A | 0.0365  |
| rs62314361  | C | 0.0337  |
| rs116122554 | T | 0.0615  |
| rs5010768   | G | 0.0674  |
| rs115322031 | T | 0.0547  |
| rs17458573  | G | 0.0447  |
| rs313958    | A | -0.0148 |
| rs2099930   | A | -0.0194 |
| rs9998370   | A | 0.0124  |
| rs66470270  | A | -0.019  |
| rs33920275  | C | 0.0246  |
| rs4566597   | C | -0.0213 |
| rs112075450 | A | 0.0282  |
| rs2350338   | A | -0.0128 |
| rs1991268   | T | -0.0152 |
| rs112043767 | A | -0.0525 |
| rs116042430 | C | -0.0478 |
| rs115024263 | G | -0.0349 |
| rs149631503 | T | -0.0458 |
| rs111462916 | G | 0.0503  |
| rs114744550 | A | -0.0648 |
| rs150267829 | G | -0.087  |
| rs17265016  | A | 0.0212  |
| rs76242377  | T | -0.0486 |
| rs6826179   | C | 0.0176  |
| rs57367677  | A | 0.0413  |
| rs55741542  | C | -0.0536 |
| rs17071237  | T | 0.0193  |
| rs79524050  | G | -0.066  |
| rs2648113   | C | -0.015  |
| rs10937831  | T | -0.0143 |
| rs116551886 | C | -0.1014 |
| rs146517239 | A | 0.033   |
| rs12642441  | G | 0.0249  |
| rs112299167 | T | 0.0209  |
| rs150570072 | G | 0.0464  |
| rs11099996  | C | -0.0222 |
| rs11132595  | C | -0.0208 |
| rs4145719   | T | -0.0692 |
| rs34646028  | A | 0.0276  |
| rs12508279  | T | -0.0122 |
| rs7696714   | T | -0.0237 |
| rs72639907  | A | 0.0733  |
| rs79897733  | A | -0.0406 |
| rs67103969  | G | -0.0172 |

|             |   |         |
|-------------|---|---------|
| rs4862107   | C | 0.0177  |
| rs77959603  | G | 0.0259  |
| rs114716640 | A | 0.0379  |
| rs34085601  | C | 0.0308  |
| rs77951209  | A | -0.0432 |
| rs4697187   | A | -0.0565 |
| rs17416271  | C | -0.021  |
| rs9291486   | C | -0.0191 |
| rs72661865  | A | 0.0153  |
| rs78134251  | T | 0.0366  |
| rs116585618 | A | -0.0896 |
| rs17066389  | G | 0.0499  |
| rs72704803  | T | -0.0296 |
| rs116710881 | T | 0.0669  |
| rs7674810   | C | -0.0252 |
| rs7664247   | C | 0.0338  |
| rs144990408 | G | -0.0692 |
| rs62312231  | A | 0.0709  |
| rs79799283  | T | 0.0341  |
| rs148275869 | A | 0.0771  |
| rs7697884   | T | -0.0128 |
| rs2540818   | G | 0.0177  |
| rs79625633  | T | -0.0354 |
| rs35724565  | C | 0.0541  |
| rs116557595 | A | 0.0712  |
| rs2079168   | A | -0.0334 |
| rs6831604   | A | -0.0142 |
| rs73238622  | C | -0.0441 |
| rs74972281  | T | -0.0885 |
| rs75876629  | A | -0.0227 |
| rs10029819  | T | 0.0118  |
| rs6852077   | T | -0.045  |
| rs114990332 | A | 0.0421  |
| rs9307949   | T | -0.0226 |
| rs74860252  | T | -0.0393 |
| rs6841555   | G | 0.0296  |
| rs13106979  | A | 0.0478  |
| rs142403753 | A | -0.0732 |
| rs6838672   | A | -0.0214 |
| rs74498004  | T | 0.0456  |
| rs116509572 | A | 0.0664  |
| rs4330344   | G | -0.0121 |
| rs2715491   | A | -0.0152 |
| rs73250544  | C | -0.08   |
| rs75953447  | G | -0.0434 |
| rs116818776 | T | 0.0511  |
| rs115735835 | A | 0.0642  |

|             |   |         |
|-------------|---|---------|
| rs114917848 | G | 0.0613  |
| rs13123967  | G | -0.044  |
| rs34605225  | T | 0.0317  |
| rs75398860  | A | -0.0289 |
| rs115092621 | T | 0.0477  |
| rs76582138  | G | -0.0692 |
| rs77429063  | G | 0.0667  |
| rs17031902  | A | -0.0257 |
| rs72709703  | C | -0.0325 |
| rs7654453   | A | 0.0166  |
| rs143414453 | G | 0.0826  |
| rs11728514  | C | -0.0135 |
| rs62347971  | C | -0.0378 |
| rs11722706  | C | 0.0287  |
| rs73228078  | T | -0.0969 |
| rs116661626 | C | 0.0796  |
| rs34414264  | T | -0.0308 |
| rs80210404  | T | -0.0435 |
| rs6818906   | T | -0.0153 |
| rs59744562  | A | -0.0573 |
| rs62297217  | A | 0.0237  |
| rs151216952 | T | 0.0719  |
| rs74320998  | T | 0.0345  |
| rs115600998 | T | -0.0641 |
| rs60159418  | A | -0.0375 |
| rs13119586  | A | 0.0223  |
| rs56065596  | G | 0.0278  |
| rs6850375   | T | 0.0587  |
| rs17072322  | G | -0.0292 |
| rs12648041  | T | -0.0146 |
| rs115431666 | C | 0.0628  |
| rs111349657 | T | -0.073  |
| rs72696737  | C | -0.0457 |
| rs34508937  | G | -0.0594 |
| rs4833071   | C | -0.0132 |
| rs12642545  | G | 0.0143  |
| rs6833032   | T | 0.0397  |
| rs115387987 | G | -0.0514 |
| rs2306987   | A | -0.0128 |
| rs112398830 | A | 0.0319  |
| rs116186246 | A | 0.0612  |
| rs4631018   | C | -0.0413 |
| rs13136286  | T | 0.0592  |
| rs57796775  | T | -0.0996 |
| rs74883009  | A | -0.0534 |
| rs116184407 | G | 0.0561  |
| rs75570306  | C | 0.0422  |

|             |   |         |
|-------------|---|---------|
| rs17060062  | G | 0.0706  |
| rs143023608 | A | 0.075   |
| rs6552614   | T | 0.0398  |
| rs116260148 | A | -0.0583 |
| rs1375884   | A | -0.05   |
| rs10017370  | G | -0.0121 |
| rs13149119  | T | -0.0118 |
| rs62297884  | T | -0.0398 |
| rs77761944  | A | 0.0536  |
| rs36025732  | T | -0.0239 |
| rs17219642  | C | 0.043   |
| rs62330731  | G | -0.0188 |
| rs28507478  | A | -0.0426 |
| rs60877918  | A | 0.1253  |
| rs55814940  | A | -0.0132 |
| rs55639924  | C | -0.0908 |
| rs7690527   | T | -0.0466 |
| rs143354489 | A | -0.0549 |
| rs115683945 | T | 0.0591  |
| rs4447895   | A | 0.0217  |
| rs62314265  | C | 0.0118  |
| rs13435237  | G | -0.022  |
| rs146142952 | C | -0.0291 |
| rs4361462   | T | 0.0401  |
| rs77827930  | T | 0.0324  |
| rs62302869  | A | -0.0528 |
| rs28497513  | C | 0.0166  |
| rs147377744 | T | 0.0925  |
| rs17017760  | G | -0.0435 |
| rs6536872   | T | -0.0475 |
| rs114941583 | A | -0.0594 |
| rs114536872 | A | -0.0624 |
| rs11099644  | G | -0.0122 |
| rs74692880  | A | 0.0428  |
| rs13150420  | G | -0.0123 |
| rs4864514   | G | -0.0224 |
| rs11736226  | C | 0.0134  |
| rs61741104  | A | -0.0284 |
| rs62322865  | C | -0.0282 |
| rs147693595 | A | -0.0448 |
| rs115593782 | A | -0.0436 |
| rs3990470   | A | -0.0686 |
| rs13102510  | T | -0.0122 |
| rs17609046  | A | -0.0283 |
| rs114062434 | A | -0.063  |
| rs67144804  | T | -0.0207 |
| rs12512593  | T | -0.012  |

|             |   |         |
|-------------|---|---------|
| rs113246750 | G | 0.0417  |
| rs115246521 | G | -0.0821 |
| rs73218817  | G | 0.0217  |
| rs113799591 | G | -0.0709 |
| rs7669159   | G | 0.0123  |
| rs17649364  | T | 0.0659  |
| rs6848512   | C | 0.013   |
| rs7660944   | T | 0.0193  |
| rs55638949  | G | 0.0167  |
| rs62409746  | A | -0.0309 |
| rs111996230 | C | -0.0307 |
| rs7699162   | A | 0.0187  |
| rs1553049   | G | 0.0692  |
| rs115705684 | G | 0.056   |
| rs116821349 | T | -0.062  |
| rs150283950 | C | 0.0758  |
| rs77705115  | A | 0.0421  |
| rs79271753  | T | -0.0373 |
| rs62326054  | T | -0.0127 |
| rs4691373   | G | -0.0119 |
| rs72695394  | C | 0.0397  |
| rs4689325   | G | 0.0441  |
| rs17838916  | A | -0.0534 |
| rs80074255  | T | -0.0542 |
| rs62324362  | T | 0.1108  |
| rs142691199 | C | -0.0717 |
| rs115240287 | A | 0.0523  |
| rs4507398   | T | 0.012   |
| rs139167733 | T | -0.1132 |
| rs62353889  | T | -0.0195 |
| rs2319657   | G | 0.024   |
| rs79187219  | A | 0.0503  |
| rs74734161  | A | 0.0248  |
| rs73210498  | A | 0.0355  |
| rs76556848  | T | -0.0614 |
| rs17722979  | A | 0.0129  |
| rs72693748  | G | 0.0464  |
| rs4835024   | G | -0.0131 |
| rs4235324   | T | -0.0211 |
| rs1947642   | T | -0.0134 |
| rs149113026 | C | -0.0562 |
| rs7666747   | C | -0.0172 |
| rs35037113  | T | -0.0446 |
| rs76555860  | G | -0.0278 |
| rs1492469   | C | -0.0251 |
| rs140453100 | A | 0.0753  |
| rs116233152 | T | 0.0288  |

|             |   |         |
|-------------|---|---------|
| rs116022064 | C | 0.0352  |
| rs11729980  | T | -0.0486 |
| rs17486603  | T | 0.0651  |
| rs78201835  | A | -0.0775 |
| rs9291432   | C | 0.0444  |
| rs79487986  | T | -0.0601 |
| rs62296169  | C | -0.0478 |
| rs76893100  | C | -0.0433 |
| rs13116233  | C | 0.0131  |
| rs71609110  | T | 0.069   |
| rs72703846  | C | -0.0337 |
| rs28783671  | A | 0.0418  |
| rs17722635  | C | -0.0142 |
| rs72720229  | A | -0.0274 |
| rs76188383  | C | 0.0563  |
| rs7680240   | C | -0.0122 |
| rs115386349 | C | 0.0371  |
| rs140775992 | G | 0.0841  |
| rs55660546  | T | -0.0216 |
| rs77898750  | C | 0.076   |
| rs114915622 | A | 0.0443  |
| rs10856861  | T | -0.0166 |
| rs6843541   | A | -0.0155 |
| rs223366    | A | -0.0184 |
| rs76848474  | A | -0.0605 |
| rs145661494 | A | -0.0376 |
| rs114940946 | C | -0.0596 |
| rs78465742  | G | -0.0604 |
| rs17488506  | C | 0.0257  |
| rs77626049  | A | 0.0246  |
| rs62350416  | T | -0.0293 |
| rs77593302  | C | 0.0626  |
| rs147194662 | C | -0.0392 |
| rs72712397  | C | 0.0282  |
| rs10022359  | A | 0.0177  |
| rs7654696   | A | 0.0219  |
| rs13101978  | T | 0.012   |
| rs7659266   | T | 0.0339  |
| rs113107201 | C | -0.066  |
| rs34789932  | C | 0.0187  |
| rs61758485  | T | 0.0521  |
| rs80146138  | T | -0.0168 |
| rs116671429 | G | -0.0752 |
| rs145304275 | A | -0.0646 |
| rs145057480 | G | -0.0427 |
| rs139163993 | C | 0.0755  |
| rs112587991 | C | 0.0311  |

|             |   |         |
|-------------|---|---------|
| rs10938725  | C | 0.0175  |
| rs62288627  | T | 0.0328  |
| rs142515524 | T | 0.0372  |
| rs2036246   | A | -0.0147 |
| rs12643438  | A | -0.0188 |
| rs508410    | A | -0.0135 |
| rs4077717   | T | -0.0254 |
| rs113824284 | A | 0.0483  |
| rs1399275   | C | 0.0125  |
| rs4146375   | C | -0.0182 |
| rs146034941 | G | -0.0535 |
| rs140214797 | G | -0.0577 |
| rs55865513  | T | -0.0166 |
| rs149004676 | G | 0.0387  |
| rs79060133  | T | 0.0652  |
| rs147225031 | A | -0.0738 |
| rs995208    | A | 0.0196  |
| rs73249608  | G | 0.0177  |
| rs142987945 | T | -0.0531 |
| rs76335033  | G | 0.0347  |
| rs34331669  | C | -0.0625 |
| rs17023469  | G | 0.0262  |
| rs56227447  | A | -0.0385 |
| rs73087244  | T | 0.0419  |
| rs116300129 | A | -0.0351 |
| rs116500770 | A | -0.0407 |
| rs73235640  | T | -0.0282 |
| rs34016159  | T | 0.063   |
| rs138058707 | A | -0.0332 |
| rs114335285 | C | -0.0513 |
| rs6536762   | A | -0.0773 |
| rs62321977  | G | -0.0232 |
| rs1921568   | T | -0.0138 |
| rs62348930  | A | -0.0223 |
| rs80089127  | A | -0.0597 |
| rs146847371 | T | 0.059   |
| rs112133317 | G | 0.0523  |
| rs12647971  | A | -0.0128 |
| rs115575008 | T | 0.031   |
| rs17045456  | C | 0.0849  |
| rs115944865 | T | 0.039   |
| rs17006882  | C | 0.0443  |
| rs114545786 | T | 0.0785  |
| rs28722043  | T | -0.0281 |
| rs11735752  | T | -0.0275 |
| rs115398829 | C | -0.078  |
| rs6847527   | A | -0.0255 |



|             |   |         |
|-------------|---|---------|
| rs4280751   | G | 0.0417  |
| rs2390805   | G | -0.0139 |
| rs6537272   | T | -0.0301 |
| rs111298014 | A | 0.0527  |
| rs75224621  | G | -0.0254 |
| rs1316966   | A | -0.0589 |
| rs3752749   | T | -0.0148 |
| rs79321814  | C | -0.084  |
| rs12331678  | T | 0.0585  |
| rs76709057  | T | 0.0753  |
| rs111458124 | C | 0.0172  |
| rs62307977  | G | -0.0695 |
| rs12498222  | A | 0.0167  |
| rs1947275   | T | 0.0149  |
| rs12504630  | T | 0.0501  |
| rs77574460  | A | -0.0327 |
| rs62324029  | G | -0.0212 |
| rs2203291   | T | -0.0166 |
| rs6822242   | G | -0.0943 |
| rs62331779  | A | -0.0327 |
| rs6812664   | G | 0.0144  |
| rs9991808   | G | 0.0187  |
| rs114527714 | G | 0.0657  |
| rs79982410  | C | -0.0627 |
| rs150723655 | A | -0.0377 |
| rs7681633   | A | 0.0542  |
| rs6818177   | C | 0.0129  |
| rs78118666  | G | -0.0237 |
| rs10011095  | T | 0.0305  |
| rs116211738 | T | -0.0759 |
| rs13150160  | C | -0.0334 |
| rs111664622 | G | -0.0656 |
| rs867322    | G | 0.0122  |
| rs2320303   | C | -0.018  |
| rs11732774  | G | 0.0133  |
| rs62352881  | T | -0.0292 |
| rs6838076   | G | 0.0176  |
| rs34374710  | C | 0.0143  |
| rs684278    | G | -0.0139 |
| rs111774103 | G | -0.0853 |
| rs114486715 | G | 0.0539  |
| rs145239041 | G | 0.0723  |
| rs78617085  | G | 0.1189  |
| rs76528335  | G | -0.0328 |
| rs72679509  | C | -0.0435 |
| rs13102887  | G | 0.0141  |
| rs2008613   | C | -0.0335 |

|             |   |         |
|-------------|---|---------|
| rs115905723 | G | -0.0729 |
| rs4696168   | A | 0.022   |
| rs2241839   | A | 0.0117  |
| rs57583915  | T | -0.0284 |
| rs78069690  | C | 0.0221  |
| rs55796533  | T | 0.0522  |
| rs13150502  | A | 0.0166  |
| rs4569733   | C | -0.012  |
| rs3857183   | A | 0.0155  |
| rs147361972 | A | -0.0464 |
| rs13143553  | C | -0.0781 |
| rs75550769  | G | -0.0724 |
| rs4863473   | C | 0.0235  |
| rs115071032 | T | 0.0284  |
| rs73853983  | C | 0.0611  |
| rs142167006 | C | -0.0812 |
| rs12650630  | G | 0.0179  |
| rs116567461 | C | -0.0604 |
| rs4443333   | T | 0.0159  |
| rs144795588 | A | -0.0964 |
| rs6812142   | C | 0.0841  |
| rs56000053  | G | -0.0142 |
| rs12641833  | C | 0.0352  |
| rs111882143 | T | 0.0192  |
| rs6845544   | G | -0.0352 |
| rs10001827  | T | -0.0136 |
| rs112143865 | T | -0.0644 |
| rs78255219  | T | 0.0879  |
| rs2141473   | A | 0.0147  |
| rs2381347   | T | -0.0141 |
| rs78855215  | G | -0.0291 |
| rs13123527  | C | 0.061   |
| rs12642360  | A | 0.0127  |
| rs9997074   | T | -0.014  |
| rs76787734  | C | 0.0512  |
| rs72690338  | A | 0.0302  |
| rs144814353 | A | 0.0225  |
| rs149016183 | T | -0.0919 |
| rs62314890  | T | 0.0732  |
| rs6842280   | T | 0.0224  |
| rs231395    | T | -0.0195 |
| rs4461470   | A | 0.0117  |
| rs1267012   | C | -0.0155 |
| rs4339221   | C | -0.0127 |
| rs10519595  | G | -0.012  |
| rs113864744 | T | 0.0545  |
| rs10013761  | G | 0.014   |

|             |   |         |
|-------------|---|---------|
| rs114983670 | T | -0.0647 |
| rs7655962   | T | -0.0149 |
| rs1986659   | G | -0.0173 |
| rs6813446   | G | 0.0249  |
| rs72668353  | T | 0.0229  |
| rs16874096  | G | 0.0535  |
| rs147575140 | C | 0.1162  |
| rs76118950  | A | -0.0137 |
| rs12644264  | A | 0.0119  |
| rs17348397  | T | 0.0194  |
| rs76999605  | A | 0.0222  |
| rs17668541  | T | 0.0122  |
| rs73798804  | G | 0.0179  |
| rs146227453 | C | 0.0432  |
| rs143136909 | A | -0.0498 |
| rs145680037 | T | 0.0405  |
| rs75771906  | A | 0.06    |
| rs77027518  | G | 0.034   |
| rs10021321  | G | -0.046  |
| rs115801060 | C | -0.0578 |
| rs74704865  | A | 0.0432  |
| rs2871328   | C | -0.0125 |
| rs1052268   | T | 0.0369  |
| rs11131458  | T | -0.0115 |
| rs149939021 | A | 0.038   |
| rs116684782 | G | 0.0839  |
| rs9884694   | A | 0.0633  |
| rs147801652 | T | 0.0556  |
| rs2345475   | G | 0.0114  |
| rs77361155  | C | 0.0684  |
| rs1545805   | A | 0.0163  |
| rs9307667   | T | -0.0241 |
| rs10084930  | A | -0.0122 |
| rs17003750  | G | -0.0391 |
| rs116082955 | T | -0.0844 |
| rs17865843  | T | 0.0212  |
| rs6818014   | C | 0.0144  |
| rs1217961   | A | -0.0121 |
| rs141098544 | C | 0.0762  |
| rs147696464 | A | -0.0803 |
| rs62296945  | G | -0.0236 |
| rs13137108  | G | -0.0141 |
| rs75629616  | A | -0.0438 |
| rs10000483  | T | -0.0289 |
| rs17066280  | T | 0.0261  |
| rs145255243 | C | 0.051   |
| rs17067909  | C | 0.0193  |

|             |   |         |
|-------------|---|---------|
| rs17050970  | C | 0.0244  |
| rs35141156  | A | -0.0211 |
| rs116543843 | T | -0.0693 |
| rs59390336  | C | 0.0128  |
| rs115134771 | G | -0.0572 |
| rs13143163  | C | -0.0345 |
| rs1568105   | C | -0.0157 |
| rs59117546  | G | 0.0513  |
| rs724198    | G | 0.0878  |
| rs76611387  | T | 0.0222  |
| rs7670501   | A | 0.0143  |
| rs113910469 | C | -0.0403 |
| rs74681276  | G | 0.0398  |
| rs1003983   | G | 0.0191  |
| rs13122339  | A | 0.0456  |
| rs76892788  | C | 0.0371  |
| rs116592363 | A | 0.0542  |
| rs2711945   | G | -0.1128 |
| rs116040389 | T | -0.0682 |
| rs113808876 | T | -0.0733 |
| rs141351781 | G | -0.0469 |
| rs34914667  | C | 0.0877  |
| rs4862632   | G | 0.0132  |
| rs4498132   | G | -0.0214 |
| rs77765044  | A | 0.0234  |
| rs55925693  | A | 0.0755  |
| rs16861114  | A | 0.0651  |
| rs13115608  | A | 0.0365  |
| rs114021099 | C | -0.0729 |
| rs6822906   | G | 0.0388  |
| rs1901220   | A | -0.0238 |
| rs6834785   | G | 0.0163  |
| rs79777036  | T | 0.0727  |
| rs78677278  | G | 0.0463  |
| rs10008952  | T | 0.0141  |
| rs4057264   | T | 0.039   |
| rs139919019 | A | 0.0877  |
| rs6851506   | G | -0.0123 |
| rs142235374 | A | -0.0392 |
| rs12507728  | A | 0.0113  |
| rs17220119  | G | 0.0417  |
| rs6850106   | C | 0.0323  |
| rs72679142  | G | 0.0368  |
| rs2014158   | T | 0.012   |
| rs115103168 | A | 0.0718  |
| rs12513098  | G | -0.0419 |
| rs76822268  | G | -0.0243 |

|             |   |         |
|-------------|---|---------|
| rs4635801   | A | 0.0285  |
| rs2726728   | G | 0.0398  |
| rs142846998 | G | -0.0689 |
| rs149373772 | T | 0.0713  |
| rs13129689  | C | 0.053   |
| rs116191943 | T | -0.0655 |
| rs114336303 | C | 0.042   |
| rs80057746  | T | -0.0463 |
| rs75292713  | T | 0.0561  |
| rs13151335  | A | 0.0183  |
| rs7699584   | G | -0.0147 |
| rs141110615 | T | -0.0551 |
| rs80227422  | T | -0.0305 |
| rs57553744  | G | -0.0222 |
| rs28548554  | G | -0.0139 |
| rs143810639 | C | 0.0566  |
| rs71614661  | A | 0.0332  |
| rs79294668  | A | 0.0701  |
| rs75118646  | T | 0.0432  |
| rs62297987  | A | 0.0522  |
| rs3899861   | A | -0.0178 |
| rs60168325  | C | 0.0151  |
| rs6853889   | A | 0.0139  |
| rs72660667  | G | 0.078   |
| rs6553812   | T | 0.045   |
| rs11731740  | T | -0.0113 |
| rs61795333  | G | -0.0256 |
| rs7665584   | T | 0.0227  |
| rs114321204 | A | -0.0395 |
| rs6531560   | A | -0.0117 |
| rs76187177  | A | 0.0414  |
| rs150997454 | G | -0.076  |
| rs78678240  | C | 0.0406  |
| rs17449015  | A | 0.0188  |
| rs16892135  | G | -0.0142 |
| rs2201220   | G | -0.0132 |
| rs6849130   | C | 0.028   |
| rs117165251 | A | 0.0458  |
| rs115113022 | C | -0.0714 |
| rs150233062 | A | -0.0862 |
| rs7671637   | C | -0.0157 |
| rs7669404   | A | 0.012   |
| rs72653244  | C | -0.0518 |
| rs2865797   | C | -0.012  |
| rs62341495  | A | 0.0148  |
| rs13143473  | C | -0.013  |
| rs112167942 | A | -0.0488 |

|             |   |         |
|-------------|---|---------|
| rs10857362  | C | -0.0124 |
| rs6824345   | T | -0.018  |
| rs75083537  | A | -0.0384 |
| rs9998543   | T | 0.0186  |
| rs7687592   | C | 0.0425  |
| rs117924853 | C | 0.0603  |
| rs78525314  | T | 0.0888  |
| rs138649472 | A | 0.0593  |
| rs28550420  | T | -0.021  |
| rs931771    | T | -0.0126 |
| rs13126097  | G | 0.0183  |
| rs72645961  | T | -0.0638 |
| rs7689647   | G | -0.0147 |
| rs2421236   | T | -0.0159 |
| rs141026432 | G | 0.0582  |
| rs113453557 | C | -0.0807 |
| rs11942836  | A | 0.0251  |
| rs62319296  | C | 0.0351  |
| rs78848263  | C | 0.0307  |
| rs78565483  | A | 0.0374  |
| rs77217464  | T | 0.0423  |
| rs76368528  | T | 0.0297  |
| rs79009784  | G | -0.0736 |
| rs80238364  | C | -0.0495 |
| rs114623700 | T | 0.042   |
| rs16878154  | A | -0.0167 |
| rs114138732 | T | 0.0566  |
| rs6839765   | A | -0.0118 |
| rs145295846 | A | -0.0636 |
| rs2940988   | C | -0.0248 |
| rs1378957   | C | -0.0128 |
| rs2980099   | A | 0.0206  |
| rs13112855  | A | -0.0157 |
| rs11931568  | T | -0.0181 |
| rs35809259  | A | 0.0211  |
| rs1486615   | G | 0.0134  |
| rs17683210  | T | 0.0158  |
| rs112058560 | A | 0.0402  |
| rs115420993 | G | 0.0947  |
| rs138102645 | G | 0.0739  |
| rs116835130 | G | -0.0681 |
| rs78230994  | A | -0.0724 |
| rs904141    | G | 0.0149  |
| rs71612756  | A | -0.0886 |
| rs142501148 | A | 0.0836  |
| rs74505529  | T | -0.0797 |
| rs75419797  | C | 0.0608  |

|             |   |         |
|-------------|---|---------|
| rs62411670  | T | -0.0338 |
| rs78462025  | A | 0.0587  |
| rs2851034   | G | -0.0168 |
| rs2348215   | A | -0.017  |
| rs1378353   | T | -0.0122 |
| rs71612738  | T | 0.0152  |
| rs76217821  | T | 0.0623  |
| rs56054115  | T | 0.0157  |
| rs16870810  | C | 0.0205  |
| rs150131655 | G | 0.0851  |
| rs115271535 | T | 0.0613  |
| rs116520997 | G | -0.0391 |
| rs62303066  | C | 0.0191  |
| rs12643524  | C | 0.0206  |
| rs1055138   | C | 0.0136  |
| rs76618467  | T | 0.0544  |
| rs1393855   | A | 0.0121  |
| rs7693131   | G | -0.0121 |
| rs55648111  | A | -0.0189 |
| rs79441402  | G | -0.0417 |
| rs115460030 | T | 0.0741  |
| rs4696584   | A | -0.0138 |
| rs61255859  | T | 0.0663  |
| rs75951869  | A | 0.0655  |
| rs6813890   | T | 0.0196  |
| rs609711    | C | -0.0256 |
| rs116236143 | A | 0.1102  |
| rs35180306  | G | 0.0855  |
| rs139748544 | G | 0.0429  |
| rs17747499  | A | 0.0209  |
| rs56282760  | G | 0.0115  |
| rs149673075 | T | 0.0505  |
| rs4689819   | G | 0.0386  |
| rs78685292  | A | 0.0494  |
| rs114823420 | T | 0.0372  |
| rs151162082 | T | -0.0542 |
| rs2348862   | C | -0.0129 |
| rs148513508 | G | 0.0789  |
| rs79849354  | G | 0.0286  |
| rs265058    | A | 0.0457  |
| rs76558123  | T | 0.0477  |
| rs76670227  | C | 0.0426  |
| rs114223719 | A | -0.0359 |
| rs77702460  | G | -0.0334 |
| rs28528690  | A | -0.0138 |
| rs10013807  | A | 0.0176  |
| rs62410608  | C | 0.0399  |

|             |   |         |
|-------------|---|---------|
| rs150789039 | A | 0.0796  |
| rs35601030  | A | 0.0194  |
| rs72714261  | G | 0.0774  |
| rs114172896 | A | 0.0878  |
| rs61737724  | A | 0.0354  |
| rs28651502  | G | 0.0159  |
| rs12648371  | C | -0.0126 |
| rs72665206  | C | -0.0905 |
| rs76527399  | G | 0.0763  |
| rs78398204  | T | 0.0168  |
| rs75550792  | G | -0.0474 |
| rs75918900  | T | -0.0391 |
| rs73022614  | C | 0.0206  |
| rs147975312 | A | -0.1244 |
| rs78655856  | A | -0.0158 |
| rs80062391  | G | -0.0718 |
| rs114626289 | G | 0.0332  |
| rs115509964 | C | 0.0629  |
| rs78741583  | C | 0.0356  |
| rs13108172  | C | -0.0381 |
| rs13134245  | C | -0.0138 |
| rs7661496   | A | 0.0263  |
| rs1458686   | G | 0.0307  |
| rs4697717   | G | -0.0156 |
| rs113739929 | A | -0.0259 |
| rs73249582  | C | 0.0249  |
| rs34557714  | G | -0.0843 |
| rs62327793  | T | 0.0253  |
| rs10024994  | G | -0.0194 |
| rs17087010  | G | 0.0615  |
| rs73219994  | A | -0.0555 |
| rs77710248  | T | -0.0412 |
| rs143870604 | T | 0.0773  |
| rs13145699  | T | -0.0123 |
| rs79696129  | A | 0.0523  |
| rs1403291   | G | 0.012   |
| rs116181867 | A | 0.0597  |
| rs59458976  | G | -0.0244 |
| rs6835647   | G | 0.0163  |
| rs219471    | G | 0.0174  |
| rs4861535   | G | -0.0147 |
| rs116089956 | C | -0.0474 |
| rs111817923 | T | -0.063  |
| rs75346839  | A | 0.0231  |
| rs139349490 | A | 0.1031  |
| rs10856843  | G | 0.0112  |
| rs71611961  | T | -0.0505 |



|             |   |         |
|-------------|---|---------|
| rs312340    | A | -0.0267 |
| rs28618325  | C | -0.0381 |
| rs1158914   | A | 0.023   |
| rs114582391 | C | -0.0644 |
| rs73222960  | C | 0.0168  |
| rs34826594  | G | -0.0708 |
| rs115270634 | A | 0.0402  |
| rs72713018  | G | -0.1024 |
| rs72726676  | A | -0.0277 |
| rs1014775   | C | 0.0163  |
| rs17437134  | T | -0.026  |
| rs78794695  | C | -0.0494 |
| rs146399812 | C | -0.0764 |
| rs75559388  | A | -0.0791 |
| rs3821949   | A | 0.0141  |
| rs4859335   | A | 0.014   |
| rs72979387  | G | -0.0374 |
| rs28735170  | A | -0.0132 |
| rs74760122  | C | -0.0829 |
| rs142967591 | T | 0.0152  |
| rs116271755 | A | 0.0561  |
| rs56226471  | A | -0.0121 |
| rs6536301   | A | 0.0313  |
| rs74378345  | A | 0.0205  |
| rs1879753   | G | -0.011  |
| rs12649911  | G | 0.0703  |
| rs28606986  | A | 0.0255  |
| rs6838876   | A | 0.0191  |
| rs79128394  | C | -0.0247 |
| rs73243338  | T | 0.0124  |
| rs6537383   | G | -0.0124 |
| rs1823193   | G | 0.012   |
| rs115476405 | C | -0.0908 |
| rs77606566  | G | -0.0511 |
| rs1606723   | A | -0.0112 |
| rs10008994  | C | 0.0229  |
| rs142334461 | T | -0.0367 |
| rs78415009  | A | 0.0469  |
| rs75319126  | T | 0.0355  |
| rs2868379   | C | -0.0352 |
| rs115652982 | C | -0.0606 |
| rs328420    | A | 0.031   |
| rs9996585   | G | 0.0158  |
| rs116416296 | G | -0.0999 |
| rs61790489  | A | -0.0494 |
| rs77485526  | T | -0.0348 |
| rs74848201  | G | 0.0718  |

|             |   |         |
|-------------|---|---------|
| rs10009026  | A | 0.0188  |
| rs1448013   | G | -0.0134 |
| rs13116446  | G | -0.0115 |
| rs138993106 | T | -0.0384 |
| rs147950281 | G | 0.0893  |
| rs972445    | T | -0.0269 |
| rs115926856 | C | 0.0541  |
| rs115400843 | G | 0.0539  |
| rs55945407  | C | -0.0119 |
| rs6842577   | A | 0.0137  |
| rs115372691 | T | -0.0669 |
| rs62324068  | T | -0.0268 |
| rs114246295 | A | -0.0471 |
| rs4470690   | C | -0.0195 |
| rs116534072 | G | 0.0592  |
| rs150351049 | G | -0.0719 |
| rs11732844  | A | 0.0124  |
| rs1865605   | T | 0.0115  |
| rs17460870  | C | -0.0452 |
| rs17770157  | C | 0.0549  |
| rs17675820  | T | 0.0347  |
| rs13106655  | G | 0.0132  |
| rs3804351   | T | -0.0349 |
| rs9312460   | A | 0.0112  |
| rs6811987   | T | -0.0163 |
| rs75827752  | T | 0.044   |
| rs35935372  | C | 0.0502  |
| rs13112670  | T | 0.0176  |
| rs147709711 | G | 0.0983  |
| rs1229982   | T | 0.0151  |
| rs6858442   | A | 0.012   |
| rs13125636  | C | 0.0155  |
| rs62313690  | T | 0.0347  |
| rs72693678  | G | 0.0586  |
| rs7664433   | T | 0.0126  |
| rs56001106  | T | -0.0592 |
| rs4835366   | A | -0.0109 |
| rs62324023  | T | -0.0184 |
| rs3756193   | C | 0.0113  |
| rs80040992  | T | -0.0368 |
| rs12501045  | G | -0.0147 |
| rs114800680 | T | -0.0454 |
| rs10020243  | A | -0.0126 |
| rs115292547 | A | -0.0426 |
| rs73820010  | A | -0.0208 |
| rs114979289 | A | -0.0375 |
| rs4833402   | G | -0.0134 |

|             |   |         |
|-------------|---|---------|
| rs11933783  | A | 0.0424  |
| rs13107434  | G | 0.0213  |
| rs4293821   | A | 0.0111  |
| rs143943271 | T | 0.0835  |
| rs12331489  | G | -0.0147 |
| rs144624495 | C | -0.032  |
| rs116816317 | A | 0.0863  |
| rs75741382  | G | -0.0555 |
| rs4689707   | T | 0.0176  |
| rs10020603  | T | -0.014  |
| rs111582316 | G | 0.0585  |
| rs34195451  | T | 0.0147  |
| rs138436734 | T | 0.02    |
| rs28699642  | C | -0.0223 |
| rs111492413 | C | 0.0718  |
| rs28830335  | C | -0.0208 |
| rs62313211  | G | -0.0416 |
| rs74818936  | A | 0.0748  |
| rs62309875  | T | 0.0168  |
| rs55752555  | G | -0.0354 |
| rs34226052  | G | 0.0148  |
| rs139827681 | A | -0.04   |
| rs57884084  | A | 0.0169  |
| rs80161101  | C | 0.0306  |
| rs78421950  | T | -0.0208 |
| rs79657099  | C | -0.0224 |
| rs141414315 | T | -0.0758 |
| rs13115143  | G | -0.023  |
| rs74881570  | C | 0.0456  |
| rs60126904  | G | -0.015  |
| rs78476542  | A | 0.0523  |
| rs72713121  | T | -0.0571 |
| rs1203778   | G | -0.0113 |
| rs16835988  | C | -0.0822 |
| rs62286320  | A | -0.0208 |
| rs74536888  | G | -0.0464 |
| rs55727267  | G | -0.0201 |
| rs12640613  | T | -0.0472 |
| rs148680840 | A | 0.0766  |
| rs73231031  | G | -0.0292 |
| rs149412625 | T | -0.0651 |
| rs13131489  | A | -0.0143 |
| rs6849568   | A | 0.0125  |
| rs34434726  | T | -0.0216 |
| rs2857958   | T | 0.0123  |
| rs111797185 | T | -0.0679 |
| rs13101799  | G | 0.0288  |

|             |   |         |
|-------------|---|---------|
| rs13126844  | A | -0.0149 |
| rs6818789   | T | 0.0222  |
| rs56194929  | A | -0.0493 |
| rs60281721  | T | 0.0116  |
| rs10033127  | T | 0.0532  |
| rs10937748  | G | 0.0141  |
| rs149159941 | C | 0.0742  |
| rs78751809  | A | -0.0816 |
| rs10428362  | G | -0.0514 |
| rs41467344  | G | 0.0274  |
| rs77104673  | T | -0.0432 |
| rs76552738  | C | 0.0285  |
| rs116391489 | A | -0.0261 |
| rs11726533  | T | 0.0164  |
| rs116512546 | A | 0.05    |
| rs11733234  | C | -0.0167 |
| rs7683406   | A | -0.0115 |
| rs4865203   | T | -0.0128 |
| rs75841681  | T | -0.0581 |
| rs72680306  | T | -0.0506 |
| rs79182054  | T | 0.0214  |
| rs62332717  | T | -0.0187 |
| rs145746291 | C | 0.039   |
| rs77779319  | A | 0.025   |
| rs114057921 | C | 0.0689  |
| rs72719044  | G | 0.0186  |
| rs78380723  | T | 0.056   |
| rs7692617   | A | 0.013   |
| rs2008120   | G | 0.0132  |
| rs13130328  | C | 0.0144  |
| rs76557582  | G | -0.0402 |
| rs77208088  | A | 0.0426  |
| rs4588446   | T | -0.011  |
| rs115796632 | C | 0.0448  |
| rs74553384  | C | 0.0237  |
| rs116238009 | C | -0.0558 |
| rs2131462   | C | 0.0163  |
| rs150066075 | C | -0.0944 |
| rs62409308  | C | -0.031  |
| rs139046970 | T | -0.0904 |
| rs1964744   | A | 0.0888  |
| rs13141490  | G | 0.0243  |
| rs4490457   | A | -0.0197 |
| rs115269865 | C | 0.0437  |
| rs72730223  | C | -0.0131 |
| rs11933140  | T | 0.0169  |
| rs145068246 | A | 0.0619  |

|             |   |         |
|-------------|---|---------|
| rs78593693  | A | -0.0533 |
| rs11131269  | A | -0.0149 |
| rs115772161 | A | 0.0589  |
| rs142845010 | T | 0.0854  |
| rs10001655  | G | 0.0115  |
| rs28838703  | G | -0.0183 |
| rs72687749  | G | 0.0469  |
| rs4588423   | A | -0.0141 |
| rs1112771   | A | 0.011   |
| rs148052581 | G | -0.032  |
| rs17038866  | C | 0.0186  |
| rs77156792  | C | -0.0495 |
| rs139681274 | A | 0.0748  |
| rs73078004  | G | -0.0332 |
| rs9994814   | C | 0.0114  |
| rs111688497 | C | 0.0291  |
| rs4861923   | C | -0.0379 |
| rs112113680 | C | -0.0447 |
| rs79409744  | A | 0.0484  |
| rs17060350  | G | 0.0188  |
| rs6840582   | T | -0.0125 |
| rs68019596  | T | -0.0225 |
| rs34131335  | C | -0.0634 |
| rs148656764 | A | -0.0877 |
| rs145538511 | C | 0.0451  |
| rs72719999  | A | 0.1143  |
| rs71603617  | T | 0.0498  |
| rs72696744  | T | -0.0514 |
| rs4382106   | A | -0.028  |
| rs6837744   | C | 0.021   |
| rs72667825  | A | -0.0341 |
| rs114411069 | T | 0.0495  |
| rs72708972  | T | 0.0218  |
| rs144730126 | A | -0.065  |
| rs2324714   | A | -0.0131 |
| rs986398    | A | -0.0106 |
| rs77924479  | A | 0.0315  |
| rs77600408  | G | -0.0694 |
| rs17222837  | C | 0.0268  |
| rs4645253   | C | -0.0194 |
| rs12643531  | C | -0.0112 |
| rs78527278  | G | 0.0841  |
| rs114750825 | A | -0.0446 |
| rs1047725   | A | 0.0131  |
| rs6819079   | G | 0.0357  |
| rs1800761   | T | 0.0136  |
| rs931481    | C | -0.015  |

|             |   |         |
|-------------|---|---------|
| rs75093179  | A | 0.024   |
| rs11733199  | A | 0.0375  |
| rs55702134  | T | -0.0209 |
| rs146167422 | A | 0.0451  |
| rs80165265  | T | 0.0443  |
| rs79650247  | A | 0.0501  |
| rs10020692  | T | 0.011   |
| rs72702990  | T | 0.0255  |
| rs62301284  | G | 0.02    |
| rs62272702  | C | -0.046  |
| rs113632446 | C | 0.0451  |
| rs9992521   | T | 0.0398  |
| rs77207697  | G | -0.0438 |
| rs35745995  | A | -0.019  |
| rs113563568 | T | -0.0244 |
| rs111389986 | A | -0.0564 |
| rs34382564  | T | 0.0126  |
| rs1013340   | T | -0.034  |
| rs62341097  | A | -0.0329 |
| rs1511674   | G | 0.0168  |
| rs35435530  | T | -0.0316 |
| rs113039810 | A | 0.0468  |
| rs12501787  | A | 0.0178  |
| rs3775203   | T | -0.0131 |
| rs2589850   | C | 0.0128  |
| rs77360224  | A | 0.0649  |
| rs138249633 | A | -0.0185 |
| rs11731986  | A | 0.0136  |
| rs7685881   | A | -0.0134 |
| rs28403200  | A | -0.0301 |
| rs13152620  | C | -0.0186 |
| rs144742597 | A | 0.0746  |
| rs62315578  | C | 0.0214  |
| rs139287825 | G | 0.0432  |
| rs35598812  | C | 0.0197  |
| rs143944809 | T | 0.0564  |
| rs729242    | G | -0.014  |
| rs79585631  | A | 0.0352  |
| rs79194082  | C | 0.0728  |
| rs41346652  | T | -0.0255 |
| rs6836031   | A | 0.019   |
| rs72674370  | T | 0.0199  |
| rs7694744   | T | 0.0114  |
| rs13108184  | A | -0.0175 |
| rs10029010  | G | 0.0157  |
| rs12644851  | A | -0.0108 |
| rs116692848 | G | 0.0546  |

|             |   |         |
|-------------|---|---------|
| rs35756863  | C | 0.0604  |
| rs79725276  | G | 0.112   |
| rs55640212  | T | -0.024  |
| rs116324888 | C | 0.0557  |
| rs115566960 | G | 0.0575  |
| rs6818762   | A | -0.025  |
| rs9683931   | A | -0.0159 |
| rs138264345 | T | 0.0424  |
| rs79866020  | T | -0.0396 |
| rs149633167 | C | -0.0414 |
| rs62326112  | A | -0.0162 |
| rs10025535  | G | -0.0114 |
| rs62351566  | A | -0.0284 |
| rs4440210   | C | -0.015  |
| rs116732080 | C | -0.0635 |
| rs111444644 | A | -0.0762 |
| rs34200011  | T | -0.0223 |
| rs1139102   | C | 0.0171  |
| rs10002586  | G | -0.0319 |
| rs6854454   | T | -0.0166 |
| rs17071833  | C | -0.0548 |
| rs60981106  | A | -0.0466 |
| rs114780141 | A | -0.0844 |
| rs6857676   | C | -0.0271 |
| rs147324374 | G | 0.0536  |
| rs56254643  | C | 0.0181  |
| rs56119267  | T | 0.0173  |
| rs62295279  | C | -0.0481 |
| rs6849535   | T | -0.0124 |
| rs114469087 | A | -0.0568 |
| rs62345560  | G | 0.0975  |
| rs12506994  | A | 0.022   |
| rs142230387 | A | -0.0367 |
| rs75097255  | T | 0.0349  |
| rs72662276  | A | 0.0813  |
| rs1904087   | G | 0.0118  |
| rs13101353  | G | -0.0137 |
| rs141991026 | C | -0.0806 |
| rs2627804   | T | 0.0114  |
| rs78111919  | T | -0.0497 |
| rs62329015  | G | -0.0719 |
| rs6841127   | G | 0.0182  |
| rs7686033   | C | -0.0136 |
| rs148180371 | A | 0.0742  |
| rs67226301  | T | 0.0463  |
| rs1032147   | G | 0.0132  |
| rs73244325  | T | -0.0229 |

|             |   |         |
|-------------|---|---------|
| rs114916669 | C | 0.0444  |
| rs79773856  | T | 0.0225  |
| rs72624197  | T | 0.0187  |
| rs56103802  | G | -0.0172 |
| rs6551556   | G | -0.014  |
| rs76177903  | G | -0.0429 |
| rs116085205 | A | -0.0588 |
| rs4505868   | A | -0.0504 |
| rs114598925 | C | -0.0572 |
| rs140474966 | A | -0.0292 |
| rs62324917  | T | 0.0431  |
| rs41279337  | T | -0.024  |
| rs2723704   | G | 0.0147  |
| rs77955396  | T | -0.029  |
| rs77669002  | C | 0.0301  |
| rs7679919   | G | -0.0105 |
| rs843011    | T | 0.0109  |
| rs142654458 | C | 0.0525  |
| rs116458351 | T | 0.0494  |
| rs902092    | A | -0.0329 |
| rs114733948 | T | 0.0538  |
| rs76208593  | G | 0.0354  |
| rs76232086  | G | 0.0399  |
| rs72706309  | A | -0.046  |
| rs61142079  | A | 0.069   |
| rs148968017 | T | -0.0542 |
| rs11929993  | T | 0.0221  |
| rs10013576  | T | -0.0119 |
| rs4140904   | G | 0.0122  |
| rs13144966  | G | 0.0127  |
| rs77378348  | A | 0.0389  |
| rs4862386   | C | 0.0141  |
| rs62296899  | A | -0.0256 |
| rs6534543   | T | -0.0122 |
| rs6552515   | C | -0.011  |
| rs598917    | A | 0.012   |
| rs13139807  | A | 0.0138  |
| rs62324862  | G | -0.0558 |
| rs77380590  | G | 0.0465  |
| rs13112783  | G | -0.0123 |
| rs7673146   | C | 0.097   |
| rs142447465 | C | 0.0436  |
| rs78596875  | A | -0.0532 |
| rs9291437   | C | -0.0112 |
| rs12505145  | C | 0.0183  |
| rs114619599 | A | 0.0422  |
| rs12108581  | T | 0.0108  |



|             |   |         |
|-------------|---|---------|
| rs78265026  | C | 0.0229  |
| rs11131831  | G | -0.0122 |
| rs34594334  | G | 0.0181  |
| rs148737459 | A | 0.0606  |
| rs76470717  | C | 0.0662  |
| rs112222948 | A | 0.0692  |
| rs12509544  | T | 0.0221  |
| rs3822260   | T | 0.0132  |
| rs11935426  | A | 0.0331  |
| rs112752580 | C | 0.0518  |
| rs116267834 | C | -0.0767 |
| rs75914918  | G | 0.0469  |
| rs114282853 | C | 0.0592  |
| rs62316502  | G | 0.0157  |
| rs6848781   | C | -0.013  |
| rs11735716  | T | 0.0233  |
| rs143442029 | G | -0.0224 |
| rs76971903  | A | 0.08    |
| rs114954222 | T | 0.0571  |
| rs12647216  | A | -0.0203 |
| rs2218427   | G | 0.0119  |
| rs62348839  | G | 0.0207  |
| rs7696264   | T | -0.0128 |
| rs56354979  | C | -0.0777 |
| rs11735083  | G | 0.0105  |
| rs151027077 | C | 0.0998  |
| rs76062976  | T | -0.0493 |
| rs114346935 | T | -0.0694 |
| rs72671583  | T | -0.0249 |
| rs6964      | A | 0.0117  |
| rs11098213  | T | -0.0115 |
| rs4692694   | G | -0.0119 |
| rs10007874  | T | 0.011   |
| rs28373479  | G | -0.02   |
| rs2878896   | G | 0.0833  |
| rs190982    | G | -0.0799 |
| rs74820434  | T | -0.2271 |
| rs11575893  | T | -0.1629 |
| rs612000    | C | 0.0959  |
| rs56104517  | G | -0.0702 |
| rs3866876   | C | 0.0673  |
| rs335472    | C | 0.1523  |
| rs17612068  | G | 0.0909  |
| rs113983456 | G | -0.1834 |
| rs17519383  | G | -0.0635 |
| rs2262573   | A | 0.068   |
| rs17165037  | A | 0.1095  |

|             |   |         |
|-------------|---|---------|
| rs73048835  | T | 0.1373  |
| rs115348864 | C | -0.2923 |
| rs7448632   | T | -0.2972 |
| rs244524    | C | -0.072  |
| rs143223647 | G | -0.1505 |
| rs66465242  | T | 0.1519  |
| rs9968676   | C | 0.065   |
| rs2963339   | A | -0.062  |
| rs62383917  | A | -0.1192 |
| rs1428037   | G | 0.0752  |
| rs16903631  | T | 0.0992  |
| rs114529015 | A | -0.1776 |
| rs72777476  | A | 0.2979  |
| rs1990895   | A | 0.0632  |
| rs12186457  | T | -0.067  |
| rs10074473  | T | 0.0615  |
| rs62346334  | G | 0.0798  |
| rs3850579   | G | -0.0611 |
| rs12519388  | T | 0.0759  |
| rs77806858  | C | -0.1396 |
| rs114376846 | T | -0.1906 |
| rs11954152  | T | 0.1566  |
| rs2962321   | C | 0.0998  |
| rs251018    | G | 0.0592  |
| rs4150221   | C | 0.0645  |
| rs57028257  | A | 0.0927  |
| rs56033499  | A | -0.2497 |
| rs11135367  | C | 0.0668  |
| rs7724702   | C | 0.1174  |
| rs4957047   | T | -0.1269 |
| rs728676    | A | 0.0569  |
| rs4868015   | T | -0.0589 |
| rs56850397  | T | 0.1933  |
| rs901248    | C | -0.1037 |
| rs62361331  | A | -0.1775 |
| rs16903026  | G | -0.1241 |
| rs79820174  | G | 0.1766  |
| rs3853483   | T | -0.1022 |
| rs75355668  | G | 0.1032  |
| rs6869197   | A | -0.0564 |
| rs78439831  | G | -0.4041 |
| rs12186736  | A | -0.2091 |
| rs73279222  | C | 0.1726  |
| rs11956240  | C | -0.0573 |
| rs13152888  | T | -0.0832 |
| rs72739043  | C | 0.1975  |
| rs329115    | C | -0.0642 |

|             |   |         |
|-------------|---|---------|
| rs6451173   | A | 0.0552  |
| rs12652626  | T | 0.1591  |
| rs35425162  | C | -0.0554 |
| rs1623177   | G | 0.0585  |
| rs76227857  | G | -0.2836 |
| rs4912711   | T | 0.1077  |
| rs6886253   | T | -0.0778 |
| rs74492263  | A | 0.1495  |
| rs111658226 | G | 0.1433  |
| rs74600408  | G | 0.1154  |
| rs139865894 | G | 0.1495  |
| rs11740547  | A | -0.0916 |
| rs11249708  | A | -0.1239 |
| rs58035347  | A | 0.2094  |
| rs74920379  | G | 0.0791  |
| rs2913573   | G | 0.0563  |
| rs6556719   | G | 0.0683  |
| rs76289392  | A | -0.2404 |
| rs79908234  | G | 0.1276  |
| rs10053217  | G | -0.0571 |
| rs970966    | G | -0.0534 |
| rs114031822 | T | 0.2416  |
| rs79153259  | T | 0.1702  |
| rs4373290   | A | 0.1006  |
| rs30061     | G | 0.1845  |
| rs2913271   | T | 0.1076  |
| rs385767    | C | -0.2415 |
| rs12520515  | C | -0.0619 |
| rs62385184  | C | -0.152  |
| rs71597645  | A | 0.1113  |
| rs61077555  | T | -0.1207 |
| rs1604108   | C | 0.0619  |
| rs2241350   | G | 0.1546  |
| rs10941231  | G | 0.062   |
| rs11747405  | C | -0.1739 |
| rs17485836  | T | -0.0838 |
| rs11950587  | T | 0.2281  |
| rs2292152   | C | 0.2208  |
| rs62389386  | T | -0.098  |
| rs7725218   | A | -0.0852 |
| rs10477862  | C | 0.0538  |
| rs78038401  | T | 0.1035  |
| rs115202009 | C | 0.1157  |
| rs72708625  | A | -0.2246 |
| rs6860504   | G | 0.0579  |
| rs7719729   | G | 0.1294  |
| rs6884334   | G | -0.0584 |

|             |   |         |
|-------------|---|---------|
| rs10039848  | A | -0.0513 |
| rs2035436   | A | 0.0739  |
| rs1183135   | C | -0.0626 |
| rs79066364  | T | -0.1379 |
| rs4380609   | T | -0.0777 |
| rs146135137 | G | 0.2114  |
| rs77977678  | G | -0.4347 |
| rs78479569  | A | -0.2014 |
| rs1552912   | G | 0.0511  |
| rs1396499   | T | -0.0552 |
| rs116015987 | G | 0.1379  |
| rs62383992  | A | -0.2776 |
| rs6893973   | A | 0.0641  |
| rs13174780  | G | -0.0797 |
| rs12519176  | T | 0.0672  |
| rs5744712   | C | 0.0763  |
| rs291844    | A | -0.0539 |
| rs428986    | A | 0.0507  |
| rs2162895   | G | -0.0506 |
| rs57068879  | A | 0.0701  |
| rs116466727 | C | -0.3551 |
| rs17098713  | T | -0.145  |
| rs3797171   | A | -0.0502 |
| rs112538306 | T | 0.3171  |
| rs114422851 | A | -0.2919 |
| rs17608675  | T | -0.0518 |
| rs11958189  | A | -0.0723 |
| rs7708505   | A | 0.057   |
| rs696035    | C | -0.0584 |
| rs115429141 | C | 0.1174  |
| rs302482    | A | 0.1979  |
| rs56827346  | T | -0.0585 |
| rs111648923 | T | -0.2454 |
| rs7726575   | G | -0.0584 |
| rs144973580 | A | 0.2522  |
| rs3910076   | C | -0.0546 |
| rs116102142 | T | -0.0975 |
| rs62405449  | C | -0.1074 |
| rs4151681   | A | 0.256   |
| rs115851441 | C | -0.2329 |
| rs72784887  | G | -0.0876 |
| rs11749395  | T | 0.157   |
| rs74984689  | T | 0.1448  |
| rs76076932  | A | 0.2188  |
| rs17099178  | T | 0.1675  |
| rs1502039   | T | 0.0516  |
| rs73116854  | T | 0.0599  |

|             |   |         |
|-------------|---|---------|
| rs72767222  | A | -0.095  |
| rs7723292   | G | -0.06   |
| rs17666378  | T | 0.1901  |
| rs67687414  | A | -0.0788 |
| rs114445756 | A | 0.3019  |
| rs2910013   | G | 0.1781  |
| rs12523175  | A | -0.0499 |
| rs77456049  | T | 0.1398  |
| rs301716    | T | 0.1149  |
| rs6863595   | T | 0.1527  |
| rs76850734  | G | 0.1535  |
| rs116242568 | G | -0.3177 |
| rs1154991   | T | 0.0814  |
| rs16879928  | A | 0.1891  |
| rs140291019 | A | 0.2255  |
| rs79623893  | A | -0.3373 |
| rs79993435  | T | 0.1342  |
| rs17736119  | C | 0.0589  |
| rs111698352 | A | 0.1403  |
| rs247461    | C | 0.0562  |
| rs4912694   | T | 0.0663  |
| rs77733126  | A | 0.3919  |
| rs34381583  | C | 0.0504  |
| rs974836    | T | 0.1238  |
| rs2279473   | A | -0.0706 |
| rs141738660 | C | 0.234   |
| rs114972489 | C | -0.2184 |
| rs74837003  | A | 0.1381  |
| rs7442874   | C | 0.2083  |
| rs17372048  | T | 0.1883  |
| rs17749279  | G | -0.1416 |
| rs10039309  | C | 0.1636  |
| rs1371384   | G | 0.1232  |
| rs56209232  | T | 0.1399  |
| rs12234109  | A | -0.0514 |
| rs7730802   | G | -0.051  |
| rs62395160  | G | -0.1116 |
| rs114341981 | T | 0.1966  |
| rs74357965  | C | -0.1509 |
| rs113694806 | G | -0.1546 |
| rs4836297   | C | -0.09   |
| rs62391182  | T | 0.1073  |
| rs2607135   | C | -0.0717 |
| rs1145622   | G | 0.0529  |
| rs1017208   | G | -0.0514 |
| rs114768612 | A | -0.1538 |
| rs250835    | G | 0.0505  |

|             |   |         |
|-------------|---|---------|
| rs7711599   | T | 0.0985  |
| rs139972771 | T | 0.0698  |
| rs903866    | C | 0.1246  |
| rs113352728 | C | 0.123   |
| rs55791214  | C | 0.2154  |
| rs732678    | C | -0.0628 |
| rs29956     | A | -0.055  |
| rs11749859  | T | 0.0504  |
| rs13165361  | A | 0.0842  |
| rs72753580  | T | 0.2041  |
| rs12658002  | A | 0.0653  |
| rs10478677  | T | 0.2188  |
| rs395183    | G | -0.0529 |
| rs10064672  | T | 0.1077  |
| rs250811    | G | 0.0706  |
| rs62382400  | T | 0.3528  |
| rs78929043  | G | 0.1476  |
| rs2935534   | T | -0.0551 |
| rs62333429  | A | -0.0505 |
| rs3924544   | A | -0.111  |
| rs12187374  | G | 0.3503  |
| rs13159296  | T | 0.6389  |
| rs27890     | G | 0.1043  |
| rs39965     | A | -0.0894 |
| rs28582119  | C | -0.2214 |
| rs1846128   | G | 0.0793  |
| rs2600831   | A | 0.0492  |
| rs11747114  | G | 0.0493  |
| rs377451    | T | -0.0486 |
| rs61289286  | T | 0.0911  |
| rs10515536  | A | -0.2242 |
| rs11743737  | T | 0.0504  |
| rs16882272  | T | 0.2925  |
| rs146438509 | T | -0.2765 |
| rs72795080  | G | -0.0804 |
| rs17063821  | T | -0.0852 |
| rs142987224 | G | -0.2748 |
| rs75478241  | C | -0.1622 |
| rs78740770  | C | 0.1702  |
| rs6879644   | A | -0.0565 |
| rs266642    | G | -0.0663 |
| rs13172430  | T | -0.0484 |
| rs10076496  | C | 0.1787  |
| rs6596755   | A | 0.0466  |
| rs77222811  | C | 0.0758  |
| rs2936586   | A | 0.0705  |
| rs115051461 | G | 0.225   |

|             |   |         |
|-------------|---|---------|
| rs331772    | G | 0.1689  |
| rs970384    | A | -0.0484 |
| rs11740086  | C | -0.0485 |
| rs10052340  | A | 0.0585  |
| rs16877662  | T | -0.0492 |
| rs6886107   | G | 0.0578  |
| rs11960583  | T | 0.0495  |
| rs252219    | T | -0.0496 |
| rs55983975  | T | 0.2958  |
| rs115791393 | G | 0.1338  |
| rs61267472  | A | -0.0745 |
| rs138863407 | G | 0.1299  |
| rs111865306 | C | 0.2051  |
| rs60259893  | C | 0.1951  |
| rs111293251 | G | 0.2268  |
| rs13189385  | C | 0.1172  |
| rs147406061 | G | -0.1863 |
| rs11745653  | T | -0.2015 |
| rs148149048 | T | -0.2987 |
| rs17140078  | T | 0.0739  |
| rs1904163   | T | 0.0674  |
| rs2277951   | C | 0.0602  |
| rs61749834  | C | 0.1505  |
| rs112822206 | C | -0.0792 |
| rs4077328   | A | 0.0941  |
| rs115179451 | G | 0.1497  |
| rs72759186  | A | 0.2678  |
| rs1643967   | A | 0.0549  |
| rs37004     | T | 0.0697  |
| rs6554809   | T | 0.0697  |
| rs11742160  | G | 0.1897  |
| rs6880993   | A | -0.09   |
| rs557292    | G | -0.1247 |
| rs6893700   | G | 0.0628  |
| rs1169649   | A | -0.0511 |
| rs147169217 | A | -0.2648 |
| rs6871019   | C | 0.061   |
| rs57792332  | T | 0.0741  |
| rs12520128  | A | -0.2012 |
| rs77338562  | T | -0.1678 |
| rs250890    | A | 0.092   |
| rs326041    | T | 0.0533  |
| rs6870863   | A | 0.0927  |
| rs76856123  | A | 0.0837  |
| rs113749444 | A | 0.0654  |
| rs12519544  | C | -0.0934 |
| rs76987314  | A | 0.2576  |

|             |   |         |
|-------------|---|---------|
| rs7726200   | G | -0.0556 |
| rs138908633 | A | -0.0807 |
| rs115564017 | T | -0.2244 |
| rs3776825   | A | -0.049  |
| rs6860227   | T | -0.0533 |
| rs34196702  | C | 0.0633  |
| rs114340813 | A | -0.326  |
| rs17467372  | T | 0.2294  |
| rs869339    | T | -0.0507 |
| rs7710292   | C | 0.0457  |
| rs113355009 | T | -0.1409 |
| rs7731281   | T | 0.1029  |
| rs13354270  | G | 0.045   |
| rs72774742  | C | 0.1784  |
| rs255571    | A | -0.1364 |
| rs13168373  | T | 0.0607  |
| rs12520671  | T | -0.0927 |
| rs62360406  | T | 0.0787  |
| rs76075715  | C | 0.1665  |
| rs10062883  | C | -0.1997 |
| rs1037598   | C | -0.045  |
| rs76985385  | A | -0.2355 |
| rs8180457   | T | -0.0639 |
| rs1593949   | A | 0.0578  |
| rs73801080  | A | 0.1396  |
| rs78137052  | C | 0.1938  |
| rs79259373  | T | 0.2023  |
| rs7713629   | A | -0.0495 |
| rs148610699 | G | -0.1968 |
| rs61602401  | C | -0.1492 |
| rs115948184 | G | 0.381   |
| rs35450986  | A | -0.0866 |
| rs246339    | G | 0.1797  |
| rs13155711  | T | 0.0712  |
| rs2607157   | T | -0.0504 |
| rs76966174  | C | 0.4043  |
| rs17568237  | T | 0.1048  |
| rs539990    | G | 0.0633  |
| rs141393173 | T | -0.2829 |
| rs706293    | A | -0.0469 |
| rs58290810  | A | -0.0478 |
| rs145753590 | T | 0.2938  |
| rs11739165  | G | -0.0443 |
| rs146231454 | G | 0.1973  |
| rs13188748  | A | -0.0592 |
| rs17797954  | T | 0.0701  |
| rs10055647  | C | 0.0579  |



|             |   |         |
|-------------|---|---------|
| rs358655    | C | 0.051   |
| rs78912683  | T | -0.3361 |
| rs181884    | C | -0.047  |
| rs150587545 | A | -0.246  |
| rs75486329  | C | 0.0964  |
| rs13172021  | A | 0.048   |
| rs7712280   | T | 0.0929  |
| rs11742784  | A | 0.0942  |
| rs488083    | C | 0.1355  |
| rs1946189   | G | -0.0595 |
| rs4490600   | T | 0.0753  |
| rs12518501  | T | 0.1773  |
| rs12186698  | T | 0.0812  |
| rs35542565  | G | -0.0829 |
| rs75194439  | A | 0.1213  |
| rs9687371   | T | 0.0599  |
| rs2471152   | G | 0.051   |
| rs76286964  | T | 0.1997  |
| rs6556395   | G | -0.0469 |
| rs79447633  | T | 0.057   |
| rs74468700  | T | 0.0832  |
| rs76928783  | T | 0.1352  |
| rs5745259   | G | 0.2991  |
| rs11750486  | T | 0.0464  |
| rs77475100  | T | -0.2429 |
| rs115136616 | T | 0.1118  |
| rs116793555 | G | 0.2548  |
| rs72786484  | G | 0.1981  |
| rs140544029 | A | 0.2619  |
| rs34030062  | T | 0.2378  |
| rs6890936   | T | -0.0474 |
| rs141513190 | G | 0.2315  |
| rs79333002  | T | -0.0985 |
| rs76227149  | T | -0.3765 |
| rs1650549   | A | 0.0522  |
| rs114721935 | A | -0.1194 |
| rs41287110  | T | 0.1435  |
| rs6881442   | A | -0.0472 |
| rs4432911   | G | 0.0489  |
| rs381489    | C | 0.0712  |
| rs4533880   | A | 0.2162  |
| rs10064067  | G | 0.0542  |
| rs2311735   | C | 0.0462  |
| rs2940527   | G | 0.0739  |
| rs114399511 | A | 0.259   |
| rs1168794   | A | 0.2728  |
| rs10059240  | C | 0.0989  |

|             |   |         |
|-------------|---|---------|
| rs115634042 | A | 0.2123  |
| rs9312872   | A | 0.0752  |
| rs1553538   | C | 0.0891  |
| rs114722835 | C | 0.2227  |
| rs9791117   | A | 0.0582  |
| rs1288758   | T | -0.0559 |
| rs13164534  | T | -0.0571 |
| rs55989583  | T | 0.0557  |
| rs116834423 | A | 0.1776  |
| rs10866666  | T | -0.0671 |
| rs1744343   | T | -0.0594 |
| rs10064812  | C | -0.0437 |
| rs34136905  | C | 0.0977  |
| rs2195375   | T | 0.1586  |
| rs6887582   | A | -0.0559 |
| rs9687011   | C | -0.0651 |
| rs9285900   | A | 0.0742  |
| rs351263    | A | -0.111  |
| rs62348975  | G | -0.3477 |
| rs153685    | C | -0.046  |
| rs634308    | C | 0.0647  |
| rs740074    | T | -0.0569 |
| rs10454812  | C | -0.0723 |
| rs58442268  | G | -0.0466 |
| rs13178739  | A | 0.1631  |
| rs112774003 | G | 0.1551  |
| rs74529719  | G | -0.1528 |
| rs17159295  | C | 0.045   |
| rs58731794  | T | -0.0939 |
| rs1159331   | A | 0.0462  |
| rs12054736  | T | 0.0463  |
| rs4476693   | T | 0.0434  |
| rs7732663   | A | 0.1397  |
| rs115210807 | A | 0.1958  |
| rs80250012  | T | 0.3759  |
| rs1422968   | G | -0.0479 |
| rs116425756 | T | 0.1551  |
| rs56330002  | T | 0.1472  |
| rs79746682  | A | 0.299   |
| rs13171453  | A | 0.4628  |
| rs4264929   | A | 0.0638  |
| rs7724676   | A | -0.0567 |
| rs75815828  | G | 0.1363  |
| rs78712920  | G | 0.197   |
| rs74683093  | A | 0.2238  |
| rs13170444  | A | -0.0502 |
| rs7724819   | T | -0.0537 |

|             |   |         |
|-------------|---|---------|
| rs78448225  | T | 0.1211  |
| rs27564     | A | 0.0469  |
| rs72763451  | T | 0.0604  |
| rs72827615  | C | 0.0613  |
| rs152536    | T | 0.0929  |
| rs10063519  | A | 0.0499  |
| rs1027634   | A | 0.1028  |
| rs262840    | A | 0.1609  |
| rs13185268  | C | -0.0965 |
| rs181281    | G | -0.0465 |
| rs1378442   | G | 0.1469  |
| rs148376513 | G | 0.0436  |
| rs141697102 | T | 0.2725  |
| rs139460302 | A | 0.219   |
| rs682798    | G | -0.049  |
| rs75283336  | C | -0.0653 |
| rs76411456  | G | 0.1422  |
| rs79785056  | T | 0.2089  |
| rs312576    | G | 0.1608  |
| rs155362    | G | 0.0688  |
| rs115504660 | G | 0.3586  |
| rs17136136  | C | -0.0506 |
| rs75042965  | T | 0.2881  |
| rs66893355  | G | 0.1105  |
| rs139927802 | C | -0.0968 |
| rs2625383   | A | 0.0712  |
| rs10515651  | C | 0.1589  |
| rs2913609   | C | 0.0593  |
| rs72816204  | T | 0.0862  |
| rs116676043 | G | 0.1678  |
| rs9765542   | T | 0.0445  |
| rs12108987  | G | -0.1559 |
| rs6862912   | A | 0.1837  |
| rs40673     | A | 0.0582  |
| rs74536649  | C | 0.1471  |
| rs58044064  | A | -0.0518 |
| rs72778756  | A | -0.1651 |
| rs6892923   | T | 0.0631  |
| rs12658235  | G | 0.0461  |
| rs114416999 | A | -0.0544 |
| rs6894208   | A | 0.0639  |
| rs59739601  | G | 0.1512  |
| rs148381498 | A | -0.2486 |
| rs16868901  | G | 0.0594  |
| rs34930818  | A | 0.2371  |
| rs2288833   | C | -0.0655 |
| rs16875781  | C | 0.0582  |

|             |   |         |
|-------------|---|---------|
| rs13179502  | A | 0.1323  |
| rs4700577   | A | 0.0438  |
| rs265427    | C | -0.0852 |
| rs3798005   | A | 0.0538  |
| rs34138509  | T | 0.2535  |
| rs114029320 | A | -0.1931 |
| rs78426874  | G | -0.088  |
| rs1421769   | A | -0.0439 |
| rs4957731   | T | 0.0602  |
| rs75516462  | C | -0.1378 |
| rs10940079  | T | -0.0622 |
| rs2336977   | A | -0.0464 |
| rs116356138 | G | -0.1853 |
| rs10038030  | C | 0.0746  |
| rs1078266   | A | 0.0582  |
| rs72822466  | C | -0.0989 |
| rs4703067   | A | -0.0876 |
| rs322474    | T | -0.0473 |
| rs35200122  | C | 0.0445  |
| rs4403177   | A | -0.0545 |
| rs34141013  | G | -0.0505 |
| rs116270893 | A | 0.1446  |
| rs13173967  | C | -0.0548 |
| rs1465390   | A | 0.1022  |
| rs62375380  | C | 0.0521  |
| rs115416593 | C | 0.3178  |
| rs147079613 | T | -0.2333 |
| rs75548802  | G | 0.2336  |
| rs10064618  | A | 0.0445  |
| rs329319    | A | -0.0435 |
| rs296283    | A | 0.2671  |
| rs268529    | C | -0.0452 |
| rs9327557   | A | 0.1128  |
| rs62362593  | A | -0.3216 |
| rs115698034 | C | -0.1659 |
| rs17265753  | G | 0.0541  |
| rs7716925   | A | 0.0496  |
| rs116625436 | G | 0.1104  |
| rs79039872  | T | 0.2343  |
| rs76005690  | T | 0.262   |
| rs35151091  | A | 0.0645  |
| rs13153471  | G | 0.0484  |
| rs12186641  | T | -0.0847 |
| rs78420903  | C | -0.1953 |
| rs76365106  | T | 0.2465  |
| rs35412     | C | 0.152   |
| rs13159062  | C | 0.0552  |

|             |   |         |
|-------------|---|---------|
| rs77346024  | T | 0.1024  |
| rs72648838  | T | 0.1804  |
| rs76658127  | T | -0.1514 |
| rs245393    | C | -0.0463 |
| rs6864599   | G | 0.0813  |
| rs35029697  | T | 0.2208  |
| rs56825733  | T | -0.1396 |
| rs79332111  | C | -0.0715 |
| rs16875209  | T | -0.0911 |
| rs116510426 | G | 0.0847  |
| rs13164310  | C | -0.1144 |
| rs115974812 | C | 0.2341  |
| rs77672264  | T | 0.1428  |
| rs161553    | G | 0.0505  |
| rs35535831  | T | 0.1603  |
| rs27509     | T | -0.0564 |
| rs56332382  | C | -0.0522 |
| rs10071912  | A | -0.1635 |
| rs72747716  | T | 0.0947  |
| rs62328199  | T | -0.0571 |
| rs57268119  | G | -0.1026 |
| rs35323270  | T | 0.0487  |
| rs7713798   | A | 0.0718  |
| rs10062954  | C | -0.0618 |
| rs114376362 | T | -0.1494 |
| rs76685061  | G | 0.0997  |
| rs76414090  | T | 0.186   |
| rs12188200  | T | 0.0919  |
| rs4296830   | G | -0.0764 |
| rs57994525  | G | -0.0433 |
| rs114337257 | A | 0.1643  |
| rs2561449   | G | 0.0493  |
| rs6868684   | T | 0.309   |
| rs140414730 | T | 0.2516  |
| rs13173647  | C | -0.0818 |
| rs115445015 | G | -0.2914 |
| rs145446193 | T | 0.1555  |
| rs62362948  | C | 0.2008  |
| rs79641002  | C | 0.3306  |
| rs2329437   | A | 0.1089  |
| rs71634931  | A | 0.1001  |
| rs12520499  | C | 0.0455  |
| rs269552    | T | -0.0577 |
| rs142186387 | C | -0.2678 |
| rs6861799   | G | 0.0438  |
| rs17451739  | T | 0.1043  |
| rs58297242  | A | -0.0453 |

|             |   |         |
|-------------|---|---------|
| rs6863789   | A | -0.1441 |
| rs76307396  | A | -0.1072 |
| rs6865035   | A | 0.1018  |
| rs145976059 | A | 0.2149  |
| rs6452405   | C | 0.1494  |
| rs2932320   | C | -0.0447 |
| rs7730789   | C | -0.0596 |
| rs140079985 | C | 0.1539  |
| rs74395588  | A | -0.0899 |
| rs34052623  | C | -0.131  |
| rs11748350  | T | 0.0461  |
| rs2360040   | G | -0.0433 |
| rs10062629  | G | 0.1914  |
| rs4866559   | G | -0.0453 |
| rs10063472  | T | -0.059  |
| rs76834393  | T | -0.1599 |
| rs56215442  | C | -0.0524 |
| rs58246412  | A | 0.2203  |
| rs6860417   | A | 0.2221  |
| rs2632138   | C | -0.0648 |
| rs72719095  | A | -0.2588 |
| rs2853677   | G | -0.0516 |
| rs35744038  | G | 0.114   |
| rs11748534  | C | -0.0414 |
| rs11956931  | T | 0.2704  |
| rs150211362 | A | 0.2297  |
| rs292213    | A | 0.0458  |
| rs114889851 | A | -0.3008 |
| rs1384266   | C | -0.1482 |
| rs4701617   | T | -0.0743 |
| rs35833524  | A | -0.1298 |
| rs58751240  | T | 0.0467  |
| rs139096818 | C | 0.1386  |
| rs77161259  | C | 0.1219  |
| rs13158983  | T | 0.0542  |
| rs4868322   | A | 0.1706  |
| rs4920695   | T | 0.0416  |
| rs11135245  | T | 0.0621  |
| rs77451029  | C | -0.0925 |
| rs16879651  | T | 0.0911  |
| rs67907667  | T | 0.0445  |
| rs10068123  | C | 0.0737  |
| rs75105202  | A | -0.0935 |
| rs4099273   | C | 0.0621  |
| rs1623702   | G | 0.0499  |
| rs115508925 | G | -0.2213 |
| rs113232588 | G | 0.2489  |

|             |   |         |
|-------------|---|---------|
| rs4957862   | T | 0.0474  |
| rs115467442 | G | -0.1313 |
| rs62393674  | C | 0.1938  |
| rs114274884 | A | -0.1971 |
| rs79325511  | A | -0.0983 |
| rs246519    | A | 0.0453  |
| rs347983    | G | 0.0845  |
| rs1024051   | A | -0.0416 |
| rs1292152   | A | 0.0588  |
| rs168752    | T | -0.1027 |
| rs115946887 | T | 0.1911  |
| rs10053962  | T | 0.0519  |
| rs7725161   | G | 0.0579  |
| rs254926    | A | -0.0415 |
| rs772655    | T | 0.0509  |
| rs1908043   | T | 0.093   |
| rs6897331   | C | 0.0458  |
| rs1781654   | G | -0.1415 |
| rs116371383 | C | -0.1509 |
| rs7709123   | C | -0.1511 |
| rs11950881  | T | 0.0949  |
| rs4530758   | G | 0.0666  |
| rs149587748 | T | 0.2899  |
| rs11567772  | A | -0.3801 |
| rs57341205  | G | 0.0485  |
| rs76915732  | G | 0.1884  |
| rs2907829   | T | 0.0443  |
| rs79617688  | C | -0.1643 |
| rs11745637  | A | 0.0409  |
| rs6894608   | G | 0.0931  |
| rs6873158   | T | 0.0426  |
| rs1463413   | G | 0.0641  |
| rs5013188   | G | 0.0631  |
| rs78292949  | T | 0.2245  |
| rs6453097   | G | 0.1441  |
| rs72758889  | G | 0.0792  |
| rs80080001  | A | -0.0845 |
| rs80031024  | G | 0.1299  |
| rs114736112 | A | 0.2406  |
| rs2083235   | G | -0.0965 |
| rs75492110  | T | 0.2527  |
| rs297620    | G | -0.0526 |
| rs17735751  | C | 0.0531  |
| rs10516102  | T | -0.0859 |
| rs7704886   | G | -0.0407 |
| rs6859424   | G | -0.0421 |
| rs116079247 | A | -0.1817 |

|             |   |         |
|-------------|---|---------|
| rs73103440  | T | -0.2459 |
| rs13165136  | T | -0.28   |
| rs11749855  | T | 0.0732  |
| rs34023     | A | -0.1189 |
| rs113204397 | T | 0.224   |
| rs2068015   | T | -0.0413 |
| rs144519314 | G | 0.0804  |
| rs9688043   | A | 0.1158  |
| rs115011838 | G | -0.0993 |
| rs5744662   | C | -0.0591 |
| rs2288796   | C | 0.0419  |
| rs1847015   | A | 0.0506  |
| rs80053539  | T | 0.3929  |
| rs146694782 | G | 0.3094  |
| rs77186996  | C | 0.1671  |
| rs77301614  | C | -0.0919 |
| rs75742647  | A | 0.1215  |
| rs115397621 | G | 0.3214  |
| rs73798420  | C | 0.2734  |
| rs3777218   | T | -0.0436 |
| rs12659840  | T | -0.1082 |
| rs7729298   | G | 0.0514  |
| rs55825428  | T | -0.0505 |
| rs6870439   | C | -0.0626 |
| rs72812642  | T | 0.1371  |
| rs143780217 | A | 0.3042  |
| rs17164160  | G | 0.3352  |
| rs113779316 | C | 0.1384  |
| rs7380824   | T | -0.0597 |
| rs35831074  | T | -0.0732 |
| rs111959022 | C | 0.1987  |
| rs67049593  | A | 0.0447  |
| rs2954360   | A | 0.0404  |
| rs2411913   | C | -0.0447 |
| rs4869609   | G | -0.4044 |
| rs1347808   | C | 0.0442  |
| rs6870884   | C | 0.1996  |
| rs72799681  | A | -0.0552 |
| rs7719950   | G | -0.0454 |
| rs2643542   | A | -0.0694 |
| rs114205523 | C | -0.1202 |
| rs1211161   | A | 0.0404  |
| rs72732779  | A | -0.1239 |
| rs1490796   | C | 0.0408  |
| rs112800718 | T | 0.1875  |
| rs114475098 | T | 0.2427  |
| rs75679558  | C | 0.4032  |



|             |   |         |
|-------------|---|---------|
| rs10078900  | A | -0.305  |
| rs11959686  | C | 0.0939  |
| rs447746    | G | -0.0431 |
| rs115906632 | C | 0.225   |
| rs75043106  | C | 0.0664  |
| rs12110304  | C | -0.041  |
| rs4869232   | C | 0.1444  |
| rs324339    | A | 0.2056  |
| rs3107556   | A | 0.0401  |
| rs2431744   | T | 0.0591  |
| rs148300034 | A | 0.2778  |
| rs11948454  | A | -0.0426 |
| rs6875296   | A | 0.0427  |
| rs116789782 | G | -0.0872 |
| rs147486450 | G | -0.2131 |
| rs7705519   | C | 0.0568  |
| rs7735639   | T | -0.0508 |
| rs112042454 | C | -0.1714 |
| rs248710    | G | -0.0449 |
| rs77025081  | A | 0.0766  |
| rs112360974 | A | 0.1651  |
| rs73774347  | C | 0.2356  |
| rs140322318 | A | -0.2142 |
| rs140268608 | A | 0.1985  |
| rs2455458   | A | -0.0443 |
| rs41290581  | T | -0.1692 |
| rs141827390 | A | -0.1926 |
| rs533965    | G | -0.041  |
| rs7737465   | G | 0.0439  |
| rs76284354  | C | 0.1442  |
| rs150048013 | A | -0.2582 |
| rs17608067  | C | 0.0455  |
| rs147960157 | T | 0.2194  |
| rs7709099   | T | 0.2292  |
| rs988413    | C | 0.0478  |
| rs6414948   | T | 0.0619  |
| rs11950233  | A | 0.186   |
| rs6883705   | T | 0.3123  |
| rs78730727  | T | 0.1761  |
| rs13181166  | T | -0.0462 |
| rs11952771  | A | -0.0409 |
| rs4527580   | T | -0.0435 |
| rs72798881  | T | 0.1044  |
| rs17690039  | T | 0.0655  |
| rs9765586   | A | 0.0457  |
| rs7720397   | C | -0.044  |
| rs34668282  | C | 0.1629  |

|             |   |         |
|-------------|---|---------|
| rs28647256  | A | -0.0651 |
| rs72720687  | T | -0.0459 |
| rs247141    | G | 0.0496  |
| rs6449522   | T | -0.0398 |
| rs370640    | T | 0.0427  |
| rs11749910  | T | 0.0797  |
| rs62383697  | A | 0.0912  |
| rs138924890 | C | 0.0461  |
| rs74654009  | C | 0.1174  |
| rs6871128   | G | 0.0761  |
| rs1173477   | A | -0.0419 |
| rs336514    | G | -0.0426 |
| rs816464    | G | 0.0611  |
| rs75148143  | A | 0.1582  |
| rs6880051   | C | -0.0397 |
| rs12519454  | T | -0.0617 |
| rs72656671  | A | -0.1173 |
| rs62388057  | T | 0.0644  |
| rs72791977  | A | -0.1898 |
| rs114828091 | T | -0.1725 |
| rs146261781 | A | -0.2011 |
| rs72805822  | T | 0.0607  |
| rs72776292  | T | -0.1272 |
| rs140837601 | G | 0.073   |
| rs1863954   | A | 0.0417  |
| rs11134106  | A | -0.0398 |
| rs6872582   | C | 0.0455  |
| rs17691375  | A | -0.043  |
| rs72794584  | A | 0.098   |
| rs73786617  | G | 0.1473  |
| rs72740863  | G | -0.096  |
| rs77069633  | T | -0.2707 |
| rs59045437  | A | 0.2236  |
| rs116335392 | A | -0.1051 |
| rs11743574  | A | -0.0543 |
| rs113136013 | G | -0.0647 |
| rs80086159  | C | -0.1474 |
| rs77196523  | C | 0.1313  |
| rs729129    | A | 0.0667  |
| rs111340055 | T | 0.2052  |
| rs62371022  | T | -0.0525 |
| rs62368240  | G | 0.0881  |
| rs116260666 | C | 0.196   |
| rs11958116  | C | 0.0436  |
| rs4957708   | A | 0.0472  |
| rs74849979  | G | 0.1372  |
| rs43178     | G | -0.0427 |

|             |   |         |
|-------------|---|---------|
| rs884462    | A | 0.0765  |
| rs13360433  | C | -0.0469 |
| rs12518049  | G | -0.0406 |
| rs3797606   | A | 0.1684  |
| rs632666    | G | -0.0852 |
| rs6865784   | T | -0.1077 |
| rs115982628 | T | -0.1573 |
| rs6898464   | C | 0.1187  |
| rs6871270   | A | 0.0393  |
| rs2348607   | C | 0.1748  |
| rs115330330 | T | -0.1991 |
| rs10065199  | C | -0.1459 |
| rs150406859 | T | -0.1725 |
| rs251566    | G | 0.043   |
| rs7702938   | C | 0.0854  |
| rs7712005   | A | -0.2341 |
| rs115753617 | T | -0.1119 |
| rs74794034  | T | -0.1955 |
| rs79332236  | T | 0.2269  |
| rs62371170  | A | 0.0725  |
| rs253444    | A | 0.0628  |
| rs75119140  | C | 0.0659  |
| rs72798512  | C | -0.1384 |
| rs1529690   | A | -0.0449 |
| rs72797099  | G | 0.1548  |
| rs13182526  | G | 0.0431  |
| rs60629856  | C | -0.0974 |
| rs17265148  | T | -0.0487 |
| rs113596009 | C | -0.1133 |
| rs114163180 | A | 0.2236  |
| rs13354417  | C | 0.0762  |
| rs76661833  | C | 0.1469  |
| rs73354941  | A | -0.0969 |
| rs430060    | C | 0.0509  |
| rs17106769  | G | -0.0391 |
| rs4379216   | C | -0.1186 |
| rs113315281 | G | -0.0896 |
| rs173842    | A | -0.0413 |
| rs77562677  | A | 0.1099  |
| rs1545373   | T | -0.2242 |
| rs6887528   | T | 0.0848  |
| rs10044480  | T | 0.0448  |
| rs1217824   | C | -0.0404 |
| rs1448479   | C | 0.0459  |
| rs62368672  | C | 0.0737  |
| rs4407647   | T | -0.0417 |
| rs6580355   | C | 0.0438  |

|             |   |         |
|-------------|---|---------|
| rs1864977   | G | 0.0398  |
| rs906356    | T | 0.0442  |
| rs508371    | T | 0.0406  |
| rs76067291  | T | 0.1656  |
| rs60376038  | G | 0.0995  |
| rs72771084  | T | 0.2522  |
| rs10073774  | C | 0.1156  |
| rs10038210  | A | -0.0426 |
| rs12519035  | A | 0.1603  |
| rs10036953  | G | -0.0558 |
| rs12516176  | C | 0.0461  |
| rs75844295  | T | -0.1918 |
| rs78116826  | C | 0.176   |
| rs151454    | A | 0.0461  |
| rs997428    | C | -0.0628 |
| rs60259641  | A | -0.0553 |
| rs73185060  | G | -0.087  |
| rs33568     | T | 0.0391  |
| rs2913513   | A | 0.1221  |
| rs76688241  | A | 0.1798  |
| rs113460261 | A | 0.1276  |
| rs80155794  | A | 0.1169  |
| rs6869901   | A | -0.0734 |
| rs2451003   | G | 0.0445  |
| rs149944812 | A | 0.1431  |
| rs149377    | A | 0.0561  |
| rs34040620  | C | -0.0616 |
| rs4298254   | A | 0.1352  |
| rs12521781  | G | -0.0541 |
| rs62362794  | T | -0.0712 |
| rs72785003  | C | 0.0769  |
| rs1501682   | A | 0.1138  |
| rs150708529 | C | -0.3893 |
| rs7732568   | C | -0.0485 |
| rs62384738  | C | 0.1371  |
| rs17476752  | G | -0.0581 |
| rs1482483   | G | 0.0499  |
| rs72790396  | A | -0.1804 |
| rs115356392 | T | -0.2736 |
| rs12653097  | T | 0.0585  |
| rs62368465  | C | 0.053   |
| rs4282336   | T | 0.0495  |
| rs112616783 | T | -0.1921 |
| rs4916834   | C | -0.1195 |
| rs7702525   | A | -0.0401 |
| rs77970539  | A | 0.1737  |
| rs79025422  | A | 0.0953  |

|             |   |         |
|-------------|---|---------|
| rs7737136   | A | -0.0605 |
| rs72834098  | A | 0.0566  |
| rs2973139   | C | -0.0503 |
| rs4585468   | T | -0.0406 |
| rs7712127   | G | -0.1529 |
| rs11746561  | T | -0.0585 |
| rs6420088   | A | -0.0794 |
| rs6867766   | T | 0.1388  |
| rs16894362  | T | 0.2352  |
| rs113732731 | A | -0.2124 |
| rs11948045  | A | -0.0594 |
| rs272862    | C | -0.0427 |
| rs114047445 | T | 0.3338  |
| rs115738794 | T | -0.1794 |
| rs34552623  | C | -0.0595 |
| rs115511437 | T | 0.1628  |
| rs56240825  | T | 0.0455  |
| rs1995274   | A | -0.0501 |
| rs41271119  | G | 0.1917  |
| rs71600231  | C | -0.2516 |
| rs9293517   | C | -0.065  |
| rs141516846 | A | 0.1966  |
| rs114057527 | A | 0.137   |
| rs13190241  | A | 0.1598  |
| rs32753     | T | 0.0417  |
| rs10476105  | A | -0.0653 |
| rs77554499  | T | -0.1468 |
| rs115288005 | T | 0.1875  |
| rs4532367   | G | -0.0437 |
| rs34184031  | G | -0.04   |
| rs441492    | A | -0.0395 |
| rs4704617   | A | 0.041   |
| rs148957720 | C | 0.128   |
| rs112408047 | T | 0.0957  |
| rs31740     | A | 0.0855  |
| rs114281340 | G | 0.2164  |
| rs74810661  | A | 0.1363  |
| rs6556439   | A | 0.0439  |
| rs62367623  | G | 0.1329  |
| rs6874376   | T | 0.0512  |
| rs77351337  | A | 0.0894  |
| rs36049337  | A | -0.0598 |
| rs17700949  | G | 0.0418  |
| rs247951    | T | 0.0443  |
| rs7728435   | C | 0.0443  |
| rs1445787   | T | 0.0419  |
| rs12188319  | T | 0.0776  |

|             |   |         |
|-------------|---|---------|
| rs114881854 | G | 0.3116  |
| rs79392570  | T | -0.0668 |
| rs56303038  | A | 0.089   |
| rs72766221  | G | 0.101   |
| rs114112468 | G | -0.0831 |
| rs113090604 | T | 0.167   |
| rs4701374   | T | 0.0937  |
| rs447939    | C | -0.1272 |
| rs1078059   | A | 0.0725  |
| rs13184107  | A | 0.1206  |
| rs6872575   | T | 0.2488  |
| rs7731279   | T | 0.0445  |
| rs77360706  | A | 0.2207  |
| rs484573    | A | 0.0617  |
| rs342559    | G | 0.0547  |
| rs78622594  | T | 0.18    |
| rs114113431 | A | -0.1063 |
| rs17267677  | T | 0.1224  |
| rs282280    | G | -0.0397 |
| rs77604759  | C | 0.1981  |
| rs8180514   | G | 0.0585  |
| rs10491345  | A | 0.1418  |
| rs80201268  | G | 0.0887  |
| rs80157830  | C | 0.0491  |
| rs1261387   | G | -0.0451 |
| rs79229678  | A | 0.1381  |
| rs55884701  | T | 0.0544  |
| rs153012    | A | 0.0473  |
| rs41311341  | T | 0.124   |
| rs6897062   | C | 0.0383  |
| rs2927631   | T | 0.0431  |
| rs138257897 | C | -0.1661 |
| rs148731161 | T | 0.1562  |
| rs71613436  | C | 0.0598  |
| rs6452820   | G | -0.0558 |
| rs62371184  | T | -0.2192 |
| rs35018833  | A | -0.0961 |
| rs77390892  | T | 0.1795  |
| rs10805445  | A | -0.0402 |
| rs143445950 | A | -0.1229 |
| rs74557927  | A | 0.1542  |
| rs145371563 | T | 0.1276  |
| rs77711173  | G | -0.1754 |
| rs6883205   | G | 0.0486  |
| rs36307     | A | 0.038   |
| rs62372279  | C | -0.133  |
| rs75118214  | A | -0.1003 |

|             |   |         |
|-------------|---|---------|
| rs16889901  | A | -0.0428 |
| rs12186729  | G | -0.0591 |
| rs11741766  | C | -0.0447 |
| rs79297119  | T | 0.0496  |
| rs145421819 | T | 0.1547  |
| rs153261    | G | 0.1738  |
| rs143673159 | T | 0.2054  |
| rs1035909   | C | -0.0409 |
| rs10478742  | A | 0.0436  |
| rs2910729   | C | -0.0575 |
| rs2115210   | C | -0.0404 |
| rs138668383 | A | 0.185   |
| rs34147245  | G | -0.0388 |
| rs2964066   | A | -0.1754 |
| rs17323383  | T | 0.1049  |
| rs115777838 | T | -0.1394 |
| rs71577425  | T | -0.2494 |
| rs6595415   | A | -0.0648 |
| rs173072    | G | 0.0435  |
| rs10058560  | A | 0.0489  |
| rs57406157  | G | 0.1633  |
| rs254833    | T | 0.0391  |
| rs350042    | G | -0.0721 |
| rs6892163   | G | -0.0413 |
| rs7731318   | C | -0.0479 |
| rs706722    | A | -0.0402 |
| rs56026432  | A | -0.1307 |
| rs115080149 | T | 0.0893  |
| rs145529452 | T | -0.2453 |
| rs7725907   | C | -0.1371 |
| rs79681527  | A | -0.1623 |
| rs116969221 | G | -0.2553 |
| rs1458348   | T | 0.0449  |
| rs248340    | G | -0.0394 |
| rs2964550   | T | 0.0442  |
| rs141866682 | A | -0.1651 |
| rs146143774 | C | 0.2884  |
| rs77546691  | T | 0.2664  |
| rs3761971   | C | -0.0407 |
| rs147500202 | C | -0.1937 |
| rs6869139   | G | 0.0422  |
| rs76089769  | T | 0.2328  |
| rs10070052  | T | -0.0782 |
| rs6450140   | A | 0.0478  |
| rs148128901 | T | 0.158   |
| rs141448564 | G | 0.1466  |
| rs513165    | C | -0.0564 |

|             |   |         |
|-------------|---|---------|
| rs16898904  | T | 0.0889  |
| rs72779490  | C | -0.0815 |
| rs112815502 | A | -0.0882 |
| rs334896    | A | 0.0428  |
| rs34673178  | G | -0.0813 |
| rs55719753  | C | 0.1155  |
| rs6891142   | C | -0.0676 |
| rs77988929  | G | 0.1533  |
| rs164870    | C | -0.0497 |
| rs3857395   | G | 0.0398  |
| rs149079722 | A | 0.175   |
| rs6872378   | C | 0.1602  |
| rs307306    | T | 0.0387  |
| rs409074    | G | 0.0492  |
| rs73334286  | G | 0.0759  |
| rs113535740 | A | 0.1518  |
| rs324438    | A | 0.0423  |
| rs10474354  | T | -0.1437 |
| rs10070958  | T | 0.0456  |
| rs72781028  | T | 0.0595  |
| rs40657     | T | -0.0915 |
| rs115812240 | G | -0.2245 |
| rs172389    | C | -0.083  |
| rs10079508  | T | 0.06    |
| rs1423294   | A | -0.0421 |
| rs72758173  | G | -0.0558 |
| rs4975635   | A | -0.1545 |
| rs4317338   | G | -0.0553 |
| rs111471163 | A | -0.1548 |
| rs116476327 | T | -0.2928 |
| rs7709937   | C | 0.1679  |
| rs6453530   | G | 0.0383  |
| rs113808558 | A | -0.1073 |
| rs7445593   | T | 0.0687  |
| rs115623173 | G | 0.22    |
| rs2249616   | A | 0.0451  |
| rs72750929  | T | 0.1135  |
| rs149627557 | C | 0.191   |
| rs275489    | C | 0.0811  |
| rs895378    | A | -0.0403 |
| rs1820043   | A | 0.1981  |
| rs111459128 | A | -0.3193 |
| rs1801718   | C | 0.047   |
| rs138377433 | C | -0.2667 |
| rs10064799  | A | 0.0376  |
| rs992807    | G | -0.0699 |
| rs2252859   | G | -0.1291 |



|             |   |         |
|-------------|---|---------|
| rs10514959  | C | 0.0552  |
| rs230868    | C | 0.0409  |
| rs10050777  | C | 0.0386  |
| rs71629091  | C | -0.0591 |
| rs57072679  | A | 0.0558  |
| rs13163277  | C | -0.0461 |
| rs173758    | C | -0.0409 |
| rs6556924   | C | -0.0558 |
| rs116056790 | G | -0.206  |
| rs17799161  | T | 0.0467  |
| rs115171563 | T | 0.2625  |
| rs72799615  | A | -0.1173 |
| rs2937801   | G | 0.0626  |
| rs77797868  | C | -0.2105 |
| rs78115154  | C | 0.1237  |
| rs111684945 | C | 0.1677  |
| rs12518064  | A | -0.1134 |
| rs116535500 | T | -0.1392 |
| rs6881850   | A | 0.0579  |
| rs71626450  | C | -0.2198 |
| rs36811     | C | 0.0522  |
| rs10068414  | A | 0.0444  |
| rs11742039  | G | 0.0488  |
| rs13155647  | T | -0.0378 |
| rs116028569 | G | -0.2009 |
| rs116539587 | C | 0.1913  |
| rs79466936  | C | 0.1125  |
| rs354331    | T | 0.1186  |
| rs10073996  | T | 0.066   |
| rs4376284   | G | 0.0635  |
| rs74770633  | T | -0.1906 |
| rs72752381  | T | 0.1184  |
| rs116144993 | T | -0.0968 |
| rs158824    | T | 0.2624  |
| rs74719227  | A | 0.0866  |
| rs78237336  | T | -0.1588 |
| rs114627650 | C | 0.1772  |
| rs62381637  | T | 0.0599  |
| rs10055050  | A | 0.0432  |
| rs11740765  | T | 0.1393  |
| rs56111638  | C | -0.0416 |
| rs17084109  | G | 0.1292  |
| rs258875    | G | 0.0642  |
| rs3100935   | C | 0.0481  |
| rs78829388  | A | -0.1038 |
| rs7737127   | T | 0.0502  |
| rs147027708 | A | 0.1703  |

|             |   |         |
|-------------|---|---------|
| rs11951879  | G | 0.0746  |
| rs76976015  | G | -0.1508 |
| rs17803788  | C | 0.215   |
| rs148278867 | T | -0.2438 |
| rs4599515   | A | -0.0398 |
| rs10074585  | G | -0.0409 |
| rs72790610  | A | 0.1766  |
| rs116351538 | C | 0.0868  |
| rs2562573   | T | -0.0384 |
| rs115754602 | A | -0.1605 |
| rs10866508  | G | 0.1711  |
| rs347433    | T | -0.0863 |
| rs2545656   | G | 0.1027  |
| rs271938    | T | -0.0868 |
| rs1370965   | C | -0.0613 |
| rs116633766 | G | -0.2684 |
| rs1428282   | C | -0.0555 |
| rs74437402  | C | -0.1673 |
| rs264845    | C | 0.0386  |
| rs323673    | C | 0.0408  |
| rs76165695  | A | -0.0701 |
| rs115327059 | A | 0.1485  |
| rs115208295 | C | 0.2496  |
| rs7712580   | T | 0.049   |
| rs56033108  | G | -0.0496 |
| rs115120178 | C | 0.1329  |
| rs145049430 | G | 0.1596  |
| rs1631530   | G | 0.0411  |
| rs74502439  | G | -0.1118 |
| rs10053158  | T | -0.1521 |
| rs6878597   | T | -0.048  |
| rs146770673 | G | -0.0945 |
| rs148216059 | A | -0.2206 |
| rs2216588   | G | -0.062  |
| rs6870917   | C | -0.068  |
| rs62378684  | C | 0.0802  |
| rs115611622 | C | -0.2279 |
| rs72760281  | G | -0.1662 |
| rs4512161   | G | -0.04   |
| rs114597681 | G | -0.144  |
| rs149949213 | A | 0.1577  |
| rs62406106  | A | -0.0413 |
| rs11743544  | T | 0.0993  |
| rs10473412  | C | 0.0444  |
| rs10044103  | A | 0.0553  |
| rs150086051 | T | 0.1764  |
| rs9327375   | T | 0.0441  |

|             |   |         |
|-------------|---|---------|
| rs10940261  | A | -0.037  |
| rs7730916   | T | -0.0457 |
| rs62395179  | A | -0.0594 |
| rs74661208  | T | 0.22    |
| rs10076898  | C | 0.0837  |
| rs62342711  | A | -0.047  |
| rs6882322   | A | -0.0377 |
| rs10940005  | A | -0.0614 |
| rs1432797   | T | 0.2046  |
| rs7728647   | G | -0.0975 |
| rs35987304  | T | -0.0385 |
| rs78959072  | G | 0.0846  |
| rs4704447   | G | 0.0438  |
| rs2560520   | T | -0.0484 |
| rs76341250  | T | -0.0986 |
| rs10461497  | C | -0.0379 |
| rs76998662  | G | 0.2883  |
| rs45613531  | T | 0.1537  |
| rs2961636   | T | 0.0848  |
| rs10061009  | G | 0.3495  |
| rs11948772  | T | 0.158   |
| rs78043699  | T | -0.1437 |
| rs115293001 | T | 0.1609  |
| rs10051451  | C | -0.0457 |
| rs72768205  | C | -0.2593 |
| rs12652539  | T | 0.0393  |
| rs356447    | G | -0.0886 |
| rs75710504  | C | -0.1873 |
| rs10042915  | C | 0.174   |
| rs79567601  | C | 0.0948  |
| rs271213    | G | 0.0467  |
| rs112415189 | G | -0.1577 |
| rs71604185  | C | 0.1791  |
| rs10072475  | G | 0.0573  |
| rs62372406  | T | 0.2022  |
| rs35840971  | T | -0.0781 |
| rs138811672 | T | 0.1884  |
| rs10475219  | T | 0.0533  |
| rs112197512 | T | 0.093   |
| rs75246422  | T | 0.0593  |
| rs114729761 | G | -0.1169 |
| rs116771392 | G | 0.1543  |
| rs76001528  | C | 0.0602  |
| rs4700414   | A | -0.0442 |
| rs76071360  | A | -0.1911 |
| rs78851373  | G | 0.1317  |
| rs62359099  | A | 0.1867  |

|             |   |         |
|-------------|---|---------|
| rs75546961  | T | 0.0553  |
| rs7701234   | T | 0.0607  |
| rs144960055 | C | -0.1096 |
| rs375260    | C | -0.0723 |
| rs12655342  | G | 0.0537  |
| rs111621500 | T | -0.194  |
| rs7724808   | T | 0.0842  |
| rs78274939  | A | 0.1596  |
| rs166264    | C | 0.0514  |
| rs79062115  | C | 0.1609  |
| rs10045892  | A | -0.0503 |
| rs636354    | A | 0.2393  |
| rs9327305   | T | -0.0662 |
| rs12187428  | A | -0.1715 |
| rs17367158  | C | 0.1811  |
| rs72738411  | A | 0.1044  |
| rs10065697  | C | -0.0592 |
| rs66553670  | T | 0.0695  |
| rs169822    | A | -0.0489 |
| rs4554269   | C | 0.0395  |
| rs161511    | C | 0.096   |
| rs1531234   | T | 0.037   |
| rs72494183  | A | -0.0888 |
| rs159945    | T | -0.0893 |
| rs77769375  | A | -0.2489 |
| rs145408087 | G | 0.1902  |
| rs112610979 | C | 0.1814  |
| rs74723465  | A | 0.0854  |
| rs442232    | G | -0.0528 |
| rs116460392 | T | -0.2364 |
| rs115886253 | A | -0.248  |
| rs7715823   | G | -0.2007 |
| rs10038344  | T | -0.0367 |
| rs113931070 | G | 0.0923  |
| rs2636973   | G | -0.0445 |
| rs7718001   | C | -0.0462 |
| rs112221277 | T | 0.0856  |
| rs77415726  | C | -0.3058 |
| rs116552503 | A | -0.1056 |
| rs144474106 | T | 0.3133  |
| rs71641951  | T | 0.1179  |
| rs76383005  | A | 0.0752  |
| rs318004    | T | 0.0525  |
| rs7379318   | A | 0.0393  |
| rs79273355  | T | 0.1294  |
| rs1010250   | C | -0.0576 |
| rs700917    | A | -0.0364 |

|             |   |         |
|-------------|---|---------|
| rs17650871  | C | 0.0793  |
| rs164436    | A | 0.0384  |
| rs7727002   | G | 0.0388  |
| rs61729480  | C | 0.0967  |
| rs9800337   | A | -0.0905 |
| rs35020694  | T | 0.3414  |
| rs62384005  | T | 0.2048  |
| rs347426    | A | -0.0373 |
| rs115479662 | T | 0.1025  |
| rs35550655  | T | -0.1395 |
| rs6895877   | G | 0.0392  |
| rs41358349  | G | -0.1321 |
| rs11749694  | T | 0.1581  |
| rs62353607  | C | 0.0888  |
| rs7737572   | T | -0.0525 |
| rs73254248  | T | 0.1035  |
| rs113214066 | A | -0.1851 |
| rs4704693   | C | 0.0977  |
| rs10052682  | G | -0.0407 |
| rs12518229  | C | -0.0387 |
| rs6883033   | A | -0.1576 |
| rs76821534  | G | -0.0518 |
| rs77913425  | A | 0.0978  |
| rs148692666 | C | -0.1527 |
| rs78561168  | A | 0.165   |
| rs12520611  | G | 0.0647  |
| rs71652152  | T | 0.2926  |
| rs61203679  | C | -0.2619 |
| rs66615905  | T | 0.054   |
| rs75609965  | A | 0.1362  |
| rs55650501  | T | -0.0804 |
| rs116203754 | A | -0.1468 |
| rs11954115  | C | -0.092  |
| rs1963856   | C | 0.1369  |
| rs11741131  | G | 0.0528  |
| rs3930398   | T | 0.0401  |
| rs115490114 | T | 0.1351  |
| rs12659837  | T | 0.0813  |
| rs1852723   | A | -0.0372 |
| rs78576058  | C | -0.1639 |
| rs78839803  | C | -0.2785 |
| rs702640    | T | -0.0366 |
| rs2913246   | T | 0.0471  |
| rs62350667  | C | -0.0584 |
| rs34240069  | A | -0.2314 |
| rs10074227  | T | -0.0364 |
| rs13165515  | A | 0.1742  |

|             |   |         |
|-------------|---|---------|
| rs34863649  | T | 0.0527  |
| rs9716005   | G | 0.056   |
| rs155349    | A | -0.0451 |
| rs11739870  | T | -0.1536 |
| rs71588370  | G | 0.1038  |
| rs16898024  | C | 0.0576  |
| rs11747709  | T | -0.0483 |
| rs115847863 | G | -0.2588 |
| rs10866713  | A | 0.0444  |
| rs17362907  | C | -0.1615 |
| rs11744046  | T | 0.039   |
| rs10053243  | A | -0.0547 |
| rs415721    | A | 0.0457  |
| rs76369882  | T | 0.0845  |
| rs13174846  | A | -0.1057 |
| rs78660570  | C | 0.1546  |
| rs151101649 | G | -0.2661 |
| rs6890989   | T | 0.0428  |
| rs80348211  | C | 0.1501  |
| rs6870488   | G | 0.0622  |
| rs459770    | G | -0.0393 |
| rs10065611  | C | -0.0439 |
| rs71604198  | A | 0.2058  |
| rs11958830  | C | 0.0494  |
| rs11741938  | A | -0.0381 |
| rs7703481   | T | 0.0643  |
| rs76876998  | A | 0.1622  |
| rs62370418  | C | 0.0431  |
| rs2900098   | T | -0.0437 |
| rs1494066   | A | -0.044  |
| rs9716277   | C | -0.0476 |
| rs68032127  | C | 0.1137  |
| rs77602684  | T | 0.1075  |
| rs12651778  | A | 0.0671  |
| rs144070522 | C | 0.2775  |
| rs7735782   | A | 0.0681  |
| rs62373329  | G | 0.129   |
| rs149064213 | T | -0.2304 |
| rs112113790 | A | 0.1309  |
| rs6874460   | G | 0.0577  |
| rs13176090  | A | -0.1816 |
| rs971916    | C | -0.1132 |
| rs62381783  | T | 0.0471  |
| rs35728418  | A | 0.0982  |
| rs414754    | T | -0.0601 |
| rs145633910 | A | -0.1929 |
| rs56225510  | A | 0.0616  |

|             |   |         |
|-------------|---|---------|
| rs10477653  | G | 0.0666  |
| rs149403689 | T | -0.2938 |
| rs17720191  | A | 0.0485  |
| rs146315802 | G | -0.2669 |
| rs11738825  | C | -0.0388 |
| rs1644287   | G | -0.0431 |
| rs1592876   | T | 0.0443  |
| rs17165234  | G | 0.1551  |
| rs72727380  | C | 0.2425  |
| rs177438    | T | 0.0379  |
| rs116013137 | T | -0.1375 |
| rs62364700  | T | -0.0527 |
| rs77090738  | T | -0.0718 |
| rs7736526   | T | -0.0403 |
| rs2350640   | A | 0.0367  |
| rs251430    | T | -0.0371 |
| rs6894433   | C | 0.1169  |
| rs55783710  | T | 0.0967  |
| rs115636842 | G | 0.1019  |
| rs300263    | T | 0.0442  |
| rs62328804  | T | -0.2023 |
| rs115858392 | T | 0.1514  |
| rs72801474  | A | 0.0894  |
| rs13159489  | T | -0.0611 |
| rs75527168  | C | -0.1382 |
| rs150464121 | A | -0.155  |
| rs35375483  | T | -0.0536 |
| rs13357839  | A | -0.1061 |
| rs112366449 | A | 0.1266  |
| rs475655    | C | 0.1604  |
| rs35760173  | A | 0.2388  |
| rs6554928   | C | 0.0366  |
| rs74722751  | T | 0.2774  |
| rs12109256  | C | 0.058   |
| rs4700401   | A | 0.0427  |
| rs34351120  | C | 0.0609  |
| rs56276808  | A | 0.0461  |
| rs13173191  | G | -0.1941 |
| rs17223381  | A | 0.0541  |
| rs1154758   | C | -0.0366 |
| rs76857197  | T | -0.2085 |
| rs6876737   | A | 0.0375  |
| rs114470612 | G | -0.276  |
| rs75314766  | A | 0.1812  |
| rs7702512   | T | -0.0872 |
| rs3096032   | T | 0.0529  |
| rs11743498  | G | -0.0411 |

|             |   |         |
|-------------|---|---------|
| rs1059236   | G | -0.0676 |
| rs2974571   | A | -0.0361 |
| rs73088907  | A | 0.0849  |
| rs145421262 | T | -0.1986 |
| rs112200846 | G | -0.1038 |
| rs115797546 | A | -0.1533 |
| rs79987984  | G | -0.0625 |
| rs16903375  | C | 0.0882  |
| rs1910057   | G | -0.0396 |
| rs13172523  | A | -0.077  |
| rs62362314  | C | -0.1435 |
| rs75820777  | A | -0.108  |
| rs17762082  | T | 0.0793  |
| rs7726249   | G | 0.0391  |
| rs114171468 | T | -0.0927 |
| rs7721974   | G | 0.0363  |
| rs73282538  | A | 0.2042  |
| rs163433    | T | 0.0393  |
| rs12515546  | T | -0.0549 |
| rs36072175  | A | 0.1838  |
| rs72792036  | A | -0.221  |
| rs218043    | T | 0.0391  |
| rs72776725  | A | -0.1251 |
| rs72491364  | A | -0.0746 |
| rs13189182  | T | 0.0758  |
| rs138692848 | G | -0.0824 |
| rs765505    | G | 0.0454  |
| rs11742397  | T | 0.0436  |
| rs62360231  | T | 0.0676  |
| rs10045562  | G | -0.0358 |
| rs62354980  | A | -0.1965 |
| rs115646952 | G | -0.2044 |
| rs12520078  | T | 0.0849  |
| rs72803430  | T | 0.221   |
| rs78536218  | T | 0.121   |
| rs146313255 | A | -0.1892 |
| rs10039774  | A | 0.2489  |
| rs34915065  | A | 0.0357  |
| rs114823969 | G | 0.1127  |
| rs75821411  | C | 0.1493  |
| rs115650403 | T | 0.2083  |
| rs6877500   | T | 0.2811  |
| rs72780453  | T | 0.0848  |
| rs72762741  | T | 0.0665  |
| rs112127627 | G | -0.0579 |
| rs13361175  | T | 0.0364  |
| rs76441131  | A | -0.1452 |



|             |   |         |
|-------------|---|---------|
| rs35195537  | T | 0.0458  |
| rs4975726   | G | -0.0403 |
| rs924093    | T | 0.0459  |
| rs469280    | G | 0.0426  |
| rs115078214 | A | 0.0855  |
| rs7705243   | T | 0.0383  |
| rs7701321   | G | 0.0876  |
| rs28566539  | T | -0.0506 |
| rs17530768  | G | 0.0638  |
| rs114068841 | C | -0.1353 |
| rs31837     | A | 0.0661  |
| rs2086136   | T | -0.0367 |
| rs145278880 | C | 0.052   |
| rs17191346  | G | -0.1377 |
| rs836797    | T | 0.0366  |
| rs17233321  | G | -0.1128 |
| rs62366700  | G | -0.0401 |
| rs10478774  | C | -0.0374 |
| rs56289418  | C | -0.32   |
| rs2043048   | A | -0.0365 |
| rs114482621 | A | -0.185  |
| rs76798728  | T | 0.0964  |
| rs77597518  | T | 0.1083  |
| rs112249745 | C | 0.2284  |
| rs2402348   | C | 0.0367  |
| rs77976407  | T | 0.1131  |
| rs889022    | C | -0.0452 |
| rs1374089   | A | -0.1821 |
| rs17197133  | A | -0.0725 |
| rs115281990 | T | 0.1137  |
| rs31250     | C | 0.0423  |
| rs10060706  | C | -0.0765 |
| rs13189844  | A | -0.085  |
| rs35017972  | T | -0.1211 |
| rs58551365  | T | -0.0448 |
| rs2029873   | G | -0.1221 |
| rs889226    | C | 0.0427  |
| rs2201416   | A | 0.0994  |
| rs76413089  | T | -0.1001 |
| rs80333428  | A | 0.103   |
| rs11745797  | T | 0.0991  |
| rs890824    | T | -0.0507 |
| rs115505631 | G | 0.183   |
| rs2278265   | T | -0.0435 |
| rs75387589  | G | 0.101   |
| rs6452857   | G | -0.0426 |
| rs75391564  | A | 0.0541  |

|             |   |         |
|-------------|---|---------|
| rs2560824   | T | -0.0658 |
| rs17650177  | T | -0.0542 |
| rs159178    | G | -0.0478 |
| rs74661537  | G | 0.0584  |
| rs13357734  | T | 0.0363  |
| rs73798503  | G | 0.0591  |
| rs17099022  | T | 0.1008  |
| rs715847    | A | 0.0475  |
| rs147403246 | C | 0.1841  |
| rs6861188   | T | 0.0373  |
| rs10073872  | A | -0.0398 |
| rs112856628 | C | 0.1353  |
| rs72814069  | A | 0.1081  |
| rs11739989  | G | -0.0382 |
| rs112831860 | C | 0.0587  |
| rs1559097   | T | 0.0974  |
| rs115076851 | G | -0.151  |
| rs114936058 | G | 0.1689  |
| rs72787139  | T | 0.1469  |
| rs62361987  | A | 0.1907  |
| rs7443674   | C | 0.1034  |
| rs10061174  | T | 0.0381  |
| rs6866961   | T | -0.0678 |
| rs7734050   | G | -0.0406 |
| rs17789300  | T | 0.1464  |
| rs6888913   | G | -0.0656 |
| rs265918    | T | 0.0831  |
| rs6887251   | T | -0.12   |
| rs114718260 | G | 0.1855  |
| rs3132145   | C | -0.0651 |
| rs59650752  | C | 0.0681  |
| rs116731418 | T | 0.1612  |
| rs79660427  | T | 0.1541  |
| rs139021395 | A | 0.1612  |
| rs112741081 | A | 0.0919  |
| rs145980512 | A | 0.0989  |
| rs565335    | T | -0.0469 |
| rs149084    | C | 0.0535  |
| rs10900774  | T | 0.0428  |
| rs73076132  | A | -0.0521 |
| rs71586080  | A | -0.0424 |
| rs77688818  | A | -0.2513 |
| rs150910074 | T | -0.2461 |
| rs115930379 | T | -0.1845 |
| rs17314584  | T | 0.1474  |
| rs17136716  | T | -0.0489 |
| rs11747139  | C | 0.0409  |

|             |   |         |
|-------------|---|---------|
| rs116363204 | G | 0.1049  |
| rs56106466  | A | 0.0541  |
| rs74449972  | G | -0.2295 |
| rs149726987 | T | 0.092   |
| rs309335    | C | 0.041   |
| rs77705550  | T | 0.1457  |
| rs10940072  | A | -0.0353 |
| rs149832560 | G | 0.1445  |
| rs16888249  | C | 0.1991  |
| rs142502036 | A | 0.1537  |
| rs149415708 | T | -0.2016 |
| rs76226881  | G | 0.0715  |
| rs34325832  | G | 0.0522  |
| rs11740355  | G | 0.0701  |
| rs116700443 | A | 0.2011  |
| rs26076     | A | 0.048   |
| rs35734818  | G | 0.1154  |
| rs142396656 | A | 0.1699  |
| rs114447755 | G | 0.1831  |
| rs12653107  | T | -0.0359 |
| rs10059563  | C | -0.0573 |
| rs148884099 | G | 0.1753  |
| rs12654253  | A | -0.057  |
| rs79477877  | C | -0.1101 |
| rs146198134 | T | -0.0672 |
| rs114893010 | T | 0.2001  |
| rs147131583 | A | 0.1273  |
| rs79121223  | T | -0.0919 |
| rs2636101   | A | -0.0353 |
| rs17523262  | C | 0.0602  |
| rs1565895   | T | 0.0524  |
| rs13178390  | G | 0.0408  |
| rs75544947  | T | 0.1829  |
| rs922436    | T | -0.0675 |
| rs1015624   | T | 0.1261  |
| rs11749598  | T | -0.2281 |
| rs2544700   | G | -0.0553 |
| rs115118278 | C | 0.1404  |
| rs811599    | G | 0.036   |
| rs139467184 | C | 0.1287  |
| rs160873    | G | 0.0365  |
| rs113346664 | A | -0.2291 |
| rs73023422  | T | 0.2505  |
| rs115763073 | T | 0.1544  |
| rs10056753  | A | 0.0464  |
| rs62381841  | T | 0.1271  |
| rs327833    | G | 0.0619  |

|             |   |         |
|-------------|---|---------|
| rs150840102 | T | -0.1003 |
| rs151209347 | C | 0.1428  |
| rs6891343   | T | -0.0439 |
| rs78423157  | G | 0.0849  |
| rs77305101  | C | -0.1321 |
| rs78680449  | A | -0.302  |
| rs1439607   | G | -0.037  |
| rs341883    | C | 0.0566  |
| rs4295369   | A | 0.0758  |
| rs7734420   | T | -0.0394 |
| rs1073567   | G | 0.128   |
| rs391707    | A | 0.0366  |
| rs35978340  | C | -0.1386 |
| rs150648378 | C | -0.2839 |
| rs13189082  | G | 0.041   |
| rs2915800   | A | -0.0457 |
| rs73326014  | C | -0.2572 |
| rs112288823 | T | 0.142   |
| rs13168447  | T | 0.0365  |
| rs116557884 | T | -0.1274 |
| rs62350967  | T | 0.083   |
| rs1030182   | T | 0.0371  |
| rs1560064   | A | -0.0521 |
| rs78537725  | C | -0.2344 |
| rs114395716 | A | 0.1178  |
| rs3756616   | A | 0.0367  |
| rs72756829  | A | -0.1854 |
| rs4704756   | T | 0.0716  |
| rs115851665 | T | -0.1467 |
| rs171752    | C | 0.0359  |
| rs4704006   | C | -0.0395 |
| rs13361446  | G | -0.0397 |
| rs458160    | T | 0.1417  |
| rs57755609  | T | -0.1794 |
| rs148259252 | C | -0.203  |
| rs76969222  | T | 0.1769  |
| rs251295    | G | -0.0356 |
| rs2594864   | A | 0.0859  |
| rs77923728  | G | -0.2144 |
| rs11743430  | T | -0.0361 |
| rs6895209   | C | 0.0613  |
| rs114323007 | A | 0.2211  |
| rs258820    | A | -0.0359 |
| rs75265867  | G | 0.1104  |
| rs149417399 | G | 0.26    |
| rs6879328   | T | -0.0383 |
| rs2221272   | G | 0.036   |

|             |   |         |
|-------------|---|---------|
| rs115665697 | T | 0.172   |
| rs115824169 | A | -0.0483 |
| rs13178078  | G | -0.0386 |
| rs12153591  | C | 0.0875  |
| rs11241708  | A | 0.0352  |
| rs153450    | A | 0.0456  |
| rs391474    | G | 0.0452  |
| rs17275319  | T | 0.0782  |
| rs72763129  | C | 0.0545  |
| rs6894325   | T | -0.0732 |
| rs10514303  | A | -0.0625 |
| rs10063341  | T | 0.0729  |
| rs144907801 | T | 0.0982  |
| rs141831969 | G | 0.1461  |
| rs6862020   | T | 0.0399  |
| rs74492166  | G | 0.0935  |
| rs6866304   | G | -0.0356 |
| rs111519738 | T | -0.185  |
| rs1148362   | G | 0.0747  |
| rs115678276 | T | 0.1003  |
| rs57212455  | G | 0.0649  |
| rs11750870  | G | 0.1379  |
| rs1080826   | A | 0.0434  |
| rs143970447 | T | 0.2491  |
| rs116397156 | A | 0.196   |
| rs7721515   | T | -0.0536 |
| rs114028795 | A | 0.1861  |
| rs79173153  | T | 0.1747  |
| rs4487463   | C | -0.1072 |
| rs10037489  | G | -0.0404 |
| rs3829987   | A | 0.1212  |
| rs17154140  | A | 0.069   |
| rs17607923  | C | 0.1687  |
| rs7718378   | T | 0.1788  |
| rs2972332   | A | 0.072   |
| rs115962749 | G | 0.2077  |
| rs112111070 | T | 0.1379  |
| rs17352686  | C | -0.0398 |
| rs1469104   | A | 0.0343  |
| rs12189436  | G | -0.0613 |
| rs75386791  | G | 0.1594  |
| rs115484225 | T | -0.183  |
| rs7714234   | G | -0.0422 |
| rs144482664 | C | 0.2043  |
| rs80337961  | G | -0.1175 |
| rs281134    | A | 0.0498  |
| rs150054275 | T | 0.3415  |

|             |   |         |
|-------------|---|---------|
| rs12657536  | A | -0.0433 |
| rs76749537  | C | 0.1687  |
| rs10515630  | T | 0.2976  |
| rs58144271  | C | 0.1589  |
| rs78964020  | G | 0.137   |
| rs111983365 | G | -0.159  |
| rs79879776  | C | 0.0956  |
| rs79419306  | A | -0.2506 |
| rs159729    | A | 0.038   |
| rs77830299  | C | 0.0955  |
| rs10078999  | C | -0.0352 |
| rs11740482  | A | -0.1279 |
| rs296404    | G | -0.1714 |
| rs139425945 | G | 0.1534  |
| rs17797667  | C | 0.1062  |
| rs72835351  | A | -0.1295 |
| rs139325176 | C | 0.297   |
| rs10052142  | A | -0.0778 |
| rs79983152  | A | 0.2026  |
| rs62370434  | A | -0.1375 |
| rs76055328  | G | 0.1544  |
| rs142261229 | A | 0.1124  |
| rs13156451  | C | 0.0492  |
| rs10071245  | A | 0.0628  |
| rs318398    | A | -0.0383 |
| rs116341734 | G | 0.2606  |
| rs468494    | A | -0.0507 |
| rs10068583  | T | 0.0782  |
| rs9327668   | T | -0.0611 |
| rs2453299   | A | 0.0488  |
| rs146403851 | C | 0.2633  |
| rs77216091  | G | -0.0938 |
| rs114864685 | G | 0.0898  |
| rs112160985 | A | -0.2643 |
| rs4705944   | A | 0.1216  |
| rs116780415 | A | -0.1692 |
| rs13167261  | G | 0.1189  |
| rs142974302 | A | -0.2319 |
| rs74959667  | G | 0.075   |
| rs11744429  | A | -0.0475 |
| rs11956778  | T | 0.1027  |
| rs13185328  | A | -0.071  |
| rs72781281  | C | 0.1055  |
| rs79096859  | C | -0.2216 |
| rs277054    | G | 0.0445  |
| rs1154735   | T | -0.0352 |
| rs34074582  | C | -0.1685 |

|             |   |         |
|-------------|---|---------|
| rs7732088   | G | 0.0835  |
| rs10075377  | T | 0.0342  |
| rs6862580   | G | 0.0497  |
| rs246387    | T | -0.2069 |
| rs34803595  | T | 0.0616  |
| rs115305711 | A | 0.0889  |
| rs76796138  | C | 0.1855  |
| rs2081838   | T | -0.1158 |
| rs76452612  | A | -0.1051 |
| rs75198306  | C | 0.1086  |
| rs2561277   | C | 0.041   |
| rs17083806  | T | 0.2518  |
| rs73757564  | A | -0.1106 |
| rs7705051   | T | -0.0364 |
| rs73315617  | A | -0.1431 |
| rs17692739  | T | -0.0368 |
| rs74902680  | T | -0.1476 |
| rs4912860   | G | -0.0574 |
| rs489077    | C | 0.0864  |
| rs113460149 | A | 0.1261  |
| rs117208334 | T | 0.1061  |
| rs75833750  | C | -0.1482 |
| rs144537600 | C | 0.2643  |
| rs4604209   | T | 0.0428  |
| rs75900621  | T | 0.0836  |
| rs456863    | G | 0.0407  |
| rs10476513  | C | -0.0401 |
| rs116050238 | G | -0.1339 |
| rs78189034  | G | 0.1596  |
| rs76288065  | A | -0.2373 |
| rs825393    | G | -0.1891 |
| rs1175307   | A | 0.1189  |
| rs143622642 | G | 0.2041  |
| rs12516486  | A | -0.058  |
| rs2338211   | T | 0.0363  |
| rs144171439 | A | 0.2671  |
| rs116413686 | G | 0.1259  |
| rs79757330  | A | 0.1401  |
| rs55926015  | G | -0.0875 |
| rs73323775  | T | 0.0766  |
| rs56047874  | A | -0.0931 |
| rs11749222  | T | -0.0386 |
| rs16872476  | G | -0.0452 |
| rs10080199  | C | 0.1249  |
| rs77624502  | A | -0.0756 |
| rs7722746   | T | 0.036   |
| rs75637320  | T | 0.1531  |

|             |   |         |
|-------------|---|---------|
| rs143305664 | G | 0.1705  |
| rs59190821  | C | -0.0408 |
| rs154261    | A | 0.0439  |
| rs146384059 | T | -0.2396 |
| rs2270899   | T | 0.0641  |
| rs76267040  | T | -0.1136 |
| rs17169302  | A | 0.0597  |
| rs76323515  | C | 0.1218  |
| rs28434025  | T | 0.1361  |
| rs149570576 | T | -0.1762 |
| rs260996    | C | -0.0445 |
| rs1426088   | C | 0.1289  |
| rs1948755   | A | 0.0937  |
| rs152700    | A | 0.0387  |
| rs145327232 | C | 0.1935  |
| rs10477857  | A | -0.0405 |
| rs79420339  | G | 0.2717  |
| rs350452    | T | -0.0771 |
| rs72767911  | C | 0.1324  |
| rs7729166   | T | 0.0417  |
| rs75267496  | C | -0.2016 |
| rs115002220 | G | 0.1603  |
| rs13156050  | A | 0.0545  |
| rs733032    | T | 0.0352  |
| rs13153089  | C | -0.0481 |
| rs78255279  | A | 0.1116  |
| rs1705863   | T | 0.0797  |
| rs10042243  | T | 0.0349  |
| rs390954    | T | -0.0563 |
| rs114995504 | G | 0.1874  |
| rs187505    | C | 0.2264  |
| rs76998435  | A | -0.0858 |
| rs861185    | G | -0.0429 |
| rs1500259   | G | 0.0378  |
| rs10063658  | T | 0.0991  |
| rs4608976   | A | 0.1105  |
| rs73781851  | A | 0.1987  |
| rs77403484  | A | -0.1376 |
| rs3934591   | A | 0.035   |
| rs140097264 | A | 0.1781  |
| rs116279824 | G | 0.2956  |
| rs114434771 | G | -0.1314 |
| rs3776567   | C | -0.0719 |
| rs4702211   | A | 0.1068  |
| rs6881525   | C | -0.0764 |
| rs62355188  | G | 0.1952  |
| rs10475476  | G | 0.0798  |



|             |   |         |
|-------------|---|---------|
| rs889324    | T | 0.0899  |
| rs60425019  | G | 0.0582  |
| rs288864    | A | -0.0336 |
| rs10065531  | T | 0.0354  |
| rs142236689 | G | 0.1409  |
| rs72788669  | T | -0.1128 |
| rs150651372 | A | 0.201   |
| rs111912908 | C | 0.0928  |
| rs115827369 | C | -0.1382 |
| rs11958640  | A | -0.1389 |
| rs12186497  | G | 0.0352  |
| rs114645182 | C | 0.2174  |
| rs76134513  | C | -0.0433 |
| rs11241196  | G | -0.0363 |
| rs10066438  | A | -0.0474 |
| rs115628511 | A | -0.1199 |
| rs3097777   | C | -0.1292 |
| rs2044065   | T | 0.1518  |
| rs114647884 | G | 0.2468  |
| rs73248944  | T | -0.1147 |
| rs12153723  | G | -0.082  |
| rs72799565  | T | 0.165   |
| rs10512986  | G | -0.1651 |
| rs116285830 | A | 0.1053  |
| rs17786186  | A | -0.0373 |
| rs12153196  | T | 0.0369  |
| rs10065435  | C | 0.0522  |
| rs13153644  | A | -0.164  |
| rs90682     | C | 0.0364  |
| rs139267086 | T | -0.0575 |
| rs25943     | C | -0.0479 |
| rs7710600   | T | 0.0385  |
| rs141681569 | A | -0.2161 |
| rs62361895  | T | 0.0547  |
| rs628871    | C | 0.0506  |
| rs4590189   | A | -0.0464 |
| rs77794169  | T | -0.25   |
| rs1835038   | A | -0.0619 |
| rs76373643  | G | -0.0772 |
| rs13340387  | C | -0.0774 |
| rs13361997  | C | 0.0455  |
| rs35682327  | T | -0.0441 |
| rs144992039 | G | 0.2069  |
| rs6878643   | T | -0.0424 |
| rs79956101  | A | 0.1021  |
| rs78853971  | G | -0.1566 |
| rs76046133  | A | 0.1598  |

|             |   |         |
|-------------|---|---------|
| rs255518    | C | -0.041  |
| rs1006549   | A | -0.0452 |
| rs7349835   | C | 0.0866  |
| rs74490548  | T | -0.2516 |
| rs17804984  | A | -0.1547 |
| rs114608946 | C | 0.0801  |
| rs160280    | A | -0.0389 |
| rs75197808  | C | -0.1817 |
| rs10069000  | T | 0.0374  |
| rs13187977  | T | 0.045   |
| rs114182946 | C | 0.1068  |
| rs62367816  | C | 0.0357  |
| rs77187400  | T | 0.1075  |
| rs258523    | A | -0.0359 |
| rs139110426 | G | 0.2221  |
| rs150976434 | G | 0.2022  |
| rs142504205 | C | 0.1756  |
| rs11954821  | T | 0.0695  |
| rs6862256   | C | 0.063   |
| rs146527697 | T | -0.1166 |
| rs13741     | T | 0.0453  |
| rs7713065   | A | 0.0392  |
| rs13152886  | T | -0.1226 |
| rs10071812  | G | -0.0353 |
| rs140677337 | A | -0.1345 |
| rs146820664 | G | 0.2108  |
| rs6449621   | A | 0.1913  |
| rs75531116  | T | 0.1838  |
| rs146076273 | G | -0.0854 |
| rs10514336  | T | -0.1918 |
| rs78458156  | C | 0.264   |
| rs34739826  | T | 0.0673  |
| rs114685606 | T | 0.0882  |
| rs115161402 | A | 0.3114  |
| rs10040940  | C | -0.0636 |
| rs10051286  | C | -0.0349 |
| rs4515290   | T | 0.0352  |
| rs151275746 | A | -0.0804 |
| rs6861112   | A | -0.0426 |
| rs6882846   | C | -0.0564 |
| rs2243302   | A | 0.0849  |
| rs72794023  | C | -0.0485 |
| rs4976055   | T | -0.04   |
| rs13168532  | A | -0.1093 |
| rs2910114   | G | 0.039   |
| rs490928    | T | 0.041   |
| rs72778778  | G | -0.0737 |

|             |   |         |
|-------------|---|---------|
| rs10068619  | T | -0.052  |
| rs6580395   | C | -0.0391 |
| rs145738817 | A | 0.2553  |
| rs1501839   | C | -0.0447 |
| rs115246584 | C | 0.1894  |
| rs4835903   | A | 0.0717  |
| rs12656560  | C | -0.0353 |
| rs6580256   | T | 0.0645  |
| rs114231705 | T | 0.1141  |
| rs10055665  | T | -0.0339 |
| rs138635547 | G | 0.132   |
| rs17775895  | C | -0.0548 |
| rs256102    | A | 0.1048  |
| rs2913770   | T | 0.0462  |
| rs78524507  | G | -0.1664 |
| rs1498928   | A | 0.0593  |
| rs62377196  | A | 0.074   |
| rs247520    | C | 0.0401  |
| rs77417304  | G | 0.0712  |
| rs80272607  | A | 0.1801  |
| rs116691038 | G | 0.269   |
| rs55734275  | G | -0.0556 |
| rs34846940  | A | 0.049   |
| rs12519342  | A | -0.0417 |
| rs34817407  | A | -0.0408 |
| rs72810084  | G | -0.0717 |
| rs4958361   | C | -0.0336 |
| rs139158651 | T | 0.1486  |
| rs111521468 | T | 0.0422  |
| rs78528065  | T | -0.0565 |
| rs79035284  | G | 0.217   |
| rs11960365  | T | -0.0479 |
| rs116376669 | A | 0.1466  |
| rs74378324  | C | -0.1447 |
| rs11960897  | T | 0.1264  |
| rs246769    | A | -0.0426 |
| rs114441735 | A | 0.1174  |
| rs77492065  | A | 0.1745  |
| rs1368438   | T | -0.0342 |
| rs11557568  | T | 0.1708  |
| rs114082589 | C | -0.2729 |
| rs74540949  | A | 0.1742  |
| rs80122572  | G | 0.2172  |
| rs4958191   | G | -0.0374 |
| rs80075704  | C | 0.1371  |
| rs73344225  | G | 0.0957  |
| rs73274883  | A | 0.1396  |

|             |   |         |
|-------------|---|---------|
| rs137902614 | A | -0.0981 |
| rs249728    | A | -0.036  |
| rs4836434   | T | 0.0439  |
| rs73754328  | C | 0.0853  |
| rs7728215   | A | -0.0425 |
| rs1694064   | T | 0.0343  |
| rs73772666  | T | 0.0905  |
| rs11555275  | T | 0.1958  |
| rs79423478  | T | 0.0905  |
| rs11738856  | G | -0.1773 |
| rs40722     | G | -0.0362 |
| rs36117773  | C | -0.1143 |
| rs79274321  | A | 0.075   |
| rs150446468 | A | 0.1506  |
| rs139389372 | G | -0.2725 |
| rs76711950  | A | 0.1027  |
| rs78257539  | G | 0.1356  |
| rs79974920  | T | 0.11    |
| rs62341581  | A | 0.0384  |
| rs73300952  | A | -0.0585 |
| rs796893    | G | 0.1009  |
| rs16868044  | G | 0.2055  |
| rs114770246 | C | 0.1532  |
| rs7443444   | A | -0.1801 |
| rs78103527  | C | -0.3156 |
| rs74503244  | C | -0.0848 |
| rs113534626 | G | -0.1754 |
| rs114066544 | C | 0.1895  |
| rs6595428   | G | -0.0366 |
| rs55710479  | T | 0.0726  |
| rs2161533   | C | 0.0351  |
| rs74756208  | G | 0.1429  |
| rs17074035  | T | -0.0718 |
| rs72750190  | C | 0.1232  |
| rs2432144   | T | -0.0486 |
| rs2594860   | G | 0.0337  |
| rs56272130  | T | 0.0538  |
| rs2546904   | G | -0.0355 |
| rs17633307  | C | -0.0794 |
| rs6875133   | C | -0.0828 |
| rs265984    | C | 0.0348  |
| rs350930    | G | 0.0887  |
| rs62385130  | T | 0.0883  |
| rs62374606  | G | 0.1902  |
| rs11741331  | T | 0.0348  |
| rs4376296   | A | 0.0371  |
| rs26914     | T | 0.0347  |

|             |   |         |
|-------------|---|---------|
| rs1182085   | G | -0.1281 |
| rs216124    | A | -0.0423 |
| rs145419903 | T | 0.1972  |
| rs72782310  | A | -0.1362 |
| rs114951387 | G | 0.1479  |
| rs1377333   | C | 0.0427  |
| rs56958517  | A | -0.0489 |
| rs76444309  | G | -0.1231 |
| rs74849218  | T | 0.1366  |
| rs16881275  | G | 0.068   |
| rs78785440  | A | -0.229  |
| rs11955915  | G | 0.0542  |
| rs2330728   | A | -0.0606 |
| rs16903320  | C | 0.0642  |
| rs17327526  | A | 0.0408  |
| rs78909387  | A | 0.0919  |
| rs2032805   | T | 0.0473  |
| rs257003    | A | -0.2177 |
| rs115655007 | T | 0.1826  |
| rs76991357  | A | -0.0628 |
| rs115244890 | G | 0.1324  |
| rs1465689   | A | 0.0714  |
| rs72848138  | G | -0.0549 |
| rs74846498  | G | 0.1345  |
| rs61734263  | A | -0.1696 |
| rs79815391  | G | 0.0726  |
| rs1493246   | A | -0.0401 |
| rs116807223 | A | -0.1181 |
| rs11949034  | A | 0.0335  |
| rs11750308  | A | 0.045   |
| rs2961772   | G | 0.0342  |
| rs114304148 | T | -0.1438 |
| rs114307780 | A | -0.1356 |
| rs113978759 | T | 0.1715  |
| rs140116951 | T | 0.1885  |
| rs77486821  | C | 0.116   |
| rs6873862   | G | 0.1464  |
| rs139206733 | A | 0.2269  |
| rs62378712  | C | 0.038   |
| rs11959399  | A | 0.0861  |
| rs77979139  | A | 0.135   |
| rs116383897 | T | 0.1411  |
| rs16886656  | C | 0.1222  |
| rs143677427 | G | -0.1891 |
| rs11741189  | T | -0.0446 |
| rs7727701   | C | -0.0377 |
| rs115295612 | T | 0.1419  |

|             |   |         |
|-------------|---|---------|
| rs62356139  | C | -0.1754 |
| rs4377712   | A | -0.0352 |
| rs114378857 | A | 0.1104  |
| rs140133672 | T | -0.1236 |
| rs73130845  | C | 0.0419  |
| rs76897607  | A | 0.1097  |
| rs17086593  | G | 0.0782  |
| rs2676227   | G | -0.042  |
| rs1000586   | C | -0.0376 |
| rs151272493 | T | 0.2298  |
| rs115586636 | T | -0.1283 |
| rs12658628  | A | 0.239   |
| rs62360204  | C | 0.1336  |
| rs12521197  | C | 0.1192  |
| rs77455398  | C | 0.2372  |
| rs3850578   | A | 0.1652  |
| rs10474677  | A | -0.06   |
| rs59547927  | C | -0.1397 |
| rs115506793 | T | 0.1524  |
| rs79863196  | A | 0.1291  |
| rs114602220 | T | -0.0537 |
| rs474776    | T | -0.0759 |
| rs115986467 | A | -0.2666 |
| rs6881967   | A | -0.0387 |
| rs10515689  | C | 0.0643  |
| rs10046083  | C | -0.0449 |
| rs80341292  | T | -0.0647 |
| rs141638529 | A | -0.2244 |
| rs144964785 | G | 0.1994  |
| rs113749584 | G | 0.073   |
| rs10491318  | C | 0.0363  |
| rs80014321  | A | 0.1682  |
| rs17311148  | G | -0.1138 |
| rs6886028   | T | 0.0375  |
| rs17564192  | A | -0.0972 |
| rs11957362  | C | -0.0683 |
| rs115990973 | T | 0.227   |
| rs1542284   | T | 0.0408  |
| rs79879886  | C | 0.1531  |
| rs41298958  | C | -0.1478 |
| rs17444806  | G | -0.1831 |
| rs16878549  | T | 0.0933  |
| rs113885171 | A | 0.0787  |
| rs62388840  | T | 0.0848  |
| rs142207501 | A | 0.1492  |
| rs149326    | A | -0.045  |
| rs3111201   | A | 0.0444  |

|             |   |         |
|-------------|---|---------|
| rs7716909   | A | 0.0993  |
| rs79585494  | A | -0.2967 |
| rs13187596  | G | 0.0381  |
| rs74548637  | A | 0.1554  |
| rs141453797 | A | 0.1     |
| rs62393728  | T | 0.0913  |
| rs72769642  | G | 0.2094  |
| rs62343950  | T | 0.0842  |
| rs62355918  | T | -0.1078 |
| rs41298324  | A | -0.1313 |
| rs150480750 | A | 0.1778  |
| rs10514365  | T | 0.1145  |
| rs11746804  | T | 0.1428  |
| rs1351585   | C | 0.0484  |
| rs76665579  | A | 0.1799  |
| rs17590693  | G | -0.2015 |
| rs116023678 | T | 0.1757  |
| rs1531263   | G | -0.0346 |
| rs72733871  | C | -0.0956 |
| rs147811117 | T | 0.2469  |
| rs114765638 | C | 0.1617  |
| rs6865028   | T | 0.0633  |
| rs636150    | A | -0.041  |
| rs35001259  | C | -0.0907 |
| rs10035152  | T | -0.0341 |
| rs2544712   | A | -0.0339 |
| rs12513642  | G | -0.0371 |
| rs2338819   | T | 0.038   |
| rs80200198  | A | 0.2563  |
| rs76415053  | G | -0.181  |
| rs34526491  | A | -0.093  |
| rs79775443  | C | -0.2336 |
| rs72783620  | C | 0.0793  |
| rs115955490 | T | 0.1077  |
| rs11746698  | G | 0.0359  |
| rs6450174   | A | -0.098  |
| rs308204    | C | 0.0328  |
| rs429946    | T | 0.0649  |
| rs3104225   | A | 0.09    |
| rs10463352  | A | -0.0345 |
| rs115274762 | C | 0.1489  |
| rs72805248  | A | -0.0733 |
| rs295997    | C | -0.0735 |
| rs6886603   | T | -0.1094 |
| rs115905296 | C | 0.1592  |
| rs62388815  | A | 0.0843  |
| rs79996949  | G | 0.1171  |

|             |   |         |
|-------------|---|---------|
| rs34037118  | T | -0.0494 |
| rs17501392  | C | -0.0603 |
| rs150010554 | T | -0.0402 |
| rs62377627  | A | 0.0344  |
| rs13170207  | T | 0.0392  |
| rs79976140  | C | 0.1899  |
| rs12514650  | T | -0.0416 |
| rs273082    | A | -0.0808 |
| rs13171332  | G | -0.0973 |
| rs30826     | C | -0.0357 |
| rs13155080  | G | 0.0382  |
| rs214114    | C | 0.045   |
| rs26737     | C | -0.0383 |
| rs73048737  | C | 0.1077  |
| rs1650586   | T | -0.0577 |
| rs78556314  | T | -0.1349 |
| rs34623162  | G | 0.0604  |
| rs6451288   | A | 0.1042  |
| rs11749919  | G | -0.1688 |
| rs1345086   | C | -0.0335 |
| rs79781656  | A | -0.0626 |
| rs34159926  | C | -0.0903 |
| rs71616994  | C | 0.1523  |
| rs1643889   | C | 0.0623  |
| rs10051966  | G | 0.0539  |
| rs341260    | T | -0.0396 |
| rs114946055 | A | 0.1147  |
| rs9324900   | A | 0.1657  |
| rs114641207 | T | -0.1003 |
| rs1583280   | T | -0.0995 |
| rs77552424  | T | -0.2824 |
| rs32947     | T | -0.035  |
| rs150525991 | T | -0.2122 |
| rs2967808   | A | 0.0376  |
| rs40153     | A | -0.0531 |
| rs11746182  | A | 0.0446  |
| rs10073429  | C | 0.047   |
| rs2112330   | C | -0.1055 |
| rs56197143  | G | 0.0633  |
| rs76465214  | C | 0.0572  |
| rs16903588  | T | 0.1003  |
| rs10068553  | G | 0.0406  |
| rs35654169  | A | 0.0906  |
| rs114530628 | G | -0.1278 |
| rs62347140  | C | 0.1086  |
| rs17553357  | A | -0.046  |
| rs114452353 | T | 0.1523  |



|             |   |         |
|-------------|---|---------|
| rs34355252  | T | -0.0629 |
| rs735130    | C | 0.0611  |
| rs2964431   | A | 0.0344  |
| rs2249506   | G | -0.0367 |
| rs62355616  | T | -0.1007 |
| rs76775317  | C | 0.0687  |
| rs269762    | A | -0.0728 |
| rs114256650 | T | 0.1705  |
| rs17185365  | C | -0.0716 |
| rs112375441 | G | 0.0482  |
| rs11954639  | T | 0.063   |
| rs145973883 | A | 0.0519  |
| rs12657652  | G | -0.0403 |
| rs1592635   | C | 0.0346  |
| rs6876740   | A | -0.1168 |
| rs2565000   | G | 0.0532  |
| rs17548653  | T | 0.0789  |
| rs258879    | A | -0.0406 |
| rs7731584   | T | -0.0988 |
| rs115699001 | G | -0.1351 |
| rs114466801 | T | 0.1819  |
| rs17234877  | C | 0.1212  |
| rs55735085  | A | -0.0417 |
| rs142241598 | A | 0.1189  |
| rs318048    | C | 0.0364  |
| rs392598    | G | -0.0394 |
| rs146781257 | T | 0.0878  |
| rs114154950 | C | 0.1559  |
| rs116620319 | G | 0.1236  |
| rs141927375 | G | -0.1354 |
| rs3131914   | T | -0.179  |
| rs11241731  | T | 0.0651  |
| rs78136632  | T | -0.2108 |
| rs2914030   | C | -0.0411 |
| rs75780405  | G | 0.0858  |
| rs1439603   | T | 0.0411  |
| rs79922713  | A | 0.1736  |
| rs2962192   | T | 0.0379  |
| rs34275630  | G | 0.1213  |
| rs11739287  | A | 0.1002  |
| rs16888142  | A | -0.0485 |
| rs3121686   | G | 0.037   |
| rs113241520 | G | -0.1874 |
| rs10076086  | G | -0.0324 |
| rs1847032   | C | 0.0493  |
| rs446709    | T | 0.0337  |
| rs17720107  | G | 0.1633  |

|             |   |         |
|-------------|---|---------|
| rs113407513 | G | 0.0688  |
| rs10479200  | G | -0.0367 |
| rs76991933  | A | -0.0695 |
| rs9293639   | C | -0.0945 |
| rs6887576   | A | -0.0723 |
| rs62395254  | T | 0.1244  |
| rs115946512 | G | 0.1267  |
| rs66734219  | A | 0.1233  |
| rs79593753  | T | -0.1368 |
| rs11747392  | A | -0.1392 |
| rs72736824  | T | 0.2343  |
| rs60976050  | T | 0.1529  |
| rs12520323  | G | 0.101   |
| rs74754561  | C | 0.1436  |
| rs72804081  | G | 0.0836  |
| rs74856414  | C | 0.1002  |
| rs9313037   | A | -0.0357 |
| rs74385363  | C | 0.1254  |
| rs150466846 | T | 0.1713  |
| rs6883043   | T | 0.0386  |
| rs17825532  | A | -0.0375 |
| rs820889    | T | -0.0606 |
| rs78879221  | T | 0.279   |
| rs79976506  | C | 0.1085  |
| rs146914084 | C | 0.1796  |
| rs72757553  | A | 0.1216  |
| rs72763426  | A | 0.0978  |
| rs115522202 | T | -0.1128 |
| rs11134817  | C | -0.0833 |
| rs77659713  | G | -0.0888 |
| rs75761291  | C | 0.2299  |
| rs114928910 | A | 0.0733  |
| rs56114960  | A | 0.0485  |
| rs112901231 | T | 0.2116  |
| rs255739    | G | 0.0393  |
| rs16894710  | T | 0.0611  |
| rs116010940 | A | 0.157   |
| rs114931937 | A | 0.1673  |
| rs80124255  | T | 0.1379  |
| rs116061375 | A | -0.1767 |
| rs73279871  | C | 0.1622  |
| rs10061911  | T | 0.034   |
| rs35285688  | T | -0.1193 |
| rs138206701 | G | 0.1687  |
| rs7702720   | G | -0.0337 |
| rs6555301   | T | 0.0639  |
| rs139297873 | T | -0.3042 |

|             |   |         |
|-------------|---|---------|
| rs111751755 | T | 0.2525  |
| rs2962073   | A | 0.0382  |
| rs112807385 | A | 0.1871  |
| rs6872566   | G | 0.0478  |
| rs10054341  | A | -0.0666 |
| rs4867498   | C | 0.033   |
| rs72810603  | A | 0.0789  |
| rs143444501 | G | -0.04   |
| rs114794137 | T | 0.1446  |
| rs3923826   | T | 0.0597  |
| rs72781244  | G | 0.046   |
| rs79898060  | T | 0.0975  |
| rs4701639   | C | -0.0352 |
| rs13171158  | G | 0.0439  |
| rs61153247  | A | -0.1022 |
| rs62358105  | A | -0.1283 |
| rs34650005  | G | 0.0841  |
| rs10477082  | T | -0.1131 |
| rs79224511  | G | 0.1931  |
| rs116333551 | A | 0.1031  |
| rs115025668 | A | 0.1149  |
| rs77937295  | T | 0.2525  |
| rs74500280  | T | -0.1452 |
| rs7724964   | C | 0.0616  |
| rs68020281  | T | 0.0761  |
| rs28540019  | T | -0.0337 |
| rs2888222   | A | 0.033   |
| rs138436060 | T | -0.1653 |
| rs75600649  | A | -0.1309 |
| rs4895277   | T | 0.0327  |
| rs76624386  | A | 0.1258  |
| rs638333    | C | 0.0369  |
| rs77775253  | T | 0.0627  |
| rs2229944   | A | -0.0604 |
| rs72803592  | A | 0.1754  |
| rs77403054  | T | 0.0666  |
| rs71603625  | C | -0.1149 |
| rs10079555  | C | 0.0645  |
| rs4703614   | A | -0.0374 |
| rs918520    | G | 0.0419  |
| rs6876038   | T | -0.0333 |
| rs10052563  | T | 0.0521  |
| rs2387568   | C | -0.0571 |
| rs62340147  | T | -0.0339 |
| rs3798027   | G | 0.0739  |
| rs150210514 | A | 0.1401  |
| rs9293636   | A | -0.0544 |

|             |   |         |
|-------------|---|---------|
| rs264347    | C | 0.0333  |
| rs116378421 | C | -0.0717 |
| rs141759051 | T | 0.1469  |
| rs80102542  | G | -0.0737 |
| rs55682310  | T | 0.0858  |
| rs12514047  | A | 0.167   |
| rs115629349 | A | 0.0832  |
| rs34524659  | A | 0.0328  |
| rs285878    | C | 0.0335  |
| rs1423554   | C | 0.0568  |
| rs17720329  | T | -0.0957 |
| rs6869265   | A | -0.0354 |
| rs16881639  | G | 0.0779  |
| rs1429722   | T | 0.0745  |
| rs11955835  | A | -0.0426 |
| rs76271498  | A | -0.1915 |
| rs244964    | G | 0.0961  |
| rs10062067  | C | 0.0732  |
| rs80317934  | G | 0.194   |
| rs72783837  | G | 0.138   |
| rs76497986  | A | 0.1814  |
| rs116327032 | G | 0.1128  |
| rs116906681 | G | -0.1941 |
| rs66891434  | C | -0.058  |
| rs142089619 | T | -0.1657 |
| rs77332028  | G | -0.1366 |
| rs72756164  | A | 0.0743  |
| rs10070717  | A | 0.0559  |
| rs163040    | G | 0.0401  |
| rs277973    | T | 0.038   |
| rs10056571  | A | 0.0665  |
| rs2619786   | C | 0.1575  |
| rs112120524 | G | 0.1976  |
| rs28651169  | C | 0.0328  |
| rs425059    | G | 0.0788  |
| rs11743017  | G | 0.0324  |
| rs4308511   | T | 0.1258  |
| rs78233963  | G | 0.1662  |
| rs1971715   | G | -0.0339 |
| rs79437499  | C | 0.1045  |
| rs62379984  | G | -0.0661 |
| rs4635924   | G | -0.0336 |
| rs958776    | T | -0.1102 |
| rs78050832  | T | -0.1009 |
| rs72798164  | T | -0.0792 |
| rs779846    | A | -0.06   |
| rs116272447 | G | 0.1596  |

|             |   |         |
|-------------|---|---------|
| rs72800817  | C | 0.0965  |
| rs13155145  | T | 0.035   |
| rs72760985  | A | -0.1584 |
| rs79716714  | A | -0.1848 |
| rs146562132 | C | 0.1009  |
| rs145972982 | C | 0.0456  |
| rs146828532 | G | -0.1099 |
| rs13155201  | A | 0.0416  |
| rs114562112 | A | 0.1657  |
| rs13171146  | G | 0.0349  |
| rs72813443  | G | 0.0729  |
| rs16902088  | C | 0.2067  |
| rs145968335 | A | -0.1524 |
| rs148707382 | G | -0.215  |
| rs115214100 | A | -0.1036 |
| rs4467676   | A | 0.0363  |
| rs62359375  | A | -0.06   |
| rs145793076 | A | 0.1465  |
| rs112581622 | C | -0.1139 |
| rs154577    | A | -0.0328 |
| rs148954292 | C | 0.2258  |
| rs244448    | A | -0.0943 |
| rs10472329  | C | -0.0386 |
| rs1552837   | C | -0.0526 |
| rs11249765  | T | -0.2258 |
| rs4626342   | G | 0.0851  |
| rs2407757   | T | -0.0777 |
| rs13159669  | G | 0.1129  |
| rs115380718 | C | 0.2547  |
| rs116676851 | C | 0.2009  |
| rs2860884   | T | -0.0322 |
| rs6887042   | C | 0.0365  |
| rs1422301   | C | 0.0361  |
| rs77045731  | G | 0.0756  |
| rs13184342  | A | 0.0477  |
| rs116332105 | C | 0.1425  |
| rs76434694  | G | -0.1471 |
| rs76297085  | C | 0.1005  |
| rs78308718  | C | 0.0364  |
| rs6601175   | A | 0.1112  |
| rs78443863  | A | 0.1646  |
| rs2313977   | G | -0.0369 |
| rs35745862  | T | 0.083   |
| rs163279    | T | -0.0358 |
| rs451643    | T | -0.0367 |
| rs78891762  | A | 0.074   |
| rs34445952  | G | 0.0389  |

|             |   |         |
|-------------|---|---------|
| rs72777661  | G | -0.1113 |
| rs13171967  | T | -0.0396 |
| rs1456275   | C | -0.0473 |
| rs9291954   | C | 0.0324  |
| rs16893560  | G | -0.1032 |
| rs17391678  | G | 0.0425  |
| rs35710183  | C | -0.0462 |
| rs1542429   | G | 0.0325  |
| rs865635    | T | 0.0581  |
| rs76793858  | T | 0.2024  |
| rs10462369  | C | -0.0485 |
| rs59430785  | A | 0.0428  |
| rs1366418   | G | -0.0615 |
| rs2160505   | A | -0.0317 |
| rs17595865  | A | 0.0689  |
| rs7706135   | A | -0.0615 |
| rs10512670  | C | -0.0411 |
| rs35465005  | A | 0.2215  |
| rs76725169  | A | -0.1201 |
| rs4394144   | A | 0.0456  |
| rs115745437 | A | -0.2005 |
| rs6554660   | A | 0.0452  |
| rs111821231 | T | 0.0456  |
| rs113638297 | A | 0.137   |
| rs55714803  | C | 0.0535  |
| rs55972248  | A | 0.1504  |
| rs10059787  | C | -0.0887 |
| rs146594921 | C | 0.1076  |
| rs56972284  | A | 0.1218  |
| rs76874890  | C | -0.1875 |
| rs1012025   | T | 0.0351  |
| rs6880853   | T | 0.0434  |
| rs62368126  | T | 0.1663  |
| rs1104792   | C | 0.1326  |
| rs6890900   | A | -0.1616 |
| rs6556884   | A | -0.0365 |
| rs153385    | T | -0.0465 |
| rs61085512  | C | -0.0878 |
| rs2032852   | T | -0.0351 |
| rs4147091   | T | -0.0368 |
| rs3815764   | C | 0.0769  |
| rs79143720  | C | -0.1509 |
| rs4976806   | T | -0.035  |
| rs113986197 | A | -0.1135 |
| rs62365751  | G | 0.0351  |
| rs7718226   | G | -0.0336 |
| rs10066787  | A | -0.0327 |

|             |   |         |
|-------------|---|---------|
| rs76271405  | A | -0.1245 |
| rs76717566  | T | 0.232   |
| rs2914076   | T | -0.0378 |
| rs247172    | T | -0.0565 |
| rs1533006   | T | -0.0412 |
| rs10056310  | A | 0.0768  |
| rs114143124 | T | 0.2338  |
| rs115540055 | T | 0.1169  |
| rs1862621   | T | -0.0557 |
| rs72794478  | G | 0.1967  |
| rs41275269  | T | -0.121  |
| rs140297989 | G | -0.1882 |
| rs75611485  | A | -0.1298 |
| rs79091269  | A | 0.1253  |
| rs56385303  | A | -0.0331 |
| rs1476481   | A | 0.0318  |
| rs246995    | G | -0.0369 |
| rs9292193   | G | 0.0356  |
| rs78695259  | T | -0.0495 |
| rs114366537 | T | 0.2103  |
| rs73798047  | A | 0.0577  |
| rs74608764  | C | 0.1051  |
| rs3857237   | C | -0.1729 |
| rs3756314   | C | -0.0571 |
| rs146753251 | T | 0.1937  |
| rs10461663  | C | 0.0426  |
| rs34754905  | G | -0.0337 |
| rs6860785   | T | 0.0361  |
| rs80067547  | G | -0.0426 |
| rs76188105  | A | -0.0839 |
| rs59239478  | T | -0.0671 |
| rs2973692   | C | 0.0356  |
| rs2546775   | A | 0.0464  |
| rs16902810  | A | -0.0437 |
| rs78285874  | G | -0.2383 |
| rs11134622  | T | -0.0324 |
| rs114433777 | A | 0.2215  |
| rs56270722  | C | 0.1347  |
| rs116816678 | G | -0.1296 |
| rs160919    | A | 0.0361  |
| rs698383    | G | 0.036   |
| rs17532664  | T | -0.0475 |
| rs59428951  | G | 0.1357  |
| rs13186045  | T | 0.0383  |
| rs152019    | G | -0.0365 |
| rs17490390  | A | 0.0675  |
| rs74694918  | C | 0.1373  |

|             |   |         |
|-------------|---|---------|
| rs4958734   | C | 0.0616  |
| rs11746248  | A | -0.0348 |
| rs2372608   | C | 0.0782  |
| rs7727195   | A | 0.0469  |
| rs1423217   | T | -0.0333 |
| rs12187656  | C | 0.037   |
| rs116756989 | G | 0.1433  |
| rs37793     | G | -0.0812 |
| rs27637     | A | 0.0313  |
| rs71599591  | G | -0.045  |
| rs12652649  | T | -0.0562 |
| rs113567132 | C | -0.3088 |
| rs114570277 | C | -0.0645 |
| rs116218522 | T | -0.2516 |
| rs115221969 | T | 0.1383  |
| rs114293186 | G | 0.2204  |
| rs72788740  | C | 0.0456  |
| rs72754234  | A | -0.1288 |
| rs75501727  | A | 0.1107  |
| rs458164    | A | -0.0467 |
| rs1422670   | T | -0.1123 |
| rs34285863  | A | 0.164   |
| rs245677    | A | 0.078   |
| rs72833941  | T | -0.1956 |
| rs10516132  | A | 0.0432  |
| rs76018937  | T | 0.1278  |
| rs116713572 | A | 0.132   |
| rs17138316  | G | 0.0973  |
| rs77383095  | C | 0.2094  |
| rs74966541  | G | 0.1383  |
| rs34957718  | C | 0.0472  |
| rs72789001  | T | -0.1056 |
| rs116011174 | G | -0.1556 |
| rs292165    | C | 0.0318  |
| rs139257230 | T | 0.0962  |
| rs16902429  | G | -0.0343 |
| rs75327226  | T | 0.1236  |
| rs111866562 | C | -0.0353 |
| rs7724768   | G | 0.0354  |
| rs113275192 | G | 0.1783  |
| rs1908720   | A | 0.0942  |
| rs76293856  | A | -0.2686 |
| rs4634339   | A | 0.214   |
| rs143424034 | G | 0.2673  |
| rs1345697   | T | 0.0322  |
| rs58927248  | G | 0.0522  |
| rs74380035  | G | -0.1447 |



|             |   |         |
|-------------|---|---------|
| rs297885    | C | 0.0375  |
| rs4340923   | C | 0.0687  |
| rs111297126 | C | 0.2002  |
| rs62396770  | T | 0.071   |
| rs114422223 | C | -0.1584 |
| rs314133    | G | 0.0355  |
| rs2937555   | A | 0.0536  |
| rs115546942 | G | -0.1802 |
| rs312559    | G | 0.0517  |
| rs74719680  | C | 0.1002  |
| rs279762    | G | 0.0652  |
| rs62364007  | G | 0.2598  |
| rs115424635 | A | 0.1451  |
| rs138574546 | T | 0.2111  |
| rs11950787  | T | -0.2286 |
| rs113994760 | T | -0.1394 |
| rs13161063  | G | 0.0697  |
| rs10463271  | T | 0.0498  |
| rs75517204  | C | -0.0862 |
| rs7702646   | T | 0.0325  |
| rs115950013 | C | 0.1237  |
| rs77338616  | A | -0.0669 |
| rs230878    | A | -0.036  |
| rs73265668  | C | 0.1552  |
| rs262045    | G | 0.0401  |
| rs141533838 | T | -0.1955 |
| rs10866750  | C | 0.0372  |
| rs76200751  | C | -0.2739 |
| rs153644    | T | -0.0415 |
| rs115549640 | G | 0.199   |
| rs13181406  | A | -0.1104 |
| rs4358486   | A | 0.0508  |
| rs34498555  | G | -0.0619 |
| rs115806359 | C | 0.1494  |
| rs9324921   | A | 0.0806  |
| rs10066649  | A | 0.0595  |
| rs73789387  | T | 0.0442  |
| rs11744911  | G | 0.0854  |
| rs12513914  | G | -0.0537 |
| rs10515353  | C | 0.0495  |
| rs72756892  | C | 0.1627  |
| rs74526442  | T | -0.211  |
| rs1104959   | T | 0.1088  |
| rs1366988   | G | 0.0401  |
| rs13186598  | C | 0.0507  |
| rs176799    | A | -0.0578 |
| rs114663862 | T | 0.1427  |

|             |   |         |
|-------------|---|---------|
| rs7720886   | G | 0.0586  |
| rs3756612   | G | -0.0388 |
| rs80228232  | T | -0.1532 |
| rs139604545 | T | 0.0811  |
| rs151217229 | T | -0.0882 |
| rs10479268  | C | -0.0417 |
| rs7736838   | A | -0.0438 |
| rs77474383  | T | -0.0971 |
| rs150516701 | C | 0.152   |
| rs12654274  | A | -0.0757 |
| rs13164495  | A | -0.0579 |
| rs72815289  | T | 0.0816  |
| rs112234443 | T | 0.0931  |
| rs35352527  | A | -0.0669 |
| rs1422860   | A | -0.0439 |
| rs73338288  | A | -0.2123 |
| rs10039543  | A | -0.0358 |
| rs73746152  | T | 0.1693  |
| rs115060008 | C | -0.0696 |
| rs76825937  | C | -0.1317 |
| rs16901145  | G | -0.0529 |
| rs838786    | C | 0.1728  |
| rs11748140  | T | -0.0369 |
| rs116201171 | G | 0.162   |
| rs6877326   | T | 0.1027  |
| rs115707601 | C | -0.2233 |
| rs72741117  | T | -0.2227 |
| rs7728260   | C | -0.0427 |
| rs1971391   | A | -0.0349 |
| rs367597    | C | -0.0352 |
| rs33344     | T | -0.0526 |
| rs6876364   | T | 0.0535  |
| rs114907564 | T | -0.2735 |
| rs147935204 | T | 0.1523  |
| rs10223133  | A | 0.0415  |
| rs2973476   | C | 0.0488  |
| rs2347096   | T | 0.0324  |
| rs116042547 | T | 0.1623  |
| rs17054255  | G | -0.1145 |
| rs1428054   | C | -0.1263 |
| rs62388656  | A | 0.0703  |
| rs116647825 | T | -0.092  |
| rs13154808  | G | 0.0329  |
| rs6889063   | T | 0.0729  |
| rs4490621   | C | -0.168  |
| rs59580263  | A | -0.0359 |
| rs187143    | C | 0.0627  |

|             |   |         |
|-------------|---|---------|
| rs2047384   | T | -0.0361 |
| rs6892164   | C | 0.0571  |
| rs6885423   | T | -0.0322 |
| rs17496593  | C | -0.0538 |
| rs62350865  | C | -0.1836 |
| rs76405951  | T | -0.0341 |
| rs268510    | A | 0.0641  |
| rs6878621   | G | -0.0477 |
| rs34777842  | C | -0.2306 |
| rs7715159   | T | -0.037  |
| rs6555708   | A | 0.0384  |
| rs72749841  | C | -0.085  |
| rs142741734 | G | 0.1461  |
| rs10035394  | G | 0.041   |
| rs17266567  | A | 0.1209  |
| rs10065216  | C | -0.0932 |
| rs60654108  | C | -0.2244 |
| rs13179478  | C | -0.1937 |
| rs2916601   | T | -0.0484 |
| rs78094752  | C | -0.099  |
| rs264982    | T | 0.0429  |
| rs147495946 | C | 0.1146  |
| rs115548638 | C | -0.1018 |
| rs75859476  | T | -0.1259 |
| rs13170552  | T | -0.1034 |
| rs2112483   | G | -0.1111 |
| rs371741    | A | -0.0318 |
| rs7732013   | T | -0.0849 |
| rs80092121  | A | 0.0461  |
| rs12189045  | C | -0.0368 |
| rs10056824  | T | 0.0509  |
| rs13188042  | A | -0.045  |
| rs216535    | A | 0.0327  |
| rs10056183  | G | 0.1033  |
| rs16903832  | T | -0.0478 |
| rs6580013   | G | 0.0581  |
| rs115874651 | A | 0.1329  |
| rs116460946 | A | -0.2722 |
| rs112926751 | A | -0.1114 |
| rs4836134   | G | 0.0488  |
| rs34076397  | T | 0.0342  |
| rs13174639  | G | 0.037   |
| rs17548073  | T | -0.1171 |
| rs60127859  | C | 0.0604  |
| rs62358280  | A | -0.12   |
| rs35144579  | T | 0.1841  |
| rs78051326  | C | 0.0859  |

|             |   |         |
|-------------|---|---------|
| rs56353827  | C | -0.0416 |
| rs10050720  | A | -0.0508 |
| rs10942443  | T | 0.0936  |
| rs114724587 | G | 0.2729  |
| rs7703784   | C | 0.0438  |
| rs77448138  | T | 0.1982  |
| rs244730    | A | -0.0364 |
| rs2438377   | C | -0.0676 |
| rs11747050  | G | 0.0352  |
| rs366055    | G | 0.0314  |
| rs6889586   | C | -0.0498 |
| rs76535658  | T | 0.1285  |
| rs72732816  | T | 0.1637  |
| rs943954    | C | 0.0436  |
| rs111372208 | A | 0.1743  |
| rs114733425 | G | 0.1729  |
| rs10057794  | G | -0.2329 |
| rs115125355 | A | -0.2187 |
| rs77465361  | T | 0.2536  |
| rs138360977 | C | -0.2206 |
| rs13175586  | A | 0.0527  |
| rs78357394  | A | -0.1836 |
| rs113332067 | T | -0.1213 |
| rs114211799 | C | -0.1617 |
| rs62406102  | T | -0.1773 |
| rs79088118  | T | 0.1483  |
| rs145489452 | T | -0.1245 |
| rs7727694   | A | 0.0578  |
| rs6450602   | A | 0.0384  |
| rs712618    | C | 0.0819  |
| rs59511389  | A | -0.0547 |
| rs71589379  | T | -0.0459 |
| rs17348129  | G | 0.0487  |
| rs115566087 | C | 0.0465  |
| rs56050517  | A | -0.202  |
| rs17260912  | C | -0.0578 |
| rs143949486 | A | 0.1163  |
| rs12188996  | C | 0.1586  |
| rs12520285  | A | 0.1372  |
| rs256607    | G | -0.0356 |
| rs13358107  | C | 0.054   |
| rs13168419  | A | 0.1115  |
| rs150596    | C | -0.0604 |
| rs10045568  | C | 0.0502  |
| rs138989328 | A | 0.2609  |
| rs76202191  | A | 0.1493  |
| rs35943711  | T | -0.0692 |

|             |   |         |
|-------------|---|---------|
| rs71186     | T | 0.0324  |
| rs26211     | A | -0.0373 |
| rs77071252  | G | 0.1448  |
| rs4122269   | C | 0.0332  |
| rs40424     | T | -0.0659 |
| rs77928465  | T | 0.1579  |
| rs6887628   | A | -0.0322 |
| rs79331299  | T | 0.1107  |
| rs17834549  | C | -0.058  |
| rs4702607   | A | -0.0609 |
| rs115913860 | A | 0.1212  |
| rs79927710  | C | 0.1012  |
| rs10037638  | A | -0.0636 |
| rs10065484  | C | 0.1177  |
| rs114688473 | A | -0.2352 |
| rs78699274  | T | 0.0978  |
| rs6893037   | G | -0.1888 |
| rs150065298 | T | -0.162  |
| rs7715910   | T | 0.0307  |
| rs6895737   | C | 0.0627  |
| rs11948699  | T | -0.0325 |
| rs55927941  | A | 0.037   |
| rs111279951 | A | -0.0791 |
| rs4835957   | G | 0.031   |
| rs73801029  | A | 0.0941  |
| rs55849374  | G | -0.0755 |
| rs13355543  | G | 0.0327  |
| rs4868904   | G | 0.0533  |
| rs77478573  | C | -0.1052 |
| rs11952756  | A | -0.0368 |
| rs114844989 | A | -0.1177 |
| rs6864490   | G | 0.2088  |
| rs506598    | A | 0.0325  |
| rs77280431  | A | -0.0735 |
| rs11745773  | T | -0.032  |
| rs7729198   | T | 0.0468  |
| rs3797203   | T | -0.0408 |
| rs79591417  | T | 0.1496  |
| rs2964472   | G | -0.0343 |
| rs138284391 | T | 0.1428  |
| rs28728131  | A | 0.1475  |
| rs7711546   | T | 0.044   |
| rs4392635   | T | 0.0372  |
| rs6594595   | C | 0.0862  |
| rs76748392  | G | 0.0902  |
| rs112290739 | G | 0.2488  |
| rs114217198 | T | -0.1226 |

|             |   |         |
|-------------|---|---------|
| rs4703568   | A | 0.1556  |
| rs11747617  | T | 0.2662  |
| rs57347718  | A | -0.0457 |
| rs10520896  | A | -0.0522 |
| rs589468    | T | 0.147   |
| rs7702411   | T | 0.0492  |
| rs1150151   | C | -0.2517 |
| rs80299798  | C | -0.1539 |
| rs10057700  | A | 0.1424  |
| rs248623    | G | 0.0307  |
| rs1053477   | C | 0.0325  |
| rs35885422  | T | 0.0715  |
| rs115629470 | A | 0.1762  |
| rs6595621   | A | 0.0362  |
| rs10037831  | G | 0.0707  |
| rs16873802  | C | 0.1044  |
| rs6453106   | A | 0.0341  |
| rs115123121 | C | -0.2275 |
| rs6898179   | G | 0.0313  |
| rs1097724   | G | -0.0341 |
| rs115763470 | A | 0.1273  |
| rs2901564   | T | 0.0608  |
| rs1373997   | T | -0.0405 |
| rs148347489 | T | 0.1448  |
| rs55850341  | A | -0.2025 |
| rs28767478  | G | 0.0304  |
| rs2042235   | T | 0.0393  |
| rs59520572  | C | 0.1544  |
| rs10755219  | C | -0.0397 |
| rs56167750  | A | 0.1425  |
| rs116410675 | C | 0.2366  |
| rs12516947  | C | 0.2564  |
| rs11241536  | T | -0.0338 |
| rs3846494   | A | -0.0417 |
| rs115146392 | A | -0.131  |
| rs75126126  | C | 0.1971  |
| rs77681779  | A | -0.2001 |
| rs115945214 | C | 0.1156  |
| rs11744909  | T | 0.0341  |
| rs72804534  | C | 0.2515  |
| rs6556045   | A | 0.0631  |
| rs16878547  | C | -0.053  |
| rs6877603   | A | 0.203   |
| rs154467    | G | -0.0373 |
| rs144512430 | G | 0.1744  |
| rs1565513   | T | -0.0315 |
| rs12189454  | C | 0.0544  |

|             |   |         |
|-------------|---|---------|
| rs461018    | T | -0.0331 |
| rs7718320   | T | -0.0513 |
| rs139883693 | A | 0.2173  |
| rs4867448   | C | 0.0816  |
| rs62384560  | T | -0.2548 |
| rs2934821   | T | -0.0393 |
| rs2936652   | T | 0.0381  |
| rs141313112 | C | 0.113   |
| rs4702202   | A | -0.0355 |
| rs11167755  | A | -0.032  |
| rs3906540   | C | 0.1408  |
| rs72776407  | C | -0.1097 |
| rs115454073 | A | 0.1566  |
| rs116299734 | A | 0.1168  |
| rs113433840 | A | 0.1825  |
| rs75122752  | T | -0.1143 |
| rs148044198 | G | -0.1565 |
| rs149948725 | G | 0.182   |
| rs17782374  | C | -0.0396 |
| rs57106376  | C | -0.1197 |
| rs26000     | A | 0.0363  |
| rs2059131   | G | -0.0341 |
| rs1319959   | T | -0.0382 |
| rs114579373 | T | 0.0997  |
| rs72755505  | G | 0.0425  |
| rs10079977  | T | 0.0494  |
| rs4702772   | G | -0.0564 |
| rs73801230  | C | -0.1175 |
| rs62360232  | A | 0.0971  |
| rs114712296 | G | 0.0826  |
| rs252067    | C | -0.0576 |
| rs4976566   | T | -0.0428 |
| rs72767411  | A | 0.1075  |
| rs141907033 | T | -0.1662 |
| rs151242810 | T | 0.0806  |
| rs246902    | A | 0.0338  |
| rs117491880 | A | -0.1355 |
| rs35505221  | G | -0.0737 |
| rs34575001  | T | 0.0475  |
| rs865340    | T | 0.0454  |
| rs2256840   | G | 0.0375  |
| rs159746    | T | -0.0546 |
| rs10063997  | C | 0.0384  |
| rs80217160  | T | 0.1849  |
| rs16902363  | C | 0.1082  |
| rs113769858 | C | 0.1149  |
| rs61609768  | T | 0.1611  |

|             |   |         |
|-------------|---|---------|
| rs6594798   | A | -0.0375 |
| rs1501913   | A | -0.0485 |
| rs331565    | C | -0.0341 |
| rs535858    | A | 0.0434  |
| rs71611338  | T | -0.083  |
| rs7705643   | G | -0.0495 |
| rs34293007  | G | 0.0471  |
| rs4434365   | A | -0.0312 |
| rs79210488  | G | -0.159  |
| rs113158780 | A | 0.1365  |
| rs138997507 | T | 0.1858  |
| rs336471    | A | 0.0305  |
| rs6876638   | T | -0.0456 |
| rs62357753  | G | 0.1184  |
| rs78077440  | A | 0.0411  |
| rs163423    | T | -0.0981 |
| rs71591978  | C | 0.204   |
| rs17717970  | C | 0.0498  |
| rs16900243  | A | 0.0395  |
| rs2167763   | G | 0.033   |
| rs16901854  | A | 0.0465  |
| rs114454669 | A | 0.1424  |
| rs143011323 | C | 0.1952  |
| rs7725600   | T | 0.1468  |
| rs283174    | G | 0.1276  |
| rs111809027 | T | 0.0787  |
| rs71606445  | T | -0.0412 |
| rs62328320  | G | 0.039   |
| rs6596239   | C | 0.0383  |
| rs2319808   | C | -0.0938 |
| rs4958120   | A | -0.0391 |
| rs13160014  | C | 0.0665  |
| rs140795371 | G | 0.092   |
| rs114267072 | T | 0.1899  |
| rs2387291   | T | 0.0409  |
| rs72753837  | G | 0.2098  |
| rs77122116  | G | 0.1451  |
| rs11465446  | G | 0.0494  |
| rs115531887 | C | -0.082  |
| rs253908    | G | -0.0372 |
| rs2120727   | A | 0.0308  |
| rs113803662 | A | 0.2166  |
| rs246380    | C | -0.0761 |
| rs72754592  | G | 0.0631  |
| rs717763    | T | 0.0683  |
| rs76873330  | A | -0.0675 |
| rs74484473  | G | 0.118   |



|             |   |         |
|-------------|---|---------|
| rs298060    | T | -0.0346 |
| rs2241349   | A | 0.0359  |
| rs7710549   | C | 0.0311  |
| rs34859584  | G | 0.0349  |
| rs17155526  | T | -0.0585 |
| rs12108976  | C | 0.055   |
| rs10045268  | G | 0.0423  |
| rs6878842   | G | 0.0498  |
| rs17783825  | C | 0.1429  |
| rs140363936 | C | 0.2032  |
| rs72799812  | G | 0.0832  |
| rs17057846  | A | 0.0495  |
| rs28474734  | A | 0.0415  |
| rs62372477  | C | -0.1823 |
| rs2937715   | G | -0.0325 |
| rs17087760  | T | -0.0855 |
| rs30365     | A | 0.0451  |
| rs72754650  | C | 0.1926  |
| rs78318261  | T | 0.1029  |
| rs4704147   | A | -0.0377 |
| rs147081725 | T | -0.2172 |
| rs58108907  | T | 0.0754  |
| rs259069    | A | 0.0397  |
| rs10044695  | G | 0.1311  |
| rs62352846  | T | 0.12    |
| rs74530888  | T | -0.2153 |
| rs254080    | T | -0.0386 |
| rs4046165   | G | 0.0504  |
| rs80285806  | G | 0.2014  |
| rs11954014  | T | -0.0309 |
| rs12658909  | C | -0.0364 |
| rs13186519  | G | 0.0888  |
| rs72764537  | G | 0.0921  |
| rs10060877  | A | 0.0417  |
| rs1444885   | A | 0.0703  |
| rs79993120  | G | -0.1642 |
| rs2042939   | A | 0.1007  |
| rs115534005 | C | -0.1344 |
| rs168817    | A | -0.0302 |
| rs9790969   | C | 0.033   |
| rs7701366   | G | 0.0414  |
| rs1664734   | A | -0.0864 |
| rs76256920  | T | 0.0841  |
| rs6894872   | G | -0.0402 |
| rs10074776  | C | -0.0591 |
| rs78453264  | G | 0.1157  |
| rs17611199  | T | 0.1154  |

|             |   |         |
|-------------|---|---------|
| rs35489432  | T | -0.0543 |
| rs864686    | T | -0.0321 |
| rs4701755   | A | 0.064   |
| rs10066802  | A | 0.0313  |
| rs2402181   | C | -0.0585 |
| rs115637726 | T | -0.1199 |
| rs62353354  | C | 0.0344  |
| rs76533296  | G | 0.0995  |
| rs139814803 | A | -0.2618 |
| rs72795974  | A | 0.0933  |
| rs10477745  | G | -0.0338 |
| rs11739810  | T | -0.0765 |
| rs116038366 | G | -0.1608 |
| rs74562158  | G | -0.0475 |
| rs72748835  | T | -0.1283 |
| rs250112    | C | 0.0595  |
| rs111827064 | C | 0.0878  |
| rs72818223  | A | 0.1833  |
| rs149462352 | T | 0.2928  |
| rs247228    | A | -0.0455 |
| rs74691855  | T | 0.1267  |
| rs32687     | T | 0.0474  |
| rs145390574 | T | 0.1416  |
| rs6898214   | T | 0.0314  |
| rs10073029  | T | 0.0515  |
| rs146426722 | T | -0.1312 |
| rs142028784 | G | 0.166   |
| rs79132161  | C | -0.0798 |
| rs17383748  | T | -0.0966 |
| rs10512893  | A | 0.0317  |
| rs71603842  | A | 0.1444  |
| rs138233479 | C | 0.2034  |
| rs35108106  | G | 0.1243  |
| rs13177082  | T | -0.0427 |
| rs75251913  | T | 0.0754  |
| rs633881    | C | -0.049  |
| rs74401147  | T | 0.1157  |
| rs72776070  | G | -0.1733 |
| rs72801022  | A | 0.0485  |
| rs6881057   | C | 0.0524  |
| rs62375682  | C | -0.1058 |
| rs12654796  | A | 0.0684  |
| rs62385670  | A | 0.1939  |
| rs75156784  | T | -0.1372 |
| rs10070245  | C | -0.0434 |
| rs6879329   | G | -0.03   |
| rs72727781  | T | -0.1529 |

|             |   |         |
|-------------|---|---------|
| rs71599565  | A | 0.1309  |
| rs56155803  | C | -0.1614 |
| rs114526317 | A | 0.1609  |
| rs79460369  | G | 0.1075  |
| rs7715484   | C | 0.1409  |
| rs75034557  | G | -0.1155 |
| rs3923770   | G | -0.0381 |
| rs4869080   | A | 0.2049  |
| rs16877221  | G | -0.0669 |
| rs6884056   | C | 0.1299  |
| rs76868541  | T | 0.104   |
| rs12518607  | C | -0.0853 |
| rs1004385   | G | 0.0484  |
| rs148929325 | T | 0.0725  |
| rs10055698  | G | 0.1228  |
| rs7716977   | G | -0.1528 |
| rs3864249   | T | 0.0325  |
| rs1799536   | G | -0.0302 |
| rs1346471   | C | -0.031  |
| rs75988023  | G | -0.1414 |
| rs6860007   | T | -0.1324 |
| rs72761236  | C | 0.1516  |
| rs72781793  | G | 0.166   |
| rs116256651 | G | 0.119   |
| rs150318822 | G | -0.1573 |
| rs6884561   | G | 0.0327  |
| rs6887047   | C | 0.0429  |
| rs1506131   | T | -0.0495 |
| rs10074342  | C | -0.0312 |
| rs149323735 | G | 0.2088  |
| rs13164765  | G | -0.0858 |
| rs79946984  | T | 0.0568  |
| rs4957270   | C | -0.0317 |
| rs1217772   | T | -0.1016 |
| rs12519034  | A | 0.0375  |
| rs4370259   | T | -0.0315 |
| rs890950    | A | 0.0328  |
| rs13176141  | G | 0.0444  |
| rs71632909  | A | 0.1217  |
| rs11951568  | T | -0.039  |
| rs6870663   | G | -0.0349 |
| rs11750519  | T | -0.042  |
| rs116356369 | T | 0.2812  |
| rs649357    | C | 0.0578  |
| rs114145122 | G | -0.1227 |
| rs2128309   | A | 0.1424  |
| rs74713191  | G | 0.1003  |

|             |   |         |
|-------------|---|---------|
| rs116497867 | T | -0.1105 |
| rs4836277   | T | 0.0345  |
| rs79939287  | T | -0.0609 |
| rs6858967   | C | -0.0462 |
| rs115219751 | A | 0.2404  |
| rs3805705   | C | -0.0343 |
| rs62385619  | G | -0.1243 |
| rs139517013 | A | 0.1437  |
| rs891982    | A | 0.1162  |
| rs144143596 | A | -0.3054 |
| rs72808865  | A | 0.2046  |
| rs113542306 | A | 0.113   |
| rs1862618   | G | 0.0372  |
| rs78760882  | T | -0.1085 |
| rs160039    | A | 0.0625  |
| rs12521133  | T | -0.056  |
| rs72794428  | G | -0.0732 |
| rs113110903 | A | 0.1874  |
| rs6894105   | C | -0.037  |
| rs193447    | T | 0.0383  |
| rs112892123 | C | -0.1303 |
| rs57315995  | T | -0.042  |
| rs10057083  | G | 0.0484  |
| rs151008642 | T | 0.106   |
| rs112818761 | A | -0.2811 |
| rs10515562  | G | 0.0859  |
| rs58884460  | C | -0.0559 |
| rs11739100  | G | 0.0302  |
| rs114177603 | C | -0.2046 |
| rs75283003  | C | 0.0828  |
| rs3857376   | A | -0.1323 |
| rs4317279   | A | -0.1478 |
| rs3797126   | C | 0.0439  |
| rs13172815  | A | -0.0709 |
| rs2126039   | T | 0.0409  |
| rs116719999 | G | -0.0778 |
| rs114510890 | T | -0.1046 |
| rs72824978  | T | 0.1491  |
| rs56388645  | C | -0.1177 |
| rs1813830   | A | 0.044   |
| rs1056491   | G | 0.0316  |
| rs115142710 | T | 0.1301  |
| rs115794282 | G | 0.1361  |
| rs62383864  | C | 0.062   |
| rs16870823  | C | 0.08    |
| rs62379505  | T | 0.2214  |
| rs26717     | T | -0.0515 |

|             |   |         |
|-------------|---|---------|
| rs76076024  | A | 0.0754  |
| rs138877329 | G | 0.1418  |
| rs2678173   | A | 0.0775  |
| rs150104955 | T | -0.1109 |
| rs17083131  | T | -0.136  |
| rs60682212  | G | 0.1507  |
| rs74360204  | T | 0.1809  |
| rs6872677   | A | 0.1657  |
| rs71605708  | C | 0.1424  |
| rs12654017  | T | -0.0441 |
| rs36977     | G | 0.0324  |
| rs114496545 | A | 0.1469  |
| rs26584     | C | 0.0387  |
| rs71612940  | T | 0.0433  |
| rs6890448   | C | -0.0351 |
| rs144654989 | T | -0.1238 |
| rs1497469   | G | -0.039  |
| rs13160977  | G | -0.0905 |
| rs11739429  | A | -0.0795 |
| rs72810270  | C | -0.0617 |
| rs115995955 | A | 0.1698  |
| rs10515579  | G | 0.0389  |
| rs2909726   | A | -0.0374 |
| rs78990654  | G | -0.1868 |
| rs1196      | T | -0.0308 |
| rs115973015 | T | 0.1159  |
| rs71596751  | A | 0.0732  |
| rs75252375  | G | -0.115  |
| rs79670039  | C | -0.094  |
| rs2560262   | C | 0.0356  |
| rs17809930  | G | 0.116   |
| rs77599664  | A | 0.1733  |
| rs920388    | T | -0.0654 |
| rs2921533   | G | -0.0337 |
| rs4401602   | T | 0.0325  |
| rs72777277  | T | 0.1614  |
| rs2221441   | G | 0.0349  |
| rs62366044  | G | 0.1982  |
| rs11953167  | G | 0.112   |
| rs79754576  | T | 0.1388  |
| rs66490960  | A | 0.1082  |
| rs113676695 | A | 0.0724  |
| rs13173028  | G | 0.0557  |
| rs150341710 | G | -0.1271 |
| rs78289681  | G | 0.0696  |
| rs147656586 | T | 0.146   |
| rs2973342   | G | -0.0356 |

|             |   |         |
|-------------|---|---------|
| rs1559130   | C | -0.031  |
| rs78594111  | C | -0.1667 |
| rs10478737  | T | 0.0587  |
| rs10058743  | A | 0.0375  |
| rs370401    | G | 0.0472  |
| rs17648820  | A | -0.0301 |
| rs17098621  | C | 0.0593  |
| rs898599    | A | -0.0298 |
| rs111954700 | G | 0.1451  |
| rs6893265   | G | 0.0423  |
| rs79515928  | A | -0.1044 |
| rs2331104   | G | -0.0559 |
| rs149378132 | T | 0.1215  |
| rs143576918 | A | 0.2036  |
| rs6890910   | C | 0.0312  |
| rs10077282  | G | 0.0646  |
| rs34404780  | G | 0.2067  |
| rs2306617   | C | 0.0328  |
| rs852244    | C | -0.0485 |
| rs114780784 | C | 0.1914  |
| rs114586418 | T | 0.124   |
| rs298402    | A | 0.0311  |
| rs9329092   | C | 0.0388  |
| rs13170880  | T | -0.0855 |
| rs6888613   | C | -0.034  |
| rs145440989 | A | 0.1497  |
| rs72759779  | C | -0.1379 |
| rs59338075  | G | -0.0903 |
| rs55804820  | T | 0.0893  |
| rs61091971  | A | -0.0378 |
| rs78355606  | T | 0.1591  |
| rs150576669 | G | 0.1793  |
| rs9687880   | G | -0.1226 |
| rs115419644 | A | -0.071  |
| rs55695437  | T | 0.1019  |
| rs11134428  | T | 0.0574  |
| rs2913848   | T | -0.0313 |
| rs2059127   | T | -0.0345 |
| rs1439573   | G | 0.0304  |
| rs17649880  | G | -0.0742 |
| rs4702673   | G | 0.0465  |
| rs146410525 | T | 0.2052  |
| rs2589772   | G | -0.0772 |
| rs71599549  | A | 0.0831  |
| rs12109551  | A | 0.0893  |
| rs72725379  | A | 0.0784  |
| rs61231319  | C | -0.0669 |

|             |   |         |
|-------------|---|---------|
| rs7737428   | A | 0.0392  |
| rs144532710 | A | 0.1219  |
| rs114963949 | A | 0.1639  |
| rs11134480  | C | 0.0502  |
| rs11135371  | A | -0.0529 |
| rs141979912 | G | 0.3013  |
| rs58140182  | C | 0.0569  |
| rs17211100  | G | -0.0348 |
| rs148940280 | T | 0.2224  |
| rs141247850 | A | 0.1446  |
| rs114723049 | G | 0.1636  |
| rs6861818   | T | -0.0336 |
| rs3777364   | T | 0.0463  |
| rs10068000  | A | 0.0387  |
| rs693553    | C | -0.0294 |
| rs353482    | T | -0.0362 |
| rs74658102  | T | 0.1358  |
| rs7735534   | G | -0.0403 |
| rs13157979  | A | 0.0332  |
| rs139912848 | G | -0.1706 |
| rs79105210  | G | -0.0961 |
| rs74660183  | C | 0.0956  |
| rs12652255  | A | -0.0436 |
| rs115451900 | G | 0.0947  |
| rs113924541 | G | 0.2561  |
| rs114922915 | T | 0.1113  |
| rs11744400  | C | 0.1168  |
| rs3111187   | A | 0.0992  |
| rs10516077  | G | 0.0427  |
| rs113000243 | T | -0.0979 |
| rs59153872  | T | -0.1457 |
| rs160615    | T | -0.0751 |
| rs12521024  | A | -0.049  |
| rs75748527  | A | 0.1524  |
| rs145414527 | A | 0.2407  |
| rs6862942   | T | 0.0375  |
| rs10514347  | T | 0.067   |
| rs75807485  | A | 0.0589  |
| rs17441007  | T | 0.0789  |
| rs114879277 | C | 0.2311  |
| rs17228255  | T | 0.1994  |
| rs144992162 | A | 0.1311  |
| rs115219068 | C | -0.1924 |
| rs159721    | T | -0.038  |
| rs35131072  | T | -0.0304 |
| rs114037350 | G | 0.0748  |
| rs62388285  | T | 0.0499  |

|             |   |         |
|-------------|---|---------|
| rs16879113  | G | -0.0514 |
| rs116464191 | T | 0.075   |
| rs55932955  | A | -0.0887 |
| rs113456633 | A | 0.0493  |
| rs11746589  | A | -0.0306 |
| rs9327159   | A | 0.0477  |
| rs142228802 | T | 0.1011  |
| rs4957874   | C | 0.1633  |
| rs3094359   | T | 0.0338  |
| rs7725047   | T | 0.0964  |
| rs10463291  | A | 0.1661  |
| rs10478635  | C | -0.0488 |
| rs143724308 | T | 0.2251  |
| rs253217    | T | -0.0585 |
| rs73774896  | G | 0.1236  |
| rs11744156  | C | 0.0304  |
| rs80163706  | A | 0.0691  |
| rs62405526  | G | 0.1209  |
| rs309621    | A | -0.0793 |
| rs78287360  | A | -0.1622 |
| rs113672102 | C | 0.1966  |
| rs163186    | C | 0.0346  |
| rs357281    | T | -0.0397 |
| rs115592263 | T | 0.1068  |
| rs59014024  | T | -0.0989 |
| rs163907    | C | -0.0295 |
| rs145445282 | G | 0.273   |
| rs72750736  | T | -0.1333 |
| rs143229033 | C | 0.1322  |
| rs80100773  | A | -0.1575 |
| rs79884224  | C | -0.0533 |
| rs17325968  | C | 0.0779  |
| rs11953724  | C | 0.0445  |
| rs9637761   | C | 0.0641  |
| rs114363252 | A | -0.0562 |
| rs139038364 | A | 0.1421  |
| rs72786955  | C | -0.1052 |
| rs115653200 | C | -0.2125 |
| rs147858049 | A | 0.1886  |
| rs10515625  | C | 0.0515  |
| rs71599721  | T | 0.1254  |
| rs148749364 | G | 0.2176  |
| rs115182768 | T | 0.1342  |
| rs76851893  | A | -0.1159 |
| rs77390459  | T | -0.1899 |
| rs35101096  | C | 0.1568  |
| rs7709566   | G | -0.0399 |



|             |   |         |
|-------------|---|---------|
| rs10045976  | T | 0.0672  |
| rs1549225   | C | 0.0305  |
| rs7729897   | G | 0.1309  |
| rs2569236   | G | 0.1128  |
| rs115958455 | C | -0.1046 |
| rs903246    | C | 0.1017  |
| rs6872054   | G | 0.1472  |
| rs6872503   | G | -0.039  |
| rs62394983  | T | -0.0632 |
| rs59717957  | C | 0.1435  |
| rs62372178  | C | -0.0298 |
| rs115356342 | C | 0.1439  |
| rs145251588 | T | 0.035   |
| rs1559125   | T | -0.0295 |
| rs31692     | C | -0.0456 |
| rs9716541   | G | -0.0292 |
| rs114749676 | T | -0.2028 |
| rs448038    | C | -0.0516 |
| rs11740118  | T | 0.0713  |
| rs138617277 | T | 0.1002  |
| rs138322076 | C | -0.1963 |
| rs55818561  | A | 0.1069  |
| rs72804002  | T | -0.0945 |
| rs17713762  | G | 0.0742  |
| rs318108    | T | 0.0396  |
| rs353241    | T | 0.05    |
| rs80320219  | T | 0.086   |
| rs151264833 | G | -0.1004 |
| rs17360625  | G | -0.108  |
| rs35142985  | G | 0.0535  |
| rs76403299  | T | 0.1187  |
| rs10041871  | G | 0.0318  |
| rs139020602 | G | 0.2228  |
| rs1363846   | A | 0.0304  |
| rs11738844  | A | -0.0564 |
| rs4976310   | T | 0.0291  |
| rs148487301 | C | 0.1141  |
| rs7722252   | T | -0.0957 |
| rs73116717  | C | 0.0495  |
| rs17310366  | C | -0.1042 |
| rs75258736  | C | -0.1798 |
| rs34491350  | T | -0.0582 |
| rs6877486   | T | 0.0489  |
| rs1422947   | C | -0.0854 |
| rs56405886  | T | 0.0465  |
| rs59329233  | C | -0.0366 |
| rs2950491   | C | -0.0308 |

|             |   |         |
|-------------|---|---------|
| rs141561531 | A | 0.1465  |
| rs998906    | C | 0.0307  |
| rs116575206 | G | -0.1207 |
| rs116000185 | T | 0.1907  |
| rs3797652   | A | -0.0508 |
| rs17653203  | G | -0.0603 |
| rs13160430  | C | 0.0922  |
| rs245365    | T | 0.0325  |
| rs144546474 | A | 0.1382  |
| rs7737824   | G | 0.0469  |
| rs73331122  | A | 0.0447  |
| rs4492144   | C | -0.0515 |
| rs17548207  | A | -0.0498 |
| rs4246742   | A | -0.0707 |
| rs114932289 | A | -0.1047 |
| rs34391562  | G | 0.0321  |
| rs13186680  | A | 0.0808  |
| rs114069635 | A | -0.0817 |
| rs114980400 | G | 0.1523  |
| rs144528270 | C | 0.1413  |
| rs10478039  | T | 0.034   |
| rs111235580 | A | 0.2753  |
| rs72821231  | G | 0.0496  |
| rs10077569  | T | -0.1798 |
| rs7729289   | T | 0.1504  |
| rs10078702  | T | 0.0743  |
| rs10070409  | A | -0.0303 |
| rs34111680  | C | -0.0399 |
| rs13158555  | C | -0.103  |
| rs72798310  | A | -0.1218 |
| rs32458     | G | 0.0424  |
| rs74601361  | G | -0.143  |
| rs80110707  | G | -0.1097 |
| rs72791889  | G | -0.1011 |
| rs59269054  | A | -0.0713 |
| rs73074607  | A | -0.0613 |
| rs1546162   | T | 0.0437  |
| rs4957275   | G | 0.0687  |
| rs2913372   | G | -0.03   |
| rs1946758   | T | -0.0642 |
| rs78240826  | A | 0.0954  |
| rs62369447  | A | 0.1017  |
| rs62374201  | A | 0.0385  |
| rs62330267  | C | -0.0478 |
| rs78950633  | T | -0.093  |
| rs114717582 | C | 0.088   |
| rs2974621   | A | 0.0292  |

|             |   |         |
|-------------|---|---------|
| rs78007136  | G | -0.0835 |
| rs78780834  | G | 0.0692  |
| rs693064    | C | 0.1441  |
| rs520002    | T | 0.0321  |
| rs30436     | G | -0.0302 |
| rs115795341 | T | 0.1229  |
| rs145915759 | A | -0.1084 |
| rs77092041  | A | 0.0774  |
| rs1864217   | T | 0.0312  |
| rs4869247   | G | -0.0434 |
| rs10462505  | G | -0.0575 |
| rs17512901  | A | 0.0975  |
| rs76820758  | A | 0.1812  |
| rs11135445  | G | 0.0651  |
| rs57491109  | G | 0.0839  |
| rs75148452  | T | 0.1626  |
| rs78275416  | C | 0.0693  |
| rs2227821   | A | -0.1204 |
| rs114732391 | C | -0.1275 |
| rs34567864  | T | 0.0938  |
| rs17738166  | A | 0.0302  |
| rs33885     | A | -0.0349 |
| rs1453108   | A | 0.1706  |
| rs77011286  | T | 0.1205  |
| rs115559931 | T | -0.0833 |
| rs6555390   | T | -0.03   |
| rs1028161   | G | 0.0349  |
| rs75799087  | T | -0.1226 |
| rs4554172   | G | 0.1918  |
| rs2963482   | G | 0.0307  |
| rs10474185  | C | -0.2108 |
| rs7449037   | G | 0.0305  |
| rs79594311  | G | -0.1038 |
| rs6888372   | A | 0.1488  |
| rs150553367 | G | 0.1509  |
| rs17348383  | A | -0.1533 |
| rs78835418  | C | -0.1744 |
| rs79973119  | C | 0.122   |
| rs10066065  | G | -0.0377 |
| rs79667811  | A | 0.16    |
| rs2968217   | C | 0.0339  |
| rs113169134 | T | 0.1529  |
| rs68035693  | A | 0.0816  |
| rs145450186 | G | -0.196  |
| rs112826936 | T | 0.2178  |
| rs144951524 | A | -0.0637 |
| rs73187188  | G | -0.1109 |

|             |   |         |
|-------------|---|---------|
| rs80299423  | G | -0.1264 |
| rs6889989   | A | 0.0357  |
| rs115196520 | G | 0.1864  |
| rs32800     | C | -0.0316 |
| rs28657832  | G | 0.1221  |
| rs115302400 | A | 0.0799  |
| rs56892928  | G | 0.0835  |
| rs72770640  | A | 0.2268  |
| rs6888174   | T | -0.1578 |
| rs6865614   | C | 0.0551  |
| rs28415991  | C | -0.0366 |
| rs7718468   | G | -0.0301 |
| rs28871984  | G | -0.0437 |
| rs35772887  | T | 0.1164  |
| rs16874759  | A | -0.0371 |
| rs7737462   | G | -0.0309 |
| rs736514    | T | 0.0332  |
| rs73755047  | C | 0.1492  |
| rs13155916  | A | -0.0534 |
| rs17256526  | T | 0.0587  |
| rs71595946  | T | -0.1658 |
| rs13362489  | C | -0.062  |
| rs35929063  | G | 0.0618  |
| rs11952452  | C | -0.0614 |
| rs6897795   | A | -0.0453 |
| rs7718916   | T | -0.0431 |
| rs71609222  | C | 0.0956  |
| rs34936557  | C | -0.0621 |
| rs17166980  | T | 0.0686  |
| rs17058402  | A | -0.0954 |
| rs72733363  | G | 0.1039  |
| rs12173033  | A | -0.0556 |
| rs140712457 | G | 0.1939  |
| rs29833     | T | -0.0294 |
| rs111503391 | T | 0.1193  |
| rs6887281   | G | 0.0305  |
| rs824893    | C | -0.0411 |
| rs41389245  | G | 0.0706  |
| rs62364317  | C | 0.1327  |
| rs4343874   | G | 0.0286  |
| rs13173915  | T | 0.2907  |
| rs7721835   | C | -0.0289 |
| rs77314253  | A | -0.1139 |
| rs1972638   | T | -0.0423 |
| rs17361885  | T | -0.0471 |
| rs72757836  | T | 0.075   |
| rs34951517  | T | -0.1377 |

|             |   |         |
|-------------|---|---------|
| rs7704494   | C | -0.2109 |
| rs116814422 | C | 0.1672  |
| rs72791998  | T | 0.0551  |
| rs6595711   | T | -0.0499 |
| rs12189401  | C | -0.0715 |
| rs73177409  | G | 0.1256  |
| rs148027378 | A | -0.1185 |
| rs2288777   | G | 0.0535  |
| rs4432839   | G | 0.114   |
| rs115098885 | A | -0.1949 |
| rs11741278  | G | 0.0392  |
| rs76598981  | A | 0.1466  |
| rs11326     | C | -0.0437 |
| rs13164693  | G | 0.0645  |
| rs72731048  | C | -0.0532 |
| rs257344    | G | -0.0341 |
| rs334484    | T | -0.0525 |
| rs3212682   | G | 0.0749  |
| rs72831337  | T | -0.063  |
| rs2736103   | C | -0.0359 |
| rs56096651  | G | -0.116  |
| rs11740933  | A | -0.059  |
| rs73073975  | C | 0.1637  |
| rs2306339   | A | 0.0338  |
| rs168331    | C | 0.0349  |
| rs35350827  | T | -0.1085 |
| rs13155194  | G | 0.0543  |
| rs7705407   | G | -0.0364 |
| rs114961826 | A | 0.0912  |
| rs150954750 | T | 0.2292  |
| rs6868626   | G | 0.0505  |
| rs74369478  | T | 0.0963  |
| rs270201    | C | -0.0344 |
| rs138561538 | C | -0.18   |
| rs6896626   | A | -0.0361 |
| rs116847641 | T | 0.1324  |
| rs2471130   | C | 0.0324  |
| rs79835633  | T | -0.1298 |
| rs4957639   | T | 0.0592  |
| rs62622796  | T | 0.1427  |
| rs7735262   | A | 0.0491  |
| rs16894499  | C | 0.0948  |
| rs151152    | T | -0.0411 |
| rs4314381   | A | -0.0305 |
| rs71615994  | T | 0.0665  |
| rs55927048  | T | -0.0755 |
| rs4990391   | T | 0.0499  |

|             |   |         |
|-------------|---|---------|
| rs146441880 | T | 0.1285  |
| rs4145748   | T | 0.0633  |
| rs79421516  | T | -0.0829 |
| rs17584481  | T | 0.0326  |
| rs12653262  | T | -0.0846 |
| rs250833    | T | -0.0362 |
| rs7737937   | A | 0.0411  |
| rs17613411  | T | 0.0979  |
| rs143325363 | T | -0.1685 |
| rs62376929  | A | 0.0396  |
| rs13436933  | G | -0.0554 |
| rs34981398  | T | -0.0369 |
| rs114058786 | A | -0.1437 |
| rs3924895   | T | 0.0454  |
| rs11745468  | T | -0.057  |
| rs292212    | A | 0.0768  |
| rs116839170 | C | -0.1513 |
| rs62377732  | T | 0.0352  |
| rs34162788  | G | 0.0306  |
| rs76587999  | C | 0.0521  |
| rs145935887 | T | -0.1791 |
| rs17214025  | G | -0.2233 |
| rs115366841 | A | 0.1288  |
| rs2592093   | C | -0.0402 |
| rs114463499 | T | -0.1328 |
| rs244714    | T | -0.0541 |
| rs62357146  | A | 0.1348  |
| rs115671741 | A | -0.2544 |
| rs75256387  | C | 0.1088  |
| rs72751304  | G | -0.0899 |
| rs2161343   | G | -0.0295 |
| rs59551663  | T | -0.0866 |
| rs17450784  | C | -0.0447 |
| rs143693125 | A | 0.1536  |
| rs12518719  | C | 0.1632  |
| rs114964389 | T | 0.1052  |
| rs75601385  | C | 0.0483  |
| rs79243469  | A | -0.1191 |
| rs79978341  | A | -0.1256 |
| rs12332657  | A | 0.0945  |
| rs78869868  | C | 0.1388  |
| rs73247096  | G | -0.0483 |
| rs75679736  | A | 0.1569  |
| rs78206189  | C | 0.1158  |
| rs983571    | G | 0.0286  |
| rs10051868  | T | 0.0941  |
| rs148046905 | G | -0.1387 |

|             |   |         |
|-------------|---|---------|
| rs1501756   | G | -0.049  |
| rs77747317  | A | -0.2242 |
| rs12520985  | T | 0.0367  |
| rs10064001  | C | 0.0348  |
| rs2963663   | C | 0.031   |
| rs1500127   | T | 0.0636  |
| rs17256961  | C | 0.0438  |
| rs73072233  | G | -0.1612 |
| rs75507866  | A | -0.172  |
| rs75938462  | T | 0.2382  |
| rs72822744  | T | 0.0502  |
| rs4422515   | G | 0.0336  |
| rs77609659  | T | 0.1654  |
| rs112384424 | T | 0.1098  |
| rs149828140 | C | -0.0956 |
| rs73123908  | A | -0.0779 |
| rs1398336   | T | -0.0347 |
| rs115693949 | C | -0.1235 |
| rs71575323  | T | 0.0453  |
| rs114135854 | G | 0.2417  |
| rs371869    | A | -0.0951 |
| rs2913381   | A | -0.1326 |
| rs4235498   | T | 0.0287  |
| rs702077    | A | 0.1538  |
| rs115417347 | G | 0.0654  |
| rs76249205  | G | -0.1378 |
| rs114812871 | G | 0.0744  |
| rs62367073  | T | 0.1402  |
| rs9686714   | C | 0.0617  |
| rs6898432   | C | 0.0552  |
| rs4702330   | T | -0.033  |
| rs139097116 | G | -0.099  |
| rs73297633  | A | 0.0763  |
| rs116031596 | A | -0.0693 |
| rs7705904   | G | 0.0288  |
| rs1896607   | A | -0.1004 |
| rs28377118  | T | 0.1003  |
| rs72771875  | A | 0.0991  |
| rs76016407  | T | 0.1924  |
| rs1315588   | A | 0.0912  |
| rs7705419   | C | 0.0743  |
| rs76729740  | G | -0.0648 |
| rs888783    | T | -0.0306 |
| rs10064430  | G | 0.2206  |
| rs11167741  | G | 0.0342  |
| rs696737    | C | -0.061  |
| rs265416    | C | -0.0433 |

|             |   |         |
|-------------|---|---------|
| rs7716440   | C | 0.0699  |
| rs116000100 | G | 0.1297  |
| rs17255924  | A | -0.1577 |
| rs62375978  | T | 0.1668  |
| rs116416589 | A | 0.1736  |
| rs72796064  | T | -0.0589 |
| rs79797086  | T | -0.2397 |
| rs1205742   | C | 0.0312  |
| rs929765    | G | 0.0381  |
| rs113513390 | C | 0.1705  |
| rs138278269 | T | -0.2095 |
| rs115934700 | T | 0.0607  |
| rs55838022  | C | -0.0402 |
| rs10941232  | G | 0.0327  |
| rs114657307 | A | -0.1635 |
| rs6874642   | T | -0.0374 |
| rs56214827  | A | 0.1132  |
| rs149584    | G | 0.0314  |
| rs115952066 | A | 0.1049  |
| rs11958655  | C | 0.0432  |
| rs7703866   | C | 0.1803  |
| rs76285486  | A | 0.1561  |
| rs56143350  | T | -0.0295 |
| rs78053946  | T | 0.1028  |
| rs111295019 | G | 0.0703  |
| rs10077700  | T | -0.0473 |
| rs28764835  | A | -0.0482 |
| rs72764168  | T | 0.0367  |
| rs147570823 | T | 0.1941  |
| rs7726258   | G | 0.0521  |
| rs28866924  | G | 0.0589  |
| rs75631290  | A | 0.0623  |
| rs11956185  | C | 0.0738  |
| rs13154202  | C | -0.0879 |
| rs146657394 | C | 0.1176  |
| rs2112618   | G | -0.0401 |
| rs35431917  | T | 0.0749  |
| rs75250438  | A | -0.0656 |
| rs822470    | A | -0.0359 |
| rs13359356  | A | 0.0627  |
| rs6891100   | C | 0.0458  |
| rs114814118 | C | -0.1097 |
| rs3776579   | G | -0.0689 |
| rs78296213  | G | -0.1311 |
| rs78730246  | A | 0.0716  |
| rs10462632  | A | 0.029   |
| rs905176    | A | 0.0313  |



|             |   |         |
|-------------|---|---------|
| rs76079891  | T | -0.0717 |
| rs72760191  | A | -0.0802 |
| rs113564264 | C | 0.208   |
| rs116608979 | T | 0.2124  |
| rs282406    | A | 0.0729  |
| rs72752089  | G | 0.1061  |
| rs17788784  | C | -0.1083 |
| rs76342122  | T | 0.1303  |
| rs116685436 | A | -0.1423 |
| rs12153513  | G | 0.0326  |
| rs79881090  | G | -0.0865 |
| rs142109317 | C | -0.1755 |
| rs6897626   | T | -0.0346 |
| rs12520996  | C | -0.0304 |
| rs67658220  | C | 0.0438  |
| rs77568003  | T | 0.071   |
| rs72791286  | C | 0.0645  |
| rs150826772 | A | -0.1503 |
| rs142877472 | T | -0.0853 |
| rs114560566 | T | -0.249  |
| rs194450    | C | 0.0476  |
| rs62377261  | A | 0.032   |
| rs113630952 | T | 0.0487  |
| rs6555342   | A | 0.0357  |
| rs78009119  | G | 0.1278  |
| rs10223138  | G | 0.0405  |
| rs72785074  | G | 0.0894  |
| rs56122927  | T | -0.0496 |
| rs72820336  | C | -0.0992 |
| rs34398974  | G | 0.1159  |
| rs7707080   | T | -0.0438 |
| rs79483746  | A | 0.1387  |
| rs11134906  | T | -0.0378 |
| rs10068326  | A | -0.0328 |
| rs2974436   | C | 0.0921  |
| rs62362011  | C | 0.0398  |
| rs7720980   | C | -0.0335 |
| rs56344225  | A | -0.0748 |
| rs12153452  | G | -0.054  |
| rs75963578  | T | 0.1042  |
| rs35190985  | A | 0.1045  |
| rs1145623   | A | -0.0479 |
| rs2112867   | T | -0.0301 |
| rs139556122 | C | -0.1377 |
| rs16886829  | G | -0.0684 |
| rs72777928  | A | 0.0736  |
| rs252417    | C | 0.1282  |

|             |   |         |
|-------------|---|---------|
| rs6601095   | T | -0.0348 |
| rs11960727  | A | 0.0623  |
| rs114081440 | A | -0.2042 |
| rs113558640 | C | 0.1296  |
| rs32494     | C | 0.0353  |
| rs147669488 | A | 0.2359  |
| rs115769200 | A | 0.1161  |
| rs10038242  | G | 0.0787  |
| rs77691727  | G | -0.0877 |
| rs6898088   | A | -0.0283 |
| rs150364709 | T | -0.2024 |
| rs141625627 | G | 0.1848  |
| rs72800828  | G | 0.1083  |
| rs142346433 | C | -0.1136 |
| rs76858877  | C | 0.0865  |
| rs141418579 | A | -0.2287 |
| rs10475993  | G | -0.0432 |
| rs114574654 | T | -0.2501 |
| rs13168660  | A | -0.0421 |
| rs4145068   | T | 0.031   |
| rs142176042 | C | -0.1121 |
| rs17460496  | A | -0.0566 |
| rs56390865  | C | 0.0851  |
| rs59927528  | C | 0.1297  |
| rs4452568   | G | -0.0321 |
| rs10060477  | G | 0.0365  |
| rs13156175  | A | 0.0437  |
| rs4703511   | A | 0.0709  |
| rs58851047  | A | -0.038  |
| rs11948950  | A | 0.0517  |
| rs17147577  | A | 0.0287  |
| rs261052    | A | -0.0718 |
| rs71592151  | C | 0.0926  |
| rs13157627  | A | -0.029  |
| rs114335886 | C | -0.0817 |
| rs56349318  | T | -0.099  |
| rs9687078   | T | 0.0327  |
| rs1428925   | T | 0.0613  |
| rs895801    | A | -0.0482 |
| rs6595203   | A | 0.07    |
| rs78778481  | A | -0.1073 |
| rs72793010  | G | 0.1674  |
| rs140102601 | T | -0.2409 |
| rs62357336  | G | 0.0992  |
| rs26436     | T | -0.0448 |
| rs17707884  | A | -0.0296 |
| rs6871011   | C | 0.0428  |

|             |   |         |
|-------------|---|---------|
| rs72647757  | A | 0.1374  |
| rs11135378  | G | 0.05    |
| rs1477284   | C | 0.0291  |
| rs267385    | C | -0.0429 |
| rs112406293 | A | -0.1402 |
| rs17571587  | T | 0.0442  |
| rs446421    | A | -0.142  |
| rs13156994  | A | -0.0936 |
| rs4588550   | T | 0.0324  |
| rs255577    | C | -0.0852 |
| rs75354639  | T | -0.1012 |
| rs115427528 | A | -0.1722 |
| rs56798969  | A | 0.0396  |
| rs79863393  | G | 0.0667  |
| rs62383936  | C | 0.1412  |
| rs778826    | G | -0.0438 |
| rs80356008  | C | -0.0411 |
| rs77147454  | G | -0.2299 |
| rs297176    | T | 0.1048  |
| rs34995018  | G | 0.1413  |
| rs114362822 | T | 0.1497  |
| rs2456220   | A | 0.0287  |
| rs12188029  | T | -0.0901 |
| rs251086    | A | 0.0429  |
| rs750493    | A | -0.0453 |
| rs11134453  | A | -0.0291 |
| rs2057796   | A | -0.2451 |
| rs62372460  | T | 0.0912  |
| rs10214211  | C | -0.0637 |
| rs11133960  | T | -0.0488 |
| rs1363969   | G | 0.0298  |
| rs2881773   | G | -0.0339 |
| rs12520708  | A | 0.1312  |
| rs62357006  | A | 0.0312  |
| rs78084101  | A | -0.1747 |
| rs72739430  | C | -0.0568 |
| rs1828181   | C | 0.0613  |
| rs111402958 | T | -0.0761 |
| rs114185447 | T | 0.2193  |
| rs2964348   | C | -0.0328 |
| rs1902950   | C | 0.1822  |
| rs4298283   | C | 0.0417  |
| rs792966    | G | 0.0325  |
| rs7379023   | T | 0.0383  |
| rs116437228 | C | -0.0638 |
| rs5744463   | G | -0.0869 |
| rs455355    | T | 0.0312  |

|             |   |         |
|-------------|---|---------|
| rs11950112  | A | 0.1774  |
| rs115919668 | A | -0.1957 |
| rs141310981 | G | 0.1617  |
| rs25745     | G | 0.0285  |
| rs144171969 | A | 0.1202  |
| rs80042887  | A | 0.1575  |
| rs66778937  | G | -0.04   |
| rs62377098  | A | 0.1233  |
| rs114765571 | A | -0.0506 |
| rs7708829   | G | 0.028   |
| rs30268     | G | -0.0406 |
| rs7702731   | A | 0.0309  |
| rs5006710   | C | 0.125   |
| rs62339020  | T | 0.1137  |
| rs7711187   | A | 0.1219  |
| rs6869766   | G | 0.0545  |
| rs73808738  | G | 0.1016  |
| rs72818028  | T | -0.1302 |
| rs6888181   | C | 0.1817  |
| rs6452576   | G | 0.0314  |
| rs12514957  | G | 0.0542  |
| rs78550861  | G | 0.0875  |
| rs3111093   | T | 0.0452  |
| rs7714652   | A | 0.0303  |
| rs139896030 | T | -0.2578 |
| rs4865845   | A | 0.0319  |
| rs138854325 | C | 0.1525  |
| rs57199527  | T | -0.0481 |
| rs6885936   | A | -0.0423 |
| rs73037046  | G | 0.1056  |
| rs12518735  | T | 0.0358  |
| rs140947680 | T | 0.1908  |
| rs115165944 | A | -0.1325 |
| rs62357170  | T | -0.0411 |
| rs62363941  | G | 0.0623  |
| rs34500994  | A | -0.1264 |
| rs72835811  | C | 0.0397  |
| rs79359975  | C | 0.0887  |
| rs12519655  | A | 0.1026  |
| rs36050325  | A | -0.0426 |
| rs76685766  | T | -0.1363 |
| rs374138    | A | 0.036   |
| rs4700716   | T | 0.1933  |
| rs7733346   | T | -0.0352 |
| rs72790894  | C | -0.0639 |
| rs7447569   | T | -0.1181 |
| rs7701775   | A | -0.0488 |

|             |   |         |
|-------------|---|---------|
| rs10472230  | C | -0.0342 |
| rs41420550  | A | 0.0614  |
| rs55637827  | G | 0.1818  |
| rs1438733   | T | 0.0561  |
| rs12652501  | G | 0.0327  |
| rs111869964 | T | -0.0397 |
| rs6868854   | C | -0.0337 |
| rs75722097  | G | 0.0427  |
| rs149006992 | A | -0.1533 |
| rs149002177 | G | 0.2009  |
| rs35294     | C | 0.0314  |
| rs2545660   | A | 0.0318  |
| rs34440596  | C | 0.1268  |
| rs12522757  | A | -0.0525 |
| rs115844017 | C | -0.2484 |
| rs16887626  | T | 0.0392  |
| rs163215    | C | -0.0597 |
| rs16872900  | C | 0.0897  |
| rs17572668  | C | 0.1778  |
| rs323654    | C | -0.0484 |
| rs62367502  | G | -0.1057 |
| rs11740661  | T | -0.1418 |
| rs77499817  | T | 0.0983  |
| rs32283     | G | -0.0402 |
| rs139298380 | A | 0.0916  |
| rs293123    | G | 0.0283  |
| rs2530216   | C | 0.0277  |
| rs11242234  | C | 0.0332  |
| rs111254460 | T | -0.0892 |
| rs13189018  | T | -0.0423 |
| rs11241388  | G | -0.0481 |
| rs113209155 | T | 0.1715  |
| rs248607    | G | 0.0386  |
| rs17110665  | A | -0.0667 |
| rs79089301  | A | -0.1134 |
| rs10042968  | G | 0.0336  |
| rs6555883   | G | 0.0329  |
| rs74605242  | A | 0.083   |
| rs154447    | G | 0.0302  |
| rs140260076 | T | 0.2407  |
| rs76094815  | T | 0.1093  |
| rs1444120   | G | -0.0299 |
| rs2019005   | G | 0.0286  |
| rs10463707  | C | 0.0657  |
| rs1186995   | C | 0.1252  |
| rs17136124  | T | -0.0401 |
| rs2011395   | C | 0.0281  |

|             |   |         |
|-------------|---|---------|
| rs79817769  | G | -0.0531 |
| rs75538428  | A | -0.2172 |
| rs76553060  | C | -0.1939 |
| rs9292199   | C | -0.0806 |
| rs2287744   | A | 0.0636  |
| rs62372486  | T | -0.1075 |
| rs149235996 | G | 0.1458  |
| rs78776144  | C | 0.1019  |
| rs745978    | C | -0.1779 |
| rs1008855   | T | 0.0786  |
| rs148430805 | T | 0.0784  |
| rs2973809   | T | 0.0328  |
| rs1862175   | C | -0.0317 |
| rs4957045   | T | -0.0348 |
| rs71588347  | G | -0.1131 |
| rs62380623  | A | -0.0826 |
| rs114135504 | C | -0.2073 |
| rs116413117 | A | -0.2277 |
| rs79769846  | G | 0.0974  |
| rs115461303 | T | 0.2153  |
| rs4365850   | C | 0.0375  |
| rs75428798  | T | 0.0897  |
| rs3812046   | A | 0.0325  |
| rs6898481   | G | 0.0768  |
| rs146790863 | T | -0.1613 |
| rs7706331   | T | 0.1407  |
| rs72809664  | C | 0.0992  |
| rs112027369 | A | 0.1528  |
| rs199188    | T | 0.0405  |
| rs35691319  | A | 0.0943  |
| rs10476909  | C | -0.0405 |
| rs55922930  | C | 0.1299  |
| rs115727248 | A | -0.1325 |
| rs146441991 | A | -0.1469 |
| rs1974789   | G | 0.0303  |
| rs144186074 | C | 0.2043  |
| rs3111112   | C | 0.0284  |
| rs10461875  | A | -0.0368 |
| rs34191738  | G | 0.0804  |
| rs148793245 | T | 0.1432  |
| rs13175533  | T | -0.0397 |
| rs11135382  | A | 0.0987  |
| rs10940565  | T | 0.0316  |
| rs27303     | G | 0.0377  |
| rs331025    | A | -0.041  |
| rs1630663   | A | -0.0343 |
| rs27351     | C | -0.0363 |

|             |   |         |
|-------------|---|---------|
| rs10472519  | A | -0.033  |
| rs1465415   | T | 0.0739  |
| rs72773789  | T | 0.1777  |
| rs114497419 | G | -0.0969 |
| rs7724670   | A | 0.0917  |
| rs12654055  | C | -0.0283 |
| rs114173054 | T | -0.2207 |
| rs17454632  | T | -0.0331 |
| rs12518302  | T | -0.0771 |
| rs115811725 | G | 0.1283  |
| rs12716253  | C | 0.0369  |
| rs144325903 | G | 0.2073  |
| rs10491257  | T | 0.0739  |
| rs11960129  | G | 0.0316  |
| rs150362959 | A | -0.1778 |
| rs116368911 | T | 0.1328  |
| rs13182491  | C | -0.1046 |
| rs17082764  | T | -0.0515 |
| rs142790525 | T | 0.2427  |
| rs75934119  | T | 0.0401  |
| rs31009     | G | -0.0485 |
| rs56148609  | C | 0.0338  |
| rs78523556  | G | -0.2733 |
| rs78798700  | G | -0.196  |
| rs78345977  | G | 0.1596  |
| rs72782145  | A | 0.1172  |
| rs55899552  | T | -0.1548 |
| rs11742336  | C | -0.0313 |
| rs114561331 | C | 0.2235  |
| rs62372090  | A | 0.1006  |
| rs10428597  | A | -0.0371 |
| rs56059805  | T | 0.1197  |
| rs62378056  | A | -0.1202 |
| rs10514220  | G | -0.0431 |
| rs77694828  | A | 0.0451  |
| rs10072756  | A | 0.0912  |
| rs4410655   | T | -0.0283 |
| rs80059114  | A | 0.1012  |
| rs6860677   | A | -0.0275 |
| rs139824252 | A | -0.1557 |
| rs17159197  | A | -0.0402 |
| rs144237942 | G | -0.1026 |
| rs116378353 | A | 0.1369  |
| rs112667211 | C | 0.1674  |
| rs13155055  | T | -0.0721 |
| rs147604995 | A | 0.0563  |
| rs2463773   | A | -0.0648 |

|             |   |         |
|-------------|---|---------|
| rs35737824  | T | 0.1036  |
| rs10463262  | A | 0.0373  |
| rs6450855   | C | -0.0285 |
| rs72795263  | T | -0.0497 |
| rs727301    | A | 0.0674  |
| rs17553840  | T | 0.0361  |
| rs10075171  | G | -0.0299 |
| rs72804586  | T | 0.0431  |
| rs34993     | C | -0.0403 |
| rs79323781  | T | 0.1071  |
| rs13168988  | C | -0.0883 |
| rs80178004  | A | -0.1425 |
| rs72804361  | T | 0.0645  |
| rs72771597  | C | 0.1333  |
| rs58239922  | G | -0.0764 |
| rs11952011  | C | 0.0344  |
| rs75875510  | A | -0.0317 |
| rs6596121   | G | 0.0315  |
| rs7722590   | T | 0.0331  |
| rs62387267  | A | 0.2346  |
| rs78469311  | G | 0.116   |
| rs1506126   | G | 0.0353  |
| rs79038279  | A | 0.1016  |
| rs4868462   | C | 0.0279  |
| rs74549930  | G | 0.1549  |
| rs6869256   | A | -0.1188 |
| rs111275255 | T | 0.0714  |
| rs6555548   | A | -0.0448 |
| rs1596776   | G | 0.0327  |
| rs6864913   | A | 0.0304  |
| rs3857431   | A | 0.0303  |
| rs150479817 | C | -0.2296 |
| rs145790649 | C | -0.1161 |
| rs59621871  | C | 0.047   |
| rs331098    | C | -0.0276 |
| rs77567670  | G | 0.137   |
| rs72779109  | T | -0.08   |
| rs11960831  | T | 0.052   |
| rs12514566  | A | -0.0301 |
| rs62360118  | T | 0.1813  |
| rs7734622   | C | 0.1546  |
| rs267793    | G | -0.0419 |
| rs138416857 | G | -0.0736 |
| rs719702    | T | -0.0287 |
| rs150880208 | T | -0.1186 |
| rs141451424 | C | 0.0604  |
| rs116147527 | A | 0.186   |



|             |   |         |
|-------------|---|---------|
| rs1152154   | A | 0.0511  |
| rs3798012   | A | 0.0664  |
| rs7713028   | A | 0.0793  |
| rs6869903   | C | 0.0429  |
| rs326145    | G | -0.034  |
| rs149851341 | G | -0.1769 |
| rs3857307   | T | 0.0346  |
| rs72775387  | T | -0.0541 |
| rs72793048  | C | -0.3107 |
| rs6860678   | T | 0.0433  |
| rs114661737 | G | 0.1265  |
| rs10042095  | G | 0.0449  |
| rs74576285  | G | -0.1842 |
| rs4616844   | G | -0.0481 |
| rs116132831 | C | -0.1087 |
| rs78269864  | A | 0.1212  |
| rs34836059  | G | 0.0345  |
| rs58460999  | T | 0.0638  |
| rs115083495 | A | 0.1317  |
| rs137876353 | C | 0.2363  |
| rs62335997  | T | -0.0359 |
| rs111243563 | A | -0.1594 |
| rs78875108  | G | 0.1276  |
| rs7720567   | C | 0.0933  |
| rs62341160  | T | 0.0397  |
| rs298596    | T | -0.0322 |
| rs115715159 | C | -0.134  |
| rs1428709   | C | -0.1113 |
| rs77098289  | A | 0.0651  |
| rs2936970   | A | -0.035  |
| rs2195371   | C | 0.044   |
| rs75976778  | A | 0.1972  |
| rs72765172  | A | -0.1847 |
| rs7722265   | G | 0.1844  |
| rs13159905  | A | -0.0519 |
| rs79509696  | A | -0.0959 |
| rs59024931  | A | -0.0522 |
| rs10038371  | C | 0.0281  |
| rs2887694   | A | -0.0711 |
| rs56112136  | T | 0.1132  |
| rs75478641  | C | 0.1496  |
| rs35259902  | T | -0.0493 |
| rs72747768  | T | 0.0928  |
| rs76145636  | A | 0.1512  |
| rs76236043  | G | 0.1613  |
| rs11954764  | A | -0.0284 |
| rs116315659 | C | 0.226   |

|             |   |         |
|-------------|---|---------|
| rs116144011 | C | 0.2159  |
| rs56387034  | A | -0.0316 |
| rs78320618  | A | 0.0617  |
| rs78541804  | T | 0.0786  |
| rs6864849   | G | -0.0285 |
| rs76693878  | T | 0.229   |
| rs60794186  | T | 0.0448  |
| rs78282908  | C | -0.2662 |
| rs13160457  | A | 0.033   |
| rs114130885 | G | -0.077  |
| rs1644314   | G | -0.0682 |
| rs78591977  | A | 0.1277  |
| rs62383000  | A | 0.0837  |
| rs2115046   | C | 0.0657  |
| rs147165657 | G | -0.0967 |
| rs115502782 | T | 0.0939  |
| rs2408763   | A | 0.0353  |
| rs12187782  | T | 0.0283  |
| rs7728599   | G | -0.0357 |
| rs12515016  | G | 0.0975  |
| rs75172471  | C | -0.1049 |
| rs246598    | T | 0.0754  |
| rs13177591  | A | -0.0315 |
| rs1483300   | A | -0.0335 |
| rs13162060  | C | -0.0925 |
| rs10078713  | T | -0.1597 |
| rs78536858  | T | 0.1686  |
| rs2120099   | G | -0.0907 |
| rs72704438  | G | -0.0712 |
| rs62369724  | C | -0.1842 |
| rs13169302  | G | -0.1138 |
| rs142181551 | A | -0.1509 |
| rs37790     | C | -0.0287 |
| rs147522793 | T | -0.1987 |
| rs17205642  | A | 0.1683  |
| rs75535881  | T | 0.1265  |
| rs62361810  | C | 0.263   |
| rs34227376  | C | 0.1276  |
| rs1609462   | C | 0.0291  |
| rs354599    | G | 0.0363  |
| rs153577    | T | -0.0442 |
| rs57229190  | A | 0.0314  |
| rs4552565   | A | 0.0294  |
| rs11744048  | T | -0.0388 |
| rs149237441 | A | -0.1028 |
| rs77276103  | A | 0.0961  |
| rs4235508   | C | 0.0353  |

|             |   |         |
|-------------|---|---------|
| rs1996778   | G | -0.0338 |
| rs72766486  | T | 0.1049  |
| rs35808268  | G | -0.0849 |
| rs150850907 | A | 0.15    |
| rs11738550  | C | 0.0414  |
| rs79683263  | A | -0.0494 |
| rs72782857  | A | -0.0782 |
| rs7701208   | A | -0.0368 |
| rs7720377   | G | -0.0295 |
| rs11567997  | G | 0.0852  |
| rs17527699  | G | 0.1087  |
| rs62343902  | C | 0.062   |
| rs115395026 | A | -0.137  |
| rs114912254 | G | 0.1999  |
| rs6596145   | T | -0.0295 |
| rs78563288  | T | 0.246   |
| rs151212400 | G | 0.1425  |
| rs62367504  | C | -0.0934 |
| rs17228156  | C | -0.0572 |
| rs76273759  | A | 0.1858  |
| rs138262648 | C | -0.144  |
| rs2578483   | G | -0.0291 |
| rs6554994   | T | -0.0279 |
| rs3828569   | G | -0.0472 |
| rs2662521   | A | 0.0382  |
| rs10077468  | G | 0.0326  |
| rs78529762  | C | -0.1051 |
| rs28865092  | A | 0.0488  |
| rs27685     | A | 0.0436  |
| rs116703382 | A | 0.1734  |
| rs4288127   | G | 0.0279  |
| rs4868150   | A | 0.0717  |
| rs11744283  | T | -0.0875 |
| rs79493336  | G | -0.1143 |
| rs3843449   | A | 0.0282  |
| rs74716916  | T | 0.177   |
| rs77314194  | A | 0.0684  |
| rs77523629  | T | 0.0486  |
| rs13356285  | T | 0.0484  |
| rs10519490  | G | -0.0451 |
| rs139632390 | T | 0.0649  |
| rs115610921 | G | -0.0825 |
| rs11133633  | C | 0.0295  |
| rs13162125  | G | 0.0315  |
| rs11134781  | A | -0.0819 |
| rs12657668  | A | 0.1245  |
| rs9293354   | A | 0.0306  |

|             |   |         |
|-------------|---|---------|
| rs328671    | G | 0.0297  |
| rs1021224   | C | -0.0302 |
| rs1379546   | A | 0.221   |
| rs17681860  | T | 0.0855  |
| rs73288823  | C | -0.0539 |
| rs115993758 | T | -0.1418 |
| rs17480969  | A | 0.0653  |
| rs17155896  | A | -0.045  |
| rs2304793   | C | 0.1513  |
| rs1107621   | A | 0.027   |
| rs292210    | A | -0.0325 |
| rs7704135   | T | 0.1933  |
| rs336463    | T | -0.0281 |
| rs115356469 | T | -0.134  |
| rs2731897   | A | -0.0455 |
| rs74466285  | G | 0.0532  |
| rs31533     | A | 0.0272  |
| rs10044874  | G | -0.051  |
| rs79130729  | C | -0.1039 |
| rs76992598  | C | 0.0638  |
| rs59761481  | A | -0.0818 |
| rs147804310 | C | 0.1381  |
| rs72738264  | T | 0.121   |
| rs7719826   | C | 0.0272  |
| rs13156977  | G | -0.0336 |
| rs6890327   | A | -0.033  |
| rs76506912  | G | 0.1473  |
| rs7735330   | C | 0.103   |
| rs56234115  | T | -0.1875 |
| rs139515851 | G | 0.1068  |
| rs7721111   | C | 0.0573  |
| rs111889445 | C | -0.14   |
| rs74513251  | A | -0.1134 |
| rs78174798  | A | 0.0593  |
| rs7726734   | A | -0.0407 |
| rs2303644   | A | 0.0318  |
| rs115266434 | T | 0.1757  |
| rs80087625  | G | -0.0569 |
| rs314727    | C | -0.0325 |
| rs11746369  | T | 0.1109  |
| rs113214835 | G | -0.1562 |
| rs142265478 | A | -0.1526 |
| rs17611733  | G | 0.1371  |
| rs4048662   | G | 0.0309  |
| rs17408227  | T | 0.0286  |
| rs146306245 | A | -0.1794 |
| rs4326178   | T | -0.0403 |

|             |   |         |
|-------------|---|---------|
| rs1805945   | C | 0.0491  |
| rs6879791   | C | -0.0407 |
| rs10058439  | C | 0.1431  |
| rs79934913  | G | -0.0402 |
| rs76031814  | C | -0.1267 |
| rs6874289   | T | -0.0323 |
| rs113220171 | C | 0.0943  |
| rs4516815   | T | -0.0587 |
| rs2434306   | T | -0.0436 |
| rs114864735 | C | -0.0768 |
| rs58404507  | T | -0.1857 |
| rs17645506  | T | 0.1088  |
| rs35714004  | G | -0.0611 |
| rs75052570  | G | 0.1385  |
| rs62374060  | T | 0.1732  |
| rs6891745   | A | 0.0288  |
| rs3798017   | T | 0.1856  |
| rs2168878   | G | -0.0318 |
| rs11135421  | C | 0.0317  |
| rs17140605  | A | 0.1043  |
| rs10053398  | T | -0.0477 |
| rs13173859  | G | -0.0908 |
| rs7710225   | G | 0.0285  |
| rs115670978 | A | 0.1848  |
| rs11948085  | A | -0.0669 |
| rs72789003  | A | -0.0732 |
| rs74717808  | C | 0.1235  |
| rs10040844  | T | -0.047  |
| rs76471671  | T | -0.08   |
| rs10514958  | T | 0.0407  |
| rs11960621  | A | 0.0482  |
| rs114071238 | A | -0.1314 |
| rs78513438  | G | -0.0607 |
| rs72723039  | G | 0.0787  |
| rs115789483 | A | -0.1099 |
| rs140524876 | G | 0.1363  |
| rs13171100  | A | 0.0298  |
| rs10074040  | T | -0.0439 |
| rs147544795 | A | -0.2136 |
| rs1549653   | A | 0.0293  |
| rs75650444  | A | -0.1318 |
| rs72761638  | C | 0.081   |
| rs6882133   | A | -0.0372 |
| rs114306395 | C | 0.1851  |
| rs113182839 | T | -0.1672 |
| rs55952204  | C | 0.1895  |
| rs10067413  | C | -0.0976 |

|             |   |         |
|-------------|---|---------|
| rs986280    | C | -0.0459 |
| rs76360570  | C | 0.2112  |
| rs150566949 | C | -0.1276 |
| rs12654617  | C | 0.0712  |
| rs72782461  | G | -0.0423 |
| rs17733395  | T | 0.0652  |
| rs77069707  | C | 0.0787  |
| rs3111532   | T | 0.0273  |
| rs34810711  | G | -0.0562 |
| rs114386433 | A | -0.0745 |
| rs292966    | A | -0.0344 |
| rs1846418   | G | 0.0337  |
| rs79008776  | T | 0.1095  |
| rs4976741   | G | -0.0476 |
| rs76344378  | A | 0.1088  |
| rs261129    | C | -0.0291 |
| rs6886664   | G | -0.0314 |
| rs79638027  | C | 0.0606  |
| rs2913750   | T | 0.0903  |
| rs74577814  | T | -0.0854 |
| rs2404548   | G | -0.1005 |
| rs35559997  | T | -0.0482 |
| rs115950699 | T | -0.1967 |
| rs34610852  | G | 0.0366  |
| rs148846311 | T | 0.1477  |
| rs386476    | T | 0.0287  |
| rs297846    | A | -0.0425 |
| rs73785915  | A | -0.0696 |
| rs74446910  | T | 0.0941  |
| rs34019662  | T | -0.0562 |
| rs72740002  | T | -0.1387 |
| rs163953    | A | -0.1077 |
| rs7702810   | C | 0.0404  |
| rs183869    | T | 0.0367  |
| rs62357933  | G | -0.0376 |
| rs7734222   | A | -0.0325 |
| rs76589451  | G | 0.1013  |
| rs75367588  | G | -0.1259 |
| rs1374028   | G | 0.0447  |
| rs6594969   | T | 0.0311  |
| rs367842    | A | 0.0321  |
| rs115323833 | T | -0.2361 |
| rs7706066   | T | -0.049  |
| rs152564    | A | -0.0624 |
| rs17426775  | A | 0.077   |
| rs75599243  | A | 0.1169  |
| rs2649635   | A | -0.0458 |

|             |   |         |
|-------------|---|---------|
| rs116447691 | T | 0.084   |
| rs60089999  | G | 0.0281  |
| rs899550    | A | 0.0895  |
| rs36047096  | C | 0.1265  |
| rs72643721  | T | 0.107   |
| rs72813360  | T | -0.0322 |
| rs113174371 | T | -0.1769 |
| rs79511864  | C | 0.141   |
| rs17287615  | A | 0.0306  |
| rs75224406  | A | -0.0936 |
| rs62355578  | T | -0.0478 |
| rs71614077  | T | 0.079   |
| rs113527345 | A | 0.0621  |
| rs4975646   | A | -0.0284 |
| rs11742433  | G | 0.0605  |
| rs13171910  | G | 0.0274  |
| rs151284504 | T | 0.1404  |
| rs114798976 | G | -0.0967 |
| rs270214    | G | 0.0591  |
| rs13361759  | G | 0.031   |
| rs78740109  | G | -0.1737 |
| rs145123698 | G | -0.1487 |
| rs10471440  | A | -0.1519 |
| rs16901200  | A | 0.0532  |
| rs16889923  | A | -0.0429 |
| rs10074292  | G | 0.249   |
| rs114430159 | A | 0.1052  |
| rs77050045  | A | 0.04    |
| rs74632339  | G | 0.1079  |
| rs13181073  | A | -0.0438 |
| rs6889573   | A | 0.0291  |
| rs56071134  | C | 0.0886  |
| rs306104    | T | 0.0293  |
| rs146304218 | T | -0.1387 |
| rs2961683   | A | 0.0325  |
| rs7705194   | T | 0.0507  |
| rs450821    | C | -0.0306 |
| rs113499246 | T | 0.1568  |
| rs139458222 | T | 0.1431  |
| rs67453023  | G | -0.0439 |
| rs115184022 | G | -0.0754 |
| rs17104497  | T | -0.0745 |
| rs17565369  | C | 0.0568  |
| rs28472510  | C | 0.0366  |
| rs2973821   | C | -0.0414 |
| rs72784324  | C | 0.0637  |
| rs1110351   | T | 0.0277  |

|             |   |         |
|-------------|---|---------|
| rs75288567  | A | -0.1312 |
| rs39867     | A | -0.0826 |
| rs6601197   | A | -0.0584 |
| rs114863883 | G | 0.118   |
| rs115117274 | G | -0.1877 |
| rs4921190   | T | 0.0718  |
| rs9313810   | C | -0.0358 |
| rs56132368  | T | 0.1286  |
| rs35658696  | G | 0.1207  |
| rs17510007  | C | 0.0964  |
| rs149484071 | A | -0.1823 |
| rs76174191  | T | -0.1171 |
| rs7732120   | A | 0.0321  |
| rs114506423 | G | -0.1727 |
| rs75775315  | A | 0.0539  |
| rs60673405  | T | -0.0471 |
| rs56202189  | A | 0.0671  |
| rs251868    | G | 0.0309  |
| rs17146651  | G | -0.0946 |
| rs62388572  | A | 0.1055  |
| rs13187353  | C | -0.0512 |
| rs80330932  | G | 0.0623  |
| rs77957449  | C | -0.0803 |
| rs17083126  | G | 0.1508  |
| rs79583134  | A | -0.0778 |
| rs7713570   | T | 0.028   |
| rs142169179 | A | 0.1912  |
| rs76391114  | T | -0.1603 |
| rs10065018  | A | 0.0506  |
| rs146594797 | T | 0.2027  |
| rs1664600   | G | 0.0757  |
| rs13167313  | A | 0.0704  |
| rs2909813   | G | -0.0802 |
| rs7719358   | A | -0.0295 |
| rs12517311  | C | 0.0325  |
| rs7447422   | C | -0.1909 |
| rs6884676   | T | 0.0375  |
| rs2927413   | T | 0.0306  |
| rs114465055 | C | -0.1176 |
| rs4704095   | T | 0.0286  |
| rs10079250  | C | -0.054  |
| rs4703520   | A | 0.0271  |
| rs146871589 | A | -0.1185 |
| rs700604    | A | -0.0287 |
| rs78817202  | T | -0.1051 |
| rs11134123  | C | 0.1047  |
| rs1526888   | G | 0.0485  |



|             |   |         |
|-------------|---|---------|
| rs75157611  | A | -0.0741 |
| rs10900892  | A | -0.0289 |
| rs115712182 | C | 0.1462  |
| rs10063923  | T | -0.0293 |
| rs1368430   | A | 0.0269  |
| rs140354889 | T | 0.1042  |
| rs4105718   | A | 0.0301  |
| rs112234138 | C | -0.1995 |
| rs72758825  | T | -0.1951 |
| rs61539130  | T | 0.1175  |
| rs148306845 | T | -0.2095 |
| rs2941664   | T | -0.0266 |
| rs142133903 | G | 0.113   |
| rs16878153  | T | -0.1034 |
| rs116444257 | G | 0.1295  |
| rs56268952  | T | -0.106  |
| rs13178893  | G | 0.1052  |
| rs78777703  | T | -0.0638 |
| rs13181306  | G | 0.0381  |
| rs78703938  | T | -0.0867 |
| rs77814845  | T | 0.0851  |
| rs1862559   | T | 0.0273  |
| rs72768121  | G | -0.0967 |
| rs79338527  | A | 0.1137  |
| rs291856    | G | 0.0361  |
| rs2053681   | A | 0.0289  |
| rs80162459  | T | 0.1381  |
| rs2448435   | A | 0.031   |
| rs73344234  | C | 0.0985  |
| rs4701478   | T | 0.0271  |
| rs6866022   | A | -0.0656 |
| rs113866468 | A | 0.1134  |
| rs144957580 | A | 0.0899  |
| rs4267850   | A | 0.0267  |
| rs117273720 | G | 0.1061  |
| rs138734352 | A | 0.1453  |
| rs7378861   | G | -0.0616 |
| rs116508359 | T | 0.1316  |
| rs79938983  | T | 0.1906  |
| rs114628423 | G | -0.1253 |
| rs1422934   | C | 0.0554  |
| rs72754169  | A | -0.1384 |
| rs7448244   | T | -0.0316 |
| rs114142592 | G | 0.1915  |
| rs805233    | G | 0.0553  |
| rs35231852  | C | -0.0339 |
| rs78898468  | T | 0.0596  |

|             |   |         |
|-------------|---|---------|
| rs73763925  | T | 0.0952  |
| rs1297835   | C | 0.028   |
| rs115958955 | T | 0.2145  |
| rs62364160  | G | 0.0404  |
| rs72782749  | T | 0.0944  |
| rs6881915   | G | 0.1117  |
| rs141945625 | T | 0.1524  |
| rs7707367   | A | -0.0335 |
| rs7700369   | G | 0.041   |
| rs74295642  | A | 0.108   |
| rs2471014   | C | 0.0347  |
| rs62370004  | A | 0.121   |
| rs74689374  | C | 0.2685  |
| rs79102171  | T | -0.1758 |
| rs115156813 | G | 0.055   |
| rs57171320  | T | 0.0744  |
| rs62405490  | C | 0.0282  |
| rs111901972 | A | 0.0405  |
| rs76601456  | T | 0.1447  |
| rs115610684 | T | 0.0954  |
| rs2255915   | T | 0.0308  |
| rs4869558   | T | 0.0307  |
| rs151315299 | G | 0.1904  |
| rs249117    | T | 0.0338  |
| rs114236321 | G | 0.0324  |
| rs78018439  | T | 0.1036  |
| rs10070848  | T | 0.0876  |
| rs78532245  | T | -0.1321 |
| rs35595324  | T | 0.0554  |
| rs17181184  | C | -0.0505 |
| rs13176432  | G | -0.0754 |
| rs7708891   | A | -0.0686 |
| rs2628163   | T | 0.028   |
| rs114171730 | A | 0.1143  |
| rs112456505 | A | 0.081   |
| rs10475171  | A | 0.0618  |
| rs79838069  | T | 0.1209  |
| rs4976254   | T | 0.0292  |
| rs78855286  | G | 0.1381  |
| rs58265751  | T | 0.0284  |
| rs79050608  | A | 0.1273  |
| rs34659052  | C | -0.0365 |
| rs72790069  | C | -0.0831 |
| rs2652723   | A | 0.0575  |
| rs12523068  | A | 0.0546  |
| rs34304     | T | 0.0278  |
| rs115911152 | G | -0.1738 |

|             |   |         |
|-------------|---|---------|
| rs116391698 | T | -0.1053 |
| rs354958    | G | -0.0309 |
| rs6879302   | A | -0.0296 |
| rs13180530  | C | 0.0299  |
| rs72758408  | G | 0.1478  |
| rs6884540   | T | 0.0623  |
| rs76094274  | G | -0.0712 |
| rs116299554 | T | 0.084   |
| rs2329670   | G | 0.034   |
| rs17070550  | C | -0.0584 |
| rs2330882   | T | 0.0363  |
| rs10056131  | G | -0.0299 |
| rs145363974 | T | 0.2647  |
| rs137968990 | A | -0.1823 |
| rs114819739 | C | 0.1018  |
| rs62349125  | G | 0.0458  |
| rs143791573 | A | 0.0436  |
| rs62362949  | G | -0.0323 |
| rs10062341  | C | 0.0328  |
| rs2111008   | C | -0.1404 |
| rs150618962 | G | -0.1066 |
| rs152619    | A | 0.0298  |
| rs145911067 | T | 0.2459  |
| rs77910548  | G | 0.1072  |
| rs148009407 | A | -0.0944 |
| rs62379376  | T | 0.0767  |
| rs1469434   | T | 0.0469  |
| rs13176438  | T | 0.0466  |
| rs171095    | A | 0.0392  |
| rs62355024  | T | -0.0467 |
| rs112499004 | G | -0.0963 |
| rs7714397   | C | 0.1027  |
| rs259105    | A | 0.0284  |
| rs116495524 | T | 0.1411  |
| rs115635140 | A | -0.0908 |
| rs76295705  | G | 0.2142  |
| rs7378720   | G | -0.0282 |
| rs61531962  | A | 0.1781  |
| rs16878144  | G | -0.0395 |
| rs12522035  | C | -0.0539 |
| rs11949558  | G | 0.0403  |
| rs353970    | T | 0.0813  |
| rs62405739  | G | 0.0505  |
| rs7726500   | G | -0.0276 |
| rs113335650 | G | 0.2101  |
| rs2288442   | T | 0.0307  |
| rs9324683   | T | 0.0407  |

|             |   |         |
|-------------|---|---------|
| rs112070692 | A | 0.0414  |
| rs113351896 | G | -0.1806 |
| rs13154326  | A | -0.0453 |
| rs148736189 | G | 0.0997  |
| rs62354639  | C | -0.0769 |
| rs147701368 | G | 0.2231  |
| rs76383438  | A | -0.1319 |
| rs592418    | C | 0.038   |
| rs1703043   | C | -0.027  |
| rs41438949  | G | 0.0643  |
| rs62371616  | T | -0.0844 |
| rs55998640  | A | -0.0881 |
| rs34027546  | T | 0.0417  |
| rs74834144  | C | 0.1563  |
| rs6555230   | G | -0.0456 |
| rs114338272 | G | -0.1574 |
| rs12520729  | C | 0.0818  |
| rs74774304  | G | 0.0697  |
| rs113606115 | G | -0.1812 |
| rs13159871  | G | 0.0815  |
| rs11134096  | C | 0.0376  |
| rs35461047  | A | -0.0631 |
| rs7715634   | T | 0.0516  |
| rs57100135  | T | -0.0298 |
| rs4091641   | C | -0.0386 |
| rs116229104 | T | -0.0922 |
| rs76869836  | C | -0.0559 |
| rs77482162  | C | 0.1145  |
| rs62382034  | T | -0.0558 |
| rs62347664  | A | -0.0845 |
| rs151157    | C | 0.027   |
| rs72773229  | A | 0.1199  |
| rs14153     | C | -0.0271 |
| rs72749205  | T | -0.0613 |
| rs115851834 | C | 0.1716  |
| rs7733030   | C | -0.1097 |
| rs12187218  | A | 0.1241  |
| rs300226    | C | 0.214   |
| rs72777622  | G | 0.0268  |
| rs6885593   | A | 0.0271  |
| rs148604983 | A | -0.1768 |
| rs2972844   | G | -0.0271 |
| rs142588045 | A | 0.1401  |
| rs1048957   | G | 0.1455  |
| rs115000305 | G | -0.1136 |
| rs2972342   | T | -0.03   |
| rs150775272 | T | 0.0366  |

|             |   |         |
|-------------|---|---------|
| rs256907    | C | 0.0336  |
| rs10052847  | C | 0.027   |
| rs585991    | T | -0.0312 |
| rs75532836  | T | -0.1662 |
| rs10057965  | C | 0.0301  |
| rs10065075  | A | 0.0311  |
| rs2280170   | A | -0.1246 |
| rs2306961   | C | -0.0317 |
| rs116207300 | G | 0.0601  |
| rs149627990 | A | -0.2385 |
| rs147116058 | C | -0.154  |
| rs17142889  | T | 0.0376  |
| rs147633951 | T | 0.1023  |
| rs141823625 | A | 0.1581  |
| rs2541313   | A | -0.11   |
| rs12659333  | T | -0.0424 |
| rs7719298   | C | -0.0353 |
| rs76908973  | A | -0.0441 |
| rs150409128 | C | 0.1332  |
| rs6875921   | G | -0.0309 |
| rs56064611  | T | 0.0496  |
| rs2278461   | A | -0.0439 |
| rs2548129   | A | 0.0275  |
| rs79176365  | T | 0.0968  |
| rs60758715  | T | -0.029  |
| rs151108949 | G | -0.1745 |
| rs139685918 | T | -0.0891 |
| rs11960832  | T | -0.0347 |
| rs854143    | T | -0.0298 |
| rs17208017  | G | -0.0649 |
| rs3734099   | A | 0.0429  |
| rs57734928  | A | 0.1405  |
| rs17410311  | T | -0.1871 |
| rs444610    | A | 0.0267  |
| rs72776637  | T | 0.1216  |
| rs6873535   | T | 0.0464  |
| rs10475982  | T | 0.0439  |
| rs2112362   | A | -0.0354 |
| rs3111115   | C | -0.0537 |
| rs4703252   | T | -0.0462 |
| rs112700520 | A | -0.0613 |
| rs141394251 | C | 0.0864  |
| rs11135103  | C | -0.0267 |
| rs2330300   | A | -0.0304 |
| rs2964139   | G | 0.0352  |
| rs112508177 | T | 0.1042  |
| rs12187451  | C | 0.1206  |

|             |   |         |
|-------------|---|---------|
| rs1035859   | A | 0.0501  |
| rs10036314  | A | 0.1013  |
| rs75551978  | T | 0.0819  |
| rs17608368  | T | -0.1063 |
| rs78882906  | C | 0.0499  |
| rs77941183  | C | 0.0857  |
| rs55727923  | T | -0.0317 |
| rs62371496  | A | 0.1593  |
| rs76032705  | C | -0.0922 |
| rs10045682  | G | -0.049  |
| rs78735287  | G | 0.0327  |
| rs143661356 | T | 0.0941  |
| rs138373756 | A | -0.1376 |
| rs55972503  | G | 0.0372  |
| rs6883334   | G | -0.0281 |
| rs7700948   | T | -0.1016 |
| rs6863009   | G | 0.0487  |
| rs12516969  | G | -0.0716 |
| rs2434708   | A | 0.0263  |
| rs150965377 | C | -0.2108 |
| rs7719954   | C | -0.0302 |
| rs116604184 | T | -0.2169 |
| rs77117323  | T | -0.0715 |
| rs78598485  | T | 0.0625  |
| rs116413485 | T | -0.1439 |
| rs7445787   | A | -0.0433 |
| rs116457023 | T | 0.2553  |
| rs3922193   | T | -0.0359 |
| rs2306521   | C | -0.0991 |
| rs58914297  | A | -0.0357 |
| rs79602604  | C | 0.1583  |
| rs10079800  | A | -0.0591 |
| rs12186888  | T | 0.03    |
| rs144143594 | C | -0.1584 |
| rs35265178  | A | 0.1219  |
| rs34674518  | G | -0.0497 |
| rs2973361   | A | -0.0264 |
| rs75831637  | A | 0.0879  |
| rs115919945 | A | 0.1966  |
| rs7715469   | G | 0.0357  |
| rs74775741  | T | 0.0599  |
| rs72756203  | G | -0.0481 |
| rs114379134 | T | 0.1539  |
| rs34317388  | G | 0.0568  |
| rs26103     | G | -0.048  |
| rs76641739  | C | -0.0696 |
| rs4235619   | C | 0.0299  |

|             |   |         |
|-------------|---|---------|
| rs150852284 | T | -0.228  |
| rs80029268  | A | -0.0399 |
| rs1651265   | A | -0.0323 |
| rs77731531  | G | -0.2202 |
| rs11745887  | G | -0.0395 |
| rs78609389  | T | -0.0451 |
| rs74818661  | C | -0.2219 |
| rs73134569  | G | -0.0467 |
| rs72795945  | T | 0.0601  |
| rs73280613  | A | -0.0583 |
| rs184652    | G | -0.0299 |
| rs888859    | T | 0.1862  |
| rs75228384  | A | 0.1193  |
| rs77260314  | T | 0.1059  |
| rs16900399  | A | -0.0399 |
| rs12522627  | G | -0.0341 |
| rs17648121  | T | 0.1045  |
| rs920387    | C | 0.0264  |
| rs154576    | G | 0.0307  |
| rs61047153  | G | 0.0628  |
| rs986275    | A | -0.0265 |
| rs145669126 | C | 0.2133  |
| rs79466072  | C | 0.1359  |
| rs10475950  | A | 0.0284  |
| rs148479670 | G | 0.1561  |
| rs115960741 | C | 0.214   |
| rs76571364  | A | -0.0757 |
| rs2034241   | G | 0.0325  |
| rs153415    | A | 0.0348  |
| rs113157826 | A | -0.0994 |
| rs1503317   | T | -0.0308 |
| rs41340145  | G | 0.1581  |
| rs144375178 | G | -0.095  |
| rs76974769  | C | -0.128  |
| rs75237981  | A | -0.1066 |
| rs10213861  | G | 0.1048  |
| rs17646591  | G | 0.1767  |
| rs1974960   | T | 0.0761  |
| rs149807841 | A | 0.1067  |
| rs1024970   | A | 0.0448  |
| rs72777511  | T | 0.1238  |
| rs72814096  | G | -0.059  |
| rs186560    | T | 0.031   |
| rs4352622   | G | -0.0269 |
| rs75426042  | A | 0.1521  |
| rs7719439   | C | 0.035   |
| rs722888    | T | -0.0309 |

|             |   |         |
|-------------|---|---------|
| rs11737995  | T | -0.0767 |
| rs57948471  | C | 0.0698  |
| rs76004297  | C | 0.0694  |
| rs10512964  | C | -0.096  |
| rs13173199  | T | -0.0264 |
| rs4865881   | C | 0.0491  |
| rs6883727   | G | 0.0305  |
| rs1432929   | C | -0.0412 |
| rs140982215 | G | -0.1585 |
| rs12653711  | A | 0.0313  |
| rs78313715  | A | -0.1162 |
| rs4705335   | A | 0.0398  |
| rs116223898 | G | 0.1134  |
| rs16895755  | T | 0.1642  |
| rs12522563  | A | -0.0333 |
| rs1397576   | A | 0.0442  |
| rs6896985   | C | 0.049   |
| rs77587070  | T | 0.2018  |
| rs149096812 | C | -0.1113 |
| rs34748226  | A | -0.0381 |
| rs72836279  | C | 0.2008  |
| rs111759120 | C | 0.1748  |
| rs55650598  | C | 0.0492  |
| rs244987    | G | 0.0843  |
| rs111274433 | A | -0.0812 |
| rs7701811   | A | 0.0271  |
| rs6886800   | T | -0.0301 |
| rs114849902 | G | -0.1638 |
| rs7722182   | T | 0.0861  |
| rs60706114  | A | 0.0992  |
| rs10068864  | C | 0.0413  |
| rs139801725 | A | 0.1658  |
| rs7732431   | C | -0.0309 |
| rs13179097  | T | 0.0419  |
| rs1432760   | G | 0.074   |
| rs142570159 | G | -0.1232 |
| rs72824811  | A | 0.084   |
| rs11954915  | T | -0.0262 |
| rs12659665  | A | -0.0337 |
| rs114456280 | C | 0.2199  |
| rs296408    | A | 0.028   |
| rs30949     | A | 0.0322  |
| rs115494457 | C | -0.0896 |
| rs145646677 | G | 0.1188  |
| rs3776656   | G | 0.0486  |
| rs115457551 | T | -0.2232 |
| rs7718789   | G | -0.0326 |



|             |   |         |
|-------------|---|---------|
| rs6875109   | A | -0.0504 |
| rs78685648  | T | -0.096  |
| rs162085    | A | 0.0308  |
| rs6878762   | C | 0.0417  |
| rs13436383  | G | -0.0277 |
| rs1320021   | C | 0.1767  |
| rs143524376 | C | 0.0978  |
| rs355428    | T | -0.0512 |
| rs3846680   | T | -0.0444 |
| rs34887328  | A | 0.0762  |
| rs253258    | G | -0.0341 |
| rs11951424  | C | -0.0526 |
| rs6556074   | T | 0.0385  |
| rs7731387   | A | 0.0266  |
| rs71636336  | A | 0.1267  |
| rs2910167   | T | 0.0359  |
| rs2962916   | A | 0.1853  |
| rs4958522   | A | -0.0266 |
| rs429332    | A | -0.032  |
| rs115819690 | A | 0.1705  |
| rs10514059  | G | -0.0283 |
| rs4865807   | G | 0.0336  |
| rs115980932 | T | -0.0639 |
| rs139720866 | T | -0.1925 |
| rs151029544 | G | 0.1473  |
| rs4866439   | G | 0.031   |
| rs2561076   | C | -0.0938 |
| rs11746586  | G | -0.0258 |
| rs34133652  | A | 0.1338  |
| rs1240647   | C | -0.031  |
| rs1617686   | G | -0.033  |
| rs17668664  | A | 0.0619  |
| rs6861699   | C | -0.0309 |
| rs77633958  | G | 0.0845  |
| rs67808740  | A | 0.0595  |
| rs113089720 | A | 0.1369  |
| rs10512952  | C | 0.1164  |
| rs12521076  | C | 0.123   |
| rs62364323  | T | 0.0727  |
| rs4555831   | T | -0.0285 |
| rs491605    | A | 0.1666  |
| rs72791030  | T | 0.0545  |
| rs111985428 | A | 0.0835  |
| rs12516993  | G | 0.0367  |
| rs10213901  | T | -0.0513 |
| rs61748184  | T | 0.1179  |
| rs17790357  | T | -0.0327 |

|             |   |         |
|-------------|---|---------|
| rs34372226  | G | 0.0479  |
| rs16868513  | A | 0.0985  |
| rs62370320  | T | 0.1954  |
| rs76843722  | A | 0.118   |
| rs114715618 | G | 0.1322  |
| rs17086521  | C | -0.0831 |
| rs2961986   | A | 0.0272  |
| rs2937791   | T | -0.0289 |
| rs1875973   | T | -0.0662 |
| rs34084892  | G | 0.0388  |
| rs13166018  | G | -0.0529 |
| rs62380354  | C | -0.0836 |
| rs114247209 | A | -0.0827 |
| rs112189743 | A | 0.1176  |
| rs77904219  | C | 0.1232  |
| rs113932812 | C | 0.1074  |
| rs143254504 | A | -0.0396 |
| rs35998539  | T | -0.1325 |
| rs6861683   | A | -0.0299 |
| rs10515549  | G | 0.0263  |
| rs77522543  | T | 0.181   |
| rs73764222  | A | 0.0994  |
| rs116130646 | T | -0.1546 |
| rs114927146 | G | 0.1381  |
| rs75670174  | A | 0.0871  |
| rs74470731  | C | -0.0856 |
| rs17058270  | G | -0.0326 |
| rs17745815  | T | 0.0436  |
| rs80186049  | C | -0.144  |
| rs2966749   | C | 0.038   |
| rs4836066   | A | -0.0305 |
| rs3010269   | C | 0.0295  |
| rs308207    | A | -0.0488 |
| rs78874933  | T | -0.0546 |
| rs77286102  | T | 0.1207  |
| rs2637146   | A | 0.0292  |
| rs115923899 | A | 0.0904  |
| rs112791587 | T | 0.071   |
| rs77547872  | T | 0.2035  |
| rs116011248 | A | -0.135  |
| rs78753141  | T | 0.2098  |
| rs12519134  | A | 0.0309  |
| rs294096    | C | -0.0289 |
| rs57109300  | A | 0.0397  |
| rs157445    | T | -0.0539 |
| rs115283897 | C | 0.1985  |
| rs815621    | A | 0.0326  |

|             |   |         |
|-------------|---|---------|
| rs10044947  | C | 0.0276  |
| rs2021200   | C | -0.0682 |
| rs116337260 | G | -0.1038 |
| rs13169369  | C | 0.0337  |
| rs10061434  | T | 0.0338  |
| rs35370358  | A | -0.0538 |
| rs149779588 | A | -0.1906 |
| rs152957    | A | 0.0317  |
| rs17164526  | A | -0.0331 |
| rs72816022  | T | 0.0766  |
| rs151059630 | G | 0.1469  |
| rs56884234  | A | 0.1405  |
| rs11134151  | A | -0.0269 |
| rs539936    | C | 0.0881  |
| rs116061799 | G | 0.0604  |
| rs62366175  | G | 0.0307  |
| rs72763785  | T | 0.1323  |
| rs115441058 | C | 0.0944  |
| rs2052486   | C | -0.0264 |
| rs28665017  | A | -0.0671 |
| rs72785901  | T | -0.1002 |
| rs6898342   | G | -0.0401 |
| rs78426297  | A | -0.1144 |
| rs112786913 | G | -0.051  |
| rs115382875 | C | -0.0886 |
| rs2402396   | A | -0.0516 |
| rs114620601 | G | -0.1511 |
| rs137964734 | T | -0.0909 |
| rs75858139  | C | -0.1628 |
| rs115284741 | T | 0.1316  |
| rs9885085   | T | -0.0867 |
| rs12515770  | T | -0.0487 |
| rs73294123  | G | 0.124   |
| rs7728620   | T | 0.1073  |
| rs6885923   | C | -0.03   |
| rs639674    | T | 0.0308  |
| rs116271865 | A | -0.0654 |
| rs4956936   | C | -0.0306 |
| rs1566161   | T | -0.0277 |
| rs138022180 | A | -0.0938 |
| rs115884241 | A | 0.1331  |
| rs3909307   | A | -0.0363 |
| rs72805805  | T | 0.0782  |
| rs11744120  | C | -0.036  |
| rs72792362  | A | 0.1246  |
| rs75539681  | A | -0.0784 |
| rs13159980  | A | 0.0483  |

|             |   |         |
|-------------|---|---------|
| rs4348200   | G | 0.0324  |
| rs115447505 | C | -0.1887 |
| rs62350664  | C | -0.1125 |
| rs256229    | G | 0.027   |
| rs12522449  | C | -0.0494 |
| rs55999423  | T | -0.0388 |
| rs140845466 | G | -0.2242 |
| rs67502357  | T | 0.0565  |
| rs6881369   | T | 0.073   |
| rs40096     | G | 0.034   |
| rs150729085 | T | 0.1494  |
| rs2161387   | A | 0.0301  |
| rs581957    | C | 0.0483  |
| rs116022205 | G | 0.0731  |
| rs7707060   | C | 0.028   |
| rs78967214  | C | 0.0894  |
| rs10455046  | A | 0.0836  |
| rs62363197  | A | -0.0544 |
| rs138668071 | A | 0.136   |
| rs293048    | A | -0.0921 |
| rs62377968  | G | -0.1667 |
| rs10474922  | C | -0.0376 |
| rs139377134 | T | 0.1853  |
| rs150432147 | A | 0.2035  |
| rs116155983 | A | -0.0746 |
| rs1873906   | T | -0.0768 |
| rs6885336   | G | -0.0314 |
| rs76058109  | C | 0.0989  |
| rs71585694  | A | -0.1043 |
| rs114714290 | G | 0.0996  |
| rs13156574  | T | -0.0623 |
| rs59798058  | A | 0.1326  |
| rs114886029 | T | 0.1213  |
| rs305768    | T | 0.0964  |
| rs6896202   | C | 0.064   |
| rs77785770  | G | 0.0697  |
| rs1835979   | T | 0.0314  |
| rs116466108 | T | 0.1358  |
| rs56216223  | T | 0.0844  |
| rs137951469 | G | -0.1649 |
| rs34362287  | A | -0.0927 |
| rs7737692   | G | 0.0277  |
| rs696128    | C | -0.0371 |
| rs1566107   | G | 0.0383  |
| rs346661    | C | -0.0537 |
| rs62360710  | A | -0.0696 |
| rs73814520  | G | 0.1398  |

|             |   |         |
|-------------|---|---------|
| rs403409    | T | 0.0318  |
| rs55901262  | C | 0.0368  |
| rs2159253   | A | -0.0832 |
| rs7448024   | C | 0.079   |
| rs76919286  | C | -0.0711 |
| rs35428496  | A | 0.1294  |
| rs115265814 | T | 0.184   |
| rs4867851   | T | -0.0294 |
| rs76594676  | T | 0.0842  |
| rs10073644  | T | 0.0283  |
| rs35898644  | G | -0.1344 |
| rs113990285 | T | -0.1049 |
| rs11957299  | A | -0.0386 |
| rs351125    | G | 0.0329  |
| rs13174219  | G | 0.027   |
| rs10068263  | T | 0.0291  |
| rs112446830 | A | 0.0662  |
| rs11950701  | C | 0.0268  |
| rs6879279   | C | -0.039  |
| rs10070901  | T | 0.0842  |
| rs140386144 | C | 0.1365  |
| rs115171575 | G | -0.1878 |
| rs576547    | G | 0.0461  |
| rs79810893  | G | 0.1446  |
| rs10057318  | C | 0.0398  |
| rs55946428  | G | -0.1632 |
| rs6876763   | G | -0.0286 |
| rs34344458  | A | 0.0305  |
| rs6877854   | G | -0.1926 |
| rs1010376   | A | -0.0283 |
| rs7714314   | G | 0.0503  |
| rs2567590   | A | 0.1763  |
| rs249240    | T | 0.0289  |
| rs114807924 | G | 0.1383  |
| rs192265    | T | 0.1192  |
| rs77018382  | A | -0.1433 |
| rs155057    | C | 0.0266  |
| rs112324292 | G | -0.1127 |
| rs10477190  | T | 0.0489  |
| rs17632785  | C | -0.0371 |
| rs2036688   | T | 0.0885  |
| rs138164917 | G | 0.0703  |
| rs4549579   | G | 0.1201  |
| rs72813239  | T | -0.0912 |
| rs16874267  | C | 0.0382  |
| rs10462668  | G | 0.0306  |
| rs74377146  | A | 0.0624  |

|             |   |         |
|-------------|---|---------|
| rs150725010 | T | -0.1916 |
| rs2591422   | G | -0.0736 |
| rs10061599  | G | -0.0259 |
| rs75843420  | G | 0.1254  |
| rs35844012  | T | 0.0718  |
| rs114409159 | A | 0.0947  |
| rs12651882  | C | 0.0416  |
| rs58347081  | G | -0.0296 |
| rs56200916  | A | -0.0663 |
| rs7720212   | A | -0.0557 |
| rs145653672 | T | 0.2629  |
| rs150833394 | T | 0.0258  |
| rs7446196   | C | 0.0381  |
| rs13154291  | C | -0.0772 |
| rs62369350  | G | -0.0431 |
| rs6865160   | G | -0.0325 |
| rs113399235 | A | 0.1137  |
| rs146566775 | T | -0.0841 |
| rs6594564   | C | 0.0353  |
| rs79903251  | A | -0.0547 |
| rs13361325  | T | -0.1447 |
| rs11955225  | C | 0.0823  |
| rs77590307  | A | -0.1337 |
| rs149212241 | G | 0.1045  |
| rs75912034  | G | 0.0792  |
| rs76785079  | T | 0.062   |
| rs11134794  | A | 0.0261  |
| rs1623885   | T | 0.0549  |
| rs78882761  | A | 0.1864  |
| rs39842     | G | -0.028  |
| rs73237209  | C | 0.0509  |
| rs10063995  | T | 0.1116  |
| rs75860704  | G | 0.0785  |
| rs26771     | C | -0.0267 |
| rs7341066   | T | -0.0551 |
| rs10058969  | T | 0.0408  |
| rs4703503   | T | 0.0316  |
| rs6864119   | C | 0.1061  |
| rs78788073  | G | 0.1308  |
| rs2545022   | A | 0.0997  |
| rs60153262  | T | -0.075  |
| rs72801500  | T | 0.0309  |
| rs112483574 | T | 0.1007  |
| rs10514065  | T | -0.0286 |
| rs62384759  | A | 0.0313  |
| rs7711801   | T | 0.0253  |
| rs62375109  | C | 0.0301  |

|             |   |         |
|-------------|---|---------|
| rs72807308  | G | -0.0301 |
| rs145315307 | G | 0.1385  |
| rs144355005 | A | 0.0874  |
| rs2291699   | A | 0.0254  |
| rs1859894   | T | 0.0279  |
| rs10065959  | A | 0.0252  |
| rs6880191   | T | 0.0297  |
| rs62380586  | G | 0.0653  |
| rs337098    | C | -0.0276 |
| rs1345708   | G | 0.0291  |
| rs11744528  | C | -0.0312 |
| rs2161431   | T | 0.0705  |
| rs114319277 | T | 0.1578  |
| rs72742287  | A | 0.0958  |
| rs1288205   | A | -0.0274 |
| rs6859561   | A | 0.0478  |
| rs4975526   | A | -0.0506 |
| rs79057073  | G | -0.0738 |
| rs150031336 | C | -0.1252 |
| rs112882370 | G | 0.1358  |
| rs355417    | T | -0.0264 |
| rs74532993  | A | 0.1463  |
| rs62361355  | G | -0.0447 |
| rs2124950   | C | -0.0264 |
| rs73754329  | A | -0.1518 |
| rs141636679 | A | -0.1784 |
| rs114464189 | G | 0.1345  |
| rs77595592  | G | 0.0381  |
| rs35330811  | G | -0.0377 |
| rs17052462  | A | -0.0447 |
| rs13541     | A | -0.027  |
| rs75104962  | A | 0.1263  |
| rs114025493 | A | -0.0503 |
| rs6874756   | G | 0.0373  |
| rs79348094  | G | 0.1505  |
| rs17344021  | G | 0.1184  |
| rs144584219 | A | 0.0831  |
| rs6879924   | G | 0.0453  |
| rs72741755  | G | -0.1226 |
| rs112628364 | T | -0.0612 |
| rs56262220  | A | 0.0397  |
| rs77780035  | T | -0.1698 |
| rs67514550  | T | -0.1016 |
| rs116514813 | C | 0.1452  |
| rs150685334 | G | 0.0949  |
| rs140410449 | C | 0.1439  |
| rs11960798  | G | -0.0289 |

|             |   |         |
|-------------|---|---------|
| rs111951863 | G | 0.0978  |
| rs12697291  | A | 0.0272  |
| rs3776403   | T | 0.1057  |
| rs112813906 | T | -0.1317 |
| rs2012870   | A | -0.0289 |
| rs114920225 | T | -0.1241 |
| rs7444781   | C | -0.0399 |
| rs116564886 | A | 0.1353  |
| rs9329142   | A | 0.0997  |
| rs6879843   | A | 0.0557  |
| rs17055363  | G | -0.0487 |
| rs2594867   | A | -0.0252 |
| rs115260667 | A | 0.0871  |
| rs2216548   | C | -0.03   |
| rs9293310   | C | -0.0499 |
| rs78753966  | C | -0.0847 |
| rs72793849  | G | 0.098   |
| rs77073849  | T | 0.1092  |
| rs143427361 | C | 0.0696  |
| rs116745220 | G | 0.1086  |
| rs139588030 | G | 0.1529  |
| rs9784596   | C | 0.0363  |
| rs10075422  | G | 0.0865  |
| rs114447896 | A | -0.0945 |
| rs11742884  | C | -0.0329 |
| rs113512645 | T | -0.1621 |
| rs34732059  | A | -0.0718 |
| rs7732249   | C | 0.0428  |
| rs10063542  | A | 0.1445  |
| rs76637006  | A | 0.0764  |
| rs7736056   | T | 0.0627  |
| rs10035273  | T | -0.0527 |
| rs2166013   | A | -0.0342 |
| rs6894854   | C | 0.0872  |
| rs115293400 | T | -0.0809 |
| rs140530048 | T | 0.0688  |
| rs62361912  | C | -0.1947 |
| rs113349612 | A | 0.0491  |
| rs72770398  | T | -0.1147 |
| rs6875385   | T | 0.0265  |
| rs10041862  | C | -0.2037 |
| rs12513514  | T | -0.0388 |
| rs9313201   | C | 0.0361  |
| rs10077851  | T | -0.032  |
| rs1864945   | C | 0.0275  |
| rs79335189  | A | -0.07   |
| rs6451147   | C | 0.034   |



|             |   |         |
|-------------|---|---------|
| rs1429864   | G | 0.0898  |
| rs143202155 | G | -0.0669 |
| rs2561053   | T | 0.0295  |
| rs10940540  | T | 0.0339  |
| rs1479561   | A | 0.0361  |
| rs2170015   | G | 0.0435  |
| rs114225939 | A | 0.1186  |
| rs146801240 | A | -0.1685 |
| rs13184127  | A | -0.039  |
| rs11950891  | G | 0.0258  |
| rs78138958  | T | 0.1225  |
| rs114802370 | G | -0.1215 |
| rs7720815   | C | 0.0271  |
| rs2968192   | A | 0.0254  |
| rs62405406  | C | -0.1274 |
| rs115862443 | G | 0.1314  |
| rs11958865  | G | -0.1    |
| rs155354    | A | 0.0435  |
| rs2968099   | G | -0.0323 |
| rs74387696  | G | -0.182  |
| rs16883672  | T | -0.14   |
| rs79709878  | T | 0.0704  |
| rs11748332  | T | 0.1794  |
| rs3097813   | G | 0.0302  |
| rs1405708   | T | -0.029  |
| rs889189    | T | 0.0292  |
| rs56128939  | T | -0.0739 |
| rs6556367   | C | 0.1109  |
| rs35288236  | T | -0.0412 |
| rs2348192   | A | 0.0261  |
| rs75502158  | G | -0.1039 |
| rs7706334   | G | -0.0316 |
| rs115766828 | T | 0.0961  |
| rs10042345  | T | -0.0304 |
| rs1387767   | C | -0.0265 |
| rs1027742   | G | 0.0292  |
| rs4958571   | T | 0.0271  |
| rs2879468   | T | -0.0689 |
| rs17776108  | A | 0.1352  |
| rs11745136  | A | -0.0601 |
| rs79258190  | T | 0.1672  |
| rs17285400  | G | -0.0413 |
| rs34385285  | T | 0.0448  |
| rs2910230   | G | 0.1567  |
| rs171862    | A | -0.0288 |
| rs1553242   | G | -0.0259 |
| rs75313346  | G | 0.1469  |

|             |   |         |
|-------------|---|---------|
| rs151015315 | T | -0.1008 |
| rs59442697  | C | 0.0834  |
| rs72743912  | A | -0.1253 |
| rs251395    | G | 0.0776  |
| rs257241    | C | -0.0441 |
| rs7445392   | C | -0.0248 |
| rs13173035  | G | -0.0262 |
| rs12513779  | T | -0.1796 |
| rs10075937  | T | -0.0761 |
| rs7730438   | G | 0.0906  |
| rs141086050 | A | -0.2025 |
| rs10223129  | G | 0.0256  |
| rs6874651   | G | 0.0349  |
| rs6892616   | C | 0.0263  |
| rs113287932 | T | 0.066   |
| rs2967110   | C | -0.0271 |
| rs144453541 | C | -0.1685 |
| rs79277737  | T | -0.0933 |
| rs1423515   | A | 0.0593  |
| rs73194851  | C | -0.029  |
| rs10068405  | T | -0.0319 |
| rs1002844   | C | 0.04    |
| rs150928567 | G | -0.1373 |
| rs1673952   | A | 0.0316  |
| rs2973820   | A | -0.0311 |
| rs114704427 | T | 0.0781  |
| rs114875812 | G | -0.1862 |
| rs113270064 | G | 0.0921  |
| rs35082346  | G | 0.088   |
| rs11242335  | A | -0.0278 |
| rs139855537 | C | 0.1592  |
| rs72808193  | G | 0.0984  |
| rs114048281 | T | 0.0977  |
| rs17804757  | T | -0.0505 |
| rs4428446   | A | 0.0255  |
| rs146138537 | T | -0.089  |
| rs2675982   | T | 0.0574  |
| rs76469823  | G | 0.1918  |
| rs7715533   | A | -0.0397 |
| rs852566    | A | -0.0255 |
| rs2973099   | T | 0.0331  |
| rs76824400  | T | -0.1286 |
| rs74989199  | A | -0.0957 |
| rs115737163 | C | 0.1425  |
| rs74641893  | G | -0.0623 |
| rs297854    | T | 0.0255  |
| rs77637357  | T | 0.0539  |

|             |   |         |
|-------------|---|---------|
| rs11741988  | G | -0.0654 |
| rs10471727  | G | -0.0308 |
| rs11954776  | G | 0.0275  |
| rs11167737  | C | -0.0311 |
| rs13188498  | T | -0.0253 |
| rs71595003  | A | 0.1545  |
| rs76273978  | T | -0.0816 |
| rs13164751  | G | -0.0307 |
| rs72755826  | G | -0.0486 |
| rs116075160 | G | -0.1094 |
| rs2042335   | T | -0.0296 |
| rs56259598  | G | 0.0664  |
| rs6890438   | A | -0.0599 |
| rs6884240   | T | 0.0389  |
| rs79131400  | C | -0.0487 |
| rs10515407  | G | 0.0586  |
| rs139437169 | T | 0.0979  |
| rs79526694  | T | 0.0306  |
| rs13181775  | A | 0.2106  |
| rs13187414  | G | -0.0335 |
| rs140585075 | C | -0.1327 |
| rs79588994  | T | -0.055  |
| rs12516338  | G | 0.0911  |
| rs115709601 | T | 0.1881  |
| rs10040908  | C | 0.1779  |
| rs114595940 | T | 0.097   |
| rs34460247  | T | 0.0932  |
| rs13167468  | C | 0.0453  |
| rs16876357  | T | 0.0618  |
| rs36098405  | C | -0.0443 |
| rs9293560   | G | 0.0259  |
| rs2194074   | A | -0.0696 |
| rs76713008  | A | -0.1691 |
| rs75037374  | A | 0.051   |
| rs112497611 | A | -0.1025 |
| rs17144869  | C | 0.0338  |
| rs116503229 | G | -0.0839 |
| rs72745658  | T | -0.0569 |
| rs146465945 | T | 0.1793  |
| rs58068115  | C | 0.084   |
| rs4699954   | A | 0.0348  |
| rs76606335  | G | -0.0393 |
| rs114921404 | C | 0.1549  |
| rs4895273   | C | 0.036   |
| rs4868876   | G | -0.0328 |
| rs2387207   | T | -0.0339 |
| rs2617582   | T | -0.0301 |

|             |   |         |
|-------------|---|---------|
| rs72715004  | A | 0.0586  |
| rs1423142   | T | 0.0939  |
| rs145160188 | G | 0.1145  |
| rs72810829  | G | -0.1398 |
| rs6859287   | C | 0.0311  |
| rs60767224  | A | 0.0658  |
| rs75155390  | C | -0.1672 |
| rs28630025  | A | 0.031   |
| rs73311010  | G | -0.0616 |
| rs2961725   | G | 0.0253  |
| rs35601112  | C | 0.0576  |
| rs143573650 | A | 0.0984  |
| rs114273359 | T | 0.0604  |
| rs147706416 | T | 0.1114  |
| rs58618024  | C | -0.0644 |
| rs56216143  | A | -0.1352 |
| rs114507742 | T | -0.1124 |
| rs6879208   | A | -0.0425 |
| rs792985    | T | -0.0765 |
| rs10058518  | A | 0.0659  |
| rs4398615   | C | 0.1628  |
| rs11953890  | G | 0.0889  |
| rs147209075 | C | 0.1188  |
| rs12109059  | T | -0.0707 |
| rs35419082  | A | -0.0287 |
| rs144779135 | T | -0.1654 |
| rs3909338   | G | -0.0271 |
| rs2101146   | A | 0.0476  |
| rs248604    | G | 0.0495  |
| rs286607    | C | 0.0253  |
| rs148460314 | G | -0.0669 |
| rs7733121   | C | -0.0249 |
| rs13161474  | C | -0.0904 |
| rs74429045  | C | -0.0723 |
| rs6862843   | C | -0.0256 |
| rs6555806   | G | 0.0576  |
| rs2936946   | T | 0.0253  |
| rs62394876  | T | -0.1126 |
| rs114081574 | T | -0.1345 |
| rs12657779  | G | 0.025   |
| rs113553649 | T | 0.1055  |
| rs112084706 | T | -0.1088 |
| rs112319712 | C | -0.0632 |
| rs1264053   | G | 0.0588  |
| rs115352742 | T | 0.1123  |
| rs62390635  | G | -0.0625 |
| rs143759103 | T | 0.1566  |

|             |   |         |
|-------------|---|---------|
| rs76384963  | A | -0.0681 |
| rs114657832 | A | 0.0866  |
| rs72820665  | G | -0.031  |
| rs41329347  | T | -0.1456 |
| rs379672    | C | 0.0278  |
| rs1867664   | A | -0.1695 |
| rs13357799  | T | -0.1693 |
| rs76281164  | A | 0.0858  |
| rs4702635   | A | -0.1436 |
| rs114252559 | G | -0.0861 |
| rs11957820  | T | 0.0576  |
| rs11950688  | T | -0.0306 |
| rs114966235 | C | 0.0684  |
| rs116458312 | T | 0.1011  |
| rs11954799  | C | -0.0439 |
| rs1896702   | T | -0.0336 |
| rs10942300  | C | 0.0365  |
| rs1109524   | G | -0.0323 |
| rs62378797  | T | -0.113  |
| rs55760233  | A | 0.1336  |
| rs59777533  | T | 0.0607  |
| rs116480816 | G | 0.0324  |
| rs28550282  | G | 0.0318  |
| rs835156    | A | 0.0263  |
| rs656376    | C | 0.0322  |
| rs9329079   | G | 0.0336  |
| rs256471    | A | 0.0452  |
| rs144194390 | A | -0.102  |
| rs4976131   | T | -0.0372 |
| rs113505109 | A | -0.1067 |
| rs75744593  | G | 0.0775  |
| rs116758536 | C | -0.1141 |
| rs75587759  | C | 0.0875  |
| rs59274432  | C | 0.0926  |
| rs140015203 | T | -0.1644 |
| rs78385878  | G | 0.0987  |
| rs2591765   | A | 0.146   |
| rs10463338  | T | -0.1322 |
| rs347989    | T | -0.027  |
| rs114579496 | T | 0.1285  |
| rs1423434   | A | -0.0422 |
| rs318069    | A | 0.0427  |
| rs72797568  | T | 0.1232  |
| rs10058383  | T | 0.0447  |
| rs17207212  | T | 0.0375  |
| rs13184739  | A | 0.0396  |
| rs13157053  | G | 0.0264  |

|             |   |         |
|-------------|---|---------|
| rs1992368   | A | -0.0445 |
| rs79037971  | T | 0.1315  |
| rs115067032 | G | -0.0969 |
| rs1363845   | G | 0.1302  |
| rs112141918 | C | 0.1253  |
| rs13188370  | A | -0.081  |
| rs112683740 | C | 0.123   |
| rs17526497  | G | -0.0662 |
| rs111936482 | G | 0.0378  |
| rs34676505  | T | -0.2203 |
| rs987369    | A | -0.0348 |
| rs114708803 | C | 0.0866  |
| rs6859250   | G | 0.1266  |
| rs17710780  | C | -0.0393 |
| rs300230    | C | 0.0382  |
| rs115957678 | T | 0.1077  |
| rs112074553 | T | -0.0753 |
| rs74749534  | G | -0.0537 |
| rs72737327  | C | -0.1962 |
| rs7713291   | G | 0.0518  |
| rs77680401  | C | 0.0658  |
| rs73139504  | A | 0.2088  |
| rs149163147 | G | 0.1667  |
| rs1864950   | C | 0.0982  |
| rs152425    | C | 0.1397  |
| rs2447874   | T | 0.029   |
| rs56066233  | C | -0.1104 |
| rs35712831  | A | -0.081  |
| rs1353065   | G | -0.0578 |
| rs149340188 | G | -0.1149 |
| rs55700282  | T | 0.0388  |
| rs116235218 | T | -0.1047 |
| rs115599776 | A | 0.1591  |
| rs72797136  | A | 0.0716  |
| rs75808885  | A | -0.0794 |
| rs74990010  | T | 0.1022  |
| rs79721045  | G | 0.0928  |
| rs252926    | T | 0.0403  |
| rs2455232   | A | 0.0253  |
| rs116701222 | A | 0.1272  |
| rs6862415   | G | 0.0468  |
| rs73315808  | T | -0.0521 |
| rs2318852   | A | 0.1244  |
| rs111302085 | A | -0.187  |
| rs62378717  | A | 0.1047  |
| rs35283341  | A | -0.052  |
| rs356076    | T | -0.0389 |

|             |   |         |
|-------------|---|---------|
| rs116723832 | G | 0.1221  |
| rs72773344  | C | 0.1147  |
| rs17592741  | G | -0.058  |
| rs144948689 | C | 0.2043  |
| rs114763189 | C | -0.077  |
| rs62350177  | G | 0.1504  |
| rs112073130 | G | 0.1709  |
| rs7719370   | T | 0.0376  |
| rs71639273  | A | -0.0973 |
| rs4129567   | A | 0.0646  |
| rs28706600  | A | 0.0479  |
| rs62384105  | C | 0.0996  |
| rs41275291  | T | -0.1275 |
| rs17788804  | G | -0.0618 |
| rs9283770   | T | -0.0371 |
| rs10050400  | C | 0.0928  |
| rs78475341  | T | -0.137  |
| rs144779711 | T | 0.1788  |
| rs144662538 | C | -0.0964 |
| rs114476672 | T | -0.1409 |
| rs10057180  | G | 0.0249  |
| rs62394277  | A | 0.0537  |
| rs115658859 | G | 0.1987  |
| rs10077187  | T | 0.0287  |
| rs9313851   | C | 0.0816  |
| rs78891732  | G | 0.1758  |
| rs75949957  | A | 0.0606  |
| rs73387348  | G | 0.1234  |
| rs11956010  | A | -0.0337 |
| rs10052829  | G | -0.0273 |
| rs77505956  | A | 0.1368  |
| rs12517737  | G | -0.0444 |
| rs62366562  | A | 0.0301  |
| rs2973501   | A | -0.0283 |
| rs6888955   | C | -0.0275 |
| rs72741351  | C | 0.1917  |
| rs114701353 | T | -0.0567 |
| rs11740253  | T | 0.0254  |
| rs116372658 | C | -0.1892 |
| rs2431701   | G | 0.0278  |
| rs62393912  | T | -0.1762 |
| rs7701523   | G | 0.1002  |
| rs1345724   | G | 0.0348  |
| rs76721662  | G | -0.1102 |
| rs77369378  | G | -0.1269 |
| rs1025003   | A | -0.0281 |
| rs751937    | C | -0.0324 |

|             |   |         |
|-------------|---|---------|
| rs6453374   | A | -0.0268 |
| rs28521144  | T | 0.0253  |
| rs71587585  | G | -0.0667 |
| rs62379961  | G | 0.1073  |
| rs901498    | G | -0.0416 |
| rs10079562  | G | -0.0258 |
| rs10077722  | A | -0.0254 |
| rs146816907 | A | 0.1855  |
| rs647031    | T | 0.0476  |
| rs79157268  | G | -0.0845 |
| rs114064162 | A | 0.1233  |
| rs74803156  | A | 0.0651  |
| rs79591093  | T | 0.1463  |
| rs34082374  | G | 0.0994  |
| rs13161823  | T | -0.031  |
| rs620327    | G | 0.0285  |
| rs4975713   | A | -0.0378 |
| rs2141154   | C | 0.0397  |
| rs13157390  | G | 0.0812  |
| rs7736530   | T | -0.0319 |
| rs7700397   | T | -0.0253 |
| rs17446600  | T | -0.0578 |
| rs76430831  | A | -0.0901 |
| rs6864284   | G | 0.1114  |
| rs16878811  | A | 0.0318  |
| rs10472795  | A | 0.0286  |
| rs115106504 | T | -0.1389 |
| rs13189951  | A | -0.033  |
| rs6879745   | T | 0.0728  |
| rs2047311   | C | 0.0355  |
| rs113971212 | C | 0.1135  |
| rs77021388  | T | 0.1272  |
| rs16886149  | A | 0.1233  |
| rs35842568  | C | 0.0479  |
| rs77963149  | C | 0.0666  |
| rs17784968  | G | 0.0589  |
| rs7729152   | T | -0.0714 |
| rs11466767  | C | 0.0987  |
| rs6895199   | A | 0.0295  |
| rs62385782  | T | -0.0292 |
| rs79269872  | A | 0.121   |
| rs115033640 | T | 0.1932  |
| rs112057946 | A | -0.0767 |
| rs12655266  | A | 0.0483  |
| rs7724797   | A | -0.0259 |
| rs149554983 | T | 0.0315  |
| rs114270617 | T | -0.0535 |



|             |   |         |
|-------------|---|---------|
| rs1981851   | T | -0.0264 |
| rs11745151  | C | 0.031   |
| rs555016    | G | -0.0261 |
| rs80271107  | A | -0.0839 |
| rs11135063  | T | -0.0263 |
| rs10078309  | C | -0.0725 |
| rs4627945   | A | 0.0334  |
| rs62357426  | G | -0.1334 |
| rs114609964 | T | 0.1154  |
| rs2042345   | A | -0.0515 |
| rs13164947  | C | 0.0277  |
| rs77771305  | T | 0.0391  |
| rs13357800  | C | -0.0252 |
| rs40275     | T | 0.0255  |
| rs75571022  | G | -0.1145 |
| rs6888261   | G | 0.1961  |
| rs152582    | C | 0.0291  |
| rs17449298  | T | 0.0626  |
| rs116544800 | T | 0.1849  |
| rs56376012  | A | 0.0356  |
| rs148781670 | T | -0.1401 |
| rs17707681  | A | 0.0569  |
| rs6871436   | T | 0.0975  |
| rs149015662 | A | -0.2405 |
| rs16901136  | A | 0.0526  |
| rs3096143   | T | 0.0516  |
| rs2963695   | T | 0.0388  |
| rs4869077   | A | -0.0477 |
| rs11134628  | A | -0.029  |
| rs12517206  | A | -0.0734 |
| rs61417301  | A | 0.1387  |
| rs13189716  | A | 0.0798  |
| rs115388252 | T | -0.1304 |
| rs2974497   | G | -0.026  |
| rs11133597  | C | -0.0517 |
| rs72740866  | A | 0.0798  |
| rs114519311 | G | -0.1596 |
| rs116300509 | A | 0.1293  |
| rs28360118  | T | 0.0919  |
| rs4489106   | C | 0.0546  |
| rs145163379 | C | 0.1534  |
| rs7718632   | T | -0.0745 |
| rs12188924  | A | -0.2024 |
| rs249916    | G | 0.0244  |
| rs72842823  | T | -0.0864 |
| rs40566     | G | -0.0316 |
| rs72779435  | G | 0.0617  |

|             |   |         |
|-------------|---|---------|
| rs465527    | A | -0.0339 |
| rs10054549  | C | 0.063   |
| rs2173696   | A | 0.0254  |
| rs6886546   | G | -0.1438 |
| rs114895936 | A | -0.0964 |
| rs13182425  | C | -0.1368 |
| rs2607378   | T | 0.0695  |
| rs143955911 | G | 0.051   |
| rs13158382  | T | 0.0974  |
| rs26002     | A | 0.027   |
| rs56027506  | T | -0.1699 |
| rs115978458 | T | -0.1307 |
| rs13173866  | T | 0.0873  |
| rs11465452  | G | -0.1203 |
| rs144291753 | T | -0.1538 |
| rs76215216  | A | 0.072   |
| rs34847978  | A | -0.0656 |
| rs72798639  | T | -0.0766 |
| rs11738423  | G | -0.0251 |
| rs4349725   | G | -0.0959 |
| rs13189364  | A | 0.0611  |
| rs148150424 | A | -0.1144 |
| rs113149525 | G | 0.1005  |
| rs17288874  | T | 0.0963  |
| rs146459234 | T | -0.0475 |
| rs17053595  | A | -0.0501 |
| rs2964118   | A | -0.0873 |
| rs2062334   | A | -0.0256 |
| rs72740558  | T | 0.0358  |
| rs6895055   | A | 0.0355  |
| rs17549485  | T | 0.0845  |
| rs1479624   | A | -0.1058 |
| rs112747910 | C | -0.1294 |
| rs4957043   | A | -0.0429 |
| rs75974893  | C | 0.0857  |
| rs137931970 | A | 0.0528  |
| rs80007114  | G | 0.088   |
| rs55977949  | A | -0.0412 |
| rs78269862  | G | 0.0564  |
| rs142036710 | A | -0.1402 |
| rs6870461   | T | -0.0385 |
| rs2125793   | T | 0.0265  |
| rs10043230  | C | 0.0703  |
| rs62381421  | A | 0.0436  |
| rs142052557 | T | 0.1477  |
| rs115723717 | A | -0.0998 |
| rs72776515  | G | -0.1447 |

|             |   |         |
|-------------|---|---------|
| rs4916704   | T | 0.0464  |
| rs10516146  | A | 0.0241  |
| rs2967946   | A | -0.0273 |
| rs147165000 | T | -0.132  |
| rs62363771  | G | -0.055  |
| rs17207191  | C | 0.1832  |
| rs113365723 | A | 0.1095  |
| rs28368377  | A | 0.1321  |
| rs144337820 | T | 0.189   |
| rs72798216  | T | 0.0368  |
| rs4457100   | G | 0.0299  |
| rs1691053   | C | 0.0433  |
| rs79720487  | T | 0.0643  |
| rs13356491  | C | -0.0351 |
| rs11742455  | T | 0.097   |
| rs58633209  | T | -0.0878 |
| rs76328823  | C | -0.1836 |
| rs140675993 | G | 0.1607  |
| rs78751425  | A | 0.0757  |
| rs11742631  | A | -0.0516 |
| rs4957611   | A | 0.0292  |
| rs4975630   | A | 0.0593  |
| rs34096138  | A | -0.0288 |
| rs114123132 | G | 0.1252  |
| rs524700    | A | 0.0979  |
| rs34025335  | T | -0.0367 |
| rs72753384  | T | -0.1061 |
| rs13181560  | T | -0.0294 |
| rs35052284  | G | -0.0392 |
| rs13188682  | T | 0.0362  |
| rs34710578  | T | -0.1408 |
| rs36297     | G | 0.0361  |
| rs59422766  | T | -0.0448 |
| rs646289    | A | -0.0254 |
| rs2548052   | G | 0.1362  |
| rs10515749  | A | -0.0314 |
| rs17065067  | C | -0.0592 |
| rs9293293   | T | -0.0251 |
| rs61294948  | A | 0.0463  |
| rs35570556  | T | 0.0427  |
| rs2408428   | C | 0.0374  |
| rs969706    | C | 0.095   |
| rs76331179  | G | 0.0719  |
| rs142875236 | C | -0.181  |
| rs10075136  | C | -0.2091 |
| rs6860662   | C | -0.0725 |
| rs9763994   | T | 0.0298  |

|             |   |         |
|-------------|---|---------|
| rs115452320 | A | 0.1152  |
| rs7730987   | A | 0.0627  |
| rs13171792  | C | 0.0258  |
| rs13154384  | G | 0.0329  |
| rs17153978  | G | -0.0421 |
| rs58514953  | T | 0.045   |
| rs1073677   | C | 0.0869  |
| rs13358386  | A | 0.0904  |
| rs4866385   | A | -0.0288 |
| rs408417    | A | -0.0257 |
| rs10066818  | T | 0.0539  |
| rs11167672  | T | -0.0273 |
| rs60572841  | G | 0.045   |
| rs11746153  | C | 0.0333  |
| rs7448245   | T | 0.0335  |
| rs7719165   | G | -0.0265 |
| rs153446    | A | -0.025  |
| rs6872387   | A | -0.0306 |
| rs72742752  | G | 0.0936  |
| rs116802168 | T | -0.0604 |
| rs115032522 | C | 0.1235  |
| rs111900535 | C | 0.1276  |
| rs72789171  | A | 0.0881  |
| rs10942124  | T | -0.026  |
| rs10520933  | T | 0.0305  |
| rs35936     | G | -0.0672 |
| rs147999261 | A | 0.1124  |
| rs74656149  | T | -0.1691 |
| rs10519702  | G | 0.0338  |
| rs75316240  | G | -0.054  |
| rs6898357   | A | -0.0282 |
| rs4569891   | G | -0.0248 |
| rs4354016   | G | 0.0333  |
| rs58262192  | C | 0.0834  |
| rs72763722  | G | 0.1791  |
| rs114846407 | C | 0.0892  |
| rs1872004   | C | 0.0334  |
| rs72757294  | A | 0.0292  |
| rs4703321   | C | 0.045   |
| rs114838933 | A | -0.126  |
| rs17550586  | G | 0.0371  |
| rs10476070  | T | -0.0345 |
| rs115505153 | C | 0.1429  |
| rs144411237 | C | 0.1261  |
| rs142593964 | A | -0.1066 |
| rs115491411 | G | 0.0923  |
| rs112881034 | T | -0.0697 |

|             |   |         |
|-------------|---|---------|
| rs142685487 | T | 0.1299  |
| rs117110053 | T | -0.1796 |
| rs76066200  | C | 0.0367  |
| rs2897243   | A | -0.0252 |
| rs4444959   | T | 0.0319  |
| rs145181412 | G | 0.1318  |
| rs4701904   | T | -0.1029 |
| rs143033950 | T | 0.1027  |
| rs35694431  | A | -0.0659 |
| rs114219890 | A | 0.0653  |
| rs2860381   | A | -0.031  |
| rs114913608 | T | -0.1618 |
| rs116407479 | T | 0.0774  |
| rs10941089  | A | -0.0252 |
| rs78691996  | G | -0.2268 |
| rs77892425  | G | 0.1206  |
| rs66972346  | G | 0.0293  |
| rs28710811  | A | 0.0454  |
| rs17448714  | T | -0.1416 |
| rs173564    | T | -0.0269 |
| rs75415424  | C | 0.1239  |
| rs10473715  | G | -0.1093 |
| rs4466201   | G | -0.0282 |
| rs149487690 | A | 0.1154  |
| rs77888214  | T | 0.0511  |
| rs115847844 | G | 0.1425  |
| rs55802894  | C | 0.0416  |
| rs115135582 | A | 0.1052  |
| rs104895045 | T | -0.0941 |
| rs79048561  | C | -0.2044 |
| rs76334393  | C | 0.0929  |
| rs422224    | C | -0.0352 |
| rs62361443  | A | 0.0352  |
| rs72773348  | C | 0.0538  |
| rs7705057   | A | 0.0904  |
| rs7727718   | C | 0.0416  |
| rs11740226  | T | 0.0248  |
| rs218052    | C | 0.0653  |
| rs255031    | A | -0.0304 |
| rs62362296  | A | 0.1013  |
| rs80116523  | C | 0.1255  |
| rs6882704   | A | 0.0305  |
| rs11948601  | C | -0.0316 |
| rs76520379  | T | 0.1134  |
| rs17797412  | G | 0.0252  |
| rs116202338 | A | -0.1869 |
| rs62384805  | C | 0.0274  |

|             |   |         |
|-------------|---|---------|
| rs114645617 | A | 0.0863  |
| rs2232193   | C | 0.0434  |
| rs10471394  | A | 0.0534  |
| rs111718461 | A | 0.0879  |
| rs62378492  | C | 0.0805  |
| rs149631237 | G | 0.2005  |
| rs75586238  | A | 0.1123  |
| rs79764706  | T | 0.1191  |
| rs72751973  | C | 0.0583  |
| rs114627769 | G | 0.1108  |
| rs12187144  | T | -0.0473 |
| rs11959635  | A | -0.0392 |
| rs451157    | G | -0.0277 |
| rs113441086 | A | 0.0773  |
| rs113563943 | C | -0.1549 |
| rs41268429  | G | 0.1491  |
| rs13361457  | T | 0.0281  |
| rs7446650   | G | 0.0322  |
| rs28698773  | C | -0.0493 |
| rs347639    | T | -0.0287 |
| rs116118350 | T | -0.2192 |
| rs113769728 | A | -0.0813 |
| rs4975547   | A | 0.0365  |
| rs4702048   | A | -0.0556 |
| rs77345737  | A | 0.0846  |
| rs149599940 | G | -0.084  |
| rs17258120  | T | -0.0382 |
| rs73094799  | G | 0.0602  |
| rs12514193  | C | 0.0351  |
| rs60681548  | G | 0.0389  |
| rs2924606   | T | -0.0277 |
| rs12516593  | A | -0.0323 |
| rs79474702  | T | -0.1765 |
| rs3797225   | T | -0.0749 |
| rs146302107 | T | 0.0656  |
| rs6874639   | G | -0.0304 |
| rs115305990 | G | -0.129  |
| rs12518674  | A | 0.0475  |
| rs7715938   | G | 0.0257  |
| rs77666057  | G | 0.1008  |
| rs163818    | C | -0.0277 |
| rs387308    | T | -0.0242 |
| rs147129706 | C | 0.1097  |
| rs72771167  | T | -0.1158 |
| rs12517782  | T | 0.0264  |
| rs71605759  | T | -0.0634 |
| rs141322430 | T | -0.2112 |

|             |   |         |
|-------------|---|---------|
| rs1104987   | G | -0.0352 |
| rs16894475  | C | 0.0381  |
| rs41315904  | C | 0.0912  |
| rs78734286  | C | -0.04   |
| rs72791265  | A | -0.0678 |
| rs7736811   | T | 0.0331  |
| rs1593082   | A | 0.0375  |
| rs77157918  | T | 0.1163  |
| rs112244286 | T | -0.1573 |
| rs1990941   | C | 0.0257  |
| rs72834090  | T | 0.0835  |
| rs142191948 | A | -0.0283 |
| rs17363592  | T | -0.0777 |
| rs74349916  | T | -0.0477 |
| rs6891840   | T | -0.0239 |
| rs78361367  | A | 0.0765  |
| rs116198989 | T | -0.135  |
| rs17541471  | C | 0.0306  |
| rs4700303   | T | -0.0304 |
| rs145591474 | T | -0.1709 |
| rs641101    | A | 0.0268  |
| rs149271475 | A | -0.1916 |
| rs72788055  | A | -0.1329 |
| rs6897549   | C | -0.0262 |
| rs77972025  | C | -0.1834 |
| rs13184961  | G | -0.1028 |
| rs3756644   | C | -0.0496 |
| rs1689718   | G | 0.0263  |
| rs114270473 | T | 0.0959  |
| rs62370525  | A | -0.0484 |
| rs7712663   | T | 0.0809  |
| rs4397137   | C | 0.0437  |
| rs116329305 | A | 0.1614  |
| rs12188608  | A | -0.0439 |
| rs10942919  | C | -0.0331 |
| rs1600144   | A | 0.1251  |
| rs7729024   | T | -0.0272 |
| rs10941891  | G | -0.0386 |
| rs35131409  | G | 0.0745  |
| rs12655444  | T | -0.1024 |
| rs143295879 | G | -0.1455 |
| rs112629380 | C | 0.1629  |
| rs138592326 | G | -0.1622 |
| rs10074790  | G | -0.1181 |
| rs7711139   | A | -0.0394 |
| rs115282530 | G | -0.1536 |
| rs147334094 | G | 0.1677  |

|             |   |         |
|-------------|---|---------|
| rs113795423 | T | 0.0344  |
| rs2936922   | G | -0.0461 |
| rs12187126  | C | -0.0336 |
| rs115132741 | C | 0.1192  |
| rs146130346 | C | -0.1048 |
| rs3852193   | A | 0.03    |
| rs78019335  | A | 0.0871  |
| rs75457358  | T | 0.1423  |
| rs2607391   | C | -0.0391 |
| rs140769475 | T | 0.1135  |
| rs335484    | G | 0.0344  |
| rs11134161  | G | 0.041   |
| rs1396471   | G | 0.0241  |
| rs2036347   | A | -0.0282 |
| rs6232      | C | 0.0577  |
| rs555989    | A | 0.0275  |
| rs62384409  | T | 0.0898  |
| rs6870394   | T | 0.0283  |
| rs139987351 | C | -0.0377 |
| rs76512048  | C | -0.1079 |
| rs1021416   | C | -0.0273 |
| rs13356785  | G | 0.0297  |
| rs72736722  | A | -0.0931 |
| rs73762723  | C | -0.1187 |
| rs72731439  | T | 0.1345  |
| rs116750170 | A | -0.0874 |
| rs150402777 | A | 0.1282  |
| rs2961897   | G | 0.0821  |
| rs77862526  | C | 0.1493  |
| rs76337875  | A | -0.0527 |
| rs27109     | T | 0.0298  |
| rs173468    | T | -0.1611 |
| rs114608531 | A | -0.0986 |
| rs10472800  | C | 0.0541  |
| rs4337870   | A | 0.0293  |
| rs17084072  | G | 0.0654  |
| rs62380327  | T | 0.0436  |
| rs143533214 | T | -0.0962 |
| rs4705096   | A | -0.0655 |
| rs79687941  | T | 0.1763  |
| rs147692080 | G | 0.1891  |
| rs12109265  | G | -0.03   |
| rs62381983  | A | 0.062   |
| rs56407265  | A | 0.0612  |
| rs1318458   | T | 0.0256  |
| rs76059604  | C | 0.0563  |
| rs67642756  | T | 0.0244  |



|             |   |         |
|-------------|---|---------|
| rs75570428  | A | -0.1064 |
| rs62381757  | T | 0.0835  |
| rs72809031  | C | 0.1818  |
| rs339417    | T | -0.0661 |
| rs16893874  | A | -0.1492 |
| rs76566646  | A | -0.0718 |
| rs148498614 | G | -0.1528 |
| rs77888311  | G | -0.1239 |
| rs59564280  | A | 0.0819  |
| rs79683734  | A | 0.0534  |
| rs145348362 | A | -0.1741 |
| rs72762921  | A | 0.0516  |
| rs9293347   | A | 0.0343  |
| rs143615560 | T | -0.0622 |
| rs57449604  | A | 0.0512  |
| rs12652313  | A | 0.0962  |
| rs78271253  | A | 0.0581  |
| rs7729995   | G | 0.0264  |
| rs144745055 | C | 0.1636  |
| rs76543967  | G | -0.0915 |
| rs11744288  | T | 0.1134  |
| rs1432865   | A | -0.0241 |
| rs1438675   | C | -0.0283 |
| rs13166306  | G | 0.0305  |
| rs147234003 | T | 0.1976  |
| rs112424890 | T | -0.0344 |
| rs113380534 | G | -0.1117 |
| rs26621     | C | -0.0271 |
| rs10491456  | A | -0.0283 |
| rs113187154 | G | -0.0608 |
| rs116250377 | T | -0.0923 |
| rs151027839 | C | -0.1405 |
| rs75406603  | C | 0.106   |
| rs13188890  | T | 0.0563  |
| rs77221424  | T | 0.1161  |
| rs115271382 | G | 0.1439  |
| rs2910124   | T | 0.0416  |
| rs6885424   | C | -0.2335 |
| rs141625356 | T | -0.1041 |
| rs9112      | A | -0.0251 |
| rs16891079  | C | -0.1223 |
| rs75903831  | T | -0.1354 |
| rs7731846   | C | -0.1222 |
| rs114394074 | T | -0.0788 |
| rs62379337  | T | 0.1025  |
| rs77978806  | C | 0.0561  |
| rs72825420  | G | 0.0807  |

|             |   |         |
|-------------|---|---------|
| rs146989490 | G | 0.1104  |
| rs145910067 | A | 0.1063  |
| rs683004    | T | 0.0259  |
| rs224810    | T | -0.0884 |
| rs79914222  | A | 0.0487  |
| rs74663524  | G | -0.1543 |
| rs73254441  | A | 0.061   |
| rs17599129  | T | -0.1006 |
| rs258756    | T | 0.0245  |
| rs4835906   | G | 0.1988  |
| rs115665303 | C | 0.1284  |
| rs115831302 | C | 0.1413  |
| rs35804713  | A | -0.0447 |
| rs34135303  | T | 0.0659  |
| rs16893020  | G | 0.0399  |
| rs17516937  | T | -0.2096 |
| rs116246032 | C | -0.0658 |
| rs13362566  | G | 0.1018  |
| rs12055013  | A | -0.1083 |
| rs60868839  | C | 0.0258  |
| rs13436118  | A | -0.0656 |
| rs79932861  | A | 0.2159  |
| rs78280656  | T | 0.039   |
| rs11167767  | C | -0.025  |
| rs73807874  | T | 0.0677  |
| rs16870629  | T | 0.0267  |
| rs35710224  | C | 0.0244  |
| rs13178345  | A | 0.0246  |
| rs150064799 | T | -0.1454 |
| rs6898698   | A | -0.0931 |
| rs72776535  | A | -0.1305 |
| rs115278176 | A | -0.1202 |
| rs9687184   | G | -0.0317 |
| rs112054130 | T | 0.0808  |
| rs10068683  | T | -0.0738 |
| rs6453185   | T | 0.0278  |
| rs80120717  | A | -0.1725 |
| rs145489210 | C | 0.0952  |
| rs72797317  | T | -0.0726 |
| rs17415614  | G | 0.035   |
| rs10068322  | T | -0.0516 |
| rs6882673   | T | -0.059  |
| rs12516742  | T | 0.0417  |
| rs115791932 | G | 0.0998  |
| rs7732384   | C | 0.0354  |
| rs79836083  | T | -0.0812 |
| rs116692686 | A | -0.0895 |

|             |   |         |
|-------------|---|---------|
| rs72749783  | G | 0.0972  |
| rs10054115  | C | -0.0343 |
| rs77088572  | G | -0.098  |
| rs1153432   | C | -0.0305 |
| rs13178787  | A | 0.0301  |
| rs78374861  | T | 0.1242  |
| rs112955479 | A | 0.1058  |
| rs7717590   | C | 0.0253  |
| rs4362966   | A | 0.0247  |
| rs59728202  | A | -0.062  |
| rs32550     | G | -0.027  |
| rs1503510   | T | -0.0254 |
| rs115394991 | G | 0.1137  |
| rs12187431  | T | -0.0292 |
| rs3097798   | A | -0.0379 |
| rs142623759 | T | -0.1003 |
| rs59353105  | C | 0.0691  |
| rs77650498  | A | 0.0452  |
| rs6884838   | T | 0.0466  |
| rs34404560  | C | -0.0502 |
| rs6449985   | C | -0.047  |
| rs7720303   | T | 0.0484  |
| rs12657145  | T | 0.0492  |
| rs113304944 | C | -0.0723 |
| rs17231839  | A | 0.0589  |
| rs10454915  | G | 0.1531  |
| rs67124431  | C | -0.0355 |
| rs469942    | T | 0.0279  |
| rs113341439 | A | -0.0399 |
| rs1302779   | G | 0.0401  |
| rs4866773   | C | 0.0341  |
| rs730907    | A | 0.0257  |
| rs765503    | T | -0.0616 |
| rs72749680  | C | -0.0774 |
| rs72781123  | A | -0.2121 |
| rs74739622  | A | -0.0753 |
| rs79099809  | A | -0.121  |
| rs3010251   | T | 0.0305  |
| rs74824388  | G | 0.1285  |
| rs74596086  | T | -0.0735 |
| rs114456509 | G | 0.1455  |
| rs116712847 | A | -0.125  |
| rs114212497 | G | 0.0921  |
| rs16879259  | C | 0.0777  |
| rs76270904  | C | 0.0548  |
| rs4836117   | G | 0.0314  |
| rs11960397  | T | 0.0852  |

|             |   |         |
|-------------|---|---------|
| rs115508732 | T | 0.1137  |
| rs12153391  | A | 0.0332  |
| rs79329941  | C | -0.0972 |
| rs7736168   | A | -0.0386 |
| rs17117926  | C | -0.0534 |
| rs115365741 | C | 0.1041  |
| rs79813906  | C | -0.087  |
| rs147665979 | G | 0.1605  |
| rs12522968  | A | 0.1034  |
| rs10054312  | C | -0.0258 |
| rs2967810   | A | 0.0405  |
| rs3815774   | G | -0.0434 |
| rs115164815 | T | -0.1342 |
| rs4310017   | A | 0.0269  |
| rs115820067 | A | 0.0965  |
| rs11743273  | T | 0.0596  |
| rs80208771  | C | 0.1126  |
| rs72779337  | C | -0.1553 |
| rs74818437  | A | -0.0613 |
| rs72783100  | C | 0.0503  |
| rs78726748  | G | -0.0574 |
| rs1449273   | A | 0.0753  |
| rs1019762   | C | 0.0356  |
| rs115630272 | G | -0.0684 |
| rs115351269 | A | 0.15    |
| rs149459935 | C | -0.0948 |
| rs182888    | C | 0.0267  |
| rs2562350   | T | 0.0245  |
| rs2933639   | T | -0.0248 |
| rs31034     | G | -0.0338 |
| rs1347135   | G | 0.0264  |
| rs115768951 | G | -0.2078 |
| rs849730    | A | -0.0262 |
| rs11953682  | G | 0.0716  |
| rs74531107  | A | -0.0696 |
| rs4132261   | A | -0.0269 |
| rs79857698  | T | 0.0344  |
| rs10476108  | T | -0.0318 |
| rs11738002  | T | 0.0264  |
| rs113534766 | C | 0.192   |
| rs71581238  | G | -0.1172 |
| rs7727131   | C | -0.0479 |
| rs73298707  | G | 0.1142  |
| rs4867726   | T | -0.0278 |
| rs78712731  | G | 0.1071  |
| rs76319586  | A | 0.052   |
| rs4587034   | G | 0.0281  |

|             |   |         |
|-------------|---|---------|
| rs67981551  | C | -0.0273 |
| rs148106764 | C | 0.1355  |
| rs185217    | C | -0.0315 |
| rs62360442  | C | 0.0799  |
| rs72797108  | C | -0.0895 |
| rs74770571  | A | -0.1468 |
| rs17287627  | C | -0.0294 |
| rs55930725  | T | -0.1088 |
| rs729823    | A | -0.0295 |
| rs905843    | A | -0.0399 |
| rs75053571  | C | -0.027  |
| rs2215252   | T | 0.0346  |
| rs146065830 | G | -0.111  |
| rs76375074  | T | 0.1833  |
| rs62363478  | C | 0.1174  |
| rs116056834 | T | 0.1842  |
| rs882282    | A | 0.0467  |
| rs13179607  | C | -0.0467 |
| rs140964952 | G | -0.1312 |
| rs72731047  | C | 0.0363  |
| rs72784238  | T | 0.0532  |
| rs6884077   | A | -0.0577 |
| rs150234718 | G | 0.1145  |
| rs1684963   | A | -0.0389 |
| rs6895825   | C | -0.0333 |
| rs76673787  | A | 0.0697  |
| rs116203702 | C | -0.1546 |
| rs2591520   | T | 0.0736  |
| rs1393133   | T | 0.0245  |
| rs75146333  | C | -0.1674 |
| rs2162995   | T | 0.0347  |
| rs6893444   | A | 0.0323  |
| rs138564751 | A | 0.0806  |
| rs67616821  | T | -0.0459 |
| rs290753    | G | 0.0319  |
| rs13188756  | A | 0.0442  |
| rs11747041  | A | 0.1667  |
| rs116799713 | T | 0.183   |
| rs173425    | C | -0.0381 |
| rs10050470  | A | 0.0237  |
| rs75581418  | C | 0.1557  |
| rs75247614  | T | -0.0612 |
| rs17256306  | A | -0.0502 |
| rs28505035  | T | -0.0256 |
| rs141761179 | C | 0.1305  |
| rs17429640  | A | -0.0442 |
| rs62378269  | A | -0.0436 |

|             |   |         |
|-------------|---|---------|
| rs79216568  | T | -0.1433 |
| rs34774872  | G | 0.0669  |
| rs867279    | G | -0.034  |
| rs62335516  | G | 0.0269  |
| rs906092    | A | -0.0248 |
| rs114969851 | G | -0.0713 |
| rs275510    | T | -0.0264 |
| rs4702783   | A | 0.0258  |
| rs116057168 | A | 0.1549  |
| rs4868794   | C | -0.0574 |
| rs11954778  | G | 0.129   |
| rs17400434  | G | -0.052  |
| rs112410868 | G | 0.1464  |
| rs62378178  | T | 0.1032  |
| rs71599493  | G | 0.1129  |
| rs144025068 | G | -0.1163 |
| rs4895304   | G | 0.0305  |
| rs17524358  | G | 0.0334  |
| rs72747708  | A | -0.1286 |
| rs11743838  | T | 0.0824  |
| rs173908    | T | 0.0294  |
| rs62350405  | A | 0.0674  |
| rs12054905  | C | -0.0327 |
| rs79091143  | A | -0.1604 |
| rs1423300   | A | 0.0271  |
| rs62368553  | A | -0.0781 |
| rs79873086  | C | -0.1992 |
| rs10055300  | T | 0.0257  |
| rs78422605  | C | 0.0678  |
| rs45498700  | T | 0.0387  |
| rs7715501   | A | -0.0243 |
| rs7710874   | C | -0.0236 |
| rs6555961   | A | 0.0276  |
| rs76294854  | A | 0.0806  |
| rs7718618   | A | -0.048  |
| rs2397770   | T | 0.0336  |
| rs10079058  | C | -0.0253 |
| rs55904245  | T | 0.078   |
| rs80250173  | T | 0.0847  |
| rs11958614  | A | 0.0325  |
| rs71602119  | T | 0.065   |
| rs140677969 | A | 0.1136  |
| rs2662338   | A | 0.053   |
| rs62365589  | T | 0.171   |
| rs2168308   | G | 0.0255  |
| rs113530973 | A | 0.1017  |
| rs6870403   | A | -0.0348 |

|             |   |         |
|-------------|---|---------|
| rs61341705  | T | 0.0899  |
| rs75387556  | T | 0.0874  |
| rs9292370   | G | 0.0338  |
| rs7714673   | A | 0.0379  |
| rs79900148  | A | 0.1149  |
| rs11746623  | G | 0.0267  |
| rs1609916   | A | 0.1595  |
| rs4128586   | T | -0.0271 |
| rs10035248  | C | 0.0246  |
| rs80084852  | A | 0.1151  |
| rs77720550  | A | 0.0993  |
| rs80144885  | C | 0.0946  |
| rs59372931  | A | 0.0351  |
| rs72761032  | G | -0.0384 |
| rs6868445   | C | -0.0275 |
| rs34733436  | A | 0.0309  |
| rs78489558  | A | 0.0454  |
| rs76586448  | T | -0.0364 |
| rs7700559   | G | 0.0524  |
| rs77784716  | A | -0.0771 |
| rs12653570  | A | -0.025  |
| rs17627542  | T | 0.0899  |
| rs7729096   | A | 0.0933  |
| rs13189372  | A | -0.0732 |
| rs73818111  | C | 0.1431  |
| rs79185262  | T | -0.0617 |
| rs1215667   | T | 0.0265  |
| rs77618950  | G | 0.1249  |
| rs137986307 | T | 0.1207  |
| rs56359114  | T | -0.0627 |
| rs115471915 | A | 0.1325  |
| rs10065761  | T | -0.1136 |
| rs62352332  | A | 0.047   |
| rs17463165  | T | -0.0246 |
| rs56245000  | G | 0.0645  |
| rs171646    | G | -0.0707 |
| rs12658840  | A | -0.0248 |
| rs74626775  | T | 0.163   |
| rs78738180  | G | -0.046  |
| rs4866963   | G | -0.0256 |
| rs3889805   | A | 0.0995  |
| rs16895637  | C | 0.0388  |
| rs115563674 | G | -0.0874 |
| rs11249802  | T | 0.0447  |
| rs13189532  | T | 0.1362  |
| rs17688323  | C | 0.0458  |
| rs10462819  | C | -0.12   |

|             |   |         |
|-------------|---|---------|
| rs77031961  | T | -0.0818 |
| rs6451489   | G | 0.0266  |
| rs6874301   | C | 0.0394  |
| rs72776307  | A | -0.0927 |
| rs73772282  | C | -0.0475 |
| rs13174320  | A | -0.0464 |
| rs77509622  | C | -0.1151 |
| rs111226309 | T | 0.071   |
| rs35611158  | T | 0.073   |
| rs78684573  | G | 0.1458  |
| rs10059053  | C | -0.0275 |
| rs141529932 | T | 0.1941  |
| rs74544330  | G | -0.0783 |
| rs6554658   | C | -0.0479 |
| rs530967    | T | 0.0905  |
| rs61751678  | G | 0.0896  |
| rs10059074  | G | 0.0592  |
| rs13156917  | C | 0.0962  |
| rs112678431 | A | -0.072  |
| rs13175002  | T | 0.0271  |
| rs75078531  | G | -0.1387 |
| rs7707293   | T | 0.1588  |
| rs77078243  | G | 0.1099  |
| rs4307115   | A | -0.023  |
| rs13164950  | T | -0.0391 |
| rs116793337 | G | -0.1076 |
| rs62367636  | C | 0.1312  |
| rs77791861  | T | -0.147  |
| rs7712285   | C | 0.081   |
| rs35323305  | G | -0.0663 |
| rs145750890 | A | 0.1341  |
| rs72806425  | T | 0.041   |
| rs55717920  | T | 0.046   |
| rs112987123 | T | 0.0891  |
| rs28121     | G | 0.0758  |
| rs79017454  | T | -0.0741 |
| rs7718577   | A | -0.0259 |
| rs2359877   | A | -0.0413 |
| rs4443451   | A | -0.0391 |
| rs13160945  | T | 0.0336  |
| rs2398617   | G | -0.0271 |
| rs6868937   | G | 0.0285  |
| rs150868997 | C | -0.1227 |
| rs10079416  | T | -0.0307 |
| rs981411    | G | 0.0306  |
| rs6867860   | T | 0.0518  |
| rs895314    | A | 0.0332  |



|             |   |         |
|-------------|---|---------|
| rs78657849  | A | -0.1648 |
| rs10068846  | T | -0.0341 |
| rs79199538  | T | -0.0333 |
| rs13153233  | T | 0.1212  |
| rs72777626  | C | 0.0389  |
| rs116487489 | A | -0.1236 |
| rs141706099 | T | -0.0995 |
| rs2973688   | A | 0.0291  |
| rs75268547  | T | 0.0665  |
| rs72712922  | T | 0.0549  |
| rs62342039  | A | -0.0714 |
| rs115021283 | T | 0.0561  |
| rs805143    | T | 0.0752  |
| rs62379403  | T | 0.0608  |
| rs10066328  | G | -0.0317 |
| rs36068909  | G | 0.1963  |
| rs972832    | A | 0.0389  |
| rs6871449   | T | 0.0497  |
| rs300973    | T | -0.0238 |
| rs112237589 | A | 0.0435  |
| rs12654257  | G | 0.0299  |
| rs75596288  | A | -0.1406 |
| rs116416683 | A | 0.0827  |
| rs1700667   | A | -0.0291 |
| rs4866637   | T | -0.0472 |
| rs35842518  | A | 0.0439  |
| rs150284247 | A | 0.1449  |
| rs394961    | G | 0.028   |
| rs10479376  | A | 0.0235  |
| rs72780208  | A | 0.0484  |
| rs714304    | A | 0.0274  |
| rs29439     | G | 0.0273  |
| rs28515667  | C | -0.04   |
| rs10069971  | C | 0.0253  |
| rs143649953 | G | 0.0878  |
| rs72738233  | A | 0.1163  |
| rs72762653  | T | -0.0645 |
| rs17280356  | C | -0.0342 |
| rs77149340  | G | 0.0528  |
| rs16899497  | G | 0.1386  |
| rs16871513  | T | 0.0464  |
| rs74975092  | A | -0.1285 |
| rs4386746   | T | 0.098   |
| rs141031376 | T | 0.1238  |
| rs291122    | C | 0.0251  |
| rs148805068 | G | -0.1526 |
| rs148007856 | T | -0.1001 |

|             |   |         |
|-------------|---|---------|
| rs1428281   | C | 0.0278  |
| rs79156343  | A | -0.1071 |
| rs40070     | A | 0.0306  |
| rs4254949   | G | -0.0284 |
| rs116294253 | A | 0.1012  |
| rs7714795   | A | -0.0248 |
| rs17551008  | C | -0.0554 |
| rs1597956   | C | -0.0863 |
| rs114563827 | A | -0.1239 |
| rs16874441  | A | 0.1144  |
| rs75461452  | A | -0.0387 |
| rs76027915  | A | -0.1094 |
| rs11738166  | A | 0.1191  |
| rs13159974  | C | 0.1163  |
| rs9313476   | T | 0.0244  |
| rs113567524 | T | 0.0687  |
| rs7725717   | G | -0.0254 |
| rs111833896 | A | -0.168  |
| rs10044540  | C | 0.1175  |
| rs16895146  | T | -0.0279 |
| rs56324443  | T | -0.1278 |
| rs150683172 | C | 0.0582  |
| rs112030805 | G | -0.0475 |
| rs142570716 | A | 0.135   |
| rs72755599  | C | 0.0552  |
| rs72774736  | T | 0.025   |
| rs6860661   | G | -0.0243 |
| rs4869299   | G | -0.0337 |
| rs1530120   | T | -0.0299 |
| rs143193565 | C | 0.0857  |
| rs6859219   | A | 0.0294  |
| rs115454486 | C | 0.0853  |
| rs1153085   | T | 0.023   |
| rs17739586  | C | -0.0289 |
| rs62338563  | A | -0.0309 |
| rs6880347   | T | -0.0238 |
| rs10067511  | G | -0.048  |
| rs34006880  | T | 0.0298  |
| rs33687     | C | -0.0256 |
| rs79687446  | A | 0.0811  |
| rs16897838  | G | 0.0663  |
| rs115030432 | A | 0.1499  |
| rs11742596  | T | -0.0806 |
| rs72777604  | T | -0.0356 |
| rs1583291   | T | 0.0445  |
| rs144731242 | A | -0.1338 |
| rs115342137 | C | 0.0917  |

|             |   |         |
|-------------|---|---------|
| rs55910052  | A | -0.0255 |
| rs315718    | A | 0.0309  |
| rs76145689  | G | 0.1087  |
| rs140156989 | G | -0.1653 |
| rs17675345  | A | 0.095   |
| rs115990381 | A | -0.1322 |
| rs9313515   | C | -0.0317 |
| rs79709946  | T | -0.0481 |
| rs1833550   | A | -0.0436 |
| rs4257797   | T | -0.0242 |
| rs59995036  | T | -0.0585 |
| rs26271     | C | -0.0232 |
| rs11740264  | G | -0.0238 |
| rs72796427  | G | -0.0645 |
| rs55714015  | G | -0.0532 |
| rs72745284  | T | -0.0369 |
| rs28568321  | T | 0.0494  |
| rs35420569  | T | 0.0615  |
| rs34200966  | G | -0.0253 |
| rs347569    | G | 0.0911  |
| rs75537346  | G | 0.1117  |
| rs28362590  | G | 0.028   |
| rs12516938  | T | 0.0563  |
| rs112673672 | T | -0.0425 |
| rs10075253  | T | -0.0346 |
| rs17649125  | T | -0.0271 |
| rs72835655  | T | -0.0799 |
| rs62388428  | A | -0.1649 |
| rs295972    | C | -0.0349 |
| rs114293325 | C | -0.0485 |
| rs28557779  | A | 0.0242  |
| rs4128401   | C | -0.1276 |
| rs79571991  | A | -0.0599 |
| rs62370544  | A | -0.0898 |
| rs10044764  | C | 0.0893  |
| rs78546851  | C | -0.0994 |
| rs75437083  | A | -0.0934 |
| rs13162241  | G | 0.0924  |
| rs3806925   | A | -0.0291 |
| rs142510402 | A | 0.1221  |
| rs28669813  | C | -0.0296 |
| rs78520883  | T | -0.171  |
| rs76805699  | A | 0.0769  |
| rs116578841 | T | 0.1759  |
| rs112990530 | T | 0.1246  |
| rs75839063  | T | -0.1172 |
| rs62362078  | C | -0.0296 |

|             |   |         |
|-------------|---|---------|
| rs16900701  | C | -0.0396 |
| rs6883732   | G | 0.0689  |
| rs12522568  | G | -0.137  |
| rs153269    | T | -0.0586 |
| rs57325913  | C | 0.0644  |
| rs73782003  | T | -0.1038 |
| rs17100639  | A | -0.0336 |
| rs113562753 | A | -0.0813 |
| rs6880242   | G | -0.0315 |
| rs168706    | T | -0.072  |
| rs55887238  | A | 0.0643  |
| rs309591    | C | -0.0425 |
| rs115593190 | A | 0.0678  |
| rs2400180   | T | -0.0434 |
| rs147732347 | T | 0.1163  |
| rs10072518  | C | 0.0234  |
| rs75868120  | C | -0.131  |
| rs75574456  | A | -0.066  |
| rs253629    | T | -0.0458 |
| rs1366436   | C | -0.0295 |
| rs143333596 | A | -0.0906 |
| rs11740703  | G | 0.0842  |
| rs139314862 | C | 0.0631  |
| rs154181    | T | 0.0891  |
| rs17658004  | G | 0.0459  |
| rs6601060   | C | -0.048  |
| rs6860505   | T | 0.0245  |
| rs6452482   | T | 0.028   |
| rs116434848 | A | 0.135   |
| rs111665239 | C | 0.0882  |
| rs112192314 | C | 0.117   |
| rs7714356   | T | -0.0372 |
| rs840839    | T | 0.106   |
| rs11954601  | A | -0.0314 |
| rs72808164  | A | -0.0903 |
| rs79891032  | T | -0.0915 |
| rs115417310 | G | -0.0645 |
| rs876303    | T | -0.0267 |
| rs75651620  | A | 0.0891  |
| rs113164247 | C | -0.0415 |
| rs17450096  | A | 0.1273  |
| rs2589398   | C | 0.0264  |
| rs115062827 | G | 0.092   |
| rs17054104  | T | 0.0481  |
| rs2255207   | C | 0.0266  |
| rs56829103  | G | 0.0323  |
| rs79094249  | A | 0.1366  |

|             |   |         |
|-------------|---|---------|
| rs30140     | T | -0.0262 |
| rs148954002 | T | 0.144   |
| rs10038547  | A | -0.0243 |
| rs3096169   | G | 0.0338  |
| rs58729412  | C | 0.0259  |
| rs116431783 | C | 0.0535  |
| rs17074976  | A | 0.0288  |
| rs57093811  | G | 0.1606  |
| rs6451182   | T | -0.0704 |
| rs6883472   | A | 0.0307  |
| rs17670044  | T | 0.046   |
| rs76926672  | C | 0.1334  |
| rs75180394  | T | 0.1992  |
| rs4705730   | C | -0.058  |
| rs114018330 | C | 0.0729  |
| rs115523584 | A | 0.111   |
| rs17557368  | A | -0.0578 |
| rs79034754  | C | -0.0979 |
| rs670357    | A | 0.0357  |
| rs79113958  | A | 0.0617  |
| rs328647    | T | 0.0242  |
| rs34825424  | A | -0.0252 |
| rs76307722  | A | -0.072  |
| rs72478580  | G | 0.0968  |
| rs11740965  | C | 0.0423  |
| rs62375403  | G | 0.1122  |
| rs13181480  | G | -0.0376 |
| rs7706818   | A | -0.104  |
| rs7722205   | T | 0.0376  |
| rs73328174  | G | 0.0696  |
| rs146956996 | C | -0.118  |
| rs73286621  | G | 0.034   |
| rs138616988 | G | -0.1701 |
| rs3776057   | T | 0.0529  |
| rs10036072  | C | -0.0249 |
| rs10079348  | G | -0.0425 |
| rs73749129  | A | 0.0347  |
| rs714458    | C | 0.0348  |
| rs76098492  | G | 0.1287  |
| rs62363681  | G | 0.0567  |
| rs115803493 | T | -0.1444 |
| rs150210114 | G | -0.1794 |
| rs76452300  | A | 0.1275  |
| rs73302530  | T | 0.089   |
| rs2748216   | T | -0.0305 |
| rs17668965  | G | -0.0476 |
| rs78623124  | T | -0.0622 |

|             |   |         |
|-------------|---|---------|
| rs17266771  | C | 0.0346  |
| rs7721744   | A | -0.031  |
| rs111615510 | A | -0.0292 |
| rs6580502   | T | -0.0244 |
| rs77536542  | G | 0.0468  |
| rs114518238 | T | 0.1093  |
| rs77172964  | T | -0.0864 |
| rs115855220 | A | 0.0942  |
| rs244688    | T | -0.0335 |
| rs72745841  | T | 0.0396  |
| rs35299027  | C | -0.0289 |
| rs10036064  | G | -0.0771 |
| rs112332486 | G | 0.1536  |
| rs6867504   | T | 0.0277  |
| rs269497    | A | 0.149   |
| rs62374612  | T | 0.1764  |
| rs76666804  | A | 0.0816  |
| rs7737019   | G | -0.0232 |
| rs2961857   | G | 0.0287  |
| rs150839898 | A | 0.0657  |
| rs6870831   | C | -0.0528 |
| rs17162515  | C | 0.0764  |
| rs78697546  | G | 0.0658  |
| rs10050896  | G | -0.0782 |
| rs13178791  | C | 0.0263  |
| rs56404137  | T | 0.066   |
| rs56289164  | T | 0.0763  |
| rs113281707 | T | 0.0908  |
| rs72757607  | T | -0.1342 |
| rs77915579  | T | 0.1424  |
| rs31564     | G | 0.0247  |
| rs114807615 | T | 0.1506  |
| rs6871126   | T | 0.0281  |
| rs41520248  | A | 0.1489  |
| rs10055226  | A | 0.0236  |
| rs11743265  | A | -0.0269 |
| rs17640419  | A | 0.0319  |
| rs1432822   | T | 0.0272  |
| rs1563911   | C | 0.0252  |
| rs115005694 | C | -0.1525 |
| rs17814286  | G | 0.0268  |
| rs2961874   | A | -0.0261 |
| rs1845841   | A | 0.2054  |
| rs114040017 | T | 0.1028  |
| rs9293033   | C | 0.0273  |
| rs114158032 | A | 0.1304  |
| rs62384948  | C | -0.1071 |

|             |   |         |
|-------------|---|---------|
| rs116591686 | A | -0.1785 |
| rs72803552  | G | -0.0498 |
| rs193716    | T | -0.0905 |
| rs62358706  | A | -0.0811 |
| rs116211796 | A | 0.114   |
| rs11740660  | T | 0.0319  |
| rs36830     | A | 0.0786  |
| rs164079    | C | -0.0286 |
| rs245084    | C | 0.0464  |
| rs34556930  | A | -0.0879 |
| rs35310736  | T | 0.0354  |
| rs66524638  | G | 0.0309  |
| rs111326540 | T | 0.1331  |
| rs77955596  | A | -0.14   |
| rs4629610   | G | -0.0269 |
| rs73138817  | T | 0.03    |
| rs11960487  | C | 0.0232  |
| rs143264260 | G | -0.1638 |
| rs137862217 | T | -0.0292 |
| rs67419929  | A | -0.0387 |
| rs10063070  | A | -0.0314 |
| rs143077005 | T | -0.1144 |
| rs501031    | C | 0.0243  |
| rs78247396  | G | 0.0691  |
| rs1990266   | T | 0.0348  |
| rs112131726 | G | -0.1452 |
| rs329195    | T | -0.0234 |
| rs67604528  | A | 0.0285  |
| rs1350379   | C | -0.0379 |
| rs269872    | A | 0.0311  |
| rs10473116  | A | -0.0308 |
| rs27635     | G | -0.0617 |
| rs115817506 | C | 0.1067  |
| rs115938660 | T | -0.1799 |
| rs66855880  | G | 0.0368  |
| rs12054828  | T | 0.0388  |
| rs1505064   | A | -0.057  |
| rs4403184   | G | -0.0435 |
| rs115940524 | G | 0.1779  |
| rs141235183 | T | -0.2168 |
| rs150233308 | T | 0.0935  |
| rs3777226   | A | 0.0986  |
| rs79005972  | T | -0.1332 |
| rs114192852 | A | -0.1489 |
| rs41389446  | T | 0.0414  |
| rs113999028 | A | 0.1322  |
| rs2607170   | T | 0.0251  |

|             |   |         |
|-------------|---|---------|
| rs6897141   | T | -0.0364 |
| rs9313708   | C | 0.037   |
| rs30362     | T | -0.0252 |
| rs73148652  | A | -0.0961 |
| rs76456360  | C | -0.1182 |
| rs115156794 | A | 0.1182  |
| rs79708954  | T | -0.0797 |
| rs41446444  | A | 0.0285  |
| rs72812194  | A | 0.0476  |
| rs72813895  | C | 0.1655  |
| rs77268416  | T | -0.0811 |
| rs4529201   | T | -0.0233 |
| rs116741169 | T | -0.1273 |
| rs71603813  | A | -0.0698 |
| rs230076    | T | -0.0262 |
| rs76279938  | C | 0.0957  |
| rs114743130 | G | -0.125  |
| rs72770733  | A | -0.0419 |
| rs364037    | C | -0.0258 |
| rs114423586 | A | 0.1146  |
| rs250084    | G | -0.0368 |
| rs13184368  | A | 0.0705  |
| rs2404280   | A | 0.0929  |
| rs40206     | T | -0.0303 |
| rs12656592  | C | -0.036  |
| rs114237436 | G | 0.0749  |
| rs10434802  | A | 0.0261  |
| rs7723568   | A | 0.032   |
| rs12186941  | A | -0.0984 |
| rs60913280  | G | -0.0473 |
| rs6897579   | C | 0.151   |
| rs62335652  | T | 0.0434  |
| rs67629927  | C | 0.0311  |
| rs2438594   | C | 0.0352  |
| rs72810003  | G | 0.0751  |
| rs269515    | T | -0.0231 |
| rs34166097  | A | -0.1165 |
| rs17067427  | A | -0.0406 |
| rs66870314  | C | 0.0302  |
| rs2255778   | T | -0.0281 |
| rs272485    | T | -0.0261 |
| rs10044403  | A | 0.0666  |
| rs2594836   | G | -0.0258 |
| rs3923919   | T | 0.0248  |
| rs2962365   | C | -0.0405 |
| rs11739203  | A | 0.0263  |
| rs13354829  | A | 0.0296  |



|             |   |         |
|-------------|---|---------|
| rs28418769  | G | -0.042  |
| rs28097     | G | -0.0267 |
| rs74392806  | C | -0.0712 |
| rs13172085  | C | 0.0249  |
| rs2964769   | A | 0.0359  |
| rs115033718 | C | 0.1575  |
| rs30726     | A | 0.0391  |
| rs72758875  | C | -0.0428 |
| rs841135    | C | -0.0318 |
| rs144327890 | A | -0.0493 |
| rs17250399  | C | -0.0302 |
| rs60197079  | G | -0.0317 |
| rs1482680   | G | 0.0258  |
| rs80014607  | G | -0.1811 |
| rs396712    | C | -0.0495 |
| rs77169384  | C | 0.1323  |
| rs114325671 | A | 0.1403  |
| rs75666474  | A | 0.1223  |
| rs78475353  | T | 0.2347  |
| rs10037461  | C | -0.0338 |
| rs75055749  | G | 0.0429  |
| rs77880952  | C | -0.06   |
| rs1501763   | G | -0.1078 |
| rs2672823   | T | 0.0321  |
| rs16883415  | C | 0.1122  |
| rs62381541  | G | -0.0303 |
| rs77519178  | G | -0.1068 |
| rs11740513  | A | 0.0276  |
| rs79716048  | G | 0.1054  |
| rs40983     | A | 0.0246  |
| rs80014283  | C | -0.0471 |
| rs12109186  | C | -0.1504 |
| rs2962544   | A | 0.0435  |
| rs145203584 | A | -0.1719 |
| rs77056270  | T | -0.1131 |
| rs6580594   | C | 0.0258  |
| rs6879396   | A | 0.062   |
| rs16886773  | T | 0.138   |
| rs76636413  | A | 0.1116  |
| rs4912939   | G | 0.0243  |
| rs76717078  | G | -0.1603 |
| rs79642606  | C | 0.1455  |
| rs74824005  | G | 0.0982  |
| rs34333927  | A | -0.0491 |
| rs115970740 | T | -0.0717 |
| rs2042227   | G | -0.0285 |
| rs17152833  | C | -0.0532 |

|             |   |         |
|-------------|---|---------|
| rs2731655   | C | -0.0242 |
| rs146267301 | A | 0.1093  |
| rs17055399  | C | -0.0869 |
| rs72810109  | G | -0.0529 |
| rs150219286 | A | -0.1073 |
| rs138235131 | T | 0.0779  |
| rs11957412  | C | 0.0959  |
| rs62333208  | C | 0.0277  |
| rs10461649  | G | 0.0847  |
| rs115236488 | C | -0.1065 |
| rs74527303  | G | 0.0647  |
| rs13170573  | G | 0.0229  |
| rs28416956  | A | -0.0251 |
| rs62368986  | G | -0.0402 |
| rs11134529  | T | -0.0424 |
| rs9688120   | C | 0.0241  |
| rs115682048 | T | -0.1564 |
| rs144312799 | A | 0.1889  |
| rs74558069  | A | 0.0753  |
| rs150076623 | T | 0.0998  |
| rs28698273  | T | -0.0994 |
| rs930275    | T | 0.0237  |
| rs7730218   | G | -0.0238 |
| rs35763577  | T | 0.0683  |
| rs6895774   | T | 0.0969  |
| rs435413    | G | 0.0308  |
| rs10463010  | A | 0.0324  |
| rs4407602   | G | 0.0255  |
| rs79401898  | G | 0.1343  |
| rs115035236 | G | 0.0676  |
| rs35466461  | C | -0.065  |
| rs59841346  | T | -0.0515 |
| rs1445904   | A | -0.0266 |
| rs111825886 | A | -0.0634 |
| rs10079641  | G | 0.0399  |
| rs6870256   | C | -0.0235 |
| rs141877573 | T | 0.1425  |
| rs72755524  | T | 0.0834  |
| rs138543092 | A | -0.1581 |
| rs76910269  | T | 0.0348  |
| rs115102364 | T | -0.1078 |
| rs12055002  | A | 0.0444  |
| rs16901423  | C | 0.0288  |
| rs55662485  | G | -0.0826 |
| rs34214357  | T | -0.0538 |
| rs138538729 | C | -0.1099 |
| rs1421951   | T | 0.1055  |

|             |   |         |
|-------------|---|---------|
| rs16869386  | C | 0.0309  |
| rs114313688 | G | 0.1464  |
| rs116064607 | T | 0.1195  |
| rs112932186 | T | -0.1316 |
| rs67143037  | T | 0.0405  |
| rs7706345   | T | -0.0278 |
| rs7705072   | T | -0.0228 |
| rs16901481  | T | 0.0374  |
| rs34208740  | T | 0.0515  |
| rs116179296 | T | -0.1039 |
| rs138354507 | A | 0.1477  |
| rs2115114   | C | 0.0269  |
| rs41387251  | C | 0.1156  |
| rs1289186   | A | 0.0569  |
| rs79681701  | C | 0.1798  |
| rs10516121  | G | -0.0542 |
| rs79206112  | C | -0.0716 |
| rs11951324  | G | 0.0396  |
| rs62355126  | T | -0.0282 |
| rs76057457  | A | 0.0401  |
| rs56215057  | T | 0.1051  |
| rs923467    | T | 0.0246  |
| rs75283052  | A | 0.0723  |
| rs77305922  | T | 0.1093  |
| rs116051509 | C | 0.1123  |
| rs11740796  | A | -0.026  |
| rs4529206   | T | -0.0238 |
| rs6449557   | C | -0.0248 |
| rs78681108  | C | 0.0444  |
| rs356060    | T | 0.0255  |
| rs74518462  | C | 0.1276  |
| rs4574552   | G | -0.0268 |
| rs112395401 | T | -0.0879 |
| rs10900708  | G | 0.0319  |
| rs75023004  | T | -0.1182 |
| rs32406     | T | 0.0337  |
| rs115640023 | T | -0.1388 |
| rs2438631   | A | -0.0241 |
| rs79945450  | T | -0.1701 |
| rs147915451 | T | 0.162   |
| rs2905209   | T | -0.0385 |
| rs113483569 | T | 0.084   |
| rs10036620  | C | -0.0291 |
| rs2386466   | G | -0.0444 |
| rs112449649 | A | 0.0298  |
| rs77612578  | C | 0.1242  |
| rs34112229  | A | -0.0497 |

|             |   |         |
|-------------|---|---------|
| rs12520735  | G | -0.0446 |
| rs116799494 | A | -0.1408 |
| rs2968190   | T | 0.0316  |
| rs114268170 | A | -0.1217 |
| rs74554941  | A | 0.0353  |
| rs12522909  | G | -0.0273 |
| rs79820638  | T | -0.0994 |
| rs80242933  | T | 0.1844  |
| rs17057106  | T | 0.0491  |
| rs6885965   | T | -0.0249 |
| rs255426    | A | 0.0841  |
| rs4868940   | C | 0.039   |
| rs75127752  | C | -0.106  |
| rs113381014 | T | 0.0944  |
| rs4958443   | A | -0.0478 |
| rs10072809  | A | 0.0539  |
| rs4866066   | C | -0.029  |
| rs75675239  | A | -0.07   |
| rs76243701  | T | -0.1461 |
| rs115249783 | T | 0.0982  |
| rs2553484   | A | -0.0285 |
| rs2652080   | T | 0.0236  |
| rs75041013  | T | -0.1139 |
| rs819318    | T | 0.0268  |
| rs163192    | A | -0.0224 |
| rs6883314   | T | 0.0422  |
| rs6884390   | T | -0.1215 |
| rs890717    | C | -0.0332 |
| rs76247772  | A | -0.0556 |
| rs80231792  | A | 0.0655  |
| rs77812008  | A | 0.103   |
| rs62389586  | A | -0.1125 |
| rs74608240  | A | 0.1569  |
| rs299600    | T | -0.0339 |
| rs111926371 | C | -0.0695 |
| rs10052709  | G | -0.0334 |
| rs6862071   | T | 0.135   |
| rs76820463  | G | 0.1052  |
| rs11466805  | A | -0.067  |
| rs75731976  | C | -0.1382 |
| rs6873481   | A | 0.0305  |
| rs75617254  | C | 0.1354  |
| rs260410    | T | -0.0472 |
| rs151017324 | A | 0.1268  |
| rs55989644  | C | 0.039   |
| rs114954806 | A | 0.1608  |
| rs62369942  | G | 0.0306  |

|             |   |         |
|-------------|---|---------|
| rs3902904   | A | -0.0239 |
| rs76775978  | T | -0.0663 |
| rs7726545   | C | 0.0325  |
| rs112679894 | G | 0.0975  |
| rs62381222  | A | 0.0741  |
| rs12658529  | T | 0.0245  |
| rs1125150   | A | 0.0445  |
| rs13183618  | C | 0.0358  |
| rs149824420 | T | 0.1018  |
| rs10067626  | T | 0.0479  |
| rs72736843  | T | 0.0699  |
| rs138600763 | T | -0.0767 |
| rs3733665   | G | 0.0328  |
| rs4704855   | G | -0.0807 |
| rs114513947 | T | -0.0516 |
| rs3776572   | C | -0.0246 |
| rs150058215 | A | -0.1278 |
| rs150512724 | A | -0.1254 |
| rs143194600 | T | -0.1233 |
| rs62373353  | G | -0.0384 |
| rs10075265  | C | 0.0247  |
| rs28448491  | C | -0.0311 |
| rs3852162   | C | 0.028   |
| rs114477795 | C | -0.0986 |
| rs113012916 | T | 0.0536  |
| rs77265670  | G | 0.2028  |
| rs114989548 | A | 0.0352  |
| rs6871931   | A | -0.0292 |
| rs921038    | T | -0.024  |
| rs10057191  | G | -0.0391 |
| rs6898533   | T | -0.0269 |
| rs116293072 | A | -0.0974 |
| rs143073349 | C | 0.1067  |
| rs11960943  | A | 0.0814  |
| rs380671    | G | 0.0397  |
| rs62372808  | T | 0.023   |
| rs112432522 | G | 0.0288  |
| rs2439652   | C | 0.0638  |
| rs9312862   | G | 0.023   |
| rs150454290 | A | 0.1483  |
| rs16887892  | T | 0.0363  |
| rs76570422  | G | -0.1365 |
| rs58490646  | G | -0.0259 |
| rs80310419  | T | -0.0953 |
| rs6872013   | A | 0.027   |
| rs748464    | T | 0.0351  |
| rs326057    | T | -0.026  |

|             |   |         |
|-------------|---|---------|
| rs80063823  | G | -0.0904 |
| rs9986202   | C | 0.0318  |
| rs7711836   | G | 0.0893  |
| rs17307853  | C | -0.0359 |
| rs17488820  | T | -0.0968 |
| rs31695     | C | 0.0271  |
| rs10866528  | G | 0.0241  |
| rs6555155   | G | 0.0242  |
| rs2120247   | A | -0.0398 |
| rs11745315  | A | -0.1592 |
| rs78948732  | G | -0.0807 |
| rs17143349  | G | 0.0487  |
| rs113326966 | A | -0.0901 |
| rs7729366   | C | 0.0647  |
| rs62347661  | T | -0.1601 |
| rs79135374  | G | 0.139   |
| rs73106785  | A | 0.0583  |
| rs72804114  | C | -0.1193 |
| rs7709258   | T | -0.0297 |
| rs7445547   | C | 0.0289  |
| rs114395416 | C | 0.0713  |
| rs115759720 | C | 0.107   |
| rs114362481 | C | 0.1183  |
| rs246347    | T | -0.031  |
| rs78381698  | A | 0.1126  |
| rs116750291 | T | 0.1033  |
| rs77431394  | C | -0.0774 |
| rs115109737 | A | 0.0583  |
| rs33998119  | G | -0.1105 |
| rs13361385  | A | 0.0498  |
| rs150903870 | C | -0.1881 |
| rs2962407   | A | 0.024   |
| rs6895377   | A | -0.0246 |
| rs4324679   | C | 0.0328  |
| rs116546588 | A | 0.1617  |
| rs25890     | C | 0.0234  |
| rs72652822  | C | -0.0426 |
| rs13186966  | T | -0.029  |
| rs261227    | C | 0.0222  |
| rs12518772  | G | 0.0552  |
| rs1109017   | C | -0.0224 |
| rs9313900   | G | 0.0476  |
| rs55885327  | C | 0.121   |
| rs72815417  | A | -0.0634 |
| rs1366164   | T | 0.1138  |
| rs696879    | T | -0.0248 |
| rs2112474   | G | -0.0319 |

|             |   |         |
|-------------|---|---------|
| rs140817866 | C | -0.1526 |
| rs74952776  | G | 0.0426  |
| rs16903289  | T | -0.0667 |
| rs74462807  | G | 0.1452  |
| rs316231    | G | 0.0445  |
| rs11135558  | C | -0.0343 |
| rs11956685  | G | -0.023  |
| rs10519393  | T | 0.0838  |
| rs1366232   | T | -0.0561 |
| rs10472945  | A | -0.058  |
| rs11953852  | T | -0.0628 |
| rs11742772  | C | -0.0411 |
| rs12655129  | A | -0.0288 |
| rs186296    | A | 0.0244  |
| rs74868150  | T | 0.0821  |
| rs2591777   | G | 0.0233  |
| rs75600552  | A | 0.0698  |
| rs145211206 | A | 0.2243  |
| rs10079625  | C | 0.0408  |
| rs72835138  | T | -0.0397 |
| rs138006451 | C | 0.1321  |
| rs114236690 | T | 0.1532  |
| rs78520502  | T | 0.1278  |
| rs62386228  | A | 0.0747  |
| rs255885    | A | -0.0342 |
| rs2115513   | A | 0.0245  |
| rs77137793  | G | 0.1557  |
| rs57856381  | G | -0.0331 |
| rs16869106  | G | -0.0293 |
| rs74498779  | A | 0.1349  |
| rs34475559  | A | 0.0708  |
| rs62381099  | C | 0.1443  |
| rs55671936  | G | -0.0509 |
| rs17684382  | C | -0.0931 |
| rs58854937  | A | 0.0854  |
| rs6897051   | T | -0.0308 |
| rs36093359  | C | -0.0242 |
| rs138601175 | T | -0.0783 |
| rs62373261  | G | 0.026   |
| rs116277771 | C | 0.0521  |
| rs13158164  | C | 0.0329  |
| rs116419653 | A | 0.0662  |
| rs17629575  | T | 0.0315  |
| rs9688218   | C | -0.0324 |
| rs147162978 | G | 0.1489  |
| rs62383313  | A | 0.102   |
| rs17358298  | T | 0.0338  |

|             |   |         |
|-------------|---|---------|
| rs76089030  | A | -0.112  |
| rs76698196  | G | 0.1154  |
| rs11952985  | G | 0.0495  |
| rs6555977   | C | 0.0374  |
| rs211036    | C | -0.0232 |
| rs2592019   | A | 0.0259  |
| rs76423202  | T | -0.0733 |
| rs111842095 | T | -0.1131 |
| rs2163156   | C | -0.0683 |
| rs9327137   | G | 0.0236  |
| rs114842847 | A | -0.1113 |
| rs75523539  | C | 0.1181  |
| rs26730     | C | 0.0287  |
| rs11741651  | T | -0.0241 |
| rs357616    | C | -0.0233 |
| rs10037475  | C | 0.0254  |
| rs163941    | A | -0.1013 |
| rs138474957 | T | 0.1299  |
| rs72765914  | G | 0.1149  |
| rs35601608  | T | -0.0377 |
| rs56185482  | T | -0.0796 |
| rs10491313  | G | 0.0417  |
| rs77707099  | G | -0.0862 |
| rs149221457 | A | 0.0987  |
| rs1592764   | T | 0.0469  |
| rs77716259  | A | 0.0923  |
| rs59561259  | A | 0.054   |
| rs72791660  | G | -0.0336 |
| rs9312759   | A | 0.0242  |
| rs79550103  | A | 0.073   |
| rs76672628  | C | 0.2075  |
| rs113672927 | A | 0.0663  |
| rs75243891  | T | 0.1378  |
| rs4916832   | A | -0.0347 |
| rs80090739  | T | -0.0731 |
| rs980982    | A | -0.0361 |
| rs62354903  | A | -0.0734 |
| rs115698653 | G | 0.1696  |
| rs114154867 | C | 0.063   |
| rs12520961  | T | 0.1587  |
| rs114366839 | T | -0.0917 |
| rs78189310  | G | 0.1098  |
| rs143106433 | T | 0.1179  |
| rs27986     | T | 0.0303  |
| rs331300    | T | 0.0323  |
| rs62374244  | G | 0.0514  |
| rs74446249  | T | -0.1117 |



|             |   |         |
|-------------|---|---------|
| rs115447028 | C | 0.1153  |
| rs28419632  | G | -0.0422 |
| rs17491085  | T | -0.0492 |
| rs11738271  | T | 0.0325  |
| rs147967158 | G | 0.1076  |
| rs76425426  | T | 0.1501  |
| rs6871209   | C | 0.0355  |
| rs148372020 | G | -0.099  |
| rs143566186 | T | 0.1541  |
| rs146257961 | G | -0.0921 |
| rs2347095   | G | -0.1093 |
| rs12654386  | T | 0.0356  |
| rs79320861  | T | 0.1645  |
| rs72761980  | A | -0.1502 |
| rs116812760 | G | 0.0895  |
| rs75668588  | G | 0.037   |
| rs988573    | T | -0.0218 |
| rs16901212  | C | 0.1352  |
| rs10059353  | T | 0.0232  |
| rs13159807  | A | -0.0233 |
| rs79408370  | T | 0.0837  |
| rs12516223  | T | 0.1929  |
| rs7730725   | A | 0.0382  |
| rs73351643  | C | -0.0676 |
| rs30420     | T | -0.0582 |
| rs77002777  | A | 0.1     |
| rs115204289 | C | -0.0609 |
| rs4423958   | T | 0.0325  |
| rs150746614 | T | -0.1676 |
| rs16894008  | T | -0.1552 |
| rs116320613 | G | -0.1759 |
| rs11952614  | T | -0.0936 |
| rs6869904   | T | -0.0226 |
| rs62382674  | A | 0.0578  |
| rs10476743  | A | -0.0242 |
| rs113786844 | G | -0.0941 |
| rs2968221   | T | 0.0285  |
| rs16902235  | T | -0.0353 |
| rs113229815 | C | 0.0564  |
| rs73320842  | C | 0.056   |
| rs2449451   | T | -0.0261 |
| rs2962004   | A | 0.0231  |
| rs78144338  | A | -0.0484 |
| rs116237919 | T | 0.0857  |
| rs2282810   | T | 0.0233  |
| rs141808137 | T | 0.1346  |
| rs7711618   | G | -0.0284 |

|             |   |         |
|-------------|---|---------|
| rs73763356  | T | -0.0527 |
| rs75259086  | A | -0.0751 |
| rs2169095   | C | 0.0269  |
| rs4443446   | G | 0.0346  |
| rs2032893   | T | -0.0235 |
| rs114959781 | T | -0.0937 |
| rs2161140   | G | 0.0283  |
| rs115060811 | C | -0.0803 |
| rs75813237  | T | -0.1041 |
| rs112547373 | G | 0.1006  |
| rs61730936  | T | -0.0551 |
| rs75205348  | A | 0.1013  |
| rs78437988  | T | -0.1    |
| rs7713659   | T | 0.0253  |
| rs270207    | A | -0.0243 |
| rs34894525  | C | 0.042   |
| rs4702124   | T | 0.0272  |
| rs62355073  | C | 0.0424  |
| rs138227704 | G | -0.131  |
| rs6864965   | C | -0.0477 |
| rs56156016  | A | -0.0761 |
| rs72494581  | C | -0.0272 |
| rs987951    | A | 0.0258  |
| rs141748690 | C | 0.0433  |
| rs115498644 | G | 0.0557  |
| rs17070929  | G | -0.0658 |
| rs74592396  | T | -0.0701 |
| rs4388185   | G | -0.0381 |
| rs114021239 | T | 0.1314  |
| rs114416259 | T | 0.1546  |
| rs35770269  | T | -0.0353 |
| rs1445950   | G | 0.0915  |
| rs13185436  | G | 0.0228  |
| rs7446952   | C | 0.0267  |
| rs111580843 | T | -0.0629 |
| rs116818387 | C | -0.101  |
| rs10067964  | C | -0.0256 |
| rs139708133 | T | 0.0853  |
| rs17591912  | A | 0.1152  |
| rs16867565  | C | 0.0609  |
| rs319590    | G | 0.0256  |
| rs12519985  | T | 0.0462  |
| rs4703742   | C | -0.0338 |
| rs488152    | A | 0.0586  |
| rs62381863  | G | 0.0749  |
| rs72729023  | T | 0.1104  |
| rs6874175   | A | -0.0268 |

|             |   |         |
|-------------|---|---------|
| rs75846301  | T | -0.0889 |
| rs142080367 | C | 0.144   |
| rs77962363  | T | -0.053  |
| rs11134126  | G | -0.0388 |
| rs149964392 | A | 0.0961  |
| rs72791076  | C | -0.2211 |
| rs6580205   | C | 0.0224  |
| rs4976595   | T | 0.0662  |
| rs56216638  | T | 0.0261  |
| rs645283    | A | -0.0326 |
| rs6882021   | T | -0.0263 |
| rs80035655  | G | -0.0511 |
| rs74967474  | A | -0.0824 |
| rs150325827 | A | -0.1772 |
| rs117180991 | C | 0.1493  |
| rs76591266  | T | 0.0637  |
| rs9327643   | A | -0.0393 |
| rs7448059   | C | -0.0282 |
| rs13357458  | T | 0.0813  |
| rs16898148  | A | -0.038  |
| rs72809910  | G | -0.0778 |
| rs17689103  | T | 0.0568  |
| rs440485    | A | 0.0327  |
| rs76239041  | A | 0.0324  |
| rs117147870 | A | -0.083  |
| rs16879047  | T | 0.1158  |
| rs78519065  | A | -0.0822 |
| rs55944115  | T | -0.0787 |
| rs168666    | A | -0.0307 |
| rs34507337  | C | -0.0478 |
| rs76767118  | C | -0.0514 |
| rs4496697   | A | -0.0611 |
| rs16881303  | A | -0.1282 |
| rs11241133  | T | -0.028  |
| rs76156728  | C | 0.0361  |
| rs13174489  | A | 0.0654  |
| rs72782825  | C | 0.0583  |
| rs1288869   | T | -0.0241 |
| rs11952306  | A | 0.1768  |
| rs26222     | A | -0.022  |
| rs619491    | T | -0.0281 |
| rs115889761 | G | 0.1438  |
| rs55793074  | A | 0.0605  |
| rs17502163  | A | -0.0389 |
| rs9312983   | A | 0.0524  |
| rs154819    | C | -0.0792 |
| rs469785    | C | -0.024  |

|             |   |         |
|-------------|---|---------|
| rs146511228 | T | -0.0839 |
| rs139033950 | C | -0.1028 |
| rs34716738  | T | 0.1108  |
| rs115689552 | T | -0.0679 |
| rs465059    | A | -0.0249 |
| rs62382286  | T | -0.0553 |
| rs74556816  | C | 0.0871  |
| rs190408    | G | 0.0218  |
| rs17146261  | T | 0.1195  |
| rs1428692   | T | -0.0224 |
| rs13356132  | C | 0.032   |
| rs6882967   | T | 0.0263  |
| rs75638121  | T | -0.0728 |
| rs75819534  | C | 0.0595  |
| rs116474205 | G | -0.0733 |
| rs6883238   | G | 0.0728  |
| rs516960    | C | 0.0218  |
| rs410805    | T | -0.0367 |
| rs42278     | A | 0.0769  |
| rs835075    | A | -0.0218 |
| rs76916440  | T | -0.0658 |
| rs56257248  | T | 0.1283  |
| rs138774398 | T | -0.1592 |
| rs76110851  | T | 0.0713  |
| rs17133873  | C | 0.1424  |
| rs174809    | C | 0.0239  |
| rs259193    | T | 0.0251  |
| rs4629578   | G | 0.0231  |
| rs3850200   | C | -0.0411 |
| rs1565808   | A | 0.0236  |
| rs140255145 | A | -0.1097 |
| rs151043706 | C | -0.1249 |
| rs293040    | T | -0.023  |
| rs114153128 | A | -0.151  |
| rs138929812 | C | 0.2191  |
| rs3890111   | A | 0.0282  |
| rs11741357  | A | -0.0532 |
| rs111820457 | A | 0.0943  |
| rs116696144 | A | 0.1462  |
| rs2445801   | G | -0.0241 |
| rs13360357  | C | 0.0339  |
| rs73039092  | G | 0.0689  |
| rs17196901  | C | -0.0306 |
| rs6897179   | A | 0.0729  |
| rs12513951  | T | -0.0233 |
| rs80146384  | G | -0.0446 |
| rs139734798 | T | -0.1246 |

|             |   |         |
|-------------|---|---------|
| rs57694281  | A | -0.0366 |
| rs17211235  | G | 0.0707  |
| rs4482879   | C | 0.0213  |
| rs149556    | C | -0.0246 |
| rs142588802 | A | 0.1099  |
| rs115114236 | C | 0.0945  |
| rs11955654  | A | -0.0814 |
| rs13169485  | C | 0.0276  |
| rs10036550  | C | 0.0705  |
| rs142704329 | C | 0.0987  |
| rs13165456  | A | 0.0297  |
| rs72759034  | C | -0.1407 |
| rs6863337   | G | 0.0325  |
| rs9327811   | A | -0.036  |
| rs35745062  | A | -0.0273 |
| rs77521253  | A | -0.107  |
| rs7737882   | T | 0.0217  |
| rs7704166   | G | 0.022   |
| rs183683    | T | 0.0384  |
| rs6887810   | C | -0.0605 |
| rs140563449 | G | -0.1011 |
| rs10078075  | T | 0.0222  |
| rs80150811  | T | -0.0388 |
| rs7727211   | C | -0.0545 |
| rs1871186   | C | 0.0225  |
| rs17061281  | G | -0.0539 |
| rs325874    | G | 0.0256  |
| rs146200818 | C | 0.1207  |
| rs56412085  | T | -0.089  |
| rs73312260  | A | 0.0674  |
| rs139548616 | A | -0.1126 |
| rs2112485   | T | -0.0244 |
| rs17839719  | G | -0.0488 |
| rs113389383 | G | 0.1335  |
| rs2594835   | A | 0.0421  |
| rs2319566   | G | 0.0339  |
| rs74632981  | A | -0.0873 |
| rs3212690   | C | 0.0853  |
| rs1020388   | G | -0.0223 |
| rs145927524 | G | -0.1808 |
| rs72769333  | C | -0.1218 |
| rs11738346  | T | -0.0289 |
| rs7734645   | G | 0.0263  |
| rs62364477  | G | 0.0732  |
| rs115374444 | T | -0.2085 |
| rs6874303   | A | -0.0299 |
| rs6887271   | C | -0.1761 |

|             |   |         |
|-------------|---|---------|
| rs143563818 | C | 0.1518  |
| rs149110471 | C | -0.1758 |
| rs6596684   | G | 0.0235  |
| rs116577322 | G | -0.0776 |
| rs61760346  | C | -0.0411 |
| rs80332895  | C | 0.0854  |
| rs114657505 | A | 0.0902  |
| rs116512330 | T | -0.0793 |
| rs17553041  | G | -0.0972 |
| rs17151324  | C | 0.1115  |
| rs74453068  | T | -0.058  |
| rs113874251 | G | 0.062   |
| rs112056090 | A | -0.0721 |
| rs150251051 | A | -0.1092 |
| rs71622133  | T | -0.0483 |
| rs62376493  | G | 0.2122  |
| rs111620363 | T | 0.0888  |
| rs73110654  | A | -0.0344 |
| rs13165031  | T | 0.1659  |
| rs115800087 | A | -0.1122 |
| rs9885487   | T | -0.0257 |
| rs2625203   | G | -0.0277 |
| rs58824859  | C | 0.0259  |
| rs12514931  | A | -0.0301 |
| rs73137871  | A | 0.0508  |
| rs12655335  | T | -0.1503 |
| rs145280166 | T | -0.1183 |
| rs142237249 | T | -0.1956 |
| rs114690837 | G | -0.1722 |
| rs16868011  | G | -0.0248 |
| rs2662330   | C | -0.0213 |
| rs1030676   | C | 0.025   |
| rs140108923 | T | -0.1123 |
| rs334287    | T | 0.0298  |
| rs114796358 | A | -0.1071 |
| rs72772045  | C | 0.036   |
| rs150352588 | T | 0.0785  |
| rs11750252  | T | 0.043   |
| rs59709139  | T | 0.0525  |
| rs79150989  | C | -0.0359 |
| rs115615701 | C | 0.0929  |
| rs6874591   | G | 0.0457  |
| rs78289804  | T | 0.0509  |
| rs7722138   | A | -0.0238 |
| rs114214303 | A | 0.1726  |
| rs55866397  | T | -0.0872 |
| rs2329624   | A | 0.0222  |

|             |   |         |
|-------------|---|---------|
| rs76373384  | A | 0.0699  |
| rs10052787  | G | 0.0486  |
| rs72832722  | G | -0.026  |
| rs56000969  | T | 0.046   |
| rs9292022   | A | 0.022   |
| rs72801757  | G | 0.0607  |
| rs62364681  | T | -0.0908 |
| rs6555900   | C | 0.0247  |
| rs35445112  | T | 0.1049  |
| rs6452565   | G | 0.0263  |
| rs7711699   | A | 0.0564  |
| rs11951820  | A | 0.0501  |
| rs34510849  | G | -0.028  |
| rs114728425 | A | -0.0303 |
| rs9325082   | G | -0.0247 |
| rs62379906  | A | 0.0302  |
| rs77916175  | T | 0.1364  |
| rs78062799  | C | 0.0853  |
| rs74633676  | C | -0.0466 |
| rs71627305  | T | 0.0506  |
| rs11242493  | G | -0.0339 |
| rs889063    | T | 0.0247  |
| rs150563599 | A | 0.1797  |
| rs77719555  | G | -0.2731 |
| rs142892719 | A | -0.064  |
| rs2950030   | G | 0.0219  |
| rs114915558 | G | -0.0554 |
| rs77911314  | T | 0.0722  |
| rs142352339 | C | -0.1557 |
| rs17716274  | C | -0.0888 |
| rs13183455  | A | -0.0238 |
| rs144053127 | C | -0.0842 |
| rs72738979  | G | -0.0516 |
| rs76829704  | T | -0.1179 |
| rs17596440  | G | -0.0436 |
| rs116545048 | A | 0.0649  |
| rs10064083  | G | -0.0329 |
| rs246578    | G | -0.07   |
| rs16877779  | A | 0.0376  |
| rs2113070   | T | -0.0316 |
| rs11242118  | A | -0.0326 |
| rs78943951  | A | -0.1823 |
| rs9329104   | G | -0.0323 |
| rs17662111  | C | -0.1221 |
| rs10038654  | A | 0.0255  |
| rs322392    | A | -0.0535 |
| rs8192250   | G | 0.1356  |

|             |   |         |
|-------------|---|---------|
| rs925824    | G | 0.0237  |
| rs28636     | T | 0.0267  |
| rs1839862   | A | -0.0224 |
| rs17168361  | T | 0.0309  |
| rs165064    | T | 0.0239  |
| rs13171998  | A | 0.135   |
| rs6862278   | A | 0.0827  |
| rs10072136  | T | -0.0232 |
| rs62377918  | C | 0.0276  |
| rs33710     | T | -0.0254 |
| rs77626626  | T | 0.1212  |
| rs114398092 | A | -0.2054 |
| rs17462769  | A | 0.0335  |
| rs75437378  | T | -0.0502 |
| rs115862372 | T | 0.0906  |
| rs77111266  | A | 0.1061  |
| rs11743557  | C | 0.0684  |
| rs34245560  | C | 0.0745  |
| rs499652    | T | -0.0716 |
| rs35552     | C | -0.026  |
| rs34514413  | A | -0.0326 |
| rs4702305   | C | -0.0491 |
| rs145611763 | G | -0.0333 |
| rs79366947  | A | 0.0969  |
| rs666056    | A | -0.028  |
| rs79928779  | C | 0.0398  |
| rs4367299   | G | 0.0221  |
| rs114562926 | A | -0.1612 |
| rs78006747  | C | -0.0644 |
| rs77225675  | A | 0.0897  |
| rs4076522   | T | -0.0231 |
| rs77881193  | C | -0.1191 |
| rs73286094  | G | 0.0565  |
| rs78779890  | G | 0.1036  |
| rs75076783  | T | 0.1174  |
| rs1531312   | T | 0.0244  |
| rs148180366 | C | -0.1181 |
| rs3806839   | C | 0.0222  |
| rs72746695  | G | -0.0576 |
| rs13355409  | T | 0.0473  |
| rs115245277 | A | -0.0714 |
| rs7728908   | A | -0.0269 |
| rs17668155  | T | -0.0607 |
| rs12518180  | T | 0.0271  |
| rs6868874   | G | 0.0739  |
| rs10941519  | C | 0.023   |
| rs139938174 | C | 0.0981  |



|             |   |         |
|-------------|---|---------|
| rs140212011 | T | 0.0639  |
| rs143545250 | A | 0.1112  |
| rs114988639 | G | 0.1602  |
| rs1428022   | T | 0.0315  |
| rs10462816  | A | 0.0382  |
| rs74689401  | G | 0.0532  |
| rs4703976   | T | 0.1023  |
| rs36009432  | G | 0.0434  |
| rs78443050  | T | 0.06    |
| rs11749213  | A | -0.0344 |
| rs27636     | T | -0.0475 |
| rs78327014  | T | 0.0664  |
| rs112375259 | G | -0.039  |
| rs73044430  | T | 0.0846  |
| rs114965676 | A | -0.098  |
| rs11241792  | T | -0.0617 |
| rs79717079  | T | 0.0709  |
| rs17568300  | A | 0.0425  |
| rs139160176 | C | 0.0905  |
| rs67502985  | C | 0.0949  |
| rs149718288 | T | 0.0833  |
| rs114342230 | A | 0.0867  |
| rs79296605  | G | -0.096  |
| rs75582205  | T | 0.0717  |
| rs75833488  | C | 0.1869  |
| rs7443765   | T | 0.0233  |
| rs113165359 | A | -0.0963 |
| rs79855726  | C | 0.1337  |
| rs6883291   | G | -0.0236 |
| rs113383727 | C | 0.1334  |
| rs2569093   | T | -0.028  |
| rs2033270   | T | 0.0446  |
| rs148467998 | A | 0.1037  |
| rs115444259 | T | 0.0902  |
| rs17146625  | A | 0.0622  |
| rs45451099  | A | -0.0844 |
| rs76830161  | T | -0.1235 |
| rs72759979  | C | 0.094   |
| rs75460986  | A | 0.0868  |
| rs114773198 | C | -0.0845 |
| rs34358194  | T | 0.0878  |
| rs73122939  | C | 0.0283  |
| rs10478920  | C | 0.0567  |
| rs11740563  | A | -0.0817 |
| rs116258873 | T | 0.1648  |
| rs13177688  | C | 0.0538  |
| rs115863756 | T | -0.1145 |

|             |   |         |
|-------------|---|---------|
| rs4457074   | A | 0.0385  |
| rs79541172  | G | 0.1367  |
| rs10076705  | T | -0.0224 |
| rs7720827   | C | 0.0438  |
| rs75593963  | T | 0.1034  |
| rs34541030  | G | -0.0621 |
| rs139260103 | T | -0.042  |
| rs6863329   | C | 0.03    |
| rs4912601   | C | -0.022  |
| rs115147665 | A | 0.068   |
| rs72807935  | G | 0.04    |
| rs77056845  | C | 0.0854  |
| rs13153440  | C | -0.0626 |
| rs74562222  | G | -0.0534 |
| rs113860509 | G | -0.1135 |
| rs31309     | C | 0.0508  |
| rs6594688   | C | 0.1203  |
| rs80234471  | A | -0.126  |
| rs114307037 | G | -0.0624 |
| rs151176650 | A | -0.0466 |
| rs12153461  | T | 0.0349  |
| rs16897840  | T | 0.0791  |
| rs114573843 | G | 0.0791  |
| rs260398    | G | 0.0319  |
| rs4866098   | T | -0.0272 |
| rs13161158  | C | -0.0482 |
| rs62392840  | T | 0.04    |
| rs138090569 | C | -0.1529 |
| rs17512887  | T | -0.0703 |
| rs8180513   | A | -0.0437 |
| rs6891752   | C | -0.0265 |
| rs16880508  | A | -0.0935 |
| rs17068395  | A | 0.0262  |
| rs115213011 | T | -0.1384 |
| rs72783447  | T | -0.0608 |
| rs13357784  | G | -0.1973 |
| rs78547914  | C | -0.0482 |
| rs1030955   | C | -0.051  |
| rs11739460  | G | -0.0222 |
| rs1043196   | C | 0.0953  |
| rs147282880 | C | 0.0416  |
| rs146879873 | C | 0.1407  |
| rs7706479   | G | -0.0383 |
| rs791077    | A | -0.0267 |
| rs4346818   | T | 0.0331  |
| rs147317250 | A | -0.1052 |
| rs116168349 | C | 0.128   |

|             |   |         |
|-------------|---|---------|
| rs1650553   | G | -0.0286 |
| rs77546932  | G | -0.0685 |
| rs143421881 | C | 0.093   |
| rs72773205  | G | -0.0545 |
| rs7735232   | T | 0.0296  |
| rs11738979  | T | -0.0244 |
| rs2906080   | A | -0.0251 |
| rs316720    | C | -0.022  |
| rs73787313  | C | -0.138  |
| rs17792072  | G | -0.0244 |
| rs62361593  | A | -0.0558 |
| rs62372192  | A | -0.0635 |
| rs2547545   | C | -0.0331 |
| rs2059805   | T | -0.0254 |
| rs114712682 | A | -0.0713 |
| rs12655058  | A | 0.0804  |
| rs55872233  | G | -0.1043 |
| rs34856940  | G | 0.0661  |
| rs114556328 | G | -0.0545 |
| rs62405384  | G | 0.031   |
| rs72771678  | A | -0.0269 |
| rs115424919 | G | 0.1347  |
| rs116242230 | A | 0.1202  |
| rs72816433  | T | -0.0451 |
| rs76309560  | A | 0.1909  |
| rs78389968  | A | 0.0815  |
| rs6555013   | T | 0.0627  |
| rs115353097 | T | 0.0722  |
| rs114017691 | A | 0.1409  |
| rs73348141  | A | -0.0505 |
| rs7732007   | T | -0.0426 |
| rs2972892   | T | 0.0213  |
| rs6873307   | G | 0.0277  |
| rs77272082  | G | 0.105   |
| rs28676354  | T | 0.0531  |
| rs4361562   | A | 0.0308  |
| rs17468120  | T | -0.0825 |
| rs147724279 | C | 0.1427  |
| rs245580    | A | 0.0221  |
| rs11739898  | T | -0.0286 |
| rs62388142  | A | 0.0501  |
| rs4836345   | C | -0.0838 |
| rs13172769  | T | 0.0372  |
| rs17634885  | C | -0.0672 |
| rs72763496  | C | 0.0303  |
| rs13166502  | C | -0.0289 |
| rs10044521  | T | 0.0903  |

|             |   |         |
|-------------|---|---------|
| rs3909281   | T | 0.0224  |
| rs80125361  | T | 0.0637  |
| rs113089586 | T | -0.0833 |
| rs62374921  | T | -0.0271 |
| rs11957787  | T | -0.0957 |
| rs3777167   | G | -0.0249 |
| rs3846555   | A | -0.0982 |
| rs150634149 | C | 0.0831  |
| rs142604597 | T | 0.1288  |
| rs79298582  | T | 0.0648  |
| rs80215556  | T | -0.0933 |
| rs74713547  | C | 0.1371  |
| rs7706649   | C | 0.0258  |
| rs74581328  | A | -0.1021 |
| rs166281    | G | 0.0596  |
| rs11948555  | G | -0.0867 |
| rs75798204  | T | -0.0939 |
| rs80179578  | C | 0.0884  |
| rs78199631  | T | 0.1366  |
| rs77302430  | C | 0.1257  |
| rs4286653   | A | -0.0417 |
| rs34492233  | C | -0.0211 |
| rs17052958  | G | 0.0301  |
| rs75598880  | A | -0.1071 |
| rs3097245   | A | 0.0223  |
| rs55869777  | C | -0.0955 |
| rs142391743 | T | -0.1371 |
| rs55951984  | T | 0.0294  |
| rs2135072   | C | -0.0254 |
| rs144710012 | T | 0.1511  |
| rs11746495  | G | -0.0504 |
| rs9885375   | T | -0.0284 |
| rs898172    | A | 0.0286  |
| rs115632126 | A | -0.0993 |
| rs6882708   | T | 0.0375  |
| rs10041025  | A | 0.0671  |
| rs61761656  | G | -0.1444 |
| rs115704670 | C | -0.1097 |
| rs62356092  | A | -0.0515 |
| rs28433586  | G | 0.0406  |
| rs2898207   | G | -0.046  |
| rs67145573  | T | 0.0585  |
| rs58140608  | T | 0.0403  |
| rs2021776   | T | -0.028  |
| rs10471525  | A | 0.0233  |
| rs7706720   | G | -0.0239 |
| rs6890558   | C | -0.0233 |

|             |   |         |
|-------------|---|---------|
| rs725635    | T | 0.0283  |
| rs112097091 | G | -0.1218 |
| rs3733973   | A | -0.0948 |
| rs4976716   | C | 0.046   |
| rs874428    | A | 0.0293  |
| rs80204486  | A | -0.1285 |
| rs72758881  | G | 0.0955  |
| rs79310598  | A | 0.0785  |
| rs79465959  | T | -0.1056 |
| rs78000636  | A | 0.1364  |
| rs115911679 | T | 0.088   |
| rs1698011   | G | 0.0306  |
| rs144575152 | C | 0.0549  |
| rs138295474 | T | 0.167   |
| rs41271749  | A | -0.1196 |
| rs145192592 | A | 0.1012  |
| rs6594886   | T | 0.0848  |
| rs116173340 | C | -0.1104 |
| rs72818798  | G | 0.0775  |
| rs1494643   | T | 0.0261  |
| rs226210    | G | -0.0254 |
| rs924615    | A | 0.0226  |
| rs72724148  | C | -0.1136 |
| rs78498300  | A | 0.0646  |
| rs74419000  | A | 0.0338  |
| rs80339103  | G | -0.0777 |
| rs113818186 | T | -0.0745 |
| rs3846706   | G | 0.0392  |
| rs930072    | C | -0.0348 |
| rs139921506 | T | -0.1524 |
| rs75061443  | T | 0.1139  |
| rs3756561   | T | 0.0511  |
| rs79468919  | G | -0.0648 |
| rs11167700  | T | 0.0292  |
| rs10942171  | G | -0.0224 |
| rs112655125 | G | 0.1215  |
| rs113056318 | C | 0.1062  |
| rs75671783  | C | 0.1218  |
| rs4540153   | G | 0.0218  |
| rs16901341  | C | 0.0715  |
| rs10515058  | A | 0.021   |
| rs75172869  | G | -0.0578 |
| rs112225407 | A | 0.0652  |
| rs9327357   | G | 0.0301  |
| rs77452085  | T | 0.1651  |
| rs959937    | A | -0.0232 |
| rs35131009  | T | -0.0619 |

|             |   |         |
|-------------|---|---------|
| rs35849238  | A | 0.048   |
| rs114468478 | C | 0.0834  |
| rs75563609  | A | -0.0745 |
| rs73240895  | G | -0.0344 |
| rs78768931  | A | 0.0764  |
| rs139508250 | C | 0.1034  |
| rs1295217   | T | -0.0273 |
| rs75397573  | C | -0.0558 |
| rs7713083   | G | 0.0251  |
| rs75241215  | T | 0.0445  |
| rs72771293  | G | -0.0288 |
| rs78892297  | C | -0.0252 |
| rs62378901  | C | -0.0692 |
| rs142208154 | A | -0.1419 |
| rs72814085  | C | 0.0374  |
| rs10076041  | T | 0.0337  |
| rs61737137  | G | -0.1173 |
| rs112033423 | T | 0.0602  |
| rs77783902  | T | -0.079  |
| rs76687592  | T | 0.0887  |
| rs4869685   | C | -0.0251 |
| rs12517397  | G | -0.0374 |
| rs17148568  | C | -0.0472 |
| rs1896691   | G | -0.0237 |
| rs6892660   | C | 0.0292  |
| rs9647596   | A | 0.0213  |
| rs116458160 | A | 0.1193  |
| rs6873527   | A | 0.0812  |
| rs6870462   | G | 0.0258  |
| rs72494108  | A | 0.034   |
| rs79074361  | G | -0.0743 |
| rs116348487 | A | 0.1098  |
| rs2909993   | A | 0.0278  |
| rs12188736  | T | -0.022  |
| rs139708314 | T | 0.089   |
| rs80351291  | G | -0.0476 |
| rs11749433  | G | 0.1065  |
| rs37435     | G | -0.0963 |
| rs75691701  | A | 0.1177  |
| rs11951016  | A | 0.0657  |
| rs40992     | T | 0.0249  |
| rs55699024  | A | 0.1427  |
| rs11737908  | A | -0.043  |
| rs55689180  | A | 0.0468  |
| rs72706729  | C | -0.0383 |
| rs16883082  | T | 0.0351  |
| rs35424849  | C | -0.0932 |

|             |   |         |
|-------------|---|---------|
| rs72758522  | T | -0.0389 |
| rs10061587  | G | -0.0383 |
| rs115754825 | G | -0.0977 |
| rs7446822   | G | 0.0352  |
| rs13164945  | T | 0.0262  |
| rs16892406  | G | -0.0259 |
| rs3776761   | A | -0.0501 |
| rs1036172   | C | -0.0266 |
| rs12188219  | C | -0.0285 |
| rs13167351  | C | -0.024  |
| rs79297063  | G | -0.0429 |
| rs12516799  | A | 0.023   |
| rs148646754 | C | 0.1008  |
| rs770179    | C | -0.0326 |
| rs77860393  | T | -0.088  |
| rs13160719  | C | 0.0248  |
| rs62337754  | T | -0.0244 |
| rs34735826  | C | -0.0238 |
| rs194068    | G | -0.0216 |
| rs4422542   | A | 0.0258  |
| rs6453285   | T | 0.0411  |
| rs13154789  | A | -0.0279 |
| rs55823210  | A | 0.0311  |
| rs114511130 | A | 0.0989  |
| rs115485411 | A | -0.0556 |
| rs140875636 | T | -0.1696 |
| rs10076405  | G | -0.0214 |
| rs75108770  | G | -0.0592 |
| rs115800577 | T | 0.0901  |
| rs1104824   | C | -0.0222 |
| rs1423304   | T | 0.0243  |
| rs4302547   | A | -0.0984 |
| rs1193355   | G | 0.0221  |
| rs79153232  | A | 0.0661  |
| rs6896218   | C | 0.024   |
| rs62351762  | C | 0.0547  |
| rs74934251  | G | 0.1051  |
| rs10042448  | G | -0.0446 |
| rs4389663   | A | 0.0277  |
| rs146424380 | C | 0.1509  |
| rs62392640  | C | 0.1695  |
| rs72790986  | G | -0.0255 |
| rs140282010 | A | 0.2123  |
| rs73766165  | A | -0.0632 |
| rs112326146 | G | 0.0698  |
| rs314013    | C | -0.0462 |
| rs76674412  | G | 0.0773  |

|             |   |         |
|-------------|---|---------|
| rs144410638 | C | 0.1028  |
| rs17087114  | C | 0.0567  |
| rs147243219 | G | 0.1481  |
| rs56923208  | C | -0.0221 |
| rs17145294  | T | 0.0258  |
| rs72786629  | A | 0.1267  |
| rs77417662  | T | 0.0837  |
| rs254037    | C | -0.0511 |
| rs13170838  | T | -0.063  |
| rs13171422  | C | 0.0237  |
| rs76780202  | C | -0.0701 |
| rs75761803  | T | 0.1517  |
| rs76034239  | T | 0.035   |
| rs116042277 | C | 0.0885  |
| rs113114438 | T | 0.0757  |
| rs4867616   | A | -0.021  |
| rs11746696  | A | 0.0328  |
| rs1698135   | G | -0.0268 |
| rs12519801  | T | -0.024  |
| rs73330467  | G | 0.0289  |
| rs78666348  | G | 0.0902  |
| rs62384543  | T | 0.0415  |
| rs75592436  | A | -0.1134 |
| rs62387712  | C | 0.1623  |
| rs114992997 | A | 0.1296  |
| rs11951658  | T | 0.066   |
| rs11954119  | T | 0.1029  |
| rs1862523   | C | -0.0233 |
| rs12189222  | A | -0.0766 |
| rs9326755   | G | -0.0327 |
| rs34248265  | T | -0.0379 |
| rs144058241 | T | -0.0892 |
| rs10900767  | C | 0.0217  |
| rs10066520  | A | 0.0455  |
| rs16903407  | T | -0.0537 |
| rs267939    | C | 0.022   |
| rs2347598   | C | 0.0552  |
| rs6873053   | A | -0.0381 |
| rs464850    | C | -0.0326 |
| rs62337125  | T | 0.0249  |
| rs57184151  | T | 0.0797  |
| rs7447957   | T | 0.0209  |
| rs114436902 | A | 0.0535  |
| rs36118613  | A | 0.024   |
| rs10063020  | T | 0.0541  |
| rs115189732 | T | -0.1536 |
| rs10039222  | T | -0.0274 |



|             |   |         |
|-------------|---|---------|
| rs76085768  | G | 0.0392  |
| rs146555728 | G | -0.1756 |
| rs148353418 | T | -0.0829 |
| rs112297723 | T | 0.1406  |
| rs1799291   | T | -0.0557 |
| rs2190779   | G | 0.0696  |
| rs55700967  | C | -0.0815 |
| rs268553    | G | 0.0313  |
| rs77520293  | C | 0.1323  |
| rs35559377  | T | 0.065   |
| rs66828454  | A | -0.0406 |
| rs350049    | T | -0.034  |
| rs114802859 | C | 0.0596  |
| rs275456    | T | -0.0242 |
| rs16871467  | T | 0.1192  |
| rs34070088  | A | -0.0251 |
| rs114853425 | A | 0.113   |
| rs7731784   | T | 0.0399  |
| rs4288136   | C | 0.0211  |
| rs72750878  | C | 0.1073  |
| rs72808586  | T | 0.0746  |
| rs145296812 | A | -0.1863 |
| rs116315804 | G | 0.1753  |
| rs2892154   | G | -0.1348 |
| rs13171873  | A | -0.0879 |
| rs906069    | A | -0.0316 |
| rs7721732   | A | -0.0342 |
| rs111694881 | C | -0.049  |
| rs1473399   | A | 0.0258  |
| rs145489384 | G | 0.1131  |
| rs6884186   | G | 0.0239  |
| rs77010519  | C | 0.0697  |
| rs62383308  | A | -0.0442 |
| rs16902313  | C | -0.0535 |
| rs115638623 | G | -0.0717 |
| rs72761687  | A | -0.0405 |
| rs72772455  | T | 0.0607  |
| rs1007838   | A | 0.0211  |
| rs1371975   | C | 0.0338  |
| rs73272842  | A | 0.0307  |
| rs79501605  | T | -0.1002 |
| rs114052460 | C | 0.1232  |
| rs1664645   | A | 0.0592  |
| rs10076158  | T | -0.028  |
| rs151021153 | G | 0.0773  |
| rs62377827  | A | -0.0262 |
| rs2589656   | A | -0.0224 |

|             |   |         |
|-------------|---|---------|
| rs140443794 | G | -0.1538 |
| rs77089651  | T | 0.0292  |
| rs138207695 | T | 0.0446  |
| rs767411    | C | -0.0225 |
| rs115523561 | A | 0.0561  |
| rs10043667  | T | -0.0684 |
| rs11747314  | T | 0.027   |
| rs79018744  | T | 0.1262  |
| rs138957655 | T | 0.1414  |
| rs2029164   | A | -0.0461 |
| rs116166366 | G | -0.112  |
| rs10066865  | A | 0.0392  |
| rs9895      | C | -0.0337 |
| rs115617551 | A | -0.0757 |
| rs115110154 | C | -0.1102 |
| rs74929657  | G | 0.0483  |
| rs113082788 | C | 0.1408  |
| rs41290553  | A | -0.1608 |
| rs17082088  | A | 0.1421  |
| rs141534120 | A | -0.0811 |
| rs112490937 | T | 0.0927  |
| rs34226861  | G | 0.0369  |
| rs13158904  | A | 0.036   |
| rs337104    | A | -0.0481 |
| rs75368393  | G | 0.06    |
| rs114851674 | A | -0.0726 |
| rs77954436  | G | -0.1326 |
| rs28539026  | T | 0.0756  |
| rs3095903   | A | -0.0275 |
| rs9918266   | G | -0.0256 |
| rs16874911  | G | 0.1114  |
| rs62374736  | C | -0.0498 |
| rs66514130  | G | -0.0232 |
| rs1820717   | C | 0.0289  |
| rs178146    | C | -0.0594 |
| rs72799274  | T | -0.0436 |
| rs28601600  | T | -0.0232 |
| rs2217265   | T | 0.0216  |
| rs1828173   | G | -0.0455 |
| rs72798222  | T | 0.1358  |
| rs114336609 | A | 0.0729  |
| rs113886793 | A | 0.0372  |
| rs2966752   | A | 0.021   |
| rs10069011  | T | 0.0222  |
| rs34471074  | A | 0.0457  |
| rs66497446  | G | -0.0431 |
| rs10514276  | A | 0.0246  |

|             |   |         |
|-------------|---|---------|
| rs74873965  | G | 0.0884  |
| rs115080184 | A | -0.0832 |
| rs1524565   | A | 0.0222  |
| rs10461892  | C | -0.042  |
| rs6883960   | G | -0.0512 |
| rs34792681  | G | 0.0724  |
| rs3099067   | G | 0.0466  |
| rs298597    | A | 0.0265  |
| rs112791932 | T | -0.1505 |
| rs147683092 | A | -0.0759 |
| rs954273    | G | -0.0276 |
| rs6872393   | A | 0.0585  |
| rs4512111   | A | 0.0297  |
| rs143666273 | G | 0.1832  |
| rs56187062  | C | 0.1171  |
| rs1183069   | G | -0.023  |
| rs1035467   | C | -0.0223 |
| rs75763539  | A | 0.0657  |
| rs32831     | C | 0.0497  |
| rs10075613  | T | 0.0235  |
| rs3110972   | T | -0.0599 |
| rs145823949 | A | 0.0868  |
| rs6580353   | T | -0.0251 |
| rs16903195  | C | 0.0881  |
| rs76504641  | G | -0.0434 |
| rs35515495  | A | 0.0362  |
| rs116099179 | A | -0.1185 |
| rs77884898  | A | 0.091   |
| rs77356916  | G | -0.1166 |
| rs75594479  | T | 0.0658  |
| rs76624497  | T | 0.0724  |
| rs114805763 | T | -0.1294 |
| rs4976265   | C | -0.0235 |
| rs116635866 | C | 0.1432  |
| rs35981402  | T | 0.071   |
| rs41290569  | T | 0.1262  |
| rs116687379 | T | 0.1156  |
| rs1453360   | T | -0.0215 |
| rs252161    | G | -0.0235 |
| rs116492045 | T | -0.0903 |
| rs11956866  | T | -0.0213 |
| rs3749627   | T | -0.0234 |
| rs10214063  | A | 0.0281  |
| rs9885124   | T | -0.0867 |
| rs17642976  | G | 0.094   |
| rs76527501  | C | 0.0386  |
| rs6872459   | T | 0.0319  |

|             |   |         |
|-------------|---|---------|
| rs148968114 | G | -0.1286 |
| rs78398614  | A | -0.1267 |
| rs330206    | C | 0.0422  |
| rs401553    | A | -0.0393 |
| rs13165003  | G | 0.0687  |
| rs75096835  | A | -0.0716 |
| rs115014357 | A | 0.1021  |
| rs159728    | T | -0.0394 |
| rs11742035  | A | -0.0474 |
| rs7734540   | A | 0.0212  |
| rs114705966 | C | 0.1029  |
| rs62384593  | A | -0.0749 |
| rs182778    | C | 0.0223  |
| rs17356099  | C | 0.0456  |
| rs2545073   | C | -0.0321 |
| rs6895118   | G | -0.0273 |
| rs11743510  | T | 0.0849  |
| rs78024211  | G | 0.0791  |
| rs73244742  | C | 0.0598  |
| rs6875431   | A | -0.0868 |
| rs80037764  | G | 0.1031  |
| rs56081500  | C | -0.0869 |
| rs62337327  | T | 0.0696  |
| rs74575614  | A | -0.1032 |
| rs138894992 | C | -0.1304 |
| rs116752538 | C | 0.1151  |
| rs116156248 | C | -0.05   |
| rs7713312   | G | -0.0282 |
| rs144196863 | G | 0.1065  |
| rs7701594   | T | -0.0289 |
| rs78632795  | A | 0.1287  |
| rs149416233 | A | 0.0326  |
| rs17224116  | T | 0.0322  |
| rs113728742 | T | -0.1293 |
| rs149776789 | G | 0.1     |
| rs75256520  | A | -0.106  |
| rs112913448 | G | 0.0278  |
| rs116694254 | G | -0.1244 |
| rs78016682  | T | -0.148  |
| rs7708256   | T | -0.0665 |
| rs113259604 | A | 0.1309  |
| rs72816627  | A | 0.1139  |
| rs56284148  | C | 0.0871  |
| rs140949563 | T | 0.0778  |
| rs2511927   | A | -0.0654 |
| rs115960045 | T | 0.0729  |
| rs2471155   | T | 0.0519  |

|             |   |         |
|-------------|---|---------|
| rs4131986   | G | 0.1214  |
| rs34570808  | G | -0.0277 |
| rs114034962 | T | -0.113  |
| rs77934062  | T | -0.1222 |
| rs146786301 | G | 0.0918  |
| rs258835    | G | -0.0226 |
| rs116669320 | C | 0.0702  |
| rs115234459 | A | 0.08    |
| rs17566351  | T | 0.0267  |
| rs62396573  | G | 0.0554  |
| rs13355160  | T | 0.1232  |
| rs9686679   | A | -0.034  |
| rs145713138 | A | 0.0481  |
| rs56340328  | C | 0.0821  |
| rs13164401  | A | 0.026   |
| rs77695336  | A | 0.1176  |
| rs56266231  | A | -0.043  |
| rs4429819   | T | 0.056   |
| rs76974205  | A | -0.1365 |
| rs17083735  | C | -0.0458 |
| rs10475117  | G | -0.0263 |
| rs9291848   | A | 0.0295  |
| rs13153631  | A | 0.0301  |
| rs17165328  | T | -0.0736 |
| rs6862721   | A | 0.0239  |
| rs12188811  | G | 0.0337  |
| rs77471216  | C | -0.0317 |
| rs78345014  | T | -0.0973 |
| rs62360399  | A | -0.0335 |
| rs10071281  | C | 0.0248  |
| rs116434112 | G | 0.0731  |
| rs12520471  | C | 0.0357  |
| rs6865239   | G | -0.0262 |
| rs116101724 | T | -0.1517 |
| rs150796338 | C | -0.1024 |
| rs76066073  | C | 0.0763  |
| rs313595    | C | 0.0266  |
| rs7729507   | T | 0.0208  |
| rs75616410  | C | -0.0765 |
| rs78537118  | T | 0.0608  |
| rs3846534   | A | -0.0235 |
| rs114287281 | G | -0.1903 |
| rs116780328 | A | 0.0679  |
| rs72732631  | T | -0.0887 |
| rs434130    | T | 0.0232  |
| rs76822011  | A | -0.1163 |
| rs2457722   | T | 0.0228  |

|             |   |         |
|-------------|---|---------|
| rs116770480 | A | 0.0736  |
| rs143788056 | T | -0.1228 |
| rs12657599  | C | 0.0701  |
| rs148515035 | A | 0.116   |
| rs79042882  | A | 0.0831  |
| rs61227722  | A | 0.0368  |
| rs75226111  | C | -0.0472 |
| rs6894765   | C | 0.0232  |
| rs17768474  | T | 0.045   |
| rs114429064 | T | 0.1327  |
| rs56343304  | T | -0.0522 |
| rs55670260  | G | -0.091  |
| rs891921    | A | 0.0379  |
| rs75598288  | G | 0.0984  |
| rs72647765  | C | 0.1038  |
| rs116376602 | T | 0.0631  |
| rs79213598  | C | -0.0592 |
| rs1217806   | G | 0.0211  |
| rs139757274 | G | -0.0404 |
| rs62356412  | C | -0.093  |
| rs16884711  | C | 0.0262  |
| rs139435126 | T | 0.11    |
| rs111690100 | C | 0.0821  |
| rs149343830 | G | -0.154  |
| rs152628    | C | 0.0237  |
| rs115328258 | T | 0.1132  |
| rs75761138  | C | -0.1018 |
| rs2407211   | G | 0.0225  |
| rs115260787 | C | -0.0363 |
| rs10052968  | C | 0.0307  |
| rs147679094 | A | 0.0832  |
| rs4704525   | C | 0.0249  |
| rs114825991 | T | 0.1248  |
| rs140529339 | T | 0.1493  |
| rs2436404   | C | -0.0371 |
| rs7711578   | T | -0.0208 |
| rs34196215  | C | 0.032   |
| rs17065069  | T | -0.0319 |
| rs72722925  | A | -0.0331 |
| rs72759790  | A | -0.0549 |
| rs112176488 | G | -0.0605 |
| rs79744520  | T | -0.1663 |
| rs408619    | C | 0.0252  |
| rs116060611 | G | -0.1283 |
| rs72747285  | C | 0.0243  |
| rs2372403   | A | -0.0451 |
| rs10070905  | A | -0.0256 |

|             |   |         |
|-------------|---|---------|
| rs77017429  | A | -0.0718 |
| rs6867763   | T | -0.0252 |
| rs261137    | C | 0.0213  |
| rs147719983 | T | 0.0401  |
| rs17299506  | A | -0.0274 |
| rs1471154   | T | -0.0343 |
| rs76720867  | A | 0.0691  |
| rs17354278  | C | 0.0719  |
| rs6897621   | A | -0.1072 |
| rs112469821 | C | -0.0823 |
| rs17644636  | G | 0.0275  |
| rs676689    | T | -0.0223 |
| rs74472993  | T | 0.1654  |
| rs116507500 | C | 0.1124  |
| rs115937409 | T | 0.1229  |
| rs115764806 | C | -0.1864 |
| rs115502843 | A | -0.0558 |
| rs2937725   | G | -0.0257 |
| rs1799571   | A | 0.0376  |
| rs34149265  | A | 0.0501  |
| rs3111611   | T | 0.025   |
| rs34538921  | C | 0.1487  |
| rs6883971   | A | 0.0223  |
| rs112900586 | C | -0.0923 |
| rs78587554  | G | -0.0486 |
| rs74450214  | T | 0.1193  |
| rs1835045   | C | -0.0203 |
| rs6557031   | G | -0.0268 |
| rs13165883  | A | 0.0376  |
| rs78231782  | C | 0.0451  |
| rs3797288   | T | 0.0235  |
| rs6891926   | C | 0.0217  |
| rs3853121   | T | -0.0217 |
| rs7445500   | G | 0.0947  |
| rs34301415  | A | 0.0348  |
| rs2973533   | G | 0.0208  |
| rs203309    | A | 0.0248  |
| rs79139671  | A | 0.0802  |
| rs252545    | T | -0.0262 |
| rs286000    | G | 0.0218  |
| rs7710990   | T | -0.0218 |
| rs12521956  | G | -0.1501 |
| rs77356506  | T | -0.0472 |
| rs173054    | A | 0.0229  |
| rs147575525 | G | 0.138   |
| rs73300188  | T | 0.0577  |
| rs62366398  | C | 0.0217  |

|             |   |         |
|-------------|---|---------|
| rs72779284  | C | 0.0402  |
| rs73127689  | C | 0.1282  |
| rs77065859  | A | 0.0556  |
| rs76495826  | C | -0.1788 |
| rs11957970  | A | 0.0271  |
| rs113277188 | C | 0.0656  |
| rs112708733 | G | -0.0658 |
| rs79167220  | A | 0.1379  |
| rs962686    | C | 0.052   |
| rs16896949  | C | -0.116  |
| rs4386717   | T | -0.0326 |
| rs73810353  | A | -0.0431 |
| rs113455635 | C | -0.1341 |
| rs17155755  | T | 0.0462  |
| rs115004203 | A | -0.0917 |
| rs149889732 | C | 0.1013  |
| rs6580097   | A | 0.0397  |
| rs971716    | T | 0.0264  |
| rs111877031 | A | 0.0634  |
| rs1396462   | A | -0.0261 |
| rs7711759   | A | 0.026   |
| rs144913485 | A | -0.0633 |
| rs75178425  | T | -0.075  |
| rs406992    | A | 0.029   |
| rs115160648 | C | 0.1098  |
| rs10055822  | T | -0.0913 |
| rs28564484  | T | -0.0216 |
| rs247995    | G | 0.0361  |
| rs4357015   | T | -0.0328 |
| rs62405548  | T | 0.1037  |
| rs115586823 | T | 0.0549  |
| rs11952888  | G | 0.0975  |
| rs111701347 | A | 0.0952  |
| rs113389783 | T | 0.078   |
| rs2662334   | A | 0.0218  |
| rs138683011 | T | 0.0894  |
| rs150902001 | T | 0.0682  |
| rs1363542   | G | -0.0268 |
| rs2287763   | C | 0.0262  |
| rs2569049   | T | 0.0432  |
| rs77274493  | T | -0.0622 |
| rs75739765  | C | -0.0572 |
| rs77773291  | G | 0.0736  |
| rs77860636  | G | -0.0964 |
| rs318373    | C | -0.0215 |
| rs9313941   | A | -0.0201 |
| rs34891838  | T | -0.1319 |



|             |   |         |
|-------------|---|---------|
| rs7730834   | A | 0.1225  |
| rs111407262 | A | 0.1839  |
| rs10476658  | G | -0.0334 |
| rs138969900 | C | 0.0599  |
| rs72764837  | G | 0.033   |
| rs1145055   | C | 0.0641  |
| rs55645918  | A | 0.0717  |
| rs60172775  | T | -0.0249 |
| rs77886352  | G | 0.0471  |
| rs138679938 | G | -0.1146 |
| rs73780640  | C | -0.0661 |
| rs62373614  | G | 0.0263  |
| rs11949431  | G | 0.0359  |
| rs12189046  | A | -0.1325 |
| rs72802311  | A | -0.1003 |
| rs114659943 | T | 0.1164  |
| rs7716514   | A | 0.1258  |
| rs79041515  | A | -0.0607 |
| rs35508964  | G | -0.1247 |
| rs78216956  | G | -0.0509 |
| rs113656885 | G | 0.0519  |
| rs7444312   | G | -0.024  |
| rs13181479  | T | -0.0332 |
| rs76015360  | A | 0.1549  |
| rs3110993   | A | 0.0244  |
| rs115718059 | C | 0.0994  |
| rs112401261 | T | -0.1019 |
| rs75653787  | T | 0.1418  |
| rs6876965   | G | -0.0221 |
| rs79452965  | C | 0.0937  |
| rs4976288   | A | 0.0336  |
| rs10515574  | C | -0.0732 |
| rs75933825  | G | -0.0912 |
| rs13167383  | C | -0.022  |
| rs35019626  | G | 0.0349  |
| rs73300307  | G | 0.0927  |
| rs1027248   | T | -0.045  |
| rs793222    | T | 0.0652  |
| rs72647739  | A | 0.1086  |
| rs62360975  | C | 0.0964  |
| rs115110069 | A | 0.1415  |
| rs62361641  | A | 0.0355  |
| rs115247635 | A | 0.1344  |
| rs72807356  | A | 0.0392  |
| rs1598734   | C | 0.0224  |
| rs76977233  | A | 0.0635  |
| rs6893775   | T | 0.1641  |

|             |   |         |
|-------------|---|---------|
| rs17166991  | G | -0.0483 |
| rs73090210  | G | 0.0276  |
| rs116321246 | T | -0.1223 |
| rs146230703 | G | 0.0794  |
| rs138801397 | C | 0.0743  |
| rs1422058   | T | -0.083  |
| rs6892187   | G | 0.0223  |
| rs11134022  | T | 0.0214  |
| rs142023621 | T | -0.0798 |
| rs10044140  | T | 0.0239  |
| rs62388099  | T | 0.0236  |
| rs116361197 | A | 0.1063  |
| rs440583    | C | 0.0271  |
| rs1319728   | T | 0.0269  |
| rs12519711  | A | 0.0209  |
| rs7722984   | G | 0.0945  |
| rs35035730  | G | -0.0592 |
| rs74838555  | T | 0.097   |
| rs7712194   | G | -0.0281 |
| rs2962642   | G | -0.0242 |
| rs315796    | A | 0.0459  |
| rs16888608  | A | 0.0363  |
| rs114562495 | G | 0.0795  |
| rs17812877  | C | 0.0248  |
| rs170603    | A | -0.1743 |
| rs710375    | T | 0.0215  |
| rs884120    | C | 0.0322  |
| rs72830345  | C | -0.0618 |
| rs114828442 | C | 0.0997  |
| rs4302583   | T | 0.0214  |
| rs62378415  | C | 0.0737  |
| rs17076267  | A | 0.0445  |
| rs16876939  | C | -0.05   |
| rs74968288  | T | 0.1634  |
| rs17074068  | C | 0.0898  |
| rs75202758  | G | -0.0566 |
| rs4867958   | A | -0.0699 |
| rs55947813  | A | 0.0587  |
| rs384621    | C | -0.0344 |
| rs13355477  | G | 0.0226  |
| rs116791268 | T | -0.0806 |
| rs73744043  | A | 0.1054  |
| rs4701453   | C | 0.0257  |
| rs34432044  | T | 0.0958  |
| rs466154    | A | 0.0272  |
| rs116493477 | A | 0.1402  |
| rs10061669  | A | -0.0243 |

|             |   |         |
|-------------|---|---------|
| rs16899194  | C | -0.0775 |
| rs113706598 | T | 0.1478  |
| rs35812131  | G | -0.0476 |
| rs6877669   | A | -0.0422 |
| rs116341525 | A | 0.0835  |
| rs76808777  | C | 0.0828  |
| rs73801276  | A | -0.0779 |
| rs7735643   | T | 0.0547  |
| rs17246578  | A | 0.0727  |
| rs4252233   | A | 0.105   |
| rs140238957 | A | -0.1193 |
| rs116601445 | G | -0.0841 |
| rs2053030   | T | 0.0249  |
| rs55946739  | T | 0.0548  |
| rs2984628   | A | -0.0345 |
| rs1173453   | G | 0.0259  |
| rs10035896  | A | -0.0456 |
| rs16896822  | G | -0.0297 |
| rs72759882  | C | -0.1095 |
| rs13154141  | T | -0.0464 |
| rs150223647 | T | 0.0955  |
| rs281441    | C | 0.0397  |
| rs7712135   | G | -0.0297 |
| rs10085059  | A | -0.0394 |
| rs25767     | A | -0.0225 |
| rs4295416   | G | 0.0966  |
| rs73065953  | A | -0.0584 |
| rs62365549  | G | 0.1105  |
| rs111432819 | C | -0.1147 |
| rs12519768  | A | 0.0228  |
| rs116021322 | C | -0.0903 |
| rs115033938 | A | 0.1432  |
| rs1221847   | A | 0.0539  |
| rs17075031  | C | -0.0443 |
| rs17196775  | C | -0.1423 |
| rs6888067   | T | 0.0336  |
| rs141144862 | T | -0.0581 |
| rs56142455  | A | -0.0301 |
| rs61448329  | T | 0.0451  |
| rs77131945  | C | -0.102  |
| rs114078227 | C | 0.0832  |
| rs62355927  | G | -0.0268 |
| rs57518296  | A | -0.0552 |
| rs75506645  | A | 0.1148  |
| rs141211372 | C | -0.1192 |
| rs1828614   | G | -0.0256 |
| rs111399799 | T | 0.1105  |

|             |   |         |
|-------------|---|---------|
| rs116333286 | A | 0.0879  |
| rs337831    | A | 0.0885  |
| rs80014354  | T | 0.0547  |
| rs6881338   | C | -0.0229 |
| rs13164158  | C | -0.07   |
| rs62384377  | C | -0.1057 |
| rs10515241  | T | 0.0233  |
| rs79305999  | T | 0.1082  |
| rs35833     | C | 0.0294  |
| rs76729154  | A | -0.083  |
| rs116736362 | T | 0.1123  |
| rs62341027  | G | -0.0271 |
| rs13173482  | G | -0.0431 |
| rs17557312  | T | 0.1206  |
| rs28326     | G | -0.0257 |
| rs12657010  | C | -0.0247 |
| rs4364369   | A | -0.022  |
| rs16875704  | G | -0.0916 |
| rs142242065 | G | 0.0751  |
| rs138106021 | T | 0.0633  |
| rs6880979   | C | 0.0204  |
| rs10941472  | A | 0.0233  |
| rs12516928  | A | -0.038  |
| rs115507637 | T | 0.0699  |
| rs142464932 | A | 0.1088  |
| rs7725455   | T | -0.0271 |
| rs2199466   | T | -0.0205 |
| rs72787459  | A | -0.089  |
| rs13174310  | C | -0.0426 |
| rs2338296   | C | 0.0205  |
| rs1330656   | T | -0.028  |
| rs17063007  | T | 0.0386  |
| rs116774745 | G | -0.0726 |
| rs80067969  | C | 0.1173  |
| rs71627267  | C | -0.0797 |
| rs114208675 | G | -0.1899 |
| rs76623936  | C | -0.1504 |
| rs72835052  | A | -0.048  |
| rs16876026  | G | -0.0387 |
| rs1277463   | A | -0.0479 |
| rs17060307  | C | 0.032   |
| rs73043322  | T | 0.0595  |
| rs35590681  | C | 0.1282  |
| rs112555014 | T | 0.1092  |
| rs10155646  | A | -0.0638 |
| rs10058899  | T | 0.0298  |
| rs77553016  | T | -0.0845 |

|             |   |         |
|-------------|---|---------|
| rs2934131   | T | 0.063   |
| rs2973112   | A | -0.035  |
| rs116439919 | A | -0.075  |
| rs115629837 | C | 0.1149  |
| rs62382815  | A | -0.0667 |
| rs112662562 | G | 0.0317  |
| rs56154830  | C | -0.0316 |
| rs2897457   | T | 0.0201  |
| rs1039787   | G | 0.0291  |
| rs62355960  | T | 0.0528  |
| rs11739475  | A | 0.0203  |
| rs7444996   | A | 0.0218  |
| rs148326619 | C | -0.2023 |
| rs62330993  | A | -0.0835 |
| rs115038493 | G | -0.0532 |
| rs146577364 | T | 0.1029  |
| rs143726108 | G | 0.0894  |
| rs466522    | A | 0.0291  |
| rs17651154  | G | -0.0216 |
| rs6451016   | G | 0.0208  |
| rs16903170  | C | 0.044   |
| rs75589997  | T | 0.0591  |
| rs4895331   | A | 0.0322  |
| rs10043551  | T | 0.0526  |
| rs114557462 | A | 0.0989  |
| rs114548064 | A | 0.1312  |
| rs141658986 | A | -0.1267 |
| rs6861361   | A | -0.0964 |
| rs114249657 | G | 0.1098  |
| rs10474498  | C | -0.0213 |
| rs56257788  | G | -0.0294 |
| rs141437903 | C | -0.0928 |
| rs114104716 | T | -0.1562 |
| rs25919     | C | 0.0297  |
| rs2070715   | T | 0.0212  |
| rs114469503 | C | 0.0637  |
| rs75059452  | A | 0.0608  |
| rs11949362  | T | 0.1124  |
| rs151036165 | G | 0.1256  |
| rs631607    | G | 0.0217  |
| rs71639252  | G | 0.0784  |
| rs80115428  | C | -0.0943 |
| rs4339351   | C | -0.0493 |
| rs34767607  | T | 0.047   |
| rs257230    | T | -0.1212 |
| rs76168713  | T | 0.0869  |
| rs2029526   | C | -0.023  |

|             |   |         |
|-------------|---|---------|
| rs11740383  | G | 0.0393  |
| rs55691649  | C | 0.0877  |
| rs17079284  | C | -0.0633 |
| rs171099    | A | -0.0506 |
| rs7737823   | T | -0.0394 |
| rs17461542  | A | 0.0218  |
| rs79063234  | T | 0.1242  |
| rs11952975  | T | -0.0225 |
| rs72757702  | A | 0.1057  |
| rs1826825   | C | -0.1217 |
| rs80166866  | A | -0.0421 |
| rs1010647   | T | -0.1073 |
| rs6875226   | C | 0.027   |
| rs113281663 | T | 0.1162  |
| rs62381665  | G | 0.0271  |
| rs77534570  | A | -0.0845 |
| rs78189180  | A | 0.1461  |
| rs143033020 | A | 0.1442  |
| rs77475767  | T | 0.0703  |
| rs35130     | T | -0.1206 |
| rs111282266 | A | 0.1246  |
| rs144648725 | T | 0.0783  |
| rs74537373  | A | 0.157   |
| rs552519    | T | -0.0234 |
| rs6555119   | G | 0.0266  |
| rs75111414  | A | 0.1248  |
| rs151329141 | T | 0.0999  |
| rs116051841 | G | -0.1361 |
| rs78726546  | A | -0.1466 |
| rs6868378   | C | -0.1292 |
| rs4339375   | C | 0.0723  |
| rs34691283  | G | 0.0266  |
| rs55936747  | A | -0.1256 |
| rs6894715   | A | -0.0221 |
| rs17163471  | T | -0.0739 |
| rs72802273  | A | -0.1332 |
| rs62357377  | T | 0.0205  |
| rs78050973  | G | -0.0639 |
| rs78889454  | C | 0.0868  |
| rs12332370  | A | -0.0267 |
| rs35577150  | A | 0.0409  |
| rs113943922 | T | 0.0816  |
| rs247165    | G | 0.0249  |
| rs12514495  | G | -0.0266 |
| rs111849167 | G | 0.0227  |
| rs922431    | T | 0.024   |
| rs3776753   | A | -0.03   |

|             |   |         |
|-------------|---|---------|
| rs76590304  | A | 0.0866  |
| rs41298966  | A | -0.0781 |
| rs78836916  | T | 0.0397  |
| rs17732981  | C | 0.0348  |
| rs116159544 | T | 0.0783  |
| rs72757581  | C | -0.026  |
| rs1478903   | G | 0.0213  |
| rs2227828   | T | 0.0654  |
| rs7729168   | T | 0.0207  |
| rs430183    | C | 0.0251  |
| rs13166574  | G | 0.0236  |
| rs791075    | A | 0.0384  |
| rs75367687  | A | -0.0867 |
| rs78800426  | G | -0.1504 |
| rs115514382 | G | -0.0733 |
| rs78875199  | T | -0.116  |
| rs62379538  | G | -0.123  |
| rs79637734  | A | -0.104  |
| rs72753478  | A | 0.0933  |
| rs79951588  | A | -0.1443 |
| rs150797391 | G | -0.1231 |
| rs17105189  | G | 0.0635  |
| rs72763074  | T | -0.0432 |
| rs112038804 | A | -0.0622 |
| rs55637384  | A | -0.0786 |
| rs11750155  | C | 0.0293  |
| rs7735154   | T | 0.0396  |
| rs111528711 | G | 0.06    |
| rs142852154 | T | 0.0809  |
| rs11953927  | T | -0.0289 |
| rs884356    | C | 0.0271  |
| rs75516268  | G | -0.1394 |
| rs151003880 | T | 0.0546  |
| rs147129603 | C | -0.2176 |
| rs170316    | T | 0.0272  |
| rs10054636  | T | -0.0222 |
| rs2429307   | G | 0.0242  |
| rs450399    | G | 0.1632  |
| rs115236351 | C | -0.1026 |
| rs1428393   | T | 0.0201  |
| rs62384265  | T | -0.0456 |
| rs10476849  | A | -0.0531 |
| rs146036368 | A | -0.1119 |
| rs146950191 | A | 0.0836  |
| rs77885363  | C | -0.1312 |
| rs10475760  | C | 0.0634  |
| rs75324676  | C | -0.032  |

|             |   |         |
|-------------|---|---------|
| rs6555395   | T | 0.0649  |
| rs35115113  | T | -0.0634 |
| rs55944951  | A | 0.1025  |
| rs79080616  | G | -0.1251 |
| rs151240414 | A | 0.0962  |
| rs77402464  | A | 0.0921  |
| rs11744406  | T | 0.0436  |
| rs62351982  | A | -0.0626 |
| rs150849021 | T | -0.12   |
| rs143913574 | A | 0.1303  |
| rs76926736  | T | 0.0611  |
| rs4866870   | T | -0.0333 |
| rs17200692  | A | 0.0463  |
| rs11743830  | A | -0.046  |
| rs7726571   | T | -0.0231 |
| rs437987    | A | 0.0873  |
| rs895301    | G | -0.0336 |
| rs10085020  | G | 0.037   |
| rs114825995 | T | -0.1004 |
| rs17589815  | T | 0.1398  |
| rs116009835 | T | 0.0828  |
| rs142511886 | G | -0.1051 |
| rs11135051  | T | 0.0286  |
| rs146468915 | T | -0.0218 |
| rs116292983 | C | 0.071   |
| rs2731665   | T | 0.0209  |
| rs116029312 | T | 0.0915  |
| rs74555722  | T | 0.1634  |
| rs62357017  | G | 0.1505  |
| rs16891337  | G | 0.0392  |
| rs2287672   | T | -0.0221 |
| rs76235620  | G | -0.1324 |
| rs11955080  | A | 0.0566  |
| rs77520624  | A | 0.1178  |
| rs4976278   | C | -0.0307 |
| rs6889194   | C | 0.0265  |
| rs77740621  | A | 0.0801  |
| rs431448    | C | 0.0758  |
| rs11750023  | A | 0.0999  |
| rs74326323  | T | -0.0405 |
| rs112065214 | A | -0.0948 |
| rs75271155  | T | 0.0489  |
| rs115636073 | C | -0.0948 |
| rs11749307  | A | -0.0417 |
| rs6888920   | T | -0.0236 |
| rs7730728   | T | 0.0201  |
| rs58433852  | T | -0.042  |



|             |   |         |
|-------------|---|---------|
| rs72811600  | T | -0.0927 |
| rs141097160 | T | 0.0325  |
| rs114739423 | A | -0.0819 |
| rs6889519   | A | -0.0253 |
| rs140372034 | A | 0.0776  |
| rs13168460  | T | 0.066   |
| rs146223266 | A | -0.1306 |
| rs58743615  | C | 0.0662  |
| rs10070654  | T | 0.0228  |
| rs79253704  | A | -0.0934 |
| rs73782012  | C | -0.0651 |
| rs11742135  | C | 0.0595  |
| rs17117165  | C | 0.0482  |
| rs113323712 | C | -0.0909 |
| rs78090931  | C | -0.0485 |
| rs1494608   | A | -0.0657 |
| rs146548695 | A | 0.1124  |
| rs572192    | C | 0.0238  |
| rs79712354  | A | 0.097   |
| rs72791298  | T | 0.1372  |
| rs35976559  | T | -0.0621 |
| rs72748067  | C | 0.0595  |
| rs16878747  | C | -0.1378 |
| rs78401485  | T | 0.0692  |
| rs11953302  | A | 0.0621  |
| rs9885316   | G | -0.023  |
| rs7707030   | C | 0.0239  |
| rs115123109 | G | 0.0641  |
| rs17396761  | A | 0.0325  |
| rs146194295 | G | -0.0963 |
| rs78513507  | T | 0.0569  |
| rs75074281  | A | 0.0638  |
| rs7713243   | T | 0.0209  |
| rs114635591 | C | 0.0947  |
| rs6883285   | G | -0.0575 |
| rs1055975   | G | -0.0879 |
| rs1422415   | T | -0.0219 |
| rs77805361  | C | -0.1129 |
| rs72777429  | A | 0.0628  |
| rs408075    | G | 0.0218  |
| rs114099443 | C | 0.1095  |
| rs3860761   | C | 0.0218  |
| rs331742    | G | 0.0274  |
| rs79718394  | A | -0.0522 |
| rs1863956   | G | -0.0202 |
| rs78791299  | C | -0.0561 |
| rs72814728  | T | -0.1058 |

|             |   |         |
|-------------|---|---------|
| rs11747312  | C | -0.1094 |
| rs72739439  | C | -0.0681 |
| rs59134524  | C | 0.0457  |
| rs76778372  | G | -0.0302 |
| rs115762831 | T | 0.1008  |
| rs75759774  | T | -0.0765 |
| rs62382598  | A | 0.0247  |
| rs74489965  | T | 0.0861  |
| rs1990892   | A | -0.0237 |
| rs115971241 | A | -0.2066 |
| rs4532407   | A | -0.0257 |
| rs149929033 | T | 0.1602  |
| rs16882239  | C | 0.0518  |
| rs78566823  | G | -0.0233 |
| rs116546796 | T | 0.0996  |
| rs56279810  | T | 0.0534  |
| rs17146783  | C | -0.0322 |
| rs72773046  | C | -0.0745 |
| rs77710699  | C | -0.0745 |
| rs10513010  | A | 0.0352  |
| rs6883451   | A | -0.0611 |
| rs59691507  | T | 0.0302  |
| rs78781243  | A | -0.1149 |
| rs116338317 | T | -0.0457 |
| rs75712578  | G | -0.1686 |
| rs1496294   | T | -0.0244 |
| rs79148429  | T | -0.0885 |
| rs12654661  | A | 0.0199  |
| rs12657061  | C | 0.0229  |
| rs4868774   | G | -0.0265 |
| rs111984203 | T | 0.0993  |
| rs72713502  | C | 0.0351  |
| rs76971538  | A | 0.0703  |
| rs73758533  | C | -0.1536 |
| rs66489335  | T | -0.0531 |
| rs16879328  | T | 0.0817  |
| rs17640574  | A | -0.0278 |
| rs34528346  | G | 0.0371  |
| rs4976691   | C | 0.0263  |
| rs67428898  | T | 0.022   |
| rs112411697 | A | 0.1726  |
| rs1330657   | A | -0.0309 |
| rs143865212 | T | 0.0936  |
| rs12514487  | T | 0.043   |
| rs144943223 | A | 0.1066  |
| rs144037047 | C | -0.0944 |
| rs868531    | A | 0.0246  |

|             |   |         |
|-------------|---|---------|
| rs62380073  | G | 0.023   |
| rs57917647  | T | 0.0818  |
| rs72760644  | G | -0.0295 |
| rs11740481  | G | 0.0317  |
| rs2112536   | C | 0.0211  |
| rs1471107   | A | 0.0198  |
| rs329174    | A | 0.0199  |
| rs142807220 | T | 0.1599  |
| rs6871858   | A | 0.0536  |
| rs695905    | A | 0.0201  |
| rs10060668  | C | -0.0322 |
| rs149697749 | G | 0.0853  |
| rs2915802   | C | 0.02    |
| rs114064433 | T | 0.0943  |
| rs2656848   | A | 0.0403  |
| rs113199965 | T | -0.0911 |
| rs11957769  | T | -0.0295 |
| rs17377080  | G | -0.0301 |
| rs7706207   | C | 0.1138  |
| rs272188    | G | 0.0213  |
| rs80087214  | G | -0.0771 |
| rs155982    | G | 0.0369  |
| rs115147710 | T | 0.0703  |
| rs72835360  | G | -0.1041 |
| rs10062923  | A | 0.0273  |
| rs113295181 | T | -0.0696 |
| rs72720942  | T | -0.0842 |
| rs7720897   | A | 0.0233  |
| rs139003215 | A | 0.0762  |
| rs75197749  | C | -0.14   |
| rs71588794  | C | 0.0378  |
| rs995620    | C | -0.0194 |
| rs13355051  | A | -0.0216 |
| rs141365544 | C | -0.1126 |
| rs10471750  | G | -0.0258 |
| rs150924    | C | 0.0314  |
| rs147352878 | G | 0.097   |
| rs11739589  | T | 0.0283  |
| rs140155481 | G | -0.1345 |
| rs116267579 | A | 0.1081  |
| rs10214210  | T | 0.0548  |
| rs62355671  | T | -0.1433 |
| rs146732791 | T | -0.0902 |
| rs77414237  | A | -0.0906 |
| rs597099    | T | 0.0298  |
| rs150236532 | T | -0.1349 |
| rs9688069   | G | -0.0299 |

|             |   |         |
|-------------|---|---------|
| rs72804123  | T | 0.1052  |
| rs144617589 | A | 0.1348  |
| rs7701911   | A | -0.0368 |
| rs4519924   | T | 0.0294  |
| rs61261876  | G | -0.0894 |
| rs382444    | T | 0.0395  |
| rs902522    | A | -0.0208 |
| rs72737462  | G | 0.1666  |
| rs74530757  | A | 0.0845  |
| rs79537984  | A | 0.0819  |
| rs78669032  | A | -0.07   |
| rs116062216 | T | -0.0866 |
| rs10037405  | G | 0.0197  |
| rs7714393   | C | 0.0211  |
| rs10076118  | C | -0.1443 |
| rs73139386  | C | 0.0341  |
| rs74884811  | T | -0.0318 |
| rs639617    | T | -0.0251 |
| rs4499861   | C | -0.0463 |
| rs6556215   | C | 0.0261  |
| rs62364653  | G | 0.1244  |
| rs318659    | G | -0.0203 |
| rs141632266 | T | 0.1313  |
| rs115454495 | T | -0.0712 |
| rs251537    | A | -0.0779 |
| rs59123240  | A | -0.1188 |
| rs141115794 | A | -0.1306 |
| rs112614793 | C | -0.0541 |
| rs4836261   | T | -0.0295 |
| rs79861969  | A | -0.0443 |
| rs2962313   | G | -0.0402 |
| rs17566960  | A | 0.0528  |
| rs114326187 | T | -0.0714 |
| rs56045542  | G | 0.0369  |
| rs72737774  | T | 0.1643  |
| rs34913150  | A | 0.023   |
| rs79303646  | C | 0.0411  |
| rs61604648  | C | 0.0363  |
| rs79307958  | A | 0.0533  |
| rs11960685  | A | 0.0393  |
| rs79411483  | C | 0.0846  |
| rs2649696   | C | 0.0208  |
| rs116420237 | T | 0.0885  |
| rs6889422   | G | -0.0215 |
| rs158084    | T | 0.0527  |
| rs159727    | A | 0.0649  |
| rs2455403   | G | 0.0279  |

|             |   |         |
|-------------|---|---------|
| rs115119245 | A | -0.0827 |
| rs281453    | C | 0.0392  |
| rs10866715  | C | 0.02    |
| rs7727067   | A | -0.0283 |
| rs62342681  | T | 0.2129  |
| rs28463448  | G | 0.0789  |
| rs149224989 | T | 0.0834  |
| rs17218427  | G | 0.0818  |
| rs979666    | A | -0.0245 |
| rs1609445   | T | -0.0252 |
| rs74700822  | G | 0.0433  |
| rs76418630  | G | -0.1344 |
| rs149095688 | G | -0.168  |
| rs73047751  | A | 0.0386  |
| rs10068754  | T | 0.0416  |
| rs10075762  | A | 0.0951  |
| rs2964912   | G | -0.0281 |
| rs297543    | C | 0.0425  |
| rs13354437  | G | -0.0235 |
| rs11741865  | T | 0.0367  |
| rs4395682   | T | -0.02   |
| rs116570012 | T | 0.1164  |
| rs10043773  | T | 0.0716  |
| rs72755455  | T | -0.0324 |
| rs4443404   | G | -0.0298 |
| rs11954685  | T | -0.0323 |
| rs11953164  | C | 0.0204  |
| rs74905733  | A | 0.1049  |
| rs112944794 | A | 0.0719  |
| rs140806892 | A | 0.124   |
| rs11747055  | A | -0.0214 |
| rs5012863   | A | -0.0308 |
| rs2963062   | T | -0.0366 |
| rs7726910   | T | 0.0259  |
| rs11134256  | G | 0.0196  |
| rs77589906  | T | -0.0544 |
| rs275026    | A | 0.0648  |
| rs62370317  | C | 0.0595  |
| rs1422450   | T | -0.0198 |
| rs61649471  | G | -0.0656 |
| rs114392469 | G | -0.0546 |
| rs80001540  | G | 0.0609  |
| rs7715173   | C | 0.0233  |
| rs115440884 | T | 0.1395  |
| rs72764091  | C | -0.0488 |
| rs1673140   | A | 0.0201  |
| rs4143487   | A | -0.0269 |

|             |   |         |
|-------------|---|---------|
| rs2963753   | A | 0.0292  |
| rs75198179  | A | -0.0919 |
| rs448373    | A | -0.0194 |
| rs115509548 | T | -0.1126 |
| rs10941035  | T | 0.0324  |
| rs35232491  | C | 0.0214  |
| rs114303660 | A | 0.0962  |
| rs4438855   | T | 0.0397  |
| rs3810859   | A | 0.0226  |
| rs143003219 | C | -0.0736 |
| rs73333727  | T | 0.1355  |
| rs6885199   | A | -0.0954 |
| rs139749854 | A | -0.0831 |
| rs78088236  | C | 0.0583  |
| rs138621118 | T | 0.0854  |
| rs246791    | T | 0.1456  |
| rs73283390  | G | -0.0446 |
| rs28390199  | T | -0.1258 |
| rs1976826   | T | 0.0849  |
| rs112742236 | A | -0.1523 |
| rs143662186 | G | 0.1504  |
| rs871269    | T | -0.022  |
| rs28581532  | A | 0.0708  |
| rs114117044 | C | 0.0674  |
| rs116271371 | G | -0.1179 |
| rs72785251  | C | -0.1036 |
| rs35949573  | A | 0.1013  |
| rs144120518 | A | 0.1288  |
| rs11745951  | A | 0.0363  |
| rs6870478   | C | 0.0313  |
| rs147905543 | A | 0.1271  |
| rs10515627  | C | -0.0284 |
| rs12188682  | T | 0.1423  |
| rs147466443 | A | -0.155  |
| rs114322326 | A | 0.1076  |
| rs17222002  | A | 0.1127  |
| rs56082332  | G | 0.0279  |
| rs111789476 | A | 0.0968  |
| rs190292    | G | -0.0239 |
| rs147670804 | A | 0.0979  |
| rs1451575   | G | 0.0234  |
| rs10515762  | T | 0.0458  |
| rs61128629  | G | -0.0236 |
| rs62376904  | A | -0.0856 |
| rs11742902  | T | 0.0385  |
| rs74882902  | C | -0.191  |
| rs6864338   | C | -0.0225 |

|             |   |         |
|-------------|---|---------|
| rs111697046 | G | 0.0689  |
| rs114965194 | A | 0.1443  |
| rs139690135 | T | 0.0415  |
| rs10063588  | T | -0.0629 |
| rs157481    | T | -0.021  |
| rs384267    | G | 0.0227  |
| rs116593612 | C | -0.1091 |
| rs114986020 | A | -0.0948 |
| rs2088670   | G | 0.0374  |
| rs115873785 | C | -0.0845 |
| rs148119793 | T | 0.0796  |
| rs17517197  | G | 0.0291  |
| rs139710633 | G | -0.0648 |
| rs16880521  | C | -0.0898 |
| rs4397112   | C | -0.0239 |
| rs11749082  | T | -0.1168 |
| rs138512084 | T | 0.1485  |
| rs6890956   | G | 0.0518  |
| rs3777121   | A | -0.0325 |
| rs59853497  | G | 0.0297  |
| rs9313379   | G | 0.0202  |
| rs35945713  | G | 0.0244  |
| rs72768066  | C | -0.0664 |
| rs62376007  | A | 0.0254  |
| rs115958428 | A | -0.1293 |
| rs1185740   | T | -0.0227 |
| rs113019087 | T | -0.0587 |
| rs1946267   | A | 0.0306  |
| rs2202526   | A | -0.043  |
| rs7714589   | C | -0.0423 |
| rs2913869   | G | -0.0221 |
| rs1592907   | A | -0.0194 |
| rs10516057  | C | 0.0318  |
| rs80259092  | A | -0.0768 |
| rs6880986   | A | 0.021   |
| rs347353    | G | -0.0194 |
| rs79951022  | A | -0.112  |
| rs113655944 | T | 0.0756  |
| rs116254855 | T | 0.119   |
| rs112700944 | A | -0.0248 |
| rs385454    | A | 0.0692  |
| rs116327243 | A | 0.0637  |
| rs17589766  | T | 0.1231  |
| rs16877249  | C | -0.0583 |
| rs73788932  | A | -0.1177 |
| rs74887137  | T | -0.1191 |
| rs723218    | T | -0.0245 |

|             |   |         |
|-------------|---|---------|
| rs72776333  | T | -0.062  |
| rs115972051 | A | -0.1107 |
| rs72818031  | G | -0.05   |
| rs113046930 | G | -0.1034 |
| rs141161634 | G | -0.1127 |
| rs6450995   | G | -0.0668 |
| rs335195    | A | 0.0447  |
| rs10056011  | C | 0.0673  |
| rs114353277 | T | -0.0604 |
| rs261115    | A | -0.0203 |
| rs2088732   | T | 0.0202  |
| rs147661169 | A | 0.1228  |
| rs111310512 | T | -0.0858 |
| rs4639245   | T | 0.0958  |
| rs16903045  | G | 0.0782  |
| rs112694713 | G | 0.087   |
| rs145575509 | C | 0.1448  |
| rs139162785 | A | -0.0819 |
| rs11567998  | G | -0.1015 |
| rs77978007  | A | -0.0731 |
| rs77057252  | A | 0.048   |
| rs73042787  | C | 0.0955  |
| rs111906832 | C | -0.1171 |
| rs35547049  | T | -0.0705 |
| rs11952583  | A | 0.0411  |
| rs1439595   | G | 0.0199  |
| rs28445651  | A | -0.0632 |
| rs2937452   | T | -0.0243 |
| rs80027342  | G | -0.1756 |
| rs75510438  | G | -0.1415 |
| rs111905227 | G | 0.061   |
| rs6868410   | G | -0.0238 |
| rs76027152  | A | -0.0506 |
| rs75089632  | A | 0.1304  |
| rs10064630  | T | -0.0317 |
| rs76769197  | A | -0.1068 |
| rs62348735  | T | -0.1087 |
| rs3900460   | T | 0.0494  |
| rs141113556 | G | -0.1121 |
| rs114601922 | T | 0.0474  |
| rs114101580 | A | -0.0683 |
| rs76673082  | A | 0.0449  |
| rs76450343  | T | 0.0963  |
| rs116408101 | A | 0.1102  |
| rs11740964  | G | 0.0703  |
| rs113974483 | G | 0.0569  |
| rs77762888  | T | -0.0358 |



|             |   |         |
|-------------|---|---------|
| rs12521940  | G | 0.0226  |
| rs80075421  | C | 0.0743  |
| rs75846086  | A | -0.0519 |
| rs112459382 | T | 0.0974  |
| rs12652968  | G | 0.0198  |
| rs17260787  | T | 0.0628  |
| rs17590975  | C | 0.0448  |
| rs79942004  | C | 0.0587  |
| rs10066634  | A | 0.0202  |
| rs35429128  | G | -0.023  |
| rs17417644  | C | 0.1417  |
| rs294711    | G | -0.051  |
| rs7725982   | C | 0.0253  |
| rs10050980  | A | -0.023  |
| rs140880575 | C | 0.0926  |
| rs6874368   | C | -0.0202 |
| rs17137035  | C | -0.0828 |
| rs116171579 | T | -0.0702 |
| rs10050568  | G | -0.0223 |
| rs245071    | T | 0.0833  |
| rs17501044  | G | -0.0555 |
| rs114286107 | T | -0.0868 |
| rs115351622 | A | -0.0812 |
| rs13188074  | A | 0.0194  |
| rs76550495  | C | 0.106   |
| rs75253829  | A | 0.0651  |
| rs12189445  | G | 0.0194  |
| rs62385070  | C | -0.1152 |
| rs75617348  | C | 0.1184  |
| rs10472394  | C | -0.0196 |
| rs140809897 | A | -0.0869 |
| rs138753242 | A | 0.0743  |
| rs6600948   | T | 0.0214  |
| rs2967820   | G | -0.0266 |
| rs76217431  | T | 0.0357  |
| rs17654427  | C | 0.0372  |
| rs142025792 | G | -0.1175 |
| rs2445805   | C | -0.0243 |
| rs1045392   | A | -0.0272 |
| rs114925391 | G | 0.0504  |
| rs62368101  | C | -0.0351 |
| rs77433527  | T | -0.0873 |
| rs4700986   | T | -0.0297 |
| rs148356586 | G | -0.0729 |
| rs28647467  | G | 0.0914  |
| rs12518835  | G | -0.042  |
| rs79526925  | T | -0.1031 |

|             |   |         |
|-------------|---|---------|
| rs79891685  | C | -0.0869 |
| rs111397382 | G | -0.0574 |
| rs10064462  | T | -0.1086 |
| rs76122881  | T | 0.0324  |
| rs72798400  | T | -0.1256 |
| rs62393033  | A | -0.0364 |
| rs62337495  | G | 0.0212  |
| rs76276378  | T | -0.0947 |
| rs397649    | T | 0.024   |
| rs4081576   | T | -0.0335 |
| rs10039597  | C | -0.0234 |
| rs12187141  | G | -0.0199 |
| rs11738209  | A | -0.0462 |
| rs114096471 | A | 0.0989  |
| rs116171571 | A | 0.1581  |
| rs72791362  | C | 0.0595  |
| rs144829685 | A | 0.0864  |
| rs72811547  | C | 0.0701  |
| rs4585472   | T | 0.0289  |
| rs78994221  | T | 0.0719  |
| rs72833342  | T | -0.0881 |
| rs72835209  | A | -0.0409 |
| rs79838921  | G | 0.1316  |
| rs1027653   | G | -0.043  |
| rs930523    | A | -0.0643 |
| rs12516582  | A | -0.0196 |
| rs10471676  | G | -0.0357 |
| rs112983953 | A | -0.1433 |
| rs13354547  | A | 0.0241  |
| rs2287934   | A | 0.0305  |
| rs114449308 | T | -0.11   |
| rs78830679  | C | -0.0964 |
| rs293058    | T | -0.0226 |
| rs13173742  | A | -0.0197 |
| rs17851288  | T | 0.101   |
| rs1559098   | T | -0.0425 |
| rs17110660  | C | -0.0748 |
| rs140306448 | A | 0.0822  |
| rs10805422  | G | 0.0331  |
| rs2973743   | C | 0.037   |
| rs151218391 | C | -0.1404 |
| rs249251    | G | -0.0401 |
| rs58184555  | C | -0.0381 |
| rs141313810 | G | 0.1029  |
| rs10051337  | C | -0.0283 |
| rs76348718  | C | -0.0904 |
| rs7705914   | C | 0.1235  |

|             |   |         |
|-------------|---|---------|
| rs28503890  | G | -0.1368 |
| rs76142137  | G | -0.057  |
| rs17132482  | A | -0.0363 |
| rs115925249 | A | -0.1689 |
| rs919757    | T | -0.0334 |
| rs17770324  | A | -0.0254 |
| rs79677303  | C | 0.0407  |
| rs62380294  | A | -0.0679 |
| rs143363029 | G | 0.0877  |
| rs80010034  | T | -0.0832 |
| rs581914    | G | 0.0194  |
| rs113599834 | A | -0.041  |
| rs143282708 | T | -0.0873 |
| rs77515126  | G | -0.0354 |
| rs17147449  | C | 0.0295  |
| rs2161305   | A | -0.0213 |
| rs80330120  | A | -0.0394 |
| rs271407    | A | -0.032  |
| rs4524512   | T | 0.0595  |
| rs66479188  | T | 0.0778  |
| rs141849916 | T | -0.0911 |
| rs17096539  | C | 0.0593  |
| rs6450877   | A | -0.0258 |
| rs77492162  | C | -0.0996 |
| rs72720028  | C | 0.0368  |
| rs4704059   | A | -0.0239 |
| rs141270303 | A | -0.1266 |
| rs634234    | A | 0.0472  |
| rs35623831  | T | -0.1121 |
| rs57395697  | C | -0.0542 |
| rs11743450  | T | 0.0785  |
| rs79680734  | G | -0.054  |
| rs76321204  | C | -0.0993 |
| rs71597323  | G | -0.0525 |
| rs77478288  | A | 0.0395  |
| rs111858761 | A | 0.1133  |
| rs12153246  | T | -0.0241 |
| rs7715637   | A | -0.0249 |
| rs10462003  | G | 0.0297  |
| rs2662042   | T | 0.0434  |
| rs74474009  | G | -0.1039 |
| rs10063674  | C | -0.0279 |
| rs114693368 | T | 0.1114  |
| rs72819098  | C | 0.0596  |
| rs72768752  | T | -0.0502 |
| rs56123342  | C | -0.045  |
| rs250212    | A | -0.0553 |

|             |   |         |
|-------------|---|---------|
| rs17886031  | G | -0.0809 |
| rs72775043  | G | -0.1145 |
| rs72795292  | T | 0.0242  |
| rs6870218   | C | -0.0362 |
| rs12655401  | G | -0.0271 |
| rs1405907   | C | -0.021  |
| rs2964481   | C | 0.0222  |
| rs12109364  | G | -0.0282 |
| rs60756335  | A | 0.0524  |
| rs4601059   | T | 0.0397  |
| rs10077809  | A | -0.0331 |
| rs147617022 | G | -0.0656 |
| rs2526115   | A | -0.0322 |
| rs71627074  | A | 0.07    |
| rs6873579   | G | -0.0287 |
| rs77568798  | T | 0.0738  |
| rs147916361 | T | 0.1321  |
| rs11739782  | A | -0.0279 |
| rs13161510  | G | 0.0799  |
| rs13166952  | G | -0.0313 |
| rs78620177  | G | -0.1177 |
| rs72782885  | A | -0.0989 |
| rs7702041   | C | -0.0202 |
| rs11743690  | A | 0.0863  |
| rs35316183  | A | 0.027   |
| rs6601054   | T | -0.0333 |
| rs142144219 | A | -0.0945 |
| rs28440900  | T | -0.0266 |
| rs78566312  | T | 0.0497  |
| rs2548246   | G | -0.0258 |
| rs260994    | T | 0.0238  |
| rs116231328 | A | -0.1679 |
| rs6890708   | C | 0.0595  |
| rs114080641 | A | -0.0693 |
| rs68157929  | C | 0.0238  |
| rs77500562  | A | -0.0687 |
| rs17685073  | A | -0.0639 |
| rs77627814  | A | 0.0628  |
| rs114323392 | A | -0.1046 |
| rs399731    | T | 0.0263  |
| rs116660113 | T | 0.1075  |
| rs76604815  | A | -0.1421 |
| rs149174120 | A | 0.1063  |
| rs353297    | A | -0.0297 |
| rs1833798   | A | -0.0351 |
| rs62357253  | C | -0.0349 |
| rs10044299  | C | -0.0589 |

|             |   |         |
|-------------|---|---------|
| rs56233804  | A | -0.0355 |
| rs35024371  | G | -0.0766 |
| rs11742147  | T | 0.0248  |
| rs62376492  | C | 0.0645  |
| rs115229463 | T | 0.1197  |
| rs35823     | T | -0.0202 |
| rs248141    | A | -0.0381 |
| rs6898137   | T | 0.0353  |
| rs115743216 | T | 0.0536  |
| rs169765    | A | 0.0203  |
| rs34627668  | A | -0.0289 |
| rs62377213  | C | 0.0554  |
| rs17077197  | G | 0.0443  |
| rs56707337  | A | 0.1246  |
| rs148930845 | G | 0.1365  |
| rs76960400  | A | -0.0584 |
| rs78248401  | C | 0.1345  |
| rs2243551   | G | -0.1511 |
| rs80273656  | A | -0.0632 |
| rs16896895  | T | 0.0784  |
| rs76115441  | T | 0.1092  |
| rs111236621 | T | 0.1334  |
| rs7378587   | G | -0.0357 |
| rs11952498  | T | 0.0205  |
| rs6453433   | T | -0.0977 |
| rs1530812   | G | -0.0188 |
| rs13359779  | A | 0.0468  |
| rs75341480  | C | 0.0877  |
| rs12153809  | A | -0.0305 |
| rs6876546   | T | 0.0746  |
| rs80313501  | T | -0.0677 |
| rs148040944 | A | -0.0833 |
| rs72741706  | A | -0.03   |
| rs7729718   | C | -0.0191 |
| rs72779482  | C | -0.0878 |
| rs9285885   | A | 0.0194  |
| rs144453106 | T | 0.0905  |
| rs4703527   | G | 0.0579  |
| rs1644387   | A | 0.0965  |
| rs114898031 | G | -0.1025 |
| rs10077307  | G | 0.0418  |
| rs114709432 | T | -0.0748 |
| rs265429    | A | -0.0751 |
| rs116541671 | A | 0.0939  |
| rs115983025 | T | 0.0794  |
| rs4869057   | A | -0.0823 |
| rs3804449   | T | 0.0207  |

|             |   |         |
|-------------|---|---------|
| rs76640109  | A | -0.0874 |
| rs10067667  | C | -0.1641 |
| rs143623684 | T | 0.0904  |
| rs294706    | A | -0.0202 |
| rs10071708  | C | -0.0716 |
| rs149155019 | A | -0.0998 |
| rs12188125  | G | 0.0225  |
| rs4868176   | G | -0.0311 |
| rs11749838  | C | 0.0221  |
| rs150789474 | T | -0.1184 |
| rs3822357   | T | 0.0405  |
| rs77801191  | A | 0.1625  |
| rs16871599  | G | 0.0237  |
| rs72794881  | A | 0.0358  |
| rs10053699  | G | 0.0225  |
| rs36086     | T | 0.0705  |
| rs72810750  | C | 0.0458  |
| rs116072091 | C | -0.0954 |
| rs7728258   | T | -0.0196 |
| rs32819     | A | -0.0518 |
| rs3822432   | G | 0.019   |
| rs12153332  | A | -0.0315 |
| rs16868385  | C | -0.0234 |
| rs26054     | A | -0.0296 |
| rs140170213 | A | -0.0959 |
| rs10461576  | T | 0.0203  |
| rs2946166   | C | 0.0186  |
| rs35718944  | A | -0.0321 |
| rs147315809 | C | 0.072   |
| rs76082881  | T | -0.0813 |
| rs142556671 | G | 0.1488  |
| rs13154867  | T | 0.0241  |
| rs142350716 | T | -0.1276 |
| rs10214283  | G | -0.0512 |
| rs12515243  | G | 0.0275  |
| rs116406903 | A | 0.0865  |
| rs149521914 | A | -0.1071 |
| rs140197905 | T | -0.0923 |
| rs6860584   | A | 0.0549  |
| rs62378328  | C | -0.0932 |
| rs116061214 | T | -0.0804 |
| rs6866017   | G | -0.0243 |
| rs6872736   | G | 0.1272  |
| rs2287673   | G | 0.0342  |
| rs6899114   | G | 0.0246  |
| rs75503721  | C | 0.1089  |
| rs114090611 | C | 0.1295  |

|             |   |         |
|-------------|---|---------|
| rs147924755 | G | 0.1203  |
| rs17160700  | T | -0.0356 |
| rs35952     | C | 0.0266  |
| rs116585597 | C | 0.0925  |
| rs10039034  | T | 0.0236  |
| rs6594609   | T | 0.0762  |
| rs114200915 | G | -0.0654 |
| rs56256748  | C | 0.0752  |
| rs78087274  | C | -0.1431 |
| rs4701169   | G | 0.0371  |
| rs62367725  | A | -0.0298 |
| rs73786417  | C | -0.1278 |
| rs115438639 | T | 0.1471  |
| rs12189516  | T | 0.1296  |
| rs111355115 | G | 0.0911  |
| rs80007798  | A | -0.1586 |
| rs32079     | T | -0.0687 |
| rs112905166 | A | 0.0734  |
| rs13160143  | G | -0.0412 |
| rs76732650  | A | -0.0442 |
| rs71636085  | A | 0.1093  |
| rs143699848 | C | 0.0892  |
| rs116585830 | C | -0.0992 |
| rs10045505  | A | 0.0435  |
| rs114942211 | T | 0.125   |
| rs79806124  | C | 0.0418  |
| rs72813165  | G | 0.1328  |
| rs147034280 | T | -0.1747 |
| rs114584323 | C | -0.1147 |
| rs10064124  | G | -0.038  |
| rs1035961   | C | 0.0379  |
| rs115114547 | T | -0.0901 |
| rs10793831  | C | 0.0215  |
| rs115959533 | T | -0.1027 |
| rs66841274  | C | 0.0202  |
| rs76073772  | T | -0.0533 |
| rs7731053   | C | 0.0285  |
| rs149734429 | T | 0.0653  |
| rs13190140  | T | -0.067  |
| rs34218     | T | -0.0231 |
| rs149298152 | A | 0.1074  |
| rs138637107 | A | 0.0863  |
| rs7380230   | G | 0.0196  |
| rs17205894  | C | -0.0364 |
| rs74850119  | A | -0.0427 |
| rs2916626   | T | 0.0516  |
| rs76553140  | C | -0.1128 |

|             |   |         |
|-------------|---|---------|
| rs56063233  | G | -0.0686 |
| rs11948828  | A | 0.0219  |
| rs731891    | T | 0.0198  |
| rs62365715  | A | 0.1176  |
| rs17718975  | T | -0.1    |
| rs111473293 | C | 0.0891  |
| rs17642472  | A | -0.0367 |
| rs6867165   | A | 0.0565  |
| rs62377802  | T | -0.0356 |
| rs139463183 | T | 0.0753  |
| rs78138091  | T | -0.1255 |
| rs114519967 | A | -0.0886 |
| rs62369493  | T | -0.076  |
| rs1393252   | C | -0.0271 |
| rs4704591   | C | -0.0196 |
| rs9327063   | A | 0.0319  |
| rs727432    | T | -0.0207 |
| rs146649413 | T | -0.1525 |
| rs7724569   | A | -0.0624 |
| rs2591454   | G | 0.0307  |
| rs79436016  | G | 0.0796  |
| rs142195087 | G | -0.0318 |
| rs6876914   | G | 0.0203  |
| rs140470110 | A | -0.1242 |
| rs27827     | A | -0.0222 |
| rs2530905   | C | 0.0239  |
| rs62352434  | A | -0.0453 |
| rs11742064  | G | 0.0923  |
| rs17060182  | G | 0.0249  |
| rs72818994  | C | -0.047  |
| rs1568212   | T | -0.0368 |
| rs115884625 | G | -0.0659 |
| rs6889222   | T | -0.0545 |
| rs114612102 | T | -0.0932 |
| rs111542764 | G | -0.1018 |
| rs72761500  | G | 0.1019  |
| rs4093977   | C | 0.0987  |
| rs11750638  | G | 0.0234  |
| rs4702250   | A | 0.033   |
| rs73758614  | G | -0.0451 |
| rs306076    | T | 0.027   |
| rs6879140   | A | -0.0192 |
| rs6881005   | T | 0.028   |
| rs10440734  | G | -0.0197 |
| rs1011220   | T | -0.0207 |
| rs16868778  | A | 0.0469  |
| rs79327132  | T | -0.1168 |



|             |   |         |
|-------------|---|---------|
| rs1443096   | G | -0.0232 |
| rs116368335 | A | -0.0585 |
| rs112571747 | A | -0.0664 |
| rs138102861 | A | 0.0392  |
| rs75511274  | C | -0.0793 |
| rs116829588 | T | 0.0414  |
| rs7706787   | T | 0.0356  |
| rs77226946  | T | -0.0648 |
| rs10072565  | C | -0.0415 |
| rs75816854  | A | -0.0992 |
| rs35715923  | T | -0.0259 |
| rs144496345 | A | 0.1087  |
| rs114927543 | A | 0.0677  |
| rs72754127  | A | 0.0455  |
| rs10479128  | C | -0.0214 |
| rs1445793   | T | -0.0345 |
| rs662720    | C | 0.0624  |
| rs67456472  | T | 0.0374  |
| rs77535619  | G | -0.0987 |
| rs150896638 | C | 0.168   |
| rs149236462 | A | -0.1052 |
| rs143944341 | A | 0.1426  |
| rs13357887  | A | -0.0669 |
| rs145117434 | A | -0.0825 |
| rs141378005 | A | -0.1714 |
| rs16896209  | T | 0.0312  |
| rs6881897   | C | 0.06    |
| rs33911714  | T | -0.0811 |
| rs6866817   | T | 0.0329  |
| rs146820761 | T | -0.0755 |
| rs252077    | T | -0.022  |
| rs75370726  | A | -0.1566 |
| rs6556504   | A | -0.0242 |
| rs79436444  | A | -0.1382 |
| rs77236997  | T | -0.0406 |
| rs62355574  | T | 0.0874  |
| rs16902802  | T | -0.0608 |
| rs144684612 | A | 0.1548  |
| rs17735123  | C | -0.0267 |
| rs79492803  | T | -0.0468 |
| rs113706654 | T | 0.0277  |
| rs142931941 | T | 0.1314  |
| rs11957627  | A | 0.0856  |
| rs4463197   | G | 0.0233  |
| rs13355085  | T | 0.0336  |
| rs3925097   | C | -0.0751 |
| rs143851392 | G | 0.0791  |

|             |   |         |
|-------------|---|---------|
| rs17313920  | T | 0.0712  |
| rs6876365   | T | 0.0776  |
| rs75206954  | A | -0.0638 |
| rs11957239  | G | 0.0601  |
| rs77088264  | G | 0.0896  |
| rs58048648  | C | 0.0551  |
| rs6866397   | T | -0.0329 |
| rs114809461 | T | 0.0975  |
| rs10461828  | A | -0.0359 |
| rs112046627 | A | 0.139   |
| rs11134923  | A | 0.0193  |
| rs13175466  | G | -0.0445 |
| rs13161454  | C | -0.0968 |
| rs139750364 | A | -0.1329 |
| rs141840773 | A | -0.1764 |
| rs62345579  | T | 0.125   |
| rs72635232  | A | -0.0401 |
| rs1455023   | C | 0.0238  |
| rs72703154  | A | -0.1416 |
| rs75354858  | A | 0.1054  |
| rs6868361   | T | -0.0212 |
| rs114439297 | A | 0.128   |
| rs2731656   | G | -0.0653 |
| rs734618    | A | 0.0246  |
| rs115336703 | T | -0.0883 |
| rs112927678 | C | -0.0377 |
| rs111601836 | T | -0.0476 |
| rs10065912  | G | -0.0412 |
| rs62371989  | A | -0.0809 |
| rs6449637   | A | 0.0197  |
| rs12518812  | T | -0.0214 |
| rs74981057  | G | 0.1432  |
| rs78505982  | T | -0.0505 |
| rs58355514  | T | 0.0192  |
| rs10073956  | G | -0.0216 |
| rs11738725  | A | -0.0494 |
| rs113210485 | T | -0.0944 |
| rs115259994 | T | -0.0908 |
| rs115058576 | A | -0.0651 |
| rs32198     | A | -0.0264 |
| rs72767928  | T | -0.093  |
| rs1549192   | C | -0.0216 |
| rs34302973  | T | 0.0199  |
| rs2972337   | A | 0.0276  |
| rs115184596 | C | 0.0648  |
| rs77695718  | A | -0.092  |
| rs78658924  | C | -0.0539 |

|             |   |         |
|-------------|---|---------|
| rs9313042   | T | -0.0337 |
| rs111622158 | G | -0.0379 |
| rs151316500 | T | -0.1079 |
| rs4958153   | C | -0.021  |
| rs75979119  | C | 0.065   |
| rs1450829   | G | 0.0347  |
| rs1847020   | A | 0.1356  |
| rs13357023  | T | 0.1137  |
| rs76098844  | T | -0.0484 |
| rs35959012  | G | 0.0613  |
| rs351854    | T | -0.1581 |
| rs115262501 | C | -0.0844 |
| rs10060708  | C | -0.0843 |
| rs7723542   | A | -0.0354 |
| rs115150723 | A | -0.1221 |
| rs115697419 | G | -0.0684 |
| rs13158321  | A | 0.0371  |
| rs35582898  | A | -0.0536 |
| rs147582765 | G | -0.041  |
| rs10044844  | A | -0.0436 |
| rs62370890  | G | 0.1007  |
| rs13164435  | G | -0.0237 |
| rs17860510  | G | -0.0588 |
| rs11746292  | G | 0.0247  |
| rs117472072 | A | 0.1336  |
| rs440396    | T | -0.0379 |
| rs77780265  | C | 0.1014  |
| rs115350141 | T | -0.1049 |
| rs143557356 | T | 0.1349  |
| rs138245698 | C | -0.0403 |
| rs4701455   | A | -0.029  |
| rs142800864 | C | -0.1424 |
| rs4976141   | T | -0.0291 |
| rs56147374  | G | -0.1541 |
| rs77660989  | T | 0.1497  |
| rs17284044  | G | -0.0208 |
| rs77357125  | A | -0.0659 |
| rs11745082  | T | 0.0947  |
| rs13177954  | T | -0.0269 |
| rs145624674 | C | -0.1847 |
| rs115085814 | A | -0.0693 |
| rs6887605   | T | -0.0199 |
| rs251312    | T | -0.0191 |
| rs116536950 | C | -0.0881 |
| rs4700745   | A | 0.0207  |
| rs59460189  | C | 0.0697  |
| rs253127    | A | 0.0211  |

|             |   |         |
|-------------|---|---------|
| rs80053453  | T | 0.034   |
| rs2367279   | G | 0.0325  |
| rs17157132  | G | -0.0649 |
| rs1421746   | G | 0.0191  |
| rs79413851  | T | -0.0604 |
| rs138354137 | T | -0.0559 |
| rs2547906   | G | -0.0655 |
| rs6879168   | T | 0.0317  |
| rs77194111  | T | -0.0919 |
| rs155788    | C | 0.033   |
| rs16897511  | C | -0.0224 |
| rs142257713 | A | 0.1117  |
| rs6877107   | C | -0.0189 |
| rs71603662  | C | 0.0351  |
| rs16870825  | T | -0.0734 |
| rs17510653  | A | 0.0215  |
| rs36138     | A | -0.0299 |
| rs13153584  | T | -0.0184 |
| rs72835829  | G | -0.0717 |
| rs140172505 | C | 0.0871  |
| rs77274344  | G | 0.1191  |
| rs80158412  | T | 0.1409  |
| rs329321    | G | 0.0205  |
| rs80101290  | T | 0.0409  |
| rs76586619  | A | -0.0393 |
| rs58473287  | A | 0.0491  |
| rs34756     | A | 0.0207  |
| rs12657525  | G | -0.0224 |
| rs10042985  | A | 0.0185  |
| rs62369880  | C | 0.1073  |
| rs115254796 | G | 0.096   |
| rs62374514  | C | -0.0263 |
| rs72733441  | G | 0.0391  |
| rs60734136  | G | 0.0553  |
| rs55869701  | T | 0.0481  |
| rs10041050  | C | 0.0204  |
| rs16874620  | T | 0.0731  |
| rs144843793 | T | -0.065  |
| rs76696170  | G | -0.0711 |
| rs12658379  | C | 0.0187  |
| rs79919966  | A | -0.1388 |
| rs114452608 | A | -0.0375 |
| rs890769    | T | 0.059   |
| rs72730531  | C | 0.0579  |
| rs6887860   | C | 0.0876  |
| rs61732050  | A | 0.0681  |
| rs77287813  | C | -0.0483 |

|             |   |         |
|-------------|---|---------|
| rs17645160  | T | 0.0383  |
| rs72797892  | C | -0.0886 |
| rs2731957   | G | -0.0204 |
| rs140373830 | G | -0.0234 |
| rs75758164  | A | 0.0567  |
| rs11958570  | A | 0.0222  |
| rs142148160 | G | -0.1568 |
| rs79537711  | C | -0.1007 |
| rs77551862  | G | 0.0833  |
| rs4701616   | C | 0.0208  |
| rs67157132  | T | 0.0983  |
| rs116258033 | C | -0.0495 |
| rs7715176   | T | 0.0782  |
| rs73741392  | C | 0.0492  |
| rs17670556  | A | 0.057   |
| rs115573942 | G | 0.1159  |
| rs142483645 | A | 0.1575  |
| rs7356681   | G | -0.0323 |
| rs78185913  | A | -0.1059 |
| rs143643213 | T | -0.0856 |
| rs79480743  | G | 0.0934  |
| rs11167695  | A | -0.0211 |
| rs72814595  | T | -0.0234 |
| rs13181223  | A | 0.0351  |
| rs7723348   | C | 0.0199  |
| rs4868527   | G | -0.0202 |
| rs10080049  | G | -0.02   |
| rs62353081  | C | -0.2037 |
| rs6453459   | G | -0.0222 |
| rs6863312   | G | -0.1005 |
| rs25863     | A | 0.0183  |
| rs1347156   | C | 0.037   |
| rs1424908   | A | -0.0185 |
| rs10053880  | C | -0.0229 |
| rs150695872 | A | 0.0524  |
| rs116200464 | G | 0.0681  |
| rs7704722   | A | -0.0476 |
| rs4702472   | A | -0.0668 |
| rs112145625 | A | 0.0245  |
| rs161944    | T | -0.1102 |
| rs163305    | C | 0.0312  |
| rs10056264  | T | 0.0491  |
| rs142562168 | T | 0.111   |
| rs62371885  | A | 0.0979  |
| rs72775168  | C | -0.0403 |
| rs62370339  | C | 0.0773  |
| rs246852    | T | -0.0287 |

|             |   |         |
|-------------|---|---------|
| rs265975    | T | -0.0199 |
| rs77206166  | G | -0.0832 |
| rs17283932  | G | -0.0329 |
| rs715692    | C | 0.0294  |
| rs17113912  | G | 0.0235  |
| rs744048    | G | -0.0212 |
| rs137921573 | G | -0.0827 |
| rs146190812 | G | 0.0748  |
| rs381638    | A | -0.0189 |
| rs141299264 | C | 0.1668  |
| rs411585    | T | -0.0248 |
| rs28730886  | C | 0.1057  |
| rs146541189 | A | -0.0922 |
| rs76905085  | T | -0.0872 |
| rs79882551  | A | 0.0658  |
| rs28540272  | G | 0.0194  |
| rs56070750  | T | -0.0384 |
| rs13166845  | A | -0.0678 |
| rs143788170 | T | 0.0701  |
| rs11249682  | C | 0.0209  |
| rs78064730  | C | 0.1281  |
| rs30120     | C | 0.0206  |
| rs17267245  | C | -0.1084 |
| rs4270681   | A | -0.0522 |
| rs2421530   | T | -0.0311 |
| rs116574759 | C | 0.0867  |
| rs297450    | A | 0.0216  |
| rs116414876 | T | 0.1183  |
| rs145275389 | A | 0.0599  |
| rs7719422   | C | -0.0407 |
| rs249009    | C | 0.0191  |
| rs1199641   | A | 0.0862  |
| rs116350144 | T | -0.0598 |
| rs77580839  | A | -0.0498 |
| rs75734012  | T | 0.1394  |
| rs41304894  | C | 0.0836  |
| rs2278008   | C | 0.0234  |
| rs113511234 | A | 0.0766  |
| rs17647191  | A | 0.0374  |
| rs6861190   | C | -0.0628 |
| rs144760999 | G | 0.1091  |
| rs13152924  | C | -0.0583 |
| rs17285982  | C | 0.0337  |
| rs114609598 | A | 0.0866  |
| rs78518174  | A | -0.1061 |
| rs77147416  | C | 0.1069  |
| rs4867154   | C | 0.0209  |

|             |   |         |
|-------------|---|---------|
| rs72765604  | A | 0.0895  |
| rs62364113  | T | -0.0549 |
| rs72810163  | A | -0.0232 |
| rs3798028   | T | -0.0207 |
| rs62357370  | T | -0.1254 |
| rs1023926   | A | -0.0641 |
| rs17686707  | G | 0.1393  |
| rs13159458  | G | -0.0313 |
| rs141830804 | T | 0.0357  |
| rs145613067 | A | -0.1177 |
| rs113577494 | G | -0.1582 |
| rs141842106 | G | 0.1083  |
| rs146822328 | T | 0.0748  |
| rs148739954 | A | -0.0907 |
| rs74356971  | A | -0.0887 |
| rs78384756  | C | 0.0668  |
| rs9654388   | C | 0.0517  |
| rs6888389   | A | -0.0256 |
| rs72798062  | G | 0.0799  |
| rs112849364 | T | -0.0665 |
| rs6877860   | A | 0.0772  |
| rs10038264  | C | -0.0201 |
| rs10942879  | A | -0.019  |
| rs11745791  | G | 0.1032  |
| rs79676579  | G | 0.0637  |
| rs35374524  | C | 0.0979  |
| rs2963784   | T | -0.0206 |
| rs9292436   | A | 0.0417  |
| rs160074    | T | -0.031  |
| rs72759764  | T | 0.1062  |
| rs16892778  | G | -0.0226 |
| rs116629743 | G | -0.0959 |
| rs13354784  | T | -0.0582 |
| rs77327672  | C | 0.0823  |
| rs13354596  | G | -0.0229 |
| rs113628875 | C | 0.0653  |
| rs115409437 | G | -0.1304 |
| rs7703951   | G | 0.0853  |
| rs2560677   | A | -0.0315 |
| rs72819276  | C | -0.0296 |
| rs72714303  | A | 0.1352  |
| rs62371988  | C | -0.0241 |
| rs964279    | C | -0.0207 |
| rs78270882  | G | 0.1027  |
| rs116336950 | G | -0.1344 |
| rs29754     | G | 0.0451  |
| rs755188    | T | 0.0213  |

|             |   |         |
|-------------|---|---------|
| rs62359289  | T | 0.0677  |
| rs80008149  | C | 0.083   |
| rs12654847  | T | -0.0362 |
| rs75178857  | G | -0.0964 |
| rs79536381  | T | 0.1114  |
| rs6894644   | A | -0.0388 |
| rs7715272   | G | -0.0638 |
| rs56208896  | T | 0.028   |
| rs16892228  | A | -0.0328 |
| rs1344690   | C | -0.0187 |
| rs114704612 | A | -0.0835 |
| rs56159886  | A | -0.0375 |
| rs2973689   | G | 0.0235  |
| rs62342789  | A | 0.1131  |
| rs114695114 | G | 0.0471  |
| rs116278272 | C | 0.132   |
| rs13185181  | T | -0.1524 |
| rs111525279 | A | 0.0765  |
| rs32436     | G | 0.0815  |
| rs10037187  | T | 0.0229  |
| rs35510250  | C | 0.0748  |
| rs4836459   | A | -0.0239 |
| rs115404824 | T | -0.0291 |
| rs34247468  | T | 0.0625  |
| rs2068452   | G | 0.0601  |
| rs111621170 | A | -0.0419 |
| rs296004    | T | -0.0185 |
| rs77563740  | C | 0.0616  |
| rs112512516 | T | 0.0224  |
| rs139674369 | C | 0.0728  |
| rs26056     | A | 0.0184  |
| rs71596739  | T | 0.137   |
| rs1513084   | T | -0.0278 |
| rs338685    | A | -0.0203 |
| rs10055047  | C | 0.0256  |
| rs13171854  | A | 0.0189  |
| rs140743036 | G | -0.0774 |
| rs149869719 | T | -0.1328 |
| rs140266896 | T | 0.095   |
| rs34521     | A | 0.0232  |
| rs4451087   | C | -0.0448 |
| rs143021712 | G | -0.1704 |
| rs16890369  | G | 0.0411  |
| rs3822434   | A | 0.0286  |
| rs347352    | G | -0.0571 |
| rs13162018  | G | -0.0833 |
| rs72812540  | T | -0.0934 |



|             |   |         |
|-------------|---|---------|
| rs3923156   | A | 0.0308  |
| rs115119775 | C | 0.1412  |
| rs116423466 | T | 0.0652  |
| rs149976817 | T | -0.0956 |
| rs7737186   | T | 0.0315  |
| rs56868865  | A | -0.0378 |
| rs76263239  | G | 0.0807  |
| rs1877842   | A | 0.0214  |
| rs55664417  | T | -0.0695 |
| rs112185717 | G | 0.0363  |
| rs74893289  | G | 0.1994  |
| rs6866084   | G | 0.0406  |
| rs80022068  | C | 0.0914  |
| rs72832116  | G | -0.0285 |
| rs77445936  | C | 0.1084  |
| rs62353856  | T | 0.0664  |
| rs72762800  | A | 0.0622  |
| rs142015363 | G | 0.0877  |
| rs4342283   | A | -0.0355 |
| rs11133994  | A | 0.025   |
| rs1499279   | G | -0.0541 |
| rs10072773  | T | 0.0391  |
| rs59882566  | A | 0.037   |
| rs392421    | C | 0.0201  |
| rs1428246   | G | -0.0209 |
| rs141439879 | G | 0.1443  |
| rs17099033  | T | 0.0397  |
| rs56292928  | A | 0.027   |
| rs11748176  | C | 0.0268  |
| rs76515773  | T | -0.11   |
| rs10043446  | G | -0.0245 |
| rs77586651  | A | 0.0306  |
| rs6873298   | C | 0.0215  |
| rs992408    | G | -0.0234 |
| rs115002537 | C | 0.0943  |
| rs79935160  | T | -0.1491 |
| rs115823811 | T | -0.1808 |
| rs963104    | G | 0.0903  |
| rs114481850 | G | 0.1015  |
| rs6871434   | T | -0.0685 |
| rs116227384 | A | 0.0614  |
| rs1465400   | C | -0.037  |
| rs6877524   | C | 0.0333  |
| rs6881743   | C | 0.0227  |
| rs28764860  | T | -0.1505 |
| rs61686864  | T | 0.0586  |
| rs2652514   | A | -0.0216 |

|             |   |         |
|-------------|---|---------|
| rs145187952 | T | 0.1204  |
| rs331744    | G | -0.019  |
| rs150596227 | G | 0.1199  |
| rs79781172  | T | 0.1056  |
| rs4704514   | T | -0.0208 |
| rs116513937 | G | 0.1322  |
| rs79267814  | A | -0.0701 |
| rs28820682  | A | -0.0284 |
| rs12697248  | T | 0.0221  |
| rs17577085  | G | 0.0384  |
| rs77627402  | C | 0.0857  |
| rs72634797  | G | 0.1225  |
| rs79019854  | T | -0.0978 |
| rs116787099 | A | 0.1032  |
| rs79433422  | T | -0.1169 |
| rs115754050 | T | -0.1217 |
| rs6450127   | A | 0.0199  |
| rs2158959   | T | -0.0899 |
| rs72827697  | A | -0.0375 |
| rs251444    | T | 0.0217  |
| rs138033762 | T | 0.0642  |
| rs114961807 | C | -0.1031 |
| rs73734642  | T | 0.0839  |
| rs6881564   | A | -0.0367 |
| rs36034956  | G | 0.0362  |
| rs116600350 | T | 0.1123  |
| rs79394390  | A | -0.1001 |
| rs7732237   | A | -0.0194 |
| rs35408399  | G | 0.1083  |
| rs114266703 | G | -0.1165 |
| rs11747571  | T | 0.0286  |
| rs36114956  | C | 0.0315  |
| rs75264825  | A | 0.052   |
| rs17494314  | C | 0.1256  |
| rs17628768  | T | 0.0364  |
| rs2337693   | C | -0.0186 |
| rs7712085   | C | -0.0344 |
| rs7443230   | T | 0.0352  |
| rs62369473  | A | -0.0284 |
| rs314112    | C | -0.033  |
| rs73060773  | A | -0.0447 |
| rs79877348  | A | 0.0718  |
| rs67316346  | G | 0.0454  |
| rs2565011   | T | -0.0199 |
| rs10040485  | G | 0.0179  |
| rs331919    | G | -0.1213 |
| rs141660555 | T | -0.1424 |

|             |   |         |
|-------------|---|---------|
| rs4516825   | G | 0.0233  |
| rs27042     | A | 0.0185  |
| rs76327534  | T | -0.0637 |
| rs62337742  | C | -0.0513 |
| rs17730517  | A | 0.0345  |
| rs57205685  | C | -0.126  |
| rs919741    | T | -0.0224 |
| rs11744052  | T | 0.021   |
| rs6876382   | G | -0.0391 |
| rs79273956  | T | 0.0723  |
| rs80192777  | A | -0.082  |
| rs13157759  | T | 0.023   |
| rs112942600 | C | 0.0802  |
| rs77043792  | T | 0.1461  |
| rs4579270   | T | 0.0239  |
| rs11745993  | A | -0.0359 |
| rs112793694 | G | 0.1376  |
| rs2303038   | T | -0.0226 |
| rs720938    | T | 0.0399  |
| rs17731499  | C | -0.0273 |
| rs55775465  | C | -0.0209 |
| rs113981500 | C | 0.0719  |
| rs75756090  | T | -0.1188 |
| rs72775785  | G | 0.0441  |
| rs17285006  | T | -0.0424 |
| rs62361275  | G | -0.0575 |
| rs17839786  | C | 0.035   |
| rs72792319  | G | 0.0722  |
| rs74388624  | G | 0.1643  |
| rs13178801  | G | -0.0688 |
| rs79281622  | A | 0.0736  |
| rs12187623  | G | -0.0588 |
| rs11949885  | A | 0.0473  |
| rs165185    | A | -0.02   |
| rs114014558 | T | 0.1028  |
| rs4593315   | T | -0.0307 |
| rs148304419 | T | 0.0747  |
| rs2913328   | A | 0.0189  |
| rs77722566  | G | 0.102   |
| rs13181961  | G | 0.0279  |
| rs3114508   | A | 0.026   |
| rs10805495  | T | -0.0256 |
| rs78109688  | A | -0.0923 |
| rs28493554  | C | 0.1669  |
| rs77155899  | A | 0.0921  |
| rs113106833 | T | 0.0264  |
| rs10041437  | T | -0.0526 |

|             |   |         |
|-------------|---|---------|
| rs6896718   | C | -0.0185 |
| rs315780    | A | 0.0202  |
| rs13153864  | T | 0.0308  |
| rs79661351  | G | -0.0709 |
| rs116255239 | A | 0.0544  |
| rs72785442  | C | -0.0564 |
| rs7725481   | G | 0.0512  |
| rs1432676   | A | 0.0194  |
| rs11739213  | G | 0.0269  |
| rs72737027  | C | -0.1008 |
| rs78826626  | T | -0.1111 |
| rs74537256  | T | -0.0249 |
| rs80210816  | T | -0.0709 |
| rs12659798  | T | -0.0447 |
| rs10054436  | T | 0.1032  |
| rs6555796   | T | 0.0187  |
| rs17547230  | A | -0.0186 |
| rs17560660  | G | 0.1142  |
| rs12153227  | C | -0.0412 |
| rs7729696   | T | -0.0277 |
| rs114459565 | A | -0.0697 |
| rs2307111   | C | 0.0186  |
| rs9885278   | C | 0.0279  |
| rs55897771  | T | 0.0386  |
| rs59038291  | T | 0.0259  |
| rs1354575   | A | 0.0325  |
| rs36109172  | A | 0.0217  |
| rs10063238  | A | 0.0426  |
| rs112609654 | T | -0.0589 |
| rs1079748   | A | 0.0253  |
| rs292205    | C | 0.0258  |
| rs13185194  | A | -0.0203 |
| rs72766260  | G | 0.0343  |
| rs10041008  | T | -0.0245 |
| rs17283890  | T | -0.0237 |
| rs11738456  | T | -0.0213 |
| rs17309726  | A | -0.0348 |
| rs1423417   | C | 0.02    |
| rs11951956  | G | -0.0759 |
| rs116756844 | C | 0.0842  |
| rs143226976 | T | 0.0223  |
| rs13174461  | C | 0.1188  |
| rs140098553 | C | -0.0749 |
| rs2112179   | A | -0.0465 |
| rs62405372  | C | 0.04    |
| rs72724287  | T | 0.0973  |
| rs3898746   | A | 0.069   |

|             |   |         |
|-------------|---|---------|
| rs75835310  | A | -0.1267 |
| rs398829    | T | -0.0227 |
| rs6555624   | C | -0.0269 |
| rs16872766  | A | 0.0522  |
| rs76414732  | A | 0.0837  |
| rs13159560  | A | -0.0281 |
| rs11742896  | G | 0.0962  |
| rs12513754  | T | 0.0264  |
| rs354662    | G | 0.0451  |
| rs146489454 | T | -0.1311 |
| rs32655     | A | -0.0181 |
| rs7733743   | T | 0.0239  |
| rs7727080   | G | 0.0235  |
| rs41508850  | A | 0.0308  |
| rs72818119  | A | -0.0455 |
| rs1353064   | T | 0.0447  |
| rs72783212  | A | -0.0385 |
| rs17171888  | A | -0.0381 |
| rs72794170  | G | -0.0321 |
| rs115543948 | A | 0.0689  |
| rs116228836 | A | 0.1072  |
| rs62372400  | G | 0.1415  |
| rs77362422  | G | -0.0893 |
| rs16876696  | C | 0.0515  |
| rs16903859  | A | 0.0217  |
| rs115145569 | T | 0.0885  |
| rs114130118 | T | -0.0552 |
| rs10076899  | C | 0.0207  |
| rs28396805  | C | 0.0306  |
| rs115180954 | A | -0.0566 |
| rs72754173  | T | -0.0515 |
| rs1428027   | T | -0.0296 |
| rs4355471   | C | -0.0182 |
| rs80342231  | T | -0.0792 |
| rs250595    | A | 0.0484  |
| rs115566472 | A | -0.0624 |
| rs76828515  | A | -0.058  |
| rs10055799  | T | -0.027  |
| rs116108705 | T | -0.0934 |
| rs77138904  | T | -0.1124 |
| rs48624     | T | -0.0545 |
| rs72846913  | C | -0.0411 |
| rs72643767  | A | 0.0728  |
| rs115226967 | A | 0.0783  |
| rs524610    | T | 0.0184  |
| rs77162643  | A | 0.1415  |
| rs6865424   | T | 0.0273  |

|             |   |         |
|-------------|---|---------|
| rs72725265  | T | -0.0534 |
| rs10462509  | G | -0.0593 |
| rs114183944 | C | -0.1368 |
| rs10042077  | T | -0.0277 |
| rs112902435 | T | -0.0388 |
| rs77140588  | G | 0.0449  |
| rs27341     | C | 0.0187  |
| rs62339744  | A | -0.02   |
| rs7378850   | T | -0.02   |
| rs77621221  | C | 0.0444  |
| rs114324507 | G | -0.0836 |
| rs9324865   | T | 0.0222  |
| rs6888329   | G | 0.0209  |
| rs10471435  | G | 0.0209  |
| rs62364223  | C | -0.0205 |
| rs138870372 | C | -0.1028 |
| rs11745042  | T | 0.0661  |
| rs76636050  | A | 0.0753  |
| rs112786522 | T | -0.0294 |
| rs112221428 | G | -0.0505 |
| rs112914833 | C | 0.0542  |
| rs6882277   | G | 0.022   |
| rs58219693  | T | -0.0798 |
| rs147237320 | T | -0.0735 |
| rs74294189  | A | -0.0291 |
| rs2650088   | C | -0.0711 |
| rs1529506   | G | -0.0207 |
| rs116070290 | A | -0.0868 |
| rs27522     | A | 0.0388  |
| rs11133896  | T | -0.0205 |
| rs158342    | G | -0.0223 |
| rs111233493 | T | 0.0259  |
| rs62375415  | C | 0.0686  |
| rs115275746 | T | 0.1121  |
| rs1173708   | G | -0.0193 |
| rs72768288  | G | 0.126   |
| rs76934192  | C | 0.101   |
| rs17690417  | A | -0.1122 |
| rs114920358 | G | 0.1007  |
| rs2379249   | G | -0.0833 |
| rs13157304  | C | 0.0275  |
| rs114066815 | A | 0.1028  |
| rs2221443   | T | -0.0183 |
| rs2388364   | G | -0.0212 |
| rs139902231 | A | 0.0741  |
| rs34107378  | T | -0.0215 |
| rs34314188  | C | -0.021  |

|             |   |         |
|-------------|---|---------|
| rs79174917  | T | -0.0499 |
| rs77032080  | T | -0.0676 |
| rs1496398   | A | -0.0376 |
| rs74548071  | A | -0.0647 |
| rs79109049  | G | -0.0489 |
| rs32574     | A | -0.0204 |
| rs274716    | C | -0.0192 |
| rs79967398  | C | 0.0653  |
| rs11134717  | C | 0.0186  |
| rs74911958  | G | 0.0488  |
| rs398799    | A | -0.0527 |
| rs71624133  | C | -0.0264 |
| rs62355718  | C | -0.1013 |
| rs144220068 | G | 0.0442  |
| rs7445366   | C | 0.0196  |
| rs138765581 | A | -0.0945 |
| rs115890479 | G | -0.0807 |
| rs75022624  | C | -0.1026 |
| rs115914233 | T | 0.0849  |
| rs981713    | G | -0.0219 |
| rs17697839  | G | -0.0953 |
| rs114346285 | C | -0.0443 |
| rs79443828  | C | -0.0548 |
| rs146220453 | G | 0.1207  |
| rs114146200 | T | -0.0916 |
| rs17818103  | T | -0.0206 |
| rs115073007 | C | -0.1009 |
| rs79099448  | C | 0.0455  |
| rs3797772   | T | -0.0343 |
| rs55646741  | C | -0.0448 |
| rs245584    | T | -0.0221 |
| rs113997100 | A | -0.0671 |
| rs156659    | T | -0.0251 |
| rs116596059 | T | 0.0354  |
| rs116213385 | T | 0.0914  |
| rs72758284  | G | 0.0452  |
| rs76542541  | T | 0.0891  |
| rs17701155  | C | 0.045   |
| rs141916639 | C | 0.0843  |
| rs78330488  | C | 0.0815  |
| rs116206517 | G | -0.0535 |
| rs72800539  | C | 0.0739  |
| rs2938772   | A | 0.0184  |
| rs11746500  | A | -0.0205 |
| rs77928272  | A | -0.0645 |
| rs1604677   | C | 0.0178  |
| rs12186498  | T | -0.0743 |

|             |   |         |
|-------------|---|---------|
| rs404223    | G | -0.0986 |
| rs113365093 | G | -0.1002 |
| rs76131878  | A | -0.0745 |
| rs314007    | A | -0.0213 |
| rs716897    | C | -0.0192 |
| rs62383775  | C | -0.0807 |
| rs13158253  | C | -0.1137 |
| rs75268691  | A | 0.0833  |
| rs72821359  | A | 0.0285  |
| rs724865    | A | -0.0642 |
| rs10213864  | G | 0.0191  |
| rs7713961   | G | 0.0261  |
| rs7710699   | A | -0.0349 |
| rs209357    | C | 0.0181  |
| rs114007240 | C | -0.1235 |
| rs112323728 | T | -0.0822 |
| rs145388915 | A | 0.1186  |
| rs141689464 | T | 0.0932  |
| rs10940185  | T | -0.0215 |
| rs244981    | A | 0.1135  |
| rs80324564  | G | -0.0834 |
| rs17680732  | A | -0.053  |
| rs71576167  | T | 0.0958  |
| rs62359661  | T | 0.0539  |
| rs115551235 | T | -0.109  |
| rs3101178   | C | -0.0304 |
| rs115479017 | A | 0.1003  |
| rs77785972  | G | -0.0407 |
| rs143596641 | C | -0.0892 |
| rs17640662  | G | -0.0654 |
| rs1490982   | A | 0.0183  |
| rs114686588 | G | 0.1002  |
| rs272452    | A | 0.0225  |
| rs10058839  | G | -0.0403 |
| rs145235104 | A | -0.1121 |
| rs142073073 | T | -0.0871 |
| rs1453363   | A | -0.0255 |
| rs745349    | C | 0.0189  |
| rs6894156   | T | 0.0294  |
| rs2544961   | T | 0.0218  |
| rs115230077 | G | 0.0467  |
| rs116064582 | T | -0.1353 |
| rs12516609  | G | -0.0802 |
| rs153197    | T | -0.0532 |
| rs62382336  | A | -0.0503 |
| rs17775602  | A | 0.0376  |
| rs61748198  | G | 0.0424  |



|             |   |         |
|-------------|---|---------|
| rs72770470  | T | -0.0846 |
| rs13359372  | G | -0.018  |
| rs28381436  | A | 0.0634  |
| rs114253859 | T | 0.1037  |
| rs72802396  | T | 0.0415  |
| rs111849861 | C | -0.0654 |
| rs58538877  | T | -0.1347 |
| rs139169967 | G | 0.0638  |
| rs139836776 | T | 0.1409  |
| rs6872064   | G | 0.057   |
| rs6451295   | T | -0.0185 |
| rs17258745  | G | -0.0315 |
| rs4354086   | G | -0.0192 |
| rs62404929  | A | -0.1065 |
| rs72746641  | T | 0.0703  |
| rs112196336 | A | 0.1242  |
| rs74505169  | T | 0.0605  |
| rs72820820  | G | 0.08    |
| rs10454973  | T | -0.0198 |
| rs60779518  | C | -0.0614 |
| rs11742805  | A | 0.0306  |
| rs11956527  | T | -0.0219 |
| rs75880063  | C | 0.0375  |
| rs149534390 | C | -0.1197 |
| rs150389076 | C | 0.086   |
| rs17629371  | G | -0.0274 |
| rs2135079   | T | -0.0356 |
| rs36049028  | G | 0.032   |
| rs28458262  | G | -0.0752 |
| rs114547313 | A | 0.1227  |
| rs75617723  | T | 0.0456  |
| rs77242286  | T | 0.0964  |
| rs60107710  | G | 0.0538  |
| rs79686191  | T | 0.0298  |
| rs140335884 | T | -0.0682 |
| rs77712823  | C | 0.0568  |
| rs1816263   | C | 0.0203  |
| rs6877607   | G | 0.0174  |
| rs115951288 | C | 0.0571  |
| rs114434084 | T | 0.1301  |
| rs72764959  | G | -0.0704 |
| rs77926720  | T | -0.1138 |
| rs78349204  | C | 0.0854  |
| rs12516144  | C | -0.0233 |
| rs16892876  | A | -0.0246 |
| rs254920    | G | -0.0185 |
| rs141439138 | T | 0.0567  |

|             |   |         |
|-------------|---|---------|
| rs7725816   | T | -0.028  |
| rs76319441  | C | 0.0379  |
| rs6878448   | A | -0.0183 |
| rs7719514   | A | -0.0489 |
| rs1104891   | A | -0.0184 |
| rs352336    | G | -0.018  |
| rs74363872  | C | -0.0869 |
| rs7734901   | G | 0.035   |
| rs58725285  | A | -0.039  |
| rs2569047   | C | -0.0197 |
| rs149310696 | C | 0.0951  |
| rs72829014  | G | -0.0355 |
| rs7726227   | C | -0.0463 |
| rs139881710 | T | 0.1179  |
| rs376310    | G | -0.0232 |
| rs78918464  | C | 0.1102  |
| rs1971657   | C | 0.068   |
| rs334907    | A | 0.048   |
| rs72768128  | A | -0.0326 |
| rs1279745   | T | -0.0434 |
| rs4869686   | A | -0.0178 |
| rs115984045 | A | -0.0661 |
| rs17147209  | T | 0.0695  |
| rs35472856  | G | -0.0781 |
| rs185319    | T | 0.1509  |
| rs113270088 | C | 0.0495  |
| rs17080471  | G | 0.0323  |
| rs79992020  | C | 0.0507  |
| rs9293820   | G | -0.028  |
| rs11955368  | G | 0.0811  |
| rs72822021  | A | 0.0285  |
| rs115313378 | T | 0.1125  |
| rs115200967 | C | -0.0891 |
| rs141234613 | G | 0.0729  |
| rs7718805   | A | 0.0184  |
| rs11739204  | C | -0.0287 |
| rs138129582 | T | -0.0499 |
| rs9313503   | T | 0.0223  |
| rs2189082   | G | -0.0181 |
| rs7707082   | C | -0.0232 |
| rs252070    | A | -0.0177 |
| rs80012401  | T | 0.0843  |
| rs35008216  | T | -0.0334 |
| rs72818832  | T | -0.097  |
| rs13187844  | A | -0.0221 |
| rs75025321  | T | 0.0852  |
| rs32461     | A | -0.0194 |

|             |   |         |
|-------------|---|---------|
| rs115024699 | C | 0.1213  |
| rs463614    | C | -0.0175 |
| rs4605828   | C | 0.0182  |
| rs114744414 | A | 0.1314  |
| rs74910426  | T | 0.0828  |
| rs56226654  | A | 0.0948  |
| rs117019477 | G | -0.0619 |
| rs2003625   | C | 0.0212  |
| rs73796494  | T | 0.0881  |
| rs67198509  | G | -0.0575 |
| rs1394613   | A | -0.0244 |
| rs7729882   | G | -0.0597 |
| rs114603029 | G | -0.0494 |
| rs34913136  | A | -0.0603 |
| rs72755916  | A | 0.0868  |
| rs115485379 | T | -0.0816 |
| rs4435901   | G | 0.0393  |
| rs13167314  | A | 0.0227  |
| rs77828422  | C | 0.0907  |
| rs13165930  | G | -0.0418 |
| rs292402    | G | -0.023  |
| rs78124484  | T | 0.1011  |
| rs79767625  | G | 0.0739  |
| rs139145942 | A | 0.0765  |
| rs7712742   | G | -0.018  |
| rs17343376  | T | 0.0685  |
| rs117502300 | T | -0.1285 |
| rs148967622 | T | 0.0729  |
| rs11749851  | A | -0.0186 |
| rs62368968  | C | 0.0367  |
| rs6869928   | T | -0.02   |
| rs77868904  | G | -0.0567 |
| rs112370704 | T | -0.0296 |
| rs77665535  | C | -0.04   |
| rs16895357  | T | -0.037  |
| rs7380333   | C | -0.0261 |
| rs113519421 | A | -0.0246 |
| rs3822741   | A | 0.0247  |
| rs4131182   | A | 0.0213  |
| rs111839657 | C | -0.1187 |
| rs74404711  | A | 0.1095  |
| rs80185844  | G | -0.0412 |
| rs11738516  | G | 0.0244  |
| rs11745977  | T | 0.0272  |
| rs145322377 | T | 0.0604  |
| rs254224    | A | -0.0203 |
| rs248448    | A | 0.0294  |

|             |   |         |
|-------------|---|---------|
| rs55950636  | C | 0.0603  |
| rs13166250  | A | -0.0175 |
| rs73760027  | C | 0.0495  |
| rs149575755 | A | 0.0791  |
| rs112654635 | G | 0.0827  |
| rs17718347  | C | -0.0193 |
| rs7716998   | C | -0.0219 |
| rs33425     | G | 0.0179  |
| rs929785    | T | 0.0261  |
| rs17673359  | C | -0.0263 |
| rs10042146  | A | -0.0332 |
| rs154767    | C | 0.0238  |
| rs1387638   | T | 0.0427  |
| rs9293638   | A | 0.0717  |
| rs168773    | T | -0.0311 |
| rs138535579 | C | -0.0963 |
| rs874083    | T | 0.0233  |
| rs79858270  | A | 0.1151  |
| rs112858343 | G | 0.1033  |
| rs55800842  | C | -0.106  |
| rs978568    | A | 0.1522  |
| rs118097756 | A | -0.0693 |
| rs34572107  | G | 0.0384  |
| rs17585622  | T | -0.0746 |
| rs32392     | T | -0.0195 |
| rs77094331  | C | 0.1074  |
| rs11741401  | G | 0.0225  |
| rs539822    | A | -0.025  |
| rs16877256  | G | 0.0445  |
| rs111580445 | T | -0.0483 |
| rs4496700   | G | -0.0546 |
| rs79596419  | A | -0.0903 |
| rs7728926   | G | -0.0241 |
| rs140625329 | C | -0.1157 |
| rs819600    | A | 0.0181  |
| rs13174340  | A | -0.0221 |
| rs115166547 | C | 0.0699  |
| rs7737635   | A | -0.0228 |
| rs12521444  | A | 0.0701  |
| rs141914150 | G | 0.0877  |
| rs10515081  | A | -0.0403 |
| rs2227460   | A | 0.091   |
| rs72817253  | T | 0.0599  |
| rs1501745   | T | 0.0209  |
| rs80106479  | T | -0.0926 |
| rs73288241  | A | 0.0781  |
| rs4867002   | T | 0.0196  |

|             |   |         |
|-------------|---|---------|
| rs9293720   | T | 0.027   |
| rs116441758 | C | -0.0503 |
| rs10056700  | C | -0.02   |
| rs115081118 | C | -0.0896 |
| rs72732258  | C | -0.029  |
| rs10515357  | G | -0.0188 |
| rs26246     | G | 0.023   |
| rs905148    | T | 0.0226  |
| rs16891256  | T | -0.0285 |
| rs2059071   | T | 0.0212  |
| rs2950856   | A | -0.0226 |
| rs115521825 | A | -0.1163 |
| rs17348877  | T | -0.0288 |
| rs2372405   | A | -0.0192 |
| rs79699409  | T | -0.043  |
| rs229955    | A | -0.0554 |
| rs730623    | A | 0.0955  |
| rs72492477  | T | -0.0434 |
| rs11738499  | G | 0.0526  |
| rs146892963 | T | -0.0673 |
| rs902521    | A | -0.0761 |
| rs9632393   | A | 0.0519  |
| rs114355296 | A | 0.0894  |
| rs144018189 | T | 0.1276  |
| rs6895279   | C | 0.018   |
| rs35406999  | A | 0.0312  |
| rs79072761  | A | 0.1097  |
| rs4866611   | T | -0.0184 |
| rs12153548  | A | 0.0225  |
| rs75515129  | A | 0.1011  |
| rs11948267  | A | -0.054  |
| rs148913985 | A | -0.0822 |
| rs79164763  | A | -0.1316 |
| rs78818909  | T | -0.0568 |
| rs78874503  | G | -0.1446 |
| rs13172486  | C | -0.0756 |
| rs150619371 | T | -0.0995 |
| rs79412078  | T | 0.1141  |
| rs72759171  | T | -0.0248 |
| rs62365768  | T | -0.0443 |
| rs35689156  | G | -0.0797 |
| rs659562    | G | -0.0218 |
| rs4317351   | T | -0.0191 |
| rs17110375  | G | 0.0314  |
| rs3860796   | G | 0.0367  |
| rs34510     | C | 0.107   |
| rs4702064   | C | -0.0228 |

|             |   |         |
|-------------|---|---------|
| rs72824321  | A | -0.0565 |
| rs13159066  | C | -0.1346 |
| rs60460377  | G | 0.0209  |
| rs62378044  | C | -0.0174 |
| rs75743946  | G | 0.1111  |
| rs80107312  | C | -0.0584 |
| rs72781890  | C | -0.0827 |
| rs113786960 | C | 0.0411  |
| rs12652842  | G | 0.0675  |
| rs28718219  | T | 0.064   |
| rs328830    | A | 0.0289  |
| rs258522    | A | 0.0239  |
| rs72800723  | A | -0.0469 |
| rs33894     | G | -0.0182 |
| rs2547003   | A | -0.0217 |
| rs12152738  | G | 0.0175  |
| rs140421141 | A | -0.0919 |
| rs115229178 | C | 0.0628  |
| rs28693862  | T | -0.0818 |
| rs78989266  | C | 0.0532  |
| rs11739878  | G | 0.0278  |
| rs17057955  | G | -0.0347 |
| rs12518467  | C | 0.0234  |
| rs80075439  | C | 0.0872  |
| rs76202597  | T | -0.0257 |
| rs17434455  | T | 0.046   |
| rs147823689 | G | -0.1428 |
| rs17137984  | C | -0.0766 |
| rs6889736   | G | 0.025   |
| rs142843540 | G | -0.1214 |
| rs114873563 | A | -0.0639 |
| rs17501324  | T | 0.035   |
| rs72776174  | T | 0.0514  |
| rs34040787  | G | 0.022   |
| rs142604904 | C | 0.0606  |
| rs874429    | C | -0.0184 |
| rs61161625  | C | 0.0293  |
| rs3797245   | A | 0.0367  |
| rs13190153  | A | -0.0353 |
| rs4256366   | C | 0.0255  |
| rs11956007  | G | -0.0372 |
| rs10434536  | C | -0.0293 |
| rs35898852  | T | 0.0535  |
| rs9285895   | C | -0.0219 |
| rs73804494  | T | 0.053   |
| rs79459376  | A | 0.0675  |
| rs138156510 | C | 0.0803  |

|             |   |         |
|-------------|---|---------|
| rs115315385 | A | 0.1229  |
| rs143025845 | G | -0.1295 |
| rs12719304  | C | 0.0207  |
| rs60032057  | A | 0.0546  |
| rs116300666 | G | -0.1027 |
| rs72784667  | A | -0.0875 |
| rs353287    | A | 0.0195  |
| rs73075183  | A | -0.0323 |
| rs16889948  | A | -0.0277 |
| rs13177143  | C | 0.0317  |
| rs2085448   | T | -0.0219 |
| rs116215437 | G | 0.1046  |
| rs112905460 | G | -0.0704 |
| rs77082129  | T | 0.0584  |
| rs1472798   | A | -0.0373 |
| rs149890441 | C | 0.1287  |
| rs77254023  | C | -0.0367 |
| rs294581    | T | 0.0476  |
| rs145171014 | G | -0.1348 |
| rs10079560  | G | 0.0587  |
| rs12520602  | A | 0.0357  |
| rs62381584  | G | 0.0891  |
| rs79517745  | T | 0.1009  |
| rs432449    | A | -0.0184 |
| rs4345357   | T | -0.1169 |
| rs78715016  | G | -0.0886 |
| rs111546564 | A | -0.0736 |
| rs16868023  | G | -0.0745 |
| rs141261132 | G | -0.0755 |
| rs3792751   | T | 0.0183  |
| rs17055976  | A | 0.0176  |
| rs72827680  | A | -0.0526 |
| rs114054878 | C | 0.0847  |
| rs149642894 | G | 0.1342  |
| rs77850724  | C | -0.0439 |
| rs76711209  | A | -0.0574 |
| rs34080101  | C | 0.03    |
| rs3815674   | C | -0.045  |
| rs34648000  | A | -0.0453 |
| rs115436949 | C | 0.1056  |
| rs31038     | C | 0.0856  |
| rs2937771   | C | 0.0521  |
| rs266563    | A | 0.0172  |
| rs1975147   | A | -0.0511 |
| rs13188125  | G | 0.0397  |
| rs148092962 | A | -0.1051 |
| rs77794964  | C | 0.0939  |

|             |   |         |
|-------------|---|---------|
| rs4976780   | T | 0.019   |
| rs114282497 | C | 0.0704  |
| rs76654970  | G | 0.04    |
| rs704040    | T | -0.0186 |
| rs72775027  | T | -0.0273 |
| rs1020662   | T | 0.0199  |
| rs12521482  | A | 0.0546  |
| rs3866445   | A | 0.0183  |
| rs116551544 | T | -0.1197 |
| rs74415557  | G | 0.033   |
| rs114121871 | A | -0.0655 |
| rs76494843  | C | 0.0956  |
| rs77624317  | G | -0.0755 |
| rs55897571  | T | -0.0424 |
| rs150877849 | G | 0.09    |
| rs12658336  | A | -0.0181 |
| rs10463907  | T | 0.1644  |
| rs2961639   | A | 0.0202  |
| rs72814140  | T | -0.1537 |
| rs72725071  | G | 0.0565  |
| rs113829713 | G | -0.0699 |
| rs16896364  | A | 0.0319  |
| rs7708149   | T | -0.027  |
| rs148040619 | T | -0.047  |
| rs116143889 | C | 0.0874  |
| rs12654902  | G | -0.0298 |
| rs7721418   | A | 0.0676  |
| rs116811993 | T | -0.125  |
| rs1353061   | G | -0.0199 |
| rs79946897  | T | 0.0491  |
| rs1422889   | A | 0.0252  |
| rs72807715  | C | 0.0632  |
| rs5024074   | G | 0.0313  |
| rs76844786  | G | -0.0689 |
| rs144632920 | C | 0.0922  |
| rs75144132  | A | 0.1615  |
| rs115670584 | A | -0.0895 |
| rs13155750  | G | -0.0204 |
| rs116416453 | T | 0.0757  |
| rs261541    | A | -0.0301 |
| rs10077835  | G | -0.0258 |
| rs17488104  | A | -0.1062 |
| rs17509347  | T | 0.1168  |
| rs26217     | A | 0.027   |
| rs115161726 | C | -0.0974 |
| rs7730026   | A | -0.0299 |
| rs146312027 | A | -0.1515 |



|             |   |         |
|-------------|---|---------|
| rs154811    | C | 0.0805  |
| rs115427030 | G | 0.1119  |
| rs72752439  | C | 0.0477  |
| rs77808056  | T | 0.0872  |
| rs116327468 | G | -0.0779 |
| rs2972820   | T | -0.0226 |
| rs72791198  | A | 0.0389  |
| rs80273957  | G | 0.0821  |
| rs114139277 | C | -0.1198 |
| rs16886034  | C | -0.0376 |
| rs74901968  | G | -0.0206 |
| rs60468287  | A | 0.0326  |
| rs2589406   | G | -0.0461 |
| rs77306996  | A | 0.124   |
| rs71638263  | A | -0.0266 |
| rs112532184 | C | -0.17   |
| rs138612228 | T | -0.1139 |
| rs77245021  | T | -0.1149 |
| rs72790645  | G | -0.0421 |
| rs3135928   | A | 0.0388  |
| rs76378258  | A | -0.0683 |
| rs76562197  | C | 0.0994  |
| rs7711393   | C | -0.0215 |
| rs76432248  | T | -0.1144 |
| rs78468322  | T | 0.0707  |
| rs11741697  | A | 0.0182  |
| rs140952543 | A | 0.0623  |
| rs879817    | T | -0.0274 |
| rs7718987   | G | 0.0227  |
| rs56920429  | C | 0.0371  |
| rs34048092  | T | 0.0542  |
| rs62377193  | T | 0.0886  |
| rs7717530   | C | 0.0208  |
| rs12109866  | C | -0.0178 |
| rs77073500  | A | 0.0481  |
| rs10514071  | A | 0.0208  |
| rs78969277  | C | -0.031  |
| rs37781     | A | 0.0245  |
| rs34410424  | C | -0.1157 |
| rs115827777 | T | 0.0732  |
| rs26531     | G | 0.0194  |
| rs6898019   | C | 0.0187  |
| rs252652    | T | -0.046  |
| rs113014073 | A | 0.0786  |
| rs116241849 | T | 0.1079  |
| rs4868528   | G | 0.026   |
| rs145207384 | C | 0.1037  |

|             |   |         |
|-------------|---|---------|
| rs10515621  | C | -0.0251 |
| rs2068156   | A | -0.0623 |
| rs34296     | G | -0.0198 |
| rs115508444 | C | 0.0977  |
| rs148218594 | C | 0.0323  |
| rs60714766  | T | 0.0205  |
| rs34178972  | T | 0.0566  |
| rs150799901 | A | 0.0311  |
| rs62376615  | A | 0.0336  |
| rs78978742  | G | -0.1159 |
| rs74327998  | T | 0.1087  |
| rs586056    | G | -0.0183 |
| rs116178163 | A | 0.0651  |
| rs139598534 | C | 0.1181  |
| rs17674707  | C | -0.0611 |
| rs114875437 | T | 0.0765  |
| rs637240    | T | 0.0314  |
| rs17626606  | T | 0.0345  |
| rs34518711  | T | 0.085   |
| rs74803095  | A | -0.1126 |
| rs3733731   | G | 0.0202  |
| rs35896460  | C | 0.0294  |
| rs113151424 | C | 0.0183  |
| rs79694480  | T | -0.0707 |
| rs34738690  | T | -0.027  |
| rs62351297  | G | 0.0919  |
| rs462744    | C | 0.085   |
| rs74782096  | G | 0.06    |
| rs149376403 | C | 0.0746  |
| rs138320883 | C | 0.1045  |
| rs28399365  | T | 0.0831  |
| rs72773216  | G | -0.0344 |
| rs115361386 | G | -0.097  |
| rs2420210   | G | 0.1043  |
| rs2962017   | A | 0.0231  |
| rs116256155 | A | -0.1509 |
| rs10068684  | T | -0.017  |
| rs1215684   | T | 0.0207  |
| rs9418      | T | -0.0183 |
| rs34530685  | T | -0.068  |
| rs163436    | T | -0.0448 |
| rs115088694 | C | 0.0983  |
| rs72795416  | G | 0.0636  |
| rs62378018  | T | -0.0625 |
| rs79316320  | G | -0.0629 |
| rs147207149 | G | 0.1063  |
| rs7737801   | G | -0.1413 |

|             |   |         |
|-------------|---|---------|
| rs73308313  | A | 0.0471  |
| rs76201679  | G | -0.1005 |
| rs13179715  | A | -0.0429 |
| rs116808588 | T | 0.1126  |
| rs10066347  | T | 0.063   |
| rs111746678 | A | -0.0379 |
| rs17559604  | A | -0.0489 |
| rs11949196  | C | -0.0257 |
| rs4704116   | T | 0.0209  |
| rs7733337   | C | 0.0294  |
| rs7735477   | A | -0.0195 |
| rs13156341  | G | -0.06   |
| rs150062630 | G | -0.1258 |
| rs114248710 | A | -0.0718 |
| rs34725144  | C | 0.1139  |
| rs13183153  | C | -0.0174 |
| rs62385438  | C | 0.0255  |
| rs115899831 | A | -0.1139 |
| rs6914      | C | -0.0365 |
| rs76472099  | T | 0.035   |
| rs115993790 | T | 0.1207  |
| rs115820628 | A | -0.0444 |
| rs7736113   | T | 0.0537  |
| rs3811854   | T | -0.0352 |
| rs7734738   | G | -0.1089 |
| rs138709711 | T | 0.0636  |
| rs34051295  | A | 0.0546  |
| rs17825723  | G | -0.0357 |
| rs31012     | G | 0.0181  |
| rs78049380  | G | 0.0593  |
| rs111813656 | C | 0.1173  |
| rs17559708  | C | 0.0192  |
| rs150660742 | G | 0.0701  |
| rs6595545   | C | 0.0437  |
| rs72800024  | C | 0.0229  |
| rs3097823   | C | 0.0294  |
| rs12186812  | G | -0.0178 |
| rs80133753  | C | -0.064  |
| rs4457094   | A | 0.1008  |
| rs147013653 | A | -0.1034 |
| rs1992239   | T | 0.12    |
| rs74591138  | C | 0.0527  |
| rs114723432 | C | 0.1226  |
| rs140560184 | G | -0.1116 |
| rs77448748  | G | 0.1118  |
| rs7725836   | C | -0.0188 |
| rs62385560  | C | -0.0318 |

|             |   |         |
|-------------|---|---------|
| rs72802850  | A | -0.0679 |
| rs76121883  | A | -0.039  |
| rs316212    | A | -0.0192 |
| rs72704473  | T | 0.0351  |
| rs76177735  | T | 0.0378  |
| rs149393688 | G | 0.0879  |
| rs150337017 | A | -0.0823 |
| rs2416331   | A | -0.0196 |
| rs72815264  | A | 0.1464  |
| rs142587456 | A | -0.1304 |
| rs74457857  | G | 0.0566  |
| rs76679079  | G | -0.0693 |
| rs115186014 | C | 0.0815  |
| rs1395026   | T | -0.0271 |
| rs4958167   | C | 0.0191  |
| rs147227141 | T | -0.0406 |
| rs147976589 | A | 0.0821  |
| rs6449563   | G | -0.1    |
| rs166061    | T | -0.0246 |
| rs151219964 | G | -0.0222 |
| rs74540481  | G | 0.0942  |
| rs60218730  | G | -0.0866 |
| rs10515523  | T | -0.031  |
| rs112076045 | A | -0.0251 |
| rs4704759   | T | -0.0735 |
| rs13189848  | C | -0.0478 |
| rs113628285 | G | -0.1234 |
| rs147200319 | C | -0.0548 |
| rs7734853   | A | -0.0168 |
| rs140646053 | T | -0.1188 |
| rs68076125  | T | -0.0547 |
| rs72730739  | T | -0.0392 |
| rs114361368 | C | 0.1098  |
| rs78992973  | T | 0.0989  |
| rs72766579  | T | 0.0245  |
| rs79455943  | A | 0.0536  |
| rs9885127   | C | 0.108   |
| rs12153146  | A | 0.0296  |
| rs79577858  | A | 0.0557  |
| rs10069497  | G | 0.0197  |
| rs371732    | T | -0.1073 |
| rs10513075  | C | 0.1183  |
| rs72781640  | T | -0.0465 |
| rs34125848  | C | -0.0265 |
| rs245072    | G | -0.0269 |
| rs17773992  | G | -0.0234 |
| rs17831789  | G | 0.106   |

|             |   |         |
|-------------|---|---------|
| rs72755037  | G | -0.0483 |
| rs13154883  | C | 0.0176  |
| rs62391195  | G | -0.0698 |
| rs2118585   | C | 0.0683  |
| rs75231259  | T | 0.0356  |
| rs35764125  | A | -0.0361 |
| rs79112883  | T | -0.1042 |
| rs144242918 | C | -0.1212 |
| rs13178747  | T | -0.025  |
| rs74510410  | C | -0.0754 |
| rs2913841   | A | -0.0654 |
| rs461340    | T | -0.0251 |
| rs11747606  | T | 0.0191  |
| rs115845757 | A | 0.0721  |
| rs72777147  | T | -0.0872 |
| rs62377216  | G | 0.0269  |
| rs79950446  | A | -0.1068 |
| rs76423319  | T | 0.1055  |
| rs148349690 | A | -0.0827 |
| rs1428365   | C | -0.0317 |
| rs72777824  | T | -0.1083 |
| rs144843727 | G | 0.0851  |
| rs62383695  | T | -0.0262 |
| rs77274808  | T | -0.0369 |
| rs6890997   | T | 0.0423  |
| rs2354124   | T | -0.0187 |
| rs4425547   | G | -0.0178 |
| rs6891720   | C | 0.0186  |
| rs3925397   | T | 0.0188  |
| rs76561438  | G | -0.0722 |
| rs114560833 | A | -0.091  |
| rs56243355  | A | 0.0824  |
| rs74584991  | A | 0.0456  |
| rs12109336  | T | -0.0712 |
| rs55638770  | C | 0.0305  |
| rs79062017  | G | 0.0478  |
| rs73028178  | T | 0.0395  |
| rs77545081  | T | 0.0973  |
| rs607613    | T | 0.0268  |
| rs147267277 | T | 0.1119  |
| rs10078331  | T | -0.0744 |
| rs140970314 | G | -0.1093 |
| rs113100583 | G | 0.087   |
| rs4836114   | C | 0.0192  |
| rs77332236  | G | -0.0997 |
| rs2962545   | G | -0.1132 |
| rs35792510  | G | 0.0187  |

|             |   |         |
|-------------|---|---------|
| rs13181056  | A | 0.1093  |
| rs9293567   | T | 0.0519  |
| rs113089229 | A | -0.0556 |
| rs11744003  | A | 0.0174  |
| rs340698    | C | -0.0227 |
| rs112308223 | G | -0.0818 |
| rs10041019  | T | -0.0633 |
| rs6880261   | T | 0.019   |
| rs79208904  | C | -0.0766 |
| rs113018931 | C | -0.1198 |
| rs74780513  | C | 0.0727  |
| rs10515708  | C | -0.0924 |
| rs76714429  | T | -0.1017 |
| rs114200085 | A | -0.0452 |
| rs1105168   | G | 0.0168  |
| rs1287269   | C | -0.0171 |
| rs141564499 | G | 0.1009  |
| rs74994719  | T | 0.0486  |
| rs11954899  | T | 0.0698  |
| rs7708962   | A | -0.0726 |
| rs6889411   | C | -0.0556 |
| rs449837    | G | -0.0305 |
| rs76285129  | A | 0.0754  |
| rs114795012 | A | 0.1351  |
| rs76194262  | C | -0.0505 |
| rs77843905  | C | -0.0491 |
| rs62374499  | G | 0.0746  |
| rs11167849  | T | 0.0174  |
| rs144145672 | A | 0.0806  |
| rs6890940   | T | 0.0822  |
| rs78228540  | C | -0.0478 |
| rs74333372  | C | -0.1256 |
| rs17294084  | A | -0.0448 |
| rs151197849 | C | 0.0652  |
| rs9763202   | G | 0.0261  |
| rs6885280   | T | -0.0242 |
| rs344650    | G | 0.1072  |
| rs2436340   | A | -0.0189 |
| rs34396639  | T | 0.02    |
| rs10045203  | C | 0.0173  |
| rs75069949  | G | 0.0633  |
| rs62375424  | A | 0.0631  |
| rs138561095 | T | -0.1401 |
| rs149799339 | A | -0.0497 |
| rs74986981  | A | -0.0631 |
| rs4895263   | G | 0.0629  |
| rs4912872   | A | 0.0451  |

|             |   |         |
|-------------|---|---------|
| rs10051686  | T | 0.0907  |
| rs6881726   | G | -0.0325 |
| rs11749914  | T | -0.0201 |
| rs1862576   | T | 0.0277  |
| rs143921720 | T | -0.065  |
| rs2432061   | A | -0.018  |
| rs10053320  | T | -0.0279 |
| rs73741953  | A | 0.0542  |
| rs16889451  | A | -0.109  |
| rs3776585   | A | -0.0215 |
| rs12654235  | T | -0.031  |
| rs17796994  | T | -0.0477 |
| rs62348994  | T | -0.0695 |
| rs16896509  | A | -0.0611 |
| rs73312397  | G | 0.034   |
| rs113826192 | C | -0.0783 |
| rs72745858  | T | -0.0494 |
| rs13160267  | T | 0.0187  |
| rs7710738   | T | -0.0173 |
| rs11748173  | T | 0.0172  |
| rs153968    | C | -0.0175 |
| rs113321316 | A | 0.0758  |
| rs253700    | A | -0.0215 |
| rs56065024  | G | 0.0416  |
| rs2029517   | G | 0.0224  |
| rs13171866  | A | 0.0676  |
| rs111783146 | C | 0.0996  |
| rs115188177 | A | -0.1176 |
| rs114154431 | C | 0.0843  |
| rs78608186  | A | 0.119   |
| rs882981    | A | -0.0356 |
| rs10045909  | C | -0.0188 |
| rs11958311  | A | 0.018   |
| rs12521544  | T | -0.0247 |
| rs181832    | G | -0.0967 |
| rs77195914  | C | 0.0722  |
| rs138119614 | T | -0.1015 |
| rs76281170  | A | -0.1055 |
| rs1559047   | G | 0.0184  |
| rs12659608  | A | -0.0308 |
| rs143989686 | T | 0.0601  |
| rs74770849  | T | 0.0335  |
| rs9293535   | T | -0.0204 |
| rs73124395  | A | -0.1298 |
| rs77474729  | G | 0.0653  |
| rs35777878  | T | -0.0938 |
| rs2910133   | C | 0.0227  |

|             |   |         |
|-------------|---|---------|
| rs138052413 | T | -0.0752 |
| rs115019932 | G | -0.0923 |
| rs57520116  | A | 0.0668  |
| rs142473188 | G | -0.1093 |
| rs139626822 | A | -0.0818 |
| rs35662449  | T | -0.0219 |
| rs76226349  | A | -0.0945 |
| rs113794264 | T | 0.1332  |
| rs116328010 | C | -0.0627 |
| rs750803    | C | -0.0181 |
| rs10066332  | T | -0.0399 |
| rs140555387 | C | -0.0765 |
| rs11739695  | A | 0.0169  |
| rs78391915  | A | -0.0372 |
| rs12517450  | T | -0.0209 |
| rs6882169   | T | -0.0218 |
| rs3798031   | T | 0.0187  |
| rs35521783  | C | 0.08    |
| rs6600981   | T | -0.0248 |
| rs10434577  | A | 0.0475  |
| rs10059023  | G | -0.0216 |
| rs75152008  | A | -0.1006 |
| rs350536    | G | 0.024   |
| rs4240393   | G | -0.0229 |
| rs142071374 | T | 0.0833  |
| rs2243467   | A | 0.0206  |
| rs16885969  | A | -0.0194 |
| rs17143629  | G | -0.0643 |
| rs979453    | G | -0.0183 |
| rs142395214 | C | -0.04   |
| rs149591616 | T | 0.1103  |
| rs79215600  | G | -0.0229 |
| rs74997429  | C | -0.0895 |
| rs2339961   | A | 0.0179  |
| rs142843389 | G | 0.0661  |
| rs73752318  | A | 0.0459  |
| rs6452273   | G | 0.0251  |
| rs13165652  | T | 0.1335  |
| rs79640862  | A | -0.0567 |
| rs559712    | C | 0.038   |
| rs75962185  | T | 0.0429  |
| rs62368621  | G | 0.025   |
| rs77076353  | G | -0.0599 |
| rs72795386  | G | 0.1313  |
| rs17428710  | T | 0.017   |
| rs78987836  | T | -0.1124 |
| rs4867073   | G | 0.0191  |



|             |   |         |
|-------------|---|---------|
| rs251516    | T | 0.031   |
| rs75945244  | T | -0.0809 |
| rs4640780   | A | 0.0276  |
| rs79605226  | G | 0.0401  |
| rs6883640   | T | -0.0245 |
| rs10079701  | G | -0.0964 |
| rs16900130  | G | -0.029  |
| rs72777262  | A | 0.146   |
| rs350492    | C | 0.0302  |
| rs137879228 | A | -0.0836 |
| rs17537048  | G | 0.0245  |
| rs4701707   | A | -0.0198 |
| rs10521011  | C | 0.0379  |
| rs249915    | C | 0.0177  |
| rs36119939  | A | 0.1012  |
| rs145217986 | C | -0.0739 |
| rs9313654   | T | 0.0481  |
| rs111538473 | T | 0.0644  |
| rs16887211  | C | -0.0239 |
| rs114779704 | G | -0.0687 |
| rs11958631  | G | 0.039   |
| rs1181337   | G | 0.074   |
| rs71623828  | G | -0.022  |
| rs11739457  | G | -0.1155 |
| rs2534842   | C | 0.051   |
| rs140139312 | G | 0.0735  |
| rs148725978 | T | 0.0647  |
| rs11744289  | G | -0.0378 |
| rs140820152 | A | -0.0594 |
| rs2925729   | C | 0.0416  |
| rs114553786 | C | 0.1205  |
| rs10059476  | T | -0.0172 |
| rs111396125 | C | 0.1161  |
| rs10942554  | A | -0.019  |
| rs77456412  | T | 0.074   |
| rs9292552   | G | 0.0244  |
| rs4958081   | C | -0.0262 |
| rs2973189   | T | -0.065  |
| rs76998582  | T | 0.0355  |
| rs7379396   | C | -0.0263 |
| rs116601729 | A | 0.1316  |
| rs12522033  | T | 0.0174  |
| rs5008734   | A | 0.0446  |
| rs78811944  | A | 0.0589  |
| rs2591205   | G | -0.0188 |
| rs10461928  | G | -0.0181 |
| rs114280069 | T | -0.1405 |

|             |   |         |
|-------------|---|---------|
| rs60475980  | A | -0.0741 |
| rs77099102  | G | -0.0443 |
| rs76882147  | G | 0.1338  |
| rs115961055 | C | 0.0531  |
| rs79866724  | C | 0.0443  |
| rs34316798  | A | 0.021   |
| rs11747190  | A | 0.0261  |
| rs17466571  | T | 0.0349  |
| rs79674207  | G | 0.1146  |
| rs142719322 | G | -0.1019 |
| rs145812874 | G | 0.1199  |
| rs56102010  | A | -0.0208 |
| rs165950    | T | 0.0767  |
| rs163591    | T | -0.0166 |
| rs115569378 | T | 0.0309  |
| rs58414253  | C | -0.0545 |
| rs112774055 | A | -0.059  |
| rs72721561  | A | -0.0316 |
| rs80059277  | T | -0.0933 |
| rs147197656 | T | -0.0895 |
| rs7727766   | G | 0.0178  |
| rs9313398   | G | 0.0193  |
| rs17097438  | T | 0.0237  |
| rs74411785  | C | 0.0348  |
| rs62337200  | T | 0.0974  |
| rs113768561 | A | -0.0315 |
| rs113715862 | C | -0.0676 |
| rs35601434  | C | -0.0229 |
| rs80119082  | C | -0.081  |
| rs12659427  | T | -0.0329 |
| rs10447170  | A | -0.0233 |
| rs4958893   | T | 0.0196  |
| rs74863661  | T | 0.0269  |
| rs10462251  | T | -0.0225 |
| rs10073728  | G | -0.0254 |
| rs1380942   | G | 0.0929  |
| rs115568758 | C | 0.0649  |
| rs139349294 | G | 0.11    |
| rs6885539   | A | 0.0439  |
| rs11741229  | C | -0.0208 |
| rs10520885  | A | 0.0345  |
| rs76861702  | A | 0.0281  |
| rs6895930   | G | 0.0752  |
| rs80209529  | A | -0.0351 |
| rs10475103  | G | 0.018   |
| rs17318932  | T | -0.0485 |
| rs75997440  | G | 0.1109  |

|             |   |         |
|-------------|---|---------|
| rs1544786   | G | -0.0251 |
| rs17439150  | T | -0.024  |
| rs1438681   | A | 0.0314  |
| rs111912456 | T | 0.0504  |
| rs76654752  | G | -0.0261 |
| rs1910789   | G | -0.0168 |
| rs7732747   | A | 0.0462  |
| rs113824777 | A | 0.0662  |
| rs4703395   | A | 0.0227  |
| rs76198120  | A | 0.0751  |
| rs32387     | C | -0.0173 |
| rs17544008  | T | -0.0325 |
| rs4072550   | T | 0.0194  |
| rs4582253   | T | 0.0509  |
| rs4836268   | C | 0.0232  |
| rs10057235  | G | -0.0198 |
| rs78526142  | G | -0.0369 |
| rs258779    | A | 0.0222  |
| rs62384027  | C | -0.0286 |
| rs1291486   | G | -0.0564 |
| rs7737228   | G | -0.0342 |
| rs10075071  | C | 0.0187  |
| rs111665719 | T | -0.0773 |
| rs2964793   | T | 0.0299  |
| rs840380    | C | -0.0779 |
| rs7717619   | A | -0.03   |
| rs9313102   | T | 0.0255  |
| rs10940989  | T | -0.0972 |
| rs6867436   | T | -0.0373 |
| rs115693820 | T | -0.0852 |
| rs1353500   | T | -0.0202 |
| rs6452377   | G | 0.0176  |
| rs9293695   | C | 0.0169  |
| rs9327318   | A | -0.0256 |
| rs149670015 | G | 0.1197  |
| rs76661052  | T | 0.0469  |
| rs12654925  | C | -0.0303 |
| rs767177    | T | 0.0201  |
| rs3756531   | C | -0.0679 |
| rs72744536  | T | 0.1221  |
| rs340057    | C | 0.0189  |
| rs7737359   | T | 0.017   |
| rs6887277   | C | 0.0313  |
| rs147612380 | G | 0.0995  |
| rs1809354   | T | -0.03   |
| rs113582022 | A | -0.0472 |
| rs62364572  | T | 0.0356  |

|             |   |         |
|-------------|---|---------|
| rs1025659   | C | -0.0343 |
| rs72544120  | A | 0.0933  |
| rs56120208  | T | 0.0539  |
| rs9292991   | C | -0.0216 |
| rs4342288   | C | 0.0204  |
| rs142728440 | G | 0.1154  |
| rs1918779   | T | -0.0304 |
| rs148155977 | C | 0.0819  |
| rs292988    | G | -0.0166 |
| rs256322    | A | 0.0176  |
| rs78503918  | G | -0.082  |
| rs76003044  | G | -0.0712 |
| rs7709701   | C | 0.0212  |
| rs116194818 | G | 0.0426  |
| rs144197059 | T | -0.1069 |
| rs62357516  | T | -0.018  |
| rs12653680  | G | 0.0332  |
| rs72764055  | G | 0.0255  |
| rs4613682   | C | 0.0247  |
| rs111329434 | A | -0.1197 |
| rs76662990  | G | -0.0267 |
| rs34312     | A | -0.0193 |
| rs80185276  | A | 0.1374  |
| rs80170246  | T | 0.0814  |
| rs33956     | T | 0.0208  |
| rs79584436  | A | -0.0988 |
| rs35688882  | G | -0.0459 |
| rs13188664  | T | 0.018   |
| rs74986854  | T | 0.0612  |
| rs6888774   | G | -0.023  |
| rs2416258   | C | 0.0237  |
| rs139097020 | T | 0.0951  |
| rs2972781   | C | 0.0925  |
| rs2964383   | A | -0.0228 |
| rs12187148  | G | 0.0299  |
| rs72752792  | G | 0.042   |
| rs72800727  | A | -0.0484 |
| rs72739772  | G | -0.0229 |
| rs42868     | G | 0.023   |
| rs149270592 | C | -0.0969 |
| rs17480083  | C | -0.0543 |
| rs55703460  | G | 0.0507  |
| rs78607863  | T | -0.1019 |
| rs7704641   | G | -0.0163 |
| rs78015059  | C | -0.0829 |
| rs4957585   | T | -0.0322 |
| rs149035132 | A | 0.1283  |

|             |   |         |
|-------------|---|---------|
| rs17590178  | T | 0.0561  |
| rs115017116 | A | -0.0999 |
| rs7448264   | T | 0.0298  |
| rs76774366  | T | 0.1133  |
| rs1058047   | A | 0.0932  |
| rs116496896 | C | -0.0836 |
| rs4699967   | G | -0.152  |
| rs61170933  | C | 0.0871  |
| rs79171834  | T | -0.0985 |
| rs77013900  | A | 0.0571  |
| rs114489491 | A | 0.0482  |
| rs2964620   | G | 0.0348  |
| rs11740374  | C | -0.0203 |
| rs116170069 | T | 0.0794  |
| rs80240558  | A | 0.1386  |
| rs113468244 | A | 0.0644  |
| rs712633    | A | 0.0921  |
| rs77355454  | T | -0.0455 |
| rs13188008  | T | -0.0219 |
| rs299915    | C | 0.0174  |
| rs143528549 | A | 0.1093  |
| rs17437433  | A | -0.0181 |
| rs4958260   | C | -0.0169 |
| rs148410592 | C | 0.0751  |
| rs13156920  | G | 0.0669  |
| rs74792889  | C | -0.0814 |
| rs78184459  | T | -0.149  |
| rs12513624  | C | -0.0256 |
| rs17351074  | G | -0.0652 |
| rs141600383 | A | 0.1165  |
| rs116124785 | A | 0.1153  |
| rs116283588 | A | -0.0517 |
| rs111755671 | C | 0.0263  |
| rs11745906  | C | -0.019  |
| rs3866382   | G | -0.0377 |
| rs34231     | T | 0.025   |
| rs116444595 | A | -0.0569 |
| rs10805491  | G | -0.0185 |
| rs141287669 | C | -0.0316 |
| rs148158839 | G | 0.0726  |
| rs62406230  | T | 0.0728  |
| rs76223357  | C | 0.1017  |
| rs76364926  | A | 0.1092  |
| rs62364785  | T | -0.0594 |
| rs458304    | T | 0.0169  |
| rs11960089  | T | 0.0196  |
| rs72802195  | A | -0.0806 |

|             |   |         |
|-------------|---|---------|
| rs11750498  | G | 0.0233  |
| rs114298940 | T | 0.1271  |
| rs11948445  | G | 0.0178  |
| rs1279618   | C | -0.0926 |
| rs4560600   | T | 0.0349  |
| rs116417701 | T | 0.0973  |
| rs111562886 | G | -0.026  |
| rs76964486  | A | -0.0867 |
| rs1115243   | A | -0.0174 |
| rs72760642  | G | -0.1157 |
| rs72763369  | G | 0.0386  |
| rs11958578  | C | 0.0522  |
| rs143271219 | T | -0.0865 |
| rs433917    | T | -0.0281 |
| rs299372    | A | -0.0181 |
| rs116540299 | A | 0.0885  |
| rs3798014   | C | -0.0213 |
| rs11744603  | T | 0.0426  |
| rs1153985   | G | 0.0194  |
| rs35706784  | C | 0.1276  |
| rs115453279 | A | -0.0616 |
| rs146505077 | T | -0.0222 |
| rs73804722  | G | 0.0926  |
| rs143411938 | A | -0.1355 |
| rs1840553   | A | 0.0178  |
| rs141659417 | G | 0.0984  |
| rs76946260  | A | 0.063   |
| rs114848449 | T | -0.0718 |
| rs4700302   | A | -0.0277 |
| rs149055465 | T | 0.0706  |
| rs13436818  | C | 0.0206  |
| rs1034890   | A | 0.0351  |
| rs76963506  | C | 0.0657  |
| rs138324979 | A | -0.0558 |
| rs116685780 | G | -0.1435 |
| rs1394671   | G | 0.0186  |
| rs115134455 | G | 0.0832  |
| rs10055153  | C | -0.0165 |
| rs80313012  | T | 0.0694  |
| rs7715526   | A | -0.0212 |
| rs355412    | T | 0.0186  |
| rs59099286  | C | 0.0894  |
| rs145181966 | T | 0.0686  |
| rs62391507  | T | -0.0503 |
| rs152118    | T | -0.0185 |
| rs116697576 | T | 0.0416  |
| rs116125702 | T | 0.0674  |

|             |   |         |
|-------------|---|---------|
| rs62383741  | G | 0.0612  |
| rs72811302  | T | 0.0708  |
| rs10060537  | A | -0.0352 |
| rs150886112 | G | 0.1464  |
| rs34018     | C | -0.0214 |
| rs148678419 | C | -0.0912 |
| rs12653079  | T | 0.0327  |
| rs148598827 | T | 0.0998  |
| rs1544774   | A | 0.0365  |
| rs146166447 | T | -0.1205 |
| rs6883030   | C | 0.0386  |
| rs73774916  | G | -0.0642 |
| rs995120    | G | 0.0167  |
| rs149031574 | G | 0.0545  |
| rs77948337  | G | -0.09   |
| rs25812     | C | 0.094   |
| rs11242145  | C | 0.0181  |
| rs17429287  | A | 0.0372  |
| rs143226676 | A | -0.0956 |
| rs76635141  | A | -0.0717 |
| rs12516175  | G | -0.0857 |
| rs114494033 | C | 0.1211  |
| rs115838845 | A | 0.0753  |
| rs149306709 | T | 0.0875  |
| rs368686    | G | 0.0197  |
| rs34902218  | T | -0.0504 |
| rs13162868  | C | 0.1184  |
| rs17796049  | G | 0.0435  |
| rs35259104  | G | 0.0172  |
| rs146951773 | T | -0.0818 |
| rs12517909  | T | 0.0487  |
| rs2353590   | T | 0.0169  |
| rs79571104  | T | -0.0825 |
| rs62357147  | A | 0.0501  |
| rs4266361   | C | -0.029  |
| rs116214935 | G | 0.05    |
| rs79576178  | C | 0.0801  |
| rs6860194   | G | -0.0231 |
| rs76588821  | C | -0.0718 |
| rs11743000  | T | -0.0285 |
| rs113136269 | C | 0.056   |
| rs7714769   | G | -0.0168 |
| rs6892611   | A | 0.0399  |
| rs75773310  | T | 0.099   |
| rs114896530 | A | -0.0768 |
| rs116636735 | G | 0.0853  |
| rs73132456  | A | 0.0862  |

|             |   |         |
|-------------|---|---------|
| rs114622510 | G | 0.0669  |
| rs62372211  | T | -0.0174 |
| rs79966610  | C | -0.1056 |
| rs112042240 | C | 0.0632  |
| rs831780    | G | 0.0177  |
| rs60509487  | T | -0.0422 |
| rs11747087  | C | 0.0833  |
| rs202797    | C | 0.0197  |
| rs76468165  | A | -0.1039 |
| rs112629170 | T | -0.0422 |
| rs114517997 | C | -0.1361 |
| rs56738803  | A | 0.0422  |
| rs7709390   | T | -0.0365 |
| rs2941898   | A | 0.0226  |
| rs62392211  | T | -0.0371 |
| rs55845262  | A | -0.0549 |
| rs77012855  | A | -0.0357 |
| rs769730    | G | 0.0184  |
| rs115861866 | G | 0.0692  |
| rs60997868  | T | -0.0391 |
| rs116278501 | G | -0.0413 |
| rs138965792 | G | 0.1185  |
| rs76111918  | G | -0.1177 |
| rs6862916   | G | -0.0463 |
| rs4705742   | T | -0.0166 |
| rs141748778 | T | -0.1164 |
| rs72777525  | A | 0.1148  |
| rs116596425 | A | -0.0963 |
| rs74400063  | A | 0.1214  |
| rs2388875   | A | 0.0218  |
| rs2895578   | G | -0.0164 |
| rs72635213  | C | 0.0362  |
| rs114808468 | G | 0.0767  |
| rs354333    | T | 0.0293  |
| rs76277581  | G | 0.0876  |
| rs79301232  | T | -0.0825 |
| rs77393926  | T | 0.0679  |
| rs4703480   | G | -0.0222 |
| rs72797840  | G | -0.0557 |
| rs2233289   | A | -0.1086 |
| rs77097024  | A | 0.0419  |
| rs67186626  | T | 0.036   |
| rs59308551  | A | 0.1015  |
| rs140581843 | A | -0.0931 |
| rs66782     | C | 0.0187  |
| rs6883603   | C | 0.0226  |
| rs10514211  | G | -0.0272 |



|             |   |         |
|-------------|---|---------|
| rs12514594  | A | 0.0458  |
| rs12187189  | T | 0.0167  |
| rs79289695  | A | 0.1316  |
| rs78622840  | T | 0.0701  |
| rs115955736 | A | 0.0758  |
| rs7704804   | G | 0.0174  |
| rs6873558   | A | 0.0288  |
| rs77121693  | T | 0.0455  |
| rs166238    | C | -0.0289 |
| rs75778985  | C | -0.0709 |
| rs7719274   | G | -0.0306 |
| rs115228397 | T | -0.0909 |
| rs146621524 | T | -0.1253 |
| rs149098773 | G | 0.1083  |
| rs17163440  | T | 0.0258  |
| rs12188757  | A | 0.0699  |
| rs77240110  | A | 0.0383  |
| rs115091100 | T | 0.0746  |
| rs56152341  | T | -0.0251 |
| rs78979439  | T | 0.0827  |
| rs299299    | G | -0.0231 |
| rs147360755 | G | -0.1304 |
| rs62382479  | G | -0.091  |
| rs139524988 | A | 0.0603  |
| rs7701143   | A | 0.0188  |
| rs76467553  | G | 0.0606  |
| rs151154723 | C | 0.0466  |
| rs116406117 | A | -0.1062 |
| rs2338833   | A | -0.022  |
| rs17075056  | A | -0.0628 |
| rs116266958 | A | -0.093  |
| rs10061649  | C | -0.0178 |
| rs6869338   | G | 0.0414  |
| rs10060807  | A | -0.0228 |
| rs148777289 | T | -0.1275 |
| rs79544313  | A | -0.0958 |
| rs55754450  | C | -0.0627 |
| rs116154070 | T | 0.0739  |
| rs13162831  | G | 0.0163  |
| rs62333229  | T | 0.0254  |
| rs78471324  | A | 0.0811  |
| rs2915855   | A | -0.016  |
| rs79734659  | A | -0.0752 |
| rs58007106  | A | 0.03    |
| rs115755349 | C | -0.0582 |
| rs75220098  | T | 0.0519  |
| rs78802908  | A | -0.1343 |

|             |   |         |
|-------------|---|---------|
| rs115622195 | G | -0.0556 |
| rs143341739 | T | 0.0906  |
| rs7731005   | T | 0.0257  |
| rs194180    | A | 0.0394  |
| rs990454    | A | 0.0328  |
| rs10067935  | G | 0.0423  |
| rs34830028  | G | -0.0221 |
| rs4836375   | T | -0.0178 |
| rs114789386 | T | -0.0873 |
| rs73786008  | C | -0.0341 |
| rs79327170  | C | 0.0388  |
| rs77117813  | T | 0.0474  |
| rs256427    | G | 0.0227  |
| rs11949284  | T | 0.021   |
| rs1982660   | C | 0.0186  |
| rs7704456   | G | -0.0348 |
| rs11135477  | A | 0.0182  |
| rs55959162  | G | -0.0279 |
| rs56095367  | C | -0.0183 |
| rs80129047  | C | 0.0277  |
| rs149150230 | C | -0.1354 |
| rs17137771  | G | -0.0407 |
| rs113908908 | C | 0.0872  |
| rs75889308  | C | -0.0508 |
| rs73735780  | C | 0.0315  |
| rs16871035  | A | -0.0405 |
| rs79156629  | C | -0.0775 |
| rs4380635   | G | -0.0304 |
| rs139954900 | T | 0.1093  |
| rs116818570 | A | 0.0933  |
| rs67780637  | C | 0.049   |
| rs139699419 | G | 0.1101  |
| rs115250766 | C | 0.0553  |
| rs872622    | C | 0.0164  |
| rs2278232   | C | -0.0401 |
| rs150942040 | A | 0.0799  |
| rs142872853 | T | 0.1264  |
| rs17685437  | C | 0.0445  |
| rs58214669  | T | 0.0382  |
| rs2898269   | T | -0.0347 |
| rs150366802 | G | 0.097   |
| rs17074144  | G | 0.0248  |
| rs16901973  | T | -0.0692 |
| rs12171528  | T | -0.0518 |
| rs3852143   | A | -0.0812 |
| rs1910092   | A | -0.0262 |
| rs1697915   | A | -0.0982 |

|             |   |         |
|-------------|---|---------|
| rs4141317   | T | 0.0225  |
| rs56295745  | T | 0.021   |
| rs12188938  | A | 0.1155  |
| rs1553322   | C | -0.0966 |
| rs114423732 | A | -0.1003 |
| rs930204    | A | 0.1177  |
| rs1021471   | C | 0.0169  |
| rs4868149   | G | 0.0185  |
| rs275826    | A | -0.0235 |
| rs116715588 | C | -0.0643 |
| rs12520404  | A | 0.0331  |
| rs13187132  | T | 0.0263  |
| rs694749    | C | -0.0298 |
| rs76054385  | A | -0.132  |
| rs10462485  | G | -0.0167 |
| rs1988145   | A | -0.0168 |
| rs72751602  | C | -0.0954 |
| rs17054347  | T | -0.0196 |
| rs77468923  | G | -0.0671 |
| rs78986183  | G | 0.0519  |
| rs12652807  | G | 0.0327  |
| rs77481271  | G | -0.077  |
| rs115710100 | A | 0.0558  |
| rs112394679 | C | -0.0615 |
| rs146757815 | A | 0.109   |
| rs1347111   | C | -0.0186 |
| rs2895772   | A | -0.0191 |
| rs6890634   | C | -0.0193 |
| rs115234103 | C | -0.0782 |
| rs34221241  | C | -0.0486 |
| rs56399454  | T | 0.0788  |
| rs145760819 | C | 0.0638  |
| rs141530748 | C | -0.137  |
| rs35577905  | A | -0.0172 |
| rs822405    | C | 0.0315  |
| rs56230710  | A | 0.0572  |
| rs79165396  | T | 0.1182  |
| rs116554310 | G | -0.0551 |
| rs11745089  | T | -0.0332 |
| rs74565063  | G | -0.1067 |
| rs1366564   | C | 0.0165  |
| rs116802236 | A | 0.0813  |
| rs252094    | G | -0.0271 |
| rs73736846  | G | 0.0296  |
| rs75403803  | G | 0.0912  |
| rs144689014 | T | 0.0848  |
| rs140924513 | G | -0.064  |

|             |   |         |
|-------------|---|---------|
| rs143828590 | G | 0.1081  |
| rs13173214  | T | 0.0193  |
| rs77393803  | G | -0.0752 |
| rs114943455 | A | -0.0676 |
| rs1201598   | C | 0.0182  |
| rs2731671   | C | -0.0485 |
| rs79229694  | C | -0.0367 |
| rs114264394 | C | -0.0933 |
| rs34031036  | C | -0.0298 |
| rs79090999  | G | 0.081   |
| rs72732657  | T | -0.0826 |
| rs256651    | T | -0.0306 |
| rs319912    | C | -0.0164 |
| rs4072529   | A | 0.0265  |
| rs3798097   | T | -0.0176 |
| rs41330246  | A | 0.0361  |
| rs72784573  | C | 0.0583  |
| rs10058032  | A | -0.0171 |
| rs78378399  | C | 0.0919  |
| rs150609703 | A | 0.1366  |
| rs60373834  | T | 0.0328  |
| rs116234516 | T | -0.0352 |
| rs13183784  | C | -0.1504 |
| rs791645    | T | 0.0244  |
| rs2099080   | T | -0.0486 |
| rs16891329  | T | -0.1094 |
| rs10519452  | C | -0.0323 |
| rs114544162 | A | 0.0764  |
| rs138533851 | C | -0.0403 |
| rs11953052  | T | 0.0207  |
| rs10939979  | A | 0.0271  |
| rs148948633 | A | 0.0898  |
| rs6898905   | C | -0.0205 |
| rs28363164  | T | -0.1209 |
| rs13360158  | C | -0.0242 |
| rs62360873  | G | 0.0703  |
| rs11738748  | G | 0.0168  |
| rs149256834 | C | 0.086   |
| rs254153    | C | 0.0232  |
| rs1044997   | A | -0.0269 |
| rs4280889   | T | 0.0306  |
| rs114432259 | T | -0.0615 |
| rs6871948   | A | -0.0184 |
| rs113599771 | G | 0.0621  |
| rs377925    | C | -0.0184 |
| rs12652307  | C | 0.0287  |
| rs75059256  | G | 0.1375  |

|             |   |         |
|-------------|---|---------|
| rs62379670  | T | -0.0268 |
| rs113907575 | G | 0.0434  |
| rs17069346  | C | 0.0199  |
| rs72799606  | G | 0.0276  |
| rs11959739  | A | 0.0232  |
| rs254125    | T | 0.0238  |
| rs35155151  | T | 0.0465  |
| rs140104870 | T | -0.0515 |
| rs72808095  | G | 0.0498  |
| rs138232438 | C | 0.0375  |
| rs7717830   | T | 0.0497  |
| rs7732589   | A | 0.0238  |
| rs12521069  | G | -0.0335 |
| rs11958032  | T | 0.0495  |
| rs35291414  | T | 0.0446  |
| rs76944554  | A | 0.0614  |
| rs13163152  | T | 0.0542  |
| rs7701734   | T | 0.1037  |
| rs73180582  | T | -0.0539 |
| rs17052948  | C | 0.1071  |
| rs1905655   | G | 0.022   |
| rs2233277   | C | 0.0161  |
| rs56212706  | A | -0.0629 |
| rs2403446   | C | -0.0228 |
| rs11747954  | A | 0.0488  |
| rs74666719  | A | 0.0725  |
| rs2330698   | A | -0.0183 |
| rs61483329  | G | -0.1161 |
| rs10052416  | A | -0.0172 |
| rs4577701   | C | 0.0178  |
| rs114965806 | T | 0.075   |
| rs10447123  | A | -0.039  |
| rs74976973  | C | 0.0952  |
| rs267411    | C | -0.0389 |
| rs35655139  | A | -0.0313 |
| rs74948699  | C | -0.1031 |
| rs145273523 | A | -0.0929 |
| rs56738488  | C | -0.0481 |
| rs2036339   | G | -0.0337 |
| rs72757385  | G | 0.0888  |
| rs2241583   | A | 0.0175  |
| rs7711645   | G | 0.0172  |
| rs143446709 | T | 0.0916  |
| rs35751312  | C | -0.0206 |
| rs76957260  | T | 0.105   |
| rs146192426 | T | 0.108   |
| rs114623970 | A | -0.0995 |

|             |   |         |
|-------------|---|---------|
| rs13172239  | G | -0.0619 |
| rs35684381  | C | 0.0259  |
| rs7712649   | G | 0.0213  |
| rs34943604  | G | -0.0192 |
| rs76337500  | A | -0.0896 |
| rs149751713 | T | -0.0904 |
| rs112015137 | C | -0.0558 |
| rs79481254  | G | -0.0493 |
| rs144010090 | G | 0.0798  |
| rs2895607   | C | 0.0525  |
| rs62349109  | C | 0.0891  |
| rs76917228  | T | -0.051  |
| rs71616993  | A | 0.0406  |
| rs150458272 | G | -0.1226 |
| rs138913419 | C | 0.0775  |
| rs111519591 | A | -0.0889 |
| rs71607582  | G | -0.119  |
| rs745798    | G | 0.0257  |
| rs10058451  | T | 0.0358  |
| rs72784606  | T | -0.0271 |
| rs2059960   | G | -0.0209 |
| rs72644094  | G | 0.0405  |
| rs73132014  | A | 0.037   |
| rs10482628  | A | -0.0805 |
| rs78367291  | G | 0.0445  |
| rs77597785  | G | 0.0256  |
| rs59969675  | C | 0.0267  |
| rs13355630  | A | -0.0675 |
| rs57390799  | C | 0.0633  |
| rs12517424  | A | 0.0205  |
| rs112643784 | A | 0.0603  |
| rs2341235   | C | 0.0623  |
| rs140140997 | A | 0.1119  |
| rs7965      | A | -0.0365 |
| rs10042330  | A | 0.0536  |
| rs13186041  | G | 0.0417  |
| rs77475797  | T | 0.103   |
| rs142421834 | G | 0.1114  |
| rs57639230  | G | -0.0262 |
| rs13153501  | T | 0.0223  |
| rs76368598  | A | 0.0386  |
| rs114458274 | C | 0.0623  |
| rs78901782  | T | 0.1145  |
| rs11746003  | G | 0.0448  |
| rs60865161  | A | 0.0185  |
| rs142740187 | C | 0.0524  |
| rs11739329  | A | -0.0187 |

|             |   |         |
|-------------|---|---------|
| rs11959674  | C | -0.0247 |
| rs116082697 | T | 0.0561  |
| rs4505973   | G | -0.0267 |
| rs7734291   | G | 0.0185  |
| rs78445902  | C | 0.0763  |
| rs75688752  | C | -0.0329 |
| rs72799992  | G | 0.0493  |
| rs75170821  | C | 0.0904  |
| rs114166067 | A | -0.1186 |
| rs17657378  | C | 0.0228  |
| rs191082    | C | -0.0477 |
| rs115408938 | T | 0.1036  |
| rs80177618  | C | 0.0365  |
| rs1422467   | T | -0.0244 |
| rs6893365   | A | -0.0211 |
| rs10038021  | C | 0.0269  |
| rs7707802   | C | 0.0181  |
| rs10061722  | C | -0.0204 |
| rs72743684  | A | 0.0992  |
| rs116388024 | G | -0.1227 |
| rs79986886  | G | 0.0533  |
| rs143152707 | A | 0.1048  |
| rs114497105 | T | 0.1178  |
| rs114808591 | C | -0.1025 |
| rs72787097  | C | -0.0392 |
| rs28491808  | G | 0.0247  |
| rs75979846  | T | 0.0477  |
| rs1173214   | C | -0.0268 |
| rs112516565 | A | -0.0838 |
| rs7728114   | A | -0.0178 |
| rs78532767  | T | 0.035   |
| rs1460806   | A | 0.0158  |
| rs79492076  | G | -0.0323 |
| rs145931005 | T | 0.1199  |
| rs7704052   | A | -0.1042 |
| rs34554374  | C | -0.0612 |
| rs77458849  | C | -0.0661 |
| rs4099108   | A | -0.0335 |
| rs72738833  | C | -0.0599 |
| rs77035238  | A | 0.0468  |
| rs114557152 | A | 0.033   |
| rs1864925   | G | -0.0263 |
| rs10155659  | A | -0.0408 |
| rs13174183  | T | -0.0715 |
| rs79663639  | C | 0.1097  |
| rs111553625 | T | 0.0212  |
| rs71627991  | A | -0.0654 |

|             |   |         |
|-------------|---|---------|
| rs62359372  | G | 0.0745  |
| rs1991493   | G | -0.0193 |
| rs1187484   | T | 0.0218  |
| rs76500399  | G | -0.128  |
| rs73800277  | A | 0.0584  |
| rs78514874  | A | 0.0716  |
| rs112845837 | T | -0.1214 |
| rs7720871   | A | 0.0177  |
| rs72743351  | A | -0.0457 |
| rs142294216 | G | 0.0933  |
| rs16897281  | T | -0.0968 |
| rs148804457 | A | -0.0626 |
| rs17536228  | G | 0.0969  |
| rs115192909 | G | -0.0439 |
| rs6860534   | T | -0.0177 |
| rs2054842   | T | 0.0479  |
| rs7714005   | G | 0.0298  |
| rs115117213 | T | 0.088   |
| rs1580395   | A | -0.0289 |
| rs55728126  | A | 0.0478  |
| rs4702765   | T | 0.0577  |
| rs60501065  | A | -0.0861 |
| rs6594352   | A | -0.016  |
| rs140035152 | G | 0.072   |
| rs114578724 | A | -0.1001 |
| rs75329963  | A | -0.0779 |
| rs4975593   | T | -0.0168 |
| rs74771814  | T | 0.0944  |
| rs270589    | C | -0.0245 |
| rs116748684 | T | 0.0792  |
| rs10476921  | G | 0.0158  |
| rs78458554  | A | -0.0453 |
| rs79062239  | C | 0.0742  |
| rs2451011   | G | -0.0239 |
| rs3843489   | T | 0.0271  |
| rs10039262  | G | 0.0444  |
| rs115064122 | T | -0.0956 |
| rs76414050  | C | -0.0857 |
| rs151036450 | T | -0.0952 |
| rs79111715  | G | 0.0572  |
| rs72751414  | T | -0.0528 |
| rs12173252  | T | 0.0335  |
| rs4703573   | A | -0.02   |
| rs72778784  | A | 0.0294  |
| rs144155258 | A | 0.065   |
| rs76486454  | A | 0.0639  |
| rs12189541  | C | 0.018   |



|             |   |         |
|-------------|---|---------|
| rs1428600   | A | -0.0185 |
| rs114811340 | G | -0.0766 |
| rs116300228 | C | 0.0599  |
| rs78347435  | C | -0.064  |
| rs6885176   | A | 0.0649  |
| rs146669452 | C | 0.047   |
| rs150692263 | G | 0.069   |
| rs77108342  | A | -0.0342 |
| rs115335141 | G | 0.0938  |
| rs17294112  | G | 0.0524  |
| rs144046478 | A | 0.0979  |
| rs13179916  | A | -0.0522 |
| rs2591453   | A | -0.0174 |
| rs141799772 | G | -0.1135 |
| rs80105314  | A | -0.0737 |
| rs7711454   | C | -0.0233 |
| rs9293716   | T | -0.0248 |
| rs76773338  | G | 0.0338  |
| rs10059700  | G | 0.0257  |
| rs74891075  | T | 0.0556  |
| rs72747396  | A | 0.1082  |
| rs76690378  | A | -0.0512 |
| rs6896685   | T | 0.0297  |
| rs75264367  | T | 0.0512  |
| rs355415    | G | 0.0273  |
| rs766444    | G | 0.0456  |
| rs72710660  | T | -0.0562 |
| rs141258167 | C | 0.1104  |
| rs35558461  | A | 0.0217  |
| rs11744676  | A | -0.056  |
| rs173780    | A | 0.0209  |
| rs72771598  | A | 0.0186  |
| rs76398000  | A | -0.0553 |
| rs76838000  | T | 0.1398  |
| rs7731599   | C | 0.0167  |
| rs111538191 | T | 0.0743  |
| rs140333045 | T | 0.0801  |
| rs79888344  | C | -0.0305 |
| rs59402030  | A | 0.1001  |
| rs72816340  | A | -0.024  |
| rs830668    | G | 0.0417  |
| rs72828896  | T | 0.0224  |
| rs58317134  | C | 0.0689  |
| rs55650607  | A | 0.033   |
| rs146999487 | T | -0.0928 |
| rs61754594  | T | -0.0353 |
| rs115335337 | A | 0.0492  |

|             |   |         |
|-------------|---|---------|
| rs62341816  | T | 0.0592  |
| rs72736081  | T | 0.0438  |
| rs116022046 | C | 0.0593  |
| rs9327026   | A | 0.0218  |
| rs2190787   | A | 0.0177  |
| rs61290176  | A | -0.0209 |
| rs35742     | A | 0.0187  |
| rs140434738 | A | 0.0598  |
| rs77667435  | A | -0.0487 |
| rs115282024 | A | 0.0865  |
| rs17828481  | G | -0.0254 |
| rs142751125 | A | -0.0959 |
| rs72710606  | C | -0.0257 |
| rs75642795  | A | -0.0674 |
| rs147866699 | G | -0.1264 |
| rs76210039  | T | 0.0509  |
| rs314155    | A | 0.0156  |
| rs11749125  | G | 0.018   |
| rs80218654  | A | 0.0331  |
| rs115690446 | A | 0.0692  |
| rs12652402  | G | 0.0213  |
| rs114320292 | A | -0.0855 |
| rs7730928   | T | -0.0168 |
| rs428925    | G | 0.021   |
| rs2914241   | C | -0.0171 |
| rs9313502   | G | 0.0648  |
| rs143867325 | T | -0.1363 |
| rs11959675  | A | -0.0196 |
| rs75769046  | G | -0.0394 |
| rs112820422 | G | 0.0467  |
| rs145800063 | A | -0.1014 |
| rs4957476   | A | 0.0163  |
| rs5745232   | T | 0.0428  |
| rs150417658 | A | -0.0919 |
| rs740657    | T | -0.0325 |
| rs66507348  | T | -0.0322 |
| rs883031    | A | 0.0336  |
| rs319134    | G | 0.0242  |
| rs76926676  | C | -0.0978 |
| rs79556779  | T | -0.0467 |
| rs74560420  | T | -0.0493 |
| rs115179162 | A | 0.0555  |
| rs78894899  | C | 0.057   |
| rs416271    | T | -0.0165 |
| rs62398155  | G | -0.069  |
| rs4380683   | T | 0.0191  |
| rs59173395  | A | -0.0233 |

|             |   |         |
|-------------|---|---------|
| rs2962632   | C | -0.0247 |
| rs40473     | T | -0.0292 |
| rs62375660  | T | 0.0675  |
| rs116364340 | C | 0.0901  |
| rs73322054  | A | 0.0658  |
| rs138606028 | G | -0.0739 |
| rs17060800  | C | 0.0175  |
| rs12520845  | A | -0.0684 |
| rs148043394 | T | -0.0906 |
| rs2195391   | C | -0.0951 |
| rs113126704 | G | 0.0266  |
| rs11167618  | T | 0.0653  |
| rs115962932 | A | -0.0868 |
| rs1601246   | C | 0.0267  |
| rs35447611  | C | -0.0267 |
| rs147031556 | G | -0.0774 |
| rs78060907  | A | 0.109   |
| rs115623369 | T | -0.089  |
| rs111258973 | T | 0.0459  |
| rs156002    | T | -0.0174 |
| rs74957275  | G | 0.0557  |
| rs79101108  | A | 0.0441  |
| rs400183    | A | 0.1173  |
| rs35004257  | C | -0.0288 |
| rs3797115   | T | -0.0502 |
| rs12189448  | C | -0.0268 |
| rs146444509 | C | 0.0711  |
| rs2928180   | C | 0.0212  |
| rs115078251 | A | -0.0792 |
| rs286602    | A | -0.0163 |
| rs1354141   | T | 0.0492  |
| rs6886492   | G | 0.0227  |
| rs10051978  | A | -0.0205 |
| rs72762973  | C | -0.0336 |
| rs149330187 | C | -0.1398 |
| rs7716554   | G | -0.0178 |
| rs76168257  | G | 0.1002  |
| rs13189427  | A | -0.0919 |
| rs114277270 | C | -0.1011 |
| rs10075932  | A | 0.0474  |
| rs10076945  | A | -0.0153 |
| rs152268    | C | -0.0344 |
| rs17653965  | G | -0.0538 |
| rs115641149 | T | 0.0541  |
| rs77885558  | G | -0.0449 |
| rs347249    | T | 0.0172  |
| rs17642594  | C | 0.0285  |

|             |   |         |
|-------------|---|---------|
| rs79815346  | G | 0.0577  |
| rs1586336   | C | -0.0199 |
| rs2059854   | C | 0.024   |
| rs34946211  | C | -0.0167 |
| rs4976585   | C | -0.0208 |
| rs6151874   | C | 0.0828  |
| rs72816850  | T | 0.1315  |
| rs114590188 | A | -0.0506 |
| rs258874    | G | 0.0161  |
| rs115476521 | C | 0.0684  |
| rs139090658 | T | -0.0772 |
| rs11167513  | A | 0.1236  |
| rs67714388  | A | 0.0325  |
| rs17840646  | T | 0.0219  |
| rs115101409 | A | 0.094   |
| rs74422098  | C | -0.1112 |
| rs72735072  | C | 0.0492  |
| rs11949724  | A | -0.0183 |
| rs62372004  | A | 0.054   |
| rs13184970  | A | 0.0498  |
| rs12514952  | T | -0.0343 |
| rs6883794   | C | 0.07    |
| rs3914101   | G | 0.0414  |
| rs2288794   | G | -0.0271 |
| rs27011     | T | -0.017  |
| rs6894022   | T | 0.0166  |
| rs3811879   | C | 0.0188  |
| rs78191176  | C | -0.054  |
| rs143097607 | C | -0.0531 |
| rs929757    | G | 0.0168  |
| rs114738076 | T | -0.1149 |
| rs148220650 | A | -0.0825 |
| rs10491354  | C | -0.0267 |
| rs156030    | A | 0.0417  |
| rs7718220   | C | -0.0183 |
| rs17079867  | T | 0.0543  |
| rs4535467   | A | -0.0234 |
| rs26688     | C | 0.0166  |
| rs4582264   | G | -0.0198 |
| rs139956311 | T | -0.0668 |
| rs12516458  | G | 0.0401  |
| rs74635969  | G | 0.0964  |
| rs147491427 | A | -0.0562 |
| rs116520836 | C | -0.1117 |
| rs41298318  | T | 0.0715  |
| rs72771117  | C | 0.0698  |
| rs141437059 | C | 0.074   |

|             |   |         |
|-------------|---|---------|
| rs9324855   | G | -0.0159 |
| rs115539035 | T | 0.0568  |
| rs114905048 | G | -0.1124 |
| rs150866586 | A | 0.0827  |
| rs112382177 | A | 0.0916  |
| rs146697834 | A | -0.1106 |
| rs7712578   | A | 0.0374  |
| rs62392878  | T | -0.0289 |
| rs111409332 | A | -0.1059 |
| rs61468039  | C | 0.1015  |
| rs34247509  | A | -0.0267 |
| rs77938026  | T | -0.0433 |
| rs4422549   | T | -0.0324 |
| rs72734890  | G | -0.0197 |
| rs7720881   | C | 0.0444  |
| rs2435069   | C | -0.0219 |
| rs114490150 | A | -0.0815 |
| rs149420761 | A | -0.0698 |
| rs6861217   | A | 0.0251  |
| rs143093730 | G | 0.1113  |
| rs114773313 | C | 0.0447  |
| rs7701155   | T | 0.1099  |
| rs150641322 | G | -0.0857 |
| rs10462008  | G | -0.0194 |
| rs29918     | G | 0.0193  |
| rs10060511  | G | 0.0209  |
| rs35144421  | T | 0.0157  |
| rs13175612  | C | 0.0582  |
| rs78821619  | C | -0.0916 |
| rs9968642   | A | 0.0164  |
| rs13184191  | C | 0.0998  |
| rs12513965  | C | 0.0355  |
| rs72845182  | T | 0.0609  |
| rs144662964 | C | -0.0808 |
| rs116170604 | A | 0.0527  |
| rs62351298  | A | 0.0589  |
| rs330663    | T | 0.0214  |
| rs111779486 | A | -0.0634 |
| rs56341838  | C | -0.107  |
| rs155344    | C | 0.1084  |
| rs62382769  | G | -0.0245 |
| rs142833413 | A | -0.0727 |
| rs62359711  | A | 0.0887  |
| rs9765366   | T | 0.0251  |
| rs11241517  | C | -0.0244 |
| rs115309353 | G | 0.0714  |
| rs138741256 | T | 0.0797  |

|             |   |         |
|-------------|---|---------|
| rs111746628 | T | 0.0746  |
| rs12153376  | T | -0.0359 |
| rs146407773 | T | 0.0189  |
| rs445410    | A | -0.0166 |
| rs145830186 | G | 0.077   |
| rs116308168 | T | 0.123   |
| rs147251680 | A | -0.1158 |
| rs147493048 | G | -0.0931 |
| rs144857590 | T | 0.0597  |
| rs78701483  | C | 0.0926  |
| rs116345865 | C | -0.0448 |
| rs75895997  | T | 0.0401  |
| rs7713705   | G | -0.0155 |
| rs13153403  | G | -0.0156 |
| rs13184674  | T | -0.0229 |
| rs34110937  | G | -0.1204 |
| rs74391321  | A | -0.0972 |
| rs115543657 | G | -0.1024 |
| rs115928949 | G | -0.0453 |
| rs76773844  | A | 0.0713  |
| rs72815842  | A | -0.0737 |
| rs115687557 | T | 0.0613  |
| rs331088    | G | -0.1227 |
| rs4912660   | G | -0.0242 |
| rs75060595  | G | -0.0913 |
| rs1301456   | A | -0.0166 |
| rs6890933   | G | -0.0697 |
| rs71627555  | G | 0.0852  |
| rs6555377   | G | -0.0597 |
| rs74474222  | G | -0.0688 |
| rs62333204  | A | 0.0309  |
| rs42569     | T | -0.0456 |
| rs13164208  | A | 0.0287  |
| rs12186394  | A | -0.0315 |
| rs79584479  | T | 0.0993  |
| rs6877876   | G | -0.03   |
| rs7731808   | C | -0.0747 |
| rs2973494   | G | 0.0153  |
| rs39957     | C | 0.0167  |
| rs34707747  | C | 0.0293  |
| rs938452    | C | -0.0873 |
| rs115950840 | C | -0.0556 |
| rs12110006  | T | -0.0236 |
| rs115305281 | A | -0.0605 |
| rs17836080  | C | 0.0421  |
| rs112374268 | C | -0.072  |
| rs72811356  | C | 0.0732  |

|             |   |         |
|-------------|---|---------|
| rs493321    | T | -0.0179 |
| rs10076927  | T | -0.0426 |
| rs114839543 | T | 0.1019  |
| rs17085088  | A | 0.0565  |
| rs13360326  | C | 0.0333  |
| rs76179633  | G | 0.0903  |
| rs717594    | C | -0.0582 |
| rs74944515  | T | 0.0366  |
| rs80007090  | T | -0.0968 |
| rs80065157  | C | -0.0433 |
| rs113620971 | G | -0.0705 |
| rs1460952   | C | -0.0374 |
| rs10515513  | G | 0.0315  |
| rs114558737 | T | 0.0504  |
| rs11952802  | A | 0.0177  |
| rs1672486   | T | 0.0202  |
| rs144272042 | G | 0.114   |
| rs151002621 | C | 0.072   |
| rs1121657   | A | -0.022  |
| rs3884534   | G | -0.0176 |
| rs10462737  | G | -0.0252 |
| rs12522820  | A | -0.0927 |
| rs4379229   | T | -0.0158 |
| rs34858255  | A | 0.0463  |
| rs79513073  | G | 0.041   |
| rs34538285  | G | -0.0957 |
| rs55974446  | G | -0.029  |
| rs2460503   | C | -0.0155 |
| rs3922757   | G | -0.0195 |
| rs171745    | G | -0.0494 |
| rs937621    | A | -0.0165 |
| rs79421664  | A | -0.0415 |
| rs11249743  | T | -0.0222 |
| rs60952816  | C | -0.0159 |
| rs1845516   | A | -0.0208 |
| rs1580183   | G | 0.0463  |
| rs78730320  | C | 0.0819  |
| rs57873423  | T | 0.0975  |
| rs62387885  | C | 0.1067  |
| rs116072313 | C | 0.062   |
| rs1382888   | C | -0.0624 |
| rs254572    | C | 0.0191  |
| rs78055590  | C | -0.0454 |
| rs77901845  | A | 0.0397  |
| rs71615844  | T | -0.061  |
| rs115931518 | T | -0.0713 |
| rs11953143  | T | 0.0303  |

|             |   |         |
|-------------|---|---------|
| rs10471635  | C | -0.024  |
| rs252786    | C | -0.0997 |
| rs62390589  | T | 0.0339  |
| rs6863970   | A | -0.0169 |
| rs16885817  | T | -0.0263 |
| rs17060195  | G | -0.0564 |
| rs2459790   | T | -0.027  |
| rs7737075   | A | -0.0161 |
| rs344652    | C | 0.0207  |
| rs1363886   | C | 0.0216  |
| rs13189850  | C | 0.0271  |
| rs77351430  | T | 0.0548  |
| rs140175056 | T | 0.1232  |
| rs981144    | A | 0.0172  |
| rs852560    | G | -0.0245 |
| rs34109633  | C | -0.0227 |
| rs78527211  | C | 0.047   |
| rs6555857   | G | 0.0372  |
| rs78433415  | A | 0.0449  |
| rs35524424  | A | 0.026   |
| rs10940193  | C | 0.0216  |
| rs76639436  | C | 0.1122  |
| rs6885775   | G | 0.0361  |
| rs3822426   | T | 0.0188  |
| rs4867096   | T | -0.0252 |
| rs11242504  | G | 0.0239  |
| rs75134071  | G | -0.0372 |
| rs1363564   | T | 0.0245  |
| rs77580679  | A | -0.0372 |
| rs62355194  | T | 0.0288  |
| rs905213    | G | 0.0156  |
| rs9686337   | A | -0.1053 |
| rs115483539 | A | -0.0656 |
| rs10065655  | C | 0.0169  |
| rs116325239 | A | -0.0808 |
| rs6892849   | G | 0.0207  |
| rs12516186  | C | 0.0158  |
| rs75060506  | G | -0.0917 |
| rs56240842  | A | -0.0491 |
| rs274714    | T | 0.0163  |
| rs74765485  | C | 0.0424  |
| rs7705340   | T | 0.0291  |
| rs11954765  | A | -0.0209 |
| rs140830961 | A | 0.0719  |
| rs12516620  | A | -0.0298 |
| rs56154420  | G | -0.0522 |
| rs113162577 | T | 0.0374  |



|             |   |         |
|-------------|---|---------|
| rs113948548 | A | -0.0945 |
| rs1494594   | C | -0.0223 |
| rs116018226 | A | 0.0866  |
| rs114532334 | G | -0.0418 |
| rs11739949  | A | 0.0155  |
| rs115605143 | C | 0.1166  |
| rs139035236 | A | -0.0836 |
| rs10075324  | T | 0.0295  |
| rs76278782  | T | -0.0669 |
| rs34057521  | A | -0.0871 |
| rs173703    | A | -0.0184 |
| rs112000058 | T | -0.0673 |
| rs112699376 | T | 0.0295  |
| rs112830694 | C | 0.1148  |
| rs450060    | T | -0.0297 |
| rs74446937  | T | 0.0532  |
| rs27485     | A | 0.0178  |
| rs140788915 | A | -0.0738 |
| rs72810065  | A | 0.0412  |
| rs77483990  | A | 0.0259  |
| rs74821709  | T | 0.068   |
| rs71628483  | T | 0.1097  |
| rs76857366  | C | -0.0694 |
| rs884083    | T | 0.0157  |
| rs463129    | C | 0.0166  |
| rs7705566   | G | -0.0185 |
| rs1833525   | A | -0.0223 |
| rs72735252  | T | -0.0597 |
| rs114452286 | A | 0.0902  |
| rs729341    | T | -0.02   |
| rs11951043  | A | -0.0783 |
| rs145138976 | T | 0.0481  |
| rs259102    | T | 0.022   |
| rs72794288  | A | -0.081  |
| rs72760907  | T | -0.0446 |
| rs72802985  | A | -0.0326 |
| rs6898306   | C | -0.0159 |
| rs10050584  | G | 0.027   |
| rs330173    | G | -0.0275 |
| rs72792292  | T | 0.028   |
| rs72773874  | C | 0.0416  |
| rs75970410  | A | 0.0814  |
| rs111281890 | C | -0.0714 |
| rs13163736  | C | 0.1304  |
| rs4235601   | C | -0.0418 |
| rs138403210 | C | -0.0841 |
| rs1457756   | T | 0.0159  |

|             |   |         |
|-------------|---|---------|
| rs117002136 | T | 0.0733  |
| rs76313312  | A | 0.0414  |
| rs6450173   | A | -0.119  |
| rs80126199  | C | -0.0699 |
| rs77887838  | T | -0.0958 |
| rs17236381  | A | -0.0228 |
| rs116466855 | T | -0.0943 |
| rs140888223 | C | -0.0678 |
| rs78423633  | C | -0.0589 |
| rs115244819 | T | 0.0929  |
| rs72812336  | T | 0.0404  |
| rs55828022  | G | -0.0343 |
| rs62365247  | C | 0.0647  |
| rs113730340 | T | 0.0261  |
| rs11948464  | T | -0.0198 |
| rs114985850 | T | -0.1093 |
| rs3805435   | C | -0.0287 |
| rs6859903   | T | 0.0182  |
| rs79898340  | T | 0.0347  |
| rs1963311   | T | 0.0229  |
| rs78787613  | T | 0.0913  |
| rs76467337  | G | 0.0466  |
| rs76052183  | T | 0.0483  |
| rs13177707  | G | -0.0181 |
| rs58954036  | T | 0.0321  |
| rs80147738  | A | 0.1399  |
| rs10044050  | C | 0.0768  |
| rs1001714   | G | 0.0441  |
| rs743562    | T | 0.0156  |
| rs10073113  | T | -0.0225 |
| rs114845688 | T | 0.0627  |
| rs17303482  | A | -0.0317 |
| rs76691464  | A | -0.0718 |
| rs882253    | A | -0.017  |
| rs6868319   | A | 0.0746  |
| rs1060559   | T | 0.025   |
| rs10940176  | G | -0.0232 |
| rs80322095  | C | 0.09    |
| rs75365643  | C | 0.0841  |
| rs80083863  | C | -0.0714 |
| rs115873564 | A | -0.0719 |
| rs4975680   | C | 0.0173  |
| rs77768119  | T | -0.0919 |
| rs115276939 | A | -0.143  |
| rs3121689   | T | -0.0152 |
| rs116537641 | G | 0.0557  |
| rs72778783  | G | -0.037  |

|             |   |         |
|-------------|---|---------|
| rs80303191  | C | -0.0377 |
| rs17538629  | T | -0.0234 |
| rs62372472  | T | 0.0388  |
| rs1895436   | C | -0.0348 |
| rs11741502  | A | -0.0616 |
| rs114111616 | A | 0.1209  |
| rs73733208  | C | -0.0925 |
| rs79613992  | G | 0.0945  |
| rs62360135  | G | -0.0766 |
| rs72759847  | G | 0.0235  |
| rs6895227   | C | -0.0716 |
| rs114871733 | A | 0.0637  |
| rs62378159  | A | -0.0994 |
| rs114612963 | T | -0.0986 |
| rs7702122   | A | -0.024  |
| rs145482298 | C | -0.1148 |
| rs76867997  | A | -0.0854 |
| rs71624136  | A | 0.0779  |
| rs140733734 | A | -0.0704 |
| rs142332041 | C | 0.0685  |
| rs322363    | C | -0.0208 |
| rs71609316  | C | 0.0654  |
| rs115097311 | G | 0.049   |
| rs12516253  | G | -0.02   |
| rs115140284 | A | 0.0506  |
| rs72768351  | G | -0.0705 |
| rs114374563 | A | -0.0734 |
| rs7719325   | G | 0.0184  |
| rs116510005 | G | 0.0269  |
| rs11747647  | C | -0.0209 |
| rs79931155  | T | -0.0587 |
| rs114974882 | T | 0.0695  |
| rs148978753 | C | 0.0736  |
| rs13172196  | A | 0.0972  |
| rs4958706   | C | 0.0332  |
| rs7733905   | T | 0.0415  |
| rs73334729  | G | -0.0205 |
| rs161869    | T | 0.0151  |
| rs13184487  | C | -0.0183 |
| rs145058715 | T | 0.0867  |
| rs76378431  | G | 0.0546  |
| rs6862962   | T | 0.0215  |
| rs56023185  | G | -0.0673 |
| rs77105535  | T | 0.0673  |
| rs114793339 | T | 0.0452  |
| rs1363138   | A | -0.0213 |
| rs10941998  | C | -0.0234 |

|             |   |         |
|-------------|---|---------|
| rs17519929  | G | -0.0187 |
| rs74337987  | G | 0.0759  |
| rs114850823 | T | 0.15    |
| rs6886461   | T | 0.0222  |
| rs72645719  | T | -0.0442 |
| rs2853687   | A | 0.0175  |
| rs11739496  | T | -0.0329 |
| rs7705127   | G | 0.0341  |
| rs71637505  | A | 0.0427  |
| rs4704611   | G | 0.0161  |
| rs35786549  | A | -0.016  |
| rs139844252 | T | 0.0561  |
| rs77318359  | G | -0.0349 |
| rs62368670  | C | 0.0482  |
| rs178782    | T | -0.0505 |
| rs168463    | T | -0.0155 |
| rs113092628 | G | -0.1109 |
| rs35551776  | G | 0.0242  |
| rs422437    | T | 0.0246  |
| rs74675480  | A | 0.0468  |
| rs4921040   | C | 0.0226  |
| rs62331187  | T | 0.0186  |
| rs12332475  | T | -0.0626 |
| rs10052830  | T | -0.0601 |
| rs56085567  | G | -0.0212 |
| rs77222052  | C | 0.0653  |
| rs143767084 | A | -0.0656 |
| rs74470003  | G | -0.0446 |
| rs2330780   | A | -0.0157 |
| rs111941445 | T | -0.0444 |
| rs10477173  | G | 0.0169  |
| rs78992920  | A | -0.0593 |
| rs12522129  | A | -0.019  |
| rs12108894  | G | -0.0216 |
| rs27877     | C | 0.0205  |
| rs10461439  | C | 0.0177  |
| rs142801833 | C | 0.0828  |
| rs149789973 | T | 0.0691  |
| rs75644220  | T | -0.1106 |
| rs1104965   | T | 0.0248  |
| rs4131028   | C | 0.0696  |
| rs144170534 | A | -0.0723 |
| rs68006832  | G | 0.0362  |
| rs7726574   | C | -0.0216 |
| rs147782602 | C | -0.0805 |
| rs10866635  | T | 0.0163  |
| rs71594959  | T | -0.0376 |

|             |   |         |
|-------------|---|---------|
| rs12513607  | T | -0.0282 |
| rs10440671  | T | -0.0159 |
| rs9327119   | C | 0.0156  |
| rs28877570  | A | -0.018  |
| rs6871717   | T | 0.0158  |
| rs4867089   | T | 0.0183  |
| rs11134138  | T | 0.0155  |
| rs3846596   | A | -0.016  |
| rs12188296  | T | 0.0405  |
| rs13170328  | G | 0.0328  |
| rs3798083   | G | 0.0266  |
| rs36004601  | A | 0.0159  |
| rs2657471   | T | 0.0445  |
| rs250323    | C | -0.0726 |
| rs72744640  | C | 0.076   |
| rs4699955   | G | -0.0157 |
| rs1973538   | G | -0.0188 |
| rs10071342  | G | -0.0235 |
| rs2166722   | T | -0.0293 |
| rs7709638   | C | -0.0154 |
| rs7737771   | C | -0.1266 |
| rs146496958 | T | -0.0565 |
| rs151863    | C | -0.0259 |
| rs2913899   | T | 0.0276  |
| rs13185048  | T | -0.0152 |
| rs72763764  | A | -0.1094 |
| rs148749060 | A | -0.0619 |
| rs114369638 | A | 0.0703  |
| rs74329504  | A | -0.0646 |
| rs7714366   | G | 0.0178  |
| rs79457550  | A | 0.0276  |
| rs4702561   | T | 0.0163  |
| rs61372352  | T | 0.1136  |
| rs150444223 | A | -0.0723 |
| rs62338567  | T | 0.0715  |
| rs62379265  | T | 0.0567  |
| rs74731672  | A | 0.0989  |
| rs6580150   | G | 0.0315  |
| rs35474055  | A | -0.0345 |
| rs264843    | G | -0.0236 |
| rs7446517   | C | -0.0208 |
| rs138863998 | A | 0.1074  |
| rs113674007 | G | 0.051   |
| rs749965    | A | -0.0161 |
| rs77745226  | A | 0.0535  |
| rs7733387   | A | 0.0871  |
| rs78690792  | A | -0.0297 |

|             |   |         |
|-------------|---|---------|
| rs479812    | C | 0.0173  |
| rs76957203  | A | -0.0445 |
| rs112923389 | T | 0.0435  |
| rs11740143  | C | 0.0401  |
| rs515443    | A | 0.0179  |
| rs115666662 | G | -0.0529 |
| rs11741219  | A | -0.0166 |
| rs148267324 | T | 0.0796  |
| rs17183978  | G | -0.0167 |
| rs35522058  | G | -0.0319 |
| rs41271133  | A | -0.0525 |
| rs177281    | A | -0.0246 |
| rs35881510  | G | 0.0396  |
| rs164504    | A | -0.068  |
| rs4705387   | T | 0.0162  |
| rs79521616  | T | -0.0986 |
| rs12109442  | A | -0.0413 |
| rs3798132   | T | 0.0207  |
| rs62380968  | G | -0.0218 |
| rs75162800  | C | -0.0411 |
| rs6866600   | G | -0.02   |
| rs2069658   | A | -0.0191 |
| rs17374573  | T | -0.0627 |
| rs78417112  | T | 0.0794  |
| rs149641852 | T | -0.0889 |
| rs17597355  | G | -0.0385 |
| rs13171109  | T | 0.0395  |
| rs12515007  | G | -0.0336 |
| rs141172419 | A | -0.078  |
| rs1592736   | T | -0.0148 |
| rs115556951 | T | -0.1096 |
| rs76171396  | G | -0.1052 |
| rs7711463   | T | 0.019   |
| rs115537678 | T | -0.1085 |
| rs112397247 | T | 0.042   |
| rs10038847  | T | 0.018   |
| rs252802    | C | -0.0153 |
| rs114250834 | T | 0.1027  |
| rs1875981   | A | -0.052  |
| rs150848050 | A | 0.0761  |
| rs74867193  | G | 0.0451  |
| rs10072082  | G | 0.0371  |
| rs75885215  | A | -0.0409 |
| rs71611366  | C | -0.0347 |
| rs115503893 | C | 0.067   |
| rs4141220   | G | 0.0162  |
| rs1177764   | C | 0.0151  |

|             |   |         |
|-------------|---|---------|
| rs4975544   | A | -0.0183 |
| rs1707082   | G | -0.0406 |
| rs13162191  | A | -0.0215 |
| rs11750387  | T | 0.0375  |
| rs72828880  | A | -0.0906 |
| rs116739737 | T | -0.0713 |
| rs57108856  | T | -0.0607 |
| rs1487228   | C | -0.017  |
| rs113711068 | G | 0.1103  |
| rs10057578  | C | -0.0158 |
| rs13190572  | C | 0.0199  |
| rs17844607  | G | -0.0541 |
| rs74739320  | T | 0.0514  |
| rs72771971  | G | -0.0244 |
| rs144728538 | T | 0.115   |
| rs147945648 | C | 0.0592  |
| rs13162116  | T | 0.0243  |
| rs13182811  | T | -0.0659 |
| rs13170530  | C | 0.0182  |
| rs59615642  | G | 0.043   |
| rs7718829   | T | 0.0888  |
| rs55930118  | A | -0.0778 |
| rs76731489  | G | 0.0586  |
| rs76390533  | T | 0.0456  |
| rs6895378   | G | 0.0166  |
| rs72753316  | T | 0.0458  |
| rs4314456   | T | 0.0215  |
| rs17287634  | A | -0.0236 |
| rs252797    | G | 0.0235  |
| rs148507203 | T | 0.1081  |
| rs112363291 | A | -0.0511 |
| rs270221    | A | -0.0558 |
| rs149722851 | C | 0.1123  |
| rs11739994  | T | -0.0284 |
| rs34698853  | T | -0.0262 |
| rs572281    | G | 0.0217  |
| rs113211483 | G | 0.0502  |
| rs79459409  | A | 0.0491  |
| rs116220107 | A | -0.0409 |
| rs77196517  | A | 0.0785  |
| rs138865344 | T | -0.0708 |
| rs79208351  | A | 0.0426  |
| rs10515901  | C | -0.025  |
| rs76777518  | T | -0.0679 |
| rs6555620   | T | 0.0228  |
| rs34747519  | C | 0.0616  |
| rs115407388 | T | -0.0704 |

|             |   |         |
|-------------|---|---------|
| rs6866421   | A | 0.0209  |
| rs36001893  | T | 0.0392  |
| rs6894958   | G | -0.0205 |
| rs17229817  | C | 0.0646  |
| rs111427748 | A | 0.0933  |
| rs1195947   | C | 0.0175  |
| rs17344298  | T | -0.032  |
| rs75927865  | C | 0.0729  |
| rs73064153  | C | -0.0812 |
| rs79640551  | T | -0.0818 |
| rs77891660  | C | -0.0786 |
| rs78947974  | G | -0.0648 |
| rs115392132 | C | 0.0668  |
| rs141075269 | T | 0.088   |
| rs4370260   | G | 0.0237  |
| rs79275996  | A | 0.064   |
| rs72831391  | T | -0.0542 |
| rs116469032 | T | -0.0961 |
| rs148733061 | A | -0.1064 |
| rs263733    | T | -0.036  |
| rs56034857  | G | 0.0313  |
| rs75212378  | C | -0.1128 |
| rs7722953   | A | 0.0322  |
| rs10045126  | G | -0.0156 |
| rs138879963 | T | 0.1357  |
| rs26241     | C | 0.0441  |
| rs62356362  | T | 0.03    |
| rs77348008  | T | -0.0635 |
| rs11952611  | C | 0.0184  |
| rs142267165 | G | 0.0441  |
| rs1353885   | T | 0.0429  |
| rs4404647   | T | -0.0235 |
| rs114841155 | G | -0.1224 |
| rs10050596  | C | -0.0559 |
| rs76548177  | A | 0.0612  |
| rs62348041  | A | 0.0793  |
| rs35884882  | T | 0.1236  |
| rs145875843 | T | 0.0285  |
| rs112751821 | T | 0.06    |
| rs17671990  | T | -0.0302 |
| rs2115310   | G | -0.0151 |
| rs138007459 | A | 0.0851  |
| rs146551307 | C | 0.0865  |
| rs350116    | T | 0.0557  |
| rs2198891   | A | -0.1236 |
| rs4418103   | A | -0.0301 |
| rs116691411 | G | 0.0892  |



|             |   |         |
|-------------|---|---------|
| rs13175350  | C | 0.0253  |
| rs8192228   | T | -0.0942 |
| rs72761671  | A | 0.0491  |
| rs112815023 | G | 0.0414  |
| rs4310002   | C | -0.0187 |
| rs11743751  | C | -0.0198 |
| rs75697877  | T | -0.1112 |
| rs819550    | C | 0.0154  |
| rs116635665 | T | 0.0511  |
| rs74428247  | C | -0.0326 |
| rs10474658  | T | 0.0191  |
| rs113077359 | A | 0.0819  |
| rs76719902  | C | -0.0561 |
| rs10064177  | G | -0.0158 |
| rs2964154   | A | 0.0214  |
| rs12657419  | A | 0.0932  |
| rs13190297  | G | 0.0172  |
| rs12513559  | C | -0.0169 |
| rs114602062 | A | -0.0844 |
| rs78776997  | G | 0.0515  |
| rs17067598  | A | 0.0398  |
| rs10067727  | A | 0.0485  |
| rs138296328 | A | 0.0997  |
| rs138326927 | C | 0.0961  |
| rs10041702  | C | -0.0502 |
| rs79310574  | T | 0.0679  |
| rs114091179 | G | -0.0637 |
| rs74862596  | G | -0.0708 |
| rs115715871 | T | 0.0628  |
| rs17436077  | G | -0.0432 |
| rs4836058   | C | 0.0157  |
| rs7702234   | A | 0.0655  |
| rs9293301   | T | -0.0286 |
| rs71594460  | A | 0.0259  |
| rs10050427  | G | 0.0206  |
| rs17242184  | C | 0.0678  |
| rs17206949  | A | -0.0755 |
| rs273084    | T | 0.0242  |
| rs115992025 | A | 0.0332  |
| rs4146151   | G | -0.0204 |
| rs17341948  | G | 0.0197  |
| rs255524    | A | 0.0167  |
| rs113090486 | A | 0.0452  |
| rs31027     | A | 0.0306  |
| rs793028    | T | 0.0429  |
| rs262754    | T | 0.0172  |
| rs57405979  | G | 0.0175  |

|             |   |         |
|-------------|---|---------|
| rs11738531  | C | 0.0252  |
| rs114728016 | A | 0.0545  |
| rs35374348  | T | -0.0356 |
| rs115543611 | A | -0.0718 |
| rs17681146  | T | 0.058   |
| rs2431716   | T | -0.086  |
| rs257363    | A | 0.0283  |
| rs17831594  | A | -0.0196 |
| rs112724647 | C | -0.059  |
| rs145389399 | T | 0.0623  |
| rs12514451  | T | 0.0163  |
| rs79066570  | T | 0.0904  |
| rs7734723   | T | 0.0216  |
| rs79254350  | A | 0.0751  |
| rs113903721 | C | -0.0252 |
| rs67223734  | C | -0.0664 |
| rs247732    | C | 0.0238  |
| rs79638198  | A | 0.0309  |
| rs62373640  | A | -0.078  |
| rs144307263 | A | -0.1021 |
| rs80323252  | A | -0.0257 |
| rs461660    | C | 0.015   |
| rs72783231  | A | -0.0791 |
| rs10520926  | A | -0.0215 |
| rs145460790 | G | 0.1342  |
| rs10520924  | G | -0.024  |
| rs3730090   | T | -0.0679 |
| rs80014013  | G | -0.1387 |
| rs11959235  | T | 0.0222  |
| rs55856457  | G | -0.0385 |
| rs35448538  | T | -0.034  |
| rs1868038   | A | 0.0166  |
| rs72774403  | G | -0.0306 |
| rs35834675  | C | -0.0524 |
| rs2861947   | A | 0.0215  |
| rs10491421  | A | -0.1296 |
| rs116640576 | C | 0.0479  |
| rs77327270  | G | -0.0673 |
| rs72739357  | A | 0.0536  |
| rs77905455  | G | 0.083   |
| rs78921919  | A | 0.0771  |
| rs145014109 | T | 0.0769  |
| rs141563031 | T | -0.0589 |
| rs56370120  | A | 0.1158  |
| rs6865969   | C | -0.0156 |
| rs7702664   | C | -0.0696 |
| rs17055317  | C | 0.0928  |

|             |   |         |
|-------------|---|---------|
| rs115218903 | A | -0.0818 |
| rs16867918  | G | -0.0167 |
| rs56043426  | A | 0.0149  |
| rs79765511  | T | 0.0802  |
| rs12514464  | A | 0.0181  |
| rs2227469   | T | -0.0314 |
| rs702072    | A | 0.0192  |
| rs4302611   | C | 0.0201  |
| rs79874449  | T | -0.0537 |
| rs4835669   | A | -0.0156 |
| rs111598753 | T | -0.0262 |
| rs77032093  | A | 0.0929  |
| rs76172503  | T | 0.0408  |
| rs111728896 | A | 0.0852  |
| rs2547002   | C | -0.0143 |
| rs4868535   | A | -0.0223 |
| rs13185464  | T | 0.0314  |
| rs116016184 | G | -0.0388 |
| rs116712401 | T | 0.0587  |
| rs265989    | T | -0.0185 |
| rs114585097 | T | 0.049   |
| rs146566553 | A | 0.1574  |
| rs72753416  | C | -0.0199 |
| rs30092     | C | -0.0392 |
| rs115558511 | C | 0.0492  |
| rs2055439   | C | -0.0149 |
| rs10463788  | T | 0.0179  |
| rs12109728  | A | 0.0208  |
| rs143244900 | T | 0.0891  |
| rs74450161  | G | -0.0819 |
| rs2448427   | T | 0.0272  |
| rs116214712 | T | -0.0329 |
| rs1346497   | A | 0.0291  |
| rs35740255  | C | -0.0678 |
| rs112999802 | G | 0.1203  |
| rs12516085  | A | -0.0146 |
| rs139231986 | T | -0.0457 |
| rs113847300 | T | 0.076   |
| rs137953160 | A | 0.0498  |
| rs62377126  | C | 0.0197  |
| rs935163    | G | -0.0176 |
| rs76883943  | A | 0.0746  |
| rs1421763   | A | -0.0176 |
| rs76668381  | A | 0.0587  |
| rs56092644  | T | -0.024  |
| rs17151458  | A | 0.0315  |
| rs34599377  | T | 0.0962  |

|             |   |         |
|-------------|---|---------|
| rs116030935 | T | -0.1032 |
| rs12188488  | A | -0.0513 |
| rs75701852  | T | 0.0323  |
| rs139227070 | T | 0.109   |
| rs80050416  | A | 0.087   |
| rs114458543 | A | -0.0667 |
| rs17301389  | A | 0.0335  |
| rs75970051  | C | 0.0451  |
| rs114847179 | A | 0.0322  |
| rs6868686   | C | 0.015   |
| rs11749356  | G | 0.026   |
| rs78558532  | T | 0.0558  |
| rs111503523 | G | 0.0517  |
| rs141422582 | C | 0.0427  |
| rs28452177  | T | -0.0369 |
| rs72764607  | T | 0.0389  |
| rs12109162  | G | -0.0185 |
| rs75127828  | A | 0.0837  |
| rs10941002  | A | -0.0151 |
| rs59378166  | A | 0.0539  |
| rs4141140   | T | 0.0178  |
| rs7737582   | C | 0.0163  |
| rs115979124 | A | -0.0451 |
| rs114726473 | T | 0.0515  |
| rs114583874 | C | -0.1216 |
| rs2054622   | T | -0.0173 |
| rs142460820 | C | -0.0836 |
| rs3863200   | C | -0.0217 |
| rs116434629 | A | 0.1229  |
| rs76112808  | A | 0.047   |
| rs72736135  | C | -0.0266 |
| rs34546597  | C | -0.0164 |
| rs13181419  | A | 0.0175  |
| rs142832067 | G | 0.1095  |
| rs113410158 | G | 0.0468  |
| rs115135629 | C | 0.1038  |
| rs72652821  | G | 0.081   |
| rs148213548 | T | -0.046  |
| rs7719598   | A | 0.0168  |
| rs79369332  | T | -0.0566 |
| rs11743679  | C | 0.0568  |
| rs80126195  | T | -0.0635 |
| rs10939944  | A | 0.0207  |
| rs765631    | T | -0.0309 |
| rs1550805   | T | 0.0266  |
| rs11750334  | T | 0.0338  |
| rs17366761  | T | 0.0198  |

|             |   |         |
|-------------|---|---------|
| rs1971108   | G | 0.015   |
| rs12516539  | C | -0.0931 |
| rs1501934   | C | 0.0566  |
| rs13187174  | C | -0.059  |
| rs72807365  | A | -0.0687 |
| rs13181910  | C | -0.0154 |
| rs6871614   | C | -0.0192 |
| rs7717785   | T | 0.0341  |
| rs28272     | A | 0.0352  |
| rs72760064  | G | 0.1235  |
| rs115112002 | C | -0.1123 |
| rs66739650  | T | -0.0423 |
| rs114674839 | T | 0.0728  |
| rs16873324  | C | 0.0926  |
| rs62366823  | G | -0.0612 |
| rs6872949   | T | 0.077   |
| rs57004341  | T | -0.1319 |
| rs113902758 | G | -0.0855 |
| rs77635795  | A | 0.0553  |
| rs6452541   | C | -0.0155 |
| rs7703398   | C | 0.0309  |
| rs114921658 | A | -0.0737 |
| rs211005    | G | -0.0607 |
| rs75613517  | C | 0.0603  |
| rs115409086 | C | 0.0583  |
| rs336949    | G | -0.0194 |
| rs114916317 | C | -0.0638 |
| rs115171701 | C | -0.1175 |
| rs57668018  | G | 0.0338  |
| rs140816220 | C | 0.0504  |
| rs78078095  | T | 0.0474  |
| rs72802739  | C | 0.0605  |
| rs10051273  | A | 0.0149  |
| rs28473373  | C | 0.0666  |
| rs13169754  | C | 0.0357  |
| rs116601610 | C | -0.0595 |
| rs114663709 | G | 0.0646  |
| rs10058318  | G | -0.0176 |
| rs12153049  | C | 0.021   |
| rs889191    | G | -0.0152 |
| rs72778390  | A | 0.0268  |
| rs140057292 | T | 0.0642  |
| rs141790440 | A | 0.0652  |
| rs2302179   | A | 0.0173  |
| rs11133637  | A | 0.0143  |
| rs4867463   | G | -0.0209 |
| rs115905766 | T | 0.0767  |

|             |   |         |
|-------------|---|---------|
| rs349732    | T | -0.0187 |
| rs13176868  | T | -0.058  |
| rs153912    | G | -0.0146 |
| rs11741356  | C | -0.0167 |
| rs148317979 | G | 0.0594  |
| rs146428387 | C | -0.0533 |
| rs79818596  | A | 0.0383  |
| rs17076264  | G | -0.0721 |
| rs1566642   | T | -0.0155 |
| rs12519432  | C | -0.0166 |
| rs1087519   | G | 0.0159  |
| rs188807    | C | -0.0189 |
| rs139726075 | T | -0.0658 |
| rs75808768  | C | 0.0518  |
| rs304584    | T | 0.0207  |
| rs149181218 | G | 0.077   |
| rs4921028   | T | -0.0271 |
| rs174726    | C | 0.0275  |
| rs2291705   | A | -0.1105 |
| rs406534    | A | 0.0151  |
| rs79791766  | T | 0.0858  |
| rs116495636 | T | 0.0904  |
| rs6889435   | C | 0.0174  |
| rs4562051   | A | 0.0167  |
| rs77209042  | A | -0.0546 |
| rs139417620 | A | 0.0225  |
| rs76598703  | A | 0.0603  |
| rs115973252 | A | -0.0498 |
| rs2936194   | A | 0.0154  |
| rs114975014 | A | 0.0564  |
| rs17633770  | C | -0.0185 |
| rs12656163  | G | -0.028  |
| rs2158351   | G | -0.0193 |
| rs78536169  | T | 0.0426  |
| rs62351090  | C | 0.1073  |
| rs72770115  | C | -0.0898 |
| rs11749540  | G | -0.096  |
| rs58370320  | C | 0.0169  |
| rs79957782  | C | 0.0941  |
| rs79130003  | T | -0.1117 |
| rs76484921  | A | 0.0843  |
| rs114254019 | A | 0.0871  |
| rs4702506   | C | -0.0193 |
| rs17085243  | C | -0.0871 |
| rs74917009  | A | -0.0593 |
| rs62333940  | C | 0.0308  |
| rs78601843  | C | 0.0984  |

|             |   |         |
|-------------|---|---------|
| rs77788774  | A | 0.1251  |
| rs12108943  | G | -0.0198 |
| rs6875501   | T | -0.0154 |
| rs140299416 | C | -0.0802 |
| rs13188052  | A | -0.0478 |
| rs17421267  | A | -0.0496 |
| rs115946229 | A | 0.1194  |
| rs114100028 | C | -0.055  |
| rs6580060   | T | 0.0158  |
| rs112159685 | A | -0.0624 |
| rs141334107 | T | 0.0828  |
| rs78127188  | G | 0.0528  |
| rs11740691  | T | -0.0282 |
| rs7700353   | G | 0.0171  |
| rs17339892  | A | 0.0161  |
| rs17456679  | G | -0.026  |
| rs1449228   | T | 0.0266  |
| rs72819522  | A | -0.0588 |
| rs36092948  | A | -0.0749 |
| rs17358216  | T | 0.0433  |
| rs891988    | G | 0.0166  |
| rs540027    | T | -0.0152 |
| rs113427406 | T | 0.0473  |
| rs4702062   | T | 0.0145  |
| rs17100410  | G | 0.0262  |
| rs62379736  | A | -0.043  |
| rs76362414  | T | -0.1092 |
| rs13182056  | T | 0.0233  |
| rs74365663  | C | -0.0733 |
| rs79254635  | A | 0.0382  |
| rs57598127  | A | 0.0206  |
| rs2441087   | C | -0.0165 |
| rs6878088   | A | 0.0191  |
| rs116680989 | T | 0.0626  |
| rs413946    | G | -0.0151 |
| rs4521516   | C | 0.0218  |
| rs13176694  | A | -0.0408 |
| rs62356558  | G | 0.0297  |
| rs115489400 | G | -0.0991 |
| rs72765244  | G | -0.045  |
| rs150560493 | A | 0.0575  |
| rs167782    | T | -0.0344 |
| rs75198420  | T | 0.0346  |
| rs11739281  | T | -0.0583 |
| rs12516040  | A | 0.0145  |
| rs4565214   | C | -0.0186 |
| rs112342917 | C | -0.0572 |

|             |   |         |
|-------------|---|---------|
| rs34106514  | T | 0.0481  |
| rs72761254  | T | 0.0239  |
| rs77711186  | C | -0.0367 |
| rs139795283 | C | -0.045  |
| rs78500887  | C | -0.0771 |
| rs6580210   | T | -0.0277 |
| rs161033    | T | 0.0167  |
| rs76776090  | C | 0.0784  |
| rs71639972  | C | -0.0696 |
| rs1517807   | T | 0.0511  |
| rs73282718  | T | -0.0325 |
| rs77731941  | A | -0.0551 |
| rs78797773  | A | 0.0755  |
| rs142434044 | T | -0.085  |
| rs918426    | T | -0.017  |
| rs10078182  | C | -0.0324 |
| rs4703056   | C | -0.0162 |
| rs13167682  | A | -0.0164 |
| rs1995375   | A | 0.0428  |
| rs7715167   | T | 0.0151  |
| rs62370442  | T | 0.0308  |
| rs114536711 | T | 0.1304  |
| rs10477775  | A | 0.0148  |
| rs12719880  | C | 0.0173  |
| rs4321728   | G | -0.0211 |
| rs17250927  | A | 0.0171  |
| rs10065179  | A | -0.0157 |
| rs6889538   | T | 0.0235  |
| rs145045198 | T | -0.0805 |
| rs12374505  | G | -0.0189 |
| rs35119910  | A | 0.0465  |
| rs78706112  | T | 0.0368  |
| rs148447521 | G | 0.1506  |
| rs140912046 | T | 0.0565  |
| rs75126469  | G | -0.0373 |
| rs11744902  | G | -0.0162 |
| rs17511061  | T | -0.0639 |
| rs6876442   | T | 0.0342  |
| rs2385957   | A | 0.0144  |
| rs11746118  | A | -0.0255 |
| rs845741    | G | -0.0175 |
| rs77702583  | T | 0.0801  |
| rs7718894   | A | -0.0147 |
| rs112898841 | T | -0.1184 |
| rs12517252  | C | -0.0155 |
| rs146261479 | T | -0.0663 |
| rs112461308 | A | 0.0591  |



|             |   |         |
|-------------|---|---------|
| rs4705856   | T | 0.0951  |
| rs72724261  | C | -0.0389 |
| rs75656928  | T | 0.038   |
| rs4302612   | C | -0.016  |
| rs74916355  | A | 0.0863  |
| rs7708319   | A | 0.0164  |
| rs700612    | C | 0.0583  |
| rs77536080  | G | 0.0616  |
| rs149494635 | C | 0.0691  |
| rs1363672   | G | -0.0142 |
| rs72735255  | A | -0.0381 |
| rs10071187  | G | 0.0224  |
| rs3761772   | G | -0.0227 |
| rs16878160  | A | -0.0677 |
| rs116395790 | G | 0.0607  |
| rs140958748 | C | -0.0973 |
| rs61603987  | A | -0.0273 |
| rs41290585  | G | 0.0468  |
| rs11747969  | T | -0.0194 |
| rs114694513 | C | 0.0626  |
| rs77198701  | C | -0.0378 |
| rs17580372  | T | 0.0642  |
| rs113005080 | C | 0.0918  |
| rs17547112  | T | 0.0145  |
| rs145016664 | T | 0.0427  |
| rs13164814  | A | -0.0267 |
| rs79922460  | T | -0.0461 |
| rs72747423  | A | -0.0291 |
| rs60756038  | C | -0.0276 |
| rs6860374   | T | 0.0405  |
| rs13179226  | G | -0.0646 |
| rs116251837 | A | 0.1177  |
| rs218318    | C | -0.0157 |
| rs145888104 | A | 0.0971  |
| rs35503473  | T | 0.0236  |
| rs9324755   | C | -0.0203 |
| rs11249621  | G | 0.0176  |
| rs1696979   | T | 0.0149  |
| rs4361563   | C | -0.0969 |
| rs12515823  | C | -0.0234 |
| rs74327653  | C | -0.0557 |
| rs2163777   | G | -0.0233 |
| rs1482344   | A | 0.0198  |
| rs7704815   | G | 0.051   |
| rs145011468 | T | 0.0476  |
| rs10071738  | A | -0.0216 |
| rs10057533  | G | -0.0195 |

|             |   |         |
|-------------|---|---------|
| rs114953360 | C | -0.0628 |
| rs154516    | G | -0.0148 |
| rs72839821  | T | 0.0484  |
| rs11959064  | A | -0.0153 |
| rs150537186 | G | -0.0524 |
| rs4705346   | A | 0.0904  |
| rs62376006  | G | 0.0201  |
| rs2936997   | G | -0.0196 |
| rs4431350   | A | -0.0149 |
| rs7731095   | T | -0.0281 |
| rs72770698  | G | -0.1086 |
| rs72762121  | A | 0.0458  |
| rs2910598   | C | -0.0195 |
| rs2052007   | A | 0.0207  |
| rs17776353  | C | -0.0503 |
| rs16878218  | G | 0.021   |
| rs17147703  | G | 0.0238  |
| rs7702671   | T | 0.0171  |
| rs34174836  | T | -0.0498 |
| rs147072238 | T | -0.0842 |
| rs139578818 | C | 0.0687  |
| rs13175455  | C | -0.0205 |
| rs307807    | G | 0.0177  |
| rs2567564   | G | 0.0226  |
| rs1379311   | T | 0.0542  |
| rs115264096 | C | -0.072  |
| rs148877732 | G | -0.0682 |
| rs341925    | C | 0.0155  |
| rs71637297  | T | 0.0535  |
| rs150001568 | T | -0.0819 |
| rs139397694 | C | -0.0396 |
| rs7733007   | T | 0.0724  |
| rs148351999 | C | -0.0705 |
| rs112291903 | A | -0.0822 |
| rs1477321   | T | -0.0165 |
| rs80179159  | G | -0.0425 |
| rs2287768   | C | 0.0204  |
| rs13159757  | T | -0.0155 |
| rs149509    | G | 0.0215  |
| rs13183782  | T | 0.0802  |
| rs76165831  | C | -0.0317 |
| rs72771237  | C | -0.0704 |
| rs11739086  | G | -0.0255 |
| rs17594296  | G | -0.0319 |
| rs2034488   | T | -0.0194 |
| rs78601570  | T | -0.0785 |
| rs4566808   | A | 0.0163  |

|             |   |         |
|-------------|---|---------|
| rs35646068  | T | -0.0594 |
| rs147373103 | T | -0.0155 |
| rs35622184  | T | 0.0761  |
| rs147512038 | A | 0.0842  |
| rs624846    | G | -0.0502 |
| rs150068295 | G | 0.0701  |
| rs6873187   | A | 0.0252  |
| rs1494678   | G | -0.0172 |
| rs10052719  | G | 0.0175  |
| rs115077319 | T | -0.0777 |
| rs1003371   | A | -0.0152 |
| rs187413    | G | -0.0143 |
| rs13174549  | T | 0.03    |
| rs59944075  | G | 0.0202  |
| rs17538857  | A | 0.0199  |
| rs75228081  | G | 0.0692  |
| rs145290357 | T | -0.1239 |
| rs62390292  | G | -0.0661 |
| rs77289896  | C | 0.119   |
| rs10055619  | T | -0.0248 |
| rs10050399  | C | -0.0166 |
| rs72817212  | A | 0.0313  |
| rs10064609  | A | 0.0149  |
| rs72749986  | A | -0.0407 |
| rs116286908 | G | -0.0881 |
| rs60150178  | C | -0.0206 |
| rs62371267  | T | 0.0368  |
| rs73783053  | T | -0.0433 |
| rs61181426  | T | 0.0329  |
| rs116306695 | C | 0.0914  |
| rs299318    | T | -0.0368 |
| rs74700482  | A | -0.0998 |
| rs7707498   | C | 0.015   |
| rs74469597  | T | -0.0514 |
| rs700934    | A | -0.0406 |
| rs4957787   | T | -0.0174 |
| rs147089578 | A | 0.0443  |
| rs28363347  | T | 0.0862  |
| rs7707863   | A | 0.0189  |
| rs17370371  | T | -0.0573 |
| rs148010405 | A | 0.0764  |
| rs13156607  | T | 0.0179  |
| rs1470866   | T | -0.0185 |
| rs637396    | T | -0.0144 |
| rs114018794 | G | -0.0747 |
| rs115437789 | T | 0.0264  |
| rs57882180  | A | -0.0495 |

|             |   |         |
|-------------|---|---------|
| rs277334    | T | 0.0236  |
| rs148815245 | T | -0.086  |
| rs114790929 | G | -0.0788 |
| rs116523421 | C | -0.1016 |
| rs7734184   | C | 0.0209  |
| rs72805393  | G | 0.0292  |
| rs139126213 | T | -0.0414 |
| rs2544916   | T | -0.0425 |
| rs10077623  | G | 0.0286  |
| rs13189311  | G | -0.0267 |
| rs315802    | G | 0.0217  |
| rs78859670  | C | -0.1412 |
| rs1991504   | A | 0.0177  |
| rs80237554  | T | -0.0635 |
| rs111566331 | G | -0.0965 |
| rs310904    | T | -0.0347 |
| rs12522269  | C | 0.0194  |
| rs77163496  | C | -0.0549 |
| rs17494594  | T | -0.1044 |
| rs72801094  | C | -0.0904 |
| rs10940140  | T | 0.0261  |
| rs78276986  | T | 0.0686  |
| rs77228903  | T | 0.1291  |
| rs62351093  | G | 0.0216  |
| rs115123856 | G | -0.0778 |
| rs75078870  | C | -0.0426 |
| rs11741811  | A | 0.0591  |
| rs17649710  | T | 0.0204  |
| rs17825047  | G | 0.1156  |
| rs171757    | C | -0.0151 |
| rs114719782 | C | -0.1217 |
| rs111395412 | T | 0.1054  |
| rs115178567 | T | -0.0699 |
| rs12518216  | T | -0.0263 |
| rs148984658 | A | 0.0732  |
| rs13173741  | G | -0.0144 |
| rs331905    | A | -0.075  |
| rs4868006   | A | 0.0687  |
| rs143889436 | G | 0.1281  |
| rs16875916  | T | 0.0903  |
| rs75039256  | G | 0.0778  |
| rs145549790 | G | 0.0591  |
| rs79819432  | G | 0.0805  |
| rs114736407 | T | 0.0502  |
| rs146394620 | T | -0.1066 |
| rs76794628  | G | -0.0699 |
| rs17166590  | C | -0.0156 |

|             |   |         |
|-------------|---|---------|
| rs55934881  | C | -0.0239 |
| rs56055373  | T | -0.0368 |
| rs114491743 | T | -0.0934 |
| rs139468359 | C | 0.0782  |
| rs148597378 | C | -0.0707 |
| rs13181696  | G | -0.0189 |
| rs61746772  | A | 0.07    |
| rs41236     | G | -0.0142 |
| rs1438290   | T | -0.0171 |
| rs7726646   | G | -0.0199 |
| rs6880249   | C | -0.0165 |
| rs457778    | G | 0.015   |
| rs77573837  | C | -0.0835 |
| rs1553847   | A | 0.0147  |
| rs62357089  | C | 0.0161  |
| rs113992298 | A | -0.0809 |
| rs1837253   | T | 0.0163  |
| rs11744366  | T | -0.0843 |
| rs6885113   | C | -0.0472 |
| rs79151187  | T | -0.0557 |
| rs67723751  | A | -0.0431 |
| rs75300697  | A | 0.0633  |
| rs115038111 | A | 0.0675  |
| rs7729316   | T | 0.0222  |
| rs17534675  | C | 0.0503  |
| rs294967    | T | 0.079   |
| rs116550072 | T | 0.0651  |
| rs17070509  | T | 0.025   |
| rs731998    | C | -0.0576 |
| rs3095989   | T | 0.0146  |
| rs13162927  | T | -0.0624 |
| rs163614    | G | 0.0188  |
| rs12515227  | C | 0.0156  |
| rs79347666  | C | 0.0755  |
| rs76003654  | T | 0.0255  |
| rs2859576   | C | 0.0227  |
| rs74605597  | G | 0.0594  |
| rs3995521   | G | 0.0212  |
| rs56222943  | T | 0.0327  |
| rs115409090 | C | -0.0335 |
| rs114321240 | T | -0.0628 |
| rs72756432  | C | 0.0281  |
| rs10052870  | T | 0.0857  |
| rs72762226  | T | 0.0259  |
| rs6888139   | C | -0.0267 |
| rs74405117  | G | 0.1016  |
| rs6890213   | T | 0.0299  |

|             |   |         |
|-------------|---|---------|
| rs2962333   | C | -0.0294 |
| rs13155798  | T | 0.0269  |
| rs1697823   | G | 0.0211  |
| rs2731694   | A | 0.0153  |
| rs7727037   | C | -0.0218 |
| rs139420929 | G | -0.1032 |
| rs72793008  | T | 0.0223  |
| rs10078761  | A | -0.0173 |
| rs464610    | G | -0.0155 |
| rs6876265   | A | 0.0144  |
| rs73058483  | A | 0.0391  |
| rs143741970 | A | -0.0631 |
| rs72829354  | A | 0.028   |
| rs169260    | G | -0.0407 |
| rs62343091  | C | -0.0476 |
| rs7720468   | A | -0.0308 |
| rs146249247 | T | 0.064   |
| rs72806611  | G | 0.0675  |
| rs7707542   | G | 0.0149  |
| rs2101404   | C | 0.0139  |
| rs116445630 | G | -0.0604 |
| rs13189047  | A | 0.0172  |
| rs147122750 | G | 0.1155  |
| rs36129368  | A | 0.0351  |
| rs139437258 | G | 0.0584  |
| rs6878299   | A | 0.0424  |
| rs10035578  | G | 0.0172  |
| rs1039440   | A | -0.014  |
| rs114860533 | T | 0.0529  |
| rs115131295 | A | 0.0969  |
| rs62359170  | T | 0.0265  |
| rs16871887  | C | -0.0217 |
| rs79408210  | A | -0.0209 |
| rs115816219 | A | -0.049  |
| rs148399126 | T | 0.0492  |
| rs71622114  | T | -0.0227 |
| rs12515992  | C | 0.0216  |
| rs4578      | T | -0.0142 |
| rs114371318 | C | -0.0907 |
| rs72733133  | A | 0.0621  |
| rs78420634  | A | 0.0675  |
| rs354595    | C | 0.0644  |
| rs62398839  | T | -0.0755 |
| rs6555594   | A | -0.0172 |
| rs140281173 | T | 0.0748  |
| rs10035317  | G | 0.046   |
| rs142654715 | G | 0.0869  |

|             |   |         |
|-------------|---|---------|
| rs1504967   | A | -0.0199 |
| rs143804536 | C | -0.0935 |
| rs76962772  | C | 0.0585  |
| rs80157421  | G | 0.0595  |
| rs116736573 | C | 0.1084  |
| rs444932    | A | 0.0368  |
| rs2051803   | C | 0.1031  |
| rs144252892 | T | 0.0719  |
| rs77088033  | A | -0.1129 |
| rs78945092  | T | -0.0378 |
| rs78747339  | G | 0.0929  |
| rs13178127  | G | -0.0335 |
| rs10520025  | A | -0.0194 |
| rs116064644 | G | -0.0769 |
| rs78786231  | C | 0.0664  |
| rs10471970  | C | 0.0698  |
| rs2562301   | C | -0.0581 |
| rs13169416  | G | 0.0903  |
| rs113269494 | A | -0.0607 |
| rs77203066  | T | 0.0906  |
| rs111519852 | A | -0.0625 |
| rs1390670   | C | 0.0224  |
| rs7713002   | A | 0.0144  |
| rs75780649  | A | -0.0489 |
| rs62329579  | A | -0.1282 |
| rs79858994  | G | 0.0865  |
| rs145240814 | A | -0.071  |
| rs62345573  | C | 0.0159  |
| rs17181344  | A | -0.0193 |
| rs116519778 | G | -0.0643 |
| rs114786181 | A | 0.0855  |
| rs7703161   | T | -0.0271 |
| rs114458957 | T | -0.0477 |
| rs7718704   | G | -0.0797 |
| rs10069553  | G | 0.0181  |
| rs144242778 | T | -0.0775 |
| rs66493052  | A | 0.0149  |
| rs73028895  | A | -0.0397 |
| rs116988772 | A | 0.0668  |
| rs148287599 | C | -0.0681 |
| rs78231579  | C | -0.0563 |
| rs76519040  | G | 0.0722  |
| rs34420374  | G | -0.0196 |
| rs254238    | A | 0.0219  |
| rs114269238 | T | -0.071  |
| rs78055219  | T | 0.0724  |
| rs2896245   | T | 0.017   |

|             |   |         |
|-------------|---|---------|
| rs62364032  | C | -0.0467 |
| rs28383127  | T | -0.0888 |
| rs147694756 | A | -0.1223 |
| rs10059388  | A | -0.0151 |
| rs10053714  | C | 0.0632  |
| rs76862096  | G | -0.0594 |
| rs3822511   | T | -0.0246 |
| rs12522315  | A | 0.0199  |
| rs632993    | A | 0.0143  |
| rs76057453  | A | 0.0852  |
| rs6879079   | G | -0.0184 |
| rs78154935  | G | -0.0711 |
| rs116297720 | A | -0.0986 |
| rs56076160  | G | 0.0608  |
| rs116444035 | C | -0.0679 |
| rs148161264 | G | 0.0687  |
| rs7724288   | T | 0.0558  |
| rs138807259 | T | 0.0535  |
| rs113309176 | A | 0.0781  |
| rs188841    | G | 0.0195  |
| rs112203761 | T | -0.1008 |
| rs78238012  | G | 0.0564  |
| rs31341     | G | 0.0219  |
| rs2471159   | A | 0.0567  |
| rs3188121   | A | 0.0629  |
| rs140711025 | A | -0.0635 |
| rs4701115   | C | 0.0265  |
| rs62364723  | T | -0.0604 |
| rs10070462  | A | -0.0297 |
| rs10068957  | G | -0.0183 |
| rs79331981  | G | 0.0358  |
| rs10512742  | A | -0.0294 |
| rs400595    | T | 0.0171  |
| rs12515837  | C | 0.0386  |
| rs116270229 | A | -0.0718 |
| rs73195425  | C | -0.0439 |
| rs2900119   | C | -0.0155 |
| rs28849434  | A | 0.0282  |
| rs139240554 | T | 0.1139  |
| rs33878     | C | -0.0175 |
| rs113521612 | T | 0.0548  |
| rs13177865  | A | -0.0292 |
| rs72801485  | G | -0.0291 |
| rs114746313 | G | 0.0599  |
| rs6864823   | A | 0.0394  |
| rs11742846  | A | -0.0158 |
| rs78192148  | T | -0.0852 |



|             |   |         |
|-------------|---|---------|
| rs111543038 | T | -0.0845 |
| rs73219359  | G | 0.1124  |
| rs1505007   | A | 0.0234  |
| rs17513975  | C | 0.0855  |
| rs62364027  | C | 0.0234  |
| rs10078465  | T | 0.0352  |
| rs62397841  | C | 0.0188  |
| rs12652220  | A | 0.0196  |
| rs62377920  | C | -0.0325 |
| rs56223687  | T | 0.1046  |
| rs114828602 | C | 0.0917  |
| rs28668657  | A | -0.0452 |
| rs314127    | A | -0.0226 |
| rs76875894  | C | 0.0822  |
| rs148535205 | T | 0.0985  |
| rs143224177 | G | 0.0727  |
| rs4100170   | A | -0.0299 |
| rs79372425  | A | -0.058  |
| rs115276372 | C | -0.0346 |
| rs78844764  | A | 0.0313  |
| rs7446362   | A | -0.0187 |
| rs17431165  | G | 0.0508  |
| rs17064971  | C | 0.0156  |
| rs77969063  | G | -0.0234 |
| rs55808226  | A | 0.1013  |
| rs1864041   | A | -0.0157 |
| rs137910526 | C | 0.1216  |
| rs61489938  | A | -0.0272 |
| rs17229124  | T | 0.1161  |
| rs78668600  | G | -0.0679 |
| rs62389377  | T | 0.0603  |
| rs11750732  | A | -0.0508 |
| rs358537    | G | 0.0747  |
| rs11241819  | C | -0.0182 |
| rs57400361  | C | -0.1116 |
| rs72758674  | G | -0.0166 |
| rs3857232   | A | -0.0212 |
| rs75794170  | A | -0.0542 |
| rs142967351 | A | 0.0721  |
| rs147113236 | T | -0.0619 |
| rs3736432   | T | -0.0196 |
| rs116535333 | G | -0.0506 |
| rs11749641  | T | -0.0485 |
| rs2914315   | G | 0.0149  |
| rs78713949  | C | -0.0583 |
| rs114100434 | T | -0.087  |
| rs77376470  | A | -0.0399 |

|             |   |         |
|-------------|---|---------|
| rs7701510   | T | -0.0142 |
| rs114072432 | T | -0.1334 |
| rs59548637  | G | -0.0338 |
| rs138548309 | G | -0.0391 |
| rs34486666  | T | 0.0218  |
| rs10067199  | A | -0.0164 |
| rs141657870 | T | 0.0826  |
| rs72802705  | C | 0.0477  |
| rs12514981  | C | -0.0276 |
| rs150643922 | G | -0.0526 |
| rs79433674  | C | 0.0462  |
| rs72805937  | C | 0.0474  |
| rs139477807 | T | 0.0667  |
| rs11738064  | A | -0.0304 |
| rs77139126  | T | 0.063   |
| rs1391126   | C | 0.0148  |
| rs2929726   | A | -0.0136 |
| rs13187321  | A | 0.0325  |
| rs34727555  | G | -0.1033 |
| rs7446534   | A | -0.0269 |
| rs17079413  | T | 0.0485  |
| rs71630720  | T | 0.0498  |
| rs11958054  | T | 0.0617  |
| rs4866478   | G | 0.0781  |
| rs1651766   | T | 0.0174  |
| rs9790977   | T | 0.0419  |
| rs10065841  | T | 0.0144  |
| rs35524     | G | -0.0143 |
| rs72804343  | A | -0.043  |
| rs27047     | C | -0.0189 |
| rs143779626 | C | -0.0879 |
| rs62379760  | C | 0.0235  |
| rs10077390  | T | 0.0217  |
| rs62333311  | G | -0.0443 |
| rs11747529  | T | -0.0171 |
| rs144512987 | T | 0.0506  |
| rs55827115  | C | 0.023   |
| rs77610878  | T | 0.0436  |
| rs4262111   | A | -0.0347 |
| rs113448121 | A | 0.0559  |
| rs116139367 | C | -0.0884 |
| rs283447    | G | 0.0204  |
| rs11742768  | G | -0.0163 |
| rs138849335 | G | -0.0565 |
| rs148969045 | T | 0.09    |
| rs2292268   | G | -0.0284 |
| rs2002075   | T | 0.0188  |

|             |   |         |
|-------------|---|---------|
| rs148824467 | A | -0.0938 |
| rs32973     | G | 0.0202  |
| rs115454586 | C | -0.0785 |
| rs73773337  | A | -0.0497 |
| rs4958100   | T | -0.0155 |
| rs114009882 | T | 0.0818  |
| rs57163327  | A | 0.0611  |
| rs17701436  | C | -0.0365 |
| rs4269289   | T | 0.0519  |
| rs77766537  | C | -0.0849 |
| rs72815228  | C | -0.0254 |
| rs298519    | C | -0.0145 |
| rs10060763  | T | -0.0152 |
| rs58895956  | T | -0.0284 |
| rs10054338  | A | 0.1042  |
| rs10063471  | T | 0.0138  |
| rs34358086  | T | -0.0275 |
| rs10513144  | G | 0.0156  |
| rs1286371   | C | -0.0163 |
| rs72831032  | T | -0.0448 |
| rs79394843  | T | -0.0526 |
| rs17519206  | T | -0.0692 |
| rs10060075  | C | -0.0318 |
| rs78561520  | A | -0.0685 |
| rs75699956  | C | -0.0755 |
| rs77136039  | A | 0.0492  |
| rs10515490  | A | -0.0374 |
| rs74600056  | G | 0.0363  |
| rs929763    | A | -0.0171 |
| rs13167016  | A | 0.0167  |
| rs12654005  | G | 0.0149  |
| rs72813904  | T | -0.1111 |
| rs435913    | T | 0.0411  |
| rs12658202  | C | -0.0147 |
| rs12656910  | A | 0.0261  |
| rs10066238  | C | -0.0409 |
| rs34207034  | A | 0.0538  |
| rs13436405  | T | 0.0381  |
| rs62356604  | C | 0.085   |
| rs75664479  | G | 0.0581  |
| rs35291988  | T | 0.084   |
| rs72810631  | A | -0.0546 |
| rs17082783  | A | -0.0442 |
| rs13158571  | A | 0.0642  |
| rs78112089  | T | -0.0461 |
| rs7708798   | C | -0.0267 |
| rs13189187  | C | 0.0312  |

|             |   |         |
|-------------|---|---------|
| rs795516    | T | -0.0208 |
| rs6896215   | G | -0.05   |
| rs13156083  | C | -0.0652 |
| rs72818213  | T | 0.0374  |
| rs79307816  | T | -0.0264 |
| rs114447383 | A | 0.085   |
| rs2900724   | G | 0.0149  |
| rs13158954  | T | 0.0141  |
| rs4073918   | C | 0.0163  |
| rs150206711 | C | -0.0554 |
| rs78258004  | A | -0.0825 |
| rs17660141  | T | 0.0255  |
| rs34449304  | T | -0.05   |
| rs3010256   | C | -0.0612 |
| rs758588    | A | 0.0164  |
| rs115449545 | C | 0.0551  |
| rs632441    | A | 0.014   |
| rs148148994 | A | 0.0751  |
| rs76409056  | T | 0.0301  |
| rs78844769  | T | -0.0479 |
| rs17445968  | G | 0.0361  |
| rs17301661  | G | 0.0337  |
| rs113830368 | T | -0.0472 |
| rs78558832  | A | -0.1043 |
| rs7379260   | A | 0.064   |
| rs6596230   | C | -0.083  |
| rs10515167  | G | -0.0146 |
| rs59532905  | A | 0.0668  |
| rs201671    | C | 0.0196  |
| rs4704542   | C | -0.0252 |
| rs56153101  | A | 0.0284  |
| rs74766152  | G | 0.103   |
| rs17432084  | G | -0.046  |
| rs261130    | C | -0.0219 |
| rs1974829   | A | 0.0296  |
| rs74686451  | T | -0.0487 |
| rs2887091   | G | 0.0225  |
| rs141456335 | T | -0.0591 |
| rs59340608  | T | 0.0165  |
| rs6878970   | T | -0.0316 |
| rs34653266  | G | -0.0749 |
| rs140900432 | G | -0.0669 |
| rs113943813 | C | 0.0603  |
| rs72746302  | C | 0.0666  |
| rs116467373 | G | 0.0329  |
| rs2589658   | C | -0.0143 |
| rs161545    | G | 0.0472  |

|             |   |         |
|-------------|---|---------|
| rs12186525  | C | 0.0205  |
| rs6888660   | C | 0.0136  |
| rs140004097 | C | -0.0684 |
| rs60174623  | G | 0.026   |
| rs147195349 | G | 0.1237  |
| rs77558518  | A | 0.0435  |
| rs6882848   | T | 0.0236  |
| rs72831365  | C | 0.1392  |
| rs34278891  | G | -0.0212 |
| rs78741891  | A | -0.0589 |
| rs11134494  | A | -0.0278 |
| rs16870625  | A | -0.0241 |
| rs1982928   | T | -0.0221 |
| rs62372303  | T | -0.0557 |
| rs1470990   | A | 0.0257  |
| rs17425291  | G | -0.0147 |
| rs6866506   | C | -0.0148 |
| rs1849555   | G | -0.0163 |
| rs4958464   | T | -0.0556 |
| rs116464056 | A | 0.0765  |
| rs2591529   | T | 0.0245  |
| rs17251179  | C | 0.0322  |
| rs1349364   | G | 0.0264  |
| rs55904947  | T | 0.0209  |
| rs113189773 | G | -0.0505 |
| rs114223012 | A | -0.1202 |
| rs117424359 | A | 0.066   |
| rs35603591  | A | 0.0342  |
| rs7729710   | C | 0.0151  |
| rs72807386  | T | 0.044   |
| rs115055295 | G | 0.0834  |
| rs149875907 | A | 0.0595  |
| rs6875544   | A | -0.0415 |
| rs62348777  | A | 0.021   |
| rs79290638  | A | -0.0844 |
| rs112090774 | A | -0.0531 |
| rs7726728   | T | 0.0523  |
| rs143601530 | A | -0.054  |
| rs40680     | G | 0.0209  |
| rs248452    | A | -0.0146 |
| rs35888677  | G | 0.0307  |
| rs62342472  | C | 0.0368  |
| rs4868241   | C | -0.0144 |
| rs116040832 | C | 0.0587  |
| rs338660    | A | -0.0165 |
| rs78178436  | T | 0.0327  |
| rs17054386  | G | -0.0445 |

|             |   |         |
|-------------|---|---------|
| rs163439    | G | -0.0198 |
| rs114693310 | C | -0.0606 |
| rs111665201 | A | -0.0683 |
| rs62360600  | T | -0.0809 |
| rs62379817  | T | 0.0574  |
| rs80326256  | C | -0.0832 |
| rs72748151  | C | 0.0285  |
| rs2188958   | T | -0.014  |
| rs74391107  | C | -0.0596 |
| rs75426653  | A | 0.0341  |
| rs4704722   | G | -0.0302 |
| rs62378200  | T | -0.0765 |
| rs145921378 | G | 0.0579  |
| rs1840160   | T | -0.0533 |
| rs75863230  | G | 0.0533  |
| rs115522995 | T | 0.0804  |
| rs76330189  | A | -0.0677 |
| rs115698988 | A | 0.0516  |
| rs114563449 | G | -0.0683 |
| rs12522517  | A | 0.0239  |
| rs336472    | T | -0.0201 |
| rs75433226  | A | 0.0347  |
| rs79690271  | G | 0.0845  |
| rs112551564 | G | -0.0526 |
| rs35949741  | T | -0.0198 |
| rs2964093   | T | 0.0209  |
| rs150387082 | C | 0.0911  |
| rs145264430 | A | -0.1021 |
| rs12657131  | G | 0.023   |
| rs1363787   | A | 0.0156  |
| rs76306129  | A | 0.0308  |
| rs77657594  | A | -0.0683 |
| rs145749214 | G | -0.0584 |
| rs4976753   | T | 0.0368  |
| rs1816148   | C | -0.0274 |
| rs12516297  | T | 0.0637  |
| rs7712180   | G | -0.0271 |
| rs155805    | T | 0.024   |
| rs76922282  | A | -0.0493 |
| rs115783940 | A | -0.0799 |
| rs79711597  | A | 0.0841  |
| rs17236680  | A | -0.0252 |
| rs76945796  | G | 0.0222  |
| rs79915152  | T | -0.0674 |
| rs76221446  | C | 0.0454  |
| rs3849775   | C | -0.0251 |
| rs853163    | A | 0.015   |

|             |   |         |
|-------------|---|---------|
| rs73033840  | G | -0.0254 |
| rs11134725  | G | 0.0232  |
| rs7711399   | G | -0.0141 |
| rs150716282 | A | -0.056  |
| rs33035     | C | -0.0204 |
| rs113226216 | C | 0.0503  |
| rs819571    | T | 0.0204  |
| rs160991    | A | -0.0151 |
| rs7720174   | A | -0.0256 |
| rs114487065 | C | 0.0683  |
| rs116079739 | T | 0.047   |
| rs139857891 | C | 0.1022  |
| rs78377068  | A | 0.0624  |
| rs114511498 | T | -0.0397 |
| rs34347717  | T | 0.048   |
| rs35817396  | G | 0.0221  |
| rs6878535   | C | 0.0156  |
| rs144894220 | C | -0.0762 |
| rs35627320  | C | 0.082   |
| rs139221186 | C | -0.0851 |
| rs75854843  | T | 0.09    |
| rs7708314   | T | 0.0211  |
| rs75454996  | G | -0.0712 |
| rs62350973  | C | 0.0213  |
| rs145199040 | T | 0.0716  |
| rs6859771   | C | -0.0149 |
| rs16869392  | C | -0.0214 |
| rs1490778   | A | -0.0157 |
| rs2190783   | A | 0.0149  |
| rs7723514   | G | 0.0452  |
| rs34851705  | A | -0.0245 |
| rs418957    | C | 0.0752  |
| rs6863657   | A | -0.0267 |
| rs142651456 | A | 0.0663  |
| rs2910203   | G | 0.0643  |
| rs10478871  | A | 0.0134  |
| rs35442571  | A | 0.0972  |
| rs72727222  | T | 0.0599  |
| rs2068984   | A | 0.0359  |
| rs35266320  | T | -0.1216 |
| rs10044582  | A | -0.0157 |
| rs72796431  | A | 0.0705  |
| rs58515314  | A | 0.0548  |
| rs114203104 | G | -0.0855 |
| rs12655804  | C | 0.0212  |
| rs26906     | T | -0.026  |
| rs71626147  | T | 0.0645  |

|             |   |         |
|-------------|---|---------|
| rs145520666 | A | -0.0633 |
| rs56174930  | G | -0.0973 |
| rs1835055   | C | 0.0134  |
| rs6859714   | C | 0.0234  |
| rs57297544  | A | 0.0372  |
| rs1106449   | C | -0.0149 |
| rs77643156  | C | -0.0812 |
| rs160068    | A | 0.0249  |
| rs148824188 | C | 0.1039  |
| rs783781    | A | 0.0145  |
| rs142269587 | C | 0.1061  |
| rs255332    | T | 0.0164  |
| rs28419071  | C | -0.0345 |
| rs1545708   | C | -0.0175 |
| rs150431495 | A | 0.0484  |
| rs7722066   | T | -0.0155 |
| rs142313781 | T | -0.043  |
| rs116214561 | T | 0.0546  |
| rs158341    | G | 0.0138  |
| rs322397    | T | -0.0615 |
| rs116527706 | G | -0.0578 |
| rs12188806  | A | 0.0592  |
| rs10077808  | A | 0.0314  |
| rs10068105  | C | -0.0151 |
| rs141263578 | G | -0.1006 |
| rs2963155   | G | 0.016   |
| rs10061592  | T | -0.0166 |
| rs79525479  | G | 0.0556  |
| rs4392641   | G | 0.0183  |
| rs142853547 | T | -0.0734 |
| rs75604905  | A | 0.0437  |
| rs76668783  | T | -0.0548 |
| rs111990800 | T | -0.0347 |
| rs10491465  | T | -0.0597 |
| rs143929693 | A | -0.072  |
| rs80340494  | C | 0.0626  |
| rs141771168 | A | 0.0868  |
| rs60667734  | C | 0.0228  |
| rs28556920  | A | 0.0412  |
| rs4700952   | G | -0.0269 |
| rs7701438   | T | -0.0399 |
| rs17342020  | C | -0.0258 |
| rs2455377   | T | 0.0148  |
| rs62372578  | C | 0.0654  |
| rs17290929  | A | 0.0152  |
| rs78581596  | C | 0.0332  |
| rs11134559  | T | 0.05    |



|             |   |         |
|-------------|---|---------|
| rs116254795 | G | -0.0878 |
| rs16879231  | A | -0.0232 |
| rs17214157  | T | -0.0242 |
| rs75475091  | A | -0.0722 |
| rs75460850  | C | -0.0197 |
| rs450944    | A | 0.0622  |
| rs76224959  | G | 0.1     |
| rs7728770   | T | -0.0181 |
| rs147575018 | G | 0.0537  |
| rs2932318   | T | -0.0328 |
| rs114129967 | G | -0.0337 |
| rs72764207  | T | -0.0639 |
| rs114380160 | G | 0.0605  |
| rs138145985 | G | -0.054  |
| rs2075612   | T | -0.0206 |
| rs72769411  | G | -0.0516 |
| rs1014643   | G | -0.0168 |
| rs62385329  | T | 0.0557  |
| rs34553240  | G | 0.0264  |
| rs114110222 | T | 0.0428  |
| rs2974537   | A | 0.0745  |
| rs13184609  | C | 0.0471  |
| rs6893034   | A | 0.0496  |
| rs13362304  | G | -0.0158 |
| rs60420739  | T | 0.0359  |
| rs17138646  | G | 0.0208  |
| rs77404353  | T | -0.0419 |
| rs141679948 | G | -0.1271 |
| rs315755    | A | -0.0257 |
| rs79931555  | G | 0.029   |
| rs115825538 | A | -0.0243 |
| rs113054286 | A | 0.0735  |
| rs10070267  | T | 0.0156  |
| rs35945862  | A | 0.0143  |
| rs76926262  | T | -0.0994 |
| rs75120780  | A | 0.0328  |
| rs114895921 | G | 0.0636  |
| rs115715686 | G | 0.0561  |
| rs78540823  | A | 0.0484  |
| rs79772796  | C | -0.0591 |
| rs76899255  | A | -0.0417 |
| rs76386529  | G | 0.0244  |
| rs12515163  | G | -0.0201 |
| rs72822730  | T | -0.0242 |
| rs62328822  | G | -0.0206 |
| rs256294    | C | 0.0167  |
| rs75471630  | T | 0.0358  |

|             |   |         |
|-------------|---|---------|
| rs1366604   | G | -0.013  |
| rs17286171  | T | 0.0192  |
| rs6885426   | T | 0.0248  |
| rs6886617   | G | 0.0188  |
| rs116093010 | T | -0.0786 |
| rs12658353  | C | 0.0457  |
| rs72667128  | G | -0.0809 |
| rs159388    | T | -0.0147 |
| rs79912543  | G | 0.0411  |
| rs34369404  | A | 0.0603  |
| rs172362    | C | -0.0184 |
| rs114556846 | T | 0.0693  |
| rs6869645   | T | 0.0291  |
| rs78490604  | T | -0.0532 |
| rs3815763   | C | 0.0316  |
| rs79356121  | A | -0.0433 |
| rs111502718 | A | 0.0912  |
| rs150458038 | T | -0.0898 |
| rs1284641   | G | 0.0203  |
| rs79508398  | A | 0.0533  |
| rs115910468 | T | 0.0811  |
| rs75706031  | A | -0.0669 |
| rs149260376 | A | -0.0575 |
| rs77706140  | G | 0.0314  |
| rs62336924  | T | -0.0137 |
| rs72802913  | T | -0.0394 |
| rs115561052 | A | -0.0662 |
| rs58038450  | G | -0.0725 |
| rs139263931 | A | -0.0637 |
| rs60615228  | C | -0.029  |
| rs140216398 | A | -0.06   |
| rs141192907 | C | 0.0685  |
| rs111640720 | T | 0.0743  |
| rs12515686  | T | 0.0504  |
| rs77272660  | G | 0.1131  |
| rs80155052  | T | -0.0431 |
| rs33385     | A | 0.0192  |
| rs116378066 | G | 0.077   |
| rs149959982 | A | 0.0941  |
| rs75961053  | G | 0.055   |
| rs1990897   | G | -0.0148 |
| rs378361    | A | -0.0141 |
| rs41309138  | A | -0.1091 |
| rs114073958 | A | 0.0375  |
| rs71621887  | A | 0.0158  |
| rs11958604  | A | -0.0189 |
| rs6882208   | A | 0.0161  |

|             |   |         |
|-------------|---|---------|
| rs76878863  | T | 0.0483  |
| rs62360023  | A | -0.0173 |
| rs111465844 | T | -0.0537 |
| rs17609095  | T | 0.0714  |
| rs113648319 | T | 0.08    |
| rs1423114   | G | -0.0643 |
| rs75801160  | T | -0.0498 |
| rs1432975   | T | 0.0277  |
| rs75714224  | C | 0.0684  |
| rs62379458  | C | 0.0923  |
| rs115636397 | A | 0.0834  |
| rs12519849  | G | -0.0145 |
| rs6449807   | T | 0.0225  |
| rs141131225 | T | -0.0229 |
| rs72792256  | G | 0.0519  |
| rs34964755  | T | -0.0812 |
| rs150102730 | A | 0.0135  |
| rs79304882  | T | 0.0414  |
| rs116616277 | A | 0.0569  |
| rs111342705 | A | 0.046   |
| rs78992167  | A | -0.0757 |
| rs113249351 | T | -0.0733 |
| rs116225615 | T | -0.0519 |
| rs32466     | T | -0.0182 |
| rs76807531  | T | -0.0796 |
| rs114447625 | A | 0.0551  |
| rs115751208 | T | -0.0527 |
| rs13181108  | T | 0.0487  |
| rs1508883   | G | 0.0152  |
| rs72737735  | T | 0.0514  |
| rs13173010  | T | 0.0357  |
| rs35243222  | T | -0.0303 |
| rs78392002  | T | -0.0627 |
| rs77423390  | T | 0.0492  |
| rs150342774 | G | -0.08   |
| rs3851474   | G | 0.0248  |
| rs6878827   | G | 0.0237  |
| rs10939863  | C | 0.014   |
| rs250008    | T | -0.0141 |
| rs17629424  | C | 0.0286  |
| rs141998983 | A | -0.1187 |
| rs62365562  | A | 0.0245  |
| rs149194407 | A | 0.1052  |
| rs74652789  | T | 0.047   |
| rs62347189  | G | 0.0285  |
| rs76845127  | T | -0.034  |
| rs6594530   | G | 0.0161  |

|             |   |         |
|-------------|---|---------|
| rs12187637  | C | 0.0183  |
| rs114226421 | A | -0.0975 |
| rs56409388  | G | -0.0456 |
| rs140238751 | G | -0.0746 |
| rs77520614  | T | -0.0885 |
| rs116141798 | A | 0.093   |
| rs4593230   | C | -0.0227 |
| rs116513181 | T | 0.0548  |
| rs4703261   | T | 0.0134  |
| rs74994751  | C | 0.0779  |
| rs7732840   | A | -0.0255 |
| rs9885512   | C | -0.0191 |
| rs112732303 | A | -0.0481 |
| rs267403    | A | 0.0134  |
| rs6875904   | T | -0.0465 |
| rs114322497 | A | 0.0335  |
| rs11749139  | G | -0.0345 |
| rs974847    | C | -0.0138 |
| rs153411    | T | -0.0147 |
| rs34884555  | A | -0.0213 |
| rs79109957  | C | -0.0718 |
| rs7714402   | C | -0.0144 |
| rs28439930  | C | 0.0135  |
| rs75213821  | T | -0.0921 |
| rs4583881   | G | -0.0412 |
| rs115975873 | A | -0.063  |
| rs114878984 | T | -0.0716 |
| rs17614174  | C | 0.0231  |
| rs146580046 | C | -0.0692 |
| rs13170976  | A | 0.0148  |
| rs4868487   | G | 0.0144  |
| rs7735724   | T | 0.0136  |
| rs79828202  | G | 0.0683  |
| rs2909788   | A | 0.0518  |
| rs114048671 | T | -0.0993 |
| rs10068900  | A | -0.0144 |
| rs146236379 | A | -0.1162 |
| rs7341045   | T | 0.0445  |
| rs11743661  | A | -0.0153 |
| rs17749497  | T | -0.0416 |
| rs35647190  | T | -0.1018 |
| rs17546357  | C | 0.0373  |
| rs1290217   | T | 0.0227  |
| rs144496652 | T | -0.0651 |
| rs139554519 | T | 0.0633  |
| rs17626893  | G | 0.0273  |
| rs114106626 | T | 0.0454  |

|             |   |         |
|-------------|---|---------|
| rs75117507  | C | 0.0919  |
| rs292489    | A | 0.0146  |
| rs1428135   | C | -0.0136 |
| rs140490373 | C | 0.1271  |
| rs141159574 | T | -0.0409 |
| rs12656634  | T | 0.0352  |
| rs32815     | G | -0.021  |
| rs115438256 | A | 0.1536  |
| rs116463838 | C | 0.1004  |
| rs10479055  | C | -0.0152 |
| rs76646154  | A | -0.0836 |
| rs10063304  | G | -0.0205 |
| rs13165588  | T | -0.0384 |
| rs74665254  | C | -0.0583 |
| rs7710192   | T | -0.0237 |
| rs67672984  | A | -0.0136 |
| rs72830347  | A | 0.0598  |
| rs113850298 | A | 0.0363  |
| rs702519    | A | 0.0178  |
| rs73791718  | T | 0.0465  |
| rs79096996  | T | -0.0556 |
| rs863118    | C | 0.0138  |
| rs141195591 | A | -0.0572 |
| rs114458512 | A | -0.0683 |
| rs77363425  | A | 0.0432  |
| rs987651    | G | -0.0191 |
| rs11747044  | C | 0.0411  |
| rs62354927  | A | 0.0547  |
| rs78143711  | T | 0.0434  |
| rs138209529 | A | 0.0685  |
| rs62402626  | A | -0.0422 |
| rs114980322 | G | -0.0535 |
| rs145434002 | A | 0.0789  |
| rs13189488  | G | -0.0551 |
| rs148989365 | T | 0.0412  |
| rs17662639  | T | -0.0198 |
| rs111772294 | A | 0.0344  |
| rs288872    | A | -0.0136 |
| rs12332301  | T | -0.0212 |
| rs75108785  | T | 0.0404  |
| rs55946719  | T | -0.0378 |
| rs139094104 | A | -0.144  |
| rs115611385 | T | 0.0896  |
| rs71601314  | T | 0.0465  |
| rs115545694 | T | -0.0362 |
| rs114758842 | G | -0.0523 |
| rs114227825 | C | -0.0561 |

|             |   |         |
|-------------|---|---------|
| rs7729009   | A | -0.0146 |
| rs78068123  | C | 0.114   |
| rs150561871 | A | -0.1293 |
| rs143199201 | A | -0.0645 |
| rs73788980  | T | 0.0768  |
| rs80258189  | A | 0.0843  |
| rs116421750 | T | 0.0967  |
| rs74491427  | T | 0.0819  |
| rs11960122  | G | 0.0179  |
| rs9327409   | T | 0.028   |
| rs10040899  | A | -0.0171 |
| rs2278382   | G | 0.02    |
| rs4368707   | C | -0.015  |
| rs73779892  | G | 0.0541  |
| rs6892455   | C | 0.0186  |
| rs150367039 | A | -0.0409 |
| rs144190228 | G | 0.1309  |
| rs72750636  | C | -0.0225 |
| rs712546    | G | 0.0508  |
| rs62355499  | T | -0.017  |
| rs12187560  | T | -0.0224 |
| rs77801681  | T | -0.0485 |
| rs6893339   | C | 0.0156  |
| rs75488845  | A | 0.0576  |
| rs12514687  | A | -0.0513 |
| rs11952725  | C | 0.0367  |
| rs116576422 | A | -0.045  |
| rs17670683  | A | 0.0145  |
| rs74586474  | C | 0.0474  |
| rs17384913  | T | 0.0268  |
| rs329828    | T | -0.0224 |
| rs78166047  | G | 0.0394  |
| rs61998228  | T | -0.0865 |
| rs17467491  | G | -0.0527 |
| rs79279619  | A | -0.0194 |
| rs10461906  | C | -0.0275 |
| rs114055671 | T | -0.0713 |
| rs13190673  | A | -0.0167 |
| rs62377187  | A | 0.1056  |
| rs67399707  | A | -0.0247 |
| rs114832061 | A | -0.0348 |
| rs144405476 | G | 0.0714  |
| rs7735308   | T | 0.0418  |
| rs76657877  | T | -0.0564 |
| rs115981903 | C | 0.0531  |
| rs16876243  | G | 0.026   |
| rs75833824  | A | -0.0418 |

|             |   |         |
|-------------|---|---------|
| rs75503645  | A | 0.0388  |
| rs353247    | T | -0.0133 |
| rs114128552 | A | -0.0294 |
| rs17206432  | C | -0.0589 |
| rs153512    | T | 0.0136  |
| rs34536507  | A | 0.0434  |
| rs62357926  | T | -0.0235 |
| rs4867046   | C | 0.0289  |
| rs72747728  | G | 0.0553  |
| rs10076509  | T | -0.1059 |
| rs58274722  | T | 0.0134  |
| rs62358755  | G | 0.0147  |
| rs75549217  | T | 0.056   |
| rs139716206 | G | 0.0652  |
| rs6450922   | G | 0.0181  |
| rs7717673   | T | 0.022   |
| rs56227820  | T | 0.0506  |
| rs149062489 | A | -0.0662 |
| rs4868851   | G | -0.014  |
| rs78718653  | T | -0.0646 |
| rs57363479  | T | 0.0283  |
| rs76600039  | T | 0.049   |
| rs79173044  | G | 0.0384  |
| rs2170901   | C | -0.0135 |
| rs142861020 | C | 0.0575  |
| rs113283247 | G | -0.0569 |
| rs4958992   | G | -0.0253 |
| rs61036452  | T | 0.0143  |
| rs4131470   | G | -0.014  |
| rs6862821   | G | 0.0244  |
| rs249211    | T | 0.0393  |
| rs10155513  | G | -0.0311 |
| rs145408518 | C | 0.0879  |
| rs114673678 | T | -0.0901 |
| rs115302814 | G | 0.0772  |
| rs792989    | T | 0.043   |
| rs835126    | G | -0.0481 |
| rs12651830  | A | -0.0313 |
| rs35215562  | C | 0.0453  |
| rs2964436   | A | -0.0288 |
| rs2637078   | A | 0.0148  |
| rs75652764  | T | 0.1156  |
| rs77646712  | A | 0.0501  |
| rs6885855   | G | -0.0167 |
| rs13174900  | G | 0.0152  |
| rs1298928   | G | 0.0171  |
| rs17517907  | G | 0.0231  |

|             |   |         |
|-------------|---|---------|
| rs77458454  | G | 0.0524  |
| rs39597     | T | -0.0163 |
| rs139276758 | A | -0.0702 |
| rs13187351  | T | 0.0535  |
| rs73361464  | A | 0.0426  |
| rs7725661   | T | 0.0172  |
| rs75921978  | G | 0.0414  |
| rs114428655 | A | -0.0542 |
| rs146709953 | C | 0.0977  |
| rs114469173 | A | -0.059  |
| rs463240    | T | 0.0335  |
| rs6893446   | A | 0.0251  |
| rs2961934   | T | 0.0194  |
| rs34724631  | A | -0.0522 |
| rs17109884  | C | -0.0491 |
| rs62395040  | T | 0.0146  |
| rs112371752 | C | -0.0571 |
| rs347994    | T | 0.0146  |
| rs71592582  | A | -0.0883 |
| rs4958094   | A | 0.037   |
| rs2895167   | A | 0.0135  |
| rs16903409  | G | 0.0185  |
| rs114845406 | G | 0.0382  |
| rs12517880  | T | -0.0278 |
| rs114637863 | G | 0.078   |
| rs35816211  | T | -0.0424 |
| rs74632736  | G | -0.0499 |
| rs144335406 | C | 0.0483  |
| rs72778111  | T | -0.0316 |
| rs142133426 | T | -0.0743 |
| rs62370437  | T | -0.0136 |
| rs72492471  | C | 0.0155  |
| rs4702738   | A | 0.0448  |
| rs11747024  | C | 0.0572  |
| rs115250017 | T | 0.0331  |
| rs17394821  | A | 0.0581  |
| rs301784    | T | 0.0397  |
| rs76605364  | T | -0.0341 |
| rs1457752   | C | 0.0147  |
| rs17625615  | A | -0.0407 |
| rs138726330 | G | -0.0939 |
| rs700714    | C | 0.0129  |
| rs114762132 | T | -0.0386 |
| rs146554613 | T | 0.0786  |
| rs62334640  | A | 0.0934  |
| rs246550    | G | 0.0145  |
| rs58997507  | A | -0.0361 |



|             |   |         |
|-------------|---|---------|
| rs16875961  | G | 0.0216  |
| rs17305746  | G | 0.0659  |
| rs74756703  | T | -0.0601 |
| rs116708512 | A | -0.0589 |
| rs17400549  | C | 0.0306  |
| rs12522470  | C | -0.0142 |
| rs11743619  | A | -0.07   |
| rs4574539   | A | -0.0131 |
| rs116290528 | T | -0.0455 |
| rs1808401   | T | -0.1059 |
| rs116499895 | A | -0.0878 |
| rs8119      | T | 0.0504  |
| rs10515088  | G | 0.0613  |
| rs246373    | T | -0.0164 |
| rs2962058   | G | 0.0136  |
| rs78145385  | A | -0.0442 |
| rs115189894 | C | 0.0328  |
| rs34027359  | T | 0.0164  |
| rs11748835  | C | -0.0306 |
| rs74548773  | T | 0.0365  |
| rs71581241  | T | -0.0337 |
| rs1859295   | C | 0.0135  |
| rs114834630 | T | -0.0556 |
| rs75674384  | G | -0.0401 |
| rs4151699   | C | -0.026  |
| rs835066    | T | 0.0185  |
| rs80052994  | T | -0.1013 |
| rs137984564 | A | 0.0439  |
| rs115755474 | T | 0.0749  |
| rs3815919   | G | 0.0172  |
| rs35810955  | A | -0.0523 |
| rs6886928   | A | 0.0245  |
| rs310909    | T | 0.0536  |
| rs696738    | A | 0.0456  |
| rs72746528  | C | -0.0552 |
| rs142056798 | A | -0.0566 |
| rs2936590   | T | 0.0151  |
| rs72768792  | G | 0.0308  |
| rs147515472 | A | -0.0377 |
| rs62365776  | C | -0.0938 |
| rs11741851  | C | -0.0352 |
| rs115920015 | A | 0.0496  |
| rs7725332   | T | -0.0131 |
| rs116536764 | G | 0.0943  |
| rs79290950  | T | -0.0354 |
| rs113917835 | G | 0.0425  |
| rs78978107  | G | 0.0265  |

|             |   |         |
|-------------|---|---------|
| rs34599407  | T | 0.0162  |
| rs79384050  | T | 0.0381  |
| rs2617354   | A | -0.0281 |
| rs7725317   | C | 0.0503  |
| rs116710163 | A | 0.0761  |
| rs114899800 | C | -0.0616 |
| rs114877025 | A | 0.0602  |
| rs6450828   | C | 0.0216  |
| rs10447131  | T | 0.0129  |
| rs11739371  | A | 0.0269  |
| rs6873973   | G | 0.0208  |
| rs112811539 | T | 0.0382  |
| rs10042589  | A | 0.0147  |
| rs155382    | C | 0.0131  |
| rs13170484  | A | 0.0144  |
| rs114699736 | T | -0.0583 |
| rs12514882  | C | 0.0377  |
| rs140626673 | C | -0.0755 |
| rs72800678  | G | 0.0797  |
| rs77666247  | G | -0.0462 |
| rs62391847  | C | 0.0279  |
| rs149179903 | G | -0.0902 |
| rs147386079 | G | 0.0686  |
| rs73800148  | A | -0.0178 |
| rs75700971  | T | 0.0145  |
| rs78938409  | C | 0.0613  |
| rs80160782  | T | 0.0227  |
| rs78171175  | A | 0.0475  |
| rs56226307  | G | 0.0884  |
| rs74295116  | C | 0.03    |
| rs78369469  | A | 0.0313  |
| rs79013732  | A | 0.0491  |
| rs113674749 | C | 0.1032  |
| rs72723247  | G | 0.0221  |
| rs72749151  | G | 0.0482  |
| rs10055402  | G | 0.0217  |
| rs144920836 | A | 0.054   |
| rs10035990  | A | -0.0692 |
| rs114754423 | T | -0.0919 |
| rs13169569  | G | -0.0139 |
| rs150268356 | T | -0.0347 |
| rs150518042 | A | -0.1001 |
| rs150042048 | A | 0.1209  |
| rs151879    | T | 0.0143  |
| rs2261740   | A | 0.0132  |
| rs34483220  | C | 0.0224  |
| rs72748753  | T | 0.0138  |

|             |   |         |
|-------------|---|---------|
| rs116419770 | C | -0.0512 |
| rs115013214 | A | 0.1127  |
| rs62362305  | G | -0.0472 |
| rs72771702  | G | 0.0434  |
| rs1858428   | A | -0.0136 |
| rs115420189 | A | -0.0554 |
| rs10039338  | A | -0.0134 |
| rs10214265  | A | -0.0228 |
| rs163432    | A | 0.0175  |
| rs73803914  | T | -0.0748 |
| rs17644733  | T | -0.0568 |
| rs4868739   | A | 0.0145  |
| rs2902803   | T | 0.0449  |
| rs10040268  | C | 0.0756  |
| rs78047627  | C | 0.0419  |
| rs142404685 | T | -0.0412 |
| rs114224737 | T | 0.0352  |
| rs2434295   | G | -0.0129 |
| rs41290549  | T | 0.0931  |
| rs6897902   | T | 0.019   |
| rs3805620   | C | 0.0239  |
| rs138803630 | T | -0.0231 |
| rs71594789  | G | -0.0655 |
| rs77543132  | A | 0.0548  |
| rs140265222 | A | -0.0724 |
| rs10805545  | G | -0.0144 |
| rs2972686   | T | -0.0162 |
| rs114125415 | T | 0.0439  |
| rs141165113 | T | 0.0678  |
| rs55723797  | T | -0.0151 |
| rs71632918  | T | 0.0829  |
| rs11749614  | T | 0.0634  |
| rs7727110   | T | 0.0152  |
| rs79108349  | T | -0.0569 |
| rs12518466  | C | 0.0379  |
| rs75503445  | A | 0.0232  |
| rs144851357 | A | -0.0319 |
| rs6870572   | T | -0.0163 |
| rs9292503   | T | 0.0151  |
| rs1318743   | C | 0.0569  |
| rs7715979   | C | -0.0272 |
| rs73802682  | G | 0.0722  |
| rs74942845  | T | -0.0654 |
| rs192426    | T | -0.0204 |
| rs17600489  | T | 0.0524  |
| rs116686459 | A | 0.089   |
| rs2055873   | T | -0.0142 |

|             |   |         |
|-------------|---|---------|
| rs1209696   | T | -0.0161 |
| rs2569107   | T | 0.0329  |
| rs17053001  | G | -0.0417 |
| rs2890825   | A | -0.0143 |
| rs16884101  | T | 0.0515  |
| rs10941263  | C | -0.0137 |
| rs13180249  | T | 0.0154  |
| rs286963    | G | -0.0154 |
| rs718291    | G | -0.0235 |
| rs6895117   | T | 0.0269  |
| rs6881232   | A | 0.0156  |
| rs58055222  | A | -0.0328 |
| rs116488857 | C | -0.0706 |
| rs17067797  | G | -0.0303 |
| rs2411906   | C | 0.0135  |
| rs2973104   | G | -0.0799 |
| rs7703879   | A | 0.0198  |
| rs12653975  | C | 0.0222  |
| rs173134    | G | 0.0161  |
| rs2431962   | G | -0.0135 |
| rs146433997 | C | -0.0657 |
| rs116554275 | T | 0.0917  |
| rs80039069  | T | 0.0881  |
| rs32928     | T | -0.0204 |
| rs72818285  | A | 0.0484  |
| rs40684     | C | 0.0133  |
| rs2702361   | G | 0.0385  |
| rs117477516 | C | -0.1132 |
| rs148362115 | T | -0.0672 |
| rs13164873  | G | -0.0132 |
| rs166137    | C | 0.0254  |
| rs75442098  | A | -0.0779 |
| rs67267578  | G | -0.0315 |
| rs28526622  | A | 0.035   |
| rs148591445 | A | -0.061  |
| rs151206634 | G | 0.0533  |
| rs34934247  | A | 0.0182  |
| rs116001973 | G | -0.1047 |
| rs12518246  | A | -0.0134 |
| rs73218729  | G | 0.0231  |
| rs115825819 | T | -0.0987 |
| rs139054938 | C | -0.0387 |
| rs76028206  | T | -0.0494 |
| rs142151784 | A | 0.0688  |
| rs6898262   | C | -0.0138 |
| rs728079    | G | 0.0777  |
| rs10069430  | G | 0.1047  |

|             |   |         |
|-------------|---|---------|
| rs12187956  | A | 0.0187  |
| rs27002     | T | 0.016   |
| rs58496276  | T | -0.0385 |
| rs10213690  | C | 0.0205  |
| rs72803107  | A | 0.0821  |
| rs114452287 | T | -0.0677 |
| rs58567058  | C | 0.0216  |
| rs72740471  | A | 0.0407  |
| rs10069395  | A | -0.0264 |
| rs13171310  | A | -0.0181 |
| rs7728408   | A | -0.0154 |
| rs74543911  | A | -0.0243 |
| rs3749671   | A | -0.0353 |
| rs6886366   | C | 0.0222  |
| rs13187208  | A | 0.0313  |
| rs34619013  | C | 0.0143  |
| rs114815715 | T | -0.0873 |
| rs4700642   | A | 0.0156  |
| rs10866546  | A | 0.019   |
| rs199177    | G | -0.0587 |
| rs114573082 | A | 0.0765  |
| rs146715678 | A | 0.0734  |
| rs144321806 | G | -0.0515 |
| rs1094604   | C | 0.0132  |
| rs10044606  | G | -0.0718 |
| rs384821    | A | 0.0164  |
| rs7733118   | A | 0.0207  |
| rs1604391   | T | 0.0321  |
| rs112934434 | G | -0.0461 |
| rs114140355 | T | 0.0654  |
| rs3992620   | G | 0.0264  |
| rs71593319  | G | -0.049  |
| rs138703776 | A | 0.0538  |
| rs16884782  | G | -0.0298 |
| rs17398382  | T | -0.0187 |
| rs17519835  | G | 0.0657  |
| rs336486    | C | 0.0182  |
| rs116001075 | T | -0.0646 |
| rs656450    | C | 0.0131  |
| rs75627498  | C | -0.0247 |
| rs767133    | A | 0.0871  |
| rs6861416   | T | -0.0172 |
| rs4916762   | T | -0.0257 |
| rs150547118 | T | 0.0596  |
| rs111543567 | G | -0.0637 |
| rs55774545  | G | 0.0191  |
| rs4704398   | T | -0.0175 |

|             |   |         |
|-------------|---|---------|
| rs16876106  | A | -0.0586 |
| rs115533502 | C | -0.0386 |
| rs11739380  | C | -0.0378 |
| rs1444902   | C | 0.0223  |
| rs55812413  | C | 0.0192  |
| rs116445262 | G | -0.0437 |
| rs12152863  | T | -0.013  |
| rs56324007  | G | 0.0682  |
| rs140404099 | A | 0.0567  |
| rs75257498  | T | -0.0222 |
| rs77608563  | G | -0.0436 |
| rs62377485  | T | 0.0233  |
| rs76829797  | A | 0.0171  |
| rs13168488  | A | -0.0244 |
| rs4461603   | A | 0.0307  |
| rs11744551  | A | -0.0273 |
| rs6864491   | A | 0.0124  |
| rs32955     | T | 0.018   |
| rs115045678 | C | -0.0627 |
| rs888822    | C | 0.013   |
| rs10058668  | T | 0.0396  |
| rs1432654   | A | -0.0138 |
| rs72837084  | G | -0.0278 |
| rs2964115   | A | 0.0164  |
| rs72753909  | A | -0.0401 |
| rs77917390  | A | 0.024   |
| rs77260586  | A | 0.0183  |
| rs148942089 | C | -0.0285 |
| rs115451943 | T | -0.0496 |
| rs10042819  | G | 0.0205  |
| rs10054492  | A | -0.049  |
| rs117429330 | A | -0.0809 |
| rs72744549  | C | -0.0149 |
| rs138347232 | G | -0.1103 |
| rs1651030   | C | 0.0338  |
| rs10515553  | C | 0.014   |
| rs72848113  | A | 0.0364  |
| rs77262990  | C | 0.0757  |
| rs35443155  | T | -0.0177 |
| rs78051935  | T | 0.0367  |
| rs143759184 | C | -0.1008 |
| rs138645287 | G | -0.0673 |
| rs74374290  | C | 0.0683  |
| rs72733461  | G | -0.0615 |
| rs78782357  | A | 0.0516  |
| rs3930161   | G | -0.0628 |
| rs55688478  | C | 0.0403  |

|             |   |         |
|-------------|---|---------|
| rs187645    | A | 0.024   |
| rs13185623  | T | -0.0136 |
| rs78864194  | G | -0.0297 |
| rs77276399  | T | 0.0548  |
| rs13171476  | A | 0.0398  |
| rs72663332  | T | -0.0641 |
| rs75274358  | A | 0.0723  |
| rs6894058   | G | 0.0408  |
| rs6872674   | T | 0.0165  |
| rs116471059 | A | -0.0429 |
| rs17075181  | G | -0.0162 |
| rs73175982  | T | 0.0265  |
| rs41291439  | C | -0.0543 |
| rs60562987  | A | -0.0224 |
| rs4267847   | C | 0.0242  |
| rs370974    | C | -0.0134 |
| rs76713961  | A | -0.0798 |
| rs1182092   | T | -0.0776 |
| rs114749926 | A | -0.0795 |
| rs72802040  | G | 0.0674  |
| rs11749175  | A | -0.0419 |
| rs41472     | A | -0.0161 |
| rs6863650   | C | -0.0135 |
| rs898219    | G | 0.0142  |
| rs4572979   | A | 0.0125  |
| rs62404187  | G | -0.0396 |
| rs17456198  | C | -0.019  |
| rs114723092 | G | -0.06   |
| rs1502044   | C | 0.053   |
| rs78074575  | A | 0.0397  |
| rs76803557  | G | 0.0753  |
| rs72732035  | A | -0.1035 |
| rs13169752  | C | 0.0239  |
| rs2633525   | G | 0.0125  |
| rs56759022  | T | 0.0155  |
| rs62350672  | T | -0.0249 |
| rs9291933   | A | -0.0129 |
| rs34120426  | T | -0.0164 |
| rs72777855  | G | -0.0233 |
| rs35820409  | C | 0.0311  |
| rs35599431  | A | -0.0465 |
| rs7712562   | A | -0.0226 |
| rs28673714  | T | -0.0358 |
| rs13187145  | C | 0.014   |
| rs72765445  | A | -0.0156 |
| rs3097843   | A | 0.0238  |
| rs62365592  | T | 0.0213  |

|             |   |         |
|-------------|---|---------|
| rs7706103   | A | -0.0129 |
| rs112124717 | G | -0.0336 |
| rs116373854 | C | -0.0363 |
| rs10051970  | C | 0.0202  |
| rs27171     | G | 0.0136  |
| rs2431075   | C | 0.0159  |
| rs147857162 | A | 0.0913  |
| rs147055962 | T | -0.119  |
| rs16873641  | A | 0.0722  |
| rs13152921  | A | 0.0653  |
| rs446878    | T | 0.0153  |
| rs76845051  | T | -0.0749 |
| rs16900263  | A | -0.1166 |
| rs1847523   | G | 0.0745  |
| rs75887138  | T | 0.0816  |
| rs6888451   | G | 0.0189  |
| rs144642500 | G | -0.0565 |
| rs11740939  | G | -0.0608 |
| rs76267957  | T | 0.0527  |
| rs116520850 | T | 0.0602  |
| rs111494867 | A | -0.0687 |
| rs115107216 | G | 0.0292  |
| rs75828864  | C | 0.0374  |
| rs1038704   | T | 0.0172  |
| rs13360073  | T | -0.0261 |
| rs58773699  | A | 0.0231  |
| rs113805989 | T | -0.0776 |
| rs62389383  | A | 0.0419  |
| rs78630867  | G | -0.0621 |
| rs316385    | T | 0.0371  |
| rs78226761  | C | 0.0377  |
| rs74583623  | T | 0.0213  |
| rs114919096 | T | 0.0431  |
| rs16900080  | G | -0.0539 |
| rs114445892 | A | -0.0701 |
| rs75954784  | T | 0.0177  |
| rs28495954  | A | -0.0168 |
| rs149338720 | A | 0.0489  |
| rs17487986  | A | 0.0394  |
| rs30948     | G | -0.0214 |
| rs114142577 | A | 0.0736  |
| rs62404889  | T | -0.0147 |
| rs72734932  | C | 0.0417  |
| rs62349577  | T | -0.0813 |
| rs79519933  | T | 0.0326  |
| rs7708350   | G | 0.0145  |
| rs62392638  | A | -0.0339 |



|             |   |         |
|-------------|---|---------|
| rs79232537  | G | -0.033  |
| rs76110902  | C | -0.0573 |
| rs17730662  | G | -0.0196 |
| rs80154924  | T | 0.045   |
| rs2042249   | A | 0.0182  |
| rs77427298  | C | 0.0362  |
| rs74802145  | G | -0.0479 |
| rs16875556  | A | -0.0198 |
| rs76207061  | C | -0.022  |
| rs73757016  | G | -0.0218 |
| rs2913752   | T | 0.0185  |
| rs899354    | T | 0.0186  |
| rs12518426  | T | -0.0366 |
| rs116625633 | G | 0.0594  |
| rs2242214   | T | 0.0198  |
| rs13163051  | A | 0.0245  |
| rs62368504  | G | -0.0445 |
| rs2910256   | A | -0.0125 |
| rs35120264  | T | -0.0746 |
| rs72818251  | T | 0.0287  |
| rs77949234  | G | 0.0544  |
| rs116399905 | A | -0.0573 |
| rs12332587  | A | -0.0311 |
| rs59652007  | C | 0.0473  |
| rs73268346  | T | -0.0426 |
| rs4370295   | C | -0.0254 |
| rs3006070   | T | -0.024  |
| rs74658934  | A | -0.096  |
| rs76925293  | T | 0.026   |
| rs75269565  | A | -0.0309 |
| rs149354504 | C | 0.0968  |
| rs17418646  | A | 0.0561  |
| rs156666    | A | -0.015  |
| rs74483492  | T | 0.0491  |
| rs246602    | C | 0.0131  |
| rs116125493 | T | 0.0665  |
| rs27677     | C | 0.0134  |
| rs140189694 | T | -0.0759 |
| rs7734080   | G | 0.0509  |
| rs72821329  | A | -0.0185 |
| rs11747259  | C | -0.0131 |
| rs320606    | T | 0.0131  |
| rs1486944   | T | -0.0212 |
| rs17166460  | G | -0.019  |
| rs11956891  | T | 0.0173  |
| rs73124158  | A | 0.0393  |
| rs59929074  | G | 0.0334  |

|             |   |         |
|-------------|---|---------|
| rs140357119 | C | 0.0389  |
| rs17663891  | T | 0.0247  |
| rs2956549   | A | -0.0174 |
| rs80005712  | G | -0.0579 |
| rs150168210 | A | -0.0602 |
| rs72835259  | C | -0.043  |
| rs2242415   | C | -0.0138 |
| rs144884942 | T | 0.0685  |
| rs4836257   | A | 0.0205  |
| rs34042385  | A | -0.0152 |
| rs10075779  | C | 0.1143  |
| rs4704396   | C | -0.0254 |
| rs55698168  | T | 0.0466  |
| rs72783204  | G | 0.0672  |
| rs116753755 | C | -0.0617 |
| rs79573956  | C | -0.0241 |
| rs40993     | G | -0.0151 |
| rs77823969  | G | 0.0575  |
| rs6870681   | A | 0.0231  |
| rs3806947   | T | 0.0311  |
| rs12657566  | A | 0.1089  |
| rs141309854 | T | -0.0538 |
| rs28361299  | C | 0.0195  |
| rs78116747  | C | -0.0541 |
| rs10041956  | G | 0.0124  |
| rs141438466 | G | -0.0879 |
| rs72790758  | A | -0.0394 |
| rs115554147 | T | 0.0836  |
| rs7725944   | C | 0.0186  |
| rs55801091  | G | 0.0807  |
| rs60938824  | C | 0.0169  |
| rs74981111  | G | -0.0255 |
| rs10477790  | C | -0.0572 |
| rs112749767 | T | 0.0306  |
| rs13183996  | A | 0.052   |
| rs114271952 | A | 0.049   |
| rs79008179  | A | 0.0393  |
| rs62362653  | A | 0.0181  |
| rs28508166  | G | -0.0164 |
| rs144893800 | T | -0.0603 |
| rs74500299  | T | -0.0367 |
| rs78558829  | C | 0.0622  |
| rs116261554 | C | 0.0679  |
| rs28702802  | G | -0.0142 |
| rs80302840  | G | 0.0879  |
| rs10075826  | G | -0.0154 |
| rs2455280   | C | -0.0262 |

|             |   |         |
|-------------|---|---------|
| rs2632149   | C | -0.0217 |
| rs2904956   | T | 0.0126  |
| rs2069680   | T | 0.0122  |
| rs115704882 | A | -0.0767 |
| rs34961375  | T | -0.0166 |
| rs72780406  | T | 0.0633  |
| rs6869409   | A | -0.0312 |
| rs140159084 | T | 0.0643  |
| rs73804226  | G | -0.0185 |
| rs73051687  | C | 0.0334  |
| rs12522914  | T | -0.0279 |
| rs10045669  | C | 0.0133  |
| rs141091429 | A | -0.0883 |
| rs59092768  | T | -0.0245 |
| rs114807353 | G | 0.0804  |
| rs11740792  | G | -0.0158 |
| rs7700446   | A | 0.017   |
| rs13359522  | A | 0.0125  |
| rs11750734  | A | 0.0152  |
| rs78454748  | T | -0.0664 |
| rs75140737  | G | -0.0518 |
| rs115105516 | T | 0.0876  |
| rs12522080  | A | -0.021  |
| rs78330866  | A | -0.0254 |
| rs147101982 | C | -0.1021 |
| rs4472239   | T | 0.0136  |
| rs10054504  | T | 0.0201  |
| rs116771263 | C | 0.0538  |
| rs4975605   | A | 0.0143  |
| rs4376275   | T | -0.0386 |
| rs78155988  | T | -0.0333 |
| rs74502549  | G | -0.0412 |
| rs10461698  | A | 0.0273  |
| rs71625647  | A | 0.0478  |
| rs41271059  | A | 0.0714  |
| rs114700046 | C | 0.034   |
| rs148175502 | T | -0.0976 |
| rs12514998  | G | 0.0974  |
| rs74678313  | C | -0.0898 |
| rs28546703  | A | 0.0477  |
| rs74776255  | G | -0.0559 |
| rs4957166   | T | -0.0199 |
| rs12513427  | A | 0.0383  |
| rs246420    | T | -0.0217 |
| rs39691     | C | 0.0168  |
| rs35075830  | T | -0.0622 |
| rs74804126  | T | 0.0773  |

|             |   |         |
|-------------|---|---------|
| rs28415624  | A | 0.0478  |
| rs114491858 | A | 0.025   |
| rs116277886 | G | 0.0578  |
| rs74379306  | G | -0.0599 |
| rs150547358 | C | 0.0692  |
| rs115931344 | T | 0.0447  |
| rs7705716   | G | -0.0569 |
| rs74798522  | T | 0.0551  |
| rs13159465  | A | -0.0583 |
| rs115000205 | A | 0.0546  |
| rs300231    | T | -0.0161 |
| rs1330644   | T | 0.038   |
| rs115418828 | G | 0.0356  |
| rs59443641  | A | 0.0791  |
| rs12655536  | T | -0.0208 |
| rs16875319  | G | -0.0282 |
| rs79953387  | T | -0.0323 |
| rs148887253 | C | 0.0326  |
| rs72785881  | A | 0.0526  |
| rs1366337   | C | -0.0177 |
| rs16899845  | C | 0.021   |
| rs9327739   | C | -0.0254 |
| rs140204469 | C | 0.0313  |
| rs4128741   | T | -0.0137 |
| rs62374581  | T | 0.0191  |
| rs7356666   | T | 0.0267  |
| rs55965681  | A | -0.0633 |
| rs113275890 | C | -0.0746 |
| rs27852     | A | 0.0131  |
| rs60936840  | T | 0.0313  |
| rs75848007  | G | 0.0776  |
| rs56221720  | T | 0.0134  |
| rs6879116   | C | 0.0172  |
| rs4615304   | G | 0.0304  |
| rs116762625 | T | -0.0486 |
| rs76746356  | T | 0.0831  |
| rs113890413 | T | 0.0789  |
| rs4869373   | C | -0.0381 |
| rs438913    | A | 0.0225  |
| rs36089     | G | 0.0363  |
| rs113417969 | C | 0.0705  |
| rs150514712 | A | 0.0626  |
| rs115474849 | G | 0.0423  |
| rs77098238  | T | -0.0338 |
| rs9986212   | C | 0.115   |
| rs141051038 | G | -0.0843 |
| rs2009378   | T | 0.0206  |

|             |   |         |
|-------------|---|---------|
| rs142590035 | C | -0.0461 |
| rs113995393 | G | -0.044  |
| rs75172127  | T | 0.0452  |
| rs1587176   | G | -0.0168 |
| rs2625210   | T | -0.0152 |
| rs55759333  | T | 0.028   |
| rs17138632  | T | 0.048   |
| rs116241081 | T | 0.0769  |
| rs116682854 | A | 0.0715  |
| rs252706    | A | 0.0528  |
| rs146686275 | C | -0.0609 |
| rs141718513 | A | -0.0439 |
| rs12653484  | A | -0.0164 |
| rs140305586 | T | -0.1137 |
| rs141621500 | G | 0.0441  |
| rs75644344  | C | 0.0411  |
| rs62392999  | A | -0.0226 |
| rs115154333 | T | -0.0765 |
| rs7731762   | A | 0.0203  |
| rs61748764  | T | -0.0474 |
| rs10052095  | T | 0.0158  |
| rs4835646   | C | 0.0156  |
| rs112553617 | G | -0.065  |
| rs62361627  | A | -0.0349 |
| rs115288944 | G | -0.0165 |
| rs72795755  | C | -0.0614 |
| rs1816046   | C | -0.0307 |
| rs11742713  | A | 0.0875  |
| rs734862    | T | 0.0152  |
| rs2028260   | G | 0.014   |
| rs13188115  | C | -0.0182 |
| rs78451873  | A | -0.0532 |
| rs11958144  | T | 0.0417  |
| rs147075327 | G | 0.0609  |
| rs13180149  | C | -0.0613 |
| rs141487877 | T | 0.0605  |
| rs79358439  | T | 0.0436  |
| rs10062483  | T | 0.0211  |
| rs10035433  | C | 0.0187  |
| rs2055608   | T | -0.0195 |
| rs72759033  | T | -0.035  |
| rs115111458 | A | 0.0573  |
| rs17823816  | C | -0.0477 |
| rs11738482  | A | 0.021   |
| rs6899000   | T | 0.0134  |
| rs61003709  | T | 0.077   |
| rs886510    | T | 0.0171  |

|             |   |         |
|-------------|---|---------|
| rs2927613   | A | 0.0128  |
| rs72754197  | T | -0.1025 |
| rs2032816   | A | 0.0118  |
| rs77060141  | T | 0.0564  |
| rs150658936 | G | -0.0407 |
| rs114890975 | T | 0.0537  |
| rs7711670   | G | 0.0452  |
| rs73792311  | G | -0.0218 |
| rs1542285   | C | -0.0196 |
| rs1423222   | C | 0.0254  |
| rs146405906 | T | -0.0487 |
| rs72779273  | C | -0.0762 |
| rs168534    | C | 0.0168  |
| rs116557849 | G | 0.0799  |
| rs114998510 | G | 0.0445  |
| rs79195066  | T | -0.0466 |
| rs17412042  | A | 0.0223  |
| rs10793826  | G | 0.0165  |
| rs79317443  | T | -0.0404 |
| rs148555060 | G | -0.0567 |
| rs72757270  | C | -0.055  |
| rs10052672  | A | -0.0156 |
| rs2133740   | A | -0.0169 |
| rs148176539 | T | -0.0371 |
| rs6876781   | G | -0.0147 |
| rs138485375 | C | 0.0831  |
| rs78608604  | G | 0.0315  |
| rs61593351  | G | 0.017   |
| rs79693403  | G | 0.044   |
| rs141658174 | T | 0.0686  |
| rs10472290  | T | -0.015  |
| rs6865378   | G | -0.0201 |
| rs114946557 | T | -0.0604 |
| rs42757     | G | 0.0162  |
| rs10070472  | C | 0.0322  |
| rs395780    | G | -0.0154 |
| rs752922    | A | 0.0146  |
| rs2974640   | T | -0.0444 |
| rs4867991   | G | 0.0161  |
| rs772677    | T | 0.081   |
| rs75155833  | T | 0.0838  |
| rs116629946 | T | -0.0501 |
| rs4702639   | T | -0.0232 |
| rs10472791  | C | -0.0257 |
| rs28450080  | T | 0.0315  |
| rs77429717  | A | 0.0654  |
| rs151207    | G | 0.0138  |

|             |   |         |
|-------------|---|---------|
| rs12659839  | G | -0.0285 |
| rs10053346  | C | -0.073  |
| rs78380242  | T | 0.037   |
| rs10073149  | C | -0.0154 |
| rs73745624  | T | 0.0289  |
| rs116588714 | G | 0.0393  |
| rs11739800  | G | 0.0138  |
| rs10058502  | G | 0.0242  |
| rs11745163  | G | -0.0126 |
| rs149661428 | C | 0.0503  |
| rs469300    | A | 0.0127  |
| rs2113043   | G | -0.0183 |
| rs258953    | T | 0.0134  |
| rs12516046  | G | -0.0131 |
| rs79255783  | T | 0.0748  |
| rs147767356 | C | 0.0814  |
| rs66693652  | A | 0.0215  |
| rs112919456 | C | 0.0321  |
| rs13172268  | A | -0.0496 |
| rs115198418 | C | 0.0537  |
| rs71630412  | A | 0.0424  |
| rs16899727  | A | 0.0804  |
| rs139137392 | A | 0.0518  |
| rs10055027  | A | -0.0138 |
| rs4296807   | G | -0.0279 |
| rs2549779   | G | -0.0118 |
| rs9313243   | C | 0.0123  |
| rs10058679  | A | -0.0307 |
| rs72789387  | A | 0.0229  |
| rs1546251   | G | 0.013   |
| rs2973384   | C | -0.0208 |
| rs6875107   | C | 0.0481  |
| rs76938202  | G | 0.0582  |
| rs191297    | A | 0.0146  |
| rs118583    | C | -0.013  |
| rs697618    | G | -0.0567 |
| rs12514417  | G | -0.0213 |
| rs56788223  | T | -0.0125 |
| rs11957001  | A | 0.013   |
| rs79675555  | C | 0.032   |
| rs115894424 | G | -0.0709 |
| rs113357719 | T | -0.0773 |
| rs13164653  | C | -0.0177 |
| rs148534687 | T | -0.0741 |
| rs114462406 | A | 0.0874  |
| rs76296609  | A | 0.0502  |
| rs10476071  | A | -0.0138 |

|             |   |         |
|-------------|---|---------|
| rs199174    | G | -0.0127 |
| rs142773662 | T | 0.0558  |
| rs113949559 | A | 0.0608  |
| rs115525179 | A | 0.0777  |
| rs116829224 | G | 0.0525  |
| rs78843508  | A | 0.0725  |
| rs56660020  | T | 0.0145  |
| rs40312     | T | 0.093   |
| rs80332383  | C | 0.063   |
| rs11744488  | A | -0.0535 |
| rs150446715 | C | -0.0991 |
| rs71639264  | C | 0.023   |
| rs78087099  | A | 0.0521  |
| rs2530229   | G | 0.0218  |
| rs145893102 | T | -0.0862 |
| rs78813958  | G | 0.0619  |
| rs139514601 | T | 0.0525  |
| rs77729022  | C | -0.0195 |
| rs10068970  | C | -0.018  |
| rs75526595  | A | -0.0188 |
| rs78479536  | C | -0.0534 |
| rs114900018 | T | -0.0663 |
| rs11745126  | C | 0.0134  |
| rs7446710   | A | 0.0278  |
| rs140524467 | G | 0.0717  |
| rs1445789   | G | 0.0133  |
| rs76056373  | C | -0.0305 |
| rs2044033   | G | 0.0142  |
| rs115099021 | T | 0.047   |
| rs13177139  | T | 0.014   |
| rs9324938   | C | 0.0165  |
| rs79893053  | C | -0.0166 |
| rs115181379 | C | -0.0717 |
| rs113383339 | G | 0.0267  |
| rs116389382 | A | -0.0501 |
| rs113043033 | C | -0.0547 |
| rs9292760   | T | 0.0137  |
| rs71581217  | G | -0.0196 |
| rs2961705   | G | -0.0153 |
| rs2964252   | A | 0.0129  |
| rs138448052 | G | 0.114   |
| rs16880227  | C | 0.0354  |
| rs116644220 | A | -0.0567 |
| rs2472648   | C | 0.0277  |
| rs56276028  | C | 0.0343  |
| rs17321708  | A | 0.0615  |
| rs3111487   | A | -0.0321 |



|             |   |         |
|-------------|---|---------|
| rs7727063   | A | 0.0357  |
| rs113320278 | T | -0.0622 |
| rs11948236  | G | -0.0184 |
| rs73075922  | A | 0.0614  |
| rs12513773  | C | -0.0266 |
| rs114370305 | A | 0.0408  |
| rs6872356   | T | 0.0166  |
| rs150655703 | C | 0.046   |
| rs6871539   | G | -0.022  |
| rs10039003  | G | -0.0271 |
| rs112590711 | T | -0.0594 |
| rs62356064  | T | 0.0339  |
| rs142389904 | G | 0.0771  |
| rs115923511 | T | 0.081   |
| rs7718393   | A | -0.0125 |
| rs12515653  | T | 0.0252  |
| rs10078743  | G | 0.0158  |
| rs10213856  | A | 0.0207  |
| rs115511395 | G | 0.0998  |
| rs116116916 | G | 0.0572  |
| rs758347    | C | 0.0146  |
| rs10039706  | A | -0.0119 |
| rs7725561   | T | -0.0132 |
| rs466366    | G | 0.0118  |
| rs78294858  | T | -0.0558 |
| rs77404119  | C | -0.0382 |
| rs75426270  | T | 0.0313  |
| rs78349856  | T | 0.0947  |
| rs77613984  | C | 0.0758  |
| rs116566991 | A | -0.0824 |
| rs11135001  | C | 0.0168  |
| rs6883684   | T | -0.0256 |
| rs79668711  | G | -0.0242 |
| rs16889126  | T | 0.0213  |
| rs79032298  | A | 0.0662  |
| rs10479088  | C | -0.0184 |
| rs115535251 | T | -0.0681 |
| rs115481708 | T | 0.0502  |
| rs115325566 | T | -0.0295 |
| rs149255564 | G | -0.0914 |
| rs11134752  | G | -0.0124 |
| rs72810783  | A | -0.0354 |
| rs73105531  | C | -0.0471 |
| rs4701348   | A | 0.0125  |
| rs12153257  | T | 0.0196  |
| rs79600097  | G | 0.0207  |
| rs62377317  | T | -0.0348 |

|             |   |         |
|-------------|---|---------|
| rs34954967  | A | 0.0138  |
| rs76629065  | A | -0.0698 |
| rs188446    | G | -0.0118 |
| rs640837    | C | -0.0154 |
| rs1860409   | T | 0.0304  |
| rs12153170  | A | -0.018  |
| rs35136     | A | 0.0138  |
| rs180473    | T | -0.0126 |
| rs4868222   | T | 0.0185  |
| rs10462304  | A | -0.0451 |
| rs410443    | C | -0.0163 |
| rs13188582  | C | -0.0311 |
| rs2406905   | T | 0.0124  |
| rs13355819  | A | -0.0162 |
| rs17087379  | T | 0.0428  |
| rs1036174   | A | 0.0121  |
| rs62368966  | A | -0.0537 |
| rs112979063 | A | 0.0463  |
| rs67386558  | A | -0.0256 |
| rs1007560   | C | -0.0227 |
| rs78734624  | A | -0.0658 |
| rs1426094   | C | -0.0164 |
| rs35218351  | A | -0.0177 |
| rs35888615  | A | -0.0173 |
| rs140816908 | A | -0.0786 |
| rs11750104  | C | 0.0123  |
| rs11134727  | C | 0.0404  |
| rs35294602  | T | -0.0132 |
| rs1559096   | G | 0.0208  |
| rs6895072   | T | -0.0209 |
| rs13156223  | C | -0.0142 |
| rs147311675 | T | -0.0592 |
| rs7701818   | A | -0.0167 |
| rs72799426  | G | 0.0261  |
| rs73038940  | A | 0.0772  |
| rs62387568  | A | -0.0134 |
| rs1805971   | T | 0.0178  |
| rs7731790   | A | 0.0125  |
| rs117755368 | A | -0.0443 |
| rs78777255  | T | -0.0686 |
| rs9293003   | T | 0.0525  |
| rs2453318   | C | 0.0155  |
| rs1593973   | G | 0.0218  |
| rs12522597  | G | -0.0124 |
| rs17643048  | T | 0.03    |
| rs79255608  | T | -0.0217 |
| rs78163253  | G | -0.0252 |

|             |   |         |
|-------------|---|---------|
| rs75993295  | A | 0.0333  |
| rs76533320  | C | 0.0476  |
| rs4240406   | T | 0.0202  |
| rs113754080 | A | -0.0567 |
| rs138490321 | A | 0.038   |
| rs150553271 | A | 0.0679  |
| rs78759178  | A | 0.0309  |
| rs150178086 | T | 0.0498  |
| rs112446475 | T | 0.0792  |
| rs11739735  | T | 0.0699  |
| rs79824688  | T | -0.0563 |
| rs1505995   | G | 0.0171  |
| rs35017008  | C | -0.0787 |
| rs3933807   | A | -0.0329 |
| rs6880471   | C | 0.0323  |
| rs35566995  | G | -0.0259 |
| rs68164553  | G | -0.0182 |
| rs111929801 | C | -0.0603 |
| rs77489428  | A | -0.034  |
| rs12653513  | C | -0.0558 |
| rs115172522 | T | -0.0322 |
| rs11738553  | T | 0.0448  |
| rs115665430 | G | 0.0755  |
| rs114912544 | T | 0.0396  |
| rs12521751  | A | -0.0179 |
| rs145778552 | A | -0.0407 |
| rs13179154  | G | -0.012  |
| rs57217872  | T | -0.0245 |
| rs28379503  | G | -0.0818 |
| rs74893077  | C | 0.0731  |
| rs55674118  | T | -0.0415 |
| rs115806002 | C | 0.08    |
| rs4868737   | C | 0.0324  |
| rs11743881  | G | -0.0118 |
| rs114240096 | A | -0.0561 |
| rs1463781   | C | -0.0143 |
| rs66942438  | G | 0.0249  |
| rs73762024  | C | -0.0624 |
| rs7701158   | C | 0.0236  |
| rs71624142  | G | 0.0852  |
| rs78494713  | G | 0.0303  |
| rs209337    | A | -0.0306 |
| rs148583391 | G | -0.051  |
| rs80194132  | A | 0.055   |
| rs7701103   | G | 0.019   |
| rs142114555 | C | 0.0593  |
| rs78240130  | G | -0.0575 |

|             |   |         |
|-------------|---|---------|
| rs62385311  | A | 0.0178  |
| rs72756114  | A | 0.0161  |
| rs731405    | T | 0.0632  |
| rs7729095   | C | -0.0179 |
| rs511038    | G | -0.0197 |
| rs72811499  | A | -0.0342 |
| rs61577032  | T | 0.0162  |
| rs13176310  | A | -0.0617 |
| rs147281586 | T | -0.0671 |
| rs62357310  | T | 0.0617  |
| rs7722653   | G | -0.0246 |
| rs4702210   | T | 0.0217  |
| rs9292972   | G | -0.0503 |
| rs35702468  | C | -0.0166 |
| rs114591911 | A | -0.0719 |
| rs255045    | T | -0.0179 |
| rs2913487   | A | 0.0207  |
| rs58292560  | C | 0.0519  |
| rs35408423  | A | -0.0575 |
| rs116579107 | T | 0.0652  |
| rs11952454  | C | 0.0356  |
| rs1979979   | A | 0.0251  |
| rs13170299  | A | -0.0365 |
| rs77545517  | C | -0.1021 |
| rs79247868  | A | -0.015  |
| rs7723051   | A | 0.0132  |
| rs706728    | A | 0.0138  |
| rs75686232  | A | 0.0443  |
| rs72735064  | T | -0.0235 |
| rs6897038   | T | -0.0202 |
| rs13162877  | A | 0.0221  |
| rs331030    | A | -0.0218 |
| rs146064934 | T | 0.0939  |
| rs72816980  | T | -0.0398 |
| rs7721589   | C | 0.0157  |
| rs146477618 | G | -0.0723 |
| rs142455130 | A | -0.0558 |
| rs6594726   | T | 0.0215  |
| rs72765132  | A | -0.0575 |
| rs144422011 | T | 0.0585  |
| rs6859412   | G | 0.0692  |
| rs115172908 | A | 0.0516  |
| rs275496    | A | 0.0127  |
| rs141010652 | T | 0.0589  |
| rs141207501 | A | 0.0867  |
| rs4412104   | T | 0.0351  |
| rs79191455  | T | -0.0243 |

|             |   |         |
|-------------|---|---------|
| rs56090436  | A | -0.0647 |
| rs462520    | G | 0.0119  |
| rs62396155  | A | 0.0313  |
| rs75286224  | T | -0.0637 |
| rs140080098 | C | 0.0387  |
| rs10454982  | C | 0.014   |
| rs13183528  | C | 0.0585  |
| rs36007018  | A | -0.0652 |
| rs139134395 | C | 0.0687  |
| rs149724478 | G | 0.0995  |
| rs148906015 | G | -0.0454 |
| rs1091970   | T | 0.013   |
| rs72802718  | C | -0.0403 |
| rs114163910 | G | -0.035  |
| rs33809     | T | 0.0124  |
| rs116827415 | A | 0.05    |
| rs269494    | T | -0.0195 |
| rs112150821 | T | 0.0747  |
| rs74292706  | G | 0.0697  |
| rs114610013 | G | -0.0638 |
| rs77616493  | T | 0.0507  |
| rs116108996 | T | 0.0906  |
| rs78639324  | T | 0.049   |
| rs115990993 | A | 0.0972  |
| rs34747682  | G | 0.043   |
| rs114104940 | G | -0.0398 |
| rs12523588  | T | -0.0199 |
| rs77650590  | A | 0.0696  |
| rs254663    | T | 0.0134  |
| rs7723967   | T | 0.0148  |
| rs4957214   | T | -0.0364 |
| rs4704362   | C | 0.0216  |
| rs77360799  | T | 0.0948  |
| rs77884354  | G | 0.0263  |
| rs145984998 | G | -0.068  |
| rs7718036   | T | -0.0137 |
| rs146819365 | C | -0.0725 |
| rs3822657   | G | 0.0168  |
| rs6886057   | C | -0.0121 |
| rs72750230  | A | -0.0346 |
| rs13158009  | C | -0.0136 |
| rs139990650 | A | -0.0717 |
| rs10058392  | C | -0.0449 |
| rs35782901  | T | 0.0256  |
| rs116794962 | T | 0.07    |
| rs983013    | A | -0.0125 |
| rs17524553  | A | -0.0213 |

|             |   |         |
|-------------|---|---------|
| rs141490086 | C | 0.0444  |
| rs1833809   | A | -0.0118 |
| rs72725373  | A | -0.0352 |
| rs72781718  | T | -0.0209 |
| rs7736942   | G | 0.0149  |
| rs10036381  | C | -0.0306 |
| rs113513002 | A | -0.0412 |
| rs11749036  | T | -0.0231 |
| rs112879314 | G | -0.0318 |
| rs114246870 | T | -0.067  |
| rs77895261  | A | -0.0302 |
| rs139647383 | T | -0.092  |
| rs112911797 | C | -0.0377 |
| rs114613874 | C | 0.0427  |
| rs7723812   | T | -0.0126 |
| rs77875753  | T | -0.0502 |
| rs79745818  | T | -0.0376 |
| rs12515639  | T | 0.0282  |
| rs147723143 | G | 0.0433  |
| rs453157    | A | 0.0233  |
| rs10071962  | A | 0.0135  |
| rs307822    | T | 0.032   |
| rs79016435  | G | -0.0279 |
| rs77335018  | A | 0.0387  |
| rs3846564   | G | -0.0207 |
| rs79555789  | G | 0.057   |
| rs3733897   | G | -0.0173 |
| rs33862     | G | -0.012  |
| rs116598935 | C | -0.0645 |
| rs10053802  | T | 0.0136  |
| rs1345732   | G | -0.019  |
| rs72735272  | C | -0.0508 |
| rs6882956   | A | 0.0166  |
| rs2218515   | G | 0.0117  |
| rs139700159 | G | -0.0779 |
| rs72792583  | A | -0.0281 |
| rs113728746 | T | -0.0805 |
| rs11567738  | T | -0.0168 |
| rs255868    | C | -0.0308 |
| rs13182406  | T | -0.0157 |
| rs10805900  | G | 0.0164  |
| rs4704437   | T | -0.0966 |
| rs62373660  | T | -0.0342 |
| rs34544075  | A | -0.0952 |
| rs28552875  | T | -0.0319 |
| rs146262729 | G | -0.0527 |
| rs116151398 | G | 0.0464  |

|             |   |         |
|-------------|---|---------|
| rs114178259 | T | -0.0772 |
| rs3101714   | C | -0.0119 |
| rs462020    | T | 0.0575  |
| rs376874    | A | -0.0141 |
| rs6874186   | G | -0.0124 |
| rs34232869  | C | -0.0198 |
| rs145180754 | G | -0.0714 |
| rs7732251   | T | 0.0201  |
| rs11954708  | T | 0.0562  |
| rs149053988 | T | -0.0918 |
| rs59658700  | T | 0.0417  |
| rs80326131  | A | -0.0533 |
| rs114160651 | A | 0.0363  |
| rs115648250 | G | -0.0509 |
| rs12656263  | C | 0.012   |
| rs62392748  | A | -0.041  |
| rs140401199 | C | 0.0553  |
| rs6556194   | G | -0.0565 |
| rs10041223  | T | -0.0161 |
| rs10062464  | C | 0.0286  |
| rs11951951  | C | 0.0562  |
| rs4835970   | A | 0.0119  |
| rs962102    | T | -0.0126 |
| rs11747026  | G | 0.0738  |
| rs113510309 | T | 0.0575  |
| rs114924432 | G | 0.068   |
| rs77146987  | T | 0.0603  |
| rs6555165   | T | -0.0187 |
| rs77662493  | G | 0.0312  |
| rs77809557  | A | -0.0303 |
| rs9968738   | A | -0.0121 |
| rs74484706  | A | -0.0489 |
| rs75856775  | T | -0.0248 |
| rs73804202  | C | 0.0355  |
| rs58631537  | A | 0.0237  |
| rs67537855  | G | 0.0254  |
| rs17146891  | A | -0.0492 |
| rs146304360 | A | -0.063  |
| rs10070486  | T | -0.0169 |
| rs113123001 | T | 0.0759  |
| rs75146828  | G | -0.0444 |
| rs4479880   | C | -0.0117 |
| rs17060660  | G | -0.0181 |
| rs11748493  | A | -0.07   |
| rs116366915 | T | -0.0515 |
| rs1363933   | A | 0.0217  |
| rs12109259  | A | -0.0169 |

|             |   |         |
|-------------|---|---------|
| rs6864320   | T | -0.0127 |
| rs35920955  | A | -0.0448 |
| rs141253840 | C | 0.0399  |
| rs57332443  | T | 0.0636  |
| rs114159643 | A | 0.058   |
| rs112798600 | T | 0.0337  |
| rs76031353  | A | -0.063  |
| rs2278240   | A | 0.0347  |
| rs2172792   | G | 0.0177  |
| rs77124169  | G | -0.1008 |
| rs114544529 | T | -0.0289 |
| rs12186718  | T | 0.0717  |
| rs73259299  | G | 0.0687  |
| rs78838035  | A | 0.0218  |
| rs145753979 | A | 0.0917  |
| rs7728010   | G | -0.0116 |
| rs115724012 | A | 0.0642  |
| rs58255401  | A | -0.0187 |
| rs72746895  | G | -0.0699 |
| rs35906608  | A | -0.0196 |
| rs72781473  | A | 0.0392  |
| rs142276294 | A | -0.0609 |
| rs114081063 | T | 0.0737  |
| rs76444042  | T | 0.0506  |
| rs78108636  | A | 0.0891  |
| rs260878    | C | -0.017  |
| rs1691082   | A | 0.0135  |
| rs71615831  | C | -0.0149 |
| rs10038120  | G | 0.0627  |
| rs863241    | T | 0.012   |
| rs10076754  | C | 0.0498  |
| rs2964077   | G | 0.0161  |
| rs75579499  | T | -0.0758 |
| rs2089903   | A | -0.0447 |
| rs164080    | A | 0.0122  |
| rs28420730  | T | -0.0196 |
| rs11741455  | A | -0.0663 |
| rs17643035  | A | -0.0423 |
| rs115739857 | T | -0.0867 |
| rs116501851 | T | 0.0604  |
| rs116391805 | G | 0.0817  |
| rs72803927  | T | 0.0635  |
| rs116325063 | G | 0.0753  |
| rs4704068   | C | 0.0166  |
| rs144989886 | G | -0.0764 |
| rs12520932  | G | -0.0401 |
| rs10078573  | T | 0.0629  |



|             |   |         |
|-------------|---|---------|
| rs12516627  | T | -0.0115 |
| rs138260496 | G | -0.0633 |
| rs514336    | T | -0.0194 |
| rs76985054  | A | 0.0571  |
| rs71602131  | C | 0.0523  |
| rs114944556 | A | 0.0742  |
| rs17656896  | T | 0.0424  |
| rs73277389  | A | 0.048   |
| rs72798343  | T | -0.0147 |
| rs115158681 | G | -0.0713 |
| rs17566483  | G | -0.0244 |
| rs10044282  | A | 0.0168  |
| rs115103503 | C | 0.0335  |
| rs1563783   | T | 0.0163  |
| rs12653828  | T | 0.0307  |
| rs12659147  | G | 0.0221  |
| rs13167259  | T | -0.0224 |
| rs17302470  | A | -0.0216 |
| rs10079594  | T | 0.0122  |
| rs11955940  | T | 0.0202  |
| rs143745746 | A | 0.0779  |
| rs10038653  | C | 0.0217  |
| rs76572924  | A | -0.0809 |
| rs113750646 | G | -0.0457 |
| rs56195530  | C | 0.0447  |
| rs3733925   | C | -0.0269 |
| rs9324741   | T | -0.0158 |
| rs12659172  | A | -0.0171 |
| rs112014262 | A | -0.0255 |
| rs114492202 | T | -0.0521 |
| rs368729    | G | 0.0175  |
| rs151786    | A | -0.0184 |
| rs7704889   | A | -0.0164 |
| rs62362488  | T | -0.0404 |
| rs1841974   | C | 0.0337  |
| rs78720022  | A | 0.0309  |
| rs12332121  | G | -0.0136 |
| rs4921448   | T | 0.0321  |
| rs7734525   | T | -0.0418 |
| rs78024709  | T | 0.0459  |
| rs17708342  | G | 0.0339  |
| rs11954916  | A | -0.0705 |
| rs111706939 | A | 0.0772  |
| rs17099100  | G | -0.0352 |
| rs173503    | G | 0.0115  |
| rs7700739   | C | -0.0132 |
| rs72807528  | A | 0.0218  |

|             |   |         |
|-------------|---|---------|
| rs34406828  | A | -0.0247 |
| rs34303513  | A | 0.0367  |
| rs11956417  | T | -0.0528 |
| rs7737778   | T | -0.0203 |
| rs79972705  | G | 0.0239  |
| rs4551015   | G | 0.0119  |
| rs824853    | C | 0.0115  |
| rs32119     | T | -0.0328 |
| rs10053131  | G | -0.0139 |
| rs140213369 | T | -0.0489 |
| rs60472664  | T | -0.0695 |
| rs75140822  | A | 0.0361  |
| rs76522158  | A | -0.0511 |
| rs35555580  | G | 0.0117  |
| rs76557386  | A | -0.0147 |
| rs77825133  | C | -0.0875 |
| rs143013487 | T | 0.0547  |
| rs17109693  | A | 0.0695  |
| rs144587768 | A | -0.0359 |
| rs17076500  | A | 0.0184  |
| rs146178490 | G | 0.0594  |
| rs4380603   | A | 0.0199  |
| rs111404975 | A | 0.0441  |
| rs75458354  | G | 0.0562  |
| rs76302589  | A | 0.0585  |
| rs32274     | C | -0.0115 |
| rs2897686   | C | -0.0156 |
| rs6886690   | T | 0.0146  |
| rs11241245  | G | 0.0365  |
| rs77590071  | T | -0.0717 |
| rs58600572  | G | -0.0216 |
| rs112839265 | T | -0.0484 |
| rs75500407  | G | 0.0631  |
| rs112665633 | A | -0.029  |
| rs7717164   | A | 0.0262  |
| rs7730471   | G | 0.0113  |
| rs10066938  | T | -0.0583 |
| rs76630253  | G | 0.0202  |
| rs80140684  | A | 0.0836  |
| rs6870130   | A | 0.0654  |
| rs143638902 | T | 0.082   |
| rs76385051  | A | -0.0344 |
| rs17764045  | C | 0.0303  |
| rs7727095   | A | 0.0115  |
| rs111350181 | A | 0.0803  |
| rs2964110   | A | -0.0169 |
| rs115998917 | G | -0.0359 |

|             |   |         |
|-------------|---|---------|
| rs77681946  | A | -0.0337 |
| rs115562674 | T | -0.0936 |
| rs76582322  | T | -0.032  |
| rs114752601 | A | 0.059   |
| rs112607086 | C | -0.0394 |
| rs116326079 | C | 0.0697  |
| rs11741063  | G | -0.0122 |
| rs140007111 | A | -0.0672 |
| rs67119804  | G | 0.0494  |
| rs113282942 | A | 0.0208  |
| rs4270726   | G | 0.0118  |
| rs10067057  | G | 0.0415  |
| rs112062071 | A | 0.0355  |
| rs1004522   | C | -0.0146 |
| rs72822560  | C | -0.0586 |
| rs116664154 | T | -0.0613 |
| rs116114859 | C | 0.066   |
| rs57044280  | G | 0.0155  |
| rs6892011   | C | 0.0455  |
| rs150562304 | A | 0.0511  |
| rs60178408  | T | 0.0303  |
| rs79733774  | A | 0.0931  |
| rs16879046  | T | 0.0526  |
| rs7723014   | A | -0.0159 |
| rs6595870   | C | 0.0118  |
| rs115841793 | G | -0.0379 |
| rs147594163 | T | 0.0622  |
| rs254223    | A | -0.0342 |
| rs7714138   | T | -0.0162 |
| rs114477901 | A | -0.0371 |
| rs72733891  | T | 0.067   |
| rs75074779  | T | -0.0304 |
| rs6871204   | G | 0.0151  |
| rs116600786 | G | 0.0709  |
| rs116464374 | G | 0.0749  |
| rs114085403 | T | 0.1288  |
| rs56328705  | G | -0.0367 |
| rs114021757 | A | -0.053  |
| rs3797612   | C | 0.0184  |
| rs453876    | G | -0.024  |
| rs77045691  | C | -0.0319 |
| rs115575798 | A | -0.0475 |
| rs71588360  | T | -0.0744 |
| rs6861024   | T | -0.0158 |
| rs149907583 | A | 0.0888  |
| rs29543     | G | -0.0124 |
| rs147793447 | T | -0.0797 |

|             |   |         |
|-------------|---|---------|
| rs2913854   | G | -0.0155 |
| rs17068863  | T | 0.0614  |
| rs79173098  | G | 0.028   |
| rs137858508 | A | -0.0516 |
| rs77826446  | C | 0.0699  |
| rs111458150 | C | 0.0139  |
| rs13163362  | A | -0.014  |
| rs75151751  | G | -0.0462 |
| rs77527278  | A | 0.0288  |
| rs59029779  | T | 0.0467  |
| rs141661269 | T | 0.0385  |
| rs76717944  | T | 0.0439  |
| rs79725500  | T | -0.0567 |
| rs78477488  | A | 0.103   |
| rs10472770  | A | -0.024  |
| rs34391790  | A | -0.0432 |
| rs116681139 | T | 0.0744  |
| rs6878991   | C | 0.0161  |
| rs79191452  | A | -0.026  |
| rs256634    | C | 0.0164  |
| rs59170767  | T | 0.0427  |
| rs75851973  | G | 0.0251  |
| rs80097481  | C | 0.0273  |
| rs76883130  | G | -0.0743 |
| rs116270041 | T | -0.0467 |
| rs76123396  | A | 0.0183  |
| rs13170938  | T | -0.0227 |
| rs143820569 | G | -0.0759 |
| rs114726440 | T | -0.0851 |
| rs56242251  | T | 0.0145  |
| rs334913    | T | 0.0151  |
| rs6862196   | T | -0.0811 |
| rs248511    | C | -0.0144 |
| rs10074608  | A | 0.0141  |
| rs147470603 | A | -0.0381 |
| rs2016666   | T | 0.0129  |
| rs113596729 | C | 0.0545  |
| rs2173225   | G | -0.0492 |
| rs114712271 | C | -0.0617 |
| rs998837    | C | -0.012  |
| rs4702390   | C | 0.0194  |
| rs62347239  | A | -0.0162 |
| rs11959615  | T | -0.0112 |
| rs76627392  | T | 0.0409  |
| rs11953280  | C | 0.0184  |
| rs72777444  | G | -0.0755 |
| rs2400643   | G | 0.0129  |

|             |   |         |
|-------------|---|---------|
| rs248004    | C | -0.0132 |
| rs72752218  | A | 0.0257  |
| rs358824    | A | 0.0193  |
| rs16868006  | T | 0.0549  |
| rs78219477  | C | -0.045  |
| rs770167    | T | -0.0183 |
| rs115544756 | A | -0.0425 |
| rs141530133 | A | 0.0605  |
| rs114254961 | A | 0.04    |
| rs13165583  | T | 0.021   |
| rs12514603  | T | -0.0143 |
| rs6899064   | A | -0.0147 |
| rs2371382   | A | -0.0121 |
| rs138598437 | G | 0.027   |
| rs2936976   | T | 0.0186  |
| rs11748009  | T | 0.014   |
| rs4957420   | C | -0.0123 |
| rs2287693   | A | 0.0112  |
| rs150009797 | A | -0.1029 |
| rs34525350  | C | 0.0153  |
| rs147347993 | T | -0.0669 |
| rs17467229  | T | -0.0457 |
| rs1116919   | T | -0.0122 |
| rs11748833  | A | 0.0175  |
| rs387569    | T | -0.0123 |
| rs114484231 | C | 0.0693  |
| rs650640    | A | -0.0116 |
| rs1363624   | C | 0.0322  |
| rs78945613  | T | 0.0775  |
| rs1366265   | G | -0.0215 |
| rs77502913  | G | -0.0399 |
| rs9291827   | T | 0.0157  |
| rs10067617  | A | 0.0198  |
| rs10065057  | T | 0.0514  |
| rs6888635   | G | -0.0112 |
| rs74517671  | A | -0.0451 |
| rs79950972  | G | 0.0604  |
| rs77460798  | G | -0.0602 |
| rs3909469   | G | 0.0142  |
| rs4705634   | T | 0.0116  |
| rs111785482 | T | -0.0726 |
| rs78360632  | T | -0.0497 |
| rs79372888  | C | -0.0657 |
| rs35050974  | A | 0.012   |
| rs2961797   | G | -0.0189 |
| rs114537113 | T | -0.1182 |
| rs77463231  | C | -0.0237 |

|             |   |         |
|-------------|---|---------|
| rs7723619   | A | -0.0197 |
| rs6893165   | A | -0.0117 |
| rs10036124  | C | -0.0621 |
| rs11249625  | C | -0.0124 |
| rs7733012   | T | -0.0505 |
| rs55841820  | T | -0.0186 |
| rs35895944  | A | -0.0293 |
| rs72806749  | A | -0.0489 |
| rs113042334 | A | -0.0202 |
| rs76438240  | A | 0.0509  |
| rs147620167 | A | 0.0615  |
| rs76927007  | A | 0.0278  |
| rs7719832   | T | 0.0214  |
| rs2438646   | T | -0.0129 |
| rs115752754 | T | 0.0745  |
| rs72796195  | C | 0.0244  |
| rs76403032  | A | 0.0788  |
| rs149719481 | A | -0.0583 |
| rs6863410   | A | -0.0175 |
| rs76532749  | C | 0.0446  |
| rs430020    | A | -0.017  |
| rs80347912  | G | -0.072  |
| rs142427859 | C | 0.0649  |
| rs12521441  | C | 0.0131  |
| rs16893881  | A | 0.0593  |
| rs74420063  | T | -0.0379 |
| rs74513285  | G | 0.0415  |
| rs114518508 | T | 0.0419  |
| rs13357425  | G | 0.0159  |
| rs111228736 | C | 0.0235  |
| rs139860626 | A | -0.0558 |
| rs1011651   | T | 0.0213  |
| rs35257550  | G | -0.0192 |
| rs55730643  | T | -0.017  |
| rs113554866 | T | 0.0305  |
| rs138579051 | C | -0.0832 |
| rs10476760  | G | 0.0834  |
| rs7733421   | G | -0.0195 |
| rs17134475  | C | 0.0432  |
| rs12173124  | T | -0.0116 |
| rs76331250  | A | -0.0363 |
| rs16869638  | A | 0.0233  |
| rs2034289   | T | 0.0118  |
| rs11743198  | T | 0.0471  |
| rs6867879   | A | -0.0117 |
| rs79741157  | A | 0.0445  |
| rs114601412 | T | 0.0646  |

|             |   |         |
|-------------|---|---------|
| rs463868    | T | 0.0237  |
| rs147076668 | G | 0.0904  |
| rs114690976 | T | -0.0527 |
| rs72810123  | C | 0.0479  |
| rs114726734 | G | 0.0744  |
| rs78098071  | C | -0.0862 |
| rs72739415  | C | -0.1079 |
| rs76257697  | A | -0.0761 |
| rs6869655   | A | -0.0257 |
| rs78750164  | T | -0.0569 |
| rs13159627  | T | 0.0181  |
| rs115769486 | A | 0.0576  |
| rs74638372  | T | -0.0821 |
| rs4958508   | G | 0.023   |
| rs114284798 | A | 0.0856  |
| rs112119197 | C | 0.0518  |
| rs116292864 | A | 0.0529  |
| rs17369132  | T | -0.0351 |
| rs116160787 | T | 0.0451  |
| rs114910084 | C | -0.049  |
| rs11741497  | G | 0.0517  |
| rs62360598  | G | 0.0178  |
| rs77126180  | A | 0.0414  |
| rs67781169  | C | -0.0123 |
| rs80127522  | C | -0.058  |
| rs113501141 | G | -0.0879 |
| rs150683016 | G | -0.0608 |
| rs9284980   | G | -0.0186 |
| rs147893568 | T | -0.0688 |
| rs676030    | C | 0.0189  |
| rs16896849  | T | 0.0208  |
| rs72771187  | A | -0.0157 |
| rs75783207  | A | 0.0589  |
| rs115075184 | C | -0.0628 |
| rs148241516 | A | -0.06   |
| rs716518    | G | 0.0573  |
| rs145674487 | A | 0.0406  |
| rs116584432 | A | -0.0442 |
| rs114540968 | G | 0.0448  |
| rs56124608  | T | 0.0391  |
| rs78741843  | C | 0.0348  |
| rs9293788   | G | 0.013   |
| rs62373290  | A | 0.0516  |
| rs193552    | A | 0.015   |
| rs2962492   | G | 0.0153  |
| rs72763094  | T | 0.0412  |
| rs17139946  | C | -0.0227 |

|             |   |         |
|-------------|---|---------|
| rs11747130  | A | 0.0326  |
| rs9293700   | A | 0.0307  |
| rs56323619  | A | -0.0198 |
| rs114294084 | C | -0.061  |
| rs75493867  | T | 0.0359  |
| rs11747690  | C | -0.0522 |
| rs78567234  | A | -0.0352 |
| rs74489587  | A | 0.0632  |
| rs116521664 | G | -0.0623 |
| rs79518688  | G | -0.0474 |
| rs35365858  | T | -0.0158 |
| rs75976249  | A | 0.0328  |
| rs4700216   | A | 0.0116  |
| rs4298216   | A | -0.0383 |
| rs4323228   | C | 0.0128  |
| rs111841666 | G | -0.0381 |
| rs145123986 | C | 0.0597  |
| rs114151801 | A | 0.0222  |
| rs115844784 | T | 0.067   |
| rs6601132   | A | 0.0413  |
| rs36050966  | T | 0.0838  |
| rs72725218  | T | -0.095  |
| rs139094032 | T | -0.0348 |
| rs80013291  | A | 0.0603  |
| rs6876369   | G | -0.0169 |
| rs10076051  | T | -0.0718 |
| rs4131230   | G | -0.0461 |
| rs1978632   | C | 0.0717  |
| rs2562582   | C | 0.0141  |
| rs137855265 | T | -0.0892 |
| rs76709465  | C | -0.041  |
| rs6859185   | G | 0.0118  |
| rs17322880  | T | -0.021  |
| rs34858774  | C | 0.0336  |
| rs111272623 | C | -0.0764 |
| rs35886244  | G | -0.0173 |
| rs28551152  | A | -0.0685 |
| rs72775860  | T | -0.034  |
| rs147992763 | G | 0.074   |
| rs73815505  | G | 0.0299  |
| rs62075704  | A | -0.0508 |
| rs433227    | A | -0.0123 |
| rs56264732  | C | -0.0158 |
| rs143493976 | T | 0.033   |
| rs62382051  | T | 0.0154  |
| rs17075007  | A | 0.0148  |
| rs141519303 | T | -0.0429 |



|             |   |         |
|-------------|---|---------|
| rs17879984  | C | -0.0291 |
| rs75473231  | C | 0.0709  |
| rs79213501  | A | 0.0369  |
| rs143631582 | A | -0.0674 |
| rs17643844  | A | -0.015  |
| rs72729382  | T | -0.0195 |
| rs12513794  | G | 0.0165  |
| rs6868831   | T | -0.0783 |
| rs79019287  | C | 0.0458  |
| rs115035783 | C | -0.041  |
| rs114752366 | A | 0.0467  |
| rs78537826  | G | 0.0797  |
| rs35332751  | C | 0.0314  |
| rs2964675   | A | 0.0136  |
| rs279390    | A | 0.0162  |
| rs62376500  | C | -0.0721 |
| rs62385988  | A | 0.0307  |
| rs6876370   | T | 0.0113  |
| rs2303676   | T | -0.0252 |
| rs7709783   | C | 0.0247  |
| rs283619    | G | -0.0119 |
| rs76579560  | C | -0.1178 |
| rs148824742 | T | 0.0737  |
| rs77370310  | G | -0.0452 |
| rs140676405 | T | 0.0391  |
| rs140998748 | A | -0.0425 |
| rs115493729 | A | 0.0545  |
| rs10051358  | G | -0.0116 |
| rs10475844  | A | 0.0195  |
| rs112086585 | T | 0.0658  |
| rs141098171 | G | -0.0634 |
| rs11948305  | G | 0.0567  |
| rs77269405  | A | -0.0834 |
| rs73756380  | T | 0.0654  |
| rs1366089   | T | -0.0124 |
| rs77845673  | A | -0.0162 |
| rs9647580   | C | -0.0554 |
| rs744286    | G | 0.0131  |
| rs6601029   | A | -0.065  |
| rs635790    | T | 0.0344  |
| rs151127750 | A | -0.0744 |
| rs34565959  | T | -0.011  |
| rs9293790   | A | -0.0122 |
| rs11744381  | C | 0.0276  |
| rs72742744  | G | -0.0659 |
| rs139712384 | A | -0.1347 |
| rs60431728  | A | 0.0466  |

|             |   |         |
|-------------|---|---------|
| rs115229681 | A | 0.03    |
| rs111942249 | A | 0.0669  |
| rs62365254  | A | -0.0818 |
| rs2434713   | C | 0.0123  |
| rs29642     | C | -0.0119 |
| rs6881356   | A | -0.0154 |
| rs149358807 | T | 0.0442  |
| rs112720032 | G | -0.0768 |
| rs13179536  | T | -0.0233 |
| rs114787649 | T | 0.0931  |
| rs4867969   | T | -0.0735 |
| rs140969230 | T | -0.0322 |
| rs142816355 | G | -0.0709 |
| rs72741079  | T | -0.0699 |
| rs12517523  | A | 0.038   |
| rs4558971   | A | -0.0175 |
| rs28676880  | G | 0.015   |
| rs115740428 | G | 0.0588  |
| rs2913913   | T | -0.0292 |
| rs10080135  | T | 0.0147  |
| rs62369879  | G | 0.0629  |
| rs270184    | C | 0.015   |
| rs7728456   | G | 0.017   |
| rs117248506 | A | 0.0487  |
| rs113123917 | A | 0.0665  |
| rs157501    | G | 0.0117  |
| rs79360421  | G | -0.0293 |
| rs62355612  | A | 0.025   |
| rs77436203  | A | -0.0573 |
| rs148379904 | G | -0.0597 |
| rs17329450  | A | 0.029   |
| rs115232111 | T | -0.0854 |
| rs11739824  | T | 0.0515  |
| rs73800669  | T | 0.0407  |
| rs72818611  | G | 0.028   |
| rs457365    | T | -0.0125 |
| rs6596411   | A | -0.014  |
| rs72793007  | C | 0.0293  |
| rs2617984   | G | -0.0128 |
| rs72760690  | A | -0.0436 |
| rs74935352  | C | 0.0397  |
| rs142165536 | T | 0.0475  |
| rs115832799 | A | -0.0531 |
| rs72791034  | T | 0.0222  |
| rs140172510 | C | -0.0686 |
| rs11134510  | T | -0.0119 |
| rs2167085   | A | 0.036   |

|             |   |         |
|-------------|---|---------|
| rs2937538   | T | 0.0156  |
| rs116434801 | T | 0.0761  |
| rs1292143   | A | 0.0352  |
| rs116053005 | T | -0.0221 |
| rs144587740 | G | -0.0687 |
| rs4703266   | C | 0.0488  |
| rs17269014  | T | 0.0214  |
| rs76508569  | C | 0.0411  |
| rs148960151 | T | -0.0902 |
| rs4867247   | A | -0.0204 |
| rs6860843   | C | 0.0129  |
| rs6873065   | C | 0.0282  |
| rs34912304  | G | 0.0227  |
| rs17798350  | A | -0.0457 |
| rs114793447 | A | -0.0608 |
| rs12515558  | G | 0.0116  |
| rs504596    | G | -0.0149 |
| rs7706372   | C | -0.0274 |
| rs11949190  | A | 0.0214  |
| rs340671    | G | -0.0206 |
| rs66750569  | A | 0.033   |
| rs62373160  | T | -0.0443 |
| rs13178105  | T | 0.0152  |
| rs115137541 | G | -0.0535 |
| rs6890778   | T | -0.0125 |
| rs76076425  | A | -0.0475 |
| rs2279979   | T | 0.0285  |
| rs13169373  | T | -0.0147 |
| rs4467714   | T | 0.0142  |
| rs114359949 | A | 0.0385  |
| rs10875551  | A | 0.0121  |
| rs114048838 | C | 0.0511  |
| rs13186467  | A | 0.0198  |
| rs10039679  | C | -0.0412 |
| rs116269680 | T | -0.0543 |
| rs116883002 | T | 0.0627  |
| rs79382972  | T | -0.051  |
| rs10472786  | A | -0.013  |
| rs1148360   | A | -0.0182 |
| rs143150325 | T | 0.0838  |
| rs62388865  | G | 0.0411  |
| rs13357663  | G | -0.0122 |
| rs6899175   | C | 0.0185  |
| rs32872     | T | -0.0185 |
| rs114579110 | G | 0.0321  |
| rs9327191   | A | 0.0118  |
| rs72798541  | G | 0.0557  |

|             |   |         |
|-------------|---|---------|
| rs71581211  | A | 0.0535  |
| rs17521336  | C | -0.0361 |
| rs78902239  | A | 0.0657  |
| rs6882346   | T | 0.018   |
| rs852623    | A | -0.0126 |
| rs58048147  | C | -0.0404 |
| rs6883143   | C | -0.0122 |
| rs145786696 | T | 0.0926  |
| rs36016760  | G | 0.0298  |
| rs13178434  | T | 0.022   |
| rs77506002  | G | -0.0387 |
| rs1429053   | T | 0.0168  |
| rs12653481  | G | -0.0143 |
| rs62373830  | C | -0.0396 |
| rs115473344 | A | 0.0876  |
| rs13361142  | A | -0.019  |
| rs149827624 | C | -0.1402 |
| rs116402636 | A | -0.069  |
| rs114444069 | A | -0.0382 |
| rs55753653  | T | -0.0376 |
| rs6893475   | C | 0.0134  |
| rs11749738  | T | -0.0305 |
| rs12516177  | A | 0.0215  |
| rs77821955  | T | 0.0662  |
| rs114925849 | A | 0.0633  |
| rs114955451 | C | -0.0673 |
| rs141935790 | G | 0.0906  |
| rs10057541  | T | 0.0649  |
| rs79338118  | A | 0.0486  |
| rs34818909  | T | -0.0742 |
| rs12520292  | C | 0.0191  |
| rs7721851   | C | 0.0155  |
| rs61749601  | C | 0.0369  |
| rs604263    | T | -0.0193 |
| rs143823697 | A | 0.0756  |
| rs55982560  | T | -0.0397 |
| rs116390835 | A | -0.0552 |
| rs13169699  | C | 0.0364  |
| rs2112695   | T | 0.0158  |
| rs79736681  | C | -0.0942 |
| rs315917    | G | -0.022  |
| rs11953800  | C | -0.0166 |
| rs116066421 | C | 0.0505  |
| rs2902557   | T | 0.0306  |
| rs115358056 | A | -0.0649 |
| rs74893885  | T | -0.0362 |
| rs76525092  | A | 0.0196  |

|             |   |         |
|-------------|---|---------|
| rs72791976  | A | -0.0239 |
| rs1022040   | C | -0.013  |
| rs17641761  | G | -0.0121 |
| rs248180    | T | 0.0129  |
| rs74471414  | A | -0.0645 |
| rs114641557 | C | -0.0531 |
| rs72767061  | T | -0.0188 |
| rs116257021 | A | 0.0537  |
| rs76952064  | C | 0.0491  |
| rs445049    | A | 0.0216  |
| rs145197515 | G | -0.0887 |
| rs112017372 | T | 0.0383  |
| rs117012412 | G | -0.0471 |
| rs77215280  | C | 0.0528  |
| rs1035856   | A | 0.037   |
| rs143689810 | C | 0.0631  |
| rs75737019  | A | -0.0312 |
| rs6898636   | C | -0.0125 |
| rs148658824 | C | 0.0323  |
| rs75712536  | G | -0.0671 |
| rs79155969  | G | -0.0578 |
| rs28478094  | T | 0.0652  |
| rs6556840   | A | -0.0115 |
| rs891950    | G | -0.0133 |
| rs62359600  | A | 0.0551  |
| rs76647637  | T | -0.0397 |
| rs72812114  | T | -0.0267 |
| rs12186442  | A | 0.0165  |
| rs74955361  | T | -0.0307 |
| rs10045712  | G | 0.0127  |
| rs4242256   | C | 0.0197  |
| rs76887055  | T | 0.0465  |
| rs16871030  | G | 0.0134  |
| rs78268733  | A | -0.063  |
| rs12652602  | T | -0.0128 |
| rs4976592   | T | -0.0124 |
| rs114872024 | A | 0.0444  |
| rs159349    | C | 0.0119  |
| rs6899034   | A | -0.0315 |
| rs161643    | G | 0.0141  |
| rs2287890   | G | -0.0231 |
| rs35399432  | T | -0.0334 |
| rs173504    | A | 0.0287  |
| rs4958276   | C | -0.0135 |
| rs6601221   | C | 0.0115  |
| rs1435247   | A | -0.0133 |
| rs1650639   | C | 0.0122  |

|             |   |         |
|-------------|---|---------|
| rs113533968 | C | -0.0385 |
| rs72740610  | T | 0.0257  |
| rs33278     | C | 0.0137  |
| rs10054028  | T | -0.0125 |
| rs7443143   | T | 0.0215  |
| rs77510598  | G | -0.0648 |
| rs114369201 | C | -0.0754 |
| rs76551019  | A | -0.0683 |
| rs79806058  | C | 0.0481  |
| rs9637856   | C | 0.0214  |
| rs1466620   | G | 0.0123  |
| rs2901630   | A | 0.0229  |
| rs12522014  | A | 0.0146  |
| rs143028553 | T | 0.0945  |
| rs148457919 | A | -0.0521 |
| rs77201191  | T | -0.0875 |
| rs62374476  | G | -0.047  |
| rs6860803   | A | -0.015  |
| rs199200    | A | 0.0145  |
| rs79143726  | A | -0.0282 |
| rs73807305  | A | -0.0475 |
| rs111614647 | G | 0.0541  |
| rs76952610  | G | 0.0364  |
| rs115371176 | T | 0.0607  |
| rs111351657 | G | -0.0838 |
| rs74828350  | A | -0.0504 |
| rs78053739  | T | -0.0604 |
| rs162022    | A | -0.0129 |
| rs13163994  | T | 0.0358  |
| rs33936334  | T | -0.0231 |
| rs62361314  | A | 0.0198  |
| rs7703564   | A | -0.0117 |
| rs2961870   | G | 0.0203  |
| rs11750165  | T | -0.0218 |
| rs149781377 | G | 0.0517  |
| rs10038146  | T | 0.0329  |
| rs11135533  | G | 0.026   |
| rs142910163 | A | 0.0322  |
| rs9313026   | C | -0.0122 |
| rs13158322  | A | 0.0328  |
| rs72819588  | A | -0.0164 |
| rs80275264  | A | -0.0414 |
| rs262864    | A | 0.0146  |
| rs12658121  | A | 0.0284  |
| rs61160639  | T | -0.0162 |
| rs10805887  | A | -0.0111 |
| rs144371909 | A | 0.0345  |

|             |   |         |
|-------------|---|---------|
| rs62362782  | A | 0.0185  |
| rs11739996  | A | -0.0145 |
| rs113414659 | T | 0.1095  |
| rs596342    | C | 0.0114  |
| rs17079868  | A | 0.0376  |
| rs112676138 | G | -0.0701 |
| rs37209     | G | 0.0192  |
| rs144111161 | G | 0.0657  |
| rs75166778  | C | -0.054  |
| rs150425521 | C | -0.086  |
| rs114382043 | T | -0.0363 |
| rs116202999 | C | -0.0485 |
| rs75209549  | G | -0.019  |
| rs7731015   | T | 0.0123  |
| rs2662333   | T | -0.0109 |
| rs6453276   | A | 0.0388  |
| rs112450131 | T | 0.0596  |
| rs114870872 | T | 0.0449  |
| rs35031865  | T | 0.0264  |
| rs162448    | G | -0.0119 |
| rs4989585   | T | 0.0142  |
| rs141342281 | G | -0.08   |
| rs4701878   | C | -0.0199 |
| rs17627528  | G | -0.0119 |
| rs139503977 | T | 0.0925  |
| rs80124130  | C | 0.0398  |
| rs72796558  | A | -0.0528 |
| rs1351140   | C | -0.0227 |
| rs79680695  | G | 0.0625  |
| rs6881329   | G | -0.0151 |
| rs113175693 | A | 0.0334  |
| rs9272561   | A | -0.136  |
| rs9381563   | C | 0.0968  |
| rs112572344 | G | -0.1878 |
| rs28895055  | G | 0.1193  |
| rs9270893   | C | 0.0955  |
| rs9275072   | T | -0.1273 |
| rs12197270  | A | 0.0911  |
| rs2018420   | C | -0.0854 |
| rs72508436  | G | -0.1199 |
| rs9273491   | A | -0.1507 |
| rs35696625  | C | 0.1239  |
| rs1497526   | A | 0.2113  |
| rs9273165   | T | -0.0953 |
| rs114812713 | C | 0.2295  |
| rs6458567   | T | -0.0747 |
| rs117845581 | A | 0.3357  |

|             |   |         |
|-------------|---|---------|
| rs75700544  | T | 0.1012  |
| rs2496140   | T | -0.0734 |
| rs113464648 | C | -0.1041 |
| rs80225070  | C | -0.0925 |
| rs9465770   | A | 0.2289  |
| rs351739    | A | 0.0676  |
| rs77835086  | A | -0.339  |
| rs764650    | C | -0.0835 |
| rs75463813  | A | 0.1912  |
| rs9372118   | C | -0.0632 |
| rs113278846 | A | 0.3766  |
| rs1993330   | G | -0.0619 |
| rs116132619 | C | 0.1089  |
| rs9272598   | T | -0.0834 |
| rs113155855 | A | 0.3488  |
| rs9493824   | A | 0.1609  |
| rs12194027  | C | 0.2792  |
| rs76006345  | T | -0.3447 |
| rs9465461   | G | 0.1171  |
| rs116928889 | A | 0.3509  |
| rs4380799   | G | 0.1072  |
| rs149089889 | A | 0.263   |
| rs217523    | A | 0.0605  |
| rs12661844  | T | -0.0738 |
| rs77036739  | T | -0.1124 |
| rs113664977 | G | -0.1371 |
| rs12193068  | C | 0.1102  |
| rs2284796   | G | 0.1351  |
| rs1741738   | G | -0.0843 |
| rs17135328  | A | -0.1032 |
| rs144363587 | T | 0.6385  |
| rs9471497   | C | 0.146   |
| rs150098776 | T | -0.0992 |
| rs9489900   | C | 0.2099  |
| rs13219130  | A | 0.0888  |
| rs116193532 | A | -0.0997 |
| rs145027869 | T | 0.2522  |
| rs9348302   | A | -0.0722 |
| rs4716373   | C | -0.3523 |
| rs115830429 | A | -0.3461 |
| rs117395478 | C | -0.2854 |
| rs28383456  | T | -0.152  |
| rs7774782   | C | -0.0783 |
| rs783414    | A | 0.1038  |
| rs138040595 | T | 0.2007  |
| rs12198405  | G | 0.2216  |
| rs150332915 | T | 0.2303  |



|             |   |         |
|-------------|---|---------|
| rs142006308 | A | 0.1852  |
| rs139388925 | C | -0.4083 |
| rs9385845   | C | 0.0767  |
| rs9479690   | A | 0.1166  |
| rs62385056  | G | -0.0585 |
| rs72944972  | A | 0.0847  |
| rs9496727   | A | -0.1407 |
| rs77242216  | C | 0.1562  |
| rs56245033  | C | 0.187   |
| rs720741    | A | 0.0625  |
| rs16881463  | T | 0.1406  |
| rs66607538  | A | 0.0769  |
| rs857433    | G | -0.0851 |
| rs72826288  | T | 0.4194  |
| rs9452736   | G | -0.0712 |
| rs140678794 | C | 0.3727  |
| rs79251236  | C | -0.163  |
| rs140073883 | C | -0.1332 |
| rs146978108 | G | -0.3365 |
| rs73740846  | T | 0.2166  |
| rs2144747   | C | 0.0981  |
| rs6934812   | A | -0.0548 |
| rs112540561 | T | -0.2271 |
| rs4714579   | A | 0.0583  |
| rs144947706 | G | 0.102   |
| rs7747540   | T | 0.0924  |
| rs3777721   | C | 0.2158  |
| rs41292868  | T | 0.1187  |
| rs9367081   | T | 0.0975  |
| rs17749438  | T | 0.1464  |
| rs608116    | A | 0.2147  |
| rs2151984   | G | 0.0579  |
| rs114717496 | G | -0.1124 |
| rs12202773  | A | 0.1064  |
| rs72843780  | T | 0.267   |
| rs141452036 | A | 0.1016  |
| rs72819725  | A | -0.1444 |
| rs1576088   | T | -0.0616 |
| rs206731    | A | 0.0938  |
| rs9385377   | G | -0.057  |
| rs16871188  | G | -0.1213 |
| rs114693948 | T | -0.0954 |
| rs9381040   | T | -0.0588 |
| rs9470378   | T | 0.0975  |
| rs35069188  | A | 0.2003  |
| rs73021100  | T | -0.2483 |
| rs1819282   | C | 0.0554  |

|             |   |         |
|-------------|---|---------|
| rs9404027   | A | 0.0624  |
| rs1151      | C | -0.0685 |
| rs111931519 | C | 0.2654  |
| rs77222031  | A | 0.2333  |
| rs9405613   | T | 0.0627  |
| rs62424611  | C | 0.1293  |
| rs2816222   | C | -0.0786 |
| rs75781786  | T | -0.2869 |
| rs11754115  | A | 0.0926  |
| rs114956101 | C | 0.2459  |
| rs141930421 | G | 0.2697  |
| rs9356624   | C | -0.0821 |
| rs72916026  | G | 0.2192  |
| rs17644411  | A | -0.0928 |
| rs12193809  | T | 0.0894  |
| rs3106169   | A | -0.0863 |
| rs114975388 | G | 0.3051  |
| rs78310013  | T | 0.1414  |
| rs116844982 | T | 0.1974  |
| rs74686406  | A | 0.2519  |
| rs117448803 | A | -0.2809 |
| rs57317418  | A | 0.072   |
| rs117205535 | G | 0.2662  |
| rs59750613  | T | -0.0614 |
| rs11967822  | G | -0.0897 |
| rs80066353  | C | 0.0806  |
| rs71536602  | C | 0.1066  |
| rs115877125 | A | 0.0851  |
| rs300121    | G | 0.1317  |
| rs2268444   | A | 0.0986  |
| rs139052545 | G | -0.2131 |
| rs11757341  | T | 0.0578  |
| rs3024304   | T | 0.0607  |
| rs7772364   | A | 0.1015  |
| rs139589178 | T | 0.2465  |
| rs4299808   | C | 0.0513  |
| rs9378903   | A | 0.0648  |
| rs9265052   | A | -0.0714 |
| rs13215666  | G | 0.0517  |
| rs6900851   | G | -0.0765 |
| rs9296253   | A | 0.1213  |
| rs116829906 | C | -0.1129 |
| rs58297187  | T | 0.077   |
| rs1542638   | G | 0.0544  |
| rs2852577   | G | 0.054   |
| rs9390765   | T | 0.0762  |
| rs9460978   | T | 0.3425  |

|             |   |         |
|-------------|---|---------|
| rs1395452   | G | 0.0696  |
| rs9394416   | G | 0.0602  |
| rs115026842 | T | 0.3808  |
| rs2819095   | G | 0.1437  |
| rs73735826  | A | 0.204   |
| rs77328882  | A | 0.1393  |
| rs41285646  | A | -0.0817 |
| rs2093565   | A | 0.0527  |
| rs17753919  | A | 0.2241  |
| rs75829713  | C | -0.147  |
| rs9296553   | G | 0.108   |
| rs7741054   | G | -0.0582 |
| rs9362046   | C | -0.0498 |
| rs6938623   | G | -0.0812 |
| rs2071863   | A | -0.0656 |
| rs2342647   | G | -0.0525 |
| rs2274154   | T | 0.0806  |
| rs10223449  | C | 0.0556  |
| rs2875546   | C | 0.0498  |
| rs3904923   | A | -0.059  |
| rs75048539  | T | 0.2462  |
| rs12197625  | A | 0.0887  |
| rs9394778   | A | -0.0494 |
| rs150765422 | T | 0.17    |
| rs4870286   | T | -0.2007 |
| rs9495526   | T | 0.103   |
| rs7454318   | T | 0.0514  |
| rs999613    | T | -0.0505 |
| rs9502415   | A | 0.0937  |
| rs78804960  | A | 0.1485  |
| rs2071939   | C | -0.0575 |
| rs138753999 | T | 0.2512  |
| rs76950983  | G | -0.1544 |
| rs17755573  | A | -0.093  |
| rs145115100 | T | 0.2236  |
| rs1794851   | G | 0.0927  |
| rs574716    | C | 0.053   |
| rs116683092 | T | 0.3437  |
| rs35997400  | A | -0.0638 |
| rs2501634   | C | 0.2592  |
| rs79502920  | A | 0.1556  |
| rs114642512 | A | 0.1935  |
| rs1925690   | T | -0.0826 |
| rs12523862  | C | -0.2087 |
| rs9371853   | A | -0.0531 |
| rs17348429  | T | -0.0646 |
| rs9295628   | T | 0.0582  |

|             |   |         |
|-------------|---|---------|
| rs13196087  | A | -0.0881 |
| rs200467    | G | -0.1926 |
| rs9340837   | G | 0.1171  |
| rs1847473   | C | 0.0565  |
| rs9480288   | T | -0.1075 |
| rs7741794   | G | 0.0571  |
| rs62442662  | C | 0.1765  |
| rs139801819 | A | 0.0604  |
| rs9471734   | A | 0.0809  |
| rs79704124  | A | 0.1081  |
| rs9400911   | A | -0.1007 |
| rs878175    | C | -0.0665 |
| rs7772697   | C | 0.0515  |
| rs143632538 | C | 0.2205  |
| rs79581427  | T | -0.2374 |
| rs9459154   | C | -0.0853 |
| rs1184446   | C | 0.0586  |
| rs7746074   | T | -0.0512 |
| rs1359001   | C | -0.0697 |
| rs9354913   | T | 0.0544  |
| rs4437456   | G | -0.0881 |
| rs2811676   | T | -0.061  |
| rs236968    | G | 0.0869  |
| rs28381339  | C | 0.1976  |
| rs1581774   | T | 0.0678  |
| rs57720005  | A | 0.1226  |
| rs75222823  | A | 0.1736  |
| rs16871880  | C | 0.2511  |
| rs62432566  | G | 0.0889  |
| rs149506511 | A | -0.3365 |
| rs1737316   | T | 0.2311  |
| rs9369414   | A | 0.0777  |
| rs77031799  | A | 0.4418  |
| rs604927    | T | 0.073   |
| rs76762820  | A | -0.0772 |
| rs71556132  | C | 0.2785  |
| rs4709876   | C | 0.1423  |
| rs2237249   | G | 0.0491  |
| rs311239    | G | -0.0583 |
| rs9374588   | A | -0.0496 |
| rs150586208 | C | 0.387   |
| rs2842370   | T | 0.0494  |
| rs76562254  | T | 0.0942  |
| rs7755731   | A | 0.0505  |
| rs12528948  | T | -0.0658 |
| rs2813566   | A | 0.0521  |
| rs1004018   | A | -0.0619 |

|             |   |         |
|-------------|---|---------|
| rs146187357 | A | 0.1492  |
| rs4840008   | T | 0.0875  |
| rs17636617  | A | 0.0941  |
| rs13217932  | T | -0.0576 |
| rs9380511   | A | 0.0912  |
| rs6900329   | T | -0.0472 |
| rs807916    | C | -0.0648 |
| rs9387903   | T | -0.0796 |
| rs9353708   | A | 0.192   |
| rs17307478  | C | 0.0861  |
| rs117140009 | A | 0.2876  |
| rs2101878   | A | 0.0476  |
| rs117473598 | G | -0.3775 |
| rs79091739  | C | 0.2406  |
| rs4960469   | C | -0.1016 |
| rs449473    | G | -0.0549 |
| rs11759210  | C | -0.1551 |
| rs72877828  | A | -0.1643 |
| rs9450926   | T | 0.0989  |
| rs9348480   | A | 0.0638  |
| rs111939998 | T | 0.241   |
| rs3003965   | G | -0.0545 |
| rs143023026 | T | -0.2276 |
| rs4485990   | T | 0.1657  |
| rs2496694   | G | 0.0485  |
| rs62441066  | T | 0.4021  |
| rs2808006   | C | 0.178   |
| rs1528506   | A | -0.0478 |
| rs1044759   | T | -0.2189 |
| rs147014997 | A | 0.2355  |
| rs522923    | T | 0.0504  |
| rs9348655   | T | 0.0759  |
| rs2876189   | G | 0.0541  |
| rs117451605 | A | -0.2109 |
| rs12211017  | C | -0.1202 |
| rs9372449   | G | -0.0598 |
| rs6919154   | G | -0.0622 |
| rs4707535   | T | 0.0614  |
| rs2396258   | G | -0.0508 |
| rs143640766 | C | -0.3503 |
| rs162985    | C | 0.0487  |
| rs144358965 | T | 0.2162  |
| rs77792583  | C | -0.1419 |
| rs9484672   | T | -0.2129 |
| rs4959847   | C | 0.0527  |
| rs594902    | C | 0.0476  |
| rs11751154  | T | 0.1079  |

|             |   |         |
|-------------|---|---------|
| rs4599678   | A | 0.0918  |
| rs72999705  | T | 0.1789  |
| rs11243078  | G | 0.0774  |
| rs142011475 | C | 0.2329  |
| rs12212983  | G | 0.0481  |
| rs6924775   | C | 0.0789  |
| rs4506071   | T | -0.077  |
| rs9504668   | A | -0.0467 |
| rs7741143   | G | -0.211  |
| rs4946580   | T | 0.0913  |
| rs117874319 | C | -0.196  |
| rs13212681  | C | 0.065   |
| rs73014960  | G | 0.1806  |
| rs10080249  | T | 0.0614  |
| rs12195804  | T | 0.08    |
| rs827419    | C | -0.0473 |
| rs148558121 | G | 0.3361  |
| rs148509634 | T | 0.5078  |
| rs76835268  | T | -0.2116 |
| rs1739678   | A | -0.076  |
| rs76631016  | T | 0.1061  |
| rs149283133 | A | 0.4095  |
| rs12528267  | G | -0.0853 |
| rs138188178 | T | -0.1489 |
| rs138966729 | T | 0.3603  |
| rs736794    | T | -0.0491 |
| rs140432852 | A | 0.1638  |
| rs9468918   | C | -0.0642 |
| rs112346745 | T | -0.1191 |
| rs9380909   | A | 0.1731  |
| rs111374124 | T | -0.1815 |
| rs143421891 | G | -0.1765 |
| rs9365166   | T | 0.0472  |
| rs17827161  | G | -0.1203 |
| rs149173486 | C | 0.1873  |
| rs140849036 | A | 0.2573  |
| rs141732981 | C | 0.1578  |
| rs488865    | G | -0.0701 |
| rs7744382   | A | -0.0462 |
| rs6458829   | C | -0.091  |
| rs138713450 | T | 0.2497  |
| rs2984428   | A | 0.1421  |
| rs2487372   | C | 0.1176  |
| rs34512839  | A | 0.2214  |
| rs648096    | A | 0.0614  |
| rs12663271  | T | 0.154   |
| rs74887879  | T | 0.1634  |

|             |   |         |
|-------------|---|---------|
| rs4896965   | A | 0.0471  |
| rs17653941  | G | 0.0572  |
| rs9496823   | A | 0.0544  |
| rs7753185   | T | -0.1016 |
| rs9341498   | C | 0.0623  |
| rs2101241   | C | 0.1648  |
| rs77137410  | G | 0.2131  |
| rs140434804 | T | 0.1863  |
| rs6936631   | A | 0.0563  |
| rs2756038   | G | 0.0523  |
| rs9358393   | A | 0.0453  |
| rs117497020 | C | -0.4214 |
| rs9344737   | T | 0.1327  |
| rs35351535  | G | 0.1619  |
| rs416177    | A | 0.0839  |
| rs4236109   | A | 0.0494  |
| rs9379282   | A | -0.0593 |
| rs77491413  | A | -0.3267 |
| rs75841697  | G | 0.1438  |
| rs6925551   | C | 0.1502  |
| rs72904366  | C | -0.2237 |
| rs1358904   | T | -0.0514 |
| rs149287514 | T | 0.2319  |
| rs74653931  | A | 0.1278  |
| rs35348004  | T | 0.0729  |
| rs145713174 | C | 0.0782  |
| rs4897609   | G | 0.0559  |
| rs10455654  | T | 0.0668  |
| rs9453115   | T | -0.0518 |
| rs78979753  | C | -0.16   |
| rs6920285   | C | 0.2302  |
| rs2503763   | G | 0.1308  |
| rs72932884  | T | -0.2259 |
| rs6941854   | C | 0.0581  |
| rs9384274   | C | 0.0591  |
| rs56266836  | G | 0.2815  |
| rs13196021  | T | 0.1517  |
| rs17072527  | A | 0.057   |
| rs143845990 | C | -0.2595 |
| rs12528631  | A | 0.0741  |
| rs10455281  | A | -0.0516 |
| rs4707758   | C | 0.1004  |
| rs9405538   | C | 0.1878  |
| rs2076060   | C | 0.0557  |
| rs9295408   | G | 0.0535  |
| rs72832365  | C | -0.1981 |
| rs113070082 | C | -0.3774 |

|             |   |         |
|-------------|---|---------|
| rs12202556  | G | 0.0456  |
| rs550170    | G | -0.0471 |
| rs117846256 | A | 0.1137  |
| rs813882    | T | 0.0564  |
| rs117398492 | C | -0.1937 |
| rs72894776  | T | 0.117   |
| rs72875397  | G | -0.0998 |
| rs57222907  | G | 0.0895  |
| rs9266303   | T | 0.0735  |
| rs9359318   | T | -0.0491 |
| rs1335026   | T | -0.1272 |
| rs75098702  | T | -0.3909 |
| rs9381994   | T | -0.0462 |
| rs6936500   | C | 0.2652  |
| rs9484111   | T | 0.0588  |
| rs11753013  | G | -0.0714 |
| rs11759982  | T | 0.0832  |
| rs4431433   | T | -0.0528 |
| rs113468450 | G | -0.2486 |
| rs7760387   | C | -0.0631 |
| rs9351133   | C | 0.0482  |
| rs9273554   | C | -0.0933 |
| rs505358    | A | 0.0485  |
| rs6935171   | A | 0.0931  |
| rs58001263  | T | 0.2056  |
| rs75971334  | C | 0.2747  |
| rs6903469   | T | 0.0472  |
| rs147134965 | T | 0.3098  |
| rs142472800 | A | -0.2545 |
| rs6910583   | A | 0.0825  |
| rs34294370  | A | -0.085  |
| rs113045441 | A | 0.1343  |
| rs145079843 | G | 0.2496  |
| rs2817025   | T | 0.1947  |
| rs34172167  | T | -0.0556 |
| rs6935226   | T | 0.0896  |
| rs13192562  | C | -0.1936 |
| rs114277506 | C | -0.1856 |
| rs10946351  | C | -0.0518 |
| rs9405858   | C | 0.0555  |
| rs11962973  | C | 0.0619  |
| rs3025007   | T | 0.0603  |
| rs6454602   | T | 0.0681  |
| rs55810140  | T | 0.2382  |
| rs140250980 | G | 0.05    |
| rs4714699   | C | -0.049  |
| rs17135521  | C | 0.1341  |



|             |   |         |
|-------------|---|---------|
| rs11961984  | T | 0.054   |
| rs4709721   | A | -0.1447 |
| rs113542614 | C | 0.19    |
| rs7761789   | A | 0.0453  |
| rs9365885   | A | -0.0614 |
| rs231949    | G | 0.0587  |
| rs12216129  | T | -0.1403 |
| rs138195044 | A | -0.0961 |
| rs1410525   | T | 0.0466  |
| rs7776176   | A | -0.0743 |
| rs115140746 | A | -0.1549 |
| rs58646840  | T | 0.1379  |
| rs61385640  | C | 0.1367  |
| rs117497224 | A | 0.2725  |
| rs35298258  | C | 0.0467  |
| rs716951    | T | 0.1836  |
| rs16881749  | A | -0.1487 |
| rs1076743   | G | -0.0529 |
| rs118004929 | T | -0.2956 |
| rs74446562  | A | 0.1049  |
| rs197954    | G | 0.0821  |
| rs7745203   | G | -0.06   |
| rs74599670  | C | 0.1293  |
| rs12208357  | T | -0.0841 |
| rs7763782   | A | -0.0616 |
| rs76071086  | C | -0.3274 |
| rs6927072   | T | 0.048   |
| rs11758584  | T | -0.134  |
| rs2183499   | G | 0.0549  |
| rs2603688   | C | -0.0457 |
| rs9473060   | G | 0.0471  |
| rs139222246 | A | 0.071   |
| rs17212273  | A | 0.3511  |
| rs9401606   | T | -0.044  |
| rs968147    | A | -0.0593 |
| rs551175    | A | 0.0514  |
| rs6906236   | G | 0.1927  |
| rs9475808   | T | 0.114   |
| rs80163834  | A | -0.1153 |
| rs77549727  | G | 0.1052  |
| rs2073634   | A | -0.0787 |
| rs12190715  | G | -0.0796 |
| rs58254626  | T | -0.0747 |
| rs10949486  | A | -0.0472 |
| rs2842650   | C | 0.0583  |
| rs2495986   | G | -0.0508 |
| rs150511164 | T | 0.3721  |

|             |   |         |
|-------------|---|---------|
| rs10948314  | G | -0.073  |
| rs76467698  | G | 0.3083  |
| rs142090224 | T | 0.0903  |
| rs508493    | T | -0.0455 |
| rs17219737  | G | 0.0931  |
| rs140445772 | G | 0.3117  |
| rs141439502 | C | -0.2626 |
| rs117596870 | A | -0.1425 |
| rs9321429   | G | 0.0595  |
| rs58667017  | A | -0.0585 |
| rs113534616 | C | 0.1753  |
| rs145151871 | T | 0.2007  |
| rs112783738 | A | -0.064  |
| rs6458287   | C | -0.0506 |
| rs72979311  | A | 0.2447  |
| rs113466984 | C | -0.0811 |
| rs7750106   | A | 0.1028  |
| rs12196933  | T | 0.0974  |
| rs34471491  | T | 0.113   |
| rs114264459 | A | -0.3151 |
| rs17213693  | C | 0.0864  |
| rs12660139  | C | 0.0578  |
| rs75249927  | T | -0.2    |
| rs73020537  | C | 0.0641  |
| rs179957    | A | 0.0523  |
| rs11961920  | T | 0.0709  |
| rs112654238 | A | 0.2783  |
| rs9479706   | T | 0.0613  |
| rs12193586  | T | 0.2436  |
| rs934147    | T | 0.055   |
| rs179939    | A | 0.0627  |
| rs75465431  | C | -0.1854 |
| rs140302846 | G | -0.197  |
| rs2050427   | A | -0.0483 |
| rs1467927   | C | -0.3008 |
| rs9504937   | A | 0.0578  |
| rs75353579  | A | -0.3223 |
| rs7774012   | T | 0.2099  |
| rs77897225  | A | -0.101  |
| rs79750757  | G | 0.3347  |
| rs17073643  | T | -0.0607 |
| rs2734325   | T | -0.0499 |
| rs4709856   | T | -0.0454 |
| rs16872748  | C | 0.1283  |
| rs62427400  | A | 0.3782  |
| rs41292866  | T | -0.0736 |
| rs3789220   | A | -0.1206 |

|             |   |         |
|-------------|---|---------|
| rs3819405   | T | 0.0592  |
| rs1983800   | A | -0.0561 |
| rs12194163  | G | 0.2701  |
| rs62436618  | C | 0.1641  |
| rs72890979  | A | 0.1948  |
| rs959063    | A | -0.1004 |
| rs7763000   | G | 0.2741  |
| rs79680184  | G | 0.1012  |
| rs10806837  | T | 0.1156  |
| rs146098784 | T | -0.19   |
| rs112356474 | G | -0.1379 |
| rs1936902   | G | -0.0438 |
| rs2875954   | C | -0.0473 |
| rs9458121   | G | -0.0759 |
| rs9395504   | T | -0.0465 |
| rs12189566  | C | -0.1675 |
| rs60349803  | G | 0.0953  |
| rs7450397   | C | 0.0451  |
| rs9445061   | C | -0.0507 |
| rs76245847  | C | 0.1333  |
| rs9380731   | T | 0.2501  |
| rs34878964  | G | 0.1022  |
| rs9386162   | C | 0.0595  |
| rs114422378 | T | -0.1631 |
| rs2457003   | C | -0.1047 |
| rs138906148 | C | 0.3018  |
| rs4076025   | A | -0.1981 |
| rs7761791   | C | -0.0462 |
| rs35783095  | A | 0.0737  |
| rs9477351   | C | -0.0479 |
| rs62413947  | C | 0.2783  |
| rs222453    | C | -0.0713 |
| rs7754689   | T | 0.0802  |
| rs71561161  | A | 0.1777  |
| rs7741440   | G | 0.1198  |
| rs9390542   | A | 0.0562  |
| rs7756000   | G | 0.1022  |
| rs72845848  | A | 0.1995  |
| rs72850547  | T | 0.2566  |
| rs117912406 | G | -0.1289 |
| rs138620436 | A | 0.2896  |
| rs12665571  | T | -0.2678 |
| rs143017509 | A | 0.234   |
| rs2746591   | T | 0.16    |
| rs115807406 | A | -0.3632 |
| rs71573452  | G | 0.1067  |
| rs6930296   | C | 0.0468  |

|             |   |         |
|-------------|---|---------|
| rs10458189  | G | 0.1129  |
| rs113717694 | C | 0.285   |
| rs28360551  | G | 0.0906  |
| rs73018271  | T | 0.2716  |
| rs1200428   | T | -0.0527 |
| rs11966570  | T | 0.0616  |
| rs12664929  | G | 0.307   |
| rs1987388   | A | 0.0644  |
| rs535479    | C | 0.0446  |
| rs608242    | T | 0.0596  |
| rs13220323  | T | 0.0619  |
| rs2562895   | A | -0.067  |
| rs342622    | T | 0.0596  |
| rs34412485  | C | 0.1508  |
| rs12215198  | A | -0.0988 |
| rs9479488   | A | 0.0423  |
| rs11961143  | T | -0.0618 |
| rs117818034 | A | 0.1913  |
| rs78594129  | A | 0.3964  |
| rs13208950  | G | -0.0824 |
| rs127503    | A | 0.0598  |
| rs116171194 | T | 0.3497  |
| rs72851058  | T | -0.1209 |
| rs34199346  | G | 0.1307  |
| rs73727915  | T | -0.0834 |
| rs146335257 | C | -0.3264 |
| rs2256349   | G | -0.0507 |
| rs11759723  | G | 0.0953  |
| rs34836283  | A | 0.078   |
| rs208459    | C | -0.0452 |
| rs9473176   | T | -0.0474 |
| rs9381234   | G | 0.0465  |
| rs145983443 | G | -0.1274 |
| rs1998736   | A | -0.0772 |
| rs2671291   | G | 0.0514  |
| rs35309891  | G | -0.0448 |
| rs117950842 | C | 0.1753  |
| rs117724512 | G | 0.2411  |
| rs75777107  | G | 0.167   |
| rs11752636  | G | -0.1843 |
| rs112439241 | G | 0.0518  |
| rs4712653   | C | 0.0429  |
| rs712218    | G | -0.0425 |
| rs269431    | T | -0.0682 |
| rs9481844   | A | -0.0593 |
| rs2457349   | T | -0.0467 |
| rs9479184   | A | -0.0926 |

|             |   |         |
|-------------|---|---------|
| rs17639655  | C | -0.0615 |
| rs56172380  | C | -0.0901 |
| rs72867290  | A | 0.2133  |
| rs6925430   | G | 0.1089  |
| rs4897519   | T | 0.0455  |
| rs71565641  | C | -0.3783 |
| rs75752391  | A | -0.1032 |
| rs581094    | G | 0.0603  |
| rs2025490   | T | 0.0439  |
| rs57333273  | A | 0.0531  |
| rs12198236  | T | 0.0439  |
| rs78819207  | A | 0.1054  |
| rs73726189  | T | -0.08   |
| rs9295541   | C | -0.0454 |
| rs75806315  | C | 0.1396  |
| rs723787    | G | 0.0659  |
| rs41267789  | G | 0.1467  |
| rs75554720  | G | -0.1492 |
| rs79456939  | T | 0.1726  |
| rs9353352   | C | -0.0979 |
| rs12214365  | A | -0.0526 |
| rs10947977  | C | 0.286   |
| rs72817758  | A | -0.1879 |
| rs6928024   | A | -0.0489 |
| rs143554546 | C | 0.2135  |
| rs113123340 | A | 0.3015  |
| rs73554550  | C | 0.2674  |
| rs9459695   | A | 0.0522  |
| rs77696335  | T | 0.1933  |
| rs486233    | C | -0.116  |
| rs4053616   | A | 0.0462  |
| rs12203161  | G | 0.135   |
| rs12207253  | C | -0.123  |
| rs4706864   | A | -0.146  |
| rs11758521  | T | 0.0419  |
| rs77148153  | A | -0.1428 |
| rs2249818   | G | -0.0424 |
| rs146558906 | T | 0.2174  |
| rs41360849  | C | 0.0716  |
| rs6908730   | G | -0.2106 |
| rs1915560   | G | 0.0613  |
| rs11755221  | A | 0.0844  |
| rs57400420  | A | 0.0613  |
| rs1066731   | A | -0.1045 |
| rs112755797 | G | 0.1928  |
| rs220969    | C | -0.0479 |
| rs144132248 | T | -0.1409 |

|             |   |         |
|-------------|---|---------|
| rs9398288   | T | 0.0682  |
| rs73576046  | C | 0.0885  |
| rs77587111  | G | -0.23   |
| rs16886806  | T | 0.2666  |
| rs9483210   | T | 0.0505  |
| rs59546143  | T | 0.1239  |
| rs9450782   | C | 0.0969  |
| rs9374477   | A | -0.0425 |
| rs77780966  | C | 0.2188  |
| rs146218224 | C | 0.1418  |
| rs1205498   | C | 0.0617  |
| rs74882303  | C | -0.2584 |
| rs9369964   | C | -0.0612 |
| rs115683811 | G | 0.2321  |
| rs149067324 | A | 0.1617  |
| rs75302607  | G | 0.1945  |
| rs9480032   | G | -0.0418 |
| rs4711926   | G | 0.0431  |
| rs75839544  | G | -0.1208 |
| rs2500464   | T | 0.0519  |
| rs75102631  | A | -0.1412 |
| rs17083816  | G | 0.0831  |
| rs205661    | G | -0.0869 |
| rs79482367  | C | -0.0976 |
| rs146401261 | T | -0.2951 |
| rs7764525   | T | 0.0428  |
| rs9469963   | A | 0.1242  |
| rs149844116 | T | 0.1012  |
| rs11961876  | G | 0.1949  |
| rs56177516  | C | 0.0512  |
| rs9474543   | C | 0.1777  |
| rs6569439   | A | -0.0437 |
| rs62431518  | T | 0.1532  |
| rs4708660   | T | -0.0493 |
| rs75026206  | T | 0.1044  |
| rs148235295 | A | 0.2478  |
| rs77985343  | A | 0.1403  |
| rs142804446 | A | 0.2548  |
| rs72886856  | A | 0.1189  |
| rs6456167   | A | -0.0527 |
| rs9459725   | G | 0.0447  |
| rs12526492  | C | 0.0854  |
| rs12193693  | G | 0.1087  |
| rs143490455 | C | 0.1808  |
| rs9460657   | T | 0.1564  |
| rs73546608  | A | 0.0986  |
| rs1877770   | T | 0.0877  |

|             |   |         |
|-------------|---|---------|
| rs148756768 | T | 0.2045  |
| rs12183294  | T | 0.0683  |
| rs116522341 | G | -0.1305 |
| rs115601376 | G | 0.1132  |
| rs62422887  | T | -0.118  |
| rs78076759  | T | 0.2091  |
| rs143548716 | C | 0.1217  |
| rs9490385   | T | 0.2042  |
| rs1027484   | T | -0.0516 |
| rs147333795 | G | 0.3196  |
| rs140034075 | T | 0.1583  |
| rs34865928  | A | 0.1825  |
| rs17748476  | C | 0.134   |
| rs12190767  | C | -0.3044 |
| rs148371742 | C | -0.2879 |
| rs13437161  | T | 0.1162  |
| rs9373250   | T | -0.0457 |
| rs6922044   | T | 0.047   |
| rs12193477  | G | -0.1058 |
| rs77963967  | A | -0.1433 |
| rs9375993   | T | -0.0543 |
| rs7767084   | C | 0.0569  |
| rs4839725   | G | 0.0521  |
| rs9474108   | A | -0.0801 |
| rs78365769  | T | -0.1766 |
| rs114601975 | G | 0.1834  |
| rs62419862  | G | 0.2363  |
| rs12173725  | T | -0.1999 |
| rs9352692   | A | 0.0673  |
| rs228425    | A | 0.2035  |
| rs1267856   | T | 0.1149  |
| rs142456847 | T | -0.175  |
| rs801260    | T | 0.0498  |
| rs9386316   | C | -0.0733 |
| rs526586    | G | 0.0426  |
| rs75052448  | A | -0.1427 |
| rs4148872   | T | 0.0629  |
| rs362870    | C | 0.1471  |
| rs1237944   | G | -0.0463 |
| rs76840420  | G | 0.0739  |
| rs75785398  | A | -0.3213 |
| rs1753990   | T | 0.0484  |
| rs2096982   | C | 0.045   |
| rs2493166   | T | 0.0468  |
| rs74949883  | A | 0.0967  |
| rs77582796  | A | 0.2404  |
| rs116681984 | T | -0.2028 |

|             |   |         |
|-------------|---|---------|
| rs76600361  | A | 0.1792  |
| rs9405784   | C | -0.0485 |
| rs149214145 | C | -0.0796 |
| rs9450928   | C | 0.0513  |
| rs778010    | T | -0.0904 |
| rs80225290  | T | 0.1947  |
| rs9357963   | C | -0.0975 |
| rs9382101   | A | 0.1055  |
| rs864111    | C | 0.07    |
| rs146547345 | T | -0.2221 |
| rs17071520  | G | 0.1998  |
| rs35602444  | C | -0.0478 |
| rs2328068   | C | 0.0446  |
| rs57506541  | A | -0.0722 |
| rs117415359 | T | -0.2244 |
| rs7738724   | G | -0.0479 |
| rs2444785   | A | 0.0475  |
| rs9296328   | C | 0.0644  |
| rs877267    | C | -0.0453 |
| rs9364716   | G | 0.0406  |
| rs9462036   | A | -0.0412 |
| rs2504821   | A | 0.0732  |
| rs148415100 | T | -0.1439 |
| rs72817755  | G | -0.1807 |
| rs116868135 | T | 0.1259  |
| rs236978    | A | -0.0472 |
| rs384167    | A | 0.0542  |
| rs12205919  | A | 0.0704  |
| rs7769423   | G | -0.0675 |
| rs7776096   | C | -0.0516 |
| rs6459026   | T | 0.0419  |
| rs62427107  | T | 0.1402  |
| rs144951705 | C | -0.1481 |
| rs78286647  | C | -0.1445 |
| rs75490802  | T | 0.198   |
| rs2842063   | T | 0.0534  |
| rs940741    | G | -0.331  |
| rs9475399   | A | -0.0657 |
| rs6933642   | A | -0.0494 |
| rs17062582  | A | 0.2399  |
| rs6904106   | G | 0.0458  |
| rs9390416   | A | 0.0548  |
| rs4709829   | A | 0.0455  |
| rs1377392   | T | -0.0459 |
| rs114618388 | G | -0.3577 |
| rs138277375 | A | 0.1466  |
| rs76165471  | T | -0.2274 |



|             |   |         |
|-------------|---|---------|
| rs11155259  | A | -0.0833 |
| rs6935454   | T | 0.0478  |
| rs12193758  | T | 0.0471  |
| rs57658970  | T | 0.158   |
| rs35609130  | C | 0.0474  |
| rs113789221 | C | 0.1991  |
| rs139523312 | A | 0.2218  |
| rs1355494   | A | 0.0706  |
| rs117726857 | C | -0.1695 |
| rs9392280   | A | 0.111   |
| rs4706693   | A | 0.1016  |
| rs9498665   | T | -0.0599 |
| rs6908781   | T | -0.1993 |
| rs7744977   | C | 0.1367  |
| rs35254761  | A | 0.102   |
| rs149224456 | T | -0.1984 |
| rs146803692 | A | 0.1986  |
| rs2820396   | G | -0.0401 |
| rs1325545   | T | 0.0473  |
| rs138283867 | C | 0.2772  |
| rs2690133   | A | 0.0407  |
| rs58173756  | A | -0.0572 |
| rs111629317 | G | -0.0641 |
| rs76243243  | C | 0.1665  |
| rs75667310  | A | 0.1757  |
| rs116842249 | C | 0.1661  |
| rs16879977  | C | 0.1722  |
| rs7738664   | C | -0.0433 |
| rs2619514   | G | 0.0684  |
| rs6923988   | C | -0.0518 |
| rs9458995   | C | 0.0495  |
| rs9405967   | T | 0.0482  |
| rs9384741   | G | -0.0441 |
| rs78219304  | G | -0.2145 |
| rs6901252   | T | 0.1109  |
| rs9457307   | A | 0.149   |
| rs117405796 | C | 0.335   |
| rs116595283 | G | -0.0882 |
| rs58083797  | C | -0.0636 |
| rs303079    | A | -0.0488 |
| rs9455593   | G | -0.0526 |
| rs111509337 | G | -0.1744 |
| rs9689944   | G | -0.0429 |
| rs73517041  | C | 0.1901  |
| rs6910607   | T | 0.0628  |
| rs1953321   | A | -0.1506 |
| rs9405285   | T | 0.0458  |

|             |   |         |
|-------------|---|---------|
| rs2503097   | G | 0.0501  |
| rs77253483  | C | 0.1574  |
| rs2486414   | A | -0.0736 |
| rs6916316   | C | 0.0649  |
| rs60101936  | A | 0.1696  |
| rs7769290   | A | 0.0756  |
| rs999898    | T | 0.1795  |
| rs477407    | G | -0.0714 |
| rs2350523   | G | -0.0445 |
| rs6910466   | C | -0.0497 |
| rs59548069  | G | -0.0491 |
| rs72895711  | A | 0.0718  |
| rs149857108 | A | -0.1761 |
| rs4715893   | C | 0.1113  |
| rs1947701   | G | -0.0428 |
| rs4577812   | A | 0.0567  |
| rs6938091   | G | 0.0477  |
| rs114108311 | T | -0.3008 |
| rs4560653   | C | 0.0604  |
| rs28362848  | T | 0.0941  |
| rs9396682   | C | 0.0815  |
| rs2100967   | G | -0.0504 |
| rs62395247  | A | -0.0566 |
| rs2131870   | T | 0.0612  |
| rs77930893  | T | -0.1965 |
| rs62436113  | C | 0.0835  |
| rs150724396 | T | -0.2486 |
| rs77209474  | T | -0.0665 |
| rs609764    | C | -0.0478 |
| rs2516104   | G | -0.0419 |
| rs2626125   | A | -0.3955 |
| rs78195170  | T | 0.124   |
| rs72927277  | A | -0.2074 |
| rs117736689 | G | -0.1991 |
| rs117954634 | A | 0.1849  |
| rs62440472  | A | -0.1077 |
| rs141802825 | C | 0.1786  |
| rs113701493 | G | 0.2761  |
| rs9384122   | A | 0.0472  |
| rs7759024   | C | 0.2136  |
| rs35064671  | G | 0.056   |
| rs72942166  | C | 0.1934  |
| rs146119674 | C | -0.3084 |
| rs11753599  | G | -0.0518 |
| rs74456389  | T | 0.1309  |
| rs9390537   | C | -0.0501 |
| rs116428971 | A | -0.0999 |

|             |   |         |
|-------------|---|---------|
| rs4529305   | C | 0.0867  |
| rs6929400   | C | -0.0444 |
| rs147863631 | A | -0.3386 |
| rs10457138  | C | -0.0455 |
| rs55873083  | A | 0.2497  |
| rs9456577   | C | 0.2331  |
| rs2206736   | A | 0.0595  |
| rs7744913   | T | 0.1197  |
| rs9460969   | C | 0.1238  |
| rs4708278   | C | -0.0706 |
| rs1698998   | A | -0.053  |
| rs10478718  | T | 0.1387  |
| rs9479762   | T | -0.0649 |
| rs10948478  | A | -0.0505 |
| rs2064323   | T | 0.0487  |
| rs870481    | A | -0.0924 |
| rs716952    | A | 0.0557  |
| rs76323237  | T | -0.2401 |
| rs55785931  | T | 0.0893  |
| rs17079957  | A | 0.0891  |
| rs6919593   | C | 0.0899  |
| rs72861517  | T | -0.1378 |
| rs9492642   | C | 0.0938  |
| rs78151190  | C | -0.0609 |
| rs62428788  | T | -0.1795 |
| rs72953216  | A | 0.0701  |
| rs12198606  | T | 0.0563  |
| rs3823096   | T | -0.0414 |
| rs405742    | A | -0.0394 |
| rs7753620   | C | 0.1333  |
| rs17143007  | T | 0.0939  |
| rs118163492 | A | 0.1258  |
| rs112392367 | C | -0.2076 |
| rs117080580 | A | 0.2088  |
| rs385230    | G | -0.0517 |
| rs60859984  | G | 0.0969  |
| rs7761614   | C | 0.0518  |
| rs74919739  | G | 0.102   |
| rs115070292 | G | 0.2058  |
| rs4707826   | T | 0.279   |
| rs12111337  | C | -0.1979 |
| rs12662990  | A | -0.0677 |
| rs62434812  | C | -0.1053 |
| rs73736912  | G | 0.094   |
| rs76418374  | G | -0.1239 |
| rs114202986 | C | -0.0888 |
| rs56231335  | C | -0.0471 |

|             |   |         |
|-------------|---|---------|
| rs2757573   | G | 0.0917  |
| rs118061248 | G | -0.1142 |
| rs7744777   | T | 0.052   |
| rs144142721 | A | 0.1058  |
| rs139566008 | C | -0.1723 |
| rs77446781  | A | 0.1818  |
| rs17077993  | C | 0.1101  |
| rs4541756   | A | 0.0418  |
| rs4438965   | T | 0.0427  |
| rs1575612   | T | -0.0391 |
| rs7744358   | G | -0.0417 |
| rs7759731   | T | -0.062  |
| rs4707654   | T | 0.0397  |
| rs9403057   | G | 0.0395  |
| rs111920036 | G | 0.0421  |
| rs6932413   | A | -0.0416 |
| rs77250353  | C | 0.1238  |
| rs36050334  | T | 0.1749  |
| rs77791760  | T | 0.1793  |
| rs9444613   | A | -0.0401 |
| rs73775367  | T | 0.0733  |
| rs17073830  | C | 0.1031  |
| rs6933499   | C | -0.1852 |
| rs71561432  | G | 0.3891  |
| rs79728378  | A | -0.2352 |
| rs6937922   | A | -0.0529 |
| rs75983197  | G | -0.0679 |
| rs2983212   | G | -0.0616 |
| rs9485540   | G | -0.0632 |
| rs12665592  | A | 0.1065  |
| rs518954    | C | 0.0602  |
| rs1989412   | A | 0.0394  |
| rs62450873  | G | -0.1301 |
| rs58632953  | C | -0.0469 |
| rs2746181   | G | -0.1011 |
| rs2483759   | A | 0.043   |
| rs9352968   | C | -0.1678 |
| rs143069752 | A | -0.1022 |
| rs77122081  | A | -0.1925 |
| rs116552783 | A | 0.1533  |
| rs7771103   | T | 0.0584  |
| rs117814233 | A | 0.2355  |
| rs12527576  | A | -0.04   |
| rs138370706 | C | 0.0875  |
| rs114710818 | A | -0.38   |
| rs9480446   | G | -0.1313 |
| rs51630     | T | -0.0475 |

|             |   |         |
|-------------|---|---------|
| rs150803433 | G | -0.2352 |
| rs79070268  | T | -0.1699 |
| rs9487380   | G | 0.1344  |
| rs73384391  | A | 0.1358  |
| rs72859444  | C | 0.1532  |
| rs11758653  | A | -0.1868 |
| rs10457125  | C | 0.0756  |
| rs574975    | T | -0.0427 |
| rs145657950 | G | -0.1912 |
| rs12210698  | A | 0.0554  |
| rs1246938   | A | 0.061   |
| rs77104800  | T | 0.129   |
| rs9363471   | C | 0.0577  |
| rs75317166  | G | -0.1696 |
| rs80107372  | A | -0.0558 |
| rs4716067   | T | 0.0433  |
| rs9379512   | A | 0.0479  |
| rs76654289  | G | 0.107   |
| rs73775136  | A | -0.1019 |
| rs477721    | G | 0.064   |
| rs75293364  | C | -0.0806 |
| rs3908266   | G | -0.0407 |
| rs117420543 | T | -0.1281 |
| rs76331220  | A | 0.1263  |
| rs73002630  | T | -0.076  |
| rs9295501   | G | 0.144   |
| rs9481407   | T | -0.0434 |
| rs9384112   | T | -0.0598 |
| rs1983573   | G | -0.0849 |
| rs4441933   | C | 0.1165  |
| rs117587443 | A | 0.222   |
| rs78919651  | T | -0.0621 |
| rs6459154   | T | -0.0525 |
| rs35576598  | G | -0.0384 |
| rs55710288  | C | 0.1473  |
| rs6458752   | A | -0.0605 |
| rs2748164   | A | 0.0379  |
| rs143000332 | C | 0.2282  |
| rs12202108  | C | 0.0696  |
| rs3818698   | A | -0.061  |
| rs113268711 | G | 0.0644  |
| rs79810500  | A | 0.1299  |
| rs7739567   | A | 0.0443  |
| rs74826818  | A | -0.2417 |
| rs4897046   | A | -0.0431 |
| rs62422916  | G | -0.0591 |
| rs35858726  | A | 0.2249  |

|             |   |         |
|-------------|---|---------|
| rs17077439  | A | 0.0967  |
| rs72827146  | G | 0.12    |
| rs4716406   | G | -0.0487 |
| rs13220718  | G | 0.0504  |
| rs148595008 | A | 0.1957  |
| rs34233897  | A | -0.1185 |
| rs75245335  | A | 0.0617  |
| rs115388828 | A | 0.1006  |
| rs4712742   | T | -0.0665 |
| rs2457982   | A | -0.0466 |
| rs417399    | A | -0.0386 |
| rs142351259 | C | 0.2704  |
| rs72941879  | C | -0.066  |
| rs160692    | T | -0.039  |
| rs293517    | T | -0.0433 |
| rs469228    | G | 0.0495  |
| rs6455069   | C | -0.0572 |
| rs11755841  | T | -0.0811 |
| rs141652866 | C | -0.155  |
| rs74397656  | T | 0.1612  |
| rs803397    | G | 0.05    |
| rs7770494   | T | -0.0452 |
| rs12178565  | T | -0.0458 |
| rs12207529  | G | 0.0625  |
| rs13204927  | A | 0.046   |
| rs143891369 | T | 0.1663  |
| rs150765547 | A | -0.0693 |
| rs2518158   | A | 0.0393  |
| rs1412926   | T | 0.0398  |
| rs311353    | T | -0.0631 |
| rs28692567  | A | 0.1416  |
| rs9320931   | T | 0.0425  |
| rs2328186   | T | 0.0399  |
| rs140931929 | A | 0.0951  |
| rs1084657   | A | -0.0624 |
| rs1767800   | C | 0.062   |
| rs17794973  | C | 0.0932  |
| rs148493042 | C | 0.1991  |
| rs118041099 | G | 0.1784  |
| rs77009508  | G | -0.0806 |
| rs1078911   | A | -0.0447 |
| rs2063192   | G | 0.0986  |
| rs2295936   | T | -0.041  |
| rs78575930  | C | 0.2775  |
| rs111681245 | A | 0.204   |
| rs62418797  | C | 0.1614  |
| rs7755002   | G | 0.0642  |

|             |   |         |
|-------------|---|---------|
| rs146211076 | C | -0.2935 |
| rs4141800   | G | 0.049   |
| rs4714059   | T | -0.0967 |
| rs9369273   | G | -0.0438 |
| rs145656368 | A | -0.2326 |
| rs74990652  | T | 0.2401  |
| rs9455873   | T | 0.0868  |
| rs9322337   | A | 0.1384  |
| rs118052586 | C | 0.1615  |
| rs78978017  | C | 0.1293  |
| rs141962852 | A | -0.2304 |
| rs143335515 | A | 0.1538  |
| rs78684009  | C | 0.1446  |
| rs146769836 | T | 0.2768  |
| rs16881097  | T | 0.1019  |
| rs117411268 | T | -0.2142 |
| rs6935568   | T | -0.092  |
| rs73564723  | T | 0.197   |
| rs146873863 | T | -0.1999 |
| rs12202286  | T | 0.0551  |
| rs17057233  | C | 0.0759  |
| rs12199291  | C | 0.0501  |
| rs1923070   | G | -0.0448 |
| rs9393378   | G | 0.2506  |
| rs6932206   | T | 0.2119  |
| rs10946724  | T | -0.0441 |
| rs6456223   | A | 0.0476  |
| rs1288155   | T | 0.0406  |
| rs71562801  | A | 0.1926  |
| rs1040045   | G | -0.0452 |
| rs114946987 | A | -0.0616 |
| rs147504709 | A | -0.3565 |
| rs72840508  | T | 0.1082  |
| rs3008832   | T | -0.0399 |
| rs116005088 | T | 0.2566  |
| rs6928713   | G | 0.0384  |
| rs11962103  | A | -0.0397 |
| rs112278033 | C | 0.2101  |
| rs1767978   | T | 0.0583  |
| rs2876044   | A | -0.0552 |
| rs2395729   | C | -0.039  |
| rs17069158  | A | 0.0565  |
| rs12190566  | A | -0.2978 |
| rs77564689  | T | -0.2051 |
| rs28381451  | A | 0.1991  |
| rs55793253  | C | -0.0656 |
| rs73019178  | T | 0.107   |

|             |   |         |
|-------------|---|---------|
| rs200205    | C | 0.04    |
| rs79597525  | C | 0.2269  |
| rs2328400   | G | 0.0907  |
| rs111426351 | G | -0.1232 |
| rs62438386  | C | -0.2979 |
| rs62442281  | G | -0.0742 |
| rs9365323   | C | 0.0387  |
| rs113167840 | G | -0.1589 |
| rs9260258   | C | -0.0966 |
| rs9494385   | G | 0.2169  |
| rs2157494   | T | 0.0452  |
| rs72831581  | C | 0.1005  |
| rs9374121   | T | -0.0395 |
| rs12215355  | C | 0.091   |
| rs77596503  | G | 0.1759  |
| rs4357093   | T | 0.042   |
| rs75260799  | A | 0.2124  |
| rs2791523   | G | 0.1601  |
| rs4507631   | C | -0.0725 |
| rs17068109  | G | -0.0987 |
| rs143258807 | T | -0.2162 |
| rs75503975  | A | -0.098  |
| rs6908907   | A | -0.1306 |
| rs201328    | G | -0.0501 |
| rs79797646  | T | -0.1317 |
| rs11757415  | G | -0.0422 |
| rs4710361   | G | -0.0492 |
| rs79820675  | C | 0.0898  |
| rs17834507  | C | 0.05    |
| rs2579989   | T | -0.0607 |
| rs12662510  | G | 0.0519  |
| rs77768478  | C | 0.1431  |
| rs803472    | T | 0.0418  |
| rs1716009   | T | 0.139   |
| rs6909060   | T | 0.0399  |
| rs141534112 | C | 0.1918  |
| rs1536812   | C | 0.1238  |
| rs117935574 | T | 0.1483  |
| rs13199464  | G | -0.0397 |
| rs114749299 | A | 0.1683  |
| rs9460928   | A | 0.1436  |
| rs7738646   | A | -0.0457 |
| rs116867937 | A | 0.1037  |
| rs1890135   | T | 0.0423  |
| rs2439558   | C | -0.0394 |
| rs1906953   | T | -0.0575 |
| rs4706855   | G | -0.0375 |



|             |   |         |
|-------------|---|---------|
| rs6456181   | C | -0.0671 |
| rs80342388  | A | 0.2124  |
| rs9362176   | T | 0.0703  |
| rs111240003 | G | 0.2619  |
| rs1737311   | G | 0.0647  |
| rs111836898 | T | 0.1393  |
| rs78354798  | A | 0.1311  |
| rs78543929  | A | -0.1371 |
| rs72899326  | A | 0.2649  |
| rs17058035  | G | 0.1697  |
| rs10305423  | T | -0.2776 |
| rs76580439  | C | -0.2866 |
| rs72861555  | C | -0.0632 |
| rs114379841 | G | 0.1995  |
| rs7748582   | C | -0.064  |
| rs9353802   | G | -0.0441 |
| rs10945911  | T | 0.127   |
| rs17657328  | C | 0.0407  |
| rs4714570   | A | 0.0435  |
| rs3734229   | C | 0.0415  |
| rs145169613 | G | 0.2496  |
| rs2817937   | C | 0.0665  |
| rs115236493 | G | 0.2413  |
| rs212389    | G | -0.0388 |
| rs36061016  | T | 0.0646  |
| rs2234185   | C | 0.0384  |
| rs117149702 | C | 0.1496  |
| rs78972962  | A | -0.1168 |
| rs79455299  | G | 0.2716  |
| rs4947143   | C | -0.0386 |
| rs1281980   | T | -0.0391 |
| rs742106    | A | -0.0398 |
| rs12206701  | A | 0.0538  |
| rs9469806   | A | 0.0728  |
| rs9333535   | A | -0.086  |
| rs141237621 | T | -0.2306 |
| rs1554447   | C | 0.058   |
| rs75313035  | T | -0.1322 |
| rs138062643 | A | -0.277  |
| rs2070698   | T | 0.0447  |
| rs34880503  | G | -0.0897 |
| rs484164    | C | -0.049  |
| rs13208824  | A | 0.0604  |
| rs77000205  | T | 0.0607  |
| rs1265248   | T | 0.0606  |
| rs71562485  | A | 0.093   |
| rs3822904   | T | -0.0391 |

|             |   |         |
|-------------|---|---------|
| rs9458674   | A | -0.1521 |
| rs79421475  | T | 0.1009  |
| rs34461859  | G | -0.0777 |
| rs150494905 | C | -0.1786 |
| rs142608073 | T | -0.1101 |
| rs73733094  | T | 0.0866  |
| rs953150    | A | 0.1004  |
| rs406019    | T | -0.1879 |
| rs7754423   | A | -0.0698 |
| rs4960329   | T | 0.0746  |
| rs74575582  | G | 0.1661  |
| rs4960095   | G | -0.1388 |
| rs6933549   | C | -0.0742 |
| rs118151342 | G | -0.294  |
| rs3763328   | A | -0.0832 |
| rs62401909  | G | -0.1507 |
| rs74929281  | A | -0.2864 |
| rs6905063   | T | 0.0384  |
| rs79882951  | G | -0.157  |
| rs11965075  | A | -0.0561 |
| rs141102160 | T | -0.4892 |
| rs115310674 | T | 0.1185  |
| rs76936659  | G | -0.1201 |
| rs4960257   | C | -0.0388 |
| rs140333591 | G | 0.2104  |
| rs114024257 | C | -0.2585 |
| rs73386086  | G | 0.0802  |
| rs35055927  | A | -0.1748 |
| rs145307277 | G | -0.246  |
| rs9360041   | T | 0.1047  |
| rs79082344  | G | -0.0491 |
| rs1741821   | C | -0.0692 |
| rs111707472 | A | -0.1047 |
| rs6938859   | C | -0.2541 |
| rs6911335   | T | -0.0367 |
| rs11754148  | C | 0.1149  |
| rs74893147  | T | 0.1813  |
| rs114662567 | T | -0.1709 |
| rs12200373  | T | 0.0888  |
| rs17070980  | A | 0.2213  |
| rs140953685 | G | -0.0724 |
| rs12664620  | G | -0.0453 |
| rs67873921  | C | 0.0785  |
| rs4706070   | A | 0.0567  |
| rs114123076 | A | 0.2016  |
| rs146091785 | T | -0.1196 |
| rs12197457  | G | 0.0379  |

|             |   |         |
|-------------|---|---------|
| rs12202887  | A | 0.1633  |
| rs73787042  | C | -0.064  |
| rs75185058  | T | 0.2367  |
| rs2275395   | G | -0.2152 |
| rs3889452   | A | 0.1416  |
| rs6915194   | G | 0.0658  |
| rs142921362 | G | -0.2395 |
| rs76942797  | G | -0.1639 |
| rs75040593  | T | 0.0585  |
| rs116398174 | A | -0.2311 |
| rs752292    | A | 0.1462  |
| rs34184819  | G | 0.0752  |
| rs76958978  | T | -0.2205 |
| rs118135398 | T | -0.1759 |
| rs142040013 | G | 0.1366  |
| rs707998    | A | -0.0434 |
| rs112949734 | C | 0.1654  |
| rs116481153 | A | 0.1856  |
| rs9448887   | C | 0.0376  |
| rs78781306  | G | 0.2638  |
| rs116018552 | C | -0.1894 |
| rs79242376  | A | -0.0711 |
| rs7751107   | G | 0.0493  |
| rs74426827  | C | 0.0622  |
| rs71541061  | A | 0.1644  |
| rs76325977  | T | 0.0943  |
| rs11755522  | G | 0.1347  |
| rs16868943  | A | 0.1084  |
| rs6932353   | C | 0.0436  |
| rs1977200   | G | -0.0455 |
| rs9346117   | A | -0.1109 |
| rs75712926  | G | -0.2115 |
| rs6938677   | T | 0.0422  |
| rs1555430   | A | 0.0384  |
| rs116293333 | A | 0.1867  |
| rs144273252 | C | 0.1815  |
| rs56193101  | A | -0.119  |
| rs56977771  | T | 0.1667  |
| rs144398793 | T | -0.2744 |
| rs9345067   | T | -0.0379 |
| rs45480197  | A | 0.142   |
| rs2782892   | C | 0.04    |
| rs6913044   | C | 0.0867  |
| rs114582382 | T | 0.2062  |
| rs116917138 | T | 0.1772  |
| rs141649110 | T | 0.1821  |
| rs7739471   | C | -0.0827 |

|             |   |         |
|-------------|---|---------|
| rs3778249   | A | 0.0713  |
| rs1634222   | T | -0.0662 |
| rs62433397  | G | -0.0567 |
| rs13211482  | A | 0.1181  |
| rs351345    | G | -0.1329 |
| rs74658388  | G | 0.1783  |
| rs148905934 | T | 0.0631  |
| rs520478    | G | 0.0396  |
| rs112647257 | T | 0.08    |
| rs78257305  | C | -0.0582 |
| rs74760074  | A | -0.0377 |
| rs56161627  | T | -0.0507 |
| rs9480084   | C | 0.0435  |
| rs6924566   | T | -0.0832 |
| rs12209691  | T | 0.0388  |
| rs142735258 | T | 0.2215  |
| rs9392544   | G | -0.0437 |
| rs4706786   | C | 0.0833  |
| rs9386051   | C | -0.0414 |
| rs10498650  | A | -0.0518 |
| rs78242163  | G | 0.2005  |
| rs6924504   | T | -0.0417 |
| rs62427070  | C | -0.1105 |
| rs2002561   | A | 0.2383  |
| rs113067550 | A | 0.0725  |
| rs807889    | T | -0.0435 |
| rs813691    | T | 0.1116  |
| rs12207297  | T | 0.0707  |
| rs4960405   | T | 0.051   |
| rs72912957  | A | -0.0659 |
| rs75163278  | T | 0.1125  |
| rs41271338  | C | 0.1527  |
| rs17757727  | T | 0.183   |
| rs2477307   | A | 0.0915  |
| rs9477243   | T | -0.1489 |
| rs4272232   | T | 0.0381  |
| rs75820852  | G | 0.1469  |
| rs76445456  | G | 0.1489  |
| rs12525372  | G | 0.0586  |
| rs142120112 | C | -0.2089 |
| rs150906773 | T | -0.183  |
| rs17707973  | A | 0.0879  |
| rs664355    | T | 0.038   |
| rs72825588  | C | 0.0857  |
| rs6902826   | C | -0.0656 |
| rs10457154  | G | -0.0989 |
| rs1340994   | A | -0.0794 |

|             |   |         |
|-------------|---|---------|
| rs1334898   | T | 0.0362  |
| rs12208344  | A | 0.1181  |
| rs150989750 | A | 0.1543  |
| rs17748851  | A | 0.0801  |
| rs226463    | T | 0.0387  |
| rs9494879   | C | 0.0406  |
| rs72920226  | G | 0.1068  |
| rs2066508   | A | 0.1107  |
| rs228856    | T | 0.0518  |
| rs12662140  | A | 0.0529  |
| rs12204356  | C | -0.2769 |
| rs17080925  | T | 0.1227  |
| rs62440563  | T | -0.0934 |
| rs9405778   | A | -0.0873 |
| rs2164166   | G | 0.037   |
| rs9379507   | T | -0.0434 |
| rs2327033   | T | 0.0392  |
| rs62424887  | C | -0.1154 |
| rs9355242   | G | 0.1162  |
| rs150396395 | T | 0.1094  |
| rs62417297  | C | -0.1126 |
| rs74593053  | G | 0.1952  |
| rs2817119   | T | 0.1368  |
| rs12193054  | T | -0.0893 |
| rs17782909  | C | 0.0617  |
| rs12663407  | G | 0.0467  |
| rs316364    | T | -0.046  |
| rs116978703 | A | -0.1825 |
| rs1206080   | T | -0.0369 |
| rs17219182  | G | -0.1454 |
| rs2818054   | C | 0.0536  |
| rs76793066  | C | -0.1997 |
| rs75091131  | G | 0.0883  |
| rs147889124 | A | -0.1445 |
| rs146369928 | C | -0.1222 |
| rs139289963 | A | 0.1725  |
| rs147768504 | A | 0.104   |
| rs9361108   | T | -0.0374 |
| rs9475436   | T | 0.045   |
| rs12203102  | G | -0.0556 |
| rs116982671 | A | -0.1518 |
| rs117078259 | T | -0.0736 |
| rs7769139   | T | -0.071  |
| rs9322285   | G | -0.0852 |
| rs9295314   | G | -0.044  |
| rs149165247 | C | 0.1836  |
| rs9391961   | T | -0.0569 |

|             |   |         |
|-------------|---|---------|
| rs1474595   | A | 0.0657  |
| rs117026860 | T | 0.2205  |
| rs171054    | T | 0.137   |
| rs75640685  | G | 0.1947  |
| rs139383262 | A | -0.1946 |
| rs79355581  | T | -0.3129 |
| rs9355988   | A | -0.0359 |
| rs2876551   | A | 0.054   |
| rs78932423  | C | -0.0625 |
| rs12208868  | T | -0.1375 |
| rs9348003   | A | -0.062  |
| rs57470224  | T | 0.0678  |
| rs11961127  | G | 0.1316  |
| rs112517282 | T | -0.0501 |
| rs145009438 | G | 0.1589  |
| rs7768117   | G | -0.038  |
| rs76139830  | G | 0.0821  |
| rs7749683   | T | -0.0707 |
| rs117538470 | T | 0.2182  |
| rs2071941   | A | -0.0582 |
| rs12529268  | G | 0.0593  |
| rs1128998   | T | -0.0744 |
| rs17262993  | T | -0.0396 |
| rs148210811 | A | 0.1668  |
| rs11752942  | A | 0.0373  |
| rs9392877   | C | 0.0601  |
| rs115018313 | C | -0.1948 |
| rs13201244  | A | 0.2768  |
| rs9385808   | T | -0.0559 |
| rs684147    | T | -0.1691 |
| rs6907097   | T | -0.0459 |
| rs13198264  | C | -0.1496 |
| rs3798756   | A | 0.0568  |
| rs76391982  | C | 0.1262  |
| rs75400774  | C | 0.0842  |
| rs9490591   | A | -0.0448 |
| rs79147057  | G | 0.2369  |
| rs9383600   | G | -0.1417 |
| rs111305993 | A | 0.1675  |
| rs145913301 | T | -0.2178 |
| rs17174935  | T | 0.1212  |
| rs74961323  | A | 0.2166  |
| rs11751963  | A | -0.057  |
| rs4440469   | T | -0.038  |
| rs79951128  | A | -0.1749 |
| rs79025189  | T | 0.2669  |
| rs9401123   | C | 0.0415  |

|             |   |         |
|-------------|---|---------|
| rs6915765   | T | -0.039  |
| rs4713285   | G | 0.1005  |
| rs13210497  | A | -0.0525 |
| rs141418189 | G | 0.0989  |
| rs316036    | A | 0.0366  |
| rs4715145   | T | 0.0407  |
| rs4713407   | T | 0.063   |
| rs9466254   | G | 0.1414  |
| rs10947653  | T | -0.0464 |
| rs9493900   | A | -0.0557 |
| rs351734    | A | -0.0376 |
| rs45529339  | T | 0.089   |
| rs7760183   | G | 0.0543  |
| rs984789    | T | -0.0538 |
| rs12524229  | A | 0.0893  |
| rs67212963  | T | -0.0511 |
| rs2004249   | G | 0.0972  |
| rs17053047  | G | -0.0883 |
| rs34534140  | T | 0.1829  |
| rs2446099   | T | 0.0392  |
| rs62407367  | T | 0.043   |
| rs62430350  | T | -0.179  |
| rs17708991  | A | -0.0608 |
| rs117478321 | G | 0.1349  |
| rs17214099  | T | -0.0782 |
| rs117506323 | T | -0.1326 |
| rs10455860  | T | -0.0526 |
| rs3857455   | A | -0.0861 |
| rs72947624  | T | 0.0528  |
| rs9492532   | C | 0.1843  |
| rs9383542   | T | 0.0378  |
| rs6914810   | T | 0.0405  |
| rs143504217 | T | -0.167  |
| rs4530887   | G | -0.0359 |
| rs6934262   | A | 0.0395  |
| rs2062412   | T | -0.0389 |
| rs7770554   | G | 0.0395  |
| rs9471932   | A | 0.08    |
| rs6906938   | T | -0.0372 |
| rs73021246  | A | 0.0803  |
| rs11754909  | T | 0.145   |
| rs9346051   | C | 0.1013  |
| rs2211365   | C | 0.1078  |
| rs9373027   | T | 0.0512  |
| rs13208349  | T | 0.0481  |
| rs4959851   | T | 0.0425  |
| rs118114184 | A | -0.1289 |

|             |   |         |
|-------------|---|---------|
| rs149667543 | A | -0.1464 |
| rs9460955   | G | 0.0417  |
| rs2057033   | C | -0.062  |
| rs1738076   | C | -0.0424 |
| rs72817765  | A | 0.074   |
| rs77099138  | C | 0.1451  |
| rs645649    | C | -0.0435 |
| rs111353726 | C | -0.2456 |
| rs111589067 | T | 0.0812  |
| rs10948275  | C | -0.0737 |
| rs116643871 | A | -0.2286 |
| rs112726309 | G | 0.2201  |
| rs4242285   | G | -0.0556 |
| rs12664020  | C | -0.0491 |
| rs56024008  | C | 0.1078  |
| rs6911758   | C | -0.0467 |
| rs34300562  | T | 0.1185  |
| rs117593249 | T | -0.1676 |
| rs7769663   | A | 0.0425  |
| rs74702197  | T | 0.2972  |
| rs117774925 | C | -0.1762 |
| rs7755530   | G | -0.04   |
| rs2087566   | C | 0.042   |
| rs35430530  | T | 0.1639  |
| rs7753102   | T | 0.2288  |
| rs34144260  | T | 0.0971  |
| rs9347873   | A | 0.0549  |
| rs118184445 | G | -0.1209 |
| rs117923579 | T | -0.1922 |
| rs149550642 | G | -0.125  |
| rs441770    | C | 0.0881  |
| rs111838739 | A | -0.1382 |
| rs11757861  | C | 0.0636  |
| rs147782380 | T | -0.1218 |
| rs6929098   | C | -0.1388 |
| rs9379064   | T | 0.0428  |
| rs116893412 | C | 0.1293  |
| rs1334328   | G | 0.0367  |
| rs41270992  | C | 0.1464  |
| rs112492430 | A | 0.2194  |
| rs77323361  | G | -0.1972 |
| rs72907043  | G | 0.1272  |
| rs77596043  | C | -0.0796 |
| rs7773153   | A | -0.1584 |
| rs72948641  | T | 0.0442  |
| rs9494763   | T | 0.0362  |
| rs7751928   | A | -0.0518 |



|             |   |         |
|-------------|---|---------|
| rs803398    | C | -0.0508 |
| rs3891273   | C | -0.2839 |
| rs114871470 | A | 0.1743  |
| rs9379480   | G | -0.0668 |
| rs12212717  | T | 0.1892  |
| rs76127459  | G | 0.1208  |
| rs2812774   | A | 0.0358  |
| rs78937213  | G | 0.1842  |
| rs17134305  | G | 0.117   |
| rs75772809  | T | 0.1033  |
| rs9351764   | C | 0.0396  |
| rs115982359 | C | 0.3317  |
| rs9393387   | T | 0.0363  |
| rs62396695  | A | 0.069   |
| rs12175062  | T | -0.0579 |
| rs6936736   | T | 0.0923  |
| rs62388149  | T | 0.0643  |
| rs78084555  | G | -0.0646 |
| rs4959585   | A | -0.0907 |
| rs1018552   | T | 0.0418  |
| rs12190678  | T | 0.0827  |
| rs111810414 | A | 0.3136  |
| rs56211936  | G | 0.0868  |
| rs10485115  | G | 0.1114  |
| rs7741532   | T | 0.0385  |
| rs142713628 | G | -0.1059 |
| rs12190710  | T | 0.0681  |
| rs117094768 | T | 0.2856  |
| rs12526737  | C | 0.0478  |
| rs9397029   | A | -0.0561 |
| rs12663235  | G | -0.1244 |
| rs72834856  | G | 0.0747  |
| rs11751494  | G | 0.1768  |
| rs79929541  | A | -0.1616 |
| rs1762125   | T | 0.0395  |
| rs17572815  | T | 0.1258  |
| rs35507674  | A | -0.1073 |
| rs16884481  | T | 0.11    |
| rs536298    | G | 0.036   |
| rs117507065 | A | 0.0848  |
| rs2981976   | G | 0.0625  |
| rs6924849   | C | 0.0846  |
| rs76661686  | G | 0.1673  |
| rs11758548  | G | 0.1339  |
| rs56895609  | T | -0.1861 |
| rs55781756  | A | -0.0572 |
| rs2387360   | C | -0.1788 |

|             |   |         |
|-------------|---|---------|
| rs7765420   | A | -0.2354 |
| rs142109306 | C | -0.1332 |
| rs62417306  | T | -0.2869 |
| rs9347545   | A | -0.0353 |
| rs145974619 | C | 0.2871  |
| rs112896991 | T | 0.1122  |
| rs116961079 | A | 0.0868  |
| rs855404    | C | 0.0423  |
| rs63034     | C | -0.0425 |
| rs73410507  | T | 0.0952  |
| rs17137008  | G | 0.0823  |
| rs76312591  | C | -0.0927 |
| rs9460356   | C | 0.086   |
| rs118002975 | G | -0.1774 |
| rs62390996  | A | -0.1473 |
| rs2472768   | A | -0.0428 |
| rs17415785  | A | 0.1125  |
| rs9404128   | A | 0.0366  |
| rs34706458  | A | 0.0663  |
| rs77291984  | A | 0.108   |
| rs13219142  | A | -0.1828 |
| rs140924180 | T | 0.0702  |
| rs10499079  | C | -0.0749 |
| rs10947428  | C | 0.0454  |
| rs75996608  | C | 0.0743  |
| rs77046468  | A | -0.1063 |
| rs3008008   | C | 0.0363  |
| rs117586472 | G | -0.1774 |
| rs594158    | T | -0.0504 |
| rs9403059   | G | -0.0381 |
| rs148217689 | A | 0.2588  |
| rs9481388   | C | 0.0377  |
| rs117647483 | T | 0.0883  |
| rs76271144  | G | -0.2344 |
| rs9383685   | T | -0.0359 |
| rs12203300  | T | -0.0508 |
| rs72961385  | A | -0.1547 |
| rs9463962   | A | 0.0555  |
| rs2432761   | G | 0.0365  |
| rs2788278   | T | -0.0706 |
| rs139286979 | T | -0.1259 |
| rs142076555 | T | -0.2946 |
| rs10944774  | G | 0.0365  |
| rs12209476  | T | -0.0555 |
| rs4559123   | T | 0.0626  |
| rs78875166  | T | 0.1102  |
| rs13206164  | C | -0.127  |

|             |   |         |
|-------------|---|---------|
| rs9364071   | T | -0.0595 |
| rs1740075   | G | -0.0378 |
| rs4252121   | G | -0.1759 |
| rs72931889  | T | -0.236  |
| rs139797530 | T | -0.1906 |
| rs74338849  | T | -0.2327 |
| rs9378620   | T | -0.0688 |
| rs75606533  | A | -0.2032 |
| rs17658313  | A | -0.0749 |
| rs2239797   | G | 0.0623  |
| rs7751997   | A | -0.077  |
| rs10455566  | G | -0.0687 |
| rs141089310 | G | 0.2183  |
| rs10733175  | G | -0.0561 |
| rs17067608  | A | -0.0969 |
| rs12662480  | C | 0.0371  |
| rs955333    | G | -0.0483 |
| rs1572852   | T | 0.0408  |
| rs115385902 | T | 0.286   |
| rs117597689 | C | 0.2248  |
| rs13218868  | C | 0.067   |
| rs78641392  | A | -0.0832 |
| rs117619430 | G | 0.1698  |
| rs808038    | C | -0.0599 |
| rs669995    | G | 0.0426  |
| rs62402522  | G | 0.1528  |
| rs113032355 | T | -0.0756 |
| rs140152686 | A | 0.1943  |
| rs72965005  | C | 0.2138  |
| rs144144440 | T | 0.2614  |
| rs62419703  | A | 0.1161  |
| rs117686420 | T | 0.1151  |
| rs11968322  | A | -0.0627 |
| rs149702128 | A | -0.0677 |
| rs140965158 | A | 0.3304  |
| rs12204686  | T | 0.196   |
| rs1481320   | A | -0.2416 |
| rs112718606 | G | 0.0585  |
| rs72952992  | A | 0.2104  |
| rs6913708   | C | -0.1368 |
| rs113014817 | G | 0.1392  |
| rs2326628   | A | -0.0488 |
| rs10455427  | A | -0.0911 |
| rs9328056   | T | 0.0759  |
| rs114647513 | A | -0.212  |
| rs112467026 | G | 0.1399  |
| rs34164466  | T | 0.0612  |

|             |   |         |
|-------------|---|---------|
| rs115006495 | A | 0.31    |
| rs12212858  | A | 0.2224  |
| rs909989    | A | 0.0517  |
| rs62437804  | C | 0.1279  |
| rs2064712   | A | 0.0478  |
| rs1915463   | G | 0.052   |
| rs2327811   | G | 0.1281  |
| rs9457301   | G | -0.2244 |
| rs17684193  | T | -0.1032 |
| rs146395150 | G | 0.1483  |
| rs12193163  | G | -0.039  |
| rs116017094 | A | -0.1375 |
| rs9366472   | A | -0.0514 |
| rs12663693  | G | 0.0596  |
| rs9459301   | C | 0.0679  |
| rs3008010   | G | 0.0516  |
| rs9399010   | C | 0.039   |
| rs12213665  | G | 0.1231  |
| rs144190683 | T | 0.1391  |
| rs116133298 | G | -0.1125 |
| rs5008921   | T | -0.0363 |
| rs7758171   | A | -0.1169 |
| rs6941421   | C | 0.036   |
| rs79039980  | C | -0.0553 |
| rs72838015  | T | -0.1542 |
| rs113314131 | G | 0.2425  |
| rs4945829   | C | -0.0368 |
| rs140999665 | G | 0.055   |
| rs9361982   | C | -0.048  |
| rs11156392  | C | 0.0615  |
| rs55960011  | T | 0.0836  |
| rs214438    | T | 0.0411  |
| rs7770298   | T | 0.0548  |
| rs73015248  | C | 0.1055  |
| rs2852541   | A | -0.0385 |
| rs61689184  | T | 0.1242  |
| rs79294515  | T | 0.1651  |
| rs6903775   | T | 0.109   |
| rs9394876   | T | 0.0425  |
| rs56289566  | C | 0.0982  |
| rs4546499   | T | -0.066  |
| rs75119927  | A | -0.0719 |
| rs67798973  | A | -0.0411 |
| rs6929802   | T | -0.0644 |
| rs56410799  | G | 0.1213  |
| rs78665196  | A | -0.2018 |
| rs115067343 | G | -0.0744 |

|             |   |         |
|-------------|---|---------|
| rs6912965   | T | -0.1592 |
| rs4527731   | G | 0.0432  |
| rs9493051   | A | 0.1353  |
| rs145289628 | T | -0.1044 |
| rs115758726 | G | -0.1472 |
| rs13215784  | C | -0.0588 |
| rs113947152 | A | 0.129   |
| rs1485649   | A | 0.0555  |
| rs12190698  | A | 0.0403  |
| rs78514512  | G | 0.1013  |
| rs72968540  | G | 0.088   |
| rs1776889   | T | 0.0468  |
| rs1390735   | G | -0.0363 |
| rs12195244  | T | 0.0762  |
| rs11757836  | T | -0.0521 |
| rs17539309  | T | 0.1189  |
| rs803445    | C | -0.0541 |
| rs62400836  | A | 0.0505  |
| rs9444597   | C | 0.0343  |
| rs1407268   | G | -0.2081 |
| rs12214621  | G | -0.0561 |
| rs961846    | C | 0.0551  |
| rs143304715 | G | 0.1885  |
| rs2782295   | C | -0.0374 |
| rs150865823 | T | -0.1668 |
| rs9371956   | T | -0.0392 |
| rs12200571  | G | -0.0949 |
| rs35870788  | T | 0.0896  |
| rs1008461   | T | 0.069   |
| rs7768342   | C | 0.0394  |
| rs9372240   | A | 0.036   |
| rs2983526   | G | -0.0361 |
| rs1535706   | C | 0.0374  |
| rs702347    | T | 0.0376  |
| rs116067179 | G | 0.1378  |
| rs1886881   | T | -0.0373 |
| rs6913075   | C | 0.0367  |
| rs115616369 | C | 0.1402  |
| rs7767470   | T | -0.1036 |
| rs12664512  | C | -0.0809 |
| rs17335798  | G | -0.0607 |
| rs391875    | A | -0.036  |
| rs150776057 | A | -0.253  |
| rs75335867  | C | 0.1598  |
| rs148218954 | A | -0.2501 |
| rs59912723  | A | -0.149  |
| rs2988685   | T | -0.0446 |

|             |   |         |
|-------------|---|---------|
| rs56144134  | A | 0.1749  |
| rs114360649 | G | -0.0626 |
| rs118103136 | A | 0.1592  |
| rs2817063   | G | -0.0363 |
| rs155489    | C | 0.0405  |
| rs9386845   | A | -0.0464 |
| rs146618449 | T | 0.0798  |
| rs9373081   | G | 0.0367  |
| rs6905254   | A | 0.0362  |
| rs9405139   | C | -0.0467 |
| rs114876878 | T | -0.0733 |
| rs148239948 | A | -0.1362 |
| rs41273315  | T | 0.1364  |
| rs117164500 | A | -0.2257 |
| rs28648619  | G | -0.0781 |
| rs80100580  | A | -0.1883 |
| rs78219794  | C | 0.0921  |
| rs73365018  | C | 0.2161  |
| rs201048    | A | 0.0549  |
| rs9942536   | A | -0.0383 |
| rs4476815   | C | 0.1566  |
| rs114385359 | A | 0.1392  |
| rs114658269 | T | 0.1046  |
| rs555574    | G | 0.0426  |
| rs13192816  | G | 0.2393  |
| rs35881063  | T | 0.113   |
| rs113768464 | G | -0.1325 |
| rs604711    | A | -0.0342 |
| rs269442    | A | -0.0456 |
| rs199104    | C | 0.0546  |
| rs2503800   | G | 0.0403  |
| rs115674093 | G | 0.139   |
| rs663875    | A | 0.0958  |
| rs141406059 | T | 0.1256  |
| rs9294414   | T | 0.0963  |
| rs79202544  | G | 0.145   |
| rs111770758 | G | 0.1264  |
| rs9347601   | C | 0.0637  |
| rs276362    | C | 0.0391  |
| rs2500206   | T | -0.0352 |
| rs2504684   | C | 0.1042  |
| rs72940808  | G | -0.0694 |
| rs117725926 | T | 0.0971  |
| rs783402    | C | -0.036  |
| rs12201710  | A | 0.0394  |
| rs35596894  | C | -0.119  |
| rs4945778   | A | -0.0364 |

|             |   |         |
|-------------|---|---------|
| rs4706480   | T | 0.044   |
| rs13201174  | C | -0.0805 |
| rs10499129  | G | 0.0572  |
| rs4716063   | G | 0.1051  |
| rs1743942   | A | 0.0442  |
| rs3886378   | T | -0.04   |
| rs9470949   | G | 0.0537  |
| rs73032560  | T | -0.218  |
| rs78002156  | A | 0.1142  |
| rs143068473 | A | -0.0755 |
| rs2251647   | A | -0.0824 |
| rs79480816  | C | 0.1633  |
| rs143133270 | C | 0.2801  |
| rs76427181  | C | 0.1616  |
| rs11970753  | C | 0.1315  |
| rs6557411   | T | -0.042  |
| rs79936851  | C | -0.1044 |
| rs61610312  | T | 0.1028  |
| rs73371691  | T | 0.0915  |
| rs17576708  | C | 0.0631  |
| rs9492068   | T | 0.067   |
| rs9471115   | T | 0.1758  |
| rs3799647   | G | 0.0535  |
| rs11153945  | T | 0.1181  |
| rs78915936  | C | 0.0839  |
| rs72840342  | A | 0.1237  |
| rs7766286   | G | -0.1028 |
| rs62390734  | A | -0.1522 |
| rs75606736  | A | 0.1002  |
| rs205993    | T | -0.1217 |
| rs72869199  | G | 0.1369  |
| rs35168417  | G | 0.1031  |
| rs117454044 | G | 0.2009  |
| rs117661706 | A | -0.1735 |
| rs138440716 | T | -0.2266 |
| rs6935402   | G | -0.0362 |
| rs4960264   | A | 0.0372  |
| rs12198996  | C | 0.157   |
| rs682518    | C | 0.063   |
| rs35373534  | T | 0.084   |
| rs146874730 | C | 0.1984  |
| rs116314998 | G | -0.2577 |
| rs7751635   | A | 0.0464  |
| rs1790007   | T | -0.0351 |
| rs168623    | T | -0.0999 |
| rs77576518  | G | 0.1124  |
| rs117377407 | A | 0.0966  |

|             |   |         |
|-------------|---|---------|
| rs78121609  | C | -0.0717 |
| rs17475060  | A | 0.0425  |
| rs5010546   | A | -0.1425 |
| rs6919120   | A | -0.0636 |
| rs16885273  | G | -0.0626 |
| rs77401727  | T | 0.1796  |
| rs137923925 | T | 0.0953  |
| rs172004    | T | -0.037  |
| rs9473276   | A | 0.0569  |
| rs114496068 | A | 0.2732  |
| rs112737586 | A | -0.1112 |
| rs112328831 | A | 0.209   |
| rs79648498  | C | -0.1945 |
| rs3818315   | T | -0.0429 |
| rs117083468 | A | 0.3087  |
| rs10944275  | A | 0.0644  |
| rs75287119  | T | 0.0433  |
| rs147582037 | G | 0.1694  |
| rs59962157  | A | 0.0975  |
| rs115576830 | T | 0.0909  |
| rs1482849   | A | -0.0347 |
| rs115163329 | T | 0.2053  |
| rs1598170   | T | 0.0821  |
| rs6904170   | A | -0.066  |
| rs16900053  | C | 0.0482  |
| rs75349418  | G | 0.197   |
| rs56326806  | T | 0.1414  |
| rs2504263   | G | 0.0353  |
| rs1575241   | A | 0.0443  |
| rs9504343   | A | -0.2299 |
| rs114828244 | A | 0.1137  |
| rs17437627  | G | -0.0435 |
| rs9480834   | A | 0.0596  |
| rs78041671  | G | -0.2248 |
| rs56224003  | T | -0.1297 |
| rs9353969   | G | 0.2022  |
| rs6932055   | C | 0.0406  |
| rs9395134   | A | -0.0375 |
| rs9349119   | T | 0.0931  |
| rs1856384   | G | 0.0572  |
| rs78573870  | G | -0.1076 |
| rs147540303 | A | 0.0828  |
| rs1543602   | G | 0.0361  |
| rs112457737 | G | -0.1147 |
| rs74468395  | T | 0.1138  |
| rs80143203  | G | -0.0472 |
| rs111462355 | T | 0.1606  |



|             |   |         |
|-------------|---|---------|
| rs149753028 | C | 0.1311  |
| rs9386011   | G | 0.0364  |
| rs9392913   | G | 0.0587  |
| rs430216    | G | -0.0746 |
| rs141084670 | T | -0.056  |
| rs1743257   | C | -0.0518 |
| rs9389870   | C | 0.0553  |
| rs116941248 | T | 0.1074  |
| rs7746088   | C | -0.288  |
| rs114795214 | T | -0.1278 |
| rs56187477  | C | 0.0677  |
| rs62405878  | T | -0.1141 |
| rs9357035   | A | -0.0475 |
| rs62420840  | G | 0.154   |
| rs4945869   | A | -0.0438 |
| rs116247546 | A | 0.0832  |
| rs749005    | T | -0.0496 |
| rs4712591   | G | 0.0411  |
| rs73782956  | T | 0.171   |
| rs6924353   | T | 0.0705  |
| rs16872377  | G | -0.0736 |
| rs17240294  | A | 0.0394  |
| rs6925920   | A | 0.0365  |
| rs62385053  | C | 0.1008  |
| rs3806134   | G | -0.0459 |
| rs13212016  | T | 0.043   |
| rs1150561   | A | 0.1035  |
| rs9355623   | A | -0.1754 |
| rs9397335   | T | -0.0391 |
| rs62417497  | A | 0.1472  |
| rs2766592   | A | 0.0805  |
| rs2766536   | T | 0.0372  |
| rs17689694  | A | 0.0656  |
| rs117478813 | T | 0.1458  |
| rs6908427   | A | 0.1861  |
| rs9363322   | G | 0.1717  |
| rs35056042  | A | 0.0886  |
| rs12208265  | A | 0.2039  |
| rs9398385   | T | -0.0536 |
| rs9347128   | G | 0.0391  |
| rs9461119   | C | -0.0358 |
| rs1014742   | G | -0.0734 |
| rs118160616 | C | 0.092   |
| rs111970372 | G | 0.0384  |
| rs7755135   | T | 0.0625  |
| rs7755784   | A | -0.2867 |
| rs12191992  | T | -0.1432 |

|             |   |         |
|-------------|---|---------|
| rs7772042   | G | 0.0442  |
| rs75395780  | T | 0.0782  |
| rs149466133 | A | -0.1924 |
| rs565744    | C | 0.0479  |
| rs9381680   | C | -0.051  |
| rs138708491 | T | 0.2112  |
| rs73594711  | A | -0.2072 |
| rs72904869  | T | 0.1343  |
| rs3734232   | T | -0.1251 |
| rs143328469 | C | -0.195  |
| rs117687499 | A | 0.0655  |
| rs243791    | T | -0.1757 |
| rs12215536  | A | 0.1891  |
| rs2066015   | T | -0.0456 |
| rs10455771  | G | -0.0522 |
| rs75269299  | G | 0.1792  |
| rs368429    | T | -0.0374 |
| rs117723264 | T | 0.2079  |
| rs6916315   | C | -0.0405 |
| rs55995839  | A | 0.084   |
| rs117533947 | T | -0.2055 |
| rs56061453  | A | 0.1815  |
| rs4145450   | T | -0.0598 |
| rs1267914   | T | 0.0496  |
| rs149683325 | T | -0.1145 |
| rs2051651   | G | 0.1114  |
| rs10457078  | G | 0.0532  |
| rs3799133   | G | -0.0495 |
| rs4240565   | C | -0.073  |
| rs115202932 | C | -0.2604 |
| rs9395511   | G | -0.0488 |
| rs1221559   | C | 0.0758  |
| rs138802603 | A | -0.1396 |
| rs35574055  | A | 0.0618  |
| rs58904784  | T | -0.0451 |
| rs36027979  | T | -0.046  |
| rs34881184  | A | 0.2102  |
| rs7772274   | C | 0.0787  |
| rs17461178  | G | -0.0429 |
| rs113185994 | A | -0.1759 |
| rs12209170  | A | 0.0411  |
| rs73001053  | T | -0.1374 |
| rs9399614   | G | 0.0914  |
| rs10457867  | T | -0.0523 |
| rs62423394  | A | 0.1294  |
| rs76567979  | C | 0.1687  |
| rs139438544 | C | -0.1467 |

|             |   |         |
|-------------|---|---------|
| rs16880007  | C | -0.0658 |
| rs1883622   | T | -0.1551 |
| rs61748576  | A | -0.1829 |
| rs117936887 | T | 0.25    |
| rs6917331   | A | -0.0395 |
| rs6907965   | T | -0.0351 |
| rs9482328   | A | -0.0627 |
| rs6919702   | T | 0.034   |
| rs115873244 | G | 0.1299  |
| rs139836409 | T | -0.13   |
| rs73011149  | T | -0.0998 |
| rs72878679  | A | 0.1842  |
| rs4285325   | C | -0.0685 |
| rs605671    | A | -0.0368 |
| rs76945248  | C | 0.1338  |
| rs114945415 | C | 0.0434  |
| rs148770520 | A | -0.2094 |
| rs75670275  | G | 0.1065  |
| rs141166343 | A | -0.0704 |
| rs34630065  | C | -0.0958 |
| rs77506063  | C | 0.1635  |
| rs11759347  | A | 0.0439  |
| rs112707938 | G | -0.1195 |
| rs111851929 | T | -0.1083 |
| rs6936713   | A | 0.0532  |
| rs16893659  | T | 0.0856  |
| rs114492203 | A | 0.1671  |
| rs9448057   | C | 0.0739  |
| rs6914511   | C | 0.0801  |
| rs112347493 | A | -0.1322 |
| rs78404212  | C | -0.1018 |
| rs9402934   | T | -0.0669 |
| rs35111339  | C | -0.1508 |
| rs6903763   | A | 0.1008  |
| rs12197301  | T | -0.1433 |
| rs2477828   | G | 0.0361  |
| rs13199179  | A | -0.1514 |
| rs145666563 | C | 0.2398  |
| rs112298416 | A | 0.2099  |
| rs742387    | A | 0.0397  |
| rs140441726 | T | -0.243  |
| rs115692085 | G | 0.1126  |
| rs78066321  | T | -0.311  |
| rs114555140 | G | -0.2395 |
| rs78175903  | T | -0.0635 |
| rs114864671 | T | 0.2381  |
| rs1626313   | A | -0.1086 |

|             |   |         |
|-------------|---|---------|
| rs149805399 | C | -0.1314 |
| rs7741137   | G | -0.0612 |
| rs62427366  | T | 0.0896  |
| rs9389685   | C | -0.045  |
| rs12191722  | C | 0.0356  |
| rs62397685  | G | -0.1047 |
| rs6935830   | G | -0.0451 |
| rs113882894 | A | 0.165   |
| rs75108267  | T | -0.2118 |
| rs10455823  | G | 0.1089  |
| rs116085911 | A | -0.1421 |
| rs3823191   | T | -0.0341 |
| rs76261413  | G | 0.1049  |
| rs10947720  | T | 0.0446  |
| rs73034986  | C | 0.1256  |
| rs114033125 | T | -0.1619 |
| rs4320349   | T | -0.2147 |
| rs587503    | G | -0.0333 |
| rs13215427  | C | 0.0762  |
| rs11751096  | A | -0.1873 |
| rs79541230  | T | 0.1635  |
| rs9355181   | A | 0.0378  |
| rs114918679 | G | -0.1981 |
| rs6911143   | T | -0.0423 |
| rs12527545  | C | 0.0525  |
| rs2342452   | C | -0.0374 |
| rs113154956 | C | -0.0842 |
| rs111456861 | T | 0.1038  |
| rs75159068  | T | 0.0709  |
| rs9482816   | A | 0.0511  |
| rs76399283  | C | -0.2177 |
| rs55897192  | A | 0.2565  |
| rs632914    | T | 0.0472  |
| rs72914281  | T | 0.0977  |
| rs117983576 | C | -0.1988 |
| rs7758061   | T | 0.0518  |
| rs111987196 | G | 0.057   |
| rs117641964 | C | 0.1376  |
| rs113416075 | A | -0.0969 |
| rs6907771   | A | 0.0413  |
| rs112571096 | A | 0.2157  |
| rs34729252  | G | -0.174  |
| rs113094556 | T | 0.1148  |
| rs118145001 | T | 0.1285  |
| rs80044034  | A | 0.1188  |
| rs4639331   | C | -0.0352 |
| rs12197169  | A | -0.0462 |

|             |   |         |
|-------------|---|---------|
| rs76003618  | T | -0.124  |
| rs113190554 | C | 0.1565  |
| rs210194    | G | -0.0575 |
| rs151106325 | T | -0.1686 |
| rs146985296 | C | -0.1484 |
| rs77980283  | T | -0.0463 |
| rs12209723  | T | -0.0335 |
| rs879294    | T | -0.036  |
| rs34801493  | A | 0.0333  |
| rs79695080  | C | -0.05   |
| rs4897530   | T | -0.1792 |
| rs116401625 | T | -0.1509 |
| rs72917312  | C | 0.0864  |
| rs34006391  | T | 0.0761  |
| rs74339302  | T | 0.0927  |
| rs59388348  | A | 0.1284  |
| rs11757967  | T | -0.0384 |
| rs16884650  | G | -0.0916 |
| rs71557616  | T | -0.1029 |
| rs17060730  | C | 0.0595  |
| rs9399918   | G | -0.0333 |
| rs117743397 | C | 0.1969  |
| rs13437177  | C | 0.0392  |
| rs9376578   | C | 0.1045  |
| rs73761404  | A | -0.2368 |
| rs139743733 | A | 0.2359  |
| rs11970353  | G | 0.1544  |
| rs11155900  | G | 0.0478  |
| rs115610513 | C | 0.1029  |
| rs284512    | C | -0.0509 |
| rs2131283   | A | 0.0552  |
| rs74511933  | T | -0.0621 |
| rs9387723   | C | 0.1444  |
| rs77954609  | C | -0.1511 |
| rs199122    | A | -0.037  |
| rs17501289  | T | 0.1467  |
| rs35257815  | T | -0.2846 |
| rs12197292  | G | 0.0597  |
| rs144697020 | T | -0.0932 |
| rs4510658   | A | 0.0332  |
| rs9350080   | C | -0.0369 |
| rs9474391   | A | 0.1033  |
| rs56733566  | T | -0.0547 |
| rs9398738   | G | -0.0444 |
| rs75418047  | T | -0.0574 |
| rs117517408 | G | 0.1122  |
| rs115353372 | T | 0.1369  |

|             |   |         |
|-------------|---|---------|
| rs1206674   | A | -0.071  |
| rs163071    | G | 0.1208  |
| rs58370001  | C | -0.0807 |
| rs10945874  | T | 0.0516  |
| rs140241921 | C | -0.1636 |
| rs13362595  | C | -0.0348 |
| rs6933555   | A | -0.2075 |
| rs117658912 | C | 0.1305  |
| rs9457725   | T | -0.0409 |
| rs17257970  | T | -0.0529 |
| rs112412669 | T | -0.0734 |
| rs79433163  | G | 0.232   |
| rs9476952   | T | 0.0403  |
| rs932408    | T | -0.0423 |
| rs3749875   | A | -0.0758 |
| rs12665528  | G | -0.0383 |
| rs146810919 | T | 0.0799  |
| rs111999460 | C | -0.1461 |
| rs36053978  | G | 0.1342  |
| rs9384793   | T | -0.2079 |
| rs2072900   | G | 0.0759  |
| rs1578256   | A | 0.0391  |
| rs68173156  | G | -0.1986 |
| rs113943906 | T | -0.2308 |
| rs116842238 | C | 0.1045  |
| rs72950777  | T | 0.0965  |
| rs80087591  | T | 0.2385  |
| rs78314535  | C | -0.1059 |
| rs118133178 | G | 0.1244  |
| rs2491209   | A | -0.0568 |
| rs615114    | T | 0.0415  |
| rs6934209   | T | -0.0382 |
| rs7747302   | A | 0.0357  |
| rs117214975 | G | 0.129   |
| rs2746183   | A | 0.0483  |
| rs143248626 | T | 0.2297  |
| rs141695234 | A | 0.1148  |
| rs2503801   | C | -0.0427 |
| rs115926099 | A | 0.191   |
| rs138268427 | A | -0.1459 |
| rs117637827 | C | 0.1223  |
| rs76712002  | T | 0.115   |
| rs9484119   | A | 0.2237  |
| rs13214476  | A | -0.0918 |
| rs75938857  | T | 0.1487  |
| rs56100698  | A | 0.2045  |
| rs6904230   | C | 0.0329  |

|             |   |         |
|-------------|---|---------|
| rs74419207  | C | 0.1374  |
| rs76186075  | A | 0.1231  |
| rs9355548   | G | -0.0343 |
| rs717894    | A | 0.0701  |
| rs45472393  | A | -0.1565 |
| rs62421103  | T | 0.095   |
| rs1510      | G | -0.0675 |
| rs80063165  | G | 0.1488  |
| rs2282842   | G | 0.1239  |
| rs34886803  | G | 0.0868  |
| rs4707805   | C | 0.186   |
| rs62395240  | C | -0.18   |
| rs144449152 | A | -0.1619 |
| rs112590021 | G | -0.0508 |
| rs77855090  | C | -0.1387 |
| rs79528360  | T | 0.0696  |
| rs170641    | A | 0.0364  |
| rs506423    | G | -0.133  |
| rs17754450  | C | 0.1284  |
| rs144795815 | A | -0.1329 |
| rs6925813   | T | 0.0438  |
| rs74322151  | C | -0.1693 |
| rs4263608   | A | -0.0429 |
| rs76786648  | G | -0.243  |
| rs72933309  | T | -0.1909 |
| rs2760118   | T | 0.0351  |
| rs59927454  | A | -0.1497 |
| rs77783105  | G | -0.1369 |
| rs55654584  | A | 0.0649  |
| rs4467806   | G | 0.0928  |
| rs76249494  | G | 0.2647  |
| rs12190738  | G | -0.0522 |
| rs9385565   | C | -0.0438 |
| rs41317791  | A | 0.0608  |
| rs77175832  | A | 0.2327  |
| rs7747978   | A | 0.2411  |
| rs7451673   | G | -0.0362 |
| rs2773326   | A | 0.134   |
| rs66853520  | A | -0.0982 |
| rs78249647  | G | -0.0849 |
| rs9342722   | T | -0.0422 |
| rs17626544  | T | 0.0658  |
| rs72853237  | A | -0.0733 |
| rs72919764  | G | 0.1347  |
| rs76311095  | T | -0.281  |
| rs76827408  | G | 0.1065  |
| rs114461005 | A | -0.1692 |

|             |   |         |
|-------------|---|---------|
| rs2813499   | A | -0.0601 |
| rs180500    | G | -0.0743 |
| rs76651954  | T | 0.1975  |
| rs34583085  | G | -0.0573 |
| rs1466339   | G | -0.0324 |
| rs116230079 | A | -0.21   |
| rs117225565 | C | 0.2172  |
| rs11753948  | T | -0.0532 |
| rs148789733 | A | -0.2308 |
| rs145789369 | G | 0.2056  |
| rs13191030  | C | 0.0348  |
| rs6936895   | C | 0.0692  |
| rs117220126 | C | 0.0917  |
| rs9487935   | G | -0.0412 |
| rs72934889  | C | 0.2129  |
| rs8085      | G | -0.0341 |
| rs141250001 | A | 0.2238  |
| rs35818202  | G | -0.1073 |
| rs4711793   | C | -0.0404 |
| rs4590314   | A | 0.0358  |
| rs77512605  | G | 0.0911  |
| rs9456738   | C | 0.0383  |
| rs72998105  | C | 0.1705  |
| rs4452682   | A | 0.0367  |
| rs116452521 | T | 0.2542  |
| rs75312323  | G | 0.1606  |
| rs9405192   | A | 0.0509  |
| rs141762451 | A | 0.1448  |
| rs4464843   | T | 0.0526  |
| rs9345472   | A | 0.0501  |
| rs141845997 | T | 0.1669  |
| rs62408293  | A | 0.0769  |
| rs749621    | C | -0.0649 |
| rs76441702  | C | -0.0924 |
| rs473306    | G | -0.0485 |
| rs2315065   | A | -0.1055 |
| rs724651    | C | -0.0448 |
| rs11155276  | A | 0.182   |
| rs74605779  | T | 0.171   |
| rs80110343  | G | 0.1235  |
| rs1590320   | C | 0.0339  |
| rs9364968   | G | -0.0392 |
| rs1997823   | T | -0.0587 |
| rs3846813   | A | -0.0576 |
| rs9488716   | G | -0.0491 |
| rs62440945  | G | 0.0932  |
| rs2328525   | G | -0.0357 |



|             |   |         |
|-------------|---|---------|
| rs1413189   | A | -0.0469 |
| rs6457201   | T | 0.0404  |
| rs114626053 | A | 0.1332  |
| rs17794361  | C | -0.0703 |
| rs77137580  | T | -0.057  |
| rs80096605  | A | 0.0948  |
| rs7750601   | T | -0.0621 |
| rs9394971   | G | 0.0547  |
| rs2326833   | C | -0.051  |
| rs17835844  | T | -0.1357 |
| rs141768500 | A | -0.0656 |
| rs67993875  | G | 0.0504  |
| rs116925409 | G | -0.2043 |
| rs62434795  | T | -0.1958 |
| rs6942373   | G | -0.0584 |
| rs73004494  | G | 0.1001  |
| rs73015544  | G | 0.0552  |
| rs78939746  | T | -0.1843 |
| rs9461175   | C | -0.0755 |
| rs7765391   | A | 0.0734  |
| rs28381350  | A | -0.128  |
| rs9394532   | T | 0.0824  |
| rs3811087   | A | -0.0611 |
| rs72831298  | T | 0.0889  |
| rs16890441  | T | -0.0508 |
| rs9387542   | C | 0.0391  |
| rs36035061  | A | -0.0795 |
| rs631036    | A | 0.0341  |
| rs9392880   | C | 0.037   |
| rs7754577   | C | -0.0491 |
| rs923083    | C | 0.1126  |
| rs76418926  | G | 0.0551  |
| rs140483144 | A | 0.2561  |
| rs113388209 | G | 0.1284  |
| rs6453711   | T | 0.1625  |
| rs138270309 | A | -0.0712 |
| rs9501762   | G | 0.0441  |
| rs9480598   | G | -0.0616 |
| rs77232428  | G | -0.173  |
| rs76623159  | A | 0.1581  |
| rs1776817   | A | 0.0534  |
| rs12204655  | T | -0.1054 |
| rs6921353   | G | 0.037   |
| rs2025997   | T | 0.0341  |
| rs75433417  | T | 0.1565  |
| rs72946548  | C | 0.1215  |
| rs140792999 | G | -0.1609 |

|             |   |         |
|-------------|---|---------|
| rs9342120   | A | -0.046  |
| rs117035366 | G | 0.2186  |
| rs6934874   | T | -0.0328 |
| rs4709271   | A | 0.1069  |
| rs9364795   | A | -0.0318 |
| rs73731228  | C | 0.0538  |
| rs79469331  | G | 0.1111  |
| rs58806922  | T | 0.0861  |
| rs117576911 | A | -0.1766 |
| rs4305746   | G | -0.0325 |
| rs34051481  | A | 0.2105  |
| rs76734947  | A | -0.1236 |
| rs6940612   | A | -0.0464 |
| rs9402974   | T | -0.074  |
| rs9494034   | G | 0.0806  |
| rs7763154   | A | 0.2695  |
| rs9354219   | G | 0.0344  |
| rs78503386  | C | -0.1747 |
| rs117921490 | A | 0.2467  |
| rs11967579  | A | -0.0443 |
| rs7746273   | G | 0.0359  |
| rs117744418 | C | -0.1573 |
| rs7754795   | G | -0.0394 |
| rs2811694   | T | 0.0469  |
| rs76713488  | C | -0.1729 |
| rs77735344  | T | 0.0653  |
| rs139407918 | A | 0.106   |
| rs78450878  | T | -0.0826 |
| rs2802679   | G | 0.0354  |
| rs6597123   | T | 0.0319  |
| rs113511619 | T | 0.12    |
| rs12215908  | A | -0.2087 |
| rs3127216   | A | 0.0418  |
| rs75485413  | T | 0.097   |
| rs11757007  | A | 0.0573  |
| rs6910860   | G | 0.1162  |
| rs9478776   | C | -0.0535 |
| rs116910573 | A | 0.1601  |
| rs147845031 | C | -0.0743 |
| rs76112426  | G | -0.0335 |
| rs115391698 | A | 0.135   |
| rs76159329  | T | -0.2047 |
| rs9470238   | T | 0.0353  |
| rs9401064   | A | -0.0475 |
| rs6928404   | T | 0.0327  |
| rs117794442 | A | -0.1961 |
| rs6915474   | A | 0.0804  |

|             |   |         |
|-------------|---|---------|
| rs1539276   | T | 0.0429  |
| rs117604452 | T | -0.0635 |
| rs714112    | C | 0.0386  |
| rs139126414 | C | 0.1599  |
| rs2788234   | G | 0.0529  |
| rs113239947 | T | 0.0414  |
| rs9320279   | T | 0.0349  |
| rs78459872  | G | -0.1166 |
| rs11756274  | A | 0.2713  |
| rs117584400 | A | 0.0794  |
| rs72995698  | C | 0.2035  |
| rs9295388   | T | -0.0445 |
| rs150584519 | A | -0.121  |
| rs6916258   | C | -0.0331 |
| rs9378670   | C | -0.0362 |
| rs4434461   | C | 0.1054  |
| rs142185350 | G | 0.091   |
| rs56128680  | G | -0.1602 |
| rs117734952 | A | -0.3478 |
| rs62402517  | A | 0.0344  |
| rs117651013 | T | 0.0642  |
| rs9376030   | A | -0.0318 |
| rs2064401   | A | -0.0327 |
| rs11962627  | G | 0.0389  |
| rs143259920 | T | 0.1073  |
| rs116929434 | G | -0.1266 |
| rs78513750  | T | 0.1221  |
| rs17620182  | G | 0.1164  |
| rs17722373  | T | -0.0475 |
| rs141418269 | A | 0.1341  |
| rs117958716 | A | 0.1315  |
| rs149923323 | C | -0.1557 |
| rs2273215   | A | 0.0367  |
| rs11961635  | C | -0.0681 |
| rs75726660  | A | 0.0386  |
| rs77233846  | C | 0.1593  |
| rs7743663   | T | 0.0625  |
| rs352081    | T | -0.0482 |
| rs12198467  | T | -0.1632 |
| rs576871    | A | -0.091  |
| rs521715    | A | -0.0738 |
| rs59236185  | C | 0.0421  |
| rs17070471  | T | 0.0939  |
| rs9466288   | T | 0.1306  |
| rs2206722   | C | 0.0621  |
| rs78409080  | T | 0.0877  |
| rs12206227  | G | -0.0512 |

|             |   |         |
|-------------|---|---------|
| rs72938252  | C | 0.0838  |
| rs4960266   | C | -0.0912 |
| rs10499305  | C | -0.0552 |
| rs115453475 | T | -0.1045 |
| rs13220420  | G | 0.0651  |
| rs2325174   | T | 0.1123  |
| rs9264544   | G | 0.0443  |
| rs2396086   | T | 0.0564  |
| rs11962165  | A | 0.0935  |
| rs114905808 | G | -0.1904 |
| rs2095374   | G | 0.0366  |
| rs11757620  | G | 0.1383  |
| rs72917686  | A | 0.1213  |
| rs4148876   | A | -0.0678 |
| rs2145745   | G | 0.0447  |
| rs117426892 | G | 0.1964  |
| rs9369277   | T | 0.0384  |
| rs73490290  | G | 0.077   |
| rs3923049   | C | 0.035   |
| rs3800128   | C | 0.0347  |
| rs9448019   | A | -0.1394 |
| rs149596964 | A | -0.2308 |
| rs56305244  | C | -0.047  |
| rs12197804  | C | -0.0336 |
| rs1011119   | G | -0.033  |
| rs117389517 | C | -0.1934 |
| rs34588518  | C | 0.1857  |
| rs6928621   | T | 0.0895  |
| rs1856918   | A | 0.0481  |
| rs118061217 | A | 0.1139  |
| rs72888151  | T | -0.0773 |
| rs13211253  | G | 0.0452  |
| rs71565765  | A | 0.0926  |
| rs112111114 | C | 0.195   |
| rs9461247   | C | 0.1201  |
| rs74370723  | A | 0.1191  |
| rs112013442 | A | 0.0909  |
| rs1799945   | G | -0.045  |
| rs16899265  | C | 0.0348  |
| rs73040892  | G | -0.057  |
| rs203141    | A | 0.0367  |
| rs2448296   | T | 0.0532  |
| rs78457404  | A | -0.0755 |
| rs17616429  | G | 0.125   |
| rs9478138   | G | -0.1068 |
| rs35050538  | T | 0.0828  |
| rs114857861 | G | 0.069   |

|             |   |         |
|-------------|---|---------|
| rs1205869   | A | 0.0659  |
| rs4478392   | T | -0.0852 |
| rs149744120 | C | -0.2193 |
| rs11756982  | C | 0.0576  |
| rs77303095  | T | -0.1402 |
| rs17761570  | C | 0.0489  |
| rs4541755   | G | 0.0352  |
| rs17227387  | C | 0.1569  |
| rs148773253 | T | 0.145   |
| rs16894387  | C | -0.0441 |
| rs117799403 | T | 0.2377  |
| rs7765779   | C | 0.0709  |
| rs111548503 | A | 0.2603  |
| rs7767721   | A | 0.0483  |
| rs116053767 | T | -0.2464 |
| rs75237141  | G | 0.0792  |
| rs1927586   | C | 0.1192  |
| rs80157224  | G | -0.1252 |
| rs76716155  | T | 0.1213  |
| rs829929    | C | -0.0402 |
| rs118156968 | T | 0.0783  |
| rs117491743 | C | -0.195  |
| rs2148252   | A | -0.0329 |
| rs1080629   | A | -0.0314 |
| rs2811653   | C | -0.1658 |
| rs118151284 | C | -0.1288 |
| rs12195386  | A | 0.1391  |
| rs9354126   | C | 0.1381  |
| rs144660674 | C | 0.1968  |
| rs9400381   | A | -0.0413 |
| rs11757051  | G | -0.0744 |
| rs2804910   | A | 0.0357  |
| rs112725396 | T | 0.0933  |
| rs143578170 | T | -0.0591 |
| rs9381175   | T | -0.0436 |
| rs851849    | T | 0.0341  |
| rs1188899   | T | -0.034  |
| rs3019424   | C | 0.1049  |
| rs205953    | A | 0.173   |
| rs1489817   | C | -0.0401 |
| rs113639243 | T | -0.0558 |
| rs9360234   | A | 0.0392  |
| rs62421069  | G | -0.149  |
| rs12198900  | A | -0.0317 |
| rs9356737   | T | -0.0365 |
| rs116706159 | T | 0.2351  |
| rs79308973  | G | -0.076  |

|             |   |         |
|-------------|---|---------|
| rs9477212   | T | 0.078   |
| rs7744826   | T | -0.0467 |
| rs77754045  | C | -0.1285 |
| rs13197887  | T | 0.057   |
| rs7763005   | G | 0.0796  |
| rs77907459  | T | -0.0817 |
| rs113125518 | T | -0.09   |
| rs684770    | C | 0.1114  |
| rs4713445   | T | 0.0606  |
| rs12664322  | C | 0.0353  |
| rs1338262   | A | 0.1506  |
| rs1488      | G | -0.0324 |
| rs2796050   | G | 0.0799  |
| rs112481501 | C | -0.1264 |
| rs145055895 | A | 0.1299  |
| rs12195946  | A | -0.035  |
| rs9471624   | C | -0.0387 |
| rs75356952  | A | 0.141   |
| rs117080755 | T | 0.1472  |
| rs2493164   | T | 0.0404  |
| rs7754265   | C | 0.0921  |
| rs10946753  | T | 0.0581  |
| rs1204295   | C | 0.0444  |
| rs9375638   | C | 0.036   |
| rs73412635  | A | -0.078  |
| rs115942143 | A | -0.1031 |
| rs62417709  | G | 0.1495  |
| rs17073244  | A | 0.1062  |
| rs10434830  | A | -0.0315 |
| rs113024811 | G | -0.1051 |
| rs1406946   | T | -0.0354 |
| rs116842250 | T | 0.1286  |
| rs1762718   | A | 0.068   |
| rs9358645   | C | -0.0436 |
| rs4617023   | A | -0.0581 |
| rs9402503   | A | 0.0551  |
| rs4142803   | T | 0.0373  |
| rs9371317   | T | -0.0727 |
| rs12213388  | C | -0.0448 |
| rs9456663   | C | -0.0364 |
| rs7746774   | G | -0.055  |
| rs147385696 | G | 0.1084  |
| rs77558344  | T | -0.1936 |
| rs144538633 | A | -0.1459 |
| rs74919629  | C | 0.1082  |
| rs62428860  | T | 0.1129  |
| rs9368306   | T | 0.0337  |

|             |   |         |
|-------------|---|---------|
| rs147247331 | A | -0.2442 |
| rs75592645  | T | 0.1885  |
| rs9396083   | A | -0.0314 |
| rs78320870  | A | -0.1036 |
| rs3800130   | A | 0.0335  |
| rs10456786  | C | 0.1431  |
| rs56167530  | T | 0.0436  |
| rs9352575   | G | 0.0389  |
| rs10946459  | T | -0.0361 |
| rs76544741  | T | -0.0849 |
| rs117589464 | C | 0.0756  |
| rs11753056  | A | -0.1337 |
| rs6931795   | G | 0.1373  |
| rs13207194  | T | 0.0813  |
| rs4707550   | A | 0.0324  |
| rs626653    | C | -0.0986 |
| rs7754424   | A | 0.0809  |
| rs75796246  | A | 0.1317  |
| rs114789305 | T | 0.2792  |
| rs139328289 | A | 0.1108  |
| rs1889216   | A | 0.0381  |
| rs142912475 | C | 0.2801  |
| rs143679520 | A | 0.1012  |
| rs73772465  | C | 0.1228  |
| rs148830519 | G | -0.1603 |
| rs16881797  | G | 0.1975  |
| rs1490356   | G | 0.0713  |
| rs12190413  | G | -0.2184 |
| rs9393764   | A | 0.0359  |
| rs6900235   | T | -0.0322 |
| rs138282826 | C | -0.2495 |
| rs4960139   | C | 0.035   |
| rs72943363  | C | 0.1263  |
| rs145510071 | A | 0.1298  |
| rs56132110  | A | -0.0759 |
| rs6907696   | G | -0.1713 |
| rs12208248  | T | -0.0369 |
| rs9450026   | G | -0.0633 |
| rs6913341   | A | 0.0349  |
| rs2294326   | G | 0.0613  |
| rs9358089   | G | -0.0844 |
| rs114558159 | A | -0.0842 |
| rs9352376   | C | -0.0338 |
| rs222557    | G | -0.0639 |
| rs56387606  | A | 0.1185  |
| rs2842889   | C | 0.0432  |
| rs62385448  | G | -0.0444 |

|             |   |         |
|-------------|---|---------|
| rs2842647   | A | -0.0435 |
| rs115032392 | T | 0.2401  |
| rs77705726  | C | -0.2222 |
| rs4367362   | T | -0.0332 |
| rs7739450   | A | 0.0341  |
| rs147899431 | C | -0.0958 |
| rs72815688  | T | -0.1441 |
| rs2812710   | T | 0.0339  |
| rs12215949  | G | 0.0447  |
| rs12214828  | T | 0.0638  |
| rs62408234  | T | 0.0469  |
| rs117464851 | T | 0.1583  |
| rs35484089  | C | -0.1792 |
| rs117367315 | C | -0.1436 |
| rs149742504 | A | -0.1825 |
| rs17421895  | T | 0.1349  |
| rs12200581  | T | -0.059  |
| rs117734719 | G | 0.1375  |
| rs73720836  | A | 0.0983  |
| rs9350482   | A | 0.1429  |
| rs1887843   | C | 0.0318  |
| rs806551    | G | 0.0348  |
| rs12197628  | A | -0.0732 |
| rs1880271   | C | -0.0779 |
| rs659755    | T | 0.0369  |
| rs608702    | T | -0.0332 |
| rs1883327   | G | -0.0339 |
| rs12110340  | T | 0.0356  |
| rs2028037   | T | 0.0334  |
| rs113333629 | T | 0.1567  |
| rs71574625  | C | -0.0389 |
| rs117181379 | G | -0.1328 |
| rs4709798   | C | -0.0419 |
| rs2057066   | C | -0.0372 |
| rs62411559  | C | 0.1309  |
| rs608914    | G | 0.0352  |
| rs114283564 | A | 0.0806  |
| rs4463222   | C | -0.0328 |
| rs3777464   | G | -0.0541 |
| rs111276177 | A | -0.0679 |
| rs2224993   | T | -0.0924 |
| rs9473663   | C | -0.0336 |
| rs78732890  | G | 0.3384  |
| rs362848    | G | 0.0509  |
| rs6570852   | T | 0.0433  |
| rs56089850  | T | 0.1021  |
| rs76976933  | T | -0.1623 |



|             |   |         |
|-------------|---|---------|
| rs4839813   | T | -0.0568 |
| rs141915994 | T | -0.2331 |
| rs7741122   | T | 0.0334  |
| rs12196710  | T | 0.0724  |
| rs9397978   | A | -0.0322 |
| rs1711957   | T | 0.0439  |
| rs3799623   | A | -0.0322 |
| rs45483501  | G | 0.0587  |
| rs9466460   | A | 0.0433  |
| rs79979660  | C | 0.1464  |
| rs9369261   | G | 0.0334  |
| rs146438288 | C | 0.1982  |
| rs2876600   | G | -0.0363 |
| rs11753929  | C | 0.1128  |
| rs145285508 | G | -0.2035 |
| rs2797681   | C | -0.0524 |
| rs6905095   | A | -0.0318 |
| rs79601106  | T | 0.0738  |
| rs2477836   | C | 0.0379  |
| rs833052    | A | -0.0502 |
| rs1032143   | G | 0.033   |
| rs114103176 | T | 0.0757  |
| rs78865887  | C | 0.2102  |
| rs6910279   | G | 0.0457  |
| rs150439904 | A | 0.2584  |
| rs16889963  | C | 0.0836  |
| rs9352352   | A | -0.0355 |
| rs72909504  | C | 0.1171  |
| rs7742982   | G | 0.0326  |
| rs12195018  | G | 0.0637  |
| rs235459    | C | 0.031   |
| rs79900481  | A | -0.0594 |
| rs11963043  | A | -0.0649 |
| rs148470768 | A | -0.1413 |
| rs56103760  | T | -0.1087 |
| rs61054781  | T | 0.0333  |
| rs147974285 | A | -0.151  |
| rs78934815  | C | -0.1125 |
| rs9448835   | T | -0.0387 |
| rs7766975   | G | -0.069  |
| rs17239297  | G | 0.0359  |
| rs13213201  | G | 0.0603  |
| rs6905679   | C | -0.0586 |
| rs116417902 | G | 0.1679  |
| rs4260759   | C | 0.0331  |
| rs117713769 | G | 0.3359  |
| rs1190473   | A | -0.0507 |

|             |   |         |
|-------------|---|---------|
| rs73730919  | C | -0.0622 |
| rs77938586  | T | 0.047   |
| rs117358289 | A | 0.0612  |
| rs9362727   | T | -0.0345 |
| rs6453919   | G | 0.0376  |
| rs34610439  | A | 0.1035  |
| rs111554286 | A | 0.1534  |
| rs116213531 | T | -0.1555 |
| rs17678353  | A | -0.1403 |
| rs35724689  | G | 0.0944  |
| rs116212401 | C | -0.2037 |
| rs6929505   | T | 0.1022  |
| rs9386671   | G | -0.0314 |
| rs2626121   | T | -0.0334 |
| rs146339353 | T | 0.2451  |
| rs1145972   | A | -0.0327 |
| rs79307900  | A | -0.193  |
| rs11759005  | C | 0.0786  |
| rs9486179   | G | 0.0701  |
| rs115833115 | G | -0.1794 |
| rs1998219   | T | 0.043   |
| rs12665596  | A | -0.042  |
| rs140305827 | A | 0.1494  |
| rs56043967  | T | -0.0338 |
| rs78758000  | G | 0.0547  |
| rs12203034  | A | -0.0928 |
| rs79387680  | A | -0.1667 |
| rs9470023   | T | 0.1038  |
| rs857412    | A | 0.1859  |
| rs75202647  | T | 0.2     |
| rs17069446  | G | 0.0591  |
| rs148248486 | T | -0.2072 |
| rs72966947  | C | -0.1785 |
| rs56034906  | C | 0.065   |
| rs2022419   | A | 0.032   |
| rs17656694  | T | -0.0528 |
| rs4256429   | T | 0.1299  |
| rs6902878   | T | -0.0315 |
| rs151139170 | A | 0.2248  |
| rs9403527   | T | -0.0332 |
| rs36065805  | G | -0.0827 |
| rs62395902  | T | -0.0987 |
| rs422952    | A | 0.051   |
| rs142628962 | T | 0.1727  |
| rs17257056  | T | -0.1682 |
| rs117060742 | G | 0.1112  |
| rs116997897 | G | 0.1554  |

|             |   |         |
|-------------|---|---------|
| rs342639    | T | -0.135  |
| rs7775047   | C | 0.0465  |
| rs2085110   | G | 0.034   |
| rs260245    | G | 0.0358  |
| rs79741232  | A | 0.2391  |
| rs2093877   | G | 0.0327  |
| rs12213901  | A | 0.3257  |
| rs735466    | T | 0.0804  |
| rs72817852  | G | 0.0752  |
| rs7741581   | C | 0.0318  |
| rs148565609 | A | -0.25   |
| rs75465676  | A | -0.0476 |
| rs882003    | A | -0.042  |
| rs62439978  | C | 0.0424  |
| rs16892747  | C | 0.1965  |
| rs9360598   | G | 0.0605  |
| rs112191466 | G | 0.0816  |
| rs146376441 | A | -0.1539 |
| rs34892989  | A | 0.0361  |
| rs3822923   | T | 0.1381  |
| rs862439    | G | -0.0659 |
| rs76643488  | T | 0.1908  |
| rs1873249   | G | 0.0306  |
| rs11753419  | C | 0.1373  |
| rs13208243  | G | -0.056  |
| rs72820121  | C | 0.0571  |
| rs62440828  | T | 0.0845  |
| rs9373095   | A | 0.1112  |
| rs9357537   | T | 0.1379  |
| rs2500531   | G | 0.0962  |
| rs7747072   | C | 0.06    |
| rs6928991   | A | 0.0371  |
| rs2089017   | G | -0.0341 |
| rs7755836   | C | 0.1364  |
| rs76440129  | A | 0.1954  |
| rs9495462   | T | -0.0737 |
| rs34638064  | C | -0.0719 |
| rs9505848   | A | 0.0467  |
| rs115892464 | T | -0.1115 |
| rs13204236  | A | 0.1092  |
| rs958126    | A | 0.0503  |
| rs116446701 | C | 0.1231  |
| rs9296804   | A | 0.0323  |
| rs761590    | A | -0.0443 |
| rs79724002  | T | -0.215  |
| rs79021277  | C | 0.0506  |
| rs56303914  | A | 0.115   |

|             |   |         |
|-------------|---|---------|
| rs9969102   | A | 0.0445  |
| rs806276    | G | 0.0324  |
| rs12194640  | G | 0.0523  |
| rs9277563   | G | 0.0697  |
| rs4515359   | A | 0.0822  |
| rs114413775 | T | 0.1053  |
| rs4252075   | A | 0.0356  |
| rs28753046  | T | 0.0617  |
| rs117227712 | G | -0.2617 |
| rs117746159 | T | 0.2426  |
| rs13220464  | A | 0.0691  |
| rs62397860  | T | -0.1993 |
| rs72965017  | G | 0.1181  |
| rs72931458  | C | 0.1091  |
| rs9322523   | C | 0.1221  |
| rs13205659  | G | -0.0974 |
| rs115135082 | T | 0.1772  |
| rs13191647  | T | 0.2916  |
| rs10944440  | A | -0.0369 |
| rs316002    | T | 0.0521  |
| rs10455428  | A | -0.0449 |
| rs9458186   | A | -0.0408 |
| rs117228923 | C | -0.1646 |
| rs12203733  | T | -0.0645 |
| rs72935612  | A | -0.0631 |
| rs9392177   | G | 0.0406  |
| rs35122215  | T | -0.1478 |
| rs115870904 | G | 0.1281  |
| rs715831    | A | 0.0316  |
| rs13203976  | A | -0.0387 |
| rs62402551  | C | 0.1631  |
| rs13211945  | T | -0.1063 |
| rs75960486  | C | 0.1466  |
| rs55758956  | T | -0.1309 |
| rs11755993  | C | 0.2009  |
| rs9389585   | T | 0.0521  |
| rs10456561  | A | -0.1782 |
| rs111771992 | T | 0.1557  |
| rs80312260  | A | 0.1143  |
| rs71564497  | A | -0.1166 |
| rs9364972   | T | 0.0358  |
| rs965918    | T | -0.2127 |
| rs2038552   | G | 0.0314  |
| rs72855233  | A | -0.0632 |
| rs78345441  | G | -0.103  |
| rs116877625 | C | 0.1518  |
| rs115256817 | A | 0.1932  |

|             |   |         |
|-------------|---|---------|
| rs62395876  | C | 0.1235  |
| rs79218758  | A | -0.1034 |
| rs9471080   | G | -0.0401 |
| rs746095    | G | 0.031   |
| rs9356966   | G | -0.0376 |
| rs195502    | C | 0.0316  |
| rs56238691  | T | 0.2965  |
| rs11963172  | A | 0.0357  |
| rs78407802  | A | 0.1939  |
| rs10807248  | A | -0.0322 |
| rs79065329  | C | -0.1495 |
| rs150440562 | A | 0.1291  |
| rs9392122   | T | 0.1061  |
| rs117912185 | T | -0.1529 |
| rs79705480  | G | 0.0808  |
| rs12194720  | T | -0.2422 |
| rs9392769   | G | 0.0691  |
| rs1569567   | C | -0.0621 |
| rs28457181  | G | -0.1879 |
| rs6568924   | T | -0.0354 |
| rs112336085 | G | 0.0389  |
| rs6919483   | G | 0.0896  |
| rs78648597  | T | 0.1013  |
| rs149439986 | C | -0.213  |
| rs9374668   | A | 0.058   |
| rs117492487 | T | 0.1373  |
| rs7751176   | G | -0.0303 |
| rs6455995   | A | 0.0322  |
| rs111855865 | T | 0.0632  |
| rs142978834 | G | -0.0736 |
| rs3863223   | T | -0.0318 |
| rs4236055   | C | 0.0306  |
| rs76426793  | A | -0.1404 |
| rs6458089   | A | 0.031   |
| rs77767947  | C | 0.1963  |
| rs115373329 | G | 0.1361  |
| rs9403485   | C | -0.0392 |
| rs142026813 | A | 0.117   |
| rs148700778 | T | 0.1357  |
| rs16891404  | A | 0.0703  |
| rs142387256 | G | 0.1889  |
| rs115816184 | A | 0.2399  |
| rs9379096   | C | -0.075  |
| rs115039558 | T | 0.1297  |
| rs9266529   | G | -0.0823 |
| rs112770728 | T | -0.1545 |
| rs75005237  | G | -0.1313 |

|             |   |         |
|-------------|---|---------|
| rs79092173  | G | -0.1506 |
| rs10499273  | T | -0.1134 |
| rs1743634   | T | -0.0544 |
| rs78412997  | G | -0.2338 |
| rs117190995 | T | 0.1419  |
| rs7769759   | C | 0.0379  |
| rs112297316 | A | -0.0867 |
| rs72831274  | A | -0.0688 |
| rs6456002   | C | 0.1872  |
| rs79041970  | T | 0.1712  |
| rs35744607  | G | -0.05   |
| rs116243543 | T | 0.2451  |
| rs9475717   | T | -0.0531 |
| rs62437269  | G | 0.034   |
| rs80315720  | C | 0.0753  |
| rs78503670  | T | -0.0975 |
| rs17142021  | T | 0.0823  |
| rs77932206  | C | 0.1325  |
| rs636393    | G | 0.0318  |
| rs9362878   | C | -0.0335 |
| rs115584488 | C | 0.131   |
| rs75061448  | C | 0.1567  |
| rs12110990  | A | -0.1081 |
| rs10080831  | G | -0.061  |
| rs150398674 | T | 0.1676  |
| rs12202898  | T | -0.0312 |
| rs56854917  | C | -0.0685 |
| rs1324430   | C | -0.0418 |
| rs2503897   | G | 0.0306  |
| rs57646517  | G | -0.0685 |
| rs98899     | C | 0.0559  |
| rs117756793 | T | 0.1513  |
| rs117582398 | G | -0.0692 |
| rs288955    | C | 0.0714  |
| rs112664127 | C | 0.1701  |
| rs77668857  | T | -0.1633 |
| rs9270060   | C | -0.0591 |
| rs6923824   | G | 0.0568  |
| rs115327013 | T | -0.0918 |
| rs9449851   | G | 0.0376  |
| rs116839142 | G | -0.141  |
| rs2077647   | C | -0.0319 |
| rs2490037   | C | 0.0481  |
| rs112643977 | A | -0.1359 |
| rs138849897 | T | -0.0719 |
| rs9342220   | A | -0.0436 |
| rs72833794  | T | -0.1308 |

|             |   |         |
|-------------|---|---------|
| rs12195499  | C | -0.0301 |
| rs75247589  | G | -0.1741 |
| rs34241261  | G | -0.053  |
| rs112885187 | C | -0.094  |
| rs4713989   | T | -0.0347 |
| rs4580892   | T | -0.034  |
| rs9347168   | T | -0.0325 |
| rs117922374 | G | 0.1279  |
| rs6919626   | G | 0.0311  |
| rs150695584 | T | -0.159  |
| rs12200682  | A | -0.208  |
| rs116877880 | C | 0.2355  |
| rs116889945 | G | 0.1355  |
| rs111692386 | T | -0.1669 |
| rs4895638   | T | 0.0503  |
| rs9356417   | T | 0.0326  |
| rs143477035 | A | -0.0959 |
| rs35911902  | T | 0.1401  |
| rs75061917  | A | -0.0631 |
| rs6927712   | G | 0.0518  |
| rs939749    | T | 0.0394  |
| rs9451196   | T | -0.0487 |
| rs958656    | G | 0.0684  |
| rs9473024   | C | -0.0423 |
| rs2983532   | T | 0.0702  |
| rs112689870 | G | 0.1971  |
| rs75899170  | T | 0.1273  |
| rs76973777  | A | -0.0683 |
| rs34444456  | A | -0.117  |
| rs9353890   | A | 0.0397  |
| rs6415091   | G | -0.03   |
| rs112632224 | G | 0.1509  |
| rs6935186   | C | -0.0304 |
| rs114962280 | A | -0.1195 |
| rs9766010   | G | 0.0312  |
| rs3812141   | T | 0.0425  |
| rs149086365 | G | 0.1298  |
| rs112028731 | T | 0.1178  |
| rs142878091 | C | -0.1873 |
| rs77119522  | T | 0.238   |
| rs9321963   | C | -0.1003 |
| rs1954946   | A | -0.0423 |
| rs12526857  | T | 0.0499  |
| rs4896884   | G | 0.0388  |
| rs116098447 | T | 0.1988  |
| rs806383    | T | 0.0331  |
| rs2064233   | G | -0.0325 |

|             |   |         |
|-------------|---|---------|
| rs62424026  | G | -0.1442 |
| rs138822353 | T | -0.1986 |
| rs113559289 | A | 0.1404  |
| rs148268586 | G | -0.1945 |
| rs2756318   | G | 0.033   |
| rs112582310 | C | -0.149  |
| rs145470632 | G | -0.097  |
| rs12197287  | T | 0.0903  |
| rs9295361   | A | 0.0371  |
| rs9378429   | C | 0.0397  |
| rs79275002  | C | 0.139   |
| rs1417698   | C | 0.0301  |
| rs9466530   | A | -0.0623 |
| rs7356868   | A | 0.0325  |
| rs80097734  | G | 0.0638  |
| rs13215310  | C | 0.1046  |
| rs1325699   | G | -0.0374 |
| rs1002559   | C | 0.0402  |
| rs138064474 | G | 0.193   |
| rs9294430   | T | 0.04    |
| rs1931821   | G | -0.0369 |
| rs80315748  | A | 0.1467  |
| rs11754379  | A | 0.1214  |
| rs13206094  | C | -0.0346 |
| rs142306808 | G | -0.132  |
| rs150445982 | T | 0.1539  |
| rs56140098  | T | 0.2335  |
| rs7775578   | C | 0.0497  |
| rs6910895   | T | 0.0402  |
| rs112118530 | C | 0.1247  |
| rs179944    | T | -0.0604 |
| rs79522289  | A | 0.0761  |
| rs9885976   | T | 0.0324  |
| rs73749500  | A | 0.1596  |
| rs150589232 | A | -0.1461 |
| rs78758785  | G | 0.0887  |
| rs6920533   | A | 0.0804  |
| rs150620688 | C | 0.1167  |
| rs139587293 | C | 0.2491  |
| rs11967122  | A | 0.0841  |
| rs6938042   | G | 0.0329  |
| rs4896668   | G | 0.0375  |
| rs9444602   | T | 0.0319  |
| rs77132754  | A | 0.0715  |
| rs6934274   | A | -0.158  |
| rs4295507   | A | 0.0307  |
| rs117243860 | T | -0.1091 |



|             |   |         |
|-------------|---|---------|
| rs77921955  | T | 0.2091  |
| rs145615649 | C | 0.3495  |
| rs17507623  | A | 0.0719  |
| rs148718496 | T | 0.2231  |
| rs9394719   | A | -0.0339 |
| rs76437270  | T | 0.0367  |
| rs117173250 | A | 0.1456  |
| rs1205005   | C | 0.0701  |
| rs2490031   | A | 0.032   |
| rs73385280  | T | -0.1173 |
| rs9458946   | T | -0.0397 |
| rs6934248   | T | -0.0469 |
| rs9369325   | T | 0.0316  |
| rs62393198  | C | 0.1518  |
| rs6927641   | G | 0.0316  |
| rs585398    | G | -0.0634 |
| rs9460191   | C | -0.1674 |
| rs10943040  | A | -0.0324 |
| rs13213144  | C | -0.0541 |
| rs9294602   | A | -0.0624 |
| rs62420315  | C | -0.0677 |
| rs138804962 | A | 0.0858  |
| rs146337895 | T | 0.1569  |
| rs12524029  | A | 0.1677  |
| rs150052515 | A | 0.1601  |
| rs17594202  | C | -0.1178 |
| rs55815143  | A | 0.1374  |
| rs1147855   | A | 0.0367  |
| rs72984203  | G | 0.1085  |
| rs764285    | T | 0.038   |
| rs6456056   | C | 0.0321  |
| rs150917901 | T | 0.1292  |
| rs1492967   | A | 0.0336  |
| rs6570682   | A | 0.0585  |
| rs1115208   | G | 0.074   |
| rs111546880 | G | -0.0762 |
| rs114955215 | T | -0.2543 |
| rs7766122   | A | 0.0512  |
| rs73028181  | T | -0.1353 |
| rs13216693  | A | 0.0453  |
| rs114387959 | A | 0.1505  |
| rs9343683   | G | 0.2438  |
| rs115382122 | C | -0.1172 |
| rs4709110   | T | 0.0573  |
| rs58503060  | G | 0.065   |
| rs9476344   | T | 0.1536  |
| rs12662969  | G | -0.0498 |

|             |   |         |
|-------------|---|---------|
| rs2062327   | C | -0.0296 |
| rs853964    | A | 0.1289  |
| rs707816    | T | 0.0331  |
| rs11970468  | C | -0.1421 |
| rs113379704 | T | 0.0945  |
| rs9378848   | C | 0.0341  |
| rs113122701 | A | -0.1839 |
| rs78044257  | G | -0.1586 |
| rs13212091  | T | 0.0533  |
| rs9276342   | A | -0.032  |
| rs115787483 | T | -0.1093 |
| rs11963377  | C | -0.0444 |
| rs117726556 | C | 0.1417  |
| rs36026124  | G | -0.1184 |
| rs113752238 | T | -0.1114 |
| rs139600027 | T | 0.2828  |
| rs2352061   | C | -0.2436 |
| rs772909    | T | -0.0721 |
| rs73016016  | C | 0.1281  |
| rs34292570  | G | -0.0571 |
| rs13194850  | C | 0.0336  |
| rs7760119   | T | 0.1474  |
| rs12191772  | A | -0.051  |
| rs9499062   | T | 0.0366  |
| rs139116545 | G | 0.0769  |
| rs59092163  | C | 0.0485  |
| rs4236095   | G | 0.0431  |
| rs112703294 | A | 0.2105  |
| rs1265103   | T | -0.1167 |
| rs116068893 | A | 0.1369  |
| rs998307    | C | 0.1554  |
| rs4562179   | C | -0.068  |
| rs9356833   | T | 0.0297  |
| rs145782713 | G | -0.0379 |
| rs72846627  | C | -0.0713 |
| rs33980664  | T | 0.1813  |
| rs73435933  | C | -0.0644 |
| rs2499497   | T | 0.1039  |
| rs80035653  | C | 0.1506  |
| rs7754410   | G | -0.0427 |
| rs111646647 | G | 0.2274  |
| rs74906171  | T | 0.1573  |
| rs17550901  | C | 0.0771  |
| rs2798767   | G | -0.046  |
| rs294911    | G | 0.0361  |
| rs7763778   | A | -0.0502 |
| rs75861194  | A | -0.2275 |

|             |   |         |
|-------------|---|---------|
| rs9400485   | C | -0.0362 |
| rs62413934  | T | -0.0999 |
| rs6921770   | A | 0.0443  |
| rs78179779  | A | 0.0963  |
| rs116202490 | C | -0.1033 |
| rs802287    | G | -0.1208 |
| rs79738048  | A | -0.0855 |
| rs117409649 | A | 0.1208  |
| rs9451304   | A | 0.0534  |
| rs11551053  | C | -0.1134 |
| rs1539403   | T | 0.0326  |
| rs62413165  | A | 0.1314  |
| rs2490565   | G | 0.0638  |
| rs9458323   | C | -0.0351 |
| rs9322470   | A | 0.0379  |
| rs114588158 | T | -0.0685 |
| rs146550301 | G | -0.1616 |
| rs111631648 | G | 0.1944  |
| rs10457283  | T | 0.1006  |
| rs10046356  | T | 0.0819  |
| rs609122    | C | 0.0445  |
| rs10455670  | A | 0.0324  |
| rs3749872   | C | -0.0782 |
| rs16890508  | C | -0.0715 |
| rs13437621  | A | -0.0679 |
| rs78827298  | T | -0.124  |
| rs146332994 | G | 0.1042  |
| rs142333793 | T | -0.1812 |
| rs13219766  | A | -0.0421 |
| rs1318075   | A | 0.0449  |
| rs288976    | A | 0.0317  |
| rs117314357 | A | 0.1798  |
| rs7764603   | G | 0.0422  |
| rs139105056 | G | -0.1258 |
| rs9321225   | T | -0.0372 |
| rs4709380   | A | 0.035   |
| rs13206457  | C | 0.0401  |
| rs148447019 | T | 0.0802  |
| rs77606296  | A | 0.1574  |
| rs9502311   | G | 0.0301  |
| rs62385049  | T | 0.1308  |
| rs1591440   | G | 0.0985  |
| rs9406010   | C | 0.0936  |
| rs62432296  | T | 0.0636  |
| rs34575407  | A | 0.1418  |
| rs1187122   | C | 0.0588  |
| rs56401777  | C | 0.0506  |

|             |   |         |
|-------------|---|---------|
| rs41264790  | C | 0.0395  |
| rs35126064  | A | 0.0515  |
| rs609579    | G | -0.0389 |
| rs117572385 | G | 0.1495  |
| rs147098362 | T | 0.2068  |
| rs79036187  | C | 0.133   |
| rs77244473  | G | 0.1632  |
| rs34395672  | C | 0.0469  |
| rs77868189  | A | 0.059   |
| rs1856501   | T | 0.174   |
| rs1999083   | A | 0.0448  |
| rs6938753   | G | 0.0389  |
| rs116727414 | G | -0.1673 |
| rs16873301  | T | -0.046  |
| rs113721602 | G | 0.0792  |
| rs78975229  | A | 0.159   |
| rs55637706  | T | 0.2094  |
| rs76085342  | T | 0.0785  |
| rs11962122  | T | 0.0878  |
| rs6926191   | G | -0.0605 |
| rs78946657  | A | -0.0445 |
| rs6928623   | G | -0.1057 |
| rs11155532  | G | 0.1461  |
| rs62420365  | T | 0.17    |
| rs62389639  | G | 0.0698  |
| rs17164485  | C | 0.2035  |
| rs112575125 | T | -0.1477 |
| rs77134397  | G | -0.0577 |
| rs28746892  | T | 0.049   |
| rs17068852  | C | 0.1087  |
| rs1391243   | G | 0.2036  |
| rs3804121   | G | -0.0426 |
| rs77706164  | T | -0.0843 |
| rs3798979   | C | -0.0305 |
| rs17778438  | A | 0.0529  |
| rs73475352  | G | 0.042   |
| rs78843035  | C | -0.1603 |
| rs13196352  | C | 0.0352  |
| rs214994    | G | 0.0297  |
| rs6900482   | T | -0.0298 |
| rs17217045  | C | -0.1991 |
| rs7755014   | T | 0.0351  |
| rs4959377   | C | 0.0325  |
| rs77207462  | C | -0.0992 |
| rs113827100 | T | 0.2163  |
| rs1262475   | C | 0.0979  |
| rs75585669  | C | -0.123  |

|             |   |         |
|-------------|---|---------|
| rs76849326  | G | 0.1988  |
| rs72980621  | C | -0.062  |
| rs79046990  | G | 0.1438  |
| rs7770527   | A | -0.0756 |
| rs2242298   | C | -0.0338 |
| rs117399368 | T | 0.129   |
| rs6942259   | G | 0.0338  |
| rs12528807  | G | -0.0553 |
| rs9476653   | A | 0.0798  |
| rs13217719  | C | 0.0328  |
| rs13193757  | G | 0.0382  |
| rs66790278  | G | -0.0392 |
| rs551470    | A | -0.0851 |
| rs72821411  | G | -0.0716 |
| rs2505031   | T | 0.0604  |
| rs76536567  | T | -0.0566 |
| rs79493976  | C | -0.1608 |
| rs2679651   | T | 0.0336  |
| rs117838266 | G | 0.1155  |
| rs115027829 | T | -0.0743 |
| rs66531067  | A | 0.0584  |
| rs2842071   | A | -0.1433 |
| rs9349641   | A | -0.0298 |
| rs4960065   | A | 0.1792  |
| rs147852146 | G | 0.1829  |
| rs419563    | G | 0.0311  |
| rs6921858   | G | 0.0787  |
| rs6905723   | T | 0.0415  |
| rs78737701  | T | -0.1896 |
| rs774438    | G | 0.0744  |
| rs11754012  | T | 0.0429  |
| rs74855572  | A | -0.084  |
| rs9351523   | C | 0.1005  |
| rs35081495  | C | 0.1359  |
| rs891646    | G | 0.0319  |
| rs9479824   | C | 0.0315  |
| rs2811692   | T | -0.0327 |
| rs56039346  | G | 0.0619  |
| rs74969259  | C | 0.0927  |
| rs77941573  | G | 0.1353  |
| rs6927499   | T | 0.0391  |
| rs73017119  | T | -0.1582 |
| rs10947433  | A | -0.0519 |
| rs317104    | G | 0.0349  |
| rs7739372   | A | 0.1789  |
| rs3179865   | A | -0.1508 |
| rs9452762   | T | -0.1112 |

|             |   |         |
|-------------|---|---------|
| rs148728092 | A | 0.0892  |
| rs59180865  | A | -0.0613 |
| rs12208779  | C | 0.0373  |
| rs9374430   | T | -0.0863 |
| rs149057720 | C | -0.0731 |
| rs7761397   | A | -0.0378 |
| rs13192126  | A | -0.0485 |
| rs9502483   | A | 0.0381  |
| rs4869909   | T | 0.0305  |
| rs7760557   | A | -0.0727 |
| rs116667806 | A | 0.1392  |
| rs518204    | C | 0.0337  |
| rs17061497  | G | 0.051   |
| rs1026153   | G | 0.0296  |
| rs11465551  | C | -0.0592 |
| rs79469867  | C | 0.0532  |
| rs114356416 | T | 0.1185  |
| rs117081750 | C | -0.1543 |
| rs1320995   | T | 0.03    |
| rs116983610 | C | 0.1589  |
| rs71653628  | T | -0.0831 |
| rs79549473  | C | -0.086  |
| rs117791936 | A | 0.2312  |
| rs1132742   | G | 0.0405  |
| rs11970280  | T | -0.1043 |
| rs2327659   | T | 0.043   |
| rs2012790   | C | 0.0303  |
| rs62444781  | A | -0.2738 |
| rs72960467  | A | -0.1659 |
| rs927795    | C | 0.0324  |
| rs72968570  | T | -0.2604 |
| rs2859138   | C | 0.0543  |
| rs13199174  | T | 0.0633  |
| rs9355682   | T | -0.0323 |
| rs656938    | G | 0.0306  |
| rs114913966 | A | 0.1622  |
| rs112740328 | T | -0.0567 |
| rs116986682 | T | 0.1539  |
| rs75811042  | A | -0.1926 |
| rs9402564   | T | -0.0562 |
| rs75303464  | C | -0.165  |
| rs76981546  | C | -0.0503 |
| rs3800003   | T | -0.0366 |
| rs4712775   | T | 0.0305  |
| rs829473    | A | 0.0308  |
| rs76833819  | A | 0.1993  |
| rs6596957   | G | -0.0361 |

|             |   |         |
|-------------|---|---------|
| rs12665552  | C | 0.0367  |
| rs2198624   | G | -0.0522 |
| rs1511084   | C | -0.06   |
| rs11242702  | C | -0.0373 |
| rs140752913 | A | 0.2047  |
| rs12527037  | T | 0.1165  |
| rs149546308 | A | 0.1367  |
| rs113514146 | C | -0.2214 |
| rs9405949   | T | -0.0515 |
| rs6458123   | C | 0.0471  |
| rs7773277   | C | 0.0424  |
| rs6902488   | T | 0.1709  |
| rs6941065   | G | 0.0529  |
| rs12194277  | T | -0.0304 |
| rs114655470 | G | 0.2055  |
| rs79401068  | T | 0.1014  |
| rs196026    | G | 0.0479  |
| rs1179384   | C | 0.0315  |
| rs10945912  | G | 0.0526  |
| rs1204179   | T | 0.0781  |
| rs55809194  | G | 0.0881  |
| rs62415498  | T | -0.0431 |
| rs117763874 | G | 0.1094  |
| rs7771304   | C | -0.054  |
| rs41284712  | T | -0.1352 |
| rs111309660 | A | -0.1608 |
| rs543087    | C | 0.0834  |
| rs9393382   | T | 0.046   |
| rs79664570  | T | 0.0594  |
| rs150111062 | A | 0.2579  |
| rs605570    | A | 0.0473  |
| rs76236413  | G | 0.0914  |
| rs6457962   | A | -0.148  |
| rs17236659  | G | 0.0359  |
| rs118072256 | C | -0.1397 |
| rs77654275  | T | -0.1093 |
| rs9482161   | G | 0.044   |
| rs72865365  | T | -0.0523 |
| rs149949891 | A | 0.1113  |
| rs4609019   | C | 0.0308  |
| rs60645501  | A | -0.1223 |
| rs6937648   | A | 0.0308  |
| rs12211938  | C | -0.0607 |
| rs79135470  | G | 0.165   |
| rs74409654  | A | -0.1196 |
| rs111494929 | A | 0.2122  |
| rs12200363  | C | -0.1534 |

|             |   |         |
|-------------|---|---------|
| rs1476418   | C | 0.0299  |
| rs12198566  | G | -0.0302 |
| rs273924    | T | 0.0475  |
| rs141513476 | C | -0.1113 |
| rs12660941  | T | 0.0489  |
| rs1534753   | G | 0.0493  |
| rs144254280 | C | 0.1109  |
| rs9363186   | A | 0.145   |
| rs11963210  | A | 0.1668  |
| rs3846947   | C | 0.0326  |
| rs77557089  | G | 0.1439  |
| rs113015584 | C | -0.1067 |
| rs9495276   | T | -0.0701 |
| rs3778661   | C | -0.0516 |
| rs28561438  | C | 0.1001  |
| rs9456743   | A | -0.0875 |
| rs56090758  | A | -0.0331 |
| rs117113063 | A | 0.1368  |
| rs79087386  | C | 0.1359  |
| rs1767777   | G | 0.0341  |
| rs72880034  | A | 0.1153  |
| rs2251690   | T | 0.0555  |
| rs117509702 | G | 0.1923  |
| rs9467505   | C | 0.0452  |
| rs78340257  | G | 0.088   |
| rs74531963  | G | -0.059  |
| rs1009763   | C | 0.0326  |
| rs13201432  | A | -0.0435 |
| rs116328478 | T | 0.2223  |
| rs9466287   | T | -0.0495 |
| rs144815083 | A | -0.1404 |
| rs62428160  | T | -0.1933 |
| rs17650378  | G | 0.131   |
| rs144657866 | C | 0.1901  |
| rs931443    | G | 0.0317  |
| rs77334285  | T | -0.1225 |
| rs13195338  | T | 0.0311  |
| rs214597    | G | 0.0377  |
| rs7356982   | G | 0.0358  |
| rs470922    | T | -0.0401 |
| rs117032878 | C | 0.2335  |
| rs1682763   | A | -0.0327 |
| rs3813485   | T | -0.0437 |
| rs961918    | C | -0.033  |
| rs1796743   | T | -0.0312 |
| rs9320467   | A | -0.0627 |
| rs72982936  | G | 0.0541  |



|             |   |         |
|-------------|---|---------|
| rs12213989  | C | -0.0342 |
| rs630220    | T | 0.0317  |
| rs282083    | T | -0.0676 |
| rs12174402  | T | 0.0551  |
| rs4706262   | C | -0.0306 |
| rs76485673  | G | -0.0957 |
| rs417362    | T | 0.1464  |
| rs62413670  | A | 0.1622  |
| rs2815715   | C | -0.0316 |
| rs67458734  | T | 0.0487  |
| rs3778542   | T | -0.0913 |
| rs12529708  | C | 0.0676  |
| rs145990275 | C | 0.197   |
| rs10499252  | G | -0.0428 |
| rs12210467  | G | -0.0365 |
| rs118134452 | C | -0.1748 |
| rs77981129  | A | -0.1161 |
| rs9382099   | T | -0.0423 |
| rs6931936   | G | 0.0412  |
| rs73790998  | T | 0.1235  |
| rs9342796   | T | 0.0833  |
| rs60463810  | T | -0.0778 |
| rs1389921   | A | -0.0417 |
| rs118128376 | A | 0.156   |
| rs7744062   | G | -0.0377 |
| rs144643348 | C | 0.1892  |
| rs73739929  | T | -0.2051 |
| rs1361687   | A | -0.1294 |
| rs12193488  | G | 0.0644  |
| rs116971335 | A | 0.0925  |
| rs112696491 | T | 0.1688  |
| rs115605965 | T | 0.0802  |
| rs12193058  | A | 0.0658  |
| rs13192546  | A | 0.0345  |
| rs4946880   | T | 0.0319  |
| rs9384376   | T | 0.0824  |
| rs115096687 | T | 0.1223  |
| rs75862174  | G | 0.2095  |
| rs2327805   | T | 0.0638  |
| rs12154136  | A | 0.0742  |
| rs11243252  | A | -0.0382 |
| rs77182302  | T | -0.1139 |
| rs1341095   | T | 0.1562  |
| rs76732986  | T | 0.0574  |
| rs1323320   | A | -0.0326 |
| rs74745501  | T | 0.0993  |
| rs146551511 | T | 0.1691  |

|             |   |         |
|-------------|---|---------|
| rs9766360   | G | -0.0711 |
| rs12198703  | T | 0.0459  |
| rs198829    | A | -0.0289 |
| rs62414940  | G | -0.0394 |
| rs28639589  | C | 0.0967  |
| rs76763527  | G | -0.1943 |
| rs13204527  | T | -0.0458 |
| rs9478954   | A | 0.0751  |
| rs113787267 | G | 0.1065  |
| rs114646660 | C | -0.142  |
| rs146699273 | A | -0.216  |
| rs111302908 | A | 0.162   |
| rs73722207  | A | 0.2296  |
| rs76991271  | A | -0.075  |
| rs12194709  | G | -0.0376 |
| rs9397720   | A | -0.0323 |
| rs62429821  | T | 0.1863  |
| rs1322394   | A | 0.0331  |
| rs4620120   | C | 0.0291  |
| rs62417505  | T | -0.0729 |
| rs4343921   | T | 0.0409  |
| rs863161    | A | 0.1537  |
| rs76653190  | C | 0.0537  |
| rs34441199  | A | -0.0777 |
| rs13198928  | C | 0.2396  |
| rs144573297 | G | -0.149  |
| rs6597148   | A | 0.0656  |
| rs79592380  | T | 0.2509  |
| rs11153356  | C | -0.0296 |
| rs6903953   | G | 0.0299  |
| rs113301526 | G | 0.1457  |
| rs2235258   | G | 0.0346  |
| rs78518956  | A | -0.1493 |
| rs9468152   | C | 0.0408  |
| rs144714430 | C | -0.1141 |
| rs62407989  | T | -0.1059 |
| rs2816258   | A | -0.0432 |
| rs12197970  | A | 0.1405  |
| rs2764159   | G | -0.0327 |
| rs1576754   | G | -0.1004 |
| rs6936162   | C | -0.147  |
| rs62461291  | C | -0.0809 |
| rs148292624 | T | 0.1506  |
| rs4254958   | T | -0.03   |
| rs1535986   | T | -0.0459 |
| rs111477762 | C | 0.1089  |
| rs9467421   | A | 0.0799  |

|             |   |         |
|-------------|---|---------|
| rs9368395   | A | 0.0377  |
| rs12663560  | G | -0.0291 |
| rs1872244   | C | -0.029  |
| rs76404875  | A | 0.2088  |
| rs1874197   | A | -0.1543 |
| rs60177803  | C | -0.0537 |
| rs12190953  | C | -0.108  |
| rs71556322  | A | -0.0906 |
| rs73566043  | A | 0.0544  |
| rs1028334   | G | -0.0382 |
| rs9390588   | C | 0.0362  |
| rs7739779   | G | -0.0292 |
| rs1983798   | T | -0.0387 |
| rs9467745   | A | 0.0373  |
| rs57443907  | A | 0.0891  |
| rs9345092   | T | 0.1226  |
| rs34727771  | G | 0.1104  |
| rs150731746 | C | -0.1252 |
| rs2095369   | G | -0.0335 |
| rs2216463   | A | 0.0332  |
| rs12212616  | C | 0.1332  |
| rs78007848  | G | 0.1017  |
| rs17194424  | G | 0.1259  |
| rs7757618   | A | 0.0379  |
| rs7754801   | A | -0.0325 |
| rs62397035  | A | 0.1044  |
| rs13200385  | A | 0.1398  |
| rs72821503  | C | -0.0719 |
| rs9469623   | A | -0.038  |
| rs1288969   | T | -0.1081 |
| rs78645122  | A | 0.1202  |
| rs9394548   | G | -0.0313 |
| rs13213825  | C | -0.0447 |
| rs236348    | C | 0.0445  |
| rs117756064 | T | 0.1001  |
| rs2819863   | G | -0.0542 |
| rs62427103  | G | -0.0638 |
| rs62416164  | A | 0.0803  |
| rs926416    | T | 0.0304  |
| rs1167970   | C | -0.0294 |
| rs35113152  | G | 0.0495  |
| rs34575946  | T | 0.0394  |
| rs2352147   | G | 0.1293  |
| rs11965737  | A | -0.0545 |
| rs117609653 | G | 0.1665  |
| rs76179437  | T | -0.1285 |
| rs77615349  | T | 0.134   |

|             |   |         |
|-------------|---|---------|
| rs114678255 | G | 0.1304  |
| rs79068959  | C | -0.0613 |
| rs117996992 | T | -0.165  |
| rs141277067 | A | -0.1763 |
| rs67007116  | A | -0.3173 |
| rs1145998   | G | -0.1964 |
| rs9459982   | A | -0.0715 |
| rs79782063  | C | 0.1053  |
| rs78886474  | T | 0.1411  |
| rs57858119  | A | 0.1424  |
| rs2785910   | G | -0.0304 |
| rs141769235 | G | -0.125  |
| rs78650088  | A | 0.1515  |
| rs143561148 | C | -0.191  |
| rs9502036   | C | 0.0484  |
| rs9456505   | A | 0.0568  |
| rs35951109  | G | -0.0419 |
| rs7747077   | G | 0.0409  |
| rs10484817  | C | 0.0726  |
| rs79911190  | G | 0.147   |
| rs10457375  | T | -0.029  |
| rs12527253  | G | -0.0398 |
| rs117696055 | C | 0.1878  |
| rs143884317 | G | 0.1819  |
| rs13220290  | T | -0.1416 |
| rs115307097 | G | 0.1311  |
| rs115997994 | A | -0.2574 |
| rs4897002   | C | -0.0321 |
| rs833070    | T | 0.0323  |
| rs72830065  | T | 0.1137  |
| rs72987732  | G | -0.0911 |
| rs77564475  | G | -0.0777 |
| rs76124397  | C | -0.0492 |
| rs76049501  | G | 0.0485  |
| rs73240927  | T | 0.1711  |
| rs17343605  | T | -0.1207 |
| rs138112329 | A | -0.054  |
| rs17524448  | C | 0.0442  |
| rs7753791   | A | 0.0347  |
| rs4706518   | G | 0.0411  |
| rs12213214  | A | 0.0403  |
| rs75414471  | A | -0.0669 |
| rs199644    | G | -0.0293 |
| rs80326832  | C | -0.0756 |
| rs12200214  | A | 0.0562  |
| rs77200743  | C | 0.1361  |
| rs116883706 | A | -0.129  |

|             |   |         |
|-------------|---|---------|
| rs55724578  | A | -0.0925 |
| rs60587153  | C | 0.0586  |
| rs115610115 | T | 0.1193  |
| rs9396707   | T | -0.0314 |
| rs146368704 | A | 0.1375  |
| rs9342037   | T | -0.0294 |
| rs149163521 | A | -0.2144 |
| rs578654    | C | -0.029  |
| rs2350388   | C | -0.0284 |
| rs7769929   | C | 0.1024  |
| rs73242472  | C | -0.0632 |
| rs149928954 | A | -0.2045 |
| rs148711289 | C | 0.1766  |
| rs75624437  | C | 0.0404  |
| rs142462017 | T | -0.0495 |
| rs116939776 | G | -0.1544 |
| rs2064793   | A | -0.0279 |
| rs62425956  | C | 0.0475  |
| rs1883629   | T | -0.0351 |
| rs77898797  | C | -0.0982 |
| rs74514478  | A | -0.1197 |
| rs7758467   | C | 0.0445  |
| rs9489468   | C | -0.0987 |
| rs17824144  | C | 0.0618  |
| rs3777957   | C | 0.0459  |
| rs35128272  | A | -0.0607 |
| rs3822846   | C | 0.108   |
| rs72939813  | T | 0.0413  |
| rs71570977  | G | 0.0562  |
| rs10434891  | G | -0.0563 |
| rs74698276  | T | 0.1726  |
| rs76328855  | T | 0.099   |
| rs117153335 | T | 0.1773  |
| rs12213941  | C | -0.1289 |
| rs117182085 | T | 0.1502  |
| rs13195443  | C | 0.091   |
| rs1441889   | C | 0.0726  |
| rs11756937  | T | -0.0796 |
| rs116106688 | A | -0.2222 |
| rs74507427  | T | 0.0915  |
| rs1003260   | A | -0.0347 |
| rs117030276 | C | -0.1678 |
| rs11755844  | A | -0.0895 |
| rs3756814   | C | -0.0291 |
| rs118002341 | A | 0.095   |
| rs540908    | G | 0.0364  |
| rs12208992  | A | 0.0353  |

|             |   |         |
|-------------|---|---------|
| rs182320    | C | -0.0301 |
| rs55971720  | A | 0.0286  |
| rs2087786   | C | -0.0468 |
| rs138285423 | T | 0.1794  |
| rs3747745   | A | 0.0357  |
| rs78862062  | G | 0.0955  |
| rs10455998  | A | -0.0357 |
| rs2506739   | C | -0.0375 |
| rs72832919  | T | 0.1528  |
| rs2328398   | C | 0.0625  |
| rs7741251   | G | -0.0333 |
| rs3757028   | T | -0.0362 |
| rs76485047  | T | 0.1668  |
| rs9356147   | A | -0.0295 |
| rs272236    | C | 0.034   |
| rs139043951 | G | -0.1556 |
| rs67903272  | T | 0.0365  |
| rs75766550  | T | 0.1444  |
| rs13219102  | T | 0.1745  |
| rs9387994   | A | 0.0481  |
| rs139320712 | A | 0.2661  |
| rs112264746 | T | 0.1913  |
| rs1033390   | T | -0.029  |
| rs74805700  | A | -0.0975 |
| rs140627805 | A | 0.1823  |
| rs148356569 | T | -0.2006 |
| rs77501937  | G | -0.09   |
| rs62392447  | A | -0.0468 |
| rs6913005   | G | -0.0587 |
| rs62394635  | G | -0.0528 |
| rs10946843  | G | -0.0334 |
| rs9363723   | C | 0.0451  |
| rs9460207   | C | -0.0313 |
| rs9394504   | T | -0.0299 |
| rs4576265   | C | -0.0281 |
| rs114182312 | T | 0.149   |
| rs77345379  | T | 0.1162  |
| rs9400333   | A | 0.0484  |
| rs72905329  | A | -0.1882 |
| rs72845857  | T | 0.2382  |
| rs13206894  | A | -0.1675 |
| rs9399374   | G | -0.1489 |
| rs77486022  | A | 0.0993  |
| rs199621    | C | 0.0281  |
| rs17678784  | C | -0.0841 |
| rs9360206   | G | -0.043  |
| rs11154614  | A | -0.0323 |

|             |   |         |
|-------------|---|---------|
| rs113105647 | T | 0.2454  |
| rs143508449 | G | 0.2471  |
| rs72845643  | C | 0.0736  |
| rs6932238   | G | -0.0357 |
| rs111899933 | C | 0.1051  |
| rs117016563 | A | -0.2372 |
| rs62430414  | G | -0.0445 |
| rs111282184 | A | 0.1293  |
| rs12199148  | T | -0.0301 |
| rs9456367   | C | -0.212  |
| rs71554541  | T | -0.1244 |
| rs151002338 | T | -0.1713 |
| rs77646630  | G | 0.2575  |
| rs6924721   | G | -0.0467 |
| rs12209674  | A | 0.048   |
| rs5017128   | G | 0.0775  |
| rs112920330 | T | 0.0495  |
| rs2494548   | T | 0.0295  |
| rs75098244  | T | 0.167   |
| rs6914004   | T | -0.0351 |
| rs77595430  | C | -0.17   |
| rs113292103 | A | 0.0927  |
| rs78052620  | A | -0.097  |
| rs609421    | A | -0.0579 |
| rs7756982   | G | -0.0302 |
| rs35775692  | C | -0.0744 |
| rs11155190  | C | -0.0398 |
| rs55739478  | C | 0.0658  |
| rs114871321 | G | 0.1539  |
| rs140554193 | G | -0.1694 |
| rs10456709  | G | 0.0293  |
| rs117747374 | T | -0.1375 |
| rs76758151  | G | -0.1373 |
| rs299412    | C | -0.0469 |
| rs12212957  | T | 0.1332  |
| rs2219667   | G | 0.031   |
| rs113578887 | T | 0.1496  |
| rs140650994 | C | -0.2012 |
| rs55845536  | T | 0.1454  |
| rs79244342  | G | -0.0508 |
| rs9457562   | C | -0.0724 |
| rs62430736  | G | 0.0668  |
| rs80269362  | A | 0.0735  |
| rs139281147 | G | 0.1718  |
| rs991762    | T | 0.036   |
| rs71562454  | A | -0.0885 |
| rs61401710  | C | -0.1496 |

|             |   |         |
|-------------|---|---------|
| rs59090158  | A | 0.0397  |
| rs148933967 | G | -0.0783 |
| rs117370516 | A | -0.1474 |
| rs343677    | C | 0.0303  |
| rs17511083  | C | -0.0943 |
| rs144264268 | G | -0.1441 |
| rs17063765  | G | 0.0948  |
| rs144472941 | T | 0.102   |
| rs34643319  | A | 0.0453  |
| rs116946085 | A | -0.1772 |
| rs55891460  | A | 0.1366  |
| rs2076518   | A | -0.0281 |
| rs4960194   | T | 0.0307  |
| rs56224400  | C | -0.1274 |
| rs12530080  | A | 0.0391  |
| rs11758588  | C | 0.0634  |
| rs1999045   | T | 0.0468  |
| rs9394939   | T | 0.1714  |
| rs9347824   | A | -0.0616 |
| rs113135622 | A | 0.0775  |
| rs117325598 | A | -0.1555 |
| rs9688599   | C | -0.032  |
| rs4709649   | G | 0.0778  |
| rs11756646  | T | -0.0679 |
| rs789963    | C | 0.0809  |
| rs2498750   | G | 0.1036  |
| rs1259069   | G | -0.0811 |
| rs9472840   | A | -0.1835 |
| rs2499901   | A | 0.0313  |
| rs113030748 | C | -0.2272 |
| rs6921289   | T | 0.2015  |
| rs116869494 | T | 0.1638  |
| rs112121678 | G | -0.0893 |
| rs76719030  | A | -0.1372 |
| rs143253375 | G | -0.1406 |
| rs113460526 | A | -0.0999 |
| rs143254079 | A | 0.0722  |
| rs11965215  | G | 0.0757  |
| rs77835011  | T | 0.0903  |
| rs7449962   | A | 0.0345  |
| rs116457443 | C | 0.0541  |
| rs9465076   | T | -0.029  |
| rs9322341   | C | 0.091   |
| rs114383434 | C | -0.073  |
| rs77850033  | G | -0.2094 |
| rs6927457   | G | 0.0585  |
| rs115138315 | A | -0.1379 |



|             |   |         |
|-------------|---|---------|
| rs57442432  | C | 0.048   |
| rs2138340   | T | -0.0771 |
| rs2516397   | T | -0.04   |
| rs203147    | A | 0.0318  |
| rs3777569   | T | -0.0902 |
| rs2566823   | T | 0.0375  |
| rs11755133  | C | 0.1806  |
| rs111504786 | T | -0.2056 |
| rs4869738   | T | -0.0338 |
| rs1518512   | G | 0.0311  |
| rs17592434  | C | 0.0389  |
| rs143289486 | T | -0.1965 |
| rs4623240   | A | 0.0351  |
| rs144528336 | A | 0.1108  |
| rs16879129  | C | -0.0316 |
| rs7768742   | T | 0.1097  |
| rs79844070  | A | -0.0443 |
| rs1346297   | T | -0.0289 |
| rs6906280   | T | 0.051   |
| rs115806028 | C | 0.1278  |
| rs477230    | A | 0.0342  |
| rs6912769   | G | 0.0291  |
| rs143836175 | A | 0.3024  |
| rs73525872  | T | 0.1334  |
| rs6911837   | G | 0.0302  |
| rs6455351   | G | -0.0352 |
| rs72952403  | G | 0.0925  |
| rs55894055  | T | 0.0499  |
| rs117685663 | G | -0.1708 |
| rs1427081   | C | 0.0819  |
| rs7738300   | T | 0.0332  |
| rs76848603  | A | -0.0764 |
| rs2095343   | A | 0.0287  |
| rs62408760  | T | -0.0934 |
| rs2281830   | A | -0.0314 |
| rs797554    | T | -0.0664 |
| rs13217912  | C | 0.1764  |
| rs6923772   | A | -0.0594 |
| rs72856422  | C | -0.0385 |
| rs4897560   | C | 0.0312  |
| rs73007724  | A | 0.0758  |
| rs9455729   | C | -0.0672 |
| rs75496503  | C | 0.1155  |
| rs9393002   | G | 0.0294  |
| rs146990774 | G | -0.2208 |
| rs4711035   | A | -0.0294 |
| rs113721836 | G | -0.1051 |

|             |   |         |
|-------------|---|---------|
| rs12211616  | A | 0.0319  |
| rs6902048   | A | 0.0289  |
| rs141307800 | A | 0.18    |
| rs11752133  | A | 0.0816  |
| rs4997823   | G | -0.0313 |
| rs219965    | G | -0.0307 |
| rs1890580   | T | 0.0313  |
| rs75065496  | T | 0.0875  |
| rs9386188   | T | 0.0279  |
| rs117451378 | G | 0.0647  |
| rs34683309  | G | -0.1474 |
| rs79599055  | T | 0.121   |
| rs141766382 | C | -0.2237 |
| rs60880319  | T | 0.0687  |
| rs1079237   | T | 0.1019  |
| rs2223220   | A | 0.0285  |
| rs4945761   | A | -0.1463 |
| rs60555451  | G | -0.0893 |
| rs9449384   | T | 0.0362  |
| rs75512843  | T | -0.1603 |
| rs111250448 | T | 0.144   |
| rs60917185  | T | -0.0433 |
| rs139746618 | C | -0.1481 |
| rs7762317   | C | 0.0568  |
| rs1575595   | T | 0.0608  |
| rs13196636  | C | 0.108   |
| rs9368594   | G | 0.0304  |
| rs9487850   | A | 0.0434  |
| rs4713078   | G | -0.1615 |
| rs115756530 | T | 0.1303  |
| rs41288592  | T | -0.2128 |
| rs4609066   | C | 0.0286  |
| rs918300    | G | -0.0449 |
| rs62407183  | A | -0.1346 |
| rs13219327  | A | 0.1763  |
| rs75411742  | T | 0.0418  |
| rs114443081 | A | 0.2294  |
| rs12213706  | T | -0.1072 |
| rs145626427 | G | -0.254  |
| rs10081125  | C | 0.0288  |
| rs111243489 | A | 0.146   |
| rs116716295 | A | 0.1845  |
| rs548083    | G | -0.0455 |
| rs79234575  | T | 0.0391  |
| rs78654791  | G | 0.1385  |
| rs6597061   | G | 0.0853  |
| rs145813896 | C | -0.173  |

|             |   |         |
|-------------|---|---------|
| rs72936194  | C | 0.0632  |
| rs2064875   | A | -0.0293 |
| rs6904719   | G | 0.0328  |
| rs11965551  | A | -0.0568 |
| rs3005503   | T | -0.0391 |
| rs140986363 | A | 0.1795  |
| rs11966041  | G | 0.0389  |
| rs13205491  | T | -0.034  |
| rs6939650   | A | -0.0586 |
| rs118166695 | A | 0.1511  |
| rs73022146  | C | 0.1434  |
| rs75745945  | T | 0.0494  |
| rs148679347 | C | -0.0896 |
| rs114565826 | C | 0.1001  |
| rs13205177  | A | 0.1448  |
| rs9376004   | C | -0.0934 |
| rs111247421 | T | 0.1156  |
| rs9322364   | G | -0.0278 |
| rs75357341  | T | -0.1289 |
| rs149526839 | G | -0.0939 |
| rs6935203   | A | -0.0418 |
| rs76061775  | A | 0.1767  |
| rs2744484   | C | 0.0796  |
| rs9377123   | G | -0.0374 |
| rs9367079   | G | 0.0296  |
| rs3799733   | A | 0.031   |
| rs143640606 | A | -0.1229 |
| rs146551903 | G | 0.1614  |
| rs9356850   | A | -0.0299 |
| rs77475382  | A | 0.0567  |
| rs138087738 | C | 0.1715  |
| rs58584994  | T | 0.0818  |
| rs34496500  | A | -0.0406 |
| rs4706738   | G | -0.033  |
| rs6929326   | G | 0.0309  |
| rs72922977  | C | 0.0479  |
| rs351323    | A | -0.036  |
| rs6919257   | T | 0.029   |
| rs35759094  | A | 0.0693  |
| rs117420714 | A | 0.1513  |
| rs74462002  | G | 0.147   |
| rs35401098  | A | 0.0354  |
| rs143245518 | T | -0.049  |
| rs9402077   | G | 0.028   |
| rs115496049 | T | -0.1091 |
| rs73442516  | T | 0.1352  |
| rs74881936  | C | 0.16    |

|             |   |         |
|-------------|---|---------|
| rs440163    | C | 0.0478  |
| rs144911617 | G | 0.0438  |
| rs11753989  | C | -0.0872 |
| rs77249378  | T | -0.0741 |
| rs114387742 | G | -0.1064 |
| rs12202948  | G | -0.0484 |
| rs6459426   | T | 0.0809  |
| rs12200114  | A | 0.0298  |
| rs8192619   | A | 0.0598  |
| rs139878170 | A | 0.1429  |
| rs168455    | G | -0.0643 |
| rs9443267   | A | -0.1652 |
| rs270321    | T | -0.0332 |
| rs78279801  | T | 0.0577  |
| rs4870140   | T | -0.0534 |
| rs722755    | A | -0.0564 |
| rs578560    | G | -0.0375 |
| rs78530656  | A | -0.0405 |
| rs75493095  | C | 0.0874  |
| rs440530    | A | -0.0315 |
| rs9499429   | C | 0.0671  |
| rs9372179   | C | 0.1041  |
| rs56125781  | A | -0.0663 |
| rs764343    | C | 0.0334  |
| rs73744711  | C | -0.1046 |
| rs9397901   | G | 0.0276  |
| rs117257321 | C | 0.1701  |
| rs113913318 | A | 0.0626  |
| rs77680150  | G | 0.1906  |
| rs117623212 | T | -0.2159 |
| rs77355849  | T | -0.1318 |
| rs9485099   | T | -0.0315 |
| rs147867111 | T | 0.15    |
| rs2324579   | T | -0.0286 |
| rs12198280  | G | 0.0437  |
| rs71556167  | C | -0.0919 |
| rs11964500  | T | 0.1209  |
| rs4710150   | T | 0.1297  |
| rs7749864   | G | 0.0337  |
| rs10945846  | A | -0.0286 |
| rs3757062   | A | 0.0441  |
| rs13193413  | T | -0.0281 |
| rs78629448  | A | -0.109  |
| rs1722363   | G | 0.0612  |
| rs8191813   | T | 0.2329  |
| rs6924158   | C | 0.033   |
| rs34677780  | T | 0.0535  |

|             |   |         |
|-------------|---|---------|
| rs72851457  | T | 0.1286  |
| rs112143178 | T | 0.1123  |
| rs62399336  | G | 0.037   |
| rs117264621 | A | -0.0911 |
| rs77120877  | C | -0.2004 |
| rs9398785   | T | -0.0298 |
| rs11754731  | G | 0.1245  |
| rs6456449   | C | 0.0434  |
| rs141147244 | T | 0.2025  |
| rs1410669   | G | -0.0934 |
| rs6915118   | A | 0.0418  |
| rs116843518 | T | 0.1678  |
| rs74759796  | G | -0.0869 |
| rs117143336 | A | -0.1021 |
| rs2292575   | G | -0.0473 |
| rs118095216 | A | -0.1611 |
| rs483481    | A | -0.0295 |
| rs12209786  | A | -0.0875 |
| rs74958138  | C | -0.0651 |
| rs9355187   | C | 0.1257  |
| rs139294148 | C | -0.2187 |
| rs62436484  | T | -0.0406 |
| rs117665489 | C | -0.0791 |
| rs2506745   | C | 0.0289  |
| rs79052905  | T | 0.0734  |
| rs116240204 | G | 0.2684  |
| rs12211693  | C | 0.1285  |
| rs2328542   | C | 0.028   |
| rs148810333 | C | 0.1235  |
| rs143367815 | G | 0.1582  |
| rs139409966 | C | -0.0979 |
| rs9470112   | C | 0.0602  |
| rs6926991   | C | -0.0427 |
| rs11755088  | A | 0.1467  |
| rs72556089  | A | 0.1484  |
| rs9393072   | G | 0.1069  |
| rs74874219  | G | -0.0963 |
| rs78324519  | G | -0.1137 |
| rs77320369  | A | 0.1096  |
| rs72886156  | C | 0.1229  |
| rs114927772 | T | -0.1925 |
| rs9390463   | G | 0.0278  |
| rs3799639   | G | 0.032   |
| rs12196575  | G | -0.1002 |
| rs1892356   | G | 0.0311  |
| rs6916167   | C | -0.0282 |
| rs565583    | C | 0.0385  |

|             |   |         |
|-------------|---|---------|
| rs116881264 | A | -0.1584 |
| rs779478    | T | -0.0293 |
| rs11968993  | G | -0.0709 |
| rs9366651   | G | 0.0278  |
| rs62395035  | G | 0.0701  |
| rs6941697   | G | 0.0369  |
| rs6934100   | T | -0.0556 |
| rs56411819  | T | 0.0453  |
| rs62411093  | T | -0.0346 |
| rs13209666  | G | 0.0414  |
| rs9397190   | C | -0.0443 |
| rs1355023   | C | 0.0305  |
| rs78988207  | T | 0.0448  |
| rs9471789   | T | -0.0336 |
| rs7775313   | T | -0.1347 |
| rs9457136   | T | -0.0892 |
| rs113744067 | C | 0.1041  |
| rs9455952   | C | 0.0451  |
| rs9344230   | C | -0.0311 |
| rs72913851  | A | 0.0966  |
| rs4947176   | C | -0.0277 |
| rs143168564 | G | 0.2464  |
| rs35374042  | T | 0.1823  |
| rs9349342   | A | -0.0347 |
| rs58324137  | C | -0.037  |
| rs2475505   | C | -0.0273 |
| rs5008971   | A | -0.044  |
| rs34170156  | T | -0.0895 |
| rs76492053  | A | 0.1139  |
| rs77245878  | T | 0.1144  |
| rs1457956   | C | 0.0281  |
| rs141679807 | T | 0.12    |
| rs702348    | A | 0.0781  |
| rs117978402 | A | -0.1035 |
| rs112899359 | A | 0.1105  |
| rs9455927   | C | 0.0327  |
| rs78594141  | G | -0.1797 |
| rs9462996   | C | -0.044  |
| rs2071809   | T | 0.0938  |
| rs74525762  | C | -0.0387 |
| rs116783208 | T | 0.1468  |
| rs12215131  | A | -0.0286 |
| rs35666540  | A | -0.1238 |
| rs234478    | G | -0.0328 |
| rs11967262  | G | -0.0308 |
| rs9357383   | A | -0.0321 |
| rs1132357   | A | -0.0376 |

|             |   |         |
|-------------|---|---------|
| rs111265768 | A | 0.0507  |
| rs75294527  | G | 0.1235  |
| rs12175854  | A | -0.0472 |
| rs116968463 | G | 0.1367  |
| rs3778158   | T | 0.0387  |
| rs115532759 | T | 0.1232  |
| rs9373334   | C | -0.0276 |
| rs4052720   | A | -0.03   |
| rs13214509  | T | 0.0312  |
| rs9321103   | G | 0.0272  |
| rs303058    | G | -0.0689 |
| rs113783884 | A | -0.2171 |
| rs9885838   | C | 0.0329  |
| rs2840801   | G | 0.0405  |
| rs715441    | C | -0.0506 |
| rs139248034 | T | 0.1805  |
| rs77001295  | T | -0.1573 |
| rs75363928  | A | -0.1319 |
| rs9474880   | T | 0.0292  |
| rs4712000   | A | 0.0298  |
| rs117944720 | T | -0.1844 |
| rs116240317 | A | 0.1764  |
| rs13193243  | T | 0.0953  |
| rs9361759   | A | -0.034  |
| rs228419    | C | 0.0445  |
| rs827996    | C | -0.0513 |
| rs2326632   | G | -0.0313 |
| rs7742413   | T | 0.0268  |
| rs62392008  | G | -0.0394 |
| rs55679900  | T | 0.1064  |
| rs116410585 | C | -0.0802 |
| rs2271116   | A | 0.0322  |
| rs150321190 | T | -0.1332 |
| rs35408284  | T | -0.0774 |
| rs10455932  | A | -0.0277 |
| rs72896737  | G | -0.1735 |
| rs3798315   | T | 0.0463  |
| rs9503012   | C | -0.0339 |
| rs72947982  | C | -0.0815 |
| rs9486092   | G | -0.0283 |
| rs62400394  | G | -0.0565 |
| rs76671793  | C | 0.1258  |
| rs72898109  | A | -0.0838 |
| rs557544    | C | -0.03   |
| rs9356006   | A | -0.03   |
| rs79131379  | A | -0.066  |
| rs141751476 | T | 0.1652  |

|             |   |         |
|-------------|---|---------|
| rs143045199 | C | -0.1306 |
| rs480122    | A | -0.0349 |
| rs2502546   | C | 0.1292  |
| rs116699560 | A | 0.2104  |
| rs4896779   | A | 0.082   |
| rs4708108   | T | -0.0529 |
| rs118146092 | T | 0.0886  |
| rs1972281   | C | -0.0345 |
| rs9332735   | A | 0.1357  |
| rs2744186   | T | 0.1502  |
| rs62393063  | G | -0.0747 |
| rs2569824   | G | 0.0442  |
| rs750810    | C | 0.066   |
| rs151189490 | G | 0.0842  |
| rs79916911  | G | -0.1043 |
| rs857423    | C | -0.0296 |
| rs6936963   | T | 0.0514  |
| rs78851451  | A | 0.0989  |
| rs2181351   | A | 0.0288  |
| rs7452004   | A | -0.1631 |
| rs2616032   | G | -0.0273 |
| rs56242039  | C | 0.0559  |
| rs117695022 | T | 0.1563  |
| rs4428494   | A | 0.0491  |
| rs13198046  | A | 0.0653  |
| rs693850    | G | 0.0385  |
| rs75038185  | T | -0.0924 |
| rs62440831  | C | -0.1138 |
| rs115650159 | A | 0.0608  |
| rs8191744   | C | 0.0781  |
| rs79453941  | C | 0.1399  |
| rs117452037 | A | 0.2135  |
| rs12206903  | T | 0.0375  |
| rs78870594  | T | -0.098  |
| rs2840835   | A | 0.0267  |
| rs76084741  | T | 0.0881  |
| rs235701    | T | -0.0398 |
| rs10944332  | G | 0.0536  |
| rs57310726  | A | -0.046  |
| rs112014403 | G | 0.1527  |
| rs75976263  | G | -0.1454 |
| rs35555027  | G | 0.1337  |
| rs7766349   | G | 0.0278  |
| rs145421717 | T | 0.0783  |
| rs9264911   | G | 0.0473  |
| rs117765914 | T | -0.1334 |
| rs45560534  | G | 0.0823  |



|             |   |         |
|-------------|---|---------|
| rs117340637 | A | 0.0954  |
| rs113457553 | T | -0.0387 |
| rs11963964  | A | 0.146   |
| rs9400372   | G | 0.033   |
| rs11967988  | T | -0.0925 |
| rs145194133 | G | -0.0689 |
| rs4267983   | G | 0.0786  |
| rs511700    | G | -0.0301 |
| rs11753137  | C | 0.0428  |
| rs76107052  | A | 0.0414  |
| rs75871609  | A | -0.1238 |
| rs199045    | A | 0.0286  |
| rs73772253  | A | -0.0945 |
| rs239516    | T | -0.0299 |
| rs2357524   | G | -0.0267 |
| rs10947505  | G | 0.0277  |
| rs750811    | A | 0.0328  |
| rs35432724  | G | -0.1146 |
| rs56040637  | G | -0.1003 |
| rs149565585 | A | -0.1578 |
| rs6935864   | C | 0.0321  |
| rs117289729 | A | 0.0903  |
| rs2047      | C | 0.0874  |
| rs922898    | T | 0.0475  |
| rs9474718   | C | 0.0472  |
| rs7452199   | G | 0.0771  |
| rs1161389   | C | 0.0698  |
| rs72872997  | G | -0.0978 |
| rs2397146   | A | 0.0303  |
| rs114821072 | T | 0.0715  |
| rs77697467  | A | 0.0559  |
| rs4278033   | C | -0.0416 |
| rs735297    | C | -0.0346 |
| rs74650262  | A | -0.118  |
| rs146875626 | G | 0.0994  |
| rs68092383  | G | 0.0517  |
| rs1000041   | T | 0.0917  |
| rs77425805  | A | 0.1337  |
| rs78814919  | A | -0.175  |
| rs680200    | A | 0.0273  |
| rs79500771  | G | 0.1455  |
| rs6939771   | G | 0.0348  |
| rs142060097 | T | -0.1782 |
| rs114246451 | T | 0.1739  |
| rs144653986 | C | 0.0529  |
| rs35479904  | A | 0.1697  |
| rs7755894   | G | -0.0531 |

|             |   |         |
|-------------|---|---------|
| rs9349303   | G | -0.0283 |
| rs139752958 | A | 0.182   |
| rs4613838   | A | 0.0396  |
| rs73537770  | G | -0.0585 |
| rs12203615  | T | 0.0316  |
| rs35844431  | T | 0.0332  |
| rs4708564   | C | 0.0588  |
| rs78083592  | G | -0.2058 |
| rs6569076   | G | 0.028   |
| rs11153532  | T | -0.0891 |
| rs1013507   | G | -0.0378 |
| rs6900079   | C | 0.0332  |
| rs13210187  | C | 0.0342  |
| rs2254574   | T | -0.0412 |
| rs200151    | T | 0.0704  |
| rs141391640 | C | 0.1934  |
| rs77777074  | C | -0.0992 |
| rs34137062  | T | 0.0964  |
| rs12214721  | T | 0.1008  |
| rs56230562  | T | -0.0626 |
| rs75842709  | T | 0.0742  |
| rs6918295   | A | 0.0475  |
| rs117902421 | G | 0.1827  |
| rs6938622   | G | -0.037  |
| rs77757079  | G | 0.0594  |
| rs7762216   | T | -0.0577 |
| rs113857603 | G | -0.153  |
| rs149424314 | G | 0.0333  |
| rs1983785   | C | 0.0679  |
| rs76654323  | T | -0.1462 |
| rs4535557   | G | 0.0273  |
| rs78740494  | G | 0.1588  |
| rs28763969  | C | -0.2246 |
| rs17060275  | T | 0.0537  |
| rs151013782 | G | 0.1408  |
| rs73025525  | G | 0.0757  |
| rs118175120 | A | 0.1534  |
| rs6936315   | C | -0.0419 |
| rs6909569   | G | 0.1152  |
| rs28696668  | C | 0.1243  |
| rs1145749   | T | -0.0753 |
| rs71558326  | T | 0.0334  |
| rs9502303   | T | -0.0878 |
| rs72909431  | G | 0.0716  |
| rs6915881   | G | 0.0306  |
| rs6928424   | T | 0.0386  |
| rs77783986  | C | 0.0698  |

|             |   |         |
|-------------|---|---------|
| rs6928374   | A | 0.0273  |
| rs2575004   | G | 0.0327  |
| rs9478592   | T | -0.0319 |
| rs3124923   | A | 0.0333  |
| rs146865883 | T | 0.1411  |
| rs138264124 | G | 0.1183  |
| rs34765554  | T | 0.0944  |
| rs9385271   | C | -0.0306 |
| rs117079568 | T | 0.1019  |
| rs9478538   | A | -0.0278 |
| rs4714406   | T | 0.0302  |
| rs144183381 | C | -0.113  |
| rs148428781 | T | -0.1087 |
| rs11968750  | T | 0.1324  |
| rs118028109 | T | -0.1088 |
| rs72968918  | T | 0.1016  |
| rs41406448  | A | 0.0395  |
| rs2028156   | G | -0.0443 |
| rs7746829   | T | -0.0442 |
| rs6921502   | G | -0.0264 |
| rs148499541 | C | 0.1213  |
| rs112982380 | C | 0.0889  |
| rs73009097  | C | -0.2155 |
| rs2025993   | A | 0.0788  |
| rs9320853   | A | -0.0615 |
| rs9357728   | A | 0.0582  |
| rs78666034  | T | 0.1273  |
| rs155459    | A | 0.1348  |
| rs73779953  | G | -0.0483 |
| rs149091838 | T | -0.1936 |
| rs77722701  | A | -0.0583 |
| rs9371410   | T | -0.0368 |
| rs73440447  | T | -0.0882 |
| rs78377438  | C | -0.1838 |
| rs147922484 | A | 0.2329  |
| rs111642260 | C | 0.1127  |
| rs12524960  | G | -0.0281 |
| rs12197777  | T | -0.0444 |
| rs75439598  | T | -0.0901 |
| rs111557465 | T | 0.1112  |
| rs151007294 | A | -0.1636 |
| rs144823657 | A | 0.1387  |
| rs78320184  | T | -0.1167 |
| rs17588579  | A | -0.0618 |
| rs6919025   | A | 0.0561  |
| rs35126624  | C | 0.074   |
| rs9470819   | A | -0.0304 |

|             |   |         |
|-------------|---|---------|
| rs1003737   | C | -0.027  |
| rs116423312 | A | 0.0974  |
| rs6934474   | T | -0.0331 |
| rs151243528 | A | -0.177  |
| rs62388445  | T | -0.0647 |
| rs13198589  | T | -0.0995 |
| rs116674911 | G | 0.0828  |
| rs9378300   | T | 0.1149  |
| rs114773899 | T | 0.0866  |
| rs113226307 | T | -0.1596 |
| rs9458991   | A | -0.0318 |
| rs146470015 | G | 0.1994  |
| rs73423105  | T | 0.0868  |
| rs455247    | G | 0.0269  |
| rs9463015   | G | -0.0805 |
| rs79768046  | T | 0.1286  |
| rs1032153   | T | -0.0395 |
| rs9354011   | A | -0.0477 |
| rs72984713  | G | 0.0688  |
| rs9496445   | T | -0.0373 |
| rs9480482   | A | -0.0352 |
| rs115471174 | T | 0.0969  |
| rs362885    | C | 0.0891  |
| rs115714691 | C | 0.113   |
| rs118077679 | G | -0.0671 |
| rs150061454 | C | 0.0887  |
| rs11965193  | T | -0.0464 |
| rs116657251 | G | 0.1788  |
| rs9390585   | A | -0.0292 |
| rs9321164   | A | 0.029   |
| rs236423    | T | 0.058   |
| rs1983703   | G | 0.0667  |
| rs9385643   | A | 0.0267  |
| rs7744789   | G | -0.0283 |
| rs76637693  | A | -0.076  |
| rs62435615  | T | 0.0391  |
| rs6926924   | T | 0.039   |
| rs10499068  | G | 0.0408  |
| rs62417239  | C | -0.046  |
| rs17548238  | A | 0.1086  |
| rs4715359   | G | 0.0274  |
| rs228433    | G | -0.0285 |
| rs12665556  | A | -0.0278 |
| rs12212842  | T | 0.0457  |
| rs1987789   | A | 0.0297  |
| rs76286838  | T | 0.0901  |
| rs73021276  | T | 0.05    |

|             |   |         |
|-------------|---|---------|
| rs77468769  | T | 0.176   |
| rs117732151 | T | 0.0653  |
| rs77439453  | G | 0.0692  |
| rs4285294   | T | 0.0398  |
| rs7775027   | G | 0.1627  |
| rs147007455 | T | -0.1417 |
| rs35795009  | T | -0.0639 |
| rs13218577  | C | -0.0304 |
| rs12206967  | A | -0.0442 |
| rs12201004  | G | 0.1017  |
| rs667651    | C | 0.0439  |
| rs76219667  | T | 0.0786  |
| rs73027963  | A | -0.0502 |
| rs58920749  | G | 0.0314  |
| rs9370111   | G | -0.0454 |
| rs78455245  | G | -0.0858 |
| rs9393230   | T | 0.0686  |
| rs13209760  | A | -0.0402 |
| rs17619987  | G | -0.1053 |
| rs148094737 | A | -0.0972 |
| rs116893172 | G | -0.0848 |
| rs9390576   | G | 0.0472  |
| rs6907858   | C | 0.0362  |
| rs7747434   | G | 0.0511  |
| rs112379521 | A | 0.1935  |
| rs6571051   | T | -0.0929 |
| rs35591210  | A | -0.0815 |
| rs58167717  | C | 0.0469  |
| rs946971    | C | -0.1876 |
| rs62435863  | A | -0.0482 |
| rs55986107  | G | 0.1061  |
| rs17136721  | A | 0.0694  |
| rs6588711   | T | -0.0426 |
| rs761586    | T | 0.0278  |
| rs117743467 | G | 0.154   |
| rs149447298 | G | 0.1028  |
| rs241590    | A | 0.0574  |
| rs9392901   | T | 0.0301  |
| rs80343086  | T | 0.1415  |
| rs35496612  | C | 0.0699  |
| rs62433240  | A | 0.1116  |
| rs148713892 | A | 0.0793  |
| rs143699786 | T | -0.1575 |
| rs117702298 | G | -0.194  |
| rs117394632 | A | 0.1106  |
| rs150618707 | T | 0.1764  |
| rs2233123   | C | 0.1941  |

|             |   |         |
|-------------|---|---------|
| rs144872584 | C | -0.1507 |
| rs12111375  | C | -0.0274 |
| rs3127355   | T | 0.0284  |
| rs9368070   | C | 0.0287  |
| rs1268125   | T | -0.0288 |
| rs6928488   | C | 0.12    |
| rs6923318   | A | 0.0955  |
| rs2352423   | G | -0.0285 |
| rs12207401  | A | 0.0767  |
| rs9346858   | A | -0.0308 |
| rs6903224   | T | -0.0443 |
| rs114413559 | A | 0.1433  |
| rs75272847  | C | 0.2069  |
| rs141142621 | C | 0.2064  |
| rs76518538  | G | 0.1332  |
| rs1555374   | C | -0.0416 |
| rs1407500   | T | -0.0377 |
| rs12529519  | G | 0.0451  |
| rs116429927 | C | 0.1707  |
| rs12201767  | A | -0.0684 |
| rs117499911 | A | 0.0458  |
| rs9349204   | G | 0.0298  |
| rs115389113 | T | 0.2067  |
| rs9379165   | G | -0.0266 |
| rs9459132   | T | -0.0833 |
| rs1247346   | A | 0.0348  |
| rs72932238  | A | -0.0991 |
| rs9347991   | C | 0.0344  |
| rs56343703  | A | 0.1235  |
| rs115973781 | C | 0.1756  |
| rs115321177 | T | 0.1123  |
| rs1337130   | T | -0.0283 |
| rs12198155  | A | 0.0468  |
| rs56200230  | C | -0.0471 |
| rs57526507  | A | -0.0817 |
| rs73744674  | C | 0.0645  |
| rs62408031  | A | 0.044   |
| rs75459234  | A | -0.154  |
| rs145904713 | T | -0.1196 |
| rs7745749   | A | 0.0266  |
| rs56017398  | C | 0.1404  |
| rs7771311   | C | 0.076   |
| rs141041825 | A | -0.2123 |
| rs149696474 | C | 0.209   |
| rs76229032  | C | -0.1162 |
| rs479736    | G | 0.0534  |
| rs13216865  | A | 0.07    |

|             |   |         |
|-------------|---|---------|
| rs9472286   | A | -0.0751 |
| rs9398464   | T | -0.1398 |
| rs117779266 | T | 0.1348  |
| rs149577990 | A | 0.1849  |
| rs9492388   | G | -0.0283 |
| rs9398952   | G | 0.0758  |
| rs9342603   | T | -0.0367 |
| rs114052356 | T | -0.0868 |
| rs9453939   | T | 0.0561  |
| rs72820159  | T | 0.1274  |
| rs13196356  | A | 0.0385  |
| rs77173746  | T | -0.1358 |
| rs79945133  | G | -0.1809 |
| rs144769391 | A | 0.1198  |
| rs78624661  | G | -0.0948 |
| rs116076878 | T | -0.1027 |
| rs6458854   | G | 0.0289  |
| rs115811491 | A | -0.0896 |
| rs7756474   | G | -0.0363 |
| rs72952499  | A | 0.079   |
| rs4708909   | G | 0.0329  |
| rs12193109  | G | 0.0792  |
| rs12209854  | T | -0.0365 |
| rs117893322 | T | -0.1027 |
| rs12191760  | T | 0.0545  |
| rs1018156   | T | -0.0338 |
| rs72935783  | A | 0.0484  |
| rs6925001   | G | -0.045  |
| rs76699979  | A | 0.1715  |
| rs9486961   | T | 0.067   |
| rs1998794   | G | -0.0294 |
| rs79487282  | C | 0.1126  |
| rs2504373   | C | 0.0274  |
| rs117625717 | G | -0.1604 |
| rs75732053  | A | 0.0787  |
| rs34067087  | T | -0.088  |
| rs7770108   | G | -0.038  |
| rs6914160   | G | 0.0273  |
| rs142848532 | T | -0.0663 |
| rs117780815 | T | -0.0844 |
| rs117630754 | C | -0.1662 |
| rs6569504   | T | -0.0278 |
| rs79415730  | A | 0.0587  |
| rs13215236  | G | -0.1248 |
| rs4543325   | A | -0.1889 |
| rs72900210  | C | 0.075   |
| rs72906955  | T | -0.0307 |

|             |   |         |
|-------------|---|---------|
| rs76958658  | T | -0.0613 |
| rs10214716  | A | 0.0993  |
| rs9367925   | C | -0.031  |
| rs78443670  | T | 0.0573  |
| rs7745268   | C | 0.1028  |
| rs143300159 | G | 0.1645  |
| rs34673899  | G | -0.082  |
| rs73779520  | C | -0.1428 |
| rs1983790   | T | 0.0311  |
| rs4708769   | G | -0.0328 |
| rs4714133   | T | -0.0327 |
| rs6918225   | T | -0.0292 |
| rs62428930  | A | 0.1001  |
| rs2097292   | T | 0.1552  |
| rs75356348  | C | -0.0765 |
| rs117988724 | A | -0.111  |
| rs9351961   | C | -0.0343 |
| rs9460468   | C | 0.0568  |
| rs118184320 | A | 0.0733  |
| rs7776194   | A | 0.0269  |
| rs79629641  | G | -0.1848 |
| rs11757832  | G | -0.0474 |
| rs7743622   | C | 0.0289  |
| rs35383047  | A | 0.0628  |
| rs72939644  | T | 0.0423  |
| rs56050802  | T | -0.086  |
| rs62423458  | G | -0.0966 |
| rs7451929   | A | 0.0765  |
| rs4839735   | C | 0.0323  |
| rs112604384 | T | 0.0489  |
| rs117717426 | G | 0.0954  |
| rs416688    | T | -0.0276 |
| rs111397862 | G | 0.1087  |
| rs854922    | A | 0.0747  |
| rs117955794 | T | -0.1709 |
| rs74788768  | A | 0.2281  |
| rs151203402 | T | -0.1385 |
| rs7742810   | C | -0.0417 |
| rs111327422 | T | 0.1426  |
| rs142141811 | A | 0.132   |
| rs2794724   | G | 0.0389  |
| rs9459015   | C | -0.0645 |
| rs9392557   | C | 0.0455  |
| rs10944722  | A | -0.0291 |
| rs12664633  | A | 0.0977  |
| rs75534946  | G | 0.0841  |
| rs2397078   | G | 0.0274  |



|             |   |         |
|-------------|---|---------|
| rs78335847  | A | 0.068   |
| rs117050722 | T | -0.1475 |
| rs56243433  | G | 0.0385  |
| rs141543627 | C | 0.151   |
| rs9349934   | C | 0.0506  |
| rs6454568   | T | -0.0267 |
| rs657839    | T | -0.0413 |
| rs12208932  | A | 0.0551  |
| rs12524770  | T | -0.0291 |
| rs9259946   | T | 0.0667  |
| rs12614     | T | 0.0475  |
| rs74411444  | C | -0.0526 |
| rs72937728  | G | -0.1131 |
| rs34873203  | C | -0.0974 |
| rs141929042 | T | -0.1405 |
| rs150841634 | G | -0.1112 |
| rs41271563  | T | -0.1688 |
| rs11751849  | C | -0.0749 |
| rs75571551  | C | 0.0688  |
| rs147673809 | A | -0.0863 |
| rs113472089 | A | 0.0621  |
| rs112914546 | C | -0.1584 |
| rs146547348 | C | 0.1677  |
| rs9488815   | T | 0.0979  |
| rs627148    | A | -0.0283 |
| rs9478383   | A | -0.0453 |
| rs113977884 | G | -0.1423 |
| rs10485092  | G | 0.0574  |
| rs111650185 | T | 0.1918  |
| rs9458867   | A | 0.0293  |
| rs705795    | T | 0.0311  |
| rs143771978 | A | -0.1578 |
| rs112046217 | T | -0.0605 |
| rs1472312   | T | -0.062  |
| rs56854777  | A | 0.0351  |
| rs79332350  | G | -0.1758 |
| rs145390496 | A | 0.1282  |
| rs833619    | G | -0.0487 |
| rs13215938  | T | 0.0619  |
| rs991299    | T | 0.0651  |
| rs16887254  | T | -0.1107 |
| rs4706561   | A | 0.0301  |
| rs6937402   | G | 0.0605  |
| rs76018352  | T | 0.0707  |
| rs73028311  | T | -0.1228 |
| rs7740577   | G | -0.0345 |
| rs35119602  | T | 0.1592  |

|             |   |         |
|-------------|---|---------|
| rs115086524 | T | 0.1069  |
| rs1475069   | C | -0.0282 |
| rs169738    | A | 0.0269  |
| rs665947    | T | 0.0335  |
| rs111464978 | G | 0.1139  |
| rs55816872  | G | 0.1488  |
| rs12195819  | G | -0.0328 |
| rs74804103  | G | 0.0587  |
| rs17055011  | C | -0.1344 |
| rs13216697  | C | -0.035  |
| rs112766381 | A | 0.1585  |
| rs184074    | T | -0.0283 |
| rs7745390   | G | 0.0691  |
| rs9459691   | C | 0.0426  |
| rs497085    | G | -0.0318 |
| rs34374374  | C | 0.04    |
| rs6910245   | C | -0.0289 |
| rs74735168  | T | -0.1522 |
| rs2294758   | A | 0.0271  |
| rs116812356 | C | 0.0713  |
| rs12190327  | A | 0.0498  |
| rs7739076   | G | 0.0263  |
| rs6915253   | C | -0.0352 |
| rs77831595  | T | -0.0841 |
| rs146349166 | A | 0.17    |
| rs345723    | T | 0.0501  |
| rs73568231  | A | -0.0703 |
| rs3817758   | C | -0.056  |
| rs13213944  | C | 0.1258  |
| rs62439202  | C | 0.0903  |
| rs11752246  | G | 0.0608  |
| rs9459660   | G | -0.0293 |
| rs4486014   | G | 0.1033  |
| rs10458134  | C | -0.0412 |
| rs117686854 | T | -0.1821 |
| rs115156254 | T | -0.0977 |
| rs12206629  | T | -0.0297 |
| rs116251618 | T | 0.1499  |
| rs6568958   | T | 0.0299  |
| rs11968793  | C | -0.0419 |
| rs9472136   | T | 0.0287  |
| rs114241152 | G | -0.0978 |
| rs77096418  | A | -0.1368 |
| rs117688004 | T | -0.1131 |
| rs834361    | C | 0.028   |
| rs117414992 | A | -0.1635 |
| rs1653097   | C | 0.05    |

|             |   |         |
|-------------|---|---------|
| rs140349825 | T | 0.0936  |
| rs17799548  | A | 0.0966  |
| rs6913277   | A | -0.0415 |
| rs146390294 | C | 0.1688  |
| rs150760759 | T | -0.1893 |
| rs148924541 | T | 0.2305  |
| rs17461965  | T | -0.1746 |
| rs7744596   | G | -0.1072 |
| rs62427297  | G | -0.1477 |
| rs1026152   | T | -0.0758 |
| rs678705    | G | -0.0437 |
| rs111387202 | T | 0.1496  |
| rs117536381 | A | 0.1138  |
| rs2516794   | C | -0.0304 |
| rs61078652  | G | -0.0326 |
| rs62401834  | A | -0.2232 |
| rs7766141   | A | 0.0338  |
| rs62387050  | T | -0.042  |
| rs79415097  | A | -0.0486 |
| rs60205147  | T | -0.04   |
| rs17249399  | G | -0.0817 |
| rs1116435   | A | -0.0288 |
| rs9448789   | T | -0.0769 |
| rs76932775  | C | -0.1084 |
| rs11752897  | A | -0.1364 |
| rs56357508  | G | -0.0877 |
| rs764450    | A | -0.0297 |
| rs115437181 | T | -0.1419 |
| rs73581825  | C | 0.0542  |
| rs142085785 | A | -0.1297 |
| rs9396281   | G | -0.132  |
| rs60119736  | A | -0.123  |
| rs3127345   | G | 0.03    |
| rs79140820  | C | -0.1188 |
| rs2328489   | G | -0.0318 |
| rs2816907   | G | 0.0346  |
| rs34308009  | C | -0.1163 |
| rs111831326 | T | 0.1282  |
| rs17059001  | G | 0.1372  |
| rs76079032  | A | -0.0824 |
| rs7761056   | C | 0.031   |
| rs75908196  | T | -0.0782 |
| rs9352784   | A | 0.04    |
| rs56161613  | G | 0.0357  |
| rs12527800  | A | -0.1023 |
| rs13206199  | C | -0.0261 |
| rs992155    | A | 0.0409  |

|             |   |         |
|-------------|---|---------|
| rs76833262  | A | -0.0633 |
| rs7742985   | C | -0.0341 |
| rs146416114 | A | 0.1218  |
| rs75304158  | G | 0.1282  |
| rs35276016  | T | 0.0637  |
| rs118038583 | G | -0.188  |
| rs13215272  | T | 0.0348  |
| rs235154    | T | 0.1181  |
| rs72853823  | C | 0.0835  |
| rs141787754 | G | 0.1229  |
| rs76563242  | A | 0.1041  |
| rs9368133   | G | 0.0323  |
| rs13215360  | G | 0.036   |
| rs117022147 | C | -0.064  |
| rs146383337 | T | 0.0849  |
| rs117191969 | C | -0.1265 |
| rs143355453 | G | -0.1423 |
| rs148793909 | G | -0.124  |
| rs36092134  | A | 0.0305  |
| rs9405910   | T | 0.04    |
| rs9397289   | T | -0.032  |
| rs78783051  | A | 0.1264  |
| rs56405309  | C | 0.0527  |
| rs72985103  | C | -0.1553 |
| rs13196069  | C | -0.0293 |
| rs2791526   | C | 0.0372  |
| rs115934170 | C | 0.1441  |
| rs72837389  | C | -0.0506 |
| rs79602544  | T | -0.1844 |
| rs397039    | T | -0.0599 |
| rs151093026 | T | -0.0984 |
| rs117279957 | T | -0.1294 |
| rs116844495 | A | 0.2178  |
| rs139752133 | A | 0.1636  |
| rs140119848 | A | 0.1984  |
| rs35769721  | T | 0.0596  |
| rs11756089  | T | 0.0529  |
| rs2813495   | G | -0.0626 |
| rs1833461   | T | 0.0478  |
| rs74762055  | A | 0.043   |
| rs74556434  | C | -0.1472 |
| rs117245225 | T | -0.1288 |
| rs777659    | A | -0.0301 |
| rs9475723   | C | -0.0269 |
| rs12208448  | A | -0.0369 |
| rs9399249   | G | 0.0263  |
| rs4410732   | G | 0.0308  |

|             |   |         |
|-------------|---|---------|
| rs117386492 | T | 0.116   |
| rs2129211   | G | 0.0271  |
| rs733985    | T | 0.0327  |
| rs147486668 | A | -0.1804 |
| rs9502656   | A | 0.1031  |
| rs78091026  | G | -0.0679 |
| rs72832539  | T | 0.1414  |
| rs6571141   | T | 0.0267  |
| rs1367645   | C | 0.0548  |
| rs67827672  | T | 0.0309  |
| rs12208456  | T | 0.117   |
| rs9402791   | C | 0.0343  |
| rs77679733  | C | 0.0745  |
| rs9394877   | A | -0.0588 |
| rs76237797  | A | 0.1676  |
| rs146349001 | G | 0.1198  |
| rs150251345 | C | -0.12   |
| rs150298702 | A | -0.2327 |
| rs73736571  | T | 0.0934  |
| rs9447791   | G | 0.0288  |
| rs62433150  | C | 0.068   |
| rs6918655   | G | -0.0412 |
| rs62422314  | G | -0.0505 |
| rs2019710   | G | 0.0267  |
| rs148716963 | C | -0.1371 |
| rs6915490   | A | -0.0663 |
| rs209512    | C | -0.0347 |
| rs2143134   | A | 0.1226  |
| rs138039007 | C | -0.1072 |
| rs73602366  | A | -0.0721 |
| rs9342624   | T | -0.0273 |
| rs72833450  | G | 0.1698  |
| rs75012252  | T | -0.1242 |
| rs559816    | C | 0.043   |
| rs9397099   | G | 0.0269  |
| rs75844717  | A | -0.1849 |
| rs7748638   | C | -0.0312 |
| rs9451014   | A | 0.0631  |
| rs9296364   | C | 0.0274  |
| rs11758798  | T | -0.0287 |
| rs116966706 | A | 0.0869  |
| rs118185615 | C | 0.1321  |
| rs13193748  | C | -0.1289 |
| rs60141514  | T | 0.0757  |
| rs9496200   | G | 0.1766  |
| rs6903217   | C | 0.0426  |
| rs113422092 | T | 0.1832  |

|             |   |         |
|-------------|---|---------|
| rs12210959  | C | -0.0352 |
| rs9377177   | A | -0.0272 |
| rs13218988  | A | 0.0298  |
| rs2326778   | A | -0.0319 |
| rs34902503  | T | 0.0619  |
| rs75296463  | C | -0.0819 |
| rs316349    | G | 0.0284  |
| rs72894084  | G | 0.0526  |
| rs9402556   | T | 0.0507  |
| rs117965562 | C | 0.2059  |
| rs117734911 | T | 0.0711  |
| rs117968324 | A | -0.1546 |
| rs9384034   | T | -0.0846 |
| rs145796387 | A | 0.1179  |
| rs112444547 | G | -0.118  |
| rs10807156  | A | -0.0317 |
| rs143534836 | G | -0.0858 |
| rs7759040   | T | 0.0381  |
| rs2050041   | T | 0.0297  |
| rs546979    | G | 0.0261  |
| rs13192698  | T | -0.0349 |
| rs72893990  | C | -0.0853 |
| rs2022330   | G | 0.0279  |
| rs10947917  | C | 0.0592  |
| rs9356741   | C | 0.0278  |
| rs4713011   | A | -0.0373 |
| rs76610203  | C | -0.058  |
| rs9470843   | C | -0.0317 |
| rs113873143 | T | -0.1555 |
| rs13197917  | G | 0.0836  |
| rs78109147  | T | -0.0564 |
| rs13196018  | T | -0.065  |
| rs118127217 | A | -0.1744 |
| rs10946106  | T | 0.0325  |
| rs4715912   | G | 0.0343  |
| rs4896416   | T | 0.1591  |
| rs112896523 | T | 0.1688  |
| rs4489132   | T | 0.0339  |
| rs4504494   | A | 0.0589  |
| rs72967400  | T | -0.0423 |
| rs147577133 | G | -0.2044 |
| rs72909593  | T | -0.0532 |
| rs13217025  | C | 0.0726  |
| rs2502557   | G | -0.1235 |
| rs62427796  | A | 0.0893  |
| rs1771743   | C | 0.0265  |
| rs146432781 | T | 0.204   |

|             |   |         |
|-------------|---|---------|
| rs72971882  | G | 0.087   |
| rs17072881  | G | 0.0503  |
| rs117496327 | A | 0.1188  |
| rs2347389   | G | 0.0278  |
| rs149610253 | T | 0.1388  |
| rs3778395   | T | 0.071   |
| rs12209145  | G | -0.0417 |
| rs144277946 | T | 0.1105  |
| rs12204242  | A | -0.0276 |
| rs62436839  | T | -0.1033 |
| rs34105976  | A | 0.0689  |
| rs13203110  | A | -0.0271 |
| rs111799544 | G | 0.1268  |
| rs194905    | G | -0.0292 |
| rs72883023  | T | -0.0703 |
| rs992003    | A | 0.0255  |
| rs143857717 | A | -0.1106 |
| rs72938710  | A | 0.1637  |
| rs113635267 | G | 0.1991  |
| rs818234    | C | -0.0618 |
| rs142094351 | C | 0.237   |
| rs208710    | G | -0.0339 |
| rs62407065  | A | 0.2012  |
| rs144721194 | G | -0.2301 |
| rs9392751   | A | -0.0376 |
| rs72973111  | T | -0.0908 |
| rs76485922  | A | -0.0702 |
| rs73005452  | G | 0.1296  |
| rs79928818  | C | 0.1797  |
| rs596728    | G | 0.0743  |
| rs74514277  | C | 0.1699  |
| rs679410    | A | -0.0256 |
| rs113059453 | C | 0.1296  |
| rs12195685  | A | 0.0465  |
| rs1206684   | A | -0.0272 |
| rs11968396  | T | 0.0751  |
| rs9445435   | G | -0.0274 |
| rs79189509  | A | -0.0965 |
| rs7768772   | T | -0.0406 |
| rs7758822   | T | 0.046   |
| rs75798921  | C | 0.0946  |
| rs80015333  | A | 0.0601  |
| rs72835519  | T | 0.1282  |
| rs62424630  | G | -0.0906 |
| rs522102    | T | 0.0502  |
| rs12208981  | G | 0.0616  |
| rs114115853 | T | -0.1088 |

|             |   |         |
|-------------|---|---------|
| rs111292115 | C | 0.0845  |
| rs117920115 | T | 0.1077  |
| rs62414226  | T | 0.1198  |
| rs55687767  | C | -0.0899 |
| rs946236    | A | 0.0328  |
| rs2346143   | T | 0.0468  |
| rs12205082  | A | 0.0784  |
| rs7454978   | A | 0.0268  |
| rs260262    | G | -0.1401 |
| rs72912321  | A | 0.1226  |
| rs519627    | G | -0.0788 |
| rs117671752 | T | 0.1081  |
| rs76584712  | G | 0.1169  |
| rs9364987   | T | 0.0509  |
| rs35003014  | G | 0.0463  |
| rs7773207   | C | -0.044  |
| rs2050390   | A | 0.039   |
| rs10945638  | A | -0.0361 |
| rs144962245 | A | 0.0944  |
| rs1155391   | A | -0.0967 |
| rs2806359   | G | 0.0311  |
| rs3936066   | C | -0.0396 |
| rs72852580  | C | -0.1662 |
| rs72982069  | A | 0.1279  |
| rs72953812  | G | 0.0648  |
| rs74663579  | C | -0.0704 |
| rs149167447 | A | 0.1627  |
| rs911980    | C | -0.0305 |
| rs150098540 | G | -0.157  |
| rs77126071  | T | 0.0441  |
| rs9402590   | A | -0.1916 |
| rs11964915  | T | 0.0375  |
| rs2237143   | C | 0.0325  |
| rs913500    | G | 0.0262  |
| rs78815011  | T | -0.0655 |
| rs200147    | T | -0.0293 |
| rs74632861  | A | 0.1847  |
| rs972660    | A | -0.0678 |
| rs13219016  | A | -0.0325 |
| rs150614061 | C | 0.1123  |
| rs9503549   | C | -0.0388 |
| rs541668    | C | 0.1336  |
| rs79857964  | T | 0.086   |
| rs72918686  | G | 0.1087  |
| rs12209443  | G | -0.05   |
| rs9405242   | A | 0.0291  |
| rs10484316  | T | 0.0551  |



|             |   |         |
|-------------|---|---------|
| rs75722055  | C | 0.1204  |
| rs113091999 | T | -0.0871 |
| rs9403943   | C | -0.0371 |
| rs9348375   | A | -0.0353 |
| rs77318667  | G | -0.0688 |
| rs10945340  | T | -0.0304 |
| rs7771670   | A | 0.0361  |
| rs2730879   | C | -0.0684 |
| rs76090839  | C | 0.1453  |
| rs8191711   | A | 0.0541  |
| rs77870843  | T | 0.0747  |
| rs74457659  | T | -0.0469 |
| rs9465982   | C | -0.0269 |
| rs75995195  | C | 0.0804  |
| rs1004249   | T | 0.0363  |
| rs116000952 | G | -0.0881 |
| rs62414067  | A | 0.0501  |
| rs3910127   | T | 0.0262  |
| rs118088779 | T | 0.1164  |
| rs13218225  | T | 0.0418  |
| rs113403224 | T | -0.0997 |
| rs34105568  | G | -0.0306 |
| rs145827565 | A | 0.0801  |
| rs78335173  | G | 0.1465  |
| rs12663498  | T | -0.0484 |
| rs4710055   | C | -0.0323 |
| rs71551049  | A | -0.1605 |
| rs144449688 | A | -0.0787 |
| rs75124571  | A | 0.0923  |
| rs2516496   | C | -0.0366 |
| rs72934812  | G | -0.1133 |
| rs6900714   | C | -0.0312 |
| rs10944560  | G | 0.032   |
| rs72986816  | C | -0.0707 |
| rs12214138  | C | -0.0921 |
| rs12526493  | G | -0.055  |
| rs114249958 | T | -0.0601 |
| rs325282    | T | 0.175   |
| rs6938924   | A | 0.0308  |
| rs72828474  | T | 0.0771  |
| rs6928884   | G | -0.0282 |
| rs145048989 | T | 0.1654  |
| rs7767850   | T | 0.1244  |
| rs144032821 | T | -0.0916 |
| rs4870074   | T | 0.1676  |
| rs13191142  | G | 0.0282  |
| rs2277122   | T | -0.0642 |

|             |   |         |
|-------------|---|---------|
| rs1408702   | G | -0.0257 |
| rs806967    | C | 0.1497  |
| rs115096857 | C | -0.109  |
| rs10458158  | T | -0.0669 |
| rs9469619   | G | 0.0267  |
| rs115252352 | G | -0.1081 |
| rs149735795 | T | 0.1831  |
| rs75736006  | G | 0.2185  |
| rs11154337  | C | -0.0253 |
| rs62434322  | T | 0.0486  |
| rs220807    | C | 0.0296  |
| rs11753974  | A | -0.0542 |
| rs4716240   | T | -0.0379 |
| rs143924044 | T | -0.1154 |
| rs36105216  | T | 0.1468  |
| rs9363066   | G | -0.0334 |
| rs17133185  | T | -0.0472 |
| rs10458098  | T | 0.042   |
| rs12663119  | C | 0.0269  |
| rs314279    | C | -0.0421 |
| rs117813850 | G | -0.1305 |
| rs9504407   | A | 0.1103  |
| rs148861418 | T | -0.1513 |
| rs79821177  | A | 0.1241  |
| rs3799487   | A | -0.0274 |
| rs79489282  | A | 0.0422  |
| rs115170333 | C | -0.0706 |
| rs72969120  | G | 0.1038  |
| rs13195122  | G | -0.0443 |
| rs73585947  | T | -0.0834 |
| rs534403    | A | -0.0298 |
| rs59112287  | G | -0.0878 |
| rs2763223   | A | 0.025   |
| rs72843321  | G | 0.1447  |
| rs7739014   | C | 0.0266  |
| rs7754269   | C | 0.048   |
| rs4254985   | C | -0.0293 |
| rs12529287  | C | -0.0326 |
| rs2237182   | T | 0.0312  |
| rs41271265  | A | -0.1667 |
| rs117253359 | G | -0.1472 |
| rs9369226   | A | 0.031   |
| rs11757190  | G | 0.063   |
| rs62402384  | T | 0.1913  |
| rs13194787  | A | -0.0566 |
| rs117974886 | T | 0.1271  |
| rs149916263 | A | 0.2264  |

|             |   |         |
|-------------|---|---------|
| rs4959165   | G | -0.0505 |
| rs12523847  | A | -0.0403 |
| rs9345569   | T | 0.0348  |
| rs7763653   | A | -0.0263 |
| rs6458488   | A | -0.0261 |
| rs143865469 | T | 0.1724  |
| rs116132952 | T | 0.0582  |
| rs138731606 | A | -0.1761 |
| rs62422088  | G | -0.0821 |
| rs9486212   | G | 0.0779  |
| rs4548040   | A | 0.0299  |
| rs62434225  | T | -0.0626 |
| rs74435128  | A | -0.1088 |
| rs118128194 | C | -0.1552 |
| rs2684257   | C | -0.0316 |
| rs62423609  | A | -0.0891 |
| rs1998402   | G | 0.0287  |
| rs11751523  | T | -0.1475 |
| rs112742256 | G | -0.0648 |
| rs80004866  | T | -0.1548 |
| rs148363209 | A | -0.1066 |
| rs80205892  | A | 0.1217  |
| rs115832614 | C | -0.1287 |
| rs116793067 | T | -0.1603 |
| rs4713944   | G | 0.0294  |
| rs10948107  | A | 0.0295  |
| rs75520503  | C | 0.1159  |
| rs9450118   | C | -0.026  |
| rs9456745   | G | -0.0281 |
| rs72894003  | T | -0.0944 |
| rs11758603  | A | -0.1292 |
| rs221655    | A | 0.0472  |
| rs9367880   | T | -0.0278 |
| rs79523120  | C | -0.1278 |
| rs17079407  | C | -0.0335 |
| rs3800052   | T | 0.0493  |
| rs2841296   | C | -0.0386 |
| rs160669    | T | 0.0338  |
| rs6920024   | A | -0.033  |
| rs115221241 | A | -0.1515 |
| rs1744401   | T | 0.0425  |
| rs16875524  | A | -0.0942 |
| rs210648    | A | 0.0265  |
| rs116908047 | G | 0.186   |
| rs9359692   | T | -0.0295 |
| rs9400317   | A | 0.0372  |
| rs117305571 | A | -0.0466 |

|             |   |         |
|-------------|---|---------|
| rs117720371 | C | 0.2039  |
| rs1537648   | T | -0.1045 |
| rs62435672  | T | -0.0469 |
| rs3127182   | G | 0.03    |
| rs78343911  | C | 0.1182  |
| rs78276919  | T | -0.1274 |
| rs116490940 | T | -0.0465 |
| rs59788088  | G | 0.1858  |
| rs17056587  | T | -0.0989 |
| rs62431949  | T | 0.1952  |
| rs12206918  | T | 0.0346  |
| rs76750040  | A | -0.1095 |
| rs4635987   | A | -0.0419 |
| rs34919380  | C | 0.0518  |
| rs9486811   | A | -0.0421 |
| rs184702    | A | -0.0256 |
| rs12192672  | A | -0.0285 |
| rs1924672   | A | -0.0265 |
| rs142640758 | T | -0.1203 |
| rs11960975  | A | 0.1035  |
| rs141394783 | A | 0.1198  |
| rs7742367   | C | 0.033   |
| rs514998    | A | 0.0301  |
| rs10080782  | G | 0.0399  |
| rs74834193  | G | 0.16    |
| rs9394738   | A | 0.0309  |
| rs73466165  | G | -0.0815 |
| rs9480770   | C | 0.0462  |
| rs78496280  | T | -0.1081 |
| rs1327658   | C | -0.0295 |
| rs3829966   | T | 0.0436  |
| rs6458697   | G | 0.1018  |
| rs76611500  | A | -0.0419 |
| rs146872954 | A | -0.1708 |
| rs809709    | T | 0.0667  |
| rs150856119 | A | -0.1112 |
| rs55725944  | G | -0.0741 |
| rs2181001   | C | 0.1682  |
| rs72946188  | A | -0.058  |
| rs140534836 | T | -0.0989 |
| rs117688739 | A | 0.1137  |
| rs9398296   | T | -0.0363 |
| rs72875001  | T | -0.0691 |
| rs72985338  | G | -0.1526 |
| rs12191131  | G | -0.0681 |
| rs73733283  | G | 0.0634  |
| rs77304534  | G | 0.1449  |

|             |   |         |
|-------------|---|---------|
| rs77830739  | C | 0.1033  |
| rs1150859   | C | -0.0309 |
| rs6941160   | A | 0.0333  |
| rs9504399   | A | -0.084  |
| rs118126013 | C | 0.1608  |
| rs4538721   | A | 0.0294  |
| rs9295503   | G | -0.0392 |
| rs117690601 | A | 0.135   |
| rs9488268   | A | 0.0255  |
| rs80048846  | G | 0.1648  |
| rs55860916  | T | -0.0926 |
| rs7742134   | T | -0.0262 |
| rs1333712   | T | -0.0337 |
| rs2787863   | T | 0.0308  |
| rs9470617   | A | 0.0266  |
| rs2478348   | A | 0.0266  |
| rs9451249   | C | -0.034  |
| rs116887248 | A | 0.1968  |
| rs7770576   | G | 0.0514  |
| rs2736191   | G | -0.0784 |
| rs3804475   | T | 0.0993  |
| rs72829890  | C | -0.2304 |
| rs72976570  | A | -0.0903 |
| rs16878011  | C | -0.039  |
| rs6910572   | C | -0.0484 |
| rs72864223  | A | 0.0933  |
| rs117840142 | A | 0.1848  |
| rs9376782   | G | 0.0254  |
| rs17860605  | T | -0.1427 |
| rs1267718   | T | 0.0269  |
| rs115650132 | G | -0.078  |
| rs11759436  | G | -0.0612 |
| rs55969543  | A | -0.0494 |
| rs72508445  | T | -0.0799 |
| rs145171871 | T | 0.1619  |
| rs12189839  | C | -0.1954 |
| rs17625558  | C | -0.0281 |
| rs78413805  | G | -0.1184 |
| rs62432923  | A | -0.2056 |
| rs72980278  | T | 0.1303  |
| rs10872467  | G | 0.028   |
| rs1524094   | G | 0.0317  |
| rs141298105 | A | -0.1477 |
| rs78255807  | T | -0.102  |
| rs4707913   | C | 0.0266  |
| rs552195    | G | 0.0268  |
| rs9497876   | C | 0.029   |

|             |   |         |
|-------------|---|---------|
| rs732594    | A | 0.0258  |
| rs10484785  | A | -0.044  |
| rs1012614   | T | -0.0347 |
| rs9478527   | C | 0.025   |
| rs116727946 | G | -0.1285 |
| rs13202103  | T | 0.1112  |
| rs78147575  | T | 0.0836  |
| rs142811849 | A | -0.1438 |
| rs77526660  | C | 0.0709  |
| rs145101359 | A | 0.1216  |
| rs2072737   | A | 0.1277  |
| rs520650    | T | -0.0424 |
| rs4706267   | A | -0.0304 |
| rs4706353   | C | 0.0287  |
| rs7356971   | T | 0.0452  |
| rs2473530   | G | 0.0293  |
| rs2048697   | G | -0.0791 |
| rs6570177   | T | -0.0614 |
| rs12192005  | G | 0.1377  |
| rs9389952   | T | 0.0318  |
| rs4895757   | T | -0.1028 |
| rs76841661  | A | 0.0745  |
| rs12190211  | T | 0.0969  |
| rs72927679  | T | -0.0336 |
| rs75094054  | A | -0.2151 |
| rs1753528   | G | -0.0515 |
| rs144879235 | A | -0.2579 |
| rs6910651   | G | 0.0482  |
| rs11752282  | A | -0.0539 |
| rs12202601  | C | -0.0471 |
| rs2268413   | C | 0.0363  |
| rs488429    | C | 0.0447  |
| rs293339    | A | 0.0705  |
| rs76757415  | A | 0.0971  |
| rs117085260 | G | 0.0541  |
| rs2499783   | A | 0.026   |
| rs2343401   | T | 0.0263  |
| rs72899385  | A | 0.0789  |
| rs4706286   | A | 0.0497  |
| rs79555856  | C | -0.0584 |
| rs115764614 | T | 0.1368  |
| rs151082774 | G | 0.1261  |
| rs76174726  | C | 0.1386  |
| rs12525069  | A | 0.086   |
| rs11963727  | T | 0.0418  |
| rs77787390  | T | 0.0873  |
| rs7746355   | C | -0.0298 |

|             |   |         |
|-------------|---|---------|
| rs75495146  | T | -0.0826 |
| rs115936553 | G | 0.1364  |
| rs72928307  | T | 0.2455  |
| rs7741731   | C | 0.0345  |
| rs199253    | C | -0.0256 |
| rs17755831  | A | -0.0689 |
| rs144061592 | T | 0.1526  |
| rs4376392   | C | 0.0299  |
| rs34490153  | T | -0.0658 |
| rs117088982 | T | 0.1529  |
| rs149602099 | G | 0.1124  |
| rs9365333   | C | 0.0286  |
| rs34976370  | A | 0.0842  |
| rs164292    | T | -0.0264 |
| rs117514503 | A | 0.1048  |
| rs9396905   | A | 0.0455  |
| rs75738717  | T | 0.0493  |
| rs72940140  | G | -0.0781 |
| rs3734227   | T | -0.0276 |
| rs9378895   | T | -0.0367 |
| rs117498596 | G | 0.2322  |
| rs12202427  | T | 0.053   |
| rs144783080 | C | 0.0689  |
| rs80298718  | C | 0.0749  |
| rs6456184   | A | -0.0325 |
| rs2092588   | T | -0.1262 |
| rs17682588  | C | -0.0464 |
| rs112654316 | C | -0.1397 |
| rs220806    | T | 0.032   |
| rs76055944  | T | -0.101  |
| rs851854    | C | 0.0371  |
| rs6916789   | G | -0.0261 |
| rs62427302  | A | 0.0836  |
| rs12213948  | G | 0.0252  |
| rs73430420  | G | 0.0527  |
| rs17700293  | C | -0.1031 |
| rs12199102  | A | -0.0624 |
| rs10458089  | T | -0.0475 |
| rs201059    | T | 0.0276  |
| rs76161919  | T | 0.118   |
| rs117540703 | T | -0.1156 |
| rs72951358  | A | 0.1161  |
| rs12204448  | T | -0.0276 |
| rs1886237   | C | 0.0256  |
| rs9383267   | A | 0.029   |
| rs147466660 | T | -0.0871 |
| rs147375668 | G | -0.0756 |

|             |   |         |
|-------------|---|---------|
| rs879836    | G | 0.0857  |
| rs9379773   | C | -0.0928 |
| rs9296461   | T | -0.0256 |
| rs1510296   | C | -0.0572 |
| rs578774    | A | 0.0314  |
| rs4354186   | G | -0.0935 |
| rs1042303   | C | 0.0255  |
| rs76222979  | T | 0.1553  |
| rs117903444 | G | 0.0857  |
| rs4896446   | C | 0.027   |
| rs4286768   | C | 0.0482  |
| rs34892827  | T | -0.1027 |
| rs7750925   | G | 0.0279  |
| rs75268172  | G | -0.0901 |
| rs62440942  | T | 0.0303  |
| rs74353552  | A | 0.0627  |
| rs73598152  | T | 0.0782  |
| rs1923380   | G | 0.0281  |
| rs1028488   | T | -0.0274 |
| rs12203600  | A | 0.1044  |
| rs116711810 | T | -0.1477 |
| rs117499567 | T | -0.0755 |
| rs35878453  | T | -0.1099 |
| rs113169770 | G | 0.1184  |
| rs56017032  | C | 0.0636  |
| rs1340024   | A | 0.0251  |
| rs35511533  | G | 0.0692  |
| rs77504727  | T | -0.0473 |
| rs117686005 | T | 0.107   |
| rs9320326   | G | -0.0319 |
| rs117197673 | C | 0.1281  |
| rs62427182  | T | -0.2255 |
| rs114172887 | T | 0.149   |
| rs1742936   | G | 0.0273  |
| rs58738575  | T | 0.0449  |
| rs78189219  | T | -0.1525 |
| rs11756223  | C | 0.1749  |
| rs4708457   | A | -0.1452 |
| rs9446510   | T | 0.0399  |
| rs74551974  | C | 0.0992  |
| rs7761674   | G | 0.0267  |
| rs147938885 | T | 0.1328  |
| rs11243308  | T | 0.053   |
| rs10458214  | G | -0.1004 |
| rs74351111  | G | -0.0701 |
| rs12660584  | G | 0.0648  |
| rs12204970  | A | -0.0355 |



|             |   |         |
|-------------|---|---------|
| rs2064717   | T | 0.026   |
| rs12663386  | T | -0.0676 |
| rs117029258 | A | -0.1049 |
| rs76437321  | T | -0.0872 |
| rs13204576  | A | -0.0447 |
| rs144276244 | G | -0.1929 |
| rs75346070  | G | 0.0608  |
| rs17061980  | C | 0.0437  |
| rs2206790   | A | 0.028   |
| rs62386474  | G | -0.172  |
| rs146575762 | C | -0.1129 |
| rs115578397 | G | -0.0619 |
| rs143080784 | A | -0.1847 |
| rs13215565  | C | -0.0439 |
| rs341120    | T | 0.0261  |
| rs12214102  | G | 0.1699  |
| rs17087543  | C | 0.1456  |
| rs17457033  | A | 0.1098  |
| rs9452458   | G | 0.0981  |
| rs9482897   | G | 0.0463  |
| rs76517316  | A | 0.2104  |
| rs111797764 | T | 0.0936  |
| rs3793099   | G | -0.0288 |
| rs72556062  | G | -0.0658 |
| rs11571907  | A | 0.1629  |
| rs9450932   | T | -0.0575 |
| rs146758088 | T | -0.1401 |
| rs6915317   | G | -0.1176 |
| rs12197878  | T | -0.0833 |
| rs17282486  | G | 0.0547  |
| rs11756761  | G | -0.0706 |
| rs677882    | T | 0.0384  |
| rs2397084   | C | -0.0446 |
| rs1999630   | A | 0.0451  |
| rs77158231  | A | 0.2346  |
| rs147340884 | T | 0.1235  |
| rs6928745   | T | 0.0308  |
| rs6910588   | C | -0.0358 |
| rs9367023   | G | 0.0448  |
| rs139842749 | T | -0.1376 |
| rs9473594   | C | 0.0256  |
| rs3798502   | G | 0.0345  |
| rs12203067  | A | -0.0271 |
| rs2007513   | T | 0.0279  |
| rs4708544   | A | -0.0255 |
| rs9378628   | C | -0.0364 |
| rs55944368  | T | 0.0543  |

|             |   |         |
|-------------|---|---------|
| rs114889417 | G | -0.1185 |
| rs667878    | A | 0.0394  |
| rs35697401  | G | 0.0549  |
| rs1878474   | T | -0.0447 |
| rs113809508 | A | 0.1076  |
| rs74298291  | T | -0.0427 |
| rs75025485  | G | 0.0699  |
| rs116906662 | T | -0.0499 |
| rs225598    | T | 0.0294  |
| rs2245544   | T | -0.0869 |
| rs113778034 | A | 0.0869  |
| rs72999359  | C | 0.0707  |
| rs9295070   | A | 0.0286  |
| rs9383292   | C | 0.0253  |
| rs10948312  | A | -0.0281 |
| rs114530284 | C | 0.1265  |
| rs12192867  | T | 0.0349  |
| rs149933495 | G | -0.1102 |
| rs116986790 | G | 0.1987  |
| rs12664966  | C | -0.0344 |
| rs76379071  | C | -0.0423 |
| rs74650648  | T | -0.124  |
| rs4716419   | A | -0.0287 |
| rs1350849   | T | -0.0309 |
| rs114241659 | G | 0.109   |
| rs117490467 | A | 0.0398  |
| rs9463509   | A | -0.0703 |
| rs1361250   | T | -0.1121 |
| rs72952000  | A | 0.2245  |
| rs2756310   | T | 0.0278  |
| rs572618    | T | -0.026  |
| rs74431853  | C | -0.0798 |
| rs150509868 | C | -0.1151 |
| rs932364    | T | 0.0258  |
| rs12527619  | C | 0.1065  |
| rs12216323  | C | 0.0364  |
| rs113713640 | C | 0.2248  |
| rs75570474  | A | 0.1399  |
| rs116524264 | A | 0.1394  |
| rs76196757  | A | 0.09    |
| rs9350674   | G | -0.0341 |
| rs77441054  | T | 0.1373  |
| rs111993255 | C | 0.1319  |
| rs448116    | G | 0.0732  |
| rs76296427  | A | 0.2094  |
| rs78938408  | C | -0.1001 |
| rs78691829  | A | -0.112  |

|             |   |         |
|-------------|---|---------|
| rs753501    | C | 0.0718  |
| rs10457622  | C | 0.0572  |
| rs140215863 | T | 0.2201  |
| rs7757694   | C | 0.0406  |
| rs142649634 | A | -0.1707 |
| rs4946883   | A | -0.034  |
| rs35815032  | C | 0.0464  |
| rs73577104  | T | -0.0296 |
| rs113596345 | G | -0.0751 |
| rs142586950 | T | -0.096  |
| rs9328424   | C | -0.0613 |
| rs117442943 | T | -0.1291 |
| rs4714350   | A | 0.0377  |
| rs12525942  | A | 0.0717  |
| rs9370222   | G | 0.0536  |
| rs7768134   | T | 0.0344  |
| rs7764390   | C | -0.0284 |
| rs10457675  | C | -0.027  |
| rs12527711  | T | 0.0322  |
| rs72822638  | A | -0.0616 |
| rs260281    | C | 0.0567  |
| rs486872    | T | 0.0906  |
| rs6904939   | G | 0.1545  |
| rs145655884 | T | 0.1001  |
| rs13211003  | A | 0.041   |
| rs116538677 | C | 0.1256  |
| rs74970833  | C | 0.0905  |
| rs144358253 | C | -0.0881 |
| rs1884260   | G | 0.0254  |
| rs138324910 | A | 0.0574  |
| rs12664955  | C | 0.0533  |
| rs1454452   | G | -0.1257 |
| rs1775848   | A | 0.0283  |
| rs139717215 | C | 0.2032  |
| rs6926406   | A | 0.043   |
| rs499095    | T | 0.0645  |
| rs75813914  | A | 0.1502  |
| rs61738623  | G | 0.1766  |
| rs55736098  | C | -0.126  |
| rs1079153   | C | 0.1501  |
| rs2817198   | G | -0.0322 |
| rs35323107  | T | 0.1346  |
| rs41329645  | T | -0.0483 |
| rs144754163 | T | 0.1347  |
| rs2184404   | T | -0.0265 |
| rs79637224  | G | -0.1138 |
| rs4947045   | A | 0.0539  |

|             |   |         |
|-------------|---|---------|
| rs1281989   | A | -0.0429 |
| rs78743834  | G | 0.0704  |
| rs12190821  | A | 0.0685  |
| rs3899143   | T | 0.103   |
| rs2270450   | T | -0.0276 |
| rs117761418 | A | -0.0749 |
| rs10872479  | A | -0.0247 |
| rs7765751   | T | -0.0357 |
| rs145078743 | A | 0.1344  |
| rs114951432 | T | 0.1768  |
| rs142911321 | C | 0.1379  |
| rs2354223   | G | 0.0245  |
| rs761589    | G | 0.0245  |
| rs17072327  | G | 0.1371  |
| rs9377096   | C | 0.0245  |
| rs138799654 | A | -0.1574 |
| rs148844446 | T | 0.1049  |
| rs11751308  | T | 0.0277  |
| rs706983    | C | -0.0264 |
| rs9385497   | G | 0.0393  |
| rs9351099   | T | 0.0507  |
| rs12214118  | G | 0.0309  |
| rs553920    | T | 0.0288  |
| rs148620558 | C | -0.1344 |
| rs7753252   | A | -0.0251 |
| rs149645488 | G | -0.1776 |
| rs2181914   | T | 0.0637  |
| rs9465438   | A | -0.064  |
| rs80160802  | C | -0.0772 |
| rs9322466   | T | 0.0308  |
| rs55817623  | T | -0.1521 |
| rs61212666  | A | 0.0782  |
| rs35446748  | G | 0.0835  |
| rs62414157  | T | -0.2084 |
| rs13203149  | C | 0.0432  |
| rs79947552  | G | -0.0893 |
| rs12195072  | C | -0.0384 |
| rs6936357   | C | 0.1151  |
| rs117443792 | A | 0.093   |
| rs2465051   | G | -0.0314 |
| rs55655549  | A | 0.1432  |
| rs117345902 | A | -0.1224 |
| rs6456268   | T | -0.0269 |
| rs10807343  | C | -0.0249 |
| rs9454965   | G | 0.0372  |
| rs75941117  | T | -0.0551 |
| rs9398022   | G | 0.0258  |

|             |   |         |
|-------------|---|---------|
| rs34364852  | C | -0.0741 |
| rs72850897  | T | 0.0934  |
| rs11153695  | G | -0.0331 |
| rs12661010  | G | 0.0909  |
| rs34908129  | T | 0.0282  |
| rs761264    | G | 0.0314  |
| rs140036576 | T | -0.0867 |
| rs55674325  | C | 0.0993  |
| rs9321908   | T | -0.0291 |
| rs77841332  | A | -0.1855 |
| rs11242989  | C | -0.0902 |
| rs6921521   | T | 0.0777  |
| rs79494367  | A | -0.1192 |
| rs111766406 | A | 0.1655  |
| rs1018437   | C | 0.0245  |
| rs112582793 | T | 0.2049  |
| rs78047683  | A | 0.1038  |
| rs61020617  | T | 0.1931  |
| rs1868033   | T | 0.0598  |
| rs1538741   | A | -0.0296 |
| rs62398159  | A | 0.0247  |
| rs79842528  | C | -0.1267 |
| rs7773079   | T | -0.1254 |
| rs142544311 | A | -0.1313 |
| rs9489310   | G | -0.0339 |
| rs35433555  | T | 0.1464  |
| rs1053657   | T | 0.0384  |
| rs73028012  | A | -0.0342 |
| rs9379881   | C | -0.0251 |
| rs2792833   | G | 0.0252  |
| rs17619477  | C | 0.028   |
| rs140113386 | G | 0.1067  |
| rs139352951 | G | -0.1331 |
| rs9445162   | T | 0.0967  |
| rs9388755   | G | -0.0831 |
| rs72976125  | C | -0.0434 |
| rs10223767  | A | 0.0373  |
| rs1741740   | A | -0.0328 |
| rs113830967 | T | 0.0466  |
| rs76808173  | T | 0.0816  |
| rs17165381  | T | 0.0328  |
| rs5003438   | C | 0.0301  |
| rs57463781  | C | 0.026   |
| rs72851396  | A | 0.1202  |
| rs9357771   | A | 0.0678  |
| rs58482981  | C | 0.1161  |
| rs9350145   | C | 0.0458  |

|             |   |         |
|-------------|---|---------|
| rs117609185 | A | 0.1388  |
| rs1192460   | G | 0.0673  |
| rs756258    | G | 0.0348  |
| rs2143435   | C | 0.0681  |
| rs2498635   | T | -0.0289 |
| rs149001409 | A | 0.1011  |
| rs115970361 | T | 0.0833  |
| rs56338633  | T | 0.1212  |
| rs35559591  | C | -0.0468 |
| rs9386758   | C | 0.0902  |
| rs1740391   | G | -0.078  |
| rs9478923   | A | -0.0894 |
| rs56148603  | T | -0.0805 |
| rs72958295  | G | -0.1277 |
| rs118160454 | T | 0.0758  |
| rs3778036   | C | -0.047  |
| rs16873750  | T | 0.0343  |
| rs117933944 | G | -0.2219 |
| rs151009732 | G | -0.0816 |
| rs145703514 | A | -0.0678 |
| rs115601680 | T | 0.1514  |
| rs533558    | G | -0.0256 |
| rs117428900 | A | -0.0758 |
| rs445099    | T | -0.0245 |
| rs12529720  | T | -0.1284 |
| rs2474881   | T | -0.0589 |
| rs12208748  | C | 0.164   |
| rs1884043   | C | -0.05   |
| rs7756308   | G | -0.0266 |
| rs80334334  | T | 0.1709  |
| rs111269462 | T | 0.0706  |
| rs12206105  | A | -0.0919 |
| rs116854053 | G | -0.0829 |
| rs149641711 | C | 0.127   |
| rs28362859  | C | 0.0704  |
| rs114872545 | G | 0.126   |
| rs75081520  | A | -0.1047 |
| rs76640217  | G | 0.0801  |
| rs79487230  | T | -0.0702 |
| rs76114578  | T | -0.117  |
| rs117750703 | T | 0.1002  |
| rs79203373  | G | -0.0704 |
| rs9353530   | T | 0.0353  |
| rs117487548 | C | -0.0791 |
| rs1157673   | T | 0.0297  |
| rs9332739   | C | -0.0633 |
| rs35164930  | C | -0.0481 |

|             |   |         |
|-------------|---|---------|
| rs115392940 | G | -0.1781 |
| rs74497537  | T | 0.1416  |
| rs6571213   | A | 0.0301  |
| rs117466474 | T | -0.1241 |
| rs341100    | A | 0.0614  |
| rs73029313  | A | -0.0476 |
| rs111801092 | G | -0.1623 |
| rs9321593   | T | -0.026  |
| rs116961316 | G | -0.0911 |
| rs2326108   | T | 0.0307  |
| rs7741210   | T | 0.0246  |
| rs1334742   | G | -0.0509 |
| rs4389767   | C | 0.0326  |
| rs3857494   | T | 0.0315  |
| rs1010578   | C | -0.0417 |
| rs146063859 | A | -0.1666 |
| rs147375849 | C | 0.0838  |
| rs391116    | T | 0.0454  |
| rs76917465  | G | 0.1366  |
| rs1819138   | T | 0.0491  |
| rs112332078 | G | -0.1283 |
| rs74571545  | C | -0.1018 |
| rs142603887 | A | -0.1024 |
| rs1546295   | A | 0.1269  |
| rs139930823 | A | -0.1086 |
| rs4711688   | G | -0.0515 |
| rs79732956  | A | 0.0782  |
| rs17057971  | A | 0.0491  |
| rs78377552  | A | -0.0854 |
| rs7768498   | C | 0.1448  |
| rs9393657   | A | 0.1087  |
| rs4707174   | C | 0.0264  |
| rs34482073  | T | -0.0355 |
| rs59258015  | A | 0.1221  |
| rs150029778 | C | 0.1435  |
| rs4897265   | G | -0.0546 |
| rs9483364   | A | -0.0265 |
| rs9480049   | G | -0.0365 |
| rs117142782 | T | 0.1133  |
| rs4959569   | C | 0.0266  |
| rs71542803  | A | 0.0317  |
| rs80292163  | G | 0.164   |
| rs9344606   | T | -0.0352 |
| rs6570212   | G | 0.1065  |
| rs55879925  | T | -0.1201 |
| rs74513734  | T | 0.132   |
| rs77155695  | T | 0.0946  |

|             |   |         |
|-------------|---|---------|
| rs10484348  | C | -0.0253 |
| rs13192566  | C | 0.0663  |
| rs41270547  | T | 0.0715  |
| rs117269303 | T | -0.1071 |
| rs9389161   | A | 0.0305  |
| rs148426815 | T | 0.0642  |
| rs2503808   | A | -0.0246 |
| rs9367892   | G | 0.0241  |
| rs142390964 | G | -0.1101 |
| rs145505764 | T | -0.1624 |
| rs115983673 | C | 0.1207  |
| rs79631836  | T | -0.1135 |
| rs76913619  | G | -0.1544 |
| rs4896142   | G | -0.0318 |
| rs113183292 | G | -0.0697 |
| rs77366010  | C | -0.098  |
| rs12195708  | A | 0.0251  |
| rs311333    | C | -0.1213 |
| rs6557372   | A | -0.08   |
| rs231948    | A | -0.024  |
| rs114634557 | T | -0.154  |
| rs77901469  | T | 0.1006  |
| rs75062250  | T | 0.1046  |
| rs9494704   | C | -0.0358 |
| rs4267945   | G | -0.0301 |
| rs78116090  | G | 0.1424  |
| rs72944663  | A | 0.0819  |
| rs13215842  | A | 0.0388  |
| rs113330361 | A | -0.1011 |
| rs9502003   | G | -0.0279 |
| rs1223541   | T | -0.0301 |
| rs76787405  | A | -0.0368 |
| rs150343013 | A | -0.0576 |
| rs11759826  | A | 0.0337  |
| rs12212322  | G | -0.0306 |
| rs11961231  | T | 0.042   |
| rs2814811   | A | -0.0238 |
| rs116428991 | G | -0.1504 |
| rs77710623  | T | -0.0461 |
| rs74847142  | T | -0.0804 |
| rs9478187   | A | 0.0264  |
| rs2325102   | G | -0.0265 |
| rs2502052   | T | 0.0277  |
| rs9460118   | A | -0.1302 |
| rs7762265   | T | -0.0313 |
| rs146847092 | A | -0.2303 |
| rs12195532  | T | 0.1941  |



|             |   |         |
|-------------|---|---------|
| rs7759459   | G | -0.0705 |
| rs117298099 | A | 0.0883  |
| rs3897190   | A | -0.0251 |
| rs111551979 | A | -0.1523 |
| rs9348511   | A | 0.0893  |
| rs113689403 | C | -0.0408 |
| rs34086921  | C | 0.0958  |
| rs117342682 | T | 0.2184  |
| rs141060403 | A | 0.1056  |
| rs12663346  | T | 0.0477  |
| rs6906931   | G | -0.0455 |
| rs6937783   | G | -0.0259 |
| rs9340941   | T | 0.0607  |
| rs6906255   | T | 0.0466  |
| rs9356797   | G | -0.051  |
| rs77803031  | C | -0.087  |
| rs9399099   | T | 0.0263  |
| rs78448316  | A | -0.0404 |
| rs34905593  | A | 0.1558  |
| rs7773088   | A | 0.0313  |
| rs115840307 | C | 0.1389  |
| rs116023803 | G | 0.0851  |
| rs16877518  | C | 0.0546  |
| rs7748986   | C | 0.0616  |
| rs78845160  | G | -0.1447 |
| rs4712891   | T | -0.0241 |
| rs145348074 | G | -0.1896 |
| rs6921813   | C | -0.0351 |
| rs114664730 | C | 0.1773  |
| rs62419018  | A | -0.1492 |
| rs12204923  | G | 0.18    |
| rs79398870  | C | 0.0432  |
| rs2219900   | A | -0.0247 |
| rs9388823   | G | 0.079   |
| rs78569722  | T | -0.076  |
| rs139247086 | A | 0.09    |
| rs9486503   | G | -0.0369 |
| rs117133344 | T | -0.0504 |
| rs6934514   | G | 0.029   |
| rs2064082   | T | -0.034  |
| rs9382909   | T | 0.0988  |
| rs145915312 | A | 0.1715  |
| rs112143946 | C | 0.1524  |
| rs9495578   | A | -0.0467 |
| rs9458693   | T | 0.0592  |
| rs4618518   | T | -0.0313 |
| rs17813462  | C | 0.0406  |

|             |   |         |
|-------------|---|---------|
| rs17442147  | C | -0.07   |
| rs115390893 | C | 0.0965  |
| rs138015700 | G | -0.1311 |
| rs116443688 | T | -0.0605 |
| rs7760960   | T | 0.0245  |
| rs12201082  | A | 0.0548  |
| rs6908210   | T | -0.0567 |
| rs114101672 | A | 0.1012  |
| rs7740988   | A | 0.072   |
| rs146479959 | T | 0.1194  |
| rs115161131 | A | -0.0392 |
| rs1555906   | A | -0.0261 |
| rs56109946  | C | -0.0796 |
| rs4540281   | C | 0.0301  |
| rs115583461 | T | 0.1054  |
| rs79764119  | T | -0.0401 |
| rs142852510 | A | -0.0756 |
| rs147887670 | C | -0.1182 |
| rs148176197 | A | 0.1398  |
| rs6913445   | G | -0.0248 |
| rs73012119  | G | -0.0385 |
| rs9351064   | C | -0.0433 |
| rs13192271  | G | -0.1398 |
| rs74641219  | A | -0.123  |
| rs111323259 | G | 0.2102  |
| rs6904241   | G | -0.0247 |
| rs11758691  | T | 0.0502  |
| rs522123    | A | -0.033  |
| rs6921201   | C | -0.0251 |
| rs7750360   | G | 0.1564  |
| rs9396681   | C | -0.0453 |
| rs9259033   | T | -0.0309 |
| rs873690    | C | 0.0575  |
| rs113311090 | A | -0.1539 |
| rs6926520   | G | 0.0281  |
| rs13205403  | A | 0.0383  |
| rs13205057  | G | -0.1391 |
| rs62426708  | A | 0.0372  |
| rs117291065 | C | 0.1411  |
| rs55697625  | T | 0.0826  |
| rs139399426 | T | -0.0532 |
| rs12208562  | A | -0.0544 |
| rs7747167   | G | 0.0238  |
| rs72970257  | A | 0.0868  |
| rs1033181   | A | 0.0569  |
| rs61583620  | T | 0.0415  |
| rs74600361  | A | 0.1397  |

|             |   |         |
|-------------|---|---------|
| rs34804693  | T | 0.0426  |
| rs117858056 | A | -0.0709 |
| rs6934673   | T | 0.0366  |
| rs72893153  | C | 0.0431  |
| rs9486817   | C | 0.047   |
| rs147084482 | A | 0.1634  |
| rs4530821   | A | 0.0316  |
| rs34325529  | A | 0.1523  |
| rs2249425   | A | 0.0368  |
| rs2299033   | G | 0.0246  |
| rs6456785   | T | -0.0249 |
| rs9885864   | C | -0.0849 |
| rs12528308  | G | 0.0273  |
| rs80029245  | G | 0.215   |
| rs9479093   | G | 0.0869  |
| rs16892708  | T | 0.0419  |
| rs148385307 | C | -0.1994 |
| rs116869480 | C | 0.1072  |
| rs2815154   | T | 0.0247  |
| rs7771818   | T | -0.0304 |
| rs76347216  | G | 0.1059  |
| rs73538345  | A | 0.0714  |
| rs150475343 | T | 0.1367  |
| rs72878444  | A | -0.0951 |
| rs117847945 | G | -0.1396 |
| rs28661534  | T | 0.0668  |
| rs140059306 | A | -0.1235 |
| rs1929772   | G | 0.0264  |
| rs117099175 | T | 0.1401  |
| rs12660977  | T | -0.0424 |
| rs1225957   | T | 0.0596  |
| rs16887812  | T | 0.0251  |
| rs144743316 | C | -0.1778 |
| rs111997666 | T | -0.0816 |
| rs4716210   | T | -0.0262 |
| rs2950531   | T | -0.0241 |
| rs118064549 | A | 0.1904  |
| rs9378631   | A | -0.0295 |
| rs12204232  | A | -0.0309 |
| rs2709665   | G | 0.0429  |
| rs72929193  | A | -0.0412 |
| rs116115257 | A | -0.0614 |
| rs145793800 | C | -0.1618 |
| rs2153543   | C | -0.0282 |
| rs80239654  | G | 0.1742  |
| rs113570791 | G | -0.1122 |
| rs12213424  | A | 0.041   |

|             |   |         |
|-------------|---|---------|
| rs62405504  | A | 0.0578  |
| rs12204115  | C | 0.0327  |
| rs117847236 | G | 0.1059  |
| rs62437247  | C | -0.1521 |
| rs2073526   | G | 0.0258  |
| rs137858104 | T | -0.1065 |
| rs3823447   | A | -0.062  |
| rs62437290  | T | -0.1098 |
| rs12529935  | T | -0.0438 |
| rs12661678  | T | 0.0286  |
| rs138483567 | A | 0.1175  |
| rs9401499   | C | 0.0378  |
| rs2753147   | C | 0.0409  |
| rs57344122  | A | -0.0808 |
| rs12526530  | A | 0.0642  |
| rs150019660 | T | -0.1567 |
| rs12200580  | T | 0.0325  |
| rs142852789 | A | 0.2318  |
| rs12529779  | G | -0.0301 |
| rs112272912 | T | 0.1579  |
| rs113892814 | A | -0.2428 |
| rs72933577  | C | 0.0729  |
| rs78028054  | G | 0.0347  |
| rs114287729 | G | 0.139   |
| rs77537878  | A | 0.148   |
| rs16880966  | G | 0.0363  |
| rs16882185  | G | 0.0273  |
| rs112516091 | G | 0.121   |
| rs77994021  | T | -0.1576 |
| rs140380083 | T | 0.1451  |
| rs147657480 | C | -0.1568 |
| rs3800065   | A | 0.0291  |
| rs114996888 | C | 0.1378  |
| rs12528076  | T | 0.1291  |
| rs113854936 | A | -0.0497 |
| rs1124161   | C | 0.0254  |
| rs79185180  | A | -0.0505 |
| rs582559    | T | -0.1137 |
| rs116333817 | A | 0.0917  |
| rs1581045   | C | 0.1176  |
| rs74613567  | A | -0.1053 |
| rs4994273   | A | 0.0291  |
| rs6921376   | G | 0.0246  |
| rs12661503  | A | -0.1375 |
| rs116729051 | A | 0.1789  |
| rs4355617   | T | 0.0616  |
| rs62405959  | T | 0.054   |

|             |   |         |
|-------------|---|---------|
| rs72907491  | G | -0.0385 |
| rs6935143   | C | -0.1077 |
| rs116353880 | G | 0.1336  |
| rs55875823  | T | 0.0983  |
| rs145716387 | T | 0.111   |
| rs1382818   | A | -0.0256 |
| rs114058754 | G | 0.1941  |
| rs138262121 | C | 0.1328  |
| rs12197495  | C | -0.1208 |
| rs6921324   | T | -0.0618 |
| rs9489175   | A | 0.0573  |
| rs112024728 | T | -0.1417 |
| rs77703740  | C | 0.1337  |
| rs465969    | A | 0.041   |
| rs149889395 | T | 0.085   |
| rs17060390  | A | -0.0693 |
| rs2317616   | A | 0.0799  |
| rs9356787   | T | 0.12    |
| rs2024762   | C | -0.0608 |
| rs2036039   | C | 0.0351  |
| rs73775562  | A | -0.0374 |
| rs140269555 | C | -0.0893 |
| rs6930157   | T | 0.0266  |
| rs2819081   | C | -0.0286 |
| rs74592687  | A | -0.0399 |
| rs60167914  | A | 0.0401  |
| rs35514877  | C | 0.1134  |
| rs4709692   | T | -0.0295 |
| rs58195830  | T | -0.0342 |
| rs112950689 | C | 0.1193  |
| rs577824    | T | -0.0241 |
| rs35134930  | A | -0.1249 |
| rs2269564   | T | 0.0254  |
| rs6458318   | G | -0.0371 |
| rs76265077  | G | -0.0706 |
| rs12213120  | C | -0.09   |
| rs6570846   | A | 0.0316  |
| rs12193939  | A | -0.0322 |
| rs56398248  | C | 0.0588  |
| rs72977002  | A | 0.1598  |
| rs115138709 | C | -0.0905 |
| rs6569936   | A | 0.0254  |
| rs112832771 | G | 0.0839  |
| rs2179646   | C | 0.0701  |
| rs140539606 | A | -0.0467 |
| rs73012513  | C | -0.0982 |
| rs142628975 | G | 0.0843  |

|             |   |         |
|-------------|---|---------|
| rs74498411  | C | -0.0785 |
| rs75770797  | C | 0.0603  |
| rs141902412 | G | 0.0698  |
| rs73027025  | A | -0.1069 |
| rs11242955  | G | 0.0235  |
| rs4429934   | C | -0.0979 |
| rs542023    | T | -0.0788 |
| rs75669677  | T | 0.0953  |
| rs9397972   | A | -0.0537 |
| rs9369749   | C | 0.0475  |
| rs6935885   | C | -0.0345 |
| rs866165    | G | 0.0468  |
| rs1963096   | A | -0.0465 |
| rs144883634 | G | -0.0547 |
| rs144057459 | A | 0.1511  |
| rs147689002 | A | 0.1183  |
| rs144363421 | C | -0.1622 |
| rs142340573 | C | -0.1436 |
| rs9321270   | A | 0.0307  |
| rs9379332   | C | 0.0376  |
| rs34845395  | T | -0.0639 |
| rs118113693 | C | 0.143   |
| rs75456009  | G | -0.0466 |
| rs10046352  | T | 0.0702  |
| rs112647602 | A | -0.0411 |
| rs151106078 | A | 0.0873  |
| rs2205682   | T | 0.0256  |
| rs117626189 | G | -0.1309 |
| rs9364974   | T | 0.0253  |
| rs12209898  | C | -0.0415 |
| rs2500088   | C | -0.0561 |
| rs75089429  | T | 0.0493  |
| rs73021179  | C | -0.0761 |
| rs9458931   | A | -0.0373 |
| rs73771895  | A | -0.112  |
| rs1652483   | T | -0.0305 |
| rs11760185  | C | 0.0714  |
| rs9375613   | T | -0.0311 |
| rs673806    | T | -0.0361 |
| rs1475251   | G | 0.025   |
| rs713383    | A | -0.0281 |
| rs12190534  | T | 0.03    |
| rs111779938 | A | -0.0862 |
| rs9356821   | G | -0.0251 |
| rs6932524   | T | 0.0271  |
| rs9477037   | A | 0.0336  |
| rs11751686  | A | 0.1478  |

|             |   |         |
|-------------|---|---------|
| rs910529    | A | 0.0455  |
| rs203134    | C | 0.0266  |
| rs34038602  | T | -0.0334 |
| rs13362590  | T | -0.0811 |
| rs9490678   | A | -0.0262 |
| rs13211315  | C | 0.0261  |
| rs7744915   | T | 0.0361  |
| rs35033794  | T | -0.0965 |
| rs72869204  | T | -0.0507 |
| rs10484585  | C | -0.1053 |
| rs41302049  | A | 0.1513  |
| rs998318    | G | 0.0257  |
| rs12524697  | A | -0.0562 |
| rs1328479   | C | -0.1348 |
| rs140697867 | A | 0.1688  |
| rs35705010  | T | -0.1378 |
| rs1812988   | C | -0.0263 |
| rs1524738   | G | 0.0242  |
| rs12215322  | C | 0.0401  |
| rs118131869 | T | -0.1494 |
| rs113852683 | T | 0.093   |
| rs34978340  | T | 0.0688  |
| rs13212680  | C | -0.0644 |
| rs9479822   | G | 0.0299  |
| rs1246934   | T | -0.027  |
| rs706867    | T | 0.0276  |
| rs12529004  | G | -0.0678 |
| rs75883108  | T | 0.0761  |
| rs280327    | T | 0.0564  |
| rs9459734   | C | -0.05   |
| rs13197896  | T | -0.0267 |
| rs2083315   | C | -0.0421 |
| rs11757806  | C | -0.0352 |
| rs2787746   | T | 0.0318  |
| rs2210968   | A | 0.0283  |
| rs7746111   | A | -0.0333 |
| rs77568507  | T | -0.0668 |
| rs270049    | T | 0.1887  |
| rs71569456  | C | 0.0493  |
| rs1764047   | C | 0.0275  |
| rs150833    | T | -0.0739 |
| rs6921990   | C | -0.029  |
| rs10901038  | T | 0.0268  |
| rs74588797  | T | 0.0797  |
| rs9444258   | A | -0.0417 |
| rs78817076  | G | -0.1521 |
| rs78634420  | T | -0.0804 |

|             |   |         |
|-------------|---|---------|
| rs6903627   | T | -0.0323 |
| rs9295754   | G | 0.0278  |
| rs6911008   | T | 0.0465  |
| rs16881502  | G | 0.095   |
| rs79681478  | T | 0.0829  |
| rs6454706   | T | 0.0496  |
| rs4535571   | T | -0.0353 |
| rs1026901   | G | -0.0247 |
| rs7762563   | T | 0.0378  |
| rs140413692 | G | -0.1313 |
| rs637886    | C | -0.0781 |
| rs145598019 | G | -0.143  |
| rs55864988  | C | 0.0258  |
| rs146003962 | A | -0.1586 |
| rs139707110 | G | -0.1619 |
| rs111616983 | T | 0.1474  |
| rs35603779  | A | 0.0922  |
| rs1269287   | C | 0.0288  |
| rs139909955 | A | -0.1285 |
| rs11153022  | C | 0.0263  |
| rs4896972   | G | -0.048  |
| rs2171249   | C | 0.0624  |
| rs79446103  | A | 0.063   |
| rs66570903  | C | 0.0263  |
| rs12529944  | T | -0.0406 |
| rs111262506 | A | 0.1649  |
| rs2290340   | C | 0.025   |
| rs62402795  | C | 0.0749  |
| rs74851838  | C | -0.1046 |
| rs73001652  | C | 0.0559  |
| rs72994644  | G | 0.1094  |
| rs763598    | A | -0.0254 |
| rs9461944   | C | 0.0789  |
| rs146669089 | C | -0.0963 |
| rs115480347 | T | 0.1563  |
| rs4706308   | G | -0.0262 |
| rs9460322   | A | -0.0483 |
| rs497051    | A | 0.0304  |
| rs12213261  | A | -0.0909 |
| rs794673    | G | -0.0475 |
| rs138048851 | T | -0.1242 |
| rs12195092  | A | -0.0811 |
| rs79495151  | C | 0.1169  |
| rs9469640   | G | -0.1099 |
| rs79135883  | T | -0.0621 |
| rs9373030   | C | -0.0244 |
| rs60084677  | C | 0.0298  |



|             |   |         |
|-------------|---|---------|
| rs62434710  | C | 0.122   |
| rs2627229   | C | -0.0349 |
| rs442629    | A | -0.024  |
| rs3024439   | T | 0.0379  |
| rs9504935   | G | 0.0572  |
| rs77580093  | G | 0.0707  |
| rs12199272  | A | -0.0272 |
| rs72853756  | T | 0.0643  |
| rs149127208 | A | -0.1207 |
| rs176765    | C | -0.0254 |
| rs116853915 | C | 0.125   |
| rs58457955  | A | -0.0589 |
| rs75815315  | A | -0.1808 |
| rs116048542 | C | -0.0927 |
| rs112039550 | C | 0.039   |
| rs77723571  | G | 0.1554  |
| rs4489183   | G | 0.0338  |
| rs6902050   | G | 0.0426  |
| rs1334969   | A | -0.0827 |
| rs11967219  | T | -0.0365 |
| rs7748353   | G | 0.0404  |
| rs79916412  | T | -0.0867 |
| rs41302899  | T | -0.1568 |
| rs2233969   | G | 0.0323  |
| rs7769202   | C | -0.0257 |
| rs12529038  | G | 0.0411  |
| rs111754540 | A | -0.0445 |
| rs150155292 | C | -0.1196 |
| rs62416354  | A | -0.0799 |
| rs77359095  | C | -0.1017 |
| rs9689465   | T | 0.0286  |
| rs1475343   | T | -0.0259 |
| rs9654641   | G | -0.045  |
| rs13202954  | A | 0.077   |
| rs144331500 | A | 0.0341  |
| rs62453684  | A | -0.096  |
| rs16875267  | A | 0.1317  |
| rs117956049 | T | -0.1258 |
| rs1336534   | T | -0.0258 |
| rs117035303 | C | -0.1139 |
| rs72912690  | T | -0.0463 |
| rs117448535 | G | -0.2013 |
| rs142978192 | A | -0.1076 |
| rs78389894  | T | 0.0566  |
| rs12661009  | C | 0.0329  |
| rs2223793   | T | -0.0504 |
| rs76223132  | C | 0.0706  |

|             |   |         |
|-------------|---|---------|
| rs6920224   | C | -0.0407 |
| rs77965231  | G | 0.0981  |
| rs112895306 | A | -0.0991 |
| rs61492526  | G | -0.0494 |
| rs4714077   | A | -0.0651 |
| rs149644372 | T | 0.1122  |
| rs7766238   | A | 0.0413  |
| rs117681387 | T | -0.1462 |
| rs1535949   | A | -0.0274 |
| rs145763533 | A | 0.1497  |
| rs1591387   | C | 0.0914  |
| rs2874787   | T | 0.0315  |
| rs112257183 | T | 0.1191  |
| rs13208043  | C | 0.0691  |
| rs149268659 | A | -0.1184 |
| rs116550754 | A | -0.0915 |
| rs6934908   | C | 0.0263  |
| rs4380756   | A | 0.0276  |
| rs2295003   | C | -0.1523 |
| rs138908509 | A | 0.1459  |
| rs1032140   | G | -0.0243 |
| rs7759056   | A | -0.0318 |
| rs56200744  | A | 0.035   |
| rs62421041  | T | -0.0624 |
| rs75403651  | T | 0.1209  |
| rs9378365   | T | -0.0268 |
| rs12204730  | G | -0.1193 |
| rs72989684  | G | -0.1601 |
| rs9478949   | G | -0.0245 |
| rs78730289  | G | -0.1106 |
| rs142520959 | C | 0.1485  |
| rs4296905   | C | 0.0421  |
| rs13196685  | C | -0.0515 |
| rs1084051   | T | -0.0385 |
| rs7744854   | C | -0.0475 |
| rs34006826  | A | -0.038  |
| rs12529369  | A | -0.0429 |
| rs117587475 | A | 0.1414  |
| rs72992165  | C | 0.0871  |
| rs10945306  | A | -0.0576 |
| rs9351695   | C | -0.024  |
| rs111793227 | T | -0.0358 |
| rs117220641 | T | 0.0675  |
| rs79634517  | G | -0.1481 |
| rs62402216  | G | 0.1139  |
| rs9322290   | C | -0.0542 |
| rs1998620   | A | 0.024   |

|             |   |         |
|-------------|---|---------|
| rs62387399  | A | -0.0807 |
| rs146253696 | A | 0.2118  |
| rs9398163   | A | -0.0316 |
| rs73029582  | A | 0.2091  |
| rs9379997   | A | -0.1561 |
| rs139820499 | C | -0.0875 |
| rs145336618 | A | 0.1407  |
| rs72978614  | T | 0.1175  |
| rs12211969  | G | 0.0345  |
| rs12110546  | A | -0.0586 |
| rs72985903  | T | -0.0636 |
| rs74629262  | C | 0.1295  |
| rs6459511   | A | 0.0366  |
| rs9366430   | A | 0.1149  |
| rs13216034  | T | 0.1835  |
| rs117993975 | G | 0.0677  |
| rs2749676   | C | -0.0487 |
| rs113265288 | T | -0.0437 |
| rs12529000  | T | 0.047   |
| rs13212439  | A | 0.1549  |
| rs116980543 | C | 0.1158  |
| rs3087943   | G | -0.0323 |
| rs9495535   | G | -0.0251 |
| rs62393164  | C | -0.0405 |
| rs9359125   | A | 0.0369  |
| rs72904365  | G | -0.0669 |
| rs1145758   | T | 0.0723  |
| rs73717499  | A | -0.1562 |
| rs116632495 | G | 0.0677  |
| rs79693237  | T | -0.0954 |
| rs1202098   | A | 0.1685  |
| rs12196104  | T | 0.0272  |
| rs62415668  | A | 0.1071  |
| rs35776683  | A | -0.0246 |
| rs115909525 | G | 0.1111  |
| rs138018595 | A | -0.0712 |
| rs117114723 | T | -0.0866 |
| rs117906718 | A | -0.0651 |
| rs4711092   | T | 0.0247  |
| rs113113104 | T | 0.0793  |
| rs1150793   | G | -0.0471 |
| rs147005885 | A | -0.0723 |
| rs74835003  | G | -0.1094 |
| rs149819578 | T | -0.0578 |
| rs79007406  | C | -0.1476 |
| rs17592687  | A | 0.1378  |
| rs1324520   | T | -0.034  |

|             |   |         |
|-------------|---|---------|
| rs9454581   | T | 0.0441  |
| rs60172093  | G | -0.0247 |
| rs72857753  | A | 0.0533  |
| rs113321160 | A | 0.1013  |
| rs9458876   | T | 0.0358  |
| rs141031807 | T | -0.1617 |
| rs11754507  | G | 0.094   |
| rs117366665 | T | -0.1343 |
| rs73733701  | C | 0.1181  |
| rs271151    | T | -0.0242 |
| rs67585566  | C | 0.1072  |
| rs146186562 | G | -0.1495 |
| rs75383429  | C | 0.1249  |
| rs17452374  | T | 0.1889  |
| rs77862476  | C | 0.0955  |
| rs13195295  | T | 0.044   |
| rs71556185  | A | 0.0501  |
| rs7452521   | A | 0.0928  |
| rs17058033  | C | 0.0514  |
| rs760674    | A | 0.0535  |
| rs10946345  | C | -0.027  |
| rs76906845  | T | -0.1348 |
| rs533452    | A | 0.0244  |
| rs60345306  | T | -0.0608 |
| rs9451722   | A | 0.0356  |
| rs234405    | A | -0.0245 |
| rs62425031  | C | 0.0272  |
| rs210146    | G | -0.0234 |
| rs9502953   | A | -0.0651 |
| rs649278    | G | -0.0274 |
| rs1929770   | A | -0.0231 |
| rs143039758 | C | -0.0738 |
| rs116343230 | A | -0.0967 |
| rs77116795  | C | -0.0635 |
| rs6926300   | A | -0.023  |
| rs1867348   | T | 0.0431  |
| rs71570705  | G | -0.063  |
| rs12173570  | T | -0.0387 |
| rs10807494  | G | -0.0232 |
| rs72932747  | T | -0.0743 |
| rs149344629 | A | 0.0439  |
| rs77916869  | G | 0.1517  |
| rs112380321 | A | 0.1942  |
| rs111917078 | C | 0.1053  |
| rs17614675  | A | -0.0305 |
| rs113221085 | C | 0.0582  |
| rs7768487   | T | -0.0657 |

|             |   |         |
|-------------|---|---------|
| rs72869081  | T | -0.1596 |
| rs9346956   | T | 0.0264  |
| rs17164920  | G | -0.1442 |
| rs7770731   | C | 0.0289  |
| rs6900694   | T | -0.0632 |
| rs55933828  | T | 0.0265  |
| rs9379729   | T | 0.0328  |
| rs145314192 | A | -0.1142 |
| rs73373942  | T | 0.0375  |
| rs9502622   | T | 0.0376  |
| rs71567663  | G | -0.096  |
| rs62390654  | T | -0.1337 |
| rs9445946   | G | 0.0269  |
| rs112650707 | T | 0.1288  |
| rs145004312 | A | -0.2105 |
| rs75358650  | A | 0.0893  |
| rs4598080   | C | 0.0402  |
| rs35639545  | G | -0.1141 |
| rs9461938   | C | 0.037   |
| rs658262    | A | 0.1059  |
| rs72956169  | A | 0.0847  |
| rs113269121 | A | -0.0651 |
| rs115462783 | G | -0.0866 |
| rs142560408 | C | 0.1645  |
| rs117517417 | A | 0.158   |
| rs72926591  | T | -0.219  |
| rs12525992  | C | -0.0363 |
| rs147365573 | A | -0.0935 |
| rs113875218 | T | -0.0294 |
| rs76480692  | A | 0.0748  |
| rs139037649 | A | -0.1854 |
| rs117511082 | A | -0.1658 |
| rs3804117   | A | 0.0323  |
| rs2812152   | G | 0.0256  |
| rs72960556  | G | -0.0865 |
| rs78595707  | A | -0.2127 |
| rs13204461  | T | -0.1173 |
| rs74356029  | A | 0.0646  |
| rs76497931  | A | 0.0623  |
| rs62427075  | G | 0.1092  |
| rs2395780   | A | -0.0292 |
| rs75781704  | C | 0.1242  |
| rs807901    | G | 0.0408  |
| rs12192259  | T | 0.0309  |
| rs11759636  | A | 0.0274  |
| rs3813375   | A | -0.165  |
| rs6919243   | C | 0.0255  |

|             |   |         |
|-------------|---|---------|
| rs9356360   | A | 0.0788  |
| rs7767024   | T | 0.0352  |
| rs9468156   | C | 0.0287  |
| rs2351725   | T | 0.0281  |
| rs117100447 | A | 0.1441  |
| rs9480538   | G | -0.1125 |
| rs6900406   | T | 0.029   |
| rs62395341  | A | -0.1468 |
| rs9296716   | T | -0.0359 |
| rs12205684  | C | 0.0283  |
| rs34688926  | T | -0.0496 |
| rs17053540  | T | 0.0327  |
| rs6458351   | T | 0.0414  |
| rs6909280   | A | 0.023   |
| rs505625    | C | 0.0265  |
| rs7770507   | G | 0.0246  |
| rs114726046 | T | 0.1227  |
| rs648927    | A | -0.0677 |
| rs9404549   | A | 0.0343  |
| rs77657592  | C | -0.1024 |
| rs11963639  | T | -0.032  |
| rs67703914  | T | 0.1701  |
| rs9320356   | C | 0.0439  |
| rs3777811   | G | -0.0407 |
| rs77600992  | C | -0.0702 |
| rs150354697 | T | 0.0851  |
| rs146328382 | A | 0.1288  |
| rs145867090 | T | 0.0989  |
| rs117739175 | A | -0.1057 |
| rs147221758 | T | -0.1896 |
| rs1321473   | G | -0.0234 |
| rs140158212 | C | 0.114   |
| rs381952    | C | 0.0259  |
| rs4379275   | T | 0.0243  |
| rs12110686  | G | -0.0502 |
| rs113856628 | A | 0.0675  |
| rs11154851  | T | -0.0679 |
| rs114614811 | C | 0.0883  |
| rs77840901  | A | -0.033  |
| rs280280    | C | -0.0324 |
| rs117204267 | G | 0.1183  |
| rs7743439   | G | 0.0296  |
| rs144543565 | C | 0.1301  |
| rs362832    | A | -0.0313 |
| rs111405966 | A | 0.1351  |
| rs72842394  | T | -0.0473 |
| rs1185719   | G | 0.0254  |

|             |   |         |
|-------------|---|---------|
| rs441745    | A | 0.0352  |
| rs12216196  | G | 0.0233  |
| rs79528276  | G | -0.101  |
| rs2224972   | C | 0.0973  |
| rs35474162  | A | 0.0645  |
| rs138083068 | G | -0.1294 |
| rs75182331  | A | -0.1591 |
| rs72835315  | C | -0.0578 |
| rs6457942   | T | -0.0233 |
| rs12192747  | G | 0.1018  |
| rs138096353 | T | -0.0979 |
| rs73003158  | A | 0.1123  |
| rs149320012 | G | 0.099   |
| rs6923303   | C | 0.0547  |
| rs2206330   | G | -0.0247 |
| rs118033332 | G | -0.1469 |
| rs112839059 | G | 0.1156  |
| rs9465051   | A | -0.1658 |
| rs10807000  | A | -0.0312 |
| rs6455096   | T | 0.0354  |
| rs17592629  | C | -0.1011 |
| rs143119622 | G | -0.1875 |
| rs113032094 | C | 0.0814  |
| rs115820082 | G | 0.0796  |
| rs12202610  | A | 0.1937  |
| rs114873993 | T | 0.1242  |
| rs9345436   | A | -0.031  |
| rs9495271   | A | -0.0428 |
| rs1555375   | G | 0.0256  |
| rs138573813 | C | 0.0931  |
| rs875590    | A | -0.0275 |
| rs16899900  | C | 0.0896  |
| rs138750655 | C | 0.1129  |
| rs4599622   | C | -0.0269 |
| rs62438513  | C | -0.1011 |
| rs9276815   | T | -0.0258 |
| rs9394866   | G | -0.0241 |
| rs2446256   | A | -0.0229 |
| rs13193545  | C | -0.0297 |
| rs62429660  | T | -0.0398 |
| rs73786690  | T | 0.0553  |
| rs9369202   | T | 0.0713  |
| rs137925571 | T | -0.1669 |
| rs6910997   | C | -0.0339 |
| rs73726918  | A | 0.0892  |
| rs17795818  | G | 0.0802  |
| rs76893487  | C | -0.0319 |

|             |   |         |
|-------------|---|---------|
| rs3778470   | A | -0.036  |
| rs911028    | C | 0.0276  |
| rs10947567  | T | 0.0231  |
| rs12662518  | T | -0.0284 |
| rs758398    | T | 0.0325  |
| rs140378210 | G | 0.1652  |
| rs78876209  | G | 0.1101  |
| rs112879458 | T | -0.1618 |
| rs9465115   | G | 0.0723  |
| rs12529629  | G | -0.0288 |
| rs2161972   | T | 0.0239  |
| rs79287287  | T | -0.0624 |
| rs72938831  | G | 0.085   |
| rs118172736 | A | 0.1322  |
| rs138219404 | T | 0.1302  |
| rs149255008 | A | 0.062   |
| rs72994226  | T | -0.1045 |
| rs73022592  | C | 0.0692  |
| rs112494811 | C | -0.0758 |
| rs78194975  | T | -0.11   |
| rs17135958  | C | 0.0523  |
| rs34058293  | T | 0.1678  |
| rs116995534 | T | 0.087   |
| rs4946124   | A | -0.0393 |
| rs143578458 | A | -0.1283 |
| rs7773884   | G | 0.0237  |
| rs6900980   | T | 0.0306  |
| rs148633421 | A | -0.0844 |
| rs34414694  | A | -0.0738 |
| rs2014208   | C | 0.0239  |
| rs6926138   | C | -0.0237 |
| rs9442941   | T | 0.0279  |
| rs2569825   | C | 0.0452  |
| rs12203547  | C | 0.0908  |
| rs115775486 | C | -0.1074 |
| rs72836428  | G | 0.1355  |
| rs9492816   | A | 0.0248  |
| rs16892989  | G | 0.2062  |
| rs62388697  | T | 0.0857  |
| rs62395842  | T | -0.132  |
| rs13196991  | G | 0.0316  |
| rs111468783 | A | 0.0287  |
| rs111527197 | T | 0.0919  |
| rs77239935  | T | 0.1344  |
| rs9383399   | G | 0.0274  |
| rs144073536 | A | -0.1571 |
| rs140575290 | A | 0.0974  |



|             |   |         |
|-------------|---|---------|
| rs619598    | T | 0.0644  |
| rs10949323  | G | -0.0791 |
| rs7750646   | T | -0.0378 |
| rs9452272   | G | -0.0531 |
| rs7766904   | C | -0.0306 |
| rs807836    | C | -0.0234 |
| rs149245164 | A | -0.1269 |
| rs9462518   | T | 0.1062  |
| rs56882294  | T | -0.0566 |
| rs66765303  | G | -0.0319 |
| rs9384268   | A | 0.049   |
| rs2504796   | T | -0.0237 |
| rs11961630  | A | 0.0905  |
| rs4895792   | C | -0.0357 |
| rs11242796  | A | 0.0364  |
| rs111434016 | A | 0.1549  |
| rs34637212  | G | 0.1469  |
| rs859983    | A | -0.0231 |
| rs141686851 | C | -0.1525 |
| rs77417335  | C | -0.0745 |
| rs2072022   | T | 0.0847  |
| rs9456047   | T | -0.0389 |
| rs56073887  | G | 0.1074  |
| rs6922630   | A | 0.024   |
| rs4712798   | C | -0.0253 |
| rs11153501  | C | 0.0374  |
| rs7757124   | C | 0.0289  |
| rs7749563   | C | 0.0292  |
| rs4870351   | T | 0.0367  |
| rs4714562   | T | -0.0283 |
| rs6899348   | G | 0.1206  |
| rs556613    | A | 0.0251  |
| rs2008783   | A | -0.0296 |
| rs117185897 | T | -0.0736 |
| rs143328175 | G | -0.0659 |
| rs3763172   | C | 0.0254  |
| rs7753079   | A | 0.0495  |
| rs117092488 | G | 0.1593  |
| rs2744105   | C | -0.037  |
| rs2492928   | C | 0.0285  |
| rs6921076   | G | 0.0291  |
| rs61250961  | T | -0.0321 |
| rs11155364  | A | 0.0354  |
| rs7758228   | C | 0.0272  |
| rs77376788  | G | 0.1144  |
| rs112535790 | T | 0.2155  |
| rs12201836  | A | 0.0268  |

|             |   |         |
|-------------|---|---------|
| rs2078064   | A | -0.0478 |
| rs10498677  | G | 0.0439  |
| rs77744142  | T | 0.0414  |
| rs806488    | A | 0.086   |
| rs816377    | A | 0.0248  |
| rs10485427  | G | -0.0251 |
| rs117648760 | G | -0.1462 |
| rs71574981  | A | 0.1074  |
| rs12210350  | G | 0.0272  |
| rs78611727  | G | -0.0633 |
| rs4642520   | C | 0.0356  |
| rs6941907   | A | -0.0255 |
| rs116109127 | A | 0.0988  |
| rs1205510   | A | 0.0262  |
| rs145691963 | C | 0.1772  |
| rs9344218   | T | 0.0237  |
| rs12204950  | C | -0.0366 |
| rs2353038   | C | 0.0253  |
| rs9482462   | C | -0.117  |
| rs11465553  | T | 0.0793  |
| rs75218721  | G | -0.0746 |
| rs150883323 | G | 0.1469  |
| rs72949824  | A | -0.1392 |
| rs13212292  | C | 0.0337  |
| rs12523668  | G | 0.0457  |
| rs115716958 | T | 0.083   |
| rs11964305  | T | 0.1586  |
| rs117257765 | A | 0.0736  |
| rs112686732 | A | -0.0448 |
| rs117615018 | A | -0.1383 |
| rs114068063 | T | 0.0696  |
| rs1034070   | T | -0.072  |
| rs72928451  | A | 0.0825  |
| rs78600213  | C | 0.107   |
| rs2242299   | C | 0.0301  |
| rs1723519   | C | -0.0237 |
| rs2207224   | A | -0.0261 |
| rs171033    | T | -0.0253 |
| rs2852532   | G | 0.0508  |
| rs6901858   | G | 0.0255  |
| rs150517499 | T | 0.186   |
| rs74591725  | A | -0.0918 |
| rs160601    | T | 0.0462  |
| rs138982658 | G | -0.2183 |
| rs80150024  | C | 0.0628  |
| rs9371497   | A | -0.0267 |
| rs72912047  | C | 0.0917  |

|             |   |         |
|-------------|---|---------|
| rs150790861 | A | -0.1497 |
| rs7765774   | G | 0.0223  |
| rs6939369   | A | 0.0411  |
| rs62420176  | G | -0.0926 |
| rs117675669 | A | 0.0708  |
| rs117101311 | T | 0.0854  |
| rs146987124 | T | 0.1646  |
| rs74344035  | A | 0.1956  |
| rs6455738   | A | 0.0231  |
| rs6940413   | C | -0.0346 |
| rs117202633 | G | 0.1746  |
| rs34119039  | T | -0.0866 |
| rs10485417  | T | 0.0701  |
| rs7750211   | T | 0.041   |
| rs150010965 | T | 0.1083  |
| rs139986569 | T | -0.1583 |
| rs35776718  | A | 0.0337  |
| rs720170    | T | -0.0423 |
| rs12191883  | C | -0.0248 |
| rs141843605 | T | 0.2006  |
| rs73370671  | T | -0.1343 |
| rs149987181 | A | -0.0733 |
| rs140085949 | G | 0.1079  |
| rs9502352   | G | -0.0357 |
| rs77729056  | C | -0.0664 |
| rs56391337  | T | -0.0691 |
| rs149657771 | C | 0.1213  |
| rs62424286  | A | 0.0495  |
| rs12202023  | C | -0.0288 |
| rs115736195 | A | 0.0524  |
| rs10456655  | G | -0.0357 |
| rs9362867   | G | 0.0251  |
| rs116841476 | T | 0.0928  |
| rs564911    | A | -0.0407 |
| rs3798531   | A | -0.1169 |
| rs10085363  | G | 0.033   |
| rs78104861  | A | 0.0825  |
| rs118078855 | A | 0.0852  |
| rs172660    | C | -0.0489 |
| rs75224034  | C | 0.0965  |
| rs12215567  | C | 0.0509  |
| rs9394792   | A | -0.0623 |
| rs4707600   | G | -0.046  |
| rs12201692  | T | -0.0822 |
| rs139125503 | C | 0.1395  |
| rs486470    | A | 0.0345  |
| rs4708531   | T | 0.0315  |

|             |   |         |
|-------------|---|---------|
| rs17570917  | A | -0.0646 |
| rs113090976 | G | -0.0884 |
| rs80131465  | G | -0.1349 |
| rs72962492  | G | 0.0868  |
| rs7773220   | T | 0.029   |
| rs1794849   | T | 0.0304  |
| rs1204338   | A | 0.0227  |
| rs2143830   | G | 0.0227  |
| rs12192909  | T | -0.0289 |
| rs12661085  | C | 0.0279  |
| rs79151326  | A | -0.0646 |
| rs9484743   | C | -0.0729 |
| rs78289332  | A | 0.0481  |
| rs13207719  | T | -0.0239 |
| rs114138513 | A | 0.088   |
| rs62422204  | A | 0.075   |
| rs6906375   | G | 0.0243  |
| rs1382814   | C | -0.023  |
| rs28746833  | A | 0.033   |
| rs6926599   | A | 0.0753  |
| rs73736330  | T | 0.0582  |
| rs115358581 | G | 0.0858  |
| rs75477838  | T | -0.0495 |
| rs138076889 | A | -0.1835 |
| rs11753485  | G | 0.0247  |
| rs55709292  | G | 0.18    |
| rs116140172 | A | -0.0496 |
| rs6915415   | C | -0.0253 |
| rs35296992  | G | -0.1389 |
| rs11751997  | G | 0.0533  |
| rs7738600   | C | 0.0971  |
| rs62430677  | T | 0.0573  |
| rs6927982   | G | -0.0245 |
| rs9379195   | C | -0.1118 |
| rs4998124   | A | -0.0731 |
| rs79549818  | C | 0.0693  |
| rs78829749  | T | -0.1728 |
| rs17084781  | A | 0.0843  |
| rs13217471  | T | -0.0854 |
| rs9364183   | A | -0.0903 |
| rs76618312  | T | 0.1015  |
| rs1925458   | T | -0.0368 |
| rs4998072   | G | -0.0341 |
| rs9373688   | C | -0.1638 |
| rs142603604 | C | -0.122  |
| rs9482178   | A | -0.0256 |
| rs34656248  | G | -0.1159 |

|             |   |         |
|-------------|---|---------|
| rs142666971 | T | -0.0875 |
| rs13207742  | A | -0.0314 |
| rs112711879 | A | 0.0716  |
| rs730860    | A | -0.0284 |
| rs1328708   | C | 0.0298  |
| rs78656481  | A | -0.1046 |
| rs6911374   | A | -0.056  |
| rs78400456  | C | 0.0836  |
| rs141886990 | C | -0.0989 |
| rs4960330   | G | 0.0249  |
| rs76010139  | A | -0.0781 |
| rs1049846   | T | -0.0242 |
| rs79691360  | G | 0.1568  |
| rs13194166  | C | 0.0344  |
| rs1929089   | C | -0.0316 |
| rs139993175 | T | -0.0998 |
| rs1934792   | A | 0.0231  |
| rs2675737   | G | 0.0248  |
| rs1744856   | A | -0.0303 |
| rs12201134  | G | 0.0256  |
| rs9367540   | T | 0.0278  |
| rs12212188  | T | -0.0301 |
| rs2180107   | A | 0.0839  |
| rs73017164  | G | -0.0495 |
| rs11760203  | C | 0.1406  |
| rs62408382  | A | -0.0635 |
| rs220944    | C | 0.038   |
| rs6925319   | T | 0.024   |
| rs76468593  | A | 0.1409  |
| rs145818000 | A | -0.0559 |
| rs117218887 | C | -0.1017 |
| rs150164834 | G | 0.1426  |
| rs139805399 | T | -0.0784 |
| rs499374    | A | 0.023   |
| rs9375094   | T | 0.1098  |
| rs12525348  | T | 0.0833  |
| rs7763454   | G | -0.0236 |
| rs7750365   | G | 0.0228  |
| rs141554023 | A | 0.0999  |
| rs13197038  | G | 0.0295  |
| rs114433798 | T | 0.141   |
| rs4392689   | T | -0.0301 |
| rs2248046   | C | -0.0298 |
| rs6927246   | T | -0.0822 |
| rs34917732  | C | -0.0501 |
| rs9397689   | C | -0.0248 |
| rs4711634   | G | 0.0222  |

|             |   |         |
|-------------|---|---------|
| rs41286236  | T | 0.1569  |
| rs17318151  | G | 0.0939  |
| rs114074527 | C | 0.0928  |
| rs292247    | C | 0.0319  |
| rs117847613 | C | -0.1135 |
| rs115574767 | A | 0.1093  |
| rs72835688  | T | 0.0733  |
| rs72863201  | C | 0.0459  |
| rs2895612   | G | 0.0245  |
| rs76064370  | T | -0.0903 |
| rs11969660  | T | -0.0385 |
| rs9383281   | T | -0.0329 |
| rs150833665 | T | -0.103  |
| rs117969642 | G | 0.1705  |
| rs12201279  | T | -0.0263 |
| rs140369053 | G | -0.231  |
| rs139020319 | A | -0.1307 |
| rs4566921   | T | -0.027  |
| rs151657    | C | 0.0221  |
| rs77617208  | A | 0.0617  |
| rs73025103  | T | -0.1318 |
| rs55796317  | T | -0.1333 |
| rs139055819 | T | 0.1471  |
| rs936497    | G | -0.0375 |
| rs142280280 | A | 0.1772  |
| rs56932539  | T | -0.0876 |
| rs2095773   | A | 0.1698  |
| rs12529678  | T | 0.0381  |
| rs117809840 | T | 0.1489  |
| rs7760247   | A | -0.0254 |
| rs141574720 | G | -0.1144 |
| rs112795201 | A | 0.1245  |
| rs11153311  | G | 0.0336  |
| rs199133    | T | 0.0532  |
| rs1342005   | C | -0.0389 |
| rs11755957  | A | 0.0933  |
| rs196669    | C | -0.0262 |
| rs41288570  | A | 0.1124  |
| rs79997548  | A | -0.1541 |
| rs149700674 | C | -0.0926 |
| rs1394235   | G | -0.0313 |
| rs145221006 | A | 0.08    |
| rs115125095 | A | 0.1382  |
| rs111749531 | C | 0.0639  |
| rs9398066   | A | -0.1125 |
| rs35701911  | G | 0.0872  |
| rs9457500   | T | 0.0859  |

|             |   |         |
|-------------|---|---------|
| rs116539774 | A | 0.1262  |
| rs11154022  | A | -0.0238 |
| rs12197827  | A | -0.1956 |
| rs57178058  | T | -0.0353 |
| rs1285057   | T | -0.024  |
| rs76920525  | G | 0.0557  |
| rs234411    | T | -0.0373 |
| rs10947356  | A | 0.0617  |
| rs115308106 | A | 0.1     |
| rs145877894 | T | 0.1149  |
| rs78264783  | T | 0.1115  |
| rs1286041   | C | 0.0332  |
| rs144744272 | G | -0.1373 |
| rs11153046  | A | 0.0321  |
| rs17207986  | C | -0.0532 |
| rs148409932 | C | -0.0951 |
| rs75795218  | G | 0.1031  |
| rs73785450  | C | 0.0753  |
| rs116078111 | G | 0.0479  |
| rs76154834  | A | -0.1128 |
| rs12212010  | G | 0.1144  |
| rs803455    | A | -0.0446 |
| rs13218434  | T | -0.0344 |
| rs2038066   | T | -0.0287 |
| rs10499061  | T | -0.0462 |
| rs2506728   | C | -0.0655 |
| rs78051094  | C | -0.0654 |
| rs7757144   | G | 0.0228  |
| rs62395343  | C | -0.0657 |
| rs9767795   | A | 0.0348  |
| rs115128769 | A | -0.1173 |
| rs910244    | A | -0.0243 |
| rs79666295  | T | 0.1696  |
| rs9347598   | G | 0.0392  |
| rs9396857   | T | 0.0251  |
| rs73433414  | A | 0.0736  |
| rs34550542  | A | -0.0246 |
| rs117563628 | A | -0.1041 |
| rs71573202  | C | -0.0967 |
| rs117894788 | G | -0.0947 |
| rs4275069   | T | -0.0333 |
| rs11966074  | G | 0.0313  |
| rs114326829 | G | -0.0747 |
| rs145046593 | A | 0.1142  |
| rs9294275   | T | 0.0395  |
| rs1321308   | C | -0.0225 |
| rs117094924 | C | 0.107   |

|             |   |         |
|-------------|---|---------|
| rs9365544   | C | -0.0249 |
| rs10947742  | A | 0.0651  |
| rs11752082  | A | 0.0969  |
| rs78762426  | A | -0.0643 |
| rs114944794 | G | 0.1464  |
| rs9459053   | A | -0.0245 |
| rs117174708 | A | -0.1246 |
| rs9455680   | T | -0.042  |
| rs9501873   | G | -0.0229 |
| rs17249378  | T | -0.0224 |
| rs7747449   | C | 0.108   |
| rs62436763  | C | -0.0489 |
| rs12194492  | A | 0.1259  |
| rs9478760   | T | -0.029  |
| rs9397340   | T | 0.0296  |
| rs146895232 | C | -0.1454 |
| rs6924289   | C | -0.0324 |
| rs6939645   | C | -0.0574 |
| rs139915313 | G | -0.0886 |
| rs6911503   | A | 0.0539  |
| rs1112062   | G | -0.031  |
| rs4533956   | A | -0.1628 |
| rs72925500  | G | -0.1065 |
| rs2758305   | T | 0.1015  |
| rs9370893   | T | -0.025  |
| rs9379892   | G | -0.0273 |
| rs9447985   | G | 0.0254  |
| rs117547578 | G | 0.1983  |
| rs6930628   | A | -0.077  |
| rs150562760 | C | -0.1258 |
| rs111320577 | A | -0.0861 |
| rs73450950  | G | 0.0421  |
| rs17737566  | C | -0.0865 |
| rs17436349  | C | 0.0922  |
| rs7751482   | A | 0.0388  |
| rs12201453  | C | -0.0334 |
| rs7763873   | A | -0.071  |
| rs6930022   | A | -0.0233 |
| rs6933203   | A | 0.0235  |
| rs1254731   | A | 0.0244  |
| rs4712032   | G | -0.0231 |
| rs79346915  | T | -0.0921 |
| rs113272923 | A | -0.132  |
| rs139089467 | G | -0.0424 |
| rs116547170 | C | 0.1122  |
| rs11758985  | T | 0.0587  |
| rs1370132   | C | 0.034   |



|             |   |         |
|-------------|---|---------|
| rs660081    | C | -0.0296 |
| rs7749165   | T | -0.029  |
| rs1407211   | A | -0.0229 |
| rs12203695  | A | -0.027  |
| rs354399    | A | 0.144   |
| rs117865019 | G | -0.0987 |
| rs11154704  | A | 0.0332  |
| rs56014011  | T | -0.0765 |
| rs6569128   | T | -0.025  |
| rs4714598   | G | -0.0248 |
| rs114722093 | T | -0.1553 |
| rs117625888 | G | -0.123  |
| rs112638117 | G | 0.0889  |
| rs138426241 | T | -0.1754 |
| rs6919462   | G | 0.0576  |
| rs62418822  | G | 0.0577  |
| rs6908578   | T | -0.0322 |
| rs9490953   | G | 0.0856  |
| rs11154723  | G | 0.0325  |
| rs9402889   | G | -0.0369 |
| rs113431178 | A | -0.0607 |
| rs114884732 | C | -0.1225 |
| rs62417280  | T | 0.0894  |
| rs4479904   | T | -0.0244 |
| rs56740201  | C | 0.0391  |
| rs76039115  | G | -0.1736 |
| rs150537370 | A | -0.1584 |
| rs12197284  | T | -0.0437 |
| rs117341910 | A | 0.0961  |
| rs9346687   | T | -0.0636 |
| rs1342058   | T | 0.0487  |
| rs6911288   | G | 0.029   |
| rs151307515 | T | 0.1328  |
| rs12198184  | A | 0.03    |
| rs515975    | G | -0.0226 |
| rs13219726  | C | -0.0245 |
| rs77945001  | T | -0.0793 |
| rs111785908 | T | -0.0821 |
| rs1038304   | A | -0.0219 |
| rs6557420   | T | -0.0309 |
| rs9346979   | T | 0.0229  |
| rs78178560  | T | 0.1221  |
| rs9371507   | T | 0.0555  |
| rs149502929 | T | -0.1347 |
| rs10456424  | T | -0.0262 |
| rs12196775  | T | 0.0829  |
| rs145099817 | A | 0.0993  |

|             |   |         |
|-------------|---|---------|
| rs75008412  | A | -0.1124 |
| rs118051512 | T | -0.1236 |
| rs7757960   | A | 0.1221  |
| rs76502314  | T | 0.0435  |
| rs6571142   | C | 0.0269  |
| rs7743799   | A | 0.0343  |
| rs116956435 | A | -0.1139 |
| rs78397089  | A | 0.1242  |
| rs6910382   | C | 0.0292  |
| rs11758513  | A | 0.1267  |
| rs11756169  | G | 0.0339  |
| rs10080774  | A | -0.0339 |
| rs9462844   | G | 0.0284  |
| rs6918798   | A | 0.0229  |
| rs314266    | C | -0.0228 |
| rs783190    | G | -0.0329 |
| rs9457557   | A | 0.0716  |
| rs145416913 | T | -0.0554 |
| rs9364212   | T | -0.0279 |
| rs56272524  | G | -0.1056 |
| rs148739977 | T | -0.1568 |
| rs3800376   | C | -0.0919 |
| rs113663673 | T | -0.1324 |
| rs111694554 | C | 0.1724  |
| rs76155224  | A | -0.0738 |
| rs34010141  | G | -0.0482 |
| rs59136952  | A | -0.1715 |
| rs56327608  | C | 0.1042  |
| rs77350304  | C | -0.1245 |
| rs72906423  | T | 0.0771  |
| rs117386155 | G | -0.097  |
| rs1418706   | G | 0.0311  |
| rs6937889   | A | 0.0297  |
| rs9456363   | T | 0.0246  |
| rs2280612   | C | 0.045   |
| rs9379038   | C | -0.0299 |
| rs77937097  | A | -0.0419 |
| rs7745912   | T | 0.035   |
| rs117833626 | G | 0.1115  |
| rs11751921  | C | 0.0259  |
| rs60369726  | C | 0.0538  |
| rs78745230  | T | 0.1458  |
| rs7449864   | T | -0.1295 |
| rs9885797   | T | 0.0644  |
| rs505148    | G | 0.0582  |
| rs12195897  | G | 0.1157  |
| rs148216304 | C | 0.214   |

|             |   |         |
|-------------|---|---------|
| rs4129313   | G | -0.0219 |
| rs7746540   | A | -0.0226 |
| rs12198275  | G | -0.0219 |
| rs114653095 | C | -0.1251 |
| rs9357240   | A | 0.023   |
| rs17067435  | A | -0.0653 |
| rs75054201  | T | -0.1269 |
| rs141351662 | A | -0.1467 |
| rs9800782   | T | 0.1263  |
| rs116530969 | T | 0.1835  |
| rs79441354  | A | -0.0753 |
| rs17812916  | A | 0.0402  |
| rs1894660   | T | 0.0415  |
| rs2636353   | T | 0.0346  |
| rs16874625  | C | -0.0719 |
| rs4574651   | T | 0.0238  |
| rs6458155   | C | -0.0278 |
| rs72877933  | T | 0.0795  |
| rs4896970   | G | -0.1539 |
| rs9503199   | A | -0.0226 |
| rs117056302 | A | 0.1627  |
| rs113478855 | C | 0.0448  |
| rs149631868 | C | 0.0681  |
| rs1267840   | T | -0.027  |
| rs72974638  | T | -0.0909 |
| rs75142754  | G | 0.0863  |
| rs11155980  | A | 0.0326  |
| rs6456280   | A | 0.032   |
| rs62414043  | C | 0.1427  |
| rs78537086  | C | 0.0887  |
| rs113416887 | T | 0.0676  |
| rs75300464  | C | -0.0642 |
| rs4708880   | C | 0.0256  |
| rs55953126  | T | -0.0413 |
| rs7772880   | C | 0.0328  |
| rs117010499 | C | 0.0877  |
| rs17052989  | T | 0.0439  |
| rs62426087  | C | -0.0894 |
| rs9479275   | A | 0.025   |
| rs10085355  | C | -0.0248 |
| rs990189    | T | 0.046   |
| rs76219286  | A | 0.0929  |
| rs1738292   | C | 0.0384  |
| rs77321476  | G | -0.0698 |
| rs117902779 | T | 0.1305  |
| rs138864823 | C | -0.0632 |
| rs791048    | C | 0.0482  |

|             |   |         |
|-------------|---|---------|
| rs142711727 | G | -0.0504 |
| rs75965745  | T | -0.1464 |
| rs55785509  | G | 0.0472  |
| rs114721596 | T | 0.1089  |
| rs77678784  | A | -0.0841 |
| rs77349131  | C | -0.1033 |
| rs206180    | G | 0.0316  |
| rs10944866  | A | 0.052   |
| rs2024846   | A | 0.025   |
| rs35330352  | G | 0.0234  |
| rs9491697   | G | 0.0228  |
| rs117554376 | T | -0.0966 |
| rs117934509 | A | -0.1236 |
| rs62420522  | G | 0.0323  |
| rs2749078   | T | -0.0369 |
| rs10456222  | A | -0.0231 |
| rs13204294  | A | -0.0713 |
| rs77366450  | G | -0.1244 |
| rs7766231   | G | 0.0865  |
| rs78859372  | C | -0.1228 |
| rs12192444  | G | 0.0599  |
| rs151001348 | C | -0.0847 |
| rs62407176  | A | 0.1434  |
| rs7764033   | A | 0.0265  |
| rs117585620 | T | 0.1541  |
| rs1084330   | A | 0.0851  |
| rs2223802   | C | -0.0613 |
| rs6557139   | T | -0.0245 |
| rs34852247  | A | 0.0287  |
| rs117720602 | G | -0.0886 |
| rs78070658  | C | 0.1708  |
| rs806275    | G | 0.0402  |
| rs75147479  | A | 0.0881  |
| rs6933614   | A | -0.0267 |
| rs9405605   | C | -0.1616 |
| rs116618167 | C | -0.1072 |
| rs77952702  | A | 0.1167  |
| rs11751539  | T | -0.0407 |
| rs206916    | T | -0.0234 |
| rs11754677  | G | -0.0232 |
| rs7756478   | A | -0.0225 |
| rs10944485  | G | -0.0311 |
| rs146882562 | A | -0.1355 |
| rs116933909 | G | -0.0959 |
| rs713460    | A | -0.0245 |
| rs116068878 | C | 0.0837  |
| rs76117633  | C | 0.1324  |

|             |   |         |
|-------------|---|---------|
| rs112049388 | A | -0.1517 |
| rs66906244  | T | 0.0656  |
| rs77866267  | T | 0.1034  |
| rs9461933   | T | -0.0379 |
| rs13214173  | A | -0.0241 |
| rs846972    | A | -0.0597 |
| rs141136928 | C | 0.0824  |
| rs146796817 | A | 0.1217  |
| rs72873354  | A | -0.1726 |
| rs78845043  | T | 0.0826  |
| rs149959373 | T | 0.1341  |
| rs17061461  | C | -0.0869 |
| rs1743967   | T | -0.0292 |
| rs9376032   | A | 0.0338  |
| rs142354984 | G | -0.1272 |
| rs76776176  | T | -0.0695 |
| rs808438    | T | -0.0252 |
| rs287885    | G | -0.0232 |
| rs62435957  | C | -0.0611 |
| rs112023841 | T | 0.1463  |
| rs11756399  | C | -0.0624 |
| rs62385478  | T | -0.0659 |
| rs138288491 | G | 0.0594  |
| rs6914495   | A | 0.0233  |
| rs3793071   | T | -0.0351 |
| rs1157867   | C | -0.0711 |
| rs41288975  | A | 0.1897  |
| rs78086009  | G | -0.103  |
| rs56274426  | T | -0.1274 |
| rs79993912  | A | 0.1192  |
| rs9392032   | A | 0.0339  |
| rs72827710  | G | 0.1184  |
| rs141085810 | A | 0.1421  |
| rs9343479   | T | -0.0284 |
| rs9466473   | C | 0.0466  |
| rs12204857  | T | -0.1136 |
| rs34319269  | T | -0.0636 |
| rs1004020   | A | -0.124  |
| rs9389536   | A | -0.0528 |
| rs1937584   | T | -0.0259 |
| rs9365548   | C | -0.0268 |
| rs16878431  | G | 0.0579  |
| rs75723654  | G | 0.0754  |
| rs9353797   | A | 0.049   |
| rs13219062  | G | 0.1503  |
| rs147294009 | T | 0.1184  |
| rs12207443  | G | -0.0378 |

|             |   |         |
|-------------|---|---------|
| rs114009741 | T | 0.1265  |
| rs1475770   | G | -0.0709 |
| rs62402645  | G | 0.1409  |
| rs9346225   | G | -0.0456 |
| rs4714104   | T | -0.0226 |
| rs77366525  | T | 0.2045  |
| rs144202244 | G | 0.0757  |
| rs79433832  | T | -0.141  |
| rs117891955 | G | -0.1331 |
| rs34309175  | C | 0.0341  |
| rs3846817   | T | -0.0276 |
| rs4470825   | A | 0.023   |
| rs9362216   | T | 0.0306  |
| rs76185631  | T | -0.0878 |
| rs6907261   | T | 0.0394  |
| rs6942087   | A | -0.0274 |
| rs12523851  | C | -0.031  |
| rs438258    | T | -0.0283 |
| rs2270989   | A | -0.024  |
| rs55771509  | A | 0.0343  |
| rs55751523  | T | 0.0653  |
| rs13203293  | T | -0.1485 |
| rs522611    | G | 0.0289  |
| rs4273713   | G | -0.1811 |
| rs9344721   | A | -0.0749 |
| rs9345345   | G | -0.0347 |
| rs79112629  | C | -0.0507 |
| rs112880431 | A | 0.1881  |
| rs76081715  | A | 0.1783  |
| rs115185185 | T | -0.0631 |
| rs9472275   | C | 0.0604  |
| rs272582    | A | 0.0239  |
| rs10457912  | T | -0.0829 |
| rs3127369   | T | -0.0633 |
| rs143902884 | G | -0.0501 |
| rs240735    | T | 0.024   |
| rs117477197 | A | -0.1462 |
| rs227478    | T | -0.0243 |
| rs116261629 | G | 0.0576  |
| rs35287046  | A | 0.0645  |
| rs143236495 | A | -0.0729 |
| rs139421732 | A | 0.0601  |
| rs116969303 | G | 0.084   |
| rs111710107 | A | -0.0598 |
| rs58528208  | C | 0.0996  |
| rs12206901  | C | 0.0333  |
| rs11758971  | T | -0.0752 |

|             |   |         |
|-------------|---|---------|
| rs148466304 | T | -0.1198 |
| rs501762    | C | -0.0293 |
| rs117561214 | C | 0.0642  |
| rs145134255 | G | -0.0948 |
| rs7760727   | A | 0.0779  |
| rs4714872   | C | 0.0321  |
| rs1137086   | G | -0.0798 |
| rs1334576   | A | -0.0218 |
| rs1266834   | G | 0.0222  |
| rs111388793 | T | 0.1485  |
| rs113177453 | T | -0.1151 |
| rs1538965   | A | 0.0228  |
| rs117663659 | G | -0.0562 |
| rs9362768   | G | -0.0408 |
| rs140362194 | C | -0.1285 |
| rs117657016 | T | 0.0563  |
| rs117452854 | A | -0.1312 |
| rs77995889  | C | -0.0808 |
| rs3762004   | A | 0.0425  |
| rs118092625 | G | -0.1411 |
| rs7759851   | C | 0.0217  |
| rs79157610  | T | -0.0648 |
| rs73774480  | C | 0.0679  |
| rs141896531 | G | 0.082   |
| rs117509604 | G | 0.1101  |
| rs11756261  | A | -0.0478 |
| rs544840    | A | 0.0227  |
| rs114808021 | A | 0.1302  |
| rs158774    | G | 0.024   |
| rs11754095  | A | -0.0354 |
| rs9372031   | C | 0.0336  |
| rs12208377  | T | -0.0676 |
| rs76318624  | A | 0.1552  |
| rs117400657 | T | 0.0768  |
| rs2465845   | C | -0.0228 |
| rs79049160  | A | 0.0359  |
| rs148930634 | C | 0.0914  |
| rs79537824  | A | -0.1021 |
| rs1171106   | T | 0.022   |
| rs11758450  | G | 0.0419  |
| rs139612798 | C | -0.0864 |
| rs2155482   | G | -0.0252 |
| rs144935992 | T | -0.1268 |
| rs6928832   | G | 0.022   |
| rs149088714 | A | -0.1324 |
| rs7750238   | T | -0.0412 |
| rs78727148  | C | 0.1055  |

|             |   |         |
|-------------|---|---------|
| rs116499343 | G | 0.0821  |
| rs1969767   | T | 0.0286  |
| rs117364854 | A | -0.0567 |
| rs74491590  | G | 0.0934  |
| rs11964836  | T | -0.13   |
| rs9294757   | A | -0.0408 |
| rs117670969 | G | -0.1255 |
| rs75179846  | C | 0.1441  |
| rs9458662   | G | 0.0221  |
| rs113969967 | G | 0.0857  |
| rs6923516   | T | -0.1135 |
| rs2326995   | C | 0.0279  |
| rs144456468 | A | 0.0955  |
| rs9394865   | T | -0.0492 |
| rs117170698 | A | 0.1125  |
| rs8180566   | A | -0.0459 |
| rs7757668   | T | -0.1172 |
| rs112537015 | T | -0.1274 |
| rs59584256  | G | -0.1847 |
| rs112516254 | C | -0.135  |
| rs74337290  | T | -0.1202 |
| rs117303967 | A | 0.1343  |
| rs117597579 | A | 0.1457  |
| rs72977992  | A | -0.0433 |
| rs7738425   | A | 0.0858  |
| rs75749871  | A | 0.1234  |
| rs6931660   | T | 0.097   |
| rs13193662  | G | 0.0344  |
| rs13211463  | T | 0.0883  |
| rs17664981  | C | 0.0662  |
| rs17495762  | C | -0.068  |
| rs138908132 | C | -0.1686 |
| rs76347204  | A | 0.0775  |
| rs41289787  | T | -0.1369 |
| rs58599785  | T | 0.0312  |
| rs116691191 | A | 0.0819  |
| rs114546521 | C | 0.1     |
| rs72848575  | C | 0.0261  |
| rs118071085 | T | 0.0566  |
| rs13218939  | G | -0.0566 |
| rs73014937  | C | -0.0778 |
| rs142168130 | A | 0.1532  |
| rs9394809   | T | -0.0395 |
| rs6900550   | G | -0.0506 |
| rs4706203   | T | -0.0238 |
| rs12201257  | G | -0.0524 |
| rs9347511   | C | -0.034  |



|             |   |         |
|-------------|---|---------|
| rs9456684   | A | -0.0213 |
| rs117393305 | A | -0.1136 |
| rs188542    | T | 0.0218  |
| rs12216476  | G | 0.022   |
| rs9403959   | A | -0.0239 |
| rs35458044  | C | 0.0532  |
| rs62442142  | C | 0.0946  |
| rs9405851   | A | 0.0271  |
| rs77713950  | A | -0.099  |
| rs78206787  | A | 0.128   |
| rs113350772 | T | 0.1097  |
| rs113458269 | A | 0.0941  |
| rs12174150  | A | -0.0349 |
| rs11154289  | G | 0.0226  |
| rs117905603 | G | 0.1517  |
| rs73008043  | A | -0.0918 |
| rs9396802   | T | 0.0264  |
| rs6912334   | G | 0.038   |
| rs148307346 | T | 0.1236  |
| rs72994847  | C | 0.0703  |
| rs270412    | T | 0.0264  |
| rs9465426   | C | -0.0282 |
| rs2237201   | T | 0.0228  |
| rs2473600   | C | -0.0599 |
| rs146939919 | C | -0.1419 |
| rs1686161   | T | 0.0266  |
| rs112437992 | A | 0.1781  |
| rs4707038   | T | -0.0267 |
| rs78563638  | G | 0.0739  |
| rs4713714   | T | 0.0275  |
| rs139346281 | T | 0.0616  |
| rs485225    | G | -0.022  |
| rs9371582   | T | -0.0307 |
| rs138483875 | C | 0.1441  |
| rs59712603  | T | 0.0212  |
| rs112913222 | C | 0.0962  |
| rs9443009   | T | 0.0235  |
| rs149691558 | T | 0.0785  |
| rs6906912   | G | -0.0367 |
| rs74711970  | T | -0.1926 |
| rs7772103   | A | 0.0339  |
| rs928534    | T | 0.0395  |
| rs118182349 | G | 0.0752  |
| rs146602665 | G | 0.0931  |
| rs36077033  | A | 0.029   |
| rs149967589 | A | -0.1315 |
| rs112365493 | C | 0.1711  |

|             |   |         |
|-------------|---|---------|
| rs17633311  | T | -0.0633 |
| rs74571611  | G | 0.1571  |
| rs9345141   | C | 0.0749  |
| rs79650283  | T | -0.1547 |
| rs115719968 | G | 0.0597  |
| rs148104576 | C | 0.1079  |
| rs12197175  | C | -0.0468 |
| rs79972021  | T | -0.073  |
| rs74389716  | A | 0.107   |
| rs78666861  | T | -0.2021 |
| rs9498058   | G | 0.0258  |
| rs11755055  | C | 0.0373  |
| rs72850675  | A | -0.14   |
| rs62416163  | C | -0.0265 |
| rs35454259  | A | -0.027  |
| rs9483497   | A | -0.0318 |
| rs11752337  | A | -0.1905 |
| rs9654561   | C | 0.128   |
| rs13208375  | G | 0.1838  |
| rs41273854  | T | 0.0957  |
| rs35485861  | A | -0.0646 |
| rs55922526  | T | -0.0328 |
| rs12192239  | C | -0.0289 |
| rs1741939   | T | -0.0246 |
| rs62413715  | C | -0.1191 |
| rs12055671  | C | 0.022   |
| rs76599643  | G | 0.0883  |
| rs1919533   | G | 0.0214  |
| rs56130549  | C | -0.0292 |
| rs6918918   | T | 0.0277  |
| rs147286205 | A | -0.1326 |
| rs9349503   | T | -0.0576 |
| rs9349262   | C | 0.0461  |
| rs148055133 | T | -0.1099 |
| rs10434890  | T | -0.0228 |
| rs208732    | T | 0.0234  |
| rs1540661   | T | 0.0403  |
| rs78327096  | T | -0.0542 |
| rs75969465  | C | -0.032  |
| rs113109305 | A | -0.046  |
| rs4897178   | G | -0.0244 |
| rs13194866  | G | 0.0737  |
| rs116478188 | A | -0.1162 |
| rs12211829  | C | 0.1058  |
| rs13205704  | C | -0.0812 |
| rs6456009   | A | -0.0311 |
| rs72953441  | C | -0.0722 |

|             |   |         |
|-------------|---|---------|
| rs79564246  | A | 0.0675  |
| rs117510326 | A | 0.0766  |
| rs55893097  | C | -0.0363 |
| rs78576899  | T | 0.0564  |
| rs41273776  | T | 0.0757  |
| rs9453351   | G | 0.0236  |
| rs1826560   | A | -0.1842 |
| rs116953502 | G | 0.0629  |
| rs117789396 | G | 0.1738  |
| rs1933743   | T | -0.0223 |
| rs34798647  | A | 0.0233  |
| rs2248288   | G | 0.0821  |
| rs78039179  | T | -0.1315 |
| rs3024370   | A | -0.0237 |
| rs73448967  | C | 0.0552  |
| rs75750738  | T | 0.0636  |
| rs62420175  | C | 0.109   |
| rs6916485   | T | 0.1747  |
| rs647635    | C | -0.0739 |
| rs79957187  | A | -0.0821 |
| rs12529835  | C | -0.0593 |
| rs851982    | C | -0.0221 |
| rs11755280  | C | -0.0258 |
| rs9364296   | G | 0.021   |
| rs10949239  | T | 0.0286  |
| rs117121598 | C | -0.0697 |
| rs9471076   | T | -0.0362 |
| rs10947973  | A | 0.0479  |
| rs2225912   | G | -0.0346 |
| rs138615353 | A | 0.0655  |
| rs118175036 | T | -0.1547 |
| rs1320963   | G | -0.0247 |
| rs62401986  | A | -0.0854 |
| rs9372971   | A | 0.1047  |
| rs11753714  | T | 0.0362  |
| rs73035520  | T | -0.0557 |
| rs17644486  | T | 0.0766  |
| rs9372322   | A | -0.054  |
| rs9320710   | C | 0.0459  |
| rs112426386 | A | -0.0595 |
| rs117182394 | T | 0.0873  |
| rs2146031   | T | 0.0437  |
| rs78209349  | G | 0.0537  |
| rs116921275 | A | 0.102   |
| rs9386278   | G | -0.0626 |
| rs6908435   | T | 0.0379  |
| rs79868819  | A | -0.1251 |

|             |   |         |
|-------------|---|---------|
| rs116435868 | A | 0.0754  |
| rs1359227   | C | -0.0268 |
| rs74896922  | A | -0.0661 |
| rs11754890  | G | 0.1149  |
| rs4706381   | G | 0.0311  |
| rs138997689 | T | -0.0892 |
| rs45621032  | A | -0.1068 |
| rs9396161   | C | 0.0946  |
| rs7771249   | C | 0.0289  |
| rs55916823  | T | -0.1312 |
| rs17056140  | C | -0.0469 |
| rs6915235   | C | 0.0344  |
| rs858334    | G | -0.0302 |
| rs56324875  | T | -0.0249 |
| rs115806935 | C | -0.117  |
| rs62435966  | T | 0.0566  |
| rs114793773 | T | -0.1045 |
| rs144364238 | A | 0.1197  |
| rs9344751   | T | -0.1185 |
| rs116882447 | C | 0.0653  |
| rs9377010   | A | -0.0433 |
| rs62405007  | G | 0.0754  |
| rs9473243   | A | 0.0344  |
| rs9482341   | A | -0.1272 |
| rs9353394   | C | 0.0228  |
| rs7758257   | T | 0.0268  |
| rs35876294  | T | 0.0443  |
| rs79252365  | G | -0.0821 |
| rs12528664  | A | 0.0323  |
| rs2001575   | A | -0.0543 |
| rs6899369   | T | 0.0486  |
| rs9328112   | A | -0.0214 |
| rs4712955   | A | 0.0223  |
| rs4707320   | T | -0.0234 |
| rs59114190  | A | -0.0261 |
| rs62393799  | T | -0.1277 |
| rs150371615 | A | 0.1248  |
| rs7770224   | T | -0.0335 |
| rs7771861   | C | -0.0816 |
| rs117211954 | G | 0.1519  |
| rs62414880  | G | -0.0622 |
| rs73001787  | T | 0.0706  |
| rs7769660   | G | 0.1347  |
| rs12661222  | G | -0.0352 |
| rs58942161  | G | 0.0461  |
| rs73003254  | A | -0.0688 |
| rs117859594 | T | -0.0637 |

|             |   |         |
|-------------|---|---------|
| rs58684332  | A | 0.0313  |
| rs75141905  | G | -0.0526 |
| rs9456839   | C | -0.0385 |
| rs146784571 | T | -0.0784 |
| rs76515784  | T | -0.0428 |
| rs6913928   | A | 0.0245  |
| rs35741880  | C | -0.0622 |
| rs9294679   | T | 0.0359  |
| rs35029799  | G | -0.0709 |
| rs12199855  | C | -0.0339 |
| rs59290912  | C | 0.0479  |
| rs4708883   | A | 0.1013  |
| rs4959303   | G | -0.0294 |
| rs16870749  | C | 0.0886  |
| rs28746771  | T | -0.0782 |
| rs74360887  | A | -0.1332 |
| rs11751623  | T | -0.0591 |
| rs9341086   | A | -0.0871 |
| rs17200884  | C | 0.0597  |
| rs6926308   | T | 0.0313  |
| rs9380754   | G | -0.0326 |
| rs12173674  | A | -0.0556 |
| rs117685521 | A | -0.1262 |
| rs9347886   | A | 0.04    |
| rs148022866 | A | 0.1237  |
| rs932403    | T | 0.0262  |
| rs144457826 | A | 0.0792  |
| rs6902375   | A | -0.0406 |
| rs9458274   | G | 0.1271  |
| rs9368620   | G | -0.0329 |
| rs6938515   | A | -0.0252 |
| rs870631    | G | 0.021   |
| rs72923293  | G | -0.1844 |
| rs117738229 | G | 0.146   |
| rs117589858 | T | -0.0481 |
| rs112546719 | G | -0.1076 |
| rs117701920 | T | -0.1168 |
| rs114809691 | G | -0.0838 |
| rs9460382   | G | 0.0418  |
| rs75635919  | C | 0.054   |
| rs117865583 | G | -0.1138 |
| rs6932044   | G | 0.0283  |
| rs77262737  | A | -0.0881 |
| rs429655    | A | -0.0626 |
| rs7381369   | A | 0.0299  |
| rs78769847  | G | 0.1329  |
| rs72928017  | T | -0.1103 |

|             |   |         |
|-------------|---|---------|
| rs9376410   | G | -0.0232 |
| rs483403    | T | 0.1158  |
| rs10945497  | T | 0.032   |
| rs1858505   | A | -0.0502 |
| rs6901315   | C | 0.027   |
| rs4895565   | A | 0.0399  |
| rs9348842   | T | -0.022  |
| rs1295857   | T | 0.0575  |
| rs9366916   | G | 0.0225  |
| rs72914601  | G | 0.1733  |
| rs75513300  | A | 0.0844  |
| rs114714132 | T | 0.1275  |
| rs2237213   | T | -0.0333 |
| rs78244560  | A | 0.0688  |
| rs147578874 | A | -0.1382 |
| rs9370290   | G | -0.0236 |
| rs17786870  | A | -0.0373 |
| rs117245877 | T | 0.0797  |
| rs55934883  | A | -0.0378 |
| rs77063817  | C | -0.0769 |
| rs76925105  | A | 0.0701  |
| rs147627526 | T | 0.1141  |
| rs552655    | T | 0.022   |
| rs144360625 | C | -0.034  |
| rs11242798  | T | 0.0287  |
| rs9460635   | C | 0.0229  |
| rs142776031 | A | -0.124  |
| rs72866531  | A | 0.0878  |
| rs73480668  | C | 0.1113  |
| rs2518237   | T | 0.0389  |
| rs111558445 | T | -0.1094 |
| rs11758317  | A | -0.108  |
| rs9357918   | T | 0.0235  |
| rs6939261   | A | 0.0229  |
| rs41286208  | A | -0.0552 |
| rs75677840  | T | -0.1029 |
| rs143852945 | G | -0.1371 |
| rs55919767  | T | -0.0507 |
| rs10947086  | T | -0.0556 |
| rs75179224  | T | 0.0885  |
| rs9349843   | A | 0.0252  |
| rs7765980   | C | 0.0587  |
| rs35208385  | A | 0.1042  |
| rs9394959   | A | -0.0239 |
| rs6929755   | G | 0.0799  |
| rs72830693  | G | -0.0673 |
| rs78596750  | A | -0.0847 |

|             |   |         |
|-------------|---|---------|
| rs111665764 | C | 0.0897  |
| rs11961869  | G | 0.099   |
| rs1627049   | A | -0.0786 |
| rs156061    | T | 0.0259  |
| rs12199027  | G | 0.032   |
| rs143463310 | T | -0.1271 |
| rs9479520   | A | -0.0785 |
| rs150893688 | G | -0.121  |
| rs78517222  | T | -0.0672 |
| rs10457062  | A | -0.0652 |
| rs139780287 | T | 0.0909  |
| rs118140117 | T | 0.1046  |
| rs118159208 | C | -0.1409 |
| rs75844329  | T | 0.0873  |
| rs6940335   | G | 0.0401  |
| rs6596783   | A | -0.0252 |
| rs12529598  | G | -0.0489 |
| rs75544445  | G | 0.1432  |
| rs77641161  | T | 0.0755  |
| rs12210579  | C | -0.0251 |
| rs12173949  | G | 0.0387  |
| rs72841079  | T | 0.1122  |
| rs9470258   | T | 0.0759  |
| rs113880644 | T | -0.0714 |
| rs146988595 | T | -0.1324 |
| rs113473141 | T | -0.1343 |
| rs79633578  | A | 0.1254  |
| rs62440909  | T | -0.0346 |
| rs72940404  | A | 0.0539  |
| rs6903342   | A | -0.0215 |
| rs17712040  | C | 0.0309  |
| rs77782362  | C | -0.0632 |
| rs533810    | C | 0.0224  |
| rs4144237   | G | 0.0276  |
| rs12665013  | A | 0.0868  |
| rs62416388  | G | -0.0796 |
| rs77488972  | G | 0.0712  |
| rs57562398  | C | -0.0949 |
| rs6929764   | G | -0.0272 |
| rs3901049   | A | 0.0905  |
| rs2039559   | T | -0.0212 |
| rs10485084  | A | 0.0308  |
| rs4896963   | T | -0.0472 |
| rs6455708   | T | 0.0238  |
| rs76143740  | G | -0.1044 |
| rs140411193 | C | -0.1682 |
| rs35328058  | G | -0.1231 |

|             |   |         |
|-------------|---|---------|
| rs74745938  | C | -0.068  |
| rs7452774   | T | 0.0526  |
| rs79374694  | C | -0.0692 |
| rs78281483  | A | 0.0478  |
| rs9357064   | C | 0.0572  |
| rs9474056   | T | -0.0251 |
| rs12201448  | A | 0.1306  |
| rs117984853 | T | 0.0595  |
| rs1205892   | C | -0.0267 |
| rs3012377   | T | 0.0337  |
| rs9386481   | T | 0.1274  |
| rs58735415  | T | -0.041  |
| rs144867071 | C | 0.0646  |
| rs116957737 | T | -0.204  |
| rs138660914 | T | 0.0938  |
| rs9458796   | G | -0.0228 |
| rs13206468  | T | -0.0335 |
| rs12523760  | A | 0.0475  |
| rs1147562   | G | -0.0236 |
| rs9359385   | A | 0.0773  |
| rs6571009   | G | -0.0225 |
| rs74604864  | A | 0.1479  |
| rs9397264   | C | -0.0227 |
| rs113441958 | G | 0.0654  |
| rs12526460  | T | -0.1426 |
| rs72851404  | G | 0.0651  |
| rs2485804   | G | -0.055  |
| rs150031848 | A | 0.1629  |
| rs9396476   | C | 0.033   |
| rs12524981  | C | 0.121   |
| rs9362652   | G | -0.0255 |
| rs9478710   | G | 0.0925  |
| rs6941696   | T | -0.0222 |
| rs72857948  | C | -0.0433 |
| rs74535709  | G | -0.0868 |
| rs9496652   | G | -0.0287 |
| rs76503069  | T | -0.0665 |
| rs12664562  | G | 0.0276  |
| rs145981952 | G | -0.0511 |
| rs72887080  | C | -0.1014 |
| rs62390871  | T | 0.0865  |
| rs1761511   | A | -0.0645 |
| rs3777966   | T | -0.0732 |
| rs117853111 | T | 0.1433  |
| rs138024011 | G | -0.0871 |
| rs62397638  | C | -0.0618 |
| rs9453880   | T | -0.0337 |



|             |   |         |
|-------------|---|---------|
| rs72942932  | T | -0.0614 |
| rs71548519  | G | 0.0495  |
| rs807817    | T | 0.0856  |
| rs73548973  | C | 0.0311  |
| rs2786181   | T | 0.0217  |
| rs10945935  | C | -0.0357 |
| rs732290    | T | 0.082   |
| rs1482871   | G | -0.0241 |
| rs303054    | T | -0.0563 |
| rs72833278  | T | -0.1051 |
| rs115648200 | G | 0.1167  |
| rs7746723   | G | -0.0385 |
| rs74517041  | G | 0.0666  |
| rs62421305  | G | -0.0419 |
| rs147459035 | C | 0.0713  |
| rs6906212   | T | -0.0226 |
| rs57942326  | A | 0.0382  |
| rs77495929  | T | 0.0525  |
| rs2170616   | T | -0.0255 |
| rs17799269  | G | -0.0265 |
| rs7763524   | C | -0.0341 |
| rs9296439   | G | -0.0235 |
| rs149084480 | G | -0.1742 |
| rs2787750   | A | 0.0234  |
| rs3799577   | T | -0.0423 |
| rs62390318  | G | 0.0377  |
| rs117535069 | T | -0.1805 |
| rs56283145  | A | 0.1004  |
| rs1885127   | C | 0.0366  |
| rs143845322 | A | -0.1716 |
| rs4590275   | C | 0.03    |
| rs1024216   | C | 0.0207  |
| rs139193873 | A | 0.0725  |
| rs62422353  | T | 0.064   |
| rs1890301   | A | -0.0733 |
| rs12199488  | T | 0.0446  |
| rs7453358   | T | -0.0255 |
| rs12206398  | C | 0.0312  |
| rs117215033 | C | 0.0969  |
| rs9345068   | A | 0.1277  |
| rs145113975 | T | -0.0856 |
| rs9490824   | A | -0.0268 |
| rs17181220  | A | -0.0838 |
| rs72836738  | C | 0.0397  |
| rs114236593 | A | 0.0664  |
| rs13193159  | T | -0.0662 |
| rs62436576  | A | -0.0315 |

|             |   |         |
|-------------|---|---------|
| rs78119441  | G | -0.0705 |
| rs17087572  | A | 0.0328  |
| rs75038513  | T | -0.0965 |
| rs12530184  | C | -0.0258 |
| rs2237180   | A | -0.0468 |
| rs9375685   | A | -0.0307 |
| rs62406601  | T | -0.0689 |
| rs197240    | T | -0.0876 |
| rs1744499   | T | 0.0421  |
| rs992970    | G | 0.0224  |
| rs818449    | C | -0.0208 |
| rs67352322  | G | 0.0284  |
| rs62386571  | G | -0.0368 |
| rs148874160 | A | -0.1814 |
| rs412746    | T | 0.0614  |
| rs823400    | A | -0.0255 |
| rs147359812 | G | -0.143  |
| rs74534865  | C | -0.1306 |
| rs7773386   | T | 0.0443  |
| rs79847426  | C | -0.0353 |
| rs76347422  | A | -0.1303 |
| rs62408080  | G | 0.0232  |
| rs138309208 | T | 0.1226  |
| rs4506053   | T | -0.0782 |
| rs76503183  | T | -0.0481 |
| rs208869    | C | -0.0212 |
| rs62429838  | A | 0.1317  |
| rs79663182  | T | -0.1264 |
| rs12210817  | T | 0.0214  |
| rs115411850 | C | -0.0459 |
| rs276572    | G | -0.0334 |
| rs3778353   | C | -0.0236 |
| rs118147285 | A | -0.0649 |
| rs77470450  | G | -0.1518 |
| rs55760480  | C | -0.0348 |
| rs113190010 | C | 0.0469  |
| rs113597165 | G | -0.0638 |
| rs802288    | A | -0.0287 |
| rs117830188 | T | -0.1317 |
| rs62427126  | T | 0.0344  |
| rs73001026  | C | -0.0675 |
| rs9348154   | T | 0.041   |
| rs117037809 | T | -0.1437 |
| rs141485912 | G | -0.0711 |
| rs118159673 | T | 0.1856  |
| rs74461216  | C | -0.0697 |
| rs10943666  | T | 0.0221  |

|             |   |         |
|-------------|---|---------|
| rs17080794  | A | 0.101   |
| rs2046174   | G | -0.0278 |
| rs10499156  | A | -0.0475 |
| rs75969618  | T | 0.0577  |
| rs149714383 | T | 0.0963  |
| rs979775    | A | -0.0316 |
| rs16892547  | G | -0.0331 |
| rs76939198  | A | -0.1206 |
| rs112730263 | T | 0.0982  |
| rs145799064 | C | -0.1544 |
| rs116243632 | A | 0.0849  |
| rs941834    | A | -0.0392 |
| rs143326098 | G | 0.0901  |
| rs17304585  | T | -0.0405 |
| rs115402675 | A | -0.1026 |
| rs144648410 | A | 0.1172  |
| rs7753863   | G | -0.022  |
| rs139897182 | A | 0.1574  |
| rs6914426   | A | 0.141   |
| rs1777766   | C | -0.031  |
| rs117413085 | G | 0.0671  |
| rs73432274  | A | 0.0381  |
| rs531486    | T | 0.0255  |
| rs116960804 | G | -0.0844 |
| rs75168788  | A | -0.0805 |
| rs13212563  | C | -0.0428 |
| rs9404782   | G | -0.0274 |
| rs73506708  | T | 0.0407  |
| rs638393    | T | -0.0219 |
| rs4073521   | C | -0.096  |
| rs7452620   | G | 0.0217  |
| rs7739198   | T | 0.0709  |
| rs4364467   | C | 0.0257  |
| rs142236546 | T | 0.1618  |
| rs844601    | G | 0.0322  |
| rs62414039  | A | -0.0878 |
| rs116919362 | A | -0.0803 |
| rs17190291  | G | 0.0539  |
| rs1571564   | C | -0.0263 |
| rs13201464  | A | -0.0351 |
| rs558134    | T | -0.0223 |
| rs72912820  | C | 0.0568  |
| rs2882105   | T | -0.0244 |
| rs13218258  | A | 0.0512  |
| rs17073572  | A | 0.044   |
| rs115444364 | T | 0.1092  |
| rs117315841 | A | -0.0542 |

|             |   |         |
|-------------|---|---------|
| rs74962903  | G | 0.0541  |
| rs13211557  | A | -0.0231 |
| rs117588763 | T | -0.1015 |
| rs139755506 | T | -0.0861 |
| rs118045883 | G | 0.1051  |
| rs6455864   | T | -0.0261 |
| rs113427297 | T | 0.1313  |
| rs76513322  | G | 0.1081  |
| rs493451    | G | -0.0285 |
| rs77349214  | G | 0.082   |
| rs1443844   | G | -0.0207 |
| rs117719795 | A | 0.0849  |
| rs138613502 | T | 0.1111  |
| rs6930053   | T | 0.0228  |
| rs2670394   | G | 0.0391  |
| rs76036443  | C | 0.211   |
| rs628559    | G | 0.0245  |
| rs115619095 | T | 0.1337  |
| rs75808470  | T | 0.0967  |
| rs2327396   | T | 0.0295  |
| rs115999576 | A | 0.0721  |
| rs117141776 | G | -0.0868 |
| rs72832220  | C | 0.1336  |
| rs114128590 | A | -0.1185 |
| rs35233644  | A | 0.0322  |
| rs12528858  | G | 0.0429  |
| rs9370525   | T | 0.0214  |
| rs146585447 | C | 0.1514  |
| rs9495081   | G | 0.0591  |
| rs2635472   | A | 0.0233  |
| rs62427599  | A | -0.0535 |
| rs78871092  | T | 0.057   |
| rs35776872  | C | -0.0228 |
| rs17419851  | T | 0.0321  |
| rs9402978   | C | -0.0229 |
| rs600102    | T | -0.0982 |
| rs112753251 | T | 0.1324  |
| rs12211989  | T | 0.0387  |
| rs118045401 | G | -0.092  |
| rs7750425   | T | -0.0211 |
| rs9467268   | G | -0.0475 |
| rs115828190 | A | 0.0653  |
| rs78448955  | T | -0.0795 |
| rs9503631   | T | 0.0796  |
| rs17055316  | T | -0.077  |
| rs9373672   | G | -0.0238 |
| rs149202178 | C | -0.1284 |

|             |   |         |
|-------------|---|---------|
| rs117697165 | T | 0.1102  |
| rs1188857   | A | -0.0252 |
| rs147111001 | C | -0.0935 |
| rs75764657  | T | 0.1458  |
| rs55775848  | T | -0.098  |
| rs1989470   | A | -0.0224 |
| rs9486151   | G | 0.2026  |
| rs12523957  | T | 0.0552  |
| rs6910676   | G | 0.0268  |
| rs10946490  | T | -0.0247 |
| rs138396776 | A | 0.1479  |
| rs4710525   | C | -0.0259 |
| rs6570858   | A | 0.0216  |
| rs7738367   | T | -0.0213 |
| rs13212178  | G | -0.0359 |
| rs79059708  | G | -0.0583 |
| rs58638848  | A | -0.1245 |
| rs2291385   | T | 0.0486  |
| rs17710038  | T | -0.0303 |
| rs140912531 | G | 0.1035  |
| rs78159679  | T | -0.1249 |
| rs833050    | A | -0.0769 |
| rs2220228   | T | -0.0402 |
| rs73020709  | G | -0.0353 |
| rs59597240  | C | -0.0613 |
| rs9394830   | A | 0.0227  |
| rs76813789  | A | 0.076   |
| rs12525073  | G | 0.0298  |
| rs76921821  | C | -0.0494 |
| rs13217797  | C | 0.0245  |
| rs9269128   | C | -0.0501 |
| rs80246542  | A | 0.073   |
| rs12198220  | G | 0.0258  |
| rs79934408  | A | -0.0935 |
| rs150411085 | T | 0.1274  |
| rs12660197  | T | -0.0758 |
| rs544757    | C | 0.0547  |
| rs13192074  | A | 0.0598  |
| rs77843107  | G | 0.0669  |
| rs77555954  | A | 0.0787  |
| rs12197358  | G | -0.0271 |
| rs116997744 | G | 0.057   |
| rs72840563  | C | 0.1713  |
| rs2326711   | C | 0.0466  |
| rs78930009  | A | 0.1157  |
| rs17456524  | C | 0.1067  |
| rs35197990  | A | 0.0711  |

|             |   |         |
|-------------|---|---------|
| rs9478380   | A | 0.0213  |
| rs7776345   | C | 0.0327  |
| rs2281272   | T | -0.0352 |
| rs12528768  | C | 0.0252  |
| rs6917207   | T | 0.0319  |
| rs4708657   | A | 0.0318  |
| rs6459472   | A | 0.0207  |
| rs79402321  | A | -0.1877 |
| rs75546663  | C | 0.1106  |
| rs7742826   | T | -0.022  |
| rs9321750   | A | 0.0287  |
| rs72836724  | A | -0.0864 |
| rs13191092  | G | -0.1088 |
| rs76453333  | G | 0.1057  |
| rs73484053  | C | 0.0306  |
| rs112054365 | T | -0.105  |
| rs4708993   | C | 0.0228  |
| rs6909508   | T | 0.114   |
| rs35681781  | C | -0.0299 |
| rs77565989  | G | 0.1134  |
| rs6939093   | A | -0.0603 |
| rs2296341   | C | -0.0248 |
| rs13212321  | T | 0.0215  |
| rs2273242   | C | -0.1331 |
| rs9386389   | G | 0.0313  |
| rs11755452  | T | 0.1036  |
| rs115974924 | C | 0.0894  |
| rs113086184 | G | 0.0685  |
| rs5977      | A | 0.0287  |
| rs150552973 | T | -0.1544 |
| rs4708658   | A | -0.0327 |
| rs116666011 | A | 0.1151  |
| rs6569662   | G | 0.0215  |
| rs2209491   | G | -0.0435 |
| rs9479940   | G | 0.0231  |
| rs4072591   | G | 0.0486  |
| rs74935546  | G | 0.0358  |
| rs11156052  | A | -0.0922 |
| rs1973894   | A | 0.0583  |
| rs149865491 | T | 0.1483  |
| rs35170510  | A | -0.0733 |
| rs72823524  | T | 0.0871  |
| rs61131185  | G | -0.0246 |
| rs654621    | T | -0.029  |
| rs4537129   | T | -0.0244 |
| rs143575769 | A | 0.1257  |
| rs72919720  | A | 0.0246  |

|             |   |         |
|-------------|---|---------|
| rs76675635  | A | 0.0291  |
| rs7767917   | T | 0.023   |
| rs4478401   | A | -0.0241 |
| rs141401255 | G | -0.0904 |
| rs761149    | G | -0.0516 |
| rs2795303   | G | 0.0216  |
| rs45492394  | A | -0.1517 |
| rs142027232 | T | 0.1049  |
| rs2555772   | A | -0.0271 |
| rs9376044   | T | 0.079   |
| rs62429523  | C | 0.0886  |
| rs9442858   | C | -0.022  |
| rs1107885   | C | 0.0213  |
| rs55704362  | C | 0.0487  |
| rs9463175   | T | 0.0221  |
| rs11152978  | C | -0.0228 |
| rs73560338  | A | 0.102   |
| rs62397397  | G | -0.0257 |
| rs12055849  | T | -0.1314 |
| rs9480582   | T | 0.0502  |
| rs1410295   | C | 0.0313  |
| rs75023367  | A | 0.0806  |
| rs970067    | G | -0.0238 |
| rs72983029  | T | 0.0556  |
| rs473767    | C | 0.0209  |
| rs454359    | T | 0.0478  |
| rs9491388   | G | -0.024  |
| rs2818255   | G | -0.1011 |
| rs4895749   | G | -0.0285 |
| rs9471170   | A | 0.0321  |
| rs114160588 | G | 0.0986  |
| rs117555972 | C | -0.2039 |
| rs9347984   | G | 0.0204  |
| rs9459470   | G | -0.0337 |
| rs2787930   | G | 0.0211  |
| rs1355021   | C | -0.0226 |
| rs1321168   | A | -0.0216 |
| rs9403930   | A | -0.0225 |
| rs689035    | T | -0.0334 |
| rs137954862 | A | 0.1423  |
| rs9502195   | A | 0.0338  |
| rs73742863  | G | 0.1428  |
| rs588496    | G | -0.066  |
| rs78608503  | A | 0.1191  |
| rs1986923   | C | 0.0224  |
| rs17059187  | C | 0.0205  |
| rs62435616  | C | 0.0824  |

|             |   |         |
|-------------|---|---------|
| rs491902    | G | 0.0213  |
| rs145750584 | A | 0.1151  |
| rs117686245 | A | 0.0892  |
| rs148479379 | T | 0.0856  |
| rs147221531 | T | 0.1655  |
| rs117909491 | A | -0.1047 |
| rs11962766  | C | -0.1021 |
| rs12174279  | C | -0.0538 |
| rs79551667  | A | 0.0957  |
| rs145323168 | A | 0.1465  |
| rs80206529  | C | 0.0771  |
| rs72833659  | T | 0.0365  |
| rs41272210  | T | 0.0892  |
| rs140862226 | G | -0.1331 |
| rs9294906   | C | 0.0211  |
| rs117096955 | C | 0.1284  |
| rs62424987  | C | 0.098   |
| rs150533314 | T | 0.0678  |
| rs1535584   | A | 0.0362  |
| rs6904723   | C | -0.02   |
| rs9392279   | A | -0.021  |
| rs6458114   | G | 0.0681  |
| rs2498529   | A | 0.0233  |
| rs77233031  | G | -0.0807 |
| rs12213552  | A | 0.0536  |
| rs9370068   | C | -0.0212 |
| rs148257123 | G | 0.101   |
| rs4530899   | T | 0.0256  |
| rs73781052  | T | 0.0905  |
| rs2134087   | G | -0.0204 |
| rs1886814   | C | -0.1052 |
| rs34650286  | C | 0.0566  |
| rs3823046   | G | 0.0724  |
| rs62427990  | A | 0.036   |
| rs226932    | A | 0.0212  |
| rs7746069   | T | -0.0646 |
| rs12523753  | A | 0.0871  |
| rs4945551   | T | 0.0236  |
| rs4714649   | C | 0.0398  |
| rs3734230   | T | 0.0299  |
| rs35606812  | A | 0.0316  |
| rs9491109   | A | -0.0346 |
| rs56036778  | T | 0.0786  |
| rs113574779 | T | 0.0909  |
| rs147443423 | T | -0.1492 |
| rs6934844   | T | -0.0208 |
| rs58680651  | A | 0.0476  |



|             |   |         |
|-------------|---|---------|
| rs6918041   | A | -0.0211 |
| rs804837    | C | -0.0223 |
| rs12526194  | T | 0.0248  |
| rs75405026  | A | 0.0692  |
| rs112445345 | C | -0.0547 |
| rs117573747 | C | 0.1209  |
| rs270320    | A | -0.025  |
| rs10456816  | A | 0.0479  |
| rs9472812   | C | 0.0518  |
| rs1687120   | T | 0.0448  |
| rs117145491 | T | 0.0901  |
| rs146771887 | A | -0.1667 |
| rs117436733 | C | 0.1369  |
| rs78314943  | C | 0.0322  |
| rs56235303  | A | -0.2485 |
| rs62434363  | T | -0.025  |
| rs9379336   | T | -0.0251 |
| rs9394269   | G | -0.041  |
| rs71566550  | G | 0.0544  |
| rs118053308 | G | -0.1228 |
| rs114677387 | A | -0.0627 |
| rs72975861  | T | 0.061   |
| rs114245037 | A | -0.0926 |
| rs114601429 | T | -0.0959 |
| rs7744063   | T | 0.021   |
| rs72940366  | G | 0.091   |
| rs6926192   | C | 0.0208  |
| rs141745443 | G | -0.1702 |
| rs80339217  | C | -0.067  |
| rs76445500  | A | -0.1157 |
| rs11965339  | C | -0.0434 |
| rs7749892   | C | -0.0212 |
| rs6916186   | A | 0.0513  |
| rs7454506   | C | -0.0891 |
| rs41265493  | A | 0.0964  |
| rs78069026  | A | 0.0697  |
| rs2207446   | A | 0.0223  |
| rs4946198   | C | 0.0228  |
| rs75986527  | A | -0.1165 |
| rs13190913  | A | 0.0271  |
| rs2615512   | A | -0.0207 |
| rs11755676  | G | -0.0304 |
| rs77588041  | A | 0.1736  |
| rs1681939   | A | 0.0324  |
| rs13214624  | T | 0.0616  |
| rs6900286   | C | -0.0303 |
| rs77248306  | G | -0.0816 |

|             |   |         |
|-------------|---|---------|
| rs72830818  | A | 0.1014  |
| rs3734558   | T | -0.0974 |
| rs79581912  | T | 0.0599  |
| rs78354558  | C | -0.0672 |
| rs115139920 | A | -0.1132 |
| rs13199373  | T | 0.0463  |
| rs79080656  | A | -0.067  |
| rs62406971  | A | -0.0215 |
| rs149283903 | A | 0.0601  |
| rs6899540   | C | 0.0308  |
| rs77707778  | A | 0.0985  |
| rs73772502  | T | 0.0445  |
| rs1051218   | A | 0.081   |
| rs146589806 | T | 0.1275  |
| rs75833810  | T | 0.1283  |
| rs72836598  | A | 0.0958  |
| rs36184164  | G | -0.0455 |
| rs11758366  | G | 0.0244  |
| rs34284521  | C | 0.0415  |
| rs6934614   | C | 0.0208  |
| rs315410    | C | 0.081   |
| rs4317453   | A | -0.0275 |
| rs9352030   | C | 0.1065  |
| rs7762026   | A | 0.0602  |
| rs79952742  | T | 0.0847  |
| rs2049661   | T | -0.0275 |
| rs9504609   | T | 0.0205  |
| rs116240337 | A | 0.0852  |
| rs16889542  | T | -0.0987 |
| rs149898127 | A | 0.1103  |
| rs932681    | A | -0.0345 |
| rs3861398   | C | 0.0223  |
| rs4714243   | A | 0.0225  |
| rs145856810 | C | 0.1343  |
| rs117905342 | A | 0.1412  |
| rs16871271  | A | 0.0929  |
| rs2439566   | T | -0.0717 |
| rs76524657  | G | 0.0522  |
| rs145125135 | T | 0.0286  |
| rs4870489   | G | 0.0498  |
| rs12192975  | A | -0.0496 |
| rs76236447  | C | 0.0593  |
| rs145126165 | T | 0.1151  |
| rs13212962  | A | -0.0567 |
| rs76216052  | T | -0.0778 |
| rs149491820 | A | 0.0864  |
| rs11970100  | A | 0.0244  |

|             |   |         |
|-------------|---|---------|
| rs12200797  | G | -0.0271 |
| rs3778171   | A | -0.0255 |
| rs7760359   | G | 0.0271  |
| rs4946938   | C | -0.0383 |
| rs62441185  | T | -0.0252 |
| rs12210841  | A | 0.1008  |
| rs2859308   | A | -0.0709 |
| rs73539559  | T | -0.147  |
| rs3024331   | A | 0.0838  |
| rs12197552  | G | -0.0415 |
| rs7452024   | A | 0.0818  |
| rs41271874  | A | -0.1027 |
| rs2033970   | C | 0.0493  |
| rs13200910  | A | 0.0635  |
| rs3024448   | C | 0.0254  |
| rs9385451   | C | -0.0885 |
| rs1208241   | A | 0.0242  |
| rs13437440  | T | -0.0679 |
| rs112200634 | C | 0.1079  |
| rs151140102 | T | -0.1315 |
| rs9383201   | C | -0.0231 |
| rs75289445  | A | -0.121  |
| rs12529699  | A | 0.023   |
| rs6899522   | C | 0.0295  |
| rs117317130 | A | 0.0925  |
| rs9504748   | C | -0.0852 |
| rs80112131  | T | -0.1196 |
| rs115524282 | T | 0.1228  |
| rs79107575  | T | 0.0983  |
| rs9349534   | C | 0.0203  |
| rs1058462   | C | -0.1174 |
| rs11153824  | G | -0.0273 |
| rs78256732  | A | -0.0885 |
| rs578540    | G | -0.0759 |
| rs3966705   | T | -0.1545 |
| rs80323078  | G | 0.134   |
| rs774410    | C | 0.021   |
| rs2753159   | G | 0.0405  |
| rs1293960   | C | -0.0239 |
| rs17084089  | A | 0.0472  |
| rs77034156  | A | 0.1842  |
| rs55810843  | G | -0.0417 |
| rs7753111   | G | -0.0212 |
| rs72817684  | T | 0.0748  |
| rs115209266 | A | 0.1554  |
| rs34340170  | C | -0.0709 |
| rs12210777  | T | 0.0388  |

|             |   |         |
|-------------|---|---------|
| rs2397144   | T | -0.0283 |
| rs9344770   | A | 0.0994  |
| rs17057200  | T | -0.0539 |
| rs146709547 | G | 0.094   |
| rs4714225   | A | -0.0372 |
| rs115829335 | G | -0.0721 |
| rs13214526  | G | -0.1274 |
| rs11156123  | C | 0.0208  |
| rs74903129  | G | -0.083  |
| rs80093726  | A | -0.1134 |
| rs7748154   | T | -0.0687 |
| rs4544930   | T | -0.0262 |
| rs4707649   | C | 0.0302  |
| rs75267288  | G | -0.0707 |
| rs1298764   | T | 0.0835  |
| rs13198422  | T | 0.0285  |
| rs942734    | A | -0.0352 |
| rs116498958 | T | 0.0959  |
| rs149166737 | T | -0.1592 |
| rs142096226 | T | 0.1015  |
| rs6936055   | T | 0.0264  |
| rs9486235   | A | -0.0957 |
| rs1001143   | C | -0.0241 |
| rs55827754  | C | -0.021  |
| rs151154305 | T | -0.1155 |
| rs113144748 | A | -0.0456 |
| rs4714101   | T | -0.0255 |
| rs72980836  | T | -0.056  |
| rs79337363  | A | 0.0936  |
| rs2813536   | G | 0.0212  |
| rs6933801   | T | -0.0223 |
| rs34444826  | A | 0.0242  |
| rs62418560  | T | -0.0463 |
| rs114374680 | T | -0.1183 |
| rs141039990 | A | 0.0514  |
| rs6904128   | A | -0.0796 |
| rs34181795  | T | 0.0368  |
| rs116449831 | T | 0.0885  |
| rs148170700 | G | 0.085   |
| rs7773747   | A | 0.1289  |
| rs654993    | T | 0.0204  |
| rs62407271  | C | -0.0465 |
| rs74376220  | A | -0.1064 |
| rs72817051  | C | -0.0617 |
| rs115201362 | T | 0.1498  |
| rs146349108 | T | 0.1233  |
| rs143500414 | C | -0.1086 |

|             |   |         |
|-------------|---|---------|
| rs78908498  | A | 0.0586  |
| rs80341092  | C | -0.1353 |
| rs2762357   | T | 0.0249  |
| rs287948    | T | 0.103   |
| rs8193036   | C | -0.0304 |
| rs10457015  | G | 0.1168  |
| rs146144490 | C | -0.0463 |
| rs76914359  | C | 0.0413  |
| rs10806401  | T | -0.0208 |
| rs9402515   | G | 0.0342  |
| rs75431542  | A | 0.0432  |
| rs670755    | A | 0.0253  |
| rs6458374   | C | -0.0267 |
| rs2816099   | C | -0.0204 |
| rs77276966  | T | 0.1294  |
| rs114309260 | G | -0.103  |
| rs74801158  | A | -0.1813 |
| rs151157093 | T | 0.1068  |
| rs117479373 | C | -0.0814 |
| rs72863164  | A | -0.0335 |
| rs1359015   | G | -0.1079 |
| rs79725689  | A | -0.0641 |
| rs17370253  | A | 0.0403  |
| rs780556    | T | -0.02   |
| rs139419772 | T | 0.0866  |
| rs114428951 | T | 0.0879  |
| rs62436298  | A | -0.0289 |
| rs1352678   | C | -0.0205 |
| rs35353646  | A | -0.0265 |
| rs147807551 | C | -0.0993 |
| rs115130399 | C | -0.0926 |
| rs12211012  | T | 0.0433  |
| rs34792310  | A | -0.1422 |
| rs9356371   | A | 0.0432  |
| rs10945513  | A | -0.0203 |
| rs3778253   | A | -0.0257 |
| rs143741838 | T | -0.035  |
| rs113107726 | C | 0.0821  |
| rs6568743   | C | 0.0499  |
| rs759102    | C | 0.0208  |
| rs1359486   | C | 0.0251  |
| rs72898526  | A | -0.1646 |
| rs74682745  | C | 0.07    |
| rs770939    | T | 0.0358  |
| rs2281444   | G | -0.0279 |
| rs71548190  | T | -0.0307 |
| rs114116686 | G | 0.1357  |

|             |   |         |
|-------------|---|---------|
| rs76560544  | T | 0.0881  |
| rs9321601   | C | -0.02   |
| rs138387193 | A | -0.0798 |
| rs35730227  | G | -0.1192 |
| rs112107383 | T | -0.0479 |
| rs71572515  | C | -0.0529 |
| rs11964424  | A | 0.0841  |
| rs55710344  | G | 0.0742  |
| rs138027083 | A | 0.0808  |
| rs1034115   | T | -0.0367 |
| rs12191730  | A | 0.1083  |
| rs57150324  | A | 0.1543  |
| rs6903191   | G | 0.1165  |
| rs139651287 | A | 0.0718  |
| rs139069569 | T | -0.0888 |
| rs12205693  | C | -0.0862 |
| rs16897776  | C | 0.0359  |
| rs7762545   | G | 0.0289  |
| rs12216013  | A | -0.0219 |
| rs539255    | C | 0.0351  |
| rs73752627  | T | 0.03    |
| rs803457    | T | 0.0227  |
| rs71569398  | A | 0.0625  |
| rs13206772  | T | 0.0278  |
| rs9348357   | A | -0.0387 |
| rs147844237 | A | 0.1478  |
| rs240641    | C | -0.0275 |
| rs1297769   | A | 0.0456  |
| rs4712745   | A | -0.0298 |
| rs9393426   | G | 0.0328  |
| rs111651548 | T | -0.096  |
| rs17795656  | G | 0.0955  |
| rs62434324  | T | 0.0937  |
| rs1267516   | C | 0.0333  |
| rs62398588  | A | 0.0976  |
| rs12528470  | G | -0.0821 |
| rs6925610   | A | -0.0832 |
| rs6909081   | C | 0.043   |
| rs77063378  | A | -0.0678 |
| rs481701    | G | 0.031   |
| rs75115591  | C | -0.1585 |
| rs9492471   | C | -0.0262 |
| rs140673951 | C | 0.06    |
| rs75424836  | C | -0.0762 |
| rs9364837   | G | 0.0204  |
| rs116210867 | A | 0.0516  |
| rs36095346  | A | -0.0245 |

|             |   |         |
|-------------|---|---------|
| rs12206299  | C | 0.0201  |
| rs73766109  | T | 0.0847  |
| rs75071176  | C | -0.1377 |
| rs352077    | G | 0.0234  |
| rs4869726   | C | -0.0727 |
| rs73344748  | G | 0.0423  |
| rs1964742   | C | 0.0357  |
| rs117765327 | T | -0.0758 |
| rs75130806  | G | 0.0928  |
| rs1408458   | T | 0.0242  |
| rs77153455  | T | -0.0538 |
| rs12197028  | G | -0.0439 |
| rs62420988  | T | -0.0502 |
| rs76689511  | T | 0.0851  |
| rs12209626  | A | -0.0649 |
| rs141140196 | T | 0.0661  |
| rs12197618  | A | -0.0753 |
| rs2295084   | T | 0.0291  |
| rs75599866  | G | -0.1336 |
| rs60566230  | T | 0.0923  |
| rs270284    | C | -0.021  |
| rs112592247 | T | -0.151  |
| rs147691853 | T | -0.1551 |
| rs9390089   | G | 0.0245  |
| rs115234559 | G | -0.0281 |
| rs45547134  | T | 0.0481  |
| rs62431430  | A | -0.0596 |
| rs76658305  | C | -0.0534 |
| rs72850003  | T | 0.0521  |
| rs7742752   | A | -0.1271 |
| rs685655    | G | -0.0219 |
| rs2858840   | T | 0.0213  |
| rs12197456  | G | -0.0407 |
| rs6933548   | T | 0.0299  |
| rs78838868  | T | 0.0432  |
| rs1107040   | A | 0.0695  |
| rs117366538 | T | -0.0985 |
| rs9371831   | T | -0.0431 |
| rs72944240  | T | 0.0415  |
| rs1998742   | A | 0.024   |
| rs9459883   | C | 0.0362  |
| rs80356346  | T | -0.0481 |
| rs113484791 | A | 0.0934  |
| rs62406399  | C | -0.0506 |
| rs114586321 | C | 0.0498  |
| rs117059757 | C | 0.1488  |
| rs62402186  | A | -0.1168 |

|             |   |         |
|-------------|---|---------|
| rs78855701  | T | 0.0339  |
| rs4452603   | T | -0.0314 |
| rs10944457  | C | -0.1264 |
| rs13203106  | A | 0.0853  |
| rs6570598   | A | -0.0276 |
| rs1247347   | G | 0.0385  |
| rs661325    | C | -0.0244 |
| rs6936379   | G | 0.1246  |
| rs116286373 | A | 0.1771  |
| rs75542355  | G | 0.1313  |
| rs55821059  | C | -0.0676 |
| rs6934982   | G | -0.0211 |
| rs12205758  | C | 0.1516  |
| rs113224977 | C | 0.1126  |
| rs11756360  | C | -0.0936 |
| rs113422523 | A | -0.0281 |
| rs3857470   | T | -0.0543 |
| rs117673633 | T | 0.0992  |
| rs28503735  | C | -0.0692 |
| rs659512    | G | 0.0199  |
| rs9456942   | C | 0.0255  |
| rs74820743  | C | -0.0375 |
| rs116077471 | A | 0.0642  |
| rs77018900  | T | 0.1416  |
| rs72937947  | G | 0.0266  |
| rs1076746   | C | 0.0552  |
| rs55717394  | A | -0.0237 |
| rs6941664   | C | 0.0207  |
| rs73385432  | C | 0.0444  |
| rs3180196   | C | -0.0289 |
| rs75243431  | T | 0.0494  |
| rs35328363  | T | 0.0437  |
| rs1598790   | A | 0.0249  |
| rs144540639 | C | 0.1241  |
| rs77365462  | C | -0.0724 |
| rs114961115 | A | 0.0746  |
| rs77298394  | T | 0.0933  |
| rs138497773 | C | 0.1568  |
| rs17260521  | C | 0.0942  |
| rs1474922   | C | 0.0537  |
| rs2982906   | A | -0.0321 |
| rs3828857   | T | -0.0209 |
| rs11758673  | T | 0.0492  |
| rs111742523 | A | 0.0976  |
| rs17550658  | A | 0.0631  |
| rs146521951 | A | -0.07   |
| rs4128134   | T | -0.0318 |



|             |   |         |
|-------------|---|---------|
| rs34843939  | A | 0.1065  |
| rs34214306  | G | -0.0979 |
| rs146794405 | C | 0.1098  |
| rs262464    | C | -0.0209 |
| rs9321725   | T | -0.0249 |
| rs9356168   | G | -0.0203 |
| rs117801438 | A | -0.0726 |
| rs115119339 | T | -0.0701 |
| rs61452398  | G | 0.0653  |
| rs71573700  | G | -0.0399 |
| rs335356    | G | -0.0234 |
| rs116539742 | A | 0.1603  |
| rs116877697 | T | -0.1034 |
| rs12214854  | A | -0.0258 |
| rs12206038  | A | -0.0532 |
| rs6927180   | C | -0.057  |
| rs34039795  | G | -0.0282 |
| rs7767018   | A | -0.0293 |
| rs144727113 | T | -0.139  |
| rs140926852 | A | 0.1408  |
| rs568744    | A | 0.0496  |
| rs115747855 | G | 0.0769  |
| rs7762714   | T | 0.034   |
| rs7742350   | T | -0.0456 |
| rs55920178  | A | 0.0347  |
| rs75268917  | A | -0.047  |
| rs67115866  | T | 0.0322  |
| rs13219581  | A | -0.1152 |
| rs9389712   | G | -0.0212 |
| rs9344246   | A | 0.0728  |
| rs9489143   | T | 0.0394  |
| rs79264903  | C | 0.1503  |
| rs17568061  | A | 0.0792  |
| rs60613897  | A | 0.046   |
| rs77911361  | C | -0.0703 |
| rs146134798 | C | -0.0911 |
| rs9502452   | A | 0.0244  |
| rs413627    | T | -0.0205 |
| rs72865160  | C | -0.1084 |
| rs4715229   | C | -0.0334 |
| rs139472920 | G | -0.0724 |
| rs7738490   | T | 0.0451  |
| rs9341066   | A | 0.0501  |
| rs7761476   | G | -0.0219 |
| rs4714469   | C | 0.0232  |
| rs795217    | T | 0.0267  |
| rs12211046  | A | -0.0398 |

|             |   |         |
|-------------|---|---------|
| rs112270871 | C | 0.0952  |
| rs9388988   | C | -0.0586 |
| rs35570061  | A | -0.0254 |
| rs10945493  | T | -0.0442 |
| rs77839024  | C | 0.0418  |
| rs9403404   | C | 0.0304  |
| rs12210829  | A | -0.0557 |
| rs139017785 | T | -0.0846 |
| rs76846903  | G | -0.0803 |
| rs114375948 | T | -0.0701 |
| rs117666915 | T | 0.102   |
| rs9386496   | C | -0.0276 |
| rs9494913   | A | 0.1203  |
| rs1886334   | T | -0.0314 |
| rs6927056   | G | -0.0208 |
| rs72833030  | A | -0.0417 |
| rs9355936   | A | -0.0361 |
| rs79265294  | T | 0.0445  |
| rs138602639 | A | 0.0968  |
| rs75614139  | G | 0.0794  |
| rs13213717  | G | -0.0999 |
| rs113515267 | C | -0.1015 |
| rs1761769   | G | 0.0209  |
| rs6933485   | C | -0.0213 |
| rs58133527  | C | -0.0205 |
| rs72883866  | A | -0.038  |
| rs145793994 | A | -0.1268 |
| rs9403479   | C | -0.0195 |
| rs7739751   | A | 0.046   |
| rs7738284   | C | -0.0202 |
| rs13215522  | A | -0.0571 |
| rs6939137   | A | -0.0351 |
| rs143390411 | G | -0.1132 |
| rs72947457  | A | 0.1524  |
| rs521638    | G | 0.0216  |
| rs9369482   | T | 0.0828  |
| rs75356817  | A | 0.0816  |
| rs72610885  | C | 0.0298  |
| rs1688609   | T | -0.0214 |
| rs28489468  | T | -0.0474 |
| rs117801134 | G | 0.1694  |
| rs112962054 | T | 0.0958  |
| rs9365514   | A | -0.0196 |
| rs114393117 | G | 0.1426  |
| rs114823885 | C | -0.1934 |
| rs12194748  | T | -0.0195 |
| rs11964098  | T | 0.0299  |

|             |   |         |
|-------------|---|---------|
| rs34087314  | A | 0.0202  |
| rs149203270 | A | -0.0811 |
| rs12205504  | T | 0.0229  |
| rs71558469  | A | 0.1443  |
| rs1919691   | T | -0.0204 |
| rs12194558  | C | -0.0286 |
| rs67440644  | A | 0.022   |
| rs6912671   | T | -0.0241 |
| rs4571560   | C | -0.0441 |
| rs4639316   | A | 0.0212  |
| rs1850629   | T | 0.0433  |
| rs6900124   | C | 0.0206  |
| rs113766362 | T | -0.0763 |
| rs117654177 | C | -0.1992 |
| rs80325777  | T | 0.076   |
| rs146950657 | C | 0.0463  |
| rs77115912  | A | -0.0826 |
| rs6928538   | T | 0.042   |
| rs114406136 | G | -0.0453 |
| rs2273176   | T | 0.0222  |
| rs1534357   | G | 0.0587  |
| rs1955221   | A | -0.0233 |
| rs9460454   | C | 0.0358  |
| rs9383665   | C | 0.0293  |
| rs879036    | T | -0.0294 |
| rs118060938 | C | -0.0805 |
| rs6927491   | G | 0.1418  |
| rs507532    | A | 0.0254  |
| rs116798700 | G | 0.1048  |
| rs117854466 | T | 0.1798  |
| rs75037585  | G | 0.111   |
| rs6455383   | C | 0.0639  |
| rs141340589 | A | 0.1049  |
| rs9348953   | G | -0.0259 |
| rs475395    | A | 0.0213  |
| rs116964195 | C | 0.0703  |
| rs2813565   | C | 0.0594  |
| rs4715352   | T | -0.0364 |
| rs9349764   | G | 0.075   |
| rs76699361  | C | 0.1048  |
| rs3817795   | T | 0.0233  |
| rs1557031   | A | 0.0432  |
| rs79579487  | A | -0.1345 |
| rs78596106  | A | 0.0457  |
| rs117951074 | T | 0.1537  |
| rs12211973  | C | 0.0204  |
| rs6928116   | G | 0.02    |

|             |   |         |
|-------------|---|---------|
| rs2613121   | G | -0.0217 |
| rs79581324  | T | -0.0349 |
| rs9371553   | G | 0.0864  |
| rs77381302  | G | 0.0454  |
| rs78271394  | C | -0.0612 |
| rs79205822  | A | -0.0834 |
| rs17590501  | T | -0.0613 |
| rs10457823  | G | 0.0221  |
| rs1853151   | G | -0.02   |
| rs524983    | T | 0.0513  |
| rs144809585 | A | 0.0999  |
| rs2876532   | G | 0.0455  |
| rs4254969   | A | 0.044   |
| rs72956654  | A | -0.0523 |
| rs113617776 | A | -0.1178 |
| rs118161974 | C | -0.181  |
| rs73364911  | A | -0.0936 |
| rs77026276  | A | 0.1674  |
| rs35741167  | G | 0.0301  |
| rs11753836  | T | 0.0392  |
| rs7759294   | A | -0.1175 |
| rs781762    | A | -0.0516 |
| rs72954873  | A | -0.0715 |
| rs6909476   | A | 0.0209  |
| rs118075660 | A | 0.0957  |
| rs56411036  | T | 0.0527  |
| rs114884404 | T | 0.1387  |
| rs7767612   | G | -0.0261 |
| rs2560764   | A | -0.0269 |
| rs12193608  | A | 0.0322  |
| rs61069137  | A | -0.0614 |
| rs142045074 | G | 0.1611  |
| rs73762984  | G | -0.0307 |
| rs10452561  | C | -0.0295 |
| rs60395676  | A | 0.0571  |
| rs143652753 | C | 0.1139  |
| rs62419227  | T | -0.0775 |
| rs806381    | G | 0.022   |
| rs113216682 | G | -0.1355 |
| rs9482299   | T | -0.0263 |
| rs11155216  | A | -0.0637 |
| rs78593667  | G | -0.0638 |
| rs117565947 | G | 0.0958  |
| rs9465873   | G | -0.0199 |
| rs62415423  | A | -0.0321 |
| rs13203604  | A | -0.031  |
| rs75386346  | G | -0.0802 |

|             |   |         |
|-------------|---|---------|
| rs9347107   | A | -0.036  |
| rs10484321  | G | 0.0216  |
| rs539133    | G | -0.0244 |
| rs9295635   | A | 0.0249  |
| rs35642078  | C | 0.0245  |
| rs11153123  | G | -0.0254 |
| rs34941391  | T | -0.0512 |
| rs4988945   | A | -0.0356 |
| rs118092297 | C | 0.12    |
| rs9486370   | G | 0.0198  |
| rs4959249   | T | 0.0343  |
| rs114961271 | T | -0.0356 |
| rs2073297   | G | -0.022  |
| rs9383828   | G | 0.0194  |
| rs36087964  | C | 0.0675  |
| rs180839    | A | 0.0215  |
| rs80159967  | G | 0.0948  |
| rs116956616 | T | 0.0534  |
| rs4714711   | C | 0.0389  |
| rs117217284 | T | -0.1677 |
| rs80054731  | A | 0.037   |
| rs6903035   | T | -0.04   |
| rs6903171   | C | 0.0444  |
| rs7767863   | T | 0.0226  |
| rs9366277   | A | 0.0208  |
| rs74777085  | A | 0.1195  |
| rs141628849 | A | -0.1215 |
| rs72981337  | G | 0.0682  |
| rs112553742 | G | 0.0555  |
| rs78341983  | T | -0.1655 |
| rs9397194   | G | -0.0332 |
| rs79004482  | T | 0.0396  |
| rs12528911  | T | 0.0371  |
| rs6903040   | C | -0.0265 |
| rs1883181   | C | 0.0198  |
| rs114255765 | G | -0.0557 |
| rs9383626   | G | 0.0292  |
| rs77052819  | T | -0.0525 |
| rs3931577   | T | -0.0502 |
| rs2346508   | G | -0.035  |
| rs7753099   | A | 0.0247  |
| rs7769594   | T | 0.0274  |
| rs2396165   | C | 0.0195  |
| rs145257354 | C | 0.061   |
| rs9401826   | G | -0.0298 |
| rs73022775  | T | 0.076   |
| rs1981090   | A | -0.0213 |

|             |   |         |
|-------------|---|---------|
| rs7759230   | A | 0.0199  |
| rs9405837   | A | -0.0272 |
| rs9367057   | G | -0.0226 |
| rs60636106  | T | 0.0934  |
| rs17631225  | C | -0.1018 |
| rs9455624   | G | -0.0483 |
| rs9505233   | G | -0.037  |
| rs77406821  | T | 0.1719  |
| rs9384653   | T | 0.0252  |
| rs112179516 | C | -0.0767 |
| rs3757115   | A | -0.024  |
| rs62421030  | G | -0.0533 |
| rs111513274 | T | 0.0623  |
| rs76985475  | T | 0.045   |
| rs11751767  | C | -0.0345 |
| rs1675414   | C | -0.02   |
| rs623329    | C | -0.0202 |
| rs142378256 | G | -0.1638 |
| rs620598    | G | 0.0229  |
| rs6915472   | A | 0.0311  |
| rs68009975  | A | 0.0248  |
| rs11753918  | C | -0.0301 |
| rs62430697  | T | -0.1231 |
| rs4960202   | T | -0.0488 |
| rs10458125  | C | -0.0851 |
| rs4712462   | A | -0.0217 |
| rs13193186  | A | -0.0543 |
| rs6457967   | C | 0.0607  |
| rs1998453   | G | -0.1114 |
| rs117401577 | A | -0.0966 |
| rs72959825  | T | 0.1451  |
| rs7766143   | T | -0.026  |
| rs6919270   | A | -0.0544 |
| rs303899    | G | -0.0197 |
| rs1040664   | C | 0.0617  |
| rs12524153  | T | 0.0317  |
| rs13212980  | T | -0.0581 |
| rs76550996  | A | 0.0866  |
| rs9365006   | T | 0.0216  |
| rs116395497 | A | 0.0817  |
| rs7758544   | T | 0.0689  |
| rs72886929  | T | 0.2137  |
| rs1214752   | T | 0.0199  |
| rs7767026   | C | -0.0285 |
| rs75383519  | C | -0.088  |
| rs7770974   | T | -0.031  |
| rs10447371  | A | 0.0269  |

|             |   |         |
|-------------|---|---------|
| rs75713187  | T | 0.0684  |
| rs142913303 | C | 0.0818  |
| rs118034128 | C | 0.0824  |
| rs6915655   | T | -0.0492 |
| rs147571755 | G | -0.0511 |
| rs3798602   | G | -0.0202 |
| rs142824006 | T | -0.0745 |
| rs13196238  | A | -0.1114 |
| rs150866206 | A | 0.1697  |
| rs148375451 | T | 0.1152  |
| rs17134263  | T | 0.0313  |
| rs147685533 | A | 0.0739  |
| rs35511673  | A | -0.0219 |
| rs16900471  | C | 0.118   |
| rs9494646   | A | -0.0588 |
| rs77613383  | G | -0.1321 |
| rs114038763 | T | 0.1463  |
| rs13193115  | G | 0.0548  |
| rs1409096   | C | 0.0206  |
| rs592551    | A | 0.0686  |
| rs75612754  | A | 0.0662  |
| rs438259    | A | -0.0212 |
| rs77388525  | C | 0.1284  |
| rs5746081   | A | 0.078   |
| rs77293650  | T | 0.0828  |
| rs1001092   | C | 0.0209  |
| rs9379187   | G | 0.0473  |
| rs73000595  | A | -0.0932 |
| rs330112    | A | -0.0223 |
| rs12202150  | T | 0.0881  |
| rs2281054   | T | 0.0671  |
| rs115503606 | A | 0.0553  |
| rs74657755  | C | 0.0382  |
| rs9350450   | C | 0.0196  |
| rs139976797 | T | -0.0826 |
| rs6931997   | G | 0.0383  |
| rs2627230   | T | -0.0225 |
| rs142540499 | T | -0.0822 |
| rs115883845 | C | -0.0992 |
| rs199743    | T | 0.0223  |
| rs77268207  | T | -0.0564 |
| rs145211473 | G | 0.0872  |
| rs78372022  | A | 0.1102  |
| rs72945356  | G | 0.0953  |
| rs57111320  | A | -0.0371 |
| rs144703226 | A | 0.096   |
| rs9356710   | G | -0.0889 |

|             |   |         |
|-------------|---|---------|
| rs113472417 | A | -0.1665 |
| rs113870385 | C | 0.0332  |
| rs12665580  | G | -0.0639 |
| rs7761587   | G | -0.0196 |
| rs9384060   | A | -0.0221 |
| rs853363    | C | 0.0205  |
| rs34286460  | T | -0.1173 |
| rs4714899   | A | -0.0216 |
| rs4959584   | C | 0.025   |
| rs78525404  | G | -0.0241 |
| rs146778812 | G | 0.1352  |
| rs116520501 | T | 0.0871  |
| rs12660424  | T | -0.0466 |
| rs62416617  | C | -0.0882 |
| rs41269311  | A | 0.1773  |
| rs72896527  | T | 0.0649  |
| rs9386296   | C | -0.0233 |
| rs77937059  | C | -0.0409 |
| rs151272685 | A | 0.0674  |
| rs17207882  | C | -0.0225 |
| rs139042710 | A | -0.0928 |
| rs1777764   | G | 0.0201  |
| rs138938508 | G | 0.1473  |
| rs74903882  | C | -0.0368 |
| rs75297300  | C | -0.0803 |
| rs847852    | A | 0.019   |
| rs141097573 | C | 0.0459  |
| rs72952037  | T | -0.0784 |
| rs117912502 | G | 0.0908  |
| rs148576231 | C | -0.1512 |
| rs72835911  | G | 0.0387  |
| rs149465829 | T | -0.1003 |
| rs36018387  | T | -0.0488 |
| rs79951429  | C | 0.0598  |
| rs74294950  | T | 0.1996  |
| rs7758525   | A | 0.0206  |
| rs12205213  | T | -0.0394 |
| rs140013811 | T | -0.1004 |
| rs7453274   | C | 0.1231  |
| rs9405868   | T | -0.023  |
| rs12661088  | A | 0.0212  |
| rs75679408  | C | -0.0288 |
| rs17184754  | T | -0.1265 |
| rs3851224   | C | 0.027   |
| rs73716783  | A | 0.0813  |
| rs9274253   | A | -0.0364 |
| rs3912465   | G | 0.0211  |



|             |   |         |
|-------------|---|---------|
| rs74360346  | G | 0.049   |
| rs9322191   | G | 0.0758  |
| rs75337380  | G | 0.1276  |
| rs75821134  | G | 0.0564  |
| rs9463470   | A | 0.0517  |
| rs12194208  | G | 0.0532  |
| rs151259301 | T | 0.0853  |
| rs1326169   | T | -0.0638 |
| rs143303199 | A | 0.0943  |
| rs78811857  | G | 0.0522  |
| rs117207049 | G | 0.1477  |
| rs55980638  | A | 0.0501  |
| rs72901582  | T | -0.1137 |
| rs903440    | A | 0.0322  |
| rs35948631  | C | -0.095  |
| rs12203928  | C | 0.0617  |
| rs916719    | C | 0.0319  |
| rs113761470 | A | 0.1267  |
| rs138642634 | T | 0.106   |
| rs3864311   | G | -0.0218 |
| rs76024139  | T | -0.1549 |
| rs7758392   | T | 0.0332  |
| rs9382081   | T | 0.0503  |
| rs12153902  | C | 0.0193  |
| rs115241209 | T | -0.1155 |
| rs112376926 | T | -0.1041 |
| rs345716    | C | 0.0404  |
| rs4452655   | T | 0.0415  |
| rs78944975  | G | -0.0842 |
| rs55635926  | G | 0.0843  |
| rs9388352   | A | -0.0215 |
| rs72973496  | T | 0.0428  |
| rs4314516   | T | -0.03   |
| rs1009667   | G | 0.0206  |
| rs117422713 | A | 0.096   |
| rs6934528   | C | -0.0272 |
| rs7741539   | C | 0.0373  |
| rs73022722  | T | -0.0843 |
| rs73246780  | G | 0.0663  |
| rs140544526 | T | -0.0377 |
| rs79899973  | C | 0.0672  |
| rs3861443   | C | 0.0289  |
| rs2224646   | C | -0.0225 |
| rs117110373 | G | 0.1119  |
| rs7773701   | A | 0.0228  |
| rs62432006  | C | -0.0567 |
| rs723255    | G | -0.0601 |

|             |   |         |
|-------------|---|---------|
| rs2473486   | G | -0.0294 |
| rs13204120  | A | -0.0203 |
| rs72831877  | G | 0.0481  |
| rs28810763  | G | -0.081  |
| rs2477834   | T | 0.0546  |
| rs139289246 | T | -0.1533 |
| rs111892029 | C | -0.1179 |
| rs73021829  | T | -0.0777 |
| rs6900023   | G | -0.0212 |
| rs149056521 | G | -0.0792 |
| rs147349361 | T | 0.1314  |
| rs147244310 | A | -0.103  |
| rs72898498  | T | 0.0586  |
| rs1924696   | G | -0.0229 |
| rs144191235 | T | 0.1923  |
| rs3805994   | A | 0.0188  |
| rs62421573  | T | 0.123   |
| rs140937379 | A | 0.0888  |
| rs126343    | A | 0.0236  |
| rs115032958 | T | -0.0836 |
| rs138699438 | A | -0.1444 |
| rs78032275  | C | -0.0822 |
| rs7767809   | T | -0.0248 |
| rs78984672  | G | 0.0424  |
| rs59321915  | G | -0.09   |
| rs2153172   | A | -0.0322 |
| rs9373154   | G | 0.0236  |
| rs78179859  | A | -0.1139 |
| rs111687588 | A | -0.1199 |
| rs77684545  | A | -0.0901 |
| rs74449072  | G | -0.0459 |
| rs56277421  | T | -0.0256 |
| rs1295392   | T | 0.0216  |
| rs4461751   | C | 0.021   |
| rs1540689   | A | 0.0329  |
| rs17356490  | T | -0.0399 |
| rs74480191  | A | -0.0579 |
| rs382047    | G | -0.0281 |
| rs9402478   | A | 0.0264  |
| rs7752455   | A | 0.0493  |
| rs144961578 | A | -0.0535 |
| rs62423062  | G | 0.0736  |
| rs6455733   | T | -0.0432 |
| rs141605343 | C | 0.074   |
| rs77302115  | T | -0.0657 |
| rs140444701 | T | -0.096  |
| rs76290206  | T | 0.1324  |

|             |   |         |
|-------------|---|---------|
| rs9398031   | A | 0.0285  |
| rs2461732   | A | 0.0661  |
| rs72845056  | T | 0.0972  |
| rs55775512  | A | -0.0895 |
| rs79732430  | T | 0.1365  |
| rs1417182   | G | -0.0192 |
| rs9456280   | T | 0.1167  |
| rs112211672 | A | -0.0562 |
| rs3734318   | A | 0.0309  |
| rs114283165 | C | -0.0985 |
| rs9321042   | C | 0.0241  |
| rs34504929  | A | -0.0444 |
| rs74575778  | T | 0.0857  |
| rs1342227   | G | 0.0549  |
| rs62413457  | G | -0.0866 |
| rs71556153  | A | -0.0448 |
| rs9463883   | G | -0.0215 |
| rs72934611  | T | 0.0828  |
| rs4367404   | C | 0.0246  |
| rs7767170   | T | 0.068   |
| rs9472194   | A | 0.0238  |
| rs12664158  | C | -0.0551 |
| rs141713008 | C | -0.105  |
| rs113636553 | T | -0.0475 |
| rs80343804  | T | -0.1155 |
| rs4960228   | C | -0.0238 |
| rs75894238  | A | -0.0811 |
| rs6569399   | A | 0.0328  |
| rs34938980  | C | 0.0989  |
| rs66775508  | A | 0.0256  |
| rs4349831   | G | -0.0195 |
| rs11968435  | G | -0.0429 |
| rs62399315  | A | 0.1009  |
| rs111452637 | C | -0.1075 |
| rs140012484 | A | 0.1635  |
| rs77811564  | T | 0.0389  |
| rs2768981   | G | -0.0314 |
| rs1325400   | C | 0.0276  |
| rs139931652 | A | -0.1779 |
| rs77804402  | G | 0.0685  |
| rs141160655 | T | -0.1012 |
| rs62412509  | T | -0.1134 |
| rs117270970 | T | -0.1534 |
| rs35517608  | A | 0.0231  |
| rs4707829   | A | -0.0207 |
| rs79029509  | T | -0.0827 |
| rs632286    | A | 0.0349  |

|             |   |         |
|-------------|---|---------|
| rs62440111  | C | 0.0756  |
| rs77153348  | G | -0.0389 |
| rs1535011   | G | 0.0252  |
| rs1205032   | C | 0.0191  |
| rs2446649   | G | 0.0235  |
| rs10944393  | T | -0.0303 |
| rs118009134 | C | -0.0723 |
| rs365936    | C | 0.0195  |
| rs11155714  | G | -0.0268 |
| rs55837325  | A | -0.0818 |
| rs4577820   | T | 0.0255  |
| rs147500434 | T | 0.0976  |
| rs2294265   | C | 0.0227  |
| rs117545152 | A | -0.09   |
| rs13216723  | A | -0.1411 |
| rs149788879 | C | -0.0859 |
| rs78263175  | C | 0.0797  |
| rs7741182   | T | -0.1027 |
| rs6926560   | C | -0.0359 |
| rs6909335   | A | 0.0483  |
| rs34155455  | A | -0.0859 |
| rs1590184   | T | 0.0304  |
| rs115392832 | T | 0.0883  |
| rs79805935  | G | -0.0353 |
| rs55904268  | A | -0.0382 |
| rs117566725 | A | -0.1837 |
| rs4532481   | C | -0.0235 |
| rs2007297   | T | 0.0188  |
| rs6925753   | T | 0.0186  |
| rs7747414   | G | 0.0198  |
| rs432375    | C | -0.0353 |
| rs114551752 | A | 0.0964  |
| rs7766608   | T | 0.0251  |
| rs9471281   | T | -0.0742 |
| rs115120576 | G | 0.1301  |
| rs9372096   | T | 0.0208  |
| rs4709984   | A | 0.0278  |
| rs79349153  | T | 0.0351  |
| rs7770637   | G | 0.0393  |
| rs4869993   | G | -0.0201 |
| rs72817773  | T | -0.0561 |
| rs149471989 | A | 0.0861  |
| rs116541189 | A | -0.1597 |
| rs35862066  | A | 0.0405  |
| rs2110184   | A | 0.0199  |
| rs6921677   | C | 0.0222  |
| rs75093590  | G | -0.0406 |

|             |   |         |
|-------------|---|---------|
| rs7746784   | T | -0.0468 |
| rs17495728  | C | -0.0657 |
| rs1208474   | A | -0.1446 |
| rs75964568  | T | -0.0577 |
| rs28381546  | T | 0.1182  |
| rs1737633   | T | 0.0336  |
| rs599699    | T | 0.0862  |
| rs11965528  | C | -0.0262 |
| rs7764896   | T | 0.0448  |
| rs150801948 | T | 0.0807  |
| rs1366326   | A | -0.0255 |
| rs80079655  | C | 0.0982  |
| rs72937217  | A | 0.1474  |
| rs7752376   | T | -0.0201 |
| rs76041891  | C | 0.0583  |
| rs142225921 | A | 0.1544  |
| rs144356687 | C | -0.0718 |
| rs17550839  | C | 0.077   |
| rs9403342   | G | -0.0503 |
| rs117608362 | T | 0.0762  |
| rs9384273   | G | 0.0351  |
| rs9349621   | A | 0.0238  |
| rs9346010   | T | -0.0207 |
| rs9362705   | G | 0.0742  |
| rs75733681  | G | -0.1165 |
| rs4960332   | A | -0.0205 |
| rs6568472   | G | 0.0194  |
| rs116228246 | C | -0.1225 |
| rs73006735  | A | -0.0324 |
| rs74593972  | C | 0.0777  |
| rs115506472 | A | -0.0782 |
| rs148558920 | T | 0.0997  |
| rs148801478 | C | 0.0605  |
| rs62438060  | A | -0.1029 |
| rs72894719  | G | -0.1288 |
| rs4498322   | T | 0.0598  |
| rs117790547 | C | -0.0823 |
| rs72948326  | G | 0.0517  |
| rs3861415   | G | 0.1174  |
| rs569647    | C | -0.0249 |
| rs77743335  | A | -0.167  |
| rs72889407  | C | -0.062  |
| rs6930367   | T | 0.0275  |
| rs76483406  | G | -0.029  |
| rs480733    | C | -0.0352 |
| rs113250608 | A | -0.0738 |
| rs117582034 | A | -0.1251 |

|             |   |         |
|-------------|---|---------|
| rs115929150 | A | 0.0973  |
| rs7767895   | G | -0.1047 |
| rs76710364  | T | 0.0886  |
| rs77863623  | A | 0.0363  |
| rs9283907   | A | 0.0281  |
| rs75597991  | C | 0.0757  |
| rs117168946 | G | -0.1218 |
| rs3008058   | G | 0.0408  |
| rs4615440   | G | 0.0212  |
| rs79142717  | A | -0.0967 |
| rs35553402  | T | -0.0958 |
| rs2497155   | A | -0.0352 |
| rs332608    | C | 0.0243  |
| rs115387031 | C | 0.0734  |
| rs12198226  | T | -0.0508 |
| rs7743582   | C | -0.0554 |
| rs117275436 | T | 0.1353  |
| rs9487834   | A | 0.0411  |
| rs9399229   | C | 0.0233  |
| rs13205480  | A | -0.0303 |
| rs143187914 | T | -0.1275 |
| rs76220245  | A | 0.0287  |
| rs112544501 | A | -0.13   |
| rs34053687  | C | 0.0306  |
| rs142413590 | G | -0.0997 |
| rs76245018  | C | -0.1121 |
| rs6569287   | C | 0.0308  |
| rs16886351  | A | -0.0363 |
| rs793850    | C | -0.0192 |
| rs80115000  | A | -0.0747 |
| rs529038    | T | -0.0224 |
| rs9399087   | T | 0.1     |
| rs117687112 | C | -0.0866 |
| rs78031131  | G | 0.0437  |
| rs76649585  | G | -0.0539 |
| rs2950      | C | 0.023   |
| rs1235349   | G | 0.0629  |
| rs72920092  | C | 0.0591  |
| rs80101783  | C | 0.077   |
| rs7742396   | G | -0.0258 |
| rs116499876 | G | -0.1536 |
| rs62421264  | C | 0.0727  |
| rs221724    | C | 0.0195  |
| rs6940498   | A | -0.0193 |
| rs113063961 | C | -0.1405 |
| rs11758065  | T | 0.035   |
| rs117521037 | T | -0.131  |

|             |   |         |
|-------------|---|---------|
| rs117242811 | A | 0.0523  |
| rs147440056 | A | 0.1253  |
| rs11968375  | A | 0.0338  |
| rs4946246   | G | -0.0222 |
| rs212806    | A | -0.0193 |
| rs143402164 | T | -0.0861 |
| rs117333950 | A | 0.0813  |
| rs790582    | A | -0.0352 |
| rs17068980  | A | -0.0718 |
| rs6909230   | G | 0.0557  |
| rs2064319   | A | 0.0195  |
| rs55891333  | G | -0.0387 |
| rs3012465   | A | 0.0193  |
| rs75343357  | T | 0.0638  |
| rs149760576 | T | -0.1608 |
| rs688359    | G | 0.0201  |
| rs1328694   | G | 0.0591  |
| rs80330690  | G | -0.1177 |
| rs45561736  | T | 0.1068  |
| rs6922309   | C | -0.0523 |
| rs75994967  | T | -0.1048 |
| rs195853    | A | 0.0264  |
| rs7742603   | C | -0.0267 |
| rs6901560   | C | 0.0229  |
| rs34666489  | T | -0.1181 |
| rs9497965   | T | -0.0191 |
| rs1071911   | G | 0.0209  |
| rs9276799   | C | -0.0215 |
| rs74351293  | C | 0.0228  |
| rs4596499   | A | 0.0497  |
| rs9470177   | C | -0.0397 |
| rs17409951  | T | -0.0393 |
| rs149918547 | A | 0.0589  |
| rs802504    | A | 0.0544  |
| rs74678912  | G | 0.0896  |
| rs13194692  | G | 0.0379  |
| rs111227477 | C | -0.0475 |
| rs115827149 | A | -0.0586 |
| rs9367931   | A | 0.0288  |
| rs9342769   | G | 0.0192  |
| rs147278440 | T | 0.0412  |
| rs12200924  | A | 0.0239  |
| rs114001413 | G | -0.0786 |
| rs77036635  | A | -0.081  |
| rs74586189  | T | 0.0963  |
| rs75155619  | A | 0.1021  |
| rs117229870 | A | -0.1069 |

|             |   |         |
|-------------|---|---------|
| rs79293673  | T | -0.0371 |
| rs4840052   | A | -0.0379 |
| rs238020    | G | 0.1269  |
| rs114830895 | G | 0.0999  |
| rs4707424   | G | -0.0288 |
| rs113827859 | C | 0.0868  |
| rs3864289   | C | -0.0186 |
| rs149466387 | A | 0.0255  |
| rs75507352  | T | 0.0975  |
| rs11966947  | A | -0.0233 |
| rs76848794  | C | -0.1106 |
| rs149424838 | A | 0.0903  |
| rs9322261   | G | -0.019  |
| rs141609193 | G | -0.0856 |
| rs140405357 | A | -0.1036 |
| rs9367080   | T | 0.0351  |
| rs10498966  | G | -0.0618 |
| rs77192673  | G | -0.0382 |
| rs117316637 | T | -0.0419 |
| rs1001015   | G | -0.0205 |
| rs2077176   | T | -0.0562 |
| rs74385879  | A | 0.0539  |
| rs4707488   | A | -0.0712 |
| rs72924490  | T | 0.058   |
| rs12201585  | A | -0.0377 |
| rs143594643 | A | -0.1297 |
| rs346319    | G | 0.0271  |
| rs118134300 | C | 0.0485  |
| rs6930756   | G | 0.0298  |
| rs79415071  | G | 0.1647  |
| rs9351647   | T | 0.0354  |
| rs144168965 | T | 0.1515  |
| rs548373    | A | -0.1325 |
| rs62404989  | C | -0.0461 |
| rs76471553  | A | -0.1171 |
| rs139480212 | T | -0.1069 |
| rs73566351  | C | -0.0325 |
| rs114552328 | T | 0.1147  |
| rs151272995 | A | 0.1468  |
| rs117397443 | A | -0.1306 |
| rs911749    | A | -0.0224 |
| rs150420484 | T | 0.0417  |
| rs11961226  | T | 0.0538  |
| rs72914817  | T | 0.0442  |
| rs17059090  | C | 0.052   |
| rs34637389  | G | 0.0321  |
| rs13198841  | G | 0.0256  |



|             |   |         |
|-------------|---|---------|
| rs117549058 | T | 0.0972  |
| rs117573132 | T | 0.0626  |
| rs9491248   | A | 0.0303  |
| rs629497    | C | -0.0199 |
| rs7765298   | C | 0.02    |
| rs2859370   | T | 0.0333  |
| rs14217     | T | 0.1275  |
| rs2147761   | A | 0.0205  |
| rs13200043  | A | 0.0515  |
| rs1156561   | C | -0.0193 |
| rs7761483   | A | 0.0372  |
| rs6933523   | C | 0.024   |
| rs7453458   | A | 0.1447  |
| rs2104117   | T | -0.0753 |
| rs601543    | G | -0.0515 |
| rs85462     | G | 0.0242  |
| rs78361545  | A | -0.0476 |
| rs6909187   | T | -0.0186 |
| rs116179532 | A | 0.1123  |
| rs4706623   | C | 0.02    |
| rs768382    | T | -0.0265 |
| rs34610829  | A | 0.1022  |
| rs34807537  | C | 0.0377  |
| rs141615119 | T | 0.0851  |
| rs17747812  | C | -0.0477 |
| rs62421554  | A | -0.0308 |
| rs115098108 | T | -0.0929 |
| rs12110845  | C | -0.0253 |
| rs113467469 | A | -0.052  |
| rs1246994   | T | 0.0243  |
| rs17653732  | C | -0.0548 |
| rs77027282  | T | 0.0922  |
| rs144523185 | G | -0.1187 |
| rs9504127   | C | 0.0669  |
| rs767231    | A | -0.0199 |
| rs113760175 | A | -0.0749 |
| rs7744700   | A | 0.0232  |
| rs77632450  | A | 0.0982  |
| rs855375    | T | 0.021   |
| rs7752834   | G | -0.0329 |
| rs149611536 | C | 0.1005  |
| rs1418673   | T | -0.0223 |
| rs75051234  | T | 0.0212  |
| rs145678031 | T | 0.1083  |
| rs13193916  | G | -0.0444 |
| rs73024503  | T | 0.04    |
| rs149291898 | G | -0.1248 |

|             |   |         |
|-------------|---|---------|
| rs114055853 | G | 0.1027  |
| rs2274952   | G | 0.121   |
| rs114032730 | A | -0.0755 |
| rs148673814 | T | -0.1153 |
| rs4235862   | T | -0.022  |
| rs148159357 | A | 0.0991  |
| rs117083828 | C | 0.1194  |
| rs75886224  | G | 0.0741  |
| rs9401670   | G | -0.0566 |
| rs116901473 | T | -0.085  |
| rs111427717 | T | -0.0911 |
| rs72929523  | T | 0.0631  |
| rs76579796  | T | 0.0897  |
| rs747144    | C | 0.0635  |
| rs34101156  | C | -0.0436 |
| rs6597110   | C | 0.0354  |
| rs10484620  | G | -0.0345 |
| rs117545193 | C | 0.0934  |
| rs13208357  | T | -0.0276 |
| rs115209374 | C | 0.0865  |
| rs9490152   | C | 0.032   |
| rs7758091   | A | -0.0206 |
| rs7746985   | C | 0.0251  |
| rs150562166 | A | 0.0746  |
| rs12203950  | G | 0.0794  |
| rs62429512  | T | 0.0694  |
| rs149074192 | A | -0.1255 |
| rs78552097  | C | 0.1734  |
| rs694733    | G | -0.0266 |
| rs113275261 | T | 0.0865  |
| rs9472491   | A | 0.0422  |
| rs147926185 | A | -0.0678 |
| rs55809483  | C | 0.0269  |
| rs4870327   | T | 0.0239  |
| rs75924259  | T | -0.0536 |
| rs4535590   | G | -0.0205 |
| rs140911576 | G | 0.0981  |
| rs2395672   | A | -0.0233 |
| rs116068552 | A | 0.1159  |
| rs148369637 | A | 0.0788  |
| rs79527223  | C | 0.0746  |
| rs142289772 | A | 0.0322  |
| rs9374021   | G | 0.0232  |
| rs117253928 | T | 0.1214  |
| rs9389632   | A | -0.0414 |
| rs17710848  | A | 0.0391  |
| rs78881098  | C | 0.0898  |

|             |   |         |
|-------------|---|---------|
| rs12662114  | T | 0.0411  |
| rs144313735 | A | -0.0874 |
| rs56064451  | G | 0.0353  |
| rs77669664  | T | 0.09    |
| rs62440061  | T | 0.0535  |
| rs4143683   | C | -0.0229 |
| rs72885005  | C | 0.083   |
| rs150548777 | A | 0.196   |
| rs12214720  | A | 0.0211  |
| rs11963180  | T | 0.0219  |
| rs62430887  | A | 0.0318  |
| rs113283159 | G | 0.0473  |
| rs9364263   | A | -0.0204 |
| rs78066694  | A | 0.0772  |
| rs117497208 | A | 0.0999  |
| rs4451148   | T | 0.0228  |
| rs72838937  | A | 0.0615  |
| rs7743005   | C | -0.0193 |
| rs9496805   | A | 0.059   |
| rs12210995  | A | -0.0456 |
| rs78946541  | C | -0.1518 |
| rs12193609  | G | 0.0414  |
| rs73746517  | G | -0.0368 |
| rs149136178 | T | 0.1428  |
| rs79222768  | T | -0.0499 |
| rs12526543  | T | 0.033   |
| rs9381295   | T | -0.019  |
| rs13219623  | G | -0.0496 |
| rs113110521 | T | 0.0687  |
| rs117497469 | G | -0.0573 |
| rs12202269  | C | -0.0227 |
| rs111464791 | G | -0.1265 |
| rs76372845  | T | -0.0949 |
| rs2304895   | T | 0.027   |
| rs9800493   | G | 0.0305  |
| rs7738081   | T | -0.0252 |
| rs2040424   | T | -0.022  |
| rs118036110 | C | 0.0956  |
| rs144015474 | A | -0.0781 |
| rs76037039  | T | 0.1462  |
| rs12198474  | G | 0.0207  |
| rs72841030  | T | -0.0644 |
| rs79850139  | C | -0.0479 |
| rs12197609  | T | 0.0448  |
| rs117304163 | G | 0.0935  |
| rs9451310   | G | 0.0292  |
| rs111984076 | G | 0.0901  |

|             |   |         |
|-------------|---|---------|
| rs76224162  | T | -0.1685 |
| rs6939337   | A | -0.0392 |
| rs9380633   | G | -0.0209 |
| rs78903563  | T | 0.059   |
| rs13217897  | A | -0.0269 |
| rs77379831  | G | -0.0594 |
| rs144504419 | T | 0.0948  |
| rs77598707  | T | -0.1413 |
| rs9356007   | G | -0.0832 |
| rs151676    | G | 0.0232  |
| rs112938313 | G | 0.0399  |
| rs2015786   | A | 0.0834  |
| rs57799830  | A | 0.052   |
| rs9472288   | G | 0.0205  |
| rs9355091   | A | 0.0344  |
| rs144438489 | C | 0.1084  |
| rs2670352   | T | 0.0776  |
| rs1977149   | A | 0.0235  |
| rs227451    | T | -0.0311 |
| rs72999713  | A | -0.0736 |
| rs80190707  | T | -0.0486 |
| rs116561186 | C | 0.0672  |
| rs72860606  | C | -0.1171 |
| rs36046852  | A | -0.0289 |
| rs4959341   | C | 0.0187  |
| rs35249748  | T | 0.0259  |
| rs114802795 | A | 0.0335  |
| rs6924488   | C | -0.0302 |
| rs111719438 | T | 0.04    |
| rs114088660 | A | -0.1269 |
| rs9350318   | T | -0.0255 |
| rs147235190 | G | -0.0518 |
| rs72909800  | C | -0.0296 |
| rs34450444  | G | -0.0534 |
| rs9370523   | T | 0.028   |
| rs115042681 | G | -0.1024 |
| rs4707016   | T | -0.0193 |
| rs7743878   | A | 0.0967  |
| rs149192379 | A | 0.0824  |
| rs3913970   | T | 0.0735  |
| rs4870455   | C | -0.0246 |
| rs76807618  | T | -0.0686 |
| rs12195291  | A | -0.0214 |
| rs1449646   | T | 0.0419  |
| rs141615621 | G | -0.0805 |
| rs13209675  | T | 0.0548  |
| rs56282140  | A | 0.0346  |

|             |   |         |
|-------------|---|---------|
| rs6455889   | C | 0.0226  |
| rs55995725  | A | 0.0466  |
| rs117604569 | T | -0.0705 |
| rs1407801   | G | 0.0557  |
| rs76881092  | A | 0.1451  |
| rs7762516   | C | -0.0291 |
| rs9382606   | C | -0.0275 |
| rs9446853   | A | 0.1798  |
| rs17531803  | A | -0.048  |
| rs811581    | C | -0.0314 |
| rs9470502   | A | 0.106   |
| rs260258    | A | 0.0315  |
| rs194633    | A | -0.0183 |
| rs113844332 | T | 0.1166  |
| rs143050594 | G | -0.0674 |
| rs9460922   | C | 0.0818  |
| rs2327658   | A | -0.0198 |
| rs9481240   | C | -0.0274 |
| rs71573331  | A | -0.0499 |
| rs2609325   | C | -0.0281 |
| rs7760673   | T | 0.0258  |
| rs17428325  | A | -0.1422 |
| rs150841483 | T | -0.0603 |
| rs72948758  | T | -0.0698 |
| rs1538575   | T | -0.0182 |
| rs4629681   | A | -0.028  |
| rs45586535  | G | 0.143   |
| rs34957234  | A | 0.0406  |
| rs7751978   | G | -0.0199 |
| rs9348414   | T | 0.0252  |
| rs74329432  | T | -0.0668 |
| rs17720559  | A | 0.0235  |
| rs9493241   | T | -0.0456 |
| rs80346884  | T | -0.0867 |
| rs71570996  | G | 0.0791  |
| rs6455622   | T | 0.0203  |
| rs142928527 | G | 0.1214  |
| rs35254019  | T | -0.0483 |
| rs1854153   | T | 0.0227  |
| rs34429222  | G | 0.1298  |
| rs142622504 | G | -0.1194 |
| rs72884665  | A | -0.1046 |
| rs1854892   | T | -0.1559 |
| rs72610811  | T | 0.119   |
| rs2858853   | G | -0.0303 |
| rs12195406  | T | -0.0196 |
| rs223590    | A | 0.0323  |

|             |   |         |
|-------------|---|---------|
| rs76870765  | C | -0.1047 |
| rs55899330  | A | -0.0995 |
| rs117909536 | A | 0.0588  |
| rs6933790   | C | 0.0288  |
| rs62421145  | C | -0.0762 |
| rs62391860  | C | 0.0472  |
| rs147853351 | A | 0.0869  |
| rs2482401   | G | 0.0335  |
| rs138057074 | A | 0.1195  |
| rs143961350 | A | 0.0461  |
| rs13437366  | T | 0.0231  |
| rs77003531  | T | -0.0427 |
| rs4896704   | A | -0.0416 |
| rs114042150 | C | 0.0596  |
| rs145876861 | A | 0.1018  |
| rs72943319  | A | 0.0537  |
| rs6915601   | T | 0.0193  |
| rs74440805  | A | 0.0523  |
| rs12205846  | C | -0.0189 |
| rs74722570  | G | -0.0739 |
| rs117055041 | C | 0.1745  |
| rs9405486   | T | -0.038  |
| rs115832438 | T | -0.0587 |
| rs2282521   | T | -0.0251 |
| rs72991812  | C | 0.0841  |
| rs12199232  | C | 0.0481  |
| rs7745519   | C | 0.0368  |
| rs11756474  | A | -0.0584 |
| rs141708928 | C | 0.1309  |
| rs9399106   | C | -0.0347 |
| rs62392050  | A | 0.0309  |
| rs72918692  | T | 0.0289  |
| rs72846137  | C | -0.0514 |
| rs118069420 | T | -0.0686 |
| rs150851725 | A | 0.0853  |
| rs143439730 | C | -0.0836 |
| rs75746833  | C | 0.0809  |
| rs117878891 | T | 0.0443  |
| rs6915318   | T | -0.0199 |
| rs72917598  | G | 0.0987  |
| rs1204836   | A | -0.022  |
| rs145545928 | A | -0.0989 |
| rs13202365  | C | -0.0333 |
| rs143075636 | T | -0.0535 |
| rs2893936   | C | 0.0431  |
| rs12208020  | G | -0.0778 |
| rs137917299 | C | -0.0926 |

|             |   |         |
|-------------|---|---------|
| rs7773371   | T | -0.0209 |
| rs79632896  | T | -0.0863 |
| rs2815125   | T | 0.0434  |
| rs4544896   | A | 0.1222  |
| rs111706709 | T | 0.0523  |
| rs1407530   | A | -0.0265 |
| rs12663314  | A | -0.0196 |
| rs73009418  | T | 0.0385  |
| rs2057082   | A | 0.0262  |
| rs78830488  | A | 0.061   |
| rs727854    | C | -0.0312 |
| rs72898603  | T | 0.1345  |
| rs118060873 | T | 0.0657  |
| rs111685429 | A | 0.0251  |
| rs9403408   | G | -0.0205 |
| rs9456538   | A | -0.0246 |
| rs138998029 | G | 0.1593  |
| rs6912011   | A | -0.0181 |
| rs115222778 | A | 0.1154  |
| rs728285    | T | 0.0618  |
| rs55958968  | G | -0.052  |
| rs73021887  | G | -0.0451 |
| rs75976951  | T | -0.1073 |
| rs2207626   | A | -0.0307 |
| rs12208538  | A | 0.0198  |
| rs9340789   | C | -0.0999 |
| rs151166284 | G | 0.1611  |
| rs140145829 | A | 0.0947  |
| rs79992066  | C | 0.1066  |
| rs62399110  | C | -0.0336 |
| rs137956299 | G | -0.036  |
| rs1927777   | T | -0.0194 |
| rs4711780   | A | -0.0217 |
| rs142558049 | C | 0.1162  |
| rs1437282   | A | 0.025   |
| rs1199414   | A | 0.0206  |
| rs75393728  | T | -0.1047 |
| rs12207423  | A | -0.0484 |
| rs57574422  | T | -0.0458 |
| rs74670824  | A | 0.0957  |
| rs2033530   | G | -0.0186 |
| rs7757485   | C | 0.0606  |
| rs12192160  | A | -0.0771 |
| rs1201875   | T | 0.0321  |
| rs142202225 | A | -0.0803 |
| rs223300    | C | 0.0221  |
| rs4945482   | T | -0.0233 |

|             |   |         |
|-------------|---|---------|
| rs112998929 | T | 0.073   |
| rs9393077   | T | 0.0412  |
| rs531972    | A | -0.0657 |
| rs2208421   | A | 0.0185  |
| rs62437220  | A | 0.0568  |
| rs963386    | G | 0.0199  |
| rs71570208  | C | -0.0847 |
| rs4869987   | A | -0.0189 |
| rs11751058  | T | 0.0568  |
| rs139767115 | C | 0.1001  |
| rs2032564   | G | 0.0266  |
| rs13204511  | G | -0.034  |
| rs142477472 | C | 0.083   |
| rs9474249   | T | 0.0912  |
| rs2485077   | C | -0.0255 |
| rs2328878   | G | -0.0181 |
| rs72922629  | G | -0.0375 |
| rs12206193  | T | 0.0236  |
| rs4712717   | C | 0.0231  |
| rs146780325 | T | -0.2094 |
| rs113730546 | G | -0.0678 |
| rs73768046  | C | 0.0225  |
| rs6902168   | C | 0.0299  |
| rs2816227   | T | -0.0355 |
| rs55658364  | A | -0.0677 |
| rs7749355   | A | -0.0806 |
| rs2981975   | C | -0.0244 |
| rs1036500   | G | -0.0691 |
| rs17701487  | A | -0.0455 |
| rs9486081   | C | -0.0249 |
| rs115183117 | C | -0.0902 |
| rs1292829   | A | 0.027   |
| rs11759442  | G | 0.0246  |
| rs6913507   | A | 0.1444  |
| rs72976291  | C | 0.0242  |
| rs13201100  | G | 0.0408  |
| rs58177962  | A | 0.0409  |
| rs2273961   | A | -0.0548 |
| rs477004    | C | -0.037  |
| rs34147569  | C | 0.0238  |
| rs72897251  | T | 0.045   |
| rs74414010  | C | 0.1049  |
| rs1923747   | G | 0.0185  |
| rs80116524  | T | -0.0833 |
| rs10499281  | C | -0.0245 |
| rs150235825 | T | 0.0776  |
| rs76409629  | G | -0.0741 |



|             |   |         |
|-------------|---|---------|
| rs6932184   | A | -0.0272 |
| rs72966694  | T | 0.0531  |
| rs3793113   | G | 0.0186  |
| rs117104308 | C | -0.0896 |
| rs56335411  | A | 0.0906  |
| rs9404303   | T | 0.0202  |
| rs79130410  | C | -0.0567 |
| rs145215133 | A | -0.1192 |
| rs17875381  | G | 0.048   |
| rs2503772   | T | 0.0199  |
| rs411236    | A | -0.0275 |
| rs9461918   | C | -0.0361 |
| rs77439189  | G | -0.0935 |
| rs111607050 | G | 0.0676  |
| rs9449588   | C | 0.0255  |
| rs62432792  | A | 0.0401  |
| rs35131064  | T | 0.0266  |
| rs6934510   | A | 0.0238  |
| rs62391994  | C | 0.1363  |
| rs16896629  | A | 0.0445  |
| rs55957118  | C | -0.0683 |
| rs2738820   | C | 0.0225  |
| rs72828924  | G | -0.0194 |
| rs1065272   | G | -0.02   |
| rs9384604   | A | 0.0186  |
| rs9355976   | C | 0.0245  |
| rs79003840  | A | 0.0546  |
| rs148286307 | G | 0.1014  |
| rs9451531   | C | -0.0302 |
| rs77409229  | C | 0.0856  |
| rs138276217 | A | 0.1655  |
| rs3846930   | T | 0.0264  |
| rs115013778 | G | 0.1312  |
| rs75780449  | A | -0.0467 |
| rs17076235  | A | 0.0717  |
| rs1883239   | C | 0.0299  |
| rs117457703 | T | 0.1026  |
| rs12665548  | T | 0.0394  |
| rs7773759   | G | -0.0645 |
| rs76280411  | A | 0.0593  |
| rs147862009 | A | -0.1746 |
| rs519862    | A | 0.0237  |
| rs11758940  | A | -0.0617 |
| rs34618792  | T | 0.0703  |
| rs116352336 | G | 0.0881  |
| rs75721495  | A | 0.0536  |
| rs2316796   | A | -0.0225 |

|             |   |         |
|-------------|---|---------|
| rs7746053   | C | 0.0717  |
| rs57078108  | C | -0.0331 |
| rs145681012 | T | -0.0729 |
| rs1885959   | T | -0.0221 |
| rs117182629 | A | -0.0973 |
| rs2982904   | G | 0.0194  |
| rs146118920 | C | -0.1271 |
| rs4707492   | G | 0.0204  |
| rs9356475   | T | -0.0202 |
| rs6456588   | A | 0.0802  |
| rs113378651 | A | -0.0935 |
| rs74760108  | G | 0.0251  |
| rs117791855 | A | 0.0632  |
| rs11970707  | T | 0.0232  |
| rs9358206   | A | -0.0936 |
| rs158773    | T | 0.019   |
| rs377609    | T | 0.0381  |
| rs12525260  | C | 0.0188  |
| rs117119044 | T | -0.0583 |
| rs11963920  | C | -0.0788 |
| rs116849978 | T | 0.0635  |
| rs12214332  | A | -0.0364 |
| rs62441466  | C | -0.0351 |
| rs2071797   | T | -0.0382 |
| rs9471187   | C | 0.0406  |
| rs9384926   | G | -0.0575 |
| rs2734344   | A | -0.0235 |
| rs117922347 | T | -0.1563 |
| rs118158359 | T | -0.1484 |
| rs118074655 | T | 0.0975  |
| rs79288867  | G | -0.094  |
| rs17201433  | A | 0.1429  |
| rs2353059   | C | 0.0459  |
| rs78369364  | G | -0.0504 |
| rs1893115   | G | 0.0244  |
| rs146169947 | A | 0.0739  |
| rs73786758  | T | -0.0363 |
| rs117944123 | G | -0.1011 |
| rs56250784  | A | -0.0684 |
| rs115828691 | T | 0.1508  |
| rs9388935   | A | -0.0614 |
| rs73012844  | A | 0.0725  |
| rs4712696   | G | 0.065   |
| rs17062729  | T | 0.0646  |
| rs1935106   | G | -0.1012 |
| rs9402570   | C | 0.0246  |
| rs829914    | A | 0.0734  |

|             |   |         |
|-------------|---|---------|
| rs116941503 | C | 0.1397  |
| rs74662370  | A | 0.0853  |
| rs13206045  | C | -0.0258 |
| rs12202730  | T | 0.0424  |
| rs6932421   | C | 0.0757  |
| rs12055716  | G | 0.0217  |
| rs141631313 | G | 0.1165  |
| rs9384599   | T | -0.0188 |
| rs4364453   | G | -0.0194 |
| rs12191060  | T | 0.0652  |
| rs79756813  | T | 0.0451  |
| rs9647621   | C | -0.0896 |
| rs12214664  | G | -0.052  |
| rs62408253  | C | -0.062  |
| rs9396701   | T | 0.0224  |
| rs113629437 | A | 0.0646  |
| rs117963002 | T | -0.0615 |
| rs35587516  | G | 0.0856  |
| rs9378418   | C | -0.0399 |
| rs6920534   | C | 0.0325  |
| rs10485318  | G | 0.0327  |
| rs115856115 | A | -0.0737 |
| rs74926148  | T | -0.0633 |
| rs2180135   | G | 0.0188  |
| rs380386    | A | 0.1165  |
| rs9480156   | C | 0.024   |
| rs9454805   | A | -0.0614 |
| rs79254826  | A | 0.0579  |
| rs59257657  | G | -0.0979 |
| rs77594551  | T | -0.0293 |
| rs1331301   | C | -0.0181 |
| rs77446948  | A | -0.0936 |
| rs16873023  | C | 0.0476  |
| rs476276    | G | -0.0212 |
| rs76528078  | T | 0.0363  |
| rs17432662  | A | 0.0249  |
| rs140013486 | G | -0.1061 |
| rs55813531  | G | -0.0256 |
| rs117584366 | C | -0.105  |
| rs1201447   | A | -0.0206 |
| rs1377973   | G | 0.0254  |
| rs6597394   | C | 0.019   |
| rs75493882  | G | -0.051  |
| rs651164    | A | 0.0199  |
| rs72839144  | T | 0.049   |
| rs146874451 | G | -0.1166 |
| rs141349970 | T | 0.0858  |

|             |   |         |
|-------------|---|---------|
| rs118103985 | C | -0.0911 |
| rs547108    | A | -0.0226 |
| rs117691003 | T | 0.0933  |
| rs55775145  | G | -0.1108 |
| rs6458518   | T | 0.0189  |
| rs143716889 | G | -0.1023 |
| rs813812    | C | -0.0182 |
| rs12527305  | A | 0.1128  |
| rs74699117  | A | 0.0672  |
| rs265352    | G | -0.0222 |
| rs9355898   | T | 0.0227  |
| rs73398195  | C | 0.1656  |
| rs144403399 | G | -0.0698 |
| rs139504288 | T | -0.1262 |
| rs111898862 | G | -0.0709 |
| rs61198286  | A | 0.0288  |
| rs13207017  | G | -0.0197 |
| rs7756762   | C | 0.0598  |
| rs145570831 | G | 0.0862  |
| rs145766462 | C | 0.1124  |
| rs116836554 | A | 0.1137  |
| rs139022015 | A | -0.089  |
| rs116683794 | G | -0.0846 |
| rs13213655  | A | -0.0334 |
| rs55869568  | G | -0.033  |
| rs9371318   | G | 0.0258  |
| rs76876342  | C | 0.0715  |
| rs11962544  | G | 0.1097  |
| rs140547939 | A | -0.0806 |
| rs316154    | A | -0.018  |
| rs114643095 | G | -0.091  |
| rs7752335   | A | 0.0568  |
| rs149679222 | C | 0.0909  |
| rs1891455   | A | -0.0547 |
| rs117754215 | G | -0.1113 |
| rs62422551  | T | -0.096  |
| rs147609952 | A | -0.0894 |
| rs148563541 | T | 0.0913  |
| rs138725724 | G | 0.0838  |
| rs117473080 | G | 0.062   |
| rs9398796   | A | 0.0425  |
| rs148243848 | A | -0.0909 |
| rs2815146   | G | 0.0178  |
| rs116548130 | A | -0.1003 |
| rs77788936  | T | 0.1202  |
| rs150639932 | T | -0.1112 |
| rs117384713 | T | -0.0938 |

|             |   |         |
|-------------|---|---------|
| rs140709290 | T | -0.0454 |
| rs9368621   | A | -0.0252 |
| rs510420    | T | -0.0251 |
| rs117327305 | T | 0.0987  |
| rs72943999  | T | -0.1464 |
| rs1000864   | T | -0.0225 |
| rs74908414  | C | -0.0936 |
| rs12110995  | T | -0.0747 |
| rs111705046 | T | 0.1325  |
| rs117989419 | G | 0.0666  |
| rs113486176 | T | 0.063   |
| rs2819860   | A | 0.0259  |
| rs13199545  | T | -0.0331 |
| rs10457686  | G | -0.023  |
| rs2201595   | A | 0.0267  |
| rs113051211 | G | 0.0784  |
| rs62419605  | G | -0.057  |
| rs149121877 | A | -0.0978 |
| rs139363174 | T | 0.043   |
| rs1590299   | T | 0.0184  |
| rs115064283 | C | -0.0637 |
| rs1042987   | A | 0.0363  |
| rs1479054   | G | 0.029   |
| rs7767069   | T | 0.0191  |
| rs2474153   | T | -0.0985 |
| rs10456667  | G | 0.0194  |
| rs2031258   | A | 0.0589  |
| rs142279800 | G | -0.0688 |
| rs150220705 | T | 0.0748  |
| rs9405519   | A | -0.0198 |
| rs2500086   | G | -0.0212 |
| rs6929988   | C | 0.0187  |
| rs113500511 | C | 0.0883  |
| rs10948234  | A | -0.0195 |
| rs2818120   | T | 0.0577  |
| rs9373965   | C | 0.0282  |
| rs505799    | G | 0.0245  |
| rs117343043 | C | 0.0768  |
| rs144357991 | G | -0.1435 |
| rs114154728 | T | -0.1065 |
| rs77332505  | T | 0.0476  |
| rs2504434   | C | -0.0212 |
| rs117969328 | C | 0.123   |
| rs372440    | A | -0.018  |
| rs150464234 | T | 0.0794  |
| rs11154135  | C | -0.0248 |
| rs11759954  | T | 0.1489  |

|             |   |         |
|-------------|---|---------|
| rs73733632  | G | -0.1086 |
| rs10944844  | T | -0.0804 |
| rs220809    | T | 0.0221  |
| rs113989935 | A | 0.1008  |
| rs1504368   | A | -0.0278 |
| rs977559    | A | -0.0338 |
| rs77634133  | C | -0.1804 |
| rs1873731   | A | -0.1175 |
| rs10455980  | T | 0.1017  |
| rs12661152  | C | 0.0316  |
| rs78659979  | A | -0.0473 |
| rs16871157  | G | -0.0335 |
| rs1931001   | T | 0.0193  |
| rs33951897  | T | 0.037   |
| rs117041153 | T | 0.0762  |
| rs114296519 | C | -0.1442 |
| rs115841821 | C | -0.0777 |
| rs2157501   | G | 0.0203  |
| rs117566280 | A | 0.105   |
| rs73004750  | T | -0.0226 |
| rs147609578 | C | 0.0515  |
| rs77036729  | A | -0.0474 |
| rs899519    | C | -0.0278 |
| rs2296197   | C | -0.0218 |
| rs118055404 | A | 0.0806  |
| rs147268064 | G | -0.1159 |
| rs114919458 | A | -0.1062 |
| rs9495589   | G | -0.0199 |
| rs9480347   | A | 0.0313  |
| rs57547880  | A | -0.026  |
| rs78066977  | C | 0.0526  |
| rs2031259   | A | -0.0294 |
| rs138358390 | A | -0.1047 |
| rs116881654 | T | -0.0838 |
| rs62400452  | G | 0.0334  |
| rs76392524  | G | 0.0635  |
| rs12189591  | T | 0.0429  |
| rs2077681   | C | 0.0513  |
| rs80269558  | A | 0.058   |
| rs139127306 | T | 0.1686  |
| rs74805720  | T | 0.0875  |
| rs114968474 | T | -0.0979 |
| rs118168647 | T | -0.1038 |
| rs13208036  | C | 0.0283  |
| rs114315636 | G | -0.0703 |
| rs116830898 | T | -0.0528 |
| rs62412652  | C | -0.0616 |

|             |   |         |
|-------------|---|---------|
| rs424687    | G | -0.099  |
| rs145448915 | T | -0.0715 |
| rs9343778   | G | -0.0178 |
| rs78775575  | A | -0.1191 |
| rs1835472   | T | -0.0189 |
| rs12215634  | A | -0.028  |
| rs76937132  | C | 0.1337  |
| rs9405991   | G | 0.0189  |
| rs7381992   | T | -0.0462 |
| rs118101137 | C | -0.1429 |
| rs71547111  | T | -0.0196 |
| rs276574    | A | -0.018  |
| rs12663763  | T | -0.0814 |
| rs6917049   | A | -0.025  |
| rs2745608   | T | -0.0352 |
| rs4713043   | A | -0.0199 |
| rs13212273  | C | -0.0193 |
| rs9487750   | C | -0.0263 |
| rs1374984   | G | 0.0699  |
| rs61738668  | A | -0.0643 |
| rs72873088  | T | 0.0575  |
| rs114885239 | G | 0.0688  |
| rs744196    | G | 0.024   |
| rs139435237 | A | -0.0264 |
| rs114379727 | A | 0.1007  |
| rs6910415   | T | 0.0187  |
| rs72950387  | G | -0.0949 |
| rs12526165  | A | 0.029   |
| rs4870110   | T | -0.0233 |
| rs34059508  | A | 0.0722  |
| rs3851508   | T | 0.0203  |
| rs76092088  | A | 0.0482  |
| rs139731201 | T | -0.108  |
| rs72880303  | T | 0.1038  |
| rs7773835   | A | -0.0239 |
| rs72848525  | A | -0.0671 |
| rs1738452   | A | 0.024   |
| rs9312      | T | -0.0273 |
| rs2181061   | C | 0.0182  |
| rs78326332  | T | -0.0555 |
| rs2023075   | G | -0.0288 |
| rs79440553  | G | 0.092   |
| rs9395786   | T | -0.0267 |
| rs112424710 | C | 0.0634  |
| rs855575    | A | 0.0249  |
| rs79403850  | A | -0.0871 |
| rs145249325 | G | -0.0717 |

|             |   |         |
|-------------|---|---------|
| rs13200114  | T | -0.024  |
| rs6918106   | G | -0.0368 |
| rs807841    | T | 0.0203  |
| rs2984442   | T | -0.0181 |
| rs117420901 | G | 0.0536  |
| rs34482742  | G | 0.0352  |
| rs11963965  | A | 0.0311  |
| rs60700772  | C | -0.023  |
| rs143148648 | T | 0.071   |
| rs77437032  | G | 0.0758  |
| rs113689173 | C | -0.0337 |
| rs34527581  | A | -0.0422 |
| rs13192123  | A | 0.0844  |
| rs6568389   | C | -0.0193 |
| rs9394824   | A | 0.018   |
| rs72940858  | G | -0.0285 |
| rs12202682  | G | 0.0809  |
| rs74722344  | T | 0.0665  |
| rs75027218  | A | 0.0791  |
| rs35187199  | G | -0.0735 |
| rs76458711  | A | 0.0573  |
| rs9383068   | T | 0.0584  |
| rs79525339  | G | 0.1145  |
| rs12199128  | T | 0.0337  |
| rs72931111  | C | 0.0472  |
| rs12525680  | A | -0.0228 |
| rs9478846   | G | 0.0279  |
| rs9459712   | A | 0.0589  |
| rs77101688  | G | 0.0791  |
| rs73765692  | A | 0.0442  |
| rs4897093   | C | -0.0184 |
| rs1965303   | G | 0.0179  |
| rs73720347  | G | 0.144   |
| rs116832569 | G | 0.0946  |
| rs79132986  | T | -0.0361 |
| rs2149586   | T | 0.026   |
| rs150508116 | T | -0.0502 |
| rs148864987 | A | -0.0802 |
| rs1928968   | G | -0.0263 |
| rs72823520  | A | -0.1291 |
| rs56196646  | C | 0.036   |
| rs79129577  | A | -0.0426 |
| rs9378547   | T | 0.0192  |
| rs9368883   | A | -0.0186 |
| rs72852023  | C | -0.045  |
| rs77109711  | G | 0.0786  |
| rs6570144   | G | -0.0284 |



|             |   |         |
|-------------|---|---------|
| rs77056198  | C | -0.0911 |
| rs73007982  | G | 0.0478  |
| rs148054831 | T | -0.0826 |
| rs17673321  | C | -0.0855 |
| rs3734795   | T | 0.0596  |
| rs6915297   | T | -0.0544 |
| rs115764518 | T | -0.1237 |
| rs9689078   | C | -0.0184 |
| rs2493331   | C | 0.0197  |
| rs78926933  | A | -0.0629 |
| rs4601145   | T | -0.0496 |
| rs161061    | C | 0.0183  |
| rs142530793 | T | 0.1075  |
| rs11751477  | G | -0.0573 |
| rs9404028   | C | 0.154   |
| rs12529267  | A | -0.0584 |
| rs7772821   | G | 0.0257  |
| rs139047372 | A | -0.1102 |
| rs11757396  | A | 0.0239  |
| rs143142433 | C | -0.0943 |
| rs9501862   | T | 0.02    |
| rs62425871  | G | -0.0651 |
| rs62413992  | A | 0.1434  |
| rs150227179 | T | -0.0978 |
| rs138595014 | T | -0.1049 |
| rs13203024  | G | -0.0474 |
| rs75097297  | T | 0.0804  |
| rs17812192  | C | -0.04   |
| rs77800539  | G | 0.0877  |
| rs10455513  | G | -0.0225 |
| rs1354452   | T | 0.0352  |
| rs9481246   | A | -0.0174 |
| rs6942027   | A | -0.0218 |
| rs9477316   | G | -0.1046 |
| rs6910479   | C | 0.0204  |
| rs72834800  | C | 0.0821  |
| rs17647528  | G | 0.0922  |
| rs1541227   | G | -0.0217 |
| rs9479114   | T | -0.0697 |
| rs7752984   | C | 0.0332  |
| rs113694908 | A | 0.0441  |
| rs111725661 | A | -0.1217 |
| rs4989286   | G | -0.0316 |
| rs2799365   | A | -0.0573 |
| rs2000382   | A | 0.019   |
| rs4897098   | C | 0.0219  |
| rs17453908  | G | -0.0939 |

|             |   |         |
|-------------|---|---------|
| rs117453238 | A | 0.0632  |
| rs78495383  | T | -0.0904 |
| rs2763277   | A | -0.0267 |
| rs2022439   | G | -0.0286 |
| rs78278446  | C | -0.0826 |
| rs4391258   | C | -0.0248 |
| rs145766752 | A | -0.0687 |
| rs998045    | T | 0.021   |
| rs72922239  | G | -0.0307 |
| rs77995203  | A | -0.0356 |
| rs6928203   | A | 0.0419  |
| rs1998368   | G | 0.1043  |
| rs7739775   | T | -0.0283 |
| rs17725277  | C | 0.0803  |
| rs17224695  | G | 0.0212  |
| rs12206292  | C | -0.0471 |
| rs146349909 | G | 0.0924  |
| rs111958187 | A | -0.1059 |
| rs57978061  | A | -0.036  |
| rs7742491   | G | -0.0229 |
| rs142682278 | A | -0.0799 |
| rs12198333  | C | -0.0312 |
| rs116681888 | T | -0.0652 |
| rs10457511  | C | 0.1063  |
| rs9492602   | T | 0.0191  |
| rs2018629   | T | 0.0318  |
| rs111505011 | T | 0.1165  |
| rs118139935 | C | 0.0675  |
| rs2482409   | C | -0.0216 |
| rs72840809  | A | 0.0431  |
| rs117628588 | A | 0.1438  |
| rs114731381 | T | 0.1632  |
| rs77670165  | G | -0.0187 |
| rs78350800  | G | 0.0899  |
| rs114694086 | A | -0.0508 |
| rs1619811   | A | 0.0191  |
| rs7743956   | T | -0.0213 |
| rs72936848  | A | -0.0955 |
| rs1496975   | T | -0.0179 |
| rs143675863 | G | -0.1316 |
| rs3793039   | G | -0.0233 |
| rs4706323   | T | 0.0221  |
| rs72946274  | G | 0.0663  |
| rs2172329   | G | -0.0367 |
| rs7746417   | T | 0.0214  |
| rs75101588  | C | -0.0655 |
| rs117016549 | C | -0.0834 |

|             |   |         |
|-------------|---|---------|
| rs62422160  | A | 0.1512  |
| rs9371808   | G | -0.0245 |
| rs72558886  | G | 0.0223  |
| rs75950600  | T | -0.0251 |
| rs4708922   | C | 0.0234  |
| rs74585377  | G | 0.0677  |
| rs145912914 | C | -0.0661 |
| rs10223752  | T | -0.0373 |
| rs76215240  | A | 0.0514  |
| rs111258739 | A | 0.108   |
| rs227452    | A | -0.0205 |
| rs114586090 | T | 0.0869  |
| rs62414117  | G | 0.0228  |
| rs11963368  | G | -0.0413 |
| rs6927299   | A | 0.0213  |
| rs6910640   | A | 0.1204  |
| rs1150593   | T | -0.0303 |
| rs6936307   | T | -0.0869 |
| rs283576    | A | -0.0573 |
| rs117174185 | T | 0.0319  |
| rs9360306   | C | 0.0545  |
| rs77841747  | A | 0.0624  |
| rs58579648  | G | -0.0334 |
| rs9351978   | T | -0.0424 |
| rs2206987   | G | -0.0176 |
| rs140507407 | A | -0.1106 |
| rs9356344   | C | -0.0209 |
| rs210053    | T | -0.0238 |
| rs1150092   | C | -0.018  |
| rs4870266   | A | 0.0403  |
| rs2457334   | C | 0.0191  |
| rs74523776  | C | -0.1159 |
| rs17688983  | C | -0.0578 |
| rs72986510  | T | -0.0378 |
| rs115749548 | A | 0.0911  |
| rs12527470  | G | -0.0982 |
| rs34443729  | T | 0.041   |
| rs112128375 | C | 0.0473  |
| rs115626932 | C | 0.0903  |
| rs76089784  | G | 0.0315  |
| rs9486067   | A | -0.0334 |
| rs74703311  | A | 0.0971  |
| rs13203885  | C | -0.027  |
| rs12205564  | T | 0.1086  |
| rs141601578 | C | 0.0819  |
| rs17709524  | A | 0.0885  |
| rs9364229   | G | 0.0183  |

|             |   |         |
|-------------|---|---------|
| rs527322    | A | -0.0229 |
| rs114029947 | T | -0.1116 |
| rs72930641  | T | 0.154   |
| rs9478185   | T | -0.0404 |
| rs140268173 | A | 0.106   |
| rs4583938   | T | -0.0178 |
| rs2211493   | C | -0.0243 |
| rs12173486  | A | 0.0235  |
| rs61413749  | C | 0.0644  |
| rs118099249 | C | 0.0809  |
| rs12193149  | A | 0.034   |
| rs117603699 | C | 0.149   |
| rs12525319  | G | 0.0282  |
| rs1857233   | T | 0.0423  |
| rs117090646 | C | -0.0638 |
| rs783152    | T | -0.0845 |
| rs35953940  | G | 0.0235  |
| rs75173805  | A | 0.0638  |
| rs78024037  | T | 0.1191  |
| rs449985    | C | -0.0178 |
| rs75573044  | A | 0.0509  |
| rs10900941  | G | 0.0188  |
| rs58938823  | T | 0.0375  |
| rs73251306  | A | 0.0707  |
| rs62444444  | A | 0.0625  |
| rs4574662   | C | -0.0185 |
| rs35662273  | A | -0.0344 |
| rs9477697   | C | -0.0326 |
| rs728835    | C | 0.0974  |
| rs72870013  | A | -0.0242 |
| rs13216342  | A | 0.0297  |
| rs7744685   | C | -0.0187 |
| rs143680498 | A | -0.057  |
| rs9322774   | A | 0.0974  |
| rs150599334 | A | -0.1725 |
| rs2206195   | A | -0.0176 |
| rs196698    | A | 0.0248  |
| rs118045663 | A | -0.0948 |
| rs544241    | T | -0.0215 |
| rs378411    | G | 0.0194  |
| rs12202891  | T | -0.0368 |
| rs7762347   | C | 0.0191  |
| rs115941737 | G | -0.0636 |
| rs7743046   | C | 0.0187  |
| rs72893703  | A | -0.0732 |
| rs116352020 | T | -0.1238 |
| rs2499697   | A | -0.0326 |

|             |   |         |
|-------------|---|---------|
| rs9352507   | C | 0.0497  |
| rs79180769  | G | 0.1407  |
| rs79404627  | A | 0.1112  |
| rs114887085 | T | -0.1135 |
| rs76092956  | C | -0.0274 |
| rs73002988  | G | 0.1266  |
| rs72826277  | G | 0.1304  |
| rs9379627   | T | 0.0216  |
| rs2327252   | G | 0.0215  |
| rs75742993  | T | -0.0877 |
| rs13213640  | G | 0.0398  |
| rs12204736  | C | 0.0185  |
| rs76903247  | T | -0.0365 |
| rs9366466   | T | -0.0268 |
| rs71563072  | G | -0.0595 |
| rs113096698 | C | -0.1111 |
| rs7750152   | C | -0.018  |
| rs12193816  | A | -0.0191 |
| rs138855395 | A | -0.1065 |
| rs12213679  | A | -0.0666 |
| rs2388038   | C | 0.0244  |
| rs508751    | C | -0.0476 |
| rs707832    | A | 0.0222  |
| rs34947828  | A | -0.1481 |
| rs9378747   | A | 0.0213  |
| rs41303785  | A | -0.0803 |
| rs145001196 | T | -0.0618 |
| rs6934233   | C | 0.0348  |
| rs138499165 | A | 0.1048  |
| rs9376059   | A | -0.0193 |
| rs62392036  | T | 0.0303  |
| rs807533    | C | -0.0194 |
| rs58275900  | A | -0.0788 |
| rs55755722  | T | 0.0234  |
| rs9458661   | T | 0.017   |
| rs115925091 | T | -0.1534 |
| rs150889581 | T | 0.0852  |
| rs1577598   | A | 0.0238  |
| rs446698    | C | 0.0278  |
| rs12175122  | G | 0.0222  |
| rs73412244  | C | 0.0613  |
| rs142753940 | T | 0.0207  |
| rs80111919  | G | -0.0664 |
| rs116129585 | C | -0.0942 |
| rs12194234  | T | 0.0298  |
| rs75231773  | T | 0.0814  |
| rs9499216   | G | -0.0237 |

|             |   |         |
|-------------|---|---------|
| rs72829872  | T | 0.053   |
| rs813227    | A | 0.0197  |
| rs117321521 | T | -0.051  |
| rs12173775  | A | 0.0606  |
| rs4568455   | A | 0.078   |
| rs3024317   | A | -0.0203 |
| rs115408158 | G | 0.0401  |
| rs624201    | T | -0.0196 |
| rs2180146   | T | -0.0173 |
| rs67258057  | A | 0.0409  |
| rs10485126  | T | 0.0295  |
| rs73774676  | T | 0.0499  |
| rs9359682   | T | 0.0189  |
| rs115989354 | T | 0.0332  |
| rs62422966  | C | 0.1189  |
| rs409359    | C | -0.018  |
| rs9347865   | A | 0.0246  |
| rs143658610 | C | 0.1287  |
| rs9486466   | A | 0.0813  |
| rs145299639 | A | -0.0772 |
| rs4960080   | T | 0.0215  |
| rs72811071  | A | -0.0454 |
| rs79872066  | G | -0.0383 |
| rs140101319 | T | 0.1031  |
| rs139742532 | G | 0.1193  |
| rs117654394 | A | 0.1099  |
| rs118089736 | A | 0.0861  |
| rs12526713  | T | -0.0981 |
| rs145978557 | A | -0.0536 |
| rs9478960   | C | -0.0194 |
| rs72869671  | T | 0.0418  |
| rs79903297  | A | 0.0901  |
| rs12526848  | G | 0.069   |
| rs984427    | T | 0.1104  |
| rs4707602   | A | 0.0777  |
| rs1394220   | C | 0.0175  |
| rs75098203  | T | 0.0301  |
| rs72912346  | A | -0.0733 |
| rs111739263 | T | 0.1156  |
| rs9363840   | A | -0.0259 |
| rs141145375 | A | 0.1063  |
| rs9355199   | T | -0.0467 |
| rs112889612 | A | 0.0924  |
| rs147927820 | T | 0.0414  |
| rs10872660  | T | 0.0311  |
| rs76339249  | C | -0.0445 |
| rs2655651   | A | 0.0359  |

|             |   |         |
|-------------|---|---------|
| rs71571138  | A | -0.0729 |
| rs11961765  | A | -0.0239 |
| rs74816829  | A | -0.059  |
| rs114866415 | A | 0.0592  |
| rs4579348   | C | -0.0271 |
| rs76530659  | C | 0.1068  |
| rs76275816  | T | -0.0789 |
| rs11752543  | A | 0.0347  |
| rs12204590  | A | -0.0217 |
| rs4714790   | T | -0.0297 |
| rs1190305   | C | 0.0525  |
| rs1590329   | A | -0.0214 |
| rs265371    | C | 0.0223  |
| rs1247306   | A | 0.0574  |
| rs9400996   | A | 0.0175  |
| rs72881008  | T | -0.0969 |
| rs730224    | G | -0.0177 |
| rs12528618  | C | 0.0212  |
| rs9375753   | T | -0.0402 |
| rs61243641  | T | -0.0307 |
| rs115647609 | T | 0.1547  |
| rs113030479 | T | 0.0711  |
| rs6938519   | G | -0.045  |
| rs9494030   | C | -0.0227 |
| rs6907578   | A | -0.0191 |
| rs9463121   | T | 0.0405  |
| rs76807281  | A | -0.0858 |
| rs1007274   | T | 0.0216  |
| rs75414281  | A | 0.0637  |
| rs145400085 | C | -0.0513 |
| rs2444721   | G | 0.0334  |
| rs72897410  | T | -0.1017 |
| rs117010903 | T | -0.0761 |
| rs10499160  | C | -0.0229 |
| rs78324975  | T | -0.0706 |
| rs72984264  | G | 0.1936  |
| rs1029166   | A | -0.017  |
| rs116742444 | A | -0.0927 |
| rs62431317  | C | 0.0666  |
| rs71568147  | T | 0.0437  |
| rs3806125   | T | -0.0269 |
| rs12200527  | T | 0.0557  |
| rs117419548 | A | -0.05   |
| rs117780471 | C | -0.0547 |
| rs11961326  | T | 0.1441  |
| rs145963916 | A | -0.073  |
| rs116592302 | T | 0.0448  |

|             |   |         |
|-------------|---|---------|
| rs115552552 | T | -0.0662 |
| rs2073067   | G | 0.0197  |
| rs9371779   | T | -0.1632 |
| rs138304423 | C | -0.0686 |
| rs7774614   | T | -0.0317 |
| rs2328391   | G | -0.0383 |
| rs79188767  | A | -0.0896 |
| rs9396691   | G | -0.0385 |
| rs7767306   | C | -0.0278 |
| rs2108924   | C | 0.0749  |
| rs146334111 | T | 0.1255  |
| rs140740500 | A | 0.1205  |
| rs116977633 | G | 0.0514  |
| rs9486655   | C | -0.0329 |
| rs78777101  | T | -0.1186 |
| rs12527321  | T | 0.0426  |
| rs9505301   | G | -0.03   |
| rs4714390   | A | -0.0209 |
| rs9383831   | G | -0.0251 |
| rs76925178  | A | 0.029   |
| rs56026348  | G | -0.0276 |
| rs62387054  | A | -0.0254 |
| rs116627795 | T | 0.1024  |
| rs3065      | T | 0.0263  |
| rs603859    | C | 0.0229  |
| rs75950754  | C | 0.1241  |
| rs72932812  | A | -0.0471 |
| rs117992279 | T | -0.1042 |
| rs12199829  | A | 0.0429  |
| rs56046750  | C | 0.0316  |
| rs72947268  | A | 0.0792  |
| rs9379661   | C | -0.0184 |
| rs12153949  | T | -0.0197 |
| rs77246003  | A | -0.0594 |
| rs9346476   | G | -0.05   |
| rs828636    | A | -0.055  |
| rs6920944   | T | -0.0286 |
| rs6912625   | C | -0.0246 |
| rs75219998  | C | 0.0912  |
| rs7743501   | C | -0.0319 |
| rs428407    | T | 0.0246  |
| rs210157    | T | -0.0181 |
| rs4895601   | C | 0.0175  |
| rs9402444   | G | -0.0341 |
| rs899855    | G | -0.0332 |
| rs111750937 | A | 0.1358  |
| rs13198462  | A | -0.0549 |



|             |   |         |
|-------------|---|---------|
| rs115061178 | A | 0.068   |
| rs72827095  | T | -0.0798 |
| rs9465660   | T | 0.1283  |
| rs2234025   | G | -0.0716 |
| rs145627627 | G | -0.1305 |
| rs138777018 | G | 0.0964  |
| rs112900413 | T | -0.0992 |
| rs697749    | G | -0.0185 |
| rs9376499   | G | 0.0276  |
| rs9373204   | G | 0.0221  |
| rs111586616 | A | 0.1551  |
| rs11758161  | T | -0.0234 |
| rs17140654  | A | 0.0258  |
| rs76710640  | A | 0.0346  |
| rs942642    | T | 0.0182  |
| rs72948202  | A | 0.1153  |
| rs114493150 | T | -0.0788 |
| rs75868974  | T | -0.1154 |
| rs117755420 | G | 0.0976  |
| rs75949436  | T | 0.091   |
| rs10945142  | A | 0.0199  |
| rs78684393  | T | 0.0609  |
| rs71574629  | C | -0.045  |
| rs9456123   | C | -0.0699 |
| rs6458206   | A | -0.027  |
| rs73468478  | C | 0.0564  |
| rs9458244   | T | -0.0206 |
| rs150385544 | C | -0.0797 |
| rs142191821 | G | 0.1009  |
| rs62432356  | T | 0.0968  |
| rs118133674 | A | -0.1104 |
| rs75650625  | C | -0.0844 |
| rs76096820  | C | -0.0941 |
| rs671703    | A | -0.0278 |
| rs75252708  | T | 0.0422  |
| rs116748312 | C | -0.0814 |
| rs573216    | T | -0.1006 |
| rs1977248   | C | 0.0203  |
| rs75100832  | T | -0.1317 |
| rs2655439   | T | -0.0254 |
| rs114677976 | G | -0.1007 |
| rs6454752   | T | -0.0216 |
| rs35316193  | A | -0.0356 |
| rs4959184   | G | 0.0252  |
| rs11152896  | G | 0.0312  |
| rs4599586   | T | -0.0353 |
| rs611413    | G | -0.0242 |

|             |   |         |
|-------------|---|---------|
| rs6932498   | C | 0.0248  |
| rs7746874   | T | -0.0195 |
| rs13211793  | A | 0.0225  |
| rs113158611 | T | -0.0472 |
| rs12664517  | G | 0.0452  |
| rs2842623   | G | -0.0203 |
| rs80009254  | A | -0.073  |
| rs115467887 | C | -0.1064 |
| rs6937927   | G | -0.0181 |
| rs78983140  | G | 0.044   |
| rs2477758   | A | 0.0244  |
| rs1339229   | G | 0.0169  |
| rs12524904  | T | -0.0431 |
| rs2294729   | A | -0.0287 |
| rs143249867 | T | 0.079   |
| rs223615    | A | 0.1285  |
| rs9457226   | A | 0.0692  |
| rs4634493   | T | 0.0281  |
| rs114292923 | T | -0.085  |
| rs114690310 | C | 0.0832  |
| rs602261    | T | -0.0472 |
| rs72833726  | A | 0.0321  |
| rs76430436  | C | 0.1038  |
| rs701682    | T | 0.0276  |
| rs9355724   | G | -0.0289 |
| rs58276920  | A | -0.0842 |
| rs140636335 | A | -0.0358 |
| rs138162375 | C | 0.0938  |
| rs45578845  | G | -0.076  |
| rs9464229   | T | -0.0239 |
| rs79025812  | A | 0.1296  |
| rs9479286   | A | 0.0424  |
| rs57781085  | T | 0.1291  |
| rs4870059   | G | 0.0781  |
| rs116554614 | T | -0.0962 |
| rs59345044  | A | -0.0225 |
| rs6916223   | A | -0.0193 |
| rs116988680 | T | 0.1375  |
| rs2295985   | T | 0.0286  |
| rs9351294   | G | 0.0184  |
| rs2614273   | C | 0.0323  |
| rs138617544 | A | -0.0714 |
| rs114071965 | A | 0.095   |
| rs7746054   | T | -0.1246 |
| rs1530306   | A | 0.0277  |
| rs73738197  | A | 0.0274  |
| rs2439040   | G | 0.0173  |

|             |   |         |
|-------------|---|---------|
| rs62401130  | C | 0.0385  |
| rs35048568  | T | 0.0214  |
| rs9351736   | G | 0.0428  |
| rs9375428   | A | 0.021   |
| rs10949397  | A | 0.0294  |
| rs1562067   | G | 0.0187  |
| rs117101502 | T | 0.0943  |
| rs484498    | T | 0.0168  |
| rs11965437  | C | 0.044   |
| rs149709859 | T | -0.0588 |
| rs7756506   | C | -0.021  |
| rs1322667   | G | -0.0246 |
| rs1687140   | A | 0.026   |
| rs115550388 | T | 0.0447  |
| rs236411    | G | 0.0228  |
| rs12199493  | T | -0.0302 |
| rs17061483  | G | 0.0539  |
| rs62397618  | G | 0.0415  |
| rs117187192 | A | -0.0453 |
| rs9496500   | G | -0.0169 |
| rs1577709   | T | -0.0536 |
| rs9482851   | T | 0.0243  |
| rs78670628  | C | 0.0721  |
| rs146401688 | T | -0.09   |
| rs12195699  | T | -0.0427 |
| rs220682    | C | -0.0535 |
| rs6901280   | C | -0.0318 |
| rs35085819  | A | -0.0441 |
| rs56251517  | G | -0.0379 |
| rs4959232   | A | 0.0187  |
| rs76177823  | T | 0.0767  |
| rs75204191  | C | -0.059  |
| rs113477321 | T | -0.0461 |
| rs117279411 | C | -0.0743 |
| rs150522168 | C | -0.0231 |
| rs149187368 | A | 0.0951  |
| rs9381012   | C | -0.0507 |
| rs2635471   | G | 0.025   |
| rs940920    | C | -0.0623 |
| rs847000    | T | -0.0285 |
| rs72962728  | A | 0.0343  |
| rs1535353   | C | -0.0236 |
| rs116479312 | G | 0.075   |
| rs11153434  | T | -0.0188 |
| rs66686473  | A | -0.0444 |
| rs2811664   | G | -0.0408 |
| rs117639105 | C | -0.0645 |

|             |   |         |
|-------------|---|---------|
| rs11155969  | C | 0.0598  |
| rs74639254  | C | 0.0322  |
| rs6569251   | G | -0.0974 |
| rs62434339  | C | -0.0324 |
| rs3024428   | A | -0.034  |
| rs6935076   | T | -0.0177 |
| rs12193223  | G | 0.0508  |
| rs117472277 | G | 0.1142  |
| rs1880964   | A | -0.0171 |
| rs117966692 | C | -0.0555 |
| rs73003378  | A | -0.0597 |
| rs7768966   | T | -0.027  |
| rs145150818 | A | 0.0399  |
| rs149332166 | T | 0.0709  |
| rs147963059 | A | -0.0581 |
| rs7739006   | T | 0.0178  |
| rs115066795 | T | -0.0624 |
| rs78159733  | A | -0.0541 |
| rs7741248   | G | -0.0419 |
| rs112436628 | G | -0.1207 |
| rs73026247  | A | 0.0704  |
| rs80038711  | G | 0.1064  |
| rs6903668   | A | 0.0339  |
| rs45578734  | T | -0.1014 |
| rs11752883  | C | -0.1104 |
| rs524693    | G | 0.0503  |
| rs4947132   | C | -0.0297 |
| rs72898398  | T | 0.0956  |
| rs9320142   | T | -0.0287 |
| rs9328061   | C | 0.0204  |
| rs116392250 | C | -0.0985 |
| rs72839013  | A | -0.1379 |
| rs12202642  | T | -0.04   |
| rs12191758  | C | 0.0411  |
| rs77771496  | A | -0.0905 |
| rs117281614 | G | -0.0609 |
| rs9479884   | T | 0.0238  |
| rs12212557  | A | -0.0196 |
| rs9361559   | T | -0.0198 |
| rs117721194 | C | 0.0591  |
| rs12200737  | A | -0.0305 |
| rs147468806 | T | -0.1175 |
| rs12153871  | A | 0.0237  |
| rs6915606   | C | -0.0277 |
| rs138192737 | T | 0.0712  |
| rs141310150 | A | 0.0926  |
| rs149131395 | A | 0.0803  |

|             |   |         |
|-------------|---|---------|
| rs72963565  | C | -0.1148 |
| rs71572245  | T | 0.0929  |
| rs13207019  | C | 0.0172  |
| rs59622819  | G | -0.033  |
| rs9489521   | T | 0.0306  |
| rs117664789 | A | -0.1048 |
| rs13216887  | C | 0.0436  |
| rs10947510  | C | 0.018   |
| rs114119236 | A | 0.0746  |
| rs78355320  | A | -0.0935 |
| rs78310404  | A | 0.0889  |
| rs145559090 | C | -0.0921 |
| rs141362599 | C | 0.071   |
| rs55710678  | G | -0.0205 |
| rs78954049  | G | 0.0269  |
| rs77151877  | T | -0.1155 |
| rs146709625 | C | 0.1135  |
| rs35647908  | C | -0.1134 |
| rs149988324 | A | -0.0761 |
| rs6570992   | C | -0.0279 |
| rs146411966 | A | 0.089   |
| rs13209570  | A | 0.0412  |
| rs146560293 | G | 0.0581  |
| rs2479092   | A | -0.0282 |
| rs149581410 | C | 0.1183  |
| rs77721334  | G | 0.0632  |
| rs146956257 | G | 0.1592  |
| rs36038344  | T | 0.0571  |
| rs117320420 | A | 0.1111  |
| rs117160742 | C | -0.1016 |
| rs73477937  | T | 0.0466  |
| rs9383963   | C | 0.0206  |
| rs1883901   | A | -0.0357 |
| rs147297468 | C | 0.0843  |
| rs12192889  | A | -0.1649 |
| rs111772363 | T | 0.0493  |
| rs9495060   | A | 0.0569  |
| rs10080528  | G | 0.0268  |
| rs79128689  | A | -0.0393 |
| rs72839148  | G | -0.0981 |
| rs62425450  | G | -0.0222 |
| rs116909908 | C | -0.0949 |
| rs9397388   | T | 0.019   |
| rs9688479   | A | -0.0219 |
| rs4461777   | G | -0.0165 |
| rs195420    | G | 0.0509  |
| rs71568821  | A | -0.0819 |

|             |   |         |
|-------------|---|---------|
| rs34092665  | C | -0.0203 |
| rs112165399 | T | 0.0842  |
| rs73525129  | C | 0.0352  |
| rs76782605  | C | -0.0875 |
| rs9378640   | C | -0.0784 |
| rs2745333   | A | 0.0179  |
| rs148825753 | T | 0.0985  |
| rs2502603   | T | 0.0174  |
| rs16897883  | C | 0.0273  |
| rs116983004 | C | 0.0886  |
| rs111347090 | A | -0.0666 |
| rs139363138 | A | -0.0791 |
| rs79342443  | A | 0.0224  |
| rs13205081  | A | 0.0294  |
| rs118188175 | T | 0.0946  |
| rs147883969 | A | -0.0979 |
| rs62396677  | T | -0.0255 |
| rs2025660   | C | -0.0247 |
| rs72819751  | G | 0.0312  |
| rs114651263 | C | 0.0418  |
| rs1080140   | T | 0.0218  |
| rs115086705 | T | -0.0658 |
| rs76587575  | A | 0.16    |
| rs11755745  | C | 0.0207  |
| rs79127913  | A | -0.0314 |
| rs12663170  | C | -0.0648 |
| rs148395656 | T | 0.0967  |
| rs74440855  | T | -0.0893 |
| rs56369933  | C | -0.0609 |
| rs141776890 | T | -0.1015 |
| rs1928277   | T | -0.0389 |
| rs72978072  | T | -0.0503 |
| rs9367890   | A | 0.0168  |
| rs139201639 | A | -0.1094 |
| rs9388727   | A | -0.0238 |
| rs4078087   | C | -0.0199 |
| rs9356011   | T | -0.0192 |
| rs113996068 | A | 0.0418  |
| rs114693682 | A | 0.0446  |
| rs79500768  | C | -0.0613 |
| rs197126    | G | -0.0411 |
| rs6901970   | T | -0.0203 |
| rs75544575  | C | 0.0403  |
| rs573291    | G | 0.024   |
| rs116516111 | A | 0.0789  |
| rs7750167   | C | 0.0413  |
| rs78456519  | T | 0.0701  |

|             |   |         |
|-------------|---|---------|
| rs9502511   | G | -0.043  |
| rs111638801 | G | -0.07   |
| rs146643595 | T | -0.1051 |
| rs144664609 | C | -0.0696 |
| rs118048838 | T | -0.1045 |
| rs13193595  | A | -0.0253 |
| rs111787177 | C | -0.0286 |
| rs148870053 | A | 0.054   |
| rs147805723 | G | 0.1131  |
| rs78424533  | T | 0.0447  |
| rs9400249   | T | -0.0197 |
| rs72948552  | G | -0.0794 |
| rs17196103  | A | -0.0752 |
| rs138375036 | A | 0.1086  |
| rs6923464   | C | 0.0772  |
| rs9460343   | G | 0.0239  |
| rs79976718  | A | -0.0338 |
| rs9399964   | T | 0.0251  |
| rs78892371  | G | 0.0694  |
| rs789942    | C | 0.0191  |
| rs637547    | A | 0.0273  |
| rs149487143 | G | 0.0549  |
| rs900475    | G | 0.0179  |
| rs80256901  | C | 0.0475  |
| rs145790455 | A | -0.1186 |
| rs149538228 | T | 0.0669  |
| rs4714585   | G | 0.0312  |
| rs1466202   | A | -0.0236 |
| rs9370441   | T | -0.0174 |
| rs13204324  | A | 0.0669  |
| rs11243151  | C | 0.06    |
| rs7750629   | C | -0.0175 |
| rs9392407   | A | 0.0283  |
| rs79367940  | T | -0.0749 |
| rs62419590  | C | 0.0636  |
| rs7770982   | G | 0.0274  |
| rs62421039  | T | 0.027   |
| rs9403314   | T | -0.0191 |
| rs145046912 | T | 0.0816  |
| rs180002    | A | -0.0178 |
| rs139886310 | G | 0.0758  |
| rs12201612  | G | 0.0225  |
| rs2183690   | C | -0.076  |
| rs12200698  | A | -0.0189 |
| rs11759075  | T | 0.0296  |
| rs80043268  | G | -0.0416 |
| rs11964938  | A | 0.0314  |

|             |   |         |
|-------------|---|---------|
| rs9354726   | A | 0.0175  |
| rs74603364  | T | -0.053  |
| rs7764374   | T | 0.0278  |
| rs197897    | A | -0.035  |
| rs138660468 | G | -0.0607 |
| rs885488    | T | -0.0271 |
| rs803386    | A | 0.0462  |
| rs77604457  | G | -0.0546 |
| rs4711227   | T | -0.0782 |
| rs150360    | A | -0.0181 |
| rs1743953   | T | 0.0337  |
| rs73633603  | C | -0.036  |
| rs144235619 | G | 0.1061  |
| rs77626560  | T | -0.0883 |
| rs3777595   | G | -0.0202 |
| rs117419380 | C | -0.0838 |
| rs7739002   | A | 0.0344  |
| rs141790235 | T | 0.0617  |
| rs141189288 | A | 0.1374  |
| rs11751448  | G | 0.017   |
| rs693145    | A | 0.0419  |
| rs75962856  | C | -0.0628 |
| rs62393012  | C | 0.0311  |
| rs317796    | C | 0.0249  |
| rs4960027   | G | 0.0188  |
| rs117488433 | G | -0.0506 |
| rs59305149  | C | 0.0464  |
| rs77492816  | A | -0.06   |
| rs58942070  | C | -0.028  |
| rs12173751  | G | -0.0285 |
| rs34843161  | A | -0.0445 |
| rs143285466 | A | -0.0843 |
| rs112204664 | A | -0.024  |
| rs79257481  | G | -0.052  |
| rs41306045  | T | -0.0684 |
| rs75110573  | G | -0.1366 |
| rs143251971 | G | 0.078   |
| rs10946358  | T | -0.0212 |
| rs13198476  | T | -0.0736 |
| rs13192185  | A | 0.0299  |
| rs1040941   | A | 0.0166  |
| rs12199300  | T | 0.0336  |
| rs9401098   | C | 0.0341  |
| rs117824536 | C | -0.0563 |
| rs35891907  | C | -0.0263 |
| rs11242780  | C | 0.0402  |
| rs12191029  | A | -0.0434 |



|             |   |         |
|-------------|---|---------|
| rs112159673 | C | 0.0411  |
| rs71564466  | G | 0.0902  |
| rs138109148 | C | -0.0737 |
| rs4645455   | G | -0.0253 |
| rs35634786  | A | 0.0265  |
| rs75603749  | T | -0.0844 |
| rs4714803   | G | 0.0192  |
| rs9451755   | T | -0.0213 |
| rs4448103   | A | 0.0181  |
| rs62432310  | C | 0.0261  |
| rs75986277  | G | -0.0508 |
| rs9363609   | T | 0.0188  |
| rs72910506  | C | -0.0848 |
| rs6458005   | G | 0.0519  |
| rs10948246  | G | 0.0348  |
| rs13205141  | T | 0.1055  |
| rs2997096   | T | 0.0191  |
| rs11759003  | A | -0.0185 |
| rs6907762   | T | -0.0901 |
| rs79242960  | T | -0.053  |
| rs3093015   | G | -0.0253 |
| rs9504466   | C | -0.0169 |
| rs117440298 | G | 0.0818  |
| rs73436114  | C | 0.1162  |
| rs1576241   | A | 0.0167  |
| rs1591728   | G | -0.0183 |
| rs73037389  | C | 0.083   |
| rs4639390   | C | -0.0571 |
| rs72834577  | T | 0.0978  |
| rs12524090  | A | 0.0594  |
| rs55714725  | T | 0.0881  |
| rs113870285 | C | 0.0734  |
| rs75742947  | T | 0.0877  |
| rs12661024  | A | 0.0929  |
| rs77914691  | G | 0.0397  |
| rs17816030  | T | -0.0225 |
| rs114387324 | G | -0.0473 |
| rs9486330   | T | -0.0243 |
| rs77267637  | A | 0.0536  |
| rs9488698   | C | 0.017   |
| rs75430078  | A | 0.0538  |
| rs7739354   | G | -0.0169 |
| rs147646090 | C | -0.0869 |
| rs11962345  | G | 0.018   |
| rs2211241   | G | -0.0235 |
| rs6915259   | T | 0.0397  |
| rs11156164  | C | 0.0259  |

|             |   |         |
|-------------|---|---------|
| rs114153557 | A | -0.0721 |
| rs118033237 | A | -0.0822 |
| rs73005197  | T | 0.0902  |
| rs1736511   | G | -0.0193 |
| rs9345992   | C | 0.0522  |
| rs9371242   | T | 0.1232  |
| rs28451072  | A | -0.0275 |
| rs220422    | T | -0.0252 |
| rs145428571 | A | 0.0752  |
| rs117529806 | C | 0.16    |
| rs4709298   | C | -0.0228 |
| rs9481003   | A | 0.0407  |
| rs2093518   | A | 0.0648  |
| rs2328261   | A | -0.0178 |
| rs75351148  | G | -0.0575 |
| rs17814604  | G | -0.0203 |
| rs13211771  | C | 0.0916  |
| rs148375482 | T | -0.0906 |
| rs503456    | G | -0.0402 |
| rs12195664  | A | -0.0202 |
| rs72998327  | C | -0.0854 |
| rs8180559   | A | 0.0188  |
| rs113274256 | T | -0.0438 |
| rs35150263  | A | -0.0855 |
| rs73533310  | G | -0.0487 |
| rs62429920  | A | 0.0924  |
| rs79239612  | A | -0.0521 |
| rs6930877   | A | -0.0387 |
| rs77816364  | A | 0.0836  |
| rs145949299 | G | 0.0801  |
| rs115461370 | A | 0.0595  |
| rs55964643  | G | 0.0194  |
| rs1581717   | A | -0.0164 |
| rs1032418   | T | 0.0169  |
| rs1150616   | A | -0.023  |
| rs432753    | C | -0.0212 |
| rs12215017  | T | 0.0207  |
| rs150007382 | A | -0.0979 |
| rs794113    | C | -0.0273 |
| rs115548555 | T | 0.0591  |
| rs71569388  | C | 0.0272  |
| rs117391588 | T | -0.0479 |
| rs4424058   | A | -0.074  |
| rs145550847 | A | -0.076  |
| rs9322597   | T | 0.0176  |
| rs72822327  | A | 0.0978  |
| rs117632033 | C | 0.0811  |

|             |   |         |
|-------------|---|---------|
| rs113609522 | G | 0.1599  |
| rs41270565  | A | -0.0561 |
| rs139169578 | T | 0.0745  |
| rs72874588  | G | -0.038  |
| rs6937293   | T | -0.0231 |
| rs148562661 | G | -0.1271 |
| rs2328602   | G | -0.032  |
| rs144600472 | T | -0.0742 |
| rs75581061  | G | -0.0297 |
| rs62408584  | A | 0.0587  |
| rs240873    | A | -0.0189 |
| rs35787156  | G | 0.0876  |
| rs1408501   | G | -0.0239 |
| rs76702047  | G | -0.084  |
| rs140747790 | A | -0.1186 |
| rs7750307   | G | 0.0199  |
| rs568567    | G | -0.0237 |
| rs78198851  | T | -0.032  |
| rs143997521 | C | -0.071  |
| rs702290    | G | 0.0201  |
| rs117670030 | G | 0.0663  |
| rs751873    | T | -0.0175 |
| rs686168    | T | 0.042   |
| rs6921033   | A | 0.0781  |
| rs6457926   | G | 0.0338  |
| rs77837613  | A | 0.0722  |
| rs117956394 | C | 0.0883  |
| rs9451862   | T | 0.0636  |
| rs210644    | G | 0.0216  |
| rs12202134  | G | -0.0724 |
| rs74594114  | T | 0.0359  |
| rs142721902 | T | 0.1164  |
| rs6935970   | T | -0.0189 |
| rs12202051  | A | 0.0235  |
| rs79177630  | G | -0.0425 |
| rs2503633   | G | 0.0194  |
| rs143698223 | G | 0.0308  |
| rs62425372  | A | -0.0357 |
| rs80228707  | A | 0.1125  |
| rs9375320   | A | -0.027  |
| rs10872604  | T | -0.0183 |
| rs150116044 | A | 0.0764  |
| rs7747276   | A | 0.0187  |
| rs75195214  | T | 0.0268  |
| rs145174666 | A | 0.0716  |
| rs7088      | T | -0.0205 |
| rs143049119 | A | -0.117  |

|             |   |         |
|-------------|---|---------|
| rs144956709 | C | 0.073   |
| rs79350134  | T | 0.076   |
| rs3914898   | C | 0.0204  |
| rs73788320  | T | -0.0329 |
| rs138361561 | C | -0.1087 |
| rs7751381   | T | 0.0288  |
| rs117674852 | T | -0.0482 |
| rs12524288  | A | 0.0399  |
| rs77038275  | C | 0.0688  |
| rs58946825  | A | -0.0463 |
| rs9355987   | T | -0.0177 |
| rs144220310 | G | -0.1189 |
| rs13203744  | C | 0.0736  |
| rs34857211  | T | -0.0217 |
| rs941814    | G | -0.0544 |
| rs140707994 | A | 0.0913  |
| rs66472208  | A | -0.0184 |
| rs139739446 | A | -0.0951 |
| rs742102    | A | -0.0646 |
| rs9463249   | A | -0.0276 |
| rs2608903   | C | -0.0185 |
| rs803420    | T | 0.0173  |
| rs113363514 | G | -0.0453 |
| rs112903134 | G | 0.0305  |
| rs113669475 | A | -0.069  |
| rs62402408  | G | 0.0582  |
| rs2058733   | G | 0.0714  |
| rs77386420  | G | 0.0304  |
| rs11755556  | A | 0.0249  |
| rs36020905  | G | 0.0733  |
| rs35163034  | G | 0.0758  |
| rs10499259  | G | -0.0221 |
| rs12523669  | C | -0.0191 |
| rs156130    | C | 0.0175  |
| rs9380549   | A | -0.0233 |
| rs117541436 | T | -0.0741 |
| rs143147350 | A | -0.0678 |
| rs2018906   | A | 0.0165  |
| rs114435980 | C | -0.0895 |
| rs6454911   | G | -0.0196 |
| rs17795453  | G | -0.0386 |
| rs11755540  | G | 0.0827  |
| rs114549697 | G | 0.0834  |
| rs2776911   | T | -0.0192 |
| rs77857409  | G | 0.096   |
| rs78677840  | C | 0.0476  |
| rs6900651   | G | 0.0202  |

|             |   |         |
|-------------|---|---------|
| rs707793    | T | -0.017  |
| rs9385678   | C | -0.0304 |
| rs6941319   | G | -0.0295 |
| rs11963795  | T | -0.1026 |
| rs72956116  | C | 0.0601  |
| rs540391    | A | 0.0523  |
| rs72836324  | A | -0.0319 |
| rs78770847  | G | -0.0408 |
| rs17141163  | T | 0.0657  |
| rs116936782 | G | -0.0806 |
| rs78372511  | A | -0.0922 |
| rs1535833   | T | -0.019  |
| rs111709940 | T | 0.0548  |
| rs72992089  | T | -0.0249 |
| rs75324476  | C | 0.0647  |
| rs7767794   | G | 0.0407  |
| rs114128170 | A | -0.0727 |
| rs75637467  | T | -0.057  |
| rs2040017   | C | -0.0306 |
| rs11967552  | A | 0.0734  |
| rs4527728   | A | 0.0179  |
| rs117096532 | A | 0.0605  |
| rs77805549  | G | -0.0509 |
| rs774433    | A | 0.0252  |
| rs146055380 | G | 0.0249  |
| rs76786839  | G | -0.0652 |
| rs6921338   | A | 0.0168  |
| rs572435    | C | -0.0178 |
| rs9458255   | A | -0.0234 |
| rs707821    | A | 0.0256  |
| rs34515178  | T | -0.0497 |
| rs76031565  | A | -0.0709 |
| rs9458051   | C | -0.0173 |
| rs11753744  | A | 0.0337  |
| rs9360407   | G | -0.0251 |
| rs621829    | T | -0.0185 |
| rs6940982   | G | -0.0211 |
| rs62416063  | G | -0.0438 |
| rs17461397  | T | 0.0203  |
| rs55759606  | T | -0.0259 |
| rs1847912   | G | 0.0188  |
| rs150026961 | C | 0.0803  |
| rs74507270  | G | 0.0503  |
| rs12200057  | T | -0.0765 |
| rs117136394 | G | 0.0684  |
| rs9348979   | G | -0.0194 |
| rs73027171  | C | 0.0899  |

|             |   |         |
|-------------|---|---------|
| rs67183699  | A | 0.0436  |
| rs116929968 | G | 0.0729  |
| rs143638510 | C | -0.0907 |
| rs72886982  | T | -0.0576 |
| rs2495977   | G | -0.017  |
| rs79173537  | C | -0.1068 |
| rs151270311 | A | -0.0917 |
| rs74867371  | G | -0.0826 |
| rs17712618  | G | -0.0601 |
| rs12174742  | A | 0.0421  |
| rs2451334   | A | -0.018  |
| rs6935334   | C | 0.0207  |
| rs60539412  | G | 0.0306  |
| rs148264510 | C | 0.0644  |
| rs78737248  | G | 0.0859  |
| rs6458116   | C | -0.0236 |
| rs116171420 | T | 0.0587  |
| rs72841082  | T | -0.0455 |
| rs114415241 | T | 0.09    |
| rs80136615  | T | -0.0874 |
| rs117332921 | G | 0.0777  |
| rs115017759 | T | 0.1029  |
| rs426656    | G | -0.0412 |
| rs9348539   | T | 0.0188  |
| rs77258054  | T | 0.0499  |
| rs77503400  | T | -0.1284 |
| rs140877316 | A | -0.0842 |
| rs56150020  | A | 0.0323  |
| rs12196721  | C | -0.0171 |
| rs117016594 | T | 0.073   |
| rs3127645   | T | -0.0201 |
| rs140656472 | T | -0.13   |
| rs11964034  | C | 0.0186  |
| rs80254806  | A | -0.0943 |
| rs117523287 | A | -0.0629 |
| rs2438064   | C | -0.0193 |
| rs10806416  | C | -0.0191 |
| rs4706387   | T | 0.0218  |
| rs117588225 | A | -0.0886 |
| rs9477127   | G | 0.0229  |
| rs72837788  | A | -0.0564 |
| rs150334185 | C | 0.0975  |
| rs67252443  | G | -0.0228 |
| rs16884136  | A | -0.0626 |
| rs4371833   | C | 0.0217  |
| rs10455308  | T | 0.0509  |
| rs4626416   | C | -0.0171 |

|             |   |         |
|-------------|---|---------|
| rs80001416  | T | 0.0489  |
| rs6920693   | C | -0.0171 |
| rs77839777  | A | -0.0665 |
| rs7765179   | A | 0.0416  |
| rs36025386  | G | 0.0565  |
| rs9485915   | C | 0.0408  |
| rs142751994 | A | -0.073  |
| rs9342188   | C | 0.0334  |
| rs111720445 | A | 0.049   |
| rs11154200  | C | 0.0181  |
| rs116869427 | C | -0.1207 |
| rs59965691  | G | 0.0691  |
| rs150927488 | T | 0.1077  |
| rs41274878  | T | -0.1053 |
| rs12206089  | T | 0.09    |
| rs34124489  | C | 0.082   |
| rs77947727  | A | -0.1782 |
| rs9489115   | G | 0.041   |
| rs143965788 | T | -0.1187 |
| rs9376422   | T | 0.0165  |
| rs7768595   | G | 0.0238  |
| rs71573682  | C | 0.0607  |
| rs145162876 | T | 0.0832  |
| rs4870372   | T | -0.021  |
| rs28844436  | T | -0.1348 |
| rs12198930  | A | 0.0304  |
| rs9322787   | T | -0.02   |
| rs62427699  | T | 0.0837  |
| rs113775105 | G | -0.0355 |
| rs17631294  | C | 0.0453  |
| rs6902733   | T | -0.109  |
| rs111425246 | G | 0.098   |
| rs72963808  | T | -0.0778 |
| rs111483004 | T | 0.048   |
| rs114051311 | A | -0.1051 |
| rs114262246 | A | -0.0717 |
| rs77835974  | T | 0.0895  |
| rs112964954 | C | -0.0737 |
| rs72817750  | T | 0.0772  |
| rs112316846 | G | -0.0332 |
| rs75240679  | C | 0.1139  |
| rs35830149  | T | -0.0189 |
| rs72912775  | A | -0.0533 |
| rs648248    | C | 0.0268  |
| rs55905825  | T | -0.0402 |
| rs72945523  | G | -0.1115 |
| rs113570629 | G | 0.0506  |

|             |   |         |
|-------------|---|---------|
| rs2982836   | A | 0.0187  |
| rs28494563  | A | 0.0252  |
| rs113248545 | C | 0.064   |
| rs7774786   | T | 0.071   |
| rs9471574   | A | -0.0257 |
| rs9342222   | C | -0.1272 |
| rs117312426 | A | 0.1271  |
| rs1223053   | T | 0.0637  |
| rs3777925   | A | -0.0271 |
| rs12194068  | C | 0.0174  |
| rs76109953  | A | 0.1036  |
| rs72818396  | C | -0.062  |
| rs10455539  | T | -0.0205 |
| rs77414620  | A | 0.0297  |
| rs79720883  | G | -0.0875 |
| rs7768493   | G | 0.0445  |
| rs10485046  | G | 0.0422  |
| rs6569265   | T | 0.0228  |
| rs117844585 | A | 0.0493  |
| rs8191728   | G | -0.0327 |
| rs77612799  | T | 0.0605  |
| rs7742585   | C | 0.039   |
| rs62621664  | T | -0.1133 |
| rs117338889 | T | 0.0766  |
| rs9403064   | G | -0.0189 |
| rs11575835  | T | -0.0663 |
| rs115874035 | C | 0.1152  |
| rs10457183  | T | 0.027   |
| rs117882367 | A | 0.1073  |
| rs142722674 | T | 0.1023  |
| rs143950455 | T | -0.1149 |
| rs35449987  | A | 0.1111  |
| rs9384333   | A | -0.0208 |
| rs41289361  | G | 0.1024  |
| rs146777656 | T | -0.026  |
| rs6909376   | T | 0.019   |
| rs115493680 | A | -0.0598 |
| rs1407209   | T | 0.0513  |
| rs56125128  | G | 0.0186  |
| rs1233894   | T | -0.0277 |
| rs7774317   | C | -0.0279 |
| rs13218465  | T | -0.1044 |
| rs9486291   | T | -0.0264 |
| rs76780347  | A | -0.0477 |
| rs147256622 | T | 0.1348  |
| rs621796    | T | -0.0173 |
| rs112999365 | T | -0.069  |



|             |   |         |
|-------------|---|---------|
| rs10484667  | T | -0.0963 |
| rs2237106   | T | 0.1096  |
| rs62411297  | A | -0.0416 |
| rs9400207   | G | -0.0195 |
| rs62396735  | C | 0.0192  |
| rs112030155 | T | 0.0612  |
| rs7357076   | C | 0.0205  |
| rs9296525   | A | 0.057   |
| rs79647247  | C | 0.0964  |
| rs117140950 | A | 0.0773  |
| rs2076186   | A | -0.0484 |
| rs35632400  | A | 0.022   |
| rs2223767   | C | 0.0713  |
| rs12193433  | G | 0.0196  |
| rs62401887  | G | -0.0203 |
| rs76648182  | T | 0.0703  |
| rs2223440   | G | 0.0229  |
| rs117267712 | G | -0.1279 |
| rs367274    | T | 0.0161  |
| rs62441224  | T | 0.0191  |
| rs78309979  | C | 0.0717  |
| rs6902309   | T | 0.0184  |
| rs1885627   | C | 0.1122  |
| rs11967051  | G | 0.0597  |
| rs114987593 | T | -0.0727 |
| rs4960236   | T | -0.0262 |
| rs262907    | G | 0.0188  |
| rs760612    | A | -0.0377 |
| rs116926974 | A | -0.0808 |
| rs3819726   | A | 0.0267  |
| rs1407658   | T | 0.0392  |
| rs227475    | A | 0.0783  |
| rs114415531 | C | 0.063   |
| rs926624    | G | 0.0175  |
| rs676740    | G | -0.0234 |
| rs1022107   | G | -0.0251 |
| rs62388789  | T | 0.0649  |
| rs516515    | C | -0.0477 |
| rs76966106  | T | -0.0413 |
| rs11757727  | G | -0.0207 |
| rs16872095  | G | 0.0304  |
| rs4707479   | T | 0.0194  |
| rs9405270   | G | 0.0423  |
| rs11962222  | T | 0.0822  |
| rs118154429 | T | -0.1071 |
| rs6921083   | T | -0.0179 |
| rs79354452  | C | 0.1197  |

|             |   |         |
|-------------|---|---------|
| rs114005035 | C | -0.0591 |
| rs12528194  | A | 0.0723  |
| rs74996370  | T | 0.0766  |
| rs9403544   | T | 0.0217  |
| rs71573702  | T | 0.0247  |
| rs117397529 | G | -0.0588 |
| rs112634302 | T | -0.0802 |
| rs35824890  | T | -0.0407 |
| rs79844558  | A | 0.0487  |
| rs12523876  | T | -0.0362 |
| rs17540607  | G | 0.0233  |
| rs6940144   | G | 0.0246  |
| rs75714781  | A | 0.0713  |
| rs6455266   | C | -0.0188 |
| rs10943427  | A | 0.0223  |
| rs139932581 | G | -0.0389 |
| rs9403856   | T | 0.028   |
| rs551499    | T | -0.0164 |
| rs6932569   | G | 0.0195  |
| rs2235142   | C | -0.0297 |
| rs149649744 | T | 0.0494  |
| rs55820941  | A | -0.0637 |
| rs4473872   | G | 0.0234  |
| rs17221703  | A | 0.0643  |
| rs6570865   | A | 0.0196  |
| rs146172821 | C | -0.1019 |
| rs17617930  | G | 0.0506  |
| rs77960115  | T | -0.0965 |
| rs12198790  | T | -0.0258 |
| rs80077363  | T | 0.0955  |
| rs3822969   | A | 0.0309  |
| rs17625497  | A | -0.0185 |
| rs111518623 | C | -0.1033 |
| rs75718246  | T | -0.1    |
| rs34746412  | A | -0.0866 |
| rs76050460  | T | -0.0426 |
| rs117526298 | C | 0.0619  |
| rs141329741 | G | -0.0685 |
| rs117718501 | A | 0.0529  |
| rs117547145 | C | -0.102  |
| rs13197982  | T | 0.0205  |
| rs17496723  | A | 0.0177  |
| rs75496356  | A | 0.0501  |
| rs142150611 | A | 0.0845  |
| rs445693    | C | 0.0741  |
| rs73026765  | A | 0.0363  |
| rs6915373   | T | 0.0579  |

|             |   |         |
|-------------|---|---------|
| rs17055158  | T | 0.0496  |
| rs76299747  | A | -0.0774 |
| rs117474134 | A | 0.1276  |
| rs9502035   | C | 0.0242  |
| rs9350149   | T | 0.0591  |
| rs72867257  | T | -0.0491 |
| rs12204754  | C | 0.0427  |
| rs145168291 | A | 0.1159  |
| rs144684832 | A | 0.1379  |
| rs13219222  | C | 0.0195  |
| rs12530065  | T | -0.081  |
| rs1265337   | C | -0.0773 |
| rs1181555   | G | 0.0235  |
| rs140894313 | G | 0.1135  |
| rs62432464  | T | -0.051  |
| rs72952065  | C | -0.0365 |
| rs62437750  | A | -0.0377 |
| rs77944731  | C | 0.0465  |
| rs4839796   | T | -0.0202 |
| rs74664164  | T | 0.0826  |
| rs76198360  | T | 0.1196  |
| rs115076031 | T | 0.0798  |
| rs9354868   | C | 0.017   |
| rs117426102 | T | 0.1172  |
| rs76338706  | A | -0.0763 |
| rs1466533   | A | 0.0238  |
| rs9382932   | A | -0.0189 |
| rs147171865 | T | 0.0881  |
| rs78336757  | T | 0.1344  |
| rs733701    | T | 0.0187  |
| rs11966342  | C | -0.02   |
| rs138331459 | G | -0.1382 |
| rs149699848 | A | -0.1111 |
| rs4305776   | C | 0.0236  |
| rs76676412  | A | 0.0632  |
| rs1408459   | C | 0.0183  |
| rs72650640  | C | 0.059   |
| rs112554699 | C | -0.0626 |
| rs113068239 | T | 0.0465  |
| rs59448052  | A | 0.0676  |
| rs138760086 | C | 0.1025  |
| rs80108596  | C | -0.0537 |
| rs115274935 | T | 0.0644  |
| rs111784690 | T | 0.1069  |
| rs13204629  | G | -0.0259 |
| rs79461099  | T | 0.0307  |
| rs2013003   | T | 0.0576  |

|             |   |         |
|-------------|---|---------|
| rs16883665  | C | 0.0841  |
| rs76760015  | C | -0.0616 |
| rs556742    | T | -0.0166 |
| rs11758732  | C | -0.0553 |
| rs116869609 | A | -0.102  |
| rs4346826   | G | 0.0236  |
| rs7764505   | C | -0.0291 |
| rs149152777 | T | 0.0937  |
| rs12199767  | T | -0.0707 |
| rs2178127   | T | -0.1042 |
| rs12190176  | G | -0.0164 |
| rs434602    | C | 0.0173  |
| rs17737759  | C | 0.0417  |
| rs6913681   | A | -0.0217 |
| rs7383484   | T | 0.0196  |
| rs75920132  | C | 0.0766  |
| rs488862    | A | 0.0544  |
| rs4490653   | A | 0.075   |
| rs9446109   | A | -0.0226 |
| rs117630704 | C | 0.0737  |
| rs9381953   | C | 0.0907  |
| rs12212499  | A | -0.0529 |
| rs76707786  | A | 0.0451  |
| rs60336430  | A | 0.0267  |
| rs11752769  | T | -0.0213 |
| rs66805874  | C | 0.038   |
| rs114976735 | A | 0.1347  |
| rs143752285 | A | -0.0826 |
| rs2495990   | A | -0.0172 |
| rs12201679  | T | -0.021  |
| rs144886986 | T | -0.0826 |
| rs56211045  | A | 0.0595  |
| rs17383629  | G | -0.0522 |
| rs200232    | T | 0.019   |
| rs2297848   | G | 0.0374  |
| rs75673873  | T | 0.0614  |
| rs13219339  | G | -0.0165 |
| rs4424056   | T | 0.0215  |
| rs4385343   | T | 0.0481  |
| rs6927852   | C | -0.0249 |
| rs7757204   | C | -0.0254 |
| rs146044877 | A | -0.052  |
| rs1207782   | C | -0.0163 |
| rs73396412  | G | -0.0815 |
| rs4714770   | T | 0.0196  |
| rs114255266 | A | 0.0794  |
| rs660153    | T | 0.0279  |

|             |   |         |
|-------------|---|---------|
| rs113451798 | T | -0.0581 |
| rs10455086  | T | 0.0167  |
| rs62427435  | A | -0.0219 |
| rs62392414  | A | -0.0451 |
| rs76629292  | A | -0.0209 |
| rs7758106   | A | -0.0194 |
| rs139211404 | C | 0.0189  |
| rs595298    | A | 0.016   |
| rs467304    | T | -0.0186 |
| rs76387507  | C | 0.0993  |
| rs34425373  | C | 0.0263  |
| rs7774312   | G | 0.0265  |
| rs6934225   | A | 0.0177  |
| rs448190    | T | -0.0187 |
| rs62394951  | A | -0.0935 |
| rs74543915  | T | 0.0229  |
| rs118051759 | G | 0.0557  |
| rs76869551  | C | -0.0924 |
| rs4707752   | A | -0.0583 |
| rs117622458 | T | -0.1065 |
| rs58270293  | C | 0.0682  |
| rs73003057  | T | -0.046  |
| rs12210263  | C | 0.049   |
| rs62420104  | T | -0.0212 |
| rs75972333  | G | 0.0788  |
| rs10305432  | C | 0.0229  |
| rs12197250  | A | 0.02    |
| rs72841669  | T | -0.0195 |
| rs12055409  | A | -0.0166 |
| rs7454644   | C | 0.0677  |
| rs118066307 | G | 0.1113  |
| rs7738520   | A | 0.0177  |
| rs9478188   | T | -0.0505 |
| rs6928736   | T | 0.0561  |
| rs150205636 | T | 0.0973  |
| rs9449256   | C | 0.0714  |
| rs150500269 | T | 0.1244  |
| rs12213034  | G | -0.0211 |
| rs80347742  | G | 0.0637  |
| rs6570317   | C | -0.0308 |
| rs116993891 | A | 0.0726  |
| rs12214941  | C | -0.023  |
| rs9471750   | T | 0.0476  |
| rs12333172  | T | -0.0224 |
| rs75719339  | A | -0.0551 |
| rs141647808 | T | -0.112  |
| rs115557837 | C | -0.07   |

|             |   |         |
|-------------|---|---------|
| rs78859830  | G | -0.0275 |
| rs9392815   | T | -0.0334 |
| rs62453672  | G | -0.1031 |
| rs118015324 | A | -0.0683 |
| rs116971478 | T | 0.0874  |
| rs6926672   | T | -0.0278 |
| rs77997043  | C | 0.0565  |
| rs143498712 | T | 0.1522  |
| rs6920363   | A | 0.0609  |
| rs2294776   | G | 0.0219  |
| rs114285775 | G | 0.0445  |
| rs2237192   | T | 0.0303  |
| rs116761339 | C | -0.0742 |
| rs117632195 | C | 0.0588  |
| rs2759264   | C | -0.0178 |
| rs116938321 | A | 0.0912  |
| rs80026287  | A | -0.082  |
| rs12189820  | T | -0.1206 |
| rs7751456   | G | 0.0169  |
| rs72927977  | T | 0.0866  |
| rs76979774  | A | -0.0933 |
| rs117032570 | G | -0.0566 |
| rs285977    | C | -0.018  |
| rs34390485  | G | -0.055  |
| rs2787900   | A | 0.0245  |
| rs75771395  | A | -0.0803 |
| rs9464132   | G | -0.0229 |
| rs910321    | A | -0.0391 |
| rs72935743  | T | -0.0279 |
| rs9358742   | C | 0.0158  |
| rs111443140 | C | 0.0678  |
| rs148909721 | G | -0.1219 |
| rs56056045  | G | 0.0653  |
| rs61197453  | C | 0.0288  |
| rs77262091  | T | 0.0536  |
| rs151142289 | A | -0.0825 |
| rs111675957 | G | 0.1173  |
| rs80238595  | A | 0.0979  |
| rs62429592  | A | 0.0491  |
| rs9494682   | G | 0.0562  |
| rs61523006  | G | -0.0731 |
| rs6921178   | G | -0.0221 |
| rs9472516   | G | -0.0177 |
| rs117174663 | A | 0.079   |
| rs4085784   | A | 0.0204  |
| rs75164695  | C | 0.1595  |
| rs114910239 | T | -0.0512 |

|             |   |         |
|-------------|---|---------|
| rs111610028 | G | -0.0847 |
| rs71565360  | C | 0.0312  |
| rs72873364  | T | -0.04   |
| rs117372007 | T | 0.0807  |
| rs117884747 | T | 0.1079  |
| rs11758349  | G | 0.0517  |
| rs73744913  | T | -0.0313 |
| rs17071524  | T | -0.0927 |
| rs143338725 | A | 0.0557  |
| rs17884696  | T | 0.0938  |
| rs13215600  | T | 0.0222  |
| rs62422864  | A | -0.0186 |
| rs9401138   | T | 0.0469  |
| rs35018037  | T | -0.0496 |
| rs732080    | A | 0.0253  |
| rs1079154   | T | -0.0551 |
| rs112928054 | A | 0.0855  |
| rs117426532 | G | 0.0871  |
| rs75144846  | A | 0.0456  |
| rs116536492 | T | -0.0542 |
| rs55913593  | C | -0.0206 |
| rs1246188   | G | -0.0194 |
| rs7761574   | C | 0.0224  |
| rs146951951 | C | -0.069  |
| rs72986611  | G | 0.0281  |
| rs9473196   | C | 0.0175  |
| rs117804419 | A | -0.061  |
| rs526865    | A | -0.0228 |
| rs115062655 | C | -0.0411 |
| rs545825    | T | -0.0506 |
| rs138041388 | C | 0.0715  |
| rs139523347 | C | 0.0624  |
| rs12192824  | A | 0.0816  |
| rs59857461  | T | -0.0199 |
| rs2501516   | T | -0.0863 |
| rs141060908 | A | 0.1287  |
| rs9402234   | T | 0.0502  |
| rs147992165 | G | 0.0918  |
| rs11968072  | C | 0.0437  |
| rs4711674   | G | -0.0229 |
| rs72959316  | T | -0.0872 |
| rs9405327   | C | 0.0235  |
| rs113473182 | A | 0.0297  |
| rs115635276 | G | 0.1033  |
| rs117548956 | A | -0.0602 |
| rs76863489  | C | 0.0421  |
| rs75634124  | C | 0.076   |

|             |   |         |
|-------------|---|---------|
| rs9354216   | T | -0.0204 |
| rs11962783  | C | 0.037   |
| rs9471595   | T | -0.0225 |
| rs782674    | A | 0.0349  |
| rs6919959   | C | 0.0168  |
| rs412771    | G | 0.0551  |
| rs10046376  | C | 0.0558  |
| rs236956    | A | -0.0165 |
| rs145452073 | T | 0.0828  |
| rs9386490   | G | 0.0201  |
| rs62427370  | T | -0.0516 |
| rs11756060  | T | -0.0971 |
| rs13207588  | A | -0.0267 |
| rs7758731   | G | -0.017  |
| rs113978517 | T | -0.0778 |
| rs117838821 | A | 0.035   |
| rs9487777   | C | -0.0629 |
| rs80197184  | T | -0.0561 |
| rs9294133   | T | 0.0256  |
| rs7772349   | A | 0.0184  |
| rs2784890   | G | -0.0159 |
| rs115784238 | T | -0.0949 |
| rs4368803   | T | -0.0172 |
| rs12189947  | A | -0.0411 |
| rs72831043  | T | -0.0751 |
| rs117197955 | G | -0.1097 |
| rs77663813  | T | 0.1089  |
| rs13220668  | T | -0.0751 |
| rs62397915  | A | -0.0353 |
| rs141585961 | T | 0.0833  |
| rs140954064 | C | -0.0604 |
| rs13206766  | T | -0.0213 |
| rs72905752  | G | 0.0554  |
| rs12201879  | A | -0.0181 |
| rs1675915   | T | 0.0177  |
| rs7738923   | C | -0.0809 |
| rs78052165  | T | -0.0562 |
| rs145043726 | A | 0.1076  |
| rs2474265   | T | -0.0329 |
| rs142116833 | A | 0.1046  |
| rs7749823   | C | -0.0243 |
| rs4053615   | C | -0.0178 |
| rs73572752  | A | -0.0701 |
| rs73021941  | A | 0.0218  |
| rs114652147 | A | -0.0503 |
| rs112998638 | A | 0.0389  |
| rs76506288  | C | 0.0799  |



|             |   |         |
|-------------|---|---------|
| rs117024834 | T | -0.089  |
| rs12216028  | A | -0.031  |
| rs77425684  | T | 0.0537  |
| rs9472250   | T | 0.0161  |
| rs7741147   | C | 0.0273  |
| rs9376074   | C | -0.0168 |
| rs144789875 | C | -0.1063 |
| rs147278660 | A | -0.072  |
| rs116287338 | G | -0.0658 |
| rs77043406  | A | -0.0518 |
| rs6908928   | C | -0.0465 |
| rs62441190  | A | -0.0352 |
| rs73040309  | T | -0.0372 |
| rs149477097 | T | -0.0822 |
| rs3734316   | T | 0.0219  |
| rs11156357  | A | 0.0313  |
| rs2223621   | T | -0.0161 |
| rs55963754  | C | -0.0498 |
| rs77633150  | C | -0.0433 |
| rs1188829   | T | -0.038  |
| rs9471553   | C | -0.0201 |
| rs147936503 | T | -0.0882 |
| rs12212058  | T | -0.061  |
| rs7770529   | T | -0.0186 |
| rs117979546 | G | 0.0675  |
| rs62418809  | G | -0.0983 |
| rs117203708 | C | 0.0508  |
| rs79916965  | A | -0.0443 |
| rs116222360 | G | 0.0679  |
| rs72885182  | G | -0.0826 |
| rs354365    | C | -0.0158 |
| rs9392835   | G | -0.0664 |
| rs114681109 | T | -0.1438 |
| rs73433687  | T | 0.1096  |
| rs118049203 | C | 0.0564  |
| rs80116720  | T | -0.0259 |
| rs62436044  | T | 0.0924  |
| rs67123029  | T | 0.0576  |
| rs79253164  | A | -0.0538 |
| rs214432    | A | -0.018  |
| rs9465124   | C | 0.0912  |
| rs9394337   | T | -0.0727 |
| rs72942747  | C | 0.0616  |
| rs71555328  | A | -0.0727 |
| rs140813448 | G | -0.079  |
| rs57915701  | T | 0.0196  |
| rs2269058   | G | 0.0163  |

|             |   |         |
|-------------|---|---------|
| rs143173586 | T | 0.0655  |
| rs7740073   | C | 0.0191  |
| rs9466766   | G | 0.0342  |
| rs1977059   | T | 0.0471  |
| rs115008112 | A | -0.0292 |
| rs236446    | T | -0.0175 |
| rs10456992  | A | 0.0164  |
| rs115036623 | A | -0.0276 |
| rs10080387  | G | 0.017   |
| rs62397735  | C | -0.0351 |
| rs1853522   | T | -0.0609 |
| rs12213157  | G | -0.0197 |
| rs73035314  | A | 0.0536  |
| rs6454096   | A | 0.0154  |
| rs77632648  | G | 0.0477  |
| rs147414811 | C | -0.076  |
| rs17139269  | C | -0.0265 |
| rs76990366  | A | 0.0567  |
| rs72822330  | A | -0.0763 |
| rs76464067  | T | -0.1121 |
| rs62437357  | T | -0.0291 |
| rs34354954  | T | 0.0201  |
| rs9466697   | C | -0.0166 |
| rs149861887 | G | -0.1103 |
| rs62434758  | G | -0.0282 |
| rs1080261   | G | -0.0227 |
| rs6570634   | T | -0.0182 |
| rs75882651  | T | -0.065  |
| rs9505870   | A | 0.0414  |
| rs114074958 | G | -0.0509 |
| rs146291514 | T | 0.092   |
| rs1753288   | G | -0.0171 |
| rs35216375  | A | -0.04   |
| rs77466265  | A | -0.0696 |
| rs113454146 | A | -0.0288 |
| rs28385699  | T | -0.0538 |
| rs4897291   | C | -0.0393 |
| rs78653318  | A | 0.0492  |
| rs4715958   | A | 0.0278  |
| rs75913810  | A | -0.0664 |
| rs17635304  | A | 0.0164  |
| rs55871727  | T | -0.0167 |
| rs114467971 | C | 0.058   |
| rs648253    | A | -0.0156 |
| rs79336333  | T | 0.0602  |
| rs72857302  | T | -0.1359 |
| rs17447588  | C | 0.0201  |

|             |   |         |
|-------------|---|---------|
| rs12199099  | G | 0.0845  |
| rs113737349 | A | 0.0634  |
| rs78336780  | T | -0.0496 |
| rs267194    | A | -0.0156 |
| rs117628228 | C | 0.0392  |
| rs150011076 | T | 0.1154  |
| rs72842539  | C | 0.0299  |
| rs72978160  | A | -0.0621 |
| rs35067097  | G | -0.0918 |
| rs117874193 | G | -0.0997 |
| rs2457330   | A | 0.0174  |
| rs74915337  | A | 0.0303  |
| rs115881400 | C | -0.0785 |
| rs1408027   | C | 0.0172  |
| rs75839360  | C | 0.0542  |
| rs78158615  | C | -0.1452 |
| rs115533396 | A | 0.0601  |
| rs370058    | A | 0.0244  |
| rs743870    | T | -0.0157 |
| rs72861802  | A | 0.0286  |
| rs4714896   | C | 0.0193  |
| rs11966254  | C | 0.0777  |
| rs17052129  | T | 0.0711  |
| rs9784885   | T | -0.0166 |
| rs117152997 | A | -0.0883 |
| rs4260772   | T | -0.0417 |
| rs11759651  | T | -0.0202 |
| rs143490941 | T | -0.0924 |
| rs17065667  | T | -0.0239 |
| rs4712026   | G | -0.025  |
| rs79359868  | G | 0.081   |
| rs116469676 | T | 0.0841  |
| rs62431013  | T | 0.077   |
| rs138654798 | T | 0.1064  |
| rs9476741   | A | -0.0406 |
| rs2025984   | A | -0.0184 |
| rs138578493 | T | 0.0622  |
| rs6571061   | T | 0.0393  |
| rs113362227 | T | 0.0825  |
| rs146306968 | G | -0.0821 |
| rs9400058   | G | -0.0303 |
| rs6457733   | C | -0.0154 |
| rs6458012   | G | -0.0165 |
| rs954818    | A | 0.0208  |
| rs76643471  | T | 0.0327  |
| rs111622678 | T | 0.0828  |
| rs2454133   | C | -0.0733 |

|             |   |         |
|-------------|---|---------|
| rs2673305   | A | -0.0224 |
| rs73000626  | T | 0.0558  |
| rs12665561  | A | 0.0177  |
| rs116597145 | T | 0.0582  |
| rs17753035  | C | -0.0203 |
| rs4710126   | T | 0.0187  |
| rs73034306  | A | 0.0374  |
| rs1743947   | T | 0.0425  |
| rs74713348  | T | 0.0368  |
| rs9368153   | G | -0.0951 |
| rs75157698  | A | 0.079   |
| rs76122491  | T | -0.054  |
| rs1794817   | A | 0.0218  |
| rs77148132  | G | -0.035  |
| rs60089353  | T | -0.0344 |
| rs78675746  | A | -0.0339 |
| rs77445839  | A | 0.1099  |
| rs138869222 | A | 0.1467  |
| rs11961028  | A | -0.0282 |
| rs13220008  | G | -0.0292 |
| rs1931786   | A | -0.0225 |
| rs72824755  | A | -0.0433 |
| rs150373548 | T | 0.075   |
| rs12525869  | A | 0.0182  |
| rs77830836  | G | -0.0728 |
| rs62442055  | C | -0.1185 |
| rs117662743 | G | 0.0467  |
| rs4034228   | T | 0.0174  |
| rs13191871  | A | 0.0251  |
| rs113255646 | T | 0.0958  |
| rs41271324  | A | 0.0581  |
| rs10947458  | T | -0.023  |
| rs148161536 | C | 0.114   |
| rs13215189  | A | -0.0423 |
| rs632385    | T | 0.0203  |
| rs11760175  | G | 0.0434  |
| rs2206926   | C | -0.0264 |
| rs73008259  | A | 0.08    |
| rs79719606  | T | 0.0466  |
| rs78918643  | C | 0.0868  |
| rs77680302  | A | -0.0569 |
| rs7760898   | G | 0.0702  |
| rs1322643   | T | 0.0167  |
| rs9402593   | T | 0.0353  |
| rs75190083  | T | 0.042   |
| rs175855    | T | -0.0221 |
| rs235147    | A | -0.0158 |

|             |   |         |
|-------------|---|---------|
| rs117468593 | T | 0.0969  |
| rs73017498  | C | 0.1054  |
| rs6570675   | A | -0.017  |
| rs35505521  | A | -0.0436 |
| rs10944575  | C | 0.0157  |
| rs6455639   | A | 0.022   |
| rs74389935  | T | -0.0628 |
| rs75280925  | C | 0.0849  |
| rs7759630   | C | -0.0252 |
| rs6934829   | G | 0.0196  |
| rs12661831  | A | -0.0262 |
| rs146817300 | T | 0.0762  |
| rs1889889   | A | 0.035   |
| rs6916465   | T | 0.0347  |
| rs362928    | C | -0.1    |
| rs36016088  | G | -0.0316 |
| rs140488464 | A | 0.0551  |
| rs140682696 | T | 0.1245  |
| rs2056937   | C | -0.0169 |
| rs833802    | C | 0.0245  |
| rs141518116 | C | -0.1023 |
| rs1145785   | G | -0.0183 |
| rs10457665  | G | 0.0599  |
| rs13211784  | G | 0.0235  |
| rs77024033  | C | -0.0987 |
| rs12203964  | A | 0.0497  |
| rs77581107  | G | -0.0693 |
| rs62391066  | G | 0.0441  |
| rs116287594 | G | 0.0983  |
| rs114467368 | G | 0.0426  |
| rs1543404   | T | -0.0157 |
| rs9380475   | T | -0.0226 |
| rs9471813   | T | 0.0314  |
| rs138783171 | G | 0.0547  |
| rs116265755 | C | 0.1273  |
| rs1997858   | C | 0.0157  |
| rs55641385  | A | -0.0644 |
| rs9359512   | G | 0.0196  |
| rs763247    | C | -0.016  |
| rs12214167  | G | 0.0215  |
| rs117816668 | C | -0.0757 |
| rs150022964 | G | 0.1212  |
| rs12199594  | A | 0.0479  |
| rs74840397  | G | -0.1252 |
| rs61336829  | C | 0.0236  |
| rs73001817  | G | 0.033   |
| rs34895403  | C | -0.0578 |

|             |   |         |
|-------------|---|---------|
| rs111908096 | T | 0.0814  |
| rs117020137 | A | 0.0618  |
| rs62435526  | A | 0.0777  |
| rs11756027  | C | 0.0188  |
| rs7771802   | C | -0.0864 |
| rs6932028   | T | 0.051   |
| rs6905055   | G | -0.0275 |
| rs62395096  | G | -0.0358 |
| rs4713936   | C | -0.0161 |
| rs9357251   | T | 0.0159  |
| rs13202834  | G | 0.0662  |
| rs9459625   | G | 0.0164  |
| rs72977763  | A | 0.0407  |
| rs59080024  | T | -0.0188 |
| rs510088    | A | -0.0179 |
| rs143447360 | T | -0.102  |
| rs79936183  | G | -0.0382 |
| rs1300164   | C | 0.0598  |
| rs201017    | G | -0.0184 |
| rs77714440  | C | 0.0503  |
| rs12200597  | G | 0.044   |
| rs9376280   | A | 0.016   |
| rs2743019   | G | -0.051  |
| rs9398530   | T | -0.0174 |
| rs139647088 | C | 0.11    |
| rs144523881 | C | 0.0849  |
| rs17078062  | C | 0.02    |
| rs117429693 | T | -0.0969 |
| rs12199285  | C | 0.1129  |
| rs10807397  | G | -0.0151 |
| rs115461793 | A | -0.0536 |
| rs75833726  | C | -0.0901 |
| rs11152998  | A | -0.021  |
| rs6596868   | G | 0.0162  |
| rs7764540   | A | 0.0793  |
| rs77442135  | A | -0.0237 |
| rs34324334  | T | 0.0402  |
| rs117197310 | A | 0.0384  |
| rs138162252 | G | 0.0628  |
| rs78857090  | T | -0.0637 |
| rs9394804   | T | 0.0338  |
| rs144678090 | A | 0.1342  |
| rs111839599 | G | 0.035   |
| rs62390276  | A | -0.0231 |
| rs10946366  | G | -0.0153 |
| rs1192040   | T | 0.0227  |
| rs2505033   | G | 0.0161  |

|             |   |         |
|-------------|---|---------|
| rs13200235  | G | 0.0252  |
| rs3861470   | T | 0.0236  |
| rs117378100 | T | 0.0505  |
| rs145251451 | A | -0.1053 |
| rs1034058   | C | 0.0188  |
| rs3814080   | G | 0.0163  |
| rs4714010   | T | 0.0159  |
| rs9376716   | G | 0.0293  |
| rs360557    | C | 0.0154  |
| rs117683676 | A | -0.0454 |
| rs117027165 | T | 0.1084  |
| rs1224330   | T | 0.0158  |
| rs144648465 | C | 0.0703  |
| rs9489504   | T | 0.0162  |
| rs146736338 | A | 0.0767  |
| rs6938922   | A | 0.0311  |
| rs9464379   | T | -0.0182 |
| rs76695086  | C | -0.0159 |
| rs4617006   | A | -0.0192 |
| rs146097993 | C | -0.055  |
| rs9386531   | T | -0.0665 |
| rs10872180  | C | -0.0172 |
| rs10457446  | T | -0.0157 |
| rs2277081   | A | 0.0154  |
| rs877943    | G | -0.0168 |
| rs66896554  | G | 0.02    |
| rs9479843   | T | 0.0325  |
| rs10485151  | A | -0.0224 |
| rs11155981  | G | 0.0438  |
| rs114049180 | A | -0.0796 |
| rs13213678  | C | -0.035  |
| rs116735766 | T | 0.0602  |
| rs114173740 | C | -0.0758 |
| rs13192868  | G | -0.0275 |
| rs117905487 | G | 0.0724  |
| rs139337437 | T | -0.0861 |
| rs77849165  | G | 0.0756  |
| rs116983845 | A | 0.0807  |
| rs3850237   | A | 0.0435  |
| rs73780805  | C | 0.0645  |
| rs12211228  | C | 0.0225  |
| rs77993542  | T | 0.0886  |
| rs12196493  | G | 0.0348  |
| rs4946723   | A | -0.018  |
| rs407724    | C | -0.0159 |
| rs62444018  | T | -0.0304 |
| rs12525504  | C | -0.0264 |

|             |   |         |
|-------------|---|---------|
| rs7739802   | C | 0.0158  |
| rs2561424   | A | 0.0716  |
| rs142145473 | T | -0.1491 |
| rs9487863   | A | -0.0154 |
| rs78195620  | G | 0.0458  |
| rs77093815  | T | 0.07    |
| rs5012873   | C | 0.0261  |
| rs7762812   | G | -0.0168 |
| rs2021966   | G | -0.0153 |
| rs141378584 | A | 0.0574  |
| rs9340840   | T | 0.0509  |
| rs73043938  | A | 0.0806  |
| rs1125640   | C | 0.0304  |
| rs142886166 | T | 0.0467  |
| rs2787901   | C | 0.0231  |
| rs146687921 | T | -0.0744 |
| rs79905498  | T | 0.064   |
| rs77581947  | G | -0.0373 |
| rs2789065   | A | -0.023  |
| rs139061868 | G | -0.12   |
| rs147462711 | G | -0.0632 |
| rs62426455  | C | -0.0522 |
| rs9479548   | G | -0.0177 |
| rs73537796  | A | -0.1017 |
| rs9285478   | C | -0.0183 |
| rs146728068 | C | 0.0434  |
| rs13209535  | G | -0.0269 |
| rs150858221 | A | -0.0812 |
| rs9498294   | T | 0.0212  |
| rs9456909   | A | 0.0198  |
| rs9396473   | C | 0.0488  |
| rs9388039   | T | -0.0333 |
| rs967300    | T | -0.0199 |
| rs3019428   | A | 0.0321  |
| rs139514371 | T | -0.074  |
| rs55641926  | T | 0.0749  |
| rs146643611 | T | -0.0427 |
| rs140413393 | A | 0.0989  |
| rs115148306 | A | 0.0777  |
| rs113928027 | A | 0.0894  |
| rs78405610  | A | -0.0418 |
| rs74809446  | T | -0.0558 |
| rs4708037   | C | -0.0626 |
| rs12189936  | A | -0.0559 |
| rs76534240  | A | 0.0491  |
| rs2010190   | G | -0.0271 |
| rs10455357  | G | 0.0161  |



|             |   |         |
|-------------|---|---------|
| rs77613424  | A | 0.0637  |
| rs77354271  | A | -0.1414 |
| rs9376024   | T | -0.0209 |
| rs151039065 | A | 0.0563  |
| rs2473610   | T | 0.0745  |
| rs13194075  | G | -0.0325 |
| rs114068530 | A | -0.0332 |
| rs111329411 | T | -0.0968 |
| rs72847747  | A | 0.1219  |
| rs6458907   | T | -0.0999 |
| rs9396468   | A | 0.0323  |
| rs115563291 | C | -0.0872 |
| rs13200036  | G | 0.0296  |
| rs1998043   | G | -0.0214 |
| rs7746685   | T | -0.0154 |
| rs116154316 | T | 0.0747  |
| rs9460617   | G | -0.0172 |
| rs116019440 | A | 0.0643  |
| rs114426165 | A | -0.0861 |
| rs76586075  | G | -0.0831 |
| rs79079640  | G | 0.1034  |
| rs9476516   | A | 0.1119  |
| rs144294698 | A | 0.0734  |
| rs11153673  | C | 0.0484  |
| rs11751990  | T | -0.0243 |
| rs74951535  | A | 0.0444  |
| rs117470016 | C | 0.0772  |
| rs12661042  | A | -0.0185 |
| rs55905647  | T | 0.0214  |
| rs2496655   | A | -0.0419 |
| rs73021469  | A | 0.0613  |
| rs117455688 | T | 0.0408  |
| rs9503919   | G | -0.0178 |
| rs2451377   | A | -0.0693 |
| rs17072795  | A | 0.0319  |
| rs75233650  | G | 0.0711  |
| rs1122537   | C | 0.0208  |
| rs116328606 | A | 0.0929  |
| rs9388708   | T | -0.0234 |
| rs76515493  | A | -0.0231 |
| rs72960018  | A | -0.0227 |
| rs2248426   | A | -0.0166 |
| rs59131074  | A | -0.067  |
| rs73030310  | G | -0.0469 |
| rs76104748  | T | 0.0768  |
| rs4563711   | C | -0.0177 |
| rs80209403  | G | -0.0667 |

|             |   |         |
|-------------|---|---------|
| rs139291349 | C | -0.0838 |
| rs76817332  | C | -0.0727 |
| rs1338462   | A | 0.0157  |
| rs534433    | G | -0.0322 |
| rs12206833  | C | 0.0651  |
| rs13219162  | A | 0.019   |
| rs7757749   | A | 0.0315  |
| rs115200584 | T | -0.062  |
| rs141048782 | G | 0.0605  |
| rs74946737  | C | -0.0576 |
| rs10946236  | T | 0.0177  |
| rs76560705  | G | -0.0307 |
| rs80065224  | A | -0.0966 |
| rs1107943   | C | -0.0337 |
| rs74999245  | C | -0.1128 |
| rs77055558  | A | 0.0615  |
| rs11755392  | T | -0.0369 |
| rs9366198   | G | 0.02    |
| rs116612357 | G | 0.0663  |
| rs7757085   | A | -0.0751 |
| rs78093901  | G | 0.0432  |
| rs9467560   | G | -0.0411 |
| rs17211156  | C | -0.0514 |
| rs118002962 | A | -0.1101 |
| rs112150566 | A | -0.0659 |
| rs7759507   | A | -0.0225 |
| rs57838719  | T | 0.0224  |
| rs10455974  | C | -0.0186 |
| rs11756322  | G | -0.0153 |
| rs11760009  | G | -0.0506 |
| rs9476933   | G | -0.0732 |
| rs146278406 | C | 0.0589  |
| rs12215454  | A | -0.0389 |
| rs17145441  | G | 0.0708  |
| rs6458393   | A | 0.0285  |
| rs116846677 | T | 0.0523  |
| rs77103356  | A | 0.062   |
| rs62412865  | A | -0.079  |
| rs34879741  | C | 0.0316  |
| rs113916120 | A | -0.0267 |
| rs146085537 | A | 0.0755  |
| rs149947750 | T | 0.0604  |
| rs116503115 | T | -0.1243 |
| rs9466363   | G | 0.0222  |
| rs139655434 | T | 0.0666  |
| rs1479037   | C | -0.1152 |
| rs4349837   | A | 0.032   |

|             |   |         |
|-------------|---|---------|
| rs9365938   | T | 0.0224  |
| rs113572884 | G | 0.111   |
| rs114124688 | G | 0.0848  |
| rs139653035 | A | 0.0631  |
| rs72890617  | T | -0.0579 |
| rs79083271  | T | -0.0487 |
| rs6901281   | A | 0.0152  |
| rs72854870  | T | -0.0338 |
| rs73536748  | G | -0.0653 |
| rs139507494 | C | 0.1164  |
| rs13208867  | G | -0.0554 |
| rs17395361  | A | -0.0492 |
| rs9491039   | A | 0.0149  |
| rs6926933   | G | -0.0183 |
| rs116897001 | G | 0.098   |
| rs12197522  | G | -0.0292 |
| rs3010313   | C | 0.0157  |
| rs149551769 | T | 0.0782  |
| rs72839385  | A | 0.0488  |
| rs4523130   | G | -0.0653 |
| rs9368744   | T | -0.0637 |
| rs10945857  | C | -0.0798 |
| rs6935762   | T | -0.023  |
| rs17068227  | C | 0.0291  |
| rs17560881  | G | -0.0253 |
| rs2395633   | C | 0.0196  |
| rs10081074  | C | 0.0201  |
| rs77066347  | T | -0.1246 |
| rs17753769  | G | 0.063   |
| rs3805935   | G | 0.0586  |
| rs148525130 | A | -0.0815 |
| rs72981615  | C | 0.0674  |
| rs71569461  | A | 0.0369  |
| rs4707434   | T | 0.0216  |
| rs71562214  | T | 0.0877  |
| rs4896780   | A | -0.0299 |
| rs143097378 | C | 0.0453  |
| rs11752106  | A | -0.0209 |
| rs61034957  | T | -0.059  |
| rs117303117 | A | 0.0891  |
| rs6570428   | T | 0.016   |
| rs117163316 | T | -0.1077 |
| rs3806105   | A | -0.0258 |
| rs909714    | T | 0.0157  |
| rs75495295  | G | 0.0497  |
| rs17486144  | T | 0.0296  |
| rs9402617   | G | 0.0471  |

|             |   |         |
|-------------|---|---------|
| rs75602008  | C | 0.1074  |
| rs62408192  | A | -0.0729 |
| rs9399606   | T | -0.0287 |
| rs9504932   | T | 0.0175  |
| rs116969159 | T | 0.119   |
| rs1855590   | A | 0.0339  |
| rs999553    | A | 0.0169  |
| rs12662137  | T | -0.0256 |
| rs483792    | A | -0.0193 |
| rs72920785  | C | 0.0619  |
| rs34888999  | G | -0.0762 |
| rs140256808 | A | -0.0833 |
| rs78270682  | C | 0.0596  |
| rs61756902  | C | -0.0748 |
| rs78458700  | C | -0.0578 |
| rs12205942  | A | 0.0178  |
| rs72902769  | G | -0.0947 |
| rs12210123  | G | 0.0193  |
| rs9320489   | G | 0.015   |
| rs77726388  | C | 0.1101  |
| rs139261160 | T | 0.0852  |
| rs9295309   | A | -0.02   |
| rs9406120   | T | -0.0235 |
| rs60981052  | G | -0.0355 |
| rs117294321 | G | 0.1084  |
| rs7764927   | C | -0.0634 |
| rs2494092   | T | 0.018   |
| rs114819946 | T | 0.1232  |
| rs13200436  | T | -0.0623 |
| rs117217533 | T | -0.0463 |
| rs113459520 | T | 0.0657  |
| rs9479925   | C | -0.0227 |
| rs73010272  | G | 0.0508  |
| rs148615922 | T | -0.0735 |
| rs114934834 | A | -0.0707 |
| rs2114528   | G | 0.0197  |
| rs11969354  | A | -0.0184 |
| rs6927829   | G | 0.0476  |
| rs76968006  | T | -0.1327 |
| rs79342148  | G | 0.0724  |
| rs80070117  | T | 0.062   |
| rs145797781 | G | 0.0707  |
| rs62389984  | C | -0.0456 |
| rs6912713   | G | -0.0247 |
| rs17059698  | A | 0.0462  |
| rs9379335   | A | -0.0668 |
| rs943069    | C | -0.1758 |

|             |   |         |
|-------------|---|---------|
| rs117866066 | A | -0.0285 |
| rs80182561  | C | 0.0577  |
| rs12196541  | C | 0.023   |
| rs77454922  | C | 0.0787  |
| rs112315958 | T | -0.0777 |
| rs77392220  | T | -0.0378 |
| rs60599718  | C | 0.0493  |
| rs1856714   | G | -0.0296 |
| rs4566922   | C | 0.018   |
| rs115297741 | C | 0.0683  |
| rs9372715   | A | -0.0272 |
| rs6903950   | A | -0.0281 |
| rs116014494 | A | 0.0783  |
| rs150623375 | G | 0.0886  |
| rs1230319   | A | 0.0771  |
| rs1969811   | G | -0.0234 |
| rs74874394  | A | -0.0524 |
| rs1407671   | G | 0.0441  |
| rs35714984  | C | 0.1273  |
| rs6933963   | C | -0.0157 |
| rs55687922  | A | 0.0855  |
| rs13197674  | C | -0.0172 |
| rs17067075  | A | -0.0294 |
| rs72971396  | A | 0.1016  |
| rs112353412 | A | 0.0292  |
| rs151333639 | A | 0.0706  |
| rs116970393 | T | -0.0898 |
| rs10872745  | A | -0.0171 |
| rs146857351 | A | 0.0589  |
| rs860444    | C | 0.0236  |
| rs11548249  | T | -0.0626 |
| rs3800061   | T | -0.0476 |
| rs1408276   | C | 0.0379  |
| rs7754980   | A | -0.0317 |
| rs576420    | A | 0.0248  |
| rs75189136  | T | 0.115   |
| rs113201467 | T | -0.048  |
| rs6568421   | G | 0.0178  |
| rs77697932  | A | 0.0691  |
| rs72928414  | C | -0.1082 |
| rs76206774  | A | 0.0961  |
| rs1520969   | G | 0.0236  |
| rs77416793  | G | 0.0476  |
| rs9345218   | G | 0.0164  |
| rs75883220  | C | -0.0566 |
| rs79817128  | C | 0.0882  |
| rs79581497  | G | -0.0904 |

|             |   |         |
|-------------|---|---------|
| rs77076398  | G | 0.093   |
| rs145572300 | T | -0.1231 |
| rs150510066 | G | -0.0887 |
| rs72828272  | G | -0.0653 |
| rs62432537  | C | -0.0901 |
| rs7775043   | A | -0.0159 |
| rs17573740  | T | -0.0481 |
| rs116983787 | A | -0.0824 |
| rs9461212   | T | 0.0665  |
| rs150904618 | C | -0.0823 |
| rs34242178  | A | 0.0296  |
| rs17827934  | T | 0.0255  |
| rs56159258  | C | 0.0273  |
| rs34184971  | C | 0.0245  |
| rs79105398  | G | 0.0395  |
| rs28619134  | T | -0.0161 |
| rs76083520  | G | 0.0482  |
| rs9483091   | C | 0.0391  |
| rs9466505   | C | 0.0374  |
| rs75637884  | T | -0.027  |
| rs142256338 | T | 0.0556  |
| rs113857308 | T | 0.0443  |
| rs118075461 | T | 0.0842  |
| rs12191584  | A | -0.0317 |
| rs2064706   | T | 0.033   |
| rs80129656  | G | -0.0878 |
| rs144277367 | T | 0.0495  |
| rs28360577  | G | 0.0419  |
| rs1923589   | T | -0.0198 |
| rs11153575  | T | 0.0261  |
| rs62395290  | G | -0.0259 |
| rs115146108 | G | -0.0352 |
| rs12189763  | G | 0.0211  |
| rs117818596 | T | -0.0876 |
| rs79288848  | T | 0.0358  |
| rs78471309  | C | 0.0692  |
| rs7771469   | A | -0.0148 |
| rs7760124   | T | -0.0149 |
| rs9369236   | T | 0.0523  |
| rs55649954  | T | -0.0544 |
| rs17502590  | A | 0.0553  |
| rs6920377   | T | 0.0177  |
| rs146526849 | T | 0.0463  |
| rs807507    | G | 0.0157  |
| rs139789839 | T | -0.0719 |
| rs117410884 | G | -0.0949 |
| rs9458066   | T | 0.0536  |

|             |   |         |
|-------------|---|---------|
| rs10456246  | G | -0.0224 |
| rs45520731  | T | -0.0911 |
| rs80063653  | T | 0.0648  |
| rs1150639   | T | -0.0211 |
| rs35163131  | T | -0.0689 |
| rs7751055   | A | 0.0152  |
| rs7767845   | C | -0.1018 |
| rs75949261  | C | 0.0537  |
| rs971623    | G | 0.0162  |
| rs7741871   | A | -0.0218 |
| rs75171158  | T | 0.0982  |
| rs75952872  | T | 0.0858  |
| rs9384347   | G | 0.017   |
| rs220725    | A | -0.1012 |
| rs73030889  | C | -0.0704 |
| rs1399223   | C | -0.0206 |
| rs149589825 | A | 0.1013  |
| rs9765923   | G | -0.0165 |
| rs79976124  | A | -0.0161 |
| rs150971345 | A | -0.0898 |
| rs72827923  | A | 0.0523  |
| rs77598196  | C | 0.0491  |
| rs62442638  | A | 0.0453  |
| rs75340873  | C | -0.1194 |
| rs151210518 | C | -0.1484 |
| rs138779657 | G | -0.1011 |
| rs112306239 | T | 0.083   |
| rs118119755 | C | -0.1032 |
| rs6914209   | G | 0.0246  |
| rs74799835  | A | -0.0481 |
| rs73545352  | C | -0.044  |
| rs79797664  | G | 0.0776  |
| rs7760887   | T | 0.0288  |
| rs11961545  | G | 0.0952  |
| rs75052563  | G | 0.0501  |
| rs146392538 | G | 0.054   |
| rs9367856   | G | 0.0444  |
| rs113893968 | G | 0.0962  |
| rs2029516   | T | 0.0163  |
| rs17056928  | C | 0.0733  |
| rs146534110 | T | 0.0912  |
| rs141091799 | A | -0.0866 |
| rs4140499   | A | 0.0167  |
| rs6919346   | T | 0.0197  |
| rs6568632   | C | -0.0796 |
| rs2810189   | T | 0.0231  |
| rs72817840  | C | 0.0226  |

|             |   |         |
|-------------|---|---------|
| rs116458756 | G | 0.0381  |
| rs114262061 | T | -0.0737 |
| rs9367186   | T | 0.0185  |
| rs9447729   | C | -0.0237 |
| rs9365002   | A | -0.04   |
| rs971144    | G | -0.0207 |
| rs651903    | A | -0.0155 |
| rs114652844 | C | -0.0242 |
| rs117165145 | A | -0.0553 |
| rs1871427   | A | -0.0161 |
| rs75788406  | T | 0.1117  |
| rs72971770  | T | -0.0329 |
| rs143968004 | G | -0.0856 |
| rs76140014  | C | 0.0806  |
| rs17591381  | A | 0.0202  |
| rs9480082   | G | -0.0215 |
| rs4255018   | C | 0.0192  |
| rs13217586  | C | -0.0192 |
| rs149045402 | A | -0.1043 |
| rs9320231   | G | -0.0188 |
| rs78650738  | A | 0.0999  |
| rs9293946   | C | 0.0236  |
| rs62415376  | G | 0.0165  |
| rs76040412  | T | -0.0658 |
| rs76566117  | C | 0.0378  |
| rs12212206  | T | -0.0801 |
| rs73035768  | A | 0.0564  |
| rs2294672   | T | 0.0753  |
| rs114173264 | A | 0.0715  |
| rs7766910   | G | -0.0193 |
| rs9477044   | T | -0.0302 |
| rs111528647 | T | -0.0488 |
| rs142204813 | A | -0.0688 |
| rs9463179   | A | -0.0344 |
| rs78622577  | C | -0.0844 |
| rs497236    | C | -0.0258 |
| rs72940721  | T | -0.0564 |
| rs6910034   | A | 0.0146  |
| rs1011969   | A | -0.0196 |
| rs117730999 | A | -0.1075 |
| rs1793890   | A | 0.0187  |
| rs77785297  | C | -0.1013 |
| rs73529595  | A | -0.0437 |
| rs56361523  | T | 0.047   |
| rs117654231 | A | -0.0775 |
| rs6936415   | A | 0.0312  |
| rs9378575   | G | -0.0305 |



|             |   |         |
|-------------|---|---------|
| rs79434212  | G | -0.0542 |
| rs10457938  | G | 0.0446  |
| rs13211676  | T | 0.0419  |
| rs6912768   | C | 0.025   |
| rs114019669 | C | -0.1062 |
| rs80138418  | G | -0.04   |
| rs113608863 | G | -0.0566 |
| rs16885931  | G | 0.0187  |
| rs9380002   | G | 0.0193  |
| rs9349635   | C | 0.0292  |
| rs9347614   | C | 0.022   |
| rs116915567 | A | 0.0631  |
| rs9487190   | C | -0.0977 |
| rs9383052   | C | 0.0184  |
| rs12210737  | T | 0.0298  |
| rs6455587   | T | 0.0331  |
| rs2281274   | C | -0.0184 |
| rs1984689   | G | 0.0148  |
| rs688167    | C | 0.0176  |
| rs3805942   | C | -0.0155 |
| rs1128930   | C | 0.0159  |
| rs113804124 | A | 0.0399  |
| rs75089337  | C | -0.0495 |
| rs12195526  | G | -0.1041 |
| rs507059    | A | -0.0237 |
| rs5986      | C | -0.0268 |
| rs116108051 | T | 0.0981  |
| rs1444140   | T | 0.0253  |
| rs12526782  | T | -0.0361 |
| rs78454315  | T | 0.0628  |
| rs77049902  | A | -0.0506 |
| rs78826146  | A | -0.0581 |
| rs2561401   | C | -0.0279 |
| rs1763523   | T | 0.0188  |
| rs148204579 | C | -0.093  |
| rs147361734 | C | 0.0728  |
| rs6938742   | T | 0.0259  |
| rs79332237  | A | -0.0707 |
| rs78123791  | A | 0.0893  |
| rs79510007  | A | -0.0587 |
| rs73002301  | G | 0.074   |
| rs2341531   | T | -0.0194 |
| rs117795802 | A | -0.1078 |
| rs77527285  | G | -0.0673 |
| rs78640728  | T | -0.1012 |
| rs112749390 | T | -0.1184 |
| rs5002573   | A | -0.0209 |

|             |   |         |
|-------------|---|---------|
| rs77537019  | C | 0.0634  |
| rs57605348  | C | -0.0524 |
| rs75049012  | C | -0.0241 |
| rs17628699  | A | -0.0878 |
| rs117623598 | T | 0.095   |
| rs76358743  | C | 0.0571  |
| rs2388840   | G | 0.0152  |
| rs115114886 | T | -0.0853 |
| rs34695416  | A | 0.0315  |
| rs9370918   | T | 0.0152  |
| rs13203014  | C | 0.0467  |
| rs10484699  | T | 0.0238  |
| rs111318415 | A | 0.0639  |
| rs7765104   | G | 0.0217  |
| rs111777044 | T | 0.0395  |
| rs9455595   | T | 0.0374  |
| rs76793683  | A | 0.0827  |
| rs1190043   | C | -0.11   |
| rs72970895  | A | -0.0561 |
| rs9459339   | T | 0.0359  |
| rs7767339   | T | -0.019  |
| rs1416636   | C | -0.0999 |
| rs975002    | A | -0.0183 |
| rs114995028 | C | -0.0919 |
| rs145269582 | T | 0.0715  |
| rs6569733   | G | -0.0206 |
| rs897405    | C | -0.0155 |
| rs79380272  | T | -0.081  |
| rs117688959 | A | 0.0823  |
| rs113235143 | G | -0.1081 |
| rs4896082   | C | -0.0233 |
| rs544108    | G | 0.016   |
| rs11755381  | A | 0.0216  |
| rs74590024  | T | 0.0731  |
| rs73015010  | A | -0.0617 |
| rs3102985   | A | -0.0391 |
| rs35605315  | T | -0.0368 |
| rs9462794   | T | -0.0165 |
| rs143465788 | A | 0.0745  |
| rs12181211  | G | 0.0185  |
| rs150084830 | T | -0.0911 |
| rs9377320   | C | -0.0185 |
| rs17616631  | A | -0.0553 |
| rs58868620  | C | 0.0229  |
| rs2477223   | A | -0.0317 |
| rs80150111  | T | -0.0659 |
| rs149970086 | T | 0.1064  |

|             |   |         |
|-------------|---|---------|
| rs12211395  | T | -0.0501 |
| rs12529580  | A | 0.0597  |
| rs9393163   | A | -0.0152 |
| rs2473545   | T | -0.016  |
| rs118068560 | G | -0.065  |
| rs62433645  | T | -0.0205 |
| rs4716317   | T | 0.0161  |
| rs111622469 | A | 0.0408  |
| rs16879995  | G | 0.0598  |
| rs73001079  | A | -0.0364 |
| rs80164481  | C | 0.0469  |
| rs72901883  | A | 0.0486  |
| rs9321079   | A | -0.0167 |
| rs11154527  | G | -0.0148 |
| rs12214694  | T | -0.0723 |
| rs12198824  | C | -0.0282 |
| rs79667557  | A | -0.0309 |
| rs72839009  | C | -0.0429 |
| rs11965054  | A | 0.032   |
| rs35416771  | C | -0.0512 |
| rs75395804  | T | 0.0472  |
| rs139143298 | A | -0.0617 |
| rs117098244 | C | 0.1385  |
| rs139658628 | T | -0.0888 |
| rs62414225  | C | -0.0343 |
| rs140472219 | T | 0.0808  |
| rs6899541   | T | -0.0729 |
| rs9478294   | C | 0.0305  |
| rs78678492  | C | 0.0345  |
| rs75410851  | T | -0.1226 |
| rs144271389 | C | -0.1239 |
| rs117491315 | C | 0.059   |
| rs140215218 | G | 0.105   |
| rs71560871  | T | -0.0406 |
| rs55934442  | A | 0.0756  |
| rs1408733   | C | -0.0392 |
| rs11756137  | C | -0.0719 |
| rs2008287   | C | 0.0247  |
| rs62441895  | A | 0.062   |
| rs6934837   | G | 0.021   |
| rs6923850   | C | -0.0206 |
| rs4516957   | A | -0.0192 |
| rs9460613   | G | -0.0195 |
| rs12215305  | C | -0.0578 |
| rs151307249 | C | 0.0352  |
| rs139571037 | C | 0.0905  |
| rs946223    | G | 0.0149  |

|             |   |         |
|-------------|---|---------|
| rs9502824   | G | -0.0238 |
| rs11243273  | G | 0.0206  |
| rs117860445 | G | -0.0653 |
| rs77138068  | C | 0.0495  |
| rs9394479   | A | -0.0187 |
| rs141920269 | A | -0.1206 |
| rs11156382  | A | -0.0157 |
| rs576558    | G | -0.0504 |
| rs75640584  | A | -0.05   |
| rs75828750  | A | 0.0679  |
| rs1544148   | C | 0.0143  |
| rs117249836 | A | -0.0594 |
| rs62406422  | G | -0.0804 |
| rs72971352  | A | 0.0588  |
| rs1268075   | A | -0.0576 |
| rs3963366   | G | 0.0224  |
| rs72972197  | C | 0.0656  |
| rs72978928  | T | -0.0389 |
| rs1468639   | T | 0.0209  |
| rs11153328  | A | -0.0539 |
| rs77878549  | A | -0.0701 |
| rs927418    | G | -0.023  |
| rs79494858  | G | -0.052  |
| rs1206100   | G | 0.0146  |
| rs150401787 | C | -0.1292 |
| rs117865671 | A | 0.1131  |
| rs144861742 | A | 0.0866  |
| rs12214518  | G | -0.0545 |
| rs75993446  | C | 0.0407  |
| rs146837623 | G | 0.0862  |
| rs9456494   | A | 0.0222  |
| rs2473651   | C | -0.0217 |
| rs9454624   | T | -0.0196 |
| rs118042963 | C | 0.0519  |
| rs76835620  | G | 0.0327  |
| rs150677033 | C | 0.0613  |
| rs7453658   | G | 0.0183  |
| rs79026903  | G | -0.0423 |
| rs210920    | A | -0.0213 |
| rs112568394 | T | 0.0962  |
| rs79077350  | T | 0.0406  |
| rs9377127   | T | -0.0192 |
| rs112851833 | A | 0.0987  |
| rs56405624  | T | -0.0497 |
| rs73779948  | T | -0.0405 |
| rs118003879 | G | 0.0646  |
| rs4897341   | T | 0.0223  |

|             |   |         |
|-------------|---|---------|
| rs34422152  | G | -0.0224 |
| rs4960195   | G | -0.0225 |
| rs12201254  | G | -0.0211 |
| rs9405929   | C | 0.0525  |
| rs3734665   | G | -0.0184 |
| rs75034777  | C | 0.0588  |
| rs151015191 | A | 0.0604  |
| rs80057567  | C | -0.1125 |
| rs1433768   | A | -0.0264 |
| rs115842942 | T | -0.1047 |
| rs415425    | C | -0.0256 |
| rs73725220  | A | 0.0858  |
| rs146256339 | T | 0.0565  |
| rs10457366  | A | -0.042  |
| rs6908639   | G | 0.0471  |
| rs112505086 | A | 0.0464  |
| rs6456467   | G | 0.0223  |
| rs72843729  | T | -0.0519 |
| rs75537244  | A | -0.0758 |
| rs6935482   | G | -0.021  |
| rs117945408 | A | 0.063   |
| rs76233105  | A | 0.072   |
| rs2205860   | T | -0.0162 |
| rs495157    | C | 0.0196  |
| rs9361892   | C | 0.0292  |
| rs234487    | G | -0.0463 |
| rs112464023 | C | -0.0689 |
| rs4506057   | A | -0.0538 |
| rs74488670  | T | 0.0328  |
| rs13214603  | G | 0.1066  |
| rs114338779 | T | 0.0984  |
| rs2745585   | A | -0.0165 |
| rs9272543   | C | -0.042  |
| rs118066916 | T | 0.0705  |
| rs12527494  | G | -0.0621 |
| rs7747428   | C | 0.0213  |
| rs72991294  | C | 0.0211  |
| rs75015416  | G | 0.0545  |
| rs1270859   | G | -0.0401 |
| rs9350014   | C | 0.0586  |
| rs13203325  | A | -0.0145 |
| rs35498687  | A | 0.0623  |
| rs2503303   | C | -0.018  |
| rs2689887   | C | -0.0155 |
| rs7774682   | C | 0.0148  |
| rs113048426 | T | 0.0491  |
| rs6917861   | T | -0.0851 |

|             |   |         |
|-------------|---|---------|
| rs111544000 | T | -0.0648 |
| rs871746    | A | 0.0164  |
| rs115972027 | T | -0.0788 |
| rs3213529   | A | -0.0809 |
| rs151002403 | C | -0.1161 |
| rs147606020 | G | 0.0883  |
| rs117037008 | T | -0.1036 |
| rs62431584  | A | -0.0347 |
| rs9791210   | G | -0.0227 |
| rs73015707  | A | 0.1365  |
| rs9381514   | A | -0.0142 |
| rs17085793  | G | -0.0249 |
| rs78268152  | A | 0.0938  |
| rs78107229  | C | -0.0756 |
| rs12204666  | A | -0.022  |
| rs10948139  | T | -0.016  |
| rs12523843  | A | 0.0293  |
| rs142842055 | T | 0.0845  |
| rs10223785  | C | 0.0399  |
| rs9343481   | A | 0.0167  |
| rs4870452   | A | 0.0316  |
| rs9469705   | A | -0.0142 |
| rs11757490  | C | -0.0937 |
| rs4896888   | T | 0.0146  |
| rs6568382   | C | -0.0248 |
| rs397370    | T | 0.0206  |
| rs1024189   | T | 0.0153  |
| rs6934462   | G | 0.015   |
| rs76333878  | G | -0.0571 |
| rs9371494   | G | -0.0151 |
| rs140619509 | C | -0.0733 |
| rs71539133  | A | 0.0609  |
| rs950425    | T | -0.0399 |
| rs1613103   | G | -0.0178 |
| rs13437602  | C | -0.0609 |
| rs116831257 | C | 0.0552  |
| rs114112061 | A | 0.0849  |
| rs72904170  | A | -0.052  |
| rs116998804 | T | 0.0546  |
| rs6458577   | C | 0.0715  |
| rs112576278 | A | -0.0552 |
| rs2051630   | A | -0.0163 |
| rs6917152   | A | 0.0438  |
| rs111410085 | G | -0.0875 |
| rs74935697  | C | 0.0559  |
| rs62424667  | T | -0.0746 |
| rs10946117  | A | 0.0258  |

|             |   |         |
|-------------|---|---------|
| rs12210119  | G | 0.0744  |
| rs117915458 | A | 0.0838  |
| rs12201214  | T | -0.0388 |
| rs62390322  | A | 0.0652  |
| rs79459944  | C | -0.1036 |
| rs2185805   | T | -0.0574 |
| rs117946728 | T | 0.0619  |
| rs35682391  | T | -0.0453 |
| rs12203711  | G | -0.0378 |
| rs2748171   | T | 0.0153  |
| rs114439891 | A | 0.0623  |
| rs7764576   | G | 0.0453  |
| rs17723116  | G | 0.0532  |
| rs117485699 | T | 0.0555  |
| rs73366900  | A | 0.0184  |
| rs76524395  | G | 0.1088  |
| rs9388996   | C | 0.0208  |
| rs11969257  | T | -0.0192 |
| rs926406    | A | -0.0296 |
| rs118018800 | A | 0.0725  |
| rs117448071 | T | 0.1001  |
| rs75506597  | A | -0.0405 |
| rs142135770 | T | -0.1375 |
| rs57214955  | A | -0.0383 |
| rs17200465  | A | -0.042  |
| rs1727043   | T | 0.0395  |
| rs139700360 | T | -0.075  |
| rs146284082 | G | -0.0766 |
| rs6458068   | G | -0.0178 |
| rs4708168   | C | 0.0247  |
| rs12201377  | G | 0.0926  |
| rs62420078  | G | -0.0298 |
| rs62421013  | C | -0.0578 |
| rs73048552  | A | 0.0349  |
| rs6908236   | A | 0.0146  |
| rs2812117   | A | -0.02   |
| rs9365262   | C | 0.0166  |
| rs1407383   | T | 0.0153  |
| rs7772293   | G | -0.0174 |
| rs114979482 | A | 0.0628  |
| rs13213961  | A | -0.0251 |
| rs7739748   | G | 0.0143  |
| rs2746313   | C | 0.0187  |
| rs77529239  | C | -0.0911 |
| rs9356969   | T | -0.0531 |
| rs9484545   | T | 0.1042  |
| rs76294135  | G | -0.0271 |

|             |   |         |
|-------------|---|---------|
| rs12209114  | A | -0.0763 |
| rs73382480  | T | -0.0972 |
| rs111306255 | T | -0.0806 |
| rs143040512 | A | -0.0817 |
| rs9477140   | C | 0.0188  |
| rs9384474   | G | 0.0619  |
| rs146089302 | C | 0.1032  |
| rs9498166   | T | -0.0181 |
| rs6911490   | T | 0.018   |
| rs540009    | T | 0.0159  |
| rs113716932 | G | 0.077   |
| rs7755259   | C | -0.0773 |
| rs73361260  | C | 0.0348  |
| rs146260219 | C | -0.039  |
| rs12205098  | A | 0.0987  |
| rs76533956  | C | 0.0989  |
| rs113308506 | A | 0.0383  |
| rs9388668   | C | 0.0164  |
| rs74438331  | A | -0.0535 |
| rs11758298  | T | -0.021  |
| rs113246345 | T | 0.0595  |
| rs62432357  | T | 0.019   |
| rs55856212  | T | -0.0544 |
| rs13212727  | A | -0.1368 |
| rs12111048  | A | 0.024   |
| rs12211948  | T | 0.0146  |
| rs11969212  | T | 0.0314  |
| rs2327335   | T | 0.0181  |
| rs7763153   | G | 0.0171  |
| rs76439864  | G | 0.0791  |
| rs117202994 | G | 0.0518  |
| rs78343481  | A | -0.0392 |
| rs111727926 | T | 0.0604  |
| rs115962085 | T | -0.1262 |
| rs117559133 | C | 0.0629  |
| rs80049312  | A | 0.1244  |
| rs2636355   | C | -0.0331 |
| rs78995700  | G | 0.0892  |
| rs3843525   | G | 0.014   |
| rs138643886 | C | 0.0333  |
| rs76545383  | G | 0.0469  |
| rs75718706  | T | 0.0916  |
| rs13191359  | C | -0.0232 |
| rs4897268   | T | -0.0331 |
| rs2749669   | T | -0.0297 |
| rs77135383  | C | 0.0387  |
| rs1388044   | A | 0.0162  |



|             |   |         |
|-------------|---|---------|
| rs35278019  | T | 0.028   |
| rs673318    | G | 0.0145  |
| rs10457476  | C | -0.018  |
| rs341132    | T | -0.0208 |
| rs75975360  | C | -0.0437 |
| rs9376987   | G | 0.0326  |
| rs75719470  | C | 0.056   |
| rs76558532  | A | -0.0838 |
| rs75034694  | G | 0.067   |
| rs12198582  | C | 0.1052  |
| rs9658142   | A | 0.0224  |
| rs6903926   | T | -0.0307 |
| rs112657916 | G | -0.0748 |
| rs7743076   | T | 0.0146  |
| rs1538384   | T | 0.0176  |
| rs9331338   | T | 0.0252  |
| rs7750249   | T | 0.0855  |
| rs115197213 | A | -0.0499 |
| rs35200873  | A | 0.0539  |
| rs114612417 | G | 0.0497  |
| rs11757145  | C | 0.0236  |
| rs62414576  | C | -0.0217 |
| rs17084964  | C | -0.0256 |
| rs137879209 | G | 0.0667  |
| rs144766754 | C | 0.0855  |
| rs13207757  | T | 0.0244  |
| rs145343587 | G | -0.1195 |
| rs9482981   | T | -0.0437 |
| rs114244045 | T | 0.0667  |
| rs75646206  | T | 0.031   |
| rs143555480 | T | -0.0824 |
| rs549965    | T | 0.0144  |
| rs138028107 | T | 0.0722  |
| rs78747268  | T | 0.0703  |
| rs6921283   | T | 0.0477  |
| rs111993351 | C | 0.1102  |
| rs234933    | A | 0.0216  |
| rs75532080  | C | 0.0447  |
| rs56336490  | G | 0.0208  |
| rs78806291  | A | -0.0585 |
| rs4959582   | G | -0.0251 |
| rs72832862  | T | 0.0371  |
| rs6457898   | T | 0.0334  |
| rs11756131  | A | -0.0153 |
| rs9498161   | T | -0.0148 |
| rs11154794  | C | -0.0224 |
| rs17264332  | G | -0.017  |

|             |   |         |
|-------------|---|---------|
| rs111659990 | A | 0.0455  |
| rs145738025 | C | -0.0662 |
| rs80259516  | A | -0.0502 |
| rs76364903  | A | -0.0182 |
| rs148067430 | A | -0.0676 |
| rs12204529  | G | 0.0203  |
| rs150968187 | T | -0.0773 |
| rs117998078 | A | 0.0703  |
| rs34748010  | T | 0.1202  |
| rs17064501  | G | 0.0767  |
| rs5745577   | T | 0.0355  |
| rs113949988 | T | -0.0345 |
| rs7741961   | A | -0.014  |
| rs7761907   | G | -0.0163 |
| rs9373955   | G | -0.025  |
| rs41301861  | C | 0.0405  |
| rs12205386  | A | 0.0161  |
| rs4613794   | G | -0.0144 |
| rs117139036 | T | -0.0688 |
| rs2259192   | G | -0.0565 |
| rs13216160  | C | -0.0221 |
| rs117718912 | G | 0.0913  |
| rs4709623   | A | -0.0159 |
| rs112788064 | A | 0.069   |
| rs1431222   | T | -0.0196 |
| rs9402643   | A | -0.0216 |
| rs75149985  | G | 0.0502  |
| rs71569652  | C | 0.0766  |
| rs6459150   | A | 0.0384  |
| rs1022748   | G | 0.0293  |
| rs12211496  | T | -0.014  |
| rs78661138  | G | 0.0309  |
| rs13199416  | G | -0.0196 |
| rs74908610  | C | -0.0733 |
| rs6926641   | C | 0.0188  |
| rs4840092   | A | -0.0224 |
| rs4563734   | T | 0.0216  |
| rs77407137  | A | 0.062   |
| rs117157494 | T | 0.0707  |
| rs143462117 | T | -0.0471 |
| rs116385413 | G | -0.0624 |
| rs76389676  | A | 0.0625  |
| rs2496494   | T | -0.0227 |
| rs35216394  | G | 0.0512  |
| rs9464676   | T | -0.0166 |
| rs76935850  | C | 0.0672  |
| rs117278707 | G | 0.0907  |

|             |   |         |
|-------------|---|---------|
| rs35170101  | T | -0.0535 |
| rs2505284   | C | 0.0138  |
| rs116880670 | A | -0.1018 |
| rs78353268  | A | -0.0488 |
| rs6912396   | T | 0.0148  |
| rs113994624 | G | 0.073   |
| rs74392007  | T | -0.0225 |
| rs6918026   | G | -0.0195 |
| rs2318061   | C | 0.0222  |
| rs34136766  | C | -0.0959 |
| rs116561744 | C | -0.1455 |
| rs72871701  | T | -0.0422 |
| rs11962625  | C | -0.0803 |
| rs2552291   | G | 0.0175  |
| rs1214      | T | 0.1034  |
| rs76693439  | C | -0.0276 |
| rs137980747 | A | 0.1092  |
| rs145443213 | T | 0.0587  |
| rs115979397 | A | -0.0768 |
| rs914508    | A | -0.0386 |
| rs17057302  | T | 0.0456  |
| rs112487217 | A | 0.0254  |
| rs732394    | C | 0.0143  |
| rs74614833  | C | -0.0404 |
| rs76174003  | G | -0.0647 |
| rs115149542 | A | -0.0373 |
| rs9791265   | T | 0.0159  |
| rs9368087   | G | 0.0149  |
| rs12154106  | A | -0.0439 |
| rs73044101  | G | 0.0332  |
| rs9368288   | A | 0.0201  |
| rs79149393  | T | 0.0555  |
| rs6597205   | T | -0.0453 |
| rs2206994   | G | 0.0802  |
| rs62437172  | G | 0.0886  |
| rs7453674   | C | 0.0152  |
| rs35872353  | A | 0.0428  |
| rs28831698  | C | -0.0194 |
| rs73243047  | G | 0.0383  |
| rs1854006   | T | -0.0253 |
| rs7775460   | T | -0.0182 |
| rs77559144  | T | 0.0372  |
| rs75767930  | A | -0.0384 |
| rs723052    | C | -0.0478 |
| rs142673164 | T | -0.0953 |
| rs78101564  | A | -0.0906 |
| rs113410894 | T | -0.035  |

|             |   |         |
|-------------|---|---------|
| rs79085720  | G | -0.032  |
| rs9294334   | G | -0.0148 |
| rs9348099   | T | 0.0579  |
| rs236977    | T | 0.0409  |
| rs151163111 | C | -0.1139 |
| rs60373379  | G | 0.0447  |
| rs74888509  | C | -0.0287 |
| rs6570562   | A | 0.019   |
| rs72994054  | G | -0.0308 |
| rs768150    | T | 0.0155  |
| rs114844065 | C | 0.0747  |
| rs112957353 | C | 0.0308  |
| rs148234538 | A | -0.078  |
| rs115237946 | A | 0.0643  |
| rs4708503   | G | -0.0321 |
| rs4959455   | C | 0.0502  |
| rs1410821   | T | 0.0155  |
| rs55909294  | A | -0.0844 |
| rs806449    | G | -0.0176 |
| rs72944178  | A | 0.0574  |
| rs11154117  | T | 0.0154  |
| rs7769874   | T | -0.0206 |
| rs13196532  | C | -0.0158 |
| rs3005765   | A | -0.0184 |
| rs57204178  | C | -0.0199 |
| rs6941042   | C | 0.0437  |
| rs56368595  | C | -0.0219 |
| rs12174547  | T | -0.0182 |
| rs17138491  | A | -0.0467 |
| rs6922262   | G | -0.0185 |
| rs6933366   | A | 0.0147  |
| rs601639    | G | -0.0217 |
| rs114536102 | G | -0.0694 |
| rs2802414   | G | 0.0449  |
| rs12174277  | T | 0.0294  |
| rs4896427   | G | 0.0552  |
| rs79089106  | C | 0.0957  |
| rs72984652  | G | 0.0202  |
| rs116929240 | T | 0.0752  |
| rs4870094   | T | -0.0381 |
| rs9489863   | C | -0.0186 |
| rs75607367  | C | 0.0728  |
| rs10457827  | C | 0.0186  |
| rs72946106  | A | 0.0879  |
| rs13206771  | T | 0.0321  |
| rs146478285 | A | -0.0648 |
| rs17085806  | A | 0.0426  |

|             |   |         |
|-------------|---|---------|
| rs16873881  | A | -0.0181 |
| rs17073061  | G | -0.0287 |
| rs56172867  | A | 0.0293  |
| rs55721409  | C | -0.0729 |
| rs34474894  | G | -0.0198 |
| rs113949400 | T | 0.0615  |
| rs80020306  | G | 0.1041  |
| rs34160063  | T | 0.0291  |
| rs4714575   | C | -0.0178 |
| rs115206757 | A | -0.0796 |
| rs6917194   | G | 0.0148  |
| rs17327457  | T | -0.0567 |
| rs9458611   | T | 0.0157  |
| rs7764139   | T | 0.0247  |
| rs4706511   | G | -0.0168 |
| rs117516302 | C | 0.0802  |
| rs17828760  | G | -0.0754 |
| rs78551156  | C | 0.0648  |
| rs72933032  | A | -0.0383 |
| rs9348093   | C | -0.025  |
| rs214500    | A | 0.0326  |
| rs74453029  | T | -0.1482 |
| rs4897064   | A | 0.0226  |
| rs117057504 | T | 0.0658  |
| rs75770214  | A | 0.065   |
| rs9444435   | G | -0.0618 |
| rs62434768  | A | -0.051  |
| rs76667285  | A | -0.0228 |
| rs112253106 | T | 0.0824  |
| rs6926970   | A | 0.0196  |
| rs211622    | G | -0.0242 |
| rs116056957 | G | -0.0565 |
| rs1291463   | T | -0.0297 |
| rs34272273  | T | 0.0483  |
| rs139332017 | G | -0.0726 |
| rs7743428   | G | 0.0211  |
| rs117531829 | T | 0.0851  |
| rs150031656 | G | 0.0832  |
| rs6928836   | T | -0.0175 |
| rs12190912  | T | -0.0205 |
| rs13192030  | T | 0.0693  |
| rs73001963  | T | 0.0543  |
| rs74740079  | C | 0.0334  |
| rs74484105  | A | 0.0585  |
| rs79152473  | A | 0.1015  |
| rs1485663   | T | -0.0195 |
| rs149107436 | T | -0.0504 |

|             |   |         |
|-------------|---|---------|
| rs78095665  | T | 0.0708  |
| rs56169037  | C | -0.0602 |
| rs7775180   | A | 0.0201  |
| rs78873324  | A | 0.0498  |
| rs80117334  | C | -0.0855 |
| rs9455852   | A | -0.0149 |
| rs57995395  | T | -0.0603 |
| rs56122038  | A | -0.0776 |
| rs6923965   | T | -0.0263 |
| rs16883791  | A | 0.0343  |
| rs79869988  | T | 0.1021  |
| rs697464    | A | -0.0314 |
| rs9462200   | T | -0.0333 |
| rs9488227   | C | 0.0152  |
| rs1033575   | C | 0.0157  |
| rs9502374   | G | 0.0273  |
| rs76000435  | A | 0.0204  |
| rs12523897  | G | 0.0175  |
| rs2817435   | C | -0.0533 |
| rs114020166 | T | -0.0467 |
| rs73454309  | T | 0.02    |
| rs9341787   | A | -0.0253 |
| rs112842501 | A | 0.0898  |
| rs150187342 | G | -0.0825 |
| rs4709725   | T | -0.0157 |
| rs17363382  | G | -0.0409 |
| rs7766262   | C | -0.0143 |
| rs9296290   | A | -0.0186 |
| rs9360196   | A | 0.0208  |
| rs141855322 | C | 0.1339  |
| rs35858567  | T | 0.0234  |
| rs7740758   | T | -0.0195 |
| rs74391595  | T | 0.0701  |
| rs6569924   | T | -0.0572 |
| rs9347027   | A | 0.0163  |
| rs12523813  | C | 0.0183  |
| rs76459312  | T | 0.0271  |
| rs138075694 | G | 0.0699  |
| rs56274407  | A | -0.0429 |
| rs73598502  | G | -0.0353 |
| rs9379861   | C | 0.0718  |
| rs4708090   | A | -0.0209 |
| rs62421908  | G | 0.0246  |
| rs72826452  | A | -0.1007 |
| rs115977008 | A | 0.0467  |
| rs139952639 | A | 0.0599  |
| rs17499688  | T | 0.0243  |

|             |   |         |
|-------------|---|---------|
| rs111270386 | T | 0.0585  |
| rs11753298  | T | -0.0318 |
| rs57433876  | G | -0.0612 |
| rs35092455  | G | 0.0458  |
| rs35282407  | C | 0.02    |
| rs6918619   | G | 0.0602  |
| rs79435668  | C | -0.0731 |
| rs1884046   | G | -0.0161 |
| rs72992742  | A | -0.0606 |
| rs9342784   | A | 0.0252  |
| rs116849441 | T | -0.0526 |
| rs139455919 | A | -0.0911 |
| rs150072235 | A | -0.0864 |
| rs9353513   | A | 0.0157  |
| rs74368660  | C | 0.0403  |
| rs75301713  | G | 0.0776  |
| rs72915779  | C | -0.0633 |
| rs11964020  | G | 0.1179  |
| rs73777863  | C | 0.0629  |
| rs56724212  | T | -0.0307 |
| rs12207936  | G | -0.0912 |
| rs71575023  | A | -0.0418 |
| rs146109165 | A | 0.0808  |
| rs11752518  | A | -0.0412 |
| rs9399387   | C | -0.0261 |
| rs73031062  | T | 0.0229  |
| rs115459827 | T | -0.077  |
| rs117807123 | G | 0.0867  |
| rs11754224  | G | -0.024  |
| rs117862675 | A | -0.0345 |
| rs76092111  | A | 0.0524  |
| rs1121647   | T | -0.0151 |
| rs117631232 | G | 0.0706  |
| rs699696    | C | 0.0174  |
| rs113033654 | C | -0.0567 |
| rs111253712 | A | -0.0423 |
| rs12205477  | C | -0.0281 |
| rs71570220  | G | 0.0202  |
| rs78687571  | G | 0.0876  |
| rs17184090  | G | -0.0512 |
| rs7753542   | G | -0.0674 |
| rs113303329 | T | 0.0823  |
| rs9460844   | T | -0.0181 |
| rs117981790 | G | 0.1188  |
| rs141622099 | C | 0.081   |
| rs114475737 | A | 0.0567  |
| rs35096966  | G | -0.02   |

|             |   |         |
|-------------|---|---------|
| rs13191298  | G | -0.0204 |
| rs72956240  | C | 0.0963  |
| rs117688413 | A | 0.0535  |
| rs9455483   | A | 0.0161  |
| rs79527966  | G | -0.0917 |
| rs9388387   | G | -0.035  |
| rs12110827  | A | 0.0624  |
| rs11966014  | C | -0.0315 |
| rs1240817   | A | -0.0148 |
| rs78459964  | A | 0.0422  |
| rs9386149   | C | -0.0753 |
| rs78132250  | T | 0.0813  |
| rs9458393   | T | -0.0149 |
| rs12216321  | G | -0.0278 |
| rs117318238 | A | -0.0695 |
| rs62416460  | A | -0.0499 |
| rs117582409 | C | -0.0962 |
| rs7753036   | T | 0.0204  |
| rs117665332 | T | 0.0366  |
| rs6913914   | T | -0.039  |
| rs35898099  | A | 0.0212  |
| rs12196494  | G | -0.0181 |
| rs62427286  | T | -0.0142 |
| rs72975549  | A | -0.0365 |
| rs73749058  | G | -0.0906 |
| rs7749810   | A | 0.0189  |
| rs113324766 | G | -0.072  |
| rs4143744   | G | -0.0135 |
| rs13197026  | A | -0.0143 |
| rs13215373  | T | -0.0157 |
| rs7383246   | G | -0.0163 |
| rs117212757 | A | -0.1095 |
| rs117253945 | G | -0.0921 |
| rs114931811 | G | 0.0929  |
| rs144317871 | T | -0.0749 |
| rs62408255  | G | 0.024   |
| rs3104091   | T | -0.0153 |
| rs75041599  | A | 0.0662  |
| rs142832010 | G | -0.0837 |
| rs71568132  | A | 0.0635  |
| rs72933650  | T | -0.0323 |
| rs9498059   | T | 0.0316  |
| rs142844733 | C | -0.0447 |
| rs4709305   | G | 0.0152  |
| rs141897194 | G | -0.0802 |
| rs150447513 | A | 0.1108  |
| rs117952102 | T | 0.064   |



|             |   |         |
|-------------|---|---------|
| rs78638968  | C | -0.0395 |
| rs644637    | A | -0.0149 |
| rs13216380  | G | 0.0404  |
| rs74615090  | G | -0.1164 |
| rs2474889   | T | 0.0571  |
| rs138186190 | G | -0.0532 |
| rs2876038   | G | 0.0513  |
| rs142189162 | A | -0.0596 |
| rs12215841  | A | -0.0599 |
| rs115675539 | A | -0.0513 |
| rs806374    | C | -0.0189 |
| rs6914431   | G | -0.0208 |
| rs9394816   | A | -0.0257 |
| rs9355413   | A | 0.0281  |
| rs77562520  | T | 0.0753  |
| rs1617669   | A | 0.0321  |
| rs2172785   | C | 0.0581  |
| rs12212391  | A | -0.0528 |
| rs118138549 | T | -0.0764 |
| rs933199    | C | 0.028   |
| rs145397260 | C | -0.0586 |
| rs510067    | A | 0.0157  |
| rs78888580  | G | 0.0606  |
| rs72903128  | G | 0.0382  |
| rs141704260 | C | 0.0853  |
| rs117622209 | C | -0.0542 |
| rs143156106 | C | -0.0905 |
| rs9353523   | C | -0.0396 |
| rs6914743   | A | -0.0197 |
| rs17165429  | T | -0.0226 |
| rs77647214  | G | -0.0614 |
| rs9462715   | C | -0.0542 |
| rs77786417  | T | -0.1178 |
| rs6939405   | T | -0.0196 |
| rs80086785  | G | -0.0333 |
| rs9503323   | G | -0.0251 |
| rs146922207 | A | 0.0599  |
| rs9365161   | T | -0.0265 |
| rs9360964   | T | -0.0201 |
| rs72915761  | C | -0.0509 |
| rs6921351   | T | 0.0347  |
| rs111300783 | C | -0.1044 |
| rs4959846   | A | 0.0559  |
| rs9461923   | A | 0.0139  |
| rs74928432  | T | 0.0981  |
| rs6928665   | A | 0.0169  |
| rs12527613  | A | -0.0139 |

|             |   |         |
|-------------|---|---------|
| rs79516858  | A | 0.0722  |
| rs144936651 | A | 0.0506  |
| rs146575374 | A | -0.08   |
| rs115504329 | C | 0.057   |
| rs76832078  | A | 0.0588  |
| rs1222956   | G | 0.0318  |
| rs62418417  | G | -0.0223 |
| rs73017871  | A | -0.0329 |
| rs1909055   | A | 0.0169  |
| rs860749    | G | 0.0261  |
| rs34158695  | C | 0.0438  |
| rs957513    | T | -0.0162 |
| rs4870190   | A | 0.0499  |
| rs7750101   | C | -0.0141 |
| rs117138463 | A | -0.0675 |
| rs117787837 | A | 0.0873  |
| rs7755405   | G | 0.0712  |
| rs10455523  | G | 0.0137  |
| rs12174258  | A | 0.0227  |
| rs62441982  | A | 0.1016  |
| rs9503884   | G | -0.0168 |
| rs112236135 | A | 0.0548  |
| rs118169250 | C | 0.099   |
| rs9392155   | G | -0.019  |
| rs6902144   | G | 0.0167  |
| rs12189786  | G | 0.0207  |
| rs12211003  | T | 0.0161  |
| rs9379764   | G | -0.0185 |
| rs146508901 | T | -0.0722 |
| rs9386196   | G | -0.0166 |
| rs6570836   | C | 0.0142  |
| rs13198447  | T | 0.0617  |
| rs73038016  | A | 0.1165  |
| rs395575    | T | 0.0517  |
| rs12201060  | A | 0.0858  |
| rs877536    | C | -0.0246 |
| rs143413278 | C | -0.0391 |
| rs66805147  | G | -0.0471 |
| rs76668896  | T | 0.1179  |
| rs117292587 | C | 0.1104  |
| rs1906924   | T | -0.0144 |
| rs1382815   | A | 0.0211  |
| rs438310    | T | -0.052  |
| rs1044724   | C | -0.0214 |
| rs11754085  | C | 0.0514  |
| rs117827510 | A | 0.0709  |
| rs34060277  | A | 0.0564  |

|             |   |         |
|-------------|---|---------|
| rs67118378  | A | 0.0376  |
| rs2747688   | C | -0.0147 |
| rs3901123   | T | 0.0281  |
| rs72837214  | C | 0.0501  |
| rs9358867   | G | -0.0477 |
| rs9403829   | A | -0.0191 |
| rs141688879 | A | -0.1364 |
| rs116301436 | T | 0.0615  |
| rs112276550 | T | -0.063  |
| rs540462    | T | 0.0416  |
| rs777625    | T | -0.0587 |
| rs75215494  | C | 0.0737  |
| rs62397386  | G | -0.0367 |
| rs148490113 | T | -0.0529 |
| rs67839107  | T | 0.0342  |
| rs9476570   | C | 0.0686  |
| rs7742708   | G | 0.0926  |
| rs2226121   | A | 0.0218  |
| rs12200530  | G | 0.0162  |
| rs12191794  | G | -0.018  |
| rs117167536 | C | 0.0771  |
| rs76355624  | T | 0.0497  |
| rs4709704   | A | 0.0176  |
| rs28384094  | A | 0.0517  |
| rs518359    | G | 0.0166  |
| rs10455948  | G | 0.0206  |
| rs150382665 | A | 0.0397  |
| rs12213843  | G | -0.061  |
| rs10945406  | C | -0.0368 |
| rs112397180 | A | 0.0753  |
| rs56787980  | A | -0.0147 |
| rs117809917 | T | 0.0804  |
| rs4134942   | G | -0.0515 |
| rs7755331   | A | 0.0148  |
| rs78067832  | A | -0.0541 |
| rs74480479  | A | 0.0443  |
| rs11961656  | A | -0.0338 |
| rs76900947  | G | 0.0502  |
| rs2068686   | G | -0.1052 |
| rs113988379 | A | -0.0573 |
| rs9451553   | T | -0.0709 |
| rs111919151 | T | -0.0766 |
| rs75521106  | A | 0.0393  |
| rs72914681  | C | 0.0325  |
| rs79535031  | A | 0.0394  |
| rs72914284  | A | 0.0695  |
| rs35370909  | T | 0.0143  |

|             |   |         |
|-------------|---|---------|
| rs7764989   | A | 0.0953  |
| rs75027372  | A | -0.0624 |
| rs9391240   | T | -0.027  |
| rs62435263  | T | -0.0278 |
| rs9451413   | T | 0.0445  |
| rs68077340  | T | -0.0282 |
| rs9398863   | C | 0.022   |
| rs116307976 | T | -0.0611 |
| rs10948709  | G | -0.0132 |
| rs62425470  | T | 0.0388  |
| rs62431618  | T | 0.0259  |
| rs1811899   | C | -0.017  |
| rs141837862 | A | -0.1019 |
| rs6458543   | C | 0.0499  |
| rs73018041  | A | 0.0796  |
| rs139438374 | T | -0.091  |
| rs12195711  | T | 0.0234  |
| rs78983386  | A | 0.0474  |
| rs3819025   | A | -0.0361 |
| rs9497973   | G | -0.068  |
| rs10456448  | T | 0.0246  |
| rs6938290   | G | -0.0145 |
| rs76098320  | G | 0.0605  |
| rs55902602  | T | 0.0197  |
| rs62395314  | A | -0.0462 |
| rs72867836  | T | -0.0542 |
| rs148085518 | T | 0.0866  |
| rs1591830   | A | 0.0148  |
| rs75747990  | T | -0.0357 |
| rs74792762  | G | 0.0257  |
| rs4870376   | T | -0.0334 |
| rs7748999   | C | 0.0343  |
| rs396869    | T | -0.0138 |
| rs148420656 | C | 0.0518  |
| rs114089370 | T | 0.0845  |
| rs7752219   | G | -0.0132 |
| rs9483967   | A | 0.0494  |
| rs138572033 | T | -0.0767 |
| rs4708163   | G | 0.0283  |
| rs1871664   | G | 0.014   |
| rs151090304 | T | 0.0991  |
| rs74355118  | A | 0.0714  |
| rs1220316   | G | -0.0149 |
| rs111703165 | C | 0.0779  |
| rs75917718  | T | -0.0771 |
| rs76120761  | G | 0.0741  |
| rs75813400  | T | 0.044   |

|             |   |         |
|-------------|---|---------|
| rs147825756 | G | -0.0584 |
| rs79027811  | G | -0.0956 |
| rs73014598  | T | 0.0319  |
| rs1931657   | G | 0.0395  |
| rs284428    | C | 0.0199  |
| rs79080242  | T | 0.0324  |
| rs79450642  | A | -0.0349 |
| rs35173014  | T | 0.0626  |
| rs62426547  | A | -0.07   |
| rs77190492  | T | -0.0662 |
| rs117095837 | T | -0.1319 |
| rs80126803  | T | -0.0505 |
| rs77843487  | T | 0.061   |
| rs114966475 | C | 0.0747  |
| rs35771086  | C | -0.0319 |
| rs2247218   | C | -0.0148 |
| rs149280381 | A | 0.0748  |
| rs1205501   | G | -0.0139 |
| rs529948    | A | 0.0235  |
| rs13362710  | T | 0.0332  |
| rs10782199  | A | -0.0136 |
| rs144789101 | A | -0.1097 |
| rs12195760  | C | 0.0675  |
| rs79034856  | T | -0.0871 |
| rs140728948 | G | -0.0832 |
| rs2932673   | G | -0.0199 |
| rs141632724 | C | -0.079  |
| rs3019438   | C | -0.027  |
| rs2183074   | G | -0.014  |
| rs78231576  | T | 0.0864  |
| rs11154225  | G | 0.0188  |
| rs11754685  | C | -0.0141 |
| rs12193421  | T | 0.0588  |
| rs1931692   | T | 0.0166  |
| rs7761282   | T | 0.0713  |
| rs7756874   | G | 0.0206  |
| rs938152    | A | -0.0457 |
| rs11752709  | T | -0.0531 |
| rs2294675   | C | -0.0387 |
| rs79706021  | T | -0.0248 |
| rs12660909  | C | -0.042  |
| rs1941905   | T | 0.0163  |
| rs79577561  | A | 0.0644  |
| rs73546331  | T | -0.0825 |
| rs116276283 | T | -0.0553 |
| rs72851865  | T | 0.0451  |
| rs80150253  | A | -0.0363 |

|             |   |         |
|-------------|---|---------|
| rs116911111 | T | -0.0846 |
| rs112401888 | A | -0.1117 |
| rs73752779  | T | -0.0148 |
| rs4713648   | T | -0.0136 |
| rs1078299   | C | -0.0237 |
| rs3752611   | C | -0.0223 |
| rs140588597 | T | 0.0752  |
| rs72951735  | G | 0.0594  |
| rs3116712   | T | 0.0571  |
| rs12208633  | T | -0.0664 |
| rs73479333  | C | -0.0248 |
| rs2816262   | C | 0.0544  |
| rs12193921  | C | -0.0315 |
| rs7772726   | A | 0.019   |
| rs62395881  | T | -0.0542 |
| rs10456666  | T | -0.0204 |
| rs116813163 | T | 0.0481  |
| rs150910593 | T | -0.0952 |
| rs76088838  | C | -0.0656 |
| rs79339883  | A | -0.0593 |
| rs117182159 | T | -0.064  |
| rs9402506   | A | 0.0163  |
| rs145594663 | A | 0.0666  |
| rs11752885  | A | -0.0228 |
| rs765169    | C | 0.0139  |
| rs17730964  | A | 0.1419  |
| rs12207165  | T | 0.1216  |
| rs12190797  | A | 0.0503  |
| rs11759252  | G | -0.0164 |
| rs12664560  | G | 0.0221  |
| rs116975870 | A | 0.0926  |
| rs72820248  | T | 0.0567  |
| rs139613893 | C | 0.0889  |
| rs9486068   | A | -0.0273 |
| rs114536838 | A | -0.0668 |
| rs72995130  | A | 0.0279  |
| rs12205975  | C | 0.0237  |
| rs144413142 | G | 0.0441  |
| rs116015924 | C | -0.1013 |
| rs114381567 | C | 0.0392  |
| rs73046034  | A | 0.015   |
| rs234480    | T | 0.0169  |
| rs140084164 | G | 0.0482  |
| rs140373863 | A | 0.0596  |
| rs17086536  | C | -0.0241 |
| rs4090309   | G | 0.0161  |
| rs7741940   | T | -0.015  |

|             |   |         |
|-------------|---|---------|
| rs2237197   | G | -0.018  |
| rs79623802  | A | -0.0467 |
| rs145338198 | G | 0.0579  |
| rs10485120  | C | -0.0815 |
| rs9403386   | C | 0.1203  |
| rs150856223 | C | 0.1019  |
| rs509102    | A | -0.0421 |
| rs1294421   | T | 0.0144  |
| rs117768666 | T | 0.0567  |
| rs143885568 | A | 0.0263  |
| rs206721    | G | -0.055  |
| rs77922290  | A | 0.0288  |
| rs2764084   | T | 0.0143  |
| rs7768199   | C | -0.0575 |
| rs111820644 | A | 0.0627  |
| rs77709442  | T | -0.0407 |
| rs3928896   | G | 0.014   |
| rs9496692   | C | -0.0132 |
| rs79674673  | T | -0.0712 |
| rs6906404   | T | -0.0475 |
| rs35236821  | A | 0.0599  |
| rs1497745   | G | -0.0969 |
| rs2292477   | T | -0.0256 |
| rs118091720 | A | -0.0905 |
| rs117810733 | T | 0.0797  |
| rs6932906   | T | -0.0154 |
| rs141393670 | T | 0.0838  |
| rs13195163  | T | -0.0143 |
| rs72928771  | T | -0.0324 |
| rs591109    | T | -0.0143 |
| rs58593658  | C | -0.0246 |
| rs9328435   | C | 0.0188  |
| rs115782355 | G | 0.0706  |
| rs17792953  | G | 0.0418  |
| rs12213031  | T | 0.0142  |
| rs2092626   | T | 0.0174  |
| rs74972795  | A | 0.0392  |
| rs1232314   | G | 0.0175  |
| rs12202796  | A | -0.1105 |
| rs17555505  | C | -0.0184 |
| rs34590679  | T | -0.0302 |
| rs9375896   | A | -0.0189 |
| rs12191731  | C | 0.0148  |
| rs151183473 | G | 0.068   |
| rs9480474   | A | -0.0679 |
| rs145663573 | G | 0.0619  |
| rs77249508  | T | 0.0457  |

|             |   |         |
|-------------|---|---------|
| rs148202962 | T | -0.0456 |
| rs75948054  | A | -0.072  |
| rs73000779  | A | 0.0908  |
| rs6908099   | T | 0.0196  |
| rs11752680  | A | -0.0546 |
| rs4546536   | G | -0.0239 |
| rs10484840  | G | 0.0188  |
| rs76773251  | G | -0.0527 |
| rs79820138  | T | 0.0551  |
| rs2200959   | G | -0.0142 |
| rs72968544  | G | 0.0264  |
| rs62424598  | T | 0.0449  |
| rs140617270 | A | -0.066  |
| rs116136354 | C | 0.0546  |
| rs9322103   | T | -0.0301 |
| rs112694982 | A | -0.0569 |
| rs4407694   | A | -0.024  |
| rs80234262  | C | -0.0792 |
| rs6908818   | G | -0.0141 |
| rs79034709  | G | 0.106   |
| rs62391551  | G | 0.0626  |
| rs74626493  | C | 0.0594  |
| rs201265    | T | 0.0227  |
| rs35227147  | T | 0.049   |
| rs6922523   | T | 0.0138  |
| rs17883901  | A | 0.0565  |
| rs72906228  | C | 0.0571  |
| rs12193071  | G | -0.0187 |
| rs111744674 | G | 0.0364  |
| rs146674032 | A | -0.0428 |
| rs12197692  | T | 0.0202  |
| rs1491071   | C | 0.0179  |
| rs610402    | T | -0.0372 |
| rs61073169  | C | -0.0197 |
| rs62437447  | A | -0.1009 |
| rs407626    | C | -0.0155 |
| rs11759530  | G | 0.0206  |
| rs141058626 | A | -0.0601 |
| rs13214731  | T | 0.0157  |
| rs78855103  | T | -0.0237 |
| rs6928120   | C | -0.0204 |
| rs611823    | G | 0.0193  |
| rs1077782   | C | 0.0707  |
| rs114209367 | T | 0.094   |
| rs6903080   | T | -0.0137 |
| rs7757357   | T | 0.0147  |
| rs76778765  | C | 0.1093  |



|             |   |         |
|-------------|---|---------|
| rs3010555   | G | 0.0138  |
| rs2272884   | G | 0.0943  |
| rs2038155   | G | -0.015  |
| rs2820221   | C | 0.0135  |
| rs115370609 | T | 0.0472  |
| rs6934715   | A | 0.0413  |
| rs56290231  | T | -0.0325 |
| rs3798938   | C | 0.0351  |
| rs149861956 | G | -0.0493 |
| rs72982241  | A | -0.0728 |
| rs147506448 | T | 0.0726  |
| rs117459545 | T | 0.1243  |
| rs138522328 | T | -0.0565 |
| rs7763368   | G | -0.0218 |
| rs72936467  | A | 0.0843  |
| rs34179517  | C | 0.0214  |
| rs643002    | T | 0.0699  |
| rs112939612 | C | 0.0538  |
| rs138609221 | T | -0.0282 |
| rs145236937 | A | 0.0172  |
| rs62304163  | T | 0.073   |
| rs12206991  | C | 0.0252  |
| rs76077281  | C | -0.0593 |
| rs6908131   | A | -0.0185 |
| rs55810031  | G | -0.017  |
| rs117139013 | T | -0.0765 |
| rs145201033 | T | -0.0796 |
| rs7748648   | C | -0.0151 |
| rs1351662   | T | -0.0281 |
| rs113045044 | C | 0.0958  |
| rs117071085 | G | 0.035   |
| rs13204843  | G | -0.078  |
| rs77455352  | T | -0.023  |
| rs142752653 | A | -0.0607 |
| rs142724247 | A | -0.0851 |
| rs80070452  | C | -0.0501 |
| rs12208447  | T | -0.0641 |
| rs75525399  | T | -0.0342 |
| rs148823945 | A | 0.0637  |
| rs7756128   | T | 0.0145  |
| rs62394953  | T | -0.0354 |
| rs62386713  | A | 0.0711  |
| rs6938628   | C | -0.0192 |
| rs2233423   | A | 0.0593  |
| rs1341229   | C | 0.015   |
| rs78664914  | G | 0.0381  |
| rs72952438  | T | 0.0521  |

|             |   |         |
|-------------|---|---------|
| rs9477412   | C | 0.0178  |
| rs72836038  | A | 0.059   |
| rs71555176  | G | 0.0154  |
| rs74692870  | T | -0.1022 |
| rs12203435  | C | -0.0155 |
| rs78929763  | A | -0.0556 |
| rs72967121  | T | -0.1187 |
| rs78559768  | C | -0.0983 |
| rs4257832   | A | -0.0237 |
| rs9483671   | C | 0.0178  |
| rs7750445   | G | -0.0171 |
| rs150918171 | G | 0.0208  |
| rs12209689  | T | -0.0284 |
| rs111880881 | T | -0.0769 |
| rs76207208  | C | -0.0312 |
| rs6905381   | A | 0.0131  |
| rs9365309   | A | -0.0177 |
| rs9398162   | G | 0.021   |
| rs116279574 | T | -0.0293 |
| rs13193586  | G | -0.026  |
| rs78535534  | G | -0.0914 |
| rs149259092 | G | -0.0589 |
| rs1413524   | A | 0.0245  |
| rs79696043  | G | 0.0509  |
| rs148144206 | G | -0.074  |
| rs72951213  | T | -0.0625 |
| rs142861463 | A | 0.0622  |
| rs115325450 | A | -0.0566 |
| rs11756916  | A | 0.0279  |
| rs6926102   | C | 0.0171  |
| rs2744119   | G | 0.0215  |
| rs2328515   | T | -0.0193 |
| rs147158572 | A | -0.1002 |
| rs765783    | A | -0.0853 |
| rs12192976  | T | 0.028   |
| rs9383942   | C | 0.0191  |
| rs10498979  | C | -0.0153 |
| rs143486410 | C | -0.1034 |
| rs701658    | G | -0.0243 |
| rs77639270  | T | 0.041   |
| rs116984225 | T | -0.0584 |
| rs9372043   | T | 0.0552  |
| rs4709431   | C | -0.051  |
| rs113566654 | A | 0.0887  |
| rs62403700  | G | 0.0394  |
| rs115958076 | G | -0.1003 |
| rs141430659 | G | -0.0551 |

|             |   |         |
|-------------|---|---------|
| rs4598104   | G | 0.0342  |
| rs56255801  | T | 0.0183  |
| rs117670566 | A | 0.0597  |
| rs6904374   | T | -0.0136 |
| rs139826151 | T | 0.0324  |
| rs78807090  | T | 0.0517  |
| rs117363081 | C | 0.1078  |
| rs13215649  | C | 0.0157  |
| rs34055431  | C | -0.0143 |
| rs146412429 | T | -0.0683 |
| rs951402    | A | -0.0324 |
| rs9466763   | T | 0.0217  |
| rs28604540  | C | 0.1073  |
| rs1282343   | G | -0.015  |
| rs75776381  | G | 0.0479  |
| rs115481281 | G | -0.076  |
| rs117784469 | A | 0.0409  |
| rs7754874   | A | 0.0166  |
| rs35580045  | C | -0.0432 |
| rs62429045  | C | 0.0554  |
| rs1555230   | G | -0.0137 |
| rs9968989   | C | 0.0636  |
| rs474043    | T | -0.0153 |
| rs9294393   | T | -0.0181 |
| rs9502289   | T | 0.0259  |
| rs77460697  | C | -0.0548 |
| rs3862815   | A | 0.0156  |
| rs140559673 | A | 0.0651  |
| rs895991    | G | -0.0309 |
| rs79967991  | C | -0.0438 |
| rs62429148  | T | 0.0801  |
| rs10456296  | C | -0.0607 |
| rs151157286 | T | -0.1118 |
| rs9343999   | T | 0.0166  |
| rs72879670  | G | 0.0659  |
| rs9485487   | A | 0.0595  |
| rs9391116   | G | 0.0135  |
| rs34482705  | T | -0.0167 |
| rs9380605   | C | 0.0128  |
| rs73571039  | T | -0.054  |
| rs4870428   | C | 0.0132  |
| rs9378725   | A | 0.0521  |
| rs7762972   | A | 0.0189  |
| rs17496632  | G | 0.0289  |
| rs55804364  | T | 0.0517  |
| rs74381964  | C | -0.0807 |
| rs2031552   | G | 0.0319  |

|             |   |         |
|-------------|---|---------|
| rs138153202 | T | -0.0976 |
| rs141795049 | C | 0.0689  |
| rs140281629 | A | 0.0654  |
| rs4708721   | T | 0.0219  |
| rs146004357 | G | 0.0781  |
| rs6941150   | A | 0.0144  |
| rs4712499   | A | 0.0435  |
| rs35232995  | A | -0.0669 |
| rs17057571  | C | -0.0164 |
| rs79753905  | T | 0.0619  |
| rs13205844  | G | 0.0128  |
| rs13209980  | A | 0.0458  |
| rs118103708 | T | 0.0463  |
| rs12524286  | T | -0.1189 |
| rs833066    | C | -0.0138 |
| rs445850    | G | 0.0141  |
| rs9490813   | G | 0.0294  |
| rs57503276  | T | -0.0229 |
| rs737548    | A | -0.0129 |
| rs73506660  | G | 0.0673  |
| rs9385806   | G | -0.0515 |
| rs10755703  | G | 0.0147  |
| rs7764729   | T | 0.0303  |
| rs140019284 | T | 0.0886  |
| rs71533645  | G | -0.043  |
| rs12215349  | A | -0.061  |
| rs276698    | C | 0.0184  |
| rs114705768 | C | -0.0505 |
| rs72921237  | G | -0.0646 |
| rs78120776  | T | 0.044   |
| rs117389564 | C | -0.0886 |
| rs16892196  | A | 0.0226  |
| rs77512470  | T | -0.0862 |
| rs6454746   | A | -0.0239 |
| rs2397695   | A | -0.0619 |
| rs7770934   | A | -0.0185 |
| rs34909032  | G | 0.0461  |
| rs77755513  | T | -0.0498 |
| rs7764555   | C | -0.0128 |
| rs142201344 | T | 0.1145  |
| rs56155196  | G | 0.0246  |
| rs114704323 | G | 0.0265  |
| rs4870053   | A | 0.0151  |
| rs9383708   | T | 0.0346  |
| rs116870380 | G | 0.0522  |
| rs6570632   | G | 0.0161  |
| rs4715959   | A | -0.0172 |

|             |   |         |
|-------------|---|---------|
| rs9453845   | T | 0.0232  |
| rs113336571 | A | 0.0433  |
| rs139859322 | C | 0.0658  |
| rs112241394 | C | -0.0671 |
| rs78300652  | A | -0.0859 |
| rs11719     | C | 0.0155  |
| rs141314578 | C | -0.0665 |
| rs75370926  | A | 0.0339  |
| rs10806746  | A | -0.0203 |
| rs17165365  | C | 0.0292  |
| rs73352953  | T | 0.0343  |
| rs145535615 | C | 0.0642  |
| rs9465936   | G | 0.0146  |
| rs114676809 | T | 0.0512  |
| rs10456430  | A | -0.0506 |
| rs72827827  | T | 0.0303  |
| rs74601915  | C | 0.0473  |
| rs35398163  | A | 0.0319  |
| rs12528356  | C | 0.0906  |
| rs36061316  | A | -0.0201 |
| rs141382271 | A | -0.0683 |
| rs12190942  | C | 0.0382  |
| rs10085258  | T | -0.0206 |
| rs143305981 | G | 0.0384  |
| rs142547443 | T | -0.0724 |
| rs7774391   | A | -0.0138 |
| rs35354215  | G | -0.0498 |
| rs145587407 | A | 0.0756  |
| rs2300423   | G | 0.0629  |
| rs141809254 | T | 0.0698  |
| rs855357    | C | -0.1141 |
| rs12200599  | C | -0.0129 |
| rs75778409  | G | -0.0699 |
| rs78754976  | C | 0.0262  |
| rs115521166 | A | -0.08   |
| rs7747501   | T | -0.0583 |
| rs71566447  | C | -0.0283 |
| rs138887273 | G | -0.0877 |
| rs117480301 | A | -0.0359 |
| rs2876555   | C | -0.0141 |
| rs72963538  | T | -0.0392 |
| rs9479832   | A | -0.0191 |
| rs60911616  | G | -0.018  |
| rs510587    | A | -0.0354 |
| rs117599227 | G | -0.0995 |
| rs1934904   | A | 0.013   |
| rs13206538  | G | 0.0247  |

|             |   |         |
|-------------|---|---------|
| rs117247182 | C | -0.0669 |
| rs9402351   | G | -0.018  |
| rs16900404  | T | -0.0251 |
| rs17057629  | G | 0.0145  |
| rs62406546  | A | -0.0854 |
| rs7761140   | G | -0.0141 |
| rs12190587  | G | 0.0608  |
| rs9393112   | T | -0.0276 |
| rs62432669  | A | -0.096  |
| rs74911991  | T | -0.039  |
| rs1933177   | T | 0.048   |
| rs17627242  | C | 0.0384  |
| rs117125544 | A | -0.0495 |
| rs9386999   | A | -0.0713 |
| rs7739871   | T | 0.0127  |
| rs73599442  | T | 0.0481  |
| rs117731281 | G | -0.0664 |
| rs150642924 | T | -0.0424 |
| rs2165122   | C | 0.0206  |
| rs56240552  | T | -0.0445 |
| rs6903922   | A | -0.0135 |
| rs415446    | C | 0.0131  |
| rs77029318  | A | 0.0196  |
| rs78380086  | G | -0.0645 |
| rs62401421  | G | -0.0389 |
| rs148317771 | A | 0.0494  |
| rs147723688 | A | -0.0321 |
| rs6904769   | C | 0.0218  |
| rs138129120 | C | -0.0324 |
| rs72938036  | T | 0.0262  |
| rs80077916  | G | -0.0304 |
| rs74756259  | T | 0.0265  |
| rs67382538  | C | 0.0407  |
| rs9349158   | C | 0.0183  |
| rs79959226  | T | 0.0262  |
| rs2753977   | C | -0.0199 |
| rs79964174  | C | 0.0419  |
| rs141952015 | A | 0.1021  |
| rs2788942   | G | 0.0133  |
| rs9458223   | G | -0.0145 |
| rs76115148  | G | -0.0296 |
| rs116950002 | C | 0.0318  |
| rs77232508  | T | 0.0546  |
| rs117179436 | A | -0.0964 |
| rs115458883 | C | 0.1183  |
| rs75301026  | G | -0.0395 |
| rs117109994 | G | 0.0582  |

|             |   |         |
|-------------|---|---------|
| rs149830460 | G | -0.0479 |
| rs2146274   | C | 0.0127  |
| rs78699110  | G | 0.0481  |
| rs9474420   | T | -0.0562 |
| rs76115844  | A | -0.0153 |
| rs4710707   | A | 0.023   |
| rs1485363   | G | -0.0129 |
| rs73032045  | A | -0.0244 |
| rs9654578   | A | 0.0574  |
| rs1545092   | C | 0.0138  |
| rs117083306 | G | -0.045  |
| rs116488359 | T | -0.0705 |
| rs115769567 | C | -0.0657 |
| rs62407750  | T | -0.0329 |
| rs115456811 | G | -0.0994 |
| rs116852554 | G | -0.0779 |
| rs13213337  | A | 0.0156  |
| rs7766672   | G | 0.0181  |
| rs78647687  | T | -0.0282 |
| rs1226548   | A | 0.0188  |
| rs57121184  | G | 0.0657  |
| rs9473037   | G | -0.0416 |
| rs111916518 | T | 0.0581  |
| rs142915124 | T | 0.0925  |
| rs13196881  | T | 0.0499  |
| rs9470047   | C | -0.0237 |
| rs17409658  | T | -0.023  |
| rs79597003  | C | 0.0393  |
| rs2144437   | A | -0.0553 |
| rs55967121  | A | 0.0521  |
| rs28971492  | G | 0.044   |
| rs9363587   | A | 0.0535  |
| rs3122369   | C | 0.013   |
| rs62433806  | T | -0.0151 |
| rs2233437   | A | -0.0144 |
| rs1409837   | C | 0.0223  |
| rs74358705  | G | -0.0377 |
| rs150100479 | T | -0.0559 |
| rs35408229  | T | -0.0282 |
| rs2842963   | A | -0.013  |
| rs4710750   | A | 0.0144  |
| rs140132907 | T | 0.0496  |
| rs79825954  | G | 0.0367  |
| rs9375675   | G | 0.0211  |
| rs3010282   | T | 0.0155  |
| rs79140486  | A | 0.0317  |
| rs11155567  | T | -0.0167 |

|             |   |         |
|-------------|---|---------|
| rs12197494  | T | 0.0447  |
| rs78481266  | C | -0.0334 |
| rs117938016 | T | -0.0618 |
| rs7751537   | G | 0.0503  |
| rs9349220   | C | -0.0133 |
| rs78297996  | A | 0.1082  |
| rs35795392  | C | 0.0231  |
| rs2031551   | T | 0.0353  |
| rs12211302  | A | 0.0153  |
| rs115623160 | G | -0.0932 |
| rs41267137  | A | -0.0561 |
| rs116539622 | T | 0.0694  |
| rs113705174 | T | 0.0411  |
| rs9391217   | T | -0.0162 |
| rs56231728  | T | -0.015  |
| rs72823879  | A | -0.0318 |
| rs117163292 | G | 0.0559  |
| rs140433505 | T | -0.0598 |
| rs7759804   | G | -0.0156 |
| rs13209233  | C | -0.0127 |
| rs79770432  | T | 0.0543  |
| rs74842671  | T | 0.0561  |
| rs116845698 | C | 0.0385  |
| rs12206142  | A | 0.038   |
| rs3800232   | T | -0.0197 |
| rs9381122   | C | 0.0177  |
| rs13196624  | A | 0.0317  |
| rs7758977   | T | 0.0164  |
| rs10499179  | G | -0.036  |
| rs113323160 | A | -0.0624 |
| rs2064604   | T | 0.0206  |
| rs12665492  | G | 0.0569  |
| rs62435893  | T | 0.0253  |
| rs58163119  | A | -0.042  |
| rs7771713   | C | 0.0143  |
| rs73775652  | C | 0.0177  |
| rs12204671  | T | 0.0611  |
| rs62389469  | C | -0.0222 |
| rs10948902  | G | 0.0316  |
| rs145698892 | A | 0.0615  |
| rs9360663   | G | -0.0168 |
| rs112581842 | A | -0.0598 |
| rs12197393  | G | -0.0157 |
| rs117620046 | T | -0.0678 |
| rs117245681 | G | 0.0774  |
| rs17143233  | T | 0.0302  |
| rs72947184  | G | 0.0321  |



|             |   |         |
|-------------|---|---------|
| rs151119089 | A | 0.0823  |
| rs2235144   | C | -0.0568 |
| rs117929666 | C | -0.047  |
| rs10948085  | T | -0.0148 |
| rs147930481 | C | 0.1089  |
| rs932477    | A | 0.0212  |
| rs80169501  | C | -0.0751 |
| rs35965870  | A | 0.0198  |
| rs73007465  | C | -0.0285 |
| rs58140569  | G | 0.0149  |
| rs149635339 | C | -0.0618 |
| rs12665096  | A | 0.0127  |
| rs115602828 | C | 0.0524  |
| rs75145031  | T | 0.0216  |
| rs56343863  | G | -0.0386 |
| rs59926254  | C | 0.0209  |
| rs2819974   | T | -0.0152 |
| rs72833065  | C | 0.0857  |
| rs9345131   | C | 0.0393  |
| rs117651719 | A | 0.0643  |
| rs9376370   | A | 0.0166  |
| rs149285538 | T | 0.0581  |
| rs12192393  | G | -0.0173 |
| rs12527089  | T | -0.033  |
| rs115809148 | T | 0.1284  |
| rs12524910  | G | 0.0439  |
| rs9378796   | T | -0.0146 |
| rs72991714  | T | -0.0837 |
| rs75209629  | G | -0.0636 |
| rs697465    | T | -0.0135 |
| rs72833749  | A | -0.0509 |
| rs117183258 | A | 0.0741  |
| rs112450243 | A | 0.0316  |
| rs10458192  | A | -0.0183 |
| rs1397845   | G | 0.0155  |
| rs1322862   | C | 0.0135  |
| rs9375327   | A | -0.0477 |
| rs4959271   | A | 0.018   |
| rs76527487  | G | -0.0879 |
| rs4870513   | T | -0.0129 |
| rs180005    | T | 0.0737  |
| rs223287    | C | 0.0244  |
| rs1050979   | G | -0.0126 |
| rs1016925   | T | 0.0178  |
| rs140493815 | G | 0.0575  |
| rs4506076   | A | 0.016   |
| rs958762    | C | -0.0125 |

|             |   |         |
|-------------|---|---------|
| rs143588486 | G | -0.0522 |
| rs9322315   | G | -0.0244 |
| rs117564808 | T | -0.0351 |
| rs2487403   | C | -0.0213 |
| rs75480731  | C | 0.0926  |
| rs115958920 | T | -0.0423 |
| rs828657    | T | 0.0125  |
| rs76340109  | A | -0.063  |
| rs639777    | G | -0.0141 |
| rs9451596   | G | 0.081   |
| rs115983727 | A | -0.0552 |
| rs73026487  | C | 0.0259  |
| rs16893713  | G | -0.0479 |
| rs139002060 | T | -0.0482 |
| rs79868980  | G | -0.0348 |
| rs1050517   | C | 0.024   |
| rs9504568   | A | 0.0354  |
| rs73367528  | T | 0.0171  |
| rs71572930  | G | -0.0324 |
| rs34753549  | C | -0.0154 |
| rs5026278   | C | 0.0348  |
| rs10484539  | G | 0.0436  |
| rs9395650   | C | -0.0188 |
| rs55707028  | T | -0.0645 |
| rs72995719  | T | -0.0195 |
| rs2763021   | A | 0.0202  |
| rs12203956  | C | -0.0248 |
| rs6569812   | C | -0.0152 |
| rs11753802  | G | 0.0134  |
| rs36113073  | G | -0.0812 |
| rs114528761 | T | 0.061   |
| rs513216    | T | 0.0153  |
| rs10943371  | G | -0.0186 |
| rs78598996  | A | 0.0739  |
| rs111429499 | G | 0.0551  |
| rs141744295 | T | -0.0384 |
| rs78136374  | A | 0.0858  |
| rs62411156  | A | 0.0886  |
| rs56061537  | A | 0.0525  |
| rs12200524  | A | -0.018  |
| rs9366872   | G | 0.0126  |
| rs140092432 | C | 0.0744  |
| rs11752209  | G | -0.0217 |
| rs143102031 | C | -0.098  |
| rs74873441  | G | -0.0732 |
| rs1474710   | T | -0.0335 |
| rs150857648 | A | -0.109  |

|             |   |         |
|-------------|---|---------|
| rs76282826  | A | 0.0493  |
| rs6455455   | C | 0.0232  |
| rs9405976   | G | -0.0144 |
| rs4410751   | T | -0.0136 |
| rs72817801  | C | -0.0733 |
| rs541076    | C | -0.018  |
| rs12197673  | C | 0.0721  |
| rs8180615   | T | -0.0145 |
| rs9378957   | C | 0.0193  |
| rs821292    | G | -0.0209 |
| rs76610007  | C | -0.0342 |
| rs4513792   | G | -0.0225 |
| rs75962000  | A | 0.0572  |
| rs76738896  | T | 0.0346  |
| rs111424769 | G | -0.0798 |
| rs1619049   | T | 0.0198  |
| rs77440450  | A | -0.0258 |
| rs75837827  | A | -0.0227 |
| rs1482445   | T | -0.0177 |
| rs9458596   | G | -0.0671 |
| rs145096356 | A | -0.1184 |
| rs80072717  | G | 0.084   |
| rs62398905  | T | -0.0362 |
| rs9395381   | G | -0.0323 |
| rs9347272   | T | -0.0137 |
| rs78382872  | G | -0.0522 |
| rs72880136  | A | -0.0741 |
| rs79105133  | G | 0.0748  |
| rs1918334   | T | 0.0155  |
| rs9453403   | T | -0.0286 |
| rs62420360  | T | -0.0179 |
| rs3789793   | C | -0.0132 |
| rs148545942 | A | 0.0787  |
| rs4712001   | A | -0.0134 |
| rs61150018  | G | 0.0397  |
| rs117178447 | C | -0.068  |
| rs1962749   | A | 0.027   |
| rs34815181  | A | -0.0852 |
| rs2496639   | T | -0.0196 |
| rs12197252  | A | -0.0379 |
| rs145704363 | A | 0.0594  |
| rs118126095 | G | 0.0638  |
| rs4432994   | T | 0.0316  |
| rs147775550 | T | 0.0904  |
| rs146701865 | A | 0.0469  |
| rs8191782   | T | 0.061   |
| rs77673709  | A | -0.0441 |

|             |   |         |
|-------------|---|---------|
| rs79171795  | G | -0.0479 |
| rs9464966   | C | -0.0144 |
| rs6912271   | T | 0.0268  |
| rs116912878 | A | -0.0525 |
| rs7766157   | G | 0.0206  |
| rs115218879 | A | -0.0582 |
| rs221735    | G | 0.013   |
| rs879159    | A | -0.0817 |
| rs13194405  | G | 0.0157  |
| rs7740664   | T | -0.0211 |
| rs41308309  | A | 0.0565  |
| rs62412948  | T | -0.023  |
| rs73780575  | C | -0.0847 |
| rs78598955  | C | -0.0677 |
| rs41497951  | T | 0.0473  |
| rs75377552  | A | -0.0609 |
| rs4870480   | C | 0.0161  |
| rs943079    | G | 0.015   |
| rs2187213   | A | 0.0139  |
| rs111294277 | C | -0.0632 |
| rs267808    | A | -0.0127 |
| rs1229693   | C | -0.0279 |
| rs61730651  | T | -0.0185 |
| rs4712466   | A | -0.0246 |
| rs205208    | T | 0.0208  |
| rs6901639   | C | 0.0198  |
| rs9384400   | T | 0.0249  |
| rs2493833   | C | 0.0133  |
| rs72874563  | A | 0.0486  |
| rs78416260  | C | 0.113   |
| rs9400482   | T | -0.0192 |
| rs59563594  | A | -0.0952 |
| rs71570812  | A | 0.0558  |
| rs111847338 | A | 0.0361  |
| rs117812465 | A | -0.0639 |
| rs80111909  | A | 0.0621  |
| rs148969162 | T | 0.0612  |
| rs9348927   | A | -0.013  |
| rs80037755  | A | -0.0231 |
| rs118117193 | G | 0.0486  |
| rs2745635   | A | -0.0317 |
| rs7764197   | T | 0.0224  |
| rs79292643  | A | -0.0701 |
| rs78906096  | T | 0.0388  |
| rs77705101  | G | 0.0631  |
| rs73426626  | A | 0.0434  |
| rs113400315 | T | 0.0547  |

|             |   |         |
|-------------|---|---------|
| rs78800707  | C | -0.1457 |
| rs748227    | T | -0.042  |
| rs6936915   | C | 0.0123  |
| rs11759691  | T | -0.0199 |
| rs10807584  | C | -0.0127 |
| rs76633334  | C | -0.0329 |
| rs11755131  | T | -0.014  |
| rs78119392  | G | 0.0699  |
| rs117952484 | C | -0.0803 |
| rs384105    | A | 0.0124  |
| rs62417883  | T | -0.0182 |
| rs35183314  | C | 0.0579  |
| rs172272    | C | 0.0263  |
| rs143679753 | A | 0.0871  |
| rs13200279  | A | 0.0671  |
| rs9445085   | T | 0.0199  |
| rs7740880   | G | 0.0406  |
| rs9345733   | A | 0.0499  |
| rs11757496  | T | -0.0498 |
| rs73718409  | T | -0.0372 |
| rs17618335  | G | 0.057   |
| rs72860448  | C | 0.0132  |
| rs117224807 | C | 0.0634  |
| rs9502088   | C | 0.0198  |
| rs117846699 | T | 0.0488  |
| rs142985379 | A | 0.0704  |
| rs72831707  | T | 0.0453  |
| rs115251449 | G | -0.0605 |
| rs17088106  | A | -0.0531 |
| rs77871658  | C | 0.0714  |
| rs77853384  | T | 0.0344  |
| rs75201597  | G | 0.0445  |
| rs76051250  | A | -0.0476 |
| rs147425425 | T | -0.0594 |
| rs56297647  | A | 0.0582  |
| rs112464557 | C | -0.0969 |
| rs74790524  | C | 0.0407  |
| rs9369649   | C | 0.0122  |
| rs75897880  | C | -0.0699 |
| rs4084217   | G | -0.0202 |
| rs1150567   | C | 0.0366  |
| rs12528537  | A | -0.0587 |
| rs115885550 | T | 0.0601  |
| rs35402192  | C | 0.0231  |
| rs3819403   | T | -0.0238 |
| rs3828927   | T | 0.0134  |
| rs6455372   | T | 0.0168  |

|             |   |         |
|-------------|---|---------|
| rs78757952  | A | -0.0846 |
| rs2295205   | G | -0.0201 |
| rs34805502  | A | -0.0415 |
| rs4637660   | C | -0.0242 |
| rs2235269   | T | 0.0205  |
| rs114772285 | C | -0.033  |
| rs4537158   | T | 0.0743  |
| rs5017599   | G | -0.0476 |
| rs76159240  | T | -0.0606 |
| rs114713905 | A | 0.0902  |
| rs146822273 | A | -0.064  |
| rs11961616  | G | -0.0159 |
| rs6455002   | G | -0.0458 |
| rs6597269   | A | 0.0174  |
| rs72998509  | C | -0.0507 |
| rs11967485  | A | 0.0209  |
| rs6458821   | A | -0.0142 |
| rs9294899   | T | -0.0206 |
| rs117311733 | T | 0.0464  |
| rs17083085  | T | 0.0169  |
| rs407024    | T | -0.0627 |
| rs10948102  | T | 0.0129  |
| rs141816380 | A | 0.0992  |
| rs608255    | C | 0.0158  |
| rs9396529   | T | 0.0171  |
| rs115936161 | C | -0.0547 |
| rs59720758  | C | -0.0296 |
| rs3822849   | G | -0.015  |
| rs12214820  | A | 0.0236  |
| rs2792467   | T | -0.0609 |
| rs111303907 | G | -0.0446 |
| rs6926157   | G | 0.0397  |
| rs28576886  | A | 0.0482  |
| rs147305091 | A | 0.0892  |
| rs10807621  | G | -0.0126 |
| rs139489426 | C | -0.0797 |
| rs79344150  | T | 0.0736  |
| rs75352718  | A | 0.0648  |
| rs2505035   | T | -0.0326 |
| rs117069960 | G | -0.047  |
| rs10447432  | C | 0.1     |
| rs1190798   | C | -0.0616 |
| rs17860840  | A | 0.0618  |
| rs9348528   | A | -0.0155 |
| rs71567654  | T | 0.0214  |
| rs116655995 | A | 0.0552  |
| rs77945565  | T | 0.0794  |

|             |   |         |
|-------------|---|---------|
| rs142832276 | T | -0.0737 |
| rs11962421  | T | 0.0498  |
| rs9399642   | G | 0.0122  |
| rs17348534  | T | 0.0152  |
| rs79253340  | G | -0.0681 |
| rs988309    | G | -0.0294 |
| rs9370979   | G | 0.0152  |
| rs115736156 | A | 0.0345  |
| rs13201880  | G | -0.0455 |
| rs112134339 | T | -0.0723 |
| rs76206780  | A | 0.0354  |
| rs141416490 | C | -0.1104 |
| rs138274389 | C | -0.0718 |
| rs6454648   | A | 0.0198  |
| rs34273859  | T | 0.0264  |
| rs9447269   | C | -0.0204 |
| rs72929079  | T | 0.0752  |
| rs79281039  | C | 0.0249  |
| rs112430465 | G | 0.0847  |
| rs12208278  | A | 0.0151  |
| rs4839760   | C | -0.0128 |
| rs9295069   | T | 0.0341  |
| rs6927917   | A | -0.0163 |
| rs4596494   | T | -0.0496 |
| rs55701430  | A | 0.0192  |
| rs7749680   | G | -0.0167 |
| rs9294162   | G | 0.0333  |
| rs13208270  | A | 0.0245  |
| rs147901870 | C | 0.0432  |
| rs62427644  | G | -0.0327 |
| rs2094442   | C | -0.0196 |
| rs12192017  | C | 0.0249  |
| rs150678222 | T | 0.0659  |
| rs11153822  | T | -0.0125 |
| rs113239707 | T | 0.0394  |
| rs117249716 | C | 0.0483  |
| rs80354513  | T | 0.0384  |
| rs56324439  | A | -0.0285 |
| rs35257641  | G | -0.0567 |
| rs114789960 | C | 0.0688  |
| rs146645113 | A | 0.0525  |
| rs72971879  | C | 0.0204  |
| rs73633151  | G | -0.0214 |
| rs75629635  | C | 0.0361  |
| rs2730847   | C | 0.0121  |
| rs529535    | G | 0.0689  |
| rs62420186  | A | 0.0159  |

|             |   |         |
|-------------|---|---------|
| rs78477460  | C | -0.0369 |
| rs2180105   | T | -0.0804 |
| rs55993288  | G | 0.0563  |
| rs77984790  | T | 0.03    |
| rs115033195 | G | 0.0504  |
| rs6902672   | C | 0.0185  |
| rs78335089  | G | -0.021  |
| rs143718349 | G | 0.1082  |
| rs117709083 | A | -0.0798 |
| rs11755555  | A | -0.0213 |
| rs2245409   | G | -0.0183 |
| rs352099    | A | -0.0142 |
| rs9357566   | T | 0.0133  |
| rs75665649  | C | 0.0749  |
| rs6922102   | T | 0.0148  |
| rs75646579  | T | 0.0301  |
| rs9295731   | T | 0.0344  |
| rs380825    | A | 0.0133  |
| rs6929268   | C | -0.0132 |
| rs79236020  | T | -0.051  |
| rs10454302  | C | -0.0527 |
| rs2495994   | G | -0.0232 |
| rs2806373   | G | 0.0139  |
| rs9388388   | T | 0.0138  |
| rs117793638 | G | -0.0505 |
| rs79268175  | T | 0.0394  |
| rs139501873 | T | -0.0898 |
| rs9458246   | C | 0.026   |
| rs6923082   | T | -0.0125 |
| rs117402056 | A | 0.0514  |
| rs72855994  | T | 0.0568  |
| rs9450232   | G | 0.0157  |
| rs117545513 | T | -0.0497 |
| rs116226296 | A | 0.0676  |
| rs9320941   | C | -0.018  |
| rs150993367 | T | 0.0931  |
| rs9378314   | A | -0.0197 |
| rs79800690  | G | 0.0498  |
| rs73761407  | C | -0.0332 |
| rs12207591  | G | -0.0207 |
| rs28634272  | C | -0.0796 |
| rs112620420 | G | -0.0735 |
| rs73026185  | A | -0.0457 |
| rs471255    | C | 0.0222  |
| rs4946678   | C | -0.0144 |
| rs73006343  | T | -0.0442 |
| rs6931002   | G | 0.0125  |



|             |   |         |
|-------------|---|---------|
| rs77554466  | T | 0.111   |
| rs10485414  | T | 0.0212  |
| rs72866311  | C | -0.0245 |
| rs12194922  | T | -0.0647 |
| rs74767227  | T | 0.0444  |
| rs115937691 | G | 0.0267  |
| rs79382527  | G | 0.0425  |
| rs6932796   | T | -0.0772 |
| rs844134    | T | 0.0189  |
| rs146123284 | A | -0.0836 |
| rs144680988 | C | -0.0922 |
| rs11752412  | T | -0.0559 |
| rs10080757  | C | -0.0154 |
| rs115403893 | A | 0.0619  |
| rs140931532 | T | -0.0548 |
| rs79159299  | T | 0.0329  |
| rs71551270  | C | -0.0532 |
| rs12213467  | T | 0.013   |
| rs12200663  | T | -0.0127 |
| rs1076673   | T | 0.014   |
| rs74786154  | A | 0.0655  |
| rs75256899  | A | 0.0449  |
| rs117207089 | G | -0.0711 |
| rs113909235 | A | -0.0547 |
| rs10484813  | G | -0.017  |
| rs117481755 | G | -0.0858 |
| rs9399997   | T | -0.0194 |
| rs17076418  | G | 0.0419  |
| rs9395787   | A | -0.0127 |
| rs62436330  | C | 0.0328  |
| rs1326591   | G | -0.1026 |
| rs9370225   | G | 0.0125  |
| rs13216344  | C | 0.0289  |
| rs4716079   | C | 0.0166  |
| rs9460847   | A | -0.0199 |
| rs2818126   | C | -0.0227 |
| rs1064713   | A | -0.0482 |
| rs777609    | T | 0.012   |
| rs10944035  | T | -0.0131 |
| rs13205973  | G | 0.015   |
| rs78522703  | G | 0.0458  |
| rs55665958  | C | 0.0577  |
| rs78859390  | T | -0.0968 |
| rs72827430  | C | 0.0597  |
| rs143432463 | G | 0.0217  |
| rs74886564  | C | 0.0185  |
| rs72990756  | G | 0.0603  |

|             |   |         |
|-------------|---|---------|
| rs11754940  | G | 0.036   |
| rs6457897   | C | -0.0133 |
| rs73010626  | A | -0.0531 |
| rs117550016 | T | -0.0631 |
| rs7771562   | T | 0.058   |
| rs77119381  | T | 0.0807  |
| rs4870306   | G | -0.0135 |
| rs9365906   | C | -0.0124 |
| rs140111526 | T | 0.03    |
| rs765338    | G | 0.02    |
| rs73735244  | C | 0.0353  |
| rs112748126 | C | 0.0446  |
| rs139162074 | A | -0.076  |
| rs536980    | C | 0.0146  |
| rs17667167  | T | -0.0134 |
| rs115387803 | T | 0.0608  |
| rs228141    | C | -0.0126 |
| rs1160475   | G | 0.02    |
| rs59610822  | T | 0.0193  |
| rs117480495 | G | -0.058  |
| rs75310373  | G | -0.0532 |
| rs34460753  | T | 0.052   |
| rs4270816   | T | 0.016   |
| rs17058099  | C | -0.0337 |
| rs6454267   | G | -0.0376 |
| rs75269259  | T | 0.0522  |
| rs16888819  | T | -0.0179 |
| rs149792345 | G | 0.0199  |
| rs118149501 | A | 0.0738  |
| rs672311    | T | 0.0137  |
| rs76020312  | A | 0.0626  |
| rs11755828  | A | 0.0235  |
| rs112077510 | T | -0.0483 |
| rs6911282   | A | -0.0173 |
| rs139415713 | T | 0.0439  |
| rs146597926 | T | 0.0555  |
| rs1268123   | T | -0.0163 |
| rs145828523 | A | 0.0519  |
| rs115584651 | C | -0.0381 |
| rs76212347  | T | -0.0571 |
| rs116462846 | A | 0.072   |
| rs62391489  | C | 0.021   |
| rs1226540   | T | -0.0131 |
| rs79864131  | G | -0.0635 |
| rs1407220   | G | 0.0154  |
| rs117292830 | A | 0.0727  |
| rs117626851 | G | -0.054  |

|             |   |         |
|-------------|---|---------|
| rs6933819   | G | 0.0223  |
| rs117076332 | A | -0.1103 |
| rs11243022  | T | 0.0658  |
| rs117475326 | A | -0.0452 |
| rs9321271   | C | 0.0284  |
| rs112221359 | T | 0.0178  |
| rs9347350   | T | 0.017   |
| rs2267955   | G | -0.0232 |
| rs62412954  | T | -0.0505 |
| rs6455130   | T | -0.021  |
| rs75438188  | G | 0.1034  |
| rs675640    | A | -0.0205 |
| rs10455150  | A | 0.0145  |
| rs11155282  | G | 0.0124  |
| rs148499459 | C | 0.051   |
| rs147257756 | G | 0.0832  |
| rs11155558  | A | 0.0155  |
| rs77739330  | A | 0.0629  |
| rs114526872 | A | -0.079  |
| rs117498119 | C | 0.0831  |
| rs140795895 | T | 0.0901  |
| rs1485375   | C | -0.0121 |
| rs78995803  | T | -0.0346 |
| rs77009034  | T | 0.0553  |
| rs4609005   | A | -0.0485 |
| rs9405981   | T | 0.0147  |
| rs144957017 | G | -0.0536 |
| rs10457506  | A | -0.0436 |
| rs12191820  | T | -0.014  |
| rs2802453   | T | -0.0173 |
| rs56385537  | A | 0.0285  |
| rs9394404   | T | -0.0289 |
| rs75920973  | A | -0.1116 |
| rs116106982 | T | -0.0459 |
| rs79966981  | C | 0.0427  |
| rs116606878 | A | 0.0596  |
| rs144851197 | T | -0.075  |
| rs529788    | C | -0.015  |
| rs9346723   | T | 0.0645  |
| rs62430810  | T | -0.0352 |
| rs2281435   | T | 0.0417  |
| rs4947170   | A | -0.0803 |
| rs12205236  | A | 0.014   |
| rs62408588  | A | -0.0643 |
| rs6910739   | T | 0.0134  |
| rs117730750 | T | 0.0673  |
| rs78057115  | C | 0.0782  |

|             |   |         |
|-------------|---|---------|
| rs12201447  | G | 0.0236  |
| rs55849430  | T | 0.0163  |
| rs146393298 | T | -0.0494 |
| rs9361533   | G | -0.0162 |
| rs62432763  | A | 0.0251  |
| rs72867559  | A | 0.0421  |
| rs77985133  | A | -0.0445 |
| rs2498232   | C | 0.055   |
| rs1742531   | A | 0.0189  |
| rs7769514   | G | 0.0185  |
| rs114435103 | T | 0.0516  |
| rs2820350   | A | -0.0204 |
| rs13217078  | A | -0.0436 |
| rs11755847  | T | 0.0715  |
| rs13219690  | A | 0.0157  |
| rs11756088  | T | -0.0534 |
| rs9496516   | G | 0.0396  |
| rs117435507 | T | -0.0965 |
| rs9342101   | T | -0.0145 |
| rs77653701  | A | 0.0705  |
| rs78034479  | G | -0.0397 |
| rs9368815   | C | -0.031  |
| rs114087172 | C | 0.0565  |
| rs116818216 | T | 0.0472  |
| rs9363051   | T | 0.0128  |
| rs72984871  | C | 0.0859  |
| rs150897668 | G | 0.0617  |
| rs62432361  | C | 0.025   |
| rs139649381 | A | 0.0506  |
| rs78187052  | A | -0.0718 |
| rs6921543   | G | 0.0443  |
| rs9392297   | T | -0.036  |
| rs12207703  | G | -0.0158 |
| rs72901687  | A | -0.0394 |
| rs12200342  | C | 0.0142  |
| rs2769345   | C | 0.0121  |
| rs74435299  | C | -0.0502 |
| rs72916565  | A | -0.0285 |
| rs118002022 | C | -0.0372 |
| rs61574843  | T | -0.0349 |
| rs72846526  | T | 0.0208  |
| rs3814072   | T | 0.0223  |
| rs41292886  | T | 0.0311  |
| rs145247370 | A | 0.0851  |
| rs116954615 | G | 0.0456  |
| rs116799780 | A | 0.0541  |
| rs117255992 | G | -0.0739 |

|             |   |         |
|-------------|---|---------|
| rs4895860   | A | -0.0576 |
| rs73002128  | G | 0.0573  |
| rs12210267  | T | 0.0132  |
| rs114926417 | A | -0.061  |
| rs10946674  | G | -0.0132 |
| rs4383818   | G | 0.0153  |
| rs117416990 | T | 0.0665  |
| rs7761103   | T | -0.0123 |
| rs116427122 | C | 0.0684  |
| rs6921059   | T | -0.0472 |
| rs149671834 | G | 0.0911  |
| rs12196511  | T | -0.0221 |
| rs12204269  | A | -0.0256 |
| rs72912851  | A | -0.0551 |
| rs746096    | T | -0.0178 |
| rs114096814 | T | -0.0682 |
| rs9358817   | A | -0.0118 |
| rs77980411  | A | -0.0524 |
| rs6913732   | G | -0.0295 |
| rs116315805 | G | -0.0494 |
| rs75506523  | T | 0.074   |
| rs9353761   | G | -0.012  |
| rs111675938 | C | 0.0736  |
| rs12210659  | G | 0.014   |
| rs72925407  | C | 0.0407  |
| rs72956707  | G | 0.0229  |
| rs151086917 | G | -0.0541 |
| rs114199601 | A | 0.0634  |
| rs142512113 | C | -0.0767 |
| rs147759922 | C | -0.0417 |
| rs8180539   | A | 0.0125  |
| rs13213832  | G | -0.0176 |
| rs13213123  | T | 0.0468  |
| rs62448866  | T | -0.0638 |
| rs77488117  | T | 0.0422  |
| rs11759033  | T | 0.022   |
| rs4946576   | C | -0.0715 |
| rs78539857  | A | 0.0572  |
| rs117868400 | G | -0.0243 |
| rs10085328  | G | 0.0197  |
| rs114300920 | C | 0.0428  |
| rs35806880  | C | 0.0515  |
| rs28594633  | A | 0.0423  |
| rs76390570  | A | 0.0566  |
| rs12154078  | G | 0.0356  |
| rs140077194 | A | -0.0843 |
| rs9492410   | A | -0.0154 |

|             |   |         |
|-------------|---|---------|
| rs77114388  | T | 0.0292  |
| rs12211622  | T | 0.0283  |
| rs868905    | C | 0.0119  |
| rs144438383 | T | 0.0667  |
| rs2076308   | C | 0.0161  |
| rs1266787   | C | 0.033   |
| rs73028191  | C | 0.0475  |
| rs262915    | G | -0.0452 |
| rs12528445  | T | 0.0187  |
| rs73577434  | T | -0.0503 |
| rs148346782 | G | -0.0712 |
| rs117979657 | C | 0.0403  |
| rs76415553  | A | -0.0624 |
| rs13202730  | G | 0.0288  |
| rs117592779 | C | 0.0702  |
| rs55698849  | C | 0.0459  |
| rs6927647   | G | -0.0221 |
| rs138532649 | T | 0.086   |
| rs150338298 | T | 0.0716  |
| rs138130332 | C | -0.0249 |
| rs9494673   | A | -0.0244 |
| rs80257655  | G | -0.0456 |
| rs12182252  | G | 0.0132  |
| rs115236394 | A | 0.0326  |
| rs146562348 | T | 0.0398  |
| rs114215488 | A | 0.0442  |
| rs16881835  | C | -0.0278 |
| rs2324227   | C | 0.0238  |
| rs3804527   | C | 0.0204  |
| rs80003300  | C | 0.0232  |
| rs139194191 | G | -0.086  |
| rs1886241   | C | 0.0453  |
| rs12664350  | T | -0.021  |
| rs79815996  | T | 0.041   |
| rs523536    | C | -0.0289 |
| rs112789860 | T | -0.1089 |
| rs74976211  | T | 0.074   |
| rs77079164  | C | -0.0367 |
| rs59871575  | A | 0.0341  |
| rs12206888  | A | 0.0252  |
| rs6915641   | A | 0.068   |
| rs74702185  | T | -0.0342 |
| rs72849702  | T | -0.0202 |
| rs9485335   | G | 0.0165  |
| rs1276643   | A | 0.0567  |
| rs13218460  | A | 0.012   |
| rs196709    | A | 0.0222  |

|             |   |         |
|-------------|---|---------|
| rs11154282  | A | -0.0128 |
| rs12663089  | G | -0.0167 |
| rs17815180  | C | -0.0983 |
| rs75262380  | A | -0.0454 |
| rs1445287   | T | -0.0128 |
| rs7771631   | A | 0.0147  |
| rs12524704  | C | -0.0204 |
| rs113029951 | C | 0.0997  |
| rs2018894   | T | -0.0136 |
| rs807904    | A | -0.0144 |
| rs118124932 | T | 0.0649  |
| rs11966733  | A | -0.0584 |
| rs74557262  | C | -0.0488 |
| rs4712578   | A | -0.0137 |
| rs74366840  | T | -0.0313 |
| rs36062337  | T | 0.0203  |
| rs140654241 | A | 0.0767  |
| rs143326101 | T | 0.088   |
| rs9969033   | G | 0.0147  |
| rs9321061   | A | 0.0115  |
| rs76339198  | C | 0.0756  |
| rs2140034   | T | -0.0197 |
| rs10949381  | C | -0.0119 |
| rs12214353  | G | -0.0489 |
| rs73004733  | A | -0.0553 |
| rs80127959  | C | 0.0655  |
| rs2015467   | T | 0.0409  |
| rs13205584  | A | 0.0628  |
| rs62407996  | G | -0.0279 |
| rs76693637  | A | -0.0404 |
| rs12211639  | C | 0.0136  |
| rs73028667  | C | 0.0273  |
| rs76665517  | C | 0.0302  |
| rs2983509   | A | -0.0127 |
| rs236391    | C | -0.0129 |
| rs9398071   | C | -0.0143 |
| rs767860    | A | 0.0119  |
| rs115680002 | G | -0.0843 |
| rs148824683 | T | 0.0572  |
| rs9294597   | A | -0.0368 |
| rs113075418 | A | 0.0287  |
| rs74626027  | A | -0.0232 |
| rs78693146  | T | 0.0197  |
| rs61448283  | T | -0.0504 |
| rs79096514  | A | -0.0469 |
| rs76945403  | C | -0.0851 |
| rs55856113  | G | 0.0237  |

|             |   |         |
|-------------|---|---------|
| rs143193030 | G | 0.0482  |
| rs140068881 | T | -0.0765 |
| rs150483277 | A | 0.0312  |
| rs846978    | T | -0.0209 |
| rs116978893 | C | -0.0403 |
| rs113658918 | C | -0.0716 |
| rs4962255   | G | -0.0216 |
| rs139072234 | C | 0.0771  |
| rs9322138   | A | -0.0139 |
| rs12203869  | T | 0.0132  |
| rs7754435   | A | 0.0878  |
| rs9459498   | G | 0.0139  |
| rs138751275 | T | 0.0663  |
| rs964420    | G | 0.0121  |
| rs1599056   | A | 0.0611  |
| rs1853146   | A | -0.0122 |
| rs9492364   | C | -0.014  |
| rs117352334 | T | 0.0423  |
| rs17772897  | C | -0.0169 |
| rs75817810  | A | 0.035   |
| rs7766795   | G | -0.0125 |
| rs4716310   | G | 0.0153  |
| rs650342    | C | -0.0139 |
| rs9321994   | G | 0.0195  |
| rs11538984  | C | 0.0573  |
| rs34794236  | C | 0.0447  |
| rs9379643   | A | 0.0141  |
| rs114020237 | A | -0.0713 |
| rs150812071 | C | 0.0632  |
| rs111765040 | A | 0.0159  |
| rs35249926  | T | 0.0169  |
| rs76542502  | G | 0.049   |
| rs9376408   | T | 0.0156  |
| rs10945891  | C | -0.0216 |
| rs113102559 | T | -0.066  |
| rs77209735  | C | 0.0949  |
| rs117769709 | T | 0.0392  |
| rs3734903   | T | 0.0278  |
| rs59124372  | T | 0.0143  |
| rs9491123   | A | -0.0548 |
| rs72831692  | T | 0.0588  |
| rs141738411 | C | -0.0738 |
| rs74348304  | A | 0.0574  |
| rs4557511   | T | -0.0137 |
| rs4276495   | T | 0.0135  |
| rs149990048 | C | -0.0567 |
| rs74809754  | A | -0.022  |



|             |   |         |
|-------------|---|---------|
| rs16894544  | A | 0.0296  |
| rs75628159  | T | 0.0322  |
| rs111986715 | G | 0.0646  |
| rs76599837  | C | -0.0232 |
| rs75472965  | G | -0.0394 |
| rs9505291   | G | -0.0282 |
| rs12190326  | A | 0.0275  |
| rs138704807 | G | 0.0807  |
| rs16897954  | A | 0.0375  |
| rs113660916 | T | -0.0623 |
| rs499466    | C | -0.012  |
| rs12527133  | C | -0.0376 |
| rs17574500  | T | 0.017   |
| rs138165380 | A | 0.031   |
| rs149651374 | T | -0.0255 |
| rs7746854   | C | 0.0118  |
| rs6458308   | C | 0.0121  |
| rs62423789  | A | 0.0514  |
| rs77138841  | C | 0.041   |
| rs13205478  | T | -0.0138 |
| rs142703670 | A | 0.075   |
| rs34923767  | T | 0.0309  |
| rs7754553   | G | -0.0324 |
| rs118102217 | A | 0.1076  |
| rs148130390 | C | 0.0575  |
| rs79210306  | T | 0.1     |
| rs62401199  | T | 0.0246  |
| rs62433169  | A | -0.0713 |
| rs12192953  | T | -0.0553 |
| rs62427867  | C | 0.0309  |
| rs74482173  | A | 0.0501  |
| rs58334434  | T | -0.0333 |
| rs116378338 | T | -0.0491 |
| rs62422696  | A | -0.0389 |
| rs1413601   | C | -0.0152 |
| rs117021682 | T | -0.0497 |
| rs9372877   | T | 0.0543  |
| rs116972215 | T | -0.0439 |
| rs318487    | G | 0.0154  |
| rs57967133  | T | 0.0169  |
| rs72954164  | A | -0.0794 |
| rs11155308  | A | -0.0266 |
| rs115037482 | C | -0.057  |
| rs11961437  | A | 0.0358  |
| rs144112342 | C | 0.0638  |
| rs117313106 | A | -0.061  |
| rs9372529   | C | -0.0191 |

|             |   |         |
|-------------|---|---------|
| rs408889    | A | -0.0119 |
| rs1486761   | T | 0.0117  |
| rs9366016   | C | -0.0269 |
| rs116320231 | A | -0.0259 |
| rs6916515   | A | 0.0174  |
| rs12190943  | C | 0.0285  |
| rs9365736   | A | 0.0169  |
| rs56193336  | A | -0.0334 |
| rs11752829  | T | -0.0476 |
| rs4715523   | A | -0.012  |
| rs2340748   | T | -0.0128 |
| rs74749089  | T | 0.0728  |
| rs7771538   | A | 0.0651  |
| rs76775154  | C | 0.0496  |
| rs76465737  | A | 0.0606  |
| rs9392320   | A | -0.0119 |
| rs3024994   | T | 0.0368  |
| rs139567883 | C | 0.0678  |
| rs117913137 | C | 0.057   |
| rs34923036  | T | 0.0277  |
| rs76396345  | C | -0.0411 |
| rs9406122   | G | 0.0203  |
| rs142869390 | A | -0.0376 |
| rs144637238 | A | -0.0616 |
| rs73614006  | C | -0.0238 |
| rs114248015 | T | 0.0532  |
| rs6906202   | C | 0.0139  |
| rs75408463  | G | 0.0331  |
| rs9401591   | A | 0.0562  |
| rs12660660  | T | 0.0667  |
| rs77017049  | T | -0.014  |
| rs9399667   | G | 0.023   |
| rs72825059  | T | -0.0376 |
| rs6557389   | T | -0.0146 |
| rs112853751 | T | -0.0839 |
| rs17639308  | C | -0.0184 |
| rs9369151   | G | 0.0158  |
| rs12154060  | G | -0.0396 |
| rs17445591  | A | -0.0192 |
| rs72849175  | G | 0.0339  |
| rs151093994 | A | 0.0515  |
| rs75328481  | A | 0.0394  |
| rs146919999 | T | 0.0839  |
| rs76931947  | G | 0.0615  |
| rs138833403 | T | 0.0825  |
| rs146695676 | C | 0.0774  |
| rs2635446   | C | -0.0185 |

|             |   |         |
|-------------|---|---------|
| rs79950704  | A | -0.0313 |
| rs9473201   | T | -0.0949 |
| rs6924562   | T | 0.0121  |
| rs148373102 | A | -0.0864 |
| rs76127820  | T | 0.0433  |
| rs6939385   | G | -0.0228 |
| rs4959688   | G | -0.02   |
| rs114643255 | A | -0.0425 |
| rs77447476  | C | 0.0818  |
| rs72840810  | G | -0.0271 |
| rs75990502  | G | -0.0595 |
| rs1757973   | G | 0.0132  |
| rs112718726 | A | -0.0885 |
| rs12660487  | G | 0.0649  |
| rs149771331 | C | 0.041   |
| rs75764140  | T | 0.04    |
| rs75885118  | C | -0.036  |
| rs9467372   | T | -0.0859 |
| rs7748810   | G | -0.0182 |
| rs12529883  | A | 0.0362  |
| rs13195776  | T | -0.023  |
| rs17722237  | A | 0.0124  |
| rs78146023  | A | -0.0514 |
| rs897099    | T | -0.0393 |
| rs73586939  | A | -0.0898 |
| rs795213    | A | -0.0126 |
| rs12530098  | T | 0.0296  |
| rs77703928  | A | 0.0491  |
| rs75835956  | A | 0.0397  |
| rs80223363  | T | 0.0552  |
| rs78361121  | G | 0.0654  |
| rs77178280  | G | 0.0463  |
| rs148176000 | T | -0.0483 |
| rs75630080  | C | -0.0555 |
| rs76233003  | A | 0.0598  |
| rs9457329   | A | 0.019   |
| rs627358    | A | 0.012   |
| rs75244712  | A | 0.0478  |
| rs55912985  | T | 0.0414  |
| rs9384363   | A | -0.0264 |
| rs7765395   | T | 0.0145  |
| rs12526330  | C | -0.0187 |
| rs41441749  | T | 0.0153  |
| rs142419325 | C | 0.0507  |
| rs79964987  | T | 0.0872  |
| rs16899319  | T | 0.0357  |
| rs667078    | G | -0.0136 |

|             |   |         |
|-------------|---|---------|
| rs9363661   | A | 0.0178  |
| rs76093384  | A | -0.0622 |
| rs139927758 | A | 0.0563  |
| rs9342660   | C | -0.0145 |
| rs72901307  | G | 0.0277  |
| rs141014363 | C | -0.0712 |
| rs79260876  | A | 0.0436  |
| rs748550    | T | 0.0315  |
| rs548826    | T | -0.0557 |
| rs4709732   | T | 0.0119  |
| rs1226527   | C | 0.0434  |
| rs77920493  | T | 0.087   |
| rs117060047 | T | -0.0451 |
| rs114475039 | T | -0.0419 |
| rs9345854   | A | -0.0131 |
| rs118148704 | A | -0.0772 |
| rs74187450  | G | -0.0343 |
| rs79202141  | C | -0.0653 |
| rs147599707 | T | 0.0628  |
| rs117795127 | T | -0.0855 |
| rs138314378 | A | 0.0443  |
| rs79977265  | T | -0.0531 |
| rs77933553  | T | 0.0277  |
| rs4711769   | C | 0.0142  |
| rs240763    | T | -0.0166 |
| rs9321502   | C | -0.0117 |
| rs12199089  | C | 0.0492  |
| rs72865526  | T | -0.0185 |
| rs79908603  | T | 0.0649  |
| rs2206978   | A | -0.0515 |
| rs138689880 | A | 0.0856  |
| rs2816223   | G | -0.0187 |
| rs6569691   | C | 0.0176  |
| rs749659    | T | -0.0273 |
| rs138008618 | T | -0.044  |
| rs76370341  | A | 0.0406  |
| rs12216113  | G | 0.0117  |
| rs10498658  | T | -0.0142 |
| rs75887241  | C | 0.0498  |
| rs17558183  | A | 0.0526  |
| rs9372397   | T | 0.0113  |
| rs72876079  | C | 0.0307  |
| rs117502166 | G | -0.0474 |
| rs9343497   | C | 0.0311  |
| rs12205009  | C | -0.0151 |
| rs72833873  | A | 0.0151  |
| rs148268499 | A | 0.0788  |

|             |   |         |
|-------------|---|---------|
| rs146925628 | T | 0.077   |
| rs12526866  | G | -0.0459 |
| rs17753839  | G | -0.0604 |
| rs78965803  | A | -0.0513 |
| rs10484959  | G | -0.0262 |
| rs78272961  | C | -0.0398 |
| rs56098473  | C | 0.0146  |
| rs78917720  | A | -0.0766 |
| rs6930752   | A | 0.0159  |
| rs9493793   | G | -0.0166 |
| rs13197551  | C | 0.03    |
| rs116107402 | G | -0.0598 |
| rs112110051 | A | -0.0304 |
| rs115388133 | T | -0.0383 |
| rs146873237 | C | -0.035  |
| rs115328834 | G | -0.0318 |
| rs179942    | T | 0.014   |
| rs9345263   | A | -0.0121 |
| rs146780523 | A | 0.1167  |
| rs11756333  | G | -0.0359 |
| rs112497407 | T | -0.0284 |
| rs1265251   | A | 0.0365  |
| rs76358326  | C | 0.0284  |
| rs62435598  | G | 0.0279  |
| rs62401163  | C | 0.0257  |
| rs76086990  | T | 0.0251  |
| rs73373091  | T | -0.0377 |
| rs115905035 | C | 0.0615  |
| rs35621098  | A | -0.0911 |
| rs2184453   | C | -0.0117 |
| rs76749940  | A | -0.0583 |
| rs9472543   | C | -0.0512 |
| rs12663803  | T | 0.0186  |
| rs117015197 | T | 0.0594  |
| rs72924793  | C | 0.0201  |
| rs1544168   | C | -0.0126 |
| rs77173674  | T | 0.0722  |
| rs78520004  | T | -0.0339 |
| rs72997017  | T | -0.0341 |
| rs150579764 | T | 0.0469  |
| rs2326918   | G | -0.0167 |
| rs115596157 | C | -0.0734 |
| rs9454653   | C | -0.0775 |
| rs1890542   | C | 0.0362  |
| rs11756191  | T | 0.0153  |
| rs2326357   | T | 0.0158  |
| rs116608512 | G | 0.0336  |

|             |   |         |
|-------------|---|---------|
| rs115573365 | T | -0.0708 |
| rs72889324  | G | 0.0375  |
| rs10214526  | C | -0.0227 |
| rs72815658  | T | -0.0155 |
| rs13193475  | T | -0.0376 |
| rs7755652   | T | -0.0112 |
| rs150479150 | A | 0.0475  |
| rs7765898   | A | -0.0316 |
| rs13195323  | C | -0.0448 |
| rs9377073   | G | 0.0237  |
| rs12055715  | T | 0.0118  |
| rs9446650   | T | -0.0171 |
| rs11752653  | T | 0.012   |
| rs117819382 | T | -0.0947 |
| rs115250714 | G | 0.0536  |
| rs11153367  | C | -0.0116 |
| rs118086453 | A | 0.0919  |
| rs112448721 | C | 0.0571  |
| rs1889289   | T | 0.0222  |
| rs144660617 | A | -0.0643 |
| rs148318354 | C | -0.0564 |
| rs1037881   | A | 0.0134  |
| rs9380766   | C | -0.0112 |
| rs6934866   | A | -0.0143 |
| rs62432300  | A | -0.0256 |
| rs62405932  | C | 0.0223  |
| rs2770125   | T | 0.0461  |
| rs9376016   | T | -0.0334 |
| rs57225509  | G | 0.0771  |
| rs9397359   | T | 0.0129  |
| rs77232230  | A | 0.0744  |
| rs520318    | C | -0.0133 |
| rs9379644   | C | -0.093  |
| rs114862040 | T | 0.0527  |
| rs9328376   | T | 0.012   |
| rs62431594  | C | 0.0624  |
| rs73745852  | C | -0.0281 |
| rs56402635  | C | 0.0483  |
| rs76301448  | G | -0.0618 |
| rs112906420 | T | -0.0337 |
| rs9358986   | A | -0.0113 |
| rs10944578  | G | 0.0152  |
| rs62423578  | T | -0.0379 |
| rs113067695 | A | 0.0742  |
| rs17062666  | G | -0.032  |
| rs117924626 | A | -0.0485 |
| rs117499398 | A | -0.0441 |

|             |   |         |
|-------------|---|---------|
| rs734242    | C | -0.0135 |
| rs117785035 | A | 0.1162  |
| rs435612    | A | 0.0189  |
| rs78055825  | T | 0.0561  |
| rs115022680 | G | -0.0467 |
| rs111693731 | A | 0.0866  |
| rs16883400  | A | -0.0487 |
| rs75367177  | A | 0.0366  |
| rs149816189 | C | -0.064  |
| rs9365407   | G | -0.0168 |
| rs71568844  | A | 0.0755  |
| rs76189782  | T | -0.0492 |
| rs10457161  | T | -0.0128 |
| rs9357703   | G | -0.0124 |
| rs2179093   | G | 0.0116  |
| rs57030570  | A | 0.031   |
| rs11759763  | G | 0.0242  |
| rs3213536   | T | -0.0505 |
| rs143739466 | T | 0.095   |
| rs75120063  | A | 0.0366  |
| rs2781562   | A | -0.0141 |
| rs140845898 | G | -0.0479 |
| rs150275472 | T | 0.0695  |
| rs6915702   | A | -0.0123 |
| rs80340126  | A | 0.0288  |
| rs389746    | A | -0.0227 |
| rs62432363  | A | -0.0505 |
| rs75570691  | C | 0.0262  |
| rs142414701 | G | 0.1005  |
| rs7756100   | C | 0.0436  |
| rs116867480 | A | -0.0767 |
| rs846996    | A | 0.022   |
| rs7764498   | T | -0.0477 |
| rs74816853  | T | 0.094   |
| rs56005436  | A | 0.0703  |
| rs12200903  | G | 0.0244  |
| rs11962839  | T | -0.0156 |
| rs117831466 | T | 0.0397  |
| rs12661464  | A | 0.0182  |
| rs56285624  | C | -0.0902 |
| rs79386604  | T | 0.034   |
| rs75338457  | T | 0.0621  |
| rs76958929  | C | -0.0437 |
| rs145833614 | T | -0.0543 |
| rs12214915  | A | 0.0797  |
| rs76703121  | A | -0.0138 |
| rs72827461  | T | -0.0315 |

|             |   |         |
|-------------|---|---------|
| rs2192      | C | -0.022  |
| rs11756340  | C | 0.0456  |
| rs17071767  | C | -0.0144 |
| rs111594447 | T | 0.051   |
| rs2803054   | C | 0.0111  |
| rs221746    | A | -0.0111 |
| rs112486509 | A | -0.0376 |
| rs1931005   | T | -0.0144 |
| rs73589101  | G | 0.0232  |
| rs141268643 | A | 0.0934  |
| rs150028286 | A | 0.0605  |
| rs9322617   | T | -0.0113 |
| rs75155434  | T | 0.021   |
| rs72967553  | C | 0.0296  |
| rs13215048  | A | -0.0569 |
| rs7450390   | A | -0.0194 |
| rs72861166  | T | -0.0778 |
| rs6925778   | T | -0.0162 |
| rs9444173   | C | 0.0245  |
| rs35616144  | G | -0.0142 |
| rs80078771  | C | -0.0201 |
| rs78256488  | A | -0.0265 |
| rs12206958  | A | 0.0173  |
| rs148692466 | T | 0.0553  |
| rs1327665   | A | 0.0184  |
| rs9376260   | A | 0.0116  |
| rs113267580 | C | -0.0298 |
| rs6911836   | A | -0.0779 |
| rs74517173  | A | -0.0292 |
| rs111625475 | G | -0.0726 |
| rs11968222  | G | 0.0197  |
| rs34474291  | T | -0.0285 |
| rs12527344  | C | -0.0201 |
| rs7745414   | T | 0.0468  |
| rs113447878 | T | -0.0402 |
| rs12213583  | A | -0.0184 |
| rs79256101  | C | 0.0412  |
| rs789483    | T | 0.0117  |
| rs2225036   | A | -0.0142 |
| rs78799498  | A | 0.0456  |
| rs6458389   | T | -0.0155 |
| rs197461    | A | 0.0112  |
| rs7755470   | T | 0.0208  |
| rs115535118 | A | 0.0679  |
| rs78746307  | C | 0.062   |
| rs9496978   | C | -0.0226 |
| rs6940131   | T | 0.0189  |



|             |   |         |
|-------------|---|---------|
| rs117560596 | A | -0.0338 |
| rs77789012  | C | 0.053   |
| rs9296239   | C | 0.0203  |
| rs238053    | A | -0.0134 |
| rs72951456  | T | 0.0249  |
| rs142346229 | A | 0.0969  |
| rs56883200  | C | 0.0207  |
| rs6935086   | C | 0.0223  |
| rs56969383  | G | 0.0208  |
| rs911837    | T | 0.0389  |
| rs55860270  | A | -0.0175 |
| rs11753766  | T | 0.0261  |
| rs34289240  | T | 0.0734  |
| rs75031674  | A | -0.0356 |
| rs116834573 | A | -0.0549 |
| rs62418780  | A | -0.0688 |
| rs365475    | T | -0.0119 |
| rs12207890  | G | -0.0165 |
| rs6906621   | T | -0.0132 |
| rs74540422  | C | 0.0472  |
| rs34118837  | C | 0.0191  |
| rs56216918  | A | -0.067  |
| rs9381126   | G | -0.0294 |
| rs9380535   | T | 0.0115  |
| rs117070653 | T | -0.0481 |
| rs62419688  | C | 0.0732  |
| rs115837179 | C | -0.0761 |
| rs727330    | G | 0.0123  |
| rs688163    | T | 0.0192  |
| rs80023423  | A | 0.046   |
| rs811753    | T | -0.0244 |
| rs1039866   | A | -0.0147 |
| rs62397690  | T | -0.041  |
| rs17334702  | A | -0.0494 |
| rs78184169  | C | 0.0645  |
| rs144306676 | T | -0.0667 |
| rs11759759  | C | 0.0181  |
| rs17295879  | C | 0.0326  |
| rs115290859 | A | -0.0923 |
| rs80019737  | C | -0.083  |
| rs742297    | G | -0.0338 |
| rs144243622 | A | 0.0365  |
| rs4870358   | G | -0.0291 |
| rs9368268   | C | -0.0119 |
| rs72850633  | A | 0.0315  |
| rs3799583   | G | -0.0141 |
| rs73773207  | T | 0.0441  |

|             |   |         |
|-------------|---|---------|
| rs143182015 | T | -0.0537 |
| rs113209002 | G | 0.0631  |
| rs62427426  | T | 0.0226  |
| rs13215338  | T | -0.0413 |
| rs112820829 | C | -0.0377 |
| rs754783    | G | -0.0245 |
| rs62435712  | G | 0.011   |
| rs9504599   | T | 0.019   |
| rs9368886   | G | -0.0251 |
| rs2747697   | T | -0.0204 |
| rs9380734   | C | -0.0488 |
| rs9498580   | T | 0.0219  |
| rs76296293  | G | -0.0695 |
| rs146968264 | A | -0.0545 |
| rs35151682  | G | -0.0515 |
| rs179981    | A | -0.0171 |
| rs1883930   | T | 0.0129  |
| rs72926518  | T | -0.0239 |
| rs117109045 | T | 0.0747  |
| rs62420318  | A | -0.1049 |
| rs73015046  | T | 0.03    |
| rs2142524   | G | -0.0117 |
| rs77968219  | A | 0.0284  |
| rs10455494  | T | 0.0204  |
| rs62437245  | T | -0.0311 |
| rs9348131   | T | 0.0196  |
| rs78255781  | C | -0.0321 |
| rs115293002 | T | 0.0693  |
| rs76054016  | T | 0.0265  |
| rs12663659  | G | 0.0303  |
| rs74540606  | G | 0.0505  |
| rs17590608  | C | 0.013   |
| rs145395134 | T | 0.0575  |
| rs62440933  | T | 0.0183  |
| rs72844451  | A | -0.0381 |
| rs138468773 | A | 0.0312  |
| rs35592974  | A | -0.0317 |
| rs146426522 | A | -0.0955 |
| rs4869841   | G | 0.0147  |
| rs117004988 | T | -0.0293 |
| rs13191949  | T | 0.017   |
| rs12213283  | T | 0.0834  |
| rs12527410  | C | 0.0154  |
| rs9353162   | A | -0.0315 |
| rs73504047  | T | -0.0692 |
| rs9495493   | T | 0.0536  |
| rs140137338 | T | 0.0436  |

|             |   |         |
|-------------|---|---------|
| rs79098780  | G | 0.0934  |
| rs9358634   | A | -0.0116 |
| rs115594399 | G | 0.0646  |
| rs71539135  | C | 0.0327  |
| rs138922662 | A | 0.0823  |
| rs76014293  | T | -0.0239 |
| rs111351228 | A | 0.0326  |
| rs111579252 | A | -0.0568 |
| rs117701650 | G | -0.0465 |
| rs138415791 | C | 0.0737  |
| rs151316120 | T | 0.0962  |
| rs148722815 | C | -0.048  |
| rs72943849  | A | -0.0351 |
| rs62401919  | A | 0.0454  |
| rs2745640   | G | 0.0137  |
| rs4714795   | G | -0.0136 |
| rs13195836  | T | -0.0146 |
| rs56044834  | C | 0.0575  |
| rs143283885 | A | -0.0577 |
| rs74612738  | T | -0.048  |
| rs72836715  | A | 0.0257  |
| rs139449562 | A | -0.0344 |
| rs75081802  | G | -0.0307 |
| rs199002    | T | -0.0119 |
| rs75191354  | G | -0.0875 |
| rs2252114   | G | 0.0208  |
| rs12204755  | A | -0.011  |
| rs62402573  | C | -0.0223 |
| rs4716220   | G | -0.0149 |
| rs79728133  | G | -0.0968 |
| rs9457451   | G | 0.0134  |
| rs6570855   | A | -0.0161 |
| rs9480248   | C | -0.0335 |
| rs73246220  | T | -0.0347 |
| rs4959171   | G | -0.0136 |
| rs41286192  | G | -0.0556 |
| rs57712676  | T | -0.0205 |
| rs497392    | T | 0.0113  |
| rs11155593  | C | 0.0141  |
| rs6914526   | C | -0.0219 |
| rs370266    | G | 0.0299  |
| rs72992203  | T | -0.0605 |
| rs72970097  | C | -0.0487 |
| rs76303728  | A | 0.0598  |
| rs17540269  | C | -0.0603 |
| rs142327749 | G | -0.0511 |
| rs116328486 | C | -0.0893 |

|             |   |         |
|-------------|---|---------|
| rs151219033 | C | 0.0585  |
| rs117055820 | C | 0.0555  |
| rs80179541  | C | -0.0309 |
| rs2327953   | T | 0.0129  |
| rs112780688 | T | 0.0722  |
| rs73035146  | A | -0.0456 |
| rs77037913  | T | 0.0724  |
| rs362941    | C | 0.0671  |
| rs114400270 | T | -0.0364 |
| rs9451756   | T | 0.0596  |
| rs6914406   | A | 0.0466  |
| rs1101834   | T | -0.0123 |
| rs114085835 | C | 0.0396  |
| rs10485377  | C | -0.0197 |
| rs72823435  | G | 0.0382  |
| rs10456227  | T | -0.0254 |
| rs60942489  | T | -0.0214 |
| rs116230179 | G | 0.0474  |
| rs9396130   | A | -0.0241 |
| rs9352755   | G | 0.0167  |
| rs1324440   | C | 0.0194  |
| rs852937    | G | -0.0108 |
| rs12529659  | C | 0.0195  |
| rs77648628  | T | 0.036   |
| rs72867511  | C | -0.0348 |
| rs77880750  | C | 0.0563  |
| rs80128985  | A | -0.0753 |
| rs72978772  | T | 0.0341  |
| rs9495143   | T | -0.0168 |
| rs60281203  | A | 0.0892  |
| rs9455193   | G | 0.0139  |
| rs34172193  | A | 0.0458  |
| rs62427380  | T | -0.0166 |
| rs73359372  | C | -0.0237 |
| rs76038000  | G | -0.021  |
| rs13208509  | C | -0.0201 |
| rs11965881  | G | 0.0122  |
| rs13207048  | C | -0.0149 |
| rs1221930   | A | 0.0113  |
| rs9397819   | T | 0.0303  |
| rs2803356   | T | -0.0411 |
| rs6911499   | A | -0.0121 |
| rs538681    | C | 0.0194  |
| rs72650636  | A | 0.0281  |
| rs117997480 | A | -0.0372 |
| rs117881253 | G | -0.0482 |
| rs147938177 | A | 0.043   |

|             |   |         |
|-------------|---|---------|
| rs9389487   | G | -0.0273 |
| rs9402669   | T | 0.0164  |
| rs147505285 | C | -0.0391 |
| rs56234955  | A | -0.0471 |
| rs56953281  | T | -0.0219 |
| rs7753883   | T | 0.0124  |
| rs140380306 | A | -0.0395 |
| rs76951179  | C | 0.0447  |
| rs9364407   | C | 0.0211  |
| rs115889733 | A | 0.0583  |
| rs78255700  | C | -0.0233 |
| rs3099328   | A | 0.0176  |
| rs112658003 | G | 0.0503  |
| rs75288323  | T | -0.0598 |
| rs72834531  | G | 0.0723  |
| rs72840968  | A | 0.0199  |
| rs80039733  | T | -0.0407 |
| rs80343398  | G | 0.0648  |
| rs74704436  | G | 0.0626  |
| rs116132304 | G | 0.0487  |
| rs12525367  | A | 0.0149  |
| rs118045925 | T | 0.0635  |
| rs12662383  | G | 0.0128  |
| rs72977845  | A | -0.0736 |
| rs146674359 | G | 0.0697  |
| rs113478134 | G | 0.0616  |
| rs9353505   | G | 0.0165  |
| rs9399754   | G | -0.0303 |
| rs112944586 | T | -0.0279 |
| rs116859103 | T | -0.0471 |
| rs117064128 | A | -0.0794 |
| rs9479874   | C | 0.0375  |
| rs2749266   | T | -0.0119 |
| rs117430901 | C | 0.047   |
| rs876784    | G | -0.0617 |
| rs4716068   | C | -0.0157 |
| rs76070928  | G | 0.046   |
| rs72944444  | T | 0.0272  |
| rs12662612  | C | -0.0133 |
| rs73017910  | T | 0.0207  |
| rs1888865   | A | -0.0151 |
| rs143704530 | A | -0.0763 |
| rs9378350   | A | -0.0119 |
| rs117893130 | T | 0.0593  |
| rs12191978  | G | 0.0123  |
| rs71559118  | T | 0.0458  |
| rs75459354  | T | 0.0546  |

|             |   |         |
|-------------|---|---------|
| rs118152911 | T | 0.0924  |
| rs151129965 | T | 0.0545  |
| rs72949648  | A | 0.0129  |
| rs150303004 | G | 0.066   |
| rs116331835 | A | -0.058  |
| rs62398681  | T | 0.0194  |
| rs74615184  | C | 0.0264  |
| rs34296594  | T | 0.0355  |
| rs9353192   | A | -0.0127 |
| rs150335804 | A | 0.0408  |
| rs2148976   | T | 0.0121  |
| rs11969110  | C | 0.0195  |
| rs142690722 | C | 0.0562  |
| rs117005380 | G | 0.0775  |
| rs72952408  | G | -0.0822 |
| rs537112    | T | -0.0228 |
| rs117432917 | A | -0.0856 |
| rs4897554   | G | -0.0108 |
| rs7774801   | G | -0.0184 |
| rs2395723   | T | -0.0423 |
| rs3127615   | C | 0.0134  |
| rs4487629   | A | -0.0256 |
| rs9350478   | G | -0.0261 |
| rs76792021  | A | -0.0528 |
| rs138490162 | G | -0.0832 |
| rs79651864  | A | 0.0344  |
| rs74659354  | T | 0.0575  |
| rs146315965 | T | 0.0588  |
| rs4440488   | T | 0.0401  |
| rs80034878  | A | 0.0607  |
| rs2756117   | A | -0.0165 |
| rs13204683  | T | 0.0214  |
| rs9295185   | C | 0.0128  |
| rs9462975   | C | -0.0337 |
| rs1680847   | C | 0.0158  |
| rs72829723  | A | 0.0203  |
| rs77971746  | A | 0.045   |
| rs79265725  | T | -0.0772 |
| rs11968272  | G | 0.0479  |
| rs6925380   | C | -0.0116 |
| rs484763    | A | 0.011   |
| rs4960223   | C | -0.0154 |
| rs1890512   | T | 0.0133  |
| rs9486344   | C | -0.0124 |
| rs2096426   | C | -0.0216 |
| rs115719309 | G | -0.0384 |
| rs9371800   | G | -0.0148 |

|             |   |         |
|-------------|---|---------|
| rs73003497  | C | -0.0776 |
| rs78844728  | G | -0.0736 |
| rs1819637   | C | -0.0153 |
| rs143436256 | G | 0.0646  |
| rs1534360   | C | -0.0229 |
| rs145162940 | T | 0.0626  |
| rs13192561  | G | -0.0271 |
| rs62411320  | G | -0.011  |
| rs73009566  | A | 0.0218  |
| rs71570842  | G | 0.0185  |
| rs58304909  | A | -0.0283 |
| rs12524566  | A | -0.018  |
| rs2235386   | T | 0.0163  |
| rs13219969  | A | 0.0287  |
| rs150940109 | A | 0.0823  |
| rs2448925   | T | 0.0126  |
| rs113666426 | A | 0.0522  |
| rs11572031  | A | -0.039  |
| rs144408414 | G | -0.0746 |
| rs117560190 | A | -0.0891 |
| rs118001567 | C | 0.0634  |
| rs6907961   | G | -0.0552 |
| rs143304748 | G | -0.0476 |
| rs139945810 | C | -0.0857 |
| rs16895714  | C | 0.0222  |
| rs10484390  | A | 0.0672  |
| rs58278694  | A | -0.0249 |
| rs2502037   | T | 0.0181  |
| rs72826615  | T | 0.0361  |
| rs12211900  | C | -0.0174 |
| rs7763729   | G | -0.0112 |
| rs78433223  | G | -0.0394 |
| rs34674146  | T | -0.0541 |
| rs117768935 | C | -0.0664 |
| rs79476859  | T | -0.0744 |
| rs146182524 | C | -0.0545 |
| rs114307537 | T | -0.0681 |
| rs62421391  | C | -0.0592 |
| rs190546    | T | 0.0735  |
| rs77859722  | T | -0.0196 |
| rs140216732 | A | 0.0671  |
| rs79886418  | G | 0.0446  |
| rs55798471  | A | -0.0429 |
| rs3817779   | T | -0.0417 |
| rs554653    | A | 0.0106  |
| rs74980380  | G | 0.0654  |
| rs6906772   | T | -0.0119 |

|             |   |         |
|-------------|---|---------|
| rs77628310  | T | -0.0668 |
| rs12198473  | G | 0.0194  |
| rs76251760  | G | 0.0749  |
| rs74634845  | A | 0.0559  |
| rs116365617 | A | -0.0375 |
| rs80168526  | G | 0.0537  |
| rs72976132  | G | -0.0433 |
| rs12189770  | G | 0.0157  |
| rs16888718  | T | 0.0261  |
| rs7757672   | A | 0.0116  |
| rs72920084  | C | -0.0977 |
| rs71557566  | A | 0.0425  |
| rs116083240 | C | 0.0708  |
| rs2023556   | C | 0.0464  |
| rs10948286  | C | 0.0123  |
| rs12196638  | A | -0.0144 |
| rs111885910 | C | 0.0856  |
| rs6917297   | A | 0.013   |
| rs2800714   | T | -0.0619 |
| rs2145047   | G | 0.0188  |
| rs3103000   | A | 0.011   |
| rs76293162  | C | -0.0377 |
| rs144898592 | G | 0.0293  |
| rs139944666 | G | -0.0132 |
| rs12662509  | T | -0.0403 |
| rs9384873   | A | -0.0132 |
| rs6929614   | T | 0.0152  |
| rs12203856  | T | -0.0121 |
| rs1924463   | T | -0.0615 |
| rs112160599 | G | 0.0599  |
| rs149042841 | T | 0.0523  |
| rs76444259  | G | -0.0676 |
| rs9389475   | T | 0.0144  |
| rs1569836   | T | 0.0148  |
| rs139963055 | G | -0.0389 |
| rs144894654 | C | 0.0152  |
| rs75387494  | T | -0.0558 |
| rs3778002   | A | 0.0216  |
| rs149988970 | G | -0.0274 |
| rs12207736  | G | -0.0136 |
| rs9359645   | A | -0.0115 |
| rs7382278   | C | 0.0133  |
| rs117648157 | A | 0.0443  |
| rs9347944   | G | -0.0403 |
| rs2282831   | G | 0.0123  |
| rs150976971 | A | -0.0662 |
| rs146307882 | C | 0.0688  |



|             |   |         |
|-------------|---|---------|
| rs12207069  | T | -0.0115 |
| rs80228310  | T | 0.045   |
| rs9463782   | C | 0.014   |
| rs12192364  | A | 0.0192  |
| rs56402704  | C | 0.0198  |
| rs4714887   | C | 0.0201  |
| rs140594033 | C | 0.0724  |
| rs10808026  | A | -0.1393 |
| rs10226151  | A | 0.0995  |
| rs3935067   | C | 0.0856  |
| rs7384878   | C | -0.0839 |
| rs59415886  | G | -0.0742 |
| rs1180296   | T | 0.1455  |
| rs293188    | A | 0.1222  |
| rs10272283  | T | -0.0774 |
| rs77115164  | G | 0.227   |
| rs10270490  | C | 0.0663  |
| rs10234891  | C | -0.2583 |
| rs2949747   | C | -0.1267 |
| rs117491805 | C | 0.2875  |
| rs7780766   | T | -0.1555 |
| rs1026423   | T | -0.0659 |
| rs141872738 | G | 0.2716  |
| rs13312083  | G | -0.0726 |
| rs4031449   | C | 0.0759  |
| rs28561385  | C | 0.0698  |
| rs10807828  | T | -0.0608 |
| rs112992915 | G | 0.1775  |
| rs142379492 | A | -0.2157 |
| rs12113018  | T | 0.1359  |
| rs11981812  | A | 0.0796  |
| rs10252293  | A | -0.1108 |
| rs117281307 | C | -0.2528 |
| rs1552732   | G | 0.1241  |
| rs1852107   | T | 0.07    |
| rs17135127  | T | 0.0963  |
| rs1525121   | G | -0.0623 |
| rs42711     | T | 0.1672  |
| rs17153037  | A | 0.1292  |
| rs58276769  | T | -0.0841 |
| rs12539802  | T | 0.3069  |
| rs12672919  | A | 0.1394  |
| rs1029567   | C | -0.1651 |
| rs759181    | G | 0.0642  |
| rs116898687 | C | -0.3147 |
| rs7781047   | A | -0.0642 |
| rs4721055   | C | 0.0577  |

|             |   |         |
|-------------|---|---------|
| rs77463368  | C | 0.1474  |
| rs12154498  | A | -0.0851 |
| rs3800688   | G | 0.0612  |
| rs34578115  | T | -0.0998 |
| rs10259351  | T | -0.1946 |
| rs117117268 | A | 0.1614  |
| rs112378913 | A | 0.1236  |
| rs11979645  | G | 0.0661  |
| rs41687     | A | -0.0838 |
| rs17789624  | C | 0.1437  |
| rs111316182 | C | 0.2866  |
| rs10215582  | C | 0.1259  |
| rs2396574   | T | 0.0658  |
| rs4723219   | G | 0.0619  |
| rs2537604   | T | 0.0594  |
| rs9768425   | C | -0.0804 |
| rs73054888  | C | 0.1219  |
| rs7797978   | G | 0.0632  |
| rs62456046  | A | 0.3602  |
| rs138290846 | G | 0.4041  |
| rs639387    | A | 0.0814  |
| rs1513275   | C | -0.0774 |
| rs17695887  | T | -0.142  |
| rs6967287   | T | -0.0751 |
| rs12535226  | A | -0.0551 |
| rs2699451   | G | 0.0647  |
| rs6972885   | C | -0.076  |
| rs74701600  | C | 0.2632  |
| rs73047199  | G | 0.2029  |
| rs3823585   | G | -0.0645 |
| rs4495341   | A | 0.0722  |
| rs56004723  | T | -0.0608 |
| rs10952904  | T | 0.178   |
| rs4570064   | A | 0.0955  |
| rs6465842   | G | 0.0656  |
| rs10281628  | G | -0.1002 |
| rs201465    | T | 0.0634  |
| rs11761441  | G | 0.0581  |
| rs71536699  | A | -0.1994 |
| rs702483    | T | -0.0549 |
| rs58792306  | G | 0.2083  |
| rs79604473  | T | 0.0718  |
| rs6958008   | C | 0.0668  |
| rs145203830 | T | 0.205   |
| rs12536393  | A | 0.0926  |
| rs62453415  | T | 0.0634  |
| rs1420427   | T | 0.0634  |

|             |   |         |
|-------------|---|---------|
| rs73122240  | C | 0.0936  |
| rs10235034  | C | -0.0607 |
| rs4731772   | G | -0.0943 |
| rs78954498  | G | 0.1815  |
| rs117696165 | G | 0.2172  |
| rs700320    | T | 0.0592  |
| rs7778330   | A | -0.0645 |
| rs56408285  | A | 0.2087  |
| rs34110100  | G | 0.163   |
| rs3735009   | C | 0.2128  |
| rs77941682  | C | 0.3247  |
| rs73054050  | A | 0.0575  |
| rs12740     | G | -0.054  |
| rs111674294 | G | -0.3179 |
| rs9690947   | A | 0.1391  |
| rs75897059  | G | -0.2571 |
| rs73158249  | G | -0.1455 |
| rs4266558   | G | -0.0619 |
| rs79744825  | C | 0.343   |
| rs117263825 | T | 0.183   |
| rs112964232 | A | 0.1954  |
| rs57125545  | A | 0.1115  |
| rs35503973  | A | -0.0564 |
| rs34943126  | G | 0.0534  |
| rs3807475   | A | 0.0725  |
| rs79055890  | G | 0.2945  |
| rs73064610  | C | 0.1269  |
| rs73087911  | A | -0.2063 |
| rs73098088  | T | -0.1844 |
| rs78481812  | T | -0.2129 |
| rs6465651   | C | -0.0749 |
| rs17159044  | T | -0.1009 |
| rs78265539  | T | 0.1577  |
| rs13244962  | T | 0.1281  |
| rs2729548   | G | 0.1284  |
| rs58078798  | A | -0.1629 |
| rs11984213  | T | -0.1085 |
| rs17353194  | G | 0.2293  |
| rs75377053  | A | -0.1751 |
| rs13229654  | T | 0.2118  |
| rs62468084  | A | -0.0694 |
| rs28702730  | T | -0.1397 |
| rs118091716 | A | -0.2724 |
| rs4916928   | C | 0.0767  |
| rs117077931 | T | 0.2651  |
| rs36185389  | A | 0.2488  |
| rs28488198  | C | 0.1136  |

|             |   |         |
|-------------|---|---------|
| rs2056659   | T | 0.0609  |
| rs10246472  | C | 0.0523  |
| rs117594554 | A | -0.1554 |
| rs2040997   | T | 0.0532  |
| rs113919014 | C | 0.134   |
| rs150955441 | G | -0.3776 |
| rs62461388  | T | 0.3043  |
| rs55879743  | T | 0.1211  |
| rs62479525  | C | 0.1126  |
| rs2391134   | A | -0.0526 |
| rs11971473  | G | 0.14    |
| rs79693194  | A | -0.0579 |
| rs12536121  | A | 0.09    |
| rs1615197   | C | 0.0517  |
| rs17159615  | G | 0.2447  |
| rs9632641   | C | 0.0695  |
| rs2528659   | G | -0.0674 |
| rs2390079   | A | 0.1744  |
| rs12666009  | T | -0.2053 |
| rs10267539  | A | 0.0537  |
| rs593784    | C | -0.0538 |
| rs76031991  | T | -0.1375 |
| rs17171169  | A | 0.0598  |
| rs2622247   | C | 0.0745  |
| rs13438480  | C | -0.2223 |
| rs923713    | C | -0.0552 |
| rs111683568 | G | -0.2751 |
| rs2527662   | G | -0.0512 |
| rs73183169  | C | -0.1012 |
| rs852447    | T | -0.0531 |
| rs2390554   | G | 0.0551  |
| rs7801082   | T | 0.0804  |
| rs28539367  | G | 0.069   |
| rs73077857  | G | -0.2054 |
| rs74766564  | G | 0.2408  |
| rs3779347   | T | 0.0731  |
| rs2372798   | T | 0.0606  |
| rs7799622   | T | 0.0545  |
| rs11769780  | T | 0.0896  |
| rs6462343   | A | -0.0498 |
| rs434564    | C | -0.0553 |
| rs62459174  | A | 0.1068  |
| rs13234979  | T | 0.1495  |
| rs2535967   | C | -0.0778 |
| rs6464671   | T | 0.0619  |
| rs12535787  | G | 0.0534  |
| rs73163880  | T | -0.0658 |

|             |   |         |
|-------------|---|---------|
| rs75789733  | A | 0.246   |
| rs13223692  | C | 0.0491  |
| rs1156142   | T | -0.057  |
| rs1524235   | C | 0.1189  |
| rs11981254  | A | 0.049   |
| rs150076285 | A | 0.2127  |
| rs10270243  | C | -0.0781 |
| rs848010    | G | 0.0925  |
| rs1860489   | G | -0.0633 |
| rs78042336  | A | 0.4137  |
| rs113237190 | G | -0.2119 |
| rs6975264   | G | -0.0529 |
| rs1845418   | T | -0.0754 |
| rs141557155 | G | 0.289   |
| rs10253269  | G | -0.0498 |
| rs6960432   | G | 0.0493  |
| rs2108554   | C | 0.0634  |
| rs6977312   | A | 0.0583  |
| rs10240034  | T | 0.0509  |
| rs76021340  | T | 0.1604  |
| rs2067624   | C | 0.078   |
| rs12671277  | G | 0.104   |
| rs3095199   | G | -0.06   |
| rs76704148  | C | -0.2682 |
| rs62447173  | T | -0.1392 |
| rs147437183 | T | 0.233   |
| rs6968605   | A | 0.0677  |
| rs58334061  | C | -0.1069 |
| rs78400273  | G | 0.1148  |
| rs139495655 | A | 0.2175  |
| rs61741425  | A | -0.2203 |
| rs73104587  | G | 0.2031  |
| rs117651735 | T | -0.1811 |
| rs10250461  | T | -0.0782 |
| rs10236813  | C | 0.0941  |
| rs516481    | A | 0.1087  |
| rs12700293  | A | -0.0669 |
| rs726126    | G | 0.0509  |
| rs73680633  | T | 0.1246  |
| rs1419566   | C | -0.0518 |
| rs62479774  | A | 0.0742  |
| rs73271804  | G | 0.2744  |
| rs56026364  | C | -0.1502 |
| rs11766078  | C | 0.0902  |
| rs77257701  | A | -0.2261 |
| rs2074674   | A | -0.0523 |
| rs1990602   | C | 0.0663  |

|             |   |         |
|-------------|---|---------|
| rs62467585  | G | -0.1471 |
| rs6978284   | T | 0.1971  |
| rs12718665  | C | -0.0513 |
| rs10233060  | C | 0.0783  |
| rs218097    | C | 0.0554  |
| rs2528465   | C | 0.0497  |
| rs73399370  | G | 0.1583  |
| rs62441132  | A | -0.1672 |
| rs11520738  | G | 0.1568  |
| rs10241674  | G | 0.1386  |
| rs78167227  | A | 0.1216  |
| rs613169    | T | 0.0837  |
| rs1899691   | G | -0.0668 |
| rs17863238  | G | 0.1939  |
| rs11771299  | T | 0.0746  |
| rs73231935  | G | -0.129  |
| rs77003451  | G | 0.085   |
| rs111877390 | C | 0.212   |
| rs6975099   | G | 0.0711  |
| rs113162975 | C | 0.2128  |
| rs407349    | A | 0.1086  |
| rs148367917 | G | 0.335   |
| rs1733874   | A | -0.0518 |
| rs62470049  | A | 0.0869  |
| rs139553739 | A | 0.0672  |
| rs6092      | A | 0.0913  |
| rs6950294   | A | 0.0766  |
| rs2191872   | A | -0.1949 |
| rs3750145   | C | -0.0637 |
| rs12536382  | T | -0.0498 |
| rs76412284  | C | 0.067   |
| rs59832199  | C | 0.0568  |
| rs115166858 | G | 0.1779  |
| rs35378304  | C | -0.0959 |
| rs7810756   | T | 0.0591  |
| rs10239474  | A | 0.0605  |
| rs4132734   | G | 0.051   |
| rs73177692  | C | 0.1088  |
| rs7795881   | T | 0.186   |
| rs117974861 | A | 0.2323  |
| rs117521164 | T | 0.2101  |
| rs75928252  | A | 0.1524  |
| rs1045897   | T | -0.0782 |
| rs1073469   | T | -0.0493 |
| rs117182342 | T | -0.1597 |
| rs2072428   | C | 0.0571  |
| rs7792715   | T | -0.1927 |

|             |   |         |
|-------------|---|---------|
| rs1527478   | A | -0.0797 |
| rs62483962  | A | -0.217  |
| rs9649194   | G | -0.0478 |
| rs17862309  | C | -0.0953 |
| rs68012076  | A | -0.1008 |
| rs7807463   | T | -0.0779 |
| rs55951812  | A | 0.2423  |
| rs76042375  | A | 0.2033  |
| rs55908065  | A | 0.1303  |
| rs78390372  | C | 0.2091  |
| rs9639460   | A | -0.0531 |
| rs77055547  | C | 0.1944  |
| rs12705334  | T | 0.0474  |
| rs150033305 | A | 0.2076  |
| rs74446891  | G | 0.1475  |
| rs17862372  | C | 0.1596  |
| rs2525748   | G | 0.0465  |
| rs117117921 | G | -0.1887 |
| rs80038359  | T | -0.1274 |
| rs11762660  | T | 0.0829  |
| rs6973848   | G | -0.0477 |
| rs7778077   | A | -0.0471 |
| rs981903    | C | -0.0631 |
| rs117026229 | T | 0.3845  |
| rs17165557  | C | -0.1158 |
| rs4724580   | G | -0.0527 |
| rs1016289   | G | 0.1192  |
| rs2711133   | C | 0.0608  |
| rs77739256  | G | -0.3226 |
| rs6959654   | C | 0.047   |
| rs17170015  | G | 0.0586  |
| rs11560239  | C | 0.1557  |
| rs35743922  | A | 0.1108  |
| rs2248363   | G | -0.0522 |
| rs79137508  | A | 0.2423  |
| rs221207    | A | -0.1099 |
| rs75358342  | T | -0.0735 |
| rs62476228  | G | 0.0693  |
| rs11768769  | G | 0.1495  |
| rs17400329  | T | -0.0955 |
| rs78531240  | G | 0.11    |
| rs56188618  | T | -0.4498 |
| rs6583382   | C | -0.3897 |
| rs77269753  | G | -0.1916 |
| rs117416418 | T | 0.2194  |
| rs13226762  | T | 0.1205  |
| rs75047193  | C | 0.1438  |

|             |   |         |
|-------------|---|---------|
| rs150010171 | A | -0.2112 |
| rs7811495   | C | 0.0497  |
| rs12700025  | A | 0.0627  |
| rs6592988   | T | -0.0621 |
| rs17404500  | G | -0.1525 |
| rs4728253   | A | 0.046   |
| rs76906477  | A | -0.0921 |
| rs117212297 | T | -0.2029 |
| rs62449547  | G | -0.1578 |
| rs9641974   | G | 0.086   |
| rs13224904  | G | 0.0457  |
| rs10485961  | A | 0.0607  |
| rs2290223   | T | 0.0793  |
| rs117864602 | T | -0.3019 |
| rs76865114  | C | 0.0745  |
| rs111846205 | C | -0.1185 |
| rs12154453  | G | -0.053  |
| rs117126197 | A | -0.1512 |
| rs10224543  | T | -0.0877 |
| rs62477189  | G | 0.3488  |
| rs215700    | T | -0.0531 |
| rs117080868 | A | 0.194   |
| rs117187954 | T | 0.4099  |
| rs117231768 | C | 0.2287  |
| rs112735939 | C | 0.192   |
| rs7795005   | T | 0.0574  |
| rs2195139   | G | 0.0636  |
| rs145002105 | G | 0.1827  |
| rs62453407  | G | 0.0709  |
| rs870682    | A | -0.3441 |
| rs55841026  | G | 0.4072  |
| rs4507718   | A | 0.0467  |
| rs35674183  | G | -0.1058 |
| rs117597803 | A | 0.103   |
| rs2471000   | T | 0.0457  |
| rs117335089 | A | -0.344  |
| rs77379913  | A | -0.2479 |
| rs13227280  | G | -0.1743 |
| rs10899754  | T | -0.0523 |
| rs2057976   | T | -0.0497 |
| rs146755827 | A | -0.2329 |
| rs28458251  | G | -0.0721 |
| rs77046669  | T | 0.1341  |
| rs799966    | G | -0.2141 |
| rs3864550   | G | -0.0493 |
| rs13437666  | C | 0.1839  |
| rs45503495  | G | -0.3271 |



|             |   |         |
|-------------|---|---------|
| rs17135967  | A | 0.1582  |
| rs35619640  | T | -0.1401 |
| rs6464407   | C | -0.0496 |
| rs17164717  | G | -0.1997 |
| rs117486744 | T | 0.2     |
| rs6955135   | T | -0.0523 |
| rs75929881  | T | 0.1467  |
| rs11770565  | T | -0.0914 |
| rs4427064   | G | -0.1057 |
| rs774267    | T | 0.0448  |
| rs74672264  | C | -0.1104 |
| rs117517817 | G | 0.2501  |
| rs62457492  | T | -0.1037 |
| rs147951036 | A | 0.3446  |
| rs76493409  | C | 0.1365  |
| rs75413175  | G | 0.115   |
| rs74525238  | T | -0.1633 |
| rs802799    | T | 0.1135  |
| rs6463778   | C | 0.0545  |
| rs245873    | C | -0.0464 |
| rs594501    | A | 0.0547  |
| rs11766256  | C | 0.2496  |
| rs73729763  | A | 0.1816  |
| rs10128     | G | -0.0698 |
| rs1035147   | C | -0.0573 |
| rs150139631 | T | -0.2293 |
| rs12533390  | C | 0.2224  |
| rs73410794  | T | 0.0569  |
| rs10261632  | T | 0.05    |
| rs76396283  | G | -0.1772 |
| rs7799415   | A | 0.0534  |
| rs17393131  | G | -0.0936 |
| rs67350319  | T | -0.1142 |
| rs2917753   | A | -0.0719 |
| rs13229524  | T | 0.1701  |
| rs374226    | C | 0.0512  |
| rs56265974  | G | 0.0849  |
| rs1059182   | G | -0.0813 |
| rs71572431  | T | 0.1696  |
| rs6975606   | G | 0.2218  |
| rs2057944   | A | 0.1856  |
| rs75745382  | A | 0.2749  |
| rs62461883  | C | 0.103   |
| rs10231130  | T | 0.1666  |
| rs10271887  | G | -0.0512 |
| rs111780621 | C | 0.344   |
| rs10241311  | G | -0.1608 |

|             |   |         |
|-------------|---|---------|
| rs13244349  | T | 0.0447  |
| rs116988187 | A | 0.1141  |
| rs116337362 | T | -0.3312 |
| rs10274856  | C | -0.0516 |
| rs118099935 | G | -0.3206 |
| rs73154476  | C | -0.072  |
| rs4436026   | G | -0.0676 |
| rs17586365  | A | 0.0633  |
| rs112397911 | G | 0.3867  |
| rs11980740  | T | 0.0966  |
| rs2908429   | A | 0.0521  |
| rs6961690   | C | 0.046   |
| rs715274    | T | -0.1265 |
| rs10237021  | G | -0.0513 |
| rs118098649 | A | 0.2942  |
| rs584586    | G | -0.0762 |
| rs11770703  | C | 0.0518  |
| rs117897813 | A | 0.196   |
| rs11546656  | A | 0.2178  |
| rs17682856  | G | 0.1049  |
| rs62444135  | A | -0.1195 |
| rs1263553   | G | 0.0482  |
| rs78551832  | C | -0.1648 |
| rs6963356   | T | 0.2044  |
| rs77500383  | C | 0.066   |
| rs2487161   | C | 0.081   |
| rs148524588 | A | 0.1452  |
| rs117121161 | G | 0.3199  |
| rs6459727   | A | 0.2236  |
| rs143011947 | G | -0.1394 |
| rs7801761   | C | 0.1209  |
| rs139584174 | C | 0.1706  |
| rs1728476   | G | -0.2472 |
| rs17642302  | A | 0.0576  |
| rs28654576  | G | 0.0457  |
| rs62477219  | A | 0.1101  |
| rs983874    | T | 0.1897  |
| rs117442394 | G | -0.1508 |
| rs34851328  | A | 0.2666  |
| rs12702730  | C | 0.0758  |
| rs4535613   | G | 0.0466  |
| rs11765579  | T | 0.1729  |
| rs74970338  | T | 0.2399  |
| rs78243235  | G | -0.2203 |
| rs66704307  | T | 0.1126  |
| rs138545616 | T | 0.2161  |
| rs117779630 | G | 0.2874  |

|             |   |         |
|-------------|---|---------|
| rs112550924 | A | 0.2031  |
| rs117830183 | G | 0.1867  |
| rs79929051  | C | -0.0678 |
| rs758917    | C | -0.0487 |
| rs148877140 | C | -0.0949 |
| rs79310090  | C | 0.1914  |
| rs3735653   | C | -0.0738 |
| rs4722603   | A | -0.0595 |
| rs79313675  | A | 0.1713  |
| rs111993847 | A | 0.1301  |
| rs145286667 | T | 0.25    |
| rs114919563 | T | -0.1336 |
| rs75865347  | T | -0.2482 |
| rs17139283  | G | -0.1685 |
| rs13239708  | T | 0.0453  |
| rs2037650   | A | 0.0877  |
| rs11970845  | A | -0.1961 |
| rs627704    | C | -0.0493 |
| rs7797014   | T | -0.0895 |
| rs10236448  | G | 0.058   |
| rs1552431   | A | -0.0528 |
| rs7780161   | G | 0.0487  |
| rs77830331  | C | 0.1678  |
| rs204596    | G | -0.0591 |
| rs73227771  | A | 0.2564  |
| rs4731808   | T | 0.0814  |
| rs17683715  | T | -0.0657 |
| rs145834805 | T | 0.3024  |
| rs7783022   | C | 0.2115  |
| rs116967987 | A | -0.1424 |
| rs144187083 | A | 0.1602  |
| rs12701263  | T | -0.0432 |
| rs77117375  | G | 0.1632  |
| rs150868012 | G | -0.2201 |
| rs6970508   | A | 0.1172  |
| rs10282382  | A | -0.0446 |
| rs2938107   | A | 0.0427  |
| rs150266465 | A | 0.1846  |
| rs149815905 | G | -0.3337 |
| rs7790378   | A | -0.0444 |
| rs62459590  | T | -0.2244 |
| rs1987195   | C | 0.0465  |
| rs35963913  | T | -0.0722 |
| rs10249820  | T | 0.0709  |
| rs12705002  | G | -0.0506 |
| rs73184021  | A | -0.171  |
| rs10273901  | C | -0.0861 |

|             |   |         |
|-------------|---|---------|
| rs17750878  | T | 0.1604  |
| rs2372806   | G | 0.046   |
| rs147125063 | T | 0.1551  |
| rs117669910 | A | -0.2134 |
| rs1823532   | G | 0.0731  |
| rs140608541 | A | -0.218  |
| rs10278985  | T | 0.0482  |
| rs117527070 | G | -0.1408 |
| rs6957202   | G | -0.0738 |
| rs62472536  | G | 0.1708  |
| rs7800672   | G | 0.2352  |
| rs78779686  | A | -0.1523 |
| rs6950188   | C | 0.2465  |
| rs17687519  | T | -0.0546 |
| rs144905484 | T | 0.1574  |
| rs117351380 | C | 0.1248  |
| rs6959667   | A | -0.1278 |
| rs146880831 | A | 0.2053  |
| rs2903811   | G | 0.0433  |
| rs7806660   | T | 0.0535  |
| rs62443167  | A | -0.0821 |
| rs76341365  | G | -0.0794 |
| rs11982318  | C | -0.0696 |
| rs76918959  | T | -0.1987 |
| rs117459347 | A | -0.1967 |
| rs6961222   | C | -0.0449 |
| rs2642124   | A | 0.0631  |
| rs117455353 | A | -0.1481 |
| rs2580812   | C | 0.0447  |
| rs17700466  | C | 0.0673  |
| rs77840844  | A | -0.3032 |
| rs11762083  | C | 0.0548  |
| rs41723     | C | -0.057  |
| rs12540793  | G | 0.0436  |
| rs6965775   | T | -0.0633 |
| rs4727415   | T | 0.1551  |
| rs117875805 | C | -0.1666 |
| rs7811294   | A | 0.0489  |
| rs669641    | T | -0.0485 |
| rs62448525  | C | 0.1763  |
| rs138029976 | T | -0.3283 |
| rs62479926  | T | 0.1522  |
| rs75812488  | C | 0.1559  |
| rs35678268  | C | 0.1639  |
| rs147196505 | G | 0.2839  |
| rs4512301   | C | -0.1916 |
| rs59860440  | T | -0.0467 |

|             |   |         |
|-------------|---|---------|
| rs13223015  | G | -0.0621 |
| rs113828597 | T | -0.1574 |
| rs624448919 | C | 0.1427  |
| rs11764795  | A | -0.0757 |
| rs2049512   | G | 0.0776  |
| rs117804920 | C | 0.2888  |
| rs148479562 | T | 0.2091  |
| rs12673509  | T | -0.1054 |
| rs10249763  | A | 0.1602  |
| rs62455980  | G | -0.064  |
| rs314648    | G | -0.0561 |
| rs10238697  | A | -0.1314 |
| rs4486080   | G | 0.2666  |
| rs76957900  | C | 0.1515  |
| rs74549088  | C | -0.1038 |
| rs79239938  | C | 0.1079  |
| rs10265214  | C | 0.0457  |
| rs7776713   | T | 0.0493  |
| rs13236526  | A | 0.0474  |
| rs118044781 | C | -0.2097 |
| rs10249265  | T | 0.0442  |
| rs2074672   | G | -0.1754 |
| rs6980052   | A | 0.1665  |
| rs117644350 | A | 0.1481  |
| rs73458572  | A | 0.2608  |
| rs13225755  | T | -0.1005 |
| rs7809639   | T | 0.1084  |
| rs34532843  | A | 0.3985  |
| rs116948100 | C | 0.1054  |
| rs80155557  | C | 0.1914  |
| rs10215613  | G | 0.0479  |
| rs1013878   | C | 0.0505  |
| rs17156915  | G | 0.171   |
| rs16873403  | A | -0.0759 |
| rs143807795 | A | 0.1677  |
| rs6942674   | T | 0.0814  |
| rs2723539   | C | -0.0458 |
| rs10232725  | T | 0.0419  |
| rs4336535   | T | 0.0585  |
| rs73692554  | T | 0.13    |
| rs13226240  | G | 0.0881  |
| rs146278617 | T | 0.2069  |
| rs2952518   | T | 0.0433  |
| rs150863171 | T | 0.2859  |
| rs6952006   | G | 0.0665  |
| rs718015    | G | -0.042  |
| rs117641498 | A | -0.193  |

|             |   |         |
|-------------|---|---------|
| rs10807762  | T | -0.0423 |
| rs75448832  | A | -0.1462 |
| rs362644    | A | -0.0416 |
| rs11976006  | A | 0.1627  |
| rs661818    | T | -0.044  |
| rs146282033 | A | 0.2043  |
| rs6969370   | A | -0.0906 |
| rs4728340   | A | -0.0568 |
| rs10258860  | T | -0.106  |
| rs2282867   | T | 0.0477  |
| rs28758523  | G | -0.0488 |
| rs1861287   | A | -0.0801 |
| rs7789596   | T | 0.0741  |
| rs7808841   | T | 0.1894  |
| rs138364108 | C | 0.1714  |
| rs62434490  | G | -0.0487 |
| rs6461924   | G | 0.0508  |
| rs9641538   | G | -0.0414 |
| rs11772895  | C | -0.0531 |
| rs60012951  | G | -0.2303 |
| rs117208899 | T | 0.2207  |
| rs62482187  | T | -0.2602 |
| rs73051795  | T | -0.0613 |
| rs78855990  | T | 0.179   |
| rs149929836 | C | -0.3094 |
| rs34739460  | A | 0.1742  |
| rs1362361   | C | -0.068  |
| rs117576861 | T | 0.1651  |
| rs80348575  | T | 0.0899  |
| rs17276     | G | 0.0454  |
| rs73255258  | G | 0.1522  |
| rs117547300 | A | 0.1392  |
| rs76471434  | A | 0.2485  |
| rs13362829  | T | 0.0465  |
| rs143106244 | C | 0.3081  |
| rs35997022  | T | 0.2761  |
| rs3912597   | T | -0.0734 |
| rs56239274  | T | -0.0647 |
| rs17171705  | A | 0.0666  |
| rs17166480  | G | 0.0482  |
| rs148009350 | C | 0.1892  |
| rs34146903  | T | 0.1469  |
| rs55842018  | G | 0.0646  |
| rs10281146  | G | 0.0588  |
| rs6953542   | T | 0.0725  |
| rs177466    | G | 0.0423  |
| rs6942734   | T | 0.0637  |

|             |   |         |
|-------------|---|---------|
| rs2528808   | C | 0.118   |
| rs75914987  | T | 0.1603  |
| rs10257901  | A | -0.049  |
| rs3812394   | C | -0.1171 |
| rs117076918 | A | 0.3197  |
| rs10487253  | G | -0.0807 |
| rs6962281   | G | -0.0827 |
| rs7777138   | C | 0.1694  |
| rs13233633  | A | 0.0496  |
| rs67391165  | A | 0.0703  |
| rs6957938   | T | -0.0639 |
| rs12707289  | T | -0.1116 |
| rs7794181   | T | 0.047   |
| rs113796389 | T | -0.1382 |
| rs12703796  | A | -0.0425 |
| rs10953880  | T | 0.0467  |
| rs79088452  | T | 0.1895  |
| rs10235235  | C | 0.074   |
| rs2293501   | G | 0.0463  |
| rs1229534   | G | 0.0896  |
| rs4591928   | C | 0.0464  |
| rs17765485  | A | 0.1599  |
| rs144166323 | A | -0.3567 |
| rs17739622  | T | 0.1913  |
| rs12667805  | A | -0.0465 |
| rs17436757  | C | -0.1117 |
| rs138192041 | A | 0.2079  |
| rs112724866 | T | 0.047   |
| rs62485639  | G | 0.0478  |
| rs11770270  | A | 0.0551  |
| rs34154732  | A | 0.0424  |
| rs74396557  | C | 0.0637  |
| rs28817620  | G | 0.0632  |
| rs4728017   | A | 0.0711  |
| rs7811024   | C | 0.0694  |
| rs1020518   | T | 0.0776  |
| rs13225259  | A | -0.0489 |
| rs77492018  | T | 0.0696  |
| rs7783918   | A | -0.0414 |
| rs2168589   | A | 0.0441  |
| rs13241685  | G | -0.0528 |
| rs73488568  | A | -0.1429 |
| rs35257100  | T | 0.0515  |
| rs12671608  | C | -0.0802 |
| rs6944878   | T | 0.0763  |
| rs11768823  | T | 0.1066  |
| rs112420448 | G | 0.124   |

|             |   |         |
|-------------|---|---------|
| rs34784488  | C | -0.117  |
| rs17148140  | A | -0.0571 |
| rs11768586  | G | -0.0513 |
| rs3102787   | T | -0.0492 |
| rs2717903   | C | -0.0511 |
| rs77859486  | G | -0.1162 |
| rs4718889   | T | 0.0466  |
| rs77451681  | C | 0.1016  |
| rs12386663  | C | 0.1105  |
| rs62459096  | T | 0.1829  |
| rs7786363   | T | 0.1717  |
| rs6463935   | A | -0.0458 |
| rs9656664   | G | 0.0639  |
| rs1230541   | A | 0.0504  |
| rs1202283   | G | 0.0404  |
| rs117045673 | G | 0.1648  |
| rs4410855   | A | -0.088  |
| rs147068273 | G | -0.3707 |
| rs17153336  | G | 0.0501  |
| rs150294981 | T | 0.2211  |
| rs116928454 | C | 0.1673  |
| rs6963241   | A | 0.1312  |
| rs6972443   | G | 0.0561  |
| rs1859545   | C | 0.0528  |
| rs13228671  | T | -0.0931 |
| rs117902884 | A | 0.1427  |
| rs80026040  | T | -0.209  |
| rs6949344   | G | 0.0956  |
| rs75980220  | G | -0.051  |
| rs7781334   | A | -0.104  |
| rs72587332  | C | -0.0527 |
| rs73181324  | G | 0.0569  |
| rs117440560 | A | 0.0942  |
| rs17150828  | A | 0.0455  |
| rs80288505  | G | 0.191   |
| rs140071201 | T | 0.1872  |
| rs7786537   | C | 0.052   |
| rs111938506 | A | 0.0962  |
| rs62450855  | G | 0.063   |
| rs73114858  | T | -0.1838 |
| rs117657027 | G | 0.0802  |
| rs28557040  | G | -0.1894 |
| rs55762657  | C | -0.0833 |
| rs53        | T | 0.0492  |
| rs75940454  | A | -0.1986 |
| rs118154933 | C | -0.1452 |
| rs6464182   | T | 0.047   |



|             |   |         |
|-------------|---|---------|
| rs118007150 | T | -0.2602 |
| rs28506104  | G | -0.0487 |
| rs73089933  | C | -0.0573 |
| rs34062071  | T | 0.0491  |
| rs73344604  | T | 0.0768  |
| rs1029380   | T | 0.0465  |
| rs34096175  | G | 0.1758  |
| rs196603    | T | 0.0763  |
| rs118064802 | T | 0.089   |
| rs73165663  | C | 0.0874  |
| rs6459977   | A | 0.0584  |
| rs10259493  | G | -0.1545 |
| rs73053736  | C | -0.2073 |
| rs62488038  | C | 0.1586  |
| rs144432240 | G | -0.1591 |
| rs62468130  | A | 0.1033  |
| rs149226112 | C | 0.1113  |
| rs76793014  | T | 0.0933  |
| rs73687853  | T | 0.1609  |
| rs12531890  | T | -0.041  |
| rs12154442  | C | -0.0672 |
| rs73714065  | A | -0.0663 |
| rs62473166  | T | 0.0897  |
| rs139263964 | A | -0.2968 |
| rs2389963   | G | 0.0438  |
| rs142878189 | T | 0.0601  |
| rs118085352 | C | -0.2488 |
| rs35329971  | A | 0.078   |
| rs1608485   | A | 0.1026  |
| rs117402302 | A | -0.1872 |
| rs77996714  | T | 0.1936  |
| rs138257185 | A | 0.1727  |
| rs2278130   | A | 0.0452  |
| rs13235422  | A | -0.0423 |
| rs1474511   | A | 0.0933  |
| rs146020162 | G | 0.0846  |
| rs13232677  | C | 0.1003  |
| rs73096377  | C | 0.1753  |
| rs2237643   | T | 0.0409  |
| rs112702840 | G | -0.1144 |
| rs6964086   | A | 0.0843  |
| rs7792839   | G | 0.1955  |
| rs117839430 | T | 0.283   |
| rs7802665   | C | 0.0488  |
| rs221164    | C | 0.049   |
| rs3887186   | T | 0.0479  |
| rs75020839  | A | 0.0689  |

|             |   |         |
|-------------|---|---------|
| rs79196752  | G | -0.0912 |
| rs142804987 | A | -0.225  |
| rs4719941   | G | -0.0478 |
| rs73193879  | A | 0.0906  |
| rs325456    | T | -0.0448 |
| rs55760223  | G | -0.2574 |
| rs2079001   | G | 0.0504  |
| rs10237263  | T | -0.0407 |
| rs9648824   | T | 0.2005  |
| rs149339004 | T | -0.1611 |
| rs78705693  | T | 0.1123  |
| rs150815667 | T | 0.3094  |
| rs6467135   | A | 0.1462  |
| rs73722806  | T | 0.0918  |
| rs112798759 | T | 0.3441  |
| rs6962406   | T | 0.1378  |
| rs78249197  | G | -0.1189 |
| rs114853379 | C | -0.2924 |
| rs3800932   | T | 0.1844  |
| rs74636425  | A | 0.1091  |
| rs80216601  | G | 0.1218  |
| rs2014954   | T | -0.0929 |
| rs17174366  | C | 0.0797  |
| rs146048977 | T | -0.0713 |
| rs73227553  | G | 0.1739  |
| rs12671810  | G | 0.0437  |
| rs28521791  | G | -0.0758 |
| rs10441090  | T | -0.0588 |
| rs6465722   | C | -0.0757 |
| rs2526684   | C | 0.0538  |
| rs1637760   | C | 0.2437  |
| rs117633744 | T | -0.1762 |
| rs73155973  | A | -0.1715 |
| rs12540300  | G | 0.1255  |
| rs671425    | A | -0.0697 |
| rs1595804   | A | 0.0399  |
| rs6956684   | A | 0.0396  |
| rs4731411   | T | 0.0658  |
| rs7341482   | G | 0.1229  |
| rs55821175  | T | 0.2346  |
| rs73408028  | A | 0.0873  |
| rs6463082   | G | -0.0419 |
| rs139075872 | A | -0.129  |
| rs148533110 | C | -0.3073 |
| rs687836    | A | -0.088  |
| rs35625550  | T | 0.2217  |
| rs216733    | A | 0.1555  |

|             |   |         |
|-------------|---|---------|
| rs544974    | T | 0.043   |
| rs112702513 | T | 0.1888  |
| rs73155245  | A | 0.1451  |
| rs55653240  | A | 0.0518  |
| rs77039065  | A | -0.0851 |
| rs61304065  | A | -0.0713 |
| rs7801472   | T | 0.079   |
| rs117808151 | G | -0.1354 |
| rs1346392   | G | -0.1424 |
| rs62448652  | G | 0.056   |
| rs112710860 | T | -0.094  |
| rs62485100  | C | 0.0934  |
| rs7782428   | C | -0.0462 |
| rs715937    | A | 0.0473  |
| rs3778688   | A | -0.0402 |
| rs73159373  | T | 0.1649  |
| rs111700092 | T | -0.0769 |
| rs10953271  | T | 0.0465  |
| rs73284152  | A | -0.0879 |
| rs940874    | T | 0.0401  |
| rs67138874  | A | -0.0902 |
| rs17180415  | T | -0.1215 |
| rs74803716  | A | -0.0787 |
| rs35485629  | G | -0.0905 |
| rs864249    | T | -0.0535 |
| rs11773436  | A | 0.0429  |
| rs10274273  | C | -0.0735 |
| rs17762670  | T | 0.1285  |
| rs6978565   | T | 0.0686  |
| rs117406788 | A | 0.195   |
| rs62449929  | A | 0.0814  |
| rs740541    | A | 0.1487  |
| rs141450475 | C | -0.3169 |
| rs6974672   | G | -0.051  |
| rs73108798  | G | 0.1671  |
| rs73158905  | C | 0.2836  |
| rs57331773  | G | 0.0852  |
| rs17425950  | T | 0.0705  |
| rs730771    | A | -0.0663 |
| rs35698389  | G | -0.0894 |
| rs6972287   | G | 0.045   |
| rs75884150  | G | -0.0909 |
| rs17152316  | A | 0.0953  |
| rs11770081  | C | 0.0392  |
| rs11981261  | A | 0.1602  |
| rs6962219   | A | 0.1065  |
| rs2158796   | A | -0.0626 |

|             |   |         |
|-------------|---|---------|
| rs2709926   | T | 0.0647  |
| rs2028029   | T | 0.0629  |
| rs745095    | T | 0.075   |
| rs145285289 | G | 0.2493  |
| rs11981462  | T | 0.115   |
| rs10274928  | A | -0.0418 |
| rs6980219   | T | -0.046  |
| rs117676643 | G | 0.165   |
| rs67783517  | G | 0.0507  |
| rs62450070  | G | 0.0486  |
| rs4722567   | C | -0.0491 |
| rs7791323   | G | 0.0403  |
| rs79116105  | C | 0.2385  |
| rs10234070  | T | -0.0595 |
| rs34276468  | C | 0.0479  |
| rs12706298  | T | -0.057  |
| rs117768489 | C | -0.1915 |
| rs3936259   | A | 0.3832  |
| rs71523284  | A | 0.3577  |
| rs78848166  | G | 0.1565  |
| rs17208431  | C | -0.0962 |
| rs73070710  | G | -0.2178 |
| rs145435640 | G | 0.2251  |
| rs7786484   | A | 0.0777  |
| rs143436036 | T | 0.3088  |
| rs73152519  | T | 0.2067  |
| rs1464889   | C | -0.0511 |
| rs13229591  | C | -0.2215 |
| rs117188647 | G | 0.1603  |
| rs12538862  | C | -0.0567 |
| rs17151922  | T | 0.2408  |
| rs79594379  | C | 0.2296  |
| rs11561931  | A | -0.0408 |
| rs141698020 | A | 0.194   |
| rs117144480 | T | 0.2849  |
| rs6979377   | C | -0.1    |
| rs1233557   | A | -0.0915 |
| rs76229426  | A | 0.103   |
| rs9655107   | T | -0.0408 |
| rs17158338  | G | 0.1264  |
| rs111316560 | G | 0.3072  |
| rs17157063  | C | -0.0869 |
| rs73069263  | C | -0.0759 |
| rs17142906  | A | -0.0505 |
| rs2235033   | G | -0.0386 |
| rs7779804   | C | 0.0551  |
| rs57201349  | T | -0.064  |

|             |   |         |
|-------------|---|---------|
| rs327690    | A | -0.2536 |
| rs3800989   | G | -0.0388 |
| rs10249125  | A | -0.0461 |
| rs10488383  | T | 0.086   |
| rs75814881  | G | -0.2048 |
| rs1024717   | A | -0.0909 |
| rs10259461  | C | 0.0419  |
| rs7799709   | A | 0.0515  |
| rs79299150  | A | 0.2224  |
| rs74589576  | T | -0.1548 |
| rs73084868  | T | 0.1298  |
| rs17133294  | G | 0.1874  |
| rs6960036   | A | -0.0587 |
| rs1376277   | A | -0.0738 |
| rs137963417 | C | -0.2169 |
| rs73217789  | A | -0.1653 |
| rs117665660 | A | 0.1501  |
| rs4503002   | T | 0.0449  |
| rs117499601 | T | 0.1321  |
| rs74623215  | A | -0.1488 |
| rs812570    | C | -0.0413 |
| rs117235544 | C | -0.0994 |
| rs79915357  | C | 0.2898  |
| rs112003126 | T | -0.0935 |
| rs117080895 | G | -0.1621 |
| rs28558501  | A | -0.165  |
| rs2463676   | C | -0.0526 |
| rs73191636  | G | -0.0611 |
| rs756859    | T | -0.0397 |
| rs62482173  | A | -0.2369 |
| rs143400493 | T | -0.2173 |
| rs117165573 | A | 0.3399  |
| rs73721526  | T | 0.1353  |
| rs10237509  | A | 0.0524  |
| rs222237    | T | -0.1136 |
| rs41828     | G | -0.0484 |
| rs10249851  | G | -0.0956 |
| rs73736619  | C | 0.1867  |
| rs112796016 | C | 0.1607  |
| rs17435216  | C | -0.0467 |
| rs117081579 | C | -0.244  |
| rs2471614   | G | 0.0737  |
| rs180283    | C | 0.041   |
| rs62454711  | T | -0.0882 |
| rs140063859 | A | 0.1866  |
| rs6947458   | C | -0.0393 |
| rs77471511  | G | -0.179  |

|             |   |         |
|-------------|---|---------|
| rs11767268  | T | -0.0653 |
| rs1916931   | A | -0.0435 |
| rs111368360 | T | -0.1714 |
| rs7797944   | T | 0.0514  |
| rs7808966   | A | -0.0427 |
| rs142833435 | G | 0.1627  |
| rs6464798   | G | -0.0398 |
| rs12705979  | T | -0.0399 |
| rs2158249   | G | 0.041   |
| rs143447746 | T | -0.1218 |
| rs116993213 | G | 0.0988  |
| rs6466753   | C | 0.1856  |
| rs17144136  | A | -0.1045 |
| rs73156163  | T | 0.1186  |
| rs848813    | C | -0.0527 |
| rs17149924  | T | 0.1522  |
| rs11763069  | A | -0.1151 |
| rs112972831 | A | 0.2781  |
| rs13245023  | G | -0.1105 |
| rs13230284  | G | -0.0519 |
| rs1863015   | G | 0.0392  |
| rs73206017  | G | -0.1596 |
| rs1037437   | G | -0.1514 |
| rs12234733  | T | 0.2306  |
| rs73109056  | T | -0.2971 |
| rs78047442  | T | -0.061  |
| rs62444185  | A | -0.2207 |
| rs13437974  | A | 0.0778  |
| rs63        | G | 0.1053  |
| rs10252460  | C | -0.0501 |
| rs13228524  | C | 0.2575  |
| rs73158222  | G | 0.0779  |
| rs1547952   | C | 0.0753  |
| rs2528861   | T | 0.0544  |
| rs10231629  | G | 0.0464  |
| rs7789126   | T | 0.1009  |
| rs7791998   | T | 0.1376  |
| rs12536975  | G | 0.2352  |
| rs4717195   | A | 0.1409  |
| rs599574    | G | -0.0544 |
| rs917805    | A | 0.2631  |
| rs111481865 | T | 0.255   |
| rs10267271  | C | -0.0412 |
| rs62448567  | A | -0.2272 |
| rs6466505   | G | -0.0385 |
| rs77321620  | G | 0.3323  |
| rs74905287  | T | 0.1264  |

|             |   |         |
|-------------|---|---------|
| rs2009079   | G | 0.0778  |
| rs1525538   | G | 0.0475  |
| rs10282509  | T | 0.0692  |
| rs7797659   | A | 0.075   |
| rs2284215   | G | -0.0448 |
| rs76342500  | C | 0.2136  |
| rs73197504  | G | 0.0575  |
| rs74610871  | G | 0.0996  |
| rs73058720  | C | 0.1348  |
| rs11979306  | T | 0.0589  |
| rs2075005   | A | 0.1055  |
| rs113877411 | T | 0.233   |
| rs4731532   | A | -0.0384 |
| rs117160058 | T | -0.1503 |
| rs12705494  | A | -0.0399 |
| rs12667983  | T | 0.0925  |
| rs1991763   | G | 0.0428  |
| rs6943115   | C | -0.0403 |
| rs62462218  | G | -0.1936 |
| rs147353855 | T | 0.1353  |
| rs73159150  | A | 0.1103  |
| rs151067231 | A | 0.1804  |
| rs146307959 | T | -0.0797 |
| rs6966185   | A | 0.0381  |
| rs4731562   | A | 0.0417  |
| rs117377783 | A | 0.2126  |
| rs55986977  | T | 0.1887  |
| rs145136476 | A | 0.0836  |
| rs565901    | C | -0.105  |
| rs117737275 | A | 0.1966  |
| rs146662231 | T | 0.1424  |
| rs17160179  | T | -0.0883 |
| rs146403573 | T | 0.2023  |
| rs322731    | T | -0.0393 |
| rs3800743   | T | 0.0482  |
| rs11764513  | A | -0.0829 |
| rs117968513 | T | -0.1737 |
| rs6978310   | G | 0.0827  |
| rs7800049   | G | 0.048   |
| rs79216212  | C | 0.0853  |
| rs2023702   | G | -0.0677 |
| rs79048545  | A | 0.2531  |
| rs410866    | G | 0.0395  |
| rs7793443   | C | -0.0516 |
| rs56379351  | T | -0.0404 |
| rs77070191  | T | -0.1465 |
| rs9639138   | G | -0.0575 |

|             |   |         |
|-------------|---|---------|
| rs78706127  | C | -0.1908 |
| rs76833370  | C | 0.1291  |
| rs117951976 | A | -0.1611 |
| rs28360936  | T | -0.0655 |
| rs2282991   | T | 0.0729  |
| rs117626076 | T | 0.3014  |
| rs139980184 | G | -0.2669 |
| rs11981765  | A | 0.1827  |
| rs149912319 | T | -0.237  |
| rs76838724  | A | 0.0432  |
| rs1858339   | C | -0.0535 |
| rs4718778   | G | 0.0418  |
| rs62442538  | G | -0.0975 |
| rs16882459  | T | 0.2031  |
| rs73071792  | T | 0.1839  |
| rs2722310   | T | 0.0395  |
| rs17521723  | G | -0.0822 |
| rs73112290  | A | 0.2092  |
| rs142647741 | G | 0.1658  |
| rs12671964  | C | -0.0377 |
| rs6460169   | C | -0.044  |
| rs6956453   | C | 0.0516  |
| rs66985679  | C | 0.0653  |
| rs78257794  | A | 0.1221  |
| rs740141    | G | 0.0421  |
| rs79364329  | A | 0.2146  |
| rs76988120  | A | 0.0539  |
| rs111740338 | A | 0.1267  |
| rs73057348  | A | 0.0743  |
| rs62479651  | A | -0.2669 |
| rs6959356   | T | -0.065  |
| rs13235572  | A | 0.1045  |
| rs116601642 | C | 0.0696  |
| rs117272866 | C | -0.1296 |
| rs11974640  | G | -0.0846 |
| rs1550202   | A | -0.048  |
| rs1267269   | G | 0.0908  |
| rs68136574  | A | 0.0686  |
| rs78284327  | C | 0.0865  |
| rs117148982 | G | -0.1666 |
| rs117054034 | C | 0.089   |
| rs28609543  | G | 0.0379  |
| rs117689540 | A | 0.1517  |
| rs73109720  | G | -0.1335 |
| rs149220912 | G | 0.0475  |
| rs36198804  | T | 0.0513  |
| rs116971685 | T | -0.1767 |



|             |   |         |
|-------------|---|---------|
| rs9640161   | A | -0.0391 |
| rs6974847   | G | 0.0428  |
| rs78198447  | C | 0.1462  |
| rs10266230  | C | 0.0469  |
| rs13245680  | T | -0.0506 |
| rs7791057   | G | 0.0518  |
| rs34872188  | T | -0.0799 |
| rs10269431  | C | 0.058   |
| rs62441697  | T | 0.119   |
| rs9657874   | T | 0.2319  |
| rs3779361   | A | 0.0478  |
| rs6463092   | G | -0.0459 |
| rs58883029  | A | 0.1407  |
| rs76296148  | T | 0.0833  |
| rs138927799 | A | 0.1762  |
| rs112001608 | G | -0.1464 |
| rs62467091  | T | 0.0641  |
| rs145160039 | C | 0.1513  |
| rs13236076  | C | -0.0916 |
| rs74807692  | T | 0.1367  |
| rs62447006  | G | 0.0863  |
| rs853055    | C | -0.0502 |
| rs4719616   | T | 0.0509  |
| rs7789815   | C | 0.0684  |
| rs77321838  | A | -0.0858 |
| rs17148189  | T | -0.1891 |
| rs766087    | G | 0.2091  |
| rs7792748   | T | 0.0418  |
| rs720253    | G | -0.043  |
| rs79827766  | A | 0.1201  |
| rs12668467  | T | 0.0442  |
| rs1568827   | A | -0.0501 |
| rs112881900 | T | -0.0902 |
| rs41390847  | C | -0.1002 |
| rs17168279  | T | 0.1102  |
| rs35894114  | C | 0.2092  |
| rs78723462  | C | 0.1826  |
| rs75657806  | T | 0.0852  |
| rs78101308  | C | -0.1844 |
| rs17708126  | G | -0.0549 |
| rs17166374  | G | 0.0412  |
| rs6466594   | C | 0.1806  |
| rs1673164   | T | 0.0957  |
| rs73047060  | T | 0.1206  |
| rs1731877   | T | 0.0481  |
| rs176566    | A | 0.0478  |
| rs73093582  | G | -0.1793 |

|             |   |         |
|-------------|---|---------|
| rs73163251  | A | 0.1874  |
| rs4292602   | A | -0.0459 |
| rs73099556  | T | -0.0806 |
| rs4725266   | T | 0.0426  |
| rs42476     | G | 0.0662  |
| rs302160    | G | -0.1266 |
| rs12706100  | C | 0.0757  |
| rs12540122  | A | 0.0466  |
| rs57474611  | C | 0.1122  |
| rs9656217   | T | 0.0565  |
| rs74507980  | G | 0.0884  |
| rs78457930  | A | 0.108   |
| rs28446329  | T | 0.2475  |
| rs4000866   | T | 0.1209  |
| rs37981     | T | -0.0379 |
| rs117939470 | A | -0.1606 |
| rs77930089  | A | -0.2432 |
| rs12700947  | C | 0.0481  |
| rs17837793  | A | 0.0926  |
| rs79296431  | A | 0.0426  |
| rs59789360  | G | 0.0873  |
| rs114103365 | T | 0.1412  |
| rs73221230  | A | -0.1038 |
| rs4236432   | A | -0.0518 |
| rs10241087  | G | 0.0539  |
| rs10252663  | G | 0.1392  |
| rs57213785  | G | 0.2291  |
| rs117195218 | T | -0.272  |
| rs12698668  | G | -0.0391 |
| rs36007503  | C | 0.0939  |
| rs17141284  | C | 0.0559  |
| rs117979993 | T | -0.0843 |
| rs6949069   | T | 0.058   |
| rs2189439   | A | 0.0366  |
| rs2192676   | G | 0.0379  |
| rs6460436   | A | 0.0638  |
| rs62481321  | C | -0.1743 |
| rs76012712  | A | -0.1766 |
| rs6459688   | C | 0.0952  |
| rs3779330   | A | -0.0446 |
| rs34405085  | T | -0.1693 |
| rs1859492   | G | -0.0652 |
| rs1527222   | G | 0.0742  |
| rs80057254  | T | 0.0923  |
| rs2241439   | G | -0.0414 |
| rs7782146   | G | 0.1733  |
| rs6949091   | A | 0.06    |

|             |   |         |
|-------------|---|---------|
| rs74814591  | T | 0.0779  |
| rs4727687   | C | -0.0391 |
| rs39100     | T | -0.0394 |
| rs17676175  | T | 0.0572  |
| rs10276939  | G | -0.047  |
| rs12673437  | G | -0.0558 |
| rs11765706  | T | 0.0551  |
| rs145309176 | C | -0.2108 |
| rs113510157 | T | 0.199   |
| rs117781377 | A | -0.2324 |
| rs117191597 | C | 0.1795  |
| rs1472274   | A | 0.1912  |
| rs2692410   | T | 0.0419  |
| rs79172074  | A | -0.1057 |
| rs117708891 | C | 0.1553  |
| rs255104    | T | 0.057   |
| rs7809644   | C | -0.1756 |
| rs117881869 | A | 0.1486  |
| rs12154666  | A | -0.0376 |
| rs7796500   | A | -0.065  |
| rs13241200  | C | -0.0375 |
| rs13227861  | T | 0.2232  |
| rs73209384  | G | -0.0965 |
| rs113613559 | T | 0.209   |
| rs62447464  | T | 0.2338  |
| rs6977189   | T | 0.0513  |
| rs6955039   | A | -0.0598 |
| rs111859304 | T | -0.1286 |
| rs537647    | A | 0.0507  |
| rs10278416  | A | 0.086   |
| rs73228376  | A | 0.1121  |
| rs7809066   | A | -0.0379 |
| rs1557738   | C | 0.1017  |
| rs9801438   | T | 0.0896  |
| rs3757524   | C | 0.0634  |
| rs76740961  | T | -0.0983 |
| rs146252887 | T | 0.1288  |
| rs6967783   | T | 0.0998  |
| rs142446897 | A | -0.2949 |
| rs691130    | G | 0.0383  |
| rs62439602  | A | -0.0492 |
| rs62457207  | A | 0.1778  |
| rs113611553 | A | 0.1225  |
| rs74795786  | G | 0.0983  |
| rs13245723  | A | 0.0744  |
| rs17159844  | T | 0.0778  |
| rs117911989 | A | 0.1341  |

|             |   |         |
|-------------|---|---------|
| rs73695492  | A | 0.1219  |
| rs143118379 | T | 0.1979  |
| rs117477355 | T | -0.2852 |
| rs74998753  | G | 0.0739  |
| rs76303215  | A | -0.1238 |
| rs10275171  | C | 0.1796  |
| rs137888771 | A | -0.2145 |
| rs57258037  | C | -0.0715 |
| rs9642365   | A | -0.0579 |
| rs55909665  | T | 0.1806  |
| rs4602777   | T | 0.0421  |
| rs116894758 | A | 0.321   |
| rs2023968   | C | 0.0399  |
| rs13222916  | A | 0.0555  |
| rs17172001  | A | 0.0815  |
| rs6966068   | T | 0.1398  |
| rs41278836  | C | -0.152  |
| rs77651623  | T | 0.2185  |
| rs13243654  | A | -0.0412 |
| rs146844554 | C | -0.1882 |
| rs2177450   | C | 0.0402  |
| rs213190    | G | 0.0384  |
| rs17296151  | G | 0.0501  |
| rs35796336  | C | 0.1006  |
| rs78619463  | T | -0.1775 |
| rs11766346  | T | -0.0651 |
| rs273972    | A | -0.0399 |
| rs117296068 | G | 0.1183  |
| rs2108130   | A | -0.0457 |
| rs4730772   | T | 0.0428  |
| rs6956754   | A | 0.038   |
| rs11975565  | C | 0.0446  |
| rs35313157  | T | 0.1038  |
| rs117110169 | A | 0.2088  |
| rs55924567  | T | 0.0553  |
| rs45519131  | C | 0.2467  |
| rs6956114   | A | -0.0373 |
| rs144937857 | A | 0.1225  |
| rs34280758  | T | -0.1274 |
| rs10282062  | G | -0.0787 |
| rs11762929  | G | 0.0365  |
| rs140604916 | G | -0.1275 |
| rs6978407   | C | 0.0693  |
| rs13241175  | G | -0.0563 |
| rs76949178  | T | -0.1562 |
| rs12155019  | G | -0.0467 |
| rs71546185  | T | 0.1517  |

|             |   |         |
|-------------|---|---------|
| rs10950664  | G | 0.0375  |
| rs78659401  | G | -0.1099 |
| rs4727127   | G | -0.0394 |
| rs118078689 | G | 0.2049  |
| rs12700267  | T | 0.0388  |
| rs13238380  | T | 0.0374  |
| rs62457523  | A | 0.0479  |
| rs9641920   | G | -0.04   |
| rs12699823  | A | 0.2793  |
| rs61564286  | C | 0.0624  |
| rs73228330  | G | 0.2018  |
| rs9648098   | C | -0.2081 |
| rs9640640   | C | 0.0373  |
| rs12540625  | A | -0.0754 |
| rs61040990  | A | 0.0747  |
| rs940269    | C | -0.0533 |
| rs77837153  | T | 0.2539  |
| rs6957576   | C | 0.1554  |
| rs11981663  | C | 0.1545  |
| rs10274596  | G | -0.0589 |
| rs35141395  | A | -0.06   |
| rs146950566 | G | -0.1877 |
| rs17169473  | T | 0.1856  |
| rs17139630  | G | -0.0837 |
| rs7779409   | G | -0.0409 |
| rs6459842   | A | 0.0435  |
| rs150736708 | C | 0.1484  |
| rs10252827  | C | -0.0393 |
| rs2451233   | A | -0.0406 |
| rs12701832  | C | 0.0395  |
| rs13233635  | G | -0.1981 |
| rs74534901  | C | 0.1379  |
| rs1020112   | A | 0.0407  |
| rs1796092   | G | -0.0395 |
| rs13233261  | A | 0.039   |
| rs61689701  | T | 0.0591  |
| rs1431092   | A | 0.2461  |
| rs58591745  | A | -0.0749 |
| rs62434091  | C | 0.0653  |
| rs12701010  | C | 0.1276  |
| rs62442529  | A | -0.0465 |
| rs138532740 | A | -0.1922 |
| rs117792834 | T | -0.2587 |
| rs803118    | T | -0.0378 |
| rs149096544 | A | -0.0882 |
| rs73162214  | T | -0.0547 |
| rs117755521 | G | 0.2032  |

|             |   |         |
|-------------|---|---------|
| rs117808689 | A | 0.1694  |
| rs893939    | T | -0.1503 |
| rs10951266  | T | -0.0381 |
| rs17709421  | T | -0.0446 |
| rs10249732  | T | -0.0572 |
| rs7791310   | C | -0.1354 |
| rs7800715   | G | -0.0395 |
| rs56399693  | A | -0.1724 |
| rs142935507 | A | -0.0941 |
| rs4725336   | C | 0.0506  |
| rs139996879 | T | 0.1931  |
| rs2041684   | A | -0.0463 |
| rs12540451  | A | 0.1229  |
| rs117349069 | A | 0.1436  |
| rs1004028   | C | -0.0467 |
| rs7806790   | C | 0.143   |
| rs4590345   | T | 0.0632  |
| rs34106623  | T | 0.0455  |
| rs12674323  | T | 0.0725  |
| rs62489471  | T | 0.217   |
| rs28671431  | T | 0.0405  |
| rs2299337   | A | 0.0396  |
| rs116976887 | A | 0.14    |
| rs10274344  | G | -0.1194 |
| rs1547471   | A | 0.037   |
| rs34219043  | T | -0.0456 |
| rs78594338  | G | 0.2322  |
| rs10234980  | T | 0.0913  |
| rs166313    | C | -0.0368 |
| rs73091056  | A | 0.1349  |
| rs28381866  | G | 0.2348  |
| rs10224170  | G | 0.0368  |
| rs17397797  | T | 0.18    |
| rs13241158  | T | 0.045   |
| rs76507815  | C | 0.1367  |
| rs10249257  | A | 0.0708  |
| rs1230424   | G | -0.0554 |
| rs17229226  | G | 0.0923  |
| rs2538132   | T | 0.0559  |
| rs17785005  | T | 0.0487  |
| rs73319733  | T | 0.1123  |
| rs10247302  | T | -0.0587 |
| rs2622217   | C | 0.0398  |
| rs80281474  | T | 0.0787  |
| rs1863226   | G | -0.042  |
| rs1638755   | T | 0.1387  |
| rs2030712   | T | 0.0373  |

|             |   |         |
|-------------|---|---------|
| rs7794546   | T | 0.0414  |
| rs34814028  | A | -0.0786 |
| rs10953322  | A | 0.0528  |
| rs4722844   | T | -0.0412 |
| rs218123    | A | -0.0374 |
| rs10234796  | A | -0.0378 |
| rs117664890 | A | 0.0801  |
| rs62446120  | A | 0.049   |
| rs988567    | G | 0.0376  |
| rs117522961 | T | 0.2277  |
| rs12540655  | C | 0.0533  |
| rs150879973 | A | -0.1951 |
| rs13245748  | C | -0.133  |
| rs76449555  | G | 0.255   |
| rs7776612   | C | 0.0399  |
| rs7798735   | T | 0.0593  |
| rs17155324  | A | 0.1095  |
| rs849090    | G | 0.0482  |
| rs78721875  | A | 0.0568  |
| rs79487522  | T | -0.1015 |
| rs61447843  | C | 0.0474  |
| rs73161537  | C | 0.0453  |
| rs55768593  | A | -0.0379 |
| rs6958048   | C | -0.121  |
| rs74385643  | C | -0.1827 |
| rs111577430 | G | -0.2183 |
| rs75701553  | T | -0.0724 |
| rs1047785   | C | 0.0369  |
| rs77596091  | T | 0.108   |
| rs1063964   | A | -0.0384 |
| rs12698671  | C | 0.0494  |
| rs78184013  | T | 0.1825  |
| rs6978735   | C | -0.0627 |
| rs6959490   | T | 0.0517  |
| rs6977304   | G | 0.0386  |
| rs2429221   | A | 0.0712  |
| rs34709209  | T | -0.1588 |
| rs61343371  | G | -0.1444 |
| rs6978374   | G | -0.0491 |
| rs17611216  | T | -0.0742 |
| rs116258732 | G | 0.104   |
| rs73221988  | A | 0.1131  |
| rs76356935  | G | 0.2704  |
| rs6951424   | C | 0.0462  |
| rs3789835   | C | -0.1374 |
| rs4716653   | C | 0.0389  |
| rs146793248 | C | 0.1409  |

|             |   |         |
|-------------|---|---------|
| rs73145154  | G | 0.1202  |
| rs147120097 | G | -0.1642 |
| rs73332295  | T | 0.1283  |
| rs12056297  | C | 0.0767  |
| rs17142054  | G | 0.1292  |
| rs116928768 | G | -0.2158 |
| rs1860282   | A | 0.05    |
| rs142746418 | T | 0.1895  |
| rs2371660   | T | -0.0457 |
| rs117477886 | T | 0.1566  |
| rs6967743   | A | 0.0538  |
| rs1079358   | A | -0.0656 |
| rs6980242   | A | 0.0592  |
| rs143062643 | T | -0.2611 |
| rs117670396 | C | 0.1511  |
| rs4464906   | C | 0.0466  |
| rs77862222  | G | 0.1468  |
| rs3135679   | A | 0.1309  |
| rs79534848  | T | 0.0572  |
| rs6945759   | A | 0.042   |
| rs62454419  | T | -0.0701 |
| rs74900296  | C | -0.2578 |
| rs4252487   | T | 0.1649  |
| rs62481855  | C | 0.0539  |
| rs28988601  | C | 0.2178  |
| rs78758471  | T | 0.1729  |
| rs2237291   | T | -0.0392 |
| rs35442187  | C | 0.1256  |
| rs59319753  | C | 0.044   |
| rs118063014 | T | 0.2104  |
| rs7792895   | T | -0.0549 |
| rs6962925   | T | 0.0429  |
| rs17386646  | G | -0.213  |
| rs60546668  | G | 0.0414  |
| rs817772    | A | 0.0598  |
| rs10276992  | T | -0.0395 |
| rs117949534 | G | -0.1188 |
| rs7788728   | A | 0.0915  |
| rs117682311 | A | -0.1904 |
| rs116869865 | G | -0.1403 |
| rs17160679  | C | -0.1317 |
| rs6963635   | T | -0.0442 |
| rs74439174  | C | 0.1051  |
| rs10264725  | G | -0.0438 |
| rs7777438   | C | 0.0694  |
| rs75612746  | C | 0.2558  |
| rs6958032   | T | -0.0369 |



|             |   |         |
|-------------|---|---------|
| rs56377166  | T | 0.2141  |
| rs116875317 | T | -0.3328 |
| rs2908744   | G | 0.0405  |
| rs146961637 | T | 0.1706  |
| rs2908749   | A | -0.0378 |
| rs117289073 | G | -0.1225 |
| rs3757523   | T | 0.0481  |
| rs78669955  | C | 0.2385  |
| rs75469352  | A | -0.1475 |
| rs12700771  | G | -0.0524 |
| rs77254950  | C | 0.2061  |
| rs13244251  | C | 0.0434  |
| rs17139332  | A | 0.1025  |
| rs138724297 | C | 0.1882  |
| rs77119003  | T | 0.1229  |
| rs10499596  | C | -0.0636 |
| rs62459520  | T | 0.0763  |
| rs62480380  | C | 0.1561  |
| rs73047796  | T | -0.1048 |
| rs1202459   | T | 0.1732  |
| rs11761705  | T | 0.0379  |
| rs117905260 | A | -0.2176 |
| rs12536185  | C | -0.0712 |
| rs2893559   | C | 0.0393  |
| rs17162037  | C | -0.1141 |
| rs12154905  | A | -0.0397 |
| rs117886222 | T | -0.1135 |
| rs17575311  | G | -0.0916 |
| rs1560577   | C | 0.0391  |
| rs73430835  | C | -0.3255 |
| rs112820944 | G | 0.2069  |
| rs149721465 | A | -0.2296 |
| rs78004750  | C | 0.1444  |
| rs113248801 | C | -0.2227 |
| rs2531109   | G | 0.0434  |
| rs114400619 | G | -0.1011 |
| rs10952036  | G | 0.1782  |
| rs11768764  | G | -0.067  |
| rs117470130 | A | -0.153  |
| rs12234472  | C | 0.0623  |
| rs112592895 | C | -0.2256 |
| rs60925013  | T | -0.0362 |
| rs42128     | C | 0.0744  |
| rs77420714  | T | -0.098  |
| rs117720314 | A | -0.1608 |
| rs10246885  | C | -0.045  |
| rs73157665  | T | 0.0699  |

|             |   |         |
|-------------|---|---------|
| rs10499807  | T | 0.0611  |
| rs1089519   | T | 0.0535  |
| rs10248387  | G | 0.0782  |
| rs12668416  | G | -0.039  |
| rs112267346 | T | -0.0956 |
| rs11238250  | C | 0.0454  |
| rs2948390   | A | 0.0416  |
| rs80246097  | C | 0.0886  |
| rs7806675   | G | -0.0388 |
| rs80068686  | T | 0.0889  |
| rs1488515   | G | -0.0577 |
| rs42724     | A | 0.0687  |
| rs6960309   | T | -0.1189 |
| rs111359270 | C | 0.0691  |
| rs10807943  | T | 0.0767  |
| rs113249148 | A | 0.1526  |
| rs80320649  | C | -0.3188 |
| rs6977777   | C | 0.046   |
| rs12703296  | C | -0.0347 |
| rs79825245  | C | 0.2139  |
| rs62477070  | G | 0.0877  |
| rs10281898  | A | -0.0547 |
| rs11973867  | G | -0.0832 |
| rs1204594   | G | -0.0357 |
| rs1073578   | C | -0.0521 |
| rs39047     | G | 0.0539  |
| rs2692467   | C | -0.0356 |
| rs138299920 | G | 0.1553  |
| rs117413392 | A | -0.151  |
| rs343716    | A | -0.0746 |
| rs1012122   | A | -0.0695 |
| rs3114723   | A | -0.0371 |
| rs117709691 | A | 0.0597  |
| rs17159566  | A | 0.08    |
| rs6964055   | T | -0.0812 |
| rs145690477 | T | 0.1612  |
| rs147510687 | G | -0.1679 |
| rs142386862 | T | -0.1841 |
| rs4719165   | T | -0.1274 |
| rs12699320  | G | -0.0478 |
| rs80284093  | C | -0.093  |
| rs38135     | T | 0.1277  |
| rs2465785   | T | -0.0942 |
| rs7794404   | C | 0.0486  |
| rs6962385   | C | 0.046   |
| rs12540002  | C | 0.0459  |
| rs6947214   | G | 0.0682  |

|             |   |         |
|-------------|---|---------|
| rs117015925 | C | -0.0913 |
| rs7785156   | G | -0.0496 |
| rs78580109  | A | 0.119   |
| rs1362039   | A | 0.0343  |
| rs148266381 | A | -0.2545 |
| rs7810502   | G | -0.0407 |
| rs12537801  | G | 0.0712  |
| rs3816420   | C | 0.0501  |
| rs73163648  | C | 0.1332  |
| rs17358527  | C | -0.1134 |
| rs4721317   | A | 0.0445  |
| rs10268536  | G | 0.0633  |
| rs262375    | G | -0.0434 |
| rs12535664  | A | 0.0654  |
| rs2188994   | G | -0.0367 |
| rs11764479  | A | -0.0819 |
| rs275534    | C | -0.0676 |
| rs7781877   | T | -0.0708 |
| rs7808331   | A | 0.0508  |
| rs149739689 | C | -0.1202 |
| rs59913213  | C | 0.0748  |
| rs149778    | T | 0.038   |
| rs4725075   | C | 0.1098  |
| rs57842684  | G | 0.0457  |
| rs792186    | T | 0.1919  |
| rs77284408  | A | 0.0512  |
| rs57225931  | T | -0.0453 |
| rs12674395  | A | 0.2383  |
| rs11981999  | A | 0.0579  |
| rs10269105  | C | 0.2102  |
| rs116016816 | A | -0.0949 |
| rs10266115  | C | 0.1854  |
| rs77539579  | G | -0.1795 |
| rs111695172 | T | -0.3223 |
| rs6945447   | A | 0.0374  |
| rs6957997   | A | 0.0519  |
| rs77524436  | T | -0.0794 |
| rs73124106  | T | 0.0799  |
| rs4728961   | A | -0.1615 |
| rs118127201 | A | 0.1255  |
| rs117980701 | C | 0.1514  |
| rs3801514   | G | -0.0356 |
| rs10282626  | G | -0.1765 |
| rs73154206  | T | -0.1563 |
| rs11762080  | G | -0.0413 |
| rs12112053  | C | -0.0645 |
| rs12539321  | T | 0.0362  |

|             |   |         |
|-------------|---|---------|
| rs847725    | C | 0.0363  |
| rs148548182 | A | 0.2219  |
| rs17151558  | T | -0.0583 |
| rs139586836 | A | -0.1179 |
| rs117781477 | C | -0.1353 |
| rs3851536   | A | -0.0403 |
| rs147043492 | A | 0.1431  |
| rs117990536 | C | -0.2129 |
| rs73178546  | A | -0.0473 |
| rs76207724  | T | -0.112  |
| rs10499379  | T | 0.0609  |
| rs13238682  | A | 0.0407  |
| rs13239216  | G | 0.0889  |
| rs13238458  | A | -0.0701 |
| rs80150515  | A | -0.0765 |
| rs31666     | C | 0.0505  |
| rs75696536  | A | 0.0919  |
| rs4721910   | A | 0.1241  |
| rs6952940   | T | 0.1371  |
| rs10216032  | G | 0.0611  |
| rs73286893  | G | -0.1646 |
| rs3761806   | C | 0.0642  |
| rs10273502  | G | -0.1191 |
| rs141504833 | G | 0.1723  |
| rs113764553 | G | 0.1231  |
| rs76301941  | C | -0.0768 |
| rs80143958  | T | -0.2403 |
| rs13235639  | T | 0.0727  |
| rs2189869   | T | -0.0365 |
| rs117708232 | A | 0.1642  |
| rs143690913 | A | 0.1518  |
| rs62452224  | C | 0.0679  |
| rs114722266 | T | -0.2256 |
| rs117919318 | T | 0.0708  |
| rs992154    | A | -0.0766 |
| rs1548625   | T | 0.1183  |
| rs12534491  | G | -0.0384 |
| rs1405320   | A | -0.0371 |
| rs141825589 | A | 0.0734  |
| rs34523634  | T | 0.1178  |
| rs10264898  | A | -0.047  |
| rs117847999 | T | 0.1117  |
| rs245931    | A | -0.0456 |
| rs62471590  | C | 0.2111  |
| rs7493      | C | 0.0408  |
| rs35939036  | G | -0.0624 |
| rs2071045   | C | -0.0504 |

|             |   |         |
|-------------|---|---------|
| rs73685449  | T | -0.2317 |
| rs13233413  | C | 0.048   |
| rs150053027 | G | -0.1899 |
| rs117324206 | G | -0.2487 |
| rs2353837   | C | -0.0533 |
| rs56342316  | A | 0.0437  |
| rs6950165   | A | -0.0344 |
| rs12672732  | C | 0.0386  |
| rs10263181  | G | -0.0836 |
| rs9638856   | A | -0.0517 |
| rs13228122  | C | 0.0363  |
| rs1997276   | T | 0.0448  |
| rs73137833  | T | 0.061   |
| rs2140742   | A | -0.0349 |
| rs117118060 | A | 0.1398  |
| rs74741412  | C | -0.2083 |
| rs12538020  | G | -0.0369 |
| rs143687743 | C | -0.0713 |
| rs6946187   | T | -0.0368 |
| rs13221012  | T | -0.0378 |
| rs6463521   | G | -0.0931 |
| rs17862300  | C | -0.1108 |
| rs35140375  | G | 0.0454  |
| rs43037     | C | -0.0356 |
| rs145156985 | A | 0.1451  |
| rs11979413  | A | 0.0546  |
| rs58458725  | C | 0.0459  |
| rs7808467   | C | -0.0855 |
| rs7795236   | T | 0.0398  |
| rs17141563  | G | 0.1758  |
| rs2007481   | G | 0.0365  |
| rs3735537   | A | 0.0595  |
| rs1526770   | T | 0.042   |
| rs77032931  | A | 0.1535  |
| rs28492066  | T | 0.0391  |
| rs79544783  | C | 0.2024  |
| rs113222728 | G | 0.1484  |
| rs4301368   | C | -0.0773 |
| rs145187571 | T | 0.2031  |
| rs111966208 | T | 0.2236  |
| rs74935491  | A | 0.1086  |
| rs141451069 | T | -0.2377 |
| rs10230771  | A | 0.0508  |
| rs113268914 | C | 0.1462  |
| rs117141428 | A | -0.142  |
| rs3793304   | A | -0.0896 |
| rs117383073 | T | -0.1511 |

|             |   |         |
|-------------|---|---------|
| rs35038651  | G | 0.2403  |
| rs10250564  | A | -0.0403 |
| rs117130677 | C | -0.1279 |
| rs144269672 | C | 0.2867  |
| rs836547    | T | -0.0748 |
| rs10253545  | G | -0.0365 |
| rs117450257 | G | 0.0842  |
| rs10277791  | C | 0.0501  |
| rs12668956  | G | -0.0521 |
| rs10274425  | A | 0.0383  |
| rs112309294 | T | -0.1932 |
| rs10952693  | G | 0.0702  |
| rs12704793  | T | 0.171   |
| rs7803425   | G | -0.0837 |
| rs2966482   | T | -0.0413 |
| rs145600349 | T | -0.2129 |
| rs74521389  | G | -0.1359 |
| rs6460967   | T | -0.035  |
| rs1796119   | A | 0.0339  |
| rs139579516 | T | 0.1852  |
| rs117888414 | G | -0.1989 |
| rs7793524   | C | 0.0489  |
| rs11761254  | T | 0.0544  |
| rs7785074   | A | -0.0408 |
| rs28490943  | A | -0.1054 |
| rs1002562   | C | 0.0794  |
| rs142219806 | C | -0.2404 |
| rs6462224   | G | 0.0356  |
| rs146388562 | G | -0.2135 |
| rs7795565   | A | -0.0704 |
| rs34658335  | T | -0.157  |
| rs6980241   | T | 0.035   |
| rs78916232  | G | -0.1668 |
| rs79403349  | A | -0.1002 |
| rs117487846 | C | 0.0848  |
| rs9656532   | A | 0.0362  |
| rs118086975 | A | 0.2586  |
| rs117608815 | A | -0.1579 |
| rs73693168  | A | 0.1078  |
| rs7785788   | G | -0.0522 |
| rs1406603   | T | -0.0379 |
| rs822537    | G | 0.0396  |
| rs59637506  | A | -0.0429 |
| rs137967196 | C | -0.0515 |
| rs6463345   | G | -0.046  |
| rs10268510  | C | 0.0341  |
| rs12668458  | C | -0.0412 |

|             |   |         |
|-------------|---|---------|
| rs1603455   | C | -0.0595 |
| rs57167163  | T | -0.0343 |
| rs140670232 | A | -0.2125 |
| rs58919541  | A | -0.2079 |
| rs2240842   | T | -0.0455 |
| rs38526     | C | -0.0647 |
| rs145696979 | T | -0.1557 |
| rs141480664 | A | 0.2558  |
| rs2462549   | G | 0.0675  |
| rs6944588   | T | -0.0403 |
| rs142345070 | A | 0.1063  |
| rs111956383 | C | 0.2536  |
| rs73221263  | C | 0.1324  |
| rs56696175  | G | -0.2407 |
| rs71539569  | G | 0.0626  |
| rs76667818  | C | 0.0769  |
| rs112379097 | C | 0.1167  |
| rs11983544  | T | 0.0385  |
| rs568479    | T | 0.0694  |
| rs877155    | T | 0.0479  |
| rs17604518  | A | -0.0574 |
| rs118112104 | G | -0.181  |
| rs76890506  | G | 0.251   |
| rs11761970  | T | -0.0423 |
| rs2525555   | T | 0.0366  |
| rs17230060  | G | -0.0486 |
| rs118139397 | G | 0.0943  |
| rs1068156   | T | -0.0356 |
| rs10487524  | A | 0.0529  |
| rs62481783  | C | -0.0973 |
| rs7802004   | G | 0.0738  |
| rs17642816  | T | -0.1356 |
| rs71542303  | C | 0.1292  |
| rs77661287  | G | 0.0709  |
| rs7808205   | C | -0.0482 |
| rs2893079   | G | 0.0413  |
| rs144635327 | T | 0.1245  |
| rs78884493  | A | 0.2029  |
| rs2371541   | T | -0.0361 |
| rs35492548  | C | 0.2972  |
| rs2373493   | T | -0.0736 |
| rs55711817  | T | 0.0543  |
| rs6953947   | A | 0.0363  |
| rs78865297  | A | 0.1792  |
| rs150373598 | T | 0.0848  |
| rs846425    | T | -0.1029 |
| rs1796258   | T | 0.0587  |

|             |   |         |
|-------------|---|---------|
| rs4351318   | A | 0.0361  |
| rs116796297 | A | -0.2398 |
| rs10240080  | A | -0.0597 |
| rs6950738   | G | 0.0351  |
| rs2392550   | G | -0.0852 |
| rs76997602  | G | 0.1412  |
| rs76778951  | T | -0.0541 |
| rs59965966  | T | 0.2398  |
| rs608441    | C | -0.0385 |
| rs117967806 | T | 0.1544  |
| rs77470528  | T | 0.0785  |
| rs117687153 | A | 0.1625  |
| rs4732451   | C | 0.047   |
| rs7789628   | T | -0.0551 |
| rs75234799  | G | 0.1197  |
| rs77203753  | T | 0.1613  |
| rs62484670  | C | 0.1363  |
| rs73195738  | T | -0.1017 |
| rs339057    | A | -0.0362 |
| rs117075173 | T | 0.1165  |
| rs2350852   | G | -0.0535 |
| rs73362451  | G | 0.1672  |
| rs16875072  | A | 0.1029  |
| rs117243016 | T | 0.1164  |
| rs71560750  | C | -0.0907 |
| rs148758419 | G | -0.1875 |
| rs35213026  | T | 0.119   |
| rs75002295  | A | 0.1835  |
| rs10243813  | G | 0.0806  |
| rs1647791   | A | 0.0338  |
| rs150824187 | A | -0.1579 |
| rs6972827   | G | -0.0967 |
| rs3801957   | T | 0.1406  |
| rs117569239 | G | -0.1522 |
| rs1990344   | A | -0.0431 |
| rs35071727  | A | 0.0724  |
| rs13247131  | A | -0.0399 |
| rs2074891   | C | 0.0346  |
| rs7789065   | T | -0.0344 |
| rs35029494  | A | -0.0954 |
| rs147175402 | A | -0.1739 |
| rs4716557   | G | 0.043   |
| rs117057462 | T | 0.1648  |
| rs17789894  | T | 0.0492  |
| rs117586731 | T | 0.2273  |
| rs17457580  | G | -0.0686 |
| rs112726611 | T | -0.1675 |



|             |   |         |
|-------------|---|---------|
| rs149879953 | T | 0.1598  |
| rs1208167   | A | 0.0332  |
| rs7801969   | G | -0.2552 |
| rs2538467   | A | 0.0395  |
| rs148263653 | G | -0.2326 |
| rs117312989 | C | -0.2182 |
| rs12718703  | A | -0.0404 |
| rs59981375  | A | 0.1383  |
| rs535516    | A | 0.0427  |
| rs365896    | A | 0.0337  |
| rs1076219   | A | 0.0421  |
| rs79406710  | G | 0.2146  |
| rs9885993   | T | -0.0417 |
| rs9969128   | G | 0.0778  |
| rs117446522 | A | -0.2459 |
| rs74297456  | C | 0.1303  |
| rs4075268   | T | -0.0803 |
| rs117423417 | T | 0.1793  |
| rs12667569  | G | -0.0339 |
| rs138994021 | A | 0.2525  |
| rs78698789  | T | 0.0853  |
| rs80270350  | C | 0.0544  |
| rs16884656  | C | 0.0552  |
| rs117811227 | G | 0.1825  |
| rs73099347  | G | -0.1103 |
| rs9691724   | C | -0.0403 |
| rs111809624 | A | -0.2492 |
| rs389704    | A | 0.2491  |
| rs117374458 | G | 0.0885  |
| rs17740845  | G | 0.0498  |
| rs79790719  | T | 0.1138  |
| rs73185015  | T | 0.2331  |
| rs10236085  | G | -0.1791 |
| rs11773818  | T | -0.0392 |
| rs78589696  | A | 0.0923  |
| rs76739083  | T | 0.2057  |
| rs1879852   | T | 0.0376  |
| rs117662279 | A | 0.1621  |
| rs993861    | A | -0.1491 |
| rs76524064  | G | -0.0891 |
| rs10241209  | T | -0.0573 |
| rs1006482   | A | -0.0538 |
| rs55984533  | A | -0.2155 |
| rs74790454  | A | -0.1627 |
| rs144168002 | C | 0.2154  |
| rs117285521 | G | -0.2595 |
| rs147351105 | G | -0.0929 |

|             |   |         |
|-------------|---|---------|
| rs144978447 | G | -0.2084 |
| rs116912623 | A | -0.1523 |
| rs3801206   | T | -0.0434 |
| rs62446544  | G | 0.1764  |
| rs116936592 | A | -0.2402 |
| rs79636847  | A | 0.0895  |
| rs73719003  | G | -0.0732 |
| rs6943301   | T | 0.1303  |
| rs13228501  | C | -0.0771 |
| rs4726423   | T | 0.0667  |
| rs34653367  | G | -0.1568 |
| rs138097864 | T | -0.1495 |
| rs6461947   | T | 0.0376  |
| rs62477605  | A | -0.2542 |
| rs13306926  | T | 0.1876  |
| rs2622243   | A | -0.0368 |
| rs17426587  | C | 0.2543  |
| rs56388170  | T | 0.0397  |
| rs2157816   | T | -0.0411 |
| rs73170689  | C | -0.0412 |
| rs73083791  | A | -0.1518 |
| rs118104755 | A | 0.1067  |
| rs114702698 | G | 0.1409  |
| rs62445312  | A | -0.1357 |
| rs78148632  | C | 0.1881  |
| rs76215142  | A | -0.2988 |
| rs75397016  | G | 0.2315  |
| rs11767740  | T | 0.0831  |
| rs2107115   | G | 0.0356  |
| rs79362511  | C | 0.078   |
| rs78528273  | G | -0.1227 |
| rs2158573   | C | 0.0354  |
| rs3213655   | C | 0.1453  |
| rs117920677 | T | -0.1743 |
| rs12540192  | G | 0.0735  |
| rs4716923   | T | 0.0382  |
| rs73173966  | A | -0.082  |
| rs791597    | A | 0.0396  |
| rs78913740  | A | -0.0651 |
| rs56289897  | G | -0.1005 |
| rs117058392 | A | -0.0651 |
| rs144456149 | G | 0.2349  |
| rs734547    | A | -0.0416 |
| rs73128622  | A | 0.061   |
| rs10238018  | T | -0.0716 |
| rs11764952  | A | 0.0391  |
| rs2286269   | G | -0.102  |

|             |   |         |
|-------------|---|---------|
| rs74711896  | A | 0.0665  |
| rs6951829   | T | -0.0364 |
| rs76758915  | C | 0.129   |
| rs140947174 | C | -0.1914 |
| rs139474581 | A | -0.0833 |
| rs77013197  | G | 0.0905  |
| rs2968864   | C | -0.0382 |
| rs62485760  | G | 0.0428  |
| rs2158134   | C | -0.0551 |
| rs66643629  | A | 0.0384  |
| rs10247950  | G | -0.0367 |
| rs76487881  | G | 0.233   |
| rs80207295  | C | -0.2088 |
| rs147659158 | A | 0.2069  |
| rs4947420   | T | -0.0658 |
| rs73076991  | C | 0.0848  |
| rs62451196  | A | 0.0912  |
| rs25416     | C | 0.0438  |
| rs12539718  | G | 0.0427  |
| rs112051214 | T | -0.1522 |
| rs28570309  | A | -0.058  |
| rs73166402  | A | -0.2141 |
| rs11769674  | T | 0.0345  |
| rs2700990   | A | 0.039   |
| rs149365200 | A | 0.2011  |
| rs139703697 | C | -0.2779 |
| rs34624532  | A | 0.0677  |
| rs35696201  | C | 0.0381  |
| rs77936002  | A | 0.0732  |
| rs7794143   | T | -0.0382 |
| rs80151297  | A | 0.1037  |
| rs114191674 | A | -0.157  |
| rs17437824  | G | 0.0774  |
| rs78900159  | A | 0.1139  |
| rs73129944  | G | -0.2261 |
| rs78883037  | T | -0.071  |
| rs6467666   | A | 0.0396  |
| rs77958198  | G | 0.1621  |
| rs117281256 | T | 0.1013  |
| rs1963815   | T | 0.0356  |
| rs6946635   | T | -0.1061 |
| rs12540519  | T | 0.069   |
| rs118079866 | G | -0.1659 |
| rs77811272  | T | 0.137   |
| rs7799444   | C | 0.0328  |
| rs117697718 | G | -0.0624 |
| rs12540548  | T | 0.0331  |

|             |   |         |
|-------------|---|---------|
| rs6970197   | A | -0.0746 |
| rs73203019  | G | 0.1169  |
| rs12537581  | A | -0.047  |
| rs17155352  | C | 0.058   |
| rs10487629  | T | -0.0437 |
| rs147134761 | A | 0.1517  |
| rs12234852  | T | 0.0531  |
| rs77141632  | C | -0.0392 |
| rs62474005  | C | 0.0373  |
| rs10278573  | G | 0.0714  |
| rs60009508  | G | 0.1234  |
| rs11982951  | T | 0.0567  |
| rs6947178   | T | -0.052  |
| rs117605382 | G | -0.1323 |
| rs62480111  | C | 0.2466  |
| rs75509990  | T | 0.1291  |
| rs73123364  | C | -0.0711 |
| rs12718224  | A | -0.0373 |
| rs10274854  | A | -0.0415 |
| rs55787858  | C | 0.1173  |
| rs1088555   | C | -0.0386 |
| rs10230879  | T | -0.1133 |
| rs10237658  | G | 0.0363  |
| rs2299189   | T | -0.0456 |
| rs77103870  | T | 0.1031  |
| rs113829953 | G | 0.0861  |
| rs17233604  | C | -0.0485 |
| rs12672558  | C | -0.0364 |
| rs73159932  | A | -0.0553 |
| rs117321860 | T | -0.2314 |
| rs55668221  | A | -0.0373 |
| rs117957914 | C | -0.1182 |
| rs17427703  | G | 0.0921  |
| rs28581369  | A | 0.0442  |
| rs17164202  | G | 0.076   |
| rs11768401  | T | 0.0621  |
| rs798543    | G | 0.0366  |
| rs144264663 | C | 0.1521  |
| rs10233586  | C | -0.1569 |
| rs76866977  | T | -0.1435 |
| rs1733623   | T | 0.0337  |
| rs17364455  | C | -0.0586 |
| rs111854091 | A | -0.2281 |
| rs28450660  | A | 0.0866  |
| rs74680792  | T | -0.1126 |
| rs71546626  | C | -0.0869 |
| rs318580    | A | 0.0639  |

|             |   |         |
|-------------|---|---------|
| rs2293369   | A | 0.0365  |
| rs881789    | C | 0.0385  |
| rs74425990  | T | 0.0748  |
| rs17156744  | G | 0.0961  |
| rs1622319   | G | 0.1003  |
| rs1525307   | C | -0.0426 |
| rs77717306  | T | 0.1133  |
| rs1406085   | A | 0.1532  |
| rs76142911  | C | -0.1697 |
| rs141267614 | A | 0.1318  |
| rs55712047  | C | -0.0596 |
| rs78997001  | C | -0.1337 |
| rs79080238  | T | 0.1287  |
| rs34210378  | G | 0.2295  |
| rs111450429 | T | 0.1258  |
| rs73166011  | C | 0.1152  |
| rs10280239  | T | 0.0337  |
| rs2524930   | C | 0.0367  |
| rs4731725   | T | -0.0379 |
| rs7811595   | T | -0.0806 |
| rs73041345  | A | -0.1003 |
| rs111342539 | A | 0.2144  |
| rs11772397  | G | 0.2388  |
| rs2576507   | A | 0.04    |
| rs78048444  | G | 0.2284  |
| rs1834300   | T | -0.087  |
| rs113511554 | A | -0.1522 |
| rs1978157   | T | -0.0918 |
| rs62449592  | G | -0.0456 |
| rs118126310 | T | 0.2138  |
| rs2429582   | C | -0.0348 |
| rs1179626   | A | -0.0563 |
| rs12113674  | T | 0.0475  |
| rs10247993  | C | 0.0333  |
| rs113452392 | T | 0.0974  |
| rs17863241  | A | -0.1697 |
| rs34836271  | A | -0.1021 |
| rs1858943   | C | -0.0407 |
| rs4131224   | A | 0.0671  |
| rs139902924 | T | 0.0679  |
| rs13240400  | T | 0.153   |
| rs60187388  | G | -0.0522 |
| rs3757449   | C | -0.1526 |
| rs145822671 | C | 0.2625  |
| rs17732242  | T | -0.0517 |
| rs4726566   | C | 0.0328  |
| rs58897972  | T | -0.2066 |

|             |   |         |
|-------------|---|---------|
| rs34340061  | C | -0.0943 |
| rs79202708  | A | 0.1177  |
| rs4722891   | T | 0.0572  |
| rs112356730 | A | -0.1315 |
| rs61676577  | A | 0.0726  |
| rs11979100  | C | 0.1096  |
| rs9648765   | C | 0.0372  |
| rs1015865   | G | 0.0518  |
| rs6944113   | C | -0.0518 |
| rs1851896   | G | 0.0879  |
| rs12702093  | A | -0.0972 |
| rs77292900  | C | 0.0993  |
| rs13231119  | G | 0.0572  |
| rs11981141  | T | 0.0616  |
| rs139997034 | C | 0.1642  |
| rs56372533  | T | -0.0597 |
| rs78451817  | A | 0.1665  |
| rs56140759  | G | 0.1778  |
| rs141720439 | T | 0.1232  |
| rs73701416  | G | 0.0516  |
| rs73461827  | C | 0.1484  |
| rs117964768 | A | 0.3215  |
| rs118070737 | T | 0.1173  |
| rs79897872  | G | 0.1248  |
| rs10235583  | T | 0.15    |
| rs1442261   | T | -0.0352 |
| rs79917001  | G | 0.199   |
| rs2888581   | G | -0.0824 |
| rs9649819   | T | -0.0328 |
| rs74696656  | A | -0.0579 |
| rs76321133  | G | -0.1636 |
| rs149340202 | C | 0.1527  |
| rs56108536  | C | -0.0397 |
| rs394366    | C | -0.0475 |
| rs73380918  | T | 0.0735  |
| rs7800663   | T | 0.0377  |
| rs4730626   | A | -0.042  |
| rs142305422 | T | 0.108   |
| rs17168292  | T | 0.2485  |
| rs410825    | G | -0.0384 |
| rs139901658 | C | 0.1546  |
| rs798464    | T | -0.0428 |
| rs2329850   | T | -0.0369 |
| rs62443661  | T | -0.0356 |
| rs78819157  | G | 0.0479  |
| rs62451158  | G | 0.0558  |
| rs4719869   | G | 0.0348  |

|             |   |         |
|-------------|---|---------|
| rs2402673   | G | 0.0409  |
| rs2718361   | C | -0.0484 |
| rs1706896   | G | 0.0335  |
| rs74604579  | C | -0.2295 |
| rs111889929 | G | 0.1403  |
| rs116938731 | C | -0.1477 |
| rs2704282   | A | -0.0392 |
| rs1174968   | T | -0.0643 |
| rs7805910   | A | 0.0325  |
| rs2040908   | G | -0.036  |
| rs794353    | T | 0.1256  |
| rs6967789   | T | 0.0552  |
| rs11977946  | A | 0.1324  |
| rs112484184 | G | 0.2364  |
| rs4236418   | T | -0.0693 |
| rs77740204  | T | 0.1182  |
| rs150703563 | G | -0.2046 |
| rs73402679  | G | -0.0481 |
| rs11982216  | C | -0.0567 |
| rs17153731  | T | -0.046  |
| rs13226390  | G | -0.1247 |
| rs184381    | A | -0.032  |
| rs75137959  | G | 0.0907  |
| rs2189731   | G | 0.0322  |
| rs117625718 | T | -0.1104 |
| rs10486116  | G | 0.0535  |
| rs1506639   | T | 0.0332  |
| rs1005461   | T | 0.0444  |
| rs3212001   | A | -0.1566 |
| rs145749539 | C | -0.107  |
| rs79401853  | T | 0.0782  |
| rs73156537  | C | -0.0688 |
| rs12532812  | A | -0.0472 |
| rs11977608  | A | -0.1398 |
| rs17263531  | A | -0.0437 |
| rs78140712  | A | 0.1183  |
| rs2329393   | A | 0.0507  |
| rs4724913   | C | -0.0346 |
| rs148780227 | C | -0.1899 |
| rs10266706  | G | -0.0334 |
| rs78260220  | C | -0.1441 |
| rs116868636 | T | -0.1544 |
| rs35513519  | A | 0.1651  |
| rs10229949  | G | 0.042   |
| rs73103399  | G | 0.1739  |
| rs10275746  | T | -0.0322 |
| rs4720824   | G | 0.0835  |

|             |   |         |
|-------------|---|---------|
| rs150630947 | T | 0.1881  |
| rs4723995   | A | 0.0371  |
| rs11766632  | A | 0.0339  |
| rs3113176   | G | 0.0582  |
| rs6942458   | G | -0.0391 |
| rs146459471 | A | -0.1695 |
| rs76971904  | G | -0.1519 |
| rs75699366  | T | -0.1445 |
| rs9912      | A | 0.0394  |
| rs17170577  | G | 0.0997  |
| rs111240602 | A | 0.0689  |
| rs73212247  | A | -0.0585 |
| rs11974528  | T | 0.1206  |
| rs6943830   | T | 0.0335  |
| rs28954371  | T | -0.0911 |
| rs117648861 | G | 0.22    |
| rs116948990 | G | 0.1932  |
| rs35039803  | T | 0.1057  |
| rs2734887   | T | -0.0623 |
| rs151317745 | T | 0.1773  |
| rs4270847   | G | -0.0375 |
| rs6966677   | C | 0.0502  |
| rs79636621  | G | -0.08   |
| rs62446525  | G | 0.0543  |
| rs2217183   | T | -0.1396 |
| rs74527005  | G | -0.0572 |
| rs2110382   | G | -0.053  |
| rs73464385  | T | 0.042   |
| rs62444774  | G | -0.144  |
| rs73158836  | T | 0.0892  |
| rs17764272  | T | 0.1075  |
| rs142799007 | T | -0.2087 |
| rs80154660  | G | 0.1815  |
| rs117910193 | A | 0.0814  |
| rs78163636  | C | -0.2168 |
| rs76573916  | C | 0.1918  |
| rs2695561   | A | 0.0386  |
| rs116603536 | T | 0.1457  |
| rs2699823   | T | -0.0336 |
| rs151139477 | A | -0.0893 |
| rs12670675  | G | 0.062   |
| rs146939960 | C | 0.1427  |
| rs343042    | C | 0.0387  |
| rs12671508  | A | -0.1202 |
| rs117020868 | G | 0.118   |
| rs118188625 | A | 0.2575  |
| rs117954076 | A | 0.1158  |



|             |   |         |
|-------------|---|---------|
| rs1808235   | T | -0.0383 |
| rs3801189   | T | 0.0333  |
| rs148582201 | T | 0.2491  |
| rs9641483   | A | -0.032  |
| rs80246513  | C | -0.0784 |
| rs17150425  | T | 0.1272  |
| rs17171310  | T | -0.1293 |
| rs151026386 | T | 0.2987  |
| rs221123    | C | 0.0525  |
| rs116866571 | C | 0.3584  |
| rs73737777  | C | -0.103  |
| rs141643454 | A | -0.1896 |
| rs3808019   | C | -0.0612 |
| rs13240132  | A | 0.1796  |
| rs13237311  | T | 0.0374  |
| rs13227603  | C | 0.1686  |
| rs10278222  | G | 0.0592  |
| rs61254201  | C | -0.073  |
| rs62478505  | A | -0.1028 |
| rs117318597 | G | -0.141  |
| rs2972121   | G | -0.0402 |
| rs2330784   | T | -0.0331 |
| rs12112240  | G | 0.0623  |
| rs112256120 | T | 0.0701  |
| rs7796835   | T | 0.0467  |
| rs6947120   | G | -0.0708 |
| rs117865882 | A | -0.1435 |
| rs7787683   | C | -0.0456 |
| rs665687    | A | 0.0649  |
| rs2041301   | A | 0.0317  |
| rs62476227  | C | 0.0542  |
| rs57143312  | C | 0.1172  |
| rs73321464  | A | -0.2151 |
| rs4541811   | T | 0.0385  |
| rs79524655  | T | -0.1362 |
| rs7804659   | C | 0.0486  |
| rs7810525   | T | 0.0521  |
| rs111466677 | G | -0.1206 |
| rs7801489   | C | 0.1692  |
| rs138331021 | C | -0.2579 |
| rs6952765   | G | -0.0317 |
| rs78995201  | G | -0.2595 |
| rs2965385   | C | -0.0427 |
| rs73142171  | C | 0.109   |
| rs139295670 | G | 0.1012  |
| rs17150403  | T | -0.1006 |
| rs11768402  | T | 0.0414  |

|             |   |         |
|-------------|---|---------|
| rs141814044 | G | 0.106   |
| rs12670733  | T | -0.0337 |
| rs1981715   | A | 0.0491  |
| rs117159846 | C | 0.1294  |
| rs17171540  | G | 0.0733  |
| rs6967038   | T | 0.0473  |
| rs62491796  | T | 0.1732  |
| rs10215958  | C | 0.0458  |
| rs1525468   | C | 0.0332  |
| rs142922521 | C | 0.1428  |
| rs3807099   | G | 0.112   |
| rs150584319 | C | 0.2599  |
| rs7790299   | C | -0.108  |
| rs117018941 | T | -0.1771 |
| rs34623553  | A | 0.0375  |
| rs17160720  | G | -0.0615 |
| rs73212058  | A | 0.0992  |
| rs146744621 | T | -0.0426 |
| rs6593207   | C | 0.0528  |
| rs4368897   | T | -0.0488 |
| rs1183079   | A | -0.0332 |
| rs111507308 | T | -0.119  |
| rs116922441 | A | -0.1495 |
| rs17824602  | G | 0.1319  |
| rs2190393   | G | -0.0604 |
| rs1406100   | C | 0.0895  |
| rs35701152  | T | -0.0388 |
| rs10487240  | G | 0.0799  |
| rs17540141  | A | -0.1909 |
| rs13245634  | T | -0.1076 |
| rs17167079  | T | 0.1226  |
| rs4585645   | T | 0.0476  |
| rs149322401 | C | -0.134  |
| rs62451149  | G | 0.095   |
| rs79942720  | G | 0.0471  |
| rs11771253  | C | 0.0389  |
| rs147560418 | G | 0.085   |
| rs7795862   | C | 0.0465  |
| rs117053966 | A | -0.1241 |
| rs117521177 | T | 0.1853  |
| rs1005312   | A | -0.0324 |
| rs117369726 | T | -0.0968 |
| rs112706360 | A | 0.1234  |
| rs150878019 | G | -0.1358 |
| rs60296393  | T | -0.1505 |
| rs147085522 | G | 0.196   |
| rs144530208 | G | -0.3168 |

|             |   |         |
|-------------|---|---------|
| rs12531431  | G | 0.0325  |
| rs61734185  | T | -0.1918 |
| rs78142619  | T | -0.1352 |
| rs17366199  | A | 0.1147  |
| rs41374744  | G | 0.1343  |
| rs77281489  | T | -0.1023 |
| rs34333097  | C | 0.086   |
| rs2528468   | A | 0.0582  |
| rs4722184   | T | 0.044   |
| rs35763039  | A | 0.0356  |
| rs142841070 | G | 0.0837  |
| rs73224177  | A | -0.2187 |
| rs11983752  | G | 0.0729  |
| rs17166341  | A | -0.0801 |
| rs3087368   | T | 0.1364  |
| rs1307292   | T | 0.0354  |
| rs77233699  | A | 0.0932  |
| rs73148443  | G | 0.056   |
| rs118033547 | G | -0.1421 |
| rs2470983   | A | 0.0451  |
| rs79417970  | A | -0.1532 |
| rs61741736  | C | 0.1493  |
| rs11771547  | C | -0.0449 |
| rs1561602   | T | 0.035   |
| rs6980141   | G | 0.1226  |
| rs117224720 | T | 0.239   |
| rs3935925   | C | 0.1007  |
| rs12534652  | T | -0.125  |
| rs6972839   | G | -0.0488 |
| rs77671246  | T | 0.1152  |
| rs489942    | T | 0.033   |
| rs2598124   | A | -0.0324 |
| rs80095409  | C | 0.1914  |
| rs10236887  | T | -0.0429 |
| rs114       | G | -0.0318 |
| rs35177186  | A | -0.132  |
| rs72624207  | A | -0.126  |
| rs12534759  | T | 0.0577  |
| rs62443735  | T | 0.0623  |
| rs77376533  | T | 0.1353  |
| rs78443874  | A | -0.092  |
| rs76893606  | G | 0.0641  |
| rs116894699 | A | 0.1302  |
| rs142788561 | G | 0.1223  |
| rs7790776   | G | 0.032   |
| rs28746508  | G | 0.1766  |
| rs78026402  | G | 0.2983  |

|             |   |         |
|-------------|---|---------|
| rs7778867   | T | -0.0556 |
| rs10225927  | G | -0.0397 |
| rs58130666  | T | 0.0398  |
| rs62447175  | C | 0.0819  |
| rs79210156  | T | -0.2335 |
| rs10274089  | T | 0.0608  |
| rs79465089  | C | -0.0657 |
| rs117718459 | G | -0.1502 |
| rs73045781  | G | -0.0879 |
| rs1525205   | T | -0.0379 |
| rs146509093 | G | -0.2463 |
| rs886966    | A | 0.2197  |
| rs10256430  | G | -0.0358 |
| rs4721048   | T | -0.0417 |
| rs2061471   | T | -0.0359 |
| rs75380717  | A | -0.1032 |
| rs117120426 | A | 0.1655  |
| rs2451236   | G | -0.0377 |
| rs7777398   | T | 0.0345  |
| rs114259026 | G | 0.1164  |
| rs75685985  | C | -0.1118 |
| rs2106727   | A | -0.0326 |
| rs116987600 | T | 0.2269  |
| rs113942280 | G | 0.0516  |
| rs1534003   | G | -0.0588 |
| rs7803594   | C | 0.0332  |
| rs10435178  | A | 0.0818  |
| rs13239836  | A | 0.0612  |
| rs7788485   | T | 0.0606  |
| rs2302344   | C | 0.0337  |
| rs10282364  | C | -0.0459 |
| rs76381678  | G | -0.1061 |
| rs2331004   | G | -0.0625 |
| rs11980096  | C | -0.1094 |
| rs1705109   | C | -0.0336 |
| rs148841964 | C | 0.1884  |
| rs34536127  | G | -0.0812 |
| rs6949550   | A | 0.0333  |
| rs79424388  | G | -0.0825 |
| rs117382630 | A | 0.2181  |
| rs13312195  | G | 0.0365  |
| rs75672964  | T | 0.1128  |
| rs145464938 | A | 0.1803  |
| rs35100406  | C | -0.0595 |
| rs111789364 | A | 0.2198  |
| rs7800508   | T | 0.0392  |
| rs3907713   | C | 0.0509  |

|             |   |         |
|-------------|---|---------|
| rs117852363 | A | -0.0428 |
| rs1007192   | G | -0.0342 |
| rs75068980  | T | 0.1177  |
| rs113027793 | C | 0.083   |
| rs62472724  | T | 0.0561  |
| rs118053872 | T | 0.2028  |
| rs7784500   | G | 0.0331  |
| rs4722267   | G | -0.0362 |
| rs17703228  | A | 0.038   |
| rs76089259  | G | -0.0993 |
| rs80072358  | A | -0.2234 |
| rs58921692  | A | 0.0797  |
| rs2523188   | C | 0.0816  |
| rs148999677 | A | 0.1562  |
| rs16207     | C | -0.0346 |
| rs2331221   | T | 0.0329  |
| rs12534845  | A | 0.0487  |
| rs740542    | T | 0.2568  |
| rs12701915  | G | 0.0395  |
| rs2659911   | A | -0.0485 |
| rs6965851   | A | 0.0556  |
| rs35574739  | A | 0.1725  |
| rs117718047 | A | -0.0505 |
| rs150205657 | A | 0.1815  |
| rs3111284   | T | 0.0516  |
| rs76188411  | A | 0.0911  |
| rs10257785  | A | -0.1203 |
| rs4717022   | A | 0.0342  |
| rs6466761   | A | 0.0368  |
| rs6966944   | G | -0.0395 |
| rs79434696  | G | 0.0875  |
| rs75193610  | A | -0.0844 |
| rs67176119  | A | -0.0367 |
| rs77363802  | A | 0.096   |
| rs2970495   | A | 0.0389  |
| rs73088306  | A | 0.0638  |
| rs78770530  | G | 0.1953  |
| rs17885912  | G | 0.074   |
| rs75480139  | C | 0.135   |
| rs10265042  | A | 0.0468  |
| rs118091779 | G | -0.1593 |
| rs78618273  | C | 0.0874  |
| rs4716915   | A | -0.0356 |
| rs2158923   | T | 0.0543  |
| rs17651890  | A | -0.0684 |
| rs79209503  | T | -0.1252 |
| rs17438410  | A | -0.065  |

|             |   |         |
|-------------|---|---------|
| rs2301630   | T | -0.0324 |
| rs7791042   | C | 0.0375  |
| rs118104117 | T | -0.1614 |
| rs17170286  | C | -0.0549 |
| rs13230913  | A | -0.148  |
| rs2239926   | C | 0.0352  |
| rs1031487   | T | -0.0431 |
| rs6950998   | A | -0.0446 |
| rs62482486  | T | 0.0965  |
| rs117323850 | A | 0.0868  |
| rs13232692  | G | -0.0306 |
| rs10231661  | C | 0.0324  |
| rs116994178 | T | -0.3159 |
| rs1295158   | C | -0.0329 |
| rs117978569 | G | 0.2593  |
| rs6949509   | G | -0.0317 |
| rs4732296   | A | 0.0551  |
| rs11761581  | A | 0.067   |
| rs12154280  | A | -0.0475 |
| rs7802263   | G | 0.0378  |
| rs75943470  | G | 0.1378  |
| rs73156176  | A | 0.0546  |
| rs117285623 | G | 0.3124  |
| rs140422405 | A | -0.2466 |
| rs75610937  | T | -0.0878 |
| rs150601505 | G | -0.1213 |
| rs75297438  | T | -0.1243 |
| rs112805388 | A | -0.2167 |
| rs1593215   | T | 0.0596  |
| rs7811364   | C | 0.044   |
| rs10239485  | A | 0.0417  |
| rs1608837   | G | 0.0333  |
| rs79073424  | G | -0.076  |
| rs6971531   | T | 0.0404  |
| rs118157164 | T | 0.1111  |
| rs143261428 | C | -0.0821 |
| rs177684    | T | 0.0918  |
| rs77929844  | T | 0.1103  |
| rs79414056  | T | -0.2412 |
| rs117736677 | A | -0.1239 |
| rs79688422  | T | 0.1031  |
| rs150336095 | G | -0.1111 |
| rs80204349  | T | 0.1365  |
| rs34889008  | G | -0.0565 |
| rs113401261 | A | -0.0592 |
| rs150609    | T | -0.0388 |
| rs149460737 | G | -0.1487 |

|             |   |         |
|-------------|---|---------|
| rs6968714   | A | -0.0519 |
| rs12702768  | T | -0.0392 |
| rs76591213  | A | -0.1267 |
| rs10251598  | C | 0.0362  |
| rs1722927   | A | -0.0356 |
| rs10950535  | G | -0.0868 |
| rs13222234  | A | 0.0986  |
| rs111321716 | C | -0.1612 |
| rs7793993   | C | 0.0352  |
| rs151300444 | T | -0.2068 |
| rs12699521  | T | -0.0533 |
| rs2709983   | G | 0.2019  |
| rs11766189  | G | -0.1048 |
| rs6977854   | G | 0.0329  |
| rs3750105   | A | -0.0429 |
| rs138877993 | T | 0.2014  |
| rs6953977   | A | 0.0439  |
| rs7791083   | G | -0.1024 |
| rs11768430  | G | -0.083  |
| rs58602292  | A | 0.0776  |
| rs147485949 | G | -0.1628 |
| rs146057520 | C | -0.1422 |
| rs112196273 | C | 0.0736  |
| rs10261824  | C | -0.0469 |
| rs10241490  | T | -0.0307 |
| rs7792046   | G | 0.0744  |
| rs71530711  | G | 0.1063  |
| rs2330951   | C | 0.0365  |
| rs116965862 | G | 0.3572  |
| rs117312427 | G | -0.1277 |
| rs78132730  | G | -0.0454 |
| rs147492621 | G | -0.1803 |
| rs79933123  | A | 0.1441  |
| rs10262976  | G | -0.0478 |
| rs10226233  | T | -0.0348 |
| rs73709826  | G | 0.2181  |
| rs73727208  | G | 0.0854  |
| rs78121801  | T | 0.1494  |
| rs55660257  | G | 0.0832  |
| rs73081995  | A | -0.1143 |
| rs11540426  | A | -0.1499 |
| rs1030034   | T | 0.0427  |
| rs73223671  | T | 0.2242  |
| rs117693998 | G | -0.1368 |
| rs28459281  | T | 0.0489  |
| rs41648     | A | 0.2313  |
| rs7793366   | C | 0.0426  |

|             |   |         |
|-------------|---|---------|
| rs149826073 | A | 0.1068  |
| rs1558180   | G | 0.0738  |
| rs77478093  | T | 0.0882  |
| rs9691676   | T | 0.059   |
| rs75109974  | A | 0.0724  |
| rs10225870  | A | -0.0539 |
| rs74892167  | G | 0.0451  |
| rs3750132   | C | 0.0491  |
| rs75770077  | A | 0.1192  |
| rs117205897 | T | 0.153   |
| rs74903483  | T | -0.0999 |
| rs6974065   | G | 0.0535  |
| rs77611310  | T | 0.1625  |
| rs60772695  | G | 0.0676  |
| rs6958152   | A | -0.134  |
| rs6465687   | T | 0.0323  |
| rs77497849  | G | -0.0478 |
| rs6950786   | A | 0.0819  |
| rs7791320   | T | -0.0639 |
| rs74505180  | G | -0.1821 |
| rs2463487   | A | -0.0905 |
| rs116936483 | C | 0.1589  |
| rs117335186 | C | 0.1623  |
| rs11980430  | C | 0.0582  |
| rs78105963  | T | 0.0642  |
| rs77561061  | C | 0.2173  |
| rs77095273  | T | -0.1585 |
| rs111733652 | A | -0.1998 |
| rs36014002  | C | 0.0461  |
| rs143659187 | G | -0.2339 |
| rs117961618 | T | -0.2609 |
| rs39028     | G | 0.0641  |
| rs75732507  | A | -0.1521 |
| rs17377633  | T | 0.1836  |
| rs75064927  | C | 0.1956  |
| rs11536396  | C | 0.0721  |
| rs112802670 | G | -0.3024 |
| rs1109806   | C | -0.0343 |
| rs10265492  | A | 0.0455  |
| rs971334    | G | 0.0441  |
| rs75285193  | G | 0.082   |
| rs80086158  | C | 0.0574  |
| rs75628688  | T | -0.1278 |
| rs56094953  | G | 0.0872  |
| rs2329939   | T | 0.0362  |
| rs12706455  | C | -0.0318 |
| rs41272936  | T | 0.1401  |



|             |   |         |
|-------------|---|---------|
| rs62456322  | C | 0.0708  |
| rs10486771  | G | 0.0508  |
| rs75130376  | G | 0.0533  |
| rs149307564 | C | -0.0556 |
| rs111916718 | A | -0.0583 |
| rs10244678  | T | 0.0359  |
| rs10235630  | A | -0.0307 |
| rs7797777   | G | -0.0605 |
| rs116858634 | C | 0.1544  |
| rs6978840   | T | -0.0344 |
| rs2471320   | C | 0.0847  |
| rs9692191   | A | -0.1329 |
| rs73152805  | C | 0.2456  |
| rs11762004  | C | 0.0914  |
| rs12532699  | A | -0.0349 |
| rs58487019  | G | 0.0302  |
| rs60755077  | T | -0.0368 |
| rs1966363   | A | -0.0397 |
| rs143336333 | C | -0.2053 |
| rs2286116   | G | -0.0456 |
| rs2568639   | C | 0.0321  |
| rs6948544   | A | 0.0412  |
| rs13225227  | G | 0.2322  |
| rs117952485 | T | -0.1288 |
| rs11763290  | A | 0.043   |
| rs138313558 | A | -0.2238 |
| rs3807850   | C | -0.0613 |
| rs17704807  | C | -0.0324 |
| rs3735517   | A | -0.037  |
| rs71543535  | T | 0.0487  |
| rs118158551 | A | -0.2197 |
| rs6966580   | A | 0.1005  |
| rs2097873   | T | -0.0469 |
| rs7787767   | G | -0.0559 |
| rs80055786  | A | -0.1293 |
| rs114491466 | A | 0.1977  |
| rs2355779   | G | 0.0361  |
| rs314313    | C | 0.0337  |
| rs75273485  | T | 0.1718  |
| rs2079328   | C | 0.0392  |
| rs71540712  | G | 0.1958  |
| rs138984737 | A | 0.1851  |
| rs38404     | T | -0.0487 |
| rs17864158  | T | -0.2046 |
| rs7790788   | T | -0.0319 |
| rs35787627  | A | 0.0741  |
| rs149688227 | G | -0.2183 |

|             |   |         |
|-------------|---|---------|
| rs150471809 | T | -0.0921 |
| rs7784835   | G | 0.0325  |
| rs76693575  | G | -0.1404 |
| rs296296    | A | 0.0306  |
| rs143907258 | T | 0.2339  |
| rs4730320   | A | 0.0338  |
| rs10215205  | A | -0.0791 |
| rs7790049   | A | 0.1979  |
| rs62481915  | A | -0.057  |
| rs73041665  | A | -0.0634 |
| rs74717354  | T | 0.051   |
| rs62470436  | A | -0.071  |
| rs13244325  | G | -0.0492 |
| rs144003784 | C | -0.2434 |
| rs4722163   | A | 0.0881  |
| rs4726088   | A | -0.0359 |
| rs77571687  | T | 0.1414  |
| rs13223694  | T | -0.0366 |
| rs62468891  | A | -0.0535 |
| rs78427960  | A | -0.0681 |
| rs149363203 | C | 0.1046  |
| rs73170563  | T | 0.0368  |
| rs62490076  | T | 0.0841  |
| rs113247718 | A | 0.2222  |
| rs17170574  | G | 0.187   |
| rs38539     | A | 0.1621  |
| rs1378766   | A | 0.0483  |
| rs117028194 | T | -0.1523 |
| rs117159521 | G | -0.1542 |
| rs6465409   | T | 0.0377  |
| rs17131948  | A | -0.0519 |
| rs6976902   | T | -0.1031 |
| rs79928190  | T | 0.0645  |
| rs117348280 | A | 0.1324  |
| rs142419045 | A | -0.1052 |
| rs2541094   | T | 0.0641  |
| rs60024065  | G | -0.0976 |
| rs12702457  | A | -0.035  |
| rs17171056  | A | -0.0463 |
| rs17149415  | G | -0.038  |
| rs221791    | A | -0.2067 |
| rs2214551   | C | 0.047   |
| rs6467296   | C | 0.0335  |
| rs6949694   | A | 0.0306  |
| rs38101     | A | -0.0386 |
| rs7803528   | T | -0.0439 |
| rs17154322  | G | 0.0907  |

|             |   |         |
|-------------|---|---------|
| rs79445594  | C | -0.1229 |
| rs60588984  | A | 0.0769  |
| rs10258495  | T | -0.0327 |
| rs75433422  | A | -0.0809 |
| rs116916961 | G | -0.2479 |
| rs57425123  | C | -0.0391 |
| rs62452245  | T | -0.1407 |
| rs117415406 | A | -0.1216 |
| rs899129    | C | -0.047  |
| rs146580062 | G | 0.1433  |
| rs140021541 | T | 0.0948  |
| rs78293454  | C | 0.0645  |
| rs117394037 | A | 0.1764  |
| rs17154941  | T | 0.0957  |
| rs78862065  | A | 0.1471  |
| rs452475    | T | 0.0415  |
| rs3025140   | A | 0.0425  |
| rs12113684  | C | 0.0673  |
| rs2293339   | T | -0.0313 |
| rs4723002   | G | -0.051  |
| rs73071669  | C | -0.1634 |
| rs4723587   | T | 0.1269  |
| rs146149116 | T | 0.1028  |
| rs12540889  | G | 0.0725  |
| rs7780254   | T | 0.0903  |
| rs2717799   | A | -0.0342 |
| rs62440816  | A | -0.101  |
| rs17795169  | C | -0.0826 |
| rs6956026   | G | 0.0306  |
| rs117058994 | C | 0.1046  |
| rs3847027   | A | 0.0329  |
| rs62477389  | C | -0.0669 |
| rs62449075  | G | -0.0791 |
| rs117597021 | G | 0.1065  |
| rs73081642  | T | 0.0895  |
| rs13223290  | C | 0.0394  |
| rs11981725  | A | -0.0336 |
| rs10269856  | C | 0.0386  |
| rs77893573  | C | -0.0846 |
| rs10261554  | G | -0.0342 |
| rs12535476  | T | 0.1726  |
| rs117923965 | C | 0.2068  |
| rs11532787  | T | 0.0495  |
| rs117586214 | A | -0.1428 |
| rs146834669 | G | -0.2251 |
| rs12698848  | G | 0.0597  |
| rs35546972  | G | -0.0593 |

|             |   |         |
|-------------|---|---------|
| rs10255565  | C | 0.0671  |
| rs6963094   | C | -0.0422 |
| rs3807277   | A | -0.0825 |
| rs77175102  | T | -0.18   |
| rs7806617   | G | 0.0324  |
| rs146186318 | T | 0.129   |
| rs112330055 | A | -0.0704 |
| rs73223584  | A | -0.2019 |
| rs799312    | G | 0.0558  |
| rs73498458  | G | -0.2399 |
| rs62491681  | T | -0.27   |
| rs79829318  | C | 0.1029  |
| rs1858786   | G | 0.0356  |
| rs35688866  | T | 0.0592  |
| rs117766959 | G | 0.1033  |
| rs13224052  | G | -0.0322 |
| rs17782704  | C | -0.1672 |
| rs62481806  | T | -0.1056 |
| rs10229866  | C | 0.0626  |
| rs73338982  | A | 0.0774  |
| rs6962540   | C | -0.0764 |
| rs10276466  | C | -0.032  |
| rs2285647   | A | -0.0329 |
| rs2954559   | C | 0.0602  |
| rs60002512  | A | 0.1327  |
| rs55754145  | C | -0.0647 |
| rs112920429 | T | 0.094   |
| rs2667740   | T | -0.204  |
| rs112618643 | A | 0.1556  |
| rs62454448  | A | 0.0423  |
| rs12673506  | A | -0.0406 |
| rs73433064  | G | 0.0501  |
| rs17150350  | T | 0.1236  |
| rs41875     | C | -0.035  |
| rs73238109  | A | 0.0835  |
| rs141980218 | A | 0.1196  |
| rs77136845  | T | -0.0687 |
| rs56278796  | C | 0.0525  |
| rs75890722  | T | 0.2044  |
| rs6960667   | G | -0.0791 |
| rs62444907  | T | 0.0416  |
| rs73148751  | C | 0.1366  |
| rs846925    | A | 0.0514  |
| rs17632787  | C | 0.0529  |
| rs34300034  | T | -0.1838 |
| rs12701650  | C | 0.0484  |
| rs146734383 | A | 0.1098  |

|             |   |         |
|-------------|---|---------|
| rs62480712  | G | 0.1069  |
| rs6977562   | G | -0.041  |
| rs145403918 | G | 0.0432  |
| rs34006745  | G | 0.088   |
| rs78597317  | C | -0.0567 |
| rs6970897   | G | 0.0543  |
| rs71536269  | T | 0.0746  |
| rs12536370  | G | -0.0419 |
| rs10271765  | T | -0.0969 |
| rs12670263  | A | -0.0463 |
| rs73158758  | T | 0.1111  |
| rs68102118  | C | 0.042   |
| rs116906789 | G | -0.17   |
| rs6945610   | T | 0.0433  |
| rs12706962  | T | 0.039   |
| rs62464484  | C | -0.0418 |
| rs142863261 | A | 0.294   |
| rs150534918 | G | 0.098   |
| rs73185100  | C | 0.0987  |
| rs4731863   | A | 0.0721  |
| rs17324090  | T | 0.1495  |
| rs62436863  | A | -0.1697 |
| rs7812128   | A | -0.0707 |
| rs62481358  | T | 0.0314  |
| rs319290    | A | 0.1485  |
| rs1007471   | T | 0.0299  |
| rs56281112  | A | -0.0548 |
| rs149003019 | T | 0.1959  |
| rs144459373 | G | -0.1955 |
| rs117009903 | G | 0.2035  |
| rs1721435   | C | -0.0406 |
| rs118149039 | T | 0.2386  |
| rs74798265  | G | 0.1881  |
| rs11973363  | G | -0.0391 |
| rs10251856  | A | 0.0306  |
| rs79732633  | T | 0.1249  |
| rs11768613  | C | 0.0384  |
| rs7777324   | A | -0.0553 |
| rs73220765  | T | 0.2482  |
| rs75840154  | A | 0.226   |
| rs72586150  | G | 0.0695  |
| rs74906648  | C | 0.1764  |
| rs117443862 | A | 0.1957  |
| rs11767043  | A | 0.0374  |
| rs11973740  | A | 0.2068  |
| rs77450216  | G | 0.1686  |
| rs10278005  | A | 0.0406  |

|             |   |         |
|-------------|---|---------|
| rs80178054  | T | 0.0778  |
| rs10950595  | C | -0.0336 |
| rs74495545  | T | -0.092  |
| rs56129486  | T | 0.0769  |
| rs6948980   | C | 0.0792  |
| rs77364030  | T | 0.0688  |
| rs4947978   | A | 0.0308  |
| rs11767545  | T | 0.0312  |
| rs4074784   | C | 0.0356  |
| rs55947524  | A | -0.1915 |
| rs139061821 | T | 0.1191  |
| rs138932766 | T | 0.2088  |
| rs139994248 | G | -0.2463 |
| rs994241    | T | 0.076   |
| rs4947831   | G | 0.0306  |
| rs799161    | C | -0.0322 |
| rs141154295 | A | -0.1361 |
| rs461       | A | 0.1091  |
| rs56080411  | C | -0.0471 |
| rs112414672 | A | -0.0787 |
| rs56042035  | T | 0.0687  |
| rs73154205  | T | 0.1555  |
| rs28852695  | T | 0.0374  |
| rs117873276 | G | -0.2174 |
| rs205769    | T | 0.0501  |
| rs74983009  | A | -0.0769 |
| rs78629471  | T | -0.1505 |
| rs78573816  | A | -0.0567 |
| rs116859565 | C | 0.1339  |
| rs6463475   | C | -0.0558 |
| rs143581808 | A | -0.1077 |
| rs17288513  | C | 0.0736  |
| rs117370201 | T | 0.0964  |
| rs62484402  | T | -0.1484 |
| rs111707942 | G | 0.2377  |
| rs7799927   | C | 0.0419  |
| rs13437653  | G | 0.059   |
| rs2968833   | A | -0.0505 |
| rs4727332   | T | -0.0723 |
| rs4730685   | A | 0.0304  |
| rs3887211   | G | -0.0314 |
| rs7798971   | A | 0.036   |
| rs76117559  | A | 0.063   |
| rs145008384 | C | -0.0992 |
| rs56285148  | T | -0.0787 |
| rs62481863  | G | 0.0933  |
| rs141253442 | G | -0.1266 |

|             |   |         |
|-------------|---|---------|
| rs520556    | C | -0.0378 |
| rs2107798   | T | -0.0305 |
| rs10232282  | T | 0.1011  |
| rs73740586  | A | 0.0729  |
| rs7778134   | G | 0.0363  |
| rs58154629  | A | -0.093  |
| rs73099538  | G | 0.0752  |
| rs3807744   | A | 0.0373  |
| rs6966393   | A | 0.0536  |
| rs12705619  | A | -0.0308 |
| rs11763888  | T | -0.0458 |
| rs114601314 | T | -0.2016 |
| rs13309829  | G | -0.036  |
| rs112941847 | G | 0.0457  |
| rs138826449 | A | 0.165   |
| rs73106210  | C | 0.1324  |
| rs12537749  | G | 0.064   |
| rs117869120 | A | 0.1591  |
| rs758261    | T | 0.0358  |
| rs17155447  | C | -0.091  |
| rs38520     | A | 0.0537  |
| rs62474010  | T | 0.0917  |
| rs139917795 | T | -0.1823 |
| rs56912929  | C | -0.07   |
| rs142514412 | G | -0.2239 |
| rs797635    | C | 0.0309  |
| rs10486050  | T | -0.0782 |
| rs73069230  | C | -0.0431 |
| rs146750051 | A | -0.0759 |
| rs117905460 | A | -0.1712 |
| rs1730150   | A | -0.0762 |
| rs10486061  | A | -0.0397 |
| rs117573700 | A | -0.1867 |
| rs76660450  | C | 0.1469  |
| rs117653048 | A | 0.1542  |
| rs117590953 | C | 0.1587  |
| rs57627778  | T | 0.0922  |
| rs10234315  | T | -0.0375 |
| rs62458259  | A | -0.0433 |
| rs117827648 | T | 0.0699  |
| rs62469951  | G | -0.1269 |
| rs150490992 | T | 0.0448  |
| rs77462394  | C | 0.1035  |
| rs11768344  | A | -0.0723 |
| rs78153615  | A | 0.1691  |
| rs2106563   | C | -0.0347 |
| rs77962661  | T | 0.1343  |

|             |   |         |
|-------------|---|---------|
| rs146490015 | C | 0.1156  |
| rs6957801   | A | 0.1595  |
| rs12706452  | C | 0.0896  |
| rs35036465  | A | 0.1542  |
| rs2614948   | C | -0.0823 |
| rs11563496  | C | 0.051   |
| rs113051485 | A | 0.1304  |
| rs146933220 | A | -0.195  |
| rs6464267   | C | 0.0433  |
| rs79278736  | A | 0.1439  |
| rs112232507 | C | -0.2229 |
| rs17660308  | G | 0.0417  |
| rs148613887 | A | -0.0593 |
| rs141057219 | G | 0.1855  |
| rs73689806  | A | 0.1235  |
| rs73238124  | G | -0.1454 |
| rs150376397 | C | -0.1805 |
| rs6956300   | C | 0.0467  |
| rs2270311   | T | 0.0325  |
| rs150647742 | G | 0.1749  |
| rs10486064  | T | -0.0454 |
| rs78763360  | G | 0.1686  |
| rs146726252 | A | -0.1905 |
| rs12698919  | A | -0.0318 |
| rs73696815  | C | -0.0714 |
| rs6946096   | C | 0.0442  |
| rs10257396  | A | -0.0436 |
| rs4723125   | C | -0.0532 |
| rs1268900   | T | 0.1859  |
| rs1880623   | T | 0.1287  |
| rs147608908 | T | 0.1795  |
| rs3734942   | A | 0.0434  |
| rs10227734  | A | -0.1261 |
| rs117932280 | A | 0.0957  |
| rs67460790  | C | -0.0367 |
| rs76175086  | C | 0.1051  |
| rs1027670   | A | -0.05   |
| rs143314052 | A | 0.1935  |
| rs62457787  | C | 0.106   |
| rs80105652  | G | 0.0818  |
| rs55846951  | G | 0.1918  |
| rs113829300 | G | -0.1727 |
| rs28375913  | G | -0.072  |
| rs117536155 | A | 0.0806  |
| rs75901634  | A | 0.0771  |
| rs62467736  | C | -0.0853 |
| rs4732284   | G | -0.0541 |



|             |   |         |
|-------------|---|---------|
| rs73075129  | A | -0.2057 |
| rs73233048  | T | -0.1924 |
| rs73177891  | G | -0.134  |
| rs12668627  | A | 0.0323  |
| rs62453389  | T | 0.0455  |
| rs1557788   | A | 0.0334  |
| rs150136963 | C | 0.1743  |
| rs10953460  | T | 0.0365  |
| rs76473115  | T | 0.0735  |
| rs11532668  | G | 0.0476  |
| rs145336472 | C | -0.2176 |
| rs6464878   | G | -0.0775 |
| rs77834423  | G | 0.0954  |
| rs2349178   | A | 0.0297  |
| rs74912454  | T | -0.1504 |
| rs118173313 | T | 0.1617  |
| rs78156677  | C | -0.1357 |
| rs2717897   | T | 0.0642  |
| rs17251889  | G | -0.1328 |
| rs139278576 | T | 0.2213  |
| rs10250561  | C | -0.1073 |
| rs71541354  | C | -0.0877 |
| rs8177828   | T | 0.258   |
| rs140489009 | G | 0.1618  |
| rs7789612   | G | -0.0685 |
| rs10265249  | A | -0.0665 |
| rs997782    | G | -0.0369 |
| rs6593296   | T | 0.0337  |
| rs1015571   | T | 0.0306  |
| rs117166444 | A | -0.1316 |
| rs116968266 | A | 0.1187  |
| rs11771790  | A | 0.3132  |
| rs1220753   | C | -0.0622 |
| rs4724613   | A | -0.0303 |
| rs73241153  | G | 0.1837  |
| rs118025257 | T | -0.139  |
| rs1639911   | A | 0.0809  |
| rs2347694   | A | -0.0347 |
| rs13247947  | A | -0.0401 |
| rs79310932  | G | 0.1919  |
| rs35420793  | A | 0.0982  |
| rs386223    | C | 0.0346  |
| rs117485804 | A | 0.2323  |
| rs2971783   | C | 0.0317  |
| rs62449838  | C | 0.0353  |
| rs118121776 | A | 0.14    |
| rs77938085  | G | -0.0955 |

|             |   |         |
|-------------|---|---------|
| rs3793270   | T | -0.0451 |
| rs6977162   | C | -0.1377 |
| rs78756658  | C | 0.0849  |
| rs2961237   | C | 0.0317  |
| rs6466463   | A | 0.0291  |
| rs28636508  | C | 0.0478  |
| rs4723147   | A | 0.0337  |
| rs116970311 | A | -0.1663 |
| rs138154852 | A | -0.0708 |
| rs1391991   | A | 0.0328  |
| rs75243573  | T | -0.2061 |
| rs28916280  | T | -0.1797 |
| rs78813715  | C | 0.1211  |
| rs2037704   | G | 0.0475  |
| rs58943687  | T | 0.0998  |
| rs6962878   | G | 0.0417  |
| rs111924755 | C | 0.1808  |
| rs11575387  | G | 0.0525  |
| rs77265959  | C | -0.173  |
| rs149721630 | C | 0.2436  |
| rs2908277   | A | 0.0439  |
| rs57364258  | C | -0.117  |
| rs2614957   | C | -0.0327 |
| rs62483591  | T | -0.0341 |
| rs112525104 | A | -0.1251 |
| rs62448270  | A | -0.1085 |
| rs112721398 | C | -0.0845 |
| rs12534224  | T | 0.0554  |
| rs117779140 | T | 0.1469  |
| rs75557125  | T | -0.1004 |
| rs60406257  | G | -0.0473 |
| rs990919    | T | 0.0308  |
| rs990528    | A | 0.0432  |
| rs62471757  | G | -0.1052 |
| rs1990366   | A | 0.0411  |
| rs13438013  | A | 0.1395  |
| rs75328086  | A | 0.102   |
| rs55643551  | C | 0.1009  |
| rs10241449  | T | -0.0322 |
| rs1917738   | C | -0.0452 |
| rs17162758  | C | -0.0309 |
| rs17166813  | A | 0.1224  |
| rs13243544  | T | 0.0852  |
| rs11769938  | A | -0.0812 |
| rs148848038 | C | 0.1383  |
| rs11980747  | T | 0.0917  |
| rs62461161  | A | -0.0802 |

|             |   |         |
|-------------|---|---------|
| rs55903617  | C | 0.1698  |
| rs11768467  | T | -0.1232 |
| rs73158560  | A | -0.0457 |
| rs117122959 | A | -0.1254 |
| rs113857157 | G | 0.2456  |
| rs357366    | A | -0.0449 |
| rs4383914   | C | -0.0302 |
| rs11769410  | G | 0.0814  |
| rs1524926   | T | 0.0344  |
| rs56946039  | T | -0.1263 |
| rs6967566   | C | 0.0359  |
| rs6965015   | T | 0.0297  |
| rs757702    | A | -0.1197 |
| rs1557978   | T | -0.0316 |
| rs74591996  | T | 0.0589  |
| rs7804983   | C | 0.0304  |
| rs144573006 | G | -0.1263 |
| rs78512772  | T | 0.1594  |
| rs60209489  | C | 0.0876  |
| rs2002874   | C | -0.0336 |
| rs80111597  | A | -0.074  |
| rs28847753  | C | 0.058   |
| rs117783599 | G | -0.1031 |
| rs41271241  | A | 0.0624  |
| rs117883964 | G | 0.0896  |
| rs76186886  | A | -0.0855 |
| rs272659    | A | 0.0334  |
| rs113062222 | T | 0.1277  |
| rs149940229 | C | -0.1394 |
| rs71536085  | G | -0.0528 |
| rs10952211  | C | 0.0299  |
| rs143034022 | T | -0.2262 |
| rs111227588 | A | -0.0626 |
| rs78469462  | T | 0.0575  |
| rs3807504   | A | -0.1889 |
| rs12705026  | A | 0.0453  |
| rs79490442  | A | 0.1977  |
| rs117601773 | G | 0.1504  |
| rs6959020   | G | -0.029  |
| rs4612221   | G | -0.0454 |
| rs17657924  | A | 0.0333  |
| rs62452041  | T | -0.1359 |
| rs67596028  | A | 0.0413  |
| rs73178459  | G | 0.1108  |
| rs138179924 | T | -0.1985 |
| rs10238092  | T | -0.0592 |
| rs145855974 | T | -0.1536 |

|             |   |         |
|-------------|---|---------|
| rs147704044 | T | -0.1465 |
| rs13234653  | A | -0.037  |
| rs2140583   | C | -0.0328 |
| rs816229    | T | -0.0355 |
| rs12698418  | G | -0.0602 |
| rs57339436  | G | 0.0613  |
| rs930355    | G | -0.0325 |
| rs12706977  | C | -0.0337 |
| rs9886279   | T | 0.0299  |
| rs10945     | G | -0.0448 |
| rs6945516   | G | 0.03    |
| rs113570998 | A | 0.1335  |
| rs113938477 | C | 0.048   |
| rs73081416  | T | 0.063   |
| rs4727908   | C | -0.0956 |
| rs148244709 | C | -0.2308 |
| rs73169173  | A | -0.096  |
| rs78284522  | T | 0.0957  |
| rs12536027  | A | -0.1079 |
| rs2189930   | C | 0.0298  |
| rs1989905   | A | -0.0784 |
| rs4732278   | C | 0.0435  |
| rs28611316  | C | -0.0595 |
| rs71228086  | G | -0.0497 |
| rs9720071   | A | 0.0407  |
| rs78227631  | A | 0.194   |
| rs140188704 | T | -0.2172 |
| rs79647391  | A | -0.2445 |
| rs62441380  | C | -0.0609 |
| rs75199833  | G | -0.0799 |
| rs79119050  | T | -0.1666 |
| rs76024794  | T | 0.2098  |
| rs113461837 | T | 0.18    |
| rs79779003  | C | 0.057   |
| rs700318    | A | 0.0317  |
| rs114128161 | T | 0.1053  |
| rs117719438 | T | 0.1362  |
| rs73037719  | G | -0.0552 |
| rs7803459   | T | 0.0697  |
| rs116944085 | G | 0.0595  |
| rs11973042  | A | 0.0532  |
| rs3807496   | G | -0.0298 |
| rs36144086  | T | 0.0701  |
| rs28733769  | T | 0.0527  |
| rs10264872  | C | 0.0862  |
| rs76335349  | A | 0.0825  |
| rs75502789  | A | 0.1071  |

|             |   |         |
|-------------|---|---------|
| rs7803208   | A | -0.0366 |
| rs4728499   | T | -0.0356 |
| rs6972997   | T | -0.0317 |
| rs1357646   | C | 0.0583  |
| rs10952979  | C | 0.0312  |
| rs73067817  | G | -0.0566 |
| rs10249517  | A | 0.0297  |
| rs12532804  | G | 0.0395  |
| rs17483874  | C | -0.0404 |
| rs78832356  | C | -0.1238 |
| rs62497452  | C | 0.0834  |
| rs2886777   | C | -0.1064 |
| rs887904    | C | -0.043  |
| rs73235915  | C | 0.0942  |
| rs146151847 | T | 0.1686  |
| rs74564713  | G | -0.2259 |
| rs17167731  | T | -0.1201 |
| rs4722480   | T | -0.0438 |
| rs117383012 | C | 0.1266  |
| rs13232464  | A | -0.0371 |
| rs7789679   | A | 0.1201  |
| rs13308169  | G | -0.0324 |
| rs62487032  | T | 0.1606  |
| rs3800734   | A | 0.0288  |
| rs12669153  | G | 0.0341  |
| rs37920     | C | -0.0623 |
| rs71582886  | A | 0.1012  |
| rs2714657   | G | 0.0314  |
| rs140352008 | C | 0.1355  |
| rs2237804   | T | 0.0354  |
| rs1014201   | A | -0.0781 |
| rs6466015   | A | -0.0645 |
| rs73077968  | G | 0.0536  |
| rs75468479  | G | 0.0888  |
| rs17142666  | G | 0.1602  |
| rs73139400  | G | 0.1091  |
| rs7812168   | G | -0.0449 |
| rs78904460  | C | -0.1123 |
| rs10808024  | A | 0.0324  |
| rs1468149   | G | -0.0673 |
| rs1421347   | G | 0.2291  |
| rs17171924  | C | -0.0963 |
| rs116989655 | A | 0.2262  |
| rs12674175  | A | 0.0466  |
| rs10499470  | A | 0.0645  |
| rs11772774  | A | -0.0757 |
| rs113019952 | C | 0.1534  |

|             |   |         |
|-------------|---|---------|
| rs73158295  | C | 0.0704  |
| rs10487853  | G | 0.0767  |
| rs143471659 | T | 0.143   |
| rs1918283   | G | 0.1426  |
| rs10250481  | G | 0.0286  |
| rs76934691  | C | 0.077   |
| rs77279103  | A | 0.1369  |
| rs73221367  | A | 0.0447  |
| rs72611583  | G | 0.0796  |
| rs74897641  | A | 0.1991  |
| rs146789999 | A | 0.1517  |
| rs74504935  | T | 0.0946  |
| rs17160259  | G | 0.0874  |
| rs140164898 | T | 0.1702  |
| rs41335     | G | 0.0308  |
| rs80199553  | C | 0.0831  |
| rs111376530 | T | -0.1251 |
| rs80024658  | T | 0.1865  |
| rs118135113 | G | -0.1709 |
| rs73176040  | A | -0.1901 |
| rs62470226  | A | 0.0633  |
| rs4726826   | G | 0.0325  |
| rs10239669  | A | -0.0588 |
| rs17171372  | G | -0.0408 |
| rs117203961 | T | 0.1078  |
| rs4527795   | C | -0.0384 |
| rs139361602 | C | 0.1864  |
| rs75257084  | G | 0.0845  |
| rs13311326  | T | -0.0341 |
| rs17771638  | T | 0.1119  |
| rs73157032  | A | -0.1348 |
| rs317760    | C | 0.1752  |
| rs10230995  | G | 0.1812  |
| rs10234985  | T | -0.1375 |
| rs56304237  | C | -0.1137 |
| rs9942557   | G | -0.0709 |
| rs7811360   | T | -0.0528 |
| rs143323273 | A | 0.176   |
| rs74800313  | T | -0.1279 |
| rs1881379   | T | -0.0617 |
| rs143880919 | A | -0.22   |
| rs117768937 | A | -0.2369 |
| rs62436675  | C | 0.0578  |
| rs11766629  | G | -0.0497 |
| rs62459628  | T | 0.0869  |
| rs57211544  | T | 0.0481  |
| rs77043744  | C | -0.1711 |

|             |   |         |
|-------------|---|---------|
| rs2190082   | G | 0.2073  |
| rs6466140   | T | -0.0308 |
| rs848886    | T | -0.034  |
| rs343054    | C | 0.031   |
| rs76790369  | G | 0.2354  |
| rs139521481 | C | 0.1133  |
| rs917440    | T | 0.0285  |
| rs10256221  | T | 0.0295  |
| rs2534578   | C | 0.0346  |
| rs139659407 | A | 0.0572  |
| rs61227992  | G | -0.0456 |
| rs6959233   | A | 0.1477  |
| rs28719153  | A | 0.0985  |
| rs207212    | T | 0.0561  |
| rs6462466   | A | 0.0352  |
| rs11765383  | G | 0.0549  |
| rs3857703   | G | 0.1066  |
| rs73221185  | C | 0.1366  |
| rs75256674  | T | 0.1258  |
| rs56015142  | A | 0.0917  |
| rs78769318  | T | 0.1864  |
| rs74582735  | T | -0.0716 |
| rs56088656  | A | -0.0755 |
| rs12155203  | T | 0.0593  |
| rs142905690 | C | 0.1769  |
| rs11760846  | T | 0.0311  |
| rs7782079   | C | 0.0324  |
| rs2712212   | G | 0.0348  |
| rs114783219 | T | -0.1148 |
| rs76091122  | C | 0.1335  |
| rs6973200   | C | -0.0583 |
| rs77320582  | T | 0.117   |
| rs12702798  | G | 0.1898  |
| rs78913267  | C | -0.109  |
| rs11973260  | C | 0.0449  |
| rs140869485 | T | 0.1383  |
| rs140059823 | A | 0.2161  |
| rs12705199  | A | 0.0316  |
| rs117891535 | G | 0.2045  |
| rs74519968  | G | -0.1113 |
| rs113645572 | T | -0.1078 |
| rs10259603  | G | -0.0288 |
| rs7789169   | G | 0.0517  |
| rs28739398  | G | -0.0799 |
| rs75651683  | A | -0.0807 |
| rs55800141  | T | 0.1013  |
| rs12539170  | A | 0.0579  |

|             |   |         |
|-------------|---|---------|
| rs10238612  | C | 0.0335  |
| rs117944082 | A | -0.0636 |
| rs10269440  | T | 0.0331  |
| rs75035289  | T | 0.0623  |
| rs75215248  | A | -0.1612 |
| rs75218076  | T | 0.2097  |
| rs6948719   | G | -0.0321 |
| rs117797113 | A | -0.102  |
| rs76612823  | A | -0.0858 |
| rs80005921  | G | 0.0307  |
| rs13222091  | C | -0.0553 |
| rs117435198 | A | 0.0995  |
| rs117750344 | A | 0.144   |
| rs34485968  | C | -0.1305 |
| rs2690354   | T | 0.0536  |
| rs2097678   | C | 0.0297  |
| rs75013729  | A | -0.1855 |
| rs4731528   | T | -0.0333 |
| rs71552411  | G | 0.077   |
| rs73123157  | C | -0.0597 |
| rs56264812  | A | 0.0545  |
| rs62438218  | C | 0.0599  |
| rs10280560  | T | -0.0344 |
| rs11978096  | T | 0.0563  |
| rs11769256  | T | 0.0391  |
| rs578099    | C | -0.038  |
| rs76100411  | T | 0.1251  |
| rs10259308  | G | -0.0287 |
| rs6942605   | A | -0.0451 |
| rs995309    | T | 0.0364  |
| rs2299184   | G | 0.0348  |
| rs73451452  | A | 0.1157  |
| rs11973869  | C | 0.1186  |
| rs116718187 | T | 0.0844  |
| rs7780837   | A | -0.0288 |
| rs34689793  | A | -0.0432 |
| rs1830342   | T | 0.0319  |
| rs4496902   | C | 0.0354  |
| rs7783192   | T | 0.0615  |
| rs117979756 | A | 0.1732  |
| rs76604945  | C | -0.1116 |
| rs11771901  | T | 0.0295  |
| rs12671694  | C | 0.0307  |
| rs6463267   | C | 0.0325  |
| rs4720613   | G | -0.0594 |
| rs111518948 | G | 0.1396  |
| rs2355782   | T | 0.0294  |



|             |   |         |
|-------------|---|---------|
| rs13224999  | C | 0.0693  |
| rs150652111 | A | -0.1201 |
| rs11772610  | A | -0.0331 |
| rs34840477  | C | 0.128   |
| rs12665946  | C | 0.0287  |
| rs4729109   | G | 0.0834  |
| rs74896221  | T | 0.0337  |
| rs4128399   | C | 0.048   |
| rs10256700  | T | -0.0465 |
| rs6974602   | T | 0.1194  |
| rs138821010 | A | -0.135  |
| rs7809835   | T | 0.0573  |
| rs117395108 | G | -0.1817 |
| rs10952517  | A | 0.0365  |
| rs34262985  | T | -0.092  |
| rs1513912   | A | -0.0315 |
| rs140513756 | G | -0.1091 |
| rs117734047 | A | -0.1426 |
| rs73175001  | A | -0.0371 |
| rs13230755  | A | 0.0481  |
| rs2110711   | C | 0.0654  |
| rs73096418  | A | 0.0916  |
| rs4557602   | A | -0.0984 |
| rs73228599  | T | -0.1103 |
| rs17772859  | T | 0.1099  |
| rs66603063  | A | -0.0297 |
| rs6978206   | A | -0.0539 |
| rs117244340 | G | 0.2469  |
| rs6952728   | T | 0.0593  |
| rs10274901  | T | -0.0792 |
| rs62480516  | T | -0.0438 |
| rs7806674   | C | -0.0309 |
| rs10281041  | C | 0.031   |
| rs4266583   | C | -0.0281 |
| rs75622856  | A | -0.135  |
| rs10253121  | T | -0.0321 |
| rs11972328  | T | 0.0909  |
| rs150560724 | T | -0.1694 |
| rs73730153  | T | 0.1309  |
| rs1160299   | G | -0.0291 |
| rs78491575  | C | -0.2156 |
| rs116945813 | A | -0.1192 |
| rs118186770 | G | -0.2233 |
| rs148919506 | C | 0.1568  |
| rs150013081 | T | -0.0849 |
| rs57623511  | A | 0.0617  |
| rs10952550  | A | -0.055  |

|             |   |         |
|-------------|---|---------|
| rs140649869 | C | -0.2469 |
| rs10263410  | A | -0.0288 |
| rs4718603   | G | 0.0282  |
| rs145020897 | C | -0.2232 |
| rs17596661  | T | -0.312  |
| rs62458613  | G | 0.1017  |
| rs35793787  | T | -0.0653 |
| rs34233830  | C | 0.0702  |
| rs10232413  | T | 0.0688  |
| rs113106817 | A | 0.0743  |
| rs118037742 | G | -0.1155 |
| rs7803608   | C | -0.0599 |
| rs143721374 | A | 0.0829  |
| rs73109616  | C | -0.1386 |
| rs10245681  | C | -0.0516 |
| rs3779547   | G | -0.0283 |
| rs61245367  | A | 0.0405  |
| rs117780099 | A | -0.2384 |
| rs139088319 | G | 0.069   |
| rs2521315   | T | -0.0314 |
| rs7793669   | T | 0.0324  |
| rs10258885  | C | -0.0295 |
| rs77508712  | G | 0.1673  |
| rs62451649  | A | -0.0578 |
| rs10499344  | G | -0.0433 |
| rs11767490  | A | 0.0466  |
| rs2331097   | C | -0.0303 |
| rs78174904  | C | -0.1024 |
| rs74599724  | A | 0.1919  |
| rs10262173  | T | -0.1123 |
| rs78840759  | C | 0.0802  |
| rs67753165  | A | 0.1134  |
| rs36113918  | G | -0.1256 |
| rs1130329   | C | -0.03   |
| rs10950838  | G | 0.0282  |
| rs35966180  | A | 0.0284  |
| rs1347800   | G | -0.0317 |
| rs141598971 | A | 0.1941  |
| rs137894083 | T | 0.1702  |
| rs78597093  | G | -0.1157 |
| rs1988540   | A | -0.0302 |
| rs62469981  | C | -0.0877 |
| rs117374763 | C | -0.1235 |
| rs2941549   | A | 0.0328  |
| rs11766666  | T | -0.0956 |
| rs1075907   | C | 0.2127  |
| rs6955430   | A | -0.0342 |

|             |   |         |
|-------------|---|---------|
| rs141215102 | C | -0.1359 |
| rs17146362  | A | 0.0433  |
| rs17639782  | G | -0.0428 |
| rs11763677  | T | -0.0693 |
| rs139574219 | C | -0.176  |
| rs10252043  | A | 0.0296  |
| rs75808529  | C | 0.1911  |
| rs11763359  | T | 0.0696  |
| rs2091104   | C | -0.0442 |
| rs55812329  | T | -0.0516 |
| rs11563402  | T | -0.1048 |
| rs2269972   | A | 0.0292  |
| rs4947952   | A | 0.0379  |
| rs143032027 | G | 0.0385  |
| rs3757572   | C | 0.0313  |
| rs79493584  | A | 0.1291  |
| rs4732480   | G | -0.0447 |
| rs62452969  | T | 0.0713  |
| rs66775024  | T | -0.1104 |
| rs11980237  | A | 0.1134  |
| rs115246845 | A | -0.164  |
| rs6957747   | A | 0.1851  |
| rs6462597   | T | 0.1753  |
| rs34556371  | A | 0.0322  |
| rs2106291   | C | -0.0537 |
| rs76004791  | C | -0.2504 |
| rs57502740  | C | 0.0464  |
| rs73049077  | T | 0.0399  |
| rs6971331   | C | 0.0382  |
| rs57776221  | T | 0.1274  |
| rs111977942 | A | 0.1343  |
| rs13232076  | A | -0.0825 |
| rs10951014  | T | -0.0422 |
| rs4948030   | A | 0.1146  |
| rs80104655  | A | -0.0719 |
| rs6958591   | C | 0.028   |
| rs1294905   | T | -0.0454 |
| rs28402281  | G | -0.0756 |
| rs141393192 | C | 0.1541  |
| rs4451238   | G | -0.0287 |
| rs146477346 | A | -0.1452 |
| rs963843    | A | 0.0489  |
| rs2191701   | A | 0.0301  |
| rs2267878   | C | 0.0325  |
| rs149115078 | G | 0.1575  |
| rs139858452 | T | 0.1611  |
| rs1708416   | A | -0.0334 |

|             |   |         |
|-------------|---|---------|
| rs35656988  | T | -0.0298 |
| rs112203743 | G | -0.1924 |
| rs2718228   | C | -0.0453 |
| rs118017659 | G | -0.1567 |
| rs55837573  | A | -0.0523 |
| rs12671918  | T | 0.113   |
| rs73122291  | A | -0.1222 |
| rs6969684   | T | 0.0305  |
| rs10252407  | G | 0.0834  |
| rs2691382   | G | 0.0789  |
| rs6958584   | C | 0.0312  |
| rs17137052  | T | -0.0518 |
| rs74324174  | C | -0.1377 |
| rs7809981   | T | -0.033  |
| rs62468068  | A | -0.0293 |
| rs11521116  | T | 0.0397  |
| rs7803381   | T | 0.0739  |
| rs61549812  | T | -0.0644 |
| rs73144387  | T | -0.1803 |
| rs138738236 | A | 0.2173  |
| rs62463000  | G | -0.0695 |
| rs78867440  | T | 0.1471  |
| rs77330245  | C | -0.1183 |
| rs117944884 | A | -0.1614 |
| rs2163935   | G | 0.0379  |
| rs17161326  | A | 0.0462  |
| rs138210559 | G | 0.0856  |
| rs73274230  | G | 0.0998  |
| rs17168120  | T | 0.051   |
| rs9639812   | T | 0.0323  |
| rs116855266 | G | -0.2054 |
| rs145462231 | G | 0.1683  |
| rs75821800  | A | 0.1992  |
| rs62438836  | C | -0.0506 |
| rs74779693  | A | -0.1489 |
| rs79362250  | G | 0.0599  |
| rs2717772   | T | -0.0305 |
| rs62465643  | T | 0.0887  |
| rs7792568   | G | -0.0433 |
| rs1799025   | A | -0.0291 |
| rs73202210  | G | -0.0897 |
| rs10234940  | G | -0.0359 |
| rs73038418  | T | 0.1554  |
| rs2677041   | C | -0.0827 |
| rs146617122 | G | 0.1551  |
| rs16869824  | T | 0.0331  |
| rs77271252  | G | -0.1903 |

|             |   |         |
|-------------|---|---------|
| rs17647288  | A | 0.073   |
| rs79125765  | A | 0.1057  |
| rs10215377  | T | 0.0629  |
| rs147466112 | G | 0.1424  |
| rs17669801  | T | -0.1417 |
| rs17563229  | G | -0.034  |
| rs72595980  | G | -0.0656 |
| rs6957233   | T | 0.0393  |
| rs7782161   | A | -0.0309 |
| rs1868359   | C | -0.0308 |
| rs116878177 | A | 0.1083  |
| rs76324744  | G | -0.1479 |
| rs117764329 | T | -0.0934 |
| rs4719979   | T | 0.0692  |
| rs2522220   | C | 0.0319  |
| rs113161767 | T | -0.0737 |
| rs62445824  | A | 0.0372  |
| rs117217126 | A | -0.1865 |
| rs142481524 | G | 0.2429  |
| rs12532198  | T | 0.0599  |
| rs3823765   | T | -0.0458 |
| rs6963296   | T | 0.0283  |
| rs2523187   | C | -0.0297 |
| rs2018260   | G | -0.1232 |
| rs12538946  | G | -0.0848 |
| rs73232616  | G | 0.0553  |
| rs2523084   | G | 0.0284  |
| rs115872145 | C | -0.1112 |
| rs12670828  | C | 0.0773  |
| rs4727595   | G | 0.0482  |
| rs143129943 | G | 0.1925  |
| rs1528683   | G | -0.0491 |
| rs10954385  | C | 0.034   |
| rs956392    | A | -0.0616 |
| rs140514927 | A | 0.2247  |
| rs73044691  | A | -0.1898 |
| rs114622917 | G | -0.0579 |
| rs10951404  | T | -0.0303 |
| rs10257040  | C | -0.0493 |
| rs117943789 | C | -0.207  |
| rs4629751   | G | 0.0333  |
| rs3111216   | G | -0.0316 |
| rs35673917  | T | -0.0633 |
| rs75400353  | A | 0.1426  |
| rs78006606  | G | -0.1946 |
| rs1358305   | T | -0.0438 |
| rs1362356   | C | -0.0325 |

|             |   |         |
|-------------|---|---------|
| rs7798420   | T | 0.0274  |
| rs5009007   | G | 0.0324  |
| rs71526008  | T | 0.077   |
| rs13225700  | C | -0.0368 |
| rs74477971  | T | -0.163  |
| rs1404824   | T | -0.0292 |
| rs13243058  | A | 0.0328  |
| rs17674478  | C | 0.1185  |
| rs6977421   | T | 0.0303  |
| rs79549727  | G | -0.2132 |
| rs77823918  | G | -0.0681 |
| rs73052922  | G | -0.1083 |
| rs10242186  | G | -0.0296 |
| rs34251381  | T | 0.0327  |
| rs12705121  | T | 0.0372  |
| rs117349485 | A | 0.0877  |
| rs6973468   | T | -0.0366 |
| rs77162285  | A | 0.0922  |
| rs113050156 | A | 0.1682  |
| rs112749609 | T | 0.0828  |
| rs6967551   | T | 0.0328  |
| rs849910    | A | -0.037  |
| rs118150939 | T | -0.0759 |
| rs75686544  | A | -0.0614 |
| rs76173039  | A | 0.0731  |
| rs55986120  | A | 0.0917  |
| rs6963155   | A | 0.1388  |
| rs61747545  | A | 0.0961  |
| rs855909    | A | -0.0693 |
| rs701323    | C | 0.0321  |
| rs74615319  | A | 0.1195  |
| rs117611172 | C | 0.118   |
| rs562467    | G | 0.0523  |
| rs2677083   | G | 0.0785  |
| rs118112940 | G | -0.1298 |
| rs111725152 | C | 0.2132  |
| rs3808030   | G | 0.0772  |
| rs112567934 | T | -0.1163 |
| rs61328023  | T | 0.135   |
| rs2465786   | G | 0.0307  |
| rs7804701   | T | 0.0818  |
| rs10276962  | T | 0.0495  |
| rs117529768 | A | -0.1956 |
| rs61146810  | C | 0.0316  |
| rs7808135   | A | 0.0449  |
| rs57749831  | A | -0.0353 |
| rs111792703 | T | 0.0292  |

|             |   |         |
|-------------|---|---------|
| rs73479737  | A | 0.0668  |
| rs2731549   | A | -0.0319 |
| rs62466495  | C | -0.0551 |
| rs4409303   | T | -0.0341 |
| rs151174370 | A | -0.2185 |
| rs10251209  | G | 0.0404  |
| rs10241035  | T | -0.0678 |
| rs38888     | G | -0.0361 |
| rs79172360  | A | -0.0855 |
| rs117755034 | C | -0.1704 |
| rs9639594   | A | 0.0391  |
| rs117024451 | C | 0.1228  |
| rs9638581   | A | -0.0494 |
| rs10253857  | T | -0.0336 |
| rs61758978  | G | 0.1453  |
| rs6959765   | C | -0.0276 |
| rs118062414 | T | 0.0848  |
| rs113388134 | A | -0.1059 |
| rs73109207  | G | 0.0755  |
| rs117618314 | G | 0.0773  |
| rs75721726  | G | 0.1257  |
| rs2528825   | A | -0.0839 |
| rs117715922 | G | 0.0642  |
| rs74995727  | A | 0.0317  |
| rs34001382  | T | -0.2044 |
| rs77035295  | C | -0.1571 |
| rs112026073 | G | 0.0707  |
| rs17810687  | A | 0.0574  |
| rs6959186   | C | 0.0319  |
| rs77020101  | C | -0.1192 |
| rs56037855  | A | 0.1243  |
| rs73156733  | G | 0.0631  |
| rs141869974 | A | -0.1885 |
| rs116212434 | T | 0.1057  |
| rs75897700  | G | -0.1606 |
| rs75213674  | T | -0.196  |
| rs12530797  | C | 0.028   |
| rs39048     | T | -0.0406 |
| rs113979934 | T | 0.1064  |
| rs6971173   | G | 0.0357  |
| rs10487403  | A | 0.1018  |
| rs73121627  | A | -0.0911 |
| rs10235949  | A | -0.072  |
| rs56395840  | G | -0.1058 |
| rs137891434 | A | 0.1694  |
| rs73168279  | A | 0.1134  |
| rs17165396  | A | -0.0748 |

|             |   |         |
|-------------|---|---------|
| rs71534633  | T | 0.0339  |
| rs6459794   | G | -0.0413 |
| rs6973839   | T | -0.1418 |
| rs77649879  | T | 0.0372  |
| rs73497204  | T | 0.1409  |
| rs61742328  | G | 0.1297  |
| rs4732250   | A | -0.0823 |
| rs968917    | G | -0.0296 |
| rs17645224  | T | 0.0292  |
| rs73148903  | T | 0.1836  |
| rs62447490  | G | 0.1035  |
| rs55687362  | G | -0.0382 |
| rs10226156  | G | 0.028   |
| rs77657145  | C | -0.0436 |
| rs62453192  | T | 0.1082  |
| rs62439353  | T | -0.0797 |
| rs34146604  | A | -0.0571 |
| rs740182    | T | -0.0281 |
| rs150490009 | C | 0.1294  |
| rs72601714  | C | 0.0402  |
| rs141576690 | T | 0.1406  |
| rs2396722   | C | -0.0282 |
| rs6969978   | T | 0.0397  |
| rs117854808 | C | -0.1935 |
| rs60811897  | T | 0.0689  |
| rs73185918  | A | 0.0477  |
| rs12536569  | C | -0.0582 |
| rs78336250  | A | -0.1092 |
| rs34618925  | C | 0.0709  |
| rs181079    | G | 0.0387  |
| rs474039    | T | -0.0418 |
| rs13307200  | A | -0.03   |
| rs113297525 | C | 0.0703  |
| rs150184023 | G | 0.17    |
| rs62482210  | G | 0.0407  |
| rs61742185  | T | -0.1643 |
| rs4727331   | C | -0.0995 |
| rs144701976 | C | 0.1668  |
| rs17220132  | T | 0.1854  |
| rs11763272  | A | -0.0586 |
| rs13227618  | T | -0.1015 |
| rs3863239   | T | 0.0588  |
| rs17756941  | G | 0.0319  |
| rs765939    | C | 0.0313  |
| rs62489164  | G | -0.1158 |
| rs1882599   | G | 0.0368  |
| rs139777336 | G | 0.1173  |



|             |   |         |
|-------------|---|---------|
| rs117003488 | C | -0.1597 |
| rs42953     | G | 0.0282  |
| rs74506957  | A | 0.1823  |
| rs143364347 | A | -0.188  |
| rs62446953  | T | -0.0421 |
| rs71524097  | T | 0.0766  |
| rs3914125   | G | 0.0407  |
| rs148144412 | T | -0.1147 |
| rs74840326  | G | -0.0937 |
| rs6942916   | A | 0.0599  |
| rs116941370 | A | 0.1734  |
| rs11768549  | T | -0.1517 |
| rs150582792 | T | 0.1214  |
| rs117851548 | C | -0.1939 |
| rs12530731  | A | 0.038   |
| rs141098993 | A | -0.1445 |
| rs17678858  | G | 0.1552  |
| rs227947    | T | 0.0278  |
| rs10486524  | G | 0.0331  |
| rs73154723  | C | -0.2154 |
| rs12056245  | C | -0.0641 |
| rs77110976  | C | -0.0335 |
| rs4716919   | C | 0.0837  |
| rs2158513   | T | 0.0525  |
| rs12704849  | T | -0.0438 |
| rs10224153  | T | -0.046  |
| rs17618654  | C | -0.0905 |
| rs62468599  | C | -0.0507 |
| rs144324170 | A | 0.2246  |
| rs10256973  | G | 0.0541  |
| rs4724180   | G | -0.0327 |
| rs78953790  | G | 0.0762  |
| rs13234783  | C | -0.0352 |
| rs13221972  | T | -0.0433 |
| rs75436973  | T | -0.1544 |
| rs4446624   | C | 0.0355  |
| rs12707641  | T | -0.0696 |
| rs116850860 | C | 0.1386  |
| rs149899296 | T | -0.0729 |
| rs17197589  | C | 0.1084  |
| rs799958    | A | 0.0308  |
| rs1601036   | G | -0.0761 |
| rs73155656  | G | -0.0977 |
| rs142466716 | A | -0.1936 |
| rs4427095   | C | 0.0575  |
| rs78166147  | C | 0.1172  |
| rs76012587  | T | -0.0907 |

|             |   |         |
|-------------|---|---------|
| rs116175184 | C | -0.1612 |
| rs4716922   | C | -0.0926 |
| rs79175142  | T | 0.0719  |
| rs939910    | G | -0.0299 |
| rs78890254  | A | -0.1102 |
| rs34635172  | A | -0.1524 |
| rs17683112  | A | -0.0931 |
| rs6960410   | C | -0.0281 |
| rs6461179   | G | 0.0376  |
| rs12536329  | G | 0.0278  |
| rs3801222   | G | 0.0272  |
| rs6461814   | A | -0.0269 |
| rs76335499  | T | -0.0466 |
| rs11773726  | T | -0.035  |
| rs7783497   | A | -0.0391 |
| rs75869462  | G | -0.0456 |
| rs12532626  | C | -0.0498 |
| rs145859757 | C | -0.1969 |
| rs79143117  | A | -0.096  |
| rs2160024   | T | 0.0761  |
| rs17170356  | G | 0.0864  |
| rs71540773  | C | -0.045  |
| rs2108717   | A | -0.0455 |
| rs12669498  | C | 0.0398  |
| rs1133058   | T | 0.1339  |
| rs62456350  | A | -0.0289 |
| rs12540795  | A | -0.0338 |
| rs76049150  | G | 0.1661  |
| rs143793465 | G | 0.0949  |
| rs138834086 | C | 0.1378  |
| rs73044672  | G | 0.2192  |
| rs62456112  | G | 0.1927  |
| rs11973716  | G | -0.0487 |
| rs11531619  | G | -0.1816 |
| rs17158805  | T | 0.1156  |
| rs74461811  | A | -0.1748 |
| rs74994201  | G | -0.1337 |
| rs79614365  | A | -0.1011 |
| rs6956302   | T | 0.027   |
| rs6461877   | G | -0.0782 |
| rs2390659   | C | 0.0439  |
| rs73219085  | A | -0.1747 |
| rs12540293  | T | -0.1373 |
| rs73094807  | C | 0.0637  |
| rs6953064   | G | 0.0704  |
| rs80330776  | A | -0.1727 |
| rs7798692   | A | -0.0288 |

|             |   |         |
|-------------|---|---------|
| rs12705281  | A | 0.1431  |
| rs73210758  | G | -0.1489 |
| rs2718132   | T | -0.0552 |
| rs118137586 | A | 0.2082  |
| rs74902059  | T | -0.0905 |
| rs73048779  | C | -0.2441 |
| rs138081433 | T | -0.131  |
| rs111492056 | T | 0.0478  |
| rs113723896 | C | -0.1616 |
| rs62470909  | C | 0.0729  |
| rs10244748  | C | 0.0514  |
| rs196631    | A | 0.0402  |
| rs62473341  | C | 0.0429  |
| rs6978995   | T | -0.0444 |
| rs56245619  | A | -0.0706 |
| rs74410974  | C | -0.1888 |
| rs896783    | A | -0.0391 |
| rs139421056 | T | 0.1674  |
| rs117064592 | G | 0.0956  |
| rs9649304   | T | 0.048   |
| rs13240854  | C | -0.0276 |
| rs17805585  | T | 0.0313  |
| rs143372159 | G | -0.1295 |
| rs12703157  | C | 0.0687  |
| rs12533035  | A | -0.0816 |
| rs1722883   | C | 0.0277  |
| rs80281559  | G | 0.2336  |
| rs10223914  | A | 0.0492  |
| rs60271634  | C | -0.0463 |
| rs757035    | T | 0.168   |
| rs41789     | T | -0.0282 |
| rs10276609  | T | 0.0389  |
| rs143060651 | T | -0.1064 |
| rs10487320  | T | 0.0282  |
| rs117793761 | A | -0.1588 |
| rs13438138  | C | 0.1608  |
| rs7458089   | G | -0.0553 |
| rs55747191  | C | -0.0452 |
| rs1472210   | C | -0.0273 |
| rs75821488  | T | -0.0415 |
| rs11975640  | T | -0.0297 |
| rs12671881  | C | -0.0284 |
| rs1012151   | G | 0.0283  |
| rs17328122  | C | 0.1151  |
| rs76107914  | G | -0.1172 |
| rs143805115 | A | 0.1363  |
| rs78204407  | G | -0.0846 |

|             |   |         |
|-------------|---|---------|
| rs2727479   | A | 0.0335  |
| rs10263151  | C | -0.0292 |
| rs74915240  | T | -0.2    |
| rs73690020  | A | 0.0582  |
| rs2527536   | T | -0.0991 |
| rs28369212  | G | 0.0563  |
| rs142450156 | T | 0.17    |
| rs17805757  | A | 0.0454  |
| rs74881133  | A | 0.1692  |
| rs471303    | G | -0.0469 |
| rs10243335  | A | 0.0354  |
| rs76023764  | A | -0.1556 |
| rs76770917  | C | 0.105   |
| rs111844273 | A | 0.1594  |
| rs144855951 | C | 0.1508  |
| rs1882086   | C | -0.0318 |
| rs73082009  | A | 0.0527  |
| rs79260156  | T | 0.0924  |
| rs75030973  | A | -0.0745 |
| rs78315112  | C | 0.1259  |
| rs10258977  | A | -0.1992 |
| rs73032334  | A | 0.1105  |
| rs28520755  | A | -0.0615 |
| rs10259239  | C | 0.1157  |
| rs3778829   | G | -0.0284 |
| rs55968636  | T | 0.0289  |
| rs6968311   | T | 0.0286  |
| rs117760646 | A | 0.1301  |
| rs145724947 | T | -0.2152 |
| rs6952197   | C | -0.0304 |
| rs9691148   | C | -0.0277 |
| rs35949935  | G | -0.042  |
| rs118068608 | T | 0.1208  |
| rs78193445  | C | 0.086   |
| rs13224218  | C | 0.1527  |
| rs10280848  | T | 0.0283  |
| rs117773753 | A | 0.1642  |
| rs7805367   | C | -0.0302 |
| rs143019999 | G | 0.1424  |
| rs37071     | C | -0.0315 |
| rs1230423   | C | -0.0421 |
| rs6466873   | T | 0.0298  |
| rs10234808  | T | 0.0279  |
| rs2163509   | A | 0.0482  |
| rs77419057  | G | 0.1166  |
| rs76776296  | G | 0.0877  |
| rs7795607   | C | -0.0287 |

|             |   |         |
|-------------|---|---------|
| rs6465639   | A | -0.0361 |
| rs917716    | A | 0.0344  |
| rs6459693   | C | -0.039  |
| rs2022230   | G | 0.0297  |
| rs112459898 | A | -0.1162 |
| rs11763694  | C | -0.0368 |
| rs17347338  | C | 0.0992  |
| rs10950817  | G | 0.0565  |
| rs73090089  | T | 0.1124  |
| rs846429    | A | -0.0275 |
| rs75061547  | C | -0.0814 |
| rs116858253 | C | -0.1083 |
| rs75374517  | A | 0.155   |
| rs75704780  | C | -0.2559 |
| rs30583     | G | 0.0377  |
| rs10249228  | G | -0.1161 |
| rs2069441   | T | 0.1215  |
| rs76658110  | G | 0.0737  |
| rs77423355  | G | -0.0833 |
| rs57819574  | C | -0.0387 |
| rs149942998 | T | 0.1564  |
| rs4342489   | T | -0.0281 |
| rs67079113  | G | -0.1132 |
| rs11973267  | A | -0.0309 |
| rs146257014 | C | 0.166   |
| rs10280448  | T | -0.1638 |
| rs34301839  | C | 0.0448  |
| rs79151381  | T | -0.1089 |
| rs73193850  | A | -0.1362 |
| rs141371155 | A | 0.1887  |
| rs143817006 | A | 0.2174  |
| rs147811487 | G | -0.1739 |
| rs62464627  | T | 0.1568  |
| rs73115375  | T | -0.0477 |
| rs112769043 | C | 0.0865  |
| rs117770379 | T | 0.0984  |
| rs10229557  | A | 0.0284  |
| rs61444512  | G | 0.0384  |
| rs61180243  | G | 0.062   |
| rs7384424   | A | -0.0537 |
| rs149219430 | T | 0.09    |
| rs2709772   | G | 0.1374  |
| rs10251493  | T | 0.0427  |
| rs17862316  | G | 0.1045  |
| rs78092358  | A | 0.1396  |
| rs141347515 | A | -0.1572 |
| rs113134543 | C | 0.2191  |

|             |   |         |
|-------------|---|---------|
| rs11771713  | C | -0.0782 |
| rs798312    | A | 0.0368  |
| rs62450816  | A | 0.0333  |
| rs3109114   | T | -0.0387 |
| rs139229172 | A | 0.142   |
| rs4730499   | A | 0.0376  |
| rs1485002   | C | -0.0322 |
| rs66656487  | G | 0.0312  |
| rs344473    | G | -0.0416 |
| rs117417893 | G | 0.159   |
| rs12533226  | A | 0.0366  |
| rs6466603   | G | 0.0326  |
| rs10237919  | A | -0.0532 |
| rs7783203   | G | -0.0279 |
| rs78628967  | T | -0.1113 |
| rs2005697   | C | -0.0345 |
| rs77519280  | C | 0.1158  |
| rs35067516  | T | -0.0325 |
| rs4730134   | T | 0.0524  |
| rs77839215  | T | 0.0667  |
| rs80218044  | T | 0.1088  |
| rs77398712  | A | -0.1161 |
| rs16873123  | C | 0.0323  |
| rs118093266 | A | 0.2024  |
| rs140299180 | A | 0.1157  |
| rs17663622  | A | -0.0328 |
| rs4329187   | T | -0.0268 |
| rs4727757   | T | -0.0696 |
| rs35552268  | A | 0.0846  |
| rs6948733   | G | 0.078   |
| rs78880961  | T | -0.0886 |
| rs6467404   | A | -0.0586 |
| rs117773972 | T | 0.1041  |
| rs112425367 | A | -0.0733 |
| rs2960258   | A | -0.037  |
| rs141841947 | T | -0.0937 |
| rs59464694  | T | 0.1299  |
| rs118101814 | A | 0.0991  |
| rs1524599   | G | -0.0265 |
| rs146409284 | A | -0.108  |
| rs10278743  | A | -0.0328 |
| rs77854248  | G | 0.0668  |
| rs17166216  | C | 0.0666  |
| rs36017655  | C | 0.0426  |
| rs80013344  | G | -0.0416 |
| rs28542988  | A | 0.0569  |
| rs17522339  | T | 0.1422  |

|             |   |         |
|-------------|---|---------|
| rs35535941  | T | -0.0289 |
| rs6955606   | T | -0.0562 |
| rs77529569  | C | 0.0493  |
| rs10232428  | C | 0.07    |
| rs7800055   | A | -0.0502 |
| rs13236410  | A | 0.0301  |
| rs2691591   | G | -0.0809 |
| rs690702    | C | 0.035   |
| rs79780633  | G | 0.1118  |
| rs62441392  | C | 0.0908  |
| rs2687480   | C | 0.0266  |
| rs118035296 | G | 0.183   |
| rs1637310   | A | -0.0333 |
| rs146328643 | T | 0.0902  |
| rs118166162 | T | -0.1902 |
| rs4527779   | C | -0.1028 |
| rs73134458  | A | -0.1794 |
| rs76149623  | C | 0.0569  |
| rs58736800  | G | 0.0325  |
| rs10261146  | G | 0.027   |
| rs10253593  | T | -0.0446 |
| rs11770852  | T | -0.0491 |
| rs2001817   | A | 0.0284  |
| rs12540532  | T | 0.073   |
| rs79323414  | T | -0.118  |
| rs117155707 | T | -0.177  |
| rs12706544  | C | -0.0314 |
| rs17637915  | G | 0.0572  |
| rs6956539   | C | 0.0658  |
| rs730364    | T | -0.0531 |
| rs79093981  | T | -0.2209 |
| rs1638201   | A | 0.0514  |
| rs117140681 | T | 0.0631  |
| rs2030947   | C | 0.043   |
| rs6969888   | A | 0.0511  |
| rs4626515   | C | -0.0417 |
| rs3778995   | C | 0.0456  |
| rs3735502   | C | 0.0309  |
| rs150094062 | C | 0.1024  |
| rs77008163  | T | 0.0724  |
| rs11772035  | A | 0.0436  |
| rs105347    | T | -0.0318 |
| rs13437999  | C | -0.0278 |
| rs6963264   | C | -0.0321 |
| rs850361    | T | -0.0303 |
| rs140008460 | G | -0.0811 |
| rs12532251  | G | 0.0426  |

|             |   |         |
|-------------|---|---------|
| rs79224964  | A | 0.046   |
| rs1357550   | C | 0.0402  |
| rs76363137  | T | -0.127  |
| rs34699890  | A | 0.0305  |
| rs10952749  | G | -0.0275 |
| rs62461470  | G | -0.1553 |
| rs79017130  | T | -0.1763 |
| rs118168713 | C | -0.1027 |
| rs117658107 | G | -0.1091 |
| rs117890863 | G | -0.093  |
| rs145847285 | T | -0.1263 |
| rs10225218  | G | 0.0263  |
| rs10232809  | C | -0.0443 |
| rs2520602   | T | 0.0904  |
| rs62435333  | T | 0.0329  |
| rs73220280  | T | -0.1251 |
| rs6964410   | G | -0.0633 |
| rs62439465  | A | -0.097  |
| rs117255613 | A | 0.1429  |
| rs6969904   | C | -0.027  |
| rs118173496 | A | 0.1827  |
| rs2523018   | T | 0.039   |
| rs73708748  | T | -0.0302 |
| rs144441993 | C | 0.1043  |
| rs117879402 | C | 0.1294  |
| rs62451700  | C | -0.0467 |
| rs79628046  | C | 0.1417  |
| rs1285466   | G | 0.0787  |
| rs974583    | A | -0.0333 |
| rs17164003  | G | 0.1458  |
| rs13233838  | A | 0.1421  |
| rs7788194   | A | 0.0429  |
| rs11763653  | A | 0.1209  |
| rs75756499  | C | 0.2033  |
| rs117667731 | T | -0.2066 |
| rs115980385 | T | 0.1734  |
| rs35846618  | T | -0.0446 |
| rs6464471   | G | -0.027  |
| rs217517    | A | 0.0341  |
| rs17667062  | G | 0.0321  |
| rs13247109  | C | 0.0594  |
| rs138392184 | T | -0.0653 |
| rs6953971   | C | 0.05    |
| rs12113525  | A | -0.0474 |
| rs74794332  | T | 0.1095  |
| rs12216706  | C | -0.0291 |
| rs4348407   | G | -0.0352 |



|             |   |         |
|-------------|---|---------|
| rs4308625   | C | -0.036  |
| rs141664396 | A | -0.1572 |
| rs6467607   | T | -0.0453 |
| rs34587888  | A | 0.1306  |
| rs79203460  | G | -0.1238 |
| rs17155659  | G | 0.0315  |
| rs2350179   | G | 0.0272  |
| rs80120558  | G | 0.094   |
| rs116736013 | A | 0.1054  |
| rs1526561   | C | 0.0293  |
| rs117513979 | C | -0.2491 |
| rs11761519  | T | -0.0984 |
| rs4140913   | A | 0.0346  |
| rs59229896  | G | 0.0992  |
| rs939962    | G | 0.0839  |
| rs73360756  | T | -0.0352 |
| rs6948398   | C | 0.0275  |
| rs6464655   | T | 0.0262  |
| rs35724228  | C | 0.0417  |
| rs115091985 | T | -0.0834 |
| rs6952125   | T | -0.0274 |
| rs73097683  | T | 0.0428  |
| rs6952589   | T | -0.0272 |
| rs17136588  | G | -0.0512 |
| rs245990    | T | -0.0457 |
| rs17604552  | A | -0.0382 |
| rs76143034  | T | 0.0801  |
| rs78002901  | G | 0.1679  |
| rs3801214   | C | -0.0401 |
| rs6954065   | T | -0.0274 |
| rs34979958  | T | 0.0459  |
| rs6461556   | G | 0.0263  |
| rs1560956   | T | 0.0747  |
| rs113074612 | C | 0.0588  |
| rs4609107   | G | -0.031  |
| rs74318842  | C | -0.1049 |
| rs117587325 | C | -0.0918 |
| rs77531420  | A | -0.1049 |
| rs75247887  | T | 0.1788  |
| rs11760933  | C | 0.0398  |
| rs117204291 | T | 0.1415  |
| rs2350782   | C | 0.0455  |
| rs6460068   | T | -0.0272 |
| rs56313117  | A | -0.1462 |
| rs78353391  | A | 0.1007  |
| rs34984609  | T | 0.0494  |
| rs17330828  | T | 0.0867  |

|             |   |         |
|-------------|---|---------|
| rs10277344  | A | -0.0426 |
| rs13310795  | C | 0.0385  |
| rs142766181 | C | -0.1095 |
| rs62441366  | T | 0.0669  |
| rs73203236  | G | -0.0799 |
| rs11771659  | A | -0.2028 |
| rs141097646 | C | -0.1695 |
| rs12540374  | T | -0.0332 |
| rs6461109   | C | 0.0421  |
| rs111835936 | C | 0.0807  |
| rs6961285   | C | -0.0272 |
| rs76943653  | G | 0.1481  |
| rs76016942  | T | 0.1246  |
| rs11977883  | T | 0.0296  |
| rs321188    | G | 0.2376  |
| rs73156745  | T | 0.1149  |
| rs117556793 | C | -0.1083 |
| rs143149138 | T | 0.0929  |
| rs78841803  | T | -0.15   |
| rs146515155 | T | 0.1893  |
| rs59727186  | A | 0.0471  |
| rs117576120 | T | 0.0993  |
| rs112854948 | A | -0.1106 |
| rs141019679 | T | 0.2307  |
| rs6969783   | A | 0.0269  |
| rs62477026  | A | 0.1425  |
| rs77562410  | G | -0.1119 |
| rs141579069 | G | -0.1004 |
| rs112359376 | A | -0.0304 |
| rs77798417  | C | 0.0856  |
| rs35520130  | G | 0.0354  |
| rs1636167   | G | -0.0293 |
| rs177678    | A | 0.0305  |
| rs7792652   | A | 0.0278  |
| rs17168354  | T | 0.0367  |
| rs80147874  | T | -0.0564 |
| rs147270136 | A | -0.1974 |
| rs758988    | A | -0.0367 |
| rs78257684  | A | 0.1098  |
| rs13235210  | T | -0.0276 |
| rs141662455 | C | 0.0961  |
| rs4727383   | G | 0.0586  |
| rs10225252  | G | 0.0461  |
| rs67253715  | C | 0.0429  |
| rs146106831 | T | 0.1468  |
| rs58773168  | A | 0.0748  |
| rs116862102 | T | -0.1936 |

|             |   |         |
|-------------|---|---------|
| rs74201524  | G | 0.0411  |
| rs11771608  | C | 0.0845  |
| rs17334667  | G | -0.0642 |
| rs1014110   | C | 0.0298  |
| rs11764733  | C | -0.037  |
| rs117555102 | C | -0.1523 |
| rs197343    | T | -0.1427 |
| rs114192792 | T | 0.1447  |
| rs73065755  | T | -0.1078 |
| rs38599     | G | 0.0458  |
| rs3829001   | T | 0.0322  |
| rs41428650  | T | -0.0776 |
| rs2356878   | A | -0.0279 |
| rs4722470   | A | -0.0297 |
| rs117865143 | T | -0.0957 |
| rs17156522  | T | 0.0651  |
| rs6951474   | T | 0.0596  |
| rs4723443   | A | 0.2241  |
| rs62459447  | T | 0.1271  |
| rs12532519  | A | 0.0333  |
| rs149872295 | C | 0.1633  |
| rs6974404   | T | -0.0511 |
| rs117914483 | C | 0.0879  |
| rs73113022  | A | -0.0537 |
| rs17153477  | A | 0.0315  |
| rs4500035   | A | 0.1308  |
| rs117891460 | G | 0.1083  |
| rs10232000  | C | -0.0335 |
| rs1436812   | T | -0.0477 |
| rs79789350  | T | 0.1122  |
| rs2971676   | A | -0.051  |
| rs10280706  | A | 0.1318  |
| rs73102380  | A | -0.0548 |
| rs79981024  | C | 0.0416  |
| rs12534220  | C | -0.0765 |
| rs2528466   | G | 0.0362  |
| rs78627460  | C | -0.0667 |
| rs756668    | A | -0.0261 |
| rs4917011   | T | 0.0335  |
| rs117369930 | A | -0.1609 |
| rs17862212  | A | 0.1199  |
| rs62481937  | G | 0.076   |
| rs144280649 | T | 0.1455  |
| rs117294037 | T | -0.148  |
| rs144635172 | T | -0.126  |
| rs2464921   | G | 0.0331  |
| rs855738    | A | 0.0288  |

|             |   |         |
|-------------|---|---------|
| rs3814474   | T | -0.0487 |
| rs142857936 | T | 0.173   |
| rs76060199  | G | 0.1617  |
| rs76522008  | A | 0.1659  |
| rs146859695 | T | 0.0398  |
| rs11978796  | C | -0.039  |
| rs117830687 | A | 0.0929  |
| rs6949729   | T | 0.0844  |
| rs78692823  | A | 0.149   |
| rs6951501   | C | -0.0268 |
| rs2885959   | T | 0.0968  |
| rs117698881 | A | -0.2733 |
| rs12538529  | C | 0.032   |
| rs3862849   | A | -0.0307 |
| rs74708492  | C | 0.122   |
| rs60202974  | T | 0.0834  |
| rs117780162 | A | -0.0281 |
| rs6946822   | T | -0.0268 |
| rs29465     | T | -0.0272 |
| rs10271601  | T | -0.0421 |
| rs117286316 | G | -0.2157 |
| rs57190024  | T | 0.1294  |
| rs41488846  | G | 0.0339  |
| rs10487881  | A | 0.0305  |
| rs17168516  | G | -0.0315 |
| rs2880161   | C | -0.0363 |
| rs77631966  | C | -0.046  |
| rs117201869 | A | -0.1617 |
| rs117480496 | A | -0.0761 |
| rs917244    | G | 0.0354  |
| rs55956125  | G | -0.0317 |
| rs139694065 | A | -0.2049 |
| rs56287355  | T | -0.0419 |
| rs28495309  | A | 0.0319  |
| rs17867847  | T | 0.1313  |
| rs117870580 | G | -0.1332 |
| rs148176125 | T | -0.0659 |
| rs74223516  | A | 0.1538  |
| rs17162597  | A | -0.042  |
| rs145538823 | A | -0.1451 |
| rs111305498 | G | -0.1365 |
| rs12534100  | A | -0.0428 |
| rs145346516 | A | -0.0954 |
| rs1476881   | T | -0.1524 |
| rs150187675 | T | -0.168  |
| rs111685565 | G | -0.1055 |
| rs1961330   | C | 0.0311  |

|             |   |         |
|-------------|---|---------|
| rs10261428  | G | 0.0529  |
| rs2465073   | G | 0.0286  |
| rs7808422   | G | -0.1078 |
| rs566595    | C | 0.0377  |
| rs10258368  | C | 0.0493  |
| rs10281278  | G | 0.0293  |
| rs144714401 | T | 0.1133  |
| rs76733282  | A | -0.0655 |
| rs34448698  | T | 0.0557  |
| rs608271    | A | 0.0394  |
| rs78467163  | T | 0.0704  |
| rs1525682   | T | -0.028  |
| rs1376529   | T | 0.0276  |
| rs113795926 | G | -0.141  |
| rs79781035  | G | 0.08    |
| rs11981751  | C | 0.0394  |
| rs149442388 | G | -0.2197 |
| rs12666580  | A | -0.0402 |
| rs147724156 | T | -0.1003 |
| rs2303364   | C | -0.0687 |
| rs12670991  | A | 0.0308  |
| rs11979341  | G | -0.0356 |
| rs79840503  | C | -0.0782 |
| rs145359047 | G | -0.1501 |
| rs73149049  | T | 0.1362  |
| rs11773885  | T | -0.0346 |
| rs4722141   | A | 0.1204  |
| rs2375048   | T | 0.0271  |
| rs113446599 | T | -0.1197 |
| rs73155788  | A | -0.1837 |
| rs10271614  | T | -0.0551 |
| rs147193234 | T | 0.0992  |
| rs515906    | T | -0.0292 |
| rs141480543 | G | -0.138  |
| rs17209408  | T | -0.2055 |
| rs60648807  | A | 0.0297  |
| rs10272257  | C | -0.0328 |
| rs140990971 | A | 0.1317  |
| rs1859478   | A | -0.0308 |
| rs74335752  | A | 0.1449  |
| rs139990708 | A | -0.2214 |
| rs148677083 | T | -0.1659 |
| rs6974545   | A | -0.0715 |
| rs6956423   | T | 0.027   |
| rs17143212  | T | -0.1084 |
| rs77170981  | A | -0.0703 |
| rs117219096 | G | 0.1655  |

|             |   |         |
|-------------|---|---------|
| rs2528407   | T | -0.0754 |
| rs117668655 | C | -0.146  |
| rs740819    | A | -0.0608 |
| rs62463899  | C | -0.318  |
| rs12671068  | T | -0.0877 |
| rs62479578  | C | -0.0263 |
| rs7805700   | C | 0.029   |
| rs10230324  | A | -0.0953 |
| rs138708443 | T | 0.1363  |
| rs400218    | A | -0.0266 |
| rs12532316  | T | -0.0273 |
| rs28381946  | G | -0.0885 |
| rs2526407   | A | -0.0928 |
| rs10435125  | G | -0.0321 |
| rs1012796   | G | -0.0487 |
| rs150082036 | T | 0.1403  |
| rs67938138  | G | -0.0272 |
| rs13241062  | A | -0.0335 |
| rs142007861 | A | -0.0792 |
| rs17691802  | G | -0.074  |
| rs388121    | A | 0.0368  |
| rs7805466   | A | -0.0347 |
| rs10951005  | T | -0.0301 |
| rs116871569 | T | -0.0733 |
| rs1807980   | A | -0.0438 |
| rs112903241 | T | -0.1301 |
| rs13235065  | C | 0.0305  |
| rs140612158 | A | 0.0785  |
| rs10249070  | C | -0.0568 |
| rs80006387  | G | -0.0982 |
| rs137973464 | T | 0.1707  |
| rs62481256  | T | 0.0526  |
| rs57900069  | T | 0.0582  |
| rs76747084  | C | 0.0662  |
| rs10429091  | T | -0.0367 |
| rs62445957  | C | 0.0365  |
| rs1863039   | C | -0.0525 |
| rs146877416 | A | 0.1397  |
| rs117102651 | A | -0.0804 |
| rs3757441   | C | 0.0306  |
| rs149438483 | T | -0.2071 |
| rs1858782   | T | 0.0381  |
| rs9632698   | T | -0.036  |
| rs2008582   | T | -0.0302 |
| rs75019655  | A | 0.0801  |
| rs77157479  | T | 0.1112  |
| rs77990080  | C | 0.0667  |

|             |   |         |
|-------------|---|---------|
| rs78742318  | G | 0.1754  |
| rs76587338  | G | -0.0852 |
| rs10954317  | T | 0.0265  |
| rs7803701   | A | -0.0287 |
| rs10223928  | T | 0.0346  |
| rs117784940 | G | 0.2054  |
| rs151015197 | G | -0.134  |
| rs73184244  | T | -0.0846 |
| rs146195722 | G | 0.1443  |
| rs880285    | T | -0.0515 |
| rs13223102  | G | -0.1903 |
| rs71536900  | C | 0.2471  |
| rs10236056  | A | 0.0897  |
| rs10245219  | A | 0.0398  |
| rs11766427  | A | 0.0386  |
| rs2598405   | A | 0.0502  |
| rs2540346   | C | -0.0416 |
| rs10282508  | G | 0.0625  |
| rs113311333 | A | 0.1315  |
| rs145370039 | A | -0.1547 |
| rs4717468   | C | 0.0562  |
| rs73465029  | C | 0.0339  |
| rs41487549  | G | -0.0733 |
| rs11763616  | A | 0.0481  |
| rs145943681 | T | -0.1029 |
| rs2527863   | C | 0.0585  |
| rs77116508  | A | -0.0824 |
| rs62469034  | T | 0.0978  |
| rs151095847 | T | -0.1621 |
| rs12703547  | T | -0.0322 |
| rs117851490 | A | 0.0672  |
| rs71534697  | T | -0.0823 |
| rs143168942 | T | 0.1307  |
| rs62498268  | G | -0.154  |
| rs4725431   | C | -0.0396 |
| rs73071947  | T | -0.1218 |
| rs6951439   | A | 0.0254  |
| rs1636181   | G | -0.0296 |
| rs112204799 | G | -0.0965 |
| rs117146664 | C | -0.128  |
| rs117302151 | C | -0.1345 |
| rs73170221  | C | 0.0571  |
| rs960343    | C | 0.0274  |
| rs6950755   | C | 0.0341  |
| rs9638053   | A | -0.0672 |
| rs56199110  | C | -0.0539 |
| rs7806531   | T | -0.0266 |

|             |   |         |
|-------------|---|---------|
| rs757390    | C | 0.0263  |
| rs10225040  | T | -0.089  |
| rs148235734 | G | 0.0976  |
| rs221113    | A | 0.0878  |
| rs116891891 | T | 0.148   |
| rs28379415  | C | 0.129   |
| rs77514279  | C | 0.1123  |
| rs77729114  | C | -0.113  |
| rs308095    | A | -0.0692 |
| rs1525506   | C | 0.0372  |
| rs4726614   | T | -0.036  |
| rs149193000 | G | -0.1747 |
| rs117281098 | C | 0.0598  |
| rs71563649  | A | -0.0378 |
| rs144583776 | C | -0.2004 |
| rs2253729   | C | -0.0298 |
| rs12535753  | T | -0.0533 |
| rs76256415  | G | -0.1403 |
| rs10241886  | T | 0.0374  |
| rs7784931   | A | -0.0281 |
| rs2677031   | C | 0.042   |
| rs117192518 | G | 0.1044  |
| rs118036388 | T | 0.1137  |
| rs78664098  | A | 0.172   |
| rs10237324  | A | -0.04   |
| rs1681289   | A | 0.0414  |
| rs10250329  | C | -0.0279 |
| rs116869549 | T | -0.1651 |
| rs142653616 | A | -0.1334 |
| rs141254853 | T | 0.1574  |
| rs144653339 | A | 0.0541  |
| rs73410456  | A | -0.0286 |
| rs17863184  | G | 0.1881  |
| rs75090216  | T | 0.1884  |
| rs197370    | G | -0.0309 |
| rs10277089  | A | -0.0439 |
| rs42178     | G | 0.0861  |
| rs17170936  | A | 0.0376  |
| rs149788966 | A | -0.1228 |
| rs17714364  | A | 0.129   |
| rs1637078   | G | -0.086  |
| rs6945809   | T | -0.0539 |
| rs12666214  | C | 0.0587  |
| rs7805271   | C | 0.0506  |
| rs117480627 | T | 0.1131  |
| rs146740708 | G | -0.0399 |
| rs74880847  | G | 0.1012  |



|             |   |         |
|-------------|---|---------|
| rs6950290   | G | 0.0287  |
| rs141990565 | T | -0.1367 |
| rs852483    | C | 0.0339  |
| rs145654239 | A | 0.0808  |
| rs75507582  | A | 0.1101  |
| rs73090794  | C | -0.1118 |
| rs12670187  | A | -0.0459 |
| rs2267693   | G | 0.0693  |
| rs10282314  | T | -0.0729 |
| rs6950076   | T | 0.031   |
| rs2456948   | G | -0.0383 |
| rs10951516  | A | -0.0275 |
| rs56332325  | A | 0.166   |
| rs78790885  | T | 0.1711  |
| rs11766140  | G | -0.0265 |
| rs117056557 | T | 0.1268  |
| rs17545060  | C | 0.0307  |
| rs62455497  | A | 0.0344  |
| rs17488042  | G | -0.066  |
| rs2908004   | A | 0.0259  |
| rs6957290   | A | 0.0301  |
| rs60310885  | C | -0.0461 |
| rs6944365   | A | -0.1708 |
| rs11762846  | G | 0.0283  |
| rs2237571   | G | 0.2231  |
| rs73724504  | G | 0.1109  |
| rs12666834  | A | -0.0411 |
| rs11973308  | C | 0.063   |
| rs12540071  | G | -0.0266 |
| rs71524242  | G | -0.0891 |
| rs76425524  | C | 0.0627  |
| rs73226645  | T | -0.0852 |
| rs11773652  | C | 0.0264  |
| rs9791719   | G | -0.0277 |
| rs117740899 | C | 0.1064  |
| rs7293529   | T | 0.0424  |
| rs117183463 | T | 0.1173  |
| rs17622128  | A | 0.0849  |
| rs2073974   | T | 0.0263  |
| rs73210806  | A | 0.0943  |
| rs149270955 | G | 0.1187  |
| rs10277608  | C | -0.0449 |
| rs59153727  | C | -0.0428 |
| rs11465315  | T | -0.0381 |
| rs73196937  | G | 0.1608  |
| rs2734657   | T | -0.0321 |
| rs75128707  | T | -0.1086 |

|             |   |         |
|-------------|---|---------|
| rs2074999   | C | 0.0345  |
| rs117919356 | A | 0.1215  |
| rs58828027  | C | 0.1351  |
| rs12536551  | A | 0.027   |
| rs2021265   | T | 0.0279  |
| rs62444695  | C | -0.0489 |
| rs139454890 | T | -0.1217 |
| rs757714    | C | 0.0293  |
| rs118098206 | A | 0.1091  |
| rs73166403  | T | -0.0727 |
| rs33956262  | A | -0.0534 |
| rs61465601  | C | 0.0969  |
| rs73160965  | T | -0.0925 |
| rs116956474 | C | -0.0763 |
| rs146118865 | T | -0.2421 |
| rs1419838   | C | 0.0618  |
| rs62443552  | A | 0.1158  |
| rs79509283  | T | -0.0607 |
| rs149434125 | T | 0.0787  |
| rs7384984   | A | -0.0446 |
| rs75964345  | C | -0.0922 |
| rs62452756  | C | -0.1118 |
| rs62478781  | G | 0.0822  |
| rs75321463  | T | -0.0604 |
| rs11972890  | T | -0.0388 |
| rs117063287 | A | 0.151   |
| rs117054218 | G | -0.0934 |
| rs80066123  | C | 0.1199  |
| rs28521430  | G | -0.0267 |
| rs74521593  | A | -0.122  |
| rs36041265  | A | -0.1167 |
| rs73433740  | G | 0.0927  |
| rs11981374  | C | 0.0914  |
| rs150296482 | G | 0.1085  |
| rs719313    | G | -0.0359 |
| rs79934275  | G | 0.0954  |
| rs117922259 | G | -0.2098 |
| rs118174386 | A | 0.1227  |
| rs6461959   | A | 0.0399  |
| rs113205553 | T | -0.1244 |
| rs74393538  | G | 0.1256  |
| rs145589702 | C | 0.1136  |
| rs193961    | C | -0.1149 |
| rs67656175  | G | 0.027   |
| rs117893708 | G | 0.199   |
| rs12673837  | G | 0.0288  |
| rs73380035  | A | -0.0314 |

|             |   |         |
|-------------|---|---------|
| rs10277546  | T | 0.0334  |
| rs1722504   | T | 0.0838  |
| rs77075634  | G | 0.0617  |
| rs117768024 | C | -0.2768 |
| rs7809386   | T | 0.1024  |
| rs10272052  | T | 0.0744  |
| rs117590717 | T | 0.1247  |
| rs1554638   | T | 0.2673  |
| rs2392015   | T | -0.031  |
| rs7806156   | A | -0.0269 |
| rs9655758   | G | 0.1035  |
| rs73216120  | T | -0.1213 |
| rs3757514   | T | 0.0473  |
| rs11770658  | G | 0.0258  |
| rs2367091   | A | -0.0407 |
| rs142222622 | G | -0.1033 |
| rs117526048 | T | 0.1417  |
| rs77242122  | T | 0.1736  |
| rs193842    | C | 0.0354  |
| rs78479792  | C | -0.0583 |
| rs6944493   | T | -0.0463 |
| rs67909848  | T | -0.0661 |
| rs10954240  | T | -0.0282 |
| rs1357307   | C | 0.0258  |
| rs76349746  | G | 0.0834  |
| rs12530640  | C | -0.0345 |
| rs11761701  | A | 0.0487  |
| rs4452707   | T | 0.0461  |
| rs7791589   | G | 0.0252  |
| rs74674432  | G | -0.1315 |
| rs117995816 | C | -0.1318 |
| rs10950954  | G | -0.03   |
| rs117067519 | T | 0.201   |
| rs74916317  | T | -0.1016 |
| rs73114531  | G | 0.2171  |
| rs6956800   | C | -0.0352 |
| rs79870708  | G | 0.1259  |
| rs144807808 | A | 0.138   |
| rs12538191  | A | 0.0567  |
| rs28454335  | C | 0.0279  |
| rs145762889 | T | -0.1792 |
| rs62472104  | A | -0.0476 |
| rs140739258 | C | -0.1453 |
| rs11563971  | C | 0.0311  |
| rs62459959  | T | 0.0786  |
| rs78806568  | C | 0.1102  |
| rs12668172  | C | -0.0262 |

|             |   |         |
|-------------|---|---------|
| rs1559971   | C | -0.0282 |
| rs78938412  | A | 0.0779  |
| rs10238945  | C | 0.0424  |
| rs13246232  | G | 0.0265  |
| rs73714617  | A | 0.1035  |
| rs62448299  | A | -0.1102 |
| rs11972195  | A | 0.0609  |
| rs13239463  | G | -0.026  |
| rs73117959  | T | -0.0818 |
| rs6980213   | C | -0.0354 |
| rs6949398   | A | 0.0769  |
| rs4723900   | A | 0.0379  |
| rs73187466  | T | 0.2155  |
| rs6969411   | C | -0.0465 |
| rs10261298  | C | 0.0567  |
| rs17158079  | C | -0.0626 |
| rs78640831  | G | -0.0461 |
| rs4723742   | C | 0.0279  |
| rs117685634 | C | 0.1182  |
| rs12704475  | T | 0.0338  |
| rs141456801 | C | 0.1604  |
| rs59097327  | G | -0.0746 |
| rs6969424   | C | 0.0393  |
| rs78963798  | A | -0.1939 |
| rs6964466   | A | -0.0279 |
| rs117920942 | A | 0.1442  |
| rs117570434 | A | -0.1369 |
| rs34221172  | T | 0.095   |
| rs111761363 | T | 0.1218  |
| rs7780107   | T | 0.0607  |
| rs75303257  | C | -0.0694 |
| rs150937332 | T | -0.2453 |
| rs28549749  | C | 0.0334  |
| rs36026452  | T | -0.0352 |
| rs75334230  | C | -0.1713 |
| rs17462032  | A | 0.0827  |
| rs6965641   | T | -0.0781 |
| rs7811959   | C | -0.0424 |
| rs28731427  | A | -0.0375 |
| rs117241806 | A | 0.0893  |
| rs1011605   | T | -0.0252 |
| rs723300    | A | -0.0253 |
| rs34258792  | A | -0.0424 |
| rs2159696   | A | 0.0415  |
| rs78006708  | G | -0.0992 |
| rs62479577  | T | 0.0469  |
| rs13239615  | A | 0.0256  |

|             |   |         |
|-------------|---|---------|
| rs73700670  | C | 0.12    |
| rs3960541   | T | -0.0464 |
| rs11560388  | A | 0.0386  |
| rs73044225  | G | 0.1069  |
| rs6953591   | G | -0.153  |
| rs1965532   | G | -0.0284 |
| rs79855481  | A | 0.0871  |
| rs6459714   | A | -0.0546 |
| rs76571239  | T | -0.2278 |
| rs79988172  | T | -0.2271 |
| rs56252016  | C | -0.0489 |
| rs9282564   | C | 0.0464  |
| rs17863948  | A | -0.159  |
| rs35877682  | T | -0.0671 |
| rs146549199 | C | 0.2162  |
| rs4573153   | G | -0.0275 |
| rs1179600   | C | -0.0309 |
| rs73175497  | C | 0.1612  |
| rs7783026   | A | 0.0263  |
| rs445       | T | 0.0416  |
| rs6955882   | T | -0.0935 |
| rs4722112   | C | -0.0253 |
| rs112637800 | A | -0.0998 |
| rs145179551 | T | -0.071  |
| rs7800918   | T | -0.0382 |
| rs117538764 | T | 0.1172  |
| rs10273455  | C | 0.0251  |
| rs2252579   | C | -0.0266 |
| rs6957405   | C | -0.042  |
| rs62473918  | A | 0.1298  |
| rs1880734   | C | 0.0459  |
| rs112788967 | A | -0.0521 |
| rs35414502  | C | 0.0787  |
| rs34823146  | G | -0.1008 |
| rs12539793  | T | -0.0487 |
| rs2140768   | G | 0.0332  |
| rs116979358 | T | 0.1574  |
| rs10435093  | T | -0.0332 |
| rs75929607  | C | 0.067   |
| rs73092427  | G | 0.1295  |
| rs76578643  | A | 0.0449  |
| rs116942496 | A | -0.1402 |
| rs73163226  | T | 0.0825  |
| rs80157225  | A | 0.1177  |
| rs75864611  | A | -0.1915 |
| rs3823743   | A | 0.0853  |
| rs12668466  | T | 0.0344  |

|             |   |         |
|-------------|---|---------|
| rs34169847  | C | -0.0315 |
| rs361445    | A | -0.0384 |
| rs79124100  | T | 0.1989  |
| rs35353621  | G | -0.0323 |
| rs117831912 | C | -0.1716 |
| rs117498252 | G | 0.1067  |
| rs2930329   | T | -0.0427 |
| rs7810509   | C | -0.0256 |
| rs111647436 | A | 0.0833  |
| rs10231459  | G | 0.0316  |
| rs78193156  | T | 0.0527  |
| rs16475     | G | -0.0482 |
| rs116939442 | T | 0.1545  |
| rs13240558  | A | 0.0563  |
| rs6974748   | C | -0.0573 |
| rs2906310   | C | 0.0299  |
| rs10227837  | G | 0.1464  |
| rs73387942  | A | -0.08   |
| rs141875313 | G | -0.1895 |
| rs1012811   | C | -0.0296 |
| rs144331716 | C | 0.1236  |
| rs10265564  | A | 0.09    |
| rs111508898 | G | -0.0293 |
| rs74481931  | A | 0.0431  |
| rs12112376  | T | 0.0704  |
| rs62478981  | G | -0.049  |
| rs73715906  | G | 0.1005  |
| rs112538802 | C | 0.0612  |
| rs1611919   | C | 0.1669  |
| rs2711006   | T | 0.0274  |
| rs35677104  | T | 0.1239  |
| rs9791577   | T | 0.0628  |
| rs10226817  | G | 0.0541  |
| rs17647913  | A | -0.0341 |
| rs73101611  | C | -0.1105 |
| rs730727    | C | -0.0256 |
| rs114158961 | T | 0.0823  |
| rs17338703  | A | -0.0777 |
| rs17665172  | A | 0.0994  |
| rs80253370  | C | 0.082   |
| rs9969220   | G | -0.0276 |
| rs2471918   | T | -0.0284 |
| rs10264093  | T | -0.036  |
| rs57920196  | G | 0.1024  |
| rs643569    | T | 0.1075  |
| rs13228368  | T | -0.0931 |
| rs139486315 | G | 0.2077  |

|             |   |         |
|-------------|---|---------|
| rs79082503  | A | 0.0766  |
| rs7807085   | T | -0.0429 |
| rs39333     | C | 0.0323  |
| rs1544733   | C | 0.033   |
| rs1031273   | G | -0.0285 |
| rs60324668  | T | 0.0634  |
| rs10269478  | G | 0.0545  |
| rs148377045 | C | 0.1348  |
| rs60502652  | T | -0.0906 |
| rs10235257  | C | 0.0372  |
| rs55871833  | A | -0.104  |
| rs2390555   | A | -0.0464 |
| rs56298557  | T | -0.0547 |
| rs1357315   | A | -0.031  |
| rs117532936 | C | 0.1251  |
| rs76837778  | G | 0.0538  |
| rs17171572  | G | 0.0697  |
| rs35456446  | T | 0.0631  |
| rs147614397 | G | 0.1414  |
| rs4720605   | C | -0.0254 |
| rs62466701  | C | 0.1007  |
| rs73688195  | C | -0.0501 |
| rs1833180   | T | 0.0676  |
| rs79984270  | A | -0.1036 |
| rs144278319 | C | -0.1146 |
| rs74793891  | T | -0.1161 |
| rs80089068  | C | -0.1186 |
| rs73287115  | A | 0.068   |
| rs12667020  | C | -0.0257 |
| rs148140007 | G | 0.1146  |
| rs117937578 | G | 0.0973  |
| rs9640467   | C | 0.0318  |
| rs4719930   | G | 0.0344  |
| rs4960563   | T | 0.0286  |
| rs13245146  | G | 0.0258  |
| rs79842123  | G | 0.1751  |
| rs11772805  | C | -0.0382 |
| rs6968980   | A | -0.0332 |
| rs117931501 | T | 0.0764  |
| rs143946550 | G | -0.06   |
| rs144854755 | T | 0.1319  |
| rs143467327 | T | 0.1473  |
| rs6462986   | A | -0.0514 |
| rs67355497  | C | -0.0411 |
| rs205756    | T | 0.034   |
| rs146706277 | T | -0.0519 |
| rs6464802   | T | -0.0264 |

|             |   |         |
|-------------|---|---------|
| rs12673829  | G | 0.0388  |
| rs11761624  | T | -0.0293 |
| rs2302480   | A | 0.0339  |
| rs11773617  | A | -0.0305 |
| rs77709911  | C | 0.0494  |
| rs73109714  | G | -0.1695 |
| rs917880    | C | -0.0361 |
| rs73163412  | G | -0.0698 |
| rs6975879   | G | 0.0256  |
| rs215718    | T | -0.0937 |
| rs10266243  | T | 0.036   |
| rs4718814   | T | -0.0662 |
| rs56344545  | T | 0.0289  |
| rs17675732  | T | 0.156   |
| rs78291089  | T | 0.1868  |
| rs12534764  | G | 0.0711  |
| rs6945047   | C | 0.0337  |
| rs2285757   | T | 0.0298  |
| rs11977413  | G | -0.0245 |
| rs150505352 | G | 0.0805  |
| rs293194    | G | 0.0316  |
| rs62463361  | T | 0.1444  |
| rs111523047 | C | 0.097   |
| rs2971683   | C | 0.0253  |
| rs57194047  | A | 0.0896  |
| rs76281508  | G | -0.0796 |
| rs80339285  | A | 0.139   |
| rs74777339  | G | -0.1141 |
| rs17490126  | T | 0.0301  |
| rs35066058  | A | 0.0729  |
| rs34817844  | T | 0.0642  |
| rs34388043  | A | -0.0937 |
| rs73097190  | T | -0.1331 |
| rs10250693  | A | 0.055   |
| rs10224443  | C | -0.0376 |
| rs6463040   | A | 0.0306  |
| rs62454447  | G | -0.0984 |
| rs17289385  | T | 0.0639  |
| rs11766392  | T | 0.0275  |
| rs17781170  | C | -0.0486 |
| rs73098677  | A | -0.088  |
| rs3113606   | A | 0.0971  |
| rs12672696  | A | -0.0304 |
| rs76132823  | G | 0.1908  |
| rs150737733 | T | 0.1238  |
| rs6963279   | T | 0.0343  |
| rs4722458   | T | -0.0269 |



|             |   |         |
|-------------|---|---------|
| rs113675491 | C | 0.03    |
| rs9655359   | T | -0.0258 |
| rs12668475  | T | -0.0433 |
| rs7811936   | A | 0.0259  |
| rs28672121  | C | 0.1639  |
| rs79787018  | C | 0.0943  |
| rs17867687  | A | -0.1117 |
| rs111300990 | A | 0.0528  |
| rs10224546  | A | 0.0337  |
| rs74375659  | A | 0.1093  |
| rs10230521  | G | -0.0266 |
| rs6952061   | T | -0.1398 |
| rs80297934  | C | 0.0297  |
| rs74360678  | A | 0.1382  |
| rs112074531 | T | -0.1222 |
| rs74392612  | C | -0.0867 |
| rs79711919  | A | -0.1911 |
| rs6952111   | C | 0.0337  |
| rs16871577  | T | -0.0767 |
| rs6945114   | C | -0.0251 |
| rs1228934   | A | -0.1027 |
| rs79062394  | G | -0.115  |
| rs73157688  | T | -0.2404 |
| rs142282196 | G | -0.1699 |
| rs78424750  | T | 0.1082  |
| rs11521066  | C | 0.0282  |
| rs55893703  | T | -0.0754 |
| rs74999436  | G | 0.0603  |
| rs10234595  | T | -0.0658 |
| rs78640788  | A | -0.0648 |
| rs78106920  | A | 0.0801  |
| rs146009688 | A | 0.1234  |
| rs2196395   | G | 0.0271  |
| rs117286512 | A | -0.1324 |
| rs62442520  | C | -0.0966 |
| rs117032239 | C | 0.1257  |
| rs75442609  | T | -0.0581 |
| rs117798125 | A | 0.1676  |
| rs2106913   | A | 0.0326  |
| rs73075178  | G | -0.0601 |
| rs77078927  | T | 0.0512  |
| rs2011037   | C | 0.0765  |
| rs1734232   | T | 0.0255  |
| rs117351350 | T | -0.1397 |
| rs12671025  | C | -0.0255 |
| rs145179427 | A | 0.1904  |
| rs35122394  | A | -0.0685 |

|             |   |         |
|-------------|---|---------|
| rs115219749 | T | -0.0425 |
| rs10239988  | A | -0.0352 |
| rs118177481 | C | 0.1243  |
| rs117954660 | A | 0.0554  |
| rs2119220   | A | 0.0302  |
| rs2235099   | A | -0.0286 |
| rs59337615  | G | 0.0408  |
| rs6942909   | T | 0.0663  |
| rs1989837   | G | -0.06   |
| rs75083786  | G | 0.0645  |
| rs3779370   | A | 0.0357  |
| rs73716353  | A | 0.1509  |
| rs73155969  | C | 0.0711  |
| rs62451685  | A | -0.1294 |
| rs79142095  | A | -0.0498 |
| rs2288645   | A | -0.0313 |
| rs80033128  | C | -0.1179 |
| rs2568644   | T | -0.0254 |
| rs55724173  | A | 0.0994  |
| rs12537062  | A | 0.08    |
| rs12534926  | A | -0.0728 |
| rs140641825 | A | -0.0821 |
| rs117460911 | C | -0.0869 |
| rs12706849  | T | 0.0278  |
| rs117244355 | T | -0.1353 |
| rs117737221 | T | 0.1538  |
| rs145273674 | C | 0.1364  |
| rs581760    | A | 0.0366  |
| rs17165334  | T | -0.0474 |
| rs36126389  | T | 0.0308  |
| rs75897007  | G | -0.0462 |
| rs77961773  | G | -0.0894 |
| rs143506936 | T | -0.1007 |
| rs17863071  | G | 0.0787  |
| rs57326623  | A | -0.0945 |
| rs80274324  | G | -0.144  |
| rs4316089   | A | 0.0273  |
| rs77997292  | C | 0.0805  |
| rs34579418  | T | 0.0303  |
| rs73037741  | T | 0.0497  |
| rs12154999  | A | 0.2236  |
| rs2529753   | C | -0.0258 |
| rs145985743 | C | 0.1513  |
| rs142977212 | A | 0.1407  |
| rs1860487   | C | -0.0249 |
| rs117299533 | A | -0.1206 |
| rs62486975  | G | 0.0431  |

|             |   |         |
|-------------|---|---------|
| rs62445274  | T | 0.0368  |
| rs73301337  | T | 0.0774  |
| rs62445133  | A | -0.101  |
| rs73079954  | A | 0.1026  |
| rs62458497  | G | 0.0927  |
| rs111689977 | C | 0.06    |
| rs7787344   | C | -0.0265 |
| rs10235598  | A | 0.0392  |
| rs11762894  | T | 0.0656  |
| rs117768662 | T | -0.1011 |
| rs4732401   | T | 0.0389  |
| rs73226948  | C | 0.1584  |
| rs73151056  | T | 0.0927  |
| rs13224823  | C | 0.0826  |
| rs2157820   | G | -0.0269 |
| rs75806864  | T | 0.0338  |
| rs4723514   | A | 0.0279  |
| rs73098674  | C | 0.0554  |
| rs62477309  | C | 0.0586  |
| rs80123330  | G | 0.1638  |
| rs17168865  | C | -0.0748 |
| rs2190671   | C | -0.0315 |
| rs34158     | C | 0.0264  |
| rs73097937  | T | 0.0882  |
| rs117828608 | G | 0.1008  |
| rs7810966   | T | 0.073   |
| rs111766061 | A | 0.0982  |
| rs983681    | T | -0.0245 |
| rs60224992  | C | 0.0475  |
| rs78736838  | A | -0.0581 |
| rs2552074   | T | -0.0835 |
| rs62473038  | T | -0.0454 |
| rs75995738  | T | 0.0982  |
| rs138013477 | G | 0.0995  |
| rs73110344  | T | -0.1434 |
| rs13221109  | G | 0.043   |
| rs55864601  | G | 0.0434  |
| rs62469187  | C | 0.0566  |
| rs140223551 | G | -0.2605 |
| rs62475518  | T | -0.085  |
| rs76336285  | A | 0.1058  |
| rs11762767  | C | -0.0779 |
| rs10231301  | T | -0.1764 |
| rs117062013 | A | 0.0591  |
| rs1861525   | G | -0.0598 |
| rs74705109  | C | 0.0898  |
| rs62484928  | T | 0.0892  |

|             |   |         |
|-------------|---|---------|
| rs148987572 | G | 0.1111  |
| rs13228728  | G | -0.1491 |
| rs17172215  | G | -0.0275 |
| rs17434745  | C | 0.0316  |
| rs11766676  | T | 0.1051  |
| rs7783537   | A | -0.0287 |
| rs7786872   | G | 0.0337  |
| rs2727760   | T | -0.0479 |
| rs146755416 | C | -0.1245 |
| rs76129516  | A | 0.1786  |
| rs78430106  | T | -0.0925 |
| rs73076032  | A | 0.0983  |
| rs5014165   | T | 0.0983  |
| rs146018453 | T | 0.126   |
| rs76807645  | A | -0.0711 |
| rs17246880  | A | -0.0941 |
| rs35971770  | A | 0.0828  |
| rs3111448   | A | -0.0253 |
| rs117089416 | A | -0.1377 |
| rs150372801 | T | -0.0462 |
| rs147359763 | C | -0.176  |
| rs59140252  | T | -0.0376 |
| rs12670637  | T | 0.0302  |
| rs8192846   | T | 0.0323  |
| rs12673302  | T | 0.0716  |
| rs2056819   | C | -0.0266 |
| rs76840429  | T | -0.0872 |
| rs4722883   | G | 0.0277  |
| rs12154880  | C | -0.0438 |
| rs67424549  | C | 0.031   |
| rs150137924 | T | -0.1208 |
| rs67399664  | T | -0.0435 |
| rs34155826  | A | -0.1179 |
| rs28670168  | A | 0.0423  |
| rs117950714 | G | 0.1457  |
| rs78400762  | C | 0.0783  |
| rs12706002  | A | -0.0363 |
| rs13236413  | T | 0.0463  |
| rs38371     | T | -0.0247 |
| rs77196416  | A | -0.0551 |
| rs10255910  | A | -0.0935 |
| rs10224728  | G | -0.0279 |
| rs111851535 | G | -0.0743 |
| rs145743281 | A | 0.0895  |
| rs77517668  | G | -0.0748 |
| rs117417775 | A | 0.1115  |
| rs11975913  | G | -0.03   |

|             |   |         |
|-------------|---|---------|
| rs10949621  | C | -0.0793 |
| rs144422390 | A | -0.1205 |
| rs73276244  | T | -0.0424 |
| rs62473376  | T | 0.1231  |
| rs57006226  | T | 0.138   |
| rs35346499  | T | -0.1007 |
| rs2192315   | T | 0.0266  |
| rs73229392  | A | -0.0615 |
| rs7457045   | A | 0.0926  |
| rs75568585  | G | 0.0315  |
| rs139192559 | A | -0.1305 |
| rs138969146 | T | -0.1083 |
| rs10257073  | C | 0.103   |
| rs76269547  | A | -0.0568 |
| rs56149437  | G | 0.0315  |
| rs79576996  | A | -0.149  |
| rs73065689  | G | 0.0351  |
| rs113270132 | T | 0.1036  |
| rs3960426   | A | 0.031   |
| rs801859    | G | 0.0545  |
| rs79511104  | A | -0.1656 |
| rs17520243  | G | -0.0513 |
| rs17265837  | G | 0.1239  |
| rs112660012 | A | 0.074   |
| rs78825404  | G | 0.1063  |
| rs67024761  | T | -0.0987 |
| rs74680099  | G | 0.1063  |
| rs75473064  | G | 0.2871  |
| rs139006431 | A | -0.1197 |
| rs117565579 | T | 0.117   |
| rs117733396 | T | 0.1741  |
| rs17463319  | G | 0.0275  |
| rs11763763  | G | 0.0393  |
| rs11977758  | C | 0.1189  |
| rs80341455  | A | 0.1181  |
| rs4717104   | G | -0.0249 |
| rs73426514  | A | -0.118  |
| rs62468065  | T | 0.0283  |
| rs11761174  | A | 0.0506  |
| rs73123947  | G | -0.0299 |
| rs8180805   | T | 0.0555  |
| rs62461981  | A | 0.1109  |
| rs79999996  | C | -0.1521 |
| rs142169607 | T | 0.0583  |
| rs62442225  | T | -0.057  |
| rs6947981   | C | -0.0839 |
| rs75012783  | G | 0.1348  |

|             |   |         |
|-------------|---|---------|
| rs1993053   | T | -0.0956 |
| rs111486884 | G | 0.0772  |
| rs1916874   | T | 0.0469  |
| rs6956186   | T | -0.0712 |
| rs3910828   | T | 0.0713  |
| rs74301271  | T | -0.0793 |
| rs10245896  | G | 0.0468  |
| rs10268257  | G | 0.0848  |
| rs17866154  | C | 0.039   |
| rs4723497   | C | -0.0247 |
| rs1453281   | A | 0.0263  |
| rs80023108  | A | -0.1314 |
| rs139491350 | A | -0.2113 |
| rs73683355  | A | -0.1175 |
| rs75367503  | C | 0.1288  |
| rs144190145 | G | -0.1306 |
| rs7788116   | C | 0.0321  |
| rs142587467 | A | -0.0793 |
| rs13230949  | G | -0.0489 |
| rs2718316   | C | 0.0321  |
| rs10951898  | G | -0.0297 |
| rs17699960  | T | 0.0632  |
| rs893238    | C | 0.0396  |
| rs34282205  | A | -0.0485 |
| rs767834    | G | -0.0298 |
| rs28690333  | T | -0.1286 |
| rs117370222 | G | -0.159  |
| rs73042477  | T | 0.0619  |
| rs1622717   | G | -0.0982 |
| rs17141736  | T | 0.0478  |
| rs146123573 | C | 0.1122  |
| rs34858959  | A | 0.0684  |
| rs60484951  | C | -0.0308 |
| rs12706929  | G | -0.0248 |
| rs56222733  | C | 0.0606  |
| rs11983127  | A | 0.0822  |
| rs6461368   | G | -0.026  |
| rs78138595  | T | -0.0497 |
| rs61212333  | G | 0.0451  |
| rs60562275  | T | -0.0435 |
| rs2941531   | G | 0.0441  |
| rs73217659  | C | 0.0443  |
| rs2519618   | G | 0.0508  |
| rs141379112 | T | 0.1312  |
| rs2519739   | A | 0.0468  |
| rs74981071  | A | 0.1688  |
| rs10273565  | C | 0.0282  |

|             |   |         |
|-------------|---|---------|
| rs10236975  | A | -0.0465 |
| rs1076161   | G | -0.0328 |
| rs147359310 | A | 0.1394  |
| rs116963300 | G | -0.1389 |
| rs11971588  | A | 0.0543  |
| rs112514349 | T | -0.0958 |
| rs10952629  | T | 0.0263  |
| rs139348478 | C | -0.1819 |
| rs141959364 | C | 0.1032  |
| rs1558209   | C | -0.0287 |
| rs113683318 | T | 0.1092  |
| rs41321     | G | -0.0274 |
| rs73106625  | A | -0.1386 |
| rs13246738  | A | -0.039  |
| rs113411351 | C | -0.2081 |
| rs73194401  | A | -0.0435 |
| rs117607413 | G | -0.1328 |
| rs9969163   | T | 0.0279  |
| rs73461162  | C | 0.032   |
| rs2691813   | T | -0.0268 |
| rs17628318  | T | -0.0299 |
| rs34419262  | C | -0.0589 |
| rs489403    | A | 0.0259  |
| rs35892561  | T | -0.0705 |
| rs112436320 | A | 0.0768  |
| rs62441417  | A | 0.0479  |
| rs13235705  | T | 0.0532  |
| rs55989557  | T | -0.0486 |
| rs3778885   | T | -0.0292 |
| rs929404    | C | -0.0291 |
| rs10230396  | C | 0.0247  |
| rs2014665   | A | -0.0351 |
| rs12540943  | A | -0.0347 |
| rs149397635 | C | 0.1204  |
| rs28590272  | G | 0.0299  |
| rs77222592  | A | 0.1691  |
| rs6464499   | G | 0.0463  |
| rs2888553   | C | 0.0497  |
| rs114881283 | T | 0.1139  |
| rs117473637 | T | 0.1416  |
| rs9648554   | C | 0.0619  |
| rs2290228   | A | -0.0329 |
| rs72617383  | A | -0.0815 |
| rs149425951 | C | 0.0791  |
| rs4909109   | G | 0.0338  |
| rs1127607   | T | -0.0374 |
| rs80212784  | A | 0.1159  |

|             |   |         |
|-------------|---|---------|
| rs222320    | C | 0.0836  |
| rs73066588  | C | -0.0318 |
| rs13234570  | A | -0.0415 |
| rs7802273   | G | 0.0236  |
| rs34407351  | C | 0.0794  |
| rs11982958  | T | -0.0263 |
| rs76705541  | C | -0.2618 |
| rs78173333  | T | -0.1067 |
| rs10278603  | A | 0.0239  |
| rs55745081  | A | 0.0862  |
| rs13229676  | A | 0.0665  |
| rs66825525  | G | 0.0447  |
| rs34801616  | C | -0.0263 |
| rs17567022  | G | 0.0321  |
| rs75476037  | T | -0.1029 |
| rs215727    | C | 0.0254  |
| rs142632199 | T | -0.0897 |
| rs62448549  | C | -0.0404 |
| rs6974402   | T | -0.044  |
| rs7787652   | T | -0.0264 |
| rs13232839  | A | 0.1684  |
| rs10259068  | G | 0.0327  |
| rs1233560   | G | 0.0275  |
| rs2215934   | G | 0.0289  |
| rs73082218  | T | -0.1002 |
| rs28541964  | T | 0.0247  |
| rs56337980  | G | 0.2076  |
| rs77287077  | T | 0.1706  |
| rs35634228  | G | -0.1926 |
| rs2106435   | T | 0.0374  |
| rs4236486   | T | -0.0262 |
| rs3918228   | A | -0.1511 |
| rs116863023 | A | 0.1445  |
| rs143283789 | T | -0.1007 |
| rs116855239 | G | 0.1892  |
| rs62433202  | A | -0.0303 |
| rs116857244 | T | 0.2121  |
| rs11535353  | A | -0.1052 |
| rs62448528  | C | -0.0299 |
| rs73161871  | G | -0.1184 |
| rs13222016  | C | 0.1502  |
| rs12112259  | C | 0.033   |
| rs77427637  | T | -0.0937 |
| rs73156689  | A | -0.0749 |
| rs10258803  | C | 0.0413  |
| rs7794735   | A | 0.0641  |
| rs78950093  | T | 0.1038  |



|             |   |         |
|-------------|---|---------|
| rs2390479   | T | -0.0356 |
| rs73099611  | A | 0.0897  |
| rs111865251 | C | 0.046   |
| rs111409389 | A | -0.1428 |
| rs11773091  | C | 0.0244  |
| rs145677835 | A | -0.1215 |
| rs12700856  | C | 0.0401  |
| rs75198642  | T | -0.0501 |
| rs10267171  | C | 0.0291  |
| rs13242213  | T | -0.0312 |
| rs147348766 | C | -0.0695 |
| rs76851059  | T | 0.0638  |
| rs11983101  | C | 0.0288  |
| rs9655065   | C | 0.085   |
| rs111770529 | T | -0.0259 |
| rs891511    | A | -0.0333 |
| rs77136144  | C | -0.0758 |
| rs75555966  | G | 0.1241  |
| rs58281576  | A | 0.1017  |
| rs7778633   | A | -0.0454 |
| rs145133816 | G | -0.0936 |
| rs77097165  | G | 0.2117  |
| rs77774685  | G | 0.0784  |
| rs4728213   | G | 0.0274  |
| rs2693651   | C | 0.0269  |
| rs74620732  | A | -0.1404 |
| rs2301971   | G | 0.0268  |
| rs28382641  | C | -0.1521 |
| rs260370    | C | 0.0396  |
| rs56090802  | T | 0.0609  |
| rs74913765  | T | 0.1782  |
| rs13235612  | T | -0.0416 |
| rs113535897 | T | -0.1916 |
| rs882160    | T | -0.0256 |
| rs77626213  | C | 0.0516  |
| rs75459042  | A | 0.121   |
| rs80022912  | C | 0.1086  |
| rs6415322   | T | -0.0339 |
| rs691183    | T | 0.0245  |
| rs6956329   | T | 0.0386  |
| rs79007956  | T | 0.048   |
| rs73090540  | G | -0.0337 |
| rs28441480  | T | 0.0433  |
| rs35713820  | G | 0.0714  |
| rs6463108   | C | 0.0252  |
| rs146497183 | A | -0.1514 |
| rs6977570   | C | 0.0592  |

|             |   |         |
|-------------|---|---------|
| rs150642750 | T | 0.1468  |
| rs77297762  | A | 0.0276  |
| rs11760954  | A | 0.0355  |
| rs116925265 | A | 0.1605  |
| rs1030309   | C | 0.028   |
| rs117321199 | C | -0.0935 |
| rs75530821  | G | 0.146   |
| rs71544730  | T | -0.0307 |
| rs117943535 | T | 0.1323  |
| rs1721505   | C | 0.0559  |
| rs13226861  | G | 0.0283  |
| rs117470138 | A | 0.1381  |
| rs1349695   | A | 0.0685  |
| rs677442    | C | 0.0257  |
| rs6466228   | C | -0.055  |
| rs138323248 | C | 0.1769  |
| rs7809764   | A | 0.0264  |
| rs6952740   | C | -0.1683 |
| rs36199910  | G | 0.0365  |
| rs501492    | C | -0.024  |
| rs6979813   | G | -0.0261 |
| rs73133368  | A | -0.0791 |
| rs11514653  | C | -0.1171 |
| rs143193695 | T | -0.113  |
| rs77002948  | T | -0.0528 |
| rs111644200 | C | -0.0522 |
| rs117186537 | C | -0.0894 |
| rs10499990  | A | -0.0311 |
| rs1181742   | A | 0.035   |
| rs6461085   | A | -0.0314 |
| rs116937762 | C | 0.084   |
| rs117747704 | A | 0.1111  |
| rs76700052  | G | 0.0495  |
| rs141636670 | G | 0.139   |
| rs12531639  | C | 0.0321  |
| rs145077271 | G | 0.1     |
| rs117897932 | T | -0.1693 |
| rs150885199 | T | 0.0833  |
| rs17290785  | T | 0.1431  |
| rs17139782  | T | -0.032  |
| rs254927    | C | 0.0244  |
| rs139316935 | A | -0.047  |
| rs17538251  | A | -0.1941 |
| rs62456485  | A | -0.0992 |
| rs35081291  | T | -0.0461 |
| rs55672351  | G | 0.0288  |
| rs76473891  | C | 0.1582  |

|             |   |         |
|-------------|---|---------|
| rs75672994  | A | 0.0661  |
| rs4467866   | C | -0.0756 |
| rs17743047  | A | 0.0624  |
| rs79431138  | C | 0.0334  |
| rs140963375 | C | -0.0386 |
| rs181016    | A | -0.0253 |
| rs59806639  | T | 0.1087  |
| rs34348920  | A | -0.0697 |
| rs58793037  | C | 0.123   |
| rs12535525  | G | 0.0236  |
| rs12705315  | A | 0.0634  |
| rs55757328  | T | -0.039  |
| rs2691810   | C | 0.0377  |
| rs10228423  | T | 0.0724  |
| rs77182850  | T | 0.0987  |
| rs4716481   | T | -0.0701 |
| rs74986339  | A | 0.22    |
| rs701311    | A | -0.0296 |
| rs11576047  | A | 0.0846  |
| rs198       | C | 0.0341  |
| rs343066    | C | -0.0236 |
| rs112866701 | T | -0.1854 |
| rs13240791  | C | -0.0792 |
| rs117184896 | A | 0.0867  |
| rs6944991   | C | 0.1069  |
| rs73139750  | C | 0.027   |
| rs9986856   | A | -0.0248 |
| rs12540817  | T | 0.0968  |
| rs111297448 | G | -0.1337 |
| rs77981828  | G | -0.0906 |
| rs117584436 | A | -0.1048 |
| rs73299168  | T | 0.0944  |
| rs34851495  | T | 0.0355  |
| rs10245251  | A | 0.0632  |
| rs17206741  | T | -0.0573 |
| rs11766410  | C | -0.0242 |
| rs6950938   | T | -0.0453 |
| rs79303299  | A | -0.1184 |
| rs111232174 | A | 0.137   |
| rs4272280   | A | -0.0245 |
| rs56199516  | C | 0.0379  |
| rs73672039  | G | 0.1056  |
| rs117455324 | G | 0.0792  |
| rs6949360   | C | -0.0452 |
| rs111831596 | A | -0.0657 |
| rs1534767   | T | 0.0238  |
| rs7788108   | C | 0.0321  |

|             |   |         |
|-------------|---|---------|
| rs10271095  | A | 0.0796  |
| rs143449588 | C | -0.1725 |
| rs12721456  | A | 0.1595  |
| rs7804035   | T | -0.0351 |
| rs7785085   | A | 0.0356  |
| rs12702109  | T | -0.043  |
| rs73105755  | C | -0.0262 |
| rs7803515   | T | 0.0975  |
| rs262136    | T | -0.0603 |
| rs73084951  | A | -0.1046 |
| rs75712657  | A | 0.1758  |
| rs13242646  | C | -0.03   |
| rs12700889  | A | -0.034  |
| rs6462134   | G | 0.0273  |
| rs1007311   | G | 0.0297  |
| rs117187818 | T | -0.1503 |
| rs138116210 | T | 0.1405  |
| rs11972497  | A | 0.0771  |
| rs759550    | C | 0.0246  |
| rs10953622  | T | 0.0366  |
| rs13230204  | C | -0.0629 |
| rs13234046  | A | -0.0291 |
| rs146681349 | T | -0.1677 |
| rs77415516  | C | -0.028  |
| rs144212807 | A | 0.1304  |
| rs117431822 | C | -0.069  |
| rs62477608  | C | -0.0276 |
| rs3112337   | C | -0.0307 |
| rs12701078  | C | -0.0281 |
| rs76237359  | T | -0.1323 |
| rs73364664  | T | 0.0654  |
| rs6965931   | A | -0.0431 |
| rs112152085 | A | -0.086  |
| rs7785141   | A | 0.0929  |
| rs77618380  | A | 0.0602  |
| rs142193203 | C | -0.1222 |
| rs28445055  | C | 0.0934  |
| rs61198215  | A | 0.0261  |
| rs10953099  | T | 0.0295  |
| rs148670787 | T | 0.0961  |
| rs55829938  | A | 0.0886  |
| rs73158285  | C | -0.0668 |
| rs193845    | C | 0.0382  |
| rs117316336 | C | 0.1743  |
| rs75635983  | T | 0.0726  |
| rs150904779 | T | 0.1162  |
| rs79708025  | A | -0.0589 |

|             |   |         |
|-------------|---|---------|
| rs147133726 | T | 0.2308  |
| rs11761688  | T | -0.172  |
| rs73695747  | T | -0.0364 |
| rs77626328  | C | -0.0386 |
| rs9691189   | T | 0.026   |
| rs117721206 | T | -0.0988 |
| rs13229564  | T | 0.0781  |
| rs4457260   | T | 0.0234  |
| rs73490983  | G | -0.0712 |
| rs28874407  | T | -0.0838 |
| rs17626550  | T | 0.0455  |
| rs13235618  | C | -0.0843 |
| rs80258445  | T | 0.1059  |
| rs75078544  | C | -0.0607 |
| rs905890    | C | -0.0272 |
| rs75366553  | T | 0.111   |
| rs73277699  | T | 0.0586  |
| rs116920512 | C | -0.1212 |
| rs78247597  | C | -0.0961 |
| rs116597643 | T | 0.0977  |
| rs62444531  | G | 0.0875  |
| rs701310    | C | 0.0263  |
| rs62478573  | A | -0.0865 |
| rs7794192   | G | -0.0349 |
| rs2357363   | T | -0.0281 |
| rs1918709   | G | 0.0236  |
| rs71527454  | T | 0.1273  |
| rs117831678 | T | 0.1525  |
| rs78309297  | G | -0.1125 |
| rs17580083  | C | -0.0715 |
| rs77100512  | G | -0.0951 |
| rs73179828  | C | 0.1123  |
| rs12532814  | T | 0.1476  |
| rs62449219  | T | 0.0385  |
| rs13232272  | T | -0.0247 |
| rs112402453 | T | -0.0334 |
| rs834776    | A | -0.0242 |
| rs117929027 | G | 0.1439  |
| rs74327040  | T | -0.0899 |
| rs77311312  | G | 0.0245  |
| rs79723556  | A | -0.094  |
| rs10499549  | T | -0.0363 |
| rs79462961  | G | 0.1619  |
| rs71524203  | A | -0.0381 |
| rs142637196 | A | -0.1861 |
| rs59313845  | T | -0.1687 |
| rs117361217 | A | 0.2051  |

|             |   |         |
|-------------|---|---------|
| rs145213662 | G | -0.09   |
| rs1005335   | A | -0.0292 |
| rs3114477   | A | 0.0233  |
| rs7784796   | C | 0.0259  |
| rs118030351 | C | -0.1099 |
| rs6463540   | C | -0.0428 |
| rs3025144   | A | 0.1166  |
| rs1522917   | T | -0.047  |
| rs62483924  | A | 0.0411  |
| rs6966118   | G | -0.0246 |
| rs4725165   | C | -0.0311 |
| rs1406755   | A | 0.0243  |
| rs34751086  | T | -0.0372 |
| rs6962732   | T | 0.0437  |
| rs10487906  | A | -0.06   |
| rs11972120  | C | 0.1167  |
| rs73111892  | G | 0.0845  |
| rs117451190 | A | -0.0999 |
| rs140950313 | T | 0.1816  |
| rs11765339  | T | -0.0243 |
| rs75695297  | C | 0.1116  |
| rs1989875   | G | 0.0246  |
| rs151056552 | T | -0.1389 |
| rs1833081   | G | -0.0244 |
| rs11982419  | A | 0.1243  |
| rs12666830  | T | 0.0767  |
| rs3923702   | T | -0.0339 |
| rs6961908   | G | 0.0268  |
| rs73151974  | T | 0.0329  |
| rs2189533   | T | 0.041   |
| rs34517554  | A | 0.0285  |
| rs39270     | T | 0.0774  |
| rs6969321   | G | 0.0365  |
| rs1859504   | C | -0.0324 |
| rs5745730   | G | -0.1001 |
| rs116925432 | G | -0.1137 |
| rs117973557 | T | -0.0535 |
| rs56125153  | G | -0.0243 |
| rs55932122  | G | -0.0586 |
| rs9770190   | A | 0.0313  |
| rs6949701   | A | 0.0327  |
| rs10258279  | C | -0.03   |
| rs55845600  | A | 0.087   |
| rs2533461   | G | 0.1385  |
| rs13232414  | C | -0.03   |
| rs143664050 | A | 0.1278  |
| rs79202942  | T | 0.1539  |

|             |   |         |
|-------------|---|---------|
| rs75077401  | G | -0.0888 |
| rs141383342 | G | 0.1275  |
| rs12154556  | G | -0.0308 |
| rs28548765  | G | 0.1247  |
| rs73212416  | G | -0.0688 |
| rs1419771   | C | -0.0272 |
| rs4729659   | A | -0.0287 |
| rs74516383  | G | 0.0924  |
| rs6955795   | G | 0.0237  |
| rs10265279  | G | -0.0288 |
| rs17832522  | G | -0.0432 |
| rs117890845 | A | -0.0626 |
| rs79533876  | T | 0.0884  |
| rs193858    | A | -0.0462 |
| rs3750035   | C | -0.0267 |
| rs61076439  | C | 0.0978  |
| rs7790642   | C | 0.025   |
| rs7796684   | A | -0.0472 |
| rs7781364   | C | 0.0346  |
| rs17150416  | T | -0.1237 |
| rs882168    | C | -0.0244 |
| rs7794855   | T | -0.0274 |
| rs7779897   | G | -0.0287 |
| rs71555287  | T | -0.1153 |
| rs117878708 | T | 0.1039  |
| rs62484733  | A | 0.0543  |
| rs7798550   | C | 0.0832  |
| rs75927706  | A | 0.0364  |
| rs17134378  | T | -0.0341 |
| rs41521746  | G | 0.0875  |
| rs749539    | C | -0.0533 |
| rs4728656   | C | -0.0352 |
| rs6464295   | G | 0.0471  |
| rs10487353  | T | -0.0499 |
| rs73226278  | A | 0.0415  |
| rs10248766  | T | -0.0274 |
| rs1859804   | C | -0.0296 |
| rs74534006  | A | 0.1036  |
| rs117638711 | T | -0.0391 |
| rs12698025  | C | -0.0868 |
| rs78123593  | T | 0.0642  |
| rs4947993   | C | -0.0265 |
| rs60920612  | A | 0.1089  |
| rs1404151   | G | -0.0252 |
| rs10252625  | G | -0.0519 |
| rs116911339 | T | -0.0737 |
| rs118082723 | T | -0.1612 |

|             |   |         |
|-------------|---|---------|
| rs11976895  | T | 0.1023  |
| rs140074414 | T | -0.0852 |
| rs4332041   | T | -0.0242 |
| rs17659634  | G | 0.0302  |
| rs6962966   | G | 0.023   |
| rs39494     | G | -0.0808 |
| rs79029221  | A | 0.0348  |
| rs11563709  | C | 0.0866  |
| rs75215979  | T | 0.1533  |
| rs17734042  | T | 0.0275  |
| rs11974082  | C | -0.0336 |
| rs67389746  | A | -0.0346 |
| rs2402061   | G | 0.0244  |
| rs7808497   | C | -0.0932 |
| rs73461593  | T | -0.1245 |
| rs7810003   | C | -0.0266 |
| rs34393279  | G | 0.0333  |
| rs1973771   | T | -0.0354 |
| rs76031179  | C | 0.1064  |
| rs73194028  | A | -0.0309 |
| rs36198873  | C | 0.0256  |
| rs1981702   | A | 0.0397  |
| rs10242998  | G | 0.0292  |
| rs117253884 | G | -0.1266 |
| rs1156280   | C | 0.0884  |
| rs1114097   | A | -0.0285 |
| rs148611662 | A | 0.2022  |
| rs13225657  | A | 0.0363  |
| rs3757685   | A | -0.0251 |
| rs11761622  | A | 0.0293  |
| rs13222431  | T | -0.1056 |
| rs74662268  | A | 0.1117  |
| rs11977045  | T | 0.0286  |
| rs1523728   | G | 0.0245  |
| rs10273199  | C | 0.0562  |
| rs8180847   | G | 0.0268  |
| rs117854110 | T | -0.0798 |
| rs7779866   | T | 0.026   |
| rs145608148 | T | 0.0372  |
| rs143019093 | A | 0.1373  |
| rs76991511  | A | 0.0576  |
| rs150802667 | T | -0.1366 |
| rs118015072 | G | -0.1029 |
| rs12155302  | T | 0.0286  |
| rs146879844 | T | 0.0465  |
| rs62491473  | A | -0.0404 |
| rs7798986   | G | 0.024   |



|             |   |         |
|-------------|---|---------|
| rs141747331 | C | 0.1241  |
| rs11766508  | A | -0.0313 |
| rs62491564  | G | 0.0363  |
| rs77590770  | G | 0.102   |
| rs117397249 | A | 0.1555  |
| rs7779243   | G | 0.12    |
| rs73186279  | G | -0.1166 |
| rs35586102  | G | 0.0285  |
| rs75654781  | G | 0.1419  |
| rs145824991 | G | -0.1557 |
| rs2107730   | G | 0.0933  |
| rs55837343  | T | 0.0799  |
| rs111303546 | T | -0.0484 |
| rs61108238  | A | -0.0774 |
| rs73224265  | T | -0.1013 |
| rs2123499   | A | -0.0658 |
| rs147727253 | C | 0.0904  |
| rs62442178  | G | 0.135   |
| rs10239506  | C | 0.0233  |
| rs12155002  | T | -0.0262 |
| rs148286384 | T | 0.1213  |
| rs10464364  | C | -0.0302 |
| rs73696318  | A | -0.0956 |
| rs111996166 | A | -0.1082 |
| rs12532687  | T | -0.0535 |
| rs17332138  | G | -0.0294 |
| rs117106373 | A | -0.2464 |
| rs76906600  | C | -0.0876 |
| rs6974790   | T | -0.025  |
| rs7796420   | T | 0.059   |
| rs2974129   | C | 0.0247  |
| rs7792864   | G | 0.1001  |
| rs35298927  | A | -0.0303 |
| rs117843214 | A | 0.1083  |
| rs117056226 | T | 0.096   |
| rs55703680  | A | 0.0326  |
| rs117337474 | T | 0.1237  |
| rs62444716  | T | -0.0332 |
| rs150831924 | C | -0.0923 |
| rs62473876  | G | -0.063  |
| rs73053922  | G | 0.0657  |
| rs143692655 | G | -0.1284 |
| rs10487231  | T | 0.0855  |
| rs1635366   | C | 0.0241  |
| rs4729598   | T | -0.0392 |
| rs144531519 | G | 0.0989  |
| rs1695515   | A | -0.031  |

|             |   |         |
|-------------|---|---------|
| rs6953623   | T | 0.0315  |
| rs56105228  | G | 0.0272  |
| rs11763904  | A | -0.04   |
| rs115340122 | C | -0.063  |
| rs516924    | T | -0.0764 |
| rs13226903  | C | 0.0352  |
| rs75564712  | A | -0.0359 |
| rs13229452  | C | -0.0254 |
| rs39425     | A | 0.0455  |
| rs2714463   | G | 0.0383  |
| rs28645540  | A | -0.0291 |
| rs145455394 | A | -0.0757 |
| rs150347234 | A | 0.0771  |
| rs35514223  | G | -0.0274 |
| rs13225288  | T | -0.0309 |
| rs73168560  | T | -0.0657 |
| rs4618643   | G | 0.0316  |
| rs41359944  | C | -0.1401 |
| rs77862064  | T | 0.0476  |
| rs10273450  | C | -0.0276 |
| rs2158042   | A | -0.2156 |
| rs73726870  | C | -0.0451 |
| rs6459843   | C | 0.0343  |
| rs2526632   | C | -0.0233 |
| rs2190432   | G | 0.0575  |
| rs1429562   | C | 0.1542  |
| rs2537618   | A | 0.0357  |
| rs2541903   | T | 0.1379  |
| rs10486947  | T | 0.0936  |
| rs56048032  | T | 0.0589  |
| rs6957322   | G | 0.0434  |
| rs6977424   | A | -0.0248 |
| rs73281643  | C | -0.0855 |
| rs117289063 | G | -0.1624 |
| rs77551592  | C | -0.1298 |
| rs1491835   | C | 0.0242  |
| rs118035614 | T | -0.0799 |
| rs196613    | T | 0.1476  |
| rs11980158  | C | 0.0297  |
| rs45469297  | C | 0.062   |
| rs28992770  | A | 0.0916  |
| rs118134568 | A | -0.1564 |
| rs113841128 | T | 0.0428  |
| rs7796440   | C | 0.0245  |
| rs10269548  | T | 0.0243  |
| rs9639711   | T | 0.024   |
| rs71524257  | T | -0.1275 |

|             |   |         |
|-------------|---|---------|
| rs1456029   | G | 0.0425  |
| rs11523691  | T | 0.0558  |
| rs10808148  | G | -0.0311 |
| rs142915027 | T | -0.0783 |
| rs3800996   | T | -0.0304 |
| rs270895    | T | -0.025  |
| rs12707445  | A | 0.0371  |
| rs116874638 | A | 0.1536  |
| rs17764589  | C | 0.0443  |
| rs3813690   | G | -0.0244 |
| rs112501465 | A | 0.0685  |
| rs143841308 | A | 0.2127  |
| rs13228765  | G | 0.035   |
| rs76412750  | A | 0.1509  |
| rs7793315   | C | -0.0355 |
| rs150597503 | A | 0.1181  |
| rs73145346  | G | 0.0519  |
| rs75050597  | A | 0.1141  |
| rs74476558  | A | -0.1279 |
| rs62472575  | T | -0.0992 |
| rs12532643  | G | -0.0317 |
| rs1079954   | C | 0.0246  |
| rs1433502   | T | 0.0914  |
| rs117718984 | T | 0.0908  |
| rs612427    | T | 0.0538  |
| rs1088909   | A | -0.0398 |
| rs149451517 | A | -0.0825 |
| rs706043    | G | 0.0376  |
| rs114623966 | T | 0.1184  |
| rs79055768  | A | -0.0554 |
| rs150450584 | C | 0.101   |
| rs56131428  | T | 0.2133  |
| rs12154456  | G | 0.029   |
| rs35769526  | A | 0.0789  |
| rs74839062  | T | -0.0421 |
| rs117770974 | C | -0.1041 |
| rs75268598  | A | 0.1176  |
| rs60873959  | G | 0.0258  |
| rs9640199   | G | 0.0326  |
| rs2391442   | T | 0.1314  |
| rs117956817 | C | 0.0785  |
| rs67800652  | T | 0.0407  |
| rs143478934 | T | 0.1146  |
| rs12705175  | C | 0.063   |
| rs4721606   | A | -0.0397 |
| rs34162551  | A | -0.0805 |
| rs7779210   | A | 0.0272  |

|             |   |         |
|-------------|---|---------|
| rs3807609   | A | 0.0243  |
| rs56272877  | A | 0.1012  |
| rs10953507  | T | 0.0333  |
| rs6979366   | A | -0.0359 |
| rs10280011  | C | 0.0566  |
| rs35787845  | T | -0.0573 |
| rs12534360  | G | -0.0698 |
| rs10254343  | A | 0.0247  |
| rs1068290   | G | 0.0244  |
| rs2686829   | T | 0.0259  |
| rs17416979  | T | 0.0574  |
| rs143996536 | A | -0.0968 |
| rs886073    | C | -0.1062 |
| rs7787210   | A | -0.0261 |
| rs35032751  | A | -0.0467 |
| rs28436173  | T | -0.0452 |
| rs139000941 | T | -0.2129 |
| rs43041     | C | 0.0291  |
| rs1177950   | G | -0.081  |
| rs111548202 | T | -0.0795 |
| rs3852332   | C | -0.0339 |
| rs56050261  | A | 0.0395  |
| rs6964492   | C | 0.0234  |
| rs9691929   | T | -0.0373 |
| rs12698219  | T | 0.0473  |
| rs6980441   | A | 0.0252  |
| rs2960632   | T | 0.0239  |
| rs73140938  | C | -0.0985 |
| rs10447811  | G | 0.0239  |
| rs138890280 | A | 0.1151  |
| rs76989822  | A | 0.2251  |
| rs73174672  | G | -0.1086 |
| rs721994    | A | -0.0252 |
| rs4726781   | T | 0.0234  |
| rs117599883 | C | 0.0935  |
| rs45444695  | A | 0.1061  |
| rs193813    | A | 0.091   |
| rs12700019  | C | -0.0299 |
| rs117505203 | A | -0.156  |
| rs10225058  | A | -0.0588 |
| rs12671186  | A | 0.0481  |
| rs56313562  | A | 0.0635  |
| rs149613705 | T | 0.026   |
| rs118006501 | T | -0.1507 |
| rs495658    | T | 0.038   |
| rs73049099  | C | -0.1706 |
| rs10275524  | T | -0.0226 |

|             |   |         |
|-------------|---|---------|
| rs10241708  | C | 0.0935  |
| rs117432963 | A | -0.1813 |
| rs10499976  | C | 0.0448  |
| rs12113818  | A | -0.0457 |
| rs17287011  | T | -0.0352 |
| rs148560251 | C | 0.1666  |
| rs72592137  | A | 0.0635  |
| rs73094682  | G | 0.0904  |
| rs9639261   | C | -0.0614 |
| rs58289504  | A | -0.0551 |
| rs116931674 | C | 0.1407  |
| rs75346767  | T | -0.11   |
| rs77408020  | T | 0.0551  |
| rs4730953   | T | -0.1152 |
| rs35888257  | A | 0.0349  |
| rs2254897   | C | 0.0746  |
| rs76526947  | C | 0.1353  |
| rs71532775  | T | -0.0446 |
| rs28648461  | A | 0.0261  |
| rs78577568  | C | -0.0617 |
| rs73071326  | G | -0.0524 |
| rs117296998 | T | -0.1081 |
| rs13246671  | G | -0.0286 |
| rs2177479   | A | -0.0233 |
| rs117930921 | G | -0.108  |
| rs12668796  | T | 0.028   |
| rs73195464  | G | -0.093  |
| rs75698514  | C | 0.0677  |
| rs739457    | C | 0.102   |
| rs12705992  | G | 0.0309  |
| rs2960628   | G | 0.0267  |
| rs117859627 | C | -0.1556 |
| rs11766531  | G | -0.08   |
| rs10247681  | C | -0.0332 |
| rs77166288  | G | -0.0998 |
| rs117969794 | T | -0.1185 |
| rs7782251   | G | 0.0339  |
| rs73219862  | T | 0.1535  |
| rs56010135  | A | 0.0387  |
| rs5024287   | T | 0.0628  |
| rs116853350 | C | -0.0769 |
| rs150177343 | A | -0.1069 |
| rs146653274 | G | -0.1503 |
| rs76018895  | A | -0.0695 |
| rs62447381  | T | -0.1543 |
| rs7809488   | A | 0.1236  |
| rs75307282  | T | -0.0505 |

|             |   |         |
|-------------|---|---------|
| rs148775240 | T | 0.0419  |
| rs468       | G | -0.0497 |
| rs2398795   | T | -0.0323 |
| rs74444202  | C | -0.0742 |
| rs117486723 | T | 0.1751  |
| rs2237403   | T | 0.0239  |
| rs118052929 | A | 0.1379  |
| rs11773335  | C | 0.0468  |
| rs7785406   | G | 0.0905  |
| rs3824080   | T | 0.0546  |
| rs73128198  | G | -0.041  |
| rs74599145  | T | 0.1076  |
| rs3807830   | G | 0.0468  |
| rs17675703  | G | -0.0367 |
| rs1229453   | T | 0.0346  |
| rs73133635  | T | -0.0628 |
| rs56384234  | A | -0.1725 |
| rs117011531 | T | -0.2206 |
| rs6944202   | A | 0.0424  |
| rs12538824  | C | -0.0348 |
| rs7791362   | C | -0.03   |
| rs10278922  | T | 0.0351  |
| rs117650331 | A | -0.1135 |
| rs76178563  | G | 0.1288  |
| rs113146569 | T | 0.1235  |
| rs1859841   | G | -0.0293 |
| rs28526693  | C | -0.0365 |
| rs13225627  | T | 0.0915  |
| rs6460830   | T | 0.0706  |
| rs35612403  | A | 0.0899  |
| rs117587622 | T | 0.1483  |
| rs6975239   | T | -0.0856 |
| rs11981764  | A | -0.1158 |
| rs78465752  | A | 0.1031  |
| rs137983409 | A | 0.0975  |
| rs143264308 | A | -0.1789 |
| rs151320177 | G | 0.177   |
| rs17638038  | C | -0.0756 |
| rs116896949 | G | -0.0693 |
| rs11773265  | C | 0.0339  |
| rs17489587  | A | -0.165  |
| rs16871945  | G | 0.1061  |
| rs79829932  | A | -0.1697 |
| rs28916279  | G | 0.0822  |
| rs113586606 | G | 0.1127  |
| rs34392440  | G | -0.0732 |
| rs4299919   | C | -0.0485 |

|             |   |         |
|-------------|---|---------|
| rs75855943  | A | -0.1859 |
| rs74554512  | T | -0.1026 |
| rs3807376   | C | 0.0282  |
| rs139332052 | T | 0.1311  |
| rs79370721  | A | -0.0356 |
| rs118074119 | A | 0.0837  |
| rs71573372  | A | -0.0853 |
| rs35046850  | T | -0.2019 |
| rs2528648   | G | -0.0257 |
| rs10953258  | A | -0.0252 |
| rs117160563 | A | -0.0941 |
| rs140271261 | A | -0.1531 |
| rs10255948  | A | 0.0228  |
| rs146609722 | A | 0.1292  |
| rs2237280   | T | -0.0933 |
| rs148279070 | A | 0.1139  |
| rs4728246   | A | 0.0291  |
| rs117167685 | C | 0.1551  |
| rs141136158 | T | 0.1462  |
| rs11772043  | A | -0.0228 |
| rs73085863  | T | -0.0784 |
| rs17773256  | A | -0.0415 |
| rs2723997   | G | -0.0485 |
| rs78671845  | C | 0.0486  |
| rs10266177  | A | -0.0266 |
| rs4282461   | G | 0.0807  |
| rs140249654 | C | 0.0702  |
| rs142920129 | T | -0.0765 |
| rs117857932 | A | 0.1508  |
| rs13236842  | C | -0.0941 |
| rs12668250  | G | 0.0293  |
| rs11773017  | A | -0.0285 |
| rs2074598   | A | 0.0298  |
| rs75078181  | T | -0.0512 |
| rs10271444  | A | 0.0563  |
| rs34659848  | A | -0.0855 |
| rs62477034  | G | 0.0856  |
| rs117601592 | T | -0.0943 |
| rs7779524   | C | -0.0691 |
| rs111709955 | C | 0.147   |
| rs62447118  | T | 0.1563  |
| rs11765828  | C | 0.0684  |
| rs62480729  | T | 0.0698  |
| rs11773621  | T | -0.1488 |
| rs79133447  | C | -0.1739 |
| rs10225496  | G | 0.0277  |
| rs62458630  | C | 0.0454  |

|             |   |         |
|-------------|---|---------|
| rs62450593  | C | 0.0331  |
| rs10251937  | C | 0.0249  |
| rs11465296  | T | -0.0753 |
| rs9690635   | A | -0.0264 |
| rs4285375   | C | -0.0253 |
| rs111912288 | A | -0.1548 |
| rs73167437  | C | 0.0414  |
| rs56793527  | G | -0.0426 |
| rs149415944 | C | -0.101  |
| rs6967493   | T | 0.0366  |
| rs12700207  | A | 0.0628  |
| rs150088795 | A | -0.0907 |
| rs10265207  | T | -0.0232 |
| rs145213426 | G | -0.1212 |
| rs57927451  | A | 0.0926  |
| rs117751629 | A | -0.1664 |
| rs73170907  | C | 0.0384  |
| rs78233955  | G | 0.1583  |
| rs17667768  | G | -0.0533 |
| rs112544372 | T | 0.1672  |
| rs79981473  | A | -0.0911 |
| rs36121244  | T | 0.0766  |
| rs2882947   | C | 0.1123  |
| rs10276739  | T | 0.0263  |
| rs141725800 | G | 0.0919  |
| rs35658693  | G | -0.1074 |
| rs117024920 | A | -0.1353 |
| rs10155893  | G | 0.0233  |
| rs3734999   | G | -0.0337 |
| rs73160621  | T | -0.1168 |
| rs10272570  | G | -0.0304 |
| rs1473894   | G | -0.0447 |
| rs73065462  | G | 0.0649  |
| rs117663904 | A | -0.1247 |
| rs148040250 | C | 0.172   |
| rs56327451  | T | -0.0807 |
| rs13221233  | T | 0.0242  |
| rs73046528  | A | -0.1546 |
| rs56786487  | G | -0.0453 |
| rs816233    | T | -0.0685 |
| rs117572597 | A | 0.0699  |
| rs13242084  | A | 0.0399  |
| rs143026417 | G | 0.1738  |
| rs140294798 | A | -0.1045 |
| rs117267436 | T | 0.1067  |
| rs11984338  | G | -0.0384 |
| rs17438083  | A | -0.0601 |



|             |   |         |
|-------------|---|---------|
| rs10950263  | G | -0.0482 |
| rs13238511  | A | 0.1109  |
| rs17144331  | T | 0.0561  |
| rs149882437 | A | -0.1681 |
| rs10248783  | G | 0.0637  |
| rs1178356   | T | -0.025  |
| rs12699138  | C | -0.0443 |
| rs7783458   | A | -0.0486 |
| rs73066829  | C | 0.1165  |
| rs36100361  | G | 0.0336  |
| rs13235125  | C | 0.0681  |
| rs35855035  | T | 0.029   |
| rs140605348 | A | -0.1265 |
| rs13244987  | A | 0.068   |
| rs4722097   | C | 0.0282  |
| rs71537604  | T | 0.061   |
| rs35328593  | G | 0.0357  |
| rs2712227   | A | -0.0249 |
| rs1074212   | T | 0.0456  |
| rs10254422  | G | -0.0535 |
| rs74324602  | A | -0.1117 |
| rs2014867   | T | 0.0403  |
| rs62484374  | T | -0.0368 |
| rs2709054   | A | -0.0682 |
| rs138429056 | C | 0.1108  |
| rs6962477   | T | 0.0254  |
| rs117091015 | A | -0.0877 |
| rs2040945   | A | 0.0567  |
| rs142560873 | T | 0.1185  |
| rs74550933  | A | -0.0782 |
| rs36010716  | T | 0.1771  |
| rs79623643  | T | 0.0584  |
| rs1473355   | C | 0.0237  |
| rs62480280  | T | -0.0877 |
| rs141664969 | A | 0.1169  |
| rs7795415   | C | 0.0471  |
| rs117278774 | A | 0.0772  |
| rs10273266  | T | 0.0515  |
| rs111514975 | A | 0.104   |
| rs12531774  | T | -0.0459 |
| rs117018601 | T | 0.1149  |
| rs1822709   | A | 0.0373  |
| rs6945253   | T | 0.0236  |
| rs13228962  | T | 0.0902  |
| rs10807833  | A | 0.0332  |
| rs150438881 | A | 0.1113  |
| rs73170628  | C | 0.0359  |

|             |   |         |
|-------------|---|---------|
| rs79865925  | A | 0.0546  |
| rs4731678   | A | -0.0458 |
| rs67088129  | A | 0.0357  |
| rs76710064  | G | -0.1445 |
| rs879428    | T | -0.0739 |
| rs138367038 | A | -0.1325 |
| rs150322232 | G | 0.1059  |
| rs57777958  | T | 0.0429  |
| rs917625    | A | 0.0329  |
| rs76174232  | T | -0.0613 |
| rs11773284  | A | -0.0457 |
| rs79609250  | A | -0.067  |
| rs149118925 | G | 0.0902  |
| rs35108922  | A | -0.1452 |
| rs56309253  | T | -0.1135 |
| rs76761784  | T | 0.054   |
| rs117098561 | G | -0.1583 |
| rs2908730   | G | 0.0291  |
| rs72603570  | A | -0.1152 |
| rs4716672   | C | -0.1192 |
| rs113484432 | T | 0.1336  |
| rs74820132  | C | -0.0795 |
| rs11760449  | C | -0.0487 |
| rs3087888   | G | -0.0534 |
| rs76796991  | C | 0.1269  |
| rs138500066 | G | -0.127  |
| rs7801260   | A | 0.1281  |
| rs78002217  | A | -0.1324 |
| rs13240245  | A | 0.1145  |
| rs6944473   | C | 0.0596  |
| rs78752246  | T | 0.0316  |
| rs60314967  | C | -0.057  |
| rs6965244   | G | 0.0276  |
| rs139729787 | A | 0.0892  |
| rs118030712 | A | 0.0953  |
| rs6955460   | A | 0.036   |
| rs1731282   | T | 0.1175  |
| rs7809341   | G | -0.024  |
| rs6464618   | C | -0.0802 |
| rs73164726  | A | -0.061  |
| rs73674221  | G | 0.0405  |
| rs3917592   | T | -0.0721 |
| rs76163201  | C | 0.1387  |
| rs2961238   | G | -0.0307 |
| rs17398575  | A | -0.0284 |
| rs9641707   | G | -0.0238 |
| rs62477222  | A | 0.0257  |

|             |   |         |
|-------------|---|---------|
| rs116959131 | G | -0.0566 |
| rs28594383  | A | 0.0567  |
| rs71532720  | A | 0.0996  |
| rs4719526   | T | 0.0402  |
| rs62448766  | T | -0.1865 |
| rs118167494 | A | 0.1081  |
| rs10215923  | T | 0.1439  |
| rs73163636  | G | 0.134   |
| rs113362450 | T | 0.0552  |
| rs10487635  | A | 0.0676  |
| rs17170378  | T | 0.0397  |
| rs75701177  | T | 0.0823  |
| rs4722362   | C | 0.082   |
| rs78923822  | T | 0.1363  |
| rs2158706   | A | 0.028   |
| rs17275582  | C | 0.0853  |
| rs73222478  | C | -0.1674 |
| rs3779056   | G | -0.0454 |
| rs3757552   | G | -0.0355 |
| rs2024257   | G | -0.0262 |
| rs139174034 | G | 0.0768  |
| rs80306758  | C | -0.0537 |
| rs148352301 | A | -0.1355 |
| rs10240353  | T | 0.0807  |
| rs117388386 | G | -0.0988 |
| rs12670880  | T | -0.1006 |
| rs117299036 | T | 0.1177  |
| rs117142915 | G | -0.0705 |
| rs79466239  | C | -0.0853 |
| rs12700548  | T | 0.0245  |
| rs10260150  | T | 0.0385  |
| rs10229146  | G | -0.0263 |
| rs150046801 | T | -0.1009 |
| rs73065165  | C | 0.1467  |
| rs76731559  | C | -0.0491 |
| rs10264307  | A | 0.1084  |
| rs673396    | C | 0.0386  |
| rs17176235  | A | 0.0921  |
| rs1990436   | G | -0.0298 |
| rs79176582  | A | 0.0821  |
| rs4718585   | G | 0.0691  |
| rs844732    | C | -0.0392 |
| rs982389    | C | 0.0871  |
| rs28578577  | A | 0.0628  |
| rs75669519  | T | 0.0846  |
| rs34543870  | C | 0.1135  |
| rs62453029  | A | 0.0343  |

|             |   |         |
|-------------|---|---------|
| rs6979115   | A | 0.135   |
| rs138972761 | A | -0.165  |
| rs727390    | A | 0.0248  |
| rs6946676   | A | 0.0423  |
| rs117167853 | A | -0.1027 |
| rs80124315  | T | -0.0614 |
| rs78813710  | G | 0.1401  |
| rs102       | A | 0.1579  |
| rs146279024 | C | -0.0863 |
| rs4730173   | G | -0.0287 |
| rs725393    | G | 0.087   |
| rs117915852 | G | -0.1198 |
| rs117136500 | T | -0.1736 |
| rs2391170   | T | -0.0411 |
| rs117929345 | T | 0.0529  |
| rs259139    | C | 0.0239  |
| rs2365151   | C | -0.0813 |
| rs6965873   | A | 0.0259  |
| rs7798085   | T | 0.0225  |
| rs62441741  | A | 0.0758  |
| rs10257957  | T | 0.0246  |
| rs1456905   | A | -0.0292 |
| rs76021034  | C | -0.0797 |
| rs7457468   | G | -0.0239 |
| rs75283809  | G | 0.0876  |
| rs79344636  | A | 0.0632  |
| rs7811345   | G | 0.023   |
| rs78033872  | G | 0.2141  |
| rs11773537  | A | -0.058  |
| rs75179088  | G | 0.119   |
| rs6955608   | T | 0.0782  |
| rs147510662 | A | 0.1376  |
| rs112703426 | G | 0.1182  |
| rs13242586  | T | -0.0845 |
| rs3812325   | G | -0.0261 |
| rs166677    | C | 0.0223  |
| rs111669719 | G | 0.2097  |
| rs73138560  | A | -0.0421 |
| rs6955717   | C | -0.033  |
| rs78762694  | C | 0.0826  |
| rs61496093  | T | -0.0283 |
| rs73716958  | T | 0.0975  |
| rs73158141  | A | -0.1731 |
| rs144462147 | A | -0.0987 |
| rs10275580  | T | -0.0471 |
| rs66488846  | A | -0.0222 |
| rs57603312  | T | 0.0608  |

|             |   |         |
|-------------|---|---------|
| rs321975    | C | -0.0235 |
| rs28708749  | G | -0.0422 |
| rs113889044 | A | 0.0673  |
| rs73082373  | G | 0.0808  |
| rs3176616   | A | -0.0689 |
| rs10247037  | T | 0.132   |
| rs1964986   | A | -0.0237 |
| rs73086934  | C | -0.0554 |
| rs4236343   | G | 0.0256  |
| rs1880292   | A | -0.0382 |
| rs55777236  | C | 0.1046  |
| rs80152699  | C | -0.0232 |
| rs17781398  | T | -0.042  |
| rs57810363  | T | 0.1825  |
| rs78493614  | C | -0.0482 |
| rs815945    | T | 0.0244  |
| rs6460550   | T | 0.0246  |
| rs117420544 | C | 0.0684  |
| rs76489283  | G | 0.0549  |
| rs76225214  | T | 0.0876  |
| rs34848311  | G | 0.0845  |
| rs17687569  | T | 0.0381  |
| rs117006827 | A | -0.0565 |
| rs34988054  | T | 0.0968  |
| rs1035087   | T | 0.0471  |
| rs114239081 | T | 0.1373  |
| rs77724826  | C | -0.0962 |
| rs2024266   | T | -0.0234 |
| rs17576226  | T | -0.0392 |
| rs73694933  | A | -0.0502 |
| rs3757772   | C | 0.1034  |
| rs6949446   | A | 0.0585  |
| rs80118450  | A | 0.099   |
| rs11974013  | T | 0.0876  |
| rs380283    | A | 0.0323  |
| rs10253685  | T | 0.073   |
| rs117721631 | C | 0.1005  |
| rs4607522   | G | 0.0302  |
| rs140241700 | A | 0.2036  |
| rs2358068   | T | -0.0345 |
| rs7780443   | T | -0.0222 |
| rs7806766   | T | 0.1271  |
| rs6969337   | C | 0.0833  |
| rs11772617  | G | 0.0581  |
| rs117830955 | A | -0.1735 |
| rs56389635  | T | -0.0412 |
| rs76644462  | A | -0.0642 |

|             |   |         |
|-------------|---|---------|
| rs1085926   | T | 0.0624  |
| rs80016323  | C | 0.1528  |
| rs3778692   | A | 0.0392  |
| rs142485430 | C | 0.0899  |
| rs78255265  | G | -0.0275 |
| rs144568166 | T | 0.1351  |
| rs55659022  | A | 0.0893  |
| rs4722380   | G | -0.0731 |
| rs1002205   | C | 0.0647  |
| rs7788240   | T | -0.055  |
| rs10247785  | A | 0.0783  |
| rs4732447   | T | -0.0242 |
| rs79494124  | C | 0.0973  |
| rs10253606  | C | -0.063  |
| rs12703639  | T | 0.0252  |
| rs111259928 | A | -0.0518 |
| rs75629163  | A | -0.0963 |
| rs2357842   | A | -0.041  |
| rs3095210   | G | 0.1259  |
| rs62454454  | T | 0.1522  |
| rs13236400  | A | 0.0232  |
| rs17157615  | C | -0.0458 |
| rs58823540  | A | 0.0297  |
| rs17753647  | G | 0.0752  |
| rs118035796 | A | -0.1269 |
| rs9647771   | C | -0.0939 |
| rs11766158  | T | -0.0537 |
| rs116966036 | C | 0.1138  |
| rs62454580  | C | 0.0881  |
| rs7783045   | T | 0.0919  |
| rs78283854  | C | -0.0923 |
| rs845056    | A | 0.0245  |
| rs620269    | A | 0.0224  |
| rs142575299 | T | -0.1061 |
| rs13237474  | T | -0.1281 |
| rs2373436   | A | 0.1796  |
| rs12671353  | T | 0.1289  |
| rs139995160 | T | -0.1527 |
| rs144389235 | C | 0.1041  |
| rs34491468  | A | 0.078   |
| rs117973197 | C | 0.1211  |
| rs4434576   | C | 0.0302  |
| rs117199755 | A | 0.1236  |
| rs116701256 | T | -0.1952 |
| rs117337131 | T | 0.0594  |
| rs117868969 | A | 0.1243  |
| rs74694663  | G | -0.0818 |

|             |   |         |
|-------------|---|---------|
| rs113423124 | C | -0.1216 |
| rs145510996 | A | -0.0709 |
| rs141130258 | T | 0.1226  |
| rs214852    | C | -0.0401 |
| rs17837687  | C | 0.0505  |
| rs4720949   | T | -0.0291 |
| rs73080363  | T | 0.0417  |
| rs117600568 | G | -0.0754 |
| rs138169552 | C | -0.1477 |
| rs150396237 | A | -0.1694 |
| rs62001896  | T | 0.1188  |
| rs117108350 | T | 0.0625  |
| rs4730030   | C | 0.0281  |
| rs61325611  | A | -0.0268 |
| rs117124198 | C | -0.1249 |
| rs11980632  | C | 0.0458  |
| rs2690945   | A | -0.0242 |
| rs117534353 | A | 0.0946  |
| rs147340765 | T | 0.1391  |
| rs7776515   | A | -0.0272 |
| rs3801094   | A | -0.0234 |
| rs28452921  | A | -0.1291 |
| rs112628594 | G | 0.1011  |
| rs73110956  | A | -0.0962 |
| rs117795193 | T | 0.1031  |
| rs7780149   | T | 0.024   |
| rs76686747  | T | 0.1125  |
| rs117104394 | T | 0.0476  |
| rs74433509  | C | 0.1148  |
| rs77079774  | A | 0.1002  |
| rs79622615  | T | 0.1184  |
| rs78294940  | A | -0.2497 |
| rs2367939   | A | -0.0484 |
| rs12699279  | C | -0.1055 |
| rs73107852  | T | -0.1436 |
| rs62490527  | A | -0.0772 |
| rs2283088   | C | 0.0259  |
| rs80218144  | A | 0.1182  |
| rs4133600   | G | 0.0309  |
| rs79830717  | G | 0.1794  |
| rs111630199 | G | -0.1231 |
| rs117048034 | A | 0.1583  |
| rs6945202   | T | -0.023  |
| rs10487088  | A | 0.0731  |
| rs73148941  | A | 0.0719  |
| rs117143437 | T | 0.1189  |
| rs1196510   | A | 0.022   |

|             |   |         |
|-------------|---|---------|
| rs10268598  | T | -0.0278 |
| rs62452051  | T | 0.0964  |
| rs59599037  | C | -0.119  |
| rs73209305  | G | -0.1015 |
| rs113007778 | G | 0.1517  |
| rs11563716  | A | -0.0274 |
| rs6958569   | A | -0.0257 |
| rs75948232  | C | 0.0566  |
| rs111376476 | T | 0.0683  |
| rs62439555  | C | 0.0529  |
| rs252995    | C | 0.0305  |
| rs17170309  | G | 0.0449  |
| rs11761463  | A | 0.1104  |
| rs10272016  | C | -0.0432 |
| rs6950626   | G | -0.0312 |
| rs58342196  | T | 0.0799  |
| rs142802454 | A | -0.1587 |
| rs117711570 | G | 0.0878  |
| rs79395816  | A | -0.0973 |
| rs77308787  | C | -0.0867 |
| rs11769145  | C | -0.0296 |
| rs17165823  | C | 0.0754  |
| rs2073791   | G | 0.0283  |
| rs1524756   | C | 0.0295  |
| rs7800316   | T | 0.1017  |
| rs4719565   | T | 0.0238  |
| rs2107167   | A | 0.0331  |
| rs137995830 | G | -0.1335 |
| rs1547960   | G | 0.0224  |
| rs112216864 | C | 0.1762  |
| rs2724024   | A | -0.0292 |
| rs7783102   | G | 0.0305  |
| rs17548486  | G | -0.0536 |
| rs113593140 | T | -0.1667 |
| rs12672761  | G | -0.0346 |
| rs76562464  | C | 0.0946  |
| rs35652175  | T | -0.042  |
| rs73679546  | C | 0.1507  |
| rs62476992  | G | 0.0699  |
| rs6980397   | C | 0.0405  |
| rs10273338  | A | 0.0428  |
| rs13226011  | C | -0.0873 |
| rs17142711  | A | 0.0328  |
| rs73111453  | T | -0.1164 |
| rs77029327  | A | 0.082   |
| rs17241389  | C | -0.0218 |
| rs79364458  | G | 0.0404  |



|             |   |         |
|-------------|---|---------|
| rs10277333  | G | -0.0583 |
| rs73449395  | C | 0.0584  |
| rs117647300 | T | -0.0931 |
| rs10270760  | C | -0.1306 |
| rs17583919  | C | -0.0581 |
| rs145942506 | C | 0.1193  |
| rs2098560   | C | 0.0698  |
| rs113289750 | T | 0.1193  |
| rs144730039 | C | -0.1179 |
| rs76418432  | T | -0.0521 |
| rs139155792 | T | -0.1349 |
| rs2615691   | A | -0.0602 |
| rs10257166  | T | -0.0523 |
| rs10242940  | A | 0.023   |
| rs2329828   | A | 0.0533  |
| rs73699607  | A | 0.0572  |
| rs138191091 | C | -0.0532 |
| rs11980808  | T | 0.0304  |
| rs6949769   | G | -0.0251 |
| rs73674639  | G | -0.0379 |
| rs38434     | G | -0.0284 |
| rs391926    | A | 0.0222  |
| rs16872336  | G | 0.181   |
| rs7810587   | C | -0.0352 |
| rs73691110  | C | -0.188  |
| rs79926626  | T | -0.0963 |
| rs62459065  | T | 0.0679  |
| rs17157984  | G | 0.0348  |
| rs78184746  | G | -0.0526 |
| rs77590426  | T | 0.043   |
| rs149732311 | T | 0.0859  |
| rs7803602   | A | 0.0858  |
| rs145689859 | C | 0.1877  |
| rs148670193 | C | 0.1434  |
| rs11554710  | A | 0.0471  |
| rs2067634   | A | 0.0215  |
| rs141413658 | A | 0.0869  |
| rs35526683  | C | 0.0958  |
| rs1182891   | T | 0.0321  |
| rs117603700 | T | 0.1087  |
| rs2718094   | A | 0.0295  |
| rs10278129  | G | -0.0354 |
| rs111443080 | G | -0.0673 |
| rs802786    | A | 0.0262  |
| rs78914218  | G | -0.1274 |
| rs1406628   | G | -0.0422 |
| rs12700229  | T | -0.0281 |

|             |   |         |
|-------------|---|---------|
| rs10239122  | A | -0.0355 |
| rs77306929  | T | -0.0522 |
| rs17464549  | A | -0.1174 |
| rs138128842 | T | 0.0324  |
| rs145493821 | G | 0.1409  |
| rs681385    | G | 0.0264  |
| rs73157510  | A | -0.1667 |
| rs11540024  | G | -0.0993 |
| rs4719282   | C | 0.026   |
| rs1528151   | T | 0.0271  |
| rs75896348  | C | 0.1315  |
| rs116969930 | G | 0.0328  |
| rs62476226  | T | 0.0815  |
| rs7780193   | A | 0.0616  |
| rs7776826   | T | 0.038   |
| rs12538644  | A | -0.0407 |
| rs4020018   | C | 0.1258  |
| rs116850678 | G | -0.0856 |
| rs66677469  | A | -0.0266 |
| rs17352534  | G | -0.0556 |
| rs2893109   | A | -0.0239 |
| rs73144792  | A | 0.0281  |
| rs6947732   | A | 0.0254  |
| rs13231475  | C | -0.0541 |
| rs12532271  | A | 0.0267  |
| rs118158647 | C | -0.0707 |
| rs73120491  | T | -0.1129 |
| rs117573379 | A | 0.1387  |
| rs56998355  | T | -0.0441 |
| rs115344588 | T | 0.0515  |
| rs73135194  | G | 0.0953  |
| rs77268931  | A | 0.103   |
| rs62483067  | T | -0.141  |
| rs6943731   | T | 0.033   |
| rs12537496  | A | -0.0279 |
| rs58498831  | G | 0.0275  |
| rs56371849  | C | 0.0229  |
| rs17717645  | C | -0.1218 |
| rs4617108   | A | 0.0575  |
| rs10486979  | T | 0.0735  |
| rs73061333  | T | -0.0628 |
| rs28458270  | A | -0.0441 |
| rs113943842 | A | -0.1382 |
| rs4724785   | C | -0.025  |
| rs17154948  | T | 0.0365  |
| rs12533103  | A | 0.0535  |
| rs10241532  | C | 0.0399  |

|             |   |         |
|-------------|---|---------|
| rs146904836 | G | -0.102  |
| rs113786528 | T | 0.0673  |
| rs6944917   | A | 0.0505  |
| rs80325477  | A | 0.069   |
| rs1881650   | T | 0.063   |
| rs118141906 | G | 0.1847  |
| rs74333003  | T | 0.0461  |
| rs7456462   | C | 0.0472  |
| rs143535094 | C | -0.1321 |
| rs2839834   | G | -0.0654 |
| rs78641188  | A | -0.0415 |
| rs6949899   | G | -0.0261 |
| rs76136436  | T | 0.0755  |
| rs452310    | T | 0.0281  |
| rs145688644 | T | -0.1437 |
| rs10280180  | C | -0.0232 |
| rs2392581   | G | -0.0215 |
| rs78738783  | C | -0.1135 |
| rs13308242  | G | 0.0381  |
| rs10280457  | C | 0.0347  |
| rs117843550 | T | 0.0815  |
| rs73052106  | C | -0.0478 |
| rs38333     | C | 0.0477  |
| rs73186244  | G | -0.0295 |
| rs10254348  | A | -0.0472 |
| rs73158362  | G | -0.1452 |
| rs116901171 | G | -0.1459 |
| rs75980860  | T | -0.1118 |
| rs17168277  | C | -0.033  |
| rs7788346   | T | -0.0966 |
| rs9642032   | A | 0.0309  |
| rs2072169   | G | -0.0239 |
| rs118156474 | T | -0.0974 |
| rs67952914  | C | -0.0571 |
| rs74660599  | A | 0.1179  |
| rs6975898   | T | 0.0228  |
| rs62448536  | A | 0.0265  |
| rs17252863  | T | -0.0481 |
| rs113542579 | G | -0.116  |
| rs78758465  | C | -0.1783 |
| rs7801022   | A | -0.0626 |
| rs7807123   | C | 0.0223  |
| rs10951167  | C | 0.023   |
| rs67597940  | C | 0.0992  |
| rs17172194  | A | 0.0619  |
| rs798336    | C | -0.0425 |
| rs77273237  | C | 0.142   |

|             |   |         |
|-------------|---|---------|
| rs77354398  | A | -0.0437 |
| rs10228863  | C | 0.0413  |
| rs73142829  | A | 0.0729  |
| rs80158380  | C | -0.1058 |
| rs10278805  | A | -0.0251 |
| rs62468377  | A | 0.087   |
| rs139254967 | C | -0.1407 |
| rs117739094 | T | 0.0538  |
| rs148869037 | C | 0.1012  |
| rs62470525  | T | 0.0225  |
| rs7793339   | T | -0.0308 |
| rs739750    | A | -0.0391 |
| rs9649765   | A | -0.1284 |
| rs111726105 | A | -0.0819 |
| rs2250465   | C | -0.0387 |
| rs903448    | T | 0.0601  |
| rs57625156  | T | -0.108  |
| rs10276578  | T | -0.0316 |
| rs2665466   | A | -0.0216 |
| rs73042552  | G | 0.0661  |
| rs1545977   | A | -0.0421 |
| rs4716437   | C | 0.0268  |
| rs2191994   | C | 0.0379  |
| rs75441711  | A | 0.0764  |
| rs146534453 | C | 0.095   |
| rs9691873   | C | 0.0219  |
| rs239959    | G | 0.025   |
| rs75561094  | C | 0.1031  |
| rs10238370  | A | -0.0265 |
| rs56078427  | C | -0.0443 |
| rs78774838  | A | -0.0889 |
| rs73344835  | T | -0.0227 |
| rs672838    | T | 0.0363  |
| rs62464498  | A | 0.1203  |
| rs2371364   | G | -0.033  |
| rs7805535   | G | -0.0303 |
| rs59914810  | G | 0.0498  |
| rs918037    | G | 0.0247  |
| rs75532071  | G | 0.0808  |
| rs149995651 | A | 0.1698  |
| rs76418193  | G | -0.1051 |
| rs76433408  | A | 0.0553  |
| rs6944111   | C | 0.0258  |
| rs141272162 | C | -0.0843 |
| rs723900    | G | -0.03   |
| rs34864656  | A | 0.0767  |
| rs77698672  | A | 0.0458  |

|             |   |         |
|-------------|---|---------|
| rs6462818   | A | 0.0215  |
| rs4721277   | T | -0.0306 |
| rs7790037   | A | -0.0246 |
| rs6978076   | C | -0.0326 |
| rs117157481 | T | 0.1137  |
| rs116991436 | G | 0.0513  |
| rs78608647  | C | 0.0867  |
| rs7778553   | G | -0.0249 |
| rs80098017  | T | -0.1816 |
| rs2402180   | T | 0.0571  |
| rs73205931  | G | 0.025   |
| rs149710878 | C | 0.0884  |
| rs6461301   | T | -0.0424 |
| rs62441763  | G | -0.0737 |
| rs17134469  | A | -0.0216 |
| rs56285805  | C | 0.0478  |
| rs17732862  | A | -0.0293 |
| rs117206819 | T | 0.0664  |
| rs12538185  | T | 0.0397  |
| rs146569248 | G | 0.0788  |
| rs117910513 | T | -0.1043 |
| rs2068863   | A | 0.0467  |
| rs56123946  | C | -0.0715 |
| rs12698938  | T | 0.0479  |
| rs144994126 | C | -0.0944 |
| rs73160450  | A | 0.0779  |
| rs7805519   | A | 0.0279  |
| rs117605245 | C | -0.0913 |
| rs112241661 | T | -0.1845 |
| rs1003288   | T | -0.168  |
| rs273143    | G | 0.0239  |
| rs11768786  | C | -0.0224 |
| rs3735568   | T | -0.0572 |
| rs72592920  | A | -0.1047 |
| rs10950208  | C | 0.0332  |
| rs705347    | G | 0.0238  |
| rs7800986   | T | 0.0279  |
| rs3800629   | A | 0.0793  |
| rs34832267  | A | -0.0285 |
| rs17166937  | A | -0.0953 |
| rs79023216  | G | 0.1555  |
| rs2727824   | A | -0.0226 |
| rs78018977  | A | 0.031   |
| rs76655930  | G | 0.112   |
| rs116878467 | T | -0.126  |
| rs1028265   | A | -0.0802 |
| rs79668495  | G | 0.0666  |

|             |   |         |
|-------------|---|---------|
| rs111339680 | T | -0.1155 |
| rs118065531 | T | 0.1609  |
| rs74439935  | C | 0.1091  |
| rs13236491  | C | 0.0471  |
| rs7357092   | A | 0.0302  |
| rs45507091  | A | 0.0489  |
| rs11978537  | G | 0.064   |
| rs12534741  | T | 0.0231  |
| rs6973915   | T | -0.0212 |
| rs12718296  | G | -0.0226 |
| rs141922569 | A | 0.1711  |
| rs3801909   | T | -0.0231 |
| rs1109443   | C | 0.041   |
| rs116911803 | T | -0.067  |
| rs139758223 | T | 0.1242  |
| rs17741730  | T | 0.0442  |
| rs707704    | T | 0.1119  |
| rs11974667  | A | 0.0299  |
| rs7782624   | T | 0.0781  |
| rs17290183  | T | 0.0464  |
| rs1606623   | G | 0.043   |
| rs62482606  | A | 0.0297  |
| rs12718121  | A | 0.0965  |
| rs11768391  | A | 0.0272  |
| rs6463060   | A | 0.0453  |
| rs4437584   | A | 0.0849  |
| rs6976205   | A | -0.0236 |
| rs117576015 | G | 0.1875  |
| rs117353648 | T | 0.0734  |
| rs6949487   | C | -0.0229 |
| rs149582498 | A | -0.081  |
| rs4722131   | G | 0.034   |
| rs875572    | A | 0.0381  |
| rs144540837 | A | -0.0685 |
| rs143294959 | C | 0.0561  |
| rs145773390 | C | -0.1075 |
| rs62446629  | A | 0.0671  |
| rs55808866  | A | 0.1123  |
| rs41535251  | C | 0.0923  |
| rs76827545  | T | 0.0471  |
| rs6976361   | C | 0.0306  |
| rs6973780   | G | -0.0239 |
| rs59666987  | A | -0.0305 |
| rs10253230  | C | 0.0389  |
| rs11762252  | G | -0.0777 |
| rs1796266   | T | 0.1424  |
| rs2072183   | C | -0.0306 |

|             |   |         |
|-------------|---|---------|
| rs117532184 | C | 0.1188  |
| rs17155421  | G | 0.0336  |
| rs149896875 | T | 0.1072  |
| rs1017005   | T | 0.0296  |
| rs10245726  | G | -0.0261 |
| rs35069407  | A | 0.0508  |
| rs10251469  | T | 0.0904  |
| rs1540881   | C | -0.0235 |
| rs10241351  | C | 0.0413  |
| rs17621533  | G | 0.1202  |
| rs76537687  | G | -0.1312 |
| rs138364925 | T | -0.1528 |
| rs13227879  | T | 0.0349  |
| rs140265612 | A | -0.1143 |
| rs62455881  | G | 0.0847  |
| rs117306948 | C | -0.0652 |
| rs75871930  | A | 0.0669  |
| rs35909474  | G | 0.1008  |
| rs13243259  | T | 0.1062  |
| rs258682    | C | -0.0215 |
| rs111468575 | T | -0.0375 |
| rs73159305  | T | 0.0398  |
| rs9769038   | A | 0.0248  |
| rs28439674  | C | -0.0239 |
| rs151296821 | C | -0.0459 |
| rs12531125  | G | 0.0415  |
| rs205731    | A | 0.0237  |
| rs144594912 | C | 0.1626  |
| rs12538176  | C | -0.0222 |
| rs79589472  | A | -0.1194 |
| rs77516697  | G | 0.0755  |
| rs7782412   | C | 0.0231  |
| rs4724964   | C | -0.0251 |
| rs73460980  | C | 0.0579  |
| rs77188329  | T | -0.0506 |
| rs141087696 | A | -0.168  |
| rs141958517 | C | 0.0892  |
| rs34832825  | C | -0.0292 |
| rs73063942  | T | 0.0953  |
| rs142708379 | G | -0.0592 |
| rs117925523 | A | 0.1138  |
| rs2722281   | C | 0.0335  |
| rs55760216  | C | -0.045  |
| rs79397862  | A | 0.0819  |
| rs2578412   | T | 0.0405  |
| rs405966    | T | 0.0334  |
| rs11773745  | A | -0.027  |

|             |   |         |
|-------------|---|---------|
| rs75215288  | G | 0.1084  |
| rs62505098  | A | -0.0718 |
| rs117367884 | C | 0.0915  |
| rs62467035  | T | 0.1155  |
| rs73238199  | T | 0.0691  |
| rs62475824  | C | -0.0355 |
| rs62450339  | C | 0.0601  |
| rs76191407  | A | 0.059   |
| rs148337637 | G | 0.0772  |
| rs17168692  | G | -0.0932 |
| rs113676233 | A | 0.0468  |
| rs3763432   | T | -0.023  |
| rs7795979   | T | 0.0512  |
| rs2906167   | G | -0.0228 |
| rs73143179  | G | -0.1282 |
| rs2074123   | C | 0.0214  |
| rs113251366 | A | -0.0889 |
| rs57352501  | A | -0.0283 |
| rs6464425   | G | -0.0269 |
| rs930339    | C | 0.0229  |
| rs6460799   | C | -0.0269 |
| rs2711014   | T | -0.0278 |
| rs80114087  | T | 0.0748  |
| rs117623312 | A | -0.1116 |
| rs6467465   | G | -0.0291 |
| rs33997152  | A | -0.0757 |
| rs111702000 | T | 0.1255  |
| rs916905    | C | 0.0248  |
| rs117850903 | A | -0.0894 |
| rs6966904   | T | 0.0247  |
| rs141730722 | A | 0.1057  |
| rs7384058   | A | 0.0361  |
| rs1708414   | C | -0.0266 |
| rs972619    | C | 0.0298  |
| rs77782453  | A | -0.0543 |
| rs117493070 | T | -0.1284 |
| rs73100811  | C | 0.0307  |
| rs78151800  | G | -0.0343 |
| rs9333592   | T | 0.0563  |
| rs6959875   | A | 0.0246  |
| rs10486599  | T | 0.1029  |
| rs78699388  | T | 0.0986  |
| rs116923905 | T | 0.18    |
| rs4722103   | C | -0.1383 |
| rs2693726   | C | -0.0243 |
| rs75422854  | A | 0.0755  |
| rs117161474 | T | -0.1636 |



|             |   |         |
|-------------|---|---------|
| rs10241622  | T | -0.0962 |
| rs17164729  | C | -0.0406 |
| rs74412434  | A | -0.1023 |
| rs10280038  | A | -0.1234 |
| rs62461209  | T | 0.0709  |
| rs17595064  | A | 0.0299  |
| rs73158615  | T | 0.0632  |
| rs36020274  | A | -0.046  |
| rs117562695 | A | -0.0713 |
| rs117262907 | C | 0.0947  |
| rs79444715  | G | 0.0829  |
| rs40143     | G | -0.0219 |
| rs6946799   | T | -0.0237 |
| rs150422355 | T | -0.1389 |
| rs17254711  | A | -0.0955 |
| rs140673762 | T | -0.126  |
| rs1991764   | G | 0.0221  |
| rs17168780  | T | 0.0456  |
| rs76687885  | G | 0.1041  |
| rs4301397   | C | 0.0332  |
| rs76894116  | A | 0.0704  |
| rs74801114  | C | 0.1419  |
| rs11977812  | A | -0.0332 |
| rs76758927  | T | -0.1207 |
| rs117955352 | C | -0.0653 |
| rs78916066  | G | -0.0877 |
| rs6464119   | T | -0.0286 |
| rs150640127 | G | 0.1035  |
| rs56679115  | T | -0.0349 |
| rs2215580   | C | -0.0269 |
| rs35593508  | G | 0.0544  |
| rs146204630 | T | 0.149   |
| rs62501473  | G | 0.0278  |
| rs62474147  | G | 0.0411  |
| rs1997336   | G | -0.0338 |
| rs13235569  | G | -0.0293 |
| rs11767067  | G | 0.0249  |
| rs112000003 | A | 0.1349  |
| rs73171503  | C | -0.0576 |
| rs11771525  | T | -0.0329 |
| rs11762030  | A | -0.0696 |
| rs78915485  | G | -0.1625 |
| rs146284561 | C | -0.086  |
| rs2944272   | G | -0.0378 |
| rs11769200  | A | -0.0292 |
| rs79434718  | A | -0.0874 |
| rs141489247 | A | 0.0946  |

|             |   |         |
|-------------|---|---------|
| rs73214320  | G | 0.0746  |
| rs6961372   | G | 0.064   |
| rs73226906  | C | -0.0663 |
| rs112557620 | A | 0.0826  |
| rs12538725  | C | 0.0239  |
| rs6460960   | G | -0.0219 |
| rs142864303 | T | 0.1292  |
| rs78370742  | T | 0.0472  |
| rs1918261   | A | -0.0247 |
| rs7796232   | T | 0.0325  |
| rs74467805  | T | -0.0732 |
| rs78845264  | A | 0.1081  |
| rs139117707 | T | -0.1009 |
| rs4725565   | A | 0.0259  |
| rs6972620   | A | -0.0342 |
| rs4720546   | T | 0.0261  |
| rs112762953 | T | -0.1297 |
| rs722277    | C | 0.0215  |
| rs113362089 | T | -0.0525 |
| rs73494161  | C | 0.0719  |
| rs117582436 | A | -0.0537 |
| rs2158799   | C | -0.0225 |
| rs1528503   | C | 0.0226  |
| rs76641388  | T | -0.0489 |
| rs140046410 | C | -0.066  |
| rs6948988   | G | 0.0388  |
| rs1029559   | A | -0.0221 |
| rs142854193 | T | 0.0958  |
| rs146782375 | A | -0.0553 |
| rs111840021 | A | 0.0677  |
| rs73047187  | T | 0.0295  |
| rs7808209   | C | 0.0244  |
| rs10260404  | C | 0.0221  |
| rs75038520  | A | -0.0313 |
| rs10265277  | A | 0.1041  |
| rs35510569  | T | 0.172   |
| rs62481788  | C | -0.1082 |
| rs4721709   | A | 0.0841  |
| rs10249533  | T | -0.0428 |
| rs117888859 | T | 0.1058  |
| rs2903400   | T | 0.0324  |
| rs1912367   | T | -0.0235 |
| rs78884894  | C | 0.1048  |
| rs139264037 | T | -0.0923 |
| rs62481150  | G | 0.0299  |
| rs11973221  | T | 0.0867  |
| rs7350039   | A | 0.0253  |

|             |   |         |
|-------------|---|---------|
| rs7788959   | T | 0.0566  |
| rs56284030  | C | -0.1411 |
| rs80313515  | A | 0.115   |
| rs13306993  | G | -0.0222 |
| rs79926438  | A | -0.0276 |
| rs196644    | T | 0.0337  |
| rs118060065 | C | 0.1455  |
| rs73164713  | C | 0.0505  |
| rs4722829   | T | 0.0342  |
| rs4721402   | T | -0.0273 |
| rs73146116  | A | -0.1124 |
| rs117636250 | A | -0.194  |
| rs10952807  | G | -0.0301 |
| rs2189638   | G | 0.0235  |
| rs140660656 | A | 0.1669  |
| rs10281498  | C | 0.0532  |
| rs117365536 | T | 0.1171  |
| rs142702069 | T | -0.0596 |
| rs140099385 | T | -0.1443 |
| rs112619356 | T | 0.0741  |
| rs10250047  | A | -0.0213 |
| rs73160274  | A | 0.0986  |
| rs79363616  | G | 0.0548  |
| rs7778129   | C | 0.0926  |
| rs10226436  | A | 0.0209  |
| rs17259795  | T | 0.0256  |
| rs141385383 | T | 0.1135  |
| rs35531597  | G | 0.0403  |
| rs147642472 | T | 0.1206  |
| rs73080521  | C | 0.0727  |
| rs35555176  | A | 0.0284  |
| rs35525433  | G | 0.0814  |
| rs79017614  | T | -0.0733 |
| rs9654903   | T | -0.0312 |
| rs77524431  | T | -0.032  |
| rs139672000 | T | -0.1277 |
| rs7800598   | A | -0.0409 |
| rs62438192  | G | -0.0349 |
| rs1362175   | T | 0.0212  |
| rs140729436 | G | 0.1333  |
| rs6948502   | T | -0.0242 |
| rs13311114  | G | -0.023  |
| rs117885103 | G | 0.0737  |
| rs62479857  | T | -0.0694 |
| rs10277542  | T | 0.0258  |
| rs74842200  | T | 0.0864  |
| rs4720208   | C | 0.1123  |

|             |   |         |
|-------------|---|---------|
| rs66643431  | G | 0.0335  |
| rs73074121  | G | 0.055   |
| rs112239443 | T | -0.0492 |
| rs117989436 | G | -0.1029 |
| rs12530645  | C | 0.0319  |
| rs117217076 | G | 0.1379  |
| rs145223213 | C | -0.1094 |
| rs76535182  | G | 0.0378  |
| rs7796302   | A | 0.0213  |
| rs454       | T | -0.0223 |
| rs34064507  | A | 0.0361  |
| rs10247502  | A | 0.0288  |
| rs35936954  | T | 0.155   |
| rs55901351  | T | 0.0587  |
| rs13241741  | C | 0.1031  |
| rs11772821  | G | 0.082   |
| rs13232103  | T | 0.0863  |
| rs73136471  | A | -0.1073 |
| rs12705587  | C | -0.0324 |
| rs73171814  | T | 0.0329  |
| rs17167564  | A | -0.112  |
| rs117502983 | G | -0.087  |
| rs10270702  | C | 0.0259  |
| rs28379233  | T | 0.032   |
| rs12670446  | T | 0.0507  |
| rs2530446   | T | 0.0234  |
| rs76478602  | A | 0.1394  |
| rs11980721  | G | -0.0462 |
| rs76640526  | T | -0.1232 |
| rs4637709   | A | -0.0335 |
| rs62462985  | G | -0.0228 |
| rs10228034  | G | 0.0239  |
| rs2642268   | C | -0.0229 |
| rs147605424 | A | -0.1178 |
| rs60901799  | T | 0.0882  |
| rs13230096  | G | -0.1146 |
| rs79462886  | C | 0.0544  |
| rs688822    | A | -0.0277 |
| rs17321820  | G | -0.0452 |
| rs79167244  | T | 0.0612  |
| rs4548075   | C | 0.0258  |
| rs1633715   | C | -0.0536 |
| rs4720871   | A | 0.0792  |
| rs116936775 | T | -0.1607 |
| rs6945054   | C | 0.0322  |
| rs10244345  | A | 0.0293  |
| rs12700827  | G | 0.0227  |

|             |   |         |
|-------------|---|---------|
| rs55920785  | C | 0.0279  |
| rs73406288  | T | -0.0593 |
| rs34715900  | G | 0.0407  |
| rs17706870  | C | -0.1001 |
| rs116987919 | G | 0.0909  |
| rs4998803   | C | -0.057  |
| rs6978470   | C | -0.0306 |
| rs2970471   | T | -0.0222 |
| rs113705861 | G | 0.0408  |
| rs11766726  | T | -0.0468 |
| rs17168771  | A | 0.0435  |
| rs5029226   | T | 0.102   |
| rs1420133   | G | -0.0225 |
| rs12539777  | A | -0.0353 |
| rs7776595   | A | -0.0953 |
| rs113741403 | C | 0.0584  |
| rs118164299 | T | -0.0605 |
| rs76556624  | T | 0.0907  |
| rs79971836  | A | -0.1104 |
| rs2526105   | G | 0.0485  |
| rs713337    | A | -0.0966 |
| rs150790712 | G | 0.0808  |
| rs145429728 | C | 0.1227  |
| rs77065488  | C | 0.0772  |
| rs112756178 | C | -0.0584 |
| rs141821132 | A | -0.1472 |
| rs2058274   | A | -0.0355 |
| rs1076517   | A | 0.0335  |
| rs5012029   | G | 0.0227  |
| rs1731855   | A | 0.0363  |
| rs2367915   | C | 0.0218  |
| rs76785870  | C | -0.0722 |
| rs235401    | A | -0.1026 |
| rs117451770 | A | 0.1729  |
| rs73724045  | T | 0.1338  |
| rs62446510  | C | -0.1099 |
| rs6465321   | G | -0.0909 |
| rs117344836 | T | -0.1402 |
| rs1419529   | A | -0.0699 |
| rs113697470 | T | -0.0314 |
| rs78081525  | A | 0.0539  |
| rs7811125   | C | 0.0432  |
| rs68103316  | C | -0.0367 |
| rs77355890  | A | -0.0945 |
| rs78730674  | C | 0.0721  |
| rs76463017  | A | -0.0714 |
| rs77584600  | A | -0.06   |

|             |   |         |
|-------------|---|---------|
| rs12699865  | G | -0.023  |
| rs71521782  | T | -0.0394 |
| rs148792801 | T | 0.1099  |
| rs74485317  | G | 0.0285  |
| rs13240759  | C | 0.0288  |
| rs6957884   | C | -0.0755 |
| rs66979309  | G | 0.0246  |
| rs11975638  | C | 0.0501  |
| rs111630016 | T | 0.0632  |
| rs17170608  | G | 0.038   |
| rs73214741  | A | 0.0967  |
| rs10249476  | T | 0.0221  |
| rs75967976  | A | 0.1348  |
| rs115549887 | G | -0.1314 |
| rs12530833  | A | -0.1649 |
| rs117544739 | C | 0.1137  |
| rs111418528 | C | -0.0705 |
| rs2178057   | C | 0.0276  |
| rs117483227 | G | 0.1125  |
| rs117898413 | G | -0.1791 |
| rs1370917   | C | -0.0224 |
| rs62456583  | G | 0.0438  |
| rs6955911   | G | -0.0258 |
| rs10260886  | T | -0.0316 |
| rs73115461  | T | -0.0599 |
| rs115913967 | G | -0.0678 |
| rs73108304  | T | 0.1174  |
| rs77349793  | C | -0.1605 |
| rs117068800 | C | -0.0557 |
| rs7809107   | G | 0.0674  |
| rs7796607   | T | -0.0541 |
| rs118151746 | A | 0.1124  |
| rs10255971  | G | -0.0296 |
| rs1881007   | A | 0.0299  |
| rs13229648  | A | 0.0245  |
| rs3095029   | C | -0.0273 |
| rs1208209   | A | 0.0366  |
| rs6967817   | A | -0.1247 |
| rs645793    | C | -0.0281 |
| rs10227141  | T | -0.1306 |
| rs71530539  | G | 0.1025  |
| rs956089    | A | 0.039   |
| rs13234669  | A | -0.0644 |
| rs10253827  | T | 0.0283  |
| rs35230654  | G | 0.046   |
| rs138798777 | G | -0.0951 |
| rs117518341 | T | 0.055   |

|             |   |         |
|-------------|---|---------|
| rs28564079  | C | 0.0636  |
| rs62437912  | A | 0.1127  |
| rs62462007  | G | -0.0312 |
| rs10272208  | A | -0.0206 |
| rs13241065  | A | 0.0264  |
| rs2079262   | G | -0.0294 |
| rs929405    | T | 0.0409  |
| rs6465381   | C | -0.0318 |
| rs11768801  | A | 0.0784  |
| rs207210    | G | 0.0214  |
| rs138449026 | T | 0.1382  |
| rs116839932 | A | 0.0501  |
| rs872491    | G | 0.1174  |
| rs148898353 | A | -0.0971 |
| rs56118357  | A | 0.0654  |
| rs10949684  | G | -0.0451 |
| rs62459637  | C | 0.0427  |
| rs17811625  | T | -0.0812 |
| rs17861292  | G | 0.1348  |
| rs78277340  | T | -0.0596 |
| rs150885016 | G | -0.0946 |
| rs17167552  | C | 0.1069  |
| rs2523016   | A | 0.0539  |
| rs147982156 | A | -0.1556 |
| rs12674051  | A | -0.0437 |
| rs117422089 | C | -0.1261 |
| rs118051337 | T | -0.1431 |
| rs4724481   | A | -0.1402 |
| rs10265155  | C | 0.0231  |
| rs17143466  | T | 0.0717  |
| rs2868777   | A | -0.0727 |
| rs62481823  | C | 0.0586  |
| rs713598    | G | -0.0228 |
| rs17165008  | A | 0.0476  |
| rs147302687 | A | 0.1874  |
| rs80032372  | A | 0.0564  |
| rs9656687   | A | -0.0294 |
| rs28379283  | T | -0.0419 |
| rs11764772  | G | -0.0917 |
| rs1429537   | A | 0.0576  |
| rs117118687 | G | 0.1124  |
| rs55649390  | T | -0.085  |
| rs13232003  | G | 0.0219  |
| rs9784936   | T | -0.0876 |
| rs73049128  | C | 0.0979  |
| rs12702670  | A | 0.0241  |
| rs74703585  | T | -0.1025 |

|             |   |         |
|-------------|---|---------|
| rs80020885  | A | 0.1347  |
| rs2371872   | G | -0.046  |
| rs4732113   | C | -0.0244 |
| rs10260359  | T | 0.0374  |
| rs144546841 | A | -0.1257 |
| rs2595704   | G | -0.0216 |
| rs28720702  | G | 0.1289  |
| rs3729622   | C | 0.04    |
| rs62459121  | G | -0.0273 |
| rs117637257 | A | -0.0681 |
| rs59079790  | G | -0.1072 |
| rs116946295 | C | 0.1008  |
| rs161612    | C | 0.0236  |
| rs6964431   | T | -0.023  |
| rs78910000  | C | 0.1077  |
| rs7807362   | C | 0.0374  |
| rs12532850  | C | 0.0214  |
| rs115738375 | C | 0.0978  |
| rs4947865   | C | 0.0259  |
| rs10949834  | A | 0.0312  |
| rs1406196   | C | -0.022  |
| rs115853373 | A | -0.1083 |
| rs11760901  | A | -0.0982 |
| rs17864929  | C | 0.097   |
| rs75301094  | A | 0.1097  |
| rs12705896  | C | 0.0273  |
| rs55858541  | A | -0.0308 |
| rs118026861 | C | 0.0704  |
| rs76401687  | A | -0.0499 |
| rs147898513 | A | 0.0973  |
| rs405725    | T | 0.0556  |
| rs80063574  | C | -0.0488 |
| rs7800411   | C | -0.0227 |
| rs3218552   | T | 0.0631  |
| rs13231911  | C | -0.0305 |
| rs7385601   | G | 0.0214  |
| rs118025340 | C | 0.1218  |
| rs77783439  | A | 0.0991  |
| rs77095508  | T | 0.0354  |
| rs79374617  | G | 0.033   |
| rs74522043  | T | 0.0864  |
| rs58612109  | A | 0.0218  |
| rs117137232 | T | -0.1141 |
| rs10233240  | T | 0.0276  |
| rs143912796 | A | 0.133   |
| rs151144316 | A | -0.0959 |
| rs77790056  | C | 0.1655  |



|             |   |         |
|-------------|---|---------|
| rs75735645  | C | 0.1208  |
| rs10236216  | C | -0.022  |
| rs111375658 | G | -0.0996 |
| rs3917548   | G | 0.0443  |
| rs74365117  | A | -0.0943 |
| rs141865717 | A | -0.161  |
| rs148716255 | T | 0.0702  |
| rs10435058  | G | -0.029  |
| rs17170045  | G | -0.0697 |
| rs35156985  | T | 0.039   |
| rs35507251  | C | -0.0736 |
| rs17146449  | C | 0.0298  |
| rs6946008   | A | 0.0435  |
| rs77979311  | T | 0.0547  |
| rs150813    | T | 0.0438  |
| rs76089999  | A | 0.0929  |
| rs113752955 | G | 0.1326  |
| rs17169046  | G | -0.0646 |
| rs6951397   | C | 0.0229  |
| rs1659805   | A | 0.0294  |
| rs13227272  | C | -0.0352 |
| rs7787630   | C | -0.0431 |
| rs17143281  | T | 0.1206  |
| rs11977010  | G | 0.0282  |
| rs4716573   | C | -0.0651 |
| rs113009596 | A | 0.1338  |
| rs258849    | A | 0.0909  |
| rs6947464   | T | -0.021  |
| rs147527948 | T | -0.0537 |
| rs11766232  | T | -0.0446 |
| rs13234975  | C | -0.0238 |
| rs35736024  | C | 0.1678  |
| rs73110188  | T | -0.1184 |
| rs1732145   | T | -0.0236 |
| rs74986929  | C | -0.0838 |
| rs79075163  | T | 0.0737  |
| rs9769730   | A | 0.0329  |
| rs531088    | A | 0.0858  |
| rs12698975  | T | 0.0679  |
| rs75308247  | C | -0.0421 |
| rs10259110  | C | 0.1102  |
| rs17143131  | G | -0.0971 |
| rs10953134  | G | 0.0394  |
| rs6960548   | C | -0.0291 |
| rs117067562 | G | -0.1198 |
| rs79768008  | C | 0.037   |
| rs11769338  | T | -0.0314 |

|             |   |         |
|-------------|---|---------|
| rs1528512   | G | 0.0224  |
| rs4726187   | G | -0.0358 |
| rs7787362   | T | 0.0245  |
| rs10224288  | A | 0.0216  |
| rs77193320  | A | -0.102  |
| rs10240988  | C | 0.0271  |
| rs80313136  | G | 0.0753  |
| rs6979407   | C | -0.033  |
| rs17164162  | C | 0.0768  |
| rs317722    | C | 0.0486  |
| rs116996844 | C | 0.0752  |
| rs12671873  | G | 0.0474  |
| rs66595363  | A | -0.0442 |
| rs4538793   | G | 0.0392  |
| rs10232726  | T | 0.028   |
| rs2188159   | G | 0.0273  |
| rs139322663 | T | 0.1117  |
| rs35313928  | T | -0.1169 |
| rs143632180 | T | -0.1412 |
| rs28716662  | T | -0.0246 |
| rs255167    | G | 0.0414  |
| rs113924578 | G | -0.0863 |
| rs6461611   | G | 0.0286  |
| rs78496132  | T | 0.0409  |
| rs111767247 | T | 0.0782  |
| rs58237078  | C | 0.1017  |
| rs7794604   | T | 0.0211  |
| rs79499545  | C | 0.1414  |
| rs146174538 | T | 0.0796  |
| rs28510688  | G | 0.0305  |
| rs142199928 | C | 0.1111  |
| rs218107    | T | -0.0208 |
| rs76725615  | T | 0.1109  |
| rs10273877  | C | -0.0389 |
| rs142138241 | A | 0.123   |
| rs117385564 | G | 0.1258  |
| rs73141872  | A | 0.0752  |
| rs666121    | T | -0.0366 |
| rs140251324 | A | 0.1177  |
| rs73696933  | T | 0.0363  |
| rs78729555  | T | -0.1231 |
| rs73071083  | A | -0.0579 |
| rs7783279   | G | 0.0203  |
| rs117364154 | A | -0.0943 |
| rs818494    | C | -0.0581 |
| rs2691588   | A | -0.0251 |
| rs12533530  | G | 0.0361  |

|             |   |         |
|-------------|---|---------|
| rs143491117 | T | -0.1187 |
| rs13235964  | A | 0.0369  |
| rs76687522  | G | 0.0285  |
| rs10243330  | A | -0.0216 |
| rs6964317   | A | 0.0233  |
| rs117364612 | C | 0.1213  |
| rs11979934  | T | 0.0772  |
| rs77899429  | G | -0.0767 |
| rs148548045 | A | -0.1038 |
| rs2034510   | G | 0.0249  |
| rs971818    | G | -0.022  |
| rs3735131   | G | 0.0977  |
| rs77159851  | C | -0.0253 |
| rs3843533   | T | -0.0328 |
| rs146053817 | A | 0.0819  |
| rs28647841  | C | 0.0808  |
| rs113277967 | C | -0.1097 |
| rs2011336   | A | 0.0218  |
| rs3206736   | T | -0.0317 |
| rs13222653  | A | 0.0341  |
| rs117976147 | T | 0.0351  |
| rs73177620  | A | -0.026  |
| rs56967982  | T | 0.0904  |
| rs2539826   | G | -0.0913 |
| rs62447922  | A | 0.0335  |
| rs9655380   | C | 0.021   |
| rs876590    | C | 0.0283  |
| rs4476935   | T | 0.0209  |
| rs139035138 | A | 0.0907  |
| rs62481580  | C | 0.0446  |
| rs10267401  | A | 0.0608  |
| rs145271624 | A | 0.0693  |
| rs118158584 | T | -0.097  |
| rs79946992  | T | -0.0863 |
| rs3888311   | G | 0.0246  |
| rs73189295  | C | -0.0266 |
| rs138963715 | C | -0.1287 |
| rs1431518   | A | 0.0434  |
| rs80269587  | C | 0.0806  |
| rs28608003  | G | 0.024   |
| rs78527084  | G | -0.0948 |
| rs73165284  | G | 0.1458  |
| rs887459    | A | -0.0442 |
| rs10228948  | G | -0.0264 |
| rs67050321  | C | -0.0221 |
| rs17417090  | C | -0.0238 |
| rs78682449  | G | -0.17   |

|             |   |         |
|-------------|---|---------|
| rs2355328   | T | 0.0325  |
| rs58579472  | G | -0.0237 |
| rs967050    | C | 0.0302  |
| rs73740440  | A | 0.1085  |
| rs7809883   | G | -0.0265 |
| rs111956025 | T | -0.0297 |
| rs150195893 | G | 0.1058  |
| rs141484683 | T | 0.0943  |
| rs146570191 | G | 0.1211  |
| rs138541260 | A | 0.1075  |
| rs117342777 | A | -0.1458 |
| rs146687467 | C | 0.1398  |
| rs1375237   | T | -0.0212 |
| rs112190998 | T | -0.0775 |
| rs79706198  | C | -0.1851 |
| rs58270876  | A | -0.0218 |
| rs78253170  | T | 0.0298  |
| rs13238507  | G | 0.0707  |
| rs17366934  | A | -0.0898 |
| rs117924304 | A | -0.0862 |
| rs77160182  | C | 0.1214  |
| rs1721482   | T | 0.0239  |
| rs78718118  | G | 0.0904  |
| rs12531078  | C | 0.0227  |
| rs12154327  | C | 0.078   |
| rs73351303  | A | 0.1193  |
| rs34998949  | T | -0.0406 |
| rs39121     | A | 0.0202  |
| rs1125208   | C | -0.0295 |
| rs117410309 | A | 0.0745  |
| rs146445303 | T | 0.0456  |
| rs1997123   | A | 0.0201  |
| rs7799036   | G | -0.0256 |
| rs853071    | G | -0.0544 |
| rs35995317  | G | 0.0993  |
| rs2717941   | G | 0.0318  |
| rs484625    | C | 0.0464  |
| rs116915350 | T | 0.1222  |
| rs62447663  | G | -0.138  |
| rs12539506  | T | 0.1143  |
| rs62465594  | T | 0.1223  |
| rs12112334  | G | -0.0362 |
| rs34735197  | G | 0.0515  |
| rs7799957   | T | 0.0216  |
| rs13229371  | T | -0.0238 |
| rs118179983 | C | 0.0603  |
| rs58292326  | G | 0.0271  |

|             |   |         |
|-------------|---|---------|
| rs34362136  | T | 0.0992  |
| rs145997560 | A | 0.1738  |
| rs11973216  | G | 0.0221  |
| rs79200365  | G | 0.0443  |
| rs62445828  | A | 0.0797  |
| rs75670532  | T | 0.1249  |
| rs146683624 | G | 0.1241  |
| rs71578252  | A | 0.0977  |
| rs149673598 | G | -0.0878 |
| rs4720814   | T | -0.0489 |
| rs111372030 | A | -0.0422 |
| rs144503156 | G | -0.1214 |
| rs17518998  | G | 0.0889  |
| rs2374313   | A | 0.0201  |
| rs11772639  | C | -0.0284 |
| rs17137816  | C | -0.0261 |
| rs4245567   | C | 0.0563  |
| rs3823657   | G | 0.0632  |
| rs11766751  | C | -0.0322 |
| rs11976979  | A | 0.0269  |
| rs7808944   | T | 0.0378  |
| rs10499755  | T | 0.036   |
| rs42181     | G | 0.0354  |
| rs62473585  | A | 0.0602  |
| rs17639438  | T | -0.025  |
| rs62464788  | G | 0.0313  |
| rs56249828  | C | 0.0219  |
| rs11564032  | C | 0.021   |
| rs117460325 | T | -0.1205 |
| rs17172306  | G | 0.0614  |
| rs117635288 | A | -0.0739 |
| rs117995487 | G | -0.0795 |
| rs139245696 | A | 0.0536  |
| rs17459241  | T | -0.0218 |
| rs10269294  | C | 0.0261  |
| rs141326445 | A | 0.2161  |
| rs117955931 | A | -0.0823 |
| rs74339898  | C | 0.0734  |
| rs2141362   | A | -0.04   |
| rs13238838  | C | 0.0338  |
| rs62446659  | A | 0.0719  |
| rs148088171 | G | 0.0694  |
| rs145447445 | G | -0.1247 |
| rs35825246  | C | -0.0288 |
| rs886505    | G | 0.0204  |
| rs541415    | T | 0.0322  |
| rs113548383 | C | -0.0303 |

|             |   |         |
|-------------|---|---------|
| rs34293043  | A | -0.0616 |
| rs62443598  | A | 0.0289  |
| rs10264231  | T | -0.0305 |
| rs799712    | G | 0.0302  |
| rs1974489   | T | -0.0248 |
| rs17156942  | G | -0.0436 |
| rs4948076   | G | 0.0313  |
| rs17367034  | C | 0.0936  |
| rs2965366   | T | -0.0302 |
| rs4719704   | G | -0.0387 |
| rs77573589  | T | -0.1254 |
| rs1195221   | G | -0.0242 |
| rs2108073   | C | 0.0426  |
| rs10487225  | C | 0.0471  |
| rs2188872   | G | 0.0318  |
| rs34289827  | A | -0.0394 |
| rs4074119   | C | 0.0237  |
| rs78195070  | C | 0.0262  |
| rs75070564  | C | -0.0306 |
| rs11767165  | C | -0.0247 |
| rs75430547  | T | 0.0562  |
| rs139845795 | A | -0.0914 |
| rs6466236   | T | -0.0522 |
| rs17214004  | T | -0.0611 |
| rs17640401  | T | -0.1355 |
| rs74687253  | A | -0.0592 |
| rs79623377  | A | 0.0512  |
| rs17697366  | T | -0.0829 |
| rs112023742 | G | 0.0692  |
| rs13231615  | A | -0.0838 |
| rs145066611 | A | 0.1347  |
| rs1030268   | G | -0.0225 |
| rs117161041 | A | 0.123   |
| rs994306    | A | 0.0228  |
| rs74574661  | T | -0.0922 |
| rs76545314  | G | 0.1426  |
| rs79225790  | T | -0.0672 |
| rs1404041   | T | -0.0205 |
| rs75836291  | A | -0.1285 |
| rs75810263  | A | 0.1276  |
| rs73169624  | A | 0.0601  |
| rs2531037   | T | -0.0302 |
| rs73220186  | A | -0.0448 |
| rs118050197 | T | -0.0979 |
| rs28685713  | G | 0.0668  |
| rs7790933   | A | -0.0562 |
| rs112871324 | G | 0.0402  |

|             |   |         |
|-------------|---|---------|
| rs117287276 | T | 0.0795  |
| rs117003842 | T | -0.0704 |
| rs77166990  | T | -0.1042 |
| rs117542090 | G | 0.0672  |
| rs79377053  | A | 0.0547  |
| rs148743489 | A | 0.0854  |
| rs199659    | A | -0.0397 |
| rs318585    | G | -0.0751 |
| rs79782196  | A | -0.0647 |
| rs929322    | A | -0.0334 |
| rs58146134  | C | -0.161  |
| rs11773736  | A | -0.0219 |
| rs117337251 | G | 0.0837  |
| rs17705734  | T | -0.0463 |
| rs2293748   | T | 0.0207  |
| rs143042331 | A | 0.0512  |
| rs146227189 | T | -0.0602 |
| rs2099282   | A | -0.0311 |
| rs78423812  | C | 0.0795  |
| rs4553      | A | -0.022  |
| rs146090591 | T | -0.1354 |
| rs142247162 | A | -0.1124 |
| rs2158768   | A | -0.02   |
| rs4722101   | T | 0.021   |
| rs60171273  | G | 0.0271  |
| rs4723127   | G | -0.0209 |
| rs111342824 | G | 0.0612  |
| rs7383917   | A | 0.0336  |
| rs10237147  | G | 0.0268  |
| rs12668716  | C | 0.0354  |
| rs62469044  | A | 0.1448  |
| rs17272724  | G | -0.0212 |
| rs960316    | G | -0.047  |
| rs11761950  | A | -0.0269 |
| rs140260962 | T | 0.0864  |
| rs112872348 | A | -0.0809 |
| rs142888109 | G | 0.122   |
| rs147021356 | C | 0.1472  |
| rs174978    | C | 0.0212  |
| rs73210604  | G | -0.1141 |
| rs10486140  | G | -0.1404 |
| rs10258132  | C | 0.0354  |
| rs75544000  | A | -0.0982 |
| rs78619205  | C | 0.091   |
| rs10271744  | A | 0.0239  |
| rs4909090   | A | 0.1215  |
| rs75978360  | T | -0.1145 |

|             |   |         |
|-------------|---|---------|
| rs9770544   | C | -0.0277 |
| rs17165530  | T | 0.0415  |
| rs3807495   | A | 0.0213  |
| rs117101848 | T | -0.0837 |
| rs116954070 | C | 0.058   |
| rs807871    | T | 0.0239  |
| rs38125     | T | -0.0316 |
| rs75382398  | A | -0.1574 |
| rs55856710  | G | 0.0691  |
| rs116914745 | T | 0.0869  |
| rs75932357  | C | 0.1077  |
| rs2938504   | A | 0.0613  |
| rs151055766 | A | 0.1153  |
| rs4729976   | T | 0.0357  |
| rs111322577 | G | 0.0696  |
| rs78643463  | C | 0.0294  |
| rs34466907  | G | -0.1131 |
| rs10271150  | T | 0.0309  |
| rs150607    | G | -0.0218 |
| rs145288189 | T | -0.1104 |
| rs144628666 | C | -0.0897 |
| rs1860867   | A | 0.0382  |
| rs116986160 | A | -0.1049 |
| rs141468826 | C | 0.1057  |
| rs149598774 | T | 0.0903  |
| rs78754800  | C | -0.0893 |
| rs138553251 | T | -0.0881 |
| rs10280844  | C | -0.0308 |
| rs117847998 | C | -0.0767 |
| rs146986883 | T | 0.1297  |
| rs114193497 | A | 0.0528  |
| rs10260111  | A | 0.0217  |
| rs304803    | G | 0.023   |
| rs60732348  | T | -0.0382 |
| rs12698186  | G | -0.0333 |
| rs139885797 | A | -0.0595 |
| rs62507050  | A | 0.0298  |
| rs113253983 | T | -0.0399 |
| rs118104413 | A | 0.0898  |
| rs117807393 | C | 0.1616  |
| rs73077991  | T | 0.0723  |
| rs74957998  | T | -0.0564 |
| rs141911937 | T | 0.1346  |
| rs76145193  | G | 0.1943  |
| rs35798385  | T | 0.0492  |
| rs4727825   | C | 0.0747  |
| rs6946551   | T | -0.0263 |



|             |   |         |
|-------------|---|---------|
| rs150257620 | T | -0.0373 |
| rs150481811 | A | 0.0835  |
| rs10240510  | G | -0.091  |
| rs62435371  | T | -0.0557 |
| rs55924429  | G | 0.0284  |
| rs142860901 | T | 0.1022  |
| rs705351    | T | -0.026  |
| rs73715114  | G | 0.0235  |
| rs149103385 | T | 0.1052  |
| rs10254582  | G | 0.05    |
| rs2876862   | C | -0.0213 |
| rs6977438   | T | 0.1062  |
| rs111981194 | A | -0.1149 |
| rs1859798   | A | 0.0308  |
| rs117278879 | T | -0.142  |
| rs17168056  | A | -0.0276 |
| rs139700037 | A | -0.1438 |
| rs73153877  | T | 0.096   |
| rs6943446   | T | 0.0219  |
| rs56378865  | C | -0.0438 |
| rs145580602 | T | 0.1118  |
| rs7787826   | G | -0.1497 |
| rs143338988 | T | 0.0873  |
| rs1565628   | A | -0.0323 |
| rs12531806  | T | -0.0315 |
| rs2355092   | C | -0.0258 |
| rs6955974   | A | 0.0203  |
| rs146871352 | G | 0.044   |
| rs4455743   | T | 0.0209  |
| rs142703226 | A | 0.0585  |
| rs80254327  | C | -0.0298 |
| rs144080229 | T | 0.1164  |
| rs11771629  | T | 0.0209  |
| rs7804323   | T | 0.0396  |
| rs3936103   | C | 0.0262  |
| rs111823336 | T | 0.0924  |
| rs58832265  | G | -0.0651 |
| rs847922    | A | 0.0761  |
| rs117667816 | C | 0.1086  |
| rs118140475 | T | 0.0911  |
| rs62479324  | G | 0.1407  |
| rs73740447  | G | 0.0276  |
| rs80219231  | A | -0.0806 |
| rs77076746  | T | 0.1088  |
| rs12532890  | T | -0.0215 |
| rs146358883 | T | 0.0691  |
| rs17321119  | T | 0.0725  |

|             |   |         |
|-------------|---|---------|
| rs117385374 | A | -0.0925 |
| rs1990381   | A | -0.0614 |
| rs112389415 | C | 0.0474  |
| rs117389774 | T | -0.0904 |
| rs116929256 | A | 0.0635  |
| rs2528650   | T | 0.0221  |
| rs13241973  | A | -0.0227 |
| rs77046554  | G | -0.0573 |
| rs28535364  | A | 0.0415  |
| rs17274449  | G | -0.1142 |
| rs734900    | C | -0.0538 |
| rs73684804  | T | -0.0976 |
| rs73295445  | C | 0.0963  |
| rs306723    | G | -0.0205 |
| rs1285909   | T | -0.0734 |
| rs11766076  | G | -0.026  |
| rs624502    | T | 0.0446  |
| rs117153597 | A | -0.1479 |
| rs77437331  | T | -0.0622 |
| rs113511828 | A | 0.0792  |
| rs62469405  | G | 0.0758  |
| rs57590058  | A | 0.0273  |
| rs4724359   | C | 0.0226  |
| rs146491260 | G | 0.1102  |
| rs2942562   | G | -0.0203 |
| rs34768970  | A | 0.0441  |
| rs7811800   | C | 0.0341  |
| rs9639635   | A | 0.0384  |
| rs147113355 | C | 0.0683  |
| rs79795851  | G | 0.0352  |
| rs217554    | G | -0.0211 |
| rs79711231  | C | 0.0668  |
| rs1524583   | T | 0.0208  |
| rs76610954  | T | 0.0525  |
| rs140237145 | G | -0.1147 |
| rs1522527   | G | 0.0294  |
| rs61330082  | A | 0.0234  |
| rs75244173  | C | 0.1379  |
| rs60662306  | A | 0.0686  |
| rs62447215  | T | 0.0347  |
| rs78078245  | G | 0.1039  |
| rs1468517   | T | -0.0263 |
| rs57358258  | C | -0.0322 |
| rs61244245  | T | 0.021   |
| rs2528481   | A | 0.025   |
| rs75626119  | T | 0.1188  |
| rs11508468  | A | 0.026   |

|             |   |         |
|-------------|---|---------|
| rs78519558  | G | -0.0654 |
| rs141582822 | G | -0.1468 |
| rs9647683   | A | 0.0541  |
| rs117076523 | C | -0.0927 |
| rs16874131  | G | 0.046   |
| rs17170799  | C | -0.0463 |
| rs115819045 | C | -0.0432 |
| rs4722887   | C | 0.0434  |
| rs2695568   | G | -0.0274 |
| rs17428785  | T | 0.1104  |
| rs150469999 | G | 0.0566  |
| rs2949767   | T | 0.0215  |
| rs142692664 | T | 0.1132  |
| rs80020669  | A | -0.0972 |
| rs59765664  | A | -0.0415 |
| rs74874178  | C | 0.1753  |
| rs76291571  | A | 0.1005  |
| rs144890299 | A | 0.1804  |
| rs4141354   | T | 0.0232  |
| rs12536521  | A | -0.0797 |
| rs3735259   | A | 0.1315  |
| rs13233768  | T | 0.0435  |
| rs148433404 | T | 0.11    |
| rs11761769  | G | 0.0293  |
| rs150181620 | G | -0.0849 |
| rs4640950   | T | 0.06    |
| rs150025549 | A | 0.1228  |
| rs4732065   | T | 0.0198  |
| rs706155    | G | 0.054   |
| rs80153822  | G | -0.1041 |
| rs73105929  | T | 0.1784  |
| rs1229653   | G | 0.0228  |
| rs4718189   | T | 0.0681  |
| rs12673159  | T | 0.0236  |
| rs146634903 | T | 0.1068  |
| rs79199344  | T | 0.1148  |
| rs75719450  | C | -0.0818 |
| rs13243666  | G | 0.0435  |
| rs148224844 | C | -0.1008 |
| rs112427007 | G | -0.0318 |
| rs6971630   | C | 0.0226  |
| rs78300077  | A | -0.1005 |
| rs139238239 | A | 0.0906  |
| rs117916034 | T | 0.1045  |
| rs146373017 | G | -0.0524 |
| rs79578652  | A | -0.0273 |
| rs10248621  | G | 0.0207  |

|             |   |         |
|-------------|---|---------|
| rs78417052  | T | 0.136   |
| rs11514839  | G | -0.0724 |
| rs73083829  | A | 0.0281  |
| rs4361695   | G | -0.0304 |
| rs2428927   | A | 0.0217  |
| rs2460483   | T | 0.0252  |
| rs150598554 | C | -0.087  |
| rs6961510   | A | 0.0316  |
| rs10486317  | G | -0.0492 |
| rs111775586 | G | -0.0501 |
| rs17156560  | C | 0.133   |
| rs4726499   | G | -0.0248 |
| rs149733450 | A | 0.1831  |
| rs117035372 | A | -0.0955 |
| rs79873590  | C | 0.1557  |
| rs17549133  | T | 0.0622  |
| rs145340245 | C | -0.0685 |
| rs61756571  | C | 0.0549  |
| rs77483481  | G | -0.0543 |
| rs17648     | C | 0.0262  |
| rs6967177   | C | -0.0237 |
| rs75782629  | G | 0.0563  |
| rs147419492 | T | -0.174  |
| rs961564    | A | 0.0239  |
| rs56044965  | T | -0.0631 |
| rs73049325  | G | 0.052   |
| rs12668317  | A | 0.0228  |
| rs139925968 | A | -0.1122 |
| rs1859667   | T | 0.0303  |
| rs10260481  | T | -0.025  |
| rs4960565   | T | 0.0803  |
| rs151149153 | G | 0.0659  |
| rs117530834 | C | -0.1145 |
| rs13233933  | C | -0.0403 |
| rs139738088 | T | -0.0582 |
| rs73112992  | G | -0.0503 |
| rs73169577  | C | 0.1107  |
| rs6972455   | A | 0.0293  |
| rs10266615  | C | -0.0694 |
| rs6961574   | G | -0.0358 |
| rs75594548  | T | 0.1163  |
| rs2301911   | G | -0.0804 |
| rs6460818   | G | -0.0247 |
| rs11772090  | A | 0.0207  |
| rs6467366   | T | 0.0252  |
| rs1997011   | C | 0.0302  |
| rs79875198  | C | -0.0608 |

|             |   |         |
|-------------|---|---------|
| rs13236607  | G | 0.0369  |
| rs79853837  | A | -0.1029 |
| rs117140710 | C | 0.1052  |
| rs146602082 | G | 0.1948  |
| rs117666749 | G | 0.024   |
| rs67708934  | A | -0.0577 |
| rs10248388  | C | -0.0507 |
| rs7783698   | A | 0.0301  |
| rs79264542  | T | -0.1118 |
| rs73058286  | A | -0.1108 |
| rs2020451   | C | -0.0225 |
| rs112823540 | G | 0.1314  |
| rs882362    | A | 0.0207  |
| rs112950415 | C | 0.164   |
| rs76160867  | C | -0.0858 |
| rs74597998  | A | -0.0837 |
| rs17153997  | T | 0.0204  |
| rs112995359 | C | -0.1524 |
| rs12707434  | G | -0.0816 |
| rs59608562  | T | 0.0534  |
| rs145267197 | A | 0.1023  |
| rs10263780  | A | 0.0281  |
| rs17147989  | C | 0.0337  |
| rs148031773 | A | 0.1229  |
| rs10254169  | G | -0.0398 |
| rs55985730  | G | 0.0535  |
| rs56739941  | C | 0.0382  |
| rs6977240   | G | 0.0233  |
| rs34786218  | A | 0.0799  |
| rs149415372 | A | -0.0606 |
| rs62494291  | T | 0.0356  |
| rs75254306  | T | 0.0543  |
| rs78690380  | G | -0.1002 |
| rs55703874  | G | -0.0835 |
| rs146546654 | C | -0.1471 |
| rs7789949   | C | 0.1162  |
| rs448210    | A | 0.0203  |
| rs77488390  | C | -0.1432 |
| rs75015447  | T | 0.118   |
| rs6969583   | A | 0.0443  |
| rs12533381  | A | -0.0483 |
| rs4530935   | T | 0.0212  |
| rs117003255 | T | -0.0956 |
| rs1362215   | G | -0.0197 |
| rs17667513  | C | -0.0754 |
| rs55976107  | A | -0.0268 |
| rs113804736 | T | -0.0707 |

|             |   |         |
|-------------|---|---------|
| rs10488345  | C | -0.0222 |
| rs58759116  | C | -0.0253 |
| rs74381963  | T | 0.1326  |
| rs7789646   | T | -0.0604 |
| rs73091233  | C | -0.044  |
| rs62478621  | A | 0.0444  |
| rs112174963 | C | -0.081  |
| rs7786289   | C | 0.0205  |
| rs2024248   | G | 0.0868  |
| rs117571770 | G | 0.0954  |
| rs4723021   | T | -0.0443 |
| rs117475163 | A | -0.0952 |
| rs61322867  | A | -0.0394 |
| rs117273005 | A | -0.0927 |
| rs73128610  | T | 0.0531  |
| rs149782083 | C | 0.1337  |
| rs11770303  | C | -0.0811 |
| rs1993094   | C | -0.03   |
| rs111959244 | A | 0.1397  |
| rs79808290  | T | 0.1148  |
| rs2189311   | A | 0.0211  |
| rs6943055   | T | -0.0346 |
| rs2501440   | G | -0.0217 |
| rs75546197  | T | 0.0428  |
| rs6973612   | G | 0.108   |
| rs2117519   | T | -0.0324 |
| rs62452800  | T | 0.0965  |
| rs10953721  | G | -0.0215 |
| rs35946341  | G | 0.0474  |
| rs62448338  | A | -0.0266 |
| rs4731418   | G | 0.0241  |
| rs10239567  | A | -0.0282 |
| rs79290247  | T | -0.0705 |
| rs118094880 | A | 0.0462  |
| rs66669305  | A | -0.0557 |
| rs12155423  | T | -0.0233 |
| rs764723    | A | 0.0239  |
| rs6463794   | T | 0.0438  |
| rs12702911  | A | 0.0303  |
| rs116996912 | T | -0.1126 |
| rs4729137   | A | 0.0198  |
| rs117689425 | G | 0.0868  |
| rs1079265   | G | 0.0225  |
| rs118164698 | G | 0.0535  |
| rs116858470 | T | -0.143  |
| rs41482947  | T | -0.051  |
| rs149298460 | C | 0.0365  |

|             |   |         |
|-------------|---|---------|
| rs151227573 | A | -0.1976 |
| rs11773460  | G | 0.0218  |
| rs7808252   | A | 0.0269  |
| rs112101425 | T | -0.1229 |
| rs6463779   | C | 0.0486  |
| rs1837523   | C | -0.0254 |
| rs2634092   | G | -0.0204 |
| rs6957713   | A | 0.0408  |
| rs150920393 | T | 0.1256  |
| rs2727846   | T | 0.0259  |
| rs2177795   | A | -0.0424 |
| rs7791717   | T | 0.0545  |
| rs2190204   | T | -0.0298 |
| rs17136116  | T | -0.0499 |
| rs9648375   | C | -0.0209 |
| rs12718819  | A | 0.0443  |
| rs75030876  | T | -0.0881 |
| rs73172908  | C | 0.0429  |
| rs58347265  | G | 0.0484  |
| rs6979515   | C | -0.0197 |
| rs28753677  | G | 0.0286  |
| rs1179605   | A | -0.0343 |
| rs17153298  | T | -0.0539 |
| rs17132133  | T | 0.1033  |
| rs79425103  | C | -0.0781 |
| rs75158997  | T | -0.1049 |
| rs886765    | T | 0.0348  |
| rs150830068 | A | -0.1195 |
| rs62441892  | T | -0.0364 |
| rs77668198  | A | 0.0519  |
| rs73159622  | A | 0.0606  |
| rs117136684 | T | 0.1407  |
| rs75196715  | T | -0.1262 |
| rs13229160  | T | -0.1337 |
| rs10281913  | G | 0.022   |
| rs150520298 | T | -0.1797 |
| rs145057031 | G | -0.0889 |
| rs10267908  | A | -0.0252 |
| rs35301223  | T | 0.0597  |
| rs10224415  | G | 0.0506  |
| rs6463968   | T | -0.0286 |
| rs62446894  | T | -0.0895 |
| rs35220173  | T | 0.1217  |
| rs143721490 | A | -0.1606 |
| rs1731355   | G | -0.0343 |
| rs11979797  | T | 0.0549  |
| rs4732386   | C | -0.0204 |

|             |   |         |
|-------------|---|---------|
| rs117979569 | A | 0.1264  |
| rs147078427 | T | -0.12   |
| rs17862313  | A | -0.0792 |
| rs6465304   | G | -0.0246 |
| rs117914069 | G | -0.1343 |
| rs56282081  | A | 0.0456  |
| rs6966236   | G | -0.0252 |
| rs12699659  | C | -0.0275 |
| rs1860531   | T | -0.0239 |
| rs74989189  | T | -0.0883 |
| rs34119690  | T | 0.0804  |
| rs4728404   | C | -0.02   |
| rs4716447   | A | 0.0258  |
| rs1636409   | G | 0.0247  |
| rs73066013  | G | 0.1382  |
| rs79684285  | T | 0.0637  |
| rs10499481  | C | 0.0309  |
| rs61407167  | T | 0.0772  |
| rs141221783 | C | 0.0903  |
| rs34376116  | G | -0.0492 |
| rs1733876   | A | -0.0689 |
| rs11771429  | T | -0.0337 |
| rs4947864   | T | -0.0642 |
| rs117999997 | G | -0.0556 |
| rs79676622  | C | -0.1364 |
| rs146365048 | A | -0.1433 |
| rs4720600   | G | 0.0418  |
| rs4728500   | C | -0.0394 |
| rs7779534   | G | -0.0249 |
| rs12700893  | A | -0.0215 |
| rs117686839 | T | 0.1406  |
| rs77352106  | G | 0.0506  |
| rs302121    | T | 0.0274  |
| rs73238193  | G | 0.0286  |
| rs11762316  | C | -0.0205 |
| rs80083939  | T | -0.1193 |
| rs62466269  | C | 0.0211  |
| rs683778    | G | -0.0671 |
| rs28572114  | G | 0.0462  |
| rs10264199  | C | 0.025   |
| rs3109433   | T | 0.0305  |
| rs17209031  | T | 0.0237  |
| rs113406048 | T | -0.1084 |
| rs6957850   | T | -0.1712 |
| rs62446761  | T | 0.0893  |
| rs2727744   | C | 0.0217  |
| rs117454762 | A | -0.1135 |



|             |   |         |
|-------------|---|---------|
| rs117336065 | A | 0.0972  |
| rs62451586  | A | 0.0329  |
| rs79581811  | C | -0.1897 |
| rs78512671  | A | 0.1102  |
| rs80073993  | T | -0.047  |
| rs62482461  | A | -0.1014 |
| rs62482945  | T | -0.0432 |
| rs12674035  | A | 0.0705  |
| rs4731623   | A | 0.0625  |
| rs28450978  | C | 0.0668  |
| rs6963498   | C | -0.0238 |
| rs34254427  | G | -0.117  |
| rs62500789  | A | 0.0362  |
| rs71566703  | T | -0.0486 |
| rs2267881   | C | -0.0204 |
| rs117349131 | C | -0.1335 |
| rs17478890  | C | 0.0376  |
| rs6966750   | T | -0.0232 |
| rs2285943   | T | -0.02   |
| rs112627484 | T | -0.055  |
| rs74631427  | A | -0.0533 |
| rs34290936  | G | 0.0334  |
| rs150296381 | T | 0.1244  |
| rs7805248   | G | 0.0696  |
| rs75388673  | G | -0.0336 |
| rs12540520  | C | -0.0463 |
| rs57007054  | A | 0.0577  |
| rs117646443 | T | -0.0921 |
| rs78946363  | A | 0.0375  |
| rs17350515  | A | -0.0256 |
| rs112165822 | T | 0.0768  |
| rs13225183  | T | -0.0317 |
| rs28884831  | T | 0.0248  |
| rs12670132  | G | -0.026  |
| rs117791788 | G | -0.1094 |
| rs74436047  | T | 0.0598  |
| rs34420973  | T | 0.1082  |
| rs3956665   | C | 0.0218  |
| rs74752840  | A | 0.0483  |
| rs117258619 | C | -0.1234 |
| rs77071878  | T | -0.0564 |
| rs62456804  | T | -0.054  |
| rs139854416 | G | -0.099  |
| rs11762168  | T | 0.0435  |
| rs147263866 | C | -0.1351 |
| rs117547329 | T | 0.0826  |
| rs73715304  | A | -0.0294 |

|             |   |         |
|-------------|---|---------|
| rs62449364  | G | -0.0267 |
| rs10244840  | G | -0.0231 |
| rs141519570 | A | -0.1136 |
| rs73477651  | T | 0.0237  |
| rs79133698  | G | -0.0737 |
| rs1628197   | C | -0.0193 |
| rs79448043  | G | 0.0988  |
| rs10952755  | A | 0.0304  |
| rs35183929  | C | -0.0386 |
| rs2074748   | G | 0.1144  |
| rs73485699  | T | 0.0809  |
| rs78389063  | C | -0.0744 |
| rs55645606  | C | 0.0369  |
| rs117626618 | T | -0.0464 |
| rs2692430   | G | 0.03    |
| rs78734830  | A | -0.0403 |
| rs9649808   | C | -0.0452 |
| rs4718722   | C | -0.0194 |
| rs75516541  | G | -0.0731 |
| rs117609149 | A | 0.0664  |
| rs76024622  | C | 0.1192  |
| rs17153674  | T | 0.0325  |
| rs73164374  | C | 0.0912  |
| rs118088294 | G | -0.07   |
| rs147447470 | T | -0.0782 |
| rs143747981 | G | -0.0578 |
| rs12671649  | G | -0.0358 |
| rs141463960 | C | -0.1239 |
| rs802192    | A | -0.068  |
| rs6972000   | G | 0.0489  |
| rs6462803   | A | 0.0805  |
| rs77877909  | T | 0.0638  |
| rs9969155   | T | -0.0838 |
| rs12718496  | A | 0.0203  |
| rs117721509 | A | 0.1274  |
| rs79164340  | C | -0.1073 |
| rs4475383   | C | 0.0374  |
| rs3757596   | A | 0.0523  |
| rs79694276  | T | -0.1585 |
| rs1735087   | C | -0.0202 |
| rs17147267  | A | -0.0263 |
| rs2903598   | T | -0.1511 |
| rs2625400   | C | 0.0247  |
| rs17495590  | A | 0.1339  |
| rs1525513   | G | 0.0197  |
| rs4730285   | C | 0.0409  |
| rs17862340  | T | -0.0387 |

|             |   |         |
|-------------|---|---------|
| rs67169845  | A | 0.0878  |
| rs118170002 | C | 0.1237  |
| rs74692743  | T | -0.0995 |
| rs2971036   | T | -0.0313 |
| rs117268673 | T | -0.0783 |
| rs140279526 | C | -0.0823 |
| rs75754264  | G | -0.1064 |
| rs3807228   | T | 0.0401  |
| rs7781014   | C | 0.0217  |
| rs499953    | G | 0.0238  |
| rs35967536  | A | -0.0458 |
| rs145881069 | T | -0.0897 |
| rs10807725  | G | -0.0362 |
| rs62447167  | T | 0.0423  |
| rs272663    | T | 0.0251  |
| rs35709627  | A | 0.0794  |
| rs16872383  | T | -0.0296 |
| rs6953041   | G | -0.033  |
| rs13224525  | C | 0.0248  |
| rs76727930  | G | -0.0846 |
| rs148935394 | G | 0.0656  |
| rs118044442 | A | -0.1441 |
| rs149139205 | C | -0.138  |
| rs117002191 | T | 0.0549  |
| rs139242962 | T | 0.0792  |
| rs10248580  | T | 0.0257  |
| rs28447185  | T | -0.021  |
| rs10269867  | C | 0.043   |
| rs11535228  | T | 0.0406  |
| rs76730145  | A | -0.1077 |
| rs11762520  | T | 0.032   |
| rs116945925 | T | -0.1578 |
| rs79394434  | C | -0.0755 |
| rs75722109  | C | 0.0525  |
| rs2079888   | A | 0.0247  |
| rs7455872   | A | 0.0214  |
| rs146231889 | T | -0.2123 |
| rs12112299  | G | -0.0883 |
| rs73193746  | T | 0.0438  |
| rs12537281  | T | -0.0316 |
| rs75316717  | G | -0.0464 |
| rs138759023 | A | -0.1165 |
| rs142339756 | C | -0.0897 |
| rs757683    | T | -0.02   |
| rs2394502   | A | 0.0504  |
| rs117328598 | T | 0.1205  |
| rs144800125 | C | -0.0336 |

|             |   |         |
|-------------|---|---------|
| rs2711027   | A | -0.0193 |
| rs11489452  | C | 0.0463  |
| rs9641219   | G | -0.0206 |
| rs11970793  | T | 0.0344  |
| rs112659834 | G | 0.0809  |
| rs145271874 | C | -0.1568 |
| rs6973398   | C | 0.0519  |
| rs117781784 | T | -0.1264 |
| rs4302794   | T | 0.0413  |
| rs118168602 | G | 0.0778  |
| rs16871112  | G | -0.0624 |
| rs1405992   | A | -0.0675 |
| rs117891853 | A | 0.0652  |
| rs71538040  | T | 0.0384  |
| rs7782329   | C | -0.0452 |
| rs77922561  | G | 0.0723  |
| rs7781440   | T | 0.0287  |
| rs117408557 | G | 0.1002  |
| rs4726484   | A | -0.0267 |
| rs6969241   | C | -0.0506 |
| rs4427074   | G | -0.0413 |
| rs6967028   | C | 0.0341  |
| rs78854667  | T | 0.0734  |
| rs300533    | C | 0.0226  |
| rs74695706  | G | -0.0835 |
| rs76044193  | T | 0.091   |
| rs6956360   | A | -0.0205 |
| rs4725395   | G | 0.0221  |
| rs146487426 | C | -0.1176 |
| rs140776873 | T | 0.1725  |
| rs1353563   | G | 0.023   |
| rs573017    | C | -0.0437 |
| rs62495819  | A | -0.0733 |
| rs10237191  | T | 0.0792  |
| rs17143831  | G | 0.0309  |
| rs117163136 | A | 0.08    |
| rs74853323  | G | 0.0328  |
| rs79521811  | C | 0.1349  |
| rs12707085  | T | 0.0363  |
| rs7800754   | A | -0.0419 |
| rs12533066  | G | -0.0257 |
| rs12718975  | T | -0.0277 |
| rs10248360  | A | -0.0198 |
| rs57925255  | C | 0.0709  |
| rs4720401   | G | 0.0203  |
| rs117148543 | C | -0.1573 |
| rs73322523  | A | -0.0794 |

|             |   |         |
|-------------|---|---------|
| rs117271000 | A | -0.094  |
| rs60794956  | A | -0.1282 |
| rs1802073   | T | -0.0198 |
| rs117290238 | C | 0.0564  |
| rs39439     | T | -0.0258 |
| rs116208440 | T | 0.1118  |
| rs74509800  | T | 0.144   |
| rs139546511 | A | 0.0987  |
| rs2699779   | G | -0.0247 |
| rs73671970  | G | 0.0414  |
| rs6462228   | A | -0.0236 |
| rs148586084 | C | -0.0548 |
| rs506875    | C | 0.0266  |
| rs117943867 | G | 0.1511  |
| rs17547853  | A | -0.0312 |
| rs2242029   | A | 0.026   |
| rs75339298  | G | 0.0716  |
| rs3934868   | A | -0.0252 |
| rs7796437   | G | -0.022  |
| rs115772308 | C | 0.0354  |
| rs157926    | C | 0.0234  |
| rs2971741   | T | 0.0975  |
| rs111549903 | C | -0.0701 |
| rs28374747  | A | 0.0235  |
| rs12666031  | G | -0.063  |
| rs34182312  | C | 0.0316  |
| rs58647432  | C | 0.1558  |
| rs7783368   | G | 0.0362  |
| rs6962036   | T | -0.0996 |
| rs6967655   | T | 0.0453  |
| rs12702020  | G | -0.0853 |
| rs117551236 | C | -0.072  |
| rs117634525 | A | 0.0558  |
| rs11769315  | G | 0.1085  |
| rs62465983  | G | -0.1179 |
| rs489916    | C | -0.0239 |
| rs79509517  | C | -0.0574 |
| rs73158267  | A | 0.0796  |
| rs17375390  | A | -0.0525 |
| rs79264750  | A | 0.1033  |
| rs62445409  | T | -0.0221 |
| rs10954664  | C | 0.0196  |
| rs17863228  | T | 0.0196  |
| rs10244562  | T | 0.0559  |
| rs61121697  | A | -0.0297 |
| rs219266    | C | -0.0621 |
| rs850074    | A | -0.0264 |

|             |   |         |
|-------------|---|---------|
| rs6949521   | G | -0.0821 |
| rs117615138 | C | 0.0818  |
| rs80258026  | C | -0.0813 |
| rs77237897  | T | -0.0777 |
| rs6955790   | C | -0.0276 |
| rs2471905   | G | 0.021   |
| rs2727803   | C | -0.0198 |
| rs77876529  | G | 0.0752  |
| rs78027772  | A | -0.0586 |
| rs73162738  | C | -0.0591 |
| rs17156534  | T | 0.089   |
| rs2374678   | T | -0.054  |
| rs6958434   | T | 0.0276  |
| rs28611315  | C | 0.0395  |
| rs62448745  | A | 0.0565  |
| rs73132140  | G | 0.0798  |
| rs117461769 | G | -0.1151 |
| rs117756006 | T | -0.1356 |
| rs62460338  | T | 0.0545  |
| rs42077     | C | -0.0283 |
| rs4808      | T | -0.0231 |
| rs16874924  | C | 0.0261  |
| rs2049387   | A | 0.0217  |
| rs117778854 | T | -0.0515 |
| rs74544846  | T | 0.0558  |
| rs79206892  | A | -0.1063 |
| rs74326718  | T | 0.0576  |
| rs76393003  | T | -0.0369 |
| rs144161825 | G | -0.1439 |
| rs35577833  | T | 0.0708  |
| rs150613    | A | 0.0225  |
| rs78509173  | T | 0.1011  |
| rs61023017  | C | 0.0368  |
| rs142006223 | G | -0.0429 |
| rs56412240  | T | 0.0692  |
| rs117425320 | T | -0.0325 |
| rs62456184  | A | -0.022  |
| rs76481702  | C | -0.0835 |
| rs149707170 | G | -0.0629 |
| rs78759229  | C | -0.134  |
| rs140724128 | A | -0.1236 |
| rs11761143  | T | -0.0484 |
| rs71543791  | A | 0.1169  |
| rs314657    | A | 0.0293  |
| rs3817557   | T | -0.0297 |
| rs73486021  | C | -0.0461 |
| rs850556    | C | -0.0224 |

|             |   |         |
|-------------|---|---------|
| rs144114273 | T | 0.1079  |
| rs115130914 | C | -0.0319 |
| rs2108941   | T | -0.0547 |
| rs141048332 | T | -0.1436 |
| rs10953870  | A | 0.0203  |
| rs56290847  | A | 0.0396  |
| rs79775380  | A | -0.0942 |
| rs1675569   | A | -0.0218 |
| rs4719680   | T | -0.0279 |
| rs6973014   | G | 0.0245  |
| rs10278814  | T | -0.0281 |
| rs848474    | G | 0.0196  |
| rs117490597 | C | 0.0894  |
| rs12530606  | A | -0.0205 |
| rs77032156  | G | 0.1138  |
| rs1991313   | C | -0.0257 |
| rs139135206 | C | 0.0942  |
| rs73498044  | A | -0.0511 |
| rs79072625  | A | 0.09    |
| rs140481765 | A | -0.1591 |
| rs755349    | A | 0.0399  |
| rs62454712  | C | 0.0259  |
| rs10435126  | G | -0.0424 |
| rs35127557  | G | 0.0287  |
| rs111763221 | A | 0.1167  |
| rs55696825  | T | -0.0224 |
| rs1676911   | T | -0.0232 |
| rs6957588   | G | 0.0695  |
| rs10270627  | G | -0.0195 |
| rs73161322  | G | -0.035  |
| rs750464    | T | -0.0446 |
| rs117663768 | T | -0.095  |
| rs17496031  | C | 0.0698  |
| rs1011441   | G | -0.0213 |
| rs17166330  | T | -0.0243 |
| rs56076739  | A | -0.0206 |
| rs148487752 | A | -0.1434 |
| rs10807660  | T | -0.0273 |
| rs7777594   | A | -0.0487 |
| rs112178775 | A | 0.0527  |
| rs149027120 | G | -0.0752 |
| rs71550904  | C | -0.0631 |
| rs2188148   | T | 0.0264  |
| rs11764098  | G | 0.0961  |
| rs118126799 | C | 0.1035  |
| rs73206874  | G | 0.0522  |
| rs148449364 | G | -0.0715 |

|             |   |         |
|-------------|---|---------|
| rs34011652  | C | 0.021   |
| rs146877251 | G | 0.0963  |
| rs11770421  | C | 0.0273  |
| rs12690837  | A | -0.0633 |
| rs12718939  | A | 0.0201  |
| rs34184609  | T | 0.0698  |
| rs2944814   | A | 0.0186  |
| rs10264043  | C | 0.0306  |
| rs157934    | C | -0.0211 |
| rs79597403  | T | 0.1655  |
| rs77005385  | T | 0.0497  |
| rs218138    | A | -0.031  |
| rs57447448  | G | -0.0873 |
| rs60969734  | C | 0.0952  |
| rs149775673 | A | 0.099   |
| rs6969728   | A | 0.0207  |
| rs12535648  | C | -0.0295 |
| rs572250    | G | 0.0255  |
| rs79123154  | T | 0.0988  |
| rs111297338 | A | 0.0486  |
| rs77448786  | C | -0.0956 |
| rs11983707  | T | -0.0769 |
| rs6954931   | G | -0.0279 |
| rs1866573   | G | 0.1535  |
| rs144526050 | T | 0.0903  |
| rs4724065   | T | -0.0264 |
| rs62444753  | C | -0.0309 |
| rs77317256  | G | 0.0987  |
| rs76551060  | T | 0.0813  |
| rs17153394  | T | 0.038   |
| rs62491054  | G | 0.0485  |
| rs80058453  | G | -0.1179 |
| rs75779620  | C | -0.0803 |
| rs140622649 | G | -0.0728 |
| rs56132087  | C | 0.1063  |
| rs76746037  | C | 0.0685  |
| rs286545    | A | 0.0272  |
| rs75303132  | C | 0.0998  |
| rs983497    | A | 0.0349  |
| rs73041570  | T | -0.0414 |
| rs79155275  | A | -0.0944 |
| rs17672457  | G | -0.0463 |
| rs78929845  | G | -0.0758 |
| rs12702509  | G | 0.0283  |
| rs7801030   | C | 0.0398  |
| rs75894962  | C | -0.0993 |
| rs75252689  | T | 0.0543  |



|             |   |         |
|-------------|---|---------|
| rs150439718 | C | -0.0281 |
| rs10277665  | C | -0.0254 |
| rs12702367  | T | 0.0202  |
| rs12705149  | C | 0.0252  |
| rs17376373  | G | 0.043   |
| rs6968087   | A | 0.0374  |
| rs62444669  | C | 0.0569  |
| rs10257471  | A | -0.0687 |
| rs10499858  | G | 0.0394  |
| rs62622406  | T | 0.0885  |
| rs62443825  | A | 0.0741  |
| rs10487762  | T | -0.0303 |
| rs77299546  | A | 0.04    |
| rs113357258 | T | 0.0759  |
| rs116866223 | G | -0.1512 |
| rs117750744 | T | -0.0998 |
| rs34906271  | G | 0.0208  |
| rs4446672   | G | 0.0293  |
| rs1108864   | C | 0.0245  |
| rs10272727  | T | 0.0193  |
| rs139365075 | G | -0.0811 |
| rs62464049  | G | 0.0553  |
| rs10238387  | C | -0.0251 |
| rs6966047   | T | 0.043   |
| rs112013316 | T | 0.0744  |
| rs11763130  | G | -0.0229 |
| rs11978682  | G | -0.0644 |
| rs76855160  | A | 0.0666  |
| rs76129746  | G | 0.0817  |
| rs145928980 | T | 0.1506  |
| rs28526781  | A | -0.0373 |
| rs2470932   | T | 0.025   |
| rs2906409   | G | 0.0192  |
| rs142674483 | G | -0.1667 |
| rs2299893   | G | -0.0216 |
| rs35622755  | G | -0.0534 |
| rs60629322  | G | 0.1167  |
| rs757524    | G | 0.0847  |
| rs2729549   | C | -0.0244 |
| rs73181649  | G | -0.0574 |
| rs17159201  | G | 0.1168  |
| rs112955057 | T | -0.1163 |
| rs56184508  | T | 0.0365  |
| rs7781416   | G | 0.0274  |
| rs17256477  | T | -0.0608 |
| rs78638169  | G | -0.0608 |
| rs6963617   | T | 0.0233  |

|             |   |         |
|-------------|---|---------|
| rs11767053  | T | -0.0199 |
| rs117901794 | A | -0.0757 |
| rs7801609   | A | 0.0961  |
| rs7797461   | T | -0.1075 |
| rs115364130 | A | 0.0849  |
| rs4562244   | G | 0.0194  |
| rs75938160  | A | 0.0875  |
| rs76684936  | A | 0.0656  |
| rs117694744 | T | -0.1518 |
| rs17379997  | T | 0.0334  |
| rs148922085 | G | 0.1045  |
| rs3893568   | T | 0.0299  |
| rs73070418  | T | 0.0604  |
| rs6959589   | G | 0.0792  |
| rs705337    | T | 0.029   |
| rs1688934   | A | 0.0194  |
| rs144900329 | G | 0.0828  |
| rs3114423   | A | 0.0541  |
| rs2700911   | T | -0.0238 |
| rs116911941 | G | 0.1526  |
| rs34458430  | G | 0.0342  |
| rs71549329  | A | 0.1055  |
| rs111512307 | T | 0.1218  |
| rs34009550  | T | -0.0572 |
| rs11773028  | C | -0.0211 |
| rs1568844   | C | 0.0254  |
| rs310587    | A | 0.0273  |
| rs56758628  | C | -0.0479 |
| rs11552744  | A | 0.0816  |
| rs77489095  | C | 0.0431  |
| rs112497204 | G | -0.1112 |
| rs113354822 | T | -0.0492 |
| rs60813659  | T | -0.0423 |
| rs143366982 | T | -0.0241 |
| rs13230532  | T | 0.123   |
| rs117470439 | A | 0.1384  |
| rs79401968  | C | -0.0356 |
| rs62471539  | T | -0.1262 |
| rs74658014  | C | -0.0431 |
| rs74866478  | C | -0.0777 |
| rs112558837 | A | 0.1547  |
| rs113991636 | A | -0.0699 |
| rs34832590  | T | 0.0327  |
| rs117784758 | G | -0.1307 |
| rs12672090  | G | 0.0191  |
| rs7781584   | A | 0.0288  |
| rs78614415  | T | 0.0713  |

|             |   |         |
|-------------|---|---------|
| rs6947055   | T | 0.0876  |
| rs12702535  | C | -0.0238 |
| rs6953682   | G | -0.0354 |
| rs6942831   | G | 0.0204  |
| rs117321303 | C | -0.1635 |
| rs56042994  | G | -0.0257 |
| rs68004894  | G | 0.0333  |
| rs149652300 | T | -0.1454 |
| rs118098949 | A | -0.0816 |
| rs145696025 | T | 0.1124  |
| rs74614872  | G | -0.1015 |
| rs1859768   | T | -0.0198 |
| rs10259352  | G | 0.0192  |
| rs6966759   | A | -0.0273 |
| rs10232125  | G | -0.0206 |
| rs35642091  | T | 0.0298  |
| rs142495890 | C | 0.1555  |
| rs17332440  | C | 0.0788  |
| rs6949597   | A | 0.0196  |
| rs2711346   | C | 0.0632  |
| rs17132418  | C | 0.0771  |
| rs142991771 | T | 0.1262  |
| rs7458521   | T | 0.0279  |
| rs13238805  | T | 0.1421  |
| rs2464947   | A | -0.0863 |
| rs118049281 | T | 0.0964  |
| rs118087745 | C | 0.1183  |
| rs1548638   | T | -0.0205 |
| rs145608946 | A | 0.0507  |
| rs117613566 | A | -0.1706 |
| rs74995252  | A | -0.1102 |
| rs4720731   | A | -0.0404 |
| rs34289290  | T | 0.0602  |
| rs73085687  | C | 0.0718  |
| rs77587023  | G | 0.0489  |
| rs11769293  | T | -0.0714 |
| rs77313586  | T | 0.051   |
| rs6963721   | C | -0.0237 |
| rs34807801  | T | -0.0615 |
| rs10228564  | T | -0.0253 |
| rs71551223  | C | -0.059  |
| rs150425596 | G | -0.0861 |
| rs112922414 | A | 0.0614  |
| rs6960950   | G | -0.0386 |
| rs10247300  | A | 0.0199  |
| rs78556203  | T | 0.1236  |
| rs12532163  | C | -0.021  |

|             |   |         |
|-------------|---|---------|
| rs78343530  | A | -0.1346 |
| rs141340449 | T | -0.0408 |
| rs140878963 | A | -0.0964 |
| rs77335686  | C | 0.0893  |
| rs12534453  | G | 0.0414  |
| rs79736513  | A | -0.0769 |
| rs76380505  | T | 0.101   |
| rs78512819  | A | -0.0875 |
| rs12706994  | T | -0.0745 |
| rs2190935   | T | 0.0193  |
| rs62456061  | T | 0.0313  |
| rs4593484   | G | -0.1199 |
| rs146550260 | T | -0.0454 |
| rs112393619 | A | 0.0588  |
| rs112931287 | G | 0.0657  |
| rs116895085 | C | 0.1238  |
| rs13243618  | C | 0.0225  |
| rs118124981 | T | -0.0664 |
| rs411776    | A | 0.0954  |
| rs759657    | G | -0.0499 |
| rs6464166   | C | 0.0265  |
| rs17686832  | T | -0.025  |
| rs38958     | C | -0.0378 |
| rs6942399   | C | -0.0237 |
| rs78447765  | C | -0.0443 |
| rs10487316  | C | -0.0381 |
| rs157944    | G | -0.0267 |
| rs117813491 | A | -0.0632 |
| rs150290553 | G | -0.1471 |
| rs35218421  | A | 0.0222  |
| rs75227775  | C | -0.094  |
| rs117414517 | A | 0.0706  |
| rs141824671 | G | 0.1076  |
| rs3779452   | C | -0.0244 |
| rs117066720 | A | 0.169   |
| rs78986541  | A | 0.0329  |
| rs79177720  | C | -0.0658 |
| rs10215482  | A | 0.0532  |
| rs74522535  | T | 0.0591  |
| rs79889898  | G | 0.0376  |
| rs318572    | C | -0.0197 |
| rs6593266   | A | 0.0207  |
| rs78241237  | G | -0.0587 |
| rs10480442  | G | 0.0634  |
| rs7383998   | C | 0.1056  |
| rs895710    | T | -0.0194 |
| rs62444463  | G | 0.0688  |

|             |   |         |
|-------------|---|---------|
| rs78543513  | C | -0.0435 |
| rs17157585  | C | 0.0244  |
| rs17314955  | C | -0.1403 |
| rs78627146  | C | 0.0476  |
| rs10246157  | A | 0.0249  |
| rs77383078  | A | -0.1259 |
| rs118009044 | T | -0.1064 |
| rs4719831   | G | 0.022   |
| rs117477826 | A | 0.1403  |
| rs13230778  | A | 0.0789  |
| rs74721945  | C | -0.0446 |
| rs79575437  | T | -0.0928 |
| rs10274130  | C | 0.0625  |
| rs77110733  | C | -0.1239 |
| rs113369035 | T | 0.0939  |
| rs75270669  | A | -0.1514 |
| rs143783128 | G | -0.0775 |
| rs75323514  | G | 0.1589  |
| rs36199726  | C | 0.0514  |
| rs118180640 | G | -0.0509 |
| rs1206387   | C | 0.0291  |
| rs117619335 | G | -0.0722 |
| rs10257657  | T | -0.0193 |
| rs12111630  | T | -0.024  |
| rs117875458 | C | 0.0885  |
| rs849322    | A | -0.0189 |
| rs11764303  | G | 0.0357  |
| rs74860216  | A | -0.0926 |
| rs79010415  | C | 0.0737  |
| rs7789134   | C | 0.0193  |
| rs116953158 | A | -0.097  |
| rs7810741   | G | 0.0305  |
| rs7785544   | T | 0.0683  |
| rs10262722  | G | -0.0222 |
| rs148026885 | T | 0.1226  |
| rs78040638  | T | -0.03   |
| rs848452    | T | 0.0334  |
| rs76917787  | C | -0.051  |
| rs1238799   | A | -0.0451 |
| rs73149916  | G | -0.064  |
| rs73154274  | A | 0.0307  |
| rs5017429   | C | 0.0218  |
| rs13245654  | T | -0.0418 |
| rs1881645   | G | 0.021   |
| rs3944102   | C | -0.026  |
| rs6947510   | A | 0.0187  |
| rs2214726   | G | -0.0278 |

|             |   |         |
|-------------|---|---------|
| rs112888228 | G | -0.1215 |
| rs34625486  | T | 0.0711  |
| rs7807337   | G | -0.0195 |
| rs2091110   | A | 0.022   |
| rs73126149  | A | 0.04    |
| rs17565995  | C | 0.1287  |
| rs118135439 | C | 0.0602  |
| rs113563543 | T | -0.0648 |
| rs12703769  | C | -0.1044 |
| rs55788064  | G | -0.0272 |
| rs117993013 | G | -0.1595 |
| rs2227983   | A | 0.023   |
| rs117448083 | G | -0.1946 |
| rs1881170   | C | 0.0556  |
| rs78057363  | T | 0.0704  |
| rs79760243  | T | 0.128   |
| rs118000134 | A | 0.1069  |
| rs2396969   | A | 0.0586  |
| rs73213941  | C | 0.0675  |
| rs75834704  | A | 0.0934  |
| rs10243972  | A | -0.0446 |
| rs13230920  | T | 0.0404  |
| rs79715837  | T | -0.0379 |
| rs140012602 | A | -0.1301 |
| rs145174846 | A | -0.0893 |
| rs149322794 | G | 0.1578  |
| rs117730347 | A | 0.0825  |
| rs10215311  | T | 0.0291  |
| rs117053795 | A | 0.0648  |
| rs11773505  | G | -0.1241 |
| rs141566438 | C | 0.1085  |
| rs2191034   | A | 0.0414  |
| rs34796513  | G | -0.1315 |
| rs6460090   | G | 0.0796  |
| rs117056856 | A | 0.0869  |
| rs148945021 | T | 0.1035  |
| rs78170391  | G | 0.0722  |
| rs77087276  | C | 0.1131  |
| rs62470166  | A | -0.0792 |
| rs9654707   | C | -0.0638 |
| rs1647795   | C | -0.0199 |
| rs112605674 | T | 0.0516  |
| rs117093982 | T | 0.0641  |
| rs6464450   | G | -0.0388 |
| rs77329945  | A | 0.099   |
| rs3823518   | C | -0.0214 |
| rs10226846  | G | 0.0258  |

|             |   |         |
|-------------|---|---------|
| rs118173432 | T | -0.1475 |
| rs10242720  | C | -0.0201 |
| rs4440514   | C | -0.0248 |
| rs77039984  | A | 0.0878  |
| rs34414323  | G | -0.1    |
| rs149904285 | C | 0.1575  |
| rs1833090   | A | -0.0209 |
| rs12386747  | A | -0.0413 |
| rs10224038  | A | -0.0276 |
| rs143084323 | G | -0.0326 |
| rs62455368  | G | -0.031  |
| rs7784116   | A | 0.1732  |
| rs62462208  | T | 0.0336  |
| rs111474588 | T | -0.1111 |
| rs11762209  | G | 0.0311  |
| rs111954136 | G | 0.1114  |
| rs113509794 | C | -0.0867 |
| rs140575110 | T | -0.0979 |
| rs10250915  | T | -0.023  |
| rs2555048   | C | 0.0196  |
| rs6975809   | G | 0.0321  |
| rs6977597   | A | 0.0315  |
| rs6461264   | G | -0.0186 |
| rs12671067  | T | 0.0362  |
| rs1017002   | C | -0.0191 |
| rs763317    | A | -0.0187 |
| rs77444844  | G | -0.1177 |
| rs986062    | A | -0.0204 |
| rs11764240  | A | -0.0302 |
| rs71540268  | T | 0.0625  |
| rs1109277   | C | 0.0193  |
| rs17624598  | T | -0.1701 |
| rs117792957 | A | -0.1191 |
| rs1012090   | C | 0.0267  |
| rs4726783   | G | -0.0246 |
| rs144259943 | A | 0.1749  |
| rs117653898 | T | 0.1257  |
| rs73205983  | G | -0.0714 |
| rs10271926  | C | -0.0204 |
| rs76887009  | A | -0.0292 |
| rs145148678 | A | 0.1     |
| rs117224447 | T | -0.0707 |
| rs2216075   | A | -0.0328 |
| rs4730275   | T | 0.0198  |
| rs76240477  | G | 0.081   |
| rs1530820   | A | -0.0212 |
| rs11761383  | T | 0.0444  |

|             |   |         |
|-------------|---|---------|
| rs10275769  | C | -0.0188 |
| rs10486201  | T | -0.027  |
| rs145978581 | T | 0.1115  |
| rs1681288   | G | 0.0243  |
| rs3778709   | C | -0.0202 |
| rs4409354   | T | -0.0202 |
| rs148331633 | T | 0.0598  |
| rs117294606 | T | 0.121   |
| rs149309380 | G | 0.0784  |
| rs77990495  | A | 0.0207  |
| rs111811152 | A | -0.0603 |
| rs10952752  | G | -0.0198 |
| rs1075234   | T | -0.0281 |
| rs741838    | T | 0.033   |
| rs62478277  | T | -0.1214 |
| rs73185880  | G | -0.027  |
| rs6466899   | T | 0.0248  |
| rs17670818  | A | -0.0457 |
| rs2030861   | G | -0.0187 |
| rs113043276 | G | 0.0914  |
| rs55844228  | T | 0.0927  |
| rs73149847  | T | -0.0323 |
| rs140591827 | G | 0.106   |
| rs144955952 | A | 0.0931  |
| rs7800477   | G | -0.0732 |
| rs115150719 | G | 0.137   |
| rs11533930  | T | 0.0602  |
| rs145273304 | C | 0.0888  |
| rs142991792 | A | -0.0979 |
| rs4724512   | G | 0.0345  |
| rs10954676  | A | -0.0233 |
| rs76814278  | A | -0.0659 |
| rs144567832 | T | -0.0557 |
| rs10227858  | C | -0.0295 |
| rs13230674  | A | -0.0288 |
| rs55647445  | A | -0.0404 |
| rs4997807   | T | 0.0196  |
| rs61234847  | A | 0.1063  |
| rs58839422  | G | -0.0452 |
| rs35944523  | G | -0.0682 |
| rs17172457  | T | 0.0558  |
| rs41601     | C | 0.0187  |
| rs4729514   | A | 0.0252  |
| rs117208500 | T | -0.1058 |
| rs3801345   | T | 0.0449  |
| rs4720584   | G | -0.0197 |
| rs17437496  | T | 0.0638  |



|             |   |         |
|-------------|---|---------|
| rs10249287  | G | 0.0306  |
| rs117823179 | G | 0.1625  |
| rs79973718  | T | -0.0716 |
| rs74443372  | G | -0.0574 |
| rs13241633  | T | -0.0671 |
| rs848403    | A | -0.0205 |
| rs79025338  | C | 0.0696  |
| rs117484175 | A | 0.1077  |
| rs10952373  | T | -0.026  |
| rs117989766 | C | -0.1036 |
| rs17173197  | T | -0.0192 |
| rs62480411  | C | 0.0226  |
| rs6943930   | C | -0.0556 |
| rs56318548  | A | 0.0553  |
| rs6967497   | T | -0.0268 |
| rs150949599 | C | -0.1229 |
| rs11981038  | A | -0.0249 |
| rs13239638  | A | 0.021   |
| rs16872494  | A | 0.082   |
| rs138934652 | T | 0.045   |
| rs10274223  | T | -0.0426 |
| rs386437    | A | 0.129   |
| rs77744143  | T | -0.0753 |
| rs584394    | C | -0.0234 |
| rs73232631  | T | 0.057   |
| rs117092584 | A | 0.0705  |
| rs147253054 | A | 0.057   |
| rs62465802  | C | 0.1427  |
| rs142566764 | A | 0.1594  |
| rs12707236  | G | -0.0267 |
| rs118099258 | G | 0.118   |
| rs75033400  | G | 0.039   |
| rs12666455  | T | 0.0545  |
| rs11760281  | A | -0.0217 |
| rs73414213  | T | -0.0245 |
| rs113441260 | C | -0.0784 |
| rs11974508  | C | -0.0474 |
| rs10247700  | A | -0.0199 |
| rs78455900  | A | -0.0386 |
| rs2030790   | C | -0.0468 |
| rs73176835  | C | 0.0436  |
| rs73089168  | T | 0.0368  |
| rs11770780  | C | -0.0295 |
| rs73127064  | G | -0.0711 |
| rs140398185 | A | -0.0726 |
| rs112207000 | T | 0.0786  |
| rs73056170  | G | 0.0336  |

|             |   |         |
|-------------|---|---------|
| rs245922    | T | -0.0236 |
| rs940378    | G | 0.0492  |
| rs62450420  | T | -0.0453 |
| rs2276536   | T | 0.0777  |
| rs2642138   | C | -0.0294 |
| rs76025010  | T | 0.1352  |
| rs117743149 | C | 0.0798  |
| rs41308870  | A | 0.1561  |
| rs78492849  | C | 0.1385  |
| rs17165191  | C | 0.0269  |
| rs6964588   | C | -0.108  |
| rs73160527  | C | -0.1075 |
| rs140861971 | A | 0.1404  |
| rs62456194  | C | -0.0674 |
| rs17544266  | C | 0.1104  |
| rs1876043   | A | -0.0427 |
| rs14270     | C | 0.053   |
| rs7796597   | C | -0.0296 |
| rs4327750   | T | -0.0196 |
| rs10266907  | C | -0.0291 |
| rs28555365  | T | 0.0596  |
| rs10244725  | T | 0.0924  |
| rs111608589 | A | -0.1162 |
| rs6950208   | A | 0.0265  |
| rs78925043  | A | -0.0366 |
| rs6969922   | A | -0.0336 |
| rs10226831  | A | 0.0307  |
| rs145325361 | T | 0.1171  |
| rs3808258   | C | 0.044   |
| rs12538845  | A | -0.0304 |
| rs4727710   | A | -0.0178 |
| rs28473402  | C | -0.0314 |
| rs10251396  | C | -0.019  |
| rs13234998  | C | -0.028  |
| rs77395240  | C | -0.0679 |
| rs150584585 | T | -0.0809 |
| rs1659812   | G | 0.0258  |
| rs7777690   | T | -0.0661 |
| rs17529991  | C | 0.0943  |
| rs11973076  | C | 0.0298  |
| rs7797071   | G | -0.0595 |
| rs2528643   | T | -0.0195 |
| rs144697490 | T | 0.0415  |
| rs150640087 | T | -0.0853 |
| rs219236    | A | 0.025   |
| rs12539785  | A | -0.0585 |
| rs146206955 | T | 0.1017  |

|             |   |         |
|-------------|---|---------|
| rs13238736  | T | 0.0239  |
| rs35965629  | T | 0.0253  |
| rs143526741 | A | 0.1262  |
| rs117115784 | T | 0.1048  |
| rs116885673 | T | 0.1069  |
| rs57009672  | T | 0.0446  |
| rs6977776   | T | -0.0286 |
| rs10488463  | C | 0.0294  |
| rs17672475  | G | 0.119   |
| rs13224322  | A | -0.0211 |
| rs74764946  | A | 0.0473  |
| rs79616118  | A | -0.1003 |
| rs11769036  | A | -0.0593 |
| rs11771309  | A | 0.0931  |
| rs2037636   | T | 0.0638  |
| rs12540505  | A | -0.021  |
| rs143266869 | A | -0.1184 |
| rs146035742 | T | 0.1392  |
| rs740145    | C | 0.0603  |
| rs118166359 | A | -0.0986 |
| rs143245946 | T | -0.1782 |
| rs732398    | C | 0.0205  |
| rs139976084 | C | -0.1388 |
| rs1546740   | T | -0.0504 |
| rs13222308  | G | -0.1382 |
| rs12670420  | A | -0.0272 |
| rs55816952  | A | 0.0785  |
| rs35748753  | T | -0.0211 |
| rs57948129  | C | -0.0321 |
| rs2233397   | A | -0.0206 |
| rs13233709  | A | 0.0195  |
| rs17473999  | T | 0.0704  |
| rs117515602 | G | 0.0346  |
| rs148171877 | A | -0.1654 |
| rs75426340  | A | -0.1415 |
| rs10257135  | C | 0.0254  |
| rs12699842  | C | -0.0734 |
| rs71541305  | G | -0.0901 |
| rs6959625   | A | -0.0376 |
| rs140464632 | T | 0.1375  |
| rs59970113  | T | 0.0778  |
| rs11762476  | A | 0.122   |
| rs112022696 | G | 0.0789  |
| rs4721969   | C | -0.0181 |
| rs6960666   | A | -0.0345 |
| rs77958922  | G | -0.0697 |
| rs149767109 | C | 0.1078  |

|             |   |         |
|-------------|---|---------|
| rs16163     | A | 0.0557  |
| rs73110108  | T | 0.0256  |
| rs16882280  | G | 0.05    |
| rs73067596  | A | 0.065   |
| rs144585044 | A | 0.0943  |
| rs34772540  | C | 0.0982  |
| rs116846721 | C | 0.0858  |
| rs10235861  | G | 0.042   |
| rs9690828   | G | 0.0246  |
| rs150558032 | A | -0.0718 |
| rs117094612 | G | 0.1243  |
| rs79779587  | A | -0.1075 |
| rs10277990  | C | 0.0269  |
| rs2192601   | A | 0.0363  |
| rs2246709   | G | 0.0208  |
| rs117889431 | C | -0.0882 |
| rs12533187  | C | -0.0957 |
| rs62475299  | T | 0.0458  |
| rs10245536  | T | -0.0296 |
| rs7799877   | G | -0.1053 |
| rs34029083  | C | 0.0357  |
| rs1186745   | A | 0.0588  |
| rs143879654 | G | 0.1253  |
| rs12536996  | G | -0.0313 |
| rs17640003  | C | -0.0443 |
| rs117650598 | T | -0.0481 |
| rs148638821 | A | 0.1435  |
| rs161339    | G | 0.0381  |
| rs112273128 | T | 0.0682  |
| rs138362339 | A | 0.0673  |
| rs798334    | G | -0.0269 |
| rs149945779 | A | 0.0833  |
| rs145751085 | A | -0.0841 |
| rs112216314 | A | 0.0437  |
| rs56931946  | T | -0.0369 |
| rs12673237  | T | 0.0226  |
| rs10276883  | A | -0.0371 |
| rs626030    | T | -0.0412 |
| rs6965808   | A | 0.0194  |
| rs1732002   | C | -0.0268 |
| rs75485115  | T | -0.0387 |
| rs34056816  | C | 0.0424  |
| rs10273273  | C | -0.0215 |
| rs117365498 | G | 0.1103  |
| rs73208175  | C | -0.0816 |
| rs57481991  | A | 0.0261  |
| rs79010707  | T | -0.0739 |

|             |   |         |
|-------------|---|---------|
| rs6973895   | C | -0.019  |
| rs17437518  | G | 0.0498  |
| rs73164391  | G | 0.0831  |
| rs6956998   | G | 0.0253  |
| rs117209692 | C | -0.1088 |
| rs7456519   | C | 0.0448  |
| rs7357212   | A | -0.029  |
| rs11983722  | T | 0.0381  |
| rs12670274  | G | 0.0318  |
| rs62474621  | C | 0.0723  |
| rs79819788  | C | 0.0503  |
| rs4644148   | G | -0.0192 |
| rs72611587  | T | 0.0324  |
| rs116965044 | A | -0.0689 |
| rs141304599 | C | 0.0965  |
| rs140420031 | C | 0.1571  |
| rs12718948  | A | -0.0405 |
| rs11764555  | T | -0.1366 |
| rs117857144 | A | -0.1289 |
| rs56015951  | G | -0.0191 |
| rs137959780 | A | 0.0796  |
| rs11773302  | C | -0.0436 |
| rs17668468  | T | 0.0316  |
| rs834790    | G | 0.1071  |
| rs74327254  | A | -0.0997 |
| rs11763287  | C | -0.028  |
| rs73140137  | T | -0.0316 |
| rs35122961  | A | 0.0257  |
| rs73051717  | T | -0.0543 |
| rs137870571 | A | 0.0893  |
| rs117254232 | G | 0.0404  |
| rs304516    | T | -0.0648 |
| rs117857439 | T | 0.0675  |
| rs73723788  | T | 0.1393  |
| rs147732171 | T | -0.0321 |
| rs845551    | A | 0.0213  |
| rs73177178  | A | -0.0219 |
| rs150340519 | G | -0.0786 |
| rs1229051   | C | -0.0232 |
| rs74603332  | G | 0.084   |
| rs3815332   | T | -0.028  |
| rs10243359  | C | 0.0419  |
| rs150928371 | C | 0.0777  |
| rs2699818   | G | 0.0279  |
| rs7357284   | A | 0.0253  |
| rs2285843   | A | 0.0213  |
| rs118171230 | T | -0.0879 |

|             |   |         |
|-------------|---|---------|
| rs62469903  | A | -0.0771 |
| rs113183088 | C | 0.1093  |
| rs16871947  | T | -0.0535 |
| rs10224861  | A | -0.0228 |
| rs12112552  | A | 0.0936  |
| rs16868021  | G | -0.1161 |
| rs36198732  | C | 0.0251  |
| rs717226    | A | 0.0348  |
| rs74995987  | A | -0.0736 |
| rs917940    | T | -0.032  |
| rs73285230  | A | -0.0596 |
| rs76742203  | G | 0.0678  |
| rs147641870 | T | -0.0821 |
| rs73156392  | T | 0.0498  |
| rs117161527 | T | 0.0637  |
| rs519654    | A | 0.0708  |
| rs10269750  | T | -0.032  |
| rs17169541  | C | 0.0286  |
| rs12672619  | T | -0.0349 |
| rs10279223  | T | 0.0186  |
| rs6945975   | C | -0.0204 |
| rs74674686  | A | 0.0784  |
| rs12700832  | G | 0.0178  |
| rs142115657 | A | -0.1404 |
| rs142213630 | G | 0.0716  |
| rs56154979  | T | -0.0667 |
| rs28391158  | T | -0.0337 |
| rs2938106   | T | 0.0299  |
| rs4723557   | T | 0.0261  |
| rs115684607 | A | -0.0721 |
| rs17288875  | C | -0.077  |
| rs34339674  | A | 0.024   |
| rs6946006   | A | 0.0273  |
| rs7803406   | C | 0.032   |
| rs6947134   | G | -0.0323 |
| rs151331581 | A | -0.0613 |
| rs143778020 | A | -0.1164 |
| rs274626    | G | 0.0373  |
| rs10488395  | C | 0.0285  |
| rs6975781   | T | 0.0269  |
| rs73079569  | A | -0.1339 |
| rs80251137  | C | 0.0619  |
| rs113513869 | A | -0.0578 |
| rs76635289  | C | 0.1633  |
| rs10807809  | C | -0.02   |
| rs28467     | C | 0.018   |
| rs1450851   | T | 0.0184  |

|             |   |         |
|-------------|---|---------|
| rs76869074  | C | 0.0418  |
| rs12672049  | T | 0.111   |
| rs117948936 | C | 0.0914  |
| rs71557123  | G | 0.0456  |
| rs62447495  | C | 0.0842  |
| rs117930667 | A | -0.0537 |
| rs117809882 | G | 0.1327  |
| rs78926573  | T | 0.1318  |
| rs1657273   | T | -0.0197 |
| rs117568894 | G | 0.1063  |
| rs10228358  | T | 0.0554  |
| rs12234702  | T | -0.0316 |
| rs13227108  | T | 0.0797  |
| rs251990    | G | 0.0191  |
| rs17689091  | G | -0.0478 |
| rs877940    | A | 0.0362  |
| rs145144490 | G | 0.0957  |
| rs142296892 | C | 0.093   |
| rs143951448 | T | -0.1361 |
| rs112059682 | C | 0.1411  |
| rs117445779 | G | -0.1099 |
| rs146421498 | G | -0.0874 |
| rs73140486  | T | -0.1287 |
| rs117264159 | G | -0.0906 |
| rs114642522 | C | 0.063   |
| rs55825898  | T | 0.0449  |
| rs10276957  | A | -0.1429 |
| rs12669732  | A | 0.0258  |
| rs116853542 | G | -0.1102 |
| rs118182113 | T | -0.093  |
| rs71548294  | G | 0.0393  |
| rs144007091 | T | 0.1406  |
| rs78944692  | T | 0.0784  |
| rs62463217  | A | 0.0312  |
| rs4728736   | T | 0.0666  |
| rs62433368  | A | -0.0689 |
| rs1001396   | C | -0.0361 |
| rs73729501  | C | -0.1219 |
| rs12537422  | G | 0.018   |
| rs10808113  | T | -0.0591 |
| rs2110784   | A | 0.0193  |
| rs3819479   | A | 0.0412  |
| rs34650679  | A | -0.067  |
| rs111543638 | A | -0.0833 |
| rs141905836 | G | 0.0976  |
| rs993183    | A | 0.0177  |
| rs75416127  | A | -0.082  |

|             |   |         |
|-------------|---|---------|
| rs11970859  | A | -0.0367 |
| rs113651058 | A | -0.1043 |
| rs12666221  | T | -0.024  |
| rs62445422  | C | -0.0257 |
| rs12669271  | T | 0.0355  |
| rs73202739  | T | -0.0334 |
| rs111665519 | G | -0.1396 |
| rs118016024 | C | 0.0515  |
| rs113714835 | A | -0.0615 |
| rs76234744  | A | -0.1004 |
| rs10257611  | A | 0.0645  |
| rs79370229  | T | 0.1016  |
| rs11770456  | A | -0.042  |
| rs111274317 | A | 0.0783  |
| rs58394495  | T | 0.063   |
| rs62460725  | T | 0.0711  |
| rs17164910  | G | 0.0482  |
| rs17388775  | G | -0.0723 |
| rs2016945   | T | 0.0178  |
| rs77484877  | A | -0.0577 |
| rs249685    | C | 0.0201  |
| rs2237573   | G | 0.0283  |
| rs75542153  | T | -0.0463 |
| rs740107    | A | 0.0202  |
| rs4721882   | A | 0.0406  |
| rs117032411 | A | -0.0958 |
| rs112084155 | A | -0.1268 |
| rs117027613 | A | -0.0999 |
| rs118070860 | A | -0.1059 |
| rs146854312 | T | -0.0303 |
| rs75306693  | T | 0.049   |
| rs62441774  | G | -0.0311 |
| rs3828998   | C | 0.0184  |
| rs117315991 | C | -0.069  |
| rs7807308   | C | 0.0342  |
| rs12703099  | T | -0.022  |
| rs113314021 | A | 0.0502  |
| rs34727111  | C | 0.1353  |
| rs12666793  | G | 0.0467  |
| rs143835549 | G | 0.1167  |
| rs6463054   | A | 0.0585  |
| rs76122431  | A | -0.0761 |
| rs76979219  | G | 0.0826  |
| rs36904     | T | 0.0224  |
| rs78521224  | A | -0.1345 |
| rs7807011   | A | -0.0314 |
| rs61594321  | A | 0.0183  |



|             |   |         |
|-------------|---|---------|
| rs7811703   | T | 0.03    |
| rs1533086   | C | 0.0197  |
| rs73108350  | A | -0.0285 |
| rs2214823   | A | -0.0179 |
| rs4727328   | C | -0.0292 |
| rs17577604  | C | 0.0276  |
| rs62447198  | C | 0.0861  |
| rs62470045  | G | -0.0559 |
| rs62436918  | A | 0.042   |
| rs68095349  | T | -0.0189 |
| rs17235266  | G | 0.0551  |
| rs142426754 | T | 0.0415  |
| rs117979771 | T | -0.0778 |
| rs6950190   | C | -0.0226 |
| rs75966897  | G | -0.0715 |
| rs117685738 | G | -0.0895 |
| rs10238429  | A | 0.0563  |
| rs2192046   | A | -0.0678 |
| rs6953065   | A | -0.019  |
| rs17146516  | G | -0.024  |
| rs77610879  | T | 0.0387  |
| rs10246122  | G | -0.0241 |
| rs148253666 | C | -0.1152 |
| rs10227451  | G | -0.1064 |
| rs12666173  | C | 0.0372  |
| rs62473030  | G | 0.0758  |
| rs144383285 | G | 0.1353  |
| rs1722207   | G | -0.019  |
| rs73153964  | C | 0.0517  |
| rs77071331  | T | -0.0911 |
| rs117129149 | C | -0.0919 |
| rs672644    | T | 0.0205  |
| rs78645232  | G | -0.0617 |
| rs77913685  | G | 0.0653  |
| rs11764284  | G | -0.0229 |
| rs62456135  | G | 0.0748  |
| rs12673815  | T | 0.0583  |
| rs6963792   | T | 0.0222  |
| rs10249336  | C | 0.0628  |
| rs700317    | A | 0.0175  |
| rs141738897 | G | -0.0465 |
| rs75012740  | A | 0.0749  |
| rs10246937  | C | -0.0271 |
| rs142479347 | T | 0.093   |
| rs78155782  | C | 0.1277  |
| rs17057     | T | -0.0627 |
| rs3763469   | C | 0.0235  |

|             |   |         |
|-------------|---|---------|
| rs4731559   | G | -0.0871 |
| rs34748741  | C | 0.0263  |
| rs11773377  | T | 0.1082  |
| rs80017836  | A | -0.0825 |
| rs2189437   | G | 0.0232  |
| rs75412253  | G | 0.0909  |
| rs139355497 | G | 0.1174  |
| rs60518021  | G | 0.0263  |
| rs804753    | T | -0.0367 |
| rs2286841   | A | 0.1168  |
| rs752677    | A | 0.0375  |
| rs7811413   | T | 0.0345  |
| rs6974714   | C | -0.0184 |
| rs73166481  | C | -0.0642 |
| rs2390500   | T | -0.0179 |
| rs7790089   | A | -0.0717 |
| rs6953951   | C | 0.0214  |
| rs362771    | T | 0.0517  |
| rs62485877  | C | 0.1043  |
| rs7780294   | T | 0.0347  |
| rs73152544  | A | -0.0518 |
| rs71543788  | T | 0.0411  |
| rs117850148 | T | 0.0939  |
| rs177670    | A | -0.0441 |
| rs13221419  | T | -0.0403 |
| rs7804147   | T | 0.0253  |
| rs13231248  | A | -0.0581 |
| rs12533943  | C | -0.0438 |
| rs11771826  | T | 0.044   |
| rs3847079   | T | -0.019  |
| rs117196981 | A | -0.112  |
| rs117436891 | G | 0.0933  |
| rs62467608  | G | -0.0264 |
| rs146291140 | T | 0.1026  |
| rs6965765   | T | -0.0185 |
| rs147448362 | T | 0.092   |
| rs17707859  | G | 0.1319  |
| rs2267727   | G | -0.0324 |
| rs77831921  | T | -0.106  |
| rs146376512 | G | -0.1054 |
| rs2254724   | C | 0.1225  |
| rs138146547 | A | 0.0738  |
| rs71527417  | A | 0.0763  |
| rs73057267  | A | -0.0691 |
| rs78400113  | T | -0.0946 |
| rs118142296 | T | 0.0567  |
| rs10215379  | T | 0.0945  |

|             |   |         |
|-------------|---|---------|
| rs142442013 | A | 0.1269  |
| rs17247268  | T | 0.0511  |
| rs57827093  | T | -0.0274 |
| rs4401799   | T | 0.0228  |
| rs10230113  | T | -0.0189 |
| rs138696854 | T | -0.1308 |
| rs3729871   | T | 0.1396  |
| rs140279295 | G | -0.1024 |
| rs4916931   | G | -0.0362 |
| rs28614087  | A | 0.0189  |
| rs12700041  | G | 0.0463  |
| rs79672752  | G | 0.0469  |
| rs6962428   | T | -0.0327 |
| rs13239704  | C | 0.0828  |
| rs78364945  | C | 0.0577  |
| rs10250252  | C | -0.0222 |
| rs149170977 | A | -0.1001 |
| rs61388620  | G | 0.069   |
| rs7789930   | C | -0.024  |
| rs2003417   | C | 0.039   |
| rs147828190 | T | -0.115  |
| rs144757109 | T | 0.0483  |
| rs73153275  | C | 0.0298  |
| rs76536681  | G | 0.0713  |
| rs62490714  | A | 0.0666  |
| rs936904    | A | -0.0183 |
| rs4721938   | T | -0.0196 |
| rs17543692  | T | -0.0243 |
| rs176576    | G | 0.0182  |
| rs854568    | G | 0.021   |
| rs11762454  | C | 0.0176  |
| rs78634923  | G | 0.0658  |
| rs55682486  | C | 0.023   |
| rs62435400  | C | -0.0426 |
| rs76678761  | G | 0.1023  |
| rs2903899   | G | -0.0467 |
| rs146018587 | T | -0.1115 |
| rs4719625   | G | -0.0289 |
| rs1229503   | G | 0.0193  |
| rs76752294  | A | -0.0663 |
| rs62498265  | G | -0.0891 |
| rs73066357  | C | -0.075  |
| rs62473072  | T | -0.1104 |
| rs77597316  | A | -0.0351 |
| rs35435128  | A | -0.0608 |
| rs78694204  | C | -0.0338 |
| rs140889208 | T | 0.0851  |

|             |   |         |
|-------------|---|---------|
| rs9648239   | A | 0.0326  |
| rs73116690  | G | -0.102  |
| rs79641804  | G | 0.0933  |
| rs10233832  | A | -0.0184 |
| rs117118069 | G | -0.0467 |
| rs143435796 | A | 0.0553  |
| rs62435140  | C | 0.0469  |
| rs6959755   | C | 0.0319  |
| rs150129140 | A | 0.1486  |
| rs75532300  | A | 0.0414  |
| rs118130034 | G | -0.041  |
| rs62483977  | C | -0.0746 |
| rs62448552  | T | -0.0784 |
| rs2045369   | T | 0.0315  |
| rs62454803  | T | -0.0489 |
| rs10214998  | G | 0.0189  |
| rs1344380   | A | -0.019  |
| rs1882426   | C | 0.0273  |
| rs1174995   | T | 0.0211  |
| rs116149349 | A | -0.0888 |
| rs79627248  | T | -0.0389 |
| rs12669428  | A | 0.0233  |
| rs13312652  | G | -0.0813 |
| rs34300529  | A | 0.0233  |
| rs62459153  | A | 0.0539  |
| rs10488519  | C | 0.0457  |
| rs117493829 | C | 0.0873  |
| rs1050327   | A | -0.0172 |
| rs117544650 | A | 0.0656  |
| rs73223659  | T | 0.0602  |
| rs55995100  | A | 0.0184  |
| rs138298962 | A | -0.0462 |
| rs76274660  | C | -0.0472 |
| rs138368684 | A | -0.0386 |
| rs4728417   | C | -0.033  |
| rs1960024   | A | -0.0177 |
| rs78318517  | T | -0.1461 |
| rs36056205  | A | -0.082  |
| rs139866720 | G | 0.0911  |
| rs10245983  | G | 0.0226  |
| rs10262590  | T | -0.0271 |
| rs117283944 | T | -0.1339 |
| rs17862285  | C | 0.052   |
| rs74974830  | A | 0.1424  |
| rs56263889  | T | -0.0191 |
| rs319325    | G | -0.0208 |
| rs17132513  | T | -0.0273 |

|             |   |         |
|-------------|---|---------|
| rs12699441  | C | -0.0245 |
| rs117996983 | C | 0.1063  |
| rs758250    | G | 0.0232  |
| rs11974993  | G | -0.02   |
| rs147282614 | T | -0.1209 |
| rs117760197 | T | 0.0719  |
| rs917144    | G | -0.0257 |
| rs78928893  | A | 0.083   |
| rs116956424 | G | 0.1274  |
| rs6945111   | A | -0.0483 |
| rs17163662  | G | 0.119   |
| rs76325161  | C | 0.0628  |
| rs2700993   | A | -0.042  |
| rs150679357 | A | -0.098  |
| rs3823944   | A | 0.0176  |
| rs117213838 | C | -0.0768 |
| rs78785126  | C | -0.09   |
| rs4475404   | G | 0.0264  |
| rs6465403   | T | -0.0228 |
| rs117986340 | T | -0.0821 |
| rs1468247   | C | 0.0983  |
| rs151003795 | T | 0.0703  |
| rs1799384   | A | 0.0182  |
| rs34748427  | G | 0.0763  |
| rs117649664 | C | -0.0911 |
| rs77670206  | C | -0.0447 |
| rs12701640  | C | 0.0263  |
| rs78200473  | A | -0.1435 |
| rs62449506  | T | 0.0661  |
| rs76368620  | G | 0.0841  |
| rs28428733  | G | 0.0852  |
| rs140588686 | A | 0.0974  |
| rs12534860  | A | 0.0244  |
| rs6979784   | A | -0.0221 |
| rs6961832   | C | 0.0191  |
| rs7788617   | T | -0.0488 |
| rs4515442   | C | 0.0188  |
| rs7792541   | T | 0.0221  |
| rs73158798  | C | 0.0257  |
| rs62469281  | C | 0.0773  |
| rs13234280  | C | 0.0986  |
| rs78578338  | G | -0.0787 |
| rs117326991 | T | 0.1321  |
| rs12540205  | T | 0.022   |
| rs1183450   | A | -0.0981 |
| rs74296742  | G | -0.0619 |
| rs55783121  | A | 0.1158  |

|             |   |         |
|-------------|---|---------|
| rs10950917  | A | -0.0196 |
| rs7787077   | C | 0.0237  |
| rs6979816   | G | 0.0208  |
| rs13246961  | T | -0.0207 |
| rs7776983   | T | -0.0696 |
| rs3801590   | A | 0.0417  |
| rs62488263  | C | -0.0335 |
| rs146747871 | C | -0.1075 |
| rs6962246   | T | 0.0181  |
| rs4948016   | G | 0.0227  |
| rs10224117  | A | 0.0782  |
| rs77574732  | A | -0.0795 |
| rs117364851 | T | 0.0672  |
| rs62503483  | G | -0.0327 |
| rs73379615  | G | -0.0549 |
| rs1009538   | G | 0.0237  |
| rs118087621 | A | 0.0418  |
| rs1721443   | C | 0.0293  |
| rs12535470  | G | -0.0687 |
| rs7780911   | C | 0.0184  |
| rs17794801  | G | 0.0176  |
| rs740088    | T | 0.0232  |
| rs73156827  | C | -0.0433 |
| rs17274454  | G | 0.0573  |
| rs142715891 | T | 0.1124  |
| rs13230084  | G | 0.0286  |
| rs74850797  | A | -0.06   |
| rs113725174 | C | 0.1172  |
| rs76621474  | T | -0.0884 |
| rs4623340   | G | 0.0197  |
| rs56273601  | T | -0.0475 |
| rs78161073  | T | -0.0477 |
| rs11764669  | A | -0.0288 |
| rs141705933 | A | -0.0731 |
| rs116925086 | A | 0.0808  |
| rs4947521   | A | 0.0342  |
| rs79817260  | C | 0.0691  |
| rs117577375 | A | -0.0842 |
| rs10954291  | A | -0.0379 |
| rs80233112  | C | -0.1072 |
| rs149480949 | A | 0.0982  |
| rs9691059   | C | 0.0212  |
| rs7784624   | A | -0.0181 |
| rs150746921 | A | -0.0906 |
| rs6959390   | C | 0.0185  |
| rs138929907 | G | 0.0777  |
| rs56352403  | A | 0.0188  |

|             |   |         |
|-------------|---|---------|
| rs6942841   | A | -0.1023 |
| rs144247219 | C | -0.2256 |
| rs3807694   | T | -0.0183 |
| rs4731513   | G | 0.0184  |
| rs73085974  | G | -0.1242 |
| rs10247140  | G | 0.0247  |
| rs10243617  | A | -0.0258 |
| rs1294911   | T | -0.0286 |
| rs34754076  | A | 0.1036  |
| rs114175764 | C | 0.0363  |
| rs2710099   | A | -0.0173 |
| rs116965220 | A | 0.0436  |
| rs7786496   | G | -0.0194 |
| rs74395790  | T | -0.0807 |
| rs3935568   | C | -0.0189 |
| rs34873775  | A | -0.0585 |
| rs10252562  | C | -0.0667 |
| rs10267850  | A | -0.0519 |
| rs62475323  | G | 0.0696  |
| rs780334    | A | -0.0467 |
| rs79842255  | C | 0.0578  |
| rs555562    | A | 0.0241  |
| rs142101795 | T | -0.1724 |
| rs850377    | T | 0.0186  |
| rs77269642  | G | -0.1343 |
| rs62443964  | T | 0.0903  |
| rs6978599   | G | -0.0177 |
| rs6964914   | T | 0.0325  |
| rs112180365 | C | 0.0704  |
| rs116859096 | A | -0.0719 |
| rs10275053  | C | 0.0897  |
| rs79469415  | G | 0.1077  |
| rs79140496  | G | -0.0543 |
| rs10807722  | T | -0.0178 |
| rs142245947 | A | 0.114   |
| rs73073988  | A | 0.0796  |
| rs35008772  | G | -0.0284 |
| rs79097943  | A | 0.0382  |
| rs114563381 | G | -0.0954 |
| rs368370    | G | 0.0223  |
| rs116644006 | A | -0.0911 |
| rs13228414  | C | -0.0224 |
| rs17244449  | G | -0.0508 |
| rs7804390   | T | 0.0368  |
| rs117385598 | T | -0.0538 |
| rs73171356  | C | 0.0734  |
| rs62496924  | T | -0.0264 |

|             |   |         |
|-------------|---|---------|
| rs4632997   | T | -0.0225 |
| rs1088868   | G | 0.0256  |
| rs75481777  | A | 0.0798  |
| rs148580221 | A | 0.1045  |
| rs78884002  | C | -0.0332 |
| rs112996733 | T | 0.081   |
| rs149093095 | C | 0.0959  |
| rs2285505   | C | 0.018   |
| rs73162894  | A | -0.0433 |
| rs74403520  | T | -0.081  |
| rs79182592  | T | -0.0567 |
| rs12154761  | A | -0.0583 |
| rs117910348 | A | 0.0773  |
| rs10247241  | T | -0.0212 |
| rs77245244  | G | -0.0275 |
| rs117275160 | T | 0.0733  |
| rs77406469  | T | 0.057   |
| rs16881929  | C | -0.0238 |
| rs1269633   | T | -0.0226 |
| rs149572245 | T | -0.0835 |
| rs145861687 | T | -0.1244 |
| rs112561183 | T | 0.0408  |
| rs12672237  | T | 0.028   |
| rs80218618  | A | 0.0676  |
| rs17164857  | C | -0.0225 |
| rs138698158 | C | -0.0961 |
| rs144368635 | G | 0.1129  |
| rs75100429  | T | -0.1219 |
| rs78601747  | A | -0.0683 |
| rs117719453 | T | 0.1067  |
| rs145075500 | A | -0.114  |
| rs11763759  | C | -0.0225 |
| rs117079011 | G | -0.1293 |
| rs9656461   | C | 0.0172  |
| rs71543363  | C | 0.1227  |
| rs143747856 | T | 0.0282  |
| rs2189902   | G | -0.0224 |
| rs2906726   | G | -0.0236 |
| rs2267890   | A | 0.0219  |
| rs111675190 | C | 0.0537  |
| rs73718645  | T | -0.0409 |
| rs884479    | T | 0.0183  |
| rs143938101 | C | -0.1285 |
| rs849761    | G | 0.0301  |
| rs57630187  | C | 0.0587  |
| rs17579197  | G | -0.0438 |
| rs34213934  | T | 0.0707  |



|             |   |         |
|-------------|---|---------|
| rs142858389 | T | 0.0586  |
| rs11974784  | T | -0.0293 |
| rs115083238 | T | 0.0753  |
| rs141860306 | A | 0.0484  |
| rs10229550  | A | 0.0346  |
| rs2333894   | T | 0.0174  |
| rs78530399  | T | 0.0416  |
| rs17587202  | T | 0.0195  |
| rs57036769  | C | -0.0472 |
| rs6959826   | T | -0.0295 |
| rs17133198  | T | 0.0179  |
| rs10807974  | A | 0.0186  |
| rs113450291 | C | 0.0471  |
| rs118077907 | G | 0.0706  |
| rs2240419   | T | -0.0201 |
| rs7809724   | C | 0.0425  |
| rs706022    | C | -0.0197 |
| rs6980084   | A | -0.0606 |
| rs12702393  | G | -0.0264 |
| rs3109109   | C | -0.0422 |
| rs13230925  | C | 0.0224  |
| rs11765432  | A | -0.1369 |
| rs10952955  | T | -0.0274 |
| rs722048    | C | -0.0195 |
| rs76977067  | T | -0.0622 |
| rs7791356   | T | 0.0912  |
| rs74979647  | G | 0.0733  |
| rs1117533   | G | 0.0181  |
| rs17292270  | A | 0.0581  |
| rs73159212  | C | 0.1019  |
| rs80194886  | A | -0.0835 |
| rs75346621  | A | 0.1005  |
| rs6973259   | A | -0.0209 |
| rs757931    | A | 0.0193  |
| rs58632387  | C | -0.0322 |
| rs113818754 | C | 0.0971  |
| rs6949536   | T | -0.0179 |
| rs73222698  | C | -0.0504 |
| rs12706551  | T | -0.0435 |
| rs77001183  | G | -0.0825 |
| rs118036969 | T | -0.1145 |
| rs118152176 | T | -0.0831 |
| rs55683341  | A | 0.0611  |
| rs12531773  | C | -0.0399 |
| rs12670477  | A | 0.1215  |
| rs2906670   | C | -0.0197 |
| rs2960821   | A | -0.0357 |

|             |   |         |
|-------------|---|---------|
| rs17714729  | G | -0.0414 |
| rs11773608  | T | 0.063   |
| rs1013307   | G | 0.0284  |
| rs4731320   | T | 0.0191  |
| rs117768534 | A | -0.0799 |
| rs39018     | G | 0.0751  |
| rs10273876  | G | 0.0218  |
| rs117526226 | A | 0.0834  |
| rs6466129   | T | 0.0175  |
| rs1962975   | C | 0.0933  |
| rs71538866  | G | 0.0554  |
| rs6943425   | G | 0.0215  |
| rs12671878  | A | -0.0207 |
| rs62482302  | A | -0.0314 |
| rs77878970  | T | -0.0323 |
| rs17232677  | T | 0.0276  |
| rs10243283  | G | -0.0278 |
| rs148698706 | T | -0.0814 |
| rs77381601  | A | 0.0686  |
| rs141635338 | T | -0.1555 |
| rs38094     | T | 0.0217  |
| rs142159888 | T | -0.0745 |
| rs117176883 | A | 0.0689  |
| rs76058699  | A | -0.0319 |
| rs73033555  | G | -0.1178 |
| rs34593300  | G | 0.0484  |
| rs11972449  | C | 0.0195  |
| rs3801777   | C | 0.0325  |
| rs113063541 | C | 0.0723  |
| rs6970230   | G | 0.0225  |
| rs73180850  | A | -0.0235 |
| rs78233204  | A | 0.0741  |
| rs34673392  | T | -0.03   |
| rs118141450 | T | 0.1032  |
| rs17405965  | C | 0.1015  |
| rs17170583  | C | -0.0213 |
| rs17275193  | G | 0.0181  |
| rs10233489  | C | 0.0219  |
| rs706030    | T | 0.0209  |
| rs78405601  | G | 0.1133  |
| rs4909217   | G | -0.0526 |
| rs73344550  | G | 0.0666  |
| rs1450184   | T | -0.0272 |
| rs117431242 | A | 0.0745  |
| rs6977984   | T | 0.115   |
| rs114059756 | C | -0.1529 |
| rs148649430 | G | 0.0523  |

|             |   |         |
|-------------|---|---------|
| rs143650859 | A | 0.0851  |
| rs117690714 | C | 0.0832  |
| rs112136164 | G | 0.1416  |
| rs7799070   | A | 0.1175  |
| rs78764793  | T | -0.1    |
| rs142062163 | T | 0.092   |
| rs12670282  | A | -0.0204 |
| rs117050082 | A | 0.1282  |
| rs2190411   | C | 0.0257  |
| rs73088368  | A | -0.0799 |
| rs118191506 | A | 0.0682  |
| rs10281326  | T | 0.0388  |
| rs2072063   | T | -0.0377 |
| rs963781    | A | -0.0246 |
| rs73101477  | G | -0.0717 |
| rs76817258  | A | 0.0489  |
| rs73168055  | T | 0.0464  |
| rs9244      | C | -0.0367 |
| rs73164048  | T | 0.0218  |
| rs117183193 | T | -0.0787 |
| rs12535860  | C | 0.1521  |
| rs17167977  | T | 0.092   |
| rs38521     | C | -0.0177 |
| rs55785951  | G | -0.0511 |
| rs6466156   | G | 0.0176  |
| rs4286841   | A | 0.0201  |
| rs76743801  | C | -0.0746 |
| rs148190239 | A | -0.0873 |
| rs79972167  | T | 0.0595  |
| rs74980805  | T | 0.0638  |
| rs62454536  | A | -0.1369 |
| rs73104988  | A | 0.0655  |
| rs77944001  | C | 0.0763  |
| rs144087161 | C | -0.0763 |
| rs148610977 | T | -0.0904 |
| rs117458150 | A | 0.0674  |
| rs117252441 | C | 0.1063  |
| rs73034481  | T | 0.1251  |
| rs60570942  | C | 0.0287  |
| rs17172647  | G | 0.0206  |
| rs75591773  | C | -0.1263 |
| rs10953472  | T | 0.0852  |
| rs141567772 | T | 0.103   |
| rs4720647   | G | -0.0264 |
| rs17345892  | T | -0.0391 |
| rs71572230  | T | -0.0518 |
| rs112170982 | T | 0.0257  |

|             |   |         |
|-------------|---|---------|
| rs2893031   | G | 0.0583  |
| rs10250618  | T | -0.0317 |
| rs365844    | C | 0.0352  |
| rs77320856  | T | -0.0601 |
| rs146499629 | T | 0.0919  |
| rs4140745   | T | 0.0191  |
| rs2538958   | C | -0.0169 |
| rs146193509 | G | 0.0815  |
| rs34498904  | C | 0.0198  |
| rs117874121 | A | 0.0403  |
| rs56082732  | C | 0.0343  |
| rs396751    | C | 0.0183  |
| rs11764843  | A | 0.0215  |
| rs12539059  | A | 0.0368  |
| rs2075382   | A | 0.0201  |
| rs10952093  | G | 0.0186  |
| rs55802598  | G | 0.1151  |
| rs73078611  | A | 0.0931  |
| rs816248    | T | 0.0168  |
| rs7783908   | T | -0.0474 |
| rs74611272  | C | 0.044   |
| rs17328414  | T | -0.0952 |
| rs10229460  | T | 0.0174  |
| rs146235428 | C | 0.0644  |
| rs78841127  | T | -0.0578 |
| rs2949827   | A | 0.0748  |
| rs73038783  | A | -0.1064 |
| rs138392446 | C | 0.1173  |
| rs73129534  | C | -0.133  |
| rs7795420   | G | -0.017  |
| rs79388098  | A | -0.1238 |
| rs10266859  | T | 0.0217  |
| rs56048615  | C | 0.0244  |
| rs9785052   | C | 0.0245  |
| rs4725534   | A | 0.0226  |
| rs327703    | C | -0.0179 |
| rs79649309  | G | -0.0338 |
| rs116841159 | G | 0.0837  |
| rs4725765   | G | -0.0382 |
| rs4917198   | T | -0.0432 |
| rs75442122  | A | 0.0934  |
| rs6976073   | T | -0.0259 |
| rs2078032   | C | 0.0206  |
| rs10953644  | C | 0.02    |
| rs145418291 | A | -0.0749 |
| rs17483166  | G | -0.0396 |
| rs9638116   | A | -0.0306 |

|             |   |         |
|-------------|---|---------|
| rs4717473   | G | -0.0487 |
| rs17520411  | T | 0.0548  |
| rs138316059 | G | 0.0671  |
| rs10486920  | A | 0.0196  |
| rs67240868  | A | 0.0311  |
| rs80277330  | C | -0.101  |
| rs11978879  | C | -0.1157 |
| rs2051936   | T | -0.0245 |
| rs73120130  | G | 0.0565  |
| rs74754346  | T | -0.0381 |
| rs117201047 | G | -0.0649 |
| rs111227579 | A | 0.1171  |
| rs10279898  | A | 0.019   |
| rs7798497   | C | 0.0537  |
| rs2351379   | C | 0.022   |
| rs4720620   | C | 0.0197  |
| rs142850019 | C | -0.0785 |
| rs78410409  | G | 0.0267  |
| rs4909055   | G | -0.0179 |
| rs76047690  | C | 0.0784  |
| rs1646649   | C | 0.094   |
| rs10488225  | T | -0.0229 |
| rs117781758 | T | 0.0867  |
| rs3778699   | A | 0.0691  |
| rs113652908 | A | -0.057  |
| rs1003575   | C | -0.0183 |
| rs139881377 | C | 0.0636  |
| rs117809373 | T | 0.1534  |
| rs12703385  | T | -0.0702 |
| rs38403     | C | 0.0177  |
| rs12535883  | G | 0.0995  |
| rs11980501  | C | 0.0268  |
| rs77424671  | G | 0.1346  |
| rs11761745  | G | -0.0937 |
| rs2533466   | C | -0.0306 |
| rs4726298   | G | -0.0536 |
| rs34823338  | T | 0.0198  |
| rs6465989   | C | 0.0228  |
| rs76949564  | A | 0.0313  |
| rs6960871   | T | -0.0169 |
| rs73679201  | T | 0.0497  |
| rs7780977   | G | 0.0186  |
| rs1614702   | T | 0.0204  |
| rs76718825  | T | 0.0463  |
| rs62457776  | A | -0.1338 |
| rs149193387 | C | -0.1256 |
| rs57831171  | G | -0.0535 |

|             |   |         |
|-------------|---|---------|
| rs577642    | T | 0.0874  |
| rs2907684   | T | 0.0332  |
| rs7826      | A | -0.0192 |
| rs117907102 | C | 0.0538  |
| rs7808650   | T | 0.0253  |
| rs60582977  | A | 0.0351  |
| rs62467330  | G | -0.0268 |
| rs139429527 | A | 0.1468  |
| rs35274980  | A | 0.0356  |
| rs1181951   | A | -0.0549 |
| rs961652    | G | -0.0194 |
| rs16880070  | C | -0.0659 |
| rs79775388  | C | -0.092  |
| rs1657248   | A | 0.0396  |
| rs13230108  | C | -0.0328 |
| rs4731075   | T | 0.0211  |
| rs113656073 | C | -0.1525 |
| rs4289724   | C | 0.0479  |
| rs1420118   | T | -0.0641 |
| rs76822090  | C | 0.0453  |
| rs56998446  | G | -0.037  |
| rs6968241   | G | 0.0275  |
| rs73113753  | A | -0.1141 |
| rs11769029  | G | -0.0187 |
| rs7798400   | A | -0.0364 |
| rs56050015  | C | -0.0575 |
| rs76654506  | G | -0.0989 |
| rs35206412  | T | 0.0296  |
| rs580365    | A | 0.0235  |
| rs1636868   | A | -0.0347 |
| rs117917139 | A | 0.0459  |
| rs2813837   | A | -0.0255 |
| rs62480907  | C | -0.0473 |
| rs56349397  | C | 0.0331  |
| rs13224128  | T | 0.0618  |
| rs138059213 | T | -0.1059 |
| rs217003    | T | -0.0306 |
| rs55948937  | C | -0.0195 |
| rs67667933  | A | -0.0437 |
| rs7786916   | T | -0.026  |
| rs78803237  | C | 0.0728  |
| rs117019499 | A | 0.1221  |
| rs12533583  | T | -0.0846 |
| rs3734953   | A | -0.0314 |
| rs78659910  | C | 0.0673  |
| rs17567105  | G | -0.0388 |
| rs111692147 | T | -0.0833 |

|             |   |         |
|-------------|---|---------|
| rs148990616 | A | -0.1073 |
| rs12670049  | A | 0.0377  |
| rs2285690   | T | -0.0185 |
| rs2705798   | G | -0.0836 |
| rs73102277  | T | -0.0802 |
| rs2534569   | G | 0.023   |
| rs150662325 | A | 0.1287  |
| rs73202298  | C | 0.0587  |
| rs74575105  | A | -0.0418 |
| rs77998268  | A | 0.0387  |
| rs73160514  | A | -0.1249 |
| rs78939919  | T | 0.0374  |
| rs7783714   | G | -0.0187 |
| rs6969670   | T | 0.024   |
| rs17429501  | C | 0.0758  |
| rs10251129  | C | 0.0197  |
| rs55972315  | C | -0.0233 |
| rs7781331   | C | 0.0173  |
| rs12537149  | G | 0.0192  |
| rs118125216 | T | -0.0668 |
| rs111397655 | T | 0.0168  |
| rs75376335  | A | -0.0248 |
| rs2037697   | C | -0.0183 |
| rs73462663  | G | -0.0847 |
| rs12718208  | C | 0.0225  |
| rs75563053  | T | 0.0195  |
| rs7811315   | A | 0.052   |
| rs6467318   | A | 0.0231  |
| rs73174910  | C | 0.0514  |
| rs73220834  | A | -0.1373 |
| rs113380269 | A | -0.0616 |
| rs36132066  | T | -0.0337 |
| rs35286474  | C | -0.02   |
| rs13244742  | T | 0.0182  |
| rs76747125  | T | 0.059   |
| rs77396275  | G | -0.038  |
| rs6975118   | A | -0.0666 |
| rs117041543 | C | -0.0895 |
| rs77484983  | T | 0.0849  |
| rs11770327  | G | 0.0324  |
| rs757132    | G | -0.0188 |
| rs118027863 | G | 0.078   |
| rs6952109   | A | -0.018  |
| rs73144129  | T | -0.0219 |
| rs112826922 | T | 0.0255  |
| rs112928369 | G | -0.0765 |
| rs6971628   | A | 0.0775  |

|             |   |         |
|-------------|---|---------|
| rs144037984 | A | -0.0724 |
| rs3113318   | G | -0.023  |
| rs117697267 | T | 0.0842  |
| rs10253125  | A | -0.0178 |
| rs35193439  | C | -0.0206 |
| rs12667359  | T | 0.0173  |
| rs73231948  | T | -0.0425 |
| rs235415    | C | 0.0364  |
| rs148175705 | C | -0.1019 |
| rs113697366 | C | 0.0855  |
| rs10277497  | T | -0.0183 |
| rs72612623  | C | 0.0607  |
| rs801121    | G | -0.0327 |
| rs12673279  | T | 0.025   |
| rs7811444   | G | 0.0259  |
| rs76353014  | G | -0.0547 |
| rs150488813 | G | -0.0876 |
| rs4513910   | T | 0.0245  |
| rs6950447   | T | -0.0199 |
| rs75591473  | A | 0.0651  |
| rs211811    | A | -0.0242 |
| rs4731424   | T | 0.0315  |
| rs1427484   | G | -0.0312 |
| rs272656    | G | 0.0204  |
| rs34767325  | T | 0.0843  |
| rs1735006   | G | 0.1196  |
| rs58856240  | A | 0.0666  |
| rs113452856 | A | 0.1151  |
| rs78315636  | T | 0.0914  |
| rs2267723   | G | -0.0167 |
| rs78878767  | C | 0.1266  |
| rs113903787 | A | 0.0742  |
| rs117144249 | A | 0.0696  |
| rs10224467  | C | 0.0188  |
| rs7785516   | C | -0.0432 |
| rs149522137 | A | 0.0734  |
| rs17429037  | A | 0.034   |
| rs2237710   | G | -0.0184 |
| rs114949263 | C | -0.0281 |
| rs6961781   | T | -0.0173 |
| rs7803334   | C | -0.0186 |
| rs117538244 | G | -0.0924 |
| rs73721684  | A | -0.0975 |
| rs111408805 | A | -0.0314 |
| rs10253787  | G | -0.0382 |
| rs146651985 | T | 0.0249  |
| rs12702901  | A | -0.017  |



|             |   |         |
|-------------|---|---------|
| rs36082545  | C | 0.0286  |
| rs67511428  | A | 0.0714  |
| rs116388460 | G | -0.0685 |
| rs77492263  | T | 0.038   |
| rs143716591 | A | -0.071  |
| rs1888349   | T | 0.0215  |
| rs73284711  | T | -0.0255 |
| rs628653    | G | -0.0174 |
| rs75684479  | A | -0.0915 |
| rs161089    | A | -0.0168 |
| rs73061744  | G | -0.0627 |
| rs6972713   | C | -0.0179 |
| rs112316397 | A | -0.0897 |
| rs73163298  | A | -0.0285 |
| rs73054067  | T | 0.0301  |
| rs6969502   | A | 0.0217  |
| rs11761910  | A | 0.0191  |
| rs41826     | T | 0.0241  |
| rs1919912   | T | 0.0172  |
| rs75484189  | A | 0.1484  |
| rs7801695   | T | 0.025   |
| rs112682023 | T | 0.108   |
| rs6943549   | A | -0.029  |
| rs10265341  | C | 0.0215  |
| rs116971278 | G | -0.0886 |
| rs73160267  | A | -0.037  |
| rs149078150 | T | 0.1062  |
| rs76528922  | G | 0.0863  |
| rs212832    | G | -0.0299 |
| rs62477967  | C | -0.0622 |
| rs80101314  | G | -0.0747 |
| rs4131646   | T | -0.0216 |
| rs17151997  | G | 0.0178  |
| rs1590033   | C | 0.0187  |
| rs2392244   | G | 0.0228  |
| rs74514019  | T | -0.0698 |
| rs2730617   | C | -0.018  |
| rs74977547  | C | -0.0581 |
| rs36198157  | T | -0.0366 |
| rs117397802 | T | 0.0746  |
| rs62478262  | G | -0.0189 |
| rs78544505  | C | -0.0565 |
| rs2950627   | C | 0.0244  |
| rs116861258 | T | 0.0794  |
| rs74493872  | G | -0.0598 |
| rs11761204  | A | 0.0614  |
| rs4722086   | C | -0.0172 |

|             |   |         |
|-------------|---|---------|
| rs6466155   | T | 0.0167  |
| rs38763     | C | 0.0269  |
| rs7803859   | G | -0.0215 |
| rs10224358  | A | -0.0653 |
| rs4073529   | A | 0.0204  |
| rs117442283 | T | 0.0823  |
| rs73163391  | A | 0.064   |
| rs2107702   | T | 0.0819  |
| rs6971946   | T | -0.0301 |
| rs139305083 | G | -0.129  |
| rs150686152 | T | 0.054   |
| rs78817539  | T | 0.0769  |
| rs4103227   | T | 0.038   |
| rs74338692  | T | 0.07    |
| rs2429216   | T | -0.0194 |
| rs852541    | C | -0.1151 |
| rs74646736  | G | -0.0829 |
| rs2005745   | C | 0.0292  |
| rs17439476  | T | 0.0637  |
| rs17513961  | G | -0.0291 |
| rs141418902 | G | -0.103  |
| rs73179848  | T | -0.077  |
| rs73282974  | C | 0.035   |
| rs117985843 | G | -0.0343 |
| rs13246749  | T | 0.0216  |
| rs7784318   | A | -0.07   |
| rs79649571  | A | 0.0531  |
| rs10267740  | C | -0.0196 |
| rs10244823  | T | 0.0189  |
| rs113769513 | T | 0.0334  |
| rs7799860   | C | -0.0177 |
| rs17143311  | T | -0.0462 |
| rs56368732  | T | -0.098  |
| rs114972150 | A | -0.1291 |
| rs7783822   | G | -0.0248 |
| rs4719379   | T | 0.02    |
| rs113061844 | C | -0.1068 |
| rs55802461  | T | 0.0926  |
| rs62441660  | T | -0.098  |
| rs10951067  | C | -0.0242 |
| rs138978539 | C | 0.1023  |
| rs2371212   | A | -0.0234 |
| rs6946379   | A | 0.0773  |
| rs7456569   | A | -0.024  |
| rs757705    | G | 0.0164  |
| rs17714394  | T | 0.0564  |
| rs117735175 | T | 0.0614  |

|             |   |         |
|-------------|---|---------|
| rs73707847  | A | -0.0546 |
| rs10233107  | T | -0.0216 |
| rs13233604  | A | -0.0334 |
| rs143153915 | A | -0.1007 |
| rs3892251   | A | 0.0318  |
| rs77936800  | A | -0.023  |
| rs6968756   | C | -0.0173 |
| rs10276004  | T | 0.0285  |
| rs6949412   | G | -0.0221 |
| rs150725674 | G | -0.0259 |
| rs13238508  | T | -0.0389 |
| rs55897432  | T | -0.0383 |
| rs10249244  | C | 0.035   |
| rs79138945  | G | 0.0631  |
| rs35881810  | A | 0.0511  |
| rs73101470  | A | 0.0613  |
| rs117061327 | C | 0.0787  |
| rs62467866  | A | -0.0731 |
| rs75690071  | C | 0.1294  |
| rs60157575  | A | 0.0884  |
| rs6962496   | A | -0.0192 |
| rs208358    | A | -0.0198 |
| rs13229852  | T | -0.0328 |
| rs79198232  | G | -0.0533 |
| rs1673162   | G | -0.0301 |
| rs75430042  | T | 0.0362  |
| rs56970370  | T | 0.022   |
| rs6944978   | A | -0.0236 |
| rs117863841 | C | 0.0641  |
| rs149907410 | A | 0.0534  |
| rs4731661   | G | -0.022  |
| rs112117078 | T | 0.1067  |
| rs74642859  | A | 0.038   |
| rs80187045  | T | 0.0481  |
| rs117197846 | G | -0.129  |
| rs73429561  | C | 0.0815  |
| rs75189374  | A | -0.11   |
| rs6966065   | G | -0.0225 |
| rs10230143  | A | 0.0239  |
| rs113450714 | T | -0.1203 |
| rs117137967 | T | -0.0692 |
| rs78637561  | A | -0.1045 |
| rs73210122  | G | -0.0304 |
| rs117152497 | A | 0.1144  |
| rs2237711   | A | 0.033   |
| rs73429809  | G | 0.0733  |
| rs10244617  | C | 0.0763  |

|             |   |         |
|-------------|---|---------|
| rs118030713 | G | 0.1519  |
| rs117819872 | C | 0.0786  |
| rs59558034  | C | -0.0638 |
| rs12672550  | C | 0.0203  |
| rs117352177 | G | 0.0619  |
| rs117347452 | A | -0.1163 |
| rs117215038 | A | 0.0868  |
| rs73165004  | T | 0.0268  |
| rs73174912  | C | 0.0316  |
| rs12155446  | T | 0.0342  |
| rs73714031  | A | 0.1065  |
| rs117742326 | A | -0.0622 |
| rs12668748  | T | 0.0186  |
| rs111877580 | A | -0.0557 |
| rs2429218   | C | -0.0182 |
| rs12534200  | T | 0.025   |
| rs6952465   | G | -0.043  |
| rs75612885  | C | -0.101  |
| rs17169964  | A | -0.0487 |
| rs2906740   | A | 0.136   |
| rs706568    | A | -0.0356 |
| rs2965628   | C | -0.0914 |
| rs7780216   | C | -0.0935 |
| rs151234675 | A | 0.0988  |
| rs1636295   | T | 0.034   |
| rs117808204 | T | -0.0899 |
| rs12540024  | A | -0.0299 |
| rs2027985   | A | 0.0169  |
| rs2191280   | T | 0.0168  |
| rs79175771  | T | 0.0732  |
| rs4259322   | T | 0.0227  |
| rs1179476   | T | -0.0918 |
| rs34516090  | G | 0.0211  |
| rs117412746 | A | -0.0969 |
| rs17155297  | A | -0.0426 |
| rs143261448 | T | -0.0436 |
| rs74367059  | A | -0.0728 |
| rs12706046  | G | -0.0272 |
| rs76105265  | C | -0.0756 |
| rs118111667 | C | 0.0886  |
| rs10278201  | G | -0.0171 |
| rs79883393  | C | 0.0562  |
| rs143227942 | T | 0.0977  |
| rs4716474   | G | -0.0729 |
| rs79918809  | C | -0.08   |
| rs757934    | T | 0.0228  |
| rs76498375  | C | 0.0673  |

|             |   |         |
|-------------|---|---------|
| rs7809045   | A | -0.0398 |
| rs73464025  | G | -0.0185 |
| rs112829231 | A | 0.0695  |
| rs112389601 | A | -0.0912 |
| rs144204914 | G | 0.0894  |
| rs73334527  | A | 0.0197  |
| rs6973784   | G | -0.0405 |
| rs148036655 | A | -0.0798 |
| rs1156183   | T | 0.0193  |
| rs117762358 | T | -0.056  |
| rs4729246   | C | 0.0409  |
| rs6651061   | A | 0.0201  |
| rs2024372   | G | 0.0167  |
| rs3800939   | G | 0.0344  |
| rs111493281 | G | -0.0679 |
| rs146620404 | A | -0.0909 |
| rs143448414 | T | -0.0338 |
| rs198322    | G | 0.0389  |
| rs11768960  | A | 0.0233  |
| rs143770629 | C | -0.0794 |
| rs1208822   | T | -0.017  |
| rs77511758  | G | 0.0429  |
| rs78340259  | T | 0.0761  |
| rs55776209  | T | -0.0309 |
| rs117909879 | G | 0.0841  |
| rs5019918   | A | -0.0268 |
| rs147794726 | C | -0.1535 |
| rs147147953 | A | -0.0904 |
| rs78913246  | C | 0.0542  |
| rs138953514 | C | -0.0906 |
| rs2394631   | T | 0.0183  |
| rs145587241 | A | -0.0711 |
| rs13241183  | C | -0.1164 |
| rs2965042   | G | -0.0171 |
| rs117148116 | T | -0.0549 |
| rs846392    | G | -0.0169 |
| rs77914626  | G | -0.0358 |
| rs145932968 | T | 0.0866  |
| rs696268    | T | -0.0175 |
| rs112147257 | G | -0.1419 |
| rs75336631  | G | 0.0663  |
| rs62457247  | T | 0.0581  |
| rs13237501  | A | 0.0204  |
| rs4726201   | T | 0.0203  |
| rs113689966 | T | 0.0725  |
| rs7794904   | G | -0.1154 |
| rs41531     | T | 0.0189  |

|             |   |         |
|-------------|---|---------|
| rs112941854 | A | -0.0465 |
| rs13227372  | G | 0.1271  |
| rs10231185  | G | 0.0756  |
| rs116970869 | A | 0.1669  |
| rs76692059  | G | 0.0763  |
| rs11767267  | T | -0.0453 |
| rs113103356 | G | 0.0578  |
| rs7798770   | A | -0.0191 |
| rs62467702  | A | 0.073   |
| rs10234321  | T | 0.0536  |
| rs62473833  | T | -0.0595 |
| rs78769212  | G | 0.0934  |
| rs215750    | A | 0.0298  |
| rs111884465 | A | -0.0758 |
| rs111535337 | A | -0.0676 |
| rs216579    | C | -0.0168 |
| rs11768734  | T | 0.0381  |
| rs2052405   | G | 0.0163  |
| rs73073128  | C | -0.0347 |
| rs80208585  | A | 0.0954  |
| rs6462199   | A | 0.0192  |
| rs149144752 | A | -0.0451 |
| rs75776050  | G | 0.0838  |
| rs12673061  | T | 0.0356  |
| rs28485513  | C | -0.0198 |
| rs4722048   | G | -0.0603 |
| rs4367464   | C | 0.0357  |
| rs6970331   | T | -0.0177 |
| rs10263013  | T | 0.0321  |
| rs17290392  | T | 0.0258  |
| rs7776538   | C | 0.0174  |
| rs1635081   | A | 0.0165  |
| rs13241700  | C | -0.0374 |
| rs78242508  | A | 0.0532  |
| rs77705491  | A | -0.0336 |
| rs57654112  | C | 0.0195  |
| rs10260030  | C | 0.0334  |
| rs6973455   | T | -0.0495 |
| rs79560520  | G | -0.1196 |
| rs4473930   | C | 0.0219  |
| rs2189772   | G | -0.0165 |
| rs2192341   | G | 0.0429  |
| rs12540575  | G | 0.0201  |
| rs11761720  | T | 0.0173  |
| rs35469283  | T | 0.0632  |
| rs76843561  | A | 0.0393  |
| rs116871188 | A | 0.079   |

|             |   |         |
|-------------|---|---------|
| rs35933018  | C | -0.0894 |
| rs35851880  | C | -0.0514 |
| rs117076706 | G | 0.0823  |
| rs1178109   | A | 0.0211  |
| rs73232702  | G | -0.0481 |
| rs75742675  | C | 0.0773  |
| rs56118280  | C | 0.0461  |
| rs140447396 | G | 0.0981  |
| rs17375174  | C | 0.0513  |
| rs11767731  | G | -0.0262 |
| rs705330    | G | -0.0409 |
| rs4722444   | A | 0.0191  |
| rs28437188  | A | 0.0769  |
| rs502600    | T | -0.0594 |
| rs855744    | A | 0.0308  |
| rs726297    | A | -0.0175 |
| rs11760697  | G | 0.0168  |
| rs6961225   | T | 0.04    |
| rs117830108 | A | -0.0941 |
| rs76107249  | T | 0.0557  |
| rs112459121 | A | 0.0608  |
| rs55858298  | A | -0.0368 |
| rs79120630  | G | 0.0553  |
| rs76500314  | G | 0.0654  |
| rs148773818 | A | 0.0958  |
| rs2187620   | T | -0.0279 |
| rs117693550 | G | -0.1456 |
| rs113710466 | A | 0.0534  |
| rs329278    | T | -0.0427 |
| rs7794802   | C | -0.0513 |
| rs6977590   | C | -0.0212 |
| rs4623321   | T | 0.0214  |
| rs140886185 | A | -0.0661 |
| rs117943725 | T | -0.0698 |
| rs12666508  | T | 0.0694  |
| rs12670036  | G | -0.0267 |
| rs113441570 | G | -0.0308 |
| rs74854825  | A | -0.0289 |
| rs2343282   | C | -0.0176 |
| rs76151260  | A | 0.1097  |
| rs139972590 | G | 0.0902  |
| rs10255852  | C | -0.0163 |
| rs116644139 | T | 0.053   |
| rs73143203  | A | -0.1291 |
| rs117616605 | C | 0.0792  |
| rs78383242  | T | -0.1133 |
| rs76026460  | C | -0.0385 |

|             |   |         |
|-------------|---|---------|
| rs62451494  | A | -0.0221 |
| rs113850673 | A | -0.0888 |
| rs140674469 | C | 0.0835  |
| rs62455836  | C | 0.0536  |
| rs722134    | G | -0.0262 |
| rs2690376   | G | -0.0413 |
| rs3114794   | G | -0.0172 |
| rs17346538  | C | -0.079  |
| rs147680571 | A | 0.0537  |
| rs113284011 | G | -0.0677 |
| rs11979694  | T | 0.0205  |
| rs917139    | G | -0.0479 |
| rs2907962   | G | 0.0173  |
| rs4143614   | T | -0.0287 |
| rs117488841 | A | 0.0962  |
| rs60227295  | A | -0.0334 |
| rs74399814  | A | 0.0822  |
| rs113160618 | T | 0.0358  |
| rs117719486 | G | -0.0636 |
| rs17683699  | A | -0.0326 |
| rs113451963 | T | -0.0538 |
| rs6973277   | C | -0.0313 |
| rs138437528 | G | 0.0724  |
| rs117597420 | C | 0.1448  |
| rs76450011  | T | 0.0614  |
| rs6977724   | G | -0.0246 |
| rs17146225  | A | -0.0212 |
| rs60679030  | C | -0.0381 |
| rs2471226   | C | 0.0208  |
| rs71564771  | A | 0.0435  |
| rs76539784  | G | 0.0926  |
| rs12703318  | A | -0.0274 |
| rs111515250 | T | 0.1001  |
| rs10952786  | A | 0.0201  |
| rs35020917  | A | 0.0601  |
| rs117850218 | A | -0.0914 |
| rs140011449 | A | 0.1647  |
| rs73211466  | A | 0.0504  |
| rs76244553  | A | -0.0577 |
| rs76133351  | G | 0.0885  |
| rs151209499 | T | -0.1217 |
| rs143517886 | C | 0.0908  |
| rs75010656  | T | -0.0919 |
| rs62462922  | G | -0.1293 |
| rs2711013   | T | 0.0199  |
| rs71561774  | A | 0.044   |
| rs7805545   | T | -0.0231 |



|             |   |         |
|-------------|---|---------|
| rs10156137  | T | 0.0241  |
| rs1523613   | A | -0.0309 |
| rs1557909   | A | -0.0404 |
| rs55881038  | T | -0.0722 |
| rs28617575  | C | -0.0423 |
| rs150092077 | T | 0.0324  |
| rs77268043  | A | 0.1128  |
| rs10281112  | C | -0.0196 |
| rs59413218  | T | -0.0321 |
| rs116885810 | A | -0.0583 |
| rs17628482  | A | -0.0432 |
| rs118163799 | T | 0.071   |
| rs77908014  | C | 0.0339  |
| rs73725287  | T | -0.129  |
| rs35573106  | A | -0.0182 |
| rs38400     | G | 0.0588  |
| rs7782002   | G | 0.0216  |
| rs13240743  | G | 0.018   |
| rs2521310   | C | -0.0237 |
| rs80025143  | G | -0.0403 |
| rs10226309  | A | -0.0341 |
| rs6958083   | T | 0.0341  |
| rs62437933  | G | 0.0346  |
| rs10249849  | C | -0.0171 |
| rs7777627   | C | -0.0164 |
| rs1263570   | G | -0.0183 |
| rs73322714  | A | -0.092  |
| rs2686806   | C | -0.0243 |
| rs2711363   | C | 0.0277  |
| rs3128391   | C | 0.0211  |
| rs75380079  | C | -0.0412 |
| rs77834136  | C | -0.0671 |
| rs56116000  | A | 0.019   |
| rs6463183   | C | -0.0159 |
| rs2043251   | G | -0.0352 |
| rs76720560  | G | -0.0418 |
| rs7796577   | G | -0.1011 |
| rs13239625  | G | 0.029   |
| rs10282667  | G | 0.0433  |
| rs2008723   | A | -0.0507 |
| rs274023    | T | -0.0529 |
| rs1916710   | T | 0.0763  |
| rs77517800  | T | 0.0521  |
| rs112060062 | T | 0.1701  |
| rs6968829   | G | 0.0173  |
| rs3800627   | C | 0.0809  |
| rs73062658  | C | -0.0808 |

|             |   |         |
|-------------|---|---------|
| rs146963699 | T | -0.0611 |
| rs71541312  | C | 0.0706  |
| rs6461058   | G | 0.0274  |
| rs7788611   | C | 0.0631  |
| rs4398813   | C | -0.0162 |
| rs62459761  | A | 0.0208  |
| rs140942505 | G | 0.098   |
| rs56168037  | C | 0.0753  |
| rs112268762 | C | -0.1259 |
| rs74822408  | G | -0.0749 |
| rs204603    | T | 0.0318  |
| rs2214360   | T | -0.0158 |
| rs11764607  | A | 0.0479  |
| rs7792706   | C | -0.0238 |
| rs62488602  | C | 0.0567  |
| rs7456798   | C | -0.0468 |
| rs117626190 | A | -0.1243 |
| rs1880316   | T | -0.016  |
| rs1878806   | G | 0.0176  |
| rs67807295  | A | 0.0355  |
| rs10270171  | C | -0.019  |
| rs73716111  | T | -0.1202 |
| rs11767046  | T | -0.0202 |
| rs17165187  | A | 0.066   |
| rs17153388  | A | 0.0211  |
| rs80160758  | A | -0.0902 |
| rs969197    | C | 0.0436  |
| rs1549078   | T | 0.0326  |
| rs142706820 | G | -0.0628 |
| rs62480162  | A | 0.0347  |
| rs114450340 | A | -0.0534 |
| rs34511948  | C | 0.0212  |
| rs117943632 | A | -0.1375 |
| rs4142278   | T | -0.0176 |
| rs1258631   | T | 0.0282  |
| rs4725830   | G | -0.0163 |
| rs12113385  | G | 0.0163  |
| rs2548066   | G | 0.0927  |
| rs118179075 | G | -0.1016 |
| rs146579004 | C | 0.1143  |
| rs77165683  | C | 0.0665  |
| rs2079833   | A | -0.018  |
| rs76244464  | C | 0.0286  |
| rs112984890 | G | 0.1075  |
| rs7791488   | A | -0.016  |
| rs12673654  | A | 0.0262  |
| rs116892368 | G | -0.1333 |

|             |   |         |
|-------------|---|---------|
| rs6462316   | C | -0.0866 |
| rs4320483   | C | -0.0185 |
| rs79374993  | G | -0.0931 |
| rs6976362   | A | -0.016  |
| rs60981836  | A | -0.0472 |
| rs4595067   | C | -0.0296 |
| rs149389939 | A | 0.0532  |
| rs145450251 | C | -0.0951 |
| rs79945753  | T | -0.1007 |
| rs4326309   | A | -0.0208 |
| rs6949201   | C | -0.0591 |
| rs116991468 | C | -0.074  |
| rs117692076 | A | -0.0474 |
| rs6945758   | A | 0.0238  |
| rs314295    | G | 0.0286  |
| rs17193476  | G | 0.0286  |
| rs74753202  | C | -0.0687 |
| rs141195463 | A | -0.1194 |
| rs144894007 | C | -0.0981 |
| rs79447064  | C | 0.017   |
| rs117747385 | A | 0.0829  |
| rs74598024  | A | -0.1189 |
| rs4725298   | A | 0.0201  |
| rs117275624 | T | -0.0592 |
| rs11765862  | C | 0.0457  |
| rs6968518   | T | -0.0171 |
| rs11505797  | G | 0.0498  |
| rs55752971  | G | 0.0536  |
| rs1842990   | A | 0.0565  |
| rs73219003  | A | -0.0616 |
| rs75209728  | T | -0.0756 |
| rs12702049  | T | 0.0217  |
| rs112001594 | T | -0.0534 |
| rs73074858  | C | 0.0485  |
| rs6950687   | C | 0.0173  |
| rs55955615  | T | -0.0318 |
| rs143621906 | A | 0.0816  |
| rs80012273  | C | -0.0663 |
| rs62442614  | C | 0.034   |
| rs10264025  | A | -0.0183 |
| rs149472435 | C | 0.0491  |
| rs62467727  | T | 0.0453  |
| rs76288157  | G | -0.0608 |
| rs117221356 | T | -0.124  |
| rs75209323  | C | 0.0255  |
| rs293142    | A | 0.0764  |
| rs146472156 | G | 0.0754  |

|             |   |         |
|-------------|---|---------|
| rs2243424   | G | 0.1089  |
| rs13241099  | C | -0.092  |
| rs71538883  | T | 0.0629  |
| rs6948247   | G | 0.0204  |
| rs9638928   | G | -0.0293 |
| rs1846488   | T | -0.0256 |
| rs45454594  | A | -0.0757 |
| rs6957751   | A | 0.0188  |
| rs7795528   | A | 0.0205  |
| rs118122130 | T | -0.0634 |
| rs77231907  | T | 0.091   |
| rs71541964  | T | -0.0762 |
| rs7808621   | T | -0.0202 |
| rs11763126  | A | -0.0469 |
| rs844758    | T | -0.0165 |
| rs146602071 | C | 0.0604  |
| rs117054545 | A | 0.065   |
| rs17168574  | A | -0.0555 |
| rs75087342  | T | 0.0527  |
| rs10282321  | A | -0.0374 |
| rs73179368  | C | 0.0564  |
| rs28439290  | T | -0.1198 |
| rs1730915   | C | -0.018  |
| rs9690908   | A | 0.0399  |
| rs12702711  | T | 0.0184  |
| rs12670260  | C | -0.0269 |
| rs73227480  | G | 0.0521  |
| rs147164880 | A | 0.0842  |
| rs77795417  | T | -0.0295 |
| rs73214714  | C | 0.0634  |
| rs10241422  | T | 0.0746  |
| rs1380377   | G | -0.0169 |
| rs147712831 | A | -0.0675 |
| rs139275461 | A | 0.1274  |
| rs77138299  | C | -0.0413 |
| rs73157641  | T | 0.049   |
| rs12700916  | C | -0.0176 |
| rs76553755  | T | -0.058  |
| rs34486407  | T | -0.0693 |
| rs118127234 | C | 0.0367  |
| rs2723548   | A | 0.016   |
| rs74396401  | G | 0.1021  |
| rs1001733   | A | 0.0236  |
| rs10247662  | G | 0.0545  |
| rs77432368  | T | 0.1041  |
| rs80014719  | A | 0.076   |
| rs117023943 | T | -0.1329 |

|             |   |         |
|-------------|---|---------|
| rs3801315   | C | -0.016  |
| rs150287024 | T | -0.0448 |
| rs75959717  | G | -0.0379 |
| rs58183547  | C | 0.0252  |
| rs10247757  | A | 0.0249  |
| rs34052317  | C | 0.0377  |
| rs77089127  | C | -0.0824 |
| rs6464297   | A | 0.0173  |
| rs75712393  | C | -0.0432 |
| rs58639929  | T | 0.0322  |
| rs10282569  | A | -0.0202 |
| rs11973891  | T | 0.0394  |
| rs6466999   | G | -0.0183 |
| rs111976839 | A | 0.0873  |
| rs148650267 | T | -0.074  |
| rs145209548 | A | -0.0564 |
| rs3095359   | C | 0.0324  |
| rs79463429  | A | 0.0467  |
| rs62456774  | G | 0.0956  |
| rs118002197 | T | 0.0808  |
| rs12673493  | T | 0.0321  |
| rs4717907   | A | -0.0189 |
| rs117833543 | A | -0.1096 |
| rs10263361  | A | -0.0163 |
| rs80356311  | C | 0.0806  |
| rs80325638  | G | -0.0587 |
| rs7787898   | G | -0.0156 |
| rs77466790  | T | 0.0262  |
| rs144461234 | A | 0.0676  |
| rs4722596   | T | -0.0268 |
| rs116945152 | A | -0.0906 |
| rs62482524  | G | -0.0519 |
| rs41275979  | A | 0.0456  |
| rs60847318  | G | 0.0438  |
| rs78936782  | T | -0.0698 |
| rs2159503   | A | -0.0306 |
| rs57620592  | C | 0.0167  |
| rs74794886  | A | 0.0403  |
| rs147831911 | A | 0.064   |
| rs28669137  | C | -0.0203 |
| rs79795037  | T | 0.0274  |
| rs6950264   | G | -0.0164 |
| rs73100892  | A | -0.0245 |
| rs113500780 | A | 0.1001  |
| rs79316464  | T | -0.072  |
| rs77742508  | A | -0.0616 |
| rs80046733  | A | 0.1368  |

|             |   |         |
|-------------|---|---------|
| rs12540247  | A | 0.0455  |
| rs146185745 | A | -0.0574 |
| rs12700862  | G | -0.018  |
| rs74642501  | T | -0.0372 |
| rs4236395   | A | 0.0241  |
| rs17435702  | T | -0.0166 |
| rs12540699  | A | 0.037   |
| rs73091042  | A | -0.0343 |
| rs17158181  | T | 0.0897  |
| rs78573068  | G | 0.0402  |
| rs12534332  | G | 0.0198  |
| rs11440806  | G | 0.0501  |
| rs117911427 | A | 0.1129  |
| rs111461090 | C | 0.0567  |
| rs117245562 | A | 0.0405  |
| rs146349362 | A | 0.041   |
| rs12155412  | A | -0.05   |
| rs74404483  | A | -0.1013 |
| rs11980216  | T | 0.0707  |
| rs28677469  | G | 0.1209  |
| rs34132710  | C | 0.0916  |
| rs76427730  | T | 0.091   |
| rs657199    | T | 0.0288  |
| rs73107125  | C | -0.0388 |
| rs11983800  | C | -0.037  |
| rs17595350  | A | -0.0285 |
| rs62441762  | C | 0.032   |
| rs13236669  | C | 0.0282  |
| rs809132    | C | -0.0164 |
| rs117359983 | G | -0.058  |
| rs12667858  | A | 0.0253  |
| rs151324217 | A | -0.0858 |
| rs7794608   | A | -0.0645 |
| rs117941166 | A | -0.0677 |
| rs10239315  | C | 0.0165  |
| rs1432189   | T | -0.0456 |
| rs145047262 | T | -0.0709 |
| rs143140455 | T | -0.0358 |
| rs10233878  | T | -0.0175 |
| rs1985530   | G | 0.0175  |
| rs144929731 | G | -0.1188 |
| rs78462774  | G | 0.0598  |
| rs75039350  | T | -0.0918 |
| rs10265126  | G | 0.0214  |
| rs80061180  | C | -0.1077 |
| rs11772886  | C | 0.0457  |
| rs117281569 | A | 0.0559  |

|             |   |         |
|-------------|---|---------|
| rs7784889   | A | 0.0366  |
| rs117321452 | A | 0.1308  |
| rs35344703  | A | -0.0571 |
| rs79941662  | A | -0.0889 |
| rs7795053   | G | 0.0439  |
| rs2158837   | T | -0.0196 |
| rs55703903  | T | 0.0212  |
| rs990108    | C | 0.0214  |
| rs141807409 | A | 0.0833  |
| rs17336352  | C | 0.0784  |
| rs12154454  | A | -0.0155 |
| rs13241159  | C | -0.0348 |
| rs76877479  | T | 0.0687  |
| rs6945426   | C | -0.0779 |
| rs11761093  | G | -0.0245 |
| rs34621905  | T | 0.0382  |
| rs7793077   | T | 0.0462  |
| rs117017775 | G | -0.0375 |
| rs35496280  | T | -0.0286 |
| rs17154833  | C | 0.0996  |
| rs6969383   | G | 0.0159  |
| rs78686616  | G | 0.0627  |
| rs10231832  | A | -0.0164 |
| rs1182397   | T | 0.0222  |
| rs73150989  | A | -0.0633 |
| rs148945863 | C | -0.0689 |
| rs137870785 | G | -0.1006 |
| rs151180363 | T | -0.1005 |
| rs114392052 | A | 0.0944  |
| rs4722579   | G | 0.0194  |
| rs73126469  | C | -0.0609 |
| rs80317525  | A | 0.0475  |
| rs116974528 | C | -0.0608 |
| rs73160623  | G | -0.0521 |
| rs12531005  | A | -0.0163 |
| rs2902631   | T | 0.0201  |
| rs149121000 | A | 0.0773  |
| rs41281695  | A | 0.1007  |
| rs7806058   | G | 0.0173  |
| rs7786197   | G | 0.0228  |
| rs12705148  | G | 0.0177  |
| rs112688590 | T | 0.0473  |
| rs116924599 | C | -0.1028 |
| rs7795019   | A | 0.0512  |
| rs117146865 | C | -0.058  |
| rs4716685   | A | 0.0196  |
| rs11982232  | G | 0.0275  |

|             |   |         |
|-------------|---|---------|
| rs118142297 | A | 0.0759  |
| rs17305753  | G | 0.0452  |
| rs62473882  | C | -0.1178 |
| rs78018792  | T | 0.1037  |
| rs4725545   | G | -0.0189 |
| rs740993    | T | 0.0198  |
| rs117334116 | C | -0.0464 |
| rs73088279  | T | 0.0217  |
| rs6978858   | T | 0.0776  |
| rs4484598   | G | 0.0242  |
| rs149901303 | A | -0.0673 |
| rs55930280  | G | -0.0168 |
| rs73157972  | A | -0.0238 |
| rs1421321   | A | 0.021   |
| rs74593744  | G | -0.0733 |
| rs11976341  | C | -0.0293 |
| rs113210078 | T | 0.0566  |
| rs150136658 | A | -0.1272 |
| rs79186435  | C | 0.0571  |
| rs73521447  | C | -0.0667 |
| rs56178992  | G | 0.0155  |
| rs146757684 | A | 0.1058  |
| rs58937146  | G | -0.0224 |
| rs79664726  | G | 0.1134  |
| rs984184    | C | 0.0182  |
| rs7809323   | A | 0.0237  |
| rs77557832  | G | -0.1093 |
| rs1918523   | T | -0.0258 |
| rs2243572   | T | -0.0191 |
| rs35349017  | C | 0.0605  |
| rs140527995 | T | 0.1079  |
| rs35105540  | G | -0.0205 |
| rs940417    | G | -0.0256 |
| rs73091352  | A | 0.0564  |
| rs118186700 | A | 0.0561  |
| rs149790855 | T | 0.0826  |
| rs117707977 | A | -0.0918 |
| rs73225066  | A | -0.0236 |
| rs76746441  | A | 0.0407  |
| rs80281693  | T | -0.034  |
| rs4723132   | G | -0.0188 |
| rs73149720  | T | 0.0722  |
| rs143244279 | A | -0.0629 |
| rs56388003  | C | 0.0675  |
| rs75435015  | A | 0.0717  |
| rs57852521  | G | -0.0396 |
| rs62454608  | T | -0.059  |



|             |   |         |
|-------------|---|---------|
| rs76902068  | C | -0.0282 |
| rs12535655  | C | 0.023   |
| rs73054552  | C | -0.1179 |
| rs73075691  | C | -0.0838 |
| rs1796058   | A | -0.0434 |
| rs17149405  | C | 0.0556  |
| rs117138030 | A | -0.085  |
| rs12670354  | T | -0.0379 |
| rs17346782  | T | 0.0221  |
| rs114200618 | C | 0.0845  |
| rs117461805 | T | 0.0701  |
| rs73717574  | T | -0.0314 |
| rs80040498  | C | 0.0925  |
| rs117696411 | A | -0.0646 |
| rs9639139   | A | 0.0187  |
| rs78558874  | G | 0.124   |
| rs11767730  | T | 0.0173  |
| rs6974204   | G | 0.0179  |
| rs117756080 | T | 0.0814  |
| rs73080559  | G | 0.071   |
| rs78662193  | C | 0.1129  |
| rs34242866  | G | 0.0236  |
| rs118126014 | A | -0.0632 |
| rs117441258 | G | 0.0641  |
| rs7782904   | A | 0.02    |
| rs78821950  | T | 0.0639  |
| rs73219303  | A | -0.0322 |
| rs117665859 | G | 0.0931  |
| rs62488040  | T | -0.0654 |
| rs4295612   | A | 0.0183  |
| rs76353799  | G | -0.1063 |
| rs12534236  | T | 0.0327  |
| rs62443899  | C | 0.0221  |
| rs35767496  | G | 0.09    |
| rs4725234   | T | 0.0258  |
| rs79664878  | T | 0.0807  |
| rs17284906  | G | 0.0234  |
| rs661575    | T | 0.0198  |
| rs17139263  | A | 0.0227  |
| rs138998706 | G | 0.0835  |
| rs17170353  | C | 0.0484  |
| rs17134078  | A | 0.0454  |
| rs114445117 | A | -0.0331 |
| rs117381290 | T | -0.0656 |
| rs2069454   | G | -0.0386 |
| rs78412822  | T | -0.0515 |
| rs11760574  | C | 0.0312  |

|             |   |         |
|-------------|---|---------|
| rs75025763  | T | 0.0399  |
| rs4726445   | T | 0.0499  |
| rs74947242  | T | -0.0447 |
| rs10264676  | T | -0.0194 |
| rs11769529  | T | 0.0216  |
| rs12698950  | A | -0.1332 |
| rs62489382  | T | -0.0235 |
| rs148203273 | A | 0.0595  |
| rs6972533   | C | 0.0177  |
| rs6946418   | G | 0.0167  |
| rs140271103 | G | -0.0388 |
| rs150058126 | G | -0.0825 |
| rs74603433  | T | 0.0684  |
| rs117542096 | A | -0.0455 |
| rs17376624  | A | -0.038  |
| rs12113848  | G | 0.018   |
| rs61740884  | A | 0.0425  |
| rs34939615  | C | 0.0244  |
| rs116434331 | C | -0.0629 |
| rs147161951 | C | -0.0976 |
| rs6971088   | G | -0.0719 |
| rs79615056  | A | -0.072  |
| rs113080870 | T | -0.1193 |
| rs147889591 | A | -0.1202 |
| rs147175025 | C | -0.1144 |
| rs62464721  | G | -0.0257 |
| rs4729974   | A | 0.0174  |
| rs13438248  | G | 0.0229  |
| rs3779074   | A | -0.0159 |
| rs4728972   | T | 0.0176  |
| rs1075135   | T | -0.0303 |
| rs10236516  | T | 0.0225  |
| rs139848219 | A | 0.0628  |
| rs10951082  | C | 0.0162  |
| rs80201663  | C | 0.0219  |
| rs10954306  | T | -0.0187 |
| rs147303478 | A | -0.0902 |
| rs117243001 | A | -0.1173 |
| rs6969195   | T | -0.0171 |
| rs73154588  | G | 0.0417  |
| rs117285203 | T | -0.058  |
| rs58796591  | C | -0.0296 |
| rs10268755  | A | 0.0587  |
| rs17163952  | A | 0.0467  |
| rs7791027   | C | 0.0466  |
| rs62469047  | A | 0.0946  |
| rs4909058   | A | -0.0478 |

|             |   |         |
|-------------|---|---------|
| rs59927964  | T | -0.0221 |
| rs150212709 | A | 0.0371  |
| rs11764560  | T | -0.0154 |
| rs140190778 | T | 0.0812  |
| rs74391996  | T | 0.0369  |
| rs62450963  | C | 0.0275  |
| rs17655848  | C | -0.0613 |
| rs116621669 | T | 0.0418  |
| rs1637075   | C | 0.016   |
| rs7811872   | A | 0.0998  |
| rs112560527 | C | 0.0818  |
| rs75582641  | A | -0.0254 |
| rs77572832  | A | -0.0722 |
| rs41276021  | T | -0.0529 |
| rs141621306 | A | -0.0396 |
| rs34287328  | T | 0.0359  |
| rs62484939  | T | -0.0882 |
| rs4724878   | C | 0.0221  |
| rs78468065  | G | 0.0294  |
| rs60123787  | G | 0.0989  |
| rs118076241 | A | -0.0745 |
| rs850403    | G | 0.016   |
| rs6951637   | C | -0.0391 |
| rs6952508   | C | -0.0162 |
| rs1302921   | A | 0.0194  |
| rs1621828   | T | -0.0204 |
| rs116913190 | A | -0.1206 |
| rs4728437   | T | -0.0478 |
| rs35851551  | G | -0.0271 |
| rs111623954 | A | 0.0466  |
| rs151096906 | A | -0.0796 |
| rs116159902 | T | -0.0872 |
| rs140303545 | G | -0.1086 |
| rs116978650 | A | -0.0808 |
| rs73269158  | G | -0.0665 |
| rs10274166  | C | 0.0234  |
| rs1991119   | G | -0.0669 |
| rs147891950 | A | -0.1155 |
| rs117468143 | G | -0.086  |
| rs80185257  | G | 0.029   |
| rs142988524 | T | 0.0825  |
| rs141397424 | G | -0.1101 |
| rs254866    | C | -0.0639 |
| rs11771570  | G | -0.0273 |
| rs9647758   | G | -0.1166 |
| rs75218827  | T | -0.0875 |
| rs138831874 | T | 0.0739  |

|             |   |         |
|-------------|---|---------|
| rs2884251   | C | -0.0211 |
| rs79837401  | T | 0.0887  |
| rs116937608 | T | 0.0675  |
| rs918974    | A | -0.0154 |
| rs138970916 | G | 0.1059  |
| rs764702    | A | -0.0152 |
| rs4731298   | C | 0.0943  |
| rs17336916  | A | 0.0353  |
| rs117832997 | T | -0.1477 |
| rs145255289 | C | 0.0742  |
| rs7786333   | T | 0.0218  |
| rs59032797  | A | 0.0594  |
| rs6968930   | C | -0.0272 |
| rs117570619 | G | 0.069   |
| rs73078859  | T | 0.057   |
| rs62467661  | C | 0.0416  |
| rs76441478  | G | -0.0606 |
| rs142270731 | C | -0.0461 |
| rs4727484   | A | 0.0167  |
| rs56127755  | C | 0.0186  |
| rs117365636 | T | 0.0657  |
| rs71534672  | G | 0.0625  |
| rs78263145  | A | -0.046  |
| rs66535843  | G | -0.0296 |
| rs142062200 | T | 0.024   |
| rs116981799 | A | -0.0687 |
| rs117484155 | A | 0.0429  |
| rs10952099  | T | -0.0269 |
| rs10254658  | A | 0.0181  |
| rs11762989  | C | 0.0187  |
| rs111454409 | C | 0.0726  |
| rs57241062  | A | 0.0358  |
| rs143307882 | G | -0.1156 |
| rs6466942   | C | 0.0211  |
| rs17158491  | T | 0.0224  |
| rs13222549  | C | -0.0159 |
| rs68172234  | A | 0.0669  |
| rs1175452   | A | -0.0194 |
| rs13438573  | A | -0.0446 |
| rs117404958 | T | -0.0584 |
| rs73194954  | T | -0.0324 |
| rs3212298   | T | -0.0357 |
| rs117185485 | A | -0.0758 |
| rs60522379  | T | -0.0412 |
| rs111657334 | C | -0.0704 |
| rs6971784   | C | -0.0268 |
| rs35764173  | G | 0.0752  |

|             |   |         |
|-------------|---|---------|
| rs2622261   | T | -0.0278 |
| rs80254191  | A | 0.0591  |
| rs11489258  | C | 0.1029  |
| rs61154959  | G | -0.0407 |
| rs55803842  | A | -0.0194 |
| rs11768528  | G | 0.0166  |
| rs116987594 | C | -0.1169 |
| rs117334378 | A | -0.0974 |
| rs117655012 | G | -0.0464 |
| rs1639895   | T | -0.0222 |
| rs74501837  | C | -0.0544 |
| rs10253408  | C | -0.0251 |
| rs2040740   | C | 0.0227  |
| rs4469374   | T | 0.0164  |
| rs78828774  | C | -0.0599 |
| rs11768953  | G | 0.0275  |
| rs113930185 | A | 0.0293  |
| rs73090654  | C | 0.04    |
| rs1799249   | A | -0.0594 |
| rs4425666   | A | 0.0195  |
| rs79587751  | T | -0.0481 |
| rs55971747  | A | -0.0195 |
| rs117307535 | T | 0.1444  |
| rs62461177  | T | 0.0352  |
| rs80311328  | T | -0.0552 |
| rs10953699  | C | 0.0615  |
| rs71541401  | A | 0.0533  |
| rs2161825   | T | -0.0156 |
| rs17152307  | G | -0.0628 |
| rs35899914  | G | -0.04   |
| rs1643287   | C | -0.0171 |
| rs138627009 | A | 0.0378  |
| rs7786318   | G | -0.0188 |
| rs62453396  | A | -0.0813 |
| rs150653978 | G | 0.0415  |
| rs150413520 | T | -0.0256 |
| rs2949833   | T | -0.0172 |
| rs17132922  | T | -0.0189 |
| rs137964939 | C | 0.0585  |
| rs146095058 | G | -0.1499 |
| rs1004318   | T | -0.0305 |
| rs17151129  | G | -0.0736 |
| rs117255601 | T | 0.0527  |
| rs12535674  | C | 0.0266  |
| rs886756    | C | -0.0175 |
| rs113269040 | G | 0.0439  |
| rs12706992  | A | 0.0228  |

|             |   |         |
|-------------|---|---------|
| rs17132703  | G | -0.0275 |
| rs56320202  | C | 0.0351  |
| rs117360332 | A | 0.0673  |
| rs73094712  | G | 0.0677  |
| rs77483305  | T | -0.0568 |
| rs10233097  | C | -0.058  |
| rs62481070  | A | 0.0456  |
| rs74491433  | T | 0.0292  |
| rs1636309   | T | -0.0268 |
| rs41339     | T | -0.0452 |
| rs147270390 | T | 0.0707  |
| rs73155514  | C | -0.0819 |
| rs2164220   | T | 0.0311  |
| rs11762478  | A | 0.0267  |
| rs2132046   | G | -0.0231 |
| rs56311160  | T | -0.017  |
| rs12674335  | G | -0.0166 |
| rs76668325  | A | -0.0755 |
| rs1468147   | A | 0.0328  |
| rs6959644   | A | 0.0154  |
| rs149476607 | C | 0.0789  |
| rs10237500  | T | 0.0254  |
| rs11575472  | C | 0.0505  |
| rs140503843 | G | -0.1207 |
| rs34500452  | G | 0.0526  |
| rs56156312  | C | 0.0548  |
| rs731263    | A | 0.0704  |
| rs79784692  | G | -0.05   |
| rs7458892   | A | -0.0364 |
| rs117306251 | T | 0.0532  |
| rs112068143 | A | -0.0346 |
| rs6952065   | C | 0.0251  |
| rs116919730 | C | -0.1212 |
| rs270905    | G | -0.0617 |
| rs78550989  | T | 0.0675  |
| rs7792765   | G | -0.0153 |
| rs2697493   | C | 0.0292  |
| rs59150282  | A | -0.0394 |
| rs62481784  | G | -0.0391 |
| rs76303566  | C | -0.1046 |
| rs80172977  | A | 0.0408  |
| rs1860755   | A | 0.026   |
| rs73187336  | C | -0.0818 |
| rs2854542   | C | 0.0166  |
| rs143365016 | A | -0.1105 |
| rs30598     | C | -0.0166 |
| rs76243452  | A | -0.1069 |

|             |   |         |
|-------------|---|---------|
| rs28916317  | A | 0.0729  |
| rs2893528   | T | 0.0157  |
| rs117927502 | A | 0.0956  |
| rs10269466  | T | 0.0624  |
| rs7804328   | A | 0.0368  |
| rs72578846  | G | -0.0246 |
| rs6970846   | A | -0.1116 |
| rs35200331  | T | -0.0186 |
| rs73088099  | T | 0.0592  |
| rs75840590  | C | 0.0553  |
| rs4724298   | T | 0.0209  |
| rs56269250  | C | -0.0441 |
| rs141716694 | G | 0.068   |
| rs62463680  | G | 0.0974  |
| rs151331733 | T | -0.0696 |
| rs12539434  | A | 0.0582  |
| rs6967974   | G | -0.0207 |
| rs114922155 | T | -0.0738 |
| rs10248789  | A | 0.045   |
| rs138022514 | A | 0.0775  |
| rs118050768 | T | -0.0454 |
| rs11768968  | T | 0.0501  |
| rs78363426  | C | 0.0598  |
| rs12530995  | T | 0.0626  |
| rs150151702 | G | 0.0596  |
| rs73164988  | C | -0.0379 |
| rs75866668  | C | 0.1302  |
| rs76091302  | T | 0.0812  |
| rs290805    | T | -0.0198 |
| rs219232    | A | -0.0275 |
| rs13231272  | C | 0.0192  |
| rs73053454  | C | 0.0908  |
| rs10275475  | C | -0.0183 |
| rs1529005   | C | -0.0187 |
| rs73219928  | A | 0.045   |
| rs113975726 | T | 0.0548  |
| rs146168447 | A | 0.1027  |
| rs6950368   | A | 0.0922  |
| rs2527515   | T | 0.0301  |
| rs111464092 | T | -0.1045 |
| rs113920358 | T | -0.0293 |
| rs73139137  | A | -0.0549 |
| rs28510521  | A | 0.0646  |
| rs141240909 | A | -0.0651 |
| rs71534174  | C | 0.0631  |
| rs78172408  | C | 0.0459  |
| rs803162    | G | 0.0844  |

|             |   |         |
|-------------|---|---------|
| rs1558633   | G | -0.0403 |
| rs62470441  | C | -0.0692 |
| rs10232519  | G | -0.018  |
| rs117796827 | C | -0.1124 |
| rs73080785  | C | 0.0787  |
| rs112242155 | G | -0.0919 |
| rs12699393  | C | 0.0221  |
| rs13246950  | G | -0.0153 |
| rs56311485  | A | -0.0322 |
| rs12113762  | G | 0.0236  |
| rs140563003 | C | -0.0609 |
| rs117662398 | G | -0.0805 |
| rs17437670  | G | 0.0296  |
| rs116962535 | T | -0.0898 |
| rs62475060  | A | -0.0207 |
| rs78192754  | A | -0.0292 |
| rs17330494  | G | -0.0952 |
| rs17504846  | T | -0.0833 |
| rs1114970   | A | -0.0165 |
| rs2722246   | G | -0.0235 |
| rs17172727  | T | 0.0365  |
| rs77440558  | T | 0.0428  |
| rs17164284  | C | 0.033   |
| rs117098410 | A | 0.0698  |
| rs146264011 | G | -0.0967 |
| rs17143818  | T | 0.063   |
| rs79523657  | G | -0.1041 |
| rs138081872 | T | 0.106   |
| rs140722456 | G | 0.1045  |
| rs73740304  | C | -0.0292 |
| rs55933763  | G | -0.0583 |
| rs28706311  | A | -0.0209 |
| rs6949365   | G | 0.0637  |
| rs74863174  | G | -0.0571 |
| rs79321816  | A | -0.0561 |
| rs74448410  | A | -0.0569 |
| rs1558319   | C | -0.0216 |
| rs117080968 | C | -0.0467 |
| rs112462338 | C | -0.0382 |
| rs36067352  | A | -0.0371 |
| rs77798372  | A | 0.037   |
| rs117181902 | A | 0.0645  |
| rs13233862  | G | 0.0253  |
| rs75315517  | A | -0.0506 |
| rs35157811  | A | -0.038  |
| rs149264113 | A | -0.0968 |
| rs112075312 | C | -0.0423 |



|             |   |         |
|-------------|---|---------|
| rs36061166  | A | -0.0467 |
| rs2466559   | T | -0.0413 |
| rs7784076   | C | 0.0152  |
| rs113623189 | A | 0.0482  |
| rs73096196  | G | -0.0558 |
| rs4947475   | G | 0.0158  |
| rs148389880 | G | 0.0686  |
| rs2074711   | C | -0.0203 |
| rs3735438   | T | 0.0737  |
| rs77891347  | G | 0.0378  |
| rs2240470   | C | -0.0661 |
| rs757963    | T | -0.0172 |
| rs2075069   | G | 0.0157  |
| rs10488027  | T | 0.0205  |
| rs3757570   | G | -0.0206 |
| rs17614406  | A | -0.0691 |
| rs11770661  | A | -0.056  |
| rs12666785  | C | -0.0155 |
| rs77240401  | T | -0.0643 |
| rs62444177  | T | -0.0206 |
| rs7800829   | A | 0.0299  |
| rs73123381  | C | -0.1038 |
| rs10232072  | C | -0.0203 |
| rs77417070  | T | -0.0939 |
| rs11185580  | C | 0.0175  |
| rs7788187   | A | 0.0289  |
| rs111319184 | A | 0.1117  |
| rs77366225  | A | -0.0544 |
| rs117368082 | G | -0.1086 |
| rs671234    | C | -0.0162 |
| rs72583180  | G | 0.0224  |
| rs56152275  | A | -0.0537 |
| rs17590581  | A | -0.0237 |
| rs2391937   | A | 0.0612  |
| rs62446922  | T | 0.0637  |
| rs62445273  | T | 0.0225  |
| rs12706326  | A | 0.0341  |
| rs41329345  | C | 0.022   |
| rs12532866  | A | 0.0229  |
| rs28858679  | T | -0.0982 |
| rs144154058 | A | -0.0612 |
| rs10264520  | T | 0.0311  |
| rs17170013  | G | 0.0855  |
| rs77698107  | C | 0.039   |
| rs61245404  | A | 0.0283  |
| rs12532736  | A | 0.0157  |
| rs111556020 | A | 0.024   |

|             |   |         |
|-------------|---|---------|
| rs142048554 | G | 0.102   |
| rs117391024 | T | -0.0673 |
| rs144761883 | C | 0.124   |
| rs62468019  | C | 0.0214  |
| rs75520353  | C | 0.1154  |
| rs10225228  | C | 0.0481  |
| rs4724970   | C | 0.0173  |
| rs73679859  | C | 0.1117  |
| rs6979478   | T | 0.0158  |
| rs149251786 | T | -0.0421 |
| rs1394170   | C | -0.0421 |
| rs2470990   | A | -0.052  |
| rs17169573  | T | -0.029  |
| rs2727474   | T | -0.0159 |
| rs140169695 | T | -0.0791 |
| rs117126000 | C | -0.0776 |
| rs6974893   | C | 0.0358  |
| rs4730423   | C | 0.016   |
| rs73121595  | T | -0.0428 |
| rs7792034   | C | 0.016   |
| rs73168394  | A | 0.0394  |
| rs67281112  | G | -0.031  |
| rs6943342   | A | 0.0196  |
| rs10277764  | A | -0.016  |
| rs77205573  | T | -0.0267 |
| rs10954160  | A | 0.0241  |
| rs79506772  | C | 0.0529  |
| rs78853580  | A | 0.0602  |
| rs10281894  | C | -0.0309 |
| rs37944     | T | -0.0154 |
| rs73216663  | G | -0.0308 |
| rs17170313  | A | 0.0829  |
| rs113178027 | G | 0.0269  |
| rs71534626  | C | 0.0306  |
| rs13236085  | T | -0.023  |
| rs9886331   | C | -0.1148 |
| rs73068931  | G | -0.0252 |
| rs206195    | T | 0.0152  |
| rs150738959 | T | 0.1023  |
| rs7799868   | C | 0.038   |
| rs73063149  | C | -0.0616 |
| rs111696725 | A | 0.1052  |
| rs2109857   | T | -0.0154 |
| rs58061627  | C | 0.0257  |
| rs4724545   | T | -0.0213 |
| rs28713461  | T | 0.0263  |
| rs1799884   | T | 0.0198  |

|             |   |         |
|-------------|---|---------|
| rs6961720   | G | 0.0239  |
| rs112815321 | T | -0.0417 |
| rs2390787   | A | 0.0169  |
| rs6961627   | A | 0.085   |
| rs58597105  | G | 0.0384  |
| rs79121484  | C | 0.1022  |
| rs28405593  | T | -0.0174 |
| rs10248115  | A | 0.0514  |
| rs10261069  | C | 0.0226  |
| rs62468274  | A | -0.0517 |
| rs58113645  | A | 0.1194  |
| rs117789449 | G | -0.0693 |
| rs10488404  | T | -0.063  |
| rs34538852  | C | 0.0209  |
| rs80199361  | C | -0.1257 |
| rs151145303 | A | 0.0921  |
| rs117001133 | C | 0.0682  |
| rs2560640   | T | -0.0199 |
| rs4723842   | T | -0.021  |
| rs79367275  | C | 0.0392  |
| rs2191486   | G | -0.0152 |
| rs74718589  | T | -0.0455 |
| rs713493    | G | -0.015  |
| rs6948929   | T | -0.0708 |
| rs11771356  | C | 0.057   |
| rs117039808 | A | -0.1218 |
| rs2028008   | C | -0.0168 |
| rs73345866  | T | 0.034   |
| rs35859876  | T | 0.1069  |
| rs9690436   | T | 0.0282  |
| rs79495002  | T | 0.1032  |
| rs112879609 | C | 0.0683  |
| rs2057923   | A | 0.0568  |
| rs1181906   | G | 0.0245  |
| rs12667387  | T | -0.0197 |
| rs73102659  | T | -0.0833 |
| rs56881191  | T | 0.0413  |
| rs35669785  | T | -0.0281 |
| rs34084492  | A | -0.0216 |
| rs10487169  | T | 0.0459  |
| rs2965397   | G | 0.0288  |
| rs6953791   | C | -0.0244 |
| rs73084317  | G | -0.0254 |
| rs76169611  | C | 0.0769  |
| rs76023942  | A | 0.0597  |
| rs117775965 | A | -0.0691 |
| rs73124021  | G | 0.0205  |

|             |   |         |
|-------------|---|---------|
| rs79000792  | A | -0.072  |
| rs76038373  | T | 0.0589  |
| rs219827    | A | 0.0147  |
| rs3111456   | A | -0.0167 |
| rs139522149 | A | -0.0899 |
| rs78737793  | G | 0.0695  |
| rs138800483 | T | -0.1163 |
| rs9641218   | A | 0.0178  |
| rs6978672   | A | -0.0595 |
| rs12538388  | C | 0.0246  |
| rs1151791   | G | 0.0388  |
| rs10435401  | C | 0.0695  |
| rs111618323 | T | -0.0596 |
| rs6971997   | C | 0.0194  |
| rs117872065 | G | -0.0422 |
| rs150875    | A | -0.0406 |
| rs77512044  | T | 0.0578  |
| rs34962711  | A | -0.0155 |
| rs2727835   | G | 0.0232  |
| rs172707    | A | 0.0168  |
| rs9638310   | A | -0.0212 |
| rs6466052   | C | 0.0179  |
| rs113431652 | G | 0.0809  |
| rs13227146  | C | -0.0284 |
| rs12531679  | A | -0.0266 |
| rs73076716  | A | -0.022  |
| rs39577     | A | -0.0193 |
| rs68101472  | A | -0.0384 |
| rs55688203  | T | -0.0441 |
| rs112149122 | A | 0.085   |
| rs144605212 | T | -0.071  |
| rs994247    | T | 0.0296  |
| rs2282872   | G | 0.0147  |
| rs55741256  | A | 0.0208  |
| rs77458669  | G | -0.0575 |
| rs2240005   | A | -0.0178 |
| rs80280566  | A | -0.1353 |
| rs12670483  | G | 0.0165  |
| rs55917587  | G | 0.0167  |
| rs11971309  | T | 0.0153  |
| rs2345055   | A | -0.0153 |
| rs75372553  | T | -0.0455 |
| rs142352643 | T | -0.0626 |
| rs13234159  | G | 0.0635  |
| rs117067537 | T | -0.0562 |
| rs34320540  | A | 0.0355  |
| rs151223554 | T | 0.0456  |

|             |   |         |
|-------------|---|---------|
| rs10499477  | G | 0.0235  |
| rs2107726   | A | -0.0155 |
| rs140247094 | A | 0.1012  |
| rs62480428  | A | -0.0185 |
| rs75272741  | C | 0.0785  |
| rs150099834 | T | -0.0671 |
| rs62468057  | A | 0.0174  |
| rs7812156   | C | 0.0156  |
| rs74337584  | T | -0.1188 |
| rs4295596   | A | -0.0167 |
| rs35402076  | A | -0.0262 |
| rs76883725  | T | 0.033   |
| rs6961247   | T | -0.0149 |
| rs7797948   | C | -0.025  |
| rs2374131   | T | -0.0261 |
| rs2316531   | G | 0.02    |
| rs2060329   | C | -0.0163 |
| rs11761713  | G | -0.0353 |
| rs7800650   | C | -0.0367 |
| rs7778641   | A | 0.0179  |
| rs117104597 | A | 0.0485  |
| rs34016595  | T | -0.0167 |
| rs4727203   | C | -0.0323 |
| rs17146953  | C | -0.0206 |
| rs150809692 | C | 0.0587  |
| rs34783436  | T | 0.0881  |
| rs117125121 | T | 0.0441  |
| rs7456644   | G | 0.085   |
| rs41317     | G | 0.0192  |
| rs73134721  | T | 0.1302  |
| rs139752311 | A | 0.0277  |
| rs141810204 | T | -0.0823 |
| rs114523219 | A | 0.0393  |
| rs74559608  | A | -0.0508 |
| rs117613231 | C | 0.0599  |
| rs117923478 | C | 0.0864  |
| rs6960531   | A | 0.0307  |
| rs17426755  | A | -0.0432 |
| rs138701201 | T | -0.0709 |
| rs75795650  | G | 0.0316  |
| rs35346230  | C | -0.0772 |
| rs1124156   | A | -0.0186 |
| rs111573955 | T | -0.0609 |
| rs117323937 | G | -0.1157 |
| rs141937197 | A | -0.1203 |
| rs140196032 | G | 0.052   |
| rs12703117  | T | -0.0244 |

|             |   |         |
|-------------|---|---------|
| rs148250798 | G | -0.0636 |
| rs62444088  | A | -0.0549 |
| rs10267219  | T | 0.0156  |
| rs66778150  | T | -0.02   |
| rs10279904  | T | -0.1508 |
| rs116887986 | C | 0.0366  |
| rs77311002  | C | -0.0633 |
| rs2391755   | T | 0.0387  |
| rs73714920  | C | -0.0327 |
| rs34954123  | C | 0.0804  |
| rs10280625  | C | 0.0199  |
| rs6463815   | G | -0.0152 |
| rs16875645  | C | -0.0562 |
| rs79969407  | A | 0.0386  |
| rs73157685  | C | -0.0698 |
| rs75116588  | A | -0.056  |
| rs4724467   | G | -0.0154 |
| rs62456447  | G | 0.0438  |
| rs12531018  | C | -0.0173 |
| rs2708652   | C | 0.0407  |
| rs6945162   | A | 0.0478  |
| rs78835339  | A | 0.1295  |
| rs73099996  | A | 0.093   |
| rs146543341 | A | 0.124   |
| rs149049743 | T | 0.0622  |
| rs143904627 | T | 0.0687  |
| rs12537476  | A | 0.0333  |
| rs28415399  | C | -0.0731 |
| rs6465007   | C | -0.0442 |
| rs140511303 | T | -0.0587 |
| rs58967321  | C | -0.0482 |
| rs10234925  | G | 0.0783  |
| rs34372488  | G | 0.0259  |
| rs2280654   | A | -0.0234 |
| rs31645     | T | 0.0243  |
| rs56183317  | T | 0.0692  |
| rs10280493  | A | 0.0271  |
| rs144656974 | T | 0.0645  |
| rs7804568   | T | -0.0322 |
| rs10215394  | C | 0.0146  |
| rs11765495  | A | 0.0636  |
| rs62460728  | G | -0.0245 |
| rs76681999  | T | -0.0536 |
| rs6961894   | T | 0.0229  |
| rs1860480   | G | 0.0316  |
| rs66620421  | T | 0.0226  |
| rs12700631  | G | 0.041   |

|             |   |         |
|-------------|---|---------|
| rs855673    | C | 0.0208  |
| rs147464277 | A | -0.0534 |
| rs116908511 | T | 0.0437  |
| rs117196090 | T | 0.0923  |
| rs140442775 | A | 0.1135  |
| rs148442408 | A | 0.0488  |
| rs35511810  | G | 0.0448  |
| rs35936518  | T | 0.0234  |
| rs112874046 | T | 0.0872  |
| rs6968484   | T | -0.0158 |
| rs76146992  | G | 0.0561  |
| rs7806017   | G | 0.0218  |
| rs146077884 | T | -0.1102 |
| rs10235010  | C | -0.0218 |
| rs62464636  | G | -0.0777 |
| rs117922523 | T | -0.0959 |
| rs73165294  | A | 0.0326  |
| rs13234810  | G | 0.0292  |
| rs7456677   | C | -0.0502 |
| rs6951879   | T | -0.0225 |
| rs1725623   | T | 0.023   |
| rs117801000 | A | -0.056  |
| rs73099684  | A | 0.04    |
| rs11760690  | C | -0.0287 |
| rs62457839  | A | 0.0198  |
| rs11763719  | T | 0.0178  |
| rs75296166  | C | 0.0589  |
| rs1695513   | G | 0.0228  |
| rs4721330   | G | 0.0153  |
| rs17162736  | A | -0.0228 |
| rs10282196  | T | 0.0661  |
| rs57615459  | G | 0.0189  |
| rs79054735  | A | 0.0951  |
| rs4371883   | G | 0.0151  |
| rs75084004  | T | -0.027  |
| rs143365941 | T | -0.032  |
| rs62456769  | A | 0.0713  |
| rs10255611  | A | 0.0342  |
| rs12669612  | G | -0.0201 |
| rs13226749  | T | 0.0826  |
| rs10486971  | G | -0.018  |
| rs117418184 | T | 0.0701  |
| rs117044701 | C | 0.0543  |
| rs2037795   | T | 0.0343  |
| rs10244057  | C | -0.0152 |
| rs13239309  | C | 0.0289  |
| rs2021885   | T | -0.0163 |

|             |   |         |
|-------------|---|---------|
| rs78981294  | A | -0.056  |
| rs148324787 | G | -0.0791 |
| rs10264843  | C | -0.0161 |
| rs73100889  | T | 0.0925  |
| rs79896977  | T | 0.0938  |
| rs73699748  | A | 0.0307  |
| rs2129906   | A | 0.043   |
| rs73276267  | T | 0.0632  |
| rs7804046   | G | -0.0248 |
| rs11980359  | G | -0.0182 |
| rs2192001   | C | 0.0198  |
| rs79595953  | T | -0.079  |
| rs74503578  | A | 0.0335  |
| rs117011695 | A | 0.0666  |
| rs12718951  | C | 0.0437  |
| rs151194942 | C | 0.04    |
| rs73745045  | T | 0.0626  |
| rs117714269 | T | -0.0571 |
| rs73058542  | T | 0.0877  |
| rs2278364   | G | 0.0847  |
| rs62469778  | C | -0.034  |
| rs692350    | A | 0.0719  |
| rs117567158 | G | -0.0553 |
| rs4948051   | T | -0.0219 |
| rs2158623   | G | -0.0179 |
| rs7806362   | A | -0.0144 |
| rs75709773  | A | -0.0692 |
| rs34095637  | A | 0.0368  |
| rs1347389   | A | -0.0266 |
| rs10247883  | G | 0.0168  |
| rs60545783  | T | 0.0721  |
| rs117230246 | G | 0.1071  |
| rs2267703   | A | -0.0187 |
| rs4263651   | G | 0.0838  |
| rs74598990  | A | 0.0885  |
| rs10229414  | C | 0.0256  |
| rs7785881   | A | 0.0635  |
| rs4404832   | T | 0.0213  |
| rs144273091 | T | 0.092   |
| rs7805822   | C | 0.0228  |
| rs17777219  | C | -0.0976 |
| rs6466073   | A | -0.0185 |
| rs147193037 | C | -0.0952 |
| rs10248735  | A | 0.045   |
| rs1421309   | G | 0.0177  |
| rs140179963 | T | 0.0455  |
| rs1222396   | G | -0.0195 |



|             |   |         |
|-------------|---|---------|
| rs78220870  | C | -0.1213 |
| rs75537154  | A | 0.1111  |
| rs77269700  | A | -0.031  |
| rs139474912 | T | -0.1265 |
| rs116028098 | G | 0.0273  |
| rs3095477   | G | 0.0163  |
| rs79695153  | G | 0.0849  |
| rs11770791  | A | -0.0227 |
| rs62477625  | A | -0.019  |
| rs147067788 | A | -0.0641 |
| rs117971953 | T | -0.0381 |
| rs117201097 | G | -0.1032 |
| rs55940255  | A | 0.0172  |
| rs71528915  | T | 0.0286  |
| rs78918375  | A | -0.0879 |
| rs111723448 | C | -0.0334 |
| rs35459577  | T | 0.015   |
| rs323184    | T | 0.0192  |
| rs146508432 | T | -0.0444 |
| rs73122953  | C | 0.0571  |
| rs78868449  | C | 0.0527  |
| rs11977085  | A | -0.018  |
| rs151069873 | A | 0.0945  |
| rs75474346  | T | -0.0338 |
| rs36069358  | A | -0.0631 |
| rs6961130   | C | 0.026   |
| rs75244753  | G | -0.0623 |
| rs9692242   | G | -0.0161 |
| rs78042243  | G | 0.0592  |
| rs16883157  | T | -0.098  |
| rs13224010  | C | 0.0678  |
| rs17146811  | T | 0.017   |
| rs77226429  | A | 0.0743  |
| rs139573600 | G | -0.1093 |
| rs116893627 | A | 0.1203  |
| rs117773911 | G | -0.0934 |
| rs6960545   | T | -0.028  |
| rs11761760  | A | -0.015  |
| rs6954326   | T | -0.0242 |
| rs10256063  | T | -0.0201 |
| rs117767698 | T | 0.0512  |
| rs149663990 | A | -0.0673 |
| rs11771506  | A | -0.0162 |
| rs74950941  | C | -0.0792 |
| rs139744883 | A | 0.0835  |
| rs10950140  | A | -0.0179 |
| rs142174683 | C | 0.0591  |

|             |   |         |
|-------------|---|---------|
| rs79175211  | T | 0.0613  |
| rs117376637 | C | 0.0696  |
| rs142725665 | A | 0.0853  |
| rs75901808  | G | -0.0274 |
| rs117257266 | T | 0.1163  |
| rs151104795 | C | 0.0897  |
| rs73091437  | G | 0.0729  |
| rs13232836  | T | -0.039  |
| rs13243623  | G | -0.0838 |
| rs12539689  | G | -0.0289 |
| rs62458187  | A | 0.0908  |
| rs56402454  | A | -0.0547 |
| rs118001463 | C | 0.0865  |
| rs6467334   | C | 0.0322  |
| rs117189839 | A | 0.0838  |
| rs112617635 | C | -0.0552 |
| rs113409538 | A | 0.0332  |
| rs115127521 | T | 0.0636  |
| rs79599576  | T | 0.0874  |
| rs74664880  | T | 0.0657  |
| rs35995765  | T | -0.0244 |
| rs7810985   | T | 0.0487  |
| rs7787578   | A | 0.0238  |
| rs116986856 | C | 0.062   |
| rs59650922  | G | 0.1162  |
| rs1964235   | T | 0.0214  |
| rs79864825  | C | -0.0315 |
| rs117816691 | T | 0.0767  |
| rs10235330  | T | -0.0643 |
| rs147531408 | A | 0.1065  |
| rs138342776 | T | -0.0893 |
| rs67955352  | T | -0.0168 |
| rs10231475  | A | 0.0148  |
| rs7456197   | C | -0.0261 |
| rs73317078  | C | -0.0231 |
| rs79550579  | G | -0.0677 |
| rs1229656   | A | -0.017  |
| rs6960859   | T | 0.0206  |
| rs4731621   | A | 0.0249  |
| rs1186746   | C | 0.0245  |
| rs17157950  | G | 0.0418  |
| rs13240286  | A | -0.0241 |
| rs10269157  | T | -0.0372 |
| rs144781039 | T | 0.0442  |
| rs139496092 | G | 0.0724  |
| rs76302778  | T | -0.0329 |
| rs17156685  | G | 0.035   |

|             |   |         |
|-------------|---|---------|
| rs17546921  | T | 0.0278  |
| rs73149798  | T | -0.0632 |
| rs138702355 | C | 0.0406  |
| rs138127343 | A | -0.1106 |
| rs74490938  | A | 0.0303  |
| rs2371732   | A | 0.0186  |
| rs3807294   | A | 0.0159  |
| rs62481179  | A | -0.0344 |
| rs78139597  | A | 0.1035  |
| rs12670755  | T | 0.0147  |
| rs79124605  | T | 0.0364  |
| rs113353068 | A | 0.0625  |
| rs142596194 | A | -0.0856 |
| rs142523255 | A | 0.0718  |
| rs112852185 | T | 0.0574  |
| rs6975490   | A | -0.0143 |
| rs146345928 | A | -0.0683 |
| rs34620479  | T | 0.0251  |
| rs56104611  | C | 0.0643  |
| rs117414022 | T | 0.0233  |
| rs116887959 | T | 0.0346  |
| rs12537313  | T | 0.0496  |
| rs799617    | T | 0.0192  |
| rs3823689   | G | -0.0244 |
| rs12673247  | G | -0.0278 |
| rs72613912  | T | -0.0266 |
| rs2188508   | T | 0.0267  |
| rs139765219 | A | 0.101   |
| rs7800517   | A | 0.0199  |
| rs11766032  | C | -0.0667 |
| rs77749087  | C | 0.0371  |
| rs111703314 | A | -0.0219 |
| rs118097298 | T | 0.0606  |
| rs12539223  | C | -0.0161 |
| rs17437677  | G | 0.0678  |
| rs3731332   | T | 0.0623  |
| rs6979461   | G | -0.0155 |
| rs141689518 | C | -0.1039 |
| rs6464326   | C | 0.0329  |
| rs3735115   | A | -0.0158 |
| rs117010641 | T | -0.0481 |
| rs79415164  | A | -0.0684 |
| rs80250614  | T | 0.0443  |
| rs77537245  | T | -0.0964 |
| rs10488187  | C | 0.0243  |
| rs141850046 | A | 0.0752  |
| rs78916633  | A | 0.0757  |

|             |   |         |
|-------------|---|---------|
| rs6462110   | T | -0.0155 |
| rs2728468   | C | -0.0149 |
| rs117111008 | T | 0.1063  |
| rs111761453 | T | 0.0382  |
| rs117917698 | A | -0.0561 |
| rs12155314  | T | -0.0204 |
| rs73174577  | T | 0.0512  |
| rs11771361  | G | -0.0243 |
| rs4270895   | G | 0.0314  |
| rs146059753 | C | -0.0712 |
| rs17594625  | A | -0.05   |
| rs138961668 | G | -0.0913 |
| rs113629383 | G | -0.0506 |
| rs149521450 | T | 0.0913  |
| rs117844665 | G | -0.0539 |
| rs2214930   | C | 0.0145  |
| rs12702241  | A | 0.0433  |
| rs13247531  | T | -0.0553 |
| rs73156279  | C | 0.0489  |
| rs17777652  | C | -0.0478 |
| rs4448158   | G | 0.0168  |
| rs149619723 | T | 0.1241  |
| rs34413901  | A | 0.0342  |
| rs77463771  | C | 0.0854  |
| rs145290269 | A | -0.0347 |
| rs1863375   | C | -0.0143 |
| rs7781551   | C | -0.0146 |
| rs76982860  | C | -0.0797 |
| rs9769716   | A | 0.02    |
| rs7799293   | T | -0.0607 |
| rs113649298 | C | -0.0276 |
| rs4720055   | T | 0.0395  |
| rs245982    | A | 0.016   |
| rs151060298 | A | -0.0946 |
| rs6945225   | G | 0.0144  |
| rs2302006   | G | 0.0185  |
| rs11773369  | T | 0.0247  |
| rs73101932  | A | -0.0226 |
| rs17497711  | T | 0.0401  |
| rs62481307  | A | -0.0994 |
| rs141040185 | C | 0.0803  |
| rs4032750   | T | 0.0361  |
| rs6966956   | G | -0.0181 |
| rs117353063 | C | 0.0478  |
| rs4394326   | A | 0.0701  |
| rs117710498 | A | 0.0549  |
| rs4725460   | T | -0.0182 |

|             |   |         |
|-------------|---|---------|
| rs79264854  | C | 0.1133  |
| rs117160294 | C | 0.0716  |
| rs12705836  | A | -0.0148 |
| rs34483944  | A | 0.0146  |
| rs73717440  | A | -0.0519 |
| rs17680970  | A | -0.0389 |
| rs3907714   | T | 0.0174  |
| rs79716602  | C | 0.0172  |
| rs118125989 | G | 0.1286  |
| rs117983995 | A | -0.0572 |
| rs111649133 | G | 0.036   |
| rs75297010  | A | -0.1274 |
| rs10950320  | C | -0.014  |
| rs35080674  | T | -0.0781 |
| rs4724565   | G | -0.0142 |
| rs80018803  | T | -0.0848 |
| rs1852005   | T | -0.0289 |
| rs1468184   | G | -0.0142 |
| rs2527189   | C | -0.0435 |
| rs212661    | A | 0.0441  |
| rs62468110  | T | -0.1343 |
| rs73156503  | T | 0.044   |
| rs2109379   | C | -0.0507 |
| rs80076384  | A | -0.0569 |
| rs10257540  | A | 0.0168  |
| rs75685723  | C | 0.1119  |
| rs79635349  | T | 0.1039  |
| rs1961969   | G | 0.0194  |
| rs2052321   | T | -0.0176 |
| rs6967740   | C | 0.0146  |
| rs72505505  | T | 0.0187  |
| rs2193443   | C | 0.0168  |
| rs17156498  | C | 0.0796  |
| rs6970983   | G | -0.0154 |
| rs17172644  | T | -0.0174 |
| rs55673824  | T | 0.0191  |
| rs117852030 | T | -0.0315 |
| rs112405288 | T | -0.0651 |
| rs35128286  | A | -0.1057 |
| rs4721526   | G | 0.018   |
| rs113473803 | A | 0.0456  |
| rs2710967   | C | 0.0179  |
| rs2131058   | T | 0.0195  |
| rs76170772  | G | -0.1313 |
| rs144649826 | A | 0.0602  |
| rs7784370   | A | 0.0142  |
| rs80228270  | T | -0.0337 |

|             |   |         |
|-------------|---|---------|
| rs28408636  | T | -0.0436 |
| rs141824929 | A | 0.0607  |
| rs6979063   | G | -0.0142 |
| rs143693335 | A | 0.0796  |
| rs269243    | G | 0.0312  |
| rs34540882  | T | 0.0546  |
| rs28451351  | A | -0.0896 |
| rs117066703 | C | -0.0706 |
| rs116932565 | G | -0.0718 |
| rs142076757 | A | -0.0727 |
| rs34302122  | A | -0.0606 |
| rs112946207 | A | 0.0625  |
| rs146197163 | T | 0.0638  |
| rs2394871   | A | -0.0262 |
| rs149508373 | T | 0.0527  |
| rs28375432  | G | -0.0244 |
| rs13438084  | C | -0.0379 |
| rs75998658  | T | 0.038   |
| rs10246862  | A | 0.1104  |
| rs77112913  | C | -0.0837 |
| rs13245847  | C | 0.0148  |
| rs4717837   | A | 0.0154  |
| rs617433    | T | 0.0227  |
| rs79077402  | G | 0.0549  |
| rs6461593   | C | 0.0193  |
| rs2237428   | C | -0.0144 |
| rs56401515  | A | -0.0157 |
| rs34053130  | T | 0.1125  |
| rs59143542  | T | -0.0229 |
| rs13230282  | T | 0.0916  |
| rs4272327   | A | 0.0193  |
| rs176560    | A | -0.042  |
| rs13238852  | A | 0.0441  |
| rs13224945  | A | -0.0258 |
| rs117253568 | A | -0.0718 |
| rs1950011   | G | 0.0339  |
| rs10279211  | C | -0.0391 |
| rs11768709  | T | 0.0212  |
| rs59672182  | T | 0.0315  |
| rs145724351 | T | 0.0477  |
| rs17239572  | T | 0.0627  |
| rs12534177  | G | 0.04    |
| rs117825984 | A | -0.0919 |
| rs79511654  | T | -0.0517 |
| rs10950558  | G | -0.0171 |
| rs75345508  | C | 0.0416  |
| rs2729551   | T | -0.0149 |

|             |   |         |
|-------------|---|---------|
| rs34694271  | C | -0.0409 |
| rs61006673  | A | -0.0193 |
| rs17427651  | C | 0.0881  |
| rs13236614  | T | 0.0178  |
| rs12666367  | G | 0.0327  |
| rs2058545   | C | 0.0157  |
| rs10262989  | A | -0.0283 |
| rs17133451  | C | -0.0221 |
| rs146844569 | A | -0.0787 |
| rs80325961  | T | 0.0342  |
| rs7799413   | A | 0.0389  |
| rs75756980  | G | -0.0937 |
| rs117768391 | A | -0.0432 |
| rs1167797   | C | -0.0165 |
| rs12155151  | G | 0.065   |
| rs68078138  | T | 0.0331  |
| rs34472934  | C | -0.0193 |
| rs73172838  | T | 0.0434  |
| rs75911329  | G | 0.0418  |
| rs4717127   | A | 0.0329  |
| rs73439367  | G | 0.1386  |
| rs846928    | A | 0.0192  |
| rs11770969  | C | 0.0333  |
| rs118096813 | A | 0.0754  |
| rs78640994  | T | 0.075   |
| rs113809330 | A | 0.1073  |
| rs7808600   | G | 0.0385  |
| rs4724081   | C | 0.0152  |
| rs76974008  | A | 0.0856  |
| rs113526095 | A | 0.0627  |
| rs6968858   | C | -0.0416 |
| rs2727536   | G | -0.0197 |
| rs13246994  | A | 0.1007  |
| rs143336976 | T | 0.056   |
| rs2299169   | C | -0.0184 |
| rs17869364  | A | -0.0326 |
| rs4349905   | T | -0.0232 |
| rs73133466  | C | -0.0418 |
| rs62480210  | T | -0.0806 |
| rs140554601 | G | 0.1024  |
| rs1990554   | A | -0.0784 |
| rs10954224  | T | 0.0143  |
| rs141963972 | T | -0.0558 |
| rs903889    | G | 0.0174  |
| rs141636340 | C | -0.0961 |
| rs17140370  | T | 0.0278  |
| rs117284917 | G | 0.0662  |

|             |   |         |
|-------------|---|---------|
| rs78871323  | G | -0.023  |
| rs4729325   | C | 0.0338  |
| rs62472112  | G | -0.0629 |
| rs10952785  | C | -0.0166 |
| rs13235568  | C | -0.0771 |
| rs142020035 | A | -0.0919 |
| rs4724400   | A | 0.0144  |
| rs252854    | T | -0.0143 |
| rs73462764  | A | -0.1155 |
| rs10261336  | A | -0.027  |
| rs115645526 | C | -0.0334 |
| rs117450283 | T | -0.0804 |
| rs17133172  | G | 0.0201  |
| rs73066260  | G | 0.038   |
| rs2714874   | T | 0.029   |
| rs13232452  | C | -0.0141 |
| rs1596974   | T | -0.0215 |
| rs73446845  | A | -0.0535 |
| rs4727809   | A | 0.0145  |
| rs151323477 | C | 0.1142  |
| rs17155853  | A | 0.0227  |
| rs11982012  | C | -0.0153 |
| rs116964607 | A | -0.0407 |
| rs144082901 | A | -0.0532 |
| rs10277381  | A | 0.0969  |
| rs117774815 | T | -0.0624 |
| rs35722522  | G | -0.064  |
| rs117254741 | T | 0.0946  |
| rs117314219 | A | -0.0756 |
| rs6971882   | A | 0.014   |
| rs12155487  | T | 0.0706  |
| rs10236842  | G | 0.0293  |
| rs77540070  | G | 0.0335  |
| rs113314246 | C | 0.0663  |
| rs62462212  | C | 0.0231  |
| rs2239614   | C | 0.0154  |
| rs117768683 | C | 0.0396  |
| rs1018954   | A | 0.0143  |
| rs13447418  | T | 0.071   |
| rs77257971  | T | -0.0311 |
| rs6583344   | A | 0.0153  |
| rs10246880  | C | -0.0369 |
| rs4716798   | C | -0.0341 |
| rs6980090   | A | 0.0921  |
| rs80226429  | G | -0.0642 |
| rs7792711   | C | -0.0291 |
| rs4724910   | G | 0.0192  |



|             |   |         |
|-------------|---|---------|
| rs10950452  | C | -0.015  |
| rs75934656  | A | -0.0689 |
| rs71565179  | A | -0.0229 |
| rs3094752   | G | 0.0161  |
| rs117157077 | G | 0.0756  |
| rs151255502 | A | -0.1209 |
| rs7779173   | T | 0.0138  |
| rs80232444  | C | -0.0462 |
| rs112251449 | A | -0.0721 |
| rs56129741  | G | 0.0495  |
| rs7800698   | G | 0.0205  |
| rs113683295 | A | -0.046  |
| rs4720525   | G | 0.0174  |
| rs7791141   | C | -0.0172 |
| rs56065752  | A | 0.0765  |
| rs10241157  | T | 0.0195  |
| rs10953648  | T | 0.0166  |
| rs17151702  | A | 0.0922  |
| rs7793135   | C | 0.0509  |
| rs11761128  | C | -0.0181 |
| rs11763697  | G | -0.0715 |
| rs6466153   | C | -0.0366 |
| rs10232497  | G | 0.0142  |
| rs118018636 | T | -0.0588 |
| rs11980482  | C | -0.0396 |
| rs73169575  | T | 0.0296  |
| rs10248655  | T | 0.0351  |
| rs116990431 | G | 0.0751  |
| rs79116681  | T | -0.0266 |
| rs73056249  | T | -0.0668 |
| rs73092001  | G | 0.0542  |
| rs10259160  | C | -0.0657 |
| rs118152528 | C | -0.0444 |
| rs74653354  | T | 0.049   |
| rs1513916   | G | -0.0742 |
| rs1670375   | C | -0.0406 |
| rs11769046  | A | -0.0248 |
| rs117675066 | T | -0.0351 |
| rs17517584  | T | 0.0624  |
| rs77578254  | C | 0.1091  |
| rs76417578  | T | -0.0364 |
| rs111961085 | C | 0.0337  |
| rs17438501  | C | -0.0139 |
| rs11767512  | A | -0.0327 |
| rs112928102 | A | 0.0304  |
| rs6951168   | G | -0.0194 |
| rs1011189   | C | -0.0198 |

|             |   |         |
|-------------|---|---------|
| rs142649480 | T | 0.0988  |
| rs112339969 | G | 0.093   |
| rs79250250  | A | -0.0786 |
| rs67852718  | A | 0.0566  |
| rs61008539  | G | 0.0152  |
| rs4544985   | C | 0.0139  |
| rs73121539  | T | -0.0695 |
| rs116429461 | A | 0.0462  |
| rs140445513 | A | -0.0605 |
| rs117088506 | T | 0.0754  |
| rs143749435 | T | -0.0798 |
| rs2398743   | G | 0.0285  |
| rs12674398  | C | 0.0225  |
| rs117927076 | G | 0.0729  |
| rs113767488 | C | 0.0237  |
| rs2267704   | T | -0.0171 |
| rs112472263 | C | 0.0971  |
| rs74786220  | A | 0.0873  |
| rs117173569 | A | 0.1668  |
| rs79433223  | G | 0.0643  |
| rs79253785  | G | 0.0259  |
| rs138741913 | G | -0.0714 |
| rs12538362  | T | -0.0178 |
| rs111416724 | A | -0.0207 |
| rs61442297  | C | -0.0219 |
| rs17788685  | C | -0.0147 |
| rs150660795 | A | 0.0538  |
| rs757725    | T | 0.0197  |
| rs35859528  | C | 0.0343  |
| rs62459390  | T | 0.1097  |
| rs74453342  | G | 0.0634  |
| rs75583840  | G | 0.0207  |
| rs76767333  | T | 0.0267  |
| rs35986085  | T | -0.0732 |
| rs74762778  | T | 0.0593  |
| rs1122660   | A | 0.0144  |
| rs78126664  | A | 0.0734  |
| rs73151595  | G | 0.0592  |
| rs17172063  | A | -0.0292 |
| rs12536242  | C | -0.0261 |
| rs13225659  | T | -0.023  |
| rs7802309   | G | -0.0245 |
| rs6958809   | G | -0.0559 |
| rs1201841   | C | 0.0482  |
| rs6964155   | T | -0.0281 |
| rs62486616  | G | 0.0955  |
| rs72589653  | C | 0.0399  |

|             |   |         |
|-------------|---|---------|
| rs76617483  | C | -0.0365 |
| rs117838789 | G | -0.0991 |
| rs7808403   | C | 0.0162  |
| rs3823702   | T | -0.0258 |
| rs10232276  | C | 0.0169  |
| rs76940751  | A | -0.0797 |
| rs112029095 | T | 0.0925  |
| rs145912049 | C | -0.0839 |
| rs758987    | T | -0.0184 |
| rs75714524  | G | 0.0734  |
| rs117432259 | C | 0.088   |
| rs17154888  | A | -0.0608 |
| rs117754094 | A | -0.0627 |
| rs1477523   | T | 0.0444  |
| rs150181967 | C | -0.0921 |
| rs10243011  | C | -0.0232 |
| rs6943726   | C | -0.0592 |
| rs62462048  | T | 0.0237  |
| rs4719622   | C | 0.0159  |
| rs79193283  | A | 0.0338  |
| rs79278487  | T | -0.0572 |
| rs74844191  | C | 0.041   |
| rs2717777   | C | -0.0236 |
| rs73076529  | A | -0.0239 |
| rs76628417  | T | 0.0392  |
| rs112012363 | G | -0.0325 |
| rs62489373  | A | -0.048  |
| rs11976947  | A | -0.0496 |
| rs118103824 | G | -0.091  |
| rs117753993 | A | 0.0754  |
| rs28521864  | G | -0.0193 |
| rs1073379   | C | -0.0496 |
| rs6965442   | T | -0.0181 |
| rs117345524 | A | -0.0557 |
| rs12700465  | C | 0.0179  |
| rs117141297 | C | 0.0268  |
| rs17156176  | C | -0.0316 |
| rs79384054  | T | 0.0631  |
| rs12668631  | C | 0.0224  |
| rs3801901   | A | 0.03    |
| rs71571032  | C | -0.018  |
| rs11977715  | A | -0.0179 |
| rs6970952   | T | 0.0212  |
| rs138832027 | T | -0.0633 |
| rs6605557   | T | -0.0395 |
| rs77955986  | A | -0.0917 |
| rs80223789  | T | -0.0249 |

|             |   |         |
|-------------|---|---------|
| rs34259212  | A | 0.0218  |
| rs74552041  | C | 0.0633  |
| rs11771511  | A | -0.0577 |
| rs76879813  | G | -0.0415 |
| rs75828991  | C | 0.0216  |
| rs744684    | G | 0.022   |
| rs73034709  | C | -0.0324 |
| rs28915981  | G | -0.0518 |
| rs880048    | T | 0.0163  |
| rs7806168   | A | -0.0226 |
| rs28945388  | G | -0.0703 |
| rs118019795 | G | -0.0781 |
| rs62448763  | A | -0.0475 |
| rs77015200  | C | -0.0769 |
| rs79832128  | C | 0.0372  |
| rs12702770  | A | -0.0175 |
| rs13230075  | T | 0.0161  |
| rs76519620  | G | 0.0546  |
| rs36100522  | G | -0.047  |
| rs6948884   | G | 0.014   |
| rs140870288 | T | -0.0823 |
| rs10261165  | T | 0.0265  |
| rs61125234  | C | -0.0286 |
| rs11773094  | T | -0.0142 |
| rs6948773   | T | 0.025   |
| rs4728224   | A | -0.0174 |
| rs4727013   | T | 0.0136  |
| rs141845679 | G | 0.0703  |
| rs78785751  | C | 0.0614  |
| rs12112226  | A | 0.0849  |
| rs67756771  | A | 0.018   |
| rs71536628  | G | 0.0609  |
| rs1294889   | T | -0.0158 |
| rs13232049  | A | -0.0353 |
| rs34653179  | A | -0.0459 |
| rs74758987  | T | -0.0705 |
| rs6945410   | G | -0.0364 |
| rs62449712  | A | 0.0158  |
| rs34979616  | A | 0.016   |
| rs661492    | C | -0.0182 |
| rs1376293   | A | 0.0253  |
| rs143868566 | T | 0.0174  |
| rs73107846  | C | -0.0802 |
| rs146325469 | T | 0.1229  |
| rs6461048   | A | 0.0141  |
| rs10236671  | C | 0.023   |
| rs7809796   | T | 0.0891  |

|             |   |         |
|-------------|---|---------|
| rs73067073  | A | -0.0399 |
| rs11978340  | T | -0.0174 |
| rs6966182   | C | 0.0169  |
| rs13246275  | C | 0.0143  |
| rs12667304  | C | -0.0412 |
| rs112841525 | T | 0.0927  |
| rs75480238  | G | 0.0697  |
| rs6467098   | T | -0.0264 |
| rs78383740  | G | 0.0813  |
| rs12111817  | G | -0.0398 |
| rs10281346  | G | -0.0208 |
| rs62473863  | C | -0.0685 |
| rs12672431  | A | 0.028   |
| rs141041425 | T | 0.0547  |
| rs55674430  | A | 0.0655  |
| rs73177713  | A | 0.0595  |
| rs73170687  | G | 0.0699  |
| rs62495804  | C | -0.047  |
| rs146177803 | A | 0.1458  |
| rs73329157  | T | -0.0259 |
| rs56185223  | A | -0.0727 |
| rs143627625 | T | -0.095  |
| rs74701313  | C | -0.0485 |
| rs76982682  | T | -0.0559 |
| rs62472213  | A | 0.0662  |
| rs896153    | G | -0.0153 |
| rs78788350  | T | -0.0347 |
| rs12700596  | C | 0.0811  |
| rs116849631 | C | 0.0553  |
| rs117664051 | A | -0.0569 |
| rs73701152  | A | -0.0742 |
| rs749318    | A | 0.0134  |
| rs1203189   | G | -0.0181 |
| rs117296024 | A | 0.069   |
| rs142662185 | C | 0.0951  |
| rs79016700  | C | -0.101  |
| rs1646540   | C | 0.0147  |
| rs117868012 | T | 0.0915  |
| rs2526633   | G | -0.0162 |
| rs76093185  | G | 0.0344  |
| rs117318173 | T | -0.0607 |
| rs71540533  | T | -0.0657 |
| rs74995732  | A | -0.0373 |
| rs966790    | G | -0.0155 |
| rs115466192 | A | 0.0613  |
| rs138596206 | T | 0.022   |
| rs7790407   | C | -0.025  |

|             |   |         |
|-------------|---|---------|
| rs79728644  | C | -0.0497 |
| rs3801903   | G | 0.0162  |
| rs113866103 | G | -0.0319 |
| rs117646587 | G | -0.0419 |
| rs13242770  | C | 0.0228  |
| rs7809545   | C | 0.0619  |
| rs17248858  | T | -0.0238 |
| rs77488208  | G | -0.0341 |
| rs1076412   | C | -0.0788 |
| rs10487554  | A | -0.0156 |
| rs117455207 | A | -0.0555 |
| rs4724364   | T | -0.0184 |
| rs76771186  | A | -0.036  |
| rs80143037  | G | 0.0269  |
| rs9690101   | A | -0.0163 |
| rs117959844 | A | 0.0899  |
| rs10237014  | A | -0.047  |
| rs798476    | C | -0.0187 |
| rs2041333   | C | 0.0202  |
| rs12534304  | G | -0.0146 |
| rs1657295   | A | 0.0307  |
| rs11984260  | G | -0.0335 |
| rs150407153 | C | -0.0992 |
| rs73224109  | A | -0.0181 |
| rs118180668 | A | -0.0579 |
| rs59258133  | A | 0.017   |
| rs35320903  | G | -0.0264 |
| rs67111772  | T | 0.0194  |
| rs12699694  | T | -0.0162 |
| rs12154928  | T | -0.0791 |
| rs10085484  | A | -0.0368 |
| rs78389375  | T | 0.0761  |
| rs76538400  | A | -0.0849 |
| rs7782787   | G | -0.0285 |
| rs118189638 | C | -0.0629 |
| rs62457770  | G | -0.0805 |
| rs73406897  | C | 0.0658  |
| rs17141317  | T | 0.0365  |
| rs145662449 | G | 0.0747  |
| rs10262584  | C | -0.0167 |
| rs79709310  | C | -0.0365 |
| rs10953241  | T | -0.0165 |
| rs17151686  | G | -0.075  |
| rs78883636  | C | 0.0457  |
| rs12536619  | G | 0.0176  |
| rs583381    | G | 0.0166  |
| rs310588    | G | -0.02   |

|             |   |         |
|-------------|---|---------|
| rs10255671  | A | -0.015  |
| rs113195570 | T | -0.015  |
| rs150451407 | C | -0.0224 |
| rs143717085 | A | 0.0977  |
| rs117929998 | C | 0.0694  |
| rs6460456   | T | 0.0143  |
| rs76692704  | G | 0.0377  |
| rs78288902  | T | 0.1178  |
| rs78343286  | C | 0.0421  |
| rs6980334   | G | -0.0153 |
| rs78836284  | C | 0.0784  |
| rs116954381 | G | -0.08   |
| rs12705616  | T | -0.0164 |
| rs144729196 | A | -0.0671 |
| rs73108823  | T | 0.0208  |
| rs139839446 | T | 0.0509  |
| rs80278808  | A | 0.073   |
| rs2428432   | T | 0.0162  |
| rs17245098  | T | 0.0471  |
| rs55940510  | A | -0.0152 |
| rs35369674  | C | -0.0445 |
| rs4947752   | C | -0.0153 |
| rs73235101  | G | 0.0764  |
| rs68127125  | C | -0.0191 |
| rs11975644  | A | -0.0454 |
| rs76402591  | G | -0.0414 |
| rs73686729  | A | -0.0804 |
| rs6972838   | T | -0.0219 |
| rs78012615  | A | 0.0767  |
| rs79993564  | A | 0.0875  |
| rs74803363  | C | -0.0573 |
| rs117516937 | C | -0.0609 |
| rs77284477  | G | -0.0184 |
| rs118010371 | T | -0.0472 |
| rs1017607   | G | -0.0135 |
| rs12540414  | A | 0.0201  |
| rs35979304  | C | 0.0225  |
| rs118050574 | C | 0.0626  |
| rs117720337 | T | 0.0421  |
| rs117508204 | C | 0.106   |
| rs111697653 | C | 0.0386  |
| rs78162955  | A | -0.0286 |
| rs2109780   | T | -0.017  |
| rs75757921  | A | -0.0659 |
| rs10264753  | A | 0.0137  |
| rs142640200 | G | -0.0765 |
| rs139017108 | T | -0.0684 |

|             |   |         |
|-------------|---|---------|
| rs17160602  | G | 0.0234  |
| rs1981603   | T | 0.0166  |
| rs150644977 | G | 0.045   |
| rs140700014 | G | -0.0312 |
| rs116952651 | A | 0.0342  |
| rs76219498  | A | 0.0714  |
| rs55905803  | T | 0.0293  |
| rs147926119 | C | 0.0651  |
| rs78842911  | T | 0.0703  |
| rs10274233  | A | -0.0378 |
| rs10225367  | C | -0.0264 |
| rs627151    | A | 0.0159  |
| rs56879997  | C | 0.0292  |
| rs73699812  | C | 0.0647  |
| rs11766642  | A | 0.0447  |
| rs6951184   | A | 0.0943  |
| rs113461821 | T | 0.0258  |
| rs9640116   | T | 0.0698  |
| rs17341408  | A | 0.0207  |
| rs118038972 | G | -0.0588 |
| rs73302756  | A | 0.0825  |
| rs7808444   | C | 0.0267  |
| rs17289756  | A | 0.0194  |
| rs141047820 | A | -0.0663 |
| rs78084707  | C | -0.0501 |
| rs117485563 | A | 0.0602  |
| rs62443177  | T | 0.0392  |
| rs77912590  | C | -0.0379 |
| rs35763250  | G | -0.0795 |
| rs74318622  | T | -0.0383 |
| rs117153459 | C | 0.1113  |
| rs150463063 | T | -0.0705 |
| rs449372    | C | 0.0243  |
| rs17319264  | A | -0.0537 |
| rs73056381  | T | 0.0397  |
| rs75679039  | T | 0.0268  |
| rs11982075  | A | -0.0237 |
| rs12113051  | C | 0.0145  |
| rs79399015  | C | 0.0562  |
| rs62477113  | A | -0.03   |
| rs78205196  | G | -0.0403 |
| rs55727467  | A | 0.0278  |
| rs73061089  | T | -0.0386 |
| rs145584310 | C | 0.0488  |
| rs10954300  | G | -0.0169 |
| rs75939368  | C | 0.0334  |
| rs116909157 | A | -0.0884 |



|             |   |         |
|-------------|---|---------|
| rs17152163  | G | 0.0306  |
| rs73049206  | T | -0.0443 |
| rs6962016   | T | 0.0162  |
| rs886829    | C | -0.0148 |
| rs117497704 | A | 0.084   |
| rs144423288 | A | -0.0354 |
| rs141605778 | C | 0.1201  |
| rs1880403   | G | 0.0134  |
| rs62468328  | C | -0.0147 |
| rs73061064  | G | -0.0922 |
| rs901799    | T | 0.019   |
| rs62490626  | C | -0.0439 |
| rs13311601  | T | -0.0412 |
| rs193835    | G | 0.0725  |
| rs35494245  | G | -0.0735 |
| rs9986692   | T | 0.014   |
| rs140158904 | T | 0.045   |
| rs12531098  | C | -0.0478 |
| rs117758892 | C | 0.05    |
| rs6976046   | A | -0.0477 |
| rs12701503  | G | 0.0272  |
| rs62481397  | G | 0.0278  |
| rs77034627  | A | -0.1114 |
| rs2107888   | T | -0.0165 |
| rs76693344  | C | 0.0433  |
| rs77555119  | G | 0.0574  |
| rs3857714   | T | 0.0254  |
| rs1119331   | G | 0.0177  |
| rs6975308   | T | 0.0253  |
| rs7791037   | T | -0.0136 |
| rs3923876   | G | -0.0159 |
| rs7809262   | A | -0.0135 |
| rs35432853  | C | -0.0164 |
| rs113717650 | T | -0.0796 |
| rs6467409   | C | -0.0181 |
| rs62435410  | G | -0.0293 |
| rs35824403  | A | 0.0273  |
| rs1882477   | G | 0.0192  |
| rs75923419  | T | 0.0358  |
| rs117048074 | A | -0.081  |
| rs9690609   | G | -0.0293 |
| rs11771854  | C | 0.0271  |
| rs117263622 | T | -0.0373 |
| rs73689662  | A | 0.0381  |
| rs12699142  | C | 0.0159  |
| rs76191781  | G | 0.0679  |
| rs113818595 | G | -0.045  |

|             |   |         |
|-------------|---|---------|
| rs55781135  | T | 0.049   |
| rs118129704 | A | -0.0974 |
| rs12705849  | A | 0.0151  |
| rs73722742  | A | 0.0366  |
| rs112445955 | A | 0.0709  |
| rs6950397   | A | 0.0402  |
| rs13308728  | G | 0.0177  |
| rs17467925  | A | 0.0532  |
| rs79638573  | G | 0.0699  |
| rs35674633  | G | -0.0674 |
| rs4720800   | G | -0.0285 |
| rs149018092 | T | 0.0473  |
| rs73104577  | G | -0.0231 |
| rs34339670  | G | -0.0597 |
| rs11983543  | G | 0.0986  |
| rs11773350  | T | 0.0293  |
| rs62445677  | T | 0.0661  |
| rs7791777   | G | -0.0425 |
| rs73675007  | T | 0.0389  |
| rs13231184  | G | -0.0248 |
| rs142613188 | C | 0.0757  |
| rs6976218   | G | -0.0143 |
| rs138498268 | G | -0.0375 |
| rs58127279  | T | -0.0575 |
| rs10452877  | T | 0.0241  |
| rs144679859 | T | 0.0337  |
| rs35954343  | A | 0.0502  |
| rs7797123   | C | 0.0696  |
| rs2003525   | A | -0.0169 |
| rs55835328  | A | 0.0162  |
| rs939961    | G | 0.0213  |
| rs4305834   | T | 0.0133  |
| rs12673306  | G | -0.0533 |
| rs116964755 | A | 0.0401  |
| rs2287179   | G | 0.0452  |
| rs78949758  | G | 0.0745  |
| rs1625464   | G | 0.0211  |
| rs11771687  | T | -0.0211 |
| rs80224065  | A | 0.0588  |
| rs76478203  | A | -0.0874 |
| rs41273644  | T | 0.0306  |
| rs73744305  | A | 0.0443  |
| rs143793737 | A | -0.0947 |
| rs4947753   | T | -0.019  |
| rs73100394  | G | -0.0192 |
| rs117862879 | T | -0.0453 |
| rs10269830  | A | -0.0145 |

|             |   |         |
|-------------|---|---------|
| rs117068630 | T | -0.0813 |
| rs55896324  | G | 0.0724  |
| rs7805846   | T | 0.0217  |
| rs10269786  | A | 0.0227  |
| rs150784320 | A | -0.103  |
| rs7799218   | C | -0.0178 |
| rs149936054 | A | 0.0598  |
| rs62451938  | C | -0.0604 |
| rs4720414   | G | 0.0171  |
| rs117108554 | A | 0.0692  |
| rs7778219   | G | -0.0223 |
| rs142967078 | T | -0.0449 |
| rs12702108  | T | 0.0999  |
| rs2711020   | G | 0.0163  |
| rs28455678  | C | 0.0899  |
| rs17169449  | A | 0.0506  |
| rs4716694   | C | -0.032  |
| rs147512888 | G | -0.0734 |
| rs6960717   | C | 0.0185  |
| rs17137799  | A | 0.0178  |
| rs75955781  | C | 0.0374  |
| rs147465402 | C | 0.053   |
| rs148189228 | T | 0.0824  |
| rs76014191  | T | 0.07    |
| rs13227760  | C | -0.0152 |
| rs760196    | T | 0.0305  |
| rs73095729  | A | 0.0629  |
| rs140126324 | G | 0.1235  |
| rs61045241  | C | 0.0204  |
| rs77130839  | A | -0.065  |
| rs791596    | T | 0.0581  |
| rs12532042  | T | 0.0259  |
| rs116855827 | T | 0.0651  |
| rs7455906   | T | 0.0179  |
| rs116979359 | A | 0.0481  |
| rs2350850   | C | -0.0183 |
| rs245918    | T | 0.0499  |
| rs6964760   | C | 0.0143  |
| rs71549322  | C | -0.0886 |
| rs76729360  | A | -0.0912 |
| rs10258331  | G | -0.0361 |
| rs62453428  | A | -0.0512 |
| rs7787590   | A | 0.0384  |
| rs34281173  | T | -0.0142 |
| rs12540326  | T | 0.0192  |
| rs138481432 | C | -0.0754 |
| rs77751347  | T | -0.0455 |

|             |   |         |
|-------------|---|---------|
| rs2191479   | G | 0.0256  |
| rs28619339  | T | -0.0286 |
| rs117236982 | A | 0.0893  |
| rs6954993   | T | -0.0269 |
| rs111519497 | C | 0.0861  |
| rs13247687  | A | -0.013  |
| rs141745930 | T | 0.0803  |
| rs42042     | C | 0.0139  |
| rs111602161 | A | 0.0446  |
| rs79467411  | A | -0.0412 |
| rs118121809 | C | 0.0753  |
| rs75421433  | A | 0.0518  |
| rs12666870  | C | 0.0151  |
| rs17271538  | T | 0.0664  |
| rs118189482 | T | 0.1231  |
| rs318649    | T | 0.0393  |
| rs273201    | A | 0.0154  |
| rs117562696 | A | 0.0309  |
| rs74606521  | G | -0.0668 |
| rs740576    | A | -0.0158 |
| rs111230253 | C | 0.1078  |
| rs74525884  | T | -0.0859 |
| rs148833687 | T | -0.0583 |
| rs6960499   | G | -0.0162 |
| rs11770510  | T | -0.0159 |
| rs80016579  | G | -0.0493 |
| rs144887524 | A | 0.0765  |
| rs2971112   | T | 0.0151  |
| rs79118731  | C | -0.0537 |
| rs10952849  | C | 0.0192  |
| rs79961771  | C | 0.059   |
| rs35567816  | C | 0.0445  |
| rs4721878   | G | 0.0182  |
| rs10261724  | G | 0.0288  |
| rs146885998 | T | -0.0856 |
| rs111600043 | G | 0.0683  |
| rs10232160  | G | -0.0194 |
| rs117458370 | G | 0.0868  |
| rs62457653  | A | -0.0559 |
| rs4321939   | T | 0.019   |
| rs2697177   | C | 0.0553  |
| rs12534580  | C | 0.0301  |
| rs12669419  | C | -0.0166 |
| rs141463491 | A | -0.0622 |
| rs117173089 | A | -0.0464 |
| rs13224059  | G | -0.0197 |
| rs37265     | G | -0.0163 |

|             |   |         |
|-------------|---|---------|
| rs28850905  | G | -0.0171 |
| rs292694    | G | 0.0195  |
| rs6955988   | A | 0.0246  |
| rs41282703  | T | -0.0539 |
| rs76188372  | C | 0.1078  |
| rs78423347  | C | 0.0513  |
| rs115254103 | C | 0.0374  |
| rs117373257 | A | 0.1094  |
| rs111997877 | G | 0.0805  |
| rs4917124   | A | 0.0148  |
| rs141134171 | G | 0.0856  |
| rs6943819   | A | 0.0684  |
| rs112370475 | G | -0.0872 |
| rs73161741  | A | 0.0181  |
| rs10488577  | A | -0.0269 |
| rs28716377  | G | -0.0835 |
| rs62447479  | T | -0.0513 |
| rs78160112  | T | 0.0627  |
| rs17438930  | T | -0.0431 |
| rs177507    | T | 0.0324  |
| rs149319483 | A | -0.0689 |
| rs116872814 | A | -0.0388 |
| rs62472766  | A | 0.0503  |
| rs13309471  | C | 0.0203  |
| rs4270864   | G | 0.0164  |
| rs73090604  | T | -0.0695 |
| rs1990372   | A | 0.0573  |
| rs17148045  | A | -0.0137 |
| rs11981977  | G | 0.0428  |
| rs36091127  | A | -0.0489 |
| rs10235118  | T | -0.0347 |
| rs39381     | A | -0.0605 |
| rs140864512 | T | 0.0369  |
| rs4573160   | A | -0.0181 |
| rs34148494  | C | -0.0801 |
| rs7799996   | T | -0.0631 |
| rs35966503  | A | 0.048   |
| rs73078423  | A | -0.1347 |
| rs141909513 | A | 0.0663  |
| rs117386001 | A | 0.0751  |
| rs7794558   | C | 0.0373  |
| rs111237481 | T | 0.0372  |
| rs2372021   | T | 0.0139  |
| rs62473832  | T | -0.0834 |
| rs150698261 | T | -0.0528 |
| rs73424594  | A | 0.077   |
| rs11520752  | G | -0.023  |

|             |   |         |
|-------------|---|---------|
| rs35013617  | G | -0.02   |
| rs138941198 | T | 0.0968  |
| rs117271857 | T | 0.087   |
| rs73048764  | T | -0.0586 |
| rs71564814  | G | -0.0569 |
| rs117463670 | A | -0.0692 |
| rs77848060  | G | -0.0435 |
| rs3735564   | G | 0.0145  |
| rs12674278  | G | 0.0267  |
| rs55989103  | C | -0.0395 |
| rs73183259  | T | -0.0822 |
| rs77532855  | G | -0.0544 |
| rs74788416  | C | 0.0926  |
| rs7805420   | A | 0.0137  |
| rs74460878  | C | 0.0434  |
| rs117659988 | T | -0.0202 |
| rs4720758   | A | 0.0187  |
| rs60926589  | T | -0.0671 |
| rs12538237  | A | -0.0198 |
| rs10236653  | G | -0.0128 |
| rs34789846  | T | 0.0741  |
| rs611466    | G | -0.0314 |
| rs76310739  | G | -0.0605 |
| rs7787707   | A | 0.0173  |
| rs115250092 | C | 0.0555  |
| rs10273481  | T | 0.0267  |
| rs10258400  | T | -0.0281 |
| rs28591174  | T | 0.0156  |
| rs7802612   | T | 0.0152  |
| rs78445393  | A | -0.0409 |
| rs17308158  | T | 0.0179  |
| rs138744483 | C | 0.0531  |
| rs856537    | C | -0.0137 |
| rs76133028  | A | -0.033  |
| rs77689585  | A | 0.0386  |
| rs111964154 | C | -0.0245 |
| rs28362705  | C | -0.05   |
| rs112101383 | A | 0.0608  |
| rs79667421  | A | 0.0632  |
| rs13240900  | T | -0.0145 |
| rs10275560  | T | -0.0144 |
| rs117151498 | C | 0.0561  |
| rs55680216  | A | 0.014   |
| rs2691034   | G | 0.0149  |
| rs116957577 | G | -0.0634 |
| rs118033335 | G | -0.0951 |
| rs6949644   | T | 0.0155  |

|             |   |         |
|-------------|---|---------|
| rs3779034   | C | 0.0132  |
| rs112668004 | T | 0.0438  |
| rs73106658  | T | -0.0396 |
| rs116893594 | C | -0.06   |
| rs79844580  | T | 0.0518  |
| rs28253     | G | -0.0133 |
| rs1880791   | T | -0.018  |
| rs80151357  | G | -0.0253 |
| rs17170324  | C | 0.0376  |
| rs1796244   | A | 0.021   |
| rs17437175  | G | 0.0486  |
| rs116860476 | G | 0.0803  |
| rs1529237   | T | -0.0173 |
| rs77653402  | A | -0.0586 |
| rs80183847  | G | -0.0393 |
| rs10156110  | A | -0.0377 |
| rs13230001  | G | 0.0733  |
| rs17165722  | G | -0.0141 |
| rs139834220 | A | 0.0632  |
| rs112771318 | G | -0.017  |
| rs35395285  | A | 0.0828  |
| rs76474496  | G | 0.067   |
| rs1405830   | T | 0.032   |
| rs2191731   | T | -0.0221 |
| rs13242914  | T | -0.0176 |
| rs62457841  | T | -0.0573 |
| rs6460553   | T | 0.0161  |
| rs111323500 | T | -0.1275 |
| rs77777719  | A | 0.066   |
| rs73160003  | T | -0.0431 |
| rs7811771   | G | 0.0198  |
| rs80289884  | T | -0.0317 |
| rs10951012  | C | -0.0145 |
| rs111228012 | A | -0.0577 |
| rs62489650  | G | -0.0683 |
| rs73091540  | C | 0.1104  |
| rs4722625   | T | -0.0137 |
| rs117286876 | G | 0.0465  |
| rs77305840  | T | -0.0827 |
| rs1404831   | C | -0.0128 |
| rs75199229  | C | 0.0384  |
| rs1109781   | G | 0.0207  |
| rs17138251  | A | -0.0335 |
| rs1440029   | A | -0.0128 |
| rs2299155   | T | -0.0293 |
| rs141558797 | A | 0.0807  |
| rs111342365 | C | 0.0323  |

|             |   |         |
|-------------|---|---------|
| rs111358001 | G | 0.0258  |
| rs76389640  | G | -0.0698 |
| rs73109436  | G | 0.0523  |
| rs2905322   | A | 0.0144  |
| rs141593373 | A | 0.0543  |
| rs61405391  | A | 0.0706  |
| rs17419156  | G | 0.0136  |
| rs36071966  | A | -0.0218 |
| rs117235388 | A | -0.0838 |
| rs713061    | A | 0.0168  |
| rs61057705  | G | -0.0138 |
| rs2109782   | A | 0.0165  |
| rs3113295   | A | -0.0271 |
| rs113355971 | T | 0.0559  |
| rs75620290  | C | 0.046   |
| rs4454205   | C | 0.0157  |
| rs138951115 | T | 0.0582  |
| rs7803078   | G | 0.0338  |
| rs11760913  | T | -0.013  |
| rs13225059  | C | 0.0284  |
| rs339067    | G | -0.0157 |
| rs117780801 | T | 0.108   |
| rs148586124 | C | -0.077  |
| rs6958448   | C | 0.0203  |
| rs160366    | T | -0.0186 |
| rs5745752   | T | -0.0144 |
| rs847442    | G | 0.0132  |
| rs678500    | C | -0.095  |
| rs6958424   | T | 0.0173  |
| rs17154960  | T | -0.0522 |
| rs73689064  | G | -0.0381 |
| rs38211     | C | -0.0138 |
| rs66985090  | G | -0.0305 |
| rs4302786   | A | 0.0545  |
| rs147854862 | T | 0.0612  |
| rs143721232 | G | 0.0483  |
| rs113862551 | G | -0.0442 |
| rs77478282  | A | 0.0444  |
| rs10155948  | C | 0.0163  |
| rs117566183 | T | 0.0632  |
| rs11761932  | C | -0.0604 |
| rs34870465  | G | 0.0164  |
| rs71546760  | C | -0.0654 |
| rs7457522   | G | -0.025  |
| rs117423832 | C | 0.0887  |
| rs114832573 | T | 0.032   |
| rs7809037   | A | -0.0337 |



|             |   |         |
|-------------|---|---------|
| rs76590388  | A | 0.1036  |
| rs117668099 | T | -0.0592 |
| rs1558065   | G | 0.0176  |
| rs117294607 | G | 0.0669  |
| rs142248885 | G | 0.0925  |
| rs2191468   | G | -0.0155 |
| rs749717    | C | 0.0938  |
| rs17619647  | T | 0.0133  |
| rs10243165  | C | 0.0535  |
| rs2218463   | C | 0.0177  |
| rs78249428  | C | 0.0461  |
| rs77179259  | C | -0.0709 |
| rs17152823  | T | -0.0215 |
| rs1405208   | C | -0.0137 |
| rs691089    | C | -0.0145 |
| rs269266    | G | -0.0153 |
| rs73112772  | A | 0.0456  |
| rs113909170 | A | -0.0486 |
| rs76093331  | T | 0.0552  |
| rs79139698  | G | 0.0463  |
| rs146482324 | G | -0.0223 |
| rs11772359  | A | 0.014   |
| rs10232610  | G | 0.0635  |
| rs2540593   | A | 0.0372  |
| rs7807824   | A | -0.017  |
| rs140448877 | C | -0.0642 |
| rs10265548  | C | 0.0147  |
| rs76096310  | C | -0.0498 |
| rs39179     | A | 0.0533  |
| rs6960332   | C | -0.0139 |
| rs11575309  | T | -0.0689 |
| rs13225589  | A | -0.0672 |
| rs118045622 | A | 0.0679  |
| rs73168047  | A | -0.0227 |
| rs6974830   | A | -0.0128 |
| rs2644285   | G | 0.0382  |
| rs11766845  | G | -0.0142 |
| rs4726517   | G | 0.0132  |
| rs6952467   | T | 0.0132  |
| rs116245461 | T | 0.0614  |
| rs139983233 | A | -0.0481 |
| rs151049698 | T | 0.0727  |
| rs7782784   | T | -0.0277 |
| rs79534456  | C | 0.0391  |
| rs56209286  | G | -0.0391 |
| rs17171426  | C | 0.0671  |
| rs1554496   | A | -0.0155 |

|             |   |         |
|-------------|---|---------|
| rs17146351  | T | 0.0249  |
| rs77643247  | G | 0.0375  |
| rs849381    | G | -0.0159 |
| rs7786445   | T | 0.0195  |
| rs149157257 | C | 0.0653  |
| rs4351339   | T | 0.0148  |
| rs117764071 | T | -0.0563 |
| rs2707375   | C | -0.0301 |
| rs76434245  | T | -0.0209 |
| rs2189013   | A | -0.0497 |
| rs10259022  | T | -0.0139 |
| rs28503717  | A | 0.0221  |
| rs117926310 | C | 0.0647  |
| rs77475581  | G | -0.0787 |
| rs73141160  | G | 0.0749  |
| rs6948782   | G | 0.0195  |
| rs117974010 | A | -0.1208 |
| rs12670096  | G | 0.0702  |
| rs117460099 | T | 0.0571  |
| rs4716749   | T | 0.0246  |
| rs76543911  | G | 0.0206  |
| rs10486295  | A | 0.0767  |
| rs17738405  | C | -0.0503 |
| rs116960099 | T | 0.0751  |
| rs12698370  | A | -0.0248 |
| rs3095011   | A | -0.0127 |
| rs9639019   | C | 0.0126  |
| rs140781783 | C | 0.0734  |
| rs2250058   | C | -0.0242 |
| rs73150150  | C | 0.0299  |
| rs1476604   | G | -0.0303 |
| rs117958961 | G | 0.081   |
| rs144233025 | A | 0.0765  |
| rs117440882 | A | 0.0863  |
| rs10281751  | A | -0.0956 |
| rs56729506  | T | 0.0493  |
| rs113079307 | T | 0.0228  |
| rs12666664  | T | 0.0174  |
| rs73169204  | T | 0.0461  |
| rs62481442  | G | 0.0856  |
| rs28473163  | T | -0.0416 |
| rs10226266  | A | 0.0142  |
| rs117311916 | G | -0.0497 |
| rs73169262  | C | -0.0602 |
| rs75879079  | G | 0.0882  |
| rs10480428  | G | -0.0184 |
| rs292500    | T | -0.0524 |

|             |   |         |
|-------------|---|---------|
| rs10248342  | A | -0.0197 |
| rs28545304  | A | -0.0258 |
| rs10269437  | T | -0.0826 |
| rs406889    | C | 0.0157  |
| rs16875030  | C | 0.0371  |
| rs117393775 | T | 0.0845  |
| rs10268263  | C | 0.0154  |
| rs79400272  | T | -0.0287 |
| rs17160564  | C | 0.0676  |
| rs78690665  | C | 0.0463  |
| rs80075871  | T | 0.1043  |
| rs7805954   | A | -0.0166 |
| rs1003573   | T | -0.0139 |
| rs151107462 | A | 0.0571  |
| rs7784595   | T | -0.03   |
| rs686562    | A | 0.0667  |
| rs146429602 | G | 0.0407  |
| rs2855896   | A | 0.0139  |
| rs35759902  | G | 0.0559  |
| rs10277837  | C | 0.0153  |
| rs150605964 | T | -0.0623 |
| rs117724503 | T | 0.0697  |
| rs80088245  | A | 0.0653  |
| rs2392151   | C | 0.0137  |
| rs17755229  | G | -0.016  |
| rs56113738  | T | -0.0533 |
| rs78474347  | G | -0.09   |
| rs71566704  | A | 0.0162  |
| rs855651    | A | 0.0197  |
| rs7800352   | T | 0.0208  |
| rs35746260  | T | -0.0244 |
| rs73107214  | C | 0.0206  |
| rs76296693  | C | -0.0536 |
| rs17157018  | G | 0.1042  |
| rs2193261   | T | -0.0131 |
| rs4723612   | G | 0.0367  |
| rs148492854 | G | 0.0916  |
| rs998546    | G | 0.0529  |
| rs10236463  | G | 0.0149  |
| rs6957224   | T | 0.0264  |
| rs1866580   | T | 0.0173  |
| rs216708    | G | 0.0132  |
| rs143517906 | T | 0.0509  |
| rs13233140  | G | 0.0154  |
| rs79263180  | C | 0.0344  |
| rs150835363 | A | -0.089  |
| rs79873944  | A | 0.0334  |

|             |   |         |
|-------------|---|---------|
| rs143854367 | A | -0.0747 |
| rs150751330 | A | 0.1145  |
| rs4434553   | G | 0.0127  |
| rs10227634  | C | -0.0393 |
| rs113456848 | A | -0.052  |
| rs116846403 | C | 0.0612  |
| rs9654749   | T | 0.0224  |
| rs139446214 | C | -0.0352 |
| rs10242365  | G | 0.0147  |
| rs66555488  | G | -0.022  |
| rs79616628  | A | -0.0888 |
| rs2644290   | C | -0.0162 |
| rs79250469  | C | 0.0465  |
| rs1993247   | G | -0.0223 |
| rs13245414  | T | -0.0357 |
| rs73080042  | T | -0.0265 |
| rs71539582  | T | 0.0254  |
| rs139528791 | A | -0.0555 |
| rs149626485 | A | -0.0764 |
| rs62478582  | T | 0.0484  |
| rs149014448 | T | 0.0935  |
| rs10236300  | C | 0.0261  |
| rs117195892 | G | -0.0566 |
| rs117971314 | G | 0.0682  |
| rs10242969  | C | 0.0137  |
| rs11770645  | G | 0.0186  |
| rs1404398   | T | -0.017  |
| rs75068432  | C | -0.0366 |
| rs35992428  | G | 0.018   |
| rs79937658  | C | -0.0532 |
| rs79236085  | T | -0.0385 |
| rs12333492  | C | 0.0252  |
| rs78529309  | G | -0.0264 |
| rs73357667  | T | 0.0209  |
| rs117861379 | A | -0.0505 |
| rs4730271   | C | -0.0195 |
| rs150271841 | A | -0.0594 |
| rs62437917  | C | 0.0167  |
| rs140900956 | T | 0.0728  |
| rs78910298  | C | -0.1323 |
| rs11771710  | A | -0.0172 |
| rs1636738   | A | -0.0539 |
| rs76431495  | T | 0.0601  |
| rs2352139   | C | -0.0536 |
| rs77121356  | A | 0.0493  |
| rs59456152  | C | 0.0131  |
| rs11520696  | G | 0.0226  |

|             |   |         |
|-------------|---|---------|
| rs2972122   | C | 0.0158  |
| rs113465279 | G | -0.065  |
| rs1981632   | A | 0.0139  |
| rs117516642 | G | 0.0941  |
| rs113871891 | G | -0.0747 |
| rs111495067 | T | 0.0319  |
| rs78662263  | T | 0.0593  |
| rs10267808  | T | 0.03    |
| rs7802703   | C | 0.0135  |
| rs2108166   | C | -0.0156 |
| rs76668774  | G | 0.0352  |
| rs115951366 | T | 0.0741  |
| rs142257488 | C | 0.0651  |
| rs3779434   | C | -0.0129 |
| rs10440995  | C | 0.0148  |
| rs2107155   | G | 0.0137  |
| rs139437434 | T | 0.0552  |
| rs73170036  | G | 0.0772  |
| rs11771069  | A | -0.0137 |
| rs73274441  | A | -0.047  |
| rs146591543 | T | 0.058   |
| rs1425128   | C | 0.0164  |
| rs6952642   | G | 0.0124  |
| rs56386980  | T | 0.1022  |
| rs145596099 | T | 0.066   |
| rs115773380 | G | 0.0459  |
| rs147485057 | C | 0.0709  |
| rs79061704  | T | 0.0407  |
| rs75014180  | G | 0.0534  |
| rs42876     | C | -0.0162 |
| rs2074335   | C | -0.0192 |
| rs76907223  | G | -0.0267 |
| rs73161172  | T | 0.0555  |
| rs117559155 | G | -0.0849 |
| rs62451677  | C | -0.0465 |
| rs147878798 | T | 0.0759  |
| rs79376903  | C | -0.0317 |
| rs9801492   | T | 0.0157  |
| rs62442221  | G | -0.0602 |
| rs117464055 | C | -0.0353 |
| rs4725607   | A | 0.0246  |
| rs73058337  | T | -0.0275 |
| rs17590791  | C | 0.0152  |
| rs550607    | G | -0.0124 |
| rs34010750  | G | 0.0252  |
| rs66496457  | A | -0.0305 |
| rs111815373 | C | -0.076  |

|             |   |         |
|-------------|---|---------|
| rs6970726   | C | 0.017   |
| rs55676709  | T | 0.0208  |
| rs79274199  | G | -0.0392 |
| rs1458808   | A | 0.0164  |
| rs2023937   | T | 0.0205  |
| rs1589965   | C | 0.03    |
| rs73131876  | T | -0.0659 |
| rs73164512  | G | -0.0384 |
| rs73687323  | A | 0.0304  |
| rs7986      | A | -0.0126 |
| rs882612    | G | 0.0343  |
| rs35771771  | T | 0.0588  |
| rs10225126  | A | -0.0133 |
| rs56394409  | G | 0.1024  |
| rs1524408   | T | 0.0129  |
| rs78409484  | C | 0.0242  |
| rs17172009  | T | -0.0536 |
| rs76593243  | A | 0.0522  |
| rs141144146 | C | -0.048  |
| rs10277213  | G | 0.028   |
| rs1034839   | G | 0.0621  |
| rs17146521  | C | 0.0221  |
| rs150309983 | T | -0.0471 |
| rs11975712  | T | 0.0455  |
| rs652383    | G | 0.0614  |
| rs116916321 | T | -0.0588 |
| rs139275853 | C | -0.0878 |
| rs28499482  | G | 0.0658  |
| rs62430601  | G | 0.0385  |
| rs111939165 | G | -0.0511 |
| rs147130488 | G | 0.0145  |
| rs2526976   | A | -0.0161 |
| rs117698491 | G | 0.0459  |
| rs112225612 | G | 0.0775  |
| rs2299183   | G | 0.0538  |
| rs982645    | A | 0.0215  |
| rs78414417  | A | 0.0507  |
| rs3864589   | T | 0.0507  |
| rs77236902  | C | 0.0698  |
| rs73097343  | C | -0.0245 |
| rs7784222   | C | -0.0264 |
| rs13239448  | A | 0.039   |
| rs116969342 | T | -0.0377 |
| rs6952695   | T | 0.0153  |
| rs73145764  | G | -0.1009 |
| rs62490897  | T | -0.0347 |
| rs79788079  | G | -0.046  |

|             |   |         |
|-------------|---|---------|
| rs10950898  | T | -0.0149 |
| rs115381790 | T | -0.0574 |
| rs78060243  | C | 0.0443  |
| rs78856909  | G | -0.0415 |
| rs4540304   | T | 0.0158  |
| rs62450182  | A | -0.0345 |
| rs17168080  | G | 0.0181  |
| rs10954176  | C | 0.019   |
| rs68052338  | G | 0.0238  |
| rs10254769  | C | -0.0171 |
| rs959494    | G | 0.0878  |
| rs12112284  | G | -0.0293 |
| rs1357746   | T | -0.0165 |
| rs78630972  | T | -0.0404 |
| rs76488641  | T | 0.0837  |
| rs78459335  | G | -0.0381 |
| rs77373302  | G | -0.0618 |
| rs10256840  | C | 0.0534  |
| rs77954913  | A | 0.1133  |
| rs2709028   | C | 0.0149  |
| rs141397331 | A | 0.0546  |
| rs117461145 | A | -0.0499 |
| rs6462801   | A | 0.0124  |
| rs6465529   | T | 0.056   |
| rs17862249  | A | 0.0645  |
| rs56320659  | T | -0.0345 |
| rs12530775  | T | -0.0653 |
| rs35829939  | A | 0.0277  |
| rs117114682 | G | 0.047   |
| rs11769443  | C | 0.013   |
| rs722737    | T | 0.0126  |
| rs139876506 | T | 0.0319  |
| rs73125641  | C | 0.0673  |
| rs13240285  | C | -0.0313 |
| rs12698162  | C | 0.0439  |
| rs73151815  | A | 0.0341  |
| rs39742     | C | 0.0129  |
| rs57459742  | G | 0.017   |
| rs144571572 | A | 0.057   |
| rs117611384 | T | 0.0433  |
| rs17151993  | T | -0.0161 |
| rs112995214 | G | 0.0815  |
| rs28445867  | T | -0.0136 |
| rs10257645  | C | -0.0196 |
| rs62458621  | T | 0.058   |
| rs11977439  | C | -0.0334 |
| rs118181517 | A | -0.0298 |

|             |   |         |
|-------------|---|---------|
| rs6969570   | G | 0.0181  |
| rs3917510   | G | 0.0386  |
| rs73208664  | T | 0.0598  |
| rs73153011  | A | 0.0377  |
| rs7803686   | A | 0.0477  |
| rs112633117 | A | 0.0493  |
| rs714111    | C | 0.015   |
| rs117357010 | A | 0.0256  |
| rs73082965  | G | -0.0358 |
| rs11773616  | T | -0.021  |
| rs13227426  | T | 0.0369  |
| rs117227268 | A | -0.0512 |
| rs9632793   | G | 0.0254  |
| rs73162964  | C | -0.0695 |
| rs76909560  | A | -0.0197 |
| rs17171421  | G | -0.0429 |
| rs62468500  | G | -0.0334 |
| rs74479588  | G | 0.0644  |
| rs17635852  | C | -0.0413 |
| rs56015778  | A | -0.0326 |
| rs1525735   | C | 0.0126  |
| rs4445156   | G | 0.0135  |
| rs147801285 | C | -0.059  |
| rs1376523   | T | 0.0394  |
| rs12698425  | T | 0.0137  |
| rs10952813  | G | 0.026   |
| rs74929325  | T | 0.0621  |
| rs58270141  | C | -0.0427 |
| rs146786991 | A | -0.0842 |
| rs71530789  | C | -0.0298 |
| rs111791830 | C | 0.0319  |
| rs79776490  | G | 0.0324  |
| rs62479565  | A | 0.0417  |
| rs78160053  | G | -0.0759 |
| rs140494603 | T | 0.0555  |
| rs73707860  | G | 0.0409  |
| rs1722048   | T | 0.0145  |
| rs17166650  | C | 0.0133  |
| rs62474294  | T | 0.0334  |
| rs117367818 | T | 0.0689  |
| rs73065791  | G | 0.0555  |
| rs10280502  | A | -0.0177 |
| rs3095930   | A | 0.0648  |
| rs2893061   | G | 0.0382  |
| rs147273060 | T | 0.0568  |
| rs10480799  | A | 0.0186  |
| rs10486891  | G | 0.0285  |



|             |   |         |
|-------------|---|---------|
| rs10273633  | G | 0.0238  |
| rs80294570  | G | -0.0341 |
| rs35928597  | T | 0.0472  |
| rs12666394  | A | -0.0191 |
| rs4361654   | A | 0.0216  |
| rs4617107   | C | -0.0161 |
| rs4725556   | G | -0.0496 |
| rs17507244  | T | 0.0358  |
| rs17855988  | C | 0.0222  |
| rs13310735  | A | -0.0498 |
| rs12670951  | C | -0.0147 |
| rs10480300  | T | 0.0135  |
| rs62431991  | G | -0.057  |
| rs17159922  | G | -0.0263 |
| rs2008400   | A | 0.0153  |
| rs11767274  | A | 0.0142  |
| rs117309730 | T | 0.0327  |
| rs76863538  | C | 0.0318  |
| rs75126895  | C | 0.0447  |
| rs6971248   | T | -0.0143 |
| rs80128281  | C | 0.0292  |
| rs73221772  | G | 0.0604  |
| rs59135073  | G | -0.0401 |
| rs396983    | G | 0.017   |
| rs117792378 | G | 0.0444  |
| rs79171406  | A | -0.0213 |
| rs62455784  | T | 0.0506  |
| rs17158564  | A | 0.03    |
| rs759176    | G | 0.0441  |
| rs79949540  | G | 0.0244  |
| rs7807897   | T | -0.0144 |
| rs12704481  | A | 0.012   |
| rs62482552  | G | 0.014   |
| rs17160621  | T | 0.0207  |
| rs6460354   | T | 0.0135  |
| rs281878    | A | 0.0146  |
| rs10245689  | C | 0.0465  |
| rs17134265  | G | -0.0222 |
| rs73055772  | T | -0.0544 |
| rs75332094  | T | 0.0668  |
| rs139407025 | C | -0.0768 |
| rs73180557  | T | 0.0269  |
| rs9691603   | C | -0.0136 |
| rs116948327 | T | -0.0554 |
| rs2392468   | T | -0.0159 |
| rs75575749  | T | 0.029   |
| rs76776362  | C | 0.0632  |

|             |   |         |
|-------------|---|---------|
| rs62451570  | T | -0.0402 |
| rs2867514   | G | 0.0153  |
| rs6951640   | C | -0.0389 |
| rs17136572  | G | 0.069   |
| rs4598173   | A | 0.0143  |
| rs6970802   | T | -0.0144 |
| rs79605394  | T | -0.0445 |
| rs73127623  | A | 0.0498  |
| rs6467509   | T | 0.0259  |
| rs77902041  | A | 0.0266  |
| rs77144871  | G | 0.0244  |
| rs34194180  | T | 0.0803  |
| rs75071114  | A | 0.0526  |
| rs1994506   | G | -0.0205 |
| rs7790917   | C | 0.0395  |
| rs6971213   | G | -0.0254 |
| rs10952493  | T | -0.0143 |
| rs13242030  | T | 0.0241  |
| rs12670198  | G | 0.0179  |
| rs34246218  | C | -0.0461 |
| rs12537687  | A | 0.0393  |
| rs7782656   | C | -0.029  |
| rs10499490  | T | -0.0286 |
| rs6975890   | A | 0.0142  |
| rs4289740   | A | 0.0467  |
| rs17289533  | A | -0.0191 |
| rs10278227  | A | -0.0204 |
| rs73169960  | C | 0.0189  |
| rs79847565  | C | -0.0961 |
| rs917804    | T | 0.015   |
| rs2082726   | A | 0.0363  |
| rs4721896   | G | -0.0155 |
| rs6463716   | A | 0.0148  |
| rs118008922 | T | -0.0629 |
| rs117214298 | C | -0.0601 |
| rs62491310  | A | -0.0402 |
| rs144258278 | G | -0.0813 |
| rs142147164 | A | 0.0465  |
| rs7803508   | G | 0.0187  |
| rs111495612 | T | -0.0544 |
| rs9784929   | T | 0.0222  |
| rs7797455   | G | -0.0255 |
| rs77630140  | G | 0.0587  |
| rs146707191 | A | -0.0368 |
| rs150566692 | A | 0.1188  |
| rs62478188  | T | 0.0213  |
| rs75306000  | T | 0.0619  |

|             |   |         |
|-------------|---|---------|
| rs75507249  | T | 0.0585  |
| rs111459061 | T | 0.0399  |
| rs894794    | C | 0.0122  |
| rs148644457 | T | -0.0539 |
| rs56277122  | G | -0.028  |
| rs75234364  | A | 0.0439  |
| rs57286818  | G | 0.0234  |
| rs73107472  | T | 0.0848  |
| rs73154769  | C | -0.0427 |
| rs71574780  | A | 0.0789  |
| rs150935093 | C | 0.0636  |
| rs117496645 | C | 0.1082  |
| rs117451953 | A | 0.0438  |
| rs6953523   | G | 0.0132  |
| rs118116182 | A | 0.0311  |
| rs55774621  | T | 0.0127  |
| rs4276617   | T | 0.0476  |
| rs17379876  | G | -0.0124 |
| rs146545726 | A | 0.0835  |
| rs142505676 | T | -0.0767 |
| rs117286658 | T | 0.0479  |
| rs218153    | T | 0.0132  |
| rs73695652  | A | -0.0446 |
| rs34101595  | T | -0.0293 |
| rs1135411   | T | -0.0336 |
| rs116934797 | T | -0.0814 |
| rs116214582 | A | -0.0381 |
| rs1125198   | C | 0.0206  |
| rs1468299   | A | -0.0256 |
| rs77824788  | A | -0.0752 |
| rs112528513 | T | 0.03    |
| rs117308927 | G | -0.0284 |
| rs117158774 | C | 0.0401  |
| rs2160124   | T | 0.0166  |
| rs17837768  | C | -0.0531 |
| rs77232992  | G | -0.0689 |
| rs801943    | A | 0.044   |
| rs4252424   | A | -0.0155 |
| rs10261505  | G | -0.0128 |
| rs117789223 | A | 0.0472  |
| rs35083965  | G | 0.0662  |
| rs193857    | A | 0.0182  |
| rs117260063 | T | -0.0456 |
| rs62449703  | G | 0.0393  |
| rs67976709  | T | -0.0127 |
| rs7781552   | C | 0.0244  |
| rs4720706   | A | -0.0164 |

|             |   |         |
|-------------|---|---------|
| rs62442252  | A | -0.0409 |
| rs59356257  | T | 0.0653  |
| rs79062215  | T | -0.0777 |
| rs35363891  | T | 0.0299  |
| rs2371208   | T | 0.0151  |
| rs113240263 | A | -0.0815 |
| rs62487870  | T | -0.021  |
| rs112268816 | T | -0.0445 |
| rs7783602   | T | 0.0126  |
| rs17160964  | A | 0.0722  |
| rs112102642 | A | -0.07   |
| rs117729456 | A | 0.0571  |
| rs36115542  | C | 0.0361  |
| rs10236746  | A | 0.0578  |
| rs10447493  | G | 0.0196  |
| rs10279299  | C | 0.0258  |
| rs2909984   | G | 0.0247  |
| rs10488223  | C | 0.0294  |
| rs35254822  | G | 0.04    |
| rs73175990  | C | 0.0252  |
| rs62467349  | T | 0.019   |
| rs10248478  | T | 0.0259  |
| rs116948115 | T | 0.0526  |
| rs9648723   | C | -0.0163 |
| rs34930362  | T | 0.1145  |
| rs34618439  | G | 0.0562  |
| rs76881284  | A | -0.0481 |
| rs73039629  | T | -0.0406 |
| rs10277012  | A | 0.0136  |
| rs1860805   | T | -0.0196 |
| rs73091867  | A | 0.0829  |
| rs326231    | A | 0.0274  |
| rs2267818   | G | 0.0368  |
| rs79487450  | G | -0.0193 |
| rs138352377 | A | 0.0799  |
| rs113722604 | T | -0.0397 |
| rs113510235 | C | -0.0571 |
| rs77531530  | T | 0.0411  |
| rs11974817  | A | 0.0146  |
| rs144620234 | A | 0.0288  |
| rs17168971  | A | 0.0395  |
| rs80201255  | A | 0.0175  |
| rs2583877   | G | 0.0121  |
| rs2368027   | A | -0.0323 |
| rs79091781  | T | 0.0988  |
| rs3850492   | A | 0.0221  |
| rs73126026  | G | -0.0187 |

|             |   |         |
|-------------|---|---------|
| rs117070616 | C | -0.0623 |
| rs10215695  | G | 0.0177  |
| rs117106618 | G | 0.059   |
| rs2453839   | C | 0.016   |
| rs78354317  | C | 0.0416  |
| rs3750103   | G | -0.0262 |
| rs62451648  | A | 0.0198  |
| rs10215805  | A | 0.0253  |
| rs73159167  | T | 0.071   |
| rs79004846  | C | -0.0468 |
| rs118098103 | A | -0.044  |
| rs116887927 | G | 0.0899  |
| rs79036249  | G | 0.0448  |
| rs3807823   | T | -0.028  |
| rs11975417  | A | 0.0327  |
| rs78488091  | T | -0.0279 |
| rs149294868 | T | 0.0825  |
| rs76212690  | G | 0.0542  |
| rs10951833  | T | -0.0389 |
| rs3110800   | T | 0.0122  |
| rs117850363 | A | 0.0941  |
| rs79670429  | A | 0.0539  |
| rs74493069  | A | 0.055   |
| rs75222717  | T | -0.0825 |
| rs62439550  | G | -0.0525 |
| rs59509745  | A | -0.0434 |
| rs140593118 | T | -0.0427 |
| rs73046587  | C | -0.0595 |
| rs66736733  | C | -0.0234 |
| rs12534818  | A | 0.0129  |
| rs116431    | A | -0.04   |
| rs4720860   | C | -0.0168 |
| rs80331552  | G | 0.0396  |
| rs1444464   | A | -0.0525 |
| rs112144752 | T | -0.086  |
| rs34904831  | T | 0.0355  |
| rs6956634   | C | 0.0509  |
| rs4495368   | C | 0.0179  |
| rs55642333  | A | -0.0248 |
| rs75369631  | C | -0.0418 |
| rs73041563  | C | -0.0558 |
| rs113905636 | C | -0.0689 |
| rs35843104  | C | -0.0322 |
| rs113087430 | C | 0.0366  |
| rs116932871 | T | 0.0427  |
| rs117741646 | C | -0.0617 |
| rs144893918 | A | 0.0482  |

|             |   |         |
|-------------|---|---------|
| rs34524571  | C | 0.0219  |
| rs6961449   | T | -0.0127 |
| rs141672910 | A | -0.0552 |
| rs117343093 | A | -0.1086 |
| rs117747944 | T | 0.0565  |
| rs208356    | T | 0.013   |
| rs3213615   | G | 0.0137  |
| rs79718801  | G | -0.0419 |
| rs35465323  | A | -0.0323 |
| rs4419745   | G | -0.0519 |
| rs12537411  | T | 0.0119  |
| rs145248969 | T | -0.0927 |
| rs77155679  | T | 0.0576  |
| rs6944900   | A | 0.037   |
| rs111851701 | C | 0.021   |
| rs7795919   | C | -0.0178 |
| rs117225215 | G | 0.0781  |
| rs150491507 | T | 0.0528  |
| rs10255106  | C | -0.0492 |
| rs113787934 | A | -0.0404 |
| rs10262899  | T | -0.0201 |
| rs1432511   | A | 0.0125  |
| rs34840527  | A | -0.0842 |
| rs11763267  | C | 0.0158  |
| rs6957465   | A | -0.0171 |
| rs146044869 | T | 0.0836  |
| rs61554885  | T | 0.0505  |
| rs141653880 | C | -0.0466 |
| rs112025920 | G | 0.0517  |
| rs6953563   | T | 0.0139  |
| rs77308886  | T | 0.0398  |
| rs1465682   | A | -0.0173 |
| rs73139868  | G | -0.0193 |
| rs56965416  | G | 0.0141  |
| rs73369284  | T | 0.0552  |
| rs1583138   | C | 0.016   |
| rs141304720 | T | -0.0629 |
| rs73166231  | C | -0.0826 |
| rs35953236  | G | 0.0696  |
| rs117972482 | T | -0.0535 |
| rs75352266  | T | 0.0296  |
| rs6945781   | A | -0.0201 |
| rs7804771   | C | -0.0193 |
| rs6583354   | T | -0.0244 |
| rs117868109 | T | -0.0688 |
| rs2710948   | T | -0.0126 |
| rs7805541   | C | 0.0181  |

|             |   |         |
|-------------|---|---------|
| rs17388921  | G | -0.0275 |
| rs56204210  | A | 0.0603  |
| rs117735652 | A | -0.0414 |
| rs6967474   | T | -0.0182 |
| rs117585725 | C | -0.0388 |
| rs73160060  | A | 0.0521  |
| rs6462063   | G | -0.0121 |
| rs255142    | A | -0.0118 |
| rs144937505 | A | 0.0621  |
| rs73134369  | T | -0.0181 |
| rs73045032  | A | 0.0293  |
| rs74918074  | C | 0.0779  |
| rs6970343   | T | 0.0254  |
| rs62485336  | C | 0.0647  |
| rs10464222  | A | 0.0196  |
| rs4917071   | T | -0.054  |
| rs13228121  | T | -0.0168 |
| rs1526760   | G | 0.0202  |
| rs6954291   | T | 0.0148  |
| rs2189424   | A | 0.0201  |
| rs77979824  | T | -0.0558 |
| rs117071351 | T | -0.0507 |
| rs17159210  | A | -0.0605 |
| rs6971655   | A | -0.0156 |
| rs138160646 | T | -0.0722 |
| rs10225135  | G | 0.0134  |
| rs62489506  | A | 0.0305  |
| rs35211946  | T | 0.0362  |
| rs79413509  | G | 0.0546  |
| rs138897294 | A | 0.0379  |
| rs145095841 | G | 0.0888  |
| rs2461130   | A | 0.0211  |
| rs113422712 | C | -0.0774 |
| rs73436726  | T | -0.0328 |
| rs73455982  | C | 0.0455  |
| rs76179176  | C | 0.0368  |
| rs7789547   | A | 0.0125  |
| rs62471959  | G | -0.0315 |
| rs10247739  | C | 0.0146  |
| rs138315778 | T | 0.0662  |
| rs13224441  | C | 0.0359  |
| rs12532526  | A | -0.0229 |
| rs73035463  | G | -0.0481 |
| rs112306042 | T | -0.0776 |
| rs73374829  | G | 0.026   |
| rs1859207   | T | 0.014   |
| rs55862041  | A | 0.0344  |

|             |   |         |
|-------------|---|---------|
| rs13309576  | T | 0.0464  |
| rs2044225   | T | -0.013  |
| rs73110615  | G | -0.0617 |
| rs62481075  | T | 0.0406  |
| rs2350157   | T | -0.0124 |
| rs845561    | C | 0.0141  |
| rs59529559  | T | 0.055   |
| rs6968796   | C | 0.0186  |
| rs74832606  | A | -0.0424 |
| rs6968512   | C | -0.0167 |
| rs71550664  | A | -0.0163 |
| rs12333784  | T | -0.0142 |
| rs17618588  | C | -0.0558 |
| rs143606559 | T | 0.0538  |
| rs6948452   | C | 0.0121  |
| rs28532286  | C | -0.0347 |
| rs147226519 | C | -0.045  |
| rs116984912 | A | 0.0896  |
| rs76879769  | T | -0.0292 |
| rs10227914  | A | 0.015   |
| rs56219098  | A | 0.0305  |
| rs12533335  | T | -0.0802 |
| rs768830    | G | 0.0181  |
| rs12532124  | A | 0.0144  |
| rs1637076   | T | 0.0347  |
| rs117463813 | C | 0.0657  |
| rs116996953 | A | -0.066  |
| rs113947297 | A | 0.0392  |
| rs112620804 | T | -0.1    |
| rs55909410  | A | 0.0166  |
| rs12700707  | A | 0.0142  |
| rs117490989 | T | -0.0457 |
| rs7807721   | A | 0.0143  |
| rs13222836  | C | 0.012   |
| rs34234003  | T | -0.0126 |
| rs12700803  | T | 0.0461  |
| rs11770118  | G | -0.0126 |
| rs2214610   | G | -0.0119 |
| rs983926    | T | 0.0429  |
| rs145392011 | A | -0.0818 |
| rs77748279  | T | 0.0475  |
| rs2049820   | A | 0.0578  |
| rs7790963   | T | -0.0145 |
| rs17665165  | T | 0.0201  |
| rs6977823   | T | 0.0144  |
| rs6952872   | T | -0.0146 |
| rs112395795 | T | -0.0479 |



|             |   |         |
|-------------|---|---------|
| rs80219644  | G | -0.0548 |
| rs73412441  | T | -0.0729 |
| rs13245401  | G | -0.0193 |
| rs13237983  | C | -0.0232 |
| rs13246814  | G | -0.0745 |
| rs78906654  | T | 0.0637  |
| rs117698752 | T | 0.0515  |
| rs57503556  | T | 0.0522  |
| rs62444998  | C | 0.02    |
| rs112854772 | C | -0.0481 |
| rs4472431   | T | 0.0191  |
| rs6977816   | T | -0.0271 |
| rs3735430   | T | -0.0603 |
| rs73705826  | A | -0.0221 |
| rs80325983  | T | 0.1023  |
| rs55980978  | G | 0.0332  |
| rs6962976   | G | -0.0269 |
| rs79737195  | T | -0.0528 |
| rs10250530  | G | 0.021   |
| rs28414348  | C | 0.0589  |
| rs10238114  | C | -0.017  |
| rs10236134  | A | 0.0143  |
| rs117973616 | A | 0.0544  |
| rs35265824  | G | 0.0224  |
| rs73096398  | G | -0.0286 |
| rs6956067   | C | -0.027  |
| rs111870002 | T | -0.0255 |
| rs17134902  | G | 0.0616  |
| rs117371744 | T | -0.0497 |
| rs12538853  | T | -0.0217 |
| rs117729532 | G | -0.0501 |
| rs79170178  | G | -0.0953 |
| rs6958516   | C | 0.0171  |
| rs10268032  | A | 0.0139  |
| rs62459196  | T | -0.0153 |
| rs117186171 | G | -0.0584 |
| rs73225220  | A | 0.0209  |
| rs117137537 | A | -0.0363 |
| rs117911199 | A | 0.0532  |
| rs34830857  | G | 0.0593  |
| rs1424557   | T | 0.0223  |
| rs150303026 | A | 0.0856  |
| rs4403339   | A | -0.0684 |
| rs116979959 | T | -0.0532 |
| rs55977327  | T | 0.039   |
| rs73170577  | C | -0.0353 |
| rs4727221   | A | 0.0139  |

|             |   |         |
|-------------|---|---------|
| rs117265891 | A | -0.0543 |
| rs6670      | A | -0.0195 |
| rs13228175  | A | 0.1149  |
| rs1444455   | T | 0.0122  |
| rs78447532  | G | 0.0231  |
| rs145563166 | G | -0.0845 |
| rs6463336   | T | -0.0208 |
| rs62449580  | T | 0.0147  |
| rs706053    | G | -0.0177 |
| rs149283044 | C | 0.078   |
| rs56932207  | T | 0.0329  |
| rs75748794  | A | 0.0538  |
| rs141725912 | G | 0.0423  |
| rs79554269  | T | 0.0332  |
| rs79440030  | T | 0.0588  |
| rs6977771   | C | 0.0123  |
| rs11771332  | T | -0.0207 |
| rs79729143  | C | 0.0736  |
| rs149061827 | C | -0.0626 |
| rs73096135  | T | -0.0334 |
| rs74299838  | G | -0.0348 |
| rs143680308 | T | 0.0611  |
| rs113990647 | T | 0.0415  |
| rs117605538 | A | 0.0856  |
| rs117026972 | A | -0.0953 |
| rs73172625  | T | 0.0324  |
| rs75351420  | A | -0.0824 |
| rs6974399   | G | 0.0607  |
| rs6969238   | G | 0.0146  |
| rs79307940  | G | -0.0535 |
| rs17260570  | C | -0.0397 |
| rs1208091   | T | -0.0143 |
| rs76385361  | C | -0.0474 |
| rs601729    | G | -0.0322 |
| rs112694110 | A | -0.0531 |
| rs117466293 | A | 0.0373  |
| rs79306039  | T | -0.0625 |
| rs111741789 | G | 0.05    |
| rs117333976 | A | 0.032   |
| rs80226561  | A | -0.0568 |
| rs10255616  | A | 0.0244  |
| rs17166906  | T | -0.029  |
| rs12535452  | A | 0.0196  |
| rs12333769  | A | -0.0302 |
| rs13240057  | T | 0.1095  |
| rs35074397  | G | 0.0126  |
| rs73078703  | G | 0.0339  |

|             |   |         |
|-------------|---|---------|
| rs2240465   | T | -0.0177 |
| rs142258209 | A | -0.0527 |
| rs4723333   | C | -0.0243 |
| rs978738    | C | 0.0222  |
| rs6961921   | G | 0.0205  |
| rs13221774  | G | -0.0153 |
| rs79607600  | G | -0.0307 |
| rs9638079   | T | 0.0189  |
| rs12668965  | T | -0.0191 |
| rs17339057  | C | 0.0538  |
| rs117862850 | A | 0.0704  |
| rs138692051 | C | -0.0433 |
| rs62449878  | C | 0.0776  |
| rs2158550   | G | -0.0214 |
| rs28690366  | C | -0.0139 |
| rs35431959  | A | 0.0118  |
| rs77148428  | T | 0.0513  |
| rs118125906 | T | 0.0654  |
| rs2073548   | G | -0.0394 |
| rs140318716 | A | -0.0819 |
| rs117922200 | C | -0.0408 |
| rs117616092 | G | 0.0197  |
| rs28502707  | G | -0.0309 |
| rs10237517  | A | -0.0144 |
| rs6966798   | A | 0.0225  |
| rs146355844 | A | -0.0546 |
| rs66547659  | A | 0.0307  |
| rs57862761  | A | -0.0231 |
| rs17627139  | G | -0.0617 |
| rs34543955  | T | 0.0154  |
| rs113114385 | C | -0.0763 |
| rs10232633  | A | 0.0212  |
| rs17393539  | A | -0.0261 |
| rs60736603  | T | 0.0395  |
| rs141333045 | C | 0.0948  |
| rs2362375   | G | -0.0188 |
| rs21424     | A | 0.0146  |
| rs1178121   | A | 0.0136  |
| rs116391882 | G | 0.0496  |
| rs78246798  | C | 0.0494  |
| rs142910754 | A | 0.1022  |
| rs11768465  | T | -0.0142 |
| rs17138074  | G | 0.0738  |
| rs4726303   | C | 0.0392  |
| rs1559561   | T | -0.095  |
| rs78218276  | T | 0.0355  |
| rs80332851  | T | 0.0199  |

|             |   |         |
|-------------|---|---------|
| rs10441382  | A | 0.019   |
| rs79157358  | A | -0.0385 |
| rs6975043   | C | -0.0202 |
| rs2009836   | T | 0.0137  |
| rs116977503 | T | -0.06   |
| rs7792583   | G | 0.0173  |
| rs59514120  | T | -0.0171 |
| rs11980191  | G | 0.1039  |
| rs34721514  | A | 0.0219  |
| rs67858210  | C | 0.0592  |
| rs9639165   | T | 0.0125  |
| rs73137740  | T | 0.0461  |
| rs77157613  | A | 0.0769  |
| rs117880906 | C | -0.0455 |
| rs7809020   | A | -0.0393 |
| rs17143950  | C | 0.0306  |
| rs73048281  | T | -0.0618 |
| rs10282089  | C | -0.0193 |
| rs2267701   | C | -0.0182 |
| rs73181243  | A | -0.0517 |
| rs1637054   | A | -0.0665 |
| rs11983970  | G | -0.0243 |
| rs61732373  | A | 0.0854  |
| rs10953098  | T | 0.0126  |
| rs62465194  | T | -0.0551 |
| rs11556924  | T | -0.0129 |
| rs2189626   | T | -0.0387 |
| rs7807069   | G | 0.0132  |
| rs146532374 | G | 0.1029  |
| rs74516523  | T | 0.0521  |
| rs2527693   | G | -0.0275 |
| rs1526537   | A | -0.0122 |
| rs2727810   | C | 0.0132  |
| rs73111956  | A | 0.0146  |
| rs4726086   | C | 0.012   |
| rs76985190  | G | -0.0388 |
| rs7811548   | A | 0.0307  |
| rs117887060 | G | -0.0609 |
| rs2240049   | T | -0.0188 |
| rs4725349   | G | -0.0334 |
| rs13233162  | G | 0.0514  |
| rs10229733  | G | -0.0137 |
| rs73139785  | G | 0.0177  |
| rs2130032   | T | -0.0191 |
| rs6973224   | A | -0.0458 |
| rs17170987  | G | -0.0155 |
| rs112979748 | T | 0.0338  |

|             |   |         |
|-------------|---|---------|
| rs13227214  | C | -0.0115 |
| rs73222235  | C | -0.0182 |
| rs78765043  | G | -0.0264 |
| rs6950254   | G | -0.02   |
| rs73040031  | T | -0.0602 |
| rs117091209 | T | -0.0522 |
| rs77617183  | C | 0.0294  |
| rs2107785   | C | 0.0186  |
| rs147706257 | C | 0.0535  |
| rs55803204  | C | -0.0132 |
| rs2727762   | T | 0.0121  |
| rs117613752 | C | 0.0413  |
| rs62439313  | A | -0.0633 |
| rs2969069   | T | -0.0121 |
| rs73114499  | G | 0.0503  |
| rs73069491  | T | -0.02   |
| rs79781079  | G | -0.0529 |
| rs147735351 | C | -0.1044 |
| rs4716962   | C | -0.0276 |
| rs6463728   | G | -0.0186 |
| rs6945457   | A | -0.0166 |
| rs778686    | T | 0.013   |
| rs6976409   | G | -0.0519 |
| rs111916780 | A | -0.0209 |
| rs116871081 | A | -0.074  |
| rs146781625 | T | 0.051   |
| rs7787510   | C | -0.0402 |
| rs10954386  | C | -0.0129 |
| rs73467088  | T | 0.0969  |
| rs73056323  | T | 0.0884  |
| rs798360    | C | 0.0176  |
| rs117037468 | G | 0.0924  |
| rs76917448  | T | -0.0395 |
| rs1011780   | C | -0.0126 |
| rs181038    | T | -0.0437 |
| rs62473545  | A | -0.0154 |
| rs13243521  | C | -0.0473 |
| rs17153042  | C | 0.0149  |
| rs149420299 | C | -0.0752 |
| rs142176245 | A | 0.0797  |
| rs80224817  | A | -0.0779 |
| rs74349987  | G | -0.0679 |
| rs62481404  | C | -0.0393 |
| rs117546856 | A | -0.0462 |
| rs11773804  | G | 0.0121  |
| rs7792725   | A | 0.0181  |
| rs388303    | A | -0.0345 |

|             |   |         |
|-------------|---|---------|
| rs76501298  | A | 0.0363  |
| rs321281    | A | 0.0234  |
| rs7780321   | C | 0.0158  |
| rs10278860  | C | -0.0325 |
| rs114647121 | T | -0.0346 |
| rs147456728 | T | -0.0168 |
| rs6943456   | C | 0.0177  |
| rs10249933  | C | -0.0271 |
| rs113960110 | T | 0.0913  |
| rs62491364  | T | 0.049   |
| rs140184060 | G | -0.058  |
| rs874607    | G | 0.0194  |
| rs17132410  | A | -0.0403 |
| rs73184260  | G | -0.0318 |
| rs117960367 | T | 0.0752  |
| rs3857796   | A | 0.0373  |
| rs145156184 | G | 0.0706  |
| rs255103    | G | 0.0174  |
| rs75981133  | A | 0.0483  |
| rs145955307 | C | 0.0805  |
| rs73046123  | A | -0.0266 |
| rs6950833   | T | 0.013   |
| rs10258797  | A | -0.0147 |
| rs4236412   | C | 0.0127  |
| rs36028345  | C | 0.0126  |
| rs55901559  | T | 0.0162  |
| rs77933113  | C | -0.0586 |
| rs62446259  | T | 0.0693  |
| rs79339200  | C | 0.024   |
| rs1557658   | C | -0.0185 |
| rs17224988  | C | 0.0342  |
| rs138445875 | T | 0.0599  |
| rs79909212  | A | 0.0272  |
| rs56094929  | A | -0.0577 |
| rs62459262  | T | -0.0328 |
| rs76720278  | T | 0.0638  |
| rs144270822 | C | 0.049   |
| rs77285285  | T | -0.0467 |
| rs28636374  | G | 0.0214  |
| rs77934992  | T | -0.0645 |
| rs1005082   | T | 0.0166  |
| rs73163057  | G | -0.0204 |
| rs77644037  | T | 0.0591  |
| rs10953855  | A | -0.0222 |
| rs7799966   | G | -0.0556 |
| rs2521028   | G | -0.0188 |
| rs56005128  | A | -0.0332 |

|             |   |         |
|-------------|---|---------|
| rs78977652  | G | -0.1033 |
| rs117496212 | C | 0.0724  |
| rs71538666  | A | -0.0331 |
| rs117940574 | A | -0.0531 |
| rs79061107  | G | -0.0632 |
| rs2188799   | G | 0.0119  |
| rs10275647  | G | 0.0214  |
| rs4721066   | A | -0.0138 |
| rs4721532   | T | -0.0147 |
| rs149388993 | G | 0.061   |
| rs6943276   | C | -0.0132 |
| rs62439064  | G | -0.0207 |
| rs55666906  | A | -0.0209 |
| rs35635926  | T | -0.0172 |
| rs78925209  | C | -0.1178 |
| rs2140516   | C | 0.0123  |
| rs111945529 | C | 0.0219  |
| rs56727124  | T | 0.0173  |
| rs111752385 | G | -0.0418 |
| rs222312    | C | -0.0161 |
| rs117096831 | T | -0.05   |
| rs66645003  | C | 0.0163  |
| rs117300161 | A | -0.1047 |
| rs28715660  | T | -0.0201 |
| rs17395672  | G | 0.0785  |
| rs80289182  | T | 0.0378  |
| rs474274    | C | 0.0202  |
| rs139595375 | C | -0.0541 |
| rs41833     | C | 0.0134  |
| rs76827614  | C | -0.0693 |
| rs10256642  | T | -0.0137 |
| rs77905609  | G | 0.0218  |
| rs147312315 | T | -0.0314 |
| rs10255915  | T | -0.0163 |
| rs73702385  | A | -0.0713 |
| rs78950323  | G | 0.0363  |
| rs77641568  | A | 0.0486  |
| rs12532096  | G | -0.0488 |
| rs117687649 | T | 0.0574  |
| rs62458216  | A | 0.0478  |
| rs7777880   | T | 0.0198  |
| rs117083436 | A | 0.0435  |
| rs62445999  | G | 0.0338  |
| rs2330786   | A | 0.0149  |
| rs79882879  | T | 0.0621  |
| rs6461942   | T | -0.0117 |
| rs74424468  | T | -0.0487 |

|             |   |         |
|-------------|---|---------|
| rs62482768  | C | -0.0406 |
| rs144636539 | T | 0.0375  |
| rs35221806  | C | -0.0359 |
| rs10272180  | G | 0.0169  |
| rs62451401  | G | -0.046  |
| rs17172180  | T | 0.0283  |
| rs111390369 | T | -0.013  |
| rs4582488   | T | -0.0172 |
| rs62475991  | T | 0.016   |
| rs144770493 | G | 0.0958  |
| rs10269628  | C | 0.0128  |
| rs55873571  | A | 0.0532  |
| rs117078343 | C | 0.0555  |
| rs73148327  | T | 0.0567  |
| rs146218207 | T | -0.0328 |
| rs116944078 | T | 0.0715  |
| rs3095014   | T | -0.0323 |
| rs73163574  | C | 0.0198  |
| rs78681243  | T | 0.0726  |
| rs77597387  | C | -0.0859 |
| rs116850906 | T | 0.0734  |
| rs78964579  | C | 0.0881  |
| rs118060783 | T | -0.0566 |
| rs75894429  | G | -0.049  |
| rs112024199 | A | -0.0566 |
| rs35975087  | T | -0.0595 |
| rs150227712 | G | 0.0695  |
| rs113454306 | T | -0.0394 |
| rs7777661   | G | 0.0203  |
| rs116853246 | A | -0.0751 |
| rs36004660  | A | -0.0334 |
| rs117135114 | T | 0.0301  |
| rs6593208   | A | 0.054   |
| rs662635    | C | 0.0191  |
| rs12705170  | A | -0.0146 |
| rs117979323 | C | 0.068   |
| rs10155882  | C | 0.0119  |
| rs144606162 | A | -0.0843 |
| rs17579329  | G | 0.0236  |
| rs3857759   | T | -0.0527 |
| rs79422073  | G | 0.045   |
| rs17139364  | G | 0.0272  |
| rs2734077   | C | 0.0234  |
| rs6966804   | C | 0.0197  |
| rs803157    | T | 0.015   |
| rs7785579   | T | -0.0123 |
| rs61100082  | A | -0.05   |



|             |   |         |
|-------------|---|---------|
| rs1729824   | T | 0.0128  |
| rs6942982   | A | -0.0193 |
| rs113371527 | T | -0.0513 |
| rs77035447  | A | 0.0395  |
| rs80076277  | A | 0.0638  |
| rs111383128 | C | -0.0406 |
| rs112773844 | G | -0.0661 |
| rs2718237   | T | 0.0254  |
| rs148965877 | G | -0.0661 |
| rs73186275  | T | 0.0148  |
| rs17530756  | T | 0.016   |
| rs11765367  | T | -0.0128 |
| rs10264599  | G | -0.0125 |
| rs75631280  | T | 0.0927  |
| rs72611586  | G | -0.0294 |
| rs73696828  | A | 0.0328  |
| rs141366050 | C | 0.0734  |
| rs10953594  | C | 0.0291  |
| rs76384469  | G | -0.0345 |
| rs138574619 | A | 0.0742  |
| rs73097626  | A | 0.0356  |
| rs117440956 | A | 0.0453  |
| rs10243955  | T | 0.0129  |
| rs143477829 | A | -0.0427 |
| rs80193558  | C | -0.0171 |
| rs71536859  | T | 0.0407  |
| rs10272022  | G | 0.0392  |
| rs1861068   | C | 0.0482  |
| rs320101    | G | -0.0272 |
| rs35336896  | G | -0.0214 |
| rs117315456 | A | 0.066   |
| rs78378585  | C | 0.0454  |
| rs13234854  | T | -0.0811 |
| rs2079277   | G | -0.0144 |
| rs6942576   | G | 0.0204  |
| rs7792548   | T | 0.0128  |
| rs147784529 | A | 0.0335  |
| rs11974397  | G | 0.0826  |
| rs13246772  | G | -0.0691 |
| rs10281519  | G | 0.0172  |
| rs12706130  | G | -0.0164 |
| rs117984514 | C | -0.0394 |
| rs12703601  | C | 0.0308  |
| rs10225443  | A | 0.0126  |
| rs11771157  | A | 0.0131  |
| rs76351028  | T | -0.0351 |
| rs34906168  | C | 0.012   |

|             |   |         |
|-------------|---|---------|
| rs62624461  | C | -0.0374 |
| rs55783991  | A | 0.0441  |
| rs6944565   | A | 0.0217  |
| rs3801926   | A | -0.0373 |
| rs17347135  | A | -0.0153 |
| rs6946307   | T | -0.0166 |
| rs11972734  | A | 0.0117  |
| rs117727609 | C | 0.0527  |
| rs73433734  | G | -0.0324 |
| rs12154772  | A | 0.0349  |
| rs844775    | G | -0.0112 |
| rs17158733  | G | 0.0363  |
| rs79745368  | T | -0.0942 |
| rs6943378   | G | -0.0147 |
| rs2214931   | A | -0.0177 |
| rs78936923  | C | -0.0583 |
| rs62457835  | T | 0.0415  |
| rs1557908   | C | 0.0224  |
| rs56358028  | C | 0.0182  |
| rs75333688  | T | -0.0448 |
| rs7802036   | T | 0.013   |
| rs10232104  | G | 0.02    |
| rs117466433 | T | 0.0717  |
| rs35000274  | A | -0.0271 |
| rs116920885 | G | -0.0743 |
| rs113446740 | C | -0.0163 |
| rs111764525 | T | -0.0365 |
| rs141603443 | G | 0.0659  |
| rs10276861  | G | -0.0188 |
| rs7799696   | T | 0.0121  |
| rs76605191  | T | -0.0335 |
| rs251993    | T | 0.0187  |
| rs78068411  | T | 0.0203  |
| rs112608485 | T | -0.0533 |
| rs73179052  | T | -0.0243 |
| rs73134054  | A | 0.0153  |
| rs17146102  | T | 0.0364  |
| rs11764797  | T | 0.0154  |
| rs6974565   | A | -0.0115 |
| rs17623716  | T | -0.0133 |
| rs142999489 | G | -0.0513 |
| rs117961376 | C | 0.0561  |
| rs3807992   | A | 0.0127  |
| rs7792841   | A | 0.0378  |
| rs150119084 | G | 0.062   |
| rs11973993  | C | -0.041  |
| rs75225991  | A | -0.0464 |

|             |   |         |
|-------------|---|---------|
| rs73523919  | C | -0.0609 |
| rs13230918  | G | -0.014  |
| rs79875907  | A | -0.041  |
| rs13234451  | T | 0.0403  |
| rs9639432   | A | 0.0407  |
| rs10215454  | T | 0.0144  |
| rs116995119 | G | -0.0422 |
| rs17146221  | C | -0.052  |
| rs80195582  | T | -0.0359 |
| rs6949342   | T | 0.0116  |
| rs117689211 | T | 0.0431  |
| rs35528290  | T | 0.0482  |
| rs11765599  | A | 0.0154  |
| rs13239058  | T | -0.0159 |
| rs117822269 | A | -0.0515 |
| rs10278906  | G | 0.0154  |
| rs1159878   | C | -0.0225 |
| rs139891665 | G | -0.0418 |
| rs36040343  | A | 0.0302  |
| rs2348526   | A | -0.014  |
| rs6970519   | T | -0.0338 |
| rs941346    | G | 0.0113  |
| rs146676151 | A | 0.0562  |
| rs17789942  | G | 0.0141  |
| rs80005650  | G | 0.0416  |
| rs76277022  | C | -0.0269 |
| rs111817209 | A | -0.0187 |
| rs150074439 | G | -0.0661 |
| rs115056285 | G | 0.0886  |
| rs36060893  | A | 0.0448  |
| rs9719539   | A | -0.0597 |
| rs117959479 | T | -0.0325 |
| rs62456811  | C | -0.0175 |
| rs77174995  | A | 0.0793  |
| rs150248815 | A | -0.0624 |
| rs112011760 | C | -0.0534 |
| rs117946951 | T | -0.0482 |
| rs810555    | T | -0.0192 |
| rs78325389  | A | -0.0506 |
| rs117197881 | G | 0.0498  |
| rs10277316  | C | 0.011   |
| rs62479901  | A | 0.0288  |
| rs3800570   | G | 0.0282  |
| rs9692134   | T | 0.0132  |
| rs74403918  | G | -0.0552 |
| rs73179925  | G | 0.0536  |
| rs62455053  | A | -0.0144 |

|             |   |         |
|-------------|---|---------|
| rs10226536  | G | 0.0129  |
| rs117807131 | G | -0.0449 |
| rs117139498 | A | 0.0562  |
| rs10225408  | C | -0.0113 |
| rs141663882 | T | 0.0479  |
| rs76444342  | A | -0.0578 |
| rs6968592   | T | 0.0568  |
| rs10236826  | C | -0.025  |
| rs2526740   | T | 0.0268  |
| rs6957108   | T | -0.0158 |
| rs12666524  | T | 0.0218  |
| rs2051681   | T | 0.0142  |
| rs75826176  | T | 0.0581  |
| rs144537790 | C | -0.0605 |
| rs146659738 | A | 0.0529  |
| rs6957024   | A | -0.0167 |
| rs2240642   | C | -0.0248 |
| rs78467385  | A | -0.0259 |
| rs10245440  | A | -0.0143 |
| rs76624233  | A | 0.0463  |
| rs117991562 | T | -0.0589 |
| rs7797212   | T | 0.0142  |
| rs2282981   | T | 0.0404  |
| rs71529316  | A | 0.0232  |
| rs78291009  | G | -0.0766 |
| rs62446275  | T | 0.0592  |
| rs9648079   | G | 0.0135  |
| rs17167132  | G | -0.036  |
| rs6962788   | T | 0.0318  |
| rs17137770  | A | -0.0131 |
| rs79155667  | C | 0.068   |
| rs1988495   | A | -0.015  |
| rs2371666   | G | -0.0133 |
| rs13225969  | T | -0.0204 |
| rs73122176  | T | -0.0296 |
| rs77969592  | T | 0.0609  |
| rs7800860   | T | -0.0145 |
| rs28690034  | G | -0.0113 |
| rs12666686  | C | -0.054  |
| rs853047    | A | 0.0159  |
| rs117589798 | T | -0.0944 |
| rs117907831 | G | -0.0565 |
| rs145932118 | G | 0.085   |
| rs77917158  | C | 0.0326  |
| rs112140212 | C | -0.0278 |
| rs2971672   | C | -0.0112 |
| rs150039619 | C | 0.0574  |

|             |   |         |
|-------------|---|---------|
| rs56307781  | T | -0.0449 |
| rs149445780 | T | 0.0578  |
| rs73203224  | C | 0.081   |
| rs62438814  | T | -0.0716 |
| rs34173     | G | -0.0133 |
| rs75716819  | C | 0.0454  |
| rs361491    | A | 0.0375  |
| rs67448664  | C | 0.0207  |
| rs75523660  | C | 0.0245  |
| rs11979388  | T | 0.0163  |
| rs117911546 | T | -0.0424 |
| rs117759832 | G | -0.0421 |
| rs763452    | A | -0.0122 |
| rs62489862  | G | 0.039   |
| rs142008801 | T | -0.0777 |
| rs73186469  | G | 0.023   |
| rs13237881  | T | 0.0319  |
| rs6463425   | C | 0.0193  |
| rs62454843  | A | 0.0825  |
| rs62479512  | C | 0.0347  |
| rs55853654  | T | 0.0487  |
| rs143394307 | G | 0.075   |
| rs73271703  | T | 0.0599  |
| rs75701893  | A | -0.0567 |
| rs6956266   | T | -0.0402 |
| rs112343949 | T | 0.035   |
| rs73108595  | G | 0.0592  |
| rs144750702 | A | 0.0345  |
| rs73148857  | A | 0.0214  |
| rs9640426   | G | -0.0166 |
| rs144444574 | G | 0.057   |
| rs117481762 | A | 0.0492  |
| rs552146    | A | 0.0428  |
| rs62448069  | C | 0.0324  |
| rs1558310   | C | 0.0196  |
| rs10269988  | A | -0.0166 |
| rs118187203 | C | 0.0627  |
| rs56059607  | G | 0.075   |
| rs17151393  | G | -0.0115 |
| rs6956101   | G | -0.0186 |
| rs350651    | T | -0.0216 |
| rs117060266 | G | 0.0676  |
| rs78656787  | C | 0.0167  |
| rs141503247 | A | 0.0375  |
| rs78951555  | A | 0.059   |
| rs6951767   | G | 0.0111  |
| rs78958255  | G | -0.0676 |

|             |   |         |
|-------------|---|---------|
| rs73446900  | T | 0.043   |
| rs73682691  | T | -0.0264 |
| rs150250697 | G | -0.0993 |
| rs111714272 | T | 0.0663  |
| rs12056086  | A | 0.0464  |
| rs1725600   | T | -0.0136 |
| rs73161825  | C | -0.0183 |
| rs74367556  | C | -0.0474 |
| rs117705242 | G | 0.0496  |
| rs73221727  | A | 0.0166  |
| rs11981283  | C | 0.0302  |
| rs2204488   | C | 0.0117  |
| rs73146998  | A | -0.0851 |
| rs79805857  | T | 0.0208  |
| rs844752    | T | 0.0152  |
| rs62477171  | T | 0.0531  |
| rs1233555   | C | -0.0189 |
| rs13310847  | C | 0.0253  |
| rs17274824  | A | -0.05   |
| rs62458694  | C | 0.0229  |
| rs117610895 | C | -0.0471 |
| rs117256343 | T | 0.0478  |
| rs56139221  | T | -0.0476 |
| rs75666178  | T | 0.023   |
| rs10239977  | T | -0.0116 |
| rs12666195  | G | -0.02   |
| rs12540682  | G | -0.0119 |
| rs140596698 | T | 0.069   |
| rs854548    | A | 0.0122  |
| rs35726496  | A | -0.0456 |
| rs11760611  | G | 0.0394  |
| rs7784509   | G | -0.0225 |
| rs149182942 | A | 0.04    |
| rs76420978  | C | 0.0542  |
| rs112692411 | G | 0.0222  |
| rs57043161  | G | -0.0279 |
| rs10249249  | T | -0.0148 |
| rs17690319  | A | 0.04    |
| rs137971582 | A | -0.028  |
| rs75239735  | T | 0.0424  |
| rs117884179 | A | -0.078  |
| rs72611549  | C | -0.0242 |
| rs112869816 | G | 0.0983  |
| rs77904442  | G | 0.0387  |
| rs76939587  | C | -0.0539 |
| rs150028194 | T | -0.1126 |
| rs71545944  | G | 0.0801  |

|             |   |         |
|-------------|---|---------|
| rs11766696  | A | 0.0134  |
| rs138965937 | G | -0.0764 |
| rs11770488  | A | 0.019   |
| rs73220115  | T | -0.0294 |
| rs13226251  | T | -0.0154 |
| rs117779588 | G | 0.0443  |
| rs73110392  | T | 0.0362  |
| rs150896206 | G | 0.038   |
| rs426249    | G | -0.0123 |
| rs17815216  | G | 0.0175  |
| rs10240887  | T | -0.0161 |
| rs62456633  | A | 0.0191  |
| rs11768925  | G | 0.0125  |
| rs67928103  | C | -0.0127 |
| rs10247325  | G | -0.0112 |
| rs75965632  | A | -0.03   |
| rs147576253 | C | -0.0499 |
| rs143305379 | G | -0.0521 |
| rs2075778   | C | 0.0154  |
| rs143815095 | G | 0.0704  |
| rs74299234  | A | 0.0203  |
| rs3807242   | T | -0.0276 |
| rs80055518  | C | -0.0379 |
| rs28385274  | T | -0.0207 |
| rs11980576  | G | 0.0631  |
| rs7803844   | C | -0.0162 |
| rs146836828 | A | 0.0638  |
| rs117673757 | T | -0.0629 |
| rs78721608  | C | -0.0331 |
| rs10256372  | T | 0.0111  |
| rs78539913  | C | 0.028   |
| rs77106988  | A | 0.0443  |
| rs117818887 | C | -0.0524 |
| rs1477033   | C | 0.0108  |
| rs76329849  | A | 0.0779  |
| rs146793543 | A | -0.0879 |
| rs73405609  | C | 0.0157  |
| rs73165444  | A | 0.0225  |
| rs11769264  | T | 0.0598  |
| rs6950766   | C | -0.023  |
| rs76768690  | T | 0.0353  |
| rs118147724 | T | -0.0418 |
| rs144652712 | A | -0.0617 |
| rs76494662  | A | 0.0512  |
| rs59901530  | T | -0.0213 |
| rs148714100 | T | 0.0593  |
| rs1995050   | G | 0.0114  |

|             |   |         |
|-------------|---|---------|
| rs6462990   | C | -0.0112 |
| rs28770314  | T | -0.0133 |
| rs117805454 | C | 0.0836  |
| rs141731458 | T | 0.0615  |
| rs17335283  | C | -0.0351 |
| rs9690597   | T | 0.0161  |
| rs139027148 | A | 0.0534  |
| rs74752170  | T | -0.064  |
| rs113292010 | A | 0.0282  |
| rs17206894  | T | -0.0321 |
| rs144599138 | A | 0.0614  |
| rs116940741 | C | -0.0231 |
| rs71532926  | A | -0.0281 |
| rs41334     | C | -0.0132 |
| rs10243669  | C | 0.0152  |
| rs62449780  | A | -0.0214 |
| rs73497081  | A | 0.0294  |
| rs11767956  | C | -0.0128 |
| rs75395794  | G | -0.05   |
| rs78640418  | A | -0.0263 |
| rs1269620   | T | -0.0405 |
| rs856551    | A | 0.0149  |
| rs78093309  | T | -0.032  |
| rs116906588 | T | 0.0604  |
| rs117914238 | T | 0.0655  |
| rs114010129 | T | -0.0304 |
| rs79677194  | A | 0.0288  |
| rs6467134   | A | 0.0152  |
| rs141709776 | T | -0.0403 |
| rs10264997  | G | 0.0108  |
| rs74487951  | C | -0.0351 |
| rs78650027  | G | 0.0919  |
| rs2527539   | C | -0.0137 |
| rs142281982 | A | -0.0702 |
| rs117478656 | G | 0.026   |
| rs2909682   | G | -0.0206 |
| rs10258713  | G | -0.0202 |
| rs73473567  | A | -0.019  |
| rs17565867  | G | -0.0697 |
| rs137939582 | C | 0.0638  |
| rs117375018 | C | -0.0443 |
| rs77911409  | T | -0.0415 |
| rs77143874  | C | 0.0377  |
| rs2246953   | T | -0.0196 |
| rs143035127 | A | -0.0862 |
| rs73174000  | G | 0.0485  |
| rs76745761  | G | 0.0391  |



|             |   |         |
|-------------|---|---------|
| rs985054    | A | -0.0155 |
| rs138869312 | C | -0.0502 |
| rs145696656 | T | -0.0338 |
| rs141471645 | A | -0.0507 |
| rs73065421  | T | -0.0209 |
| rs6460831   | T | 0.0114  |
| rs12539743  | T | 0.0262  |
| rs113381242 | G | -0.0311 |
| rs117297720 | C | -0.039  |
| rs62476413  | T | 0.0311  |
| rs80354096  | C | 0.0406  |
| rs77821503  | G | 0.0674  |
| rs7779962   | A | -0.0128 |
| rs2530727   | G | 0.0162  |
| rs9648043   | A | 0.0123  |
| rs3218454   | A | -0.0423 |
| rs10257085  | G | -0.0125 |
| rs35079424  | A | -0.016  |
| rs73090915  | A | 0.0451  |
| rs721583    | T | -0.0173 |
| rs13226698  | G | 0.0115  |
| rs17171847  | C | 0.0183  |
| rs57459747  | T | -0.0257 |
| rs74552781  | T | 0.0191  |
| rs77819981  | A | 0.0328  |
| rs74323257  | G | 0.0259  |
| rs149099175 | T | -0.0741 |
| rs56390909  | T | 0.0245  |
| rs17683576  | A | -0.0573 |
| rs17821377  | G | -0.0135 |
| rs140426471 | G | 0.0546  |
| rs28662     | T | -0.014  |
| rs219228    | C | 0.014   |
| rs111492208 | A | 0.0218  |
| rs117610105 | C | 0.0421  |
| rs117184206 | A | 0.0476  |
| rs137884567 | A | 0.0897  |
| rs10231952  | A | -0.019  |
| rs73097493  | T | -0.0298 |
| rs76677867  | T | -0.0461 |
| rs73184281  | T | 0.0644  |
| rs76740431  | G | 0.0242  |
| rs112366506 | C | 0.0387  |
| rs118095153 | G | -0.0456 |
| rs117199265 | G | -0.0411 |
| rs117292359 | T | -0.0312 |
| rs3113173   | T | -0.0124 |

|             |   |         |
|-------------|---|---------|
| rs1089471   | T | 0.0556  |
| rs17832600  | G | -0.0753 |
| rs7982      | A | -0.14   |
| rs28834970  | C | 0.0959  |
| rs9331926   | G | 0.2761  |
| rs111679419 | T | 0.3741  |
| rs2635147   | T | 0.1995  |
| rs138529507 | C | -0.2668 |
| rs17466060  | A | 0.0746  |
| rs78894418  | C | 0.3227  |
| rs504038    | T | -0.0739 |
| rs2741342   | T | -0.0916 |
| rs72621189  | C | 0.0765  |
| rs7812391   | T | 0.0831  |
| rs2565045   | C | 0.0946  |
| rs11774290  | C | 0.2276  |
| rs7818382   | T | 0.0673  |
| rs147587285 | C | 0.3616  |
| rs888577    | T | 0.1602  |
| rs148788106 | A | 0.3     |
| rs77271157  | A | -0.1426 |
| rs2271920   | A | 0.0678  |
| rs145576515 | T | 0.1781  |
| rs10097415  | C | -0.1839 |
| rs7829537   | G | 0.0979  |
| rs76383426  | G | -0.3697 |
| rs3105438   | A | -0.1118 |
| rs7002825   | C | 0.0785  |
| rs7836278   | G | 0.0629  |
| rs75344402  | A | 0.304   |
| rs62492281  | T | -0.1698 |
| rs74317412  | G | 0.2802  |
| rs73179594  | A | 0.1068  |
| rs203740    | T | 0.0986  |
| rs56929960  | A | 0.0815  |
| rs2945562   | G | -0.1966 |
| rs1518894   | T | 0.0809  |
| rs1604918   | G | -0.0694 |
| rs117137177 | T | 0.1374  |
| rs10956787  | C | -0.1461 |
| rs2640723   | G | -0.0788 |
| rs77141770  | C | 0.2939  |
| rs10105299  | G | 0.131   |
| rs7015698   | T | -0.0668 |
| rs16927139  | C | 0.2007  |
| rs78206589  | A | -0.2099 |
| rs34043643  | T | -0.0682 |

|             |   |         |
|-------------|---|---------|
| rs74775484  | G | 0.0941  |
| rs9331916   | T | 0.0802  |
| rs116236945 | T | 0.1334  |
| rs36073504  | A | 0.3437  |
| rs2972178   | T | -0.079  |
| rs145213860 | C | -0.3777 |
| rs62515401  | A | -0.0752 |
| rs13268786  | C | 0.0703  |
| rs7012610   | T | 0.2292  |
| rs7014168   | A | -0.0673 |
| rs74655933  | C | 0.1001  |
| rs72671505  | G | 0.1871  |
| rs35123419  | A | -0.3538 |
| rs57956255  | A | -0.2652 |
| rs72687188  | T | 0.1137  |
| rs72687312  | T | -0.1101 |
| rs1500896   | A | 0.056   |
| rs62478424  | T | 0.1638  |
| rs117362864 | T | -0.2235 |
| rs11778669  | A | 0.1401  |
| rs277012    | C | 0.081   |
| rs112458807 | C | -0.1697 |
| rs56287961  | C | 0.0741  |
| rs11776965  | G | 0.0595  |
| rs12675463  | C | 0.2495  |
| rs72652556  | G | 0.0781  |
| rs117257602 | A | 0.1619  |
| rs1264600   | T | 0.0607  |
| rs80307099  | G | 0.2536  |
| rs11993441  | T | 0.0941  |
| rs10105956  | A | 0.0604  |
| rs76686639  | T | 0.4251  |
| rs77480427  | A | 0.223   |
| rs10112475  | G | 0.084   |
| rs17695458  | C | -0.1014 |
| rs231144    | T | 0.0679  |
| rs62503696  | C | 0.2707  |
| rs142559179 | G | 0.2964  |
| rs7018023   | G | 0.1115  |
| rs8185943   | A | -0.1448 |
| rs1462891   | T | -0.0698 |
| rs139027793 | A | 0.2527  |
| rs6991681   | A | -0.0723 |
| rs1705695   | T | 0.0625  |
| rs72607352  | C | 0.1311  |
| rs62507082  | A | -0.0539 |
| rs1394435   | T | 0.0615  |

|             |   |         |
|-------------|---|---------|
| rs79845923  | A | 0.064   |
| rs140883758 | C | 0.3172  |
| rs56945566  | T | -0.1604 |
| rs76653274  | T | 0.2951  |
| rs78805009  | C | -0.4231 |
| rs56120866  | A | -0.0651 |
| rs73225321  | G | -0.0704 |
| rs9643444   | C | 0.0687  |
| rs117953109 | C | 0.3337  |
| rs1563030   | A | -0.0868 |
| rs6987386   | C | -0.1894 |
| rs59885740  | T | -0.2168 |
| rs7813298   | A | 0.2726  |
| rs149439379 | A | 0.2203  |
| rs71524118  | G | -0.2529 |
| rs10097474  | C | -0.1102 |
| rs73214859  | C | 0.138   |
| rs1693547   | T | 0.0532  |
| rs57974486  | A | 0.1279  |
| rs111281369 | T | -0.1696 |
| rs6997622   | G | -0.1216 |
| rs11987200  | T | -0.0993 |
| rs76484230  | T | -0.1243 |
| rs6471195   | C | 0.0512  |
| rs1917432   | A | 0.121   |
| rs13277568  | G | 0.0585  |
| rs6474288   | T | 0.0626  |
| rs16915836  | C | 0.1074  |
| rs73233270  | G | -0.1559 |
| rs2974333   | A | -0.0525 |
| rs12678147  | C | -0.0945 |
| rs55934323  | C | 0.1925  |
| rs6987592   | C | -0.094  |
| rs147936453 | T | -0.2384 |
| rs7842177   | A | 0.2341  |
| rs62518014  | C | -0.1251 |
| rs55869905  | C | -0.2014 |
| rs3765215   | G | 0.0586  |
| rs79454612  | T | 0.187   |
| rs9329196   | T | 0.2241  |
| rs117508517 | G | -0.1398 |
| rs7836856   | G | 0.0713  |
| rs2241895   | A | 0.0792  |
| rs17446371  | G | -0.1435 |
| rs59657583  | A | 0.0598  |
| rs13249544  | T | -0.157  |
| rs1812574   | G | 0.0704  |

|             |   |         |
|-------------|---|---------|
| rs1499424   | T | 0.0514  |
| rs62524197  | G | 0.1052  |
| rs10088894  | C | 0.065   |
| rs117064624 | C | -0.2032 |
| rs3132880   | T | 0.0585  |
| rs34028235  | G | -0.1994 |
| rs5784      | G | 0.1334  |
| rs56300145  | C | 0.1579  |
| rs764512    | C | -0.0569 |
| rs73237159  | A | 0.1669  |
| rs13273073  | T | -0.0582 |
| rs79004800  | A | -0.3121 |
| rs1866274   | G | -0.0667 |
| rs28378733  | T | -0.3214 |
| rs13264544  | G | -0.0508 |
| rs7831820   | C | 0.0553  |
| rs76757271  | A | -0.1498 |
| rs35297960  | G | 0.2704  |
| rs35043130  | A | 0.1384  |
| rs61753693  | A | -0.4027 |
| rs35851624  | T | -0.0503 |
| rs72671953  | A | -0.0948 |
| rs1483168   | A | -0.0959 |
| rs2931329   | T | -0.0597 |
| rs115284612 | C | 0.1537  |
| rs6993111   | C | 0.0824  |
| rs7465327   | A | 0.0603  |
| rs75669570  | A | 0.1068  |
| rs17747191  | C | 0.2502  |
| rs147743872 | T | 0.0816  |
| rs77559549  | G | 0.1471  |
| rs62524762  | G | -0.0682 |
| rs115566642 | T | -0.1526 |
| rs6991707   | G | -0.0533 |
| rs13267545  | G | 0.1718  |
| rs73369587  | A | -0.1525 |
| rs55989726  | T | -0.1723 |
| rs74566911  | T | 0.1753  |
| rs897149    | T | -0.0529 |
| rs117061297 | T | 0.3891  |
| rs7005339   | A | -0.2848 |
| rs76334200  | G | -0.2793 |
| rs1858459   | G | -0.0512 |
| rs10086882  | A | 0.049   |
| rs142016808 | T | -0.1812 |
| rs7834449   | A | -0.059  |
| rs75312334  | C | 0.2976  |

|             |   |         |
|-------------|---|---------|
| rs117650553 | T | -0.2001 |
| rs7842976   | T | -0.0682 |
| rs10110552  | C | -0.0882 |
| rs75705962  | G | 0.1027  |
| rs41460646  | C | 0.0521  |
| rs56276984  | T | 0.1038  |
| rs55696534  | C | -0.0528 |
| rs72709035  | C | -0.1052 |
| rs17744327  | C | -0.0704 |
| rs7387179   | T | 0.0526  |
| rs7816651   | A | -0.0487 |
| rs333032    | G | -0.0601 |
| rs2449905   | G | 0.1912  |
| rs2227019   | C | 0.0737  |
| rs73209425  | T | 0.3686  |
| rs521619    | G | -0.1054 |
| rs10102235  | C | -0.0561 |
| rs13272098  | C | 0.1032  |
| rs2511724   | G | 0.0479  |
| rs10088592  | C | -0.0492 |
| rs74592838  | A | 0.2084  |
| rs2450763   | A | 0.208   |
| rs35927132  | T | 0.0671  |
| rs16907737  | T | 0.0713  |
| rs11783408  | A | 0.0555  |
| rs62492168  | G | 0.0508  |
| rs148167753 | A | 0.343   |
| rs143009349 | G | 0.2436  |
| rs2975726   | G | 0.0673  |
| rs58927152  | G | 0.0726  |
| rs11787031  | A | -0.0651 |
| rs10866931  | G | -0.0797 |
| rs2660665   | T | -0.0505 |
| rs62640329  | G | 0.0762  |
| rs114045300 | C | 0.1414  |
| rs117648486 | A | 0.3049  |
| rs72720415  | G | -0.1992 |
| rs3134163   | T | 0.1019  |
| rs28614138  | G | 0.1911  |
| rs1813496   | C | 0.0503  |
| rs141075252 | G | 0.129   |
| rs6651329   | G | 0.0471  |
| rs117929779 | T | -0.2572 |
| rs3852350   | T | -0.0881 |
| rs140632357 | A | -0.0633 |
| rs141674672 | G | -0.2387 |
| rs28627996  | T | 0.1046  |

|             |   |         |
|-------------|---|---------|
| rs62501973  | C | 0.0557  |
| rs73359011  | T | 0.1107  |
| rs138813311 | C | -0.2455 |
| rs924008    | C | -0.0691 |
| rs17685247  | G | 0.0609  |
| rs145493204 | T | 0.1734  |
| rs6998010   | C | 0.0638  |
| rs10105788  | A | 0.0699  |
| rs894886    | T | -0.055  |
| rs6999287   | A | 0.0497  |
| rs10866930  | G | -0.0602 |
| rs35262742  | G | -0.0566 |
| rs62526538  | G | 0.0577  |
| rs149286751 | G | -0.2464 |
| rs4733248   | T | -0.0498 |
| rs12542305  | A | -0.0488 |
| rs75123216  | C | -0.2825 |
| rs241149    | A | -0.0573 |
| rs142582654 | A | 0.2928  |
| rs59105885  | A | 0.1428  |
| rs62518735  | T | -0.1923 |
| rs77914296  | G | 0.0764  |
| rs17738097  | G | -0.0977 |
| rs77646170  | C | 0.0618  |
| rs10090429  | C | -0.0513 |
| rs7834495   | A | 0.1017  |
| rs140138231 | T | -0.0931 |
| rs13272069  | G | 0.1764  |
| rs2052720   | T | 0.0473  |
| rs1841670   | G | 0.0468  |
| rs79629245  | T | 0.1995  |
| rs151006889 | G | -0.1941 |
| rs117036346 | G | 0.1094  |
| rs36115529  | C | -0.1701 |
| rs72720270  | C | 0.1679  |
| rs1584217   | A | -0.0544 |
| rs13254338  | T | 0.0495  |
| rs73210545  | A | 0.1667  |
| rs7005678   | G | -0.0725 |
| rs7831166   | T | 0.4037  |
| rs17574523  | C | 0.1127  |
| rs117895677 | T | -0.2076 |
| rs116972329 | C | -0.2423 |
| rs57127265  | G | 0.2135  |
| rs62519036  | T | 0.2358  |
| rs34319290  | T | 0.1122  |
| rs13258408  | A | 0.0472  |

|             |   |         |
|-------------|---|---------|
| rs56121766  | A | -0.0521 |
| rs78258642  | C | 0.1097  |
| rs3919762   | T | -0.2693 |
| rs74405906  | C | 0.2462  |
| rs13249923  | C | -0.1041 |
| rs7000140   | T | 0.103   |
| rs62498361  | G | 0.0524  |
| rs57346531  | G | -0.0756 |
| rs34142108  | A | 0.2858  |
| rs6558237   | A | -0.2128 |
| rs149926967 | T | -0.3142 |
| rs75210113  | C | 0.0858  |
| rs4591990   | A | 0.2117  |
| rs144056452 | A | -0.2487 |
| rs77701028  | T | 0.1888  |
| rs624798    | C | 0.0491  |
| rs12375331  | T | -0.0587 |
| rs72673771  | G | -0.2994 |
| rs79114193  | A | -0.3766 |
| rs17375582  | C | 0.0914  |
| rs4537315   | G | 0.0467  |
| rs77793352  | C | 0.2095  |
| rs7015362   | T | 0.088   |
| rs57351533  | A | 0.1265  |
| rs7843007   | A | 0.0556  |
| rs74568387  | T | -0.1367 |
| rs62504819  | T | -0.0688 |
| rs4585778   | G | 0.0485  |
| rs77116462  | A | 0.2896  |
| rs117621282 | C | 0.121   |
| rs305270    | A | 0.1067  |
| rs117010425 | A | 0.3871  |
| rs72718094  | C | 0.0627  |
| rs151252309 | G | 0.2604  |
| rs34035094  | T | -0.2792 |
| rs4873644   | C | 0.0459  |
| rs57227466  | C | 0.0787  |
| rs10503830  | G | -0.0551 |
| rs1858420   | C | -0.1365 |
| rs2345575   | A | 0.2576  |
| rs13251671  | G | -0.06   |
| rs11990930  | C | 0.0493  |
| rs146358480 | G | -0.1113 |
| rs62481634  | A | 0.073   |
| rs139067125 | T | 0.1986  |
| rs78434963  | G | -0.2867 |
| rs13274229  | T | -0.0974 |



|             |   |         |
|-------------|---|---------|
| rs138885279 | T | -0.185  |
| rs72673503  | A | 0.0733  |
| rs7005132   | A | -0.0776 |
| rs75183772  | A | 0.1724  |
| rs58065091  | T | -0.0495 |
| rs148687077 | A | 0.1992  |
| rs2634527   | C | -0.0481 |
| rs1731263   | G | 0.0463  |
| rs2977180   | T | 0.0612  |
| rs4145006   | T | 0.1329  |
| rs117848049 | T | -0.2847 |
| rs2906342   | C | 0.1256  |
| rs13271542  | C | -0.0639 |
| rs2685372   | T | -0.0519 |
| rs988563    | T | -0.0775 |
| rs16888859  | G | 0.0615  |
| rs79988966  | C | 0.343   |
| rs3134211   | T | 0.0778  |
| rs56300202  | T | 0.295   |
| rs113651139 | T | 0.2155  |
| rs2406569   | T | 0.0904  |
| rs72659734  | A | 0.0984  |
| rs4480127   | C | -0.102  |
| rs11786458  | T | 0.0479  |
| rs11991419  | T | 0.0589  |
| rs75316218  | A | 0.0576  |
| rs17823309  | A | -0.1538 |
| rs34373558  | A | -0.0918 |
| rs72682220  | A | 0.1135  |
| rs78034492  | T | -0.1406 |
| rs77957593  | G | 0.1651  |
| rs7009832   | C | -0.1021 |
| rs2957435   | G | 0.0474  |
| rs13265054  | T | -0.0487 |
| rs73185574  | C | 0.0611  |
| rs16867707  | T | 0.1408  |
| rs2448794   | T | -0.0517 |
| rs67535397  | T | 0.058   |
| rs74829139  | C | 0.2     |
| rs76610942  | G | 0.1949  |
| rs72714591  | C | 0.2387  |
| rs16938814  | A | -0.1516 |
| rs2703263   | T | -0.0493 |
| rs79595095  | A | 0.1545  |
| rs11785496  | T | 0.0692  |
| rs75231170  | C | 0.1388  |
| rs4875621   | G | -0.0579 |

|             |   |         |
|-------------|---|---------|
| rs11988412  | T | 0.0493  |
| rs74496890  | C | 0.1502  |
| rs78862711  | G | 0.177   |
| rs62525473  | G | 0.1345  |
| rs56239519  | A | 0.1109  |
| rs79016959  | C | 0.1231  |
| rs530515    | T | 0.0453  |
| rs10097691  | G | -0.0495 |
| rs11994674  | T | -0.0581 |
| rs2923404   | T | -0.0459 |
| rs73503779  | A | -0.0879 |
| rs1398480   | G | 0.0642  |
| rs75613390  | T | 0.1994  |
| rs7004093   | A | 0.0476  |
| rs7839112   | T | 0.0548  |
| rs17717529  | C | 0.1007  |
| rs118039809 | T | 0.2587  |
| rs75224336  | A | 0.3045  |
| rs75402183  | G | 0.199   |
| rs62516035  | A | 0.1914  |
| rs11779951  | A | -0.0449 |
| rs13274152  | G | -0.0496 |
| rs11996166  | G | -0.1375 |
| rs6985201   | C | 0.0555  |
| rs141601750 | T | 0.1026  |
| rs3134172   | T | -0.0538 |
| rs73206163  | T | 0.0518  |
| rs2978095   | T | -0.0512 |
| rs986634    | T | 0.0497  |
| rs17268916  | T | 0.056   |
| rs2959779   | G | -0.0864 |
| rs2436914   | C | 0.0453  |
| rs139648144 | C | 0.3995  |
| rs60603161  | A | -0.0943 |
| rs9297267   | A | 0.0462  |
| rs117667921 | A | 0.1819  |
| rs310274    | T | -0.048  |
| rs116236890 | A | -0.2512 |
| rs979843    | G | -0.0458 |
| rs151056609 | T | 0.1819  |
| rs116971935 | A | 0.1401  |
| rs144701971 | C | 0.3326  |
| rs144276513 | T | -0.1671 |
| rs59884678  | A | -0.1048 |
| rs118123453 | G | 0.2019  |
| rs1824203   | A | -0.0459 |
| rs2447953   | A | -0.0576 |

|             |   |         |
|-------------|---|---------|
| rs139777902 | G | 0.166   |
| rs10102416  | T | 0.0547  |
| rs56319343  | G | 0.1009  |
| rs17335476  | C | -0.0545 |
| rs4282549   | G | -0.0632 |
| rs6996446   | G | -0.0482 |
| rs34364895  | G | 0.3864  |
| rs72681938  | C | -0.214  |
| rs62504861  | T | -0.1316 |
| rs445675    | A | -0.0436 |
| rs7844066   | G | 0.0639  |
| rs62500168  | A | -0.0494 |
| rs151159151 | T | 0.2163  |
| rs16938682  | T | 0.1183  |
| rs73668436  | T | -0.1123 |
| rs117433876 | T | 0.3118  |
| rs76520611  | A | -0.1624 |
| rs7820689   | G | 0.1266  |
| rs138021116 | G | 0.158   |
| rs139835350 | A | -0.1805 |
| rs80246725  | T | 0.1336  |
| rs7819367   | A | 0.054   |
| rs62481013  | C | 0.1376  |
| rs4379463   | G | 0.0427  |
| rs1026850   | G | -0.0661 |
| rs73293974  | G | 0.0992  |
| rs16906843  | T | 0.2516  |
| rs964141    | A | 0.0581  |
| rs13270601  | C | -0.0499 |
| rs13268936  | C | 0.063   |
| rs117289055 | T | -0.2463 |
| rs7812470   | G | 0.0436  |
| rs28445847  | G | 0.0556  |
| rs10090021  | C | 0.0821  |
| rs71525087  | A | 0.1261  |
| rs73189479  | C | -0.2074 |
| rs10104602  | A | 0.0641  |
| rs59770832  | G | 0.054   |
| rs17371341  | C | 0.0894  |
| rs117045236 | T | 0.1591  |
| rs12677300  | C | 0.0887  |
| rs4735966   | A | 0.1621  |
| rs6468382   | T | -0.1146 |
| rs117134115 | T | -0.2514 |
| rs6997056   | A | -0.0699 |
| rs117135233 | C | 0.2018  |
| rs982290    | A | -0.0435 |

|             |   |         |
|-------------|---|---------|
| rs72667436  | T | -0.1182 |
| rs1376513   | C | -0.0637 |
| rs72672966  | G | -0.3613 |
| rs1949595   | T | 0.0665  |
| rs6473372   | G | -0.0656 |
| rs117909672 | G | 0.2177  |
| rs76108334  | T | -0.2125 |
| rs2609620   | T | 0.0641  |
| rs140421517 | G | 0.284   |
| rs76935377  | G | -0.094  |
| rs7463907   | G | 0.0444  |
| rs17740762  | A | 0.0714  |
| rs4733299   | C | -0.0808 |
| rs141538823 | A | -0.1718 |
| rs146354326 | C | -0.0727 |
| rs16900667  | G | 0.074   |
| rs11997526  | C | 0.0431  |
| rs117149675 | A | 0.3355  |
| rs6980868   | G | 0.0435  |
| rs35586561  | T | -0.0794 |
| rs16906018  | G | 0.2946  |
| rs78947244  | C | 0.1901  |
| rs10956372  | T | -0.0496 |
| rs2976282   | C | -0.0535 |
| rs2514970   | T | -0.0492 |
| rs4907385   | T | 0.0463  |
| rs2306234   | T | -0.061  |
| rs73597688  | A | 0.0544  |
| rs4737847   | C | -0.0787 |
| rs76941511  | T | -0.1194 |
| rs75577415  | T | 0.2196  |
| rs36035531  | C | 0.0578  |
| rs7814902   | G | 0.0422  |
| rs35927632  | T | -0.1091 |
| rs142027376 | G | 0.1883  |
| rs56073911  | A | 0.1067  |
| rs17213452  | G | -0.1718 |
| rs34416676  | C | 0.0809  |
| rs3911702   | T | -0.0703 |
| rs147276766 | A | 0.2089  |
| rs142793946 | T | 0.2093  |
| rs138568788 | C | 0.2604  |
| rs2060996   | A | 0.0431  |
| rs13282907  | A | -0.0446 |
| rs79067195  | C | -0.1619 |
| rs2202381   | C | 0.0435  |
| rs75444784  | T | 0.1004  |

|             |   |         |
|-------------|---|---------|
| rs2120468   | G | -0.2354 |
| rs62497646  | A | -0.1762 |
| rs12678635  | C | 0.0593  |
| rs3968851   | C | -0.1064 |
| rs2587000   | T | -0.0525 |
| rs2579861   | C | -0.0609 |
| rs11782049  | C | 0.1249  |
| rs28601685  | T | -0.0589 |
| rs16900790  | G | -0.062  |
| rs12544703  | G | 0.0548  |
| rs112872251 | G | 0.1141  |
| rs79839693  | G | -0.1349 |
| rs28804470  | G | 0.078   |
| rs13275717  | G | 0.0439  |
| rs11775342  | T | -0.0695 |
| rs6985780   | G | -0.0484 |
| rs55948483  | A | 0.0568  |
| rs576405    | T | -0.0438 |
| rs79564025  | T | -0.2889 |
| rs6577698   | C | -0.0528 |
| rs2709632   | C | 0.067   |
| rs9298606   | T | 0.0786  |
| rs73668037  | T | 0.0914  |
| rs2433084   | A | -0.0567 |
| rs76144348  | C | -0.3558 |
| rs146587807 | T | 0.2343  |
| rs72638530  | C | 0.1054  |
| rs11781188  | C | -0.0516 |
| rs78573442  | A | 0.2493  |
| rs13265381  | G | 0.0597  |
| rs13274765  | G | -0.0496 |
| rs117364124 | T | -0.3076 |
| rs60492193  | A | 0.0694  |
| rs117166652 | G | -0.2036 |
| rs16939227  | C | 0.0686  |
| rs6994627   | A | 0.045   |
| rs1180626   | G | 0.0508  |
| rs73555472  | A | 0.0878  |
| rs117750938 | C | -0.2013 |
| rs4237000   | T | -0.051  |
| rs28700218  | T | 0.2092  |
| rs13258615  | T | 0.1041  |
| rs62477558  | C | 0.4189  |
| rs480482    | C | 0.0979  |
| rs17581368  | A | 0.0475  |
| rs112448720 | A | 0.0912  |
| rs2469666   | C | -0.0483 |

|             |   |         |
|-------------|---|---------|
| rs10096897  | C | -0.0459 |
| rs17550206  | A | 0.08    |
| rs76413385  | T | -0.1253 |
| rs76768131  | G | 0.1825  |
| rs10112381  | G | -0.043  |
| rs112651084 | A | 0.2817  |
| rs62507636  | A | -0.2725 |
| rs7822302   | G | 0.0452  |
| rs13253422  | C | -0.3119 |
| rs2656122   | G | -0.053  |
| rs823591    | A | 0.0768  |
| rs72716464  | T | -0.0773 |
| rs20576     | G | -0.0592 |
| rs76217986  | T | 0.1302  |
| rs117277630 | G | -0.0814 |
| rs111940206 | A | 0.1546  |
| rs3739330   | A | -0.0625 |
| rs60057489  | C | -0.0457 |
| rs3133836   | C | -0.0706 |
| rs117295012 | G | 0.2339  |
| rs3133712   | G | 0.0416  |
| rs7819631   | G | -0.0931 |
| rs3779701   | T | 0.1829  |
| rs117145251 | T | 0.1576  |
| rs74716906  | A | -0.1743 |
| rs6999153   | G | -0.0441 |
| rs140925663 | G | 0.1803  |
| rs7464819   | A | -0.0471 |
| rs56052312  | T | 0.0666  |
| rs60652219  | G | -0.1342 |
| rs144847713 | C | 0.2884  |
| rs79408606  | G | 0.2567  |
| rs117120108 | T | 0.2405  |
| rs2514986   | T | -0.058  |
| rs80175743  | C | -0.2821 |
| rs7819896   | C | 0.0512  |
| rs74703390  | G | -0.2155 |
| rs9987406   | A | 0.2174  |
| rs2816516   | T | -0.0431 |
| rs116197565 | A | 0.1982  |
| rs7009074   | C | 0.0774  |
| rs7838717   | T | 0.0473  |
| rs151064981 | T | 0.277   |
| rs1460578   | G | 0.0423  |
| rs666862    | C | 0.0421  |
| rs17707940  | T | -0.106  |
| rs148862676 | T | 0.1556  |

|             |   |         |
|-------------|---|---------|
| rs56114779  | G | -0.0422 |
| rs11782136  | G | 0.2531  |
| rs13255002  | A | -0.057  |
| rs2587155   | T | 0.0477  |
| rs7819659   | A | 0.0466  |
| rs149036787 | G | -0.2092 |
| rs78550405  | T | -0.2213 |
| rs2943179   | T | 0.0508  |
| rs79309403  | G | 0.2169  |
| rs714650    | A | 0.0718  |
| rs113445103 | C | 0.2488  |
| rs4735558   | G | -0.0572 |
| rs11987398  | C | 0.2722  |
| rs10088319  | A | 0.2202  |
| rs7011442   | T | 0.0501  |
| rs73210863  | T | 0.2383  |
| rs73708540  | C | 0.1341  |
| rs1049697   | A | 0.0561  |
| rs146888514 | C | 0.1371  |
| rs6980863   | A | 0.1079  |
| rs17088571  | A | 0.0881  |
| rs68172823  | T | 0.0457  |
| rs77821413  | G | -0.108  |
| rs2679739   | C | -0.0424 |
| rs77959025  | A | 0.1653  |
| rs140429928 | C | 0.2313  |
| rs142054966 | A | 0.1502  |
| rs4075397   | G | -0.1524 |
| rs28827881  | G | -0.0483 |
| rs6993385   | G | -0.0432 |
| rs73176967  | C | 0.1296  |
| rs13275667  | C | 0.0433  |
| rs35248145  | A | 0.2056  |
| rs10086355  | A | 0.0709  |
| rs76138364  | A | -0.0532 |
| rs76316415  | T | 0.1755  |
| rs138403641 | A | 0.1377  |
| rs7834373   | C | 0.0559  |
| rs112383223 | C | 0.1275  |
| rs72666645  | A | -0.2231 |
| rs6992732   | G | -0.0426 |
| rs111381476 | T | -0.173  |
| rs2101109   | A | 0.0618  |
| rs17293383  | T | 0.2965  |
| rs13255451  | C | -0.0751 |
| rs77722929  | C | -0.1451 |
| rs13269646  | C | -0.047  |

|             |   |         |
|-------------|---|---------|
| rs2683298   | A | 0.0482  |
| rs117415295 | A | 0.2194  |
| rs7833057   | A | -0.0485 |
| rs2651469   | G | 0.0437  |
| rs10090760  | T | 0.0458  |
| rs62497594  | T | 0.1108  |
| rs75246489  | T | -0.0703 |
| rs62474662  | C | 0.0437  |
| rs10098260  | T | 0.0715  |
| rs141215172 | C | 0.1183  |
| rs2957058   | C | 0.0504  |
| rs4478537   | A | -0.0548 |
| rs17403147  | C | 0.1634  |
| rs7838354   | C | 0.0422  |
| rs2721291   | C | 0.0664  |
| rs6995384   | A | -0.091  |
| rs6473532   | C | 0.0429  |
| rs117399944 | A | 0.203   |
| rs4871503   | C | 0.053   |
| rs138974856 | A | 0.2182  |
| rs80120866  | T | 0.0862  |
| rs62515404  | C | -0.1405 |
| rs71528491  | G | -0.1724 |
| rs118027060 | C | -0.1929 |
| rs202298    | A | 0.0773  |
| rs55858769  | G | -0.0867 |
| rs1000375   | G | 0.0855  |
| rs79182981  | A | 0.16    |
| rs10099635  | G | -0.0447 |
| rs958899    | C | 0.0441  |
| rs4733108   | T | -0.0483 |
| rs17785868  | A | 0.0673  |
| rs117116755 | T | 0.1747  |
| rs10086265  | G | 0.0835  |
| rs2952252   | G | 0.041   |
| rs4092398   | T | 0.1766  |
| rs72662475  | C | 0.089   |
| rs16898762  | G | -0.0438 |
| rs117182086 | G | 0.2068  |
| rs17697619  | C | 0.0674  |
| rs74632515  | A | -0.2796 |
| rs920200    | G | -0.0519 |
| rs117696510 | G | -0.2685 |
| rs10107655  | T | -0.0738 |
| rs11136882  | G | 0.1064  |
| rs10955113  | A | 0.0418  |
| rs117424092 | A | 0.2602  |



|             |   |         |
|-------------|---|---------|
| rs117978916 | A | -0.1046 |
| rs111259947 | T | 0.0425  |
| rs2068449   | G | 0.0862  |
| rs79891515  | C | 0.1767  |
| rs2703301   | T | -0.0427 |
| rs34884064  | C | -0.1651 |
| rs512598    | C | -0.047  |
| rs28631239  | T | 0.138   |
| rs79459444  | A | -0.1153 |
| rs74580717  | T | -0.0991 |
| rs138701895 | T | 0.2036  |
| rs7838195   | C | 0.1699  |
| rs12675379  | T | 0.0398  |
| rs77285785  | T | 0.1198  |
| rs6470443   | A | -0.0497 |
| rs78402244  | T | 0.1284  |
| rs111941841 | G | 0.0599  |
| rs16887794  | G | -0.2319 |
| rs72654134  | G | 0.1934  |
| rs75701187  | T | 0.0846  |
| rs117954564 | A | -0.1625 |
| rs72690977  | T | 0.0501  |
| rs10100199  | C | 0.1337  |
| rs2436946   | A | 0.061   |
| rs10955922  | C | -0.145  |
| rs11775465  | C | -0.0462 |
| rs10958702  | T | -0.0488 |
| rs9298224   | A | 0.0556  |
| rs77566027  | T | 0.0853  |
| rs7826015   | G | -0.0443 |
| rs62511501  | T | -0.052  |
| rs2202056   | G | 0.0523  |
| rs4307360   | C | 0.0413  |
| rs150826265 | G | 0.0653  |
| rs9774417   | G | 0.176   |
| rs3812475   | C | 0.0408  |
| rs79122877  | A | 0.185   |
| rs146922731 | C | 0.2436  |
| rs59544142  | T | -0.098  |
| rs74325431  | G | 0.1445  |
| rs1806921   | A | 0.0453  |
| rs890315    | A | 0.042   |
| rs12541881  | T | -0.0735 |
| rs144290708 | T | -0.2449 |
| rs77312736  | A | -0.0733 |
| rs17063860  | G | 0.1076  |
| rs72679400  | A | 0.1495  |

|             |   |         |
|-------------|---|---------|
| rs10089333  | G | 0.0535  |
| rs7829604   | A | 0.0509  |
| rs62526128  | T | 0.0723  |
| rs148214882 | T | 0.2229  |
| rs79028176  | C | -0.217  |
| rs4236810   | G | -0.0572 |
| rs117163956 | T | -0.2068 |
| rs55965307  | A | 0.1673  |
| rs75314003  | C | -0.1398 |
| rs117492025 | T | 0.1083  |
| rs2341799   | A | 0.0801  |
| rs34578829  | G | 0.0548  |
| rs73579880  | A | 0.128   |
| rs2442562   | C | 0.0444  |
| rs62508257  | T | 0.0734  |
| rs78829996  | C | -0.0739 |
| rs77397190  | T | -0.0444 |
| rs1481649   | A | 0.0817  |
| rs3110143   | A | 0.1178  |
| rs76622845  | C | 0.2347  |
| rs1962471   | G | -0.0511 |
| rs11985587  | C | -0.0423 |
| rs151274593 | C | -0.1885 |
| rs28615194  | G | -0.0453 |
| rs1673239   | A | 0.0467  |
| rs77388186  | T | 0.0978  |
| rs35311737  | T | -0.0605 |
| rs2933040   | A | 0.048   |
| rs35139123  | A | -0.358  |
| rs16923672  | G | -0.1391 |
| rs17708310  | T | 0.108   |
| rs72667504  | A | -0.1619 |
| rs74464585  | G | -0.2448 |
| rs73183570  | T | -0.099  |
| rs143768324 | A | 0.1916  |
| rs7821593   | T | 0.0405  |
| rs75683021  | A | 0.0883  |
| rs7842946   | T | 0.0496  |
| rs78472435  | C | -0.1867 |
| rs141043423 | A | -0.1532 |
| rs151187686 | A | 0.1762  |
| rs17725981  | A | 0.1641  |
| rs1125374   | A | 0.0433  |
| rs117763488 | A | 0.2124  |
| rs74386054  | C | 0.137   |
| rs113177309 | T | -0.1916 |
| rs58052642  | C | 0.1572  |

|             |   |         |
|-------------|---|---------|
| rs16886173  | G | -0.0765 |
| rs9969472   | G | -0.0397 |
| rs17437952  | A | 0.1027  |
| rs7003993   | T | -0.0616 |
| rs9650235   | C | 0.0937  |
| rs111822071 | A | 0.2955  |
| rs79850773  | T | -0.0936 |
| rs75864200  | T | 0.1159  |
| rs17706148  | A | -0.1988 |
| rs74900642  | T | 0.0653  |
| rs1466785   | T | -0.0407 |
| rs35258707  | A | -0.2349 |
| rs1119519   | G | -0.0437 |
| rs10111516  | T | 0.1378  |
| rs72673144  | G | 0.0632  |
| rs56013629  | A | 0.0528  |
| rs56263050  | A | 0.076   |
| rs35276356  | G | 0.0791  |
| rs77201428  | A | -0.056  |
| rs55918052  | G | -0.1918 |
| rs28907871  | T | -0.1349 |
| rs11552577  | G | -0.0531 |
| rs16938679  | T | 0.079   |
| rs2442603   | G | 0.0619  |
| rs112632942 | T | -0.0743 |
| rs78382479  | C | -0.2597 |
| rs78030386  | C | 0.1427  |
| rs4500116   | T | 0.0415  |
| rs79007531  | G | 0.0853  |
| rs62501893  | T | 0.1525  |
| rs399030    | A | 0.0678  |
| rs79152459  | T | 0.1829  |
| rs7007762   | G | 0.0508  |
| rs80067341  | C | -0.0639 |
| rs148171282 | A | 0.1422  |
| rs2339734   | C | -0.0974 |
| rs2627383   | A | 0.0419  |
| rs55875009  | A | 0.0615  |
| rs151112304 | A | -0.1178 |
| rs7006520   | A | 0.2458  |
| rs16868264  | A | -0.046  |
| rs4977187   | T | -0.0789 |
| rs17413882  | C | -0.0479 |
| rs56171452  | A | 0.2863  |
| rs118018845 | C | 0.1711  |
| rs6415462   | T | 0.1643  |
| rs151235216 | C | -0.3375 |

|             |   |         |
|-------------|---|---------|
| rs17464622  | G | 0.1751  |
| rs13258117  | A | -0.047  |
| rs10107930  | A | 0.1321  |
| rs10087581  | C | -0.1177 |
| rs145737958 | T | 0.1927  |
| rs7826070   | C | -0.0601 |
| rs11782473  | A | 0.1525  |
| rs116476138 | C | 0.0932  |
| rs117526124 | T | -0.141  |
| rs28928597  | G | -0.0764 |
| rs117638557 | G | 0.192   |
| rs4841789   | T | 0.0457  |
| rs77053356  | C | 0.1084  |
| rs62506263  | A | -0.2284 |
| rs34918665  | T | -0.0818 |
| rs13268926  | C | -0.0405 |
| rs12548930  | A | -0.1814 |
| rs875164    | T | 0.0402  |
| rs7813124   | T | 0.1755  |
| rs80196311  | T | -0.0938 |
| rs77557587  | T | 0.1024  |
| rs73683803  | C | 0.1828  |
| rs7825346   | T | 0.0483  |
| rs113630164 | T | -0.104  |
| rs77538674  | C | 0.1004  |
| rs150105750 | C | 0.1734  |
| rs76729432  | C | -0.0866 |
| rs3935197   | T | -0.0398 |
| rs75941307  | T | -0.2879 |
| rs57428505  | C | -0.0409 |
| rs72641288  | A | -0.1445 |
| rs77385495  | C | 0.0881  |
| rs79382561  | T | -0.0949 |
| rs7846132   | G | 0.0795  |
| rs58078057  | T | -0.0518 |
| rs12234946  | G | -0.0771 |
| rs76571637  | C | -0.1398 |
| rs814360    | T | 0.055   |
| rs117617200 | G | 0.1234  |
| rs74878727  | T | -0.1073 |
| rs1914826   | T | 0.052   |
| rs76968380  | A | 0.1045  |
| rs75711848  | A | -0.1267 |
| rs116901650 | C | -0.1934 |
| rs6984245   | T | -0.0711 |
| rs75568845  | A | 0.176   |
| rs72654661  | C | -0.265  |

|             |   |         |
|-------------|---|---------|
| rs2978901   | G | -0.0394 |
| rs6982451   | A | 0.0479  |
| rs10098042  | T | -0.0697 |
| rs144161328 | C | -0.046  |
| rs79706006  | C | 0.1826  |
| rs75483726  | A | 0.1006  |
| rs4389914   | T | 0.0558  |
| rs58538103  | G | 0.0486  |
| rs117718326 | A | 0.1881  |
| rs1526335   | A | 0.0599  |
| rs57772271  | A | 0.0423  |
| rs77474338  | A | 0.1653  |
| rs55928722  | A | -0.0873 |
| rs3808385   | T | -0.0411 |
| rs2688274   | A | -0.079  |
| rs72682245  | C | 0.1096  |
| rs4403373   | A | -0.0388 |
| rs341809    | A | 0.0407  |
| rs60391037  | A | 0.1151  |
| rs10102575  | T | 0.072   |
| rs61342069  | G | 0.0701  |
| rs35310547  | G | 0.1499  |
| rs2977044   | A | -0.0427 |
| rs118148352 | A | -0.281  |
| rs232726    | C | -0.0417 |
| rs142352903 | T | 0.0868  |
| rs62512863  | G | 0.05    |
| rs113409223 | A | 0.1482  |
| rs1965818   | C | 0.058   |
| rs117277402 | C | -0.2129 |
| rs1015778   | C | -0.1184 |
| rs35642329  | G | -0.0543 |
| rs7844765   | T | 0.0547  |
| rs2141560   | T | -0.0647 |
| rs62521264  | T | 0.1371  |
| rs3793382   | C | 0.0675  |
| rs142130265 | A | -0.251  |
| rs2386126   | C | 0.0383  |
| rs9297663   | G | -0.0512 |
| rs17116074  | A | 0.0627  |
| rs2975424   | C | 0.0535  |
| rs2554698   | C | 0.0687  |
| rs28774977  | A | 0.0551  |
| rs1978825   | C | 0.0734  |
| rs12547236  | C | 0.1188  |
| rs10095706  | T | -0.1169 |
| rs117139499 | A | 0.1036  |

|             |   |         |
|-------------|---|---------|
| rs2433087   | T | 0.0803  |
| rs4457379   | C | 0.0675  |
| rs12547417  | T | 0.0683  |
| rs594006    | A | -0.0381 |
| rs16877095  | T | 0.0557  |
| rs116859300 | C | -0.139  |
| rs4509280   | C | -0.0508 |
| rs10110090  | T | -0.04   |
| rs117198966 | A | 0.2225  |
| rs77071578  | G | -0.1558 |
| rs17066728  | G | -0.0595 |
| rs117665000 | A | -0.1335 |
| rs11987540  | A | 0.1636  |
| rs7843557   | C | 0.0406  |
| rs1078840   | G | 0.0601  |
| rs4531096   | T | -0.0411 |
| rs7821349   | A | -0.2004 |
| rs60369626  | G | 0.0623  |
| rs2927124   | C | 0.0399  |
| rs117708055 | A | 0.1476  |
| rs75721569  | T | 0.1895  |
| rs6997301   | G | 0.0748  |
| rs75649401  | C | -0.078  |
| rs4541976   | C | 0.0735  |
| rs11779526  | T | 0.0412  |
| rs776271    | G | 0.2101  |
| rs72659603  | C | -0.0636 |
| rs117498583 | C | -0.3477 |
| rs7006244   | G | -0.0897 |
| rs72643906  | G | -0.2891 |
| rs6989399   | T | 0.2084  |
| rs56336546  | A | 0.0488  |
| rs73286308  | C | 0.0502  |
| rs11992863  | T | 0.1081  |
| rs6998745   | T | -0.0397 |
| rs17697423  | A | 0.1935  |
| rs13249792  | G | -0.0415 |
| rs75996570  | C | -0.0785 |
| rs13274052  | T | 0.1504  |
| rs7823326   | C | 0.0486  |
| rs75764044  | A | 0.1117  |
| rs72674311  | C | 0.0489  |
| rs13262305  | A | -0.0443 |
| rs1107217   | T | -0.0398 |
| rs34741712  | G | 0.0502  |
| rs13261414  | G | -0.0568 |
| rs10081517  | G | -0.0401 |

|             |   |         |
|-------------|---|---------|
| rs13261233  | A | 0.1072  |
| rs891398    | T | 0.0387  |
| rs78811926  | A | 0.1336  |
| rs13270169  | T | -0.1075 |
| rs149267109 | T | 0.1351  |
| rs2244358   | C | -0.0752 |
| rs117366327 | A | 0.154   |
| rs79948702  | A | -0.0588 |
| rs10094763  | T | -0.0419 |
| rs112674872 | C | 0.1714  |
| rs11787527  | G | -0.0635 |
| rs580415    | A | -0.1223 |
| rs12114331  | T | -0.2345 |
| rs10094161  | A | -0.0382 |
| rs79737036  | T | -0.0804 |
| rs11136375  | A | 0.0622  |
| rs62513021  | G | 0.0421  |
| rs62520524  | A | 0.0837  |
| rs4452774   | G | -0.0399 |
| rs3927941   | A | 0.0388  |
| rs10111907  | C | -0.0717 |
| rs2062067   | T | -0.1609 |
| rs62521444  | A | -0.0454 |
| rs2142215   | T | 0.052   |
| rs113663064 | G | -0.1342 |
| rs77784867  | T | 0.186   |
| rs6981596   | T | -0.0806 |
| rs4840487   | T | -0.0386 |
| rs2896713   | A | -0.0411 |
| rs13250105  | G | -0.1119 |
| rs7836445   | A | 0.0433  |
| rs146704850 | T | 0.2495  |
| rs62530017  | A | 0.2233  |
| rs75969311  | A | 0.1115  |
| rs117384185 | C | -0.0968 |
| rs75944327  | T | 0.3137  |
| rs11785829  | G | 0.0395  |
| rs17060380  | C | 0.0707  |
| rs117064419 | C | -0.1516 |
| rs13263979  | G | 0.0502  |
| rs4500115   | T | -0.0534 |
| rs79720526  | A | -0.094  |
| rs117956750 | A | 0.1727  |
| rs1973130   | A | 0.0614  |
| rs76795656  | T | 0.1501  |
| rs6982127   | C | -0.0409 |
| rs113823331 | C | 0.1485  |

|             |   |         |
|-------------|---|---------|
| rs76866829  | G | -0.1896 |
| rs10088843  | C | -0.0724 |
| rs149474520 | A | -0.2159 |
| rs4242392   | C | 0.0463  |
| rs7013420   | C | -0.041  |
| rs10504943  | A | -0.0489 |
| rs72722167  | A | 0.0654  |
| rs77473255  | G | -0.1313 |
| rs76972097  | A | -0.239  |
| rs9297881   | A | 0.0403  |
| rs7821432   | A | 0.0903  |
| rs73273285  | C | 0.0849  |
| rs142403668 | A | -0.2166 |
| rs17437006  | A | 0.0575  |
| rs2016508   | T | 0.087   |
| rs72682934  | T | 0.1122  |
| rs13258081  | G | -0.0386 |
| rs1983543   | G | 0.0894  |
| rs7833916   | G | -0.0717 |
| rs10111585  | G | 0.0407  |
| rs73197263  | C | -0.0564 |
| rs72671252  | T | -0.054  |
| rs76391545  | C | 0.106   |
| rs143181333 | C | 0.2475  |
| rs7832991   | A | 0.1543  |
| rs141450316 | T | -0.1799 |
| rs72641499  | C | 0.2197  |
| rs62493325  | A | -0.1254 |
| rs7814439   | A | 0.0532  |
| rs2670020   | A | 0.1898  |
| rs328106    | G | -0.0426 |
| rs2189025   | A | 0.0467  |
| rs74517825  | G | 0.1579  |
| rs117383367 | G | 0.1328  |
| rs2121886   | C | -0.0619 |
| rs78201365  | A | 0.191   |
| rs7827532   | T | 0.0812  |
| rs9693121   | T | -0.1323 |
| rs73532118  | A | -0.2034 |
| rs2299561   | T | 0.0403  |
| rs137954109 | C | -0.1004 |
| rs118051915 | A | -0.3231 |
| rs7840807   | T | 0.2255  |
| rs77020020  | G | 0.092   |
| rs17074252  | A | -0.0836 |
| rs1947919   | C | -0.0494 |
| rs4503099   | A | 0.0449  |



|             |   |         |
|-------------|---|---------|
| rs6472714   | A | 0.0376  |
| rs263332    | C | 0.0477  |
| rs12682460  | A | -0.1698 |
| rs10504541  | T | 0.1202  |
| rs112507540 | A | -0.0978 |
| rs12543336  | A | 0.07    |
| rs11994116  | A | -0.0458 |
| rs60326992  | A | -0.0672 |
| rs10504898  | A | -0.0386 |
| rs4977149   | T | -0.047  |
| rs7841066   | A | -0.1141 |
| rs2008571   | G | -0.0516 |
| rs73219825  | G | -0.0899 |
| rs7008864   | G | -0.0452 |
| rs72680550  | G | 0.0483  |
| rs78089617  | G | -0.1809 |
| rs62520947  | C | 0.1882  |
| rs10096376  | C | -0.1404 |
| rs13253277  | C | -0.0372 |
| rs140176096 | T | 0.1854  |
| rs112552956 | T | -0.1326 |
| rs77399904  | A | 0.1482  |
| rs56070317  | G | 0.0808  |
| rs1806291   | G | -0.0599 |
| rs4739284   | T | -0.0827 |
| rs6987448   | T | -0.0833 |
| rs3886996   | C | 0.1276  |
| rs12549617  | T | 0.0547  |
| rs919067    | T | -0.0431 |
| rs118043985 | G | 0.183   |
| rs2622571   | A | 0.0443  |
| rs2685419   | A | 0.0419  |
| rs73214805  | T | 0.0617  |
| rs72652101  | C | 0.1386  |
| rs16890085  | G | -0.2045 |
| rs74466606  | T | -0.1138 |
| rs71532429  | G | 0.2107  |
| rs16939099  | T | 0.0628  |
| rs34214051  | C | -0.0604 |
| rs117086853 | G | 0.1967  |
| rs13261644  | A | 0.1424  |
| rs3020288   | A | 0.1567  |
| rs117869545 | T | 0.1004  |
| rs7846017   | G | 0.0422  |
| rs7833107   | A | -0.118  |
| rs10096149  | C | -0.0406 |
| rs56903658  | G | 0.204   |

|             |   |         |
|-------------|---|---------|
| rs73216788  | T | 0.1985  |
| rs147305264 | T | 0.1726  |
| rs28578258  | G | 0.0542  |
| rs62518566  | G | 0.0709  |
| rs148348342 | T | -0.1356 |
| rs2470715   | T | -0.0524 |
| rs2954877   | T | 0.0386  |
| rs68189791  | T | 0.112   |
| rs78459449  | T | 0.0996  |
| rs142963618 | T | 0.2438  |
| rs2336866   | C | 0.0526  |
| rs139968922 | C | -0.1322 |
| rs13268133  | T | -0.0413 |
| rs62494026  | T | 0.1815  |
| rs34437310  | T | 0.1646  |
| rs73534918  | C | 0.0478  |
| rs76565395  | G | 0.257   |
| rs57897378  | A | 0.0802  |
| rs117574829 | T | 0.1919  |
| rs11786655  | C | -0.1041 |
| rs2469522   | A | -0.0441 |
| rs10955829  | T | -0.0646 |
| rs111720583 | T | -0.1982 |
| rs117803486 | G | -0.2243 |
| rs34667744  | C | -0.0397 |
| rs76303667  | T | -0.1641 |
| rs13251461  | T | 0.0478  |
| rs7825488   | G | 0.1222  |
| rs7833656   | C | 0.038   |
| rs62516028  | T | 0.0895  |
| rs116923340 | G | 0.3097  |
| rs11775541  | C | -0.0515 |
| rs6993442   | C | -0.084  |
| rs137944103 | G | 0.1735  |
| rs13268765  | T | -0.0546 |
| rs118091868 | A | -0.146  |
| rs10093375  | G | 0.0482  |
| rs141886143 | C | -0.2765 |
| rs138054362 | A | -0.0657 |
| rs62525762  | T | -0.1221 |
| rs2591017   | T | -0.0367 |
| rs498917    | T | -0.06   |
| rs7842319   | G | -0.0516 |
| rs117761443 | A | 0.1667  |
| rs116918532 | T | 0.1519  |
| rs9656832   | A | 0.0918  |
| rs28802289  | T | -0.0852 |

|             |   |         |
|-------------|---|---------|
| rs17089585  | A | -0.0523 |
| rs6474040   | T | -0.0412 |
| rs17396948  | C | 0.0922  |
| rs17813547  | C | -0.0854 |
| rs7010888   | C | -0.0531 |
| rs7828186   | G | 0.0405  |
| rs12678610  | C | -0.0402 |
| rs11203640  | G | 0.0413  |
| rs118004663 | T | 0.1652  |
| rs117433038 | T | -0.1379 |
| rs62499936  | A | -0.0379 |
| rs35152482  | T | -0.1015 |
| rs75592700  | G | 0.2031  |
| rs145863730 | G | -0.3312 |
| rs10094988  | A | 0.038   |
| rs11780656  | T | -0.0465 |
| rs11774700  | C | -0.0433 |
| rs6470163   | A | 0.0431  |
| rs13256945  | A | -0.0372 |
| rs139774951 | G | -0.1844 |
| rs12545745  | G | -0.0574 |
| rs75060870  | G | -0.0587 |
| rs2626353   | A | -0.0473 |
| rs7813988   | G | -0.0375 |
| rs118153060 | A | 0.1472  |
| rs116976900 | G | 0.273   |
| rs11993516  | T | -0.0507 |
| rs113072145 | A | 0.1511  |
| rs142985453 | A | -0.0835 |
| rs11135811  | T | 0.0954  |
| rs1347605   | C | 0.0466  |
| rs13255181  | A | 0.2781  |
| rs77371181  | A | 0.1537  |
| rs62520898  | T | 0.0476  |
| rs1901061   | A | -0.0367 |
| rs150036020 | T | -0.1198 |
| rs11992458  | A | -0.0546 |
| rs2469331   | A | -0.0493 |
| rs7834736   | G | -0.0408 |
| rs579798    | C | -0.0437 |
| rs76809099  | A | 0.0879  |
| rs112665984 | C | -0.12   |
| rs76064050  | C | -0.3607 |
| rs2457423   | T | 0.045   |
| rs117572112 | T | 0.1553  |
| rs79609345  | C | 0.0755  |
| rs12674982  | G | -0.0509 |

|             |   |         |
|-------------|---|---------|
| rs72640331  | T | -0.1696 |
| rs959976    | C | 0.0486  |
| rs80263108  | A | 0.0438  |
| rs4876717   | C | 0.0552  |
| rs118040159 | G | 0.2783  |
| rs73699267  | T | 0.1398  |
| rs117414883 | A | 0.2135  |
| rs12547085  | C | 0.0516  |
| rs148520329 | C | 0.1765  |
| rs1729161   | T | -0.0366 |
| rs2615767   | C | -0.0479 |
| rs150543261 | T | -0.2822 |
| rs75653133  | C | 0.1151  |
| rs79951249  | T | 0.0862  |
| rs117329014 | C | -0.2608 |
| rs12547615  | G | -0.0792 |
| rs12674503  | A | 0.0406  |
| rs13282848  | C | 0.0375  |
| rs35897939  | A | 0.0932  |
| rs113968718 | A | 0.1845  |
| rs7844344   | A | -0.041  |
| rs35347573  | C | -0.0816 |
| rs3862090   | T | 0.0572  |
| rs150668710 | A | -0.2412 |
| rs116365745 | A | 0.281   |
| rs992891    | C | 0.0372  |
| rs75367481  | A | 0.2436  |
| rs2318144   | A | 0.0529  |
| rs137962475 | G | 0.2895  |
| rs34878373  | A | 0.0706  |
| rs11997401  | T | -0.0413 |
| rs2445720   | G | -0.0744 |
| rs77198961  | C | 0.0509  |
| rs7002807   | G | 0.036   |
| rs112234186 | C | 0.1035  |
| rs16922990  | T | -0.0457 |
| rs2577033   | T | 0.0427  |
| rs76713096  | A | -0.2912 |
| rs34214752  | G | 0.3217  |
| rs56121069  | T | 0.1772  |
| rs78959420  | G | -0.18   |
| rs2980003   | T | -0.0417 |
| rs12549958  | T | -0.0355 |
| rs2198749   | A | -0.0382 |
| rs62513548  | A | -0.0732 |
| rs72727859  | T | 0.1762  |
| rs79853059  | T | 0.0549  |

|             |   |         |
|-------------|---|---------|
| rs77291612  | C | 0.2958  |
| rs78076205  | C | 0.0831  |
| rs4872309   | G | -0.0376 |
| rs4736640   | G | -0.0417 |
| rs75633240  | A | 0.114   |
| rs10503288  | T | 0.0542  |
| rs117512053 | T | -0.1085 |
| rs7015639   | C | -0.0501 |
| rs117276614 | T | -0.3442 |
| rs4909447   | T | -0.0488 |
| rs2922806   | T | 0.0441  |
| rs71518538  | A | -0.1647 |
| rs1004380   | G | 0.042   |
| rs75343997  | G | 0.1201  |
| rs1227643   | A | -0.0753 |
| rs348148    | C | 0.0384  |
| rs16913721  | A | -0.0379 |
| rs2385167   | C | -0.0745 |
| rs6558722   | G | -0.0778 |
| rs1499685   | C | 0.0549  |
| rs1498179   | A | 0.0441  |
| rs67456872  | C | 0.1154  |
| rs4506214   | T | 0.0396  |
| rs117798498 | T | -0.158  |
| rs117096465 | A | -0.1019 |
| rs7001297   | T | -0.0665 |
| rs118038063 | G | -0.1361 |
| rs2403730   | A | -0.038  |
| rs74376093  | G | 0.1386  |
| rs142342247 | T | -0.35   |
| rs6578086   | T | 0.0384  |
| rs17644430  | C | -0.0543 |
| rs1516950   | A | -0.0573 |
| rs144718139 | G | -0.1782 |
| rs72718761  | T | 0.2273  |
| rs72659523  | C | 0.2887  |
| rs10086322  | G | -0.1577 |
| rs113544822 | C | -0.1098 |
| rs4909836   | G | 0.1001  |
| rs10094348  | A | -0.0386 |
| rs148118226 | T | 0.1664  |
| rs2954866   | G | 0.054   |
| rs76888183  | G | -0.2457 |
| rs2447496   | G | 0.0425  |
| rs113608028 | C | 0.1934  |
| rs138701653 | G | 0.1845  |
| rs79352999  | C | -0.1897 |

|             |   |         |
|-------------|---|---------|
| rs72672141  | T | 0.0933  |
| rs1513337   | G | -0.0371 |
| rs73536280  | G | 0.2057  |
| rs79371866  | C | 0.0621  |
| rs75888379  | A | 0.1661  |
| rs142253994 | C | -0.2144 |
| rs79320696  | G | 0.3477  |
| rs6470791   | T | -0.0362 |
| rs7844565   | T | -0.0467 |
| rs3779865   | C | -0.038  |
| rs78243082  | C | 0.1181  |
| rs111568704 | A | -0.1034 |
| rs994618    | A | 0.1366  |
| rs10104711  | A | -0.0411 |
| rs6470706   | T | 0.0419  |
| rs279953    | G | 0.1307  |
| rs4733037   | T | 0.0381  |
| rs17064135  | G | 0.0716  |
| rs57316316  | G | 0.2003  |
| rs56311335  | A | 0.0686  |
| rs78409406  | C | -0.1305 |
| rs144914372 | T | 0.1193  |
| rs11783199  | A | 0.1905  |
| rs80148198  | G | 0.1972  |
| rs28490140  | C | 0.1872  |
| rs7825638   | T | 0.12    |
| rs77024535  | G | 0.2705  |
| rs116920073 | T | 0.1512  |
| rs10109698  | C | 0.0911  |
| rs117206569 | T | 0.2229  |
| rs3779853   | T | 0.037   |
| rs62521888  | G | -0.0737 |
| rs12547360  | G | -0.0381 |
| rs55762291  | G | 0.0381  |
| rs34397313  | T | -0.0572 |
| rs2575041   | C | 0.0398  |
| rs11203675  | C | -0.083  |
| rs2177010   | G | 0.0417  |
| rs117798478 | A | 0.1153  |
| rs17325726  | A | 0.1052  |
| rs73181042  | A | -0.2994 |
| rs77888285  | A | 0.1786  |
| rs117230303 | A | -0.1874 |
| rs73676415  | G | -0.0804 |
| rs586859    | A | 0.2047  |
| rs16869594  | A | 0.1826  |
| rs73187277  | T | -0.0914 |

|             |   |         |
|-------------|---|---------|
| rs7815708   | A | 0.0796  |
| rs77550417  | A | -0.1209 |
| rs17448722  | A | 0.1058  |
| rs4297011   | C | 0.0369  |
| rs11786061  | A | -0.0442 |
| rs117988568 | G | -0.199  |
| rs13272422  | A | 0.0388  |
| rs12678215  | T | -0.0378 |
| rs2981190   | A | 0.0372  |
| rs41395344  | G | -0.0461 |
| rs2970613   | G | -0.0369 |
| rs6997873   | C | -0.0581 |
| rs117114368 | C | -0.1475 |
| rs6557865   | G | -0.0553 |
| rs6982829   | T | -0.0635 |
| rs117969529 | G | -0.1139 |
| rs149243878 | G | -0.2591 |
| rs13267916  | G | 0.0575  |
| rs138566061 | G | 0.0982  |
| rs62526997  | T | 0.2558  |
| rs4532638   | T | -0.0373 |
| rs62503589  | C | 0.226   |
| rs1264478   | G | 0.0353  |
| rs10282829  | A | -0.0477 |
| rs80340820  | A | 0.1357  |
| rs2142182   | T | -0.0399 |
| rs75441727  | G | -0.0677 |
| rs148957661 | A | 0.1838  |
| rs17236260  | G | 0.167   |
| rs7829342   | T | -0.1088 |
| rs112357934 | C | -0.0908 |
| rs145408327 | C | -0.2259 |
| rs145040925 | A | -0.1719 |
| rs715006    | T | -0.0362 |
| rs11781699  | C | -0.0463 |
| rs140943806 | T | -0.2403 |
| rs9969425   | A | -0.2188 |
| rs7844963   | T | -0.0414 |
| rs141064053 | C | 0.1897  |
| rs17502474  | T | -0.1148 |
| rs3857915   | A | -0.0465 |
| rs138699995 | G | 0.2032  |
| rs3793428   | A | 0.0492  |
| rs9644125   | T | 0.0805  |
| rs62519394  | A | 0.0373  |
| rs66787637  | T | 0.0674  |
| rs1481714   | C | -0.0504 |

|             |   |         |
|-------------|---|---------|
| rs7002349   | C | -0.0355 |
| rs75507034  | A | -0.0594 |
| rs13254863  | C | 0.0471  |
| rs142837012 | T | 0.299   |
| rs77089355  | C | -0.1651 |
| rs57934624  | G | 0.0677  |
| rs11784384  | T | 0.1194  |
| rs35389369  | T | 0.0775  |
| rs72737860  | A | 0.1072  |
| rs139667340 | T | 0.1709  |
| rs28444902  | A | 0.0584  |
| rs7824222   | C | 0.0653  |
| rs72658967  | T | 0.0524  |
| rs56193586  | C | 0.0827  |
| rs78668364  | T | -0.0768 |
| rs34279110  | T | 0.1044  |
| rs73702980  | G | 0.1035  |
| rs117984872 | T | 0.0635  |
| rs7829210   | C | -0.1463 |
| rs4076991   | A | -0.0584 |
| rs10092916  | G | -0.0365 |
| rs116927692 | C | -0.1936 |
| rs78819393  | G | 0.1301  |
| rs12675996  | A | 0.0438  |
| rs79928657  | T | -0.1572 |
| rs2977550   | T | 0.0933  |
| rs7814494   | T | 0.0708  |
| rs1898465   | T | -0.1724 |
| rs17245479  | G | 0.1644  |
| rs149071605 | C | -0.2004 |
| rs10102821  | A | -0.0517 |
| rs7828534   | G | 0.0349  |
| rs728827    | T | 0.0445  |
| rs75228134  | C | -0.3292 |
| rs72685546  | G | -0.0727 |
| rs74451105  | T | -0.0673 |
| rs17553961  | G | 0.1166  |
| rs117509386 | T | 0.13    |
| rs28388282  | G | 0.1408  |
| rs35048281  | C | -0.2318 |
| rs116856256 | C | -0.1489 |
| rs113112414 | A | -0.1218 |
| rs140520777 | T | -0.2623 |
| rs146797292 | A | 0.1458  |
| rs140399132 | T | -0.1859 |
| rs13278368  | C | 0.0368  |
| rs17430266  | A | 0.0426  |



|             |   |         |
|-------------|---|---------|
| rs17435835  | G | 0.045   |
| rs1060730   | T | -0.0861 |
| rs80274285  | A | -0.1555 |
| rs1872498   | T | 0.0442  |
| rs73179240  | C | -0.2075 |
| rs13262474  | A | 0.068   |
| rs4976897   | C | -0.0406 |
| rs6471693   | G | 0.0475  |
| rs10112831  | G | 0.0856  |
| rs4506244   | G | -0.0421 |
| rs145761674 | T | -0.2412 |
| rs115717995 | T | -0.1457 |
| rs72678536  | T | -0.2979 |
| rs10101471  | C | -0.113  |
| rs11774790  | A | 0.111   |
| rs117243705 | G | 0.1741  |
| rs62515082  | A | -0.0843 |
| rs7814445   | G | -0.0607 |
| rs34280380  | A | 0.1251  |
| rs78421679  | G | -0.1526 |
| rs11136232  | A | 0.1361  |
| rs2555714   | T | -0.1358 |
| rs4875135   | C | 0.0643  |
| rs112242999 | C | 0.1925  |
| rs113102551 | C | 0.2157  |
| rs28859044  | G | 0.0704  |
| rs6997892   | A | 0.0493  |
| rs148052891 | G | 0.1839  |
| rs10086758  | A | -0.0406 |
| rs11135840  | A | 0.0351  |
| rs148857213 | T | -0.3117 |
| rs10108957  | C | -0.0393 |
| rs142172244 | A | 0.104   |
| rs1542148   | G | -0.0461 |
| rs72652735  | T | -0.0774 |
| rs12680594  | G | -0.0404 |
| rs1109797   | T | -0.1927 |
| rs2441921   | C | -0.0379 |
| rs34556927  | G | 0.0459  |
| rs12680808  | T | 0.0351  |
| rs56319340  | A | 0.0526  |
| rs62499946  | A | 0.1457  |
| rs17093403  | G | -0.0347 |
| rs71519015  | T | 0.2103  |
| rs147550094 | A | -0.1216 |
| rs150272093 | A | 0.1441  |
| rs28427014  | T | 0.0961  |

|             |   |         |
|-------------|---|---------|
| rs57333355  | A | 0.2571  |
| rs147181182 | C | 0.1128  |
| rs17347874  | G | 0.0607  |
| rs12546277  | G | 0.0784  |
| rs80295339  | A | -0.1802 |
| rs10092590  | G | 0.0433  |
| rs2676435   | G | -0.0493 |
| rs13282889  | G | 0.0362  |
| rs77978126  | A | 0.2328  |
| rs137870106 | G | 0.2605  |
| rs80090205  | C | -0.2165 |
| rs55940216  | G | -0.0518 |
| rs75671328  | C | 0.0475  |
| rs145676277 | A | 0.3087  |
| rs116346947 | A | 0.1904  |
| rs17065804  | G | 0.078   |
| rs118100600 | T | -0.1557 |
| rs72678441  | G | 0.0487  |
| rs2959820   | G | 0.0504  |
| rs144646178 | A | 0.117   |
| rs116919497 | T | 0.2188  |
| rs72662924  | G | -0.0708 |
| rs78346531  | C | 0.1387  |
| rs4384000   | T | -0.0414 |
| rs17343259  | T | 0.0448  |
| rs62498398  | G | 0.1313  |
| rs7005288   | G | -0.0425 |
| rs13270872  | A | 0.0773  |
| rs10111254  | T | -0.0549 |
| rs12550831  | C | -0.0359 |
| rs4872011   | C | 0.0369  |
| rs71504479  | G | -0.0684 |
| rs28424144  | A | 0.0544  |
| rs34637388  | T | 0.1224  |
| rs73357898  | T | -0.0718 |
| rs6474091   | C | 0.0373  |
| rs2976967   | C | -0.1719 |
| rs78437271  | T | -0.1036 |
| rs80087815  | G | 0.2562  |
| rs67453036  | G | 0.085   |
| rs2648871   | A | 0.0872  |
| rs10089722  | T | -0.0359 |
| rs35342845  | T | 0.0924  |
| rs73193550  | G | 0.1507  |
| rs2127652   | T | 0.0988  |
| rs6468204   | T | -0.036  |
| rs143123821 | A | -0.2485 |

|             |   |         |
|-------------|---|---------|
| rs62524107  | C | 0.091   |
| rs333615    | A | -0.0453 |
| rs12155646  | C | 0.0479  |
| rs143313110 | G | 0.1635  |
| rs2410410   | G | 0.1621  |
| rs62525672  | A | -0.1225 |
| rs147423659 | G | -0.3269 |
| rs7006041   | T | -0.0367 |
| rs2953957   | G | -0.0542 |
| rs7016335   | C | 0.0409  |
| rs2979782   | C | 0.0422  |
| rs9650218   | A | 0.0373  |
| rs3016888   | C | 0.0486  |
| rs1700106   | A | 0.0343  |
| rs2923772   | A | -0.0384 |
| rs73176758  | T | -0.0978 |
| rs76578121  | G | -0.1979 |
| rs10109776  | T | 0.096   |
| rs78623944  | G | 0.0573  |
| rs146710292 | T | -0.2064 |
| rs12547205  | T | -0.0379 |
| rs2385429   | T | -0.1166 |
| rs12548451  | C | -0.0584 |
| rs7827660   | A | 0.0504  |
| rs118105048 | G | 0.2773  |
| rs416829    | G | -0.0343 |
| rs78141699  | A | 0.0809  |
| rs2977377   | T | -0.1504 |
| rs13270795  | T | 0.111   |
| rs111502878 | G | -0.1678 |
| rs12546027  | A | -0.0407 |
| rs137936316 | A | 0.2747  |
| rs2978243   | T | -0.0534 |
| rs13258742  | G | 0.0555  |
| rs78189481  | T | -0.194  |
| rs17739011  | C | -0.11   |
| rs2956253   | G | 0.0432  |
| rs143243312 | A | -0.2103 |
| rs10111821  | T | -0.0516 |
| rs4872124   | C | -0.0554 |
| rs6985858   | G | 0.0476  |
| rs61121407  | T | 0.2104  |
| rs62524190  | G | 0.0482  |
| rs4736759   | C | -0.048  |
| rs2975186   | C | -0.0387 |
| rs11787070  | T | -0.2631 |
| rs1111391   | T | 0.037   |

|             |   |         |
|-------------|---|---------|
| rs28593230  | A | 0.1175  |
| rs118188455 | T | 0.1833  |
| rs2465006   | T | 0.0474  |
| rs13277690  | C | -0.0497 |
| rs11136447  | C | -0.04   |
| rs4876359   | G | 0.042   |
| rs6982771   | T | -0.1952 |
| rs4870786   | C | -0.0375 |
| rs117772331 | G | 0.4208  |
| rs55780211  | T | -0.0714 |
| rs78051589  | G | -0.0553 |
| rs76865400  | C | -0.1139 |
| rs3824147   | A | -0.0344 |
| rs2977728   | G | -0.0533 |
| rs77160823  | C | -0.1204 |
| rs2513356   | T | 0.2905  |
| rs10505000  | C | -0.0627 |
| rs79979087  | A | -0.1214 |
| rs11203982  | C | 0.0629  |
| rs4523235   | G | 0.037   |
| rs77913875  | C | -0.1018 |
| rs10095665  | G | -0.055  |
| rs56255745  | T | 0.1586  |
| rs4391458   | T | 0.036   |
| rs78708939  | C | 0.1049  |
| rs6983357   | G | 0.1718  |
| rs141244598 | C | 0.2055  |
| rs73683787  | C | -0.0543 |
| rs12545907  | A | -0.05   |
| rs77847518  | T | 0.0653  |
| rs7016136   | G | 0.0359  |
| rs67650071  | A | 0.2434  |
| rs17052096  | G | -0.0387 |
| rs72641940  | A | -0.0826 |
| rs77238883  | T | 0.0656  |
| rs72674002  | G | 0.0949  |
| rs10453142  | G | 0.1046  |
| rs116867061 | A | -0.1597 |
| rs16938824  | C | 0.0411  |
| rs72689069  | T | 0.1318  |
| rs7012576   | G | -0.1564 |
| rs113176873 | T | 0.1263  |
| rs146768202 | C | 0.1069  |
| rs35379646  | A | 0.0433  |
| rs1463259   | T | 0.0401  |
| rs79458489  | C | 0.0758  |
| rs28546364  | T | -0.1394 |

|             |   |         |
|-------------|---|---------|
| rs7826147   | T | 0.0925  |
| rs7461883   | C | 0.0512  |
| rs117089745 | T | -0.2624 |
| rs3793371   | A | -0.0591 |
| rs1705702   | G | -0.0395 |
| rs13256555  | C | -0.0879 |
| rs11135998  | A | 0.0783  |
| rs76039193  | G | -0.0587 |
| rs76373859  | G | -0.2103 |
| rs10092983  | A | 0.0385  |
| rs35100730  | G | 0.0651  |
| rs147470265 | C | -0.251  |
| rs7815792   | T | -0.0403 |
| rs9694132   | T | 0.0895  |
| rs12156156  | A | -0.0688 |
| rs12550241  | A | -0.0816 |
| rs16923080  | T | 0.1012  |
| rs117489053 | G | -0.0524 |
| rs13263193  | T | 0.1706  |
| rs59934325  | G | -0.157  |
| rs73595458  | T | 0.0663  |
| rs306973    | A | -0.0665 |
| rs139680456 | T | -0.1532 |
| rs58977584  | G | 0.0429  |
| rs10091119  | T | -0.0725 |
| rs7816215   | T | 0.0695  |
| rs72734050  | T | -0.0868 |
| rs117149818 | A | -0.1395 |
| rs1442333   | C | 0.0826  |
| rs4735258   | C | -0.0354 |
| rs11990682  | G | 0.1032  |
| rs79828069  | C | 0.0576  |
| rs72664125  | G | -0.1256 |
| rs59973272  | C | -0.0346 |
| rs13280104  | A | -0.047  |
| rs6473960   | T | 0.1256  |
| rs117430607 | T | -0.1452 |
| rs11775742  | C | -0.0338 |
| rs72676799  | A | -0.106  |
| rs73678290  | C | -0.1255 |
| rs4041618   | G | 0.0425  |
| rs112134915 | G | 0.1984  |
| rs4545075   | T | -0.0375 |
| rs118189065 | A | 0.0717  |
| rs73208640  | C | 0.0769  |
| rs4618655   | T | 0.1188  |
| rs117470569 | G | 0.2481  |

|             |   |         |
|-------------|---|---------|
| rs56015539  | A | 0.063   |
| rs117256994 | A | -0.1572 |
| rs113151178 | A | 0.0903  |
| rs78887157  | G | -0.0987 |
| rs34040169  | T | -0.2659 |
| rs7819725   | C | 0.1048  |
| rs17318192  | A | 0.1376  |
| rs118017300 | T | 0.1837  |
| rs2873955   | T | 0.0344  |
| rs7813443   | G | -0.0357 |
| rs210677    | A | 0.0346  |
| rs79767592  | G | 0.1607  |
| rs2725694   | T | 0.1262  |
| rs10092807  | T | -0.0407 |
| rs7842063   | A | 0.0436  |
| rs6989679   | G | -0.0433 |
| rs2218367   | T | -0.0382 |
| rs59818496  | T | -0.0588 |
| rs311667    | G | -0.0535 |
| rs117262908 | C | -0.1367 |
| rs11774859  | T | -0.092  |
| rs13267292  | T | 0.0483  |
| rs7825193   | T | -0.064  |
| rs12546759  | T | -0.0548 |
| rs2004977   | T | -0.0428 |
| rs12543807  | A | -0.0422 |
| rs1985958   | G | 0.0336  |
| rs36091914  | T | 0.0809  |
| rs4831768   | C | 0.0477  |
| rs6997818   | A | 0.0458  |
| rs1492970   | A | -0.0481 |
| rs61759697  | A | 0.0893  |
| rs7013729   | G | 0.0681  |
| rs71530825  | T | -0.1248 |
| rs73179684  | T | -0.0459 |
| rs13278687  | C | 0.0455  |
| rs74682344  | G | 0.2695  |
| rs7388163   | G | 0.042   |
| rs13270739  | T | 0.0601  |
| rs60232281  | G | -0.189  |
| rs17602352  | C | 0.0515  |
| rs7008571   | G | 0.0427  |
| rs62511254  | A | -0.0743 |
| rs112140564 | G | -0.2096 |
| rs2411275   | T | 0.0414  |
| rs149736151 | A | -0.2221 |
| rs62491339  | A | 0.1134  |

|             |   |         |
|-------------|---|---------|
| rs6996522   | C | 0.0522  |
| rs62519452  | C | -0.0897 |
| rs117243673 | T | -0.1588 |
| rs10429299  | C | -0.0418 |
| rs146962850 | G | -0.0903 |
| rs11135714  | A | 0.0451  |
| rs17418058  | G | 0.0363  |
| rs62531721  | G | -0.1277 |
| rs74501864  | C | 0.2151  |
| rs76534524  | G | 0.1148  |
| rs117387496 | T | 0.2783  |
| rs1154044   | C | 0.0423  |
| rs766796    | T | 0.0743  |
| rs6472304   | C | 0.0585  |
| rs2555722   | A | -0.035  |
| rs73705634  | T | -0.1168 |
| rs72678181  | A | -0.2317 |
| rs147830933 | A | 0.1458  |
| rs12679721  | T | 0.0522  |
| rs2029619   | T | 0.1196  |
| rs118105552 | G | -0.1841 |
| rs78376019  | A | 0.1036  |
| rs4442136   | G | 0.0625  |
| rs73706517  | A | 0.1524  |
| rs10113679  | G | 0.0858  |
| rs73171174  | T | -0.0532 |
| rs7814762   | C | -0.0482 |
| rs1383580   | T | 0.0615  |
| rs147476476 | C | -0.123  |
| rs116899009 | A | 0.1504  |
| rs75843534  | C | 0.1028  |
| rs71519616  | A | 0.2063  |
| rs60855925  | C | 0.0595  |
| rs7845563   | C | 0.0388  |
| rs144933141 | T | 0.0871  |
| rs117607789 | T | 0.2173  |
| rs7462854   | T | 0.0534  |
| rs141858579 | T | 0.212   |
| rs77292620  | T | 0.1545  |
| rs112471020 | C | 0.1218  |
| rs113102002 | G | 0.0583  |
| rs79170142  | G | 0.0715  |
| rs117421967 | A | -0.1254 |
| rs28498180  | C | -0.0337 |
| rs35631780  | A | 0.1834  |
| rs2954347   | G | 0.0463  |
| rs7002893   | A | 0.0817  |

|             |   |         |
|-------------|---|---------|
| rs56168271  | T | 0.0747  |
| rs62532575  | G | 0.1349  |
| rs1994540   | A | 0.0343  |
| rs74633848  | A | 0.1318  |
| rs7840263   | T | 0.0659  |
| rs3108906   | A | -0.0971 |
| rs6557679   | T | 0.0389  |
| rs2172166   | G | 0.0488  |
| rs1862222   | T | 0.0448  |
| rs75252401  | C | -0.1854 |
| rs59281026  | A | -0.0461 |
| rs2317587   | C | -0.038  |
| rs4410871   | T | -0.0383 |
| rs74628826  | T | -0.0593 |
| rs113785455 | T | 0.147   |
| rs117204589 | C | 0.1322  |
| rs117615420 | A | 0.2039  |
| rs140037858 | C | -0.1516 |
| rs6985431   | T | 0.0384  |
| rs77481784  | G | -0.1325 |
| rs80066068  | A | 0.0836  |
| rs12676679  | T | 0.034   |
| rs16893808  | C | -0.0754 |
| rs116880118 | C | 0.1069  |
| rs73532518  | G | -0.1129 |
| rs72678162  | G | -0.2257 |
| rs268428    | A | 0.0499  |
| rs11777608  | G | 0.0812  |
| rs17373464  | G | -0.125  |
| rs6988947   | C | 0.0634  |
| rs7828305   | T | -0.0561 |
| rs73519430  | C | -0.0664 |
| rs1879189   | G | -0.0446 |
| rs35325283  | C | -0.0426 |
| rs10505038  | T | -0.1171 |
| rs630459    | G | 0.0712  |
| rs4737459   | C | 0.0372  |
| rs11780294  | G | -0.2493 |
| rs72649441  | C | 0.0605  |
| rs7834345   | G | 0.0371  |
| rs76315763  | C | 0.0411  |
| rs73572338  | T | -0.0995 |
| rs12541397  | A | -0.0527 |
| rs2959381   | A | -0.0421 |
| rs117714724 | A | 0.2094  |
| rs78546906  | T | 0.1628  |
| rs4738618   | A | 0.0372  |



|             |   |         |
|-------------|---|---------|
| rs117095989 | A | 0.1641  |
| rs7842410   | G | -0.0331 |
| rs11997441  | C | -0.0433 |
| rs74908317  | T | -0.0436 |
| rs75272363  | T | -0.1052 |
| rs61236019  | T | 0.2346  |
| rs7832332   | G | 0.0344  |
| rs116904889 | T | 0.1146  |
| rs113069111 | T | 0.1836  |
| rs11995910  | A | -0.0945 |
| rs76598349  | T | -0.0847 |
| rs11780744  | C | -0.0378 |
| rs17069769  | G | -0.0467 |
| rs74592179  | G | 0.2565  |
| rs7017329   | C | -0.0471 |
| rs13263615  | G | 0.0978  |
| rs62518480  | T | -0.1708 |
| rs4352868   | T | 0.033   |
| rs11780530  | C | -0.0341 |
| rs941159    | T | -0.0357 |
| rs9298508   | A | 0.0796  |
| rs78545439  | G | 0.1689  |
| rs138648352 | C | 0.1088  |
| rs11989872  | C | 0.0522  |
| rs67709527  | G | -0.236  |
| rs80192739  | C | -0.1203 |
| rs78874526  | A | -0.0923 |
| rs75713971  | T | 0.1342  |
| rs73192370  | C | -0.2009 |
| rs2450144   | T | -0.0368 |
| rs78511714  | T | 0.078   |
| rs17757600  | G | 0.0409  |
| rs59703453  | A | 0.2131  |
| rs2958318   | C | 0.2801  |
| rs60446074  | G | 0.1418  |
| rs3808602   | A | 0.1285  |
| rs111705634 | T | 0.1833  |
| rs62512735  | G | -0.0379 |
| rs113727389 | T | 0.0971  |
| rs118060306 | G | -0.1471 |
| rs62478633  | T | 0.0922  |
| rs11996743  | A | -0.0343 |
| rs62511316  | A | 0.1454  |
| rs117434637 | A | 0.1152  |
| rs141486622 | G | 0.1081  |
| rs115581627 | T | 0.1023  |
| rs7010504   | C | 0.1167  |

|             |   |         |
|-------------|---|---------|
| rs117057334 | T | -0.3267 |
| rs78845838  | G | 0.0803  |
| rs924741    | C | 0.0409  |
| rs2442589   | C | 0.0387  |
| rs143456917 | C | 0.2631  |
| rs117448937 | A | 0.2252  |
| rs72680712  | C | 0.1327  |
| rs10283033  | A | 0.1013  |
| rs36076909  | A | 0.1138  |
| rs12682059  | T | 0.0579  |
| rs11166762  | A | 0.0532  |
| rs112939848 | T | 0.1668  |
| rs7836590   | T | -0.0452 |
| rs10503788  | T | 0.044   |
| rs148979866 | T | -0.1591 |
| rs117274496 | T | -0.1398 |
| rs4873795   | T | 0.0665  |
| rs7843884   | A | -0.0332 |
| rs2958830   | C | -0.0433 |
| rs117850193 | A | 0.15    |
| rs11136995  | A | 0.0698  |
| rs13262092  | G | -0.0568 |
| rs3852346   | G | -0.1227 |
| rs11562663  | C | -0.1536 |
| rs10087622  | A | -0.1583 |
| rs17770513  | C | -0.0726 |
| rs4976882   | T | 0.0572  |
| rs13254448  | T | -0.0402 |
| rs56117219  | A | 0.0837  |
| rs2679763   | A | 0.0463  |
| rs111896348 | A | 0.048   |
| rs117844806 | C | 0.1082  |
| rs118009612 | T | 0.0872  |
| rs2440651   | T | -0.0918 |
| rs76537124  | G | 0.1179  |
| rs117005482 | A | -0.1363 |
| rs17217477  | C | -0.0648 |
| rs7838472   | A | -0.0454 |
| rs73544064  | A | 0.046   |
| rs11991889  | A | 0.0905  |
| rs72682565  | T | -0.1085 |
| rs2081668   | C | 0.0388  |
| rs10109512  | T | 0.063   |
| rs118177060 | A | 0.2217  |
| rs1986373   | T | 0.1115  |
| rs62510077  | A | -0.1064 |
| rs10481212  | T | -0.0339 |

|             |   |         |
|-------------|---|---------|
| rs73563431  | C | 0.1197  |
| rs55677263  | C | 0.1865  |
| rs9792154   | T | 0.0475  |
| rs1438196   | G | 0.0359  |
| rs62509485  | C | 0.0803  |
| rs4452812   | T | 0.0361  |
| rs78845770  | A | -0.259  |
| rs7835014   | G | 0.0461  |
| rs6993480   | G | 0.0339  |
| rs74947224  | C | 0.1573  |
| rs4907394   | G | -0.2062 |
| rs114554200 | C | -0.0976 |
| rs13252796  | A | -0.1715 |
| rs78122859  | T | -0.1096 |
| rs298603    | C | -0.0424 |
| rs2514783   | G | 0.0919  |
| rs150767351 | A | -0.215  |
| rs11996929  | T | -0.0367 |
| rs10090072  | A | 0.1133  |
| rs4236834   | A | 0.0351  |
| rs5018145   | A | 0.0451  |
| rs112653206 | T | 0.0532  |
| rs2853172   | A | -0.0329 |
| rs17292295  | A | -0.0904 |
| rs7837487   | A | -0.0459 |
| rs2449226   | T | 0.0343  |
| rs117613321 | C | 0.1856  |
| rs2436909   | G | 0.0385  |
| rs302960    | G | -0.0384 |
| rs59807200  | A | -0.0963 |
| rs117809999 | A | 0.0931  |
| rs72725712  | A | 0.1287  |
| rs4909342   | A | 0.0386  |
| rs117887919 | T | 0.1829  |
| rs13271760  | A | 0.0474  |
| rs4738857   | G | -0.0919 |
| rs11776876  | T | -0.0397 |
| rs74346532  | T | 0.239   |
| rs73503845  | G | 0.0998  |
| rs72684011  | G | 0.2472  |
| rs7838572   | C | 0.0471  |
| rs72507529  | G | 0.0943  |
| rs74790510  | C | -0.2431 |
| rs2245642   | G | 0.0713  |
| rs117789940 | C | -0.1263 |
| rs146035247 | C | 0.1367  |
| rs73717252  | T | 0.0466  |

|             |   |         |
|-------------|---|---------|
| rs75505403  | C | -0.1932 |
| rs12677152  | T | 0.0601  |
| rs897153    | C | 0.0346  |
| rs11988063  | A | -0.0348 |
| rs75214481  | C | 0.1347  |
| rs9918805   | A | 0.0678  |
| rs62512933  | G | 0.0376  |
| rs2736320   | G | 0.0355  |
| rs72688936  | C | -0.0611 |
| rs2701924   | C | 0.0682  |
| rs28435468  | T | 0.0965  |
| rs61318915  | C | 0.08    |
| rs16889881  | T | 0.037   |
| rs10101101  | A | 0.0508  |
| rs56350209  | A | 0.1255  |
| rs72728672  | C | -0.1798 |
| rs118053167 | G | -0.0977 |
| rs330918    | G | -0.0365 |
| rs35542655  | C | 0.0459  |
| rs34359359  | C | 0.1171  |
| rs408133    | C | 0.0626  |
| rs117697854 | G | -0.1675 |
| rs61471953  | T | 0.096   |
| rs10106723  | T | -0.0903 |
| rs3739231   | T | 0.0344  |
| rs77833570  | G | -0.1314 |
| rs77846271  | T | -0.0864 |
| rs7814488   | C | -0.0378 |
| rs7846057   | G | -0.1092 |
| rs80308327  | G | -0.2066 |
| rs78227062  | G | -0.0651 |
| rs117485408 | T | 0.1278  |
| rs12216811  | A | 0.0378  |
| rs117730861 | G | -0.1374 |
| rs142030959 | T | -0.1313 |
| rs13250586  | A | 0.065   |
| rs10100547  | A | -0.0429 |
| rs72624079  | A | -0.0849 |
| rs7014460   | C | -0.1197 |
| rs6990313   | T | -0.0512 |
| rs72676249  | G | -0.104  |
| rs17077573  | A | 0.0686  |
| rs117387035 | G | 0.185   |
| rs4404873   | G | -0.0337 |
| rs77775126  | T | -0.1729 |
| rs75054750  | G | -0.1994 |
| rs11986338  | T | -0.0877 |

|             |   |         |
|-------------|---|---------|
| rs4633040   | T | -0.0375 |
| rs74731011  | G | -0.0988 |
| rs73505282  | G | 0.0513  |
| rs7840417   | G | 0.0765  |
| rs768753    | C | 0.0394  |
| rs55720593  | T | 0.0645  |
| rs2977557   | A | 0.0401  |
| rs10504517  | T | -0.0348 |
| rs6987910   | G | -0.044  |
| rs142794355 | A | 0.2117  |
| rs62501883  | C | 0.0777  |
| rs112106159 | A | 0.1073  |
| rs17319945  | G | -0.1078 |
| rs146396593 | T | 0.1611  |
| rs75071157  | T | 0.1863  |
| rs16896856  | T | 0.1068  |
| rs6992980   | T | 0.0397  |
| rs349354    | A | -0.06   |
| rs118126485 | T | -0.1517 |
| rs111657005 | T | 0.2222  |
| rs74921693  | T | 0.0909  |
| rs4623482   | G | -0.0339 |
| rs34188729  | C | 0.0322  |
| rs11988178  | T | -0.0686 |
| rs79659277  | G | -0.1807 |
| rs79828337  | G | 0.0804  |
| rs117842313 | C | 0.1242  |
| rs117685537 | A | -0.1382 |
| rs28368823  | A | 0.1572  |
| rs117327527 | T | 0.2264  |
| rs72716950  | T | -0.1197 |
| rs117508105 | T | 0.1974  |
| rs75458601  | A | 0.1185  |
| rs76870384  | T | -0.1285 |
| rs7816475   | A | 0.0393  |
| rs76972941  | C | 0.1142  |
| rs35537947  | A | 0.0514  |
| rs117829508 | C | -0.1237 |
| rs73184337  | C | 0.1508  |
| rs2912053   | G | 0.0394  |
| rs73709081  | G | 0.0656  |
| rs10096686  | A | -0.2153 |
| rs75767349  | C | 0.0745  |
| rs594685    | A | 0.1061  |
| rs71571620  | A | 0.0678  |
| rs2912304   | T | 0.0436  |
| rs57067863  | G | -0.0444 |

|             |   |         |
|-------------|---|---------|
| rs139465645 | T | 0.0798  |
| rs75917665  | T | -0.1093 |
| rs10106820  | G | 0.0366  |
| rs7018017   | A | -0.0532 |
| rs2404332   | T | 0.0362  |
| rs17727266  | C | 0.066   |
| rs2597860   | A | 0.0558  |
| rs10096894  | A | 0.0337  |
| rs728271    | G | -0.0455 |
| rs12682294  | C | -0.063  |
| rs2975644   | C | 0.0562  |
| rs7815537   | G | 0.0549  |
| rs12542663  | G | 0.0605  |
| rs73714847  | G | 0.1217  |
| rs12676467  | A | 0.1432  |
| rs35552599  | G | 0.1313  |
| rs7844514   | T | -0.0883 |
| rs2009603   | C | 0.1138  |
| rs78461838  | G | 0.1905  |
| rs4875308   | A | 0.0327  |
| rs117535834 | T | -0.2625 |
| rs34573020  | A | 0.037   |
| rs117912630 | T | 0.2719  |
| rs2125917   | T | 0.0324  |
| rs1442398   | A | -0.0325 |
| rs16907587  | T | 0.1026  |
| rs28438570  | C | 0.1368  |
| rs78498989  | T | -0.1673 |
| rs78740005  | C | 0.0762  |
| rs13278956  | T | -0.0394 |
| rs72735972  | G | -0.0793 |
| rs2720500   | G | -0.0423 |
| rs118049064 | G | -0.2301 |
| rs35451013  | C | 0.043   |
| rs7839438   | T | 0.0428  |
| rs7820616   | T | 0.1008  |
| rs17191425  | A | 0.0727  |
| rs3780006   | C | -0.0361 |
| rs72690741  | T | 0.1005  |
| rs149264414 | G | -0.1481 |
| rs62504318  | C | 0.0464  |
| rs10089375  | G | -0.1463 |
| rs67746629  | T | 0.0923  |
| rs114820954 | C | 0.0804  |
| rs6989393   | T | -0.2343 |
| rs76234025  | A | 0.0802  |
| rs116895369 | A | 0.1004  |

|             |   |         |
|-------------|---|---------|
| rs114609785 | G | 0.1204  |
| rs117707788 | G | -0.1286 |
| rs62523744  | T | 0.094   |
| rs118103505 | C | -0.1277 |
| rs142259278 | A | 0.161   |
| rs17058685  | T | -0.0353 |
| rs72685443  | C | 0.1464  |
| rs4734617   | A | -0.0364 |
| rs17079498  | C | -0.1251 |
| rs62489214  | A | 0.0622  |
| rs117811953 | A | -0.1317 |
| rs1967328   | T | -0.0353 |
| rs11991627  | A | 0.0476  |
| rs7834362   | G | 0.0354  |
| rs71525152  | G | 0.0931  |
| rs76518681  | G | -0.1324 |
| rs117414277 | G | 0.1589  |
| rs10093239  | A | -0.0334 |
| rs6998793   | T | 0.0366  |
| rs141768434 | T | 0.1405  |
| rs17490430  | C | 0.1928  |
| rs2214417   | T | -0.036  |
| rs114422507 | C | 0.1213  |
| rs13271824  | A | -0.0665 |
| rs78679367  | G | 0.1456  |
| rs116984611 | G | -0.1855 |
| rs1982229   | T | 0.0337  |
| rs6995387   | T | 0.0394  |
| rs60545488  | A | 0.1107  |
| rs117594874 | G | -0.1076 |
| rs78440689  | T | 0.156   |
| rs4739241   | C | 0.0423  |
| rs1004349   | T | 0.0393  |
| rs41408945  | A | -0.2269 |
| rs72639918  | C | -0.066  |
| rs145959245 | A | -0.2041 |
| rs10093216  | G | -0.0492 |
| rs7010983   | C | 0.04    |
| rs11995855  | T | 0.2067  |
| rs75092182  | G | -0.1084 |
| rs7819849   | A | 0.0522  |
| rs66546292  | T | 0.0692  |
| rs10216789  | G | 0.0525  |
| rs10090636  | G | 0.08    |
| rs117879251 | A | 0.2817  |
| rs28399962  | T | -0.0339 |
| rs76109591  | C | 0.1889  |

|             |   |         |
|-------------|---|---------|
| rs116987234 | C | 0.0959  |
| rs17262061  | C | -0.2131 |
| rs879998    | A | -0.0329 |
| rs117585235 | T | 0.1423  |
| rs1868842   | C | -0.0344 |
| rs905033    | C | 0.0459  |
| rs13274130  | T | -0.1466 |
| rs1986346   | T | -0.0403 |
| rs78033444  | C | -0.0626 |
| rs7834115   | T | -0.0347 |
| rs7834945   | C | 0.0588  |
| rs76510074  | T | -0.1163 |
| rs35256682  | T | 0.085   |
| rs28435266  | A | 0.2099  |
| rs4301440   | G | 0.0325  |
| rs112704716 | G | -0.062  |
| rs2976347   | C | -0.0325 |
| rs73509235  | A | 0.1625  |
| rs7011088   | T | -0.0333 |
| rs72679677  | T | -0.0668 |
| rs141945720 | T | 0.177   |
| rs16932805  | G | 0.1927  |
| rs150920633 | T | 0.169   |
| rs118155778 | T | -0.1125 |
| rs12541119  | G | -0.0344 |
| rs4872211   | A | 0.0456  |
| rs278541    | T | -0.1636 |
| rs117777508 | A | 0.2091  |
| rs6993960   | C | 0.0559  |
| rs79485409  | T | -0.1914 |
| rs17060305  | G | -0.0343 |
| rs2447494   | A | -0.0403 |
| rs59447479  | T | 0.0558  |
| rs144663054 | A | 0.2218  |
| rs117293810 | T | -0.1625 |
| rs6989446   | T | -0.0439 |
| rs145734953 | C | -0.1476 |
| rs12541273  | T | 0.0565  |
| rs17337615  | A | -0.164  |
| rs73185722  | G | -0.0906 |
| rs143211017 | A | 0.1529  |
| rs117961017 | T | 0.1757  |
| rs117878319 | A | -0.1229 |
| rs353734    | A | -0.0361 |
| rs117711117 | C | 0.1191  |
| rs17575278  | C | 0.0641  |
| rs148383899 | T | 0.1287  |



|             |   |         |
|-------------|---|---------|
| rs78775926  | C | 0.0525  |
| rs35066695  | T | -0.1492 |
| rs73232416  | T | 0.0532  |
| rs9792278   | C | -0.0335 |
| rs78986715  | T | 0.1546  |
| rs138196053 | T | 0.2027  |
| rs13281322  | C | 0.08    |
| rs7838560   | T | 0.0793  |
| rs138834082 | A | 0.1075  |
| rs2859611   | A | 0.0543  |
| rs11778287  | A | 0.0528  |
| rs115084758 | T | 0.117   |
| rs11774384  | G | -0.0317 |
| rs117712516 | A | -0.1851 |
| rs2608038   | C | 0.0507  |
| rs150744433 | G | 0.0957  |
| rs4532585   | T | 0.0338  |
| rs4317545   | A | 0.0378  |
| rs79209807  | A | -0.1701 |
| rs9693297   | G | 0.0519  |
| rs4870903   | G | -0.0358 |
| rs10102126  | T | 0.0513  |
| rs73662220  | T | -0.2668 |
| rs2670069   | T | -0.0505 |
| rs11783339  | A | 0.0383  |
| rs77375127  | T | 0.0481  |
| rs62510497  | G | 0.0772  |
| rs11997418  | G | 0.1056  |
| rs75460234  | A | -0.1281 |
| rs330018    | T | -0.0376 |
| rs6995706   | A | 0.0346  |
| rs4871971   | A | -0.0319 |
| rs10956537  | C | 0.0408  |
| rs7820127   | T | 0.0325  |
| rs7834501   | C | 0.1536  |
| rs12677235  | G | 0.058   |
| rs13252065  | C | -0.0328 |
| rs62527004  | C | -0.0752 |
| rs35985218  | A | -0.1644 |
| rs17271555  | G | 0.1967  |
| rs1464093   | G | 0.0398  |
| rs74324089  | A | 0.1014  |
| rs880641    | C | -0.0413 |
| rs11783322  | G | 0.0326  |
| rs6474028   | A | 0.0516  |
| rs2725361   | G | 0.032   |
| rs116873760 | T | 0.1175  |

|             |   |         |
|-------------|---|---------|
| rs10866947  | T | 0.0475  |
| rs7829720   | T | -0.0335 |
| rs2623554   | C | -0.0402 |
| rs16898881  | G | 0.0693  |
| rs12547258  | C | -0.2464 |
| rs67765763  | A | 0.0744  |
| rs12544875  | T | -0.0392 |
| rs77688094  | A | -0.1485 |
| rs75056286  | G | -0.1569 |
| rs16895803  | C | 0.1648  |
| rs4360272   | A | -0.101  |
| rs10111313  | G | 0.0428  |
| rs17243073  | A | 0.0615  |
| rs2980233   | C | 0.1067  |
| rs7830618   | C | 0.0544  |
| rs16926569  | A | -0.0499 |
| rs74866131  | A | 0.051   |
| rs2163534   | C | -0.034  |
| rs62527978  | T | -0.2055 |
| rs111708510 | G | -0.0876 |
| rs140152304 | A | -0.1505 |
| rs78539693  | C | -0.2606 |
| rs78592042  | T | -0.1909 |
| rs10094842  | A | 0.1021  |
| rs78573710  | T | 0.0824  |
| rs6983443   | C | 0.0516  |
| rs2926702   | C | 0.047   |
| rs28529623  | A | -0.039  |
| rs75212406  | C | 0.2329  |
| rs34307890  | T | -0.2214 |
| rs117166607 | C | -0.061  |
| rs3907270   | C | 0.0359  |
| rs7817893   | T | -0.0868 |
| rs72692180  | A | -0.1363 |
| rs977262    | G | 0.0381  |
| rs111696946 | T | 0.0557  |
| rs111996594 | A | -0.0765 |
| rs9314528   | C | 0.041   |
| rs74963500  | C | 0.2183  |
| rs6996005   | G | -0.036  |
| rs1578978   | G | 0.0331  |
| rs55662061  | G | 0.0512  |
| rs2720884   | C | 0.1215  |
| rs11203905  | A | -0.0383 |
| rs10090690  | C | -0.0413 |
| rs13253871  | A | -0.0438 |
| rs73232846  | G | -0.0405 |

|             |   |         |
|-------------|---|---------|
| rs28408951  | G | 0.1956  |
| rs58979531  | C | 0.0839  |
| rs78112472  | T | -0.0472 |
| rs733330    | G | -0.034  |
| rs35309447  | C | -0.0336 |
| rs512130    | T | 0.0606  |
| rs7835351   | T | 0.0926  |
| rs75892398  | G | 0.1396  |
| rs55947057  | G | -0.1362 |
| rs76832253  | T | -0.1173 |
| rs72718293  | A | -0.0903 |
| rs6987784   | G | 0.0446  |
| rs76199317  | T | -0.1615 |
| rs114922934 | A | -0.1398 |
| rs16938650  | A | -0.065  |
| rs117666508 | T | 0.2249  |
| rs13281936  | C | 0.0363  |
| rs72667317  | A | 0.2623  |
| rs78980767  | A | -0.1071 |
| rs12678872  | C | 0.0573  |
| rs17151534  | C | -0.0943 |
| rs17460250  | C | -0.0725 |
| rs7823676   | G | 0.0377  |
| rs79695585  | T | 0.1359  |
| rs73531989  | C | 0.1893  |
| rs114573186 | T | -0.2214 |
| rs965670    | A | 0.0645  |
| rs143388746 | A | -0.1573 |
| rs7829921   | G | 0.0863  |
| rs13261949  | A | -0.0321 |
| rs2617065   | T | -0.0323 |
| rs77797453  | T | 0.1339  |
| rs72669332  | G | -0.1469 |
| rs1600657   | C | 0.2775  |
| rs72716935  | T | -0.0594 |
| rs117354792 | T | -0.1303 |
| rs7816571   | T | -0.0322 |
| rs2448959   | C | 0.1208  |
| rs2585128   | T | -0.0532 |
| rs28496821  | C | 0.0624  |
| rs117118392 | T | -0.0524 |
| rs7013021   | T | 0.0534  |
| rs117269862 | T | -0.1023 |
| rs9297983   | G | 0.0527  |
| rs2936530   | T | -0.0372 |
| rs142114675 | C | 0.1508  |
| rs13249086  | T | 0.075   |

|             |   |         |
|-------------|---|---------|
| rs6415707   | G | -0.0389 |
| rs112059936 | A | -0.1392 |
| rs138485997 | T | -0.1459 |
| rs11167094  | C | 0.0473  |
| rs13257876  | T | 0.0339  |
| rs7012730   | C | -0.0851 |
| rs28446468  | G | 0.2117  |
| rs13250119  | A | -0.0429 |
| rs2874536   | C | 0.0329  |
| rs1672182   | C | 0.0522  |
| rs9657386   | G | 0.0354  |
| rs7833903   | G | -0.033  |
| rs78866668  | A | -0.14   |
| rs56246320  | G | -0.1469 |
| rs141759402 | A | -0.1268 |
| rs143245260 | A | 0.142   |
| rs4009125   | G | 0.0401  |
| rs67687222  | T | 0.0505  |
| rs73216474  | A | 0.0976  |
| rs56336008  | A | 0.0511  |
| rs73560030  | G | 0.0956  |
| rs6468861   | T | 0.0319  |
| rs146113710 | G | -0.1871 |
| rs1074584   | C | 0.0334  |
| rs35122138  | A | 0.1744  |
| rs6986714   | G | 0.0568  |
| rs35228624  | T | 0.0682  |
| rs2279970   | G | 0.0312  |
| rs13272891  | G | -0.0318 |
| rs73239493  | A | 0.0837  |
| rs11994803  | G | 0.0394  |
| rs79203271  | A | -0.1416 |
| rs62519818  | A | 0.0391  |
| rs73196716  | G | 0.2418  |
| rs56343847  | G | 0.0382  |
| rs6420181   | G | 0.0333  |
| rs1488015   | A | 0.096   |
| rs17242751  | C | -0.0316 |
| rs76614662  | A | 0.1018  |
| rs118161772 | C | 0.1381  |
| rs6986324   | A | -0.2234 |
| rs16919123  | G | 0.0534  |
| rs17119951  | A | 0.0954  |
| rs12545802  | G | -0.0308 |
| rs144124093 | G | 0.1239  |
| rs10089272  | G | 0.0502  |
| rs719256    | A | 0.0333  |

|             |   |         |
|-------------|---|---------|
| rs76411566  | A | 0.2409  |
| rs117514299 | G | -0.1584 |
| rs56794209  | T | 0.0455  |
| rs1483207   | G | -0.0401 |
| rs76942741  | G | 0.1763  |
| rs13273587  | T | -0.0874 |
| rs7009113   | A | -0.0927 |
| rs146934838 | A | -0.055  |
| rs118081064 | A | -0.1118 |
| rs1809103   | T | -0.1492 |
| rs112849889 | C | 0.0976  |
| rs111507808 | C | -0.2381 |
| rs4737727   | T | 0.1018  |
| rs4330666   | T | 0.0383  |
| rs75816225  | T | 0.1468  |
| rs73235028  | C | 0.1215  |
| rs118001605 | A | 0.1194  |
| rs76626306  | T | -0.0512 |
| rs7005499   | A | -0.034  |
| rs145352011 | T | -0.1078 |
| rs10875476  | G | 0.0345  |
| rs75655766  | A | -0.1419 |
| rs113222826 | T | 0.0908  |
| rs10503445  | C | -0.0591 |
| rs7829238   | G | 0.2164  |
| rs117243920 | T | -0.1727 |
| rs4872271   | G | 0.0471  |
| rs13258239  | G | -0.0635 |
| rs118111239 | A | 0.1187  |
| rs10504287  | C | 0.1408  |
| rs11782558  | G | -0.0479 |
| rs76460838  | G | -0.2086 |
| rs76852278  | A | 0.1374  |
| rs74640587  | C | 0.1434  |
| rs10505609  | C | -0.0375 |
| rs7014510   | T | -0.0474 |
| rs79405121  | A | 0.1298  |
| rs10093130  | C | 0.093   |
| rs139269984 | T | 0.1833  |
| rs144137330 | G | 0.2059  |
| rs28770020  | T | -0.0396 |
| rs72677468  | C | 0.0757  |
| rs2945741   | T | 0.0351  |
| rs16876450  | C | -0.0321 |
| rs140486610 | A | 0.1359  |
| rs13249916  | T | 0.106   |
| rs56101456  | G | -0.1018 |

|             |   |         |
|-------------|---|---------|
| rs76903343  | G | 0.1701  |
| rs150171573 | T | 0.1773  |
| rs113791969 | T | 0.055   |
| rs1193314   | T | -0.0341 |
| rs2461341   | G | 0.0307  |
| rs79785274  | G | 0.2347  |
| rs3864670   | A | 0.0701  |
| rs62527294  | A | 0.0899  |
| rs117562813 | C | 0.0731  |
| rs4452813   | C | 0.0575  |
| rs75759704  | A | 0.0515  |
| rs62507204  | C | -0.0733 |
| rs10098478  | T | 0.2649  |
| rs2546229   | A | -0.0499 |
| rs58299989  | T | -0.1257 |
| rs996691    | T | -0.0379 |
| rs17802089  | T | 0.0593  |
| rs58732181  | G | 0.0888  |
| rs7831085   | T | -0.0324 |
| rs140649848 | A | -0.1623 |
| rs11780791  | A | 0.1807  |
| rs72660971  | C | 0.0663  |
| rs7836727   | A | 0.0331  |
| rs79325284  | A | 0.1374  |
| rs13251576  | A | 0.1491  |
| rs7013414   | T | -0.0625 |
| rs1448707   | G | 0.0404  |
| rs74522688  | A | 0.1074  |
| rs72716802  | T | 0.0848  |
| rs62510469  | G | -0.0983 |
| rs112686534 | G | -0.133  |
| rs112420524 | T | 0.1501  |
| rs7821956   | A | 0.0419  |
| rs72640355  | A | -0.1738 |
| rs144670068 | A | 0.1141  |
| rs10100696  | G | 0.2541  |
| rs1601394   | G | -0.041  |
| rs1487758   | T | 0.0314  |
| rs4055059   | C | 0.0753  |
| rs116919566 | C | 0.1586  |
| rs7841443   | A | 0.1674  |
| rs76070842  | T | 0.059   |
| rs10100570  | A | 0.1628  |
| rs76705785  | A | -0.1855 |
| rs56260433  | C | 0.0917  |
| rs112129734 | C | -0.0727 |
| rs7815043   | C | 0.0343  |

|             |   |         |
|-------------|---|---------|
| rs4871030   | A | 0.0348  |
| rs61467536  | T | 0.0866  |
| rs16884409  | C | -0.2028 |
| rs147362561 | G | 0.1318  |
| rs75531370  | A | 0.1199  |
| rs16918831  | A | 0.0722  |
| rs142162302 | T | -0.14   |
| rs7845446   | C | 0.062   |
| rs117868843 | C | 0.1586  |
| rs12546888  | C | -0.1958 |
| rs10094603  | G | 0.0412  |
| rs2177324   | A | 0.1467  |
| rs138777181 | T | 0.2567  |
| rs73186908  | T | -0.1513 |
| rs2357493   | C | 0.0363  |
| rs2116130   | C | 0.0323  |
| rs73707131  | T | 0.1277  |
| rs16918438  | G | -0.1955 |
| rs77087169  | A | -0.1112 |
| rs35835098  | A | 0.156   |
| rs353713    | A | 0.036   |
| rs111890737 | C | -0.1621 |
| rs1391116   | A | -0.0488 |
| rs143239990 | C | 0.1808  |
| rs2958323   | G | 0.0403  |
| rs116856439 | C | -0.1145 |
| rs113829080 | A | 0.2328  |
| rs75780279  | T | -0.0843 |
| rs17118863  | A | 0.0339  |
| rs80257811  | A | -0.1979 |
| rs62522694  | A | -0.1362 |
| rs8190893   | T | -0.0664 |
| rs4633091   | G | -0.0348 |
| rs12677932  | A | 0.0797  |
| rs17585571  | C | -0.0452 |
| rs7825959   | A | 0.0521  |
| rs785006    | G | -0.0949 |
| rs17121134  | C | 0.0527  |
| rs16879085  | A | 0.0566  |
| rs10098922  | C | 0.0314  |
| rs146774913 | A | -0.214  |
| rs144818065 | T | -0.0926 |
| rs138489808 | C | -0.0746 |
| rs79732777  | G | -0.2224 |
| rs28886369  | A | -0.0639 |
| rs77193633  | A | -0.0915 |
| rs147007416 | G | 0.2194  |

|             |   |         |
|-------------|---|---------|
| rs144831397 | T | -0.1483 |
| rs17057312  | A | -0.1903 |
| rs9297402   | C | -0.0687 |
| rs76520959  | T | 0.1373  |
| rs117010154 | A | 0.2119  |
| rs118130724 | G | -0.142  |
| rs56343944  | A | 0.0338  |
| rs118001413 | G | -0.1859 |
| rs74563865  | T | -0.0698 |
| rs148024950 | T | 0.0823  |
| rs17344030  | G | -0.0306 |
| rs116932075 | C | 0.1075  |
| rs35565482  | C | -0.0435 |
| rs150142783 | G | -0.1505 |
| rs139257354 | G | -0.2123 |
| rs146999950 | T | -0.2136 |
| rs405999    | A | -0.0787 |
| rs12678826  | A | 0.0591  |
| rs10808622  | T | 0.0377  |
| rs10104368  | A | -0.0629 |
| rs11995369  | C | -0.0389 |
| rs117849152 | T | 0.1241  |
| rs118173614 | A | 0.1006  |
| rs34236008  | A | 0.0532  |
| rs11774849  | T | -0.0359 |
| rs10113430  | T | -0.0443 |
| rs6987520   | C | -0.0501 |
| rs71502542  | C | 0.0721  |
| rs77536476  | A | 0.1315  |
| rs72634929  | T | -0.2247 |
| rs116161424 | G | 0.0918  |
| rs6472207   | A | 0.0356  |
| rs333044    | A | 0.0315  |
| rs1703960   | G | 0.0331  |
| rs147340448 | A | -0.1973 |
| rs61083582  | C | -0.0505 |
| rs62532232  | C | 0.0586  |
| rs117038064 | G | 0.2509  |
| rs117285312 | G | -0.215  |
| rs2467997   | A | -0.0345 |
| rs7821020   | C | 0.0415  |
| rs2721871   | A | -0.0382 |
| rs116975519 | C | -0.1605 |
| rs7014456   | A | 0.0827  |
| rs77002082  | A | -0.0667 |
| rs17709642  | G | 0.1302  |
| rs77574620  | A | -0.0422 |



|             |   |         |
|-------------|---|---------|
| rs10504320  | A | 0.1098  |
| rs7815102   | G | -0.0341 |
| rs2703264   | G | -0.0368 |
| rs112749864 | A | 0.1683  |
| rs7825513   | A | 0.1372  |
| rs116926500 | C | 0.0709  |
| rs77983068  | T | -0.1761 |
| rs142560258 | T | 0.2898  |
| rs12545570  | T | 0.1056  |
| rs4427165   | C | -0.0524 |
| rs142626011 | C | 0.0898  |
| rs77792321  | G | -0.2061 |
| rs28639498  | A | 0.0594  |
| rs6558122   | C | 0.0407  |
| rs7839411   | G | -0.0723 |
| rs79961145  | C | 0.0936  |
| rs74874280  | C | 0.1356  |
| rs150449216 | T | -0.1782 |
| rs60800787  | T | -0.0699 |
| rs2436099   | A | -0.033  |
| rs138991172 | T | 0.1736  |
| rs2030479   | T | 0.0756  |
| rs2437770   | A | 0.0335  |
| rs76239895  | T | 0.0924  |
| rs2460921   | T | -0.0683 |
| rs72725313  | A | -0.1575 |
| rs78085118  | G | 0.179   |
| rs76644861  | C | -0.0452 |
| rs118157427 | C | 0.229   |
| rs150448224 | G | 0.2395  |
| rs6996492   | T | -0.0381 |
| rs72719170  | T | 0.118   |
| rs2939979   | T | 0.034   |
| rs16909746  | T | 0.0511  |
| rs117690692 | G | -0.1336 |
| rs118043289 | A | -0.1324 |
| rs10105977  | G | -0.1476 |
| rs78648519  | A | -0.0867 |
| rs2981320   | G | 0.0346  |
| rs4873429   | T | -0.0408 |
| rs7000710   | G | 0.0516  |
| rs72724215  | A | -0.1449 |
| rs117574126 | A | 0.2419  |
| rs4733389   | C | 0.031   |
| rs2720659   | A | 0.0321  |
| rs76847734  | A | -0.2019 |
| rs78726578  | C | 0.0588  |

|             |   |         |
|-------------|---|---------|
| rs111649132 | T | 0.1609  |
| rs79116259  | T | -0.0982 |
| rs1879818   | T | 0.0335  |
| rs77725453  | A | -0.1516 |
| rs9314312   | T | -0.0322 |
| rs7831997   | C | -0.0374 |
| rs11785500  | G | 0.0523  |
| rs72714589  | T | 0.0816  |
| rs6981525   | A | 0.0321  |
| rs11997244  | T | -0.031  |
| rs74630609  | G | 0.0583  |
| rs62509529  | A | 0.1177  |
| rs10092266  | G | -0.123  |
| rs140174540 | A | -0.1085 |
| rs35106127  | T | 0.0744  |
| rs7827566   | A | 0.042   |
| rs13278335  | A | -0.0354 |
| rs151132699 | G | 0.1292  |
| rs17694784  | C | -0.1908 |
| rs4732927   | T | 0.0799  |
| rs77307652  | C | 0.0984  |
| rs73281875  | T | -0.1497 |
| rs17063757  | G | 0.1088  |
| rs56208516  | G | -0.1548 |
| rs10098917  | T | 0.1643  |
| rs2948643   | T | -0.0796 |
| rs35745659  | C | 0.0499  |
| rs73200950  | C | -0.0581 |
| rs16937356  | C | 0.1261  |
| rs114614226 | A | 0.1512  |
| rs4281089   | T | 0.1459  |
| rs12544578  | A | 0.0312  |
| rs111265646 | G | 0.1206  |
| rs13256774  | A | 0.0382  |
| rs13262824  | T | -0.0747 |
| rs143876639 | C | 0.0953  |
| rs1982092   | T | 0.0299  |
| rs73601434  | T | 0.0562  |
| rs1035379   | G | 0.0328  |
| rs71526263  | T | 0.2497  |
| rs147085229 | T | 0.1923  |
| rs75454689  | A | 0.1161  |
| rs151046235 | G | 0.1001  |
| rs139844922 | C | 0.1503  |
| rs66644352  | C | 0.0345  |
| rs75592514  | G | 0.0885  |
| rs7833560   | C | -0.0385 |

|             |   |         |
|-------------|---|---------|
| rs6468767   | G | 0.0414  |
| rs78498017  | A | 0.1717  |
| rs12680863  | A | -0.0343 |
| rs73205820  | T | -0.1544 |
| rs67847756  | G | -0.0943 |
| rs71516568  | T | 0.0306  |
| rs113212036 | A | 0.0967  |
| rs75074812  | T | -0.0975 |
| rs142043743 | T | 0.1237  |
| rs7460496   | T | 0.1099  |
| rs10107871  | A | -0.2779 |
| rs62523871  | G | -0.091  |
| rs76331441  | A | 0.0827  |
| rs35638972  | T | 0.0402  |
| rs10107206  | A | -0.0504 |
| rs1546002   | T | -0.0318 |
| rs12677602  | G | 0.0362  |
| rs1383033   | A | 0.0413  |
| rs2036273   | A | 0.0325  |
| rs144035463 | G | 0.1873  |
| rs188261    | A | -0.0325 |
| rs7004867   | T | 0.0666  |
| rs13270289  | A | 0.0334  |
| rs10481438  | C | -0.0333 |
| rs6991441   | T | -0.0498 |
| rs28623326  | T | 0.0322  |
| rs16900659  | A | 0.0818  |
| rs13255846  | T | -0.0712 |
| rs142002000 | T | 0.1812  |
| rs3133729   | T | -0.0436 |
| rs62480073  | C | 0.0977  |
| rs7831744   | G | 0.0365  |
| rs17053711  | A | -0.0353 |
| rs10090158  | A | 0.0329  |
| rs7825744   | T | -0.0501 |
| rs111502065 | A | 0.2655  |
| rs7831946   | C | -0.0869 |
| rs17687019  | T | 0.1315  |
| rs8191620   | A | 0.1206  |
| rs1349114   | A | 0.0642  |
| rs79202194  | T | 0.0531  |
| rs7833292   | G | 0.0313  |
| rs9644737   | G | -0.0359 |
| rs77726254  | A | 0.1616  |
| rs13266649  | A | 0.0308  |
| rs555601    | A | -0.0867 |
| rs10097144  | A | 0.0308  |

|             |   |         |
|-------------|---|---------|
| rs16910565  | A | -0.0619 |
| rs9657011   | C | 0.0312  |
| rs113518217 | T | 0.1634  |
| rs146150038 | C | -0.1672 |
| rs116948621 | A | 0.0683  |
| rs67922122  | A | -0.0903 |
| rs1822203   | T | -0.2185 |
| rs7825368   | G | -0.0299 |
| rs78946431  | A | 0.1083  |
| rs4272389   | G | 0.0576  |
| rs117285145 | A | -0.2122 |
| rs12549649  | T | -0.0437 |
| rs73665371  | A | 0.0722  |
| rs2472565   | A | 0.051   |
| rs4871384   | G | -0.0361 |
| rs12682038  | A | 0.0324  |
| rs144779892 | T | -0.1106 |
| rs75549213  | G | 0.0543  |
| rs6997194   | C | 0.0306  |
| rs1009699   | A | 0.034   |
| rs279967    | A | -0.0669 |
| rs28463395  | T | 0.056   |
| rs10504422  | A | 0.0528  |
| rs62487728  | C | 0.0834  |
| rs2604333   | C | 0.0342  |
| rs35534695  | T | 0.0795  |
| rs6993895   | T | 0.0424  |
| rs827730    | C | 0.0414  |
| rs117038455 | T | -0.225  |
| rs2440202   | G | -0.03   |
| rs4831251   | T | 0.0298  |
| rs62523287  | T | 0.1424  |
| rs17581453  | G | -0.0501 |
| rs1269716   | G | -0.0346 |
| rs72603988  | G | 0.1689  |
| rs77529714  | T | -0.1364 |
| rs12549163  | A | -0.0787 |
| rs11778808  | C | -0.067  |
| rs117334462 | G | 0.1352  |
| rs67650612  | C | -0.0466 |
| rs113182491 | T | -0.1005 |
| rs143415507 | A | 0.0879  |
| rs78718058  | A | 0.2418  |
| rs146714932 | C | 0.1655  |
| rs28547420  | C | 0.1294  |
| rs12544940  | C | 0.1124  |
| rs1108710   | A | 0.0313  |

|             |   |         |
|-------------|---|---------|
| rs28657008  | T | -0.0804 |
| rs35860604  | C | 0.0918  |
| rs10095656  | T | 0.034   |
| rs483392    | A | 0.0301  |
| rs307770    | A | -0.104  |
| rs73182234  | A | 0.0548  |
| rs73175735  | A | 0.0955  |
| rs6420158   | A | 0.1502  |
| rs111614454 | C | -0.0968 |
| rs11990141  | G | -0.094  |
| rs11994326  | G | -0.0788 |
| rs12056942  | T | -0.0441 |
| rs7841174   | T | 0.0314  |
| rs4298494   | A | -0.0384 |
| rs2217375   | T | -0.0458 |
| rs111647464 | T | 0.0746  |
| rs10086105  | C | -0.0327 |
| rs79451365  | C | -0.1681 |
| rs6474300   | G | 0.0393  |
| rs139653735 | G | -0.0895 |
| rs28811086  | G | -0.0296 |
| rs78937476  | T | 0.0559  |
| rs17717580  | C | 0.1154  |
| rs117223609 | G | -0.2223 |
| rs112041579 | A | -0.1471 |
| rs75340805  | C | -0.0685 |
| rs34407287  | C | -0.0528 |
| rs73170500  | T | -0.0993 |
| rs4737145   | A | 0.0468  |
| rs13261706  | T | 0.0794  |
| rs1436012   | A | 0.2258  |
| rs147473752 | T | 0.1156  |
| rs2511714   | G | 0.0328  |
| rs57699438  | C | -0.1408 |
| rs201982    | A | 0.0722  |
| rs73697569  | C | 0.1107  |
| rs13275776  | A | -0.0368 |
| rs113168400 | G | -0.1252 |
| rs1373541   | G | 0.0321  |
| rs10958318  | T | -0.036  |
| rs13272479  | G | -0.1555 |
| rs10100851  | A | 0.044   |
| rs28380608  | C | 0.0531  |
| rs57050661  | A | -0.1011 |
| rs36128721  | G | -0.038  |
| rs2514731   | G | -0.0328 |
| rs2622600   | G | -0.0302 |

|             |   |         |
|-------------|---|---------|
| rs28646885  | C | 0.0317  |
| rs13254554  | T | 0.03    |
| rs73179590  | C | -0.0815 |
| rs11994754  | C | 0.0653  |
| rs10464861  | A | 0.0421  |
| rs139588964 | G | 0.1433  |
| rs1317256   | T | -0.0336 |
| rs17639531  | A | 0.0671  |
| rs7827466   | C | -0.0417 |
| rs74430681  | T | 0.0527  |
| rs35605641  | G | 0.0481  |
| rs762679    | T | -0.0441 |
| rs75675010  | G | 0.1232  |
| rs147219680 | G | 0.2145  |
| rs34383127  | A | -0.0422 |
| rs17402856  | A | -0.0651 |
| rs10955351  | A | 0.1124  |
| rs78285053  | A | -0.1118 |
| rs3900401   | G | 0.0416  |
| rs78661410  | A | 0.158   |
| rs77642396  | C | 0.1599  |
| rs4341178   | A | -0.0482 |
| rs71526988  | A | -0.1644 |
| rs72654942  | C | 0.0936  |
| rs1369165   | C | -0.0297 |
| rs12547604  | C | 0.0348  |
| rs10088702  | T | 0.0331  |
| rs117146701 | A | -0.1369 |
| rs11774480  | A | -0.0441 |
| rs78845803  | A | -0.1758 |
| rs16888930  | C | 0.1179  |
| rs77188179  | T | 0.2398  |
| rs143541803 | T | 0.0973  |
| rs4641091   | C | 0.0389  |
| rs79310071  | G | 0.17    |
| rs13274273  | G | -0.1309 |
| rs622765    | A | -0.039  |
| rs11989117  | G | -0.0846 |
| rs4921697   | T | 0.0304  |
| rs118164941 | A | 0.1239  |
| rs1357568   | A | 0.0344  |
| rs72734203  | A | -0.0764 |
| rs149341110 | T | 0.1078  |
| rs143312828 | C | 0.1014  |
| rs73201850  | C | 0.1775  |
| rs117118944 | T | 0.1408  |
| rs77517669  | A | 0.2124  |

|             |   |         |
|-------------|---|---------|
| rs62502027  | T | -0.05   |
| rs12678463  | T | 0.0394  |
| rs57117916  | T | 0.1507  |
| rs10103019  | C | -0.0387 |
| rs10101413  | A | 0.1108  |
| rs62517830  | A | 0.0492  |
| rs1113708   | G | -0.0845 |
| rs13271784  | G | 0.0378  |
| rs9325805   | T | 0.0298  |
| rs10100188  | G | 0.0366  |
| rs7842266   | A | -0.0298 |
| rs117525389 | T | 0.2298  |
| rs141103756 | T | -0.1904 |
| rs12678875  | T | 0.0414  |
| rs7815846   | G | 0.042   |
| rs79711727  | A | 0.084   |
| rs10106035  | T | 0.0574  |
| rs16916616  | T | -0.1495 |
| rs7012649   | C | -0.0304 |
| rs113115394 | G | 0.1319  |
| rs57108635  | A | 0.1405  |
| rs77592395  | G | 0.0949  |
| rs12681953  | T | 0.0294  |
| rs117476566 | T | -0.1528 |
| rs10113333  | T | -0.0396 |
| rs77411000  | G | 0.209   |
| rs147197943 | C | 0.0962  |
| rs2934940   | A | 0.0481  |
| rs3857953   | C | 0.0435  |
| rs2947390   | G | 0.0334  |
| rs112562561 | A | 0.0416  |
| rs149432944 | A | 0.2105  |
| rs4425753   | G | 0.0581  |
| rs178021    | T | 0.2048  |
| rs75656259  | C | -0.1942 |
| rs74464121  | C | 0.0584  |
| rs7011536   | C | 0.0309  |
| rs117525857 | T | -0.1278 |
| rs11250085  | G | 0.0403  |
| rs78981378  | A | 0.1341  |
| rs56997204  | A | 0.0892  |
| rs113776200 | A | 0.1968  |
| rs75921843  | G | -0.0653 |
| rs4033002   | A | 0.0965  |
| rs118184704 | A | 0.2758  |
| rs35167320  | C | -0.0651 |
| rs72655726  | A | 0.1134  |

|             |   |         |
|-------------|---|---------|
| rs113694456 | A | -0.1476 |
| rs10216581  | T | -0.0341 |
| rs62512790  | G | -0.0482 |
| rs28623233  | G | 0.0293  |
| rs139887562 | G | 0.2464  |
| rs10093549  | T | 0.0575  |
| rs71514733  | A | 0.1215  |
| rs147884095 | T | 0.1115  |
| rs79243630  | G | 0.0859  |
| rs2618466   | C | 0.1608  |
| rs62531015  | C | -0.0522 |
| rs79566774  | C | -0.1115 |
| rs78932736  | C | 0.1274  |
| rs4735777   | C | -0.0817 |
| rs2385296   | C | -0.0288 |
| rs7821595   | G | -0.0295 |
| rs4841601   | C | -0.0317 |
| rs117358294 | A | -0.194  |
| rs17355157  | T | -0.0404 |
| rs11985779  | G | -0.0304 |
| rs76812823  | C | -0.1161 |
| rs4736218   | T | -0.0627 |
| rs57328787  | G | -0.1103 |
| rs57190673  | G | -0.0691 |
| rs62532476  | C | -0.0363 |
| rs10113614  | C | 0.051   |
| rs75445205  | T | 0.1171  |
| rs150786311 | G | 0.2207  |
| rs6982205   | A | 0.0442  |
| rs7836205   | G | 0.0431  |
| rs60741236  | T | 0.0364  |
| rs34678715  | A | -0.1086 |
| rs59316904  | C | 0.0455  |
| rs7845828   | A | 0.1004  |
| rs6988831   | T | -0.0568 |
| rs113829180 | T | 0.0538  |
| rs817250    | C | 0.1168  |
| rs73192219  | A | 0.103   |
| rs139913081 | T | 0.1016  |
| rs55771603  | T | 0.0323  |
| rs117630606 | T | 0.1433  |
| rs2277137   | A | -0.0527 |
| rs12547787  | G | 0.0968  |
| rs7821427   | C | -0.0329 |
| rs10096369  | A | -0.0424 |
| rs10108278  | G | 0.0317  |
| rs79371289  | T | 0.0982  |



|             |   |         |
|-------------|---|---------|
| rs10099182  | A | -0.0393 |
| rs113555727 | C | 0.2453  |
| rs6986899   | G | -0.0309 |
| rs999451    | T | -0.052  |
| rs17829629  | A | -0.0352 |
| rs12681639  | T | -0.0383 |
| rs73437656  | C | 0.1292  |
| rs2222831   | T | 0.0343  |
| rs138227457 | T | 0.2441  |
| rs148458269 | T | 0.1069  |
| rs7827900   | T | -0.0809 |
| rs7464466   | G | 0.0302  |
| rs1079226   | A | 0.0495  |
| rs79611771  | C | -0.0871 |
| rs77594100  | A | -0.1235 |
| rs75870656  | C | -0.1125 |
| rs7017671   | C | 0.0556  |
| rs7014923   | C | -0.0296 |
| rs117333517 | C | 0.0877  |
| rs140255290 | A | 0.1292  |
| rs34995480  | G | 0.045   |
| rs2853161   | G | 0.0288  |
| rs7823876   | G | 0.0344  |
| rs73204714  | T | 0.0485  |
| rs1378049   | A | -0.0468 |
| rs1078778   | A | -0.0442 |
| rs4567030   | A | 0.0643  |
| rs4074243   | T | -0.034  |
| rs147381996 | G | 0.1732  |
| rs58568403  | C | -0.035  |
| rs138217258 | T | 0.2297  |
| rs144755830 | A | -0.2182 |
| rs145755492 | A | 0.2172  |
| rs118141587 | C | -0.2833 |
| rs75171385  | A | 0.0632  |
| rs10113728  | T | -0.039  |
| rs13269679  | T | -0.1539 |
| rs143365634 | A | -0.213  |
| rs143867850 | C | -0.1686 |
| rs147013976 | A | 0.1175  |
| rs62503286  | C | 0.1242  |
| rs28642263  | G | -0.0417 |
| rs2588223   | A | 0.0317  |
| rs78075620  | A | 0.202   |
| rs116415326 | T | 0.0612  |
| rs12544216  | T | -0.0873 |
| rs1559950   | A | 0.0723  |

|             |   |         |
|-------------|---|---------|
| rs3133625   | G | 0.0355  |
| rs78804376  | T | 0.1081  |
| rs75858659  | T | -0.1522 |
| rs4732799   | T | -0.0293 |
| rs1000038   | C | 0.2108  |
| rs117460651 | C | -0.1005 |
| rs76601506  | A | 0.138   |
| rs141632870 | T | 0.1055  |
| rs6558946   | C | 0.0735  |
| rs28688294  | C | 0.0352  |
| rs74855612  | C | -0.0619 |
| rs10505435  | A | -0.1742 |
| rs118106671 | A | 0.214   |
| rs77847087  | A | -0.1519 |
| rs112483795 | G | 0.079   |
| rs117762155 | T | -0.263  |
| rs148721714 | G | -0.0302 |
| rs76026985  | G | 0.1585  |
| rs78294689  | C | 0.1093  |
| rs2044899   | A | -0.0305 |
| rs7007674   | G | 0.0918  |
| rs4332130   | A | 0.12    |
| rs138826942 | C | 0.2564  |
| rs399123    | C | -0.0333 |
| rs17057611  | C | -0.094  |
| rs2724953   | A | -0.0335 |
| rs78502245  | A | 0.082   |
| rs62505710  | A | -0.1945 |
| rs72678525  | T | -0.0892 |
| rs12114032  | A | -0.0306 |
| rs13249545  | T | -0.0417 |
| rs58999725  | T | -0.1497 |
| rs77906050  | C | 0.0739  |
| rs76295536  | A | -0.086  |
| rs4421349   | A | -0.0519 |
| rs13254612  | T | 0.0631  |
| rs2681533   | T | -0.0394 |
| rs907133    | C | -0.0467 |
| rs77835103  | G | -0.1407 |
| rs13262930  | C | -0.0334 |
| rs77373584  | A | 0.1475  |
| rs35360341  | A | -0.0538 |
| rs4909633   | T | -0.0426 |
| rs144692869 | C | -0.1522 |
| rs58490506  | A | -0.0874 |
| rs111435793 | C | 0.0758  |
| rs7462014   | A | -0.0577 |

|             |   |         |
|-------------|---|---------|
| rs77214276  | A | 0.1685  |
| rs73612863  | A | 0.1151  |
| rs11996576  | C | -0.0325 |
| rs79711180  | G | -0.1817 |
| rs76839426  | A | 0.1034  |
| rs16894717  | A | 0.1738  |
| rs2627274   | A | -0.1778 |
| rs2513832   | C | 0.0333  |
| rs475181    | C | 0.0362  |
| rs2061847   | C | 0.0297  |
| rs34152861  | A | 0.1079  |
| rs118046494 | T | 0.2378  |
| rs2044869   | C | -0.0319 |
| rs16894295  | A | 0.0654  |
| rs4733604   | T | -0.0854 |
| rs72649637  | C | 0.0854  |
| rs143806593 | T | 0.1845  |
| rs4445223   | A | 0.029   |
| rs73275578  | C | -0.0867 |
| rs113407587 | A | 0.0702  |
| rs113926172 | T | 0.07    |
| rs7827410   | C | -0.0391 |
| rs113729131 | A | 0.0707  |
| rs7829347   | C | -0.0507 |
| rs148157999 | T | -0.2024 |
| rs2896654   | G | -0.0526 |
| rs9297638   | A | -0.0812 |
| rs140710331 | T | 0.1125  |
| rs62485068  | C | 0.0905  |
| rs2293851   | C | -0.0364 |
| rs144615666 | G | 0.1166  |
| rs11784961  | C | -0.2    |
| rs10100563  | A | 0.0291  |
| rs113287539 | A | -0.1379 |
| rs4503060   | G | 0.0468  |
| rs2720679   | A | 0.1238  |
| rs62520496  | G | -0.1509 |
| rs117129150 | T | 0.0881  |
| rs7839016   | G | -0.0836 |
| rs7009917   | C | -0.0432 |
| rs79549616  | G | 0.1868  |
| rs72649684  | T | -0.0561 |
| rs13278246  | C | 0.042   |
| rs12541947  | T | -0.0869 |
| rs34547819  | A | -0.1471 |
| rs259854    | C | -0.0321 |
| rs72669030  | C | 0.1418  |

|             |   |         |
|-------------|---|---------|
| rs394226    | C | 0.0855  |
| rs1595874   | A | 0.0332  |
| rs11989948  | T | 0.0305  |
| rs6558433   | C | -0.0386 |
| rs77264178  | A | -0.0554 |
| rs2853181   | C | -0.2604 |
| rs78916003  | G | 0.0988  |
| rs4875583   | T | -0.0451 |
| rs79451156  | G | 0.0604  |
| rs72712735  | A | 0.1196  |
| rs13256965  | G | 0.0306  |
| rs141443024 | A | 0.2304  |
| rs7015645   | T | 0.1183  |
| rs74630760  | C | 0.133   |
| rs145000734 | C | 0.2003  |
| rs62542336  | G | -0.031  |
| rs72658040  | T | 0.1141  |
| rs116983913 | C | -0.1305 |
| rs74989464  | C | 0.0486  |
| rs11994846  | A | 0.0531  |
| rs112277589 | T | -0.099  |
| rs28406446  | T | 0.0485  |
| rs17666     | C | -0.0312 |
| rs58485326  | T | -0.1239 |
| rs1501059   | C | -0.0307 |
| rs117754629 | G | 0.0753  |
| rs62497505  | A | -0.1285 |
| rs146071260 | A | 0.153   |
| rs10505334  | C | -0.031  |
| rs78482714  | A | 0.0818  |
| rs71521808  | A | 0.12    |
| rs6996471   | A | -0.0359 |
| rs117781901 | C | 0.1189  |
| rs76540043  | T | -0.1541 |
| rs35723243  | A | 0.2516  |
| rs117362020 | A | 0.1043  |
| rs13272900  | C | -0.118  |
| rs16936623  | A | -0.0298 |
| rs7845189   | C | -0.0483 |
| rs78841698  | G | 0.0472  |
| rs116877123 | G | 0.077   |
| rs11781985  | C | 0.0351  |
| rs4705      | T | 0.0309  |
| rs117128341 | A | -0.1163 |
| rs17536700  | T | 0.2213  |
| rs62527825  | T | 0.1036  |
| rs79640982  | C | -0.1018 |

|             |   |         |
|-------------|---|---------|
| rs118158207 | G | 0.2187  |
| rs72554084  | T | -0.1936 |
| rs13258052  | A | -0.0732 |
| rs72672201  | A | -0.1212 |
| rs16915399  | C | 0.1159  |
| rs2952194   | G | 0.0517  |
| rs17089263  | G | -0.0602 |
| rs988030    | G | 0.0761  |
| rs7840808   | T | 0.0349  |
| rs144071354 | C | 0.0829  |
| rs17201     | C | 0.0298  |
| rs17820995  | T | 0.1511  |
| rs77271347  | A | 0.1577  |
| rs56316167  | T | 0.0547  |
| rs148637999 | T | 0.1184  |
| rs146440001 | A | 0.1282  |
| rs74797588  | C | -0.0865 |
| rs117488866 | T | 0.0999  |
| rs7017184   | C | -0.0386 |
| rs116950810 | G | 0.1417  |
| rs75945431  | T | -0.0807 |
| rs10283377  | T | -0.0757 |
| rs9987294   | A | 0.0394  |
| rs10481247  | A | -0.0322 |
| rs3935507   | T | 0.0385  |
| rs2953807   | A | -0.1158 |
| rs145382059 | A | 0.1033  |
| rs75662996  | A | -0.0956 |
| rs143681993 | A | -0.1448 |
| rs1028780   | C | -0.0381 |
| rs72687180  | C | 0.1297  |
| rs16904946  | G | 0.1204  |
| rs13279316  | C | 0.0341  |
| rs74743427  | G | 0.1377  |
| rs11778261  | G | 0.2268  |
| rs4133395   | G | 0.0298  |
| rs77755202  | T | 0.195   |
| rs2729973   | T | 0.0471  |
| rs56399711  | G | -0.0387 |
| rs74614220  | C | -0.1697 |
| rs117462705 | G | -0.1183 |
| rs75454421  | G | -0.0987 |
| rs2515143   | G | 0.0316  |
| rs117576993 | G | -0.1371 |
| rs146676099 | C | -0.1454 |
| rs11787233  | G | 0.065   |
| rs111779916 | G | 0.1921  |

|             |   |         |
|-------------|---|---------|
| rs149431918 | T | 0.1876  |
| rs13249487  | T | -0.0426 |
| rs4460395   | C | 0.029   |
| rs117651482 | A | 0.2027  |
| rs75562940  | A | -0.2091 |
| rs73191715  | G | -0.1155 |
| rs4738846   | T | 0.0348  |
| rs900114    | T | -0.0298 |
| rs10086012  | G | 0.0579  |
| rs111380686 | C | -0.1466 |
| rs4266657   | T | -0.0469 |
| rs77872848  | C | -0.0785 |
| rs146662931 | G | 0.134   |
| rs35112756  | C | -0.0458 |
| rs1472834   | A | -0.03   |
| rs17817279  | A | 0.0318  |
| rs10217097  | T | -0.1798 |
| rs1482015   | T | 0.0286  |
| rs117202965 | T | 0.1068  |
| rs2178255   | C | 0.0397  |
| rs111945929 | A | 0.0694  |
| rs4272417   | A | 0.0364  |
| rs73234665  | T | 0.113   |
| rs76289489  | C | 0.2027  |
| rs77946035  | G | -0.1008 |
| rs78935216  | A | 0.0558  |
| rs112657549 | T | -0.0692 |
| rs149341501 | G | -0.217  |
| rs1586475   | A | -0.0283 |
| rs115706183 | T | -0.2241 |
| rs80200098  | T | -0.1939 |
| rs112910828 | A | -0.1298 |
| rs7836501   | A | -0.0305 |
| rs62486198  | A | 0.1136  |
| rs147974720 | A | 0.0987  |
| rs76078698  | A | -0.0534 |
| rs73211392  | T | 0.0735  |
| rs73335605  | T | 0.0978  |
| rs10109767  | G | -0.0566 |
| rs2600505   | G | -0.1061 |
| rs117315157 | A | 0.0988  |
| rs73212544  | G | 0.0442  |
| rs80019879  | G | 0.063   |
| rs10100258  | A | 0.0298  |
| rs143109089 | A | -0.221  |
| rs6989616   | T | -0.0654 |
| rs13257669  | A | -0.0419 |

|             |   |         |
|-------------|---|---------|
| rs6984344   | A | 0.03    |
| rs6986421   | C | -0.0333 |
| rs77709138  | C | -0.1192 |
| rs4872278   | T | 0.0292  |
| rs77240165  | A | 0.1437  |
| rs11783389  | A | -0.1145 |
| rs2705062   | A | 0.0587  |
| rs138119556 | A | -0.1048 |
| rs13282872  | G | 0.0297  |
| rs80187473  | C | -0.0589 |
| rs12549199  | T | -0.0417 |
| rs17750541  | A | -0.0422 |
| rs80150413  | A | -0.1046 |
| rs13257704  | A | 0.1155  |
| rs56135204  | T | 0.076   |
| rs73506343  | G | 0.076   |
| rs34663620  | A | 0.1382  |
| rs11166830  | G | -0.1059 |
| rs62520488  | A | 0.1356  |
| rs7837537   | G | 0.0801  |
| rs73723436  | T | 0.1105  |
| rs4385482   | C | 0.0332  |
| rs16870125  | G | 0.0786  |
| rs79893608  | A | 0.1657  |
| rs4628252   | T | 0.0302  |
| rs17155244  | A | 0.0407  |
| rs76780389  | A | -0.047  |
| rs117190982 | T | 0.0829  |
| rs13255574  | T | -0.0371 |
| rs113931255 | G | 0.1599  |
| rs2385523   | C | 0.0356  |
| rs9314612   | A | -0.0363 |
| rs12544584  | G | -0.206  |
| rs17634200  | C | 0.0336  |
| rs277023    | T | 0.0406  |
| rs117721421 | T | 0.1092  |
| rs62522663  | G | -0.1227 |
| rs7461066   | T | 0.1103  |
| rs75655497  | A | 0.1345  |
| rs4872436   | C | -0.0417 |
| rs1864728   | C | -0.0294 |
| rs11776870  | T | 0.0527  |
| rs77997364  | G | 0.2083  |
| rs28434525  | A | 0.0326  |
| rs8190996   | A | 0.0285  |
| rs118166083 | A | 0.1684  |
| rs35530507  | C | -0.0358 |

|             |   |         |
|-------------|---|---------|
| rs55644114  | A | -0.0387 |
| rs35194005  | A | -0.0538 |
| rs80038586  | A | 0.0349  |
| rs481217    | T | 0.052   |
| rs117505118 | A | 0.1869  |
| rs143571427 | A | 0.1469  |
| rs1160132   | T | 0.029   |
| rs11782755  | G | -0.084  |
| rs6986887   | C | -0.037  |
| rs7465307   | T | -0.0459 |
| rs117559779 | A | 0.1289  |
| rs77739461  | A | -0.1903 |
| rs76669344  | T | 0.1018  |
| rs13262524  | A | 0.0958  |
| rs76885486  | G | 0.1284  |
| rs17741142  | A | 0.0673  |
| rs76209777  | G | -0.0705 |
| rs72721959  | T | -0.2414 |
| rs2118566   | A | 0.0287  |
| rs140292882 | C | 0.1477  |
| rs36033686  | C | -0.0338 |
| rs28522410  | T | 0.0377  |
| rs72692378  | A | 0.1319  |
| rs117357757 | T | 0.1079  |
| rs149861286 | A | 0.1944  |
| rs10955567  | A | -0.0359 |
| rs56077934  | A | -0.1358 |
| rs13256028  | A | 0.0306  |
| rs2843813   | A | 0.0351  |
| rs74994552  | T | -0.1652 |
| rs117355339 | A | -0.0782 |
| rs2737206   | T | -0.0283 |
| rs4922065   | C | 0.037   |
| rs2466432   | G | 0.0836  |
| rs73220082  | G | 0.0346  |
| rs2576576   | A | -0.0317 |
| rs16908717  | C | 0.041   |
| rs73423928  | A | 0.1263  |
| rs117764474 | G | -0.0753 |
| rs2439636   | G | -0.0286 |
| rs74571604  | G | 0.1458  |
| rs142424780 | G | 0.173   |
| rs117585615 | G | 0.0737  |
| rs79200379  | T | 0.1313  |
| rs7836482   | G | 0.0361  |
| rs9314572   | G | -0.0404 |
| rs117697016 | G | -0.0742 |



|             |   |         |
|-------------|---|---------|
| rs12544831  | C | -0.0472 |
| rs76991948  | A | 0.1806  |
| rs74926318  | A | -0.1215 |
| rs7813255   | G | 0.029   |
| rs6987016   | T | 0.0354  |
| rs76288681  | T | -0.1727 |
| rs2325909   | T | 0.0323  |
| rs4876026   | C | 0.0356  |
| rs7844662   | T | -0.031  |
| rs75577417  | A | -0.1529 |
| rs75655161  | A | -0.1867 |
| rs112159085 | C | 0.1982  |
| rs7844924   | C | -0.0388 |
| rs2740811   | G | -0.0344 |
| rs62477524  | C | 0.033   |
| rs17088776  | G | 0.0719  |
| rs2442756   | C | -0.029  |
| rs17740971  | C | 0.0525  |
| rs75378245  | A | 0.0875  |
| rs80292392  | T | 0.0825  |
| rs7812803   | T | 0.0402  |
| rs56189376  | T | -0.0322 |
| rs74355816  | C | -0.1492 |
| rs2686207   | T | 0.1268  |
| rs35223597  | G | 0.1358  |
| rs34939478  | G | -0.0419 |
| rs7843302   | T | 0.0391  |
| rs75109210  | A | 0.0567  |
| rs55946986  | G | 0.0895  |
| rs28661866  | A | -0.0363 |
| rs17525603  | T | -0.0429 |
| rs72713108  | G | -0.0933 |
| rs16937745  | C | 0.2205  |
| rs72606694  | C | -0.0466 |
| rs148898373 | C | 0.1467  |
| rs4377988   | G | -0.0293 |
| rs140469942 | G | -0.1128 |
| rs4363163   | A | -0.1838 |
| rs78325106  | C | 0.0601  |
| rs72676388  | C | -0.1019 |
| rs62524371  | C | 0.1695  |
| rs6995422   | C | -0.0412 |
| rs41515047  | A | -0.1461 |
| rs10096102  | C | -0.0285 |
| rs149722275 | T | -0.2772 |
| rs2607614   | T | -0.1124 |
| rs62526514  | A | -0.1382 |

|             |   |         |
|-------------|---|---------|
| rs3829018   | A | -0.045  |
| rs144280397 | T | 0.1283  |
| rs72719812  | G | 0.2209  |
| rs146561005 | G | 0.1643  |
| rs7004029   | C | 0.0333  |
| rs12543102  | A | 0.0967  |
| rs17468697  | C | -0.1413 |
| rs117178289 | T | -0.0915 |
| rs78025577  | T | -0.0971 |
| rs140402092 | G | -0.1141 |
| rs62488532  | C | -0.2016 |
| rs4871408   | A | 0.0323  |
| rs17155343  | A | -0.0657 |
| rs6471599   | G | 0.0344  |
| rs117072659 | G | 0.0957  |
| rs7835789   | A | 0.029   |
| rs117286520 | C | -0.1098 |
| rs77476371  | C | 0.0844  |
| rs7825128   | G | -0.0517 |
| rs77144145  | C | -0.1497 |
| rs62507455  | A | 0.0824  |
| rs28571632  | T | -0.085  |
| rs74527265  | C | 0.1626  |
| rs79373846  | A | 0.1042  |
| rs79447136  | T | 0.1311  |
| rs7826429   | T | 0.056   |
| rs10109611  | A | -0.0951 |
| rs2042527   | T | 0.0544  |
| rs4976858   | G | 0.0414  |
| rs4588834   | T | 0.0335  |
| rs113603691 | G | 0.1496  |
| rs2449558   | A | 0.0419  |
| rs75483357  | A | -0.0871 |
| rs17689740  | G | -0.0605 |
| rs6999156   | C | -0.0495 |
| rs151134343 | T | 0.0925  |
| rs74709851  | G | 0.1314  |
| rs77879746  | T | 0.2006  |
| rs1000803   | C | -0.0337 |
| rs1545480   | G | -0.0328 |
| rs73521111  | C | 0.0451  |
| rs13281743  | G | -0.0413 |
| rs10095847  | G | -0.0439 |
| rs2950345   | C | 0.0517  |
| rs117076718 | C | -0.1016 |
| rs148004695 | C | 0.1343  |
| rs11996036  | A | 0.0984  |

|             |   |         |
|-------------|---|---------|
| rs14375     | G | 0.0548  |
| rs117927451 | T | -0.1128 |
| rs76844207  | C | 0.1333  |
| rs28921423  | C | 0.0732  |
| rs76426590  | T | 0.057   |
| rs509479    | A | -0.1424 |
| rs78241729  | A | 0.1225  |
| rs75129249  | C | 0.142   |
| rs7387009   | C | -0.0897 |
| rs12545528  | T | 0.0291  |
| rs10092130  | A | -0.0374 |
| rs922162    | C | -0.0292 |
| rs76309088  | G | -0.273  |
| rs77194201  | C | 0.099   |
| rs74805031  | A | -0.2852 |
| rs17506603  | G | 0.0439  |
| rs1963931   | A | 0.0319  |
| rs116962581 | G | -0.1889 |
| rs79323736  | A | -0.0618 |
| rs35300584  | C | -0.1833 |
| rs10089111  | T | 0.0306  |
| rs140468283 | T | -0.1113 |
| rs7817996   | T | 0.0471  |
| rs72718565  | G | 0.0977  |
| rs2128158   | A | 0.0456  |
| rs7843243   | T | 0.0487  |
| rs13262848  | A | -0.0277 |
| rs4736932   | C | 0.0314  |
| rs60723194  | G | 0.065   |
| rs117996576 | G | 0.171   |
| rs72607381  | T | -0.0622 |
| rs7829174   | A | 0.0275  |
| rs35244840  | A | -0.169  |
| rs12375342  | C | 0.1689  |
| rs78992933  | G | -0.0456 |
| rs939024    | A | 0.0349  |
| rs11782832  | T | -0.0776 |
| rs3105764   | T | -0.0295 |
| rs7013540   | G | -0.0769 |
| rs72715726  | C | 0.047   |
| rs79682491  | C | -0.1705 |
| rs7821585   | A | 0.0395  |
| rs117966479 | C | -0.1109 |
| rs118048740 | A | -0.1715 |
| rs56223946  | T | 0.0443  |
| rs79028031  | C | 0.1659  |
| rs7013231   | G | 0.0352  |

|             |   |         |
|-------------|---|---------|
| rs1004711   | G | -0.0291 |
| rs143550027 | T | -0.1436 |
| rs34927110  | T | 0.0642  |
| rs6472910   | G | -0.0497 |
| rs150306149 | T | 0.11    |
| rs17395021  | C | -0.0436 |
| rs111545900 | A | 0.0862  |
| rs10957157  | A | -0.0711 |
| rs12548824  | T | 0.0385  |
| rs79911366  | T | -0.2146 |
| rs41491246  | C | -0.0793 |
| rs10100668  | G | -0.0289 |
| rs1531746   | C | -0.0309 |
| rs147971131 | C | 0.1248  |
| rs13261404  | G | -0.0393 |
| rs73177099  | T | 0.1727  |
| rs76111443  | A | 0.0898  |
| rs117939940 | G | 0.1273  |
| rs62489162  | C | -0.0422 |
| rs76762880  | G | 0.1763  |
| rs376600    | C | -0.0382 |
| rs17428505  | C | 0.0359  |
| rs7014150   | T | 0.1585  |
| rs12542550  | T | 0.0293  |
| rs118060646 | C | -0.1204 |
| rs72636133  | G | -0.1638 |
| rs66742107  | A | 0.0385  |
| rs146487832 | C | 0.1608  |
| rs7846428   | A | -0.0283 |
| rs80255771  | T | 0.2023  |
| rs6472465   | A | -0.028  |
| rs112329866 | G | -0.0305 |
| rs139635417 | A | -0.1145 |
| rs113482477 | T | 0.2325  |
| rs60336993  | A | -0.0616 |
| rs74647778  | C | 0.1588  |
| rs73356971  | A | -0.0695 |
| rs17683475  | T | 0.1897  |
| rs7012304   | C | -0.029  |
| rs77615252  | C | -0.0838 |
| rs117201049 | A | 0.1631  |
| rs17466259  | G | -0.0738 |
| rs13280905  | C | -0.0421 |
| rs55910148  | C | -0.1941 |
| rs141805220 | G | -0.266  |
| rs870686    | A | 0.0706  |
| rs77259059  | G | -0.1858 |

|             |   |         |
|-------------|---|---------|
| rs72724622  | T | 0.0406  |
| rs62509454  | T | 0.0941  |
| rs117021828 | T | -0.1592 |
| rs2595608   | T | -0.0644 |
| rs1450169   | T | 0.2017  |
| rs7829420   | A | -0.0293 |
| rs143600318 | G | 0.1487  |
| rs7819311   | G | 0.0386  |
| rs139275328 | T | 0.189   |
| rs77143027  | A | 0.0983  |
| rs10958423  | T | 0.0904  |
| rs76775902  | T | -0.1164 |
| rs62524698  | C | -0.0421 |
| rs75455129  | A | 0.0766  |
| rs7008984   | C | 0.0749  |
| rs73375896  | C | -0.0284 |
| rs34350704  | A | 0.1977  |
| rs76714824  | C | 0.1045  |
| rs575485    | A | -0.04   |
| rs118016934 | A | 0.1543  |
| rs9297291   | T | 0.036   |
| rs74749675  | G | 0.0805  |
| rs2154636   | T | 0.0293  |
| rs1382606   | G | -0.0272 |
| rs117780551 | T | -0.0935 |
| rs1736128   | A | -0.0303 |
| rs74876351  | T | -0.1529 |
| rs36172208  | T | -0.0471 |
| rs7459993   | A | -0.0292 |
| rs76186904  | A | 0.1191  |
| rs12682204  | G | -0.0289 |
| rs79743894  | T | -0.2371 |
| rs80093288  | A | 0.2056  |
| rs62502896  | G | -0.0918 |
| rs28845834  | C | 0.0305  |
| rs117700184 | A | -0.1027 |
| rs76923651  | T | -0.0914 |
| rs10081451  | T | -0.1388 |
| rs150741309 | G | 0.2266  |
| rs7823055   | G | 0.03    |
| rs12681551  | T | 0.0556  |
| rs2736874   | C | 0.0325  |
| rs10089568  | A | 0.0348  |
| rs13281365  | T | -0.0289 |
| rs16937735  | C | -0.0888 |
| rs2725371   | A | 0.0306  |
| rs138890563 | G | 0.2005  |

|             |   |         |
|-------------|---|---------|
| rs117431173 | C | -0.1345 |
| rs45499592  | G | -0.1297 |
| rs4739611   | C | -0.03   |
| rs117233299 | G | 0.2106  |
| rs55680837  | C | -0.0295 |
| rs62518041  | T | -0.1877 |
| rs151330623 | T | 0.0775  |
| rs75828035  | T | -0.1193 |
| rs145804220 | T | 0.18    |
| rs113243095 | C | 0.0459  |
| rs150448001 | A | 0.0874  |
| rs35290916  | T | 0.0341  |
| rs78620426  | A | 0.0467  |
| rs2954870   | C | -0.0315 |
| rs1512350   | T | 0.1133  |
| rs75855435  | T | -0.0605 |
| rs13255356  | C | -0.0364 |
| rs142728037 | C | -0.0637 |
| rs79638704  | G | -0.0608 |
| rs11780531  | C | -0.0512 |
| rs74452169  | T | -0.1325 |
| rs61453208  | C | 0.0702  |
| rs4093060   | C | -0.0316 |
| rs117714848 | A | 0.1992  |
| rs59231837  | G | 0.1321  |
| rs9792276   | C | 0.0368  |
| rs117783536 | A | 0.0764  |
| rs327223    | A | 0.0496  |
| rs114460530 | T | 0.1307  |
| rs112711962 | G | 0.1737  |
| rs112961365 | T | 0.1511  |
| rs13266183  | T | 0.0325  |
| rs62496856  | A | -0.038  |
| rs4733474   | G | 0.0561  |
| rs117685538 | C | 0.1522  |
| rs9643404   | C | 0.0345  |
| rs140124539 | A | 0.1409  |
| rs1995581   | G | 0.0281  |
| rs17093318  | C | -0.0373 |
| rs6472435   | T | -0.04   |
| rs73510805  | C | 0.189   |
| rs2672242   | C | 0.0797  |
| rs6470197   | C | 0.0355  |
| rs7003425   | C | 0.0281  |
| rs7843029   | C | -0.089  |
| rs75908462  | A | -0.0969 |
| rs60618516  | C | -0.0598 |

|             |   |         |
|-------------|---|---------|
| rs12676278  | T | 0.0291  |
| rs2013743   | C | -0.03   |
| rs10100061  | G | -0.0554 |
| rs143201132 | T | 0.1108  |
| rs2949552   | G | -0.0525 |
| rs2975842   | T | -0.028  |
| rs138603856 | A | -0.1146 |
| rs7000038   | C | 0.0409  |
| rs35934750  | T | 0.1153  |
| rs143667464 | A | 0.149   |
| rs279654    | C | 0.0281  |
| rs11990648  | T | -0.054  |
| rs4921662   | T | 0.0301  |
| rs117203445 | A | -0.2172 |
| rs4472564   | G | -0.1641 |
| rs2256399   | T | -0.1113 |
| rs6577897   | T | 0.0296  |
| rs6471427   | C | -0.0427 |
| rs58882531  | A | -0.0702 |
| rs115254148 | A | -0.1787 |
| rs62527483  | A | 0.1269  |
| rs12544235  | T | 0.0609  |
| rs10101549  | T | 0.1967  |
| rs10503332  | G | -0.0538 |
| rs111962457 | C | -0.1164 |
| rs2451169   | T | 0.0427  |
| rs16915825  | A | -0.062  |
| rs117862337 | A | 0.1574  |
| rs7000433   | C | 0.0688  |
| rs75141399  | A | -0.1113 |
| rs7836666   | C | 0.0605  |
| rs72676268  | G | -0.1743 |
| rs734810    | T | 0.031   |
| rs143256229 | A | 0.2021  |
| rs10505082  | A | -0.0367 |
| rs10956658  | T | -0.029  |
| rs7817232   | A | 0.1373  |
| rs7825233   | T | -0.0279 |
| rs10097488  | T | -0.0285 |
| rs11778564  | G | 0.0639  |
| rs77732433  | T | -0.0999 |
| rs11774279  | C | -0.0472 |
| rs144799044 | T | 0.2666  |
| rs10102508  | C | 0.1468  |
| rs11785551  | A | 0.0286  |
| rs6990554   | A | 0.0303  |
| rs78359281  | T | 0.0753  |

|             |   |         |
|-------------|---|---------|
| rs9771722   | T | -0.035  |
| rs56215468  | A | -0.0548 |
| rs78834199  | C | 0.0385  |
| rs7812739   | C | 0.0981  |
| rs28548678  | A | 0.0295  |
| rs59617265  | T | 0.0652  |
| rs72678300  | G | -0.0877 |
| rs16935065  | A | 0.0372  |
| rs7016463   | G | 0.083   |
| rs112886087 | G | 0.0956  |
| rs77471893  | T | 0.1543  |
| rs151329299 | G | 0.198   |
| rs837223    | T | 0.0293  |
| rs1454286   | G | 0.0973  |
| rs113456903 | A | 0.1645  |
| rs11776856  | C | 0.0582  |
| rs79245535  | T | -0.1137 |
| rs13274287  | G | 0.0277  |
| rs67284756  | G | 0.0712  |
| rs6983426   | T | -0.0854 |
| rs4870831   | C | -0.0325 |
| rs66610427  | C | 0.042   |
| rs16892875  | A | 0.0507  |
| rs118127421 | C | 0.1222  |
| rs149186708 | G | -0.1458 |
| rs6469626   | T | 0.0286  |
| rs7834854   | G | 0.0322  |
| rs117235607 | A | 0.1671  |
| rs9324495   | C | -0.0655 |
| rs681237    | C | 0.0268  |
| rs143515957 | A | 0.1191  |
| rs17746786  | A | 0.1107  |
| rs17789792  | A | -0.0635 |
| rs3843561   | A | -0.0343 |
| rs73698833  | C | -0.109  |
| rs72663125  | A | -0.1609 |
| rs62488415  | A | 0.1334  |
| rs148676356 | A | 0.1332  |
| rs145219019 | G | -0.1483 |
| rs10087668  | T | -0.0372 |
| rs73211759  | G | 0.0969  |
| rs6987534   | C | -0.0282 |
| rs142620742 | T | -0.1664 |
| rs17686482  | C | -0.0501 |
| rs144796111 | A | -0.1515 |
| rs74910267  | C | 0.0621  |
| rs140554017 | A | -0.0556 |



|             |   |         |
|-------------|---|---------|
| rs74647280  | C | -0.0699 |
| rs7003132   | G | 0.0573  |
| rs112585504 | G | 0.0951  |
| rs73219561  | C | 0.0737  |
| rs78130013  | A | -0.095  |
| rs57618757  | A | 0.1036  |
| rs77950751  | G | -0.1072 |
| rs146179386 | T | -0.1265 |
| rs7823749   | A | 0.0422  |
| rs11781815  | T | 0.0439  |
| rs34522868  | A | -0.0272 |
| rs72697630  | T | -0.141  |
| rs28525319  | C | -0.0381 |
| rs80167664  | C | 0.0606  |
| rs72698418  | A | 0.186   |
| rs998245    | T | -0.0748 |
| rs28379612  | C | -0.0302 |
| rs17446776  | G | 0.1219  |
| rs6471299   | C | -0.0273 |
| rs73218373  | C | 0.1367  |
| rs1388962   | G | 0.0324  |
| rs4448269   | C | -0.0397 |
| rs143507943 | T | -0.0866 |
| rs7840123   | A | 0.0435  |
| rs11203621  | C | 0.0279  |
| rs10955809  | T | 0.0664  |
| rs2248055   | C | 0.0278  |
| rs4236879   | G | 0.0436  |
| rs2922472   | A | -0.0478 |
| rs7844687   | G | -0.0309 |
| rs76106579  | G | 0.1072  |
| rs6980991   | G | 0.0371  |
| rs77456262  | A | -0.0564 |
| rs13248347  | C | -0.0392 |
| rs6998213   | A | -0.0285 |
| rs4909890   | C | 0.0282  |
| rs10955804  | A | 0.0326  |
| rs11987014  | G | -0.0881 |
| rs907157    | A | -0.0271 |
| rs16935265  | G | -0.183  |
| rs138416192 | A | -0.1044 |
| rs10100854  | T | -0.0283 |
| rs75366620  | T | 0.1813  |
| rs12546509  | A | 0.1229  |
| rs1431587   | A | 0.0289  |
| rs79293945  | G | 0.1148  |
| rs7830580   | G | 0.0277  |

|             |   |         |
|-------------|---|---------|
| rs966377    | G | 0.0303  |
| rs11785858  | G | -0.0395 |
| rs7815953   | T | 0.0616  |
| rs1992922   | C | 0.2772  |
| rs118134214 | C | 0.1572  |
| rs1968586   | T | -0.0291 |
| rs10956457  | A | 0.0783  |
| rs6468435   | G | -0.0648 |
| rs138832344 | T | 0.1755  |
| rs147393306 | C | 0.169   |
| rs139832760 | T | -0.1622 |
| rs4740011   | A | 0.1393  |
| rs150799317 | G | 0.091   |
| rs80067469  | A | -0.0581 |
| rs1436764   | T | 0.0291  |
| rs117361803 | T | -0.1072 |
| rs80215903  | T | 0.0924  |
| rs117982327 | C | -0.1026 |
| rs75946320  | T | -0.0676 |
| rs7013529   | T | -0.0378 |
| rs1009613   | C | 0.0353  |
| rs117303566 | A | -0.1977 |
| rs2235118   | C | 0.0425  |
| rs10111325  | A | -0.14   |
| rs71523636  | T | 0.11    |
| rs3763558   | A | -0.0414 |
| rs11779255  | C | 0.0727  |
| rs80243363  | C | 0.2215  |
| rs62494996  | T | 0.2509  |
| rs79795616  | T | 0.1367  |
| rs79116232  | A | -0.1297 |
| rs3808527   | C | -0.0286 |
| rs142749643 | C | 0.0966  |
| rs77093115  | T | 0.1704  |
| rs16904607  | T | 0.0484  |
| rs12549116  | A | -0.0342 |
| rs28446884  | A | -0.0635 |
| rs118013367 | T | 0.144   |
| rs150852246 | T | 0.1462  |
| rs73667408  | T | 0.0611  |
| rs140140770 | T | 0.1998  |
| rs10101864  | A | 0.0475  |
| rs140988706 | A | 0.138   |
| rs57818049  | A | 0.0399  |
| rs117005584 | C | 0.0843  |
| rs115841192 | A | -0.0684 |
| rs76146139  | C | -0.1665 |

|             |   |         |
|-------------|---|---------|
| rs117928169 | C | 0.2071  |
| rs80238839  | T | -0.2466 |
| rs10105748  | T | 0.0443  |
| rs16938860  | T | 0.1063  |
| rs6988320   | C | 0.0305  |
| rs4738021   | A | -0.0294 |
| rs17801727  | T | -0.0279 |
| rs76189808  | G | -0.062  |
| rs4634648   | C | 0.0904  |
| rs117838679 | A | -0.0626 |
| rs139139904 | A | 0.1763  |
| rs78760501  | A | 0.0618  |
| rs10504946  | A | 0.0458  |
| rs1293294   | A | -0.0982 |
| rs139423719 | A | -0.2292 |
| rs7812488   | C | 0.0409  |
| rs117049070 | G | -0.1647 |
| rs138945704 | T | 0.2041  |
| rs62489615  | T | -0.1315 |
| rs77669852  | T | 0.1446  |
| rs4237104   | C | 0.0274  |
| rs41394345  | T | 0.038   |
| rs77157137  | G | -0.0891 |
| rs72680308  | A | -0.0558 |
| rs79221195  | A | 0.0893  |
| rs78988782  | A | 0.1677  |
| rs2083770   | T | -0.0858 |
| rs28663056  | G | 0.1176  |
| rs1986407   | T | 0.0898  |
| rs13277907  | C | -0.0371 |
| rs298204    | C | 0.0365  |
| rs9643611   | G | -0.0332 |
| rs6992247   | T | -0.0301 |
| rs143682781 | A | -0.0987 |
| rs28621498  | A | -0.0544 |
| rs28651343  | A | -0.0809 |
| rs117901446 | A | -0.1378 |
| rs74983555  | T | -0.1306 |
| rs2958319   | G | -0.0862 |
| rs9644261   | T | 0.0425  |
| rs4841660   | T | -0.0378 |
| rs7832044   | G | 0.1002  |
| rs1499428   | G | 0.041   |
| rs77492777  | G | 0.1963  |
| rs12682316  | T | 0.0534  |
| rs117021381 | C | 0.0969  |
| rs62535164  | A | -0.1265 |

|             |   |         |
|-------------|---|---------|
| rs4735441   | C | 0.0488  |
| rs11786724  | G | -0.0277 |
| rs13250723  | G | -0.146  |
| rs116864849 | A | -0.1011 |
| rs11783921  | T | 0.0741  |
| rs6558668   | G | -0.0303 |
| rs6997473   | G | 0.0606  |
| rs72612129  | A | -0.1206 |
| rs141757548 | C | -0.1739 |
| rs1822063   | G | -0.0306 |
| rs113771453 | A | -0.1316 |
| rs17092214  | C | 0.0284  |
| rs13281363  | T | 0.032   |
| rs73309635  | G | 0.0916  |
| rs61705694  | T | 0.0915  |
| rs112524253 | T | -0.1346 |
| rs140013833 | G | -0.1477 |
| rs13267484  | T | 0.0329  |
| rs4512391   | C | 0.0286  |
| rs6990723   | A | 0.0807  |
| rs2904658   | T | 0.0332  |
| rs73625106  | T | -0.0514 |
| rs6999442   | C | -0.0423 |
| rs34650047  | A | 0.0416  |
| rs2634526   | T | -0.0326 |
| rs17094690  | T | 0.169   |
| rs2582778   | T | -0.0273 |
| rs117168948 | C | 0.1444  |
| rs13260311  | C | -0.0322 |
| rs72632906  | T | -0.0888 |
| rs35000052  | G | 0.1026  |
| rs60269841  | G | -0.0907 |
| rs2272613   | T | -0.0658 |
| rs117271894 | A | 0.1089  |
| rs150661457 | C | -0.1008 |
| rs36007037  | A | 0.1379  |
| rs7828209   | C | -0.0314 |
| rs10106995  | T | 0.0679  |
| rs150679144 | T | 0.17    |
| rs138777140 | A | 0.1626  |
| rs145271123 | A | 0.1576  |
| rs141296532 | G | -0.0901 |
| rs11995227  | T | -0.0387 |
| rs72723558  | T | -0.1472 |
| rs2664357   | C | -0.031  |
| rs74306769  | T | -0.1208 |
| rs55848761  | A | 0.0537  |

|             |   |         |
|-------------|---|---------|
| rs74811919  | G | -0.0742 |
| rs78396061  | A | -0.1294 |
| rs1976326   | A | -0.0306 |
| rs73269528  | G | 0.1474  |
| rs80347717  | T | 0.1086  |
| rs73595359  | T | 0.0295  |
| rs7011015   | A | -0.2356 |
| rs775951    | T | 0.0375  |
| rs58967664  | C | 0.134   |
| rs13252986  | C | -0.1106 |
| rs141456505 | T | 0.136   |
| rs34787478  | T | 0.1193  |
| rs55758770  | G | 0.0531  |
| rs4610768   | C | -0.0276 |
| rs62520815  | T | -0.0425 |
| rs28622430  | C | 0.2397  |
| rs62493308  | C | 0.0336  |
| rs11775371  | C | 0.0326  |
| rs17814124  | G | -0.0375 |
| rs79412231  | T | 0.0705  |
| rs79634557  | C | -0.1254 |
| rs76010286  | A | -0.1469 |
| rs117936713 | C | -0.2058 |
| rs56854236  | C | 0.174   |
| rs2977331   | T | 0.0444  |
| rs12679494  | G | 0.0434  |
| rs779106    | A | 0.0393  |
| rs144175904 | T | 0.1445  |
| rs1909936   | C | -0.1044 |
| rs72678111  | T | 0.0544  |
| rs13276958  | C | 0.0278  |
| rs16933666  | A | 0.0548  |
| rs118038112 | A | -0.1183 |
| rs6986612   | G | 0.0269  |
| rs13439668  | G | -0.0752 |
| rs10109243  | T | -0.0581 |
| rs145088029 | T | 0.2017  |
| rs118061513 | G | -0.1397 |
| rs3136797   | G | 0.1739  |
| rs2977372   | A | 0.1417  |
| rs72721973  | T | 0.1317  |
| rs78740295  | T | 0.1769  |
| rs112397271 | T | -0.11   |
| rs75439501  | T | -0.0716 |
| rs75655575  | G | 0.1676  |
| rs71522793  | A | 0.0288  |
| rs13256770  | C | 0.1083  |

|             |   |         |
|-------------|---|---------|
| rs13265263  | T | -0.0593 |
| rs10081580  | T | 0.1975  |
| rs75030020  | C | -0.04   |
| rs1028259   | G | -0.0404 |
| rs4738868   | G | -0.0276 |
| rs6999907   | G | 0.1037  |
| rs3908203   | T | 0.0421  |
| rs34352453  | C | 0.2107  |
| rs115273363 | C | 0.0797  |
| rs17735712  | A | -0.0309 |
| rs144537056 | T | -0.1339 |
| rs28680728  | T | 0.0745  |
| rs1481850   | A | 0.0346  |
| rs1374300   | C | -0.1547 |
| rs7829147   | A | 0.0289  |
| rs10097822  | A | -0.0337 |
| rs138618273 | C | -0.1339 |
| rs10108954  | T | 0.0802  |
| rs140389138 | C | 0.093   |
| rs74807756  | G | -0.1283 |
| rs4416853   | G | -0.0428 |
| rs61016492  | C | 0.0353  |
| rs117305468 | T | -0.1832 |
| rs12548182  | T | -0.0275 |
| rs78561947  | A | -0.0415 |
| rs10107716  | C | 0.0323  |
| rs35011721  | T | 0.0628  |
| rs112311683 | T | 0.0339  |
| rs118134341 | C | 0.1352  |
| rs6469501   | T | -0.1249 |
| rs79795740  | C | -0.1423 |
| rs117989507 | C | 0.173   |
| rs6994664   | G | -0.0312 |
| rs17226545  | T | -0.0277 |
| rs2614081   | G | -0.0365 |
| rs73691300  | C | 0.0806  |
| rs1864317   | A | -0.0429 |
| rs13258377  | C | -0.0315 |
| rs76580454  | T | 0.1265  |
| rs10503333  | T | 0.0392  |
| rs73525874  | G | 0.0852  |
| rs2622634   | G | -0.0293 |
| rs4998087   | T | -0.031  |
| rs17829237  | C | 0.0988  |
| rs117199032 | A | 0.0983  |
| rs17276050  | T | -0.0334 |
| rs56226488  | A | -0.0457 |

|             |   |         |
|-------------|---|---------|
| rs6995842   | G | -0.1233 |
| rs1608994   | T | -0.0531 |
| rs4302849   | A | -0.0297 |
| rs2721293   | G | -0.0294 |
| rs6994937   | G | -0.028  |
| rs11778621  | C | -0.0604 |
| rs16899163  | G | 0.0354  |
| rs66748173  | A | 0.0473  |
| rs111875506 | A | -0.1042 |
| rs73672948  | C | -0.159  |
| rs2468671   | T | -0.0319 |
| rs71532389  | T | 0.0956  |
| rs7006441   | T | 0.0604  |
| rs62493795  | G | -0.1421 |
| rs409783    | T | 0.028   |
| rs117528263 | A | 0.1282  |
| rs74667217  | T | 0.1217  |
| rs78148189  | A | 0.1164  |
| rs76209506  | A | 0.0856  |
| rs72663985  | T | 0.0717  |
| rs141352946 | T | 0.106   |
| rs16938240  | A | -0.097  |
| rs7836875   | C | 0.0291  |
| rs2442572   | C | -0.0261 |
| rs2956648   | A | -0.0266 |
| rs6468874   | T | 0.0411  |
| rs144251789 | G | -0.1358 |
| rs2256476   | T | -0.0309 |
| rs75810078  | T | 0.0961  |
| rs13439625  | G | 0.0348  |
| rs73345844  | C | -0.0918 |
| rs28752272  | G | 0.032   |
| rs76656751  | G | 0.1032  |
| rs2406686   | C | 0.0329  |
| rs116904731 | T | 0.088   |
| rs4831684   | G | 0.0261  |
| rs2515037   | G | 0.0282  |
| rs7828831   | C | 0.1046  |
| rs117929068 | T | 0.1227  |
| rs16887279  | T | -0.1467 |
| rs2703501   | G | -0.0346 |
| rs79928334  | T | 0.2364  |
| rs112420249 | T | -0.1931 |
| rs35389370  | T | 0.1084  |
| rs34604838  | A | 0.0848  |
| rs28625850  | C | 0.0903  |
| rs2930382   | A | 0.0273  |

|             |   |         |
|-------------|---|---------|
| rs76720866  | A | -0.127  |
| rs6998375   | A | -0.0327 |
| rs28538623  | C | 0.0287  |
| rs79338460  | C | 0.1359  |
| rs16892776  | T | 0.136   |
| rs713536    | T | -0.0299 |
| rs9656783   | A | 0.1916  |
| rs10093382  | C | 0.0325  |
| rs6982080   | T | 0.0296  |
| rs13281083  | T | 0.0295  |
| rs995172    | C | 0.0981  |
| rs10093778  | A | -0.0342 |
| rs34072568  | T | 0.0363  |
| rs1012340   | C | -0.0271 |
| rs16895840  | C | 0.0363  |
| rs118179494 | C | 0.1244  |
| rs28372269  | C | -0.0821 |
| rs117227844 | C | -0.1223 |
| rs7006947   | G | 0.0314  |
| rs143951775 | C | 0.11    |
| rs4876254   | G | -0.0314 |
| rs117464928 | T | 0.1473  |
| rs73241023  | A | 0.0335  |
| rs78637700  | A | 0.1178  |
| rs78789913  | A | -0.1631 |
| rs4641096   | C | -0.0302 |
| rs80270339  | A | -0.0962 |
| rs72672433  | A | 0.0882  |
| rs73222568  | T | 0.115   |
| rs142626063 | G | 0.0688  |
| rs77913157  | T | -0.0697 |
| rs117216345 | T | -0.0931 |
| rs116904356 | T | -0.1338 |
| rs17442432  | A | 0.0706  |
| rs111863524 | T | 0.138   |
| rs16895287  | G | -0.069  |
| rs10957032  | C | 0.0664  |
| rs72652622  | T | -0.182  |
| rs77765105  | A | -0.1951 |
| rs117318601 | A | 0.0628  |
| rs116843848 | G | 0.0746  |
| rs10109923  | A | 0.0681  |
| rs637684    | T | 0.0278  |
| rs74562439  | A | -0.1075 |
| rs73244373  | G | -0.1011 |
| rs2043376   | G | 0.0752  |
| rs117034152 | G | 0.1181  |



|             |   |         |
|-------------|---|---------|
| rs2895820   | G | 0.0635  |
| rs17242974  | A | 0.0669  |
| rs117671651 | A | -0.146  |
| rs143658440 | C | 0.1096  |
| rs117656436 | A | 0.0954  |
| rs71524160  | A | -0.087  |
| rs4060542   | A | -0.0314 |
| rs13257594  | C | 0.0308  |
| rs10105314  | G | 0.0469  |
| rs11782155  | G | 0.0461  |
| rs78607938  | T | 0.227   |
| rs75638498  | A | -0.2278 |
| rs17413763  | G | -0.0301 |
| rs1961450   | C | -0.0316 |
| rs74613220  | A | 0.0902  |
| rs77646490  | A | 0.1277  |
| rs111787623 | A | -0.3078 |
| rs76066366  | A | -0.1539 |
| rs118023157 | T | 0.0392  |
| rs118161136 | T | 0.1261  |
| rs34907178  | T | 0.1574  |
| rs12542611  | T | 0.04    |
| rs11783334  | T | 0.0284  |
| rs2945254   | T | 0.0539  |
| rs10095792  | C | -0.0338 |
| rs80017101  | A | 0.2597  |
| rs77215255  | C | -0.0499 |
| rs35177173  | T | -0.0992 |
| rs117753718 | T | -0.1499 |
| rs10503352  | C | 0.0478  |
| rs78317802  | C | -0.1561 |
| rs11785212  | T | 0.0341  |
| rs241148    | T | -0.0342 |
| rs3899796   | G | 0.0292  |
| rs117900220 | G | -0.2184 |
| rs75156433  | G | 0.1341  |
| rs113254485 | T | -0.0865 |
| rs12548036  | T | -0.0272 |
| rs2022982   | C | -0.029  |
| rs12682293  | A | 0.0265  |
| rs112639446 | A | 0.136   |
| rs13261309  | A | 0.0273  |
| rs77889460  | C | 0.0686  |
| rs59363340  | T | -0.0397 |
| rs76987852  | G | -0.1078 |
| rs10110355  | G | -0.2229 |
| rs13255639  | T | -0.056  |

|             |   |         |
|-------------|---|---------|
| rs140319256 | A | -0.1295 |
| rs12680630  | G | 0.0332  |
| rs56250442  | C | -0.028  |
| rs59107076  | A | 0.1634  |
| rs6992115   | C | -0.0282 |
| rs113636140 | T | 0.1036  |
| rs2736322   | T | 0.0436  |
| rs13281193  | A | -0.1306 |
| rs117569266 | A | -0.0956 |
| rs77462478  | A | 0.1611  |
| rs149406788 | C | 0.072   |
| rs117283755 | A | 0.1693  |
| rs62474695  | A | 0.0945  |
| rs62512811  | A | -0.1324 |
| rs79540982  | T | -0.0977 |
| rs12549623  | T | -0.0735 |
| rs4737190   | A | 0.0488  |
| rs13270564  | C | 0.0264  |
| rs687324    | C | 0.0267  |
| rs13257637  | A | -0.0274 |
| rs7813822   | C | 0.1258  |
| rs11993875  | T | 0.1335  |
| rs77343608  | T | 0.1663  |
| rs74724758  | G | -0.0569 |
| rs7008059   | C | 0.0577  |
| rs113423866 | C | 0.1389  |
| rs76892164  | A | -0.1081 |
| rs1257820   | T | 0.0678  |
| rs7003636   | A | 0.0604  |
| rs72712465  | T | -0.0672 |
| rs80228109  | A | -0.1624 |
| rs74841075  | A | -0.0768 |
| rs67415647  | T | 0.0415  |
| rs2513852   | C | -0.0293 |
| rs5025867   | T | 0.0396  |
| rs4128412   | A | 0.0289  |
| rs4554446   | T | -0.0612 |
| rs117174860 | C | 0.219   |
| rs35755521  | C | -0.1198 |
| rs117473134 | T | 0.1082  |
| rs1480390   | T | 0.0582  |
| rs2446440   | A | -0.0301 |
| rs78173877  | T | -0.1566 |
| rs117190561 | T | 0.1276  |
| rs73331791  | T | -0.0783 |
| rs143625312 | G | -0.1021 |
| rs4870858   | T | -0.0287 |

|             |   |         |
|-------------|---|---------|
| rs16922400  | T | 0.1087  |
| rs59217267  | A | 0.1218  |
| rs112238140 | T | 0.0895  |
| rs2844264   | A | 0.0391  |
| rs62502892  | G | 0.0368  |
| rs112097149 | G | 0.1197  |
| rs75586786  | A | 0.1461  |
| rs12543579  | C | -0.0661 |
| rs201981    | T | 0.0259  |
| rs117953094 | A | -0.0913 |
| rs138592102 | G | 0.1139  |
| rs71525437  | C | 0.0493  |
| rs17453707  | A | -0.1521 |
| rs115200535 | T | -0.1846 |
| rs7387833   | A | 0.0746  |
| rs35958942  | G | 0.1969  |
| rs72731690  | A | -0.0758 |
| rs28513844  | G | -0.0337 |
| rs13248986  | C | 0.1986  |
| rs417545    | A | 0.1087  |
| rs4921719   | A | -0.0273 |
| rs12675986  | T | -0.0491 |
| rs116985643 | C | 0.0749  |
| rs76129372  | T | 0.0513  |
| rs117910839 | A | 0.0844  |
| rs143236393 | A | -0.1646 |
| rs77040319  | A | 0.1335  |
| rs1866348   | G | 0.0413  |
| rs10090884  | C | -0.0491 |
| rs28741083  | T | -0.1483 |
| rs148655046 | C | 0.2299  |
| rs75831067  | C | -0.0957 |
| rs12541415  | G | -0.1935 |
| rs77968050  | C | 0.1608  |
| rs7832654   | G | -0.029  |
| rs72652529  | A | -0.1383 |
| rs17072952  | G | 0.2014  |
| rs2409700   | T | 0.0695  |
| rs6983137   | G | -0.0939 |
| rs149314092 | T | 0.1938  |
| rs185852    | A | 0.0321  |
| rs2945734   | C | 0.0267  |
| rs142555195 | A | -0.1335 |
| rs16890665  | A | 0.0392  |
| rs561255    | A | -0.0396 |
| rs149717164 | A | 0.0473  |
| rs75063305  | A | 0.0685  |

|             |   |         |
|-------------|---|---------|
| rs6578240   | T | 0.0311  |
| rs17669712  | G | -0.1337 |
| rs979954    | T | 0.156   |
| rs74834863  | A | -0.1667 |
| rs1424875   | T | 0.0268  |
| rs117811898 | T | -0.1396 |
| rs7845120   | C | -0.0272 |
| rs117692299 | A | -0.1416 |
| rs76746055  | G | 0.0413  |
| rs117405146 | T | 0.094   |
| rs146169443 | T | 0.1113  |
| rs73715503  | G | -0.093  |
| rs117702836 | A | -0.1039 |
| rs74996221  | T | -0.1483 |
| rs7016917   | T | -0.059  |
| rs7465508   | G | 0.0466  |
| rs12545129  | T | 0.0441  |
| rs74834368  | C | 0.1027  |
| rs16904846  | C | -0.1497 |
| rs1595136   | C | -0.1149 |
| rs118189071 | A | 0.0915  |
| rs78722679  | C | -0.177  |
| rs11136745  | G | 0.0351  |
| rs1563399   | A | 0.0292  |
| rs141019354 | C | 0.0905  |
| rs79227958  | G | 0.063   |
| rs7834413   | C | 0.0314  |
| rs10103652  | C | 0.0266  |
| rs10091958  | A | 0.1139  |
| rs28727988  | T | 0.1076  |
| rs117892289 | G | -0.1583 |
| rs75248740  | T | 0.1047  |
| rs72671165  | A | 0.0815  |
| rs10505429  | T | 0.0332  |
| rs142660913 | A | -0.2274 |
| rs10098876  | A | 0.1511  |
| rs80048298  | C | -0.1547 |
| rs13282727  | A | 0.0276  |
| rs28404625  | C | 0.1327  |
| rs75877530  | A | 0.1167  |
| rs13261413  | T | 0.0265  |
| rs72733662  | T | 0.065   |
| rs62496287  | T | -0.1441 |
| rs2430780   | T | -0.0278 |
| rs34666638  | G | 0.087   |
| rs35053509  | T | -0.0301 |
| rs62491924  | C | -0.0338 |

|             |   |         |
|-------------|---|---------|
| rs73211808  | T | -0.0631 |
| rs76231068  | A | 0.1103  |
| rs13263998  | C | -0.0552 |
| rs4736563   | C | -0.0281 |
| rs13276266  | T | -0.0558 |
| rs12676246  | G | -0.029  |
| rs293888    | T | 0.0264  |
| rs2856803   | T | -0.1726 |
| rs78772651  | A | 0.1256  |
| rs13261011  | A | 0.0314  |
| rs79273666  | C | 0.0777  |
| rs11579     | A | -0.0266 |
| rs1866699   | C | -0.0449 |
| rs7828912   | G | -0.0291 |
| rs143283392 | C | -0.1059 |
| rs2645438   | C | 0.0261  |
| rs3802261   | G | 0.0323  |
| rs148336595 | T | -0.1078 |
| rs148101303 | T | -0.1253 |
| rs56362701  | T | -0.0256 |
| rs35080682  | G | 0.0627  |
| rs115662107 | T | 0.0791  |
| rs117224359 | A | 0.0908  |
| rs1545314   | A | 0.0337  |
| rs6601591   | C | -0.1074 |
| rs112442251 | T | 0.0838  |
| rs117395379 | A | 0.0969  |
| rs62499265  | T | -0.0795 |
| rs11777693  | A | -0.1081 |
| rs114955412 | C | 0.155   |
| rs78972950  | C | 0.0556  |
| rs72655617  | A | 0.1315  |
| rs148666298 | A | 0.1098  |
| rs7013543   | A | -0.0274 |
| rs117559771 | T | -0.1274 |
| rs140080376 | A | -0.1545 |
| rs13274763  | A | 0.0276  |
| rs72663465  | A | -0.1471 |
| rs7831510   | T | 0.0522  |
| rs13267101  | T | -0.042  |
| rs74693171  | A | 0.1466  |
| rs4870870   | T | 0.0595  |
| rs979728    | T | -0.0294 |
| rs10108139  | C | -0.0266 |
| rs6981350   | C | 0.1799  |
| rs117962464 | C | 0.1203  |
| rs149875881 | A | 0.1594  |

|             |   |         |
|-------------|---|---------|
| rs1235759   | T | -0.026  |
| rs150611641 | T | -0.1524 |
| rs111648015 | T | 0.0804  |
| rs141641517 | C | 0.0927  |
| rs13278083  | G | -0.075  |
| rs10105611  | T | 0.0283  |
| rs28661290  | G | -0.0387 |
| rs146826266 | C | -0.1656 |
| rs79557883  | T | -0.1512 |
| rs12674732  | C | -0.0264 |
| rs16889288  | G | -0.0309 |
| rs78116359  | T | -0.1214 |
| rs9886368   | A | 0.0404  |
| rs7820468   | T | -0.042  |
| rs12114416  | A | -0.0945 |
| rs76011793  | A | 0.0696  |
| rs12546154  | G | 0.1599  |
| rs13249960  | G | -0.0262 |
| rs141524391 | A | -0.1256 |
| rs142163903 | T | 0.1069  |
| rs77106431  | A | 0.0591  |
| rs2168669   | A | 0.0693  |
| rs28469851  | T | -0.0881 |
| rs79438271  | A | -0.1059 |
| rs4831776   | C | 0.06    |
| rs116976925 | G | -0.0816 |
| rs72688133  | A | -0.1268 |
| rs118103730 | T | -0.1147 |
| rs73368810  | A | 0.0826  |
| rs111790132 | T | 0.2103  |
| rs11775759  | G | 0.0288  |
| rs79304717  | C | 0.1041  |
| rs113054717 | A | 0.109   |
| rs11990011  | C | 0.0426  |
| rs75320558  | G | -0.0399 |
| rs1370568   | G | 0.0369  |
| rs11997169  | C | 0.0386  |
| rs117773946 | A | 0.2043  |
| rs12681266  | T | -0.0316 |
| rs2430802   | A | -0.0288 |
| rs10109440  | A | -0.0585 |
| rs117450253 | T | 0.161   |
| rs79434935  | A | -0.1203 |
| rs1960439   | A | -0.0292 |
| rs73711273  | G | 0.0476  |
| rs2527761   | C | 0.0283  |
| rs76544478  | C | 0.0717  |

|             |   |         |
|-------------|---|---------|
| rs17128476  | C | 0.0685  |
| rs55635314  | C | 0.041   |
| rs7827048   | C | -0.0307 |
| rs7836937   | G | 0.0262  |
| rs77261274  | C | -0.0305 |
| rs6996970   | A | -0.03   |
| rs72674150  | T | -0.1681 |
| rs4075832   | G | -0.0425 |
| rs116947122 | G | -0.0523 |
| rs1620703   | A | -0.0276 |
| rs117102712 | G | 0.114   |
| rs72665767  | A | -0.181  |
| rs142594166 | A | 0.1424  |
| rs4602904   | A | 0.0324  |
| rs13439599  | T | 0.146   |
| rs7835387   | C | -0.028  |
| rs80248152  | C | 0.1199  |
| rs2616493   | G | 0.0292  |
| rs4625015   | T | -0.0651 |
| rs2357508   | A | 0.0264  |
| rs10094346  | A | 0.1443  |
| rs12677849  | C | 0.0318  |
| rs35114037  | T | -0.0331 |
| rs116960898 | T | -0.1434 |
| rs10090053  | G | -0.0267 |
| rs6991633   | A | 0.0411  |
| rs117412130 | C | 0.1125  |
| rs117732037 | G | -0.1225 |
| rs117368080 | G | -0.0894 |
| rs145852973 | C | 0.1329  |
| rs72676437  | C | -0.1343 |
| rs62518047  | T | 0.2336  |
| rs7829269   | T | 0.1539  |
| rs72667248  | G | -0.0501 |
| rs138784168 | T | -0.1701 |
| rs71517716  | T | 0.1832  |
| rs7350140   | T | 0.0308  |
| rs72655677  | A | -0.0728 |
| rs11984790  | A | 0.3245  |
| rs55822847  | T | -0.0789 |
| rs11775335  | T | -0.0284 |
| rs17053593  | G | -0.0389 |
| rs12682591  | C | 0.031   |
| rs150460687 | A | -0.1094 |
| rs145629257 | T | -0.1009 |
| rs112997956 | A | 0.1299  |
| rs74831260  | A | -0.074  |

|             |   |         |
|-------------|---|---------|
| rs7843708   | C | 0.0975  |
| rs4072420   | A | 0.0647  |
| rs141228350 | T | 0.0965  |
| rs147914524 | C | 0.1057  |
| rs59926069  | T | 0.0472  |
| rs58506399  | G | 0.2136  |
| rs55779207  | A | -0.038  |
| rs114435502 | A | -0.0769 |
| rs7013619   | T | -0.081  |
| rs7816981   | C | -0.1446 |
| rs73179662  | A | -0.0706 |
| rs1470994   | A | 0.0252  |
| rs143389686 | A | -0.131  |
| rs2623177   | T | 0.0312  |
| rs79100905  | G | 0.1199  |
| rs4244464   | A | 0.0732  |
| rs117463332 | C | -0.0883 |
| rs112860381 | C | -0.0716 |
| rs117349571 | C | 0.0793  |
| rs6990004   | T | -0.0272 |
| rs113904818 | T | 0.0515  |
| rs111248396 | A | -0.0837 |
| rs9465      | T | 0.084   |
| rs6996320   | G | 0.0268  |
| rs75086048  | G | 0.0681  |
| rs2189145   | T | -0.0272 |
| rs141246066 | A | 0.0742  |
| rs2278153   | A | -0.0349 |
| rs2514840   | A | 0.0271  |
| rs58498752  | A | 0.0458  |
| rs1477542   | C | -0.0626 |
| rs500458    | T | 0.0337  |
| rs17827642  | T | -0.0275 |
| rs139286242 | G | 0.1212  |
| rs74755635  | C | 0.1074  |
| rs1003316   | T | 0.0337  |
| rs310370    | G | -0.0267 |
| rs117507643 | C | -0.1386 |
| rs149381655 | G | 0.1397  |
| rs79227762  | T | -0.1201 |
| rs11785484  | A | -0.1913 |
| rs10780146  | G | -0.0355 |
| rs11776551  | T | 0.0278  |
| rs73683422  | A | 0.0711  |
| rs17667995  | G | -0.1636 |
| rs11986857  | G | 0.0557  |
| rs73223780  | A | -0.0563 |



|             |   |         |
|-------------|---|---------|
| rs4733001   | C | 0.1178  |
| rs13271337  | C | 0.0305  |
| rs72664872  | A | -0.0333 |
| rs13257779  | C | -0.0262 |
| rs11786009  | G | -0.0316 |
| rs13251901  | G | -0.0394 |
| rs79282858  | C | -0.0488 |
| rs13279782  | T | 0.0966  |
| rs58993787  | G | 0.0451  |
| rs34113671  | A | -0.0787 |
| rs149411269 | G | 0.0961  |
| rs17280878  | A | 0.0989  |
| rs73300997  | G | -0.0491 |
| rs141528311 | A | -0.1092 |
| rs7812365   | T | 0.029   |
| rs73214701  | T | -0.1147 |
| rs111719675 | A | 0.029   |
| rs10087561  | T | 0.0266  |
| rs2725732   | T | 0.038   |
| rs4871867   | C | 0.0262  |
| rs10503752  | C | 0.035   |
| rs74303387  | C | 0.1134  |
| rs1550210   | G | -0.0317 |
| rs6468507   | C | 0.048   |
| rs1900078   | T | 0.0351  |
| rs4517092   | C | -0.0756 |
| rs2721096   | G | 0.0261  |
| rs143341462 | C | -0.1226 |
| rs34015944  | T | -0.1385 |
| rs2466174   | A | -0.0971 |
| rs117090412 | C | 0.1071  |
| rs75105244  | A | -0.1394 |
| rs16937365  | A | 0.1035  |
| rs6470275   | A | -0.0299 |
| rs73191748  | G | -0.0432 |
| rs2451114   | A | -0.0498 |
| rs11784575  | A | -0.0627 |
| rs11204058  | G | -0.0275 |
| rs4386984   | T | -0.0299 |
| rs2919383   | A | -0.0307 |
| rs10106158  | A | -0.111  |
| rs2036032   | G | 0.025   |
| rs28528251  | A | -0.0852 |
| rs2270409   | A | 0.0301  |
| rs117841876 | T | -0.1872 |
| rs111498734 | A | 0.0755  |
| rs116979294 | G | -0.1431 |

|             |   |         |
|-------------|---|---------|
| rs149848692 | A | 0.0681  |
| rs77771373  | A | 0.1926  |
| rs113702129 | C | 0.1918  |
| rs4875412   | A | -0.0618 |
| rs1264202   | A | -0.0255 |
| rs62516023  | G | 0.0976  |
| rs138892153 | G | 0.1818  |
| rs6986036   | T | 0.0266  |
| rs12541654  | G | 0.0296  |
| rs13273572  | T | -0.039  |
| rs140281816 | G | 0.1163  |
| rs111462225 | A | -0.1131 |
| rs62501780  | A | -0.0356 |
| rs72691613  | A | 0.0376  |
| rs7007410   | C | -0.0318 |
| rs77900161  | T | -0.136  |
| rs112001066 | A | -0.0606 |
| rs140499763 | C | 0.0993  |
| rs7826753   | G | -0.0258 |
| rs78053255  | T | 0.1907  |
| rs17265470  | C | 0.0693  |
| rs62522824  | C | -0.11   |
| rs117456419 | A | -0.1044 |
| rs10110032  | T | -0.0603 |
| rs4733476   | C | 0.0288  |
| rs77136038  | T | -0.1155 |
| rs11990827  | C | -0.1616 |
| rs111366114 | A | -0.1683 |
| rs117098989 | T | -0.0568 |
| rs113794204 | G | -0.0614 |
| rs11990826  | C | -0.0659 |
| rs28621035  | G | -0.0335 |
| rs113782948 | A | 0.047   |
| rs16898687  | T | 0.0521  |
| rs142456404 | G | 0.151   |
| rs17066715  | C | -0.1172 |
| rs11998012  | C | -0.0311 |
| rs58916587  | A | 0.0649  |
| rs72671150  | G | 0.0549  |
| rs34905692  | T | 0.064   |
| rs139982986 | T | -0.13   |
| rs7818819   | G | 0.0268  |
| rs117870791 | A | -0.1401 |
| rs73337000  | A | 0.1085  |
| rs9644128   | C | 0.1343  |
| rs76319558  | T | -0.1047 |
| rs148271870 | A | -0.1239 |

|             |   |         |
|-------------|---|---------|
| rs2976898   | G | 0.036   |
| rs117090971 | A | 0.0887  |
| rs7822971   | T | 0.1417  |
| rs7012001   | A | 0.0313  |
| rs13281956  | A | -0.0262 |
| rs117458739 | T | -0.0867 |
| rs10106072  | T | 0.0523  |
| rs11993374  | T | -0.0269 |
| rs62519928  | A | 0.0971  |
| rs77510805  | G | -0.1082 |
| rs35420171  | A | 0.0805  |
| rs6983636   | T | -0.0368 |
| rs10956864  | A | -0.0271 |
| rs10955084  | C | -0.0257 |
| rs4559217   | T | 0.0251  |
| rs55806773  | T | 0.0307  |
| rs13272725  | G | 0.0744  |
| rs2732997   | T | -0.0286 |
| rs137962622 | G | -0.108  |
| rs190932    | G | 0.0267  |
| rs10098179  | T | 0.0261  |
| rs139818304 | C | 0.155   |
| rs118143195 | T | -0.0448 |
| rs72660336  | C | -0.1307 |
| rs9298004   | C | 0.0272  |
| rs77233704  | G | -0.0958 |
| rs11562802  | A | -0.0519 |
| rs13439830  | A | -0.0253 |
| rs73205441  | G | -0.1173 |
| rs7014937   | T | 0.033   |
| rs2599712   | T | -0.0448 |
| rs7460386   | C | 0.0306  |
| rs7819649   | G | 0.0337  |
| rs2466233   | A | 0.0324  |
| rs78164133  | G | -0.0563 |
| rs139520299 | C | 0.1585  |
| rs77783772  | T | -0.0933 |
| rs140805240 | C | -0.1013 |
| rs62518593  | A | 0.056   |
| rs118070772 | T | 0.0818  |
| rs10086362  | G | -0.0289 |
| rs117163213 | A | 0.1487  |
| rs11250031  | G | -0.0282 |
| rs117671767 | A | -0.1318 |
| rs4304324   | A | -0.0335 |
| rs117200953 | C | 0.0808  |
| rs76925816  | C | -0.1366 |

|             |   |         |
|-------------|---|---------|
| rs117176017 | G | 0.0933  |
| rs74302406  | G | 0.0693  |
| rs13274395  | C | -0.0301 |
| rs17091325  | A | -0.0432 |
| rs77748004  | A | 0.1318  |
| rs12544883  | G | -0.0789 |
| rs113455062 | C | 0.1322  |
| rs117134903 | G | -0.1047 |
| rs141008215 | G | -0.0906 |
| rs117437033 | T | 0.2013  |
| rs62523002  | G | -0.0378 |
| rs12115052  | A | -0.0254 |
| rs6991234   | T | 0.0301  |
| rs62516075  | A | -0.0355 |
| rs10957993  | T | -0.0286 |
| rs10109406  | C | -0.0361 |
| rs35567863  | T | 0.038   |
| rs4872542   | C | -0.0573 |
| rs35332304  | C | -0.138  |
| rs6990948   | G | 0.0792  |
| rs1612273   | A | 0.0387  |
| rs4739049   | A | 0.0282  |
| rs2978125   | A | 0.1565  |
| rs77228953  | A | 0.1402  |
| rs143285252 | T | 0.1415  |
| rs116692788 | T | -0.0432 |
| rs10086451  | C | -0.0808 |
| rs35431058  | C | -0.031  |
| rs11203999  | G | 0.0372  |
| rs75554284  | T | -0.0863 |
| rs62494479  | A | -0.0967 |
| rs9694405   | A | -0.0468 |
| rs79067368  | C | 0.1397  |
| rs6987817   | G | -0.0456 |
| rs12718385  | T | -0.03   |
| rs35815917  | G | -0.0313 |
| rs72664865  | A | 0.1051  |
| rs116899753 | T | 0.164   |
| rs77853555  | A | 0.1429  |
| rs1871545   | A | 0.0957  |
| rs4075536   | G | 0.0489  |
| rs10481374  | C | 0.0431  |
| rs7816996   | A | 0.0338  |
| rs2137278   | C | 0.0311  |
| rs79078566  | C | -0.1353 |
| rs6473476   | G | -0.0296 |
| rs77983284  | A | -0.0726 |

|             |   |         |
|-------------|---|---------|
| rs73686528  | C | 0.0724  |
| rs79432344  | G | -0.1129 |
| rs78519202  | T | 0.2117  |
| rs79854932  | A | -0.1331 |
| rs112021791 | T | -0.156  |
| rs74785237  | T | 0.0716  |
| rs77878899  | A | -0.1107 |
| rs75081627  | C | -0.0687 |
| rs73678324  | G | -0.0626 |
| rs117941871 | C | 0.0927  |
| rs2022925   | A | 0.0251  |
| rs7002466   | C | -0.0643 |
| rs2319215   | G | -0.0292 |
| rs4078541   | G | 0.0314  |
| rs17476242  | G | 0.0248  |
| rs10504445  | C | 0.0414  |
| rs149683971 | C | 0.0372  |
| rs62531913  | C | 0.0619  |
| rs117650608 | C | 0.0812  |
| rs77152039  | C | -0.0849 |
| rs17057357  | A | -0.1201 |
| rs77883609  | C | 0.0842  |
| rs76480365  | C | -0.0635 |
| rs2932223   | T | 0.0303  |
| rs77534581  | T | -0.0356 |
| rs17723724  | T | 0.0765  |
| rs112908219 | T | -0.0935 |
| rs76814197  | G | -0.0591 |
| rs56165549  | C | -0.0372 |
| rs17643923  | G | 0.1088  |
| rs112447003 | A | 0.1264  |
| rs117815057 | T | -0.1081 |
| rs2681543   | T | 0.0291  |
| rs1972440   | A | -0.0256 |
| rs72667937  | G | 0.0456  |
| rs117157813 | A | -0.0834 |
| rs117565321 | T | 0.1761  |
| rs2929564   | G | 0.0646  |
| rs117323163 | G | 0.104   |
| rs12547827  | T | 0.0423  |
| rs4512397   | A | 0.0311  |
| rs10105736  | G | -0.1061 |
| rs16901028  | G | -0.0626 |
| rs117774850 | C | 0.0988  |
| rs1368536   | A | -0.0742 |
| rs139020749 | A | 0.1069  |
| rs79690823  | C | -0.107  |

|             |   |         |
|-------------|---|---------|
| rs144029345 | C | -0.1495 |
| rs77967818  | G | -0.1266 |
| rs118092529 | A | 0.1239  |
| rs140146352 | A | -0.2211 |
| rs2173214   | C | 0.0389  |
| rs75661983  | C | -0.0845 |
| rs74989339  | T | -0.1792 |
| rs7829308   | G | 0.0351  |
| rs73408714  | A | 0.0736  |
| rs150498327 | T | -0.0848 |
| rs4240650   | A | 0.05    |
| rs17366372  | G | -0.0429 |
| rs147646536 | C | -0.1405 |
| rs16939186  | A | 0.0494  |
| rs73596982  | T | 0.0799  |
| rs4472548   | G | -0.0267 |
| rs113039803 | G | -0.1135 |
| rs78793166  | G | -0.0644 |
| rs76496694  | C | -0.0428 |
| rs76531897  | T | 0.2118  |
| rs73207116  | T | -0.0508 |
| rs74593167  | T | 0.1423  |
| rs117192105 | T | -0.157  |
| rs34948585  | G | 0.0317  |
| rs10504435  | C | 0.1032  |
| rs79844542  | A | -0.1613 |
| rs138829990 | T | -0.1028 |
| rs35042319  | T | 0.0339  |
| rs13249935  | C | 0.0285  |
| rs77265424  | G | 0.0512  |
| rs7827156   | C | -0.0444 |
| rs78738037  | T | 0.1536  |
| rs1485493   | T | 0.0502  |
| rs117309096 | T | -0.1343 |
| rs71521346  | T | 0.1218  |
| rs75859996  | G | -0.0675 |
| rs72724634  | C | 0.094   |
| rs71532103  | A | -0.072  |
| rs76005773  | G | 0.0662  |
| rs75800361  | T | -0.1082 |
| rs7009592   | T | -0.0263 |
| rs62530512  | A | -0.0291 |
| rs348180    | G | 0.0245  |
| rs117229513 | G | 0.1667  |
| rs56116637  | A | -0.1271 |
| rs1864673   | G | 0.0273  |
| rs139725894 | T | -0.1625 |

|             |   |         |
|-------------|---|---------|
| rs6983250   | A | 0.0264  |
| rs7815612   | G | -0.1638 |
| rs74934596  | A | -0.0972 |
| rs11783338  | T | 0.0248  |
| rs2292927   | T | 0.0318  |
| rs17695653  | T | 0.0939  |
| rs1353645   | T | 0.0406  |
| rs16902875  | A | 0.0672  |
| rs1509838   | G | -0.0338 |
| rs137912901 | C | 0.1614  |
| rs111570122 | T | -0.1089 |
| rs62516822  | T | -0.1404 |
| rs116997115 | C | 0.1038  |
| rs1376786   | A | 0.0407  |
| rs34820884  | C | 0.0746  |
| rs73537146  | C | 0.1247  |
| rs28568442  | A | 0.0248  |
| rs6981828   | C | 0.0278  |
| rs7818300   | A | -0.0271 |
| rs3735782   | A | -0.0244 |
| rs80053869  | G | 0.0685  |
| rs17664823  | T | -0.0288 |
| rs13273465  | T | -0.031  |
| rs6987418   | C | 0.0283  |
| rs34222040  | T | 0.0678  |
| rs7843237   | T | -0.0291 |
| rs10956464  | T | 0.073   |
| rs2929975   | C | -0.0255 |
| rs78121726  | T | -0.0674 |
| rs3122671   | G | 0.0412  |
| rs3134010   | C | 0.0291  |
| rs2513931   | T | 0.0641  |
| rs333052    | C | 0.0314  |
| rs7465520   | G | -0.0363 |
| rs118055385 | A | 0.1092  |
| rs10086267  | A | -0.0636 |
| rs2272722   | C | 0.0463  |
| rs3924504   | T | -0.0305 |
| rs902832    | G | -0.0256 |
| rs73176298  | G | 0.0762  |
| rs139180014 | A | 0.0909  |
| rs6997762   | T | 0.0462  |
| rs77355867  | C | -0.0609 |
| rs59801655  | A | 0.0413  |
| rs16880675  | A | 0.1042  |
| rs80078460  | G | -0.0688 |
| rs114717711 | T | -0.1619 |

|             |   |         |
|-------------|---|---------|
| rs7844608   | T | -0.056  |
| rs10101252  | C | 0.0421  |
| rs17069371  | C | -0.0349 |
| rs73182986  | A | -0.0332 |
| rs78976465  | A | -0.0558 |
| rs145075869 | G | -0.0892 |
| rs41495145  | T | 0.0939  |
| rs77791080  | C | 0.0508  |
| rs13280625  | C | -0.0495 |
| rs117458693 | C | 0.134   |
| rs13269698  | A | -0.1347 |
| rs114323395 | A | 0.0778  |
| rs113698072 | T | -0.0597 |
| rs2922789   | A | 0.1715  |
| rs35868821  | A | 0.0678  |
| rs4333553   | A | -0.0255 |
| rs78231981  | T | 0.0993  |
| rs117994398 | A | 0.1127  |
| rs140530472 | A | 0.1308  |
| rs2248178   | A | 0.0347  |
| rs17694217  | T | 0.1983  |
| rs77612665  | G | -0.0936 |
| rs3824319   | G | -0.0251 |
| rs148527937 | C | -0.1241 |
| rs79275231  | A | 0.0564  |
| rs366946    | C | -0.08   |
| rs72679153  | G | -0.0718 |
| rs117920290 | T | -0.1615 |
| rs117514636 | T | 0.0439  |
| rs75112574  | T | 0.0877  |
| rs62508166  | A | 0.0377  |
| rs79117436  | A | 0.2197  |
| rs77107575  | G | -0.132  |
| rs111994531 | G | -0.1458 |
| rs76389793  | C | 0.1275  |
| rs4733997   | T | 0.0266  |
| rs877350    | C | 0.0447  |
| rs80288017  | A | -0.0475 |
| rs2722892   | C | 0.1617  |
| rs3099399   | A | 0.0877  |
| rs2954624   | T | -0.0302 |
| rs4376526   | G | -0.0272 |
| rs117900869 | A | 0.1411  |
| rs72673319  | C | 0.0508  |
| rs117864166 | A | 0.1732  |
| rs4909455   | A | 0.0273  |
| rs77532437  | G | -0.1157 |



|             |   |         |
|-------------|---|---------|
| rs62517289  | T | -0.0374 |
| rs7838511   | G | 0.0297  |
| rs62512675  | G | 0.0378  |
| rs6474427   | C | 0.0281  |
| rs117448847 | A | 0.2245  |
| rs79660872  | A | 0.0681  |
| rs777710    | T | -0.0311 |
| rs7464508   | G | -0.0245 |
| rs28525255  | G | -0.0384 |
| rs118013819 | G | -0.0871 |
| rs10113059  | A | 0.0479  |
| rs2045642   | T | 0.0444  |
| rs2554595   | A | -0.0286 |
| rs3134373   | A | -0.0246 |
| rs76789427  | C | -0.1753 |
| rs78866869  | G | -0.1171 |
| rs9693223   | T | 0.025   |
| rs144884961 | G | 0.1544  |
| rs11547126  | T | 0.1446  |
| rs10096825  | C | 0.0267  |
| rs142678165 | A | 0.1401  |
| rs12541997  | G | -0.1554 |
| rs144786085 | C | -0.1281 |
| rs2979484   | A | -0.0281 |
| rs74420844  | C | -0.0537 |
| rs4831403   | C | -0.0255 |
| rs79351823  | T | 0.0881  |
| rs6469096   | A | -0.0382 |
| rs143597240 | A | 0.1685  |
| rs72507658  | A | -0.0984 |
| rs142406084 | G | -0.2192 |
| rs77715387  | T | 0.0779  |
| rs11786101  | G | 0.0277  |
| rs3864678   | A | 0.0408  |
| rs112743951 | T | -0.156  |
| rs6471365   | C | 0.0287  |
| rs117340040 | C | 0.0716  |
| rs2173418   | A | 0.0269  |
| rs12156198  | G | -0.0271 |
| rs1395310   | C | -0.0952 |
| rs41387254  | G | -0.0882 |
| rs140913920 | C | -0.1077 |
| rs12543164  | C | 0.0395  |
| rs17186334  | G | -0.0908 |
| rs76831404  | G | 0.0842  |
| rs116997291 | T | -0.0998 |
| rs6999366   | T | -0.0262 |

|             |   |         |
|-------------|---|---------|
| rs141877273 | A | 0.1477  |
| rs116872468 | G | -0.1199 |
| rs62497337  | C | -0.0297 |
| rs140113659 | T | -0.2    |
| rs113449565 | T | -0.0475 |
| rs73602026  | A | -0.0721 |
| rs10113516  | G | -0.0387 |
| rs7388583   | A | 0.0406  |
| rs77481455  | G | -0.1211 |
| rs62521398  | G | -0.0931 |
| rs7823750   | C | 0.0333  |
| rs2360763   | T | 0.1751  |
| rs7462759   | A | 0.0697  |
| rs45613133  | A | -0.0489 |
| rs117500122 | C | -0.1111 |
| rs11785552  | C | -0.0417 |
| rs144102129 | T | -0.0396 |
| rs10866963  | T | -0.0244 |
| rs2291574   | C | -0.0247 |
| rs12541917  | T | 0.0567  |
| rs10113610  | A | -0.0693 |
| rs2436947   | A | 0.1225  |
| rs72641806  | G | -0.1265 |
| rs16868968  | C | 0.0619  |
| rs75500211  | T | 0.0893  |
| rs13439491  | T | -0.0321 |
| rs116915897 | T | 0.0749  |
| rs28736816  | T | 0.0265  |
| rs75524957  | G | -0.1544 |
| rs151240542 | G | 0.1669  |
| rs79445352  | G | 0.0567  |
| rs12115018  | G | -0.0891 |
| rs117658441 | C | -0.1918 |
| rs7004237   | G | 0.0366  |
| rs17487214  | T | 0.0692  |
| rs618389    | C | 0.09    |
| rs77943120  | C | 0.1007  |
| rs117506664 | T | 0.1169  |
| rs56740344  | G | -0.0848 |
| rs144984853 | C | 0.1759  |
| rs146343608 | G | 0.1521  |
| rs1378897   | T | -0.0547 |
| rs141073981 | T | 0.1548  |
| rs17128441  | T | -0.046  |
| rs62514010  | T | 0.1555  |
| rs982300    | A | -0.0295 |
| rs74352757  | A | -0.1007 |

|             |   |         |
|-------------|---|---------|
| rs113992560 | T | 0.1067  |
| rs6999167   | A | -0.0316 |
| rs17071304  | G | -0.0278 |
| rs6420195   | A | -0.0299 |
| rs144002747 | G | 0.1292  |
| rs17127274  | C | 0.0569  |
| rs6990524   | C | -0.0292 |
| rs146120233 | C | -0.1092 |
| rs72671923  | C | -0.0421 |
| rs10112424  | T | -0.03   |
| rs7010346   | C | -0.0694 |
| rs62499995  | C | 0.0483  |
| rs73261997  | G | 0.0959  |
| rs13279462  | T | 0.0346  |
| rs76883664  | A | 0.0674  |
| rs147054801 | C | 0.1096  |
| rs4841455   | T | 0.0482  |
| rs75992022  | A | 0.0678  |
| rs150694964 | G | -0.1385 |
| rs2688360   | C | 0.0366  |
| rs139714457 | T | 0.0921  |
| rs139234596 | G | -0.0504 |
| rs80255732  | T | 0.0534  |
| rs74612468  | A | -0.0612 |
| rs150194585 | T | -0.0617 |
| rs113749669 | A | 0.1152  |
| rs4872206   | A | -0.0445 |
| rs141114666 | T | -0.0764 |
| rs7816270   | T | 0.0389  |
| rs79890726  | A | -0.0492 |
| rs6988955   | T | -0.0479 |
| rs1075      | T | -0.0301 |
| rs2111862   | C | 0.0574  |
| rs2974345   | G | 0.1015  |
| rs6577664   | C | -0.0251 |
| rs7010832   | C | 0.0339  |
| rs2594818   | G | -0.0597 |
| rs16922635  | T | -0.084  |
| rs13271877  | T | -0.0316 |
| rs7844974   | T | 0.0397  |
| rs55893239  | C | 0.0513  |
| rs17712160  | A | -0.0261 |
| rs117775824 | G | 0.0639  |
| rs2922494   | G | -0.0257 |
| rs116767245 | A | 0.116   |
| rs77759604  | C | -0.149  |
| rs79697151  | G | 0.0935  |

|             |   |         |
|-------------|---|---------|
| rs7813849   | C | -0.0249 |
| rs2553665   | A | 0.0325  |
| rs268590    | T | 0.0346  |
| rs2880665   | A | 0.0269  |
| rs16897502  | A | -0.0677 |
| rs118177327 | T | -0.1154 |
| rs16899964  | T | 0.1204  |
| rs1532559   | T | -0.0303 |
| rs2978669   | C | -0.0523 |
| rs1353038   | A | -0.0452 |
| rs7819237   | A | -0.1002 |
| rs117677292 | T | 0.0725  |
| rs7814222   | G | -0.0253 |
| rs139089098 | A | -0.1171 |
| rs16935544  | C | 0.0722  |
| rs77519446  | A | 0.2026  |
| rs2890502   | C | -0.039  |
| rs13275985  | G | -0.0326 |
| rs138148493 | C | 0.2529  |
| rs9657035   | C | 0.1662  |
| rs10105568  | A | -0.0266 |
| rs273421    | G | -0.0339 |
| rs72643272  | A | -0.0581 |
| rs1871729   | G | 0.0255  |
| rs117305050 | C | 0.2134  |
| rs112473977 | A | 0.2392  |
| rs62492213  | T | 0.1518  |
| rs1106689   | T | -0.0416 |
| rs77566243  | A | -0.0976 |
| rs77089592  | C | 0.0629  |
| rs118166746 | G | -0.0791 |
| rs112087043 | A | -0.0989 |
| rs4074457   | G | -0.0291 |
| rs2740863   | T | -0.0348 |
| rs4738156   | G | -0.0268 |
| rs113483572 | T | 0.0959  |
| rs62519183  | T | -0.041  |
| rs141715824 | A | 0.1558  |
| rs140779783 | C | -0.1397 |
| rs141355512 | T | -0.1299 |
| rs74732336  | G | 0.1221  |
| rs12676329  | T | 0.0354  |
| rs2976567   | T | 0.0258  |
| rs2898514   | G | 0.03    |
| rs10092989  | T | -0.0375 |
| rs76007554  | G | -0.1937 |
| rs10110783  | C | 0.0326  |

|             |   |         |
|-------------|---|---------|
| rs11782158  | G | -0.0713 |
| rs7816278   | C | -0.1034 |
| rs77381804  | A | -0.0804 |
| rs977310    | T | -0.1839 |
| rs145196890 | G | -0.08   |
| rs56383730  | T | -0.0635 |
| rs673430    | C | -0.0581 |
| rs62524470  | G | 0.0634  |
| rs7836665   | A | 0.0441  |
| rs117180297 | G | -0.1218 |
| rs117841001 | C | -0.1492 |
| rs17626155  | A | -0.0809 |
| rs4737768   | C | 0.0341  |
| rs117485107 | T | -0.1815 |
| rs62511858  | C | 0.1064  |
| rs117131658 | A | -0.1187 |
| rs17506292  | C | 0.119   |
| rs12547678  | A | 0.0338  |
| rs141318943 | C | 0.2068  |
| rs12545718  | A | 0.0486  |
| rs7003311   | C | -0.0682 |
| rs3779847   | A | 0.0384  |
| rs4735845   | T | 0.1182  |
| rs150926839 | A | 0.0959  |
| rs10085937  | A | 0.0559  |
| rs35811891  | T | 0.0367  |
| rs17514920  | A | -0.1193 |
| rs6474056   | C | -0.0255 |
| rs77471573  | A | 0.0828  |
| rs12678754  | A | 0.0274  |
| rs76617956  | T | 0.1732  |
| rs150940525 | A | 0.11    |
| rs1510103   | A | 0.0719  |
| rs7819104   | T | 0.0307  |
| rs7013334   | T | -0.041  |
| rs447796    | A | 0.1045  |
| rs10088872  | T | 0.0744  |
| rs1014032   | A | -0.0293 |
| rs80316886  | T | -0.0596 |
| rs146017423 | G | -0.1435 |
| rs80101833  | G | 0.1859  |
| rs2085786   | C | 0.0264  |
| rs10099869  | A | 0.0308  |
| rs117927638 | A | -0.1591 |
| rs2319361   | T | 0.0354  |
| rs150831478 | A | 0.1298  |
| rs74829955  | A | -0.135  |

|             |   |         |
|-------------|---|---------|
| rs62499062  | A | -0.057  |
| rs75099737  | T | -0.1485 |
| rs117086065 | G | -0.1588 |
| rs62513764  | C | 0.0902  |
| rs148575713 | G | 0.0455  |
| rs1507455   | A | 0.0952  |
| rs75882132  | A | -0.121  |
| rs10101235  | G | -0.0531 |
| rs140227140 | T | -0.1117 |
| rs17075185  | G | 0.0499  |
| rs79970085  | A | 0.1036  |
| rs6557617   | T | -0.0302 |
| rs71524712  | T | 0.1321  |
| rs79093661  | T | 0.1378  |
| rs17069667  | C | 0.1584  |
| rs17430142  | T | -0.1548 |
| rs736191    | C | -0.0255 |
| rs17382698  | C | 0.0419  |
| rs2455038   | G | 0.0279  |
| rs1316773   | G | -0.0428 |
| rs117655410 | T | 0.1395  |
| rs76801271  | A | -0.0735 |
| rs28605379  | T | 0.1005  |
| rs117968214 | C | -0.1007 |
| rs11166594  | A | -0.1059 |
| rs79592685  | T | 0.0904  |
| rs10094794  | C | 0.0241  |
| rs116872210 | A | 0.0893  |
| rs166844    | T | 0.091   |
| rs7842149   | A | 0.0266  |
| rs870585    | A | 0.0462  |
| rs117731626 | A | 0.1445  |
| rs11993339  | T | 0.0714  |
| rs148126419 | G | -0.1122 |
| rs139701569 | T | 0.1156  |
| rs62511935  | A | 0.0571  |
| rs62482708  | C | -0.0368 |
| rs62491201  | C | 0.0851  |
| rs78471104  | G | 0.1505  |
| rs6993211   | G | 0.0464  |
| rs28999702  | G | -0.0827 |
| rs139250406 | T | 0.177   |
| rs2171348   | T | -0.0247 |
| rs12542848  | A | 0.0268  |
| rs11136263  | G | -0.0308 |
| rs146350845 | A | -0.2366 |
| rs73226148  | C | -0.0348 |

|             |   |         |
|-------------|---|---------|
| rs16901312  | T | 0.1033  |
| rs10086964  | T | 0.0255  |
| rs1842794   | T | -0.0611 |
| rs9650605   | C | 0.0597  |
| rs73227847  | T | -0.0463 |
| rs13254276  | T | 0.0271  |
| rs7828755   | G | -0.1447 |
| rs75839496  | T | -0.1853 |
| rs34634680  | G | 0.1207  |
| rs62527606  | A | 0.0461  |
| rs17204975  | A | 0.0635  |
| rs10505434  | C | -0.0522 |
| rs111931925 | T | 0.0727  |
| rs16896479  | T | -0.0272 |
| rs11780602  | G | -0.028  |
| rs1429967   | G | -0.1046 |
| rs10100364  | G | -0.026  |
| rs12675721  | T | -0.0268 |
| rs76700802  | G | -0.0541 |
| rs72678336  | T | -0.0533 |
| rs78635199  | A | -0.0452 |
| rs1467269   | A | -0.0407 |
| rs12678447  | G | -0.0658 |
| rs117923613 | A | -0.1166 |
| rs3739282   | C | -0.0296 |
| rs28540013  | T | 0.0629  |
| rs17678317  | C | -0.0325 |
| rs7006866   | C | 0.0302  |
| rs196864    | C | -0.046  |
| rs62525516  | A | -0.1349 |
| rs73312569  | G | 0.064   |
| rs78274650  | G | -0.2275 |
| rs11997448  | T | 0.0259  |
| rs142633021 | A | 0.1171  |
| rs7015651   | T | -0.0252 |
| rs72657080  | G | 0.1114  |
| rs116929506 | A | 0.1374  |
| rs61243391  | G | -0.0533 |
| rs78185616  | T | -0.042  |
| rs4073762   | T | -0.0358 |
| rs62485073  | G | -0.0341 |
| rs79380391  | A | -0.084  |
| rs17155236  | T | 0.0396  |
| rs79748016  | C | -0.088  |
| rs73188893  | C | 0.1259  |
| rs73537833  | C | 0.0461  |
| rs1904276   | C | 0.0318  |

|             |   |         |
|-------------|---|---------|
| rs146892903 | G | 0.1451  |
| rs76596255  | T | -0.0768 |
| rs3758103   | C | 0.0358  |
| rs114315647 | G | 0.1388  |
| rs17394322  | T | -0.0369 |
| rs79185037  | G | 0.0716  |
| rs17358240  | G | 0.0726  |
| rs7463172   | C | -0.0352 |
| rs2447516   | C | -0.0239 |
| rs147000695 | A | -0.1007 |
| rs145208341 | A | 0.0261  |
| rs78605132  | A | -0.0705 |
| rs148661780 | T | 0.1503  |
| rs80133464  | C | -0.1772 |
| rs3020153   | T | 0.025   |
| rs62518097  | T | 0.089   |
| rs11777342  | T | 0.0271  |
| rs1009482   | C | 0.0402  |
| rs7829545   | A | 0.071   |
| rs116969830 | T | 0.1675  |
| rs16901797  | A | -0.0271 |
| rs1065712   | C | 0.0684  |
| rs145050291 | C | 0.1191  |
| rs11779323  | C | 0.0493  |
| rs60731093  | T | 0.0943  |
| rs7814666   | G | -0.1355 |
| rs116855142 | A | 0.1701  |
| rs13268812  | G | -0.024  |
| rs2511621   | C | 0.0246  |
| rs1703975   | G | -0.0373 |
| rs118082476 | T | 0.1512  |
| rs2979419   | A | -0.0262 |
| rs77553299  | C | 0.1166  |
| rs12674825  | T | 0.0829  |
| rs2514584   | G | 0.0349  |
| rs62524921  | G | 0.044   |
| rs10955398  | A | 0.0249  |
| rs117341579 | C | -0.0557 |
| rs62508986  | C | -0.0933 |
| rs6990018   | T | -0.0464 |
| rs7814012   | T | -0.024  |
| rs139794588 | G | -0.2043 |
| rs17054671  | G | -0.0385 |
| rs1836772   | T | 0.0614  |
| rs35456088  | T | 0.0963  |
| rs16889969  | T | 0.0927  |
| rs10113242  | G | -0.0255 |



|             |   |         |
|-------------|---|---------|
| rs79258290  | A | 0.1017  |
| rs1693588   | A | 0.0297  |
| rs60637514  | A | -0.0292 |
| rs2385112   | A | -0.0268 |
| rs57801943  | A | -0.0579 |
| rs302954    | T | 0.0278  |
| rs7823356   | T | -0.0561 |
| rs4395906   | T | 0.1125  |
| rs72654837  | G | 0.0538  |
| rs16938828  | G | 0.1205  |
| rs7813970   | T | 0.0314  |
| rs2583086   | T | 0.0622  |
| rs77730942  | A | -0.16   |
| rs4297037   | G | 0.0289  |
| rs143630047 | A | -0.1132 |
| rs6991596   | A | 0.0269  |
| rs79043558  | G | -0.0748 |
| rs148670176 | A | -0.1275 |
| rs4738106   | G | -0.0324 |
| rs72684878  | T | 0.064   |
| rs7016923   | C | -0.0278 |
| rs895252    | G | -0.0481 |
| rs143793867 | G | 0.1164  |
| rs517811    | G | 0.0244  |
| rs113012790 | C | -0.0432 |
| rs113395443 | G | 0.0609  |
| rs77473077  | C | 0.0717  |
| rs148475525 | A | 0.1833  |
| rs79441791  | A | -0.0313 |
| rs55855319  | T | -0.0543 |
| rs144392666 | G | -0.1415 |
| rs2658914   | C | 0.0242  |
| rs114732436 | A | 0.1213  |
| rs111377338 | G | -0.0612 |
| rs17514547  | A | 0.1008  |
| rs80022222  | C | 0.1271  |
| rs77324299  | A | 0.0915  |
| rs72609817  | A | -0.0525 |
| rs6415647   | A | -0.0264 |
| rs111913933 | T | 0.1357  |
| rs116931493 | G | 0.0966  |
| rs12678835  | C | 0.0243  |
| rs13271518  | G | 0.1021  |
| rs11777429  | G | -0.034  |
| rs17261584  | T | -0.0751 |
| rs2243749   | G | 0.0264  |
| rs73502554  | T | 0.0858  |

|             |   |         |
|-------------|---|---------|
| rs73208962  | C | -0.0992 |
| rs143959783 | A | 0.0964  |
| rs77702683  | T | 0.1512  |
| rs78136640  | A | -0.205  |
| rs7833781   | A | -0.0242 |
| rs74886184  | A | -0.0469 |
| rs17065931  | C | -0.0283 |
| rs7003951   | G | 0.0249  |
| rs10504383  | C | 0.0602  |
| rs138239723 | T | 0.0798  |
| rs10090428  | C | 0.0324  |
| rs2942201   | A | 0.0238  |
| rs7817958   | A | -0.0305 |
| rs145396934 | C | -0.133  |
| rs79644525  | A | -0.0919 |
| rs10104444  | G | -0.0241 |
| rs3757964   | C | -0.0298 |
| rs78222699  | T | 0.0784  |
| rs75036385  | C | 0.0574  |
| rs116891852 | T | -0.1392 |
| rs142372632 | C | -0.1331 |
| rs140773771 | C | 0.1649  |
| rs16885417  | T | 0.0324  |
| rs80309761  | T | -0.1127 |
| rs36058669  | T | -0.0544 |
| rs34362689  | G | 0.0668  |
| rs4242513   | T | -0.0468 |
| rs4733049   | C | 0.0396  |
| rs35813019  | T | -0.1638 |
| rs2607102   | G | 0.0503  |
| rs2927112   | C | -0.0333 |
| rs12114128  | G | -0.0913 |
| rs12682621  | A | 0.0464  |
| rs117826678 | G | 0.1375  |
| rs13258879  | T | -0.0245 |
| rs58116396  | G | 0.024   |
| rs3019877   | C | 0.0253  |
| rs7812877   | T | -0.0289 |
| rs3104313   | A | 0.0578  |
| rs10100754  | T | -0.0385 |
| rs11136844  | T | -0.0347 |
| rs62488519  | A | 0.1183  |
| rs112663270 | A | -0.1549 |
| rs10097382  | A | 0.0816  |
| rs34888580  | C | -0.0298 |
| rs62499920  | A | 0.0389  |
| rs144457637 | A | 0.1587  |

|             |   |         |
|-------------|---|---------|
| rs2126095   | C | 0.026   |
| rs79125892  | T | -0.053  |
| rs34342524  | A | 0.0299  |
| rs4736722   | C | -0.0236 |
| rs4875953   | A | -0.0296 |
| rs17116959  | C | 0.0361  |
| rs72645197  | A | -0.0511 |
| rs141093849 | T | -0.0526 |
| rs77255678  | C | 0.0903  |
| rs76467294  | C | -0.0801 |
| rs117972696 | T | 0.1348  |
| rs142898887 | A | 0.099   |
| rs1381863   | C | 0.0623  |
| rs7013158   | T | 0.0303  |
| rs429272    | C | -0.0246 |
| rs35611014  | C | 0.0659  |
| rs59287978  | A | 0.0336  |
| rs4461946   | A | 0.0255  |
| rs117974096 | T | -0.07   |
| rs78974920  | T | 0.088   |
| rs75404708  | T | 0.0971  |
| rs72721429  | T | 0.1093  |
| rs73174735  | T | -0.1056 |
| rs55908105  | T | 0.1602  |
| rs1530241   | A | 0.0232  |
| rs2167502   | A | -0.0506 |
| rs117873395 | G | 0.0723  |
| rs146570205 | T | -0.1902 |
| rs73180701  | T | -0.0444 |
| rs76339938  | T | -0.1195 |
| rs147031693 | T | -0.1223 |
| rs2445605   | T | 0.072   |
| rs73660130  | C | -0.0919 |
| rs117478964 | G | -0.0663 |
| rs45618544  | T | 0.1017  |
| rs113753795 | A | 0.0787  |
| rs775952    | C | 0.0402  |
| rs6469153   | C | -0.0255 |
| rs17070685  | C | 0.0471  |
| rs2945888   | C | -0.0447 |
| rs2350726   | A | -0.0559 |
| rs72676638  | G | 0.1053  |
| rs73193044  | A | 0.0937  |
| rs13256473  | C | 0.0418  |
| rs75858367  | A | 0.0991  |
| rs2941652   | G | 0.0464  |
| rs75915342  | T | 0.1391  |

|             |   |         |
|-------------|---|---------|
| rs73705630  | C | -0.037  |
| rs11203977  | G | -0.1032 |
| rs1955304   | C | 0.0248  |
| rs4737863   | G | -0.0255 |
| rs2088557   | G | 0.0559  |
| rs78215093  | G | 0.1127  |
| rs73201312  | C | 0.1915  |
| rs28719924  | T | 0.038   |
| rs143249752 | A | 0.1125  |
| rs75240182  | C | -0.0544 |
| rs10503189  | A | -0.0357 |
| rs77154324  | A | 0.0478  |
| rs11988789  | C | -0.0261 |
| rs61521132  | G | -0.1789 |
| rs111726582 | A | -0.1077 |
| rs72681829  | A | -0.1782 |
| rs78994050  | C | 0.0986  |
| rs2511627   | A | 0.0354  |
| rs2735975   | T | -0.0674 |
| rs4736684   | G | 0.037   |
| rs62474725  | C | 0.1702  |
| rs149558679 | A | -0.1292 |
| rs11785691  | T | -0.0279 |
| rs56388100  | C | -0.0955 |
| rs76006945  | G | -0.0897 |
| rs10109307  | C | 0.0314  |
| rs520769    | T | 0.0401  |
| rs149579473 | T | 0.0807  |
| rs13251580  | T | 0.0418  |
| rs17327523  | A | 0.0813  |
| rs78494230  | C | -0.0698 |
| rs6989666   | A | 0.0516  |
| rs72678700  | T | 0.0638  |
| rs56709779  | G | -0.0402 |
| rs264315    | A | -0.0249 |
| rs2469390   | T | -0.0319 |
| rs10504321  | A | -0.036  |
| rs2467753   | G | -0.0323 |
| rs2461063   | T | -0.0242 |
| rs117551449 | T | -0.123  |
| rs1541876   | C | -0.0445 |
| rs117312181 | G | 0.1231  |
| rs118154816 | T | 0.0903  |
| rs13260607  | T | -0.0372 |
| rs9987322   | G | 0.052   |
| rs116843131 | C | 0.0894  |
| rs2406458   | A | -0.0733 |

|             |   |         |
|-------------|---|---------|
| rs62479711  | C | 0.0384  |
| rs2469765   | C | -0.0265 |
| rs72641968  | T | -0.0359 |
| rs137900566 | T | 0.1605  |
| rs7000989   | T | 0.0355  |
| rs116878939 | A | 0.1666  |
| rs62511338  | T | -0.0404 |
| rs2927018   | T | 0.0405  |
| rs17127995  | G | 0.0337  |
| rs10448143  | T | 0.0345  |
| rs13261550  | A | 0.0235  |
| rs117277997 | A | 0.0861  |
| rs12155690  | T | 0.0346  |
| rs116979641 | A | 0.1325  |
| rs78336280  | C | 0.0451  |
| rs2460347   | A | -0.042  |
| rs2188017   | G | 0.0312  |
| rs6989050   | A | -0.026  |
| rs147595127 | C | -0.0845 |
| rs115050285 | A | -0.1505 |
| rs55904164  | T | -0.0615 |
| rs79501645  | A | -0.1851 |
| rs77391535  | T | 0.1249  |
| rs1374636   | A | 0.0269  |
| rs1568328   | C | -0.0297 |
| rs150279050 | A | -0.0965 |
| rs62488534  | A | -0.0954 |
| rs73171416  | A | -0.0594 |
| rs111817166 | G | -0.1207 |
| rs118006413 | G | 0.146   |
| rs79102749  | A | -0.1041 |
| rs4907342   | G | -0.0238 |
| rs117688090 | G | -0.2013 |
| rs4329288   | G | -0.0246 |
| rs10086503  | G | 0.0264  |
| rs4526337   | G | -0.08   |
| rs16905243  | C | 0.1222  |
| rs62530844  | A | -0.0778 |
| rs73517353  | A | 0.0516  |
| rs17526904  | T | -0.0344 |
| rs77398193  | A | 0.0993  |
| rs75173202  | A | 0.1917  |
| rs147305117 | C | -0.11   |
| rs4736287   | G | -0.0285 |
| rs4440596   | T | 0.0454  |
| rs77853163  | A | -0.1227 |
| rs80235422  | C | 0.0613  |

|             |   |         |
|-------------|---|---------|
| rs79220623  | G | 0.0831  |
| rs77994517  | T | -0.075  |
| rs35268148  | T | -0.0583 |
| rs73228405  | C | 0.1488  |
| rs79386488  | T | -0.1024 |
| rs35060104  | T | -0.1081 |
| rs73705944  | T | 0.0503  |
| rs118183366 | C | 0.0525  |
| rs2617093   | A | -0.0619 |
| rs72680215  | G | 0.0564  |
| rs79775139  | A | 0.1606  |
| rs78876603  | C | -0.1128 |
| rs13252141  | T | 0.033   |
| rs78368024  | A | 0.0255  |
| rs2466103   | G | 0.026   |
| rs78939961  | A | 0.1085  |
| rs144572246 | T | 0.1133  |
| rs6986484   | A | 0.1272  |
| rs77939104  | C | -0.0638 |
| rs1431917   | G | 0.0872  |
| rs17378130  | T | -0.0356 |
| rs5019355   | C | 0.0545  |
| rs7005082   | C | 0.0282  |
| rs9325853   | G | 0.0327  |
| rs150321678 | G | 0.07    |
| rs72640066  | T | 0.038   |
| rs78196764  | T | -0.0547 |
| rs17344544  | A | -0.0599 |
| rs150057165 | G | -0.0787 |
| rs72716669  | G | 0.1025  |
| rs117987349 | G | -0.154  |
| rs12674532  | C | -0.0802 |
| rs34366206  | A | -0.0247 |
| rs13263683  | A | 0.0563  |
| rs4739225   | T | 0.0654  |
| rs148715395 | T | -0.1176 |
| rs117429324 | G | -0.1967 |
| rs117210747 | G | -0.1281 |
| rs7008755   | G | 0.0291  |
| rs11775819  | T | -0.0496 |
| rs79247015  | T | -0.0985 |
| rs28476639  | T | -0.0342 |
| rs7011416   | G | 0.0631  |
| rs72665750  | T | -0.1319 |
| rs17189998  | A | -0.0463 |
| rs393592    | G | -0.0414 |
| rs3134496   | A | 0.0428  |

|             |   |         |
|-------------|---|---------|
| rs10097654  | T | 0.0515  |
| rs13258866  | T | -0.0256 |
| rs9721208   | A | -0.0417 |
| rs28667806  | C | -0.1462 |
| rs2513908   | A | -0.0626 |
| rs73185664  | T | 0.0546  |
| rs17525233  | T | 0.0686  |
| rs568096    | T | 0.0307  |
| rs17066208  | G | 0.0805  |
| rs78027708  | G | 0.0804  |
| rs72603874  | C | -0.0682 |
| rs76213421  | C | -0.0625 |
| rs79360039  | C | 0.1163  |
| rs13279649  | A | -0.0309 |
| rs13248930  | G | 0.053   |
| rs72721081  | A | -0.0572 |
| rs7011785   | C | -0.086  |
| rs10087914  | C | -0.0291 |
| rs11778922  | A | 0.0256  |
| rs12678957  | T | 0.03    |
| rs896682    | T | 0.1077  |
| rs11996097  | A | 0.0882  |
| rs80019839  | C | -0.0582 |
| rs55642745  | T | 0.0783  |
| rs74911805  | A | -0.0628 |
| rs73235003  | G | 0.0456  |
| rs143470807 | A | 0.111   |
| rs149785101 | G | 0.12    |
| rs4143635   | A | -0.0301 |
| rs6998194   | G | -0.0342 |
| rs2956740   | C | 0.0643  |
| rs72658913  | A | 0.0582  |
| rs7822838   | G | 0.1104  |
| rs1995534   | C | -0.0266 |
| rs72658008  | A | 0.0411  |
| rs1870389   | T | -0.0323 |
| rs7824930   | C | 0.0244  |
| rs4512398   | C | 0.0239  |
| rs1148489   | A | -0.0287 |
| rs4310239   | G | 0.0247  |
| rs78884089  | A | -0.1048 |
| rs7816968   | A | -0.1263 |
| rs139053845 | C | 0.1117  |
| rs13277218  | T | 0.0774  |
| rs72660657  | T | -0.0509 |
| rs3136426   | C | 0.0605  |
| rs59385666  | A | 0.1091  |

|             |   |         |
|-------------|---|---------|
| rs750816    | C | 0.0337  |
| rs35685763  | G | 0.0607  |
| rs11203780  | C | -0.0424 |
| rs72676570  | C | 0.1604  |
| rs10109053  | G | 0.0297  |
| rs79000771  | A | -0.2276 |
| rs12676891  | T | 0.0362  |
| rs1465886   | T | 0.0251  |
| rs114910322 | G | -0.0574 |
| rs56206503  | A | 0.035   |
| rs75899356  | G | 0.1331  |
| rs1424690   | A | -0.029  |
| rs4737240   | A | 0.0249  |
| rs117461790 | G | -0.0733 |
| rs111953360 | A | -0.0306 |
| rs61653262  | G | -0.0412 |
| rs11775871  | T | 0.0309  |
| rs117676428 | A | 0.1491  |
| rs2436875   | A | 0.0265  |
| rs330063    | A | -0.0245 |
| rs11996067  | T | 0.1254  |
| rs12678170  | C | -0.0333 |
| rs11781952  | T | 0.0262  |
| rs146761627 | G | 0.121   |
| rs8180935   | A | 0.0389  |
| rs139213298 | A | 0.1242  |
| rs117670266 | C | 0.1339  |
| rs290633    | T | 0.0412  |
| rs62495704  | A | 0.0914  |
| rs10100535  | C | 0.0258  |
| rs77592746  | G | 0.1037  |
| rs79019107  | T | -0.0608 |
| rs74633613  | A | 0.1499  |
| rs60699707  | C | -0.0453 |
| rs7000401   | C | -0.0344 |
| rs17579575  | C | 0.1175  |
| rs150019065 | A | -0.0797 |
| rs62519383  | T | 0.0531  |
| rs55708406  | T | -0.0976 |
| rs116938609 | C | 0.2045  |
| rs11783577  | T | 0.0472  |
| rs17596349  | A | -0.0401 |
| rs7845056   | C | 0.0308  |
| rs7830712   | T | 0.0616  |
| rs75279863  | T | 0.0798  |
| rs62490329  | G | -0.0449 |
| rs80089106  | A | 0.133   |



|             |   |         |
|-------------|---|---------|
| rs62520369  | A | -0.039  |
| rs118128961 | G | -0.0597 |
| rs2170416   | T | -0.0964 |
| rs13278890  | T | 0.0452  |
| rs147240359 | T | 0.1821  |
| rs74534107  | C | -0.131  |
| rs117031819 | C | 0.1679  |
| rs35366789  | T | -0.0631 |
| rs2545462   | T | -0.0244 |
| rs75251009  | A | 0.1953  |
| rs7827753   | G | 0.0446  |
| rs72716493  | T | 0.1368  |
| rs59800763  | A | -0.0329 |
| rs4102482   | T | -0.0962 |
| rs10086611  | C | 0.1138  |
| rs118081385 | A | 0.1453  |
| rs73665419  | T | -0.0781 |
| rs72637632  | T | 0.0786  |
| rs139543185 | A | -0.1666 |
| rs117763611 | C | -0.1105 |
| rs9297283   | T | -0.0331 |
| rs150458299 | A | -0.121  |
| rs55712037  | A | 0.0529  |
| rs117006641 | T | -0.106  |
| rs117150613 | A | -0.1712 |
| rs10088943  | G | 0.1323  |
| rs13256011  | T | -0.0729 |
| rs2978398   | A | 0.0255  |
| rs6984752   | G | 0.0233  |
| rs2059648   | A | -0.0294 |
| rs77573691  | A | 0.0893  |
| rs17348819  | A | 0.0928  |
| rs142225792 | A | 0.0797  |
| rs6471437   | A | 0.0262  |
| rs13259457  | G | -0.0635 |
| rs72651542  | T | -0.143  |
| rs72665543  | G | -0.1574 |
| rs13271355  | T | -0.0444 |
| rs146548402 | G | -0.1161 |
| rs11996362  | G | -0.0307 |
| rs9644666   | G | 0.0656  |
| rs10503325  | A | -0.0351 |
| rs144074211 | T | 0.105   |
| rs2685608   | G | 0.0389  |
| rs77153483  | G | 0.0614  |
| rs6982855   | T | 0.0396  |
| rs74667391  | T | -0.0397 |

|             |   |         |
|-------------|---|---------|
| rs2449215   | G | 0.0279  |
| rs73220416  | T | 0.1174  |
| rs117615878 | A | 0.1875  |
| rs114966943 | A | 0.1191  |
| rs1610136   | T | 0.0336  |
| rs2954610   | T | 0.0239  |
| rs117590808 | C | -0.1343 |
| rs79014820  | A | -0.1067 |
| rs16894729  | A | 0.0343  |
| rs6469130   | A | 0.031   |
| rs78673752  | C | 0.1298  |
| rs10504245  | C | 0.0305  |
| rs12680383  | G | 0.025   |
| rs71514746  | G | -0.0764 |
| rs112487195 | T | -0.0563 |
| rs12675580  | A | -0.0668 |
| rs13269897  | C | -0.032  |
| rs12114298  | A | 0.1351  |
| rs34680385  | C | -0.0855 |
| rs2250197   | A | -0.0239 |
| rs6471343   | T | -0.0253 |
| rs4876351   | T | 0.0627  |
| rs149808186 | A | 0.0547  |
| rs76740695  | T | 0.0876  |
| rs35618425  | A | -0.0548 |
| rs17735843  | A | -0.0543 |
| rs10101171  | G | -0.0767 |
| rs10093817  | T | 0.0353  |
| rs62499384  | T | -0.1358 |
| rs76072405  | T | 0.0419  |
| rs62636767  | T | -0.0883 |
| rs117479439 | T | 0.1939  |
| rs383848    | T | -0.0318 |
| rs147244488 | T | -0.1386 |
| rs73221570  | A | 0.0732  |
| rs34743843  | C | 0.0243  |
| rs13275137  | A | -0.1181 |
| rs17260430  | G | -0.1069 |
| rs145486602 | T | -0.101  |
| rs10104096  | A | 0.0926  |
| rs149392081 | T | 0.114   |
| rs61575731  | A | 0.1883  |
| rs71520685  | G | -0.0878 |
| rs117377987 | G | 0.0967  |
| rs11779844  | C | 0.0331  |
| rs55841665  | T | -0.0306 |
| rs72633387  | C | -0.141  |

|             |   |         |
|-------------|---|---------|
| rs79368385  | T | 0.0504  |
| rs7833600   | T | -0.0367 |
| rs2679765   | A | 0.0307  |
| rs79640123  | A | 0.1486  |
| rs2853242   | C | 0.05    |
| rs117742156 | C | 0.1812  |
| rs1996363   | C | 0.0351  |
| rs58726895  | C | 0.1065  |
| rs1363239   | A | -0.0367 |
| rs117252295 | G | -0.1922 |
| rs759648    | C | -0.0247 |
| rs117550623 | T | -0.1212 |
| rs113780647 | T | -0.1278 |
| rs10108869  | G | 0.0275  |
| rs111704855 | T | -0.0413 |
| rs73176708  | T | -0.0688 |
| rs10103751  | T | 0.042   |
| rs28666019  | C | -0.0357 |
| rs4922257   | G | -0.0494 |
| rs7012200   | A | -0.0245 |
| rs77868426  | G | -0.0569 |
| rs11786579  | A | -0.0961 |
| rs139966374 | G | 0.0927  |
| rs7817048   | C | -0.0258 |
| rs75978652  | C | 0.0471  |
| rs407202    | A | 0.1163  |
| rs141227572 | A | 0.1669  |
| rs76990473  | G | 0.0746  |
| rs62518093  | A | 0.1627  |
| rs80236348  | G | 0.1152  |
| rs7839358   | T | -0.0243 |
| rs7844039   | A | 0.0235  |
| rs75503601  | T | 0.0704  |
| rs17342145  | C | 0.3112  |
| rs76620729  | C | 0.0947  |
| rs11780424  | T | 0.0244  |
| rs118146212 | C | -0.0844 |
| rs17070769  | C | -0.0371 |
| rs58353554  | A | 0.1011  |
| rs10097657  | A | -0.0964 |
| rs7007343   | G | -0.0279 |
| rs72690659  | A | -0.0645 |
| rs139768109 | G | 0.0594  |
| rs79278194  | T | -0.066  |
| rs28548827  | G | -0.0409 |
| rs2176397   | T | 0.0258  |
| rs80042324  | G | -0.142  |

|             |   |         |
|-------------|---|---------|
| rs117004661 | T | -0.0959 |
| rs140273600 | A | 0.1333  |
| rs13277680  | A | 0.024   |
| rs6995107   | T | 0.0232  |
| rs80226983  | T | 0.0962  |
| rs72720571  | T | -0.0305 |
| rs11779422  | C | 0.0256  |
| rs79080458  | T | 0.1214  |
| rs57201132  | A | -0.043  |
| rs12545394  | C | -0.07   |
| rs77511836  | A | 0.1176  |
| rs13252768  | T | 0.062   |
| rs17644404  | A | -0.0601 |
| rs11991968  | A | 0.0566  |
| rs144367489 | A | 0.1299  |
| rs76206107  | G | 0.0296  |
| rs6995087   | A | -0.0598 |
| rs11783074  | A | -0.0325 |
| rs7814326   | T | -0.0274 |
| rs148376239 | T | 0.0992  |
| rs75293511  | T | -0.1265 |
| rs2704267   | C | -0.0652 |
| rs7830221   | C | 0.0359  |
| rs73301717  | C | 0.0575  |
| rs2623167   | C | 0.0367  |
| rs56249148  | A | -0.081  |
| rs7813501   | A | 0.0389  |
| rs73670775  | G | -0.0533 |
| rs117616789 | T | -0.1341 |
| rs62499676  | T | -0.0546 |
| rs4734184   | G | 0.03    |
| rs117740115 | T | 0.0866  |
| rs77367816  | A | 0.0568  |
| rs76971803  | A | 0.0984  |
| rs2278667   | G | -0.0444 |
| rs17077911  | A | 0.1268  |
| rs1459323   | T | 0.0689  |
| rs374759    | C | -0.1681 |
| rs117733576 | T | 0.0614  |
| rs4006530   | G | -0.026  |
| rs1400464   | T | -0.0276 |
| rs13261560  | A | 0.0628  |
| rs116929709 | T | 0.0714  |
| rs76824703  | T | -0.108  |
| rs117671350 | A | -0.1088 |
| rs79290888  | G | -0.1295 |
| rs74994615  | C | 0.0568  |

|             |   |         |
|-------------|---|---------|
| rs4734884   | C | -0.0287 |
| rs66757781  | C | 0.0424  |
| rs9324503   | C | -0.04   |
| rs117387013 | G | 0.1282  |
| rs77207042  | T | 0.0405  |
| rs17689291  | C | -0.0757 |
| rs73305097  | C | -0.0554 |
| rs12547634  | G | -0.123  |
| rs7838705   | G | 0.0828  |
| rs7827805   | G | 0.0751  |
| rs41265258  | T | 0.1042  |
| rs140562621 | T | -0.0872 |
| rs78718178  | C | 0.0632  |
| rs10503166  | G | 0.0334  |
| rs6651385   | A | 0.0256  |
| rs79204300  | G | 0.1602  |
| rs149457895 | T | -0.0398 |
| rs118098698 | C | 0.1497  |
| rs117174179 | T | -0.0952 |
| rs10113774  | T | -0.0596 |
| rs117282761 | T | -0.0932 |
| rs72664151  | C | -0.0502 |
| rs117891157 | T | 0.1437  |
| rs75414958  | T | -0.0814 |
| rs75008203  | T | 0.0432  |
| rs76282750  | C | 0.0579  |
| rs55929127  | T | -0.1053 |
| rs7821889   | C | 0.054   |
| rs10107406  | C | -0.0234 |
| rs78995633  | T | 0.112   |
| rs138876037 | A | 0.1084  |
| rs10505715  | C | 0.1146  |
| rs77823953  | T | -0.0731 |
| rs2517173   | T | 0.0574  |
| rs7837405   | G | 0.0449  |
| rs73251388  | G | 0.0443  |
| rs17753669  | A | -0.0486 |
| rs62530525  | A | -0.0826 |
| rs137895837 | G | -0.1055 |
| rs17243414  | G | 0.1687  |
| rs9650361   | T | 0.0492  |
| rs7832831   | T | 0.0362  |
| rs10087815  | T | 0.0404  |
| rs11779384  | G | -0.122  |
| rs6989168   | C | 0.0254  |
| rs6415439   | A | 0.0425  |
| rs34815771  | A | 0.0382  |

|             |   |         |
|-------------|---|---------|
| rs11786361  | C | -0.0239 |
| rs3087723   | C | 0.0362  |
| rs10091034  | T | -0.1867 |
| rs80260687  | C | 0.1317  |
| rs78753198  | A | 0.0915  |
| rs72717996  | T | -0.061  |
| rs13272940  | C | -0.0238 |
| rs117309719 | A | 0.1233  |
| rs10098194  | T | -0.0323 |
| rs74475920  | G | -0.1193 |
| rs4615527   | T | -0.0353 |
| rs2732995   | A | -0.0225 |
| rs116932590 | T | -0.1884 |
| rs4335111   | A | -0.0634 |
| rs2894495   | C | 0.0227  |
| rs151171276 | T | 0.1336  |
| rs77685454  | G | 0.11    |
| rs6996249   | T | -0.1025 |
| rs2575727   | A | 0.0339  |
| rs79137969  | T | 0.0739  |
| rs61117033  | G | 0.0252  |
| rs2579881   | T | -0.0306 |
| rs309602    | A | 0.0244  |
| rs116497158 | A | 0.0476  |
| rs76437902  | G | -0.1308 |
| rs1106629   | G | 0.0243  |
| rs17588881  | A | -0.0361 |
| rs17480734  | C | 0.0346  |
| rs73673870  | A | -0.1387 |
| rs75660087  | C | -0.1386 |
| rs143075067 | G | 0.1002  |
| rs79238579  | G | 0.0931  |
| rs79962281  | G | 0.0711  |
| rs72679503  | T | 0.1089  |
| rs145094119 | C | -0.17   |
| rs11990784  | G | -0.0554 |
| rs2189899   | T | -0.0744 |
| rs138933367 | G | -0.0867 |
| rs67402463  | G | -0.1456 |
| rs4738871   | T | 0.0319  |
| rs117097240 | A | 0.1057  |
| rs10505573  | T | -0.0235 |
| rs167042    | C | -0.0413 |
| rs2028486   | A | 0.0453  |
| rs77335492  | A | -0.0559 |
| rs62515202  | A | 0.0613  |
| rs16935103  | T | -0.0251 |

|             |   |         |
|-------------|---|---------|
| rs11137037  | C | -0.0243 |
| rs116843387 | A | -0.1297 |
| rs76582958  | G | -0.0447 |
| rs11562741  | C | 0.0658  |
| rs78568881  | T | -0.1548 |
| rs72654175  | C | 0.0573  |
| rs16906605  | T | 0.0329  |
| rs113987446 | T | 0.1467  |
| rs72733636  | C | 0.0445  |
| rs143513733 | C | 0.1427  |
| rs142856921 | A | -0.2854 |
| rs10107993  | A | 0.0421  |
| rs117451258 | G | 0.0859  |
| rs3104957   | G | 0.0227  |
| rs73410335  | C | 0.0973  |
| rs34591370  | G | 0.1034  |
| rs7834590   | G | -0.0297 |
| rs17430478  | A | -0.0349 |
| rs75089937  | T | 0.086   |
| rs62502685  | A | 0.1692  |
| rs7008774   | C | -0.0256 |
| rs59513792  | C | -0.0337 |
| rs76136993  | A | -0.0831 |
| rs7462730   | A | -0.0723 |
| rs79018924  | C | 0.1059  |
| rs7815722   | T | 0.0276  |
| rs117932206 | T | 0.1122  |
| rs118013053 | G | -0.1022 |
| rs7459480   | A | 0.029   |
| rs360967    | C | -0.0266 |
| rs140920847 | C | 0.1164  |
| rs12678056  | T | -0.0407 |
| rs76022400  | G | -0.1103 |
| rs17070403  | G | -0.0906 |
| rs55810551  | A | 0.042   |
| rs145030653 | A | 0.067   |
| rs62518649  | A | 0.0786  |
| rs11785790  | G | -0.0816 |
| rs117872754 | G | -0.0597 |
| rs7009094   | G | 0.0223  |
| rs13254475  | T | 0.0915  |
| rs35050296  | A | 0.0296  |
| rs138051230 | A | -0.1048 |
| rs79077426  | T | 0.1492  |
| rs116974235 | T | -0.0825 |
| rs9969435   | A | -0.0582 |
| rs56190911  | A | -0.0327 |

|             |   |         |
|-------------|---|---------|
| rs10102639  | G | -0.0249 |
| rs144632498 | T | 0.1222  |
| rs117150880 | C | 0.1304  |
| rs7826047   | T | -0.0395 |
| rs117952694 | T | 0.1289  |
| rs2975202   | C | 0.0288  |
| rs2978055   | A | 0.0533  |
| rs1834414   | T | -0.0235 |
| rs117225701 | C | 0.1585  |
| rs62490176  | T | -0.1419 |
| rs137959091 | A | 0.0758  |
| rs7009451   | C | 0.0259  |
| rs73225929  | A | -0.0528 |
| rs34061266  | T | -0.0656 |
| rs2618460   | C | 0.0616  |
| rs923391    | G | 0.0337  |
| rs10096739  | A | 0.0521  |
| rs10095222  | T | 0.0697  |
| rs7815318   | C | -0.0433 |
| rs57371921  | A | 0.0483  |
| rs144079051 | C | -0.1711 |
| rs112122672 | A | 0.1428  |
| rs4291242   | T | 0.0266  |
| rs76489190  | G | 0.1342  |
| rs117346679 | T | -0.2022 |
| rs116167120 | T | -0.0744 |
| rs62502460  | A | 0.0303  |
| rs56392143  | G | -0.0307 |
| rs117405034 | A | -0.1182 |
| rs17416403  | T | -0.0276 |
| rs2176455   | T | -0.0228 |
| rs73617465  | C | -0.0586 |
| rs116943191 | T | -0.1185 |
| rs509180    | C | -0.0229 |
| rs17251720  | C | 0.0858  |
| rs332022    | T | 0.0287  |
| rs514662    | T | -0.0247 |
| rs35031528  | T | -0.098  |
| rs2859568   | G | -0.0233 |
| rs10955138  | C | -0.027  |
| rs62488528  | T | 0.1009  |
| rs7462060   | A | -0.028  |
| rs6472756   | T | -0.0537 |
| rs10216422  | C | -0.0269 |
| rs13270324  | A | -0.0778 |
| rs6999859   | G | 0.0267  |
| rs116965955 | C | -0.1184 |



|             |   |         |
|-------------|---|---------|
| rs75537381  | C | 0.0378  |
| rs6577671   | A | 0.0246  |
| rs11995502  | C | 0.1091  |
| rs79494667  | C | -0.1644 |
| rs34934346  | C | 0.089   |
| rs117655449 | C | 0.1023  |
| rs62519224  | T | 0.0975  |
| rs1733906   | C | 0.1164  |
| rs28464704  | C | -0.0264 |
| rs80178238  | A | 0.0647  |
| rs16894970  | C | -0.116  |
| rs7828685   | G | 0.0229  |
| rs35323955  | T | 0.0244  |
| rs10046671  | C | 0.0501  |
| rs4361779   | T | 0.0454  |
| rs13259960  | G | -0.0347 |
| rs144023463 | T | 0.1516  |
| rs36081636  | G | 0.0939  |
| rs999376    | G | 0.0467  |
| rs11786174  | A | 0.0364  |
| rs150016289 | A | 0.1045  |
| rs270095    | T | 0.0285  |
| rs13273185  | T | 0.029   |
| rs7461503   | T | -0.0255 |
| rs4738776   | T | -0.0393 |
| rs7812947   | G | -0.0544 |
| rs73208809  | A | 0.0834  |
| rs114195612 | T | 0.0617  |
| rs10102746  | A | 0.0303  |
| rs34678948  | G | 0.0302  |
| rs2679761   | A | -0.0517 |
| rs17187593  | T | 0.0637  |
| rs2515206   | C | 0.0275  |
| rs7006762   | G | -0.0256 |
| rs28712156  | C | -0.0353 |
| rs17053499  | T | 0.0423  |
| rs10505613  | T | -0.0667 |
| rs11787137  | C | -0.0526 |
| rs111655143 | A | -0.1079 |
| rs73196842  | A | 0.0307  |
| rs118074173 | G | 0.1683  |
| rs117376021 | T | -0.0942 |
| rs4737378   | T | -0.0329 |
| rs3102478   | C | 0.0723  |
| rs4738314   | A | 0.0258  |
| rs80138272  | C | -0.0714 |
| rs7000801   | C | 0.0246  |

|             |   |         |
|-------------|---|---------|
| rs6981092   | T | 0.0486  |
| rs2008700   | G | 0.0323  |
| rs117170061 | A | 0.0734  |
| rs72651823  | A | -0.105  |
| rs117622028 | T | 0.1424  |
| rs147383134 | C | 0.1367  |
| rs2408100   | T | -0.0295 |
| rs75426915  | G | -0.0824 |
| rs138587297 | C | -0.1736 |
| rs112328432 | T | -0.1626 |
| rs2618134   | T | -0.042  |
| rs4430120   | T | -0.0241 |
| rs59428359  | C | -0.0925 |
| rs118089763 | C | 0.1124  |
| rs2459523   | T | 0.0228  |
| rs117392044 | T | -0.0558 |
| rs10099134  | C | -0.0265 |
| rs1557948   | A | 0.0251  |
| rs117691161 | T | 0.0851  |
| rs2581901   | G | 0.0999  |
| rs75775456  | C | 0.0965  |
| rs117064906 | A | 0.0962  |
| rs73180751  | A | 0.0387  |
| rs13273251  | A | -0.0442 |
| rs16935905  | T | 0.0769  |
| rs73200105  | A | 0.0982  |
| rs118169810 | T | -0.1101 |
| rs12676286  | T | -0.0295 |
| rs72672993  | G | 0.1015  |
| rs7015598   | T | 0.0522  |
| rs143300372 | C | -0.1526 |
| rs73599164  | T | 0.0554  |
| rs6468509   | A | 0.0228  |
| rs144640141 | T | 0.0825  |
| rs72652725  | G | 0.0931  |
| rs10108224  | A | -0.0254 |
| rs17382637  | G | 0.1355  |
| rs80331480  | T | 0.0776  |
| rs6984098   | G | -0.0275 |
| rs13278801  | G | -0.0353 |
| rs4087059   | T | 0.0279  |
| rs754539    | G | 0.0247  |
| rs1838621   | G | -0.0247 |
| rs13256525  | A | 0.0426  |
| rs118007158 | A | -0.0514 |
| rs150499989 | A | 0.059   |
| rs75548812  | C | 0.1106  |

|             |   |         |
|-------------|---|---------|
| rs112258707 | A | 0.0725  |
| rs7463877   | G | -0.0591 |
| rs7009708   | C | 0.0253  |
| rs147214891 | G | -0.1341 |
| rs78455636  | C | 0.1267  |
| rs73237395  | A | 0.0561  |
| rs139571972 | A | 0.1348  |
| rs117202124 | T | -0.1969 |
| rs148647506 | G | -0.1068 |
| rs5008211   | G | -0.0235 |
| rs72629413  | C | 0.1429  |
| rs78818465  | C | -0.0752 |
| rs12542177  | A | -0.1759 |
| rs34061067  | T | 0.0292  |
| rs72666738  | G | 0.0566  |
| rs79673473  | C | -0.0711 |
| rs2816413   | G | -0.0223 |
| rs2941459   | G | -0.0258 |
| rs7461052   | T | 0.1105  |
| rs900577    | C | 0.0286  |
| rs111248581 | G | 0.0901  |
| rs4100      | G | -0.0355 |
| rs11562715  | T | 0.0474  |
| rs4620244   | T | 0.0393  |
| rs150055087 | C | -0.1955 |
| rs1121948   | G | -0.0268 |
| rs72718230  | T | -0.0794 |
| rs73217929  | T | 0.038   |
| rs111697508 | A | 0.1532  |
| rs7834959   | T | 0.0473  |
| rs6999533   | A | 0.0251  |
| rs144318279 | T | -0.1212 |
| rs10505257  | A | -0.0434 |
| rs59528200  | C | 0.063   |
| rs56754306  | A | -0.1517 |
| rs7463457   | A | 0.0232  |
| rs75649855  | G | 0.1483  |
| rs13257849  | T | -0.0251 |
| rs7013743   | T | 0.0297  |
| rs79206077  | C | -0.0846 |
| rs111584417 | T | -0.0425 |
| rs13282264  | A | -0.0526 |
| rs112866586 | T | -0.0592 |
| rs10503635  | T | 0.03    |
| rs117046165 | A | 0.0774  |
| rs71519605  | T | 0.0633  |
| rs7844597   | C | -0.0224 |

|             |   |         |
|-------------|---|---------|
| rs77476195  | T | 0.1141  |
| rs830786    | T | 0.052   |
| rs118017744 | A | -0.0791 |
| rs11776784  | G | -0.0247 |
| rs111406446 | T | 0.0706  |
| rs71514530  | T | 0.0878  |
| rs72720289  | C | 0.0655  |
| rs9297581   | C | -0.0556 |
| rs141535191 | A | 0.1353  |
| rs12545978  | T | 0.0686  |
| rs4425765   | G | -0.0395 |
| rs75043257  | G | 0.101   |
| rs117878961 | G | 0.1702  |
| rs12549007  | C | 0.0337  |
| rs72719469  | T | -0.0484 |
| rs149441421 | G | 0.1754  |
| rs7828445   | A | 0.0271  |
| rs113013292 | A | 0.0874  |
| rs599814    | C | -0.026  |
| rs67397426  | A | -0.0298 |
| rs148752344 | T | 0.045   |
| rs6558971   | G | -0.0302 |
| rs11786609  | C | -0.1087 |
| rs76763032  | G | 0.104   |
| rs76643130  | C | 0.0618  |
| rs79563519  | T | 0.0672  |
| rs7841173   | C | 0.0498  |
| rs73214679  | C | -0.0278 |
| rs6473229   | G | 0.0229  |
| rs13271840  | T | 0.03    |
| rs11166919  | A | 0.0355  |
| rs12675813  | G | 0.0429  |
| rs62640315  | A | -0.0272 |
| rs34676548  | T | 0.0758  |
| rs2923775   | G | -0.0233 |
| rs4736754   | A | -0.1231 |
| rs56298325  | A | -0.0838 |
| rs2693430   | G | -0.0284 |
| rs75217122  | A | -0.0677 |
| rs7838540   | A | 0.1111  |
| rs17672211  | G | -0.1327 |
| rs67769563  | A | -0.0267 |
| rs78851776  | C | 0.0691  |
| rs35306663  | C | -0.1964 |
| rs6998217   | G | 0.0229  |
| rs12682279  | T | -0.0458 |
| rs117477275 | A | -0.0719 |

|             |   |         |
|-------------|---|---------|
| rs4876326   | C | 0.0832  |
| rs17088895  | C | -0.0596 |
| rs1809356   | T | -0.0569 |
| rs149654355 | G | 0.1478  |
| rs147073709 | C | -0.1256 |
| rs10503361  | G | -0.0355 |
| rs77514260  | A | 0.0893  |
| rs79938084  | G | -0.0947 |
| rs59324013  | T | 0.0348  |
| rs74670282  | T | 0.1268  |
| rs78852474  | T | 0.0552  |
| rs75764383  | C | 0.1241  |
| rs74861182  | C | 0.0776  |
| rs78825585  | T | 0.1155  |
| rs117076050 | A | 0.08    |
| rs62497297  | T | -0.0376 |
| rs11988359  | A | -0.0783 |
| rs117895561 | T | 0.0767  |
| rs118093722 | A | 0.0935  |
| rs79674713  | T | -0.0881 |
| rs62521382  | C | 0.1019  |
| rs77254145  | G | -0.0511 |
| rs77981355  | G | 0.1042  |
| rs117998299 | A | 0.1302  |
| rs117685930 | T | 0.1476  |
| rs117084153 | T | -0.1348 |
| rs78907601  | T | 0.1055  |
| rs3015675   | G | -0.1474 |
| rs10098792  | A | -0.0414 |
| rs7814897   | A | 0.0244  |
| rs351782    | A | 0.0638  |
| rs13265669  | A | 0.0935  |
| rs58577087  | A | -0.0448 |
| rs17474841  | T | 0.034   |
| rs75877788  | T | -0.1073 |
| rs60293067  | C | 0.0292  |
| rs77741956  | T | -0.0395 |
| rs7838777   | C | -0.0318 |
| rs12546334  | G | 0.086   |
| rs146257259 | A | -0.1689 |
| rs138373019 | C | -0.054  |
| rs145737555 | A | 0.1039  |
| rs10099976  | G | 0.0285  |
| rs77387433  | C | 0.1161  |
| rs73213606  | A | 0.041   |
| rs11562744  | A | -0.1081 |
| rs10090541  | G | 0.0406  |

|             |   |         |
|-------------|---|---------|
| rs10111056  | T | 0.022   |
| rs111465239 | A | -0.0965 |
| rs11774568  | A | 0.0258  |
| rs7010200   | C | -0.0298 |
| rs2234558   | G | -0.0893 |
| rs143337164 | C | -0.1061 |
| rs1442329   | T | 0.1236  |
| rs1635649   | A | -0.0337 |
| rs11250147  | C | 0.0257  |
| rs117789656 | C | 0.0656  |
| rs3808565   | G | 0.0578  |
| rs117668796 | G | 0.0729  |
| rs10086054  | G | 0.0917  |
| rs4734070   | T | -0.0294 |
| rs11779902  | G | 0.0232  |
| rs140629785 | A | 0.0861  |
| rs13277239  | C | -0.025  |
| rs204782    | T | 0.1037  |
| rs72673922  | A | 0.1496  |
| rs36019116  | T | -0.0719 |
| rs55956894  | A | 0.0227  |
| rs11204070  | A | 0.0466  |
| rs79387672  | G | 0.1407  |
| rs7823533   | G | 0.0398  |
| rs13257404  | A | 0.0567  |
| rs12544672  | G | 0.0326  |
| rs72731533  | G | -0.0569 |
| rs6586866   | T | -0.0316 |
| rs4275231   | T | 0.0302  |
| rs72638950  | A | -0.0615 |
| rs78131151  | G | 0.042   |
| rs141549715 | A | 0.0862  |
| rs117778878 | T | 0.1519  |
| rs13261938  | A | 0.0336  |
| rs117390404 | C | -0.1011 |
| rs72697663  | A | 0.0611  |
| rs143889949 | C | 0.0995  |
| rs7824653   | C | -0.0286 |
| rs113729785 | G | 0.0945  |
| rs117662606 | A | -0.1089 |
| rs76711355  | T | -0.1796 |
| rs117612067 | T | 0.1555  |
| rs1388766   | C | 0.0648  |
| rs60831859  | T | -0.0332 |
| rs4907322   | A | -0.045  |
| rs78866023  | G | 0.2096  |
| rs144668682 | C | 0.1019  |

|             |   |         |
|-------------|---|---------|
| rs78839578  | A | 0.066   |
| rs113639984 | A | 0.0827  |
| rs144458799 | A | 0.0931  |
| rs3105433   | T | 0.0294  |
| rs16887736  | G | -0.032  |
| rs117263635 | T | 0.0698  |
| rs12544707  | G | -0.0729 |
| rs13263522  | C | -0.0268 |
| rs75134351  | G | 0.1712  |
| rs935564    | G | 0.0607  |
| rs34591011  | A | 0.1016  |
| rs117881274 | A | 0.0744  |
| rs79868261  | C | -0.0731 |
| rs72676141  | A | -0.1074 |
| rs7823974   | T | 0.0498  |
| rs3789844   | G | -0.0533 |
| rs62517608  | C | 0.0976  |
| rs2439641   | G | 0.042   |
| rs2978951   | A | 0.0224  |
| rs850407    | A | 0.0663  |
| rs11993215  | A | 0.043   |
| rs279955    | T | -0.0241 |
| rs73181058  | C | -0.0909 |
| rs142285885 | G | -0.113  |
| rs2648899   | A | 0.0336  |
| rs11986829  | C | 0.048   |
| rs1823504   | G | -0.0297 |
| rs150976308 | G | -0.0494 |
| rs13282618  | T | -0.1246 |
| rs12543022  | C | -0.0462 |
| rs74563289  | T | -0.0373 |
| rs150879759 | T | 0.0605  |
| rs58517679  | G | -0.0627 |
| rs141729954 | A | -0.1629 |
| rs441736    | T | 0.147   |
| rs112758057 | A | -0.0841 |
| rs3990616   | A | -0.1336 |
| rs117263722 | G | 0.0994  |
| rs78651618  | T | 0.071   |
| rs7011099   | G | -0.0583 |
| rs1217683   | C | -0.065  |
| rs17685883  | T | 0.0566  |
| rs13281237  | G | 0.0304  |
| rs77644617  | T | 0.0767  |
| rs2954605   | C | 0.0218  |
| rs76677983  | A | -0.11   |
| rs4871381   | A | 0.0421  |

|             |   |         |
|-------------|---|---------|
| rs10103001  | C | -0.0429 |
| rs150100729 | T | -0.137  |
| rs10104622  | C | 0.0905  |
| rs117584342 | G | -0.0935 |
| rs1549848   | G | -0.0251 |
| rs2369411   | A | -0.0277 |
| rs5743402   | C | 0.0287  |
| rs7001286   | G | 0.1235  |
| rs111502799 | C | 0.1215  |
| rs11778703  | G | 0.0638  |
| rs2164306   | A | -0.0228 |
| rs2956902   | T | 0.0219  |
| rs7819586   | A | -0.0987 |
| rs76266819  | G | -0.0611 |
| rs144254804 | T | -0.1016 |
| rs147255993 | G | 0.1101  |
| rs78974761  | A | 0.0579  |
| rs4921603   | G | 0.0243  |
| rs35796203  | A | 0.0414  |
| rs9801830   | A | -0.029  |
| rs74480402  | C | -0.1815 |
| rs6984808   | T | 0.0224  |
| rs1514705   | G | -0.0226 |
| rs61674659  | T | -0.1744 |
| rs831735    | G | -0.0216 |
| rs7813189   | T | -0.0316 |
| rs1805787   | G | -0.0309 |
| rs62478389  | G | 0.0547  |
| rs117343217 | C | 0.1241  |
| rs2138022   | A | 0.0502  |
| rs62509353  | A | 0.1061  |
| rs74705802  | A | -0.1003 |
| rs13328379  | T | -0.0293 |
| rs75394353  | C | -0.0967 |
| rs7011783   | C | 0.0287  |
| rs140521693 | A | 0.1084  |
| rs13271306  | A | 0.0734  |
| rs11775448  | C | 0.0222  |
| rs79254283  | A | -0.0396 |
| rs55731107  | T | 0.1154  |
| rs2175311   | C | 0.023   |
| rs72661898  | A | 0.0386  |
| rs80189320  | T | -0.0356 |
| rs117546106 | G | 0.1377  |
| rs4400347   | G | -0.0284 |
| rs17120669  | G | -0.0965 |
| rs34923515  | G | 0.0522  |



|             |   |         |
|-------------|---|---------|
| rs35581786  | T | 0.1081  |
| rs72621454  | C | -0.0546 |
| rs112780027 | G | 0.1259  |
| rs73283791  | T | 0.1387  |
| rs7820794   | T | 0.0263  |
| rs142747110 | C | 0.1104  |
| rs72662491  | A | -0.079  |
| rs74384960  | A | 0.1003  |
| rs62497403  | T | 0.0237  |
| rs10088747  | A | 0.0899  |
| rs62521340  | T | -0.1666 |
| rs307395    | T | -0.0376 |
| rs76357536  | G | -0.1356 |
| rs12549845  | G | 0.0299  |
| rs10088382  | T | -0.0248 |
| rs4736239   | C | -0.0249 |
| rs4976892   | T | 0.1344  |
| rs1494971   | C | 0.0296  |
| rs75820404  | A | 0.0551  |
| rs143125161 | C | 0.1583  |
| rs6985560   | T | 0.0528  |
| rs117262040 | A | 0.108   |
| rs56373382  | A | 0.0731  |
| rs57764163  | T | -0.0423 |
| rs10108413  | G | -0.0648 |
| rs59694674  | G | 0.0509  |
| rs79942546  | G | -0.0834 |
| rs62523044  | A | 0.0659  |
| rs147105025 | C | 0.1572  |
| rs17342242  | G | -0.0271 |
| rs150751363 | G | 0.1209  |
| rs118003188 | C | -0.1685 |
| rs11989084  | C | 0.0349  |
| rs146136980 | G | 0.1909  |
| rs74566360  | C | 0.0916  |
| rs144803951 | T | 0.1328  |
| rs11778118  | C | -0.0261 |
| rs56708363  | A | 0.0637  |
| rs116877659 | T | -0.1094 |
| rs34257974  | A | 0.0577  |
| rs113523387 | A | -0.0722 |
| rs59137597  | C | 0.0583  |
| rs11781659  | C | -0.0286 |
| rs10875423  | T | -0.035  |
| rs13278923  | A | -0.0414 |
| rs12543733  | A | 0.0334  |
| rs150669949 | A | -0.1508 |

|             |   |         |
|-------------|---|---------|
| rs71510680  | A | -0.0828 |
| rs6473857   | T | 0.0647  |
| rs2637836   | G | 0.0304  |
| rs143078550 | A | -0.0535 |
| rs4236736   | A | 0.022   |
| rs71521845  | C | 0.0389  |
| rs28416648  | T | -0.1097 |
| rs56095567  | G | -0.0595 |
| rs10216990  | G | 0.0219  |
| rs10958809  | T | 0.0289  |
| rs1367916   | A | 0.0903  |
| rs117619771 | C | 0.1309  |
| rs117793078 | A | 0.0679  |
| rs17515264  | C | -0.0408 |
| rs117503643 | A | -0.065  |
| rs10216802  | C | -0.1069 |
| rs73210024  | G | 0.0499  |
| rs7464855   | C | -0.0226 |
| rs150064373 | T | -0.1672 |
| rs78812419  | C | -0.0719 |
| rs2326141   | G | 0.103   |
| rs36015978  | G | -0.042  |
| rs17220787  | G | 0.116   |
| rs72725919  | A | -0.1471 |
| rs11998308  | A | -0.0217 |
| rs72652568  | C | -0.0502 |
| rs76045952  | A | 0.1958  |
| rs28626453  | A | -0.0241 |
| rs111664833 | T | -0.0633 |
| rs4831240   | T | 0.0213  |
| rs4733957   | G | 0.0238  |
| rs55824575  | A | -0.1329 |
| rs13275923  | C | 0.0246  |
| rs139478052 | T | 0.1088  |
| rs850425    | T | -0.0272 |
| rs7836364   | T | -0.0221 |
| rs474402    | C | 0.0365  |
| rs74853540  | C | 0.1008  |
| rs118113714 | C | -0.0786 |
| rs140710986 | T | 0.1228  |
| rs137876695 | T | -0.0403 |
| rs7819563   | T | 0.1026  |
| rs141516381 | C | -0.1867 |
| rs896619    | C | 0.0215  |
| rs16894211  | C | 0.0608  |
| rs16907755  | C | 0.1984  |
| rs7462620   | T | -0.0216 |

|             |   |         |
|-------------|---|---------|
| rs75105669  | A | 0.1041  |
| rs117339258 | C | -0.1194 |
| rs2542443   | G | -0.0343 |
| rs75932619  | T | 0.0276  |
| rs78150603  | A | -0.084  |
| rs149699111 | C | -0.1155 |
| rs7004757   | A | 0.0572  |
| rs7826344   | T | 0.0238  |
| rs143105765 | T | -0.0975 |
| rs77357379  | T | -0.0782 |
| rs117587852 | G | -0.1682 |
| rs76286000  | G | 0.0428  |
| rs10108480  | A | -0.0592 |
| rs12549429  | C | 0.0322  |
| rs77090570  | A | 0.0584  |
| rs28655352  | C | 0.0591  |
| rs112454457 | T | 0.1282  |
| rs112100083 | A | -0.0733 |
| rs74412410  | G | 0.038   |
| rs80068299  | C | -0.1024 |
| rs73203400  | T | 0.0449  |
| rs17468779  | G | 0.0319  |
| rs62500461  | T | -0.1148 |
| rs147827967 | T | -0.1298 |
| rs13264376  | G | 0.1794  |
| rs11987684  | A | 0.0466  |
| rs75582262  | G | -0.0438 |
| rs3988307   | T | -0.0251 |
| rs79108128  | T | 0.0805  |
| rs111489662 | G | -0.0867 |
| rs55770107  | C | 0.0319  |
| rs116485224 | A | 0.0712  |
| rs72640960  | C | 0.1524  |
| rs139437044 | A | -0.0901 |
| rs12681038  | T | -0.0224 |
| rs17739692  | C | -0.0879 |
| rs4552929   | T | -0.0308 |
| rs75669756  | C | 0.0378  |
| rs10503270  | T | -0.0256 |
| rs2010788   | T | -0.0226 |
| rs433490    | G | -0.0287 |
| rs75538719  | T | 0.0638  |
| rs78578550  | T | 0.0652  |
| rs71510110  | A | -0.1645 |
| rs7819338   | C | 0.0861  |
| rs139790961 | C | 0.1167  |
| rs138415935 | A | -0.1469 |

|             |   |         |
|-------------|---|---------|
| rs143961826 | T | -0.0811 |
| rs62519206  | G | -0.1375 |
| rs307740    | G | -0.0219 |
| rs75332815  | G | -0.1199 |
| rs72727811  | T | -0.0832 |
| rs75903074  | A | 0.0336  |
| rs16902147  | C | 0.0971  |
| rs117541847 | C | 0.0938  |
| rs35097569  | C | 0.1473  |
| rs12680918  | T | -0.0527 |
| rs112110493 | C | 0.0943  |
| rs76093107  | A | 0.0758  |
| rs12542155  | G | 0.0219  |
| rs72670759  | T | 0.0752  |
| rs61205559  | G | 0.038   |
| rs112646805 | A | 0.0716  |
| rs117469795 | T | 0.1883  |
| rs117979403 | G | 0.0908  |
| rs74731529  | G | -0.1368 |
| rs71528708  | A | 0.0633  |
| rs3018911   | T | 0.0988  |
| rs59606339  | C | -0.1043 |
| rs77654261  | T | 0.0853  |
| rs73260731  | C | 0.0784  |
| rs117305949 | C | 0.0963  |
| rs6991990   | T | 0.0231  |
| rs62530042  | T | 0.0937  |
| rs4074834   | C | -0.0355 |
| rs118134834 | A | -0.1665 |
| rs1541933   | A | -0.065  |
| rs17632963  | G | 0.028   |
| rs73222551  | A | -0.2111 |
| rs2726980   | C | 0.0282  |
| rs7842658   | C | 0.0354  |
| rs2357956   | T | -0.0237 |
| rs147564562 | T | -0.0278 |
| rs150868293 | A | 0.0293  |
| rs1388953   | T | -0.0317 |
| rs147598798 | G | -0.0699 |
| rs28484850  | A | 0.0457  |
| rs10103724  | G | -0.0299 |
| rs79609795  | A | -0.123  |
| rs11782962  | A | 0.1105  |
| rs6993988   | G | -0.0231 |
| rs116854242 | A | 0.1411  |
| rs148319884 | C | 0.1259  |
| rs62502457  | G | 0.1078  |

|             |   |         |
|-------------|---|---------|
| rs6472316   | C | -0.0652 |
| rs16896659  | C | 0.0318  |
| rs117285233 | T | 0.0865  |
| rs10102764  | C | -0.0266 |
| rs112883887 | G | -0.1587 |
| rs4314634   | A | 0.0238  |
| rs9314548   | A | -0.0433 |
| rs112951212 | G | -0.0542 |
| rs57165765  | C | 0.0792  |
| rs3735980   | T | -0.0245 |
| rs2622590   | A | -0.0308 |
| rs73687604  | T | -0.2128 |
| rs145791813 | C | -0.0753 |
| rs113937294 | C | 0.0913  |
| rs549043    | A | 0.0373  |
| rs11782925  | A | -0.0428 |
| rs117366758 | T | 0.0804  |
| rs73442789  | T | 0.0674  |
| rs17597333  | C | 0.023   |
| rs62485661  | T | 0.0242  |
| rs4733950   | A | -0.0355 |
| rs16898151  | A | 0.053   |
| rs138780076 | A | 0.1415  |
| rs4382481   | T | -0.0545 |
| rs147929778 | T | -0.0978 |
| rs79185314  | A | -0.0473 |
| rs1442395   | T | 0.0214  |
| rs2614114   | T | -0.0239 |
| rs117809155 | G | 0.1238  |
| rs149600963 | A | -0.082  |
| rs2197393   | A | -0.0298 |
| rs13249350  | A | -0.0254 |
| rs12542653  | T | -0.0347 |
| rs28559595  | T | 0.0696  |
| rs113598024 | C | -0.1381 |
| rs17632001  | C | -0.0432 |
| rs28537965  | C | 0.1484  |
| rs55845554  | T | 0.079   |
| rs74949220  | C | -0.0565 |
| rs72666518  | C | 0.0729  |
| rs117764174 | A | -0.0989 |
| rs2853282   | T | 0.0297  |
| rs74476672  | T | 0.0709  |
| rs17268635  | G | 0.1062  |
| rs116995493 | G | -0.1012 |
| rs16901512  | G | -0.0589 |
| rs141925157 | G | 0.1336  |

|             |   |         |
|-------------|---|---------|
| rs4310230   | C | 0.0217  |
| rs6586642   | C | 0.0302  |
| rs2170484   | T | -0.0401 |
| rs28690102  | T | -0.0264 |
| rs6472472   | T | -0.0221 |
| rs11774161  | C | -0.0343 |
| rs74910418  | C | 0.1541  |
| rs11990439  | G | -0.1436 |
| rs79383412  | C | 0.1119  |
| rs72652153  | C | 0.0472  |
| rs11779840  | A | -0.031  |
| rs13271127  | C | 0.0434  |
| rs11781260  | A | 0.1071  |
| rs62496781  | A | -0.2245 |
| rs13267197  | C | -0.0336 |
| rs7844309   | T | -0.0637 |
| rs72675163  | C | 0.0708  |
| rs28522929  | T | 0.0258  |
| rs78345524  | T | 0.1064  |
| rs146834829 | G | 0.1652  |
| rs111913528 | G | -0.0858 |
| rs113171342 | T | 0.0818  |
| rs12679609  | A | 0.0301  |
| rs78694880  | T | -0.1456 |
| rs73218756  | A | -0.0302 |
| rs1442894   | C | -0.0334 |
| rs78117459  | G | 0.0475  |
| rs11136427  | C | -0.062  |
| rs13270888  | C | 0.0264  |
| rs17693103  | T | 0.0304  |
| rs3944747   | A | 0.038   |
| rs28498602  | C | -0.0277 |
| rs3758088   | C | -0.0246 |
| rs1358268   | C | 0.0213  |
| rs143932839 | T | 0.1266  |
| rs117452764 | G | 0.0905  |
| rs7006988   | C | -0.028  |
| rs78595603  | A | -0.1591 |
| rs2977509   | G | -0.0232 |
| rs12548471  | C | -0.0894 |
| rs3106317   | G | -0.0456 |
| rs77531786  | G | -0.1354 |
| rs776261    | T | -0.0253 |
| rs6992928   | C | 0.0285  |
| rs11783433  | C | 0.0953  |
| rs79896518  | T | -0.0827 |
| rs7824042   | T | -0.0286 |

|             |   |         |
|-------------|---|---------|
| rs62513883  | T | -0.1301 |
| rs60123360  | T | -0.0359 |
| rs4548180   | T | 0.0229  |
| rs147048430 | T | -0.1281 |
| rs75318169  | C | 0.0754  |
| rs114751814 | C | 0.0898  |
| rs36154387  | G | 0.0388  |
| rs146371195 | T | -0.1133 |
| rs117753442 | C | 0.0844  |
| rs75904373  | G | 0.0731  |
| rs140169038 | G | 0.1094  |
| rs62526621  | T | -0.0315 |
| rs11784619  | A | 0.0797  |
| rs17118702  | T | 0.0304  |
| rs10090993  | T | 0.0354  |
| rs146873836 | G | -0.0803 |
| rs2380472   | A | -0.0325 |
| rs116898491 | A | -0.0908 |
| rs4391401   | A | 0.0353  |
| rs150576367 | A | -0.0592 |
| rs142718833 | T | 0.1359  |
| rs80129471  | A | -0.0838 |
| rs76006906  | C | 0.0916  |
| rs57419397  | T | 0.1139  |
| rs117208114 | A | 0.0912  |
| rs17252580  | C | 0.0723  |
| rs4237085   | A | -0.0653 |
| rs143089503 | T | -0.0881 |
| rs146706952 | A | 0.1677  |
| rs56021502  | A | -0.0735 |
| rs72684232  | A | -0.0686 |
| rs138295898 | C | 0.0839  |
| rs3988279   | C | -0.0219 |
| rs80064827  | A | -0.1077 |
| rs146983172 | G | -0.0799 |
| rs141414343 | T | -0.1125 |
| rs117528653 | G | 0.0898  |
| rs17580305  | G | 0.0749  |
| rs11787082  | T | -0.0915 |
| rs117726975 | G | -0.1088 |
| rs62498645  | T | 0.1764  |
| rs116749971 | C | 0.0554  |
| rs11987760  | G | 0.024   |
| rs1269694   | G | 0.0229  |
| rs12680483  | A | -0.029  |
| rs1369769   | A | 0.0243  |
| rs10086659  | C | -0.0366 |

|             |   |         |
|-------------|---|---------|
| rs117671808 | G | 0.0968  |
| rs72683205  | C | -0.0439 |
| rs142537252 | A | 0.1184  |
| rs2470050   | G | -0.0242 |
| rs13257007  | T | 0.0628  |
| rs73210842  | C | -0.0282 |
| rs62527938  | A | 0.0434  |
| rs10094735  | T | 0.1271  |
| rs7842184   | T | 0.111   |
| rs57400114  | A | -0.064  |
| rs73514346  | A | -0.0393 |
| rs73622141  | T | 0.061   |
| rs1424867   | C | -0.029  |
| rs117752049 | C | -0.1081 |
| rs73658136  | C | 0.0454  |
| rs58535363  | G | 0.0216  |
| rs35475604  | A | 0.0399  |
| rs117854732 | G | 0.1553  |
| rs117858137 | G | 0.1359  |
| rs7832794   | C | -0.0828 |
| rs12675384  | T | -0.0238 |
| rs1858709   | C | 0.0208  |
| rs146598157 | A | -0.0755 |
| rs142486869 | A | 0.0928  |
| rs117945302 | T | 0.1426  |
| rs62522940  | T | -0.1053 |
| rs17342815  | T | 0.0553  |
| rs7813641   | A | -0.0472 |
| rs3886001   | T | 0.1958  |
| rs78866747  | T | -0.1422 |
| rs4457311   | G | -0.0208 |
| rs112836310 | A | 0.1095  |
| rs2035387   | T | -0.0526 |
| rs61757563  | A | -0.0682 |
| rs7008266   | A | 0.021   |
| rs78716984  | T | 0.0526  |
| rs381629    | T | -0.0245 |
| rs142238419 | A | 0.1738  |
| rs117510848 | T | -0.1073 |
| rs74984377  | G | 0.1332  |
| rs35487336  | T | -0.0905 |
| rs77691174  | C | 0.1253  |
| rs72629602  | G | 0.0702  |
| rs4733070   | A | -0.0219 |
| rs139066343 | T | -0.0643 |
| rs138543505 | C | 0.1712  |
| rs4629833   | A | 0.0224  |



|             |   |         |
|-------------|---|---------|
| rs75584172  | A | -0.0971 |
| rs76864564  | T | 0.1101  |
| rs34031939  | A | 0.0571  |
| rs77661506  | A | 0.0965  |
| rs776959    | C | -0.0228 |
| rs10094811  | G | 0.1252  |
| rs12548565  | G | 0.0224  |
| rs7008292   | C | 0.1133  |
| rs62502266  | T | -0.1242 |
| rs141878756 | T | 0.1826  |
| rs73367663  | T | -0.046  |
| rs75361840  | T | -0.1083 |
| rs117419833 | G | -0.174  |
| rs2077535   | C | 0.0217  |
| rs148321197 | C | -0.1371 |
| rs117574291 | A | 0.1211  |
| rs73590372  | A | -0.0355 |
| rs16876478  | A | 0.1178  |
| rs10088869  | G | 0.0352  |
| rs140988043 | A | 0.0619  |
| rs7008027   | C | -0.0323 |
| rs74860691  | T | 0.051   |
| rs80254815  | T | 0.1807  |
| rs1013209   | T | 0.024   |
| rs10095756  | G | 0.0329  |
| rs13255552  | T | 0.022   |
| rs3812416   | G | -0.0733 |
| rs76329009  | G | 0.0551  |
| rs7816810   | C | 0.0545  |
| rs28633536  | T | -0.0699 |
| rs4601298   | C | 0.0205  |
| rs7008113   | A | 0.0264  |
| rs148542103 | A | -0.1521 |
| rs117017955 | A | -0.0688 |
| rs76967344  | A | -0.0456 |
| rs2158703   | C | 0.0434  |
| rs1347547   | G | -0.0678 |
| rs72662919  | A | 0.0401  |
| rs7825431   | A | -0.0227 |
| rs767238    | G | 0.0451  |
| rs117031623 | T | -0.0976 |
| rs117567025 | G | 0.0722  |
| rs4551400   | G | -0.021  |
| rs12545100  | C | -0.0599 |
| rs12541587  | T | 0.0282  |
| rs2117148   | T | -0.0244 |
| rs117384116 | G | -0.1475 |

|             |   |         |
|-------------|---|---------|
| rs117884129 | G | 0.0744  |
| rs7827332   | G | 0.0305  |
| rs17395764  | C | -0.0711 |
| rs117531451 | A | -0.1055 |
| rs72656057  | T | 0.033   |
| rs2034779   | G | 0.025   |
| rs4510871   | A | -0.0397 |
| rs74809958  | G | -0.1066 |
| rs75470088  | C | -0.0892 |
| rs72681178  | A | 0.0948  |
| rs12542846  | A | -0.025  |
| rs9297985   | C | -0.0221 |
| rs73229905  | T | -0.0255 |
| rs141763842 | T | -0.0964 |
| rs62526653  | G | -0.066  |
| rs117140817 | T | -0.0443 |
| rs117288868 | G | 0.0782  |
| rs77503613  | T | 0.1034  |
| rs1895885   | C | 0.0238  |
| rs9650275   | A | -0.0224 |
| rs76982163  | C | 0.0642  |
| rs10110874  | C | -0.0303 |
| rs6472477   | A | 0.0206  |
| rs6981045   | A | -0.1593 |
| rs671557    | C | 0.0319  |
| rs76796524  | T | 0.0945  |
| rs139775175 | C | -0.0683 |
| rs80112761  | G | -0.1093 |
| rs117959577 | G | 0.1242  |
| rs4733322   | G | 0.0298  |
| rs77750035  | T | 0.0641  |
| rs76102281  | A | 0.0585  |
| rs56342616  | T | -0.0312 |
| rs148767130 | A | -0.1281 |
| rs4358768   | T | 0.0225  |
| rs55890546  | C | 0.0307  |
| rs116891470 | C | -0.0744 |
| rs10099675  | A | -0.1089 |
| rs12678832  | A | -0.0225 |
| rs143769538 | G | 0.0836  |
| rs4875313   | G | -0.0265 |
| rs8180956   | T | 0.0259  |
| rs1599473   | T | 0.0292  |
| rs9643901   | G | 0.0285  |
| rs67901312  | T | -0.1365 |
| rs7823336   | C | -0.0256 |
| rs4740115   | G | 0.0262  |

|             |   |         |
|-------------|---|---------|
| rs2199335   | G | 0.0348  |
| rs34074589  | G | -0.0266 |
| rs2645426   | G | 0.0214  |
| rs496887    | A | 0.0652  |
| rs116879997 | T | 0.0623  |
| rs147533329 | A | -0.0771 |
| rs55852693  | C | 0.0226  |
| rs4739064   | A | 0.1051  |
| rs78289993  | G | 0.0679  |
| rs111491660 | T | 0.099   |
| rs1714597   | G | -0.0874 |
| rs10481151  | C | -0.0386 |
| rs73226800  | G | 0.0307  |
| rs1869808   | G | 0.0217  |
| rs117848148 | A | -0.1135 |
| rs6473630   | T | -0.0252 |
| rs2976589   | T | 0.0249  |
| rs28619415  | T | 0.0323  |
| rs4732956   | T | -0.0269 |
| rs62512667  | T | -0.0855 |
| rs10429272  | T | 0.0271  |
| rs62528785  | T | 0.0717  |
| rs17058252  | G | -0.0377 |
| rs111599519 | G | -0.0982 |
| rs7841590   | C | 0.0211  |
| rs17124830  | C | 0.0879  |
| rs145414515 | C | 0.1107  |
| rs13258752  | G | -0.0211 |
| rs7015611   | T | -0.0795 |
| rs9298347   | C | 0.0248  |
| rs12548274  | G | 0.0397  |
| rs80070741  | T | -0.0334 |
| rs118166550 | T | -0.1614 |
| rs4738697   | C | -0.0737 |
| rs11775560  | G | -0.0265 |
| rs79283194  | T | 0.071   |
| rs13261356  | A | 0.0357  |
| rs117644756 | G | 0.108   |
| rs139278659 | T | 0.0824  |
| rs72722620  | G | -0.0619 |
| rs1451363   | A | 0.0214  |
| rs139563453 | C | -0.0659 |
| rs4736926   | T | 0.0219  |
| rs1838      | G | 0.0241  |
| rs55747119  | A | 0.058   |
| rs1018842   | C | -0.0211 |
| rs2410684   | G | 0.0323  |

|             |   |         |
|-------------|---|---------|
| rs74811240  | T | 0.0802  |
| rs4738914   | C | -0.0264 |
| rs78783640  | T | 0.0859  |
| rs3736436   | G | 0.0239  |
| rs35001371  | T | -0.035  |
| rs72659268  | T | 0.1334  |
| rs72676090  | A | 0.0739  |
| rs13260600  | T | 0.0365  |
| rs73190596  | C | -0.0512 |
| rs62490151  | A | -0.0667 |
| rs16885206  | C | -0.0737 |
| rs10092641  | T | -0.0394 |
| rs6468355   | T | -0.0408 |
| rs35257889  | C | 0.0303  |
| rs10088974  | T | 0.1005  |
| rs72670234  | A | 0.0573  |
| rs150811089 | G | 0.0906  |
| rs112486447 | A | 0.0702  |
| rs116888241 | C | -0.0568 |
| rs11203785  | A | -0.0281 |
| rs141979221 | T | 0.0962  |
| rs17237257  | G | 0.0208  |
| rs78574099  | A | 0.0403  |
| rs75347890  | T | -0.0847 |
| rs74570875  | T | 0.1185  |
| rs74565885  | G | -0.1683 |
| rs145726401 | T | 0.084   |
| rs116970488 | G | -0.1287 |
| rs10958017  | G | -0.1124 |
| rs74306681  | T | 0.072   |
| rs112094779 | A | 0.1062  |
| rs34225774  | A | -0.0889 |
| rs2469763   | A | -0.0407 |
| rs4481573   | G | -0.0233 |
| rs7005586   | A | 0.0319  |
| rs17631450  | A | -0.0349 |
| rs4596664   | T | -0.0297 |
| rs13251888  | A | 0.0504  |
| rs77866298  | T | 0.1026  |
| rs77981115  | T | -0.0951 |
| rs1320377   | G | -0.0582 |
| rs150882795 | A | 0.0673  |
| rs4736925   | A | -0.0354 |
| rs145818945 | G | 0.087   |
| rs1524839   | T | -0.0211 |
| rs9987381   | C | -0.0301 |
| rs72671444  | A | 0.0697  |

|             |   |         |
|-------------|---|---------|
| rs61663020  | A | -0.1279 |
| rs2688294   | G | -0.0237 |
| rs7826004   | A | -0.1487 |
| rs117295919 | A | 0.1082  |
| rs11777643  | C | -0.1308 |
| rs12550392  | G | -0.0245 |
| rs16873506  | A | 0.1531  |
| rs118124465 | C | 0.1302  |
| rs6994672   | A | 0.0987  |
| rs34475631  | A | -0.0501 |
| rs10113420  | G | -0.0617 |
| rs890443    | T | -0.0233 |
| rs71526150  | C | 0.0622  |
| rs11135795  | C | -0.0285 |
| rs6981940   | T | 0.0371  |
| rs117443048 | G | -0.1757 |
| rs75581690  | T | 0.0697  |
| rs7843130   | G | 0.0389  |
| rs4871397   | G | 0.053   |
| rs35067039  | T | -0.077  |
| rs16885617  | T | 0.0412  |
| rs143398729 | T | -0.174  |
| rs80056059  | G | 0.1597  |
| rs4732686   | G | -0.0212 |
| rs78049679  | T | -0.0902 |
| rs6992458   | A | 0.0333  |
| rs77907442  | T | 0.0685  |
| rs57690022  | A | 0.0473  |
| rs79969276  | T | -0.0494 |
| rs2741710   | T | 0.0232  |
| rs4634779   | T | -0.1306 |
| rs2172820   | G | 0.0238  |
| rs78305563  | A | -0.0833 |
| rs10095671  | C | 0.0354  |
| rs13282562  | A | 0.0208  |
| rs4425792   | G | 0.0473  |
| rs375017    | A | 0.0285  |
| rs2121550   | C | -0.0208 |
| rs11994504  | A | 0.0426  |
| rs7007575   | T | 0.0776  |
| rs16890776  | G | -0.0455 |
| rs16933301  | A | 0.0936  |
| rs73684384  | T | -0.0435 |
| rs1509849   | G | 0.0206  |
| rs2617030   | G | 0.0214  |
| rs35200988  | C | -0.026  |
| rs71523427  | C | 0.1182  |

|             |   |         |
|-------------|---|---------|
| rs113483209 | C | -0.0445 |
| rs28838027  | A | 0.0267  |
| rs117386158 | G | 0.1047  |
| rs138496517 | C | 0.0981  |
| rs4875736   | A | -0.0716 |
| rs148490904 | G | 0.1297  |
| rs77233730  | T | 0.0572  |
| rs11993273  | G | 0.0225  |
| rs6470258   | C | 0.0293  |
| rs113852898 | C | 0.0524  |
| rs78588388  | G | -0.1479 |
| rs71514796  | G | 0.0557  |
| rs11783845  | A | -0.0888 |
| rs4922153   | G | -0.0226 |
| rs73224741  | T | -0.0491 |
| rs139769108 | C | -0.104  |
| rs9644682   | G | -0.0777 |
| rs892422    | A | -0.0223 |
| rs146706620 | T | -0.1568 |
| rs622785    | G | -0.0581 |
| rs6470399   | A | -0.0214 |
| rs72689954  | T | 0.0539  |
| rs2912523   | A | -0.0256 |
| rs7814228   | G | 0.0228  |
| rs7841146   | G | -0.0702 |
| rs6474491   | C | 0.0261  |
| rs7819681   | A | -0.0358 |
| rs3133643   | C | 0.0452  |
| rs2385075   | C | 0.036   |
| rs721590    | G | -0.0264 |
| rs80036584  | T | -0.0958 |
| rs10107379  | C | -0.0258 |
| rs6994700   | T | 0.0238  |
| rs11994659  | C | -0.0405 |
| rs73226053  | G | 0.0481  |
| rs16902141  | A | 0.0258  |
| rs11786204  | T | -0.0235 |
| rs77341202  | A | -0.0803 |
| rs11779508  | G | -0.0206 |
| rs143604790 | C | 0.0657  |
| rs117147695 | A | 0.0837  |
| rs139860452 | T | -0.1058 |
| rs11785345  | G | -0.0341 |
| rs349335    | C | 0.0295  |
| rs71514927  | G | 0.0605  |
| rs74749256  | C | 0.0805  |
| rs11993109  | G | 0.0368  |

|             |   |         |
|-------------|---|---------|
| rs12550804  | G | -0.0598 |
| rs141547967 | T | 0.0219  |
| rs2904671   | G | -0.0269 |
| rs6578068   | T | -0.0211 |
| rs78416427  | T | -0.1112 |
| rs147769924 | C | 0.1132  |
| rs13274641  | A | 0.0245  |
| rs17282225  | C | 0.1145  |
| rs2977523   | A | 0.0206  |
| rs28605621  | A | 0.027   |
| rs34607844  | A | -0.0496 |
| rs72657059  | G | 0.1931  |
| rs1532577   | G | -0.0232 |
| rs2954699   | T | 0.0221  |
| rs10094863  | C | 0.0673  |
| rs28645367  | A | -0.0858 |
| rs4073594   | A | 0.0289  |
| rs78977504  | A | -0.0757 |
| rs79243480  | A | -0.0536 |
| rs6473855   | A | -0.1317 |
| rs3793435   | T | -0.021  |
| rs10109692  | C | 0.0944  |
| rs75385437  | A | 0.0529  |
| rs151205408 | A | -0.0859 |
| rs10113567  | A | -0.0307 |
| rs875366    | A | 0.0212  |
| rs2979772   | T | 0.0237  |
| rs2070687   | G | 0.0297  |
| rs57434174  | T | -0.0324 |
| rs13263859  | G | -0.0278 |
| rs4607574   | C | 0.1467  |
| rs11780415  | A | 0.0444  |
| rs1347231   | C | -0.0578 |
| rs7001454   | G | -0.0395 |
| rs58787773  | T | 0.04    |
| rs75413818  | C | 0.0341  |
| rs12674527  | G | 0.0411  |
| rs17073854  | T | -0.0373 |
| rs17461136  | T | 0.0682  |
| rs4243864   | A | -0.033  |
| rs13281577  | T | 0.0235  |
| rs35167403  | G | -0.065  |
| rs13268755  | G | -0.146  |
| rs12675250  | T | 0.0243  |
| rs149757093 | G | -0.135  |
| rs13279490  | T | 0.0322  |
| rs147944680 | A | -0.1331 |

|             |   |         |
|-------------|---|---------|
| rs12542941  | C | 0.0385  |
| rs13253573  | T | 0.1194  |
| rs148991438 | A | 0.1594  |
| rs9297623   | T | -0.0328 |
| rs144864852 | C | -0.1023 |
| rs78891183  | T | -0.0825 |
| rs1231203   | T | -0.152  |
| rs34392458  | T | 0.0798  |
| rs3918350   | C | 0.0214  |
| rs28794203  | T | 0.0348  |
| rs17195950  | C | -0.0413 |
| rs72733765  | T | 0.0591  |
| rs117743777 | T | 0.1237  |
| rs145529568 | C | 0.1688  |
| rs35987566  | C | -0.0237 |
| rs58672202  | C | -0.0293 |
| rs145936995 | G | -0.1301 |
| rs9987152   | G | 0.1095  |
| rs57135888  | T | 0.1332  |
| rs77928288  | T | 0.1146  |
| rs17060900  | G | 0.0595  |
| rs2466182   | G | -0.0204 |
| rs118051173 | C | 0.1216  |
| rs13262297  | T | 0.0372  |
| rs55977487  | G | -0.0827 |
| rs77935116  | A | 0.0933  |
| rs117333206 | A | -0.1001 |
| rs73201297  | T | -0.0456 |
| rs4872360   | C | 0.0235  |
| rs35631195  | T | 0.0338  |
| rs146123359 | C | 0.0996  |
| rs142977072 | A | -0.1695 |
| rs34083785  | A | 0.0217  |
| rs4840508   | C | -0.0251 |
| rs17069926  | T | 0.1508  |
| rs17420616  | C | -0.0419 |
| rs78470252  | A | -0.0849 |
| rs112311770 | T | 0.0862  |
| rs13270334  | T | -0.0635 |
| rs116775305 | A | 0.0865  |
| rs117823502 | T | -0.0937 |
| rs17055163  | G | 0.0298  |
| rs117600112 | C | 0.1192  |
| rs10097139  | C | 0.0211  |
| rs1388371   | T | 0.025   |
| rs76941634  | A | 0.0941  |
| rs3735828   | G | 0.023   |



|             |   |         |
|-------------|---|---------|
| rs13261466  | T | 0.0248  |
| rs62514718  | T | -0.0393 |
| rs74820353  | C | -0.0761 |
| rs4478542   | G | 0.0218  |
| rs7817662   | A | -0.0527 |
| rs7833416   | A | -0.0372 |
| rs4739470   | A | -0.0294 |
| rs2728436   | T | 0.0227  |
| rs13279707  | T | -0.0492 |
| rs79031462  | G | -0.0664 |
| rs116920651 | A | -0.0571 |
| rs2253078   | G | 0.0205  |
| rs116937600 | C | 0.0552  |
| rs80257016  | G | 0.0307  |
| rs2173117   | A | -0.0216 |
| rs16879609  | C | 0.0911  |
| rs56040398  | C | 0.1345  |
| rs13276981  | A | 0.065   |
| rs116910919 | A | 0.1319  |
| rs117245568 | G | 0.0738  |
| rs1471268   | T | 0.0217  |
| rs111657422 | C | -0.0666 |
| rs137962830 | G | 0.0721  |
| rs73175163  | A | 0.0833  |
| rs17744835  | T | 0.0615  |
| rs10088686  | A | 0.0279  |
| rs74742444  | A | -0.0953 |
| rs4645559   | T | 0.0253  |
| rs77868972  | T | -0.0776 |
| rs145312507 | C | 0.0504  |
| rs118067981 | T | -0.0729 |
| rs4240644   | G | 0.0295  |
| rs117450546 | T | 0.0424  |
| rs10504149  | G | 0.0374  |
| rs16921942  | C | -0.0317 |
| rs117450119 | T | -0.0938 |
| rs144270788 | A | -0.1371 |
| rs71530863  | C | -0.0314 |
| rs35358635  | A | -0.0201 |
| rs8191632   | G | -0.1051 |
| rs118171608 | C | -0.1149 |
| rs76971017  | G | -0.0898 |
| rs10107703  | T | 0.0548  |
| rs2613128   | A | -0.0236 |
| rs75977577  | G | 0.0889  |
| rs10093418  | G | 0.0331  |
| rs79566493  | A | 0.0644  |

|             |   |         |
|-------------|---|---------|
| rs1235387   | T | -0.0252 |
| rs4733640   | A | 0.0265  |
| rs34281757  | T | 0.043   |
| rs2957634   | C | -0.0307 |
| rs2430801   | T | -0.0274 |
| rs6474422   | T | 0.022   |
| rs55984612  | C | -0.0468 |
| rs2247534   | A | 0.02    |
| rs1469765   | A | -0.0237 |
| rs34961790  | A | 0.0552  |
| rs143273272 | G | -0.0807 |
| rs7842962   | T | -0.0477 |
| rs12550664  | A | 0.024   |
| rs72649326  | T | -0.1488 |
| rs6473008   | C | 0.0208  |
| rs76678758  | A | 0.0546  |
| rs71524596  | C | 0.0257  |
| rs117768962 | C | 0.0985  |
| rs4736570   | T | 0.0208  |
| rs6998179   | T | -0.0228 |
| rs73514597  | A | 0.0244  |
| rs2685593   | C | -0.027  |
| rs55968191  | A | -0.0267 |
| rs113697909 | T | -0.0752 |
| rs146585615 | C | 0.0993  |
| rs10958627  | A | -0.0596 |
| rs10156374  | A | 0.0388  |
| rs113909287 | T | -0.1642 |
| rs34180088  | C | 0.0347  |
| rs504387    | G | -0.0749 |
| rs55949834  | C | 0.0839  |
| rs73671030  | A | 0.1018  |
| rs34675685  | A | -0.0841 |
| rs79348942  | A | 0.0604  |
| rs113294413 | G | 0.1464  |
| rs1426569   | T | -0.07   |
| rs4626616   | A | -0.0231 |
| rs117072671 | T | -0.0881 |
| rs10504180  | A | 0.0369  |
| rs62520258  | T | -0.095  |
| rs62515760  | G | -0.0518 |
| rs66509096  | A | -0.0204 |
| rs62517408  | G | 0.0592  |
| rs117378718 | G | 0.0959  |
| rs4831379   | A | 0.093   |
| rs75293541  | C | -0.0833 |
| rs11787345  | C | -0.0307 |

|             |   |         |
|-------------|---|---------|
| rs112200478 | G | 0.0702  |
| rs79846554  | A | 0.0658  |
| rs6996245   | C | 0.0957  |
| rs10091736  | A | -0.0225 |
| rs73184308  | C | 0.1407  |
| rs143161024 | A | 0.1356  |
| rs2555561   | T | -0.0256 |
| rs113060442 | A | -0.093  |
| rs4612322   | C | 0.0256  |
| rs12546973  | A | 0.085   |
| rs117452492 | G | 0.0439  |
| rs67270397  | G | 0.0396  |
| rs11995254  | T | -0.0744 |
| rs117000077 | T | -0.1716 |
| rs117979943 | A | -0.1133 |
| rs4734367   | C | 0.0342  |
| rs4559266   | A | 0.023   |
| rs2925451   | C | -0.0496 |
| rs147653269 | C | 0.0705  |
| rs1593407   | T | 0.0256  |
| rs35182259  | C | 0.0404  |
| rs75609562  | T | 0.0959  |
| rs13276608  | T | -0.0358 |
| rs7832218   | C | 0.0608  |
| rs6470725   | C | -0.0204 |
| rs73171498  | G | -0.1288 |
| rs117871919 | C | 0.0634  |
| rs1325058   | C | 0.0199  |
| rs71512607  | G | 0.0589  |
| rs2054597   | C | 0.0216  |
| rs148654166 | G | 0.1753  |
| rs76691096  | C | 0.1437  |
| rs13261640  | C | -0.0472 |
| rs118117857 | T | -0.0856 |
| rs117727074 | C | -0.1256 |
| rs2610026   | T | -0.0202 |
| rs77826836  | A | -0.0849 |
| rs139553528 | C | 0.1086  |
| rs116895966 | A | 0.1045  |
| rs56374951  | C | -0.0485 |
| rs16920800  | T | 0.0251  |
| rs10957070  | C | 0.0266  |
| rs62490107  | C | 0.0529  |
| rs60496750  | A | -0.0257 |
| rs72672174  | A | -0.0545 |
| rs74816642  | G | -0.0468 |
| rs71526151  | T | 0.0446  |

|             |   |         |
|-------------|---|---------|
| rs17054678  | T | 0.0455  |
| rs12681226  | C | -0.0227 |
| rs57758950  | T | 0.0281  |
| rs17825670  | A | -0.0662 |
| rs139094212 | G | 0.1281  |
| rs71521437  | G | 0.0476  |
| rs56171168  | C | 0.0207  |
| rs6472429   | T | 0.0213  |
| rs6994146   | T | 0.0386  |
| rs17735742  | G | 0.0788  |
| rs2721907   | A | -0.0277 |
| rs74390307  | G | 0.0464  |
| rs78148796  | G | 0.0769  |
| rs112330911 | T | 0.0873  |
| rs74778165  | C | 0.1002  |
| rs72507619  | C | 0.0443  |
| rs6984108   | C | 0.098   |
| rs76971967  | A | 0.0599  |
| rs74428989  | A | 0.1049  |
| rs7821789   | A | 0.0803  |
| rs80084696  | G | -0.0891 |
| rs11987970  | G | -0.0204 |
| rs4543506   | G | -0.0584 |
| rs10108050  | C | 0.0614  |
| rs28756805  | A | 0.0879  |
| rs7001046   | C | -0.0213 |
| rs79665026  | C | 0.0463  |
| rs76227618  | G | -0.0725 |
| rs60799361  | C | -0.0311 |
| rs964618    | C | -0.032  |
| rs11784677  | T | 0.0724  |
| rs113084430 | C | 0.0806  |
| rs9792175   | A | -0.0198 |
| rs62525834  | G | 0.0613  |
| rs34024785  | A | 0.0564  |
| rs2979148   | T | -0.0205 |
| rs13277396  | G | 0.0309  |
| rs10808462  | A | -0.0389 |
| rs148351801 | T | -0.0647 |
| rs138377260 | G | 0.0599  |
| rs2676638   | A | -0.0351 |
| rs117526810 | T | -0.0746 |
| rs2406305   | C | 0.0335  |
| rs114306595 | A | 0.0779  |
| rs16910662  | T | -0.0317 |
| rs10088108  | G | -0.0254 |
| rs111745810 | C | 0.0995  |

|             |   |         |
|-------------|---|---------|
| rs117916977 | G | -0.0934 |
| rs13252711  | A | 0.0408  |
| rs77033808  | C | 0.192   |
| rs116994523 | G | 0.1186  |
| rs16905236  | C | 0.0209  |
| rs10283064  | T | 0.0271  |
| rs13439473  | G | 0.029   |
| rs77046693  | T | 0.1182  |
| rs62514873  | C | -0.0441 |
| rs149395299 | C | 0.136   |
| rs12056396  | G | 0.0214  |
| rs12547047  | T | 0.0263  |
| rs17093480  | A | -0.0267 |
| rs58504358  | C | -0.025  |
| rs72636690  | G | 0.0568  |
| rs12156059  | G | 0.1284  |
| rs984904    | C | 0.0207  |
| rs3101317   | G | -0.0316 |
| rs55635531  | A | -0.1349 |
| rs34665367  | G | 0.1302  |
| rs4645974   | T | 0.0834  |
| rs11987549  | T | -0.0269 |
| rs118143181 | C | 0.0752  |
| rs77491870  | T | 0.099   |
| rs12547771  | T | 0.0323  |
| rs11996448  | G | -0.0467 |
| rs113191247 | T | 0.0497  |
| rs72676734  | T | -0.0308 |
| rs113028713 | A | 0.1245  |
| rs2101663   | G | 0.0348  |
| rs2513407   | C | -0.0209 |
| rs75210227  | C | -0.063  |
| rs111583725 | A | -0.2051 |
| rs10096300  | T | 0.0928  |
| rs4735938   | G | 0.0274  |
| rs35143513  | T | 0.242   |
| rs13282045  | C | -0.0285 |
| rs12545386  | T | -0.0447 |
| rs76412623  | A | -0.0666 |
| rs117792780 | T | 0.1005  |
| rs34450678  | G | 0.0622  |
| rs80200786  | T | -0.11   |
| rs4275238   | G | 0.0512  |
| rs2956796   | A | 0.0458  |
| rs111561632 | C | -0.14   |
| rs28893272  | A | -0.0249 |
| rs72641947  | T | 0.1286  |

|             |   |         |
|-------------|---|---------|
| rs116862601 | T | -0.1004 |
| rs13282499  | G | -0.0207 |
| rs1026380   | T | -0.0398 |
| rs12676505  | A | 0.0286  |
| rs73188684  | A | 0.0365  |
| rs6988938   | G | 0.0196  |
| rs75230435  | G | 0.0524  |
| rs80090750  | A | 0.0517  |
| rs138528686 | T | -0.0708 |
| rs74788010  | T | 0.1092  |
| rs3829210   | A | -0.0201 |
| rs62520372  | G | -0.0266 |
| rs17674389  | T | 0.0327  |
| rs58868465  | G | 0.0396  |
| rs2915065   | G | -0.025  |
| rs963080    | C | 0.0224  |
| rs11203935  | G | 0.0249  |
| rs78511696  | G | -0.1114 |
| rs75215455  | G | 0.1002  |
| rs74698419  | T | 0.0666  |
| rs4299988   | C | -0.0211 |
| rs10956907  | T | -0.1278 |
| rs1403567   | G | 0.0201  |
| rs79421725  | A | -0.1106 |
| rs118112411 | A | -0.0928 |
| rs117065410 | C | -0.1272 |
| rs13280677  | T | 0.0856  |
| rs73185769  | T | 0.0716  |
| rs72633941  | G | 0.0371  |
| rs146661551 | A | 0.1613  |
| rs79771358  | A | -0.2293 |
| rs117819265 | C | 0.0776  |
| rs73658220  | G | -0.0715 |
| rs75243846  | C | 0.0405  |
| rs79131954  | A | 0.1417  |
| rs71519529  | C | 0.059   |
| rs75679157  | A | 0.0734  |
| rs3018441   | T | 0.0244  |
| rs2249869   | C | 0.0213  |
| rs62495675  | C | 0.0609  |
| rs7812728   | G | 0.0296  |
| rs117609822 | C | 0.1248  |
| rs1467161   | T | -0.0315 |
| rs16880474  | C | -0.105  |
| rs151062060 | A | 0.074   |
| rs36067242  | A | 0.0302  |
| rs117674838 | T | -0.1048 |

|             |   |         |
|-------------|---|---------|
| rs76759586  | A | 0.0324  |
| rs3109598   | T | -0.0823 |
| rs75267312  | T | -0.1147 |
| rs80124671  | A | 0.071   |
| rs78609812  | C | 0.1251  |
| rs79813388  | C | 0.0464  |
| rs34301206  | T | -0.0806 |
| rs140660630 | G | 0.1256  |
| rs150157420 | C | 0.194   |
| rs147433643 | C | -0.0965 |
| rs10217020  | C | -0.0288 |
| rs72641665  | T | -0.0573 |
| rs7016858   | A | 0.0578  |
| rs73719985  | G | 0.0516  |
| rs74548601  | G | 0.0465  |
| rs35385696  | C | 0.0277  |
| rs6987434   | A | 0.0315  |
| rs12675430  | T | -0.0664 |
| rs117793168 | A | 0.0815  |
| rs10098460  | C | -0.0288 |
| rs7821403   | A | -0.0351 |
| rs56008427  | T | -0.0293 |
| rs75164982  | T | -0.0916 |
| rs75800159  | C | 0.1286  |
| rs113426706 | T | 0.0542  |
| rs117045492 | A | -0.1331 |
| rs882229    | A | -0.0279 |
| rs1228296   | C | 0.0263  |
| rs7826681   | C | 0.0226  |
| rs10504380  | T | -0.0349 |
| rs117695243 | A | -0.1237 |
| rs62514141  | T | -0.0521 |
| rs117787897 | C | -0.1164 |
| rs12550791  | G | -0.1219 |
| rs6981557   | C | 0.0416  |
| rs118173746 | T | 0.0607  |
| rs2172780   | G | 0.0588  |
| rs74892975  | G | 0.1099  |
| rs62505609  | T | 0.0333  |
| rs12543024  | C | -0.0232 |
| rs11779543  | C | -0.0488 |
| rs62521043  | C | 0.1149  |
| rs4240662   | C | 0.0292  |
| rs1662080   | A | 0.152   |
| rs72650385  | A | 0.0386  |
| rs62525681  | C | -0.0924 |
| rs34451318  | C | 0.0248  |

|             |   |         |
|-------------|---|---------|
| rs78553033  | G | -0.1418 |
| rs78602852  | G | 0.1103  |
| rs72728027  | G | 0.0653  |
| rs113993491 | C | 0.1114  |
| rs57043821  | T | -0.0249 |
| rs76086621  | T | 0.0857  |
| rs72646351  | C | -0.0867 |
| rs145932781 | T | -0.1376 |
| rs76763990  | A | 0.0513  |
| rs4871319   | G | 0.0361  |
| rs143966405 | T | 0.0866  |
| rs10089768  | G | -0.0483 |
| rs140746982 | G | 0.0829  |
| rs13274593  | T | 0.0211  |
| rs56070845  | C | 0.0373  |
| rs2912495   | A | 0.0207  |
| rs10097082  | G | 0.0351  |
| rs112174474 | T | 0.0534  |
| rs57606700  | G | 0.0611  |
| rs10101323  | A | -0.0201 |
| rs387271    | C | 0.0578  |
| rs12545061  | T | -0.02   |
| rs34417282  | A | 0.074   |
| rs117341877 | C | 0.056   |
| rs6993846   | G | 0.025   |
| rs75232558  | G | 0.1207  |
| rs60117247  | C | -0.0237 |
| rs76464509  | C | -0.1332 |
| rs4870766   | C | -0.038  |
| rs112999326 | C | 0.1117  |
| rs116852367 | G | -0.1001 |
| rs10086802  | T | -0.1668 |
| rs143630913 | T | -0.0575 |
| rs142566386 | T | -0.0653 |
| rs74722706  | T | 0.1585  |
| rs12155545  | C | -0.0555 |
| rs13439016  | G | 0.0248  |
| rs16902657  | T | -0.0811 |
| rs78575333  | G | 0.0581  |
| rs138541968 | T | 0.1053  |
| rs7006081   | G | -0.0211 |
| rs117375785 | A | 0.1007  |
| rs62523473  | T | 0.0889  |
| rs75734402  | T | 0.0944  |
| rs140019911 | C | 0.0923  |
| rs6472855   | T | 0.0241  |
| rs573652    | T | 0.0742  |



|             |   |         |
|-------------|---|---------|
| rs62525945  | T | 0.1335  |
| rs482512    | T | 0.0535  |
| rs138848660 | G | -0.1112 |
| rs116848560 | A | -0.0977 |
| rs116963505 | G | -0.1349 |
| rs28558163  | G | -0.0797 |
| rs150635478 | T | -0.1361 |
| rs111396851 | G | 0.1207  |
| rs7004486   | T | -0.0216 |
| rs72677102  | C | 0.0825  |
| rs2511741   | G | 0.046   |
| rs117223732 | T | 0.0996  |
| rs138732831 | G | 0.1107  |
| rs6473792   | A | -0.0258 |
| rs76464990  | A | -0.1119 |
| rs13273765  | G | -0.0207 |
| rs79684485  | A | 0.0838  |
| rs72651307  | G | 0.0775  |
| rs13272827  | C | -0.093  |
| rs4870887   | A | -0.0208 |
| rs79868281  | G | -0.1232 |
| rs4732955   | C | -0.0489 |
| rs139974422 | A | 0.0961  |
| rs75548743  | T | -0.0612 |
| rs17374554  | C | -0.094  |
| rs77171565  | T | -0.1182 |
| rs118014922 | T | -0.066  |
| rs147464495 | T | -0.1202 |
| rs117744293 | T | -0.1092 |
| rs77333195  | C | 0.1302  |
| rs140036274 | A | -0.1157 |
| rs35293194  | G | 0.0726  |
| rs77104741  | G | 0.1412  |
| rs71512609  | C | 0.0809  |
| rs74347784  | G | 0.0498  |
| rs2114245   | C | -0.0254 |
| rs9644434   | G | -0.023  |
| rs35679564  | G | -0.1354 |
| rs13278017  | T | -0.0303 |
| rs12548766  | A | 0.0204  |
| rs148222530 | C | 0.0789  |
| rs79613512  | T | 0.0931  |
| rs112252251 | A | 0.0809  |
| rs900090    | A | 0.0752  |
| rs75324706  | C | -0.0852 |
| rs17059088  | C | 0.0275  |
| rs76517668  | T | -0.0502 |

|             |   |         |
|-------------|---|---------|
| rs2952006   | T | 0.1167  |
| rs56212521  | A | 0.035   |
| rs146966463 | C | -0.1169 |
| rs73279991  | T | -0.0911 |
| rs16910959  | C | -0.0311 |
| rs118142866 | C | 0.0828  |
| rs112263785 | G | 0.0251  |
| rs9643632   | G | 0.0256  |
| rs4734657   | G | 0.0286  |
| rs12164187  | A | -0.0287 |
| rs13249412  | C | 0.1615  |
| rs17749393  | G | -0.0361 |
| rs1499439   | A | 0.0221  |
| rs10102145  | C | -0.028  |
| rs11204153  | T | 0.0212  |
| rs11784364  | T | -0.0203 |
| rs6990818   | G | 0.0215  |
| rs6998964   | G | 0.0502  |
| rs4647906   | A | 0.0206  |
| rs57906368  | A | 0.1118  |
| rs9643083   | C | -0.0549 |
| rs72720419  | C | -0.0326 |
| rs7459445   | C | -0.048  |
| rs7835692   | A | -0.0208 |
| rs11783346  | A | -0.0195 |
| rs62499907  | A | -0.0486 |
| rs77359933  | T | -0.0733 |
| rs117646409 | A | -0.1516 |
| rs62517162  | T | 0.1161  |
| rs73336867  | G | 0.0664  |
| rs60723268  | G | 0.0254  |
| rs17662942  | T | 0.0601  |
| rs12545374  | T | 0.0312  |
| rs117566217 | C | -0.0969 |
| rs11136635  | C | 0.022   |
| rs28476607  | C | 0.0223  |
| rs117604010 | A | 0.0909  |
| rs2919465   | C | -0.0283 |
| rs1604897   | T | -0.0254 |
| rs80082463  | A | -0.0604 |
| rs2218060   | G | -0.0215 |
| rs61387428  | T | 0.0963  |
| rs116978147 | A | -0.1356 |
| rs1252206   | T | 0.0684  |
| rs143491088 | T | -0.0937 |
| rs72692135  | C | 0.0819  |
| rs34557926  | T | -0.0201 |

|             |   |         |
|-------------|---|---------|
| rs1078321   | G | 0.0194  |
| rs78692224  | A | 0.0635  |
| rs2741136   | G | -0.0216 |
| rs10102466  | A | -0.1099 |
| rs10107684  | T | -0.0313 |
| rs62507624  | C | -0.0467 |
| rs2554562   | T | -0.0245 |
| rs74427390  | T | -0.0792 |
| rs6985158   | A | 0.0622  |
| rs79076738  | T | 0.11    |
| rs72648770  | G | 0.0293  |
| rs72609841  | T | -0.0289 |
| rs1835841   | C | 0.0197  |
| rs6473778   | T | 0.1205  |
| rs62524914  | A | -0.0705 |
| rs113613791 | G | 0.0414  |
| rs35107632  | G | 0.082   |
| rs13280730  | T | 0.0269  |
| rs2924905   | T | 0.0306  |
| rs10095938  | C | -0.0368 |
| rs4129295   | A | -0.0258 |
| rs13255815  | T | 0.024   |
| rs10504281  | G | 0.0241  |
| rs1542682   | A | 0.0267  |
| rs9656990   | G | 0.0305  |
| rs13270825  | A | 0.0866  |
| rs74871116  | C | 0.0326  |
| rs13257039  | A | 0.0233  |
| rs4609156   | C | -0.0218 |
| rs2461327   | G | 0.0394  |
| rs147101657 | T | 0.1062  |
| rs35113952  | T | -0.0275 |
| rs10113115  | G | 0.0215  |
| rs10955316  | A | 0.0204  |
| rs117581589 | C | 0.0695  |
| rs13262715  | A | -0.0866 |
| rs148051818 | G | 0.1565  |
| rs2436862   | C | 0.1116  |
| rs117926761 | G | -0.0968 |
| rs2468150   | T | -0.0205 |
| rs7002952   | C | 0.1118  |
| rs56282058  | A | -0.1179 |
| rs139741154 | T | 0.1169  |
| rs73250465  | T | 0.0271  |
| rs10098235  | G | 0.0644  |
| rs62504673  | C | -0.0233 |
| rs62526841  | G | -0.0727 |

|             |   |         |
|-------------|---|---------|
| rs2172781   | A | -0.0223 |
| rs113324877 | T | 0.0305  |
| rs10464876  | A | 0.0669  |
| rs508630    | C | 0.0247  |
| rs1265154   | G | -0.0291 |
| rs7461241   | T | -0.071  |
| rs11781854  | C | -0.0365 |
| rs2920051   | G | -0.0283 |
| rs1863563   | C | 0.0203  |
| rs17665609  | C | -0.0676 |
| rs77428636  | A | 0.1806  |
| rs78483573  | A | 0.0949  |
| rs2980885   | G | -0.0228 |
| rs150428099 | T | 0.1092  |
| rs4339618   | T | -0.0315 |
| rs138868834 | A | 0.0957  |
| rs2730047   | A | -0.0549 |
| rs117999602 | T | 0.1218  |
| rs77815374  | T | 0.0575  |
| rs16909184  | G | 0.0515  |
| rs111966287 | C | 0.1124  |
| rs12677501  | G | -0.0263 |
| rs76679463  | G | -0.1025 |
| rs28538457  | C | -0.088  |
| rs62511800  | A | 0.0653  |
| rs7829104   | C | 0.0289  |
| rs62511177  | A | -0.1466 |
| rs75564607  | C | 0.0718  |
| rs62523268  | A | 0.1035  |
| rs28654938  | A | 0.0383  |
| rs10088859  | T | 0.0575  |
| rs2703013   | C | -0.098  |
| rs145317911 | G | -0.1127 |
| rs10093300  | C | 0.0426  |
| rs148906182 | C | 0.109   |
| rs144592713 | A | 0.0702  |
| rs306946    | T | 0.0862  |
| rs2594797   | G | -0.0218 |
| rs77057517  | T | 0.051   |
| rs35836811  | A | -0.0658 |
| rs57442358  | A | -0.0899 |
| rs4871412   | T | -0.086  |
| rs117146531 | G | -0.1508 |
| rs117266555 | T | -0.0558 |
| rs79096456  | A | -0.0785 |
| rs11775833  | T | -0.0216 |
| rs141361271 | C | 0.1003  |

|             |   |         |
|-------------|---|---------|
| rs2583082   | C | -0.0245 |
| rs28595776  | C | -0.1013 |
| rs4427288   | A | -0.0248 |
| rs114924209 | C | 0.087   |
| rs1877856   | T | 0.0333  |
| rs138089781 | C | 0.0877  |
| rs68054037  | G | 0.025   |
| rs2977484   | C | 0.0322  |
| rs13260242  | G | -0.0442 |
| rs10505380  | G | 0.0256  |
| rs73188225  | A | -0.0601 |
| rs112338203 | C | 0.0438  |
| rs76147802  | T | 0.0584  |
| rs150182930 | T | 0.1833  |
| rs2959565   | T | -0.0195 |
| rs2568450   | T | 0.0373  |
| rs16905290  | A | -0.033  |
| rs6471685   | C | 0.0375  |
| rs7016645   | T | 0.0219  |
| rs117631760 | C | 0.115   |
| rs6998248   | C | 0.03    |
| rs11203790  | C | -0.1009 |
| rs2976336   | T | -0.0199 |
| rs28839267  | A | 0.0226  |
| rs79333800  | C | 0.1079  |
| rs28718353  | C | 0.1202  |
| rs142006768 | C | -0.0965 |
| rs150006843 | T | -0.174  |
| rs16902763  | T | -0.0441 |
| rs79136639  | C | 0.13    |
| rs144001556 | C | 0.1298  |
| rs116861703 | C | 0.0778  |
| rs117126733 | C | 0.0937  |
| rs4871789   | A | 0.0196  |
| rs28359478  | T | 0.0869  |
| rs4733717   | C | 0.0201  |
| rs11996665  | T | -0.0223 |
| rs76222523  | G | -0.0396 |
| rs17663290  | T | -0.0703 |
| rs149242019 | T | -0.1675 |
| rs36028712  | C | 0.0411  |
| rs55794668  | T | 0.0774  |
| rs56323909  | G | 0.0332  |
| rs77917366  | G | 0.0336  |
| rs1692813   | T | 0.0264  |
| rs74890355  | C | 0.0652  |
| rs139508342 | T | 0.1187  |

|             |   |         |
|-------------|---|---------|
| rs76270276  | T | 0.073   |
| rs138459148 | A | 0.0618  |
| rs17068542  | C | 0.0352  |
| rs4737570   | A | -0.0551 |
| rs13272384  | C | -0.1474 |
| rs117914272 | A | 0.0869  |
| rs79524590  | C | -0.0572 |
| rs76801648  | G | -0.1611 |
| rs77781020  | A | 0.0816  |
| rs13255292  | T | -0.0211 |
| rs75754122  | A | 0.0649  |
| rs142168353 | A | -0.0985 |
| rs77393937  | C | -0.0582 |
| rs75627367  | A | -0.0633 |
| rs148965297 | G | -0.0826 |
| rs117941615 | T | 0.144   |
| rs78605166  | A | -0.0858 |
| rs2594959   | C | -0.0257 |
| rs34235852  | T | -0.1355 |
| rs118072691 | T | 0.1586  |
| rs4595130   | T | 0.0286  |
| rs72728013  | G | 0.0232  |
| rs145415939 | C | 0.1304  |
| rs149250284 | T | -0.1479 |
| rs79782859  | C | 0.0749  |
| rs148158221 | T | 0.0689  |
| rs16891294  | T | -0.0794 |
| rs118035863 | A | -0.0667 |
| rs140592384 | T | -0.0896 |
| rs76898417  | G | 0.0646  |
| rs7016840   | T | 0.0516  |
| rs74932216  | A | 0.1259  |
| rs79636860  | C | 0.0833  |
| rs67522667  | T | 0.0203  |
| rs11166962  | C | -0.0197 |
| rs2047375   | A | 0.0214  |
| rs75265241  | C | -0.0391 |
| rs6998029   | C | 0.0625  |
| rs56377863  | A | 0.0221  |
| rs261572    | G | 0.0321  |
| rs74693503  | T | -0.0594 |
| rs116965998 | C | 0.1329  |
| rs4739109   | G | 0.033   |
| rs145570629 | A | -0.0844 |
| rs75914656  | T | -0.0289 |
| rs75925590  | C | 0.0643  |
| rs78670356  | G | 0.128   |

|             |   |         |
|-------------|---|---------|
| rs4736533   | G | -0.0195 |
| rs60957496  | T | -0.0265 |
| rs62524577  | T | -0.0332 |
| rs13251662  | T | 0.073   |
| rs150125706 | C | 0.1205  |
| rs4439084   | G | 0.0204  |
| rs13276054  | G | 0.0211  |
| rs6981994   | C | 0.1029  |
| rs4831375   | T | 0.043   |
| rs77561982  | C | -0.0978 |
| rs7011514   | C | -0.0274 |
| rs74916087  | G | -0.0707 |
| rs77106575  | T | -0.0734 |
| rs13249494  | G | -0.0261 |
| rs75298101  | A | -0.0533 |
| rs67225731  | C | -0.0298 |
| rs7822305   | G | -0.0543 |
| rs79472506  | C | 0.0893  |
| rs1235369   | G | 0.0955  |
| rs117888045 | T | 0.0448  |
| rs34574215  | A | -0.0553 |
| rs4077904   | C | -0.0261 |
| rs7825349   | C | -0.0423 |
| rs62515493  | A | -0.1437 |
| rs7388381   | T | 0.0214  |
| rs77390636  | G | -0.0803 |
| rs10103470  | G | -0.0228 |
| rs28380041  | A | -0.0282 |
| rs12542683  | G | 0.0294  |
| rs72609815  | T | -0.0665 |
| rs2043405   | A | 0.0271  |
| rs62515769  | G | 0.0308  |
| rs117626443 | G | -0.1053 |
| rs11987468  | A | -0.0314 |
| rs11774129  | T | -0.0398 |
| rs13255588  | C | 0.0195  |
| rs79533692  | C | 0.0583  |
| rs1431562   | A | -0.0275 |
| rs62480601  | T | -0.0563 |
| rs117471379 | C | 0.0925  |
| rs78745993  | C | -0.1273 |
| rs4876225   | A | -0.0207 |
| rs56342536  | T | 0.0916  |
| rs2436923   | T | 0.0259  |
| rs35517059  | A | 0.0363  |
| rs59292525  | A | -0.0252 |
| rs4556055   | T | -0.0265 |

|             |   |         |
|-------------|---|---------|
| rs67611336  | C | 0.0291  |
| rs16905190  | C | -0.0199 |
| rs4424237   | T | 0.0198  |
| rs7813513   | T | -0.0192 |
| rs142819518 | A | 0.0866  |
| rs72634879  | A | -0.0437 |
| rs34307490  | T | -0.0481 |
| rs77400493  | G | -0.1371 |
| rs62523297  | T | -0.059  |
| rs62640293  | A | 0.0496  |
| rs13260228  | C | -0.0465 |
| rs892248    | G | -0.0225 |
| rs3857919   | G | 0.0442  |
| rs117730527 | A | -0.0945 |
| rs73233245  | T | 0.1747  |
| rs56097268  | A | 0.0559  |
| rs117395532 | C | 0.0825  |
| rs72690845  | A | 0.1138  |
| rs77613642  | G | 0.043   |
| rs530691    | A | -0.0213 |
| rs62497440  | G | 0.0342  |
| rs6470175   | C | 0.0193  |
| rs1879992   | C | -0.0229 |
| rs12115032  | T | 0.0938  |
| rs142094022 | T | 0.1021  |
| rs73198979  | C | -0.0809 |
| rs13278411  | C | -0.0204 |
| rs7818727   | G | -0.0223 |
| rs113269795 | G | 0.1091  |
| rs117327063 | T | 0.1018  |
| rs28672791  | A | 0.0418  |
| rs57642095  | A | 0.0239  |
| rs116930079 | G | 0.1289  |
| rs117718140 | C | 0.0867  |
| rs117416737 | G | 0.149   |
| rs112259117 | A | -0.097  |
| rs112728122 | A | 0.0763  |
| rs4922150   | C | -0.0216 |
| rs62497603  | A | 0.0609  |
| rs79031565  | G | -0.0855 |
| rs76158229  | A | -0.0891 |
| rs28517741  | T | 0.0584  |
| rs1155199   | G | -0.0193 |
| rs3935170   | G | -0.0196 |
| rs9329203   | G | -0.0226 |
| rs77423629  | G | 0.1002  |
| rs17778118  | G | 0.0325  |



|             |   |         |
|-------------|---|---------|
| rs118176716 | C | -0.0484 |
| rs4976936   | T | 0.0383  |
| rs7018455   | G | -0.0199 |
| rs1118617   | G | 0.0667  |
| rs4737206   | C | 0.024   |
| rs13264083  | C | -0.0569 |
| rs13275877  | G | -0.0326 |
| rs73218788  | C | 0.0844  |
| rs1355600   | C | -0.0203 |
| rs75698584  | C | 0.047   |
| rs117394363 | T | 0.1275  |
| rs74449519  | A | 0.0691  |
| rs76731421  | T | -0.0286 |
| rs73705026  | G | -0.0705 |
| rs34845246  | A | 0.0556  |
| rs13258993  | A | -0.0909 |
| rs10956125  | T | -0.0256 |
| rs13265893  | C | -0.0288 |
| rs3115659   | G | 0.0757  |
| rs78600253  | A | 0.0492  |
| rs62487480  | G | 0.1286  |
| rs118156226 | A | -0.0349 |
| rs112235661 | T | 0.0854  |
| rs75353197  | C | 0.0853  |
| rs78457015  | A | -0.0755 |
| rs13253415  | C | 0.0637  |
| rs2450220   | C | 0.0404  |
| rs79889339  | G | -0.1046 |
| rs12334605  | G | 0.0372  |
| rs7460004   | A | -0.019  |
| rs11996466  | A | 0.0198  |
| rs7838188   | T | -0.03   |
| rs13267096  | G | -0.0234 |
| rs13253087  | G | 0.0309  |
| rs117312660 | T | -0.1479 |
| rs118055553 | C | -0.1511 |
| rs141736335 | C | -0.1062 |
| rs10090980  | G | 0.0353  |
| rs115714667 | T | -0.0659 |
| rs117161392 | T | 0.0764  |
| rs17269707  | G | -0.0253 |
| rs138410906 | T | -0.1144 |
| rs55716119  | A | -0.1549 |
| rs140485343 | T | 0.1009  |
| rs56261729  | A | -0.067  |
| rs62494319  | T | 0.029   |
| rs1503763   | T | 0.0252  |

|             |   |         |
|-------------|---|---------|
| rs78761659  | G | 0.0459  |
| rs76975612  | G | -0.0736 |
| rs138706873 | C | 0.1101  |
| rs9886572   | C | 0.0465  |
| rs142988485 | A | 0.1123  |
| rs4736139   | G | 0.0191  |
| rs2926422   | G | -0.0257 |
| rs12549312  | C | 0.0216  |
| rs77536934  | T | -0.1034 |
| rs74335301  | G | 0.0792  |
| rs59649920  | C | 0.0301  |
| rs111539461 | T | 0.0875  |
| rs73190836  | G | -0.0656 |
| rs75818661  | T | 0.0291  |
| rs62527280  | T | 0.0195  |
| rs10098632  | T | -0.044  |
| rs16904682  | T | -0.0291 |
| rs117105430 | A | -0.0701 |
| rs57317065  | G | 0.033   |
| rs116896375 | A | -0.0575 |
| rs13278321  | C | -0.0304 |
| rs73280533  | T | -0.1233 |
| rs78148502  | T | -0.0938 |
| rs16905170  | T | 0.0965  |
| rs2919380   | A | 0.0269  |
| rs13272094  | C | 0.0653  |
| rs2341979   | A | -0.0472 |
| rs145830825 | T | 0.0818  |
| rs17368522  | G | 0.0222  |
| rs76600824  | G | 0.0716  |
| rs11984487  | G | 0.0232  |
| rs138675606 | G | -0.0857 |
| rs11995270  | C | 0.0246  |
| rs62500565  | C | -0.0299 |
| rs16934958  | T | -0.0311 |
| rs11995380  | C | 0.0998  |
| rs34754763  | T | -0.055  |
| rs117557056 | A | 0.1903  |
| rs77975479  | G | -0.0764 |
| rs76749200  | G | 0.1496  |
| rs16880206  | C | -0.0696 |
| rs11781492  | A | 0.036   |
| rs2084048   | G | -0.0715 |
| rs146458434 | C | 0.1334  |
| rs12678448  | C | -0.0432 |
| rs111232871 | C | -0.1146 |
| rs56172835  | C | 0.0903  |

|             |   |         |
|-------------|---|---------|
| rs75115534  | A | 0.0986  |
| rs17758213  | G | 0.0552  |
| rs76013276  | G | -0.0387 |
| rs34079066  | A | -0.0429 |
| rs6472762   | T | 0.0198  |
| rs148829242 | A | 0.0907  |
| rs3812429   | C | -0.0292 |
| rs73190288  | G | 0.1244  |
| rs10956169  | C | 0.0206  |
| rs10957831  | C | -0.0237 |
| rs10956380  | C | 0.0197  |
| rs138419665 | A | -0.0855 |
| rs35262672  | G | 0.105   |
| rs17815879  | C | -0.0579 |
| rs117148585 | A | -0.1021 |
| rs74537661  | C | 0.0319  |
| rs17332636  | C | 0.1101  |
| rs75425456  | C | 0.0634  |
| rs2921758   | G | 0.0452  |
| rs12545953  | G | 0.0197  |
| rs117993295 | C | 0.0542  |
| rs504574    | G | 0.0198  |
| rs13263197  | T | -0.0954 |
| rs4840410   | G | -0.0251 |
| rs72721069  | C | 0.124   |
| rs72693085  | G | -0.0767 |
| rs149033246 | T | -0.1377 |
| rs12548673  | C | -0.0363 |
| rs117847452 | A | 0.082   |
| rs146301063 | A | 0.0844  |
| rs79525950  | T | -0.06   |
| rs3019359   | T | 0.0195  |
| rs353717    | A | 0.0233  |
| rs2613211   | G | -0.0201 |
| rs117735487 | T | 0.1205  |
| rs4875784   | C | 0.0208  |
| rs111662592 | C | 0.1027  |
| rs11991652  | T | 0.0743  |
| rs112165391 | T | -0.1816 |
| rs78947860  | G | -0.098  |
| rs73186339  | T | -0.1196 |
| rs148373700 | G | 0.1077  |
| rs9657367   | G | 0.0192  |
| rs75959861  | G | -0.0682 |
| rs11989984  | T | -0.0537 |
| rs4361764   | A | -0.0189 |
| rs2164927   | C | 0.0879  |

|             |   |         |
|-------------|---|---------|
| rs62516826  | C | 0.0459  |
| rs76837246  | C | 0.1124  |
| rs6985955   | C | 0.0461  |
| rs12544743  | C | -0.0961 |
| rs12544747  | T | -0.1432 |
| rs10956535  | C | -0.0211 |
| rs76752894  | A | 0.1062  |
| rs11998295  | T | 0.0562  |
| rs7002119   | T | 0.0306  |
| rs117761956 | G | 0.124   |
| rs4363243   | T | -0.0243 |
| rs3105450   | C | 0.024   |
| rs909357    | A | 0.035   |
| rs111705233 | T | 0.0713  |
| rs56309320  | C | -0.0327 |
| rs9969625   | G | -0.0192 |
| rs74679672  | C | -0.0582 |
| rs35668340  | A | -0.0852 |
| rs7017620   | C | -0.0209 |
| rs2702860   | T | -0.0217 |
| rs16924541  | G | 0.087   |
| rs77967235  | C | -0.0897 |
| rs80139626  | C | -0.1327 |
| rs138764746 | G | -0.1211 |
| rs12545208  | C | 0.0289  |
| rs13254857  | A | 0.0237  |
| rs2975500   | A | 0.0309  |
| rs116979102 | A | -0.0871 |
| rs7829705   | G | -0.1239 |
| rs116273361 | G | -0.0642 |
| rs72685144  | A | 0.0782  |
| rs148978642 | T | -0.1276 |
| rs59064631  | G | 0.0716  |
| rs28633639  | C | -0.0256 |
| rs12676365  | A | 0.0276  |
| rs2018616   | G | 0.0207  |
| rs7013272   | A | -0.0696 |
| rs142222106 | T | 0.0548  |
| rs2884258   | A | 0.024   |
| rs77099412  | G | 0.0414  |
| rs77952968  | A | 0.0652  |
| rs68185222  | A | 0.0918  |
| rs117226826 | T | -0.0618 |
| rs35968422  | A | -0.0436 |
| rs143864372 | T | -0.0807 |
| rs7839718   | G | 0.0367  |
| rs77927743  | C | -0.0491 |

|             |   |         |
|-------------|---|---------|
| rs2441704   | C | 0.0471  |
| rs62521598  | C | 0.1381  |
| rs9314347   | G | 0.0356  |
| rs111762104 | A | -0.0826 |
| rs2022913   | C | -0.0269 |
| rs6993347   | T | -0.0415 |
| rs114488106 | G | -0.1195 |
| rs73586627  | T | -0.0369 |
| rs117571959 | T | -0.0955 |
| rs80070395  | T | -0.0714 |
| rs4570168   | G | -0.0303 |
| rs59626597  | C | 0.1172  |
| rs67694747  | C | 0.0356  |
| rs141564365 | A | 0.0633  |
| rs148241524 | G | 0.0804  |
| rs111442509 | C | -0.0698 |
| rs2055322   | C | 0.021   |
| rs72672534  | A | 0.0629  |
| rs2732309   | T | 0.0402  |
| rs76648803  | C | 0.1563  |
| rs142228788 | T | 0.1376  |
| rs141072864 | T | -0.0715 |
| rs77651912  | T | 0.0264  |
| rs10096024  | G | 0.0202  |
| rs16876652  | G | -0.0298 |
| rs78248243  | A | 0.0638  |
| rs2445026   | G | -0.0309 |
| rs17372597  | A | 0.1155  |
| rs142830490 | G | 0.0958  |
| rs13282582  | T | 0.1014  |
| rs439747    | C | 0.0214  |
| rs73593682  | C | -0.1345 |
| rs139757250 | C | 0.0833  |
| rs116986448 | T | -0.0746 |
| rs118079184 | A | -0.0823 |
| rs148026366 | C | 0.1141  |
| rs12681784  | C | -0.0228 |
| rs139800804 | A | 0.0855  |
| rs3752833   | C | 0.0462  |
| rs150094120 | T | 0.1833  |
| rs10113302  | G | -0.1195 |
| rs80347593  | A | 0.084   |
| rs149547292 | C | -0.0859 |
| rs17249231  | C | -0.0892 |
| rs76114516  | A | 0.0699  |
| rs150665187 | G | -0.0733 |
| rs2339866   | A | 0.0216  |

|             |   |         |
|-------------|---|---------|
| rs117549407 | A | -0.1166 |
| rs55875955  | A | -0.0572 |
| rs62494453  | C | 0.0339  |
| rs34068374  | C | -0.0237 |
| rs164665    | A | -0.025  |
| rs76872288  | G | 0.0663  |
| rs77532823  | C | 0.1367  |
| rs73701916  | G | 0.0561  |
| rs11992185  | T | -0.0603 |
| rs12114521  | G | 0.056   |
| rs140679591 | T | -0.0663 |
| rs144716364 | C | -0.1675 |
| rs150526328 | G | 0.0704  |
| rs11781927  | A | -0.0278 |
| rs17716502  | T | 0.0246  |
| rs62533427  | T | 0.0197  |
| rs61386175  | T | -0.0298 |
| rs71514520  | T | -0.093  |
| rs11775380  | T | 0.0261  |
| rs7000501   | G | 0.0217  |
| rs112863298 | T | -0.1313 |
| rs279968    | C | 0.0185  |
| rs10955497  | A | -0.0676 |
| rs76619657  | G | 0.0499  |
| rs78331587  | C | 0.0671  |
| rs73660131  | G | -0.0424 |
| rs1381003   | C | -0.0358 |
| rs149230480 | T | 0.0881  |
| rs12545390  | T | -0.0183 |
| rs79524930  | C | -0.1048 |
| rs10112477  | G | 0.0332  |
| rs1457185   | C | -0.0321 |
| rs7015798   | T | 0.1071  |
| rs2223037   | A | 0.0206  |
| rs11779594  | T | 0.0487  |
| rs145940817 | T | 0.1021  |
| rs117737147 | A | 0.1691  |
| rs7000128   | A | 0.022   |
| rs10505128  | T | -0.0831 |
| rs41502650  | C | 0.0816  |
| rs2509768   | T | 0.0867  |
| rs4588810   | T | -0.0922 |
| rs35469155  | T | -0.0327 |
| rs6578075   | T | -0.0526 |
| rs76003753  | T | -0.0688 |
| rs1390512   | A | -0.0256 |
| rs72640524  | G | 0.1469  |

|             |   |         |
|-------------|---|---------|
| rs58558359  | C | -0.0234 |
| rs7816972   | C | -0.0273 |
| rs77489913  | C | -0.05   |
| rs67671284  | T | -0.025  |
| rs4738006   | A | -0.0341 |
| rs1842656   | A | -0.0743 |
| rs2720672   | G | 0.0184  |
| rs144391068 | A | 0.134   |
| rs77863079  | A | -0.0473 |
| rs117873527 | C | -0.0709 |
| rs7817409   | T | -0.0318 |
| rs28440998  | G | 0.1727  |
| rs62526737  | G | 0.0337  |
| rs62489089  | A | 0.1012  |
| rs2062077   | C | -0.0199 |
| rs62524893  | C | -0.0471 |
| rs1912470   | T | -0.0278 |
| rs17621710  | T | 0.0461  |
| rs78653514  | A | -0.0799 |
| rs150259171 | A | -0.0425 |
| rs2514855   | C | -0.0209 |
| rs11778149  | A | -0.027  |
| rs11996359  | T | -0.0272 |
| rs79650812  | A | -0.0579 |
| rs58124301  | T | 0.0263  |
| rs7014143   | A | 0.0194  |
| rs34785279  | C | 0.0768  |
| rs285815    | T | -0.0187 |
| rs149792237 | G | -0.0833 |
| rs17226566  | C | 0.0306  |
| rs7008507   | T | 0.0195  |
| rs41312806  | A | 0.0637  |
| rs11782382  | T | 0.0253  |
| rs4872320   | G | 0.0212  |
| rs11782130  | T | -0.0205 |
| rs34278880  | C | -0.0904 |
| rs117104557 | A | 0.0623  |
| rs7834932   | C | -0.0368 |
| rs75186558  | G | -0.0929 |
| rs408398    | A | -0.0634 |
| rs35028499  | C | 0.0656  |
| rs78199049  | T | 0.0485  |
| rs142179222 | A | -0.0818 |
| rs146656442 | A | 0.0816  |
| rs72667594  | A | -0.0397 |
| rs143665821 | G | 0.1192  |
| rs111456999 | A | 0.0854  |

|             |   |         |
|-------------|---|---------|
| rs268391    | T | 0.0279  |
| rs7815300   | G | -0.0271 |
| rs74889569  | T | -0.0338 |
| rs74925267  | G | -0.0903 |
| rs112252471 | C | 0.0741  |
| rs143851032 | G | -0.1595 |
| rs2615147   | A | -0.0591 |
| rs141146334 | G | 0.0563  |
| rs28570266  | T | 0.0191  |
| rs7008954   | A | 0.0291  |
| rs72721434  | C | -0.0243 |
| rs145676326 | T | 0.0235  |
| rs140090444 | A | -0.1013 |
| rs71519661  | C | -0.1951 |
| rs41396645  | C | 0.0449  |
| rs2385162   | G | 0.0505  |
| rs2385686   | G | 0.02    |
| rs73210547  | G | -0.0673 |
| rs11774205  | A | 0.0369  |
| rs144543158 | T | -0.1576 |
| rs13251081  | T | -0.0279 |
| rs74622950  | C | -0.1165 |
| rs9297497   | A | 0.0209  |
| rs2001966   | C | 0.0261  |
| rs149452325 | T | 0.0696  |
| rs612423    | C | 0.0181  |
| rs77475984  | T | 0.0897  |
| rs7004125   | C | -0.0244 |
| rs6997394   | A | 0.0272  |
| rs72683199  | C | -0.0842 |
| rs7007015   | A | -0.0435 |
| rs117933211 | T | 0.084   |
| rs17396194  | G | -0.0256 |
| rs117440494 | T | -0.128  |
| rs117307578 | T | -0.1521 |
| rs148983708 | G | 0.0826  |
| rs117512957 | A | -0.0866 |
| rs10109506  | T | -0.0244 |
| rs13274306  | C | 0.0227  |
| rs72685840  | A | -0.1151 |
| rs56225427  | T | 0.0247  |
| rs141363112 | G | 0.0849  |
| rs58306009  | A | -0.0302 |
| rs118093461 | A | -0.1639 |
| rs141344551 | A | 0.099   |
| rs10099500  | T | 0.0184  |
| rs1868862   | A | -0.0572 |



|             |   |         |
|-------------|---|---------|
| rs79551163  | A | -0.1731 |
| rs17079739  | A | -0.0657 |
| rs1812141   | T | -0.0209 |
| rs13249719  | A | 0.0307  |
| rs143045363 | C | -0.0906 |
| rs7812747   | G | 0.0189  |
| rs6999594   | C | -0.0237 |
| rs62497338  | T | 0.0398  |
| rs10156353  | A | 0.036   |
| rs111999041 | A | 0.2047  |
| rs113767068 | C | 0.0604  |
| rs80237246  | T | 0.084   |
| rs2634516   | C | 0.0875  |
| rs73201722  | A | -0.024  |
| rs141670990 | C | 0.1097  |
| rs1993286   | T | -0.0206 |
| rs10447987  | G | -0.062  |
| rs193041    | A | 0.09    |
| rs10109791  | T | 0.083   |
| rs7459568   | C | 0.0224  |
| rs62498444  | G | 0.0447  |
| rs117842194 | G | 0.1033  |
| rs62508235  | A | -0.1112 |
| rs72728773  | G | -0.071  |
| rs117820382 | C | -0.1116 |
| rs6981838   | A | 0.025   |
| rs147035909 | C | 0.1228  |
| rs74635968  | C | -0.0853 |
| rs143349015 | G | -0.145  |
| rs113527266 | C | 0.0678  |
| rs62501102  | A | -0.0288 |
| rs17271629  | A | 0.03    |
| rs74353788  | C | 0.051   |
| rs34937056  | A | 0.0413  |
| rs118130299 | C | -0.1158 |
| rs6470563   | G | -0.0341 |
| rs149549370 | G | 0.1051  |
| rs113330983 | C | 0.0986  |
| rs1372617   | G | 0.0239  |
| rs17092948  | G | 0.0246  |
| rs66854454  | G | 0.0995  |
| rs17585802  | G | -0.0515 |
| rs77086485  | T | -0.0378 |
| rs13254946  | T | 0.0201  |
| rs3018455   | A | 0.0626  |
| rs10216911  | G | 0.0631  |
| rs117395080 | T | 0.0625  |

|             |   |         |
|-------------|---|---------|
| rs117068900 | G | -0.1212 |
| rs78874568  | A | 0.0711  |
| rs145013953 | G | 0.1306  |
| rs2736321   | A | -0.0553 |
| rs16932054  | T | 0.0362  |
| rs117837345 | C | 0.1071  |
| rs118077735 | C | 0.129   |
| rs117570906 | G | -0.1873 |
| rs73184393  | T | -0.0548 |
| rs2469766   | G | -0.0244 |
| rs13253182  | G | -0.0535 |
| rs894153    | G | 0.0203  |
| rs7014383   | C | -0.0268 |
| rs71521856  | C | 0.0498  |
| rs112973229 | A | -0.0844 |
| rs149929711 | T | -0.0806 |
| rs17673204  | T | -0.037  |
| rs4922220   | G | -0.0515 |
| rs16879060  | T | 0.029   |
| rs7821689   | T | 0.0292  |
| rs73665740  | T | 0.0265  |
| rs113307086 | A | 0.0431  |
| rs146436143 | T | 0.1253  |
| rs112969495 | A | -0.0393 |
| rs11167115  | G | 0.0224  |
| rs73185649  | A | 0.0331  |
| rs76020419  | T | 0.0911  |
| rs10106897  | G | 0.0184  |
| rs111312249 | T | 0.0822  |
| rs17286110  | G | 0.0204  |
| rs150521432 | G | -0.0891 |
| rs35590352  | C | -0.0217 |
| rs117550253 | G | 0.0923  |
| rs111844194 | C | 0.0733  |
| rs76728127  | C | 0.042   |
| rs76117275  | G | -0.0668 |
| rs145719931 | A | -0.1154 |
| rs146082916 | A | 0.1057  |
| rs2634521   | C | 0.0181  |
| rs2447185   | C | -0.0268 |
| rs73187206  | T | 0.035   |
| rs59371935  | C | -0.0884 |
| rs28725382  | A | 0.0479  |
| rs17712165  | C | 0.0246  |
| rs146399065 | A | -0.1325 |
| rs17658330  | T | 0.0338  |
| rs6996964   | T | -0.0366 |

|             |   |         |
|-------------|---|---------|
| rs17750806  | T | -0.0215 |
| rs72690960  | T | 0.0427  |
| rs78297319  | G | -0.0336 |
| rs117549487 | A | 0.1018  |
| rs11782406  | A | -0.0542 |
| rs1585170   | G | -0.0748 |
| rs138642340 | A | -0.102  |
| rs116861149 | G | 0.0646  |
| rs12682580  | T | 0.0276  |
| rs7836484   | A | 0.0249  |
| rs61335927  | G | -0.0829 |
| rs145304857 | A | 0.1328  |
| rs117537168 | C | 0.0816  |
| rs7465584   | C | -0.0204 |
| rs2616182   | C | 0.0257  |
| rs147744018 | A | -0.1055 |
| rs74437232  | T | 0.1198  |
| rs77588085  | T | 0.0771  |
| rs77406764  | C | -0.0716 |
| rs58394097  | T | 0.0261  |
| rs7818434   | A | 0.0257  |
| rs4292655   | T | -0.0606 |
| rs56083998  | G | -0.0226 |
| rs62492899  | T | 0.0515  |
| rs7841894   | T | 0.026   |
| rs11784974  | T | -0.0224 |
| rs145736563 | C | 0.1297  |
| rs147154280 | A | -0.1394 |
| rs78995123  | T | 0.1262  |
| rs115468458 | G | 0.0421  |
| rs6988755   | T | -0.0288 |
| rs62507633  | T | -0.0774 |
| rs62523029  | T | -0.0355 |
| rs112133470 | A | -0.0575 |
| rs11136048  | C | 0.0381  |
| rs4623373   | T | -0.0331 |
| rs950793    | T | 0.0232  |
| rs3890765   | A | -0.0405 |
| rs16884294  | T | -0.0412 |
| rs6558928   | T | -0.0662 |
| rs4831404   | T | 0.0236  |
| rs150100751 | C | 0.1322  |
| rs16936279  | G | 0.029   |
| rs2325945   | A | -0.0253 |
| rs79868575  | C | 0.0352  |
| rs12677920  | A | 0.0185  |
| rs73222594  | C | -0.0442 |

|             |   |         |
|-------------|---|---------|
| rs34196128  | G | 0.0224  |
| rs1449829   | G | 0.0206  |
| rs12677341  | G | 0.0654  |
| rs118185017 | C | -0.1179 |
| rs3967938   | G | -0.023  |
| rs12155536  | G | 0.049   |
| rs62531356  | A | -0.0199 |
| rs34249114  | A | 0.0531  |
| rs2507712   | A | -0.0913 |
| rs4598235   | G | -0.0232 |
| rs35426435  | A | -0.0483 |
| rs1531531   | C | -0.0196 |
| rs142158434 | G | 0.0939  |
| rs2004059   | A | 0.02    |
| rs62520885  | A | 0.0599  |
| rs9324592   | A | -0.0293 |
| rs62501005  | C | -0.0888 |
| rs148702291 | C | -0.0787 |
| rs72679035  | G | 0.1032  |
| rs79023486  | A | 0.0563  |
| rs7836239   | G | 0.0327  |
| rs2124600   | C | 0.0197  |
| rs77296193  | T | -0.0285 |
| rs72728256  | T | 0.1054  |
| rs75582771  | T | -0.0545 |
| rs60005708  | G | 0.1145  |
| rs144059407 | T | -0.088  |
| rs113648125 | G | 0.0979  |
| rs4384020   | C | 0.0217  |
| rs34504452  | A | 0.0382  |
| rs72638516  | C | 0.0433  |
| rs79326161  | A | 0.0957  |
| rs1448544   | G | 0.0191  |
| rs2571372   | G | -0.0278 |
| rs4841587   | T | 0.0204  |
| rs78871609  | C | -0.1059 |
| rs75489414  | A | 0.0671  |
| rs146004700 | T | 0.1038  |
| rs6982420   | T | 0.0489  |
| rs2436920   | A | 0.0387  |
| rs67638406  | A | 0.0195  |
| rs117122364 | A | 0.1495  |
| rs148383135 | A | 0.13    |
| rs34929165  | T | 0.1836  |
| rs72670642  | A | -0.1073 |
| rs80108559  | T | 0.1409  |
| rs148642270 | T | -0.0937 |

|             |   |         |
|-------------|---|---------|
| rs9298281   | T | -0.0266 |
| rs7820781   | A | 0.0301  |
| rs17666477  | G | -0.0911 |
| rs2617100   | A | -0.0224 |
| rs10103496  | T | -0.0604 |
| rs2157651   | T | -0.0205 |
| rs10099199  | C | 0.0279  |
| rs75119030  | T | 0.0516  |
| rs79930704  | A | 0.0846  |
| rs114120847 | A | -0.1266 |
| rs149176841 | A | -0.0916 |
| rs78412506  | G | -0.1121 |
| rs55729006  | C | -0.0413 |
| rs55665981  | C | -0.0535 |
| rs117729747 | A | -0.0782 |
| rs117055226 | T | -0.1255 |
| rs4629824   | A | -0.0629 |
| rs6982304   | T | 0.0191  |
| rs6583572   | C | -0.0198 |
| rs7008439   | T | 0.0185  |
| rs117837757 | A | -0.0972 |
| rs141775964 | T | 0.057   |
| rs11990693  | A | -0.0179 |
| rs4415303   | A | 0.0206  |
| rs2458412   | C | -0.0198 |
| rs17432478  | C | 0.0669  |
| rs72718832  | G | 0.0804  |
| rs7846389   | C | 0.0185  |
| rs112922038 | T | 0.0394  |
| rs62513781  | C | -0.0232 |
| rs143656515 | C | 0.083   |
| rs17073994  | T | 0.0216  |
| rs2465001   | C | 0.0566  |
| rs62518998  | G | -0.0414 |
| rs59016986  | A | 0.018   |
| rs142592830 | G | -0.0529 |
| rs145939270 | A | -0.095  |
| rs75426839  | G | -0.1484 |
| rs17714834  | G | -0.0197 |
| rs16935112  | C | -0.0484 |
| rs12156192  | A | 0.0273  |
| rs55745307  | C | 0.0988  |
| rs62499170  | T | -0.0605 |
| rs6995945   | A | 0.0181  |
| rs13257811  | C | -0.018  |
| rs117230955 | A | 0.0797  |
| rs117839902 | A | -0.0562 |

|             |   |         |
|-------------|---|---------|
| rs59110554  | C | 0.0221  |
| rs11776290  | A | -0.0181 |
| rs4565462   | C | 0.0358  |
| rs114763917 | C | 0.0722  |
| rs9644579   | T | 0.0282  |
| rs11787099  | T | 0.0236  |
| rs11987875  | A | 0.112   |
| rs6999779   | A | -0.0272 |
| rs10092400  | T | 0.0608  |
| rs3779671   | G | 0.0204  |
| rs76047412  | T | 0.0778  |
| rs75982463  | C | 0.0495  |
| rs77131321  | A | 0.0328  |
| rs2272719   | A | 0.0198  |
| rs11780790  | G | -0.0757 |
| rs75780216  | A | -0.0722 |
| rs77718771  | T | 0.0369  |
| rs117161098 | C | -0.1499 |
| rs116180957 | C | 0.0596  |
| rs117489322 | C | -0.0843 |
| rs74590551  | T | -0.0879 |
| rs62520082  | T | -0.125  |
| rs72728294  | T | 0.0669  |
| rs10107798  | A | 0.0646  |
| rs72693380  | C | -0.0361 |
| rs3922897   | G | 0.0211  |
| rs17432810  | A | -0.1599 |
| rs78988591  | G | 0.1202  |
| rs12547913  | T | -0.0294 |
| rs7820668   | C | -0.022  |
| rs77713853  | T | 0.0388  |
| rs35517356  | G | -0.0534 |
| rs77545303  | A | 0.0247  |
| rs118099515 | T | -0.0443 |
| rs117638788 | T | 0.0694  |
| rs1462030   | A | 0.0179  |
| rs3134488   | T | -0.0283 |
| rs2729982   | C | -0.0285 |
| rs2605892   | G | 0.04    |
| rs28668488  | A | -0.0725 |
| rs142025576 | G | 0.0906  |
| rs11562695  | C | 0.0256  |
| rs13279925  | G | -0.0216 |
| rs13252504  | A | 0.0838  |
| rs10092606  | C | 0.0672  |
| rs72667553  | A | -0.0824 |
| rs73320568  | T | -0.0691 |

|             |   |         |
|-------------|---|---------|
| rs4128779   | A | 0.0219  |
| rs56072384  | G | 0.0511  |
| rs117845497 | A | -0.1115 |
| rs78969819  | C | 0.062   |
| rs7830330   | T | 0.0296  |
| rs7007153   | G | -0.0704 |
| rs17088737  | C | -0.0241 |
| rs10109385  | A | -0.0231 |
| rs2599720   | C | -0.0193 |
| rs10090519  | G | 0.0202  |
| rs144889886 | G | -0.1105 |
| rs147456158 | G | 0.0994  |
| rs78139297  | T | -0.082  |
| rs7012981   | C | 0.0187  |
| rs359528    | T | -0.0312 |
| rs10464957  | G | 0.0396  |
| rs117854714 | A | -0.0819 |
| rs79425976  | C | 0.0929  |
| rs117918410 | T | -0.0679 |
| rs2552143   | A | 0.0259  |
| rs28850959  | G | -0.0331 |
| rs10955071  | C | -0.0297 |
| rs17697207  | G | 0.0769  |
| rs7837887   | A | -0.0183 |
| rs7003176   | C | -0.0603 |
| rs74858813  | C | -0.1184 |
| rs28414022  | T | 0.1033  |
| rs10092549  | C | -0.0223 |
| rs17311976  | C | -0.0238 |
| rs144444355 | T | 0.0876  |
| rs118146420 | G | 0.0868  |
| rs138067634 | A | -0.0806 |
| rs143035739 | T | 0.1331  |
| rs139678054 | A | 0.0959  |
| rs1403843   | A | 0.0183  |
| rs3110595   | C | 0.0243  |
| rs73680140  | C | -0.0665 |
| rs57012908  | T | -0.0345 |
| rs118164259 | C | 0.0803  |
| rs7838905   | G | -0.0229 |
| rs79959833  | C | 0.0727  |
| rs111267740 | G | -0.0778 |
| rs13255755  | A | -0.0533 |
| rs10088098  | C | 0.0225  |
| rs118022964 | A | 0.0611  |
| rs79607218  | C | 0.087   |
| rs17495481  | A | -0.0446 |

|             |   |         |
|-------------|---|---------|
| rs11785462  | G | 0.0547  |
| rs17641864  | A | 0.0353  |
| rs117634670 | C | 0.0803  |
| rs62509380  | A | -0.0579 |
| rs76064864  | A | 0.0481  |
| rs117118718 | A | -0.0852 |
| rs12541769  | A | -0.0399 |
| rs79660919  | G | 0.0758  |
| rs72694414  | G | -0.1007 |
| rs144107713 | C | -0.0839 |
| rs73507067  | A | 0.0224  |
| rs117012398 | A | 0.045   |
| rs144793007 | A | 0.0454  |
| rs7011133   | C | 0.0959  |
| rs117252931 | T | 0.0977  |
| rs6981397   | G | -0.0203 |
| rs56280406  | T | 0.0264  |
| rs78725827  | A | 0.2002  |
| rs55911652  | T | -0.0287 |
| rs4520143   | T | 0.0523  |
| rs117359434 | G | 0.0878  |
| rs79779354  | A | -0.1069 |
| rs111830911 | T | 0.113   |
| rs112481031 | G | 0.1429  |
| rs72690135  | A | 0.0593  |
| rs34100820  | G | -0.0358 |
| rs73201616  | G | 0.0706  |
| rs113806728 | G | -0.0826 |
| rs10503670  | G | -0.0179 |
| rs75174686  | T | -0.1004 |
| rs3922669   | T | -0.0194 |
| rs10098075  | G | 0.0998  |
| rs112132821 | G | 0.0724  |
| rs72622855  | T | -0.0959 |
| rs78952177  | C | 0.0651  |
| rs73372159  | A | 0.0601  |
| rs17760482  | G | -0.0719 |
| rs12680471  | C | 0.0257  |
| rs73197141  | T | -0.1644 |
| rs17580618  | C | 0.0599  |
| rs10505340  | T | -0.031  |
| rs117564563 | T | 0.0808  |
| rs16909306  | G | -0.03   |
| rs117384916 | A | -0.096  |
| rs6995907   | C | -0.0195 |
| rs10090612  | C | 0.0694  |
| rs7845483   | C | 0.0205  |



|             |   |         |
|-------------|---|---------|
| rs111747962 | T | 0.069   |
| rs114909308 | C | 0.0571  |
| rs17431062  | T | 0.0371  |
| rs34618550  | T | -0.1229 |
| rs76562484  | A | -0.042  |
| rs35386317  | T | -0.0281 |
| rs56152127  | T | -0.0643 |
| rs57219937  | A | 0.1208  |
| rs62476264  | A | -0.0248 |
| rs17068332  | T | 0.0293  |
| rs34159233  | A | 0.0254  |
| rs147950941 | G | -0.1615 |
| rs4977136   | C | -0.0346 |
| rs62508296  | G | -0.1275 |
| rs16883926  | T | -0.0392 |
| rs6984885   | A | -0.0273 |
| rs75077885  | A | 0.0932  |
| rs71523640  | C | 0.1423  |
| rs4448280   | C | 0.0266  |
| rs111471275 | T | 0.0928  |
| rs7012982   | G | -0.0184 |
| rs4876213   | A | 0.0186  |
| rs59130673  | G | 0.051   |
| rs78899347  | T | 0.0961  |
| rs2881827   | C | 0.0222  |
| rs62517732  | C | -0.0692 |
| rs34213415  | T | -0.0953 |
| rs149244177 | G | 0.0746  |
| rs113141301 | G | -0.0762 |
| rs2350463   | T | 0.0259  |
| rs7000535   | T | 0.018   |
| rs7820178   | A | -0.0219 |
| rs142084163 | A | -0.0614 |
| rs139247919 | C | -0.129  |
| rs117500529 | A | 0.0512  |
| rs117199622 | A | 0.068   |
| rs78387903  | C | 0.1411  |
| rs62491207  | G | -0.0551 |
| rs72674899  | A | 0.0844  |
| rs146420678 | C | 0.115   |
| rs73354063  | T | 0.0835  |
| rs111612221 | G | 0.1152  |
| rs76140942  | C | -0.0747 |
| rs142306493 | C | 0.0806  |
| rs62492342  | T | -0.0433 |
| rs73224442  | T | 0.1023  |
| rs2062787   | T | 0.0379  |

|             |   |         |
|-------------|---|---------|
| rs10097712  | A | 0.0422  |
| rs1542721   | T | 0.0232  |
| rs11782265  | C | 0.0182  |
| rs35130488  | G | 0.0305  |
| rs9649957   | T | 0.0261  |
| rs7830169   | G | -0.0767 |
| rs11781349  | T | 0.0315  |
| rs13268295  | A | 0.0733  |
| rs140336805 | G | 0.0915  |
| rs77310251  | A | -0.0391 |
| rs4237042   | C | 0.018   |
| rs55694299  | T | 0.0505  |
| rs1442408   | A | -0.0201 |
| rs117087774 | T | 0.0781  |
| rs55758345  | A | 0.0496  |
| rs145716495 | T | 0.0749  |
| rs77019054  | T | 0.1304  |
| rs6559166   | G | 0.0461  |
| rs138966847 | T | -0.0815 |
| rs72723105  | T | 0.0943  |
| rs7013830   | A | 0.0239  |
| rs79674393  | A | 0.0568  |
| rs11991640  | A | 0.0225  |
| rs2610031   | A | 0.0244  |
| rs80107815  | T | -0.0337 |
| rs34379313  | A | 0.0816  |
| rs117388169 | G | -0.0903 |
| rs62494454  | C | -0.1326 |
| rs78971392  | G | 0.1433  |
| rs2468663   | G | -0.0175 |
| rs6468134   | A | 0.0179  |
| rs76712470  | T | 0.0577  |
| rs2404035   | T | -0.037  |
| rs79317256  | T | -0.0608 |
| rs111310483 | G | -0.0864 |
| rs7007694   | C | 0.0264  |
| rs13272671  | T | -0.0279 |
| rs55798067  | T | 0.062   |
| rs144326257 | G | 0.0418  |
| rs111291122 | C | 0.0686  |
| rs17516585  | A | -0.0211 |
| rs2923422   | A | 0.0331  |
| rs34286353  | T | 0.1436  |
| rs148241365 | G | 0.1022  |
| rs483654    | T | 0.0208  |
| rs56016458  | C | -0.0837 |
| rs113634780 | G | 0.1023  |

|             |   |         |
|-------------|---|---------|
| rs35690770  | C | 0.1035  |
| rs3897955   | T | -0.0271 |
| rs2345579   | T | 0.0197  |
| rs7838749   | G | 0.0204  |
| rs116941318 | G | -0.0481 |
| rs73601241  | T | 0.0228  |
| rs138700408 | T | 0.0966  |
| rs56296411  | C | -0.0553 |
| rs34905042  | A | -0.0837 |
| rs55694307  | A | 0.0412  |
| rs140462607 | C | 0.1168  |
| rs17588440  | T | 0.033   |
| rs116783271 | A | -0.0417 |
| rs811833    | C | 0.0249  |
| rs138631496 | T | 0.0557  |
| rs8192651   | C | 0.0387  |
| rs4735401   | T | 0.0337  |
| rs9644437   | T | 0.1068  |
| rs16932321  | T | -0.0424 |
| rs77574512  | A | -0.0587 |
| rs73546213  | T | -0.0313 |
| rs13248665  | T | -0.0327 |
| rs13273605  | T | -0.0834 |
| rs2649098   | T | 0.025   |
| rs13250248  | A | -0.0228 |
| rs12335217  | T | -0.1431 |
| rs73179572  | T | 0.1123  |
| rs148899549 | T | 0.0783  |
| rs76412367  | C | -0.0635 |
| rs16904418  | C | -0.0229 |
| rs35598814  | G | 0.1615  |
| rs28848498  | A | 0.0229  |
| rs75312417  | A | 0.1205  |
| rs1550454   | A | -0.0285 |
| rs71517249  | A | 0.06    |
| rs78149698  | T | 0.0703  |
| rs7008015   | C | -0.047  |
| rs117069306 | T | 0.1287  |
| rs57279919  | T | 0.0491  |
| rs117421960 | G | 0.0494  |
| rs75982678  | T | 0.0624  |
| rs75005413  | G | 0.1089  |
| rs2436049   | C | -0.0521 |
| rs148811994 | A | 0.1649  |
| rs10093055  | T | -0.0204 |
| rs2948638   | C | -0.0752 |
| rs12540974  | A | 0.0533  |

|             |   |         |
|-------------|---|---------|
| rs62500990  | C | 0.0266  |
| rs142750805 | C | -0.1296 |
| rs137995731 | G | 0.1497  |
| rs118013985 | C | 0.0704  |
| rs4875490   | G | -0.0294 |
| rs117780272 | T | -0.158  |
| rs4909767   | T | 0.018   |
| rs118082680 | C | 0.1331  |
| rs4733481   | G | 0.0194  |
| rs149246664 | A | 0.1154  |
| rs10101338  | C | -0.0184 |
| rs41507849  | A | -0.0566 |
| rs112466685 | G | 0.041   |
| rs919547    | C | 0.1056  |
| rs28375555  | T | 0.0756  |
| rs146011582 | T | 0.093   |
| rs112099815 | A | 0.1782  |
| rs2053741   | A | -0.0276 |
| rs77315451  | T | 0.1588  |
| rs146551405 | C | -0.0467 |
| rs16908761  | G | -0.0259 |
| rs62498380  | C | 0.0511  |
| rs412488    | C | -0.0397 |
| rs13278840  | C | -0.0999 |
| rs34822190  | T | -0.0703 |
| rs139186432 | C | -0.0836 |
| rs60866237  | C | 0.0619  |
| rs13439040  | T | -0.0225 |
| rs76633579  | G | -0.0554 |
| rs13263087  | A | 0.0288  |
| rs117366919 | T | -0.0597 |
| rs77352344  | C | 0.0457  |
| rs77730543  | C | -0.0569 |
| rs16876804  | T | -0.0956 |
| rs6994286   | A | 0.0307  |
| rs146801998 | T | -0.0908 |
| rs10505248  | G | -0.1017 |
| rs112460734 | A | -0.1443 |
| rs10503719  | T | -0.023  |
| rs12544706  | C | 0.0211  |
| rs76791798  | G | 0.0816  |
| rs151222559 | A | 0.0806  |
| rs139877640 | C | 0.07    |
| rs78780911  | A | 0.0949  |
| rs1497019   | C | 0.0336  |
| rs1515012   | T | 0.0177  |
| rs34324266  | G | -0.1005 |

|             |   |         |
|-------------|---|---------|
| rs1371152   | A | -0.1174 |
| rs140419674 | A | -0.0591 |
| rs73180952  | C | -0.0662 |
| rs79748915  | C | -0.0353 |
| rs34607019  | C | -0.0423 |
| rs10103096  | G | 0.0295  |
| rs140204454 | T | -0.0369 |
| rs10091895  | T | 0.0256  |
| rs117015640 | C | 0.1174  |
| rs79685263  | T | -0.0693 |
| rs4871318   | G | -0.0329 |
| rs12550496  | T | 0.0197  |
| rs11250006  | T | 0.0218  |
| rs76131864  | A | -0.0348 |
| rs62521807  | C | 0.0384  |
| rs12680952  | A | 0.0189  |
| rs78742172  | T | 0.0748  |
| rs117213219 | C | 0.081   |
| rs75953390  | A | -0.0664 |
| rs1443948   | C | 0.0185  |
| rs148978709 | C | 0.0738  |
| rs7844465   | T | 0.0186  |
| rs117311636 | T | -0.1434 |
| rs72638969  | T | -0.1294 |
| rs118189625 | A | -0.0592 |
| rs3793357   | C | -0.0358 |
| rs60306436  | C | 0.0714  |
| rs17747688  | T | -0.0552 |
| rs10866833  | C | 0.0303  |
| rs140789410 | A | -0.0615 |
| rs12674751  | T | 0.0373  |
| rs632216    | T | -0.0654 |
| rs139977430 | C | -0.0912 |
| rs62501482  | G | 0.0622  |
| rs71527659  | A | -0.0759 |
| rs147743633 | C | -0.1428 |
| rs60332422  | A | 0.0431  |
| rs145322722 | A | 0.0959  |
| rs117579309 | A | -0.0923 |
| rs117264078 | A | 0.1049  |
| rs2572908   | G | 0.0174  |
| rs3931280   | G | 0.0176  |
| rs11782812  | G | 0.0237  |
| rs74682804  | C | -0.0641 |
| rs75462348  | A | 0.1045  |
| rs117489005 | G | 0.0501  |
| rs11784885  | G | 0.0516  |

|             |   |         |
|-------------|---|---------|
| rs1499430   | A | -0.0208 |
| rs79212932  | T | -0.054  |
| rs77868914  | C | -0.0628 |
| rs72633451  | C | -0.0413 |
| rs13268712  | C | -0.0682 |
| rs35031423  | A | -0.0334 |
| rs16871341  | T | 0.0264  |
| rs6470164   | A | 0.0877  |
| rs7002643   | G | -0.0336 |
| rs79131406  | A | -0.0399 |
| rs10046784  | A | -0.0486 |
| rs62503585  | G | -0.03   |
| rs117204569 | T | -0.0699 |
| rs118136930 | A | 0.0654  |
| rs1523215   | A | 0.1188  |
| rs17714522  | A | 0.0455  |
| rs6992413   | C | 0.0178  |
| rs146797826 | C | 0.1006  |
| rs113370265 | G | -0.1333 |
| rs12541575  | A | 0.0188  |
| rs117405276 | A | -0.0401 |
| rs2458291   | T | 0.0215  |
| rs78149610  | T | -0.1477 |
| rs78287679  | C | 0.078   |
| rs2061834   | T | -0.0273 |
| rs117194047 | T | 0.0987  |
| rs13269826  | G | 0.0201  |
| rs2597387   | C | -0.026  |
| rs79646827  | A | -0.0727 |
| rs147493922 | G | -0.0307 |
| rs34653295  | C | -0.0755 |
| rs6473606   | A | 0.0287  |
| rs11988106  | G | 0.0309  |
| rs7846394   | T | 0.0396  |
| rs1849524   | G | 0.0242  |
| rs13248236  | A | 0.0341  |
| rs28562253  | T | 0.02    |
| rs144669208 | G | -0.1285 |
| rs76882315  | G | 0.0789  |
| rs1480857   | G | 0.02    |
| rs62509076  | C | -0.0212 |
| rs62504405  | G | -0.1015 |
| rs72729624  | C | 0.0391  |
| rs139286582 | T | 0.0665  |
| rs9297739   | T | 0.0178  |
| rs330085    | T | -0.0298 |
| rs10504630  | T | -0.1136 |

|             |   |         |
|-------------|---|---------|
| rs16907247  | A | 0.064   |
| rs34454457  | G | 0.1114  |
| rs149653409 | A | -0.0665 |
| rs35386117  | A | 0.0553  |
| rs6985195   | G | -0.0185 |
| rs2565096   | G | 0.0199  |
| rs75338843  | C | 0.0496  |
| rs12679642  | C | 0.1276  |
| rs28523397  | A | 0.0186  |
| rs28523656  | C | 0.0397  |
| rs7010945   | G | -0.0229 |
| rs11785116  | G | -0.0243 |
| rs111652334 | A | 0.0527  |
| rs145389040 | T | 0.0501  |
| rs13254471  | T | 0.043   |
| rs117844685 | T | -0.0961 |
| rs1994792   | G | 0.0199  |
| rs302286    | A | -0.0175 |
| rs4367588   | C | 0.0238  |
| rs112290544 | A | 0.0203  |
| rs117448642 | C | -0.0886 |
| rs116944634 | C | -0.0827 |
| rs76729004  | A | -0.0709 |
| rs78717772  | C | -0.0439 |
| rs72684664  | T | 0.0942  |
| rs7829491   | T | 0.0321  |
| rs116928135 | G | 0.0549  |
| rs7017092   | T | 0.0429  |
| rs117139547 | A | -0.0879 |
| rs10110257  | G | -0.0187 |
| rs116999589 | T | -0.0329 |
| rs117478437 | C | -0.0816 |
| rs17383770  | A | 0.0794  |
| rs7820431   | G | 0.0173  |
| rs3209231   | A | -0.0728 |
| rs117406708 | T | -0.1034 |
| rs72673934  | A | -0.0722 |
| rs9314532   | A | -0.0219 |
| rs111703385 | A | -0.0899 |
| rs1355304   | G | 0.0169  |
| rs72653213  | C | -0.0523 |
| rs142596441 | T | 0.0527  |
| rs113950449 | T | -0.039  |
| rs117596643 | C | -0.0917 |
| rs17657626  | T | 0.0692  |
| rs117245884 | G | -0.1379 |
| rs11775938  | C | 0.0325  |

|             |   |         |
|-------------|---|---------|
| rs76079222  | A | 0.0545  |
| rs117166152 | G | 0.0728  |
| rs77723983  | G | 0.0436  |
| rs77821074  | G | 0.0466  |
| rs116877179 | G | 0.1441  |
| rs10092459  | T | 0.047   |
| rs9298515   | G | -0.0175 |
| rs75630679  | T | 0.095   |
| rs6987930   | T | -0.0187 |
| rs142904733 | T | 0.1029  |
| rs72725147  | T | 0.0205  |
| rs332036    | A | 0.0248  |
| rs78134327  | T | 0.0499  |
| rs7837938   | C | 0.1097  |
| rs17079689  | G | 0.091   |
| rs1542315   | T | -0.053  |
| rs113342751 | T | 0.0748  |
| rs872529    | C | 0.0227  |
| rs35478659  | C | 0.0172  |
| rs147449365 | G | 0.1124  |
| rs62500396  | T | -0.0365 |
| rs72651327  | G | -0.1004 |
| rs78219953  | C | 0.0733  |
| rs72674430  | A | 0.0233  |
| rs145144624 | C | -0.0713 |
| rs3802234   | A | -0.0431 |
| rs11136533  | T | -0.0262 |
| rs11778916  | A | -0.0649 |
| rs55905191  | A | -0.049  |
| rs150402113 | A | 0.0873  |
| rs62523381  | G | -0.0188 |
| rs12549368  | C | 0.0202  |
| rs12541470  | G | -0.032  |
| rs62488703  | A | -0.0194 |
| rs4736113   | C | -0.0485 |
| rs139846536 | A | -0.0969 |
| rs114604559 | C | 0.0793  |
| rs117598854 | A | -0.0897 |
| rs144962000 | A | -0.0608 |
| rs1842659   | T | 0.026   |
| rs113098005 | A | -0.0277 |
| rs10100814  | C | -0.02   |
| rs62499581  | T | -0.0312 |
| rs111237334 | G | -0.0609 |
| rs11775493  | C | -0.0246 |
| rs17065705  | G | -0.1267 |
| rs72657203  | A | -0.0717 |



|             |   |         |
|-------------|---|---------|
| rs147055569 | G | 0.127   |
| rs79123324  | C | -0.0627 |
| rs35061608  | C | -0.0177 |
| rs118119345 | G | -0.0865 |
| rs72724748  | C | 0.0885  |
| rs2873256   | C | -0.0209 |
| rs79185074  | C | 0.0344  |
| rs116844023 | T | 0.0985  |
| rs34664205  | A | 0.0249  |
| rs76969813  | C | -0.0232 |
| rs55938795  | T | -0.0246 |
| rs16894331  | G | -0.0381 |
| rs55904691  | T | 0.0182  |
| rs116977829 | C | -0.1131 |
| rs112273603 | G | 0.0711  |
| rs80203103  | A | -0.1201 |
| rs11775252  | A | -0.0894 |
| rs62527329  | G | -0.0609 |
| rs2022958   | T | -0.0177 |
| rs75452069  | A | 0.0883  |
| rs1429965   | A | -0.0435 |
| rs2432731   | A | 0.0211  |
| rs10956486  | C | -0.0205 |
| rs55966096  | C | -0.0205 |
| rs17402216  | C | 0.0344  |
| rs141958536 | T | 0.0871  |
| rs146637002 | T | 0.079   |
| rs78157344  | C | 0.0796  |
| rs17650903  | A | -0.052  |
| rs4875568   | A | -0.0371 |
| rs36074562  | G | -0.0238 |
| rs34882716  | G | -0.0425 |
| rs7817154   | T | 0.0221  |
| rs16904321  | G | -0.054  |
| rs62479703  | G | 0.0532  |
| rs118106322 | C | 0.0657  |
| rs117148755 | A | -0.1728 |
| rs6998666   | G | -0.0229 |
| rs112230761 | C | -0.0619 |
| rs72678340  | T | -0.0229 |
| rs17693374  | A | 0.0353  |
| rs151303870 | G | -0.1071 |
| rs56184717  | T | -0.042  |
| rs6997916   | A | 0.0541  |
| rs62518270  | A | 0.023   |
| rs6980781   | A | 0.0286  |
| rs6980638   | T | 0.0194  |

|             |   |         |
|-------------|---|---------|
| rs72655895  | T | 0.0705  |
| rs77688458  | G | 0.0661  |
| rs4870854   | T | 0.0271  |
| rs28865647  | A | 0.0184  |
| rs10102048  | C | -0.0429 |
| rs13274856  | C | -0.0826 |
| rs77451724  | G | 0.0776  |
| rs1473267   | G | 0.0317  |
| rs4922137   | C | 0.0576  |
| rs2042809   | G | 0.0221  |
| rs3110294   | T | 0.0392  |
| rs114560986 | T | 0.0738  |
| rs17816202  | T | -0.0451 |
| rs16869926  | A | 0.0556  |
| rs147174219 | C | 0.0595  |
| rs80141843  | G | 0.0727  |
| rs13259894  | G | 0.0203  |
| rs76132602  | T | 0.0806  |
| rs140209378 | T | 0.1102  |
| rs75635055  | A | 0.0573  |
| rs298600    | T | 0.0199  |
| rs118191091 | G | 0.0681  |
| rs3102070   | A | -0.0448 |
| rs4872404   | T | -0.0505 |
| rs16939546  | T | -0.0202 |
| rs11774216  | A | 0.0399  |
| rs139857079 | A | 0.1153  |
| rs2679759   | C | -0.0174 |
| rs4342647   | T | 0.0727  |
| rs7013233   | A | -0.0218 |
| rs118018806 | A | 0.0812  |
| rs4871316   | T | 0.0202  |
| rs75448034  | C | 0.0773  |
| rs3747811   | T | 0.0189  |
| rs116951692 | C | 0.0441  |
| rs2088356   | T | -0.0227 |
| rs13267532  | C | -0.0178 |
| rs62503505  | C | -0.0213 |
| rs116974716 | C | -0.029  |
| rs75641959  | A | 0.0586  |
| rs2465884   | T | 0.0178  |
| rs74896244  | G | -0.1393 |
| rs72612103  | A | 0.0357  |
| rs117766015 | T | -0.0738 |
| rs11783421  | C | 0.0324  |
| rs17756915  | G | 0.0199  |
| rs17063413  | G | 0.0185  |

|             |   |         |
|-------------|---|---------|
| rs2950344   | G | 0.0319  |
| rs4739899   | G | -0.0215 |
| rs17439659  | T | -0.0203 |
| rs4871091   | A | 0.0227  |
| rs117741756 | G | -0.1455 |
| rs34067098  | A | 0.0204  |
| rs147140728 | A | 0.1088  |
| rs17126062  | T | -0.0951 |
| rs62501157  | A | -0.0284 |
| rs142970767 | A | -0.0943 |
| rs76182273  | T | 0.087   |
| rs4874121   | G | 0.0454  |
| rs4240634   | T | 0.0186  |
| rs1975118   | T | 0.0232  |
| rs6981341   | G | -0.0197 |
| rs2740810   | C | 0.0199  |
| rs111992242 | G | 0.0541  |
| rs2022916   | T | 0.02    |
| rs79734093  | A | -0.1534 |
| rs71525726  | G | 0.0255  |
| rs17430154  | A | 0.0453  |
| rs2618810   | C | 0.0175  |
| rs28368805  | G | 0.0398  |
| rs142861193 | A | 0.0793  |
| rs10090332  | A | -0.0178 |
| rs62507588  | T | 0.0437  |
| rs1979154   | G | 0.0207  |
| rs16909563  | C | -0.0237 |
| rs76991528  | A | 0.1296  |
| rs931043    | A | -0.0271 |
| rs76951461  | G | -0.0789 |
| rs73203725  | T | -0.0397 |
| rs58918741  | G | 0.04    |
| rs138585523 | T | 0.097   |
| rs150711293 | T | 0.1231  |
| rs11996371  | T | 0.1272  |
| rs16896992  | C | 0.0263  |
| rs75629541  | C | -0.0448 |
| rs2980561   | G | -0.0357 |
| rs62518686  | C | -0.0769 |
| rs138369603 | C | 0.0478  |
| rs79155487  | G | 0.0353  |
| rs10105127  | T | -0.0185 |
| rs62515108  | A | 0.0597  |
| rs2439523   | A | 0.0257  |
| rs36014856  | A | 0.0977  |
| rs75987594  | G | 0.0499  |

|             |   |         |
|-------------|---|---------|
| rs117325001 | T | 0.0224  |
| rs3995247   | C | 0.021   |
| rs35033136  | T | 0.0702  |
| rs56190050  | T | 0.0846  |
| rs7001967   | T | -0.0273 |
| rs61282872  | A | -0.0331 |
| rs142211969 | T | 0.0439  |
| rs10106313  | T | 0.0193  |
| rs117398294 | A | 0.1216  |
| rs7833843   | A | 0.0682  |
| rs28410444  | A | 0.035   |
| rs6990544   | C | -0.0172 |
| rs2449840   | A | -0.0223 |
| rs138620896 | T | -0.094  |
| rs6471065   | T | 0.0216  |
| rs12675875  | T | 0.0997  |
| rs7826488   | T | -0.0179 |
| rs139261011 | G | -0.1241 |
| rs116842825 | A | -0.1138 |
| rs71530808  | A | -0.0411 |
| rs141944117 | G | 0.0902  |
| rs10088924  | G | 0.0495  |
| rs78528935  | G | 0.0338  |
| rs72719726  | C | -0.0245 |
| rs10097104  | A | -0.0199 |
| rs116913706 | C | 0.0461  |
| rs1434779   | G | 0.0189  |
| rs62491284  | C | 0.0239  |
| rs75558033  | C | -0.0517 |
| rs4735447   | A | -0.0472 |
| rs72609809  | A | 0.0668  |
| rs147269136 | C | 0.0871  |
| rs146095651 | A | -0.0824 |
| rs2100485   | G | 0.0272  |
| rs7010197   | G | 0.0254  |
| rs117216972 | T | 0.0914  |
| rs148148618 | A | -0.1187 |
| rs140289136 | A | -0.1405 |
| rs13252591  | T | 0.0338  |
| rs4347017   | A | 0.024   |
| rs4735361   | G | 0.0177  |
| rs11778777  | T | -0.0174 |
| rs10956662  | A | 0.0234  |
| rs72673745  | A | 0.0464  |
| rs145995976 | A | -0.1668 |
| rs34666187  | A | 0.0432  |
| rs12549200  | A | 0.0228  |

|             |   |         |
|-------------|---|---------|
| rs35840839  | A | 0.0283  |
| rs2350222   | C | 0.0193  |
| rs114402235 | G | -0.083  |
| rs117672580 | C | 0.0964  |
| rs9650217   | T | -0.0219 |
| rs56361906  | G | -0.1084 |
| rs12548174  | G | -0.0517 |
| rs79012187  | A | 0.0458  |
| rs56137614  | T | -0.0541 |
| rs116615362 | A | -0.0427 |
| rs117771327 | A | 0.1078  |
| rs80075655  | G | -0.0491 |
| rs35437729  | T | 0.0181  |
| rs72672243  | T | 0.0414  |
| rs77524981  | G | 0.0791  |
| rs17270918  | T | -0.0326 |
| rs2006476   | T | 0.0179  |
| rs142402963 | T | -0.1058 |
| rs117840376 | A | 0.0818  |
| rs13259920  | T | 0.0585  |
| rs117683872 | G | 0.0797  |
| rs72666441  | G | -0.0888 |
| rs111949078 | A | 0.0234  |
| rs7820402   | C | 0.0657  |
| rs16926764  | T | -0.0215 |
| rs141943384 | C | -0.0986 |
| rs4598293   | A | -0.0172 |
| rs79992273  | G | 0.0686  |
| rs2627286   | A | -0.0614 |
| rs72718418  | A | 0.0421  |
| rs341668    | T | 0.0169  |
| rs140839524 | G | -0.0814 |
| rs79050532  | T | -0.0604 |
| rs1346898   | A | -0.0883 |
| rs61667410  | C | 0.0393  |
| rs56231228  | T | -0.07   |
| rs77585394  | A | -0.0486 |
| rs143794306 | G | -0.0495 |
| rs62489387  | G | -0.0343 |
| rs451364    | A | -0.0404 |
| rs62528367  | A | 0.0382  |
| rs13261909  | A | 0.0402  |
| rs78680681  | G | 0.1159  |
| rs10086068  | T | 0.0244  |
| rs145636193 | C | -0.0567 |
| rs2725290   | C | -0.0234 |
| rs1570770   | G | 0.0174  |

|             |   |         |
|-------------|---|---------|
| rs4976988   | T | 0.0539  |
| rs117587882 | C | 0.0789  |
| rs72690477  | C | 0.0343  |
| rs118076680 | C | -0.0297 |
| rs12156071  | G | 0.0653  |
| rs117154585 | T | -0.0917 |
| rs11784591  | C | 0.062   |
| rs117892673 | G | -0.0772 |
| rs17751576  | A | 0.1002  |
| rs7003946   | T | -0.0262 |
| rs13272857  | A | 0.0264  |
| rs76714504  | G | 0.1119  |
| rs34608671  | C | -0.018  |
| rs144364813 | G | -0.1415 |
| rs75846296  | A | -0.0945 |
| rs117300675 | A | -0.0736 |
| rs12541392  | A | -0.0478 |
| rs13249568  | C | 0.0194  |
| rs4871323   | A | -0.0168 |
| rs4841224   | T | -0.0182 |
| rs62507208  | A | 0.0186  |
| rs60087888  | T | 0.0327  |
| rs16891354  | C | -0.0263 |
| rs80307083  | G | -0.0399 |
| rs72685453  | G | -0.0198 |
| rs11136743  | A | -0.0246 |
| rs1548198   | T | -0.0219 |
| rs1866277   | C | -0.1268 |
| rs78425848  | A | -0.131  |
| rs117877398 | T | 0.0711  |
| rs78010542  | A | 0.1108  |
| rs16937647  | T | -0.0357 |
| rs112007967 | G | 0.1231  |
| rs117792143 | A | -0.057  |
| rs17088800  | A | -0.0185 |
| rs2083683   | A | 0.0194  |
| rs142778284 | A | 0.1041  |
| rs4610772   | A | 0.027   |
| rs7010328   | G | -0.0234 |
| rs72722668  | A | 0.0626  |
| rs13252660  | T | 0.0171  |
| rs73277924  | G | -0.0473 |
| rs6986151   | C | 0.0253  |
| rs16898508  | C | 0.0237  |
| rs7820229   | T | -0.0256 |
| rs2447336   | T | -0.0485 |
| rs7828018   | T | 0.0861  |

|             |   |         |
|-------------|---|---------|
| rs72649590  | C | -0.0579 |
| rs17092222  | A | -0.0526 |
| rs76709048  | A | -0.0761 |
| rs13281291  | T | -0.0227 |
| rs2981155   | C | -0.0213 |
| rs3134365   | C | -0.019  |
| rs117904500 | C | 0.1098  |
| rs4736520   | T | -0.0188 |
| rs2041879   | G | -0.0303 |
| rs75691599  | T | 0.0652  |
| rs73172258  | G | -0.0455 |
| rs2552      | C | -0.0488 |
| rs7826908   | A | -0.0186 |
| rs12550275  | T | -0.0264 |
| rs7830965   | T | -0.0176 |
| rs241179    | T | -0.0248 |
| rs17386044  | T | 0.1257  |
| rs75717802  | A | -0.0871 |
| rs2920473   | T | -0.1083 |
| rs118184657 | C | -0.0417 |
| rs11780576  | C | 0.0177  |
| rs62527415  | G | 0.0235  |
| rs118029233 | G | -0.0965 |
| rs141812438 | C | -0.0781 |
| rs4073433   | C | 0.0491  |
| rs141953026 | T | -0.0933 |
| rs78865121  | A | -0.0926 |
| rs76360630  | C | 0.0871  |
| rs143405275 | A | 0.1034  |
| rs13255891  | G | -0.0251 |
| rs10504967  | A | -0.0354 |
| rs58887006  | A | 0.1263  |
| rs10458313  | C | -0.0211 |
| rs117127725 | A | 0.045   |
| rs1602511   | A | -0.0211 |
| rs75941120  | T | 0.0438  |
| rs117956319 | T | -0.0955 |
| rs75991669  | G | 0.0485  |
| rs10108226  | A | -0.0651 |
| rs78289816  | C | 0.0528  |
| rs55692143  | C | 0.0352  |
| rs62526885  | C | 0.1631  |
| rs10109704  | A | -0.0205 |
| rs79386207  | T | -0.0648 |
| rs62513806  | T | -0.0742 |
| rs517394    | A | -0.0296 |
| rs4556093   | A | -0.0289 |

|             |   |         |
|-------------|---|---------|
| rs78767086  | T | 0.1278  |
| rs117942487 | A | 0.077   |
| rs62532372  | A | -0.0635 |
| rs7815570   | T | 0.0199  |
| rs11775710  | C | 0.0815  |
| rs112704876 | T | -0.0682 |
| rs11994681  | C | -0.071  |
| rs4871749   | T | -0.0214 |
| rs4295641   | G | 0.0435  |
| rs6471740   | G | -0.03   |
| rs148788534 | G | 0.093   |
| rs79110711  | C | -0.0442 |
| rs55908136  | A | 0.0783  |
| rs73671059  | A | -0.0632 |
| rs76993561  | G | 0.0476  |
| rs72659087  | A | -0.0728 |
| rs10093462  | T | -0.0307 |
| rs62523308  | G | 0.036   |
| rs7831518   | C | 0.0252  |
| rs113116569 | G | 0.1085  |
| rs72678135  | T | 0.0396  |
| rs73711232  | C | -0.1056 |
| rs80113388  | T | -0.043  |
| rs11775810  | T | 0.0644  |
| rs11994766  | A | 0.0283  |
| rs28731319  | A | -0.0185 |
| rs144083607 | A | 0.1219  |
| rs79452980  | C | -0.0505 |
| rs76873963  | G | -0.0675 |
| rs11786762  | T | 0.0305  |
| rs142063706 | A | -0.1141 |
| rs16895340  | T | -0.0318 |
| rs116849994 | A | 0.0624  |
| rs11984877  | A | -0.0979 |
| rs36017310  | G | 0.0696  |
| rs145320757 | C | 0.1077  |
| rs79350505  | A | 0.0348  |
| rs13268584  | G | -0.1692 |
| rs11137054  | A | 0.0175  |
| rs11779132  | A | -0.0704 |
| rs17487121  | G | 0.0877  |
| rs1652783   | G | 0.0375  |
| rs4145813   | T | -0.0172 |
| rs4272400   | A | -0.0205 |
| rs7012102   | A | 0.0206  |
| rs74828088  | A | 0.0725  |
| rs10956428  | A | 0.0505  |



|             |   |         |
|-------------|---|---------|
| rs60251317  | G | 0.0336  |
| rs75256732  | T | -0.0743 |
| rs2904649   | G | 0.021   |
| rs16912410  | T | -0.0203 |
| rs11988416  | G | -0.0301 |
| rs140382393 | G | 0.063   |
| rs61146272  | C | 0.0336  |
| rs13249816  | C | -0.0229 |
| rs34872094  | C | -0.0182 |
| rs929384    | C | 0.0172  |
| rs4734141   | T | -0.0187 |
| rs2919402   | A | -0.0179 |
| rs150596557 | T | -0.0821 |
| rs10107978  | T | -0.0252 |
| rs7819295   | G | -0.0168 |
| rs17456816  | A | -0.0429 |
| rs76722150  | G | -0.1256 |
| rs34904974  | C | -0.1276 |
| rs77314546  | T | 0.0198  |
| rs28604391  | T | 0.0231  |
| rs56281752  | T | 0.1177  |
| rs6993136   | A | -0.0238 |
| rs352428    | A | -0.0354 |
| rs75532353  | C | 0.0774  |
| rs2168244   | G | -0.0236 |
| rs72681932  | A | -0.0258 |
| rs2106022   | C | 0.021   |
| rs2513374   | T | 0.0171  |
| rs17781380  | T | 0.0587  |
| rs79985398  | G | -0.1087 |
| rs76039625  | T | 0.0422  |
| rs56007959  | C | 0.0508  |
| rs11781693  | G | 0.0168  |
| rs72650449  | A | 0.1047  |
| rs141337691 | G | 0.1224  |
| rs1441399   | A | -0.0191 |
| rs28508313  | A | -0.0192 |
| rs77901739  | G | 0.0816  |
| rs62524677  | A | 0.0857  |
| rs117740651 | T | 0.098   |
| rs79941018  | A | 0.07    |
| rs147328047 | C | -0.0788 |
| rs1059588   | C | 0.0272  |
| rs74839738  | G | -0.0613 |
| rs4317609   | A | -0.0172 |
| rs146328138 | T | -0.0678 |
| rs11776995  | G | -0.0186 |

|             |   |         |
|-------------|---|---------|
| rs116972771 | G | -0.0343 |
| rs4733650   | A | 0.0187  |
| rs4326366   | G | 0.0183  |
| rs62499836  | C | -0.0296 |
| rs62499134  | A | -0.0921 |
| rs118088694 | T | -0.0923 |
| rs80340966  | T | 0.0521  |
| rs1906880   | A | -0.036  |
| rs79078426  | A | -0.072  |
| rs62513903  | A | 0.0696  |
| rs58930144  | T | 0.0686  |
| rs1193311   | A | 0.0857  |
| rs73528997  | G | -0.0722 |
| rs113074419 | A | 0.0444  |
| rs7824480   | C | -0.0225 |
| rs73278633  | T | -0.101  |
| rs74567741  | T | -0.0659 |
| rs4875508   | T | 0.0272  |
| rs117129954 | T | -0.0995 |
| rs71517437  | A | -0.0401 |
| rs16905508  | G | 0.0354  |
| rs141187825 | G | 0.0906  |
| rs11203812  | C | 0.0186  |
| rs62513954  | T | 0.0281  |
| rs17150206  | G | -0.0255 |
| rs149977519 | C | -0.0569 |
| rs146160363 | C | 0.1179  |
| rs142947859 | A | 0.0799  |
| rs34737656  | T | 0.1229  |
| rs62510038  | C | 0.0755  |
| rs4582538   | C | 0.0183  |
| rs78970675  | A | 0.0868  |
| rs117506299 | C | -0.0908 |
| rs145014416 | T | 0.076   |
| rs4490836   | C | 0.0177  |
| rs2026756   | A | 0.0271  |
| rs77676707  | T | 0.0387  |
| rs2952223   | A | 0.0201  |
| rs112049419 | A | 0.1007  |
| rs4407900   | T | -0.0318 |
| rs117387385 | A | 0.0625  |
| rs111625036 | A | -0.0731 |
| rs76693765  | G | 0.0809  |
| rs76680287  | T | -0.0796 |
| rs62483889  | T | -0.0507 |
| rs11994855  | G | 0.0894  |
| rs7838447   | C | -0.0366 |

|             |   |         |
|-------------|---|---------|
| rs1530328   | A | 0.0874  |
| rs138471264 | A | -0.0531 |
| rs148865511 | G | 0.0663  |
| rs78899514  | A | -0.0435 |
| rs2956731   | G | -0.0306 |
| rs62523037  | T | -0.0218 |
| rs16885350  | A | -0.0229 |
| rs28445619  | A | 0.0218  |
| rs73218782  | C | -0.0437 |
| rs11136586  | C | -0.0201 |
| rs79224901  | C | 0.0995  |
| rs114650605 | A | -0.0593 |
| rs117195735 | G | 0.0613  |
| rs16904885  | T | -0.0379 |
| rs35347927  | C | 0.1494  |
| rs827597    | T | 0.0906  |
| rs139340609 | G | -0.0518 |
| rs73232228  | A | 0.061   |
| rs3110471   | G | -0.0779 |
| rs73209703  | G | 0.0638  |
| rs17244207  | A | 0.0568  |
| rs7012126   | C | 0.0244  |
| rs7004951   | G | -0.0199 |
| rs10087169  | A | 0.0182  |
| rs62491019  | T | 0.0479  |
| rs7815622   | T | -0.0441 |
| rs11781449  | A | 0.0249  |
| rs2740867   | C | 0.0412  |
| rs74826807  | G | -0.1288 |
| rs62516798  | C | -0.0526 |
| rs4961052   | A | -0.0496 |
| rs2292774   | A | 0.0391  |
| rs76830538  | T | 0.0808  |
| rs4734227   | C | 0.0746  |
| rs6985907   | T | -0.0204 |
| rs72671990  | A | 0.0786  |
| rs62513557  | A | -0.0272 |
| rs113916884 | C | 0.0854  |
| rs75805199  | A | -0.1048 |
| rs12542845  | A | 0.0734  |
| rs114039795 | T | 0.0866  |
| rs72693361  | T | 0.1045  |
| rs118056170 | G | 0.0625  |
| rs2045805   | G | 0.0246  |
| rs4352883   | C | 0.0564  |
| rs73553341  | A | 0.051   |
| rs72661042  | T | 0.0369  |

|             |   |         |
|-------------|---|---------|
| rs4304355   | G | -0.0357 |
| rs34427839  | C | 0.0498  |
| rs61271662  | C | -0.0266 |
| rs72721327  | T | 0.0266  |
| rs28669816  | C | -0.0269 |
| rs77036009  | G | 0.0428  |
| rs1434756   | G | 0.0191  |
| rs4606030   | G | 0.017   |
| rs72719880  | T | -0.0987 |
| rs114692041 | T | 0.0819  |
| rs116318425 | T | 0.0684  |
| rs62512629  | A | 0.0191  |
| rs56181041  | G | -0.0447 |
| rs2341677   | T | -0.053  |
| rs77495104  | T | 0.0367  |
| rs17270259  | T | 0.0583  |
| rs17823756  | G | -0.0399 |
| rs7828869   | T | 0.1215  |
| rs2658922   | T | 0.0514  |
| rs117808972 | C | 0.1238  |
| rs114804665 | T | 0.0777  |
| rs12543515  | T | 0.0319  |
| rs7838449   | C | 0.0317  |
| rs56207250  | G | 0.0355  |
| rs11250022  | C | -0.0484 |
| rs4733548   | C | -0.0201 |
| rs13265868  | A | 0.0164  |
| rs72659241  | T | 0.0334  |
| rs2664368   | C | -0.0209 |
| rs72668177  | G | 0.079   |
| rs2157633   | A | -0.0684 |
| rs7813629   | T | -0.025  |
| rs1892767   | A | 0.0245  |
| rs11786511  | G | 0.0436  |
| rs756095    | A | 0.0175  |
| rs77357402  | A | 0.0757  |
| rs1531577   | C | 0.0191  |
| rs117708436 | T | 0.0755  |
| rs149333105 | T | -0.0665 |
| rs2511733   | T | -0.017  |
| rs4871063   | A | -0.1223 |
| rs113244198 | T | 0.0967  |
| rs62492345  | A | 0.094   |
| rs10283038  | A | -0.0183 |
| rs117815880 | G | -0.0624 |
| rs62515297  | T | 0.0804  |
| rs72674173  | C | 0.0335  |

|             |   |         |
|-------------|---|---------|
| rs7830454   | A | 0.0272  |
| rs77975580  | G | 0.0429  |
| rs112181807 | A | 0.0462  |
| rs35168446  | G | 0.0332  |
| rs62507355  | T | 0.091   |
| rs542474    | T | -0.025  |
| rs2293402   | A | -0.0248 |
| rs9785096   | A | -0.0167 |
| rs10098847  | T | -0.0602 |
| rs73194190  | C | -0.0488 |
| rs60196929  | C | 0.0439  |
| rs73548679  | C | -0.0773 |
| rs55651304  | C | -0.0239 |
| rs117072299 | G | -0.0609 |
| rs36064644  | G | 0.0879  |
| rs28509189  | T | 0.0628  |
| rs79878977  | C | -0.0924 |
| rs80117247  | T | -0.0797 |
| rs4921618   | C | 0.017   |
| rs715734    | A | 0.059   |
| rs4517084   | T | -0.019  |
| rs7832875   | C | 0.0356  |
| rs73222564  | T | -0.0409 |
| rs72650095  | C | 0.1036  |
| rs57025109  | C | 0.0299  |
| rs62515226  | G | 0.0479  |
| rs28534016  | C | 0.0188  |
| rs12682373  | C | 0.0393  |
| rs72636320  | G | -0.0691 |
| rs7005080   | A | -0.021  |
| rs71519899  | T | -0.063  |
| rs75008219  | A | 0.0273  |
| rs4922233   | T | 0.0495  |
| rs13274089  | A | -0.0611 |
| rs145852606 | T | -0.0995 |
| rs17721179  | A | -0.0356 |
| rs112300614 | T | -0.0999 |
| rs56297727  | A | 0.0893  |
| rs898510    | A | -0.018  |
| rs11991032  | T | 0.0201  |
| rs28450254  | G | -0.1433 |
| rs61418959  | A | 0.0208  |
| rs117660381 | G | 0.0792  |
| rs140474320 | G | 0.0829  |
| rs1429646   | A | -0.0613 |
| rs117806684 | A | -0.1264 |
| rs17453368  | T | 0.077   |

|             |   |         |
|-------------|---|---------|
| rs117761782 | T | 0.0536  |
| rs189213    | G | 0.0926  |
| rs117030187 | C | 0.0522  |
| rs35673986  | T | 0.0216  |
| rs34998398  | C | 0.0275  |
| rs6997162   | C | -0.0168 |
| rs12549258  | A | -0.028  |
| rs7826487   | G | 0.026   |
| rs17077609  | T | -0.1035 |
| rs150499659 | A | 0.0709  |
| rs2360802   | T | -0.0197 |
| rs72653314  | G | -0.0334 |
| rs62499079  | T | 0.0531  |
| rs73675572  | A | 0.0205  |
| rs72670519  | A | 0.0487  |
| rs1697647   | G | 0.0166  |
| rs4076625   | G | -0.0175 |
| rs17679559  | G | 0.0207  |
| rs117024898 | A | 0.0759  |
| rs59445352  | G | 0.0498  |
| rs62512621  | T | 0.0597  |
| rs140784213 | A | 0.0817  |
| rs140366008 | T | 0.0823  |
| rs13258386  | C | 0.0325  |
| rs10955292  | A | 0.0196  |
| rs9643990   | G | -0.0193 |
| rs72711678  | A | 0.0284  |
| rs2162817   | C | 0.0284  |
| rs33999374  | A | 0.0286  |
| rs10956354  | A | -0.0622 |
| rs4875886   | G | 0.0211  |
| rs6985970   | G | -0.1089 |
| rs117738476 | T | 0.0424  |
| rs56824669  | C | 0.0397  |
| rs7460429   | G | 0.0278  |
| rs72642749  | T | 0.095   |
| rs10956430  | G | 0.0179  |
| rs1816309   | T | -0.0172 |
| rs13256941  | T | -0.0181 |
| rs113664023 | T | 0.0426  |
| rs35521163  | G | 0.0788  |
| rs77289633  | A | 0.0642  |
| rs117596892 | C | 0.0955  |
| rs11989493  | C | -0.0246 |
| rs73190765  | T | 0.0529  |
| rs59079717  | C | 0.0503  |
| rs148354628 | A | 0.1042  |

|             |   |         |
|-------------|---|---------|
| rs13281874  | G | 0.0432  |
| rs2244368   | C | -0.0483 |
| rs2927238   | T | 0.0165  |
| rs10097667  | T | 0.019   |
| rs76995279  | T | 0.032   |
| rs13262914  | A | 0.0203  |
| rs10504386  | C | -0.0205 |
| rs352427    | C | -0.0403 |
| rs79913915  | A | 0.1017  |
| rs10103246  | T | -0.0191 |
| rs79181231  | C | -0.0356 |
| rs74864540  | A | 0.0476  |
| rs1598948   | G | -0.0219 |
| rs7846332   | T | 0.1834  |
| rs76992070  | A | -0.0875 |
| rs11775003  | C | -0.1192 |
| rs117154986 | G | -0.0887 |
| rs73205830  | G | 0.0273  |
| rs310282    | T | 0.0167  |
| rs76295722  | T | 0.0662  |
| rs58466563  | A | 0.0215  |
| rs75743440  | C | 0.0528  |
| rs12541647  | C | -0.0252 |
| rs17407837  | C | 0.1255  |
| rs17405215  | G | -0.0402 |
| rs72697681  | T | -0.0469 |
| rs73672825  | T | -0.0337 |
| rs11989808  | T | 0.0222  |
| rs7006105   | T | -0.0336 |
| rs4871472   | T | 0.0178  |
| rs9785172   | C | 0.0577  |
| rs62513199  | G | -0.1    |
| rs144537232 | A | 0.115   |
| rs72477569  | A | -0.1117 |
| rs56043000  | A | -0.0959 |
| rs140256742 | G | 0.0351  |
| rs57988555  | T | -0.0505 |
| rs7011401   | T | -0.0721 |
| rs117819320 | A | -0.0759 |
| rs116868494 | T | 0.0746  |
| rs10095468  | A | -0.0727 |
| rs11998620  | T | 0.0212  |
| rs12676139  | G | -0.0274 |
| rs75442345  | A | -0.0976 |
| rs142816977 | C | -0.0653 |
| rs117928223 | T | 0.0634  |
| rs6983023   | T | -0.0334 |

|             |   |         |
|-------------|---|---------|
| rs73667497  | G | -0.0377 |
| rs7845547   | C | 0.0195  |
| rs332030    | G | 0.0719  |
| rs113601392 | T | -0.1234 |
| rs77466619  | C | -0.0388 |
| rs150416833 | G | 0.0283  |
| rs17128148  | C | -0.042  |
| rs56343516  | A | 0.0288  |
| rs150836954 | A | -0.1034 |
| rs117677774 | T | 0.0255  |
| rs10101109  | C | 0.0186  |
| rs17676443  | T | 0.0185  |
| rs117724578 | T | 0.1199  |
| rs111724430 | G | 0.1013  |
| rs12677384  | A | -0.0173 |
| rs75442604  | G | -0.1278 |
| rs148115324 | A | -0.073  |
| rs117822450 | A | -0.0848 |
| rs11785609  | C | 0.0187  |
| rs73201845  | C | 0.0323  |
| rs72733756  | A | 0.1067  |
| rs62502119  | T | 0.1155  |
| rs6981075   | C | 0.0274  |
| rs7817107   | A | -0.0203 |
| rs112850706 | G | -0.1148 |
| rs2515067   | C | 0.0353  |
| rs17068241  | C | -0.0357 |
| rs4639512   | C | 0.0206  |
| rs28521190  | T | -0.1125 |
| rs118039615 | T | -0.0903 |
| rs77400577  | C | -0.1158 |
| rs76255181  | A | 0.072   |
| rs35951099  | G | -0.1525 |
| rs6601295   | G | -0.019  |
| rs150401665 | A | -0.0735 |
| rs2958824   | C | 0.0333  |
| rs78369623  | A | 0.0345  |
| rs77204023  | T | 0.0512  |
| rs17352913  | T | -0.1147 |
| rs12678140  | C | -0.0226 |
| rs6981869   | A | 0.0475  |
| rs62514066  | C | -0.0566 |
| rs73190769  | T | 0.0248  |
| rs117221176 | T | -0.07   |
| rs147143216 | T | 0.0721  |
| rs1468934   | G | 0.0161  |
| rs79106989  | C | 0.0556  |



|             |   |         |
|-------------|---|---------|
| rs76140807  | C | 0.1072  |
| rs76301949  | C | 0.0757  |
| rs6558171   | T | -0.0184 |
| rs74625341  | T | -0.0919 |
| rs2170406   | A | -0.0184 |
| rs79589984  | G | 0.089   |
| rs117450023 | C | -0.0601 |
| rs6558467   | G | -0.0215 |
| rs79901295  | A | -0.0205 |
| rs80324700  | A | 0.0736  |
| rs10089977  | T | 0.0243  |
| rs74753338  | T | -0.1    |
| rs73238269  | C | 0.0863  |
| rs112448992 | C | 0.0264  |
| rs10104523  | T | -0.0161 |
| rs3802235   | A | 0.073   |
| rs2977501   | T | 0.0454  |
| rs117272358 | T | 0.041   |
| rs148439966 | A | -0.1117 |
| rs1037938   | A | -0.0171 |
| rs17535160  | T | 0.0646  |
| rs117366701 | C | 0.0491  |
| rs77689867  | A | 0.089   |
| rs142555311 | T | 0.0838  |
| rs77613989  | G | -0.0436 |
| rs55704460  | C | -0.0724 |
| rs11784532  | C | -0.0195 |
| rs899075    | G | 0.0271  |
| rs76737777  | G | 0.0823  |
| rs117127829 | A | 0.0728  |
| rs72679694  | G | -0.1206 |
| rs2517245   | T | 0.0335  |
| rs78826090  | G | 0.0622  |
| rs11774369  | G | 0.0434  |
| rs36011589  | A | 0.0385  |
| rs16898247  | A | -0.0569 |
| rs76129207  | T | -0.0321 |
| rs11994391  | T | 0.0171  |
| rs72664750  | G | 0.0378  |
| rs72684458  | A | 0.0345  |
| rs7016950   | A | -0.1137 |
| rs138775284 | G | -0.0822 |
| rs7007570   | G | -0.0179 |
| rs113788305 | C | -0.0523 |
| rs77103999  | A | 0.0794  |
| rs1947217   | G | 0.0187  |
| rs73697870  | A | -0.0702 |

|             |   |         |
|-------------|---|---------|
| rs4609237   | G | -0.0165 |
| rs78624119  | T | 0.0643  |
| rs10103293  | A | 0.066   |
| rs13263665  | C | -0.0174 |
| rs13248175  | A | -0.0326 |
| rs35740590  | A | -0.0353 |
| rs78656914  | T | -0.0555 |
| rs117367516 | T | -0.1332 |
| rs117362571 | A | 0.0515  |
| rs75452922  | C | 0.0405  |
| rs720896    | C | 0.0163  |
| rs146929393 | C | 0.0777  |
| rs72686629  | A | -0.0354 |
| rs116965082 | C | 0.071   |
| rs142752382 | C | 0.039   |
| rs141402436 | C | 0.0741  |
| rs73230291  | A | 0.0806  |
| rs2977379   | T | 0.0363  |
| rs17227218  | A | -0.0538 |
| rs80026548  | T | -0.0723 |
| rs73687878  | C | 0.0645  |
| rs117833489 | A | 0.0847  |
| rs74428910  | A | 0.0473  |
| rs2410200   | T | 0.0174  |
| rs55803905  | A | 0.0641  |
| rs77688759  | C | 0.0646  |
| rs12676446  | T | 0.0293  |
| rs145545645 | A | 0.1031  |
| rs138435417 | A | 0.1094  |
| rs28500568  | C | 0.0368  |
| rs141828838 | C | 0.105   |
| rs73235388  | G | 0.0424  |
| rs145779946 | A | -0.1087 |
| rs78111100  | C | -0.0543 |
| rs2670681   | T | -0.0201 |
| rs111787389 | A | 0.1073  |
| rs72672699  | C | -0.08   |
| rs75699296  | G | -0.0651 |
| rs62507499  | A | 0.0449  |
| rs4737994   | A | 0.0219  |
| rs116925958 | G | -0.042  |
| rs11776321  | C | -0.1119 |
| rs79619050  | C | -0.0619 |
| rs117530267 | C | 0.1025  |
| rs117701911 | A | 0.0884  |
| rs144474737 | A | 0.0797  |
| rs7842534   | T | 0.0224  |

|             |   |         |
|-------------|---|---------|
| rs4738160   | C | 0.0353  |
| rs117344298 | T | 0.1044  |
| rs12550184  | C | -0.136  |
| rs6998565   | C | -0.0234 |
| rs118032286 | C | -0.0622 |
| rs139260764 | A | -0.1091 |
| rs73204373  | G | 0.0301  |
| rs144770207 | G | -0.1107 |
| rs17451838  | T | 0.0447  |
| rs55886127  | T | -0.0514 |
| rs117031509 | A | 0.0989  |
| rs78487953  | T | -0.0736 |
| rs141645479 | C | 0.0724  |
| rs79324469  | T | -0.1414 |
| rs34520389  | G | -0.0788 |
| rs12155945  | T | -0.0244 |
| rs4732817   | G | -0.0442 |
| rs4144406   | T | -0.0238 |
| rs10096218  | T | -0.0263 |
| rs76588837  | A | -0.0717 |
| rs143084875 | C | 0.0644  |
| rs79191770  | A | 0.0394  |
| rs145125475 | T | 0.1348  |
| rs73214639  | C | -0.0753 |
| rs117109875 | G | 0.0767  |
| rs62504966  | T | 0.0955  |
| rs79498978  | C | 0.1093  |
| rs58491800  | A | 0.0177  |
| rs72734071  | A | -0.0693 |
| rs146623940 | C | -0.0847 |
| rs142260102 | C | 0.1077  |
| rs10503244  | A | -0.0695 |
| rs74474337  | G | 0.0836  |
| rs71525073  | C | 0.0356  |
| rs73180760  | C | 0.0407  |
| rs6982340   | T | 0.0249  |
| rs10100610  | T | 0.0166  |
| rs77295886  | G | -0.0341 |
| rs117099104 | C | -0.0426 |
| rs7011412   | T | 0.0173  |
| rs143862563 | C | 0.0901  |
| rs139605157 | T | -0.0742 |
| rs2977189   | T | 0.032   |
| rs77120735  | T | -0.0262 |
| rs141204504 | G | -0.0996 |
| rs17127466  | A | 0.0823  |
| rs72659736  | T | 0.0303  |

|             |   |         |
|-------------|---|---------|
| rs4128462   | G | -0.0192 |
| rs142337870 | T | 0.1372  |
| rs113129937 | A | -0.0635 |
| rs78883066  | G | 0.094   |
| rs117566586 | A | -0.0659 |
| rs10103220  | C | 0.0222  |
| rs3133788   | T | -0.0728 |
| rs151125664 | T | -0.1032 |
| rs7836588   | C | -0.0224 |
| rs931201    | T | -0.0252 |
| rs117371543 | G | 0.0563  |
| rs2948587   | T | -0.0198 |
| rs4840835   | A | 0.0954  |
| rs4738387   | C | 0.0212  |
| rs1155021   | A | -0.018  |
| rs137956473 | T | 0.1439  |
| rs2318832   | C | 0.0232  |
| rs1988834   | G | -0.0172 |
| rs72680182  | T | 0.0525  |
| rs34154183  | T | -0.0252 |
| rs75827140  | T | 0.0455  |
| rs137896572 | A | 0.0741  |
| rs2468678   | G | 0.016   |
| rs7464746   | A | -0.0429 |
| rs11785591  | G | 0.0291  |
| rs79111016  | A | 0.0859  |
| rs6420192   | A | -0.0234 |
| rs80117793  | T | -0.1245 |
| rs35070486  | C | 0.0218  |
| rs117183686 | G | -0.0375 |
| rs13277242  | G | 0.0194  |
| rs2028968   | A | 0.0429  |
| rs16938570  | T | -0.0965 |
| rs74905804  | A | 0.0767  |
| rs16905656  | T | -0.1261 |
| rs73333216  | G | -0.0871 |
| rs74380482  | C | -0.0828 |
| rs71518503  | C | -0.0485 |
| rs117179272 | G | -0.0438 |
| rs7462904   | A | -0.0184 |
| rs57894230  | C | -0.0161 |
| rs146628196 | G | -0.0534 |
| rs12543248  | G | 0.0171  |
| rs1954734   | C | -0.0602 |
| rs6985758   | C | 0.0425  |
| rs4076547   | T | -0.0169 |
| rs2669276   | T | 0.0172  |

|             |   |         |
|-------------|---|---------|
| rs16924609  | T | -0.0226 |
| rs13258462  | C | 0.0185  |
| rs62528695  | T | -0.0611 |
| rs113586087 | C | 0.0868  |
| rs75037125  | G | 0.067   |
| rs117168167 | A | 0.0742  |
| rs71526946  | C | -0.0725 |
| rs141755631 | A | 0.07    |
| rs111346211 | T | 0.0416  |
| rs62508795  | A | -0.0795 |
| rs117907634 | T | -0.046  |
| rs73187999  | T | -0.0277 |
| rs10156285  | G | 0.028   |
| rs76786066  | G | 0.0791  |
| rs77157758  | G | 0.0911  |
| rs139324990 | T | -0.0796 |
| rs80251456  | G | -0.0721 |
| rs17064818  | T | -0.0266 |
| rs12549402  | C | 0.0238  |
| rs117157620 | A | 0.1102  |
| rs17622362  | A | 0.0473  |
| rs7818325   | T | 0.0195  |
| rs35249261  | T | 0.0168  |
| rs78393395  | T | 0.0802  |
| rs17358339  | A | -0.0712 |
| rs111703096 | A | 0.1029  |
| rs58209053  | C | 0.0507  |
| rs77360087  | A | 0.0585  |
| rs9643399   | C | 0.0252  |
| rs7813269   | G | 0.0451  |
| rs10112279  | T | 0.0236  |
| rs117876082 | A | 0.0549  |
| rs1383815   | G | 0.0186  |
| rs76745414  | C | 0.0664  |
| rs11166679  | A | 0.0182  |
| rs35943032  | T | 0.024   |
| rs73281005  | A | -0.0785 |
| rs75201054  | A | -0.0638 |
| rs72666151  | T | -0.0304 |
| rs920048    | G | 0.0168  |
| rs74377536  | A | -0.029  |
| rs75190271  | T | 0.0483  |
| rs10282786  | C | 0.0252  |
| rs34302100  | A | 0.019   |
| rs147224643 | A | 0.0595  |
| rs9987098   | T | -0.0377 |
| rs113103197 | G | 0.113   |

|             |   |         |
|-------------|---|---------|
| rs78428098  | C | -0.043  |
| rs2319093   | T | -0.0299 |
| rs62492801  | G | -0.0499 |
| rs72686707  | C | -0.0829 |
| rs75851752  | G | 0.1756  |
| rs2316312   | G | 0.0631  |
| rs74428518  | T | -0.0781 |
| rs117463486 | A | 0.069   |
| rs60411515  | A | 0.0331  |
| rs57045395  | A | -0.0582 |
| rs35394837  | G | -0.1174 |
| rs113667932 | T | -0.0732 |
| rs142995421 | A | 0.0671  |
| rs145070711 | A | -0.0911 |
| rs143900325 | A | 0.093   |
| rs10283387  | C | -0.0518 |
| rs73255934  | T | 0.0543  |
| rs117775414 | T | -0.0756 |
| rs141162627 | T | -0.124  |
| rs118065538 | C | 0.1233  |
| rs3903247   | T | -0.0168 |
| rs17372186  | T | -0.1046 |
| rs80220466  | G | -0.0423 |
| rs113931594 | A | 0.1027  |
| rs432122    | G | -0.1009 |
| rs59002378  | T | -0.0586 |
| rs11780224  | G | 0.0223  |
| rs4736310   | G | 0.0708  |
| rs7819731   | A | 0.0477  |
| rs78360728  | T | -0.0734 |
| rs10087611  | T | 0.0216  |
| rs2929079   | A | -0.0243 |
| rs1440756   | G | 0.0196  |
| rs35563223  | G | -0.0731 |
| rs16915884  | T | -0.0498 |
| rs28716822  | C | -0.0889 |
| rs116866162 | A | -0.0938 |
| rs2958751   | T | -0.021  |
| rs10086919  | A | -0.0237 |
| rs112095748 | G | 0.0771  |
| rs13248373  | A | 0.0753  |
| rs7004171   | A | -0.0168 |
| rs62529969  | T | -0.1155 |
| rs34021868  | C | 0.0383  |
| rs1968853   | C | -0.0168 |
| rs34655377  | T | -0.0728 |
| rs2439524   | C | 0.0217  |

|             |   |         |
|-------------|---|---------|
| rs117319952 | C | -0.1063 |
| rs151188010 | C | 0.1126  |
| rs75126702  | A | 0.1034  |
| rs148579648 | T | -0.1327 |
| rs2060319   | T | 0.0243  |
| rs34687306  | C | 0.0209  |
| rs62484362  | A | -0.0512 |
| rs7819464   | T | -0.0175 |
| rs7823805   | C | -0.0194 |
| rs112824227 | A | 0.043   |
| rs2086362   | T | -0.0235 |
| rs78207897  | T | 0.0691  |
| rs1473973   | A | 0.017   |
| rs117003504 | T | 0.1353  |
| rs75587839  | A | 0.0694  |
| rs117159076 | T | 0.09    |
| rs7006811   | G | 0.082   |
| rs4909783   | A | 0.0404  |
| rs12681485  | T | 0.0656  |
| rs2912029   | G | 0.0224  |
| rs2450324   | T | 0.0158  |
| rs116967356 | C | -0.0545 |
| rs9642792   | A | 0.0629  |
| rs79010549  | A | 0.0703  |
| rs117043786 | A | 0.1067  |
| rs1346114   | C | 0.0317  |
| rs117508345 | G | -0.0851 |
| rs117423580 | C | -0.1346 |
| rs35884570  | C | -0.0517 |
| rs74798053  | C | -0.0404 |
| rs74358053  | A | -0.053  |
| rs59114219  | T | 0.0282  |
| rs28665614  | T | 0.0736  |
| rs13266296  | A | 0.0725  |
| rs75249163  | A | -0.0708 |
| rs16903003  | T | -0.0797 |
| rs73186434  | A | -0.0387 |
| rs141271589 | T | 0.0535  |
| rs58520819  | G | -0.0199 |
| rs118080928 | A | 0.0267  |
| rs117534197 | A | 0.0723  |
| rs62519434  | G | 0.0268  |
| rs80029792  | T | 0.063   |
| rs17322708  | A | 0.0177  |
| rs332025    | C | -0.0243 |
| rs76912493  | G | 0.1109  |
| rs117606626 | C | 0.0824  |

|             |   |         |
|-------------|---|---------|
| rs396121    | T | 0.0806  |
| rs13267835  | T | -0.0251 |
| rs145313644 | G | 0.0951  |
| rs7012277   | T | -0.0345 |
| rs117153361 | C | -0.1189 |
| rs13258852  | A | 0.0248  |
| rs117887824 | T | 0.137   |
| rs75799297  | G | 0.0356  |
| rs28540951  | C | 0.0215  |
| rs78057154  | C | 0.0694  |
| rs141644652 | C | -0.0507 |
| rs13255413  | A | 0.0196  |
| rs13260530  | T | 0.0327  |
| rs117728565 | T | -0.0551 |
| rs1125711   | G | 0.0228  |
| rs2976952   | C | 0.0172  |
| rs7010162   | T | -0.0164 |
| rs1036540   | A | 0.0389  |
| rs138394736 | T | -0.0541 |
| rs116908237 | T | 0.0734  |
| rs77126784  | G | -0.1019 |
| rs117371606 | G | -0.0677 |
| rs3021510   | G | 0.029   |
| rs4871862   | G | -0.0647 |
| rs17696121  | G | -0.0465 |
| rs7834273   | T | -0.037  |
| rs72714295  | A | 0.0404  |
| rs117672236 | G | -0.0694 |
| rs149677340 | A | 0.085   |
| rs62513214  | A | 0.0361  |
| rs74492632  | A | -0.09   |
| rs3105773   | T | -0.0291 |
| rs2272662   | C | -0.0238 |
| rs72653977  | G | -0.0692 |
| rs2935592   | G | 0.0206  |
| rs4735811   | G | -0.0204 |
| rs7813880   | T | 0.0224  |
| rs73213617  | T | 0.057   |
| rs12677561  | G | 0.0163  |
| rs56075144  | C | 0.127   |
| rs143568834 | C | -0.0845 |
| rs76930215  | G | 0.1158  |
| rs117993125 | A | -0.0634 |
| rs13259383  | C | -0.0156 |
| rs34107329  | A | -0.0597 |
| rs7464367   | A | 0.0331  |
| rs56945296  | T | -0.0322 |



|             |   |         |
|-------------|---|---------|
| rs7814246   | T | -0.0168 |
| rs335236    | T | 0.0559  |
| rs7834029   | C | 0.0193  |
| rs7018237   | T | 0.0192  |
| rs80201701  | T | -0.0863 |
| rs117814953 | A | -0.1197 |
| rs141026096 | A | 0.1052  |
| rs11777731  | T | -0.0749 |
| rs2286217   | C | 0.0852  |
| rs28585544  | G | 0.0215  |
| rs4733225   | C | -0.0197 |
| rs17180113  | T | -0.059  |
| rs80163728  | A | -0.0479 |
| rs74529039  | C | -0.0616 |
| rs4840955   | A | 0.0193  |
| rs6984305   | A | 0.0256  |
| rs957571    | T | -0.047  |
| rs142666095 | T | 0.105   |
| rs11781720  | G | -0.0156 |
| rs117943696 | C | -0.0864 |
| rs1900080   | G | -0.0269 |
| rs678287    | G | 0.0303  |
| rs62530500  | T | 0.0181  |
| rs55817265  | T | 0.0225  |
| rs80325820  | T | 0.0415  |
| rs62520430  | C | -0.1211 |
| rs1658816   | C | 0.0319  |
| rs144929292 | A | 0.0654  |
| rs7839968   | A | -0.0199 |
| rs78298612  | A | 0.0441  |
| rs7016433   | A | 0.0176  |
| rs7834318   | A | 0.0176  |
| rs74579493  | T | 0.0246  |
| rs62521426  | A | -0.0268 |
| rs2673586   | A | -0.0244 |
| rs13256702  | C | -0.0532 |
| rs72660617  | T | 0.1283  |
| rs13263016  | A | 0.0582  |
| rs115849244 | T | 0.041   |
| rs10955072  | T | -0.0214 |
| rs17788084  | T | 0.0213  |
| rs12334622  | G | 0.0185  |
| rs10110029  | G | 0.0741  |
| rs79822933  | G | 0.1134  |
| rs117752472 | C | 0.0504  |
| rs72725828  | G | -0.0652 |
| rs76971531  | A | 0.0747  |

|             |   |         |
|-------------|---|---------|
| rs6997345   | T | 0.07    |
| rs7463045   | T | 0.0164  |
| rs13256043  | A | 0.0159  |
| rs72664678  | G | -0.0996 |
| rs4876828   | T | -0.1026 |
| rs72652144  | G | 0.0441  |
| rs74469827  | T | 0.0427  |
| rs11997454  | A | -0.0154 |
| rs59692671  | G | 0.0478  |
| rs76422870  | T | -0.0855 |
| rs2385105   | G | 0.0286  |
| rs76559556  | T | -0.0728 |
| rs56157182  | T | 0.04    |
| rs71517428  | G | -0.0807 |
| rs79035663  | A | 0.0877  |
| rs60412862  | A | 0.0233  |
| rs11984652  | T | -0.0244 |
| rs73226031  | T | 0.0445  |
| rs2509767   | T | -0.0179 |
| rs12547185  | A | -0.017  |
| rs16875207  | A | 0.0256  |
| rs7386814   | G | -0.0269 |
| rs2034139   | T | -0.0253 |
| rs922991    | G | 0.039   |
| rs968427    | C | 0.0159  |
| rs10955889  | C | -0.016  |
| rs112382505 | A | -0.0632 |
| rs80311606  | G | 0.0306  |
| rs149115174 | G | 0.1003  |
| rs72672139  | C | 0.0342  |
| rs76797667  | C | -0.0263 |
| rs141755905 | T | 0.0671  |
| rs117586154 | T | 0.075   |
| rs4831804   | T | 0.0693  |
| rs13265277  | A | -0.029  |
| rs11780536  | A | 0.0159  |
| rs56883978  | C | -0.0639 |
| rs13276096  | A | 0.0275  |
| rs77490608  | T | -0.045  |
| rs2976281   | A | -0.0172 |
| rs117147459 | T | -0.0902 |
| rs35311584  | A | -0.0788 |
| rs117287535 | A | -0.072  |
| rs17119873  | G | -0.0297 |
| rs2381884   | C | 0.076   |
| rs11783948  | C | -0.0383 |
| rs56372014  | C | -0.0769 |

|             |   |         |
|-------------|---|---------|
| rs77648387  | G | -0.0347 |
| rs1033345   | A | -0.0154 |
| rs2543132   | G | 0.0192  |
| rs11782327  | T | 0.0183  |
| rs146518054 | A | -0.0748 |
| rs117970314 | C | -0.1044 |
| rs504718    | G | 0.0179  |
| rs13265279  | C | 0.0187  |
| rs4294223   | A | 0.0271  |
| rs149285521 | G | 0.0867  |
| rs77732910  | C | 0.0577  |
| rs75608628  | C | 0.097   |
| rs6990528   | A | 0.0872  |
| rs113819739 | G | 0.0603  |
| rs118058859 | C | 0.084   |
| rs3758016   | A | 0.0299  |
| rs55715410  | C | 0.0159  |
| rs62510850  | C | -0.016  |
| rs10448055  | A | 0.0252  |
| rs79863759  | A | 0.0369  |
| rs77809897  | T | 0.0402  |
| rs117738386 | T | 0.0589  |
| rs35766475  | T | -0.037  |
| rs117119074 | A | -0.1083 |
| rs36012848  | T | 0.0624  |
| rs138975447 | T | -0.1293 |
| rs118039738 | G | -0.0628 |
| rs7386855   | A | 0.0933  |
| rs144105028 | C | 0.0485  |
| rs117417266 | C | -0.0687 |
| rs62526542  | C | -0.026  |
| rs75156607  | G | 0.1044  |
| rs7007485   | A | -0.0163 |
| rs116451605 | T | -0.0878 |
| rs138400467 | T | 0.1323  |
| rs142687757 | T | 0.0781  |
| rs79906967  | T | -0.0741 |
| rs16904722  | T | 0.0248  |
| rs2721295   | A | 0.031   |
| rs13263923  | T | -0.0215 |
| rs7826929   | G | -0.0369 |
| rs7000593   | T | -0.0194 |
| rs138381919 | A | 0.1129  |
| rs66475112  | C | 0.017   |
| rs66717547  | A | 0.06    |
| rs66797489  | T | -0.0195 |
| rs117642860 | T | 0.0777  |

|             |   |         |
|-------------|---|---------|
| rs7819785   | A | -0.0222 |
| rs10099145  | T | 0.0327  |
| rs62523328  | A | 0.0216  |
| rs4526352   | C | -0.029  |
| rs113264320 | G | 0.0905  |
| rs74869948  | T | -0.0694 |
| rs2304791   | A | 0.0199  |
| rs73368328  | A | -0.0679 |
| rs13258591  | T | 0.0174  |
| rs7000119   | C | 0.0249  |
| rs117233420 | A | -0.0791 |
| rs4831248   | G | -0.0165 |
| rs28656888  | T | -0.018  |
| rs55662275  | T | -0.0178 |
| rs13262185  | T | 0.0158  |
| rs1525053   | T | 0.0252  |
| rs60924761  | C | -0.0553 |
| rs77745148  | C | -0.0723 |
| rs144003715 | A | 0.086   |
| rs4416829   | C | -0.0226 |
| rs117517631 | T | -0.0495 |
| rs118075932 | A | 0.0528  |
| rs2511542   | T | -0.0538 |
| rs143470002 | A | -0.1435 |
| rs7813692   | G | 0.0471  |
| rs7002220   | A | 0.0236  |
| rs11775186  | G | 0.0306  |
| rs17367526  | G | -0.0328 |
| rs140539272 | G | 0.0523  |
| rs12335284  | C | 0.0231  |
| rs55941207  | G | 0.0679  |
| rs1918211   | G | 0.046   |
| rs13271368  | T | 0.0195  |
| rs56221900  | T | 0.0298  |
| rs4587358   | A | 0.016   |
| rs7386524   | T | 0.0158  |
| rs111896036 | T | 0.0872  |
| rs75170935  | A | 0.0897  |
| rs77006808  | G | 0.029   |
| rs7828102   | G | 0.0322  |
| rs144638157 | T | -0.028  |
| rs75556680  | C | 0.0748  |
| rs7833815   | T | -0.0288 |
| rs140452685 | A | -0.0377 |
| rs72677433  | C | 0.044   |
| rs74761090  | T | -0.0611 |
| rs116903865 | T | -0.0737 |

|             |   |         |
|-------------|---|---------|
| rs34001136  | T | -0.0163 |
| rs117576053 | A | 0.0512  |
| rs72682322  | C | -0.0562 |
| rs2318331   | G | -0.0163 |
| rs72683259  | G | 0.0968  |
| rs77742551  | T | 0.0396  |
| rs7835133   | T | -0.0182 |
| rs150951108 | A | -0.0758 |
| rs1542827   | G | 0.018   |
| rs6995801   | C | 0.076   |
| rs74958427  | A | 0.0924  |
| rs76346743  | A | -0.0566 |
| rs111254973 | T | 0.0398  |
| rs117482447 | G | 0.0523  |
| rs6601316   | A | -0.0163 |
| rs2684386   | A | -0.0286 |
| rs16925639  | T | -0.0848 |
| rs150154566 | G | 0.0767  |
| rs41364248  | G | -0.0456 |
| rs12155896  | C | -0.0241 |
| rs4732847   | C | 0.0153  |
| rs117071011 | G | 0.1217  |
| rs62506783  | T | -0.0754 |
| rs7007235   | T | 0.0178  |
| rs2729483   | C | -0.0248 |
| rs11779719  | C | 0.1082  |
| rs76760663  | T | -0.0486 |
| rs34392777  | T | -0.0172 |
| rs146780178 | G | 0.0573  |
| rs3758014   | A | -0.0207 |
| rs2975683   | G | -0.0286 |
| rs17357946  | G | 0.0896  |
| rs11994748  | C | -0.0171 |
| rs112798116 | C | 0.1487  |
| rs11781776  | T | 0.1067  |
| rs140221841 | A | 0.0505  |
| rs35836095  | A | -0.1206 |
| rs79571992  | A | 0.0791  |
| rs68028818  | G | -0.027  |
| rs78609377  | A | -0.0477 |
| rs16924197  | T | 0.046   |
| rs143316782 | T | 0.0763  |
| rs79101695  | T | -0.0405 |
| rs62524872  | T | -0.0182 |
| rs12548747  | G | 0.0164  |
| rs10216747  | A | -0.0218 |
| rs79913048  | T | -0.0339 |

|             |   |         |
|-------------|---|---------|
| rs7012425   | T | -0.0267 |
| rs80181644  | T | 0.1314  |
| rs74430205  | T | -0.0657 |
| rs55972712  | T | -0.0505 |
| rs117710213 | C | -0.1013 |
| rs6470195   | T | -0.0232 |
| rs17425970  | T | 0.0223  |
| rs143996979 | T | 0.0952  |
| rs4733853   | A | -0.0164 |
| rs1499456   | G | 0.0243  |
| rs13261562  | G | -0.0208 |
| rs149949951 | A | 0.1066  |
| rs2978974   | A | -0.0168 |
| rs78790733  | G | 0.0532  |
| rs16920119  | G | 0.0288  |
| rs76418330  | G | 0.0444  |
| rs2253336   | G | 0.0253  |
| rs150455944 | T | 0.0778  |
| rs143564637 | A | -0.1078 |
| rs34959295  | A | 0.0278  |
| rs144869026 | A | 0.0923  |
| rs74523250  | A | 0.0404  |
| rs4875588   | G | -0.0409 |
| rs60749214  | G | 0.0303  |
| rs2044937   | A | 0.0183  |
| rs12546068  | C | -0.0158 |
| rs270800    | T | 0.0172  |
| rs2703391   | A | -0.0188 |
| rs1493939   | G | 0.0169  |
| rs4504658   | G | 0.1107  |
| rs4563926   | T | 0.0221  |
| rs2510817   | A | 0.0183  |
| rs114557550 | T | 0.0449  |
| rs117511062 | A | -0.0557 |
| rs76792319  | A | -0.0284 |
| rs2466290   | G | -0.0215 |
| rs78010363  | A | 0.047   |
| rs75796199  | T | 0.0273  |
| rs11780368  | T | 0.0724  |
| rs13267093  | G | 0.0167  |
| rs10111384  | A | -0.022  |
| rs11987609  | C | 0.0238  |
| rs9656753   | A | 0.05    |
| rs147147962 | A | 0.1025  |
| rs148466568 | C | -0.1053 |
| rs111780706 | G | 0.0605  |
| rs144923012 | T | -0.0623 |

|             |   |         |
|-------------|---|---------|
| rs11779295  | A | -0.0398 |
| rs1217675   | T | -0.0186 |
| rs55839840  | T | 0.0565  |
| rs11779200  | T | -0.025  |
| rs10104090  | G | -0.0285 |
| rs118122144 | C | 0.0845  |
| rs11994006  | T | 0.0445  |
| rs10100562  | T | 0.0309  |
| rs2623693   | A | 0.0926  |
| rs7841934   | A | 0.0233  |
| rs12682584  | C | 0.0664  |
| rs72715324  | T | 0.1275  |
| rs146057062 | T | 0.0753  |
| rs4736442   | G | 0.0152  |
| rs2860237   | C | -0.0708 |
| rs10087462  | T | -0.035  |
| rs76914234  | C | -0.0389 |
| rs67304205  | G | 0.0195  |
| rs13274559  | C | -0.0192 |
| rs12546880  | G | -0.0173 |
| rs12678428  | C | 0.021   |
| rs56246995  | G | 0.0327  |
| rs72659279  | A | 0.1012  |
| rs78980191  | C | -0.0721 |
| rs80136771  | T | -0.0484 |
| rs4131922   | T | -0.0175 |
| rs672725    | C | 0.0652  |
| rs74917546  | T | -0.1323 |
| rs117101543 | A | 0.0328  |
| rs145479002 | T | -0.1319 |
| rs2975834   | C | 0.0201  |
| rs311636    | G | -0.0192 |
| rs73208478  | C | -0.0282 |
| rs139656724 | G | 0.0489  |
| rs75416181  | C | 0.0741  |
| rs117123626 | A | 0.0625  |
| rs75252542  | T | -0.0201 |
| rs12334999  | G | -0.0399 |
| rs76420667  | G | -0.0237 |
| rs7815362   | A | 0.0552  |
| rs4840398   | G | 0.0218  |
| rs1008786   | T | -0.0277 |
| rs113500412 | C | 0.0331  |
| rs7821231   | A | -0.0194 |
| rs112281752 | T | 0.1205  |
| rs72712446  | C | -0.036  |
| rs113395931 | A | -0.061  |

|             |   |         |
|-------------|---|---------|
| rs777606    | A | -0.0273 |
| rs79713301  | A | -0.0361 |
| rs146508400 | G | -0.0849 |
| rs1543231   | A | -0.0569 |
| rs6472184   | C | 0.0283  |
| rs140332560 | T | 0.1299  |
| rs35255772  | T | -0.0607 |
| rs75550952  | C | -0.058  |
| rs2410622   | T | 0.025   |
| rs12543427  | A | 0.0251  |
| rs111671500 | A | -0.0707 |
| rs72687474  | A | 0.0416  |
| rs78193484  | A | -0.0476 |
| rs77360592  | T | 0.0868  |
| rs2599657   | A | -0.0158 |
| rs72657107  | A | -0.0456 |
| rs62504676  | G | 0.0165  |
| rs73209710  | A | -0.085  |
| rs7014762   | A | -0.0183 |
| rs117807908 | A | -0.1165 |
| rs10111989  | T | 0.0172  |
| rs712262    | A | 0.0663  |
| rs77475575  | T | -0.0797 |
| rs143048540 | A | -0.1067 |
| rs2737423   | A | 0.0638  |
| rs77532975  | T | 0.1061  |
| rs7816400   | A | 0.0164  |
| rs148679958 | G | 0.0684  |
| rs2688388   | G | -0.0169 |
| rs73217502  | T | 0.0582  |
| rs7828107   | C | 0.016   |
| rs62490187  | G | 0.0294  |
| rs7005030   | C | 0.018   |
| rs2410092   | G | -0.0165 |
| rs79211951  | T | 0.1204  |
| rs117338900 | G | 0.1195  |
| rs112339223 | A | 0.097   |
| rs72720099  | A | 0.0853  |
| rs2245371   | G | 0.0206  |
| rs3915306   | G | -0.0254 |
| rs79820490  | C | 0.1186  |
| rs17452891  | A | 0.06    |
| rs75982150  | G | -0.1003 |
| rs4738048   | C | -0.0185 |
| rs138684658 | C | 0.1215  |
| rs13276675  | T | -0.0199 |
| rs62508293  | T | 0.0827  |



|             |   |         |
|-------------|---|---------|
| rs7006709   | G | 0.0202  |
| rs146413782 | A | -0.1263 |
| rs76437608  | C | -0.0562 |
| rs11992693  | T | -0.0287 |
| rs146551497 | T | -0.054  |
| rs71530844  | C | -0.0512 |
| rs1437593   | C | -0.0165 |
| rs12550015  | C | 0.0237  |
| rs12546284  | A | -0.0522 |
| rs62521020  | A | -0.0959 |
| rs2334794   | C | -0.0164 |
| rs10108543  | C | -0.0166 |
| rs75552314  | G | 0.0817  |
| rs333062    | G | 0.0187  |
| rs6470848   | A | 0.0182  |
| rs2258791   | C | -0.0266 |
| rs11204143  | A | 0.0235  |
| rs149801835 | G | -0.0672 |
| rs7820324   | C | 0.0163  |
| rs117267652 | T | 0.0685  |
| rs74500191  | G | -0.0849 |
| rs7826529   | T | -0.0193 |
| rs3829032   | T | 0.0188  |
| rs77536858  | C | 0.0332  |
| rs4243510   | C | 0.0186  |
| rs34269404  | T | 0.0267  |
| rs144699644 | C | -0.0651 |
| rs10100726  | T | 0.0172  |
| rs17698247  | A | -0.0233 |
| rs75671769  | G | -0.0288 |
| rs111469507 | T | 0.0678  |
| rs9643354   | A | 0.0545  |
| rs2016573   | C | -0.0187 |
| rs2916707   | C | -0.0209 |
| rs1318722   | C | -0.0329 |
| rs11786571  | G | 0.0212  |
| rs77734482  | C | 0.0465  |
| rs56265817  | T | 0.1054  |
| rs112802688 | C | -0.0472 |
| rs17379382  | C | 0.0316  |
| rs10100732  | C | -0.0251 |
| rs7007921   | C | 0.0168  |
| rs35986760  | C | -0.1175 |
| rs13250518  | C | 0.0256  |
| rs7843290   | A | 0.0466  |
| rs16936388  | T | 0.0265  |
| rs7006204   | G | -0.0172 |

|             |   |         |
|-------------|---|---------|
| rs2280819   | T | 0.0294  |
| rs142815193 | A | -0.0273 |
| rs73668782  | A | -0.046  |
| rs116945908 | A | 0.0589  |
| rs117524354 | A | -0.0906 |
| rs1554460   | C | 0.0227  |
| rs7836192   | G | 0.0149  |
| rs16897544  | T | 0.0354  |
| rs17750361  | G | 0.0496  |
| rs35461919  | T | 0.044   |
| rs4733974   | T | -0.0148 |
| rs4397371   | C | 0.0173  |
| rs691619    | C | 0.0186  |
| rs140977402 | A | 0.1033  |
| rs118008586 | T | 0.0543  |
| rs73172220  | C | -0.1323 |
| rs73309282  | C | 0.0272  |
| rs76173235  | C | 0.0199  |
| rs116848114 | A | 0.0837  |
| rs35160940  | G | 0.0719  |
| rs62498294  | C | 0.0429  |
| rs74524106  | T | 0.1153  |
| rs60331211  | A | -0.0223 |
| rs983956    | A | 0.052   |
| rs7006756   | C | -0.0199 |
| rs113852735 | C | 0.0968  |
| rs55907350  | C | 0.0363  |
| rs116874839 | A | 0.0903  |
| rs12547803  | C | -0.0202 |
| rs4310187   | G | 0.0389  |
| rs1383575   | G | 0.0158  |
| rs118152223 | A | 0.0537  |
| rs2015441   | G | -0.0358 |
| rs78574420  | C | -0.0514 |
| rs13257327  | A | 0.0223  |
| rs73225898  | A | -0.0615 |
| rs72667900  | T | -0.0311 |
| rs7832398   | G | -0.0162 |
| rs4738130   | C | 0.0208  |
| rs79915250  | T | -0.0946 |
| rs78167436  | T | 0.0505  |
| rs34503346  | T | -0.0197 |
| rs1193324   | G | 0.0202  |
| rs283       | T | -0.0206 |
| rs78940828  | A | 0.047   |
| rs62505594  | A | -0.0453 |
| rs137878516 | T | -0.0726 |

|             |   |         |
|-------------|---|---------|
| rs117553053 | A | -0.0733 |
| rs80264769  | C | -0.0597 |
| rs62526981  | A | -0.0174 |
| rs2048091   | C | 0.0165  |
| rs117371308 | T | 0.0279  |
| rs11985714  | C | 0.0153  |
| rs148729546 | C | 0.0693  |
| rs79527452  | A | -0.0878 |
| rs75973151  | T | -0.0563 |
| rs79548834  | T | -0.0857 |
| rs71516780  | T | -0.0348 |
| rs16895337  | A | 0.0214  |
| rs75943787  | T | 0.1191  |
| rs146283006 | A | -0.0983 |
| rs1436003   | A | -0.0197 |
| rs4871232   | C | 0.0153  |
| rs142033017 | C | -0.074  |
| rs62524089  | T | -0.0149 |
| rs73227150  | A | -0.0341 |
| rs56138333  | A | 0.0396  |
| rs62523421  | C | -0.0386 |
| rs2513925   | G | -0.0159 |
| rs117342558 | T | 0.0698  |
| rs1112779   | T | -0.0156 |
| rs73207298  | C | -0.0933 |
| rs78900483  | G | -0.09   |
| rs10094911  | T | -0.1159 |
| rs12386882  | G | -0.0335 |
| rs147066813 | C | -0.0709 |
| rs4496953   | G | -0.0201 |
| rs7463194   | A | -0.032  |
| rs76489584  | A | 0.0366  |
| rs11785293  | T | 0.0328  |
| rs13257707  | T | -0.019  |
| rs7017431   | A | -0.0169 |
| rs7015366   | T | 0.044   |
| rs117096064 | C | -0.0529 |
| rs13279648  | T | 0.0334  |
| rs73545193  | C | -0.0285 |
| rs117738314 | A | -0.0504 |
| rs7840443   | A | 0.0275  |
| rs143882070 | G | -0.0519 |
| rs111878738 | T | 0.0668  |
| rs145130426 | A | 0.0847  |
| rs139386199 | A | -0.0909 |
| rs111233109 | A | 0.0459  |
| rs57485414  | T | 0.0755  |

|             |   |         |
|-------------|---|---------|
| rs117884701 | A | 0.0844  |
| rs117574224 | A | 0.1072  |
| rs10098155  | A | 0.0289  |
| rs76140871  | C | 0.0698  |
| rs117537014 | A | 0.0487  |
| rs77332030  | G | -0.0649 |
| rs78200062  | C | 0.0892  |
| rs4588822   | T | 0.1534  |
| rs117171477 | C | 0.0625  |
| rs2929978   | C | 0.017   |
| rs2034355   | G | -0.0177 |
| rs11525090  | A | -0.0308 |
| rs6995518   | G | -0.0249 |
| rs11783750  | G | -0.0175 |
| rs113694160 | A | 0.088   |
| rs7010444   | A | 0.0266  |
| rs151024481 | G | 0.0928  |
| rs118150563 | A | -0.0605 |
| rs138214596 | C | 0.0831  |
| rs115211978 | C | 0.0826  |
| rs112155931 | A | 0.1287  |
| rs28678828  | A | -0.0266 |
| rs10087746  | C | -0.0312 |
| rs73233494  | T | -0.0478 |
| rs17078124  | T | 0.0323  |
| rs11774868  | G | 0.0347  |
| rs112637095 | T | 0.0867  |
| rs76689476  | T | 0.0511  |
| rs4875118   | G | -0.0884 |
| rs149092558 | C | 0.0519  |
| rs117215804 | T | 0.0557  |
| rs117517880 | G | 0.0962  |
| rs1060701   | G | 0.0267  |
| rs10958016  | G | 0.0173  |
| rs10108065  | C | 0.0796  |
| rs13249406  | G | -0.0214 |
| rs148282477 | A | 0.0579  |
| rs74791307  | C | 0.0489  |
| rs35182554  | A | 0.0155  |
| rs1549440   | C | 0.0172  |
| rs62509896  | G | -0.124  |
| rs3107045   | A | 0.034   |
| rs2467184   | T | 0.0168  |
| rs4961399   | G | 0.0199  |
| rs72640207  | A | -0.0748 |
| rs11996402  | A | 0.0229  |
| rs62488483  | A | 0.0512  |

|             |   |         |
|-------------|---|---------|
| rs76900072  | T | -0.0454 |
| rs76795304  | T | -0.0564 |
| rs117413784 | G | 0.0833  |
| rs78676714  | A | 0.0865  |
| rs1482182   | A | -0.0575 |
| rs77052332  | A | 0.0639  |
| rs907992    | A | -0.0254 |
| rs13256003  | C | 0.0262  |
| rs143831229 | T | -0.0583 |
| rs6987502   | A | 0.0355  |
| rs7013222   | A | 0.0159  |
| rs2920950   | T | 0.0174  |
| rs10110316  | A | -0.0261 |
| rs140618126 | G | 0.0669  |
| rs117052342 | C | -0.128  |
| rs74366068  | T | 0.0465  |
| rs11776835  | A | -0.0351 |
| rs2925205   | G | -0.0621 |
| rs76722755  | T | 0.0735  |
| rs17383226  | A | 0.0404  |
| rs55993767  | C | 0.0395  |
| rs74551461  | A | -0.09   |
| rs10094312  | G | 0.0197  |
| rs2945746   | C | -0.016  |
| rs144380553 | A | -0.0708 |
| rs138063965 | T | 0.0667  |
| rs74499466  | C | 0.0874  |
| rs7815786   | G | 0.0278  |
| rs4360279   | T | 0.0379  |
| rs10504453  | A | 0.028   |
| rs117474237 | A | 0.151   |
| rs79301932  | A | -0.0941 |
| rs4871716   | C | -0.0201 |
| rs12546386  | T | 0.0229  |
| rs849043    | T | -0.0697 |
| rs76175854  | C | -0.0308 |
| rs2466047   | G | 0.0448  |
| rs62513498  | A | 0.0316  |
| rs10100124  | T | 0.0491  |
| rs11776685  | C | -0.0873 |
| rs10102248  | T | 0.0165  |
| rs4922094   | T | 0.0154  |
| rs139084742 | T | 0.058   |
| rs16897856  | A | -0.0457 |
| rs2741706   | G | -0.0234 |
| rs10110850  | C | -0.0275 |
| rs72631177  | G | -0.0396 |

|             |   |         |
|-------------|---|---------|
| rs17671921  | T | -0.0235 |
| rs117984158 | T | -0.0679 |
| rs67578570  | A | -0.0226 |
| rs117475219 | A | -0.0729 |
| rs113689270 | C | -0.0553 |
| rs6984818   | T | -0.0163 |
| rs67731524  | A | 0.0196  |
| rs4875202   | T | -0.0174 |
| rs12682174  | C | -0.0192 |
| rs149022945 | T | -0.0694 |
| rs11780039  | G | 0.0847  |
| rs72658246  | C | 0.0263  |
| rs77630749  | A | 0.0699  |
| rs11785217  | G | -0.0825 |
| rs6990027   | T | -0.0231 |
| rs148656554 | C | 0.0603  |
| rs1518504   | A | 0.0182  |
| rs72654699  | T | 0.0286  |
| rs78582430  | G | 0.0887  |
| rs2278897   | A | 0.0179  |
| rs10505018  | A | 0.0238  |
| rs11136066  | T | 0.0201  |
| rs117840467 | C | -0.0797 |
| rs9324443   | T | 0.018   |
| rs2725023   | C | 0.0184  |
| rs13281210  | C | 0.0159  |
| rs76370293  | A | -0.0949 |
| rs17792062  | G | -0.0537 |
| rs34389024  | G | -0.015  |
| rs144155747 | G | -0.0735 |
| rs11786728  | T | -0.0146 |
| rs2725376   | G | 0.0173  |
| rs71529183  | T | 0.0632  |
| rs60242065  | C | -0.0269 |
| rs2736070   | G | -0.0157 |
| rs73194719  | T | -0.0635 |
| rs113847758 | G | -0.0689 |
| rs117766276 | C | -0.0374 |
| rs1105081   | C | -0.0401 |
| rs34175715  | C | 0.0461  |
| rs11774503  | G | -0.0146 |
| rs7015175   | T | 0.0184  |
| rs113661978 | T | 0.063   |
| rs4870922   | A | -0.0157 |
| rs36046373  | A | -0.0385 |
| rs138984069 | G | 0.0788  |
| rs7817826   | T | 0.0172  |

|             |   |         |
|-------------|---|---------|
| rs73185648  | G | 0.0475  |
| rs13277178  | A | -0.0173 |
| rs272612    | C | -0.0216 |
| rs150003300 | A | -0.0753 |
| rs4445215   | C | -0.0218 |
| rs75127456  | C | 0.0269  |
| rs145970676 | G | -0.0591 |
| rs78793385  | G | -0.0769 |
| rs13267449  | T | 0.0153  |
| rs17622244  | C | 0.0269  |
| rs62511413  | G | -0.0386 |
| rs10105614  | A | 0.0301  |
| rs34943901  | G | -0.02   |
| rs11779451  | A | 0.1048  |
| rs140813024 | C | 0.0761  |
| rs62519267  | G | -0.0204 |
| rs10046650  | A | 0.052   |
| rs117569167 | T | -0.0949 |
| rs1989321   | G | 0.0157  |
| rs2046180   | G | 0.0192  |
| rs904544    | A | -0.0147 |
| rs145918426 | G | -0.0479 |
| rs149404285 | T | 0.0464  |
| rs1542067   | G | 0.016   |
| rs111408549 | A | -0.0688 |
| rs16885210  | G | 0.0209  |
| rs12548864  | T | 0.0157  |
| rs75282136  | A | 0.0383  |
| rs112077869 | T | 0.0758  |
| rs76139143  | G | -0.051  |
| rs76253020  | C | 0.1257  |
| rs73201178  | A | -0.0354 |
| rs16870721  | T | 0.0643  |
| rs75004191  | A | 0.0969  |
| rs1373296   | G | -0.0223 |
| rs117978268 | T | 0.0766  |
| rs151305136 | C | 0.0598  |
| rs1481851   | T | -0.0244 |
| rs117320543 | T | -0.0857 |
| rs56262989  | A | 0.0416  |
| rs79587346  | A | -0.0242 |
| rs4504629   | T | 0.0884  |
| rs76293240  | G | -0.0646 |
| rs79409820  | T | -0.0459 |
| rs75311714  | C | -0.0614 |
| rs11785313  | T | -0.0293 |
| rs71522407  | T | -0.027  |

|             |   |         |
|-------------|---|---------|
| rs11166837  | T | -0.0209 |
| rs72646707  | T | -0.0655 |
| rs111494529 | G | -0.0993 |
| rs117697608 | T | -0.0979 |
| rs13269639  | C | 0.0152  |
| rs28733973  | C | 0.0247  |
| rs117665106 | T | 0.0763  |
| rs72662016  | G | -0.0632 |
| rs151047437 | G | 0.1055  |
| rs79924902  | G | -0.0274 |
| rs117859444 | T | 0.0418  |
| rs13258110  | A | -0.0181 |
| rs2517231   | G | -0.0381 |
| rs142970523 | C | -0.1219 |
| rs6983758   | C | -0.0485 |
| rs7819476   | C | -0.0255 |
| rs76597445  | C | 0.1174  |
| rs4736741   | T | -0.0547 |
| rs7821676   | T | -0.0427 |
| rs77709095  | A | -0.0296 |
| rs147812305 | T | -0.045  |
| rs4841164   | A | -0.0587 |
| rs2720477   | C | 0.0581  |
| rs72673731  | T | 0.0172  |
| rs2929984   | A | -0.0187 |
| rs76247125  | T | 0.1006  |
| rs34655427  | A | 0.0266  |
| rs75054813  | G | 0.0741  |
| rs62513223  | A | -0.0386 |
| rs116923120 | T | 0.0673  |
| rs141684822 | T | 0.0604  |
| rs73224730  | C | -0.0307 |
| rs41306051  | G | 0.0389  |
| rs76605947  | A | 0.0357  |
| rs139140986 | A | 0.1098  |
| rs41373445  | C | 0.0365  |
| rs2242196   | C | -0.0198 |
| rs17747417  | C | 0.0155  |
| rs116897392 | A | -0.0575 |
| rs4571694   | C | 0.0318  |
| rs7828470   | A | 0.0201  |
| rs4434641   | A | -0.0184 |
| rs2638659   | C | 0.0195  |
| rs1834743   | G | 0.0153  |
| rs72679715  | T | 0.0627  |
| rs11985852  | T | 0.0175  |
| rs147147889 | G | 0.1132  |



|             |   |         |
|-------------|---|---------|
| rs74999010  | T | 0.0681  |
| rs11775756  | A | -0.0161 |
| rs16908136  | T | 0.0485  |
| rs148696717 | A | -0.0814 |
| rs17675288  | A | 0.0657  |
| rs117234384 | G | -0.1038 |
| rs79617605  | T | -0.0857 |
| rs17445804  | C | -0.0746 |
| rs117828825 | C | -0.0585 |
| rs117159484 | T | -0.1013 |
| rs76887243  | T | 0.037   |
| rs72731834  | C | 0.1086  |
| rs62496161  | T | -0.0363 |
| rs34501252  | G | 0.0735  |
| rs7006821   | C | 0.03    |
| rs117950157 | T | -0.0657 |
| rs62499380  | T | 0.0545  |
| rs143348043 | G | -0.0861 |
| rs7833967   | T | 0.0205  |
| rs56035822  | G | 0.023   |
| rs78548220  | G | 0.0361  |
| rs144318826 | T | -0.0836 |
| rs2947388   | C | -0.017  |
| rs1374633   | T | 0.0225  |
| rs75949256  | T | 0.063   |
| rs96621     | C | 0.015   |
| rs117303935 | T | 0.0474  |
| rs17732285  | T | -0.0289 |
| rs1814597   | A | -0.0231 |
| rs62521078  | C | 0.0512  |
| rs7463341   | C | 0.0183  |
| rs2513892   | A | 0.0164  |
| rs3110545   | T | 0.0214  |
| rs34885530  | C | -0.084  |
| rs6994534   | T | 0.0152  |
| rs75313451  | T | -0.0728 |
| rs117541568 | C | -0.1018 |
| rs61400275  | A | -0.0256 |
| rs72736308  | T | -0.0804 |
| rs117138691 | T | -0.0872 |
| rs2730007   | C | -0.0162 |
| rs4449754   | T | 0.0153  |
| rs11562689  | A | 0.0482  |
| rs7835648   | C | -0.0222 |
| rs9657108   | G | -0.0284 |
| rs2527090   | A | -0.0201 |
| rs73224048  | G | -0.0182 |

|             |   |         |
|-------------|---|---------|
| rs138474473 | T | -0.0848 |
| rs147228407 | A | -0.095  |
| rs77114754  | T | 0.0406  |
| rs73190532  | G | 0.04    |
| rs13260471  | G | 0.0225  |
| rs60375104  | T | 0.0371  |
| rs117383806 | T | -0.0562 |
| rs117295144 | C | 0.0909  |
| rs13439372  | A | -0.0314 |
| rs12550738  | C | -0.0239 |
| rs144900977 | T | 0.1062  |
| rs117136348 | A | -0.0552 |
| rs118122133 | T | 0.1307  |
| rs78469946  | A | 0.0449  |
| rs148271759 | G | -0.0857 |
| rs1372725   | A | -0.0895 |
| rs10088834  | G | -0.0481 |
| rs73706474  | A | 0.0984  |
| rs10097857  | C | 0.0164  |
| rs16889988  | T | -0.0173 |
| rs34415813  | T | 0.0723  |
| rs1495008   | C | -0.0189 |
| rs11166976  | A | -0.0155 |
| rs79768953  | T | -0.0359 |
| rs2956605   | A | -0.0149 |
| rs149776412 | C | 0.0663  |
| rs13282612  | T | -0.017  |
| rs62527571  | C | 0.1031  |
| rs73317516  | A | -0.0389 |
| rs79308097  | T | -0.084  |
| rs41272429  | C | 0.1032  |
| rs144428485 | C | -0.0833 |
| rs6987973   | C | -0.0158 |
| rs2738154   | T | -0.085  |
| rs117947181 | A | -0.0992 |
| rs76496495  | G | 0.0404  |
| rs148692853 | A | -0.0756 |
| rs138379900 | T | 0.1217  |
| rs10086092  | C | -0.02   |
| rs76624063  | A | -0.0829 |
| rs62521793  | G | 0.0691  |
| rs116866149 | G | 0.0878  |
| rs75454337  | A | 0.0394  |
| rs3019409   | G | -0.0165 |
| rs10098694  | T | -0.0148 |
| rs4574885   | T | 0.0256  |
| rs75297146  | C | -0.0383 |

|             |   |         |
|-------------|---|---------|
| rs76733025  | G | 0.1594  |
| rs7014324   | A | 0.0228  |
| rs78350009  | T | 0.0436  |
| rs13262435  | C | 0.0344  |
| rs73693535  | A | 0.0375  |
| rs73680342  | G | 0.0952  |
| rs117207634 | G | 0.0855  |
| rs6468091   | T | -0.0254 |
| rs58785020  | G | 0.0669  |
| rs7015613   | C | -0.0162 |
| rs11782824  | C | 0.015   |
| rs16904047  | T | -0.0592 |
| rs78457180  | C | -0.0668 |
| rs17422451  | T | -0.0235 |
| rs76810149  | C | -0.026  |
| rs4831358   | T | 0.0164  |
| rs13269845  | G | -0.0393 |
| rs76333965  | G | 0.0337  |
| rs116966238 | T | -0.1185 |
| rs117539235 | C | 0.0484  |
| rs4549798   | C | 0.0205  |
| rs10503664  | A | 0.021   |
| rs35554133  | A | -0.0954 |
| rs72643087  | C | -0.1161 |
| rs34179728  | G | -0.0212 |
| rs74634477  | A | -0.022  |
| rs6980809   | T | -0.0166 |
| rs117031968 | G | 0.0289  |
| rs79250792  | T | 0.0557  |
| rs423150    | C | 0.0165  |
| rs75277048  | T | 0.0268  |
| rs13259811  | T | 0.0246  |
| rs80308090  | A | 0.0274  |
| rs62501810  | T | 0.0246  |
| rs7822171   | T | -0.0307 |
| rs4733014   | A | -0.019  |
| rs117180822 | T | 0.0612  |
| rs140747020 | G | -0.0715 |
| rs76519456  | G | -0.0537 |
| rs77250865  | A | 0.073   |
| rs10954970  | G | -0.0221 |
| rs17504762  | G | -0.0339 |
| rs147069404 | G | -0.1142 |
| rs2117980   | A | 0.0153  |
| rs7834677   | C | 0.0273  |
| rs80261304  | A | 0.072   |
| rs139490109 | A | -0.0822 |

|             |   |         |
|-------------|---|---------|
| rs139068311 | C | 0.0622  |
| rs7835305   | T | 0.0143  |
| rs4385439   | A | 0.0192  |
| rs148346626 | A | 0.1039  |
| rs13262251  | G | -0.0379 |
| rs116869929 | A | 0.0604  |
| rs17326642  | A | 0.0142  |
| rs10503587  | T | 0.0307  |
| rs6986328   | G | 0.0353  |
| rs1375645   | T | 0.0176  |
| rs4545067   | T | 0.0394  |
| rs3134085   | T | -0.0172 |
| rs7016572   | T | 0.0214  |
| rs61364965  | T | 0.0989  |
| rs10109527  | G | -0.0314 |
| rs117934693 | C | -0.0508 |
| rs142324274 | T | -0.1192 |
| rs71525137  | C | 0.0274  |
| rs62510310  | A | 0.1385  |
| rs117070978 | G | -0.1252 |
| rs6984312   | C | 0.02    |
| rs74913254  | G | 0.0839  |
| rs72688434  | A | -0.0945 |
| rs35628529  | A | 0.0287  |
| rs117689289 | A | 0.0806  |
| rs75898420  | G | -0.0597 |
| rs117904148 | T | -0.075  |
| rs4567028   | G | 0.0183  |
| rs10104536  | C | -0.0265 |
| rs74611631  | C | 0.0356  |
| rs1511712   | C | -0.0148 |
| rs117771239 | A | -0.0699 |
| rs4078228   | A | 0.0209  |
| rs115266803 | T | 0.1579  |
| rs12548647  | G | -0.0153 |
| rs16934276  | G | -0.036  |
| rs117832958 | C | 0.0606  |
| rs11987533  | A | -0.0225 |
| rs73184350  | A | -0.0822 |
| rs77360585  | A | 0.0371  |
| rs17313391  | T | 0.0437  |
| rs117784259 | A | 0.1163  |
| rs150159381 | T | 0.1237  |
| rs113311007 | C | -0.0814 |
| rs148019245 | G | -0.0548 |
| rs17732321  | C | 0.0924  |
| rs2941568   | C | -0.0149 |

|             |   |         |
|-------------|---|---------|
| rs75748119  | T | 0.1288  |
| rs12545686  | G | 0.0463  |
| rs148847026 | C | -0.0974 |
| rs849041    | A | -0.017  |
| rs17483163  | G | 0.0149  |
| rs62500433  | A | 0.0362  |
| rs117809659 | C | 0.0666  |
| rs72675745  | T | -0.0723 |
| rs12546301  | G | 0.0148  |
| rs35475892  | T | 0.0163  |
| rs1521365   | C | 0.0306  |
| rs141417288 | T | 0.0756  |
| rs140341974 | A | 0.0195  |
| rs1604752   | C | 0.0199  |
| rs1348794   | C | -0.0147 |
| rs71530885  | A | 0.038   |
| rs143454041 | C | -0.0758 |
| rs76693667  | T | -0.08   |
| rs76209450  | A | -0.0452 |
| rs11784808  | T | 0.0302  |
| rs6558034   | T | -0.0174 |
| rs72662957  | T | -0.021  |
| rs28549691  | A | -0.0192 |
| rs7459863   | C | 0.0146  |
| rs4503134   | A | -0.0153 |
| rs17320037  | A | -0.0577 |
| rs28645241  | T | -0.0202 |
| rs144208930 | T | -0.0739 |
| rs79030160  | A | 0.0246  |
| rs117257365 | C | -0.0966 |
| rs11787297  | G | 0.0148  |
| rs59157041  | T | 0.0228  |
| rs77712962  | C | 0.0955  |
| rs76226726  | T | 0.1132  |
| rs60567725  | G | -0.0152 |
| rs34318853  | A | 0.0178  |
| rs10092799  | C | 0.027   |
| rs73208821  | C | -0.032  |
| rs55807851  | A | -0.0291 |
| rs605422    | A | -0.0588 |
| rs1721100   | C | 0.016   |
| rs113167076 | A | 0.0771  |
| rs75098974  | C | -0.0925 |
| rs116861093 | T | -0.1137 |
| rs78263943  | C | 0.0595  |
| rs723086    | T | -0.0165 |
| rs2978128   | G | -0.0228 |

|             |   |         |
|-------------|---|---------|
| rs117505037 | A | -0.0636 |
| rs2102291   | T | 0.0174  |
| rs17064491  | A | -0.0628 |
| rs12550826  | T | -0.0251 |
| rs12682390  | G | 0.0159  |
| rs59898156  | T | 0.0275  |
| rs4961227   | A | 0.0957  |
| rs2357668   | G | 0.0161  |
| rs34045165  | A | 0.0153  |
| rs62502256  | C | -0.035  |
| rs35543354  | C | 0.0225  |
| rs1378124   | C | -0.0154 |
| rs11136271  | T | -0.0179 |
| rs74793716  | C | 0.1154  |
| rs34806397  | C | -0.0159 |
| rs17292516  | G | -0.0189 |
| rs143514045 | T | 0.0702  |
| rs17499933  | C | -0.0146 |
| rs112905772 | C | 0.0203  |
| rs34321495  | G | 0.0237  |
| rs12676220  | C | 0.0145  |
| rs77992938  | C | -0.0311 |
| rs75911157  | A | 0.0426  |
| rs117686675 | T | 0.0877  |
| rs73663939  | C | -0.0614 |
| rs78829585  | G | 0.0464  |
| rs1520931   | T | -0.0664 |
| rs7822397   | C | -0.0228 |
| rs117556959 | G | 0.0526  |
| rs17343437  | G | 0.1082  |
| rs34836431  | T | -0.0323 |
| rs117150872 | T | -0.0528 |
| rs1382259   | G | 0.0188  |
| rs1871099   | C | -0.0151 |
| rs117363849 | G | 0.0918  |
| rs17676228  | T | -0.015  |
| rs117188077 | G | 0.0822  |
| rs117667687 | A | 0.0609  |
| rs9329228   | C | -0.0145 |
| rs148552874 | T | 0.0719  |
| rs72664924  | G | -0.027  |
| rs139761808 | T | 0.0778  |
| rs13278341  | A | 0.0146  |
| rs72684507  | T | -0.0497 |
| rs117713917 | T | 0.0774  |
| rs56375803  | A | -0.0963 |
| rs13269637  | A | -0.0676 |

|             |   |         |
|-------------|---|---------|
| rs28986502  | G | -0.0578 |
| rs62486860  | T | 0.0273  |
| rs2726598   | A | 0.0161  |
| rs76360281  | G | -0.0698 |
| rs78664279  | G | 0.0482  |
| rs75582878  | C | -0.0207 |
| rs10101560  | T | -0.0789 |
| rs7826495   | G | -0.0203 |
| rs78358410  | G | 0.0211  |
| rs72676312  | A | -0.0475 |
| rs17492141  | G | -0.0575 |
| rs62487413  | T | -0.0453 |
| rs141522963 | A | -0.1197 |
| rs73672958  | T | 0.0875  |
| rs55932030  | A | -0.0575 |
| rs13261269  | T | -0.0148 |
| rs16886637  | G | -0.0315 |
| rs6980555   | T | -0.0624 |
| rs10094436  | G | 0.0749  |
| rs7829887   | T | 0.0169  |
| rs57768039  | G | 0.0213  |
| rs73215640  | C | 0.0292  |
| rs76700131  | C | 0.0729  |
| rs1447055   | G | -0.0197 |
| rs4872967   | A | 0.0227  |
| rs12679963  | T | 0.0231  |
| rs117756612 | G | -0.0605 |
| rs72652955  | T | 0.0935  |
| rs35113558  | G | 0.0789  |
| rs16904685  | A | 0.0197  |
| rs10090288  | C | 0.0258  |
| rs3134369   | G | 0.0154  |
| rs35415170  | A | 0.0316  |
| rs4736369   | C | 0.0202  |
| rs10092583  | T | -0.0741 |
| rs2638624   | T | 0.0252  |
| rs6469218   | T | -0.0529 |
| rs17834024  | C | 0.0315  |
| rs149469919 | G | -0.0764 |
| rs117095732 | T | 0.0496  |
| rs117475070 | A | 0.0454  |
| rs16915833  | G | -0.029  |
| rs77729326  | A | 0.0342  |
| rs141277904 | T | -0.0952 |
| rs7834631   | C | 0.0179  |
| rs7824918   | G | 0.0319  |
| rs34813506  | A | 0.0608  |

|             |   |         |
|-------------|---|---------|
| rs140184354 | A | 0.0785  |
| rs117922409 | C | -0.0851 |
| rs2705290   | A | 0.0274  |
| rs11779324  | G | -0.0444 |
| rs7840525   | T | 0.0151  |
| rs75777242  | G | 0.0701  |
| rs16893621  | A | -0.022  |
| rs79135882  | C | 0.1032  |
| rs2163372   | T | -0.0146 |
| rs6993241   | C | 0.0158  |
| rs10111401  | C | -0.0142 |
| rs79124969  | T | 0.0235  |
| rs2032686   | G | 0.0165  |
| rs11774592  | T | -0.0256 |
| rs59299000  | G | -0.0209 |
| rs77129522  | C | -0.0456 |
| rs117829486 | T | -0.0816 |
| rs77977869  | T | 0.0212  |
| rs7846636   | A | 0.0695  |
| rs941006    | C | 0.0255  |
| rs10093411  | G | -0.0181 |
| rs10109622  | T | -0.0175 |
| rs2924735   | C | -0.0461 |
| rs112041776 | A | 0.0841  |
| rs77807355  | T | -0.073  |
| rs151119793 | C | -0.0538 |
| rs7835273   | T | -0.0463 |
| rs75763281  | A | -0.0423 |
| rs13282051  | C | -0.0169 |
| rs16933423  | G | 0.0531  |
| rs76804878  | G | -0.0741 |
| rs113613536 | C | 0.0833  |
| rs73523296  | C | -0.0213 |
| rs80292772  | T | 0.048   |
| rs2978129   | C | -0.0155 |
| rs2033559   | T | -0.0143 |
| rs62517848  | A | 0.027   |
| rs17429734  | G | 0.0311  |
| rs2168667   | C | 0.017   |
| rs76920024  | A | -0.0819 |
| rs111609239 | G | -0.0808 |
| rs62512810  | A | 0.0305  |
| rs148590614 | T | -0.1325 |
| rs12541335  | G | 0.0144  |
| rs118053938 | C | -0.0366 |
| rs73331946  | A | 0.0205  |
| rs61219396  | T | -0.0274 |



|             |   |         |
|-------------|---|---------|
| rs479690    | C | 0.0231  |
| rs72671294  | C | -0.0232 |
| rs117908221 | T | 0.0694  |
| rs9297310   | T | -0.0257 |
| rs150473010 | A | 0.0519  |
| rs71521415  | A | 0.0899  |
| rs16878058  | A | -0.0249 |
| rs72636351  | G | 0.02    |
| rs78694188  | G | -0.0322 |
| rs62516531  | T | 0.0458  |
| rs75040489  | A | 0.076   |
| rs7813644   | C | -0.0581 |
| rs56296384  | C | -0.05   |
| rs143975428 | T | 0.0409  |
| rs13253965  | A | -0.0263 |
| rs28478334  | A | 0.0285  |
| rs7825359   | G | 0.0155  |
| rs139211268 | A | -0.0726 |
| rs75960487  | A | -0.0437 |
| rs13439396  | G | -0.0307 |
| rs3019091   | A | -0.0186 |
| rs2670083   | T | -0.0196 |
| rs117851846 | A | 0.0989  |
| rs60471102  | A | -0.1069 |
| rs138386088 | A | 0.0986  |
| rs7386945   | A | -0.0223 |
| rs74411348  | A | -0.085  |
| rs62506580  | G | 0.0198  |
| rs2980011   | C | -0.036  |
| rs2726595   | G | 0.0176  |
| rs77074319  | T | -0.09   |
| rs117553793 | T | 0.0575  |
| rs56342245  | C | -0.0395 |
| rs6471199   | G | 0.0242  |
| rs6993578   | T | 0.0206  |
| rs144495180 | T | -0.0941 |
| rs113794698 | A | 0.0178  |
| rs2895702   | C | -0.0171 |
| rs62496727  | C | 0.0572  |
| rs874270    | T | 0.0143  |
| rs2306078   | C | -0.0179 |
| rs4437635   | C | -0.0168 |
| rs10112759  | G | 0.0298  |
| rs117948684 | G | -0.0352 |
| rs139565181 | T | -0.0716 |
| rs71517894  | T | 0.0708  |
| rs2582839   | G | -0.0162 |

|             |   |         |
|-------------|---|---------|
| rs78948177  | G | -0.0342 |
| rs3816751   | C | 0.0205  |
| rs10956200  | G | 0.0156  |
| rs143051386 | A | 0.133   |
| rs112207279 | T | -0.0675 |
| rs7846494   | T | 0.0158  |
| rs72718056  | A | -0.0256 |
| rs147791117 | A | 0.0755  |
| rs6995476   | A | 0.0216  |
| rs7831282   | T | 0.016   |
| rs150672620 | A | -0.1244 |
| rs613806    | C | 0.0279  |
| rs13254335  | T | 0.0521  |
| rs148200885 | C | -0.059  |
| rs1881130   | T | -0.0152 |
| rs141080344 | G | -0.0882 |
| rs11781631  | A | 0.103   |
| rs147595766 | C | 0.0575  |
| rs73173170  | C | 0.0486  |
| rs74590675  | A | 0.0747  |
| rs116088672 | T | 0.0728  |
| rs11785037  | C | 0.055   |
| rs144570436 | T | 0.0536  |
| rs61343911  | T | -0.0871 |
| rs146729929 | G | 0.098   |
| rs17653919  | G | 0.0215  |
| rs72668188  | G | -0.0391 |
| rs35363111  | A | -0.0767 |
| rs7825448   | G | -0.028  |
| rs2517165   | A | 0.0176  |
| rs2259056   | A | 0.0142  |
| rs6471130   | A | 0.0652  |
| rs2002030   | C | 0.0281  |
| rs117517136 | G | -0.0756 |
| rs55767033  | A | -0.0828 |
| rs13249054  | G | 0.0271  |
| rs17684990  | G | -0.0227 |
| rs72666215  | C | 0.0294  |
| rs13261273  | T | 0.0314  |
| rs62525458  | T | 0.0918  |
| rs62494626  | A | 0.0607  |
| rs113886735 | T | 0.0387  |
| rs4732813   | G | -0.0212 |
| rs55869340  | T | -0.0216 |
| rs35081271  | A | -0.0462 |
| rs117808040 | A | 0.0691  |
| rs16871828  | A | 0.0174  |

|             |   |         |
|-------------|---|---------|
| rs145971230 | A | 0.0238  |
| rs2247296   | G | -0.0458 |
| rs11574365  | C | 0.0751  |
| rs62515754  | T | -0.052  |
| rs558899    | G | 0.0298  |
| rs76386471  | T | -0.0248 |
| rs2980940   | G | 0.0145  |
| rs73215261  | T | -0.0233 |
| rs11781751  | A | 0.0535  |
| rs10112630  | A | -0.0145 |
| rs71514971  | T | 0.085   |
| rs117228597 | C | -0.1125 |
| rs4579548   | C | -0.0148 |
| rs112534342 | C | -0.0825 |
| rs34564758  | A | -0.0434 |
| rs1485297   | G | 0.0249  |
| rs7007118   | T | 0.0957  |
| rs4735148   | A | -0.0152 |
| rs73707295  | G | 0.0293  |
| rs11777437  | T | -0.0154 |
| rs150524859 | G | 0.083   |
| rs146655282 | A | 0.0461  |
| rs73499844  | C | 0.0536  |
| rs60229978  | C | 0.0563  |
| rs10875455  | A | 0.0225  |
| rs59380322  | T | 0.1297  |
| rs2588112   | G | -0.0168 |
| rs72659610  | T | -0.0719 |
| rs13254844  | T | 0.0352  |
| rs10092858  | A | -0.0417 |
| rs112106846 | A | -0.0448 |
| rs143635237 | T | -0.0714 |
| rs55769860  | T | -0.0739 |
| rs74452497  | A | 0.0586  |
| rs112581479 | C | -0.0618 |
| rs146419476 | T | 0.0638  |
| rs117636503 | G | 0.0678  |
| rs13277567  | G | -0.0188 |
| rs141068466 | C | 0.0734  |
| rs2186399   | A | 0.0151  |
| rs78414372  | C | 0.0493  |
| rs57687868  | C | -0.0214 |
| rs2442982   | A | -0.0174 |
| rs75116243  | G | -0.0798 |
| rs16842     | C | -0.0155 |
| rs13274751  | G | 0.0328  |
| rs3104892   | G | 0.0149  |

|             |   |         |
|-------------|---|---------|
| rs72729861  | A | 0.0343  |
| rs75984548  | A | -0.034  |
| rs2926826   | C | -0.0159 |
| rs73183913  | C | 0.0485  |
| rs11988761  | C | 0.0154  |
| rs1385723   | G | 0.0139  |
| rs10097080  | T | -0.0611 |
| rs1861515   | C | -0.0213 |
| rs117408641 | G | -0.0646 |
| rs62487679  | C | 0.0248  |
| rs12547369  | A | -0.0158 |
| rs13261136  | G | -0.0148 |
| rs35776772  | G | 0.0386  |
| rs74724251  | A | -0.0855 |
| rs6985606   | T | -0.0137 |
| rs989991    | A | -0.0397 |
| rs79375376  | G | 0.0505  |
| rs1438353   | C | -0.0146 |
| rs62497786  | C | 0.0609  |
| rs138771051 | G | 0.0798  |
| rs17671486  | T | 0.0503  |
| rs80000894  | T | -0.0521 |
| rs139312223 | A | -0.0578 |
| rs78543350  | C | -0.0603 |
| rs4646257   | T | -0.0183 |
| rs7836905   | G | 0.0146  |
| rs7846387   | C | -0.0194 |
| rs76184552  | G | 0.1057  |
| rs4736036   | G | -0.0253 |
| rs62487340  | C | -0.0977 |
| rs75830192  | A | -0.0844 |
| rs11786500  | G | -0.0258 |
| rs12545005  | A | 0.0277  |
| rs77809042  | C | -0.0195 |
| rs1521834   | A | -0.0465 |
| rs57776602  | T | 0.1045  |
| rs4736462   | G | -0.0227 |
| rs1676976   | C | 0.0202  |
| rs2588166   | T | 0.0229  |
| rs1362891   | A | 0.0494  |
| rs138521112 | C | 0.057   |
| rs3115821   | T | 0.0538  |
| rs72686188  | A | 0.0273  |
| rs72636125  | A | -0.05   |
| rs4738131   | C | 0.023   |
| rs117823715 | G | 0.0731  |
| rs7006782   | T | 0.024   |

|             |   |         |
|-------------|---|---------|
| rs1125177   | C | 0.0157  |
| rs4736088   | C | 0.0266  |
| rs10097279  | A | 0.0214  |
| rs79689326  | A | 0.0431  |
| rs72659170  | T | -0.0559 |
| rs4379452   | A | -0.023  |
| rs72677028  | T | 0.0625  |
| rs2454668   | T | 0.0917  |
| rs34043638  | T | -0.0452 |
| rs117553335 | C | -0.1016 |
| rs10094838  | C | -0.023  |
| rs1470734   | A | 0.0136  |
| rs2735376   | C | -0.0153 |
| rs75821343  | A | -0.0378 |
| rs28380039  | A | 0.0234  |
| rs11784835  | T | -0.0278 |
| rs78724200  | A | -0.0485 |
| rs149474549 | G | 0.0489  |
| rs77611747  | T | 0.1075  |
| rs142070085 | T | 0.0593  |
| rs71651699  | C | 0.0567  |
| rs116917293 | T | -0.0686 |
| rs17611021  | G | -0.1199 |
| rs146589704 | G | 0.0655  |
| rs2464418   | A | 0.0334  |
| rs117107145 | T | 0.0839  |
| rs11136356  | G | -0.0188 |
| rs5028021   | G | 0.0196  |
| rs112272705 | C | 0.0466  |
| rs55889810  | A | -0.0522 |
| rs74495475  | A | -0.0581 |
| rs7832390   | A | -0.0173 |
| rs7459571   | G | -0.016  |
| rs67225577  | T | -0.0221 |
| rs79200391  | C | -0.0696 |
| rs7814259   | T | 0.0137  |
| rs74502019  | A | 0.035   |
| rs73225981  | T | -0.0424 |
| rs6469039   | G | 0.0169  |
| rs34281960  | C | 0.015   |
| rs116846195 | A | -0.0738 |
| rs2955067   | A | -0.0225 |
| rs6995296   | G | 0.0224  |
| rs147506694 | A | -0.0577 |
| rs73605763  | G | -0.0284 |
| rs16898841  | C | 0.0603  |
| rs4733503   | T | 0.015   |

|             |   |         |
|-------------|---|---------|
| rs16917716  | G | 0.0233  |
| rs12675863  | C | 0.0213  |
| rs56248548  | T | 0.0162  |
| rs2198044   | A | -0.0148 |
| rs62500184  | T | -0.0598 |
| rs6470948   | T | 0.0145  |
| rs7014311   | T | 0.0494  |
| rs77717981  | T | -0.0331 |
| rs79504510  | T | -0.0329 |
| rs72661806  | A | 0.0908  |
| rs118124310 | G | -0.0652 |
| rs34742398  | T | 0.0448  |
| rs147807047 | C | -0.0837 |
| rs12541115  | A | -0.0332 |
| rs4538906   | A | -0.019  |
| rs10875418  | A | -0.0205 |
| rs151047412 | T | 0.0329  |
| rs147323889 | T | 0.0925  |
| rs117118081 | G | -0.0862 |
| rs34191977  | T | 0.0146  |
| rs76918909  | A | -0.0402 |
| rs76137007  | G | 0.0428  |
| rs117300024 | A | -0.0361 |
| rs60324752  | C | 0.0196  |
| rs1436022   | G | 0.0163  |
| rs16880352  | G | -0.0173 |
| rs75877232  | G | 0.0686  |
| rs149472821 | G | 0.1295  |
| rs77239300  | A | -0.0485 |
| rs28828690  | C | 0.0631  |
| rs141416738 | G | 0.0247  |
| rs7825533   | T | -0.0172 |
| rs34608025  | T | -0.0581 |
| rs2978484   | C | 0.023   |
| rs3817662   | G | 0.0259  |
| rs1871217   | T | 0.0259  |
| rs412932    | A | -0.0183 |
| rs16893236  | C | 0.0417  |
| rs117729749 | A | -0.0537 |
| rs6980701   | G | 0.0175  |
| rs80126037  | T | 0.0752  |
| rs7824025   | A | -0.0229 |
| rs118142566 | A | -0.0513 |
| rs10958314  | G | 0.0611  |
| rs112601576 | T | -0.0184 |
| rs112024070 | A | 0.0776  |
| rs10481389  | C | 0.014   |

|             |   |         |
|-------------|---|---------|
| rs117859396 | T | -0.068  |
| rs73323018  | A | -0.0261 |
| rs138765422 | G | 0.0974  |
| rs80229524  | T | 0.0934  |
| rs11996104  | G | 0.0274  |
| rs17786663  | T | 0.0617  |
| rs143847717 | A | -0.0639 |
| rs72660616  | G | 0.0627  |
| rs13265653  | A | -0.0905 |
| rs11562658  | T | -0.0544 |
| rs4114397   | G | -0.0229 |
| rs117674595 | T | 0.0567  |
| rs35668547  | G | 0.0149  |
| rs2466254   | C | 0.017   |
| rs116934631 | A | 0.0944  |
| rs117002549 | C | 0.0388  |
| rs28633248  | C | -0.0173 |
| rs35349399  | T | 0.0865  |
| rs35980362  | A | -0.0199 |
| rs1504769   | T | -0.0348 |
| rs62501565  | A | -0.0324 |
| rs10089434  | T | 0.016   |
| rs76019286  | C | -0.0518 |
| rs11781162  | G | 0.0727  |
| rs72653994  | G | 0.0503  |
| rs2898249   | T | -0.0159 |
| rs7845956   | A | -0.0298 |
| rs72680342  | G | 0.0349  |
| rs6470760   | C | -0.0383 |
| rs76773776  | G | 0.0905  |
| rs4874120   | A | -0.039  |
| rs13253752  | C | 0.0422  |
| rs6988386   | C | -0.021  |
| rs149430111 | C | -0.0499 |
| rs11780025  | G | -0.0227 |
| rs17667231  | C | -0.0182 |
| rs12115054  | T | 0.054   |
| rs11787328  | T | 0.1126  |
| rs1866345   | G | -0.016  |
| rs71520605  | G | 0.0523  |
| rs117044667 | C | 0.0792  |
| rs137982757 | C | 0.0558  |
| rs7819700   | G | 0.0484  |
| rs11779530  | T | -0.0168 |
| rs76911378  | A | -0.0216 |
| rs62514657  | C | 0.0286  |
| rs117445843 | C | -0.0676 |

|             |   |         |
|-------------|---|---------|
| rs34765997  | G | 0.0172  |
| rs716683    | C | -0.0201 |
| rs7845582   | T | 0.0552  |
| rs148079817 | T | 0.0844  |
| rs10095860  | C | 0.0148  |
| rs17696544  | G | -0.0213 |
| rs28359477  | T | 0.0346  |
| rs2543063   | T | -0.0148 |
| rs6472158   | A | -0.0218 |
| rs60454751  | A | -0.0496 |
| rs117485224 | A | 0.0516  |
| rs77808530  | G | 0.0328  |
| rs17220879  | C | 0.0312  |
| rs1564468   | A | -0.0726 |
| rs59230153  | T | -0.0302 |
| rs111379471 | A | -0.0844 |
| rs62511269  | T | 0.0384  |
| rs72632075  | G | 0.0336  |
| rs17209016  | C | 0.0439  |
| rs10091285  | T | 0.0358  |
| rs71516559  | G | 0.0349  |
| rs11776034  | G | -0.0195 |
| rs4921582   | A | -0.0427 |
| rs6471907   | A | 0.019   |
| rs72658923  | T | 0.0505  |
| rs56044862  | C | 0.0319  |
| rs3892719   | T | 0.016   |
| rs7817525   | A | 0.0214  |
| rs3935595   | T | 0.0169  |
| rs12114124  | T | 0.021   |
| rs3105769   | T | -0.0172 |
| rs11776015  | C | 0.018   |
| rs77133047  | T | -0.0551 |
| rs1799946   | T | 0.0141  |
| rs78156837  | G | -0.0636 |
| rs71529232  | C | -0.0726 |
| rs77855221  | T | -0.1046 |
| rs74380201  | C | -0.0167 |
| rs142448541 | T | -0.0693 |
| rs117430735 | C | -0.0696 |
| rs73190740  | C | 0.0385  |
| rs143286324 | A | 0.058   |
| rs118016860 | T | -0.0846 |
| rs76652575  | T | 0.0747  |
| rs117320428 | C | -0.0682 |
| rs4736654   | C | 0.0141  |
| rs76595743  | T | 0.0573  |



|             |   |         |
|-------------|---|---------|
| rs72642362  | G | 0.0212  |
| rs114934516 | T | 0.0419  |
| rs76423404  | A | 0.0788  |
| rs13268226  | A | -0.0554 |
| rs72729540  | C | -0.0284 |
| rs72659144  | C | 0.0894  |
| rs117810755 | C | -0.0721 |
| rs114860526 | G | 0.0331  |
| rs13272405  | A | -0.039  |
| rs2936536   | G | -0.0294 |
| rs1841673   | A | 0.0151  |
| rs74389408  | T | 0.0626  |
| rs241173    | A | -0.0138 |
| rs75511256  | G | -0.0468 |
| rs72710948  | G | 0.0503  |
| rs6986399   | C | -0.016  |
| rs2263518   | T | -0.0424 |
| rs541194    | T | 0.0153  |
| rs117034122 | G | 0.0327  |
| rs13279146  | A | -0.0416 |
| rs17645686  | C | 0.0267  |
| rs10111822  | G | 0.0186  |
| rs72729807  | T | 0.1084  |
| rs72650332  | T | -0.0656 |
| rs13259361  | A | -0.0141 |
| rs76062278  | T | 0.0587  |
| rs117291648 | C | -0.0499 |
| rs113448138 | G | 0.0392  |
| rs34431723  | T | -0.0156 |
| rs73176912  | A | -0.0151 |
| rs7836467   | A | -0.0883 |
| rs73362319  | C | 0.0444  |
| rs17504533  | G | -0.0585 |
| rs79942144  | T | -0.0477 |
| rs118125298 | A | -0.0406 |
| rs140396203 | T | 0.0424  |
| rs56142222  | A | 0.0328  |
| rs116917684 | A | 0.0509  |
| rs17357147  | G | -0.0468 |
| rs16935554  | A | -0.0796 |
| rs6988176   | C | 0.0364  |
| rs12216841  | C | 0.0835  |
| rs117737447 | T | 0.0474  |
| rs117926925 | A | -0.0645 |
| rs145151126 | G | 0.0341  |
| rs77239095  | G | 0.0594  |
| rs75081552  | G | -0.0327 |

|             |   |         |
|-------------|---|---------|
| rs140848644 | T | 0.0957  |
| rs149373673 | G | 0.0659  |
| rs76362051  | G | 0.0256  |
| rs77205133  | T | -0.0915 |
| rs112734675 | T | 0.1104  |
| rs4734368   | T | -0.0726 |
| rs17737587  | T | 0.0134  |
| rs12155975  | T | -0.0205 |
| rs2719217   | C | 0.0244  |
| rs117973005 | C | -0.0731 |
| rs73716161  | A | -0.0427 |
| rs341696    | T | 0.0237  |
| rs34979226  | T | -0.0295 |
| rs118024471 | C | -0.0552 |
| rs149552396 | A | 0.0671  |
| rs73210138  | T | -0.1256 |
| rs17685720  | C | 0.0384  |
| rs78821111  | C | -0.0522 |
| rs78253848  | A | 0.05    |
| rs113676253 | A | -0.0448 |
| rs10110195  | A | -0.0469 |
| rs147576185 | C | -0.0842 |
| rs410487    | T | -0.0245 |
| rs6474105   | A | 0.0178  |
| rs74603328  | C | 0.0508  |
| rs62504670  | G | -0.0435 |
| rs6995850   | A | -0.0131 |
| rs118029457 | A | 0.0449  |
| rs112242008 | A | 0.0282  |
| rs7826154   | G | 0.0797  |
| rs60384474  | A | -0.0267 |
| rs28709028  | T | -0.0142 |
| rs11779926  | T | -0.0196 |
| rs7814325   | T | -0.057  |
| rs6989438   | A | -0.0214 |
| rs149109695 | C | 0.0467  |
| rs711033    | C | 0.0136  |
| rs6998622   | T | 0.0315  |
| rs13282678  | G | -0.0314 |
| rs13252196  | T | 0.0181  |
| rs117195466 | G | -0.0745 |
| rs118138958 | T | -0.0411 |
| rs17335309  | A | -0.0372 |
| rs13255324  | C | -0.0232 |
| rs62525018  | A | -0.0681 |
| rs117315318 | A | 0.1097  |
| rs2725093   | A | 0.045   |

|             |   |         |
|-------------|---|---------|
| rs765755    | G | 0.0145  |
| rs2627374   | C | -0.0158 |
| rs4304345   | C | -0.0334 |
| rs75477531  | T | 0.0254  |
| rs77405252  | T | 0.0277  |
| rs35767340  | A | -0.047  |
| rs2930168   | C | -0.0138 |
| rs76268691  | T | 0.0753  |
| rs117409419 | G | 0.0355  |
| rs111536803 | C | -0.0991 |
| rs12545425  | G | -0.09   |
| rs10216843  | G | 0.0141  |
| rs117325043 | T | -0.0556 |
| rs2705218   | C | 0.0235  |
| rs77745572  | G | 0.0505  |
| rs149687721 | T | -0.0612 |
| rs56372551  | C | -0.0143 |
| rs10958388  | T | 0.0157  |
| rs76795084  | G | -0.0918 |
| rs78634630  | C | 0.0785  |
| rs117176527 | T | -0.1233 |
| rs986046    | G | -0.0208 |
| rs117303583 | T | 0.0692  |
| rs3889866   | A | 0.0384  |
| rs10109856  | C | 0.0842  |
| rs111808952 | C | -0.0618 |
| rs35968440  | T | 0.0388  |
| rs60647117  | T | -0.0183 |
| rs117684587 | G | 0.0801  |
| rs144724273 | T | -0.0763 |
| rs4841569   | A | 0.0164  |
| rs77727929  | C | -0.0525 |
| rs150336632 | C | 0.0722  |
| rs6996156   | C | 0.0137  |
| rs71525770  | G | -0.0294 |
| rs75959612  | C | -0.1068 |
| rs724236    | T | 0.0302  |
| rs28550528  | G | -0.0703 |
| rs7839342   | A | 0.0223  |
| rs77278710  | A | 0.061   |
| rs4738388   | G | -0.0287 |
| rs141839121 | T | 0.0691  |
| rs714048    | C | 0.0306  |
| rs13249991  | C | 0.0452  |
| rs2256241   | G | -0.014  |
| rs17830392  | G | -0.0265 |
| rs78169289  | A | 0.045   |

|             |   |         |
|-------------|---|---------|
| rs74494241  | G | -0.0813 |
| rs7837572   | T | 0.0178  |
| rs16876093  | G | 0.0189  |
| rs77567891  | T | 0.1004  |
| rs13281389  | T | -0.0145 |
| rs72632741  | A | -0.0682 |
| rs6578085   | T | -0.0151 |
| rs74995676  | G | 0.0372  |
| rs139626679 | A | -0.0831 |
| rs73234980  | C | -0.0564 |
| rs117457159 | G | -0.0541 |
| rs117198649 | T | 0.0526  |
| rs2448905   | A | 0.0175  |
| rs73187231  | C | -0.0563 |
| rs716144    | C | -0.0144 |
| rs79845565  | G | -0.116  |
| rs71529275  | G | 0.022   |
| rs67368954  | T | 0.0383  |
| rs113001819 | A | 0.0568  |
| rs10955401  | C | 0.0392  |
| rs117719557 | A | 0.073   |
| rs997461    | G | 0.0212  |
| rs113763161 | A | -0.0558 |
| rs2252681   | G | -0.015  |
| rs117025075 | G | -0.0352 |
| rs3935019   | C | -0.0134 |
| rs2677210   | C | 0.0206  |
| rs11775346  | T | -0.0613 |
| rs77413601  | G | 0.0332  |
| rs117784231 | G | -0.0974 |
| rs78637393  | A | -0.0499 |
| rs888578    | T | 0.0209  |
| rs2440445   | C | 0.0201  |
| rs118077865 | G | 0.061   |
| rs72636190  | A | 0.0558  |
| rs1519080   | A | -0.0182 |
| rs58641124  | T | 0.043   |
| rs74206933  | C | 0.0386  |
| rs633374    | C | 0.0446  |
| rs77563502  | T | 0.0564  |
| rs12675673  | G | 0.0144  |
| rs1461856   | G | -0.0267 |
| rs150727360 | C | 0.061   |
| rs2738131   | A | -0.0201 |
| rs72639702  | A | 0.0225  |
| rs118173060 | A | 0.0746  |
| rs11783497  | T | -0.0262 |

|             |   |         |
|-------------|---|---------|
| rs138433174 | T | 0.0538  |
| rs116963628 | G | 0.07    |
| rs112044753 | A | -0.0486 |
| rs28725480  | A | -0.0195 |
| rs4897644   | A | -0.0152 |
| rs73210879  | A | 0.0182  |
| rs13281492  | G | -0.0658 |
| rs79097041  | G | -0.0473 |
| rs2256937   | G | -0.0202 |
| rs79502983  | G | 0.0585  |
| rs7000610   | T | 0.0185  |
| rs7817647   | C | -0.0141 |
| rs28631761  | T | -0.0324 |
| rs4732612   | T | -0.0444 |
| rs17389034  | G | -0.0155 |
| rs145672203 | A | 0.0987  |
| rs72730313  | T | -0.0544 |
| rs2904665   | G | -0.0182 |
| rs13282379  | G | -0.0604 |
| rs9314309   | C | -0.014  |
| rs117318266 | T | 0.0803  |
| rs35065526  | A | 0.0352  |
| rs117713323 | A | -0.0738 |
| rs35562421  | A | -0.0253 |
| rs140501009 | G | -0.075  |
| rs35099047  | G | 0.02    |
| rs72722200  | C | 0.0738  |
| rs72731656  | T | -0.0219 |
| rs28476655  | G | -0.0821 |
| rs2046571   | A | -0.0143 |
| rs11993964  | A | -0.0135 |
| rs10107633  | G | 0.0144  |
| rs4537255   | A | 0.0136  |
| rs76710054  | A | -0.0844 |
| rs35897257  | C | -0.0171 |
| rs6559217   | C | 0.1139  |
| rs11782797  | G | 0.0238  |
| rs72681141  | G | -0.0343 |
| rs74910244  | C | 0.0586  |
| rs75031738  | C | 0.0862  |
| rs147771644 | A | -0.1186 |
| rs117698743 | T | 0.0744  |
| rs2958326   | T | 0.018   |
| rs4736745   | T | 0.018   |
| rs16892789  | T | -0.0212 |
| rs12542359  | C | 0.053   |
| rs62509337  | A | 0.0546  |

|             |   |         |
|-------------|---|---------|
| rs116979987 | G | 0.0795  |
| rs79377088  | G | -0.0492 |
| rs13253056  | G | -0.0199 |
| rs138644535 | C | 0.0599  |
| rs6990473   | C | 0.028   |
| rs73535020  | C | -0.0327 |
| rs10089923  | C | -0.0212 |
| rs141507981 | C | -0.0595 |
| rs55816915  | A | -0.0429 |
| rs2163605   | G | 0.0158  |
| rs11777565  | A | 0.0964  |
| rs139304152 | T | -0.0837 |
| rs62512877  | A | -0.0792 |
| rs10107693  | C | 0.0137  |
| rs2955888   | A | 0.0168  |
| rs78805826  | A | 0.0633  |
| rs17311700  | C | -0.0335 |
| rs56885010  | G | 0.0612  |
| rs118051774 | T | 0.075   |
| rs958637    | C | -0.028  |
| rs56031413  | G | 0.018   |
| rs13268350  | A | 0.0259  |
| rs117719146 | A | 0.0801  |
| rs6994047   | T | -0.015  |
| rs144283699 | T | -0.0492 |
| rs6987909   | T | -0.0132 |
| rs144727225 | T | -0.0747 |
| rs117142223 | G | 0.0502  |
| rs16880866  | G | 0.0806  |
| rs7820230   | G | 0.0166  |
| rs7845933   | G | 0.0133  |
| rs72634146  | C | 0.0717  |
| rs34179686  | A | 0.0213  |
| rs117541841 | G | 0.0609  |
| rs77865233  | C | -0.1039 |
| rs55672141  | C | -0.0359 |
| rs7837826   | A | -0.0366 |
| rs11785913  | C | 0.0459  |
| rs13270270  | A | -0.0848 |
| rs78716794  | C | 0.0882  |
| rs75987312  | T | -0.049  |
| rs4573255   | A | -0.0218 |
| rs6981084   | C | 0.021   |
| rs118173154 | A | 0.0524  |
| rs28516548  | A | -0.0375 |
| rs147524008 | T | 0.0748  |
| rs80222081  | T | -0.0363 |

|             |   |         |
|-------------|---|---------|
| rs12677493  | C | 0.016   |
| rs72718446  | C | -0.0278 |
| rs779115    | G | -0.0147 |
| rs78643195  | T | 0.0371  |
| rs7812900   | T | -0.0154 |
| rs138777284 | T | 0.0559  |
| rs117493391 | G | 0.1267  |
| rs7463817   | G | 0.0282  |
| rs79920924  | A | 0.0454  |
| rs6471227   | G | 0.013   |
| rs7816965   | T | 0.0585  |
| rs62524038  | A | 0.0265  |
| rs149943882 | G | 0.0733  |
| rs61234368  | T | 0.0846  |
| rs7841865   | C | -0.0282 |
| rs6995409   | T | -0.0312 |
| rs2941860   | C | -0.0541 |
| rs73204960  | A | 0.0192  |
| rs145733256 | G | -0.0279 |
| rs117724388 | G | 0.04    |
| rs62525343  | A | -0.0578 |
| rs73211154  | C | -0.0369 |
| rs43870     | C | 0.0141  |
| rs140695719 | G | 0.0763  |
| rs115981840 | T | 0.0806  |
| rs13271210  | T | -0.074  |
| rs10099817  | C | -0.0282 |
| rs12155964  | A | 0.0381  |
| rs76072284  | T | -0.0479 |
| rs2739015   | A | 0.0214  |
| rs113889867 | A | -0.0266 |
| rs11993912  | T | -0.0145 |
| rs72639656  | G | 0.0373  |
| rs147790403 | A | 0.078   |
| rs73229817  | T | 0.0392  |
| rs117230781 | T | 0.0501  |
| rs77574835  | G | 0.0608  |
| rs7016944   | T | 0.0246  |
| rs7462538   | C | 0.019   |
| rs2253107   | A | -0.0175 |
| rs60163503  | T | -0.0271 |
| rs28718223  | A | 0.0174  |
| rs117057283 | T | 0.0776  |
| rs75240714  | G | 0.0612  |
| rs28482351  | C | -0.0669 |
| rs62499991  | A | -0.021  |
| rs4909583   | T | -0.0151 |

|             |   |         |
|-------------|---|---------|
| rs77143735  | T | 0.0401  |
| rs11779899  | G | 0.0578  |
| rs2313167   | C | 0.0129  |
| rs3110615   | C | 0.031   |
| rs77094659  | T | 0.017   |
| rs2112004   | A | -0.0139 |
| rs55937427  | G | 0.0171  |
| rs112480982 | T | 0.0665  |
| rs2979175   | C | -0.023  |
| rs9886420   | T | -0.016  |
| rs12544958  | G | -0.0151 |
| rs2448190   | T | -0.0661 |
| rs1495750   | A | 0.0127  |
| rs116935359 | G | -0.0799 |
| rs2000479   | A | 0.0135  |
| rs2688324   | C | 0.0254  |
| rs240648    | A | 0.0138  |
| rs73228672  | T | 0.035   |
| rs116844340 | A | -0.033  |
| rs2554635   | C | 0.013   |
| rs150977635 | T | -0.0558 |
| rs7003426   | G | -0.0381 |
| rs4922086   | T | 0.0141  |
| rs62520506  | A | -0.0245 |
| rs7819618   | G | -0.0156 |
| rs113378416 | T | 0.0737  |
| rs10098671  | T | -0.0243 |
| rs118094290 | C | 0.053   |
| rs146474675 | C | 0.0885  |
| rs147735585 | A | -0.0837 |
| rs28625531  | A | -0.0671 |
| rs72679210  | G | 0.0282  |
| rs78114026  | G | 0.0577  |
| rs17064407  | G | -0.0147 |
| rs2911747   | A | -0.0287 |
| rs10504729  | A | -0.0173 |
| rs62501708  | C | -0.0237 |
| rs117792897 | T | -0.0507 |
| rs890211    | C | 0.0146  |
| rs16879067  | T | -0.0184 |
| rs148560093 | G | 0.0859  |
| rs111266975 | G | -0.0171 |
| rs12548000  | C | -0.018  |
| rs4480103   | C | 0.045   |
| rs117992533 | C | -0.0783 |
| rs60175287  | A | -0.0695 |
| rs12548359  | T | 0.0154  |



|             |   |         |
|-------------|---|---------|
| rs111313555 | C | -0.0502 |
| rs143767361 | G | -0.0419 |
| rs149574734 | T | 0.0539  |
| rs7018306   | G | 0.013   |
| rs17550095  | A | -0.0566 |
| rs73696111  | G | 0.035   |
| rs849037    | G | 0.0154  |
| rs11992356  | A | 0.0291  |
| rs34000508  | T | 0.1061  |
| rs2685399   | G | -0.0161 |
| rs72643904  | C | -0.0513 |
| rs80159030  | C | -0.1208 |
| rs6983008   | G | -0.022  |
| rs2977878   | G | -0.018  |
| rs4269537   | C | -0.0139 |
| rs12549835  | A | 0.0153  |
| rs149788775 | C | -0.0579 |
| rs72665053  | C | 0.0237  |
| rs112126884 | T | -0.0593 |
| rs116934709 | A | -0.075  |
| rs62522074  | C | 0.0499  |
| rs56206522  | C | 0.0502  |
| rs112945955 | G | -0.0434 |
| rs111437422 | A | -0.0845 |
| rs13278837  | T | 0.0227  |
| rs4361765   | G | 0.023   |
| rs77265692  | G | -0.0525 |
| rs2166690   | G | -0.0142 |
| rs145749545 | T | 0.0639  |
| rs7832970   | T | -0.0239 |
| rs117359502 | T | 0.0564  |
| rs10504853  | C | -0.0158 |
| rs74939791  | G | 0.0432  |
| rs1503758   | G | -0.019  |
| rs9643568   | A | 0.067   |
| rs16937918  | G | -0.0644 |
| rs118187989 | T | 0.0638  |
| rs78691802  | A | -0.0462 |
| rs12550089  | C | 0.057   |
| rs17398646  | G | 0.0279  |
| rs145346553 | C | -0.0382 |
| rs17450934  | A | -0.0197 |
| rs75395288  | T | 0.0998  |
| rs11780325  | C | -0.0407 |
| rs7823005   | C | 0.0146  |
| rs150642094 | C | -0.0668 |
| rs2073696   | A | 0.0349  |

|             |   |         |
|-------------|---|---------|
| rs11994887  | C | 0.0198  |
| rs4876545   | A | -0.0242 |
| rs10100159  | T | 0.0128  |
| rs56309137  | T | 0.0791  |
| rs78533879  | A | 0.0459  |
| rs76758185  | C | 0.0264  |
| rs117869008 | T | -0.0752 |
| rs17786249  | C | -0.0409 |
| rs4870866   | T | 0.0261  |
| rs76910408  | A | 0.0329  |
| rs117309556 | T | -0.0567 |
| rs13272810  | A | -0.069  |
| rs11994154  | T | -0.0131 |
| rs73508266  | C | -0.0243 |
| rs7836624   | A | 0.0211  |
| rs73174420  | A | 0.0223  |
| rs34145287  | C | -0.021  |
| rs3757893   | T | -0.0276 |
| rs3018845   | T | -0.0129 |
| rs17263776  | G | -0.0169 |
| rs76065752  | A | -0.0178 |
| rs144639754 | T | -0.0759 |
| rs80349586  | T | 0.0216  |
| rs2347505   | A | 0.0161  |
| rs10103839  | G | 0.0234  |
| rs71532377  | A | 0.0871  |
| rs66537586  | T | -0.0267 |
| rs144013142 | A | -0.0857 |
| rs139059357 | A | 0.0954  |
| rs75218914  | A | -0.0634 |
| rs10156376  | C | 0.0266  |
| rs72687115  | C | 0.0707  |
| rs72680316  | C | -0.0236 |
| rs117061753 | T | 0.0608  |
| rs117733732 | G | 0.0625  |
| rs59790465  | C | 0.021   |
| rs58109250  | C | -0.0166 |
| rs117293809 | C | -0.0405 |
| rs34872621  | C | 0.0187  |
| rs7841129   | G | 0.0431  |
| rs7001081   | C | 0.013   |
| rs3134241   | A | -0.0126 |
| rs12679359  | T | -0.0193 |
| rs114974587 | T | 0.0408  |
| rs35505117  | C | -0.0715 |
| rs77409462  | G | -0.1201 |
| rs7824334   | T | 0.0185  |

|             |   |         |
|-------------|---|---------|
| rs61753674  | T | 0.0736  |
| rs6988999   | C | -0.018  |
| rs73177113  | C | 0.0185  |
| rs79407371  | T | 0.0524  |
| rs138019891 | C | -0.0651 |
| rs13254600  | A | -0.0142 |
| rs10098867  | G | 0.016   |
| rs7015138   | A | 0.0129  |
| rs62501980  | T | 0.033   |
| rs2607060   | G | -0.0191 |
| rs117328897 | A | -0.0171 |
| rs62523827  | G | 0.0202  |
| rs923741    | C | -0.015  |
| rs7820976   | C | 0.061   |
| rs112484429 | T | 0.0788  |
| rs80176672  | T | -0.0996 |
| rs55852919  | T | -0.0292 |
| rs116877467 | T | 0.0381  |
| rs112990710 | A | -0.1061 |
| rs74503468  | A | 0.0829  |
| rs113084137 | A | 0.0442  |
| rs7006880   | T | -0.0153 |
| rs112284453 | T | 0.036   |
| rs6651370   | A | 0.0157  |
| rs16920009  | C | 0.0211  |
| rs1465062   | C | 0.019   |
| rs145136765 | C | -0.1288 |
| rs76429968  | G | 0.0415  |
| rs75245561  | T | 0.0384  |
| rs4737438   | A | -0.0152 |
| rs4404896   | A | 0.0413  |
| rs55639005  | C | 0.0248  |
| rs76110251  | A | 0.0584  |
| rs4871268   | T | -0.0145 |
| rs2124598   | T | 0.016   |
| rs78586881  | A | 0.0415  |
| rs6984772   | A | 0.0139  |
| rs16939362  | G | 0.0376  |
| rs9650271   | A | -0.0224 |
| rs74733883  | A | -0.0477 |
| rs117307686 | A | 0.0526  |
| rs117032319 | T | -0.0686 |
| rs72718319  | A | 0.1168  |
| rs2226309   | A | 0.0279  |
| rs72680006  | A | 0.0457  |
| rs7846257   | A | 0.017   |
| rs59051363  | C | 0.0956  |

|             |   |         |
|-------------|---|---------|
| rs11995162  | A | 0.0188  |
| rs77583733  | A | 0.0375  |
| rs7846271   | A | -0.0356 |
| rs17251327  | C | -0.0357 |
| rs117305338 | T | -0.0488 |
| rs4045421   | T | -0.0551 |
| rs78026828  | G | -0.0472 |
| rs72683676  | C | 0.0298  |
| rs117342553 | A | 0.0291  |
| rs7827491   | A | -0.0142 |
| rs117298005 | A | -0.0392 |
| rs36080921  | T | 0.0163  |
| rs74737417  | G | -0.0373 |
| rs17498500  | A | 0.0328  |
| rs4907382   | C | 0.0431  |
| rs1565137   | G | 0.0257  |
| rs11204003  | G | -0.0169 |
| rs2722891   | A | 0.0171  |
| rs11783461  | C | -0.0239 |
| rs6997028   | C | 0.0143  |
| rs4579566   | C | 0.0134  |
| rs13268829  | C | 0.0132  |
| rs17401856  | T | 0.0158  |
| rs627307    | G | 0.0141  |
| rs7829806   | T | 0.0141  |
| rs77533384  | C | 0.0562  |
| rs17690844  | G | 0.0449  |
| rs10089839  | G | 0.0285  |
| rs10956062  | G | 0.0238  |
| rs16880153  | T | 0.0205  |
| rs117856710 | T | 0.0613  |
| rs78736422  | T | 0.0434  |
| rs10954846  | G | -0.0125 |
| rs73201165  | A | 0.0252  |
| rs78977294  | T | -0.0218 |
| rs67744363  | A | -0.106  |
| rs13279839  | G | -0.013  |
| rs4263752   | T | 0.0305  |
| rs117564659 | G | -0.0549 |
| rs112012767 | T | -0.1022 |
| rs112925596 | A | 0.0721  |
| rs4909575   | C | 0.0936  |
| rs117194732 | A | -0.0651 |
| rs147587547 | C | -0.064  |
| rs2741200   | C | 0.0143  |
| rs117222621 | A | -0.0624 |
| rs116996158 | T | 0.0518  |

|             |   |         |
|-------------|---|---------|
| rs10086039  | C | -0.0187 |
| rs11780485  | A | -0.0403 |
| rs9987304   | C | -0.0198 |
| rs4738065   | G | 0.0125  |
| rs17070317  | T | -0.0164 |
| rs10088203  | C | -0.0143 |
| rs17851751  | C | 0.0141  |
| rs7838551   | C | -0.0457 |
| rs28525240  | C | -0.0531 |
| rs78105669  | C | -0.084  |
| rs72676519  | C | 0.0264  |
| rs142150836 | G | -0.0747 |
| rs60356230  | A | -0.0601 |
| rs17699161  | G | -0.0133 |
| rs75557222  | T | -0.0635 |
| rs117690371 | C | 0.0555  |
| rs10956102  | C | -0.0187 |
| rs4490870   | T | -0.071  |
| rs117736438 | C | 0.0313  |
| rs35438347  | G | 0.0258  |
| rs16924770  | A | -0.0177 |
| rs118053060 | G | 0.0721  |
| rs73346160  | C | -0.0679 |
| rs75744655  | G | -0.0748 |
| rs277035    | A | -0.0145 |
| rs7824128   | A | 0.0741  |
| rs62516541  | T | 0.074   |
| rs117849454 | A | 0.0639  |
| rs117755493 | T | 0.0665  |
| rs17333876  | T | -0.0363 |
| rs76706359  | T | 0.0726  |
| rs145690314 | A | 0.0742  |
| rs56136510  | C | -0.0537 |
| rs16901238  | C | -0.0225 |
| rs75097148  | C | -0.0643 |
| rs144692302 | C | 0.0464  |
| rs78832229  | T | 0.0672  |
| rs76919038  | T | 0.0774  |
| rs17381988  | C | -0.0189 |
| rs80324183  | A | 0.0324  |
| rs78264540  | T | -0.0846 |
| rs113614326 | A | 0.0786  |
| rs71522748  | G | 0.0497  |
| rs118027410 | A | -0.0882 |
| rs62513252  | G | 0.066   |
| rs7840032   | T | 0.0189  |
| rs13269099  | G | 0.0308  |

|             |   |         |
|-------------|---|---------|
| rs3018899   | C | 0.0228  |
| rs77846676  | T | -0.0248 |
| rs4255170   | A | -0.0517 |
| rs76577430  | A | -0.0345 |
| rs11774491  | C | 0.0191  |
| rs2294037   | C | -0.013  |
| rs1472162   | G | 0.014   |
| rs74792366  | C | -0.0237 |
| rs117343260 | C | 0.0574  |
| rs4876435   | A | 0.0157  |
| rs78641371  | A | -0.0561 |
| rs10089190  | G | -0.0189 |
| rs2098885   | A | 0.0196  |
| rs72658396  | A | -0.0269 |
| rs10090365  | G | 0.013   |
| rs144157487 | A | 0.0857  |
| rs79633213  | A | 0.0707  |
| rs1050275   | C | -0.0134 |
| rs6473938   | C | 0.0177  |
| rs562889    | T | -0.089  |
| rs4562361   | T | 0.0135  |
| rs2517279   | A | -0.013  |
| rs118154880 | A | 0.0434  |
| rs559000    | A | 0.0134  |
| rs118153878 | T | 0.0485  |
| rs34688659  | C | -0.0259 |
| rs7012625   | A | -0.0149 |
| rs77680314  | G | 0.0501  |
| rs13255593  | T | -0.0174 |
| rs11778763  | C | 0.0149  |
| rs66964437  | T | 0.0553  |
| rs73205801  | G | -0.0386 |
| rs142344722 | C | 0.0574  |
| rs34383415  | T | 0.0254  |
| rs16902768  | A | 0.0375  |
| rs75381172  | A | -0.0823 |
| rs66525326  | A | -0.0206 |
| rs117912796 | C | -0.0524 |
| rs10086770  | T | 0.0241  |
| rs145671287 | T | -0.0366 |
| rs2640904   | C | -0.0408 |
| rs2443499   | C | -0.0155 |
| rs10957198  | C | -0.0168 |
| rs150227710 | C | -0.0552 |
| rs13272776  | G | -0.0239 |
| rs13265608  | C | 0.0211  |
| rs435025    | C | 0.0455  |

|             |   |         |
|-------------|---|---------|
| rs74788884  | T | -0.0393 |
| rs17055810  | G | 0.0286  |
| rs74796913  | T | 0.1054  |
| rs16900968  | C | -0.108  |
| rs78460568  | C | 0.0822  |
| rs145119638 | G | -0.0587 |
| rs11784640  | A | 0.0288  |
| rs1479911   | A | -0.0133 |
| rs11778211  | C | -0.0131 |
| rs12155956  | A | 0.0345  |
| rs3176292   | A | -0.0153 |
| rs57555511  | T | -0.0388 |
| rs7825167   | A | -0.0128 |
| rs78540368  | G | -0.0697 |
| rs75101490  | A | -0.0455 |
| rs117435503 | T | -0.0986 |
| rs2878863   | A | -0.0225 |
| rs16888519  | G | -0.0297 |
| rs62499877  | A | -0.0283 |
| rs79052118  | A | -0.0374 |
| rs143987179 | A | -0.0698 |
| rs62531409  | A | 0.0317  |
| rs3115892   | C | -0.0214 |
| rs76309089  | A | -0.0597 |
| rs117470424 | G | 0.0761  |
| rs150013265 | A | 0.0922  |
| rs76362191  | C | 0.0335  |
| rs79406151  | A | -0.0639 |
| rs117054926 | A | -0.0361 |
| rs7845175   | A | -0.035  |
| rs75605034  | C | -0.0198 |
| rs77733358  | T | -0.0665 |
| rs148732728 | A | -0.0554 |
| rs890598    | G | 0.0142  |
| rs62522676  | C | -0.0186 |
| rs12550045  | C | 0.0215  |
| rs138841568 | A | -0.0712 |
| rs11985075  | A | -0.0421 |
| rs141892139 | G | 0.0821  |
| rs111307194 | T | -0.0379 |
| rs35923293  | A | 0.0205  |
| rs7816057   | G | -0.0136 |
| rs1006203   | G | 0.0197  |
| rs66705638  | C | 0.0399  |
| rs117376409 | A | 0.0321  |
| rs62502261  | A | -0.015  |
| rs17741980  | T | -0.038  |

|             |   |         |
|-------------|---|---------|
| rs117282902 | A | 0.0551  |
| rs138012741 | G | 0.0737  |
| rs62525290  | C | 0.0283  |
| rs11783930  | C | 0.017   |
| rs112248156 | C | 0.0563  |
| rs4144734   | G | -0.03   |
| rs117990464 | C | 0.0312  |
| rs1525057   | T | -0.0128 |
| rs2444861   | G | 0.0138  |
| rs117058063 | C | 0.0359  |
| rs72692388  | G | 0.0552  |
| rs6472893   | G | -0.0338 |
| rs147184267 | A | -0.0385 |
| rs11787217  | T | 0.0166  |
| rs7846036   | A | -0.0154 |
| rs148933525 | G | 0.0785  |
| rs61732784  | A | 0.0527  |
| rs6577901   | A | -0.013  |
| rs147759747 | C | -0.0594 |
| rs113105330 | A | -0.0699 |
| rs11778299  | T | 0.0244  |
| rs13257289  | C | -0.0208 |
| rs17310011  | C | -0.0122 |
| rs341738    | A | -0.0217 |
| rs117183306 | C | -0.0269 |
| rs72710901  | G | 0.0352  |
| rs112261669 | T | 0.0645  |
| rs73236001  | T | -0.0364 |
| rs76964584  | A | -0.0472 |
| rs141386882 | A | -0.0614 |
| rs62525569  | G | 0.0884  |
| rs117483167 | A | -0.0635 |
| rs13271738  | C | -0.0124 |
| rs77944391  | G | 0.0412  |
| rs1568606   | A | 0.0348  |
| rs73174806  | C | -0.0176 |
| rs7836194   | T | -0.0591 |
| rs11781342  | A | 0.0206  |
| rs74355159  | T | 0.0361  |
| rs12056845  | T | 0.0329  |
| rs343       | A | 0.0231  |
| rs78836072  | G | -0.027  |
| rs78365229  | T | 0.0475  |
| rs6468273   | C | -0.0236 |
| rs2926717   | T | -0.0183 |
| rs116507312 | C | -0.0431 |
| rs2930376   | G | 0.0159  |



|             |   |         |
|-------------|---|---------|
| rs62504368  | T | -0.0647 |
| rs4512404   | G | 0.0154  |
| rs73670670  | G | -0.0507 |
| rs77445264  | T | 0.1041  |
| rs9643848   | A | -0.0146 |
| rs12546163  | A | 0.0377  |
| rs923853    | C | -0.0333 |
| rs17720343  | T | 0.0264  |
| rs7832136   | T | 0.0321  |
| rs3107547   | A | 0.0242  |
| rs6994540   | A | -0.0299 |
| rs11774821  | T | 0.0474  |
| rs7845067   | A | -0.0167 |
| rs2062041   | G | 0.0351  |
| rs77768891  | A | -0.0339 |
| rs141483979 | G | 0.068   |
| rs78538481  | A | 0.0766  |
| rs6988762   | T | -0.0141 |
| rs35918950  | A | -0.0204 |
| rs73200277  | T | 0.054   |
| rs17671456  | G | -0.0298 |
| rs2622554   | A | -0.0173 |
| rs7000034   | A | -0.024  |
| rs1057407   | A | -0.0256 |
| rs11987567  | A | -0.0208 |
| rs78547245  | G | 0.0615  |
| rs72652197  | A | 0.0645  |
| rs11781967  | C | 0.0278  |
| rs659200    | G | -0.0122 |
| rs1568828   | A | 0.0126  |
| rs1562371   | T | 0.0266  |
| rs7838090   | A | 0.0576  |
| rs6471325   | G | 0.0131  |
| rs55643607  | T | -0.0383 |
| rs1209      | G | -0.0128 |
| rs117173251 | T | 0.0612  |
| rs74832442  | G | -0.0207 |
| rs2938201   | T | 0.0564  |
| rs74642440  | A | 0.0415  |
| rs74584355  | T | -0.0557 |
| rs17738173  | C | -0.0366 |
| rs4243888   | G | -0.0133 |
| rs71521870  | G | 0.0287  |
| rs117142518 | G | 0.0795  |
| rs150164398 | A | 0.0418  |
| rs12541254  | A | -0.0136 |
| rs62509266  | C | 0.0316  |

|             |   |         |
|-------------|---|---------|
| rs17775981  | T | 0.0395  |
| rs4961333   | T | 0.0132  |
| rs2588248   | T | -0.0221 |
| rs1379134   | T | -0.0164 |
| rs72657939  | T | -0.0342 |
| rs10503222  | A | -0.0575 |
| rs151026391 | T | -0.0892 |
| rs76018685  | G | -0.0587 |
| rs117085925 | T | -0.0797 |
| rs62518315  | A | 0.0477  |
| rs57299725  | T | -0.0318 |
| rs13269939  | G | 0.0121  |
| rs117975364 | A | -0.0354 |
| rs2959822   | A | 0.0575  |
| rs147475322 | A | -0.0963 |
| rs56146368  | A | 0.0527  |
| rs13269324  | G | 0.0152  |
| rs78727405  | T | 0.0809  |
| rs6999538   | T | -0.0551 |
| rs58327688  | G | -0.094  |
| rs13258461  | A | 0.0121  |
| rs75487817  | A | -0.0534 |
| rs62484646  | G | -0.0348 |
| rs12718376  | T | -0.0148 |
| rs4284014   | C | 0.0129  |
| rs117376434 | A | 0.0371  |
| rs7007424   | C | -0.0371 |
| rs66645039  | C | -0.0338 |
| rs34129253  | T | -0.034  |
| rs10092643  | T | -0.0673 |
| rs146692426 | A | 0.0785  |
| rs62514812  | C | 0.0248  |
| rs12677808  | G | -0.0141 |
| rs2623857   | A | 0.0524  |
| rs147521133 | C | 0.0547  |
| rs1549849   | T | 0.0369  |
| rs77936467  | A | 0.0613  |
| rs7461353   | C | -0.0213 |
| rs12114940  | G | -0.0132 |
| rs12547478  | A | -0.0124 |
| rs74501251  | G | 0.0226  |
| rs16904505  | T | -0.0182 |
| rs77421136  | G | 0.0677  |
| rs146563732 | T | 0.0996  |
| rs145287729 | T | 0.065   |
| rs4266665   | G | -0.0141 |
| rs12543772  | T | 0.0345  |

|             |   |         |
|-------------|---|---------|
| rs80044967  | T | 0.0444  |
| rs113934412 | T | 0.0787  |
| rs78184371  | C | -0.0538 |
| rs62528346  | A | -0.0304 |
| rs1461873   | C | 0.0219  |
| rs73191538  | A | 0.0473  |
| rs12548837  | C | 0.0129  |
| rs12550736  | C | -0.0266 |
| rs9656829   | A | -0.0574 |
| rs62512406  | A | 0.0503  |
| rs77854009  | T | 0.0912  |
| rs16901935  | G | -0.045  |
| rs11986061  | A | -0.0593 |
| rs79575236  | C | -0.0795 |
| rs117870951 | G | 0.0942  |
| rs10109723  | G | -0.0909 |
| rs117124357 | A | 0.0164  |
| rs1788160   | G | -0.0201 |
| rs68094319  | T | 0.0143  |
| rs117130817 | G | 0.057   |
| rs79180949  | T | 0.0352  |
| rs1196092   | G | 0.0153  |
| rs79192394  | C | -0.087  |
| rs116902620 | C | 0.0956  |
| rs147179882 | A | 0.0329  |
| rs113014099 | T | 0.0405  |
| rs79014478  | C | -0.0543 |
| rs118035446 | A | -0.0467 |
| rs117720258 | G | -0.0737 |
| rs10481066  | T | -0.0352 |
| rs62522463  | A | 0.0864  |
| rs73600046  | G | 0.0468  |
| rs11774155  | C | 0.0439  |
| rs67080356  | T | -0.0227 |
| rs10216595  | T | 0.0554  |
| rs17432531  | C | 0.0152  |
| rs1494272   | G | 0.0142  |
| rs80336336  | T | 0.0385  |
| rs7386141   | A | 0.0132  |
| rs4316180   | T | -0.0135 |
| rs16909683  | C | 0.0481  |
| rs11786311  | G | 0.0407  |
| rs4875812   | T | -0.0132 |
| rs850428    | T | 0.0315  |
| rs72684402  | C | 0.0894  |
| rs6473735   | G | 0.0305  |
| rs394569    | G | 0.0141  |

|             |   |         |
|-------------|---|---------|
| rs147163791 | T | -0.0952 |
| rs1433964   | G | -0.0147 |
| rs7838409   | G | -0.015  |
| rs7819565   | A | 0.0337  |
| rs7341564   | T | -0.0136 |
| rs72607391  | G | -0.0415 |
| rs1877674   | A | -0.0124 |
| rs2244554   | G | -0.0121 |
| rs7009937   | C | -0.0262 |
| rs117910349 | A | -0.0399 |
| rs2977746   | G | 0.0134  |
| rs111821342 | A | -0.0649 |
| rs144681951 | A | -0.0402 |
| rs925031    | A | 0.0292  |
| rs12681711  | G | 0.0164  |
| rs78606919  | T | -0.0787 |
| rs3779791   | T | 0.0146  |
| rs56208398  | A | 0.016   |
| rs7828114   | G | 0.0164  |
| rs76116727  | C | 0.0362  |
| rs146906582 | T | 0.0547  |
| rs79805738  | C | 0.0446  |
| rs72652945  | T | 0.0834  |
| rs79929069  | G | -0.0795 |
| rs78732567  | C | -0.0726 |
| rs73184678  | T | -0.0285 |
| rs10095370  | G | 0.021   |
| rs77992063  | G | 0.0633  |
| rs1138541   | T | -0.0164 |
| rs117886972 | T | -0.0553 |
| rs116952710 | T | -0.0436 |
| rs78323951  | C | -0.0517 |
| rs71510678  | T | -0.0973 |
| rs113457062 | G | -0.0967 |
| rs61353764  | C | 0.0433  |
| rs2977475   | C | 0.0125  |
| rs145033642 | A | -0.0729 |
| rs77661773  | A | 0.0454  |
| rs143382238 | C | 0.0865  |
| rs1470777   | C | 0.0129  |
| rs10505108  | T | 0.0339  |
| rs6469935   | G | 0.0258  |
| rs76611052  | T | -0.0301 |
| rs117267411 | C | 0.061   |
| rs74567459  | A | -0.0127 |
| rs111994977 | A | -0.0648 |
| rs76720921  | C | 0.0794  |

|             |   |         |
|-------------|---|---------|
| rs7832765   | A | -0.0181 |
| rs1440260   | T | 0.0311  |
| rs7816614   | C | 0.0136  |
| rs7837499   | A | -0.0475 |
| rs117557730 | T | 0.0509  |
| rs13261736  | A | -0.0275 |
| rs12548161  | C | 0.0126  |
| rs7015054   | G | 0.0151  |
| rs13252678  | C | 0.0883  |
| rs2294015   | C | -0.0126 |
| rs146564241 | T | 0.1077  |
| rs12546013  | C | 0.0396  |
| rs117050095 | G | 0.0478  |
| rs10104141  | A | -0.0133 |
| rs12680060  | G | -0.0527 |
| rs35858015  | A | 0.045   |
| rs62486830  | C | -0.0333 |
| rs113978450 | A | 0.0754  |
| rs35941811  | A | -0.0769 |
| rs116211263 | C | -0.0379 |
| rs56025801  | G | 0.047   |
| rs11779866  | T | -0.0198 |
| rs77725490  | G | 0.0406  |
| rs10088068  | C | -0.0123 |
| rs17740942  | A | -0.0391 |
| rs72666794  | C | 0.0555  |
| rs117400391 | T | 0.0502  |
| rs1960346   | T | -0.0161 |
| rs141275317 | G | 0.0268  |
| rs79783565  | G | -0.0547 |
| rs117543790 | T | 0.076   |
| rs12676811  | C | 0.0344  |
| rs408109    | T | 0.0134  |
| rs75945891  | C | -0.0909 |
| rs1848906   | C | 0.0257  |
| rs6984489   | G | 0.0203  |
| rs7812771   | C | -0.0157 |
| rs12544562  | G | -0.0136 |
| rs2086587   | C | -0.0124 |
| rs75604487  | T | -0.0471 |
| rs28575014  | T | -0.0803 |
| rs1562871   | C | -0.0156 |
| rs62529820  | T | -0.0539 |
| rs111607524 | G | -0.0552 |
| rs28415290  | T | -0.016  |
| rs17474411  | C | 0.0227  |
| rs79309432  | G | -0.0631 |

|             |   |         |
|-------------|---|---------|
| rs118075062 | A | -0.0769 |
| rs13267563  | C | -0.0218 |
| rs521184    | C | 0.0123  |
| rs145193492 | A | -0.0434 |
| rs139093918 | G | -0.075  |
| rs73590617  | T | 0.0509  |
| rs7005164   | T | -0.0195 |
| rs12681236  | A | -0.0256 |
| rs28644470  | A | -0.0669 |
| rs10111451  | C | 0.0135  |
| rs76234685  | A | -0.0179 |
| rs10283250  | A | 0.0196  |
| rs147155769 | C | 0.0816  |
| rs76103269  | A | 0.018   |
| rs62528813  | A | 0.0166  |
| rs17088785  | G | 0.0261  |
| rs1567726   | T | -0.0164 |
| rs2514344   | T | -0.0129 |
| rs62518293  | A | 0.0525  |
| rs67386268  | G | -0.016  |
| rs76909530  | T | -0.0261 |
| rs77754233  | G | 0.0551  |
| rs72652708  | T | -0.0254 |
| rs73185737  | T | 0.0357  |
| rs2112158   | G | 0.0622  |
| rs7832833   | G | 0.0137  |
| rs117309468 | T | 0.0623  |
| rs145472404 | T | 0.0956  |
| rs1552880   | C | -0.0133 |
| rs10105003  | T | 0.014   |
| rs62512262  | A | -0.0207 |
| rs12678156  | T | 0.0157  |
| rs111849514 | C | 0.0478  |
| rs112986157 | C | 0.0222  |
| rs117401161 | T | -0.0501 |
| rs4736724   | A | -0.0515 |
| rs149299346 | C | -0.0774 |
| rs58470324  | A | 0.0411  |
| rs2975416   | T | 0.0129  |
| rs12547932  | A | 0.0282  |
| rs74967741  | A | 0.0435  |
| rs149054368 | A | -0.0486 |
| rs118159865 | G | -0.051  |
| rs13277349  | G | 0.0179  |
| rs2939976   | A | -0.0188 |
| rs13275000  | G | -0.0136 |
| rs10156337  | C | -0.0146 |

|             |   |         |
|-------------|---|---------|
| rs12682385  | A | -0.0232 |
| rs74407747  | G | 0.079   |
| rs10091209  | G | 0.013   |
| rs77166602  | A | 0.0793  |
| rs10092146  | C | -0.0211 |
| rs4549823   | C | -0.0473 |
| rs17596048  | C | 0.0748  |
| rs11778558  | T | 0.1046  |
| rs7833195   | C | -0.0272 |
| rs7842238   | T | -0.0204 |
| rs143078388 | A | 0.0693  |
| rs10447978  | T | 0.05    |
| rs9297393   | G | -0.0124 |
| rs143650828 | G | 0.1085  |
| rs899420    | C | -0.0188 |
| rs35192274  | C | 0.0813  |
| rs117119757 | T | -0.0907 |
| rs1504690   | T | -0.014  |
| rs79566311  | G | -0.0191 |
| rs138806707 | C | -0.0614 |
| rs7003834   | T | -0.0178 |
| rs2597332   | C | -0.0168 |
| rs150722470 | T | -0.0486 |
| rs17831704  | G | 0.0127  |
| rs12164189  | T | -0.0163 |
| rs113009736 | T | -0.0187 |
| rs62493319  | T | 0.0221  |
| rs76305769  | A | -0.084  |
| rs113629856 | G | 0.0469  |
| rs17576868  | G | 0.0196  |
| rs2133511   | C | 0.0144  |
| rs13252851  | T | 0.017   |
| rs146680299 | T | -0.0817 |
| rs35755105  | G | -0.0682 |
| rs7815184   | C | -0.0165 |
| rs6984309   | A | 0.0647  |
| rs76271603  | G | -0.0261 |
| rs74712693  | T | 0.0319  |
| rs2470724   | T | -0.012  |
| rs78007755  | G | 0.0518  |
| rs62508798  | G | 0.015   |
| rs16868899  | A | 0.031   |
| rs75214752  | T | 0.0252  |
| rs117187390 | G | -0.0799 |
| rs7822594   | C | 0.0135  |
| rs13253878  | T | 0.0128  |
| rs74796753  | G | 0.0207  |

|             |   |         |
|-------------|---|---------|
| rs7388125   | A | 0.0148  |
| rs77809628  | A | -0.0797 |
| rs150949764 | A | -0.0524 |
| rs7003225   | T | 0.0572  |
| rs148161159 | T | 0.072   |
| rs79465179  | G | -0.0989 |
| rs117168874 | T | -0.1015 |
| rs3105008   | T | 0.0227  |
| rs143059008 | C | -0.047  |
| rs11786114  | T | -0.073  |
| rs13271033  | T | 0.0191  |
| rs78249231  | A | -0.0796 |
| rs35590111  | C | 0.0189  |
| rs78098281  | A | -0.0769 |
| rs16939215  | T | 0.0497  |
| rs78549998  | A | -0.0833 |
| rs11777029  | T | 0.0199  |
| rs117149942 | A | -0.0409 |
| rs2589212   | G | 0.0153  |
| rs3824184   | A | -0.0167 |
| rs117806237 | G | -0.0477 |
| rs72645518  | G | 0.0449  |
| rs143832302 | A | -0.0695 |
| rs62497986  | T | -0.0151 |
| rs74866695  | A | -0.0347 |
| rs116934738 | C | 0.0739  |
| rs78252500  | A | -0.0733 |
| rs9324566   | T | -0.0129 |
| rs3208305   | T | 0.0126  |
| rs75265933  | C | -0.0765 |
| rs12540994  | T | 0.0266  |
| rs76513621  | C | -0.0297 |
| rs7830333   | C | 0.0197  |
| rs7812433   | T | 0.0128  |
| rs62640333  | C | 0.0371  |
| rs28635835  | G | 0.019   |
| rs73186503  | A | -0.0448 |
| rs62528793  | T | 0.0255  |
| rs1806755   | A | 0.0127  |
| rs79947239  | T | 0.0166  |
| rs117762924 | C | 0.0939  |
| rs142349611 | A | 0.0861  |
| rs1394476   | G | 0.0138  |
| rs72734419  | A | -0.0193 |
| rs113260219 | T | -0.078  |
| rs118035873 | A | 0.0926  |
| rs35043422  | A | 0.0258  |



|             |   |         |
|-------------|---|---------|
| rs1695724   | A | 0.0124  |
| rs17349671  | G | 0.0424  |
| rs1879674   | C | -0.0155 |
| rs75650914  | A | -0.0538 |
| rs28480665  | A | 0.0704  |
| rs57712160  | A | 0.0394  |
| rs7846282   | C | -0.0185 |
| rs117178280 | G | 0.0639  |
| rs7002157   | G | 0.0147  |
| rs2469409   | C | 0.0186  |
| rs77210320  | T | -0.0496 |
| rs117494315 | A | 0.1255  |
| rs4739250   | G | 0.0284  |
| rs150348926 | C | -0.075  |
| rs893464    | T | -0.014  |
| rs148599638 | G | 0.06    |
| rs112995692 | A | 0.0665  |
| rs6989594   | G | 0.0558  |
| rs73199727  | C | 0.0243  |
| rs75994103  | T | 0.0203  |
| rs10089627  | A | -0.0667 |
| rs1568605   | C | 0.0116  |
| rs137962880 | A | 0.0662  |
| rs7828277   | A | 0.0122  |
| rs74393836  | C | -0.0352 |
| rs35858997  | C | -0.0183 |
| rs1485748   | G | 0.0128  |
| rs2925455   | C | 0.0261  |
| rs72645637  | A | 0.0436  |
| rs62526614  | G | 0.0242  |
| rs117933198 | C | -0.0471 |
| rs78516632  | G | -0.0691 |
| rs35894632  | G | -0.0162 |
| rs72694445  | A | -0.0602 |
| rs151181371 | C | 0.0775  |
| rs1669718   | T | -0.0188 |
| rs7001838   | T | 0.014   |
| rs72669712  | T | 0.0648  |
| rs6986917   | G | -0.0116 |
| rs13282755  | A | 0.0836  |
| rs13249251  | G | 0.0398  |
| rs80279634  | T | -0.0751 |
| rs4477055   | C | -0.0127 |
| rs10958803  | T | -0.0193 |
| rs137918786 | T | 0.0673  |
| rs13257467  | A | 0.0399  |
| rs10503248  | T | -0.0184 |

|             |   |         |
|-------------|---|---------|
| rs143931177 | C | -0.0696 |
| rs72651114  | T | -0.0612 |
| rs34146789  | C | -0.0127 |
| rs11782275  | G | -0.014  |
| rs1155491   | G | -0.0163 |
| rs4735906   | C | 0.0125  |
| rs117423839 | T | 0.06    |
| rs10956903  | C | -0.0124 |
| rs140678709 | C | 0.0297  |
| rs2588186   | C | 0.0459  |
| rs2457440   | G | -0.0403 |
| rs62523331  | G | -0.034  |
| rs73182832  | T | 0.063   |
| rs1043221   | C | -0.0176 |
| rs73210143  | A | 0.0318  |
| rs72733733  | T | 0.0443  |
| rs117352317 | G | -0.0599 |
| rs56062205  | A | 0.0344  |
| rs117180954 | A | 0.0669  |
| rs62503203  | G | -0.0353 |
| rs2515198   | T | 0.0124  |
| rs117233803 | G | 0.0326  |
| rs7813874   | G | -0.0208 |
| rs6985766   | A | -0.042  |
| rs1424871   | C | -0.0142 |
| rs278579    | T | -0.0332 |
| rs55794414  | A | -0.0248 |
| rs117893164 | T | 0.0414  |
| rs74725480  | C | -0.0455 |
| rs148496536 | A | 0.0836  |
| rs73352335  | G | -0.0227 |
| rs117461022 | A | -0.0526 |
| rs75859361  | A | -0.0594 |
| rs474949    | G | 0.0125  |
| rs7016230   | G | 0.014   |
| rs11779854  | C | 0.0336  |
| rs60082340  | A | 0.0137  |
| rs62523289  | T | -0.0457 |
| rs72736398  | G | -0.0504 |
| rs145638327 | C | 0.0531  |
| rs13275875  | C | -0.0208 |
| rs17500365  | A | -0.0787 |
| rs7822459   | C | -0.031  |
| rs2732987   | G | 0.0171  |
| rs7831717   | T | -0.0204 |
| rs117310644 | G | 0.062   |
| rs56099413  | T | -0.0296 |

|             |   |         |
|-------------|---|---------|
| rs72659521  | T | 0.0279  |
| rs9324552   | G | -0.0147 |
| rs117189628 | G | 0.0793  |
| rs10088938  | A | -0.0453 |
| rs16907623  | T | -0.0367 |
| rs117972704 | C | 0.0611  |
| rs10111520  | T | -0.0391 |
| rs141111776 | A | -0.0539 |
| rs149993972 | T | -0.0396 |
| rs1007716   | G | -0.0178 |
| rs117258537 | G | -0.13   |
| rs16883949  | A | 0.0651  |
| rs6987489   | A | 0.0176  |
| rs16919354  | G | 0.0365  |
| rs116976449 | C | -0.0713 |
| rs4361792   | T | -0.0152 |
| rs112256050 | T | -0.0197 |
| rs28904611  | G | -0.0391 |
| rs10464825  | C | 0.012   |
| rs78179244  | G | 0.0632  |
| rs56304560  | T | 0.0237  |
| rs117166821 | T | 0.0716  |
| rs62506926  | T | 0.0115  |
| rs78159665  | G | -0.047  |
| rs17272364  | T | -0.0291 |
| rs6991482   | A | -0.0367 |
| rs117716615 | A | 0.0761  |
| rs75241198  | A | -0.047  |
| rs310373    | T | -0.0497 |
| rs6468439   | A | 0.0127  |
| rs143281665 | T | -0.0309 |
| rs73361006  | A | -0.034  |
| rs56142513  | A | 0.0747  |
| rs12155842  | A | 0.0138  |
| rs147487154 | T | 0.0198  |
| rs71515712  | T | -0.0572 |
| rs71532388  | A | 0.0177  |
| rs62532675  | G | -0.0389 |
| rs17693567  | G | -0.0126 |
| rs1869832   | C | -0.0145 |
| rs111230358 | A | 0.0682  |
| rs147211333 | A | -0.0546 |
| rs58035656  | T | 0.0154  |
| rs79420734  | C | 0.0684  |
| rs13266892  | C | -0.0208 |
| rs6999631   | G | -0.033  |
| rs147151989 | T | -0.0613 |

|             |   |         |
|-------------|---|---------|
| rs78460028  | T | 0.044   |
| rs6997388   | C | 0.0117  |
| rs554891    | C | -0.0129 |
| rs34722066  | A | 0.0403  |
| rs12716599  | C | -0.014  |
| rs13275758  | A | -0.0665 |
| rs117380898 | T | 0.0986  |
| rs16908658  | G | 0.016   |
| rs75354003  | A | 0.0465  |
| rs117000006 | A | -0.0684 |
| rs80003019  | T | 0.0449  |
| rs77994103  | T | 0.0528  |
| rs72691638  | C | 0.0175  |
| rs10503359  | C | -0.0168 |
| rs10086999  | G | 0.0116  |
| rs2625581   | G | 0.0192  |
| rs13249897  | A | -0.032  |
| rs74708957  | A | -0.0345 |
| rs6557710   | C | 0.0354  |
| rs10447953  | T | 0.0231  |
| rs72649622  | T | 0.0833  |
| rs150915887 | C | -0.036  |
| rs75110172  | A | 0.0533  |
| rs118147156 | G | 0.0404  |
| rs4871023   | T | -0.0516 |
| rs6578065   | T | 0.021   |
| rs2204223   | C | -0.0139 |
| rs2638634   | T | -0.0365 |
| rs16887011  | T | -0.0249 |
| rs7014508   | T | 0.0226  |
| rs79884132  | T | -0.0473 |
| rs4740035   | A | -0.0115 |
| rs142528860 | C | -0.0493 |
| rs117970705 | A | 0.0848  |
| rs75149604  | T | 0.0347  |
| rs72655561  | T | -0.1019 |
| rs2929290   | T | -0.013  |
| rs57353046  | C | -0.0168 |
| rs1877673   | T | -0.0145 |
| rs116840828 | T | -0.0925 |
| rs11986239  | C | -0.0168 |
| rs6997186   | C | 0.0113  |
| rs2952134   | G | -0.0137 |
| rs80190649  | A | 0.0338  |
| rs4421390   | C | -0.0116 |
| rs7832240   | G | -0.0171 |
| rs74954366  | A | 0.0505  |

|             |   |         |
|-------------|---|---------|
| rs34917849  | C | -0.0174 |
| rs2469650   | A | 0.0211  |
| rs74989710  | G | 0.0414  |
| rs2319585   | T | -0.0154 |
| rs73175353  | T | 0.055   |
| rs78841150  | A | 0.0477  |
| rs13274503  | A | -0.0184 |
| rs11774812  | A | -0.0271 |
| rs827541    | C | -0.0119 |
| rs76646010  | A | 0.0403  |
| rs62542292  | A | -0.0521 |
| rs2409127   | C | -0.0211 |
| rs76024238  | T | 0.0647  |
| rs115807853 | G | -0.0173 |
| rs13251209  | T | 0.0139  |
| rs34634717  | T | 0.0343  |
| rs7813266   | G | -0.0124 |
| rs150906603 | A | -0.0556 |
| rs59425508  | A | 0.0221  |
| rs11778007  | C | -0.0118 |
| rs16879552  | T | -0.0398 |
| rs12545665  | T | -0.0295 |
| rs7009274   | C | 0.0141  |
| rs147731606 | T | 0.0534  |
| rs62512194  | G | -0.0343 |
| rs117882446 | G | -0.0798 |
| rs4840583   | T | -0.0116 |
| rs62511715  | A | -0.0241 |
| rs12547374  | T | -0.0119 |
| rs28362495  | A | -0.0673 |
| rs4875346   | A | 0.0122  |
| rs146158868 | T | -0.0823 |
| rs77225512  | T | -0.0483 |
| rs10105014  | T | 0.0331  |
| rs74859760  | T | 0.0133  |
| rs6992562   | G | -0.0151 |
| rs72676264  | T | 0.0955  |
| rs118005113 | A | 0.0453  |
| rs35966335  | T | 0.0498  |
| rs75995783  | A | 0.0515  |
| rs17469886  | A | -0.0241 |
| rs11776133  | C | -0.0136 |
| rs13260610  | A | -0.0132 |
| rs2929313   | T | 0.0146  |
| rs17151185  | G | -0.0254 |
| rs28367317  | A | -0.0444 |
| rs77533024  | C | -0.0327 |

|             |   |         |
|-------------|---|---------|
| rs116971486 | T | -0.0733 |
| rs73552644  | T | -0.0467 |
| rs76839015  | G | 0.0479  |
| rs73287502  | T | -0.0141 |
| rs12544304  | C | 0.0132  |
| rs11777116  | T | -0.0226 |
| rs77955200  | C | -0.0798 |
| rs2741144   | G | -0.0146 |
| rs72661557  | C | -0.0685 |
| rs113019171 | C | 0.0514  |
| rs36068051  | G | 0.0253  |
| rs144077568 | G | 0.0592  |
| rs6583631   | C | 0.0665  |
| rs142469837 | T | 0.0519  |
| rs3735885   | T | 0.0116  |
| rs79810434  | T | 0.024   |
| rs28382277  | A | -0.1143 |
| rs59765184  | A | -0.0161 |
| rs17700720  | C | 0.0313  |
| rs72647329  | A | -0.0736 |
| rs10505619  | A | 0.0204  |
| rs6601298   | A | -0.0224 |
| rs78974512  | C | 0.0317  |
| rs111460988 | T | 0.0683  |
| rs118038954 | C | 0.1119  |
| rs6577900   | C | 0.0132  |
| rs62513284  | G | -0.0523 |
| rs16926871  | C | -0.0353 |
| rs2119228   | T | 0.0113  |
| rs117497267 | T | 0.0504  |
| rs768162    | A | -0.012  |
| rs1561655   | T | -0.0119 |
| rs73535350  | C | -0.0571 |
| rs7828117   | T | -0.0301 |
| rs13439802  | G | -0.0254 |
| rs74747028  | T | 0.0305  |
| rs118170442 | T | 0.0478  |
| rs139096354 | A | -0.0945 |
| rs142430226 | T | -0.0494 |
| rs2673573   | G | -0.0118 |
| rs72639673  | C | 0.0236  |
| rs2511746   | T | 0.0126  |
| rs16879112  | C | -0.0877 |
| rs77424530  | C | 0.0405  |
| rs12541981  | G | 0.0114  |
| rs113799592 | G | -0.0519 |
| rs2027922   | G | 0.0165  |

|             |   |         |
|-------------|---|---------|
| rs72726284  | C | -0.0195 |
| rs117214456 | T | 0.0822  |
| rs150578413 | G | -0.0918 |
| rs11777651  | T | -0.0144 |
| rs13248453  | G | -0.0178 |
| rs28366014  | T | -0.054  |
| rs17793991  | A | 0.0112  |
| rs55820651  | G | -0.0609 |
| rs75756851  | G | 0.0639  |
| rs12544552  | T | 0.0792  |
| rs76241844  | A | 0.0384  |
| rs13248915  | T | 0.0501  |
| rs1494277   | T | -0.0531 |
| rs11985404  | A | -0.023  |
| rs73718151  | A | 0.0698  |
| rs147963561 | C | -0.0669 |
| rs111886820 | A | 0.0586  |
| rs10086583  | C | -0.0567 |
| rs17694701  | T | 0.0544  |
| rs1601181   | A | 0.0111  |
| rs12544407  | T | 0.0234  |
| rs55653647  | G | 0.0375  |
| rs74947437  | G | -0.0532 |
| rs150531778 | A | 0.1027  |
| rs118049504 | A | -0.0411 |
| rs56256845  | T | 0.0366  |
| rs6474221   | G | -0.05   |
| rs149739631 | T | 0.0452  |
| rs4921580   | G | -0.0176 |
| rs4636214   | C | 0.0513  |
| rs2725708   | T | -0.0124 |
| rs117523948 | C | 0.0321  |
| rs76405190  | A | 0.0681  |
| rs138246583 | C | 0.0621  |
| rs10093894  | C | -0.0825 |
| rs147140939 | C | -0.0511 |
| rs74640035  | A | -0.0229 |
| rs13272331  | T | -0.016  |
| rs117036792 | A | -0.0917 |
| rs79768863  | G | 0.0292  |
| rs7010549   | G | 0.0111  |
| rs146949353 | A | 0.05    |
| rs7829031   | G | 0.0208  |
| rs150827586 | T | -0.0605 |
| rs4738327   | T | 0.0117  |
| rs282845    | G | 0.0143  |
| rs140327829 | G | -0.0653 |

|             |   |         |
|-------------|---|---------|
| rs77601701  | A | -0.0623 |
| rs821106    | G | 0.0197  |
| rs78994646  | C | 0.0592  |
| rs13254339  | C | -0.0165 |
| rs62524298  | T | 0.0283  |
| rs117830957 | C | 0.084   |
| rs140987203 | T | 0.0474  |
| rs62496760  | C | -0.016  |
| rs4737740   | G | -0.0155 |
| rs117099605 | T | -0.0507 |
| rs2683302   | C | 0.0131  |
| rs112365698 | A | 0.0579  |
| rs76622630  | T | -0.0489 |
| rs2594955   | T | -0.0173 |
| rs117647640 | T | -0.0587 |
| rs77492379  | C | -0.0372 |
| rs147917745 | A | 0.0534  |
| rs141588966 | A | -0.1004 |
| rs138386613 | T | 0.0489  |
| rs116873248 | T | -0.0283 |
| rs55843549  | T | -0.0124 |
| rs12546590  | A | -0.0187 |
| rs145793937 | C | 0.0446  |
| rs11996659  | T | 0.0183  |
| rs35288043  | G | 0.0117  |
| rs55947035  | G | 0.0505  |
| rs117881349 | T | 0.0948  |
| rs75159836  | G | 0.0169  |
| rs17343819  | C | -0.0161 |
| rs77504964  | C | 0.0444  |
| rs285870    | G | 0.0134  |
| rs3885006   | T | 0.0521  |
| rs13267028  | C | -0.0265 |
| rs72652530  | C | -0.0561 |
| rs55949731  | A | -0.0217 |
| rs79871976  | T | -0.0685 |
| rs111626678 | T | -0.1181 |
| rs112597107 | C | -0.0194 |
| rs72679098  | G | 0.0417  |
| rs117674929 | G | 0.0617  |
| rs144508563 | C | -0.0318 |
| rs16932710  | G | 0.0154  |
| rs11774454  | T | -0.0658 |
| rs2956746   | A | 0.0218  |
| rs28821172  | T | -0.04   |
| rs56268917  | T | 0.0307  |
| rs59452910  | G | -0.0149 |



|             |   |         |
|-------------|---|---------|
| rs3020254   | C | 0.0175  |
| rs149826021 | T | -0.0843 |
| rs11994157  | T | 0.0304  |
| rs62520221  | C | 0.0563  |
| rs2911685   | C | 0.0152  |
| rs9314316   | T | 0.0114  |
| rs115378230 | A | -0.0493 |
| rs144081709 | T | 0.0832  |
| rs17330971  | A | -0.0317 |
| rs7461129   | T | 0.0122  |
| rs7008475   | C | -0.0194 |
| rs17725200  | A | -0.0311 |
| rs118175280 | G | -0.0612 |
| rs10107582  | G | -0.0119 |
| rs117116698 | A | 0.048   |
| rs74364133  | C | 0.0638  |
| rs144918780 | A | -0.0295 |
| rs72684225  | C | -0.0425 |
| rs6998052   | G | -0.0172 |
| rs1371867   | C | 0.011   |
| rs901173    | G | -0.012  |
| rs34128301  | T | -0.0123 |
| rs72673285  | G | 0.0364  |
| rs76344651  | A | 0.0352  |
| rs4841075   | C | 0.0113  |
| rs138676644 | G | 0.0701  |
| rs2719366   | T | -0.0115 |
| rs140488652 | A | 0.0225  |
| rs67517943  | C | 0.0137  |
| rs2115811   | A | -0.0121 |
| rs117967230 | A | 0.0603  |
| rs79970083  | G | -0.0259 |
| rs141786312 | C | 0.0747  |
| rs141975339 | G | 0.095   |
| rs77507520  | G | -0.0317 |
| rs341683    | A | 0.0672  |
| rs116980440 | G | -0.0735 |
| rs78655362  | G | 0.0488  |
| rs12545068  | A | -0.0476 |
| rs75427654  | C | -0.0366 |
| rs2188023   | C | 0.013   |
| rs13263404  | A | -0.0179 |
| rs6991165   | A | 0.0142  |
| rs7830748   | G | 0.0477  |
| rs4876122   | T | 0.0161  |
| rs4598268   | T | 0.0399  |
| rs118048588 | A | -0.0685 |

|             |   |         |
|-------------|---|---------|
| rs2410530   | A | 0.02    |
| rs61729094  | T | -0.0537 |
| rs196818    | A | 0.0423  |
| rs2045028   | G | 0.0118  |
| rs36054848  | A | 0.0414  |
| rs3015656   | C | 0.0294  |
| rs80241203  | C | -0.0419 |
| rs146481403 | A | 0.039   |
| rs117084385 | C | -0.0314 |
| rs10103695  | T | -0.0134 |
| rs715388    | G | 0.012   |
| rs113373088 | A | 0.0787  |
| rs73264745  | T | -0.0456 |
| rs13258376  | A | 0.0465  |
| rs13257905  | T | -0.0118 |
| rs2953870   | T | 0.0158  |
| rs79103394  | A | -0.0437 |
| rs28676526  | A | -0.0387 |
| rs58480455  | T | 0.0726  |
| rs10093869  | A | -0.0122 |
| rs112018467 | T | 0.065   |
| rs74544831  | G | 0.0418  |
| rs17430434  | T | 0.0601  |
| rs77197880  | G | 0.0823  |
| rs13277382  | T | 0.0147  |
| rs17356096  | T | -0.0136 |
| rs117710059 | A | -0.0441 |
| rs7815110   | A | -0.0158 |
| rs74948866  | T | -0.0418 |
| rs7815647   | C | -0.0144 |
| rs17122808  | G | 0.0547  |
| rs76580505  | A | -0.0857 |
| rs62514029  | T | -0.0301 |
| rs11785872  | A | -0.0114 |
| rs72631038  | A | 0.0299  |
| rs930605    | A | -0.0788 |
| rs13263468  | T | 0.0333  |
| rs7820007   | T | -0.0128 |
| rs10085997  | C | -0.0746 |
| rs59992198  | A | -0.0341 |
| rs144287282 | C | -0.0522 |
| rs10957166  | C | 0.0242  |
| rs78112339  | T | -0.025  |
| rs5023278   | T | 0.0141  |
| rs79816894  | T | 0.0167  |
| rs140419138 | A | 0.0547  |
| rs62516788  | C | -0.0383 |

|             |   |         |
|-------------|---|---------|
| rs56172111  | C | -0.0419 |
| rs118148593 | G | -0.0328 |
| rs116999957 | A | 0.0416  |
| rs115870340 | G | 0.0302  |
| rs61239988  | T | -0.0234 |
| rs77026005  | G | -0.0702 |
| rs2617069   | T | -0.0146 |
| rs112360090 | C | 0.0304  |
| rs112195695 | G | 0.0613  |
| rs59338304  | A | -0.0149 |
| rs7829915   | A | -0.014  |
| rs79802971  | T | 0.038   |
| rs75948342  | T | 0.0451  |
| rs666099    | C | 0.0118  |
| rs72664652  | A | 0.0252  |
| rs79125998  | T | 0.0608  |
| rs72714537  | C | -0.0243 |
| rs13270585  | G | -0.0381 |
| rs11784915  | A | 0.0221  |
| rs57638952  | G | 0.0116  |
| rs2135538   | C | -0.012  |
| rs77878271  | G | -0.058  |
| rs56145568  | T | -0.0177 |
| rs7012503   | T | 0.039   |
| rs6472122   | A | -0.0284 |
| rs62529437  | G | 0.0163  |
| rs56287456  | A | -0.0123 |
| rs13271506  | A | 0.0286  |
| rs113000379 | T | 0.0557  |
| rs78947023  | G | -0.0169 |
| rs138343131 | A | 0.0589  |
| rs145594369 | T | 0.0806  |
| rs117402789 | C | -0.02   |
| rs142240761 | A | -0.0377 |
| rs1121425   | G | 0.0277  |
| rs2059582   | T | 0.0139  |
| rs79861714  | G | 0.0379  |
| rs112874447 | T | 0.0121  |
| rs79482053  | T | 0.0816  |
| rs34918176  | T | 0.0149  |
| rs28715878  | G | -0.0398 |
| rs881367    | C | 0.034   |
| rs4409393   | A | 0.0129  |
| rs116898781 | A | -0.0499 |
| rs150517910 | T | -0.0439 |
| rs36183928  | T | 0.014   |
| rs1015283   | G | -0.0146 |

|             |   |         |
|-------------|---|---------|
| rs78029245  | A | 0.0354  |
| rs2271530   | T | 0.0698  |
| rs113030861 | C | 0.0714  |
| rs113493019 | A | -0.0316 |
| rs1564480   | A | -0.011  |
| rs12548288  | T | 0.0124  |
| rs28371930  | G | 0.016   |
| rs17125353  | G | 0.0227  |
| rs11775247  | T | -0.0204 |
| rs148064442 | T | -0.071  |
| rs62499264  | G | 0.0148  |
| rs13258023  | T | -0.0224 |
| rs17746360  | G | 0.0236  |
| rs6988714   | G | 0.0257  |
| rs1478272   | G | -0.0176 |
| rs118128948 | T | -0.104  |
| rs117618461 | T | -0.0478 |
| rs112013054 | G | 0.0634  |
| rs746920    | A | 0.0641  |
| rs75790330  | C | 0.045   |
| rs13264361  | G | -0.0207 |
| rs79177469  | A | -0.0683 |
| rs62488400  | A | -0.0382 |
| rs34048256  | A | 0.0208  |
| rs12545366  | G | -0.0368 |
| rs77477207  | A | 0.0396  |
| rs75380529  | G | 0.0345  |
| rs113707131 | C | -0.0421 |
| rs72657075  | A | 0.0226  |
| rs78586664  | G | 0.043   |
| rs118050253 | A | -0.0384 |
| rs75993778  | A | -0.0277 |
| rs16901983  | T | 0.0523  |
| rs141840098 | G | 0.0218  |
| rs117188043 | C | -0.043  |
| rs72651376  | A | 0.037   |
| rs78214075  | A | -0.0222 |
| rs140894510 | A | -0.0845 |
| rs79815916  | A | -0.0337 |
| rs9987264   | T | 0.0146  |
| rs76661018  | T | 0.02    |
| rs403351    | A | -0.0272 |
| rs3934874   | A | -0.016  |
| rs11167097  | A | -0.0111 |
| rs75973699  | A | -0.0329 |
| rs9298052   | A | 0.0322  |
| rs117715021 | T | -0.0733 |

|             |   |         |
|-------------|---|---------|
| rs147848897 | G | 0.0462  |
| rs4568580   | C | -0.0206 |
| rs1010202   | A | 0.018   |
| rs17602876  | A | 0.0218  |
| rs17643058  | C | -0.0263 |
| rs80319208  | C | 0.0367  |
| rs142011628 | G | 0.0426  |
| rs7841732   | T | -0.0132 |
| rs61083392  | T | 0.0275  |
| rs10088594  | A | -0.074  |
| rs3935989   | C | 0.0113  |
| rs13274854  | G | 0.0261  |
| rs150802628 | A | -0.0559 |
| rs72685147  | T | 0.0294  |
| rs72609908  | T | -0.0657 |
| rs62521037  | A | 0.0314  |
| rs11997043  | A | 0.0137  |
| rs118130355 | A | 0.0649  |
| rs141152263 | T | 0.0378  |
| rs2554566   | C | -0.0107 |
| rs2638661   | A | 0.0149  |
| rs2242344   | T | -0.0158 |
| rs2285286   | C | 0.0248  |
| rs115458306 | A | -0.0901 |
| rs151191566 | A | -0.0539 |
| rs62528127  | T | -0.038  |
| rs7009797   | A | -0.0122 |
| rs139752805 | A | -0.0426 |
| rs62507090  | C | 0.0503  |
| rs2575738   | A | 0.0117  |
| rs117641534 | A | 0.0527  |
| rs79962576  | A | -0.0363 |
| rs62494394  | G | 0.0189  |
| rs117925305 | T | 0.0288  |
| rs62531100  | C | -0.0614 |
| rs144575914 | C | -0.0836 |
| rs62508132  | T | 0.0218  |
| rs143263305 | C | -0.0589 |
| rs137968103 | T | -0.0775 |
| rs118115798 | T | 0.0684  |
| rs76603222  | C | 0.0743  |
| rs62528258  | T | -0.0207 |
| rs7826548   | T | -0.0118 |
| rs13263396  | C | 0.0296  |
| rs381800    | G | 0.0147  |
| rs1600646   | G | -0.0114 |
| rs62499832  | C | 0.0699  |

|             |   |         |
|-------------|---|---------|
| rs72719440  | T | 0.0351  |
| rs138265365 | T | -0.0439 |
| rs7461281   | T | 0.0374  |
| rs11781201  | A | 0.0265  |
| rs7007130   | C | 0.0126  |
| rs17066722  | C | 0.0207  |
| rs75229425  | A | 0.0359  |
| rs13254113  | G | 0.0208  |
| rs117756383 | A | 0.0317  |
| rs117381802 | G | 0.053   |
| rs72666182  | T | 0.0827  |
| rs146774331 | T | -0.0863 |
| rs142585239 | A | -0.0658 |
| rs12548270  | G | -0.0168 |
| rs76591612  | C | 0.0475  |
| rs142965321 | T | 0.0604  |
| rs10106375  | A | 0.0297  |
| rs7839597   | C | 0.0126  |
| rs6995913   | C | 0.0122  |
| rs145794524 | T | 0.0777  |
| rs116856919 | T | -0.0858 |
| rs112320074 | C | 0.0294  |
| rs149050181 | T | -0.0608 |
| rs116918991 | A | -0.0537 |
| rs4733947   | G | 0.0111  |
| rs1545087   | A | -0.0149 |
| rs75948942  | T | -0.0306 |
| rs17738231  | C | 0.015   |
| rs76357261  | G | -0.0152 |
| rs57137307  | T | 0.0338  |
| rs13439370  | G | 0.0155  |
| rs77006412  | T | -0.0352 |
| rs34536038  | G | 0.0138  |
| rs10503183  | C | -0.0191 |
| rs113817531 | C | -0.0172 |
| rs13257391  | A | 0.0229  |
| rs10090848  | T | 0.0158  |
| rs116842039 | A | 0.1023  |
| rs724029    | G | -0.02   |
| rs2665636   | T | -0.0182 |
| rs117236381 | G | 0.0648  |
| rs11779891  | T | 0.0157  |
| rs117364076 | G | 0.0827  |
| rs79242484  | T | 0.0287  |
| rs10503218  | C | 0.0313  |
| rs28579545  | T | -0.0191 |
| rs4385492   | C | 0.0122  |

|             |   |         |
|-------------|---|---------|
| rs138709942 | G | 0.0831  |
| rs10105441  | G | 0.0301  |
| rs76718809  | T | 0.0354  |
| rs60667200  | T | -0.0187 |
| rs4736746   | C | 0.011   |
| rs2917552   | A | -0.0135 |
| rs3866487   | T | -0.0201 |
| rs3019089   | G | -0.011  |
| rs73216709  | G | -0.0169 |
| rs117886456 | C | 0.0653  |
| rs116899081 | G | -0.0643 |
| rs283734    | G | -0.0249 |
| rs117661117 | T | 0.053   |
| rs62522234  | T | 0.0631  |
| rs17063397  | T | -0.0171 |
| rs7386380   | G | -0.0133 |
| rs56198596  | C | -0.0146 |
| rs73662804  | G | 0.0214  |
| rs7839318   | G | -0.0489 |
| rs139315137 | C | 0.0814  |
| rs117731900 | A | -0.0613 |
| rs76902606  | T | -0.0264 |
| rs75295729  | C | -0.0632 |
| rs13278038  | G | -0.0207 |
| rs4739080   | A | -0.011  |
| rs11987577  | T | 0.0157  |
| rs74632959  | A | -0.0746 |
| rs113329286 | C | 0.0373  |
| rs77756209  | G | 0.0354  |
| rs7815606   | G | 0.017   |
| rs147347657 | A | 0.0224  |
| rs59995847  | C | -0.0153 |
| rs78640413  | A | 0.0325  |
| rs56157545  | G | -0.0136 |
| rs2454039   | T | 0.0179  |
| rs76827728  | T | -0.0405 |
| rs140527035 | T | 0.0563  |
| rs17259760  | C | 0.0155  |
| rs71515102  | G | 0.0453  |
| rs10105285  | C | -0.011  |
| rs111935171 | G | -0.0819 |
| rs689266    | T | 0.072   |
| rs11185676  | A | 0.0789  |
| rs6475528   | T | 0.0691  |
| rs10972598  | T | 0.0698  |
| rs10991386  | G | 0.0731  |
| rs73522232  | C | 0.2458  |

|             |   |         |
|-------------|---|---------|
| rs3814551   | C | 0.1454  |
| rs148101951 | G | -0.2052 |
| rs62555959  | A | 0.0627  |
| rs943424    | T | 0.0745  |
| rs12002176  | A | -0.0731 |
| rs887656    | T | 0.088   |
| rs11139090  | A | 0.1956  |
| rs10491770  | G | 0.1061  |
| rs79762261  | T | 0.1877  |
| rs7039875   | T | -0.0643 |
| rs1323342   | T | 0.07    |
| rs78893982  | G | 0.1749  |
| rs975411    | T | 0.1368  |
| rs148978555 | A | 0.197   |
| rs9298861   | G | -0.0961 |
| rs4977691   | G | 0.0993  |
| rs10967772  | T | 0.0638  |
| rs62572586  | T | -0.0762 |
| rs1409955   | C | 0.0658  |
| rs116846127 | C | 0.3184  |
| rs998990    | A | 0.0956  |
| rs76333370  | C | -0.137  |
| rs117508250 | C | -0.1628 |
| rs147549273 | G | 0.1628  |
| rs882130    | C | 0.0638  |
| rs62552179  | T | 0.1604  |
| rs17542250  | T | -0.3594 |
| rs77324810  | G | 0.3075  |
| rs17082562  | A | 0.2066  |
| rs10965163  | T | 0.1058  |
| rs10817615  | A | -0.0621 |
| rs62555918  | C | 0.1083  |
| rs75315373  | T | -0.1641 |
| rs12551377  | C | 0.0637  |
| rs13291127  | C | 0.081   |
| rs7869001   | T | 0.1192  |
| rs72748423  | G | 0.1228  |
| rs2378736   | G | 0.2829  |
| rs10964136  | T | 0.2222  |
| rs138487996 | A | 0.1106  |
| rs12375886  | T | -0.0727 |
| rs79702197  | G | 0.1164  |
| rs139047667 | T | -0.232  |
| rs12380408  | C | 0.0725  |
| rs13297364  | G | 0.0612  |
| rs17061584  | G | -0.0675 |
| rs880014    | C | -0.0538 |



|             |   |         |
|-------------|---|---------|
| rs16920612  | A | 0.0745  |
| rs2417652   | G | -0.0797 |
| rs591486    | G | -0.0539 |
| rs10972693  | T | 0.2509  |
| rs111621104 | G | 0.2006  |
| rs7033834   | C | 0.1055  |
| rs62567184  | C | -0.3238 |
| rs61681571  | A | 0.0678  |
| rs62569668  | T | -0.1617 |
| rs10991692  | C | -0.1859 |
| rs6476804   | G | 0.0517  |
| rs77530064  | A | -0.2601 |
| rs10812555  | A | -0.0572 |
| rs113554480 | T | -0.2894 |
| rs72706796  | T | -0.1277 |
| rs7040842   | C | -0.0592 |
| rs10987158  | C | -0.0732 |
| rs76937843  | G | -0.2394 |
| rs75556592  | T | -0.3087 |
| rs10821507  | T | -0.0622 |
| rs79332955  | G | 0.2791  |
| rs10746588  | G | -0.0544 |
| rs10816093  | G | -0.0596 |
| rs117499257 | A | 0.0974  |
| rs10115062  | C | 0.0504  |
| rs7872171   | G | 0.3027  |
| rs589459    | C | 0.0515  |
| rs10975966  | T | 0.2815  |
| rs12339683  | T | 0.0545  |
| rs10821026  | A | -0.1737 |
| rs146791383 | T | -0.2172 |
| rs142074874 | A | 0.1534  |
| rs13295180  | G | 0.4764  |
| rs76576991  | A | -0.1761 |
| rs72700492  | G | -0.2197 |
| rs73653246  | A | -0.123  |
| rs62565051  | T | -0.1731 |
| rs7870921   | C | -0.0688 |
| rs79161723  | A | -0.0937 |
| rs12684606  | G | -0.0512 |
| rs113565745 | T | 0.087   |
| rs1332083   | C | 0.1031  |
| rs4246868   | C | -0.0517 |
| rs28808010  | C | 0.1593  |
| rs7030443   | G | 0.0742  |
| rs1889247   | C | -0.0813 |
| rs2405373   | A | 0.0703  |

|             |   |         |
|-------------|---|---------|
| rs76235825  | G | 0.1769  |
| rs117121425 | A | 0.1412  |
| rs62570299  | G | -0.1671 |
| rs11143005  | T | 0.0659  |
| rs10961512  | T | 0.0549  |
| rs2225540   | A | -0.0548 |
| rs62584843  | C | -0.1882 |
| rs406273    | T | -0.0522 |
| rs1360555   | T | -0.0757 |
| rs75094196  | C | 0.2099  |
| rs76685628  | C | -0.1502 |
| rs116972571 | T | 0.2107  |
| rs35522861  | A | 0.1971  |
| rs13295599  | A | 0.0991  |
| rs11265930  | C | -0.0729 |
| rs10963821  | T | -0.0518 |
| rs118069744 | A | -0.2871 |
| rs7862075   | C | -0.054  |
| rs1094328   | T | 0.0935  |
| rs17251166  | C | -0.0544 |
| rs144062917 | G | -0.205  |
| rs117813170 | G | 0.1621  |
| rs10992978  | G | 0.049   |
| rs12551942  | G | -0.1374 |
| rs4538962   | T | -0.1593 |
| rs11144706  | T | -0.0928 |
| rs117425163 | A | 0.1832  |
| rs3002339   | G | -0.0542 |
| rs112191751 | C | 0.2794  |
| rs61119163  | G | 0.1823  |
| rs13292052  | A | -0.2388 |
| rs117266598 | T | 0.1746  |
| rs60125430  | T | 0.1062  |
| rs34334119  | T | 0.2032  |
| rs6477427   | G | -0.0518 |
| rs1777016   | C | -0.0522 |
| rs72713555  | A | -0.0766 |
| rs10869681  | T | -0.0765 |
| rs7027702   | T | 0.1647  |
| rs7035478   | A | -0.0563 |
| rs55719775  | A | 0.0867  |
| rs17341942  | T | 0.0583  |
| rs118067779 | A | 0.2312  |
| rs2761691   | C | -0.0489 |
| rs2382712   | A | 0.0519  |
| rs118056706 | A | -0.2145 |
| rs505698    | T | -0.065  |

|             |   |         |
|-------------|---|---------|
| rs10818074  | T | 0.0874  |
| rs4979530   | T | 0.1278  |
| rs72707092  | A | -0.1795 |
| rs10759995  | A | 0.0487  |
| rs77042776  | C | 0.1935  |
| rs10966580  | C | -0.0636 |
| rs80329300  | G | -0.2725 |
| rs142093543 | T | 0.2071  |
| rs6559320   | C | 0.0521  |
| rs72703461  | G | 0.1162  |
| rs2792222   | A | 0.0812  |
| rs116919711 | T | 0.1654  |
| rs4742223   | T | 0.0531  |
| rs529692    | T | 0.0575  |
| rs61447981  | C | -0.1224 |
| rs10760445  | C | 0.0542  |
| rs10867697  | A | 0.2862  |
| rs10756796  | A | 0.0481  |
| rs11144503  | G | 0.0532  |
| rs56916472  | A | 0.1417  |
| rs113781688 | T | -0.1708 |
| rs11791850  | G | 0.054   |
| rs56334115  | T | 0.1654  |
| rs7846888   | C | -0.0503 |
| rs2188076   | G | 0.0549  |
| rs7041169   | T | 0.0508  |
| rs7026296   | G | -0.0836 |
| rs7869045   | A | 0.102   |
| rs10964158  | T | -0.0607 |
| rs10964280  | G | 0.1363  |
| rs141264611 | A | -0.2293 |
| rs117641433 | A | 0.1892  |
| rs10815900  | T | -0.0718 |
| rs72621419  | C | 0.1431  |
| rs5320      | A | 0.1052  |
| rs10975664  | G | 0.1802  |
| rs112559397 | G | 0.2457  |
| rs77932211  | G | -0.1792 |
| rs7020640   | T | 0.0668  |
| rs12156640  | A | -0.0822 |
| rs1407920   | C | -0.054  |
| rs10979884  | T | -0.054  |
| rs10511761  | T | -0.049  |
| rs4997084   | G | -0.1755 |
| rs4740322   | C | 0.2106  |
| rs10987278  | T | -0.0525 |
| rs1029046   | T | -0.0755 |

|             |   |         |
|-------------|---|---------|
| rs148026658 | T | 0.3464  |
| rs10757083  | C | -0.0612 |
| rs1630945   | T | -0.0511 |
| rs10814744  | A | 0.052   |
| rs72700770  | A | -0.1273 |
| rs10979611  | C | 0.1347  |
| rs12237836  | G | -0.0623 |
| rs148425940 | G | -0.2416 |
| rs4078501   | C | 0.0681  |
| rs869626    | A | -0.1119 |
| rs77809181  | G | 0.1199  |
| rs11185669  | A | 0.0525  |
| rs9987900   | C | -0.0467 |
| rs12335500  | G | 0.158   |
| rs16931163  | T | 0.2292  |
| rs1571485   | C | -0.0916 |
| rs7039698   | T | -0.074  |
| rs11790381  | G | 0.278   |
| rs146423947 | A | 0.2848  |
| rs10739144  | A | -0.0588 |
| rs2382372   | A | -0.0783 |
| rs10972874  | G | -0.0498 |
| rs2768281   | A | 0.2592  |
| rs6475432   | T | -0.0613 |
| rs10758374  | T | 0.0574  |
| rs111721525 | G | 0.2321  |
| rs12343298  | C | 0.0778  |
| rs75135534  | A | 0.1678  |
| rs7875266   | G | 0.0999  |
| rs666478    | C | -0.0482 |
| rs7045961   | G | 0.0677  |
| rs16906722  | T | 0.085   |
| rs7854618   | C | -0.0786 |
| rs975696    | T | -0.1167 |
| rs1442512   | C | 0.1273  |
| rs75127805  | G | 0.3355  |
| rs74476354  | T | 0.3204  |
| rs7048837   | C | 0.0909  |
| rs12378542  | T | -0.0944 |
| rs72760773  | A | -0.0966 |
| rs139778573 | T | -0.3323 |
| rs142942636 | C | 0.3258  |
| rs4745463   | T | -0.059  |
| rs7036628   | G | -0.2215 |
| rs142893997 | G | 0.0875  |
| rs12346988  | C | -0.075  |
| rs4526420   | T | 0.0459  |

|             |   |         |
|-------------|---|---------|
| rs10858123  | A | -0.087  |
| rs7032548   | C | 0.0492  |
| rs1759617   | A | 0.0774  |
| rs7022738   | A | -0.2049 |
| rs10974408  | G | 0.0788  |
| rs10755996  | T | -0.047  |
| rs7850235   | T | -0.1283 |
| rs79723139  | G | 0.1798  |
| rs10759252  | C | 0.0458  |
| rs2578283   | A | 0.0499  |
| rs33945538  | T | -0.1371 |
| rs11103770  | C | -0.1341 |
| rs11142924  | T | 0.0945  |
| rs10115623  | G | 0.1633  |
| rs10113929  | G | -0.2053 |
| rs66825775  | A | -0.0645 |
| rs519067    | T | 0.0494  |
| rs56329463  | C | -0.1195 |
| rs1999472   | A | -0.0451 |
| rs68077160  | T | 0.1572  |
| rs7857133   | A | -0.0477 |
| rs71509778  | C | 0.1646  |
| rs12004623  | C | -0.0461 |
| rs12348644  | T | 0.1606  |
| rs968477    | A | -0.0521 |
| rs12551189  | T | 0.1637  |
| rs74758909  | G | 0.2431  |
| rs1051863   | G | -0.0771 |
| rs660148    | A | 0.0497  |
| rs2118167   | C | 0.0462  |
| rs2094394   | G | 0.0446  |
| rs78656278  | A | -0.1994 |
| rs75372853  | C | 0.1058  |
| rs57361784  | A | 0.1196  |
| rs7030465   | T | -0.0978 |
| rs117189578 | T | 0.2006  |
| rs7023003   | G | -0.0572 |
| rs116987857 | A | 0.3219  |
| rs10960500  | G | -0.0816 |
| rs10124379  | T | 0.0457  |
| rs112356767 | T | 0.1076  |
| rs66837256  | G | -0.077  |
| rs583973    | A | -0.0454 |
| rs13286950  | G | 0.0677  |
| rs7855643   | T | 0.0696  |
| rs4628337   | A | 0.0555  |
| rs78320241  | G | 0.2471  |

|             |   |         |
|-------------|---|---------|
| rs6475067   | T | 0.0487  |
| rs117885001 | T | -0.2722 |
| rs487752    | A | -0.0518 |
| rs73484595  | C | 0.0666  |
| rs7865004   | A | -0.0597 |
| rs112755903 | T | 0.2923  |
| rs2254708   | C | 0.0595  |
| rs679779    | T | -0.0611 |
| rs11140090  | T | 0.049   |
| rs2890842   | G | -0.0448 |
| rs2183686   | G | -0.0454 |
| rs116947080 | A | 0.2006  |
| rs2769064   | T | 0.0456  |
| rs10819772  | G | 0.0647  |
| rs9409574   | C | 0.0476  |
| rs4424343   | A | -0.0594 |
| rs11141291  | A | 0.049   |
| rs75510317  | G | 0.1772  |
| rs62526377  | T | 0.2805  |
| rs148601744 | G | 0.303   |
| rs12376600  | G | -0.1178 |
| rs7853599   | G | -0.0577 |
| rs3005716   | C | -0.0454 |
| rs143738065 | C | -0.315  |
| rs4740766   | G | -0.0445 |
| rs150165536 | A | 0.211   |
| rs79706990  | C | 0.2533  |
| rs7863506   | G | 0.0468  |
| rs2798024   | C | 0.2548  |
| rs56112398  | A | 0.3155  |
| rs117847368 | C | 0.2031  |
| rs147136701 | A | -0.4386 |
| rs117985421 | C | -0.2517 |
| rs10780594  | C | -0.0499 |
| rs2078291   | G | 0.0461  |
| rs4242650   | C | 0.0773  |
| rs10816685  | C | -0.0435 |
| rs117947442 | A | -0.2019 |
| rs10970862  | T | 0.0961  |
| rs72691110  | C | 0.1486  |
| rs62574343  | A | 0.0928  |
| rs1582620   | C | 0.0698  |
| rs7041450   | G | -0.0738 |
| rs117691370 | G | -0.2626 |
| rs117966406 | T | 0.3064  |
| rs59284186  | T | 0.1597  |
| rs7869386   | A | -0.1272 |

|             |   |         |
|-------------|---|---------|
| rs11140152  | T | -0.0479 |
| rs67224495  | G | 0.129   |
| rs569558    | T | 0.0583  |
| rs2067736   | C | -0.0567 |
| rs10122747  | G | 0.1327  |
| rs321738    | A | -0.0559 |
| rs7864710   | A | 0.1363  |
| rs10733205  | T | -0.0854 |
| rs149598679 | C | -0.2202 |
| rs7862414   | A | 0.0713  |
| rs2378363   | G | -0.0473 |
| rs969544    | A | 0.048   |
| rs11793040  | G | -0.045  |
| rs75751937  | T | 0.2721  |
| rs883402    | G | 0.0655  |
| rs1333039   | G | -0.0444 |
| rs56795713  | C | -0.1308 |
| rs646418    | A | 0.0494  |
| rs10970060  | C | -0.1875 |
| rs748751    | G | -0.0555 |
| rs3750325   | T | 0.1163  |
| rs118156642 | T | -0.1581 |
| rs405328    | C | -0.072  |
| rs76473683  | T | -0.2367 |
| rs10761131  | G | 0.1225  |
| rs149981113 | G | 0.2709  |
| rs118138024 | G | 0.2624  |
| rs78214843  | T | 0.2001  |
| rs62534031  | G | 0.1391  |
| rs1047868   | T | -0.0519 |
| rs547009    | T | 0.0459  |
| rs7849972   | C | -0.0479 |
| rs12336517  | C | -0.1505 |
| rs17180962  | T | -0.2046 |
| rs10512398  | C | 0.0782  |
| rs4837961   | G | 0.0721  |
| rs1648935   | G | 0.0445  |
| rs73512262  | T | 0.2004  |
| rs10491834  | T | 0.2662  |
| rs4977583   | C | -0.0612 |
| rs10977014  | C | 0.059   |
| rs1354458   | A | 0.0505  |
| rs2900286   | C | -0.0469 |
| rs2768658   | T | 0.0469  |
| rs75428492  | T | 0.2531  |
| rs10960408  | A | -0.046  |
| rs13297831  | G | -0.0445 |

|             |   |         |
|-------------|---|---------|
| rs883443    | C | 0.1245  |
| rs72701980  | T | -0.1427 |
| rs79257812  | T | 0.2653  |
| rs1926771   | T | -0.0447 |
| rs4977728   | T | -0.0631 |
| rs12685826  | A | -0.052  |
| rs12376543  | T | 0.0597  |
| rs147226013 | A | 0.2964  |
| rs2991205   | T | -0.0664 |
| rs2375256   | A | -0.0424 |
| rs10817816  | T | -0.0532 |
| rs72712882  | A | 0.0825  |
| rs1544065   | G | -0.0645 |
| rs62577093  | C | -0.2814 |
| rs12555610  | A | 0.08    |
| rs1112694   | C | 0.1382  |
| rs62559859  | C | 0.1604  |
| rs35610872  | G | 0.0451  |
| rs10809799  | C | -0.0697 |
| rs28546438  | T | 0.0492  |
| rs2148600   | C | -0.0492 |
| rs2813939   | G | -0.0485 |
| rs149232787 | G | 0.1128  |
| rs4877778   | A | -0.0477 |
| rs62570363  | A | 0.2057  |
| rs75291942  | A | -0.1991 |
| rs117934575 | T | 0.1776  |
| rs74775082  | A | 0.235   |
| rs12684396  | T | 0.2832  |
| rs71508548  | G | 0.2349  |
| rs10964145  | C | -0.2306 |
| rs143817396 | T | -0.1887 |
| rs10869633  | G | 0.0497  |
| rs10818288  | G | 0.0431  |
| rs33967773  | T | -0.0446 |
| rs1547209   | T | -0.0525 |
| rs73520181  | G | 0.0879  |
| rs117388281 | T | -0.2588 |
| rs143702057 | T | 0.2198  |
| rs12553066  | C | 0.0487  |
| rs57479634  | G | 0.0832  |
| rs111543864 | T | 0.0784  |
| rs148123055 | G | 0.2269  |
| rs1341082   | C | -0.0696 |
| rs10217194  | T | -0.043  |
| rs79714005  | G | 0.3394  |
| rs4744765   | T | 0.0594  |



|             |   |         |
|-------------|---|---------|
| rs118180674 | T | 0.2097  |
| rs2905094   | T | -0.0487 |
| rs2150089   | A | 0.0801  |
| rs10974874  | A | -0.0576 |
| rs750186    | A | 0.1459  |
| rs10812838  | A | 0.0454  |
| rs118044987 | A | 0.2886  |
| rs7862591   | T | 0.2678  |
| rs10975660  | T | 0.0943  |
| rs61145567  | T | 0.0869  |
| rs113495566 | T | 0.22    |
| rs2378755   | T | 0.0881  |
| rs73394021  | C | -0.1077 |
| rs77734730  | A | -0.3797 |
| rs62578880  | T | -0.0477 |
| rs12552738  | A | 0.0542  |
| rs913258    | C | -0.0908 |
| rs16931103  | C | -0.1133 |
| rs111355850 | A | -0.1202 |
| rs146104933 | A | 0.2161  |
| rs1407837   | G | 0.0441  |
| rs273461    | T | -0.0963 |
| rs2114521   | A | 0.0742  |
| rs609691    | A | -0.0428 |
| rs111766431 | A | -0.1512 |
| rs55799926  | A | -0.1557 |
| rs112370969 | A | 0.353   |
| rs11552451  | C | 0.0788  |
| rs10989176  | C | -0.1115 |
| rs148259476 | T | 0.2168  |
| rs576026    | A | 0.041   |
| rs67071328  | T | -0.0627 |
| rs10123003  | T | 0.0671  |
| rs12553749  | A | 0.2984  |
| rs9644983   | A | 0.0572  |
| rs4742997   | T | -0.0467 |
| rs117557066 | T | 0.2624  |
| rs2230122   | A | 0.0796  |
| rs10985169  | T | 0.1877  |
| rs11506981  | G | 0.0614  |
| rs138898773 | A | 0.0801  |
| rs2451952   | C | -0.1677 |
| rs4962160   | A | -0.1103 |
| rs112522857 | T | -0.1649 |
| rs7044202   | G | 0.1128  |
| rs80245189  | C | 0.296   |
| rs10868320  | T | -0.0567 |

|             |   |         |
|-------------|---|---------|
| rs117232661 | A | 0.1678  |
| rs1572104   | G | -0.041  |
| rs74549277  | A | 0.1668  |
| rs7858544   | T | 0.0537  |
| rs78144872  | C | 0.1324  |
| rs12004886  | A | 0.0852  |
| rs12352194  | G | 0.049   |
| rs7864347   | G | -0.0625 |
| rs10760755  | T | 0.0419  |
| rs56052111  | G | 0.166   |
| rs117209153 | C | -0.1362 |
| rs2027171   | T | 0.0429  |
| rs17440439  | T | -0.0738 |
| rs62578603  | T | 0.1701  |
| rs78283772  | G | -0.0672 |
| rs71503583  | G | -0.1855 |
| rs117443934 | A | 0.1859  |
| rs572491    | T | -0.0442 |
| rs10962953  | G | 0.0681  |
| rs979814    | G | 0.0586  |
| rs75241533  | G | 0.2412  |
| rs35838497  | A | 0.0591  |
| rs17292757  | T | -0.0831 |
| rs526139    | G | 0.0411  |
| rs35165483  | C | 0.0578  |
| rs116906369 | C | 0.2308  |
| rs2281784   | C | -0.1905 |
| rs10869736  | C | -0.0455 |
| rs1330147   | T | -0.0635 |
| rs10985914  | G | -0.0954 |
| rs7026372   | C | 0.0599  |
| rs79418597  | A | 0.2812  |
| rs1572903   | A | -0.0529 |
| rs12238386  | T | -0.0539 |
| rs977607    | T | 0.055   |
| rs10813118  | C | 0.0618  |
| rs118181102 | C | 0.2511  |
| rs920901    | G | 0.0425  |
| rs17806439  | G | -0.0863 |
| rs12235976  | G | 0.2772  |
| rs117794264 | T | 0.1706  |
| rs10118580  | G | 0.0573  |
| rs1173032   | A | 0.0419  |
| rs1029035   | G | 0.0413  |
| rs2485155   | G | 0.0427  |
| rs10979980  | G | 0.09    |
| rs2068955   | A | -0.0398 |

|             |   |         |
|-------------|---|---------|
| rs35995240  | T | 0.2054  |
| rs147857814 | A | -0.1351 |
| rs7855078   | A | -0.0429 |
| rs10156591  | C | 0.0437  |
| rs7866547   | G | -0.0731 |
| rs572195    | C | 0.157   |
| rs7846974   | C | 0.0457  |
| rs291761    | A | 0.237   |
| rs62576356  | C | 0.0765  |
| rs62568151  | G | -0.0594 |
| rs7866215   | A | -0.0603 |
| rs10812219  | A | -0.0505 |
| rs10963243  | G | 0.0802  |
| rs4743827   | T | 0.041   |
| rs599688    | T | 0.0554  |
| rs10975892  | C | -0.1471 |
| rs117718482 | T | 0.1751  |
| rs11144746  | T | 0.1105  |
| rs11145492  | T | -0.0764 |
| rs13290207  | T | -0.0665 |
| rs3003573   | G | -0.0478 |
| rs73391358  | C | 0.1238  |
| rs11791210  | G | 0.092   |
| rs17286782  | A | -0.1671 |
| rs7043378   | A | -0.04   |
| rs139144611 | A | 0.169   |
| rs28582525  | C | 0.1617  |
| rs10981340  | G | -0.0431 |
| rs80331497  | G | 0.1829  |
| rs77645975  | C | -0.0988 |
| rs80311746  | T | 0.2369  |
| rs10867949  | A | 0.0468  |
| rs1281813   | C | 0.0506  |
| rs13300660  | A | -0.0528 |
| rs2987392   | C | 0.0785  |
| rs78075956  | C | -0.0682 |
| rs7048007   | G | -0.0565 |
| rs150872239 | A | -0.1998 |
| rs7872181   | G | 0.042   |
| rs1530474   | T | -0.0426 |
| rs10811582  | G | -0.0418 |
| rs7047365   | C | -0.0401 |
| rs117936468 | T | 0.2545  |
| rs1331624   | A | -0.044  |
| rs13467     | G | -0.1204 |
| rs58312059  | C | 0.167   |
| rs10118587  | C | 0.1055  |

|             |   |         |
|-------------|---|---------|
| rs4742430   | A | -0.057  |
| rs117309685 | A | -0.125  |
| rs944641    | C | 0.0458  |
| rs111646033 | G | -0.1998 |
| rs10973751  | C | 0.2095  |
| rs34000822  | T | 0.0416  |
| rs4837492   | C | -0.0421 |
| rs150704618 | C | -0.2816 |
| rs139818891 | T | -0.1901 |
| rs117129207 | G | 0.2183  |
| rs76373463  | A | -0.2042 |
| rs72744191  | A | 0.1188  |
| rs3211703   | C | 0.0566  |
| rs1888288   | C | -0.0425 |
| rs146942615 | C | 0.164   |
| rs113382336 | C | 0.1475  |
| rs2986254   | G | 0.0422  |
| rs7044325   | C | -0.0429 |
| rs10992007  | A | 0.1586  |
| rs35237880  | C | 0.1495  |
| rs944516    | A | 0.0583  |
| rs16930650  | C | -0.1559 |
| rs72704243  | C | -0.1597 |
| rs73416629  | G | 0.171   |
| rs7871922   | G | -0.0532 |
| rs12686417  | G | -0.0514 |
| rs112080913 | C | 0.131   |
| rs13298211  | T | -0.0868 |
| rs9409099   | A | 0.0994  |
| rs143985521 | A | 0.1702  |
| rs78966040  | T | -0.0716 |
| rs815853    | G | 0.0498  |
| rs117537401 | A | 0.3049  |
| rs10974327  | G | -0.0445 |
| rs12685916  | A | 0.1658  |
| rs72758736  | C | -0.0672 |
| rs72705693  | T | 0.2948  |
| rs10973039  | A | 0.0939  |
| rs112479968 | T | -0.1959 |
| rs116958493 | G | -0.1509 |
| rs28718362  | T | 0.0559  |
| rs117052268 | T | -0.1692 |
| rs12238074  | C | 0.0644  |
| rs137893447 | A | -0.1351 |
| rs6474776   | T | 0.0967  |
| rs12350191  | T | 0.1892  |
| rs149891738 | T | -0.1539 |

|             |   |         |
|-------------|---|---------|
| rs7039011   | G | -0.0456 |
| rs2274607   | A | 0.0606  |
| rs690164    | T | -0.0512 |
| rs143072587 | A | -0.1841 |
| rs45450091  | A | 0.2569  |
| rs2636881   | G | -0.0461 |
| rs11103293  | A | -0.0592 |
| rs2149876   | G | 0.0432  |
| rs117221769 | G | 0.2585  |
| rs72707936  | C | 0.0854  |
| rs73662553  | T | 0.1479  |
| rs41274362  | A | -0.3429 |
| rs71497661  | T | -0.0669 |
| rs7032944   | A | -0.0858 |
| rs111756257 | A | 0.2073  |
| rs17056676  | C | -0.0895 |
| rs7858605   | C | 0.0415  |
| rs11143514  | A | 0.0721  |
| rs28731032  | T | -0.047  |
| rs4631582   | A | -0.1028 |
| rs7047731   | A | 0.0669  |
| rs4917341   | C | -0.0419 |
| rs111862803 | G | -0.1133 |
| rs147956168 | T | -0.2891 |
| rs13297074  | A | -0.056  |
| rs9644870   | G | -0.0829 |
| rs1414063   | T | -0.0471 |
| rs17720310  | G | 0.0612  |
| rs78932424  | T | 0.3152  |
| rs147788634 | T | 0.3739  |
| rs990000    | C | 0.051   |
| rs148399373 | T | 0.1759  |
| rs117045012 | A | 0.1481  |
| rs1755624   | T | -0.0513 |
| rs113101231 | A | -0.2354 |
| rs10119966  | T | 0.0468  |
| rs72731495  | T | -0.3366 |
| rs75213728  | C | 0.1587  |
| rs12352496  | G | 0.0613  |
| rs10738997  | C | 0.055   |
| rs1758695   | G | -0.0447 |
| rs113483724 | T | 0.2912  |
| rs9802466   | G | 0.0517  |
| rs10973426  | T | -0.0645 |
| rs146863729 | T | 0.1559  |
| rs149597588 | C | -0.212  |
| rs475775    | A | 0.0882  |

|             |   |         |
|-------------|---|---------|
| rs113591992 | G | 0.2348  |
| rs80088989  | C | -0.1324 |
| rs62581467  | G | 0.1682  |
| rs6475848   | G | -0.0484 |
| rs10820839  | A | 0.0971  |
| rs4149283   | T | -0.1057 |
| rs7028995   | T | 0.053   |
| rs145222661 | T | -0.1034 |
| rs11142081  | G | 0.0688  |
| rs74458591  | A | 0.1539  |
| rs12346901  | G | 0.1128  |
| rs35579338  | G | 0.0726  |
| rs2381675   | G | 0.0603  |
| rs1566447   | T | 0.0447  |
| rs12376386  | A | 0.0482  |
| rs872253    | A | 0.0703  |
| rs11144239  | T | -0.0989 |
| rs150649707 | T | -0.2188 |
| rs11144513  | T | 0.0873  |
| rs11790516  | G | 0.0478  |
| rs403114    | G | 0.039   |
| rs111501215 | A | 0.1662  |
| rs7856096   | G | 0.1623  |
| rs10972013  | T | -0.0419 |
| rs114648049 | T | 0.1345  |
| rs117481546 | C | 0.1958  |
| rs62572334  | G | -0.1207 |
| rs117327212 | C | 0.2252  |
| rs7465866   | G | 0.0485  |
| rs1412341   | T | -0.057  |
| rs117082960 | T | 0.1522  |
| rs7847387   | A | 0.0682  |
| rs7022716   | G | -0.119  |
| rs11141381  | A | 0.0406  |
| rs13302073  | A | 0.2139  |
| rs1220667   | A | -0.0414 |
| rs78056563  | G | 0.1704  |
| rs62581070  | T | 0.1055  |
| rs55776338  | C | 0.0583  |
| rs141337973 | A | -0.3303 |
| rs7031448   | T | 0.057   |
| rs34629716  | T | 0.1068  |
| rs10965500  | C | -0.3775 |
| rs10122574  | T | 0.0464  |
| rs12352354  | T | 0.2505  |
| rs10901225  | C | 0.0528  |
| rs2242103   | A | 0.0716  |

|             |   |         |
|-------------|---|---------|
| rs11140987  | T | -0.039  |
| rs16924806  | C | 0.1115  |
| rs4979066   | C | -0.0449 |
| rs1033794   | G | -0.04   |
| rs10813243  | G | -0.0405 |
| rs2810543   | A | 0.1499  |
| rs116921932 | A | 0.061   |
| rs12684640  | C | 0.0862  |
| rs150845005 | A | -0.2591 |
| rs3780830   | T | 0.1732  |
| rs10780982  | G | -0.0403 |
| rs4841903   | G | -0.0422 |
| rs11103542  | G | -0.0899 |
| rs142222679 | T | 0.1622  |
| rs7873304   | A | 0.0731  |
| rs7869967   | A | 0.0459  |
| rs10819944  | G | -0.0638 |
| rs73457879  | C | 0.2454  |
| rs141696739 | A | 0.2142  |
| rs2066714   | C | -0.082  |
| rs2800257   | T | -0.0448 |
| rs3910849   | A | -0.0418 |
| rs7867451   | C | 0.2648  |
| rs2986682   | T | 0.1545  |
| rs78154480  | A | 0.2198  |
| rs11103131  | A | 0.1511  |
| rs3128507   | A | 0.0409  |
| rs55679235  | A | 0.2641  |
| rs10987159  | G | 0.1582  |
| rs34513499  | C | -0.0395 |
| rs2417484   | T | 0.0556  |
| rs7026899   | T | -0.0406 |
| rs13289414  | T | 0.0488  |
| rs16931970  | C | 0.088   |
| rs79331712  | G | 0.1146  |
| rs148131930 | A | -0.2324 |
| rs79675117  | C | 0.0776  |
| rs72744009  | G | -0.3777 |
| rs1407856   | G | 0.0495  |
| rs10123563  | C | -0.0724 |
| rs6476813   | A | -0.0415 |
| rs7046854   | C | 0.0646  |
| rs112291234 | T | -0.1697 |
| rs147605527 | A | 0.2512  |
| rs36110289  | T | 0.0554  |
| rs1412068   | A | -0.0377 |
| rs11243975  | T | -0.0792 |

|             |   |         |
|-------------|---|---------|
| rs10991816  | G | 0.043   |
| rs17318283  | A | -0.0399 |
| rs148422770 | A | -0.2099 |
| rs3808759   | G | 0.0393  |
| rs61336812  | T | 0.093   |
| rs141679323 | C | 0.2795  |
| rs118062536 | T | -0.2128 |
| rs72697189  | G | -0.1441 |
| rs734477    | C | -0.0508 |
| rs72740806  | C | -0.0709 |
| rs7026716   | G | -0.0392 |
| rs72737656  | A | 0.0879  |
| rs10821164  | T | -0.0391 |
| rs139347529 | T | 0.2145  |
| rs10990447  | A | 0.076   |
| rs806031    | T | 0.0398  |
| rs11144944  | T | 0.0472  |
| rs13298924  | C | -0.0524 |
| rs278695    | C | 0.0389  |
| rs8190479   | G | 0.102   |
| rs10124606  | G | 0.0831  |
| rs156766    | C | 0.0455  |
| rs392979    | T | -0.0673 |
| rs2846450   | G | -0.0378 |
| rs112053080 | T | 0.2139  |
| rs4877576   | A | -0.0396 |
| rs138722448 | T | 0.2093  |
| rs13288466  | C | -0.0762 |
| rs1147808   | T | -0.0401 |
| rs11144690  | T | 0.1076  |
| rs10963361  | A | 0.1339  |
| rs2416981   | G | 0.0486  |
| rs1327409   | T | 0.0427  |
| rs12376869  | C | -0.0408 |
| rs78028685  | C | -0.1285 |
| rs77186611  | C | -0.0862 |
| rs2235055   | T | 0.0797  |
| rs79265313  | A | -0.14   |
| rs75694422  | T | 0.081   |
| rs7045703   | T | -0.1474 |
| rs11794209  | C | -0.0809 |
| rs12378475  | A | -0.1448 |
| rs10124839  | C | -0.0535 |
| rs62530600  | A | 0.0507  |
| rs77458469  | A | 0.1874  |
| rs61296988  | G | -0.0874 |
| rs57142353  | A | -0.0499 |



|             |   |         |
|-------------|---|---------|
| rs79709803  | T | 0.0987  |
| rs79097516  | C | 0.1053  |
| rs1935338   | T | 0.0468  |
| rs117008030 | T | -0.1341 |
| rs41289969  | A | 0.1918  |
| rs35083126  | A | -0.0427 |
| rs79534540  | C | 0.1588  |
| rs1983065   | T | 0.1896  |
| rs147486210 | A | 0.2715  |
| rs79372149  | A | 0.3326  |
| rs57660207  | A | 0.0425  |
| rs76650788  | A | 0.3186  |
| rs117258793 | A | -0.1804 |
| rs117198810 | A | -0.2846 |
| rs1322483   | G | -0.0398 |
| rs4837520   | C | 0.0435  |
| rs870164    | A | 0.0583  |
| rs77641054  | T | -0.1378 |
| rs11144947  | T | 0.0554  |
| rs74607206  | T | 0.1099  |
| rs10810676  | G | 0.0388  |
| rs17411423  | T | 0.107   |
| rs72739167  | A | 0.053   |
| rs13295532  | C | 0.0471  |
| rs10961872  | A | -0.0379 |
| rs10733506  | A | 0.0472  |
| rs137938860 | C | -0.1419 |
| rs7045481   | T | 0.0444  |
| rs117840868 | T | -0.2329 |
| rs1885471   | C | -0.0396 |
| rs1675326   | A | 0.1396  |
| rs9657672   | T | -0.0398 |
| rs4741859   | T | -0.0649 |
| rs7024300   | T | 0.1126  |
| rs79793605  | T | 0.1226  |
| rs10992568  | T | -0.0591 |
| rs2146087   | A | -0.0403 |
| rs72748888  | A | -0.1987 |
| rs7390463   | G | -0.0509 |
| rs141060507 | C | 0.142   |
| rs11141341  | T | 0.0627  |
| rs7857049   | G | -0.1051 |
| rs6478871   | C | 0.0456  |
| rs2820963   | G | -0.0417 |
| rs147144721 | A | -0.1824 |
| rs62577209  | T | 0.056   |
| rs62541439  | T | -0.4039 |

|             |   |         |
|-------------|---|---------|
| rs80327542  | C | 0.1136  |
| rs73560616  | T | 0.0956  |
| rs138104351 | G | 0.1622  |
| rs28452807  | A | 0.0674  |
| rs62553134  | C | 0.1034  |
| rs76342509  | C | -0.171  |
| rs76480456  | A | 0.2065  |
| rs7863660   | G | -0.05   |
| rs113454308 | T | 0.0917  |
| rs139191976 | T | 0.0734  |
| rs11788303  | A | 0.0733  |
| rs74391094  | T | -0.0587 |
| rs117744119 | A | 0.2282  |
| rs74725413  | C | 0.2186  |
| rs7864794   | T | 0.0597  |
| rs7046702   | G | 0.0505  |
| rs117557375 | A | 0.1413  |
| rs3780792   | G | -0.0434 |
| rs144916794 | A | 0.1513  |
| rs9785225   | A | 0.0579  |
| rs7867146   | G | -0.0464 |
| rs74877177  | G | -0.1685 |
| rs10867816  | A | -0.0696 |
| rs78424530  | G | 0.3148  |
| rs68034064  | A | -0.0741 |
| rs113849140 | G | 0.262   |
| rs12346167  | T | -0.037  |
| rs843893    | G | 0.2111  |
| rs67832400  | A | 0.1441  |
| rs117599964 | C | 0.1346  |
| rs113774249 | C | -0.0859 |
| rs17482706  | T | -0.2177 |
| rs10961955  | A | 0.1046  |
| rs373637    | T | 0.0384  |
| rs114930261 | C | -0.1173 |
| rs71508601  | C | 0.0823  |
| rs4978006   | T | -0.0408 |
| rs1489170   | A | -0.1915 |
| rs999485    | A | 0.0453  |
| rs12340030  | T | 0.0841  |
| rs76988875  | C | -0.0865 |
| rs72741198  | T | 0.115   |
| rs28565058  | C | 0.1788  |
| rs7851916   | A | -0.0395 |
| rs74719175  | G | 0.0884  |
| rs7025624   | C | -0.0994 |
| rs12553857  | A | -0.1445 |

|             |   |         |
|-------------|---|---------|
| rs2247493   | T | 0.0423  |
| rs114269013 | T | 0.09    |
| rs113539463 | A | 0.2067  |
| rs9785284   | G | 0.1957  |
| rs3126963   | G | 0.039   |
| rs79108616  | T | 0.131   |
| rs1774037   | G | -0.0401 |
| rs117041440 | T | 0.2391  |
| rs10901335  | C | -0.0393 |
| rs10810941  | A | -0.0385 |
| rs11141145  | G | 0.0554  |
| rs72743719  | T | -0.1323 |
| rs10993704  | T | 0.0778  |
| rs35250723  | T | -0.1114 |
| rs7035948   | C | 0.0381  |
| rs78012349  | A | -0.2451 |
| rs7036435   | T | 0.0452  |
| rs2481600   | C | -0.0368 |
| rs3739664   | T | -0.0374 |
| rs11795095  | G | 0.046   |
| rs117272423 | C | 0.2645  |
| rs1876752   | G | 0.0406  |
| rs114807841 | A | 0.2678  |
| rs11794874  | T | 0.233   |
| rs2460137   | T | 0.0782  |
| rs11466459  | T | 0.2454  |
| rs1329624   | T | 0.0367  |
| rs16919356  | C | 0.1397  |
| rs12380409  | G | 0.0606  |
| rs4841970   | C | 0.0532  |
| rs7019741   | G | 0.1385  |
| rs7858264   | G | -0.1178 |
| rs117530142 | A | 0.2486  |
| rs2773512   | A | -0.0419 |
| rs113208038 | A | -0.2344 |
| rs80138774  | T | -0.1376 |
| rs41283108  | G | -0.2312 |
| rs138723576 | C | 0.1749  |
| rs112642163 | A | -0.1609 |
| rs12378965  | T | 0.0729  |
| rs4475548   | T | -0.0403 |
| rs117261136 | T | 0.1082  |
| rs10756989  | G | -0.0404 |
| rs4534195   | C | 0.0392  |
| rs1819172   | C | -0.0594 |
| rs75026939  | A | -0.2178 |
| rs41277883  | G | 0.1994  |

|             |   |         |
|-------------|---|---------|
| rs6478077   | A | 0.0566  |
| rs17060568  | G | 0.0677  |
| rs139185649 | C | 0.1395  |
| rs6559869   | A | -0.0665 |
| rs148229081 | T | -0.1559 |
| rs17479209  | A | -0.0461 |
| rs117434106 | G | -0.2509 |
| rs76716728  | T | -0.1647 |
| rs10976075  | G | 0.0485  |
| rs113107528 | G | 0.2727  |
| rs118024812 | G | -0.218  |
| rs148884001 | G | -0.2022 |
| rs7849279   | C | 0.0562  |
| rs138268013 | T | 0.2415  |
| rs10966954  | A | 0.0368  |
| rs149845864 | C | -0.0626 |
| rs10869054  | T | -0.0389 |
| rs72757847  | C | -0.113  |
| rs498266    | G | 0.0372  |
| rs17052304  | T | -0.0696 |
| rs77509313  | T | 0.1413  |
| rs2094509   | G | -0.0376 |
| rs3866499   | C | -0.0597 |
| rs12343003  | A | -0.1067 |
| rs10780793  | C | 0.0429  |
| rs146928580 | T | -0.2796 |
| rs1810807   | C | -0.042  |
| rs17718680  | G | 0.053   |
| rs7861858   | A | 0.1373  |
| rs79168373  | T | -0.1439 |
| rs1327491   | G | -0.1111 |
| rs2478553   | G | -0.111  |
| rs117010490 | T | -0.1548 |
| rs72736813  | G | -0.1458 |
| rs139386570 | A | 0.265   |
| rs12345715  | T | 0.0739  |
| rs2122582   | T | 0.0382  |
| rs138097125 | T | -0.0621 |
| rs4743113   | G | 0.0452  |
| rs79882618  | T | 0.1213  |
| rs3739448   | G | 0.248   |
| rs3860902   | T | -0.0413 |
| rs34322533  | C | 0.152   |
| rs73372801  | C | 0.1485  |
| rs12236318  | C | 0.1578  |
| rs78763642  | A | 0.0941  |
| rs7021741   | C | 0.0517  |

|             |   |         |
|-------------|---|---------|
| rs149801890 | C | -0.3239 |
| rs10816063  | G | -0.0387 |
| rs10758985  | T | -0.0379 |
| rs10979336  | G | -0.059  |
| rs75302950  | C | -0.1429 |
| rs12685742  | C | 0.0372  |
| rs3922644   | C | -0.0445 |
| rs116901296 | T | 0.1886  |
| rs4350033   | G | -0.0429 |
| rs10745362  | C | -0.0553 |
| rs61339119  | T | 0.1733  |
| rs59862957  | A | -0.0516 |
| rs139228221 | T | 0.1684  |
| rs13287515  | G | 0.11    |
| rs11138882  | C | 0.0537  |
| rs2113716   | A | -0.0488 |
| rs10814139  | C | -0.0371 |
| rs79668944  | A | -0.1332 |
| rs12349446  | C | 0.0556  |
| rs1856194   | T | 0.0394  |
| rs146793328 | A | -0.1765 |
| rs668108    | G | 0.0652  |
| rs341468    | T | 0.053   |
| rs1410457   | A | 0.0515  |
| rs3897745   | A | -0.0465 |
| rs138352933 | A | 0.1845  |
| rs1926359   | G | -0.0379 |
| rs141598718 | G | 0.2107  |
| rs10818803  | T | -0.0377 |
| rs10977210  | C | 0.0379  |
| rs10759169  | C | -0.0569 |
| rs143515186 | C | 0.1586  |
| rs117682998 | C | 0.0788  |
| rs10869656  | C | -0.042  |
| rs74834254  | G | 0.0874  |
| rs10435838  | C | -0.0734 |
| rs62585968  | A | 0.2015  |
| rs2244830   | T | 0.0431  |
| rs10991512  | T | 0.0909  |
| rs4877658   | A | 0.062   |
| rs76169634  | G | 0.1542  |
| rs79280013  | T | -0.1087 |
| rs150313669 | T | 0.2058  |
| rs2479204   | T | -0.2353 |
| rs117328904 | T | -0.2445 |
| rs1755610   | G | 0.0396  |
| rs11789912  | G | 0.258   |

|             |   |         |
|-------------|---|---------|
| rs10977358  | A | -0.1644 |
| rs504184    | T | 0.0399  |
| rs72748450  | T | 0.0524  |
| rs4606126   | A | 0.041   |
| rs3780181   | G | -0.0707 |
| rs6560494   | G | -0.0542 |
| rs117579654 | A | 0.1839  |
| rs7870612   | G | -0.0395 |
| rs4745495   | A | -0.0511 |
| rs1413408   | C | 0.0388  |
| rs113379449 | T | 0.2791  |
| rs16936911  | A | -0.0772 |
| rs60418082  | C | 0.0464  |
| rs10124504  | C | 0.0463  |
| rs791656    | A | 0.0546  |
| rs1323800   | C | 0.0428  |
| rs62578230  | T | -0.1705 |
| rs9298675   | G | -0.062  |
| rs13294166  | A | -0.0669 |
| rs80079949  | A | 0.1121  |
| rs2151417   | G | -0.0383 |
| rs10114293  | A | 0.05    |
| rs77950724  | A | 0.1792  |
| rs6478104   | A | 0.0512  |
| rs2093483   | A | -0.0371 |
| rs58069462  | G | 0.118   |
| rs140066884 | G | -0.2109 |
| rs4741388   | C | 0.0399  |
| rs114818687 | A | 0.1113  |
| rs79778145  | C | 0.0873  |
| rs12347837  | G | 0.0607  |
| rs9298670   | A | 0.0376  |
| rs6476727   | G | 0.0391  |
| rs35483022  | T | 0.0973  |
| rs34767300  | T | 0.0677  |
| rs1329029   | T | -0.0414 |
| rs145148555 | G | -0.28   |
| rs75548421  | C | 0.0991  |
| rs9298653   | A | -0.0512 |
| rs71501110  | A | -0.1861 |
| rs10511460  | G | 0.1103  |
| rs7867292   | T | 0.1825  |
| rs73437258  | A | -0.0861 |
| rs7018663   | T | -0.0474 |
| rs7042550   | G | 0.1435  |
| rs943844    | G | 0.0918  |
| rs145362683 | G | -0.1774 |

|             |   |         |
|-------------|---|---------|
| rs148986298 | G | -0.2539 |
| rs75656766  | G | -0.0887 |
| rs2382001   | C | 0.0388  |
| rs4500145   | C | 0.0939  |
| rs1339289   | T | 0.0516  |
| rs3118850   | A | 0.0503  |
| rs6474795   | T | -0.0465 |
| rs73649311  | C | 0.1416  |
| rs6476383   | A | 0.1472  |
| rs10814185  | A | -0.0935 |
| rs140758933 | T | -0.1382 |
| rs12339431  | C | -0.0755 |
| rs10818924  | C | 0.038   |
| rs10967878  | A | 0.2018  |
| rs28733569  | G | 0.0381  |
| rs2814725   | C | 0.0536  |
| rs10512362  | A | -0.0859 |
| rs72700568  | A | -0.0581 |
| rs13297793  | T | 0.1639  |
| rs76279092  | A | 0.1604  |
| rs1582167   | G | 0.0396  |
| rs1926784   | C | -0.0374 |
| rs11999245  | T | 0.0801  |
| rs11144691  | A | 0.0368  |
| rs67241885  | A | 0.082   |
| rs77123276  | C | -0.1121 |
| rs10810557  | C | 0.0398  |
| rs6420260   | A | -0.0372 |
| rs2666804   | C | 0.0462  |
| rs10813869  | T | 0.0544  |
| rs146096712 | C | 0.172   |
| rs117402988 | G | -0.2184 |
| rs56250535  | C | -0.0452 |
| rs17667777  | T | -0.223  |
| rs11244080  | G | -0.188  |
| rs1817915   | A | 0.0448  |
| rs11562217  | A | -0.0416 |
| rs7864771   | A | 0.0386  |
| rs2709418   | G | -0.0531 |
| rs75621308  | C | 0.1414  |
| rs12000504  | C | -0.1083 |
| rs700123    | G | -0.0849 |
| rs10959642  | C | 0.1412  |
| rs9777103   | G | -0.0459 |
| rs11145237  | C | -0.0461 |
| rs34918828  | C | -0.0591 |
| rs8181165   | A | -0.2581 |

|             |   |         |
|-------------|---|---------|
| rs117536323 | A | -0.2556 |
| rs11789213  | A | 0.1298  |
| rs72706517  | A | 0.0926  |
| rs729098    | A | -0.0789 |
| rs1747852   | T | 0.1066  |
| rs17832109  | C | -0.0441 |
| rs2110546   | T | -0.0956 |
| rs10122520  | A | 0.0479  |
| rs113985677 | A | -0.0801 |
| rs5027585   | C | -0.0466 |
| rs11144130  | T | 0.037   |
| rs978069    | C | 0.0431  |
| rs7855517   | A | -0.0415 |
| rs6479409   | A | -0.0679 |
| rs2381413   | G | 0.0353  |
| rs11145226  | A | 0.1956  |
| rs10985473  | C | -0.1499 |
| rs12001385  | G | 0.0661  |
| rs10757872  | C | 0.1405  |
| rs56130500  | A | -0.177  |
| rs12342816  | C | 0.0914  |
| rs3758172   | T | 0.0758  |
| rs117418200 | C | 0.1572  |
| rs10980578  | C | 0.0514  |
| rs146710975 | C | 0.101   |
| rs9657646   | T | -0.0488 |
| rs147595925 | T | -0.1911 |
| rs11790107  | T | -0.0389 |
| rs78876192  | T | -0.0858 |
| rs10746785  | G | -0.0394 |
| rs112820773 | T | 0.2214  |
| rs79236151  | G | 0.1057  |
| rs17309095  | A | -0.0447 |
| rs75954634  | A | -0.0825 |
| rs2779739   | T | 0.0719  |
| rs73648452  | A | -0.1435 |
| rs2275242   | C | 0.036   |
| rs1923429   | A | 0.0363  |
| rs76185434  | A | -0.0844 |
| rs76490277  | A | -0.0559 |
| rs4294255   | G | -0.0408 |
| rs10869731  | C | -0.0539 |
| rs11145534  | A | -0.0413 |
| rs10960841  | G | -0.0398 |
| rs117328225 | T | -0.0961 |
| rs117207518 | A | -0.2907 |
| rs2417643   | A | -0.0391 |



|             |   |         |
|-------------|---|---------|
| rs2771986   | A | -0.0672 |
| rs1815361   | C | 0.0543  |
| rs10760432  | G | -0.0354 |
| rs56032937  | A | 0.0565  |
| rs4265241   | T | -0.0772 |
| rs2051126   | C | 0.0652  |
| rs142629547 | T | -0.1675 |
| rs10793973  | C | 0.037   |
| rs3025382   | A | -0.0548 |
| rs143102096 | T | 0.1566  |
| rs72734900  | G | 0.153   |
| rs12238848  | C | -0.0369 |
| rs77677727  | A | -0.1319 |
| rs56020446  | A | -0.1427 |
| rs151037307 | T | -0.1084 |
| rs62521688  | C | 0.108   |
| rs79930303  | G | -0.1351 |
| rs78987863  | G | -0.1279 |
| rs55716422  | G | -0.1752 |
| rs145681232 | T | -0.1953 |
| rs1558924   | T | 0.0402  |
| rs7872362   | A | -0.0529 |
| rs10960351  | T | 0.0734  |
| rs637416    | A | -0.0644 |
| rs74616347  | A | -0.0835 |
| rs28637654  | T | 0.0445  |
| rs117029274 | C | 0.156   |
| rs1407970   | G | 0.0492  |
| rs944069    | C | 0.039   |
| rs141495944 | G | 0.0952  |
| rs9410299   | C | -0.0357 |
| rs10981014  | T | -0.0529 |
| rs12376398  | T | 0.0366  |
| rs11138314  | G | 0.0518  |
| rs76274530  | C | 0.109   |
| rs78545033  | G | 0.0952  |
| rs13295979  | G | -0.1012 |
| rs72751656  | A | 0.0542  |
| rs79749575  | T | 0.2746  |
| rs7863381   | G | -0.0408 |
| rs2026825   | A | 0.0374  |
| rs10966901  | G | 0.0358  |
| rs4011835   | C | 0.0408  |
| rs13296946  | G | 0.0396  |
| rs11145265  | A | 0.0416  |
| rs145251708 | A | -0.244  |
| rs7033557   | C | 0.0844  |

|             |   |         |
|-------------|---|---------|
| rs10992044  | G | -0.0465 |
| rs78320984  | T | -0.1717 |
| rs12002855  | C | -0.0529 |
| rs11142877  | A | -0.1838 |
| rs2210991   | C | 0.0583  |
| rs2777794   | A | -0.0376 |
| rs2274144   | G | 0.0686  |
| rs58108882  | C | 0.1002  |
| rs10869496  | A | 0.0349  |
| rs3010752   | C | 0.0392  |
| rs148200328 | C | 0.1785  |
| rs10969072  | G | 0.0647  |
| rs7046458   | C | 0.0365  |
| rs80300711  | T | -0.081  |
| rs11142623  | T | 0.0635  |
| rs10991951  | G | 0.0372  |
| rs77524237  | G | 0.1827  |
| rs75476100  | A | 0.165   |
| rs1407971   | T | -0.0682 |
| rs55835701  | C | -0.1759 |
| rs117332362 | A | -0.0661 |
| rs7026726   | A | 0.1322  |
| rs10122917  | A | 0.0464  |
| rs10813304  | T | 0.0403  |
| rs10976756  | C | 0.075   |
| rs76375063  | A | 0.0785  |
| rs290209    | G | 0.0461  |
| rs11789543  | T | 0.0486  |
| rs117166685 | G | 0.1676  |
| rs117876650 | C | 0.2051  |
| rs57658596  | C | 0.0439  |
| rs4326442   | G | -0.0695 |
| rs62577097  | G | 0.0486  |
| rs4877406   | T | 0.0409  |
| rs111718337 | G | 0.0996  |
| rs17084876  | A | -0.093  |
| rs10809945  | A | -0.0629 |
| rs7341699   | T | 0.1554  |
| rs34715046  | C | -0.0666 |
| rs10974268  | A | -0.0788 |
| rs144411989 | G | 0.2162  |
| rs3897456   | A | 0.0407  |
| rs10988313  | C | -0.0455 |
| rs34756057  | C | 0.1228  |
| rs10114996  | C | 0.0414  |
| rs117514659 | G | 0.1787  |
| rs10122640  | A | 0.0646  |

|             |   |         |
|-------------|---|---------|
| rs55991741  | G | 0.2034  |
| rs80197395  | C | -0.1813 |
| rs142417986 | A | -0.1372 |
| rs12235827  | T | 0.0458  |
| rs7034794   | G | 0.0843  |
| rs1543615   | C | -0.0474 |
| rs76828855  | G | 0.1282  |
| rs7025578   | T | -0.04   |
| rs2810537   | C | 0.0379  |
| rs62558495  | T | 0.0354  |
| rs117223610 | T | 0.1857  |
| rs7866753   | T | -0.0437 |
| rs80124425  | A | 0.0723  |
| rs56154226  | G | 0.0925  |
| rs9409098   | T | 0.0346  |
| rs1869202   | G | -0.038  |
| rs62522805  | A | 0.1069  |
| rs7036743   | G | -0.039  |
| rs1410216   | A | -0.0466 |
| rs919860    | C | -0.1234 |
| rs2418434   | C | 0.0395  |
| rs10982670  | C | -0.0353 |
| rs78611512  | C | 0.1792  |
| rs7030204   | G | 0.0953  |
| rs112836782 | A | -0.1213 |
| rs10115296  | T | 0.0478  |
| rs140627627 | A | -0.2404 |
| rs143473321 | G | -0.2058 |
| rs3829109   | A | -0.0439 |
| rs6478338   | C | 0.0445  |
| rs74463005  | A | 0.3088  |
| rs146626278 | A | 0.2142  |
| rs2777019   | G | 0.0456  |
| rs72752974  | T | 0.0937  |
| rs75190390  | T | 0.0859  |
| rs117974354 | C | 0.1262  |
| rs10961183  | C | 0.0481  |
| rs9411266   | T | 0.1089  |
| rs140070554 | T | -0.1863 |
| rs7852110   | C | -0.0548 |
| rs10869833  | C | -0.0388 |
| rs3758258   | A | 0.0443  |
| rs149335618 | A | 0.1955  |
| rs7020906   | A | 0.0633  |
| rs11143534  | C | -0.0495 |
| rs117580605 | T | -0.1638 |
| rs75330961  | C | -0.1883 |

|             |   |         |
|-------------|---|---------|
| rs989494    | C | 0.0832  |
| rs10992630  | A | 0.0439  |
| rs11265822  | G | -0.0423 |
| rs10759690  | T | -0.0368 |
| rs3849940   | G | -0.274  |
| rs1284013   | C | -0.0844 |
| rs112288387 | C | -0.1473 |
| rs4978647   | T | 0.0526  |
| rs77977986  | T | 0.2035  |
| rs260194    | G | -0.0403 |
| rs11103480  | C | -0.0485 |
| rs12350138  | C | -0.0594 |
| rs10814527  | G | -0.0388 |
| rs784646    | T | -0.034  |
| rs139631985 | A | 0.2057  |
| rs673977    | C | 0.0889  |
| rs74577133  | A | 0.194   |
| rs10757508  | G | -0.0587 |
| rs10812860  | A | -0.0494 |
| rs10116474  | G | 0.0367  |
| rs28579110  | C | -0.0893 |
| rs140637627 | T | 0.0723  |
| rs9696691   | G | -0.0478 |
| rs73477961  | T | 0.1513  |
| rs62580255  | A | -0.1194 |
| rs2213930   | A | -0.0438 |
| rs7024328   | T | -0.0432 |
| rs903546    | A | 0.1061  |
| rs7466141   | T | 0.1844  |
| rs12353411  | T | 0.0668  |
| rs73670534  | A | -0.1837 |
| rs143407351 | T | 0.1624  |
| rs10961754  | G | -0.0455 |
| rs28624857  | T | 0.1656  |
| rs515786    | T | -0.0469 |
| rs7022645   | A | 0.1167  |
| rs10759166  | A | 0.0375  |
| rs12337796  | C | 0.1635  |
| rs611315    | C | -0.063  |
| rs4742569   | C | 0.0432  |
| rs17058626  | A | 0.0828  |
| rs7869291   | T | -0.2062 |
| rs146722823 | A | -0.1669 |
| rs2004605   | T | 0.039   |
| rs62558855  | T | 0.0833  |
| rs140575383 | G | 0.1789  |
| rs7032499   | C | 0.0382  |

|             |   |         |
|-------------|---|---------|
| rs74441363  | T | -0.1208 |
| rs7854942   | G | -0.0561 |
| rs2987736   | A | 0.0546  |
| rs117378692 | C | 0.134   |
| rs10118480  | G | 0.0718  |
| rs111881805 | C | -0.0709 |
| rs75167003  | C | 0.0882  |
| rs2451025   | T | 0.1454  |
| rs71498416  | T | -0.1951 |
| rs7869125   | T | -0.0347 |
| rs7041705   | A | 0.0499  |
| rs4842124   | T | 0.0567  |
| rs118073190 | A | -0.1698 |
| rs76165120  | T | 0.1175  |
| rs3013312   | A | -0.0739 |
| rs11788397  | G | 0.1033  |
| rs4355859   | G | -0.0405 |
| rs150459788 | G | -0.1871 |
| rs12685831  | C | -0.0564 |
| rs4743221   | C | 0.0418  |
| rs10819127  | A | 0.0415  |
| rs10983962  | A | -0.0444 |
| rs2066716   | T | -0.0612 |
| rs72703404  | T | -0.2565 |
| rs143403636 | A | -0.3674 |
| rs7038550   | C | -0.0897 |
| rs80099324  | A | 0.1217  |
| rs73647885  | G | 0.1593  |
| rs10441687  | T | 0.035   |
| rs78425248  | A | 0.0563  |
| rs923463    | G | -0.0795 |
| rs7021289   | G | 0.038   |
| rs59083789  | G | -0.0621 |
| rs74307336  | G | -0.1408 |
| rs12551632  | C | 0.1039  |
| rs10759157  | A | -0.0822 |
| rs149247734 | A | 0.1613  |
| rs11525950  | G | -0.0536 |
| rs17486712  | C | 0.2563  |
| rs72766098  | T | 0.1477  |
| rs7864079   | G | -0.0349 |
| rs7028245   | G | -0.0376 |
| rs115676813 | T | 0.2036  |
| rs12006558  | T | -0.0924 |
| rs10869774  | A | -0.0352 |
| rs1221136   | T | -0.0409 |
| rs145553441 | G | -0.2528 |

|             |   |         |
|-------------|---|---------|
| rs10986426  | C | -0.0376 |
| rs10965525  | C | -0.035  |
| rs72738896  | C | 0.0571  |
| rs142599860 | G | 0.1384  |
| rs112900944 | T | 0.198   |
| rs1771216   | A | -0.0639 |
| rs885290    | A | -0.0477 |
| rs72709062  | G | -0.0537 |
| rs117838988 | C | -0.0696 |
| rs35101286  | C | -0.0397 |
| rs10814812  | C | -0.039  |
| rs75196455  | C | -0.1231 |
| rs76853823  | T | 0.1895  |
| rs2026995   | C | -0.0363 |
| rs4237163   | A | -0.0345 |
| rs7031362   | A | -0.0353 |
| rs4977248   | C | 0.0349  |
| rs7861861   | G | -0.0535 |
| rs76079577  | A | 0.14    |
| rs75891323  | T | 0.172   |
| rs117299501 | T | 0.073   |
| rs9673      | G | 0.1213  |
| rs77242382  | T | -0.1739 |
| rs77619653  | G | -0.1348 |
| rs10977450  | T | -0.0443 |
| rs112220764 | C | 0.2757  |
| rs72695341  | T | 0.0595  |
| rs10759179  | C | 0.0529  |
| rs424450    | T | 0.0566  |
| rs11244381  | T | -0.0767 |
| rs73638386  | C | 0.1218  |
| rs10985332  | T | -0.0492 |
| rs3780136   | A | -0.0446 |
| rs1106012   | C | -0.0365 |
| rs4237110   | G | -0.0352 |
| rs10868828  | G | -0.0405 |
| rs76577650  | C | 0.1114  |
| rs148794554 | T | 0.1609  |
| rs117046865 | A | 0.1482  |
| rs147700390 | A | -0.1524 |
| rs117572418 | A | 0.1452  |
| rs62559693  | G | -0.1266 |
| rs36008893  | A | -0.1036 |
| rs7047114   | G | 0.0963  |
| rs78427282  | G | -0.1455 |
| rs146002178 | A | -0.071  |
| rs116992162 | G | 0.1715  |

|             |   |         |
|-------------|---|---------|
| rs75817725  | T | -0.2228 |
| rs12347476  | A | 0.038   |
| rs10977101  | A | 0.0436  |
| rs60894446  | C | -0.068  |
| rs2282079   | A | 0.0833  |
| rs149179961 | T | 0.1334  |
| rs111596519 | T | -0.0952 |
| rs118014352 | G | -0.2789 |
| rs10972700  | C | 0.1535  |
| rs72755474  | G | 0.0617  |
| rs2073935   | T | 0.0467  |
| rs117463379 | C | 0.0617  |
| rs1410538   | A | 0.1374  |
| rs10867904  | A | -0.0579 |
| rs60355026  | A | -0.0804 |
| rs6479332   | A | 0.0632  |
| rs11243999  | T | -0.223  |
| rs10816561  | T | 0.0486  |
| rs79956292  | T | 0.1911  |
| rs115535131 | C | -0.1588 |
| rs72705372  | A | 0.1264  |
| rs117578341 | G | 0.1334  |
| rs7874536   | T | 0.0431  |
| rs10757755  | T | 0.0362  |
| rs744216    | C | 0.0352  |
| rs7849852   | T | 0.0556  |
| rs16932079  | A | 0.0444  |
| rs1041631   | A | 0.0458  |
| rs45540242  | A | -0.0433 |
| rs10813001  | G | -0.0665 |
| rs11138128  | C | 0.0598  |
| rs59657211  | G | 0.0503  |
| rs1178258   | A | -0.0569 |
| rs10116576  | C | -0.0387 |
| rs117226840 | G | -0.1219 |
| rs56281909  | C | -0.1399 |
| rs75184390  | T | -0.063  |
| rs1951511   | C | -0.0759 |
| rs10868223  | T | 0.0498  |
| rs10985538  | T | -0.1078 |
| rs1410228   | G | 0.051   |
| rs10867236  | C | -0.0523 |
| rs10984823  | A | 0.0915  |
| rs9299056   | C | -0.0754 |
| rs1576891   | C | -0.0501 |
| rs148058478 | C | 0.1413  |
| rs72743356  | T | -0.05   |

|             |   |         |
|-------------|---|---------|
| rs138277699 | A | 0.1363  |
| rs4588941   | A | -0.0349 |
| rs10815984  | C | -0.0411 |
| rs79415353  | T | -0.0756 |
| rs7036886   | T | -0.0366 |
| rs7846916   | T | 0.182   |
| rs12378689  | A | 0.1837  |
| rs957866    | T | -0.1392 |
| rs112250396 | G | -0.1221 |
| rs117273411 | C | -0.1559 |
| rs10820955  | T | -0.1018 |
| rs138441517 | T | -0.1508 |
| rs2150014   | A | -0.0364 |
| rs10983791  | A | 0.0589  |
| rs62569569  | A | 0.0621  |
| rs11141775  | C | 0.0373  |
| rs2277185   | T | 0.0932  |
| rs55816170  | A | 0.0637  |
| rs17791393  | G | -0.0436 |
| rs74471257  | G | 0.1573  |
| rs7040038   | A | -0.034  |
| rs4977587   | G | -0.265  |
| rs28549135  | C | 0.0433  |
| rs1819208   | C | -0.0586 |
| rs75640636  | A | 0.1671  |
| rs7046408   | A | 0.0445  |
| rs78518313  | A | 0.164   |
| rs12335614  | A | 0.0449  |
| rs11243444  | C | 0.1053  |
| rs55959418  | A | -0.2096 |
| rs1039336   | G | 0.0382  |
| rs117413236 | A | 0.2267  |
| rs17179542  | A | -0.2022 |
| rs144318278 | C | 0.1879  |
| rs117437022 | A | -0.1364 |
| rs10988060  | G | -0.1778 |
| rs13300858  | G | -0.1166 |
| rs10118631  | A | 0.1169  |
| rs7852485   | G | -0.0512 |
| rs118016033 | C | -0.2538 |
| rs72654280  | C | 0.0921  |
| rs7018975   | A | -0.0368 |
| rs12552435  | G | 0.0734  |
| rs117611917 | T | -0.1654 |
| rs72724837  | A | -0.2721 |
| rs4258054   | C | -0.0477 |
| rs13301425  | A | 0.0441  |



|             |   |         |
|-------------|---|---------|
| rs10117096  | C | -0.0346 |
| rs72748951  | A | -0.1808 |
| rs11138168  | T | 0.0363  |
| rs7874540   | T | -0.0439 |
| rs1039280   | T | -0.0337 |
| rs117035033 | C | 0.1787  |
| rs10993774  | G | 0.0338  |
| rs1360534   | G | 0.0334  |
| rs117077680 | G | -0.1895 |
| rs74848006  | T | 0.2874  |
| rs72744047  | A | -0.0859 |
| rs149085746 | C | 0.2224  |
| rs34692396  | C | 0.076   |
| rs60795533  | C | 0.0396  |
| rs28433582  | C | -0.0921 |
| rs62548504  | T | -0.0824 |
| rs28421011  | A | -0.0357 |
| rs10738528  | T | 0.0374  |
| rs10814218  | G | 0.1388  |
| rs2067805   | C | 0.1191  |
| rs138734748 | A | -0.1256 |
| rs7046443   | G | 0.0831  |
| rs576129    | G | -0.0352 |
| rs1861885   | A | -0.1179 |
| rs10759646  | A | 0.0494  |
| rs78177836  | T | -0.1929 |
| rs117064840 | A | 0.0925  |
| rs72752825  | C | -0.1575 |
| rs73656437  | G | -0.1559 |
| rs13295703  | A | 0.074   |
| rs625890    | G | 0.036   |
| rs2519790   | C | 0.0753  |
| rs7030318   | G | -0.0337 |
| rs11139451  | C | 0.041   |
| rs3897285   | T | 0.1325  |
| rs74553076  | A | 0.084   |
| rs148063849 | T | -0.204  |
| rs4372065   | A | 0.0422  |
| rs77499347  | T | -0.1976 |
| rs1970120   | G | -0.0463 |
| rs79724766  | A | 0.093   |
| rs10973089  | C | 0.0732  |
| rs78546927  | T | 0.0943  |
| rs4406478   | A | 0.0412  |
| rs62576217  | T | 0.0482  |
| rs1571837   | A | -0.0405 |
| rs62564575  | C | 0.0806  |

|             |   |         |
|-------------|---|---------|
| rs10811003  | T | -0.0341 |
| rs10985385  | G | 0.0467  |
| rs61225612  | A | 0.142   |
| rs11265905  | T | -0.0531 |
| rs139670789 | C | 0.1586  |
| rs141488001 | G | -0.0792 |
| rs10984789  | T | 0.0392  |
| rs10961500  | A | 0.0338  |
| rs117385985 | T | 0.1426  |
| rs62575781  | A | 0.0379  |
| rs10972618  | C | 0.0373  |
| rs12376453  | C | 0.0376  |
| rs4361806   | G | 0.0363  |
| rs116179082 | G | 0.1556  |
| rs809099    | A | 0.0622  |
| rs7022714   | G | -0.0438 |
| rs655880    | A | 0.0325  |
| rs1475554   | C | 0.0796  |
| rs12378086  | G | -0.248  |
| rs35873671  | A | 0.0591  |
| rs1324631   | C | 0.034   |
| rs11144702  | T | -0.0383 |
| rs2905479   | T | -0.0353 |
| rs407580    | G | 0.0696  |
| rs113958606 | A | -0.1012 |
| rs75560944  | C | 0.1504  |
| rs74432891  | T | -0.0796 |
| rs78671079  | C | 0.0952  |
| rs3808899   | A | 0.0331  |
| rs78390002  | T | -0.1321 |
| rs10972196  | G | 0.0409  |
| rs150849937 | T | -0.2543 |
| rs2018973   | A | -0.0675 |
| rs118099113 | A | -0.1287 |
| rs12685026  | T | -0.035  |
| rs1889225   | C | 0.0349  |
| rs10810168  | G | -0.0455 |
| rs143753643 | T | 0.1059  |
| rs79611848  | C | 0.1624  |
| rs140671008 | C | -0.2307 |
| rs73646184  | T | 0.1144  |
| rs10814131  | G | 0.1005  |
| rs16907146  | C | 0.057   |
| rs11141965  | G | -0.1071 |
| rs71501604  | G | 0.0661  |
| rs13302235  | T | 0.0343  |
| rs7862070   | A | 0.0337  |

|             |   |         |
|-------------|---|---------|
| rs10818165  | C | 0.088   |
| rs147079609 | G | 0.1808  |
| rs67686996  | C | 0.0652  |
| rs72725087  | A | -0.0473 |
| rs10988076  | C | 0.0704  |
| rs75718793  | T | -0.0664 |
| rs78063025  | T | 0.1236  |
| rs928636    | G | 0.0362  |
| rs817182    | A | -0.0483 |
| rs10992475  | A | 0.0387  |
| rs117908733 | A | 0.1021  |
| rs141925562 | C | -0.127  |
| rs76200225  | A | -0.1531 |
| rs62586394  | G | -0.0675 |
| rs2776859   | C | 0.0339  |
| rs7467892   | A | 0.091   |
| rs117772177 | T | -0.0985 |
| rs13301242  | A | 0.0935  |
| rs4463481   | C | -0.039  |
| rs2301371   | A | 0.1493  |
| rs142786451 | C | 0.1079  |
| rs2790401   | T | -0.0422 |
| rs4237122   | A | 0.0565  |
| rs150594365 | T | -0.2294 |
| rs491749    | A | 0.0335  |
| rs117911239 | A | 0.1746  |
| rs28660034  | A | -0.0655 |
| rs117574354 | C | -0.2092 |
| rs7036187   | G | 0.0792  |
| rs10819793  | G | -0.0349 |
| rs12352267  | T | -0.0766 |
| rs79421790  | T | -0.181  |
| rs12238106  | G | -0.1608 |
| rs36022765  | A | -0.1402 |
| rs7045436   | A | 0.0378  |
| rs4742531   | T | 0.0339  |
| rs2095057   | A | -0.0642 |
| rs17728854  | A | -0.0838 |
| rs7862256   | G | -0.0422 |
| rs111413425 | T | -0.0773 |
| rs13291278  | C | -0.044  |
| rs2381400   | A | 0.0355  |
| rs6651523   | C | 0.1044  |
| rs62572808  | C | 0.0639  |
| rs62585222  | G | 0.068   |
| rs10810705  | C | -0.0354 |
| rs28584627  | T | -0.0909 |

|             |   |         |
|-------------|---|---------|
| rs33917322  | A | -0.0372 |
| rs28378867  | C | 0.0344  |
| rs16919825  | T | 0.2305  |
| rs1359703   | T | -0.0325 |
| rs74612223  | C | 0.1013  |
| rs7860181   | C | 0.036   |
| rs11521830  | C | 0.0651  |
| rs3025418   | T | 0.1686  |
| rs117608689 | G | 0.1861  |
| rs62560475  | C | 0.1604  |
| rs10124501  | T | -0.1798 |
| rs58482704  | T | 0.0594  |
| rs726363    | G | 0.035   |
| rs138405113 | T | -0.2343 |
| rs77911647  | C | 0.1409  |
| rs7047313   | A | 0.0347  |
| rs1273061   | T | -0.0348 |
| rs72759448  | A | -0.1288 |
| rs149801112 | A | 0.166   |
| rs78641403  | A | 0.1198  |
| rs62573419  | G | 0.1609  |
| rs150113758 | A | 0.0838  |
| rs34012049  | C | -0.1277 |
| rs2889245   | A | 0.0486  |
| rs117584955 | T | 0.132   |
| rs60631262  | T | -0.1374 |
| rs78398356  | T | 0.162   |
| rs73425213  | A | 0.1188  |
| rs12005685  | T | -0.1613 |
| rs72706483  | A | 0.1221  |
| rs1344797   | T | -0.0389 |
| rs118163794 | C | -0.2137 |
| rs145886786 | T | -0.0976 |
| rs3095747   | G | -0.0388 |
| rs76465543  | G | 0.0927  |
| rs17222860  | C | -0.1207 |
| rs4742928   | T | -0.034  |
| rs12377664  | A | -0.0594 |
| rs7018982   | T | -0.0357 |
| rs117376348 | G | -0.1334 |
| rs2151216   | C | -0.0621 |
| rs2252983   | C | -0.0392 |
| rs1827463   | C | 0.0344  |
| rs2007744   | T | 0.0459  |
| rs7875975   | G | 0.0435  |
| rs12376740  | C | 0.0335  |
| rs10465021  | C | -0.0371 |

|             |   |         |
|-------------|---|---------|
| rs10814364  | G | -0.0382 |
| rs10973043  | A | -0.0428 |
| rs112857459 | T | 0.214   |
| rs2153248   | A | -0.0351 |
| rs112717398 | T | -0.0491 |
| rs117204101 | T | 0.194   |
| rs10976579  | T | -0.0361 |
| rs57032514  | A | -0.2049 |
| rs140554316 | A | 0.1144  |
| rs56121773  | C | -0.0465 |
| rs72729115  | A | 0.2326  |
| rs10963461  | G | 0.0396  |
| rs7026580   | G | -0.0372 |
| rs118086648 | T | -0.1537 |
| rs77312492  | G | -0.2437 |
| rs78762428  | C | 0.1226  |
| rs1537524   | T | 0.0622  |
| rs11521817  | G | 0.1318  |
| rs56961479  | T | 0.0664  |
| rs118142950 | C | -0.1475 |
| rs7864293   | C | 0.0326  |
| rs7849144   | C | -0.0343 |
| rs73651018  | A | 0.204   |
| rs11999347  | C | -0.0465 |
| rs10123736  | A | 0.0375  |
| rs117495338 | C | 0.1863  |
| rs111281220 | C | 0.1354  |
| rs4838090   | A | -0.0341 |
| rs10448319  | T | 0.0503  |
| rs296617    | A | -0.1156 |
| rs117407235 | T | 0.2161  |
| rs11138807  | A | 0.0515  |
| rs117016985 | A | 0.2066  |
| rs113723539 | C | 0.2091  |
| rs114302447 | C | -0.2123 |
| rs10046864  | C | 0.0365  |
| rs12000848  | C | 0.0347  |
| rs12684472  | T | 0.0605  |
| rs112509299 | A | -0.2084 |
| rs4609268   | T | -0.0888 |
| rs10123961  | T | 0.0361  |
| rs7048696   | G | 0.0437  |
| rs10441802  | T | -0.0843 |
| rs7037379   | A | -0.0399 |
| rs1329735   | C | 0.0338  |
| rs1556463   | C | 0.042   |
| rs10966092  | C | -0.0362 |

|             |   |         |
|-------------|---|---------|
| rs7026101   | T | 0.0469  |
| rs28375231  | A | -0.0512 |
| rs142515913 | T | 0.2268  |
| rs117633188 | A | -0.187  |
| rs144500165 | C | 0.1593  |
| rs10868395  | G | -0.0322 |
| rs11141304  | C | -0.042  |
| rs34548949  | A | -0.0609 |
| rs2146294   | A | -0.2138 |
| rs4745377   | A | -0.0617 |
| rs10972952  | A | 0.0488  |
| rs4879740   | A | 0.1412  |
| rs112899502 | G | -0.197  |
| rs75445152  | T | 0.1932  |
| rs10858353  | T | 0.0399  |
| rs7858124   | C | 0.0317  |
| rs117332096 | T | 0.2161  |
| rs12683920  | T | 0.0691  |
| rs62560674  | G | 0.0855  |
| rs1411264   | T | -0.1796 |
| rs117460141 | C | -0.1415 |
| rs10814730  | T | 0.0369  |
| rs4744264   | A | 0.0355  |
| rs75725035  | G | 0.1288  |
| rs72743973  | G | -0.0429 |
| rs4741378   | A | -0.0334 |
| rs79378912  | A | 0.2374  |
| rs78242775  | T | 0.1924  |
| rs7046901   | G | 0.0551  |
| rs116994083 | G | -0.1183 |
| rs17312190  | C | -0.1468 |
| rs1952277   | C | -0.0514 |
| rs2777775   | T | -0.3171 |
| rs767827    | T | -0.0324 |
| rs117285194 | T | -0.1802 |
| rs11794109  | T | 0.0436  |
| rs10973358  | T | -0.0333 |
| rs7039577   | C | 0.033   |
| rs10121409  | G | -0.2057 |
| rs1925496   | C | 0.0588  |
| rs1139488   | G | 0.0347  |
| rs141439186 | T | 0.2165  |
| rs12339991  | A | 0.0425  |
| rs4083606   | G | -0.0319 |
| rs4742365   | T | 0.0446  |
| rs55780713  | C | 0.0507  |
| rs7046633   | G | 0.0473  |

|             |   |         |
|-------------|---|---------|
| rs10117315  | T | -0.0368 |
| rs11787730  | G | 0.0742  |
| rs117083786 | T | -0.1132 |
| rs142793265 | C | -0.2315 |
| rs111276706 | T | -0.0939 |
| rs62575992  | T | -0.0704 |
| rs6597537   | A | -0.0326 |
| rs10984786  | A | 0.0385  |
| rs62533703  | A | 0.1383  |
| rs12553459  | G | -0.0662 |
| rs117809191 | C | -0.1649 |
| rs10735607  | T | -0.0418 |
| rs117198845 | A | -0.2165 |
| rs12346416  | C | -0.0973 |
| rs13302851  | G | 0.0682  |
| rs75016139  | C | -0.2654 |
| rs10813457  | C | -0.0373 |
| rs72770203  | A | 0.1175  |
| rs10960398  | G | 0.0517  |
| rs1322479   | A | 0.0319  |
| rs72769724  | A | -0.1221 |
| rs10985311  | T | -0.1232 |
| rs10511442  | T | 0.0472  |
| rs139567790 | G | 0.2258  |
| rs4461986   | A | -0.0317 |
| rs10988669  | C | 0.0414  |
| rs10123407  | A | -0.0493 |
| rs4744515   | A | -0.0492 |
| rs145528005 | G | -0.1091 |
| rs78036447  | A | 0.1866  |
| rs62560767  | G | 0.0417  |
| rs2265573   | A | 0.0483  |
| rs676484    | C | 0.0354  |
| rs11103609  | C | -0.0372 |
| rs7034401   | A | 0.0922  |
| rs117268009 | A | -0.1271 |
| rs445609    | T | 0.0393  |
| rs10514825  | A | -0.038  |
| rs72743745  | G | -0.0988 |
| rs1463016   | A | 0.0687  |
| rs12235743  | G | -0.052  |
| rs999645    | T | 0.0372  |
| rs7023164   | G | 0.035   |
| rs73439398  | T | -0.0696 |
| rs117248986 | T | 0.1469  |
| rs7047482   | G | 0.0416  |
| rs13301059  | C | 0.0364  |

|             |   |         |
|-------------|---|---------|
| rs76805724  | T | -0.1256 |
| rs76587873  | G | 0.136   |
| rs62538126  | A | -0.1613 |
| rs75594099  | A | -0.0996 |
| rs2890765   | G | 0.1558  |
| rs60223038  | G | -0.0366 |
| rs539817    | T | 0.0355  |
| rs3043      | G | 0.0394  |
| rs4877258   | T | -0.0409 |
| rs117872308 | T | -0.2005 |
| rs118082591 | C | 0.164   |
| rs4877631   | C | 0.1187  |
| rs72756916  | A | 0.1569  |
| rs77977591  | A | 0.0559  |
| rs112537398 | A | 0.1207  |
| rs77384614  | A | -0.1098 |
| rs78387365  | A | -0.1489 |
| rs12353107  | T | -0.0968 |
| rs3088274   | T | 0.0347  |
| rs80341177  | T | 0.0977  |
| rs116872864 | G | 0.104   |
| rs75483724  | C | 0.085   |
| rs79129237  | C | 0.0515  |
| rs76884890  | G | 0.2242  |
| rs117467989 | A | -0.1274 |
| rs72693173  | C | 0.0489  |
| rs623646    | A | -0.0341 |
| rs75450106  | G | 0.1859  |
| rs11139280  | G | 0.1252  |
| rs56044239  | A | 0.052   |
| rs10812042  | A | 0.0614  |
| rs10756574  | C | -0.0366 |
| rs1611118   | T | -0.0704 |
| rs3808851   | G | 0.0398  |
| rs521801    | G | 0.0733  |
| rs16913661  | T | -0.0819 |
| rs10983645  | A | -0.1046 |
| rs2480804   | A | 0.0439  |
| rs117613450 | A | 0.2175  |
| rs1927638   | T | -0.0546 |
| rs10974705  | T | -0.0624 |
| rs113123    | A | 0.0364  |
| rs7037635   | A | -0.0405 |
| rs146534345 | C | -0.2405 |
| rs9411321   | T | 0.0487  |
| rs146515072 | C | -0.0683 |
| rs71511891  | T | -0.0903 |



|             |   |         |
|-------------|---|---------|
| rs117338626 | T | 0.2451  |
| rs2988571   | A | -0.0439 |
| rs10116688  | C | 0.0531  |
| rs117192703 | A | 0.1651  |
| rs150124274 | T | 0.2252  |
| rs79587553  | G | -0.058  |
| rs77699343  | A | 0.0826  |
| rs74970545  | G | -0.1496 |
| rs62582905  | T | -0.1535 |
| rs10869903  | G | -0.0339 |
| rs77508680  | G | 0.1052  |
| rs273432    | G | 0.0368  |
| rs2009301   | T | 0.1574  |
| rs7020281   | T | 0.0482  |
| rs10817973  | A | -0.0353 |
| rs143370824 | T | -0.1859 |
| rs7865226   | T | 0.0377  |
| rs3925024   | C | -0.0394 |
| rs1932457   | C | 0.0326  |
| rs818708    | A | -0.0327 |
| rs12683176  | A | 0.1093  |
| rs3850588   | T | 0.0961  |
| rs11788210  | T | -0.036  |
| rs117379899 | G | 0.1429  |
| rs12346696  | G | -0.0865 |
| rs2210421   | C | -0.0341 |
| rs10867698  | T | 0.0362  |
| rs117073130 | C | 0.1959  |
| rs9644886   | C | -0.0418 |
| rs72778149  | A | 0.0483  |
| rs12351740  | T | -0.0665 |
| rs73659029  | A | 0.0596  |
| rs608816    | C | 0.0857  |
| rs4579614   | A | 0.0365  |
| rs118114756 | T | -0.0817 |
| rs117009263 | T | -0.3061 |
| rs9308281   | T | -0.0324 |
| rs12343582  | C | -0.0382 |
| rs11243378  | T | 0.0777  |
| rs11789881  | C | -0.0576 |
| rs71514553  | A | -0.2445 |
| rs78683486  | A | -0.0854 |
| rs56341932  | T | 0.2399  |
| rs55734037  | T | -0.0417 |
| rs1463019   | A | 0.0572  |
| rs117721772 | A | -0.1134 |
| rs1541332   | A | 0.0321  |

|             |   |         |
|-------------|---|---------|
| rs945843    | C | -0.0343 |
| rs117042185 | C | 0.1582  |
| rs140262655 | G | 0.141   |
| rs706134    | A | -0.0329 |
| rs1970498   | T | 0.0458  |
| rs7863614   | C | 0.038   |
| rs10977092  | G | -0.0345 |
| rs10810176  | C | -0.0346 |
| rs1864202   | T | 0.035   |
| rs140751514 | A | -0.2544 |
| rs62555328  | T | 0.1002  |
| rs17580421  | T | 0.0628  |
| rs141557113 | G | 0.1713  |
| rs10306135  | T | -0.0538 |
| rs118120291 | C | 0.1425  |
| rs76086826  | A | -0.1874 |
| rs33941072  | G | 0.0367  |
| rs7048991   | T | 0.0956  |
| rs80250277  | C | -0.0788 |
| rs146409470 | T | 0.2207  |
| rs10283761  | C | 0.0451  |
| rs11138598  | A | -0.0356 |
| rs77565290  | T | -0.0727 |
| rs2169326   | T | 0.0499  |
| rs583201    | T | -0.0317 |
| rs10121071  | G | 0.0505  |
| rs145842140 | T | 0.2602  |
| rs13295272  | C | 0.0574  |
| rs11137475  | T | -0.0832 |
| rs11244022  | A | 0.2048  |
| rs10760066  | C | 0.1343  |
| rs2520006   | T | 0.0336  |
| rs79395844  | A | -0.2044 |
| rs1538516   | C | 0.0498  |
| rs141743066 | C | -0.1295 |
| rs149020254 | C | -0.1857 |
| rs3793516   | T | -0.0331 |
| rs79077827  | G | -0.1778 |
| rs7858552   | C | -0.0327 |
| rs59268514  | T | -0.0447 |
| rs113772124 | T | -0.0483 |
| rs59799274  | T | -0.0458 |
| rs9942933   | A | 0.0324  |
| rs140935532 | T | -0.2733 |
| rs10868017  | A | -0.0679 |
| rs1048070   | T | 0.0322  |
| rs73518170  | A | 0.2519  |

|             |   |         |
|-------------|---|---------|
| rs10817593  | C | 0.0318  |
| rs4961486   | G | -0.0404 |
| rs4961610   | T | -0.1389 |
| rs10757384  | G | 0.0359  |
| rs2519812   | T | 0.0547  |
| rs12378617  | T | 0.0424  |
| rs62571023  | A | 0.0809  |
| rs147525787 | C | -0.2169 |
| rs143395272 | G | -0.1444 |
| rs2175058   | C | -0.0473 |
| rs117959920 | T | 0.1688  |
| rs62541557  | G | 0.311   |
| rs149483122 | A | -0.1695 |
| rs734752    | T | 0.0337  |
| rs770783    | G | 0.0764  |
| rs11145050  | A | 0.0524  |
| rs145063226 | A | 0.1518  |
| rs9298685   | A | 0.0506  |
| rs13288787  | A | -0.0377 |
| rs10986088  | T | 0.0335  |
| rs72743518  | A | 0.1816  |
| rs76172911  | C | 0.0541  |
| rs149150742 | T | 0.2495  |
| rs67388180  | C | -0.0468 |
| rs13296703  | C | -0.0522 |
| rs148543098 | G | 0.1514  |
| rs10780969  | A | -0.0332 |
| rs113726944 | A | -0.1228 |
| rs10117384  | T | 0.0378  |
| rs17629207  | T | 0.063   |
| rs7871798   | A | 0.0651  |
| rs7034609   | G | 0.0798  |
| rs75922329  | A | -0.085  |
| rs7861372   | C | 0.147   |
| rs876487    | G | -0.0379 |
| rs118107594 | A | 0.2675  |
| rs12686217  | C | -0.0313 |
| rs34160974  | T | -0.1867 |
| rs11792058  | T | 0.0348  |
| rs79932272  | G | 0.069   |
| rs7873081   | C | -0.0322 |
| rs1231339   | A | -0.0316 |
| rs16929218  | G | -0.1707 |
| rs72699081  | A | -0.156  |
| rs41265298  | A | 0.0986  |
| rs10973276  | A | -0.0724 |
| rs10760256  | T | 0.0443  |

|             |   |         |
|-------------|---|---------|
| rs7866187   | T | 0.0363  |
| rs140579143 | A | -0.3387 |
| rs12337637  | G | 0.0633  |
| rs79286955  | T | -0.2163 |
| rs10733620  | T | 0.031   |
| rs79967707  | C | 0.1342  |
| rs6478890   | A | 0.0312  |
| rs137999248 | C | -0.1264 |
| rs142767966 | A | -0.2823 |
| rs139250781 | C | 0.2442  |
| rs11559374  | G | 0.0399  |
| rs75913731  | A | -0.0893 |
| rs61493153  | C | -0.0395 |
| rs36020633  | A | 0.0325  |
| rs143985783 | C | -0.1681 |
| rs58281565  | A | -0.0569 |
| rs7033490   | G | 0.0319  |
| rs671804    | A | 0.0397  |
| rs7036142   | A | -0.0358 |
| rs1037661   | A | 0.0705  |
| rs140985157 | G | 0.1448  |
| rs11792145  | T | -0.0381 |
| rs4977566   | T | 0.0509  |
| rs117813015 | A | 0.1375  |
| rs139121428 | G | -0.2118 |
| rs4548305   | C | 0.0339  |
| rs17693511  | A | 0.0797  |
| rs13291548  | C | -0.1967 |
| rs7858046   | A | 0.0894  |
| rs117033978 | T | -0.1662 |
| rs137887610 | C | 0.1874  |
| rs2787167   | A | -0.0394 |
| rs77744256  | G | -0.2434 |
| rs1377197   | C | 0.0366  |
| rs4078338   | T | -0.0342 |
| rs12686258  | C | 0.0391  |
| rs75159861  | T | -0.2056 |
| rs7867155   | T | 0.051   |
| rs2377811   | T | 0.032   |
| rs6538001   | A | -0.0369 |
| rs10491883  | C | 0.0423  |
| rs144851949 | T | 0.2034  |
| rs74346151  | C | -0.1219 |
| rs77072303  | A | 0.0592  |
| rs116911252 | T | 0.2521  |
| rs143672329 | G | 0.1383  |
| rs67239798  | C | -0.1721 |

|             |   |         |
|-------------|---|---------|
| rs12336266  | C | 0.0369  |
| rs17309781  | T | 0.0732  |
| rs148554863 | C | 0.1671  |
| rs1328546   | A | -0.0321 |
| rs146323377 | G | -0.1978 |
| rs117447085 | A | -0.1235 |
| rs142049312 | A | 0.0925  |
| rs7875963   | G | 0.035   |
| rs4961467   | T | 0.0347  |
| rs12347747  | C | 0.032   |
| rs12380243  | A | 0.0356  |
| rs13292423  | C | -0.0686 |
| rs10988421  | G | -0.132  |
| rs138047589 | T | 0.0926  |
| rs117575885 | G | 0.1217  |
| rs150443774 | T | 0.1716  |
| rs62537312  | A | 0.0406  |
| rs7029492   | A | -0.0319 |
| rs814680    | T | -0.0321 |
| rs822347    | T | -0.0323 |
| rs10964455  | C | 0.0488  |
| rs117057375 | A | 0.1235  |
| rs13300667  | A | 0.0438  |
| rs2871223   | A | -0.0335 |
| rs2228622   | A | -0.0306 |
| rs141352184 | C | 0.1466  |
| rs12002635  | T | -0.058  |
| rs7860877   | G | 0.0609  |
| rs112582628 | A | 0.1982  |
| rs12340210  | T | -0.0604 |
| rs818696    | C | 0.0395  |
| rs10491885  | G | 0.0371  |
| rs11140167  | T | 0.055   |
| rs117765099 | G | 0.1434  |
| rs77546573  | C | -0.0738 |
| rs17702967  | G | 0.1093  |
| rs12337602  | G | 0.0523  |
| rs112873172 | C | -0.1799 |
| rs146896146 | T | 0.1536  |
| rs138070122 | C | 0.1559  |
| rs306542    | A | 0.0365  |
| rs118089775 | T | -0.1635 |
| rs7038348   | C | 0.0313  |
| rs76487166  | T | -0.0474 |
| rs62582987  | T | -0.0697 |
| rs62569671  | G | 0.0416  |
| rs11145241  | T | 0.0368  |

|             |   |         |
|-------------|---|---------|
| rs11139557  | C | 0.0448  |
| rs116892575 | G | 0.2718  |
| rs2989942   | A | -0.0321 |
| rs563362    | C | 0.1029  |
| rs140657137 | C | 0.0724  |
| rs117502923 | A | -0.143  |
| rs62572528  | T | -0.1855 |
| rs11788587  | T | 0.0501  |
| rs2642004   | C | 0.0572  |
| rs61732355  | T | -0.1279 |
| rs116432222 | T | 0.1654  |
| rs10960543  | T | 0.0318  |
| rs143964321 | G | 0.1016  |
| rs357554    | T | 0.0947  |
| rs2382206   | T | -0.0506 |
| rs76404752  | C | -0.0752 |
| rs10819276  | G | 0.031   |
| rs116986168 | A | 0.1702  |
| rs11792868  | C | 0.0552  |
| rs143350649 | A | -0.0603 |
| rs10739432  | C | -0.0321 |
| rs10118605  | T | 0.0313  |
| rs10116734  | G | 0.035   |
| rs755774    | A | -0.0304 |
| rs117788803 | T | 0.17    |
| rs733531    | T | -0.2412 |
| rs75786696  | C | 0.1254  |
| rs9407721   | G | 0.0474  |
| rs2809854   | G | 0.0346  |
| rs11788110  | T | -0.0361 |
| rs13286896  | G | -0.0676 |
| rs117634467 | G | -0.1851 |
| rs7854664   | G | 0.0336  |
| rs1616813   | A | 0.1261  |
| rs784934    | G | 0.0316  |
| rs10125618  | A | -0.0468 |
| rs58960694  | A | 0.035   |
| rs10814308  | C | 0.0427  |
| rs75847657  | T | -0.1651 |
| rs72731793  | T | 0.1838  |
| rs2377916   | G | -0.0346 |
| rs62570037  | A | 0.0511  |
| rs10738612  | C | 0.0355  |
| rs140608229 | A | -0.127  |
| rs2240116   | A | -0.0736 |
| rs10993731  | T | 0.1187  |
| rs73456404  | G | 0.1605  |

|             |   |         |
|-------------|---|---------|
| rs17803098  | C | -0.0514 |
| rs10776906  | A | -0.0309 |
| rs1885926   | C | -0.0709 |
| rs62559065  | A | -0.0418 |
| rs1368679   | A | -0.1224 |
| rs11792674  | C | 0.0955  |
| rs465423    | A | 0.0548  |
| rs115131813 | T | -0.1669 |
| rs149584461 | A | -0.1342 |
| rs945386    | C | -0.0444 |
| rs10123553  | C | -0.0304 |
| rs113527854 | A | 0.1435  |
| rs10116802  | T | -0.0319 |
| rs2209802   | C | -0.0307 |
| rs148959091 | C | 0.2371  |
| rs10984639  | C | -0.0646 |
| rs1888210   | C | 0.0525  |
| rs57410174  | T | 0.0383  |
| rs78793101  | A | -0.0785 |
| rs7853795   | C | -0.0314 |
| rs61495629  | A | 0.0524  |
| rs10975173  | G | -0.0388 |
| rs150170638 | T | -0.1921 |
| rs79799516  | G | 0.1337  |
| rs149321168 | A | 0.0972  |
| rs12552430  | A | -0.0312 |
| rs10959872  | T | 0.0372  |
| rs144802866 | T | -0.1985 |
| rs1928655   | T | 0.0366  |
| rs34413958  | G | -0.0845 |
| rs10815721  | G | -0.039  |
| rs74546752  | A | 0.106   |
| rs74547575  | G | 0.0404  |
| rs77127003  | G | -0.0959 |
| rs113737047 | G | 0.0634  |
| rs75791549  | G | -0.0499 |
| rs145338109 | C | -0.1487 |
| rs11142966  | A | -0.0709 |
| rs146019517 | T | 0.145   |
| rs7854152   | C | -0.0473 |
| rs985974    | C | 0.0313  |
| rs45561035  | G | 0.1988  |
| rs57251598  | C | -0.1741 |
| rs10511729  | G | -0.0347 |
| rs79500301  | C | -0.0719 |
| rs10982277  | A | -0.0529 |
| rs2992816   | G | 0.0516  |

|             |   |         |
|-------------|---|---------|
| rs55657502  | C | -0.1975 |
| rs1970013   | T | 0.0414  |
| rs7018843   | C | -0.0505 |
| rs10972764  | G | -0.1311 |
| rs944482    | C | 0.0593  |
| rs7855109   | G | -0.0886 |
| rs12238237  | C | -0.0425 |
| rs4294262   | C | -0.0677 |
| rs7045445   | C | 0.0339  |
| rs10819817  | C | -0.0348 |
| rs145308861 | T | 0.1361  |
| rs4439225   | A | 0.0356  |
| rs142498463 | T | 0.0553  |
| rs62579535  | C | 0.0384  |
| rs7044740   | C | -0.117  |
| rs138047814 | C | -0.221  |
| rs117579224 | G | 0.342   |
| rs117359931 | G | 0.1656  |
| rs117487591 | C | 0.1657  |
| rs41278381  | C | 0.0836  |
| rs7023617   | G | -0.0649 |
| rs487882    | A | -0.0432 |
| rs62551042  | T | 0.0612  |
| rs56115080  | C | -0.0424 |
| rs10123038  | C | -0.0413 |
| rs1249759   | A | 0.0667  |
| rs147387773 | A | 0.0932  |
| rs60197911  | A | -0.0577 |
| rs139751943 | G | 0.0983  |
| rs10812653  | C | 0.1631  |
| rs4978754   | T | -0.0532 |
| rs35636057  | C | -0.1858 |
| rs10966644  | G | -0.0453 |
| rs11144045  | G | -0.168  |
| rs10114340  | A | 0.044   |
| rs3808757   | A | 0.0887  |
| rs117415762 | T | 0.181   |
| rs2290465   | G | 0.0532  |
| rs117964256 | C | 0.1898  |
| rs117412007 | A | -0.1105 |
| rs1886368   | T | 0.0324  |
| rs145624824 | T | -0.1551 |
| rs117053806 | C | -0.0921 |
| rs10980249  | T | 0.0345  |
| rs77627840  | T | -0.1696 |
| rs2476939   | T | 0.1035  |
| rs10968521  | C | 0.0487  |



|             |   |         |
|-------------|---|---------|
| rs3008709   | A | 0.0308  |
| rs28561466  | T | 0.0606  |
| rs9410806   | T | -0.0441 |
| rs12351988  | G | 0.0313  |
| rs12001999  | C | 0.0363  |
| rs12683780  | C | -0.0357 |
| rs74696492  | C | 0.1614  |
| rs117650144 | T | 0.1105  |
| rs877326    | T | 0.0303  |
| rs118051701 | A | 0.1598  |
| rs150381485 | T | -0.1191 |
| rs57287926  | G | -0.0826 |
| rs62570290  | T | -0.0833 |
| rs62566525  | T | 0.0394  |
| rs79419498  | G | -0.0477 |
| rs1228422   | T | -0.0326 |
| rs78562626  | A | 0.1769  |
| rs59966455  | C | 0.0516  |
| rs2375067   | G | -0.0384 |
| rs4744517   | A | -0.0476 |
| rs150751761 | T | -0.1822 |
| rs76628624  | T | -0.1292 |
| rs11788833  | T | -0.0459 |
| rs11137479  | G | 0.1915  |
| rs10989002  | G | 0.2352  |
| rs140802033 | T | -0.2294 |
| rs4745561   | C | -0.0307 |
| rs10970549  | A | -0.0778 |
| rs12380271  | C | 0.133   |
| rs11790666  | G | 0.0411  |
| rs117069874 | A | -0.1413 |
| rs72743635  | C | -0.3204 |
| rs118097871 | T | -0.0817 |
| rs13291406  | C | 0.0542  |
| rs4842092   | G | 0.038   |
| rs10978572  | A | -0.0606 |
| rs59373076  | A | 0.0514  |
| rs138274394 | A | 0.1122  |
| rs116015931 | A | -0.2015 |
| rs4745479   | C | -0.1226 |
| rs56997979  | A | 0.0425  |
| rs4237201   | T | 0.0514  |
| rs1679013   | T | -0.0476 |
| rs75813588  | T | 0.0797  |
| rs143896758 | T | -0.2435 |
| rs117107218 | T | 0.1707  |
| rs7023833   | T | -0.0383 |

|             |   |         |
|-------------|---|---------|
| rs9410310   | A | 0.1658  |
| rs527982    | G | -0.032  |
| rs10811008  | T | 0.0332  |
| rs10757653  | T | -0.0594 |
| rs2993180   | C | -0.0586 |
| rs80052512  | G | -0.1105 |
| rs10986222  | A | 0.0668  |
| rs74411467  | T | 0.0562  |
| rs11496771  | T | -0.2917 |
| rs10735568  | T | -0.0565 |
| rs4647497   | G | -0.1379 |
| rs10812565  | G | -0.0384 |
| rs142265011 | G | 0.2109  |
| rs12379047  | A | -0.0359 |
| rs34766870  | T | 0.1946  |
| rs10815443  | C | -0.0447 |
| rs2593410   | G | 0.1216  |
| rs10512265  | A | 0.1504  |
| rs144148672 | C | 0.1311  |
| rs73645622  | T | -0.2183 |
| rs111780368 | C | 0.0662  |
| rs78467209  | A | 0.0844  |
| rs62534482  | A | -0.034  |
| rs10869672  | T | 0.0315  |
| rs117330703 | A | 0.1552  |
| rs10986419  | T | 0.0786  |
| rs3132332   | G | 0.0359  |
| rs4745084   | C | 0.0426  |
| rs17087148  | G | -0.0885 |
| rs73667845  | A | -0.1369 |
| rs75587070  | T | 0.2365  |
| rs77597918  | G | 0.1243  |
| rs67442944  | T | -0.0502 |
| rs4877784   | A | 0.066   |
| rs10908912  | T | 0.043   |
| rs1531674   | C | -0.0368 |
| rs78230934  | A | 0.1563  |
| rs75635388  | C | 0.0724  |
| rs139935352 | G | 0.1389  |
| rs7874156   | T | -0.0345 |
| rs72761029  | T | 0.0708  |
| rs2296781   | A | 0.0299  |
| rs3025321   | A | -0.0763 |
| rs2992817   | T | 0.0312  |
| rs113843389 | A | 0.1957  |
| rs142395590 | A | 0.1338  |
| rs1326795   | C | 0.0469  |

|             |   |         |
|-------------|---|---------|
| rs66529615  | T | 0.0607  |
| rs1258094   | G | -0.0339 |
| rs79146084  | A | -0.0868 |
| rs76896301  | C | -0.1074 |
| rs10965243  | G | -0.0504 |
| rs116856958 | G | 0.104   |
| rs472170    | G | -0.0328 |
| rs12351036  | T | -0.1322 |
| rs144931775 | G | 0.1041  |
| rs76241503  | T | -0.2516 |
| rs62554699  | A | -0.2256 |
| rs77334358  | T | -0.206  |
| rs147508246 | A | -0.2269 |
| rs79614110  | G | -0.0584 |
| rs2938882   | C | 0.0395  |
| rs74835287  | A | 0.0812  |
| rs117751088 | C | -0.185  |
| rs12238007  | G | -0.0598 |
| rs4535826   | G | -0.0383 |
| rs77346095  | G | -0.0767 |
| rs138745815 | C | -0.1034 |
| rs35921828  | A | 0.1069  |
| rs117810130 | T | -0.1968 |
| rs521888    | A | 0.0318  |
| rs1323247   | A | -0.0409 |
| rs10987765  | T | 0.0476  |
| rs79835034  | G | -0.1224 |
| rs13293262  | A | 0.0389  |
| rs117344675 | A | 0.1533  |
| rs10977176  | C | -0.032  |
| rs2295927   | A | 0.0532  |
| rs13289920  | G | -0.0561 |
| rs34632222  | A | -0.0539 |
| rs148775889 | A | -0.1622 |
| rs10988811  | T | -0.1938 |
| rs4993036   | T | -0.0417 |
| rs2043465   | A | -0.0298 |
| rs17787781  | A | 0.0732  |
| rs7847590   | A | -0.0328 |
| rs117914415 | A | 0.1829  |
| rs10759255  | T | 0.0344  |
| rs10810268  | C | -0.0404 |
| rs34912528  | C | -0.0669 |
| rs62561896  | T | 0.0828  |
| rs4838080   | A | 0.1221  |
| rs79303191  | A | 0.07    |
| rs6597634   | C | 0.0408  |

|             |   |         |
|-------------|---|---------|
| rs12342992  | C | 0.0364  |
| rs10780227  | G | -0.0295 |
| rs12344549  | T | 0.0568  |
| rs113408976 | G | -0.0969 |
| rs117334132 | T | 0.1763  |
| rs10991775  | A | 0.0491  |
| rs12348853  | A | -0.0878 |
| rs147961049 | T | 0.1493  |
| rs145609450 | A | -0.0504 |
| rs10973324  | A | 0.0796  |
| rs76876243  | A | 0.1185  |
| rs5015933   | C | 0.0302  |
| rs17391944  | G | 0.0711  |
| rs62548633  | G | 0.0604  |
| rs11103540  | C | -0.0462 |
| rs112485380 | C | 0.0568  |
| rs10809905  | G | -0.0326 |
| rs56263104  | T | -0.0606 |
| rs10985452  | C | -0.0309 |
| rs10968714  | C | 0.0469  |
| rs7019128   | C | -0.0537 |
| rs74767806  | T | -0.1729 |
| rs12376625  | T | -0.0321 |
| rs77340355  | A | 0.1126  |
| rs4585801   | A | 0.03    |
| rs117554547 | C | -0.115  |
| rs2282078   | T | -0.0386 |
| rs62583467  | G | 0.199   |
| rs12351380  | C | 0.1107  |
| rs10816837  | A | 0.0542  |
| rs10992610  | A | -0.0438 |
| rs72764649  | C | 0.0742  |
| rs11792992  | T | 0.1067  |
| rs72656797  | A | -0.1367 |
| rs2232624   | A | -0.0826 |
| rs16927858  | C | 0.0478  |
| rs113286207 | T | -0.0663 |
| rs327754    | C | 0.0346  |
| rs11788628  | T | -0.1232 |
| rs11793913  | T | 0.0317  |
| rs74725663  | T | -0.058  |
| rs141172617 | G | 0.2699  |
| rs2181558   | T | 0.0318  |
| rs1547205   | C | -0.073  |
| rs117083885 | T | 0.0991  |
| rs76846053  | A | -0.1356 |
| rs11791459  | T | -0.0595 |

|             |   |         |
|-------------|---|---------|
| rs7024021   | C | 0.0298  |
| rs1334811   | A | 0.0665  |
| rs4741801   | T | 0.0303  |
| rs147056251 | A | 0.1074  |
| rs10974832  | C | -0.0381 |
| rs117897343 | G | 0.0901  |
| rs17711934  | C | 0.151   |
| rs79099476  | A | -0.0708 |
| rs10960969  | A | 0.1311  |
| rs2791599   | G | -0.0376 |
| rs2567705   | T | -0.0298 |
| rs79454398  | G | -0.131  |
| rs10869654  | T | 0.0309  |
| rs117092840 | A | -0.1468 |
| rs12550859  | C | -0.1573 |
| rs13302123  | C | -0.0464 |
| rs142392582 | C | -0.1984 |
| rs76955252  | C | -0.0664 |
| rs117697698 | A | -0.1261 |
| rs10810049  | G | -0.0364 |
| rs74581861  | T | 0.0706  |
| rs7040049   | G | 0.0333  |
| rs117297590 | A | 0.2419  |
| rs10816532  | T | 0.0444  |
| rs10441746  | T | -0.0453 |
| rs1331658   | C | -0.0298 |
| rs11265874  | G | 0.052   |
| rs80034475  | C | -0.129  |
| rs140416234 | G | -0.2065 |
| rs9802616   | A | -0.0625 |
| rs71523482  | A | 0.115   |
| rs4546732   | C | -0.059  |
| rs72748449  | T | 0.1182  |
| rs3758203   | C | -0.0565 |
| rs72718145  | C | -0.0837 |
| rs56195717  | T | 0.1146  |
| rs2417679   | G | -0.1152 |
| rs56230717  | G | 0.0609  |
| rs117506257 | T | 0.0724  |
| rs11103242  | A | 0.1507  |
| rs78378839  | C | 0.1623  |
| rs2506117   | C | -0.0454 |
| rs145982467 | A | 0.0692  |
| rs142191223 | A | 0.0853  |
| rs4978551   | T | 0.0414  |
| rs561592    | C | -0.0475 |
| rs142627873 | A | 0.1763  |

|             |   |         |
|-------------|---|---------|
| rs4741656   | G | 0.033   |
| rs77236901  | T | -0.1235 |
| rs76338121  | G | -0.083  |
| rs73656325  | T | 0.1386  |
| rs13295638  | C | -0.0439 |
| rs7872420   | G | 0.0395  |
| rs62534810  | T | 0.1027  |
| rs10114240  | G | 0.0349  |
| rs4979257   | G | 0.0373  |
| rs147080694 | T | -0.2045 |
| rs35732810  | T | -0.0572 |
| rs10124138  | T | 0.0401  |
| rs7853023   | A | -0.0376 |
| rs7872805   | A | 0.0315  |
| rs117966828 | A | 0.0931  |
| rs7873175   | A | -0.0349 |
| rs7862821   | C | -0.0542 |
| rs10429515  | T | 0.0505  |
| rs72702005  | A | -0.2114 |
| rs59512030  | A | 0.0523  |
| rs10979963  | T | 0.0799  |
| rs10990916  | A | 0.1174  |
| rs35357088  | C | -0.0596 |
| rs11243406  | A | -0.069  |
| rs139600448 | G | -0.1553 |
| rs148235562 | C | 0.0704  |
| rs62560382  | C | 0.1512  |
| rs10812321  | A | -0.0316 |
| rs2492627   | A | 0.0314  |
| rs79300279  | A | -0.1428 |
| rs111473985 | A | -0.0385 |
| rs3780827   | G | 0.0616  |
| rs11788658  | C | 0.0424  |
| rs10758441  | T | -0.0315 |
| rs41273392  | A | -0.2681 |
| rs7044535   | A | 0.0386  |
| rs7043517   | A | -0.0653 |
| rs113645292 | A | 0.0862  |
| rs7019545   | G | 0.0312  |
| rs72733451  | A | 0.1837  |
| rs80330252  | T | 0.0493  |
| rs117037505 | T | -0.1405 |
| rs142513138 | A | 0.0534  |
| rs141158563 | G | -0.1167 |
| rs111489094 | A | -0.1587 |
| rs1500309   | A | 0.0446  |
| rs144722335 | C | -0.1238 |

|             |   |         |
|-------------|---|---------|
| rs10812033  | G | -0.0302 |
| rs17708974  | A | 0.0376  |
| rs12379330  | G | 0.042   |
| rs13291055  | A | 0.037   |
| rs79225943  | G | 0.1164  |
| rs2491002   | A | -0.0657 |
| rs57728431  | G | -0.0519 |
| rs10974815  | T | 0.0418  |
| rs4741372   | T | 0.0307  |
| rs17058421  | G | 0.0566  |
| rs10119417  | T | -0.048  |
| rs71496249  | T | 0.0395  |
| rs73405730  | G | 0.0573  |
| rs117212731 | T | -0.1838 |
| rs10120932  | G | 0.0393  |
| rs72713282  | C | 0.0947  |
| rs524074    | C | 0.0487  |
| rs117709606 | A | 0.0942  |
| rs10820798  | A | -0.0369 |
| rs12351803  | A | 0.0986  |
| rs702201    | G | 0.085   |
| rs4297077   | C | -0.0472 |
| rs117488067 | C | 0.1218  |
| rs141057242 | C | -0.1629 |
| rs7874131   | T | -0.0611 |
| rs2787384   | A | -0.0293 |
| rs7857116   | A | 0.0351  |
| rs55645275  | G | -0.3334 |
| rs623318    | G | 0.0354  |
| rs72744671  | C | -0.1814 |
| rs4979502   | C | -0.039  |
| rs35258638  | A | 0.0438  |
| rs17402763  | G | -0.1196 |
| rs72709668  | T | 0.0921  |
| rs12683020  | G | -0.0349 |
| rs2456266   | G | -0.0405 |
| rs7865829   | C | -0.0489 |
| rs112271298 | G | 0.0403  |
| rs114336148 | C | 0.0913  |
| rs78920372  | A | 0.1833  |
| rs55856550  | T | 0.1527  |
| rs10984516  | T | 0.0474  |
| rs77454912  | T | 0.1081  |
| rs117913481 | A | -0.0613 |
| rs112141461 | T | -0.1276 |
| rs77788557  | A | -0.1373 |
| rs13302629  | A | 0.0346  |

|             |   |         |
|-------------|---|---------|
| rs4879640   | G | 0.0343  |
| rs117626470 | T | 0.1336  |
| rs1969763   | G | -0.0296 |
| rs983078    | G | -0.0307 |
| rs7861563   | T | -0.0435 |
| rs9407383   | C | 0.0332  |
| rs514208    | G | 0.0441  |
| rs55780758  | C | -0.1902 |
| rs56223117  | A | -0.0655 |
| rs10757140  | C | 0.0383  |
| rs145048283 | T | 0.1129  |
| rs1327796   | G | 0.0398  |
| rs734764    | G | -0.0353 |
| rs144757117 | A | 0.1544  |
| rs62577969  | T | 0.1079  |
| rs13283427  | C | -0.0418 |
| rs10817929  | C | 0.0392  |
| rs73554519  | A | 0.1218  |
| rs2772683   | C | 0.0318  |
| rs3802489   | C | -0.0678 |
| rs1984007   | T | 0.0324  |
| rs78146370  | T | -0.0828 |
| rs117997207 | T | 0.1663  |
| rs7030115   | C | -0.0299 |
| rs12351774  | G | 0.0446  |
| rs17480343  | A | 0.232   |
| rs2184979   | T | 0.1305  |
| rs10980677  | A | -0.0321 |
| rs7049038   | T | 0.0311  |
| rs72701686  | A | -0.1411 |
| rs55968210  | A | 0.0935  |
| rs1350999   | T | -0.0294 |
| rs9411017   | G | -0.037  |
| rs74730320  | T | -0.1793 |
| rs139089441 | C | -0.1135 |
| rs982464    | G | 0.0632  |
| rs62555365  | A | -0.0358 |
| rs16915452  | T | 0.1102  |
| rs13291480  | G | 0.1589  |
| rs34477738  | G | 0.0563  |
| rs574688    | C | -0.0602 |
| rs7875646   | C | -0.0481 |
| rs13286730  | G | 0.0501  |
| rs147541624 | T | -0.1261 |
| rs4745462   | A | 0.0318  |
| rs11139045  | G | -0.0885 |
| rs2236409   | C | -0.0518 |



|             |   |         |
|-------------|---|---------|
| rs4628332   | T | 0.0614  |
| rs55686925  | A | -0.0643 |
| rs142775214 | C | 0.1723  |
| rs4741751   | G | 0.0489  |
| rs913259    | T | 0.0387  |
| rs16907489  | T | 0.0761  |
| rs150236972 | C | 0.2157  |
| rs7870620   | A | -0.0474 |
| rs13301002  | C | 0.0287  |
| rs75431457  | T | 0.1717  |
| rs1552897   | A | -0.0396 |
| rs72748984  | A | -0.0797 |
| rs35553284  | A | 0.0504  |
| rs117079474 | T | 0.1121  |
| rs75631799  | T | 0.0958  |
| rs117356459 | A | 0.1036  |
| rs7021986   | G | 0.0662  |
| rs12376244  | A | 0.0343  |
| rs10122850  | T | -0.1047 |
| rs2150573   | T | -0.0285 |
| rs79455334  | T | 0.1677  |
| rs4322086   | G | 0.0284  |
| rs4836699   | A | -0.0383 |
| rs10491886  | T | -0.0594 |
| rs56277318  | C | -0.1931 |
| rs4741915   | G | -0.0321 |
| rs111584195 | G | 0.1019  |
| rs7853157   | G | 0.0301  |
| rs945852    | C | 0.034   |
| rs977124    | A | -0.0435 |
| rs148967740 | C | -0.2066 |
| rs10780314  | A | -0.0346 |
| rs7867164   | C | 0.0833  |
| rs117095515 | T | 0.0964  |
| rs79131119  | A | 0.0739  |
| rs10963744  | C | 0.0508  |
| rs1034163   | T | 0.0288  |
| rs117441751 | A | 0.1179  |
| rs78526882  | C | -0.1224 |
| rs7874810   | A | -0.0284 |
| rs7041936   | G | 0.0981  |
| rs113485919 | T | -0.2068 |
| rs117248403 | C | 0.0554  |
| rs2518129   | G | 0.0701  |
| rs34287535  | T | 0.0406  |
| rs62573231  | A | -0.1326 |
| rs61007216  | T | -0.1311 |

|             |   |         |
|-------------|---|---------|
| rs77099834  | T | -0.0914 |
| rs4842229   | A | -0.0434 |
| rs3217986   | G | 0.0516  |
| rs943423    | G | -0.0314 |
| rs72754383  | A | -0.0731 |
| rs140913548 | T | 0.1141  |
| rs10113918  | T | 0.0383  |
| rs72762562  | G | -0.0741 |
| rs10963692  | T | -0.0498 |
| rs7034420   | A | 0.0292  |
| rs117300595 | T | -0.2155 |
| rs72744167  | A | 0.1253  |
| rs13284654  | T | -0.0454 |
| rs11792737  | A | -0.049  |
| rs10983517  | A | 0.0331  |
| rs138322680 | A | -0.1212 |
| rs36121510  | C | -0.0759 |
| rs147710977 | C | 0.087   |
| rs12238280  | A | 0.0532  |
| rs13288401  | T | 0.104   |
| rs11137653  | A | 0.061   |
| rs7033257   | A | 0.031   |
| rs147057279 | T | 0.129   |
| rs12683633  | C | 0.0317  |
| rs1215176   | C | -0.0535 |
| rs34792804  | G | 0.0627  |
| rs117592346 | A | 0.1382  |
| rs117756191 | A | 0.0589  |
| rs117743368 | A | 0.2735  |
| rs72687831  | T | 0.0395  |
| rs62555368  | T | 0.1272  |
| rs56409414  | G | 0.0964  |
| rs28712321  | T | 0.0343  |
| rs72751802  | T | 0.1257  |
| rs990481    | G | 0.1816  |
| rs1557125   | G | -0.0306 |
| rs10980986  | T | 0.0458  |
| rs944036    | G | -0.0332 |
| rs72730822  | T | -0.1365 |
| rs518383    | C | 0.0369  |
| rs117706625 | G | -0.1477 |
| rs9696582   | C | 0.073   |
| rs341464    | G | 0.0466  |
| rs61558891  | T | 0.2259  |
| rs10512263  | C | 0.0606  |
| rs74215445  | G | -0.1499 |
| rs79957237  | C | 0.1225  |

|             |   |         |
|-------------|---|---------|
| rs57814978  | A | -0.0627 |
| rs79009054  | A | 0.0866  |
| rs143189158 | A | 0.0788  |
| rs117235480 | T | 0.1151  |
| rs10980614  | A | 0.0471  |
| rs7857612   | A | 0.0526  |
| rs11794219  | T | 0.1402  |
| rs75685645  | A | 0.1246  |
| rs2905072   | G | -0.0359 |
| rs62555871  | A | 0.0791  |
| rs10985154  | G | 0.1072  |
| rs74346620  | C | -0.0527 |
| rs72713597  | T | 0.0588  |
| rs1931388   | G | -0.0291 |
| rs7035838   | A | -0.0326 |
| rs34021886  | T | -0.0908 |
| rs117141493 | G | -0.0908 |
| rs117790707 | T | 0.1435  |
| rs7851929   | C | 0.0377  |
| rs75895814  | T | -0.1161 |
| rs11793532  | G | -0.0415 |
| rs7022220   | C | -0.0418 |
| rs7849478   | A | 0.0349  |
| rs117303833 | T | -0.1588 |
| rs1778974   | T | -0.0579 |
| rs7853968   | G | 0.0882  |
| rs55737197  | T | 0.1906  |
| rs117881792 | T | -0.1929 |
| rs4837897   | C | -0.032  |
| rs75008163  | T | 0.1548  |
| rs1857438   | T | 0.0794  |
| rs16920358  | C | 0.0503  |
| rs273436    | G | 0.041   |
| rs397916    | G | -0.037  |
| rs117045751 | C | -0.1975 |
| rs76429456  | A | 0.1083  |
| rs436929    | C | -0.0341 |
| rs10982612  | T | -0.2123 |
| rs117298666 | A | 0.1205  |
| rs139722282 | C | 0.2083  |
| rs117878340 | T | 0.2225  |
| rs147302394 | A | 0.1902  |
| rs1249713   | A | 0.0295  |
| rs7046765   | G | -0.0401 |
| rs80343151  | T | 0.0737  |
| rs10512213  | G | 0.0411  |
| rs1558874   | G | -0.0437 |

|             |   |         |
|-------------|---|---------|
| rs12003687  | C | -0.064  |
| rs80151685  | A | -0.0846 |
| rs79362338  | A | -0.1651 |
| rs78725238  | T | -0.1991 |
| rs71501685  | C | -0.1019 |
| rs56869826  | C | -0.0656 |
| rs79645106  | A | -0.1056 |
| rs62546174  | G | -0.0433 |
| rs17509780  | A | -0.0728 |
| rs1006418   | G | -0.0287 |
| rs116957541 | G | -0.1302 |
| rs6476690   | A | -0.0475 |
| rs79335572  | C | 0.1408  |
| rs77478190  | G | -0.1631 |
| rs420791    | T | -0.0501 |
| rs141476335 | A | -0.1366 |
| rs78621972  | G | 0.0468  |
| rs117530505 | G | 0.1161  |
| rs76174756  | C | 0.2069  |
| rs16929654  | A | 0.154   |
| rs2583837   | A | -0.0285 |
| rs76416052  | C | -0.0955 |
| rs12353545  | C | 0.0462  |
| rs7851561   | C | 0.035   |
| rs57352266  | T | 0.039   |
| rs55952720  | T | 0.1279  |
| rs77864761  | T | 0.1374  |
| rs117546508 | C | 0.1934  |
| rs2815170   | G | -0.0294 |
| rs1410577   | C | 0.1471  |
| rs117507797 | T | -0.15   |
| rs75852895  | C | 0.065   |
| rs4837521   | T | -0.0305 |
| rs118163705 | A | -0.2096 |
| rs34163298  | C | 0.0305  |
| rs118190536 | C | 0.0884  |
| rs59316391  | T | 0.2813  |
| rs13288531  | T | -0.0693 |
| rs306783    | T | -0.0315 |
| rs75864858  | A | 0.093   |
| rs75340447  | T | 0.1288  |
| rs11794589  | A | -0.1328 |
| rs148666613 | A | -0.2058 |
| rs35744101  | T | -0.0678 |
| rs10780590  | C | 0.0305  |
| rs7031396   | G | 0.0363  |
| rs9802847   | G | 0.1179  |

|             |   |         |
|-------------|---|---------|
| rs72697791  | G | 0.0361  |
| rs13295714  | G | -0.0402 |
| rs10972586  | A | -0.0516 |
| rs1609801   | C | -0.0539 |
| rs74855337  | A | -0.0732 |
| rs10115243  | C | -0.0389 |
| rs11140486  | C | 0.0434  |
| rs10963383  | C | 0.0415  |
| rs10976280  | G | -0.0355 |
| rs17787761  | C | -0.0755 |
| rs150290871 | G | 0.0927  |
| rs78107422  | T | -0.0445 |
| rs3011260   | A | -0.0364 |
| rs3904577   | C | 0.0325  |
| rs117736050 | T | 0.1218  |
| rs2482424   | T | -0.0465 |
| rs2638378   | T | -0.042  |
| rs10966438  | C | -0.0448 |
| rs2281905   | G | -0.0333 |
| rs16928621  | A | -0.0386 |
| rs72690574  | A | -0.1197 |
| rs140526396 | C | 0.1978  |
| rs140115172 | G | -0.1471 |
| rs79246818  | G | -0.1894 |
| rs2519996   | T | 0.0608  |
| rs56090700  | T | -0.1984 |
| rs1620371   | C | -0.0348 |
| rs56327511  | T | -0.1324 |
| rs35041950  | C | -0.0319 |
| rs7039736   | A | 0.0616  |
| rs13289539  | C | 0.1823  |
| rs10961175  | G | -0.0809 |
| rs34998224  | C | -0.041  |
| rs10978000  | T | 0.0521  |
| rs35841352  | A | 0.1165  |
| rs62565047  | T | 0.0944  |
| rs12554380  | C | 0.0967  |
| rs2761059   | C | 0.0312  |
| rs10511609  | G | 0.0697  |
| rs147610879 | A | 0.0957  |
| rs145822456 | A | 0.1662  |
| rs72734703  | C | -0.0521 |
| rs28377722  | T | 0.0527  |
| rs59165439  | T | 0.0329  |
| rs78713999  | G | -0.062  |
| rs140055303 | C | 0.1478  |
| rs140005736 | G | 0.1255  |

|             |   |         |
|-------------|---|---------|
| rs10964334  | T | 0.1351  |
| rs10984726  | C | -0.0314 |
| rs11139855  | A | 0.0392  |
| rs10975037  | G | -0.0298 |
| rs117917460 | A | 0.1733  |
| rs28599759  | T | -0.041  |
| rs117800046 | C | 0.1162  |
| rs117024390 | A | 0.2425  |
| rs58681542  | G | -0.0605 |
| rs142907092 | T | 0.205   |
| rs59060942  | C | 0.1786  |
| rs75131075  | A | 0.06    |
| rs11142566  | T | -0.0311 |
| rs17147185  | A | -0.0927 |
| rs3858105   | G | 0.0352  |
| rs7864719   | G | -0.0499 |
| rs10965565  | C | -0.0966 |
| rs34483649  | G | -0.1309 |
| rs7025353   | C | 0.0335  |
| rs117210009 | T | -0.2055 |
| rs55930244  | C | 0.1165  |
| rs1885238   | T | 0.0394  |
| rs3739784   | T | 0.0595  |
| rs475404    | A | 0.0626  |
| rs56281242  | C | 0.0508  |
| rs7857674   | G | 0.0324  |
| rs4744307   | A | -0.0284 |
| rs12377101  | T | -0.0582 |
| rs72761767  | C | 0.0714  |
| rs168490    | G | -0.1177 |
| rs117389221 | C | 0.1732  |
| rs58744673  | C | -0.0292 |
| rs635827    | G | -0.0425 |
| rs78159768  | C | 0.1585  |
| rs2038755   | G | 0.1643  |
| rs113180929 | G | 0.1313  |
| rs9792606   | T | 0.038   |
| rs10512145  | A | -0.0383 |
| rs1536523   | T | 0.0606  |
| rs73653910  | A | 0.0855  |
| rs73561516  | A | 0.1028  |
| rs7036698   | T | 0.1289  |
| rs143463673 | A | -0.1882 |
| rs10991461  | C | -0.0294 |
| rs11139444  | A | -0.1629 |
| rs12002347  | G | -0.0457 |
| rs144251347 | A | 0.0828  |

|             |   |         |
|-------------|---|---------|
| rs75016446  | A | -0.0896 |
| rs76964692  | T | 0.113   |
| rs10814755  | A | 0.0276  |
| rs57353091  | G | 0.1343  |
| rs113722006 | C | -0.1712 |
| rs10982569  | A | 0.1459  |
| rs10812236  | T | -0.1166 |
| rs7863156   | G | -0.0667 |
| rs4614050   | T | -0.0487 |
| rs61158277  | A | -0.1211 |
| rs62574256  | C | 0.1252  |
| rs76846982  | C | 0.0965  |
| rs71507355  | C | 0.0696  |
| rs10977620  | C | 0.0388  |
| rs3793472   | G | 0.0308  |
| rs55903340  | T | 0.0332  |
| rs409453    | C | -0.0457 |
| rs75663624  | T | -0.0603 |
| rs72761946  | T | 0.0874  |
| rs117882869 | A | 0.2     |
| rs147462154 | G | 0.1331  |
| rs1717423   | T | 0.0598  |
| rs1984216   | G | 0.0281  |
| rs60742513  | A | 0.0745  |
| rs111379640 | T | -0.1427 |
| rs2281790   | A | -0.0331 |
| rs2224489   | A | 0.0289  |
| rs116920155 | G | 0.0751  |
| rs977972    | A | -0.0769 |
| rs1575554   | T | 0.0586  |
| rs10961562  | G | -0.0344 |
| rs78538131  | T | -0.104  |
| rs10817947  | A | 0.0525  |
| rs117188510 | T | 0.111   |
| rs111384356 | T | -0.1485 |
| rs10756363  | G | 0.0427  |
| rs141414305 | T | -0.1105 |
| rs639898    | G | -0.0294 |
| rs115838846 | A | -0.0962 |
| rs11789922  | G | 0.0284  |
| rs1433825   | G | -0.0557 |
| rs2675275   | T | -0.0286 |
| rs12236652  | A | 0.1633  |
| rs149444215 | T | -0.1014 |
| rs150024629 | C | 0.1297  |
| rs13284442  | T | 0.0316  |
| rs151143703 | A | 0.1933  |

|             |   |         |
|-------------|---|---------|
| rs59164034  | G | -0.0486 |
| rs10733751  | G | 0.0599  |
| rs1933975   | T | -0.0369 |
| rs357527    | A | 0.0564  |
| rs117525133 | T | -0.1838 |
| rs60046377  | T | 0.2109  |
| rs356679    | T | 0.0367  |
| rs76997949  | C | 0.105   |
| rs79234439  | G | 0.208   |
| rs1773708   | G | 0.0372  |
| rs62578248  | A | -0.1209 |
| rs75469190  | C | -0.0784 |
| rs56156648  | G | -0.0536 |
| rs11185646  | T | 0.0302  |
| rs143321291 | T | -0.1259 |
| rs146758128 | G | 0.0701  |
| rs34622612  | G | 0.0535  |
| rs7023713   | G | -0.0338 |
| rs79567208  | T | -0.0885 |
| rs2018988   | A | -0.0534 |
| rs72761616  | T | 0.0898  |
| rs7870466   | A | 0.0288  |
| rs140273177 | C | 0.0864  |
| rs111379249 | G | 0.1017  |
| rs72703512  | A | -0.0885 |
| rs10993323  | G | 0.028   |
| rs62531731  | G | -0.1666 |
| rs35813466  | A | -0.0833 |
| rs77841483  | A | -0.3006 |
| rs62568152  | C | -0.053  |
| rs117331234 | C | 0.1811  |
| rs7855854   | T | 0.0544  |
| rs11788443  | T | 0.0491  |
| rs7852480   | G | -0.0575 |
| rs67659836  | T | 0.0437  |
| rs113895116 | T | -0.0792 |
| rs41274260  | C | -0.1387 |
| rs10978365  | C | -0.072  |
| rs10962014  | A | -0.0361 |
| rs74392475  | C | -0.0732 |
| rs13288158  | C | -0.0537 |
| rs3780164   | A | 0.0293  |
| rs76704800  | G | -0.189  |
| rs138505057 | T | 0.168   |
| rs56304357  | A | -0.0517 |
| rs7850614   | A | -0.0327 |
| rs12351083  | C | -0.0315 |



|             |   |         |
|-------------|---|---------|
| rs1887457   | T | -0.0332 |
| rs34817677  | G | 0.0342  |
| rs72752697  | T | 0.1136  |
| rs72710262  | G | 0.0954  |
| rs145339264 | A | -0.1092 |
| rs117482250 | A | -0.1006 |
| rs2289662   | G | 0.079   |
| rs16934330  | G | -0.1479 |
| rs6476410   | C | 0.0329  |
| rs28534446  | A | 0.0676  |
| rs74680962  | G | 0.1618  |
| rs72705610  | A | -0.1364 |
| rs2792233   | T | 0.0401  |
| rs75611131  | T | 0.0522  |
| rs7866213   | T | -0.1659 |
| rs62543868  | T | -0.2297 |
| rs117883886 | A | -0.1005 |
| rs116218437 | T | 0.0519  |
| rs4878060   | G | 0.0301  |
| rs776775    | C | 0.0298  |
| rs117577840 | A | -0.141  |
| rs7854402   | G | 0.0302  |
| rs118050576 | T | 0.1032  |
| rs11185687  | G | -0.0783 |
| rs117070500 | C | 0.0869  |
| rs75788448  | T | -0.1241 |
| rs838821    | G | -0.104  |
| rs138906216 | A | 0.1956  |
| rs118124201 | G | -0.1435 |
| rs75554167  | A | 0.0826  |
| rs129956    | C | -0.0749 |
| rs72751397  | G | -0.1746 |
| rs702280    | G | 0.0344  |
| rs2479836   | C | 0.0276  |
| rs17305963  | A | -0.0519 |
| rs584396    | T | -0.0334 |
| rs76229320  | T | 0.1072  |
| rs7859      | A | 0.039   |
| rs149828922 | C | -0.1947 |
| rs117922864 | T | 0.1389  |
| rs62529502  | A | 0.0584  |
| rs55854523  | G | -0.0818 |
| rs7848364   | T | 0.0761  |
| rs34081422  | C | 0.1223  |
| rs112325071 | G | -0.0849 |
| rs11138449  | T | 0.0828  |
| rs7045319   | C | -0.0697 |

|             |   |         |
|-------------|---|---------|
| rs75852853  | C | 0.0692  |
| rs59215067  | C | -0.0533 |
| rs2164097   | C | -0.0293 |
| rs62574712  | G | 0.0664  |
| rs752322    | A | -0.1491 |
| rs139642872 | C | -0.1049 |
| rs9792640   | G | 0.0312  |
| rs2995191   | T | 0.0377  |
| rs11787798  | A | 0.086   |
| rs117599516 | G | 0.1763  |
| rs77240514  | G | 0.2409  |
| rs10963857  | C | 0.0725  |
| rs147029639 | A | -0.0866 |
| rs17221008  | C | -0.0293 |
| rs60273408  | T | -0.1122 |
| rs137953993 | A | -0.1461 |
| rs142400752 | C | -0.0815 |
| rs4745507   | C | 0.032   |
| rs12337318  | A | 0.0518  |
| rs34459333  | T | 0.15    |
| rs116878438 | A | -0.1307 |
| rs11791056  | T | 0.0676  |
| rs7018744   | A | 0.1468  |
| rs78891920  | C | 0.23    |
| rs75326836  | G | -0.0653 |
| rs36101629  | T | 0.0611  |
| rs2997652   | G | -0.03   |
| rs76475736  | A | 0.1338  |
| rs7873023   | C | -0.0342 |
| rs1110264   | A | 0.0309  |
| rs572726    | C | 0.0274  |
| rs111440113 | A | -0.0551 |
| rs77153735  | C | 0.0434  |
| rs10991408  | C | -0.0561 |
| rs10979155  | G | 0.1212  |
| rs7044363   | A | -0.0482 |
| rs79697373  | A | -0.0567 |
| rs75081668  | C | 0.0768  |
| rs143658733 | G | 0.1322  |
| rs2487060   | C | 0.0489  |
| rs147257356 | C | -0.0722 |
| rs34793316  | G | -0.0493 |
| rs10960840  | T | 0.0358  |
| rs66892783  | G | -0.035  |
| rs4077822   | T | 0.0341  |
| rs150511190 | C | 0.1559  |
| rs116859551 | T | -0.2063 |

|             |   |         |
|-------------|---|---------|
| rs75412647  | G | 0.0949  |
| rs11999183  | G | -0.0499 |
| rs10981424  | A | 0.0543  |
| rs28368155  | G | -0.1232 |
| rs11143516  | C | -0.0577 |
| rs148163011 | G | 0.1577  |
| rs2383154   | A | -0.0394 |
| rs145585451 | T | 0.1259  |
| rs16908102  | C | -0.1165 |
| rs35285458  | T | 0.171   |
| rs72759006  | A | -0.2323 |
| rs10511977  | G | 0.0467  |
| rs11144083  | A | -0.0433 |
| rs145199486 | T | -0.0714 |
| rs10868650  | C | -0.044  |
| rs72712031  | G | 0.0616  |
| rs75848116  | A | 0.1038  |
| rs72760636  | G | -0.0576 |
| rs1109816   | G | 0.0279  |
| rs10868596  | A | 0.0286  |
| rs4842247   | A | -0.0292 |
| rs9298853   | A | 0.027   |
| rs80268873  | A | -0.0967 |
| rs79412286  | A | 0.043   |
| rs62534368  | G | -0.0558 |
| rs58362711  | C | -0.1005 |
| rs56011297  | T | 0.0348  |
| rs3025356   | A | 0.0582  |
| rs1536607   | A | 0.0424  |
| rs112848834 | G | -0.1784 |
| rs2636885   | A | 0.0302  |
| rs10810681  | A | 0.0275  |
| rs10971668  | A | -0.0391 |
| rs62573973  | C | 0.0856  |
| rs10816465  | A | 0.0297  |
| rs141890466 | G | -0.0401 |
| rs12551134  | C | 0.0337  |
| rs490058    | A | -0.0324 |
| rs138392998 | G | 0.1654  |
| rs149360126 | G | -0.1687 |
| rs10867442  | C | -0.0288 |
| rs7853412   | T | -0.0396 |
| rs75694035  | C | -0.0772 |
| rs72729495  | A | -0.1498 |
| rs7856461   | G | 0.1276  |
| rs10738860  | T | 0.0544  |
| rs1886264   | C | 0.0289  |

|             |   |         |
|-------------|---|---------|
| rs12552839  | A | -0.1803 |
| rs117730238 | T | -0.23   |
| rs117636905 | G | -0.1224 |
| rs117989810 | C | -0.1545 |
| rs7047205   | C | 0.031   |
| rs118112941 | A | 0.1801  |
| rs140896220 | G | -0.1986 |
| rs10959734  | G | -0.0398 |
| rs79436289  | C | -0.0335 |
| rs2383076   | G | 0.0343  |
| rs10964993  | G | -0.0362 |
| rs2047701   | A | -0.0348 |
| rs75265831  | T | 0.0858  |
| rs73468062  | T | 0.0561  |
| rs12555832  | A | 0.0475  |
| rs730705    | C | 0.0309  |
| rs117803154 | A | 0.1444  |
| rs7870225   | C | 0.0492  |
| rs117554916 | T | -0.0999 |
| rs3004299   | T | 0.0976  |
| rs35678073  | G | 0.0536  |
| rs117239796 | C | 0.126   |
| rs118171833 | T | 0.1501  |
| rs1057406   | A | -0.0317 |
| rs62561941  | A | -0.0853 |
| rs118010413 | T | 0.1834  |
| rs77237649  | T | 0.1365  |
| rs3810909   | G | -0.0334 |
| rs77419700  | G | 0.1957  |
| rs139286049 | G | -0.215  |
| rs10979766  | C | -0.043  |
| rs10738773  | T | 0.0369  |
| rs1928873   | C | -0.0285 |
| rs34117361  | A | 0.1508  |
| rs7021820   | G | -0.0363 |
| rs10962858  | A | -0.0386 |
| rs117814929 | T | -0.2381 |
| rs3808857   | T | -0.0614 |
| rs10973602  | C | 0.0556  |
| rs62532967  | C | -0.0314 |
| rs34599735  | T | -0.0338 |
| rs6476124   | A | 0.057   |
| rs117536345 | T | -0.1738 |
| rs10968623  | T | 0.0408  |
| rs1598196   | T | 0.0409  |
| rs142163540 | G | 0.1417  |
| rs117423885 | A | 0.1678  |

|             |   |         |
|-------------|---|---------|
| rs62578082  | C | 0.0454  |
| rs10119187  | C | 0.0356  |
| rs144326100 | A | -0.0869 |
| rs9410624   | C | 0.0286  |
| rs11789523  | G | 0.0511  |
| rs117435878 | G | -0.1411 |
| rs149041298 | T | 0.112   |
| rs7041855   | T | -0.028  |
| rs4740401   | C | 0.0315  |
| rs10217456  | A | 0.0276  |
| rs13298436  | T | 0.0306  |
| rs72767821  | T | -0.0439 |
| rs13302712  | G | 0.0601  |
| rs10973740  | G | 0.0427  |
| rs10982158  | T | 0.0436  |
| rs1374502   | T | -0.0378 |
| rs74945294  | C | 0.033   |
| rs35235561  | G | 0.1777  |
| rs11789626  | G | -0.0667 |
| rs35674302  | C | 0.0326  |
| rs6479189   | C | -0.0274 |
| rs3908434   | A | -0.0376 |
| rs117908413 | T | 0.12    |
| rs13285109  | G | 0.0634  |
| rs141614846 | T | -0.099  |
| rs7869336   | T | 0.0287  |
| rs2786717   | T | -0.0313 |
| rs78317337  | G | 0.2406  |
| rs2418445   | A | 0.0272  |
| rs16927142  | C | 0.1511  |
| rs10992612  | T | -0.0799 |
| rs12338709  | T | 0.0709  |
| rs11143482  | A | -0.1913 |
| rs17336838  | T | -0.1971 |
| rs145130263 | C | 0.1624  |
| rs144154605 | T | 0.1501  |
| rs34494606  | C | -0.0464 |
| rs10812440  | G | 0.0304  |
| rs17061934  | C | 0.045   |
| rs113227614 | A | 0.0866  |
| rs1567354   | T | 0.0335  |
| rs72739662  | A | 0.0784  |
| rs139495350 | C | 0.0513  |
| rs10983537  | A | 0.0597  |
| rs60821139  | A | 0.082   |
| rs72752039  | T | 0.1289  |
| rs13284095  | A | 0.0415  |

|             |   |         |
|-------------|---|---------|
| rs34019626  | A | 0.1064  |
| rs294852    | C | -0.0369 |
| rs139932931 | T | 0.0679  |
| rs112578477 | A | 0.244   |
| rs7042748   | A | -0.1688 |
| rs3780140   | T | -0.0279 |
| rs10987356  | T | 0.0543  |
| rs146405552 | A | 0.1154  |
| rs41280723  | C | 0.1388  |
| rs10961568  | G | -0.0989 |
| rs10979444  | A | 0.0503  |
| rs62534512  | T | -0.0849 |
| rs2890749   | A | -0.046  |
| rs115503356 | A | -0.0879 |
| rs10977525  | G | -0.0473 |
| rs2383713   | T | 0.1316  |
| rs77537098  | G | 0.2377  |
| rs78608246  | T | -0.1069 |
| rs117808162 | C | -0.178  |
| rs10781386  | A | 0.0356  |
| rs10739164  | A | -0.0287 |
| rs7026445   | C | -0.0501 |
| rs151091221 | C | -0.2492 |
| rs11138408  | C | 0.0524  |
| rs1856103   | G | 0.0349  |
| rs149672830 | A | -0.2059 |
| rs7020290   | T | -0.0372 |
| rs78446310  | T | 0.1611  |
| rs10987331  | G | -0.0283 |
| rs73484607  | G | -0.0827 |
| rs117964220 | T | 0.1445  |
| rs13296650  | A | 0.0625  |
| rs12349156  | C | 0.106   |
| rs7034434   | C | 0.0495  |
| rs73393857  | G | 0.0874  |
| rs71507690  | T | -0.0939 |
| rs77895351  | A | 0.1047  |
| rs147632234 | A | 0.0998  |
| rs55750783  | G | 0.2616  |
| rs72732715  | G | 0.2205  |
| rs11243889  | A | -0.0296 |
| rs7871291   | T | 0.0344  |
| rs117259125 | G | -0.1426 |
| rs72705885  | C | -0.0563 |
| rs142413887 | C | 0.1817  |
| rs35526825  | A | -0.1029 |
| rs11791194  | C | -0.0497 |

|             |   |         |
|-------------|---|---------|
| rs10120153  | T | -0.0405 |
| rs79069977  | G | 0.1472  |
| rs17539995  | A | 0.0374  |
| rs117724171 | A | 0.0879  |
| rs11103541  | A | -0.0915 |
| rs139215702 | T | 0.1396  |
| rs56093903  | T | 0.0363  |
| rs77528378  | T | 0.162   |
| rs71481354  | A | -0.0954 |
| rs702207    | T | 0.0675  |
| rs62578121  | T | -0.1164 |
| rs146235803 | T | 0.0897  |
| rs7026342   | G | -0.0309 |
| rs13289974  | A | -0.0381 |
| rs117583444 | G | -0.1411 |
| rs10963773  | C | 0.0319  |
| rs116935759 | C | -0.0698 |
| rs79520909  | A | 0.0918  |
| rs62530966  | G | -0.0282 |
| rs7043900   | G | 0.0493  |
| rs78300983  | A | -0.1245 |
| rs11794141  | G | 0.0346  |
| rs141515918 | A | -0.1797 |
| rs4585803   | A | 0.0438  |
| rs117519390 | T | -0.0875 |
| rs116846683 | T | -0.1047 |
| rs80272050  | T | 0.1421  |
| rs77472908  | G | -0.1868 |
| rs72752327  | T | -0.0843 |
| rs138159580 | T | 0.2146  |
| rs10760415  | A | -0.0446 |
| rs77193046  | A | 0.1271  |
| rs2219143   | A | -0.0446 |
| rs1325150   | G | -0.0451 |
| rs6559836   | G | 0.0367  |
| rs72753905  | T | -0.1278 |
| rs80127859  | A | 0.1853  |
| rs116455621 | A | 0.1255  |
| rs13293407  | T | -0.1745 |
| rs10114125  | C | 0.0295  |
| rs118093064 | T | 0.1355  |
| rs77664234  | T | -0.0772 |
| rs10963381  | G | 0.0815  |
| rs114660830 | G | 0.1831  |
| rs4271035   | G | 0.027   |
| rs1167767   | G | 0.0281  |
| rs73401999  | T | 0.1154  |

|             |   |         |
|-------------|---|---------|
| rs112453481 | A | -0.0846 |
| rs73503375  | T | 0.0448  |
| rs80186035  | A | 0.1103  |
| rs72729219  | A | -0.0962 |
| rs7855805   | A | 0.0285  |
| rs142695379 | A | -0.1644 |
| rs4376551   | A | -0.0272 |
| rs73663030  | G | 0.1082  |
| rs117638772 | A | 0.0618  |
| rs4149316   | T | 0.0511  |
| rs10977464  | C | -0.0364 |
| rs620073    | C | 0.0284  |
| rs62551902  | C | -0.067  |
| rs17052425  | A | -0.127  |
| rs2297402   | T | -0.1137 |
| rs79610609  | A | -0.1036 |
| rs7852392   | G | 0.0398  |
| rs17698657  | A | -0.0416 |
| rs78218769  | T | -0.1437 |
| rs34042135  | T | 0.0501  |
| rs2800265   | A | -0.0269 |
| rs146875906 | C | -0.0371 |
| rs62529157  | C | 0.1319  |
| rs14884     | T | 0.0554  |
| rs10815530  | C | 0.028   |
| rs35931893  | T | 0.0856  |
| rs11794550  | G | -0.0327 |
| rs144773511 | T | -0.1233 |
| rs2135747   | G | -0.1292 |
| rs11790120  | G | -0.1268 |
| rs2800320   | T | 0.031   |
| rs2779600   | A | -0.0263 |
| rs768225    | C | -0.0291 |
| rs75362316  | T | 0.1755  |
| rs10491876  | A | 0.0401  |
| rs1985069   | T | -0.0418 |
| rs12345504  | T | -0.0423 |
| rs1359167   | G | 0.0265  |
| rs79923706  | C | 0.0843  |
| rs34006868  | G | 0.0758  |
| rs150901548 | G | 0.1507  |
| rs7039360   | C | -0.0273 |
| rs13288659  | C | -0.0542 |
| rs12376409  | T | -0.0479 |
| rs77567806  | C | -0.1586 |
| rs116929691 | C | -0.1294 |
| rs1408325   | T | 0.0386  |



|             |   |         |
|-------------|---|---------|
| rs4742484   | T | 0.0427  |
| rs140692225 | C | 0.0503  |
| rs7047335   | T | 0.0322  |
| rs12349870  | G | 0.1841  |
| rs11103619  | T | -0.073  |
| rs846826    | T | 0.0738  |
| rs76649715  | A | 0.0554  |
| rs72742426  | A | -0.0662 |
| rs139352986 | C | -0.1585 |
| rs71496473  | C | 0.1661  |
| rs117578218 | A | 0.0982  |
| rs7032898   | C | 0.0926  |
| rs62562965  | G | 0.1346  |
| rs72734885  | G | 0.0545  |
| rs117585997 | A | 0.1082  |
| rs113918071 | T | 0.0916  |
| rs117141880 | A | 0.1337  |
| rs141650302 | A | -0.1461 |
| rs117975580 | A | -0.1539 |
| rs1887458   | T | 0.1422  |
| rs57982967  | A | 0.0385  |
| rs10739481  | C | -0.0287 |
| rs72721466  | C | 0.0998  |
| rs967057    | A | 0.0275  |
| rs13298738  | A | -0.1078 |
| rs56328143  | C | -0.0282 |
| rs35762762  | G | 0.0461  |
| rs10988690  | C | -0.0757 |
| rs10963738  | T | 0.0276  |
| rs7029146   | A | 0.0791  |
| rs9284057   | C | 0.033   |
| rs7046079   | T | 0.0917  |
| rs151139080 | A | 0.1454  |
| rs56107681  | A | -0.066  |
| rs142860035 | C | -0.11   |
| rs144749137 | G | -0.1592 |
| rs10992256  | A | -0.1264 |
| rs4977746   | C | 0.034   |
| rs1888859   | T | 0.0272  |
| rs306794    | T | 0.0537  |
| rs59653715  | C | -0.1113 |
| rs663344    | C | -0.0536 |
| rs1575960   | A | -0.0891 |
| rs10967988  | T | 0.0261  |
| rs139979398 | C | 0.0999  |
| rs12344069  | T | 0.0873  |
| rs35929653  | G | 0.0513  |

|             |   |         |
|-------------|---|---------|
| rs2937356   | G | -0.0281 |
| rs113105191 | T | -0.2287 |
| rs35365776  | C | -0.0592 |
| rs10435742  | C | 0.0621  |
| rs11142062  | T | -0.0452 |
| rs139594970 | C | 0.1525  |
| rs76997405  | C | -0.0645 |
| rs7856897   | C | 0.0264  |
| rs76881789  | A | 0.1009  |
| rs118044753 | A | -0.2163 |
| rs36131661  | A | 0.1485  |
| rs117036820 | A | -0.1707 |
| rs471525    | C | 0.0503  |
| rs79128372  | C | -0.0857 |
| rs10757443  | C | 0.0352  |
| rs77499568  | G | 0.046   |
| rs35692943  | G | 0.0446  |
| rs10760280  | C | -0.0268 |
| rs12553073  | A | -0.0946 |
| rs13289308  | C | 0.0726  |
| rs117282965 | T | 0.1003  |
| rs77833053  | T | -0.105  |
| rs10988482  | G | 0.0731  |
| rs16911932  | G | -0.082  |
| rs78525035  | G | 0.1513  |
| rs7867176   | G | 0.0414  |
| rs62563590  | C | 0.0548  |
| rs117409347 | T | 0.1281  |
| rs58532596  | A | -0.0779 |
| rs41381344  | A | 0.0801  |
| rs148441986 | A | -0.1188 |
| rs13283250  | C | -0.0282 |
| rs10812606  | T | -0.0358 |
| rs10965428  | C | -0.0459 |
| rs3858084   | T | -0.0352 |
| rs73640956  | C | 0.0984  |
| rs1249744   | G | 0.029   |
| rs573379    | T | 0.0527  |
| rs62563923  | C | 0.1291  |
| rs7038011   | G | 0.0462  |
| rs117600090 | C | 0.0842  |
| rs13301220  | T | -0.0882 |
| rs141790428 | G | -0.2347 |
| rs10814586  | G | 0.0362  |
| rs35119897  | T | 0.0928  |
| rs118073347 | G | 0.1046  |
| rs747363    | T | -0.0285 |

|             |   |         |
|-------------|---|---------|
| rs140083671 | C | -0.0615 |
| rs10961541  | A | 0.0332  |
| rs61739510  | T | -0.0508 |
| rs141120938 | C | 0.2438  |
| rs498102    | G | -0.0331 |
| rs10971798  | T | -0.1864 |
| rs7044051   | G | -0.0268 |
| rs145926017 | T | 0.1898  |
| rs17276232  | T | -0.1263 |
| rs1332521   | G | 0.0288  |
| rs34317697  | C | 0.0482  |
| rs1009259   | G | 0.0283  |
| rs112389989 | T | -0.1735 |
| rs145668077 | G | -0.1795 |
| rs4742214   | G | 0.0277  |
| rs701364    | G | 0.0273  |
| rs74457645  | G | 0.0883  |
| rs7848816   | A | -0.0422 |
| rs113238481 | T | -0.154  |
| rs10992863  | A | -0.0297 |
| rs6477543   | A | 0.0327  |
| rs113446951 | G | -0.0761 |
| rs72741436  | C | -0.0609 |
| rs4486281   | G | -0.0304 |
| rs10816917  | A | 0.0319  |
| rs10121775  | C | 0.0378  |
| rs2761063   | C | -0.0291 |
| rs62572431  | C | 0.0637  |
| rs12341647  | G | -0.0824 |
| rs79999252  | A | -0.0894 |
| rs117003640 | G | -0.0951 |
| rs2004177   | G | 0.0424  |
| rs10974334  | G | 0.032   |
| rs141153748 | A | -0.1966 |
| rs139994062 | T | 0.1766  |
| rs117571036 | G | 0.1407  |
| rs112847028 | A | -0.0856 |
| rs7860627   | G | -0.0295 |
| rs34526976  | C | -0.0564 |
| rs10970027  | T | 0.0718  |
| rs10758122  | C | -0.0333 |
| rs117756831 | A | -0.1958 |
| rs147968306 | A | 0.1801  |
| rs78435098  | C | 0.1098  |
| rs10819425  | C | -0.0593 |
| rs72755182  | C | 0.0843  |
| rs2210769   | T | 0.0431  |

|             |   |         |
|-------------|---|---------|
| rs1888794   | A | 0.1169  |
| rs72744994  | T | 0.0331  |
| rs7867853   | T | -0.0357 |
| rs114741563 | C | -0.1793 |
| rs73652645  | C | 0.1656  |
| rs13440292  | T | 0.0348  |
| rs7866486   | G | -0.0458 |
| rs12341759  | G | -0.0272 |
| rs41316534  | G | 0.1152  |
| rs10989902  | G | -0.0441 |
| rs10816499  | C | -0.03   |
| rs138445508 | G | 0.1762  |
| rs118040707 | A | 0.0708  |
| rs112135607 | C | 0.111   |
| rs146002508 | A | 0.1172  |
| rs141633858 | G | 0.1322  |
| rs117725963 | C | 0.1405  |
| rs10975837  | A | 0.1233  |
| rs35004720  | A | -0.0546 |
| rs10984568  | A | 0.0265  |
| rs76837254  | T | 0.0414  |
| rs7047988   | T | -0.0343 |
| rs55821647  | A | -0.1906 |
| rs78112418  | C | 0.1001  |
| rs4604543   | G | -0.0345 |
| rs7025330   | A | -0.0568 |
| rs2381282   | C | -0.0276 |
| rs11794579  | A | 0.0261  |
| rs296638    | A | 0.0357  |
| rs78371528  | T | 0.0548  |
| rs72739603  | A | 0.0518  |
| rs10115369  | T | 0.0276  |
| rs10815099  | T | 0.0271  |
| rs113264455 | G | -0.1865 |
| rs7047348   | C | 0.0316  |
| rs62575839  | A | -0.0436 |
| rs11795101  | A | 0.0494  |
| rs4836797   | T | 0.0278  |
| rs11142112  | A | -0.029  |
| rs10963536  | T | -0.0844 |
| rs75720701  | T | 0.0467  |
| rs13297177  | T | 0.096   |
| rs4878006   | G | 0.0304  |
| rs1359990   | T | -0.0265 |
| rs2938883   | A | 0.0526  |
| rs7023309   | T | -0.0302 |
| rs4481682   | T | 0.0356  |

|             |   |         |
|-------------|---|---------|
| rs2636873   | A | 0.0668  |
| rs117030645 | T | -0.108  |
| rs1331885   | G | 0.0292  |
| rs62546987  | T | 0.1545  |
| rs1565445   | G | 0.0294  |
| rs35654915  | G | 0.1135  |
| rs79168492  | A | 0.0588  |
| rs79082907  | T | 0.1789  |
| rs76832360  | G | 0.1165  |
| rs6474747   | T | 0.1059  |
| rs1556493   | A | 0.0995  |
| rs10816733  | G | 0.0291  |
| rs147535368 | C | 0.1526  |
| rs10081742  | G | 0.0449  |
| rs73593676  | T | 0.2436  |
| rs10733461  | G | -0.0419 |
| rs7022385   | A | -0.0451 |
| rs58334117  | T | 0.0619  |
| rs1571855   | C | 0.0351  |
| rs5000697   | T | 0.028   |
| rs4548260   | C | 0.046   |
| rs10980133  | A | 0.032   |
| rs78461013  | G | 0.0534  |
| rs143534338 | G | 0.173   |
| rs72739164  | T | -0.0772 |
| rs62534802  | A | 0.0383  |
| rs62570183  | G | 0.0643  |
| rs117147267 | A | -0.1289 |
| rs139271806 | T | -0.1354 |
| rs2900373   | A | -0.0314 |
| rs12348623  | C | 0.1345  |
| rs149324454 | A | -0.1076 |
| rs7855339   | A | 0.0373  |
| rs10776936  | A | -0.0314 |
| rs4979009   | G | -0.027  |
| rs77023772  | T | -0.0589 |
| rs57864241  | T | 0.0569  |
| rs1360133   | T | 0.0694  |
| rs1981010   | A | 0.0392  |
| rs75372811  | G | -0.0516 |
| rs117847889 | T | 0.1417  |
| rs76792431  | T | 0.0798  |
| rs1031110   | A | -0.1559 |
| rs945442    | C | -0.0307 |
| rs4504701   | G | 0.0323  |
| rs35380914  | T | -0.0554 |
| rs72691740  | A | 0.1001  |

|             |   |         |
|-------------|---|---------|
| rs2499054   | G | 0.0466  |
| rs10964323  | T | 0.0345  |
| rs76191498  | T | 0.0727  |
| rs4992497   | C | -0.0288 |
| rs76570602  | A | 0.0731  |
| rs16909250  | T | -0.0944 |
| rs76354709  | T | 0.1044  |
| rs7864621   | C | 0.0279  |
| rs146786383 | A | -0.1796 |
| rs7863407   | G | -0.0511 |
| rs143842110 | T | -0.1942 |
| rs10980811  | A | -0.0267 |
| rs67634238  | G | 0.0272  |
| rs1418509   | A | 0.0326  |
| rs61150920  | C | 0.1506  |
| rs76261771  | T | 0.1433  |
| rs2182633   | C | 0.036   |
| rs13296840  | T | 0.0552  |
| rs144785861 | A | 0.1175  |
| rs10811577  | T | -0.0539 |
| rs62574781  | A | -0.1609 |
| rs12553697  | C | -0.058  |
| rs117956774 | C | 0.0787  |
| rs78184062  | A | 0.0827  |
| rs4323566   | A | -0.0648 |
| rs117698812 | A | 0.1904  |
| rs7869667   | C | 0.0533  |
| rs17792105  | T | -0.0349 |
| rs4595175   | C | -0.0308 |
| rs75863753  | G | -0.1223 |
| rs7856201   | C | -0.0265 |
| rs16909499  | C | -0.078  |
| rs17053329  | A | -0.1029 |
| rs34518363  | C | -0.1606 |
| rs113534562 | G | 0.0766  |
| rs13288101  | A | 0.0495  |
| rs12344200  | A | -0.0828 |
| rs10122775  | T | -0.0281 |
| rs4842074   | A | 0.0406  |
| rs56848419  | G | 0.1214  |
| rs9299396   | T | 0.0346  |
| rs113711963 | A | 0.068   |
| rs139783260 | A | 0.0526  |
| rs17148812  | G | -0.0506 |
| rs147709205 | T | 0.1943  |
| rs7029556   | A | 0.0319  |
| rs10992480  | T | 0.0281  |

|             |   |         |
|-------------|---|---------|
| rs112091296 | T | -0.1614 |
| rs79890344  | T | 0.0886  |
| rs79709509  | T | 0.0671  |
| rs117886450 | T | 0.1445  |
| rs117612278 | A | -0.1833 |
| rs1336466   | C | -0.0335 |
| rs56840271  | A | 0.0584  |
| rs1410201   | G | -0.0332 |
| rs116959097 | T | -0.2241 |
| rs11794903  | A | 0.0326  |
| rs143368221 | A | 0.0763  |
| rs78029897  | A | -0.102  |
| rs118001274 | G | -0.1033 |
| rs12339024  | C | -0.0271 |
| rs150911187 | T | 0.1183  |
| rs731217    | A | 0.0397  |
| rs143438641 | A | 0.1543  |
| rs34135179  | T | -0.1066 |
| rs2208710   | G | -0.0561 |
| rs138869623 | C | 0.1039  |
| rs10817101  | A | 0.0375  |
| rs144296191 | G | -0.0654 |
| rs1838431   | T | 0.0384  |
| rs62541788  | C | -0.15   |
| rs77198048  | T | 0.0581  |
| rs72743923  | T | -0.1337 |
| rs10975961  | C | -0.0722 |
| rs55973930  | T | -0.0362 |
| rs62543701  | A | 0.0269  |
| rs75406784  | A | -0.0855 |
| rs7048602   | A | 0.1377  |
| rs17495030  | T | -0.03   |
| rs10810133  | G | -0.0273 |
| rs62560420  | T | -0.0611 |
| rs4877078   | A | -0.0306 |
| rs13294885  | A | -0.0283 |
| rs7467398   | A | 0.0316  |
| rs814683    | T | 0.0705  |
| rs7862863   | C | 0.0295  |
| rs10970244  | T | -0.122  |
| rs10814002  | A | -0.0447 |
| rs7852207   | T | 0.0435  |
| rs78243926  | T | -0.1412 |
| rs77645701  | G | -0.1549 |
| rs112804834 | T | 0.1363  |
| rs7871721   | T | 0.0595  |
| rs12340784  | A | -0.0607 |

|             |   |         |
|-------------|---|---------|
| rs149440768 | T | 0.1346  |
| rs12352099  | A | -0.0531 |
| rs2805018   | A | 0.0315  |
| rs3922914   | C | -0.0362 |
| rs7860714   | A | 0.0481  |
| rs16909976  | T | -0.0863 |
| rs78984687  | A | -0.0827 |
| rs151040438 | G | 0.0754  |
| rs72713592  | T | -0.0643 |
| rs35121702  | A | -0.0651 |
| rs72757067  | G | -0.1565 |
| rs147964814 | A | -0.122  |
| rs2258952   | G | 0.0381  |
| rs10987083  | C | 0.0614  |
| rs35697014  | C | 0.0891  |
| rs77470853  | A | 0.0813  |
| rs2183652   | G | 0.0531  |
| rs116929495 | T | 0.0982  |
| rs528374    | A | -0.0266 |
| rs11793707  | C | 0.0546  |
| rs75290004  | G | 0.1375  |
| rs12686606  | A | -0.0275 |
| rs75396223  | G | -0.0979 |
| rs7030564   | C | -0.0541 |
| rs41278655  | A | -0.2064 |
| rs77643237  | A | 0.0616  |
| rs9777619   | C | -0.1143 |
| rs111781577 | A | -0.0514 |
| rs11794968  | G | -0.0328 |
| rs2277175   | A | 0.0361  |
| rs79306632  | T | 0.1128  |
| rs10121394  | C | 0.0365  |
| rs7047186   | C | -0.0295 |
| rs28690293  | A | 0.0476  |
| rs74488704  | C | -0.1078 |
| rs6477191   | C | -0.0756 |
| rs57014573  | C | 0.17    |
| rs59592388  | C | -0.0576 |
| rs77024205  | G | 0.1511  |
| rs144286741 | A | -0.0946 |
| rs117585170 | A | -0.1236 |
| rs117820712 | T | 0.1719  |
| rs2151686   | C | 0.0498  |
| rs1805312   | G | -0.0604 |
| rs1537510   | G | 0.029   |
| rs9792531   | C | 0.0385  |
| rs10964552  | A | 0.0383  |



|             |   |         |
|-------------|---|---------|
| rs7041973   | A | 0.0531  |
| rs688807    | C | -0.0275 |
| rs117358107 | A | 0.124   |
| rs117030920 | A | 0.1755  |
| rs145874138 | C | 0.1028  |
| rs150772610 | C | -0.0685 |
| rs34215208  | T | -0.0344 |
| rs824254    | T | -0.0274 |
| rs2376125   | A | -0.0299 |
| rs12551254  | T | 0.0294  |
| rs7875489   | G | 0.0262  |
| rs1113250   | C | -0.032  |
| rs7863020   | C | -0.0255 |
| rs148590796 | T | -0.2193 |
| rs7855989   | G | -0.0745 |
| rs148106760 | G | -0.1791 |
| rs10760631  | C | 0.0342  |
| rs10963446  | G | -0.2511 |
| rs117342002 | C | -0.0613 |
| rs148955338 | T | 0.1298  |
| rs10816743  | C | -0.0288 |
| rs954492    | A | -0.0303 |
| rs144653627 | G | 0.1031  |
| rs118017519 | A | 0.1033  |
| rs77290991  | C | -0.1216 |
| rs79446419  | G | 0.074   |
| rs10119447  | A | -0.0317 |
| rs12005782  | C | -0.0527 |
| rs117845166 | T | 0.1048  |
| rs12552291  | T | 0.0401  |
| rs72614300  | A | 0.1413  |
| rs72722862  | T | -0.1303 |
| rs10814130  | A | -0.0655 |
| rs1022749   | C | 0.0358  |
| rs12555238  | T | -0.0377 |
| rs10960460  | G | -0.0275 |
| rs2150999   | T | -0.0261 |
| rs12236000  | C | 0.0474  |
| rs2253502   | G | 0.0303  |
| rs2229917   | A | 0.0513  |
| rs71487711  | A | 0.039   |
| rs148022924 | C | -0.1469 |
| rs62565788  | T | -0.0749 |
| rs640184    | A | -0.0357 |
| rs4740375   | G | -0.0291 |
| rs77665973  | C | -0.1097 |
| rs72725300  | T | 0.1315  |

|             |   |         |
|-------------|---|---------|
| rs649213    | T | -0.0303 |
| rs78500795  | C | -0.0543 |
| rs80264695  | T | 0.1218  |
| rs80255914  | G | 0.1293  |
| rs16930662  | G | 0.062   |
| rs7028048   | C | 0.0258  |
| rs78150282  | A | -0.1037 |
| rs150738141 | C | -0.2335 |
| rs118057579 | A | 0.0854  |
| rs141110876 | A | 0.0721  |
| rs62545867  | A | 0.0884  |
| rs72711404  | T | -0.1563 |
| rs72762106  | C | -0.0934 |
| rs11788416  | A | -0.0281 |
| rs10867494  | G | -0.0298 |
| rs72743216  | T | -0.1656 |
| rs7862597   | A | 0.0406  |
| rs10867328  | T | 0.033   |
| rs10991850  | T | -0.0511 |
| rs10985609  | T | -0.1057 |
| rs368562    | T | -0.0303 |
| rs12342098  | A | -0.0387 |
| rs117950650 | T | 0.0656  |
| rs1628249   | C | -0.0262 |
| rs1490741   | A | -0.0286 |
| rs10811191  | A | 0.163   |
| rs7036474   | A | -0.0363 |
| rs71501618  | A | 0.1204  |
| rs79628647  | A | -0.1166 |
| rs75565557  | A | 0.145   |
| rs10811173  | C | 0.0712  |
| rs471088    | A | 0.0557  |
| rs9407925   | A | 0.0304  |
| rs11787926  | C | -0.097  |
| rs17505573  | G | 0.1019  |
| rs7861944   | T | -0.0304 |
| rs78014291  | G | 0.1027  |
| rs7030939   | T | -0.0277 |
| rs2842474   | A | -0.0251 |
| rs138920174 | A | -0.1146 |
| rs148412578 | A | 0.1215  |
| rs117378671 | G | -0.1326 |
| rs146934890 | A | 0.124   |
| rs112102612 | T | 0.1631  |
| rs111878168 | G | -0.0826 |
| rs74862728  | A | -0.1044 |
| rs79483557  | T | 0.09    |

|             |   |         |
|-------------|---|---------|
| rs118096318 | T | 0.1832  |
| rs62570364  | T | 0.0321  |
| rs113134012 | A | 0.0845  |
| rs17057093  | G | -0.0603 |
| rs476038    | G | -0.0252 |
| rs72766233  | C | 0.0745  |
| rs150857718 | C | -0.1667 |
| rs7851841   | A | -0.0606 |
| rs2778899   | T | -0.0351 |
| rs62577873  | C | 0.0365  |
| rs72713801  | G | 0.0545  |
| rs75143555  | C | 0.1285  |
| rs13294241  | C | -0.0806 |
| rs11142821  | G | -0.0544 |
| rs10867781  | T | 0.0284  |
| rs73375715  | G | -0.063  |
| rs10760652  | T | 0.0323  |
| rs10970398  | G | 0.0352  |
| rs10964749  | G | 0.0289  |
| rs10511738  | T | 0.0316  |
| rs117971190 | T | 0.0523  |
| rs79090947  | G | 0.0634  |
| rs117368969 | A | -0.1367 |
| rs9409643   | G | 0.0259  |
| rs17080997  | C | 0.1214  |
| rs60807666  | C | -0.096  |
| rs4836647   | G | -0.032  |
| rs944814    | T | 0.1424  |
| rs700104    | A | -0.1021 |
| rs144525000 | C | -0.1208 |
| rs79534839  | G | 0.1257  |
| rs12551412  | A | 0.0612  |
| rs117707545 | C | 0.0972  |
| rs55948650  | G | 0.185   |
| rs17232558  | T | 0.0418  |
| rs78886960  | T | -0.0515 |
| rs118056048 | G | 0.2055  |
| rs145699316 | C | -0.1741 |
| rs10757741  | T | -0.0391 |
| rs73526779  | T | 0.1178  |
| rs80147227  | A | -0.1172 |
| rs117437140 | A | -0.0752 |
| rs75542138  | A | -0.0753 |
| rs75654338  | G | 0.1185  |
| rs10816625  | G | 0.0541  |
| rs4578014   | A | 0.0339  |
| rs117472385 | A | 0.1127  |

|             |   |         |
|-------------|---|---------|
| rs11143075  | T | 0.0373  |
| rs77901133  | A | 0.0561  |
| rs75653292  | T | -0.0644 |
| rs10809097  | G | 0.0365  |
| rs148570479 | T | -0.1773 |
| rs113723730 | A | -0.0932 |
| rs10981072  | T | 0.0604  |
| rs10776864  | T | -0.0804 |
| rs4744319   | T | 0.0526  |
| rs10960834  | G | 0.0509  |
| rs6477945   | G | -0.033  |
| rs117242820 | T | 0.1031  |
| rs35897611  | T | -0.0865 |
| rs17580614  | G | -0.0363 |
| rs58433377  | A | -0.1787 |
| rs4623516   | G | 0.0318  |
| rs117503669 | C | 0.0451  |
| rs10811316  | G | -0.0269 |
| rs117764417 | C | -0.1507 |
| rs618439    | A | 0.0623  |
| rs12555163  | T | -0.0452 |
| rs2150767   | A | -0.0371 |
| rs1578633   | C | -0.0681 |
| rs116904056 | T | 0.0776  |
| rs10809154  | A | -0.0358 |
| rs72726057  | T | 0.1564  |
| rs78810329  | C | -0.1697 |
| rs77633553  | G | 0.0853  |
| rs7872276   | G | -0.0407 |
| rs117507236 | A | 0.1024  |
| rs13288730  | A | 0.0854  |
| rs781332    | C | 0.0939  |
| rs117550890 | A | 0.1668  |
| rs76680280  | T | -0.0592 |
| rs72690085  | T | -0.0515 |
| rs10958851  | T | 0.1207  |
| rs10993286  | T | 0.029   |
| rs28472890  | C | -0.1431 |
| rs4461955   | T | 0.0252  |
| rs112271913 | C | 0.0949  |
| rs61506114  | G | 0.0393  |
| rs78575038  | G | -0.1098 |
| rs35941302  | A | 0.0589  |
| rs11790600  | A | 0.2127  |
| rs12005199  | A | 0.0312  |
| rs7040943   | C | 0.0867  |
| rs10816582  | T | -0.0266 |

|             |   |         |
|-------------|---|---------|
| rs10982245  | T | 0.0798  |
| rs10738378  | A | 0.0263  |
| rs480442    | C | 0.0886  |
| rs41423245  | C | -0.0587 |
| rs1760118   | G | 0.0277  |
| rs16918616  | A | 0.0872  |
| rs117842175 | G | 0.1599  |
| rs1157836   | C | -0.0257 |
| rs118132366 | C | -0.1708 |
| rs9298780   | T | -0.0389 |
| rs76542827  | A | 0.1293  |
| rs76452347  | T | 0.0615  |
| rs10793910  | C | 0.1426  |
| rs117596571 | C | -0.097  |
| rs4740592   | T | -0.0397 |
| rs12005591  | A | -0.0449 |
| rs11103569  | A | -0.0343 |
| rs116891913 | C | -0.0616 |
| rs6559435   | G | 0.0252  |
| rs9330446   | C | 0.0264  |
| rs2680196   | T | -0.0538 |
| rs16917205  | T | -0.087  |
| rs13285858  | C | -0.0564 |
| rs17821873  | T | 0.0414  |
| rs11792314  | C | -0.1589 |
| rs117573231 | A | -0.1059 |
| rs145145488 | C | 0.2025  |
| rs4743044   | T | 0.0259  |
| rs72692417  | A | 0.1104  |
| rs913358    | T | 0.0546  |
| rs72723005  | A | -0.0788 |
| rs118147144 | T | 0.1828  |
| rs7036407   | T | 0.0301  |
| rs78213778  | T | -0.2065 |
| rs2297537   | C | 0.0358  |
| rs10969031  | T | -0.0326 |
| rs145224392 | T | 0.1209  |
| rs138816520 | T | 0.1438  |
| rs753969    | T | 0.1077  |
| rs145343417 | T | 0.0449  |
| rs117467333 | T | -0.0939 |
| rs11141197  | A | 0.0479  |
| rs72771926  | G | -0.1459 |
| rs72744937  | G | -0.1309 |
| rs111438539 | A | -0.1591 |
| rs78396209  | G | -0.0629 |
| rs4487884   | G | -0.0475 |

|             |   |         |
|-------------|---|---------|
| rs2383683   | C | -0.0454 |
| rs117644227 | T | 0.105   |
| rs7869488   | G | -0.028  |
| rs10511731  | C | 0.0453  |
| rs74746968  | G | -0.105  |
| rs76962799  | A | 0.0882  |
| rs7030086   | C | 0.0263  |
| rs7040605   | T | 0.0371  |
| rs62531531  | A | -0.1113 |
| rs78187466  | C | -0.1074 |
| rs35451522  | A | -0.0803 |
| rs2065414   | A | 0.1934  |
| rs17546584  | A | -0.0826 |
| rs1220092   | T | -0.0616 |
| rs12002342  | T | 0.0564  |
| rs13297936  | G | 0.0868  |
| rs811457    | C | 0.0929  |
| rs16934320  | G | 0.0455  |
| rs61335982  | T | 0.0325  |
| rs67023560  | C | -0.0648 |
| rs1343456   | C | -0.0294 |
| rs112204615 | T | 0.1128  |
| rs11103119  | A | 0.0271  |
| rs3008143   | T | 0.0484  |
| rs7856084   | C | -0.0255 |
| rs11145002  | C | 0.0552  |
| rs72768784  | A | -0.1521 |
| rs150150613 | C | -0.1597 |
| rs78777590  | C | 0.1147  |
| rs11787645  | A | -0.046  |
| rs79428944  | G | -0.1385 |
| rs117696854 | C | 0.1277  |
| rs72754522  | A | -0.1461 |
| rs600310    | C | -0.0266 |
| rs62570343  | T | 0.1966  |
| rs7031737   | G | 0.0967  |
| rs144496584 | C | -0.1167 |
| rs117655650 | C | 0.0716  |
| rs2208506   | G | 0.0598  |
| rs12339968  | G | -0.0335 |
| rs73651385  | C | -0.1576 |
| rs950359    | A | -0.0623 |
| rs57762042  | A | 0.1233  |
| rs141551739 | C | 0.1736  |
| rs10978958  | A | 0.043   |
| rs516542    | A | -0.0316 |
| rs74955144  | G | -0.0861 |

|             |   |         |
|-------------|---|---------|
| rs35697751  | T | -0.0408 |
| rs16936745  | C | 0.0252  |
| rs11138889  | A | 0.1462  |
| rs2383475   | G | -0.1545 |
| rs13285633  | A | 0.0447  |
| rs10811763  | A | 0.0267  |
| rs138014351 | A | -0.1269 |
| rs9696698   | G | -0.0548 |
| rs140770179 | T | 0.1017  |
| rs34885485  | T | 0.0341  |
| rs59561185  | G | -0.0363 |
| rs7049139   | G | -0.1419 |
| rs78784687  | T | 0.0623  |
| rs62563151  | A | 0.1019  |
| rs78742138  | C | 0.0929  |
| rs112373974 | G | 0.1182  |
| rs10966238  | A | -0.0301 |
| rs36203854  | T | -0.1105 |
| rs62541546  | G | 0.043   |
| rs78410811  | C | 0.0561  |
| rs34399954  | A | 0.0967  |
| rs149876480 | G | -0.1117 |
| rs10991257  | A | -0.0278 |
| rs139976806 | G | 0.1884  |
| rs10811060  | G | 0.0288  |
| rs391386    | A | 0.189   |
| rs72769715  | A | -0.1144 |
| rs3780144   | T | 0.0481  |
| rs10780614  | C | 0.0273  |
| rs143469121 | C | 0.1822  |
| rs10992937  | A | 0.0944  |
| rs144650284 | A | 0.16    |
| rs80067155  | C | 0.0843  |
| rs56145554  | T | 0.1867  |
| rs7851612   | C | 0.0509  |
| rs59155241  | A | 0.1245  |
| rs9886924   | T | 0.0296  |
| rs10759304  | T | 0.0416  |
| rs117041584 | A | 0.1061  |
| rs56855717  | A | -0.0331 |
| rs11141343  | G | 0.2772  |
| rs149536573 | C | 0.1266  |
| rs35006287  | G | -0.0682 |
| rs145569006 | A | -0.1035 |
| rs117082735 | T | 0.1487  |
| rs11556891  | G | -0.0497 |
| rs4443750   | A | -0.0399 |

|             |   |         |
|-------------|---|---------|
| rs77063537  | T | 0.0746  |
| rs4979352   | A | -0.0428 |
| rs77116376  | G | -0.1231 |
| rs944106    | C | -0.0279 |
| rs10988204  | G | 0.0283  |
| rs12551002  | C | 0.0834  |
| rs7866988   | A | -0.087  |
| rs7858885   | G | -0.066  |
| rs17441127  | T | 0.0736  |
| rs476835    | G | 0.0338  |
| rs10815874  | C | 0.0424  |
| rs118065941 | T | 0.0593  |
| rs203666    | A | -0.1139 |
| rs10121110  | G | -0.0254 |
| rs142755127 | A | 0.1247  |
| rs10869402  | C | 0.033   |
| rs2417332   | T | -0.0253 |
| rs117975087 | G | -0.2757 |
| rs2065467   | T | -0.0264 |
| rs10817128  | A | -0.0262 |
| rs716632    | A | -0.0333 |
| rs72730936  | G | 0.1006  |
| rs7872900   | C | 0.0669  |
| rs10964531  | A | -0.0306 |
| rs76806472  | G | 0.1515  |
| rs10114716  | A | 0.0746  |
| rs62577782  | A | 0.0898  |
| rs77113574  | A | 0.1538  |
| rs4451360   | G | 0.0276  |
| rs1832746   | G | -0.0377 |
| rs78243697  | A | 0.1131  |
| rs117377062 | C | -0.1856 |
| rs149102065 | C | -0.2142 |
| rs1334065   | G | -0.0397 |
| rs10733388  | T | 0.0261  |
| rs72718863  | G | -0.1926 |
| rs11519     | G | 0.0321  |
| rs10993121  | T | 0.026   |
| rs377784    | C | -0.045  |
| rs59613598  | T | -0.0885 |
| rs12551975  | T | -0.0368 |
| rs117805075 | A | -0.1218 |
| rs4574921   | C | 0.0294  |
| rs628947    | G | -0.0298 |
| rs10980606  | C | 0.0421  |
| rs118104873 | C | 0.1516  |
| rs76606214  | C | -0.1594 |



|             |   |         |
|-------------|---|---------|
| rs76980420  | G | -0.0766 |
| rs1845637   | T | 0.0912  |
| rs116943245 | C | 0.0653  |
| rs13294454  | G | 0.0317  |
| rs1934280   | G | 0.0323  |
| rs2430872   | C | 0.0271  |
| rs62564006  | A | -0.0676 |
| rs62563490  | A | 0.08    |
| rs117790829 | C | 0.1373  |
| rs1978747   | G | 0.025   |
| rs148109664 | T | 0.1023  |
| rs951777    | T | 0.0277  |
| rs16936468  | T | -0.0373 |
| rs12551941  | G | -0.1087 |
| rs72735465  | T | 0.0404  |
| rs58905559  | T | -0.061  |
| rs1959404   | A | 0.0247  |
| rs10977994  | G | 0.0417  |
| rs139002890 | T | 0.1226  |
| rs77701734  | G | 0.0492  |
| rs544701    | G | -0.0371 |
| rs3780280   | A | -0.0256 |
| rs13291759  | C | -0.0341 |
| rs10809098  | T | 0.0318  |
| rs34199311  | G | 0.0312  |
| rs72727764  | T | 0.0416  |
| rs61734903  | A | -0.1237 |
| rs1360703   | G | 0.0405  |
| rs62569695  | G | -0.1712 |
| rs296620    | C | 0.0311  |
| rs116999134 | T | -0.166  |
| rs72702666  | C | -0.0931 |
| rs3824418   | G | 0.0358  |
| rs1077760   | T | 0.0263  |
| rs10983357  | G | -0.0269 |
| rs12340622  | G | 0.0251  |
| rs17221145  | T | -0.0343 |
| rs117114999 | A | 0.1179  |
| rs117606530 | A | 0.0631  |
| rs34600804  | G | 0.0309  |
| rs7041264   | T | 0.0274  |
| rs117794573 | C | 0.0724  |
| rs4745526   | G | 0.0662  |
| rs10979269  | C | 0.0415  |
| rs10821299  | T | 0.0343  |
| rs1355141   | T | -0.0326 |
| rs11791630  | A | -0.1112 |

|             |   |         |
|-------------|---|---------|
| rs61013104  | A | -0.1365 |
| rs62539062  | A | 0.0318  |
| rs4961626   | A | 0.0265  |
| rs145371735 | G | 0.1464  |
| rs78642320  | C | -0.0793 |
| rs72699839  | C | -0.1407 |
| rs603924    | C | -0.031  |
| rs116855421 | G | 0.1227  |
| rs10974606  | G | -0.1165 |
| rs17054874  | T | -0.0486 |
| rs143873122 | C | 0.1199  |
| rs75204925  | C | -0.0665 |
| rs12551231  | A | 0.028   |
| rs117376365 | T | 0.1585  |
| rs10979528  | G | -0.0477 |
| rs117214991 | T | -0.1928 |
| rs75719040  | A | -0.1279 |
| rs79455401  | A | -0.0609 |
| rs7023356   | G | 0.0248  |
| rs141263438 | T | -0.0918 |
| rs1908233   | C | -0.0873 |
| rs148396177 | T | -0.0561 |
| rs13299558  | G | 0.0285  |
| rs117781403 | A | -0.1546 |
| rs147355980 | T | 0.0882  |
| rs147456920 | C | -0.1938 |
| rs10969696  | A | 0.1225  |
| rs62578122  | A | 0.1659  |
| rs2809771   | A | -0.1538 |
| rs80079360  | A | 0.1115  |
| rs1923421   | A | -0.0393 |
| rs598123    | T | -0.0725 |
| rs73424711  | T | 0.1457  |
| rs74339334  | A | 0.0718  |
| rs149276987 | A | -0.1121 |
| rs79575950  | G | -0.0537 |
| rs76433324  | A | 0.1195  |
| rs12375805  | C | 0.1032  |
| rs62570199  | A | 0.1249  |
| rs2265520   | T | 0.0366  |
| rs117959219 | A | -0.0991 |
| rs1805347   | A | 0.1064  |
| rs58972194  | C | 0.0492  |
| rs61749087  | C | 0.045   |
| rs10816268  | C | 0.0784  |
| rs138602325 | T | 0.0261  |
| rs76771542  | G | 0.2545  |

|             |   |         |
|-------------|---|---------|
| rs10972872  | A | -0.0275 |
| rs41311422  | A | -0.064  |
| rs10759216  | T | 0.0257  |
| rs72607200  | G | 0.1039  |
| rs10983952  | A | 0.0511  |
| rs78997986  | G | 0.1409  |
| rs77611193  | C | 0.1222  |
| rs76453991  | G | 0.0508  |
| rs12684047  | A | -0.0328 |
| rs17709988  | C | 0.0448  |
| rs78201771  | C | -0.0788 |
| rs76751704  | G | -0.0842 |
| rs9410320   | G | -0.026  |
| rs34887192  | G | 0.0426  |
| rs2254070   | C | -0.0351 |
| rs9409210   | T | -0.0257 |
| rs10978761  | T | -0.0381 |
| rs9969783   | A | -0.0262 |
| rs75620665  | A | -0.1342 |
| rs10760901  | C | -0.0291 |
| rs10984224  | T | -0.0287 |
| rs60324053  | A | 0.0885  |
| rs11243913  | A | 0.0425  |
| rs117667584 | T | 0.1201  |
| rs141396387 | A | 0.099   |
| rs117832387 | C | 0.1912  |
| rs7023699   | T | -0.0314 |
| rs2416701   | C | -0.0433 |
| rs35627592  | A | 0.0444  |
| rs1776992   | G | 0.0383  |
| rs140259215 | G | 0.1065  |
| rs10972191  | T | 0.0869  |
| rs4877042   | C | 0.031   |
| rs35954601  | T | 0.0375  |
| rs56272996  | G | -0.0788 |
| rs78665980  | G | -0.0453 |
| rs35992548  | A | 0.1667  |
| rs12337714  | C | -0.026  |
| rs79920679  | A | 0.0672  |
| rs9407761   | T | -0.0302 |
| rs75267730  | C | 0.0612  |
| rs4877528   | A | 0.1388  |
| rs149626569 | C | 0.1467  |
| rs74426790  | A | -0.0599 |
| rs10818577  | C | -0.0306 |
| rs10491534  | C | 0.0405  |
| rs113094843 | G | -0.0436 |

|             |   |         |
|-------------|---|---------|
| rs74363364  | T | -0.0527 |
| rs10983600  | T | 0.0284  |
| rs10858370  | G | 0.0297  |
| rs576197    | A | 0.0993  |
| rs9407406   | T | 0.0327  |
| rs80220965  | A | -0.1633 |
| rs10756580  | T | -0.0279 |
| rs142612290 | G | 0.0981  |
| rs10963506  | G | 0.0821  |
| rs10811986  | T | 0.0345  |
| rs7036619   | G | -0.0772 |
| rs149810183 | G | 0.1752  |
| rs7041988   | T | -0.0352 |
| rs73464668  | G | 0.1117  |
| rs10760929  | A | -0.0302 |
| rs13297271  | A | -0.0844 |
| rs117550806 | A | -0.0927 |
| rs3009706   | T | -0.0258 |
| rs17051989  | G | -0.0773 |
| rs774329    | T | 0.0506  |
| rs61268824  | C | -0.0727 |
| rs12341406  | T | 0.03    |
| rs12550920  | T | -0.0976 |
| rs138439001 | A | -0.2062 |
| rs10819456  | T | 0.0561  |
| rs10125360  | A | 0.0998  |
| rs2201127   | C | 0.0254  |
| rs16916223  | C | -0.0939 |
| rs117685531 | T | 0.1048  |
| rs139704762 | A | -0.1045 |
| rs7862571   | C | -0.0252 |
| rs72739295  | C | -0.1203 |
| rs77803163  | G | -0.0509 |
| rs117411055 | G | -0.1427 |
| rs10977835  | T | -0.0376 |
| rs118186402 | A | -0.1476 |
| rs10989177  | A | 0.0251  |
| rs1014240   | T | -0.039  |
| rs117047407 | T | -0.0682 |
| rs112224959 | T | -0.0898 |
| rs150895382 | A | -0.0629 |
| rs112151809 | G | -0.0992 |
| rs79236808  | C | 0.0378  |
| rs4237190   | G | -0.0238 |
| rs3109678   | A | 0.0501  |
| rs41426847  | C | -0.0712 |
| rs1999391   | T | 0.0316  |

|             |   |         |
|-------------|---|---------|
| rs6597593   | A | -0.0318 |
| rs7024443   | A | 0.0398  |
| rs62575444  | C | -0.1322 |
| rs75066598  | A | 0.0865  |
| rs79808282  | T | -0.0396 |
| rs140094291 | A | -0.1274 |
| rs7864107   | C | -0.0525 |
| rs79484275  | A | 0.1735  |
| rs1537192   | T | 0.0916  |
| rs112131019 | T | 0.095   |
| rs117343819 | C | 0.0993  |
| rs12551452  | C | 0.0257  |
| rs55670656  | C | 0.0384  |
| rs12341993  | A | 0.0399  |
| rs74900172  | G | 0.1817  |
| rs35002229  | T | 0.1095  |
| rs112436102 | G | 0.1678  |
| rs113558270 | C | 0.0706  |
| rs117346382 | G | -0.1088 |
| rs2575874   | A | 0.0316  |
| rs112916382 | T | 0.1267  |
| rs4332185   | C | -0.0388 |
| rs79926389  | A | -0.0587 |
| rs6476976   | C | 0.0286  |
| rs80093294  | A | -0.1575 |
| rs11144483  | G | 0.0536  |
| rs62577058  | A | 0.0297  |
| rs34756986  | C | 0.0375  |
| rs12380335  | A | 0.0811  |
| rs10817686  | C | -0.0298 |
| rs148822397 | A | 0.1243  |
| rs10962536  | A | 0.0758  |
| rs10963198  | C | 0.032   |
| rs117906992 | A | -0.1045 |
| rs12340792  | A | -0.1196 |
| rs143086622 | T | -0.0929 |
| rs2851696   | C | -0.0258 |
| rs2147064   | C | -0.0254 |
| rs56699313  | T | 0.0665  |
| rs17183408  | G | 0.1109  |
| rs4978003   | C | -0.0425 |
| rs57649467  | A | 0.0263  |
| rs2049667   | T | 0.0468  |
| rs62563491  | T | 0.0458  |
| rs111324233 | G | 0.0685  |
| rs55684457  | G | -0.0871 |
| rs11141502  | T | -0.0265 |

|             |   |         |
|-------------|---|---------|
| rs17446500  | C | 0.0642  |
| rs2493641   | C | 0.0645  |
| rs4520237   | G | 0.0816  |
| rs2519090   | A | -0.031  |
| rs10962693  | T | 0.0295  |
| rs16936618  | G | -0.0543 |
| rs12553930  | G | -0.0352 |
| rs149692687 | A | -0.1335 |
| rs2889231   | T | -0.0275 |
| rs142937780 | C | 0.1118  |
| rs61534549  | T | -0.0378 |
| rs558016    | T | -0.0361 |
| rs17743789  | G | 0.1713  |
| rs2004549   | C | -0.0299 |
| rs75619159  | T | 0.1288  |
| rs72693271  | T | 0.0839  |
| rs13300035  | C | -0.0279 |
| rs10511937  | A | 0.0349  |
| rs10818798  | T | -0.0539 |
| rs17408309  | G | -0.1514 |
| rs62576492  | G | -0.0423 |
| rs11506660  | C | -0.0925 |
| rs117439022 | A | -0.2202 |
| rs12685734  | C | 0.0281  |
| rs522464    | C | -0.0279 |
| rs12348448  | G | -0.0418 |
| rs1250024   | T | 0.0238  |
| rs76746402  | A | 0.0679  |
| rs78870412  | A | -0.096  |
| rs139854962 | A | -0.0675 |
| rs78283362  | C | -0.0579 |
| rs523812    | C | 0.0261  |
| rs10982611  | G | -0.0239 |
| rs118038180 | T | 0.0432  |
| rs67723376  | C | -0.0315 |
| rs141047637 | A | -0.1703 |
| rs997392    | G | -0.1671 |
| rs10821576  | T | 0.0324  |
| rs10812040  | G | 0.044   |
| rs113594713 | G | 0.1688  |
| rs10759346  | A | -0.024  |
| rs652313    | A | 0.0352  |
| rs112898067 | T | -0.1046 |
| rs56119007  | A | 0.0967  |
| rs143036732 | A | -0.1169 |
| rs9409201   | C | 0.0503  |
| rs73449900  | T | -0.0364 |

|             |   |         |
|-------------|---|---------|
| rs36009623  | T | -0.028  |
| rs62571829  | T | -0.0537 |
| rs10977424  | A | 0.0346  |
| rs12377865  | C | 0.0521  |
| rs79935360  | A | 0.0701  |
| rs1319703   | T | -0.0774 |
| rs112494725 | A | 0.038   |
| rs72715092  | T | -0.116  |
| rs13298097  | C | -0.0312 |
| rs7029545   | C | -0.0256 |
| rs113151584 | T | -0.1198 |
| rs4962050   | C | -0.033  |
| rs72708969  | C | -0.0663 |
| rs145015337 | G | 0.1403  |
| rs1962229   | T | -0.0423 |
| rs2149370   | T | -0.0236 |
| rs72738287  | G | -0.0324 |
| rs1450192   | G | -0.0301 |
| rs3793526   | T | 0.0665  |
| rs111992727 | A | -0.1516 |
| rs77830938  | A | 0.0638  |
| rs74383043  | G | 0.0451  |
| rs4837509   | T | 0.1365  |
| rs7863055   | G | 0.0347  |
| rs10961869  | C | 0.1057  |
| rs78035398  | G | 0.1279  |
| rs117662708 | T | -0.1044 |
| rs118172905 | A | 0.0818  |
| rs888229    | A | -0.0282 |
| rs10858100  | G | -0.0361 |
| rs76261185  | T | -0.1448 |
| rs79101613  | G | -0.0759 |
| rs546044    | C | -0.0485 |
| rs71507386  | T | 0.105   |
| rs9919066   | T | 0.0414  |
| rs7849165   | G | -0.0257 |
| rs117405090 | A | -0.1015 |
| rs72703021  | G | 0.0341  |
| rs77927363  | A | 0.0708  |
| rs28516739  | G | 0.0351  |
| rs62577454  | C | -0.0765 |
| rs6477099   | A | -0.0443 |
| rs10970157  | T | -0.0354 |
| rs111370447 | T | 0.104   |
| rs988245    | C | 0.0264  |
| rs145682250 | C | 0.1266  |
| rs139814628 | C | 0.2072  |

|             |   |         |
|-------------|---|---------|
| rs10081686  | G | 0.0241  |
| rs7873280   | A | -0.0242 |
| rs17429373  | C | -0.1167 |
| rs117036306 | A | 0.0774  |
| rs150510793 | G | -0.1316 |
| rs7869598   | C | -0.0588 |
| rs12346579  | G | 0.0253  |
| rs117323842 | G | -0.117  |
| rs146313556 | C | 0.1258  |
| rs1509193   | T | 0.0335  |
| rs11243896  | T | 0.0436  |
| rs56076958  | T | 0.0358  |
| rs75770610  | C | 0.0972  |
| rs78939662  | G | -0.1227 |
| rs16937178  | C | 0.0617  |
| rs11140079  | T | 0.0394  |
| rs62563242  | C | -0.0434 |
| rs4742814   | G | -0.0249 |
| rs74667309  | T | 0.0773  |
| rs10114998  | G | 0.0321  |
| rs79268435  | G | 0.0643  |
| rs79989262  | G | 0.0694  |
| rs1329920   | C | -0.0318 |
| rs7033416   | C | 0.0276  |
| rs10752657  | A | -0.0255 |
| rs10115460  | C | -0.0243 |
| rs76584252  | G | 0.1944  |
| rs1043368   | T | -0.035  |
| rs78746136  | T | -0.1797 |
| rs74997806  | G | -0.0963 |
| rs148862528 | T | -0.1004 |
| rs2769594   | A | 0.0253  |
| rs10124327  | G | 0.0243  |
| rs142450117 | C | -0.1287 |
| rs111859821 | C | -0.0809 |
| rs117436211 | C | -0.0606 |
| rs10977617  | C | 0.0558  |
| rs75504664  | T | 0.1131  |
| rs10738297  | G | 0.0272  |
| rs75156166  | T | 0.0421  |
| rs674941    | C | 0.0239  |
| rs72757871  | C | 0.1564  |
| rs149120977 | G | 0.2351  |
| rs137949005 | G | -0.0925 |
| rs73664359  | A | 0.0446  |
| rs147524303 | A | 0.1124  |
| rs76843843  | T | 0.0908  |



|             |   |         |
|-------------|---|---------|
| rs12555438  | T | 0.0514  |
| rs72734325  | A | 0.1145  |
| rs4743826   | C | -0.1089 |
| rs76028668  | T | -0.0917 |
| rs17692145  | T | -0.0244 |
| rs1861829   | C | -0.0252 |
| rs116861759 | T | 0.2142  |
| rs10869252  | C | 0.0251  |
| rs10810813  | A | 0.0303  |
| rs10757898  | G | -0.025  |
| rs12001524  | T | -0.1464 |
| rs2233568   | A | 0.0253  |
| rs34202541  | G | -0.0777 |
| rs117546647 | G | 0.0876  |
| rs72711309  | G | -0.0582 |
| rs55772288  | C | 0.1519  |
| rs112766165 | G | 0.1318  |
| rs60269406  | G | 0.0571  |
| rs306531    | A | 0.0332  |
| rs7022583   | C | -0.0446 |
| rs9407361   | G | 0.0308  |
| rs72738478  | G | -0.0674 |
| rs947126    | A | -0.0254 |
| rs11790874  | A | -0.0384 |
| rs17506543  | G | 0.0445  |
| rs13296859  | A | 0.0358  |
| rs142652232 | C | 0.1497  |
| rs34589310  | G | -0.0276 |
| rs77079609  | A | -0.1048 |
| rs139192496 | C | -0.0723 |
| rs145097774 | G | -0.1482 |
| rs28669185  | G | 0.0503  |
| rs79863888  | T | 0.0339  |
| rs76277968  | C | 0.1646  |
| rs72767751  | A | -0.1038 |
| rs17737081  | A | 0.0841  |
| rs7847516   | A | -0.0443 |
| rs71523480  | A | 0.0716  |
| rs11138135  | C | -0.0545 |
| rs117977115 | T | 0.0955  |
| rs139794460 | C | 0.1198  |
| rs4540491   | T | -0.0461 |
| rs7860431   | T | -0.0318 |
| rs2282181   | C | 0.1093  |
| rs480866    | C | -0.0333 |
| rs56077544  | A | -0.0389 |
| rs17061821  | T | -0.0791 |

|             |   |         |
|-------------|---|---------|
| rs116948085 | A | 0.148   |
| rs7849107   | G | -0.0263 |
| rs4837763   | T | -0.0293 |
| rs6475441   | T | 0.0261  |
| rs72715227  | C | 0.1155  |
| rs76751642  | G | 0.1234  |
| rs79585655  | T | -0.0811 |
| rs3750340   | T | -0.0342 |
| rs985799    | T | 0.0311  |
| rs7029157   | T | 0.044   |
| rs145092418 | C | -0.1625 |
| rs149341958 | G | 0.1913  |
| rs71506776  | T | -0.0629 |
| rs2378711   | C | 0.0241  |
| rs465208    | G | -0.024  |
| rs10739194  | A | -0.0236 |
| rs74380861  | T | -0.0345 |
| rs60259878  | T | 0.0451  |
| rs148113073 | A | 0.1882  |
| rs7867364   | T | 0.0356  |
| rs72733233  | G | 0.0249  |
| rs13288459  | T | 0.0355  |
| rs116891570 | A | -0.1218 |
| rs10976628  | A | 0.0237  |
| rs1597502   | G | -0.0458 |
| rs10961496  | C | -0.0398 |
| rs56988496  | A | 0.0394  |
| rs75164537  | C | -0.1586 |
| rs12378553  | C | 0.0266  |
| rs1416554   | A | -0.0659 |
| rs17237524  | G | -0.1864 |
| rs7029828   | G | -0.0269 |
| rs6476998   | A | -0.0547 |
| rs10124158  | G | -0.0233 |
| rs145251136 | G | -0.1408 |
| rs72716858  | A | 0.1314  |
| rs148356396 | G | 0.1138  |
| rs112542071 | C | -0.1326 |
| rs140325058 | T | 0.1132  |
| rs576303    | T | -0.0981 |
| rs445684    | A | -0.0609 |
| rs2526      | T | 0.0982  |
| rs71522984  | A | 0.0536  |
| rs10993890  | G | -0.0555 |
| rs1519048   | A | -0.0899 |
| rs79043656  | C | -0.1611 |
| rs1114719   | A | 0.0328  |

|             |   |         |
|-------------|---|---------|
| rs33913111  | G | 0.0507  |
| rs1930410   | A | 0.0274  |
| rs11999235  | C | 0.0232  |
| rs114238874 | A | -0.0821 |
| rs76016771  | T | -0.0375 |
| rs62533313  | C | -0.0412 |
| rs10976441  | A | -0.0255 |
| rs10115336  | C | 0.0301  |
| rs73412345  | G | -0.0816 |
| rs67435368  | T | -0.0294 |
| rs75114678  | G | -0.0905 |
| rs148684364 | T | 0.1615  |
| rs7872468   | A | 0.1216  |
| rs34057980  | A | -0.0535 |
| rs967267    | C | -0.0319 |
| rs28535894  | G | 0.0407  |
| rs542062    | A | 0.033   |
| rs76200264  | A | 0.0701  |
| rs189543    | A | -0.0321 |
| rs7854863   | G | 0.134   |
| rs17149898  | T | 0.1243  |
| rs117140907 | A | -0.066  |
| rs622418    | G | 0.0264  |
| rs72736183  | A | 0.1132  |
| rs36057127  | A | 0.1102  |
| rs118166855 | G | -0.1802 |
| rs1999495   | C | -0.0472 |
| rs6477310   | C | 0.0263  |
| rs117226086 | A | 0.0472  |
| rs2383131   | T | 0.0249  |
| rs10971064  | C | 0.0678  |
| rs6560595   | A | -0.0244 |
| rs291005    | T | 0.0302  |
| rs10987235  | A | -0.0316 |
| rs117226753 | G | -0.1292 |
| rs1590840   | C | 0.066   |
| rs74703906  | G | -0.0845 |
| rs7862352   | G | -0.025  |
| rs10984724  | A | 0.0773  |
| rs79791796  | A | -0.0543 |
| rs55697116  | T | -0.045  |
| rs118073780 | A | 0.1116  |
| rs79836695  | A | 0.1766  |
| rs716076    | A | 0.0318  |
| rs10816788  | A | 0.0458  |
| rs7044799   | T | -0.0274 |
| rs143506720 | A | -0.122  |

|             |   |         |
|-------------|---|---------|
| rs112250914 | T | -0.1066 |
| rs7036539   | T | -0.0248 |
| rs11140035  | C | -0.0994 |
| rs7038037   | G | -0.0239 |
| rs79486816  | T | 0.1185  |
| rs146291167 | A | -0.1462 |
| rs17441225  | T | -0.0587 |
| rs7020021   | T | -0.0263 |
| rs12347186  | C | -0.1538 |
| rs79123898  | T | 0.1291  |
| rs62537692  | T | 0.0507  |
| rs1402792   | G | -0.0255 |
| rs117059072 | A | -0.137  |
| rs11138320  | G | 0.0241  |
| rs113322795 | G | 0.1243  |
| rs7035514   | G | -0.0316 |
| rs1125873   | A | 0.0242  |
| rs12490775  | T | -0.1338 |
| rs138576568 | T | -0.0902 |
| rs4745285   | G | 0.0328  |
| rs138522238 | G | 0.136   |
| rs76910889  | G | 0.109   |
| rs62549796  | T | 0.0485  |
| rs62559209  | A | 0.0907  |
| rs62565120  | T | -0.0472 |
| rs11138447  | G | -0.0274 |
| rs7873284   | G | -0.0267 |
| rs12551666  | C | -0.0453 |
| rs151129137 | A | -0.1148 |
| rs78673297  | C | -0.1744 |
| rs77898768  | T | -0.0879 |
| rs1825397   | T | -0.0508 |
| rs10977173  | C | 0.0322  |
| rs4879612   | T | 0.0501  |
| rs7853904   | G | -0.0245 |
| rs116955675 | A | 0.0571  |
| rs10973973  | T | -0.0421 |
| rs74605170  | A | 0.1695  |
| rs4745434   | T | -0.0242 |
| rs144225782 | T | 0.101   |
| rs4317628   | C | 0.0415  |
| rs112797848 | G | -0.0992 |
| rs4842236   | T | 0.0257  |
| rs10812062  | A | -0.0262 |
| rs150448407 | T | 0.2124  |
| rs5003830   | C | 0.1296  |
| rs77520849  | T | 0.0656  |

|             |   |         |
|-------------|---|---------|
| rs117951876 | T | 0.0843  |
| rs998369    | C | 0.0349  |
| rs79172070  | C | 0.0702  |
| rs6475339   | T | 0.0282  |
| rs117392655 | C | -0.0819 |
| rs4518727   | G | -0.0401 |
| rs62539932  | A | -0.0889 |
| rs4409473   | T | 0.0258  |
| rs11145437  | A | -0.0941 |
| rs7864558   | A | 0.0303  |
| rs72698071  | T | 0.0888  |
| rs78714729  | C | 0.1474  |
| rs2757859   | C | 0.0295  |
| rs10491829  | T | 0.0384  |
| rs112919122 | A | 0.0837  |
| rs378628    | C | -0.0364 |
| rs74621663  | T | -0.1    |
| rs138241476 | T | -0.1029 |
| rs75527174  | A | -0.0846 |
| rs17658489  | C | -0.039  |
| rs13292756  | A | -0.0901 |
| rs57332343  | A | 0.0943  |
| rs10815059  | C | -0.0311 |
| rs10758650  | A | -0.0252 |
| rs76216206  | T | 0.0911  |
| rs78584811  | C | 0.1181  |
| rs55818506  | T | 0.1461  |
| rs62576224  | A | 0.1138  |
| rs7030628   | T | -0.0235 |
| rs681470    | G | 0.0355  |
| rs138628034 | A | 0.1261  |
| rs55952607  | C | 0.0551  |
| rs10960756  | A | 0.1342  |
| rs296618    | G | 0.058   |
| rs10987245  | C | -0.0614 |
| rs869106    | A | 0.0351  |
| rs4478633   | T | -0.0229 |
| rs11140405  | C | 0.0326  |
| rs2417171   | C | -0.0372 |
| rs80231042  | A | 0.0581  |
| rs111401646 | T | 0.092   |
| rs144944060 | A | 0.0884  |
| rs147995873 | C | 0.1225  |
| rs13296652  | C | -0.0275 |
| rs62583812  | A | 0.066   |
| rs75619970  | T | -0.0954 |
| rs113629995 | C | -0.0711 |

|             |   |         |
|-------------|---|---------|
| rs994779    | A | 0.0463  |
| rs759279    | T | 0.0526  |
| rs66650617  | T | 0.0771  |
| rs10869586  | G | -0.0377 |
| rs149141360 | A | 0.0679  |
| rs34209214  | A | 0.0824  |
| rs114997615 | G | 0.0584  |
| rs76131961  | G | 0.0774  |
| rs303617    | T | -0.0343 |
| rs140030193 | T | -0.1294 |
| rs17547673  | C | 0.0424  |
| rs2025319   | A | 0.0391  |
| rs10810942  | A | 0.0296  |
| rs111662600 | A | -0.1111 |
| rs7041597   | G | -0.0277 |
| rs4961576   | T | 0.0282  |
| rs11138284  | C | 0.0987  |
| rs72741538  | G | -0.0753 |
| rs117613795 | G | 0.2073  |
| rs79432625  | T | 0.112   |
| rs4962183   | A | 0.0259  |
| rs78851887  | A | 0.1066  |
| rs7865992   | G | 0.0228  |
| rs57320259  | G | -0.0913 |
| rs10114938  | A | 0.0253  |
| rs145027798 | G | 0.1216  |
| rs117459446 | C | 0.1293  |
| rs1805343   | G | 0.0243  |
| rs146274605 | C | 0.2611  |
| rs1808749   | A | 0.0234  |
| rs142785645 | C | 0.115   |
| rs116897696 | A | -0.087  |
| rs143114574 | G | 0.1136  |
| rs10964691  | G | -0.0353 |
| rs10869686  | A | 0.0382  |
| rs12348961  | A | -0.1932 |
| rs117500277 | G | 0.1568  |
| rs1410579   | A | -0.0448 |
| rs141150326 | A | -0.0363 |
| rs2008074   | C | -0.0372 |
| rs7855365   | G | 0.0712  |
| rs10758078  | T | 0.0247  |
| rs12342339  | G | 0.1569  |
| rs17292372  | G | 0.0339  |
| rs11793482  | G | 0.0691  |
| rs73396010  | T | 0.0908  |
| rs138877558 | A | 0.1028  |

|             |   |         |
|-------------|---|---------|
| rs72700508  | T | 0.111   |
| rs1571907   | G | -0.0373 |
| rs2147245   | A | -0.0638 |
| rs112767938 | G | -0.1087 |
| rs143842848 | T | 0.0998  |
| rs139642495 | C | 0.1013  |
| rs116969817 | T | 0.0741  |
| rs3780528   | C | -0.0328 |
| rs12551024  | C | 0.0278  |
| rs7023001   | C | -0.0327 |
| rs10818462  | C | 0.0284  |
| rs78791620  | A | -0.0587 |
| rs62567973  | G | 0.0254  |
| rs78200449  | T | 0.099   |
| rs142398999 | T | -0.1313 |
| rs2760038   | A | 0.111   |
| rs117913604 | T | 0.138   |
| rs10993837  | C | 0.0326  |
| rs10975949  | A | 0.1064  |
| rs7022932   | A | -0.165  |
| rs9409842   | A | 0.0336  |
| rs716157    | T | 0.0245  |
| rs11139154  | C | -0.0264 |
| rs35337681  | A | 0.0276  |
| rs118109186 | T | -0.1196 |
| rs16918665  | G | -0.0782 |
| rs36041012  | T | 0.093   |
| rs4142436   | T | 0.0415  |
| rs12347965  | G | 0.0408  |
| rs117731478 | T | -0.1152 |
| rs7848170   | G | -0.0405 |
| rs4743123   | T | -0.0245 |
| rs932998    | T | 0.0377  |
| rs117552524 | G | 0.1063  |
| rs10984561  | T | -0.0623 |
| rs7031910   | T | 0.0487  |
| rs10980448  | C | 0.0406  |
| rs149469357 | G | 0.0608  |
| rs10868695  | A | -0.123  |
| rs79169883  | T | 0.1476  |
| rs12235387  | A | 0.036   |
| rs10980692  | T | 0.0941  |
| rs76402051  | A | -0.0645 |
| rs112296696 | A | 0.076   |
| rs7854413   | C | 0.0398  |
| rs6475046   | G | 0.0239  |
| rs1452333   | C | 0.0276  |

|             |   |         |
|-------------|---|---------|
| rs76149640  | C | 0.1025  |
| rs55738727  | A | 0.0457  |
| rs116160313 | T | 0.054   |
| rs10991109  | A | -0.0317 |
| rs4836708   | G | -0.0251 |
| rs7863227   | T | -0.0304 |
| rs117752200 | C | 0.1159  |
| rs4978688   | A | -0.0285 |
| rs13288336  | G | -0.074  |
| rs75884841  | A | -0.1458 |
| rs72773723  | T | -0.0714 |
| rs1571834   | A | 0.0241  |
| rs12005620  | T | -0.025  |
| rs1796976   | G | 0.0302  |
| rs34386249  | G | 0.1122  |
| rs75825766  | C | -0.1026 |
| rs10118877  | A | 0.0826  |
| rs2515618   | T | 0.0267  |
| rs7873274   | C | -0.0376 |
| rs117523897 | T | -0.1069 |
| rs117490999 | A | -0.1262 |
| rs10491737  | T | 0.0919  |
| rs7043791   | G | 0.0325  |
| rs117193995 | C | -0.0995 |
| rs74649008  | T | -0.0885 |
| rs1490743   | T | -0.0493 |
| rs79034296  | G | 0.0859  |
| rs117854477 | G | 0.1126  |
| rs3936899   | G | -0.0365 |
| rs117653408 | A | 0.0849  |
| rs74810039  | G | -0.0563 |
| rs9408071   | A | 0.0227  |
| rs12236014  | C | -0.031  |
| rs882728    | G | -0.027  |
| rs10982123  | G | -0.0403 |
| rs11103571  | A | 0.0298  |
| rs118121949 | C | -0.0594 |
| rs17698273  | G | -0.0714 |
| rs114632269 | A | -0.164  |
| rs118028807 | C | 0.103   |
| rs7020436   | C | -0.1688 |
| rs139627227 | A | 0.1325  |
| rs72708349  | G | 0.05    |
| rs147764631 | A | 0.1336  |
| rs150301396 | A | -0.0629 |
| rs7027174   | G | -0.0651 |
| rs3758294   | C | -0.0306 |



|             |   |         |
|-------------|---|---------|
| rs12554704  | C | 0.0368  |
| rs7469509   | G | -0.0857 |
| rs7019163   | T | -0.0317 |
| rs2073817   | T | -0.0243 |
| rs2383043   | T | -0.0429 |
| rs960617    | T | -0.0398 |
| rs12346763  | T | 0.0277  |
| rs893058    | A | -0.0935 |
| rs78670941  | G | 0.1228  |
| rs7852999   | G | -0.0243 |
| rs1816366   | T | -0.0242 |
| rs67751791  | T | 0.0707  |
| rs12380321  | C | 0.0517  |
| rs10971708  | A | -0.0445 |
| rs148922045 | A | -0.11   |
| rs76129881  | C | -0.0859 |
| rs138212791 | G | 0.0796  |
| rs56276347  | C | -0.1698 |
| rs76776560  | C | 0.042   |
| rs601370    | G | 0.027   |
| rs17739929  | C | -0.0458 |
| rs62550691  | G | -0.0251 |
| rs71508681  | T | -0.0689 |
| rs141732686 | G | -0.0954 |
| rs12336229  | A | 0.0696  |
| rs118005735 | A | 0.1441  |
| rs4877170   | C | -0.0269 |
| rs7024683   | A | 0.0624  |
| rs16914253  | G | -0.047  |
| rs11793901  | T | -0.0299 |
| rs10982331  | A | 0.0264  |
| rs7026151   | C | -0.0443 |
| rs17417575  | T | 0.1425  |
| rs117898406 | G | 0.1629  |
| rs750548    | C | 0.0252  |
| rs62541769  | A | -0.0857 |
| rs73476535  | T | 0.0555  |
| rs62559776  | G | 0.1486  |
| rs62578128  | T | 0.0809  |
| rs13289509  | G | -0.0522 |
| rs9410446   | A | 0.0572  |
| rs585819    | C | 0.0268  |
| rs112455073 | G | -0.0834 |
| rs77776831  | A | -0.1063 |
| rs117878284 | C | -0.1013 |
| rs56827419  | T | 0.0759  |
| rs10868559  | A | -0.0272 |

|             |   |         |
|-------------|---|---------|
| rs77347741  | A | -0.0517 |
| rs34711283  | C | 0.0436  |
| rs142998360 | C | 0.1259  |
| rs7847889   | T | 0.0259  |
| rs80325399  | T | -0.1413 |
| rs9406961   | A | -0.055  |
| rs143904640 | T | 0.093   |
| rs72687595  | C | -0.086  |
| rs118101707 | C | 0.12    |
| rs34369473  | G | 0.1061  |
| rs13286807  | T | 0.0938  |
| rs35258395  | C | -0.0285 |
| rs116238784 | A | 0.0491  |
| rs1810887   | T | 0.0245  |
| rs17787449  | A | -0.0482 |
| rs77709055  | A | -0.1077 |
| rs4741797   | A | 0.0235  |
| rs138245950 | A | -0.1606 |
| rs76740791  | T | 0.1111  |
| rs139679618 | T | 0.156   |
| rs143789994 | G | -0.1205 |
| rs944958    | C | -0.0789 |
| rs17590562  | C | 0.174   |
| rs74836148  | T | -0.0916 |
| rs10988346  | A | -0.0273 |
| rs578430    | T | 0.0747  |
| rs1013334   | G | -0.0282 |
| rs10121357  | G | 0.0339  |
| rs17642118  | G | -0.065  |
| rs10114013  | A | -0.0288 |
| rs4484759   | C | 0.0303  |
| rs348463    | C | -0.0265 |
| rs138463694 | C | -0.1348 |
| rs78278610  | C | 0.1453  |
| rs7040642   | G | 0.0254  |
| rs7874622   | G | 0.0291  |
| rs6597655   | T | 0.0368  |
| rs117868203 | T | 0.0902  |
| rs13298137  | T | 0.0906  |
| rs74409646  | T | -0.0652 |
| rs10320     | A | -0.049  |
| rs1413364   | G | 0.0665  |
| rs10513300  | C | 0.0528  |
| rs998188    | T | -0.0445 |
| rs1754073   | T | 0.0232  |
| rs76415695  | A | 0.1006  |
| rs17215796  | G | -0.0351 |

|             |   |         |
|-------------|---|---------|
| rs76334434  | T | 0.1775  |
| rs149009150 | C | -0.099  |
| rs72732694  | A | 0.0636  |
| rs9299268   | C | -0.0421 |
| rs41297217  | A | 0.0701  |
| rs79720540  | C | 0.051   |
| rs10982071  | G | 0.0292  |
| rs10514837  | T | 0.0263  |
| rs10491912  | C | -0.0909 |
| rs7861569   | A | -0.0406 |
| rs2297354   | C | 0.114   |
| rs117581999 | G | -0.1303 |
| rs118107566 | T | -0.1032 |
| rs628873    | T | -0.0436 |
| rs80346627  | G | -0.0494 |
| rs71504586  | A | -0.0333 |
| rs118133927 | T | -0.1874 |
| rs10512115  | C | 0.0664  |
| rs328876    | T | -0.0224 |
| rs80151777  | T | -0.0568 |
| rs73656415  | T | 0.116   |
| rs2039326   | C | -0.0277 |
| rs2808705   | T | -0.0287 |
| rs7870769   | G | 0.0412  |
| rs7037107   | T | 0.0422  |
| rs1044531   | C | 0.0418  |
| rs113550267 | A | 0.1245  |
| rs150995179 | C | -0.0982 |
| rs11788668  | T | 0.0554  |
| rs16938228  | C | 0.1085  |
| rs6559616   | G | 0.0239  |
| rs10816547  | T | 0.0307  |
| rs117787445 | T | -0.1593 |
| rs913415    | C | -0.0233 |
| rs143319204 | C | -0.1279 |
| rs7043356   | A | 0.0279  |
| rs12343735  | G | -0.0921 |
| rs9299011   | A | -0.0305 |
| rs4552996   | C | -0.0602 |
| rs28420206  | C | 0.1014  |
| rs7022582   | T | 0.0271  |
| rs74370948  | G | -0.0794 |
| rs113844804 | T | -0.0665 |
| rs55744221  | T | 0.0788  |
| rs10756029  | T | -0.0262 |
| rs7857137   | G | -0.024  |
| rs117394525 | G | -0.0927 |

|             |   |         |
|-------------|---|---------|
| rs12550895  | A | -0.0812 |
| rs71509819  | A | 0.0878  |
| rs112806449 | A | 0.1577  |
| rs118141428 | C | -0.1251 |
| rs149554236 | T | -0.1194 |
| rs112610155 | T | -0.1118 |
| rs4979349   | T | -0.0241 |
| rs72693914  | T | 0.1998  |
| rs35870372  | A | -0.0262 |
| rs73423204  | G | -0.1515 |
| rs118080256 | C | 0.139   |
| rs7869506   | T | -0.0249 |
| rs12237760  | C | -0.0308 |
| rs10966659  | T | -0.0257 |
| rs999398    | T | 0.0246  |
| rs10125467  | A | 0.0448  |
| rs117697037 | T | -0.1217 |
| rs117089147 | G | -0.1039 |
| rs75548603  | A | -0.0941 |
| rs10990106  | C | 0.0304  |
| rs7023851   | A | 0.0277  |
| rs7871741   | G | 0.1162  |
| rs4744878   | A | 0.0281  |
| rs10121981  | T | 0.0293  |
| rs7042624   | C | -0.0429 |
| rs117322910 | A | 0.0527  |
| rs10976265  | G | 0.0378  |
| rs3750420   | T | -0.0262 |
| rs10733311  | C | 0.0506  |
| rs117226256 | C | -0.1234 |
| rs111957450 | T | -0.0787 |
| rs62570789  | T | 0.0317  |
| rs77236853  | T | -0.1314 |
| rs79597889  | A | 0.1064  |
| rs466347    | C | 0.061   |
| rs13292819  | A | -0.0358 |
| rs4128120   | A | -0.0733 |
| rs72718995  | A | -0.0704 |
| rs41279065  | A | -0.1185 |
| rs143995315 | T | 0.1062  |
| rs80233584  | T | 0.0563  |
| rs11788284  | C | 0.0527  |
| rs932760    | A | 0.0469  |
| rs56191840  | T | 0.1004  |
| rs10512219  | G | 0.0299  |
| rs11789430  | A | -0.0251 |
| rs702128    | C | 0.0851  |

|             |   |         |
|-------------|---|---------|
| rs62556318  | G | -0.083  |
| rs1324462   | T | -0.0238 |
| rs10816948  | T | 0.0378  |
| rs2296261   | T | -0.0557 |
| rs34498325  | C | 0.0238  |
| rs17779800  | A | 0.0277  |
| rs4917332   | A | -0.0264 |
| rs78547087  | A | 0.067   |
| rs75193102  | C | 0.0647  |
| rs34267328  | C | 0.064   |
| rs2779726   | T | -0.0625 |
| rs6537981   | T | -0.0973 |
| rs12379845  | G | 0.0642  |
| rs356146    | T | -0.0391 |
| rs72711410  | G | 0.0819  |
| rs16906228  | C | 0.0992  |
| rs9785186   | C | -0.0277 |
| rs17657922  | A | -0.0892 |
| rs10963752  | T | 0.0522  |
| rs117744783 | T | -0.1375 |
| rs58075154  | C | 0.023   |
| rs61254203  | G | -0.0726 |
| rs17792298  | C | -0.0826 |
| rs9657707   | G | 0.0845  |
| rs74709654  | C | -0.0589 |
| rs4977818   | G | -0.0271 |
| rs11143541  | T | 0.0229  |
| rs113465500 | C | -0.1078 |
| rs7021198   | G | -0.0647 |
| rs80072503  | G | 0.0872  |
| rs9406627   | T | -0.0311 |
| rs13286637  | C | -0.0578 |
| rs734469    | T | -0.0276 |
| rs9918949   | C | -0.0918 |
| rs72737145  | A | 0.1957  |
| rs6559879   | T | -0.1017 |
| rs10809956  | C | 0.0466  |
| rs149218377 | A | 0.108   |
| rs958108    | A | 0.1075  |
| rs74306989  | A | -0.0329 |
| rs12347113  | A | 0.0279  |
| rs79438900  | A | 0.0848  |
| rs72719383  | C | 0.0799  |
| rs1332485   | C | 0.0246  |
| rs62541991  | T | -0.0976 |
| rs138906390 | G | 0.1477  |
| rs75941999  | A | 0.0664  |

|             |   |         |
|-------------|---|---------|
| rs12005689  | C | 0.0434  |
| rs1467792   | A | 0.0226  |
| rs76008127  | G | -0.1238 |
| rs117792726 | A | 0.0826  |
| rs10965745  | T | 0.1118  |
| rs72754711  | T | -0.213  |
| rs12554667  | T | -0.0248 |
| rs12550997  | C | -0.027  |
| rs72752433  | T | 0.0655  |
| rs10987575  | T | -0.029  |
| rs117650242 | A | -0.0867 |
| rs117580016 | C | 0.0911  |
| rs10491766  | T | -0.0551 |
| rs35823938  | C | 0.0901  |
| rs78892713  | T | -0.1507 |
| rs112059209 | T | -0.1189 |
| rs9886702   | C | -0.0263 |
| rs78114755  | T | 0.1012  |
| rs10816924  | T | -0.0438 |
| rs4842181   | G | 0.0246  |
| rs117355415 | T | -0.1147 |
| rs140004182 | T | -0.12   |
| rs35028373  | T | -0.0963 |
| rs139924166 | T | -0.1367 |
| rs144598681 | A | 0.0783  |
| rs79978263  | A | 0.1035  |
| rs2889952   | T | 0.0264  |
| rs4877769   | G | 0.0473  |
| rs116889581 | T | 0.0701  |
| rs13284407  | T | 0.0314  |
| rs139894760 | T | -0.0632 |
| rs2993755   | G | 0.1525  |
| rs117435874 | T | 0.1031  |
| rs62559832  | G | -0.0816 |
| rs13440094  | T | -0.0305 |
| rs117591210 | C | 0.1159  |
| rs2987365   | A | 0.0258  |
| rs17768428  | T | -0.0303 |
| rs75733144  | G | 0.1724  |
| rs7028550   | C | -0.0228 |
| rs17605754  | A | 0.0279  |
| rs11794493  | A | 0.1058  |
| rs679007    | T | 0.0373  |
| rs17828717  | T | -0.0621 |
| rs883104    | G | 0.1283  |
| rs192650    | A | -0.0228 |
| rs10978865  | T | 0.06    |

|             |   |         |
|-------------|---|---------|
| rs148776151 | A | 0.1174  |
| rs10983909  | G | -0.0266 |
| rs4527981   | T | 0.0392  |
| rs74933936  | C | -0.0337 |
| rs4615688   | G | 0.0281  |
| rs1411381   | T | 0.0252  |
| rs5025470   | T | 0.0401  |
| rs150185691 | C | 0.2309  |
| rs13301186  | T | 0.0247  |
| rs78721753  | G | 0.0499  |
| rs10982470  | T | 0.0446  |
| rs150960816 | A | -0.1094 |
| rs117638067 | A | -0.1059 |
| rs10125041  | A | -0.1647 |
| rs10973856  | T | 0.0241  |
| rs72692731  | C | 0.0435  |
| rs4317645   | G | -0.1393 |
| rs80144911  | T | 0.0669  |
| rs7874698   | A | 0.0237  |
| rs10760583  | T | 0.0258  |
| rs4842190   | T | 0.0226  |
| rs76437548  | T | 0.1588  |
| rs5789      | A | -0.0669 |
| rs79356775  | G | 0.098   |
| rs117433635 | A | -0.1239 |
| rs9314736   | G | 0.0314  |
| rs72706213  | T | 0.0361  |
| rs16925703  | A | -0.1274 |
| rs55727303  | T | 0.1526  |
| rs146029718 | G | 0.1028  |
| rs139327156 | A | 0.1464  |
| rs74741740  | A | -0.0569 |
| rs62573998  | C | 0.0732  |
| rs35484290  | G | 0.0229  |
| rs147738503 | T | 0.0638  |
| rs12340428  | C | -0.0319 |
| rs2013941   | A | -0.0288 |
| rs10122741  | A | -0.0236 |
| rs2180940   | C | 0.0228  |
| rs12684823  | A | -0.0317 |
| rs11103127  | T | -0.0233 |
| rs11794482  | T | 0.122   |
| rs141321472 | T | -0.0928 |
| rs1333892   | T | 0.0644  |
| rs10983842  | C | 0.0289  |
| rs117734440 | C | 0.0762  |
| rs4744814   | G | -0.0285 |

|             |   |         |
|-------------|---|---------|
| rs77435973  | A | 0.0654  |
| rs72759424  | A | 0.1185  |
| rs113353630 | T | 0.1211  |
| rs61602652  | C | 0.1042  |
| rs10966509  | T | 0.0928  |
| rs148481071 | A | 0.1871  |
| rs73572602  | A | -0.1776 |
| rs2382493   | G | 0.0969  |
| rs72755964  | A | -0.0817 |
| rs9695055   | G | 0.0614  |
| rs112582750 | T | 0.0873  |
| rs3739890   | A | 0.0223  |
| rs116851591 | G | 0.0574  |
| rs6477134   | A | -0.0249 |
| rs112765295 | A | -0.0954 |
| rs74808093  | T | -0.0658 |
| rs16911057  | A | -0.0406 |
| rs13296149  | A | -0.0503 |
| rs78154521  | C | 0.1418  |
| rs2494244   | A | 0.0276  |
| rs12236622  | A | -0.1242 |
| rs79777720  | T | 0.0688  |
| rs5007493   | C | 0.0283  |
| rs13287543  | A | 0.0329  |
| rs10738414  | T | 0.0468  |
| rs141098460 | T | -0.1013 |
| rs7035933   | T | 0.0325  |
| rs117872013 | T | 0.1188  |
| rs4877210   | G | 0.0726  |
| rs62000403  | A | -0.0591 |
| rs1332459   | T | 0.0267  |
| rs7872802   | G | -0.0324 |
| rs12335387  | T | -0.0506 |
| rs117586430 | C | 0.1872  |
| rs117455280 | G | 0.1294  |
| rs10819135  | T | 0.064   |
| rs4836576   | A | 0.0699  |
| rs10760911  | A | 0.0239  |
| rs117275590 | A | -0.0744 |
| rs141809815 | T | -0.1425 |
| rs10983103  | G | 0.0517  |
| rs78130223  | G | -0.1015 |
| rs10818631  | T | -0.0282 |
| rs16929957  | A | 0.0408  |
| rs75156434  | T | -0.0989 |
| rs150147591 | G | 0.107   |
| rs114907653 | T | -0.1192 |



|             |   |         |
|-------------|---|---------|
| rs117588155 | A | 0.0627  |
| rs75727796  | A | 0.0355  |
| rs1991566   | G | -0.0248 |
| rs10123413  | G | 0.0415  |
| rs10512353  | G | 0.0369  |
| rs78973310  | A | -0.0625 |
| rs4842079   | G | -0.0453 |
| rs75592094  | T | 0.0804  |
| rs72727244  | C | 0.0915  |
| rs157109    | T | 0.0389  |
| rs10867162  | G | -0.0254 |
| rs4240417   | G | -0.0252 |
| rs17179289  | C | -0.0596 |
| rs73572541  | T | 0.0488  |
| rs10818456  | T | 0.0879  |
| rs1162608   | G | 0.0246  |
| rs77565912  | T | -0.2549 |
| rs10869597  | C | -0.0235 |
| rs55737841  | A | -0.0373 |
| rs75123768  | A | 0.1008  |
| rs10965291  | G | -0.0386 |
| rs76378991  | G | 0.0869  |
| rs3011258   | T | -0.0225 |
| rs12377384  | G | 0.038   |
| rs72732095  | T | -0.1872 |
| rs2281937   | A | -0.0219 |
| rs143024039 | T | -0.0874 |
| rs71514561  | C | -0.0509 |
| rs138336817 | G | -0.12   |
| rs117642564 | G | 0.1394  |
| rs12345495  | T | 0.0374  |
| rs142688951 | G | -0.1686 |
| rs10978855  | T | 0.0652  |
| rs10811011  | G | -0.0234 |
| rs140607067 | G | 0.196   |
| rs6476619   | T | -0.0222 |
| rs7038418   | G | 0.0673  |
| rs112858117 | A | 0.1296  |
| rs10989525  | G | 0.0234  |
| rs6479300   | T | 0.0889  |
| rs73553151  | A | -0.0467 |
| rs72766607  | G | 0.1369  |
| rs2655056   | A | -0.0222 |
| rs16917501  | A | 0.0471  |
| rs117221569 | A | -0.1054 |
| rs13293008  | A | 0.0626  |
| rs117622879 | C | 0.0705  |

|             |   |         |
|-------------|---|---------|
| rs56084349  | G | -0.0265 |
| rs111284051 | T | 0.0934  |
| rs2258063   | A | 0.0331  |
| rs140346062 | A | -0.1292 |
| rs715243    | A | 0.0227  |
| rs16923950  | A | -0.0288 |
| rs28753744  | G | 0.0977  |
| rs16912035  | A | 0.0415  |
| rs117324366 | T | -0.0938 |
| rs4979391   | C | 0.0231  |
| rs62534414  | G | -0.0846 |
| rs7021711   | C | 0.0284  |
| rs6475358   | C | -0.0223 |
| rs4067304   | C | 0.1323  |
| rs4610857   | T | -0.0309 |
| rs61132577  | C | -0.0322 |
| rs1274728   | T | -0.0276 |
| rs67297747  | T | 0.0362  |
| rs80260796  | C | 0.0928  |
| rs59626663  | C | 0.0706  |
| rs80211576  | T | -0.084  |
| rs113611522 | G | 0.0933  |
| rs558097    | G | -0.0228 |
| rs11141916  | A | -0.21   |
| rs114184530 | T | 0.0498  |
| rs77178878  | C | -0.0524 |
| rs116977033 | T | 0.0835  |
| rs10961919  | T | 0.1623  |
| rs79919595  | T | 0.1343  |
| rs10115991  | T | -0.0285 |
| rs72767809  | A | 0.1411  |
| rs66693714  | A | -0.0342 |
| rs12341400  | A | 0.0469  |
| rs140526306 | T | -0.1123 |
| rs62578006  | G | 0.0259  |
| rs62570801  | T | 0.106   |
| rs116915975 | A | 0.1577  |
| rs9918961   | G | -0.0534 |
| rs10963801  | G | 0.0492  |
| rs72739027  | A | 0.0319  |
| rs77709855  | A | 0.0616  |
| rs80224084  | A | -0.1297 |
| rs75605711  | G | 0.1071  |
| rs55808543  | G | 0.0853  |
| rs10980153  | C | 0.1235  |
| rs74891065  | A | -0.0525 |
| rs116863864 | C | 0.2006  |

|             |   |         |
|-------------|---|---------|
| rs7848632   | C | -0.032  |
| rs116842138 | C | -0.1545 |
| rs13291013  | C | -0.1082 |
| rs4742378   | T | 0.0231  |
| rs11139950  | T | 0.046   |
| rs7852494   | T | -0.0775 |
| rs11140164  | T | 0.0314  |
| rs11536833  | C | 0.03    |
| rs115884600 | G | 0.139   |
| rs35559072  | T | 0.1253  |
| rs75035022  | T | -0.0895 |
| rs12348506  | T | -0.1692 |
| rs79990996  | C | 0.0708  |
| rs143022547 | G | -0.1    |
| rs112470220 | T | 0.1546  |
| rs80050802  | C | 0.093   |
| rs542859    | T | 0.0241  |
| rs17369944  | C | 0.0975  |
| rs148547824 | T | -0.0652 |
| rs144653992 | G | 0.1276  |
| rs2567712   | G | 0.0283  |
| rs144381264 | T | 0.093   |
| rs75114000  | T | -0.0381 |
| rs117345731 | G | 0.0853  |
| rs11141774  | T | -0.0272 |
| rs4149279   | A | -0.0294 |
| rs143858410 | A | 0.1444  |
| rs10975041  | G | 0.0343  |
| rs495490    | G | -0.0363 |
| rs7029429   | A | -0.024  |
| rs62577474  | C | -0.0425 |
| rs76962699  | T | -0.074  |
| rs117141248 | A | -0.0657 |
| rs16908441  | C | -0.0412 |
| rs62544595  | G | -0.0743 |
| rs117394675 | A | 0.1195  |
| rs13285370  | T | 0.0384  |
| rs34149047  | T | 0.1868  |
| rs4352899   | C | 0.0556  |
| rs10962027  | G | 0.0227  |
| rs3752951   | T | -0.1022 |
| rs55885505  | T | 0.098   |
| rs79674646  | C | -0.0382 |
| rs74494502  | T | -0.1755 |
| rs11998820  | T | 0.0764  |
| rs62571549  | C | 0.0714  |
| rs75982836  | G | -0.0616 |

|             |   |         |
|-------------|---|---------|
| rs10979979  | T | 0.0291  |
| rs7025135   | A | -0.0222 |
| rs10985661  | G | 0.0599  |
| rs79341487  | A | -0.1054 |
| rs150108287 | C | 0.1706  |
| rs1450193   | G | -0.0758 |
| rs7037878   | G | -0.0222 |
| rs12346458  | G | 0.0367  |
| rs3011261   | G | 0.032   |
| rs2486452   | T | 0.0338  |
| rs10780694  | C | -0.0259 |
| rs7870418   | A | -0.0402 |
| rs78789436  | T | 0.0862  |
| rs7040543   | C | 0.0279  |
| rs148934806 | C | -0.1522 |
| rs76570421  | T | 0.0896  |
| rs28581351  | A | -0.0591 |
| rs11788824  | T | -0.1016 |
| rs17303364  | G | 0.1373  |
| rs62549788  | G | 0.0238  |
| rs1865438   | G | -0.0224 |
| rs12554810  | T | 0.0643  |
| rs10966474  | G | -0.0447 |
| rs7035765   | T | -0.1219 |
| rs79664675  | G | -0.0802 |
| rs112318792 | T | 0.151   |
| rs117042323 | T | -0.05   |
| rs113071241 | C | -0.0996 |
| rs56087858  | A | 0.0347  |
| rs72697480  | A | 0.0331  |
| rs12237963  | C | 0.1395  |
| rs4740668   | G | -0.0225 |
| rs7041808   | T | 0.1013  |
| rs79545216  | G | -0.0687 |
| rs73406541  | G | 0.0885  |
| rs4517181   | A | -0.1301 |
| rs72728896  | G | -0.121  |
| rs315694    | T | -0.0242 |
| rs7019090   | G | 0.0378  |
| rs4838287   | G | -0.1037 |
| rs12685553  | C | -0.0235 |
| rs117863381 | C | -0.1106 |
| rs73659688  | C | 0.0692  |
| rs824244    | A | -0.0257 |
| rs75521883  | T | -0.072  |
| rs1746820   | A | 0.0355  |
| rs75365986  | G | -0.1049 |

|             |   |         |
|-------------|---|---------|
| rs145460084 | C | 0.0864  |
| rs2184540   | A | -0.0269 |
| rs140840540 | A | 0.128   |
| rs4740421   | C | -0.0321 |
| rs148542066 | A | -0.0941 |
| rs4740665   | G | 0.03    |
| rs1412272   | T | -0.0314 |
| rs140944302 | G | -0.1745 |
| rs10985788  | T | -0.1273 |
| rs1185742   | C | 0.0303  |
| rs62578232  | A | -0.0317 |
| rs74742617  | T | -0.0562 |
| rs913585    | C | -0.0424 |
| rs145478514 | T | 0.0993  |
| rs10980854  | A | 0.0452  |
| rs13286569  | A | 0.0956  |
| rs117172881 | G | -0.1513 |
| rs75969028  | T | -0.158  |
| rs10781224  | C | -0.0341 |
| rs1327355   | T | 0.0369  |
| rs78843156  | G | 0.1222  |
| rs25692     | A | 0.0314  |
| rs117322666 | G | 0.0734  |
| rs670205    | A | 0.0223  |
| rs13301509  | T | 0.129   |
| rs820503    | A | 0.0306  |
| rs10811627  | C | -0.0531 |
| rs10961613  | A | -0.0447 |
| rs72696023  | G | -0.0931 |
| rs1332912   | G | -0.0284 |
| rs9410809   | A | 0.0281  |
| rs10867884  | T | -0.0227 |
| rs111371753 | A | 0.0369  |
| rs144834290 | A | 0.0834  |
| rs10817254  | T | 0.0357  |
| rs151183821 | C | -0.0871 |
| rs61072067  | T | -0.035  |
| rs17650729  | G | -0.0952 |
| rs56324220  | A | 0.0647  |
| rs34115244  | T | 0.0896  |
| rs2766984   | T | 0.0233  |
| rs62531726  | A | -0.088  |
| rs10959203  | C | 0.0747  |
| rs12338996  | C | -0.076  |
| rs150376078 | C | -0.1805 |
| rs11999713  | A | -0.0467 |
| rs12002851  | G | 0.0373  |

|             |   |         |
|-------------|---|---------|
| rs62563278  | C | 0.0387  |
| rs10820742  | G | 0.0242  |
| rs700124    | A | 0.1795  |
| rs10118904  | A | -0.0219 |
| rs13298327  | C | 0.0271  |
| rs117807929 | C | 0.112   |
| rs7023656   | C | -0.023  |
| rs149048163 | A | 0.1222  |
| rs117620755 | G | 0.0765  |
| rs77053901  | T | 0.0466  |
| rs11140778  | T | -0.0306 |
| rs13293521  | A | -0.0274 |
| rs141683396 | C | 0.0938  |
| rs78329276  | A | -0.1299 |
| rs4979309   | T | -0.0373 |
| rs2900574   | C | -0.0245 |
| rs10964396  | G | 0.0262  |
| rs768694    | G | -0.031  |
| rs117278442 | A | 0.1282  |
| rs145604421 | T | -0.0995 |
| rs7854641   | C | 0.0572  |
| rs117265170 | T | 0.1128  |
| rs11790849  | G | -0.0249 |
| rs10814991  | T | 0.0247  |
| rs4977464   | C | -0.0329 |
| rs11790765  | C | 0.0515  |
| rs117535964 | A | 0.1304  |
| rs4744378   | A | 0.0214  |
| rs669443    | T | 0.0238  |
| rs1360547   | A | 0.0235  |
| rs13285568  | C | 0.0281  |
| rs11793819  | T | -0.1213 |
| rs1413297   | G | 0.0263  |
| rs71507580  | A | -0.0914 |
| rs172862    | C | 0.0223  |
| rs111889142 | A | -0.0391 |
| rs7021925   | A | -0.0287 |
| rs56101614  | A | -0.0442 |
| rs10817411  | C | -0.0294 |
| rs13284587  | A | 0.0261  |
| rs6474771   | G | 0.0214  |
| rs7027515   | C | -0.0219 |
| rs74350003  | G | -0.0394 |
| rs1061767   | A | -0.0286 |
| rs75498376  | T | 0.1028  |
| rs7018799   | A | 0.0449  |
| rs77518798  | G | -0.086  |

|             |   |         |
|-------------|---|---------|
| rs78005099  | A | -0.1514 |
| rs12376074  | A | 0.0654  |
| rs117749780 | T | -0.1824 |
| rs4740355   | G | -0.0233 |
| rs75413936  | C | 0.1886  |
| rs10124267  | T | 0.0298  |
| rs117521381 | A | 0.1399  |
| rs11792137  | T | -0.0737 |
| rs12347608  | A | -0.0472 |
| rs2063279   | A | -0.0265 |
| rs117303912 | A | 0.1246  |
| rs10781387  | A | 0.0312  |
| rs17257879  | T | -0.0303 |
| rs4647511   | G | 0.1214  |
| rs144293282 | T | 0.1589  |
| rs3827677   | T | 0.0231  |
| rs9407384   | G | -0.0283 |
| rs10511746  | G | 0.0333  |
| rs7862396   | C | -0.0473 |
| rs58538273  | T | -0.0552 |
| rs7857609   | G | 0.0794  |
| rs75605786  | T | 0.0882  |
| rs10966253  | C | -0.0384 |
| rs76385277  | C | -0.0864 |
| rs72743131  | G | 0.0352  |
| rs72740377  | C | -0.0335 |
| rs7870888   | A | 0.0277  |
| rs147668786 | T | -0.0556 |
| rs1986141   | A | -0.0246 |
| rs10958819  | T | 0.0475  |
| rs116915510 | G | -0.0675 |
| rs74742406  | A | -0.1274 |
| rs75084395  | G | -0.0505 |
| rs76142582  | G | 0.1069  |
| rs146112045 | T | 0.0851  |
| rs2275782   | G | 0.0319  |
| rs141629142 | T | 0.1226  |
| rs12555837  | T | 0.0288  |
| rs11143795  | T | 0.0256  |
| rs144120615 | T | 0.069   |
| rs357565    | A | -0.0292 |
| rs72692756  | C | 0.1064  |
| rs111328295 | A | -0.136  |
| rs139684883 | T | 0.1112  |
| rs666814    | C | 0.0241  |
| rs79354071  | A | 0.0921  |
| rs10780347  | C | 0.0229  |

|             |   |         |
|-------------|---|---------|
| rs150908459 | C | 0.1727  |
| rs117383976 | T | 0.0832  |
| rs17054472  | G | -0.0428 |
| rs12352462  | A | -0.0389 |
| rs2255755   | A | 0.0238  |
| rs12342110  | C | 0.1512  |
| rs141214122 | C | -0.0888 |
| rs73659570  | C | 0.0497  |
| rs61611876  | T | 0.1048  |
| rs62570036  | A | -0.0387 |
| rs1415621   | A | 0.0412  |
| rs62577777  | T | -0.0394 |
| rs144609290 | T | 0.094   |
| rs10984398  | A | -0.0294 |
| rs4618782   | A | 0.0221  |
| rs143602420 | A | -0.0987 |
| rs138997186 | A | -0.0731 |
| rs149104432 | A | 0.1004  |
| rs71501137  | C | -0.0962 |
| rs111904098 | C | -0.0795 |
| rs16928316  | G | 0.0461  |
| rs7864996   | C | 0.0281  |
| rs36211348  | G | 0.0804  |
| rs2297405   | C | 0.0452  |
| rs111935030 | G | 0.1655  |
| rs10990525  | G | 0.0307  |
| rs12335638  | A | 0.0427  |
| rs79307584  | G | 0.0983  |
| rs10816421  | T | 0.0214  |
| rs11142600  | G | 0.0528  |
| rs11144672  | T | -0.063  |
| rs7029708   | A | 0.0226  |
| rs72764080  | T | -0.0692 |
| rs80251573  | G | 0.0545  |
| rs10961418  | G | 0.1127  |
| rs10976664  | A | -0.0218 |
| rs79240685  | G | -0.0443 |
| rs117623999 | G | -0.1313 |
| rs12555569  | A | -0.1643 |
| rs147077136 | C | -0.0403 |
| rs2891138   | C | 0.0226  |
| rs77303193  | G | -0.0741 |
| rs7850708   | A | -0.0436 |
| rs79740228  | G | -0.0932 |
| rs6475704   | G | -0.0286 |
| rs78674441  | A | -0.0604 |
| rs7019762   | T | 0.0233  |



|             |   |         |
|-------------|---|---------|
| rs11790094  | C | 0.0226  |
| rs75422523  | T | 0.101   |
| rs1855185   | T | -0.0625 |
| rs2900507   | G | -0.0388 |
| rs12000633  | A | -0.024  |
| rs55851518  | A | 0.0485  |
| rs79805694  | A | -0.0678 |
| rs73566971  | T | 0.1319  |
| rs75785937  | T | 0.1129  |
| rs2476922   | C | -0.0248 |
| rs11794108  | T | 0.0334  |
| rs72752763  | G | 0.1363  |
| rs661006    | C | -0.0812 |
| rs150314644 | T | -0.0972 |
| rs150827739 | A | 0.0674  |
| rs72701093  | C | 0.1217  |
| rs13291224  | G | 0.0235  |
| rs932163    | T | -0.0218 |
| rs117338749 | T | 0.07    |
| rs10983538  | T | -0.0327 |
| rs10122734  | A | -0.0296 |
| rs75668873  | A | 0.0654  |
| rs142159148 | C | 0.1204  |
| rs71505977  | G | 0.0802  |
| rs57715716  | T | -0.0542 |
| rs10959056  | G | -0.042  |
| rs113483939 | T | -0.0963 |
| rs9785265   | C | -0.0303 |
| rs147302276 | C | 0.1383  |
| rs4146273   | A | 0.0292  |
| rs112344309 | C | 0.0828  |
| rs6559987   | G | -0.0484 |
| rs76396502  | A | -0.0983 |
| rs74898627  | A | -0.0668 |
| rs7023504   | G | -0.0299 |
| rs77418183  | T | 0.1602  |
| rs11243457  | A | -0.0234 |
| rs10975171  | A | 0.0432  |
| rs72692815  | A | -0.0427 |
| rs117634056 | A | 0.1052  |
| rs34312013  | A | 0.0336  |
| rs11787791  | C | -0.0951 |
| rs10081687  | T | -0.031  |
| rs79037178  | C | 0.0915  |
| rs10760450  | T | -0.0282 |
| rs10745384  | C | 0.0217  |
| rs10976888  | T | 0.0298  |

|             |   |         |
|-------------|---|---------|
| rs10961219  | G | -0.0237 |
| rs62586017  | G | 0.1417  |
| rs16923531  | T | -0.1227 |
| rs56273925  | G | -0.0534 |
| rs10968541  | A | 0.0927  |
| rs10814318  | C | -0.0796 |
| rs117345082 | C | 0.0745  |
| rs8188002   | A | 0.0503  |
| rs7864156   | G | -0.0217 |
| rs1537528   | A | 0.0264  |
| rs13296487  | T | 0.0236  |
| rs324490    | T | -0.0292 |
| rs7852679   | G | 0.1097  |
| rs10117426  | C | 0.0274  |
| rs62553706  | G | -0.0364 |
| rs10869027  | A | 0.0417  |
| rs10972517  | G | -0.0503 |
| rs4512433   | A | -0.0513 |
| rs141932257 | A | 0.0694  |
| rs10979128  | T | -0.0303 |
| rs12002916  | C | 0.0603  |
| rs17783673  | G | -0.038  |
| rs144237408 | G | 0.105   |
| rs141793472 | A | -0.0971 |
| rs2382      | G | -0.0391 |
| rs10992994  | A | 0.0898  |
| rs2417140   | G | 0.0428  |
| rs118054812 | G | 0.1251  |
| rs12379598  | A | -0.0519 |
| rs7850627   | C | 0.0757  |
| rs12347321  | A | -0.0533 |
| rs7020980   | G | 0.0283  |
| rs10969654  | G | 0.0335  |
| rs117049280 | A | -0.1107 |
| rs3758192   | A | 0.0368  |
| rs7861945   | T | 0.0253  |
| rs581450    | T | -0.0562 |
| rs75296510  | C | -0.1201 |
| rs76256371  | G | 0.1281  |
| rs79165034  | A | 0.1029  |
| rs7018830   | G | -0.0279 |
| rs2001322   | T | 0.0426  |
| rs2281662   | C | 0.0232  |
| rs12553715  | T | 0.157   |
| rs4442208   | T | -0.034  |
| rs2795492   | A | -0.0215 |
| rs7026750   | G | 0.1486  |

|             |   |         |
|-------------|---|---------|
| rs112257882 | A | 0.0758  |
| rs35258674  | A | 0.0343  |
| rs79790224  | G | 0.0769  |
| rs10511756  | G | -0.028  |
| rs78922346  | T | 0.1099  |
| rs1929715   | T | 0.0213  |
| rs2148847   | C | -0.0216 |
| rs75103051  | A | -0.1132 |
| rs72761995  | G | 0.0379  |
| rs10984108  | A | -0.0746 |
| rs78007909  | A | 0.0591  |
| rs17442024  | A | -0.1342 |
| rs10989533  | A | -0.08   |
| rs7875204   | A | 0.0315  |
| rs10810992  | T | 0.0247  |
| rs34176491  | C | 0.0318  |
| rs1928625   | A | 0.0249  |
| rs4742312   | A | 0.0274  |
| rs41344048  | T | 0.0339  |
| rs144458902 | A | -0.1296 |
| rs60859994  | G | 0.0288  |
| rs145357108 | G | 0.1518  |
| rs784793    | C | 0.1535  |
| rs17348377  | C | 0.0304  |
| rs320191    | A | -0.0222 |
| rs11143896  | G | -0.0212 |
| rs7019583   | A | -0.0256 |
| rs80106348  | C | 0.0312  |
| rs142053023 | G | 0.0642  |
| rs296849    | A | 0.0221  |
| rs111298749 | C | -0.1041 |
| rs2027494   | T | -0.0216 |
| rs78851847  | T | 0.182   |
| rs62580492  | T | -0.0566 |
| rs12238278  | G | 0.0426  |
| rs79913120  | T | -0.2093 |
| rs10760309  | G | 0.0219  |
| rs1928252   | C | -0.025  |
| rs7847895   | C | -0.0719 |
| rs1537960   | A | -0.0234 |
| rs4427241   | C | -0.0272 |
| rs7857956   | G | 0.022   |
| rs76966874  | T | -0.1432 |
| rs78981278  | C | 0.0723  |
| rs10982119  | A | 0.0847  |
| rs7026550   | T | 0.025   |
| rs1594277   | G | 0.0256  |

|             |   |         |
|-------------|---|---------|
| rs112822211 | A | 0.118   |
| rs2519824   | A | 0.0225  |
| rs11103372  | A | -0.0388 |
| rs74304692  | A | 0.0939  |
| rs7034380   | T | -0.0221 |
| rs79755794  | A | 0.0485  |
| rs913934    | A | 0.0318  |
| rs117819059 | A | -0.131  |
| rs2891055   | A | 0.0243  |
| rs3780606   | C | -0.0291 |
| rs10818810  | A | 0.0214  |
| rs10976307  | G | 0.0273  |
| rs62538799  | G | -0.0855 |
| rs71504798  | G | 0.0363  |
| rs72712036  | C | -0.0805 |
| rs7033814   | A | -0.0503 |
| rs62579779  | G | 0.0359  |
| rs117021367 | G | -0.1091 |
| rs1012160   | C | 0.0254  |
| rs4979171   | T | -0.0399 |
| rs117904459 | T | -0.136  |
| rs7031556   | C | 0.028   |
| rs12377295  | G | 0.0276  |
| rs76860516  | T | 0.0636  |
| rs144395396 | A | -0.0832 |
| rs74653678  | A | -0.1663 |
| rs7030382   | C | 0.0214  |
| rs149080671 | T | 0.0794  |
| rs10739421  | T | 0.0227  |
| rs7021837   | C | 0.0259  |
| rs7847966   | C | -0.0484 |
| rs72768589  | A | 0.0744  |
| rs10118244  | T | 0.057   |
| rs118059055 | T | 0.1339  |
| rs10973121  | T | -0.0479 |
| rs56339875  | A | 0.0764  |
| rs41523646  | C | -0.0332 |
| rs80021973  | T | -0.0749 |
| rs1817025   | T | 0.0697  |
| rs76485203  | T | 0.1045  |
| rs78586521  | T | -0.1761 |
| rs7047414   | A | 0.0349  |
| rs118020791 | G | -0.1511 |
| rs7048521   | A | 0.0813  |
| rs139964479 | G | -0.1104 |
| rs57010271  | T | 0.0986  |
| rs146296578 | T | 0.084   |

|             |   |         |
|-------------|---|---------|
| rs79481896  | C | 0.0431  |
| rs62581699  | T | 0.0512  |
| rs10987225  | G | 0.0616  |
| rs149128587 | G | 0.1263  |
| rs4836891   | A | -0.0409 |
| rs2182645   | G | -0.0313 |
| rs78865960  | A | 0.0481  |
| rs12686148  | G | -0.0357 |
| rs146433727 | A | 0.0857  |
| rs727913    | G | -0.0428 |
| rs62566630  | T | 0.074   |
| rs141852214 | T | -0.0869 |
| rs1328569   | T | 0.0294  |
| rs117107670 | T | 0.0898  |
| rs72760755  | T | -0.0839 |
| rs1355142   | C | 0.061   |
| rs2273784   | A | -0.1065 |
| rs11140299  | G | 0.031   |
| rs80085844  | A | 0.0461  |
| rs980140    | G | -0.0217 |
| rs146714778 | T | -0.1032 |
| rs11243389  | A | -0.0441 |
| rs117962676 | A | 0.116   |
| rs4979053   | T | -0.033  |
| rs72691836  | T | 0.1173  |
| rs7854497   | A | -0.0456 |
| rs12343468  | C | -0.0297 |
| rs117091804 | G | -0.128  |
| rs1924678   | A | -0.0223 |
| rs77494496  | G | -0.0706 |
| rs4742659   | G | -0.0233 |
| rs72759260  | G | 0.0323  |
| rs1442286   | T | 0.0226  |
| rs112258110 | C | -0.1099 |
| rs10869089  | C | -0.0311 |
| rs2613310   | C | 0.0255  |
| rs62574053  | A | -0.1462 |
| rs9721644   | T | -0.0291 |
| rs7029990   | C | -0.0272 |
| rs7854085   | A | -0.0395 |
| rs62529311  | C | -0.1142 |
| rs6559333   | C | 0.0397  |
| rs7865013   | G | 0.0232  |
| rs7469980   | A | -0.0544 |
| rs4962066   | C | 0.0277  |
| rs10810461  | T | -0.0212 |
| rs10966010  | T | 0.0951  |

|             |   |         |
|-------------|---|---------|
| rs117642199 | G | 0.1066  |
| rs10756354  | T | 0.0305  |
| rs10733494  | T | -0.0239 |
| rs10975190  | T | -0.046  |
| rs141495921 | G | -0.1176 |
| rs118150079 | C | 0.0659  |
| rs3983595   | T | -0.0277 |
| rs2381969   | A | 0.021   |
| rs2050456   | T | 0.0283  |
| rs149384014 | A | -0.1041 |
| rs143477028 | A | 0.0667  |
| rs12551183  | G | 0.0276  |
| rs1331663   | C | 0.0332  |
| rs79153634  | A | 0.0917  |
| rs34007653  | G | 0.0714  |
| rs10972328  | T | 0.1405  |
| rs145347713 | C | -0.1164 |
| rs139165114 | T | -0.1225 |
| rs7019738   | C | 0.0405  |
| rs10965830  | C | -0.0289 |
| rs4978012   | C | 0.027   |
| rs9409252   | A | 0.0323  |
| rs10974754  | G | 0.027   |
| rs9987620   | A | 0.0239  |
| rs117224005 | A | -0.0619 |
| rs117098121 | T | 0.0658  |
| rs7029925   | C | -0.118  |
| rs5030721   | A | 0.1196  |
| rs142626703 | C | -0.047  |
| rs11145702  | A | 0.0668  |
| rs10971589  | A | -0.0422 |
| rs17054251  | C | -0.0355 |
| rs111855294 | T | -0.043  |
| rs72770225  | G | 0.0503  |
| rs7855759   | T | -0.0544 |
| rs117427207 | T | 0.0985  |
| rs12352473  | C | -0.0504 |
| rs16933165  | G | 0.0696  |
| rs140726426 | C | -0.0838 |
| rs116934697 | T | 0.1432  |
| rs78369344  | C | -0.0821 |
| rs12004400  | G | -0.114  |
| rs72747215  | A | -0.1155 |
| rs117036055 | A | -0.2215 |
| rs72758349  | C | -0.0977 |
| rs79297323  | T | -0.07   |
| rs73642981  | A | -0.1194 |

|             |   |         |
|-------------|---|---------|
| rs13298102  | G | 0.0256  |
| rs72745970  | T | -0.0995 |
| rs2295932   | T | -0.0239 |
| rs7862528   | C | 0.0491  |
| rs10868533  | A | 0.0762  |
| rs11141915  | C | 0.0248  |
| rs78430690  | G | 0.073   |
| rs62543255  | A | 0.0311  |
| rs10118754  | C | -0.0256 |
| rs1360501   | C | 0.0221  |
| rs147863277 | T | -0.036  |
| rs10975444  | G | 0.0267  |
| rs77395698  | G | 0.1234  |
| rs1032404   | T | 0.0217  |
| rs719535    | T | 0.0244  |
| rs1889984   | A | -0.0215 |
| rs146294006 | C | -0.1265 |
| rs17813944  | C | 0.0386  |
| rs16908965  | A | -0.0873 |
| rs118172942 | A | 0.0648  |
| rs145472370 | G | 0.1712  |
| rs76371366  | A | -0.0959 |
| rs139374358 | T | 0.1507  |
| rs806034    | T | 0.0326  |
| rs62576441  | T | 0.0436  |
| rs10867845  | A | -0.0275 |
| rs149407265 | G | 0.0594  |
| rs11140685  | C | -0.0414 |
| rs148642731 | T | 0.1836  |
| rs142522920 | T | -0.1448 |
| rs10121709  | T | -0.05   |
| rs7871083   | A | 0.1967  |
| rs9722446   | A | -0.0557 |
| rs141963878 | C | -0.0502 |
| rs143460865 | T | -0.043  |
| rs149587957 | G | 0.0993  |
| rs141586469 | A | 0.1175  |
| rs10819122  | G | -0.0325 |
| rs16938386  | A | -0.143  |
| rs78309793  | C | -0.1012 |
| rs990938    | T | -0.0411 |
| rs113391367 | T | -0.045  |
| rs75487532  | A | 0.0417  |
| rs7851272   | C | 0.0483  |
| rs10978141  | G | 0.162   |
| rs10867922  | T | 0.046   |
| rs117551075 | T | -0.0867 |

|             |   |         |
|-------------|---|---------|
| rs12375523  | A | -0.1062 |
| rs12341604  | G | 0.0377  |
| rs12340759  | G | -0.0352 |
| rs35889561  | T | 0.1132  |
| rs2231228   | A | 0.0265  |
| rs3843933   | G | -0.041  |
| rs140881039 | T | 0.1413  |
| rs77325537  | A | 0.0256  |
| rs147018790 | G | 0.1356  |
| rs4741067   | C | -0.0396 |
| rs41505847  | A | 0.0276  |
| rs9314838   | T | 0.0211  |
| rs11138106  | C | -0.1213 |
| rs3012675   | G | -0.0354 |
| rs10739137  | T | 0.0227  |
| rs111672841 | T | 0.1149  |
| rs73654015  | G | -0.0334 |
| rs12375888  | T | 0.0423  |
| rs45623334  | G | -0.1027 |
| rs10988872  | C | 0.098   |
| rs11185702  | A | 0.0367  |
| rs4740739   | C | -0.0256 |
| rs73408618  | G | 0.0502  |
| rs6537911   | A | 0.0317  |
| rs773013    | G | 0.085   |
| rs113191239 | A | -0.1085 |
| rs77872663  | G | -0.0938 |
| rs920946    | G | 0.0477  |
| rs1999679   | G | 0.0253  |
| rs10118203  | C | -0.0268 |
| rs4008101   | A | -0.0475 |
| rs10970359  | T | -0.0583 |
| rs116877429 | G | 0.1148  |
| rs12685040  | T | -0.0293 |
| rs58039219  | C | -0.0502 |
| rs35479829  | T | -0.051  |
| rs12378485  | G | -0.0258 |
| rs139213569 | G | -0.1063 |
| rs10993713  | T | -0.0295 |
| rs76857839  | T | 0.1735  |
| rs145858480 | T | 0.1241  |
| rs11794612  | C | -0.0286 |
| rs78688471  | T | -0.1181 |
| rs74676560  | G | -0.0863 |
| rs13295517  | A | -0.0316 |
| rs12377907  | T | -0.093  |
| rs67061295  | A | 0.049   |



|             |   |         |
|-------------|---|---------|
| rs7858964   | C | 0.0309  |
| rs10759345  | G | 0.0206  |
| rs12377726  | G | 0.0273  |
| rs12348921  | G | -0.0787 |
| rs960957    | T | -0.0215 |
| rs17232268  | C | -0.1345 |
| rs17368205  | G | 0.0569  |
| rs72702857  | A | 0.0225  |
| rs11792799  | G | -0.0401 |
| rs56913441  | G | 0.1241  |
| rs7026155   | A | -0.0219 |
| rs35930792  | G | 0.1154  |
| rs10115217  | C | -0.0402 |
| rs1331384   | G | -0.0202 |
| rs148187050 | T | 0.1291  |
| rs2767409   | A | 0.0219  |
| rs11142927  | C | 0.0232  |
| rs10979985  | T | 0.0276  |
| rs62575351  | A | -0.0594 |
| rs41282441  | C | -0.1744 |
| rs118164563 | T | -0.0784 |
| rs77274586  | T | 0.0712  |
| rs140706183 | T | -0.0852 |
| rs12345838  | A | -0.0292 |
| rs72699150  | T | -0.0659 |
| rs111375817 | C | 0.0644  |
| rs80260387  | G | -0.0685 |
| rs117056642 | C | -0.1018 |
| rs79909403  | T | 0.124   |
| rs12351471  | T | -0.0896 |
| rs75902638  | C | 0.099   |
| rs10758132  | A | 0.021   |
| rs72748084  | C | -0.129  |
| rs4412427   | T | 0.0283  |
| rs75937137  | A | -0.0784 |
| rs117639733 | T | 0.073   |
| rs7028272   | G | 0.0214  |
| rs6478581   | T | 0.0219  |
| rs28795164  | A | 0.0429  |
| rs76653511  | C | -0.1177 |
| rs16906643  | C | 0.022   |
| rs67469435  | G | 0.0285  |
| rs118126411 | A | -0.1092 |
| rs745178    | G | 0.0422  |
| rs4740885   | A | 0.0228  |
| rs77536000  | A | 0.0474  |
| rs117464547 | A | 0.1088  |

|             |   |         |
|-------------|---|---------|
| rs144737531 | C | -0.1194 |
| rs77140465  | C | -0.0483 |
| rs9407079   | T | 0.0273  |
| rs10967431  | A | -0.0272 |
| rs167181    | T | 0.1118  |
| rs10816580  | C | 0.027   |
| rs41278393  | T | -0.0863 |
| rs118057622 | C | 0.0724  |
| rs7044754   | G | 0.0243  |
| rs74855019  | G | -0.0578 |
| rs10125455  | C | 0.0243  |
| rs76223667  | A | -0.0402 |
| rs78531528  | T | 0.095   |
| rs12551658  | T | 0.0212  |
| rs3012589   | C | 0.0482  |
| rs1360585   | T | -0.0244 |
| rs79474382  | T | 0.0536  |
| rs80315336  | A | 0.0634  |
| rs72719516  | C | 0.1117  |
| rs7847908   | T | 0.0336  |
| rs870975    | C | -0.0228 |
| rs944942    | A | -0.0317 |
| rs59176878  | C | -0.0716 |
| rs145873433 | A | -0.0968 |
| rs10513454  | T | 0.0214  |
| rs7039201   | G | -0.0214 |
| rs7040693   | C | -0.0741 |
| rs1858231   | G | 0.025   |
| rs141098163 | A | 0.1412  |
| rs78533777  | C | 0.0485  |
| rs2170226   | T | -0.0268 |
| rs1966950   | C | 0.1215  |
| rs72739636  | G | -0.0675 |
| rs883751    | C | -0.0239 |
| rs36020115  | C | -0.1483 |
| rs1923431   | C | -0.0328 |
| rs6415720   | T | 0.04    |
| rs12236787  | C | -0.0592 |
| rs80042388  | A | 0.156   |
| rs3780760   | A | -0.0604 |
| rs113016375 | A | 0.0752  |
| rs1359987   | T | -0.0365 |
| rs7848531   | C | 0.0233  |
| rs230088    | A | 0.0263  |
| rs11140689  | A | -0.0534 |
| rs148593339 | C | 0.1051  |
| rs138173627 | G | -0.1083 |

|             |   |         |
|-------------|---|---------|
| rs7035322   | A | 0.022   |
| rs7021547   | G | 0.0244  |
| rs116852759 | A | -0.0928 |
| rs7040146   | T | 0.0248  |
| rs1632835   | C | -0.02   |
| rs9987654   | T | 0.026   |
| rs10817179  | C | -0.0526 |
| rs72758094  | A | -0.1057 |
| rs73462552  | C | -0.1264 |
| rs6475426   | G | 0.025   |
| rs137974697 | C | 0.0891  |
| rs12348900  | T | 0.043   |
| rs79876962  | A | 0.0592  |
| rs28875822  | A | 0.0368  |
| rs9409224   | G | -0.0226 |
| rs10815875  | G | 0.028   |
| rs7046585   | T | 0.0968  |
| rs818707    | T | -0.033  |
| rs1934487   | G | -0.0203 |
| rs16930137  | A | -0.029  |
| rs2437818   | C | 0.0769  |
| rs150523721 | T | -0.0957 |
| rs143807469 | G | 0.0648  |
| rs6475463   | C | -0.0236 |
| rs12235833  | A | -0.056  |
| rs78023803  | A | 0.0424  |
| rs111813503 | T | -0.0955 |
| rs17055877  | T | 0.0888  |
| rs143700105 | C | -0.0752 |
| rs80278374  | T | 0.0576  |
| rs12375706  | C | 0.0275  |
| rs117669273 | G | -0.0989 |
| rs7031476   | A | 0.0292  |
| rs290996    | G | 0.084   |
| rs818893    | G | 0.0254  |
| rs2017195   | A | 0.0286  |
| rs11791894  | A | -0.0321 |
| rs62577059  | C | 0.0476  |
| rs10966370  | T | 0.0449  |
| rs7034928   | C | -0.0232 |
| rs3124593   | A | -0.0243 |
| rs2066474   | C | -0.0329 |
| rs10757330  | A | 0.0236  |
| rs11793814  | G | -0.1458 |
| rs111558183 | T | 0.0997  |
| rs144228487 | A | 0.0988  |
| rs7033852   | G | 0.023   |

|             |   |         |
|-------------|---|---------|
| rs2180903   | T | 0.0866  |
| rs10113990  | C | -0.0963 |
| rs167280    | G | 0.0264  |
| rs944550    | A | 0.0346  |
| rs142466391 | T | -0.1364 |
| rs72693463  | G | 0.0486  |
| rs12378992  | A | 0.1084  |
| rs62571014  | A | -0.0881 |
| rs112957391 | A | -0.0825 |
| rs1411600   | G | 0.0331  |
| rs77164468  | G | 0.0549  |
| rs150125245 | C | 0.1224  |
| rs72738015  | A | -0.0394 |
| rs35552502  | T | 0.0336  |
| rs140880671 | T | -0.0807 |
| rs16928291  | G | 0.098   |
| rs1412318   | C | 0.0306  |
| rs4836741   | G | 0.0234  |
| rs75466506  | C | 0.0411  |
| rs76441120  | A | -0.087  |
| rs12238713  | A | 0.0242  |
| rs35565936  | A | 0.0315  |
| rs7028791   | C | -0.0217 |
| rs216345    | T | 0.0252  |
| rs61143519  | G | 0.0298  |
| rs117599027 | G | -0.0761 |
| rs139900447 | T | 0.0601  |
| rs4742641   | C | 0.0284  |
| rs3847241   | G | -0.0422 |
| rs7045425   | A | 0.0286  |
| rs62559020  | C | 0.0963  |
| rs28842508  | G | 0.0306  |
| rs62569010  | G | -0.0407 |
| rs7850004   | A | 0.0216  |
| rs146451803 | C | -0.0809 |
| rs145034283 | A | 0.0969  |
| rs2094458   | T | 0.069   |
| rs13293206  | G | 0.0205  |
| rs73567692  | C | -0.0383 |
| rs118103198 | A | -0.0582 |
| rs74487105  | A | -0.103  |
| rs1501577   | G | 0.031   |
| rs3739643   | T | 0.101   |
| rs10115513  | A | 0.1164  |
| rs147351813 | C | 0.124   |
| rs144846288 | A | 0.13    |
| rs79828014  | C | 0.0486  |

|             |   |         |
|-------------|---|---------|
| rs2770829   | T | -0.0211 |
| rs76863989  | A | -0.0842 |
| rs118180686 | T | 0.1106  |
| rs117167640 | T | 0.1266  |
| rs10733471  | C | -0.0233 |
| rs13283363  | G | 0.0402  |
| rs79282095  | C | 0.091   |
| rs76502285  | A | -0.0856 |
| rs144236093 | G | 0.1082  |
| rs11795275  | C | -0.0216 |
| rs117547284 | T | 0.0451  |
| rs6477595   | C | 0.0277  |
| rs117145215 | T | 0.0853  |
| rs60546393  | T | 0.0611  |
| rs758850    | A | 0.0307  |
| rs76264641  | C | -0.1513 |
| rs3793621   | G | -0.0218 |
| rs80150610  | C | -0.1152 |
| rs117536159 | A | 0.1135  |
| rs76111677  | C | -0.0832 |
| rs75297583  | G | 0.1829  |
| rs147023843 | C | 0.1475  |
| rs72706831  | G | -0.088  |
| rs12350756  | C | 0.0707  |
| rs1831077   | A | -0.0233 |
| rs117092768 | T | -0.0983 |
| rs78638924  | C | -0.0639 |
| rs28368141  | A | 0.0805  |
| rs72714637  | T | -0.079  |
| rs78097369  | T | -0.0314 |
| rs12001399  | T | -0.0745 |
| rs59439855  | A | -0.1051 |
| rs141198312 | G | 0.0814  |
| rs2383024   | G | -0.0238 |
| rs112775629 | T | -0.0801 |
| rs35472309  | G | 0.0399  |
| rs74636786  | A | 0.0388  |
| rs56081430  | T | -0.0328 |
| rs11145608  | T | -0.0686 |
| rs11788486  | C | -0.0219 |
| rs75120019  | G | -0.0791 |
| rs139653698 | C | 0.0885  |
| rs147491531 | A | -0.1527 |
| rs41305539  | A | -0.0836 |
| rs11142704  | A | 0.0579  |
| rs117160188 | A | -0.1421 |
| rs62571835  | T | 0.0961  |

|             |   |         |
|-------------|---|---------|
| rs10759791  | A | -0.021  |
| rs111310469 | T | 0.0964  |
| rs142486538 | C | -0.0548 |
| rs13294481  | T | 0.0229  |
| rs7026686   | T | -0.0222 |
| rs1323590   | A | 0.0267  |
| rs117817036 | C | 0.1528  |
| rs7038480   | T | -0.0349 |
| rs13288003  | C | -0.0329 |
| rs10810179  | A | -0.0274 |
| rs76797759  | T | 0.0557  |
| rs11794953  | G | -0.0868 |
| rs1502717   | G | -0.0219 |
| rs140139706 | T | -0.2026 |
| rs10121766  | A | -0.0253 |
| rs113253407 | C | -0.0621 |
| rs10441684  | T | -0.0335 |
| rs140500744 | A | 0.1373  |
| rs7033776   | A | 0.0228  |
| rs7018588   | A | 0.0354  |
| rs76807870  | A | 0.0774  |
| rs7858174   | C | -0.0217 |
| rs3930538   | A | 0.0408  |
| rs78916292  | T | 0.0815  |
| rs72757695  | A | -0.1305 |
| rs72752276  | G | 0.045   |
| rs76268233  | G | 0.0605  |
| rs113153370 | A | 0.1042  |
| rs73460288  | G | 0.0707  |
| rs12350755  | T | 0.2196  |
| rs72700578  | A | -0.0659 |
| rs12684716  | A | 0.0402  |
| rs11141048  | A | 0.0305  |
| rs74814958  | A | 0.064   |
| rs75785756  | C | 0.1843  |
| rs16929673  | A | 0.053   |
| rs4837197   | T | 0.0263  |
| rs55654343  | T | -0.0756 |
| rs10982379  | G | 0.0592  |
| rs10118801  | G | -0.0212 |
| rs117350329 | T | -0.0974 |
| rs117725273 | G | -0.0965 |
| rs144643473 | A | 0.0963  |
| rs117419292 | T | 0.1745  |
| rs1819315   | C | 0.0244  |
| rs10819654  | A | 0.0327  |
| rs77329588  | T | 0.1084  |

|             |   |         |
|-------------|---|---------|
| rs7862699   | A | 0.0332  |
| rs11794535  | C | 0.0336  |
| rs12342883  | C | 0.0705  |
| rs6475056   | T | 0.0397  |
| rs79241564  | T | -0.1065 |
| rs117528624 | T | 0.0495  |
| rs10123158  | C | 0.0239  |
| rs113344558 | A | -0.1407 |
| rs58743502  | T | -0.0984 |
| rs2417335   | C | 0.0205  |
| rs1368681   | G | -0.0239 |
| rs62538508  | T | 0.0891  |
| rs79558672  | A | -0.0611 |
| rs1415649   | T | 0.0943  |
| rs116908275 | A | -0.0993 |
| rs71499467  | A | 0.0778  |
| rs10793869  | T | 0.0913  |
| rs928356    | A | 0.0199  |
| rs3818557   | C | -0.0452 |
| rs13294545  | G | -0.0242 |
| rs80176522  | T | 0.0964  |
| rs62544905  | G | 0.0369  |
| rs3789254   | T | -0.0365 |
| rs4129311   | C | 0.0213  |
| rs4146454   | A | -0.0325 |
| rs7854657   | G | 0.0236  |
| rs75219171  | T | 0.157   |
| rs1328432   | A | 0.0346  |
| rs815863    | G | 0.022   |
| rs113411714 | C | 0.1182  |
| rs7869049   | G | -0.0215 |
| rs17797799  | G | -0.1614 |
| rs11137700  | A | 0.0637  |
| rs145250514 | A | 0.1178  |
| rs74973114  | A | 0.061   |
| rs8181101   | T | -0.0329 |
| rs75807448  | T | 0.0776  |
| rs145781071 | G | -0.1118 |
| rs10977435  | C | 0.0209  |
| rs8190580   | G | 0.0625  |
| rs142262922 | G | -0.1308 |
| rs77281174  | A | -0.0713 |
| rs138170559 | A | 0.1537  |
| rs62560512  | G | 0.0644  |
| rs144440978 | A | -0.1116 |
| rs34195072  | T | 0.027   |
| rs10984797  | T | -0.0217 |

|             |   |         |
|-------------|---|---------|
| rs1220650   | A | -0.0568 |
| rs117892380 | G | -0.1139 |
| rs56871984  | G | 0.0525  |
| rs12237141  | G | 0.1197  |
| rs3814507   | T | 0.0274  |
| rs10986801  | C | 0.028   |
| rs1001919   | C | 0.0251  |
| rs10117023  | T | -0.0334 |
| rs142467388 | A | 0.1446  |
| rs80354665  | T | -0.0859 |
| rs148920830 | A | -0.0898 |
| rs12376464  | C | 0.0216  |
| rs11793385  | T | 0.0338  |
| rs12684874  | T | -0.0263 |
| rs74507490  | C | -0.0563 |
| rs3818593   | G | 0.0246  |
| rs72743960  | C | -0.0342 |
| rs377156    | T | -0.0454 |
| rs57404564  | A | 0.0265  |
| rs10760621  | G | -0.0217 |
| rs10120683  | T | 0.0294  |
| rs10739078  | C | -0.0203 |
| rs10513319  | C | 0.0773  |
| rs36081160  | C | -0.0547 |
| rs10217572  | T | 0.0199  |
| rs74785697  | T | 0.0685  |
| rs7846964   | A | 0.0416  |
| rs10962324  | C | 0.0316  |
| rs12349329  | T | -0.0519 |
| rs2781269   | T | -0.0204 |
| rs72755169  | C | 0.0776  |
| rs146961989 | A | 0.1163  |
| rs1529954   | T | -0.0243 |
| rs12682865  | C | 0.0216  |
| rs116961754 | G | 0.087   |
| rs117290733 | A | -0.1141 |
| rs17292115  | C | -0.0256 |
| rs141470687 | G | 0.1042  |
| rs11788226  | G | 0.0986  |
| rs72681798  | G | -0.0374 |
| rs11788923  | C | 0.0321  |
| rs10858367  | A | 0.0418  |
| rs146060508 | C | 0.1614  |
| rs9411210   | G | 0.0253  |
| rs72687842  | A | 0.1059  |
| rs637029    | C | 0.0298  |
| rs11138815  | G | 0.0614  |



|             |   |         |
|-------------|---|---------|
| rs41281154  | G | -0.071  |
| rs145456714 | G | 0.146   |
| rs62580981  | A | 0.0612  |
| rs7022799   | A | 0.0575  |
| rs74400012  | A | -0.0499 |
| rs12554906  | T | -0.0426 |
| rs13287382  | T | -0.024  |
| rs9406747   | T | -0.0199 |
| rs117571626 | T | 0.0612  |
| rs140300700 | A | 0.0663  |
| rs80293000  | C | -0.0373 |
| rs7856468   | A | -0.0315 |
| rs72748121  | T | -0.0863 |
| rs747073    | T | -0.0375 |
| rs149327419 | A | -0.1278 |
| rs13288296  | T | -0.0205 |
| rs113659694 | T | -0.0434 |
| rs117931871 | A | 0.1147  |
| rs1418268   | C | -0.0372 |
| rs117873424 | A | 0.1026  |
| rs62541830  | C | -0.0232 |
| rs12345322  | G | -0.0591 |
| rs79741416  | T | 0.0974  |
| rs78191876  | G | 0.0404  |
| rs60588950  | A | -0.1081 |
| rs10820853  | G | -0.0387 |
| rs72696709  | C | 0.0469  |
| rs1543495   | C | 0.0433  |
| rs147705233 | A | -0.0567 |
| rs17770335  | A | 0.0596  |
| rs35292277  | T | 0.1032  |
| rs12686703  | T | 0.0448  |
| rs62566463  | C | 0.0309  |
| rs10125964  | A | 0.0674  |
| rs117769459 | T | -0.0683 |
| rs62543872  | C | -0.0292 |
| rs76993157  | A | 0.1194  |
| rs1571231   | A | 0.0278  |
| rs139237116 | T | -0.1342 |
| rs11791586  | T | -0.0278 |
| rs10758519  | T | -0.0235 |
| rs7872678   | T | -0.0207 |
| rs149015814 | G | -0.1192 |
| rs7018888   | A | -0.058  |
| rs66885576  | T | 0.0226  |
| rs1038777   | T | -0.0275 |
| rs4604517   | C | -0.0344 |

|             |   |         |
|-------------|---|---------|
| rs74523861  | G | 0.1149  |
| rs7863986   | A | 0.0633  |
| rs10985997  | T | -0.0285 |
| rs1556135   | C | -0.0589 |
| rs7024642   | T | 0.0199  |
| rs75188859  | A | 0.0847  |
| rs78681983  | T | 0.0464  |
| rs143300661 | C | 0.1039  |
| rs28403252  | A | 0.0308  |
| rs10817239  | A | -0.0378 |
| rs79849186  | G | 0.1516  |
| rs56157836  | C | -0.1028 |
| rs137944985 | G | 0.1145  |
| rs12552196  | G | 0.1269  |
| rs62576372  | T | 0.0833  |
| rs149832268 | G | -0.125  |
| rs1929716   | G | 0.0217  |
| rs117193525 | A | -0.0839 |
| rs150947224 | C | 0.0894  |
| rs79834486  | T | 0.0597  |
| rs13296844  | C | 0.0237  |
| rs7025985   | A | 0.0217  |
| rs77251383  | C | -0.0438 |
| rs75077952  | A | 0.1088  |
| rs113787721 | T | 0.0818  |
| rs62570196  | C | 0.0413  |
| rs80238144  | G | 0.0498  |
| rs12336775  | G | 0.1215  |
| rs144967595 | A | -0.1249 |
| rs67223242  | A | 0.0306  |
| rs151162380 | T | 0.0676  |
| rs76498541  | A | 0.149   |
| rs4246908   | G | 0.0194  |
| rs7856514   | A | 0.0226  |
| rs73567531  | A | 0.0521  |
| rs3780293   | A | -0.0208 |
| rs142225787 | C | 0.0931  |
| rs150814563 | A | -0.0831 |
| rs10819506  | T | 0.0231  |
| rs10974260  | G | -0.0268 |
| rs16927235  | G | 0.0634  |
| rs10819283  | A | 0.041   |
| rs11244220  | T | -0.0241 |
| rs4740235   | T | 0.0267  |
| rs294831    | C | -0.0318 |
| rs1227469   | A | -0.0203 |
| rs172447    | C | -0.1024 |

|             |   |         |
|-------------|---|---------|
| rs72700705  | C | -0.0459 |
| rs77736189  | T | -0.0912 |
| rs2417437   | C | -0.0198 |
| rs76344517  | G | 0.0431  |
| rs2761719   | C | -0.0337 |
| rs57903073  | A | 0.0604  |
| rs117151320 | A | -0.1    |
| rs3948317   | C | -0.0226 |
| rs115175450 | A | -0.099  |
| rs77354939  | T | 0.0482  |
| rs145949072 | C | -0.1254 |
| rs7869307   | A | 0.0247  |
| rs7866591   | A | 0.0269  |
| rs77290088  | T | 0.0671  |
| rs10979225  | T | -0.0371 |
| rs137957660 | T | 0.0591  |
| rs116943723 | C | -0.1432 |
| rs62529557  | C | 0.1544  |
| rs143043058 | A | 0.1407  |
| rs118025129 | C | 0.066   |
| rs7875973   | A | 0.0324  |
| rs12380047  | G | 0.0264  |
| rs117977225 | A | -0.0344 |
| rs1978746   | C | -0.0236 |
| rs883096    | C | -0.0212 |
| rs7021674   | C | -0.0211 |
| rs78208206  | T | 0.0954  |
| rs528093    | T | -0.0851 |
| rs10983467  | T | -0.0202 |
| rs141887112 | A | -0.0615 |
| rs16929645  | T | -0.0637 |
| rs58475797  | T | 0.0309  |
| rs13291778  | G | -0.0672 |
| rs151018229 | G | -0.1004 |
| rs72700002  | C | -0.1553 |
| rs1030856   | A | -0.0209 |
| rs9722651   | C | 0.0483  |
| rs7024273   | T | 0.0837  |
| rs7032613   | T | -0.0769 |
| rs75485949  | T | 0.0685  |
| rs11140506  | G | -0.0232 |
| rs10817260  | T | -0.0271 |
| rs2075508   | C | 0.0378  |
| rs79746057  | G | -0.0397 |
| rs148958508 | G | 0.1974  |
| rs57255509  | A | -0.0737 |
| rs3739464   | A | 0.0331  |

|             |   |         |
|-------------|---|---------|
| rs77638329  | C | -0.087  |
| rs17177323  | G | 0.06    |
| rs79140238  | G | 0.0622  |
| rs117188726 | C | -0.0946 |
| rs16910134  | A | -0.0713 |
| rs7020351   | T | -0.0745 |
| rs140509063 | C | 0.1129  |
| rs7043708   | T | 0.0243  |
| rs73393341  | C | 0.0915  |
| rs62534511  | T | 0.0706  |
| rs10963299  | C | 0.0625  |
| rs10964229  | T | -0.03   |
| rs118183914 | C | -0.0721 |
| rs75696524  | A | -0.0405 |
| rs111320067 | T | -0.097  |
| rs35290397  | T | -0.131  |
| rs137900524 | A | 0.1064  |
| rs12235895  | G | 0.0269  |
| rs4837398   | T | 0.0261  |
| rs140737758 | C | -0.1354 |
| rs7029919   | T | 0.0369  |
| rs11999991  | G | 0.032   |
| rs76353520  | C | -0.0307 |
| rs1555480   | T | -0.0219 |
| rs353809    | C | 0.0242  |
| rs7026418   | C | 0.0271  |
| rs1328904   | G | 0.0255  |
| rs75618535  | A | -0.1153 |
| rs116859938 | C | 0.1195  |
| rs77073970  | T | 0.0912  |
| rs117119938 | G | -0.0849 |
| rs62534711  | G | -0.0713 |
| rs117932370 | A | 0.1201  |
| rs34348344  | C | 0.1149  |
| rs112187201 | T | 0.1093  |
| rs72742852  | T | 0.054   |
| rs72770249  | T | 0.0413  |
| rs72698070  | G | 0.0296  |
| rs75979392  | C | 0.1007  |
| rs34486000  | A | -0.0683 |
| rs656105    | C | 0.0225  |
| rs79572934  | C | -0.0536 |
| rs117630679 | T | 0.1028  |
| rs3824419   | C | -0.0221 |
| rs3814111   | C | 0.0244  |
| rs76870538  | C | 0.0739  |
| rs2418203   | A | -0.1138 |

|             |   |         |
|-------------|---|---------|
| rs11792719  | C | 0.0637  |
| rs74414565  | G | 0.08    |
| rs10812670  | C | -0.022  |
| rs755191    | T | 0.0445  |
| rs17773550  | G | -0.1433 |
| rs75585661  | T | 0.1234  |
| rs823922    | T | -0.0206 |
| rs129925    | G | 0.0854  |
| rs17220976  | C | 0.0822  |
| rs486764    | A | 0.0284  |
| rs7023764   | G | 0.0392  |
| rs117771146 | G | -0.0901 |
| rs10964948  | A | 0.0729  |
| rs56280424  | C | -0.0531 |
| rs77126598  | A | -0.1306 |
| rs507144    | T | -0.0336 |
| rs405004    | A | -0.0288 |
| rs34217909  | T | 0.0303  |
| rs34215980  | A | 0.037   |
| rs4877600   | C | -0.0232 |
| rs111293827 | A | -0.1135 |
| rs72743057  | G | 0.0818  |
| rs112992331 | A | -0.1648 |
| rs80351470  | G | 0.061   |
| rs72700764  | T | -0.0598 |
| rs7027172   | A | 0.0869  |
| rs7869144   | G | -0.0268 |
| rs114820396 | C | 0.093   |
| rs10512349  | C | 0.0413  |
| rs7853534   | C | 0.0194  |
| rs9775994   | T | -0.0262 |
| rs76518593  | G | 0.0411  |
| rs66470520  | T | -0.0454 |
| rs75609491  | T | 0.056   |
| rs4879848   | G | -0.0212 |
| rs118002071 | T | 0.1516  |
| rs142395237 | T | -0.1037 |
| rs76523935  | A | -0.083  |
| rs74883744  | C | -0.079  |
| rs4880026   | G | 0.0223  |
| rs10738745  | T | 0.0198  |
| rs62532968  | A | -0.0569 |
| rs112030729 | T | 0.0389  |
| rs150767226 | C | 0.1515  |
| rs12236419  | A | -0.1324 |
| rs62574205  | G | -0.1283 |
| rs2761735   | C | 0.0253  |

|             |   |         |
|-------------|---|---------|
| rs7850041   | A | 0.0221  |
| rs4629927   | G | -0.0246 |
| rs35382602  | C | -0.0402 |
| rs12337623  | A | 0.0243  |
| rs62571802  | C | -0.0589 |
| rs10819103  | T | 0.0248  |
| rs9409376   | C | 0.0571  |
| rs75090903  | A | -0.0946 |
| rs147171855 | T | -0.0412 |
| rs1475259   | A | -0.0218 |
| rs3739857   | A | -0.0666 |
| rs79091340  | A | 0.0368  |
| rs117278570 | C | -0.1293 |
| rs7038681   | C | -0.0513 |
| rs148623010 | A | -0.1196 |
| rs71503683  | C | 0.1469  |
| rs10983519  | T | 0.0305  |
| rs142308854 | G | 0.1418  |
| rs2149388   | G | -0.021  |
| rs7860173   | G | -0.0563 |
| rs1929886   | T | 0.0221  |
| rs12335386  | T | -0.0426 |
| rs117493433 | T | 0.1132  |
| rs11792165  | A | 0.0204  |
| rs542336    | T | -0.0194 |
| rs144864932 | A | 0.0788  |
| rs56367679  | A | -0.0546 |
| rs7021570   | T | 0.0303  |
| rs117626887 | G | 0.082   |
| rs72614698  | T | -0.0398 |
| rs117253375 | A | 0.0503  |
| rs7029654   | A | 0.0272  |
| rs10115939  | A | -0.0687 |
| rs72756808  | A | 0.0591  |
| rs768740    | A | -0.0221 |
| rs567964    | A | -0.0286 |
| rs141729313 | A | 0.1065  |
| rs80115872  | G | 0.05    |
| rs151069787 | G | 0.1318  |
| rs62570643  | A | 0.0392  |
| rs12377409  | A | -0.022  |
| rs117016656 | T | 0.0687  |
| rs7864436   | C | -0.0428 |
| rs1360593   | A | 0.02    |
| rs1937940   | C | 0.0277  |
| rs146537757 | C | -0.1076 |
| rs117635919 | T | -0.0986 |

|             |   |         |
|-------------|---|---------|
| rs55799742  | G | -0.0284 |
| rs74541369  | T | 0.0513  |
| rs68183006  | C | 0.0842  |
| rs13299371  | T | 0.0249  |
| rs4143813   | T | 0.0365  |
| rs79119056  | G | 0.1203  |
| rs752358    | T | -0.023  |
| rs111806157 | G | 0.0279  |
| rs57298855  | G | 0.1101  |
| rs2890385   | T | -0.0391 |
| rs10984722  | C | 0.0775  |
| rs146938822 | A | -0.1742 |
| rs142557905 | A | -0.0854 |
| rs55924414  | T | -0.0325 |
| rs140737736 | A | -0.1124 |
| rs10115913  | C | 0.0203  |
| rs151058696 | T | 0.0836  |
| rs117754874 | G | -0.0819 |
| rs10810642  | G | -0.0194 |
| rs10756900  | C | -0.0196 |
| rs140586099 | T | 0.0714  |
| rs12237683  | A | 0.0232  |
| rs117901368 | T | 0.0806  |
| rs2131039   | T | 0.022   |
| rs117224180 | T | 0.0725  |
| rs75124731  | A | 0.0463  |
| rs72701990  | T | 0.0435  |
| rs76048275  | G | 0.1715  |
| rs59256416  | G | -0.0471 |
| rs946708    | A | 0.0208  |
| rs118053948 | G | 0.0929  |
| rs34875451  | G | 0.0767  |
| rs117106865 | T | -0.1433 |
| rs495617    | C | 0.0986  |
| rs10979455  | A | -0.0399 |
| rs72756517  | G | -0.0559 |
| rs74787694  | T | -0.0801 |
| rs112126540 | T | 0.0585  |
| rs1926782   | A | 0.0425  |
| rs6597569   | G | 0.0214  |
| rs2054073   | A | -0.0516 |
| rs2302821   | C | -0.0384 |
| rs80277842  | T | -0.089  |
| rs10816053  | G | -0.022  |
| rs137980261 | T | -0.1251 |
| rs72741016  | A | 0.0802  |
| rs62568443  | G | 0.133   |

|             |   |         |
|-------------|---|---------|
| rs76957506  | A | -0.0751 |
| rs142470576 | G | 0.0649  |
| rs117223635 | T | -0.1349 |
| rs78028538  | C | 0.0673  |
| rs55917353  | T | -0.0254 |
| rs4743605   | C | -0.0781 |
| rs57235233  | A | 0.0672  |
| rs74846857  | T | 0.0293  |
| rs80035160  | C | -0.0709 |
| rs10991893  | G | 0.0342  |
| rs117446824 | A | 0.0478  |
| rs145801056 | A | 0.1446  |
| rs10968523  | C | -0.0267 |
| rs146456372 | G | -0.0874 |
| rs10512071  | G | -0.0343 |
| rs117028774 | A | 0.1052  |
| rs10124062  | T | 0.0237  |
| rs41274428  | G | -0.0907 |
| rs72748943  | T | -0.0395 |
| rs13284938  | A | -0.0331 |
| rs75719517  | G | 0.0998  |
| rs11789598  | A | -0.0276 |
| rs12552278  | T | 0.0837  |
| rs62533202  | C | -0.0649 |
| rs546921    | A | -0.0308 |
| rs10970977  | C | 0.0198  |
| rs148553076 | T | -0.1338 |
| rs10512187  | C | -0.0199 |
| rs11793220  | A | -0.0374 |
| rs117362775 | G | -0.0747 |
| rs15676     | G | 0.0209  |
| rs10962515  | T | 0.1042  |
| rs34189940  | G | -0.0265 |
| rs116945319 | A | 0.0526  |
| rs117818010 | T | 0.1248  |
| rs138045708 | C | 0.1141  |
| rs111644895 | G | -0.1142 |
| rs10124916  | T | 0.0202  |
| rs118116921 | G | -0.05   |
| rs9695201   | G | -0.02   |
| rs12552270  | A | 0.084   |
| rs117033155 | A | 0.0918  |
| rs10962420  | C | 0.075   |
| rs7869744   | C | -0.0256 |
| rs74644241  | C | 0.0535  |
| rs10984099  | T | -0.0457 |
| rs34683584  | T | -0.0325 |



|             |   |         |
|-------------|---|---------|
| rs146479472 | A | 0.1212  |
| rs113774962 | A | 0.1119  |
| rs72753485  | C | 0.0447  |
| rs7045614   | A | 0.0539  |
| rs7868718   | T | -0.0227 |
| rs10967262  | A | 0.0675  |
| rs78589365  | A | 0.0778  |
| rs118078457 | T | 0.073   |
| rs111877546 | A | -0.0596 |
| rs637736    | A | 0.0217  |
| rs7865511   | T | 0.0671  |
| rs72738691  | T | 0.0928  |
| rs12553127  | G | 0.0238  |
| rs10761128  | T | -0.0294 |
| rs10984186  | A | 0.026   |
| rs143771682 | A | 0.1132  |
| rs151332778 | C | 0.0973  |
| rs117377090 | A | -0.1156 |
| rs142725549 | G | -0.1569 |
| rs10980134  | A | 0.0508  |
| rs10983088  | A | 0.023   |
| rs76536327  | G | -0.0861 |
| rs2026981   | G | -0.0981 |
| rs113206157 | C | -0.1178 |
| rs118043207 | C | 0.0709  |
| rs34073965  | T | 0.0203  |
| rs12001622  | A | -0.0534 |
| rs79025923  | C | 0.0904  |
| rs142939306 | A | 0.1108  |
| rs75402700  | T | -0.0614 |
| rs10759925  | C | 0.0201  |
| rs12342733  | C | 0.1542  |
| rs117488934 | T | 0.0798  |
| rs117398529 | T | -0.118  |
| rs77757336  | C | -0.1175 |
| rs80182886  | G | 0.0701  |
| rs10983127  | C | -0.0271 |
| rs72769807  | T | -0.0659 |
| rs116939710 | C | -0.0527 |
| rs143187386 | T | 0.1146  |
| rs76864073  | G | -0.0878 |
| rs1490740   | T | 0.0256  |
| rs117200192 | A | 0.134   |
| rs558356    | T | -0.0351 |
| rs10814817  | G | -0.0274 |
| rs117530188 | T | 0.0779  |
| rs2378591   | A | 0.0193  |

|             |   |         |
|-------------|---|---------|
| rs17200841  | T | 0.0392  |
| rs79079373  | G | -0.0787 |
| rs16925027  | G | -0.0226 |
| rs7039404   | C | -0.05   |
| rs78709754  | T | 0.0549  |
| rs10812195  | C | -0.0246 |
| rs2993164   | A | 0.1209  |
| rs4113091   | T | -0.1293 |
| rs72742612  | T | -0.1025 |
| rs1830646   | T | 0.0208  |
| rs72715296  | G | 0.0337  |
| rs11144036  | A | -0.0588 |
| rs78733147  | T | 0.133   |
| rs7350246   | C | -0.0191 |
| rs9410458   | A | -0.1613 |
| rs117154710 | C | -0.0514 |
| rs12684323  | C | 0.0222  |
| rs11999890  | C | 0.0382  |
| rs16917918  | G | -0.0233 |
| rs62543588  | A | 0.1099  |
| rs56329524  | T | 0.1123  |
| rs41302909  | A | 0.0519  |
| rs1891493   | G | 0.0844  |
| rs4743670   | T | 0.0232  |
| rs76826751  | C | 0.0651  |
| rs41305337  | T | -0.0877 |
| rs117680553 | G | -0.0838 |
| rs113066078 | C | 0.0563  |
| rs55964346  | T | 0.0761  |
| rs77657971  | T | 0.0945  |
| rs2118168   | C | -0.1193 |
| rs1571804   | T | -0.0201 |
| rs148149403 | T | -0.1131 |
| rs10812334  | A | 0.0473  |
| rs1927988   | C | 0.0334  |
| rs35922510  | C | 0.111   |
| rs62585034  | C | 0.197   |
| rs7021130   | G | 0.0215  |
| rs71510489  | T | -0.141  |
| rs71512411  | C | -0.046  |
| rs72763182  | A | 0.0653  |
| rs75186455  | T | -0.1554 |
| rs7852843   | C | -0.0192 |
| rs2382039   | C | 0.0739  |
| rs10757392  | T | 0.0235  |
| rs111958999 | T | -0.0437 |
| rs72736161  | A | -0.0554 |

|             |   |         |
|-------------|---|---------|
| rs3005740   | C | 0.065   |
| rs1928691   | C | 0.0223  |
| rs73656150  | A | 0.0641  |
| rs12379295  | C | 0.0395  |
| rs2416993   | T | -0.0263 |
| rs1857416   | A | -0.022  |
| rs146360334 | T | 0.0693  |
| rs11794855  | T | -0.0298 |
| rs144547505 | A | 0.1411  |
| rs12341568  | A | -0.1059 |
| rs116907352 | T | -0.0615 |
| rs11243747  | T | 0.0264  |
| rs8181077   | T | -0.0201 |
| rs838819    | C | 0.0191  |
| rs78981589  | T | -0.046  |
| rs2570299   | G | -0.0188 |
| rs9696565   | A | 0.0754  |
| rs11794042  | T | -0.1006 |
| rs117006614 | A | 0.0876  |
| rs16937266  | C | 0.0428  |
| rs72701925  | C | -0.0494 |
| rs73466798  | G | 0.0984  |
| rs80010682  | C | -0.0577 |
| rs72735669  | T | -0.0228 |
| rs1407926   | C | -0.052  |
| rs117420678 | T | -0.1366 |
| rs72741271  | C | -0.0564 |
| rs11244354  | T | -0.0301 |
| rs149868798 | T | -0.1189 |
| rs113838706 | C | -0.1087 |
| rs77541311  | C | 0.0774  |
| rs13293046  | T | -0.0204 |
| rs117649083 | T | 0.0932  |
| rs78096325  | A | 0.0802  |
| rs1887880   | G | -0.0219 |
| rs10125791  | C | -0.0363 |
| rs138045882 | T | 0.0776  |
| rs10811002  | T | 0.0199  |
| rs1048743   | T | 0.0947  |
| rs12115234  | G | -0.0683 |
| rs12683300  | T | -0.0216 |
| rs79225992  | T | -0.0248 |
| rs76132270  | C | 0.0649  |
| rs11141785  | G | 0.024   |
| rs34757740  | C | -0.0655 |
| rs146175936 | T | -0.0454 |
| rs146181263 | A | 0.0855  |

|             |   |         |
|-------------|---|---------|
| rs10960422  | T | -0.0286 |
| rs10964415  | G | 0.122   |
| rs13296842  | G | -0.0193 |
| rs905959    | A | -0.0231 |
| rs13293241  | G | 0.0487  |
| rs12376594  | C | 0.0296  |
| rs77502858  | A | 0.1789  |
| rs10733559  | A | -0.0202 |
| rs683474    | C | -0.0198 |
| rs80102948  | A | 0.0681  |
| rs72738823  | G | 0.03    |
| rs10758900  | G | 0.0321  |
| rs12377067  | A | -0.0254 |
| rs150698247 | T | 0.1337  |
| rs7021949   | A | 0.122   |
| rs12238146  | A | 0.0219  |
| rs7038823   | T | 0.0207  |
| rs112912497 | A | 0.0958  |
| rs6477985   | C | 0.0279  |
| rs72704253  | G | 0.1012  |
| rs75234270  | T | 0.1348  |
| rs79504722  | A | 0.0859  |
| rs12379270  | T | -0.0207 |
| rs117271027 | A | 0.0513  |
| rs2209680   | C | -0.0244 |
| rs4742265   | A | -0.0399 |
| rs72718128  | G | 0.0863  |
| rs10813973  | T | -0.0247 |
| rs7860044   | T | 0.024   |
| rs10964566  | G | 0.0402  |
| rs2062865   | G | -0.0308 |
| rs77645955  | G | 0.0459  |
| rs58733878  | C | 0.12    |
| rs4439204   | G | -0.0232 |
| rs2417998   | C | 0.0208  |
| rs12348301  | G | -0.031  |
| rs147367124 | G | 0.136   |
| rs16932860  | A | -0.079  |
| rs10116370  | C | 0.0253  |
| rs76057526  | A | -0.0472 |
| rs140777914 | T | -0.1204 |
| rs72693883  | A | 0.051   |
| rs2984457   | T | 0.0358  |
| rs2309991   | C | -0.0326 |
| rs10733478  | G | -0.0267 |
| rs2026001   | T | 0.0199  |
| rs148048775 | A | -0.1424 |

|             |   |         |
|-------------|---|---------|
| rs1888713   | A | -0.0321 |
| rs10992260  | T | -0.0228 |
| rs1220652   | T | -0.0293 |
| rs78732021  | G | -0.0546 |
| rs4551422   | G | 0.04    |
| rs7847002   | T | 0.0901  |
| rs149259529 | G | -0.0774 |
| rs75284302  | A | 0.1445  |
| rs76595440  | A | 0.076   |
| rs149472658 | A | 0.1009  |
| rs10481735  | G | -0.0189 |
| rs2493633   | T | -0.0395 |
| rs10815801  | G | -0.0227 |
| rs7044734   | G | -0.0208 |
| rs7868750   | C | -0.078  |
| rs113539164 | C | -0.1534 |
| rs79254275  | T | 0.0889  |
| rs72737956  | A | 0.096   |
| rs35776948  | T | 0.0355  |
| rs71506679  | A | 0.0539  |
| rs7029959   | A | -0.0357 |
| rs7038958   | G | -0.0387 |
| rs3125001   | T | 0.0232  |
| rs12335819  | C | -0.0249 |
| rs10810584  | G | 0.021   |
| rs144623872 | G | 0.1473  |
| rs76260377  | T | 0.1199  |
| rs116859884 | T | -0.1692 |
| rs41311426  | C | 0.0926  |
| rs1837304   | A | -0.0187 |
| rs144745077 | T | -0.1133 |
| rs62567671  | G | -0.0256 |
| rs2787376   | G | -0.031  |
| rs12555242  | C | -0.0639 |
| rs146117104 | G | 0.0979  |
| rs4076140   | G | -0.0613 |
| rs75732424  | C | 0.0668  |
| rs75258673  | T | -0.0397 |
| rs74786704  | C | 0.0691  |
| rs62578445  | G | 0.0703  |
| rs4876951   | A | 0.0253  |
| rs113501273 | G | -0.0944 |
| rs1799615   | C | 0.0233  |
| rs117108716 | G | -0.0948 |
| rs12005370  | C | 0.0195  |
| rs16923816  | T | -0.0398 |
| rs11795369  | T | 0.0206  |

|             |   |         |
|-------------|---|---------|
| rs138071352 | T | 0.1028  |
| rs111519681 | A | 0.1005  |
| rs17700765  | C | 0.064   |
| rs150507023 | G | -0.1406 |
| rs117795791 | T | 0.1288  |
| rs1780153   | T | -0.0376 |
| rs56757209  | A | 0.0567  |
| rs72735901  | G | -0.0579 |
| rs117781183 | G | -0.0696 |
| rs1688964   | A | -0.0229 |
| rs10978679  | A | -0.0342 |
| rs1360690   | G | -0.0227 |
| rs611983    | T | 0.0442  |
| rs646857    | C | 0.0198  |
| rs62565753  | T | 0.1426  |
| rs55938090  | A | 0.0462  |
| rs13298842  | C | -0.0556 |
| rs7860703   | A | 0.0186  |
| rs72751706  | T | 0.0208  |
| rs41278337  | T | -0.049  |
| rs12235850  | A | -0.0511 |
| rs10820282  | A | -0.021  |
| rs56069924  | C | 0.0875  |
| rs62555389  | G | 0.1077  |
| rs7036771   | T | -0.0213 |
| rs80120503  | T | 0.1351  |
| rs10966845  | C | -0.0437 |
| rs10815398  | C | -0.0192 |
| rs145891283 | C | 0.0974  |
| rs10980288  | T | -0.0828 |
| rs296822    | T | 0.0272  |
| rs7040930   | G | 0.0187  |
| rs9409461   | A | 0.0184  |
| rs6415829   | A | 0.02    |
| rs2416739   | T | 0.0405  |
| rs117913630 | T | -0.0955 |
| rs7048572   | C | 0.0233  |
| rs114405432 | A | 0.0856  |
| rs11138465  | C | -0.0213 |
| rs10963391  | C | -0.0196 |
| rs74755714  | G | 0.0812  |
| rs7864473   | C | 0.0229  |
| rs4842122   | A | -0.04   |
| rs74855156  | C | 0.0285  |
| rs56143112  | C | 0.1586  |
| rs10973938  | T | -0.0558 |
| rs56076810  | A | 0.0796  |

|             |   |         |
|-------------|---|---------|
| rs72744352  | C | -0.0587 |
| rs72739015  | A | 0.0741  |
| rs117099040 | C | 0.0601  |
| rs77544639  | C | 0.0796  |
| rs4415394   | A | -0.0232 |
| rs1062042   | C | 0.0857  |
| rs35682418  | A | -0.0323 |
| rs36024384  | A | 0.0372  |
| rs12352797  | T | -0.0318 |
| rs78593400  | A | 0.0615  |
| rs149066077 | T | 0.1176  |
| rs11794846  | G | 0.0275  |
| rs55945399  | A | 0.0214  |
| rs55677534  | C | -0.1151 |
| rs3808849   | A | -0.03   |
| rs17062174  | A | -0.0357 |
| rs62566873  | T | -0.0581 |
| rs2277189   | C | 0.0188  |
| rs1411419   | C | 0.022   |
| rs2795119   | A | 0.0327  |
| rs117831077 | T | -0.1066 |
| rs62576202  | C | 0.033   |
| rs117657636 | T | 0.0405  |
| rs10973106  | T | 0.0478  |
| rs1768572   | A | 0.033   |
| rs11506725  | A | -0.022  |
| rs79109051  | A | 0.0762  |
| rs117995808 | C | 0.1197  |
| rs17726343  | C | 0.0219  |
| rs146696391 | C | -0.0556 |
| rs10759891  | C | 0.0188  |
| rs12344993  | A | 0.052   |
| rs2519089   | A | 0.0592  |
| rs10974639  | G | -0.0228 |
| rs72715121  | C | -0.0637 |
| rs75172407  | A | -0.0578 |
| rs12115844  | T | 0.0389  |
| rs868025    | G | 0.0989  |
| rs116856984 | T | -0.1044 |
| rs35595055  | G | -0.0478 |
| rs625351    | C | 0.0651  |
| rs117101226 | A | 0.0371  |
| rs9695668   | A | 0.0211  |
| rs11143609  | A | -0.025  |
| rs151131132 | T | -0.0841 |
| rs111302956 | A | 0.1062  |
| rs116959260 | T | -0.1241 |

|             |   |         |
|-------------|---|---------|
| rs111905467 | C | 0.1423  |
| rs28361139  | T | -0.0637 |
| rs16920291  | C | -0.0523 |
| rs10983210  | A | -0.0505 |
| rs117803387 | A | 0.065   |
| rs143537403 | A | 0.035   |
| rs34537218  | A | -0.0428 |
| rs72729171  | C | 0.0814  |
| rs142022200 | A | -0.0706 |
| rs11792361  | T | 0.0316  |
| rs10818968  | C | -0.0289 |
| rs11144781  | T | 0.062   |
| rs146444240 | C | -0.1175 |
| rs17052754  | T | 0.0764  |
| rs143246820 | C | 0.1356  |
| rs79716235  | T | 0.0913  |
| rs117581486 | C | -0.0715 |
| rs73663470  | C | -0.0562 |
| rs7860997   | T | 0.0213  |
| rs58957061  | C | 0.085   |
| rs731168    | A | -0.0183 |
| rs10759835  | G | 0.0219  |
| rs74467571  | G | -0.0386 |
| rs76046336  | A | 0.0403  |
| rs10978403  | A | 0.0303  |
| rs75447664  | G | -0.0866 |
| rs10972205  | A | -0.0267 |
| rs72735668  | T | -0.036  |
| rs62568415  | C | 0.0382  |
| rs139991194 | T | 0.0453  |
| rs13293583  | G | -0.0654 |
| rs77127797  | T | -0.0614 |
| rs7028769   | T | -0.0214 |
| rs78827367  | T | -0.116  |
| rs11788864  | T | -0.0325 |
| rs58088765  | C | -0.0226 |
| rs7872771   | A | -0.0203 |
| rs111339327 | T | -0.0392 |
| rs113892038 | A | -0.0821 |
| rs7860727   | C | -0.0301 |
| rs117278797 | A | 0.1027  |
| rs7021817   | G | -0.0328 |
| rs73400352  | C | 0.0695  |
| rs10811093  | A | 0.0341  |
| rs2061702   | A | 0.0222  |
| rs144361304 | A | -0.0853 |
| rs117730675 | A | 0.1486  |



|             |   |         |
|-------------|---|---------|
| rs55964716  | C | 0.1367  |
| rs7874366   | A | -0.0185 |
| rs117537495 | T | 0.044   |
| rs7026527   | T | 0.0488  |
| rs10972539  | T | -0.0279 |
| rs3793552   | T | -0.0358 |
| rs80142680  | A | 0.0629  |
| rs72716531  | A | -0.0469 |
| rs79241185  | A | 0.0991  |
| rs145150850 | A | -0.1204 |
| rs118001945 | T | -0.0583 |
| rs116856341 | G | 0.0984  |
| rs147534187 | A | 0.1718  |
| rs67483170  | C | -0.0645 |
| rs11137620  | C | -0.0838 |
| rs10757683  | G | 0.033   |
| rs1663111   | T | 0.0188  |
| rs145222615 | T | -0.1129 |
| rs28885746  | A | 0.0223  |
| rs144501147 | G | 0.1625  |
| rs112945300 | A | -0.1133 |
| rs62635821  | A | -0.0381 |
| rs140779483 | T | 0.1059  |
| rs62533376  | C | -0.0503 |
| rs4977232   | C | -0.0222 |
| rs170623    | G | 0.0378  |
| rs73504099  | C | 0.1148  |
| rs2618014   | A | -0.0218 |
| rs117286532 | T | -0.1356 |
| rs13299743  | A | -0.0891 |
| rs13301171  | G | 0.0376  |
| rs1339275   | C | 0.0204  |
| rs12553101  | A | 0.027   |
| rs11791569  | T | -0.065  |
| rs117068686 | T | -0.0664 |
| rs321736    | T | 0.0407  |
| rs77211821  | C | -0.0447 |
| rs10982163  | T | -0.0599 |
| rs79152799  | A | 0.1047  |
| rs7028240   | C | 0.0456  |
| rs62529521  | G | -0.0316 |
| rs4144551   | G | 0.0601  |
| rs72693986  | T | 0.0979  |
| rs41276841  | A | -0.1114 |
| rs4741872   | C | 0.0673  |
| rs7021784   | C | -0.0284 |
| rs11142399  | A | 0.0763  |

|             |   |         |
|-------------|---|---------|
| rs72735814  | A | -0.0256 |
| rs77805996  | G | -0.0734 |
| rs10984589  | T | 0.0182  |
| rs13292231  | C | 0.0223  |
| rs1325115   | C | 0.0276  |
| rs77500245  | T | 0.0372  |
| rs72748462  | T | 0.0286  |
| rs117555550 | T | 0.0628  |
| rs140009390 | T | 0.0955  |
| rs72714320  | A | -0.107  |
| rs6475240   | G | -0.019  |
| rs149591832 | C | -0.0833 |
| rs17457063  | T | 0.0675  |
| rs3095748   | G | 0.034   |
| rs2418061   | T | 0.0215  |
| rs10818015  | C | 0.024   |
| rs77932093  | G | 0.1326  |
| rs735875    | A | 0.0449  |
| rs10429585  | G | 0.0635  |
| rs13289070  | T | 0.0324  |
| rs12345631  | C | -0.0451 |
| rs7854237   | G | 0.019   |
| rs913770    | A | 0.0422  |
| rs10813900  | G | -0.0303 |
| rs34746802  | G | -0.0266 |
| rs10780323  | T | 0.0203  |
| rs72740661  | A | 0.0554  |
| rs10760333  | A | -0.0237 |
| rs76105730  | C | 0.0689  |
| rs1443870   | T | 0.019   |
| rs10512140  | C | -0.0191 |
| rs34552077  | T | -0.0736 |
| rs147464881 | T | 0.1601  |
| rs10739560  | T | -0.0601 |
| rs2814732   | A | 0.0249  |
| rs10973472  | T | 0.0359  |
| rs117743586 | G | 0.1196  |
| rs13286051  | T | 0.0392  |
| rs78663379  | G | 0.0731  |
| rs7856334   | A | 0.0254  |
| rs117061374 | A | 0.1097  |
| rs3105993   | C | 0.0197  |
| rs10819125  | T | 0.0212  |
| rs1530701   | A | 0.02    |
| rs10435825  | A | 0.0231  |
| rs1438807   | A | 0.0245  |
| rs76630484  | T | 0.0974  |

|             |   |         |
|-------------|---|---------|
| rs547237    | T | -0.0928 |
| rs301431    | C | 0.0279  |
| rs62534443  | A | -0.0275 |
| rs75999899  | T | -0.0953 |
| rs143314604 | G | -0.0385 |
| rs1412932   | A | -0.0242 |
| rs73645429  | A | -0.0874 |
| rs117601352 | C | -0.1272 |
| rs17334598  | G | -0.0606 |
| rs112003068 | A | -0.0692 |
| rs62567094  | T | 0.1516  |
| rs17774792  | A | 0.0726  |
| rs78231763  | A | -0.1066 |
| rs117327294 | G | 0.1076  |
| rs117534182 | A | 0.0951  |
| rs79032649  | G | -0.0582 |
| rs10960870  | A | -0.0972 |
| rs7848575   | T | -0.0213 |
| rs74368093  | G | 0.1064  |
| rs11794091  | T | 0.0434  |
| rs10973643  | T | 0.0775  |
| rs141096710 | G | -0.0286 |
| rs118025264 | T | -0.0829 |
| rs147668444 | A | 0.0729  |
| rs59604827  | T | -0.0593 |
| rs6475382   | A | -0.0267 |
| rs10812012  | C | 0.0254  |
| rs12342852  | G | 0.079   |
| rs7020350   | T | -0.0237 |
| rs12379402  | A | 0.0759  |
| rs10977486  | G | -0.0284 |
| rs11185638  | A | 0.0417  |
| rs11791832  | T | -0.0464 |
| rs117016925 | T | -0.1133 |
| rs7031622   | C | -0.0302 |
| rs10759234  | T | -0.0234 |
| rs10759279  | A | 0.0183  |
| rs62545087  | A | -0.0696 |
| rs11143035  | G | -0.048  |
| rs2489889   | C | 0.0317  |
| rs12685321  | T | -0.0248 |
| rs77164567  | C | 0.0781  |
| rs1936289   | T | -0.0187 |
| rs10122844  | G | 0.0259  |
| rs10901287  | A | -0.0607 |
| rs11244035  | T | 0.0619  |
| rs112934507 | C | 0.0594  |

|             |   |         |
|-------------|---|---------|
| rs1361102   | T | -0.0441 |
| rs146796586 | T | 0.1289  |
| rs716548    | C | 0.0533  |
| rs139177312 | C | -0.1246 |
| rs2889243   | T | -0.0276 |
| rs12351484  | T | 0.0293  |
| rs77057661  | A | -0.0819 |
| rs12555083  | G | -0.0594 |
| rs149815095 | T | 0.089   |
| rs113930795 | C | 0.038   |
| rs919641    | C | 0.0242  |
| rs911756    | G | 0.0246  |
| rs112654917 | T | 0.0873  |
| rs3128475   | A | 0.0255  |
| rs4646774   | A | 0.0234  |
| rs2376313   | G | 0.0337  |
| rs598296    | T | 0.0263  |
| rs10988337  | G | 0.0238  |
| rs72767969  | A | 0.0426  |
| rs112055140 | G | 0.0661  |
| rs117308290 | A | 0.0706  |
| rs17699672  | G | 0.0495  |
| rs76515778  | A | 0.1366  |
| rs62570387  | G | -0.0477 |
| rs423029    | T | 0.0635  |
| rs117727835 | A | 0.0998  |
| rs10990647  | A | 0.0399  |
| rs75423508  | C | 0.0616  |
| rs13297974  | T | 0.0607  |
| rs72700222  | A | 0.0628  |
| rs12346753  | C | 0.0309  |
| rs117542379 | G | 0.1498  |
| rs58007367  | A | -0.0682 |
| rs144611820 | T | -0.1074 |
| rs503681    | T | -0.0218 |
| rs10156594  | A | -0.0591 |
| rs117127195 | G | -0.0945 |
| rs2986608   | A | 0.0312  |
| rs76222134  | G | 0.0505  |
| rs11792232  | A | 0.0438  |
| rs204178    | G | -0.0194 |
| rs10812610  | C | 0.0179  |
| rs10812806  | T | 0.0215  |
| rs35804026  | C | -0.1027 |
| rs112338337 | G | 0.0437  |
| rs117966595 | G | 0.0589  |
| rs140374752 | C | 0.1345  |

|             |   |         |
|-------------|---|---------|
| rs10746994  | G | -0.02   |
| rs11795270  | G | -0.1403 |
| rs2164560   | C | 0.0196  |
| rs10818403  | C | 0.0607  |
| rs4745008   | G | -0.0191 |
| rs6415839   | T | 0.0469  |
| rs787879    | C | -0.0194 |
| rs11789145  | G | 0.0516  |
| rs71507526  | C | -0.0551 |
| rs72743955  | G | -0.1028 |
| rs12379013  | A | 0.0279  |
| rs78482973  | A | 0.0834  |
| rs7042038   | T | 0.0222  |
| rs77246088  | G | -0.1041 |
| rs1231336   | T | -0.0264 |
| rs112432971 | T | 0.0756  |
| rs17455999  | A | 0.0502  |
| rs12345445  | G | 0.0941  |
| rs7043382   | T | 0.0483  |
| rs76820408  | T | -0.0589 |
| rs7041495   | A | -0.0248 |
| rs2150862   | A | -0.0255 |
| rs139681283 | G | -0.0555 |
| rs74345371  | A | 0.0573  |
| rs2418410   | T | -0.0206 |
| rs139686844 | G | 0.0508  |
| rs16919176  | G | -0.0567 |
| rs78816451  | G | 0.1294  |
| rs59586663  | T | -0.0831 |
| rs13299433  | T | 0.0272  |
| rs3628      | T | 0.0951  |
| rs7034240   | G | 0.0318  |
| rs75340291  | G | -0.0551 |
| rs7871846   | T | 0.026   |
| rs7035083   | T | -0.0222 |
| rs7033243   | C | 0.0201  |
| rs79277613  | G | 0.0502  |
| rs12335362  | G | 0.1015  |
| rs7872516   | G | -0.0839 |
| rs146458896 | T | -0.0542 |
| rs117130564 | A | -0.0505 |
| rs11103033  | T | -0.0209 |
| rs56282145  | G | -0.0224 |
| rs2642412   | G | 0.0232  |
| rs117474283 | A | 0.0877  |
| rs16912052  | A | -0.0411 |
| rs3935923   | G | -0.0994 |

|             |   |         |
|-------------|---|---------|
| rs79921410  | A | 0.0484  |
| rs7875511   | G | -0.0267 |
| rs77881344  | G | -0.0957 |
| rs145170339 | A | 0.1133  |
| rs78345418  | T | 0.056   |
| rs10121813  | C | 0.0906  |
| rs62569714  | T | 0.0925  |
| rs17542133  | C | -0.0195 |
| rs9314856   | A | 0.04    |
| rs74471267  | T | -0.0678 |
| rs7861459   | G | 0.0428  |
| rs72748887  | T | -0.076  |
| rs10970830  | A | -0.0285 |
| rs11139728  | G | 0.0359  |
| rs7047044   | T | -0.0572 |
| rs78421686  | T | 0.0762  |
| rs77732566  | C | -0.0567 |
| rs72702064  | C | 0.0637  |
| rs72723437  | T | 0.0208  |
| rs143055926 | C | 0.1842  |
| rs62521684  | C | -0.0283 |
| rs56032842  | G | -0.058  |
| rs75253371  | A | -0.0755 |
| rs68058941  | C | -0.0356 |
| rs72745811  | C | 0.0523  |
| rs9785204   | T | 0.0313  |
| rs17268809  | G | -0.135  |
| rs111806309 | A | 0.1064  |
| rs75912301  | T | -0.0961 |
| rs151139569 | T | 0.0443  |
| rs75091871  | A | 0.0363  |
| rs17058481  | G | 0.037   |
| rs12345439  | A | 0.032   |
| rs10960663  | C | -0.0296 |
| rs74625362  | C | -0.0757 |
| rs140159059 | A | -0.1211 |
| rs13440221  | G | 0.0293  |
| rs7043239   | T | -0.0184 |
| rs60954364  | G | 0.0367  |
| rs7047040   | T | -0.0202 |
| rs1885967   | G | 0.0254  |
| rs10867329  | A | 0.0277  |
| rs145930030 | T | -0.1322 |
| rs143025157 | A | -0.1379 |
| rs10816484  | C | -0.0564 |
| rs76314840  | G | -0.0617 |
| rs7036943   | T | -0.0803 |

|             |   |         |
|-------------|---|---------|
| rs1409950   | C | 0.0444  |
| rs17727081  | C | -0.03   |
| rs116735838 | A | -0.1298 |
| rs72735617  | G | 0.0593  |
| rs7020500   | C | -0.0824 |
| rs4268182   | A | -0.0211 |
| rs10811320  | T | 0.0231  |
| rs7033269   | T | 0.036   |
| rs12237179  | G | -0.0457 |
| rs10512367  | T | -0.0278 |
| rs1147330   | C | -0.0344 |
| rs16919455  | T | 0.0714  |
| rs1327405   | T | -0.0202 |
| rs7026700   | T | -0.0254 |
| rs79547123  | G | 0.0547  |
| rs7027827   | A | 0.0286  |
| rs6476082   | T | 0.0368  |
| rs7032419   | G | -0.0182 |
| rs1631637   | C | -0.0193 |
| rs7021489   | A | 0.0211  |
| rs2183928   | C | -0.0972 |
| rs10981250  | T | -0.0289 |
| rs7021853   | G | 0.0908  |
| rs2381623   | T | -0.0189 |
| rs11140912  | G | -0.0453 |
| rs73646232  | T | 0.0756  |
| rs2987095   | G | -0.0606 |
| rs112863915 | A | 0.1619  |
| rs147226665 | G | -0.1752 |
| rs144761228 | T | 0.1468  |
| rs7047862   | A | -0.0407 |
| rs2149002   | G | -0.0188 |
| rs10981541  | T | -0.0201 |
| rs75585777  | A | 0.0437  |
| rs2808543   | G | 0.0175  |
| rs2194877   | G | 0.0502  |
| rs10858129  | G | -0.0252 |
| rs10983694  | T | -0.0283 |
| rs2269061   | C | -0.0251 |
| rs1756867   | T | -0.0304 |
| rs773149    | C | -0.0182 |
| rs11794646  | C | 0.1023  |
| rs3912096   | G | -0.0235 |
| rs72703655  | C | -0.0995 |
| rs12555702  | T | -0.0438 |
| rs34623313  | G | -0.0567 |
| rs2236288   | C | -0.0215 |

|             |   |         |
|-------------|---|---------|
| rs57142535  | A | 0.1349  |
| rs714875    | G | 0.0533  |
| rs7854271   | G | -0.0244 |
| rs7871386   | C | -0.0202 |
| rs72703234  | A | 0.0299  |
| rs7023507   | A | -0.0176 |
| rs117049974 | T | 0.0711  |
| rs139483023 | T | 0.1221  |
| rs117023764 | G | 0.11    |
| rs140225510 | A | -0.0961 |
| rs60838127  | G | -0.0536 |
| rs10979829  | A | -0.0215 |
| rs76186132  | G | 0.1294  |
| rs1324190   | T | 0.0226  |
| rs10116174  | C | -0.0503 |
| rs11141597  | G | 0.0701  |
| rs7852509   | G | -0.0246 |
| rs111438637 | T | -0.0345 |
| rs11145083  | C | 0.0237  |
| rs4962093   | C | -0.0794 |
| rs146212205 | C | 0.0884  |
| rs149590827 | A | 0.1015  |
| rs8176739   | A | -0.0872 |
| rs75352821  | T | 0.0325  |
| rs59681639  | A | -0.0414 |
| rs72734660  | G | 0.0797  |
| rs12376174  | A | -0.0291 |
| rs41282427  | A | 0.1031  |
| rs79364414  | A | -0.0804 |
| rs75467842  | G | -0.0364 |
| rs904780    | A | 0.0186  |
| rs3217978   | A | -0.1115 |
| rs12156499  | G | 0.0327  |
| rs10962821  | G | 0.0493  |
| rs28395380  | C | 0.0225  |
| rs142793517 | T | -0.1245 |
| rs117351128 | A | -0.0825 |
| rs2377637   | A | -0.0249 |
| rs77043466  | T | 0.0629  |
| rs62576025  | A | -0.0268 |
| rs61527790  | G | -0.0323 |
| rs12004305  | A | -0.0804 |
| rs140486269 | C | 0.0471  |
| rs10960844  | A | 0.0213  |
| rs10961244  | C | 0.0195  |
| rs10959840  | G | 0.1292  |
| rs145314540 | G | -0.0944 |



|             |   |         |
|-------------|---|---------|
| rs72742417  | A | -0.0661 |
| rs12336042  | A | 0.119   |
| rs6479056   | G | -0.0197 |
| rs150727286 | T | -0.0677 |
| rs118055049 | C | 0.051   |
| rs11138086  | C | -0.0607 |
| rs895190    | G | -0.0204 |
| rs1327366   | A | 0.0285  |
| rs11139349  | G | 0.0209  |
| rs7866853   | G | 0.0587  |
| rs117040092 | C | 0.0901  |
| rs78421381  | A | 0.1427  |
| rs117132444 | A | -0.091  |
| rs1537136   | G | -0.0202 |
| rs7020182   | G | -0.0743 |
| rs117625372 | A | 0.0573  |
| rs10984956  | C | -0.039  |
| rs79657491  | C | -0.0355 |
| rs17295330  | C | 0.0334  |
| rs164935    | A | -0.0216 |
| rs75793240  | C | -0.0599 |
| rs10818708  | A | -0.0174 |
| rs2011509   | A | -0.0202 |
| rs76443007  | A | 0.0699  |
| rs139672206 | A | -0.1332 |
| rs1360091   | G | 0.0701  |
| rs35739813  | A | 0.0854  |
| rs141720143 | C | 0.1288  |
| rs59453905  | G | 0.0552  |
| rs74784716  | T | -0.0637 |
| rs10815101  | A | -0.0315 |
| rs10810020  | T | -0.0194 |
| rs7033627   | C | -0.0208 |
| rs7852096   | C | 0.0245  |
| rs62581382  | C | 0.0717  |
| rs138474724 | T | -0.1293 |
| rs79821759  | C | 0.0495  |
| rs141431746 | G | 0.0895  |
| rs12343543  | T | 0.0809  |
| rs113301777 | T | 0.0713  |
| rs1586262   | G | 0.1277  |
| rs117389978 | A | -0.0621 |
| rs139609613 | G | -0.1036 |
| rs145007118 | T | -0.1044 |
| rs10974892  | G | -0.018  |
| rs13285525  | G | 0.0245  |
| rs72706374  | C | -0.0607 |

|             |   |         |
|-------------|---|---------|
| rs117985521 | A | 0.0892  |
| rs79751944  | C | 0.0657  |
| rs62576421  | T | -0.0782 |
| rs10974834  | A | -0.1065 |
| rs2209798   | A | 0.0361  |
| rs6478391   | C | 0.0255  |
| rs11562314  | C | -0.0265 |
| rs74358423  | T | 0.0726  |
| rs17570424  | G | -0.1261 |
| rs10512047  | C | 0.0286  |
| rs116912746 | C | 0.0302  |
| rs72684916  | A | -0.031  |
| rs1985591   | T | -0.0224 |
| rs72710525  | C | -0.1425 |
| rs12352202  | C | -0.0195 |
| rs379630    | G | 0.0191  |
| rs117208682 | T | 0.0722  |
| rs478381    | C | -0.0406 |
| rs41302966  | T | 0.1419  |
| rs10119020  | G | 0.0218  |
| rs12378228  | A | 0.1042  |
| rs118137738 | A | 0.0785  |
| rs144013484 | A | -0.0548 |
| rs10217615  | C | 0.1285  |
| rs569078    | T | 0.0191  |
| rs13300413  | A | -0.0242 |
| rs2060130   | T | 0.0195  |
| rs117423373 | T | 0.0694  |
| rs162630    | A | -0.0195 |
| rs146821502 | T | 0.0694  |
| rs2001537   | C | 0.0444  |
| rs117987088 | T | 0.0544  |
| rs11243816  | A | -0.0428 |
| rs73650495  | C | 0.055   |
| rs77743715  | G | 0.0979  |
| rs117923979 | C | 0.1537  |
| rs7874900   | T | 0.0178  |
| rs112214748 | A | -0.0757 |
| rs57773277  | T | -0.1839 |
| rs12002507  | T | -0.0554 |
| rs76920613  | C | 0.0652  |
| rs4962060   | C | 0.0194  |
| rs115658936 | A | 0.0956  |
| rs4308787   | C | 0.0184  |
| rs10970459  | C | -0.0277 |
| rs16934375  | G | 0.1222  |
| rs75520457  | C | 0.0727  |

|             |   |         |
|-------------|---|---------|
| rs75092903  | C | 0.0238  |
| rs11103331  | G | -0.033  |
| rs11137858  | G | 0.0747  |
| rs8190478   | A | -0.0203 |
| rs34538780  | A | -0.0393 |
| rs10987136  | C | -0.0198 |
| rs75604610  | C | 0.0828  |
| rs7033617   | A | 0.0189  |
| rs541382    | G | 0.0181  |
| rs34436786  | A | -0.0292 |
| rs7030528   | G | 0.0228  |
| rs7852889   | G | 0.0184  |
| rs2777318   | G | -0.0286 |
| rs7041583   | C | 0.027   |
| rs1001379   | C | -0.0384 |
| rs118140568 | C | 0.0803  |
| rs112345804 | C | -0.1274 |
| rs10125636  | T | -0.018  |
| rs10980750  | G | 0.0595  |
| rs3843568   | T | -0.0182 |
| rs78677839  | G | -0.0873 |
| rs140363728 | G | -0.0855 |
| rs7853098   | C | -0.0197 |
| rs12342789  | C | -0.0314 |
| rs117316586 | A | 0.0702  |
| rs7048090   | A | -0.09   |
| rs77137431  | A | -0.0333 |
| rs149277982 | G | -0.1488 |
| rs55831143  | A | 0.1266  |
| rs12001886  | G | -0.054  |
| rs112511714 | C | -0.0945 |
| rs10987117  | T | -0.0942 |
| rs6477206   | C | -0.0189 |
| rs10756416  | T | -0.022  |
| rs11795139  | T | 0.0206  |
| rs3761672   | A | 0.0172  |
| rs117309825 | G | -0.1045 |
| rs4743640   | C | -0.053  |
| rs79960902  | G | -0.0937 |
| rs79954163  | G | 0.0477  |
| rs10818931  | T | 0.0267  |
| rs4877115   | T | -0.0229 |
| rs117475964 | T | -0.0778 |
| rs7045549   | A | -0.0235 |
| rs11793060  | C | -0.0386 |
| rs79560267  | T | 0.0797  |
| rs10964673  | T | -0.0216 |

|             |   |         |
|-------------|---|---------|
| rs950785    | C | 0.0261  |
| rs10816087  | T | -0.0502 |
| rs139562217 | A | 0.1212  |
| rs10781268  | A | 0.0217  |
| rs10119909  | G | 0.022   |
| rs11793723  | A | -0.0796 |
| rs10984426  | A | -0.0181 |
| rs6476019   | T | -0.0182 |
| rs116969109 | T | 0.0585  |
| rs77624769  | T | -0.0474 |
| rs2791568   | G | -0.0359 |
| rs17386332  | C | -0.033  |
| rs1571232   | T | -0.0212 |
| rs79628270  | T | -0.0538 |
| rs113319470 | A | 0.0825  |
| rs140168972 | A | 0.0496  |
| rs10081674  | A | 0.0178  |
| rs7018496   | A | -0.0832 |
| rs2100012   | C | 0.0293  |
| rs143168681 | G | 0.1005  |
| rs146472183 | A | -0.0569 |
| rs9406632   | C | -0.0223 |
| rs62555176  | T | -0.075  |
| rs117844134 | T | 0.089   |
| rs10963657  | A | -0.0231 |
| rs150354730 | G | -0.0899 |
| rs74825467  | A | 0.0837  |
| rs72704767  | G | 0.0676  |
| rs77818912  | A | 0.0883  |
| rs60831596  | C | -0.1323 |
| rs7853586   | C | 0.0389  |
| rs7848102   | C | -0.0184 |
| rs57713420  | T | 0.1041  |
| rs73563930  | T | 0.1622  |
| rs72729086  | T | 0.0426  |
| rs982699    | G | 0.0999  |
| rs7847493   | T | 0.0275  |
| rs3861002   | A | 0.0229  |
| rs79742816  | T | -0.0724 |
| rs146726376 | A | -0.0265 |
| rs150291642 | C | -0.0531 |
| rs1578448   | C | 0.0176  |
| rs147055142 | T | 0.0375  |
| rs61156336  | G | -0.0614 |
| rs6560503   | G | -0.0406 |
| rs3842788   | A | 0.0623  |
| rs10963847  | T | -0.0212 |

|             |   |         |
|-------------|---|---------|
| rs1330334   | T | 0.0192  |
| rs1809921   | G | 0.0184  |
| rs4743023   | T | -0.0188 |
| rs10738318  | C | -0.0181 |
| rs145988249 | C | -0.1763 |
| rs117256269 | A | -0.0603 |
| rs147558893 | C | -0.1253 |
| rs112436435 | C | 0.039   |
| rs7030468   | T | -0.0449 |
| rs77434312  | A | 0.0879  |
| rs112630242 | G | 0.0705  |
| rs117099360 | C | -0.0934 |
| rs76311777  | G | 0.095   |
| rs1577133   | C | 0.0189  |
| rs113036030 | A | 0.0603  |
| rs7019994   | T | 0.025   |
| rs10821062  | T | -0.025  |
| rs111870956 | C | 0.0448  |
| rs433311    | C | 0.0188  |
| rs10812583  | G | -0.0301 |
| rs4878011   | A | 0.0345  |
| rs150016472 | T | 0.0856  |
| rs149096215 | A | 0.0363  |
| rs117075250 | T | 0.0966  |
| rs146639885 | T | -0.095  |
| rs1883023   | T | 0.0199  |
| rs117027906 | A | -0.0583 |
| rs72741497  | G | 0.0306  |
| rs4419911   | G | -0.0993 |
| rs138580995 | G | -0.0719 |
| rs16926157  | A | 0.0345  |
| rs1416551   | T | -0.026  |
| rs12347767  | C | 0.0252  |
| rs117253530 | T | -0.0863 |
| rs11794075  | G | 0.0347  |
| rs140139778 | A | 0.1176  |
| rs141169301 | T | -0.0861 |
| rs146010397 | G | -0.1297 |
| rs34627722  | A | 0.0719  |
| rs17454653  | C | -0.0264 |
| rs67086694  | G | -0.0551 |
| rs74578272  | T | 0.1228  |
| rs16934069  | T | 0.0239  |
| rs13298759  | G | 0.0367  |
| rs13295552  | C | -0.0804 |
| rs78644229  | T | 0.0595  |
| rs76656847  | G | -0.1321 |

|             |   |         |
|-------------|---|---------|
| rs7855713   | G | -0.03   |
| rs140865509 | C | -0.0917 |
| rs59082546  | G | -0.0262 |
| rs10511730  | T | -0.0323 |
| rs144838602 | A | 0.0506  |
| rs117740340 | C | -0.1175 |
| rs34481388  | A | -0.0251 |
| rs4509427   | T | -0.0322 |
| rs870151    | A | 0.0173  |
| rs117053302 | A | -0.1011 |
| rs117527052 | A | -0.0589 |
| rs12378013  | T | -0.0567 |
| rs7021634   | C | -0.0259 |
| rs35777897  | A | 0.0665  |
| rs118007455 | A | -0.1036 |
| rs1573018   | G | 0.0177  |
| rs148224867 | G | 0.1169  |
| rs72696536  | G | 0.0697  |
| rs10814678  | A | 0.0177  |
| rs16932291  | C | -0.0578 |
| rs4961613   | G | 0.0728  |
| rs10283446  | A | 0.1033  |
| rs1339230   | G | -0.0173 |
| rs10491606  | T | 0.0346  |
| rs7867128   | A | 0.0878  |
| rs10858365  | T | -0.0218 |
| rs148293912 | A | 0.1786  |
| rs112683748 | G | 0.0986  |
| rs117587250 | G | -0.0609 |
| rs118140656 | G | 0.0822  |
| rs3789299   | C | 0.0195  |
| rs112556192 | T | 0.1462  |
| rs11138108  | T | 0.0177  |
| rs76017116  | A | -0.0528 |
| rs72753079  | A | 0.0525  |
| rs57923575  | C | 0.044   |
| rs80020558  | T | -0.0311 |
| rs10746936  | T | -0.0182 |
| rs11142807  | A | 0.0626  |
| rs10735627  | G | 0.0392  |
| rs1322055   | C | -0.0244 |
| rs11792307  | T | 0.0317  |
| rs116846139 | T | 0.1387  |
| rs478695    | G | -0.0179 |
| rs700802    | G | -0.0213 |
| rs2570967   | G | 0.0183  |
| rs34952984  | A | -0.0676 |

|             |   |         |
|-------------|---|---------|
| rs144157767 | A | -0.0562 |
| rs117927472 | C | -0.088  |
| rs1339243   | C | -0.0238 |
| rs1017508   | G | 0.0184  |
| rs7859252   | A | 0.1354  |
| rs72721168  | C | 0.0614  |
| rs72741378  | T | 0.0686  |
| rs4744476   | A | -0.0202 |
| rs74721325  | C | -0.0619 |
| rs77665633  | T | 0.0833  |
| rs13293062  | T | 0.0372  |
| rs10973874  | C | 0.0254  |
| rs76299522  | C | 0.0858  |
| rs13299527  | A | 0.0283  |
| rs10118127  | T | -0.0214 |
| rs59080383  | T | -0.0301 |
| rs72730998  | A | -0.0467 |
| rs1886524   | G | 0.0717  |
| rs62579167  | C | 0.0319  |
| rs147199700 | G | 0.0964  |
| rs117475680 | T | 0.1228  |
| rs2018930   | T | 0.0243  |
| rs112606017 | C | 0.1393  |
| rs11791531  | A | -0.072  |
| rs72746433  | C | -0.0778 |
| rs10761407  | A | -0.0186 |
| rs665130    | G | 0.0294  |
| rs76689159  | G | -0.1506 |
| rs71510235  | G | 0.1151  |
| rs76573503  | T | -0.08   |
| rs7024407   | C | -0.0271 |
| rs60872889  | T | 0.0831  |
| rs13302753  | T | -0.0333 |
| rs1360809   | G | -0.0384 |
| rs17501156  | A | 0.0962  |
| rs10992122  | G | 0.0439  |
| rs16910976  | C | 0.0254  |
| rs10978704  | G | 0.0281  |
| rs68017481  | G | -0.0262 |
| rs10968258  | G | -0.0232 |
| rs78492166  | T | 0.0653  |
| rs10733611  | A | 0.0364  |
| rs1419373   | C | 0.0377  |
| rs62559900  | T | 0.0572  |
| rs7028273   | C | 0.0217  |
| rs13288052  | G | 0.0287  |
| rs141917313 | T | -0.1366 |

|             |   |         |
|-------------|---|---------|
| rs7038472   | T | -0.0898 |
| rs117447729 | T | -0.1323 |
| rs78008897  | G | 0.1061  |
| rs62559944  | A | 0.0552  |
| rs72745361  | C | 0.0612  |
| rs10985938  | T | -0.0297 |
| rs3758269   | A | 0.0316  |
| rs75921322  | A | 0.0871  |
| rs752359    | A | -0.0223 |
| rs118037960 | T | 0.1367  |
| rs10780535  | C | 0.0181  |
| rs76585134  | G | -0.0981 |
| rs76511072  | C | -0.0647 |
| rs13283873  | A | 0.0578  |
| rs118165826 | G | 0.1307  |
| rs35595167  | G | 0.0453  |
| rs138923808 | A | 0.0224  |
| rs117063648 | C | 0.0684  |
| rs10972604  | T | 0.0453  |
| rs77249514  | T | -0.0861 |
| rs117782957 | C | -0.0734 |
| rs7020462   | T | -0.0248 |
| rs139261028 | A | -0.1036 |
| rs2066414   | T | 0.0246  |
| rs12350870  | A | 0.0191  |
| rs72760428  | A | -0.0863 |
| rs75785779  | C | 0.0242  |
| rs75876067  | T | 0.0948  |
| rs140426593 | A | 0.0937  |
| rs1106261   | A | -0.0177 |
| rs3762076   | T | 0.0636  |
| rs13296430  | C | -0.0171 |
| rs72694641  | T | -0.1345 |
| rs296613    | A | 0.02    |
| rs62566862  | A | -0.065  |
| rs79309531  | T | -0.0524 |
| rs77485150  | A | 0.0535  |
| rs1412250   | A | -0.0785 |
| rs141822739 | T | 0.0846  |
| rs74646486  | G | 0.0553  |
| rs2480214   | C | -0.0303 |
| rs1935355   | G | 0.0449  |
| rs72754227  | T | 0.0346  |
| rs2416837   | G | -0.0323 |
| rs7027464   | C | 0.0276  |
| rs72704339  | C | 0.0329  |
| rs118186730 | A | 0.051   |



|             |   |         |
|-------------|---|---------|
| rs147807708 | G | -0.0724 |
| rs10115176  | T | -0.0211 |
| rs34148766  | C | 0.12    |
| rs146283605 | A | 0.0592  |
| rs881178    | G | 0.0627  |
| rs72746637  | T | 0.0337  |
| rs78761419  | C | -0.0346 |
| rs2478230   | C | 0.0896  |
| rs62571333  | T | -0.026  |
| rs7036453   | T | -0.0436 |
| rs111295335 | A | 0.0722  |
| rs78951991  | G | 0.0883  |
| rs10984362  | G | 0.0387  |
| rs7852014   | C | -0.0167 |
| rs62581367  | G | 0.0336  |
| rs548829    | G | -0.0513 |
| rs35318469  | C | 0.0677  |
| rs10965780  | C | 0.0188  |
| rs3849114   | G | 0.0334  |
| rs7847295   | C | 0.0184  |
| rs73426426  | A | -0.0518 |
| rs6559957   | T | -0.0198 |
| rs3124953   | A | -0.0212 |
| rs12378334  | G | -0.0196 |
| rs10971038  | A | -0.0325 |
| rs79174492  | T | -0.0373 |
| rs142135897 | T | 0.0437  |
| rs111711876 | A | -0.0677 |
| rs72739196  | G | -0.0363 |
| rs10115967  | C | 0.0226  |
| rs4745487   | C | -0.0576 |
| rs79895530  | T | -0.0247 |
| rs79281876  | C | -0.0715 |
| rs116890006 | G | 0.1386  |
| rs72694232  | G | -0.0845 |
| rs1411720   | T | -0.0183 |
| rs117482175 | G | 0.0794  |
| rs13298055  | T | 0.1143  |
| rs75477022  | A | 0.1496  |
| rs117243979 | T | 0.0719  |
| rs72733472  | A | 0.0717  |
| rs71509850  | G | -0.0753 |
| rs117979555 | G | 0.0894  |
| rs117417827 | T | -0.0995 |
| rs80119771  | A | -0.0272 |
| rs2891177   | T | 0.0224  |
| rs681410    | C | 0.0184  |

|             |   |         |
|-------------|---|---------|
| rs140098474 | A | 0.1387  |
| rs79711948  | T | -0.0517 |
| rs2487014   | T | -0.0247 |
| rs4463498   | A | 0.017   |
| rs1033866   | T | -0.0199 |
| rs2780983   | C | -0.0208 |
| rs142398114 | T | 0.0898  |
| rs150666645 | G | -0.0993 |
| rs55832155  | A | 0.0437  |
| rs10980203  | A | -0.0259 |
| rs533549    | G | -0.0178 |
| rs76351113  | T | -0.0612 |
| rs1341691   | T | -0.0968 |
| rs10119777  | G | -0.0243 |
| rs142295828 | C | -0.0584 |
| rs148877504 | T | -0.0889 |
| rs79779614  | A | 0.0416  |
| rs7042597   | C | -0.0176 |
| rs80277240  | T | -0.0814 |
| rs10961884  | C | -0.0381 |
| rs11790707  | A | -0.051  |
| rs10967056  | T | -0.0906 |
| rs10814336  | G | -0.0263 |
| rs11790223  | C | -0.0208 |
| rs142341304 | C | 0.0766  |
| rs76647193  | G | 0.0895  |
| rs17713843  | A | -0.0364 |
| rs2642413   | C | -0.0401 |
| rs10908898  | G | 0.0176  |
| rs117843929 | C | 0.1378  |
| rs116842540 | T | -0.0442 |
| rs62557119  | A | 0.0272  |
| rs117227095 | G | -0.0654 |
| rs76100797  | C | -0.0445 |
| rs17729039  | T | -0.0273 |
| rs138859769 | C | -0.0953 |
| rs28697880  | C | 0.0207  |
| rs10984575  | A | 0.0259  |
| rs10968647  | C | 0.0243  |
| rs12237774  | T | 0.1036  |
| rs56157435  | T | 0.0169  |
| rs118166920 | A | 0.06    |
| rs838837    | T | -0.0621 |
| rs112335762 | T | -0.1513 |
| rs7034018   | T | 0.0225  |
| rs7030558   | G | 0.024   |
| rs56221881  | A | -0.0418 |

|             |   |         |
|-------------|---|---------|
| rs10988354  | A | -0.0365 |
| rs2478853   | C | 0.0231  |
| rs79583613  | T | 0.0612  |
| rs117985479 | T | 0.0767  |
| rs1777034   | G | -0.0264 |
| rs599198    | G | 0.0781  |
| rs116900844 | C | 0.0831  |
| rs144345589 | T | 0.0681  |
| rs112017452 | T | -0.054  |
| rs10867933  | T | 0.0491  |
| rs72739585  | C | 0.0726  |
| rs2183328   | C | 0.0179  |
| rs118091887 | T | 0.0515  |
| rs78944799  | C | -0.0335 |
| rs914852    | T | -0.0274 |
| rs10815681  | T | 0.0209  |
| rs914490    | G | 0.0328  |
| rs66796539  | C | -0.1524 |
| rs17540238  | C | -0.0496 |
| rs78985042  | G | -0.141  |
| rs3818725   | G | 0.1215  |
| rs791658    | T | 0.0848  |
| rs10870094  | G | 0.0211  |
| rs10965649  | C | -0.0852 |
| rs876441    | A | 0.0176  |
| rs1461339   | G | 0.025   |
| rs67346842  | G | 0.0603  |
| rs10970969  | T | -0.0181 |
| rs62558294  | A | 0.0759  |
| rs969320    | C | -0.0227 |
| rs12553444  | G | -0.036  |
| rs111783254 | T | 0.0375  |
| rs2418424   | T | -0.0253 |
| rs75153929  | C | -0.0668 |
| rs10115871  | A | 0.0208  |
| rs146830243 | A | -0.1055 |
| rs10809814  | A | -0.0354 |
| rs914976    | T | 0.0322  |
| rs78105708  | A | 0.07    |
| rs117609354 | A | -0.0781 |
| rs75255774  | A | -0.0516 |
| rs75999974  | G | -0.0392 |
| rs79470696  | T | 0.0596  |
| rs10978720  | A | 0.0272  |
| rs10810383  | C | -0.02   |
| rs12554940  | C | -0.0362 |
| rs10969030  | T | -0.0179 |

|             |   |         |
|-------------|---|---------|
| rs117695347 | A | -0.0763 |
| rs62544706  | G | -0.0324 |
| rs72762641  | G | -0.0474 |
| rs144044528 | A | 0.1243  |
| rs10977116  | G | -0.0175 |
| rs13284111  | A | 0.0334  |
| rs12350582  | G | 0.0262  |
| rs117457077 | A | 0.0795  |
| rs2940908   | C | -0.1041 |
| rs10961876  | A | 0.0206  |
| rs12553005  | G | 0.0568  |
| rs12555219  | G | -0.0677 |
| rs13287938  | T | -0.0303 |
| rs4744145   | T | 0.0293  |
| rs12006545  | G | -0.1295 |
| rs10511626  | T | 0.0259  |
| rs118114093 | C | -0.0811 |
| rs13288951  | A | -0.0677 |
| rs11144054  | G | 0.0863  |
| rs146760700 | G | 0.1312  |
| rs76356203  | G | 0.0959  |
| rs951770    | C | -0.0264 |
| rs149760032 | T | -0.1506 |
| rs149270380 | C | -0.0756 |
| rs12554390  | T | 0.0197  |
| rs73672511  | T | 0.0276  |
| rs111587878 | A | -0.1447 |
| rs148703430 | T | -0.0798 |
| rs117612776 | T | -0.0517 |
| rs12551926  | C | 0.0177  |
| rs11788396  | T | -0.0339 |
| rs7034405   | C | 0.0207  |
| rs35918962  | T | -0.0301 |
| rs2291958   | C | 0.0242  |
| rs478436    | A | 0.0193  |
| rs7849586   | G | 0.0917  |
| rs10980100  | G | -0.0234 |
| rs1252041   | A | -0.0269 |
| rs60432824  | T | -0.0487 |
| rs115643439 | A | 0.0342  |
| rs75230822  | G | -0.0793 |
| rs12347366  | T | 0.0176  |
| rs74720570  | T | -0.0302 |
| rs17382009  | A | -0.0528 |
| rs2184258   | T | -0.0175 |
| rs13293794  | C | -0.0201 |
| rs62578610  | C | -0.0242 |

|             |   |         |
|-------------|---|---------|
| rs77120625  | C | 0.0823  |
| rs10986181  | C | -0.0267 |
| rs79401037  | C | -0.0661 |
| rs150463991 | C | -0.0523 |
| rs117281274 | G | -0.1099 |
| rs12335487  | G | 0.0176  |
| rs10966435  | C | -0.0215 |
| rs144667217 | A | -0.0701 |
| rs75136270  | A | 0.0615  |
| rs73653645  | T | 0.1153  |
| rs144847718 | C | 0.1021  |
| rs6477476   | C | -0.034  |
| rs10818367  | A | 0.0177  |
| rs7020186   | A | 0.0264  |
| rs77019497  | A | 0.0657  |
| rs72717828  | C | -0.063  |
| rs10821084  | A | 0.0276  |
| rs7044651   | T | -0.0225 |
| rs76614156  | G | -0.1115 |
| rs67412687  | A | -0.068  |
| rs9650779   | G | 0.0214  |
| rs116898230 | A | -0.0625 |
| rs10988837  | C | 0.0224  |
| rs11789947  | C | 0.028   |
| rs1360619   | G | 0.0173  |
| rs1220646   | T | -0.0226 |
| rs4392977   | G | 0.0482  |
| rs11791699  | A | -0.0232 |
| rs74688776  | T | -0.066  |
| rs10512168  | G | 0.0195  |
| rs10811483  | A | 0.0255  |
| rs7871096   | T | 0.0203  |
| rs62571454  | C | -0.023  |
| rs7864784   | A | 0.0205  |
| rs62568207  | C | 0.0357  |
| rs17649066  | C | 0.0654  |
| rs117350341 | A | -0.0771 |
| rs11103505  | C | 0.0422  |
| rs10814241  | G | -0.0366 |
| rs10759857  | G | -0.029  |
| rs72734708  | G | -0.0692 |
| rs34381175  | C | 0.0793  |
| rs17813801  | G | 0.0214  |
| rs1967891   | T | -0.0221 |
| rs75024460  | T | 0.0495  |
| rs72754635  | T | 0.1312  |
| rs117017534 | T | 0.0425  |

|             |   |         |
|-------------|---|---------|
| rs73667271  | C | 0.0426  |
| rs117699530 | A | -0.1546 |
| rs7863653   | C | 0.0181  |
| rs10757575  | G | -0.0225 |
| rs3132330   | A | 0.0182  |
| rs17528412  | A | -0.0305 |
| rs117945947 | G | 0.1041  |
| rs142324479 | C | 0.0482  |
| rs56310216  | C | 0.0792  |
| rs10982933  | T | -0.0243 |
| rs4741883   | C | -0.0259 |
| rs117822062 | T | 0.0858  |
| rs78295367  | T | -0.0577 |
| rs2157716   | T | 0.0213  |
| rs2275136   | G | 0.0305  |
| rs117236685 | C | 0.1139  |
| rs7029836   | A | 0.0513  |
| rs1631790   | T | -0.0576 |
| rs117040311 | C | 0.0978  |
| rs10121918  | A | -0.0177 |
| rs11144772  | T | 0.0307  |
| rs12156510  | G | 0.0213  |
| rs72760091  | T | -0.0891 |
| rs7047143   | T | 0.022   |
| rs2382525   | C | 0.0274  |
| rs10973794  | A | -0.02   |
| rs35635132  | T | 0.035   |
| rs34417811  | C | -0.0168 |
| rs12376091  | C | 0.0196  |
| rs7847839   | T | 0.0443  |
| rs56202821  | A | 0.0628  |
| rs34969649  | A | 0.0847  |
| rs56024916  | T | 0.0236  |
| rs41273907  | C | -0.1563 |
| rs16934264  | T | 0.0434  |
| rs117922225 | A | 0.1167  |
| rs72695312  | T | -0.0632 |
| rs2380902   | T | 0.0211  |
| rs78709159  | T | 0.0799  |
| rs74427190  | A | -0.1395 |
| rs58907282  | A | -0.0692 |
| rs75194523  | G | 0.1104  |
| rs532742    | A | -0.0215 |
| rs77665299  | G | -0.0489 |
| rs10966944  | G | 0.0438  |
| rs10992889  | G | 0.0236  |
| rs112911128 | C | 0.0676  |

|             |   |         |
|-------------|---|---------|
| rs12237839  | C | -0.0722 |
| rs10491772  | G | -0.0184 |
| rs76432366  | T | 0.1248  |
| rs13288450  | A | 0.0707  |
| rs10511535  | T | -0.048  |
| rs11791423  | G | -0.0583 |
| rs10986470  | A | 0.1009  |
| rs11244281  | G | 0.0579  |
| rs10125965  | C | -0.017  |
| rs62569097  | A | 0.1168  |
| rs72726065  | C | -0.0505 |
| rs79062080  | C | -0.0591 |
| rs145775619 | G | -0.141  |
| rs7869330   | G | 0.0184  |
| rs113450918 | G | -0.0961 |
| rs855438    | C | 0.0253  |
| rs17710605  | G | 0.0322  |
| rs112391657 | C | -0.1325 |
| rs3124757   | G | -0.0277 |
| rs10818649  | C | -0.0169 |
| rs116937286 | C | 0.1002  |
| rs78118182  | A | -0.0626 |
| rs72754394  | T | -0.1254 |
| rs72683424  | T | 0.0375  |
| rs148038223 | A | -0.0672 |
| rs58916113  | G | 0.0482  |
| rs41275930  | T | 0.0899  |
| rs76670837  | C | -0.037  |
| rs36214017  | T | -0.0302 |
| rs142818941 | T | -0.062  |
| rs4838179   | C | 0.0176  |
| rs7860507   | A | -0.0202 |
| rs56391297  | A | 0.0335  |
| rs75430432  | C | 0.0733  |
| rs1867178   | A | 0.0184  |
| rs10990246  | C | -0.0175 |
| rs72743370  | T | 0.0292  |
| rs73549935  | A | 0.0358  |
| rs56147443  | A | 0.0454  |
| rs13295392  | G | 0.0225  |
| rs62530467  | G | 0.0423  |
| rs72697936  | A | -0.0375 |
| rs2488274   | G | -0.0214 |
| rs10985613  | G | 0.034   |
| rs2293518   | A | -0.0197 |
| rs75781806  | T | 0.0354  |
| rs116910509 | A | -0.061  |

|             |   |         |
|-------------|---|---------|
| rs4837364   | C | -0.024  |
| rs112091734 | A | 0.0787  |
| rs3827664   | C | -0.0219 |
| rs55672367  | T | 0.0222  |
| rs142764136 | A | -0.0646 |
| rs117056887 | T | -0.0546 |
| rs7034019   | G | 0.0343  |
| rs10974619  | T | 0.0194  |
| rs77395154  | T | -0.031  |
| rs13296950  | T | 0.0281  |
| rs75121961  | A | 0.055   |
| rs13289474  | T | -0.0271 |
| rs116889518 | G | -0.0715 |
| rs10118910  | G | 0.0247  |
| rs112122377 | C | 0.0909  |
| rs560763    | T | 0.0876  |
| rs12338452  | C | 0.0318  |
| rs145815023 | G | -0.0974 |
| rs7033777   | T | 0.0164  |
| rs16931378  | A | -0.0502 |
| rs113794486 | T | -0.0839 |
| rs7873809   | G | 0.05    |
| rs79520073  | T | 0.101   |
| rs140627718 | A | -0.0716 |
| rs118035223 | A | 0.0719  |
| rs118137512 | T | 0.1013  |
| rs141734262 | A | -0.0504 |
| rs12006500  | G | -0.0444 |
| rs4526484   | A | -0.0217 |
| rs7031337   | T | 0.0173  |
| rs117349277 | T | 0.1056  |
| rs353540    | G | 0.023   |
| rs7028628   | G | 0.019   |
| rs148964186 | T | 0.1038  |
| rs16932354  | C | -0.0279 |
| rs72695988  | G | 0.0637  |
| rs7041293   | C | -0.0211 |
| rs2135744   | C | 0.0476  |
| rs144425548 | C | 0.0522  |
| rs77383859  | G | -0.0451 |
| rs118123247 | G | -0.0823 |
| rs143617309 | A | -0.0802 |
| rs76940577  | T | -0.0485 |
| rs2093379   | A | 0.0643  |
| rs73509999  | C | -0.061  |
| rs10759013  | A | -0.0289 |
| rs71507880  | G | -0.0849 |



|             |   |         |
|-------------|---|---------|
| rs62566055  | G | -0.0313 |
| rs1147191   | A | -0.0238 |
| rs118095785 | A | -0.0535 |
| rs10858120  | A | -0.0513 |
| rs776776    | A | 0.0164  |
| rs144390523 | G | -0.1092 |
| rs62533675  | A | 0.0248  |
| rs392125    | C | -0.0356 |
| rs145435502 | A | -0.0494 |
| rs6559344   | C | -0.0197 |
| rs142109743 | T | -0.0868 |
| rs10977673  | G | -0.0181 |
| rs7862678   | A | -0.0224 |
| rs2383096   | A | 0.0164  |
| rs11144217  | T | -0.0207 |
| rs147831758 | G | -0.027  |
| rs7047752   | T | 0.0279  |
| rs10119546  | C | 0.0906  |
| rs34842950  | A | 0.0359  |
| rs116950536 | C | 0.0919  |
| rs78927555  | A | 0.0377  |
| rs77867855  | T | 0.0705  |
| rs71503506  | G | 0.045   |
| rs117545267 | A | 0.0743  |
| rs78976850  | T | -0.0461 |
| rs10993591  | A | 0.027   |
| rs72758743  | T | -0.0558 |
| rs12550943  | A | -0.0189 |
| rs72760874  | A | 0.0678  |
| rs7019151   | T | 0.0289  |
| rs17786800  | A | -0.0467 |
| rs62542329  | G | 0.0272  |
| rs10814575  | G | -0.017  |
| rs2210767   | C | -0.019  |
| rs7857883   | T | 0.0224  |
| rs117049020 | G | 0.1053  |
| rs143309151 | G | -0.0819 |
| rs72737155  | A | -0.0366 |
| rs74823744  | T | -0.0678 |
| rs12552100  | C | 0.079   |
| rs12380068  | C | -0.0431 |
| rs10993849  | A | 0.0309  |
| rs2181035   | C | -0.0392 |
| rs6479634   | A | 0.0182  |
| rs4740738   | G | -0.0282 |
| rs7857516   | G | 0.0779  |
| rs787900    | T | -0.0242 |

|             |   |         |
|-------------|---|---------|
| rs78379155  | T | 0.0855  |
| rs329197    | T | -0.0315 |
| rs118106262 | C | -0.0672 |
| rs117035346 | T | 0.088   |
| rs10820080  | C | 0.031   |
| rs117034071 | A | 0.0368  |
| rs118050357 | A | 0.1284  |
| rs28877118  | C | 0.0462  |
| rs10817687  | G | -0.0782 |
| rs76577739  | A | 0.0487  |
| rs72718877  | C | 0.0512  |
| rs4877564   | C | 0.0188  |
| rs56083858  | T | -0.0743 |
| rs55919029  | G | 0.097   |
| rs7856552   | A | -0.0529 |
| rs55689715  | C | -0.021  |
| rs11142902  | G | 0.0305  |
| rs13289548  | A | 0.0726  |
| rs140987669 | G | -0.0955 |
| rs72737776  | G | -0.0553 |
| rs79325207  | T | 0.0375  |
| rs10759825  | C | 0.0161  |
| rs237625    | G | 0.0246  |
| rs62578318  | A | 0.0239  |
| rs41273386  | T | 0.0569  |
| rs3132317   | T | -0.0333 |
| rs117435320 | A | 0.1422  |
| rs13288666  | C | -0.0693 |
| rs62568072  | T | 0.1545  |
| rs1931095   | T | -0.0259 |
| rs7869537   | C | -0.0311 |
| rs12551145  | A | -0.0313 |
| rs72710509  | G | -0.0745 |
| rs7862766   | T | 0.0236  |
| rs7039494   | T | -0.0212 |
| rs10867204  | C | -0.0455 |
| rs10974770  | T | -0.0196 |
| rs62565992  | T | 0.0277  |
| rs75211280  | T | 0.0512  |
| rs1052462   | T | 0.0238  |
| rs10970568  | T | 0.0445  |
| rs79813326  | A | 0.0569  |
| rs72757431  | C | -0.0999 |
| rs2296875   | G | -0.0483 |
| rs10124385  | G | 0.0489  |
| rs118136804 | C | 0.0663  |
| rs913990    | G | 0.0191  |

|             |   |         |
|-------------|---|---------|
| rs1803716   | C | 0.075   |
| rs10124670  | C | 0.0565  |
| rs6537996   | C | 0.0687  |
| rs10958998  | G | -0.0517 |
| rs1341764   | T | -0.0437 |
| rs9776338   | G | -0.0192 |
| rs74473753  | A | 0.1044  |
| rs150134338 | A | -0.115  |
| rs61237993  | A | -0.024  |
| rs78095464  | T | -0.0472 |
| rs1460832   | A | 0.0332  |
| rs139642100 | G | -0.089  |
| rs10738299  | A | 0.0178  |
| rs114866437 | C | -0.0713 |
| rs16928463  | T | 0.0784  |
| rs10962743  | C | -0.0229 |
| rs4745500   | A | 0.0196  |
| rs7036183   | C | 0.0184  |
| rs12346867  | A | 0.0206  |
| rs116977988 | A | -0.1175 |
| rs62533473  | G | 0.0391  |
| rs147419327 | G | -0.0298 |
| rs72753718  | A | 0.1011  |
| rs16915924  | C | -0.0257 |
| rs148720641 | G | 0.0787  |
| rs147851904 | C | -0.0668 |
| rs7047255   | C | 0.0636  |
| rs112359565 | A | 0.0627  |
| rs7048235   | C | 0.0211  |
| rs75550520  | A | -0.0725 |
| rs62574318  | A | 0.0291  |
| rs62577207  | C | 0.0482  |
| rs11788465  | T | -0.0604 |
| rs10869516  | C | 0.0189  |
| rs138447739 | G | -0.074  |
| rs56411590  | G | 0.1314  |
| rs1339283   | A | 0.0221  |
| rs35217189  | G | -0.0748 |
| rs149977854 | C | -0.1217 |
| rs116898070 | A | -0.1117 |
| rs118115258 | C | -0.0749 |
| rs75354225  | A | 0.0234  |
| rs11145797  | A | -0.0214 |
| rs62554453  | G | 0.044   |
| rs147396438 | C | -0.0735 |
| rs10115114  | G | -0.0184 |
| rs117122687 | G | -0.0239 |

|             |   |         |
|-------------|---|---------|
| rs78327215  | G | 0.0718  |
| rs4838102   | T | -0.0259 |
| rs12344789  | A | 0.0289  |
| rs3750343   | A | 0.0164  |
| rs140193010 | T | -0.0684 |
| rs10813389  | C | 0.0578  |
| rs72737058  | T | 0.017   |
| rs1927156   | G | 0.0915  |
| rs117297109 | T | -0.0469 |
| rs12351466  | A | -0.0231 |
| rs143322388 | G | 0.0865  |
| rs7865034   | T | 0.0418  |
| rs117946145 | C | 0.0459  |
| rs76672098  | C | -0.127  |
| rs11243922  | A | -0.0239 |
| rs73648437  | C | 0.0336  |
| rs144538449 | T | 0.0903  |
| rs7045859   | G | -0.0179 |
| rs35116093  | G | -0.0642 |
| rs41274258  | G | -0.0705 |
| rs10491725  | T | 0.0171  |
| rs12235737  | G | 0.0253  |
| rs10819931  | T | 0.0505  |
| rs142356117 | T | -0.0996 |
| rs149397631 | C | 0.0986  |
| rs144303059 | T | -0.1413 |
| rs76433012  | A | 0.0456  |
| rs2001866   | T | 0.0232  |
| rs7855046   | C | 0.0199  |
| rs138652792 | G | -0.0845 |
| rs79515469  | C | -0.0782 |
| rs62574363  | C | 0.0656  |
| rs7855901   | A | 0.0167  |
| rs10118601  | C | 0.0241  |
| rs117299037 | G | -0.0995 |
| rs10962635  | T | 0.0644  |
| rs117461324 | T | 0.1105  |
| rs817861    | G | 0.0455  |
| rs35492632  | A | 0.0345  |
| rs34890487  | C | 0.0366  |
| rs475378    | C | -0.0836 |
| rs55909589  | A | 0.1049  |
| rs150507973 | A | 0.0376  |
| rs787894    | T | -0.0164 |
| rs10283920  | T | -0.0221 |
| rs66515112  | T | 0.0357  |
| rs7045004   | A | 0.0645  |

|             |   |         |
|-------------|---|---------|
| rs10816914  | A | 0.0175  |
| rs17292683  | C | 0.0168  |
| rs11140919  | T | 0.034   |
| rs113758230 | T | -0.1086 |
| rs10961867  | G | 0.0274  |
| rs117707475 | T | -0.0574 |
| rs7865374   | T | -0.0403 |
| rs10982661  | T | 0.0254  |
| rs78054337  | T | 0.1159  |
| rs7025850   | C | 0.016   |
| rs55817693  | A | 0.0239  |
| rs1854139   | A | -0.0175 |
| rs7873215   | A | -0.0299 |
| rs12344977  | T | 0.0197  |
| rs10984747  | C | 0.0414  |
| rs4743097   | C | 0.0158  |
| rs17402080  | T | 0.0934  |
| rs35669748  | C | -0.0318 |
| rs73556903  | T | 0.0299  |
| rs11144782  | G | 0.0224  |
| rs73504370  | C | 0.0483  |
| rs75524594  | A | -0.0396 |
| rs111705906 | G | 0.0301  |
| rs1036106   | A | 0.024   |
| rs7851492   | C | -0.0468 |
| rs145211093 | T | 0.113   |
| rs10120386  | T | 0.0303  |
| rs116922910 | A | -0.0997 |
| rs36068483  | G | 0.0446  |
| rs78038372  | G | -0.0658 |
| rs895192    | T | -0.0226 |
| rs10813970  | G | -0.0394 |
| rs10990654  | A | -0.0162 |
| rs74917204  | G | 0.0606  |
| rs59080656  | A | 0.0244  |
| rs79177442  | A | 0.1435  |
| rs11793393  | T | -0.0382 |
| rs150246710 | A | 0.121   |
| rs2777020   | G | -0.0193 |
| rs1777041   | G | -0.1338 |
| rs2148583   | C | 0.0312  |
| rs141780402 | A | -0.1432 |
| rs67776235  | A | 0.0255  |
| rs62560460  | T | 0.0425  |
| rs13293416  | C | -0.0483 |
| rs9696014   | A | -0.0389 |
| rs11141764  | T | -0.0168 |

|             |   |         |
|-------------|---|---------|
| rs7854428   | G | -0.0168 |
| rs150310731 | G | -0.1512 |
| rs308493    | A | -0.0247 |
| rs35865943  | A | -0.0177 |
| rs17403578  | A | -0.0407 |
| rs145507675 | T | 0.1197  |
| rs74558293  | A | 0.0728  |
| rs140475696 | C | -0.1747 |
| rs12378647  | G | -0.0166 |
| rs12343144  | T | -0.0238 |
| rs1769256   | A | -0.0585 |
| rs3747533   | G | -0.0279 |
| rs10121017  | A | -0.0193 |
| rs113790440 | T | -0.0904 |
| rs77712477  | A | 0.0887  |
| rs539813    | C | -0.025  |
| rs10745400  | A | 0.0225  |
| rs146683376 | C | -0.0621 |
| rs1940244   | G | 0.0164  |
| rs12342211  | T | 0.0644  |
| rs10776868  | A | -0.0271 |
| rs7872232   | A | -0.0194 |
| rs72760139  | T | 0.0483  |
| rs4307422   | A | 0.0539  |
| rs62573505  | G | 0.017   |
| rs112578134 | C | -0.0835 |
| rs1213265   | C | -0.0334 |
| rs72702518  | C | -0.0709 |
| rs77054814  | G | 0.0432  |
| rs148732050 | C | -0.1785 |
| rs111846139 | A | 0.0724  |
| rs12235175  | T | 0.0331  |
| rs2842481   | C | -0.0159 |
| rs62570790  | A | 0.0445  |
| rs1339359   | T | -0.0177 |
| rs76797338  | T | -0.0623 |
| rs143790240 | T | -0.1232 |
| rs2808801   | T | 0.0172  |
| rs80015808  | T | -0.097  |
| rs116929923 | T | 0.0618  |
| rs76187699  | T | 0.0642  |
| rs7875271   | A | 0.0707  |
| rs143803339 | G | 0.1617  |
| rs41312188  | A | -0.0485 |
| rs117769391 | G | 0.0998  |
| rs10122461  | T | -0.0215 |
| rs150585886 | T | -0.1008 |

|             |   |         |
|-------------|---|---------|
| rs143233509 | G | -0.1183 |
| rs139412433 | A | 0.0186  |
| rs17724210  | A | 0.0503  |
| rs3824437   | A | 0.0369  |
| rs76134135  | A | 0.05    |
| rs10511631  | G | 0.0632  |
| rs72702001  | G | -0.0528 |
| rs111992032 | A | 0.0698  |
| rs302917    | C | 0.0248  |
| rs75382043  | A | 0.0692  |
| rs13285464  | G | 0.0176  |
| rs56218359  | C | -0.0245 |
| rs11144072  | C | 0.0299  |
| rs12554262  | T | -0.0345 |
| rs62533939  | G | 0.0331  |
| rs62543624  | A | 0.0195  |
| rs117517710 | T | -0.1053 |
| rs138180812 | G | 0.1054  |
| rs16915689  | G | -0.0936 |
| rs117210949 | G | -0.0952 |
| rs7873724   | G | -0.0599 |
| rs10958969  | G | 0.0484  |
| rs7854010   | C | -0.0217 |
| rs111967890 | A | -0.1095 |
| rs1619211   | C | -0.0249 |
| rs970904    | A | 0.0261  |
| rs68041730  | A | -0.0803 |
| rs117689786 | A | 0.0618  |
| rs34680427  | G | 0.0189  |
| rs12003643  | G | 0.0241  |
| rs12379828  | G | -0.0519 |
| rs7390449   | T | 0.0817  |
| rs116661350 | T | 0.057   |
| rs3814542   | C | -0.0203 |
| rs7855257   | C | 0.0191  |
| rs145186633 | G | -0.1294 |
| rs72717865  | G | -0.0219 |
| rs76972116  | A | -0.0624 |
| rs2184744   | C | -0.0598 |
| rs726900    | G | 0.0264  |
| rs35223569  | T | 0.058   |
| rs143480008 | C | -0.0325 |
| rs56327216  | G | 0.0164  |
| rs79285457  | T | 0.0507  |
| rs820495    | C | -0.0211 |
| rs76584426  | T | 0.0517  |
| rs10115020  | G | -0.0178 |

|             |   |         |
|-------------|---|---------|
| rs41275920  | T | -0.0484 |
| rs7022774   | G | -0.0229 |
| rs13290407  | G | 0.0697  |
| rs75660742  | G | -0.0767 |
| rs142680652 | A | -0.1191 |
| rs512089    | C | 0.0176  |
| rs353797    | G | -0.0194 |
| rs1946588   | A | -0.0194 |
| rs11795285  | T | 0.0435  |
| rs76455554  | A | -0.1504 |
| rs144373845 | G | 0.0983  |
| rs62537497  | A | -0.0339 |
| rs4977887   | G | 0.0165  |
| rs138683682 | T | 0.1231  |
| rs10969539  | A | 0.0201  |
| rs11140417  | G | 0.0772  |
| rs143371526 | G | 0.1046  |
| rs62532824  | T | -0.0278 |
| rs139284637 | A | -0.073  |
| rs76216092  | A | -0.0493 |
| rs151083278 | G | 0.0898  |
| rs11143542  | C | 0.0505  |
| rs143972629 | G | -0.0943 |
| rs6477645   | A | 0.0267  |
| rs10810063  | G | 0.0167  |
| rs78351162  | A | -0.0875 |
| rs28650195  | C | 0.0344  |
| rs17458750  | C | 0.0169  |
| rs79668530  | T | -0.0492 |
| rs13290694  | T | -0.0896 |
| rs78662765  | A | -0.0881 |
| rs13299265  | A | -0.0297 |
| rs12002084  | C | 0.0862  |
| rs117176224 | A | -0.0776 |
| rs72779268  | A | -0.048  |
| rs10156626  | A | 0.0207  |
| rs76224851  | G | -0.0877 |
| rs11138635  | G | -0.0173 |
| rs1331665   | T | -0.0175 |
| rs10114474  | G | 0.0269  |
| rs10757122  | C | -0.0261 |
| rs116879658 | G | -0.0755 |
| rs28829689  | T | 0.0338  |
| rs142720145 | T | -0.0553 |
| rs143330436 | T | -0.113  |
| rs142712046 | G | 0.0939  |
| rs138943287 | T | 0.039   |



|             |   |         |
|-------------|---|---------|
| rs10992075  | G | -0.0173 |
| rs35653565  | A | 0.0248  |
| rs1213281   | C | 0.0195  |
| rs296724    | C | 0.0183  |
| rs7875004   | A | 0.0562  |
| rs75058897  | A | -0.0494 |
| rs17419611  | T | 0.0216  |
| rs10809874  | G | 0.0353  |
| rs117286934 | T | -0.0756 |
| rs76697639  | G | 0.0745  |
| rs12346760  | G | 0.0361  |
| rs117124067 | T | -0.0842 |
| rs111539224 | G | 0.0522  |
| rs11103632  | T | 0.0176  |
| rs7025704   | C | -0.0339 |
| rs7867992   | C | 0.0171  |
| rs151143049 | C | 0.0852  |
| rs35527067  | T | -0.1098 |
| rs80038149  | T | 0.0512  |
| rs7023142   | T | -0.0702 |
| rs141185387 | G | 0.1057  |
| rs72744721  | A | -0.0804 |
| rs118181713 | G | -0.1013 |
| rs16931666  | T | 0.0442  |
| rs10980531  | A | 0.0204  |
| rs10818679  | C | -0.0596 |
| rs55817703  | T | 0.0363  |
| rs59961223  | T | -0.1152 |
| rs74362958  | T | 0.0627  |
| rs118178916 | T | -0.1088 |
| rs76064045  | G | -0.0456 |
| rs4841977   | G | 0.0189  |
| rs11103123  | C | 0.0294  |
| rs79170989  | A | 0.1153  |
| rs17480929  | T | -0.0932 |
| rs10512176  | C | 0.0177  |
| rs73498748  | C | 0.0366  |
| rs10816522  | T | 0.0239  |
| rs12555630  | A | -0.0343 |
| rs1981263   | C | 0.022   |
| rs13299888  | A | 0.1182  |
| rs78951248  | A | 0.0899  |
| rs10964006  | G | -0.0194 |
| rs62546068  | A | -0.0703 |
| rs10858360  | T | 0.0181  |
| rs10987680  | A | -0.1243 |
| rs76280723  | A | -0.1036 |

|             |   |         |
|-------------|---|---------|
| rs13302081  | A | -0.0159 |
| rs10901094  | C | -0.0194 |
| rs60838393  | A | -0.0348 |
| rs10973682  | A | 0.0224  |
| rs146680835 | C | -0.0798 |
| rs7853267   | T | 0.017   |
| rs4877479   | A | 0.0745  |
| rs117415360 | T | -0.0818 |
| rs113830752 | T | -0.0903 |
| rs13291383  | C | -0.0194 |
| rs56270997  | G | 0.0573  |
| rs116588575 | G | -0.1144 |
| rs72747953  | A | 0.0436  |
| rs143007223 | C | 0.0709  |
| rs77503571  | C | 0.114   |
| rs28699275  | T | 0.078   |
| rs75205480  | G | 0.0443  |
| rs9410375   | C | -0.027  |
| rs1220658   | G | 0.0168  |
| rs1890539   | T | 0.0157  |
| rs151062364 | T | -0.1193 |
| rs62578969  | T | 0.0518  |
| rs140286656 | G | -0.054  |
| rs145637488 | C | -0.0686 |
| rs148724173 | A | -0.0347 |
| rs3904469   | T | -0.0327 |
| rs35819598  | T | -0.0525 |
| rs11574908  | A | 0.0469  |
| rs12686726  | T | -0.0309 |
| rs62534681  | C | -0.1224 |
| rs55990374  | T | 0.0392  |
| rs11556126  | G | 0.0721  |
| rs75487122  | A | 0.0656  |
| rs1535479   | C | 0.0228  |
| rs1265917   | A | -0.0157 |
| rs80186693  | G | 0.0849  |
| rs10810374  | C | 0.0183  |
| rs3750551   | A | 0.0256  |
| rs12379445  | G | 0.0159  |
| rs72740695  | G | -0.0761 |
| rs2805787   | G | -0.0205 |
| rs72700799  | T | -0.0629 |
| rs149055770 | A | 0.0705  |
| rs4517213   | G | -0.018  |
| rs145987219 | T | -0.0658 |
| rs2095015   | T | -0.0944 |
| rs10991991  | T | 0.0241  |

|             |   |         |
|-------------|---|---------|
| rs10983093  | G | 0.021   |
| rs138579182 | A | -0.1099 |
| rs74622034  | C | 0.0755  |
| rs10975181  | C | -0.0307 |
| rs17785979  | A | 0.0371  |
| rs142192016 | T | 0.0485  |
| rs77545353  | A | 0.0719  |
| rs79349860  | A | 0.0587  |
| rs3409      | C | 0.0208  |
| rs654611    | C | -0.0162 |
| rs10968385  | C | 0.0238  |
| rs73664150  | A | 0.0554  |
| rs117572524 | T | 0.0609  |
| rs1147796   | C | 0.0374  |
| rs147849947 | C | 0.0827  |
| rs146733170 | G | 0.0812  |
| rs11791823  | T | 0.0217  |
| rs10118404  | A | 0.0209  |
| rs3758214   | T | -0.0519 |
| rs117355427 | T | -0.0507 |
| rs1875238   | C | 0.0221  |
| rs7039369   | A | 0.0154  |
| rs72756269  | A | -0.0559 |
| rs16911452  | A | 0.0816  |
| rs144679341 | G | -0.0646 |
| rs9409332   | C | 0.0509  |
| rs10970868  | T | 0.0243  |
| rs72712913  | G | -0.0626 |
| rs1932701   | G | 0.0233  |
| rs143759825 | G | 0.0844  |
| rs1997242   | T | 0.0294  |
| rs117179150 | A | -0.0664 |
| rs71497139  | A | 0.0473  |
| rs11789584  | A | 0.0681  |
| rs6537893   | A | 0.027   |
| rs147004430 | G | 0.0809  |
| rs1778990   | A | 0.0227  |
| rs549365    | A | 0.016   |
| rs56879931  | C | -0.0233 |
| rs115581655 | A | 0.075   |
| rs2488556   | T | -0.0245 |
| rs72704003  | C | 0.0878  |
| rs55775310  | T | -0.0239 |
| rs74559033  | T | 0.0673  |
| rs113454174 | A | 0.0603  |
| rs75291557  | T | 0.0825  |
| rs115641159 | T | -0.0673 |

|             |   |         |
|-------------|---|---------|
| rs12337816  | C | 0.0241  |
| rs76670825  | A | -0.0807 |
| rs7033320   | G | 0.0157  |
| rs139725756 | C | -0.1183 |
| rs1007834   | T | -0.016  |
| rs10810062  | C | 0.0974  |
| rs4069885   | C | 0.0251  |
| rs11536675  | C | 0.0204  |
| rs12554601  | A | -0.0174 |
| rs115556035 | T | -0.079  |
| rs142862631 | T | 0.1106  |
| rs2104340   | C | -0.0194 |
| rs17174950  | T | 0.024   |
| rs17736401  | T | -0.0723 |
| rs76115167  | C | -0.0952 |
| rs71498475  | A | -0.037  |
| rs3118854   | T | -0.0174 |
| rs116684774 | A | -0.1085 |
| rs77587413  | A | 0.0383  |
| rs62548847  | A | 0.0823  |
| rs12352609  | C | -0.0158 |
| rs12351071  | A | -0.0502 |
| rs10982776  | G | 0.0208  |
| rs117922585 | G | 0.0534  |
| rs4133033   | A | -0.0158 |
| rs144504148 | A | -0.1091 |
| rs10124337  | G | 0.0204  |
| rs4740746   | C | 0.0206  |
| rs17431767  | A | 0.0886  |
| rs12349353  | G | -0.0987 |
| rs7858794   | T | -0.065  |
| rs72767254  | T | 0.0633  |
| rs7047941   | T | 0.0181  |
| rs6478376   | C | 0.018   |
| rs78687085  | A | 0.0347  |
| rs79056907  | A | 0.0397  |
| rs10283531  | T | -0.0296 |
| rs141242078 | G | 0.0711  |
| rs3818711   | A | 0.0242  |
| rs78795763  | A | 0.0271  |
| rs12336026  | A | -0.0724 |
| rs74961069  | T | -0.0344 |
| rs117313574 | G | -0.044  |
| rs10981498  | A | 0.0787  |
| rs35906864  | T | -0.0293 |
| rs991794    | C | 0.0197  |
| rs10815282  | C | -0.0954 |

|             |   |         |
|-------------|---|---------|
| rs10820179  | G | 0.0158  |
| rs7860998   | C | 0.0239  |
| rs1760111   | C | -0.0161 |
| rs1887769   | T | 0.0163  |
| rs10989055  | C | -0.0155 |
| rs117918536 | T | -0.065  |
| rs10987473  | T | -0.0208 |
| rs117421368 | C | -0.0471 |
| rs17202166  | A | -0.1139 |
| rs62567583  | A | -0.0283 |
| rs4741844   | A | 0.0458  |
| rs16909000  | T | -0.0561 |
| rs73392789  | A | -0.0699 |
| rs77447215  | A | 0.0889  |
| rs13291966  | C | -0.0154 |
| rs7863089   | C | 0.022   |
| rs12338845  | T | -0.0159 |
| rs10810702  | A | 0.019   |
| rs41305325  | C | 0.0738  |
| rs62578156  | G | 0.045   |
| rs76198225  | G | 0.0596  |
| rs73657367  | A | -0.0462 |
| rs2381616   | C | -0.0163 |
| rs1581978   | C | -0.0168 |
| rs75370868  | G | -0.0752 |
| rs290213    | C | -0.0201 |
| rs1172665   | C | -0.016  |
| rs10960480  | C | -0.019  |
| rs10963978  | A | -0.0573 |
| rs72732065  | T | -0.0252 |
| rs13288034  | A | -0.0438 |
| rs143859682 | T | 0.0777  |
| rs12555245  | G | -0.0373 |
| rs4742330   | A | -0.0196 |
| rs117355683 | T | -0.0984 |
| rs140984782 | T | -0.0499 |
| rs17304082  | G | 0.0457  |
| rs146774711 | G | -0.0726 |
| rs117459464 | G | 0.0832  |
| rs10815632  | G | -0.0178 |
| rs1231334   | T | 0.0195  |
| rs10968156  | C | 0.0873  |
| rs79925195  | G | 0.0357  |
| rs143851911 | C | -0.0247 |
| rs117402669 | T | -0.0795 |
| rs76127306  | C | 0.025   |
| rs112165735 | T | -0.0788 |

|             |   |         |
|-------------|---|---------|
| rs146293504 | C | 0.0267  |
| rs62576198  | T | -0.1029 |
| rs78692103  | A | 0.0523  |
| rs113625520 | C | 0.0733  |
| rs10867627  | A | 0.0169  |
| rs112173317 | A | 0.058   |
| rs13292451  | A | -0.0224 |
| rs141919863 | A | 0.0833  |
| rs2777678   | C | -0.019  |
| rs10817863  | T | 0.0177  |
| rs11103567  | G | 0.016   |
| rs76353290  | G | -0.0732 |
| rs77744982  | C | 0.0493  |
| rs75282440  | A | 0.0799  |
| rs10776832  | C | -0.025  |
| rs55700914  | G | -0.0301 |
| rs75504424  | T | -0.0489 |
| rs10819926  | C | 0.0167  |
| rs75824721  | T | -0.054  |
| rs62581029  | T | 0.0286  |
| rs55641349  | T | -0.0364 |
| rs13297922  | A | -0.0454 |
| rs117406814 | A | 0.077   |
| rs2026149   | G | -0.0287 |
| rs117092913 | C | -0.0978 |
| rs13290260  | A | -0.0375 |
| rs4599906   | A | 0.0198  |
| rs7866316   | A | 0.0204  |
| rs2417062   | A | 0.0993  |
| rs697048    | T | 0.0484  |
| rs12345685  | G | -0.0419 |
| rs2249576   | T | -0.0214 |
| rs2818864   | C | -0.0193 |
| rs12342539  | T | 0.0222  |
| rs118182632 | T | 0.061   |
| rs7468101   | C | -0.0379 |
| rs13290953  | T | -0.0157 |
| rs62533987  | G | -0.0334 |
| rs62562237  | C | 0.0167  |
| rs41279557  | A | 0.1019  |
| rs36021747  | G | 0.1027  |
| rs10993244  | G | 0.0288  |
| rs77116949  | A | 0.0748  |
| rs80045011  | A | -0.0479 |
| rs72719288  | C | -0.0767 |
| rs10814849  | C | 0.0175  |
| rs17323923  | T | -0.0289 |

|             |   |         |
|-------------|---|---------|
| rs79946227  | G | 0.0501  |
| rs147302158 | G | -0.0928 |
| rs147243810 | C | 0.072   |
| rs77135520  | T | -0.0544 |
| rs4917339   | T | 0.0173  |
| rs56863870  | C | 0.0589  |
| rs62575390  | A | -0.0549 |
| rs1000510   | G | -0.0305 |
| rs1062665   | T | 0.0334  |
| rs16929976  | A | 0.0624  |
| rs4313211   | A | -0.0195 |
| rs72755068  | A | -0.0374 |
| rs4262379   | C | -0.0166 |
| rs74668374  | C | -0.0463 |
| rs6476701   | G | 0.1017  |
| rs76679743  | A | -0.0795 |
| rs75202268  | T | 0.0812  |
| rs7873642   | T | 0.0181  |
| rs72753053  | C | 0.034   |
| rs773282    | T | -0.0201 |
| rs79153724  | A | 0.0576  |
| rs117890396 | G | 0.0957  |
| rs113396007 | G | 0.1072  |
| rs16936187  | A | 0.0405  |
| rs10964264  | T | 0.0301  |
| rs112463840 | G | 0.0907  |
| rs72712890  | T | -0.0491 |
| rs72621408  | A | 0.0322  |
| rs731268    | C | 0.0286  |
| rs151015421 | T | 0.1003  |
| rs78904538  | G | -0.0219 |
| rs57052773  | C | -0.0604 |
| rs34944911  | T | 0.1004  |
| rs78250150  | C | -0.1006 |
| rs12551587  | A | -0.0822 |
| rs35836706  | A | 0.096   |
| rs75252958  | A | -0.022  |
| rs843160    | G | 0.0258  |
| rs12686437  | T | 0.0835  |
| rs12003158  | G | -0.0759 |
| rs72703049  | A | 0.1011  |
| rs117908408 | G | 0.0587  |
| rs11794478  | A | -0.0246 |
| rs118036419 | A | -0.071  |
| rs62577006  | T | 0.0499  |
| rs117817197 | A | 0.0768  |
| rs6560104   | C | -0.0182 |

|             |   |         |
|-------------|---|---------|
| rs117663452 | T | 0.0882  |
| rs17652574  | G | -0.0257 |
| rs7874975   | A | -0.0149 |
| rs74732462  | A | -0.047  |
| rs36119806  | A | -0.0285 |
| rs78748664  | A | 0.0563  |
| rs11138479  | G | -0.0202 |
| rs77204621  | G | -0.0439 |
| rs113606622 | C | -0.0716 |
| rs71501882  | C | -0.0389 |
| rs514309    | A | 0.0181  |
| rs11789230  | G | 0.0977  |
| rs113975639 | T | -0.1141 |
| rs12552152  | G | 0.0856  |
| rs79480631  | T | 0.0504  |
| rs118006927 | G | 0.0442  |
| rs117602095 | A | 0.0523  |
| rs148311492 | G | -0.018  |
| rs117943175 | G | -0.0462 |
| rs911691    | T | -0.0184 |
| rs10961929  | T | -0.0188 |
| rs2383071   | A | -0.0178 |
| rs10973081  | T | -0.02   |
| rs7049033   | C | -0.0497 |
| rs74609357  | G | -0.0602 |
| rs11515333  | T | -0.0165 |
| rs3025316   | C | -0.0257 |
| rs13347415  | A | -0.0898 |
| rs10967188  | G | -0.0206 |
| rs78921718  | G | -0.0824 |
| rs59589985  | T | -0.0522 |
| rs117089293 | G | 0.1399  |
| rs117559916 | A | 0.0881  |
| rs10974587  | C | 0.0172  |
| rs13301049  | A | -0.0194 |
| rs7875247   | C | -0.0179 |
| rs11141002  | G | -0.0405 |
| rs117894448 | C | 0.1201  |
| rs12552019  | G | -0.0683 |
| rs7871616   | T | -0.0162 |
| rs1446270   | T | -0.0252 |
| rs140528937 | A | -0.1097 |
| rs10976650  | G | 0.0199  |
| rs1572137   | C | -0.0159 |
| rs147930707 | T | 0.1231  |
| rs72759169  | C | 0.031   |
| rs76541742  | A | 0.0575  |



|             |   |         |
|-------------|---|---------|
| rs13287986  | T | 0.0577  |
| rs3849867   | A | -0.035  |
| rs1329049   | G | -0.0187 |
| rs34870904  | T | -0.0315 |
| rs77310072  | A | -0.0509 |
| rs11140030  | T | 0.0424  |
| rs11792136  | C | 0.0528  |
| rs13286596  | C | 0.0167  |
| rs4744100   | G | -0.0326 |
| rs2900252   | C | -0.0212 |
| rs77455504  | T | 0.0969  |
| rs77594914  | C | -0.0588 |
| rs1828886   | G | 0.0156  |
| rs75249285  | G | -0.0863 |
| rs75053757  | A | 0.0769  |
| rs57136740  | A | 0.0155  |
| rs6478652   | T | 0.0179  |
| rs932887    | G | 0.0152  |
| rs10978859  | G | -0.1065 |
| rs390623    | G | 0.0224  |
| rs78706485  | T | 0.1368  |
| rs13293620  | T | -0.0773 |
| rs4741450   | T | -0.015  |
| rs113261688 | T | -0.0302 |
| rs75941351  | G | -0.0662 |
| rs144033789 | G | -0.0874 |
| rs16923193  | C | -0.0263 |
| rs11145866  | G | 0.05    |
| rs60600345  | C | 0.0263  |
| rs116917011 | T | 0.0488  |
| rs56153174  | G | 0.0755  |
| rs12335367  | C | -0.0204 |
| rs13294066  | G | -0.0193 |
| rs10990204  | C | 0.0289  |
| rs79960429  | T | 0.0779  |
| rs10993339  | C | -0.0657 |
| rs117649440 | C | -0.0623 |
| rs78634299  | A | -0.0786 |
| rs4880043   | T | -0.0188 |
| rs142995020 | C | -0.0567 |
| rs11790540  | C | -0.0482 |
| rs17216679  | G | -0.0925 |
| rs35185125  | A | -0.1394 |
| rs4255205   | C | -0.0153 |
| rs143055801 | T | 0.0437  |
| rs10814442  | T | -0.0155 |
| rs16918101  | T | 0.0357  |

|             |   |         |
|-------------|---|---------|
| rs62581178  | T | -0.0601 |
| rs118148110 | A | -0.0649 |
| rs4512434   | C | -0.0181 |
| rs16917411  | T | -0.0744 |
| rs3810930   | G | 0.0308  |
| rs10511903  | T | 0.0255  |
| rs12553540  | A | 0.043   |
| rs117496002 | G | 0.0813  |
| rs2486384   | T | 0.075   |
| rs75910082  | G | 0.1214  |
| rs10980747  | G | 0.109   |
| rs76087112  | T | -0.1009 |
| rs80316333  | T | 0.0555  |
| rs72757740  | T | -0.0284 |
| rs10973355  | C | 0.0207  |
| rs1332192   | A | 0.015   |
| rs74761483  | A | 0.1027  |
| rs13292581  | T | -0.0311 |
| rs4295714   | G | 0.0172  |
| rs72735306  | T | 0.0256  |
| rs11144768  | T | -0.072  |
| rs10977075  | C | -0.0286 |
| rs76011712  | G | -0.0849 |
| rs36228005  | T | -0.0515 |
| rs10448294  | T | 0.0851  |
| rs73642330  | C | -0.027  |
| rs61548263  | C | 0.0642  |
| rs72735666  | G | 0.0222  |
| rs1018587   | A | 0.017   |
| rs80220549  | T | -0.0968 |
| rs10972095  | A | 0.0158  |
| rs138392414 | G | 0.0613  |
| rs12349832  | G | 0.0162  |
| rs7466603   | T | -0.0164 |
| rs4740561   | A | -0.0163 |
| rs16925473  | A | -0.0274 |
| rs76955518  | A | 0.083   |
| rs113591087 | G | -0.0856 |
| rs1819640   | C | 0.0156  |
| rs12000829  | C | 0.0195  |
| rs10980604  | A | -0.0771 |
| rs79829688  | T | 0.0601  |
| rs56330010  | C | 0.02    |
| rs72757943  | A | -0.0616 |
| rs3124599   | A | 0.0338  |
| rs7046644   | C | 0.0192  |
| rs10974360  | G | 0.0253  |

|             |   |         |
|-------------|---|---------|
| rs77014507  | C | -0.0211 |
| rs13294994  | T | 0.0301  |
| rs13286274  | C | -0.0239 |
| rs142763992 | T | -0.0436 |
| rs12343732  | T | 0.0847  |
| rs34107454  | A | 0.0345  |
| rs1831166   | A | 0.0164  |
| rs7855521   | C | 0.0175  |
| rs140084717 | T | -0.0973 |
| rs10759329  | A | 0.0154  |
| rs76792551  | G | 0.0754  |
| rs1545229   | T | -0.0151 |
| rs144586524 | T | 0.0816  |
| rs10962350  | T | 0.03    |
| rs10512044  | A | -0.1003 |
| rs7026423   | A | 0.0301  |
| rs9696538   | A | -0.0858 |
| rs78352478  | C | 0.0703  |
| rs78255232  | A | 0.0705  |
| rs72740362  | G | 0.0204  |
| rs149792170 | G | -0.0929 |
| rs141947441 | T | 0.0613  |
| rs75610529  | T | 0.0763  |
| rs1891633   | C | 0.0294  |
| rs117664865 | G | -0.0673 |
| rs2151376   | T | -0.0174 |
| rs76518888  | C | -0.07   |
| rs62579577  | A | 0.0469  |
| rs72714949  | G | -0.0471 |
| rs996502    | A | 0.0155  |
| rs7034672   | A | 0.0318  |
| rs117092229 | A | -0.1132 |
| rs76072683  | G | 0.0688  |
| rs76828694  | T | 0.0642  |
| rs12336273  | T | -0.0448 |
| rs7033398   | C | 0.0194  |
| rs79827783  | G | 0.0304  |
| rs7867345   | A | -0.0157 |
| rs62578745  | A | -0.0359 |
| rs62569127  | T | -0.0581 |
| rs74990204  | T | -0.0415 |
| rs12341812  | C | -0.0546 |
| rs79446073  | T | -0.028  |
| rs142750734 | T | -0.1024 |
| rs72739528  | T | -0.036  |
| rs78401681  | A | 0.076   |
| rs57403314  | T | -0.0184 |

|             |   |         |
|-------------|---|---------|
| rs145880920 | A | -0.0761 |
| rs55913446  | C | -0.0317 |
| rs71508837  | T | -0.0257 |
| rs4742188   | A | 0.0277  |
| rs78242187  | T | -0.0759 |
| rs10979982  | C | -0.0243 |
| rs2441999   | C | 0.0932  |
| rs17699846  | C | 0.0818  |
| rs78774827  | T | 0.068   |
| rs10757370  | T | -0.0233 |
| rs13286385  | T | 0.0273  |
| rs34520698  | G | 0.0634  |
| rs142116470 | C | -0.0914 |
| rs575107    | A | 0.0275  |
| rs6475184   | A | 0.0262  |
| rs117255426 | C | -0.0916 |
| rs4506274   | T | 0.0152  |
| rs7859384   | A | 0.0196  |
| rs79269187  | C | 0.0829  |
| rs117386836 | A | -0.0716 |
| rs28864526  | T | 0.0306  |
| rs1328157   | T | -0.015  |
| rs13297009  | C | 0.0176  |
| rs1714492   | T | -0.0157 |
| rs7025959   | A | -0.0156 |
| rs2030643   | G | 0.026   |
| rs56068987  | C | 0.0632  |
| rs73651763  | T | -0.0337 |
| rs149391267 | T | 0.0663  |
| rs75291803  | A | 0.072   |
| rs2377527   | T | -0.0191 |
| rs10976549  | G | 0.0182  |
| rs12345640  | C | -0.0372 |
| rs13300483  | T | -0.0178 |
| rs62547351  | C | -0.0362 |
| rs4977394   | A | -0.0159 |
| rs12347915  | G | 0.0176  |
| rs112386070 | T | 0.0865  |
| rs7040161   | T | 0.0603  |
| rs4961480   | C | 0.0155  |
| rs72738458  | A | -0.0263 |
| rs10985375  | A | -0.0279 |
| rs143384998 | C | 0.1064  |
| rs113413004 | A | -0.0518 |
| rs72762579  | T | -0.0366 |
| rs10984807  | C | 0.0196  |
| rs74929585  | T | -0.0347 |

|             |   |         |
|-------------|---|---------|
| rs1759102   | G | 0.0301  |
| rs150398223 | A | -0.0732 |
| rs75183365  | T | -0.0387 |
| rs2057429   | G | -0.0177 |
| rs62546561  | A | -0.0256 |
| rs1417290   | G | -0.0396 |
| rs10985823  | A | -0.0768 |
| rs78295184  | T | -0.108  |
| rs34694656  | C | 0.0169  |
| rs79759371  | A | 0.0572  |
| rs10978535  | C | 0.0159  |
| rs74631891  | A | 0.0674  |
| rs4962058   | A | 0.0434  |
| rs144906897 | A | -0.0701 |
| rs7029924   | T | 0.0181  |
| rs117569258 | G | 0.0538  |
| rs72754725  | A | 0.0897  |
| rs1854580   | C | 0.1182  |
| rs113782033 | T | -0.0382 |
| rs78515955  | A | -0.0551 |
| rs12555559  | C | -0.0365 |
| rs561921    | G | -0.0173 |
| rs117763035 | T | -0.076  |
| rs72752741  | T | 0.1001  |
| rs10491701  | C | -0.0165 |
| rs78918586  | C | 0.0799  |
| rs72747402  | A | -0.0573 |
| rs36118163  | A | 0.0232  |
| rs72758102  | G | -0.0536 |
| rs2094843   | C | -0.0163 |
| rs117305034 | G | -0.0629 |
| rs1342478   | A | -0.0171 |
| rs2987388   | C | 0.0157  |
| rs13291648  | C | -0.0756 |
| rs142033348 | C | -0.0638 |
| rs10511904  | A | 0.0215  |
| rs1566977   | T | -0.0167 |
| rs12377636  | A | -0.0393 |
| rs117716626 | C | -0.052  |
| rs7852119   | G | -0.0155 |
| rs10815807  | T | 0.0385  |
| rs76729265  | G | -0.0929 |
| rs62560885  | T | -0.0263 |
| rs13289481  | T | 0.0237  |
| rs74606850  | A | 0.033   |
| rs72752356  | A | -0.0497 |
| rs2542242   | G | -0.0144 |

|             |   |         |
|-------------|---|---------|
| rs147723185 | G | 0.0675  |
| rs1543714   | A | 0.0197  |
| rs10988639  | G | -0.0192 |
| rs138411906 | C | -0.1251 |
| rs111716539 | G | -0.0843 |
| rs78939612  | A | -0.0449 |
| rs10981010  | T | 0.0899  |
| rs111520336 | C | -0.0636 |
| rs10901286  | G | -0.0227 |
| rs117152137 | A | 0.1124  |
| rs150519435 | C | 0.0555  |
| rs79147978  | C | -0.0466 |
| rs79994137  | T | -0.0369 |
| rs34926332  | T | -0.0173 |
| rs818691    | T | -0.0174 |
| rs113717506 | G | -0.0964 |
| rs116999229 | G | -0.0349 |
| rs147063834 | T | -0.044  |
| rs17753733  | G | -0.0297 |
| rs74612843  | G | 0.0404  |
| rs117384550 | A | -0.0753 |
| rs2809098   | T | -0.0546 |
| rs112499217 | T | 0.0232  |
| rs7865744   | A | -0.0225 |
| rs3004297   | G | 0.0165  |
| rs13287495  | C | 0.0157  |
| rs4836926   | G | 0.0256  |
| rs7852791   | T | 0.018   |
| rs13340663  | A | 0.0813  |
| rs9696452   | C | -0.0933 |
| rs7860519   | A | -0.0152 |
| rs10867765  | T | -0.0532 |
| rs11999144  | C | 0.0706  |
| rs17712104  | T | 0.0268  |
| rs72737391  | G | 0.0677  |
| rs12684129  | C | -0.0548 |
| rs112833505 | A | 0.0611  |
| rs11103115  | T | -0.0167 |
| rs951683    | T | -0.0156 |
| rs10984601  | G | -0.0169 |
| rs117515468 | C | 0.0521  |
| rs77749283  | A | -0.041  |
| rs62529068  | C | -0.0398 |
| rs10979708  | C | 0.0215  |
| rs17355986  | T | -0.0691 |
| rs10974356  | A | 0.0381  |
| rs2997555   | C | 0.0244  |

|             |   |         |
|-------------|---|---------|
| rs79143105  | C | -0.0627 |
| rs5025554   | C | 0.0225  |
| rs142103279 | A | 0.076   |
| rs149102791 | T | -0.0995 |
| rs13299248  | A | 0.0764  |
| rs112319956 | A | 0.0569  |
| rs7044619   | G | 0.0191  |
| rs534286    | G | 0.0161  |
| rs143203801 | A | 0.0748  |
| rs2026367   | T | -0.0249 |
| rs3001093   | A | -0.016  |
| rs1602261   | T | -0.0161 |
| rs11137835  | T | 0.0149  |
| rs1331453   | G | 0.0246  |
| rs72752009  | A | -0.0178 |
| rs80106043  | A | 0.0619  |
| rs13292026  | A | 0.048   |
| rs113271620 | C | -0.0934 |
| rs6537935   | T | 0.0171  |
| rs2120718   | T | 0.0178  |
| rs112896200 | A | 0.0705  |
| rs72735013  | A | -0.0486 |
| rs13287677  | C | 0.0519  |
| rs34971891  | A | 0.0242  |
| rs7865532   | C | 0.0172  |
| rs79319315  | T | 0.0276  |
| rs79520978  | T | -0.1044 |
| rs10759353  | G | -0.0147 |
| rs12339669  | T | 0.0238  |
| rs10217669  | T | -0.0315 |
| rs12351786  | G | -0.0144 |
| rs34810239  | C | 0.0965  |
| rs72731710  | C | 0.0408  |
| rs1413797   | T | 0.0266  |
| rs62532794  | A | -0.0521 |
| rs10817933  | G | 0.015   |
| rs10901309  | T | -0.0158 |
| rs115584773 | C | -0.091  |
| rs117403226 | C | 0.1111  |
| rs2224446   | C | 0.0149  |
| rs148646145 | G | -0.0853 |
| rs4387047   | T | 0.0563  |
| rs147070466 | T | 0.1035  |
| rs7031957   | C | -0.024  |
| rs62568532  | T | 0.0296  |
| rs77594518  | T | -0.0346 |
| rs59749808  | A | -0.0242 |

|             |   |         |
|-------------|---|---------|
| rs113839125 | G | -0.0292 |
| rs118075144 | A | 0.0626  |
| rs80323925  | C | -0.0495 |
| rs7851187   | G | 0.0241  |
| rs142814763 | G | 0.0625  |
| rs74902322  | C | -0.0237 |
| rs62566789  | C | -0.0821 |
| rs11139447  | C | 0.0405  |
| rs35871706  | A | 0.0331  |
| rs2484740   | C | 0.0219  |
| rs6475228   | G | 0.0157  |
| rs2811772   | C | 0.02    |
| rs72737635  | A | 0.041   |
| rs12685507  | C | 0.0307  |
| rs7043258   | G | 0.0518  |
| rs1475105   | C | -0.0483 |
| rs138393743 | T | 0.0708  |
| rs2140465   | A | 0.0152  |
| rs73479419  | A | 0.0222  |
| rs76008474  | T | 0.0706  |
| rs72735439  | T | 0.0236  |
| rs150108653 | C | -0.0644 |
| rs10757501  | C | 0.095   |
| rs62584063  | T | -0.0179 |
| rs12555482  | G | 0.0667  |
| rs60498728  | A | -0.135  |
| rs13287915  | G | 0.0193  |
| rs10818930  | T | -0.0185 |
| rs57738649  | T | 0.0346  |
| rs139634461 | T | -0.0733 |
| rs4014074   | G | -0.0796 |
| rs77225474  | T | -0.061  |
| rs3010679   | G | 0.0157  |
| rs12685185  | A | -0.0608 |
| rs10812746  | T | 0.015   |
| rs76782461  | G | 0.0268  |
| rs7860370   | C | 0.0188  |
| rs10760637  | G | 0.0226  |
| rs10816997  | G | 0.0241  |
| rs12346244  | A | -0.054  |
| rs78997789  | G | 0.0381  |
| rs12340267  | C | 0.0356  |
| rs12684475  | C | 0.0185  |
| rs79624842  | T | 0.0868  |
| rs117257076 | C | 0.073   |
| rs112997473 | T | -0.0568 |
| rs16909285  | T | 0.0679  |



|             |   |         |
|-------------|---|---------|
| rs116877633 | C | 0.062   |
| rs55680757  | T | 0.05    |
| rs10811812  | G | -0.0157 |
| rs80094297  | A | 0.1086  |
| rs117492258 | A | 0.0636  |
| rs10987616  | T | 0.0205  |
| rs12346951  | T | 0.0247  |
| rs7041223   | T | -0.0165 |
| rs62547104  | A | 0.0324  |
| rs7852051   | T | 0.0173  |
| rs117385435 | A | -0.0341 |
| rs10813033  | G | 0.0227  |
| rs71507372  | A | 0.0197  |
| rs139015755 | A | -0.0513 |
| rs12553956  | G | -0.0158 |
| rs11243620  | A | -0.0179 |
| rs10124781  | T | -0.0187 |
| rs79002672  | A | 0.0598  |
| rs35005176  | T | 0.0947  |
| rs1927316   | C | -0.0159 |
| rs117295779 | T | 0.0999  |
| rs117888210 | T | -0.0798 |
| rs67851409  | A | 0.0203  |
| rs9696018   | T | -0.0259 |
| rs116975482 | A | 0.0833  |
| rs1049927   | C | -0.0223 |
| rs670051    | C | 0.0299  |
| rs549861    | T | 0.0202  |
| rs17384966  | C | 0.0267  |
| rs111447399 | A | 0.0571  |
| rs2106116   | T | -0.0175 |
| rs140499399 | A | 0.1147  |
| rs267571    | T | -0.0165 |
| rs144196626 | A | 0.1152  |
| rs2518711   | T | -0.111  |
| rs7024766   | A | 0.017   |
| rs117819581 | T | -0.0661 |
| rs55859521  | T | -0.0888 |
| rs16919104  | T | 0.0643  |
| rs16926016  | C | 0.0184  |
| rs72686877  | A | 0.0257  |
| rs113580771 | G | -0.0385 |
| rs77394667  | A | -0.0224 |
| rs74964712  | A | 0.0377  |
| rs75646069  | G | -0.092  |
| rs10965488  | G | -0.0147 |
| rs60154898  | A | 0.0526  |

|             |   |         |
|-------------|---|---------|
| rs7029903   | A | 0.0187  |
| rs143040347 | A | 0.0693  |
| rs17456563  | T | 0.0604  |
| rs4841999   | T | -0.016  |
| rs10870093  | G | 0.0254  |
| rs115203916 | C | -0.1211 |
| rs13298532  | C | -0.0179 |
| rs1415686   | A | -0.0305 |
| rs117689876 | T | -0.114  |
| rs62534059  | T | 0.0341  |
| rs10512057  | A | -0.0156 |
| rs7041657   | A | 0.1063  |
| rs71507307  | A | -0.0417 |
| rs144472071 | C | -0.1467 |
| rs10739043  | A | -0.0881 |
| rs7038012   | C | -0.0155 |
| rs62574999  | C | -0.0226 |
| rs56332800  | T | -0.0884 |
| rs7852222   | G | 0.0159  |
| rs7033234   | C | 0.0282  |
| rs7870093   | A | -0.0169 |
| rs1929482   | C | 0.016   |
| rs10733484  | T | -0.0305 |
| rs79025389  | C | -0.0844 |
| rs145983977 | A | 0.072   |
| rs72746906  | C | 0.0523  |
| rs1978304   | C | -0.0145 |
| rs11145632  | G | 0.0388  |
| rs60500571  | A | 0.0382  |
| rs62572523  | C | 0.0805  |
| rs118088267 | G | 0.1028  |
| rs145583963 | T | 0.1297  |
| rs10988420  | T | -0.0169 |
| rs74685974  | A | 0.0301  |
| rs11103578  | G | 0.0328  |
| rs79718927  | G | 0.0494  |
| rs10820755  | C | 0.0143  |
| rs4242706   | T | -0.0417 |
| rs10812482  | C | 0.0199  |
| rs10117181  | C | 0.0217  |
| rs7044786   | C | 0.0169  |
| rs79298358  | C | -0.0798 |
| rs7867736   | G | 0.0153  |
| rs143465995 | G | 0.0849  |
| rs1566951   | T | -0.0149 |
| rs10982068  | G | 0.0288  |
| rs118093564 | T | -0.1326 |

|             |   |         |
|-------------|---|---------|
| rs140798774 | A | 0.0558  |
| rs290985    | G | -0.0163 |
| rs72761458  | T | 0.0467  |
| rs12337194  | G | -0.0384 |
| rs77144911  | G | 0.0807  |
| rs11788145  | T | 0.0521  |
| rs79161063  | T | 0.0935  |
| rs79246332  | A | 0.0347  |
| rs75057990  | A | -0.0557 |
| rs56692548  | G | 0.0882  |
| rs9886865   | C | -0.0213 |
| rs145647885 | C | -0.1523 |
| rs10123051  | C | 0.0461  |
| rs735781    | A | 0.02    |
| rs11103794  | A | 0.0146  |
| rs682631    | A | -0.0989 |
| rs10964222  | G | 0.0217  |
| rs79195057  | C | -0.0993 |
| rs59697179  | A | 0.0528  |
| rs117927529 | A | -0.0612 |
| rs117019199 | A | 0.0552  |
| rs10121167  | G | 0.0259  |
| rs141657297 | A | -0.113  |
| rs141658273 | C | -0.082  |
| rs1984119   | C | 0.0168  |
| rs170621    | G | 0.0141  |
| rs58938644  | T | -0.0227 |
| rs2209424   | C | 0.0145  |
| rs117490941 | G | -0.054  |
| rs10966747  | C | -0.089  |
| rs2118874   | C | -0.0194 |
| rs1495563   | C | -0.015  |
| rs36206048  | G | -0.0336 |
| rs117810452 | T | 0.0562  |
| rs927869    | A | 0.0142  |
| rs62555371  | T | -0.0256 |
| rs150971257 | A | 0.0759  |
| rs113280815 | A | -0.0717 |
| rs74830109  | A | -0.0909 |
| rs10967741  | A | 0.0165  |
| rs72734548  | A | 0.054   |
| rs17404479  | T | 0.0282  |
| rs7854377   | C | 0.0323  |
| rs7850874   | T | 0.0194  |
| rs117383167 | T | 0.1071  |
| rs78306315  | T | -0.0643 |
| rs149905158 | T | 0.0403  |

|             |   |         |
|-------------|---|---------|
| rs118044410 | C | -0.0917 |
| rs2761016   | T | -0.0147 |
| rs328844    | A | 0.0152  |
| rs2182903   | T | -0.0149 |
| rs141776687 | G | 0.0752  |
| rs7046036   | G | -0.015  |
| rs75011321  | T | 0.0387  |
| rs7043720   | G | 0.0284  |
| rs111750181 | T | -0.0398 |
| rs55912633  | A | 0.0265  |
| rs139289942 | A | -0.1562 |
| rs7028712   | A | 0.0149  |
| rs10512182  | C | 0.0181  |
| rs10491697  | G | 0.0183  |
| rs12342073  | T | 0.039   |
| rs34188145  | C | 0.0832  |
| rs10961698  | T | 0.0927  |
| rs80345015  | C | -0.0172 |
| rs116913961 | C | -0.0566 |
| rs56799759  | C | 0.0184  |
| rs78039921  | T | 0.0512  |
| rs117856047 | G | -0.0781 |
| rs320268    | G | -0.0175 |
| rs142975868 | A | 0.0553  |
| rs10977642  | T | 0.0567  |
| rs117136687 | T | 0.062   |
| rs10738736  | G | -0.0322 |
| rs75102928  | G | -0.0211 |
| rs11244017  | A | -0.015  |
| rs75798070  | T | 0.0352  |
| rs586046    | A | 0.0177  |
| rs62532898  | G | 0.0189  |
| rs4877745   | C | 0.0163  |
| rs10814718  | T | 0.0274  |
| rs79768091  | C | 0.0362  |
| rs7020419   | G | -0.0165 |
| rs11144158  | G | 0.0207  |
| rs62574624  | A | -0.061  |
| rs13296443  | T | -0.0455 |
| rs10759717  | A | 0.0199  |
| rs117225729 | A | -0.0588 |
| rs7868972   | C | 0.0872  |
| rs62566098  | A | -0.0326 |
| rs117208138 | A | 0.0431  |
| rs35843739  | C | 0.0413  |
| rs3898525   | A | -0.0205 |
| rs56354446  | A | -0.0358 |

|             |   |         |
|-------------|---|---------|
| rs7046123   | A | 0.0155  |
| rs2808529   | T | 0.0576  |
| rs3217750   | G | -0.0704 |
| rs116958840 | T | -0.065  |
| rs116863993 | A | 0.0393  |
| rs72700605  | C | -0.0474 |
| rs12340035  | G | 0.0433  |
| rs4878849   | T | -0.0181 |
| rs10976389  | G | 0.0698  |
| rs7865771   | A | -0.0166 |
| rs10990407  | T | -0.0433 |
| rs35994439  | G | -0.0168 |
| rs149201468 | C | 0.1077  |
| rs141682213 | T | -0.0393 |
| rs567833    | T | 0.0388  |
| rs146055749 | T | 0.0907  |
| rs74545781  | A | 0.0577  |
| rs11559379  | A | 0.0245  |
| rs150275859 | T | 0.0879  |
| rs809552    | G | -0.0231 |
| rs16934271  | A | 0.0293  |
| rs10967932  | G | 0.0408  |
| rs10114887  | A | -0.0156 |
| rs12554834  | C | 0.0156  |
| rs574842    | A | 0.0224  |
| rs118154390 | A | 0.0467  |
| rs72730880  | A | -0.0631 |
| rs117245410 | C | 0.0639  |
| rs62531530  | C | 0.0481  |
| rs7031043   | G | -0.0399 |
| rs77058886  | T | 0.0525  |
| rs72718147  | A | 0.0335  |
| rs56224002  | C | -0.0568 |
| rs4978918   | C | -0.014  |
| rs76155273  | C | 0.1139  |
| rs1413321   | G | 0.0148  |
| rs4127978   | A | -0.0305 |
| rs12684763  | A | 0.0286  |
| rs2818326   | C | -0.0152 |
| rs10858374  | C | -0.0182 |
| rs79089176  | C | 0.0302  |
| rs139391648 | A | 0.0572  |
| rs140424590 | T | 0.0608  |
| rs7024917   | A | -0.0168 |
| rs142838723 | G | -0.0736 |
| rs4878578   | T | -0.0221 |
| rs2236325   | A | -0.0378 |

|             |   |         |
|-------------|---|---------|
| rs12555254  | C | -0.0283 |
| rs532069    | A | -0.021  |
| rs75693536  | A | 0.0603  |
| rs149713332 | C | 0.0751  |
| rs2487718   | A | 0.0177  |
| rs79988714  | T | -0.0403 |
| rs2760653   | G | 0.0212  |
| rs11794947  | T | -0.0485 |
| rs62567084  | T | 0.0625  |
| rs4841924   | G | 0.0282  |
| rs140034260 | T | 0.1444  |
| rs147595295 | A | 0.0666  |
| rs839496    | A | 0.0194  |
| rs1981009   | G | -0.0176 |
| rs12555686  | T | 0.0322  |
| rs76085236  | C | -0.0286 |
| rs1439189   | G | 0.0202  |
| rs7029129   | T | 0.0271  |
| rs7035829   | C | -0.0263 |
| rs72742390  | A | 0.0296  |
| rs11140370  | A | 0.0304  |
| rs7048418   | T | -0.0159 |
| rs116943187 | A | -0.1132 |
| rs62583044  | T | -0.0939 |
| rs55701015  | C | 0.0263  |
| rs117647889 | T | -0.093  |
| rs309460    | C | 0.0151  |
| rs913933    | T | -0.0147 |
| rs306536    | C | 0.0324  |
| rs13285788  | T | -0.0251 |
| rs1571578   | T | 0.025   |
| rs12377123  | T | 0.0164  |
| rs74478921  | T | 0.0508  |
| rs117930290 | C | 0.0548  |
| rs8181059   | T | -0.0402 |
| rs10986244  | C | -0.0497 |
| rs74588921  | C | 0.0841  |
| rs1343396   | G | -0.0145 |
| rs3793577   | A | -0.0138 |
| rs10867879  | T | 0.0152  |
| rs158688    | G | -0.0143 |
| rs76656609  | A | 0.1009  |
| rs758960    | T | -0.0542 |
| rs72710093  | G | 0.0432  |
| rs12003980  | T | 0.07    |
| rs140844785 | C | 0.0419  |
| rs76217447  | G | -0.0864 |

|             |   |         |
|-------------|---|---------|
| rs79975431  | T | 0.0374  |
| rs10908932  | T | 0.0171  |
| rs62575596  | A | 0.021   |
| rs3857984   | G | 0.0141  |
| rs10780283  | G | -0.0178 |
| rs11243421  | T | -0.0144 |
| rs12056964  | T | 0.0278  |
| rs2891156   | T | 0.0198  |
| rs10981863  | G | -0.0149 |
| rs79301806  | C | 0.0891  |
| rs401690    | T | 0.0291  |
| rs1014690   | T | 0.0302  |
| rs883484    | T | 0.036   |
| rs10217679  | G | 0.0185  |
| rs7868745   | C | -0.0158 |
| rs72740869  | A | 0.0561  |
| rs147143708 | G | -0.0938 |
| rs117748521 | T | -0.0704 |
| rs11142936  | G | -0.0258 |
| rs10869537  | T | -0.0176 |
| rs12684609  | T | -0.0185 |
| rs111686734 | C | -0.0589 |
| rs55728483  | A | -0.0411 |
| rs148931369 | A | 0.0801  |
| rs80042316  | A | -0.0265 |
| rs3802363   | C | -0.0146 |
| rs117608810 | A | 0.0887  |
| rs117199422 | C | 0.0969  |
| rs55943512  | C | -0.0313 |
| rs80216962  | A | -0.0543 |
| rs112844813 | C | 0.0376  |
| rs12156479  | C | 0.056   |
| rs75781423  | C | 0.0285  |
| rs4741155   | T | -0.0153 |
| rs34979894  | T | 0.103   |
| rs1493996   | A | -0.0388 |
| rs888335    | A | -0.0161 |
| rs117748763 | A | 0.1403  |
| rs117297823 | C | -0.0369 |
| rs10986514  | C | 0.0186  |
| rs142933075 | T | -0.1264 |
| rs117321940 | G | -0.0417 |
| rs10973702  | G | -0.0152 |
| rs702220    | T | -0.0144 |
| rs74810970  | T | 0.0403  |
| rs139757018 | T | 0.0884  |
| rs3128524   | C | -0.1175 |

|             |   |         |
|-------------|---|---------|
| rs482678    | C | -0.0148 |
| rs7757777   | T | -0.0817 |
| rs62540621  | A | 0.0691  |
| rs149070179 | C | -0.0881 |
| rs148512198 | A | 0.081   |
| rs13283101  | A | 0.0195  |
| rs34781002  | C | 0.0338  |
| rs10760423  | A | 0.0159  |
| rs7861635   | A | 0.0493  |
| rs7040864   | G | 0.0242  |
| rs61747579  | A | 0.0888  |
| rs138903827 | A | -0.1008 |
| rs117530798 | T | -0.1341 |
| rs61349511  | G | 0.0608  |
| rs7863027   | T | -0.0222 |
| rs2777764   | G | -0.0266 |
| rs113263022 | T | 0.0308  |
| rs1002393   | G | 0.0196  |
| rs72736471  | T | 0.0353  |
| rs820498    | G | -0.0409 |
| rs75106887  | G | -0.0549 |
| rs570319    | T | 0.0149  |
| rs35346770  | T | 0.0432  |
| rs4979258   | G | 0.0135  |
| rs4742755   | G | 0.0223  |
| rs117014269 | G | -0.0815 |
| rs10819118  | C | -0.0385 |
| rs62576836  | C | 0.063   |
| rs2065424   | C | -0.0145 |
| rs12235504  | C | -0.0259 |
| rs7470318   | T | -0.0259 |
| rs117478574 | A | -0.0893 |
| rs144501560 | T | -0.0935 |
| rs117910805 | A | -0.0618 |
| rs10993268  | T | 0.0817  |
| rs10981281  | A | -0.0379 |
| rs7854342   | C | -0.0345 |
| rs79959225  | G | 0.0245  |
| rs55922714  | T | 0.0554  |
| rs117686075 | C | 0.0698  |
| rs75175163  | C | -0.0919 |
| rs117320598 | G | 0.0526  |
| rs7024558   | A | -0.0161 |
| rs34962635  | T | -0.054  |
| rs7032473   | C | -0.0543 |
| rs150211503 | T | 0.0398  |
| rs9409929   | A | 0.0225  |



|             |   |         |
|-------------|---|---------|
| rs147433010 | T | 0.1267  |
| rs141874116 | C | -0.111  |
| rs35690039  | T | 0.0172  |
| rs56259859  | T | -0.0509 |
| rs79960658  | T | 0.0984  |
| rs145892391 | A | 0.0963  |
| rs7049027   | G | 0.0139  |
| rs143719624 | C | 0.0674  |
| rs141211952 | A | -0.092  |
| rs12348002  | A | -0.0782 |
| rs72691965  | A | 0.0336  |
| rs116871997 | A | -0.0827 |
| rs116849325 | C | 0.04    |
| rs7037437   | A | 0.0144  |
| rs10967747  | T | 0.0263  |
| rs28361607  | C | 0.0456  |
| rs7035656   | C | 0.0295  |
| rs72731025  | A | -0.0882 |
| rs10114574  | A | 0.0171  |
| rs117149641 | C | -0.0743 |
| rs78046122  | A | -0.0925 |
| rs10964864  | C | -0.0158 |
| rs1843127   | A | 0.0143  |
| rs75106978  | A | 0.0199  |
| rs1332863   | T | 0.023   |
| rs117440800 | G | 0.0564  |
| rs62568210  | A | -0.0334 |
| rs12339569  | G | 0.0398  |
| rs10123153  | T | 0.0138  |
| rs72727048  | G | -0.0819 |
| rs142062057 | A | 0.0786  |
| rs13288700  | T | -0.0329 |
| rs79753829  | A | 0.052   |
| rs78495796  | T | 0.0198  |
| rs55688773  | T | -0.044  |
| rs2258131   | A | 0.041   |
| rs11140896  | T | -0.0992 |
| rs77916040  | T | -0.113  |
| rs1887796   | C | -0.0154 |
| rs75871451  | T | -0.114  |
| rs2492825   | G | 0.0153  |
| rs10118073  | G | 0.0177  |
| rs11103437  | C | 0.0273  |
| rs12380612  | A | 0.0605  |
| rs111716233 | C | -0.0745 |
| rs3829086   | A | -0.0249 |
| rs1448586   | T | -0.0206 |

|             |   |         |
|-------------|---|---------|
| rs111756616 | A | -0.0782 |
| rs36110869  | A | -0.0261 |
| rs13299607  | T | 0.0201  |
| rs7859473   | C | -0.0944 |
| rs10978883  | A | 0.0453  |
| rs11795304  | G | 0.0238  |
| rs149586975 | A | 0.0845  |
| rs78786136  | T | -0.04   |
| rs72739292  | A | -0.0754 |
| rs118124783 | A | 0.0432  |
| rs147917557 | A | -0.1252 |
| rs6479488   | T | -0.0424 |
| rs76543451  | A | 0.0732  |
| rs147559416 | C | 0.0657  |
| rs117879629 | C | -0.0335 |
| rs10985778  | C | 0.0651  |
| rs7867606   | T | 0.0546  |
| rs35532231  | A | 0.0188  |
| rs118123091 | T | -0.0767 |
| rs72692601  | C | -0.0273 |
| rs140257752 | G | 0.0596  |
| rs141947682 | T | -0.0559 |
| rs4745522   | G | -0.0247 |
| rs12338909  | T | -0.0269 |
| rs75869145  | C | -0.0578 |
| rs16924823  | C | -0.0231 |
| rs111420253 | T | 0.0654  |
| rs72696708  | A | -0.0312 |
| rs17812372  | G | -0.0337 |
| rs76688780  | T | -0.0713 |
| rs4742465   | G | -0.0653 |
| rs4961489   | A | -0.0495 |
| rs142143593 | T | 0.1056  |
| rs72755413  | A | -0.0355 |
| rs7023772   | T | -0.0202 |
| rs147585367 | T | 0.1208  |
| rs62574175  | A | -0.0504 |
| rs577159    | C | -0.0193 |
| rs74809207  | G | -0.0533 |
| rs117470722 | T | -0.0545 |
| rs112245221 | G | -0.0767 |
| rs34254117  | C | -0.0313 |
| rs6475010   | T | 0.0599  |
| rs7043452   | C | -0.0184 |
| rs45438993  | A | 0.0223  |
| rs114634353 | T | -0.0918 |
| rs4427226   | C | 0.0253  |

|             |   |         |
|-------------|---|---------|
| rs1412128   | G | -0.0206 |
| rs113770304 | G | 0.036   |
| rs10819042  | G | 0.0389  |
| rs1888723   | A | 0.0357  |
| rs7854383   | T | 0.0282  |
| rs666303    | T | -0.0173 |
| rs7040466   | T | 0.0318  |
| rs1930367   | C | 0.0786  |
| rs10122910  | G | -0.0171 |
| rs560960    | T | 0.0177  |
| rs2871266   | T | -0.0155 |
| rs80131783  | C | -0.0337 |
| rs35936672  | C | 0.0223  |
| rs10818187  | A | -0.0153 |
| rs7043948   | T | 0.0214  |
| rs11144032  | G | -0.0138 |
| rs34421923  | A | 0.0839  |
| rs2000299   | G | -0.0144 |
| rs140303816 | A | -0.1541 |
| rs13301675  | C | 0.0508  |
| rs77818406  | T | -0.1236 |
| rs36045367  | T | 0.0219  |
| rs77102654  | A | -0.0243 |
| rs1020369   | A | 0.0305  |
| rs7028432   | G | -0.0171 |
| rs139043665 | T | 0.065   |
| rs9696767   | G | -0.0146 |
| rs3793567   | G | -0.0174 |
| rs149444961 | A | -0.0574 |
| rs141934010 | C | 0.0555  |
| rs1333492   | G | -0.0472 |
| rs79916100  | A | 0.0528  |
| rs17456451  | A | -0.1005 |
| rs145021722 | G | -0.0591 |
| rs11103194  | T | -0.0218 |
| rs1991883   | C | -0.0206 |
| rs12377     | T | 0.0809  |
| rs7846892   | A | 0.0141  |
| rs72767888  | T | -0.0352 |
| rs10966974  | C | -0.039  |
| rs77328433  | T | 0.0556  |
| rs7864149   | A | 0.0281  |
| rs74581767  | A | 0.0449  |
| rs7040968   | G | -0.0204 |
| rs62578200  | T | 0.0204  |
| rs12685702  | T | 0.026   |
| rs71512224  | T | -0.0837 |

|             |   |         |
|-------------|---|---------|
| rs4743300   | T | 0.0171  |
| rs72761747  | T | -0.05   |
| rs946772    | G | 0.031   |
| rs10992253  | C | 0.0241  |
| rs3847281   | A | -0.0188 |
| rs263547    | A | 0.0173  |
| rs72750629  | G | 0.1101  |
| rs76181411  | C | 0.0646  |
| rs78958529  | A | 0.0724  |
| rs6479233   | T | 0.0162  |
| rs117753069 | A | 0.0383  |
| rs2778256   | C | 0.029   |
| rs28424261  | C | -0.0315 |
| rs77064700  | A | -0.0395 |
| rs145245400 | T | 0.054   |
| rs62583934  | T | 0.0405  |
| rs10122474  | C | 0.0179  |
| rs7852293   | T | 0.0168  |
| rs140152766 | T | -0.1105 |
| rs148231316 | A | -0.0968 |
| rs62581856  | A | -0.0493 |
| rs11243661  | A | -0.0218 |
| rs2101132   | G | -0.0152 |
| rs12335858  | C | 0.023   |
| rs12006331  | G | -0.0294 |
| rs7038863   | C | -0.0149 |
| rs4742014   | G | 0.025   |
| rs159878    | C | -0.0153 |
| rs55768586  | G | -0.0707 |
| rs4246838   | A | 0.0176  |
| rs10758370  | A | 0.0508  |
| rs77590525  | C | -0.0467 |
| rs10964654  | G | 0.0151  |
| rs111666839 | A | -0.027  |
| rs1468759   | T | -0.014  |
| rs73560672  | A | -0.0418 |
| rs7021672   | T | 0.0161  |
| rs112407243 | G | 0.0786  |
| rs41273913  | A | 0.117   |
| rs67504514  | T | -0.0274 |
| rs62570814  | G | 0.0552  |
| rs117044062 | G | -0.1149 |
| rs118100036 | G | 0.0812  |
| rs112264075 | A | 0.0715  |
| rs74397177  | A | 0.0578  |
| rs62582965  | A | 0.0206  |
| rs2026424   | A | -0.0246 |

|             |   |         |
|-------------|---|---------|
| rs942284    | T | 0.0198  |
| rs11244207  | C | 0.0228  |
| rs7855902   | G | 0.0588  |
| rs7853013   | G | 0.0146  |
| rs9314709   | T | -0.0144 |
| rs112380804 | T | -0.0586 |
| rs10780346  | G | 0.0173  |
| rs17547685  | G | 0.0294  |
| rs10125569  | G | -0.0142 |
| rs143675201 | G | 0.0907  |
| rs7029814   | C | 0.0206  |
| rs117409159 | T | -0.0518 |
| rs150219131 | G | 0.0655  |
| rs117356081 | G | 0.0562  |
| rs544565    | T | 0.0148  |
| rs116903872 | C | 0.1017  |
| rs62545158  | C | -0.0657 |
| rs62536868  | T | -0.0849 |
| rs140783936 | A | 0.0486  |
| rs12554670  | A | 0.0141  |
| rs10981649  | T | 0.0246  |
| rs13291445  | A | 0.0167  |
| rs79110011  | G | 0.0417  |
| rs2152606   | C | 0.0144  |
| rs150767966 | G | 0.0829  |
| rs78569495  | G | -0.0376 |
| rs72755418  | C | -0.0467 |
| rs7865072   | G | -0.0155 |
| rs72766128  | T | -0.0807 |
| rs72770764  | C | -0.0264 |
| rs113680529 | C | -0.0596 |
| rs10977992  | G | 0.0457  |
| rs62548851  | C | -0.026  |
| rs78579256  | C | 0.1139  |
| rs57337824  | T | 0.0305  |
| rs1885968   | A | 0.0144  |
| rs10809096  | G | -0.0218 |
| rs12555274  | C | -0.0183 |
| rs2203829   | T | 0.0159  |
| rs141673759 | G | -0.0641 |
| rs10758079  | C | -0.0135 |
| rs75670383  | A | -0.0994 |
| rs10511607  | G | 0.0311  |
| rs10817465  | C | -0.0137 |
| rs62535352  | T | 0.0142  |
| rs117016140 | T | 0.0595  |
| rs144793608 | G | 0.0881  |

|             |   |         |
|-------------|---|---------|
| rs79148404  | T | -0.0258 |
| rs118104749 | A | 0.0619  |
| rs2760417   | G | 0.0165  |
| rs72701653  | G | 0.0429  |
| rs10869843  | A | 0.0137  |
| rs73465268  | G | 0.0195  |
| rs118168538 | A | -0.0567 |
| rs117443347 | T | 0.0612  |
| rs138772330 | T | -0.0523 |
| rs17058723  | T | 0.0336  |
| rs11788161  | G | 0.0216  |
| rs118153232 | G | -0.1049 |
| rs7028624   | A | -0.0249 |
| rs638485    | A | 0.0149  |
| rs72760506  | T | -0.1058 |
| rs10978654  | C | -0.0156 |
| rs2483479   | A | -0.0258 |
| rs56224172  | T | 0.1009  |
| rs10987681  | A | 0.029   |
| rs118081025 | G | 0.0541  |
| rs10793892  | G | -0.0134 |
| rs72731191  | T | -0.0494 |
| rs824265    | C | 0.0205  |
| rs4978791   | C | -0.0216 |
| rs2215532   | A | 0.0173  |
| rs112063406 | A | -0.0891 |
| rs650577    | C | 0.0167  |
| rs608510    | C | 0.0153  |
| rs2094332   | A | -0.0153 |
| rs35710268  | T | 0.015   |
| rs60525232  | C | 0.0463  |
| rs139842467 | A | -0.0729 |
| rs139672606 | C | 0.114   |
| rs3118660   | A | -0.0686 |
| rs2378657   | C | 0.033   |
| rs10125301  | A | 0.0191  |
| rs12345344  | T | 0.0655  |
| rs7047546   | A | -0.0142 |
| rs113037829 | C | 0.1226  |
| rs75080905  | T | -0.0929 |
| rs10122003  | C | 0.0299  |
| rs72684965  | T | 0.0896  |
| rs11144428  | C | -0.0216 |
| rs12348864  | A | -0.0522 |
| rs77729005  | C | 0.1054  |
| rs75349419  | A | -0.0884 |
| rs1890595   | T | -0.0149 |

|             |   |         |
|-------------|---|---------|
| rs7031991   | A | 0.0133  |
| rs79784225  | T | 0.0725  |
| rs11243574  | A | -0.0324 |
| rs6559847   | T | -0.018  |
| rs10818033  | A | 0.0141  |
| rs13298983  | T | -0.0311 |
| rs11139438  | C | 0.016   |
| rs78814120  | T | -0.1428 |
| rs10816227  | A | -0.0196 |
| rs10965256  | A | 0.032   |
| rs10987253  | A | 0.0132  |
| rs112913262 | C | -0.0482 |
| rs73647017  | T | -0.0439 |
| rs116875199 | A | -0.0272 |
| rs10970605  | C | -0.0687 |
| rs7849036   | A | 0.113   |
| rs72698799  | G | -0.0344 |
| rs117164877 | T | 0.0797  |
| rs149383360 | C | -0.0691 |
| rs1361369   | A | 0.0143  |
| rs72760753  | A | 0.0504  |
| rs10117351  | C | -0.0226 |
| rs117280272 | T | -0.0513 |
| rs113297378 | C | -0.032  |
| rs118037216 | A | -0.0761 |
| rs2381115   | T | -0.0277 |
| rs2028403   | C | -0.0159 |
| rs6559714   | G | -0.0291 |
| rs10984984  | T | 0.0246  |
| rs7869761   | C | -0.0162 |
| rs76378814  | C | -0.0496 |
| rs148242319 | A | 0.0676  |
| rs7859797   | T | 0.0704  |
| rs12340152  | T | 0.0179  |
| rs74937254  | G | -0.0411 |
| rs62566117  | A | -0.0176 |
| rs78450318  | T | -0.0364 |
| rs117130106 | A | 0.0942  |
| rs28382867  | T | -0.0426 |
| rs72757117  | A | -0.0508 |
| rs3005744   | G | 0.0133  |
| rs56324034  | C | 0.0359  |
| rs10739649  | A | 0.0143  |
| rs72710784  | G | -0.0193 |
| rs72742115  | A | -0.0456 |
| rs7859789   | T | 0.019   |
| rs76002435  | G | -0.0382 |

|             |   |         |
|-------------|---|---------|
| rs148392537 | A | -0.0288 |
| rs75157772  | A | -0.0318 |
| rs10759643  | T | 0.0146  |
| rs3181347   | A | -0.0735 |
| rs17771324  | C | 0.0186  |
| rs117518193 | A | 0.0838  |
| rs77431841  | A | -0.0832 |
| rs817823    | G | 0.0647  |
| rs144062043 | C | -0.1011 |
| rs117650135 | T | 0.0607  |
| rs10812049  | G | -0.0145 |
| rs117078930 | C | 0.0813  |
| rs79519858  | C | 0.0233  |
| rs140403047 | G | -0.0799 |
| rs77642287  | G | 0.0576  |
| rs28402393  | T | -0.0581 |
| rs10119687  | G | 0.0144  |
| rs77224775  | C | 0.0446  |
| rs7467569   | T | -0.0154 |
| rs10820309  | G | -0.0178 |
| rs1411216   | A | 0.0136  |
| rs10759185  | C | 0.0144  |
| rs7021083   | C | -0.0737 |
| rs10983478  | T | 0.0802  |
| rs72697595  | G | 0.061   |
| rs144160960 | A | 0.0848  |
| rs62538949  | T | 0.0843  |
| rs7044422   | C | 0.0151  |
| rs10121282  | G | 0.0199  |
| rs77667119  | C | 0.0501  |
| rs12352391  | G | -0.0184 |
| rs55932444  | T | -0.0713 |
| rs34573474  | T | 0.0247  |
| rs34296259  | A | -0.0952 |
| rs1937949   | A | -0.0283 |
| rs290207    | C | 0.0142  |
| rs7870015   | G | 0.0136  |
| rs10968140  | T | 0.0152  |
| rs4878817   | G | 0.0131  |
| rs2787398   | C | 0.0135  |
| rs10964970  | T | -0.0163 |
| rs117839973 | A | 0.0361  |
| rs75983074  | T | 0.0838  |
| rs60395229  | C | -0.0662 |
| rs9410497   | C | 0.0178  |
| rs12238573  | T | -0.112  |
| rs79938725  | G | 0.0727  |



|             |   |         |
|-------------|---|---------|
| rs12551395  | G | -0.0155 |
| rs1831755   | T | 0.0205  |
| rs1888170   | G | 0.0339  |
| rs2417709   | A | 0.0138  |
| rs34087764  | A | -0.0155 |
| rs117830151 | A | 0.05    |
| rs112605794 | C | 0.0852  |
| rs1888798   | C | 0.0326  |
| rs74573085  | C | -0.0219 |
| rs10972498  | T | -0.0135 |
| rs34224906  | T | 0.0773  |
| rs34655989  | T | 0.0275  |
| rs72721117  | A | -0.0614 |
| rs74756265  | T | 0.0374  |
| rs118069105 | G | 0.0574  |
| rs1473180   | G | 0.0144  |
| rs13294829  | C | -0.0774 |
| rs10809636  | T | -0.02   |
| rs28647893  | T | -0.0164 |
| rs41311939  | T | 0.0467  |
| rs2210105   | G | -0.0236 |
| rs10969885  | T | 0.0136  |
| rs10988063  | T | 0.0871  |
| rs17570546  | T | -0.0159 |
| rs35683031  | A | 0.11    |
| rs273471    | C | 0.0203  |
| rs75307181  | T | -0.0632 |
| rs2181515   | C | -0.0246 |
| rs6560417   | C | -0.0228 |
| rs10989610  | T | 0.015   |
| rs74723863  | G | 0.0559  |
| rs4471123   | G | -0.0132 |
| rs2777323   | T | -0.0142 |
| rs1220687   | C | -0.0137 |
| rs78629646  | G | -0.0292 |
| rs112027007 | A | 0.0282  |
| rs62572756  | C | 0.0652  |
| rs28537454  | T | -0.0434 |
| rs62574618  | A | -0.0382 |
| rs17692460  | T | -0.0376 |
| rs77834239  | A | -0.0486 |
| rs72750902  | G | 0.0379  |
| rs62572993  | T | -0.0365 |
| rs10964426  | A | 0.0243  |
| rs6474821   | A | -0.0216 |
| rs10972147  | T | -0.0932 |
| rs280573    | C | 0.0257  |

|             |   |         |
|-------------|---|---------|
| rs12337390  | T | 0.0709  |
| rs4837104   | A | -0.041  |
| rs146939313 | A | -0.0597 |
| rs10868099  | A | -0.0161 |
| rs7871552   | A | -0.0265 |
| rs12377592  | A | 0.0187  |
| rs10781174  | G | -0.0144 |
| rs17785107  | T | -0.0323 |
| rs10964234  | T | 0.0193  |
| rs35340098  | G | 0.0305  |
| rs10979048  | C | -0.0166 |
| rs72752284  | C | 0.118   |
| rs59977015  | T | 0.0285  |
| rs7042897   | G | -0.0202 |
| rs77295865  | A | 0.0823  |
| rs149444279 | A | -0.0946 |
| rs10868657  | A | -0.0389 |
| rs75581110  | C | 0.0335  |
| rs12345835  | C | 0.0178  |
| rs2995218   | G | -0.0151 |
| rs117851980 | A | 0.0905  |
| rs11137585  | T | 0.0199  |
| rs79387436  | C | -0.044  |
| rs10123001  | G | 0.0128  |
| rs7032491   | C | 0.0452  |
| rs117587703 | A | 0.0778  |
| rs2182046   | C | -0.0144 |
| rs35483255  | T | -0.0231 |
| rs79155004  | G | -0.0463 |
| rs75729194  | T | -0.0468 |
| rs35971692  | A | 0.0279  |
| rs12351798  | A | 0.05    |
| rs139143154 | T | -0.073  |
| rs116899370 | A | -0.0664 |
| rs13292809  | G | -0.0139 |
| rs3739902   | T | -0.015  |
| rs117877945 | A | 0.0516  |
| rs143293292 | A | 0.0683  |
| rs35253812  | C | -0.0332 |
| rs2477518   | C | -0.0148 |
| rs62556471  | G | -0.0258 |
| rs117199184 | G | -0.045  |
| rs79269332  | T | 0.0586  |
| rs146622210 | G | -0.0836 |
| rs146713823 | A | 0.0456  |
| rs10435758  | T | -0.0178 |
| rs74567430  | C | -0.0916 |

|             |   |         |
|-------------|---|---------|
| rs7856656   | T | 0.0148  |
| rs77705796  | A | 0.0185  |
| rs113204330 | A | -0.0636 |
| rs7858820   | C | -0.0136 |
| rs142849627 | A | -0.0632 |
| rs144763765 | T | -0.0663 |
| rs10116621  | T | -0.0514 |
| rs79831360  | A | 0.0367  |
| rs112948348 | T | 0.088   |
| rs138755321 | A | 0.0621  |
| rs62641783  | C | 0.0316  |
| rs72700116  | G | -0.0376 |
| rs10968030  | C | -0.0257 |
| rs147816524 | G | 0.129   |
| rs77788331  | A | -0.0574 |
| rs1048228   | G | 0.018   |
| rs146543574 | A | -0.0922 |
| rs13297915  | G | 0.0194  |
| rs79577844  | G | -0.0581 |
| rs10756657  | C | -0.018  |
| rs10156618  | C | 0.0157  |
| rs56405389  | C | -0.0318 |
| rs4744509   | A | -0.0139 |
| rs150142793 | C | 0.0573  |
| rs141830570 | A | -0.0434 |
| rs13294194  | G | 0.0632  |
| rs118127931 | T | 0.0495  |
| rs11243835  | C | 0.017   |
| rs748697    | A | -0.0377 |
| rs2104848   | G | -0.1096 |
| rs11793096  | T | -0.0512 |
| rs41297187  | T | -0.0639 |
| rs147959367 | A | -0.0547 |
| rs35585955  | T | 0.0155  |
| rs6477917   | C | -0.0246 |
| rs117803155 | A | 0.0548  |
| rs17836537  | G | -0.0426 |
| rs35389915  | T | -0.0208 |
| rs141762594 | G | -0.0623 |
| rs75596875  | C | 0.0863  |
| rs72740121  | G | 0.027   |
| rs12337887  | T | -0.0271 |
| rs62576104  | G | -0.0133 |
| rs12378196  | G | 0.0164  |
| rs142387808 | C | 0.0426  |
| rs10869011  | T | 0.0684  |
| rs13284100  | T | 0.0137  |

|             |   |         |
|-------------|---|---------|
| rs9410612   | T | 0.0142  |
| rs3861867   | C | -0.0379 |
| rs17705713  | C | 0.0616  |
| rs7852852   | A | 0.0313  |
| rs4879960   | C | 0.0151  |
| rs10816481  | T | -0.0151 |
| rs111337561 | G | -0.0383 |
| rs117252627 | G | -0.0639 |
| rs77895895  | T | 0.0374  |
| rs117903057 | C | -0.0784 |
| rs62530354  | G | 0.0201  |
| rs34130265  | T | 0.0379  |
| rs60979332  | A | -0.0248 |
| rs139336758 | T | -0.0461 |
| rs117565547 | T | 0.0405  |
| rs145504905 | C | -0.0964 |
| rs12685753  | T | -0.0157 |
| rs34926716  | T | 0.0568  |
| rs4745617   | C | -0.0133 |
| rs11531651  | G | 0.0261  |
| rs12343104  | A | 0.0381  |
| rs7866774   | T | -0.0134 |
| rs10984112  | C | 0.0137  |
| rs138603811 | A | -0.0482 |
| rs55924444  | T | -0.076  |
| rs7045238   | G | 0.0236  |
| rs117827799 | T | 0.0414  |
| rs56117756  | T | 0.061   |
| rs150485718 | A | -0.1128 |
| rs117400240 | G | 0.0556  |
| rs117800106 | G | 0.0518  |
| rs4098538   | A | -0.0709 |
| rs523517    | T | -0.0296 |
| rs11103766  | C | 0.0347  |
| rs12345450  | A | -0.0149 |
| rs12552397  | G | -0.0289 |
| rs76388701  | T | -0.018  |
| rs149710253 | G | 0.0666  |
| rs142371590 | T | -0.1164 |
| rs61690615  | G | -0.0377 |
| rs10815092  | C | 0.0203  |
| rs1337017   | T | -0.0135 |
| rs12552755  | T | 0.0315  |
| rs78243214  | T | 0.0678  |
| rs139573588 | G | 0.0604  |
| rs7043212   | T | 0.0349  |
| rs57509581  | T | 0.027   |

|             |   |         |
|-------------|---|---------|
| rs7047561   | C | -0.0237 |
| rs7031871   | G | 0.0256  |
| rs78406193  | G | -0.0622 |
| rs4260950   | T | -0.0134 |
| rs80286230  | C | -0.0475 |
| rs77659617  | A | -0.031  |
| rs140359936 | T | -0.0679 |
| rs10760801  | G | -0.0127 |
| rs41296073  | A | -0.1016 |
| rs10814969  | T | -0.0167 |
| rs117306552 | G | -0.0749 |
| rs10117895  | C | 0.0138  |
| rs12555111  | A | 0.018   |
| rs855494    | C | 0.0138  |
| rs12001129  | A | -0.0145 |
| rs10987415  | G | 0.013   |
| rs11139623  | T | 0.0248  |
| rs72616670  | T | -0.0476 |
| rs62537983  | C | 0.0237  |
| rs62570798  | G | 0.0278  |
| rs1808789   | T | 0.0134  |
| rs79444665  | A | 0.0555  |
| rs4390020   | T | 0.0131  |
| rs72756317  | A | 0.0799  |
| rs654745    | C | -0.0609 |
| rs79398553  | A | 0.0193  |
| rs10757707  | C | 0.0445  |
| rs79616399  | T | 0.0822  |
| rs77945940  | C | 0.0354  |
| rs75829879  | T | -0.0622 |
| rs73564687  | A | 0.0872  |
| rs17222296  | C | -0.0357 |
| rs117217383 | A | -0.0768 |
| rs10985305  | C | 0.0383  |
| rs78129252  | C | -0.0386 |
| rs112467315 | A | 0.0556  |
| rs74921990  | G | -0.1064 |
| rs7049017   | C | 0.0253  |
| rs4741046   | G | 0.0149  |
| rs55948600  | T | 0.0599  |
| rs11790623  | T | -0.0542 |
| rs80152153  | A | -0.0749 |
| rs111810401 | T | -0.0455 |
| rs151117568 | C | 0.0505  |
| rs10992647  | G | 0.0623  |
| rs10870055  | A | -0.0535 |
| rs75161896  | T | 0.0628  |

|             |   |         |
|-------------|---|---------|
| rs2427980   | C | 0.0242  |
| rs4977417   | C | 0.0139  |
| rs117454395 | T | 0.0398  |
| rs10984847  | T | 0.0214  |
| rs10123013  | T | 0.0334  |
| rs117888291 | C | 0.0784  |
| rs57771173  | G | -0.034  |
| rs117827562 | A | 0.0857  |
| rs2680208   | G | -0.014  |
| rs144796041 | C | -0.0351 |
| rs2282334   | T | -0.0142 |
| rs11144062  | A | -0.0159 |
| rs76718000  | T | -0.0579 |
| rs11794288  | T | 0.0242  |
| rs11790321  | T | 0.0345  |
| rs10758256  | T | 0.0159  |
| rs116936087 | T | 0.0645  |
| rs1053889   | G | -0.0128 |
| rs1751243   | C | 0.0151  |
| rs10118253  | C | -0.0129 |
| rs4146134   | C | -0.0149 |
| rs1173083   | A | 0.0258  |
| rs149978771 | A | 0.0488  |
| rs142832775 | T | -0.0399 |
| rs144441491 | C | -0.0764 |
| rs117735370 | C | 0.096   |
| rs12348192  | T | -0.0136 |
| rs112985725 | G | 0.0557  |
| rs11791507  | T | -0.0414 |
| rs2519143   | A | 0.0163  |
| rs7047899   | T | 0.0288  |
| rs118167320 | T | 0.0573  |
| rs10817367  | A | -0.0172 |
| rs10118317  | C | -0.0128 |
| rs10967053  | C | -0.0203 |
| rs7389852   | A | -0.0249 |
| rs79448384  | T | 0.0235  |
| rs116917017 | C | 0.0611  |
| rs10115755  | A | -0.0305 |
| rs138363924 | G | 0.0394  |
| rs1556028   | C | -0.0147 |
| rs17501809  | A | -0.0249 |
| rs34783751  | C | 0.0139  |
| rs7466817   | G | -0.0151 |
| rs10816913  | A | -0.0168 |
| rs12006163  | A | -0.0251 |
| rs10781126  | A | 0.0137  |

|             |   |         |
|-------------|---|---------|
| rs17672683  | G | -0.0172 |
| rs41304848  | T | -0.0356 |
| rs16909493  | A | 0.0343  |
| rs72710001  | G | 0.0465  |
| rs114466823 | A | -0.0635 |
| rs7858652   | T | 0.015   |
| rs142240698 | C | 0.063   |
| rs117941983 | T | -0.0669 |
| rs76765443  | C | -0.0718 |
| rs142975155 | A | 0.0623  |
| rs74506052  | G | -0.0768 |
| rs6476873   | A | -0.0163 |
| rs77455990  | T | -0.0724 |
| rs7858600   | G | 0.0125  |
| rs76980428  | G | -0.0397 |
| rs914977    | A | 0.0152  |
| rs112031063 | G | -0.0661 |
| rs75876866  | T | 0.0585  |
| rs396622    | A | -0.0247 |
| rs28551499  | C | 0.0281  |
| rs148988697 | T | -0.0462 |
| rs7859638   | G | -0.0281 |
| rs9987728   | A | 0.0251  |
| rs138589155 | C | 0.0797  |
| rs79542514  | T | 0.015   |
| rs16909863  | G | -0.0245 |
| rs147116259 | C | 0.0575  |
| rs62575009  | C | -0.0504 |
| rs945443    | T | -0.0461 |
| rs140845383 | G | 0.054   |
| rs10817730  | A | -0.0133 |
| rs10972255  | C | 0.0266  |
| rs12554767  | G | -0.0362 |
| rs7856182   | T | 0.0183  |
| rs41278407  | G | -0.0296 |
| rs62571297  | A | -0.0173 |
| rs112270084 | G | -0.0793 |
| rs67780794  | C | -0.0596 |
| rs12343455  | C | -0.0458 |
| rs146448480 | C | -0.0647 |
| rs112780050 | G | -0.0832 |
| rs1329038   | A | -0.0533 |
| rs34718682  | A | 0.0221  |
| rs34433105  | T | 0.0475  |
| rs4836665   | A | -0.0171 |
| rs17057129  | C | -0.0165 |
| rs72741765  | C | -0.0568 |

|             |   |         |
|-------------|---|---------|
| rs118191178 | C | 0.0667  |
| rs113897857 | A | -0.0372 |
| rs17770206  | C | -0.0373 |
| rs72753404  | T | -0.0386 |
| rs73639853  | C | 0.043   |
| rs28503314  | G | -0.0407 |
| rs149159469 | C | -0.0738 |
| rs56358102  | G | -0.0186 |
| rs10964602  | A | -0.0237 |
| rs118136773 | C | 0.0376  |
| rs66747389  | T | -0.0177 |
| rs113103969 | G | 0.0267  |
| rs1434276   | T | 0.0129  |
| rs113391277 | G | 0.0401  |
| rs1184859   | A | -0.0366 |
| rs16907545  | G | 0.0257  |
| rs35781775  | A | 0.0604  |
| rs80238815  | T | 0.0513  |
| rs55992105  | T | 0.0214  |
| rs2017822   | A | -0.0161 |
| rs75240295  | T | -0.0575 |
| rs10816587  | C | 0.014   |
| rs5016540   | G | -0.0159 |
| rs872388    | A | 0.0148  |
| rs76512234  | A | 0.0251  |
| rs72746694  | T | -0.0262 |
| rs7849319   | T | -0.027  |
| rs2035071   | C | 0.0219  |
| rs78229991  | C | -0.0212 |
| rs117727432 | A | -0.0557 |
| rs12683136  | T | 0.0287  |
| rs1369198   | C | -0.0315 |
| rs10969378  | A | -0.0172 |
| rs144446964 | T | 0.091   |
| rs2486360   | G | -0.0895 |
| rs76872171  | T | -0.0362 |
| rs12683303  | A | 0.0316  |
| rs55947649  | A | 0.0548  |
| rs72619339  | A | 0.0282  |
| rs10961406  | G | -0.0476 |
| rs74351216  | A | 0.0624  |
| rs1323398   | T | 0.0136  |
| rs41311424  | T | 0.0353  |
| rs7048746   | G | 0.0306  |
| rs60831665  | A | 0.0258  |
| rs115854842 | A | 0.062   |
| rs4745099   | T | 0.0132  |



|             |   |         |
|-------------|---|---------|
| rs77721520  | T | -0.056  |
| rs7869153   | C | 0.0139  |
| rs4741405   | T | -0.0223 |
| rs2112074   | A | -0.0377 |
| rs3884535   | C | 0.0156  |
| rs584738    | A | -0.0129 |
| rs13289890  | A | 0.0752  |
| rs34021448  | C | -0.0157 |
| rs10982285  | C | -0.0155 |
| rs11999995  | A | 0.0605  |
| rs117156716 | G | 0.042   |
| rs117882853 | T | -0.0481 |
| rs145901117 | A | -0.0571 |
| rs1266033   | C | -0.0237 |
| rs117724125 | T | -0.044  |
| rs7041559   | T | 0.013   |
| rs6559520   | A | 0.0164  |
| rs17653109  | G | -0.046  |
| rs117348703 | C | -0.0744 |
| rs62567238  | A | 0.0398  |
| rs147296185 | T | -0.0453 |
| rs7035759   | G | -0.0169 |
| rs150337782 | C | 0.098   |
| rs55842273  | A | -0.0281 |
| rs76921072  | A | -0.0527 |
| rs73650029  | A | 0.0473  |
| rs72770217  | A | -0.0704 |
| rs12001652  | A | -0.024  |
| rs2026109   | A | 0.0344  |
| rs78842470  | G | 0.0309  |
| rs78308436  | G | 0.0908  |
| rs72744553  | T | 0.0302  |
| rs10984490  | C | 0.0133  |
| rs13285836  | T | 0.034   |
| rs117223159 | A | -0.0415 |
| rs7856790   | A | 0.0135  |
| rs7046369   | T | -0.015  |
| rs4358884   | C | 0.0136  |
| rs12236042  | C | -0.025  |
| rs56285355  | G | 0.0718  |
| rs140114980 | G | -0.0498 |
| rs62566087  | T | -0.0445 |
| rs77656035  | T | 0.0759  |
| rs7864112   | C | -0.0415 |
| rs117759760 | T | -0.0763 |
| rs2086106   | T | -0.0221 |
| rs79134006  | T | -0.0409 |

|             |   |         |
|-------------|---|---------|
| rs7021573   | A | -0.0127 |
| rs7853956   | A | 0.0166  |
| rs13286518  | G | 0.0152  |
| rs294804    | C | -0.0205 |
| rs3902784   | G | 0.0242  |
| rs7039300   | G | -0.0169 |
| rs2492617   | T | 0.0142  |
| rs111840823 | A | -0.0538 |
| rs3025416   | T | 0.0204  |
| rs78296475  | T | 0.0222  |
| rs80094221  | A | 0.0605  |
| rs74424312  | T | -0.0552 |
| rs77422401  | T | 0.0356  |
| rs139151708 | G | -0.0376 |
| rs17415730  | A | 0.014   |
| rs17373603  | T | 0.0193  |
| rs10989900  | A | -0.0505 |
| rs117740155 | A | -0.0193 |
| rs117433402 | T | 0.0365  |
| rs139697631 | A | -0.0365 |
| rs146228809 | G | -0.0978 |
| rs2277193   | C | 0.0137  |
| rs28425173  | C | 0.0988  |
| rs7040817   | A | 0.0769  |
| rs7037192   | A | -0.0241 |
| rs76979316  | G | 0.069   |
| rs73438273  | G | 0.0364  |
| rs118032648 | G | -0.0553 |
| rs118150290 | C | -0.076  |
| rs77557759  | A | -0.0673 |
| rs73639211  | G | 0.0178  |
| rs117271632 | A | -0.0609 |
| rs149929173 | G | 0.0709  |
| rs74641663  | A | -0.0942 |
| rs7467917   | T | 0.0178  |
| rs4135186   | T | 0.0311  |
| rs10980367  | C | -0.0305 |
| rs74305026  | G | 0.0283  |
| rs79555706  | C | 0.0414  |
| rs4135192   | G | -0.0136 |
| rs10968324  | T | 0.0187  |
| rs11138098  | G | 0.0409  |
| rs72755331  | A | 0.0866  |
| rs116862507 | A | 0.0681  |
| rs3996257   | C | 0.0332  |
| rs12346100  | C | -0.0511 |
| rs74982411  | G | 0.0707  |

|             |   |         |
|-------------|---|---------|
| rs138206492 | C | -0.0408 |
| rs4295713   | A | 0.0156  |
| rs75054746  | A | -0.0581 |
| rs11140359  | A | 0.0444  |
| rs112150359 | T | 0.0521  |
| rs79366318  | A | -0.0404 |
| rs112886936 | C | -0.0635 |
| rs12551214  | C | 0.0247  |
| rs12341763  | G | -0.0198 |
| rs1417274   | T | -0.0146 |
| rs11792411  | A | 0.0212  |
| rs143235407 | G | 0.0557  |
| rs11787905  | T | -0.0231 |
| rs4407948   | C | 0.0289  |
| rs117892184 | A | -0.0582 |
| rs118107405 | C | 0.0647  |
| rs113437020 | G | 0.0383  |
| rs111267586 | T | -0.054  |
| rs117895229 | G | 0.0461  |
| rs72747544  | A | 0.0285  |
| rs7041584   | A | -0.021  |
| rs7856559   | A | -0.0401 |
| rs74858554  | C | 0.0331  |
| rs13302145  | T | 0.0246  |
| rs7847916   | C | 0.0127  |
| rs10975224  | A | -0.0606 |
| rs80085721  | G | -0.105  |
| rs79654091  | C | -0.0867 |
| rs12004600  | A | 0.0166  |
| rs61598707  | A | -0.0121 |
| rs2185360   | T | -0.0133 |
| rs72730860  | T | 0.0428  |
| rs146619787 | T | -0.0408 |
| rs77315051  | A | -0.0493 |
| rs113469228 | C | -0.0507 |
| rs2065113   | G | -0.023  |
| rs6477317   | A | 0.0398  |
| rs34564844  | C | -0.0792 |
| rs1323226   | G | -0.013  |
| rs72700397  | C | -0.0274 |
| rs10121084  | A | 0.0135  |
| rs78439290  | G | 0.0336  |
| rs117507265 | G | -0.0567 |
| rs3012359   | T | -0.0132 |
| rs7874302   | A | -0.0136 |
| rs2077392   | C | -0.0706 |
| rs7856955   | T | 0.0327  |

|             |   |         |
|-------------|---|---------|
| rs34354627  | C | 0.05    |
| rs117340747 | G | 0.0585  |
| rs10812871  | T | 0.0163  |
| rs2043189   | A | -0.0124 |
| rs10979754  | C | -0.0229 |
| rs117412395 | A | -0.054  |
| rs77910820  | G | 0.0462  |
| rs1378324   | T | 0.0168  |
| rs12236566  | T | -0.028  |
| rs117357153 | G | 0.0698  |
| rs80052609  | T | -0.0634 |
| rs1324463   | G | -0.0297 |
| rs79657298  | A | -0.0797 |
| rs12057076  | C | -0.0304 |
| rs12338853  | C | 0.0156  |
| rs10970184  | C | -0.0442 |
| rs149361335 | C | 0.0806  |
| rs143202683 | C | -0.0819 |
| rs117198414 | T | 0.098   |
| rs117848189 | A | -0.0419 |
| rs80048197  | T | 0.0432  |
| rs10973959  | A | -0.0183 |
| rs73389454  | C | 0.0337  |
| rs894822    | A | 0.0121  |
| rs117843963 | A | -0.0527 |
| rs147109153 | C | 0.0976  |
| rs74565849  | A | -0.0466 |
| rs296647    | G | 0.0481  |
| rs74612555  | A | 0.0553  |
| rs66548202  | A | 0.0379  |
| rs74768127  | T | -0.0722 |
| rs12379473  | C | -0.0445 |
| rs10959456  | A | -0.0395 |
| rs4740583   | G | -0.0134 |
| rs12002963  | T | 0.0619  |
| rs10757838  | A | 0.0129  |
| rs117695267 | A | -0.0344 |
| rs117800199 | G | 0.101   |
| rs10967083  | T | 0.0134  |
| rs74640040  | C | 0.0424  |
| rs150601497 | A | 0.0411  |
| rs11793861  | T | 0.0155  |
| rs2073923   | C | -0.0164 |
| rs75096648  | A | 0.082   |
| rs10980573  | A | -0.0173 |
| rs117644311 | A | 0.0285  |
| rs12004116  | G | 0.0274  |

|             |   |         |
|-------------|---|---------|
| rs62576227  | A | 0.0361  |
| rs3750320   | C | -0.0168 |
| rs12350027  | C | 0.05    |
| rs117582905 | C | -0.128  |
| rs11265779  | A | -0.0272 |
| rs113408405 | G | 0.0425  |
| rs139353209 | T | 0.0986  |
| rs4598352   | G | -0.022  |
| rs17547957  | C | 0.0282  |
| rs17553998  | A | -0.0288 |
| rs79524666  | G | 0.0404  |
| rs12555114  | A | 0.0667  |
| rs117681700 | A | 0.0649  |
| rs72735053  | A | -0.0194 |
| rs117154615 | C | 0.0784  |
| rs4962210   | T | 0.0127  |
| rs142007597 | T | 0.0494  |
| rs72702422  | G | 0.0566  |
| rs78500699  | G | -0.0642 |
| rs17226531  | C | 0.0287  |
| rs951331    | A | -0.0122 |
| rs2210992   | G | 0.0134  |
| rs72764881  | C | 0.0477  |
| rs79695631  | A | -0.033  |
| rs79243935  | A | 0.0639  |
| rs3913046   | C | -0.013  |
| rs581724    | T | -0.0123 |
| rs7865415   | A | 0.0631  |
| rs10820213  | C | -0.0148 |
| rs4149264   | C | 0.016   |
| rs79085029  | A | -0.0696 |
| rs78894555  | A | -0.0682 |
| rs79336288  | G | -0.0433 |
| rs138628391 | A | 0.0658  |
| rs10816119  | T | 0.0156  |
| rs150973656 | A | -0.0275 |
| rs6476697   | G | -0.0259 |
| rs2070113   | A | 0.014   |
| rs4304399   | C | -0.016  |
| rs10961005  | A | -0.0752 |
| rs117099181 | A | -0.0439 |
| rs71492020  | G | 0.0175  |
| rs73443052  | T | 0.0176  |
| rs2258170   | A | -0.0137 |
| rs1746333   | C | 0.0213  |
| rs79181974  | A | -0.0613 |
| rs17086002  | T | -0.0284 |

|             |   |         |
|-------------|---|---------|
| rs290208    | T | -0.0163 |
| rs10810130  | A | 0.0215  |
| rs17179700  | A | 0.1056  |
| rs17276677  | T | 0.0511  |
| rs80215997  | G | -0.0268 |
| rs2493638   | T | -0.0168 |
| rs7874380   | C | -0.0347 |
| rs150811768 | T | -0.0522 |
| rs1332441   | C | -0.0134 |
| rs146367780 | A | 0.0286  |
| rs113818084 | C | 0.064   |
| rs146698638 | A | -0.108  |
| rs59297630  | G | -0.0602 |
| rs79241857  | T | 0.0618  |
| rs1288650   | C | 0.0132  |
| rs72698048  | C | 0.058   |
| rs4837390   | A | 0.0181  |
| rs1494359   | G | -0.0343 |
| rs7035173   | C | -0.0248 |
| rs117436998 | A | 0.0732  |
| rs11103678  | A | 0.0558  |
| rs149850258 | G | 0.0484  |
| rs12341219  | G | 0.0132  |
| rs3860972   | C | 0.0396  |
| rs4237197   | G | -0.0123 |
| rs138426874 | A | -0.0527 |
| rs150147381 | T | 0.0606  |
| rs148408485 | C | 0.1134  |
| rs34652877  | T | -0.0793 |
| rs7019049   | T | 0.087   |
| rs7871156   | T | 0.0166  |
| rs10815287  | G | -0.0536 |
| rs76126610  | A | 0.0693  |
| rs3758240   | C | 0.0129  |
| rs146524566 | T | -0.075  |
| rs145884531 | G | -0.0537 |
| rs10959423  | A | -0.0306 |
| rs913984    | T | -0.0145 |
| rs141181868 | G | 0.0631  |
| rs79316190  | C | 0.0594  |
| rs76125200  | A | -0.0484 |
| rs12006192  | C | -0.0272 |
| rs17742324  | C | -0.0232 |
| rs1675311   | C | -0.0181 |
| rs118157028 | T | 0.082   |
| rs34792177  | A | 0.0273  |
| rs2418076   | T | -0.0148 |

|             |   |         |
|-------------|---|---------|
| rs112738386 | A | 0.0468  |
| rs58773367  | C | -0.0231 |
| rs66779103  | A | -0.0173 |
| rs145735620 | A | 0.0836  |
| rs2417043   | C | 0.0178  |
| rs17654113  | T | -0.0155 |
| rs144191173 | T | 0.0317  |
| rs10970974  | C | -0.0158 |
| rs7854221   | C | -0.0273 |
| rs139001927 | T | 0.0676  |
| rs7854358   | C | -0.0139 |
| rs117389952 | T | -0.0336 |
| rs78136686  | T | -0.0525 |
| rs10121584  | T | 0.012   |
| rs115086429 | A | -0.0792 |
| rs10815884  | C | -0.0209 |
| rs148280145 | A | 0.0833  |
| rs552693    | C | -0.0138 |
| rs73473636  | A | 0.0223  |
| rs10901123  | A | 0.0188  |
| rs10963619  | A | -0.0235 |
| rs149795563 | A | 0.0799  |
| rs10965197  | T | -0.0127 |
| rs111464820 | T | 0.0761  |
| rs10869719  | A | -0.0296 |
| rs149713782 | T | -0.0474 |
| rs581679    | A | 0.0228  |
| rs62532938  | A | -0.0145 |
| rs17721021  | A | -0.0236 |
| rs7852701   | C | -0.0524 |
| rs2297453   | A | -0.0135 |
| rs115204880 | C | 0.0569  |
| rs77441358  | A | 0.0605  |
| rs2383244   | A | 0.0145  |
| rs117611987 | T | 0.0785  |
| rs111875630 | G | 0.0972  |
| rs586441    | C | 0.0186  |
| rs2015716   | T | 0.0639  |
| rs448698    | A | 0.0529  |
| rs76548521  | A | -0.0604 |
| rs147175589 | T | -0.0764 |
| rs11792386  | T | -0.0348 |
| rs8187876   | T | 0.0264  |
| rs10990227  | G | 0.0146  |
| rs1831120   | A | -0.0212 |
| rs10123082  | A | -0.0179 |
| rs77617599  | A | -0.061  |

|             |   |         |
|-------------|---|---------|
| rs76215051  | C | 0.0653  |
| rs12553191  | T | -0.0153 |
| rs17291372  | T | -0.0134 |
| rs113671493 | G | 0.0413  |
| rs3196378   | C | -0.0137 |
| rs139844056 | T | -0.0766 |
| rs117026821 | T | 0.0519  |
| rs56188844  | T | -0.0426 |
| rs117491755 | C | -0.0312 |
| rs72706898  | G | 0.075   |
| rs143917793 | T | 0.086   |
| rs150373132 | T | 0.111   |
| rs117736197 | A | -0.0337 |
| rs75411154  | T | 0.0319  |
| rs10988341  | G | -0.0314 |
| rs145721548 | G | 0.051   |
| rs72741818  | T | 0.0191  |
| rs12003677  | T | -0.0134 |
| rs12682680  | G | 0.0162  |
| rs80156579  | G | -0.0262 |
| rs535       | G | -0.0119 |
| rs1853424   | T | 0.0118  |
| rs117312489 | T | 0.0229  |
| rs78664628  | A | -0.0773 |
| rs117073115 | T | -0.0479 |
| rs78850504  | C | 0.0657  |
| rs117959755 | T | 0.0617  |
| rs117280213 | T | 0.0481  |
| rs74558844  | G | -0.0287 |
| rs4880021   | T | 0.0227  |
| rs7859114   | C | 0.0397  |
| rs3827828   | C | 0.1053  |
| rs78876706  | G | -0.0463 |
| rs117275385 | C | 0.0376  |
| rs117194504 | G | 0.0682  |
| rs146578924 | G | -0.086  |
| rs142911722 | C | -0.0982 |
| rs80332864  | A | -0.0487 |
| rs72725247  | C | -0.0718 |
| rs112156084 | C | 0.0742  |
| rs12376866  | G | 0.0523  |
| rs78435881  | T | 0.0209  |
| rs10979172  | T | -0.0553 |
| rs12348099  | A | 0.0731  |
| rs115829079 | G | -0.05   |
| rs17471176  | C | 0.0225  |
| rs72754960  | C | 0.0921  |



|             |   |         |
|-------------|---|---------|
| rs10983510  | A | 0.0138  |
| rs10812808  | T | 0.0164  |
| rs145045580 | A | 0.0645  |
| rs1535673   | A | 0.0278  |
| rs1929492   | A | 0.021   |
| rs150620166 | T | 0.0838  |
| rs35517289  | G | -0.0696 |
| rs139904827 | G | 0.0906  |
| rs62544425  | C | -0.0462 |
| rs76099080  | A | -0.0337 |
| rs72748040  | A | 0.0506  |
| rs73553053  | C | -0.0475 |
| rs1967851   | T | -0.0469 |
| rs7857570   | G | -0.0202 |
| rs139272716 | A | 0.0411  |
| rs2182855   | T | 0.0148  |
| rs75159117  | G | 0.0481  |
| rs11243774  | G | 0.0487  |
| rs78402722  | G | -0.0552 |
| rs1687377   | T | -0.0447 |
| rs11521180  | A | -0.0146 |
| rs113542309 | A | 0.0783  |
| rs10817585  | C | 0.0163  |
| rs2891009   | C | 0.0645  |
| rs10972596  | T | -0.0292 |
| rs111351812 | T | 0.0251  |
| rs72700537  | T | 0.0394  |
| rs28402988  | G | 0.059   |
| rs34911320  | C | -0.0141 |
| rs7034798   | C | 0.0227  |
| rs10814727  | G | -0.0162 |
| rs72706558  | T | -0.0563 |
| rs6475617   | T | 0.0163  |
| rs117257454 | G | 0.0381  |
| rs1329394   | C | 0.0546  |
| rs12378005  | C | -0.017  |
| rs62541668  | C | -0.074  |
| rs60991279  | A | 0.0525  |
| rs117852508 | G | 0.0622  |
| rs141274002 | G | 0.027   |
| rs74965239  | A | -0.0794 |
| rs112211828 | T | -0.0821 |
| rs10977171  | C | 0.0381  |
| rs6475446   | A | 0.0327  |
| rs77558099  | G | 0.0271  |
| rs10761178  | T | 0.0252  |
| rs796489    | A | 0.0748  |

|             |   |         |
|-------------|---|---------|
| rs72756599  | A | -0.0238 |
| rs10967306  | A | 0.0217  |
| rs72716891  | T | -0.067  |
| rs13288932  | A | -0.057  |
| rs113279898 | T | -0.0766 |
| rs16932288  | C | 0.0644  |
| rs13291526  | A | 0.0374  |
| rs35358081  | A | -0.0962 |
| rs972464    | T | 0.0121  |
| rs2643322   | A | 0.0155  |
| rs80256447  | T | 0.059   |
| rs112285394 | G | 0.0168  |
| rs149493275 | A | -0.0249 |
| rs1174587   | G | 0.0189  |
| rs113796516 | A | -0.0533 |
| rs71505230  | A | 0.0341  |
| rs1927942   | T | -0.0544 |
| rs10985174  | C | 0.0611  |
| rs7043882   | C | 0.0188  |
| rs118129357 | T | -0.1315 |
| rs1321919   | A | -0.0175 |
| rs12351762  | A | -0.0187 |
| rs117893954 | T | -0.0638 |
| rs117351228 | T | 0.0898  |
| rs79025950  | T | 0.0333  |
| rs11792014  | A | 0.0242  |
| rs79838298  | T | 0.0482  |
| rs17457320  | A | -0.055  |
| rs7039750   | A | -0.0135 |
| rs7027765   | C | 0.0146  |
| rs35234842  | C | -0.0299 |
| rs72750204  | G | -0.028  |
| rs12376546  | C | -0.0135 |
| rs142233622 | A | 0.0933  |
| rs72742277  | T | 0.0656  |
| rs145043945 | A | 0.0425  |
| rs1951433   | T | -0.0125 |
| rs72695174  | A | 0.0368  |
| rs117329590 | C | -0.1026 |
| rs977731    | G | 0.0204  |
| rs12004072  | T | -0.1125 |
| rs111954542 | T | -0.03   |
| rs10114701  | C | -0.0582 |
| rs77669962  | A | -0.057  |
| rs11790961  | C | 0.0553  |
| rs76438877  | T | -0.0527 |
| rs77973993  | A | 0.0457  |

|             |   |         |
|-------------|---|---------|
| rs7020343   | T | -0.0163 |
| rs1040851   | C | -0.0118 |
| rs117707756 | G | 0.046   |
| rs2184767   | C | -0.0764 |
| rs35164983  | A | -0.0217 |
| rs77376421  | G | 0.0575  |
| rs10961192  | G | -0.0539 |
| rs7035194   | G | 0.0301  |
| rs144197081 | A | 0.0546  |
| rs117626585 | T | 0.1013  |
| rs10901213  | C | 0.0185  |
| rs12350807  | G | 0.0247  |
| rs1110265   | C | 0.0279  |
| rs72763856  | A | 0.017   |
| rs72765047  | G | 0.0512  |
| rs35369779  | A | 0.0415  |
| rs143652196 | T | -0.0925 |
| rs7031344   | C | 0.0625  |
| rs7028474   | A | 0.0318  |
| rs487010    | T | -0.0214 |
| rs149865577 | G | 0.0755  |
| rs11138600  | A | -0.0615 |
| rs78120578  | A | -0.0568 |
| rs10757143  | C | 0.0165  |
| rs11793855  | G | 0.0677  |
| rs79702853  | A | -0.0492 |
| rs12352804  | A | -0.0313 |
| rs10811678  | T | -0.0172 |
| rs145573939 | A | -0.037  |
| rs62559127  | C | -0.0189 |
| rs117289744 | A | -0.0474 |
| rs12236753  | C | -0.046  |
| rs78126411  | T | 0.0382  |
| rs140825731 | T | 0.1038  |
| rs140909561 | G | -0.0588 |
| rs62544643  | T | -0.0321 |
| rs11140751  | C | -0.0909 |
| rs2152749   | T | 0.0146  |
| rs12340899  | A | 0.0149  |
| rs140928756 | G | 0.0631  |
| rs7866592   | G | 0.0195  |
| rs117260591 | A | -0.0538 |
| rs72693815  | G | -0.0355 |
| rs7035473   | G | 0.0193  |
| rs79933752  | G | -0.0374 |
| rs6560267   | T | -0.0124 |
| rs10761224  | A | -0.0115 |

|             |   |         |
|-------------|---|---------|
| rs12552098  | G | -0.0163 |
| rs13291228  | G | 0.0129  |
| rs117190063 | C | -0.1013 |
| rs353783    | C | -0.0204 |
| rs6477573   | A | 0.0125  |
| rs1360506   | G | -0.0162 |
| rs1780478   | G | -0.0122 |
| rs62572818  | G | 0.0358  |
| rs2900148   | A | -0.0155 |
| rs10868583  | C | 0.0126  |
| rs34098030  | A | -0.0255 |
| rs12684888  | T | 0.0132  |
| rs10869676  | G | -0.0136 |
| rs116946224 | G | -0.0524 |
| rs117914062 | T | 0.0609  |
| rs4744184   | T | -0.0206 |
| rs75131580  | A | -0.0253 |
| rs10776939  | T | 0.0124  |
| rs1433824   | A | -0.0114 |
| rs74866367  | C | 0.0197  |
| rs80055679  | C | 0.0826  |
| rs1982319   | C | 0.0135  |
| rs116933580 | A | 0.0628  |
| rs13285563  | A | 0.0641  |
| rs10901049  | G | -0.0128 |
| rs72769485  | A | -0.051  |
| rs11243687  | C | -0.0166 |
| rs1969936   | T | 0.0151  |
| rs11145457  | A | -0.0219 |
| rs117861301 | A | -0.057  |
| rs117040266 | T | 0.0351  |
| rs111228100 | G | -0.0667 |
| rs80336546  | T | -0.0596 |
| rs72705459  | T | -0.0458 |
| rs12000334  | C | -0.013  |
| rs138322417 | C | -0.0547 |
| rs10812634  | T | -0.019  |
| rs10992915  | A | 0.0626  |
| rs1550004   | T | 0.0121  |
| rs966697    | T | -0.0124 |
| rs75869153  | C | -0.0641 |
| rs61734455  | T | -0.0637 |
| rs117277597 | A | -0.073  |
| rs11792340  | G | -0.0245 |
| rs7858447   | G | 0.0151  |
| rs34821085  | A | -0.0366 |
| rs118016408 | G | -0.0856 |

|             |   |         |
|-------------|---|---------|
| rs10761073  | C | 0.0117  |
| rs991805    | A | 0.0301  |
| rs62571853  | G | 0.0412  |
| rs7863292   | A | -0.035  |
| rs12683110  | G | 0.012   |
| rs10118584  | T | 0.0164  |
| rs145294691 | T | -0.0439 |
| rs150263959 | T | 0.028   |
| rs2807592   | G | -0.013  |
| rs117772579 | T | 0.0542  |
| rs117772253 | A | 0.0793  |
| rs73541802  | A | -0.0677 |
| rs11794377  | T | -0.0317 |
| rs62560366  | G | -0.0613 |
| rs117188725 | T | 0.0549  |
| rs10776875  | A | 0.0113  |
| rs10759089  | T | 0.0122  |
| rs13289173  | T | -0.0277 |
| rs72757147  | C | 0.0436  |
| rs139832394 | C | -0.0988 |
| rs10818440  | T | -0.0271 |
| rs10974342  | A | 0.0287  |
| rs117379671 | T | -0.0587 |
| rs290986    | G | 0.0144  |
| rs116991912 | G | -0.0511 |
| rs79257653  | T | 0.0909  |
| rs72706503  | C | -0.0195 |
| rs16923334  | C | -0.029  |
| rs62547188  | C | 0.0625  |
| rs79344411  | T | 0.0419  |
| rs73669434  | C | 0.0558  |
| rs10975133  | G | -0.0137 |
| rs13302560  | A | -0.0142 |
| rs10757059  | C | 0.0118  |
| rs73523791  | C | -0.0201 |
| rs1571401   | T | -0.0199 |
| rs74813528  | C | -0.0185 |
| rs3758180   | T | -0.0155 |
| rs10816521  | G | -0.0164 |
| rs4147122   | C | -0.023  |
| rs4642742   | T | 0.0449  |
| rs141896197 | T | -0.0737 |
| rs2417242   | A | 0.0705  |
| rs1889817   | G | 0.012   |
| rs744594    | G | -0.0162 |
| rs10758290  | A | 0.0138  |
| rs150660984 | T | 0.0699  |

|             |   |         |
|-------------|---|---------|
| rs72697223  | C | -0.025  |
| rs117446323 | C | 0.0577  |
| rs12377695  | G | 0.017   |
| rs148814765 | A | 0.0717  |
| rs1336816   | A | 0.0591  |
| rs10961533  | T | -0.0197 |
| rs62569605  | A | 0.0772  |
| rs113623433 | T | 0.024   |
| rs1999837   | T | 0.0323  |
| rs72750977  | T | 0.0275  |
| rs79700608  | A | -0.0142 |
| rs7036239   | T | 0.0149  |
| rs117156866 | C | -0.0389 |
| rs1461340   | A | -0.016  |
| rs73581668  | C | -0.0627 |
| rs10986220  | A | -0.0563 |
| rs440497    | A | 0.0631  |
| rs2382245   | C | -0.0132 |
| rs13297875  | A | 0.0356  |
| rs74942864  | A | -0.0537 |
| rs17429715  | A | -0.0409 |
| rs1932161   | C | -0.0232 |
| rs117868588 | C | 0.0526  |
| rs117460052 | C | -0.0597 |
| rs76247442  | T | -0.0392 |
| rs75801708  | G | 0.0638  |
| rs12005300  | C | -0.0335 |
| rs141243185 | T | -0.0696 |
| rs74660106  | C | -0.0341 |
| rs6477234   | A | 0.0137  |
| rs17823832  | T | -0.037  |
| rs7852262   | C | 0.0124  |
| rs36116072  | A | -0.0299 |
| rs17202567  | T | 0.0362  |
| rs113709701 | T | -0.0377 |
| rs75988109  | A | -0.0478 |
| rs12378895  | A | -0.0239 |
| rs7847644   | G | -0.0127 |
| rs1330936   | A | 0.014   |
| rs77865716  | A | -0.0314 |
| rs1359712   | C | -0.0128 |
| rs7850090   | A | 0.0181  |
| rs1986733   | A | 0.0152  |
| rs72691040  | T | -0.0146 |
| rs147969138 | G | 0.0511  |
| rs9410201   | C | -0.0123 |
| rs4743634   | C | 0.0155  |

|             |   |         |
|-------------|---|---------|
| rs79497419  | T | 0.0933  |
| rs1220653   | G | -0.028  |
| rs144890177 | T | -0.0532 |
| rs143378631 | A | 0.0452  |
| rs7873372   | C | -0.0217 |
| rs7043497   | G | -0.0128 |
| rs80174362  | C | -0.07   |
| rs7863422   | G | 0.0314  |
| rs2249998   | T | 0.0177  |
| rs34065196  | G | 0.0378  |
| rs4879577   | C | -0.0591 |
| rs17797671  | A | -0.0716 |
| rs4246883   | G | -0.0119 |
| rs4354395   | A | -0.0122 |
| rs79542690  | G | 0.0694  |
| rs10491858  | G | -0.017  |
| rs35845312  | A | -0.0496 |
| rs73475613  | A | 0.0758  |
| rs2501945   | A | 0.0778  |
| rs144240611 | A | 0.0694  |
| rs58730159  | T | 0.0179  |
| rs116842478 | G | 0.0674  |
| rs10979285  | A | 0.027   |
| rs2808712   | A | 0.016   |
| rs62542052  | C | 0.0229  |
| rs10984590  | C | 0.0384  |
| rs118104816 | G | 0.0272  |
| rs144532927 | T | 0.0402  |
| rs17436569  | G | 0.0678  |
| rs544253    | C | 0.0127  |
| rs17835038  | C | 0.0262  |
| rs61599531  | T | 0.0156  |
| rs117652315 | A | 0.0378  |
| rs10977430  | A | -0.0271 |
| rs118100385 | A | 0.0313  |
| rs700973    | G | -0.0163 |
| rs167394    | G | 0.0136  |
| rs1004308   | T | -0.015  |
| rs7861602   | T | 0.0266  |
| rs11138141  | T | -0.0272 |
| rs56027435  | A | 0.0379  |
| rs10977130  | T | -0.0235 |
| rs141366790 | C | 0.0395  |
| rs34508562  | G | -0.0133 |
| rs2295926   | C | 0.0143  |
| rs7042824   | A | 0.0431  |
| rs11790821  | A | 0.0306  |

|             |   |         |
|-------------|---|---------|
| rs75952080  | C | 0.0763  |
| rs76212926  | C | -0.0469 |
| rs7847449   | A | 0.0117  |
| rs13288543  | T | 0.0901  |
| rs113804202 | T | -0.0807 |
| rs7857816   | G | -0.0251 |
| rs12346492  | T | -0.0498 |
| rs10961440  | C | -0.0155 |
| rs75570228  | C | 0.0424  |
| rs72760335  | A | -0.0666 |
| rs75506800  | A | 0.0612  |
| rs1535837   | A | 0.0115  |
| rs72710000  | C | 0.0684  |
| rs12682982  | G | -0.0363 |
| rs55782065  | T | -0.0542 |
| rs2183738   | C | -0.0165 |
| rs787273    | G | 0.0328  |
| rs585770    | G | 0.0341  |
| rs117476202 | T | 0.0904  |
| rs814027    | C | -0.0117 |
| rs62541551  | A | 0.0379  |
| rs117382129 | T | -0.1046 |
| rs4743992   | T | -0.0126 |
| rs960908    | T | -0.0132 |
| rs2277180   | C | 0.0191  |
| rs150433305 | T | -0.0722 |
| rs73668917  | T | -0.0378 |
| rs2094792   | T | -0.0718 |
| rs7019609   | A | -0.0497 |
| rs72735411  | G | -0.0597 |
| rs28791511  | A | -0.0168 |
| rs80062236  | C | 0.0341  |
| rs1929281   | G | 0.0253  |
| rs2779509   | G | -0.0415 |
| rs11244245  | C | -0.0189 |
| rs76518189  | C | -0.0458 |
| rs78466801  | G | -0.0398 |
| rs10513404  | C | 0.0122  |
| rs3893394   | G | -0.0131 |
| rs10987229  | T | -0.0199 |
| rs636562    | A | -0.0114 |
| rs944485    | T | 0.012   |
| rs56262218  | T | 0.0164  |
| rs12346106  | G | -0.0306 |
| rs10986537  | C | 0.0745  |
| rs80218026  | G | -0.0697 |
| rs4744521   | T | -0.0165 |



|             |   |         |
|-------------|---|---------|
| rs10115096  | G | -0.0125 |
| rs71505964  | G | -0.0815 |
| rs1003415   | C | -0.0119 |
| rs6476866   | G | -0.0114 |
| rs58693113  | C | 0.018   |
| rs16919549  | A | -0.0563 |
| rs144036678 | G | 0.0177  |
| rs7033698   | G | -0.0122 |
| rs1029064   | G | 0.0197  |
| rs113833730 | A | 0.0661  |
| rs71531238  | A | 0.0489  |
| rs117758922 | G | -0.0422 |
| rs11243362  | A | -0.0121 |
| rs117585711 | G | 0.0466  |
| rs7848550   | T | -0.0111 |
| rs62547232  | T | -0.0324 |
| rs10114604  | A | -0.0369 |
| rs17758873  | G | 0.0155  |
| rs79253703  | A | -0.0787 |
| rs11516152  | G | -0.0159 |
| rs72762670  | A | 0.0234  |
| rs9299082   | C | -0.0432 |
| rs560116    | A | -0.0249 |
| rs10120497  | A | -0.0722 |
| rs117576637 | A | -0.0938 |
| rs62571730  | A | -0.0854 |
| rs10733686  | G | -0.0129 |
| rs112579321 | A | -0.0313 |
| rs58542582  | T | -0.0125 |
| rs10973360  | G | 0.0172  |
| rs11144134  | C | 0.0224  |
| rs681842    | C | -0.0166 |
| rs7861977   | G | -0.0432 |
| rs72713906  | G | 0.0298  |
| rs113896261 | G | 0.0718  |
| rs73654356  | C | -0.0419 |
| rs737640    | G | 0.0139  |
| rs58625802  | A | -0.0161 |
| rs78786938  | C | 0.032   |
| rs112055160 | A | 0.0304  |
| rs34499892  | T | 0.0511  |
| rs74337357  | A | 0.1008  |
| rs13289993  | A | 0.0313  |
| rs117524157 | G | -0.052  |
| rs116913399 | A | -0.0449 |
| rs71508567  | C | -0.0619 |
| rs112995277 | A | 0.0621  |

|             |   |         |
|-------------|---|---------|
| rs34263635  | A | -0.0451 |
| rs60597427  | C | 0.0133  |
| rs80345406  | G | 0.0342  |
| rs10120838  | C | -0.0131 |
| rs118098363 | G | 0.0762  |
| rs2417297   | G | -0.0141 |
| rs13297075  | G | -0.0455 |
| rs4743326   | G | -0.037  |
| rs2636904   | C | -0.0291 |
| rs74673858  | C | 0.0945  |
| rs614575    | G | 0.0136  |
| rs78714908  | A | 0.0334  |
| rs72727137  | A | -0.0759 |
| rs7858704   | T | -0.0133 |
| rs11521229  | C | 0.016   |
| rs10125369  | G | -0.0115 |
| rs67854625  | C | 0.0278  |
| rs4837106   | A | -0.0124 |
| rs72767426  | A | 0.066   |
| rs515753    | C | 0.015   |
| rs35953828  | G | 0.0454  |
| rs146776580 | A | 0.046   |
| rs4837097   | A | 0.0114  |
| rs76857354  | C | 0.0572  |
| rs57895262  | C | 0.0382  |
| rs4979026   | C | -0.0118 |
| rs7864747   | G | -0.0774 |
| rs2378731   | A | -0.0165 |
| rs7858199   | G | 0.0117  |
| rs79121414  | A | 0.0559  |
| rs76553627  | A | 0.0214  |
| rs41287409  | C | 0.0952  |
| rs74817719  | T | -0.0307 |
| rs76212593  | C | -0.0273 |
| rs943508    | A | -0.0131 |
| rs72704308  | A | 0.0168  |
| rs7853832   | C | 0.0316  |
| rs16910139  | G | 0.0248  |
| rs2382461   | C | -0.0162 |
| rs112499360 | C | 0.0942  |
| rs149591584 | A | 0.0495  |
| rs77257719  | C | -0.031  |
| rs10125722  | C | 0.0214  |
| rs6475648   | T | 0.0159  |
| rs10964521  | G | 0.0126  |
| rs12553069  | G | -0.0141 |
| rs10760794  | T | -0.0118 |

|             |   |         |
|-------------|---|---------|
| rs2486670   | C | 0.015   |
| rs62561366  | T | 0.0452  |
| rs139275788 | A | -0.0773 |
| rs10985947  | C | 0.0159  |
| rs7037728   | T | -0.0136 |
| rs116929913 | A | 0.0676  |
| rs76081938  | G | -0.037  |
| rs4596720   | G | 0.0121  |
| rs142220832 | C | -0.0737 |
| rs62540152  | T | -0.0587 |
| rs1831642   | C | 0.0111  |
| rs7469950   | A | -0.022  |
| rs111697360 | G | -0.0901 |
| rs7873119   | T | -0.0119 |
| rs72743075  | G | -0.0796 |
| rs10119609  | T | 0.0177  |
| rs1475466   | G | -0.0152 |
| rs73649570  | G | -0.0279 |
| rs34419345  | C | -0.0478 |
| rs72614293  | T | -0.0268 |
| rs7038371   | A | 0.0601  |
| rs10818845  | G | -0.0153 |
| rs17471283  | T | -0.0799 |
| rs2740478   | A | 0.0123  |
| rs4399024   | G | -0.012  |
| rs111488309 | T | -0.0242 |
| rs115084107 | A | -0.0357 |
| rs76107944  | C | 0.0408  |
| rs10978751  | C | 0.0161  |
| rs2567704   | A | 0.0171  |
| rs7850434   | G | -0.0288 |
| rs12340775  | A | 0.0277  |
| rs34819617  | G | -0.0229 |
| rs76111341  | G | 0.0397  |
| rs143897339 | G | 0.0533  |
| rs142978977 | C | -0.0834 |
| rs35173546  | T | 0.0529  |
| rs114446077 | T | -0.0361 |
| rs9410938   | A | 0.0282  |
| rs117995233 | A | 0.0653  |
| rs77682387  | A | -0.0354 |
| rs10306117  | C | 0.0735  |
| rs117459276 | G | 0.0676  |
| rs9792490   | T | 0.0509  |
| rs75497687  | A | 0.0597  |
| rs78835451  | A | 0.0765  |
| rs10813818  | T | 0.011   |

|             |   |         |
|-------------|---|---------|
| rs62571995  | G | -0.0409 |
| rs490491    | A | 0.012   |
| rs72701955  | A | -0.0301 |
| rs73445076  | C | -0.0174 |
| rs62578970  | T | -0.0495 |
| rs74547496  | G | -0.0479 |
| rs2856923   | A | 0.0164  |
| rs146331324 | A | 0.0871  |
| rs10973201  | C | -0.0373 |
| rs3025324   | T | 0.0118  |
| rs10965467  | A | -0.0271 |
| rs10217315  | G | 0.0197  |
| rs880182    | A | 0.0262  |
| rs1778979   | G | -0.0117 |
| rs10813534  | C | -0.0117 |
| rs1930368   | T | -0.0121 |
| rs75687414  | T | 0.0309  |
| rs62573299  | T | 0.0244  |
| rs75062504  | T | -0.0274 |
| rs11791533  | T | 0.0375  |
| rs77164813  | A | -0.0556 |
| rs2993179   | G | -0.0141 |
| rs79710281  | C | 0.0214  |
| rs12683481  | T | -0.0129 |
| rs143427030 | T | 0.0638  |
| rs36075661  | A | 0.0123  |
| rs13300050  | C | -0.0114 |
| rs10978426  | A | -0.0455 |
| rs148720094 | C | 0.0597  |
| rs17388292  | G | 0.0333  |
| rs17736177  | C | -0.0383 |
| rs73652357  | A | -0.0578 |
| rs79498287  | A | 0.0367  |
| rs79838534  | A | 0.0351  |
| rs1576286   | C | -0.0222 |
| rs4879938   | C | -0.0121 |
| rs35473056  | C | 0.0211  |
| rs1169757   | T | -0.0112 |
| rs10981854  | C | -0.0125 |
| rs77560429  | T | -0.0664 |
| rs113873279 | T | -0.0343 |
| rs138879844 | A | -0.0462 |
| rs11792549  | G | 0.0195  |
| rs10810936  | T | -0.0125 |
| rs72738984  | A | -0.0774 |
| rs73540677  | A | -0.0265 |
| rs61311941  | G | -0.0258 |

|             |   |         |
|-------------|---|---------|
| rs11791808  | T | -0.0341 |
| rs149352613 | T | 0.0328  |
| rs142141874 | G | 0.0974  |
| rs10981570  | G | 0.0154  |
| rs6475949   | G | 0.0156  |
| rs3005833   | T | 0.0118  |
| rs10975723  | T | -0.0126 |
| rs147208736 | A | -0.0481 |
| rs2808534   | G | -0.011  |
| rs116898018 | T | -0.0194 |
| rs149600052 | A | -0.0649 |
| rs117581184 | T | 0.0374  |
| rs7861715   | T | 0.015   |
| rs62560771  | A | 0.0139  |
| rs142591876 | A | -0.0414 |
| rs142778489 | A | -0.0414 |
| rs73646145  | C | 0.0788  |
| rs10982517  | G | 0.0115  |
| rs143048777 | A | -0.0667 |
| rs117087249 | T | -0.0555 |
| rs13292228  | C | -0.0249 |
| rs118043611 | A | 0.0305  |
| rs17616057  | T | -0.0635 |
| rs4979084   | A | 0.0167  |
| rs869149    | A | -0.0173 |
| rs138258791 | A | 0.0567  |
| rs72700541  | G | -0.0976 |
| rs74380073  | A | -0.016  |
| rs117684106 | C | 0.0727  |
| rs3780275   | G | 0.014   |
| rs955792    | C | -0.0254 |
| rs72746707  | G | -0.0537 |
| rs10869096  | A | -0.0108 |
| rs162621    | C | 0.0114  |
| rs138757220 | C | -0.0741 |
| rs72706834  | T | 0.0146  |
| rs74917162  | G | -0.0221 |
| rs112696208 | C | 0.0151  |
| rs79777904  | A | -0.0417 |
| rs1538589   | T | 0.0113  |
| rs79042034  | T | 0.0596  |
| rs10869584  | C | -0.0138 |
| rs116989414 | T | 0.0418  |
| rs79361412  | T | 0.0402  |
| rs74728338  | A | -0.021  |
| rs138340377 | A | -0.0378 |
| rs72735128  | G | -0.0227 |

|             |   |         |
|-------------|---|---------|
| rs80345560  | A | 0.047   |
| rs79988810  | T | 0.0234  |
| rs4842022   | G | -0.0144 |
| rs2510262   | T | -0.0154 |
| rs1029094   | T | -0.032  |
| rs77465374  | G | 0.0371  |
| rs118023908 | A | -0.0272 |
| rs7861307   | G | -0.0144 |
| rs74497117  | A | -0.0514 |
| rs3739618   | T | 0.0152  |
| rs35332779  | G | 0.0431  |
| rs78719789  | T | -0.0452 |
| rs1470190   | A | -0.0119 |
| rs12686439  | A | -0.0172 |
| rs76828167  | T | 0.0376  |
| rs113226515 | T | -0.0496 |
| rs111704290 | T | 0.0345  |
| rs79034336  | A | 0.0516  |
| rs139899366 | C | 0.1008  |
| rs7037273   | A | 0.0175  |
| rs147187446 | C | 0.0635  |
| rs117235241 | C | 0.0468  |
| rs7468858   | A | -0.0168 |
| rs2302425   | G | -0.0257 |
| rs80271371  | G | 0.0428  |
| rs10988511  | C | 0.015   |
| rs72709195  | T | -0.0388 |
| rs146894393 | T | 0.0968  |
| rs13559     | T | -0.0247 |
| rs4741926   | A | -0.0106 |
| rs13296376  | G | -0.0122 |
| rs112430305 | A | 0.0637  |
| rs11793044  | G | 0.0153  |
| rs71495903  | C | -0.0327 |
| rs72719205  | A | 0.0713  |
| rs843168    | C | -0.0124 |
| rs56198665  | A | 0.0385  |
| rs3753029   | G | -0.0113 |
| rs10120334  | A | -0.034  |
| rs3891649   | C | -0.011  |
| rs113327033 | G | 0.0507  |
| rs12352295  | G | -0.0114 |
| rs10993290  | T | -0.0186 |
| rs149233707 | G | -0.0659 |
| rs144433255 | T | 0.0616  |
| rs62568915  | T | 0.0575  |
| rs142623931 | T | -0.0686 |

|             |   |         |
|-------------|---|---------|
| rs10817733  | C | 0.0107  |
| rs35286976  | A | 0.0166  |
| rs7860872   | C | 0.022   |
| rs1901333   | T | -0.0342 |
| rs74673343  | C | -0.0597 |
| rs78997547  | C | 0.0165  |
| rs10812402  | T | 0.0266  |
| rs71523489  | T | 0.0107  |
| rs147674555 | A | 0.0638  |
| rs7032451   | C | -0.011  |
| rs72765479  | C | -0.0216 |
| rs149181677 | T | -0.0657 |
| rs10964641  | C | -0.0319 |
| rs10981804  | T | 0.0341  |
| rs62535702  | A | 0.0478  |
| rs10820165  | C | 0.0108  |
| rs62535699  | G | -0.072  |
| rs10812054  | G | 0.0107  |
| rs11139944  | G | 0.0121  |
| rs41313973  | G | 0.0229  |
| rs149805533 | A | 0.0539  |
| rs1854444   | T | 0.012   |
| rs117970450 | C | 0.0562  |
| rs139752217 | A | -0.0476 |
| rs7870846   | T | -0.0205 |
| rs79003968  | A | 0.0645  |
| rs296842    | G | 0.0108  |
| rs58105812  | A | 0.0251  |
| rs7870939   | G | -0.0156 |
| rs7846844   | G | 0.0139  |
| rs10983001  | A | -0.0825 |
| rs74796145  | G | -0.0491 |
| rs10969874  | C | -0.0201 |
| rs113080994 | C | -0.0788 |
| rs117580532 | T | 0.0519  |
| rs466037    | C | 0.012   |
| rs10491914  | T | -0.0126 |
| rs114034808 | G | -0.0222 |
| rs10988176  | T | -0.0681 |
| rs143999471 | G | 0.0719  |
| rs7025291   | C | 0.0134  |
| rs116842574 | T | 0.0818  |
| rs2095164   | G | -0.011  |
| rs35743286  | T | 0.0229  |
| rs55896923  | A | 0.0281  |
| rs7021109   | A | 0.018   |
| rs79329115  | A | 0.028   |

|             |   |         |
|-------------|---|---------|
| rs117197865 | G | -0.0503 |
| rs77565875  | T | -0.0656 |
| rs12376283  | T | -0.016  |
| rs3012777   | T | -0.0127 |
| rs80242093  | T | -0.058  |
| rs4842080   | A | 0.0233  |
| rs4742084   | C | 0.0885  |
| rs75726564  | T | 0.042   |
| rs117128444 | T | 0.0578  |
| rs72735415  | T | 0.061   |
| rs4385587   | A | 0.0179  |
| rs7864658   | G | -0.0115 |
| rs76112787  | C | 0.0338  |
| rs78660325  | A | -0.0646 |
| rs7872082   | A | 0.0247  |
| rs113038917 | T | -0.043  |
| rs11789461  | A | 0.0405  |
| rs79692530  | G | 0.0664  |
| rs4742103   | C | -0.0136 |
| rs10813780  | G | -0.0109 |
| rs11144075  | T | -0.0244 |
| rs16914041  | G | -0.0202 |
| rs78302034  | A | 0.0253  |
| rs12335470  | C | 0.0464  |
| rs12553529  | G | -0.0542 |
| rs13289553  | T | -0.0134 |
| rs10739680  | A | -0.0152 |
| rs3132289   | G | -0.0617 |
| rs78826739  | A | 0.0614  |
| rs10986271  | A | -0.013  |
| rs35835340  | A | 0.0152  |
| rs62570856  | G | 0.0487  |
| rs11788554  | A | 0.0146  |
| rs2490588   | A | -0.0107 |
| rs12550979  | A | -0.0116 |
| rs11257242  | C | -0.0809 |
| rs10509088  | T | -0.1813 |
| rs984668    | A | -0.0711 |
| rs146373627 | A | -0.2323 |
| rs141747181 | C | -0.3411 |
| rs138436487 | G | -0.4602 |
| rs2397752   | T | 0.0774  |
| rs2049814   | A | -0.0618 |
| rs1441265   | A | 0.0624  |
| rs12359469  | A | -0.1094 |
| rs10761556  | T | -0.0613 |
| rs11188740  | T | -0.1024 |



|             |   |         |
|-------------|---|---------|
| rs12769251  | T | -0.0878 |
| rs3910869   | C | 0.064   |
| rs11528477  | T | 0.1119  |
| rs332140    | C | -0.0762 |
| rs117285649 | C | 0.2045  |
| rs10795671  | G | -0.0757 |
| rs7912495   | G | 0.0632  |
| rs11251915  | A | -0.2542 |
| rs35549346  | T | -0.0642 |
| rs7074908   | T | 0.1803  |
| rs7081173   | A | -0.0612 |
| rs11013200  | G | 0.0967  |
| rs1211325   | C | -0.1203 |
| rs146997765 | A | 0.2735  |
| rs149322444 | G | -0.152  |
| rs12252984  | T | 0.109   |
| rs3750829   | G | 0.1439  |
| rs12783314  | A | -0.0808 |
| rs147918689 | G | -0.2484 |
| rs12253621  | C | 0.0953  |
| rs16931332  | A | -0.0901 |
| rs12261126  | A | 0.0691  |
| rs12573346  | C | 0.1065  |
| rs17886252  | T | 0.1113  |
| rs7358283   | A | 0.0645  |
| rs10906257  | G | 0.0952  |
| rs3213018   | C | 0.2239  |
| rs4409731   | G | 0.0669  |
| rs75689693  | A | 0.1221  |
| rs12255516  | T | -0.0809 |
| rs12255506  | A | -0.0776 |
| rs4357603   | G | -0.1244 |
| rs78257485  | C | 0.2097  |
| rs79859036  | A | -0.2572 |
| rs11192438  | T | 0.1562  |
| rs2688767   | G | -0.0556 |
| rs1961174   | C | 0.0711  |
| rs117511331 | A | 0.3853  |
| rs7918981   | A | -0.1641 |
| rs117641222 | T | 0.2331  |
| rs72816130  | A | 0.2042  |
| rs10995911  | A | -0.0612 |
| rs4934028   | A | 0.0529  |
| rs7070673   | T | 0.148   |
| rs75199434  | C | 0.1842  |
| rs563341    | T | 0.0655  |
| rs12415708  | C | 0.0838  |

|             |   |         |
|-------------|---|---------|
| rs11002798  | A | 0.0541  |
| rs111855187 | A | -0.263  |
| rs145530227 | A | 0.3993  |
| rs150643258 | A | -0.082  |
| rs11252561  | T | 0.2019  |
| rs4411225   | C | -0.0562 |
| rs4615910   | A | 0.3155  |
| rs12354495  | G | -0.0807 |
| rs4747890   | T | -0.0684 |
| rs7078615   | A | -0.0661 |
| rs56220804  | T | -0.1728 |
| rs74724883  | T | -0.1638 |
| rs140198791 | T | 0.3281  |
| rs7087150   | T | 0.2086  |
| rs75686970  | T | 0.2588  |
| rs117393810 | C | 0.1342  |
| rs7906816   | G | -0.1089 |
| rs34074260  | G | 0.1243  |
| rs1343449   | G | 0.0601  |
| rs56402261  | C | 0.0561  |
| rs12267802  | G | 0.1132  |
| rs72547489  | C | -0.2863 |
| rs12354995  | G | -0.1844 |
| rs55969695  | T | 0.2037  |
| rs2961559   | C | -0.053  |
| rs74743081  | A | 0.208   |
| rs75340942  | T | -0.1225 |
| rs80166458  | G | -0.179  |
| rs141703655 | A | -0.2398 |
| rs1887028   | C | 0.1433  |
| rs79852255  | T | 0.171   |
| rs1227073   | T | 0.0614  |
| rs12766377  | A | -0.0698 |
| rs3121427   | G | 0.0527  |
| rs10508215  | A | -0.0621 |
| rs75526378  | A | 0.2106  |
| rs79731304  | C | -0.1186 |
| rs17221972  | A | 0.0518  |
| rs11253615  | T | -0.1175 |
| rs72789102  | T | 0.1374  |
| rs11815857  | C | 0.0647  |
| rs72782784  | T | 0.1528  |
| rs2394647   | C | 0.0903  |
| rs12242056  | C | 0.1504  |
| rs12783690  | G | 0.0811  |
| rs6585827   | A | -0.05   |
| rs17533443  | T | -0.0613 |

|             |   |         |
|-------------|---|---------|
| rs10826465  | C | -0.0808 |
| rs117537377 | T | 0.3663  |
| rs117374324 | C | -0.2434 |
| rs61869306  | A | -0.0904 |
| rs10827787  | T | -0.0664 |
| rs113097405 | G | 0.1214  |
| rs35452529  | C | 0.0643  |
| rs34611245  | T | 0.3645  |
| rs7078641   | C | -0.1054 |
| rs75466997  | T | 0.2649  |
| rs137913203 | T | 0.1598  |
| rs11254038  | G | -0.1955 |
| rs118000075 | T | -0.3342 |
| rs17389194  | T | 0.1996  |
| rs35907506  | A | -0.0678 |
| rs36072611  | T | 0.1031  |
| rs118024186 | A | -0.2831 |
| rs11201120  | G | -0.0556 |
| rs12254204  | C | -0.1151 |
| rs11599561  | C | 0.0797  |
| rs78146673  | G | -0.2512 |
| rs10741245  | T | 0.0776  |
| rs111656196 | C | 0.3031  |
| rs7091993   | C | 0.056   |
| rs149682498 | A | 0.1995  |
| rs12413954  | C | 0.2689  |
| rs959796    | C | 0.0827  |
| rs687562    | A | 0.0845  |
| rs60582627  | G | -0.131  |
| rs12772857  | C | -0.0498 |
| rs75410121  | C | 0.207   |
| rs117221150 | T | 0.1273  |
| rs10905150  | A | -0.0496 |
| rs11258862  | A | 0.1732  |
| rs113925956 | C | -0.1339 |
| rs7089562   | A | -0.073  |
| rs7079213   | T | 0.0582  |
| rs75641439  | C | 0.1186  |
| rs34830785  | G | 0.1802  |
| rs7070137   | A | 0.0784  |
| rs1763893   | G | 0.0523  |
| rs2019344   | A | 0.0776  |
| rs1209491   | G | -0.0606 |
| rs3862561   | T | -0.074  |
| rs11017162  | G | 0.0696  |
| rs75217763  | C | 0.2275  |
| rs1469631   | T | -0.0614 |

|             |   |         |
|-------------|---|---------|
| rs7919321   | G | -0.0513 |
| rs117963180 | A | -0.3225 |
| rs10764540  | G | 0.056   |
| rs118128364 | T | 0.3257  |
| rs150825076 | T | 0.299   |
| rs74140518  | G | 0.1039  |
| rs790814    | G | 0.0627  |
| rs148841064 | A | 0.2166  |
| rs66614223  | A | 0.0692  |
| rs35576272  | A | 0.0721  |
| rs7094761   | T | -0.057  |
| rs117912346 | A | 0.1915  |
| rs78768252  | A | 0.2944  |
| rs73362352  | A | 0.1128  |
| rs11018080  | G | -0.0556 |
| rs75941388  | C | 0.1057  |
| rs74343914  | T | 0.1442  |
| rs28943575  | C | 0.118   |
| rs117001479 | C | -0.1546 |
| rs4919512   | T | -0.0688 |
| rs1750761   | G | 0.071   |
| rs56125863  | T | 0.0724  |
| rs61871680  | A | -0.0694 |
| rs117405883 | A | -0.29   |
| rs61862368  | A | -0.0556 |
| rs116932661 | T | -0.2725 |
| rs61875472  | G | 0.0848  |
| rs2735350   | C | -0.0492 |
| rs79746141  | G | 0.2105  |
| rs74665297  | T | -0.1734 |
| rs72807965  | A | 0.1406  |
| rs2505606   | A | 0.0511  |
| rs1225404   | C | -0.0518 |
| rs304507    | T | 0.1196  |
| rs117368190 | C | -0.1292 |
| rs79867092  | A | 0.1305  |
| rs72780245  | A | 0.1782  |
| rs12359239  | A | -0.0477 |
| rs968626    | T | -0.0488 |
| rs7899091   | T | -0.062  |
| rs378425    | T | 0.0513  |
| rs117105638 | A | -0.1518 |
| rs151098415 | T | 0.1352  |
| rs564239    | T | 0.2387  |
| rs77252019  | T | 0.1321  |
| rs10509810  | G | -0.047  |
| rs12243453  | A | 0.121   |

|             |   |         |
|-------------|---|---------|
| rs145045006 | A | 0.138   |
| rs111416047 | G | 0.0853  |
| rs117296537 | T | -0.3178 |
| rs78378187  | T | 0.1819  |
| rs118100442 | T | -0.1403 |
| rs11194080  | C | 0.2544  |
| rs61866708  | G | -0.307  |
| rs61849817  | T | 0.0856  |
| rs2436029   | C | 0.1397  |
| rs149464173 | T | -0.2425 |
| rs117720127 | A | -0.1196 |
| rs7076208   | A | 0.0672  |
| rs7916087   | A | -0.0598 |
| rs7073238   | T | -0.0555 |
| rs17103728  | A | 0.0791  |
| rs11186244  | G | 0.0505  |
| rs583510    | C | -0.0682 |
| rs11239527  | C | 0.251   |
| rs79308189  | T | -0.1737 |
| rs1108235   | A | 0.0536  |
| rs2790453   | A | -0.0462 |
| rs117548618 | C | 0.2785  |
| rs139492032 | G | 0.2272  |
| rs10795538  | T | 0.0529  |
| rs74951188  | G | -0.1396 |
| rs117379382 | A | 0.1954  |
| rs117372254 | G | 0.1798  |
| rs117759769 | A | 0.1388  |
| rs1978997   | A | -0.1362 |
| rs10509660  | G | -0.0575 |
| rs7915416   | G | -0.0648 |
| rs7898286   | T | -0.0477 |
| rs145313914 | T | 0.2979  |
| rs11244976  | A | 0.0613  |
| rs142145800 | A | 0.18    |
| rs3750707   | G | 0.1022  |
| rs2762617   | G | 0.0842  |
| rs61863398  | G | 0.1735  |
| rs117221497 | A | 0.2265  |
| rs140377856 | T | 0.2934  |
| rs146676863 | A | 0.2412  |
| rs2093917   | T | -0.06   |
| rs2697027   | G | 0.0945  |
| rs12248379  | T | 0.0616  |
| rs112930880 | T | 0.1539  |
| rs7900202   | T | 0.0455  |
| rs11248644  | T | -0.048  |

|             |   |         |
|-------------|---|---------|
| rs1317043   | C | -0.0559 |
| rs12246948  | T | -0.0792 |
| rs596406    | C | 0.0874  |
| rs34187097  | T | -0.0979 |
| rs115239677 | A | 0.1529  |
| rs726175    | T | -0.06   |
| rs117887587 | T | -0.114  |
| rs112898269 | G | 0.1717  |
| rs1911370   | G | 0.0978  |
| rs144438275 | A | 0.1883  |
| rs79977722  | C | 0.0929  |
| rs1149727   | C | 0.0756  |
| rs34349355  | A | -0.097  |
| rs7921902   | C | 0.0466  |
| rs145022007 | G | 0.1625  |
| rs7074214   | C | 0.0642  |
| rs79948188  | A | 0.1489  |
| rs76316164  | A | 0.2699  |
| rs9422860   | A | 0.0787  |
| rs79671172  | C | -0.0835 |
| rs55706416  | C | -0.0497 |
| rs11257250  | A | 0.0775  |
| rs2025458   | C | 0.0805  |
| rs72787729  | C | 0.0525  |
| rs10994188  | G | -0.1008 |
| rs12248989  | C | 0.0982  |
| rs112671664 | C | -0.1345 |
| rs10829585  | C | 0.0491  |
| rs147287784 | T | 0.1162  |
| rs77961887  | T | 0.1028  |
| rs35591998  | C | 0.0883  |
| rs72795726  | C | 0.3005  |
| rs947366    | T | -0.0575 |
| rs114180203 | C | 0.2216  |
| rs76684984  | A | 0.079   |
| rs11017746  | T | 0.1276  |
| rs2026912   | A | -0.0578 |
| rs113366581 | A | 0.2635  |
| rs7077174   | T | -0.0751 |
| rs80247712  | A | 0.2442  |
| rs1936841   | C | -0.0612 |
| rs6602502   | T | -0.0684 |
| rs11195349  | A | -0.0501 |
| rs117056016 | G | -0.253  |
| rs117250418 | A | 0.1962  |
| rs75125072  | A | 0.1666  |
| rs942077    | G | 0.0772  |

|             |   |         |
|-------------|---|---------|
| rs142374659 | A | 0.286   |
| rs79368884  | T | 0.3402  |
| rs10823356  | T | -0.0496 |
| rs10905210  | C | 0.0701  |
| rs11013004  | G | 0.2697  |
| rs12358007  | G | -0.1583 |
| rs4590782   | C | 0.0741  |
| rs11017571  | C | -0.112  |
| rs12265995  | T | 0.1393  |
| rs79561833  | T | -0.1457 |
| rs11004590  | T | 0.0485  |
| rs74442915  | T | 0.2326  |
| rs4948244   | T | 0.0467  |
| rs7921441   | A | -0.0454 |
| rs77680851  | A | 0.1021  |
| rs780149    | G | 0.0556  |
| rs3913914   | G | -0.056  |
| rs10886148  | A | -0.0496 |
| rs117238864 | C | 0.1516  |
| rs7081399   | T | -0.1066 |
| rs116888862 | C | 0.1049  |
| rs75298540  | G | -0.2203 |
| rs4746163   | A | -0.0663 |
| rs61853119  | C | 0.19    |
| rs75230335  | C | -0.1394 |
| rs7922001   | C | -0.0469 |
| rs75069837  | G | 0.1523  |
| rs76866274  | A | -0.2245 |
| rs12217666  | C | 0.1387  |
| rs11018222  | T | -0.0593 |
| rs239864    | T | -0.0505 |
| rs2500311   | C | 0.0479  |
| rs11258950  | C | 0.1481  |
| rs4746909   | T | 0.0968  |
| rs143388240 | A | -0.2398 |
| rs114895783 | A | 0.1798  |
| rs76557053  | T | -0.244  |
| rs7904263   | A | -0.0456 |
| rs10905115  | G | 0.0492  |
| rs111399988 | G | 0.1102  |
| rs4142016   | A | -0.1238 |
| rs55873340  | G | -0.1701 |
| rs12146316  | T | -0.0759 |
| rs7088922   | T | 0.0654  |
| rs34175236  | T | 0.1433  |
| rs76421024  | G | 0.1874  |
| rs143961493 | A | -0.2327 |

|             |   |         |
|-------------|---|---------|
| rs71477520  | A | 0.2379  |
| rs73304040  | A | 0.1597  |
| rs10764956  | T | 0.0507  |
| rs1248567   | T | -0.0623 |
| rs12770749  | G | -0.0629 |
| rs17259303  | T | 0.074   |
| rs4041235   | C | 0.0458  |
| rs7914048   | A | -0.0699 |
| rs76244763  | C | 0.1059  |
| rs34113707  | A | 0.0513  |
| rs2039514   | G | 0.132   |
| rs79863726  | C | 0.1077  |
| rs1880384   | G | 0.0632  |
| rs1462134   | G | -0.0462 |
| rs118094751 | A | 0.1825  |
| rs11200084  | T | -0.0663 |
| rs1014084   | A | -0.1391 |
| rs77066813  | A | 0.0703  |
| rs1974069   | C | 0.0515  |
| rs74675105  | A | -0.1148 |
| rs11195664  | A | -0.0851 |
| rs75184896  | A | 0.0718  |
| rs12779260  | G | -0.0465 |
| rs72845619  | T | 0.1871  |
| rs16937216  | T | -0.1086 |
| rs138025492 | G | 0.1868  |
| rs117337154 | C | -0.1929 |
| rs11252061  | G | 0.1118  |
| rs57342584  | G | 0.0618  |
| rs148308239 | G | -0.3994 |
| rs72794357  | A | -0.1467 |
| rs10906734  | A | 0.0796  |
| rs1796884   | C | 0.0451  |
| rs516096    | C | -0.0486 |
| rs112702235 | C | -0.1324 |
| rs76570136  | T | 0.1106  |
| rs142823982 | C | 0.2226  |
| rs7900885   | T | 0.0434  |
| rs55819835  | T | 0.0952  |
| rs7084263   | A | 0.1124  |
| rs11244973  | C | 0.0768  |
| rs11016248  | G | -0.0768 |
| rs11813343  | A | 0.1104  |
| rs61863410  | A | 0.2434  |
| rs117721398 | G | 0.3835  |
| rs12771657  | T | 0.0796  |
| rs17616549  | G | -0.1074 |



|             |   |         |
|-------------|---|---------|
| rs1471666   | A | -0.0468 |
| rs78202847  | G | 0.2171  |
| rs702370    | G | 0.0504  |
| rs1982871   | A | 0.0468  |
| rs7921983   | A | 0.0472  |
| rs1711673   | G | 0.1493  |
| rs117769860 | C | 0.1967  |
| rs116847756 | A | 0.1332  |
| rs145370214 | T | -0.1271 |
| rs4935578   | C | 0.0515  |
| rs41302719  | T | -0.0685 |
| rs10762792  | T | 0.0794  |
| rs10902891  | G | 0.0888  |
| rs12777755  | T | 0.0854  |
| rs7920503   | T | -0.0807 |
| rs10763211  | G | 0.0563  |
| rs12253340  | C | 0.0559  |
| rs142653407 | C | 0.2666  |
| rs7067827   | G | -0.098  |
| rs12260233  | C | 0.0437  |
| rs7910719   | A | 0.1427  |
| rs2894246   | T | 0.0918  |
| rs78972616  | T | 0.1132  |
| rs11252080  | G | 0.0651  |
| rs72802693  | T | -0.0444 |
| rs3916024   | A | 0.1111  |
| rs4615961   | T | 0.0767  |
| rs116899952 | A | 0.1318  |
| rs144407482 | A | -0.4363 |
| rs74341195  | A | -0.2452 |
| rs11252709  | A | -0.0465 |
| rs72777713  | A | 0.1366  |
| rs11257814  | A | 0.0824  |
| rs10795405  | A | -0.0646 |
| rs4751371   | A | 0.0501  |
| rs2002194   | A | -0.0444 |
| rs12411683  | T | -0.0593 |
| rs77080751  | A | 0.1162  |
| rs17631759  | G | -0.0594 |
| rs1342275   | C | 0.0474  |
| rs78121526  | A | 0.1887  |
| rs6597821   | A | 0.0452  |
| rs73338595  | A | 0.0563  |
| rs1936837   | A | -0.0485 |
| rs72777177  | G | 0.2249  |
| rs79256524  | G | 0.3726  |
| rs10828405  | C | 0.0432  |

|             |   |         |
|-------------|---|---------|
| rs11255932  | G | 0.0439  |
| rs1187101   | A | -0.0427 |
| rs113767262 | A | 0.3456  |
| rs3904886   | C | -0.0479 |
| rs72816348  | G | 0.2084  |
| rs2660011   | A | 0.0526  |
| rs34243276  | G | -0.0643 |
| rs55908031  | T | -0.204  |
| rs150058961 | T | 0.1051  |
| rs1571212   | G | -0.0458 |
| rs17129610  | A | -0.1684 |
| rs760336    | C | 0.045   |
| rs4749795   | T | 0.0448  |
| rs116851534 | A | 0.2115  |
| rs145080378 | T | 0.2309  |
| rs1312841   | C | -0.0568 |
| rs10999217  | C | -0.0873 |
| rs7897142   | C | -0.0897 |
| rs7084711   | T | 0.1087  |
| rs17294005  | G | 0.0773  |
| rs2500319   | G | 0.2127  |
| rs10881933  | T | -0.0712 |
| rs10827747  | G | -0.0749 |
| rs113943543 | A | -0.1956 |
| rs7080943   | C | 0.0492  |
| rs79083224  | T | 0.2071  |
| rs76896434  | C | 0.2019  |
| rs55815154  | G | 0.092   |
| rs11193561  | T | -0.0508 |
| rs9419588   | G | -0.0425 |
| rs75512121  | G | 0.1459  |
| rs112404446 | A | -0.2479 |
| rs80261707  | C | 0.1178  |
| rs61836049  | A | 0.2145  |
| rs116215518 | T | 0.3478  |
| rs142939812 | T | -0.061  |
| rs2007553   | A | -0.0703 |
| rs10870311  | C | 0.0414  |
| rs148868539 | T | 0.1733  |
| rs117200338 | T | 0.1395  |
| rs9299503   | A | -0.0936 |
| rs74385722  | T | 0.1864  |
| rs11190274  | T | 0.0695  |
| rs77269681  | G | -0.2949 |
| rs76798908  | T | -0.0616 |
| rs112270981 | G | 0.2161  |
| rs7913894   | T | -0.0568 |

|             |   |         |
|-------------|---|---------|
| rs4917744   | T | 0.0576  |
| rs11007483  | T | -0.305  |
| rs3964873   | C | 0.0719  |
| rs16912897  | A | -0.2285 |
| rs7918046   | T | -0.0465 |
| rs10786068  | C | 0.0465  |
| rs17099185  | A | -0.049  |
| rs11190449  | C | 0.0901  |
| rs4747167   | A | 0.0494  |
| rs11202866  | T | -0.1482 |
| rs10883587  | C | 0.0421  |
| rs1543836   | G | -0.0561 |
| rs7911009   | T | 0.0614  |
| rs12770559  | G | -0.2976 |
| rs11256442  | T | 0.0449  |
| rs77393175  | T | 0.1637  |
| rs34353319  | T | -0.0741 |
| rs4917903   | C | -0.0756 |
| rs11198190  | G | 0.0491  |
| rs79977373  | G | 0.1838  |
| rs117786921 | A | -0.222  |
| rs79324861  | A | -0.0552 |
| rs75361026  | G | 0.1717  |
| rs11197446  | T | -0.1484 |
| rs61851964  | G | 0.0995  |
| rs4750928   | C | 0.044   |
| rs7075756   | A | -0.1762 |
| rs7912280   | T | -0.0427 |
| rs115185933 | C | 0.2114  |
| rs16928914  | A | 0.0488  |
| rs72829115  | T | 0.0541  |
| rs2587480   | A | 0.0691  |
| rs72784662  | C | 0.1141  |
| rs148597410 | C | 0.2978  |
| rs12722556  | A | 0.125   |
| rs76378198  | C | 0.2013  |
| rs1219788   | C | 0.0461  |
| rs17153464  | G | 0.1512  |
| rs76957876  | A | 0.4103  |
| rs111572047 | G | -0.067  |
| rs12217242  | A | 0.1918  |
| rs141653273 | T | -0.3847 |
| rs76451279  | G | 0.1039  |
| rs78860572  | T | 0.2624  |
| rs77709021  | C | 0.1984  |
| rs35645120  | G | 0.0819  |
| rs57379974  | T | -0.1286 |

|             |   |         |
|-------------|---|---------|
| rs72816711  | C | -0.1403 |
| rs12219967  | G | -0.0418 |
| rs10826578  | C | -0.0447 |
| rs748265    | T | -0.1141 |
| rs10902949  | C | 0.059   |
| rs75263751  | G | 0.1139  |
| rs10830047  | C | 0.0485  |
| rs7080306   | T | 0.0974  |
| rs117727148 | T | 0.2009  |
| rs80211932  | T | -0.0991 |
| rs80156025  | C | 0.4476  |
| rs7086494   | C | 0.0419  |
| rs72789161  | T | -0.2896 |
| rs7080168   | G | -0.0431 |
| rs2420086   | A | 0.0978  |
| rs117927297 | T | 0.1594  |
| rs1874665   | C | -0.0467 |
| rs12245508  | C | 0.0426  |
| rs10430500  | G | -0.0554 |
| rs10509684  | G | -0.0498 |
| rs79450314  | C | 0.1686  |
| rs4575213   | A | 0.0416  |
| rs502397    | C | 0.0978  |
| rs12260435  | A | -0.087  |
| rs3902965   | G | 0.044   |
| rs75971578  | A | -0.1623 |
| rs117261212 | A | -0.4177 |
| rs2479882   | T | 0.0778  |
| rs117965901 | G | -0.1268 |
| rs10752169  | C | 0.0584  |
| rs146910600 | G | 0.2031  |
| rs11595059  | G | -0.0586 |
| rs116849951 | T | -0.0969 |
| rs117244029 | T | -0.1473 |
| rs7900898   | A | -0.0985 |
| rs74724661  | A | -0.3048 |
| rs79132728  | A | -0.1282 |
| rs4934425   | G | -0.0429 |
| rs7085134   | G | 0.0501  |
| rs61875300  | T | 0.0683  |
| rs41286896  | G | 0.2402  |
| rs10466211  | T | -0.0416 |
| rs11198380  | C | -0.0546 |
| rs10822287  | T | -0.062  |
| rs12355933  | T | 0.0597  |
| rs6585572   | A | 0.0529  |
| rs1870170   | T | -0.2095 |

|             |   |         |
|-------------|---|---------|
| rs79108114  | A | 0.0998  |
| rs35320458  | C | -0.0465 |
| rs75951345  | G | 0.2391  |
| rs7911239   | C | 0.0547  |
| rs147790633 | C | -0.0655 |
| rs7071924   | A | 0.2092  |
| rs72796404  | G | 0.0678  |
| rs2394155   | C | 0.0443  |
| rs12358001  | G | -0.0537 |
| rs10788317  | T | 0.0407  |
| rs10998952  | T | 0.1645  |
| rs73596431  | G | 0.1446  |
| rs7072764   | C | -0.0414 |
| rs7907606   | G | -0.0552 |
| rs7096658   | T | -0.0494 |
| rs76464408  | T | 0.1465  |
| rs12766269  | A | -0.1427 |
| rs1551688   | A | 0.0778  |
| rs10883443  | C | 0.0615  |
| rs35800178  | G | -0.0417 |
| rs12261944  | A | 0.0445  |
| rs137882096 | T | -0.0965 |
| rs7089314   | A | 0.043   |
| rs927870    | C | 0.0934  |
| rs10900027  | A | 0.0548  |
| rs10903519  | T | 0.0411  |
| rs79066301  | G | -0.1217 |
| rs12412313  | G | -0.0475 |
| rs2807748   | G | 0.0616  |
| rs11597902  | C | -0.1437 |
| rs282661    | G | 0.0673  |
| rs117704348 | A | 0.1408  |
| rs2664319   | G | 0.0867  |
| rs145940205 | T | 0.1602  |
| rs58751041  | T | 0.104   |
| rs2782613   | A | -0.0399 |
| rs9418717   | C | 0.0557  |
| rs35912786  | C | 0.3559  |
| rs2479694   | T | -0.0553 |
| rs2255160   | G | 0.0793  |
| rs2918133   | A | 0.0951  |
| rs3013815   | T | -0.0664 |
| rs7922359   | G | -0.0463 |
| rs7893993   | A | 0.043   |
| rs4752704   | A | 0.0913  |
| rs3740551   | T | -0.0472 |
| rs1762002   | A | -0.0402 |

|             |   |         |
|-------------|---|---------|
| rs142762819 | T | -0.202  |
| rs117412548 | T | 0.1194  |
| rs143022234 | G | -0.2081 |
| rs7081208   | A | 0.0451  |
| rs7893299   | C | 0.0415  |
| rs11254647  | C | 0.136   |
| rs17229830  | T | -0.0716 |
| rs61838413  | A | 0.0547  |
| rs35627079  | A | -0.3578 |
| rs34592869  | T | 0.09    |
| rs12241375  | C | 0.0426  |
| rs80187193  | G | -0.1623 |
| rs34535475  | G | 0.0976  |
| rs41281949  | T | 0.4016  |
| rs1176414   | C | 0.0559  |
| rs28879218  | T | -0.094  |
| rs11238970  | C | 0.0746  |
| rs111971590 | G | -0.1902 |
| rs35128420  | T | -0.0427 |
| rs115871928 | A | 0.2273  |
| rs117231466 | C | 0.2458  |
| rs3912390   | A | 0.041   |
| rs17143090  | G | 0.0513  |
| rs117851550 | T | 0.2323  |
| rs2495704   | C | 0.0816  |
| rs11257772  | G | 0.074   |
| rs10430706  | G | -0.0569 |
| rs11193529  | G | -0.0863 |
| rs77456721  | A | 0.1718  |
| rs72790808  | C | -0.109  |
| rs11252540  | C | 0.0791  |
| rs2487852   | A | -0.0792 |
| rs10748721  | T | -0.0417 |
| rs117384371 | C | -0.146  |
| rs77922214  | A | 0.1747  |
| rs72814902  | T | -0.0879 |
| rs117059811 | T | 0.194   |
| rs17805636  | G | -0.102  |
| rs72805824  | T | 0.098   |
| rs61849881  | T | -0.2044 |
| rs11013248  | C | -0.212  |
| rs145986044 | A | 0.3273  |
| rs77990236  | A | -0.1564 |
| rs10883534  | A | -0.0461 |
| rs667027    | T | 0.0844  |
| rs36059849  | A | 0.0652  |
| rs12267729  | C | -0.0461 |

|             |   |         |
|-------------|---|---------|
| rs79090545  | G | -0.2994 |
| rs74426624  | C | 0.2104  |
| rs1948838   | A | 0.0472  |
| rs16917138  | G | -0.056  |
| rs6481897   | T | 0.0506  |
| rs11201928  | A | 0.067   |
| rs72816276  | G | 0.0818  |
| rs142835547 | T | -0.2126 |
| rs11817104  | G | 0.0856  |
| rs6586030   | A | -0.058  |
| rs148120086 | A | 0.2365  |
| rs12263883  | A | 0.0467  |
| rs12412938  | C | -0.1635 |
| rs224142    | G | 0.1063  |
| rs17721259  | C | -0.2219 |
| rs1986577   | T | 0.0432  |
| rs2817838   | T | -0.0776 |
| rs144167520 | A | 0.2436  |
| rs10823164  | C | 0.1185  |
| rs79189032  | G | 0.1754  |
| rs7895721   | A | -0.0715 |
| rs6585687   | C | 0.0413  |
| rs78136174  | A | 0.207   |
| rs11595641  | A | 0.0663  |
| rs10741263  | A | 0.0457  |
| rs59884527  | C | 0.1265  |
| rs11257776  | T | -0.086  |
| rs11194338  | G | -0.1494 |
| rs35938287  | A | 0.078   |
| rs1332336   | G | 0.2258  |
| rs7923713   | A | -0.0393 |
| rs7919862   | C | -0.0408 |
| rs16923413  | A | -0.0801 |
| rs145390687 | C | -0.1772 |
| rs7077085   | G | 0.0463  |
| rs9416972   | A | 0.096   |
| rs1538311   | T | 0.0405  |
| rs143642187 | G | 0.1507  |
| rs79127607  | T | 0.1488  |
| rs147099981 | T | -0.2681 |
| rs4747847   | T | 0.0827  |
| rs2664655   | G | 0.0522  |
| rs77680303  | G | 0.161   |
| rs11186052  | G | 0.1684  |
| rs10741048  | C | -0.0577 |
| rs146125173 | A | 0.2206  |
| rs11197596  | C | 0.0441  |

|             |   |         |
|-------------|---|---------|
| rs2269104   | A | -0.0463 |
| rs1779638   | G | -0.0576 |
| rs11196711  | C | 0.0595  |
| rs1192635   | G | -0.0446 |
| rs78214719  | T | -0.0427 |
| rs10764768  | T | 0.0463  |
| rs117415077 | A | -0.193  |
| rs10508489  | T | 0.0661  |
| rs74117931  | T | 0.1021  |
| rs3858218   | G | 0.0494  |
| rs4468280   | G | 0.0432  |
| rs7918153   | A | 0.2324  |
| rs10821945  | G | -0.0426 |
| rs57592469  | G | -0.0429 |
| rs10995235  | A | 0.0514  |
| rs78643841  | A | 0.0737  |
| rs72815390  | A | 0.1842  |
| rs142086777 | A | 0.3173  |
| rs4751311   | C | 0.0518  |
| rs604600    | T | 0.1118  |
| rs149160201 | T | 0.1665  |
| rs7907299   | C | 0.0407  |
| rs722258    | T | 0.0404  |
| rs77812929  | A | -0.1121 |
| rs117375416 | C | -0.2124 |
| rs142821330 | C | 0.3597  |
| rs72811328  | A | 0.174   |
| rs78613136  | A | 0.1674  |
| rs75667082  | C | 0.0815  |
| rs1796858   | A | 0.0511  |
| rs1879316   | T | 0.0578  |
| rs10882812  | T | -0.0431 |
| rs1911319   | A | 0.0744  |
| rs35740944  | C | -0.0685 |
| rs10829317  | C | 0.0436  |
| rs2894129   | A | 0.0381  |
| rs7915298   | A | -0.0782 |
| rs1255370   | C | -0.0395 |
| rs80025149  | T | 0.1512  |
| rs4545485   | G | -0.1132 |
| rs6482265   | A | -0.0442 |
| rs1240393   | A | 0.1937  |
| rs117461603 | A | 0.1843  |
| rs2986651   | C | 0.0454  |
| rs6481350   | T | 0.155   |
| rs76967740  | G | 0.1552  |
| rs61848656  | T | -0.1512 |



|             |   |         |
|-------------|---|---------|
| rs10825274  | A | 0.0483  |
| rs4750341   | A | -0.0447 |
| rs77115448  | A | -0.0672 |
| rs4933538   | T | -0.0473 |
| rs117899600 | A | -0.2645 |
| rs17725710  | G | -0.0511 |
| rs3116708   | C | -0.0437 |
| rs60015709  | A | -0.0943 |
| rs4304725   | A | 0.0395  |
| rs74590321  | A | 0.131   |
| rs74600065  | T | 0.0972  |
| rs79450558  | C | 0.211   |
| rs138780162 | A | -0.0967 |
| rs74744426  | T | -0.0912 |
| rs7092606   | C | -0.0565 |
| rs17680430  | G | -0.0658 |
| rs7915131   | C | 0.0393  |
| rs79516825  | C | 0.2091  |
| rs4934871   | A | -0.05   |
| rs4319431   | T | -0.0488 |
| rs7074195   | G | 0.0396  |
| rs2637623   | T | 0.0897  |
| rs56812512  | C | -0.0764 |
| rs55917111  | T | 0.2052  |
| rs11592521  | A | 0.2433  |
| rs116870953 | A | -0.1668 |
| rs59092106  | T | -0.039  |
| rs117875496 | T | 0.2477  |
| rs77225111  | T | 0.0872  |
| rs12250180  | G | 0.2384  |
| rs11017796  | C | 0.101   |
| rs11198905  | T | 0.0452  |
| rs72824077  | C | -0.0494 |
| rs116938586 | C | 0.0816  |
| rs117591647 | A | 0.2039  |
| rs61835717  | A | -0.0474 |
| rs74664444  | C | 0.1977  |
| rs149310859 | T | 0.0707  |
| rs72825693  | T | 0.3353  |
| rs4979930   | T | -0.0664 |
| rs61862703  | G | -0.2227 |
| rs11013257  | A | 0.0987  |
| rs138584041 | C | 0.2403  |
| rs2488161   | G | 0.0551  |
| rs2447025   | G | -0.0421 |
| rs7899488   | C | 0.0405  |
| rs117612853 | T | -0.2238 |

|             |   |         |
|-------------|---|---------|
| rs144303979 | T | -0.226  |
| rs1360749   | C | 0.0467  |
| rs74137786  | A | 0.2441  |
| rs11252810  | T | 0.0859  |
| rs35909046  | G | 0.1024  |
| rs7902346   | A | 0.0416  |
| rs11250459  | A | -0.05   |
| rs703956    | A | -0.0695 |
| rs145254414 | A | -0.2375 |
| rs1926131   | C | -0.0398 |
| rs75058807  | G | -0.1616 |
| rs11250506  | A | 0.2083  |
| rs142599947 | A | -0.2011 |
| rs75711097  | A | -0.2427 |
| rs61281666  | C | 0.1181  |
| rs7091697   | G | 0.0388  |
| rs142908159 | C | -0.1248 |
| rs10882834  | C | -0.0542 |
| rs137882235 | G | 0.0729  |
| rs117665183 | A | -0.1749 |
| rs12777489  | T | 0.0901  |
| rs146476887 | T | 0.2313  |
| rs157982    | A | 0.0374  |
| rs80193187  | A | 0.1711  |
| rs10822133  | A | 0.0444  |
| rs9971258   | G | 0.0606  |
| rs11193643  | C | -0.0418 |
| rs113566995 | A | 0.2536  |
| rs452121    | C | 0.0564  |
| rs4450129   | C | -0.071  |
| rs1569199   | C | 0.0397  |
| rs79856310  | A | 0.1801  |
| rs78692516  | T | -0.127  |
| rs1010624   | T | 0.0452  |
| rs10736991  | T | -0.1732 |
| rs12357090  | G | 0.1674  |
| rs112372528 | T | 0.2108  |
| rs3851244   | C | 0.0383  |
| rs77537106  | A | 0.3217  |
| rs6585732   | A | 0.0442  |
| rs141712064 | A | 0.1729  |
| rs117775167 | G | -0.2356 |
| rs7920896   | T | -0.1018 |
| rs4748472   | C | 0.0407  |
| rs1925265   | G | -0.0408 |
| rs1339466   | C | 0.2161  |
| rs10763402  | G | -0.0378 |

|             |   |         |
|-------------|---|---------|
| rs10884126  | A | 0.0433  |
| rs17668311  | T | 0.11    |
| rs1494203   | G | 0.0384  |
| rs118143921 | C | 0.2485  |
| rs12263840  | T | 0.0397  |
| rs117345199 | C | 0.1728  |
| rs4917795   | C | 0.0785  |
| rs12266632  | G | 0.0787  |
| rs75309653  | G | -0.1923 |
| rs76702428  | A | -0.1845 |
| rs55983164  | C | 0.2835  |
| rs79873040  | C | -0.1284 |
| rs942531    | G | -0.0398 |
| rs11007191  | C | 0.0578  |
| rs78821485  | G | 0.2807  |
| rs2671613   | C | -0.0387 |
| rs34063688  | G | 0.0408  |
| rs10508668  | T | 0.0809  |
| rs74130829  | T | -0.2317 |
| rs11816117  | T | -0.0772 |
| rs2860495   | T | -0.0446 |
| rs6585258   | T | -0.0406 |
| rs72776841  | T | 0.1625  |
| rs9804221   | G | 0.0651  |
| rs7070245   | A | -0.1761 |
| rs78312250  | G | 0.0863  |
| rs10885591  | A | -0.0639 |
| rs112653305 | A | 0.3027  |
| rs80222422  | C | 0.0851  |
| rs117753849 | G | 0.1708  |
| rs11004071  | A | -0.1002 |
| rs58462577  | G | 0.1802  |
| rs12775723  | T | 0.1012  |
| rs74124346  | C | 0.1434  |
| rs1148238   | C | 0.2988  |
| rs79166123  | C | 0.1413  |
| rs1702224   | G | -0.0384 |
| rs76181093  | T | -0.1901 |
| rs11011973  | G | -0.1041 |
| rs7901887   | T | -0.0432 |
| rs17375284  | G | 0.0938  |
| rs10997637  | T | -0.1222 |
| rs12777446  | C | -0.0456 |
| rs10128333  | T | -0.0529 |
| rs72841566  | A | -0.1609 |
| rs1413760   | A | 0.0381  |
| rs7901798   | G | 0.0408  |

|             |   |         |
|-------------|---|---------|
| rs482482    | A | 0.1144  |
| rs139829754 | T | 0.2021  |
| rs1626941   | A | 0.0436  |
| rs10160021  | A | 0.1082  |
| rs184090    | G | 0.0378  |
| rs144611657 | A | -0.0882 |
| rs35323240  | G | 0.0476  |
| rs73278303  | G | 0.1605  |
| rs11186767  | C | -0.0958 |
| rs1979336   | C | 0.0655  |
| rs563654    | T | 0.0767  |
| rs11814342  | G | -0.0413 |
| rs3847337   | T | -0.0457 |
| rs117426760 | T | -0.1263 |
| rs116930417 | T | -0.1423 |
| rs74947512  | T | -0.1056 |
| rs1475097   | C | -0.1294 |
| rs112077621 | T | 0.0607  |
| rs920409    | G | -0.0471 |
| rs10904191  | T | -0.0679 |
| rs146819031 | G | -0.3012 |
| rs35561724  | A | -0.0529 |
| rs1001875   | T | 0.0448  |
| rs2490299   | C | 0.0516  |
| rs111447170 | T | -0.0944 |
| rs4838384   | G | -0.04   |
| rs11817866  | T | 0.0383  |
| rs76204879  | A | 0.2048  |
| rs2290714   | G | -0.0921 |
| rs3780867   | A | 0.037   |
| rs72828265  | A | -0.1252 |
| rs9299498   | A | 0.149   |
| rs2394307   | C | 0.0528  |
| rs12355141  | T | -0.0373 |
| rs61849823  | C | -0.0534 |
| rs61858213  | T | 0.1714  |
| rs113372907 | A | 0.0427  |
| rs117220867 | T | -0.2191 |
| rs4519046   | A | 0.0485  |
| rs1932906   | G | -0.0604 |
| rs7907258   | A | 0.0717  |
| rs10998983  | A | -0.0405 |
| rs4350266   | A | -0.0382 |
| rs77701291  | T | 0.1727  |
| rs2631686   | C | -0.0414 |
| rs112481776 | A | -0.1821 |
| rs10903943  | T | -0.0556 |

|             |   |         |
|-------------|---|---------|
| rs10828022  | A | 0.044   |
| rs117112798 | C | 0.264   |
| rs11188249  | G | 0.0773  |
| rs142212189 | A | 0.1615  |
| rs144769602 | A | -0.1661 |
| rs6602312   | C | -0.0369 |
| rs72834786  | C | 0.1629  |
| rs1896392   | G | -0.0452 |
| rs112572686 | T | -0.0579 |
| rs10734046  | G | 0.0389  |
| rs9423444   | C | -0.0461 |
| rs10795726  | G | 0.0422  |
| rs116858785 | C | -0.0935 |
| rs11259586  | G | 0.0389  |
| rs2785244   | T | -0.0454 |
| rs4747867   | A | 0.0487  |
| rs16917268  | A | 0.1656  |
| rs118093527 | T | -0.0955 |
| rs61875110  | T | 0.0507  |
| rs56307799  | T | 0.048   |
| rs10824586  | A | 0.0487  |
| rs11191816  | A | 0.0433  |
| rs118092462 | A | 0.1714  |
| rs79023706  | G | 0.2481  |
| rs1543844   | T | 0.0985  |
| rs11200787  | T | 0.0385  |
| rs12257225  | T | -0.0502 |
| rs11259307  | T | -0.0722 |
| rs2228149   | A | -0.0973 |
| rs75342057  | G | -0.0654 |
| rs11195503  | T | 0.1229  |
| rs10762321  | G | 0.0746  |
| rs79556620  | A | 0.2129  |
| rs17608529  | T | -0.1893 |
| rs4339935   | G | 0.0378  |
| rs2297330   | A | -0.044  |
| rs76314806  | G | 0.0913  |
| rs12761729  | C | -0.0443 |
| rs17094724  | C | -0.0994 |
| rs10748726  | A | -0.044  |
| rs61870775  | A | -0.1234 |
| rs144026523 | T | 0.2619  |
| rs4749607   | T | -0.0434 |
| rs4603211   | A | -0.0499 |
| rs10886696  | A | 0.0805  |
| rs146260616 | T | 0.1393  |
| rs12217829  | T | 0.0581  |

|             |   |         |
|-------------|---|---------|
| rs17880313  | A | 0.0607  |
| rs72803021  | T | 0.1034  |
| rs117302554 | A | -0.2956 |
| rs12360508  | A | -0.0552 |
| rs41305999  | A | 0.0751  |
| rs7911266   | T | 0.0516  |
| rs61863578  | G | -0.0425 |
| rs72781882  | C | 0.0948  |
| rs827402    | T | 0.0827  |
| rs57973253  | G | -0.0518 |
| rs7903757   | G | -0.0406 |
| rs41295087  | T | 0.0602  |
| rs61736835  | A | -0.106  |
| rs55708186  | A | -0.1624 |
| rs36014643  | G | 0.0787  |
| rs11596570  | T | 0.1318  |
| rs10999828  | A | 0.067   |
| rs79229209  | G | -0.0861 |
| rs7097951   | A | 0.1748  |
| rs74142728  | G | 0.1657  |
| rs4748762   | A | 0.0544  |
| rs56013969  | A | 0.1729  |
| rs138365907 | A | 0.1635  |
| rs7909525   | C | -0.0755 |
| rs1492704   | T | -0.0602 |
| rs17560220  | C | 0.1249  |
| rs74553911  | C | -0.1019 |
| rs57734913  | A | -0.0893 |
| rs7915232   | A | 0.0672  |
| rs117737956 | G | 0.1841  |
| rs141105893 | G | -0.0749 |
| rs10762389  | G | -0.0432 |
| rs185545    | C | -0.0479 |
| rs72821592  | C | 0.1092  |
| rs80084166  | T | -0.2497 |
| rs1034139   | G | 0.0424  |
| rs74524780  | C | 0.1727  |
| rs35230147  | A | 0.0424  |
| rs4752676   | C | 0.0596  |
| rs149925047 | T | -0.1501 |
| rs140234156 | T | 0.17    |
| rs17099533  | A | 0.125   |
| rs2474748   | A | -0.038  |
| rs4980260   | T | 0.0431  |
| rs117739785 | C | -0.2787 |
| rs56074042  | C | 0.0609  |
| rs72787282  | C | -0.1155 |

|             |   |         |
|-------------|---|---------|
| rs10509540  | C | -0.0414 |
| rs78315116  | T | -0.2292 |
| rs80223245  | G | -0.1271 |
| rs4750724   | C | 0.0366  |
| rs7913836   | T | 0.0374  |
| rs117269329 | C | -0.1607 |
| rs4934158   | C | 0.0426  |
| rs728939    | C | -0.0412 |
| rs10826322  | T | -0.0371 |
| rs72640001  | A | 0.091   |
| rs35106227  | G | 0.0527  |
| rs7912111   | C | -0.0455 |
| rs12266567  | A | -0.0455 |
| rs75213911  | A | 0.2177  |
| rs2576440   | T | -0.1863 |
| rs16917616  | C | 0.2668  |
| rs7912686   | C | -0.0463 |
| rs2804081   | G | -0.0583 |
| rs9783254   | C | -0.0466 |
| rs2924301   | C | 0.0544  |
| rs116422211 | T | 0.1137  |
| rs79853435  | T | -0.2345 |
| rs6584718   | T | 0.077   |
| rs71475595  | G | 0.1401  |
| rs149925122 | G | 0.2122  |
| rs7089476   | G | 0.0735  |
| rs12783492  | T | 0.0455  |
| rs35709822  | C | -0.0568 |
| rs117684550 | A | 0.135   |
| rs12354429  | A | 0.0434  |
| rs12249846  | T | 0.1504  |
| rs946029    | A | 0.0363  |
| rs3793813   | C | 0.085   |
| rs2480290   | T | 0.0506  |
| rs7098146   | C | -0.0381 |
| rs7100998   | T | -0.0728 |
| rs140972278 | A | -0.2638 |
| rs116313472 | G | 0.1541  |
| rs112850529 | T | 0.0655  |
| rs17595905  | A | 0.1386  |
| rs10763839  | C | 0.0556  |
| rs59607258  | G | -0.0895 |
| rs12263059  | C | -0.0834 |
| rs140979856 | C | -0.1226 |
| rs55662542  | T | 0.1846  |
| rs117055026 | A | -0.1248 |
| rs1993992   | G | 0.058   |

|             |   |         |
|-------------|---|---------|
| rs11016841  | G | -0.0485 |
| rs2505523   | G | 0.0372  |
| rs11248493  | T | 0.1164  |
| rs11200687  | A | -0.1837 |
| rs7907109   | T | -0.1116 |
| rs2530338   | T | -0.054  |
| rs4747484   | A | -0.0375 |
| rs6480454   | A | 0.0845  |
| rs34955007  | A | -0.1793 |
| rs72811105  | T | -0.1044 |
| rs17109834  | C | 0.069   |
| rs139747956 | G | 0.1577  |
| rs7919068   | G | 0.0871  |
| rs117879185 | G | 0.3038  |
| rs58549051  | G | 0.1195  |
| rs17143770  | T | 0.051   |
| rs76124550  | T | 0.1434  |
| rs118034757 | T | -0.1551 |
| rs1541020   | T | 0.0379  |
| rs4539216   | A | -0.0629 |
| rs17746916  | T | -0.0839 |
| rs11186433  | A | 0.0415  |
| rs112450088 | A | -0.1356 |
| rs59153348  | G | 0.1446  |
| rs12264492  | G | -0.0396 |
| rs12257107  | A | 0.155   |
| rs1833478   | C | 0.0385  |
| rs2165874   | G | -0.0391 |
| rs144762254 | A | -0.3816 |
| rs145834487 | T | 0.221   |
| rs1368532   | T | 0.0376  |
| rs12779532  | T | -0.1285 |
| rs12415698  | G | 0.258   |
| rs1853628   | T | 0.0978  |
| rs72817812  | C | 0.0833  |
| rs2516624   | G | -0.1372 |
| rs74584858  | T | 0.1437  |
| rs4749168   | T | -0.1122 |
| rs10748857  | G | -0.0744 |
| rs7904048   | A | 0.1042  |
| rs113321184 | A | 0.0641  |
| rs11244519  | T | 0.0399  |
| rs1904667   | G | 0.0488  |
| rs10508437  | G | -0.0483 |
| rs12255622  | G | 0.1561  |
| rs78943371  | C | 0.2222  |
| rs146094654 | T | 0.1123  |



|             |   |         |
|-------------|---|---------|
| rs6479688   | G | 0.039   |
| rs1197586   | T | -0.1018 |
| rs117946494 | T | -0.2219 |
| rs5030888   | T | 0.3858  |
| rs74411266  | T | 0.179   |
| rs1978927   | T | -0.0356 |
| rs1148225   | G | 0.0385  |
| rs117675846 | C | -0.1983 |
| rs7089157   | G | 0.1099  |
| rs59208231  | A | 0.1116  |
| rs141642826 | T | 0.1221  |
| rs4253134   | T | 0.2359  |
| rs912476    | T | 0.041   |
| rs77493313  | T | -0.116  |
| rs2420784   | T | -0.0404 |
| rs117979457 | A | 0.331   |
| rs4980037   | G | -0.0553 |
| rs1349893   | C | -0.0451 |
| rs4074366   | C | -0.0429 |
| rs3094978   | T | -0.0576 |
| rs4528240   | T | -0.0405 |
| rs1806691   | A | 0.0432  |
| rs79150753  | G | -0.1033 |
| rs10827311  | A | -0.0514 |
| rs2480299   | G | -0.0388 |
| rs4751655   | C | 0.036   |
| rs1271408   | T | 0.0765  |
| rs2991930   | C | 0.036   |
| rs11245345  | A | 0.0548  |
| rs55806351  | C | -0.1046 |
| rs73593861  | G | 0.0544  |
| rs79467439  | A | 0.084   |
| rs77695516  | T | -0.2587 |
| rs1419267   | G | 0.0416  |
| rs74975330  | G | 0.0735  |
| rs61874052  | G | -0.1212 |
| rs75385007  | A | 0.0844  |
| rs117423565 | C | 0.1478  |
| rs80349868  | A | 0.2061  |
| rs117913520 | T | -0.0887 |
| rs111336872 | T | -0.259  |
| rs116725254 | T | -0.141  |
| rs17661090  | A | 0.039   |
| rs11008913  | T | 0.0479  |
| rs7916646   | A | 0.0647  |
| rs7091032   | A | -0.1423 |
| rs1870136   | T | -0.0401 |

|             |   |         |
|-------------|---|---------|
| rs12360283  | A | 0.077   |
| rs144996047 | C | -0.1424 |
| rs117508898 | T | -0.1761 |
| rs56056432  | C | 0.0563  |
| rs113106744 | T | 0.1378  |
| rs35403779  | T | -0.1454 |
| rs11198968  | A | -0.1178 |
| rs12252088  | T | 0.0675  |
| rs72822542  | A | -0.2861 |
| rs17842280  | A | -0.0786 |
| rs12412010  | T | -0.0853 |
| rs10786924  | T | 0.0408  |
| rs7896910   | A | -0.0387 |
| rs74493970  | A | 0.2673  |
| rs115350322 | T | 0.2353  |
| rs11248323  | T | -0.1377 |
| rs17144512  | T | -0.0643 |
| rs72785490  | T | -0.1253 |
| rs2383991   | C | -0.0356 |
| rs1878034   | T | -0.1017 |
| rs12765700  | T | 0.0853  |
| rs7393975   | C | 0.0432  |
| rs2490809   | C | 0.3827  |
| rs61851533  | T | 0.1253  |
| rs71475468  | G | -0.1532 |
| rs76243118  | A | -0.1626 |
| rs11002129  | C | -0.1088 |
| rs2893964   | C | 0.0519  |
| rs2060893   | G | -0.0863 |
| rs3121491   | G | 0.0353  |
| rs55801898  | A | -0.0811 |
| rs12265048  | T | -0.0366 |
| rs7075665   | C | 0.1679  |
| rs7908148   | T | 0.0469  |
| rs34386365  | A | -0.0842 |
| rs77161010  | A | 0.0481  |
| rs7898327   | A | -0.1937 |
| rs1550717   | G | -0.066  |
| rs117850540 | C | 0.3051  |
| rs11003585  | C | -0.0726 |
| rs12411614  | A | -0.0624 |
| rs80042086  | T | 0.1664  |
| rs11188950  | G | 0.1257  |
| rs10788411  | A | -0.155  |
| rs11599248  | A | 0.1058  |
| rs139953073 | A | -0.2705 |
| rs4979987   | C | 0.0525  |

|             |   |         |
|-------------|---|---------|
| rs2182303   | A | -0.092  |
| rs117612915 | A | 0.084   |
| rs16913394  | A | 0.0706  |
| rs11017551  | C | 0.047   |
| rs10741019  | G | 0.0356  |
| rs117972875 | G | 0.184   |
| rs16912807  | T | -0.0765 |
| rs28390243  | A | -0.0399 |
| rs117863884 | T | 0.2563  |
| rs117811856 | T | -0.1366 |
| rs2388895   | T | -0.1676 |
| rs4750273   | C | 0.0466  |
| rs4934518   | C | 0.0466  |
| rs17619990  | C | 0.0526  |
| rs11202091  | T | 0.0513  |
| rs12414602  | A | -0.0554 |
| rs77454771  | G | 0.1714  |
| rs11817055  | C | -0.0547 |
| rs60661480  | A | -0.1911 |
| rs10886186  | C | -0.063  |
| rs12722588  | T | 0.0458  |
| rs10905747  | A | -0.04   |
| rs12569567  | T | -0.0384 |
| rs2808067   | T | 0.0382  |
| rs61862036  | A | 0.0628  |
| rs12359318  | A | -0.0356 |
| rs11017475  | C | 0.0433  |
| rs11017757  | C | 0.067   |
| rs12246635  | C | 0.0619  |
| rs7081658   | A | -0.0508 |
| rs11192252  | C | -0.0775 |
| rs12247015  | G | -0.0354 |
| rs10887325  | G | -0.038  |
| rs117835675 | A | -0.1249 |
| rs117218991 | A | -0.1552 |
| rs149698384 | G | -0.1479 |
| rs1570956   | G | 0.0468  |
| rs61851417  | A | -0.0851 |
| rs41385044  | G | -0.0755 |
| rs77868200  | T | 0.0922  |
| rs9663244   | A | 0.0547  |
| rs12358230  | T | 0.0521  |
| rs116973456 | G | -0.1584 |
| rs10827226  | T | 0.0519  |
| rs12767507  | T | 0.0658  |
| rs72771280  | A | 0.1258  |
| rs1251123   | A | 0.1185  |

|             |   |         |
|-------------|---|---------|
| rs41306304  | G | 0.1023  |
| rs111958828 | C | 0.0426  |
| rs145854261 | A | -0.1722 |
| rs78844492  | C | 0.1418  |
| rs2349476   | A | -0.0407 |
| rs77498974  | T | 0.0649  |
| rs59827489  | C | -0.0751 |
| rs74640492  | G | 0.1552  |
| rs1149753   | T | -0.0664 |
| rs4277017   | A | -0.0412 |
| rs72786750  | G | -0.0433 |
| rs72812178  | T | 0.0893  |
| rs118117734 | T | 0.1266  |
| rs885333    | T | 0.0473  |
| rs1766274   | C | -0.0352 |
| rs16917995  | C | -0.0585 |
| rs290481    | T | 0.0476  |
| rs35208454  | C | 0.0512  |
| rs4948279   | A | -0.0488 |
| rs12764429  | G | 0.0636  |
| rs893587    | A | -0.038  |
| rs78036371  | G | -0.1097 |
| rs10509552  | T | 0.0439  |
| rs4749340   | T | 0.0804  |
| rs2388890   | A | 0.038   |
| rs12247230  | C | 0.0547  |
| rs1227063   | A | 0.05    |
| rs142328600 | A | -0.1421 |
| rs482858    | A | 0.0435  |
| rs74959971  | C | -0.1303 |
| rs117942795 | A | -0.1752 |
| rs117097631 | T | -0.1148 |
| rs76019775  | T | 0.206   |
| rs2688752   | T | 0.0386  |
| rs7086375   | A | -0.0447 |
| rs1409404   | G | 0.0355  |
| rs61876140  | T | -0.1747 |
| rs4948391   | C | -0.0593 |
| rs144810858 | A | 0.1639  |
| rs140756701 | A | 0.1616  |
| rs11251762  | G | -0.0889 |
| rs113278573 | T | -0.1025 |
| rs984340    | C | 0.049   |
| rs76414714  | C | 0.1507  |
| rs11190411  | T | 0.2112  |
| rs78939150  | A | 0.1759  |
| rs773961    | T | -0.0375 |

|             |   |         |
|-------------|---|---------|
| rs74846242  | C | 0.0935  |
| rs1324886   | T | 0.0359  |
| rs1539587   | A | 0.0781  |
| rs1888668   | A | 0.0348  |
| rs117143498 | C | 0.277   |
| rs117506885 | G | -0.239  |
| rs11016314  | G | 0.0395  |
| rs17129458  | A | 0.0839  |
| rs17226417  | C | -0.0587 |
| rs17601696  | T | 0.0672  |
| rs1655130   | A | -0.0453 |
| rs10998700  | T | -0.042  |
| rs11256966  | G | -0.0504 |
| rs115680791 | A | 0.2853  |
| rs17300357  | A | -0.1239 |
| rs7476605   | T | 0.0403  |
| rs551389    | G | 0.0459  |
| rs140490969 | A | 0.1475  |
| rs78115787  | A | 0.1336  |
| rs4750494   | T | -0.036  |
| rs4748516   | G | 0.0345  |
| rs2224506   | G | -0.0387 |
| rs138431526 | C | -0.1043 |
| rs11010995  | C | 0.0982  |
| rs10776672  | G | 0.062   |
| rs34232808  | A | 0.1455  |
| rs2845910   | A | 0.042   |
| rs7915300   | T | -0.2261 |
| rs11599327  | G | -0.0414 |
| rs10999777  | C | -0.0647 |
| rs142849501 | G | 0.4007  |
| rs35435313  | T | -0.1081 |
| rs2489836   | C | 0.1423  |
| rs17570037  | G | 0.1636  |
| rs10824736  | C | 0.0752  |
| rs145545725 | T | 0.2652  |
| rs74436219  | C | 0.2624  |
| rs55800946  | C | 0.0367  |
| rs11011872  | C | -0.0358 |
| rs6602481   | C | 0.0382  |
| rs2895527   | G | 0.0346  |
| rs79611925  | G | 0.1748  |
| rs2026417   | C | -0.083  |
| rs10995903  | A | 0.0453  |
| rs12783964  | T | -0.0422 |
| rs80269351  | A | 0.0912  |
| rs10886553  | A | -0.0364 |

|             |   |         |
|-------------|---|---------|
| rs143194160 | C | -0.172  |
| rs117453913 | C | -0.1336 |
| rs10829653  | A | -0.043  |
| rs12354871  | T | 0.0449  |
| rs9423463   | G | -0.0389 |
| rs2797879   | C | 0.2204  |
| rs4745779   | G | 0.0432  |
| rs2884577   | T | 0.0785  |
| rs12261332  | C | -0.0586 |
| rs3818910   | C | -0.0435 |
| rs55861344  | A | 0.0838  |
| rs78487324  | T | 0.1378  |
| rs17757720  | G | -0.1535 |
| rs76922144  | T | -0.185  |
| rs728709    | G | 0.0394  |
| rs10886083  | A | 0.0353  |
| rs10795060  | T | -0.0394 |
| rs10995839  | C | 0.0565  |
| rs10884478  | C | 0.0383  |
| rs2148478   | T | -0.0728 |
| rs80317006  | A | 0.0399  |
| rs146222716 | T | -0.2789 |
| rs2254501   | A | 0.0365  |
| rs76555426  | G | 0.0976  |
| rs12768311  | A | -0.0592 |
| rs1781824   | C | -0.0754 |
| rs77253611  | G | 0.1161  |
| rs16937026  | T | -0.121  |
| rs139210567 | A | 0.225   |
| rs77212942  | T | 0.0676  |
| rs12241863  | T | 0.0363  |
| rs112438819 | A | -0.2743 |
| rs3889986   | A | -0.111  |
| rs113877801 | T | 0.2627  |
| rs1537663   | C | 0.1085  |
| rs3123159   | G | -0.0655 |
| rs12247684  | C | -0.0576 |
| rs61874527  | G | -0.0511 |
| rs117564432 | T | -0.2151 |
| rs2864000   | G | -0.0362 |
| rs12783227  | A | -0.1069 |
| rs10510004  | A | 0.0377  |
| rs11251868  | T | 0.0444  |
| rs10823320  | G | 0.081   |
| rs111738770 | T | -0.173  |
| rs74813554  | A | -0.1235 |
| rs113830395 | G | -0.2008 |

|             |   |         |
|-------------|---|---------|
| rs10829152  | A | 0.0376  |
| rs17497819  | T | -0.046  |
| rs1208571   | C | -0.056  |
| rs79664729  | G | -0.2321 |
| rs11012287  | A | 0.0456  |
| rs61347790  | A | 0.0585  |
| rs41306860  | T | 0.163   |
| rs148040230 | T | 0.1889  |
| rs56197656  | C | -0.0404 |
| rs4293037   | G | 0.1397  |
| rs2779334   | C | -0.0377 |
| rs7080690   | T | 0.0659  |
| rs7084736   | G | 0.0346  |
| rs503523    | T | -0.0741 |
| rs143931397 | G | 0.1377  |
| rs142213569 | A | -0.2287 |
| rs10998440  | G | -0.1083 |
| rs1878025   | G | 0.2498  |
| rs12244413  | T | 0.0762  |
| rs4948291   | T | -0.0368 |
| rs12265171  | A | -0.0405 |
| rs146259010 | C | 0.293   |
| rs11011832  | T | 0.2429  |
| rs77225919  | C | 0.0703  |
| rs17112128  | G | -0.0582 |
| rs114779173 | C | -0.125  |
| rs78074890  | T | 0.2602  |
| rs17680667  | C | -0.0735 |
| rs10740666  | C | -0.0416 |
| rs113149471 | C | 0.2594  |
| rs7067934   | A | -0.0598 |
| rs10751551  | C | -0.0393 |
| rs3781076   | C | 0.0584  |
| rs113526280 | T | 0.3047  |
| rs75401187  | G | 0.1686  |
| rs496874    | T | -0.0417 |
| rs11187349  | T | 0.0422  |
| rs112601890 | T | 0.3034  |
| rs2782979   | T | -0.0364 |
| rs112489065 | C | -0.1604 |
| rs36113069  | T | 0.0419  |
| rs76320790  | T | -0.1847 |
| rs2256766   | T | 0.0398  |
| rs10899852  | T | 0.0462  |
| rs60685600  | G | -0.0482 |
| rs34260225  | G | -0.213  |
| rs117640182 | T | 0.1187  |

|             |   |         |
|-------------|---|---------|
| rs143007829 | T | 0.1843  |
| rs7894954   | G | 0.0839  |
| rs11250671  | A | -0.1611 |
| rs12246482  | T | 0.0549  |
| rs34081996  | T | 0.1181  |
| rs11198510  | T | 0.0353  |
| rs117593043 | A | -0.1658 |
| rs72814054  | A | 0.087   |
| rs75442093  | A | 0.1554  |
| rs57600324  | G | 0.0529  |
| rs1863902   | C | 0.0393  |
| rs61855109  | A | 0.2079  |
| rs78846361  | C | -0.2356 |
| rs74897149  | A | -0.0961 |
| rs1925643   | G | 0.0423  |
| rs148109207 | C | -0.2107 |
| rs12260956  | A | -0.0605 |
| rs11194924  | C | -0.0485 |
| rs111730382 | T | -0.0806 |
| rs2588917   | A | 0.0345  |
| rs138754361 | T | 0.1646  |
| rs113205753 | A | 0.3563  |
| rs10996079  | A | 0.2134  |
| rs148636438 | C | 0.1522  |
| rs1650      | A | -0.062  |
| rs1867993   | A | -0.074  |
| rs4880353   | G | -0.0407 |
| rs111266084 | A | -0.0985 |
| rs117708421 | A | 0.3572  |
| rs114317743 | C | -0.148  |
| rs79298577  | G | 0.1245  |
| rs12250403  | C | 0.0737  |
| rs139975549 | G | -0.1298 |
| rs11813890  | T | -0.0894 |
| rs11244813  | A | 0.0667  |
| rs145161259 | T | -0.1214 |
| rs58700445  | A | 0.0884  |
| rs74630687  | G | -0.1625 |
| rs117920091 | T | 0.084   |
| rs112207257 | C | -0.2263 |
| rs72809332  | T | -0.1124 |
| rs12359273  | G | -0.0521 |
| rs113978990 | A | 0.1651  |
| rs61856819  | T | -0.0402 |
| rs9419240   | T | 0.214   |
| rs11018089  | A | 0.0372  |
| rs150168992 | C | 0.3095  |



|             |   |         |
|-------------|---|---------|
| rs7076102   | A | 0.0336  |
| rs145432083 | G | 0.2261  |
| rs117236277 | T | -0.0532 |
| rs61827584  | G | 0.1084  |
| rs10458713  | T | 0.064   |
| rs73591764  | G | -0.0611 |
| rs2281953   | G | 0.0662  |
| rs140124680 | T | 0.1899  |
| rs7074276   | C | -0.0363 |
| rs11196803  | T | -0.0641 |
| rs11190730  | T | 0.0626  |
| rs7082862   | G | 0.0569  |
| rs17763750  | T | -0.0672 |
| rs61851258  | G | 0.0698  |
| rs79796707  | A | 0.2433  |
| rs45445395  | A | -0.0441 |
| rs117035572 | A | 0.1516  |
| rs117351856 | G | 0.1296  |
| rs116883193 | T | -0.2485 |
| rs11591283  | C | 0.0512  |
| rs7900239   | A | 0.0515  |
| rs11250633  | T | -0.0373 |
| rs80137711  | G | 0.1064  |
| rs79358604  | T | -0.0732 |
| rs12268726  | T | 0.0477  |
| rs112991768 | G | 0.0506  |
| rs2039709   | T | -0.0392 |
| rs78323624  | C | 0.2315  |
| rs10826493  | C | 0.0344  |
| rs4838698   | G | 0.0439  |
| rs2580904   | C | 0.0544  |
| rs146914920 | T | -0.1817 |
| rs11000074  | T | 0.0728  |
| rs77688920  | T | 0.1189  |
| rs2479880   | A | 0.0381  |
| rs7078869   | T | -0.0334 |
| rs12784687  | A | 0.1727  |
| rs73343659  | A | 0.0926  |
| rs7903627   | A | 0.0468  |
| rs141167218 | A | 0.2105  |
| rs796884    | C | 0.0687  |
| rs1871612   | G | -0.0486 |
| rs10906543  | T | -0.042  |
| rs2804132   | G | -0.0421 |
| rs2244675   | T | -0.0347 |
| rs111472574 | T | -0.0893 |
| rs1599817   | G | 0.0862  |

|             |   |         |
|-------------|---|---------|
| rs61856592  | G | 0.175   |
| rs72831099  | C | 0.1279  |
| rs12250629  | T | 0.0343  |
| rs61866982  | C | 0.0865  |
| rs2642591   | G | 0.0404  |
| rs12414632  | A | 0.1115  |
| rs6482175   | C | 0.0484  |
| rs1250600   | T | -0.0354 |
| rs141722806 | A | 0.2247  |
| rs11816928  | A | 0.0517  |
| rs10740466  | C | 0.0767  |
| rs11244928  | T | 0.1443  |
| rs118105769 | A | 0.2104  |
| rs3009891   | A | 0.0543  |
| rs80008789  | G | 0.131   |
| rs12098530  | G | 0.0943  |
| rs72803261  | A | -0.0755 |
| rs12766665  | C | 0.0484  |
| rs2681924   | T | 0.0638  |
| rs67259209  | T | -0.1602 |
| rs61843590  | T | 0.144   |
| rs7899461   | C | 0.0612  |
| rs10748733  | T | -0.0814 |
| rs12355656  | A | -0.1356 |
| rs11199839  | C | -0.0388 |
| rs9419601   | A | 0.1122  |
| rs117753105 | C | -0.1941 |
| rs2394638   | T | 0.2352  |
| rs117937393 | T | 0.2563  |
| rs72834474  | T | 0.1712  |
| rs2244878   | G | 0.0723  |
| rs1240380   | T | 0.068   |
| rs2488583   | T | 0.1143  |
| rs117387650 | T | 0.0993  |
| rs12243176  | G | 0.0329  |
| rs12249251  | G | 0.0641  |
| rs2704517   | G | 0.0346  |
| rs7920248   | T | 0.0437  |
| rs17747324  | C | -0.0412 |
| rs72811826  | C | -0.118  |
| rs143365522 | G | 0.1721  |
| rs7093513   | T | 0.2222  |
| rs145383036 | G | -0.264  |
| rs17316260  | G | 0.404   |
| rs2184332   | G | -0.1335 |
| rs11203134  | G | 0.0671  |
| rs12358639  | T | 0.0377  |

|             |   |         |
|-------------|---|---------|
| rs140353635 | G | -0.2303 |
| rs138689948 | A | 0.2622  |
| rs34969869  | G | 0.1506  |
| rs4881109   | G | -0.0376 |
| rs72821220  | C | -0.0466 |
| rs17106792  | T | 0.0511  |
| rs79675153  | A | 0.0627  |
| rs72814612  | C | -0.1486 |
| rs12268494  | T | 0.0433  |
| rs117250243 | A | -0.1566 |
| rs4918376   | A | -0.0328 |
| rs113723904 | G | -0.2322 |
| rs118117788 | T | 0.2101  |
| rs16917784  | G | -0.1011 |
| rs80068640  | T | 0.1851  |
| rs55739491  | T | -0.1874 |
| rs116885931 | T | 0.1508  |
| rs72777788  | A | 0.0477  |
| rs74157591  | C | 0.1993  |
| rs7921320   | T | -0.0553 |
| rs11816448  | G | 0.0938  |
| rs112238940 | A | -0.0829 |
| rs142946524 | T | -0.1695 |
| rs4897805   | T | 0.1391  |
| rs2883458   | C | 0.0643  |
| rs7084095   | C | 0.0339  |
| rs11195417  | A | 0.0552  |
| rs2421125   | T | 0.0358  |
| rs2026431   | T | -0.0369 |
| rs76204550  | T | 0.1229  |
| rs55796935  | G | -0.1077 |
| rs11200841  | T | -0.0477 |
| rs11245310  | A | -0.041  |
| rs117286748 | A | 0.2891  |
| rs10884204  | T | -0.0411 |
| rs79510275  | G | -0.1224 |
| rs276229    | G | -0.1465 |
| rs10751826  | G | 0.0366  |
| rs144584371 | T | -0.3409 |
| rs17112704  | T | 0.0732  |
| rs79453376  | G | 0.1389  |
| rs61875772  | C | 0.2001  |
| rs4453118   | G | 0.037   |
| rs76499522  | A | 0.0806  |
| rs112980676 | A | -0.0944 |
| rs1006217   | C | -0.0627 |
| rs11238813  | A | 0.0564  |

|             |   |         |
|-------------|---|---------|
| rs4264069   | G | 0.1138  |
| rs76422770  | T | -0.159  |
| rs112908837 | A | -0.1005 |
| rs35601120  | T | -0.0713 |
| rs74142332  | T | 0.2523  |
| rs11253119  | G | -0.04   |
| rs117731202 | A | -0.1002 |
| rs7900423   | A | -0.0983 |
| rs141337746 | T | 0.2531  |
| rs12247273  | G | 0.0838  |
| rs2440070   | C | -0.0435 |
| rs79053840  | A | -0.1402 |
| rs2280606   | C | -0.0451 |
| rs77168852  | T | 0.0788  |
| rs3824783   | A | 0.0419  |
| rs115001130 | A | -0.2774 |
| rs76182981  | A | 0.2227  |
| rs34393826  | A | 0.0899  |
| rs79954206  | A | 0.1104  |
| rs137955020 | G | 0.1083  |
| rs7913531   | A | -0.0342 |
| rs141831474 | A | -0.0998 |
| rs10795285  | A | 0.0342  |
| rs117828812 | C | 0.1812  |
| rs36018023  | A | -0.0786 |
| rs10795291  | C | 0.0539  |
| rs7908415   | C | -0.0616 |
| rs7080003   | T | -0.0542 |
| rs34342053  | G | 0.0867  |
| rs11188695  | A | 0.0432  |
| rs8181379   | A | -0.0596 |
| rs140257636 | C | 0.1861  |
| rs1751271   | T | 0.0359  |
| rs11817244  | A | 0.1694  |
| rs111945930 | A | -0.103  |
| rs117550886 | C | -0.24   |
| rs5030946   | A | 0.0332  |
| rs6585711   | G | -0.0391 |
| rs78899416  | T | 0.1082  |
| rs11002778  | A | -0.0426 |
| rs12243358  | C | -0.0351 |
| rs143240490 | C | -0.1546 |
| rs142184944 | T | -0.1027 |
| rs11197339  | A | -0.039  |
| rs12767877  | G | -0.1575 |
| rs143878447 | A | -0.1929 |
| rs11596867  | A | 0.0835  |

|             |   |         |
|-------------|---|---------|
| rs12761026  | A | -0.1031 |
| rs117245697 | G | -0.0831 |
| rs2477040   | G | 0.0937  |
| rs74362496  | G | -0.1266 |
| rs118067536 | G | -0.1476 |
| rs117876072 | T | 0.2354  |
| rs61837191  | T | 0.2299  |
| rs61851257  | T | -0.0779 |
| rs11016587  | G | -0.0397 |
| rs4098712   | G | -0.0384 |
| rs10509409  | C | 0.0473  |
| rs7475361   | A | -0.033  |
| rs12774387  | T | 0.0798  |
| rs142287711 | T | -0.1145 |
| rs12358617  | A | -0.0345 |
| rs10795143  | A | -0.1171 |
| rs61267025  | T | -0.3216 |
| rs115561807 | A | -0.1532 |
| rs147315159 | G | 0.201   |
| rs77821052  | G | 0.1282  |
| rs145128584 | T | 0.1953  |
| rs12722560  | A | 0.1158  |
| rs75161199  | T | 0.2125  |
| rs1219718   | A | 0.0535  |
| rs12354695  | T | 0.0794  |
| rs35556242  | T | 0.1433  |
| rs1227759   | G | 0.0593  |
| rs72848187  | A | 0.0982  |
| rs60149363  | T | 0.0426  |
| rs6480505   | A | -0.1924 |
| rs61870502  | T | 0.0824  |
| rs80196027  | C | -0.0931 |
| rs35977599  | A | -0.0656 |
| rs6584759   | C | 0.0463  |
| rs16918494  | C | -0.0848 |
| rs9419619   | A | -0.0964 |
| rs72766442  | T | 0.0806  |
| rs10752010  | G | 0.0384  |
| rs12571149  | T | 0.096   |
| rs72840745  | C | -0.0628 |
| rs11196597  | A | 0.0508  |
| rs10787607  | T | -0.0392 |
| rs111400653 | T | 0.164   |
| rs148438237 | A | -0.1625 |
| rs17689242  | T | 0.0398  |
| rs113242977 | T | -0.0957 |
| rs2578033   | G | -0.0956 |

|             |   |         |
|-------------|---|---------|
| rs143178864 | T | -0.1694 |
| rs912748    | C | 0.041   |
| rs76901374  | C | -0.1467 |
| rs79419038  | G | 0.1358  |
| rs11003269  | C | -0.0422 |
| rs143036672 | C | -0.1134 |
| rs117615434 | C | -0.1268 |
| rs276206    | G | 0.2537  |
| rs11012069  | A | 0.0558  |
| rs1418738   | T | -0.0376 |
| rs7078341   | A | 0.1575  |
| rs142176365 | A | -0.1992 |
| rs4934167   | A | 0.0323  |
| rs12570261  | T | 0.0845  |
| rs116919400 | T | 0.1385  |
| rs4948435   | C | -0.0448 |
| rs55682467  | G | -0.1503 |
| rs10749493  | T | -0.1604 |
| rs10906294  | C | -0.0369 |
| rs78908295  | C | -0.1326 |
| rs17836440  | C | 0.0342  |
| rs10997226  | T | 0.0978  |
| rs3824645   | C | -0.0386 |
| rs4282890   | C | 0.0337  |
| rs4746035   | G | -0.071  |
| rs4748987   | A | 0.0337  |
| rs141974153 | T | -0.1663 |
| rs149269720 | A | 0.1821  |
| rs17116478  | T | -0.0503 |
| rs35162716  | A | 0.0424  |
| rs10829020  | T | 0.0654  |
| rs79520705  | T | -0.1867 |
| rs76898769  | A | 0.1725  |
| rs7088481   | G | -0.0419 |
| rs1250787   | G | -0.0578 |
| rs3905635   | A | 0.0392  |
| rs2170006   | A | -0.032  |
| rs113784286 | C | 0.0967  |
| rs35316649  | G | 0.193   |
| rs10747057  | G | -0.0394 |
| rs72815123  | A | -0.1247 |
| rs74162843  | G | 0.1499  |
| rs78127659  | A | 0.125   |
| rs10795527  | T | 0.0339  |
| rs7069673   | C | -0.0592 |
| rs7914601   | T | -0.141  |
| rs10794060  | T | -0.0341 |

|             |   |         |
|-------------|---|---------|
| rs11007667  | G | 0.2244  |
| rs117384413 | T | 0.0785  |
| rs1871075   | G | -0.0402 |
| rs7090169   | C | 0.0558  |
| rs149478157 | T | -0.1779 |
| rs4396189   | C | -0.1199 |
| rs3781472   | T | 0.0341  |
| rs7912484   | C | 0.0803  |
| rs117607435 | T | 0.2562  |
| rs7080560   | G | -0.0821 |
| rs12253075  | A | 0.0893  |
| rs2614153   | C | 0.0337  |
| rs7075298   | C | 0.039   |
| rs748475    | C | 0.124   |
| rs117037425 | G | -0.1143 |
| rs2495729   | C | 0.0449  |
| rs7073953   | C | 0.0339  |
| rs9651334   | A | -0.178  |
| rs7900355   | C | 0.0697  |
| rs2628153   | A | 0.0322  |
| rs10822101  | G | -0.0335 |
| rs9415772   | T | 0.1007  |
| rs61380105  | G | -0.036  |
| rs112655239 | T | 0.1584  |
| rs77607917  | C | 0.1289  |
| rs1243422   | C | 0.063   |
| rs10905028  | G | 0.0822  |
| rs56168326  | A | 0.188   |
| rs78020979  | G | 0.1668  |
| rs2089359   | C | 0.035   |
| rs144720300 | G | 0.2054  |
| rs4750989   | C | 0.04    |
| rs12146299  | C | -0.0499 |
| rs11599275  | T | 0.0355  |
| rs75439630  | C | -0.1554 |
| rs11591727  | T | 0.0661  |
| rs12248610  | C | 0.0701  |
| rs4243516   | A | 0.0374  |
| rs77019906  | C | -0.1109 |
| rs72784927  | A | 0.0432  |
| rs67350917  | A | -0.0784 |
| rs117817683 | T | 0.1985  |
| rs150790859 | A | 0.1272  |
| rs1409757   | G | 0.0344  |
| rs11257952  | C | 0.0324  |
| rs16924760  | G | 0.0397  |
| rs10737085  | C | 0.2591  |

|             |   |         |
|-------------|---|---------|
| rs117946773 | C | 0.1036  |
| rs150411108 | G | 0.0651  |
| rs78882068  | C | 0.0614  |
| rs2489025   | T | -0.0321 |
| rs112689760 | A | 0.0947  |
| rs10999500  | C | 0.0338  |
| rs11250641  | C | 0.0347  |
| rs2704520   | G | -0.0412 |
| rs34847447  | T | 0.1399  |
| rs7080184   | G | -0.0454 |
| rs1259521   | A | 0.0348  |
| rs2292200   | A | -0.0513 |
| rs74416291  | T | -0.0926 |
| rs61850079  | A | -0.1087 |
| rs117723843 | G | 0.1875  |
| rs9971041   | C | -0.0512 |
| rs4500395   | A | -0.0448 |
| rs118075601 | C | -0.1813 |
| rs35972381  | C | 0.0671  |
| rs10430769  | C | 0.0743  |
| rs12412032  | A | -0.0682 |
| rs11005128  | C | -0.1189 |
| rs7903644   | C | -0.0376 |
| rs3124182   | T | 0.0434  |
| rs17613571  | T | 0.2154  |
| rs11597202  | A | 0.1659  |
| rs141969268 | T | -0.2078 |
| rs16933798  | C | 0.1891  |
| rs622998    | A | 0.0345  |
| rs7900290   | A | -0.1497 |
| rs12772960  | A | -0.0326 |
| rs17141058  | G | 0.0686  |
| rs17611556  | C | -0.0621 |
| rs10762111  | T | -0.0354 |
| rs11017418  | A | 0.1113  |
| rs140293381 | G | -0.1373 |
| rs1326843   | G | 0.0461  |
| rs2152032   | C | -0.1141 |
| rs146032388 | T | 0.2302  |
| rs10795995  | C | -0.0345 |
| rs1340951   | C | -0.0565 |
| rs631902    | A | 0.0327  |
| rs9421534   | A | -0.0354 |
| rs116569099 | T | 0.0666  |
| rs117262026 | T | -0.2832 |
| rs7096944   | C | -0.0449 |
| rs4075924   | T | 0.0676  |



|             |   |         |
|-------------|---|---------|
| rs74849856  | T | 0.0737  |
| rs78596344  | T | -0.1339 |
| rs11257885  | T | 0.1196  |
| rs1323074   | C | -0.0712 |
| rs12357568  | A | 0.2188  |
| rs141133242 | T | -0.1833 |
| rs2221570   | C | 0.0359  |
| rs3818783   | T | 0.0363  |
| rs7091873   | C | 0.0742  |
| rs1867075   | G | 0.0413  |
| rs12146342  | T | 0.0682  |
| rs11194649  | C | -0.0654 |
| rs4041334   | G | 0.0508  |
| rs10761715  | T | 0.1382  |
| rs61867084  | G | -0.1494 |
| rs11596819  | C | -0.1948 |
| rs2487930   | C | -0.0333 |
| rs142888065 | A | 0.1256  |
| rs2477332   | C | -0.0324 |
| rs34974391  | T | 0.0366  |
| rs1776099   | A | -0.0411 |
| rs12245456  | T | 0.0381  |
| rs78329250  | A | 0.1018  |
| rs79686892  | T | -0.1047 |
| rs3781361   | C | 0.0318  |
| rs16936361  | G | -0.0618 |
| rs117117579 | T | 0.1005  |
| rs75524400  | G | 0.0641  |
| rs147331433 | A | 0.1245  |
| rs113942212 | G | -0.1549 |
| rs111987022 | T | -0.1322 |
| rs7894297   | G | -0.1056 |
| rs61389825  | A | -0.1273 |
| rs139100264 | C | -0.1706 |
| rs145200155 | C | 0.1907  |
| rs12777241  | G | 0.0388  |
| rs139832802 | G | 0.172   |
| rs11198985  | T | 0.0842  |
| rs34723774  | C | 0.1145  |
| rs11013798  | G | 0.0348  |
| rs79302625  | G | -0.1116 |
| rs12412809  | G | 0.0559  |
| rs1525930   | C | -0.0998 |
| rs17790008  | G | -0.0472 |
| rs79962870  | C | -0.0579 |
| rs1475271   | G | -0.033  |
| rs12264388  | G | 0.0984  |

|             |   |         |
|-------------|---|---------|
| rs35891448  | C | 0.134   |
| rs34796131  | A | -0.0841 |
| rs79455282  | T | 0.0464  |
| rs78859852  | A | 0.1584  |
| rs1337322   | A | 0.0407  |
| rs55879006  | A | -0.1693 |
| rs2492643   | A | -0.0713 |
| rs11146636  | A | -0.1309 |
| rs1535557   | G | -0.0427 |
| rs10884227  | A | -0.0355 |
| rs7094389   | A | -0.0341 |
| rs111655370 | T | -0.0897 |
| rs1761601   | C | 0.0329  |
| rs118162870 | G | -0.2376 |
| rs72833533  | A | -0.1507 |
| rs7920115   | C | 0.0364  |
| rs376528    | A | -0.0701 |
| rs80168665  | G | -0.2627 |
| rs7084465   | A | -0.0772 |
| rs117177806 | A | 0.1659  |
| rs3827866   | C | 0.035   |
| rs11814429  | T | -0.0342 |
| rs34018472  | A | 0.0971  |
| rs113901641 | G | 0.1298  |
| rs61861103  | A | 0.0805  |
| rs17463021  | T | -0.0381 |
| rs10905478  | A | 0.0359  |
| rs12258847  | C | 0.149   |
| rs144586282 | C | -0.1516 |
| rs117458422 | A | 0.2773  |
| rs79693284  | T | 0.1633  |
| rs112763080 | T | -0.0484 |
| rs72778842  | T | 0.1203  |
| rs1041158   | A | 0.0576  |
| rs11251966  | G | 0.06    |
| rs111545754 | G | 0.1514  |
| rs2919291   | T | 0.1153  |
| rs703256    | C | 0.0343  |
| rs4748222   | T | -0.063  |
| rs79802990  | C | -0.1322 |
| rs7088868   | G | -0.0388 |
| rs12778878  | G | -0.0687 |
| rs4880336   | A | -0.0377 |
| rs10824803  | G | 0.032   |
| rs139339220 | A | 0.0929  |
| rs7072329   | T | 0.0474  |
| rs117838583 | T | 0.1654  |

|             |   |         |
|-------------|---|---------|
| rs112364560 | G | -0.0858 |
| rs11013284  | A | -0.0462 |
| rs7091501   | C | -0.1555 |
| rs7898026   | C | -0.0325 |
| rs151213707 | A | -0.1137 |
| rs7916810   | G | 0.0455  |
| rs1897360   | T | 0.121   |
| rs118122154 | G | -0.0624 |
| rs12217962  | T | -0.0551 |
| rs10999884  | C | -0.0893 |
| rs150196029 | T | 0.1528  |
| rs113847670 | T | 0.0924  |
| rs117068660 | G | 0.1826  |
| rs741763    | C | -0.0325 |
| rs2636800   | A | 0.0535  |
| rs72768940  | G | 0.0981  |
| rs116953193 | T | 0.1136  |
| rs2892352   | A | 0.0347  |
| rs12354975  | T | 0.0841  |
| rs113402359 | A | -0.0877 |
| rs72784665  | T | -0.0624 |
| rs11598961  | G | 0.0649  |
| rs11016131  | A | 0.0728  |
| rs77097191  | A | -0.1584 |
| rs7090922   | A | 0.0664  |
| rs17467664  | T | 0.1956  |
| rs117159474 | C | -0.1796 |
| rs34167318  | G | 0.2273  |
| rs2749608   | A | 0.0318  |
| rs10082468  | A | 0.201   |
| rs2000200   | A | 0.0317  |
| rs771874    | T | -0.067  |
| rs117651213 | G | -0.2504 |
| rs10829985  | T | 0.0346  |
| rs117092325 | A | -0.0924 |
| rs72816440  | C | 0.046   |
| rs61872695  | G | -0.0464 |
| rs35072162  | T | 0.2039  |
| rs12415732  | C | -0.0367 |
| rs7923861   | T | 0.0449  |
| rs12261323  | G | -0.0571 |
| rs149640658 | G | 0.1459  |
| rs12765156  | A | 0.0578  |
| rs6602628   | A | 0.061   |
| rs7092524   | A | 0.0324  |
| rs111783512 | T | 0.0658  |
| rs61858635  | T | 0.1128  |

|             |   |         |
|-------------|---|---------|
| rs117631535 | C | -0.1221 |
| rs45516103  | A | 0.1458  |
| rs1016267   | T | 0.1487  |
| rs138344155 | G | -0.1339 |
| rs7100317   | C | 0.0337  |
| rs150644219 | A | -0.0897 |
| rs4935078   | G | 0.0358  |
| rs2497794   | T | 0.0845  |
| rs76443714  | A | 0.1897  |
| rs1984629   | C | 0.0315  |
| rs9418561   | A | -0.1565 |
| rs79364033  | G | -0.1067 |
| rs11599323  | T | -0.0827 |
| rs10740351  | C | 0.0378  |
| rs61873667  | G | -0.1685 |
| rs77114540  | A | 0.1024  |
| rs147716504 | A | -0.1921 |
| rs12779201  | C | -0.0334 |
| rs118104785 | C | 0.1397  |
| rs12356688  | G | -0.2242 |
| rs72809138  | A | -0.0837 |
| rs11252826  | A | -0.0401 |
| rs11001184  | T | 0.1247  |
| rs76316860  | C | -0.0688 |
| rs12268071  | C | -0.1366 |
| rs75905387  | A | -0.0751 |
| rs10786364  | A | 0.0334  |
| rs11252820  | G | 0.0641  |
| rs78425398  | G | 0.106   |
| rs117067717 | G | -0.1337 |
| rs12770832  | T | 0.0527  |
| rs74970566  | A | -0.1299 |
| rs74115776  | A | 0.1934  |
| rs16927931  | A | -0.08   |
| rs10829477  | T | 0.0403  |
| rs17127375  | A | 0.0539  |
| rs2587475   | C | 0.0334  |
| rs61870795  | A | 0.1134  |
| rs17120920  | G | 0.2098  |
| rs55780146  | A | 0.1943  |
| rs145221984 | T | 0.247   |
| rs787038    | A | -0.0895 |
| rs7904081   | T | -0.034  |
| rs112297917 | T | 0.0683  |
| rs716183    | C | 0.0324  |
| rs12241163  | A | 0.079   |
| rs10787476  | C | 0.0701  |

|             |   |         |
|-------------|---|---------|
| rs137961056 | A | -0.1576 |
| rs9414950   | C | 0.0602  |
| rs78909007  | G | -0.1651 |
| rs332135    | G | 0.0424  |
| rs11191459  | A | -0.0341 |
| rs117441126 | G | -0.1562 |
| rs11596458  | A | 0.1434  |
| rs12412308  | T | 0.082   |
| rs77609995  | G | 0.1342  |
| rs11186419  | A | 0.0871  |
| rs2071498   | T | -0.0339 |
| rs117162006 | G | 0.2108  |
| rs61852624  | A | -0.1122 |
| rs78842654  | A | -0.0735 |
| rs10509482  | T | 0.1026  |
| rs12241039  | A | 0.0677  |
| rs7076670   | C | -0.0372 |
| rs80322431  | G | 0.0725  |
| rs7910566   | G | 0.1136  |
| rs10887927  | C | -0.0513 |
| rs10510024  | C | -0.0319 |
| rs2066315   | C | 0.0995  |
| rs74320338  | A | 0.1192  |
| rs10794137  | G | -0.032  |
| rs1886410   | C | -0.0387 |
| rs41258305  | C | -0.0739 |
| rs7087467   | T | -0.0393 |
| rs11016208  | G | 0.0952  |
| rs151070970 | T | 0.2849  |
| rs7075356   | T | 0.0348  |
| rs4746649   | C | 0.0333  |
| rs11258537  | A | 0.0867  |
| rs117561298 | T | -0.0793 |
| rs7095435   | A | 0.1028  |
| rs12773197  | T | -0.0716 |
| rs11197744  | G | -0.1028 |
| rs11201024  | C | -0.0444 |
| rs118033231 | C | -0.1402 |
| rs11253940  | T | 0.0515  |
| rs117354225 | T | 0.1767  |
| rs88722     | C | 0.0368  |
| rs7087685   | A | -0.037  |
| rs750635    | A | 0.0537  |
| rs12218862  | C | -0.0741 |
| rs11007343  | T | -0.1344 |
| rs2254607   | G | -0.1017 |
| rs141061131 | A | 0.2474  |

|             |   |         |
|-------------|---|---------|
| rs72844501  | C | 0.0755  |
| rs1274358   | A | 0.0393  |
| rs35420438  | T | -0.0426 |
| rs116983255 | A | -0.1456 |
| rs4880684   | C | 0.0426  |
| rs12355059  | T | -0.0515 |
| rs72819008  | T | 0.1806  |
| rs58389879  | T | -0.0336 |
| rs4752030   | G | -0.1842 |
| rs11201989  | C | -0.032  |
| rs78380528  | A | 0.087   |
| rs61850816  | T | -0.1472 |
| rs11002177  | C | 0.1328  |
| rs10994431  | G | 0.041   |
| rs1933288   | T | 0.1252  |
| rs77201695  | G | 0.1283  |
| rs11592995  | A | 0.1927  |
| rs72641321  | C | 0.0439  |
| rs141512850 | A | -0.1724 |
| rs6601982   | A | -0.0451 |
| rs76882187  | T | 0.1895  |
| rs145103989 | T | 0.1694  |
| rs11817141  | C | -0.0614 |
| rs118064184 | T | 0.1316  |
| rs34774469  | A | -0.0406 |
| rs11003158  | C | 0.0349  |
| rs1652728   | C | 0.0321  |
| rs2999233   | A | -0.0321 |
| rs117912228 | A | 0.1188  |
| rs72793138  | A | -0.0923 |
| rs111387928 | T | -0.0425 |
| rs11259405  | T | 0.035   |
| rs10994973  | C | 0.0659  |
| rs596866    | G | 0.0384  |
| rs61863387  | C | -0.045  |
| rs7910092   | T | 0.0318  |
| rs74615199  | C | 0.2192  |
| rs11239612  | G | 0.1183  |
| rs11816958  | T | 0.0366  |
| rs787674    | T | 0.032   |
| rs4545465   | T | 0.0389  |
| rs55869633  | T | 0.2295  |
| rs11254929  | C | 0.0453  |
| rs117664139 | T | 0.1635  |
| rs11199060  | T | -0.0353 |
| rs55968816  | G | -0.0571 |
| rs10508502  | T | 0.032   |

|             |   |         |
|-------------|---|---------|
| rs10785953  | C | 0.0383  |
| rs10751569  | T | -0.0318 |
| rs7074298   | C | -0.132  |
| rs7900957   | T | 0.0308  |
| rs139491881 | A | 0.1735  |
| rs75973395  | G | 0.2672  |
| rs117698899 | A | 0.1247  |
| rs117062321 | A | -0.1558 |
| rs2251077   | G | 0.0356  |
| rs1655089   | C | -0.0325 |
| rs56248031  | G | 0.0733  |
| rs78435400  | C | 0.1535  |
| rs11188354  | T | 0.0478  |
| rs114710606 | A | 0.1789  |
| rs75304361  | T | -0.1015 |
| rs10508707  | T | 0.0838  |
| rs35867728  | T | -0.0778 |
| rs10745288  | G | 0.0318  |
| rs118172155 | A | 0.1131  |
| rs72800387  | T | -0.0434 |
| rs117199015 | C | 0.1912  |
| rs77988705  | A | -0.1526 |
| rs9419585   | C | 0.0362  |
| rs985477    | G | -0.0354 |
| rs12778972  | T | 0.0425  |
| rs7084245   | T | 0.0864  |
| rs10905916  | G | -0.052  |
| rs35674927  | T | 0.0809  |
| rs118180554 | G | -0.1675 |
| rs73253648  | A | 0.1519  |
| rs57766438  | T | 0.0341  |
| rs112783614 | C | 0.052   |
| rs146989859 | C | -0.146  |
| rs2260259   | A | 0.0367  |
| rs2377595   | G | -0.0316 |
| rs7091327   | A | 0.1247  |
| rs76926441  | T | 0.175   |
| rs9787512   | T | -0.1139 |
| rs17297893  | C | 0.0793  |
| rs7082016   | T | 0.0428  |
| rs4747008   | G | -0.0374 |
| rs11597244  | A | 0.0481  |
| rs1902724   | G | 0.0346  |
| rs1554225   | C | 0.0321  |
| rs4881015   | T | -0.1224 |
| rs147687428 | G | -0.0958 |
| rs1936621   | G | -0.0318 |

|             |   |         |
|-------------|---|---------|
| rs7084919   | T | 0.0411  |
| rs3740121   | A | -0.0322 |
| rs584702    | G | -0.043  |
| rs80004378  | C | -0.1484 |
| rs118126649 | C | 0.1121  |
| rs72853606  | A | 0.0659  |
| rs11244824  | T | 0.075   |
| rs113167006 | A | -0.2356 |
| rs4607990   | T | -0.0675 |
| rs71493317  | T | 0.2568  |
| rs12355785  | T | 0.2013  |
| rs10509276  | T | 0.0553  |
| rs117206693 | A | 0.1444  |
| rs75816974  | A | -0.1026 |
| rs61864721  | G | -0.0869 |
| rs11592365  | A | -0.0954 |
| rs11187793  | A | -0.0327 |
| rs9419916   | G | -0.0393 |
| rs4746741   | C | 0.1524  |
| rs12414229  | T | 0.0667  |
| rs75294120  | T | 0.0695  |
| rs10904211  | A | -0.068  |
| rs7893754   | G | -0.0333 |
| rs10824192  | A | 0.0465  |
| rs1904597   | G | 0.0314  |
| rs11197494  | C | 0.0634  |
| rs61862934  | T | 0.107   |
| rs57261818  | A | 0.0754  |
| rs72818653  | C | 0.0846  |
| rs7921160   | C | 0.0423  |
| rs74807419  | G | 0.1771  |
| rs4748235   | G | -0.0344 |
| rs79415956  | A | 0.1947  |
| rs74148555  | T | -0.1875 |
| rs592414    | A | -0.0354 |
| rs17334005  | C | -0.2113 |
| rs112797472 | G | 0.1083  |
| rs7070568   | C | 0.0346  |
| rs2275718   | T | 0.1236  |
| rs1450774   | A | 0.0314  |
| rs2182409   | T | 0.0355  |
| rs138548052 | A | -0.1571 |
| rs4750086   | C | -0.0419 |
| rs77590175  | C | 0.0921  |
| rs117872210 | T | 0.2197  |
| rs7906019   | C | -0.038  |
| rs138988173 | A | -0.1893 |



|             |   |         |
|-------------|---|---------|
| rs17448411  | T | 0.0393  |
| rs78683870  | G | 0.195   |
| rs61833743  | T | -0.1045 |
| rs2620924   | G | 0.031   |
| rs11257083  | T | 0.0605  |
| rs61831959  | T | 0.0709  |
| rs76761570  | G | 0.1792  |
| rs12779237  | T | 0.162   |
| rs66859631  | C | 0.0688  |
| rs12415721  | T | -0.0354 |
| rs11189339  | A | 0.1476  |
| rs11146607  | A | -0.0635 |
| rs4520506   | C | 0.038   |
| rs17702348  | C | 0.0304  |
| rs74578106  | T | -0.127  |
| rs12267732  | G | 0.0724  |
| rs113080497 | T | -0.1892 |
| rs7913619   | G | 0.0532  |
| rs7920806   | T | -0.0327 |
| rs12762466  | G | -0.0354 |
| rs117598197 | A | 0.1172  |
| rs3740537   | A | -0.0626 |
| rs16914424  | C | -0.1724 |
| rs4880365   | A | 0.1026  |
| rs73374120  | A | 0.0699  |
| rs117458524 | A | 0.1662  |
| rs72784485  | C | -0.0704 |
| rs139833811 | C | 0.184   |
| rs117505423 | T | 0.1363  |
| rs36212407  | T | 0.0654  |
| rs4751550   | T | -0.0319 |
| rs139232182 | G | 0.141   |
| rs117912669 | A | -0.0922 |
| rs1238449   | T | -0.031  |
| rs1560798   | G | 0.0414  |
| rs56082096  | A | 0.0745  |
| rs4934164   | C | -0.0478 |
| rs3124737   | G | 0.0308  |
| rs61842356  | T | -0.1252 |
| rs7096105   | A | -0.1473 |
| rs1278387   | G | 0.0333  |
| rs117362991 | T | -0.0943 |
| rs11016132  | G | -0.0869 |
| rs75269387  | G | 0.2499  |
| rs12778692  | T | 0.0816  |
| rs28417886  | G | 0.0412  |
| rs61851382  | A | -0.1233 |

|             |   |         |
|-------------|---|---------|
| rs11592666  | G | 0.1306  |
| rs6537536   | A | 0.0527  |
| rs74465643  | T | 0.1239  |
| rs114370379 | C | 0.1305  |
| rs11257321  | A | -0.0382 |
| rs117031020 | T | 0.1406  |
| rs11007809  | T | -0.0596 |
| rs747715    | T | -0.0621 |
| rs2505735   | A | -0.0411 |
| rs60766650  | T | -0.0711 |
| rs2039978   | G | -0.0586 |
| rs2366881   | T | 0.0518  |
| rs61836103  | A | 0.0643  |
| rs7080598   | T | -0.0417 |
| rs6597740   | T | 0.0333  |
| rs1029024   | G | -0.0358 |
| rs77737832  | G | 0.1428  |
| rs34152780  | G | -0.1452 |
| rs4752238   | T | -0.0397 |
| rs2421027   | G | 0.0457  |
| rs2675661   | G | -0.0955 |
| rs2992034   | C | -0.0562 |
| rs11254661  | G | -0.1529 |
| rs1917193   | T | -0.0569 |
| rs56158501  | T | -0.0519 |
| rs74146685  | G | -0.0622 |
| rs72839868  | T | 0.0992  |
| rs140818442 | C | 0.1754  |
| rs79777002  | T | -0.1162 |
| rs11592243  | C | -0.0357 |
| rs117130460 | A | -0.1756 |
| rs72792469  | T | 0.1639  |
| rs77916121  | T | 0.1532  |
| rs138553235 | T | -0.2064 |
| rs76461894  | G | -0.1077 |
| rs1171828   | C | 0.0313  |
| rs150515675 | T | 0.1051  |
| rs791589    | G | -0.0444 |
| rs138948609 | A | 0.1825  |
| rs17145525  | T | -0.0344 |
| rs111995375 | A | -0.1088 |
| rs10430757  | T | 0.0308  |
| rs7913079   | A | 0.0468  |
| rs7081430   | A | -0.0487 |
| rs72785451  | A | 0.109   |
| rs150495491 | G | 0.1571  |
| rs11002811  | A | -0.0443 |

|             |   |         |
|-------------|---|---------|
| rs78598696  | T | 0.0548  |
| rs77023896  | C | 0.1615  |
| rs34125811  | C | 0.0982  |
| rs76347187  | T | 0.1336  |
| rs8177628   | T | -0.05   |
| rs12249900  | C | -0.0437 |
| rs75234855  | T | -0.1593 |
| rs17607469  | A | -0.1617 |
| rs61874665  | A | 0.1109  |
| rs145977660 | T | 0.17    |
| rs1891621   | G | 0.0307  |
| rs363222    | C | -0.0417 |
| rs1567705   | C | -0.0538 |
| rs3050508   | A | 0.0343  |
| rs10748732  | C | 0.0526  |
| rs117519922 | A | -0.0678 |
| rs113633428 | G | 0.0871  |
| rs11007060  | A | -0.0397 |
| rs117622776 | G | 0.1133  |
| rs61857061  | A | 0.0403  |
| rs147786074 | C | -0.1231 |
| rs75503696  | A | -0.1819 |
| rs1345386   | G | -0.0325 |
| rs61864252  | G | 0.2431  |
| rs11251720  | C | -0.0444 |
| rs10829485  | G | -0.0359 |
| rs143985229 | G | -0.1494 |
| rs117932856 | A | 0.1274  |
| rs11259062  | T | -0.0325 |
| rs1926225   | T | 0.0308  |
| rs10765127  | G | 0.0491  |
| rs12779809  | T | 0.0593  |
| rs150408578 | C | -0.2185 |
| rs77897526  | T | -0.1469 |
| rs75985593  | G | -0.1441 |
| rs150521221 | G | 0.1967  |
| rs116999241 | G | 0.1596  |
| rs74138066  | C | 0.0928  |
| rs61835731  | A | -0.0867 |
| rs10829447  | G | 0.0455  |
| rs7084722   | G | 0.0312  |
| rs28540341  | G | -0.2477 |
| rs5030915   | G | 0.1651  |
| rs11000970  | C | 0.0965  |
| rs112341287 | G | 0.0948  |
| rs11003740  | A | 0.0359  |
| rs17494179  | T | 0.033   |

|             |   |         |
|-------------|---|---------|
| rs78068995  | G | 0.1561  |
| rs117652614 | A | -0.1191 |
| rs9794109   | A | -0.0391 |
| rs8190704   | C | -0.1186 |
| rs17120068  | A | -0.0365 |
| rs78036941  | C | 0.1679  |
| rs72768105  | C | 0.2488  |
| rs4962584   | T | -0.032  |
| rs7904103   | T | -0.0438 |
| rs11593142  | T | -0.0587 |
| rs41311235  | C | 0.1512  |
| rs142718068 | T | 0.1716  |
| rs11017151  | T | 0.1566  |
| rs113913657 | G | -0.1616 |
| rs116869334 | C | 0.1573  |
| rs78315011  | C | 0.1432  |
| rs117137421 | T | -0.1666 |
| rs497211    | T | -0.0441 |
| rs7899396   | G | 0.0344  |
| rs118192041 | T | -0.1816 |
| rs3750764   | A | -0.0531 |
| rs12415095  | G | -0.0413 |
| rs115976767 | G | 0.2418  |
| rs72805519  | T | -0.1019 |
| rs17112469  | C | 0.0713  |
| rs10822236  | C | -0.0696 |
| rs79387392  | G | 0.1016  |
| rs61852527  | G | 0.1046  |
| rs75517334  | A | -0.0699 |
| rs74113193  | C | -0.1858 |
| rs117533027 | C | -0.1599 |
| rs112423130 | C | -0.0888 |
| rs71475659  | A | -0.1043 |
| rs1698413   | A | -0.0626 |
| rs2253901   | C | 0.0331  |
| rs12220320  | G | -0.0512 |
| rs60821795  | C | -0.0876 |
| rs77138746  | C | 0.0806  |
| rs72800977  | T | 0.1371  |
| rs11599062  | A | -0.0458 |
| rs117206115 | G | 0.096   |
| rs77039962  | T | 0.2254  |
| rs11005132  | A | 0.0395  |
| rs7908481   | G | -0.0319 |
| rs76795338  | T | 0.1862  |
| rs75078296  | T | -0.1878 |
| rs117217814 | C | 0.117   |

|             |   |         |
|-------------|---|---------|
| rs141312850 | A | 0.2116  |
| rs113709161 | T | 0.109   |
| rs11596749  | G | 0.2036  |
| rs7078148   | G | 0.05    |
| rs160824    | A | 0.0303  |
| rs10829015  | A | 0.0305  |
| rs80083265  | C | 0.0915  |
| rs11597795  | A | -0.141  |
| rs3753127   | A | 0.1104  |
| rs59727166  | A | -0.0469 |
| rs12356950  | T | 0.0582  |
| rs77783563  | A | -0.1307 |
| rs2279418   | G | -0.0855 |
| rs7905244   | C | 0.041   |
| rs76663279  | C | 0.0618  |
| rs17785928  | T | -0.1656 |
| rs72776586  | C | 0.0912  |
| rs72842541  | A | 0.239   |
| rs6584879   | G | -0.0448 |
| rs2247461   | T | 0.0313  |
| rs112465957 | C | 0.2349  |
| rs1341626   | T | 0.034   |
| rs79969816  | T | -0.1387 |
| rs7909279   | G | -0.033  |
| rs113729525 | C | -0.0446 |
| rs11598327  | C | 0.0681  |
| rs17322177  | A | 0.0795  |
| rs6583720   | A | 0.1314  |
| rs77244383  | A | 0.0688  |
| rs117960297 | T | 0.1732  |
| rs7090376   | G | -0.0432 |
| rs78395463  | G | -0.0534 |
| rs17314229  | T | 0.0724  |
| rs116854281 | T | 0.241   |
| rs4752059   | A | -0.0841 |
| rs10829237  | C | 0.0531  |
| rs7921730   | G | 0.0467  |
| rs7085874   | C | 0.0397  |
| rs118086326 | T | 0.0969  |
| rs7918373   | A | -0.0521 |
| rs2646437   | A | -0.0299 |
| rs117734414 | C | 0.1815  |
| rs144109497 | C | -0.1393 |
| rs2902273   | A | -0.1543 |
| rs117949144 | G | 0.1237  |
| rs11592443  | A | -0.0582 |
| rs34939744  | G | 0.1254  |

|             |   |         |
|-------------|---|---------|
| rs11259130  | G | -0.0678 |
| rs112332725 | G | 0.0827  |
| rs4917517   | C | 0.0916  |
| rs11251670  | A | -0.1105 |
| rs35629732  | C | 0.0339  |
| rs79594988  | G | -0.197  |
| rs685861    | G | 0.038   |
| rs1038171   | C | 0.237   |
| rs1391511   | A | 0.0305  |
| rs10822097  | C | 0.0354  |
| rs117294463 | G | -0.1322 |
| rs2575985   | C | 0.0402  |
| rs143880951 | C | -0.145  |
| rs118085085 | G | 0.1733  |
| rs2704467   | A | 0.0329  |
| rs6585364   | G | 0.0361  |
| rs10885414  | G | -0.0366 |
| rs75792257  | A | -0.1542 |
| rs149414436 | A | -0.1696 |
| rs11812276  | G | 0.0338  |
| rs77723728  | A | 0.2218  |
| rs117111496 | A | 0.1893  |
| rs34779782  | C | -0.0671 |
| rs12783409  | C | 0.0881  |
| rs61861011  | A | 0.0491  |
| rs117225806 | A | 0.2488  |
| rs11239758  | C | -0.2058 |
| rs7074979   | C | 0.0386  |
| rs7901000   | T | 0.0838  |
| rs7097091   | C | 0.0526  |
| rs4391756   | G | -0.0663 |
| rs1810393   | C | 0.0787  |
| rs76261162  | T | -0.0512 |
| rs12413272  | C | 0.1442  |
| rs6482400   | C | -0.0731 |
| rs34365829  | A | -0.1319 |
| rs76321214  | C | 0.1187  |
| rs11015807  | A | 0.2138  |
| rs11018122  | G | 0.0552  |
| rs117297278 | C | 0.0949  |
| rs11186255  | G | 0.0373  |
| rs118011494 | C | 0.2304  |
| rs73297769  | G | 0.1539  |
| rs77693289  | A | -0.0653 |
| rs211294    | G | -0.0497 |
| rs80101384  | C | 0.1708  |
| rs7072155   | A | -0.0379 |

|             |   |         |
|-------------|---|---------|
| rs78834149  | A | 0.2584  |
| rs12248369  | G | -0.0594 |
| rs146595969 | T | 0.1894  |
| rs1147961   | T | -0.0388 |
| rs11813505  | A | 0.0302  |
| rs76010911  | G | 0.1     |
| rs61869333  | G | -0.1564 |
| rs72832193  | C | 0.0742  |
| rs12248471  | T | 0.0704  |
| rs5030931   | A | 0.0394  |
| rs11196107  | G | 0.0715  |
| rs59193147  | T | 0.1622  |
| rs139387724 | C | -0.1943 |
| rs10999888  | T | -0.0406 |
| rs143783832 | T | -0.103  |
| rs7088943   | A | 0.1023  |
| rs146070841 | T | 0.1     |
| rs79709835  | T | 0.1685  |
| rs117864859 | T | -0.0443 |
| rs79857457  | T | 0.1256  |
| rs143673588 | G | 0.1401  |
| rs11188957  | T | -0.049  |
| rs1869231   | A | -0.0511 |
| rs1703647   | A | -0.0387 |
| rs117096248 | G | -0.1822 |
| rs113212038 | C | -0.0982 |
| rs80143892  | A | 0.194   |
| rs2176138   | G | -0.0324 |
| rs79681417  | A | 0.1398  |
| rs10508286  | A | 0.0373  |
| rs7895842   | C | 0.0314  |
| rs141852280 | T | -0.2159 |
| rs79496047  | A | -0.1029 |
| rs10788091  | T | 0.1463  |
| rs12772394  | A | 0.1062  |
| rs139792688 | C | -0.1223 |
| rs12572450  | T | 0.1477  |
| rs73314270  | C | 0.0819  |
| rs11595324  | C | -0.0806 |
| rs7076299   | G | 0.077   |
| rs112162558 | C | 0.1513  |
| rs113497810 | G | 0.0788  |
| rs139202257 | T | 0.0824  |
| rs7899971   | T | -0.0321 |
| rs61850788  | G | -0.0754 |
| rs67787060  | T | -0.0349 |
| rs116990128 | G | 0.2514  |

|             |   |         |
|-------------|---|---------|
| rs1340244   | T | 0.1096  |
| rs10829475  | C | -0.0479 |
| rs117352223 | A | -0.1932 |
| rs10999728  | A | 0.0386  |
| rs75769061  | G | -0.1482 |
| rs11101799  | T | 0.07    |
| rs4472839   | C | 0.0345  |
| rs113958164 | T | 0.2075  |
| rs79198653  | G | 0.1213  |
| rs139726415 | A | 0.143   |
| rs11258662  | C | 0.1017  |
| rs444386    | G | 0.0331  |
| rs11239301  | A | -0.044  |
| rs4749503   | T | 0.0308  |
| rs75162465  | G | 0.0856  |
| rs17121023  | T | 0.0919  |
| rs34208853  | A | -0.2115 |
| rs36098636  | A | -0.0676 |
| rs138181950 | C | 0.1299  |
| rs1028629   | A | 0.0419  |
| rs117769262 | T | 0.173   |
| rs17700082  | C | -0.0899 |
| rs7920420   | A | -0.0324 |
| rs34785488  | T | 0.1511  |
| rs792728    | G | 0.0302  |
| rs73374274  | A | 0.0591  |
| rs4752713   | A | -0.0849 |
| rs16935342  | G | 0.1267  |
| rs80216393  | G | 0.1109  |
| rs7086626   | T | -0.0301 |
| rs2242422   | T | 0.1531  |
| rs12263533  | G | -0.1994 |
| rs12252542  | G | 0.1555  |
| rs34281994  | G | -0.1069 |
| rs116914541 | G | 0.1591  |
| rs61856713  | C | -0.0507 |
| rs2090746   | T | -0.031  |
| rs113463922 | A | 0.223   |
| rs2577335   | G | -0.0323 |
| rs12220020  | G | -0.068  |
| rs3118956   | G | 0.0432  |
| rs74120126  | T | -0.0949 |
| rs117025236 | A | 0.1479  |
| rs4751144   | T | 0.0327  |
| rs12269364  | A | -0.1248 |
| rs11597931  | G | -0.0414 |
| rs12249390  | T | 0.0462  |



|             |   |         |
|-------------|---|---------|
| rs11819271  | T | 0.1503  |
| rs56365377  | A | 0.1569  |
| rs116866633 | A | 0.1993  |
| rs77251260  | T | 0.2112  |
| rs72809344  | C | 0.096   |
| rs72809598  | A | 0.0969  |
| rs7100096   | G | 0.1055  |
| rs139236357 | A | -0.1622 |
| rs16911752  | C | 0.13    |
| rs7919294   | A | -0.0585 |
| rs11597322  | T | 0.0302  |
| rs11251429  | T | -0.0351 |
| rs11252661  | T | 0.0907  |
| rs11597354  | C | 0.2178  |
| rs2516617   | C | 0.0373  |
| rs7069564   | T | 0.0416  |
| rs72788824  | C | 0.0357  |
| rs61857815  | T | 0.1188  |
| rs7079468   | C | 0.032   |
| rs71475473  | A | -0.1493 |
| rs61863685  | G | 0.1467  |
| rs12249583  | T | 0.1721  |
| rs1864396   | G | -0.1562 |
| rs72806301  | A | 0.0921  |
| rs1892114   | T | -0.0302 |
| rs10736309  | T | -0.131  |
| rs2490283   | G | 0.0908  |
| rs4255473   | C | 0.0334  |
| rs12572201  | A | 0.0589  |
| rs117636561 | A | 0.1715  |
| rs76289004  | G | 0.138   |
| rs10740463  | T | 0.0413  |
| rs11596464  | T | 0.0908  |
| rs118179551 | A | -0.2243 |
| rs11101417  | A | -0.0424 |
| rs61842853  | A | -0.0521 |
| rs11017809  | A | -0.0378 |
| rs16917646  | T | -0.0827 |
| rs11004638  | A | 0.0988  |
| rs11198200  | T | 0.0446  |
| rs4747843   | A | 0.0408  |
| rs56397109  | T | 0.1253  |
| rs7910895   | T | 0.1864  |
| rs12773084  | A | 0.071   |
| rs111545789 | A | 0.135   |
| rs145087672 | A | 0.1411  |
| rs11195957  | T | -0.0611 |

|             |   |         |
|-------------|---|---------|
| rs149383914 | A | 0.1661  |
| rs10905314  | C | 0.0301  |
| rs1715868   | G | 0.0466  |
| rs118101227 | T | -0.1312 |
| rs6480217   | A | 0.064   |
| rs77410127  | T | -0.0837 |
| rs139542040 | C | 0.1152  |
| rs72811531  | T | -0.1359 |
| rs112802157 | T | 0.041   |
| rs10827267  | T | 0.0326  |
| rs34308691  | C | 0.084   |
| rs11591280  | C | 0.0428  |
| rs72765346  | A | 0.0882  |
| rs78607408  | C | 0.1072  |
| rs11004315  | T | -0.045  |
| rs149674827 | T | -0.1357 |
| rs78597793  | T | -0.1816 |
| rs113276452 | G | -0.1453 |
| rs143044156 | T | 0.2341  |
| rs11257421  | G | 0.0504  |
| rs58310420  | G | -0.0397 |
| rs655318    | T | -0.0484 |
| rs17412609  | T | 0.0357  |
| rs2252564   | G | 0.0434  |
| rs78997301  | G | 0.1575  |
| rs7902011   | G | -0.0312 |
| rs7909111   | A | -0.0643 |
| rs2646425   | T | 0.0324  |
| rs112068046 | A | 0.1966  |
| rs7913756   | A | 0.1712  |
| rs77963952  | A | 0.0999  |
| rs10904101  | G | 0.032   |
| rs10762295  | G | 0.0823  |
| rs116867846 | T | 0.1387  |
| rs74595783  | T | 0.1254  |
| rs821950    | T | -0.1011 |
| rs4750020   | G | -0.034  |
| rs6480553   | A | 0.0475  |
| rs150364194 | G | 0.0979  |
| rs7897562   | G | 0.0316  |
| rs61871615  | T | 0.1455  |
| rs1554224   | G | 0.0352  |
| rs72841355  | T | 0.075   |
| rs117715839 | C | 0.2716  |
| rs138454810 | A | 0.1663  |
| rs75791853  | C | -0.1545 |
| rs144252372 | T | 0.1103  |

|             |   |         |
|-------------|---|---------|
| rs12266644  | T | 0.076   |
| rs12766168  | C | 0.0343  |
| rs1937409   | G | -0.0304 |
| rs148022488 | A | 0.0776  |
| rs2454826   | T | 0.0499  |
| rs10823365  | C | -0.0304 |
| rs79580039  | T | 0.1107  |
| rs138204332 | A | 0.0624  |
| rs6584163   | C | 0.0395  |
| rs11002022  | T | 0.0968  |
| rs79907989  | A | 0.1689  |
| rs1815718   | G | 0.0333  |
| rs9423472   | A | 0.0339  |
| rs7071171   | G | 0.0455  |
| rs117619001 | A | -0.1658 |
| rs74849502  | C | 0.0421  |
| rs10826926  | G | 0.1484  |
| rs10997065  | A | 0.046   |
| rs117942522 | A | -0.1242 |
| rs140327229 | G | 0.1299  |
| rs114644689 | T | 0.101   |
| rs72771462  | G | -0.0812 |
| rs11594422  | A | -0.1822 |
| rs10741208  | A | -0.03   |
| rs10508847  | A | -0.0345 |
| rs77224022  | A | -0.0565 |
| rs12266442  | A | -0.116  |
| rs113209609 | G | -0.2169 |
| rs236212    | C | 0.035   |
| rs72814031  | T | 0.0421  |
| rs112418262 | A | -0.1378 |
| rs72810761  | G | 0.0996  |
| rs61874140  | G | 0.1468  |
| rs113262183 | T | -0.2401 |
| rs117275391 | A | -0.2254 |
| rs117377494 | C | -0.1097 |
| rs75444568  | C | 0.0816  |
| rs79897621  | G | 0.1695  |
| rs6597879   | T | 0.0472  |
| rs61840996  | T | 0.1479  |
| rs3793695   | T | -0.0342 |
| rs61866017  | T | -0.0545 |
| rs60829940  | A | 0.0402  |
| rs74545603  | G | -0.1335 |
| rs10994222  | G | 0.064   |
| rs117678654 | A | 0.1081  |
| rs147477337 | T | 0.1256  |

|             |   |         |
|-------------|---|---------|
| rs10794768  | T | -0.0353 |
| rs11257138  | C | 0.0966  |
| rs118044349 | A | 0.1311  |
| rs3750901   | C | -0.0365 |
| rs78130427  | G | -0.0832 |
| rs2814329   | T | 0.0313  |
| rs75852046  | A | -0.1201 |
| rs56221558  | T | -0.1036 |
| rs112721172 | A | -0.2445 |
| rs17221561  | C | 0.0507  |
| rs79909788  | A | 0.0821  |
| rs12766562  | T | -0.0321 |
| rs71475820  | T | 0.0848  |
| rs1935645   | T | 0.1057  |
| rs7896684   | G | 0.0459  |
| rs111426634 | A | 0.1385  |
| rs75741671  | A | 0.131   |
| rs6479692   | T | 0.0296  |
| rs150960896 | A | -0.2131 |
| rs2352099   | C | -0.031  |
| rs117878482 | C | 0.1982  |
| rs2871741   | A | 0.0297  |
| rs1574114   | T | 0.0302  |
| rs72812991  | G | 0.1492  |
| rs112344552 | C | 0.1497  |
| rs7899415   | A | -0.1981 |
| rs117481947 | A | -0.2265 |
| rs6601761   | A | -0.0377 |
| rs112152801 | C | -0.1404 |
| rs4595466   | A | -0.0298 |
| rs1781451   | G | -0.0587 |
| rs79635948  | A | -0.0572 |
| rs2994647   | A | -0.0294 |
| rs16923187  | A | 0.1828  |
| rs12220165  | G | 0.0711  |
| rs10510096  | C | -0.1395 |
| rs150868523 | C | -0.0558 |
| rs7079701   | C | 0.0302  |
| rs7082237   | T | 0.0468  |
| rs35505416  | G | -0.1383 |
| rs117285939 | C | -0.127  |
| rs142170794 | G | 0.2224  |
| rs7912273   | T | 0.0404  |
| rs2476968   | A | 0.0367  |
| rs11012506  | C | -0.0877 |
| rs17651712  | A | 0.0509  |
| rs117064738 | A | 0.1214  |

|             |   |         |
|-------------|---|---------|
| rs147164502 | G | 0.1727  |
| rs115787620 | G | 0.0894  |
| rs12777448  | G | -0.0396 |
| rs77620771  | A | 0.1143  |
| rs1227267   | A | -0.0353 |
| rs78157043  | A | -0.068  |
| rs12358749  | G | 0.0296  |
| rs113031372 | A | -0.1348 |
| rs75674894  | G | 0.1309  |
| rs1972374   | T | 0.0423  |
| rs143048694 | T | 0.0673  |
| rs17415646  | C | 0.0374  |
| rs144969624 | C | 0.1979  |
| rs4746385   | A | -0.0852 |
| rs61867303  | A | 0.1349  |
| rs72772086  | T | 0.2236  |
| rs79747691  | T | 0.0691  |
| rs11254714  | T | -0.1225 |
| rs111342606 | A | 0.1039  |
| rs56052512  | C | 0.0807  |
| rs138097828 | A | 0.0758  |
| rs2152009   | A | -0.0343 |
| rs10826992  | A | 0.0527  |
| rs3218239   | G | 0.142   |
| rs76007938  | C | -0.0675 |
| rs7904536   | C | -0.0303 |
| rs12776070  | T | 0.0941  |
| rs12245981  | T | 0.1238  |
| rs117088611 | G | -0.1327 |
| rs6482373   | C | -0.0725 |
| rs74550188  | A | -0.1194 |
| rs792229    | C | -0.0363 |
| rs72824926  | G | -0.035  |
| rs55738160  | G | -0.086  |
| rs772067    | A | 0.0381  |
| rs6602705   | T | 0.0305  |
| rs79472981  | T | -0.0644 |
| rs2505897   | A | 0.031   |
| rs34679544  | A | -0.1115 |
| rs12252669  | T | -0.1111 |
| rs116843526 | A | 0.1127  |
| rs12767186  | A | -0.0359 |
| rs7895445   | A | 0.0558  |
| rs4748636   | A | 0.1437  |
| rs74555744  | T | -0.2072 |
| rs12354825  | T | 0.1564  |
| rs112029    | T | 0.0365  |

|             |   |         |
|-------------|---|---------|
| rs10788476  | G | -0.0295 |
| rs75345420  | C | -0.0745 |
| rs61869209  | T | -0.0569 |
| rs34759112  | C | -0.0961 |
| rs59733240  | A | -0.1384 |
| rs2944512   | A | 0.1428  |
| rs79076299  | T | -0.0518 |
| rs4918781   | T | 0.0327  |
| rs7076785   | G | -0.0743 |
| rs10902797  | T | 0.0295  |
| rs76616641  | T | -0.1324 |
| rs3006724   | A | 0.1158  |
| rs12573113  | A | 0.0835  |
| rs10829316  | G | 0.0591  |
| rs860626    | G | 0.0349  |
| rs79504766  | G | 0.103   |
| rs111398617 | G | -0.2207 |
| rs11599841  | T | -0.12   |
| rs999551    | T | 0.0293  |
| rs11254515  | T | 0.1893  |
| rs72781358  | A | 0.0723  |
| rs1571026   | G | -0.0428 |
| rs11001067  | C | -0.1832 |
| rs76146537  | T | -0.2365 |
| rs1359363   | T | 0.0313  |
| rs12265088  | T | -0.2014 |
| rs72814045  | C | -0.0599 |
| rs61854741  | A | -0.0899 |
| rs3011631   | G | -0.0724 |
| rs7086244   | G | -0.036  |
| rs2184169   | G | 0.035   |
| rs61865201  | C | -0.1151 |
| rs3763763   | A | -0.0342 |
| rs12221160  | G | -0.0356 |
| rs57605156  | T | 0.1763  |
| rs3897993   | C | -0.041  |
| rs117363783 | G | -0.1312 |
| rs293295    | G | 0.0316  |
| rs34994226  | C | 0.036   |
| rs45479994  | T | 0.1602  |
| rs117297489 | A | -0.2409 |
| rs12257319  | A | 0.042   |
| rs117007417 | T | 0.1241  |
| rs80279699  | C | -0.1032 |
| rs1907740   | G | -0.0295 |
| rs75898963  | A | -0.1652 |
| rs12768991  | T | -0.1906 |

|             |   |         |
|-------------|---|---------|
| rs157994    | G | -0.0428 |
| rs146692078 | A | 0.2379  |
| rs10733993  | T | 0.0341  |
| rs76443646  | T | -0.149  |
| rs61876596  | A | -0.0822 |
| rs2280618   | A | -0.0456 |
| rs59495064  | A | 0.0786  |
| rs4633344   | T | 0.0324  |
| rs4072195   | T | -0.0344 |
| rs6601979   | T | -0.0683 |
| rs61849167  | C | 0.0751  |
| rs113416614 | T | 0.053   |
| rs117512390 | T | 0.1201  |
| rs16929843  | A | -0.0812 |
| rs2688887   | T | -0.0288 |
| rs75260166  | C | 0.1317  |
| rs35338693  | T | 0.0969  |
| rs59666636  | G | 0.1407  |
| rs7075383   | C | 0.0358  |
| rs148524243 | A | -0.157  |
| rs79027600  | T | 0.1782  |
| rs7078266   | G | 0.053   |
| rs4919366   | C | 0.0348  |
| rs2245294   | A | -0.032  |
| rs76082055  | A | -0.1201 |
| rs11101296  | G | -0.1192 |
| rs12242535  | T | -0.0484 |
| rs6602404   | A | -0.0361 |
| rs6601744   | A | -0.0323 |
| rs17490626  | C | 0.043   |
| rs7919682   | T | 0.0294  |
| rs671530    | A | 0.0338  |
| rs7089331   | A | 0.0642  |
| rs72786478  | C | 0.1034  |
| rs1695522   | T | 0.0602  |
| rs75243114  | C | -0.0607 |
| rs79308431  | C | -0.1    |
| rs4277060   | A | 0.0448  |
| rs12251272  | G | 0.0497  |
| rs75293822  | T | -0.1055 |
| rs7072870   | A | -0.0551 |
| rs5007655   | G | -0.0448 |
| rs9804190   | T | -0.0352 |
| rs11001773  | T | -0.1316 |
| rs149397985 | G | 0.1999  |
| rs3998448   | T | 0.0306  |
| rs4317889   | C | 0.0843  |

|             |   |         |
|-------------|---|---------|
| rs7477689   | G | 0.0478  |
| rs148023559 | A | 0.1452  |
| rs2429021   | C | -0.0488 |
| rs3006963   | G | -0.0538 |
| rs12255305  | A | 0.073   |
| rs7068266   | G | 0.0554  |
| rs61831292  | T | -0.0672 |
| rs9651378   | T | 0.0382  |
| rs55749162  | A | -0.1425 |
| rs141747076 | G | 0.208   |
| rs10829654  | A | 0.0445  |
| rs141904401 | G | 0.1903  |
| rs10998922  | A | -0.0371 |
| rs72831370  | T | -0.1254 |
| rs11239295  | A | 0.0619  |
| rs17391799  | T | 0.0445  |
| rs10829532  | G | -0.0389 |
| rs78514908  | T | 0.0808  |
| rs4457708   | T | -0.0358 |
| rs10795753  | A | 0.1528  |
| rs16932709  | A | 0.1131  |
| rs118141156 | G | 0.1801  |
| rs942410    | T | 0.2116  |
| rs75413292  | A | -0.0926 |
| rs144690843 | T | 0.102   |
| rs78261328  | G | 0.0769  |
| rs35198501  | T | 0.0995  |
| rs61872836  | T | -0.0295 |
| rs12358849  | C | 0.0888  |
| rs11812558  | C | -0.066  |
| rs10826308  | G | 0.0343  |
| rs11007822  | A | 0.0289  |
| rs72845134  | G | 0.0722  |
| rs11817632  | A | 0.1305  |
| rs41282858  | T | -0.1253 |
| rs144601736 | A | -0.1483 |
| rs116865715 | A | -0.1078 |
| rs7906084   | T | 0.0295  |
| rs78419329  | A | 0.0883  |
| rs112172947 | G | 0.21    |
| rs78350705  | G | 0.0923  |
| rs150736114 | A | 0.1072  |
| rs142515313 | A | 0.1156  |
| rs11592681  | G | 0.0703  |
| rs11200369  | T | -0.0312 |
| rs111287017 | C | 0.1695  |
| rs11254854  | T | -0.0355 |



|             |   |         |
|-------------|---|---------|
| rs118119660 | T | -0.1078 |
| rs10764214  | A | -0.0325 |
| rs7079953   | A | 0.0289  |
| rs11188604  | G | 0.031   |
| rs6482131   | T | 0.0865  |
| rs4370821   | A | -0.0415 |
| rs10444136  | G | 0.0289  |
| rs17330824  | C | 0.0442  |
| rs1931713   | A | 0.0341  |
| rs7908237   | G | -0.0296 |
| rs12252633  | G | -0.0661 |
| rs55676295  | A | -0.0693 |
| rs7091756   | T | 0.1064  |
| rs78937374  | G | 0.0777  |
| rs10906211  | G | 0.1514  |
| rs2817649   | C | 0.0478  |
| rs117603284 | A | -0.1165 |
| rs12412796  | T | 0.0304  |
| rs76883427  | C | -0.1134 |
| rs140472570 | A | 0.1197  |
| rs2819213   | C | -0.0814 |
| rs117222919 | C | 0.1243  |
| rs11202700  | G | -0.0479 |
| rs7914881   | C | -0.0303 |
| rs12358036  | A | 0.1765  |
| rs140003691 | T | 0.1337  |
| rs140501686 | T | 0.1199  |
| rs78905792  | T | 0.0419  |
| rs17238769  | A | -0.0658 |
| rs1318853   | C | 0.0324  |
| rs117568395 | T | -0.1417 |
| rs118089656 | A | 0.1955  |
| rs117345836 | G | 0.0968  |
| rs80290838  | A | 0.1665  |
| rs34833894  | A | 0.1067  |
| rs78778312  | T | 0.1759  |
| rs77072151  | G | -0.1178 |
| rs1782647   | G | -0.0537 |
| rs116888772 | T | 0.2169  |
| rs11813654  | C | 0.0742  |
| rs148399083 | G | -0.1274 |
| rs11596275  | G | 0.0573  |
| rs1341677   | C | -0.045  |
| rs79699129  | C | -0.1914 |
| rs2148188   | A | 0.0277  |
| rs1541009   | A | 0.0464  |
| rs4962360   | T | -0.0323 |

|             |   |         |
|-------------|---|---------|
| rs11813523  | G | -0.1562 |
| rs17108375  | G | -0.0493 |
| rs2657530   | A | -0.0394 |
| rs7091012   | A | 0.0284  |
| rs77999677  | C | 0.0568  |
| rs11812951  | A | 0.1492  |
| rs12767504  | G | -0.0371 |
| rs1947758   | C | -0.038  |
| rs12770570  | C | 0.0898  |
| rs946328    | T | -0.0347 |
| rs117995870 | G | -0.2204 |
| rs112640176 | T | 0.2036  |
| rs12766194  | G | -0.0303 |
| rs149090465 | A | -0.1081 |
| rs71472878  | G | -0.1617 |
| rs34307685  | T | 0.0674  |
| rs2794427   | G | 0.0551  |
| rs7908389   | T | -0.0281 |
| rs1889066   | A | -0.0486 |
| rs7077862   | C | -0.1273 |
| rs12412797  | A | 0.0613  |
| rs35729454  | A | 0.086   |
| rs12416659  | T | 0.1523  |
| rs77295559  | T | 0.0704  |
| rs3927917   | C | 0.0351  |
| rs11511191  | T | -0.1693 |
| rs4409767   | C | -0.0287 |
| rs11253529  | A | 0.1714  |
| rs56126131  | A | -0.038  |
| rs35028747  | T | -0.0339 |
| rs1317833   | G | 0.0296  |
| rs17125154  | A | -0.2162 |
| rs7923647   | C | 0.0448  |
| rs12572639  | G | -0.0629 |
| rs11195188  | A | 0.035   |
| rs72837795  | G | 0.0647  |
| rs35483028  | A | 0.0483  |
| rs17465422  | A | -0.0966 |
| rs71481947  | G | 0.2191  |
| rs6599666   | G | 0.0279  |
| rs1317462   | T | 0.0302  |
| rs17097692  | G | 0.0426  |
| rs140249230 | A | -0.1806 |
| rs76513663  | A | -0.0643 |
| rs943448    | G | -0.1109 |
| rs10740060  | A | 0.0295  |
| rs2217726   | A | 0.0283  |

|             |   |         |
|-------------|---|---------|
| rs77352654  | C | -0.0674 |
| rs7478269   | C | 0.0866  |
| rs7075831   | T | -0.0565 |
| rs112114475 | A | 0.0878  |
| rs9424075   | T | 0.058   |
| rs118164457 | C | 0.0871  |
| rs17154110  | C | -0.0326 |
| rs72859872  | T | 0.0797  |
| rs1150041   | A | 0.0976  |
| rs2495707   | G | -0.0332 |
| rs148471253 | T | 0.1471  |
| rs141706337 | T | -0.0964 |
| rs10751898  | T | -0.0288 |
| rs7904875   | G | 0.0578  |
| rs12246442  | T | 0.0706  |
| rs10741267  | C | -0.0354 |
| rs7099165   | T | -0.1008 |
| rs149806869 | A | 0.1426  |
| rs1655155   | C | -0.0297 |
| rs1228652   | T | -0.0444 |
| rs28406566  | A | 0.0484  |
| rs11592545  | A | -0.0405 |
| rs881406    | A | -0.0395 |
| rs9421142   | A | 0.0329  |
| rs117066403 | T | -0.1671 |
| rs116900756 | C | 0.1675  |
| rs4747107   | C | 0.0318  |
| rs149774571 | C | -0.2364 |
| rs116932201 | A | 0.1042  |
| rs77445167  | A | 0.1712  |
| rs143817554 | C | 0.0785  |
| rs4880425   | G | -0.0356 |
| rs7903660   | G | -0.0286 |
| rs11599228  | A | 0.0721  |
| rs1926208   | T | 0.0323  |
| rs76850842  | A | -0.0602 |
| rs7081622   | T | -0.0866 |
| rs77874356  | T | -0.0687 |
| rs113945342 | T | -0.0356 |
| rs76834602  | T | -0.0569 |
| rs7894450   | T | -0.0487 |
| rs113217789 | A | -0.1229 |
| rs151137139 | G | -0.148  |
| rs11195650  | A | 0.0977  |
| rs11245468  | C | 0.1259  |
| rs9919401   | C | -0.0276 |
| rs1247445   | A | -0.0561 |

|             |   |         |
|-------------|---|---------|
| rs34260939  | T | 0.1618  |
| rs76713186  | T | -0.1098 |
| rs1930168   | T | 0.03    |
| rs35803579  | T | 0.097   |
| rs76265313  | T | -0.0854 |
| rs17875481  | G | -0.1456 |
| rs72834812  | T | 0.0979  |
| rs147477844 | A | -0.1677 |
| rs73310011  | A | 0.1     |
| rs12259375  | T | 0.0608  |
| rs11014672  | T | 0.0853  |
| rs61853594  | G | 0.0864  |
| rs146892309 | A | -0.0968 |
| rs10884436  | C | -0.0295 |
| rs55863175  | A | 0.0649  |
| rs10906150  | C | -0.0372 |
| rs79948448  | G | 0.1193  |
| rs3824685   | G | 0.0352  |
| rs1052556   | G | 0.0489  |
| rs147092384 | A | 0.1104  |
| rs2230271   | T | -0.1424 |
| rs4748317   | T | 0.0385  |
| rs148842292 | G | 0.1457  |
| rs17710656  | G | -0.0694 |
| rs56200210  | C | 0.0641  |
| rs76160885  | C | 0.1151  |
| rs149592602 | T | -0.123  |
| rs11200176  | C | -0.0295 |
| rs72810408  | A | 0.1268  |
| rs2895503   | G | -0.0654 |
| rs293244    | A | -0.0295 |
| rs7083336   | C | -0.0392 |
| rs4880769   | A | 0.029   |
| rs140952579 | T | -0.1636 |
| rs7082627   | A | 0.0512  |
| rs702999    | C | -0.0665 |
| rs56064086  | G | 0.1286  |
| rs143561662 | A | 0.1696  |
| rs117070777 | T | -0.0559 |
| rs76535435  | T | -0.1448 |
| rs75768910  | T | 0.1374  |
| rs61868812  | G | -0.1137 |
| rs12256152  | C | -0.1661 |
| rs67484203  | T | -0.063  |
| rs7907084   | T | 0.0298  |
| rs4750545   | C | -0.0362 |
| rs4750660   | C | 0.1261  |

|             |   |         |
|-------------|---|---------|
| rs34648800  | G | -0.0595 |
| rs9633756   | T | 0.0284  |
| rs75971605  | A | 0.1562  |
| rs11002602  | A | -0.2024 |
| rs1889522   | G | 0.0311  |
| rs5030935   | T | -0.0311 |
| rs1149952   | C | 0.0357  |
| rs17749022  | A | -0.0679 |
| rs1359728   | T | 0.0353  |
| rs75258021  | C | 0.1802  |
| rs61867242  | A | 0.204   |
| rs2763365   | T | -0.0299 |
| rs148558235 | T | 0.2273  |
| rs145142671 | T | 0.1134  |
| rs12571519  | C | 0.0474  |
| rs57732349  | T | -0.0428 |
| rs11199449  | C | 0.0813  |
| rs7094561   | G | -0.0317 |
| rs72786198  | G | 0.0405  |
| rs11593013  | A | 0.1138  |
| rs34071918  | T | 0.0748  |
| rs61833967  | T | -0.0376 |
| rs143797870 | T | 0.1852  |
| rs4880406   | G | 0.0678  |
| rs2295874   | T | -0.0455 |
| rs7914019   | A | -0.0315 |
| rs2724768   | T | -0.065  |
| rs1385094   | T | 0.0552  |
| rs36049124  | T | 0.1779  |
| rs7914203   | A | 0.0302  |
| rs77889224  | A | -0.1241 |
| rs10994294  | T | 0.0782  |
| rs2812535   | G | -0.0324 |
| rs10786376  | T | 0.0425  |
| rs117535965 | A | -0.1319 |
| rs28540084  | C | 0.0422  |
| rs117960290 | C | -0.2086 |
| rs138090950 | A | 0.1749  |
| rs1061498   | A | -0.0438 |
| rs4918625   | C | -0.0289 |
| rs3763958   | C | 0.0359  |
| rs117423744 | C | 0.2087  |
| rs78550424  | T | 0.0776  |
| rs7075391   | A | 0.0792  |
| rs3780905   | T | -0.0846 |
| rs11599737  | A | -0.0578 |
| rs59759821  | A | -0.1067 |

|             |   |         |
|-------------|---|---------|
| rs79490543  | G | -0.0693 |
| rs4750844   | C | 0.0324  |
| rs1471244   | A | 0.0853  |
| rs4747112   | T | 0.0521  |
| rs1766705   | G | -0.0523 |
| rs7086017   | A | -0.1001 |
| rs11591939  | C | -0.0299 |
| rs10822305  | G | -0.0285 |
| rs686374    | A | 0.0284  |
| rs61854352  | G | 0.0619  |
| rs12184367  | C | -0.071  |
| rs11005757  | T | -0.0854 |
| rs17092124  | G | -0.0297 |
| rs1970005   | T | -0.0409 |
| rs149014728 | A | 0.1402  |
| rs145299861 | G | -0.0954 |
| rs12415320  | G | 0.0866  |
| rs41513344  | C | -0.0658 |
| rs11199775  | C | -0.0383 |
| rs79879903  | G | -0.1071 |
| rs1252895   | C | -0.0304 |
| rs79964517  | T | -0.1344 |
| rs145167640 | T | -0.1407 |
| rs12773972  | G | -0.0337 |
| rs7073799   | A | -0.0357 |
| rs77781878  | G | 0.2037  |
| rs79428805  | T | 0.2251  |
| rs74774740  | A | -0.066  |
| rs117235615 | C | 0.1     |
| rs12255502  | A | 0.1013  |
| rs11597220  | A | 0.035   |
| rs472576    | C | 0.0323  |
| rs61831876  | G | 0.2369  |
| rs112367431 | A | 0.1816  |
| rs17104061  | A | -0.0465 |
| rs7903372   | G | -0.0717 |
| rs144617846 | C | 0.1727  |
| rs140891324 | A | -0.2095 |
| rs1907896   | C | 0.0352  |
| rs999965    | T | 0.0288  |
| rs4076524   | A | 0.0295  |
| rs10762702  | A | -0.0324 |
| rs140585884 | C | -0.1442 |
| rs28696905  | A | -0.0384 |
| rs12262150  | A | -0.16   |
| rs75707914  | G | -0.1368 |
| rs117473704 | A | 0.1981  |

|             |   |         |
|-------------|---|---------|
| rs117044865 | C | 0.0584  |
| rs61235100  | T | 0.1485  |
| rs34539403  | C | -0.0536 |
| rs78361904  | C | 0.1706  |
| rs7078097   | T | 0.0423  |
| rs78909097  | T | -0.0732 |
| rs45437091  | G | -0.1636 |
| rs73256450  | T | -0.074  |
| rs76200555  | C | 0.1028  |
| rs12415964  | C | -0.0619 |
| rs11013364  | G | 0.0606  |
| rs76475442  | G | -0.0781 |
| rs74123805  | C | -0.0762 |
| rs2377520   | T | 0.0314  |
| rs149135216 | G | 0.2668  |
| rs55727850  | T | 0.1318  |
| rs142485569 | G | 0.0971  |
| rs2065092   | T | 0.0506  |
| rs76543381  | T | 0.0755  |
| rs75625702  | T | 0.1599  |
| rs4570487   | A | 0.0322  |
| rs4342964   | T | 0.0335  |
| rs11257354  | A | -0.1059 |
| rs290488    | G | -0.073  |
| rs60659831  | T | -0.0334 |
| rs696206    | G | -0.0704 |
| rs75722299  | T | 0.0661  |
| rs4750156   | A | 0.1829  |
| rs844111    | A | 0.1012  |
| rs79419861  | T | -0.1326 |
| rs139980414 | A | 0.0752  |
| rs118158710 | C | 0.1276  |
| rs4242785   | A | -0.0323 |
| rs10998751  | C | -0.0411 |
| rs117125491 | T | -0.1022 |
| rs12219448  | G | 0.0439  |
| rs1691915   | A | 0.0338  |
| rs16916848  | A | -0.0968 |
| rs72835540  | A | 0.0704  |
| rs61844278  | G | 0.1024  |
| rs12252023  | T | -0.1376 |
| rs10736310  | G | 0.0279  |
| rs899865    | C | 0.0305  |
| rs498671    | C | 0.0338  |
| rs12571004  | T | -0.0483 |
| rs7067968   | G | 0.0283  |
| rs2451472   | G | 0.0304  |

|             |   |         |
|-------------|---|---------|
| rs141070543 | A | -0.0926 |
| rs7074283   | T | -0.1947 |
| rs61868714  | A | -0.0496 |
| rs118019352 | A | 0.1244  |
| rs1815520   | T | 0.0492  |
| rs10829494  | T | -0.0453 |
| rs75586882  | A | 0.1094  |
| rs116963381 | T | -0.0675 |
| rs2788300   | A | 0.0381  |
| rs117908214 | T | -0.165  |
| rs1871619   | G | 0.0308  |
| rs117441197 | C | -0.2152 |
| rs72816125  | C | 0.1504  |
| rs144955356 | T | 0.1226  |
| rs10466158  | C | -0.0324 |
| rs111982228 | G | 0.1057  |
| rs6482833   | T | 0.0626  |
| rs112758031 | T | 0.1313  |
| rs76028194  | T | 0.1707  |
| rs73345214  | T | 0.0951  |
| rs74540070  | G | -0.0858 |
| rs146173736 | C | -0.1238 |
| rs11596197  | A | 0.0658  |
| rs114428986 | G | 0.1679  |
| rs61861012  | G | 0.1197  |
| rs78456068  | A | 0.1707  |
| rs12241688  | T | 0.0886  |
| rs201082    | A | -0.0375 |
| rs1628107   | C | 0.0276  |
| rs138061716 | G | -0.1514 |
| rs75613380  | A | -0.0441 |
| rs17483623  | G | -0.0325 |
| rs145480637 | T | -0.1104 |
| rs17009575  | C | 0.0328  |
| rs10997343  | G | 0.0814  |
| rs10899968  | G | -0.033  |
| rs756322    | C | -0.058  |
| rs2265778   | T | -0.0302 |
| rs1771632   | A | 0.0883  |
| rs79589125  | T | 0.1347  |
| rs3014187   | A | 0.0358  |
| rs1172480   | T | 0.0298  |
| rs72790138  | G | 0.1915  |
| rs4881140   | T | -0.0399 |
| rs72837877  | T | 0.1065  |
| rs61848904  | A | -0.1011 |
| rs4447096   | C | -0.039  |



|             |   |         |
|-------------|---|---------|
| rs2398192   | C | -0.0309 |
| rs117225132 | A | 0.2419  |
| rs11258367  | G | 0.1238  |
| rs17885600  | T | 0.0999  |
| rs1034024   | C | -0.0323 |
| rs12784536  | G | -0.0379 |
| rs139675989 | G | -0.1676 |
| rs117621955 | T | -0.2042 |
| rs912837    | G | -0.0484 |
| rs7895980   | A | -0.0352 |
| rs139720915 | G | 0.1231  |
| rs148830115 | A | -0.116  |
| rs2504246   | G | -0.0605 |
| rs117546928 | C | -0.1628 |
| rs10998273  | C | 0.0686  |
| rs145720640 | G | 0.0422  |
| rs7079929   | A | 0.0889  |
| rs11599686  | A | 0.0509  |
| rs4933897   | T | -0.0515 |
| rs56136724  | T | -0.0348 |
| rs12772038  | G | -0.039  |
| rs2924292   | A | 0.0357  |
| rs17454621  | C | 0.0744  |
| rs77740418  | G | 0.0471  |
| rs113805169 | A | -0.0568 |
| rs7088823   | G | -0.027  |
| rs1766264   | T | -0.1516 |
| rs17331221  | A | 0.0687  |
| rs117381701 | T | 0.1679  |
| rs117348960 | A | 0.2173  |
| rs117471896 | A | 0.136   |
| rs7082704   | T | 0.0339  |
| rs914488    | T | -0.1033 |
| rs10996575  | T | -0.0276 |
| rs11014536  | T | -0.0588 |
| rs11238779  | A | 0.0688  |
| rs149461830 | T | -0.0751 |
| rs6480142   | G | -0.0384 |
| rs74494383  | A | 0.1927  |
| rs35663918  | T | -0.0678 |
| rs34605650  | A | -0.1133 |
| rs11010241  | T | -0.0309 |
| rs61862860  | T | 0.0829  |
| rs12570655  | T | -0.0646 |
| rs10824739  | T | -0.0315 |
| rs73389128  | A | 0.1759  |
| rs72795508  | G | -0.1392 |

|             |   |         |
|-------------|---|---------|
| rs10400011  | A | -0.0305 |
| rs143655478 | G | -0.142  |
| rs1676712   | G | -0.0583 |
| rs1925642   | C | 0.0405  |
| rs11192484  | A | -0.066  |
| rs151041218 | G | 0.2773  |
| rs11257492  | C | 0.1308  |
| rs2388183   | G | 0.0364  |
| rs12570317  | T | -0.1365 |
| rs3136619   | G | 0.0345  |
| rs16929708  | G | 0.1045  |
| rs76015132  | A | -0.1108 |
| rs55722426  | T | -0.0544 |
| rs72837991  | G | 0.0998  |
| rs77782465  | G | -0.0416 |
| rs72804530  | T | 0.1056  |
| rs1898094   | G | 0.0469  |
| rs80056023  | A | 0.1203  |
| rs10827167  | T | 0.03    |
| rs955289    | T | 0.0288  |
| rs74864258  | G | 0.1666  |
| rs75149842  | C | 0.1648  |
| rs1543691   | T | 0.0435  |
| rs72791566  | T | 0.1302  |
| rs117200527 | T | 0.0732  |
| rs11595318  | T | 0.0812  |
| rs140350519 | T | 0.1674  |
| rs118092471 | C | -0.1469 |
| rs117593963 | A | -0.1071 |
| rs11592104  | G | 0.0548  |
| rs4131743   | A | -0.0359 |
| rs3850690   | G | -0.0739 |
| rs75170649  | G | 0.0531  |
| rs34094323  | A | 0.0681  |
| rs58855815  | C | 0.0483  |
| rs112865701 | C | 0.0747  |
| rs7922449   | T | 0.0323  |
| rs35499719  | C | -0.0443 |
| rs2907537   | G | 0.1547  |
| rs10904015  | G | -0.0488 |
| rs10160070  | T | 0.0339  |
| rs111686952 | G | -0.1335 |
| rs10788706  | G | 0.0334  |
| rs113610170 | A | -0.17   |
| rs11016163  | A | 0.0442  |
| rs77191591  | C | 0.1335  |
| rs11238987  | A | 0.0847  |

|             |   |         |
|-------------|---|---------|
| rs4242711   | G | -0.1015 |
| rs12241804  | C | -0.0514 |
| rs117440785 | G | 0.104   |
| rs61858421  | C | 0.2029  |
| rs75485744  | T | -0.0685 |
| rs75027886  | C | 0.0964  |
| rs2935651   | T | -0.0298 |
| rs117436931 | T | -0.158  |
| rs4747358   | T | 0.0299  |
| rs822079    | C | -0.0287 |
| rs11012565  | C | -0.1277 |
| rs12783187  | A | 0.1406  |
| rs61178403  | A | 0.173   |
| rs9651499   | G | -0.0439 |
| rs1227743   | T | 0.0552  |
| rs141868076 | A | -0.194  |
| rs1538680   | A | -0.0304 |
| rs74593593  | C | -0.1071 |
| rs72847518  | C | -0.1058 |
| rs11599770  | T | 0.1468  |
| rs79436374  | T | 0.0708  |
| rs786392    | G | -0.0283 |
| rs150475355 | G | 0.2267  |
| rs78832804  | G | 0.2662  |
| rs77098141  | G | -0.0541 |
| rs141705561 | C | -0.1038 |
| rs2492448   | A | -0.0292 |
| rs2275619   | G | -0.0278 |
| rs76631414  | T | 0.1844  |
| rs112330480 | C | -0.1356 |
| rs117833151 | A | -0.121  |
| rs11202687  | C | -0.043  |
| rs80193862  | A | 0.1477  |
| rs112739730 | T | 0.1075  |
| rs73286667  | T | -0.1382 |
| rs7092164   | T | -0.0327 |
| rs111838584 | C | -0.1943 |
| rs12264477  | C | -0.0311 |
| rs7898560   | A | 0.0337  |
| rs11189259  | G | -0.0371 |
| rs10901664  | G | -0.0281 |
| rs10795171  | G | 0.0276  |
| rs59598962  | T | 0.0538  |
| rs2398002   | G | 0.0266  |
| rs3740236   | G | 0.0488  |
| rs55672249  | C | -0.0565 |
| rs17557767  | T | 0.1538  |

|             |   |         |
|-------------|---|---------|
| rs117944826 | C | -0.0975 |
| rs72773851  | C | 0.1751  |
| rs7083064   | G | -0.029  |
| rs9333182   | A | -0.0558 |
| rs77044322  | T | 0.052   |
| rs117744755 | A | 0.0996  |
| rs11251021  | T | -0.0368 |
| rs72834018  | A | -0.1172 |
| rs7070432   | A | -0.0303 |
| rs7079163   | G | 0.0271  |
| rs11013842  | G | -0.0275 |
| rs12253328  | A | 0.0776  |
| rs78902427  | G | -0.1172 |
| rs117995649 | T | -0.2333 |
| rs72846162  | G | -0.0689 |
| rs117819218 | A | 0.0895  |
| rs61868680  | T | -0.0534 |
| rs6585507   | G | 0.0298  |
| rs72775256  | T | 0.0512  |
| rs7920579   | G | -0.0445 |
| rs950041    | G | -0.2188 |
| rs78350309  | G | -0.185  |
| rs11018217  | T | 0.0305  |
| rs111812989 | C | -0.1373 |
| rs76786943  | C | -0.1239 |
| rs4934433   | C | 0.0298  |
| rs323001    | G | 0.0312  |
| rs12412801  | T | 0.1801  |
| rs7921719   | G | -0.0624 |
| rs4751323   | C | 0.0439  |
| rs10763854  | C | 0.0298  |
| rs61856566  | G | -0.0509 |
| rs766031    | T | 0.0323  |
| rs10751864  | A | 0.047   |
| rs118089014 | T | -0.1449 |
| rs7084191   | T | -0.034  |
| rs6481608   | C | 0.1148  |
| rs12360332  | T | 0.0511  |
| rs7906204   | A | 0.0559  |
| rs11190365  | G | 0.0975  |
| rs12356218  | A | -0.0341 |
| rs72778680  | G | -0.0687 |
| rs34723593  | T | 0.1731  |
| rs10794040  | A | 0.0515  |
| rs749165    | G | 0.0905  |
| rs142348442 | T | -0.1983 |
| rs148995128 | T | 0.1729  |

|             |   |         |
|-------------|---|---------|
| rs10824735  | T | 0.0328  |
| rs7893901   | A | -0.0455 |
| rs927894    | A | 0.0714  |
| rs11597510  | C | -0.0369 |
| rs11238804  | T | -0.1057 |
| rs12761607  | C | -0.0285 |
| rs71479215  | A | 0.1567  |
| rs7900899   | A | 0.0274  |
| rs142873554 | A | 0.1986  |
| rs787728    | T | -0.0315 |
| rs145241663 | G | 0.1248  |
| rs17666904  | T | 0.0546  |
| rs16927689  | A | 0.0945  |
| rs78579527  | C | 0.158   |
| rs10509392  | G | 0.0339  |
| rs1102217   | T | 0.071   |
| rs11017928  | A | -0.0444 |
| rs7902364   | A | -0.0409 |
| rs2176377   | A | 0.0312  |
| rs79070979  | T | -0.1391 |
| rs112042567 | A | 0.0479  |
| rs12220360  | T | -0.0417 |
| rs74440195  | C | 0.1734  |
| rs145123647 | T | 0.1414  |
| rs79892424  | C | 0.0351  |
| rs2388587   | A | 0.0354  |
| rs7079807   | A | -0.0332 |
| rs71490399  | T | -0.2142 |
| rs76256623  | A | -0.1814 |
| rs117718536 | T | -0.1233 |
| rs1513659   | C | -0.0275 |
| rs138886201 | G | -0.1503 |
| rs11189358  | G | 0.0608  |
| rs11813798  | A | 0.0412  |
| rs75690009  | A | -0.1108 |
| rs1227052   | C | 0.0333  |
| rs78791928  | C | -0.0827 |
| rs2243915   | C | 0.0308  |
| rs111617068 | G | -0.0795 |
| rs11256422  | T | 0.074   |
| rs4980259   | G | -0.0314 |
| rs2994634   | A | 0.034   |
| rs118023717 | T | 0.1156  |
| rs146844765 | G | -0.1991 |
| rs77984972  | C | 0.1893  |
| rs676302    | G | 0.0358  |
| rs78962285  | A | -0.1438 |

|             |   |         |
|-------------|---|---------|
| rs414871    | C | 0.0357  |
| rs79236728  | A | -0.0337 |
| rs1534627   | C | -0.0274 |
| rs117253389 | A | 0.1227  |
| rs12768505  | T | 0.0513  |
| rs7070121   | G | 0.0727  |
| rs143206673 | G | -0.0994 |
| rs79454945  | C | 0.0771  |
| rs80020510  | C | 0.1996  |
| rs72797929  | C | -0.1071 |
| rs10999658  | C | 0.0284  |
| rs35198330  | G | 0.1114  |
| rs141044629 | A | -0.1847 |
| rs2664283   | T | 0.0671  |
| rs12569494  | A | 0.0419  |
| rs2653528   | G | 0.0603  |
| rs41281977  | T | -0.0677 |
| rs35490714  | T | -0.1703 |
| rs78622406  | T | 0.1175  |
| rs3981238   | G | -0.1494 |
| rs4143766   | C | -0.0285 |
| rs1260622   | A | 0.1703  |
| rs11201870  | A | 0.034   |
| rs7908610   | A | -0.1714 |
| rs12762735  | A | -0.0282 |
| rs150819509 | A | 0.1769  |
| rs140408552 | G | 0.1113  |
| rs148317521 | G | 0.2008  |
| rs34434952  | A | 0.0498  |
| rs117414706 | A | 0.0805  |
| rs74872215  | T | 0.1204  |
| rs76327008  | A | -0.1007 |
| rs11013321  | G | 0.0278  |
| rs6593453   | A | -0.1312 |
| rs77935666  | A | -0.1078 |
| rs10748886  | G | -0.0419 |
| rs12769978  | G | -0.0381 |
| rs80351942  | T | -0.141  |
| rs17833473  | C | 0.1024  |
| rs117408676 | T | 0.1502  |
| rs79718865  | C | 0.1068  |
| rs10823785  | A | -0.0269 |
| rs146604826 | T | 0.1024  |
| rs72830729  | G | 0.0791  |
| rs773939    | A | 0.1798  |
| rs11252435  | A | -0.0484 |
| rs10881910  | A | -0.0596 |

|             |   |         |
|-------------|---|---------|
| rs74455264  | G | 0.1389  |
| rs10883873  | G | 0.0482  |
| rs75114935  | A | -0.0887 |
| rs78663664  | C | -0.0762 |
| rs148425740 | G | 0.1474  |
| rs71475881  | A | 0.0785  |
| rs61865282  | C | -0.0493 |
| rs34764480  | T | 0.0684  |
| rs76932066  | A | 0.0773  |
| rs111748137 | T | -0.2406 |
| rs116869415 | G | 0.1032  |
| rs4934867   | A | -0.1778 |
| rs117872282 | T | 0.1522  |
| rs10994497  | T | 0.0363  |
| rs116898437 | A | -0.1027 |
| rs17295738  | G | -0.033  |
| rs772016    | C | 0.0287  |
| rs56333360  | G | -0.1728 |
| rs7896393   | G | -0.0307 |
| rs10786222  | C | 0.03    |
| rs35058428  | G | 0.0559  |
| rs11592647  | G | -0.0352 |
| rs2445482   | T | 0.0893  |
| rs1679507   | A | 0.144   |
| rs35796     | T | 0.1396  |
| rs4750265   | A | -0.1032 |
| rs2932890   | T | -0.0703 |
| rs6599697   | T | 0.0427  |
| rs4751282   | C | -0.0276 |
| rs560034    | C | 0.0298  |
| rs75707075  | G | -0.1545 |
| rs11257343  | C | 0.0445  |
| rs7083779   | C | -0.0276 |
| rs117146098 | T | 0.1179  |
| rs72799021  | T | -0.082  |
| rs141731843 | C | -0.1332 |
| rs7075678   | C | 0.0317  |
| rs17333867  | C | 0.0432  |
| rs7069208   | G | 0.037   |
| rs76664225  | A | 0.1286  |
| rs117310576 | C | 0.1043  |
| rs115536361 | T | -0.0792 |
| rs10795997  | T | -0.0284 |
| rs11003403  | G | -0.028  |
| rs61847287  | C | 0.0521  |
| rs12357482  | C | 0.0512  |
| rs10795065  | A | 0.0315  |

|             |   |         |
|-------------|---|---------|
| rs73379905  | A | -0.0471 |
| rs144548322 | T | -0.1106 |
| rs77754128  | T | 0.1556  |
| rs12356236  | G | 0.0628  |
| rs117618645 | A | -0.1335 |
| rs1644419   | G | -0.0367 |
| rs117711580 | G | 0.1452  |
| rs117479624 | G | -0.0966 |
| rs2601115   | A | 0.0364  |
| rs10999863  | C | 0.0442  |
| rs71479618  | A | -0.1757 |
| rs74673398  | A | 0.0877  |
| rs139673025 | C | 0.2047  |
| rs1751913   | T | 0.0336  |
| rs117323923 | G | 0.104   |
| rs12254063  | G | 0.0588  |
| rs3913911   | A | -0.0674 |
| rs147778792 | G | -0.2431 |
| rs2453265   | A | -0.0277 |
| rs117979783 | A | -0.0905 |
| rs71486638  | G | -0.1111 |
| rs151089409 | G | -0.1344 |
| rs12778215  | T | -0.0293 |
| rs72792028  | G | 0.0551  |
| rs12359354  | C | -0.0503 |
| rs117725695 | T | 0.1623  |
| rs11190725  | T | -0.0761 |
| rs117871362 | A | -0.1036 |
| rs12254249  | T | 0.0288  |
| rs4752701   | G | 0.1503  |
| rs61871574  | T | 0.092   |
| rs7898162   | A | 0.0344  |
| rs12766956  | G | 0.0312  |
| rs11815733  | C | 0.0365  |
| rs117335323 | A | -0.1062 |
| rs607069    | A | 0.0912  |
| rs117008712 | T | 0.116   |
| rs10764448  | C | -0.0337 |
| rs3026710   | T | -0.049  |
| rs78937152  | A | 0.0539  |
| rs12415585  | C | -0.0554 |
| rs55723754  | A | 0.0381  |
| rs10787162  | C | 0.2557  |
| rs59102191  | A | -0.0381 |
| rs11599214  | G | -0.0415 |
| rs12247162  | T | -0.076  |
| rs72772830  | T | 0.0791  |



|             |   |         |
|-------------|---|---------|
| rs1998822   | G | -0.0295 |
| rs4979769   | T | -0.0422 |
| rs4498920   | A | 0.1062  |
| rs12359879  | T | -0.0504 |
| rs10824324  | C | 0.0957  |
| rs11191615  | A | -0.1129 |
| rs8181429   | C | 0.0364  |
| rs1540957   | C | -0.0405 |
| rs7072223   | C | 0.0263  |
| rs2127897   | T | -0.1138 |
| rs76674739  | A | -0.0995 |
| rs10763963  | A | 0.0337  |
| rs72846931  | A | 0.1302  |
| rs3895536   | T | 0.0307  |
| rs12249326  | T | 0.0323  |
| rs79196159  | G | 0.2594  |
| rs77209128  | G | 0.0428  |
| rs7096199   | C | 0.0484  |
| rs17245311  | G | 0.0895  |
| rs55701754  | C | 0.0357  |
| rs17145614  | G | -0.0622 |
| rs10857595  | C | 0.0265  |
| rs140263273 | T | 0.0722  |
| rs117344617 | G | 0.1283  |
| rs11200745  | C | 0.0502  |
| rs12766693  | T | -0.0352 |
| rs11008503  | C | -0.0471 |
| rs10508250  | T | -0.0505 |
| rs117330360 | A | -0.1171 |
| rs4962634   | A | -0.0272 |
| rs58870904  | T | 0.0377  |
| rs74153509  | C | 0.1142  |
| rs1699878   | C | -0.1961 |
| rs118087137 | C | -0.1754 |
| rs10764972  | T | -0.0286 |
| rs4746912   | G | 0.0316  |
| rs141096093 | C | 0.2114  |
| rs4838767   | C | 0.1633  |
| rs7082268   | A | -0.0378 |
| rs2765491   | T | -0.0517 |
| rs75353346  | T | 0.0863  |
| rs34098396  | T | -0.0737 |
| rs115841010 | C | 0.0509  |
| rs140693784 | A | -0.0751 |
| rs78690104  | G | 0.1004  |
| rs6480710   | T | 0.1669  |
| rs1417638   | T | 0.0272  |

|             |   |         |
|-------------|---|---------|
| rs11002234  | G | -0.032  |
| rs10751760  | A | 0.0273  |
| rs45604531  | A | -0.2121 |
| rs35192179  | G | 0.1577  |
| rs12780499  | T | -0.0657 |
| rs1495672   | C | 0.0561  |
| rs7909797   | A | -0.0262 |
| rs61866616  | G | -0.1136 |
| rs118126704 | A | 0.1193  |
| rs7099894   | C | 0.0278  |
| rs7894606   | A | -0.0405 |
| rs142842456 | T | 0.1392  |
| rs10752065  | A | 0.0787  |
| rs7072999   | T | 0.0285  |
| rs1674898   | C | 0.0366  |
| rs76215300  | C | 0.09    |
| rs17293956  | A | -0.0374 |
| rs11255861  | T | -0.141  |
| rs140833659 | T | -0.1448 |
| rs111608911 | C | -0.1247 |
| rs75876403  | G | -0.1252 |
| rs10734007  | C | 0.0305  |
| rs73598338  | A | 0.0764  |
| rs11593430  | T | -0.0865 |
| rs78371187  | T | 0.0758  |
| rs148138319 | G | -0.1981 |
| rs78050507  | A | -0.0824 |
| rs73383629  | A | 0.1186  |
| rs12776509  | G | -0.1224 |
| rs117825405 | G | -0.2689 |
| rs7075980   | T | -0.0548 |
| rs11599150  | T | -0.0843 |
| rs7905106   | G | -0.0275 |
| rs79252054  | G | 0.1344  |
| rs10509824  | T | 0.0882  |
| rs12415272  | G | 0.0317  |
| rs12356958  | A | 0.0646  |
| rs7068439   | C | -0.0291 |
| rs112767820 | A | -0.1643 |
| rs138553858 | G | 0.1776  |
| rs12219942  | C | -0.0343 |
| rs4746268   | G | -0.1141 |
| rs72824486  | G | -0.0517 |
| rs7073278   | A | 0.0557  |
| rs17127392  | T | -0.0394 |
| rs7080093   | G | 0.0541  |
| rs7921146   | A | -0.0334 |

|             |   |         |
|-------------|---|---------|
| rs77783505  | G | 0.1178  |
| rs17310025  | G | -0.108  |
| rs11008084  | G | -0.1258 |
| rs10821845  | G | 0.0449  |
| rs4751686   | A | 0.042   |
| rs74352101  | G | 0.0475  |
| rs12412862  | G | -0.0328 |
| rs79969015  | A | 0.0666  |
| rs2768716   | G | -0.0296 |
| rs4445543   | A | 0.075   |
| rs144934972 | G | 0.1394  |
| rs150985132 | T | -0.137  |
| rs10796199  | C | -0.038  |
| rs9664986   | G | 0.0386  |
| rs72806370  | T | -0.0818 |
| rs1326249   | G | 0.0465  |
| rs1063161   | G | 0.0514  |
| rs117716639 | C | 0.1369  |
| rs80142394  | A | -0.1067 |
| rs74479182  | C | 0.148   |
| rs7893783   | G | 0.1333  |
| rs138527223 | T | 0.1012  |
| rs4314952   | G | -0.0267 |
| rs112100783 | A | -0.1377 |
| rs117944154 | T | -0.1429 |
| rs11202373  | A | 0.1885  |
| rs61847270  | T | 0.0462  |
| rs7090831   | A | -0.0263 |
| rs11014005  | G | 0.0886  |
| rs11592128  | T | 0.027   |
| rs77899607  | T | -0.0534 |
| rs11009019  | C | -0.0304 |
| rs7902584   | G | 0.0366  |
| rs72774700  | C | 0.1426  |
| rs61450717  | C | 0.0833  |
| rs11195465  | C | -0.0387 |
| rs10830191  | A | 0.0312  |
| rs56145941  | T | 0.1097  |
| rs117974695 | G | -0.2522 |
| rs11252631  | A | -0.0521 |
| rs56062003  | G | -0.043  |
| rs4880687   | A | -0.0291 |
| rs1325591   | A | 0.028   |
| rs11200124  | A | 0.1605  |
| rs77003825  | G | -0.1313 |
| rs11594883  | C | -0.0407 |
| rs67903565  | A | 0.0491  |

|             |   |         |
|-------------|---|---------|
| rs7905739   | G | 0.0444  |
| rs72837827  | G | -0.041  |
| rs5010908   | C | 0.0507  |
| rs2505903   | C | -0.032  |
| rs10740823  | T | 0.0345  |
| rs72845444  | A | 0.1238  |
| rs12413305  | A | -0.0607 |
| rs1417210   | G | 0.0444  |
| rs7899538   | A | 0.0398  |
| rs78479818  | T | 0.0471  |
| rs72832653  | C | -0.0723 |
| rs17693423  | C | 0.1867  |
| rs16926262  | C | 0.0337  |
| rs2434087   | C | 0.0293  |
| rs661162    | A | 0.1034  |
| rs34231128  | C | -0.034  |
| rs61854262  | T | 0.1398  |
| rs10882056  | T | 0.1073  |
| rs2620881   | C | -0.027  |
| rs10751789  | A | 0.0285  |
| rs10906733  | A | -0.0376 |
| rs504595    | T | 0.0601  |
| rs7081297   | G | 0.0424  |
| rs34951790  | A | 0.0585  |
| rs56158202  | G | -0.0727 |
| rs3213024   | C | -0.0674 |
| rs77058466  | G | -0.0811 |
| rs7086718   | T | 0.141   |
| rs60981594  | C | -0.0738 |
| rs3014887   | A | -0.0268 |
| rs147539870 | G | -0.1377 |
| rs11198460  | G | 0.0866  |
| rs111422243 | T | 0.1392  |
| rs10762476  | A | -0.0373 |
| rs141227493 | T | -0.0712 |
| rs77364436  | C | 0.1175  |
| rs72805671  | G | 0.1417  |
| rs11257041  | T | 0.0334  |
| rs2026048   | C | 0.0478  |
| rs117491729 | C | 0.1507  |
| rs72799477  | T | 0.2084  |
| rs72850324  | T | -0.1137 |
| rs1247436   | T | 0.0427  |
| rs72839096  | T | -0.093  |
| rs4420158   | A | 0.028   |
| rs2478486   | T | -0.034  |
| rs7070294   | A | -0.0334 |

|             |   |         |
|-------------|---|---------|
| rs80257873  | A | -0.0597 |
| rs117497378 | G | 0.1282  |
| rs117354281 | T | -0.1392 |
| rs138891442 | A | -0.1272 |
| rs116955685 | T | 0.1573  |
| rs11259339  | T | 0.031   |
| rs181610    | T | -0.0275 |
| rs10509641  | T | 0.0416  |
| rs11001278  | G | -0.0325 |
| rs4339993   | T | 0.0741  |
| rs7894852   | A | 0.0331  |
| rs17098094  | G | -0.0436 |
| rs6583921   | A | -0.0312 |
| rs264324    | C | -0.0364 |
| rs76111919  | T | 0.1275  |
| rs11591429  | C | 0.0256  |
| rs117550317 | G | -0.1418 |
| rs145800519 | A | 0.1342  |
| rs72771763  | G | -0.1683 |
| rs73600415  | T | -0.0739 |
| rs113872980 | T | -0.1147 |
| rs75540951  | G | 0.1938  |
| rs6584181   | T | -0.0274 |
| rs7088814   | G | 0.0292  |
| rs12572050  | T | -0.0378 |
| rs2286397   | T | 0.1393  |
| rs4934282   | C | 0.0256  |
| rs835240    | C | 0.0491  |
| rs2579753   | C | -0.0332 |
| rs11252601  | C | 0.1005  |
| rs148009862 | A | -0.0732 |
| rs112773164 | T | 0.1325  |
| rs77410133  | T | 0.1394  |
| rs77149942  | C | 0.0961  |
| rs147766911 | T | 0.1205  |
| rs7916173   | G | -0.0961 |
| rs1849697   | T | -0.0468 |
| rs113379089 | A | -0.1457 |
| rs73605030  | G | -0.0465 |
| rs1024205   | G | 0.0339  |
| rs9421424   | G | 0.0976  |
| rs517486    | T | -0.172  |
| rs1832404   | C | -0.0331 |
| rs77041135  | A | 0.0366  |
| rs1698469   | A | -0.0344 |
| rs117334396 | G | -0.1278 |
| rs2357285   | T | 0.0595  |

|             |   |         |
|-------------|---|---------|
| rs79375488  | C | -0.1363 |
| rs34482651  | G | 0.1715  |
| rs1148171   | T | -0.033  |
| rs148483210 | T | 0.0691  |
| rs66530545  | C | -0.0528 |
| rs11018182  | C | -0.0274 |
| rs10795972  | T | -0.1393 |
| rs1877799   | C | 0.026   |
| rs7899426   | C | -0.0433 |
| rs10795863  | G | 0.0602  |
| rs59409030  | C | 0.0598  |
| rs4589172   | G | -0.0292 |
| rs72792773  | G | -0.1678 |
| rs78047801  | T | -0.1788 |
| rs78482268  | A | -0.1163 |
| rs2887232   | C | 0.1146  |
| rs74962080  | T | 0.1392  |
| rs72819464  | T | 0.0864  |
| rs78143698  | C | -0.1248 |
| rs10741087  | C | -0.038  |
| rs11813458  | A | -0.0404 |
| rs117626559 | A | -0.168  |
| rs11592980  | A | -0.0397 |
| rs9733876   | A | 0.0279  |
| rs8192769   | T | -0.0601 |
| rs114697026 | T | 0.1509  |
| rs72815385  | T | 0.1203  |
| rs74151272  | C | 0.1366  |
| rs2637642   | C | 0.0255  |
| rs10796164  | A | 0.0264  |
| rs1812780   | C | 0.0504  |
| rs149022885 | A | 0.1564  |
| rs72771121  | C | -0.0327 |
| rs10762787  | C | -0.0327 |
| rs74162325  | C | -0.0472 |
| rs7914844   | T | -0.0538 |
| rs11816856  | G | -0.0582 |
| rs7092578   | T | -0.0366 |
| rs114574240 | T | -0.118  |
| rs4611118   | G | -0.026  |
| rs304447    | C | 0.0357  |
| rs4918923   | G | 0.0546  |
| rs11594808  | G | -0.0311 |
| rs12356802  | A | -0.0554 |
| rs7913103   | G | 0.035   |
| rs12774671  | C | 0.0686  |
| rs72816166  | A | -0.088  |

|             |   |         |
|-------------|---|---------|
| rs2637636   | C | -0.0728 |
| rs41284072  | A | 0.1569  |
| rs74116621  | T | -0.1576 |
| rs10751935  | C | 0.0349  |
| rs12783959  | T | 0.0354  |
| rs74794974  | T | -0.1277 |
| rs1802295   | T | -0.0284 |
| rs55941926  | T | 0.0371  |
| rs149814628 | T | -0.1821 |
| rs1537142   | A | -0.0335 |
| rs12766008  | C | 0.112   |
| rs138941156 | G | 0.1017  |
| rs7083102   | A | -0.0555 |
| rs11248524  | G | 0.0421  |
| rs66554588  | G | 0.0282  |
| rs603424    | A | -0.0329 |
| rs61866566  | G | -0.0702 |
| rs118091792 | T | -0.0629 |
| rs7086208   | A | 0.1491  |
| rs55910844  | T | 0.1121  |
| rs12774811  | A | 0.1153  |
| rs10788222  | A | -0.048  |
| rs11017331  | T | 0.0769  |
| rs2995478   | C | -0.038  |
| rs2478095   | A | 0.1082  |
| rs7078410   | A | 0.0405  |
| rs11198859  | T | 0.1029  |
| rs138843817 | G | 0.1486  |
| rs7087752   | T | 0.1045  |
| rs11188792  | A | -0.0279 |
| rs79354155  | T | -0.1643 |
| rs143445464 | T | -0.1405 |
| rs151056847 | G | -0.1523 |
| rs7912455   | A | 0.0257  |
| rs117709889 | C | 0.1861  |
| rs78850358  | G | -0.0888 |
| rs77757990  | G | -0.1307 |
| rs78620612  | A | -0.12   |
| rs145644888 | G | -0.1139 |
| rs10749541  | T | 0.0415  |
| rs2104347   | G | 0.0277  |
| rs1409295   | G | -0.0511 |
| rs117144859 | G | 0.0925  |
| rs117669234 | C | 0.0889  |
| rs2023400   | T | -0.0301 |
| rs11257895  | T | -0.036  |
| rs11510884  | G | -0.0359 |

|             |   |         |
|-------------|---|---------|
| rs10740353  | T | -0.0469 |
| rs112346530 | A | 0.1026  |
| rs313452    | T | -0.0324 |
| rs10510139  | C | 0.0258  |
| rs145673528 | T | -0.1027 |
| rs7096147   | T | 0.0276  |
| rs113234602 | A | -0.2352 |
| rs1070048   | A | 0.0252  |
| rs2388864   | T | -0.0739 |
| rs986212    | T | -0.0306 |
| rs946250    | A | 0.0265  |
| rs1906461   | C | 0.0258  |
| rs4746853   | T | 0.1294  |
| rs59347504  | A | -0.1195 |
| rs1649947   | T | -0.0339 |
| rs41284380  | A | -0.1834 |
| rs56071446  | A | 0.0456  |
| rs12265288  | T | -0.0299 |
| rs79485771  | G | 0.0578  |
| rs146699770 | A | -0.0695 |
| rs113368478 | A | -0.0723 |
| rs79442765  | C | 0.0867  |
| rs4750770   | T | -0.0253 |
| rs111234103 | G | -0.1284 |
| rs7094333   | C | -0.0457 |
| rs10906875  | C | 0.0302  |
| rs7913159   | G | 0.0264  |
| rs736545    | A | -0.1174 |
| rs10752384  | T | 0.0556  |
| rs11002810  | G | 0.0297  |
| rs4579859   | G | 0.0474  |
| rs10740396  | C | 0.0263  |
| rs2789642   | G | -0.0393 |
| rs72795016  | C | -0.1386 |
| rs1995896   | A | 0.058   |
| rs4394727   | G | 0.0308  |
| rs61852884  | T | 0.173   |
| rs117422506 | T | 0.1809  |
| rs12265838  | G | 0.1106  |
| rs1644428   | C | 0.0291  |
| rs12764890  | C | -0.0873 |
| rs34318344  | T | 0.0393  |
| rs4474350   | C | 0.0347  |
| rs117704481 | C | 0.118   |
| rs111612943 | T | 0.1105  |
| rs7095526   | A | 0.026   |
| rs117181556 | T | 0.0575  |



|             |   |         |
|-------------|---|---------|
| rs12569902  | T | -0.0447 |
| rs35817274  | T | 0.0989  |
| rs3128248   | T | -0.0438 |
| rs12767609  | G | 0.1697  |
| rs10828663  | A | -0.029  |
| rs116902910 | G | 0.1755  |
| rs17116616  | C | 0.0498  |
| rs1277445   | A | 0.0267  |
| rs117987508 | G | -0.1455 |
| rs2377630   | C | -0.0511 |
| rs748504    | A | 0.0383  |
| rs146451311 | G | 0.1072  |
| rs2901281   | T | -0.0364 |
| rs1750787   | A | 0.0908  |
| rs10795701  | G | -0.0288 |
| rs61838375  | C | 0.0321  |
| rs61858409  | A | -0.0634 |
| rs116848477 | T | -0.243  |
| rs72776688  | G | 0.0999  |
| rs4746029   | T | -0.0296 |
| rs10786328  | C | -0.0287 |
| rs78941607  | T | -0.1072 |
| rs12777936  | T | -0.0337 |
| rs10881782  | A | -0.027  |
| rs11187084  | T | 0.121   |
| rs146152255 | A | 0.0302  |
| rs11815945  | A | -0.0384 |
| rs34710142  | T | -0.1059 |
| rs117966883 | G | 0.054   |
| rs12767736  | T | 0.1     |
| rs78201188  | T | 0.1184  |
| rs11202579  | G | 0.0272  |
| rs145253494 | C | -0.1617 |
| rs61863810  | G | 0.0501  |
| rs78227482  | G | 0.1002  |
| rs7072751   | A | 0.0406  |
| rs58329391  | G | 0.0373  |
| rs74583769  | T | -0.1125 |
| rs4131016   | C | -0.0262 |
| rs34566502  | C | 0.1469  |
| rs141242916 | T | 0.0912  |
| rs55945119  | T | 0.1192  |
| rs4747980   | C | -0.0524 |
| rs117994637 | T | -0.1263 |
| rs538383    | A | 0.0264  |
| rs116442462 | A | 0.1639  |
| rs10764775  | C | -0.0272 |

|             |   |         |
|-------------|---|---------|
| rs2505084   | A | -0.026  |
| rs12781906  | T | -0.0546 |
| rs12776057  | G | 0.0695  |
| rs68072991  | G | -0.1596 |
| rs17553185  | G | -0.2032 |
| rs113527222 | T | -0.1228 |
| rs17517035  | C | 0.1249  |
| rs80219165  | C | -0.1186 |
| rs72814023  | C | 0.1522  |
| rs7918749   | A | 0.0341  |
| rs75275182  | G | -0.1332 |
| rs78455555  | C | 0.0615  |
| rs211401    | C | 0.0258  |
| rs117023536 | G | 0.1825  |
| rs10218886  | T | 0.109   |
| rs80211046  | A | 0.1186  |
| rs10881925  | C | -0.0261 |
| rs61861757  | G | 0.0506  |
| rs4244317   | A | -0.0279 |
| rs148244801 | A | 0.1174  |
| rs76142959  | G | -0.1422 |
| rs12252485  | G | 0.1075  |
| rs75163165  | A | 0.1388  |
| rs7476982   | T | -0.088  |
| rs112083488 | A | 0.1691  |
| rs117335759 | G | 0.1447  |
| rs7081039   | T | -0.0363 |
| rs10883601  | A | -0.0289 |
| rs7923745   | T | 0.028   |
| rs72779730  | A | 0.0933  |
| rs35656635  | G | -0.1449 |
| rs2145310   | C | 0.039   |
| rs72842175  | A | 0.1577  |
| rs1360119   | A | -0.1221 |
| rs79466393  | A | 0.1306  |
| rs117826999 | G | 0.1837  |
| rs12249449  | T | -0.0429 |
| rs11192970  | T | 0.0861  |
| rs11015820  | G | 0.0293  |
| rs145465512 | T | 0.1581  |
| rs117598371 | A | 0.0851  |
| rs78255570  | A | -0.0639 |
| rs78316594  | C | 0.1075  |
| rs35919263  | T | -0.0586 |
| rs117062007 | A | -0.2184 |
| rs141612059 | G | 0.0883  |
| rs78711395  | C | -0.2026 |

|             |   |         |
|-------------|---|---------|
| rs2532659   | C | -0.0376 |
| rs553326    | T | 0.0412  |
| rs7910227   | A | 0.086   |
| rs1023263   | G | 0.0306  |
| rs118012581 | A | 0.1012  |
| rs45468798  | A | -0.0656 |
| rs74503287  | C | 0.3024  |
| rs12570576  | G | -0.0611 |
| rs74160409  | A | 0.0598  |
| rs116944159 | G | 0.1938  |
| rs76251294  | G | -0.0487 |
| rs7091023   | C | 0.0259  |
| rs1110399   | G | 0.0375  |
| rs1237740   | G | 0.0465  |
| rs11257272  | T | 0.0308  |
| rs553638    | A | -0.0294 |
| rs6482574   | C | 0.0285  |
| rs149220129 | T | 0.1102  |
| rs793107    | A | 0.0257  |
| rs9663425   | C | -0.0277 |
| rs11192684  | G | -0.0628 |
| rs2388711   | C | 0.0335  |
| rs2570322   | T | 0.0637  |
| rs10996926  | G | 0.0421  |
| rs112436466 | C | -0.1059 |
| rs140863982 | A | 0.2179  |
| rs117527803 | A | 0.1136  |
| rs2815614   | C | 0.0281  |
| rs4600144   | T | 0.0567  |
| rs111565909 | T | -0.1261 |
| rs149563160 | A | -0.164  |
| rs17129868  | T | 0.0902  |
| rs78555020  | T | 0.1747  |
| rs142090759 | A | 0.2329  |
| rs72814725  | G | 0.0483  |
| rs117338282 | T | -0.2089 |
| rs78069317  | A | 0.1305  |
| rs112431844 | C | 0.1072  |
| rs11193718  | A | 0.2145  |
| rs4750405   | A | -0.0249 |
| rs117357788 | C | 0.1643  |
| rs7073062   | A | -0.0261 |
| rs11202892  | C | -0.0746 |
| rs7080908   | T | -0.0417 |
| rs11013118  | T | -0.0346 |
| rs3998767   | A | 0.03    |
| rs117753350 | A | 0.12    |

|             |   |         |
|-------------|---|---------|
| rs144298946 | G | -0.152  |
| rs7091239   | T | -0.0358 |
| rs150184974 | C | -0.0679 |
| rs118008508 | A | -0.0728 |
| rs7068499   | G | 0.0261  |
| rs9418698   | T | -0.0261 |
| rs1251140   | A | -0.0352 |
| rs76529446  | G | -0.0785 |
| rs11239845  | C | -0.0359 |
| rs56226420  | G | -0.0472 |
| rs2016612   | C | -0.0262 |
| rs74496492  | A | -0.1039 |
| rs12252742  | A | 0.0254  |
| rs76576376  | A | -0.1958 |
| rs116870695 | T | 0.0734  |
| rs35997989  | C | 0.039   |
| rs76602836  | A | -0.0361 |
| rs7895107   | C | -0.0685 |
| rs4962329   | G | 0.0267  |
| rs56842128  | T | -0.0336 |
| rs10219117  | A | -0.0295 |
| rs2461225   | T | -0.0339 |
| rs61869228  | T | -0.0525 |
| rs7084040   | T | -0.0773 |
| rs137976749 | C | 0.1746  |
| rs117412128 | A | -0.1082 |
| rs12359839  | A | 0.0452  |
| rs79788987  | G | -0.1214 |
| rs72843751  | T | -0.0475 |
| rs41544714  | T | 0.1361  |
| rs113201672 | T | -0.0952 |
| rs12771698  | T | -0.0572 |
| rs9420501   | A | -0.0388 |
| rs7919667   | T | 0.0321  |
| rs117045692 | A | 0.1247  |
| rs734675    | G | -0.0378 |
| rs12254800  | A | 0.0307  |
| rs72771686  | T | -0.0734 |
| rs78530058  | C | 0.0899  |
| rs1763978   | T | -0.0252 |
| rs76670191  | A | 0.1419  |
| rs74869479  | C | -0.1912 |
| rs74526503  | G | -0.1539 |
| rs77013742  | C | -0.0682 |
| rs787796    | C | -0.107  |
| rs146099827 | C | -0.1114 |
| rs59440816  | C | 0.0349  |

|             |   |         |
|-------------|---|---------|
| rs75671129  | T | -0.0799 |
| rs72833248  | G | -0.0909 |
| rs138250735 | A | 0.1693  |
| rs11189426  | A | -0.0511 |
| rs17481680  | A | 0.0498  |
| rs79861996  | G | 0.0434  |
| rs2384175   | G | 0.0259  |
| rs141462265 | C | -0.1317 |
| rs157995    | A | 0.0273  |
| rs11202994  | A | -0.12   |
| rs11188876  | A | -0.0325 |
| rs61846654  | G | 0.0853  |
| rs224706    | T | -0.0631 |
| rs9419959   | A | 0.0333  |
| rs196310    | G | -0.0248 |
| rs3851564   | T | -0.0661 |
| rs986316    | T | -0.1245 |
| rs114964613 | T | 0.1967  |
| rs17331020  | G | 0.1834  |
| rs10822318  | A | -0.0285 |
| rs363311    | A | -0.0467 |
| rs10901533  | A | 0.0363  |
| rs6585682   | C | -0.0255 |
| rs1219733   | A | -0.0255 |
| rs56032424  | C | 0.0799  |
| rs17295731  | A | -0.1109 |
| rs2785247   | T | -0.0256 |
| rs142592602 | T | -0.1581 |
| rs72840410  | G | 0.1234  |
| rs10826871  | C | 0.0313  |
| rs75198744  | C | -0.0574 |
| rs12570517  | A | 0.1763  |
| rs138162115 | T | 0.0363  |
| rs111305572 | T | 0.1068  |
| rs34616863  | A | -0.0662 |
| rs57435050  | A | -0.0812 |
| rs4880498   | T | 0.0259  |
| rs148225109 | G | 0.1328  |
| rs6585536   | T | 0.0262  |
| rs4962397   | A | -0.0437 |
| rs61873690  | T | 0.0693  |
| rs77029746  | T | -0.1093 |
| rs597248    | G | 0.1015  |
| rs734937    | T | 0.0322  |
| rs17102281  | G | 0.0592  |
| rs11192500  | A | 0.089   |
| rs72836153  | A | 0.0895  |

|             |   |         |
|-------------|---|---------|
| rs78722685  | C | -0.0805 |
| rs149186079 | A | -0.2471 |
| rs148777067 | C | -0.1576 |
| rs112782687 | A | -0.1169 |
| rs4537679   | T | 0.0258  |
| rs7101137   | T | -0.026  |
| rs11000137  | T | 0.0332  |
| rs10823667  | G | 0.0272  |
| rs12571618  | A | 0.0496  |
| rs10795795  | G | 0.0253  |
| rs112969081 | T | 0.0292  |
| rs148402881 | A | 0.1436  |
| rs4442451   | T | 0.042   |
| rs55893119  | T | 0.0964  |
| rs10795132  | C | -0.0261 |
| rs2660016   | G | 0.0308  |
| rs4962551   | C | -0.0459 |
| rs77689060  | C | -0.1531 |
| rs7915809   | G | 0.0255  |
| rs112682566 | T | -0.0973 |
| rs4434898   | T | -0.0324 |
| rs11257687  | T | -0.0857 |
| rs17009949  | T | -0.0737 |
| rs80014091  | A | 0.0744  |
| rs11594407  | A | -0.0475 |
| rs111966404 | A | -0.0844 |
| rs11253219  | A | -0.1182 |
| rs12770852  | G | 0.0516  |
| rs75610267  | A | 0.0656  |
| rs75393360  | T | -0.1241 |
| rs6481621   | G | -0.0293 |
| rs61829873  | T | -0.1534 |
| rs2487710   | A | -0.0407 |
| rs112121821 | C | -0.1253 |
| rs17128067  | G | -0.0446 |
| rs74156334  | A | -0.062  |
| rs11594365  | A | 0.037   |
| rs61850002  | T | -0.0721 |
| rs12264955  | T | -0.05   |
| rs77906339  | A | 0.0296  |
| rs145761078 | A | -0.0969 |
| rs117119299 | C | -0.1737 |
| rs72824030  | A | 0.1239  |
| rs12245611  | C | 0.0924  |
| rs718948    | C | -0.0272 |
| rs17662793  | G | 0.0279  |
| rs58851815  | G | 0.1484  |

|             |   |         |
|-------------|---|---------|
| rs1432448   | G | -0.1555 |
| rs1969824   | A | -0.0276 |
| rs76918046  | G | 0.0591  |
| rs10823813  | G | -0.0259 |
| rs7093352   | A | -0.0422 |
| rs59016855  | C | 0.0429  |
| rs73340469  | T | 0.1039  |
| rs112493919 | C | 0.1438  |
| rs34295601  | C | -0.099  |
| rs35360884  | T | 0.0553  |
| rs118115742 | T | -0.2287 |
| rs12263420  | C | -0.0678 |
| rs115160533 | C | -0.1336 |
| rs79015497  | C | -0.044  |
| rs789923    | A | -0.0249 |
| rs41281300  | G | -0.0319 |
| rs111776551 | T | -0.1217 |
| rs12220250  | G | 0.0751  |
| rs76234702  | G | 0.1133  |
| rs118114823 | T | -0.1268 |
| rs1638674   | G | 0.0298  |
| rs11257216  | G | 0.029   |
| rs12243859  | T | 0.0265  |
| rs116899466 | A | -0.1059 |
| rs75102082  | T | 0.1113  |
| rs80159320  | A | 0.1138  |
| rs7910750   | T | -0.1743 |
| rs74803227  | G | -0.1925 |
| rs7096141   | A | -0.0546 |
| rs72810495  | C | -0.1211 |
| rs7914988   | G | 0.0307  |
| rs9421758   | T | -0.0277 |
| rs149410211 | C | -0.1941 |
| rs34826684  | C | -0.0853 |
| rs17384909  | A | -0.0611 |
| rs113085369 | A | -0.0359 |
| rs76773975  | A | -0.0682 |
| rs2486058   | C | 0.0301  |
| rs625250    | G | 0.0419  |
| rs11813818  | A | 0.0296  |
| rs11198201  | C | 0.0508  |
| rs11156472  | A | 0.1727  |
| rs12146414  | G | -0.0447 |
| rs17820033  | A | -0.0282 |
| rs145661527 | C | -0.1263 |
| rs114938928 | A | -0.1432 |
| rs2252324   | T | -0.0253 |

|             |   |         |
|-------------|---|---------|
| rs116844749 | T | 0.1584  |
| rs2478578   | T | 0.0977  |
| rs75885737  | C | 0.1487  |
| rs923800    | T | 0.1083  |
| rs1556714   | G | -0.033  |
| rs77969702  | A | 0.0654  |
| rs10882744  | T | -0.0287 |
| rs12267575  | C | 0.1676  |
| rs12414140  | A | 0.032   |
| rs77702873  | T | -0.1446 |
| rs2147941   | T | 0.036   |
| rs7068041   | A | -0.1022 |
| rs2384096   | G | 0.0412  |
| rs112625691 | A | 0.0568  |
| rs12783433  | T | 0.0813  |
| rs117075467 | A | -0.1491 |
| rs117690332 | G | -0.0985 |
| rs10827642  | G | -0.0294 |
| rs7921360   | C | 0.0247  |
| rs55970731  | G | 0.0391  |
| rs79871163  | T | 0.0557  |
| rs74161254  | C | 0.0544  |
| rs4436464   | G | -0.0249 |
| rs7912985   | T | 0.0333  |
| rs117457465 | T | 0.1743  |
| rs7476136   | A | 0.0515  |
| rs118186187 | G | 0.1679  |
| rs1133932   | G | 0.0505  |
| rs2482119   | T | 0.0895  |
| rs146767572 | A | -0.2546 |
| rs147650462 | C | -0.2021 |
| rs2002905   | A | 0.0305  |
| rs5011646   | C | -0.0843 |
| rs148986197 | A | 0.0945  |
| rs12258379  | T | 0.1366  |
| rs148654101 | C | 0.2315  |
| rs7908719   | G | -0.1133 |
| rs1835737   | G | -0.0621 |
| rs2081751   | C | -0.0291 |
| rs116950322 | C | -0.1188 |
| rs1630635   | A | -0.056  |
| rs117398558 | C | -0.1117 |
| rs79995908  | A | -0.1106 |
| rs7918839   | A | -0.0523 |
| rs76062346  | T | 0.1312  |
| rs17113872  | A | 0.0681  |
| rs77530449  | G | -0.0474 |



|             |   |         |
|-------------|---|---------|
| rs2393455   | C | 0.0259  |
| rs138057132 | C | -0.0899 |
| rs11006212  | G | -0.0245 |
| rs12569522  | T | 0.0966  |
| rs12242024  | G | -0.0827 |
| rs76726581  | T | -0.0644 |
| rs77729997  | C | -0.2247 |
| rs73245489  | C | 0.1783  |
| rs4935586   | A | 0.0488  |
| rs74113197  | G | 0.0624  |
| rs61856433  | C | 0.0351  |
| rs2418830   | A | 0.099   |
| rs111284945 | A | 0.0908  |
| rs141245474 | T | 0.1135  |
| rs76980571  | C | -0.123  |
| rs1327252   | G | 0.0437  |
| rs2384189   | G | 0.024   |
| rs141148641 | G | 0.1543  |
| rs10159855  | T | -0.043  |
| rs2892404   | T | 0.0243  |
| rs34607294  | A | 0.1088  |
| rs118153462 | A | -0.1015 |
| rs146133427 | T | 0.1368  |
| rs1995666   | C | -0.0277 |
| rs139911585 | A | 0.1982  |
| rs1966051   | G | -0.0623 |
| rs61856102  | G | -0.0828 |
| rs72775129  | A | 0.0716  |
| rs60553529  | G | 0.0573  |
| rs7071259   | C | 0.0551  |
| rs2022414   | A | 0.0405  |
| rs11188994  | T | -0.0314 |
| rs2666255   | G | 0.0255  |
| rs10995840  | C | -0.0299 |
| rs1033784   | T | 0.0293  |
| rs12416454  | T | -0.1953 |
| rs12768393  | A | 0.0299  |
| rs7091277   | G | -0.0313 |
| rs10885401  | C | 0.0972  |
| rs6597801   | A | -0.0399 |
| rs78298223  | A | 0.0813  |
| rs118135400 | G | 0.1476  |
| rs10762491  | T | 0.0255  |
| rs7078171   | G | 0.0257  |
| rs12259886  | T | 0.1026  |
| rs146182128 | A | 0.1075  |
| rs78620122  | A | 0.0908  |

|             |   |         |
|-------------|---|---------|
| rs11239303  | G | 0.0568  |
| rs4917711   | T | 0.0907  |
| rs73378492  | T | -0.1203 |
| rs79303689  | T | -0.0893 |
| rs12414094  | T | -0.0339 |
| rs117863051 | G | 0.0859  |
| rs72778763  | A | -0.0814 |
| rs75174619  | A | 0.0978  |
| rs701841    | G | 0.0285  |
| rs61870186  | G | 0.0825  |
| rs117323821 | T | -0.1674 |
| rs117577457 | A | 0.0923  |
| rs2795590   | A | 0.0894  |
| rs1571014   | C | 0.0399  |
| rs117681011 | T | -0.0816 |
| rs2393579   | C | 0.038   |
| rs117227223 | G | -0.0511 |
| rs146631457 | T | -0.1508 |
| rs1234216   | A | 0.026   |
| rs7893994   | T | 0.0588  |
| rs527918    | T | -0.0653 |
| rs117709581 | T | 0.1515  |
| rs77043155  | A | 0.0813  |
| rs150634643 | A | -0.1936 |
| rs147734323 | T | 0.0798  |
| rs11188885  | A | 0.1613  |
| rs12769650  | A | 0.0373  |
| rs117798271 | T | -0.0795 |
| rs79925464  | C | -0.0537 |
| rs11596473  | C | -0.1355 |
| rs112903443 | A | 0.082   |
| rs11012166  | C | 0.0251  |
| rs76776409  | A | -0.1284 |
| rs1122830   | C | 0.0787  |
| rs117432838 | T | 0.0655  |
| rs201062    | T | 0.0413  |
| rs7078914   | C | 0.0455  |
| rs7904790   | A | 0.0859  |
| rs112917631 | C | -0.1003 |
| rs141885732 | C | 0.0996  |
| rs2260294   | G | 0.0332  |
| rs150990184 | A | -0.0863 |
| rs75731135  | C | 0.0525  |
| rs7076763   | T | 0.0246  |
| rs17533373  | T | 0.0337  |
| rs2556537   | T | 0.0339  |
| rs7077404   | A | -0.0268 |

|             |   |         |
|-------------|---|---------|
| rs1890506   | T | -0.0278 |
| rs2785250   | C | -0.0812 |
| rs73248320  | T | 0.0294  |
| rs73391593  | A | 0.0373  |
| rs10737008  | T | -0.026  |
| rs7094118   | C | -0.0303 |
| rs74139363  | C | 0.1312  |
| rs117872341 | G | 0.1386  |
| rs7898584   | T | 0.0322  |
| rs4750148   | A | -0.035  |
| rs2420765   | G | 0.0811  |
| rs144576793 | A | -0.1118 |
| rs78400322  | A | 0.096   |
| rs77145664  | G | -0.0609 |
| rs75634795  | A | -0.2435 |
| rs4980139   | C | -0.0506 |
| rs6585879   | G | 0.0388  |
| rs73391858  | C | 0.0567  |
| rs444323    | A | 0.0282  |
| rs2377879   | T | -0.0746 |
| rs117595198 | A | 0.1463  |
| rs78235500  | A | 0.0773  |
| rs3887817   | A | 0.0297  |
| rs10857625  | C | -0.0305 |
| rs11248558  | C | -0.0277 |
| rs3780937   | T | 0.0588  |
| rs4751460   | G | 0.047   |
| rs55798271  | C | 0.0411  |
| rs34236214  | A | -0.0794 |
| rs72789374  | T | -0.0498 |
| rs1907359   | G | -0.0307 |
| rs76719963  | G | -0.0422 |
| rs10885140  | G | -0.0469 |
| rs953196    | A | -0.0245 |
| rs10829659  | T | 0.0635  |
| rs57876210  | A | 0.0647  |
| rs3901332   | G | -0.0256 |
| rs75664031  | G | -0.1146 |
| rs143737121 | T | 0.1105  |
| rs140303807 | T | 0.1324  |
| rs11256983  | C | -0.0617 |
| rs75703288  | A | 0.0473  |
| rs1929256   | G | -0.0465 |
| rs10827254  | T | 0.0334  |
| rs58048186  | T | 0.0613  |
| rs11188246  | A | 0.0314  |
| rs35301698  | T | -0.0683 |

|             |   |         |
|-------------|---|---------|
| rs1800860   | A | -0.0283 |
| rs73320584  | G | -0.0396 |
| rs12778249  | T | 0.0616  |
| rs10734105  | G | 0.0267  |
| rs16933172  | G | 0.0828  |
| rs17385180  | T | 0.0432  |
| rs76016493  | C | 0.0407  |
| rs138314328 | C | 0.2211  |
| rs76510618  | T | -0.122  |
| rs7895955   | C | 0.0253  |
| rs61860069  | T | 0.1909  |
| rs77435932  | C | -0.0539 |
| rs77399338  | A | 0.1426  |
| rs117013058 | T | -0.1002 |
| rs141632430 | G | 0.1244  |
| rs112295645 | G | 0.1069  |
| rs12257981  | T | 0.0841  |
| rs78717536  | T | 0.1459  |
| rs35807433  | T | 0.0321  |
| rs118070606 | A | 0.1386  |
| rs142584225 | G | -0.1997 |
| rs16928529  | G | -0.0376 |
| rs650903    | T | -0.0482 |
| rs78507336  | G | 0.1088  |
| rs10905392  | T | 0.0631  |
| rs11015831  | A | 0.2148  |
| rs72818235  | C | 0.2093  |
| rs17646871  | A | -0.0874 |
| rs72783245  | G | -0.1281 |
| rs12354419  | C | -0.0958 |
| rs111700229 | T | 0.0693  |
| rs7086894   | C | -0.0271 |
| rs72782884  | G | 0.2089  |
| rs145714173 | T | 0.134   |
| rs117983078 | C | -0.0736 |
| rs11594199  | A | 0.0977  |
| rs11596316  | G | -0.0586 |
| rs1992668   | A | -0.0469 |
| rs10749123  | G | -0.0304 |
| rs4918830   | T | -0.0246 |
| rs116873648 | T | -0.1176 |
| rs149809268 | G | -0.13   |
| rs117807754 | G | -0.0798 |
| rs141450998 | T | 0.1992  |
| rs4309063   | C | -0.0327 |
| rs117673713 | G | -0.1477 |
| rs11017027  | A | 0.0489  |

|             |   |         |
|-------------|---|---------|
| rs12268085  | A | 0.1214  |
| rs1430331   | T | 0.0288  |
| rs75502271  | A | -0.0591 |
| rs9421799   | G | 0.0266  |
| rs138803375 | A | 0.192   |
| rs72825852  | A | 0.0499  |
| rs1912000   | G | 0.0399  |
| rs140505891 | A | -0.0914 |
| rs72789322  | T | 0.0957  |
| rs77254652  | A | -0.1064 |
| rs146475315 | A | 0.0538  |
| rs111998417 | G | -0.1191 |
| rs17486927  | A | 0.1411  |
| rs2812666   | A | -0.0633 |
| rs138639290 | T | 0.0901  |
| rs78180416  | G | -0.0659 |
| rs7920664   | C | 0.0249  |
| rs4469796   | C | 0.0261  |
| rs73609547  | T | 0.1418  |
| rs75324441  | G | -0.1885 |
| rs116936375 | A | 0.1073  |
| rs11010642  | C | 0.0673  |
| rs11815906  | T | -0.0704 |
| rs74605360  | G | -0.1638 |
| rs77004670  | C | -0.1301 |
| rs61861752  | A | -0.0637 |
| rs7896021   | T | 0.1039  |
| rs2805513   | G | 0.025   |
| rs145342156 | C | -0.1552 |
| rs12764290  | C | 0.0763  |
| rs80011525  | A | 0.0599  |
| rs113876058 | A | -0.0924 |
| rs72773392  | C | -0.0593 |
| rs4620623   | A | -0.0289 |
| rs118039419 | T | 0.0629  |
| rs10824719  | T | 0.0407  |
| rs3847476   | T | 0.046   |
| rs72853193  | T | -0.0826 |
| rs893856    | A | 0.033   |
| rs2147289   | A | 0.024   |
| rs1624723   | C | -0.0303 |
| rs145648353 | T | 0.114   |
| rs117227937 | T | -0.122  |
| rs11594123  | C | -0.1504 |
| rs11191714  | C | -0.1892 |
| rs78355705  | C | 0.1389  |
| rs7099837   | T | 0.0285  |

|             |   |         |
|-------------|---|---------|
| rs12765679  | A | 0.0293  |
| rs7893925   | G | 0.0245  |
| rs12762068  | G | -0.0629 |
| rs11001215  | A | -0.0324 |
| rs117548198 | C | -0.096  |
| rs4537661   | C | -0.0762 |
| rs17628806  | G | -0.0316 |
| rs829225    | A | -0.0348 |
| rs147051919 | T | 0.1553  |
| rs11009583  | T | 0.0334  |
| rs9420759   | T | 0.0353  |
| rs11575661  | G | 0.0568  |
| rs117596781 | A | -0.2454 |
| rs61843389  | A | -0.0828 |
| rs11198728  | T | 0.0253  |
| rs77543613  | A | -0.0651 |
| rs2763342   | A | 0.0259  |
| rs4980054   | C | 0.0327  |
| rs113122691 | T | 0.1143  |
| rs12267933  | G | 0.0802  |
| rs12412408  | A | 0.1272  |
| rs7085115   | T | -0.0535 |
| rs10829368  | C | -0.19   |
| rs12779447  | A | 0.0306  |
| rs12761494  | A | -0.0738 |
| rs34972411  | A | -0.0724 |
| rs7906425   | G | 0.0316  |
| rs117447534 | T | -0.165  |
| rs146011267 | A | 0.1594  |
| rs7898106   | T | -0.0432 |
| rs73595902  | G | 0.098   |
| rs173175    | G | -0.0408 |
| rs61839218  | C | 0.1014  |
| rs16920587  | G | -0.051  |
| rs116269371 | T | 0.1574  |
| rs10788712  | T | -0.0639 |
| rs147370408 | A | -0.0475 |
| rs72800440  | T | -0.0503 |
| rs3098354   | A | 0.0343  |
| rs1838579   | C | -0.0303 |
| rs9419011   | T | 0.0378  |
| rs4750481   | A | -0.0757 |
| rs12414197  | A | 0.0337  |
| rs113629439 | A | -0.0901 |
| rs11199464  | G | -0.0564 |
| rs12770346  | T | 0.1286  |
| rs7076247   | T | -0.0248 |

|             |   |         |
|-------------|---|---------|
| rs116985687 | A | 0.1851  |
| rs11016877  | A | 0.0258  |
| rs117850949 | A | 0.0392  |
| rs76018080  | T | -0.0838 |
| rs61849207  | A | -0.0827 |
| rs61865236  | G | -0.0516 |
| rs151593    | A | -0.026  |
| rs2277265   | G | 0.0403  |
| rs7079463   | A | -0.0252 |
| rs7087890   | G | 0.0279  |
| rs61834057  | A | -0.0397 |
| rs4434903   | C | -0.0304 |
| rs117759893 | A | 0.1335  |
| rs4506581   | A | 0.0305  |
| rs28534804  | T | -0.0434 |
| rs10763702  | T | -0.0267 |
| rs2168109   | G | -0.0415 |
| rs4746076   | G | -0.0243 |
| rs113678104 | C | -0.166  |
| rs74957171  | T | -0.1226 |
| rs139472917 | T | 0.1397  |
| rs117696037 | C | 0.0806  |
| rs78632785  | T | 0.1979  |
| rs4919597   | G | 0.0562  |
| rs12257410  | C | -0.0273 |
| rs10740870  | A | 0.024   |
| rs72792254  | G | 0.0576  |
| rs3862501   | C | 0.0393  |
| rs7079837   | C | 0.1202  |
| rs146027574 | C | -0.1404 |
| rs2489052   | A | 0.0243  |
| rs12770885  | T | -0.0603 |
| rs11011894  | G | 0.0251  |
| rs4325270   | A | -0.0243 |
| rs71487885  | T | -0.0504 |
| rs148853631 | C | 0.127   |
| rs73305694  | G | 0.1452  |
| rs118131243 | T | -0.1441 |
| rs7913763   | A | -0.0781 |
| rs9919453   | G | -0.0237 |
| rs113789255 | A | -0.1027 |
| rs912484    | T | 0.0295  |
| rs2960376   | T | 0.07    |
| rs11186683  | A | -0.0774 |
| rs76967661  | C | -0.0966 |
| rs78854460  | C | 0.0878  |
| rs597803    | T | 0.0275  |

|             |   |         |
|-------------|---|---------|
| rs117492472 | T | 0.153   |
| rs80174741  | G | 0.0431  |
| rs61872168  | A | -0.0841 |
| rs112350020 | A | -0.1736 |
| rs117558615 | C | -0.1458 |
| rs41296131  | A | -0.101  |
| rs61861801  | T | 0.0607  |
| rs12573737  | A | 0.036   |
| rs11594148  | T | 0.0429  |
| rs11596952  | G | 0.0263  |
| rs57472807  | C | -0.0534 |
| rs2887226   | T | -0.0246 |
| rs72817493  | T | 0.0561  |
| rs10886566  | A | 0.0325  |
| rs112286601 | C | 0.0586  |
| rs11255499  | A | 0.0302  |
| rs61858029  | T | -0.0401 |
| rs61859443  | A | -0.0781 |
| rs150148564 | C | 0.1347  |
| rs304465    | T | 0.0254  |
| rs143690943 | T | 0.1404  |
| rs118162701 | C | -0.1276 |
| rs117393957 | A | 0.1101  |
| rs112545777 | C | -0.0995 |
| rs140112223 | A | 0.1333  |
| rs35978700  | G | -0.0962 |
| rs4144206   | C | -0.0306 |
| rs147722387 | T | 0.1727  |
| rs112098341 | C | 0.0629  |
| rs786779    | G | 0.0444  |
| rs7905723   | A | -0.0247 |
| rs116980629 | A | -0.0632 |
| rs7099487   | T | -0.0292 |
| rs7084635   | A | 0.0333  |
| rs145744161 | T | 0.2041  |
| rs11258628  | T | -0.0623 |
| rs55929812  | A | 0.1185  |
| rs10763961  | A | -0.0351 |
| rs16916887  | A | 0.0856  |
| rs11200011  | G | 0.036   |
| rs78255424  | T | -0.0904 |
| rs148049136 | G | 0.2106  |
| rs4556454   | G | -0.0368 |
| rs61842398  | A | -0.0377 |
| rs78241189  | C | 0.1081  |
| rs78403525  | T | 0.1468  |
| rs80209725  | C | 0.0678  |



|             |   |         |
|-------------|---|---------|
| rs116369954 | C | -0.0868 |
| rs12413425  | G | 0.1133  |
| rs111421522 | A | 0.05    |
| rs11814304  | C | -0.0475 |
| rs76249068  | C | 0.1079  |
| rs12415263  | A | 0.0284  |
| rs3979458   | A | 0.0412  |
| rs11191939  | C | -0.0393 |
| rs146134123 | C | 0.1111  |
| rs2306294   | T | -0.0404 |
| rs7068574   | C | -0.0351 |
| rs7094583   | T | -0.0256 |
| rs2169901   | G | 0.0256  |
| rs74908825  | C | -0.0964 |
| rs2574690   | C | -0.0315 |
| rs117272983 | T | -0.1241 |
| rs2892554   | A | 0.0312  |
| rs1931881   | T | -0.0313 |
| rs79836928  | A | 0.1041  |
| rs117900452 | C | 0.1143  |
| rs2994674   | G | -0.0241 |
| rs10999162  | G | 0.079   |
| rs144628354 | A | 0.1725  |
| rs10903547  | A | -0.0478 |
| rs2043089   | T | -0.0375 |
| rs3740345   | G | 0.0279  |
| rs61870229  | G | -0.1414 |
| rs11259286  | C | 0.0266  |
| rs4237353   | A | 0.0276  |
| rs2949388   | G | -0.0287 |
| rs9658706   | G | -0.0479 |
| rs7899618   | G | 0.0262  |
| rs10219075  | A | 0.0315  |
| rs11574674  | G | 0.0342  |
| rs4525114   | C | -0.0527 |
| rs4746651   | A | 0.0345  |
| rs12249150  | T | 0.0577  |
| rs2489015   | C | -0.0246 |
| rs117420397 | A | -0.097  |
| rs71494758  | A | 0.0262  |
| rs113685537 | A | -0.1672 |
| rs919206    | T | 0.0349  |
| rs72840032  | T | -0.0607 |
| rs7914933   | T | -0.0238 |
| rs11251115  | T | -0.0266 |
| rs143308830 | G | -0.1849 |
| rs6585876   | T | -0.025  |

|             |   |         |
|-------------|---|---------|
| rs10905277  | G | -0.0248 |
| rs11814445  | A | -0.0277 |
| rs7073346   | A | 0.0348  |
| rs34181456  | G | 0.0467  |
| rs34688285  | T | -0.1152 |
| rs72812285  | C | -0.065  |
| rs141316271 | T | 0.1848  |
| rs10762057  | C | -0.0285 |
| rs77800611  | T | 0.1     |
| rs76883574  | C | -0.058  |
| rs74151081  | T | 0.1233  |
| rs75596278  | A | -0.0536 |
| rs138190991 | A | 0.0872  |
| rs72784107  | T | -0.0835 |
| rs35461040  | T | 0.0425  |
| rs74845519  | T | -0.0767 |
| rs41527446  | G | -0.065  |
| rs2999437   | G | 0.033   |
| rs10509530  | T | -0.0307 |
| rs77499291  | T | 0.12    |
| rs118111448 | T | -0.0684 |
| rs58334200  | T | 0.0336  |
| rs11190037  | A | 0.0383  |
| rs78797151  | T | 0.0464  |
| rs1885793   | T | 0.0671  |
| rs7074497   | A | 0.0405  |
| rs2400060   | C | 0.0481  |
| rs73259394  | G | 0.0286  |
| rs11101563  | A | 0.1407  |
| rs1819279   | G | -0.0365 |
| rs2245569   | G | 0.0327  |
| rs75832802  | C | 0.1432  |
| rs10128172  | G | -0.0284 |
| rs11250795  | A | -0.0348 |
| rs2387993   | G | 0.0279  |
| rs11599366  | T | 0.0361  |
| rs79403713  | A | 0.0763  |
| rs57294560  | A | -0.0649 |
| rs17659493  | T | -0.0714 |
| rs140528511 | A | -0.1821 |
| rs78803196  | T | -0.0504 |
| rs17112577  | T | 0.079   |
| rs12784116  | A | -0.0253 |
| rs1380441   | A | -0.0315 |
| rs17599379  | G | 0.028   |
| rs145306099 | A | -0.1537 |
| rs1421064   | A | -0.1153 |

|             |   |         |
|-------------|---|---------|
| rs79073084  | G | -0.1352 |
| rs7101348   | T | 0.0316  |
| rs3886351   | T | 0.054   |
| rs75336121  | C | -0.0534 |
| rs10904276  | A | 0.0278  |
| rs2660040   | A | -0.0272 |
| rs10885517  | G | 0.0293  |
| rs113565006 | T | -0.0967 |
| rs10829582  | A | 0.1431  |
| rs11004745  | C | -0.0279 |
| rs111904790 | A | 0.1501  |
| rs66792934  | T | 0.0386  |
| rs12217879  | A | 0.0597  |
| rs118003092 | C | 0.125   |
| rs146170298 | C | 0.1322  |
| rs11195324  | G | 0.0343  |
| rs11528265  | A | 0.0786  |
| rs72790050  | G | -0.0419 |
| rs61851714  | A | -0.0478 |
| rs915908    | A | 0.0418  |
| rs4749679   | C | 0.0248  |
| rs13134     | T | -0.0956 |
| rs139227068 | A | -0.0923 |
| rs10430595  | C | -0.1511 |
| rs10822496  | A | 0.0239  |
| rs639390    | T | 0.0441  |
| rs7099229   | A | 0.0265  |
| rs7089539   | T | -0.0251 |
| rs78479086  | T | 0.0953  |
| rs112768584 | G | 0.0872  |
| rs72815530  | A | -0.0348 |
| rs7069420   | A | -0.0308 |
| rs10764445  | G | -0.039  |
| rs79840078  | C | 0.0431  |
| rs147419370 | G | -0.1388 |
| rs2146553   | G | 0.0234  |
| rs4381276   | T | -0.0338 |
| rs1890096   | A | -0.0242 |
| rs9419461   | T | 0.0481  |
| rs118065643 | T | -0.0642 |
| rs1887635   | A | 0.0289  |
| rs117978287 | A | -0.1285 |
| rs139079279 | A | -0.1387 |
| rs72790382  | A | 0.1286  |
| rs76423969  | G | 0.1289  |
| rs80146815  | G | 0.1627  |
| rs117208019 | G | -0.0841 |

|             |   |         |
|-------------|---|---------|
| rs117001634 | A | -0.0495 |
| rs4528239   | A | -0.0238 |
| rs76630525  | T | 0.1198  |
| rs113432483 | A | -0.1221 |
| rs61736607  | T | -0.0736 |
| rs71473505  | T | -0.1584 |
| rs56290940  | T | -0.0833 |
| rs74828130  | A | 0.0846  |
| rs17101017  | A | 0.0458  |
| rs11258126  | G | -0.0421 |
| rs17447650  | C | -0.0633 |
| rs113108881 | A | 0.0731  |
| rs762454    | C | 0.0249  |
| rs66526375  | A | 0.0481  |
| rs3123235   | T | -0.028  |
| rs117134765 | A | 0.1164  |
| rs80195668  | G | 0.0971  |
| rs7093042   | C | 0.142   |
| rs111648213 | T | 0.1     |
| rs17178691  | G | 0.0684  |
| rs10998885  | T | 0.0452  |
| rs76737403  | G | 0.0878  |
| rs10998889  | T | 0.0654  |
| rs111707552 | G | 0.1368  |
| rs11187737  | A | 0.0262  |
| rs80215060  | T | 0.0606  |
| rs141264052 | T | 0.0893  |
| rs61875108  | A | 0.0975  |
| rs2103203   | T | 0.0324  |
| rs143741181 | C | -0.1641 |
| rs11254625  | G | 0.0465  |
| rs17011056  | G | -0.1194 |
| rs11201840  | T | 0.0253  |
| rs118071736 | A | -0.1376 |
| rs572318    | T | -0.0452 |
| rs41283285  | A | 0.0894  |
| rs10761494  | A | -0.0251 |
| rs117268320 | T | 0.0596  |
| rs116526932 | G | 0.1447  |
| rs72778867  | T | 0.065   |
| rs2255513   | A | 0.0348  |
| rs11592799  | G | -0.0241 |
| rs11187032  | T | -0.0284 |
| rs66616698  | C | 0.0312  |
| rs139069829 | T | -0.0867 |
| rs11011704  | T | 0.0388  |
| rs118186958 | T | 0.1072  |

|             |   |         |
|-------------|---|---------|
| rs4145044   | C | 0.1177  |
| rs17329577  | C | -0.0884 |
| rs5030766   | G | 0.1111  |
| rs11593549  | C | 0.0307  |
| rs7085904   | G | 0.0358  |
| rs117423008 | C | -0.1353 |
| rs363285    | C | 0.0411  |
| rs2026426   | T | -0.0304 |
| rs1993488   | G | 0.0952  |
| rs139715885 | T | 0.1545  |
| rs114583160 | T | 0.1109  |
| rs73264611  | T | 0.0637  |
| rs55717466  | C | -0.0468 |
| rs639813    | C | -0.0301 |
| rs10999675  | T | 0.0257  |
| rs140503999 | G | 0.1133  |
| rs17247987  | A | 0.0247  |
| rs140887894 | T | 0.1258  |
| rs7072911   | A | 0.0279  |
| rs11011728  | A | 0.0233  |
| rs71493332  | G | 0.0899  |
| rs117674136 | T | 0.0825  |
| rs663177    | T | 0.0259  |
| rs6482225   | A | -0.0504 |
| rs79103243  | A | 0.1496  |
| rs117288353 | C | 0.1026  |
| rs2492592   | T | 0.0933  |
| rs13376755  | T | -0.0722 |
| rs11592174  | C | 0.0431  |
| rs56077987  | G | -0.0306 |
| rs111721391 | A | 0.1053  |
| rs564088    | C | 0.0255  |
| rs117802248 | T | 0.1654  |
| rs2913117   | G | -0.0361 |
| rs141663375 | C | 0.0918  |
| rs11013093  | T | 0.0326  |
| rs7916738   | T | 0.0382  |
| rs117229740 | C | -0.1907 |
| rs74441300  | C | 0.0881  |
| rs61840209  | T | -0.0253 |
| rs74139685  | T | -0.1207 |
| rs143723910 | C | 0.1197  |
| rs118073540 | T | -0.1003 |
| rs78580845  | C | 0.093   |
| rs142241419 | G | 0.1314  |
| rs117595258 | T | 0.0542  |
| rs1249402   | A | 0.0879  |

|             |   |         |
|-------------|---|---------|
| rs140909693 | A | -0.1436 |
| rs12780474  | C | -0.0353 |
| rs10128495  | T | 0.0247  |
| rs12265962  | G | 0.1275  |
| rs7086892   | C | -0.1073 |
| rs142221364 | C | 0.13    |
| rs12768504  | C | 0.0278  |
| rs12263908  | G | -0.0762 |
| rs56193492  | C | 0.1035  |
| rs3915773   | C | 0.0294  |
| rs11255522  | T | 0.0302  |
| rs146357064 | C | -0.0892 |
| rs4492772   | A | 0.028   |
| rs71493882  | T | 0.0392  |
| rs146697696 | A | 0.1745  |
| rs11200710  | C | 0.0309  |
| rs11598970  | T | 0.0369  |
| rs145483835 | T | -0.1499 |
| rs117819417 | A | -0.1177 |
| rs1343008   | T | -0.0399 |
| rs78030671  | G | 0.0903  |
| rs11196148  | T | 0.0371  |
| rs10508687  | C | 0.0453  |
| rs4474359   | C | 0.0411  |
| rs117210840 | A | 0.0779  |
| rs621375    | C | -0.0355 |
| rs7918439   | T | 0.0961  |
| rs147902578 | G | 0.086   |
| rs55764917  | T | 0.0875  |
| rs17476930  | G | 0.1049  |
| rs1926050   | T | -0.0245 |
| rs150476714 | C | -0.1459 |
| rs7089060   | G | -0.0246 |
| rs2487986   | G | -0.0237 |
| rs144205725 | T | 0.04    |
| rs1148301   | C | 0.0252  |
| rs10509158  | T | -0.0294 |
| rs7093735   | T | -0.0251 |
| rs11002453  | G | 0.0315  |
| rs61875072  | A | 0.0976  |
| rs12249419  | A | 0.041   |
| rs11007663  | T | 0.0811  |
| rs11006136  | C | -0.0369 |
| rs7085672   | A | 0.0259  |
| rs72766726  | T | -0.076  |
| rs74661804  | T | -0.1509 |
| rs2996070   | C | 0.0357  |

|             |   |         |
|-------------|---|---------|
| rs145776463 | G | -0.1028 |
| rs10437352  | C | 0.0254  |
| rs45442995  | T | -0.1963 |
| rs16930948  | C | -0.137  |
| rs2265881   | A | 0.1169  |
| rs6585999   | C | 0.233   |
| rs76296217  | T | -0.0663 |
| rs4442446   | C | 0.1176  |
| rs11014264  | T | -0.1436 |
| rs117769989 | A | 0.1996  |
| rs7903492   | G | -0.0557 |
| rs77256089  | T | 0.1439  |
| rs12411765  | A | -0.0323 |
| rs72781984  | A | -0.1526 |
| rs71492243  | A | -0.087  |
| rs2474972   | A | -0.0743 |
| rs11599843  | T | 0.0985  |
| rs1628670   | G | 0.0648  |
| rs1149938   | G | 0.0233  |
| rs12778041  | G | 0.0257  |
| rs11018207  | A | 0.044   |
| rs75916877  | T | 0.0461  |
| rs72779812  | A | 0.0888  |
| rs7081412   | A | -0.0333 |
| rs2943763   | G | -0.0285 |
| rs511295    | G | 0.1146  |
| rs1875005   | T | -0.0241 |
| rs117912694 | C | 0.0887  |
| rs117306022 | T | -0.0998 |
| rs11596238  | G | -0.0591 |
| rs10995108  | C | 0.0416  |
| rs72825240  | A | -0.0366 |
| rs11594819  | A | -0.0255 |
| rs17135903  | T | 0.1008  |
| rs145175052 | T | -0.0365 |
| rs10998358  | C | 0.0538  |
| rs72804593  | A | 0.0559  |
| rs1538897   | T | -0.0506 |
| rs72838568  | T | 0.0518  |
| rs10903509  | A | -0.0592 |
| rs11592861  | T | -0.0269 |
| rs10821696  | C | 0.0258  |
| rs10999556  | C | 0.099   |
| rs76725278  | C | 0.0616  |
| rs2015190   | A | 0.0364  |
| rs11002284  | T | 0.0308  |
| rs11814823  | T | -0.0551 |

|             |   |         |
|-------------|---|---------|
| rs72828735  | G | 0.0885  |
| rs78632776  | T | 0.0516  |
| rs7915264   | G | 0.0347  |
| rs59498073  | T | -0.0559 |
| rs111515266 | G | 0.1081  |
| rs56067805  | T | -0.0482 |
| rs10905429  | T | 0.0509  |
| rs11015890  | T | -0.0284 |
| rs78271387  | C | -0.1105 |
| rs60206118  | A | -0.0304 |
| rs11599423  | T | -0.1164 |
| rs76207412  | A | 0.1313  |
| rs11187344  | A | 0.1301  |
| rs117392249 | G | 0.0756  |
| rs17296393  | G | -0.0297 |
| rs77832620  | T | -0.0286 |
| rs4748457   | G | -0.0344 |
| rs17567544  | A | -0.0583 |
| rs12775490  | G | 0.0966  |
| rs1811676   | G | -0.0326 |
| rs12770417  | A | -0.0314 |
| rs11524313  | A | -0.0318 |
| rs10740109  | C | 0.0256  |
| rs10887331  | A | 0.0306  |
| rs147799812 | G | 0.1098  |
| rs3962222   | C | 0.0811  |
| rs10886134  | A | -0.0236 |
| rs117277796 | T | 0.1205  |
| rs80087872  | A | -0.0675 |
| rs75970537  | A | 0.0551  |
| rs12252832  | T | -0.0241 |
| rs11256974  | G | 0.0305  |
| rs72770509  | G | -0.0473 |
| rs79867207  | C | 0.0666  |
| rs117472339 | T | -0.1912 |
| rs12146164  | T | 0.0671  |
| rs1707281   | T | 0.0239  |
| rs77797978  | A | -0.0442 |
| rs11575688  | C | -0.1008 |
| rs117282992 | G | -0.0671 |
| rs7897232   | C | 0.0996  |
| rs79486175  | A | 0.0927  |
| rs11252011  | G | 0.0456  |
| rs17133009  | A | 0.0285  |
| rs68135249  | C | 0.0976  |
| rs147247912 | G | -0.1431 |
| rs10740412  | T | 0.0279  |



|             |   |         |
|-------------|---|---------|
| rs7075891   | G | -0.027  |
| rs56154977  | T | 0.0492  |
| rs117626178 | A | -0.1007 |
| rs780823    | T | 0.0254  |
| rs74426251  | G | -0.0645 |
| rs117235382 | A | 0.1384  |
| rs78239292  | T | 0.0697  |
| rs117949398 | G | 0.0933  |
| rs55836934  | A | 0.0723  |
| rs76942349  | T | 0.124   |
| rs9322838   | A | -0.0836 |
| rs7893908   | G | -0.0382 |
| rs61842752  | G | 0.0241  |
| rs41282013  | A | -0.0721 |
| rs149604849 | G | 0.1696  |
| rs56138096  | C | -0.0689 |
| rs9787599   | C | 0.0511  |
| rs2277227   | G | 0.0232  |
| rs144345547 | T | -0.1802 |
| rs17231490  | T | 0.0996  |
| rs7901633   | C | 0.0229  |
| rs2488067   | C | 0.0912  |
| rs10748636  | G | -0.038  |
| rs61869770  | G | 0.0385  |
| rs12217219  | A | 0.029   |
| rs112545254 | A | -0.1664 |
| rs61864203  | C | 0.0835  |
| rs17758801  | A | 0.0626  |
| rs10903515  | C | -0.0246 |
| rs9423431   | C | 0.0465  |
| rs118001161 | G | 0.1178  |
| rs112247469 | A | 0.0956  |
| rs75284708  | A | 0.0648  |
| rs7075850   | C | 0.0382  |
| rs58828818  | G | 0.0549  |
| rs34203753  | C | 0.0468  |
| rs115820513 | T | -0.1132 |
| rs11198112  | T | -0.0334 |
| rs11597083  | T | -0.0408 |
| rs6602798   | C | 0.0274  |
| rs2137425   | A | 0.0897  |
| rs11009684  | T | -0.1293 |
| rs75998251  | A | -0.1445 |
| rs11598011  | T | 0.1579  |
| rs10885153  | G | 0.0453  |
| rs477851    | T | 0.1366  |
| rs11598565  | G | -0.0229 |

|             |   |         |
|-------------|---|---------|
| rs744680    | A | -0.0331 |
| rs66526283  | G | 0.0956  |
| rs76136820  | A | -0.0603 |
| rs11250955  | G | 0.0252  |
| rs11599136  | C | -0.0334 |
| rs4313476   | C | 0.0265  |
| rs75918060  | A | -0.059  |
| rs117713998 | A | 0.0586  |
| rs142561255 | G | -0.1083 |
| rs4919508   | C | 0.0438  |
| rs10733990  | A | -0.0278 |
| rs79501639  | G | 0.0768  |
| rs111786141 | G | 0.0884  |
| rs61871759  | A | 0.0881  |
| rs142755663 | G | -0.0741 |
| rs17154488  | C | 0.1238  |
| rs78837686  | T | -0.0977 |
| rs11814111  | T | 0.0289  |
| rs61872814  | A | -0.1046 |
| rs2762630   | G | -0.0267 |
| rs72778707  | T | -0.1515 |
| rs74797466  | G | -0.1044 |
| rs7099743   | A | 0.0704  |
| rs72800299  | A | 0.0277  |
| rs12098433  | C | -0.0353 |
| rs74163103  | G | 0.0415  |
| rs11258710  | A | 0.0236  |
| rs147457846 | T | -0.1266 |
| rs11597567  | G | 0.0403  |
| rs72827820  | T | -0.03   |
| rs17294284  | A | -0.0531 |
| rs117655607 | C | 0.1393  |
| rs72817120  | T | 0.0639  |
| rs10509404  | T | -0.2333 |
| rs117658697 | G | 0.0823  |
| rs56088388  | G | -0.0849 |
| rs2998150   | T | 0.0342  |
| rs745986    | G | -0.0274 |
| rs118163048 | G | -0.1598 |
| rs55834629  | T | -0.0568 |
| rs142912908 | T | -0.1301 |
| rs148428310 | G | -0.1178 |
| rs911770    | A | -0.0282 |
| rs41289343  | A | -0.033  |
| rs1338055   | C | 0.0304  |
| rs115284912 | T | 0.1267  |
| rs16912322  | G | 0.0863  |

|             |   |         |
|-------------|---|---------|
| rs7912066   | T | 0.0231  |
| rs11185930  | C | -0.0504 |
| rs61864681  | T | -0.1245 |
| rs7091146   | G | -0.0635 |
| rs61678747  | A | 0.0617  |
| rs117000475 | A | 0.1127  |
| rs7907170   | T | 0.1386  |
| rs7096732   | A | 0.0406  |
| rs12247654  | G | 0.0452  |
| rs61850372  | C | -0.0602 |
| rs116953792 | T | -0.0727 |
| rs4347315   | T | 0.1042  |
| rs7903377   | A | 0.0259  |
| rs149501333 | T | -0.0854 |
| rs4935530   | G | 0.0297  |
| rs2182859   | G | 0.0277  |
| rs2039032   | C | -0.0359 |
| rs12771540  | C | -0.0328 |
| rs77519778  | A | -0.0887 |
| rs12416510  | A | -0.0296 |
| rs3026708   | C | 0.0833  |
| rs77349507  | A | -0.0755 |
| rs80217188  | C | 0.0974  |
| rs141936426 | G | 0.105   |
| rs146706804 | T | -0.1589 |
| rs10883595  | C | -0.026  |
| rs78312843  | C | -0.103  |
| rs142095230 | C | 0.1047  |
| rs4934977   | G | -0.0245 |
| rs6584049   | T | 0.0232  |
| rs10887372  | G | -0.0241 |
| rs112181830 | T | 0.152   |
| rs10788585  | C | -0.0233 |
| rs74149568  | T | 0.1811  |
| rs10788116  | T | 0.0251  |
| rs11257061  | G | 0.0277  |
| rs56022680  | A | -0.1183 |
| rs11812091  | A | 0.0432  |
| rs10748861  | T | 0.0342  |
| rs7919442   | T | 0.1823  |
| rs10906214  | A | -0.036  |
| rs72778804  | T | 0.0366  |
| rs2489389   | A | -0.0492 |
| rs4880221   | C | -0.0327 |
| rs56340524  | G | -0.0785 |
| rs147597799 | G | -0.079  |
| rs74485835  | A | -0.0891 |

|             |   |         |
|-------------|---|---------|
| rs143073859 | T | -0.0799 |
| rs796076    | G | -0.0288 |
| rs79407012  | A | -0.0561 |
| rs3858304   | A | 0.0264  |
| rs9423658   | A | -0.0317 |
| rs150295340 | C | -0.1238 |
| rs12779177  | A | -0.0774 |
| rs76988822  | T | 0.0766  |
| rs112255166 | T | 0.1731  |
| rs594701    | T | -0.0539 |
| rs71471245  | G | -0.0842 |
| rs143509576 | A | -0.1257 |
| rs74155842  | C | 0.0586  |
| rs17330671  | T | -0.1444 |
| rs143869408 | A | -0.1459 |
| rs12770141  | T | 0.0387  |
| rs117064900 | A | 0.1221  |
| rs61856140  | A | -0.0525 |
| rs805709    | A | 0.0243  |
| rs2818396   | T | 0.0488  |
| rs10795660  | A | 0.0444  |
| rs61865114  | G | 0.0318  |
| rs11593936  | T | -0.0704 |
| rs140320258 | A | 0.0425  |
| rs75175671  | A | 0.0944  |
| rs10762697  | G | 0.0233  |
| rs4596996   | G | 0.0227  |
| rs7896740   | C | 0.0559  |
| rs11187699  | G | -0.1005 |
| rs12781701  | C | 0.0334  |
| rs10827312  | A | 0.0615  |
| rs10994957  | C | 0.0998  |
| rs115148500 | T | -0.06   |
| rs12257449  | G | 0.026   |
| rs12356363  | T | 0.0369  |
| rs66546375  | G | -0.1043 |
| rs12413983  | T | -0.0666 |
| rs112058766 | A | -0.1473 |
| rs10786054  | T | -0.0507 |
| rs74386455  | T | 0.0937  |
| rs497007    | T | -0.0674 |
| rs10830106  | A | -0.0231 |
| rs7095794   | C | 0.0496  |
| rs72801406  | G | -0.0528 |
| rs701863    | C | 0.0274  |
| rs77255067  | A | 0.1004  |
| rs142266931 | A | 0.1385  |

|             |   |         |
|-------------|---|---------|
| rs76838312  | T | -0.1363 |
| rs7096573   | T | 0.0817  |
| rs10763596  | A | 0.0313  |
| rs149099589 | A | 0.106   |
| rs2211538   | C | 0.0294  |
| rs3750777   | C | 0.0241  |
| rs117780111 | A | -0.1128 |
| rs12359405  | T | -0.0529 |
| rs138004790 | T | 0.0548  |
| rs41295057  | G | -0.0546 |
| rs61847272  | T | -0.1213 |
| rs7086761   | A | 0.1115  |
| rs117206744 | T | 0.0914  |
| rs34817967  | G | 0.0942  |
| rs61837794  | A | -0.1118 |
| rs1418896   | A | 0.0806  |
| rs3119568   | T | 0.0241  |
| rs111925069 | C | 0.1241  |
| rs2394791   | A | -0.0514 |
| rs146019523 | C | -0.148  |
| rs753121    | T | 0.0962  |
| rs4078097   | A | -0.0236 |
| rs3814184   | A | -0.0293 |
| rs4747074   | C | -0.0461 |
| rs76714092  | C | 0.1636  |
| rs72829242  | C | 0.0269  |
| rs11596162  | C | 0.0249  |
| rs1775559   | A | 0.0316  |
| rs72839237  | A | -0.034  |
| rs117343383 | T | 0.0742  |
| rs7922157   | A | 0.0508  |
| rs11252102  | G | -0.036  |
| rs117363143 | T | -0.0704 |
| rs12245911  | C | -0.024  |
| rs12259680  | A | -0.1284 |
| rs1259590   | C | -0.0241 |
| rs6584312   | C | 0.028   |
| rs72774582  | A | 0.0693  |
| rs1915606   | C | -0.0227 |
| rs808279    | T | 0.0252  |
| rs7904554   | C | -0.0235 |
| rs146776177 | A | -0.1947 |
| rs7100483   | C | -0.0408 |
| rs117890858 | A | -0.0637 |
| rs117704205 | C | -0.1781 |
| rs146516596 | T | -0.1575 |
| rs1475556   | G | -0.0971 |

|             |   |         |
|-------------|---|---------|
| rs11197576  | C | -0.0283 |
| rs74507125  | C | 0.1204  |
| rs2121538   | G | 0.024   |
| rs12768377  | T | 0.0252  |
| rs117656494 | A | -0.1621 |
| rs141012959 | T | -0.1081 |
| rs974012    | C | -0.0297 |
| rs72789787  | A | -0.0338 |
| rs79459101  | A | 0.0596  |
| rs11008377  | A | 0.0824  |
| rs61875286  | C | 0.0308  |
| rs142840298 | G | 0.2188  |
| rs148601570 | A | -0.1498 |
| rs75556860  | C | -0.1173 |
| rs9423228   | A | -0.0422 |
| rs34014569  | G | -0.0878 |
| rs144380919 | T | 0.1987  |
| rs4746840   | C | -0.0393 |
| rs79340054  | C | 0.0904  |
| rs1794414   | C | 0.0222  |
| rs41308663  | C | 0.0798  |
| rs5028276   | G | 0.0904  |
| rs146294863 | A | 0.095   |
| rs72763771  | T | 0.042   |
| rs220335    | G | -0.0245 |
| rs72810942  | G | 0.0923  |
| rs74867287  | T | 0.1308  |
| rs78726987  | A | 0.1117  |
| rs16920115  | A | -0.1117 |
| rs76111283  | A | 0.1154  |
| rs11253246  | T | -0.0576 |
| rs72805171  | A | -0.102  |
| rs827329    | A | -0.0272 |
| rs2501571   | T | 0.0355  |
| rs17393077  | T | 0.1186  |
| rs7907613   | T | -0.0227 |
| rs2458689   | G | 0.032   |
| rs353191    | C | -0.025  |
| rs34148401  | A | -0.0832 |
| rs141933934 | T | 0.1006  |
| rs113869402 | C | -0.1    |
| rs7100154   | C | 0.0262  |
| rs11018008  | A | 0.0229  |
| rs112819911 | A | 0.172   |
| rs1009543   | G | -0.0242 |
| rs9663421   | T | -0.0255 |
| rs79368837  | G | -0.0873 |

|             |   |         |
|-------------|---|---------|
| rs671024    | C | 0.027   |
| rs77150680  | C | 0.0961  |
| rs12781139  | A | 0.0425  |
| rs5008535   | A | 0.0512  |
| rs72807395  | G | -0.0835 |
| rs10508291  | G | 0.0466  |
| rs17155690  | T | 0.0672  |
| rs56389707  | G | 0.0428  |
| rs61859272  | A | 0.0563  |
| rs10785943  | T | 0.0253  |
| rs55659548  | G | -0.0605 |
| rs10764769  | C | -0.0267 |
| rs150980570 | A | -0.0954 |
| rs74139266  | A | -0.0383 |
| rs3758549   | A | -0.0281 |
| rs76252319  | T | -0.2316 |
| rs7081308   | T | -0.0493 |
| rs7909711   | G | -0.0233 |
| rs11814274  | G | -0.058  |
| rs11255225  | G | -0.0283 |
| rs72771596  | A | 0.1086  |
| rs2646415   | T | 0.078   |
| rs7097367   | T | -0.0248 |
| rs58534530  | T | 0.1352  |
| rs117011462 | T | 0.1061  |
| rs117601788 | C | 0.0786  |
| rs12244411  | C | -0.0366 |
| rs1937851   | A | -0.0386 |
| rs10763837  | T | -0.0231 |
| rs7091367   | T | 0.0387  |
| rs113517693 | T | -0.1499 |
| rs67082123  | T | 0.0434  |
| rs11252664  | A | -0.031  |
| rs77952867  | C | 0.1073  |
| rs12264839  | A | -0.0771 |
| rs75548567  | T | -0.0779 |
| rs118167991 | A | -0.1174 |
| rs10825357  | T | 0.0311  |
| rs7912496   | T | 0.0339  |
| rs76970907  | G | 0.052   |
| rs7100354   | G | 0.087   |
| rs74472826  | C | 0.1089  |
| rs3125617   | T | -0.0304 |
| rs10885862  | A | 0.0295  |
| rs10786225  | G | 0.0567  |
| rs10430694  | C | -0.0237 |
| rs61749960  | A | 0.0285  |

|             |   |         |
|-------------|---|---------|
| rs142602430 | A | -0.0941 |
| rs7070819   | G | -0.0494 |
| rs2383995   | A | -0.0653 |
| rs7911503   | G | 0.0243  |
| rs4745991   | C | 0.0229  |
| rs12263941  | A | 0.0481  |
| rs116961103 | A | -0.1779 |
| rs2505431   | T | -0.0228 |
| rs10509399  | C | -0.0535 |
| rs7921411   | A | 0.0475  |
| rs76365825  | T | 0.1038  |
| rs35882064  | G | -0.0521 |
| rs12220371  | T | -0.0279 |
| rs74126769  | T | 0.2017  |
| rs149941421 | T | 0.1408  |
| rs4935046   | C | -0.0219 |
| rs10995803  | G | -0.055  |
| rs11598552  | C | 0.0354  |
| rs7913157   | A | -0.03   |
| rs893512    | A | 0.1233  |
| rs41279942  | T | -0.0983 |
| rs117269431 | T | -0.074  |
| rs138452792 | C | 0.1133  |
| rs667707    | C | -0.0247 |
| rs117349842 | C | -0.0598 |
| rs1886895   | C | 0.0231  |
| rs139656593 | T | -0.155  |
| rs7082368   | C | -0.0264 |
| rs7898891   | A | -0.0248 |
| rs114378562 | G | -0.031  |
| rs3013180   | C | 0.0275  |
| rs2812529   | T | -0.0283 |
| rs10887601  | G | -0.0225 |
| rs117945134 | T | -0.221  |
| rs7080293   | A | 0.1631  |
| rs74506454  | T | 0.0548  |
| rs117872193 | T | -0.1116 |
| rs2441735   | A | 0.0233  |
| rs150084675 | T | 0.1177  |
| rs11002175  | T | 0.046   |
| rs4880598   | C | 0.0256  |
| rs141918288 | T | -0.115  |
| rs35815495  | A | -0.0515 |
| rs11816252  | G | -0.0381 |
| rs143005444 | C | 0.1541  |
| rs41287472  | G | -0.1309 |
| rs553237    | A | 0.0501  |



|             |   |         |
|-------------|---|---------|
| rs75202291  | G | 0.0568  |
| rs137906597 | C | -0.1686 |
| rs10905278  | A | 0.0624  |
| rs11198028  | G | -0.1157 |
| rs141687605 | T | -0.1941 |
| rs117976398 | C | -0.1704 |
| rs574487    | C | -0.0233 |
| rs10886347  | C | -0.04   |
| rs55970227  | C | -0.0466 |
| rs11255016  | A | 0.0442  |
| rs78581455  | C | -0.0697 |
| rs76692741  | A | -0.0658 |
| rs7082680   | A | 0.0261  |
| rs77722205  | G | 0.0557  |
| rs12775087  | C | 0.06    |
| rs74158886  | T | 0.0664  |
| rs144406665 | G | -0.1135 |
| rs10825780  | A | 0.0307  |
| rs10885398  | G | 0.0312  |
| rs35541533  | G | 0.0829  |
| rs7912117   | T | 0.0363  |
| rs2127596   | G | 0.0862  |
| rs75793179  | T | -0.1134 |
| rs701803    | T | -0.0677 |
| rs10904125  | G | 0.0292  |
| rs10906031  | G | 0.0991  |
| rs118074019 | T | -0.0928 |
| rs7909234   | T | 0.1207  |
| rs59079404  | T | 0.0439  |
| rs116976171 | T | 0.1311  |
| rs11008826  | T | 0.0815  |
| rs56098912  | A | 0.042   |
| rs2483699   | T | -0.1454 |
| rs4919141   | G | -0.0275 |
| rs17119652  | A | 0.049   |
| rs2249693   | C | -0.0415 |
| rs143310593 | C | -0.1056 |
| rs12164772  | G | -0.0266 |
| rs74640132  | A | 0.0739  |
| rs58334421  | T | -0.042  |
| rs77063625  | G | 0.0565  |
| rs2820612   | C | 0.1407  |
| rs10828717  | A | 0.0239  |
| rs11005582  | T | 0.0504  |
| rs35267372  | C | 0.024   |
| rs67601813  | G | -0.043  |
| rs1243396   | G | 0.0229  |

|             |   |         |
|-------------|---|---------|
| rs12770130  | T | 0.1571  |
| rs2431629   | T | 0.0394  |
| rs117989165 | A | 0.1113  |
| rs140405273 | C | 0.0964  |
| rs1876324   | G | 0.0265  |
| rs1133189   | G | -0.0231 |
| rs79708112  | G | -0.0463 |
| rs79932461  | G | -0.0757 |
| rs140049944 | C | -0.1399 |
| rs150847627 | A | 0.1306  |
| rs111844758 | A | 0.1255  |
| rs552066    | G | 0.033   |
| rs7897036   | C | 0.0614  |
| rs12264426  | A | -0.0458 |
| rs10903951  | G | -0.0311 |
| rs10998517  | C | -0.0462 |
| rs10884066  | T | 0.0252  |
| rs55936526  | A | -0.0277 |
| rs117774982 | A | -0.0826 |
| rs2244172   | A | -0.032  |
| rs10047303  | A | 0.1471  |
| rs61857570  | C | -0.0551 |
| rs11192628  | G | 0.0295  |
| rs2120932   | C | 0.0464  |
| rs76735861  | C | -0.0691 |
| rs56936588  | C | 0.0295  |
| rs12776622  | G | -0.0534 |
| rs11591576  | A | -0.0389 |
| rs117685049 | G | -0.1087 |
| rs36011364  | C | -0.1072 |
| rs1997000   | T | -0.0222 |
| rs2236295   | T | 0.0229  |
| rs141815656 | C | -0.0571 |
| rs11596259  | A | -0.1061 |
| rs79560952  | T | 0.1549  |
| rs74667491  | C | -0.088  |
| rs116020030 | G | -0.1055 |
| rs73315862  | T | 0.0422  |
| rs61881651  | T | -0.0623 |
| rs4310546   | T | 0.0399  |
| rs117963870 | T | -0.1596 |
| rs12252027  | T | 0.0371  |
| rs2209095   | G | -0.0551 |
| rs79453258  | T | -0.1436 |
| rs28552714  | A | -0.029  |
| rs4748958   | T | -0.0331 |
| rs34201032  | T | -0.0279 |

|             |   |         |
|-------------|---|---------|
| rs139555180 | G | -0.1557 |
| rs12249060  | T | -0.0289 |
| rs74323412  | C | 0.0759  |
| rs12775695  | T | -0.0625 |
| rs56360211  | G | 0.0795  |
| rs1219860   | G | -0.0316 |
| rs41291358  | A | 0.024   |
| rs143981707 | G | -0.1959 |
| rs78990342  | A | -0.1653 |
| rs1219531   | T | -0.0253 |
| rs117126696 | A | -0.1018 |
| rs41288000  | A | 0.0913  |
| rs12571814  | G | 0.0886  |
| rs715835    | T | 0.0307  |
| rs80329455  | T | 0.0734  |
| rs35281099  | T | 0.0344  |
| rs4934454   | A | -0.024  |
| rs78027532  | T | 0.1346  |
| rs61836665  | C | -0.0721 |
| rs7078522   | A | 0.0876  |
| rs143760724 | A | 0.148   |
| rs112252058 | A | 0.1488  |
| rs72811493  | C | 0.1177  |
| rs76428404  | G | -0.1183 |
| rs61864510  | G | -0.0228 |
| rs141341351 | A | 0.0802  |
| rs12265861  | T | -0.0271 |
| rs117569363 | G | 0.1029  |
| rs117321461 | C | 0.1122  |
| rs79008838  | C | 0.116   |
| rs61190999  | T | -0.0443 |
| rs61862003  | T | 0.0645  |
| rs141742223 | T | 0.1686  |
| rs996359    | T | 0.0289  |
| rs10885412  | A | 0.0325  |
| rs12359826  | T | -0.0508 |
| rs150366279 | T | 0.0715  |
| rs1660997   | C | 0.023   |
| rs138369249 | T | -0.1111 |
| rs10823697  | C | -0.1316 |
| rs76537398  | T | -0.1    |
| rs11002924  | A | -0.0264 |
| rs118011456 | A | -0.0694 |
| rs10510028  | C | 0.0382  |
| rs73268556  | G | 0.0298  |
| rs36051028  | T | -0.0502 |
| rs61859874  | C | 0.1282  |

|             |   |         |
|-------------|---|---------|
| rs73322773  | A | -0.0388 |
| rs7904183   | T | -0.0286 |
| rs11250775  | C | -0.0395 |
| rs148010840 | A | -0.0865 |
| rs78054301  | T | 0.0308  |
| rs10904598  | C | -0.0391 |
| rs11101132  | A | 0.0414  |
| rs117265392 | G | -0.2118 |
| rs10885073  | G | 0.0551  |
| rs2768469   | A | -0.0245 |
| rs61838364  | A | -0.0385 |
| rs4935116   | A | 0.029   |
| rs10828206  | T | 0.0321  |
| rs76693237  | A | 0.0886  |
| rs10994972  | C | -0.1231 |
| rs118172472 | T | -0.1035 |
| rs593302    | C | -0.0448 |
| rs7079286   | G | -0.034  |
| rs10901827  | G | -0.0324 |
| rs7896220   | G | 0.0249  |
| rs2211200   | C | -0.0357 |
| rs569910    | T | -0.0285 |
| rs2542617   | A | -0.0228 |
| rs12256944  | T | -0.0366 |
| rs788054    | T | -0.0359 |
| rs61886179  | A | 0.0622  |
| rs11594117  | A | 0.0284  |
| rs11017133  | T | 0.0251  |
| rs2853764   | G | -0.0348 |
| rs148466730 | A | -0.179  |
| rs2497806   | T | -0.0231 |
| rs77405585  | G | 0.1133  |
| rs12267151  | A | 0.0447  |
| rs7097002   | A | -0.0672 |
| rs2147743   | G | 0.0229  |
| rs7910394   | C | -0.0384 |
| rs77001515  | A | 0.121   |
| rs76895669  | T | -0.0466 |
| rs12251595  | G | 0.0413  |
| rs10996350  | T | -0.0277 |
| rs7896699   | T | 0.0258  |
| rs1408816   | C | 0.0397  |
| rs35805975  | A | 0.0734  |
| rs11003355  | A | 0.0333  |
| rs11195145  | C | -0.2066 |
| rs148527100 | C | 0.0705  |
| rs74940533  | T | 0.1762  |

|             |   |         |
|-------------|---|---------|
| rs72802725  | T | 0.0611  |
| rs7098796   | G | -0.0272 |
| rs10796039  | T | 0.0294  |
| rs78106675  | C | -0.0455 |
| rs1248977   | A | -0.041  |
| rs11002613  | G | 0.0316  |
| rs2250040   | C | 0.0465  |
| rs4375352   | T | -0.0256 |
| rs145087594 | G | 0.0987  |
| rs12256545  | T | 0.0689  |
| rs4146986   | C | 0.1358  |
| rs4362074   | C | -0.0467 |
| rs72817938  | T | 0.0458  |
| rs77000635  | G | 0.1266  |
| rs75522111  | G | 0.0956  |
| rs113481021 | A | 0.1044  |
| rs149784949 | A | 0.1389  |
| rs1152661   | C | 0.0236  |
| rs11245018  | T | -0.0991 |
| rs146440143 | G | 0.134   |
| rs116914623 | C | -0.1282 |
| rs4748510   | A | 0.0422  |
| rs6585276   | C | -0.045  |
| rs61861263  | T | -0.106  |
| rs140212798 | G | -0.1313 |
| rs72845518  | T | 0.1124  |
| rs117376733 | C | 0.0779  |
| rs4917782   | C | -0.0629 |
| rs45568534  | C | -0.1187 |
| rs12262149  | T | 0.0253  |
| rs17680014  | T | 0.115   |
| rs7896345   | G | -0.0257 |
| rs72795989  | T | -0.1714 |
| rs75230436  | C | 0.1201  |
| rs12217221  | T | -0.0263 |
| rs7094354   | C | 0.1266  |
| rs12244218  | T | -0.0335 |
| rs116954407 | C | 0.1185  |
| rs11256316  | G | -0.0412 |
| rs117622348 | C | 0.1011  |
| rs4918496   | A | 0.0663  |
| rs72804888  | A | 0.0818  |
| rs117127972 | G | -0.1439 |
| rs150379236 | A | 0.1783  |
| rs117454202 | T | -0.0842 |
| rs75318090  | T | -0.0528 |
| rs77516404  | T | 0.0648  |

|             |   |         |
|-------------|---|---------|
| rs60743622  | C | -0.0732 |
| rs35956668  | T | 0.0723  |
| rs149009264 | G | -0.1687 |
| rs10508221  | A | 0.0386  |
| rs3824710   | T | 0.0786  |
| rs11004800  | C | -0.0251 |
| rs7075347   | T | 0.0482  |
| rs12246720  | A | -0.0282 |
| rs112548539 | A | -0.05   |
| rs72831468  | G | 0.0458  |
| rs111248575 | A | 0.165   |
| rs12776010  | G | 0.0632  |
| rs2816838   | T | -0.0304 |
| rs34413293  | C | 0.0952  |
| rs9783145   | C | -0.0233 |
| rs7092908   | G | 0.0769  |
| rs77610180  | G | -0.0797 |
| rs117684661 | A | -0.0953 |
| rs118019829 | G | -0.1266 |
| rs359304    | A | -0.0375 |
| rs141984722 | G | 0.1485  |
| rs11199825  | A | -0.1144 |
| rs17610275  | G | 0.0464  |
| rs10437479  | T | 0.1024  |
| rs11596266  | C | -0.0289 |
| rs17608196  | T | -0.04   |
| rs7073331   | T | 0.023   |
| rs35901205  | G | 0.1066  |
| rs61871136  | A | -0.1631 |
| rs116925738 | T | -0.1133 |
| rs4979997   | C | -0.0531 |
| rs117892250 | T | 0.0872  |
| rs3005196   | C | -0.0432 |
| rs117120818 | A | 0.11    |
| rs1915650   | T | 0.0265  |
| rs12262693  | C | -0.0361 |
| rs61830555  | T | 0.031   |
| rs1133654   | T | -0.0239 |
| rs10994615  | G | -0.0379 |
| rs363294    | T | 0.0472  |
| rs1312878   | C | -0.0326 |
| rs9663664   | A | -0.1312 |
| rs11186149  | C | -0.0407 |
| rs145452121 | A | 0.0774  |
| rs11255494  | C | -0.0418 |
| rs61851186  | T | -0.0882 |
| rs148426939 | T | -0.0956 |

|             |   |         |
|-------------|---|---------|
| rs8177607   | C | 0.0356  |
| rs117384165 | A | 0.1006  |
| rs61869494  | C | -0.0386 |
| rs1016151   | A | 0.0357  |
| rs11009356  | C | 0.0295  |
| rs77805203  | G | -0.098  |
| rs12356492  | C | -0.0635 |
| rs3954173   | A | -0.0249 |
| rs79361819  | G | 0.0412  |
| rs7899742   | C | -0.0239 |
| rs10905722  | T | 0.0266  |
| rs148426142 | A | 0.2004  |
| rs10999289  | A | 0.0246  |
| rs144373386 | A | 0.0987  |
| rs11597363  | G | 0.057   |
| rs78227460  | A | 0.05    |
| rs35606930  | G | 0.0433  |
| rs7070370   | C | 0.0695  |
| rs76986874  | A | -0.1284 |
| rs2998058   | G | 0.0227  |
| rs79478455  | T | -0.1165 |
| rs7922293   | C | -0.0222 |
| rs303468    | C | 0.0449  |
| rs884646    | C | -0.0337 |
| rs1750796   | A | 0.0324  |
| rs113231662 | C | 0.1435  |
| rs1936624   | C | -0.092  |
| rs12356102  | A | -0.0823 |
| rs143625934 | T | -0.0776 |
| rs10906852  | T | 0.0259  |
| rs76473447  | T | 0.1046  |
| rs10437464  | G | -0.025  |
| rs118056081 | A | -0.1293 |
| rs1630777   | A | -0.1756 |
| rs11200559  | T | 0.0291  |
| rs72863805  | A | 0.1594  |
| rs144683018 | G | 0.1408  |
| rs7069887   | C | 0.0323  |
| rs870390    | C | -0.0288 |
| rs71474242  | A | 0.0381  |
| rs2904797   | G | -0.0233 |
| rs4838533   | C | -0.0244 |
| rs112240959 | T | -0.0689 |
| rs72791225  | T | -0.1306 |
| rs72787326  | C | 0.0489  |
| rs61847368  | T | 0.0505  |
| rs17767748  | T | 0.0428  |

|             |   |         |
|-------------|---|---------|
| rs41289275  | T | 0.0973  |
| rs12359509  | T | 0.0318  |
| rs145589376 | A | 0.1165  |
| rs72784465  | A | 0.0955  |
| rs117427570 | T | 0.1069  |
| rs77499339  | T | -0.0315 |
| rs10997934  | A | -0.0263 |
| rs117775078 | G | 0.0639  |
| rs10906870  | T | 0.0339  |
| rs1219528   | T | -0.0558 |
| rs7893781   | G | -0.0249 |
| rs12573451  | G | 0.0698  |
| rs12770549  | T | -0.0515 |
| rs2935695   | A | 0.0296  |
| rs10996181  | C | -0.1137 |
| rs76009868  | A | -0.1406 |
| rs6599671   | A | 0.0279  |
| rs7077264   | A | 0.0216  |
| rs72791650  | G | 0.1361  |
| rs2763355   | G | 0.0438  |
| rs117374812 | T | -0.0948 |
| rs3740437   | A | 0.0282  |
| rs117093993 | T | -0.1047 |
| rs10510018  | T | 0.0728  |
| rs7907272   | T | 0.1667  |
| rs72826640  | A | -0.043  |
| rs148990920 | T | 0.1323  |
| rs150476990 | G | 0.0428  |
| rs111234578 | T | 0.0602  |
| rs697245    | A | -0.048  |
| rs10752030  | T | 0.0231  |
| rs78060993  | T | 0.1109  |
| rs72818300  | A | -0.0439 |
| rs78298791  | A | 0.1039  |
| rs1270874   | A | -0.025  |
| rs34378235  | T | -0.0531 |
| rs117893292 | C | -0.103  |
| rs11596872  | A | 0.0284  |
| rs941852    | G | 0.0295  |
| rs10509043  | C | -0.031  |
| rs4881482   | C | 0.0582  |
| rs76538879  | C | 0.0695  |
| rs17715191  | G | -0.052  |
| rs112277959 | G | -0.0375 |
| rs11187267  | A | 0.1306  |
| rs17099753  | C | -0.0715 |
| rs117359250 | C | -0.0801 |



|             |   |         |
|-------------|---|---------|
| rs80073262  | C | -0.0895 |
| rs12778715  | A | -0.0218 |
| rs147200392 | G | -0.1463 |
| rs117403577 | A | 0.1088  |
| rs657293    | T | 0.0622  |
| rs2171304   | C | -0.0301 |
| rs11239252  | C | 0.0258  |
| rs662166    | G | -0.0218 |
| rs11201891  | T | -0.0624 |
| rs11592706  | T | 0.1241  |
| rs73587799  | A | -0.0355 |
| rs72790198  | C | -0.0484 |
| rs1912313   | A | -0.0833 |
| rs2420681   | T | 0.0256  |
| rs150800001 | A | 0.1249  |
| rs12767012  | A | -0.0699 |
| rs10510108  | G | 0.1081  |
| rs79242999  | A | 0.0766  |
| rs10887793  | T | 0.0218  |
| rs10794989  | G | -0.0224 |
| rs72789720  | G | 0.1226  |
| rs1649987   | G | 0.0297  |
| rs112149712 | G | 0.0681  |
| rs2765989   | A | 0.0314  |
| rs7918490   | T | -0.0721 |
| rs139216929 | C | 0.0659  |
| rs10826804  | T | -0.0232 |
| rs147195662 | C | -0.0994 |
| rs55950087  | A | 0.0796  |
| rs79155167  | A | 0.103   |
| rs117881343 | G | 0.1345  |
| rs112100165 | C | 0.0342  |
| rs78579101  | T | 0.0405  |
| rs144974214 | C | -0.146  |
| rs17381430  | C | 0.0598  |
| rs147472310 | A | -0.1642 |
| rs34489821  | A | -0.0274 |
| rs7895288   | G | -0.0249 |
| rs2243548   | C | 0.0227  |
| rs12780500  | C | -0.0258 |
| rs2271689   | G | 0.0277  |
| rs17112021  | G | 0.0287  |
| rs17097082  | A | -0.0236 |
| rs12356891  | T | -0.0755 |
| rs2377902   | G | 0.0215  |
| rs61015767  | T | -0.0747 |
| rs1200909   | T | 0.0272  |

|             |   |         |
|-------------|---|---------|
| rs117166715 | T | -0.132  |
| rs61835105  | G | -0.0467 |
| rs151333556 | T | 0.0584  |
| rs9415377   | A | -0.0244 |
| rs113709039 | A | -0.1426 |
| rs9421387   | C | -0.0262 |
| rs2579674   | C | 0.0352  |
| rs12357334  | G | -0.0246 |
| rs16925383  | C | -0.0531 |
| rs7908417   | T | 0.0354  |
| rs12779534  | C | -0.0216 |
| rs2912760   | T | -0.0255 |
| rs115515123 | T | -0.0877 |
| rs4282897   | G | -0.0543 |
| rs10821614  | T | 0.0472  |
| rs112772757 | A | 0.0467  |
| rs73248871  | C | 0.0747  |
| rs144692395 | C | -0.1118 |
| rs2622434   | C | 0.0349  |
| rs1331328   | A | 0.0298  |
| rs10827533  | C | -0.0296 |
| rs149360790 | T | 0.1498  |
| rs1936840   | C | 0.031   |
| rs79787088  | G | 0.0876  |
| rs2478829   | A | 0.0213  |
| rs75645449  | C | 0.1125  |
| rs7072493   | A | -0.03   |
| rs10829638  | A | 0.0399  |
| rs55988901  | A | -0.0665 |
| rs76360653  | G | 0.1971  |
| rs1917146   | A | -0.0387 |
| rs10901832  | G | -0.0334 |
| rs4880243   | A | 0.0368  |
| rs1757476   | G | 0.0232  |
| rs76180097  | A | 0.0921  |
| rs150066446 | A | -0.0875 |
| rs150862362 | C | -0.0769 |
| rs79407883  | T | 0.1318  |
| rs12264121  | G | -0.0647 |
| rs1830807   | A | 0.0738  |
| rs112978925 | C | -0.0849 |
| rs35494924  | C | 0.0267  |
| rs1004004   | C | -0.0222 |
| rs79063212  | A | 0.0733  |
| rs10995907  | G | 0.0428  |
| rs2260125   | C | 0.0271  |
| rs138992213 | G | -0.0884 |

|             |   |         |
|-------------|---|---------|
| rs140247309 | T | -0.0905 |
| rs138089801 | C | 0.1209  |
| rs143846626 | T | 0.0891  |
| rs816623    | C | -0.0503 |
| rs2490515   | A | 0.0426  |
| rs35154680  | C | 0.0905  |
| rs61854437  | A | -0.0398 |
| rs140637823 | T | 0.1496  |
| rs12413276  | A | -0.0293 |
| rs116688761 | G | 0.0572  |
| rs17128533  | T | 0.1301  |
| rs2901115   | C | 0.031   |
| rs28623342  | G | 0.0402  |
| rs11101503  | T | -0.0605 |
| rs143053446 | A | -0.1323 |
| rs17149675  | A | -0.0557 |
| rs9804356   | T | -0.0255 |
| rs7079137   | T | 0.0275  |
| rs35961871  | C | -0.1118 |
| rs77766729  | G | 0.0341  |
| rs118059178 | A | -0.0526 |
| rs6481773   | T | 0.0265  |
| rs12416017  | T | -0.0556 |
| rs61862122  | G | -0.099  |
| rs2607825   | G | -0.0236 |
| rs77805137  | C | 0.1512  |
| rs12218175  | A | -0.1156 |
| rs80342607  | A | -0.046  |
| rs1775908   | C | -0.0238 |
| rs7070042   | C | 0.0256  |
| rs150073994 | A | 0.1117  |
| rs2221422   | C | -0.0242 |
| rs17678706  | A | 0.0425  |
| rs10904307  | C | -0.0673 |
| rs7919481   | C | -0.0332 |
| rs76799284  | G | -0.0808 |
| rs140290857 | G | 0.1205  |
| rs10904797  | C | 0.0285  |
| rs58726672  | T | 0.0811  |
| rs11186609  | A | 0.0364  |
| rs7068744   | C | 0.0463  |
| rs150669290 | G | 0.1486  |
| rs143730175 | A | -0.076  |
| rs111322121 | T | -0.1324 |
| rs12570459  | G | 0.0326  |
| rs12780731  | T | 0.0367  |
| rs78859547  | G | -0.0911 |

|             |   |         |
|-------------|---|---------|
| rs7919144   | G | 0.0266  |
| rs78617290  | G | 0.1001  |
| rs10822494  | A | -0.0253 |
| rs2674331   | G | -0.0231 |
| rs1866308   | C | 0.0575  |
| rs73345560  | A | -0.0273 |
| rs138199843 | A | 0.1269  |
| rs868390    | A | 0.0369  |
| rs55664470  | A | -0.0515 |
| rs17296505  | T | -0.1329 |
| rs7100563   | G | 0.0297  |
| rs75867880  | A | -0.1569 |
| rs999993    | C | 0.0243  |
| rs471869    | T | 0.1921  |
| rs4918661   | C | 0.0773  |
| rs2995251   | T | -0.0272 |
| rs7070187   | G | -0.0219 |
| rs139252314 | A | 0.0648  |
| rs10905286  | T | -0.0307 |
| rs10995853  | G | -0.138  |
| rs7082854   | T | -0.0233 |
| rs117650774 | C | 0.0952  |
| rs12772804  | T | 0.0228  |
| rs150316602 | T | 0.076   |
| rs915156    | G | -0.0348 |
| rs11186217  | G | 0.0798  |
| rs2476984   | T | -0.0316 |
| rs7915867   | G | 0.0355  |
| rs1252031   | T | -0.0306 |
| rs79602520  | G | -0.1053 |
| rs116941049 | C | 0.0941  |
| rs117298992 | G | 0.1013  |
| rs150978029 | A | -0.1524 |
| rs11572180  | A | -0.0695 |
| rs1330001   | C | -0.0275 |
| rs6560783   | T | -0.0294 |
| rs1555489   | C | -0.0218 |
| rs10508469  | C | -0.0351 |
| rs78512518  | C | -0.0464 |
| rs72826564  | A | -0.0843 |
| rs34651189  | C | -0.0857 |
| rs60140501  | C | -0.0241 |
| rs146213821 | T | 0.1058  |
| rs2936542   | A | -0.0422 |
| rs149375009 | T | 0.1115  |
| rs1000251   | T | 0.0277  |
| rs6584836   | G | 0.0257  |

|             |   |         |
|-------------|---|---------|
| rs4622154   | C | 0.1473  |
| rs112323234 | A | 0.1018  |
| rs7915144   | T | -0.0291 |
| rs11189713  | T | -0.1384 |
| rs7079070   | A | 0.0223  |
| rs41289319  | C | -0.1235 |
| rs117557962 | G | -0.1189 |
| rs149766826 | A | 0.1667  |
| rs3758539   | T | -0.0446 |
| rs10885312  | A | -0.081  |
| rs10828949  | C | 0.0305  |
| rs111390063 | T | 0.09    |
| rs12769899  | A | -0.0713 |
| rs12415149  | A | 0.0212  |
| rs75996308  | C | -0.0349 |
| rs7077593   | C | 0.0578  |
| rs72826311  | A | -0.1495 |
| rs2813381   | A | 0.0263  |
| rs150854921 | A | -0.1112 |
| rs17123423  | C | 0.0531  |
| rs313500    | T | -0.0301 |
| rs11015638  | C | 0.0699  |
| rs56125289  | T | 0.1508  |
| rs4752338   | T | -0.0483 |
| rs11248240  | A | 0.0453  |
| rs77544640  | A | 0.1161  |
| rs10828658  | A | 0.024   |
| rs116792212 | T | 0.0928  |
| rs34698019  | T | -0.0309 |
| rs79194442  | A | -0.0493 |
| rs7071876   | A | -0.036  |
| rs1576441   | A | -0.0225 |
| rs143084446 | A | 0.1544  |
| rs4980186   | A | 0.0976  |
| rs117214784 | C | -0.1295 |
| rs2211397   | T | 0.0369  |
| rs7093793   | T | 0.0426  |
| rs117534923 | T | 0.0579  |
| rs4751939   | G | -0.0209 |
| rs11006200  | A | -0.0267 |
| rs147095385 | T | 0.1789  |
| rs10787224  | C | -0.0221 |
| rs766532    | T | -0.0286 |
| rs3006773   | C | 0.0335  |
| rs145555904 | G | 0.0857  |
| rs72770541  | A | 0.0967  |
| rs7098890   | T | -0.0429 |

|             |   |         |
|-------------|---|---------|
| rs10994958  | G | -0.0332 |
| rs1764072   | G | 0.0332  |
| rs6586019   | G | 0.0325  |
| rs7901909   | C | 0.0237  |
| rs55923699  | A | -0.0244 |
| rs12356774  | T | -0.1181 |
| rs17600621  | G | -0.1143 |
| rs74665472  | A | 0.1204  |
| rs78156552  | T | -0.1197 |
| rs113459553 | T | -0.0944 |
| rs143558968 | T | -0.1014 |
| rs111356081 | A | 0.1035  |
| rs150496555 | T | 0.104   |
| rs75894772  | A | -0.1479 |
| rs34650146  | C | 0.0868  |
| rs41398148  | A | 0.0837  |
| rs75256201  | T | 0.1113  |
| rs117324569 | A | 0.0845  |
| rs1684538   | T | -0.0239 |
| rs77713165  | C | 0.0722  |
| rs8181413   | T | -0.0333 |
| rs11251199  | A | -0.062  |
| rs116942575 | C | 0.0729  |
| rs1658322   | G | -0.0245 |
| rs111465954 | A | 0.0864  |
| rs10886212  | C | 0.0393  |
| rs7070203   | T | 0.0816  |
| rs35227156  | G | 0.0415  |
| rs72777897  | A | -0.0642 |
| rs17121011  | T | -0.152  |
| rs10886110  | A | -0.0244 |
| rs7080389   | A | -0.1056 |
| rs708433    | C | 0.0322  |
| rs141648900 | G | 0.0626  |
| rs2894317   | G | 0.0228  |
| rs59262477  | A | -0.0512 |
| rs718949    | G | 0.0263  |
| rs148106839 | G | 0.0736  |
| rs74542441  | G | 0.0622  |
| rs10824778  | C | -0.0324 |
| rs34513262  | A | -0.131  |
| rs144267777 | C | -0.13   |
| rs2918100   | T | 0.024   |
| rs148628052 | C | -0.1324 |
| rs112930549 | A | -0.0371 |
| rs3847346   | C | -0.0253 |
| rs141996973 | T | -0.0652 |

|             |   |         |
|-------------|---|---------|
| rs4948915   | A | 0.0593  |
| rs116237765 | C | 0.1399  |
| rs10794962  | T | -0.0239 |
| rs766949    | A | -0.082  |
| rs10508481  | G | -0.0297 |
| rs10508478  | G | -0.0239 |
| rs28718925  | T | 0.0214  |
| rs12261036  | G | -0.0588 |
| rs144476724 | G | 0.1278  |
| rs2126772   | A | 0.0493  |
| rs74327201  | C | 0.1307  |
| rs117928693 | C | -0.0833 |
| rs75360565  | A | -0.1373 |
| rs1194692   | T | 0.0244  |
| rs7917527   | C | 0.0797  |
| rs80109682  | G | -0.0698 |
| rs4344426   | A | -0.0685 |
| rs7899270   | C | -0.023  |
| rs12784071  | T | 0.027   |
| rs4750932   | A | -0.0393 |
| rs138220763 | G | 0.1441  |
| rs111760466 | C | 0.0559  |
| rs138258992 | G | -0.1051 |
| rs61866596  | C | -0.0454 |
| rs1324228   | G | -0.0249 |
| rs118104693 | C | 0.1334  |
| rs150814676 | G | 0.113   |
| rs74127180  | A | 0.0438  |
| rs147554527 | C | 0.096   |
| rs7100400   | G | -0.045  |
| rs17101163  | C | 0.0516  |
| rs881726    | C | -0.025  |
| rs1870416   | C | -0.0253 |
| rs147688097 | T | -0.0914 |
| rs118172835 | A | 0.1648  |
| rs75587890  | A | 0.1809  |
| rs35720089  | G | -0.0507 |
| rs113691635 | A | -0.0531 |
| rs72769985  | G | 0.137   |
| rs77023352  | T | 0.1076  |
| rs117708848 | T | -0.0863 |
| rs72768279  | A | -0.0771 |
| rs142690444 | A | -0.041  |
| rs111958847 | T | -0.0546 |
| rs139443003 | C | 0.0854  |
| rs112288692 | C | 0.0739  |
| rs7086131   | T | 0.0741  |

|             |   |         |
|-------------|---|---------|
| rs17106322  | T | 0.0547  |
| rs114863326 | C | 0.0298  |
| rs11596132  | G | -0.0413 |
| rs117875392 | A | -0.1854 |
| rs113093091 | G | -0.1039 |
| rs61860538  | G | -0.1561 |
| rs111605732 | G | -0.0764 |
| rs7073511   | A | 0.0742  |
| rs7899140   | G | -0.0262 |
| rs61855296  | A | -0.0382 |
| rs17880383  | A | -0.0458 |
| rs72839269  | T | -0.0857 |
| rs7078706   | T | 0.0239  |
| rs117560611 | C | 0.1784  |
| rs2797885   | A | -0.0589 |
| rs117401822 | G | -0.1022 |
| rs12260056  | G | 0.0646  |
| rs74772559  | A | -0.093  |
| rs11256991  | G | 0.0278  |
| rs1901663   | T | 0.0216  |
| rs12415135  | G | -0.0498 |
| rs7918632   | C | 0.0796  |
| rs7917231   | T | 0.0321  |
| rs12771002  | A | 0.0307  |
| rs75476599  | T | 0.0325  |
| rs11017971  | T | 0.1088  |
| rs17465759  | C | 0.0442  |
| rs17595268  | C | -0.0697 |
| rs626114    | A | 0.1348  |
| rs139141717 | C | 0.111   |
| rs79561109  | A | 0.127   |
| rs73267649  | A | 0.0367  |
| rs188572    | A | -0.071  |
| rs4750820   | G | 0.0311  |
| rs12777926  | T | -0.0256 |
| rs7077284   | G | 0.0239  |
| rs17351977  | A | -0.0817 |
| rs11593493  | A | 0.1424  |
| rs10776668  | A | -0.0225 |
| rs118033845 | A | -0.0805 |
| rs77087051  | A | -0.0568 |
| rs117853866 | A | 0.063   |
| rs77138744  | G | -0.1178 |
| rs10902814  | A | -0.0275 |
| rs7910134   | C | 0.0427  |
| rs59140405  | A | 0.0705  |
| rs57710970  | C | -0.1356 |



|             |   |         |
|-------------|---|---------|
| rs34658597  | T | 0.0645  |
| rs2918132   | C | 0.0311  |
| rs77053471  | A | -0.0428 |
| rs10906317  | C | -0.0391 |
| rs55793716  | T | -0.1215 |
| rs12762427  | C | 0.0435  |
| rs72767677  | T | 0.0396  |
| rs7088526   | T | 0.0248  |
| rs61393415  | C | -0.0296 |
| rs144927387 | T | 0.0806  |
| rs58580722  | A | 0.1078  |
| rs13376900  | C | 0.0278  |
| rs10795966  | A | -0.0222 |
| rs7920618   | G | -0.022  |
| rs71486665  | T | -0.0347 |
| rs7922093   | G | -0.0293 |
| rs71474233  | G | 0.0307  |
| rs2270552   | C | -0.0233 |
| rs1665646   | C | -0.0239 |
| rs12782743  | T | -0.0694 |
| rs117824639 | T | -0.0681 |
| rs11010725  | C | -0.0224 |
| rs16936932  | C | -0.0778 |
| rs12266381  | C | -0.0244 |
| rs76162660  | T | -0.1307 |
| rs17195022  | T | 0.0269  |
| rs78538269  | A | 0.0435  |
| rs35389736  | G | -0.1257 |
| rs72796541  | T | 0.0281  |
| rs118029084 | A | 0.0777  |
| rs146548505 | G | 0.0876  |
| rs76795908  | T | -0.0509 |
| rs34855475  | T | 0.0447  |
| rs113478922 | G | 0.0895  |
| rs113235714 | T | 0.116   |
| rs117006567 | G | 0.1176  |
| rs112348350 | A | 0.1705  |
| rs17157014  | T | 0.0858  |
| rs112981195 | A | -0.0367 |
| rs72782176  | G | -0.0675 |
| rs146905264 | A | -0.104  |
| rs74158065  | G | -0.0901 |
| rs76929657  | T | 0.0387  |
| rs76723159  | T | -0.0781 |
| rs691660    | G | -0.0377 |
| rs72853110  | T | -0.1589 |
| rs76094285  | A | 0.0651  |

|             |   |         |
|-------------|---|---------|
| rs2578076   | G | 0.0921  |
| rs1923559   | A | -0.0281 |
| rs78134605  | G | -0.0835 |
| rs80243082  | A | 0.1225  |
| rs76529305  | T | 0.0675  |
| rs12572690  | G | -0.045  |
| rs143788922 | T | -0.0644 |
| rs16928239  | A | 0.0406  |
| rs143630088 | C | -0.1096 |
| rs75911894  | C | -0.0444 |
| rs28587850  | A | -0.0222 |
| rs6584557   | G | 0.0297  |
| rs78256379  | G | 0.0827  |
| rs4751107   | T | -0.0236 |
| rs17148786  | T | -0.024  |
| rs789760    | A | -0.0257 |
| rs11016442  | C | 0.0337  |
| rs79618383  | C | 0.0916  |
| rs75507618  | T | -0.1595 |
| rs2935649   | C | -0.0222 |
| rs61842277  | G | -0.1623 |
| rs117909585 | T | 0.1115  |
| rs10999339  | C | -0.0359 |
| rs72828315  | G | 0.0663  |
| rs835278    | T | -0.1044 |
| rs7911895   | C | 0.0214  |
| rs7094997   | G | 0.0211  |
| rs117161104 | A | -0.1324 |
| rs7907191   | G | 0.0253  |
| rs117334775 | T | 0.0815  |
| rs118151694 | T | 0.1247  |
| rs11245044  | C | 0.0355  |
| rs11009311  | A | 0.0277  |
| rs146711898 | A | -0.1119 |
| rs72818986  | T | 0.0645  |
| rs665291    | A | -0.0516 |
| rs76274373  | G | 0.1052  |
| rs59014059  | C | -0.1088 |
| rs34628335  | T | 0.0724  |
| rs138165062 | T | -0.1294 |
| rs16905674  | T | -0.043  |
| rs11002845  | T | -0.1104 |
| rs56312442  | A | -0.1612 |
| rs11255005  | A | 0.0558  |
| rs11012827  | G | 0.0985  |
| rs181498    | A | -0.0271 |
| rs41336047  | T | 0.0551  |

|             |   |         |
|-------------|---|---------|
| rs72785494  | T | -0.0217 |
| rs72805146  | C | 0.037   |
| rs7920318   | A | 0.0451  |
| rs61873079  | T | -0.0935 |
| rs76704824  | T | 0.0614  |
| rs7920253   | C | 0.0389  |
| rs10795496  | G | -0.0287 |
| rs1870959   | T | -0.0524 |
| rs16932732  | A | -0.1201 |
| rs4468256   | T | -0.1616 |
| rs239867    | A | 0.1206  |
| rs72801336  | T | -0.1027 |
| rs1796718   | T | -0.0327 |
| rs142190248 | G | -0.0912 |
| rs2292366   | A | -0.1132 |
| rs61851615  | C | -0.0594 |
| rs7918908   | A | -0.0784 |
| rs77810325  | T | 0.0828  |
| rs3006265   | A | 0.0466  |
| rs11005990  | C | -0.0245 |
| rs141638481 | C | -0.1523 |
| rs7071700   | T | -0.0343 |
| rs71471223  | C | -0.1151 |
| rs78383965  | T | -0.0596 |
| rs140812613 | T | 0.0968  |
| rs80289956  | A | -0.114  |
| rs61753077  | A | 0.0583  |
| rs11015203  | A | 0.0387  |
| rs11015470  | G | 0.042   |
| rs942789    | A | 0.0247  |
| rs12253230  | A | -0.0362 |
| rs144483650 | C | -0.0971 |
| rs11196366  | T | 0.0296  |
| rs112761104 | A | 0.1169  |
| rs118159778 | T | 0.1155  |
| rs150071630 | T | 0.1068  |
| rs12241456  | T | 0.0376  |
| rs11256461  | G | 0.0666  |
| rs146270446 | T | 0.1222  |
| rs12766963  | T | 0.0744  |
| rs111424536 | C | -0.043  |
| rs146075765 | A | -0.1068 |
| rs6421376   | T | 0.023   |
| rs72848757  | A | -0.0249 |
| rs1409339   | G | -0.0209 |
| rs11592309  | A | 0.0315  |
| rs10788173  | C | 0.025   |

|             |   |         |
|-------------|---|---------|
| rs60858493  | G | -0.087  |
| rs79556448  | A | -0.0251 |
| rs34938564  | G | -0.0263 |
| rs7896800   | C | 0.0213  |
| rs3750640   | G | 0.0224  |
| rs12777629  | T | -0.0393 |
| rs11257482  | G | -0.0217 |
| rs10737027  | T | 0.022   |
| rs73561457  | A | -0.0623 |
| rs138358400 | C | 0.0265  |
| rs4545501   | A | 0.0312  |
| rs111479962 | C | 0.0673  |
| rs2785264   | T | -0.0231 |
| rs12769037  | C | 0.0232  |
| rs11004668  | G | 0.0773  |
| rs1063119   | T | -0.0382 |
| rs142463040 | T | 0.1361  |
| rs35661955  | C | 0.0318  |
| rs74896326  | G | 0.0675  |
| rs11244439  | A | 0.0471  |
| rs12779311  | C | -0.058  |
| rs2815550   | C | -0.026  |
| rs11815025  | T | 0.0447  |
| rs77033240  | A | 0.0709  |
| rs60663284  | C | 0.1353  |
| rs12257368  | C | 0.0491  |
| rs11257978  | A | 0.1361  |
| rs72831279  | A | -0.0432 |
| rs72844582  | T | -0.0363 |
| rs4880548   | G | 0.0234  |
| rs140531157 | T | 0.1386  |
| rs116969380 | T | 0.1033  |
| rs12416025  | A | -0.119  |
| rs78372980  | A | 0.0769  |
| rs2463952   | C | -0.047  |
| rs75325583  | C | 0.0415  |
| rs12355914  | T | 0.0339  |
| rs145530097 | C | -0.1143 |
| rs75424700  | T | -0.0669 |
| rs7904520   | T | 0.023   |
| rs113506213 | A | 0.048   |
| rs158391    | T | -0.0229 |
| rs72810290  | A | 0.0457  |
| rs3793770   | T | -0.0213 |
| rs7098622   | T | -0.0284 |
| rs76622429  | C | -0.07   |
| rs80255185  | T | -0.0657 |

|             |   |         |
|-------------|---|---------|
| rs9783276   | T | 0.0701  |
| rs117021151 | T | 0.0935  |
| rs139976905 | G | 0.0925  |
| rs17734465  | C | 0.0341  |
| rs11244953  | A | 0.0996  |
| rs7097775   | G | 0.0213  |
| rs7920635   | C | -0.0262 |
| rs61854095  | T | 0.0938  |
| rs11599660  | G | 0.0782  |
| rs77115387  | C | -0.101  |
| rs2169670   | T | -0.0224 |
| rs117884824 | T | -0.0769 |
| rs144911456 | T | 0.1094  |
| rs11259772  | G | -0.0276 |
| rs7096635   | C | 0.0249  |
| rs2683553   | C | 0.024   |
| rs3136622   | C | 0.055   |
| rs534358    | T | 0.0209  |
| rs113393516 | T | -0.106  |
| rs2357286   | C | -0.021  |
| rs10827305  | C | -0.0287 |
| rs72766727  | G | -0.1054 |
| rs150315080 | T | -0.1048 |
| rs9339321   | G | -0.0461 |
| rs72816684  | A | -0.0684 |
| rs7915078   | A | 0.0261  |
| rs11594499  | A | -0.0214 |
| rs7098863   | G | 0.0756  |
| rs11002669  | T | -0.0311 |
| rs2259185   | T | 0.0316  |
| rs11016575  | G | -0.0267 |
| rs146594357 | A | -0.0914 |
| rs7093608   | G | 0.0209  |
| rs79667683  | C | 0.0991  |
| rs79491610  | T | 0.0884  |
| rs4359111   | G | -0.0699 |
| rs75525457  | T | 0.1371  |
| rs79242541  | C | -0.0983 |
| rs3006540   | T | 0.0213  |
| rs2588948   | A | 0.0229  |
| rs12413923  | T | -0.1387 |
| rs7100940   | G | 0.0216  |
| rs79841923  | A | 0.1     |
| rs1113253   | A | 0.0388  |
| rs74912000  | A | -0.0262 |
| rs72778845  | T | -0.0536 |
| rs3780893   | A | -0.0292 |

|             |   |         |
|-------------|---|---------|
| rs35272869  | T | -0.123  |
| rs2500954   | A | -0.0362 |
| rs11017803  | T | 0.0674  |
| rs72834725  | T | -0.075  |
| rs55877617  | G | -0.0341 |
| rs12356313  | T | 0.0308  |
| rs12777780  | G | -0.027  |
| rs72832300  | T | -0.1222 |
| rs12220307  | T | 0.0303  |
| rs12244897  | T | -0.0357 |
| rs2980709   | A | 0.0259  |
| rs2863761   | A | -0.0467 |
| rs59640127  | A | 0.0364  |
| rs75868614  | T | -0.0743 |
| rs10825792  | A | 0.0265  |
| rs17099338  | T | 0.0479  |
| rs17138783  | C | 0.097   |
| rs149646626 | T | 0.1155  |
| rs621681    | T | -0.0271 |
| rs75116828  | C | 0.1018  |
| rs7906815   | G | -0.0319 |
| rs7912575   | G | 0.1084  |
| rs17781278  | A | -0.0393 |
| rs1904623   | G | 0.0648  |
| rs11197517  | G | 0.0288  |
| rs11013460  | T | 0.0444  |
| rs16937008  | C | -0.1693 |
| rs117271240 | T | 0.1862  |
| rs117481478 | T | 0.1137  |
| rs4244302   | T | 0.0239  |
| rs59359619  | G | -0.0652 |
| rs117457782 | C | 0.07    |
| rs2440118   | T | 0.0265  |
| rs72781580  | T | 0.058   |
| rs75334053  | A | -0.0618 |
| rs2588964   | A | -0.0203 |
| rs11595659  | A | 0.0567  |
| rs74485927  | A | -0.0991 |
| rs61871596  | C | -0.0287 |
| rs2147290   | T | -0.0217 |
| rs79270546  | C | 0.0666  |
| rs117563776 | T | 0.111   |
| rs114847812 | A | 0.098   |
| rs140372518 | C | 0.192   |
| rs137995641 | A | 0.1319  |
| rs827306    | A | -0.0222 |
| rs140060053 | G | 0.0795  |

|             |   |         |
|-------------|---|---------|
| rs2842131   | C | 0.0229  |
| rs137917700 | T | -0.1554 |
| rs139791603 | T | -0.1399 |
| rs112942339 | A | 0.0884  |
| rs77546156  | G | 0.0993  |
| rs2352173   | C | 0.0261  |
| rs146588019 | T | -0.1152 |
| rs12415781  | G | -0.0466 |
| rs34943876  | A | -0.1534 |
| rs11192924  | A | 0.1046  |
| rs17183358  | A | -0.0804 |
| rs1762024   | T | 0.0224  |
| rs149202635 | T | 0.185   |
| rs144572792 | C | -0.1187 |
| rs114821576 | T | 0.1537  |
| rs16930542  | T | 0.0761  |
| rs11591508  | T | 0.0409  |
| rs7086726   | G | 0.021   |
| rs75804911  | A | 0.0656  |
| rs41282878  | G | -0.0361 |
| rs7071839   | T | -0.021  |
| rs76821205  | A | -0.1112 |
| rs117587034 | T | -0.0866 |
| rs6599695   | C | 0.0206  |
| rs61876582  | A | 0.0866  |
| rs955921    | G | 0.0338  |
| rs2077871   | G | -0.0213 |
| rs61868502  | C | -0.0576 |
| rs10509714  | A | 0.0355  |
| rs80210687  | T | 0.082   |
| rs1337429   | T | -0.0347 |
| rs140364123 | A | 0.139   |
| rs113514785 | T | 0.1189  |
| rs117038163 | A | -0.178  |
| rs2660072   | G | 0.063   |
| rs139761415 | T | -0.1622 |
| rs61861166  | T | 0.0368  |
| rs1911399   | T | 0.0227  |
| rs117046105 | T | -0.0286 |
| rs11101447  | A | 0.0303  |
| rs11253829  | G | -0.0224 |
| rs72799624  | G | -0.1084 |
| rs10508965  | A | -0.0635 |
| rs11816879  | G | -0.046  |
| rs7915163   | G | -0.0293 |
| rs11595450  | C | -0.0325 |
| rs853600    | C | 0.0204  |

|             |   |         |
|-------------|---|---------|
| rs11198373  | G | 0.0283  |
| rs118023768 | T | -0.0732 |
| rs552551    | C | 0.0266  |
| rs3847419   | A | 0.0633  |
| rs71493366  | T | 0.0893  |
| rs17567668  | A | 0.117   |
| rs72820004  | A | -0.0423 |
| rs2477534   | C | -0.0227 |
| rs75724004  | G | -0.091  |
| rs10491076  | A | -0.0275 |
| rs118090116 | G | 0.1337  |
| rs113921369 | A | 0.0681  |
| rs12782349  | A | -0.0206 |
| rs4918282   | A | 0.022   |
| rs35794497  | T | -0.0339 |
| rs72658784  | T | 0.0975  |
| rs1819810   | C | -0.0214 |
| rs11244969  | C | -0.021  |
| rs116985487 | T | 0.1039  |
| rs11002518  | A | -0.0281 |
| rs12266909  | C | -0.0341 |
| rs4501934   | C | -0.0559 |
| rs117741078 | G | -0.0588 |
| rs2616622   | A | 0.0242  |
| rs145687148 | T | -0.1148 |
| rs11016262  | T | -0.0394 |
| rs75229029  | G | -0.0445 |
| rs74580411  | C | 0.1248  |
| rs11239274  | T | 0.0215  |
| rs10822590  | A | 0.0572  |
| rs11189916  | A | 0.0693  |
| rs138266697 | A | -0.0936 |
| rs6602768   | A | -0.0365 |
| rs113259477 | T | 0.0677  |
| rs2288839   | T | 0.0242  |
| rs17103138  | C | -0.0392 |
| rs11813407  | G | -0.0304 |
| rs11014455  | A | -0.0659 |
| rs2394156   | A | -0.0257 |
| rs2279523   | T | 0.0713  |
| rs34754707  | A | 0.0363  |
| rs11251612  | T | -0.0766 |
| rs2804137   | G | -0.0204 |
| rs4372322   | A | 0.038   |
| rs2224077   | T | 0.079   |
| rs79127021  | C | -0.1034 |
| rs149192904 | T | 0.1496  |



|             |   |         |
|-------------|---|---------|
| rs77265037  | T | 0.1354  |
| rs7082134   | A | -0.0213 |
| rs139856032 | G | -0.0399 |
| rs61852765  | T | 0.0245  |
| rs113459884 | T | 0.0631  |
| rs2028054   | A | 0.0443  |
| rs3118154   | A | -0.0255 |
| rs7918242   | C | -0.0214 |
| rs77070234  | C | -0.1095 |
| rs61858609  | T | -0.0211 |
| rs79664939  | A | 0.0782  |
| rs4746540   | A | -0.0596 |
| rs116893761 | A | -0.1725 |
| rs117650662 | C | 0.0492  |
| rs140889282 | G | 0.1042  |
| rs224051    | A | -0.1247 |
| rs7072247   | C | -0.1107 |
| rs7098297   | C | 0.0208  |
| rs10764923  | G | -0.0313 |
| rs138912694 | T | -0.1304 |
| rs10905716  | T | 0.0248  |
| rs61864538  | G | 0.0405  |
| rs55869454  | G | 0.0818  |
| rs72847347  | A | -0.0266 |
| rs12415550  | G | 0.1094  |
| rs77374060  | T | 0.0634  |
| rs11015619  | A | 0.0411  |
| rs7086260   | T | 0.0214  |
| rs12414556  | G | 0.0228  |
| rs6602265   | A | 0.0202  |
| rs10906276  | G | 0.0305  |
| rs1765162   | G | 0.0217  |
| rs7922131   | A | 0.0719  |
| rs17875473  | T | 0.0411  |
| rs111863012 | A | -0.0626 |
| rs146197913 | C | -0.075  |
| rs1325497   | A | 0.042   |
| rs146430344 | G | -0.1198 |
| rs10906716  | C | 0.0231  |
| rs61210418  | A | 0.0743  |
| rs141361941 | A | 0.2045  |
| rs61863172  | C | -0.0295 |
| rs2961619   | T | -0.03   |
| rs7093589   | C | -0.0534 |
| rs113979492 | G | 0.1516  |
| rs11598699  | A | -0.0352 |
| rs36098862  | A | 0.0573  |

|             |   |         |
|-------------|---|---------|
| rs3824784   | G | 0.0413  |
| rs4237463   | T | 0.0254  |
| rs148589605 | G | -0.1378 |
| rs16930653  | T | -0.029  |
| rs16912172  | G | -0.1136 |
| rs142912612 | C | -0.1804 |
| rs117003718 | A | -0.1255 |
| rs17644754  | G | -0.0245 |
| rs2900993   | G | 0.035   |
| rs181604    | C | -0.0413 |
| rs117276684 | T | -0.0586 |
| rs2495775   | G | -0.0479 |
| rs111661111 | T | 0.0684  |
| rs145970807 | A | -0.0422 |
| rs77586109  | C | 0.0319  |
| rs1655630   | A | 0.0272  |
| rs12261881  | A | -0.0372 |
| rs4933380   | T | 0.0575  |
| rs1926202   | C | 0.0276  |
| rs17585124  | A | -0.0757 |
| rs11259073  | T | -0.0209 |
| rs11238614  | A | -0.0676 |
| rs12251212  | A | 0.0427  |
| rs2902446   | T | -0.0747 |
| rs1876317   | C | 0.0208  |
| rs11594385  | A | 0.0738  |
| rs12780696  | T | 0.0398  |
| rs114116720 | G | 0.0298  |
| rs80016702  | G | 0.1084  |
| rs115569596 | C | 0.0691  |
| rs111753655 | G | 0.0901  |
| rs7097615   | A | 0.0263  |
| rs72811353  | G | 0.0877  |
| rs149851503 | A | 0.0965  |
| rs61870790  | G | 0.1052  |
| rs117308243 | C | 0.1099  |
| rs75250578  | C | -0.0867 |
| rs1316687   | T | -0.0228 |
| rs116874866 | C | -0.1008 |
| rs17157531  | A | -0.0898 |
| rs10159565  | T | 0.0451  |
| rs118118199 | T | -0.0706 |
| rs11597944  | G | -0.0214 |
| rs79352688  | A | 0.0804  |
| rs140595854 | A | 0.0586  |
| rs17400195  | C | -0.0847 |
| rs145004206 | C | 0.0983  |

|             |   |         |
|-------------|---|---------|
| rs56314234  | T | 0.1003  |
| rs10999904  | A | -0.033  |
| rs841019    | G | -0.0382 |
| rs80082617  | G | -0.0362 |
| rs72784760  | C | -0.026  |
| rs2820656   | A | 0.0357  |
| rs142131631 | A | 0.0794  |
| rs72869303  | A | 0.0608  |
| rs77763464  | C | 0.1225  |
| rs7090543   | A | -0.0263 |
| rs72783006  | T | 0.0598  |
| rs75226236  | G | 0.0271  |
| rs11004575  | C | -0.0213 |
| rs12415187  | T | -0.0263 |
| rs9325599   | T | 0.0241  |
| rs12415926  | T | -0.0505 |
| rs7475111   | A | -0.0332 |
| rs34668416  | T | -0.0508 |
| rs117575321 | A | -0.1465 |
| rs1255496   | G | 0.0212  |
| rs117673567 | T | 0.0659  |
| rs2255684   | T | 0.021   |
| rs12776076  | G | -0.0452 |
| rs11014084  | G | -0.0254 |
| rs12356589  | C | -0.0458 |
| rs75160456  | A | 0.1336  |
| rs12257267  | T | -0.0857 |
| rs12773458  | G | -0.1029 |
| rs61844620  | T | -0.0344 |
| rs17148534  | G | 0.0541  |
| rs2442899   | G | -0.0258 |
| rs111591092 | C | 0.0766  |
| rs7094476   | C | -0.0312 |
| rs1933963   | A | -0.0422 |
| rs2912754   | C | 0.0826  |
| rs12571983  | T | -0.0299 |
| rs10508300  | G | 0.0416  |
| rs117501151 | T | 0.1069  |
| rs34499222  | A | -0.0716 |
| rs17135332  | A | 0.0354  |
| rs76026535  | C | 0.0585  |
| rs112413912 | A | 0.0848  |
| rs73274005  | A | -0.0889 |
| rs41274604  | C | 0.0798  |
| rs111913390 | A | -0.0955 |
| rs147081554 | T | 0.0642  |
| rs73382374  | G | -0.1046 |

|             |   |         |
|-------------|---|---------|
| rs10906128  | T | 0.0229  |
| rs7100993   | T | 0.0304  |
| rs139520894 | T | 0.0917  |
| rs4072196   | A | -0.0412 |
| rs11017878  | A | -0.0247 |
| rs41274082  | T | 0.0678  |
| rs76156132  | C | -0.0468 |
| rs12770012  | T | -0.0847 |
| rs7478058   | T | 0.0555  |
| rs7076689   | A | 0.0561  |
| rs10508827  | T | -0.0414 |
| rs16916751  | A | -0.1206 |
| rs2767420   | G | 0.0807  |
| rs72779586  | T | -0.078  |
| rs11002760  | G | -0.0695 |
| rs11813961  | A | 0.0338  |
| rs4838679   | C | 0.0434  |
| rs35047040  | T | -0.0465 |
| rs141642397 | C | 0.1018  |
| rs117792433 | G | -0.0814 |
| rs265537    | A | -0.0991 |
| rs72841518  | T | -0.0574 |
| rs4918392   | C | 0.0256  |
| rs10885410  | A | -0.0238 |
| rs142098611 | C | -0.1117 |
| rs1854167   | C | -0.0298 |
| rs145761478 | G | 0.1254  |
| rs117337143 | T | 0.1754  |
| rs117572275 | T | 0.0738  |
| rs117879220 | T | 0.0506  |
| rs144541601 | T | 0.0848  |
| rs2688865   | G | 0.0227  |
| rs1227737   | A | 0.0416  |
| rs146428968 | A | 0.0802  |
| rs75551616  | A | 0.0736  |
| rs11016465  | T | -0.0387 |
| rs78189505  | T | -0.0652 |
| rs78141143  | T | 0.1074  |
| rs34867276  | G | -0.0646 |
| rs117033067 | C | -0.1116 |
| rs114410649 | G | 0.0906  |
| rs10762547  | A | 0.0284  |
| rs7914124   | C | 0.1414  |
| rs77219799  | A | -0.0394 |
| rs6602360   | G | 0.0218  |
| rs12266432  | C | -0.0393 |
| rs1865021   | C | -0.0215 |

|             |   |         |
|-------------|---|---------|
| rs10886731  | T | -0.0344 |
| rs11252110  | G | -0.0207 |
| rs79737124  | A | 0.1087  |
| rs72635000  | T | 0.0712  |
| rs74611038  | T | 0.1536  |
| rs9418641   | A | 0.0483  |
| rs118046309 | C | 0.1216  |
| rs79455015  | A | -0.0412 |
| rs7085206   | C | -0.0417 |
| rs72780192  | G | 0.029   |
| rs111311553 | A | -0.0363 |
| rs10737048  | A | -0.0685 |
| rs17771583  | C | -0.0398 |
| rs11248487  | G | 0.0196  |
| rs17816509  | G | 0.0299  |
| rs12354907  | T | -0.0606 |
| rs76345452  | A | -0.0987 |
| rs4919416   | G | -0.0207 |
| rs4881486   | C | -0.0512 |
| rs149710105 | C | -0.1024 |
| rs12573641  | T | 0.0999  |
| rs7902878   | A | -0.0249 |
| rs11251240  | C | 0.0246  |
| rs146886031 | A | 0.1578  |
| rs12414594  | G | 0.0409  |
| rs1674887   | T | 0.0476  |
| rs1227077   | T | -0.0507 |
| rs2484099   | G | 0.0501  |
| rs117943469 | C | 0.1004  |
| rs61835977  | T | -0.0267 |
| rs149794311 | T | -0.1678 |
| rs74790299  | A | -0.0576 |
| rs118182258 | A | 0.1081  |
| rs61871502  | G | -0.0395 |
| rs9423246   | T | -0.0321 |
| rs1927457   | C | 0.0235  |
| rs12765967  | C | 0.0247  |
| rs11813320  | C | -0.0259 |
| rs17096279  | T | -0.0317 |
| rs117867454 | T | 0.1003  |
| rs146782817 | C | -0.0408 |
| rs34500125  | T | -0.078  |
| rs117275218 | T | 0.0883  |
| rs75308259  | C | 0.0818  |
| rs73582530  | A | -0.0417 |
| rs4465261   | A | 0.02    |
| rs72833891  | T | 0.0504  |

|             |   |         |
|-------------|---|---------|
| rs4749312   | T | -0.062  |
| rs11257248  | T | -0.0912 |
| rs16918455  | G | 0.0292  |
| rs117302013 | T | -0.0715 |
| rs11599055  | C | -0.1143 |
| rs75794021  | T | -0.0983 |
| rs74889195  | C | -0.0382 |
| rs7904030   | A | 0.0901  |
| rs7922733   | C | -0.0802 |
| rs4746523   | A | 0.0533  |
| rs139020900 | T | 0.1015  |
| rs12412575  | G | 0.0231  |
| rs28445838  | G | 0.0405  |
| rs11156563  | C | 0.0299  |
| rs117817926 | C | 0.1011  |
| rs7082321   | C | 0.0304  |
| rs74486294  | A | 0.0911  |
| rs7092659   | C | 0.0251  |
| rs10905553  | C | 0.0746  |
| rs10509480  | C | 0.0199  |
| rs150095486 | T | -0.1339 |
| rs142642563 | C | 0.095   |
| rs7096905   | A | -0.0282 |
| rs75896461  | A | 0.0782  |
| rs72774292  | A | -0.1055 |
| rs1249281   | T | -0.0271 |
| rs7086690   | C | 0.0207  |
| rs117988086 | C | -0.1089 |
| rs2148191   | A | -0.1101 |
| rs10997404  | T | 0.0236  |
| rs34889119  | C | 0.0865  |
| rs7901449   | A | 0.068   |
| rs1247086   | A | 0.0212  |
| rs1975191   | T | 0.0226  |
| rs642964    | T | 0.0317  |
| rs7904413   | G | -0.0196 |
| rs116085785 | C | -0.066  |
| rs140808895 | T | 0.1102  |
| rs9664298   | G | 0.0343  |
| rs139889371 | T | -0.0799 |
| rs7900144   | G | 0.0223  |
| rs11254387  | C | -0.0339 |
| rs17295310  | A | 0.0344  |
| rs9421819   | G | -0.0245 |
| rs6585737   | T | -0.0214 |
| rs76619548  | T | -0.0524 |
| rs141553311 | C | 0.1337  |

|             |   |         |
|-------------|---|---------|
| rs72817109  | T | 0.0624  |
| rs11254273  | C | -0.0936 |
| rs7083883   | T | 0.0271  |
| rs2387665   | T | 0.0239  |
| rs4543899   | A | -0.0506 |
| rs12247583  | T | 0.0287  |
| rs61291816  | A | -0.0613 |
| rs2607534   | T | -0.0271 |
| rs11197745  | T | -0.0373 |
| rs76791954  | C | -0.0709 |
| rs77107837  | T | 0.0733  |
| rs112571870 | T | -0.1013 |
| rs61832865  | A | -0.0335 |
| rs150287902 | A | 0.1112  |
| rs79883490  | A | -0.0511 |
| rs146284191 | G | 0.1422  |
| rs3758587   | A | 0.0232  |
| rs72821068  | C | 0.0767  |
| rs75134729  | A | -0.1722 |
| rs113726349 | A | -0.0649 |
| rs10787574  | T | 0.0223  |
| rs74318279  | C | 0.0753  |
| rs7915711   | A | -0.0542 |
| rs77310729  | G | -0.0665 |
| rs138373920 | T | -0.18   |
| rs115079364 | A | 0.0931  |
| rs117008031 | A | -0.0789 |
| rs117533231 | G | 0.1066  |
| rs12767554  | A | -0.0604 |
| rs7075702   | A | -0.0951 |
| rs12217499  | A | -0.1064 |
| rs74606055  | C | -0.1074 |
| rs78401416  | T | 0.1006  |
| rs1683863   | A | 0.0245  |
| rs12217487  | A | -0.132  |
| rs117844438 | G | 0.0884  |
| rs11245425  | C | -0.051  |
| rs822090    | A | 0.056   |
| rs12416565  | C | -0.0233 |
| rs12766838  | G | 0.0296  |
| rs7893126   | C | 0.027   |
| rs10795666  | G | 0.0232  |
| rs72776605  | A | -0.0263 |
| rs4132652   | A | -0.0497 |
| rs7087457   | G | 0.0467  |
| rs144632682 | T | -0.0898 |
| rs111763673 | T | 0.0536  |

|             |   |         |
|-------------|---|---------|
| rs10232     | T | -0.0803 |
| rs141948438 | A | 0.0848  |
| rs36002879  | T | -0.0445 |
| rs17296631  | T | -0.0786 |
| rs117768087 | A | -0.1111 |
| rs112789657 | C | -0.0823 |
| rs10998457  | A | -0.0214 |
| rs35810013  | T | 0.1412  |
| rs11254177  | T | 0.1034  |
| rs11011732  | C | 0.0294  |
| rs10824650  | A | -0.0195 |
| rs117447174 | T | -0.0625 |
| rs12767770  | T | -0.0324 |
| rs1338541   | C | 0.0208  |
| rs72815558  | T | -0.0813 |
| rs76786147  | C | 0.0312  |
| rs12355324  | A | 0.0467  |
| rs7900225   | C | 0.0314  |
| rs79830668  | T | 0.0834  |
| rs16930149  | T | -0.1328 |
| rs140389196 | T | -0.1523 |
| rs118068484 | A | 0.0685  |
| rs56089081  | A | 0.0404  |
| rs75433380  | C | 0.0899  |
| rs7896061   | C | 0.0265  |
| rs79577137  | A | 0.174   |
| rs141448314 | T | 0.1141  |
| rs74158446  | C | 0.1236  |
| rs4748103   | C | 0.0224  |
| rs12240574  | G | -0.1365 |
| rs76550923  | T | 0.1383  |
| rs74951282  | G | -0.0939 |
| rs76076819  | G | -0.0834 |
| rs10901528  | C | 0.0742  |
| rs79024469  | A | -0.1065 |
| rs11008047  | T | 0.0351  |
| rs7088935   | A | 0.0329  |
| rs11259458  | C | 0.0351  |
| rs56151069  | T | -0.0335 |
| rs72840349  | C | -0.0348 |
| rs3001720   | A | -0.0847 |
| rs11814422  | A | -0.0448 |
| rs138813731 | T | 0.0902  |
| rs10822896  | T | -0.0219 |
| rs10999130  | G | 0.1147  |
| rs2742050   | T | -0.0271 |
| rs11257567  | A | 0.0287  |



|             |   |         |
|-------------|---|---------|
| rs74156127  | A | 0.0389  |
| rs7902650   | G | -0.062  |
| rs72815446  | C | -0.0619 |
| rs12763924  | A | 0.0315  |
| rs77079789  | A | 0.0701  |
| rs75806021  | C | 0.0535  |
| rs17207435  | G | -0.0512 |
| rs6601986   | C | 0.0267  |
| rs2454824   | T | 0.0262  |
| rs946785    | G | -0.0197 |
| rs78950456  | A | -0.1615 |
| rs35780327  | G | -0.0947 |
| rs61862002  | C | -0.0224 |
| rs61833000  | C | -0.0528 |
| rs8177783   | A | 0.1649  |
| rs514150    | T | -0.0277 |
| rs12265599  | T | -0.0338 |
| rs139102240 | G | 0.1171  |
| rs2296637   | T | 0.0364  |
| rs12219907  | A | 0.0778  |
| rs117389458 | A | 0.1291  |
| rs4399275   | G | -0.0252 |
| rs2812589   | T | -0.0303 |
| rs4746284   | A | 0.0585  |
| rs34145904  | G | 0.0315  |
| rs536096    | G | -0.0314 |
| rs145162160 | C | 0.1163  |
| rs1336327   | A | 0.0838  |
| rs4934040   | T | -0.0831 |
| rs1343094   | T | 0.0249  |
| rs72821579  | C | -0.0252 |
| rs117260987 | T | -0.061  |
| rs78091047  | T | -0.0777 |
| rs75958476  | A | 0.0675  |
| rs117967063 | A | -0.0859 |
| rs113608681 | A | 0.0859  |
| rs118167308 | A | -0.0674 |
| rs76497130  | A | -0.0858 |
| rs2270193   | C | -0.0477 |
| rs16933996  | G | -0.0831 |
| rs12247252  | T | 0.0472  |
| rs112735875 | A | 0.1657  |
| rs78185084  | T | -0.1304 |
| rs12184361  | T | -0.0434 |
| rs17144411  | T | 0.036   |
| rs2574950   | T | 0.061   |
| rs2804951   | A | 0.0409  |

|             |   |         |
|-------------|---|---------|
| rs112717372 | A | -0.0498 |
| rs144730409 | C | 0.0716  |
| rs72811581  | C | -0.1311 |
| rs17413232  | G | -0.0526 |
| rs4303169   | A | 0.0212  |
| rs112550859 | T | 0.0632  |
| rs12773664  | G | 0.0208  |
| rs17097674  | T | 0.0497  |
| rs12571821  | C | 0.0608  |
| rs2637629   | G | -0.021  |
| rs116888080 | G | 0.0591  |
| rs7905840   | A | 0.1119  |
| rs7084814   | G | 0.0397  |
| rs77167347  | A | 0.0618  |
| rs76649942  | T | 0.0832  |
| rs11253242  | T | -0.0281 |
| rs11255875  | C | -0.0276 |
| rs61829731  | T | -0.0497 |
| rs12720436  | G | -0.1194 |
| rs146159238 | T | 0.1226  |
| rs35645587  | T | 0.099   |
| rs149767001 | A | -0.0767 |
| rs1702249   | C | 0.0202  |
| rs117754511 | G | 0.0542  |
| rs114830825 | C | 0.1026  |
| rs139169031 | A | -0.0651 |
| rs7896128   | A | 0.0505  |
| rs76536854  | A | 0.0946  |
| rs73277111  | G | -0.0811 |
| rs147359961 | A | 0.0476  |
| rs11009500  | A | 0.0514  |
| rs16906201  | A | -0.0492 |
| rs4750166   | A | 0.039   |
| rs10997704  | G | 0.0194  |
| rs11816373  | T | -0.1027 |
| rs72802333  | A | 0.0983  |
| rs78817633  | C | 0.0921  |
| rs2804118   | T | 0.0322  |
| rs61830420  | A | 0.0516  |
| rs113205343 | G | -0.0674 |
| rs113671578 | G | -0.0698 |
| rs2818389   | T | 0.0892  |
| rs11010697  | C | -0.0308 |
| rs11258278  | C | 0.0668  |
| rs57908880  | G | 0.0489  |
| rs75206876  | T | 0.0948  |
| rs1659594   | A | -0.0331 |

|             |   |         |
|-------------|---|---------|
| rs638707    | A | 0.0234  |
| rs7909468   | A | 0.0247  |
| rs11002958  | C | 0.0311  |
| rs61852960  | C | 0.0812  |
| rs644700    | C | 0.0577  |
| rs112805642 | A | 0.0444  |
| rs4962693   | C | 0.0194  |
| rs1133113   | A | -0.0201 |
| rs6602217   | C | 0.0356  |
| rs17680424  | A | 0.0311  |
| rs7071096   | C | -0.0709 |
| rs10795560  | T | 0.0245  |
| rs2176535   | T | 0.0487  |
| rs7912721   | T | 0.0227  |
| rs117295334 | A | 0.1079  |
| rs149562409 | G | 0.0464  |
| rs74125814  | C | 0.0768  |
| rs75450538  | A | -0.1085 |
| rs2691148   | A | -0.0211 |
| rs113952349 | T | -0.0351 |
| rs10787500  | C | 0.0292  |
| rs77398886  | A | 0.0452  |
| rs11595166  | T | -0.0386 |
| rs2001765   | G | -0.0399 |
| rs59411342  | C | 0.0395  |
| rs7073826   | T | 0.0227  |
| rs72820425  | A | 0.064   |
| rs41300227  | C | -0.0922 |
| rs943335    | C | 0.02    |
| rs113762232 | C | -0.0849 |
| rs76093917  | A | 0.0551  |
| rs59228293  | A | -0.0498 |
| rs140558445 | G | 0.0803  |
| rs1715877   | C | -0.0333 |
| rs16937194  | A | -0.0491 |
| rs4917802   | G | -0.026  |
| rs118132735 | T | -0.1523 |
| rs79118159  | T | -0.0737 |
| rs10829715  | C | 0.0291  |
| rs7893954   | G | -0.0229 |
| rs76597286  | T | 0.0612  |
| rs6593372   | G | 0.024   |
| rs117070930 | A | 0.1396  |
| rs11239291  | G | 0.0222  |
| rs74148316  | T | 0.0254  |
| rs11252393  | T | -0.0544 |
| rs3010501   | T | -0.0209 |

|             |   |         |
|-------------|---|---------|
| rs7901884   | T | -0.0228 |
| rs118064558 | A | -0.1369 |
| rs72774757  | T | -0.0721 |
| rs11002197  | T | 0.0529  |
| rs678395    | G | 0.0419  |
| rs76619375  | T | -0.0668 |
| rs2801527   | T | 0.0274  |
| rs10786847  | A | 0.0226  |
| rs12781072  | A | -0.0302 |
| rs144077228 | T | -0.1128 |
| rs78525943  | T | 0.0803  |
| rs1329496   | A | -0.079  |
| rs139150816 | G | -0.1228 |
| rs2047036   | C | 0.0208  |
| rs79971733  | C | 0.0859  |
| rs78518419  | A | 0.0912  |
| rs71473522  | G | 0.0598  |
| rs61831982  | G | 0.0376  |
| rs12778117  | G | 0.047   |
| rs146065661 | T | -0.1229 |
| rs61866407  | G | -0.0363 |
| rs11194132  | C | -0.0409 |
| rs77232264  | G | 0.1189  |
| rs34180426  | C | 0.0466  |
| rs1913751   | C | -0.0311 |
| rs56365500  | G | -0.0209 |
| rs149263477 | A | 0.0902  |
| rs117977331 | A | 0.0422  |
| rs780821    | T | 0.039   |
| rs79128954  | G | 0.1439  |
| rs7908497   | T | 0.033   |
| rs12570064  | C | -0.0212 |
| rs58555605  | T | -0.0468 |
| rs140600352 | G | -0.1216 |
| rs79999535  | T | 0.0717  |
| rs11598539  | C | -0.0249 |
| rs12359580  | T | 0.0339  |
| rs75813347  | T | -0.0485 |
| rs61875518  | A | -0.0261 |
| rs55859210  | C | 0.075   |
| rs111795711 | A | 0.0955  |
| rs72787457  | A | 0.0447  |
| rs72818731  | T | -0.0347 |
| rs72843303  | A | 0.1002  |
| rs78808859  | T | 0.0927  |
| rs7100181   | G | 0.0249  |
| rs7080513   | G | 0.1298  |

|             |   |         |
|-------------|---|---------|
| rs17667035  | T | -0.0653 |
| rs2420993   | T | -0.0283 |
| rs141864719 | A | -0.0935 |
| rs72803053  | T | -0.1148 |
| rs35562333  | T | -0.0583 |
| rs1576009   | C | -0.0207 |
| rs117014036 | T | -0.0501 |
| rs142704440 | T | 0.1154  |
| rs34989726  | T | 0.1043  |
| rs75354372  | A | 0.0575  |
| rs6584193   | T | -0.0245 |
| rs74629892  | C | 0.0947  |
| rs12253187  | G | -0.0239 |
| rs7922716   | C | 0.0208  |
| rs117808847 | G | 0.092   |
| rs116842595 | T | 0.0662  |
| rs41380844  | G | 0.024   |
| rs12241254  | T | 0.0316  |
| rs12411862  | A | -0.0196 |
| rs117494425 | C | 0.0931  |
| rs10951     | A | 0.0207  |
| rs117717573 | T | 0.0916  |
| rs10999152  | A | 0.0273  |
| rs143192906 | T | 0.1359  |
| rs41295119  | T | -0.0493 |
| rs477533    | T | -0.0202 |
| rs11004372  | G | 0.0203  |
| rs3125452   | G | -0.0234 |
| rs59942748  | T | 0.0773  |
| rs10751596  | A | -0.0193 |
| rs11245535  | G | -0.0221 |
| rs61463796  | C | -0.0667 |
| rs76965349  | G | -0.1673 |
| rs111238646 | A | 0.0948  |
| rs7894912   | G | -0.033  |
| rs55750934  | G | -0.0324 |
| rs2927501   | T | -0.0379 |
| rs117056425 | A | 0.064   |
| rs11238728  | G | 0.0193  |
| rs34133409  | A | -0.0364 |
| rs144518776 | A | 0.0899  |
| rs4752542   | A | -0.0198 |
| rs10829940  | G | 0.026   |
| rs752431    | T | 0.0235  |
| rs137974505 | G | 0.091   |
| rs117644619 | A | -0.1137 |
| rs927045    | T | -0.0313 |

|             |   |         |
|-------------|---|---------|
| rs117866645 | C | -0.1059 |
| rs117068496 | T | 0.1305  |
| rs11017781  | C | -0.0261 |
| rs77010998  | C | -0.0523 |
| rs112579950 | T | 0.0953  |
| rs2776925   | G | -0.0196 |
| rs4948878   | G | 0.0526  |
| rs3829196   | A | 0.0825  |
| rs41289011  | G | -0.0519 |
| rs34806745  | T | 0.1253  |
| rs4935045   | C | -0.0197 |
| rs117720340 | T | -0.0742 |
| rs61862976  | T | 0.0427  |
| rs2274530   | G | -0.1033 |
| rs7923671   | A | 0.0459  |
| rs61845862  | A | 0.0467  |
| rs1259589   | A | 0.0265  |
| rs7905047   | C | -0.0235 |
| rs3793735   | C | -0.0204 |
| rs11259028  | C | -0.09   |
| rs118179993 | C | 0.1237  |
| rs75594291  | A | -0.0393 |
| rs12249558  | G | -0.0302 |
| rs79347784  | T | -0.1118 |
| rs59807205  | C | 0.0338  |
| rs74135295  | G | -0.094  |
| rs140277646 | T | -0.0923 |
| rs2248723   | A | -0.041  |
| rs7080385   | T | 0.0193  |
| rs76563077  | T | 0.0587  |
| rs9971047   | C | -0.0586 |
| rs111915518 | A | -0.0647 |
| rs61859322  | T | 0.0394  |
| rs7898283   | T | -0.0211 |
| rs76016718  | G | 0.1734  |
| rs1416995   | C | -0.0363 |
| rs141421839 | G | -0.1758 |
| rs7923307   | G | -0.022  |
| rs35359851  | C | -0.0667 |
| rs117863452 | A | -0.0881 |
| rs61830347  | G | 0.0626  |
| rs77507653  | A | 0.0458  |
| rs11018150  | T | -0.0335 |
| rs78447252  | T | -0.0441 |
| rs2261660   | T | -0.0269 |
| rs563798    | T | 0.0279  |
| rs11238600  | T | 0.1243  |

|             |   |         |
|-------------|---|---------|
| rs11186455  | T | -0.0408 |
| rs55827747  | T | 0.0439  |
| rs79450125  | T | -0.0837 |
| rs111238039 | A | -0.1334 |
| rs12781963  | T | -0.0231 |
| rs17137848  | T | 0.0915  |
| rs1780436   | A | -0.0212 |
| rs2384532   | A | 0.0227  |
| rs11002740  | C | -0.0589 |
| rs5002977   | T | -0.0458 |
| rs79904575  | G | 0.0559  |
| rs118127236 | T | 0.1441  |
| rs78722514  | A | 0.1039  |
| rs2497342   | A | 0.0225  |
| rs10795909  | T | 0.0196  |
| rs1140      | T | -0.025  |
| rs11002910  | G | 0.1511  |
| rs1419351   | A | -0.0208 |
| rs11599640  | T | 0.0466  |
| rs3763756   | C | 0.0642  |
| rs117147102 | A | 0.1247  |
| rs12784335  | A | -0.0244 |
| rs16924739  | C | -0.0349 |
| rs7098736   | A | -0.02   |
| rs2442875   | C | 0.0268  |
| rs2800083   | T | 0.0237  |
| rs11814711  | A | 0.0482  |
| rs146403945 | A | 0.0522  |
| rs7478441   | T | 0.0874  |
| rs73418412  | C | 0.0801  |
| rs117198623 | T | -0.0652 |
| rs10829556  | G | 0.0241  |
| rs72843806  | A | -0.2121 |
| rs12355296  | T | 0.0361  |
| rs7076995   | T | 0.0194  |
| rs72793878  | T | -0.0978 |
| rs74629847  | G | 0.1789  |
| rs10999818  | C | -0.0423 |
| rs79467266  | C | -0.1086 |
| rs78969278  | G | 0.045   |
| rs61259411  | G | 0.0307  |
| rs74160064  | T | 0.0695  |
| rs9419605   | C | 0.0197  |
| rs7091396   | A | -0.0292 |
| rs35363390  | G | -0.0629 |
| rs1171647   | G | 0.0223  |
| rs149355539 | A | 0.1184  |

|             |   |         |
|-------------|---|---------|
| rs10764283  | T | -0.0195 |
| rs78474656  | C | -0.1393 |
| rs9417407   | A | -0.0757 |
| rs11003977  | T | -0.0597 |
| rs76061244  | G | -0.0416 |
| rs117486123 | A | -0.1058 |
| rs7089526   | T | 0.059   |
| rs1812887   | A | 0.0316  |
| rs117360728 | C | 0.1305  |
| rs148049083 | G | -0.1677 |
| rs41291309  | A | -0.1358 |
| rs6482350   | C | 0.0543  |
| rs3818475   | G | -0.0221 |
| rs142618415 | T | -0.1854 |
| rs12782137  | C | -0.101  |
| rs149151788 | A | -0.1099 |
| rs117275359 | A | 0.1221  |
| rs79653613  | T | -0.0775 |
| rs79252177  | G | 0.0474  |
| rs10752350  | G | -0.0203 |
| rs1247419   | T | -0.0318 |
| rs61865625  | T | 0.0524  |
| rs3829203   | A | 0.0209  |
| rs10830080  | C | -0.0197 |
| rs16921893  | G | -0.0307 |
| rs56153447  | G | 0.0266  |
| rs7086186   | G | -0.0214 |
| rs80172900  | T | -0.0317 |
| rs61871970  | T | 0.0382  |
| rs1962663   | T | 0.0194  |
| rs77948131  | A | -0.1221 |
| rs79872566  | T | -0.0809 |
| rs61858662  | T | 0.0287  |
| rs11592900  | C | -0.025  |
| rs4746137   | T | 0.043   |
| rs115614816 | T | -0.0452 |
| rs4609494   | A | 0.0286  |
| rs2459418   | T | -0.0192 |
| rs7900763   | T | 0.0234  |
| rs116868035 | G | -0.0655 |
| rs77900565  | A | 0.0405  |
| rs7083869   | A | 0.0243  |
| rs61246605  | T | -0.0261 |
| rs78756736  | C | 0.0439  |
| rs79702358  | T | 0.0961  |
| rs4752538   | G | -0.0244 |
| rs7902539   | C | -0.0253 |



|             |   |         |
|-------------|---|---------|
| rs45536936  | C | -0.0817 |
| rs117861511 | G | -0.1208 |
| rs75671286  | C | 0.0589  |
| rs11197862  | T | 0.0511  |
| rs1536442   | T | -0.0199 |
| rs6602603   | C | -0.0194 |
| rs1907747   | C | 0.0554  |
| rs7900510   | A | -0.0429 |
| rs75296824  | G | -0.0504 |
| rs11511553  | T | 0.0535  |
| rs80341435  | T | -0.0861 |
| rs79297087  | A | -0.1089 |
| rs77090059  | T | -0.0729 |
| rs17028     | T | -0.0233 |
| rs144222597 | T | 0.1225  |
| rs117651700 | C | 0.1011  |
| rs118185529 | G | -0.1491 |
| rs61857745  | G | -0.0859 |
| rs2256220   | C | 0.0198  |
| rs17529942  | A | -0.0726 |
| rs79888647  | T | 0.1052  |
| rs10159645  | A | -0.0627 |
| rs76568646  | T | -0.1185 |
| rs2393898   | G | 0.0195  |
| rs628116    | T | 0.0274  |
| rs2814315   | T | -0.0216 |
| rs290490    | G | -0.0233 |
| rs4444002   | G | 0.0651  |
| rs11256990  | T | -0.0308 |
| rs2663013   | A | 0.0466  |
| rs17100442  | T | -0.0275 |
| rs181605    | G | -0.0375 |
| rs1278281   | C | 0.0213  |
| rs145503311 | T | -0.0872 |
| rs117035601 | T | 0.1474  |
| rs4237441   | T | 0.062   |
| rs10887831  | T | -0.0275 |
| rs117152197 | G | -0.0539 |
| rs2497446   | A | 0.0327  |
| rs10749321  | T | 0.0198  |
| rs586518    | A | -0.0275 |
| rs789767    | T | 0.0204  |
| rs17296624  | T | 0.0313  |
| rs117936366 | G | 0.1128  |
| rs144913677 | T | -0.0541 |
| rs74734861  | A | -0.1334 |
| rs79196399  | C | -0.1143 |

|             |   |         |
|-------------|---|---------|
| rs676063    | T | 0.0427  |
| rs17154765  | C | 0.0272  |
| rs118048640 | T | -0.1493 |
| rs2924306   | C | -0.0226 |
| rs1539330   | T | 0.029   |
| rs74643258  | T | -0.0637 |
| rs11201666  | G | -0.0279 |
| rs117965495 | A | -0.0762 |
| rs181600    | A | 0.0554  |
| rs41284408  | T | 0.0656  |
| rs12360139  | T | 0.0215  |
| rs144122032 | G | -0.1285 |
| rs10764312  | C | -0.0228 |
| rs79655865  | T | 0.0638  |
| rs11007849  | T | 0.0344  |
| rs61873576  | C | 0.0514  |
| rs11018387  | A | -0.0308 |
| rs118043865 | T | 0.065   |
| rs11195157  | C | 0.0198  |
| rs11595009  | A | 0.1004  |
| rs10903450  | A | -0.0214 |
| rs17501874  | T | 0.0516  |
| rs61852806  | T | 0.0705  |
| rs142040668 | A | 0.125   |
| rs11599479  | T | -0.0845 |
| rs146758217 | T | -0.0748 |
| rs11595394  | G | -0.0326 |
| rs12262462  | G | -0.0575 |
| rs76569056  | G | 0.1267  |
| rs141023517 | C | -0.068  |
| rs7079183   | T | -0.0465 |
| rs1258327   | G | 0.0396  |
| rs11256835  | T | -0.0241 |
| rs780806    | A | 0.0187  |
| rs10998017  | T | 0.02    |
| rs11146066  | A | -0.0892 |
| rs117261556 | G | 0.0969  |
| rs17612029  | G | 0.0298  |
| rs12722604  | A | -0.0553 |
| rs2805566   | A | -0.0217 |
| rs79192841  | G | -0.0929 |
| rs56186782  | G | 0.033   |
| rs7902720   | T | -0.0303 |
| rs16935928  | C | -0.0694 |
| rs113582420 | T | -0.0898 |
| rs74147009  | A | -0.0779 |
| rs116821238 | C | 0.1107  |

|             |   |         |
|-------------|---|---------|
| rs61871910  | C | -0.0474 |
| rs12269409  | C | -0.0888 |
| rs12779850  | C | -0.0741 |
| rs35032171  | T | -0.0314 |
| rs113754261 | G | -0.0615 |
| rs150993762 | T | 0.1377  |
| rs12777797  | G | 0.0211  |
| rs76781384  | G | -0.0804 |
| rs2007097   | T | -0.0297 |
| rs112290338 | A | -0.042  |
| rs61835268  | G | -0.0424 |
| rs76699576  | A | -0.067  |
| rs115688306 | T | 0.0502  |
| rs78742809  | T | 0.0669  |
| rs1876895   | G | -0.0186 |
| rs74873836  | G | -0.0628 |
| rs71490924  | T | -0.0277 |
| rs1880050   | T | -0.1034 |
| rs1600579   | T | -0.0285 |
| rs10788350  | T | -0.0354 |
| rs141522763 | T | 0.0633  |
| rs1856004   | G | 0.0382  |
| rs11254052  | C | 0.0456  |
| rs571214    | A | -0.028  |
| rs76803524  | A | 0.0644  |
| rs12242494  | T | -0.041  |
| rs117311792 | A | 0.0849  |
| rs10826620  | C | -0.0276 |
| rs7069206   | G | -0.0613 |
| rs7097098   | T | -0.0515 |
| rs526666    | C | -0.031  |
| rs4148399   | G | 0.0448  |
| rs72839713  | T | 0.1066  |
| rs7910510   | G | -0.0322 |
| rs10826686  | C | -0.0194 |
| rs17407228  | G | -0.0201 |
| rs77098188  | T | -0.0517 |
| rs7085473   | T | 0.0188  |
| rs11199105  | T | 0.0347  |
| rs7920763   | A | 0.0209  |
| rs117779992 | G | 0.0873  |
| rs7086247   | C | 0.0416  |
| rs74317266  | A | -0.0591 |
| rs10430712  | G | -0.0496 |
| rs3135772   | T | -0.0325 |
| rs4411244   | A | 0.0274  |
| rs118025588 | A | 0.0975  |

|             |   |         |
|-------------|---|---------|
| rs79429105  | G | 0.0965  |
| rs56031228  | A | -0.034  |
| rs144487702 | A | 0.0723  |
| rs79642386  | T | -0.1596 |
| rs118005411 | A | -0.1106 |
| rs17566597  | G | 0.024   |
| rs145681343 | A | 0.1624  |
| rs11007069  | A | 0.0305  |
| rs7098716   | A | 0.0329  |
| rs56263512  | C | 0.0267  |
| rs7068393   | A | -0.0309 |
| rs9919480   | A | -0.0372 |
| rs116985520 | T | 0.0715  |
| rs7921799   | A | 0.0223  |
| rs117915672 | T | -0.0966 |
| rs147729266 | C | -0.136  |
| rs148046144 | A | -0.1565 |
| rs1822690   | A | 0.0188  |
| rs35936842  | A | 0.0201  |
| rs79144704  | C | -0.1095 |
| rs9416634   | T | 0.0191  |
| rs76134470  | T | -0.0639 |
| rs66962313  | G | 0.0474  |
| rs1189310   | G | -0.0224 |
| rs76797777  | T | -0.0731 |
| rs11252734  | G | -0.0696 |
| rs77101618  | T | -0.07   |
| rs143503856 | A | -0.052  |
| rs1573252   | G | 0.0347  |
| rs150287762 | T | 0.0898  |
| rs11197441  | A | -0.033  |
| rs1219792   | C | 0.0239  |
| rs11816275  | T | -0.0196 |
| rs7072502   | C | 0.0291  |
| rs2085185   | G | -0.028  |
| rs4491141   | G | 0.0237  |
| rs142240659 | G | 0.1136  |
| rs57343234  | A | 0.068   |
| rs117181203 | T | 0.0727  |
| rs61277339  | G | -0.0316 |
| rs11817583  | A | 0.0226  |
| rs16917302  | C | 0.034   |
| rs11598720  | C | -0.0203 |
| rs2282295   | A | 0.0318  |
| rs7090887   | A | 0.0184  |
| rs113399767 | A | -0.0569 |
| rs11812619  | C | -0.0193 |

|             |   |         |
|-------------|---|---------|
| rs999981    | T | -0.0192 |
| rs17325064  | A | -0.0227 |
| rs10885555  | A | 0.0271  |
| rs11575676  | A | -0.0372 |
| rs55659521  | C | 0.0248  |
| rs11008807  | C | -0.0468 |
| rs1127047   | A | 0.0638  |
| rs1591337   | T | -0.0242 |
| rs35118904  | A | -0.1279 |
| rs11202480  | G | -0.0382 |
| rs78089008  | T | 0.0856  |
| rs146339035 | T | -0.1102 |
| rs4360649   | G | -0.0203 |
| rs78657995  | C | -0.0876 |
| rs11251908  | T | 0.1333  |
| rs17139126  | C | -0.1561 |
| rs72803836  | G | 0.0692  |
| rs2488131   | G | -0.0212 |
| rs9419171   | T | -0.021  |
| rs61851099  | G | -0.1112 |
| rs1044612   | T | -0.0803 |
| rs6601797   | A | 0.019   |
| rs56108042  | G | -0.0223 |
| rs2789696   | A | 0.0215  |
| rs11203047  | C | -0.0387 |
| rs117350437 | T | -0.1086 |
| rs10740344  | C | -0.0209 |
| rs3123677   | A | -0.0213 |
| rs3829209   | T | 0.0199  |
| rs79562159  | T | 0.0465  |
| rs116942717 | A | -0.0822 |
| rs117060206 | T | -0.0795 |
| rs72791343  | T | -0.0411 |
| rs11596320  | A | 0.022   |
| rs117644544 | T | 0.1002  |
| rs11202660  | A | 0.0248  |
| rs114939400 | C | -0.0438 |
| rs9415141   | C | -0.0256 |
| rs79021032  | C | -0.0777 |
| rs4631835   | T | -0.0229 |
| rs61866469  | A | -0.0427 |
| rs117641604 | C | -0.0797 |
| rs7093372   | G | 0.0191  |
| rs12098327  | A | 0.0981  |
| rs10903937  | G | -0.024  |
| rs4918928   | G | -0.0195 |
| rs7911079   | A | 0.0959  |

|             |   |         |
|-------------|---|---------|
| rs111555772 | T | -0.0383 |
| rs74123527  | G | -0.1331 |
| rs144716933 | T | 0.1652  |
| rs117678443 | C | 0.0645  |
| rs117701120 | G | 0.0846  |
| rs12260503  | A | 0.0537  |
| rs11238505  | T | -0.0249 |
| rs12257390  | C | 0.0195  |
| rs7073292   | G | 0.019   |
| rs10795361  | A | -0.0242 |
| rs113810448 | A | 0.0958  |
| rs1384609   | T | 0.0219  |
| rs74119704  | A | 0.1536  |
| rs7913660   | C | -0.0207 |
| rs10823283  | T | -0.0192 |
| rs10884798  | G | -0.0192 |
| rs75915414  | A | -0.0709 |
| rs11195442  | C | -0.019  |
| rs2795528   | G | 0.0496  |
| rs1935915   | G | 0.0196  |
| rs111604747 | C | 0.0803  |
| rs11244982  | T | 0.0224  |
| rs72802708  | C | -0.0712 |
| rs34634472  | A | -0.0365 |
| rs7084058   | C | -0.0755 |
| rs7902502   | A | 0.1487  |
| rs75761168  | A | -0.0859 |
| rs145374627 | T | -0.0887 |
| rs117997709 | T | 0.1024  |
| rs80023834  | A | 0.0968  |
| rs148119307 | T | -0.0698 |
| rs117294291 | T | 0.1405  |
| rs61845849  | A | 0.0704  |
| rs72836084  | A | 0.1206  |
| rs75353921  | C | -0.0807 |
| rs141420171 | G | -0.0776 |
| rs35139159  | G | -0.0526 |
| rs7905184   | C | -0.0495 |
| rs7893343   | A | -0.1395 |
| rs10901874  | T | -0.0228 |
| rs7092009   | A | 0.019   |
| rs11596155  | A | 0.0247  |
| rs4447076   | G | -0.0188 |
| rs80314400  | T | 0.0613  |
| rs61860511  | C | -0.0512 |
| rs12414015  | T | 0.1151  |
| rs2812559   | C | 0.0221  |

|             |   |         |
|-------------|---|---------|
| rs7902474   | G | -0.0392 |
| rs141854007 | A | -0.0757 |
| rs4935105   | C | -0.0255 |
| rs144378014 | G | -0.1414 |
| rs140072888 | G | 0.1041  |
| rs2109153   | T | -0.0233 |
| rs115692147 | G | -0.0556 |
| rs117775390 | T | -0.0959 |
| rs76441121  | G | 0.0846  |
| rs1886413   | T | -0.0282 |
| rs898325    | A | 0.0349  |
| rs6584043   | T | -0.0352 |
| rs7083426   | G | 0.021   |
| rs76537500  | C | -0.094  |
| rs143735554 | T | 0.0802  |
| rs116933572 | T | 0.0759  |
| rs12762612  | C | -0.0959 |
| rs59750713  | G | 0.1773  |
| rs56358712  | T | 0.0603  |
| rs117067722 | G | -0.0892 |
| rs76921386  | T | 0.0608  |
| rs11250713  | T | -0.0232 |
| rs12762812  | A | -0.0775 |
| rs77268492  | A | 0.0889  |
| rs6585818   | A | 0.022   |
| rs10857435  | A | -0.1367 |
| rs12219482  | T | 0.0415  |
| rs11595448  | C | -0.0616 |
| rs76282612  | T | -0.0871 |
| rs41295597  | T | 0.0866  |
| rs77249136  | C | 0.0832  |
| rs7894320   | A | -0.0568 |
| rs72843000  | G | -0.0424 |
| rs78806596  | A | -0.102  |
| rs116920824 | A | 0.0938  |
| rs7904195   | T | 0.0283  |
| rs117058368 | G | 0.083   |
| rs77549803  | C | 0.0785  |
| rs4948675   | A | 0.0252  |
| rs17676342  | C | -0.0285 |
| rs142074160 | T | 0.0747  |
| rs72839977  | T | 0.1456  |
| rs72832754  | G | 0.1029  |
| rs841045    | C | -0.0774 |
| rs4746067   | A | 0.021   |
| rs117049531 | T | 0.0664  |
| rs72797309  | C | -0.067  |

|             |   |         |
|-------------|---|---------|
| rs12255873  | A | 0.0349  |
| rs723373    | C | -0.0265 |
| rs72838217  | G | -0.0636 |
| rs72869403  | C | 0.0911  |
| rs79897603  | C | -0.0792 |
| rs113847356 | T | 0.0725  |
| rs74548995  | G | -0.1102 |
| rs11193636  | C | -0.0237 |
| rs117092904 | G | 0.0796  |
| rs74143646  | C | -0.0869 |
| rs117423278 | T | -0.1299 |
| rs61863461  | A | 0.0916  |
| rs117293280 | A | 0.1211  |
| rs72835553  | T | 0.0296  |
| rs10905287  | C | -0.0188 |
| rs10509739  | T | 0.0357  |
| rs2813778   | C | 0.1344  |
| rs72790578  | T | -0.0597 |
| rs9420133   | G | 0.0459  |
| rs4746861   | A | -0.0451 |
| rs80078739  | T | -0.0507 |
| rs7096174   | C | 0.0251  |
| rs2446578   | A | 0.0349  |
| rs12357292  | G | 0.0772  |
| rs7096703   | G | -0.0731 |
| rs79839360  | T | 0.0715  |
| rs17666963  | T | -0.0283 |
| rs77994029  | A | -0.0418 |
| rs1930146   | C | 0.0189  |
| rs112854903 | T | 0.034   |
| rs78011651  | A | -0.0432 |
| rs2256321   | C | 0.02    |
| rs7071538   | T | -0.0197 |
| rs7071430   | C | -0.0209 |
| rs57886126  | T | 0.0477  |
| rs2944520   | T | 0.0218  |
| rs73386223  | G | 0.0711  |
| rs12360193  | T | 0.0204  |
| rs61874029  | T | 0.0478  |
| rs2812565   | C | 0.0543  |
| rs148111259 | C | -0.1427 |
| rs11814716  | A | -0.0232 |
| rs55823830  | T | -0.0811 |
| rs11198435  | A | -0.0318 |
| rs9423446   | C | -0.0303 |
| rs79439488  | C | 0.0582  |
| rs7080292   | A | -0.0301 |



|             |   |         |
|-------------|---|---------|
| rs10905490  | A | 0.0694  |
| rs161416    | G | -0.0904 |
| rs6585465   | C | 0.0189  |
| rs12413571  | T | 0.0562  |
| rs61845682  | A | -0.0999 |
| rs2394340   | C | 0.0184  |
| rs72829348  | A | -0.1362 |
| rs11190300  | C | 0.0188  |
| rs677603    | T | 0.0217  |
| rs10830158  | C | 0.0211  |
| rs41283451  | A | -0.0754 |
| rs2802477   | G | -0.0191 |
| rs11101328  | T | -0.0219 |
| rs117522231 | A | -0.1106 |
| rs10905983  | T | 0.0199  |
| rs79467692  | T | 0.1144  |
| rs10903885  | A | -0.024  |
| rs111606597 | A | 0.0302  |
| rs11238553  | G | -0.0487 |
| rs2936570   | G | -0.0225 |
| rs17104650  | C | -0.0448 |
| rs145505382 | T | 0.0605  |
| rs117497819 | T | -0.0551 |
| rs10828623  | T | 0.0258  |
| rs114274013 | C | -0.0696 |
| rs76321369  | A | 0.0658  |
| rs17154230  | G | -0.0392 |
| rs7919836   | G | 0.0646  |
| rs10886010  | A | 0.0186  |
| rs7919520   | A | -0.0197 |
| rs1951742   | A | 0.0235  |
| rs10787809  | T | -0.023  |
| rs4750835   | A | -0.0868 |
| rs117511072 | T | 0.1538  |
| rs17141695  | C | 0.0276  |
| rs79948838  | C | 0.0384  |
| rs10824997  | T | 0.0188  |
| rs11251800  | G | -0.0207 |
| rs10884031  | A | 0.0192  |
| rs11596863  | A | -0.0397 |
| rs7893960   | T | -0.0447 |
| rs4980184   | C | 0.0935  |
| rs10752214  | C | 0.0211  |
| rs61841421  | T | -0.0679 |
| rs118052097 | G | 0.1708  |
| rs4917474   | T | 0.0794  |
| rs11245450  | A | 0.0183  |

|             |   |         |
|-------------|---|---------|
| rs2454063   | T | 0.026   |
| rs7920472   | T | -0.0314 |
| rs116944484 | A | 0.1422  |
| rs67281355  | A | 0.1128  |
| rs77932703  | G | -0.051  |
| rs79935802  | A | -0.0631 |
| rs1249325   | T | 0.0504  |
| rs1649995   | A | 0.0278  |
| rs75929214  | T | 0.0355  |
| rs117399224 | A | 0.0747  |
| rs4748546   | C | 0.0221  |
| rs72792185  | T | -0.0448 |
| rs11101001  | A | 0.019   |
| rs1961949   | T | 0.0218  |
| rs75315701  | G | -0.0863 |
| rs61839304  | T | -0.0298 |
| rs115240862 | A | -0.0589 |
| rs7094470   | C | -0.025  |
| rs72837318  | G | -0.041  |
| rs73594144  | G | -0.0827 |
| rs9424088   | G | 0.0225  |
| rs117501768 | C | -0.0953 |
| rs11015399  | T | -0.0235 |
| rs117719822 | C | 0.1045  |
| rs71474251  | G | 0.0246  |
| rs7096992   | T | -0.022  |
| rs66920165  | G | 0.0815  |
| rs11199993  | C | 0.0504  |
| rs61867365  | T | 0.1326  |
| rs143917004 | A | 0.1058  |
| rs80178239  | A | 0.1271  |
| rs1693686   | C | 0.0201  |
| rs1536532   | C | 0.0206  |
| rs4472872   | A | -0.0208 |
| rs35545299  | G | -0.0547 |
| rs11195776  | T | -0.0287 |
| rs150499051 | T | -0.048  |
| rs4980226   | T | 0.0198  |
| rs72793804  | C | 0.0627  |
| rs117080279 | C | -0.0937 |
| rs76007716  | G | -0.0651 |
| rs7907901   | C | 0.0191  |
| rs17141570  | A | -0.0507 |
| rs74437464  | C | -0.0396 |
| rs115435169 | T | -0.1263 |
| rs112507132 | T | -0.0829 |
| rs138442072 | A | -0.0769 |

|             |   |         |
|-------------|---|---------|
| rs1106375   | G | -0.0228 |
| rs12354580  | G | -0.0963 |
| rs9419607   | A | -0.0422 |
| rs111248210 | A | -0.0351 |
| rs7899837   | C | -0.0223 |
| rs7923952   | T | -0.0506 |
| rs7067758   | T | 0.1029  |
| rs7893928   | T | -0.028  |
| rs3866903   | A | 0.0272  |
| rs61843666  | G | -0.0822 |
| rs1189320   | A | -0.0183 |
| rs7083130   | T | 0.0363  |
| rs10795600  | T | -0.0249 |
| rs76079531  | T | -0.1234 |
| rs151039466 | T | 0.1169  |
| rs12265034  | G | 0.0418  |
| rs1665547   | G | 0.0216  |
| rs147210446 | A | -0.0796 |
| rs12252924  | A | 0.0783  |
| rs73347750  | A | 0.0423  |
| rs117485016 | G | 0.1013  |
| rs80063971  | C | 0.1223  |
| rs11256675  | G | -0.033  |
| rs117754766 | T | 0.132   |
| rs4748014   | C | 0.0246  |
| rs243013    | A | -0.0437 |
| rs9664330   | G | 0.0195  |
| rs7068117   | A | -0.0608 |
| rs77063314  | A | -0.1396 |
| rs4881481   | C | -0.0656 |
| rs7072140   | T | -0.0185 |
| rs2062704   | G | -0.033  |
| rs61867522  | A | -0.0737 |
| rs9419741   | G | 0.0187  |
| rs3123218   | T | -0.0309 |
| rs11017056  | C | 0.0225  |
| rs7097905   | A | -0.0415 |
| rs4918178   | T | 0.0368  |
| rs34019085  | T | -0.0239 |
| rs12784160  | G | -0.1369 |
| rs10509195  | G | 0.0184  |
| rs72791426  | A | -0.0539 |
| rs1019948   | T | -0.0195 |
| rs117577922 | T | -0.0752 |
| rs117314375 | C | -0.115  |
| rs2419603   | T | 0.0395  |
| rs117510573 | C | 0.1331  |

|             |   |         |
|-------------|---|---------|
| rs3135724   | T | -0.0235 |
| rs59438814  | A | 0.0331  |
| rs61874134  | G | 0.0632  |
| rs117869464 | T | 0.0648  |
| rs17010154  | A | 0.1183  |
| rs74451053  | C | -0.067  |
| rs55846129  | T | 0.0431  |
| rs77913191  | G | 0.061   |
| rs76771888  | A | 0.0524  |
| rs79892488  | C | 0.1527  |
| rs10872825  | T | 0.0243  |
| rs11598683  | T | 0.1137  |
| rs196290    | C | 0.0187  |
| rs11200398  | A | -0.0268 |
| rs17142323  | A | 0.0485  |
| rs61838000  | T | -0.1202 |
| rs17621041  | A | 0.0433  |
| rs2672598   | C | -0.0195 |
| rs75794890  | A | 0.0438  |
| rs56323928  | G | -0.0713 |
| rs942951    | A | -0.0258 |
| rs1219597   | C | 0.0411  |
| rs813745    | G | -0.0201 |
| rs146547865 | T | -0.137  |
| rs10822645  | A | 0.0249  |
| rs61831955  | A | 0.0277  |
| rs72815685  | A | -0.0363 |
| rs117993445 | C | -0.0837 |
| rs12569658  | G | -0.0511 |
| rs2484529   | C | 0.0461  |
| rs4919142   | G | 0.0276  |
| rs11256635  | C | -0.0534 |
| rs112950289 | G | 0.0973  |
| rs11194886  | A | 0.0424  |
| rs149928030 | G | -0.0631 |
| rs117335233 | G | 0.0515  |
| rs61880840  | C | 0.1114  |
| rs10508945  | G | -0.0214 |
| rs61861775  | C | 0.0634  |
| rs79008649  | G | -0.1235 |
| rs61838560  | G | -0.0401 |
| rs117111102 | T | -0.1881 |
| rs75232203  | T | -0.1184 |
| rs7894481   | C | 0.0289  |
| rs11186543  | T | 0.038   |
| rs72836196  | A | 0.0284  |
| rs17221568  | C | -0.1039 |

|             |   |         |
|-------------|---|---------|
| rs117525282 | G | 0.133   |
| rs77555440  | C | -0.086  |
| rs72818437  | C | -0.055  |
| rs150842058 | T | 0.082   |
| rs2812602   | G | 0.0289  |
| rs116946988 | T | 0.1428  |
| rs141513212 | A | 0.0782  |
| rs151226542 | G | -0.0789 |
| rs55762031  | G | 0.0202  |
| rs3000465   | A | -0.0428 |
| rs868872    | T | -0.0238 |
| rs118001423 | T | 0.11    |
| rs4750772   | A | -0.0221 |
| rs142181564 | A | 0.1326  |
| rs143199234 | A | 0.0703  |
| rs140218733 | G | 0.0825  |
| rs1320485   | A | -0.0218 |
| rs2688874   | A | -0.0257 |
| rs72777092  | G | 0.0927  |
| rs117612405 | A | -0.1334 |
| rs2817666   | A | -0.0185 |
| rs599132    | A | -0.0185 |
| rs117433925 | A | -0.1073 |
| rs111241152 | A | 0.0522  |
| rs117140964 | T | -0.0648 |
| rs118069884 | T | 0.0778  |
| rs78877672  | T | -0.0524 |
| rs7915020   | A | 0.0473  |
| rs2359560   | T | -0.0183 |
| rs9299595   | G | 0.0275  |
| rs113873144 | G | 0.0336  |
| rs56374835  | G | 0.0218  |
| rs1278304   | A | -0.0229 |
| rs1935936   | G | 0.0179  |
| rs117053707 | C | 0.1005  |
| rs594741    | A | 0.0221  |
| rs787052    | T | 0.0332  |
| rs7101229   | C | 0.0279  |
| rs11817731  | C | -0.0434 |
| rs3012044   | G | 0.0183  |
| rs114612413 | A | -0.1081 |
| rs118180586 | T | 0.0521  |
| rs1759342   | A | 0.0247  |
| rs10785923  | C | -0.0188 |
| rs942950    | T | -0.0279 |
| rs78382211  | G | -0.0892 |
| rs17216728  | C | 0.0943  |

|             |   |         |
|-------------|---|---------|
| rs66978545  | T | 0.0358  |
| rs117109680 | C | -0.0955 |
| rs78683715  | C | -0.0573 |
| rs117849728 | A | 0.1021  |
| rs78467182  | G | -0.113  |
| rs2184386   | A | -0.0238 |
| rs11014993  | C | -0.0217 |
| rs145749815 | C | 0.1276  |
| rs807015    | G | 0.029   |
| rs74690418  | T | 0.0957  |
| rs72773001  | A | 0.081   |
| rs56054552  | G | -0.1094 |
| rs1931600   | T | -0.0212 |
| rs117889195 | G | 0.1133  |
| rs5009167   | C | -0.0494 |
| rs36103558  | T | 0.0458  |
| rs61854606  | C | -0.1069 |
| rs10509557  | C | -0.0205 |
| rs76612684  | A | 0.0559  |
| rs2505911   | T | 0.0709  |
| rs72807628  | G | 0.0551  |
| rs11016225  | G | -0.0202 |
| rs145651803 | C | -0.1017 |
| rs74120689  | G | -0.0929 |
| rs1229578   | T | -0.0246 |
| rs7079561   | G | 0.0321  |
| rs77709405  | T | 0.1113  |
| rs10509957  | A | -0.0174 |
| rs2615876   | A | 0.1196  |
| rs2985297   | G | 0.0215  |
| rs145771334 | C | 0.0996  |
| rs118115421 | T | 0.079   |
| rs144668313 | A | -0.1395 |
| rs72830306  | T | 0.0561  |
| rs143847443 | T | -0.1055 |
| rs59840866  | C | -0.0858 |
| rs77693979  | G | -0.047  |
| rs35857670  | A | 0.0314  |
| rs3108965   | A | 0.0193  |
| rs7083419   | A | -0.0217 |
| rs11146138  | A | 0.0207  |
| rs10764462  | A | -0.019  |
| rs4881466   | A | -0.0199 |
| rs2367889   | T | 0.0232  |
| rs111979314 | C | 0.1491  |
| rs17101977  | T | 0.0309  |
| rs79764755  | T | -0.0514 |

|             |   |         |
|-------------|---|---------|
| rs11597430  | A | 0.0587  |
| rs149023017 | G | 0.1239  |
| rs522400    | A | -0.022  |
| rs2653526   | C | -0.0206 |
| rs10906147  | C | -0.0236 |
| rs72821773  | A | -0.1081 |
| rs12771818  | T | -0.0221 |
| rs72831427  | T | -0.0313 |
| rs12258957  | A | 0.0191  |
| rs12253538  | A | 0.0784  |
| rs73615434  | C | 0.058   |
| rs2724816   | C | 0.0285  |
| rs78279204  | A | -0.0497 |
| rs12254466  | T | -0.0307 |
| rs72773980  | C | 0.058   |
| rs553304    | C | -0.0179 |
| rs10787004  | A | -0.0183 |
| rs11255645  | C | -0.0224 |
| rs10740350  | G | 0.0444  |
| rs4471339   | G | 0.063   |
| rs34871678  | C | -0.1391 |
| rs74643082  | T | -0.0367 |
| rs142621305 | A | -0.1409 |
| rs72792228  | A | 0.0339  |
| rs7092077   | T | 0.0421  |
| rs143277434 | C | 0.0566  |
| rs11202972  | G | 0.0293  |
| rs76664325  | T | -0.1006 |
| rs79538519  | T | 0.102   |
| rs17699290  | G | 0.0347  |
| rs138572650 | T | 0.0807  |
| rs11186592  | C | 0.0195  |
| rs73310302  | A | 0.0309  |
| rs731364    | G | -0.0631 |
| rs116918110 | G | -0.0754 |
| rs6584404   | T | 0.0214  |
| rs76996074  | C | -0.145  |
| rs148819656 | A | -0.1491 |
| rs72771259  | T | -0.032  |
| rs2646419   | A | -0.0208 |
| rs10762488  | C | 0.0192  |
| rs117958058 | T | -0.0689 |
| rs12570330  | A | -0.0289 |
| rs145964453 | T | -0.1199 |
| rs807039    | A | -0.0233 |
| rs113757082 | A | -0.1009 |
| rs78862295  | T | -0.2208 |

|             |   |         |
|-------------|---|---------|
| rs10824493  | A | 0.0304  |
| rs118037945 | A | -0.0856 |
| rs11591847  | G | 0.0246  |
| rs2808042   | A | -0.018  |
| rs61868496  | G | -0.0426 |
| rs1409296   | T | -0.0252 |
| rs11252174  | A | 0.0687  |
| rs7895446   | A | 0.036   |
| rs77098290  | T | 0.173   |
| rs34544599  | G | 0.0406  |
| rs1171649   | A | 0.0415  |
| rs55998800  | T | -0.0926 |
| rs16918693  | T | 0.0936  |
| rs78169109  | A | -0.0432 |
| rs7895693   | T | 0.0229  |
| rs116965960 | C | 0.089   |
| rs117622949 | T | 0.0759  |
| rs111724523 | G | 0.1438  |
| rs72803396  | T | -0.0567 |
| rs72825770  | A | -0.0692 |
| rs79259735  | C | 0.1147  |
| rs149543507 | T | 0.0963  |
| rs12779776  | C | -0.0691 |
| rs77673666  | T | 0.091   |
| rs11492545  | C | -0.0848 |
| rs147365221 | A | -0.0825 |
| rs145717808 | T | 0.076   |
| rs116248914 | G | 0.0478  |
| rs12252696  | G | -0.0195 |
| rs12767241  | A | 0.0339  |
| rs10996102  | A | 0.0509  |
| rs10996828  | G | 0.0244  |
| rs118099164 | A | -0.1173 |
| rs11204289  | A | 0.0755  |
| rs116934662 | A | -0.1542 |
| rs10751962  | C | 0.03    |
| rs116916149 | A | 0.0615  |
| rs10762993  | A | 0.0193  |
| rs2393780   | A | -0.0178 |
| rs6584042   | C | -0.0342 |
| rs7092673   | C | 0.02    |
| rs7922110   | C | 0.0306  |
| rs113435089 | C | -0.1285 |
| rs148454295 | G | -0.1075 |
| rs2981431   | C | -0.0186 |
| rs75811409  | A | -0.0741 |
| rs74318857  | T | -0.1399 |



|             |   |         |
|-------------|---|---------|
| rs75419445  | A | 0.1069  |
| rs10509854  | C | 0.0208  |
| rs6482968   | C | -0.0248 |
| rs11595643  | C | -0.0208 |
| rs60489290  | G | -0.0293 |
| rs143368335 | A | 0.0322  |
| rs72791589  | C | 0.0296  |
| rs12358612  | T | -0.029  |
| rs61852572  | G | 0.0443  |
| rs118019481 | A | -0.0773 |
| rs140784983 | G | 0.0436  |
| rs17102867  | C | -0.0382 |
| rs7080574   | C | 0.022   |
| rs7912890   | C | 0.0204  |
| rs112639942 | T | 0.0665  |
| rs141734849 | C | 0.0811  |
| rs55872207  | A | -0.0351 |
| rs6482681   | T | -0.0854 |
| rs4420172   | T | 0.0256  |
| rs17453066  | C | 0.0256  |
| rs12256114  | T | -0.0689 |
| rs61867367  | A | 0.1583  |
| rs1703689   | T | -0.0212 |
| rs11002435  | A | 0.0893  |
| rs524760    | T | 0.0224  |
| rs7099795   | T | 0.0396  |
| rs6480657   | C | -0.0177 |
| rs41294705  | T | -0.0807 |
| rs61835660  | G | -0.0208 |
| rs74748571  | C | 0.0697  |
| rs72828286  | T | -0.0861 |
| rs78127697  | A | 0.1537  |
| rs147768445 | A | 0.0814  |
| rs35377335  | A | 0.0302  |
| rs140539323 | G | 0.0186  |
| rs112048000 | T | -0.0865 |
| rs41297038  | G | -0.0334 |
| rs75925097  | T | -0.1151 |
| rs17494291  | G | 0.0633  |
| rs78840355  | C | 0.0932  |
| rs7921499   | T | -0.0182 |
| rs150255153 | C | 0.0837  |
| rs138392743 | G | 0.1089  |
| rs80085486  | C | 0.101   |
| rs1570426   | A | -0.0309 |
| rs7082346   | T | 0.0192  |
| rs116971723 | A | 0.0773  |

|             |   |         |
|-------------|---|---------|
| rs10905689  | C | -0.0239 |
| rs2688789   | A | 0.0182  |
| rs77973495  | G | 0.0627  |
| rs1852491   | G | 0.0258  |
| rs17113735  | A | 0.0189  |
| rs2997283   | C | 0.0299  |
| rs117398912 | G | 0.0929  |
| rs61674060  | C | 0.1127  |
| rs35202367  | A | -0.021  |
| rs117148234 | G | 0.0738  |
| rs10998384  | T | 0.1049  |
| rs73322303  | G | -0.0708 |
| rs11146120  | C | -0.0808 |
| rs7921041   | C | -0.025  |
| rs117283726 | C | 0.1059  |
| rs7100031   | G | -0.0179 |
| rs111512410 | G | 0.0793  |
| rs79756305  | C | -0.0622 |
| rs12765966  | T | -0.0226 |
| rs4751238   | G | -0.0675 |
| rs4750792   | T | 0.0193  |
| rs55837091  | T | -0.0697 |
| rs74477043  | C | 0.1207  |
| rs141579866 | T | -0.0591 |
| rs72802417  | A | 0.0917  |
| rs45547336  | C | 0.0565  |
| rs10821709  | C | 0.0195  |
| rs80247804  | T | -0.039  |
| rs138300420 | C | 0.039   |
| rs11016735  | G | 0.0547  |
| rs149973793 | C | 0.0948  |
| rs144628417 | A | 0.0776  |
| rs117479958 | A | 0.1172  |
| rs7910869   | C | 0.0214  |
| rs17581595  | C | 0.112   |
| rs12247999  | C | 0.0184  |
| rs11591829  | T | -0.0281 |
| rs10824642  | A | 0.0174  |
| rs7896713   | A | 0.0773  |
| rs142638762 | C | -0.1208 |
| rs1977389   | G | -0.0182 |
| rs12762776  | C | 0.0458  |
| rs2173243   | A | -0.0249 |
| rs2248503   | A | -0.022  |
| rs11254044  | G | -0.0223 |
| rs117075400 | A | 0.1214  |
| rs12775927  | A | -0.0558 |

|             |   |         |
|-------------|---|---------|
| rs9665327   | G | -0.0275 |
| rs1977823   | T | -0.0231 |
| rs11016374  | T | -0.0481 |
| rs12358164  | C | -0.0187 |
| rs61851650  | G | 0.0516  |
| rs75618826  | A | 0.0758  |
| rs10903678  | T | 0.0261  |
| rs59202497  | T | -0.0474 |
| rs10887543  | C | -0.0349 |
| rs59484839  | G | -0.0898 |
| rs113360081 | A | 0.1197  |
| rs55856425  | T | 0.1517  |
| rs146912493 | T | 0.0751  |
| rs12261272  | C | -0.0667 |
| rs55684379  | G | 0.1287  |
| rs58164418  | A | 0.0193  |
| rs116966798 | G | 0.1302  |
| rs11004858  | A | -0.1467 |
| rs79408743  | G | -0.029  |
| rs61871317  | A | -0.0667 |
| rs75777234  | G | -0.0828 |
| rs138514971 | A | 0.114   |
| rs74453770  | T | -0.0838 |
| rs11251064  | C | -0.0261 |
| rs75867635  | T | 0.0631  |
| rs117275550 | A | -0.0802 |
| rs77997224  | G | -0.0458 |
| rs35671509  | T | 0.1033  |
| rs139236098 | T | -0.0942 |
| rs7093035   | A | -0.0321 |
| rs72864703  | A | 0.0538  |
| rs112749099 | T | -0.1476 |
| rs11596647  | A | -0.0459 |
| rs1570937   | A | 0.1094  |
| rs2680332   | G | 0.0293  |
| rs79174007  | T | -0.0416 |
| rs2259442   | T | -0.022  |
| rs876848    | A | 0.0207  |
| rs2913115   | T | 0.0212  |
| rs11592363  | T | 0.0519  |
| rs77021842  | A | -0.0924 |
| rs138693284 | T | 0.1276  |
| rs1413196   | C | 0.059   |
| rs1990      | G | -0.0446 |
| rs1341054   | T | 0.0185  |
| rs117001410 | A | -0.0568 |
| rs12784701  | T | 0.0216  |

|             |   |         |
|-------------|---|---------|
| rs76877073  | A | 0.0736  |
| rs914363    | C | -0.0179 |
| rs419515    | C | -0.0245 |
| rs7067904   | T | 0.0313  |
| rs117219715 | C | 0.0761  |
| rs1934053   | G | 0.0215  |
| rs11201315  | T | -0.0468 |
| rs149109483 | A | 0.0808  |
| rs12414101  | G | -0.0227 |
| rs12242030  | C | 0.0506  |
| rs11146359  | T | -0.0281 |
| rs10828176  | G | -0.0342 |
| rs2130791   | G | 0.0187  |
| rs4747170   | A | 0.0513  |
| rs3781180   | T | 0.0326  |
| rs1410596   | C | 0.0254  |
| rs11198042  | G | 0.0356  |
| rs7912388   | G | 0.0223  |
| rs10786667  | C | -0.0181 |
| rs11253122  | A | 0.0216  |
| rs72784715  | T | 0.0476  |
| rs11014433  | A | 0.0262  |
| rs76276253  | T | 0.1042  |
| rs4747661   | G | -0.0236 |
| rs117527765 | A | -0.0569 |
| rs56231742  | T | 0.1027  |
| rs380003    | C | 0.0186  |
| rs71475054  | T | 0.0449  |
| rs117507586 | T | -0.0977 |
| rs149110969 | G | -0.0481 |
| rs60526605  | T | 0.0284  |
| rs72799479  | A | 0.0872  |
| rs1873465   | C | -0.0321 |
| rs74756457  | T | -0.0461 |
| rs61829431  | T | -0.0588 |
| rs7079824   | G | 0.0195  |
| rs2928461   | C | 0.0509  |
| rs860912    | A | 0.0217  |
| rs79517317  | A | 0.1018  |
| rs7072032   | A | 0.023   |
| rs10751546  | C | 0.0179  |
| rs3781338   | A | 0.0268  |
| rs11198062  | C | -0.018  |
| rs114441762 | A | -0.0383 |
| rs72825217  | C | 0.0288  |
| rs4934266   | T | -0.0182 |
| rs3129394   | T | 0.0188  |

|             |   |         |
|-------------|---|---------|
| rs16913607  | T | 0.0778  |
| rs77538607  | C | -0.0808 |
| rs79104758  | G | -0.0852 |
| rs11204220  | A | 0.0327  |
| rs11598792  | G | 0.0683  |
| rs2892166   | T | -0.0279 |
| rs11189739  | G | -0.0196 |
| rs142214444 | A | 0.0907  |
| rs11015338  | G | 0.0432  |
| rs78974648  | A | -0.1104 |
| rs604772    | C | 0.0267  |
| rs149952513 | A | -0.0967 |
| rs112000697 | G | 0.039   |
| rs150498816 | G | -0.0472 |
| rs148401823 | T | 0.0524  |
| rs10823297  | C | -0.0539 |
| rs111526946 | T | 0.0323  |
| rs71495071  | T | 0.046   |
| rs2493723   | A | -0.0178 |
| rs117568502 | C | 0.0685  |
| rs11188146  | C | 0.056   |
| rs7094676   | G | 0.0721  |
| rs117925514 | T | -0.0889 |
| rs55949954  | A | 0.0197  |
| rs61831826  | A | -0.0391 |
| rs76917466  | A | -0.0745 |
| rs141849839 | G | -0.0492 |
| rs4881528   | G | 0.0237  |
| rs17096421  | T | -0.0481 |
| rs7068411   | T | -0.0186 |
| rs7895806   | T | -0.0259 |
| rs142117385 | T | 0.1319  |
| rs2181930   | C | -0.0218 |
| rs2170778   | A | -0.0549 |
| rs7089827   | T | -0.0304 |
| rs3919692   | C | 0.0443  |
| rs79597586  | A | -0.0919 |
| rs4082332   | T | -0.0785 |
| rs10998476  | G | -0.0185 |
| rs117122649 | T | 0.0699  |
| rs117818701 | G | -0.0626 |
| rs3004928   | C | -0.0175 |
| rs2485207   | C | 0.0309  |
| rs117959007 | A | 0.0519  |
| rs78523773  | A | -0.0777 |
| rs10857735  | A | 0.0403  |
| rs113482481 | G | 0.1171  |

|             |   |         |
|-------------|---|---------|
| rs928337    | G | -0.0176 |
| rs955245    | G | 0.0379  |
| rs7072571   | G | 0.0317  |
| rs117852793 | A | 0.0707  |
| rs35366291  | A | -0.092  |
| rs4261175   | G | -0.0225 |
| rs111595519 | A | -0.0433 |
| rs4918511   | T | 0.0207  |
| rs56217306  | G | 0.0493  |
| rs61858987  | A | 0.0653  |
| rs17486941  | G | -0.0419 |
| rs2248819   | A | 0.0854  |
| rs7078308   | G | 0.0859  |
| rs77550482  | G | -0.0702 |
| rs2393596   | A | 0.0213  |
| rs7083822   | C | 0.0436  |
| rs12253535  | G | 0.1421  |
| rs11012680  | G | -0.0437 |
| rs16927781  | A | -0.0205 |
| rs117095256 | G | 0.0578  |
| rs113187693 | T | -0.0991 |
| rs855987    | G | 0.0222  |
| rs79859101  | G | 0.0488  |
| rs1898064   | T | 0.0176  |
| rs17465590  | G | -0.0262 |
| rs4917728   | G | -0.0188 |
| rs149462142 | T | 0.0741  |
| rs78620227  | G | -0.0757 |
| rs75318824  | C | 0.071   |
| rs117218080 | A | -0.1622 |
| rs883793    | C | -0.0496 |
| rs12780832  | A | -0.0439 |
| rs41277962  | A | -0.0867 |
| rs55854940  | T | -0.0628 |
| rs11255743  | T | 0.0505  |
| rs3124180   | A | -0.0203 |
| rs77391633  | G | 0.088   |
| rs10902821  | A | 0.0237  |
| rs7894706   | T | -0.018  |
| rs79347484  | T | 0.087   |
| rs61058481  | T | -0.0252 |
| rs72846903  | T | 0.077   |
| rs143683269 | C | 0.1718  |
| rs10870333  | C | 0.0518  |
| rs34448666  | C | -0.0618 |
| rs10906149  | A | -0.0446 |
| rs140544645 | A | -0.0735 |

|             |   |         |
|-------------|---|---------|
| rs61840210  | C | -0.0404 |
| rs78625734  | C | 0.0358  |
| rs10764521  | T | 0.0456  |
| rs7908620   | G | -0.0627 |
| rs6482754   | A | -0.0351 |
| rs11193676  | C | 0.0463  |
| rs7101307   | G | -0.0181 |
| rs12257709  | A | 0.0445  |
| rs4935335   | G | 0.0307  |
| rs117391608 | T | 0.1029  |
| rs11599310  | A | -0.0194 |
| rs151181927 | A | -0.091  |
| rs75334740  | G | -0.1609 |
| rs7078667   | T | 0.0504  |
| rs786819    | C | 0.0355  |
| rs56118652  | G | -0.0343 |
| rs11008297  | C | -0.0397 |
| rs72829488  | C | 0.0578  |
| rs17809678  | C | -0.0319 |
| rs28987110  | C | -0.0394 |
| rs12775265  | A | 0.0236  |
| rs7093334   | C | 0.0593  |
| rs7088405   | T | 0.033   |
| rs72786343  | A | -0.0861 |
| rs60801472  | A | 0.0398  |
| rs1343024   | A | 0.0464  |
| rs117265656 | A | 0.095   |
| rs67275451  | C | 0.0188  |
| rs78383318  | T | -0.1805 |
| rs315631    | T | 0.025   |
| rs55699146  | G | 0.0666  |
| rs12247154  | A | 0.0535  |
| rs10994167  | T | -0.0644 |
| rs7098186   | T | -0.0221 |
| rs10901545  | T | -0.0852 |
| rs113391357 | T | 0.0306  |
| rs74847430  | G | -0.0971 |
| rs7095092   | T | -0.0382 |
| rs17108061  | T | 0.0682  |
| rs12415980  | C | -0.0338 |
| rs1977850   | G | -0.0182 |
| rs4926057   | T | 0.0469  |
| rs55824528  | A | 0.0255  |
| rs6584321   | C | -0.0261 |
| rs1891193   | C | 0.0177  |
| rs6584877   | C | 0.0189  |
| rs2065360   | A | 0.078   |

|             |   |         |
|-------------|---|---------|
| rs146241196 | A | 0.0479  |
| rs72843179  | T | 0.0538  |
| rs111772430 | A | 0.1157  |
| rs1927161   | A | 0.0236  |
| rs72779582  | T | 0.0428  |
| rs11187397  | T | -0.0965 |
| rs149418734 | A | -0.0965 |
| rs11014751  | G | -0.0562 |
| rs2208587   | G | -0.0251 |
| rs10886813  | T | 0.0384  |
| rs6480848   | G | -0.022  |
| rs117240021 | A | 0.104   |
| rs117762443 | T | -0.1021 |
| rs7918466   | G | 0.0375  |
| rs147173999 | T | 0.1023  |
| rs61862999  | G | -0.0326 |
| rs11816351  | G | 0.0207  |
| rs138543040 | G | 0.1017  |
| rs117666274 | C | -0.095  |
| rs72839447  | T | 0.116   |
| rs3740051   | G | -0.0394 |
| rs80076842  | A | 0.0615  |
| rs12412199  | A | -0.0618 |
| rs75023418  | T | 0.0461  |
| rs75899802  | G | -0.0828 |
| rs7094233   | C | 0.0323  |
| rs117804930 | A | 0.073   |
| rs117275757 | G | -0.1257 |
| rs10786215  | G | -0.0191 |
| rs139048109 | C | 0.0935  |
| rs61841335  | A | -0.0307 |
| rs78546077  | C | -0.0813 |
| rs10786940  | C | -0.021  |
| rs1160630   | C | 0.0181  |
| rs55657803  | A | 0.0205  |
| rs10822615  | A | 0.017   |
| rs10466214  | C | 0.0215  |
| rs3135752   | A | 0.0311  |
| rs7088409   | C | -0.0233 |
| rs72813972  | T | 0.0624  |
| rs147513576 | C | -0.1635 |
| rs12252469  | T | 0.0326  |
| rs11192134  | A | 0.0256  |
| rs1397616   | T | 0.0679  |
| rs79333346  | T | 0.0894  |
| rs10906876  | A | 0.0483  |
| rs7095343   | C | 0.0686  |



|             |   |         |
|-------------|---|---------|
| rs11193744  | T | 0.155   |
| rs2070705   | G | 0.0335  |
| rs970664    | C | -0.0212 |
| rs873957    | G | 0.018   |
| rs7895783   | T | -0.0346 |
| rs4749035   | A | 0.0232  |
| rs117692459 | G | 0.0605  |
| rs117011568 | T | -0.0843 |
| rs7078282   | C | -0.0211 |
| rs1247004   | G | -0.0187 |
| rs4751154   | C | 0.0187  |
| rs76414740  | G | 0.0434  |
| rs7893568   | A | 0.0621  |
| rs117322957 | T | 0.0404  |
| rs896219    | C | -0.0266 |
| rs12570550  | A | 0.0481  |
| rs72795007  | G | 0.0408  |
| rs147277828 | C | 0.033   |
| rs11006569  | G | -0.0525 |
| rs10884024  | G | -0.0547 |
| rs146994949 | C | 0.1009  |
| rs142087063 | A | 0.1865  |
| rs10885423  | C | -0.0169 |
| rs11594876  | T | 0.0213  |
| rs2767070   | A | -0.0226 |
| rs113378034 | A | 0.0898  |
| rs57085186  | T | 0.0582  |
| rs7907623   | A | 0.0193  |
| rs74693287  | A | -0.1082 |
| rs35937738  | A | -0.0247 |
| rs12243667  | T | 0.083   |
| rs78986365  | A | -0.0937 |
| rs112621663 | G | 0.0702  |
| rs10741141  | A | 0.0204  |
| rs61855170  | A | 0.1516  |
| rs72833791  | A | 0.0976  |
| rs117748484 | C | 0.1074  |
| rs61840160  | T | 0.038   |
| rs75211218  | G | 0.1123  |
| rs117412481 | G | -0.0908 |
| rs2495778   | A | -0.0174 |
| rs10740486  | G | -0.0219 |
| rs7094680   | G | -0.0263 |
| rs12783330  | T | -0.0672 |
| rs10899829  | T | 0.0707  |
| rs72806568  | G | -0.0416 |
| rs78302556  | T | -0.0787 |

|             |   |         |
|-------------|---|---------|
| rs117537719 | A | 0.0589  |
| rs141156562 | T | 0.0923  |
| rs12263507  | G | -0.0734 |
| rs112294233 | C | -0.1007 |
| rs2814327   | T | 0.0202  |
| rs11596482  | G | -0.0441 |
| rs115959107 | G | -0.0488 |
| rs2459068   | T | 0.0217  |
| rs117919093 | C | 0.1362  |
| rs114360065 | A | 0.0681  |
| rs2142349   | T | -0.071  |
| rs76205417  | C | -0.0351 |
| rs35054853  | A | 0.0435  |
| rs76996467  | G | -0.0767 |
| rs77918077  | A | -0.0559 |
| rs112358299 | A | 0.0775  |
| rs137985965 | A | 0.1238  |
| rs9888112   | T | -0.0225 |
| rs150318522 | A | -0.1162 |
| rs2671709   | G | -0.0389 |
| rs75665088  | A | -0.0673 |
| rs114589517 | T | 0.0954  |
| rs9971214   | A | 0.0648  |
| rs11256585  | A | 0.0697  |
| rs7092143   | T | -0.0342 |
| rs113329269 | T | -0.116  |
| rs2269195   | T | -0.0175 |
| rs79012500  | G | -0.1168 |
| rs1572237   | T | 0.0229  |
| rs35023605  | G | 0.0743  |
| rs2488158   | A | 0.023   |
| rs74130200  | A | -0.0331 |
| rs10508314  | G | -0.0223 |
| rs9420446   | T | 0.0357  |
| rs4242724   | C | 0.0178  |
| rs6602329   | C | 0.0172  |
| rs11016227  | T | -0.0236 |
| rs703014    | A | -0.0188 |
| rs10886747  | T | -0.0236 |
| rs55714260  | G | -0.075  |
| rs7087167   | G | -0.0511 |
| rs11013438  | A | 0.027   |
| rs41281342  | T | 0.0804  |
| rs149543985 | G | -0.1131 |
| rs148681805 | G | -0.0678 |
| rs7905553   | C | 0.0172  |
| rs17536221  | C | 0.0429  |

|             |   |         |
|-------------|---|---------|
| rs117115319 | A | 0.1424  |
| rs56854660  | C | -0.0632 |
| rs79035629  | C | 0.0758  |
| rs117939042 | T | -0.1029 |
| rs7068115   | C | 0.021   |
| rs12763256  | G | -0.0203 |
| rs117074080 | A | 0.1272  |
| rs10786197  | G | 0.0287  |
| rs2944522   | C | 0.0193  |
| rs72779755  | A | -0.045  |
| rs61841435  | C | 0.0313  |
| rs708434    | C | -0.0303 |
| rs117809096 | T | 0.0745  |
| rs139827535 | A | -0.0852 |
| rs61832721  | C | -0.0265 |
| rs142540848 | T | -0.0919 |
| rs2589423   | A | -0.0201 |
| rs7917505   | C | -0.0398 |
| rs147871755 | T | 0.0879  |
| rs150265248 | G | 0.0861  |
| rs11250323  | A | -0.0181 |
| rs1332545   | A | -0.0267 |
| rs11012223  | G | 0.0251  |
| rs78835915  | A | 0.0771  |
| rs61844136  | T | 0.0438  |
| rs76811600  | G | 0.1468  |
| rs141303350 | C | 0.0754  |
| rs61005340  | A | -0.0216 |
| rs138888085 | C | -0.1131 |
| rs74532201  | A | -0.0755 |
| rs751499    | A | -0.045  |
| rs1904694   | G | -0.017  |
| rs61832014  | C | 0.0721  |
| rs75290547  | T | 0.0515  |
| rs34543669  | T | -0.0578 |
| rs61863032  | G | -0.1266 |
| rs59571548  | C | 0.0809  |
| rs11255528  | T | -0.1009 |
| rs118019887 | T | 0.1557  |
| rs76931976  | C | -0.1127 |
| rs911700    | G | 0.0226  |
| rs117215684 | G | -0.0658 |
| rs10823836  | G | -0.0181 |
| rs4918236   | T | -0.0172 |
| rs76579874  | G | 0.0759  |
| rs78377642  | T | 0.0643  |
| rs1926559   | C | 0.0338  |

|             |   |         |
|-------------|---|---------|
| rs4881072   | A | -0.0297 |
| rs2484092   | A | -0.0196 |
| rs117540626 | A | 0.1106  |
| rs9325460   | T | 0.0897  |
| rs10788312  | T | -0.019  |
| rs7082800   | A | 0.0401  |
| rs1198114   | G | -0.0167 |
| rs11003924  | T | 0.0282  |
| rs12265953  | C | 0.0489  |
| rs76490543  | T | -0.0471 |
| rs4918239   | T | -0.0222 |
| rs822075    | A | -0.0303 |
| rs2605512   | G | -0.017  |
| rs79439167  | C | 0.0361  |
| rs72845192  | C | 0.0369  |
| rs117248489 | G | 0.089   |
| rs10884551  | C | 0.0329  |
| rs7901538   | G | 0.0506  |
| rs4746915   | G | 0.0214  |
| rs1764074   | A | 0.0205  |
| rs140567520 | A | -0.1031 |
| rs1911464   | T | 0.0285  |
| rs7917174   | T | -0.0286 |
| rs2765654   | A | 0.0471  |
| rs77699142  | A | 0.0869  |
| rs117952152 | T | 0.0571  |
| rs1317296   | A | 0.0958  |
| rs117649165 | T | -0.1308 |
| rs11204267  | G | 0.1177  |
| rs116846297 | A | -0.0598 |
| rs2246667   | G | 0.0418  |
| rs2787158   | A | 0.0266  |
| rs3124199   | T | -0.0172 |
| rs76638381  | T | 0.0557  |
| rs74805311  | T | 0.104   |
| rs11238560  | T | -0.094  |
| rs74869251  | T | -0.0377 |
| rs10885999  | A | 0.0482  |
| rs4732      | T | 0.0288  |
| rs4625384   | C | -0.0329 |
| rs59522027  | A | -0.0432 |
| rs7921950   | T | 0.0202  |
| rs117623355 | T | 0.0666  |
| rs515929    | G | -0.0239 |
| rs880887    | T | -0.0207 |
| rs4880474   | T | 0.0378  |
| rs3810950   | A | 0.0192  |

|             |   |         |
|-------------|---|---------|
| rs79225871  | T | 0.0577  |
| rs142169705 | A | 0.0703  |
| rs117230203 | A | 0.1177  |
| rs117480075 | A | 0.0684  |
| rs17255302  | T | 0.0678  |
| rs117928166 | C | 0.1947  |
| rs117274510 | A | 0.0982  |
| rs1336451   | C | 0.0658  |
| rs61862496  | C | -0.0388 |
| rs7074967   | A | 0.0231  |
| rs9651301   | A | 0.0464  |
| rs112561387 | A | 0.0923  |
| rs7895277   | T | -0.0186 |
| rs41275244  | T | -0.057  |
| rs7912195   | A | 0.0218  |
| rs77697049  | A | 0.0549  |
| rs12781317  | A | 0.0206  |
| rs77625290  | T | 0.0532  |
| rs79557978  | C | -0.0248 |
| rs117574554 | C | -0.1013 |
| rs117894744 | G | 0.0712  |
| rs71486145  | G | 0.0957  |
| rs12571613  | G | -0.0214 |
| rs117241341 | A | 0.0883  |
| rs61863276  | T | -0.128  |
| rs10998437  | T | 0.1266  |
| rs148021820 | C | 0.0227  |
| rs2505501   | T | -0.0228 |
| rs10788303  | A | 0.0205  |
| rs72820141  | C | 0.0341  |
| rs77108246  | A | 0.0691  |
| rs117062064 | T | -0.08   |
| rs6481348   | G | 0.0198  |
| rs10776669  | T | 0.0337  |
| rs76692016  | A | -0.0796 |
| rs9665386   | G | 0.0691  |
| rs10751840  | G | 0.045   |
| rs75253746  | T | 0.1096  |
| rs142644119 | G | -0.1562 |
| rs4568922   | C | -0.0238 |
| rs7094347   | A | -0.0245 |
| rs11196589  | C | -0.0176 |
| rs10787993  | T | -0.0208 |
| rs79506900  | A | 0.1003  |
| rs35510320  | T | -0.0604 |
| rs41291862  | C | 0.0779  |
| rs139361990 | A | 0.0727  |

|             |   |         |
|-------------|---|---------|
| rs7901795   | T | 0.0929  |
| rs7896327   | T | -0.0177 |
| rs79751840  | C | -0.0847 |
| rs79220424  | G | 0.099   |
| rs7914325   | G | 0.0321  |
| rs7101024   | G | 0.0291  |
| rs928519    | T | 0.0448  |
| rs12778455  | A | -0.0338 |
| rs11005884  | A | 0.0216  |
| rs9703762   | A | 0.0863  |
| rs744254    | G | 0.0183  |
| rs7088969   | T | 0.0184  |
| rs148297765 | T | 0.0847  |
| rs7080775   | G | -0.0272 |
| rs61847394  | T | 0.0589  |
| rs144311573 | A | 0.1452  |
| rs78742453  | C | -0.137  |
| rs140717619 | T | 0.1202  |
| rs17707151  | G | 0.0334  |
| rs11007875  | T | 0.1131  |
| rs80318587  | T | 0.0467  |
| rs77268649  | G | 0.0489  |
| rs118004263 | A | -0.0932 |
| rs11001406  | A | 0.0965  |
| rs112994531 | G | 0.0795  |
| rs2813776   | C | 0.0219  |
| rs75848191  | T | -0.1202 |
| rs7910546   | A | 0.0268  |
| rs12761241  | T | -0.1016 |
| rs61854280  | T | 0.0808  |
| rs2495733   | C | 0.0496  |
| rs72781887  | A | -0.073  |
| rs1538246   | C | -0.0281 |
| rs144916093 | T | 0.1198  |
| rs12766588  | C | 0.0253  |
| rs12256689  | T | -0.0281 |
| rs7920283   | C | -0.0474 |
| rs34043065  | G | -0.0276 |
| rs72774724  | C | 0.0463  |
| rs10905791  | C | -0.0199 |
| rs72782359  | C | -0.1081 |
| rs28718643  | T | -0.0324 |
| rs824157    | C | -0.0203 |
| rs61848640  | T | 0.0573  |
| rs59632809  | C | -0.031  |
| rs814620    | G | -0.019  |
| rs10882792  | C | -0.02   |

|             |   |         |
|-------------|---|---------|
| rs10787429  | T | 0.0191  |
| rs7922974   | T | 0.0875  |
| rs1443136   | T | -0.0277 |
| rs72805736  | G | 0.0352  |
| rs117918857 | A | 0.0581  |
| rs7089922   | T | 0.0583  |
| rs141043949 | G | 0.102   |
| rs56051930  | C | -0.0396 |
| rs2491055   | G | -0.0212 |
| rs79003217  | C | 0.0522  |
| rs42455     | A | 0.0167  |
| rs56331530  | G | 0.0461  |
| rs72839711  | C | 0.0851  |
| rs55976550  | T | -0.1009 |
| rs76074975  | C | 0.0385  |
| rs10905961  | C | 0.0386  |
| rs77968426  | T | -0.0488 |
| rs6480557   | C | 0.019   |
| rs17824180  | A | -0.0199 |
| rs17351092  | T | 0.0276  |
| rs75891339  | T | -0.1159 |
| rs12259125  | A | -0.0333 |
| rs76163107  | A | 0.0671  |
| rs4751828   | A | 0.02    |
| rs12217931  | C | 0.0404  |
| rs76516692  | T | 0.0413  |
| rs2603804   | C | -0.0265 |
| rs7901458   | A | 0.0735  |
| rs1535387   | C | -0.0214 |
| rs72769623  | T | 0.0669  |
| rs117021948 | T | 0.0662  |
| rs11598594  | C | 0.0991  |
| rs7069452   | G | -0.0203 |
| rs11257408  | C | 0.02    |
| rs12263149  | A | 0.017   |
| rs76949305  | C | 0.0736  |
| rs7070104   | G | -0.021  |
| rs139778117 | A | -0.0696 |
| rs11189418  | A | -0.033  |
| rs112373232 | T | -0.0702 |
| rs74233809  | C | -0.029  |
| rs6585023   | A | 0.0271  |
| rs77301832  | A | -0.0568 |
| rs12763713  | A | -0.088  |
| rs16928947  | G | 0.0385  |
| rs4917962   | T | -0.0265 |
| rs7086886   | A | -0.0255 |

|             |   |         |
|-------------|---|---------|
| rs17304691  | G | 0.1409  |
| rs10824201  | G | -0.0187 |
| rs6585008   | A | -0.0223 |
| rs11196082  | G | 0.102   |
| rs2399726   | T | 0.0178  |
| rs12771641  | T | 0.0417  |
| rs10886897  | C | 0.0195  |
| rs78762327  | A | 0.0327  |
| rs113314392 | A | -0.0552 |
| rs117204878 | G | 0.0409  |
| rs7912191   | C | 0.021   |
| rs11812910  | C | -0.0358 |
| rs3862018   | C | -0.0227 |
| rs76431751  | A | -0.0799 |
| rs74351756  | C | 0.0676  |
| rs11014014  | A | 0.0414  |
| rs117385363 | T | -0.0981 |
| rs10906860  | G | 0.0168  |
| rs1339464   | G | -0.0232 |
| rs148095496 | A | 0.0766  |
| rs9420343   | A | 0.0192  |
| rs17476117  | A | 0.0296  |
| rs75955695  | C | 0.0827  |
| rs10886968  | T | 0.0216  |
| rs71489637  | C | -0.0343 |
| rs148858804 | T | -0.0521 |
| rs141380377 | A | 0.1173  |
| rs116924848 | G | 0.1276  |
| rs113582629 | T | 0.0436  |
| rs629244    | A | -0.0738 |
| rs10994257  | T | 0.0179  |
| rs4746614   | G | -0.0327 |
| rs78743623  | C | 0.0685  |
| rs77873432  | A | 0.0927  |
| rs150249331 | G | -0.0758 |
| rs61872787  | G | -0.112  |
| rs17382682  | C | -0.084  |
| rs118046020 | A | 0.119   |
| rs17503790  | C | 0.0625  |
| rs2619640   | A | -0.0204 |
| rs67847984  | A | 0.0969  |
| rs17341445  | C | 0.0277  |
| rs75662805  | G | -0.0738 |
| rs12358857  | C | 0.0528  |
| rs7912069   | T | -0.034  |
| rs943101    | C | 0.0179  |
| rs4746058   | G | 0.0297  |



|             |   |         |
|-------------|---|---------|
| rs17106123  | C | 0.0718  |
| rs11599872  | T | 0.0405  |
| rs10899838  | C | 0.0172  |
| rs1011199   | C | 0.0535  |
| rs7085750   | G | -0.0178 |
| rs860947    | G | 0.1185  |
| rs145706053 | G | 0.1001  |
| rs7916508   | T | -0.0663 |
| rs17135906  | G | 0.0524  |
| rs17150707  | A | 0.0425  |
| rs72792136  | A | 0.088   |
| rs117759913 | C | -0.0781 |
| rs4747154   | T | -0.0189 |
| rs72803517  | G | -0.0393 |
| rs10788431  | G | -0.0176 |
| rs76793515  | T | -0.0662 |
| rs10905300  | A | -0.0168 |
| rs141347662 | T | -0.0909 |
| rs7918258   | T | 0.0219  |
| rs76754088  | T | 0.0608  |
| rs75712855  | C | 0.058   |
| rs78951441  | C | 0.1037  |
| rs76536421  | C | 0.0788  |
| rs77284348  | G | -0.1016 |
| rs2225819   | G | -0.0166 |
| rs71482359  | A | 0.0628  |
| rs11596018  | T | -0.0501 |
| rs111521331 | A | -0.0882 |
| rs34404237  | T | 0.0742  |
| rs72775590  | G | 0.0401  |
| rs112541502 | T | 0.0453  |
| rs111569396 | A | 0.0735  |
| rs61849095  | G | 0.047   |
| rs72808065  | T | -0.1006 |
| rs2152635   | C | -0.0206 |
| rs1904602   | T | 0.0208  |
| rs17323417  | G | -0.0894 |
| rs73318413  | G | -0.1141 |
| rs9423344   | A | -0.0754 |
| rs79438028  | T | -0.0649 |
| rs79051267  | G | 0.0669  |
| rs139333366 | A | 0.0837  |
| rs7090782   | G | 0.0301  |
| rs11002738  | A | 0.0435  |
| rs4750528   | G | -0.0235 |
| rs12267584  | G | 0.0279  |
| rs138428941 | T | 0.0938  |

|             |   |         |
|-------------|---|---------|
| rs116844448 | A | 0.0896  |
| rs11245145  | C | 0.0331  |
| rs11200070  | A | 0.0223  |
| rs11191199  | A | -0.0367 |
| rs11244488  | A | 0.0869  |
| rs7078117   | G | 0.0184  |
| rs7902605   | G | -0.0316 |
| rs61874708  | T | 0.0693  |
| rs75732942  | A | -0.0995 |
| rs4140410   | C | 0.0188  |
| rs61847476  | A | -0.0867 |
| rs117810941 | T | -0.1095 |
| rs79196863  | T | -0.0455 |
| rs116863697 | A | 0.0657  |
| rs1092116   | A | 0.027   |
| rs75588383  | A | 0.0327  |
| rs117583436 | C | 0.053   |
| rs56280872  | T | -0.0244 |
| rs74148854  | A | 0.0777  |
| rs11818723  | G | 0.0261  |
| rs144609379 | C | -0.1188 |
| rs1909675   | T | 0.018   |
| rs4751457   | C | -0.03   |
| rs11599741  | C | 0.0408  |
| rs34266844  | G | 0.0213  |
| rs78631345  | T | 0.0428  |
| rs2027473   | T | 0.1325  |
| rs56294775  | A | -0.0368 |
| rs3026694   | A | -0.0237 |
| rs71486472  | T | -0.0906 |
| rs191614018 | A | 0.0431  |
| rs72790507  | T | -0.0629 |
| rs76496337  | G | -0.0858 |
| rs12774914  | C | -0.0241 |
| rs116901132 | T | 0.1705  |
| rs2057435   | G | 0.0162  |
| rs10882215  | T | 0.0223  |
| rs76812772  | C | 0.0824  |
| rs1418913   | G | 0.0264  |
| rs146346127 | G | -0.0765 |
| rs112007943 | T | 0.0776  |
| rs11245162  | A | -0.0339 |
| rs16924879  | G | 0.08    |
| rs74884059  | A | -0.0322 |
| rs60061490  | C | 0.0544  |
| rs1570652   | C | 0.0193  |
| rs116112527 | G | -0.0498 |

|             |   |         |
|-------------|---|---------|
| rs10997445  | G | 0.0174  |
| rs75171233  | T | -0.0721 |
| rs7097772   | T | -0.0416 |
| rs150726856 | T | 0.0801  |
| rs77206146  | G | -0.0984 |
| rs75910956  | G | 0.0982  |
| rs41294637  | C | 0.0588  |
| rs2478971   | T | 0.0575  |
| rs34414573  | A | 0.0465  |
| rs77236065  | C | 0.0463  |
| rs2251101   | C | -0.0188 |
| rs7919221   | T | -0.0265 |
| rs947478    | G | -0.0301 |
| rs7091571   | A | -0.0205 |
| rs11255309  | T | 0.0287  |
| rs12569837  | T | -0.065  |
| rs80112014  | T | -0.0904 |
| rs151011947 | T | 0.0569  |
| rs7917537   | T | -0.041  |
| rs11194696  | G | 0.0635  |
| rs36048667  | T | 0.0432  |
| rs116845450 | T | 0.0474  |
| rs57202585  | T | 0.0235  |
| rs6602613   | T | 0.0278  |
| rs9422386   | G | -0.0835 |
| rs7092269   | T | -0.0367 |
| rs72820058  | G | -0.0721 |
| rs11591800  | A | -0.026  |
| rs117857475 | G | 0.0741  |
| rs149567446 | A | -0.0379 |
| rs71459458  | C | -0.0933 |
| rs4359151   | T | -0.023  |
| rs10904073  | C | -0.0169 |
| rs10904992  | C | 0.048   |
| rs150141002 | G | 0.0678  |
| rs118011654 | A | 0.0535  |
| rs12357851  | G | -0.0603 |
| rs9663663   | C | 0.017   |
| rs12777504  | G | 0.0513  |
| rs10509771  | T | 0.0448  |
| rs117035195 | G | 0.0731  |
| rs75706183  | A | 0.0973  |
| rs2095648   | T | 0.0281  |
| rs11015994  | T | -0.0208 |
| rs78555852  | T | 0.0606  |
| rs17235154  | C | 0.0369  |
| rs2096177   | G | 0.0775  |

|             |   |         |
|-------------|---|---------|
| rs56388432  | A | -0.0434 |
| rs1977643   | C | -0.0225 |
| rs10763840  | A | 0.0638  |
| rs55947763  | A | -0.0676 |
| rs7910178   | T | -0.0192 |
| rs147907061 | G | 0.0748  |
| rs117541343 | A | 0.1479  |
| rs10857704  | G | -0.0256 |
| rs75937515  | T | -0.0448 |
| rs10824180  | G | -0.0389 |
| rs61853694  | T | 0.0579  |
| rs116976374 | A | 0.0795  |
| rs60381771  | A | 0.1133  |
| rs7900605   | T | -0.087  |
| rs4880635   | G | -0.019  |
| rs77931855  | C | 0.0696  |
| rs12416248  | C | -0.0178 |
| rs11256530  | C | -0.0251 |
| rs10828669  | G | -0.0179 |
| rs10999156  | T | 0.0522  |
| rs61850940  | A | -0.05   |
| rs76137131  | T | -0.0329 |
| rs78453281  | A | -0.0548 |
| rs1913508   | T | -0.0256 |
| rs28420458  | A | 0.031   |
| rs11011306  | C | -0.028  |
| rs117145580 | A | 0.0992  |
| rs78426660  | G | 0.0358  |
| rs76879415  | T | 0.0973  |
| rs117112474 | T | -0.0527 |
| rs17102476  | C | -0.0444 |
| rs11190797  | C | -0.0338 |
| rs3793726   | T | 0.038   |
| rs1869230   | G | -0.0221 |
| rs10999222  | G | 0.018   |
| rs12785161  | A | 0.0286  |
| rs2487503   | G | -0.0175 |
| rs7922232   | T | 0.0192  |
| rs117540137 | A | 0.0585  |
| rs118156983 | A | -0.0808 |
| rs117040291 | C | -0.1081 |
| rs117474072 | C | -0.0472 |
| rs61874865  | A | -0.0613 |
| rs78023003  | T | -0.0847 |
| rs7478337   | T | 0.0202  |
| rs117122529 | C | 0.0901  |
| rs2353945   | A | 0.0244  |

|             |   |         |
|-------------|---|---------|
| rs141803182 | T | 0.1046  |
| rs116990934 | T | 0.0696  |
| rs10994293  | T | 0.0413  |
| rs118072569 | A | 0.0858  |
| rs7907770   | G | 0.0184  |
| rs117350270 | A | 0.046   |
| rs2039385   | T | 0.0169  |
| rs61451605  | C | 0.0493  |
| rs79375306  | A | -0.052  |
| rs148234103 | T | -0.0858 |
| rs807022    | A | -0.0227 |
| rs11592039  | C | -0.0173 |
| rs4415704   | T | 0.017   |
| rs117600196 | G | -0.0465 |
| rs61850551  | C | -0.0277 |
| rs71487170  | C | -0.0562 |
| rs118086696 | A | 0.0908  |
| rs78285942  | T | -0.0765 |
| rs2619618   | T | 0.0226  |
| rs12218954  | C | 0.0244  |
| rs74894066  | A | 0.0504  |
| rs76380822  | G | -0.0352 |
| rs77499678  | T | -0.0379 |
| rs143273357 | A | -0.0674 |
| rs149256654 | C | 0.0757  |
| rs17155703  | C | -0.0232 |
| rs12240944  | G | -0.1165 |
| rs117016096 | T | 0.0742  |
| rs112474923 | A | -0.0993 |
| rs943119    | T | -0.0364 |
| rs1846220   | A | -0.0204 |
| rs7076988   | C | 0.0175  |
| rs2947339   | C | -0.1041 |
| rs113022408 | A | 0.0773  |
| rs17776547  | G | 0.0555  |
| rs2077854   | C | 0.0429  |
| rs2255950   | C | -0.0192 |
| rs61871722  | T | 0.0841  |
| rs4962444   | A | -0.0203 |
| rs1245540   | T | -0.0168 |
| rs74372874  | A | 0.0654  |
| rs17158558  | T | -0.0891 |
| rs72845715  | A | -0.1094 |
| rs117082154 | T | 0.0705  |
| rs61847243  | G | 0.0393  |
| rs78376960  | C | -0.0635 |
| rs11016333  | T | -0.0748 |

|             |   |         |
|-------------|---|---------|
| rs11598881  | T | -0.0287 |
| rs113097655 | T | -0.0566 |
| rs72836164  | C | -0.0577 |
| rs117875671 | C | 0.0927  |
| rs17642530  | T | -0.1428 |
| rs9971032   | A | -0.0202 |
| rs115850809 | A | 0.0491  |
| rs61876149  | A | -0.1204 |
| rs79052663  | T | 0.0515  |
| rs11018423  | G | -0.055  |
| rs75063491  | A | 0.1027  |
| rs17620824  | G | -0.0177 |
| rs647934    | G | 0.0307  |
| rs139274628 | C | -0.0544 |
| rs10829130  | A | 0.0327  |
| rs12265018  | A | -0.0198 |
| rs74117403  | T | 0.0797  |
| rs112922975 | G | -0.0682 |
| rs61852500  | C | -0.0269 |
| rs7081331   | A | 0.0388  |
| rs74840244  | A | 0.0378  |
| rs60473993  | T | 0.0488  |
| rs72774681  | C | 0.1025  |
| rs72841345  | A | 0.0402  |
| rs2813306   | C | -0.0176 |
| rs1043875   | A | 0.0785  |
| rs9971370   | A | -0.0189 |
| rs78132252  | C | 0.1     |
| rs9943454   | T | -0.0259 |
| rs7921289   | T | 0.0181  |
| rs72831307  | T | -0.1013 |
| rs117683843 | G | -0.0762 |
| rs4752134   | C | 0.0443  |
| rs1860260   | G | -0.02   |
| rs10903539  | G | -0.0171 |
| rs2493694   | T | 0.0226  |
| rs147513023 | A | 0.1233  |
| rs145520235 | T | 0.0921  |
| rs113576887 | A | 0.0613  |
| rs142391005 | G | -0.0429 |
| rs75638457  | A | -0.1387 |
| rs1253386   | T | 0.0189  |
| rs3935271   | A | 0.0235  |
| rs10829748  | A | 0.023   |
| rs77295048  | T | -0.0611 |
| rs77661619  | T | -0.0531 |
| rs76060179  | T | -0.0704 |

|             |   |         |
|-------------|---|---------|
| rs61639075  | T | -0.0247 |
| rs12771428  | G | 0.0327  |
| rs34652834  | A | -0.0373 |
| rs11016118  | C | -0.0209 |
| rs61844544  | T | 0.0674  |
| rs150318971 | C | -0.095  |
| rs16919363  | G | -0.0411 |
| rs7087632   | C | 0.099   |
| rs12260647  | A | 0.0746  |
| rs1360573   | G | -0.0248 |
| rs12765060  | A | 0.0409  |
| rs4750786   | G | -0.0268 |
| rs6602514   | T | -0.019  |
| rs10824838  | G | -0.0171 |
| rs142468886 | C | 0.0924  |
| rs74599191  | A | -0.0349 |
| rs55941893  | T | -0.0884 |
| rs1028858   | G | 0.048   |
| rs1740722   | C | 0.0395  |
| rs140518949 | C | -0.0757 |
| rs139626072 | T | 0.0555  |
| rs12241663  | T | -0.0175 |
| rs116968864 | A | 0.0605  |
| rs56322317  | T | -0.0432 |
| rs72808863  | G | 0.0485  |
| rs117571731 | G | -0.0943 |
| rs142047910 | T | -0.0772 |
| rs10870345  | A | -0.0361 |
| rs2454778   | T | 0.0252  |
| rs4748063   | A | -0.0247 |
| rs9415987   | T | -0.0178 |
| rs12764255  | G | 0.1235  |
| rs12246110  | A | 0.0209  |
| rs75198792  | G | -0.0455 |
| rs1756742   | A | -0.0609 |
| rs10999854  | T | 0.0194  |
| rs11256803  | G | 0.0181  |
| rs4918317   | T | -0.017  |
| rs147323146 | A | 0.0816  |
| rs1058240   | G | -0.0199 |
| rs641539    | T | 0.0324  |
| rs181630    | A | -0.0335 |
| rs79090051  | C | -0.0755 |
| rs7922347   | T | 0.0871  |
| rs3213031   | G | 0.0263  |
| rs3930291   | A | 0.0231  |
| rs1904587   | G | 0.0389  |

|             |   |         |
|-------------|---|---------|
| rs11244952  | A | -0.0204 |
| rs77957244  | A | 0.0285  |
| rs56236249  | C | 0.0468  |
| rs3890509   | A | -0.0615 |
| rs79659403  | G | 0.058   |
| rs73381895  | G | 0.0358  |
| rs111887142 | T | 0.0809  |
| rs138463018 | T | -0.0616 |
| rs7074873   | A | -0.0214 |
| rs2039566   | A | 0.0175  |
| rs12240289  | A | 0.0194  |
| rs10788250  | T | 0.0323  |
| rs17478850  | T | 0.0362  |
| rs1334469   | A | -0.0157 |
| rs7911271   | G | -0.0462 |
| rs12355407  | G | 0.0423  |
| rs4320877   | C | 0.0288  |
| rs72773391  | C | 0.0191  |
| rs72784264  | T | -0.0191 |
| rs10508728  | T | -0.0203 |
| rs3006547   | T | -0.0193 |
| rs17813699  | A | 0.0294  |
| rs117803272 | A | -0.0953 |
| rs7906088   | T | 0.0203  |
| rs10823688  | C | 0.0268  |
| rs284630    | C | 0.0165  |
| rs60790875  | C | 0.0282  |
| rs117589996 | C | -0.0478 |
| rs17103863  | T | 0.0394  |
| rs2505328   | T | -0.0163 |
| rs1618598   | A | -0.0165 |
| rs78333648  | T | 0.0292  |
| rs11251029  | A | 0.0163  |
| rs72800068  | T | 0.0416  |
| rs139126232 | A | -0.0679 |
| rs4922555   | G | 0.0373  |
| rs140267185 | T | -0.0878 |
| rs1889447   | G | -0.0164 |
| rs118020667 | A | -0.1034 |
| rs11259300  | A | 0.0338  |
| rs117954664 | T | -0.1007 |
| rs7079209   | A | 0.0219  |
| rs11252119  | A | 0.0196  |
| rs17097861  | A | 0.0497  |
| rs75347344  | T | -0.0345 |
| rs9421818   | C | 0.0171  |
| rs138958253 | T | 0.0877  |



|             |   |         |
|-------------|---|---------|
| rs61874971  | A | 0.0767  |
| rs4933605   | C | 0.0221  |
| rs117563914 | A | 0.0871  |
| rs61243351  | G | -0.0281 |
| rs77945839  | C | -0.0903 |
| rs17800766  | C | 0.1219  |
| rs117057168 | T | 0.111   |
| rs35529233  | G | 0.0755  |
| rs61857902  | A | -0.0813 |
| rs143174366 | T | -0.0979 |
| rs7072115   | C | 0.0477  |
| rs7099827   | A | 0.0315  |
| rs77957598  | A | -0.091  |
| rs11492528  | C | 0.0228  |
| rs34949105  | A | 0.1059  |
| rs117909147 | T | -0.0574 |
| rs34551097  | T | 0.0329  |
| rs12774065  | C | 0.1213  |
| rs11593456  | T | 0.0463  |
| rs147503158 | A | 0.0651  |
| rs72821539  | T | -0.0804 |
| rs1968874   | G | -0.0364 |
| rs915208    | A | -0.0305 |
| rs11012419  | T | 0.0374  |
| rs148030552 | T | 0.0761  |
| rs118122268 | A | -0.1074 |
| rs72834668  | G | 0.0587  |
| rs75889280  | G | 0.0663  |
| rs76006004  | G | -0.0351 |
| rs2637290   | T | 0.0204  |
| rs2457863   | T | -0.0159 |
| rs76624732  | C | 0.0479  |
| rs2762610   | A | 0.0278  |
| rs117842128 | C | -0.0615 |
| rs55830975  | T | 0.0394  |
| rs4919305   | G | -0.0221 |
| rs2483864   | A | 0.023   |
| rs2236210   | A | 0.0333  |
| rs61861812  | T | -0.0283 |
| rs72767591  | T | 0.0464  |
| rs61841833  | T | -0.0677 |
| rs145179971 | T | 0.104   |
| rs61851331  | T | -0.0735 |
| rs138709306 | G | -0.0839 |
| rs10885371  | A | -0.0202 |
| rs36015241  | A | 0.0262  |
| rs10788090  | G | -0.0221 |

|             |   |         |
|-------------|---|---------|
| rs303205    | T | 0.0393  |
| rs12266278  | T | -0.0436 |
| rs34269041  | A | 0.0634  |
| rs72838993  | C | -0.0779 |
| rs146073377 | G | -0.1439 |
| rs7908698   | A | -0.0351 |
| rs669312    | A | -0.0359 |
| rs72831422  | A | 0.0235  |
| rs79769355  | A | -0.0302 |
| rs146219227 | T | 0.0599  |
| rs12572234  | G | 0.0273  |
| rs2803613   | C | 0.0476  |
| rs61831977  | A | -0.0304 |
| rs4620622   | G | 0.0172  |
| rs59976873  | T | 0.0389  |
| rs117284186 | G | -0.1411 |
| rs77381096  | G | 0.0676  |
| rs2420194   | C | -0.0321 |
| rs11016754  | A | -0.0222 |
| rs1756754   | C | -0.0166 |
| rs12764182  | G | 0.0205  |
| rs72823671  | G | -0.0692 |
| rs142057405 | A | -0.1021 |
| rs7896801   | G | -0.0178 |
| rs12247601  | C | 0.0239  |
| rs11014039  | A | 0.022   |
| rs77703417  | A | 0.0612  |
| rs1897515   | G | -0.0213 |
| rs75876539  | A | 0.0459  |
| rs17761655  | A | 0.0479  |
| rs117304669 | A | -0.1113 |
| rs34003188  | A | -0.0964 |
| rs72807107  | A | -0.0222 |
| rs55744556  | A | 0.0315  |
| rs71508903  | T | 0.0212  |
| rs7923507   | T | 0.0369  |
| rs117934281 | C | -0.0777 |
| rs1624453   | A | 0.0159  |
| rs12267145  | T | 0.0477  |
| rs72841450  | G | -0.0189 |
| rs117445072 | G | 0.0751  |
| rs945294    | G | 0.0176  |
| rs61860874  | G | 0.044   |
| rs10786735  | A | -0.0203 |
| rs827628    | T | -0.0187 |
| rs2394799   | A | -0.0163 |
| rs75388473  | A | 0.0465  |

|             |   |         |
|-------------|---|---------|
| rs11200432  | C | -0.0443 |
| rs57611106  | G | -0.0413 |
| rs75172993  | C | -0.0325 |
| rs112258452 | G | 0.0729  |
| rs146396306 | A | 0.0662  |
| rs7914879   | A | -0.0498 |
| rs522186    | G | -0.0271 |
| rs6537579   | A | -0.0239 |
| rs76773368  | T | -0.0854 |
| rs11015740  | G | -0.0605 |
| rs2995399   | T | 0.0169  |
| rs111698799 | T | -0.0853 |
| rs1556646   | A | 0.0163  |
| rs79161527  | G | 0.0921  |
| rs117507138 | T | -0.1041 |
| rs77462070  | A | 0.04    |
| rs11254951  | T | -0.0549 |
| rs149091150 | G | -0.0824 |
| rs10905055  | A | 0.0191  |
| rs117605543 | A | -0.0884 |
| rs1993003   | T | -0.0486 |
| rs11017726  | T | 0.0185  |
| rs4948674   | A | 0.0161  |
| rs56323728  | T | -0.019  |
| rs73324316  | A | 0.0566  |
| rs78514112  | A | 0.0762  |
| rs75746602  | A | 0.1225  |
| rs2812491   | G | -0.0179 |
| rs7099246   | A | 0.0215  |
| rs151329457 | C | 0.0964  |
| rs7897884   | T | -0.0983 |
| rs11012327  | C | -0.0277 |
| rs34917980  | T | -0.0343 |
| rs10995105  | C | -0.0199 |
| rs1041168   | T | 0.0243  |
| rs6597702   | G | 0.0537  |
| rs61131022  | A | -0.0269 |
| rs74725297  | G | 0.0793  |
| rs12416036  | C | 0.0692  |
| rs57163392  | A | 0.0375  |
| rs6560722   | G | 0.024   |
| rs2182791   | T | 0.0202  |
| rs1931699   | T | 0.0528  |
| rs78243484  | A | -0.0185 |
| rs11202152  | T | 0.0213  |
| rs10761956  | G | 0.0167  |
| rs1996905   | T | -0.0187 |

|             |   |         |
|-------------|---|---------|
| rs76140648  | G | 0.0566  |
| rs2815659   | T | 0.0168  |
| rs12573392  | G | 0.0236  |
| rs12771128  | A | -0.0281 |
| rs79219793  | G | 0.0439  |
| rs871049    | T | -0.0176 |
| rs72843852  | T | -0.0364 |
| rs112529115 | A | 0.0693  |
| rs45606741  | G | -0.031  |
| rs71490907  | T | -0.0666 |
| rs112712433 | T | 0.0433  |
| rs72799114  | C | -0.0408 |
| rs115548138 | T | 0.052   |
| rs1775069   | C | -0.0254 |
| rs78469760  | C | 0.0347  |
| rs79872956  | G | 0.0883  |
| rs11016000  | A | -0.0222 |
| rs264320    | C | 0.068   |
| rs11819364  | C | 0.044   |
| rs113705523 | G | 0.0713  |
| rs35885062  | G | 0.0428  |
| rs4962349   | A | -0.0257 |
| rs78823447  | C | -0.0527 |
| rs144084967 | C | -0.0956 |
| rs55643809  | G | -0.0596 |
| rs4979820   | G | -0.0213 |
| rs17237130  | A | 0.0403  |
| rs1926565   | G | -0.016  |
| rs3849977   | G | 0.0208  |
| rs7917395   | C | 0.023   |
| rs61866265  | A | 0.0616  |
| rs116896691 | A | 0.083   |
| rs61855964  | C | -0.1184 |
| rs10788037  | C | -0.0228 |
| rs76103105  | A | 0.0495  |
| rs17010614  | G | -0.0518 |
| rs2147268   | C | -0.0204 |
| rs11251200  | T | 0.0562  |
| rs11253572  | G | -0.0664 |
| rs75423450  | T | -0.0774 |
| rs787339    | T | -0.0176 |
| rs17688552  | A | 0.0402  |
| rs116927769 | A | 0.0459  |
| rs4465305   | G | 0.0235  |
| rs480216    | A | -0.0165 |
| rs12764240  | G | -0.0975 |
| rs74868119  | T | -0.0573 |

|             |   |         |
|-------------|---|---------|
| rs61856370  | A | -0.0435 |
| rs1253408   | C | -0.0266 |
| rs11594163  | G | 0.0184  |
| rs12356445  | A | 0.1156  |
| rs61855372  | G | 0.0497  |
| rs117398488 | G | -0.1295 |
| rs7087073   | T | 0.0399  |
| rs111868093 | T | -0.0721 |
| rs143376929 | G | -0.1001 |
| rs72853637  | T | 0.0365  |
| rs1928721   | A | -0.0765 |
| rs11198073  | A | 0.0277  |
| rs12775744  | G | 0.0986  |
| rs45586231  | A | 0.0339  |
| rs11193667  | T | -0.121  |
| rs10828786  | T | -0.0291 |
| rs60615180  | T | 0.0289  |
| rs77608875  | T | 0.051   |
| rs151262952 | G | -0.0583 |
| rs72856814  | A | 0.0817  |
| rs77085282  | C | 0.0372  |
| rs2126771   | C | -0.0299 |
| rs74157655  | A | -0.0434 |
| rs74362737  | T | 0.1541  |
| rs146425016 | G | -0.1098 |
| rs10900140  | T | 0.0175  |
| rs72805647  | A | 0.0328  |
| rs17129769  | A | -0.0453 |
| rs11195970  | C | 0.0322  |
| rs28742224  | T | -0.0317 |
| rs116984867 | C | -0.0649 |
| rs7079658   | A | 0.0442  |
| rs72790387  | T | -0.0415 |
| rs17100602  | A | 0.0183  |
| rs4752324   | T | -0.0202 |
| rs6481650   | A | -0.023  |
| rs1078534   | C | 0.0197  |
| rs942787    | G | 0.0283  |
| rs11599008  | G | -0.049  |
| rs112478881 | A | 0.1091  |
| rs61874883  | A | -0.019  |
| rs147645970 | G | -0.0793 |
| rs1537289   | T | -0.0181 |
| rs57638399  | T | 0.0473  |
| rs113557487 | T | -0.0391 |
| rs72772008  | G | 0.0664  |
| rs56180092  | A | -0.0799 |

|             |   |         |
|-------------|---|---------|
| rs4751140   | T | -0.0166 |
| rs4558085   | A | 0.0383  |
| rs115222447 | G | -0.0494 |
| rs11196716  | G | -0.0229 |
| rs10082483  | T | -0.0315 |
| rs12358459  | A | -0.1335 |
| rs11199066  | C | -0.0197 |
| rs671799    | T | 0.0161  |
| rs517409    | C | -0.0185 |
| rs914318    | T | 0.0928  |
| rs12774329  | C | -0.0394 |
| rs117587752 | G | 0.0878  |
| rs139784551 | G | 0.1353  |
| rs2694773   | G | -0.0287 |
| rs75172023  | T | -0.1255 |
| rs72779340  | A | -0.0295 |
| rs113666149 | G | -0.0897 |
| rs145436889 | C | 0.1264  |
| rs117693836 | T | 0.0756  |
| rs142453037 | C | -0.0625 |
| rs1903895   | A | 0.021   |
| rs72838593  | A | 0.0359  |
| rs140685313 | C | 0.1017  |
| rs45590737  | G | 0.0359  |
| rs144991755 | C | 0.0788  |
| rs117135562 | C | 0.1123  |
| rs4934620   | G | -0.0178 |
| rs10826223  | A | 0.0301  |
| rs75006550  | A | -0.0685 |
| rs1228412   | T | -0.0202 |
| rs112684315 | G | 0.0624  |
| rs118119197 | G | 0.0685  |
| rs1542811   | A | -0.0159 |
| rs59677277  | T | 0.0354  |
| rs3105855   | G | 0.0167  |
| rs112293742 | T | 0.0264  |
| rs11257839  | C | -0.0169 |
| rs147824105 | A | -0.1078 |
| rs146185639 | A | 0.0514  |
| rs7897505   | T | -0.0184 |
| rs28710800  | T | -0.0692 |
| rs12355201  | G | -0.0176 |
| rs10823766  | G | -0.0691 |
| rs76841429  | G | -0.0314 |
| rs71498215  | T | -0.056  |
| rs77033506  | G | 0.0324  |
| rs72792449  | A | -0.0538 |

|             |   |         |
|-------------|---|---------|
| rs10829822  | A | -0.0167 |
| rs115859966 | A | -0.0924 |
| rs150197367 | G | 0.1125  |
| rs4284335   | A | -0.0159 |
| rs77176560  | C | -0.0582 |
| rs144183670 | A | 0.091   |
| rs12416631  | C | 0.0223  |
| rs1904031   | G | -0.0184 |
| rs197775    | T | 0.0153  |
| rs61875350  | T | 0.0252  |
| rs61857322  | T | -0.0235 |
| rs10510081  | G | -0.0243 |
| rs55755542  | T | -0.045  |
| rs11017725  | C | -0.0226 |
| rs12358884  | C | -0.0322 |
| rs6480399   | A | 0.0234  |
| rs11186651  | G | 0.0259  |
| rs697170    | C | -0.0322 |
| rs6585458   | G | 0.0287  |
| rs117280114 | A | 0.0702  |
| rs2368318   | T | -0.0199 |
| rs145048761 | A | -0.0897 |
| rs845084    | A | 0.017   |
| rs2786892   | A | 0.0883  |
| rs11816894  | T | -0.023  |
| rs74138087  | A | 0.0459  |
| rs117519161 | A | 0.0649  |
| rs7907629   | G | -0.0557 |
| rs76800091  | A | 0.0611  |
| rs4581347   | G | 0.0201  |
| rs117282327 | A | -0.0801 |
| rs12358669  | C | -0.1207 |
| rs34225606  | G | -0.0653 |
| rs76179237  | C | -0.1109 |
| rs118166408 | A | 0.0875  |
| rs12354686  | T | 0.0628  |
| rs9415997   | A | 0.0208  |
| rs79768444  | C | -0.0673 |
| rs3829924   | A | -0.0693 |
| rs77771394  | C | 0.053   |
| rs61102903  | C | 0.0286  |
| rs10904780  | A | 0.0165  |
| rs113145463 | A | 0.08    |
| rs7097017   | A | -0.0164 |
| rs76556175  | A | 0.058   |
| rs11014697  | C | 0.0227  |
| rs61861106  | T | 0.0504  |

|             |   |         |
|-------------|---|---------|
| rs11255289  | A | -0.0454 |
| rs77190301  | A | 0.022   |
| rs11016976  | C | -0.0253 |
| rs79207175  | C | 0.0542  |
| rs1685285   | T | 0.0166  |
| rs41291854  | A | 0.1004  |
| rs72853197  | T | 0.0185  |
| rs12774118  | T | 0.0367  |
| rs78797844  | G | -0.0794 |
| rs78833033  | A | -0.0735 |
| rs77158692  | G | -0.0498 |
| rs145099062 | G | -0.1077 |
| rs117027139 | T | -0.0472 |
| rs10829678  | G | 0.0242  |
| rs117617476 | T | 0.083   |
| rs34125516  | T | -0.0196 |
| rs117725179 | C | 0.095   |
| rs184844    | C | -0.0219 |
| rs35623505  | C | 0.0199  |
| rs77296510  | T | -0.0442 |
| rs11198846  | G | 0.0193  |
| rs61869035  | T | 0.0201  |
| rs2918127   | G | -0.0164 |
| rs7900205   | T | -0.0548 |
| rs10906210  | A | 0.0267  |
| rs7893898   | T | 0.0447  |
| rs112890285 | A | 0.0813  |
| rs2368319   | G | -0.0156 |
| rs117237308 | G | 0.1258  |
| rs2776932   | C | 0.0218  |
| rs74439597  | A | 0.094   |
| rs2763339   | T | -0.0164 |
| rs150127364 | T | 0.0876  |
| rs59755615  | A | 0.0433  |
| rs146696018 | G | -0.0946 |
| rs11245005  | G | 0.0337  |
| rs10906676  | G | -0.0235 |
| rs10995078  | G | 0.1098  |
| rs61864255  | T | -0.0774 |
| rs58742727  | A | -0.0627 |
| rs2438119   | T | -0.0205 |
| rs2339569   | T | -0.0235 |
| rs143165967 | A | -0.0622 |
| rs4746409   | G | 0.0179  |
| rs3752987   | A | 0.0439  |
| rs2725200   | T | -0.0223 |
| rs56759390  | A | 0.0335  |



|             |   |         |
|-------------|---|---------|
| rs7076272   | G | -0.046  |
| rs9423818   | C | -0.0268 |
| rs61840042  | T | 0.0469  |
| rs149990530 | A | 0.0989  |
| rs958624    | A | -0.0533 |
| rs56412124  | A | -0.0435 |
| rs113394401 | A | 0.0488  |
| rs59950163  | C | 0.09    |
| rs4962554   | T | -0.0555 |
| rs117628914 | T | 0.0395  |
| rs74120216  | T | -0.025  |
| rs75055710  | A | -0.0524 |
| rs796149    | C | 0.0241  |
| rs17284174  | A | 0.0974  |
| rs117440930 | G | 0.0646  |
| rs72854541  | T | 0.0954  |
| rs10823644  | T | 0.0188  |
| rs3789927   | T | 0.0209  |
| rs1891796   | G | -0.0325 |
| rs114247130 | T | 0.1031  |
| rs148580062 | A | 0.0643  |
| rs11186779  | T | 0.0464  |
| rs117343574 | A | 0.1041  |
| rs17533770  | C | 0.024   |
| rs74135368  | G | 0.0332  |
| rs141649988 | C | 0.0888  |
| rs79802205  | C | 0.0683  |
| rs117071615 | T | -0.1206 |
| rs111805349 | A | -0.0857 |
| rs148389210 | A | 0.1058  |
| rs71491574  | A | 0.0268  |
| rs117040974 | A | 0.0517  |
| rs10740661  | A | -0.0238 |
| rs11815834  | G | -0.0176 |
| rs61847573  | G | 0.0802  |
| rs12218459  | C | -0.0378 |
| rs9418118   | G | 0.0169  |
| rs116843906 | C | -0.0528 |
| rs7898019   | C | 0.0153  |
| rs78195576  | A | 0.0367  |
| rs71493110  | T | -0.0215 |
| rs1885742   | G | -0.0233 |
| rs148348513 | A | -0.086  |
| rs140927276 | C | -0.105  |
| rs78477008  | C | 0.0652  |
| rs1244159   | G | -0.024  |
| rs72803862  | G | 0.0833  |

|             |   |         |
|-------------|---|---------|
| rs74163357  | T | -0.0259 |
| rs142078861 | T | -0.1131 |
| rs10904072  | T | 0.024   |
| rs78753592  | G | 0.1363  |
| rs72809407  | G | 0.052   |
| rs2170777   | G | 0.0291  |
| rs55909737  | A | -0.0153 |
| rs118082669 | G | 0.1178  |
| rs2384105   | G | 0.0158  |
| rs652182    | T | -0.0363 |
| rs1706758   | T | 0.0217  |
| rs4745785   | G | -0.0228 |
| rs7923216   | G | 0.0205  |
| rs76633208  | G | -0.0455 |
| rs113598001 | T | 0.06    |
| rs149459659 | A | -0.0702 |
| rs117548093 | G | -0.0871 |
| rs10826858  | G | 0.0266  |
| rs72784778  | A | -0.0689 |
| rs35138017  | C | 0.0428  |
| rs77889510  | A | 0.0338  |
| rs56857627  | G | 0.1073  |
| rs11193633  | A | 0.0279  |
| rs111646844 | T | 0.0857  |
| rs17155120  | T | 0.0211  |
| rs79407850  | T | 0.0324  |
| rs7910111   | G | 0.0244  |
| rs16934081  | T | 0.0571  |
| rs75000210  | C | -0.1095 |
| rs113092035 | C | -0.0565 |
| rs17686448  | C | -0.0705 |
| rs112448153 | C | 0.0787  |
| rs118145328 | A | -0.075  |
| rs116935909 | A | 0.0663  |
| rs77392930  | A | -0.0468 |
| rs117645208 | T | -0.0583 |
| rs56009417  | A | -0.0244 |
| rs56362727  | G | -0.0364 |
| rs142295880 | A | -0.0527 |
| rs113241511 | A | 0.1029  |
| rs11195844  | C | 0.0313  |
| rs148035617 | A | -0.0314 |
| rs1148194   | A | -0.0196 |
| rs4962364   | C | 0.0264  |
| rs2186023   | A | 0.0219  |
| rs80299690  | T | -0.0696 |
| rs72767602  | C | 0.0339  |

|             |   |         |
|-------------|---|---------|
| rs10822122  | G | -0.0157 |
| rs1748494   | G | 0.0342  |
| rs3740547   | C | 0.0159  |
| rs11259362  | A | -0.017  |
| rs114211420 | G | -0.0745 |
| rs17586234  | T | -0.0643 |
| rs61869969  | T | 0.0795  |
| rs112973792 | C | -0.0728 |
| rs74856651  | T | 0.0877  |
| rs77165579  | T | -0.0772 |
| rs11010958  | G | 0.0189  |
| rs1904837   | A | 0.0155  |
| rs4747063   | G | -0.016  |
| rs113517295 | C | -0.0553 |
| rs78829887  | A | 0.0826  |
| rs11201988  | A | 0.0314  |
| rs7923259   | T | -0.018  |
| rs75730998  | A | 0.1022  |
| rs7906097   | C | -0.017  |
| rs11597217  | G | 0.0159  |
| rs142009061 | C | 0.0656  |
| rs12356274  | T | -0.0481 |
| rs117641078 | T | 0.0622  |
| rs11258516  | T | -0.0292 |
| rs35442229  | T | -0.0954 |
| rs117696455 | A | 0.1121  |
| rs10996710  | A | 0.0188  |
| rs7920092   | G | 0.0159  |
| rs72773273  | T | 0.0795  |
| rs10826591  | G | 0.0211  |
| rs112130694 | T | -0.0814 |
| rs77539019  | G | -0.0327 |
| rs117762166 | T | -0.0691 |
| rs143979479 | T | 0.0745  |
| rs1906469   | T | -0.0225 |
| rs17101312  | T | -0.0836 |
| rs118077820 | A | 0.0945  |
| rs4146431   | A | 0.0157  |
| rs55914802  | G | -0.0429 |
| rs2368251   | G | -0.0355 |
| rs150934386 | T | -0.0473 |
| rs11251721  | T | -0.0198 |
| rs150879770 | T | -0.1686 |
| rs117349039 | T | 0.0379  |
| rs16928644  | T | 0.0483  |
| rs855762    | C | -0.0367 |
| rs239855    | T | -0.0786 |

|             |   |         |
|-------------|---|---------|
| rs118076488 | C | -0.0333 |
| rs61854871  | C | -0.0266 |
| rs75992911  | C | -0.109  |
| rs10509439  | A | -0.0456 |
| rs11597334  | A | -0.0806 |
| rs12777794  | T | 0.0796  |
| rs2797480   | G | 0.0202  |
| rs4451659   | G | -0.0164 |
| rs11248532  | G | -0.0193 |
| rs1541015   | C | 0.0441  |
| rs2997235   | T | -0.032  |
| rs11245007  | T | -0.017  |
| rs71483706  | A | 0.0167  |
| rs11002797  | T | -0.0203 |
| rs11146458  | A | 0.0409  |
| rs61838390  | T | -0.0287 |
| rs702996    | A | 0.016   |
| rs4512725   | G | -0.0952 |
| rs11254293  | T | -0.0262 |
| rs79831892  | G | -0.0456 |
| rs74967172  | C | 0.0608  |
| rs10823700  | C | 0.0153  |
| rs779671    | A | -0.0274 |
| rs10788360  | T | -0.0212 |
| rs11256199  | A | -0.0454 |
| rs10997400  | A | -0.06   |
| rs72794641  | C | -0.1003 |
| rs1655626   | T | -0.0297 |
| rs10748532  | A | 0.1062  |
| rs113710348 | A | -0.1738 |
| rs117693257 | C | -0.0873 |
| rs7916688   | A | 0.0179  |
| rs145968071 | G | -0.0734 |
| rs697367    | T | -0.0176 |
| rs12266890  | C | -0.1014 |
| rs788053    | C | -0.0176 |
| rs7921638   | A | -0.0213 |
| rs77913796  | G | 0.0771  |
| rs727793    | A | -0.0464 |
| rs61862907  | T | 0.0466  |
| rs12218585  | G | -0.0171 |
| rs1278377   | G | -0.015  |
| rs6602525   | A | 0.1225  |
| rs117001659 | A | 0.1537  |
| rs17136510  | C | 0.0249  |
| rs72811683  | A | -0.0384 |
| rs11197885  | T | 0.0332  |

|             |   |         |
|-------------|---|---------|
| rs117866674 | C | 0.076   |
| rs61872092  | T | 0.0932  |
| rs80332038  | G | 0.0368  |
| rs78498277  | T | 0.0327  |
| rs35634950  | G | -0.086  |
| rs7904463   | T | 0.0162  |
| rs140050548 | C | -0.078  |
| rs74804993  | G | 0.0471  |
| rs12217915  | T | -0.0661 |
| rs148513127 | G | -0.1356 |
| rs59892663  | C | 0.0597  |
| rs76623390  | T | 0.0211  |
| rs34535212  | A | 0.0201  |
| rs1339481   | C | -0.0166 |
| rs17135074  | A | 0.0381  |
| rs148867016 | A | 0.0949  |
| rs61836083  | C | -0.0659 |
| rs142507929 | C | -0.0423 |
| rs12358616  | G | 0.0468  |
| rs117896921 | G | 0.055   |
| rs117970233 | A | 0.0521  |
| rs4750598   | A | -0.019  |
| rs145106318 | C | 0.0442  |
| rs12412818  | C | -0.0602 |
| rs150911076 | G | -0.1203 |
| rs61858129  | G | 0.0526  |
| rs3850699   | G | 0.0162  |
| rs111681402 | A | -0.0398 |
| rs3107337   | C | -0.0178 |
| rs1077685   | A | -0.028  |
| rs112606469 | T | 0.1396  |
| rs117032512 | C | 0.1318  |
| rs1503906   | A | 0.0546  |
| rs75042817  | A | 0.1028  |
| rs4335461   | C | 0.0227  |
| rs1470806   | T | 0.0801  |
| rs386560    | T | 0.0176  |
| rs4750035   | T | -0.0164 |
| rs363312    | T | -0.0158 |
| rs144227115 | T | 0.0835  |
| rs2492648   | A | 0.0186  |
| rs4363492   | T | 0.0307  |
| rs11006887  | T | 0.0315  |
| rs2181043   | G | -0.0157 |
| rs12764113  | G | 0.0258  |
| rs79339496  | A | 0.069   |
| rs4919517   | A | -0.021  |

|             |   |         |
|-------------|---|---------|
| rs11198696  | A | 0.024   |
| rs2997275   | C | 0.0149  |
| rs117508754 | T | 0.0633  |
| rs75633961  | C | 0.0748  |
| rs76314549  | T | 0.0797  |
| rs12775390  | T | -0.0544 |
| rs144328181 | A | -0.0273 |
| rs7082000   | G | 0.0206  |
| rs952199    | G | 0.0184  |
| rs6602247   | T | 0.0163  |
| rs74754409  | A | 0.08    |
| rs117751658 | C | -0.0506 |
| rs78151882  | A | -0.1045 |
| rs74796329  | G | -0.0565 |
| rs58323739  | A | -0.0382 |
| rs139876247 | T | 0.1122  |
| rs10510125  | T | 0.0284  |
| rs913170    | A | -0.0208 |
| rs61836210  | A | -0.0632 |
| rs35416088  | C | -0.0196 |
| rs79856010  | G | 0.0461  |
| rs11187529  | T | -0.0505 |
| rs593572    | C | -0.0151 |
| rs12256979  | C | 0.0162  |
| rs61866967  | T | 0.0168  |
| rs144759463 | T | -0.0626 |
| rs877396    | C | 0.0174  |
| rs7899518   | C | -0.0159 |
| rs77906158  | T | 0.1013  |
| rs4747039   | A | 0.0193  |
| rs7920142   | A | 0.0183  |
| rs75887708  | T | 0.0761  |
| rs17521676  | T | -0.0973 |
| rs34232042  | T | 0.0785  |
| rs11017255  | T | -0.0409 |
| rs73611886  | C | 0.0604  |
| rs72783649  | A | -0.1077 |
| rs7095792   | C | 0.0171  |
| rs79366643  | T | 0.0579  |
| rs2467470   | T | 0.0198  |
| rs147613713 | A | -0.0817 |
| rs74121407  | G | 0.0915  |
| rs73265130  | T | -0.0271 |
| rs1219822   | G | -0.0232 |
| rs145896878 | A | -0.0451 |
| rs11815387  | T | -0.0197 |
| rs11146188  | T | -0.081  |

|             |   |         |
|-------------|---|---------|
| rs146469548 | G | -0.0694 |
| rs11195432  | A | 0.0165  |
| rs117240274 | T | -0.0847 |
| rs55840772  | G | -0.0665 |
| rs117219052 | T | 0.0865  |
| rs9333162   | C | -0.0516 |
| rs11013738  | C | -0.0519 |
| rs1336188   | C | -0.0156 |
| rs78626135  | G | -0.0789 |
| rs79726665  | T | -0.0719 |
| rs118099215 | T | 0.0743  |
| rs115615743 | A | 0.0838  |
| rs2394730   | T | 0.0157  |
| rs11201729  | T | 0.048   |
| rs11197908  | A | 0.0632  |
| rs2610846   | A | 0.0767  |
| rs11259531  | A | -0.0427 |
| rs12262933  | T | -0.0339 |
| rs117908493 | G | -0.0675 |
| rs2704489   | T | 0.0391  |
| rs1033922   | A | -0.0154 |
| rs17370838  | G | 0.0187  |
| rs1254861   | T | -0.0387 |
| rs117318876 | A | -0.058  |
| rs75710989  | T | 0.0263  |
| rs56295025  | T | 0.0368  |
| rs3004927   | A | 0.02    |
| rs76405299  | C | -0.0426 |
| rs61849200  | A | -0.0342 |
| rs12218381  | G | 0.0301  |
| rs11251827  | A | 0.0355  |
| rs3995795   | C | -0.0173 |
| rs55832864  | A | 0.0206  |
| rs12267895  | A | -0.0376 |
| rs112855183 | A | -0.0856 |
| rs77038317  | A | -0.0227 |
| rs7078198   | G | -0.0156 |
| rs7091178   | A | -0.026  |
| rs7917660   | G | -0.0153 |
| rs11191655  | C | -0.0206 |
| rs11254337  | T | -0.0198 |
| rs147779026 | T | -0.0661 |
| rs72637026  | T | 0.0353  |
| rs701854    | C | 0.0159  |
| rs76160891  | C | -0.0798 |
| rs2277212   | A | -0.0204 |
| rs11012570  | A | -0.0676 |

|             |   |         |
|-------------|---|---------|
| rs78824587  | T | -0.0694 |
| rs150356848 | G | 0.1316  |
| rs4935614   | C | 0.0153  |
| rs45601232  | G | -0.1168 |
| rs16919757  | C | 0.0542  |
| rs17231476  | T | 0.0363  |
| rs656127    | T | -0.0184 |
| rs79486073  | A | -0.0429 |
| rs3026755   | C | 0.0514  |
| rs72798990  | G | 0.0245  |
| rs7896607   | T | -0.0168 |
| rs59948867  | A | -0.0571 |
| rs112568451 | T | 0.0492  |
| rs118055686 | G | 0.0796  |
| rs111456043 | G | 0.0623  |
| rs35881873  | A | 0.0176  |
| rs117843856 | T | 0.0521  |
| rs6584551   | C | -0.0618 |
| rs113589873 | A | -0.1219 |
| rs1887142   | A | 0.0889  |
| rs55831212  | C | -0.0249 |
| rs117147712 | A | 0.0575  |
| rs11016932  | T | 0.0639  |
| rs11599632  | C | 0.0174  |
| rs144527777 | C | 0.0882  |
| rs35957518  | A | -0.0417 |
| rs4749995   | A | 0.0147  |
| rs78904357  | A | 0.0661  |
| rs17615562  | T | 0.0559  |
| rs117315821 | A | -0.1035 |
| rs4838740   | G | 0.0341  |
| rs3125729   | A | -0.0155 |
| rs4746010   | G | 0.0375  |
| rs41277968  | A | -0.0308 |
| rs72810392  | T | 0.0882  |
| rs142960406 | G | 0.0975  |
| rs56194110  | A | -0.018  |
| rs60106199  | T | -0.0699 |
| rs117144066 | A | 0.0373  |
| rs11200077  | T | 0.0256  |
| rs7898109   | T | 0.049   |
| rs74711339  | G | -0.0303 |
| rs12356213  | T | -0.0309 |
| rs12255398  | C | 0.027   |
| rs146175627 | A | -0.101  |
| rs11245128  | T | -0.0341 |
| rs117131823 | G | 0.0684  |



|             |   |         |
|-------------|---|---------|
| rs224705    | A | 0.0396  |
| rs79245743  | T | -0.0649 |
| rs77202663  | A | 0.0315  |
| rs11598189  | T | 0.018   |
| rs147486062 | T | 0.0603  |
| rs72837633  | A | -0.0582 |
| rs61838432  | T | -0.0265 |
| rs11007479  | A | 0.0251  |
| rs1904037   | T | -0.0145 |
| rs2348331   | C | -0.0235 |
| rs12774930  | T | -0.1046 |
| rs60597070  | T | 0.1152  |
| rs80006492  | C | -0.0694 |
| rs2680310   | A | 0.0149  |
| rs75924779  | A | -0.0642 |
| rs11195815  | A | 0.0486  |
| rs117783635 | G | 0.0936  |
| rs3740172   | C | 0.0151  |
| rs11146685  | T | -0.0547 |
| rs75718137  | A | -0.0687 |
| rs117431311 | G | -0.0696 |
| rs1621183   | G | -0.0386 |
| rs4745999   | T | 0.0309  |
| rs1931902   | A | 0.0161  |
| rs117536501 | A | -0.0496 |
| rs112357539 | A | 0.0567  |
| rs2783438   | T | 0.0218  |
| rs77630752  | A | 0.0362  |
| rs61853364  | G | 0.0169  |
| rs118166606 | A | 0.0543  |
| rs2419834   | T | -0.0239 |
| rs4630218   | T | -0.0185 |
| rs146475454 | G | 0.0985  |
| rs71501209  | A | 0.0579  |
| rs74144932  | G | 0.0664  |
| rs11198155  | A | -0.0196 |
| rs72841029  | C | -0.0738 |
| rs11594811  | A | 0.0253  |
| rs78167992  | G | 0.0712  |
| rs4143249   | A | -0.0198 |
| rs148922370 | T | 0.0591  |
| rs1853950   | T | -0.0149 |
| rs61864362  | T | 0.0215  |
| rs3011775   | A | -0.0674 |
| rs10886707  | A | 0.0179  |
| rs35650     | A | -0.0271 |
| rs4747627   | C | 0.0216  |

|             |   |         |
|-------------|---|---------|
| rs650445    | C | -0.0433 |
| rs78491023  | T | 0.068   |
| rs9703813   | G | -0.0287 |
| rs11595657  | T | -0.0287 |
| rs12248327  | A | 0.0182  |
| rs7098672   | A | 0.0508  |
| rs76237571  | A | 0.054   |
| rs117301537 | T | 0.033   |
| rs17513725  | A | 0.0187  |
| rs71489516  | T | -0.0387 |
| rs117386563 | C | -0.0992 |
| rs4880851   | C | 0.0174  |
| rs76396547  | T | -0.0395 |
| rs17143715  | T | 0.0548  |
| rs140788015 | A | -0.0704 |
| rs76923631  | C | -0.0671 |
| rs138064813 | A | -0.061  |
| rs72839051  | C | 0.0691  |
| rs117594356 | A | -0.0923 |
| rs114668148 | T | 0.0325  |
| rs144368661 | T | 0.084   |
| rs61853327  | A | -0.1159 |
| rs147038744 | A | -0.055  |
| rs74631345  | A | 0.0372  |
| rs10882749  | C | -0.0829 |
| rs61863170  | T | -0.0936 |
| rs12769836  | T | -0.0193 |
| rs116858643 | T | -0.065  |
| rs11011775  | A | 0.0234  |
| rs1249136   | T | -0.019  |
| rs116926055 | T | -0.0829 |
| rs10823781  | G | -0.0296 |
| rs72794382  | C | -0.0834 |
| rs1759355   | T | 0.0469  |
| rs117884442 | T | 0.0585  |
| rs67395401  | G | -0.0191 |
| rs79968145  | C | 0.0824  |
| rs74597877  | A | 0.057   |
| rs61881590  | C | -0.0655 |
| rs72769567  | C | 0.0382  |
| rs1977584   | A | -0.0211 |
| rs10823009  | A | -0.0213 |
| rs72821811  | T | -0.0473 |
| rs625792    | C | -0.0174 |
| rs151165594 | G | -0.0481 |
| rs2435588   | G | 0.0226  |
| rs2704510   | A | 0.0345  |

|             |   |         |
|-------------|---|---------|
| rs112505448 | A | -0.0504 |
| rs118079738 | T | -0.0877 |
| rs35373694  | A | 0.0497  |
| rs117941375 | A | 0.104   |
| rs12240713  | A | -0.0263 |
| rs7085457   | A | -0.0432 |
| rs6479969   | C | 0.0234  |
| rs7085947   | A | 0.0193  |
| rs749062    | A | 0.0152  |
| rs1483017   | C | 0.0399  |
| rs750633    | A | -0.0752 |
| rs2167445   | T | -0.0347 |
| rs2435341   | T | 0.015   |
| rs9421801   | A | 0.0315  |
| rs575510    | A | 0.0212  |
| rs76700200  | T | -0.0496 |
| rs77815376  | A | 0.0235  |
| rs12267075  | C | 0.025   |
| rs138073433 | T | 0.0922  |
| rs855715    | T | 0.0228  |
| rs116865054 | A | -0.1315 |
| rs12571609  | A | 0.0169  |
| rs12356383  | T | 0.094   |
| rs789206    | G | 0.09    |
| rs4459207   | C | -0.033  |
| rs55861950  | G | -0.054  |
| rs10795749  | C | -0.015  |
| rs117101261 | G | -0.1055 |
| rs113131476 | A | 0.0575  |
| rs72763728  | T | 0.0603  |
| rs34027341  | A | 0.0491  |
| rs74342842  | A | 0.1124  |
| rs61864017  | T | -0.0349 |
| rs6602809   | C | 0.0163  |
| rs74820476  | A | 0.0371  |
| rs34246723  | C | -0.0273 |
| rs55694622  | A | 0.0463  |
| rs10906847  | A | 0.0194  |
| rs56277921  | A | -0.0227 |
| rs17138791  | A | -0.0437 |
| rs142091224 | C | 0.1006  |
| rs74679792  | C | 0.0811  |
| rs11593395  | C | -0.0724 |
| rs6602286   | C | -0.0254 |
| rs142537880 | C | -0.0601 |
| rs3793721   | G | -0.0169 |
| rs12359315  | T | -0.0145 |

|             |   |         |
|-------------|---|---------|
| rs77206664  | T | -0.112  |
| rs1389      | G | -0.0194 |
| rs4919222   | T | 0.0163  |
| rs146259380 | A | 0.0683  |
| rs117150127 | T | -0.0652 |
| rs76966499  | T | 0.0464  |
| rs61868682  | C | 0.0481  |
| rs9731091   | C | 0.0231  |
| rs77096551  | A | -0.0249 |
| rs593005    | G | 0.0239  |
| rs2801016   | A | 0.0198  |
| rs75155642  | T | -0.0664 |
| rs10906126  | A | 0.0226  |
| rs10829560  | T | 0.017   |
| rs117871265 | C | 0.1026  |
| rs72828063  | C | 0.0893  |
| rs7906771   | T | -0.0922 |
| rs139384126 | T | 0.1096  |
| rs10822931  | A | -0.0149 |
| rs6583988   | G | 0.0677  |
| rs113832927 | T | -0.0562 |
| rs72769963  | A | -0.0936 |
| rs2787150   | T | -0.0157 |
| rs117861214 | A | -0.0681 |
| rs12766692  | T | -0.0298 |
| rs143991235 | C | -0.0684 |
| rs2104157   | A | -0.0168 |
| rs12358123  | G | 0.0183  |
| rs12358465  | A | -0.0328 |
| rs35108303  | T | 0.02    |
| rs10899913  | G | -0.015  |
| rs2768738   | G | 0.0174  |
| rs75592601  | G | 0.0539  |
| rs1806474   | A | 0.0157  |
| rs7082389   | A | 0.0325  |
| rs74124173  | T | -0.0648 |
| rs11593185  | T | 0.0311  |
| rs111564993 | T | -0.0468 |
| rs12762232  | A | 0.0553  |
| rs111242277 | T | -0.0737 |
| rs11258392  | T | -0.0177 |
| rs11597566  | G | -0.057  |
| rs2010260   | C | 0.016   |
| rs17448853  | C | 0.0277  |
| rs147141806 | C | 0.1172  |
| rs79561749  | G | -0.0391 |
| rs10996371  | G | 0.0785  |

|             |   |         |
|-------------|---|---------|
| rs7098370   | A | 0.0175  |
| rs74136215  | G | 0.0597  |
| rs2491159   | C | -0.0147 |
| rs117431377 | C | 0.0909  |
| rs72812431  | C | -0.0691 |
| rs77512972  | T | 0.0786  |
| rs61873655  | T | -0.0444 |
| rs10508480  | C | -0.0306 |
| rs12219009  | G | -0.0264 |
| rs4979799   | A | -0.0274 |
| rs78669834  | T | 0.0509  |
| rs762035    | T | -0.0184 |
| rs2890079   | T | -0.0717 |
| rs4748379   | A | -0.0146 |
| rs486238    | T | -0.0158 |
| rs11596732  | T | -0.0296 |
| rs7907638   | A | 0.0262  |
| rs55893027  | T | 0.0147  |
| rs55987917  | T | 0.0206  |
| rs17755874  | G | 0.0226  |
| rs12763186  | C | 0.0675  |
| rs75055159  | A | -0.074  |
| rs2797554   | G | -0.0177 |
| rs12768055  | G | -0.0167 |
| rs7091403   | A | 0.0439  |
| rs34210369  | T | -0.0976 |
| rs76561230  | A | 0.0294  |
| rs10995570  | A | 0.0568  |
| rs4934461   | A | -0.023  |
| rs7394012   | T | -0.0194 |
| rs80225795  | A | -0.1213 |
| rs34641051  | C | 0.0195  |
| rs7071467   | G | -0.0217 |
| rs112718794 | A | 0.0625  |
| rs74623093  | G | 0.0464  |
| rs12268603  | C | 0.0552  |
| rs79442824  | T | 0.0567  |
| rs4980084   | G | 0.0268  |
| rs17103718  | T | 0.067   |
| rs12780315  | A | -0.031  |
| rs509651    | G | -0.0347 |
| rs117394098 | C | 0.0647  |
| rs117191839 | G | 0.0661  |
| rs73288574  | C | -0.119  |
| rs7071285   | C | 0.0336  |
| rs61675850  | A | -0.0406 |
| rs76067595  | A | -0.0249 |

|             |   |         |
|-------------|---|---------|
| rs720784    | T | -0.0227 |
| rs12776427  | T | -0.016  |
| rs7086522   | G | -0.049  |
| rs1924175   | A | 0.0157  |
| rs61841388  | C | -0.0714 |
| rs115606683 | C | -0.0672 |
| rs4073311   | A | -0.0187 |
| rs79241318  | T | -0.0715 |
| rs4752294   | G | -0.016  |
| rs146200631 | G | -0.0794 |
| rs78143420  | A | 0.0549  |
| rs116893376 | G | -0.0629 |
| rs61855879  | T | 0.0661  |
| rs11187554  | A | -0.0471 |
| rs12778970  | A | 0.0838  |
| rs181664    | G | -0.0154 |
| rs75137577  | A | 0.0522  |
| rs17730760  | A | 0.0192  |
| rs11595278  | A | -0.0213 |
| rs11594601  | G | -0.0239 |
| rs9418996   | C | 0.018   |
| rs72772094  | T | 0.044   |
| rs143263211 | T | 0.0448  |
| rs118074061 | G | -0.0811 |
| rs74466257  | A | -0.0359 |
| rs72854612  | T | 0.0892  |
| rs72818018  | C | -0.0433 |
| rs117935036 | A | 0.0573  |
| rs11204260  | A | 0.0162  |
| rs12265771  | T | 0.071   |
| rs7098285   | T | 0.0158  |
| rs117842395 | A | 0.0818  |
| rs16911440  | C | 0.059   |
| rs7088157   | A | -0.0158 |
| rs7918971   | T | -0.0921 |
| rs56055613  | C | -0.0429 |
| rs111490778 | C | -0.0816 |
| rs139486384 | T | 0.0802  |
| rs2437413   | C | -0.0174 |
| rs2998085   | G | -0.0156 |
| rs117572567 | C | -0.0782 |
| rs2792728   | T | 0.0215  |
| rs12219225  | A | -0.016  |
| rs112698917 | G | -0.0188 |
| rs2055040   | T | -0.0162 |
| rs2503870   | T | -0.0178 |
| rs117526961 | C | 0.0876  |

|             |   |         |
|-------------|---|---------|
| rs113012332 | T | -0.0237 |
| rs117805778 | T | 0.1364  |
| rs1171591   | T | -0.0656 |
| rs10870265  | A | -0.0184 |
| rs78910353  | C | -0.0827 |
| rs2083872   | T | 0.077   |
| rs76543662  | C | -0.0334 |
| rs117351944 | C | 0.0597  |
| rs75483945  | T | -0.0447 |
| rs117221602 | T | -0.1149 |
| rs138280732 | A | 0.0515  |
| rs945562    | C | 0.0149  |
| rs75296114  | C | 0.031   |
| rs7394241   | A | -0.02   |
| rs78319414  | A | -0.0786 |
| rs7899120   | C | 0.0231  |
| rs10763694  | A | 0.0146  |
| rs139899818 | A | -0.0563 |
| rs142769997 | C | 0.0788  |
| rs142277299 | T | 0.0409  |
| rs60806452  | A | -0.065  |
| rs117406255 | T | 0.0531  |
| rs10906698  | A | -0.0214 |
| rs146750954 | G | 0.099   |
| rs80184570  | A | 0.0416  |
| rs150658858 | T | -0.083  |
| rs2692769   | G | -0.0291 |
| rs7095043   | A | 0.0145  |
| rs12775479  | G | 0.0502  |
| rs78902843  | A | -0.0571 |
| rs79633149  | G | 0.0331  |
| rs74597962  | T | -0.1054 |
| rs17816696  | C | 0.0246  |
| rs143030124 | T | -0.0582 |
| rs12264562  | C | 0.0522  |
| rs72842101  | T | -0.0377 |
| rs12255544  | A | -0.0311 |
| rs117309371 | A | -0.0718 |
| rs11011726  | T | -0.0329 |
| rs74779652  | G | -0.0971 |
| rs893503    | A | -0.019  |
| rs115684359 | G | -0.0638 |
| rs1247467   | A | -0.1145 |
| rs10999526  | C | 0.0248  |
| rs61854637  | C | -0.0318 |
| rs11257348  | T | 0.0361  |
| rs12777782  | A | 0.0283  |

|             |   |         |
|-------------|---|---------|
| rs111492043 | A | 0.0678  |
| rs667613    | T | -0.0389 |
| rs61830425  | A | 0.0454  |
| rs7082489   | A | 0.0197  |
| rs117503534 | A | 0.0733  |
| rs35716502  | C | -0.0534 |
| rs74147457  | T | 0.0249  |
| rs145713256 | T | 0.0586  |
| rs141203118 | A | -0.0748 |
| rs59272539  | A | 0.0254  |
| rs4019515   | A | 0.1046  |
| rs75942769  | T | 0.0617  |
| rs116977492 | G | 0.0467  |
| rs1801287   | A | -0.0181 |
| rs180727    | T | -0.0189 |
| rs147472926 | T | 0.0936  |
| rs144865251 | A | -0.0821 |
| rs10764302  | A | -0.0282 |
| rs35890579  | T | -0.0591 |
| rs11016451  | T | -0.0347 |
| rs72771383  | C | 0.0293  |
| rs10787491  | T | 0.0155  |
| rs10905740  | T | -0.0217 |
| rs145617019 | G | 0.1099  |
| rs7090885   | C | -0.0145 |
| rs77262200  | A | 0.0601  |
| rs2820622   | G | -0.0311 |
| rs7087572   | A | 0.0234  |
| rs72800342  | C | -0.0329 |
| rs147298916 | T | -0.0441 |
| rs1753337   | A | -0.0884 |
| rs12767865  | T | 0.1659  |
| rs11594067  | T | 0.0192  |
| rs117650749 | C | -0.1121 |
| rs3019502   | A | 0.0306  |
| rs1334540   | C | 0.022   |
| rs146180579 | G | -0.0708 |
| rs77745635  | C | -0.0564 |
| rs116942632 | G | 0.082   |
| rs117347328 | T | -0.0848 |
| rs935444    | G | 0.0153  |
| rs34798039  | C | -0.053  |
| rs117828762 | A | -0.0933 |
| rs1977583   | A | 0.0145  |
| rs141456838 | T | 0.0831  |
| rs2386636   | G | 0.0155  |
| rs72818438  | A | -0.0235 |



|             |   |         |
|-------------|---|---------|
| rs79318920  | G | 0.068   |
| rs7073109   | A | -0.051  |
| rs11192617  | A | -0.0196 |
| rs113530235 | C | -0.1065 |
| rs2394300   | C | 0.0151  |
| rs61873892  | T | 0.0622  |
| rs2813440   | T | -0.0153 |
| rs66798099  | A | -0.0198 |
| rs150783484 | G | 0.1167  |
| rs61856614  | T | -0.0821 |
| rs35120998  | A | 0.0385  |
| rs11574852  | C | 0.0526  |
| rs117711043 | T | 0.0612  |
| rs72780230  | A | -0.0389 |
| rs7910036   | G | -0.06   |
| rs112893083 | T | 0.0295  |
| rs35489812  | C | -0.0249 |
| rs7074477   | G | 0.0192  |
| rs113696518 | T | 0.0184  |
| rs72826245  | T | 0.1216  |
| rs118167388 | T | 0.0616  |
| rs117473180 | T | 0.0733  |
| rs75595796  | A | 0.0519  |
| rs1322327   | G | 0.0168  |
| rs7082366   | C | 0.0464  |
| rs56414081  | A | 0.0813  |
| rs60914779  | A | -0.0347 |
| rs11598029  | G | -0.0962 |
| rs7071965   | A | 0.0184  |
| rs61863609  | G | -0.0705 |
| rs117902028 | C | -0.079  |
| rs61834860  | T | -0.0449 |
| rs117688784 | T | -0.051  |
| rs11254883  | G | -0.0392 |
| rs7909371   | C | -0.0232 |
| rs2893808   | T | 0.037   |
| rs79595592  | T | 0.0493  |
| rs61859394  | C | 0.0486  |
| rs9423349   | T | 0.0177  |
| rs17739429  | A | -0.0287 |
| rs139150190 | T | 0.0486  |
| rs4933851   | T | 0.0321  |
| rs66523819  | A | 0.0287  |
| rs7894390   | G | 0.0144  |
| rs74552305  | G | -0.1152 |
| rs2676187   | T | -0.0143 |
| rs77325635  | T | 0.033   |

|             |   |         |
|-------------|---|---------|
| rs10128158  | G | -0.032  |
| rs77185906  | G | 0.0305  |
| rs7097680   | A | 0.0141  |
| rs75236121  | A | 0.1027  |
| rs10822853  | T | -0.0161 |
| rs17152806  | A | -0.0745 |
| rs3213056   | A | -0.0377 |
| rs17555802  | G | -0.024  |
| rs76722744  | A | -0.1032 |
| rs73587361  | T | 0.0583  |
| rs115865745 | A | -0.102  |
| rs1858608   | T | -0.0157 |
| rs61868154  | A | 0.0169  |
| rs12248926  | A | 0.0281  |
| rs141758394 | T | -0.0353 |
| rs1926699   | A | -0.1062 |
| rs117477917 | T | -0.0848 |
| rs79213676  | C | -0.0533 |
| rs1892403   | C | -0.0202 |
| rs61857293  | A | 0.0312  |
| rs10508998  | T | -0.0301 |
| rs17424286  | T | -0.0149 |
| rs75262366  | A | 0.0469  |
| rs2839662   | G | 0.1004  |
| rs60248962  | T | -0.0405 |
| rs57319805  | C | 0.0613  |
| rs4751132   | A | 0.0626  |
| rs741804    | C | 0.0457  |
| rs74893653  | A | 0.1034  |
| rs12258526  | A | -0.0387 |
| rs12268645  | T | -0.0167 |
| rs10887918  | C | -0.0233 |
| rs11200411  | T | 0.0254  |
| rs11596109  | C | 0.0566  |
| rs76008048  | G | -0.0683 |
| rs11596669  | A | -0.0327 |
| rs4948917   | A | -0.0291 |
| rs1613776   | T | 0.0343  |
| rs3747866   | A | -0.0294 |
| rs113435323 | A | 0.0769  |
| rs11001965  | G | -0.0143 |
| rs10741142  | G | -0.0153 |
| rs61844022  | C | 0.0388  |
| rs75285491  | C | -0.0443 |
| rs2125839   | T | 0.0152  |
| rs12781755  | G | 0.0481  |
| rs72826668  | A | -0.0368 |

|             |   |         |
|-------------|---|---------|
| rs115517033 | T | 0.0568  |
| rs141503557 | A | -0.0913 |
| rs612482    | C | -0.0149 |
| rs75473018  | A | 0.0807  |
| rs117268910 | T | -0.1555 |
| rs76234839  | T | 0.1203  |
| rs139998531 | A | 0.1014  |
| rs118170502 | T | -0.0628 |
| rs143913410 | G | 0.0624  |
| rs139770154 | G | -0.0703 |
| rs11595744  | G | 0.1259  |
| rs74475781  | A | -0.0397 |
| rs1776591   | C | -0.0144 |
| rs116561107 | C | -0.119  |
| rs1690632   | C | 0.0195  |
| rs74152967  | A | 0.0356  |
| rs13376724  | G | 0.0163  |
| rs117591348 | G | -0.0837 |
| rs148162056 | A | 0.0914  |
| rs72842971  | G | -0.0567 |
| rs7076408   | G | -0.0341 |
| rs113099330 | G | -0.0496 |
| rs34258854  | C | 0.0283  |
| rs72811231  | T | -0.0402 |
| rs1915635   | T | 0.0239  |
| rs7077297   | T | 0.0735  |
| rs117843751 | T | -0.1298 |
| rs10870211  | C | -0.0602 |
| rs72772752  | C | -0.036  |
| rs76233474  | T | 0.0803  |
| rs145682498 | A | 0.0872  |
| rs75859278  | C | 0.07    |
| rs11592870  | T | -0.0763 |
| rs78580320  | A | -0.0634 |
| rs79615672  | T | -0.0792 |
| rs7068087   | T | 0.0341  |
| rs117545173 | A | -0.0822 |
| rs12354638  | T | 0.0625  |
| rs2789317   | C | -0.0254 |
| rs12768580  | G | 0.0244  |
| rs874564    | C | 0.0831  |
| rs61875499  | T | -0.0521 |
| rs11101747  | G | 0.0788  |
| rs138608414 | G | 0.0896  |
| rs77629318  | T | 0.0798  |
| rs142691560 | A | -0.0587 |
| rs1963808   | G | 0.0554  |

|             |   |         |
|-------------|---|---------|
| rs111899271 | G | -0.0398 |
| rs76509618  | G | 0.067   |
| rs34292918  | T | 0.0332  |
| rs34600782  | G | -0.0356 |
| rs118099662 | G | 0.11    |
| rs74116453  | G | 0.0522  |
| rs10795661  | T | -0.0253 |
| rs138415742 | C | 0.0637  |
| rs7085583   | G | -0.0169 |
| rs118107112 | A | 0.0895  |
| rs147698595 | G | 0.0819  |
| rs72779587  | A | -0.0479 |
| rs16921624  | G | -0.0685 |
| rs76083221  | T | 0.045   |
| rs141646081 | T | 0.0976  |
| rs1953661   | C | 0.0172  |
| rs12354441  | C | -0.0163 |
| rs77828306  | T | 0.0283  |
| rs12356684  | C | 0.0186  |
| rs560224    | C | -0.0497 |
| rs2219380   | A | 0.016   |
| rs113020242 | C | 0.0535  |
| rs1665587   | T | -0.02   |
| rs12357281  | C | 0.0291  |
| rs72836749  | T | 0.0336  |
| rs77215157  | A | -0.0515 |
| rs1749824   | A | 0.0139  |
| rs79494787  | A | 0.0609  |
| rs4612732   | A | 0.0786  |
| rs7920427   | A | -0.0276 |
| rs882531    | A | 0.0227  |
| rs112597366 | G | -0.0888 |
| rs224759    | C | 0.0245  |
| rs74486506  | T | 0.0241  |
| rs2981751   | G | -0.0211 |
| rs11014224  | A | -0.0643 |
| rs11200395  | G | 0.0234  |
| rs7911217   | A | 0.0197  |
| rs17673996  | A | 0.0682  |
| rs2803603   | A | -0.0209 |
| rs1105500   | C | -0.0158 |
| rs146824197 | G | 0.0555  |
| rs61849169  | T | 0.0594  |
| rs76296054  | G | -0.07   |
| rs116884438 | C | 0.0928  |
| rs1782644   | G | 0.0252  |
| rs11187252  | T | 0.0276  |

|             |   |         |
|-------------|---|---------|
| rs17418706  | T | -0.0252 |
| rs56145188  | C | 0.0177  |
| rs11016169  | T | 0.0427  |
| rs1946931   | C | -0.0426 |
| rs72843810  | C | 0.129   |
| rs140139544 | T | -0.0732 |
| rs117389345 | G | -0.0476 |
| rs141703641 | A | 0.0535  |
| rs17738042  | A | -0.0345 |
| rs4880998   | C | 0.0149  |
| rs7918053   | A | -0.0157 |
| rs10999249  | C | -0.0143 |
| rs141002582 | C | 0.0767  |
| rs113400260 | C | 0.0636  |
| rs61873773  | G | 0.0651  |
| rs1556638   | T | -0.0441 |
| rs150284498 | T | 0.0601  |
| rs149596473 | T | 0.067   |
| rs11596487  | C | 0.0269  |
| rs2784932   | G | -0.0165 |
| rs12783659  | A | 0.0502  |
| rs7076580   | C | -0.0178 |
| rs111938654 | T | -0.0701 |
| rs72779871  | A | 0.0917  |
| rs138480272 | A | 0.1052  |
| rs7358225   | G | 0.0193  |
| rs60399947  | G | -0.0462 |
| rs117035907 | G | 0.0576  |
| rs77792948  | T | 0.061   |
| rs142053362 | T | -0.0581 |
| rs7905496   | A | 0.0438  |
| rs10994713  | T | 0.0138  |
| rs117168459 | C | 0.052   |
| rs1064072   | G | 0.0168  |
| rs7072696   | A | 0.0158  |
| rs6560794   | A | 0.0207  |
| rs9943391   | A | -0.0304 |
| rs4586076   | C | 0.0284  |
| rs10905897  | A | -0.0187 |
| rs77120381  | T | 0.0641  |
| rs4751241   | T | -0.0185 |
| rs147149917 | A | -0.0553 |
| rs12777937  | T | 0.0857  |
| rs10763190  | T | -0.0154 |
| rs61876366  | T | -0.03   |
| rs4919333   | A | -0.0238 |
| rs67317498  | T | 0.0274  |

|             |   |         |
|-------------|---|---------|
| rs72771634  | A | -0.0181 |
| rs74559845  | C | 0.0551  |
| rs77572413  | T | -0.0333 |
| rs4745976   | A | 0.0211  |
| rs72818271  | G | -0.0579 |
| rs76788810  | T | -0.0431 |
| rs74651790  | A | -0.0179 |
| rs77570397  | C | -0.0769 |
| rs75053686  | G | 0.0773  |
| rs17141685  | G | 0.054   |
| rs11000300  | T | -0.0631 |
| rs147930122 | G | -0.0608 |
| rs7917651   | C | -0.0312 |
| rs41305022  | A | 0.1033  |
| rs3135821   | T | 0.0291  |
| rs117734758 | A | -0.0941 |
| rs76818169  | A | 0.0165  |
| rs76098923  | T | -0.0538 |
| rs11009475  | A | -0.0195 |
| rs1665636   | A | 0.0392  |
| rs2912763   | G | 0.0168  |
| rs141725614 | G | -0.0781 |
| rs11146526  | G | -0.0223 |
| rs75547204  | G | -0.0675 |
| rs150679025 | T | 0.1157  |
| rs3862019   | T | 0.0178  |
| rs10740548  | G | 0.0139  |
| rs72809856  | G | -0.0459 |
| rs78971449  | T | -0.0295 |
| rs148223994 | G | -0.1037 |
| rs11200510  | T | -0.0289 |
| rs10794202  | C | 0.0192  |
| rs72804425  | C | 0.055   |
| rs11006586  | C | 0.0179  |
| rs78381555  | T | -0.0379 |
| rs1970229   | A | 0.0145  |
| rs79666215  | G | 0.0195  |
| rs7093628   | A | 0.015   |
| rs61830471  | T | 0.0153  |
| rs10826085  | A | -0.0194 |
| rs72807022  | T | 0.0618  |
| rs12414118  | A | -0.0319 |
| rs16923642  | G | 0.0703  |
| rs10796042  | T | 0.0169  |
| rs6480516   | T | 0.02    |
| rs61857804  | G | 0.0354  |
| rs36076407  | T | 0.0755  |

|             |   |         |
|-------------|---|---------|
| rs146339450 | G | -0.1099 |
| rs12765721  | A | 0.0179  |
| rs74148920  | A | 0.071   |
| rs11594938  | A | -0.0574 |
| rs3936016   | T | 0.0338  |
| rs4582883   | T | -0.0168 |
| rs147185956 | C | 0.0725  |
| rs17710721  | A | -0.0357 |
| rs3996491   | G | 0.0208  |
| rs6602703   | G | 0.0142  |
| rs72768695  | T | -0.0545 |
| rs117936587 | A | 0.1024  |
| rs7910936   | C | 0.015   |
| rs2819044   | G | 0.014   |
| rs74433494  | C | 0.0778  |
| rs79499360  | G | 0.0666  |
| rs138832514 | A | -0.0613 |
| rs55808464  | C | -0.043  |
| rs117287552 | A | -0.0661 |
| rs146987464 | G | 0.0546  |
| rs61874695  | A | 0.0422  |
| rs117599310 | C | 0.0522  |
| rs10430710  | G | -0.0334 |
| rs1409046   | T | 0.0232  |
| rs75194882  | A | -0.0456 |
| rs144371606 | A | 0.0979  |
| rs10825025  | C | 0.0266  |
| rs10509239  | C | -0.0982 |
| rs76106906  | C | 0.0287  |
| rs2026915   | G | -0.0648 |
| rs150065886 | G | 0.0778  |
| rs4747826   | T | 0.0191  |
| rs113493661 | A | 0.0528  |
| rs12783377  | C | 0.0143  |
| rs1756741   | C | 0.0146  |
| rs61867686  | C | -0.0288 |
| rs3847430   | G | 0.0165  |
| rs4948234   | G | -0.0271 |
| rs117050497 | G | 0.0668  |
| rs12260899  | G | -0.0146 |
| rs10762666  | A | 0.016   |
| rs11199442  | G | 0.0623  |
| rs12360112  | A | 0.0242  |
| rs12263081  | T | 0.0173  |
| rs2243438   | A | 0.0673  |
| rs7072856   | G | -0.0163 |
| rs2674328   | A | 0.0148  |

|             |   |         |
|-------------|---|---------|
| rs11196017  | A | -0.0321 |
| rs1372802   | G | -0.0189 |
| rs77651552  | C | 0.0448  |
| rs74347407  | A | 0.0346  |
| rs59259654  | T | -0.0285 |
| rs148603211 | A | -0.0338 |
| rs117925643 | T | -0.0546 |
| rs79737497  | T | 0.1004  |
| rs77022003  | G | 0.0902  |
| rs11197603  | C | 0.0192  |
| rs143166862 | G | 0.0652  |
| rs7101291   | T | 0.0319  |
| rs12355257  | T | -0.0432 |
| rs145176301 | G | 0.1077  |
| rs9422854   | A | -0.0235 |
| rs7911974   | A | 0.0152  |
| rs111623883 | G | -0.018  |
| rs41282254  | A | -0.0539 |
| rs148528636 | C | -0.1292 |
| rs6560760   | T | 0.0353  |
| rs77802094  | A | 0.049   |
| rs1573204   | T | -0.0174 |
| rs11255788  | A | -0.0318 |
| rs77385970  | G | -0.0523 |
| rs75392602  | A | -0.0341 |
| rs12248509  | T | -0.033  |
| rs61843170  | A | -0.0389 |
| rs147820003 | G | -0.075  |
| rs2249656   | T | -0.0144 |
| rs7084731   | A | -0.0234 |
| rs72815176  | T | 0.0651  |
| rs112062107 | C | -0.1004 |
| rs57732085  | C | 0.0148  |
| rs17807102  | A | 0.037   |
| rs34864972  | G | -0.044  |
| rs10904838  | G | -0.0386 |
| rs2399990   | A | -0.0139 |
| rs116923347 | G | 0.0434  |
| rs2297646   | G | 0.0155  |
| rs146522491 | A | 0.0597  |
| rs7091190   | T | -0.0451 |
| rs77648923  | A | 0.0365  |
| rs4880994   | C | 0.047   |
| rs117801849 | G | 0.0601  |
| rs111922060 | T | -0.0823 |
| rs11192544  | T | 0.0439  |
| rs7895249   | C | 0.0972  |



|             |   |         |
|-------------|---|---------|
| rs10752124  | T | 0.0138  |
| rs61839354  | T | -0.1033 |
| rs76288146  | G | 0.0408  |
| rs808258    | A | -0.019  |
| rs4319428   | A | 0.0447  |
| rs139970388 | T | 0.0393  |
| rs78509553  | A | 0.0497  |
| rs117117699 | C | -0.077  |
| rs61838873  | T | 0.0383  |
| rs7086613   | T | -0.024  |
| rs11017840  | A | -0.025  |
| rs117166897 | G | 0.1046  |
| rs913517    | C | -0.0151 |
| rs17384979  | A | -0.0521 |
| rs72820782  | A | 0.0668  |
| rs7913538   | A | 0.015   |
| rs115410527 | T | -0.0351 |
| rs75967778  | T | 0.0842  |
| rs787024    | G | -0.0284 |
| rs11011985  | T | 0.0338  |
| rs11187826  | G | 0.0216  |
| rs4962391   | G | 0.0156  |
| rs17122870  | A | 0.0226  |
| rs80210217  | T | -0.0369 |
| rs17152995  | T | 0.0603  |
| rs7080366   | T | 0.0147  |
| rs79787385  | G | 0.0762  |
| rs6583779   | T | 0.036   |
| rs3814575   | C | 0.0151  |
| rs145105391 | C | -0.0239 |
| rs6537556   | T | -0.0163 |
| rs117294375 | T | 0.0639  |
| rs3748218   | T | 0.0204  |
| rs17627255  | A | 0.0536  |
| rs117824913 | A | -0.0569 |
| rs72762911  | T | -0.0667 |
| rs12777206  | C | 0.0971  |
| rs4748380   | T | -0.0252 |
| rs10823796  | C | 0.0143  |
| rs145183937 | G | 0.1006  |
| rs76875435  | A | -0.0829 |
| rs11528634  | C | -0.058  |
| rs12357408  | A | -0.0596 |
| rs11254975  | A | 0.0212  |
| rs1276723   | C | -0.0277 |
| rs79266898  | C | 0.0803  |
| rs148471831 | A | 0.0599  |

|             |   |         |
|-------------|---|---------|
| rs10994087  | C | -0.0546 |
| rs79207363  | T | -0.041  |
| rs11593678  | G | 0.0786  |
| rs7067783   | T | -0.0179 |
| rs12415461  | A | -0.0439 |
| rs75614757  | A | -0.0606 |
| rs384376    | C | -0.0145 |
| rs11597831  | T | -0.0164 |
| rs138207226 | A | -0.0828 |
| rs11815169  | C | -0.0168 |
| rs118072535 | T | 0.0556  |
| rs77140506  | G | -0.0654 |
| rs76844723  | G | 0.0377  |
| rs11594718  | C | 0.0382  |
| rs61844520  | T | 0.0234  |
| rs17809970  | A | 0.0411  |
| rs56728271  | G | 0.0782  |
| rs77105845  | A | 0.0757  |
| rs12780429  | G | -0.0311 |
| rs12783958  | C | -0.0192 |
| rs60980121  | T | -0.0287 |
| rs61833392  | C | 0.1027  |
| rs79186910  | G | -0.0475 |
| rs4918407   | T | 0.0713  |
| rs117733584 | T | 0.0833  |
| rs3123719   | T | -0.0174 |
| rs7099502   | T | -0.0191 |
| rs12261961  | C | 0.0196  |
| rs1218430   | A | 0.0207  |
| rs11011545  | G | -0.071  |
| rs79986373  | T | 0.1146  |
| rs10904574  | C | -0.051  |
| rs7897640   | C | -0.0303 |
| rs76356742  | C | 0.0673  |
| rs148097730 | A | 0.082   |
| rs11250861  | T | 0.0226  |
| rs11817889  | G | 0.0141  |
| rs2383992   | T | 0.0143  |
| rs72782185  | A | 0.068   |
| rs1578777   | T | -0.0158 |
| rs2991771   | G | -0.0155 |
| rs12414547  | C | 0.0636  |
| rs80319002  | C | 0.0229  |
| rs12777509  | G | -0.0365 |
| rs11575686  | C | -0.1469 |
| rs11199130  | C | 0.015   |
| rs78410790  | G | -0.0457 |

|             |   |         |
|-------------|---|---------|
| rs145969661 | T | 0.0774  |
| rs61863972  | C | 0.083   |
| rs78442174  | C | -0.0345 |
| rs138773508 | A | 0.0851  |
| rs72776701  | T | -0.0694 |
| rs10900290  | T | 0.0171  |
| rs113481554 | G | -0.0921 |
| rs4980069   | G | 0.0177  |
| rs12247493  | C | 0.0155  |
| rs11259202  | T | -0.0147 |
| rs77470908  | C | -0.0314 |
| rs1871448   | G | 0.0151  |
| rs11258848  | A | -0.0175 |
| rs1863833   | A | -0.0308 |
| rs138472141 | T | 0.1172  |
| rs11199513  | T | 0.0178  |
| rs10899857  | T | -0.0178 |
| rs77636900  | A | 0.0824  |
| rs12766190  | G | -0.019  |
| rs12257270  | G | -0.036  |
| rs11198937  | A | 0.0312  |
| rs79228572  | A | -0.0513 |
| rs4948440   | T | 0.0304  |
| rs74141500  | G | -0.0411 |
| rs117439994 | A | 0.0527  |
| rs3026734   | A | -0.066  |
| rs61828723  | G | 0.0403  |
| rs10905901  | C | 0.0152  |
| rs112209042 | A | -0.041  |
| rs78915471  | G | 0.1056  |
| rs11189629  | T | 0.0212  |
| rs10786623  | G | 0.0172  |
| rs11012683  | T | 0.0437  |
| rs4881130   | T | 0.0498  |
| rs11193408  | C | -0.079  |
| rs2845924   | A | -0.0216 |
| rs35075409  | A | -0.0501 |
| rs67924127  | G | 0.0367  |
| rs12765333  | G | -0.0335 |
| rs34267967  | T | 0.0173  |
| rs17287438  | T | -0.0728 |
| rs116981678 | A | -0.0597 |
| rs11251166  | C | -0.0164 |
| rs1004296   | C | -0.0194 |
| rs4409768   | C | 0.0154  |
| rs10998540  | T | 0.0225  |
| rs4271316   | T | 0.0138  |

|             |   |         |
|-------------|---|---------|
| rs10793625  | G | 0.024   |
| rs2248956   | T | -0.0142 |
| rs142520010 | A | 0.0643  |
| rs3105299   | C | -0.0149 |
| rs79807146  | A | -0.0519 |
| rs7898029   | G | 0.0878  |
| rs10904603  | C | 0.0168  |
| rs75877077  | T | 0.047   |
| rs11259539  | C | 0.014   |
| rs2393783   | A | -0.0194 |
| rs74936827  | T | 0.0581  |
| rs7092223   | A | 0.0148  |
| rs56144923  | G | 0.0184  |
| rs151259408 | C | 0.0521  |
| rs945142    | T | -0.0139 |
| rs9783253   | T | 0.0151  |
| rs7085356   | T | 0.0327  |
| rs145918498 | C | -0.1124 |
| rs144832455 | A | -0.0814 |
| rs1149979   | A | 0.0141  |
| rs11203073  | A | 0.0556  |
| rs79554609  | T | -0.0542 |
| rs1536088   | T | 0.0143  |
| rs11594179  | T | 0.0164  |
| rs6602679   | G | 0.0142  |
| rs2637637   | C | 0.0249  |
| rs78297390  | T | -0.032  |
| rs142527895 | C | -0.069  |
| rs11202915  | A | -0.0152 |
| rs34234687  | G | -0.0138 |
| rs12779869  | A | -0.0774 |
| rs10795470  | T | -0.0294 |
| rs140287625 | A | -0.0808 |
| rs144780890 | A | -0.0627 |
| rs140347896 | A | 0.0486  |
| rs10794133  | A | -0.0166 |
| rs6602025   | T | 0.0355  |
| rs12098638  | A | -0.0266 |
| rs75644171  | C | -0.0807 |
| rs11016152  | G | -0.0204 |
| rs1647202   | T | 0.0351  |
| rs61852894  | A | 0.0866  |
| rs12263685  | C | -0.0565 |
| rs56307671  | T | 0.0788  |
| rs61861700  | C | 0.0901  |
| rs60633862  | C | -0.0587 |
| rs76435187  | C | -0.042  |

|             |   |         |
|-------------|---|---------|
| rs78952425  | G | 0.0724  |
| rs2392946   | C | -0.0212 |
| rs75027289  | T | -0.0252 |
| rs4148915   | G | -0.0414 |
| rs4918785   | A | 0.0296  |
| rs72782057  | A | 0.032   |
| rs112911942 | T | -0.0651 |
| rs112607568 | G | -0.0317 |
| rs7093673   | T | -0.0152 |
| rs2892272   | A | 0.0289  |
| rs10786578  | T | -0.0177 |
| rs61833071  | A | 0.0196  |
| rs78588018  | A | 0.051   |
| rs877663    | G | 0.0214  |
| rs112619191 | G | -0.0665 |
| rs79509032  | C | 0.0265  |
| rs12570606  | C | -0.0146 |
| rs7913448   | C | -0.0216 |
| rs12414832  | A | -0.0222 |
| rs111790671 | C | 0.0228  |
| rs140302103 | A | 0.033   |
| rs3814572   | G | 0.029   |
| rs77505784  | C | 0.0522  |
| rs12268707  | G | 0.015   |
| rs61865567  | T | 0.0618  |
| rs117272312 | A | 0.0743  |
| rs112372646 | T | -0.0345 |
| rs10509922  | A | -0.0198 |
| rs35687725  | T | -0.0199 |
| rs855969    | G | 0.015   |
| rs72782016  | A | -0.044  |
| rs72780397  | A | 0.0213  |
| rs113415445 | G | 0.0166  |
| rs72792547  | C | 0.053   |
| rs117820739 | T | -0.0301 |
| rs75909562  | T | 0.0932  |
| rs4933236   | C | -0.0162 |
| rs7903554   | G | 0.0293  |
| rs77609090  | C | -0.1171 |
| rs11016251  | A | -0.0277 |
| rs11255043  | C | 0.0531  |
| rs12774422  | C | 0.0371  |
| rs3123679   | C | -0.0223 |
| rs2172305   | A | 0.0894  |
| rs7100298   | T | -0.0236 |
| rs12218446  | G | 0.0179  |
| rs147726517 | C | 0.0456  |

|             |   |         |
|-------------|---|---------|
| rs1904740   | C | -0.0235 |
| rs4554790   | C | 0.0193  |
| rs41295139  | T | -0.0456 |
| rs7915487   | A | -0.0546 |
| rs117249531 | T | -0.0611 |
| rs116464068 | T | -0.0573 |
| rs72818244  | A | -0.0191 |
| rs2813393   | G | 0.0198  |
| rs17513940  | T | -0.0177 |
| rs117222444 | C | -0.0831 |
| rs35591843  | A | -0.0236 |
| rs117244107 | G | 0.038   |
| rs117237851 | A | 0.1141  |
| rs7090884   | G | -0.0142 |
| rs2253514   | G | -0.013  |
| rs1334417   | G | -0.0135 |
| rs10995160  | G | 0.0529  |
| rs74947927  | T | 0.0144  |
| rs12722575  | T | -0.0631 |
| rs61838764  | A | 0.0437  |
| rs11009156  | A | 0.0217  |
| rs17559976  | C | 0.0369  |
| rs7088047   | G | 0.0256  |
| rs571797    | T | 0.0172  |
| rs2986970   | G | -0.0145 |
| rs117435213 | A | -0.0871 |
| rs11814573  | G | -0.0282 |
| rs2013456   | T | 0.0215  |
| rs79189833  | T | -0.0505 |
| rs4244316   | G | 0.0137  |
| rs17630692  | C | -0.0536 |
| rs7893769   | C | 0.0165  |
| rs10399975  | G | 0.0289  |
| rs1922157   | T | -0.0463 |
| rs41279656  | T | 0.0608  |
| rs117695982 | G | 0.047   |
| rs17699326  | A | 0.0233  |
| rs12571349  | A | -0.016  |
| rs138793309 | T | -0.0895 |
| rs10886706  | A | -0.0218 |
| rs10787862  | A | 0.0138  |
| rs117052054 | C | -0.069  |
| rs3740416   | G | -0.024  |
| rs7067538   | G | -0.015  |
| rs7077594   | C | 0.0199  |
| rs7358125   | G | 0.041   |
| rs150961049 | G | -0.0803 |

|             |   |         |
|-------------|---|---------|
| rs2763335   | C | 0.0272  |
| rs7083265   | T | -0.0146 |
| rs147205184 | T | 0.0741  |
| rs79665096  | T | 0.0874  |
| rs911739    | A | -0.0241 |
| rs117936805 | T | -0.0815 |
| rs11259826  | T | 0.0598  |
| rs112257722 | T | -0.0712 |
| rs61872035  | A | 0.0463  |
| rs1879314   | C | -0.0483 |
| rs10736932  | C | 0.0171  |
| rs61862017  | T | 0.0406  |
| rs9419167   | T | 0.0142  |
| rs10787005  | A | -0.0214 |
| rs80243037  | A | 0.0339  |
| rs34573070  | T | -0.0336 |
| rs148094678 | G | -0.0648 |
| rs147235284 | A | 0.1014  |
| rs74986759  | A | -0.0641 |
| rs62621207  | T | 0.0362  |
| rs74161723  | T | -0.0308 |
| rs56668248  | T | 0.0173  |
| rs118117653 | T | 0.0587  |
| rs4948738   | C | -0.0369 |
| rs142577263 | T | -0.0631 |
| rs11185753  | G | 0.0308  |
| rs11197742  | G | 0.023   |
| rs145689896 | C | 0.0731  |
| rs72815469  | C | -0.0494 |
| rs17665973  | C | 0.073   |
| rs2680315   | G | 0.025   |
| rs1576816   | A | 0.0144  |
| rs117317660 | A | -0.0506 |
| rs148626883 | G | -0.0526 |
| rs72821325  | A | -0.0467 |
| rs4619098   | C | -0.024  |
| rs7097221   | G | 0.0188  |
| rs74727814  | A | -0.1092 |
| rs1348593   | T | 0.0739  |
| rs2998148   | T | 0.0774  |
| rs7904694   | T | -0.0298 |
| rs2448111   | C | 0.019   |
| rs78050011  | T | 0.0355  |
| rs6481576   | T | 0.0266  |
| rs117100071 | A | -0.0615 |
| rs117109170 | A | 0.0449  |
| rs77506352  | T | -0.034  |

|             |   |         |
|-------------|---|---------|
| rs7916670   | C | 0.0175  |
| rs10825558  | C | 0.0176  |
| rs79249198  | T | 0.0337  |
| rs56216393  | A | -0.0285 |
| rs74474182  | C | -0.048  |
| rs59501186  | A | -0.0798 |
| rs34029493  | T | -0.0194 |
| rs80134189  | G | 0.0591  |
| rs117040132 | C | 0.05    |
| rs11198946  | A | 0.0198  |
| rs148791732 | A | -0.0523 |
| rs2217895   | T | -0.0314 |
| rs9787590   | G | -0.0166 |
| rs2288836   | T | -0.0155 |
| rs61059957  | G | 0.0201  |
| rs9787464   | G | -0.0422 |
| rs4948700   | C | 0.0166  |
| rs1581843   | C | 0.015   |
| rs4881010   | C | 0.0206  |
| rs4237337   | A | 0.0344  |
| rs7894881   | A | -0.0364 |
| rs77469062  | C | 0.0588  |
| rs78948606  | G | -0.0679 |
| rs7914597   | T | 0.0254  |
| rs80007012  | T | -0.0494 |
| rs11598190  | T | 0.0495  |
| rs17143701  | C | -0.017  |
| rs3006247   | G | -0.0205 |
| rs10905270  | G | -0.0474 |
| rs112014931 | C | 0.0744  |
| rs112928991 | T | 0.0587  |
| rs816278    | G | 0.0142  |
| rs9417918   | A | 0.0613  |
| rs11818878  | T | 0.0769  |
| rs74717762  | A | 0.0657  |
| rs75279365  | T | -0.0392 |
| rs11599499  | T | 0.023   |
| rs1652244   | G | 0.0145  |
| rs75598435  | T | 0.1002  |
| rs7914924   | C | 0.0152  |
| rs71541556  | A | 0.0339  |
| rs2505465   | G | 0.0157  |
| rs16914571  | C | -0.0246 |
| rs6586174   | T | 0.0176  |
| rs61852762  | T | 0.031   |
| rs10788525  | T | 0.0136  |
| rs4752656   | C | -0.0146 |



|             |   |         |
|-------------|---|---------|
| rs11015451  | A | 0.0596  |
| rs1539066   | G | 0.0134  |
| rs117869639 | T | 0.0892  |
| rs76692191  | T | 0.093   |
| rs76522551  | A | -0.0288 |
| rs71490995  | T | 0.0503  |
| rs11001035  | T | 0.0249  |
| rs77724785  | G | 0.0327  |
| rs34959905  | T | -0.0258 |
| rs72772241  | A | 0.0183  |
| rs79407798  | T | 0.0482  |
| rs143573767 | T | 0.068   |
| rs117425027 | G | -0.048  |
| rs72819151  | T | -0.0855 |
| rs61872793  | T | -0.0594 |
| rs1925256   | A | -0.0248 |
| rs117081154 | A | -0.0603 |
| rs117081648 | G | 0.0443  |
| rs1037431   | C | 0.0371  |
| rs75735700  | T | -0.0594 |
| rs10761659  | A | 0.0142  |
| rs7093792   | A | 0.0358  |
| rs10734104  | T | 0.0203  |
| rs7903977   | T | -0.0501 |
| rs76670846  | G | 0.0225  |
| rs2650696   | T | -0.0173 |
| rs78530715  | C | 0.0309  |
| rs141985619 | C | -0.1005 |
| rs112073019 | G | -0.0438 |
| rs3737015   | A | 0.018   |
| rs911771    | C | 0.0189  |
| rs3814676   | T | -0.0196 |
| rs55878842  | A | 0.0597  |
| rs112747719 | T | 0.0443  |
| rs77905483  | A | -0.0257 |
| rs72776446  | C | 0.0467  |
| rs11250485  | T | -0.0436 |
| rs76202058  | T | 0.0377  |
| rs76548440  | A | 0.0476  |
| rs11196316  | C | 0.0386  |
| rs117195090 | A | -0.0485 |
| rs36024369  | T | 0.0442  |
| rs35095871  | G | -0.0452 |
| rs77072476  | T | 0.046   |
| rs11818741  | A | -0.0748 |
| rs56339490  | C | 0.0369  |
| rs1248696   | T | 0.0227  |

|             |   |         |
|-------------|---|---------|
| rs17101979  | G | -0.0393 |
| rs10828409  | T | -0.0162 |
| rs58885335  | A | -0.0785 |
| rs1909433   | T | -0.0232 |
| rs77275840  | C | -0.0569 |
| rs2842288   | G | -0.013  |
| rs73348956  | T | 0.0422  |
| rs11244450  | T | 0.0236  |
| rs75365462  | T | 0.0539  |
| rs626682    | A | -0.0135 |
| rs11000904  | T | 0.0982  |
| rs11003635  | T | -0.0181 |
| rs6480059   | C | 0.0135  |
| rs7901863   | T | -0.0181 |
| rs11575690  | C | -0.0757 |
| rs1703661   | G | 0.0144  |
| rs57732552  | G | -0.0614 |
| rs12569589  | T | -0.0137 |
| rs78946495  | A | 0.0373  |
| rs11258609  | A | -0.0158 |
| rs146038807 | G | -0.0554 |
| rs150506838 | A | -0.1336 |
| rs142766905 | A | 0.0807  |
| rs10906931  | T | -0.0152 |
| rs12218330  | G | -0.0212 |
| rs117417471 | G | -0.033  |
| rs117915490 | A | 0.0801  |
| rs4750701   | A | 0.014   |
| rs2478788   | G | 0.0237  |
| rs117270944 | C | -0.0384 |
| rs113780700 | A | -0.0421 |
| rs116982169 | G | -0.0748 |
| rs10740061  | A | -0.019  |
| rs79841829  | G | 0.078   |
| rs1676802   | G | 0.0299  |
| rs117745411 | A | 0.0894  |
| rs60025203  | T | 0.03    |
| rs117246174 | G | -0.075  |
| rs2764375   | A | 0.0285  |
| rs10508810  | T | 0.0224  |
| rs145951398 | A | 0.0661  |
| rs12240969  | C | 0.0803  |
| rs10884978  | A | 0.014   |
| rs61843282  | G | -0.0335 |
| rs57180542  | G | -0.0658 |
| rs6583871   | G | 0.0154  |
| rs10905352  | A | -0.0182 |

|             |   |         |
|-------------|---|---------|
| rs61847794  | G | 0.0455  |
| rs146641805 | A | 0.0429  |
| rs76217707  | A | -0.0214 |
| rs72807136  | G | 0.0898  |
| rs9422897   | T | -0.0385 |
| rs78780174  | T | -0.0549 |
| rs2196743   | A | -0.0198 |
| rs2804004   | A | 0.0295  |
| rs2505654   | G | 0.0137  |
| rs669069    | A | -0.0446 |
| rs137960822 | T | 0.0831  |
| rs77948507  | A | 0.0483  |
| rs2256283   | G | 0.0151  |
| rs139440250 | A | 0.0539  |
| rs117422848 | T | -0.0392 |
| rs315589    | A | -0.0211 |
| rs1896407   | G | 0.0439  |
| rs17110707  | C | -0.0208 |
| rs61853618  | T | 0.026   |
| rs12359055  | C | -0.0131 |
| rs117449060 | G | -0.0289 |
| rs79914577  | T | -0.1273 |
| rs118097047 | A | -0.0575 |
| rs12784762  | A | -0.0259 |
| rs143221942 | A | 0.0605  |
| rs12772175  | C | 0.0303  |
| rs7916856   | C | -0.0227 |
| rs7910321   | G | 0.0223  |
| rs1509973   | G | 0.0203  |
| rs7902057   | C | -0.0134 |
| rs111528034 | C | -0.0593 |
| rs56086430  | C | 0.077   |
| rs6537497   | G | -0.0131 |
| rs4750964   | A | -0.065  |
| rs12570776  | A | -0.0164 |
| rs141333238 | C | -0.0402 |
| rs6602595   | G | 0.0145  |
| rs41514552  | T | 0.041   |
| rs143066257 | C | 0.0758  |
| rs3494      | A | -0.0411 |
| rs74456321  | T | 0.0598  |
| rs3123190   | T | 0.0137  |
| rs10904140  | T | -0.0173 |
| rs117408264 | C | 0.0573  |
| rs2804564   | G | -0.0236 |
| rs3125619   | C | -0.0161 |
| rs7073112   | C | -0.0251 |

|             |   |         |
|-------------|---|---------|
| rs138184292 | A | 0.0709  |
| rs112846373 | T | -0.0225 |
| rs61854121  | C | -0.0698 |
| rs76906951  | G | -0.0994 |
| rs72843870  | T | -0.0683 |
| rs61870263  | A | -0.0733 |
| rs77186164  | T | -0.0768 |
| rs112313716 | A | 0.0926  |
| rs150680365 | T | -0.0525 |
| rs113377022 | C | -0.0265 |
| rs12778553  | T | -0.0205 |
| rs17113728  | T | -0.0173 |
| rs7902218   | A | -0.0129 |
| rs11196317  | G | 0.052   |
| rs3123168   | A | -0.0139 |
| rs61872963  | G | -0.0258 |
| rs12771266  | A | 0.0251  |
| rs1227744   | G | -0.0238 |
| rs1703648   | A | -0.0222 |
| rs56072636  | T | 0.0381  |
| rs10906705  | G | -0.0185 |
| rs12355131  | A | 0.0228  |
| rs2250703   | A | 0.0482  |
| rs61860829  | A | 0.1037  |
| rs75676385  | A | 0.0457  |
| rs111626564 | T | 0.0455  |
| rs76621941  | T | 0.0679  |
| rs2279809   | A | -0.0128 |
| rs7914993   | A | 0.0191  |
| rs112299061 | T | 0.0463  |
| rs2253055   | A | -0.0155 |
| rs75856872  | A | -0.0526 |
| rs2807044   | G | 0.0147  |
| rs151032691 | C | -0.0371 |
| rs143446503 | C | -0.0699 |
| rs74454630  | A | -0.0239 |
| rs61854005  | C | -0.0514 |
| rs4917558   | T | 0.0369  |
| rs80300770  | T | 0.0785  |
| rs60864391  | T | -0.0306 |
| rs999856    | A | -0.0411 |
| rs10994609  | C | -0.0483 |
| rs11202124  | C | 0.0282  |
| rs111873696 | T | -0.0357 |
| rs3814587   | A | 0.0135  |
| rs61829306  | T | -0.0943 |
| rs77520345  | T | 0.0479  |

|             |   |         |
|-------------|---|---------|
| rs76675892  | T | -0.046  |
| rs2012324   | T | 0.0133  |
| rs10883764  | A | -0.0132 |
| rs141481670 | A | -0.0693 |
| rs7895769   | T | 0.0213  |
| rs805721    | C | -0.0151 |
| rs7918139   | G | -0.0133 |
| rs117189841 | T | 0.0508  |
| rs10906926  | G | 0.0207  |
| rs61859801  | G | -0.0448 |
| rs4933395   | C | -0.0155 |
| rs146515634 | A | -0.0667 |
| rs10906591  | G | 0.0207  |
| rs4748556   | G | 0.0129  |
| rs1629141   | A | 0.0184  |
| rs112228094 | T | 0.0768  |
| rs58657353  | C | 0.0241  |
| rs72787554  | G | 0.0414  |
| rs72808295  | T | 0.0342  |
| rs7913244   | A | -0.0242 |
| rs2944456   | C | -0.1173 |
| rs77063421  | G | -0.0332 |
| rs111793643 | G | -0.0297 |
| rs4948237   | C | 0.058   |
| rs72829362  | A | 0.0421  |
| rs1937711   | C | -0.03   |
| rs2420929   | T | 0.0232  |
| rs74855220  | G | 0.0451  |
| rs71484699  | G | -0.1027 |
| rs4751113   | C | 0.013   |
| rs11812551  | T | 0.0194  |
| rs11018001  | A | 0.014   |
| rs117431854 | T | 0.0871  |
| rs12781083  | C | 0.0136  |
| rs11254851  | T | -0.0456 |
| rs9783128   | G | -0.0138 |
| rs2167696   | T | -0.0199 |
| rs144066005 | T | 0.0784  |
| rs7072888   | C | 0.0134  |
| rs117135670 | T | -0.0521 |
| rs35906367  | T | -0.0766 |
| rs7079148   | C | 0.0142  |
| rs72826685  | C | -0.0489 |
| rs17011115  | T | -0.0242 |
| rs72804095  | G | -0.0417 |
| rs11255627  | T | 0.0645  |
| rs78100656  | A | -0.0578 |

|             |   |         |
|-------------|---|---------|
| rs2420646   | A | 0.0189  |
| rs60327242  | T | -0.0194 |
| rs41274570  | A | 0.0331  |
| rs11017548  | G | 0.0168  |
| rs75032882  | A | -0.0372 |
| rs77195003  | A | 0.043   |
| rs112215930 | T | -0.0598 |
| rs780809    | A | -0.0305 |
| rs80120044  | G | -0.029  |
| rs111615659 | T | 0.0453  |
| rs17096164  | C | 0.0293  |
| rs7924205   | G | 0.019   |
| rs61865379  | A | 0.0467  |
| rs143806012 | T | 0.0455  |
| rs35806096  | T | -0.0735 |
| rs34544020  | T | -0.0256 |
| rs79800396  | T | -0.0417 |
| rs7096148   | T | -0.0246 |
| rs1255478   | T | 0.045   |
| rs112980619 | G | -0.0679 |
| rs117940107 | A | 0.1313  |
| rs10829221  | G | -0.0146 |
| rs116947153 | A | 0.0582  |
| rs67284218  | A | -0.0163 |
| rs6597779   | A | 0.0143  |
| rs938693    | T | 0.013   |
| rs143099871 | A | 0.0757  |
| rs12240886  | G | -0.0384 |
| rs7903334   | T | 0.013   |
| rs77902356  | C | 0.0428  |
| rs534068    | G | 0.0152  |
| rs538037    | G | 0.0129  |
| rs2839664   | G | 0.0173  |
| rs138429262 | A | 0.0564  |
| rs113478061 | A | -0.0939 |
| rs55927224  | C | -0.0824 |
| rs11593919  | A | 0.0237  |
| rs143826797 | A | -0.0897 |
| rs7089697   | C | -0.0139 |
| rs45607131  | T | 0.0378  |
| rs118038035 | A | -0.0447 |
| rs7088792   | A | -0.0152 |
| rs146948298 | C | 0.0723  |
| rs10997260  | G | -0.013  |
| rs34501655  | A | -0.0279 |
| rs77089185  | A | -0.05   |
| rs112678856 | C | -0.0438 |

|             |   |         |
|-------------|---|---------|
| rs2204757   | G | -0.0202 |
| rs7902306   | T | -0.0143 |
| rs2817684   | A | -0.0153 |
| rs55978430  | A | -0.0397 |
| rs17132378  | A | -0.0287 |
| rs76397645  | T | -0.059  |
| rs10821976  | A | -0.0166 |
| rs73321246  | T | -0.0468 |
| rs11599463  | T | -0.0639 |
| rs73251160  | C | -0.0599 |
| rs7068438   | C | -0.0151 |
| rs144652060 | C | -0.0653 |
| rs78109005  | A | -0.0478 |
| rs1411711   | G | -0.013  |
| rs77952052  | T | 0.048   |
| rs72785541  | T | 0.0604  |
| rs34575651  | G | -0.0371 |
| rs76915618  | T | 0.0475  |
| rs16909032  | A | 0.0731  |
| rs11014290  | G | -0.0211 |
| rs143290705 | A | -0.0625 |
| rs35422936  | C | 0.0393  |
| rs116105957 | T | 0.0387  |
| rs11196375  | C | 0.0218  |
| rs149546747 | C | -0.0608 |
| rs61847721  | G | 0.0365  |
| rs1002652   | T | 0.0139  |
| rs73288629  | G | -0.033  |
| rs79603376  | C | -0.0654 |
| rs10829898  | A | -0.0316 |
| rs113087036 | G | -0.0944 |
| rs113674220 | T | -0.0485 |
| rs11007832  | T | -0.0867 |
| rs4237472   | A | 0.0326  |
| rs10824466  | C | 0.0233  |
| rs3802733   | C | 0.0236  |
| rs914571    | T | 0.0128  |
| rs137866180 | T | -0.0414 |
| rs11186155  | A | 0.0838  |
| rs1577226   | T | 0.0161  |
| rs10829493  | A | 0.0427  |
| rs11017919  | A | 0.0259  |
| rs76047601  | T | 0.0762  |
| rs56041199  | T | 0.0336  |
| rs61855460  | T | -0.0472 |
| rs16936637  | G | 0.0461  |
| rs2474736   | A | -0.0398 |

|             |   |         |
|-------------|---|---------|
| rs1888902   | A | -0.0174 |
| rs114083191 | A | 0.0627  |
| rs4751702   | T | 0.0247  |
| rs2118112   | G | -0.0248 |
| rs12722557  | T | 0.0691  |
| rs148847796 | A | 0.0686  |
| rs2460577   | T | -0.1128 |
| rs34614107  | G | -0.0262 |
| rs10904103  | T | -0.0153 |
| rs79877472  | G | 0.0967  |
| rs61847502  | C | 0.0533  |
| rs2488330   | C | 0.0164  |
| rs148740445 | G | 0.054   |
| rs359058    | T | -0.0495 |
| rs10825491  | T | -0.0179 |
| rs160052    | T | 0.0154  |
| rs7088476   | A | 0.0127  |
| rs4359117   | G | -0.0143 |
| rs11009264  | G | -0.0138 |
| rs77021017  | T | -0.0506 |
| rs118181646 | T | 0.0506  |
| rs3938475   | A | -0.0297 |
| rs72844247  | G | 0.027   |
| rs2091577   | C | 0.0183  |
| rs35822932  | A | -0.0577 |
| rs992193    | C | 0.0144  |
| rs75246833  | T | 0.0512  |
| rs117373597 | G | 0.0665  |
| rs10885114  | C | -0.0299 |
| rs1331291   | C | -0.0184 |
| rs11017740  | A | -0.0394 |
| rs12249078  | C | 0.0247  |
| rs78740100  | A | -0.0301 |
| rs79098065  | C | 0.0523  |
| rs117667430 | A | -0.092  |
| rs7073224   | G | -0.0257 |
| rs148274868 | A | 0.1032  |
| rs114086283 | T | 0.0732  |
| rs71484931  | G | 0.0614  |
| rs77088207  | T | 0.0914  |
| rs2619645   | A | 0.0226  |
| rs2820642   | C | -0.014  |
| rs72777814  | T | 0.0341  |
| rs7099606   | G | 0.0257  |
| rs11004941  | A | -0.0203 |
| rs149037802 | A | -0.0668 |
| rs11254065  | G | -0.0543 |



|             |   |         |
|-------------|---|---------|
| rs1243403   | C | 0.0313  |
| rs77564098  | A | -0.0304 |
| rs74691464  | G | 0.0716  |
| rs139318985 | T | -0.0484 |
| rs143027317 | T | 0.0657  |
| rs6597849   | A | 0.0184  |
| rs10996911  | T | -0.0139 |
| rs1254160   | G | 0.0238  |
| rs35708498  | A | 0.0504  |
| rs74394067  | T | -0.0744 |
| rs146316784 | A | -0.0457 |
| rs61850204  | T | 0.0167  |
| rs61866619  | T | 0.0521  |
| rs7918949   | C | 0.0208  |
| rs7080285   | T | 0.0131  |
| rs2225978   | C | -0.0131 |
| rs1947370   | G | -0.0155 |
| rs1555870   | C | 0.0139  |
| rs7914519   | A | 0.0125  |
| rs4293017   | A | -0.0134 |
| rs61874432  | C | -0.0386 |
| rs9423935   | C | -0.0356 |
| rs140091975 | A | -0.1064 |
| rs12356153  | T | 0.0587  |
| rs2147741   | T | -0.0171 |
| rs12772316  | C | -0.0283 |
| rs4505004   | A | 0.0189  |
| rs75302683  | T | -0.0444 |
| rs938517    | A | 0.0451  |
| rs118149985 | A | -0.0408 |
| rs118084896 | A | 0.0684  |
| rs11007581  | A | -0.0698 |
| rs141580708 | T | 0.0767  |
| rs111800082 | G | 0.0685  |
| rs12415912  | C | -0.0564 |
| rs138327327 | A | 0.0482  |
| rs10826777  | G | -0.0238 |
| rs6585781   | C | 0.0178  |
| rs16932843  | A | -0.0461 |
| rs61834313  | T | 0.0728  |
| rs1240370   | C | 0.0143  |
| rs10764759  | G | 0.0135  |
| rs118088143 | C | 0.0638  |
| rs77658040  | C | -0.0889 |
| rs10883663  | C | 0.0139  |
| rs80142196  | T | -0.0733 |
| rs139363088 | T | 0.0808  |

|             |   |         |
|-------------|---|---------|
| rs115255070 | A | 0.0372  |
| rs116895891 | G | -0.0603 |
| rs17129814  | G | -0.0284 |
| rs11018208  | A | 0.0995  |
| rs56172228  | A | 0.0908  |
| rs76850559  | A | 0.041   |
| rs140262235 | T | 0.0703  |
| rs7921853   | T | -0.0129 |
| rs72793306  | C | -0.0363 |
| rs56687775  | A | 0.027   |
| rs11813945  | T | 0.0157  |
| rs74973562  | A | -0.0715 |
| rs143076471 | T | -0.053  |
| rs2453942   | G | 0.0712  |
| rs75777279  | T | 0.0688  |
| rs60450948  | A | 0.0229  |
| rs10827259  | G | 0.0155  |
| rs78750129  | A | 0.0488  |
| rs10821802  | T | 0.0128  |
| rs74865240  | T | -0.0382 |
| rs75165347  | C | 0.0542  |
| rs11254669  | G | 0.0199  |
| rs79217840  | A | -0.0406 |
| rs145471007 | C | 0.0605  |
| rs12764024  | G | 0.0165  |
| rs11258719  | G | 0.0297  |
| rs74328886  | G | 0.0746  |
| rs76788836  | C | -0.0676 |
| rs10886712  | A | 0.0131  |
| rs10828718  | A | -0.013  |
| rs111964306 | G | -0.0454 |
| rs76159896  | A | -0.1044 |
| rs7475769   | G | 0.0427  |
| rs77002102  | T | 0.0244  |
| rs4635008   | C | 0.0217  |
| rs28527775  | A | -0.0164 |
| rs149747542 | A | -0.0896 |
| rs117148943 | T | -0.0503 |
| rs7914787   | G | 0.0175  |
| rs17124846  | G | 0.0489  |
| rs116899385 | C | 0.0632  |
| rs143681841 | A | 0.0867  |
| rs11016560  | G | -0.0226 |
| rs117014988 | G | -0.0655 |
| rs80086039  | C | 0.0608  |
| rs138461387 | C | 0.0742  |
| rs11199566  | A | 0.0171  |

|             |   |         |
|-------------|---|---------|
| rs117530087 | T | 0.0622  |
| rs116849791 | G | 0.0614  |
| rs72763721  | A | 0.0396  |
| rs7094607   | C | 0.0134  |
| rs2781546   | A | -0.0165 |
| rs12220494  | T | 0.0211  |
| rs290480    | T | -0.0208 |
| rs11007687  | T | -0.0165 |
| rs10785908  | A | 0.0129  |
| rs111937073 | T | 0.0625  |
| rs138713268 | A | 0.0841  |
| rs7918847   | C | 0.0294  |
| rs2099633   | A | -0.0159 |
| rs142679088 | T | 0.0832  |
| rs117061769 | A | 0.0541  |
| rs16924464  | C | 0.0526  |
| rs78214778  | A | -0.0311 |
| rs1813838   | A | 0.0267  |
| rs117045279 | T | -0.0502 |
| rs290474    | T | 0.0148  |
| rs72780027  | T | -0.0157 |
| rs7903318   | T | -0.0188 |
| rs61857742  | G | -0.0652 |
| rs148196080 | T | 0.0718  |
| rs150925885 | A | 0.0653  |
| rs12570170  | A | -0.0207 |
| rs12778554  | A | -0.019  |
| rs74415627  | G | 0.025   |
| rs12572289  | A | -0.0131 |
| rs75721203  | T | -0.0307 |
| rs80069072  | C | 0.1078  |
| rs75281384  | T | 0.0854  |
| rs6480587   | T | -0.0183 |
| rs79565842  | C | 0.0604  |
| rs1244477   | C | -0.0133 |
| rs7913222   | C | -0.0333 |
| rs11259101  | A | 0.0499  |
| rs72830157  | G | 0.0832  |
| rs1417913   | C | 0.0809  |
| rs74126107  | T | -0.0777 |
| rs77849275  | T | -0.024  |
| rs12777214  | A | 0.0174  |
| rs150871434 | C | 0.0732  |
| rs117748921 | C | 0.0537  |
| rs12411968  | A | -0.0278 |
| rs11016814  | C | -0.0229 |
| rs12779342  | T | 0.0194  |

|             |   |         |
|-------------|---|---------|
| rs117200513 | T | -0.0331 |
| rs112022139 | C | 0.0358  |
| rs79063225  | C | -0.0987 |
| rs77469739  | C | -0.071  |
| rs117188067 | T | -0.0385 |
| rs56058863  | T | 0.0874  |
| rs9419377   | T | 0.0161  |
| rs12763767  | C | 0.0388  |
| rs117781894 | T | 0.1172  |
| rs35206234  | G | -0.0562 |
| rs148341074 | T | 0.084   |
| rs12784661  | A | 0.0211  |
| rs7922625   | C | -0.0406 |
| rs139470491 | A | 0.1217  |
| rs56940532  | C | -0.0293 |
| rs117151394 | A | 0.0514  |
| rs61844962  | C | -0.0164 |
| rs117748732 | C | -0.122  |
| rs141365453 | A | -0.0558 |
| rs10905230  | T | -0.0132 |
| rs880174    | A | 0.0223  |
| rs72831155  | T | 0.0296  |
| rs2588296   | G | -0.0177 |
| rs10883348  | C | -0.0131 |
| rs148773800 | T | 0.0535  |
| rs117647697 | A | -0.0677 |
| rs12776137  | T | -0.0494 |
| rs11018334  | C | -0.0176 |
| rs77005638  | C | 0.0911  |
| rs7085645   | G | 0.0192  |
| rs7914653   | G | -0.0238 |
| rs12781634  | C | 0.0604  |
| rs12220353  | C | -0.0133 |
| rs78624347  | T | -0.0464 |
| rs148743928 | A | 0.0443  |
| rs74611457  | G | 0.0236  |
| rs11259029  | G | -0.0128 |
| rs17138915  | G | 0.0143  |
| rs4747520   | G | 0.0132  |
| rs78675205  | G | -0.0244 |
| rs141178621 | G | 0.0773  |
| rs10904381  | T | 0.0224  |
| rs635246    | A | 0.0128  |
| rs11008597  | C | -0.0131 |
| rs117767415 | T | 0.0663  |
| rs147725129 | A | 0.0722  |
| rs2451914   | T | -0.0143 |

|             |   |         |
|-------------|---|---------|
| rs7903156   | G | 0.0259  |
| rs7084378   | G | 0.0127  |
| rs11186443  | C | 0.0132  |
| rs11195334  | T | 0.0334  |
| rs72803963  | G | 0.0533  |
| rs10885640  | A | 0.0767  |
| rs12261315  | A | 0.0572  |
| rs11592768  | G | -0.0212 |
| rs11002577  | C | 0.0146  |
| rs10994396  | C | -0.0158 |
| rs7100631   | A | -0.0249 |
| rs7894040   | G | -0.0182 |
| rs10824753  | A | 0.013   |
| rs145725782 | C | 0.0997  |
| rs4750471   | T | 0.0127  |
| rs118034054 | G | 0.0855  |
| rs145634272 | C | -0.0656 |
| rs12218365  | C | -0.0178 |
| rs55850391  | A | 0.0146  |
| rs11197998  | T | -0.0142 |
| rs72763559  | T | 0.0485  |
| rs35092199  | T | 0.0164  |
| rs12767848  | T | -0.0274 |
| rs76034996  | G | 0.0506  |
| rs72763503  | T | -0.0628 |
| rs72805136  | A | 0.0529  |
| rs143449300 | A | 0.086   |
| rs72819837  | A | -0.1026 |
| rs1867991   | A | -0.0136 |
| rs77198855  | A | -0.0689 |
| rs74949722  | A | 0.0205  |
| rs142890824 | A | -0.0464 |
| rs113281421 | C | 0.0602  |
| rs10903457  | C | -0.0141 |
| rs10827991  | G | 0.0149  |
| rs11005041  | T | -0.0125 |
| rs12415040  | A | 0.0301  |
| rs146527727 | T | -0.0611 |
| rs10903866  | G | 0.0184  |
| rs113092284 | T | -0.1086 |
| rs72801750  | T | 0.065   |
| rs3218234   | T | -0.0805 |
| rs12412355  | T | 0.0592  |
| rs12782273  | T | 0.0186  |
| rs3781316   | G | 0.0149  |
| rs11146365  | T | 0.029   |
| rs57851229  | T | 0.0352  |

|             |   |         |
|-------------|---|---------|
| rs115594071 | G | -0.0449 |
| rs118103420 | T | 0.0861  |
| rs11255562  | G | 0.0128  |
| rs10751920  | C | -0.0278 |
| rs147981855 | A | 0.0272  |
| rs77008088  | G | 0.0291  |
| rs4578294   | T | -0.0166 |
| rs7093277   | T | 0.0127  |
| rs113965335 | A | -0.0812 |
| rs117874844 | T | 0.0442  |
| rs7089944   | G | 0.014   |
| rs1348632   | C | 0.0287  |
| rs150030975 | A | -0.0722 |
| rs74740809  | T | 0.0288  |
| rs35972362  | T | -0.021  |
| rs140384813 | G | 0.0394  |
| rs141915514 | G | -0.0577 |
| rs1573145   | G | 0.0178  |
| rs11196260  | A | 0.0339  |
| rs113650862 | T | 0.0884  |
| rs146525600 | C | 0.0721  |
| rs112152096 | A | 0.0555  |
| rs75682273  | A | -0.0803 |
| rs17246684  | T | -0.057  |
| rs938700    | T | 0.0296  |
| rs77212904  | T | 0.0532  |
| rs12098608  | G | 0.0669  |
| rs12781748  | T | -0.048  |
| rs112773166 | A | 0.041   |
| rs16931784  | T | -0.0177 |
| rs138981133 | T | -0.0788 |
| rs75856002  | G | 0.0544  |
| rs72819608  | T | 0.0874  |
| rs150154845 | A | 0.0634  |
| rs114239723 | C | 0.1209  |
| rs58399100  | A | 0.0366  |
| rs138902925 | G | -0.0568 |
| rs72783417  | A | 0.0765  |
| rs61851445  | T | -0.0172 |
| rs17114337  | C | -0.026  |
| rs79345631  | T | 0.0837  |
| rs1227739   | G | 0.0133  |
| rs148190151 | T | 0.0609  |
| rs143887641 | C | 0.0572  |
| rs4747060   | T | 0.0143  |
| rs10886437  | T | 0.017   |
| rs76925185  | C | 0.0541  |

|             |   |         |
|-------------|---|---------|
| rs148388983 | C | 0.0439  |
| rs643756    | T | -0.0272 |
| rs7074013   | T | 0.0257  |
| rs76779534  | G | -0.0728 |
| rs145231210 | A | 0.0614  |
| rs7078273   | T | 0.0129  |
| rs41308687  | A | 0.053   |
| rs139908768 | T | 0.068   |
| rs10829950  | C | -0.0145 |
| rs150752606 | A | 0.0581  |
| rs147681140 | C | 0.073   |
| rs2796306   | A | -0.012  |
| rs685045    | G | -0.0625 |
| rs75232887  | A | 0.0846  |
| rs61870850  | T | -0.0611 |
| rs17761126  | G | 0.0536  |
| rs288451    | T | 0.0358  |
| rs71488616  | C | 0.0642  |
| rs140518513 | T | -0.0593 |
| rs11596264  | T | 0.016   |
| rs146215475 | T | -0.0518 |
| rs111775102 | A | -0.0655 |
| rs141910418 | A | -0.053  |
| rs56732096  | T | 0.0184  |
| rs77101731  | A | -0.0742 |
| rs1495673   | A | -0.0129 |
| rs2497734   | A | 0.03    |
| rs4244945   | A | -0.0176 |
| rs3781344   | C | 0.0123  |
| rs117090315 | G | -0.0446 |
| rs61855853  | G | -0.0332 |
| rs145245475 | G | 0.0944  |
| rs12255956  | A | 0.0427  |
| rs76004246  | G | 0.0498  |
| rs117741188 | A | -0.0598 |
| rs76841693  | G | 0.0429  |
| rs12784975  | C | -0.0172 |
| rs148223786 | T | -0.0361 |
| rs9633783   | A | 0.015   |
| rs11010890  | G | 0.0334  |
| rs144254841 | G | -0.0716 |
| rs76558720  | C | -0.0215 |
| rs11591995  | G | 0.0468  |
| rs10795981  | A | 0.0148  |
| rs151020388 | C | 0.0609  |
| rs61843622  | A | 0.0167  |
| rs61383942  | C | 0.0167  |

|             |   |         |
|-------------|---|---------|
| rs77547244  | T | 0.0474  |
| rs144565153 | A | 0.0903  |
| rs36114698  | G | -0.0933 |
| rs7085996   | T | -0.0389 |
| rs12772500  | G | -0.0521 |
| rs61830561  | T | 0.02    |
| rs2043947   | G | 0.0132  |
| rs77071860  | A | 0.0589  |
| rs906233    | A | -0.0136 |
| rs142420464 | T | 0.0719  |
| rs76088362  | T | -0.0356 |
| rs61274534  | A | -0.0218 |
| rs12357099  | A | -0.0206 |
| rs72798113  | C | -0.0712 |
| rs113119072 | A | 0.0415  |
| rs73252875  | T | 0.0184  |
| rs76648682  | C | 0.0531  |
| rs117221066 | C | -0.0739 |
| rs61851264  | T | 0.0758  |
| rs116915204 | G | 0.0875  |
| rs78613088  | A | -0.0924 |
| rs7081639   | C | 0.0128  |
| rs1717542   | G | -0.0191 |
| rs11252537  | C | -0.0135 |
| rs1612986   | C | -0.0156 |
| rs72795372  | C | -0.0262 |
| rs6585624   | C | 0.0149  |
| rs9418731   | A | -0.0148 |
| rs10905409  | C | 0.0178  |
| rs113702921 | G | 0.059   |
| rs138560711 | T | 0.0511  |
| rs11003703  | G | 0.056   |
| rs7912885   | G | -0.0145 |
| rs72819040  | A | 0.0729  |
| rs139710124 | T | 0.0607  |
| rs79076305  | G | -0.0704 |
| rs116894153 | A | 0.084   |
| rs11195244  | C | 0.0134  |
| rs10903689  | A | -0.022  |
| rs11002054  | G | 0.0165  |
| rs2297471   | C | 0.0171  |
| rs77599582  | T | -0.0197 |
| rs10905935  | A | 0.0149  |
| rs61858553  | A | -0.0808 |
| rs4751862   | A | 0.0264  |
| rs147224584 | C | 0.0483  |
| rs6560740   | T | -0.0128 |



|             |   |         |
|-------------|---|---------|
| rs57653371  | A | 0.0268  |
| rs12220791  | A | 0.0233  |
| rs941910    | C | 0.0133  |
| rs2485716   | C | -0.0153 |
| rs72784236  | C | -0.0525 |
| rs111535062 | G | 0.044   |
| rs79311374  | A | -0.0673 |
| rs117699987 | A | -0.0273 |
| rs61832289  | A | 0.0172  |
| rs143166223 | T | 0.0594  |
| rs117740023 | C | 0.0817  |
| rs117585559 | A | 0.0557  |
| rs12255625  | G | 0.0595  |
| rs4934368   | G | -0.0143 |
| rs11156474  | T | 0.0179  |
| rs1702227   | A | -0.0286 |
| rs61841134  | A | 0.0364  |
| rs12415813  | T | -0.0122 |
| rs76162339  | C | -0.0497 |
| rs55884779  | C | 0.0155  |
| rs17578605  | C | -0.0458 |
| rs73607547  | G | 0.0244  |
| rs147986842 | G | -0.0542 |
| rs10787499  | A | 0.0141  |
| rs147617348 | T | 0.0524  |
| rs4917808   | G | -0.0253 |
| rs118111067 | A | 0.0586  |
| rs1250007   | T | 0.0154  |
| rs36107376  | T | 0.0136  |
| rs2339628   | A | 0.0121  |
| rs12360358  | T | 0.11    |
| rs7905081   | A | 0.0437  |
| rs72771168  | T | -0.0284 |
| rs79882698  | G | -0.0776 |
| rs571472    | G | -0.0795 |
| rs220374    | C | -0.0158 |
| rs2461863   | C | 0.0124  |
| rs12261752  | A | -0.0154 |
| rs3011412   | G | 0.0292  |
| rs12769218  | C | -0.0495 |
| rs12771007  | A | 0.0302  |
| rs6560697   | C | -0.0141 |
| rs76885000  | A | 0.0466  |
| rs2484191   | T | -0.0243 |
| rs148997442 | G | 0.0586  |
| rs139834363 | A | -0.0493 |
| rs80138389  | G | -0.0396 |

|             |   |         |
|-------------|---|---------|
| rs56052128  | C | 0.0323  |
| rs61874524  | T | 0.027   |
| rs77894611  | C | 0.0875  |
| rs74827242  | T | 0.0612  |
| rs118169673 | G | 0.0573  |
| rs11011877  | G | 0.0142  |
| rs10902940  | A | 0.0134  |
| rs12783998  | T | 0.0339  |
| rs144116117 | A | -0.0896 |
| rs11815440  | C | -0.0161 |
| rs116861924 | C | -0.0285 |
| rs116948449 | T | -0.1019 |
| rs71491348  | G | 0.0833  |
| rs111528969 | C | 0.0822  |
| rs78414621  | T | -0.0336 |
| rs117854943 | T | 0.0436  |
| rs10901408  | A | 0.0329  |
| rs4147231   | C | -0.0169 |
| rs12243364  | T | 0.0491  |
| rs521753    | C | -0.0158 |
| rs148570247 | C | 0.0427  |
| rs13376933  | A | 0.0201  |
| rs10823780  | A | -0.0121 |
| rs7924155   | G | -0.0176 |
| rs4747696   | A | 0.018   |
| rs10752181  | A | 0.0191  |
| rs1649960   | G | -0.0411 |
| rs10998960  | T | -0.0167 |
| rs2493942   | A | 0.089   |
| rs117473786 | C | 0.1167  |
| rs608788    | C | 0.0158  |
| rs147740125 | C | -0.0395 |
| rs115037054 | A | -0.1064 |
| rs79612733  | C | 0.0299  |
| rs61865471  | A | 0.0274  |
| rs2819218   | A | -0.0182 |
| rs117141220 | T | 0.085   |
| rs7094302   | C | -0.0186 |
| rs13376883  | C | 0.0199  |
| rs7078966   | G | -0.0679 |
| rs117003078 | A | 0.0613  |
| rs143786476 | A | 0.0753  |
| rs11597303  | T | 0.0176  |
| rs10787010  | G | 0.0135  |
| rs56225715  | A | 0.0167  |
| rs9804195   | T | 0.0204  |
| rs11198558  | A | -0.0189 |

|             |   |         |
|-------------|---|---------|
| rs72793479  | G | -0.0311 |
| rs11146200  | T | -0.0675 |
| rs113424328 | T | 0.0253  |
| rs10857482  | C | -0.0126 |
| rs113139668 | C | 0.0505  |
| rs7902905   | C | -0.0126 |
| rs61861109  | C | 0.0307  |
| rs61862697  | A | -0.0722 |
| rs116936678 | A | -0.0637 |
| rs1914526   | A | 0.0459  |
| rs7072836   | G | -0.0133 |
| rs117254579 | G | 0.0609  |
| rs7100789   | A | 0.0429  |
| rs56333342  | G | -0.0383 |
| rs61832639  | A | -0.0204 |
| rs59544931  | A | -0.041  |
| rs12358816  | A | 0.0549  |
| rs79820308  | T | -0.0299 |
| rs76395225  | A | 0.0194  |
| rs2884127   | G | -0.0129 |
| rs112868404 | A | 0.0648  |
| rs17117345  | C | 0.0772  |
| rs12776231  | T | -0.056  |
| rs151290075 | G | -0.0537 |
| rs72812596  | A | -0.0513 |
| rs139276170 | C | 0.053   |
| rs1711645   | C | 0.0675  |
| rs76948786  | T | -0.0209 |
| rs807012    | T | 0.0298  |
| rs10787620  | C | 0.0122  |
| rs35131856  | T | 0.0263  |
| rs77041646  | A | 0.074   |
| rs72797038  | G | 0.0205  |
| rs75596673  | A | 0.0274  |
| rs72820997  | A | -0.0678 |
| rs79384296  | T | 0.0283  |
| rs11198081  | C | 0.0374  |
| rs57388715  | C | 0.0181  |
| rs66961016  | A | 0.0143  |
| rs7079507   | C | 0.0165  |
| rs116394173 | A | 0.0174  |
| rs758582    | T | 0.0195  |
| rs11006350  | T | 0.0252  |
| rs61870221  | G | 0.045   |
| rs116988595 | A | 0.0663  |
| rs1385879   | T | 0.0743  |
| rs78535844  | C | 0.0295  |

|             |   |         |
|-------------|---|---------|
| rs1227748   | G | 0.0158  |
| rs4752420   | G | -0.0182 |
| rs141402138 | A | 0.051   |
| rs9423348   | T | 0.0796  |
| rs1983894   | C | 0.0209  |
| rs61843067  | A | 0.0214  |
| rs142114477 | C | -0.0822 |
| rs143316956 | T | 0.0484  |
| rs17708585  | T | -0.0406 |
| rs61856121  | C | 0.0907  |
| rs76923762  | A | 0.0407  |
| rs11258987  | G | 0.0157  |
| rs1970628   | T | 0.0407  |
| rs1912314   | G | -0.0169 |
| rs77965248  | C | 0.0557  |
| rs117313133 | T | -0.0606 |
| rs117651313 | C | -0.0806 |
| rs41306930  | A | 0.0865  |
| rs2559541   | C | 0.0121  |
| rs151196683 | T | -0.0444 |
| rs7906351   | G | 0.0245  |
| rs151233148 | A | -0.0966 |
| rs17103264  | C | 0.0302  |
| rs11252340  | T | -0.0643 |
| rs114419941 | T | -0.0449 |
| rs140812151 | A | -0.0814 |
| rs3940961   | A | 0.0209  |
| rs72793394  | C | -0.0483 |
| rs56343292  | G | -0.0187 |
| rs12415117  | A | -0.0248 |
| rs2224694   | A | 0.0261  |
| rs12357957  | T | -0.0197 |
| rs73351172  | G | 0.0211  |
| rs6482921   | A | -0.0141 |
| rs2962750   | G | -0.0197 |
| rs10994706  | A | -0.0175 |
| rs12415972  | C | 0.0349  |
| rs79758915  | G | -0.0908 |
| rs11252481  | T | -0.0123 |
| rs10826240  | A | -0.0124 |
| rs1572539   | C | 0.0121  |
| rs16917441  | T | -0.0132 |
| rs11146284  | A | -0.0276 |
| rs7074424   | A | 0.013   |
| rs11601     | A | 0.0156  |
| rs2924280   | T | 0.015   |
| rs76596595  | G | -0.069  |

|             |   |         |
|-------------|---|---------|
| rs12256404  | A | 0.0407  |
| rs12247156  | T | -0.0166 |
| rs11196067  | T | 0.0119  |
| rs6560766   | A | 0.0332  |
| rs17501763  | G | -0.0652 |
| rs7099939   | T | -0.0613 |
| rs116958065 | A | -0.0406 |
| rs79856389  | G | 0.0547  |
| rs7090208   | C | -0.0148 |
| rs61854880  | C | -0.0716 |
| rs34693310  | T | 0.0416  |
| rs11196531  | T | -0.0206 |
| rs112845991 | T | 0.0446  |
| rs74137404  | T | -0.0504 |
| rs78731825  | T | -0.0275 |
| rs1417031   | T | -0.012  |
| rs2247333   | A | 0.0131  |
| rs150419487 | G | 0.0838  |
| rs78582970  | A | 0.0409  |
| rs114890546 | G | -0.0469 |
| rs41287504  | T | 0.0145  |
| rs17370636  | C | -0.0372 |
| rs149773510 | G | 0.1068  |
| rs703030    | G | 0.0232  |
| rs74376596  | T | 0.0233  |
| rs111626070 | T | 0.0488  |
| rs11016429  | T | 0.0183  |
| rs7914868   | G | -0.0137 |
| rs117883695 | G | 0.0569  |
| rs117517352 | T | 0.0704  |
| rs111246513 | T | 0.0651  |
| rs118035075 | A | -0.0371 |
| rs2619651   | C | -0.0715 |
| rs323005    | A | 0.0151  |
| rs10905105  | C | 0.0179  |
| rs2488829   | T | 0.0531  |
| rs141494768 | A | -0.0523 |
| rs703262    | C | -0.0174 |
| rs1547191   | C | -0.014  |
| rs74823167  | C | -0.0299 |
| rs79183972  | C | 0.0721  |
| rs72779530  | T | -0.0472 |
| rs1952740   | T | -0.0498 |
| rs4451621   | T | 0.0121  |
| rs4598556   | C | -0.0155 |
| rs6481536   | T | -0.0119 |
| rs2488687   | A | -0.0828 |

|             |   |         |
|-------------|---|---------|
| rs118188640 | T | -0.0346 |
| rs7087477   | T | 0.0179  |
| rs61857906  | C | 0.0256  |
| rs1996525   | G | 0.0238  |
| rs72798997  | T | 0.0154  |
| rs12248027  | T | 0.0143  |
| rs117936336 | T | 0.0991  |
| rs75439663  | A | 0.0282  |
| rs142145443 | T | -0.0517 |
| rs7904487   | T | -0.0189 |
| rs144125588 | A | 0.0533  |
| rs17732220  | C | 0.0385  |
| rs10630913  | A | 0.0442  |
| rs3997796   | C | 0.0133  |
| rs117001522 | C | -0.0788 |
| rs7100066   | G | -0.0128 |
| rs75057595  | G | -0.0682 |
| rs148350108 | G | -0.0377 |
| rs11257995  | G | -0.0233 |
| rs4980029   | G | -0.0187 |
| rs142254487 | G | 0.0331  |
| rs2482069   | C | -0.0143 |
| rs12414791  | A | -0.0231 |
| rs12245251  | T | 0.0269  |
| rs71493979  | G | -0.0765 |
| rs117548813 | A | 0.0222  |
| rs117446665 | C | -0.1149 |
| rs72773194  | C | -0.0346 |
| rs118159861 | A | 0.036   |
| rs2797986   | C | 0.0158  |
| rs6602571   | T | -0.0179 |
| rs1581239   | C | -0.0117 |
| rs4881070   | C | -0.0144 |
| rs11595265  | G | -0.0139 |
| rs61838447  | A | -0.0594 |
| rs11596171  | G | 0.0423  |
| rs11594507  | T | 0.0571  |
| rs146720106 | C | -0.0853 |
| rs75499305  | G | 0.0457  |
| rs11250822  | C | -0.0139 |
| rs1312720   | C | 0.0122  |
| rs10906841  | T | 0.0122  |
| rs17151852  | T | 0.027   |
| rs12259218  | T | -0.0264 |
| rs2026121   | T | -0.0226 |
| rs10906459  | C | 0.0133  |
| rs61851358  | T | 0.0278  |

|             |   |         |
|-------------|---|---------|
| rs2026619   | A | -0.0216 |
| rs12244697  | A | -0.0241 |
| rs4917750   | G | 0.0191  |
| rs11594303  | T | 0.0435  |
| rs145898293 | C | -0.0489 |
| rs12762146  | T | 0.0385  |
| rs11194616  | G | 0.0345  |
| rs117091999 | T | -0.0283 |
| rs12768353  | T | 0.0216  |
| rs11593170  | G | 0.0281  |
| rs7095034   | G | -0.0118 |
| rs1926038   | A | 0.0596  |
| rs10825498  | C | -0.0171 |
| rs4578341   | A | -0.0144 |
| rs4304704   | T | -0.0303 |
| rs17535572  | C | -0.0522 |
| rs11189249  | G | 0.0118  |
| rs2593147   | G | -0.0123 |
| rs12246352  | G | -0.0195 |
| rs141793406 | T | -0.0411 |
| rs4515887   | G | -0.0131 |
| rs73598154  | C | 0.0155  |
| rs10764241  | T | 0.0125  |
| rs144258951 | T | 0.0663  |
| rs6602765   | T | 0.0182  |
| rs6588761   | T | 0.0409  |
| rs72811405  | G | -0.1012 |
| rs72809619  | A | -0.0499 |
| rs61870097  | A | -0.042  |
| rs80053579  | T | -0.0373 |
| rs1148197   | G | 0.0162  |
| rs80254078  | T | -0.0411 |
| rs942094    | G | -0.0212 |
| rs17696727  | A | 0.0418  |
| rs17527069  | C | -0.0168 |
| rs117654517 | T | -0.0761 |
| rs72790604  | A | 0.072   |
| rs112908954 | A | 0.052   |
| rs1106524   | A | -0.0124 |
| rs112622720 | A | -0.1078 |
| rs7098597   | T | 0.0239  |
| rs7913469   | A | -0.0194 |
| rs111584750 | C | -0.065  |
| rs17793073  | A | 0.0252  |
| rs12242505  | A | 0.0129  |
| rs61844519  | T | -0.0591 |
| rs142414122 | C | -0.0805 |

|             |   |         |
|-------------|---|---------|
| rs406255    | T | 0.0194  |
| rs4918082   | G | -0.0129 |
| rs72776865  | C | 0.0162  |
| rs112568060 | T | -0.0641 |
| rs78820289  | T | 0.0187  |
| rs10857437  | A | 0.0177  |
| rs2463150   | A | 0.0116  |
| rs58895431  | A | -0.0345 |
| rs7900113   | A | 0.0688  |
| rs17333935  | A | 0.0505  |
| rs117628047 | T | 0.0359  |
| rs115043539 | T | 0.0443  |
| rs116973750 | C | -0.0657 |
| rs7076791   | A | -0.0128 |
| rs142056784 | T | -0.0466 |
| rs72808837  | A | 0.0484  |
| rs12356487  | T | 0.0123  |
| rs117775034 | A | -0.0377 |
| rs145207871 | A | 0.0542  |
| rs4917651   | A | 0.0186  |
| rs827380    | C | -0.0145 |
| rs2989404   | C | -0.0143 |
| rs4747795   | G | -0.0114 |
| rs11191317  | A | 0.0499  |
| rs11203148  | A | 0.0799  |
| rs10509774  | T | -0.0225 |
| rs1361240   | G | -0.0128 |
| rs117970452 | A | -0.0701 |
| rs61846278  | G | 0.0354  |
| rs149138895 | T | -0.044  |
| rs150391166 | T | 0.0577  |
| rs2764982   | C | 0.0138  |
| rs736716    | T | 0.0211  |
| rs11201185  | A | 0.0453  |
| rs72823717  | T | -0.0445 |
| rs6585748   | G | 0.0165  |
| rs144051475 | A | 0.0647  |
| rs3006686   | T | 0.0538  |
| rs141039011 | A | -0.0243 |
| rs2082988   | T | 0.0118  |
| rs893507    | C | -0.0173 |
| rs143236661 | G | 0.0661  |
| rs1441267   | C | -0.0117 |
| rs506621    | A | 0.0181  |
| rs11186456  | T | -0.0167 |
| rs117028914 | G | 0.0878  |
| rs137877013 | G | 0.0856  |



|             |   |         |
|-------------|---|---------|
| rs75547358  | A | -0.0164 |
| rs11146577  | G | -0.0204 |
| rs1339750   | A | -0.0128 |
| rs2815391   | C | 0.0132  |
| rs75145342  | A | -0.042  |
| rs7086801   | A | -0.0124 |
| rs72821302  | A | 0.0481  |
| rs758367    | C | 0.0116  |
| rs2254027   | C | -0.0126 |
| rs145681021 | C | 0.0677  |
| rs72834770  | A | -0.0424 |
| rs12246844  | T | 0.0785  |
| rs11017091  | A | -0.024  |
| rs6602641   | G | -0.0113 |
| rs113308510 | G | 0.0398  |
| rs7915299   | G | 0.0894  |
| rs7908438   | C | -0.0171 |
| rs149240480 | T | 0.0913  |
| rs28706360  | C | 0.0773  |
| rs7922195   | G | 0.0143  |
| rs2776933   | C | -0.0617 |
| rs77229943  | T | 0.0353  |
| rs4747185   | G | 0.0834  |
| rs72834223  | G | -0.0252 |
| rs2767634   | G | -0.0163 |
| rs12778126  | C | 0.0565  |
| rs3858273   | G | -0.0241 |
| rs80284429  | C | -0.1083 |
| rs78260654  | G | 0.035   |
| rs75033314  | C | -0.0686 |
| rs56399937  | C | 0.0416  |
| rs4934141   | T | 0.0185  |
| rs1896529   | A | 0.0251  |
| rs117345913 | G | 0.0636  |
| rs12217377  | C | -0.0892 |
| rs117124418 | C | 0.0468  |
| rs72800382  | A | 0.0433  |
| rs61871134  | G | -0.0297 |
| rs71489630  | G | 0.0426  |
| rs41283532  | T | 0.0839  |
| rs76823730  | T | -0.0591 |
| rs61875318  | G | 0.0638  |
| rs72798168  | A | 0.0404  |
| rs146788582 | A | 0.0523  |
| rs4838555   | T | -0.0115 |
| rs6480888   | G | 0.0122  |
| rs79954195  | A | 0.0552  |

|             |   |         |
|-------------|---|---------|
| rs11002368  | G | -0.0179 |
| rs7096106   | A | 0.021   |
| rs2272146   | G | -0.019  |
| rs140157519 | A | -0.0939 |
| rs111991960 | C | -0.088  |
| rs142143107 | C | 0.1103  |
| rs61836082  | C | -0.0153 |
| rs75099680  | G | -0.0313 |
| rs150043777 | T | -0.0545 |
| rs1915680   | C | 0.0141  |
| rs117736305 | A | 0.0297  |
| rs71484669  | A | -0.0522 |
| rs12572716  | T | 0.0488  |
| rs2438120   | C | -0.0117 |
| rs74593427  | C | -0.0614 |
| rs1885283   | A | 0.0218  |
| rs11596116  | A | -0.034  |
| rs80156494  | C | -0.0473 |
| rs7919930   | T | 0.0183  |
| rs117399386 | T | -0.0494 |
| rs16922000  | A | 0.0391  |
| rs78274905  | T | -0.0608 |
| rs117812420 | C | 0.0442  |
| rs236216    | C | -0.0143 |
| rs3844118   | A | -0.0201 |
| rs72813461  | A | -0.0369 |
| rs117010451 | C | 0.1048  |
| rs1218423   | T | 0.0906  |
| rs17713345  | T | -0.0385 |
| rs676032    | T | -0.0382 |
| rs9703290   | A | 0.0166  |
| rs6482834   | A | -0.0182 |
| rs144284413 | A | -0.0514 |
| rs4838387   | T | -0.0766 |
| rs77718490  | G | -0.019  |
| rs75759528  | C | -0.0317 |
| rs66563810  | G | 0.0201  |
| rs4751832   | C | 0.0313  |
| rs76298985  | T | 0.0329  |
| rs75644913  | A | 0.0882  |
| rs75461057  | C | 0.0642  |
| rs4606409   | C | 0.0561  |
| rs117597777 | G | 0.0734  |
| rs78642896  | C | 0.0329  |
| rs147475710 | C | -0.0502 |
| rs1923263   | T | 0.0352  |
| rs72799515  | G | -0.0708 |

|             |   |         |
|-------------|---|---------|
| rs17221610  | A | -0.0537 |
| rs12267756  | G | -0.0186 |
| rs2776921   | G | -0.0187 |
| rs10883997  | C | -0.0195 |
| rs145349551 | C | -0.0493 |
| rs67925426  | G | -0.0119 |
| rs76237042  | G | 0.0248  |
| rs11599487  | G | 0.0252  |
| rs61833870  | G | -0.0207 |
| rs11201711  | T | 0.0837  |
| rs77403045  | T | -0.0444 |
| rs147803303 | C | 0.0867  |
| rs78803403  | G | 0.0444  |
| rs6480859   | T | 0.0115  |
| rs55791709  | A | -0.0273 |
| rs61852507  | G | -0.0525 |
| rs16931953  | T | -0.0172 |
| rs150647073 | A | 0.0761  |
| rs61874056  | G | 0.0143  |
| rs11252721  | C | 0.0256  |
| rs11595052  | T | -0.018  |
| rs10787130  | T | 0.0149  |
| rs117437197 | T | 0.0437  |
| rs11817535  | C | -0.0384 |
| rs4489659   | T | -0.0205 |
| rs12218859  | A | -0.03   |
| rs12781224  | C | 0.0697  |
| rs59993422  | C | -0.0221 |
| rs144454920 | T | 0.0423  |
| rs12146394  | C | -0.0293 |
| rs12218911  | T | -0.0204 |
| rs2461881   | C | -0.0117 |
| rs144335682 | A | -0.0617 |
| rs74763599  | G | 0.0553  |
| rs116916699 | C | -0.0501 |
| rs35369086  | T | 0.0371  |
| rs61842485  | A | -0.037  |
| rs117833093 | A | 0.0706  |
| rs72794810  | A | 0.0466  |
| rs17709932  | C | 0.082   |
| rs11814534  | A | -0.0365 |
| rs148934823 | A | -0.0795 |
| rs3765101   | G | 0.0236  |
| rs111307876 | A | -0.0457 |
| rs12255472  | C | 0.0283  |
| rs7919584   | A | -0.0764 |
| rs11599403  | C | -0.0176 |

|             |   |         |
|-------------|---|---------|
| rs117458268 | A | 0.0459  |
| rs7080796   | T | 0.0194  |
| rs72805185  | T | -0.0451 |
| rs10828184  | T | -0.0172 |
| rs78624271  | C | -0.0322 |
| rs610785    | G | 0.0168  |
| rs7076516   | A | 0.0378  |
| rs10795607  | T | 0.012   |
| rs10883072  | A | -0.0119 |
| rs72839746  | T | -0.0306 |
| rs3858201   | C | 0.0158  |
| rs10998997  | A | -0.0217 |
| rs141502956 | T | -0.0685 |
| rs77019111  | A | -0.0609 |
| rs17110981  | A | 0.0235  |
| rs7919737   | C | -0.0138 |
| rs870376    | G | -0.021  |
| rs147405607 | C | 0.0344  |
| rs80165793  | A | -0.0297 |
| rs140673317 | C | 0.0495  |
| rs4751348   | T | -0.0166 |
| rs112464036 | A | 0.0514  |
| rs1277737   | T | 0.0291  |
| rs117805083 | A | 0.0683  |
| rs117860778 | A | -0.0461 |
| rs12254017  | A | -0.0171 |
| rs75686135  | A | 0.0641  |
| rs11201997  | C | 0.0112  |
| rs78549690  | C | -0.0801 |
| rs73316454  | A | -0.0388 |
| rs35668691  | A | 0.0417  |
| rs17594456  | G | 0.0598  |
| rs56027359  | T | -0.0261 |
| rs10821844  | A | 0.0119  |
| rs10490904  | C | -0.0178 |
| rs112463509 | T | 0.037   |
| rs79100463  | A | 0.0487  |
| rs79722284  | T | -0.0186 |
| rs11812300  | C | -0.0159 |
| rs7080200   | T | -0.055  |
| rs12767375  | C | -0.0121 |
| rs111685823 | T | 0.0358  |
| rs77912242  | C | -0.0273 |
| rs1336405   | T | 0.0136  |
| rs74412033  | T | 0.0509  |
| rs55687062  | C | -0.0155 |
| rs11593650  | G | 0.0251  |

|             |   |         |
|-------------|---|---------|
| rs4748481   | T | 0.0128  |
| rs510393    | T | -0.0143 |
| rs10999379  | T | -0.0142 |
| rs116854338 | G | -0.0404 |
| rs10994284  | A | -0.0209 |
| rs72823066  | A | -0.0258 |
| rs35463096  | G | -0.0719 |
| rs75079653  | A | 0.0279  |
| rs7902823   | G | -0.0649 |
| rs74151252  | G | -0.0562 |
| rs61841992  | C | -0.029  |
| rs34511307  | T | 0.0289  |
| rs11499245  | C | 0.0178  |
| rs780637    | A | -0.0153 |
| rs6480533   | C | -0.0206 |
| rs117369820 | C | -0.0762 |
| rs7904679   | C | 0.0154  |
| rs7916923   | C | -0.0115 |
| rs78225208  | C | -0.0634 |
| rs12257435  | T | -0.0119 |
| rs117131236 | T | -0.0345 |
| rs75901837  | G | 0.0312  |
| rs7080570   | A | -0.0119 |
| rs10762545  | C | 0.0207  |
| rs2135706   | C | 0.0137  |
| rs35021862  | A | -0.0186 |
| rs12253011  | T | -0.0736 |
| rs1295882   | T | -0.0142 |
| rs79467510  | A | 0.0558  |
| rs143226177 | A | 0.0414  |
| rs12411400  | G | 0.0112  |
| rs427695    | T | -0.0377 |
| rs147132892 | T | -0.0549 |
| rs78024087  | A | -0.0525 |
| rs117238752 | T | -0.0452 |
| rs12360138  | G | -0.0366 |
| rs78725693  | G | 0.0803  |
| rs2504177   | T | 0.0168  |
| rs3893270   | T | 0.0169  |
| rs117346043 | T | -0.0641 |
| rs79951026  | T | -0.0233 |
| rs116939839 | A | -0.0925 |
| rs7080095   | C | 0.0113  |
| rs3014893   | C | -0.0262 |
| rs79976649  | T | 0.0642  |
| rs12765241  | A | -0.0171 |
| rs4751032   | G | -0.0123 |

|             |   |         |
|-------------|---|---------|
| rs2247214   | C | -0.0176 |
| rs1005109   | A | -0.0345 |
| rs913632    | G | 0.0198  |
| rs61854004  | A | 0.0255  |
| rs2096396   | G | 0.0118  |
| rs72834743  | G | -0.0586 |
| rs12776335  | A | 0.0151  |
| rs117607016 | T | -0.0248 |
| rs117051049 | A | 0.0871  |
| rs12355139  | G | 0.0136  |
| rs79956234  | G | 0.0394  |
| rs138399209 | G | 0.0904  |
| rs11017127  | C | 0.0162  |
| rs12569984  | T | 0.0569  |
| rs11016879  | A | 0.0119  |
| rs853930    | T | -0.0241 |
| rs10903824  | G | 0.053   |
| rs146260381 | T | 0.0605  |
| rs61872220  | A | -0.0279 |
| rs75272608  | T | -0.0322 |
| rs145594500 | G | 0.0744  |
| rs34943195  | G | 0.0177  |
| rs17367408  | C | -0.0286 |
| rs112975570 | A | -0.051  |
| rs538975    | A | 0.0471  |
| rs56076315  | C | -0.0152 |
| rs10886404  | C | 0.0137  |
| rs113751043 | A | -0.0489 |
| rs190411    | C | 0.0158  |
| rs78603154  | G | 0.0777  |
| rs76774183  | C | 0.0303  |
| rs117066711 | C | 0.0489  |
| rs224136    | T | 0.0152  |
| rs2616615   | G | -0.011  |
| rs787683    | T | 0.0556  |
| rs2420637   | A | 0.0143  |
| rs290475    | C | 0.0169  |
| rs78553468  | T | -0.041  |
| rs511991    | A | -0.0144 |
| rs79009794  | C | -0.0284 |
| rs145705052 | A | -0.0641 |
| rs72823039  | A | -0.0664 |
| rs17546598  | T | 0.0245  |
| rs17124306  | C | -0.0203 |
| rs7099645   | G | 0.0211  |
| rs11591432  | T | -0.0614 |
| rs11200955  | G | 0.0144  |

|             |   |         |
|-------------|---|---------|
| rs72851141  | T | -0.0222 |
| rs1533486   | G | 0.0114  |
| rs61859025  | G | -0.0139 |
| rs146130523 | C | -0.0523 |
| rs1977418   | G | -0.0133 |
| rs77839755  | A | 0.0518  |
| rs11190103  | A | 0.0164  |
| rs113304676 | T | 0.0693  |
| rs16928328  | A | 0.0306  |
| rs2755976   | A | -0.0228 |
| rs2999468   | G | -0.04   |
| rs4962328   | A | 0.0122  |
| rs72839498  | G | 0.0572  |
| rs76224714  | A | 0.036   |
| rs140939496 | A | 0.0431  |
| rs766922    | T | 0.0706  |
| rs117517535 | A | 0.0207  |
| rs4934619   | C | -0.0122 |
| rs80156806  | C | -0.0607 |
| rs7910132   | G | 0.0128  |
| rs116891123 | T | -0.0443 |
| rs56060941  | T | 0.0717  |
| rs143390270 | C | -0.0651 |
| rs4919153   | T | -0.0136 |
| rs4962667   | T | -0.011  |
| rs2944496   | G | 0.0131  |
| rs74889496  | G | -0.0404 |
| rs112338868 | C | 0.0512  |
| rs61859391  | A | 0.0297  |
| rs113714396 | G | -0.0516 |
| rs7092525   | C | 0.0161  |
| rs7088910   | A | 0.0121  |
| rs11006225  | A | -0.0154 |
| rs76576849  | G | -0.0423 |
| rs7907089   | A | 0.0234  |
| rs146194569 | A | 0.0397  |
| rs111587246 | A | 0.0511  |
| rs116954028 | A | -0.0543 |
| rs78416688  | C | 0.0241  |
| rs10749599  | T | -0.0122 |
| rs11239049  | T | 0.0111  |
| rs17535153  | G | -0.048  |
| rs72783371  | C | 0.0211  |
| rs118183820 | T | -0.0283 |
| rs17492254  | C | 0.0112  |
| rs1977640   | A | 0.0122  |
| rs151118498 | G | 0.0568  |

|             |   |         |
|-------------|---|---------|
| rs151014837 | A | 0.0452  |
| rs1644418   | G | 0.0467  |
| rs139151702 | G | 0.0412  |
| rs75286948  | A | 0.064   |
| rs74667739  | T | -0.0635 |
| rs10736078  | G | 0.0114  |
| rs56288821  | C | 0.0133  |
| rs12765470  | A | -0.0296 |
| rs1536558   | T | -0.013  |
| rs72760946  | A | -0.0455 |
| rs1197208   | G | 0.0112  |
| rs117850703 | G | -0.0526 |
| rs113757707 | A | 0.0744  |
| rs115569484 | G | -0.0162 |
| rs11816073  | A | 0.0178  |
| rs79965349  | C | -0.0327 |
| rs11200896  | T | -0.0126 |
| rs77096523  | T | -0.0643 |
| rs142975026 | C | -0.0515 |
| rs140138650 | A | 0.0602  |
| rs61875724  | G | -0.0547 |
| rs113867909 | G | 0.0476  |
| rs17786344  | T | 0.0192  |
| rs11598533  | A | 0.0567  |
| rs7916049   | A | -0.0138 |
| rs17444909  | A | -0.0314 |
| rs149732947 | T | -0.0665 |
| rs10824254  | T | -0.0137 |
| rs75988048  | C | 0.0256  |
| rs1997001   | T | -0.0265 |
| rs2946999   | T | 0.0114  |
| rs12360362  | A | 0.0345  |
| rs12414703  | C | -0.0138 |
| rs146866602 | T | 0.0449  |
| rs74644777  | G | -0.0235 |
| rs7091858   | C | 0.0503  |
| rs117441478 | T | 0.0361  |
| rs116920531 | T | -0.0536 |
| rs1977880   | G | -0.0189 |
| rs10751758  | T | -0.0199 |
| rs149905644 | T | 0.0487  |
| rs143615005 | A | 0.1051  |
| rs1539479   | G | 0.0125  |
| rs2482506   | G | -0.0122 |
| rs149942766 | T | -0.0507 |
| rs17502349  | G | 0.0376  |
| rs7097670   | C | 0.0135  |



|             |   |         |
|-------------|---|---------|
| rs4369330   | G | 0.0115  |
| rs4880510   | G | 0.0182  |
| rs7079162   | G | 0.0126  |
| rs41274064  | A | 0.0376  |
| rs3962120   | A | -0.0366 |
| rs113592043 | A | 0.0242  |
| rs7894567   | G | 0.0122  |
| rs117466980 | T | 0.0617  |
| rs17221881  | T | -0.0899 |
| rs149701465 | A | 0.047   |
| rs11001454  | C | 0.013   |
| rs117164512 | T | 0.0676  |
| rs7899032   | T | -0.0116 |
| rs61836095  | C | -0.0483 |
| rs1249009   | C | 0.0176  |
| rs12415583  | C | 0.0169  |
| rs11259022  | A | 0.0136  |
| rs180898    | C | 0.0348  |
| rs77620279  | A | 0.0368  |
| rs58144723  | A | 0.0175  |
| rs11189025  | G | 0.0181  |
| rs11253140  | A | -0.0757 |
| rs72824823  | T | 0.0245  |
| rs4933561   | A | 0.0116  |
| rs748308    | G | 0.0257  |
| rs61865666  | C | 0.0206  |
| rs10904377  | T | -0.0301 |
| rs117685411 | C | 0.0556  |
| rs45548338  | T | 0.0524  |
| rs11015008  | A | -0.0129 |
| rs77146289  | A | 0.0251  |
| rs4619105   | A | -0.018  |
| rs4589189   | C | -0.0132 |
| rs72773855  | A | 0.0134  |
| rs4750199   | A | 0.0199  |
| rs79777719  | A | -0.0743 |
| rs61872308  | C | -0.0227 |
| rs10788252  | G | -0.0136 |
| rs34840628  | A | 0.0275  |
| rs74627035  | C | 0.0368  |
| rs113430781 | G | -0.0884 |
| rs2530347   | T | -0.0281 |
| rs72773147  | G | -0.0395 |
| rs12779873  | A | 0.0127  |
| rs117248164 | A | 0.0561  |
| rs118017377 | G | 0.0565  |
| rs10902947  | T | 0.0142  |

|             |   |         |
|-------------|---|---------|
| rs113051524 | T | 0.0444  |
| rs117358707 | G | 0.048   |
| rs11200904  | A | -0.0473 |
| rs117089085 | G | -0.0447 |
| rs34187058  | T | -0.0194 |
| rs4748911   | A | 0.049   |
| rs78911731  | A | 0.0539  |
| rs149362415 | T | 0.0443  |
| rs7091722   | T | -0.0199 |
| rs61741380  | T | -0.0377 |
| rs11258711  | G | 0.0127  |
| rs75981293  | A | -0.0228 |
| rs3812663   | G | 0.0193  |
| rs6602599   | G | 0.0255  |
| rs79462311  | A | 0.0618  |
| rs73381191  | T | -0.033  |
| rs61849883  | A | 0.0193  |
| rs3793791   | C | -0.0217 |
| rs72826267  | A | 0.0656  |
| rs12220405  | T | -0.0279 |
| rs138264537 | A | 0.0688  |
| rs1149747   | T | -0.0133 |
| rs6586188   | C | 0.0126  |
| rs7073192   | C | 0.0377  |
| rs2574977   | T | 0.0293  |
| rs7477084   | A | -0.0118 |
| rs873740    | T | -0.0183 |
| rs148097554 | G | 0.0989  |
| rs7923725   | A | 0.0154  |
| rs75340256  | G | 0.0337  |
| rs117815247 | G | -0.0252 |
| rs12569734  | T | -0.0168 |
| rs143815521 | A | 0.0501  |
| rs4962471   | G | 0.0161  |
| rs36071724  | G | 0.0163  |
| rs12761104  | G | 0.0135  |
| rs10998691  | A | -0.0139 |
| rs1631551   | G | 0.0119  |
| rs10905350  | C | -0.0109 |
| rs76080317  | A | 0.0722  |
| rs4752164   | C | -0.0109 |
| rs10902896  | A | -0.0161 |
| rs1411173   | C | -0.0108 |
| rs7094526   | G | 0.0184  |
| rs6479941   | A | -0.0114 |
| rs79337768  | A | -0.0633 |
| rs1231248   | A | -0.0125 |

|             |   |         |
|-------------|---|---------|
| rs79716535  | C | 0.0717  |
| rs4745792   | T | 0.0568  |
| rs138459278 | G | 0.0461  |
| rs56203766  | G | 0.0533  |
| rs1557116   | T | 0.0133  |
| rs2895596   | A | 0.0157  |
| rs1935250   | C | 0.011   |
| rs72826407  | T | 0.0479  |
| rs4881027   | A | -0.0177 |
| rs55674228  | T | -0.0298 |
| rs113761749 | A | -0.047  |
| rs12250624  | A | 0.0255  |
| rs9664222   | A | -0.013  |
| rs76553409  | T | 0.0291  |
| rs2789678   | T | 0.0134  |
| rs807049    | C | 0.0114  |
| rs9418663   | A | -0.0168 |
| rs2992288   | G | -0.0124 |
| rs139557085 | G | 0.0609  |
| rs12774967  | T | -0.0194 |
| rs9414945   | C | -0.0164 |
| rs17673749  | G | -0.0585 |
| rs28506155  | T | 0.0631  |
| rs580293    | C | -0.0179 |
| rs2283138   | G | -0.0178 |
| rs76660250  | C | -0.0272 |
| rs117739219 | T | 0.0443  |
| rs143561912 | A | 0.0674  |
| rs12774899  | A | 0.0311  |
| rs76967914  | A | 0.0374  |
| rs553254    | T | -0.0163 |
| rs1001771   | G | 0.0262  |
| rs3981045   | C | 0.0267  |
| rs150642332 | A | 0.0606  |
| rs7094291   | G | -0.0186 |
| rs75561160  | A | 0.0269  |
| rs10792832  | A | -0.1297 |
| rs72924659  | T | -0.1413 |
| rs11218343  | C | -0.2697 |
| rs573605    | C | -0.4155 |
| rs664034    | C | 0.0838  |
| rs71475924  | T | 0.1244  |
| rs2071305   | C | -0.0823 |
| rs2868099   | A | -0.1419 |
| rs150020881 | A | 0.3853  |
| rs61897945  | T | -0.1624 |
| rs286043    | C | 0.2547  |

|             |   |         |
|-------------|---|---------|
| rs28365806  | C | -0.1059 |
| rs7128598   | G | 0.0782  |
| rs7479145   | G | -0.0762 |
| rs61878035  | A | 0.077   |
| rs11039162  | T | 0.0699  |
| rs1115212   | C | 0.0858  |
| rs1893306   | G | -0.0735 |
| rs61886694  | A | -0.5467 |
| rs12421128  | C | 0.1807  |
| rs10899223  | C | -0.0639 |
| rs2046377   | T | 0.0643  |
| rs501505    | A | 0.0635  |
| rs2028606   | T | -0.073  |
| rs10792421  | G | 0.0641  |
| rs57478329  | T | 0.4108  |
| rs11021857  | A | 0.1301  |
| rs1784933   | G | -0.1728 |
| rs148022396 | G | 0.2051  |
| rs7121447   | T | 0.0659  |
| rs117684072 | A | -0.2876 |
| rs72950330  | G | 0.2769  |
| rs10838519  | T | 0.0686  |
| rs12223413  | A | 0.0709  |
| rs7940291   | C | 0.3464  |
| rs6590528   | T | 0.07    |
| rs544473    | T | -0.0669 |
| rs79731890  | A | -0.1562 |
| rs55760947  | T | 0.0854  |
| rs57867316  | A | -0.1849 |
| rs147967497 | T | -0.1802 |
| rs11035257  | T | 0.0954  |
| rs10794339  | C | 0.0658  |
| rs72962020  | G | 0.0882  |
| rs35959877  | A | 0.1366  |
| rs11222306  | A | 0.1114  |
| rs12273113  | A | -0.1325 |
| rs12272665  | C | 0.0674  |
| rs7128014   | A | 0.1007  |
| rs11214260  | T | -0.0948 |
| rs67019430  | T | -0.1624 |
| rs79844325  | A | 0.3613  |
| rs525745    | T | 0.0578  |
| rs10896445  | T | 0.0605  |
| rs11607819  | C | 0.0778  |
| rs74766959  | G | 0.4847  |
| rs73440284  | A | 0.2185  |
| rs7128976   | G | -0.1659 |

|             |   |         |
|-------------|---|---------|
| rs148069665 | G | 0.3649  |
| rs12802183  | T | -0.074  |
| rs117150170 | G | 0.3157  |
| rs11246327  | A | -0.1146 |
| rs10899246  | A | -0.0686 |
| rs12291515  | G | 0.0871  |
| rs508370    | T | -0.0573 |
| rs11607927  | C | -0.1586 |
| rs77499725  | A | 0.0822  |
| rs11023537  | A | -0.103  |
| rs11212428  | A | 0.3389  |
| rs11038271  | T | 0.0634  |
| rs61897867  | T | 0.12    |
| rs17359230  | T | -0.3785 |
| rs7114040   | G | 0.0564  |
| rs10899208  | T | -0.0704 |
| rs12417836  | T | 0.1231  |
| rs7947198   | G | 0.0666  |
| rs117740883 | T | -0.3166 |
| rs10894495  | T | -0.0589 |
| rs56140628  | A | -0.183  |
| rs1263170   | T | 0.0676  |
| rs61903579  | G | -0.0803 |
| rs10837757  | G | 0.1689  |
| rs10742700  | A | 0.0642  |
| rs2889415   | A | 0.2081  |
| rs147239461 | T | 0.6769  |
| rs117793812 | A | 0.1783  |
| rs1377569   | G | -0.0656 |
| rs144143550 | T | -0.1973 |
| rs2727273   | T | -0.0546 |
| rs57607909  | C | -0.0646 |
| rs11604897  | T | -0.0904 |
| rs7927198   | G | -0.0736 |
| rs12222810  | T | 0.0782  |
| rs117812783 | G | 0.3614  |
| rs73018017  | C | 0.184   |
| rs76381558  | T | 0.1462  |
| rs111300412 | C | -0.3261 |
| rs10892727  | C | 0.0696  |
| rs274515    | G | 0.1157  |
| rs2514079   | A | 0.1863  |
| rs76448372  | A | 0.1449  |
| rs72899647  | T | -0.23   |
| rs625515    | T | -0.0554 |
| rs73027824  | T | 0.1909  |
| rs5030328   | A | -0.1561 |

|             |   |         |
|-------------|---|---------|
| rs11223007  | T | 0.2035  |
| rs73557345  | C | 0.1746  |
| rs77756595  | G | 0.1611  |
| rs74874788  | A | 0.1952  |
| rs17092444  | C | 0.0564  |
| rs77903009  | C | 0.1076  |
| rs76454956  | T | 0.1595  |
| rs4439509   | G | 0.065   |
| rs72886456  | C | 0.2721  |
| rs1493549   | A | 0.2616  |
| rs6591561   | G | 0.0546  |
| rs2725813   | T | -0.129  |
| rs79600045  | A | 0.225   |
| rs73502466  | A | 0.142   |
| rs35272687  | T | 0.0673  |
| rs518677    | C | -0.0548 |
| rs10840028  | A | -0.0533 |
| rs12791761  | C | 0.1277  |
| rs3016478   | A | 0.2672  |
| rs140687099 | A | 0.189   |
| rs534366    | A | 0.0668  |
| rs79570064  | G | -0.2149 |
| rs4938220   | T | -0.0573 |
| rs4526739   | C | 0.0611  |
| rs12807349  | G | 0.3056  |
| rs10899584  | C | 0.0537  |
| rs271038    | A | -0.0553 |
| rs1109673   | T | 0.0737  |
| rs74791313  | C | 0.2869  |
| rs117045359 | G | 0.3321  |
| rs141029110 | A | 0.2174  |
| rs77377422  | G | 0.073   |
| rs2510044   | A | -0.0717 |
| rs11036434  | G | 0.0534  |
| rs12576638  | T | 0.0861  |
| rs114515655 | T | -0.2804 |
| rs4944114   | A | -0.1629 |
| rs4453220   | A | -0.0636 |
| rs78351672  | T | 0.1768  |
| rs592268    | A | -0.0761 |
| rs61903140  | G | -0.0742 |
| rs2044983   | C | -0.0688 |
| rs668946    | A | -0.0491 |
| rs492816    | A | -0.0636 |
| rs17235951  | G | 0.2698  |
| rs75080941  | C | 0.1107  |
| rs143244841 | T | -0.1767 |

|             |   |         |
|-------------|---|---------|
| rs1039751   | C | 0.1345  |
| rs11031875  | C | -0.2591 |
| rs3890009   | T | -0.0614 |
| rs11039418  | G | -0.0712 |
| rs60651507  | A | 0.1232  |
| rs11031849  | C | -0.0643 |
| rs4757638   | G | -0.0503 |
| rs2115666   | T | 0.0525  |
| rs12290647  | C | -0.1156 |
| rs12417295  | T | 0.1155  |
| rs7929825   | G | 0.072   |
| rs7950710   | C | -0.1847 |
| rs4150530   | T | -0.0834 |
| rs57954977  | T | 0.1122  |
| rs140119145 | C | 0.286   |
| rs2729918   | C | 0.0666  |
| rs72957560  | C | 0.131   |
| rs72961871  | C | -0.0899 |
| rs78448597  | C | 0.1028  |
| rs61913712  | A | 0.4018  |
| rs76312757  | C | -0.1054 |
| rs11021040  | T | 0.1297  |
| rs11040343  | A | 0.3042  |
| rs77104999  | T | 0.2701  |
| rs79196297  | T | -0.1124 |
| rs118064842 | A | 0.1152  |
| rs7107886   | G | -0.0908 |
| rs75665195  | G | -0.1764 |
| rs63749183  | T | 0.0492  |
| rs78848972  | G | -0.0768 |
| rs61877455  | A | 0.0639  |
| rs113174256 | T | 0.2637  |
| rs77818120  | T | 0.1895  |
| rs10840252  | A | 0.0544  |
| rs11606769  | A | -0.3016 |
| rs77367824  | C | 0.1984  |
| rs10741878  | G | -0.0625 |
| rs266468    | A | 0.3001  |
| rs138788954 | T | 0.1129  |
| rs11041779  | C | -0.0891 |
| rs3867272   | C | -0.0501 |
| rs574563    | T | 0.2385  |
| rs75794554  | A | -0.2598 |
| rs7936578   | T | 0.0657  |
| rs1899052   | G | -0.0953 |
| rs79160883  | T | -0.1989 |
| rs61876925  | A | 0.2369  |

|             |   |         |
|-------------|---|---------|
| rs10766833  | C | 0.0646  |
| rs4930462   | C | 0.0585  |
| rs142227930 | A | -0.2979 |
| rs12275348  | G | 0.0872  |
| rs75603389  | T | -0.1279 |
| rs77151511  | C | 0.2067  |
| rs2298472   | A | -0.1314 |
| rs75173441  | C | -0.1135 |
| rs6592273   | G | -0.0511 |
| rs4757875   | G | -0.0565 |
| rs1094160   | T | 0.0647  |
| rs71457780  | T | 0.1058  |
| rs141698321 | C | -0.2326 |
| rs75305193  | T | 0.248   |
| rs10742276  | C | -0.0486 |
| rs499647    | A | 0.0521  |
| rs7107420   | A | -0.0987 |
| rs3870635   | C | -0.0497 |
| rs478627    | C | -0.0736 |
| rs1698197   | T | -0.0695 |
| rs74998004  | A | 0.3484  |
| rs141522983 | C | 0.1773  |
| rs16931894  | T | -0.1091 |
| rs11237102  | C | -0.0674 |
| rs150796787 | C | -0.3549 |
| rs140026918 | C | 0.1963  |
| rs74442188  | A | 0.1847  |
| rs77538513  | C | 0.2354  |
| rs150421881 | G | 0.1512  |
| rs71482592  | A | -0.1649 |
| rs1355652   | A | -0.0481 |
| rs1425227   | C | 0.051   |
| rs78339356  | T | -0.1591 |
| rs72944758  | G | 0.1035  |
| rs12276638  | T | 0.1451  |
| rs12287756  | T | -0.1307 |
| rs4944945   | G | 0.0534  |
| rs10768709  | A | -0.0597 |
| rs2564448   | G | -0.0493 |
| rs1336820   | C | 0.0917  |
| rs116246803 | T | 0.1524  |
| rs679470    | T | 0.0613  |
| rs11222395  | C | -0.0497 |
| rs117909263 | A | 0.093   |
| rs2957872   | T | -0.0486 |
| rs188255    | C | 0.0795  |
| rs79825424  | T | -0.1449 |



|             |   |         |
|-------------|---|---------|
| rs2084346   | T | 0.0628  |
| rs2852179   | A | 0.2581  |
| rs17311233  | T | -0.0864 |
| rs117948753 | T | 0.1314  |
| rs10734129  | T | -0.0627 |
| rs76775184  | T | -0.1265 |
| rs72902459  | G | -0.0973 |
| rs17820457  | C | -0.1355 |
| rs67936729  | G | 0.0597  |
| rs72963044  | C | 0.1463  |
| rs7934312   | A | 0.055   |
| rs74986907  | T | 0.2056  |
| rs79841190  | T | 0.2406  |
| rs11219442  | A | 0.0524  |
| rs61911791  | T | 0.2578  |
| rs12223084  | A | 0.263   |
| rs58761034  | A | -0.1686 |
| rs34608641  | A | 0.3151  |
| rs112104392 | A | -0.1823 |
| rs77357252  | G | -0.1194 |
| rs141417792 | G | 0.2416  |
| rs117033275 | T | 0.1157  |
| rs10790520  | C | 0.0558  |
| rs72912741  | C | -0.2038 |
| rs11024876  | C | 0.1693  |
| rs11236911  | T | -0.0943 |
| rs11214263  | G | -0.0479 |
| rs2851620   | C | 0.0584  |
| rs16922306  | T | -0.0734 |
| rs73603903  | T | -0.092  |
| rs79774351  | T | 0.0992  |
| rs4075786   | C | -0.0946 |
| rs12365591  | G | -0.0683 |
| rs117019000 | T | -0.1287 |
| rs7939948   | T | -0.0474 |
| rs11219484  | C | 0.1817  |
| rs34057425  | A | -0.0652 |
| rs1940359   | C | -0.0463 |
| rs55758252  | C | 0.0574  |
| rs66670048  | C | 0.0854  |
| rs550001    | T | 0.0935  |
| rs146177600 | G | 0.2006  |
| rs139941707 | C | -0.1249 |
| rs7928044   | T | 0.0951  |
| rs74835378  | G | 0.1252  |
| rs9919551   | T | -0.0504 |
| rs2846204   | T | 0.0504  |

|             |   |         |
|-------------|---|---------|
| rs55667192  | G | 0.0958  |
| rs72903488  | C | -0.1282 |
| rs901942    | A | -0.0489 |
| rs75987636  | G | -0.1996 |
| rs7103144   | C | -0.0469 |
| rs149772195 | C | 0.286   |
| rs80034421  | C | -0.1878 |
| rs2271449   | A | 0.0842  |
| rs28526533  | C | 0.05    |
| rs10891645  | A | 0.0848  |
| rs9736016   | A | 0.0479  |
| rs11603837  | G | -0.2315 |
| rs1160127   | A | -0.0494 |
| rs55834955  | T | 0.2964  |
| rs4561190   | A | 0.0834  |
| rs138468492 | A | -0.2553 |
| rs78049521  | C | 0.1816  |
| rs2725807   | C | 0.0453  |
| rs11219417  | A | 0.0578  |
| rs146094435 | A | 0.2984  |
| rs7119477   | C | -0.0541 |
| rs1368816   | G | -0.0541 |
| rs2322193   | A | -0.0587 |
| rs79233197  | T | -0.1228 |
| rs2099797   | G | -0.178  |
| rs34731047  | A | 0.1058  |
| rs117806264 | T | 0.1856  |
| rs76377720  | T | 0.1958  |
| rs117734523 | A | 0.1481  |
| rs73578248  | T | 0.0927  |
| rs148985548 | A | 0.1881  |
| rs72965829  | T | 0.0636  |
| rs1793778   | A | -0.0525 |
| rs146807500 | A | 0.1526  |
| rs11215916  | C | 0.2261  |
| rs12291550  | C | 0.0783  |
| rs117832492 | T | 0.1632  |
| rs117435454 | T | 0.1973  |
| rs73011260  | T | -0.1529 |
| rs670991    | C | 0.1779  |
| rs661124    | A | -0.0582 |
| rs35182654  | C | 0.1457  |
| rs34991329  | C | 0.0777  |
| rs112396211 | G | -0.1862 |
| rs80054926  | C | 0.088   |
| rs12291967  | G | 0.2924  |
| rs880946    | G | -0.0722 |

|             |   |         |
|-------------|---|---------|
| rs12421427  | G | 0.1129  |
| rs116884829 | G | 0.1231  |
| rs113015432 | T | 0.1897  |
| rs74627504  | C | -0.1305 |
| rs61900469  | A | -0.1281 |
| rs117356358 | C | -0.2966 |
| rs2236684   | G | -0.1196 |
| rs11600407  | A | -0.1004 |
| rs35016813  | G | 0.2173  |
| rs72942583  | T | -0.1917 |
| rs138727866 | A | -0.2451 |
| rs114081751 | T | 0.257   |
| rs35485609  | A | -0.0782 |
| rs79009159  | A | -0.0732 |
| rs12271867  | T | -0.1557 |
| rs140344555 | T | -0.2606 |
| rs486903    | G | -0.0949 |
| rs12417385  | T | 0.1629  |
| rs71483701  | T | -0.0837 |
| rs7947188   | A | -0.1966 |
| rs2466774   | A | -0.212  |
| rs650950    | T | 0.0444  |
| rs12799443  | T | -0.0466 |
| rs1236205   | G | 0.0538  |
| rs3851189   | T | 0.0517  |
| rs3819256   | T | -0.0438 |
| rs77844837  | G | -0.2235 |
| rs12294081  | T | -0.177  |
| rs139199415 | A | -0.2688 |
| rs490460    | C | -0.0454 |
| rs17157579  | C | 0.1739  |
| rs11607450  | G | -0.0444 |
| rs11037957  | G | 0.0448  |
| rs77476981  | C | -0.1602 |
| rs10128686  | G | 0.0553  |
| rs542426    | T | 0.0611  |
| rs112902971 | T | 0.0766  |
| rs117582460 | A | -0.1893 |
| rs2446902   | C | 0.0735  |
| rs4078520   | C | -0.0494 |
| rs10741930  | A | 0.0479  |
| rs74569331  | T | 0.1406  |
| rs117988434 | G | 0.1493  |
| rs10836345  | A | 0.1479  |
| rs7942276   | A | -0.049  |
| rs12798114  | G | -0.0446 |
| rs7478695   | T | 0.1883  |

|             |   |         |
|-------------|---|---------|
| rs10790076  | A | 0.079   |
| rs2957518   | C | 0.1494  |
| rs922006    | G | 0.0453  |
| rs7949305   | T | 0.1124  |
| rs12418276  | T | 0.0568  |
| rs11229676  | C | 0.0559  |
| rs11224969  | C | -0.0449 |
| rs34816023  | A | 0.1817  |
| rs75438046  | A | 0.1385  |
| rs11606391  | G | 0.2324  |
| rs77772082  | T | 0.1457  |
| rs2853067   | G | 0.047   |
| rs10736595  | T | -0.0607 |
| rs7131230   | C | -0.0641 |
| rs1453590   | T | -0.0463 |
| rs71474191  | C | -0.1472 |
| rs7950272   | C | 0.0464  |
| rs57095787  | T | 0.1611  |
| rs143254252 | A | 0.3704  |
| rs11232236  | C | 0.0526  |
| rs35897606  | G | -0.1161 |
| rs10838599  | T | 0.0586  |
| rs112704953 | T | 0.2238  |
| rs138345948 | A | -0.2608 |
| rs677163    | G | -0.1335 |
| rs35063518  | T | -0.097  |
| rs77687053  | A | 0.1546  |
| rs11225344  | A | 0.0765  |
| rs1459951   | A | -0.0608 |
| rs11020154  | A | -0.1995 |
| rs972139    | T | -0.1488 |
| rs2075609   | G | -0.0478 |
| rs4237707   | A | 0.043   |
| rs150703716 | A | -0.3335 |
| rs79071315  | T | 0.0949  |
| rs79205181  | C | -0.1801 |
| rs17772101  | T | -0.0498 |
| rs1487898   | T | 0.0912  |
| rs11032128  | T | -0.3275 |
| rs11522669  | T | 0.1837  |
| rs4754338   | G | -0.045  |
| rs9666492   | A | -0.0848 |
| rs973323    | C | 0.057   |
| rs12422108  | C | -0.0924 |
| rs2555162   | A | -0.0468 |
| rs12807410  | A | 0.0529  |
| rs78132205  | A | 0.2452  |

|             |   |         |
|-------------|---|---------|
| rs4937363   | G | 0.0616  |
| rs765421    | G | -0.0582 |
| rs11825598  | C | -0.0438 |
| rs11605159  | T | 0.0556  |
| rs111891933 | A | -0.0927 |
| rs66630602  | A | 0.0447  |
| rs12275368  | G | 0.0444  |
| rs12417343  | A | 0.106   |
| rs35516683  | T | -0.2065 |
| rs117082255 | G | 0.1061  |
| rs144963681 | T | -0.2693 |
| rs117207094 | T | 0.263   |
| rs118037556 | T | 0.232   |
| rs78375660  | A | 0.1302  |
| rs17125988  | T | 0.199   |
| rs16937906  | T | -0.0479 |
| rs144598523 | T | 0.1205  |
| rs1534082   | C | -0.0825 |
| rs6484449   | A | -0.0433 |
| rs16912326  | A | 0.0732  |
| rs17881620  | C | -0.0521 |
| rs139568121 | C | -0.2389 |
| rs633040    | C | -0.0477 |
| rs60354571  | G | 0.1087  |
| rs78832736  | A | -0.106  |
| rs35162070  | A | 0.0987  |
| rs78482047  | C | 0.0973  |
| rs576170    | T | 0.1646  |
| rs479966    | T | 0.0782  |
| rs11033443  | T | -0.0433 |
| rs117117915 | T | 0.1852  |
| rs10894885  | C | -0.0726 |
| rs112268927 | C | 0.2462  |
| rs117099564 | T | 0.2141  |
| rs7126220   | C | -0.0433 |
| rs10895359  | A | 0.0637  |
| rs79326329  | A | 0.1445  |
| rs118013234 | G | 0.2675  |
| rs79296768  | C | 0.1878  |
| rs140705035 | T | 0.2176  |
| rs7934959   | T | 0.0667  |
| rs142099131 | T | -0.1321 |
| rs137984130 | C | -0.183  |
| rs2734847   | T | -0.0537 |
| rs4438017   | G | -0.0553 |
| rs16935553  | C | 0.1321  |
| rs76332582  | G | 0.2167  |

|             |   |         |
|-------------|---|---------|
| rs12293229  | T | 0.1579  |
| rs74960175  | G | 0.1544  |
| rs7947726   | A | 0.0751  |
| rs528180    | T | -0.045  |
| rs71470673  | G | -0.0574 |
| rs723562    | T | -0.1107 |
| rs11607859  | A | 0.0469  |
| rs2167090   | T | 0.1525  |
| rs75829086  | G | 0.1917  |
| rs11602203  | A | -0.0775 |
| rs517684    | G | -0.0418 |
| rs10501288  | A | 0.0473  |
| rs11225924  | T | 0.2296  |
| rs1461684   | G | 0.0555  |
| rs508778    | T | 0.0526  |
| rs11233084  | C | -0.0464 |
| rs74614175  | A | 0.1488  |
| rs73413415  | A | -0.1954 |
| rs144765440 | C | 0.301   |
| rs77221694  | T | 0.1105  |
| rs11018614  | G | -0.2148 |
| rs11222081  | A | -0.0948 |
| rs2723587   | G | -0.0757 |
| rs138006447 | A | -0.1058 |
| rs2053756   | T | 0.0452  |
| rs12361143  | G | 0.0563  |
| rs117484355 | C | 0.3024  |
| rs2063082   | G | -0.05   |
| rs11019144  | G | -0.0519 |
| rs4131591   | T | -0.0685 |
| rs10793038  | G | 0.0473  |
| rs58902900  | A | -0.1391 |
| rs10898027  | A | 0.0574  |
| rs12272846  | T | 0.2221  |
| rs12365385  | C | -0.0436 |
| rs4757108   | A | -0.0465 |
| rs117988049 | C | -0.1951 |
| rs2355998   | T | 0.1405  |
| rs16930312  | A | -0.3004 |
| rs72893277  | A | -0.1224 |
| rs10790610  | C | -0.0452 |
| rs12789187  | C | -0.0934 |
| rs17233944  | C | 0.0798  |
| rs1584038   | G | 0.0566  |
| rs118170286 | A | 0.1307  |
| rs938792    | G | 0.047   |
| rs523223    | A | -0.046  |

|             |   |         |
|-------------|---|---------|
| rs11025396  | A | -0.08   |
| rs76666352  | A | -0.1286 |
| rs10834048  | G | 0.0818  |
| rs16909480  | C | -0.0724 |
| rs7107675   | A | 0.0598  |
| rs142524543 | A | 0.2434  |
| rs73034256  | C | 0.2199  |
| rs11600379  | A | -0.0443 |
| rs140175846 | G | -0.2528 |
| rs2306836   | C | -0.0595 |
| rs10899065  | T | -0.0428 |
| rs2439890   | T | -0.0477 |
| rs4362135   | C | 0.0685  |
| rs113189224 | T | 0.0646  |
| rs72958511  | G | -0.1864 |
| rs12417749  | T | 0.1341  |
| rs17377145  | T | 0.1085  |
| rs79039861  | A | -0.1833 |
| rs117557190 | T | -0.2995 |
| rs12280625  | G | 0.0573  |
| rs11235181  | C | 0.0556  |
| rs149741827 | G | 0.2467  |
| rs11025885  | A | 0.0412  |
| rs61886189  | A | 0.1236  |
| rs12274095  | A | -0.0843 |
| rs1317411   | A | -0.043  |
| rs117500455 | C | -0.2373 |
| rs12224130  | G | -0.0831 |
| rs17397821  | A | -0.0452 |
| rs7933750   | A | -0.0699 |
| rs1001118   | G | 0.066   |
| rs11216806  | C | 0.0543  |
| rs11022991  | G | -0.0657 |
| rs1222208   | C | -0.0484 |
| rs140261162 | T | -0.1158 |
| rs2865908   | T | 0.0553  |
| rs7124377   | G | 0.0773  |
| rs11041273  | C | -0.0621 |
| rs12224013  | G | -0.141  |
| rs12363906  | G | -0.0478 |
| rs16931268  | T | 0.0587  |
| rs72938129  | T | 0.1305  |
| rs112487605 | T | -0.2672 |
| rs146654860 | A | 0.1183  |
| rs12791400  | G | 0.046   |
| rs4752934   | A | 0.199   |
| rs7934586   | T | 0.0489  |

|             |   |         |
|-------------|---|---------|
| rs112166334 | A | -0.1277 |
| rs2186729   | C | 0.0504  |
| rs11030094  | A | -0.0409 |
| rs11822329  | T | -0.0528 |
| rs77294061  | T | -0.1065 |
| rs61904724  | C | -0.2832 |
| rs12271931  | G | 0.0767  |
| rs10765323  | G | 0.0428  |
| rs7932210   | G | -0.0499 |
| rs742631    | T | -0.0448 |
| rs11512905  | T | -0.0435 |
| rs7104678   | G | 0.1001  |
| rs10897120  | T | -0.0489 |
| rs138568456 | G | 0.2992  |
| rs7941869   | C | -0.0608 |
| rs12576376  | T | 0.0877  |
| rs76542543  | A | -0.2382 |
| rs117415834 | C | 0.1198  |
| rs75622977  | A | 0.2989  |
| rs4415733   | C | -0.0446 |
| rs1793835   | C | 0.3157  |
| rs61875597  | G | 0.0748  |
| rs11023925  | T | -0.0545 |
| rs11042805  | G | 0.0616  |
| rs118160608 | G | 0.2934  |
| rs117798555 | A | 0.1582  |
| rs1487875   | T | 0.0426  |
| rs12277647  | A | -0.0476 |
| rs56235868  | T | 0.0749  |
| rs596308    | A | 0.0432  |
| rs73606718  | A | 0.0651  |
| rs142655778 | C | -0.17   |
| rs492536    | G | 0.1071  |
| rs117926781 | A | -0.1141 |
| rs659953    | G | 0.0426  |
| rs10458997  | T | 0.0488  |
| rs7111419   | G | 0.0943  |
| rs636471    | A | -0.0769 |
| rs11230544  | A | -0.0585 |
| rs7110192   | G | 0.0434  |
| rs17667248  | C | 0.0609  |
| rs117608658 | C | 0.1655  |
| rs11608188  | G | -0.0969 |
| rs1368832   | A | -0.0598 |
| rs499519    | A | -0.0555 |
| rs75089348  | A | -0.1362 |
| rs573182    | T | 0.0464  |



|             |   |         |
|-------------|---|---------|
| rs77579417  | A | 0.1986  |
| rs540461    | G | 0.0395  |
| rs117242513 | A | 0.1968  |
| rs4944118   | A | -0.0493 |
| rs79222721  | C | -0.0852 |
| rs1038101   | A | 0.058   |
| rs12290368  | C | -0.0652 |
| rs1425795   | A | -0.1317 |
| rs519794    | T | 0.0617  |
| rs72920853  | A | -0.131  |
| rs1028633   | G | 0.0526  |
| rs117781395 | A | 0.2038  |
| rs80351807  | T | 0.2473  |
| rs35919814  | C | 0.1297  |
| rs61904353  | T | 0.0968  |
| rs78434666  | A | 0.2967  |
| rs545204    | C | 0.1958  |
| rs67529314  | G | 0.0727  |
| rs7118765   | C | 0.0513  |
| rs78338966  | T | -0.1534 |
| rs10899675  | A | 0.0465  |
| rs140273453 | C | -0.0757 |
| rs12421762  | A | -0.0745 |
| rs1081557   | T | -0.0459 |
| rs76303657  | C | 0.197   |
| rs11023513  | T | -0.0461 |
| rs10833076  | G | 0.0533  |
| rs3763849   | T | 0.2016  |
| rs11020141  | C | 0.0652  |
| rs72957958  | G | 0.1025  |
| rs111732554 | C | -0.2162 |
| rs581580    | G | 0.041   |
| rs80152965  | T | 0.2363  |
| rs45625132  | C | -0.1882 |
| rs2317091   | A | 0.1474  |
| rs146190129 | C | -0.0774 |
| rs1883097   | C | -0.0897 |
| rs35579110  | G | -0.1615 |
| rs7941984   | G | 0.0421  |
| rs2462414   | T | 0.0453  |
| rs11223663  | C | 0.118   |
| rs7127134   | T | 0.1107  |
| rs11037503  | T | 0.0434  |
| rs142498399 | C | 0.1793  |
| rs10831276  | C | 0.0509  |
| rs11024979  | T | 0.0606  |
| rs139112083 | C | 0.2547  |

|             |   |         |
|-------------|---|---------|
| rs57086873  | C | -0.0539 |
| rs34469991  | G | 0.1047  |
| rs78489916  | C | -0.1793 |
| rs118078858 | C | 0.1878  |
| rs108533    | T | -0.0398 |
| rs111949841 | A | 0.3408  |
| rs75227299  | T | 0.2523  |
| rs34321890  | T | 0.0585  |
| rs1783944   | A | -0.0417 |
| rs77961755  | A | 0.1803  |
| rs80159584  | A | -0.1069 |
| rs77568341  | A | -0.0714 |
| rs2276280   | A | -0.1496 |
| rs79762782  | G | 0.1681  |
| rs216496    | A | 0.095   |
| rs1789289   | T | 0.0657  |
| rs61879720  | T | 0.1717  |
| rs112883073 | T | 0.1837  |
| rs7949969   | T | -0.0726 |
| rs117625924 | C | -0.2288 |
| rs11236460  | A | -0.0577 |
| rs17885550  | G | -0.249  |
| rs2127541   | C | -0.0424 |
| rs17126230  | A | 0.0997  |
| rs2602484   | G | 0.143   |
| rs12798148  | T | -0.0666 |
| rs11602700  | T | 0.1073  |
| rs11219037  | T | 0.0894  |
| rs147515816 | T | 0.1384  |
| rs57797362  | T | 0.0437  |
| rs150088653 | C | 0.122   |
| rs117521306 | C | 0.1437  |
| rs11038615  | A | 0.0955  |
| rs78460763  | A | 0.0574  |
| rs13377224  | T | 0.2933  |
| rs7108681   | T | 0.0467  |
| rs117987574 | G | -0.2587 |
| rs73021223  | C | 0.0718  |
| rs112984201 | A | 0.1683  |
| rs10833187  | C | 0.0462  |
| rs531078    | G | -0.0444 |
| rs2852426   | G | 0.0435  |
| rs901291    | C | -0.0405 |
| rs7107574   | T | -0.0394 |
| rs17385222  | C | 0.1037  |
| rs146196822 | T | -0.236  |
| rs74899468  | T | -0.2396 |

|             |   |         |
|-------------|---|---------|
| rs12274057  | T | -0.0631 |
| rs10765278  | T | 0.0386  |
| rs11233297  | A | -0.2424 |
| rs4754860   | C | -0.0455 |
| rs35598486  | G | 0.1958  |
| rs61900264  | T | -0.1176 |
| rs80106063  | G | 0.1403  |
| rs35905202  | A | -0.2349 |
| rs61277802  | A | 0.0854  |
| rs78201620  | G | 0.3802  |
| rs7130193   | C | 0.1069  |
| rs112923397 | A | 0.1737  |
| rs1216476   | G | -0.0481 |
| rs112704858 | T | 0.0544  |
| rs34812986  | G | 0.0403  |
| rs526849    | C | 0.0427  |
| rs56244683  | A | -0.0958 |
| rs117068416 | G | 0.2478  |
| rs148536670 | C | 0.1845  |
| rs117040111 | T | 0.1447  |
| rs117261604 | T | -0.221  |
| rs45619137  | A | 0.0796  |
| rs11029547  | G | -0.0539 |
| rs59625643  | T | 0.1611  |
| rs360142    | G | 0.0654  |
| rs72991206  | A | 0.0887  |
| rs72978516  | C | 0.0991  |
| rs11025183  | C | 0.0502  |
| rs35300363  | T | -0.0593 |
| rs10082659  | T | 0.04    |
| rs71483067  | T | -0.1718 |
| rs149608281 | C | -0.3    |
| rs10894034  | T | 0.0387  |
| rs7102746   | T | -0.0524 |
| rs117679646 | G | -0.2546 |
| rs12795310  | C | 0.0437  |
| rs11823867  | G | -0.0412 |
| rs72926844  | G | 0.1468  |
| rs71488286  | G | -0.1562 |
| rs10792664  | T | 0.0442  |
| rs143482636 | T | 0.1362  |
| rs11033094  | T | 0.1622  |
| rs61908391  | T | 0.2092  |
| rs76450410  | T | 0.1932  |
| rs75709671  | G | -0.1928 |
| rs113835239 | A | 0.1089  |
| rs117581437 | C | 0.2365  |

|             |   |         |
|-------------|---|---------|
| rs2087882   | A | -0.039  |
| rs3802970   | G | -0.0412 |
| rs11607862  | T | 0.0433  |
| rs10736683  | T | 0.04    |
| rs7125595   | T | -0.0773 |
| rs73550939  | A | -0.2849 |
| rs4937420   | T | 0.058   |
| rs10840410  | C | -0.0478 |
| rs10833847  | T | 0.0475  |
| rs140665066 | A | 0.2146  |
| rs7102814   | C | -0.0607 |
| rs11030543  | T | 0.2319  |
| rs231872    | G | 0.041   |
| rs3936013   | T | 0.0417  |
| rs17253343  | G | 0.2344  |
| rs78200466  | T | -0.1868 |
| rs2186741   | T | -0.0589 |
| rs11033307  | C | -0.0734 |
| rs2156485   | T | -0.0466 |
| rs11031104  | C | 0.0639  |
| rs2604234   | G | 0.1027  |
| rs11235392  | A | 0.1274  |
| rs7930845   | C | -0.0458 |
| rs7937748   | C | -0.0729 |
| rs61620632  | T | 0.042   |
| rs117531457 | A | -0.1463 |
| rs78878323  | A | 0.0773  |
| rs61891101  | C | 0.0432  |
| rs2714039   | A | 0.1273  |
| rs59619445  | C | -0.0953 |
| rs150032404 | G | -0.1705 |
| rs80233470  | T | 0.0595  |
| rs17272137  | G | -0.0696 |
| rs4944996   | T | -0.0474 |
| rs7945507   | C | -0.043  |
| rs2682344   | A | -0.0642 |
| rs72907506  | A | 0.1559  |
| rs10834182  | T | -0.2705 |
| rs10895557  | T | -0.0541 |
| rs150628752 | T | 0.1252  |
| rs142177925 | A | 0.2357  |
| rs79280689  | A | 0.0992  |
| rs117311011 | T | 0.2479  |
| rs11227206  | G | 0.0494  |
| rs117217211 | T | 0.2443  |
| rs4757854   | T | -0.0542 |
| rs3890623   | G | 0.0398  |

|             |   |         |
|-------------|---|---------|
| rs74610753  | A | -0.1329 |
| rs12801604  | A | 0.0504  |
| rs679366    | G | 0.0511  |
| rs2570317   | A | -0.0543 |
| rs12146427  | A | 0.0839  |
| rs11222908  | T | 0.0498  |
| rs608573    | T | -0.0458 |
| rs17104009  | T | 0.158   |
| rs10830841  | C | -0.0464 |
| rs146747043 | T | 0.1516  |
| rs117255340 | G | -0.156  |
| rs78366899  | G | 0.2056  |
| rs784394    | T | 0.0702  |
| rs118188276 | T | -0.1638 |
| rs61911247  | T | 0.0885  |
| rs79617807  | G | -0.2221 |
| rs16907766  | A | 0.0584  |
| rs117644754 | C | -0.1563 |
| rs2177745   | T | -0.0617 |
| rs4882144   | T | -0.1378 |
| rs1945068   | A | -0.0718 |
| rs143563951 | T | -0.1939 |
| rs117282106 | A | 0.1667  |
| rs11553422  | T | -0.2492 |
| rs6592342   | T | 0.0759  |
| rs111544221 | A | 0.1675  |
| rs12789423  | A | 0.1316  |
| rs77458873  | G | -0.08   |
| rs10896434  | A | -0.0425 |
| rs73002351  | T | 0.1175  |
| rs10834425  | A | 0.0376  |
| rs508731    | A | -0.0749 |
| rs56038017  | A | -0.0711 |
| rs7102502   | G | -0.122  |
| rs76197191  | A | -0.1057 |
| rs1944712   | T | -0.2537 |
| rs2640760   | C | -0.1927 |
| rs7479553   | G | 0.1404  |
| rs77951189  | T | 0.2504  |
| rs71476967  | A | 0.0825  |
| rs79814726  | A | -0.1102 |
| rs574529    | C | -0.0421 |
| rs146654916 | T | 0.176   |
| rs79808604  | A | 0.2124  |
| rs11033681  | T | -0.1635 |
| rs117326349 | T | 0.1365  |
| rs11030946  | C | -0.0684 |

|             |   |         |
|-------------|---|---------|
| rs77410970  | T | 0.1554  |
| rs73013484  | A | -0.0689 |
| rs55957907  | A | 0.1684  |
| rs7937045   | T | -0.0414 |
| rs79773182  | A | 0.1044  |
| rs10894763  | T | 0.0558  |
| rs78901918  | A | 0.1097  |
| rs117854205 | G | -0.0629 |
| rs142205931 | C | -0.1763 |
| rs11022340  | T | 0.0508  |
| rs7127438   | G | 0.0469  |
| rs1943639   | A | -0.0375 |
| rs602397    | C | 0.0564  |
| rs146168120 | C | 0.229   |
| rs4373935   | G | 0.0476  |
| rs1790181   | A | -0.0402 |
| rs12285612  | T | -0.0541 |
| rs11217480  | C | -0.043  |
| rs75335147  | T | 0.2313  |
| rs459581    | C | 0.0614  |
| rs10836558  | C | -0.0504 |
| rs1349178   | T | 0.043   |
| rs117447786 | A | -0.2317 |
| rs491823    | C | -0.0454 |
| rs7929077   | A | 0.0373  |
| rs949175    | T | -0.04   |
| rs117209256 | C | -0.396  |
| rs145082019 | T | 0.1717  |
| rs1018189   | A | 0.042   |
| rs4357699   | A | 0.051   |
| rs7121386   | T | 0.1348  |
| rs80268381  | T | -0.2726 |
| rs139378309 | A | 0.346   |
| rs111464869 | A | 0.119   |
| rs117579367 | C | 0.1988  |
| rs17141233  | G | 0.2352  |
| rs10892760  | A | 0.041   |
| rs12224801  | T | -0.096  |
| rs76625879  | C | 0.2246  |
| rs10836955  | A | 0.0478  |
| rs148649545 | A | 0.1288  |
| rs1941869   | C | -0.0441 |
| rs76920208  | C | 0.1262  |
| rs75438779  | C | -0.1365 |
| rs138740842 | T | 0.1595  |
| rs2226895   | C | -0.0455 |
| rs12796559  | T | 0.2111  |

|             |   |         |
|-------------|---|---------|
| rs7118773   | A | 0.0395  |
| rs10751314  | G | 0.0449  |
| rs387137    | C | 0.042   |
| rs6650181   | G | -0.06   |
| rs113851867 | A | -0.1448 |
| rs11235142  | T | -0.04   |
| rs7104654   | A | -0.0611 |
| rs11041406  | C | -0.1571 |
| rs1961710   | T | 0.0569  |
| rs16914254  | G | 0.2088  |
| rs10890853  | A | 0.0518  |
| rs56255127  | T | 0.055   |
| rs1944438   | A | 0.0401  |
| rs148209242 | T | 0.1209  |
| rs149613666 | A | -0.054  |
| rs3824874   | G | -0.0396 |
| rs2846059   | T | 0.0429  |
| rs78727639  | A | -0.1732 |
| rs34659453  | C | 0.0577  |
| rs75746332  | T | -0.1701 |
| rs3969419   | G | -0.0522 |
| rs77270138  | A | -0.0963 |
| rs10500844  | C | -0.0406 |
| rs1581422   | A | 0.0507  |
| rs11604855  | A | 0.2027  |
| rs10751257  | G | 0.0433  |
| rs60719508  | C | 0.2213  |
| rs10894514  | G | -0.0486 |
| rs7937776   | C | 0.0491  |
| rs12419699  | C | 0.0609  |
| rs11213228  | G | -0.0478 |
| rs8189012   | T | -0.0502 |
| rs11231635  | C | 0.113   |
| rs61877361  | A | -0.1977 |
| rs55946904  | A | -0.0707 |
| rs10832232  | G | -0.0439 |
| rs111294134 | C | 0.1243  |
| rs78778622  | C | 0.1278  |
| rs11607351  | A | 0.1561  |
| rs7939560   | A | -0.0549 |
| rs2846688   | T | 0.0503  |
| rs12574921  | G | -0.0522 |
| rs10789536  | A | -0.0379 |
| rs7949570   | C | 0.0377  |
| rs71469599  | T | 0.0997  |
| rs4114383   | T | -0.0526 |
| rs72923084  | G | 0.2792  |

|             |   |         |
|-------------|---|---------|
| rs72854168  | G | 0.0543  |
| rs72884462  | A | 0.1374  |
| rs1468038   | G | -0.0456 |
| rs72884123  | C | -0.0758 |
| rs1977420   | T | 0.0398  |
| rs10891940  | A | 0.0378  |
| rs574524    | T | -0.082  |
| rs4301784   | G | -0.0524 |
| rs35211297  | A | -0.1309 |
| rs117737140 | G | -0.2228 |
| rs112272549 | A | 0.136   |
| rs77570340  | T | -0.1643 |
| rs2237956   | A | -0.0389 |
| rs511484    | C | 0.0422  |
| rs1647396   | G | -0.0384 |
| rs147587837 | C | 0.2685  |
| rs1802608   | T | 0.0954  |
| rs140658642 | C | 0.2077  |
| rs11606206  | G | 0.0533  |
| rs645411    | T | 0.039   |
| rs7930785   | T | -0.061  |
| rs1945865   | A | 0.038   |
| rs292109    | T | -0.0381 |
| rs11214140  | C | -0.0641 |
| rs1955013   | A | -0.0406 |
| rs55861597  | T | -0.0515 |
| rs12420166  | C | -0.0674 |
| rs76006672  | C | -0.126  |
| rs4531435   | G | 0.0403  |
| rs117911150 | G | -0.1937 |
| rs438274    | A | 0.0756  |
| rs6592194   | T | -0.0385 |
| rs78529703  | T | -0.0777 |
| rs10835394  | C | 0.0483  |
| rs677354    | C | -0.1112 |
| rs7103579   | A | 0.0486  |
| rs4922823   | C | -0.0509 |
| rs10501779  | G | 0.0511  |
| rs72859311  | A | -0.0785 |
| rs4937314   | G | -0.0691 |
| rs2921331   | C | 0.0449  |
| rs146629687 | G | 0.1269  |
| rs1793384   | T | -0.0534 |
| rs7943936   | C | -0.04   |
| rs78229639  | A | 0.2939  |
| rs76844341  | G | 0.239   |
| rs11032744  | T | -0.0618 |



|             |   |         |
|-------------|---|---------|
| rs117045668 | A | 0.2166  |
| rs7110391   | T | -0.1269 |
| rs12421058  | G | 0.0977  |
| rs11601240  | C | 0.1798  |
| rs11221734  | G | 0.0591  |
| rs649631    | A | -0.1174 |
| rs10893653  | G | -0.0734 |
| rs80125169  | C | -0.2851 |
| rs117259577 | T | -0.2864 |
| rs11216780  | G | -0.0948 |
| rs2746157   | T | 0.0562  |
| rs1945899   | A | 0.0418  |
| rs4938250   | A | -0.0374 |
| rs129074    | A | 0.0393  |
| rs35317814  | G | 0.2601  |
| rs7934470   | A | 0.0451  |
| rs11021058  | T | -0.0725 |
| rs674046    | G | 0.0378  |
| rs78574771  | A | 0.1587  |
| rs10836532  | T | 0.0459  |
| rs3889670   | T | 0.1374  |
| rs563942    | G | 0.0444  |
| rs7932877   | G | 0.0407  |
| rs139582878 | G | -0.3444 |
| rs10488759  | C | 0.0429  |
| rs60294623  | G | -0.1604 |
| rs34793111  | T | -0.1741 |
| rs7114137   | C | 0.04    |
| rs79579240  | A | -0.1009 |
| rs10767075  | T | -0.055  |
| rs140710168 | A | 0.2001  |
| rs117179392 | A | 0.1592  |
| rs76367202  | G | 0.2205  |
| rs666333    | A | 0.134   |
| rs16909520  | T | -0.0438 |
| rs6592325   | A | 0.0463  |
| rs1941848   | A | 0.0369  |
| rs7111586   | T | 0.0497  |
| rs11601290  | T | 0.0548  |
| rs77054772  | A | 0.1495  |
| rs148760987 | A | -0.208  |
| rs75569360  | G | -0.1339 |
| rs117108171 | T | -0.1711 |
| rs7110338   | G | 0.0387  |
| rs11025174  | G | -0.0686 |
| rs76710367  | T | -0.1972 |
| rs2513423   | T | 0.1303  |

|             |   |         |
|-------------|---|---------|
| rs12365174  | A | -0.0606 |
| rs431631    | C | 0.0624  |
| rs7945957   | T | 0.0416  |
| rs140338657 | A | -0.3128 |
| rs17577073  | C | 0.0375  |
| rs7131056   | A | 0.0371  |
| rs17671708  | C | 0.064   |
| rs12362528  | T | -0.0834 |
| rs75345324  | C | 0.1237  |
| rs72907814  | T | 0.0661  |
| rs4335517   | A | 0.0792  |
| rs12806493  | T | 0.0442  |
| rs11224988  | T | -0.0868 |
| rs73041753  | G | 0.2114  |
| rs7928362   | T | -0.0764 |
| rs7946717   | C | -0.1923 |
| rs7111774   | A | -0.0437 |
| rs72987200  | G | 0.1074  |
| rs117801657 | T | 0.2342  |
| rs11025105  | T | 0.0804  |
| rs7940959   | G | 0.0488  |
| rs2729878   | C | -0.0474 |
| rs138353070 | C | -0.1841 |
| rs77077276  | G | -0.1089 |
| rs1219447   | T | 0.0757  |
| rs117934961 | G | -0.1903 |
| rs10836914  | G | 0.0666  |
| rs10437664  | G | 0.0595  |
| rs78336694  | T | 0.1649  |
| rs11221755  | A | 0.074   |
| rs4936023   | G | 0.0544  |
| rs11529897  | G | -0.1183 |
| rs470686    | T | 0.0443  |
| rs4340077   | T | -0.0637 |
| rs7939089   | A | 0.1203  |
| rs12792418  | C | 0.0439  |
| rs79910205  | T | 0.1226  |
| rs2468859   | T | -0.0624 |
| rs11029902  | C | 0.1042  |
| rs2412432   | A | -0.0386 |
| rs4756041   | A | 0.0818  |
| rs12361252  | A | 0.0438  |
| rs647516    | A | 0.0791  |
| rs150075047 | A | 0.1933  |
| rs673796    | G | -0.0927 |
| rs112466186 | G | -0.1331 |
| rs12788072  | G | -0.072  |

|             |   |         |
|-------------|---|---------|
| rs117518228 | G | 0.0575  |
| rs4534573   | A | -0.0435 |
| rs1354790   | G | 0.0401  |
| rs71473827  | C | 0.0594  |
| rs12794723  | G | -0.0502 |
| rs116853991 | T | 0.1     |
| rs143591197 | C | 0.1325  |
| rs75040503  | C | -0.0697 |
| rs117836835 | A | 0.1086  |
| rs7114639   | T | 0.0371  |
| rs2846304   | G | 0.045   |
| rs505679    | A | -0.0654 |
| rs12272718  | G | -0.0358 |
| rs4536195   | G | -0.0443 |
| rs145331793 | G | 0.1472  |
| rs74916186  | C | -0.0638 |
| rs521765    | G | -0.0686 |
| rs34683888  | A | 0.0903  |
| rs217767    | A | -0.0359 |
| rs10501365  | G | -0.0585 |
| rs79371681  | A | -0.0734 |
| rs627956    | G | 0.1195  |
| rs493659    | A | -0.1493 |
| rs4910832   | T | 0.0609  |
| rs72944826  | T | 0.1968  |
| rs12788626  | G | -0.0495 |
| rs144208780 | T | -0.1817 |
| rs10466728  | G | -0.0744 |
| rs115482747 | T | 0.1508  |
| rs10750297  | C | 0.0424  |
| rs7105881   | T | 0.0378  |
| rs2746600   | G | 0.039   |
| rs78308457  | A | 0.098   |
| rs146218162 | G | -0.1671 |
| rs12274107  | G | -0.0612 |
| rs56126913  | T | -0.1264 |
| rs2863131   | A | -0.0379 |
| rs78451361  | A | -0.1851 |
| rs117816335 | A | -0.2085 |
| rs7952026   | G | -0.0365 |
| rs2682098   | A | -0.041  |
| rs77077698  | T | -0.1494 |
| rs61883695  | T | 0.2165  |
| rs150617529 | C | 0.2452  |
| rs137921468 | G | -0.2552 |
| rs141486174 | T | 0.1884  |
| rs140745184 | T | -0.1799 |

|             |   |         |
|-------------|---|---------|
| rs10898949  | C | -0.0574 |
| rs113732597 | T | 0.0776  |
| rs1109241   | A | 0.0946  |
| rs7104612   | A | -0.0441 |
| rs111477882 | T | 0.0707  |
| rs873491    | A | -0.0452 |
| rs117763281 | A | -0.2376 |
| rs61880906  | C | 0.1649  |
| rs217769    | T | 0.0616  |
| rs74320370  | A | 0.0668  |
| rs11601539  | C | 0.1445  |
| rs1792331   | C | -0.039  |
| rs118092964 | T | -0.3228 |
| rs74517437  | A | 0.0912  |
| rs10219376  | C | -0.0481 |
| rs72979781  | A | -0.1386 |
| rs12364141  | C | 0.0394  |
| rs10789828  | C | -0.0851 |
| rs72900479  | A | -0.0585 |
| rs117157343 | C | -0.1625 |
| rs1939981   | C | 0.0467  |
| rs151061966 | C | -0.1677 |
| rs11023744  | C | -0.041  |
| rs7480395   | G | 0.0385  |
| rs3781990   | T | 0.0624  |
| rs149930778 | T | -0.206  |
| rs670872    | A | -0.0474 |
| rs80065386  | A | -0.0845 |
| rs35486442  | T | 0.0999  |
| rs72873034  | T | -0.2642 |
| rs12806155  | C | 0.0881  |
| rs11823901  | T | 0.2212  |
| rs76210380  | C | 0.1696  |
| rs11221386  | A | -0.0489 |
| rs11021955  | T | 0.0592  |
| rs79494104  | G | 0.2411  |
| rs12295156  | A | -0.0539 |
| rs150443039 | A | -0.1145 |
| rs10892608  | A | 0.0354  |
| rs150796591 | A | -0.1995 |
| rs11228997  | G | -0.0589 |
| rs34144183  | C | 0.1237  |
| rs11224483  | T | -0.0854 |
| rs11219849  | A | -0.042  |
| rs4922580   | G | 0.0357  |
| rs7108746   | A | 0.0414  |
| rs55916845  | G | 0.2624  |

|             |   |         |
|-------------|---|---------|
| rs112477709 | T | -0.2152 |
| rs2226850   | C | -0.0492 |
| rs117802483 | A | 0.1324  |
| rs10832262  | T | 0.0488  |
| rs599776    | A | 0.0459  |
| rs116908305 | A | 0.152   |
| rs667797    | A | 0.114   |
| rs73491200  | G | 0.169   |
| rs1557434   | C | 0.0413  |
| rs75958925  | T | 0.3099  |
| rs36029262  | G | -0.2499 |
| rs4935985   | C | -0.0424 |
| rs12362499  | G | 0.0412  |
| rs72911834  | A | 0.0664  |
| rs117080064 | G | -0.1632 |
| rs74572640  | C | -0.2612 |
| rs4252588   | T | -0.1248 |
| rs111614723 | A | -0.1874 |
| rs17256048  | G | -0.1388 |
| rs10791394  | C | -0.0459 |
| rs112350723 | C | 0.1367  |
| rs11225989  | T | 0.212   |
| rs76809168  | A | 0.1227  |
| rs113043931 | C | 0.1706  |
| rs16937196  | A | -0.0396 |
| rs117681561 | A | 0.1539  |
| rs1943308   | G | -0.0474 |
| rs9667743   | C | 0.0595  |
| rs12226032  | A | 0.0368  |
| rs111921931 | T | 0.0887  |
| rs513718    | C | 0.3104  |
| rs61229722  | T | 0.0482  |
| rs12365717  | C | -0.0709 |
| rs11042224  | G | 0.0456  |
| rs2883827   | T | 0.0451  |
| rs2513645   | A | 0.0371  |
| rs77638919  | A | -0.0951 |
| rs360168    | G | 0.0917  |
| rs115897172 | C | 0.1068  |
| rs1793786   | T | 0.0889  |
| rs11026072  | A | 0.0377  |
| rs12276091  | A | -0.0963 |
| rs7941064   | G | -0.0396 |
| rs145753653 | A | -0.1651 |
| rs74736885  | G | -0.0609 |
| rs3019662   | C | -0.039  |
| rs72851966  | C | 0.1426  |

|             |   |         |
|-------------|---|---------|
| rs571348    | T | -0.0393 |
| rs10430841  | A | -0.0363 |
| rs2512988   | A | -0.0358 |
| rs602832    | G | -0.0524 |
| rs6421593   | A | -0.0359 |
| rs645275    | G | -0.0358 |
| rs898364    | G | 0.0424  |
| rs148462641 | A | -0.1598 |
| rs11022533  | T | -0.0386 |
| rs112851584 | T | 0.0665  |
| rs6484112   | C | 0.0487  |
| rs142207013 | G | 0.254   |
| rs12269876  | G | 0.0403  |
| rs12417998  | A | -0.0648 |
| rs72870320  | T | 0.0464  |
| rs1466068   | T | 0.037   |
| rs1462220   | A | 0.0372  |
| rs610160    | C | 0.055   |
| rs3133336   | T | -0.0532 |
| rs117443199 | G | -0.2107 |
| rs77398663  | C | 0.2436  |
| rs578137    | C | -0.0636 |
| rs12806670  | A | -0.0998 |
| rs12288289  | T | -0.1178 |
| rs77675731  | G | -0.1745 |
| rs58822187  | C | -0.1248 |
| rs17102966  | T | -0.1904 |
| rs4937518   | A | -0.0415 |
| rs12418076  | C | -0.0734 |
| rs12788303  | A | 0.0635  |
| rs4303250   | T | -0.1558 |
| rs78631951  | T | -0.1555 |
| rs4556546   | A | -0.0568 |
| rs118065342 | G | -0.0853 |
| rs77611215  | G | 0.1447  |
| rs12283621  | C | -0.0374 |
| rs12805441  | C | 0.1593  |
| rs55885673  | T | 0.0649  |
| rs589658    | C | 0.0359  |
| rs73024358  | G | 0.052   |
| rs7943730   | A | -0.0405 |
| rs3892729   | C | -0.0374 |
| rs117164386 | A | -0.2029 |
| rs150077704 | A | 0.132   |
| rs35155354  | C | -0.0624 |
| rs11600179  | A | 0.0844  |
| rs57094457  | A | -0.0791 |

|             |   |         |
|-------------|---|---------|
| rs566189    | C | 0.0555  |
| rs11825971  | A | -0.0432 |
| rs3990898   | T | 0.0397  |
| rs61897409  | A | -0.0634 |
| rs1792174   | G | -0.036  |
| rs11545229  | A | 0.3444  |
| rs11820842  | A | 0.1715  |
| rs73000867  | G | -0.1473 |
| rs2155849   | A | -0.1463 |
| rs77717703  | C | -0.0572 |
| rs71486326  | A | -0.0522 |
| rs10896993  | G | -0.0359 |
| rs1939483   | A | 0.07    |
| rs80053533  | T | -0.1511 |
| rs3018549   | A | -0.0427 |
| rs61883793  | T | -0.0443 |
| rs4611189   | A | 0.1486  |
| rs2928044   | C | -0.0384 |
| rs144337303 | G | -0.1722 |
| rs12365840  | A | -0.0733 |
| rs10832749  | A | 0.0591  |
| rs34009217  | C | 0.0639  |
| rs2641938   | G | 0.0435  |
| rs11034197  | A | 0.1633  |
| rs56003637  | T | 0.037   |
| rs11218059  | T | 0.0486  |
| rs4294528   | A | 0.073   |
| rs4034      | A | 0.0369  |
| rs113137102 | A | -0.1233 |
| rs10891753  | A | -0.0354 |
| rs11041124  | G | 0.0442  |
| rs12420909  | A | -0.1319 |
| rs7114400   | C | -0.0527 |
| rs4755239   | T | 0.0596  |
| rs2254643   | A | -0.039  |
| rs75257034  | G | -0.09   |
| rs12364111  | G | -0.0405 |
| rs11600953  | A | 0.0429  |
| rs12804793  | T | 0.0473  |
| rs7102245   | G | 0.0706  |
| rs504941    | C | 0.0557  |
| rs147330727 | T | -0.2409 |
| rs10047420  | A | 0.0351  |
| rs139914155 | A | 0.2269  |
| rs4757968   | T | 0.0368  |
| rs325681    | T | -0.1125 |
| rs80079872  | T | 0.0909  |

|             |   |         |
|-------------|---|---------|
| rs6484559   | G | -0.046  |
| rs3758736   | A | 0.052   |
| rs71474543  | T | 0.2042  |
| rs79931980  | G | -0.0414 |
| rs12418653  | A | -0.1219 |
| rs792520    | C | 0.0412  |
| rs11236181  | G | 0.0567  |
| rs72851226  | T | 0.1436  |
| rs61901909  | A | 0.098   |
| rs74840273  | G | -0.195  |
| rs4755240   | C | -0.0439 |
| rs34033403  | G | -0.0445 |
| rs72846743  | T | 0.1395  |
| rs113523070 | A | -0.2121 |
| rs78438473  | A | 0.1562  |
| rs12224514  | C | 0.1931  |
| rs111310676 | A | 0.2154  |
| rs6485580   | C | -0.0374 |
| rs80013263  | T | -0.1393 |
| rs7116708   | C | 0.1161  |
| rs112246582 | A | 0.203   |
| rs1984638   | T | 0.1966  |
| rs2509814   | G | 0.0479  |
| rs16913337  | C | -0.2403 |
| rs72871198  | A | 0.1061  |
| rs7105258   | T | 0.0492  |
| rs7103088   | A | -0.0581 |
| rs76513307  | A | -0.1854 |
| rs11217854  | G | -0.0505 |
| rs636629    | G | 0.0531  |
| rs34047092  | T | -0.0685 |
| rs60509704  | A | -0.1716 |
| rs75783037  | A | -0.1285 |
| rs117430265 | G | 0.1453  |
| rs73000965  | A | 0.0383  |
| rs150203597 | T | 0.1633  |
| rs78173768  | G | -0.1804 |
| rs148107033 | T | -0.1197 |
| rs77999137  | G | -0.1039 |
| rs1836794   | G | 0.2256  |
| rs113348846 | A | 0.106   |
| rs78997600  | T | 0.1976  |
| rs1151488   | C | 0.0383  |
| rs118103617 | T | 0.1115  |
| rs7110348   | G | 0.0411  |
| rs112550647 | G | 0.3298  |
| rs56404917  | T | 0.1531  |



|             |   |         |
|-------------|---|---------|
| rs112198489 | T | -0.0644 |
| rs61900277  | T | 0.1742  |
| rs10892631  | A | -0.0416 |
| rs77037840  | G | -0.0853 |
| rs7110831   | C | -0.0356 |
| rs1836119   | T | -0.0507 |
| rs6592029   | G | 0.1876  |
| rs76395044  | C | 0.0798  |
| rs11601915  | G | -0.0926 |
| rs73511848  | G | 0.0534  |
| rs17305386  | A | -0.2647 |
| rs1585226   | A | -0.0347 |
| rs76186473  | T | 0.2797  |
| rs2722776   | A | 0.0485  |
| rs11035999  | T | 0.0442  |
| rs595760    | T | 0.0373  |
| rs4910692   | A | -0.0347 |
| rs117764543 | G | -0.0903 |
| rs1219435   | C | 0.047   |
| rs7121601   | T | 0.0371  |
| rs7944716   | G | -0.0356 |
| rs75092478  | G | 0.1756  |
| rs530752    | G | -0.0672 |
| rs79741386  | A | 0.2596  |
| rs137984283 | G | 0.2396  |
| rs7119358   | G | -0.0459 |
| rs144697535 | C | 0.1581  |
| rs4936431   | G | 0.1465  |
| rs654217    | G | -0.0535 |
| rs72853268  | C | -0.1628 |
| rs1518747   | C | 0.0764  |
| rs11236569  | A | -0.0658 |
| rs645451    | T | 0.0878  |
| rs10901967  | C | 0.0748  |
| rs75039528  | T | 0.1052  |
| rs61911097  | A | 0.1138  |
| rs78705591  | C | 0.2192  |
| rs139439002 | C | -0.2    |
| rs11599989  | C | 0.2784  |
| rs73010228  | G | 0.1095  |
| rs12279719  | G | -0.0682 |
| rs2512947   | A | 0.0348  |
| rs72890830  | C | 0.2034  |
| rs72884805  | C | 0.1198  |
| rs7940590   | C | -0.0496 |
| rs11607239  | T | 0.2     |
| rs4936046   | T | -0.04   |

|             |   |         |
|-------------|---|---------|
| rs61892127  | C | -0.0406 |
| rs112534466 | T | -0.1489 |
| rs4945156   | A | -0.0544 |
| rs2002720   | A | 0.2488  |
| rs653008    | T | -0.0375 |
| rs146164779 | T | -0.2785 |
| rs643077    | A | 0.0475  |
| rs5110      | A | -0.0962 |
| rs79248351  | G | 0.1653  |
| rs71479161  | A | 0.0615  |
| rs901553    | C | -0.0368 |
| rs71491856  | A | 0.071   |
| rs61881129  | A | -0.048  |
| rs498186    | C | -0.0349 |
| rs11825791  | C | -0.0405 |
| rs4247634   | G | 0.0361  |
| rs949056    | G | -0.0385 |
| rs7949490   | A | 0.1118  |
| rs2514248   | G | 0.0907  |
| rs10765427  | C | 0.0508  |
| rs7105785   | T | 0.0798  |
| rs147554884 | G | 0.2067  |
| rs10892950  | C | -0.1092 |
| rs61878586  | G | -0.0672 |
| rs146857006 | G | 0.1874  |
| rs116899583 | T | 0.1327  |
| rs4046759   | G | 0.0954  |
| rs75278497  | T | 0.0789  |
| rs7937147   | T | -0.0441 |
| rs12792664  | A | 0.1309  |
| rs66495925  | T | 0.0725  |
| rs10836429  | T | 0.035   |
| rs6486331   | T | -0.0392 |
| rs117053481 | A | 0.2034  |
| rs10743149  | T | 0.0835  |
| rs1148093   | G | -0.034  |
| rs76613195  | A | -0.0494 |
| rs12281138  | A | 0.0739  |
| rs73026986  | A | 0.2028  |
| rs7127081   | A | 0.0791  |
| rs61895765  | A | 0.1108  |
| rs10834422  | C | -0.0448 |
| rs148036544 | T | -0.1788 |
| rs17132819  | T | -0.0861 |
| rs116856773 | G | -0.2369 |
| rs2061596   | T | 0.0512  |
| rs10769029  | G | -0.0539 |

|             |   |         |
|-------------|---|---------|
| rs10466511  | G | 0.037   |
| rs61913377  | T | 0.0349  |
| rs118006048 | G | 0.1278  |
| rs6485409   | A | -0.0669 |
| rs17306622  | A | -0.098  |
| rs75724517  | T | 0.222   |
| rs116867251 | A | -0.1349 |
| rs638089    | C | 0.0347  |
| rs684078    | A | -0.0547 |
| rs76136259  | T | -0.0355 |
| rs1648150   | A | 0.0394  |
| rs522645    | A | 0.0609  |
| rs11021929  | C | 0.0357  |
| rs73470055  | G | 0.051   |
| rs79889168  | G | -0.1485 |
| rs4617622   | A | 0.0362  |
| rs61595086  | C | -0.1453 |
| rs79997267  | C | 0.1193  |
| rs61902981  | C | -0.0942 |
| rs75461585  | G | -0.1154 |
| rs61888304  | A | 0.0499  |
| rs865174    | G | -0.1385 |
| rs11023142  | G | 0.0444  |
| rs10791409  | T | 0.0522  |
| rs144885343 | G | -0.1864 |
| rs74800709  | C | 0.085   |
| rs9943588   | T | 0.036   |
| rs117770471 | A | 0.1083  |
| rs11220380  | T | 0.1185  |
| rs11027972  | G | 0.1212  |
| rs76191344  | T | 0.163   |
| rs7940667   | A | -0.0667 |
| rs1938634   | T | -0.0421 |
| rs55637206  | T | 0.2497  |
| rs57818428  | T | -0.1086 |
| rs55770928  | G | 0.1522  |
| rs7104213   | C | 0.067   |
| rs115387481 | G | -0.1114 |
| rs141796656 | G | -0.1547 |
| rs2512096   | A | 0.0731  |
| rs7114599   | C | 0.0706  |
| rs72979267  | C | -0.0624 |
| rs75022463  | C | -0.0832 |
| rs6591518   | C | -0.0631 |
| rs2301128   | A | -0.0546 |
| rs4922677   | A | -0.1236 |
| rs1945794   | T | 0.0535  |

|             |   |         |
|-------------|---|---------|
| rs139825178 | T | -0.1514 |
| rs11236672  | T | 0.0487  |
| rs10743085  | G | -0.0575 |
| rs75237534  | A | 0.1716  |
| rs12422139  | T | -0.0679 |
| rs297321    | G | 0.2999  |
| rs2212343   | G | 0.107   |
| rs67280587  | G | 0.0345  |
| rs2676375   | G | 0.0399  |
| rs118064767 | A | -0.1029 |
| rs11230137  | A | 0.0419  |
| rs72941376  | C | -0.1541 |
| rs541545    | C | 0.0369  |
| rs77548282  | T | 0.1093  |
| rs34687622  | C | 0.13    |
| rs72868553  | A | -0.062  |
| rs653478    | A | 0.0367  |
| rs143216827 | C | -0.1788 |
| rs7114034   | G | -0.0371 |
| rs140201270 | A | 0.257   |
| rs34623831  | C | 0.2139  |
| rs112543847 | T | 0.0884  |
| rs117915906 | A | 0.0804  |
| rs35505492  | A | -0.182  |
| rs10890788  | C | 0.0401  |
| rs150041480 | G | -0.1434 |
| rs329641    | A | -0.0358 |
| rs11033303  | A | 0.0379  |
| rs34749378  | G | 0.0431  |
| rs142419042 | T | -0.2578 |
| rs144795848 | G | 0.1932  |
| rs11224819  | C | -0.0556 |
| rs11023013  | G | 0.0636  |
| rs500389    | G | 0.0346  |
| rs916812    | T | -0.0629 |
| rs10500812  | G | -0.0332 |
| rs41503846  | T | 0.1978  |
| rs72879339  | A | 0.0725  |
| rs622175    | T | 0.0347  |
| rs586064    | A | -0.0763 |
| rs61882196  | T | -0.1853 |
| rs7125753   | A | 0.1066  |
| rs11029993  | C | 0.1636  |
| rs10890781  | C | 0.0985  |
| rs75325584  | G | 0.2424  |
| rs56319966  | A | 0.0957  |
| rs76890524  | G | -0.0942 |

|             |   |         |
|-------------|---|---------|
| rs117567948 | T | 0.1937  |
| rs11022106  | A | 0.0926  |
| rs10832089  | C | 0.0355  |
| rs11600288  | T | -0.0567 |
| rs113001570 | T | -0.0746 |
| rs1670195   | C | 0.25    |
| rs1194876   | G | 0.0366  |
| rs7115549   | T | 0.2974  |
| rs60813344  | C | -0.2874 |
| rs78054182  | C | 0.0918  |
| rs76305232  | A | 0.1842  |
| rs11036788  | A | 0.0939  |
| rs75894985  | A | 0.2333  |
| rs3018731   | A | 0.0494  |
| rs11216867  | G | -0.0416 |
| rs493141    | A | 0.0464  |
| rs117994429 | G | 0.1412  |
| rs78246868  | A | 0.2048  |
| rs117832459 | A | 0.0828  |
| rs12787515  | A | -0.074  |
| rs77659302  | T | -0.2074 |
| rs78255332  | T | -0.088  |
| rs56697477  | A | 0.0426  |
| rs61891302  | G | -0.1169 |
| rs78977588  | A | -0.0566 |
| rs1793549   | T | 0.0385  |
| rs2785174   | T | 0.0398  |
| rs79988761  | A | 0.1251  |
| rs74996139  | T | -0.2094 |
| rs4148617   | A | -0.0391 |
| rs144218656 | C | -0.1858 |
| rs75406502  | A | 0.2214  |
| rs2236647   | T | 0.034   |
| rs78426959  | A | -0.1609 |
| rs17418246  | T | 0.0349  |
| rs10890847  | T | -0.0408 |
| rs7924721   | A | -0.0503 |
| rs12786868  | T | -0.1516 |
| rs55744154  | G | -0.0624 |
| rs2785184   | A | 0.0464  |
| rs658289    | C | -0.0423 |
| rs75200329  | T | 0.0843  |
| rs61913977  | C | 0.0909  |
| rs117224859 | C | 0.2315  |
| rs7114248   | T | -0.0421 |
| rs2155135   | G | 0.136   |
| rs77546866  | A | -0.0755 |

|             |   |         |
|-------------|---|---------|
| rs79892107  | T | 0.0889  |
| rs77586708  | T | -0.1384 |
| rs78756526  | T | -0.1503 |
| rs353630    | A | -0.0369 |
| rs1917871   | A | -0.0384 |
| rs4400842   | A | 0.0482  |
| rs10835105  | T | -0.0345 |
| rs12282501  | A | 0.0526  |
| rs318986    | G | 0.0487  |
| rs117568831 | A | -0.272  |
| rs6486394   | G | 0.0373  |
| rs61886710  | G | -0.0428 |
| rs12796307  | A | 0.0653  |
| rs12420723  | T | -0.0611 |
| rs55931816  | A | 0.1537  |
| rs61914738  | T | -0.1563 |
| rs3849982   | G | -0.0375 |
| rs148976811 | G | 0.2232  |
| rs74831998  | G | 0.1055  |
| rs6589499   | A | 0.079   |
| rs116017502 | T | 0.1151  |
| rs6483489   | C | -0.0351 |
| rs11604023  | T | 0.2342  |
| rs117423493 | T | -0.1527 |
| rs10765850  | T | -0.0436 |
| rs575257    | G | 0.0333  |
| rs7927310   | A | 0.1389  |
| rs660748    | C | -0.0342 |
| rs149696829 | A | -0.215  |
| rs80217529  | A | -0.1178 |
| rs79205097  | T | -0.1455 |
| rs45591844  | C | 0.1432  |
| rs10789819  | A | -0.0369 |
| rs57770200  | T | 0.062   |
| rs11038361  | T | 0.0965  |
| rs689752    | C | -0.1789 |
| rs78497305  | C | -0.2264 |
| rs12292077  | A | 0.1067  |
| rs35086137  | C | -0.0795 |
| rs2440389   | A | -0.0682 |
| rs112368778 | T | -0.158  |
| rs80212874  | G | -0.0663 |
| rs11216474  | G | 0.0326  |
| rs11025951  | G | -0.0577 |
| rs12789836  | G | -0.056  |
| rs308299    | A | -0.1306 |
| rs7121018   | T | -0.0663 |

|             |   |         |
|-------------|---|---------|
| rs36074929  | C | 0.1585  |
| rs138489397 | G | -0.0855 |
| rs75576903  | T | 0.2296  |
| rs547612    | A | -0.0345 |
| rs140218478 | T | -0.1349 |
| rs138570247 | A | 0.259   |
| rs35868113  | C | 0.0568  |
| rs9988823   | G | -0.0457 |
| rs58608217  | A | 0.0725  |
| rs112067033 | T | -0.1521 |
| rs12282538  | T | -0.1385 |
| rs151289138 | A | -0.1852 |
| rs117432293 | A | 0.1482  |
| rs286896    | A | -0.0374 |
| rs1893910   | T | -0.0327 |
| rs9667078   | A | -0.0477 |
| rs10835760  | A | -0.0355 |
| rs75134844  | G | 0.1014  |
| rs117653414 | A | -0.1634 |
| rs7943297   | A | 0.0388  |
| rs7126682   | A | -0.0789 |
| rs34451278  | G | 0.1641  |
| rs1944113   | C | -0.1011 |
| rs10891845  | T | 0.036   |
| rs144481490 | T | 0.1255  |
| rs117570651 | A | -0.1253 |
| rs11606204  | A | 0.0832  |
| rs72930283  | G | -0.0495 |
| rs4095689   | G | 0.042   |
| rs678815    | C | 0.0326  |
| rs11825265  | C | 0.0362  |
| rs1794191   | T | 0.1368  |
| rs112383992 | G | -0.2355 |
| rs10501851  | G | 0.052   |
| rs75922637  | A | 0.1293  |
| rs12574989  | T | -0.1156 |
| rs12287711  | C | 0.0391  |
| rs75160170  | T | 0.1407  |
| rs12806439  | C | 0.0515  |
| rs7933807   | C | -0.034  |
| rs7934191   | C | 0.0352  |
| rs1865731   | C | -0.0338 |
| rs2403568   | T | -0.0501 |
| rs7121214   | A | 0.0336  |
| rs11212045  | C | -0.0394 |
| rs16923378  | C | 0.0571  |
| rs4468343   | T | 0.0504  |

|             |   |         |
|-------------|---|---------|
| rs2047299   | A | 0.0928  |
| rs983914    | A | -0.0344 |
| rs7931418   | C | 0.0958  |
| rs2257023   | A | -0.0506 |
| rs58990523  | T | -0.0957 |
| rs4938111   | G | -0.0497 |
| rs67976715  | C | 0.0384  |
| rs7106446   | A | -0.0534 |
| rs12791103  | T | 0.0752  |
| rs1784021   | C | 0.0396  |
| rs75055230  | C | 0.1158  |
| rs111698961 | A | 0.106   |
| rs11021715  | C | 0.036   |
| rs12574352  | G | 0.1257  |
| rs79653698  | G | 0.1894  |
| rs11229961  | G | 0.0726  |
| rs61896909  | T | 0.0821  |
| rs10894739  | A | -0.054  |
| rs10892155  | T | -0.0981 |
| rs5006884   | T | -0.0381 |
| rs11820623  | G | -0.1156 |
| rs11232381  | C | 0.0365  |
| rs557856    | T | 0.0455  |
| rs79562743  | G | 0.1532  |
| rs79453398  | G | 0.0784  |
| rs11600250  | C | 0.2502  |
| rs13377314  | G | 0.0555  |
| rs11606534  | T | 0.0844  |
| rs61917769  | C | 0.1415  |
| rs11042643  | G | 0.0449  |
| rs1715457   | A | -0.0376 |
| rs7128890   | G | 0.0331  |
| rs11600515  | C | 0.0473  |
| rs12226744  | C | 0.0503  |
| rs117268117 | T | 0.1175  |
| rs67003790  | A | -0.0365 |
| rs72979233  | G | -0.0415 |
| rs78102309  | A | -0.0571 |
| rs1613596   | A | 0.0348  |
| rs75888579  | C | 0.1193  |
| rs11222472  | A | 0.0559  |
| rs12799769  | T | -0.1436 |
| rs11213863  | C | -0.034  |
| rs144567699 | G | 0.0881  |
| rs59677928  | G | 0.087   |
| rs12801338  | A | -0.1353 |
| rs10840228  | A | 0.0391  |



|             |   |         |
|-------------|---|---------|
| rs74669447  | G | 0.0659  |
| rs11233872  | A | 0.0478  |
| rs969055    | A | 0.1291  |
| rs78546158  | C | -0.0987 |
| rs885002    | A | 0.0938  |
| rs148248056 | G | 0.1075  |
| rs12786028  | G | 0.1887  |
| rs80091107  | G | 0.139   |
| rs72961223  | A | -0.0663 |
| rs11230741  | A | 0.0587  |
| rs116845306 | A | -0.1339 |
| rs12361540  | A | -0.0713 |
| rs4485140   | A | 0.1357  |
| rs4758341   | G | -0.0397 |
| rs72640898  | T | 0.1594  |
| rs231910    | A | 0.0339  |
| rs118119748 | C | -0.2792 |
| rs10501252  | C | 0.0358  |
| rs112451652 | T | 0.2059  |
| rs11224706  | C | -0.104  |
| rs640796    | T | 0.0457  |
| rs1944144   | T | 0.0503  |
| rs141522080 | T | 0.1815  |
| rs11607213  | A | 0.1101  |
| rs11237704  | T | 0.1283  |
| rs112461673 | T | -0.1389 |
| rs116966964 | A | 0.1713  |
| rs1615979   | G | 0.1972  |
| rs72858802  | T | 0.07    |
| rs578029    | A | -0.0393 |
| rs79502209  | T | -0.2223 |
| rs594759    | A | 0.0325  |
| rs61877000  | A | -0.0575 |
| rs10897974  | T | 0.0535  |
| rs10767518  | C | 0.0482  |
| rs118013809 | G | -0.1361 |
| rs10500956  | T | 0.0444  |
| rs2846372   | C | 0.0417  |
| rs11024786  | T | -0.0341 |
| rs73517929  | A | -0.1547 |
| rs11236497  | A | -0.0687 |
| rs12361680  | C | 0.077   |
| rs1107443   | T | -0.0567 |
| rs34356535  | G | 0.1124  |
| rs79751425  | A | 0.1363  |
| rs74576900  | G | 0.2036  |
| rs41268195  | G | 0.2092  |

|             |   |         |
|-------------|---|---------|
| rs607987    | G | 0.0329  |
| rs56208622  | T | 0.1474  |
| rs113493084 | C | 0.0566  |
| rs111642801 | G | 0.1053  |
| rs35978571  | G | -0.0359 |
| rs10789881  | A | -0.0414 |
| rs72989804  | C | -0.0499 |
| rs75045826  | A | 0.2467  |
| rs117329027 | G | -0.2362 |
| rs116865019 | A | 0.1585  |
| rs117816894 | T | -0.1779 |
| rs76285882  | T | 0.0871  |
| rs1966864   | C | -0.0439 |
| rs116864079 | T | -0.1466 |
| rs10793376  | C | -0.0773 |
| rs74789848  | C | 0.1507  |
| rs61898701  | G | 0.0766  |
| rs1993543   | T | 0.0426  |
| rs139463899 | C | -0.219  |
| rs588407    | T | 0.0472  |
| rs12363786  | G | -0.1559 |
| rs80320550  | T | 0.2     |
| rs10791602  | A | 0.0402  |
| rs7941613   | G | 0.1556  |
| rs73413393  | C | -0.0744 |
| rs10840567  | G | -0.04   |
| rs139617128 | A | -0.1644 |
| rs12417213  | A | 0.1926  |
| rs79896662  | A | 0.1356  |
| rs1793193   | T | -0.0373 |
| rs61749187  | A | 0.1076  |
| rs73025721  | C | 0.1635  |
| rs7111210   | G | 0.0452  |
| rs116973675 | A | 0.131   |
| rs11213882  | A | 0.0677  |
| rs112268165 | T | 0.182   |
| rs7110076   | G | 0.0335  |
| rs78263502  | T | 0.0719  |
| rs117750142 | G | 0.1445  |
| rs11021118  | T | -0.0461 |
| rs79226713  | C | 0.1414  |
| rs116896243 | C | -0.2076 |
| rs10893046  | A | -0.0411 |
| rs151159256 | C | 0.1538  |
| rs139506941 | A | 0.1806  |
| rs139092102 | T | -0.1577 |
| rs112345492 | G | 0.0647  |

|             |   |         |
|-------------|---|---------|
| rs147343873 | C | -0.1708 |
| rs2282507   | T | -0.0455 |
| rs112366905 | C | -0.1042 |
| rs11041218  | G | -0.0697 |
| rs74939159  | G | 0.1384  |
| rs6416052   | G | 0.1343  |
| rs4758006   | T | -0.0457 |
| rs144422373 | A | -0.1158 |
| rs146134766 | C | -0.1826 |
| rs55681536  | A | -0.0428 |
| rs117553646 | T | 0.1801  |
| rs118178307 | G | 0.1386  |
| rs871401    | T | 0.0341  |
| rs2074310   | T | 0.0333  |
| rs116941215 | G | -0.208  |
| rs10047474  | C | 0.0364  |
| rs12791316  | G | 0.0322  |
| rs142211893 | C | -0.1485 |
| rs4472968   | A | 0.0903  |
| rs4298915   | G | -0.054  |
| rs34418043  | G | 0.0384  |
| rs79868289  | T | -0.1033 |
| rs28666693  | T | -0.0408 |
| rs61898615  | A | 0.1845  |
| rs114105302 | T | -0.1726 |
| rs16915415  | A | 0.0845  |
| rs148065815 | T | -0.1078 |
| rs10891391  | G | 0.0344  |
| rs75527235  | A | 0.169   |
| rs495041    | T | 0.0527  |
| rs75757253  | G | -0.1476 |
| rs75967496  | G | 0.1217  |
| rs1906089   | A | -0.0365 |
| rs904317    | A | 0.1224  |
| rs140438555 | T | -0.1173 |
| rs34143441  | T | 0.19    |
| rs10430887  | A | -0.0457 |
| rs4936353   | A | -0.0322 |
| rs139368128 | T | -0.2698 |
| rs147985580 | T | 0.2095  |
| rs111629286 | A | 0.1515  |
| rs11024393  | T | 0.0535  |
| rs72939508  | T | 0.1447  |
| rs75318498  | C | 0.1386  |
| rs1371352   | G | 0.0787  |
| rs117039487 | A | -0.1275 |
| rs117771892 | G | -0.2084 |

|             |   |         |
|-------------|---|---------|
| rs61901226  | T | 0.0456  |
| rs72948786  | T | -0.0579 |
| rs79110604  | C | 0.1477  |
| rs12221682  | G | 0.0602  |
| rs74600223  | A | 0.0761  |
| rs12789020  | T | 0.0433  |
| rs509968    | G | -0.0358 |
| rs7947221   | T | 0.0983  |
| rs116978601 | T | -0.1598 |
| rs73014390  | T | 0.1845  |
| rs16933888  | C | 0.0647  |
| rs4996144   | T | -0.036  |
| rs12291225  | A | 0.0369  |
| rs79448290  | G | 0.0684  |
| rs113916588 | A | 0.1004  |
| rs1791802   | C | 0.043   |
| rs111570379 | G | -0.13   |
| rs68069305  | C | 0.0413  |
| rs75343922  | T | 0.0825  |
| rs117968925 | T | 0.3231  |
| rs79479926  | G | 0.3086  |
| rs4245121   | T | -0.2918 |
| rs7120258   | A | -0.0596 |
| rs2852993   | G | -0.0622 |
| rs77516921  | C | -0.1511 |
| rs74777992  | T | -0.0947 |
| rs7946851   | C | -0.0753 |
| rs11263595  | A | 0.042   |
| rs987482    | C | 0.0815  |
| rs614624    | A | 0.0423  |
| rs12362647  | G | 0.0656  |
| rs11607737  | A | -0.0356 |
| rs7123869   | C | 0.1571  |
| rs594484    | T | 0.0365  |
| rs11246074  | G | 0.042   |
| rs75214830  | A | -0.0955 |
| rs2002734   | T | -0.041  |
| rs74361939  | A | 0.1233  |
| rs61909238  | G | -0.0779 |
| rs11027687  | C | -0.0336 |
| rs10893733  | T | 0.0407  |
| rs75289671  | T | -0.1278 |
| rs1893674   | G | -0.0348 |
| rs112875798 | T | 0.0509  |
| rs2513433   | G | 0.0337  |
| rs11235292  | A | 0.1114  |
| rs77647613  | A | 0.0794  |

|             |   |         |
|-------------|---|---------|
| rs144342710 | A | 0.16    |
| rs79198283  | A | 0.1419  |
| rs56397102  | G | -0.1358 |
| rs7110347   | A | -0.0562 |
| rs61402773  | T | 0.1589  |
| rs1346836   | C | 0.1528  |
| rs117350768 | A | 0.1363  |
| rs7104343   | T | 0.0548  |
| rs10466613  | A | 0.0913  |
| rs10741421  | T | 0.1444  |
| rs75357158  | T | 0.0654  |
| rs7939244   | A | -0.1518 |
| rs72992873  | G | -0.141  |
| rs7103313   | A | 0.0594  |
| rs34281659  | C | -0.1097 |
| rs10891554  | A | 0.0552  |
| rs72986700  | A | -0.0731 |
| rs12286561  | T | -0.1976 |
| rs1993351   | G | 0.0341  |
| rs7928765   | T | 0.0637  |
| rs142898085 | G | -0.2503 |
| rs117793327 | G | 0.1468  |
| rs77448543  | T | -0.0396 |
| rs77095488  | T | 0.1107  |
| rs17592124  | A | -0.2939 |
| rs10892512  | A | -0.0364 |
| rs6592515   | T | -0.0505 |
| rs559638    | C | -0.0338 |
| rs10832878  | A | -0.0951 |
| rs11220490  | T | -0.0453 |
| rs75610316  | T | -0.0877 |
| rs76028951  | T | 0.1783  |
| rs7936123   | G | -0.0352 |
| rs118095609 | T | -0.2673 |
| rs73000671  | C | 0.0646  |
| rs7935166   | A | -0.0475 |
| rs7123198   | T | 0.0342  |
| rs4237782   | C | -0.0477 |
| rs11225490  | C | -0.0446 |
| rs140211344 | T | -0.1695 |
| rs12146463  | A | 0.0417  |
| rs1347291   | T | 0.0322  |
| rs75600565  | A | 0.1791  |
| rs7111307   | G | -0.0761 |
| rs10833190  | G | -0.0471 |
| rs2250417   | T | -0.0329 |
| rs878625    | A | 0.067   |

|             |   |         |
|-------------|---|---------|
| rs7931040   | A | 0.0457  |
| rs7926800   | T | 0.0349  |
| rs61739062  | T | -0.124  |
| rs12361994  | C | 0.075   |
| rs117894297 | T | -0.16   |
| rs10766454  | T | 0.0369  |
| rs79105967  | A | 0.2351  |
| rs901560    | G | -0.0705 |
| rs80177546  | T | 0.1218  |
| rs4150614   | A | 0.0431  |
| rs7120511   | C | -0.033  |
| rs73025685  | C | 0.0943  |
| rs144892029 | T | -0.1046 |
| rs117772124 | A | 0.1571  |
| rs142289341 | A | 0.062   |
| rs117448681 | A | 0.0844  |
| rs117921503 | A | -0.1768 |
| rs11233163  | T | -0.0349 |
| rs1837604   | A | 0.0842  |
| rs3758947   | A | 0.0408  |
| rs7126080   | G | 0.0313  |
| rs79064836  | C | 0.108   |
| rs141317479 | A | 0.1359  |
| rs324154    | T | 0.0375  |
| rs138047208 | G | 0.2204  |
| rs4757024   | A | -0.0475 |
| rs7940691   | C | -0.0343 |
| rs17653181  | C | -0.154  |
| rs262407    | C | -0.0825 |
| rs4754195   | T | 0.0315  |
| rs1393275   | C | 0.0729  |
| rs56123707  | A | -0.1666 |
| rs1715284   | T | -0.0635 |
| rs77329428  | A | -0.1353 |
| rs118029566 | A | -0.2727 |
| rs11034603  | T | 0.0405  |
| rs7109944   | C | 0.037   |
| rs1464157   | G | -0.0507 |
| rs117556552 | T | 0.1863  |
| rs147129939 | G | 0.1678  |
| rs11214883  | C | 0.104   |
| rs11041172  | A | 0.1171  |
| rs80077827  | T | -0.1367 |
| rs3740763   | T | -0.0331 |
| rs75593810  | A | -0.1639 |
| rs11236937  | T | 0.0743  |
| rs35291460  | A | 0.08    |

|             |   |         |
|-------------|---|---------|
| rs10741552  | A | -0.0574 |
| rs10790443  | C | 0.0346  |
| rs150186790 | G | 0.1288  |
| rs1800738   | A | -0.034  |
| rs145014327 | T | 0.1329  |
| rs35643618  | C | 0.0592  |
| rs12362796  | T | 0.0467  |
| rs657666    | A | 0.0411  |
| rs12282383  | C | 0.0636  |
| rs7122501   | T | -0.0775 |
| rs10741526  | C | -0.0389 |
| rs116961375 | A | 0.1354  |
| rs78294883  | A | 0.1635  |
| rs35788223  | G | -0.1726 |
| rs1216094   | T | 0.1847  |
| rs549912    | C | -0.0447 |
| rs2445260   | C | 0.0335  |
| rs2947028   | C | -0.0372 |
| rs2755167   | C | 0.1378  |
| rs7950518   | A | -0.0577 |
| rs116913465 | G | 0.2093  |
| rs61891299  | A | -0.0823 |
| rs9888256   | T | -0.0391 |
| rs4643052   | C | 0.0394  |
| rs1892786   | G | -0.1586 |
| rs473926    | C | -0.0381 |
| rs10839797  | G | 0.0323  |
| rs56107336  | T | 0.153   |
| rs117843474 | T | -0.2675 |
| rs748302    | G | -0.0402 |
| rs201834    | A | -0.0405 |
| rs515200    | T | -0.0316 |
| rs77251009  | T | -0.169  |
| rs142331786 | T | -0.1364 |
| rs11827785  | G | 0.0402  |
| rs11602047  | C | 0.0339  |
| rs4362145   | G | -0.0354 |
| rs12804300  | G | 0.0342  |
| rs117701937 | A | 0.1446  |
| rs111673037 | T | 0.1806  |
| rs12223045  | T | -0.0466 |
| rs78595522  | G | -0.0946 |
| rs73484234  | T | -0.0432 |
| rs12805953  | A | 0.255   |
| rs7947793   | C | 0.0324  |
| rs12417424  | T | -0.0412 |
| rs141504439 | T | -0.1687 |

|             |   |         |
|-------------|---|---------|
| rs10899037  | T | 0.0468  |
| rs1791808   | T | -0.0378 |
| rs2851459   | A | -0.0354 |
| rs2226604   | A | 0.0458  |
| rs487518    | A | -0.0333 |
| rs118016786 | A | -0.1132 |
| rs34701876  | G | -0.2392 |
| rs11544764  | T | -0.0546 |
| rs112100048 | G | -0.1762 |
| rs2165832   | G | -0.0316 |
| rs141498689 | A | 0.138   |
| rs11037191  | G | -0.106  |
| rs112513477 | T | -0.1584 |
| rs77482583  | A | 0.113   |
| rs2114294   | T | 0.0327  |
| rs11236867  | T | -0.0474 |
| rs12222135  | C | 0.0826  |
| rs117094876 | A | -0.1391 |
| rs75705076  | A | 0.0565  |
| rs61880372  | T | -0.1881 |
| rs147974033 | C | 0.1784  |
| rs77583616  | A | -0.1091 |
| rs78831598  | C | -0.0941 |
| rs80351178  | T | -0.0615 |
| rs1978694   | A | -0.0583 |
| rs111840366 | A | -0.2227 |
| rs614944    | C | 0.1175  |
| rs11223884  | A | 0.0785  |
| rs685929    | C | -0.0572 |
| rs1060574   | T | -0.0352 |
| rs78556369  | A | 0.1017  |
| rs12279814  | C | -0.0965 |
| rs1791577   | T | 0.0472  |
| rs4936103   | T | -0.0432 |
| rs76060406  | C | 0.0597  |
| rs76273814  | T | -0.0985 |
| rs3847644   | G | -0.0382 |
| rs643950    | A | 0.042   |
| rs12288455  | A | -0.0461 |
| rs10767960  | A | 0.1027  |
| rs78786364  | A | -0.189  |
| rs74715785  | C | 0.1115  |
| rs11824870  | T | -0.1114 |
| rs4910006   | T | -0.0641 |
| rs11602911  | C | 0.0561  |
| rs10896026  | T | -0.0322 |
| rs61880763  | G | 0.1739  |



|             |   |         |
|-------------|---|---------|
| rs4396271   | C | 0.0539  |
| rs73042847  | A | -0.1555 |
| rs77667863  | A | 0.1598  |
| rs17304039  | G | -0.0463 |
| rs75894532  | T | 0.1461  |
| rs56131605  | A | -0.0326 |
| rs10894115  | G | 0.0361  |
| rs7480849   | T | -0.0445 |
| rs79376278  | T | 0.0625  |
| rs58767122  | C | -0.2164 |
| rs72931444  | G | -0.0706 |
| rs1986981   | A | -0.0747 |
| rs41523645  | A | 0.1134  |
| rs77490132  | T | 0.0913  |
| rs12365419  | A | 0.1567  |
| rs10833142  | C | 0.1272  |
| rs2734495   | C | 0.0449  |
| rs111348735 | A | 0.1453  |
| rs143312104 | T | -0.1095 |
| rs148622342 | T | -0.0819 |
| rs2852825   | C | 0.0381  |
| rs117717442 | C | -0.1146 |
| rs10902359  | C | 0.0889  |
| rs1511518   | G | 0.0318  |
| rs148940705 | A | -0.1641 |
| rs10893088  | C | 0.0308  |
| rs112652381 | G | -0.1864 |
| rs10832694  | T | 0.0316  |
| rs79412404  | A | -0.0894 |
| rs149432547 | C | -0.1582 |
| rs4457780   | T | -0.0318 |
| rs1944505   | A | 0.0358  |
| rs7130896   | T | 0.0378  |
| rs75948396  | G | -0.1584 |
| rs11500075  | A | 0.0725  |
| rs77826655  | T | -0.1839 |
| rs11028019  | C | -0.0605 |
| rs4617579   | G | -0.0567 |
| rs72858249  | A | 0.1601  |
| rs17331385  | G | 0.0382  |
| rs75533080  | A | 0.0657  |
| rs115448493 | T | 0.1457  |
| rs7129336   | G | 0.0316  |
| rs113500486 | C | -0.0563 |
| rs73035840  | G | -0.0685 |
| rs56361714  | G | 0.0542  |
| rs12797182  | T | -0.1844 |

|             |   |         |
|-------------|---|---------|
| rs10899422  | A | 0.045   |
| rs117091772 | A | 0.1617  |
| rs12223885  | T | -0.0555 |
| rs2087216   | C | -0.0415 |
| rs72999328  | T | -0.0579 |
| rs112213410 | C | 0.1915  |
| rs35781267  | C | -0.06   |
| rs111795511 | A | 0.071   |
| rs7948547   | A | 0.0404  |
| rs117628555 | T | 0.1001  |
| rs117431642 | T | -0.1652 |
| rs7929818   | G | 0.1174  |
| rs116900370 | A | 0.1598  |
| rs77502674  | A | -0.1887 |
| rs74557470  | G | 0.0491  |
| rs55755774  | A | 0.0554  |
| rs141779583 | C | 0.1977  |
| rs7484216   | T | 0.0318  |
| rs56082516  | T | 0.0815  |
| rs75511387  | T | 0.1437  |
| rs12284795  | G | -0.0423 |
| rs9888274   | G | 0.0358  |
| rs74891809  | C | -0.1596 |
| rs2186676   | G | -0.0489 |
| rs11606292  | A | -0.0879 |
| rs117154452 | T | 0.2368  |
| rs144573364 | C | 0.172   |
| rs11211898  | G | 0.0661  |
| rs613677    | G | -0.2251 |
| rs7123684   | A | 0.0382  |
| rs36103144  | T | -0.133  |
| rs2716448   | G | -0.033  |
| rs12289503  | T | -0.0861 |
| rs113489666 | C | -0.1289 |
| rs11213040  | G | -0.1079 |
| rs4753809   | C | -0.1526 |
| rs143557119 | A | 0.1596  |
| rs146768862 | T | 0.1723  |
| rs117440454 | T | 0.0632  |
| rs75506411  | T | 0.1229  |
| rs147160256 | A | 0.1501  |
| rs35422754  | A | 0.0508  |
| rs72854318  | T | -0.1599 |
| rs117404822 | A | 0.1095  |
| rs1450219   | T | -0.0513 |
| rs16929108  | A | 0.1316  |
| rs4522157   | A | -0.0974 |

|             |   |         |
|-------------|---|---------|
| rs117165313 | A | 0.1765  |
| rs11237298  | A | -0.0509 |
| rs78966764  | A | -0.0773 |
| rs4144290   | A | 0.0497  |
| rs12797344  | T | 0.1858  |
| rs2156215   | T | 0.1132  |
| rs648996    | T | -0.0303 |
| rs117227263 | T | -0.134  |
| rs12787013  | G | 0.0468  |
| rs78815280  | G | -0.0802 |
| rs147428777 | C | -0.1475 |
| rs400869    | G | 0.0399  |
| rs11024707  | G | 0.1029  |
| rs12273597  | T | -0.1173 |
| rs7116826   | G | 0.0522  |
| rs2509150   | T | -0.0403 |
| rs590616    | A | 0.0332  |
| rs75053483  | G | 0.0887  |
| rs117620136 | T | -0.16   |
| rs4539314   | T | -0.0333 |
| rs113896223 | A | 0.2325  |
| rs117207645 | C | -0.2385 |
| rs3943756   | T | -0.0424 |
| rs6590292   | A | 0.0327  |
| rs7112009   | C | -0.036  |
| rs78921712  | T | -0.1453 |
| rs56688852  | C | -0.1373 |
| rs10894430  | C | 0.0327  |
| rs61905163  | C | -0.0775 |
| rs11025196  | G | 0.1189  |
| rs61880782  | T | 0.1267  |
| rs1883959   | C | -0.0445 |
| rs512500    | T | 0.042   |
| rs1793069   | C | 0.0396  |
| rs76419623  | C | 0.1136  |
| rs117640012 | C | 0.1413  |
| rs79273268  | A | -0.1389 |
| rs11236101  | T | 0.0553  |
| rs117905867 | C | -0.1355 |
| rs72979481  | C | 0.1425  |
| rs964882    | A | -0.0308 |
| rs112054985 | C | -0.113  |
| rs6578582   | T | -0.0388 |
| rs17753400  | A | -0.2146 |
| rs12576214  | C | -0.0687 |
| rs486487    | C | 0.0778  |
| rs117858826 | T | -0.1211 |

|             |   |         |
|-------------|---|---------|
| rs61741824  | C | 0.0946  |
| rs146971999 | G | 0.1851  |
| rs76328593  | T | 0.1974  |
| rs10769917  | C | 0.0363  |
| rs148212965 | G | 0.1093  |
| rs113664380 | T | 0.1433  |
| rs140193559 | A | -0.1749 |
| rs73414650  | G | -0.2029 |
| rs1914471   | A | -0.0318 |
| rs76370378  | C | 0.0567  |
| rs61884004  | G | 0.1178  |
| rs139297377 | T | 0.0879  |
| rs7129103   | G | -0.031  |
| rs704730    | A | 0.038   |
| rs72948216  | G | -0.1061 |
| rs12363523  | A | 0.1039  |
| rs7112389   | C | 0.0393  |
| rs7131376   | C | 0.032   |
| rs12802202  | C | 0.1459  |
| rs76390258  | C | -0.1772 |
| rs11038704  | T | 0.0376  |
| rs567105    | T | -0.0318 |
| rs12294689  | C | 0.0506  |
| rs681416    | G | 0.0461  |
| rs3136520   | T | 0.1074  |
| rs582179    | G | 0.0383  |
| rs56030503  | G | -0.0556 |
| rs10502220  | C | -0.0419 |
| rs17151053  | A | 0.1414  |
| rs76129894  | G | 0.1685  |
| rs7936364   | C | -0.0401 |
| rs12420116  | C | 0.0534  |
| rs490592    | A | -0.0378 |
| rs61883501  | C | 0.1432  |
| rs11222862  | C | 0.0402  |
| rs1557455   | G | -0.1346 |
| rs11822514  | C | 0.0332  |
| rs79889619  | A | 0.1728  |
| rs78561297  | A | 0.137   |
| rs12366193  | A | -0.0529 |
| rs2930196   | A | 0.0377  |
| rs139100355 | A | 0.1814  |
| rs11223982  | A | 0.1892  |
| rs2511878   | T | 0.0459  |
| rs1504731   | C | -0.0345 |
| rs61909515  | G | 0.066   |
| rs11601230  | T | -0.0419 |

|             |   |         |
|-------------|---|---------|
| rs11217364  | A | 0.0308  |
| rs77576737  | A | 0.0532  |
| rs57910561  | A | 0.0404  |
| rs117055341 | C | 0.1369  |
| rs11218856  | C | 0.032   |
| rs10834449  | G | 0.0328  |
| rs75165685  | A | 0.1127  |
| rs12573957  | T | 0.0604  |
| rs3847597   | C | -0.0764 |
| rs149013018 | C | 0.1334  |
| rs4617597   | G | 0.1399  |
| rs34975053  | C | 0.1035  |
| rs1372263   | G | 0.031   |
| rs72963610  | C | 0.1134  |
| rs34979869  | G | 0.1792  |
| rs11036545  | G | 0.1129  |
| rs77051819  | A | -0.0521 |
| rs112556389 | A | -0.1382 |
| rs11827962  | T | 0.1581  |
| rs7926517   | A | -0.0358 |
| rs74418850  | G | 0.1319  |
| rs548363    | C | -0.0906 |
| rs60116463  | G | -0.0696 |
| rs543583    | A | -0.0972 |
| rs142268066 | T | 0.2016  |
| rs11603929  | T | 0.1199  |
| rs3814738   | T | 0.0421  |
| rs12808107  | G | 0.0304  |
| rs79763367  | C | 0.1604  |
| rs61733868  | C | 0.0811  |
| rs12791414  | A | -0.0316 |
| rs117653194 | G | -0.0969 |
| rs77797324  | G | -0.2186 |
| rs117948525 | T | 0.2088  |
| rs16926815  | G | 0.0942  |
| rs117322495 | G | -0.1171 |
| rs646371    | G | 0.0366  |
| rs11607707  | A | 0.0349  |
| rs11038225  | A | -0.0608 |
| rs11218551  | G | -0.0403 |
| rs73041448  | G | 0.0447  |
| rs4753251   | T | 0.0571  |
| rs117569786 | C | -0.1837 |
| rs149982375 | A | 0.1783  |
| rs7102329   | C | 0.0477  |
| rs2707089   | A | 0.0337  |
| rs12418185  | C | 0.1885  |

|             |   |         |
|-------------|---|---------|
| rs12365989  | T | 0.0396  |
| rs59849361  | G | 0.0428  |
| rs79381885  | A | 0.0404  |
| rs2708521   | A | -0.1909 |
| rs10836140  | A | -0.0333 |
| rs11020466  | C | 0.0484  |
| rs143976631 | T | -0.0994 |
| rs141576245 | A | 0.1796  |
| rs4936273   | A | 0.0972  |
| rs514933    | C | 0.0316  |
| rs117884995 | A | 0.136   |
| rs10836210  | T | 0.0516  |
| rs2276118   | C | 0.0313  |
| rs147931330 | T | -0.1774 |
| rs75887360  | C | 0.1233  |
| rs614918    | T | 0.0305  |
| rs72921963  | T | -0.1148 |
| rs12421893  | T | -0.0316 |
| rs61903688  | A | 0.0723  |
| rs10839748  | A | -0.0548 |
| rs11036657  | T | 0.0363  |
| rs75492444  | A | 0.0616  |
| rs3912583   | A | 0.0613  |
| rs10837129  | T | -0.0313 |
| rs117287718 | T | -0.1238 |
| rs4245117   | C | 0.0454  |
| rs7939722   | C | -0.0301 |
| rs850291    | T | -0.0333 |
| rs4939493   | C | 0.0462  |
| rs10160745  | A | -0.0611 |
| rs17442145  | G | 0.2657  |
| rs75750482  | A | -0.1277 |
| rs146230019 | C | 0.1497  |
| rs2716442   | C | 0.0362  |
| rs11215032  | G | 0.0542  |
| rs77138418  | A | -0.085  |
| rs2033359   | C | -0.0477 |
| rs11021958  | T | 0.0335  |
| rs142813591 | G | 0.1614  |
| rs7925754   | G | 0.2043  |
| rs17140551  | C | -0.1318 |
| rs76160025  | T | 0.1121  |
| rs626260    | A | 0.0754  |
| rs78341417  | C | 0.0686  |
| rs7934690   | A | -0.0428 |
| rs61747468  | A | -0.2295 |
| rs656802    | G | -0.0659 |

|             |   |         |
|-------------|---|---------|
| rs1275095   | C | 0.0311  |
| rs117323348 | G | -0.1571 |
| rs11822189  | T | 0.108   |
| rs1903455   | T | 0.0398  |
| rs76865126  | A | 0.0778  |
| rs11021850  | A | 0.0439  |
| rs56291869  | T | -0.0538 |
| rs76686454  | A | -0.1012 |
| rs117820112 | G | 0.1638  |
| rs473075    | A | 0.032   |
| rs142631800 | A | -0.2512 |
| rs2049048   | A | 0.07    |
| rs117809167 | A | 0.1231  |
| rs1286672   | T | -0.0398 |
| rs17654212  | T | 0.0911  |
| rs144076763 | T | -0.1494 |
| rs138367740 | A | -0.1979 |
| rs1000331   | T | -0.0307 |
| rs10891856  | C | 0.0723  |
| rs11826800  | C | -0.033  |
| rs609665    | C | 0.0318  |
| rs12796977  | A | 0.0701  |
| rs74678563  | G | -0.0752 |
| rs1943527   | T | 0.1242  |
| rs4332489   | C | 0.0396  |
| rs11232859  | A | 0.106   |
| rs7129139   | G | 0.0457  |
| rs7114655   | A | 0.043   |
| rs140350151 | T | -0.1487 |
| rs139926594 | G | -0.1395 |
| rs75199214  | A | 0.0623  |
| rs74795115  | T | 0.1278  |
| rs4758417   | G | -0.0612 |
| rs72844729  | T | -0.1222 |
| rs642245    | A | 0.0368  |
| rs146480276 | G | 0.1075  |
| rs1466427   | A | -0.0379 |
| rs75670607  | T | 0.1771  |
| rs35470292  | C | -0.1721 |
| rs12576571  | T | -0.0573 |
| rs7129173   | A | 0.055   |
| rs75518689  | A | 0.2507  |
| rs7951634   | T | -0.0317 |
| rs665153    | A | 0.0354  |
| rs56255524  | A | 0.1682  |
| rs3133879   | G | -0.0343 |
| rs7942264   | G | -0.1359 |

|             |   |         |
|-------------|---|---------|
| rs2218993   | A | -0.0463 |
| rs78719386  | T | -0.0996 |
| rs117581002 | T | -0.1333 |
| rs4937387   | C | -0.0392 |
| rs7932490   | A | -0.0349 |
| rs10836903  | G | -0.0384 |
| rs117198981 | A | 0.1226  |
| rs147394337 | G | 0.172   |
| rs11236134  | T | 0.0546  |
| rs112964269 | T | -0.1527 |
| rs12807115  | C | -0.0384 |
| rs11022379  | T | -0.0913 |
| rs117391362 | A | -0.0797 |
| rs3923727   | C | -0.0593 |
| rs74982540  | T | -0.1712 |
| rs117084576 | A | 0.0802  |
| rs6485087   | A | -0.1065 |
| rs11036184  | G | 0.0412  |
| rs76082526  | T | -0.0558 |
| rs76885880  | T | 0.1576  |
| rs1569058   | C | 0.0438  |
| rs10898057  | C | 0.0856  |
| rs10836454  | C | -0.032  |
| rs117681098 | A | -0.1488 |
| rs117779867 | C | 0.2267  |
| rs145232818 | T | 0.1203  |
| rs7929357   | G | 0.0382  |
| rs11222491  | C | -0.0348 |
| rs10833978  | G | -0.0295 |
| rs1364778   | A | 0.1064  |
| rs2215086   | T | 0.0464  |
| rs79307500  | A | -0.1786 |
| rs149920911 | T | 0.1337  |
| rs10840019  | G | 0.0587  |
| rs7117305   | C | 0.1572  |
| rs11213624  | A | 0.0735  |
| rs360726    | T | -0.0402 |
| rs11605293  | T | 0.0561  |
| rs1944883   | C | 0.0685  |
| rs11220277  | G | -0.0355 |
| rs78274129  | C | 0.0766  |
| rs139068590 | T | 0.1105  |
| rs71480075  | A | 0.0966  |
| rs2846127   | T | 0.0399  |
| rs76980151  | C | 0.0864  |
| rs10765547  | T | 0.0406  |
| rs78233951  | C | 0.1532  |



|             |   |         |
|-------------|---|---------|
| rs11043095  | T | 0.14    |
| rs80133609  | G | -0.2412 |
| rs11027825  | G | 0.0303  |
| rs117178685 | C | 0.1349  |
| rs1450796   | A | 0.032   |
| rs12272393  | C | 0.0356  |
| rs1783180   | T | -0.0631 |
| rs11222953  | A | 0.06    |
| rs142025623 | A | 0.1034  |
| rs76175234  | C | 0.0764  |
| rs61882182  | C | 0.1123  |
| rs689327    | G | -0.0342 |
| rs145192053 | C | -0.1623 |
| rs2237886   | T | -0.0523 |
| rs1940201   | G | 0.0318  |
| rs117868083 | G | 0.1811  |
| rs1939896   | A | -0.0329 |
| rs4237635   | A | 0.0337  |
| rs3781812   | A | 0.0493  |
| rs35109315  | C | 0.0406  |
| rs10831010  | C | 0.0302  |
| rs1954850   | C | 0.0357  |
| rs3802881   | T | -0.0559 |
| rs72905558  | T | -0.0818 |
| rs12578065  | A | -0.065  |
| rs75708898  | G | 0.1745  |
| rs75954793  | T | -0.1586 |
| rs7948351   | T | -0.0433 |
| rs148934291 | A | 0.1338  |
| rs7933681   | A | 0.0506  |
| rs79618016  | C | 0.0454  |
| rs139152657 | T | 0.2228  |
| rs1152618   | C | -0.0868 |
| rs7949690   | A | -0.0649 |
| rs78995751  | A | -0.156  |
| rs66755234  | T | 0.0577  |
| rs117700905 | T | 0.2065  |
| rs2201256   | C | -0.0401 |
| rs61870279  | C | -0.0571 |
| rs146448143 | C | -0.1066 |
| rs2875238   | T | 0.036   |
| rs1478762   | A | -0.0312 |
| rs2212484   | T | 0.0405  |
| rs17369889  | G | 0.0361  |
| rs75932613  | A | -0.1986 |
| rs11825323  | C | 0.1269  |
| rs4758479   | A | 0.0313  |

|             |   |         |
|-------------|---|---------|
| rs79613062  | T | -0.2052 |
| rs7102652   | A | -0.0718 |
| rs72880538  | G | -0.1348 |
| rs55713687  | A | 0.1102  |
| rs146701213 | G | 0.1476  |
| rs12365005  | C | -0.1156 |
| rs7942751   | C | 0.0504  |
| rs1945441   | G | 0.0305  |
| rs10838551  | A | 0.1071  |
| rs17310989  | C | -0.1765 |
| rs118170613 | A | -0.129  |
| rs12273435  | A | 0.1381  |
| rs34987475  | T | 0.1289  |
| rs79325083  | A | -0.0616 |
| rs146773918 | A | 0.1345  |
| rs57953465  | G | -0.0406 |
| rs17464087  | G | 0.0364  |
| rs4930640   | A | 0.0351  |
| rs61879614  | C | 0.1167  |
| rs142093129 | C | -0.0577 |
| rs17134306  | C | 0.0796  |
| rs2512159   | G | -0.0321 |
| rs149199900 | T | 0.1097  |
| rs117634028 | T | 0.1886  |
| rs117837024 | T | 0.1601  |
| rs80151746  | A | -0.137  |
| rs2155438   | A | 0.1044  |
| rs10894690  | C | -0.093  |
| rs1072899   | A | 0.0309  |
| rs4945143   | A | 0.0297  |
| rs117027355 | T | 0.1191  |
| rs143831131 | T | -0.1344 |
| rs1553733   | G | -0.0316 |
| rs78348325  | G | 0.0911  |
| rs75003208  | G | -0.2006 |
| rs140698574 | C | -0.1094 |
| rs11820191  | G | -0.0343 |
| rs7933222   | A | 0.0377  |
| rs72963410  | C | 0.0988  |
| rs12276614  | A | 0.0387  |
| rs11222532  | T | -0.0464 |
| rs7927237   | C | -0.0312 |
| rs75531513  | G | -0.1226 |
| rs12792514  | A | 0.056   |
| rs7925089   | T | 0.0311  |
| rs10893131  | T | -0.0364 |
| rs145665288 | A | -0.0743 |

|             |   |         |
|-------------|---|---------|
| rs33981325  | T | 0.2299  |
| rs117115447 | G | 0.219   |
| rs11218131  | A | -0.0565 |
| rs1950031   | G | 0.031   |
| rs7117734   | G | -0.0464 |
| rs78076698  | T | -0.1343 |
| rs112869667 | G | 0.1305  |
| rs10792692  | T | 0.0405  |
| rs11823904  | T | -0.0357 |
| rs665440    | C | -0.0776 |
| rs2508938   | C | 0.0464  |
| rs12224823  | A | 0.0659  |
| rs11221012  | T | 0.045   |
| rs7939975   | C | -0.0291 |
| rs147411470 | G | -0.1641 |
| rs1793788   | T | 0.0513  |
| rs11212686  | T | 0.1425  |
| rs112226053 | T | -0.0422 |
| rs2927201   | A | 0.0725  |
| rs17212187  | T | 0.0445  |
| rs1938901   | A | 0.0319  |
| rs117289555 | G | -0.0812 |
| rs61123830  | A | -0.0333 |
| rs1549717   | T | -0.0437 |
| rs79143472  | A | -0.1627 |
| rs117483097 | T | -0.1196 |
| rs4755797   | G | -0.0328 |
| rs1940176   | A | 0.0304  |
| rs11603533  | G | -0.1278 |
| rs72847597  | G | -0.1404 |
| rs77074180  | T | -0.1833 |
| rs11235666  | C | 0.0321  |
| rs7114583   | T | -0.0493 |
| rs4930080   | C | -0.0718 |
| rs677301    | G | 0.0327  |
| rs148325483 | T | -0.2143 |
| rs118135768 | C | -0.1928 |
| rs75781807  | G | -0.1414 |
| rs72966178  | T | -0.1723 |
| rs4937776   | T | 0.041   |
| rs35441233  | G | 0.1828  |
| rs148254708 | T | 0.203   |
| rs608777    | A | 0.0407  |
| rs10837492  | G | 0.0358  |
| rs116057214 | G | -0.0603 |
| rs12802610  | A | 0.0787  |
| rs72986952  | T | 0.0703  |

|             |   |         |
|-------------|---|---------|
| rs17571251  | C | -0.0654 |
| rs75443769  | A | -0.1358 |
| rs12365545  | G | -0.0293 |
| rs2604233   | C | 0.0351  |
| rs10890845  | G | 0.0395  |
| rs613011    | T | 0.0301  |
| rs10832889  | A | -0.0298 |
| rs34987309  | C | -0.1229 |
| rs1298747   | T | 0.1114  |
| rs755071    | A | 0.0416  |
| rs139325359 | C | -0.1363 |
| rs11037965  | T | -0.0818 |
| rs10430935  | T | 0.0335  |
| rs17613646  | A | -0.0634 |
| rs61889101  | A | -0.054  |
| rs11222627  | A | 0.0727  |
| rs11028434  | A | 0.0426  |
| rs143709442 | T | 0.2824  |
| rs145520369 | T | 0.0892  |
| rs55664471  | G | 0.0544  |
| rs4755351   | G | -0.0405 |
| rs539460    | C | 0.1032  |
| rs73006540  | G | -0.1216 |
| rs11218792  | A | 0.0398  |
| rs28693674  | T | 0.0335  |
| rs117364223 | A | -0.1586 |
| rs35092360  | T | 0.0321  |
| rs73403046  | A | -0.0831 |
| rs80058873  | T | -0.1179 |
| rs117090941 | A | 0.1766  |
| rs117245870 | A | -0.1903 |
| rs10897796  | T | 0.0307  |
| rs71474104  | G | 0.0537  |
| rs143301447 | C | -0.1312 |
| rs73016277  | A | -0.074  |
| rs35552108  | C | 0.0542  |
| rs80317637  | G | -0.0902 |
| rs147999993 | A | 0.0861  |
| rs72903767  | A | -0.0454 |
| rs1514604   | C | 0.0382  |
| rs1702614   | A | -0.0395 |
| rs554180    | T | -0.0567 |
| rs704697    | T | 0.0304  |
| rs143269810 | A | -0.2433 |
| rs59224329  | T | 0.0776  |
| rs117161549 | T | 0.146   |
| rs11043075  | G | 0.0316  |

|             |   |         |
|-------------|---|---------|
| rs7129430   | G | 0.0294  |
| rs7481262   | G | 0.0316  |
| rs1256901   | T | 0.0394  |
| rs116783327 | C | 0.0808  |
| rs10769941  | G | -0.0326 |
| rs11022378  | C | -0.0299 |
| rs141550268 | T | -0.1514 |
| rs11213594  | T | -0.1186 |
| rs892685    | A | 0.0289  |
| rs147075262 | C | 0.1523  |
| rs2277280   | T | -0.0383 |
| rs7949449   | T | -0.065  |
| rs479219    | C | 0.1318  |
| rs112863958 | T | 0.0615  |
| rs11223177  | T | -0.0419 |
| rs10831742  | G | 0.0399  |
| rs7114322   | G | 0.0883  |
| rs669244    | A | 0.045   |
| rs77793149  | C | 0.2124  |
| rs58356578  | G | -0.1855 |
| rs10897764  | G | 0.031   |
| rs60181140  | T | 0.0438  |
| rs12295181  | T | -0.067  |
| rs10835182  | A | -0.0367 |
| rs117377192 | T | -0.1289 |
| rs12796753  | T | 0.1162  |
| rs143332421 | A | 0.2007  |
| rs10832568  | A | -0.0474 |
| rs736973    | G | -0.0305 |
| rs12365420  | G | -0.0318 |
| rs80242268  | A | -0.1288 |
| rs10831576  | C | -0.0433 |
| rs11041291  | T | 0.0994  |
| rs12793229  | T | -0.0888 |
| rs77055883  | T | 0.0805  |
| rs1455967   | G | 0.0464  |
| rs7951755   | C | 0.0342  |
| rs1584818   | A | -0.0325 |
| rs16921125  | T | -0.0525 |
| rs75958295  | C | -0.0891 |
| rs6590746   | C | 0.0351  |
| rs76387443  | G | 0.1212  |
| rs1629078   | A | 0.0336  |
| rs565355    | T | 0.0303  |
| rs72946837  | T | 0.0709  |
| rs11025310  | A | 0.0301  |
| rs11512747  | C | -0.1086 |

|             |   |         |
|-------------|---|---------|
| rs56002871  | G | -0.0304 |
| rs72965236  | A | -0.2077 |
| rs35503235  | G | 0.1147  |
| rs17663392  | T | 0.0881  |
| rs79358741  | T | 0.0747  |
| rs4531427   | C | 0.029   |
| rs74528749  | T | 0.0546  |
| rs34107955  | T | 0.1084  |
| rs117286036 | T | 0.16    |
| rs10791292  | A | -0.037  |
| rs75655932  | T | 0.0964  |
| rs77565963  | A | 0.1143  |
| rs71470865  | T | 0.1008  |
| rs3903036   | T | -0.0358 |
| rs3802821   | A | 0.0364  |
| rs75646182  | T | 0.0623  |
| rs10837255  | T | 0.0388  |
| rs1258852   | G | -0.045  |
| rs79569670  | A | 0.2013  |
| rs1792971   | G | 0.0561  |
| rs1554802   | G | 0.031   |
| rs111412772 | G | 0.0864  |
| rs75700025  | C | 0.1223  |
| rs12279417  | G | 0.2357  |
| rs4757115   | G | 0.0347  |
| rs7928952   | A | 0.0366  |
| rs143429004 | T | 0.1958  |
| rs549304    | A | 0.029   |
| rs56242212  | G | 0.1578  |
| rs1447514   | T | 0.0459  |
| rs10769111  | G | 0.0444  |
| rs72975499  | A | -0.0457 |
| rs117879928 | T | 0.1439  |
| rs1846443   | C | 0.0738  |
| rs11038662  | C | -0.0363 |
| rs78608812  | T | 0.1424  |
| rs73023597  | A | -0.0803 |
| rs117740484 | A | -0.12   |
| rs75921479  | C | -0.0529 |
| rs72907573  | C | -0.0927 |
| rs75562391  | C | 0.0961  |
| rs113262560 | A | -0.0611 |
| rs75185517  | T | -0.1906 |
| rs117951799 | G | -0.1678 |
| rs7941107   | A | -0.042  |
| rs2201799   | A | -0.1491 |
| rs58695771  | A | 0.0687  |

|             |   |         |
|-------------|---|---------|
| rs826048    | T | 0.1242  |
| rs595073    | C | -0.0338 |
| rs631668    | C | -0.0527 |
| rs72869975  | C | -0.1478 |
| rs10896437  | C | -0.032  |
| rs11500065  | G | 0.0313  |
| rs1541884   | T | -0.0386 |
| rs443510    | G | 0.0375  |
| rs117374580 | C | -0.0716 |
| rs16929523  | C | 0.081   |
| rs76187074  | G | 0.0715  |
| rs12290939  | A | 0.1801  |
| rs142615934 | A | -0.1261 |
| rs3018284   | G | 0.0335  |
| rs76541361  | A | 0.0646  |
| rs12785760  | G | 0.0565  |
| rs77746720  | T | -0.0684 |
| rs10160345  | G | -0.0519 |
| rs139954282 | A | -0.1502 |
| rs35429169  | A | -0.0634 |
| rs71478964  | A | 0.0491  |
| rs10834964  | G | -0.0302 |
| rs10750201  | C | -0.0492 |
| rs118171251 | T | -0.0553 |
| rs17598185  | T | -0.2137 |
| rs76333875  | A | 0.1901  |
| rs35739570  | G | 0.1568  |
| rs10891049  | C | 0.0348  |
| rs28562229  | C | 0.0387  |
| rs58148801  | A | 0.118   |
| rs73019367  | A | 0.0859  |
| rs4752767   | T | -0.0383 |
| rs17755994  | A | 0.0767  |
| rs148832730 | C | -0.1415 |
| rs7950196   | T | 0.0313  |
| rs10892919  | C | -0.029  |
| rs143634122 | T | -0.1417 |
| rs3829241   | A | -0.0289 |
| rs12417237  | T | -0.0978 |
| rs560320    | T | 0.0339  |
| rs10834971  | A | 0.0515  |
| rs117365043 | T | 0.1096  |
| rs117864380 | G | -0.2039 |
| rs7930764   | G | 0.0378  |
| rs4081796   | A | 0.0336  |
| rs55883205  | G | -0.1193 |
| rs7934933   | A | 0.0779  |

|             |   |         |
|-------------|---|---------|
| rs687042    | T | -0.0443 |
| rs1498329   | T | -0.057  |
| rs1943760   | G | 0.03    |
| rs34862746  | T | -0.0711 |
| rs12420859  | A | 0.0643  |
| rs11606633  | A | 0.0333  |
| rs623674    | T | 0.0488  |
| rs117443940 | C | 0.1627  |
| rs11230099  | A | -0.0456 |
| rs76340188  | C | 0.106   |
| rs117726858 | T | -0.2155 |
| rs76535928  | G | -0.0809 |
| rs72904135  | A | -0.2622 |
| rs2957787   | C | 0.0502  |
| rs484960    | A | -0.0318 |
| rs7109045   | T | -0.0309 |
| rs12363042  | T | -0.11   |
| rs7925431   | A | 0.1278  |
| rs2851580   | T | 0.1514  |
| rs116843545 | A | 0.1698  |
| rs10840294  | G | 0.0298  |
| rs7926722   | C | 0.0293  |
| rs11232759  | T | -0.0771 |
| rs80044058  | C | 0.0814  |
| rs72848063  | A | 0.0655  |
| rs12289793  | G | -0.0386 |
| rs61879297  | G | 0.0954  |
| rs12364674  | T | -0.099  |
| rs4243955   | T | 0.1063  |
| rs11032282  | A | 0.039   |
| rs12790184  | G | 0.0357  |
| rs146200874 | A | -0.2067 |
| rs4631901   | T | 0.1752  |
| rs56205477  | A | -0.0679 |
| rs139997788 | T | -0.1309 |
| rs146044787 | G | 0.1714  |
| rs111226913 | A | 0.1575  |
| rs4755051   | A | -0.0293 |
| rs79804264  | C | -0.0866 |
| rs112737842 | A | -0.1407 |
| rs1401786   | C | 0.0294  |
| rs71474962  | A | 0.0709  |
| rs118049895 | T | -0.1494 |
| rs112574213 | C | -0.0969 |
| rs11217499  | T | -0.1105 |
| rs117063624 | T | 0.1332  |
| rs138050656 | A | 0.0874  |



|             |   |         |
|-------------|---|---------|
| rs4430519   | T | -0.0646 |
| rs141191886 | A | -0.1448 |
| rs11223920  | T | 0.0637  |
| rs77486197  | T | 0.1156  |
| rs11224842  | C | 0.0283  |
| rs61896694  | G | 0.0489  |
| rs919098    | C | -0.031  |
| rs10768497  | A | -0.0363 |
| rs4341551   | T | 0.1135  |
| rs7944164   | G | 0.0384  |
| rs4597069   | T | 0.0366  |
| rs10768058  | A | 0.0787  |
| rs61880063  | C | -0.1478 |
| rs35095598  | A | 0.0995  |
| rs11231999  | A | 0.0834  |
| rs150955276 | T | -0.1529 |
| rs112072036 | G | 0.1013  |
| rs1259022   | A | 0.0364  |
| rs11215680  | T | 0.148   |
| rs2126410   | T | -0.0348 |
| rs144842073 | A | -0.1442 |
| rs118180268 | C | 0.2126  |
| rs73028800  | C | -0.0793 |
| rs11223971  | C | 0.0456  |
| rs75732673  | T | -0.1776 |
| rs35397222  | T | -0.0813 |
| rs12808896  | C | -0.1597 |
| rs75084595  | A | 0.1323  |
| rs74705247  | G | 0.0899  |
| rs111529285 | T | 0.0776  |
| rs117215234 | G | 0.145   |
| rs1372796   | A | 0.048   |
| rs349074    | A | 0.0425  |
| rs76660343  | G | 0.061   |
| rs11019168  | G | 0.0788  |
| rs78780504  | A | -0.1646 |
| rs10831614  | G | 0.0413  |
| rs4963412   | G | -0.0319 |
| rs117438584 | A | 0.1029  |
| rs11031691  | A | -0.0425 |
| rs3731424   | T | -0.0723 |
| rs35398780  | T | -0.037  |
| rs61882860  | G | -0.0853 |
| rs7103369   | A | 0.0764  |
| rs147586132 | G | 0.1088  |
| rs7114071   | T | -0.1454 |
| rs117543902 | T | 0.2148  |

|             |   |         |
|-------------|---|---------|
| rs72880058  | A | 0.0598  |
| rs72639163  | T | 0.0422  |
| rs9919664   | G | 0.0355  |
| rs473756    | T | -0.0289 |
| rs76291200  | C | 0.1577  |
| rs12275920  | A | 0.0579  |
| rs139969550 | T | 0.1389  |
| rs2611151   | T | -0.0758 |
| rs12801109  | T | -0.0639 |
| rs4936713   | C | 0.0506  |
| rs11499727  | T | -0.0607 |
| rs117704564 | G | -0.1639 |
| rs10892946  | G | -0.0291 |
| rs17220187  | A | -0.0526 |
| rs3819192   | A | 0.0639  |
| rs75613105  | G | -0.0962 |
| rs4939452   | T | 0.0405  |
| rs560165    | G | 0.0448  |
| rs148932521 | G | 0.117   |
| rs7932571   | A | 0.0481  |
| rs4938280   | C | 0.034   |
| rs2508967   | T | -0.0331 |
| rs11028539  | A | -0.0324 |
| rs10898225  | T | 0.0406  |
| rs61870427  | G | 0.0608  |
| rs148722907 | T | 0.0919  |
| rs895924    | T | 0.0316  |
| rs73007983  | A | 0.0531  |
| rs149446897 | G | -0.1719 |
| rs2171333   | T | 0.0404  |
| rs329635    | A | -0.0467 |
| rs147806630 | G | 0.1886  |
| rs271046    | T | 0.0496  |
| rs80124992  | A | 0.1654  |
| rs76794482  | G | 0.2283  |
| rs72991210  | T | -0.0527 |
| rs10736631  | A | -0.0318 |
| rs1441325   | G | -0.0674 |
| rs2056622   | T | -0.0301 |
| rs74384545  | C | 0.0994  |
| rs11218057  | A | -0.0307 |
| rs118050485 | A | -0.1148 |
| rs7104819   | G | 0.0293  |
| rs138907496 | A | 0.1505  |
| rs55998333  | T | 0.2302  |
| rs79004974  | C | 0.1084  |
| rs118114919 | C | 0.1297  |

|             |   |         |
|-------------|---|---------|
| rs7106797   | C | 0.0323  |
| rs12803464  | T | -0.0335 |
| rs7113281   | G | -0.0952 |
| rs11041734  | G | -0.0339 |
| rs565889    | G | 0.0333  |
| rs72941172  | C | 0.0347  |
| rs12363968  | T | -0.0523 |
| rs11217895  | C | -0.0394 |
| rs117926221 | T | -0.0723 |
| rs117189917 | A | -0.1459 |
| rs1783996   | T | -0.0523 |
| rs117435805 | A | 0.0791  |
| rs1647960   | G | 0.0411  |
| rs4151056   | T | 0.0661  |
| rs55816411  | T | -0.0503 |
| rs79874710  | T | 0.125   |
| rs2851121   | T | -0.1031 |
| rs78686784  | G | 0.0961  |
| rs1963451   | G | 0.0279  |
| rs4438033   | A | 0.0303  |
| rs60127407  | C | 0.0481  |
| rs1124492   | A | 0.0457  |
| rs75782752  | C | -0.1031 |
| rs1453635   | T | 0.0402  |
| rs118050581 | T | -0.1139 |
| rs71477990  | G | -0.0988 |
| rs4067330   | C | 0.0294  |
| rs1027837   | T | 0.0289  |
| rs148338124 | G | -0.0897 |
| rs72965878  | A | -0.0687 |
| rs61867022  | T | 0.1316  |
| rs7950274   | G | 0.0291  |
| rs78831399  | G | -0.1017 |
| rs1871031   | C | -0.0363 |
| rs2073804   | G | 0.0736  |
| rs28639773  | C | -0.0401 |
| rs72993865  | G | 0.0514  |
| rs7125367   | C | 0.038   |
| rs11043058  | T | 0.0709  |
| rs9666742   | C | 0.0514  |
| rs55932354  | G | 0.0846  |
| rs6589706   | A | -0.0292 |
| rs73546969  | A | 0.1796  |
| rs146800649 | T | -0.1091 |
| rs580545    | A | -0.05   |
| rs74926044  | A | 0.1923  |
| rs75252095  | C | -0.1274 |

|             |   |         |
|-------------|---|---------|
| rs72946996  | C | 0.1067  |
| rs12421236  | A | 0.1645  |
| rs74408867  | C | 0.1303  |
| rs10831938  | T | -0.0318 |
| rs79287777  | T | 0.085   |
| rs7947080   | T | 0.0304  |
| rs113823671 | C | 0.2691  |
| rs17409711  | G | -0.2443 |
| rs112067314 | A | -0.076  |
| rs3751076   | G | -0.0449 |
| rs117442787 | T | 0.154   |
| rs1599420   | G | 0.0535  |
| rs17509913  | A | 0.0448  |
| rs10831677  | G | 0.104   |
| rs12577616  | T | 0.09    |
| rs4938285   | C | -0.0291 |
| rs552347    | G | 0.0556  |
| rs76013355  | T | -0.1375 |
| rs61893242  | C | -0.116  |
| rs568787    | A | 0.0808  |
| rs61904673  | A | -0.0854 |
| rs9651752   | A | -0.0305 |
| rs75883616  | A | 0.1672  |
| rs17708753  | G | -0.1645 |
| rs746168    | C | 0.0374  |
| rs61893118  | G | -0.0977 |
| rs117317401 | C | -0.097  |
| rs1938594   | A | 0.0311  |
| rs574300    | G | -0.0462 |
| rs12575490  | G | 0.1326  |
| rs12575434  | G | 0.1071  |
| rs1630427   | C | -0.0455 |
| rs118001170 | C | 0.1015  |
| rs75638486  | C | -0.1157 |
| rs72939004  | C | -0.1493 |
| rs112634307 | A | -0.1122 |
| rs78530436  | T | 0.0793  |
| rs34058270  | T | 0.0343  |
| rs113136900 | T | -0.0386 |
| rs2282512   | G | 0.0629  |
| rs117914265 | A | 0.1435  |
| rs118040835 | A | 0.1168  |
| rs77968726  | C | -0.1761 |
| rs12419430  | T | -0.0286 |
| rs12226528  | G | 0.0362  |
| rs140145986 | T | -0.0837 |
| rs117034524 | A | 0.1162  |

|             |   |         |
|-------------|---|---------|
| rs12795466  | T | -0.051  |
| rs74342639  | C | 0.0916  |
| rs11029787  | C | 0.1271  |
| rs2044857   | A | -0.0309 |
| rs75894763  | A | -0.1004 |
| rs6589423   | C | 0.0419  |
| rs7114221   | C | 0.032   |
| rs6483169   | C | -0.0307 |
| rs7110392   | T | 0.0361  |
| rs1267475   | G | -0.0354 |
| rs151175886 | T | -0.1187 |
| rs11234429  | A | -0.0274 |
| rs10897605  | A | 0.0478  |
| rs4584599   | T | -0.0599 |
| rs112314727 | A | -0.1079 |
| rs7945698   | T | 0.1756  |
| rs2186780   | T | 0.0358  |
| rs10791014  | T | -0.0276 |
| rs6485186   | T | -0.0731 |
| rs72906181  | A | 0.1299  |
| rs1916053   | A | -0.0281 |
| rs117044466 | T | 0.2185  |
| rs151256771 | G | 0.2491  |
| rs79337308  | G | 0.0767  |
| rs74514855  | A | 0.0951  |
| rs76124529  | G | -0.1152 |
| rs117392808 | A | 0.1375  |
| rs149226678 | G | -0.1253 |
| rs4454703   | T | 0.2109  |
| rs7930311   | G | -0.0323 |
| rs75569662  | G | 0.0663  |
| rs72875147  | G | 0.0669  |
| rs524936    | A | -0.0462 |
| rs11228594  | A | -0.0313 |
| rs10749919  | A | 0.0436  |
| rs148410317 | C | 0.1852  |
| rs314749    | T | -0.1536 |
| rs35290444  | T | 0.2382  |
| rs559161    | A | 0.0338  |
| rs4237787   | A | -0.0364 |
| rs583647    | A | 0.0294  |
| rs76975342  | A | 0.135   |
| rs16927500  | A | 0.0962  |
| rs7116312   | G | -0.0309 |
| rs74967566  | A | -0.1006 |
| rs11018609  | C | -0.036  |
| rs12362787  | T | 0.0301  |

|             |   |         |
|-------------|---|---------|
| rs117075912 | T | -0.1372 |
| rs970719    | T | 0.0292  |
| rs11217975  | A | -0.0609 |
| rs230657    | T | -0.0281 |
| rs112519205 | G | 0.0816  |
| rs10830979  | C | -0.0333 |
| rs11021613  | G | 0.0273  |
| rs117187370 | G | -0.1553 |
| rs76902697  | T | 0.1275  |
| rs142126587 | A | 0.1816  |
| rs12292154  | C | 0.0371  |
| rs35309700  | G | 0.0368  |
| rs1376000   | C | 0.0313  |
| rs113087339 | A | -0.2175 |
| rs61880629  | T | 0.0498  |
| rs117714030 | G | -0.2149 |
| rs12271271  | A | -0.0368 |
| rs7117488   | A | 0.0541  |
| rs117447028 | A | -0.1285 |
| rs73007340  | C | -0.0725 |
| rs508286    | G | -0.0451 |
| rs7116934   | G | 0.0541  |
| rs10212     | C | 0.0349  |
| rs34745492  | T | -0.0396 |
| rs61016795  | A | -0.0966 |
| rs3107618   | T | 0.0814  |
| rs112382894 | A | -0.0981 |
| rs7120810   | T | 0.0732  |
| rs10895476  | G | 0.0359  |
| rs11825616  | G | 0.1125  |
| rs1148109   | C | -0.0312 |
| rs79332637  | G | 0.2434  |
| rs12418628  | A | -0.1559 |
| rs71465577  | G | 0.0581  |
| rs75666890  | T | 0.1171  |
| rs146121230 | A | -0.1823 |
| rs673163    | G | -0.0294 |
| rs61893847  | T | -0.0883 |
| rs17840711  | A | 0.0577  |
| rs4525269   | C | 0.0389  |
| rs11042864  | T | -0.0333 |
| rs72910343  | T | 0.1241  |
| rs140336854 | A | 0.1927  |
| rs1403946   | A | 0.1024  |
| rs12288228  | C | -0.1863 |
| rs117669898 | A | 0.1859  |
| rs117607148 | T | -0.1239 |

|             |   |         |
|-------------|---|---------|
| rs7128235   | G | -0.0558 |
| rs111614411 | T | 0.0418  |
| rs12285678  | C | 0.0644  |
| rs77990826  | T | 0.2675  |
| rs73017443  | T | -0.0577 |
| rs116987287 | T | -0.1292 |
| rs4757641   | G | -0.0296 |
| rs139666137 | A | 0.2119  |
| rs72479402  | T | -0.0365 |
| rs78296539  | G | 0.1716  |
| rs12421267  | G | 0.0305  |
| rs10750084  | T | 0.1564  |
| rs16907774  | G | -0.0513 |
| rs76319794  | A | -0.0624 |
| rs10765865  | A | -0.0657 |
| rs12289462  | G | -0.0985 |
| rs112434863 | G | -0.0415 |
| rs147294857 | A | 0.1267  |
| rs78278221  | A | -0.1317 |
| rs34151249  | T | 0.0414  |
| rs78393250  | A | 0.1902  |
| rs111286889 | C | 0.0796  |
| rs116874540 | A | -0.1582 |
| rs1367306   | T | -0.0855 |
| rs16907044  | C | 0.0746  |
| rs61890442  | A | 0.1532  |
| rs144151868 | A | 0.0545  |
| rs2155244   | C | 0.0446  |
| rs56410393  | G | -0.0744 |
| rs117980988 | T | -0.1036 |
| rs117431391 | A | -0.1281 |
| rs10833435  | A | 0.0337  |
| rs10896393  | C | -0.0302 |
| rs10791606  | C | 0.0297  |
| rs2673332   | A | 0.0572  |
| rs12269938  | T | 0.0303  |
| rs113143623 | G | -0.0508 |
| rs10833535  | A | 0.0289  |
| rs147006862 | G | -0.127  |
| rs74638028  | A | -0.0532 |
| rs116884776 | T | 0.135   |
| rs71477311  | A | 0.2034  |
| rs143058697 | A | -0.0326 |
| rs76803977  | T | 0.1778  |
| rs17811689  | G | -0.0712 |
| rs61879966  | G | 0.1303  |
| rs7106976   | T | -0.0399 |

|             |   |         |
|-------------|---|---------|
| rs17808953  | C | -0.0937 |
| rs12146653  | C | 0.0416  |
| rs10790069  | T | 0.0287  |
| rs79986171  | A | -0.1575 |
| rs4255525   | T | -0.0454 |
| rs1493547   | G | -0.0389 |
| rs7945657   | G | 0.0368  |
| rs147714439 | T | 0.2205  |
| rs61888883  | C | 0.0803  |
| rs147392939 | G | 0.1658  |
| rs80170705  | T | 0.1039  |
| rs80305020  | A | -0.0758 |
| rs11224223  | C | -0.0466 |
| rs4910321   | T | 0.0585  |
| rs79931190  | T | 0.098   |
| rs7122257   | C | -0.0301 |
| rs143190600 | T | 0.1196  |
| rs61871868  | G | 0.0918  |
| rs750666    | C | -0.0363 |
| rs142797262 | G | 0.1048  |
| rs117950915 | G | 0.1869  |
| rs77431554  | T | -0.0997 |
| rs263099    | T | 0.0319  |
| rs142810084 | A | 0.0731  |
| rs145025732 | A | -0.1464 |
| rs61911253  | T | -0.0556 |
| rs72969415  | C | 0.1163  |
| rs11607206  | T | -0.0282 |
| rs4755750   | A | -0.0279 |
| rs140625238 | G | 0.1246  |
| rs11215788  | T | 0.0397  |
| rs143012735 | T | 0.1202  |
| rs77137984  | G | 0.1979  |
| rs138526953 | A | -0.1482 |
| rs78240273  | A | -0.1559 |
| rs55915915  | T | 0.0635  |
| rs17235281  | G | 0.1541  |
| rs112508931 | C | -0.0551 |
| rs4553401   | T | -0.0305 |
| rs113243882 | G | 0.1754  |
| rs61876729  | G | -0.1013 |
| rs150774577 | G | -0.2212 |
| rs145659846 | C | 0.2215  |
| rs11216631  | T | -0.0846 |
| rs35920710  | G | -0.0522 |
| rs10898838  | G | 0.0313  |
| rs67947269  | T | -0.0535 |



|             |   |         |
|-------------|---|---------|
| rs143416017 | C | -0.222  |
| rs72887359  | G | -0.0844 |
| rs61734430  | T | 0.1098  |
| rs76036243  | T | -0.0872 |
| rs1944153   | C | 0.0925  |
| rs11232715  | T | -0.0497 |
| rs10790950  | T | 0.0276  |
| rs16920925  | C | -0.0505 |
| rs2037195   | C | 0.159   |
| rs10836520  | G | 0.029   |
| rs1939106   | T | -0.0323 |
| rs114905149 | T | -0.065  |
| rs80283068  | T | 0.09    |
| rs112662108 | C | 0.0889  |
| rs2702632   | C | -0.0814 |
| rs117594399 | G | 0.0937  |
| rs116566321 | T | 0.0585  |
| rs12364991  | T | -0.0601 |
| rs34800392  | T | -0.1536 |
| rs117412686 | G | -0.1914 |
| rs12271337  | G | 0.1043  |
| rs11823222  | A | 0.0706  |
| rs75958224  | G | 0.0916  |
| rs7109266   | A | -0.0426 |
| rs72996698  | T | -0.1946 |
| rs1939889   | C | 0.0444  |
| rs10437740  | T | 0.0517  |
| rs78607125  | T | 0.1479  |
| rs145948060 | T | -0.2305 |
| rs2729881   | C | -0.0291 |
| rs224611    | T | -0.0309 |
| rs79054252  | A | -0.2068 |
| rs142408311 | A | 0.1564  |
| rs80219289  | A | -0.1581 |
| rs117459646 | G | -0.1182 |
| rs35073096  | C | 0.1195  |
| rs7928273   | A | -0.0403 |
| rs10790999  | G | -0.0374 |
| rs117261242 | C | 0.0817  |
| rs7108908   | C | -0.0306 |
| rs1839444   | C | 0.0461  |
| rs11033232  | A | -0.062  |
| rs10895324  | T | 0.0287  |
| rs115708497 | T | 0.1008  |
| rs143717765 | T | 0.1971  |
| rs12793923  | T | -0.041  |
| rs147773920 | C | 0.1786  |

|             |   |         |
|-------------|---|---------|
| rs144780191 | T | -0.2116 |
| rs76386125  | C | -0.1202 |
| rs2075861   | A | 0.0504  |
| rs72968791  | T | -0.205  |
| rs6416166   | T | -0.029  |
| rs76427769  | C | -0.1663 |
| rs10891772  | A | 0.1408  |
| rs45449596  | C | -0.0684 |
| rs7481707   | C | -0.0335 |
| rs6589531   | C | -0.0534 |
| rs11529784  | A | -0.0361 |
| rs76419317  | A | 0.0639  |
| rs117246392 | G | 0.176   |
| rs117125382 | C | 0.14    |
| rs11606589  | G | -0.0861 |
| rs78301299  | T | 0.131   |
| rs4930491   | G | -0.041  |
| rs140577496 | T | -0.1001 |
| rs76555356  | A | -0.0783 |
| rs4757365   | T | 0.0305  |
| rs151301846 | A | 0.1041  |
| rs12795571  | A | 0.18    |
| rs72975288  | G | 0.044   |
| rs55736035  | A | -0.1234 |
| rs118116117 | G | -0.2484 |
| rs117071345 | G | 0.1644  |
| rs1791057   | T | 0.037   |
| rs675915    | A | 0.141   |
| rs117691691 | A | 0.248   |
| rs11824078  | G | -0.0504 |
| rs78993881  | A | 0.1024  |
| rs12364279  | T | -0.0426 |
| rs58267865  | C | -0.0491 |
| rs77917672  | T | -0.1141 |
| rs146763251 | A | 0.1477  |
| rs600206    | A | -0.0384 |
| rs73426108  | C | -0.0875 |
| rs72953114  | T | -0.1102 |
| rs1395906   | C | 0.056   |
| rs61883897  | T | -0.0653 |
| rs2155159   | G | -0.1733 |
| rs76892735  | G | -0.1162 |
| rs74958863  | T | -0.1043 |
| rs7941646   | C | -0.0874 |
| rs17148127  | C | -0.1086 |
| rs1149595   | T | -0.0277 |
| rs1381567   | C | 0.034   |

|             |   |         |
|-------------|---|---------|
| rs80301233  | G | 0.0761  |
| rs1503931   | G | 0.0292  |
| rs4910335   | C | 0.0314  |
| rs117779774 | T | 0.1071  |
| rs79918287  | C | -0.1188 |
| rs117275185 | T | 0.2017  |
| rs7117263   | C | -0.0295 |
| rs72950102  | A | 0.161   |
| rs7937951   | G | 0.0366  |
| rs612221    | T | -0.049  |
| rs12421016  | G | 0.0285  |
| rs2512330   | T | 0.0333  |
| rs143493949 | T | 0.1586  |
| rs748797    | G | 0.0503  |
| rs56287660  | C | -0.0418 |
| rs11028521  | A | -0.0314 |
| rs117645407 | A | 0.1455  |
| rs2897918   | T | -0.0691 |
| rs36234212  | T | 0.099   |
| rs7481342   | A | -0.069  |
| rs1587843   | T | 0.0365  |
| rs11022633  | C | 0.0266  |
| rs80259355  | A | -0.0488 |
| rs118181304 | T | -0.1126 |
| rs7943401   | A | -0.0316 |
| rs75974240  | G | -0.0683 |
| rs2512514   | A | 0.0518  |
| rs113375247 | A | -0.123  |
| rs75975454  | T | -0.0974 |
| rs11037905  | G | -0.0672 |
| rs76655861  | G | -0.1139 |
| rs7934770   | G | 0.031   |
| rs75182623  | A | -0.1645 |
| rs1267468   | A | -0.0318 |
| rs1255529   | A | -0.0272 |
| rs4755062   | T | -0.0363 |
| rs3867467   | C | 0.1255  |
| rs145493995 | A | 0.1376  |
| rs3741252   | T | -0.1058 |
| rs4551736   | C | 0.148   |
| rs12786783  | G | -0.0502 |
| rs143191128 | G | 0.145   |
| rs113295881 | A | -0.1663 |
| rs1939992   | T | 0.0318  |
| rs117222427 | T | -0.0701 |
| rs79768346  | G | 0.1088  |
| rs510960    | C | 0.0357  |

|             |   |         |
|-------------|---|---------|
| rs565420    | A | -0.0546 |
| rs117493319 | C | 0.132   |
| rs146877554 | A | -0.1338 |
| rs12223876  | A | -0.1069 |
| rs34190626  | C | -0.0364 |
| rs55803416  | G | 0.1469  |
| rs2514466   | C | 0.0514  |
| rs72946016  | C | -0.0774 |
| rs117716341 | A | 0.1778  |
| rs117483786 | C | 0.1374  |
| rs7946466   | G | -0.0886 |
| rs4910320   | T | -0.0316 |
| rs116070386 | T | -0.09   |
| rs79573026  | C | -0.126  |
| rs138548099 | A | -0.1284 |
| rs35534902  | T | 0.1114  |
| rs616714    | T | 0.0361  |
| rs141031848 | A | -0.1186 |
| rs10894276  | A | 0.1351  |
| rs80209594  | A | 0.0879  |
| rs57994965  | C | 0.0312  |
| rs689196    | G | 0.0811  |
| rs59991138  | C | 0.1052  |
| rs57701631  | C | -0.0386 |
| rs4320963   | C | 0.0909  |
| rs1653178   | C | 0.0274  |
| rs520328    | A | -0.038  |
| rs79837617  | C | -0.1645 |
| rs59367759  | T | 0.0564  |
| rs149442126 | A | 0.1274  |
| rs117993770 | C | -0.1554 |
| rs12288735  | T | -0.0376 |
| rs11606854  | T | 0.0358  |
| rs7940215   | T | 0.0284  |
| rs11553093  | G | 0.1136  |
| rs1552722   | T | 0.0287  |
| rs11604500  | T | 0.12    |
| rs142907977 | G | -0.125  |
| rs73013311  | G | -0.0395 |
| rs118012056 | G | -0.1423 |
| rs11234748  | A | 0.053   |
| rs6484712   | C | 0.0299  |
| rs143054575 | G | 0.1263  |
| rs34566602  | A | -0.0296 |
| rs76949435  | A | -0.1779 |
| rs72902437  | C | -0.1004 |
| rs10839732  | A | 0.035   |

|             |   |         |
|-------------|---|---------|
| rs965912    | A | 0.033   |
| rs12793346  | T | -0.0703 |
| rs77826181  | C | 0.2398  |
| rs7101516   | A | 0.0926  |
| rs61656851  | G | -0.05   |
| rs55945170  | G | 0.1075  |
| rs692327    | G | 0.0273  |
| rs74393839  | T | -0.0466 |
| rs10837450  | A | -0.0362 |
| rs7125704   | C | -0.1176 |
| rs10892974  | T | 0.0289  |
| rs145842240 | A | 0.1208  |
| rs11023478  | G | 0.0623  |
| rs11232165  | G | 0.0918  |
| rs55694976  | T | -0.1227 |
| rs74481413  | C | 0.1681  |
| rs143870547 | A | -0.2178 |
| rs147896578 | A | -0.1144 |
| rs506866    | T | 0.0268  |
| rs73003056  | T | 0.0386  |
| rs77010090  | A | -0.2318 |
| rs78495148  | A | -0.0985 |
| rs75878095  | G | 0.1383  |
| rs7484126   | G | 0.0368  |
| rs145889651 | A | 0.1337  |
| rs4433559   | C | 0.049   |
| rs10896623  | G | 0.0285  |
| rs73013040  | T | 0.137   |
| rs1076180   | A | -0.1705 |
| rs4753791   | T | 0.0281  |
| rs75842154  | G | -0.0476 |
| rs117022703 | A | -0.1186 |
| rs138530447 | T | -0.0811 |
| rs1149622   | G | 0.0304  |
| rs666733    | A | -0.0271 |
| rs448419    | T | -0.0429 |
| rs11022342  | A | 0.0557  |
| rs72916996  | C | 0.1276  |
| rs7480637   | G | -0.0979 |
| rs1983756   | G | -0.1279 |
| rs2125301   | C | 0.0289  |
| rs61440209  | G | 0.0355  |
| rs79247372  | T | -0.1182 |
| rs7114151   | T | 0.0411  |
| rs7948609   | C | 0.0305  |
| rs11216919  | G | -0.032  |
| rs948979    | T | -0.0354 |

|             |   |         |
|-------------|---|---------|
| rs113598713 | T | 0.1519  |
| rs77330421  | A | 0.1123  |
| rs1938995   | G | -0.1556 |
| rs79577680  | T | 0.0385  |
| rs117685986 | C | 0.1268  |
| rs112487171 | T | 0.1209  |
| rs79736391  | A | 0.2221  |
| rs116948108 | G | -0.137  |
| rs139645840 | T | 0.1115  |
| rs147332062 | C | 0.0955  |
| rs112164715 | T | -0.0822 |
| rs139847730 | A | 0.1207  |
| rs72973968  | C | -0.0336 |
| rs3087611   | T | 0.1377  |
| rs74810810  | T | -0.0908 |
| rs116980388 | A | -0.2584 |
| rs11215866  | G | -0.0557 |
| rs59762951  | A | 0.0343  |
| rs61871577  | T | 0.0755  |
| rs72958255  | T | 0.1404  |
| rs7930940   | A | -0.0424 |
| rs12797453  | T | 0.1406  |
| rs116901336 | T | -0.0573 |
| rs77199649  | G | 0.1698  |
| rs145658975 | A | -0.2189 |
| rs11043104  | G | 0.1202  |
| rs61904666  | C | 0.0949  |
| rs12274936  | A | -0.0501 |
| rs506028    | G | -0.0463 |
| rs11021961  | A | -0.0324 |
| rs62637250  | T | 0.0523  |
| rs149934734 | T | -0.11   |
| rs1974527   | A | 0.0315  |
| rs61603547  | G | 0.0306  |
| rs151159745 | T | 0.1231  |
| rs117737048 | G | 0.0834  |
| rs72903617  | T | -0.0644 |
| rs10893496  | T | 0.095   |
| rs80333316  | A | 0.112   |
| rs1793833   | T | 0.0352  |
| rs72934783  | T | -0.0332 |
| rs10894669  | A | 0.0309  |
| rs117233700 | T | 0.1591  |
| rs74362523  | T | -0.1178 |
| rs117709280 | C | -0.1718 |
| rs11221072  | C | -0.1025 |
| rs7115117   | G | 0.0485  |

|             |   |         |
|-------------|---|---------|
| rs75227293  | T | 0.0568  |
| rs2514503   | A | -0.0323 |
| rs6592424   | C | 0.0845  |
| rs2785160   | C | 0.0329  |
| rs489084    | A | 0.0974  |
| rs3934628   | T | 0.027   |
| rs76885872  | G | 0.1937  |
| rs72850206  | A | -0.0745 |
| rs55942019  | T | 0.0274  |
| rs603351    | A | 0.0317  |
| rs143932134 | G | 0.1559  |
| rs55889636  | G | 0.0295  |
| rs12362837  | C | -0.0893 |
| rs117051576 | C | -0.0634 |
| rs146414450 | A | 0.1322  |
| rs11213979  | A | -0.0293 |
| rs74651273  | G | 0.1284  |
| rs118140307 | C | 0.1653  |
| rs142590378 | G | -0.1123 |
| rs2236650   | A | -0.079  |
| rs655954    | T | 0.0383  |
| rs72858747  | A | 0.0604  |
| rs12295761  | T | -0.0594 |
| rs114588017 | G | -0.1026 |
| rs150019690 | A | -0.1476 |
| rs11215148  | C | 0.1116  |
| rs78715971  | A | -0.1758 |
| rs55817324  | T | -0.0498 |
| rs61745230  | A | 0.0913  |
| rs143068832 | T | -0.0656 |
| rs7950649   | T | -0.0433 |
| rs2902421   | A | 0.0285  |
| rs79180154  | G | -0.097  |
| rs4426128   | T | 0.0434  |
| rs17632172  | T | 0.089   |
| rs140976709 | A | -0.0725 |
| rs4937771   | A | 0.0655  |
| rs10840071  | A | -0.0945 |
| rs142344330 | C | -0.1846 |
| rs117595296 | T | 0.2008  |
| rs1374574   | G | 0.0264  |
| rs117279208 | G | -0.1017 |
| rs1585760   | C | -0.0333 |
| rs77578179  | G | 0.0708  |
| rs1533614   | T | 0.0589  |
| rs111545287 | A | -0.0905 |
| rs479139    | A | 0.0289  |

|             |   |         |
|-------------|---|---------|
| rs2846071   | C | 0.0317  |
| rs7126359   | G | -0.0376 |
| rs900467    | T | -0.0447 |
| rs116974159 | A | -0.1136 |
| rs75796067  | T | -0.0869 |
| rs79366772  | T | 0.0896  |
| rs2441689   | C | 0.0556  |
| rs17119667  | C | -0.0567 |
| rs12789212  | G | 0.027   |
| rs11223955  | T | 0.0377  |
| rs78275797  | T | -0.0933 |
| rs141064730 | G | 0.0781  |
| rs6591974   | G | 0.0665  |
| rs72930139  | T | 0.0915  |
| rs11027873  | G | 0.0382  |
| rs112150440 | A | -0.1112 |
| rs10837600  | T | 0.0346  |
| rs72927945  | G | -0.1156 |
| rs16913594  | C | -0.0521 |
| rs10793178  | T | -0.031  |
| rs2226638   | G | -0.0295 |
| rs11222959  | G | 0.0645  |
| rs1940114   | T | -0.0368 |
| rs2355251   | T | -0.0271 |
| rs286907    | A | -0.038  |
| rs80234394  | A | 0.1048  |
| rs12421611  | A | 0.0334  |
| rs1552417   | A | 0.0277  |
| rs75352711  | C | 0.0638  |
| rs61870478  | T | -0.036  |
| rs4758542   | A | -0.0321 |
| rs11219814  | G | -0.0335 |
| rs117740926 | T | 0.1326  |
| rs61880854  | A | 0.0965  |
| rs12289690  | T | -0.0426 |
| rs216491    | T | 0.03    |
| rs478002    | C | -0.0496 |
| rs11221894  | G | 0.0778  |
| rs78774289  | G | 0.1866  |
| rs11604102  | T | -0.1967 |
| rs4146883   | T | 0.0286  |
| rs17578583  | G | 0.0492  |
| rs115620185 | A | 0.0825  |
| rs79559298  | G | 0.0926  |
| rs148546265 | T | -0.1633 |
| rs34839793  | A | 0.1294  |
| rs12793618  | A | 0.1534  |



|             |   |         |
|-------------|---|---------|
| rs12576790  | G | 0.0384  |
| rs12417141  | C | 0.0422  |
| rs2511153   | C | 0.0282  |
| rs12791446  | T | 0.1273  |
| rs11023850  | G | -0.0959 |
| rs36112960  | C | -0.1112 |
| rs138898485 | G | -0.0678 |
| rs4937896   | T | 0.0469  |
| rs74984890  | G | -0.0559 |
| rs11225533  | A | -0.0343 |
| rs11213675  | T | -0.0301 |
| rs79342674  | G | 0.0897  |
| rs12364847  | A | 0.1087  |
| rs75997066  | A | -0.0714 |
| rs12285175  | C | -0.0367 |
| rs61895600  | T | 0.1239  |
| rs17743381  | T | -0.0346 |
| rs17139164  | C | -0.1337 |
| rs35903991  | A | 0.1614  |
| rs56101712  | T | -0.057  |
| rs7350520   | G | -0.0439 |
| rs12791593  | T | 0.0316  |
| rs113019061 | G | -0.1197 |
| rs2682115   | A | 0.0931  |
| rs1508103   | G | 0.0651  |
| rs10792892  | T | 0.0332  |
| rs11217440  | G | -0.0271 |
| rs11027449  | C | 0.0316  |
| rs146617441 | T | -0.1866 |
| rs34959832  | T | 0.1684  |
| rs75185783  | C | 0.0893  |
| rs184267    | A | -0.0273 |
| rs11042982  | C | -0.0414 |
| rs11529923  | C | -0.0591 |
| rs11222614  | T | -0.0311 |
| rs117964074 | C | -0.1191 |
| rs11043078  | G | -0.0311 |
| rs4451741   | T | 0.0814  |
| rs2702630   | G | -0.0312 |
| rs72849864  | G | 0.0998  |
| rs77780366  | C | -0.0547 |
| rs117615589 | A | 0.1227  |
| rs7126672   | C | 0.0321  |
| rs140022617 | A | -0.1954 |
| rs12792064  | G | 0.173   |
| rs77549103  | T | -0.091  |
| rs3750944   | G | 0.0278  |

|             |   |         |
|-------------|---|---------|
| rs3018165   | T | -0.0271 |
| rs10890907  | G | 0.0353  |
| rs7130897   | C | -0.0373 |
| rs117126314 | C | 0.1476  |
| rs117105038 | G | -0.1125 |
| rs11215963  | G | -0.0448 |
| rs28472542  | G | -0.0362 |
| rs114056142 | T | 0.0949  |
| rs10894742  | G | 0.1674  |
| rs11232912  | A | 0.0401  |
| rs72854943  | C | 0.1627  |
| rs12223575  | A | 0.0266  |
| rs6592664   | T | -0.0272 |
| rs329659    | T | -0.1221 |
| rs36064854  | A | 0.0288  |
| rs78011755  | C | -0.0551 |
| rs7105238   | G | 0.0458  |
| rs73029464  | G | -0.059  |
| rs7124398   | G | 0.058   |
| rs56358129  | A | -0.0372 |
| rs4414226   | T | 0.1675  |
| rs145422110 | T | 0.2338  |
| rs117380220 | A | 0.114   |
| rs35574500  | G | -0.0363 |
| rs2863172   | A | 0.0372  |
| rs139924137 | T | 0.1396  |
| rs12283125  | A | -0.0323 |
| rs35067061  | A | 0.0731  |
| rs7105382   | T | 0.0297  |
| rs550999    | G | -0.0292 |
| rs11222043  | T | 0.0265  |
| rs11236898  | A | 0.0347  |
| rs2862385   | T | -0.0284 |
| rs7114416   | A | 0.0654  |
| rs76882177  | T | -0.083  |
| rs500840    | A | -0.0486 |
| rs660410    | A | 0.0501  |
| rs12293164  | T | -0.1343 |
| rs73014296  | G | -0.0781 |
| rs72998668  | T | -0.0558 |
| rs76410896  | C | -0.0994 |
| rs7942997   | C | 0.0729  |
| rs141663350 | C | 0.078   |
| rs11214841  | A | 0.1327  |
| rs4980320   | C | 0.0271  |
| rs7127818   | C | -0.0293 |
| rs117900957 | C | -0.225  |

|             |   |         |
|-------------|---|---------|
| rs113246686 | A | 0.1384  |
| rs76454443  | C | -0.0985 |
| rs1983257   | C | 0.0619  |
| rs10430977  | T | -0.0318 |
| rs577414    | C | 0.0418  |
| rs10892539  | T | 0.0299  |
| rs1198803   | G | 0.041   |
| rs670875    | A | -0.0825 |
| rs77902034  | T | -0.0461 |
| rs331539    | G | -0.049  |
| rs138500824 | C | 0.1559  |
| rs12574811  | A | 0.0421  |
| rs144001962 | T | 0.0407  |
| rs113027661 | C | -0.1334 |
| rs72882584  | T | -0.1457 |
| rs60733834  | T | 0.1051  |
| rs12282537  | C | 0.0258  |
| rs117949916 | G | -0.107  |
| rs3758810   | C | -0.0996 |
| rs150943240 | A | -0.1384 |
| rs12574791  | G | 0.0529  |
| rs10765634  | T | -0.0269 |
| rs7126380   | A | 0.1328  |
| rs74661474  | A | 0.0937  |
| rs1662190   | A | -0.0796 |
| rs4616065   | C | 0.0298  |
| rs1530354   | T | -0.027  |
| rs147729624 | C | 0.1391  |
| rs144341802 | T | 0.0601  |
| rs77838060  | C | -0.1093 |
| rs2306729   | T | -0.0455 |
| rs4935894   | C | 0.0335  |
| rs4310650   | T | 0.0794  |
| rs11041973  | T | -0.0355 |
| rs61901175  | T | 0.0452  |
| rs7950266   | A | 0.0597  |
| rs908942    | A | -0.0622 |
| rs113833527 | G | 0.1381  |
| rs1164689   | G | -0.0385 |
| rs117155246 | T | 0.1529  |
| rs534279    | G | 0.0423  |
| rs113400047 | C | 0.1179  |
| rs1783582   | A | -0.028  |
| rs12808229  | G | 0.2012  |
| rs72942019  | C | 0.0855  |
| rs118149958 | G | 0.1459  |
| rs12271471  | G | -0.0368 |

|             |   |         |
|-------------|---|---------|
| rs34100087  | A | 0.173   |
| rs12576334  | C | -0.0271 |
| rs59226850  | T | 0.0533  |
| rs150599115 | A | -0.0924 |
| rs11216480  | A | -0.0478 |
| rs10894645  | T | -0.0303 |
| rs80003483  | G | -0.1824 |
| rs12804305  | C | 0.0474  |
| rs2155251   | G | -0.0323 |
| rs73028641  | C | 0.0802  |
| rs146293659 | A | -0.0905 |
| rs73019191  | A | -0.048  |
| rs77508989  | A | -0.1292 |
| rs591043    | C | 0.032   |
| rs12575978  | A | 0.0916  |
| rs7103725   | A | -0.0483 |
| rs55865591  | T | 0.1225  |
| rs34089754  | C | -0.0423 |
| rs146637638 | A | 0.1277  |
| rs72935280  | C | -0.1321 |
| rs7130750   | C | 0.0288  |
| rs75414910  | A | -0.0793 |
| rs118105182 | A | -0.0729 |
| rs138863569 | G | -0.1438 |
| rs7116096   | T | -0.0355 |
| rs61889778  | A | 0.0684  |
| rs58386631  | A | 0.0656  |
| rs71469652  | C | -0.1168 |
| rs10839820  | G | 0.0295  |
| rs11220502  | C | -0.049  |
| rs62001008  | C | 0.0742  |
| rs116871136 | A | -0.1364 |
| rs112352107 | A | 0.1156  |
| rs76300514  | A | 0.0892  |
| rs79296452  | T | -0.048  |
| rs71475390  | T | -0.0936 |
| rs11023994  | C | -0.0396 |
| rs11213674  | T | 0.0634  |
| rs117745700 | A | -0.1008 |
| rs10833259  | A | 0.0333  |
| rs10766635  | T | 0.0288  |
| rs112282948 | C | 0.0687  |
| rs55998369  | C | -0.0549 |
| rs4945276   | G | 0.0277  |
| rs77906331  | G | 0.064   |
| rs490914    | T | 0.0549  |
| rs4935838   | A | 0.0533  |

|             |   |         |
|-------------|---|---------|
| rs61908678  | T | 0.0438  |
| rs61880625  | C | 0.0326  |
| rs77493105  | G | -0.1416 |
| rs17573475  | C | 0.0275  |
| rs676904    | A | 0.0271  |
| rs12292093  | A | 0.1018  |
| rs146309680 | A | -0.1488 |
| rs2925768   | T | 0.0317  |
| rs118085659 | A | 0.1446  |
| rs78677674  | A | 0.1024  |
| rs117143472 | G | 0.1588  |
| rs75724740  | A | 0.1747  |
| rs117780316 | A | -0.1031 |
| rs1612859   | C | -0.0349 |
| rs2246755   | A | 0.0605  |
| rs117517252 | G | 0.1094  |
| rs115687576 | G | -0.1129 |
| rs10892818  | T | 0.0281  |
| rs4756118   | G | -0.0337 |
| rs78188316  | C | 0.0688  |
| rs189680    | G | 0.0435  |
| rs10750292  | C | -0.0258 |
| rs12279152  | T | -0.138  |
| rs588322    | A | -0.0507 |
| rs79228877  | C | -0.1101 |
| rs139060960 | A | 0.1826  |
| rs75876407  | G | -0.0708 |
| rs12363799  | T | 0.0893  |
| rs73437628  | C | -0.0739 |
| rs11032995  | C | -0.0447 |
| rs11234321  | A | -0.08   |
| rs691854    | A | 0.0606  |
| rs113758502 | G | 0.1734  |
| rs148387619 | C | -0.203  |
| rs61882187  | C | -0.0343 |
| rs12792924  | A | -0.0997 |
| rs34162168  | C | 0.0923  |
| rs17800588  | G | -0.1155 |
| rs12365864  | G | -0.0348 |
| rs77514995  | A | -0.0812 |
| rs144466705 | A | -0.1066 |
| rs76275158  | T | 0.0489  |
| rs116861566 | C | -0.0969 |
| rs17117217  | G | -0.0373 |
| rs117602282 | T | -0.18   |
| rs2499958   | A | -0.0278 |
| rs10840586  | G | -0.0262 |

|             |   |         |
|-------------|---|---------|
| rs7936150   | C | -0.1023 |
| rs147489334 | C | 0.0977  |
| rs79040406  | A | 0.1713  |
| rs143238313 | A | 0.1434  |
| rs2513535   | G | 0.0434  |
| rs4757362   | T | -0.0312 |
| rs116502747 | A | 0.1798  |
| rs77310001  | T | -0.156  |
| rs61910012  | A | 0.0993  |
| rs7105077   | G | 0.0346  |
| rs11218771  | C | -0.0273 |
| rs11820465  | T | 0.0486  |
| rs138661935 | C | -0.1222 |
| rs144477558 | C | 0.055   |
| rs566007    | T | 0.0308  |
| rs77479321  | C | -0.1027 |
| rs12418369  | A | -0.0527 |
| rs10892137  | T | -0.0268 |
| rs75764622  | C | -0.0779 |
| rs35794157  | A | -0.0803 |
| rs7930344   | T | 0.1545  |
| rs3922326   | T | -0.1114 |
| rs12799025  | A | 0.0694  |
| rs657364    | A | 0.1183  |
| rs6589921   | C | -0.0397 |
| rs73398846  | C | -0.0567 |
| rs9282688   | T | 0.1184  |
| rs80223125  | T | 0.0645  |
| rs11041848  | T | -0.0321 |
| rs286869    | C | -0.0853 |
| rs74740748  | A | -0.0447 |
| rs2726416   | A | -0.0353 |
| rs118177380 | A | 0.2109  |
| rs10839546  | T | 0.0365  |
| rs4755921   | A | -0.0256 |
| rs150327245 | A | -0.1661 |
| rs77042198  | C | -0.1018 |
| rs75849837  | T | -0.1761 |
| rs610104    | G | -0.0294 |
| rs117068238 | T | 0.154   |
| rs11021446  | T | 0.0427  |
| rs12798693  | G | -0.0274 |
| rs17133035  | A | 0.1155  |
| rs34988806  | A | 0.056   |
| rs147413777 | A | 0.1732  |
| rs4614465   | A | 0.0641  |
| rs1454441   | A | -0.0292 |

|             |   |         |
|-------------|---|---------|
| rs73433183  | A | 0.1192  |
| rs3866930   | C | -0.026  |
| rs790371    | A | 0.1609  |
| rs79508907  | G | -0.1138 |
| rs17628836  | G | 0.0491  |
| rs7116681   | A | -0.0347 |
| rs58936914  | G | 0.0564  |
| rs72948137  | C | 0.0899  |
| rs4963326   | A | -0.0385 |
| rs76000784  | A | -0.0731 |
| rs72914922  | A | -0.119  |
| rs149011512 | A | 0.1373  |
| rs55794678  | T | 0.127   |
| rs10893058  | A | 0.0317  |
| rs117490727 | C | -0.157  |
| rs79059416  | T | -0.0614 |
| rs1515038   | G | -0.0362 |
| rs1123608   | T | 0.08    |
| rs653206    | C | 0.1093  |
| rs71486865  | G | 0.1739  |
| rs116875372 | G | 0.0544  |
| rs116963285 | T | -0.1508 |
| rs73013529  | G | -0.1281 |
| rs11228662  | A | -0.0254 |
| rs17156618  | G | 0.0818  |
| rs140737906 | A | 0.1162  |
| rs138733198 | C | 0.1991  |
| rs496123    | C | -0.0295 |
| rs921202    | G | 0.0473  |
| rs72844252  | T | -0.0462 |
| rs79665688  | T | -0.0688 |
| rs117367036 | C | 0.108   |
| rs4127393   | A | 0.0265  |
| rs658125    | G | 0.028   |
| rs73009178  | A | 0.0544  |
| rs117080901 | A | 0.1917  |
| rs72923632  | T | -0.056  |
| rs12275828  | A | -0.0529 |
| rs79440215  | T | 0.0806  |
| rs117479061 | G | 0.0927  |
| rs35071613  | C | 0.0264  |
| rs10897521  | T | -0.0371 |
| rs11231975  | A | -0.0444 |
| rs61906588  | T | 0.0307  |
| rs76855675  | T | -0.1426 |
| rs11022381  | T | 0.0731  |
| rs117847495 | T | -0.0414 |

|             |   |         |
|-------------|---|---------|
| rs146040364 | A | -0.1098 |
| rs11603570  | T | -0.0408 |
| rs7122485   | A | 0.0887  |
| rs72934982  | C | 0.091   |
| rs2156121   | A | 0.0384  |
| rs2237903   | T | 0.0264  |
| rs4910348   | C | 0.0368  |
| rs78105512  | T | 0.0313  |
| rs117740823 | T | 0.0838  |
| rs144405764 | G | 0.1277  |
| rs118075094 | C | -0.0587 |
| rs2291120   | C | -0.0418 |
| rs7931136   | C | -0.0508 |
| rs10897600  | T | 0.1081  |
| rs7943162   | A | 0.0614  |
| rs117159008 | T | -0.0956 |
| rs12785470  | C | 0.1292  |
| rs116995241 | G | 0.1282  |
| rs117915114 | G | -0.0895 |
| rs73598457  | A | 0.0877  |
| rs61885985  | G | -0.0466 |
| rs17847539  | A | -0.0517 |
| rs117825971 | A | -0.1865 |
| rs56215256  | T | 0.2311  |
| rs117025693 | A | 0.1205  |
| rs7116675   | A | -0.0405 |
| rs73625341  | A | -0.11   |
| rs34566431  | C | -0.0269 |
| rs11220047  | A | 0.0412  |
| rs112128893 | C | -0.0949 |
| rs11037809  | G | -0.0275 |
| rs74502146  | T | 0.1232  |
| rs142994415 | G | -0.1289 |
| rs11020681  | G | -0.1598 |
| rs873497    | A | 0.038   |
| rs3819255   | T | -0.0659 |
| rs12799166  | A | 0.0398  |
| rs74679621  | G | 0.0882  |
| rs11028585  | A | 0.1312  |
| rs75370284  | A | -0.1415 |
| rs10792583  | G | -0.0255 |
| rs4937864   | A | 0.0446  |
| rs2288293   | C | 0.0281  |
| rs11227521  | T | 0.0269  |
| rs73000241  | G | 0.0542  |
| rs61907514  | G | 0.0412  |
| rs7116459   | C | -0.0292 |



|             |   |         |
|-------------|---|---------|
| rs112726879 | A | 0.1089  |
| rs118092900 | G | -0.17   |
| rs113710188 | G | 0.1169  |
| rs113255079 | T | 0.1143  |
| rs34685979  | T | 0.0827  |
| rs2083710   | C | 0.0467  |
| rs7129935   | C | 0.0336  |
| rs653617    | A | 0.0929  |
| rs557566    | G | 0.1752  |
| rs61905824  | T | 0.1218  |
| rs12786261  | T | -0.0341 |
| rs77274852  | C | -0.0825 |
| rs117082061 | A | -0.1014 |
| rs28852494  | T | 0.0429  |
| rs58311561  | C | -0.0889 |
| rs113358849 | A | -0.101  |
| rs611607    | C | -0.0257 |
| rs3763890   | T | 0.1045  |
| rs7941840   | A | 0.1244  |
| rs10767859  | T | -0.0267 |
| rs117016392 | A | -0.2172 |
| rs1459658   | T | 0.082   |
| rs2056083   | A | 0.0473  |
| rs67378754  | G | -0.0568 |
| rs75451567  | C | 0.0955  |
| rs75507001  | A | -0.1085 |
| rs147224199 | T | 0.1123  |
| rs138577970 | G | -0.0316 |
| rs4757025   | T | -0.0308 |
| rs78588119  | A | 0.1793  |
| rs36083007  | G | 0.1108  |
| rs11828252  | C | -0.0266 |
| rs17129783  | A | 0.04    |
| rs139132496 | C | -0.1246 |
| rs78955046  | G | -0.0366 |
| rs1940078   | G | 0.0521  |
| rs2399673   | G | -0.028  |
| rs4930006   | T | 0.05    |
| rs117480935 | C | -0.141  |
| rs144009148 | C | 0.1811  |
| rs2121383   | G | 0.1085  |
| rs11603354  | A | 0.1999  |
| rs2090493   | T | 0.052   |
| rs10893304  | C | -0.0272 |
| rs77110762  | T | 0.0715  |
| rs7926302   | A | -0.036  |
| rs17275066  | T | 0.0297  |

|             |   |         |
|-------------|---|---------|
| rs11030716  | T | -0.0368 |
| rs7928547   | C | -0.0269 |
| rs9804429   | A | -0.0302 |
| rs76400748  | A | -0.0722 |
| rs79082936  | T | 0.1992  |
| rs11236302  | T | 0.0357  |
| rs616769    | T | 0.0725  |
| rs118013954 | T | -0.0752 |
| rs117301475 | A | 0.1866  |
| rs112513682 | G | -0.0915 |
| rs55928243  | T | 0.1438  |
| rs117679829 | G | 0.0712  |
| rs61882030  | T | 0.1447  |
| rs12279261  | G | -0.0365 |
| rs139237596 | C | -0.0742 |
| rs10741591  | A | -0.0249 |
| rs145657975 | T | 0.1897  |
| rs7945699   | C | -0.0449 |
| rs11235671  | T | 0.0958  |
| rs6590792   | C | 0.0552  |
| rs78237782  | C | 0.0814  |
| rs12798356  | A | -0.0973 |
| rs1015201   | T | -0.0904 |
| rs11021014  | A | -0.0504 |
| rs71481808  | T | 0.0655  |
| rs329684    | G | 0.0393  |
| rs764750    | C | 0.0356  |
| rs148165165 | T | 0.1367  |
| rs72936625  | T | 0.0665  |
| rs77903186  | C | -0.1742 |
| rs74332985  | C | -0.1026 |
| rs78102600  | T | -0.1161 |
| rs74909674  | A | -0.0723 |
| rs11036158  | A | 0.0772  |
| rs77153989  | C | 0.1045  |
| rs654240    | T | -0.03   |
| rs117474502 | C | 0.0698  |
| rs117971911 | A | 0.1336  |
| rs10834029  | G | 0.0254  |
| rs11021240  | C | -0.0337 |
| rs74673622  | G | 0.08    |
| rs7928382   | G | 0.0663  |
| rs28469534  | T | 0.0596  |
| rs2656168   | A | -0.0249 |
| rs77882697  | T | 0.0824  |
| rs2088182   | A | -0.067  |
| rs1520912   | A | -0.0379 |

|             |   |         |
|-------------|---|---------|
| rs11032425  | T | -0.0435 |
| rs7108150   | A | 0.0332  |
| rs2146568   | G | 0.0407  |
| rs11601116  | T | -0.0356 |
| rs79623368  | T | -0.0639 |
| rs11236612  | G | -0.0471 |
| rs76723073  | A | 0.1108  |
| rs117821082 | T | -0.1358 |
| rs10791164  | G | 0.0369  |
| rs10741427  | C | 0.0332  |
| rs58101364  | C | 0.0429  |
| rs1788958   | C | 0.1201  |
| rs10894387  | G | 0.0308  |
| rs10833746  | A | 0.0269  |
| rs1938984   | G | 0.0257  |
| rs75013740  | G | 0.0739  |
| rs78039253  | A | -0.0756 |
| rs114366214 | A | 0.1071  |
| rs146655590 | T | -0.1349 |
| rs2102431   | A | 0.0273  |
| rs61883694  | C | -0.0675 |
| rs10765845  | A | -0.0249 |
| rs4755258   | C | -0.0318 |
| rs7128694   | T | 0.0304  |
| rs117943137 | C | 0.1004  |
| rs77873480  | A | 0.0766  |
| rs41474450  | T | -0.0618 |
| rs10750531  | G | -0.0269 |
| rs1443116   | A | 0.0317  |
| rs1792006   | G | 0.0348  |
| rs4755562   | C | 0.026   |
| rs77795390  | A | 0.1026  |
| rs144759295 | A | -0.135  |
| rs1790153   | C | 0.0256  |
| rs59057353  | C | -0.0482 |
| rs118084645 | C | 0.0932  |
| rs10834472  | G | -0.0378 |
| rs10765791  | T | -0.0277 |
| rs79584280  | T | -0.1788 |
| rs1789831   | T | 0.0522  |
| rs4937508   | G | -0.0343 |
| rs1462188   | T | -0.158  |
| rs117369982 | T | -0.1447 |
| rs2133158   | C | -0.0292 |
| rs546611    | A | 0.0252  |
| rs490435    | T | 0.056   |
| rs1506876   | C | -0.0275 |

|             |   |         |
|-------------|---|---------|
| rs138310178 | C | -0.1404 |
| rs1706945   | G | -0.0497 |
| rs11600726  | C | -0.0588 |
| rs1456889   | T | -0.0348 |
| rs55674758  | A | -0.0867 |
| rs1388465   | A | 0.0301  |
| rs72866360  | A | 0.0943  |
| rs3825023   | T | -0.0621 |
| rs10836160  | T | 0.2012  |
| rs146115456 | T | -0.0358 |
| rs7127537   | G | -0.0547 |
| rs10742704  | A | 0.0321  |
| rs12275464  | A | -0.0329 |
| rs11225377  | A | -0.0404 |
| rs7928984   | G | 0.148   |
| rs2862696   | G | 0.0459  |
| rs77085918  | A | -0.0946 |
| rs10833262  | A | 0.0553  |
| rs1386249   | A | 0.0334  |
| rs117341008 | A | 0.1407  |
| rs669669    | C | 0.0348  |
| rs78248090  | C | -0.0805 |
| rs79802671  | G | 0.1772  |
| rs17569036  | A | -0.0831 |
| rs3781578   | A | 0.0298  |
| rs78467268  | A | -0.121  |
| rs7934320   | G | 0.1555  |
| rs520176    | T | 0.0315  |
| rs78745564  | G | -0.0978 |
| rs117384784 | A | 0.0772  |
| rs61880330  | G | -0.0991 |
| rs148400810 | T | -0.1076 |
| rs3844132   | A | 0.0327  |
| rs58652566  | C | 0.1141  |
| rs7480804   | T | -0.0476 |
| rs1055581   | C | -0.0254 |
| rs7107432   | T | -0.0317 |
| rs475771    | G | 0.0321  |
| rs76957729  | A | 0.1227  |
| rs649568    | A | 0.0929  |
| rs78577252  | T | 0.1063  |
| rs113936837 | C | -0.0328 |
| rs10830452  | G | 0.0258  |
| rs2155344   | T | -0.0287 |
| rs6483767   | A | -0.0257 |
| rs795235    | C | -0.0544 |
| rs2727266   | G | -0.0637 |

|             |   |         |
|-------------|---|---------|
| rs112219657 | T | -0.1724 |
| rs4245037   | A | 0.0276  |
| rs79298452  | T | 0.0982  |
| rs117230385 | A | 0.1081  |
| rs61907767  | G | -0.0836 |
| rs144969629 | C | 0.1145  |
| rs76186327  | G | -0.0624 |
| rs7950919   | T | -0.081  |
| rs111488822 | T | -0.1854 |
| rs930786    | T | 0.2293  |
| rs78022645  | T | 0.0859  |
| rs41275166  | C | -0.166  |
| rs4255556   | A | 0.1068  |
| rs12362548  | T | 0.0879  |
| rs10895486  | T | -0.0388 |
| rs1619240   | T | -0.0259 |
| rs480859    | A | 0.0278  |
| rs75970470  | G | -0.0505 |
| rs4923429   | C | 0.0382  |
| rs112724559 | A | -0.1234 |
| rs72861990  | T | 0.2676  |
| rs737503    | T | 0.0477  |
| rs72899530  | G | 0.0433  |
| rs12364205  | A | 0.0247  |
| rs10791428  | T | -0.0243 |
| rs2066491   | T | 0.0691  |
| rs1000960   | C | -0.0341 |
| rs56411871  | T | -0.0981 |
| rs12575762  | G | -0.0634 |
| rs11599977  | G | 0.0341  |
| rs11022466  | A | 0.2133  |
| rs11263566  | G | -0.1054 |
| rs12795347  | A | 0.0905  |
| rs7105436   | T | 0.0315  |
| rs147872439 | G | 0.1145  |
| rs118051165 | C | 0.1154  |
| rs113771808 | G | -0.0698 |
| rs4399339   | A | 0.0416  |
| rs7130870   | T | -0.0271 |
| rs7118905   | T | -0.0452 |
| rs7948458   | A | 0.0319  |
| rs11225507  | C | 0.0252  |
| rs76882215  | C | 0.1218  |
| rs75972697  | T | 0.1303  |
| rs7105604   | C | 0.0918  |
| rs4757381   | A | 0.0247  |
| rs441938    | G | 0.0307  |

|             |   |         |
|-------------|---|---------|
| rs7929059   | G | 0.026   |
| rs536796    | A | -0.1327 |
| rs151174508 | T | -0.1435 |
| rs76785871  | A | 0.047   |
| rs1698149   | T | 0.0257  |
| rs150403348 | A | -0.2016 |
| rs117194848 | C | -0.1756 |
| rs76850415  | G | -0.0784 |
| rs1445477   | T | 0.0257  |
| rs495862    | C | 0.0265  |
| rs79907142  | A | 0.1089  |
| rs61881863  | A | -0.0682 |
| rs79125722  | T | 0.1627  |
| rs10766536  | T | 0.0309  |
| rs11602108  | A | 0.0455  |
| rs112206113 | C | -0.1303 |
| rs4272759   | G | 0.0363  |
| rs56281755  | C | -0.0748 |
| rs11225266  | C | -0.0431 |
| rs10790835  | G | 0.0308  |
| rs12361754  | C | 0.0413  |
| rs11041805  | G | -0.032  |
| rs78171315  | C | -0.0945 |
| rs10769679  | A | 0.0455  |
| rs1134429   | T | 0.0439  |
| rs61506620  | G | 0.1299  |
| rs2298478   | G | -0.0322 |
| rs6483760   | A | -0.0443 |
| rs78681013  | A | 0.0843  |
| rs79908039  | A | 0.0847  |
| rs10830577  | C | 0.0424  |
| rs10832824  | T | -0.0288 |
| rs116911166 | C | 0.1174  |
| rs10767576  | T | -0.0257 |
| rs1344299   | A | 0.0312  |
| rs76990690  | G | -0.1294 |
| rs58195912  | C | -0.0462 |
| rs12797743  | G | -0.1224 |
| rs118025682 | T | 0.2094  |
| rs61740182  | A | 0.1049  |
| rs12283929  | G | 0.0309  |
| rs117066950 | T | -0.1685 |
| rs1573567   | C | -0.0376 |
| rs150480597 | A | -0.1271 |
| rs963811    | A | 0.1208  |
| rs12804253  | T | 0.0592  |
| rs149922790 | T | 0.1514  |

|             |   |         |
|-------------|---|---------|
| rs17098292  | T | 0.1353  |
| rs12419156  | C | 0.0475  |
| rs73573643  | G | 0.1065  |
| rs873590    | T | -0.0301 |
| rs7942362   | A | -0.0525 |
| rs7937668   | T | -0.0258 |
| rs493263    | A | -0.0462 |
| rs12278204  | C | -0.0992 |
| rs72933221  | C | -0.1368 |
| rs4635093   | G | -0.0275 |
| rs117382011 | A | 0.1304  |
| rs61896562  | C | 0.1168  |
| rs555373    | A | -0.0269 |
| rs113461440 | C | 0.0698  |
| rs72942791  | G | 0.0701  |
| rs147685834 | C | 0.0415  |
| rs1625376   | C | -0.0722 |
| rs10750479  | C | -0.0355 |
| rs2229007   | T | -0.1055 |
| rs7948627   | A | 0.0251  |
| rs11605836  | T | -0.0317 |
| rs4930565   | T | -0.0451 |
| rs7935378   | C | 0.0345  |
| rs1666655   | T | -0.0253 |
| rs1462941   | T | -0.0442 |
| rs117350740 | T | 0.0907  |
| rs80199022  | T | 0.0653  |
| rs4923568   | T | 0.039   |
| rs145689767 | T | 0.184   |
| rs112030790 | A | -0.1241 |
| rs283289    | A | 0.0287  |
| rs1161662   | C | -0.0402 |
| rs7943590   | C | 0.0737  |
| rs142284416 | T | -0.1274 |
| rs146026283 | A | 0.068   |
| rs117237814 | T | -0.1524 |
| rs75777976  | G | 0.1168  |
| rs4331089   | A | 0.0265  |
| rs483148    | T | -0.1031 |
| rs3750929   | G | -0.0666 |
| rs118005652 | G | 0.1449  |
| rs117296223 | G | -0.1507 |
| rs117371244 | A | 0.1548  |
| rs12295449  | C | 0.2063  |
| rs2198264   | T | -0.037  |
| rs11223904  | G | 0.0283  |
| rs35373738  | C | 0.079   |

|             |   |         |
|-------------|---|---------|
| rs1813133   | T | 0.0629  |
| rs150110934 | T | 0.0992  |
| rs7931252   | A | 0.0249  |
| rs72892169  | A | 0.1199  |
| rs74666402  | G | 0.1679  |
| rs117350168 | T | 0.0763  |
| rs117056416 | T | 0.1385  |
| rs80081646  | C | 0.1     |
| rs1547486   | A | -0.0475 |
| rs524838    | A | -0.1296 |
| rs78743709  | T | 0.1009  |
| rs731639    | G | 0.0307  |
| rs11225928  | G | -0.0486 |
| rs72977522  | A | 0.0686  |
| rs111685025 | G | 0.2266  |
| rs77021468  | T | 0.0733  |
| rs118103248 | C | -0.0835 |
| rs2863001   | G | 0.0507  |
| rs17144547  | T | 0.0648  |
| rs77024575  | T | 0.0478  |
| rs11026010  | A | 0.0444  |
| rs1807217   | A | 0.0889  |
| rs117317087 | C | 0.1056  |
| rs71484170  | C | -0.0385 |
| rs7927493   | T | -0.0443 |
| rs12800249  | T | 0.0614  |
| rs7122876   | C | 0.1301  |
| rs78131992  | G | 0.0747  |
| rs1939102   | A | 0.0312  |
| rs7117176   | T | 0.0418  |
| rs75900873  | C | -0.0507 |
| rs112089939 | T | -0.0929 |
| rs10501933  | C | -0.0396 |
| rs7111759   | C | 0.0701  |
| rs17246486  | T | -0.0648 |
| rs11227030  | G | -0.0275 |
| rs58400435  | C | 0.0414  |
| rs2714062   | C | -0.0279 |
| rs17358198  | T | -0.0436 |
| rs151092418 | T | 0.1972  |
| rs7119664   | A | -0.0317 |
| rs634176    | T | 0.1004  |
| rs118135216 | A | -0.1386 |
| rs7952516   | G | -0.0272 |
| rs17601808  | A | 0.1008  |
| rs11232314  | G | 0.025   |
| rs77188501  | A | 0.1036  |



|             |   |         |
|-------------|---|---------|
| rs625524    | A | 0.1287  |
| rs72847668  | T | 0.0898  |
| rs78407496  | T | -0.1139 |
| rs150510351 | T | -0.2352 |
| rs11605994  | T | -0.0294 |
| rs1038296   | C | 0.0735  |
| rs75713846  | A | -0.1235 |
| rs61875374  | T | -0.0923 |
| rs66716358  | C | 0.0267  |
| rs78979564  | C | -0.1445 |
| rs117902993 | G | -0.1492 |
| rs61901591  | A | 0.0843  |
| rs10500734  | C | -0.031  |
| rs538255    | A | 0.0619  |
| rs76159522  | T | 0.1396  |
| rs113396479 | G | 0.0927  |
| rs4936810   | G | 0.0284  |
| rs12223633  | G | -0.0725 |
| rs76703504  | G | 0.0623  |
| rs10835212  | C | 0.0296  |
| rs12283973  | G | 0.0883  |
| rs147423409 | A | 0.1578  |
| rs10895551  | T | 0.0251  |
| rs2853049   | C | -0.0381 |
| rs76370055  | T | 0.145   |
| rs1870297   | A | -0.0353 |
| rs965506    | C | -0.024  |
| rs2268607   | C | -0.0377 |
| rs76199618  | G | -0.0885 |
| rs4556520   | C | 0.0265  |
| rs116984953 | A | 0.1108  |
| rs71456320  | C | 0.1653  |
| rs117017553 | T | 0.1596  |
| rs76126158  | A | -0.1057 |
| rs537503    | G | -0.0352 |
| rs73011920  | T | 0.0474  |
| rs4935767   | G | 0.053   |
| rs116849673 | G | 0.0771  |
| rs145143525 | G | 0.1284  |
| rs720171    | T | 0.0291  |
| rs11215017  | G | -0.0501 |
| rs78755758  | A | -0.0684 |
| rs4450154   | A | -0.0357 |
| rs11231813  | C | 0.1174  |
| rs139904303 | G | -0.1922 |
| rs12363459  | T | -0.0237 |
| rs11031586  | T | 0.0344  |

|             |   |         |
|-------------|---|---------|
| rs4944937   | A | -0.0291 |
| rs12788122  | A | 0.0602  |
| rs2595435   | G | -0.0261 |
| rs10219157  | T | 0.0475  |
| rs4980707   | T | 0.0334  |
| rs116886256 | A | -0.1049 |
| rs12295834  | A | 0.0363  |
| rs766498    | T | 0.073   |
| rs10766694  | C | -0.0302 |
| rs138799224 | G | -0.1673 |
| rs116903274 | A | 0.1555  |
| rs117558199 | C | 0.1485  |
| rs11603912  | A | 0.0836  |
| rs59772430  | G | -0.1724 |
| rs76252006  | T | -0.0812 |
| rs10835589  | T | -0.1748 |
| rs75875777  | T | 0.1094  |
| rs11218292  | A | -0.0357 |
| rs11026691  | A | 0.058   |
| rs59716761  | A | -0.0436 |
| rs11601022  | C | -0.0458 |
| rs4909947   | G | 0.0242  |
| rs149664898 | A | -0.1238 |
| rs117225048 | A | 0.0726  |
| rs117455952 | G | -0.1144 |
| rs7107142   | T | -0.0799 |
| rs450244    | T | 0.0439  |
| rs2237967   | T | -0.0263 |
| rs56117769  | A | 0.0615  |
| rs117212887 | T | 0.1792  |
| rs6485380   | A | -0.0256 |
| rs11237348  | C | -0.026  |
| rs45470105  | T | -0.1411 |
| rs10833243  | C | 0.0352  |
| rs58815028  | A | 0.0277  |
| rs11236843  | G | -0.0406 |
| rs56785227  | C | 0.0308  |
| rs1493206   | A | -0.0848 |
| rs72869784  | A | 0.1481  |
| rs10898318  | A | 0.0275  |
| rs148080250 | C | 0.2058  |
| rs118093081 | T | -0.1928 |
| rs116915405 | T | -0.0616 |
| rs113965842 | T | 0.061   |
| rs9737546   | C | -0.0338 |
| rs11031647  | G | 0.0586  |
| rs147833206 | G | 0.0949  |

|             |   |         |
|-------------|---|---------|
| rs11223337  | A | 0.045   |
| rs60365069  | T | -0.0647 |
| rs113870133 | T | -0.1055 |
| rs1685326   | C | 0.0241  |
| rs260842    | T | 0.0305  |
| rs11213921  | T | 0.0365  |
| rs11038330  | G | 0.0427  |
| rs562336    | A | 0.0238  |
| rs11019145  | G | 0.1175  |
| rs7952167   | G | -0.0576 |
| rs12225273  | C | -0.0272 |
| rs11215874  | G | 0.0321  |
| rs56149696  | T | 0.1193  |
| rs11032600  | T | 0.0444  |
| rs34172399  | C | -0.0294 |
| rs67296539  | T | -0.0839 |
| rs75793092  | A | 0.0977  |
| rs55701929  | C | 0.1528  |
| rs143961633 | G | -0.1146 |
| rs4937794   | T | 0.0621  |
| rs10839541  | T | -0.0691 |
| rs117384293 | G | -0.0779 |
| rs59850584  | C | 0.037   |
| rs61879641  | G | 0.0507  |
| rs6485459   | G | -0.0263 |
| rs10838364  | G | -0.0286 |
| rs1938821   | T | 0.0265  |
| rs2742498   | C | -0.0749 |
| rs2716470   | A | -0.061  |
| rs116951063 | T | 0.2155  |
| rs75981704  | G | 0.0651  |
| rs4945026   | C | 0.0267  |
| rs72911069  | G | -0.0703 |
| rs7949586   | C | 0.0273  |
| rs35235453  | G | -0.1142 |
| rs72988865  | T | -0.0726 |
| rs76685057  | T | -0.0987 |
| rs7928614   | G | -0.1547 |
| rs12293167  | T | 0.0245  |
| rs148976187 | C | -0.1429 |
| rs11605021  | T | -0.1507 |
| rs117900366 | T | 0.1014  |
| rs59531838  | A | 0.0454  |
| rs2034030   | T | 0.0413  |
| rs77084903  | A | -0.0971 |
| rs117011579 | A | 0.1447  |
| rs7123971   | G | -0.1145 |

|             |   |         |
|-------------|---|---------|
| rs78764020  | A | 0.0672  |
| rs117717630 | A | -0.154  |
| rs141352236 | T | 0.1256  |
| rs1277640   | G | 0.0412  |
| rs79419863  | G | -0.0461 |
| rs11039523  | A | 0.0767  |
| rs75324926  | G | -0.1749 |
| rs11031672  | G | 0.0361  |
| rs10791780  | C | 0.1247  |
| rs1490939   | A | -0.0256 |
| rs116870261 | C | 0.0741  |
| rs9300041   | G | -0.0265 |
| rs12363755  | G | 0.0461  |
| rs77342407  | T | 0.0562  |
| rs4930290   | T | 0.03    |
| rs72944704  | T | -0.0783 |
| rs72951492  | A | -0.1287 |
| rs17133608  | T | -0.0496 |
| rs10892827  | G | -0.045  |
| rs684450    | T | -0.0324 |
| rs653955    | A | 0.1186  |
| rs569575    | G | 0.0571  |
| rs79963984  | T | 0.104   |
| rs17320769  | T | 0.1478  |
| rs496852    | G | 0.0238  |
| rs112007361 | C | -0.158  |
| rs475763    | T | -0.032  |
| rs141644689 | A | 0.0927  |
| rs117293780 | A | 0.144   |
| rs10741569  | A | -0.0268 |
| rs1533475   | G | -0.0243 |
| rs2511241   | C | 0.0763  |
| rs76027079  | T | 0.118   |
| rs11825503  | A | -0.1048 |
| rs2707077   | A | -0.0244 |
| rs17508418  | G | 0.0294  |
| rs923811    | G | -0.0248 |
| rs10769011  | T | 0.0317  |
| rs12284560  | C | 0.0315  |
| rs80317839  | T | 0.0628  |
| rs968938    | T | 0.0277  |
| rs79540430  | T | 0.0791  |
| rs481539    | T | -0.025  |
| rs12361570  | C | -0.0237 |
| rs12281062  | C | 0.0249  |
| rs4435037   | T | -0.0329 |
| rs61889565  | T | 0.1346  |

|             |   |         |
|-------------|---|---------|
| rs333805    | A | -0.0259 |
| rs74982319  | T | -0.0807 |
| rs75704632  | G | 0.0971  |
| rs1477565   | G | 0.0369  |
| rs1403257   | G | 0.0235  |
| rs151036376 | T | 0.1791  |
| rs111681528 | A | 0.1311  |
| rs17642362  | G | -0.0728 |
| rs12418250  | A | 0.0248  |
| rs117639653 | C | 0.0992  |
| rs6591845   | C | -0.0905 |
| rs78750004  | T | -0.1041 |
| rs2351959   | T | -0.042  |
| rs17719728  | G | -0.0385 |
| rs1793406   | A | 0.0419  |
| rs116932437 | C | 0.0381  |
| rs61900918  | A | -0.1421 |
| rs55753209  | A | -0.0526 |
| rs7101795   | C | 0.0747  |
| rs11824398  | A | 0.1039  |
| rs118004397 | A | -0.0763 |
| rs16927077  | T | 0.0475  |
| rs7927259   | C | 0.0477  |
| rs2167457   | T | 0.0272  |
| rs9651733   | T | -0.0907 |
| rs74819113  | T | -0.0603 |
| rs72957868  | T | -0.0987 |
| rs12362067  | T | -0.0941 |
| rs10891896  | C | -0.0238 |
| rs6590871   | C | 0.0301  |
| rs117404503 | A | 0.0768  |
| rs10892587  | A | 0.0286  |
| rs2896631   | G | 0.0346  |
| rs56388104  | T | -0.0567 |
| rs117387905 | G | 0.1636  |
| rs4938769   | T | -0.032  |
| rs35123761  | T | 0.1169  |
| rs118152619 | A | -0.0438 |
| rs7129994   | A | -0.0282 |
| rs148195639 | A | 0.0765  |
| rs35070085  | G | 0.0303  |
| rs1826608   | T | 0.0323  |
| rs1939700   | G | 0.0321  |
| rs58084546  | T | 0.0393  |
| rs111483786 | G | -0.0757 |
| rs73030555  | T | -0.0611 |
| rs61878848  | G | 0.031   |

|             |   |         |
|-------------|---|---------|
| rs61880816  | T | -0.1692 |
| rs111563159 | G | -0.0746 |
| rs12421901  | T | 0.1379  |
| rs2158397   | T | -0.0988 |
| rs80160019  | A | 0.103   |
| rs74345042  | G | -0.0465 |
| rs7928703   | G | 0.0254  |
| rs71475983  | G | -0.1735 |
| rs10902141  | A | -0.0454 |
| rs76082460  | A | -0.0474 |
| rs111359253 | A | -0.0835 |
| rs56345802  | A | -0.1994 |
| rs113079998 | T | 0.0368  |
| rs72963839  | T | -0.1244 |
| rs2068413   | A | -0.0245 |
| rs77376411  | T | 0.1706  |
| rs722341    | A | 0.0349  |
| rs1783466   | G | 0.067   |
| rs149966913 | A | -0.0769 |
| rs11212028  | C | -0.1146 |
| rs113574105 | T | -0.1415 |
| rs1000256   | G | -0.0297 |
| rs1893760   | G | 0.0427  |
| rs117143906 | A | 0.0736  |
| rs11219454  | C | 0.028   |
| rs11219666  | T | 0.1398  |
| rs12361363  | T | -0.1583 |
| rs72973917  | A | -0.1033 |
| rs11233967  | C | 0.0622  |
| rs61895518  | T | -0.0589 |
| rs2659603   | C | 0.0602  |
| rs10768402  | A | -0.1472 |
| rs7128437   | T | 0.1058  |
| rs7117512   | A | 0.0399  |
| rs74852789  | A | -0.0957 |
| rs61901707  | G | 0.0743  |
| rs61877970  | A | 0.0629  |
| rs61899050  | A | -0.0299 |
| rs112646785 | C | 0.1165  |
| rs140127923 | T | 0.1353  |
| rs78591789  | C | 0.2292  |
| rs6590334   | T | 0.0247  |
| rs7129274   | A | -0.0271 |
| rs58727509  | T | -0.0297 |
| rs117983987 | A | 0.1147  |
| rs112797124 | C | 0.0449  |
| rs11233771  | A | -0.0281 |

|             |   |         |
|-------------|---|---------|
| rs12793024  | C | -0.045  |
| rs75824946  | A | 0.0524  |
| rs11219715  | A | 0.052   |
| rs72896141  | A | 0.0717  |
| rs117262601 | G | -0.08   |
| rs61874335  | A | 0.0893  |
| rs73512771  | A | 0.0298  |
| rs1845965   | C | 0.1072  |
| rs75213442  | T | -0.0462 |
| rs11222150  | A | 0.0409  |
| rs11029728  | T | 0.0627  |
| rs61880631  | T | -0.0289 |
| rs80044241  | G | 0.0987  |
| rs2658567   | C | 0.0235  |
| rs72979386  | A | 0.0818  |
| rs11224557  | C | 0.0381  |
| rs117680585 | T | -0.0854 |
| rs116875324 | T | 0.13    |
| rs75022011  | G | 0.0588  |
| rs12792216  | C | -0.0533 |
| rs76598600  | T | -0.0934 |
| rs2514897   | C | -0.0262 |
| rs76113046  | T | -0.093  |
| rs147961304 | T | 0.1301  |
| rs147786077 | T | 0.1148  |
| rs115325870 | T | 0.1063  |
| rs11229786  | A | -0.0762 |
| rs61901646  | A | -0.0566 |
| rs74776071  | T | -0.0973 |
| rs613803    | T | 0.062   |
| rs113351750 | A | -0.1017 |
| rs73593238  | C | -0.0967 |
| rs143592601 | A | 0.0995  |
| rs11226934  | A | -0.0336 |
| rs79318727  | A | -0.1599 |
| rs12419987  | C | 0.0323  |
| rs12295698  | A | 0.0611  |
| rs11223639  | G | 0.0376  |
| rs75281580  | A | -0.1067 |
| rs74945140  | A | -0.0686 |
| rs4645934   | A | -0.0787 |
| rs11603365  | A | 0.0427  |
| rs72964489  | G | 0.1021  |
| rs4753494   | T | -0.1503 |
| rs17433272  | A | 0.0872  |
| rs12292262  | C | 0.0471  |
| rs79080159  | C | 0.0961  |

|             |   |         |
|-------------|---|---------|
| rs75415537  | A | -0.0791 |
| rs12288512  | A | 0.0296  |
| rs572310    | G | -0.0258 |
| rs7944043   | G | -0.0329 |
| rs1039755   | C | -0.0284 |
| rs66464640  | C | -0.0355 |
| rs76077717  | A | -0.1815 |
| rs1940073   | G | -0.0403 |
| rs935990    | A | 0.0283  |
| rs149372895 | C | 0.0934  |
| rs116637506 | G | -0.0705 |
| rs138740265 | G | 0.1598  |
| rs11020294  | G | 0.1241  |
| rs11041303  | A | 0.0406  |
| rs1276083   | G | -0.03   |
| rs2015090   | C | 0.0523  |
| rs117370506 | T | -0.1073 |
| rs141290626 | C | -0.1021 |
| rs11603089  | G | 0.0303  |
| rs72943230  | T | 0.1075  |
| rs117471793 | C | 0.0991  |
| rs113481154 | T | 0.1296  |
| rs78462694  | T | 0.1205  |
| rs75593605  | T | -0.0849 |
| rs117596934 | A | 0.2105  |
| rs77174914  | A | 0.1359  |
| rs12366149  | A | 0.034   |
| rs10431056  | C | -0.0256 |
| rs117256638 | A | -0.1164 |
| rs66974822  | G | -0.0426 |
| rs117913056 | C | -0.1612 |
| rs7928347   | T | -0.0304 |
| rs17246102  | C | -0.1028 |
| rs72870052  | C | -0.075  |
| rs77984124  | A | 0.0456  |
| rs2568044   | T | -0.0283 |
| rs10769990  | C | -0.0246 |
| rs150231073 | T | 0.1704  |
| rs11603417  | T | 0.034   |
| rs142905457 | C | 0.125   |
| rs118113255 | T | 0.0842  |
| rs117755785 | A | -0.1193 |
| rs140673067 | T | 0.0889  |
| rs145343314 | A | 0.1532  |
| rs137906349 | A | -0.0759 |
| rs2513206   | A | -0.0236 |
| rs138351310 | C | -0.214  |



|             |   |         |
|-------------|---|---------|
| rs117769567 | A | -0.1461 |
| rs545766    | C | -0.0574 |
| rs12417751  | C | 0.1196  |
| rs11033614  | A | 0.1246  |
| rs11602379  | C | 0.1095  |
| rs35706962  | T | -0.064  |
| rs67673710  | G | -0.0652 |
| rs80124360  | C | 0.0837  |
| rs231918    | T | -0.0331 |
| rs150699722 | G | -0.1668 |
| rs75647163  | T | 0.1735  |
| rs45570644  | T | -0.0736 |
| rs512932    | G | -0.042  |
| rs11035361  | A | 0.0908  |
| rs4937560   | G | 0.0267  |
| rs12576313  | G | 0.0293  |
| rs77169798  | A | 0.056   |
| rs3741367   | C | -0.0243 |
| rs614394    | C | -0.0418 |
| rs11225967  | C | -0.0405 |
| rs995875    | C | 0.1478  |
| rs11220901  | T | 0.0388  |
| rs61878493  | A | -0.03   |
| rs78451042  | C | 0.1845  |
| rs2371372   | A | 0.0583  |
| rs416334    | T | -0.0317 |
| rs17392414  | A | -0.1254 |
| rs146000814 | C | -0.1311 |
| rs12418328  | C | 0.0825  |
| rs10836341  | A | -0.0563 |
| rs61898752  | C | 0.0772  |
| rs1883735   | C | 0.1006  |
| rs17745367  | T | -0.0837 |
| rs75006696  | T | -0.1194 |
| rs101259    | G | -0.0303 |
| rs1792539   | G | -0.0269 |
| rs2015539   | T | 0.0413  |
| rs7120564   | A | -0.0241 |
| rs11237243  | A | 0.0506  |
| rs61134913  | G | -0.0419 |
| rs61883469  | G | 0.0268  |
| rs113459670 | G | 0.0656  |
| rs77893659  | T | -0.0644 |
| rs76347292  | C | -0.0718 |
| rs4937307   | G | 0.0237  |
| rs2292889   | G | -0.0267 |
| rs118049846 | A | 0.1298  |

|             |   |         |
|-------------|---|---------|
| rs7121896   | A | -0.0271 |
| rs174472    | G | -0.0249 |
| rs12574529  | C | -0.1497 |
| rs2854117   | T | 0.0302  |
| rs11221238  | C | 0.0606  |
| rs1532504   | C | 0.0343  |
| rs4935986   | C | 0.0235  |
| rs7106971   | C | 0.0367  |
| rs61908909  | G | -0.0432 |
| rs6590352   | C | -0.0578 |
| rs10501304  | T | -0.0253 |
| rs116941471 | G | 0.1305  |
| rs3016424   | G | 0.0259  |
| rs1440716   | G | 0.0842  |
| rs147866373 | G | -0.0888 |
| rs11224338  | A | 0.0868  |
| rs1893172   | C | 0.0301  |
| rs11215933  | A | -0.04   |
| rs150947590 | T | -0.1346 |
| rs10895394  | G | 0.0261  |
| rs7124211   | C | -0.0298 |
| rs2593549   | G | 0.0231  |
| rs116942223 | C | 0.122   |
| rs12419863  | A | -0.0632 |
| rs6486099   | C | 0.0502  |
| rs142652362 | A | 0.1438  |
| rs11218079  | T | 0.1621  |
| rs67379953  | A | 0.0544  |
| rs7119840   | G | -0.0267 |
| rs149137426 | A | 0.2097  |
| rs11237819  | G | -0.1107 |
| rs59645839  | T | -0.0301 |
| rs117741333 | T | 0.2577  |
| rs4635086   | A | 0.0443  |
| rs1793076   | G | 0.0422  |
| rs79403502  | A | 0.0414  |
| rs2851602   | T | 0.0407  |
| rs2000967   | C | 0.0407  |
| rs12417645  | T | -0.1205 |
| rs11021994  | G | 0.0326  |
| rs79046471  | T | -0.0682 |
| rs113293427 | T | 0.0673  |
| rs11601011  | C | -0.1214 |
| rs11038507  | A | 0.0522  |
| rs78121842  | A | 0.2054  |
| rs55692446  | C | -0.0285 |
| rs7933996   | C | 0.0786  |

|             |   |         |
|-------------|---|---------|
| rs12800427  | G | -0.0485 |
| rs117575029 | G | 0.1162  |
| rs144718240 | T | -0.0666 |
| rs112165703 | G | -0.1322 |
| rs116541637 | C | 0.1514  |
| rs35595946  | C | 0.0253  |
| rs11218209  | T | 0.0238  |
| rs1320712   | A | -0.0394 |
| rs2234295   | T | 0.1848  |
| rs1562782   | G | -0.0235 |
| rs1788279   | T | -0.037  |
| rs72922827  | T | 0.1506  |
| rs74550015  | A | -0.1337 |
| rs11603406  | A | -0.0387 |
| rs1503389   | C | -0.0471 |
| rs12806865  | G | 0.0282  |
| rs7123943   | G | -0.037  |
| rs75581839  | A | -0.0573 |
| rs35219273  | T | 0.0648  |
| rs17744036  | T | 0.0354  |
| rs6578461   | C | -0.0463 |
| rs11605093  | G | -0.0456 |
| rs138742208 | A | 0.126   |
| rs1893687   | A | 0.0246  |
| rs10894735  | A | -0.0344 |
| rs4142964   | G | 0.0473  |
| rs117124716 | T | -0.145  |
| rs72980904  | C | -0.0913 |
| rs75772250  | C | -0.0652 |
| rs28441376  | T | 0.1     |
| rs10790759  | A | -0.0257 |
| rs113302541 | G | 0.1426  |
| rs34397855  | T | 0.1134  |
| rs7116810   | G | -0.0897 |
| rs58986040  | G | 0.0367  |
| rs11237703  | T | 0.0585  |
| rs7946695   | C | -0.0258 |
| rs112840723 | A | 0.158   |
| rs511028    | T | -0.0357 |
| rs117074452 | C | -0.1143 |
| rs1263167   | G | -0.0292 |
| rs76638746  | G | 0.1312  |
| rs11229598  | G | 0.0966  |
| rs614689    | G | -0.0263 |
| rs12802138  | T | 0.026   |
| rs10898973  | G | 0.0325  |
| rs141006886 | G | 0.1415  |

|             |   |         |
|-------------|---|---------|
| rs139472577 | T | -0.1072 |
| rs117755686 | G | 0.1392  |
| rs2374464   | G | -0.026  |
| rs3132781   | A | -0.0338 |
| rs11601331  | T | 0.0503  |
| rs7941015   | T | -0.0372 |
| rs4757661   | T | 0.1061  |
| rs10899238  | C | 0.029   |
| rs1916055   | G | -0.0251 |
| rs117288635 | A | -0.0675 |
| rs4144611   | G | 0.0257  |
| rs117757897 | T | 0.0872  |
| rs80004781  | G | 0.1452  |
| rs75366718  | G | 0.1201  |
| rs79510966  | T | 0.0668  |
| rs2212485   | G | -0.0371 |
| rs77307014  | C | 0.1312  |
| rs72998600  | A | 0.1058  |
| rs72848745  | A | -0.0438 |
| rs7358464   | T | -0.1642 |
| rs5743915   | A | -0.024  |
| rs74557060  | G | 0.1332  |
| rs7114085   | T | -0.0298 |
| rs17462019  | A | -0.0681 |
| rs11230424  | A | -0.0623 |
| rs11237286  | C | -0.0903 |
| rs7123213   | G | 0.0242  |
| rs78744083  | A | -0.1178 |
| rs80219938  | A | 0.1325  |
| rs7931539   | G | 0.029   |
| rs10743152  | T | 0.0262  |
| rs117246591 | A | -0.0938 |
| rs146812427 | T | -0.0657 |
| rs72981977  | A | 0.1213  |
| rs1589379   | C | -0.026  |
| rs11038052  | G | -0.0378 |
| rs117304134 | T | 0.0937  |
| rs3763862   | A | 0.0243  |
| rs2299639   | T | -0.0294 |
| rs4556531   | T | 0.0238  |
| rs2194961   | C | -0.0249 |
| rs117988058 | T | 0.101   |
| rs12420661  | C | 0.0257  |
| rs17146314  | T | 0.0628  |
| rs142889358 | T | 0.134   |
| rs117699168 | A | 0.1359  |
| rs113990729 | T | 0.123   |

|             |   |         |
|-------------|---|---------|
| rs3802769   | A | 0.0626  |
| rs17879733  | T | -0.051  |
| rs12293714  | G | 0.1429  |
| rs6486422   | T | 0.0232  |
| rs78284044  | T | -0.0935 |
| rs1487856   | C | -0.0265 |
| rs11231781  | T | -0.0237 |
| rs2311007   | T | 0.0476  |
| rs11025953  | C | -0.0232 |
| rs76695010  | G | 0.1178  |
| rs79015890  | A | 0.1648  |
| rs61880478  | T | -0.0912 |
| rs144334074 | A | -0.1138 |
| rs12793078  | G | -0.0687 |
| rs533239    | A | 0.0278  |
| rs147081004 | C | -0.0383 |
| rs10833122  | A | 0.0248  |
| rs76686919  | T | -0.0609 |
| rs28395875  | C | 0.0308  |
| rs12418010  | T | 0.0254  |
| rs61894720  | T | 0.0339  |
| rs7113742   | T | 0.0321  |
| rs12788593  | T | -0.1186 |
| rs10768424  | A | -0.0232 |
| rs35840688  | T | -0.0571 |
| rs111773434 | G | -0.0603 |
| rs56248452  | C | 0.0296  |
| rs1219406   | G | 0.0241  |
| rs11041870  | T | -0.0347 |
| rs12281674  | G | 0.073   |
| rs137987525 | A | -0.1006 |
| rs75620804  | T | 0.1439  |
| rs4614453   | T | -0.0372 |
| rs113538827 | G | -0.1455 |
| rs76785396  | A | -0.0611 |
| rs11222567  | A | 0.0276  |
| rs12421158  | C | -0.0262 |
| rs4752743   | T | -0.0405 |
| rs949901    | T | -0.0405 |
| rs1531825   | T | -0.028  |
| rs118055963 | A | 0.1422  |
| rs487641    | C | 0.0292  |
| rs7122541   | T | 0.0588  |
| rs1816158   | C | -0.0551 |
| rs117504461 | A | -0.1324 |
| rs118049918 | C | -0.1762 |
| rs7936856   | C | 0.0457  |

|             |   |         |
|-------------|---|---------|
| rs78353441  | A | -0.1098 |
| rs77277636  | A | -0.0737 |
| rs7928272   | T | 0.0444  |
| rs115658967 | G | -0.0707 |
| rs1452941   | T | 0.1816  |
| rs562172    | T | -0.0419 |
| rs72925304  | T | -0.0504 |
| rs76810978  | T | 0.0717  |
| rs2186798   | G | 0.0367  |
| rs3949025   | A | -0.0236 |
| rs663350    | A | -0.0801 |
| rs117307157 | A | -0.1776 |
| rs10751038  | A | 0.0266  |
| rs17469598  | G | 0.1626  |
| rs56408277  | T | -0.0265 |
| rs12286984  | T | -0.0279 |
| rs117653031 | G | -0.0958 |
| rs11028069  | A | 0.0959  |
| rs4600214   | A | 0.0541  |
| rs2000534   | A | 0.1028  |
| rs73025339  | A | -0.1817 |
| rs1794087   | C | -0.1387 |
| rs80104803  | A | -0.1056 |
| rs75408516  | G | -0.066  |
| rs72643386  | G | -0.0473 |
| rs117962347 | T | 0.0952  |
| rs12225106  | A | 0.1578  |
| rs75007400  | C | -0.1387 |
| rs2514141   | T | 0.0292  |
| rs72552131  | G | -0.08   |
| rs41464450  | T | 0.0369  |
| rs6589848   | T | -0.0305 |
| rs78490356  | A | 0.0575  |
| rs12803858  | C | -0.0763 |
| rs33998335  | T | -0.1055 |
| rs35182337  | A | 0.0508  |
| rs11021861  | T | -0.0532 |
| rs7931271   | A | 0.0362  |
| rs61878807  | G | 0.0382  |
| rs72931237  | A | -0.1259 |
| rs148569536 | A | 0.0891  |
| rs117249465 | T | 0.112   |
| rs11606552  | T | -0.1489 |
| rs80244020  | T | -0.084  |
| rs118131912 | A | 0.0944  |
| rs11037296  | A | -0.0422 |
| rs66611299  | A | -0.0664 |

|             |   |         |
|-------------|---|---------|
| rs78898518  | T | 0.0866  |
| rs11222158  | G | -0.0343 |
| rs10732521  | G | 0.027   |
| rs117299590 | C | 0.0468  |
| rs2074051   | T | -0.0276 |
| rs11216024  | G | 0.1261  |
| rs1541878   | G | -0.0625 |
| rs145596917 | T | 0.1295  |
| rs75243428  | A | -0.1063 |
| rs1110703   | G | -0.0246 |
| rs6485351   | G | -0.0234 |
| rs11022497  | A | 0.0397  |
| rs74652144  | A | 0.0552  |
| rs72955824  | T | -0.0634 |
| rs12798340  | G | 0.0466  |
| rs78198533  | G | -0.053  |
| rs79408871  | A | -0.0647 |
| rs2289571   | C | 0.0366  |
| rs61901987  | C | -0.0322 |
| rs1939894   | C | 0.0243  |
| rs72885428  | C | -0.0411 |
| rs7130635   | T | 0.0268  |
| rs12417332  | G | -0.0396 |
| rs557015    | T | -0.0721 |
| rs7479970   | A | 0.0305  |
| rs10768035  | G | -0.0266 |
| rs112727222 | A | -0.1746 |
| rs79989050  | G | -0.0505 |
| rs318969    | C | -0.0303 |
| rs10766215  | T | -0.028  |
| rs113275568 | T | 0.0892  |
| rs12283157  | C | 0.0246  |
| rs80072517  | G | -0.0847 |
| rs16912863  | C | 0.1067  |
| rs9645658   | C | -0.1512 |
| rs77578240  | T | 0.0351  |
| rs10908216  | A | 0.08    |
| rs35071479  | C | -0.0333 |
| rs12274456  | T | 0.0274  |
| rs11027279  | A | 0.0261  |
| rs111720172 | G | -0.1787 |
| rs1498552   | A | 0.0316  |
| rs117555742 | G | 0.035   |
| rs10769865  | C | -0.031  |
| rs75410373  | C | -0.1155 |
| rs512647    | C | 0.0228  |
| rs11603802  | A | 0.1222  |

|             |   |         |
|-------------|---|---------|
| rs75589519  | G | 0.1165  |
| rs112968778 | T | -0.0627 |
| rs118166879 | G | -0.0952 |
| rs11219898  | C | 0.0289  |
| rs66752582  | C | 0.0765  |
| rs12417404  | G | 0.0338  |
| rs11230499  | A | 0.0325  |
| rs55654176  | G | -0.0265 |
| rs78655128  | A | 0.0904  |
| rs11600686  | A | 0.0391  |
| rs2902388   | G | 0.0241  |
| rs10894245  | C | -0.0262 |
| rs72894757  | G | -0.0752 |
| rs118169893 | C | 0.1504  |
| rs17158489  | C | -0.0654 |
| rs142819977 | A | 0.1436  |
| rs4426152   | C | 0.0655  |
| rs76642290  | T | -0.1171 |
| rs146571326 | T | 0.1699  |
| rs11223384  | C | -0.047  |
| rs11223401  | G | -0.0356 |
| rs1286386   | T | 0.0246  |
| rs476378    | A | 0.0261  |
| rs10766778  | T | -0.0313 |
| rs12419062  | G | -0.0239 |
| rs10768246  | G | -0.0264 |
| rs12792692  | A | 0.0376  |
| rs117547372 | G | 0.1575  |
| rs148824829 | A | 0.1115  |
| rs78635013  | T | -0.1814 |
| rs67943767  | T | -0.0582 |
| rs75108985  | T | 0.075   |
| rs10501352  | A | -0.0311 |
| rs140223079 | A | 0.1246  |
| rs35597171  | T | -0.035  |
| rs4963505   | G | 0.0276  |
| rs1783136   | T | 0.0235  |
| rs3741298   | C | 0.0287  |
| rs117978923 | T | 0.1443  |
| rs1785812   | G | -0.0313 |
| rs489172    | C | 0.0321  |
| rs7938703   | G | 0.0264  |
| rs72925328  | A | 0.073   |
| rs77330481  | T | -0.0927 |
| rs117291324 | T | -0.0965 |
| rs150429053 | A | -0.1482 |
| rs10893933  | G | 0.0342  |



|             |   |         |
|-------------|---|---------|
| rs11220746  | G | -0.0767 |
| rs7123948   | T | 0.0622  |
| rs7130915   | G | 0.0567  |
| rs1465905   | T | 0.0585  |
| rs12276870  | T | 0.0266  |
| rs76074937  | C | 0.1199  |
| rs10834970  | C | 0.0237  |
| rs2761199   | A | 0.0249  |
| rs10501639  | G | 0.1105  |
| rs77226699  | T | -0.0916 |
| rs113362986 | T | -0.1003 |
| rs149272182 | A | 0.1098  |
| rs78387243  | T | -0.089  |
| rs76681647  | G | 0.057   |
| rs149645066 | A | -0.1331 |
| rs77427706  | A | 0.1922  |
| rs74981603  | G | -0.1086 |
| rs141466414 | T | -0.0675 |
| rs72867875  | A | 0.1074  |
| rs11042983  | G | -0.0254 |
| rs16928410  | G | 0.0501  |
| rs148812826 | A | -0.1534 |
| rs17810194  | A | 0.059   |
| rs7946315   | T | -0.0251 |
| rs4936428   | T | 0.0297  |
| rs80092584  | C | 0.0311  |
| rs61907009  | C | -0.0387 |
| rs12708351  | A | 0.0486  |
| rs10741584  | G | 0.035   |
| rs72960218  | G | 0.1468  |
| rs7941621   | C | 0.0583  |
| rs2926460   | G | -0.048  |
| rs7939663   | A | 0.056   |
| rs4936460   | T | 0.04    |
| rs17566849  | A | -0.0482 |
| rs78252146  | G | 0.093   |
| rs513533    | G | -0.0418 |
| rs3099793   | T | -0.1143 |
| rs4756195   | A | 0.0256  |
| rs10769068  | G | 0.0299  |
| rs147314764 | T | 0.1467  |
| rs78461527  | G | 0.1432  |
| rs61913372  | A | 0.0906  |
| rs1016564   | A | -0.0381 |
| rs72948660  | C | -0.0943 |
| rs7951509   | A | 0.0431  |
| rs1939917   | C | -0.0459 |

|             |   |         |
|-------------|---|---------|
| rs2880581   | A | -0.1168 |
| rs2597607   | T | -0.0345 |
| rs140687377 | A | 0.0838  |
| rs627999    | T | 0.1063  |
| rs11021497  | C | -0.0452 |
| rs11605623  | C | 0.0246  |
| rs137961119 | C | -0.162  |
| rs7124061   | A | 0.0455  |
| rs1939156   | C | 0.0769  |
| rs142481906 | G | 0.1254  |
| rs111517401 | C | -0.0728 |
| rs76008266  | T | -0.0745 |
| rs1520903   | T | -0.0256 |
| rs4938874   | A | 0.1287  |
| rs7941582   | G | 0.0301  |
| rs7950178   | A | 0.0764  |
| rs7124454   | G | 0.0599  |
| rs6591990   | G | -0.028  |
| rs4438001   | G | 0.0472  |
| rs2846293   | A | -0.0226 |
| rs149591403 | A | 0.0833  |
| rs117579256 | A | 0.1127  |
| rs72887352  | T | 0.117   |
| rs599994    | A | 0.0264  |
| rs4627042   | C | 0.0405  |
| rs144602098 | G | 0.1606  |
| rs113166674 | G | 0.0557  |
| rs76747140  | T | 0.114   |
| rs7946850   | T | -0.0306 |
| rs117634960 | A | -0.0909 |
| rs1877757   | C | 0.0611  |
| rs2074225   | C | -0.0239 |
| rs76721943  | C | -0.1179 |
| rs12276797  | T | 0.0515  |
| rs327028    | T | 0.0457  |
| rs7927051   | T | -0.0321 |
| rs4937179   | T | 0.0281  |
| rs117947332 | C | -0.0813 |
| rs10502109  | C | 0.0406  |
| rs61895729  | G | 0.0755  |
| rs111341626 | C | 0.1182  |
| rs12422161  | T | -0.0305 |
| rs2063475   | T | 0.0533  |
| rs12807362  | G | -0.0255 |
| rs117882103 | T | -0.1814 |
| rs75005951  | T | 0.0719  |
| rs3802863   | T | 0.0284  |

|             |   |         |
|-------------|---|---------|
| rs593252    | A | 0.0542  |
| rs2853046   | T | -0.029  |
| rs12287315  | G | 0.049   |
| rs146977943 | T | 0.1708  |
| rs74327007  | T | -0.1113 |
| rs1823635   | A | 0.2036  |
| rs78497898  | T | 0.0726  |
| rs163166    | A | -0.0333 |
| rs7951621   | T | 0.0253  |
| rs72851744  | G | 0.1346  |
| rs73473032  | G | 0.1828  |
| rs117602401 | G | -0.1453 |
| rs151018663 | T | -0.1209 |
| rs117558009 | T | -0.1497 |
| rs2941563   | T | -0.0445 |
| rs688019    | G | 0.0233  |
| rs7936573   | T | 0.1738  |
| rs111438909 | G | 0.135   |
| rs117587394 | G | 0.1021  |
| rs138203201 | C | -0.1315 |
| rs585383    | G | 0.0894  |
| rs12793579  | C | 0.0305  |
| rs151157288 | A | 0.11    |
| rs113626577 | C | 0.1464  |
| rs7125644   | T | 0.0329  |
| rs138617354 | G | 0.0801  |
| rs7949235   | A | -0.0227 |
| rs77578789  | C | -0.1006 |
| rs59826922  | A | 0.1373  |
| rs941941    | T | 0.0238  |
| rs2370753   | T | 0.0275  |
| rs143768943 | T | -0.1498 |
| rs149052739 | C | 0.1332  |
| rs1384758   | A | -0.0376 |
| rs118096785 | G | 0.0456  |
| rs17648172  | T | 0.0351  |
| rs11821838  | T | -0.0573 |
| rs118108525 | C | -0.1264 |
| rs7942200   | A | 0.0496  |
| rs34819764  | A | -0.0677 |
| rs72963306  | T | -0.0552 |
| rs198475    | T | -0.0263 |
| rs12278056  | A | 0.0722  |
| rs4939135   | C | 0.0283  |
| rs55808847  | T | -0.0598 |
| rs151215224 | T | 0.124   |
| rs55726421  | C | 0.0532  |

|             |   |         |
|-------------|---|---------|
| rs12285580  | A | -0.0296 |
| rs71539700  | G | -0.0785 |
| rs77068343  | A | 0.0909  |
| rs113340695 | T | 0.2031  |
| rs143917761 | A | 0.1102  |
| rs12274400  | T | -0.0317 |
| rs7396008   | C | -0.0277 |
| rs141048382 | A | 0.1046  |
| rs61890061  | C | 0.0599  |
| rs61899174  | G | -0.1221 |
| rs12419250  | T | -0.042  |
| rs80087013  | C | 0.0819  |
| rs17101816  | A | 0.0781  |
| rs74722038  | A | -0.0596 |
| rs59206044  | G | 0.0496  |
| rs2514351   | C | 0.023   |
| rs7111799   | A | 0.0296  |
| rs4448709   | A | 0.1398  |
| rs7128569   | T | -0.0261 |
| rs56122928  | C | 0.0778  |
| rs1011618   | A | -0.0508 |
| rs12417687  | C | 0.047   |
| rs12808105  | T | -0.0371 |
| rs11819970  | C | -0.0322 |
| rs80107941  | C | 0.0906  |
| rs80238596  | C | 0.0794  |
| rs75968067  | T | 0.0853  |
| rs34508379  | T | 0.0409  |
| rs78928746  | C | -0.0883 |
| rs72950901  | T | 0.0823  |
| rs11220593  | T | 0.1622  |
| rs79060400  | T | -0.0429 |
| rs7178      | G | 0.0414  |
| rs1817663   | G | 0.0947  |
| rs79737697  | G | 0.1425  |
| rs74886865  | C | -0.0629 |
| rs145109124 | G | -0.121  |
| rs78390286  | A | -0.0477 |
| rs117359472 | G | 0.1899  |
| rs80287271  | A | -0.0727 |
| rs12799526  | G | 0.09    |
| rs35126672  | T | -0.0434 |
| rs508334    | G | -0.0445 |
| rs117904573 | T | -0.1379 |
| rs144105490 | C | -0.0771 |
| rs7941201   | A | -0.0251 |
| rs74690518  | T | 0.0747  |

|             |   |         |
|-------------|---|---------|
| rs111946281 | T | -0.064  |
| rs116652431 | G | -0.0302 |
| rs61899171  | T | -0.0933 |
| rs11224060  | T | -0.036  |
| rs217211    | G | 0.0574  |
| rs2418589   | C | 0.0477  |
| rs615231    | C | 0.026   |
| rs2957857   | G | 0.0268  |
| rs108499    | T | -0.0249 |
| rs142461741 | C | -0.1378 |
| rs12278298  | A | -0.0234 |
| rs139986720 | T | -0.0816 |
| rs114268505 | T | 0.1065  |
| rs149618266 | G | 0.1893  |
| rs76092782  | T | 0.1746  |
| rs4757398   | T | -0.0283 |
| rs1900586   | C | -0.0328 |
| rs148175490 | C | 0.1067  |
| rs7941806   | A | -0.0909 |
| rs151107956 | C | 0.0824  |
| rs116914966 | G | 0.0724  |
| rs60337150  | T | 0.0914  |
| rs10400374  | T | 0.0582  |
| rs11221382  | T | -0.025  |
| rs12288184  | T | 0.0606  |
| rs544625    | G | -0.025  |
| rs4556519   | G | -0.043  |
| rs117227469 | C | 0.2208  |
| rs74807326  | T | 0.0734  |
| rs117766583 | A | -0.12   |
| rs77008817  | A | 0.0719  |
| rs12288424  | A | 0.0259  |
| rs188845    | C | -0.0856 |
| rs117550515 | G | 0.1625  |
| rs117467266 | G | 0.1339  |
| rs113337722 | G | -0.0695 |
| rs147620578 | C | -0.129  |
| rs7124967   | T | -0.024  |
| rs61899187  | A | -0.0309 |
| rs112473235 | T | 0.0527  |
| rs10769084  | T | -0.031  |
| rs73538868  | A | 0.073   |
| rs2254806   | A | 0.0238  |
| rs955051    | G | 0.0299  |
| rs75473162  | T | 0.0726  |
| rs118097940 | A | 0.1133  |
| rs35793721  | G | 0.0955  |

|             |   |         |
|-------------|---|---------|
| rs75880048  | A | -0.0441 |
| rs17552417  | C | -0.0428 |
| rs2513444   | A | -0.0278 |
| rs61910342  | A | -0.0906 |
| rs7125439   | A | 0.0822  |
| rs17196385  | G | 0.0312  |
| rs118151555 | G | 0.1163  |
| rs117649565 | C | -0.1253 |
| rs2291289   | T | 0.0231  |
| rs34478752  | G | -0.1474 |
| rs117547340 | C | -0.1582 |
| rs73016456  | G | -0.105  |
| rs7107699   | T | -0.0303 |
| rs34456199  | G | -0.0714 |
| rs75296380  | C | 0.0424  |
| rs79022900  | C | -0.0582 |
| rs7947538   | T | 0.0247  |
| rs141442869 | C | 0.137   |
| rs10838054  | T | 0.0411  |
| rs11037127  | A | 0.0237  |
| rs60213917  | A | 0.0606  |
| rs11232496  | C | -0.0424 |
| rs10830384  | G | 0.0626  |
| rs117388256 | G | -0.0767 |
| rs17758206  | T | 0.0348  |
| rs11213354  | T | -0.0257 |
| rs11232429  | T | 0.0673  |
| rs2852820   | T | -0.0341 |
| rs679079    | A | 0.0432  |
| rs7116183   | T | 0.0292  |
| rs73570125  | T | 0.1768  |
| rs4356265   | T | -0.0567 |
| rs7481929   | T | -0.0407 |
| rs16916484  | A | 0.0392  |
| rs117705783 | G | -0.0737 |
| rs1851625   | T | -0.0389 |
| rs1377574   | A | 0.0234  |
| rs61887513  | T | -0.084  |
| rs12361129  | A | -0.1249 |
| rs4754161   | C | 0.023   |
| rs10769861  | A | 0.0243  |
| rs10766967  | T | -0.0226 |
| rs116883661 | C | -0.1074 |
| rs12362014  | A | 0.0297  |
| rs10791571  | C | -0.033  |
| rs17417498  | A | 0.0777  |
| rs11215220  | C | 0.0793  |

|             |   |         |
|-------------|---|---------|
| rs539219    | C | -0.0318 |
| rs4936070   | G | 0.0222  |
| rs79629957  | C | -0.1955 |
| rs144971448 | G | -0.1067 |
| rs2443950   | C | 0.0236  |
| rs111879199 | A | -0.1728 |
| rs45460605  | T | -0.0955 |
| rs55934157  | T | -0.0352 |
| rs141863045 | T | -0.0857 |
| rs11221342  | C | -0.0333 |
| rs117553346 | T | 0.1046  |
| rs117064750 | T | 0.1139  |
| rs78800237  | A | 0.13    |
| rs12786738  | G | -0.0936 |
| rs57204268  | G | 0.0409  |
| rs78150667  | T | 0.0557  |
| rs167914    | C | -0.028  |
| rs72850013  | A | 0.1404  |
| rs11038242  | T | 0.078   |
| rs7107309   | C | -0.0339 |
| rs2723674   | A | -0.0285 |
| rs4756742   | C | 0.0441  |
| rs143418364 | T | -0.1153 |
| rs10890732  | A | 0.1115  |
| rs71484160  | T | -0.2067 |
| rs10835130  | A | 0.0407  |
| rs4130618   | A | -0.0229 |
| rs2604532   | A | 0.0251  |
| rs73028102  | A | 0.0399  |
| rs118013503 | C | -0.128  |
| rs112630481 | G | -0.1598 |
| rs68126098  | C | -0.0231 |
| rs117487142 | T | -0.1578 |
| rs140556226 | A | -0.0897 |
| rs10897984  | A | 0.0285  |
| rs3793949   | T | -0.025  |
| rs61907473  | G | 0.1325  |
| rs71475980  | G | -0.0872 |
| rs7939046   | A | -0.084  |
| rs139669815 | A | -0.1245 |
| rs952528    | C | -0.0614 |
| rs76554318  | T | 0.1085  |
| rs77716535  | T | 0.0977  |
| rs77037130  | A | 0.1339  |
| rs12270654  | T | -0.0386 |
| rs10898756  | A | 0.104   |
| rs12790122  | G | -0.0239 |

|             |   |         |
|-------------|---|---------|
| rs75259979  | A | 0.0901  |
| rs77191702  | G | 0.1361  |
| rs75126052  | A | -0.0879 |
| rs11042853  | A | -0.0569 |
| rs12365753  | G | 0.0222  |
| rs12418556  | A | 0.0317  |
| rs10893598  | A | -0.022  |
| rs117212524 | A | 0.1298  |
| rs78208981  | C | 0.081   |
| rs2016371   | G | 0.0707  |
| rs147937350 | T | 0.247   |
| rs142985203 | A | -0.0937 |
| rs117771849 | G | -0.0673 |
| rs7118230   | C | -0.023  |
| rs7119679   | G | 0.0421  |
| rs1542188   | A | -0.0293 |
| rs667933    | G | 0.0239  |
| rs34412377  | A | 0.0541  |
| rs12146485  | A | -0.0558 |
| rs588059    | C | -0.0238 |
| rs61900028  | T | -0.091  |
| rs11820444  | A | -0.037  |
| rs75894339  | A | -0.1036 |
| rs11827345  | A | -0.034  |
| rs2513741   | T | -0.0229 |
| rs79829381  | T | 0.0877  |
| rs10832783  | A | 0.0493  |
| rs76033331  | G | -0.0623 |
| rs10734174  | A | 0.0237  |
| rs7116491   | T | 0.0224  |
| rs7112744   | T | 0.0486  |
| rs4085170   | G | 0.0262  |
| rs146204458 | G | 0.1112  |
| rs3816791   | C | 0.0343  |
| rs149613541 | A | 0.0703  |
| rs7933088   | G | 0.0672  |
| rs12787249  | A | 0.0635  |
| rs7942935   | A | -0.0227 |
| rs77103001  | T | 0.1672  |
| rs118008100 | A | 0.1918  |
| rs10734544  | A | 0.0228  |
| rs640775    | C | 0.0272  |
| rs7110845   | A | 0.0223  |
| rs4923117   | T | -0.0511 |
| rs117431929 | A | -0.1341 |
| rs77105247  | A | -0.1533 |
| rs1377573   | G | -0.0234 |



|             |   |         |
|-------------|---|---------|
| rs12788483  | C | -0.0448 |
| rs76569692  | A | 0.056   |
| rs7938776   | G | -0.0238 |
| rs12789387  | A | -0.0402 |
| rs111679936 | T | 0.0877  |
| rs17110620  | C | 0.1457  |
| rs1783846   | A | -0.0303 |
| rs7946719   | A | 0.0246  |
| rs1557485   | A | 0.0393  |
| rs11604215  | G | -0.0256 |
| rs7117409   | A | 0.028   |
| rs11215954  | T | -0.0262 |
| rs117994943 | A | -0.1469 |
| rs112015689 | T | 0.0923  |
| rs117704289 | C | -0.1537 |
| rs2213117   | T | -0.0423 |
| rs112062329 | C | -0.2295 |
| rs117481000 | G | -0.0983 |
| rs3858463   | A | -0.075  |
| rs78082882  | G | 0.1104  |
| rs72973932  | A | -0.1146 |
| rs1793026   | A | 0.0574  |
| rs2852831   | T | 0.0307  |
| rs61906577  | G | 0.0962  |
| rs118004392 | A | -0.1964 |
| rs12277680  | G | -0.0246 |
| rs6486121   | C | -0.0231 |
| rs7105978   | T | 0.0321  |
| rs139006769 | C | 0.0909  |
| rs61882396  | A | -0.0673 |
| rs3814707   | A | -0.0251 |
| rs72984767  | A | -0.0351 |
| rs4755368   | C | 0.0411  |
| rs10128586  | C | -0.0305 |
| rs7103890   | C | 0.026   |
| rs17137241  | T | 0.0546  |
| rs72892091  | A | 0.0538  |
| rs72946474  | C | 0.0359  |
| rs537538    | A | -0.027  |
| rs11220019  | C | 0.0284  |
| rs117351395 | C | 0.06    |
| rs113083192 | C | -0.1098 |
| rs56344867  | C | -0.0258 |
| rs7117346   | A | 0.0303  |
| rs12808672  | C | 0.0234  |
| rs12417219  | C | 0.0796  |
| rs71469544  | A | -0.099  |

|             |   |         |
|-------------|---|---------|
| rs10893721  | A | -0.0218 |
| rs116900937 | G | -0.168  |
| rs78439865  | G | 0.0589  |
| rs118102189 | C | -0.1531 |
| rs17118750  | C | 0.0413  |
| rs147524131 | C | 0.0669  |
| rs76019202  | A | 0.1216  |
| rs11246115  | A | -0.0929 |
| rs12421913  | C | 0.0374  |
| rs17543109  | A | 0.1922  |
| rs56229070  | G | -0.0314 |
| rs138489504 | T | 0.0908  |
| rs60118117  | C | 0.0658  |
| rs72880585  | T | 0.0529  |
| rs2212490   | C | 0.0274  |
| rs141643527 | T | -0.1343 |
| rs3734074   | A | 0.0916  |
| rs74548265  | C | -0.0979 |
| rs76990256  | T | 0.072   |
| rs61901534  | G | -0.046  |
| rs11606497  | C | 0.0414  |
| rs2723666   | T | -0.0282 |
| rs4757065   | T | 0.0262  |
| rs12360601  | T | -0.0285 |
| rs117767065 | T | 0.0801  |
| rs34652478  | T | -0.0626 |
| rs143648571 | C | 0.1549  |
| rs4027410   | G | -0.0294 |
| rs9735013   | T | -0.0436 |
| rs117924224 | C | -0.0816 |
| rs118036473 | T | 0.1609  |
| rs2668897   | A | -0.0417 |
| rs112893541 | G | 0.0806  |
| rs73009144  | A | -0.1485 |
| rs1343784   | C | 0.0244  |
| rs4150639   | T | -0.0818 |
| rs75444514  | C | 0.0584  |
| rs34648431  | A | 0.0259  |
| rs76735255  | C | 0.0844  |
| rs45599440  | G | 0.0521  |
| rs12224054  | C | -0.049  |
| rs139211085 | C | -0.1463 |
| rs226130    | A | 0.0226  |
| rs61907021  | A | 0.0315  |
| rs45558241  | T | -0.1026 |
| rs10894116  | A | -0.0647 |
| rs6416086   | C | 0.07    |

|             |   |         |
|-------------|---|---------|
| rs7130269   | G | -0.0222 |
| rs6589969   | C | 0.022   |
| rs1436258   | T | -0.0287 |
| rs138266176 | G | -0.1056 |
| rs12224675  | T | 0.0408  |
| rs72897522  | G | -0.1102 |
| rs4755263   | A | -0.0402 |
| rs10769108  | G | 0.0227  |
| rs1871377   | C | -0.0231 |
| rs56023742  | C | 0.0366  |
| rs61893677  | A | -0.053  |
| rs11026114  | A | 0.0495  |
| rs11227385  | G | 0.1818  |
| rs75868796  | A | 0.08    |
| rs733856    | A | -0.0241 |
| rs72963740  | T | -0.1382 |
| rs74516278  | T | -0.0874 |
| rs11602900  | T | 0.163   |
| rs12418682  | G | 0.027   |
| rs74354206  | G | -0.09   |
| rs17318858  | C | 0.033   |
| rs74508703  | G | 0.1134  |
| rs76306447  | T | 0.1081  |
| rs76682217  | T | -0.1249 |
| rs907611    | A | -0.025  |
| rs12417625  | G | 0.0599  |
| rs117550899 | T | -0.0757 |
| rs118045499 | A | -0.1279 |
| rs6484805   | G | -0.0259 |
| rs74364270  | C | -0.112  |
| rs141079021 | C | 0.0818  |
| rs111942477 | A | -0.0255 |
| rs72912828  | T | 0.1025  |
| rs485165    | T | 0.0319  |
| rs117624050 | A | -0.0586 |
| rs35990895  | G | 0.0588  |
| rs17119192  | A | 0.0876  |
| rs2713802   | C | -0.0326 |
| rs540028    | G | -0.0325 |
| rs146674845 | C | 0.1691  |
| rs504542    | G | -0.0228 |
| rs4937292   | T | 0.0341  |
| rs871506    | T | -0.0511 |
| rs117007285 | C | 0.1067  |
| rs79194902  | A | -0.0635 |
| rs144072702 | A | -0.1156 |
| rs12791869  | T | 0.0817  |

|             |   |         |
|-------------|---|---------|
| rs34462999  | A | 0.1263  |
| rs77214099  | T | -0.1443 |
| rs12575795  | C | 0.1111  |
| rs2232950   | T | -0.0231 |
| rs117180985 | A | -0.1187 |
| rs17150001  | A | 0.0305  |
| rs11826022  | A | 0.1807  |
| rs140654529 | A | 0.112   |
| rs145213356 | G | -0.0699 |
| rs7933508   | G | -0.0342 |
| rs1574249   | A | -0.0214 |
| rs2271587   | T | -0.0716 |
| rs7125354   | A | 0.0337  |
| rs11021770  | C | 0.0375  |
| rs6485330   | G | 0.0421  |
| rs74490195  | A | -0.0761 |
| rs10898189  | G | 0.0692  |
| rs11019705  | T | -0.0238 |
| rs117932421 | T | 0.1073  |
| rs7940559   | A | 0.0235  |
| rs12790923  | A | -0.035  |
| rs2277283   | C | 0.0249  |
| rs34623898  | T | 0.1083  |
| rs12795021  | C | -0.1176 |
| rs12293603  | A | -0.0275 |
| rs117852332 | A | -0.1008 |
| rs10751140  | T | -0.0238 |
| rs10047494  | T | -0.0498 |
| rs2126069   | T | 0.0218  |
| rs4937944   | A | 0.0275  |
| rs2283161   | T | 0.0361  |
| rs61885870  | A | -0.1456 |
| rs113864726 | A | 0.1609  |
| rs59288233  | C | 0.0674  |
| rs3781648   | C | 0.0339  |
| rs61893858  | T | -0.1249 |
| rs116862502 | A | 0.0975  |
| rs3867275   | A | -0.0339 |
| rs61901669  | G | -0.035  |
| rs76085546  | T | -0.1003 |
| rs77384822  | G | 0.1756  |
| rs61105947  | T | -0.1564 |
| rs71490195  | C | -0.063  |
| rs118176069 | G | -0.0803 |
| rs12290102  | G | 0.043   |
| rs79122111  | A | -0.0739 |
| rs139648188 | C | 0.1411  |

|             |   |         |
|-------------|---|---------|
| rs117983439 | C | 0.0984  |
| rs75926345  | T | 0.0767  |
| rs12803628  | A | 0.0235  |
| rs11826678  | A | 0.1039  |
| rs1940937   | T | 0.0292  |
| rs72896987  | T | 0.0503  |
| rs7127139   | A | -0.0286 |
| rs1976784   | A | 0.0319  |
| rs1505203   | A | -0.0419 |
| rs72936739  | T | 0.0313  |
| rs17147208  | A | 0.045   |
| rs117716886 | A | 0.0433  |
| rs145648512 | G | 0.0714  |
| rs4328228   | T | 0.0307  |
| rs73000130  | G | 0.09    |
| rs4757853   | T | -0.0241 |
| rs12285142  | T | 0.0353  |
| rs6486126   | C | 0.0352  |
| rs11025633  | C | -0.1265 |
| rs61890324  | T | -0.092  |
| rs142049616 | T | -0.0757 |
| rs61890660  | T | 0.1118  |
| rs117976684 | C | 0.0693  |
| rs608830    | C | 0.0319  |
| rs113291741 | A | 0.0493  |
| rs111265260 | T | 0.1714  |
| rs79084878  | A | -0.0877 |
| rs2723657   | C | -0.0272 |
| rs2512139   | A | 0.0228  |
| rs4910356   | A | -0.0259 |
| rs12576062  | G | -0.0306 |
| rs80324788  | A | 0.1038  |
| rs115161284 | A | -0.1549 |
| rs11023733  | T | 0.0405  |
| rs75245229  | A | 0.063   |
| rs174481    | G | 0.0276  |
| rs601446    | A | 0.0287  |
| rs73616489  | A | -0.0965 |
| rs4936205   | C | 0.0278  |
| rs2074200   | G | 0.0429  |
| rs713402    | T | 0.0355  |
| rs118082690 | C | 0.1163  |
| rs7111422   | T | 0.0449  |
| rs12286938  | C | -0.0248 |
| rs2059615   | C | 0.0276  |
| rs11601235  | T | -0.032  |
| rs117029470 | T | 0.1265  |

|             |   |         |
|-------------|---|---------|
| rs117002568 | A | -0.098  |
| rs72997464  | C | 0.0529  |
| rs12295063  | A | 0.0648  |
| rs948414    | T | 0.024   |
| rs148713924 | C | -0.169  |
| rs117775904 | A | -0.0472 |
| rs74812099  | G | 0.0837  |
| rs536360    | C | 0.0428  |
| rs12289571  | C | 0.0289  |
| rs931393    | A | 0.0215  |
| rs117911505 | C | 0.1145  |
| rs7945210   | C | 0.0346  |
| rs1914204   | C | 0.0221  |
| rs55965525  | G | -0.0452 |
| rs117303377 | A | -0.2025 |
| rs3923014   | A | -0.0478 |
| rs1540218   | G | -0.0217 |
| rs7940961   | T | -0.0738 |
| rs11602548  | A | -0.0567 |
| rs960531    | G | 0.0443  |
| rs10892664  | A | -0.0287 |
| rs2283202   | G | 0.0232  |
| rs329537    | G | 0.0213  |
| rs11607866  | A | 0.0743  |
| rs147810421 | T | -0.1253 |
| rs12295663  | A | -0.0229 |
| rs3794015   | T | -0.0238 |
| rs112893472 | A | -0.1333 |
| rs16930026  | A | -0.0803 |
| rs117513447 | G | -0.1077 |
| rs4525266   | T | -0.0212 |
| rs114522336 | A | -0.1001 |
| rs7121636   | G | -0.0333 |
| rs11225797  | A | 0.1252  |
| rs11023435  | A | -0.0295 |
| rs79356354  | T | 0.0791  |
| rs55861306  | T | -0.0695 |
| rs147575699 | C | 0.0869  |
| rs61892858  | A | -0.1056 |
| rs117792791 | C | 0.0803  |
| rs10831550  | T | -0.0253 |
| rs61881361  | C | -0.1514 |
| rs72960077  | A | 0.0614  |
| rs112671921 | A | -0.0605 |
| rs7924413   | C | 0.0323  |
| rs137915577 | A | -0.1341 |
| rs11605162  | A | 0.0482  |

|             |   |         |
|-------------|---|---------|
| rs72980870  | A | -0.0259 |
| rs2511520   | T | 0.0301  |
| rs504339    | A | 0.0232  |
| rs7116467   | G | 0.023   |
| rs117167943 | T | 0.0701  |
| rs7945365   | T | 0.0373  |
| rs61912394  | A | 0.0595  |
| rs117117171 | A | -0.1321 |
| rs61909887  | T | 0.064   |
| rs7946758   | G | -0.0221 |
| rs7102738   | A | 0.0527  |
| rs7933728   | A | -0.0221 |
| rs2739293   | C | 0.0337  |
| rs148946270 | A | 0.1782  |
| rs7125940   | T | -0.0229 |
| rs75235269  | A | -0.0728 |
| rs59226968  | C | 0.0285  |
| rs117509017 | A | 0.0661  |
| rs138694315 | G | 0.1713  |
| rs79333868  | A | -0.0598 |
| rs2349298   | T | 0.0627  |
| rs145382247 | C | 0.12    |
| rs79829182  | T | 0.134   |
| rs79486783  | A | 0.0929  |
| rs151261867 | C | 0.119   |
| rs1921576   | C | 0.0398  |
| rs117565350 | T | 0.1006  |
| rs10837496  | T | -0.0238 |
| rs79867898  | C | 0.0471  |
| rs11038787  | C | -0.0319 |
| rs145844822 | T | -0.1242 |
| rs117549531 | T | -0.1895 |
| rs116279999 | A | 0.0298  |
| rs112966696 | A | -0.1427 |
| rs12285414  | G | 0.0245  |
| rs12226662  | C | 0.0864  |
| rs56334924  | C | -0.0523 |
| rs35601511  | T | 0.0239  |
| rs112036281 | T | -0.0855 |
| rs7948971   | G | -0.0273 |
| rs7481555   | T | 0.0364  |
| rs147946376 | A | 0.112   |
| rs148621763 | C | -0.0908 |
| rs61904419  | T | -0.0921 |
| rs61912677  | T | -0.0725 |
| rs10897325  | A | 0.0828  |
| rs117096921 | G | 0.0836  |

|             |   |         |
|-------------|---|---------|
| rs5743997   | T | 0.0943  |
| rs116865438 | T | 0.0883  |
| rs2375251   | A | -0.0481 |
| rs61642064  | A | 0.0753  |
| rs77093844  | G | -0.1197 |
| rs11237529  | G | 0.0387  |
| rs117677275 | A | 0.1297  |
| rs682386    | A | -0.0276 |
| rs2270621   | A | 0.0998  |
| rs117386456 | A | 0.1307  |
| rs72853813  | C | -0.1217 |
| rs1945690   | A | 0.022   |
| rs117819665 | T | -0.0674 |
| rs9787734   | T | 0.0272  |
| rs7938619   | T | -0.0232 |
| rs73488531  | T | -0.0755 |
| rs7941856   | A | 0.0675  |
| rs117637012 | T | -0.0464 |
| rs56380832  | G | -0.0547 |
| rs75941298  | A | 0.0366  |
| rs117333247 | A | -0.1262 |
| rs489401    | C | 0.0217  |
| rs77629554  | T | -0.0566 |
| rs61875698  | A | 0.0453  |
| rs665306    | T | -0.0232 |
| rs1106944   | C | -0.0426 |
| rs1290811   | A | -0.0241 |
| rs72849606  | G | 0.0682  |
| rs75312278  | C | -0.1311 |
| rs111917694 | G | 0.1769  |
| rs10835699  | T | 0.0224  |
| rs138409491 | A | -0.1012 |
| rs5005275   | G | 0.0508  |
| rs4542422   | T | -0.0229 |
| rs116872515 | A | -0.1486 |
| rs11221838  | G | 0.023   |
| rs11604132  | A | -0.142  |
| rs12224049  | T | 0.0477  |
| rs4757205   | A | -0.0209 |
| rs116639465 | C | 0.1119  |
| rs74975858  | G | -0.0505 |
| rs10766742  | T | -0.0367 |
| rs6598006   | T | 0.0217  |
| rs12365197  | G | -0.0448 |
| rs145315469 | G | 0.0386  |
| rs12364283  | G | -0.0393 |
| rs56318682  | T | -0.0214 |



|             |   |         |
|-------------|---|---------|
| rs231878    | A | 0.0305  |
| rs4542404   | T | 0.027   |
| rs117637275 | G | 0.1431  |
| rs72900133  | A | 0.0388  |
| rs10830964  | T | -0.0364 |
| rs4755283   | G | -0.0298 |
| rs4488184   | C | -0.0249 |
| rs12799847  | T | -0.028  |
| rs12803225  | A | -0.0271 |
| rs4756818   | A | 0.0601  |
| rs141977075 | G | 0.1406  |
| rs80150354  | A | 0.059   |
| rs66496749  | G | 0.049   |
| rs28521783  | T | -0.0452 |
| rs146070868 | T | 0.0917  |
| rs1216483   | A | 0.1189  |
| rs1530855   | C | -0.0476 |
| rs7128706   | T | 0.0259  |
| rs7948709   | T | -0.0261 |
| rs72871128  | T | -0.099  |
| rs142246108 | G | 0.1646  |
| rs61915480  | T | -0.0676 |
| rs79763002  | T | 0.051   |
| rs147179287 | C | -0.0755 |
| rs494791    | A | -0.0224 |
| rs11021169  | T | 0.0394  |
| rs61911033  | C | -0.028  |
| rs538112    | C | 0.0374  |
| rs10897741  | T | 0.0321  |
| rs11025995  | A | 0.0997  |
| rs111683933 | C | 0.1056  |
| rs7131350   | T | -0.0556 |
| rs1522433   | G | 0.0236  |
| rs112960420 | T | -0.0736 |
| rs141017967 | C | 0.0931  |
| rs55714734  | A | 0.0742  |
| rs11031510  | T | 0.0375  |
| rs548429    | G | -0.0228 |
| rs11037976  | A | 0.0223  |
| rs142782272 | T | 0.1089  |
| rs118088706 | C | 0.121   |
| rs61886860  | A | -0.0274 |
| rs10790149  | C | -0.0318 |
| rs79071997  | T | 0.0751  |
| rs79288090  | G | -0.1514 |
| rs78977082  | T | 0.0544  |
| rs117035457 | T | 0.0734  |

|             |   |         |
|-------------|---|---------|
| rs77217282  | G | -0.1792 |
| rs147935791 | T | 0.1091  |
| rs1079199   | C | 0.0259  |
| rs77070968  | T | 0.057   |
| rs71488446  | T | 0.0518  |
| rs7120277   | G | 0.0235  |
| rs78644894  | C | 0.0929  |
| rs138959949 | T | 0.047   |
| rs72997420  | T | 0.1676  |
| rs72953329  | A | 0.0934  |
| rs599191    | G | -0.0393 |
| rs2761214   | T | 0.1102  |
| rs10751211  | T | -0.0276 |
| rs113984891 | T | -0.1321 |
| rs11237796  | G | 0.0261  |
| rs112892342 | A | -0.1116 |
| rs146271995 | G | -0.0883 |
| rs903017    | G | 0.0247  |
| rs2346829   | T | 0.0229  |
| rs894008    | A | -0.0235 |
| rs12420097  | C | -0.0929 |
| rs79456221  | C | -0.1549 |
| rs862785    | G | -0.0483 |
| rs1350952   | A | 0.0462  |
| rs36188135  | C | -0.025  |
| rs10831282  | G | 0.0239  |
| rs656841    | C | 0.0219  |
| rs10501238  | T | -0.0237 |
| rs11237366  | A | 0.073   |
| rs7111517   | A | -0.0249 |
| rs646423    | A | -0.0258 |
| rs12802796  | A | 0.0734  |
| rs72889128  | A | -0.1042 |
| rs148672310 | A | 0.1644  |
| rs7950446   | A | 0.072   |
| rs143817276 | T | 0.1195  |
| rs144304353 | G | 0.0751  |
| rs75227397  | A | 0.071   |
| rs11222349  | T | 0.0379  |
| rs61869760  | T | 0.0784  |
| rs12277740  | A | 0.0848  |
| rs4264131   | T | 0.1086  |
| rs1118557   | G | 0.0213  |
| rs1939574   | C | 0.0212  |
| rs12795441  | A | -0.0306 |
| rs75796131  | G | -0.0828 |
| rs3851180   | C | 0.031   |

|             |   |         |
|-------------|---|---------|
| rs9804462   | A | 0.0479  |
| rs75732222  | G | 0.0497  |
| rs142916566 | A | -0.1195 |
| rs79519287  | G | 0.0954  |
| rs145908834 | C | 0.078   |
| rs28817619  | G | 0.0335  |
| rs12280312  | G | 0.0256  |
| rs95596     | C | 0.0217  |
| rs117176177 | C | -0.1021 |
| rs74797792  | A | -0.0588 |
| rs11600640  | A | 0.0274  |
| rs78178847  | A | 0.1017  |
| rs876797    | A | 0.0248  |
| rs74859093  | T | 0.0976  |
| rs2444242   | A | 0.039   |
| rs1274215   | G | -0.0374 |
| rs240542    | T | 0.0216  |
| rs720106    | C | 0.109   |
| rs75686089  | T | 0.163   |
| rs6486178   | T | 0.0264  |
| rs10896436  | A | -0.0613 |
| rs10891509  | G | 0.0378  |
| rs144965507 | A | -0.0737 |
| rs11043021  | C | -0.0471 |
| rs10838209  | C | 0.0453  |
| rs2852119   | G | 0.0233  |
| rs35951893  | C | -0.0414 |
| rs3827486   | A | 0.0229  |
| rs61913922  | A | 0.0958  |
| rs2723588   | G | -0.0246 |
| rs1472890   | T | -0.1304 |
| rs61888299  | C | -0.059  |
| rs117675938 | C | 0.1016  |
| rs12279578  | A | 0.0795  |
| rs4365023   | T | 0.0286  |
| rs11022462  | G | -0.0334 |
| rs477728    | A | 0.0851  |
| rs881333    | C | 0.0252  |
| rs144331791 | G | -0.1378 |
| rs149898886 | C | 0.1457  |
| rs10908212  | A | 0.0488  |
| rs77094343  | A | 0.0764  |
| rs12273350  | G | -0.0219 |
| rs12362694  | C | 0.0426  |
| rs750949    | A | -0.0226 |
| rs11038076  | A | -0.0512 |
| rs661923    | T | -0.0231 |

|             |   |         |
|-------------|---|---------|
| rs78995550  | C | 0.1679  |
| rs12223282  | C | 0.0618  |
| rs75758973  | A | 0.0707  |
| rs12288946  | C | -0.0261 |
| rs4756099   | T | 0.0219  |
| rs75908690  | A | 0.0761  |
| rs7127660   | A | 0.0223  |
| rs73535809  | A | -0.064  |
| rs74431607  | T | 0.0991  |
| rs12797436  | C | 0.0388  |
| rs11037893  | T | -0.044  |
| rs7951283   | G | -0.024  |
| rs11234088  | T | -0.0432 |
| rs448101    | C | 0.0215  |
| rs2005833   | G | 0.0246  |
| rs11600393  | C | -0.0555 |
| rs12785355  | A | -0.0589 |
| rs11600934  | T | -0.0344 |
| rs6485389   | A | 0.0227  |
| rs76472582  | C | -0.0926 |
| rs73522161  | A | -0.0343 |
| rs9971615   | A | 0.0215  |
| rs7116863   | A | 0.0228  |
| rs1858791   | T | -0.0263 |
| rs72941178  | T | -0.0392 |
| rs4262746   | A | -0.0213 |
| rs10736600  | G | -0.0228 |
| rs76841261  | T | 0.2084  |
| rs1456244   | C | 0.0418  |
| rs2510287   | T | 0.0218  |
| rs61904191  | A | -0.0313 |
| rs77084175  | A | -0.1205 |
| rs1923293   | T | -0.0599 |
| rs10792298  | A | -0.021  |
| rs139865769 | G | -0.1589 |
| rs3741089   | G | -0.0221 |
| rs117366670 | A | -0.1148 |
| rs947889    | C | -0.0211 |
| rs55877269  | C | -0.0499 |
| rs4910814   | T | 0.043   |
| rs7119386   | T | 0.023   |
| rs7126809   | G | 0.0228  |
| rs2512805   | T | 0.0377  |
| rs12363699  | T | 0.1217  |
| rs868066    | A | -0.0402 |
| rs332439    | T | -0.0328 |
| rs11606985  | C | 0.0261  |

|             |   |         |
|-------------|---|---------|
| rs12273515  | G | -0.0264 |
| rs78491612  | T | -0.054  |
| rs1073480   | C | -0.0253 |
| rs588731    | A | 0.0463  |
| rs1349807   | C | -0.0337 |
| rs10835300  | T | 0.1529  |
| rs12288230  | T | -0.0946 |
| rs73000880  | T | -0.0808 |
| rs117559142 | T | 0.0839  |
| rs148608702 | T | -0.1079 |
| rs11607959  | G | 0.0785  |
| rs117752521 | G | 0.0588  |
| rs61886136  | G | 0.0662  |
| rs483264    | A | -0.0509 |
| rs2138601   | T | -0.0663 |
| rs11229887  | A | -0.034  |
| rs77248775  | T | 0.104   |
| rs150774506 | T | -0.0839 |
| rs59896175  | C | 0.1202  |
| rs7944067   | T | -0.0248 |
| rs990648    | A | -0.0211 |
| rs10836488  | A | -0.0268 |
| rs12418165  | T | 0.0331  |
| rs77546623  | G | 0.0945  |
| rs76565618  | A | 0.093   |
| rs267447    | T | -0.0363 |
| rs929954    | G | -0.0621 |
| rs11603888  | A | -0.1133 |
| rs117248782 | A | -0.1468 |
| rs112233726 | A | 0.0921  |
| rs79678589  | G | -0.0856 |
| rs78672121  | A | -0.0577 |
| rs118171241 | G | 0.1166  |
| rs11038714  | C | -0.096  |
| rs1938868   | G | 0.0358  |
| rs117057067 | A | -0.1483 |
| rs11601610  | A | -0.0382 |
| rs77400541  | A | 0.0612  |
| rs11036643  | C | -0.0544 |
| rs1791914   | A | -0.0248 |
| rs11550904  | G | 0.1067  |
| rs7926462   | G | -0.0211 |
| rs7931951   | C | -0.0269 |
| rs117994707 | G | -0.0827 |
| rs76991401  | C | 0.0549  |
| rs75255277  | T | 0.0808  |
| rs11024916  | G | -0.1305 |

|             |   |         |
|-------------|---|---------|
| rs7118445   | G | 0.0467  |
| rs624505    | G | 0.03    |
| rs1289445   | T | 0.027   |
| rs72846059  | G | -0.029  |
| rs34997407  | T | -0.0403 |
| rs1453431   | C | -0.0313 |
| rs11602810  | G | -0.0227 |
| rs2448277   | C | -0.0305 |
| rs56400716  | T | -0.0574 |
| rs56203702  | A | 0.0954  |
| rs61752597  | G | -0.1857 |
| rs11517960  | C | -0.0601 |
| rs142268772 | G | 0.1414  |
| rs117855164 | T | -0.1651 |
| rs1784108   | T | 0.0333  |
| rs7125317   | A | -0.0288 |
| rs117632458 | G | -0.1334 |
| rs140179189 | A | 0.1025  |
| rs113863437 | T | -0.0793 |
| rs72982143  | C | 0.04    |
| rs1454002   | G | 0.038   |
| rs10501575  | G | -0.0313 |
| rs7119740   | C | 0.0556  |
| rs146458208 | T | -0.093  |
| rs58883118  | T | 0.1035  |
| rs13447704  | C | -0.1569 |
| rs145523907 | A | 0.0998  |
| rs544368    | T | -0.0322 |
| rs17160805  | T | 0.0954  |
| rs12787092  | A | 0.0309  |
| rs1383126   | T | -0.0893 |
| rs3740984   | A | -0.0616 |
| rs4980773   | A | 0.0482  |
| rs112990645 | G | -0.0676 |
| rs76954962  | T | 0.1449  |
| rs112777632 | T | 0.069   |
| rs116927795 | C | 0.0982  |
| rs77620100  | C | 0.0753  |
| rs112906111 | G | -0.157  |
| rs6589948   | G | -0.0311 |
| rs7105974   | G | 0.0591  |
| rs11529889  | C | 0.0208  |
| rs143884188 | G | 0.0742  |
| rs116947897 | C | 0.0668  |
| rs55740408  | G | 0.0566  |
| rs609115    | C | -0.0344 |
| rs35649348  | C | -0.0533 |

|             |   |         |
|-------------|---|---------|
| rs11600655  | C | 0.0238  |
| rs117072916 | T | -0.119  |
| rs79117277  | G | -0.0642 |
| rs11600120  | T | 0.0345  |
| rs61896877  | A | -0.04   |
| rs76617496  | G | -0.0543 |
| rs11032794  | C | 0.0702  |
| rs1218916   | G | 0.0971  |
| rs12801929  | C | -0.0767 |
| rs116857171 | C | -0.0614 |
| rs10501435  | G | 0.0234  |
| rs10790531  | G | 0.0205  |
| rs7951064   | G | -0.0457 |
| rs11219919  | G | 0.0289  |
| rs75957079  | A | -0.1341 |
| rs7938378   | A | 0.0215  |
| rs72930849  | T | 0.0251  |
| rs148195543 | C | -0.0975 |
| rs113161006 | C | -0.0643 |
| rs907271    | T | 0.0214  |
| rs3844144   | T | 0.0374  |
| rs6589875   | T | -0.0309 |
| rs10893616  | T | 0.0282  |
| rs538847    | T | 0.021   |
| rs61911502  | G | 0.0339  |
| rs12278021  | A | 0.031   |
| rs116992996 | T | 0.0688  |
| rs12292437  | C | -0.114  |
| rs117419015 | A | -0.1689 |
| rs73021218  | A | 0.0493  |
| rs76266984  | A | 0.0756  |
| rs7126760   | C | -0.0216 |
| rs2403686   | C | 0.0218  |
| rs10466389  | A | 0.0343  |
| rs117650859 | T | 0.098   |
| rs73396616  | G | -0.0908 |
| rs2647530   | G | -0.0327 |
| rs148294927 | T | 0.1895  |
| rs586662    | A | 0.0285  |
| rs72944264  | A | 0.0672  |
| rs112462883 | T | 0.0861  |
| rs1943850   | T | -0.0216 |
| rs139195038 | A | 0.0751  |
| rs948203    | T | -0.0217 |
| rs4756804   | C | -0.0976 |
| rs12418496  | G | -0.021  |
| rs74394148  | A | -0.157  |

|             |   |         |
|-------------|---|---------|
| rs78162690  | C | 0.0611  |
| rs117062831 | A | -0.134  |
| rs7120278   | T | -0.0257 |
| rs11217558  | T | 0.1511  |
| rs146556332 | A | -0.0578 |
| rs12420530  | T | 0.0229  |
| rs73021221  | C | 0.0558  |
| rs10742752  | T | 0.0216  |
| rs10501955  | G | -0.0214 |
| rs2676460   | T | -0.0282 |
| rs7931334   | C | 0.0443  |
| rs76535381  | G | -0.0897 |
| rs12273302  | A | -0.0475 |
| rs74375520  | G | -0.1117 |
| rs1491866   | T | -0.022  |
| rs719784    | G | 0.0295  |
| rs11022774  | G | -0.0341 |
| rs4146882   | G | -0.0419 |
| rs117222801 | T | -0.0678 |
| rs72963790  | C | 0.0493  |
| rs1373926   | T | -0.0204 |
| rs4420299   | T | -0.0206 |
| rs1015445   | C | -0.0214 |
| rs79132595  | T | -0.08   |
| rs12366073  | C | 0.1274  |
| rs217718    | G | 0.022   |
| rs17298565  | C | -0.0531 |
| rs2441939   | T | 0.0311  |
| rs115272933 | T | 0.0978  |
| rs78933139  | A | 0.0664  |
| rs72849153  | C | 0.1379  |
| rs10892945  | T | -0.0943 |
| rs74526639  | A | 0.0985  |
| rs66520188  | T | -0.0358 |
| rs11025067  | A | -0.0406 |
| rs117523717 | C | 0.0942  |
| rs12420339  | G | -0.0684 |
| rs73515581  | T | -0.0838 |
| rs78798755  | C | 0.1554  |
| rs77321525  | A | 0.033   |
| rs6590143   | C | 0.029   |
| rs7130688   | C | 0.0268  |
| rs149979965 | C | 0.0808  |
| rs12576834  | A | 0.0285  |
| rs61110451  | A | 0.0398  |
| rs34111148  | A | 0.0363  |
| rs2048246   | C | 0.0342  |



|             |   |         |
|-------------|---|---------|
| rs148769807 | T | 0.0884  |
| rs77791270  | G | -0.0475 |
| rs147559614 | T | 0.0782  |
| rs12806887  | C | 0.0478  |
| rs16910276  | A | 0.0714  |
| rs546750    | G | 0.0473  |
| rs76698515  | T | 0.0617  |
| rs117809404 | T | -0.1025 |
| rs76838437  | G | 0.0437  |
| rs9666844   | G | 0.0208  |
| rs75672397  | C | -0.0298 |
| rs3132839   | A | 0.0254  |
| rs6590598   | C | 0.0312  |
| rs11037561  | C | -0.0233 |
| rs11029579  | A | -0.1091 |
| rs147127143 | A | 0.0696  |
| rs835764    | A | -0.0352 |
| rs112910373 | T | -0.0644 |
| rs576425    | T | 0.0279  |
| rs116874100 | A | 0.099   |
| rs7111510   | C | 0.067   |
| rs12361405  | A | -0.0453 |
| rs117185201 | C | -0.1706 |
| rs4755849   | A | -0.025  |
| rs116995249 | A | -0.1086 |
| rs10898284  | A | 0.0328  |
| rs7939778   | A | 0.0239  |
| rs11602542  | C | 0.0319  |
| rs16926560  | C | 0.0585  |
| rs7350506   | G | 0.0293  |
| rs2846049   | G | -0.0295 |
| rs12366207  | G | -0.0259 |
| rs7941969   | C | -0.0554 |
| rs7948487   | G | 0.076   |
| rs79829166  | C | -0.1156 |
| rs217089    | A | -0.0273 |
| rs2139424   | C | 0.0262  |
| rs61879560  | G | 0.0575  |
| rs4756498   | C | -0.0869 |
| rs1722857   | G | 0.0231  |
| rs151281516 | T | -0.1587 |
| rs1995623   | T | 0.0339  |
| rs10734479  | T | -0.0217 |
| rs17206578  | C | 0.0439  |
| rs139423236 | G | -0.1242 |
| rs118055198 | T | 0.0745  |
| rs7116829   | G | 0.0271  |

|             |   |         |
|-------------|---|---------|
| rs138663011 | G | -0.1399 |
| rs142348028 | C | 0.0787  |
| rs60186872  | C | -0.0883 |
| rs145010870 | A | -0.0953 |
| rs114123615 | A | -0.0665 |
| rs4756578   | C | -0.0205 |
| rs10895308  | A | 0.0241  |
| rs140606519 | C | 0.0743  |
| rs1939602   | A | -0.0262 |
| rs11224695  | G | 0.0533  |
| rs418439    | T | -0.0266 |
| rs11041431  | C | 0.0268  |
| rs10766779  | G | 0.0209  |
| rs745200    | A | -0.0205 |
| rs488769    | C | 0.0216  |
| rs4939463   | T | -0.029  |
| rs78594871  | A | 0.174   |
| rs12292249  | T | -0.0348 |
| rs9943474   | T | -0.0516 |
| rs11231706  | T | 0.0793  |
| rs10838128  | A | -0.0415 |
| rs7118144   | G | 0.1126  |
| rs78360573  | A | 0.1177  |
| rs11608130  | G | 0.0485  |
| rs117634635 | A | -0.0592 |
| rs11221081  | A | 0.041   |
| rs11043081  | G | 0.0386  |
| rs117680726 | A | 0.1064  |
| rs142406864 | T | 0.0873  |
| rs1600809   | C | -0.0211 |
| rs11034518  | T | -0.1256 |
| rs7112002   | A | 0.0223  |
| rs1994117   | G | -0.0208 |
| rs11038468  | C | 0.0275  |
| rs138896418 | A | 0.1494  |
| rs557096    | T | 0.0343  |
| rs12274457  | A | 0.0651  |
| rs11041153  | A | 0.0349  |
| rs648181    | A | -0.0218 |
| rs3758970   | T | 0.0458  |
| rs73523721  | C | 0.0677  |
| rs11025260  | T | 0.0266  |
| rs1828636   | C | -0.1229 |
| rs79729971  | A | 0.0568  |
| rs2511880   | T | 0.0789  |
| rs1029349   | A | -0.0217 |
| rs80267908  | A | -0.0786 |

|             |   |         |
|-------------|---|---------|
| rs11214863  | T | 0.0243  |
| rs329673    | C | -0.0279 |
| rs117103981 | T | -0.1008 |
| rs11023171  | C | 0.0843  |
| rs7127267   | G | 0.0204  |
| rs117274104 | A | 0.1326  |
| rs59357824  | G | -0.0354 |
| rs11023074  | C | 0.0408  |
| rs72945382  | A | 0.1369  |
| rs10895175  | T | 0.0206  |
| rs112860453 | T | 0.1382  |
| rs636128    | T | -0.0214 |
| rs116922192 | A | -0.0932 |
| rs10500753  | C | 0.0223  |
| rs12421758  | T | 0.0269  |
| rs113719860 | A | -0.056  |
| rs10893846  | T | -0.027  |
| rs117828080 | A | 0.1167  |
| rs10894117  | G | -0.0241 |
| rs294335    | C | 0.0234  |
| rs7125888   | T | -0.0209 |
| rs676206    | A | 0.0254  |
| rs61745706  | G | 0.1512  |
| rs56189858  | T | -0.0778 |
| rs61870201  | G | 0.0383  |
| rs66854728  | A | -0.0281 |
| rs116900295 | A | 0.0934  |
| rs72852839  | C | 0.1108  |
| rs10836675  | T | -0.0373 |
| rs586053    | A | -0.021  |
| rs113518292 | C | 0.1211  |
| rs11235700  | G | -0.0331 |
| rs78504227  | C | 0.0813  |
| rs2237875   | G | -0.0376 |
| rs148773346 | A | 0.1758  |
| rs17502259  | G | -0.0918 |
| rs7117375   | A | 0.0225  |
| rs149221661 | G | 0.1135  |
| rs73024960  | T | 0.0634  |
| rs61869021  | A | 0.0301  |
| rs10736616  | A | -0.0293 |
| rs11246306  | C | -0.0232 |
| rs73028637  | T | -0.0835 |
| rs2344931   | C | -0.0233 |
| rs72882681  | C | -0.0903 |
| rs111451035 | C | -0.0344 |
| rs147576335 | T | 0.1311  |

|             |   |         |
|-------------|---|---------|
| rs10839964  | C | 0.0219  |
| rs7104613   | T | 0.0441  |
| rs10836386  | T | 0.0209  |
| rs2129849   | C | -0.0256 |
| rs2680284   | A | 0.1301  |
| rs117791682 | T | 0.0909  |
| rs1469170   | A | 0.0212  |
| rs61910578  | G | 0.0211  |
| rs144787688 | T | -0.0819 |
| rs76423243  | G | 0.1011  |
| rs76970109  | G | 0.0394  |
| rs10501381  | T | 0.0262  |
| rs10898849  | T | 0.025   |
| rs12282757  | T | 0.0266  |
| rs72877329  | G | -0.0571 |
| rs891441    | G | -0.0201 |
| rs139976183 | G | 0.1358  |
| rs7931430   | C | 0.0267  |
| rs3889570   | C | -0.0219 |
| rs147783403 | T | -0.0789 |
| rs646558    | A | -0.0299 |
| rs575929    | C | -0.0216 |
| rs1219385   | A | -0.0259 |
| rs117185070 | C | -0.1175 |
| rs11528938  | T | 0.0706  |
| rs17630335  | A | -0.0873 |
| rs2852242   | T | 0.0489  |
| rs56257756  | G | 0.0414  |
| rs9787826   | C | 0.0217  |
| rs1892999   | C | 0.0214  |
| rs76850153  | A | 0.0734  |
| rs631163    | G | -0.0227 |
| rs11236862  | A | 0.0316  |
| rs77972792  | T | 0.0859  |
| rs2960555   | A | 0.1362  |
| rs79183757  | T | -0.1178 |
| rs61909781  | C | -0.0711 |
| rs1945971   | C | -0.0368 |
| rs111438108 | T | -0.0332 |
| rs1906687   | T | -0.0203 |
| rs118161780 | T | 0.0809  |
| rs11026580  | C | -0.0213 |
| rs4756644   | T | -0.0242 |
| rs17551747  | G | 0.0213  |
| rs7105056   | T | -0.0844 |
| rs74922271  | G | -0.0547 |
| rs7101455   | A | 0.023   |

|             |   |         |
|-------------|---|---------|
| rs59090546  | A | 0.1287  |
| rs526484    | T | 0.021   |
| rs12802834  | A | -0.0364 |
| rs11023348  | A | -0.0473 |
| rs11025664  | A | 0.0336  |
| rs34735495  | G | -0.0742 |
| rs4755854   | C | 0.0218  |
| rs11035171  | C | 0.0276  |
| rs10833053  | G | 0.0212  |
| rs116949141 | T | 0.0972  |
| rs9943597   | C | 0.0212  |
| rs113243296 | C | 0.0749  |
| rs117279172 | C | 0.0898  |
| rs76690346  | T | 0.0529  |
| rs74681328  | T | 0.0612  |
| rs72916853  | T | 0.029   |
| rs80020135  | A | -0.1433 |
| rs7129413   | A | -0.0401 |
| rs2156526   | C | -0.0215 |
| rs78168465  | A | -0.0431 |
| rs477118    | A | -0.0606 |
| rs672796    | A | -0.0267 |
| rs2919033   | T | 0.0857  |
| rs72992188  | A | 0.0847  |
| rs12275367  | T | 0.0216  |
| rs78957281  | C | 0.0437  |
| rs4910164   | T | 0.0207  |
| rs72865735  | T | -0.0933 |
| rs3740869   | C | 0.0304  |
| rs118155370 | T | -0.0973 |
| rs76226948  | C | -0.1258 |
| rs80047824  | C | -0.1238 |
| rs142632184 | G | 0.1277  |
| rs1122273   | G | 0.0333  |
| rs524914    | C | -0.0439 |
| rs10836510  | T | 0.0209  |
| rs144362877 | T | -0.1207 |
| rs36045958  | G | -0.0393 |
| rs148145996 | G | 0.0714  |
| rs79377015  | T | 0.1222  |
| rs79822649  | A | -0.0767 |
| rs964661    | T | -0.0426 |
| rs144044938 | C | -0.0997 |
| rs117241885 | T | -0.0538 |
| rs76739307  | T | -0.0988 |
| rs117535032 | T | 0.077   |
| rs12797102  | G | -0.0363 |

|             |   |         |
|-------------|---|---------|
| rs76594667  | A | 0.0774  |
| rs10767734  | T | -0.0215 |
| rs7934632   | A | 0.0209  |
| rs1784129   | A | -0.0255 |
| rs2515951   | A | -0.0207 |
| rs10896430  | G | 0.0239  |
| rs6578263   | A | 0.0374  |
| rs55719860  | A | -0.1253 |
| rs72926728  | A | -0.0348 |
| rs80188936  | A | 0.1094  |
| rs11021360  | C | 0.0942  |
| rs17104970  | A | 0.1136  |
| rs78591480  | C | -0.0779 |
| rs61901911  | T | 0.0872  |
| rs12291536  | A | -0.0218 |
| rs12786183  | C | 0.0282  |
| rs34742099  | C | -0.0299 |
| rs2373580   | C | -0.0263 |
| rs148493466 | C | -0.1496 |
| rs80285378  | G | -0.1293 |
| rs79248761  | T | 0.0843  |
| rs118110973 | T | -0.1551 |
| rs73027988  | T | 0.0326  |
| rs2614172   | T | -0.0206 |
| rs17704641  | T | -0.0338 |
| rs78069145  | C | 0.0645  |
| rs17099622  | G | -0.0407 |
| rs56251941  | A | 0.0886  |
| rs12282553  | T | -0.0331 |
| rs860841    | T | -0.0395 |
| rs567057    | G | 0.0412  |
| rs7942030   | C | 0.0292  |
| rs116893213 | C | 0.1052  |
| rs2562250   | C | -0.0209 |
| rs77863916  | C | 0.0687  |
| rs12418475  | A | -0.0545 |
| rs1792998   | A | -0.0353 |
| rs78085398  | A | 0.127   |
| rs113425742 | G | 0.129   |
| rs71478202  | T | 0.1195  |
| rs75090113  | C | 0.061   |
| rs10896948  | A | 0.1037  |
| rs4944090   | T | 0.0208  |
| rs76774246  | C | 0.1222  |
| rs2403496   | G | 0.0597  |
| rs2900740   | A | 0.0659  |
| rs80227954  | C | 0.0342  |

|             |   |         |
|-------------|---|---------|
| rs118101644 | C | -0.1143 |
| rs67727642  | A | -0.0421 |
| rs1454001   | C | -0.0248 |
| rs117015347 | A | -0.1271 |
| rs75356132  | G | -0.1845 |
| rs10767317  | G | -0.0255 |
| rs117123068 | A | 0.1073  |
| rs10837538  | T | 0.0414  |
| rs61884778  | C | 0.0352  |
| rs79608083  | A | 0.0935  |
| rs117005908 | A | -0.1115 |
| rs1496661   | G | -0.1152 |
| rs716066    | A | 0.0271  |
| rs73578917  | T | -0.0994 |
| rs7934606   | T | -0.0259 |
| rs836144    | G | 0.0215  |
| rs11236275  | T | 0.0209  |
| rs1613367   | G | 0.0217  |
| rs72896144  | C | 0.0978  |
| rs75110218  | T | -0.0694 |
| rs112453126 | A | 0.0812  |
| rs58344561  | A | 0.0519  |
| rs56869223  | C | 0.0476  |
| rs117561223 | A | 0.1245  |
| rs760059    | C | -0.0334 |
| rs118001540 | A | 0.0943  |
| rs77898739  | A | 0.0862  |
| rs17146589  | T | 0.0365  |
| rs2508863   | G | 0.0387  |
| rs116946028 | T | 0.1431  |
| rs7945554   | A | 0.0212  |
| rs139145883 | G | -0.1267 |
| rs10751250  | C | -0.021  |
| rs147138098 | C | 0.0763  |
| rs56407311  | T | -0.0381 |
| rs2299629   | A | -0.0483 |
| rs4756274   | T | -0.1269 |
| rs7121786   | C | -0.042  |
| rs1493271   | C | -0.0369 |
| rs56071001  | C | 0.0685  |
| rs2848529   | C | -0.0235 |
| rs11213111  | C | -0.0427 |
| rs111725466 | C | 0.1091  |
| rs61895588  | G | -0.0285 |
| rs76975484  | A | 0.0911  |
| rs12787774  | C | -0.046  |
| rs7119457   | T | 0.0207  |

|             |   |         |
|-------------|---|---------|
| rs73029056  | A | -0.0263 |
| rs117162000 | C | 0.1526  |
| rs117018467 | A | -0.088  |
| rs10836405  | C | -0.0202 |
| rs144141680 | A | 0.104   |
| rs141955902 | T | 0.0787  |
| rs61897680  | G | -0.0609 |
| rs658274    | G | -0.0505 |
| rs7936665   | A | 0.0368  |
| rs79825730  | A | 0.074   |
| rs79081778  | T | -0.0375 |
| rs1995161   | A | -0.0867 |
| rs4936565   | A | -0.0235 |
| rs12808620  | A | 0.0344  |
| rs72999587  | A | 0.106   |
| rs117560430 | G | -0.0822 |
| rs79981233  | A | 0.0879  |
| rs113923589 | A | 0.0404  |
| rs10833753  | T | 0.0201  |
| rs78986132  | T | 0.1017  |
| rs7112171   | G | 0.0523  |
| rs111752425 | A | -0.0439 |
| rs117832177 | T | 0.1004  |
| rs12576744  | A | -0.0481 |
| rs74507729  | A | 0.0907  |
| rs138608984 | A | -0.1209 |
| rs80120888  | G | 0.0892  |
| rs72847942  | C | 0.0364  |
| rs74735701  | C | -0.0765 |
| rs1051121   | T | -0.083  |
| rs10750009  | G | 0.0265  |
| rs75998435  | A | 0.0626  |
| rs10765785  | G | 0.079   |
| rs11217253  | G | -0.0226 |
| rs217111    | G | -0.0205 |
| rs74632380  | A | 0.0586  |
| rs72981217  | G | 0.029   |
| rs117452286 | A | 0.1142  |
| rs34357884  | C | 0.0378  |
| rs895257    | A | -0.053  |
| rs596322    | T | -0.0411 |
| rs11824304  | T | 0.0258  |
| rs7480497   | C | 0.0241  |
| rs597599    | C | -0.0213 |
| rs16918472  | A | 0.0368  |
| rs2135630   | T | -0.0235 |
| rs117189164 | A | 0.041   |



|             |   |         |
|-------------|---|---------|
| rs11224503  | C | -0.0475 |
| rs55918321  | T | -0.07   |
| rs10894390  | A | -0.0671 |
| rs7119405   | G | 0.0513  |
| rs11221253  | C | 0.0212  |
| rs78712419  | A | 0.0731  |
| rs145338202 | T | 0.0543  |
| rs74789053  | C | -0.0482 |
| rs11225878  | G | -0.0262 |
| rs35089351  | A | 0.0311  |
| rs11222966  | G | 0.0735  |
| rs10840006  | T | 0.0596  |
| rs7119665   | A | 0.0343  |
| rs60957779  | A | 0.0472  |
| rs744894    | A | -0.038  |
| rs112898821 | C | 0.0643  |
| rs75964869  | T | -0.0738 |
| rs73017697  | T | 0.1033  |
| rs11024428  | G | 0.0403  |
| rs61886289  | A | -0.0417 |
| rs75404874  | A | -0.0736 |
| rs117485612 | T | 0.0906  |
| rs2515312   | G | -0.0278 |
| rs7114018   | T | -0.0209 |
| rs11222585  | G | 0.0637  |
| rs75418283  | T | 0.0334  |
| rs35440005  | T | 0.1105  |
| rs112153370 | C | 0.1011  |
| rs11021100  | A | 0.0217  |
| rs117065739 | G | 0.1906  |
| rs61902544  | C | 0.0474  |
| rs11036870  | T | 0.0229  |
| rs77400904  | T | 0.1124  |
| rs45520932  | T | 0.0394  |
| rs142381270 | C | 0.1285  |
| rs76253138  | T | 0.0507  |
| rs78869673  | G | -0.119  |
| rs1301842   | G | 0.0475  |
| rs147835876 | T | -0.0818 |
| rs3740793   | C | 0.0751  |
| rs62638916  | C | 0.1125  |
| rs7478816   | G | -0.036  |
| rs12146613  | G | 0.0206  |
| rs61755079  | A | 0.0614  |
| rs72984661  | G | -0.0413 |
| rs117399581 | A | -0.071  |
| rs7107618   | A | -0.0305 |

|             |   |         |
|-------------|---|---------|
| rs10437619  | G | 0.0204  |
| rs72900351  | T | -0.0714 |
| rs4382917   | A | -0.0315 |
| rs141123784 | A | -0.085  |
| rs4523710   | A | 0.0331  |
| rs143664615 | G | 0.1998  |
| rs148111974 | A | 0.1344  |
| rs12417798  | T | 0.0601  |
| rs11604080  | G | -0.0506 |
| rs7933954   | A | 0.0937  |
| rs12573862  | G | 0.0535  |
| rs11607116  | C | 0.0279  |
| rs77740780  | C | -0.0969 |
| rs11025729  | G | 0.0226  |
| rs117061194 | C | -0.0451 |
| rs79682189  | A | -0.0501 |
| rs113941138 | G | 0.0775  |
| rs959582    | C | -0.0265 |
| rs76131528  | T | -0.1114 |
| rs72999579  | G | 0.0779  |
| rs4945242   | T | -0.0238 |
| rs487306    | T | 0.0346  |
| rs116875546 | G | -0.0776 |
| rs17139341  | A | -0.1095 |
| rs117130061 | C | -0.1114 |
| rs11604895  | T | 0.0215  |
| rs118106806 | C | 0.1426  |
| rs77621647  | T | 0.0637  |
| rs531539    | C | -0.0317 |
| rs11040933  | A | -0.0215 |
| rs12796930  | A | -0.04   |
| rs6578412   | T | 0.0623  |
| rs111426027 | T | -0.097  |
| rs10830278  | T | 0.0252  |
| rs142522583 | G | 0.1353  |
| rs12791303  | C | 0.0822  |
| rs627532    | C | 0.0206  |
| rs4937635   | T | 0.0537  |
| rs12288950  | G | -0.0248 |
| rs11604388  | T | -0.0821 |
| rs145326483 | T | 0.0491  |
| rs2250721   | A | 0.0219  |
| rs79232795  | C | 0.1184  |
| rs117910161 | C | -0.0967 |
| rs77334643  | C | 0.0528  |
| rs1020679   | A | -0.0239 |
| rs41298757  | T | -0.0917 |

|             |   |         |
|-------------|---|---------|
| rs117666064 | C | 0.1279  |
| rs12099237  | A | 0.0749  |
| rs10894404  | A | 0.0281  |
| rs10768960  | T | 0.0856  |
| rs145643955 | T | 0.0839  |
| rs34135547  | T | 0.0312  |
| rs150021392 | T | 0.0983  |
| rs72980155  | C | -0.0585 |
| rs11218925  | A | 0.0511  |
| rs112120701 | A | -0.0844 |
| rs12281495  | C | -0.0233 |
| rs117086636 | C | -0.115  |
| rs1471686   | T | -0.0333 |
| rs145025905 | C | 0.0864  |
| rs1793044   | G | 0.0197  |
| rs4937769   | C | -0.0328 |
| rs502147    | A | 0.061   |
| rs71475968  | T | -0.0419 |
| rs4133622   | T | -0.0845 |
| rs2406745   | T | -0.0203 |
| rs73015403  | T | -0.1125 |
| rs117894356 | T | -0.1121 |
| rs117452935 | A | -0.0872 |
| rs76392326  | C | 0.0745  |
| rs11602821  | T | -0.0283 |
| rs73569469  | A | 0.035   |
| rs79848141  | T | 0.091   |
| rs937850    | G | 0.0272  |
| rs61879093  | A | -0.1441 |
| rs11828295  | T | 0.1046  |
| rs7122312   | G | 0.0408  |
| rs643171    | A | -0.0284 |
| rs11027419  | C | 0.0311  |
| rs61887769  | T | -0.0481 |
| rs11030865  | C | 0.045   |
| rs6485508   | A | 0.0429  |
| rs80089378  | C | 0.0411  |
| rs145784188 | A | 0.1002  |
| rs3019797   | G | -0.0206 |
| rs117239001 | A | 0.109   |
| rs112454385 | A | -0.124  |
| rs4133404   | T | -0.0448 |
| rs118069235 | A | -0.1025 |
| rs145820640 | G | 0.13    |
| rs55756957  | G | 0.027   |
| rs77172645  | A | -0.1246 |
| rs112709662 | C | 0.1153  |

|             |   |         |
|-------------|---|---------|
| rs12417578  | T | -0.0309 |
| rs79013765  | C | -0.0561 |
| rs150091196 | G | -0.1712 |
| rs514182    | A | -0.0247 |
| rs111925725 | A | -0.0362 |
| rs146889634 | C | 0.1279  |
| rs11826637  | G | -0.0466 |
| rs74715509  | G | -0.0613 |
| rs78198741  | C | 0.1308  |
| rs55778917  | A | -0.1042 |
| rs55968880  | C | -0.083  |
| rs902876    | A | 0.0223  |
| rs117945519 | C | 0.103   |
| rs1848395   | C | -0.0403 |
| rs61907184  | G | 0.0438  |
| rs73032123  | A | 0.0945  |
| rs79707198  | G | -0.0446 |
| rs117762765 | T | -0.1046 |
| rs10831561  | C | 0.0197  |
| rs77793415  | T | 0.1303  |
| rs145805633 | G | 0.0531  |
| rs142799197 | C | -0.0891 |
| rs140646702 | C | 0.0836  |
| rs117147736 | G | -0.1524 |
| rs75148986  | G | 0.0513  |
| rs1453393   | T | 0.0205  |
| rs73043131  | A | -0.0743 |
| rs4363628   | A | 0.0299  |
| rs143093834 | C | 0.1578  |
| rs80143982  | A | 0.0508  |
| rs17125980  | G | -0.0993 |
| rs76937140  | A | 0.1572  |
| rs61868780  | T | 0.0563  |
| rs10892003  | G | -0.0254 |
| rs143195987 | G | 0.1116  |
| rs35623555  | T | 0.0409  |
| rs1450211   | G | -0.0372 |
| rs11220020  | A | 0.1293  |
| rs7479875   | C | -0.026  |
| rs144892853 | G | -0.0612 |
| rs77776318  | C | 0.1201  |
| rs1008041   | C | -0.0322 |
| rs16927304  | T | -0.0683 |
| rs1790474   | A | 0.0251  |
| rs78688959  | G | 0.081   |
| rs17615581  | G | -0.0211 |
| rs143535148 | T | 0.1027  |

|             |   |         |
|-------------|---|---------|
| rs112221755 | C | 0.0415  |
| rs78316112  | T | 0.0818  |
| rs11599967  | G | 0.0327  |
| rs117740105 | A | -0.1395 |
| rs76706987  | T | -0.0591 |
| rs78202977  | T | -0.0696 |
| rs74614044  | T | 0.031   |
| rs10791302  | A | 0.0255  |
| rs117150966 | A | 0.0459  |
| rs75614345  | C | 0.086   |
| rs75527033  | A | 0.1511  |
| rs404359    | C | 0.0256  |
| rs7123046   | A | 0.09    |
| rs72959601  | G | -0.0594 |
| rs964039    | C | 0.0289  |
| rs10897110  | C | -0.0307 |
| rs111456958 | C | -0.0299 |
| rs4261274   | T | 0.0316  |
| rs12275754  | T | -0.0548 |
| rs117037102 | T | 0.0873  |
| rs11223471  | C | -0.0381 |
| rs17735232  | G | -0.0298 |
| rs142215501 | C | 0.0562  |
| rs2131695   | T | -0.0625 |
| rs610513    | T | 0.132   |
| rs11603504  | G | -0.0254 |
| rs117950200 | T | -0.2318 |
| rs34444450  | A | 0.0749  |
| rs77626841  | A | -0.0712 |
| rs117131664 | T | -0.0731 |
| rs17307438  | G | 0.0554  |
| rs900853    | A | -0.0254 |
| rs10902198  | G | -0.0368 |
| rs117257559 | T | 0.0633  |
| rs74769958  | T | 0.0463  |
| rs1817158   | G | 0.0234  |
| rs7926772   | T | 0.0201  |
| rs10890795  | T | 0.0198  |
| rs55829319  | T | -0.071  |
| rs117646342 | T | 0.1269  |
| rs73032807  | G | 0.0829  |
| rs6578388   | A | 0.0494  |
| rs11028583  | T | -0.1289 |
| rs80209255  | T | -0.1262 |
| rs10891043  | T | -0.0408 |
| rs72843957  | A | 0.0462  |
| rs150341182 | A | 0.1599  |

|             |   |         |
|-------------|---|---------|
| rs971535    | C | -0.0201 |
| rs72933178  | A | -0.1227 |
| rs12805219  | G | 0.019   |
| rs7481386   | C | -0.0351 |
| rs1433702   | C | -0.0829 |
| rs12801645  | T | 0.0487  |
| rs137912821 | G | -0.0792 |
| rs11601177  | C | -0.0259 |
| rs76942654  | C | -0.0309 |
| rs118040052 | T | 0.159   |
| rs143676006 | T | -0.1367 |
| rs17293152  | A | 0.0316  |
| rs61912568  | G | -0.0362 |
| rs78875980  | C | -0.0493 |
| rs75729876  | T | 0.0443  |
| rs116991135 | C | 0.0706  |
| rs76282174  | T | 0.0854  |
| rs34983219  | A | 0.0664  |
| rs114222696 | C | 0.0374  |
| rs7932551   | T | -0.0678 |
| rs1365425   | A | -0.0313 |
| rs117725080 | T | -0.1015 |
| rs115410762 | T | 0.092   |
| rs78699173  | A | 0.1054  |
| rs7107252   | A | 0.0233  |
| rs11021168  | A | 0.019   |
| rs4754971   | C | 0.0301  |
| rs145424477 | T | 0.0859  |
| rs138944723 | C | -0.1254 |
| rs12421957  | G | 0.0588  |
| rs1514093   | G | 0.0402  |
| rs61898828  | T | -0.0442 |
| rs148607922 | T | -0.1303 |
| rs12287744  | A | 0.027   |
| rs7942744   | C | -0.0204 |
| rs5029309   | C | 0.0225  |
| rs61884710  | C | 0.0199  |
| rs7934599   | T | 0.0278  |
| rs7931528   | A | 0.0192  |
| rs6485388   | T | -0.0247 |
| rs118009539 | T | -0.1879 |
| rs74744766  | G | 0.0838  |
| rs35485889  | C | 0.0235  |
| rs61512864  | T | -0.0265 |
| rs75155656  | A | 0.0521  |
| rs57487580  | G | 0.0548  |
| rs73455133  | T | 0.0276  |

|             |   |         |
|-------------|---|---------|
| rs79525962  | T | 0.0627  |
| rs117887907 | A | -0.0502 |
| rs72857486  | C | -0.0966 |
| rs11030140  | G | -0.1287 |
| rs112505206 | A | 0.0462  |
| rs150140754 | T | -0.0667 |
| rs12798541  | T | -0.0836 |
| rs12802923  | A | -0.0509 |
| rs2291813   | T | -0.1042 |
| rs12807913  | T | -0.0344 |
| rs11036885  | G | -0.0395 |
| rs11033925  | C | 0.131   |
| rs118143421 | T | -0.0725 |
| rs117667210 | T | 0.0677  |
| rs57424199  | A | -0.0595 |
| rs75466113  | T | 0.0744  |
| rs1631727   | G | -0.0265 |
| rs72638187  | T | 0.0646  |
| rs112111057 | C | 0.1273  |
| rs4430517   | G | -0.0216 |
| rs113859057 | G | 0.0505  |
| rs831464    | T | -0.0428 |
| rs10769121  | A | -0.0254 |
| rs73503585  | C | -0.0293 |
| rs17146032  | G | 0.0784  |
| rs10791191  | T | -0.0217 |
| rs34336740  | G | -0.0238 |
| rs11223799  | T | -0.0426 |
| rs12362429  | G | 0.019   |
| rs17310875  | C | 0.0344  |
| rs12223512  | A | 0.1688  |
| rs61894113  | A | -0.0295 |
| rs2293745   | A | -0.0337 |
| rs117529574 | A | -0.1037 |
| rs111535836 | T | 0.0906  |
| rs79474600  | T | -0.0939 |
| rs117168276 | G | -0.1089 |
| rs117370249 | A | 0.0826  |
| rs7932792   | G | 0.0476  |
| rs11042750  | T | -0.0309 |
| rs79043518  | G | 0.1422  |
| rs1893131   | C | -0.0204 |
| rs79824361  | A | 0.0809  |
| rs72872704  | C | 0.1206  |
| rs74880767  | A | -0.0512 |
| rs17242935  | C | -0.0326 |
| rs117460086 | G | 0.0568  |

|             |   |         |
|-------------|---|---------|
| rs111543079 | C | -0.09   |
| rs80106284  | T | 0.0541  |
| rs76146047  | G | 0.0753  |
| rs10741984  | G | 0.0331  |
| rs118005991 | A | 0.0541  |
| rs1586381   | C | -0.0264 |
| rs75038724  | A | -0.0654 |
| rs61916871  | G | 0.0424  |
| rs59421945  | C | 0.0845  |
| rs79101573  | G | -0.1065 |
| rs884272    | G | -0.0209 |
| rs10160296  | G | -0.052  |
| rs10838316  | A | -0.0263 |
| rs78919031  | G | 0.0443  |
| rs139714529 | A | 0.1155  |
| rs111335707 | C | 0.0892  |
| rs625061    | C | -0.0199 |
| rs71482813  | C | 0.1005  |
| rs71491887  | T | 0.0973  |
| rs7932902   | C | 0.0396  |
| rs61897656  | G | 0.0334  |
| rs71476458  | A | 0.061   |
| rs2658844   | A | 0.056   |
| rs58649734  | C | 0.0598  |
| rs674537    | G | -0.0193 |
| rs77553617  | A | 0.0807  |
| rs146718246 | G | -0.1099 |
| rs10891432  | C | 0.0234  |
| rs76291967  | A | -0.0566 |
| rs111991932 | G | -0.0872 |
| rs11231926  | C | -0.0508 |
| rs118149882 | G | 0.0815  |
| rs10839799  | G | -0.0237 |
| rs11041644  | G | 0.0259  |
| rs11603152  | G | -0.1187 |
| rs11231903  | T | 0.0259  |
| rs7128860   | T | -0.0316 |
| rs4402275   | G | 0.0229  |
| rs71486880  | G | 0.1556  |
| rs11220091  | T | 0.0374  |
| rs75871176  | C | 0.1986  |
| rs78410705  | T | 0.112   |
| rs4363570   | C | -0.0205 |
| rs74821658  | T | 0.0614  |
| rs111947060 | A | -0.0829 |
| rs117979658 | T | 0.0867  |
| rs79587123  | G | 0.1425  |



|             |   |         |
|-------------|---|---------|
| rs117941482 | G | 0.1535  |
| rs45592534  | T | 0.088   |
| rs12576112  | T | 0.0303  |
| rs34120211  | C | -0.0452 |
| rs80035427  | T | 0.1346  |
| rs542906    | G | 0.0379  |
| rs12292554  | T | 0.0265  |
| rs77876198  | C | -0.1124 |
| rs118164092 | A | -0.1116 |
| rs397034    | G | 0.0278  |
| rs12576915  | T | 0.0322  |
| rs148269848 | C | 0.1148  |
| rs75320297  | G | -0.1127 |
| rs75691776  | T | -0.0544 |
| rs61884837  | A | -0.0316 |
| rs78726806  | G | -0.1141 |
| rs78854133  | T | 0.0506  |
| rs1126205   | T | -0.0312 |
| rs2156844   | C | -0.0293 |
| rs12295256  | T | -0.0694 |
| rs117639578 | T | 0.0879  |
| rs10837152  | C | -0.0261 |
| rs76822947  | A | -0.0463 |
| rs10790142  | G | -0.0223 |
| rs72927500  | T | 0.0621  |
| rs1442717   | T | -0.0242 |
| rs72939141  | A | 0.0902  |
| rs72866114  | A | -0.0381 |
| rs2155666   | T | -0.023  |
| rs1792583   | G | 0.0243  |
| rs7480223   | T | 0.0509  |
| rs12287436  | C | 0.0451  |
| rs75815933  | C | 0.0411  |
| rs4930018   | T | -0.0214 |
| rs11226759  | C | 0.0193  |
| rs1791800   | A | -0.025  |
| rs72940991  | A | -0.0338 |
| rs1945709   | C | 0.0205  |
| rs753301    | A | 0.0481  |
| rs5009058   | A | 0.028   |
| rs72983772  | A | -0.0358 |
| rs3764892   | T | 0.0345  |
| rs59603545  | A | 0.09    |
| rs678653    | C | -0.0202 |
| rs648566    | G | -0.0199 |
| rs16907959  | A | -0.0788 |
| rs72898938  | G | -0.0337 |

|             |   |         |
|-------------|---|---------|
| rs55641841  | A | 0.0658  |
| rs10891434  | G | -0.023  |
| rs4997337   | C | -0.0411 |
| rs80001711  | A | -0.0422 |
| rs12224732  | C | -0.0292 |
| rs12363023  | C | 0.0235  |
| rs61889228  | A | -0.0735 |
| rs7939609   | G | 0.0852  |
| rs7939963   | C | -0.1146 |
| rs4930257   | T | -0.0243 |
| rs146573878 | T | 0.0707  |
| rs116134288 | G | 0.1056  |
| rs3824848   | T | 0.0213  |
| rs117821281 | A | 0.0653  |
| rs589389    | C | -0.0269 |
| rs150817513 | T | 0.1221  |
| rs10790338  | G | -0.0682 |
| rs11218704  | G | 0.0411  |
| rs72859259  | T | 0.1426  |
| rs11032981  | C | -0.0425 |
| rs2863159   | G | 0.0255  |
| rs72861742  | C | 0.1058  |
| rs79042830  | C | -0.0884 |
| rs77728001  | T | 0.0457  |
| rs12792722  | A | -0.0562 |
| rs145211159 | T | 0.1044  |
| rs138570919 | G | -0.0876 |
| rs117679229 | A | 0.0831  |
| rs78934618  | A | 0.0818  |
| rs72994900  | A | -0.0861 |
| rs1466517   | G | -0.0192 |
| rs148567132 | T | -0.095  |
| rs10891529  | T | 0.0208  |
| rs112023868 | T | -0.096  |
| rs144538629 | T | -0.0921 |
| rs7125822   | G | 0.0323  |
| rs79851468  | T | 0.0748  |
| rs112164890 | T | -0.1435 |
| rs2171344   | G | -0.02   |
| rs7935099   | T | -0.0318 |
| rs61909638  | C | -0.0957 |
| rs12417303  | T | 0.086   |
| rs1783448   | G | 0.0251  |
| rs2016337   | T | -0.0194 |
| rs7925175   | A | 0.0191  |
| rs7103089   | A | -0.1053 |
| rs76891606  | G | 0.0737  |

|             |   |         |
|-------------|---|---------|
| rs74604569  | C | -0.1061 |
| rs76779235  | C | -0.1191 |
| rs2155133   | C | 0.0982  |
| rs145919758 | T | -0.12   |
| rs117649318 | T | -0.1117 |
| rs149084104 | C | -0.142  |
| rs1315813   | A | -0.0193 |
| rs142740832 | C | -0.0997 |
| rs12277056  | G | -0.0501 |
| rs12278333  | C | 0.0383  |
| rs61884447  | C | -0.0803 |
| rs11224765  | T | -0.0287 |
| rs78873921  | G | 0.0873  |
| rs141370508 | T | 0.1014  |
| rs7939131   | C | 0.0613  |
| rs12794619  | T | 0.0522  |
| rs59011286  | G | 0.0544  |
| rs72887528  | C | -0.0649 |
| rs76784867  | G | -0.0574 |
| rs239259    | T | -0.0198 |
| rs148680806 | G | -0.0548 |
| rs140134598 | A | 0.1005  |
| rs11230646  | A | -0.0781 |
| rs79186158  | T | -0.0723 |
| rs28568889  | G | 0.0558  |
| rs61910588  | A | 0.0568  |
| rs1386155   | T | -0.0194 |
| rs140172738 | G | 0.0741  |
| rs57734211  | A | -0.0453 |
| rs4754816   | T | -0.0197 |
| rs116883740 | C | 0.0856  |
| rs11570196  | T | -0.0649 |
| rs116958467 | G | 0.0342  |
| rs68085433  | T | 0.065   |
| rs72990046  | A | 0.109   |
| rs145904821 | T | 0.0486  |
| rs77960567  | T | -0.1331 |
| rs11820624  | G | 0.0543  |
| rs9630172   | A | 0.047   |
| rs117422538 | A | 0.1197  |
| rs521976    | T | -0.0766 |
| rs17442124  | G | -0.0956 |
| rs79411094  | A | 0.116   |
| rs7927170   | G | -0.0313 |
| rs3016356   | C | -0.068  |
| rs12277152  | A | -0.0641 |
| rs7941585   | C | 0.0292  |

|             |   |         |
|-------------|---|---------|
| rs4944283   | C | 0.0201  |
| rs11214110  | T | 0.0768  |
| rs144487228 | C | 0.1444  |
| rs61224456  | G | 0.0734  |
| rs11222392  | T | -0.0256 |
| rs141339823 | G | 0.0997  |
| rs77931378  | A | 0.1205  |
| rs61885940  | T | -0.1555 |
| rs2169332   | A | 0.0219  |
| rs11223167  | G | 0.0626  |
| rs78602608  | A | -0.0348 |
| rs3967107   | A | 0.0192  |
| rs35937442  | T | 0.0939  |
| rs117300515 | G | 0.1554  |
| rs10430827  | G | 0.0387  |
| rs146267286 | G | -0.0752 |
| rs142471120 | C | -0.046  |
| rs76705707  | T | 0.111   |
| rs61874162  | C | 0.0535  |
| rs951128    | T | -0.039  |
| rs10770139  | G | -0.0188 |
| rs11024696  | G | -0.0266 |
| rs72939436  | A | 0.1266  |
| rs149169548 | A | 0.1013  |
| rs73020575  | A | 0.114   |
| rs118097798 | C | -0.1216 |
| rs1784389   | G | 0.0237  |
| rs10769675  | A | -0.0211 |
| rs117813793 | T | -0.0993 |
| rs75018393  | T | 0.0753  |
| rs17614825  | C | -0.0499 |
| rs4497407   | A | 0.021   |
| rs71465628  | G | -0.0459 |
| rs76367059  | G | -0.0407 |
| rs118127827 | G | -0.0824 |
| rs2034029   | T | 0.0257  |
| rs11036275  | G | 0.0213  |
| rs35199438  | T | 0.02    |
| rs80098336  | A | 0.056   |
| rs117901567 | T | 0.0581  |
| rs2847182   | G | 0.0837  |
| rs80178308  | G | 0.0833  |
| rs7934379   | T | 0.0855  |
| rs141368429 | T | -0.0916 |
| rs1948977   | T | 0.0353  |
| rs11607058  | T | 0.0404  |
| rs12789306  | C | 0.0722  |

|             |   |         |
|-------------|---|---------|
| rs643273    | T | 0.0797  |
| rs112497741 | C | -0.1029 |
| rs71466761  | A | 0.0995  |
| rs76725555  | A | 0.0683  |
| rs56074414  | T | 0.0329  |
| rs80181732  | T | -0.0659 |
| rs12576811  | A | -0.0311 |
| rs10749877  | C | 0.0195  |
| rs117087264 | A | 0.0902  |
| rs1786460   | A | -0.1317 |
| rs116882139 | T | -0.0766 |
| rs7936116   | C | 0.0208  |
| rs75384900  | C | -0.0888 |
| rs139948762 | A | 0.1422  |
| rs7940211   | A | -0.0196 |
| rs35170178  | G | -0.0463 |
| rs11601976  | G | 0.0312  |
| rs12365021  | T | -0.0259 |
| rs61870175  | C | -0.0508 |
| rs11022129  | C | -0.0259 |
| rs61876751  | A | -0.0495 |
| rs4472937   | C | 0.0264  |
| rs1011896   | C | 0.0231  |
| rs12807728  | T | 0.0563  |
| rs2428541   | A | -0.0995 |
| rs117334168 | C | -0.1077 |
| rs74743296  | C | -0.0276 |
| rs113457238 | A | 0.0367  |
| rs2075583   | C | -0.0327 |
| rs113156220 | T | 0.0504  |
| rs9919579   | C | -0.0199 |
| rs1124552   | C | 0.0783  |
| rs10831533  | A | -0.0207 |
| rs11223358  | A | -0.0759 |
| rs1560530   | G | 0.045   |
| rs10902203  | A | 0.0282  |
| rs11037823  | T | 0.0768  |
| rs7126420   | G | 0.0228  |
| rs567177    | T | 0.0631  |
| rs77101138  | G | -0.0752 |
| rs4336989   | C | -0.0371 |
| rs112926381 | T | 0.1627  |
| rs12420596  | A | -0.022  |
| rs7947225   | A | 0.0334  |
| rs7102471   | C | 0.0185  |
| rs59927238  | G | -0.0591 |
| rs117940263 | A | 0.0984  |

|             |   |         |
|-------------|---|---------|
| rs12807765  | T | -0.0682 |
| rs59656013  | C | -0.0438 |
| rs569550    | G | -0.02   |
| rs117486970 | G | -0.1026 |
| rs56921505  | C | -0.0811 |
| rs78210122  | T | -0.0933 |
| rs142767886 | C | 0.0586  |
| rs11607388  | A | 0.0438  |
| rs1939903   | A | -0.0209 |
| rs138481246 | T | 0.1553  |
| rs302645    | T | 0.0203  |
| rs4936027   | T | -0.0259 |
| rs12281613  | C | -0.0548 |
| rs79508809  | C | 0.0505  |
| rs2228055   | G | 0.0456  |
| rs147633276 | T | 0.1319  |
| rs116862564 | G | -0.0666 |
| rs79025219  | G | 0.0795  |
| rs1245130   | G | -0.0218 |
| rs12417395  | C | 0.0366  |
| rs12792462  | T | -0.0595 |
| rs10832082  | C | 0.0269  |
| rs10890794  | C | -0.0217 |
| rs117344772 | T | 0.0783  |
| rs326941    | A | 0.0219  |
| rs11214286  | T | 0.0638  |
| rs111894072 | C | 0.0669  |
| rs72859264  | A | -0.0533 |
| rs148460941 | C | 0.0536  |
| rs10790450  | C | 0.0192  |
| rs72973978  | G | 0.0921  |
| rs12793017  | G | -0.0564 |
| rs74843307  | A | 0.0475  |
| rs12364719  | C | -0.0268 |
| rs76173441  | C | 0.0984  |
| rs72925234  | A | 0.0499  |
| rs17827816  | T | -0.019  |
| rs61902276  | A | -0.0576 |
| rs840029    | A | 0.0215  |
| rs144535439 | T | -0.0816 |
| rs113815596 | A | 0.0356  |
| rs427354    | C | 0.0216  |
| rs77491995  | C | -0.0578 |
| rs10890755  | T | 0.0227  |
| rs12790873  | A | 0.0745  |
| rs144495474 | C | 0.1041  |
| rs117056583 | A | 0.0993  |

|             |   |         |
|-------------|---|---------|
| rs10766348  | T | -0.0492 |
| rs11026206  | T | -0.0432 |
| rs2568723   | G | 0.0186  |
| rs1944469   | G | -0.0265 |
| rs61890834  | T | -0.0693 |
| rs12420883  | C | 0.0468  |
| rs12419054  | T | -0.0375 |
| rs146143813 | T | 0.1367  |
| rs16922043  | C | -0.033  |
| rs117243782 | G | 0.076   |
| rs149695230 | G | 0.0703  |
| rs34738484  | A | 0.0876  |
| rs11021605  | C | 0.0188  |
| rs12271665  | T | -0.0542 |
| rs117275145 | G | -0.039  |
| rs76715837  | G | 0.1138  |
| rs1216186   | C | 0.0188  |
| rs80203217  | C | -0.0944 |
| rs17583177  | T | -0.0707 |
| rs35382601  | T | 0.0582  |
| rs10833369  | G | -0.0206 |
| rs117224370 | G | 0.0791  |
| rs138934849 | C | 0.1339  |
| rs11602524  | T | 0.0679  |
| rs1946075   | T | 0.0303  |
| rs11022313  | G | -0.0472 |
| rs4923161   | G | 0.0325  |
| rs11212055  | T | -0.036  |
| rs113213682 | C | -0.091  |
| rs66496921  | C | -0.0219 |
| rs11605403  | C | -0.1243 |
| rs6591003   | C | -0.0436 |
| rs76739743  | G | 0.0598  |
| rs11031651  | T | -0.0607 |
| rs11237732  | T | 0.0511  |
| rs11238027  | C | -0.0495 |
| rs645530    | A | -0.028  |
| rs17139058  | C | -0.1534 |
| rs741886    | T | -0.0358 |
| rs72927585  | A | -0.0602 |
| rs72975590  | C | -0.086  |
| rs11827261  | T | 0.0313  |
| rs7949205   | G | -0.0248 |
| rs34295474  | A | -0.0378 |
| rs4756577   | A | 0.0208  |
| rs118148210 | T | -0.0795 |
| rs67356857  | C | 0.0567  |

|             |   |         |
|-------------|---|---------|
| rs1915064   | G | -0.0357 |
| rs115093942 | T | -0.1483 |
| rs17119671  | T | 0.0285  |
| rs145950381 | C | -0.0757 |
| rs2513665   | T | -0.0328 |
| rs486394    | C | -0.0214 |
| rs1425172   | T | -0.0237 |
| rs142657381 | C | 0.1471  |
| rs1321014   | C | -0.0584 |
| rs11235322  | G | -0.0812 |
| rs878277    | A | 0.0269  |
| rs4319541   | T | 0.0337  |
| rs111965059 | G | 0.1316  |
| rs61888355  | A | -0.1196 |
| rs11034191  | A | 0.0439  |
| rs118160229 | C | 0.1358  |
| rs61908134  | G | -0.0336 |
| rs79923459  | G | 0.0739  |
| rs7928091   | T | 0.024   |
| rs61908775  | C | 0.0564  |
| rs12281247  | T | 0.0246  |
| rs28759512  | C | -0.0242 |
| rs11213704  | C | 0.0184  |
| rs10791356  | G | 0.0236  |
| rs143640935 | T | 0.055   |
| rs11603202  | G | 0.0475  |
| rs55801004  | C | -0.0436 |
| rs4936337   | T | 0.0214  |
| rs10892341  | T | 0.0211  |
| rs11234248  | G | 0.0198  |
| rs8705      | A | 0.0198  |
| rs117875263 | T | -0.0248 |
| rs1791919   | A | 0.0423  |
| rs2672214   | C | -0.02   |
| rs80147723  | T | 0.0327  |
| rs7122740   | A | -0.0194 |
| rs17375044  | A | 0.0445  |
| rs341079    | A | -0.0454 |
| rs75837718  | T | 0.0608  |
| rs7936033   | C | 0.0269  |
| rs79133834  | G | 0.0333  |
| rs10833890  | C | 0.0188  |
| rs2012618   | C | 0.0221  |
| rs17233325  | G | 0.0322  |
| rs35879271  | T | 0.036   |
| rs149850393 | A | -0.0667 |
| rs12808548  | A | 0.0255  |



|             |   |         |
|-------------|---|---------|
| rs528638    | G | 0.0189  |
| rs117680872 | C | -0.0657 |
| rs324222    | A | 0.0371  |
| rs11040248  | G | -0.0208 |
| rs61903004  | T | -0.1507 |
| rs79537065  | G | 0.1727  |
| rs12790134  | C | 0.0352  |
| rs1945419   | C | 0.0334  |
| rs12275686  | A | -0.0198 |
| rs60324279  | T | -0.0525 |
| rs567708    | C | 0.0296  |
| rs77936462  | G | -0.073  |
| rs35148943  | G | 0.0589  |
| rs112507855 | C | -0.1128 |
| rs590274    | A | -0.0195 |
| rs145985165 | T | 0.0685  |
| rs7109694   | A | -0.0263 |
| rs574422    | A | 0.0482  |
| rs75649640  | A | 0.0452  |
| rs72869866  | A | -0.0415 |
| rs10894740  | G | -0.0306 |
| rs3868123   | G | -0.0224 |
| rs12807767  | G | -0.0609 |
| rs75781942  | T | 0.0647  |
| rs11606702  | A | -0.059  |
| rs656104    | G | -0.0205 |
| rs116963824 | A | 0.1066  |
| rs139767512 | G | 0.1353  |
| rs7123679   | T | -0.0303 |
| rs149617085 | A | 0.1353  |
| rs3814728   | T | -0.0232 |
| rs77707008  | C | -0.0322 |
| rs12278936  | G | 0.0312  |
| rs12806756  | T | -0.0219 |
| rs16907412  | G | 0.0243  |
| rs1599459   | T | -0.0191 |
| rs142940894 | G | 0.1441  |
| rs491583    | C | 0.0443  |
| rs117681247 | T | 0.0987  |
| rs139841657 | G | -0.119  |
| rs7104753   | G | 0.0222  |
| rs145042101 | T | 0.0838  |
| rs17590919  | T | 0.0284  |
| rs35141420  | A | 0.0298  |
| rs143233176 | T | -0.0968 |
| rs35198163  | C | -0.0462 |
| rs117073449 | C | -0.1435 |

|             |   |         |
|-------------|---|---------|
| rs12419338  | T | 0.084   |
| rs66533705  | G | 0.0303  |
| rs2732538   | A | 0.0266  |
| rs9667418   | G | 0.0369  |
| rs4937904   | A | 0.0199  |
| rs11041880  | A | 0.0246  |
| rs75843226  | A | -0.0603 |
| rs57841376  | G | -0.0263 |
| rs80098460  | A | -0.0943 |
| rs114182339 | T | -0.0212 |
| rs147148482 | A | -0.1465 |
| rs77880069  | A | 0.1056  |
| rs7103897   | T | -0.1172 |
| rs61875895  | C | -0.0722 |
| rs3114679   | G | 0.0212  |
| rs7106466   | G | -0.039  |
| rs118034194 | A | -0.1052 |
| rs10791140  | T | 0.0241  |
| rs78465991  | A | 0.0481  |
| rs11820373  | C | -0.0367 |
| rs61892076  | T | -0.0392 |
| rs61735751  | T | -0.0754 |
| rs149086483 | C | 0.1003  |
| rs117565173 | T | 0.1275  |
| rs117605009 | G | -0.0695 |
| rs79473349  | G | -0.0851 |
| rs12794277  | C | -0.0409 |
| rs7104391   | G | 0.0484  |
| rs112769294 | C | 0.061   |
| rs138184394 | T | -0.1213 |
| rs7121496   | A | -0.0454 |
| rs11223813  | C | 0.0251  |
| rs17489368  | A | 0.0788  |
| rs10750225  | T | 0.0212  |
| rs143420013 | T | 0.0762  |
| rs141192500 | G | -0.1028 |
| rs1119618   | A | 0.0311  |
| rs73042082  | G | -0.0698 |
| rs7942824   | T | 0.0219  |
| rs564216    | C | 0.0364  |
| rs75521722  | G | 0.118   |
| rs61890222  | C | -0.0579 |
| rs494827    | T | 0.02    |
| rs7115983   | T | 0.0187  |
| rs146577192 | A | -0.0804 |
| rs118141697 | T | -0.1111 |
| rs116938054 | A | -0.0684 |

|             |   |         |
|-------------|---|---------|
| rs78559460  | C | 0.1061  |
| rs67083662  | C | -0.0279 |
| rs7118375   | G | -0.0986 |
| rs11232105  | C | 0.0304  |
| rs116967233 | T | 0.0841  |
| rs34593113  | C | -0.0253 |
| rs72860908  | G | 0.0829  |
| rs3903268   | G | -0.0194 |
| rs61904265  | G | 0.0497  |
| rs17095647  | G | -0.0623 |
| rs697320    | T | -0.0201 |
| rs144690291 | C | 0.0735  |
| rs11221494  | T | -0.0314 |
| rs144824231 | A | -0.0416 |
| rs73031235  | A | 0.0472  |
| rs61900073  | G | 0.0535  |
| rs74453680  | A | 0.0874  |
| rs2512847   | T | -0.0196 |
| rs573126    | C | -0.0202 |
| rs34144682  | A | 0.052   |
| rs35496600  | T | 0.0295  |
| rs79026207  | C | -0.0502 |
| rs71482406  | C | 0.0395  |
| rs113986909 | G | 0.0916  |
| rs16909393  | A | -0.0287 |
| rs79185600  | A | 0.0726  |
| rs79770766  | T | -0.0718 |
| rs9988914   | T | 0.0217  |
| rs77040155  | G | -0.07   |
| rs117247225 | A | 0.0622  |
| rs9666629   | G | 0.0272  |
| rs12806786  | G | -0.0464 |
| rs73414218  | A | 0.0606  |
| rs17598990  | G | 0.104   |
| rs76344204  | A | 0.089   |
| rs139236274 | G | 0.0675  |
| rs117551578 | G | 0.0851  |
| rs61878969  | T | 0.0882  |
| rs77476437  | G | -0.0504 |
| rs79058081  | G | -0.1087 |
| rs147602515 | A | 0.0503  |
| rs11022209  | T | -0.0383 |
| rs1945700   | A | 0.0257  |
| rs36001077  | A | 0.1161  |
| rs150584068 | G | 0.1079  |
| rs150663450 | T | -0.1275 |
| rs7117473   | G | 0.0473  |

|             |   |         |
|-------------|---|---------|
| rs11216466  | A | 0.0411  |
| rs12805708  | C | -0.0721 |
| rs2020038   | T | -0.1612 |
| rs117642284 | C | -0.1155 |
| rs11826055  | T | 0.0758  |
| rs1455590   | T | -0.0217 |
| rs7484176   | G | -0.0294 |
| rs72853376  | A | 0.0734  |
| rs10834864  | T | 0.0345  |
| rs7127126   | G | -0.0344 |
| rs114855326 | C | 0.0888  |
| rs75850236  | T | 0.0629  |
| rs11606101  | C | -0.0237 |
| rs6590490   | C | 0.0334  |
| rs10750198  | C | -0.0226 |
| rs55992477  | G | -0.0269 |
| rs10736643  | T | -0.0179 |
| rs74735185  | C | 0.132   |
| rs77901674  | T | 0.0964  |
| rs470504    | T | -0.0302 |
| rs138567168 | T | 0.0817  |
| rs72950236  | T | -0.061  |
| rs10894394  | T | -0.0288 |
| rs79761481  | A | 0.0413  |
| rs850294    | T | -0.0298 |
| rs746430    | T | -0.0842 |
| rs72873837  | A | -0.0414 |
| rs76674651  | A | 0.1155  |
| rs141896433 | G | -0.0925 |
| rs297505    | T | 0.0354  |
| rs12273915  | T | 0.0293  |
| rs150309718 | C | 0.1299  |
| rs11225422  | G | -0.0961 |
| rs61882689  | G | -0.0798 |
| rs4945343   | A | 0.0274  |
| rs12798518  | A | -0.0222 |
| rs117149763 | T | 0.0816  |
| rs61891517  | G | -0.0325 |
| rs11019226  | G | 0.0699  |
| rs11607024  | C | 0.0548  |
| rs72865430  | T | 0.059   |
| rs594711    | T | 0.0241  |
| rs11025194  | G | -0.0188 |
| rs1945079   | T | 0.0181  |
| rs149533328 | A | -0.1304 |
| rs117897170 | G | -0.0614 |
| rs151077944 | A | 0.1008  |

|             |   |         |
|-------------|---|---------|
| rs57077445  | C | -0.0204 |
| rs7943142   | T | -0.0296 |
| rs1465968   | T | 0.0195  |
| rs73030764  | C | -0.1044 |
| rs4509742   | A | 0.019   |
| rs1458111   | G | 0.0388  |
| rs2248540   | C | -0.0204 |
| rs61910354  | C | 0.0614  |
| rs77719655  | C | 0.0787  |
| rs77365128  | C | -0.135  |
| rs7942929   | A | 0.0836  |
| rs10836099  | C | -0.0313 |
| rs61893653  | T | -0.019  |
| rs11233685  | A | -0.0444 |
| rs1847581   | A | 0.0434  |
| rs61873496  | G | 0.1061  |
| rs111523361 | T | -0.0903 |
| rs7947615   | T | 0.0225  |
| rs7109947   | C | -0.0263 |
| rs11031636  | A | -0.0284 |
| rs147248535 | T | 0.13    |
| rs112277610 | T | -0.0839 |
| rs12225156  | T | -0.0334 |
| rs148000172 | C | -0.0998 |
| rs895797    | A | -0.0229 |
| rs67315789  | A | -0.04   |
| rs11263591  | C | -0.018  |
| rs11031147  | G | -0.1284 |
| rs74935110  | T | 0.0965  |
| rs498603    | T | -0.0241 |
| rs61898758  | A | -0.0757 |
| rs72940444  | T | -0.0482 |
| rs7938807   | T | 0.0369  |
| rs12574401  | T | -0.0257 |
| rs2755147   | C | -0.0184 |
| rs74506180  | C | 0.0981  |
| rs12275582  | T | 0.0261  |
| rs12293318  | A | 0.0507  |
| rs41534749  | A | -0.023  |
| rs142999023 | C | -0.0447 |
| rs35049301  | G | -0.0402 |
| rs55961528  | C | 0.0383  |
| rs72993661  | G | 0.0698  |
| rs78921654  | G | -0.1071 |
| rs1546215   | A | -0.056  |
| rs73007767  | G | 0.0482  |
| rs12420944  | C | 0.0199  |

|             |   |         |
|-------------|---|---------|
| rs61880853  | G | -0.0721 |
| rs72906834  | A | -0.1277 |
| rs117197644 | G | 0.0948  |
| rs11225443  | T | -0.0588 |
| rs145485933 | G | 0.0952  |
| rs2118360   | T | -0.0577 |
| rs2852845   | A | 0.0218  |
| rs2846691   | G | -0.028  |
| rs12796210  | C | 0.1165  |
| rs4100227   | A | 0.0466  |
| rs79564337  | T | -0.0624 |
| rs56103919  | A | 0.023   |
| rs526013    | G | -0.0204 |
| rs540492    | G | 0.0177  |
| rs2616271   | A | 0.0215  |
| rs35273026  | T | 0.0679  |
| rs11225798  | G | 0.0293  |
| rs1387153   | T | 0.0204  |
| rs3019210   | T | 0.0208  |
| rs117433273 | T | -0.0909 |
| rs61904661  | A | -0.0506 |
| rs11038147  | G | -0.0229 |
| rs139690197 | A | 0.0731  |
| rs117768520 | A | 0.1022  |
| rs117441926 | T | 0.0668  |
| rs80162763  | A | -0.0473 |
| rs148265252 | T | 0.0962  |
| rs76719966  | G | -0.04   |
| rs2226931   | A | 0.0184  |
| rs7125518   | C | 0.0245  |
| rs117088857 | A | -0.0733 |
| rs11222996  | T | -0.0576 |
| rs144384165 | T | -0.0793 |
| rs10500717  | T | -0.0671 |
| rs72856002  | G | 0.1335  |
| rs144952749 | A | 0.0952  |
| rs948982    | T | -0.0906 |
| rs149937791 | T | 0.1114  |
| rs11033423  | G | 0.0902  |
| rs7102375   | G | 0.0302  |
| rs12275815  | A | -0.0723 |
| rs10751237  | A | 0.0204  |
| rs55669018  | T | 0.0198  |
| rs12293985  | G | 0.0352  |
| rs117190725 | T | -0.099  |
| rs56213890  | A | -0.0275 |
| rs79549670  | G | 0.0727  |

|             |   |         |
|-------------|---|---------|
| rs17406814  | C | -0.0256 |
| rs143101596 | G | 0.0907  |
| rs12146693  | T | -0.0719 |
| rs12787691  | A | 0.0334  |
| rs7948886   | A | -0.0408 |
| rs117740614 | T | 0.05    |
| rs138372969 | A | -0.0587 |
| rs61890814  | G | -0.1389 |
| rs73019826  | C | 0.0646  |
| rs11602382  | A | 0.1052  |
| rs72861246  | A | -0.0353 |
| rs7127339   | G | 0.0222  |
| rs5020496   | C | -0.0202 |
| rs71476636  | T | -0.0776 |
| rs117058553 | G | -0.1202 |
| rs1148100   | A | -0.1264 |
| rs11222786  | C | -0.0768 |
| rs7395791   | A | -0.0183 |
| rs74852164  | A | 0.0775  |
| rs7942739   | A | 0.0793  |
| rs659742    | T | -0.018  |
| rs61869050  | A | -0.1141 |
| rs77362863  | T | -0.0591 |
| rs11827471  | G | -0.0327 |
| rs676184    | T | -0.0415 |
| rs139091062 | T | 0.1347  |
| rs10400279  | G | 0.0336  |
| rs2139333   | T | 0.0271  |
| rs10466731  | G | 0.107   |
| rs12421117  | A | -0.0199 |
| rs7121790   | A | -0.0209 |
| rs75609575  | A | -0.0701 |
| rs10741594  | G | 0.0409  |
| rs117037823 | A | -0.1088 |
| rs61877665  | A | 0.0665  |
| rs112557916 | T | 0.1264  |
| rs113271937 | A | 0.075   |
| rs10501549  | C | -0.0472 |
| rs1562220   | T | 0.1105  |
| rs140817069 | A | 0.1311  |
| rs11038040  | C | 0.0227  |
| rs17120419  | T | -0.071  |
| rs73025045  | C | 0.0304  |
| rs10750514  | A | 0.0697  |
| rs12361014  | C | -0.1121 |
| rs4945084   | G | -0.0188 |
| rs75208896  | G | 0.0217  |

|             |   |         |
|-------------|---|---------|
| rs117969972 | C | -0.1084 |
| rs72965264  | A | 0.0973  |
| rs11038180  | G | 0.052   |
| rs72980038  | G | -0.0868 |
| rs4929992   | C | 0.0189  |
| rs114306990 | G | 0.0792  |
| rs10908234  | A | -0.0192 |
| rs34879555  | G | -0.0221 |
| rs10794305  | T | -0.0181 |
| rs5013039   | A | -0.0238 |
| rs11034033  | T | -0.1035 |
| rs61907910  | C | -0.0578 |
| rs117361561 | A | -0.0743 |
| rs78303181  | C | 0.0596  |
| rs10894424  | T | 0.02    |
| rs117858640 | T | 0.0425  |
| rs45539534  | T | 0.0207  |
| rs118062825 | T | -0.0479 |
| rs76520447  | A | 0.1017  |
| rs764949    | T | -0.0193 |
| rs505317    | C | 0.02    |
| rs632137    | T | 0.0303  |
| rs11219845  | G | 0.0277  |
| rs77317382  | T | 0.0457  |
| rs74471654  | G | -0.0918 |
| rs11231168  | T | 0.0186  |
| rs11020869  | C | -0.0391 |
| rs1983101   | T | -0.0184 |
| rs111901409 | G | -0.0461 |
| rs4944223   | G | 0.019   |
| rs117940284 | T | -0.08   |
| rs1484882   | G | 0.0252  |
| rs112495093 | A | 0.1724  |
| rs118174355 | T | -0.1497 |
| rs117945252 | G | 0.1021  |
| rs139730569 | T | -0.1533 |
| rs139158269 | A | 0.0295  |
| rs533364    | T | 0.0213  |
| rs72981391  | A | -0.0611 |
| rs947979    | C | 0.0181  |
| rs3133276   | G | -0.0295 |
| rs6578273   | G | -0.0215 |
| rs77302491  | T | -0.0649 |
| rs138877884 | A | 0.0732  |
| rs75832706  | T | -0.1053 |
| rs76026404  | A | -0.0773 |
| rs7952059   | T | 0.0229  |



|             |   |         |
|-------------|---|---------|
| rs12801013  | A | 0.1393  |
| rs66874810  | T | 0.0346  |
| rs76492199  | A | -0.0413 |
| rs7126386   | T | -0.0365 |
| rs79666310  | T | -0.0766 |
| rs11035240  | C | -0.0262 |
| rs117596282 | C | -0.0805 |
| rs16927009  | T | -0.0383 |
| rs143701995 | T | 0.0651  |
| rs113981653 | T | 0.091   |
| rs73027979  | C | 0.048   |
| rs10840022  | A | -0.0376 |
| rs73498930  | G | 0.0287  |
| rs77333923  | A | 0.1039  |
| rs115658840 | T | 0.0741  |
| rs704671    | A | 0.0278  |
| rs10501538  | A | -0.0735 |
| rs4512811   | C | -0.0193 |
| rs1729411   | A | -0.0289 |
| rs7479005   | T | 0.019   |
| rs150671748 | T | 0.0964  |
| rs2282624   | C | 0.0195  |
| rs72916496  | C | 0.0426  |
| rs45509898  | T | -0.0509 |
| rs74836525  | G | 0.0427  |
| rs71488730  | G | -0.073  |
| rs78050807  | A | -0.1076 |
| rs4367942   | A | -0.0268 |
| rs75858232  | A | 0.0356  |
| rs17151079  | A | -0.0328 |
| rs989030    | C | 0.0391  |
| rs11026140  | A | -0.0895 |
| rs11034092  | A | 0.0268  |
| rs10501267  | A | -0.0274 |
| rs12284723  | A | -0.0177 |
| rs116842927 | T | 0.0753  |
| rs11216516  | T | -0.0281 |
| rs4910983   | A | -0.0335 |
| rs149275031 | A | 0.0882  |
| rs17119283  | A | 0.0433  |
| rs10899212  | C | -0.0356 |
| rs7107704   | A | 0.0197  |
| rs1991551   | C | 0.0204  |
| rs174625    | A | -0.0183 |
| rs58774930  | G | 0.1102  |
| rs74651412  | A | -0.0436 |
| rs10899266  | T | -0.0285 |

|             |   |         |
|-------------|---|---------|
| rs9299929   | C | 0.0211  |
| rs2028977   | T | 0.0603  |
| rs138080881 | T | -0.1427 |
| rs61907677  | A | 0.0209  |
| rs11022392  | G | -0.0688 |
| rs117973714 | A | -0.1189 |
| rs61888645  | A | 0.0525  |
| rs11030026  | A | 0.0243  |
| rs117097082 | C | -0.1491 |
| rs76213936  | T | 0.0295  |
| rs55882424  | T | -0.0328 |
| rs72973007  | G | -0.0696 |
| rs36107433  | T | -0.0235 |
| rs12577296  | A | 0.0419  |
| rs117498983 | A | 0.1283  |
| rs7484233   | A | -0.0216 |
| rs117223320 | C | 0.0696  |
| rs117299439 | T | 0.0559  |
| rs11236648  | G | 0.0183  |
| rs10893683  | C | -0.0198 |
| rs10898383  | C | -0.0223 |
| rs117954439 | T | 0.0928  |
| rs504909    | T | 0.0433  |
| rs76261015  | T | -0.0354 |
| rs10831741  | G | -0.0182 |
| rs79738472  | T | -0.0909 |
| rs117480109 | A | 0.0924  |
| rs78616850  | C | -0.1135 |
| rs72855304  | G | -0.1008 |
| rs521906    | C | -0.0302 |
| rs35272776  | A | -0.0477 |
| rs61880331  | G | 0.0691  |
| rs11030000  | T | -0.028  |
| rs141669645 | A | -0.1302 |
| rs117413039 | T | -0.0851 |
| rs71483623  | A | -0.0592 |
| rs118018562 | C | -0.0569 |
| rs1540155   | C | 0.0202  |
| rs11237542  | A | 0.0212  |
| rs7934423   | T | -0.0318 |
| rs11245920  | C | 0.0354  |
| rs506639    | G | -0.0195 |
| rs148603336 | A | -0.0939 |
| rs16907322  | A | 0.0339  |
| rs55997515  | C | 0.0735  |
| rs111318500 | C | -0.0437 |
| rs7104992   | G | -0.0182 |

|             |   |         |
|-------------|---|---------|
| rs73498011  | G | 0.1112  |
| rs10898210  | G | 0.0301  |
| rs72636018  | C | 0.0277  |
| rs145084678 | A | -0.1127 |
| rs67093151  | A | 0.0355  |
| rs17445272  | T | 0.0965  |
| rs61883582  | T | 0.0196  |
| rs7926205   | T | -0.0194 |
| rs16911746  | C | 0.0302  |
| rs11263567  | C | -0.0195 |
| rs558229    | G | 0.0232  |
| rs11023324  | T | -0.1066 |
| rs4307719   | T | -0.0223 |
| rs4945421   | C | -0.039  |
| rs4755862   | A | 0.0214  |
| rs141828468 | T | 0.0602  |
| rs117823060 | A | 0.0868  |
| rs36088190  | C | 0.0783  |
| rs2555174   | G | 0.0207  |
| rs34876870  | C | 0.0368  |
| rs117881242 | T | 0.1229  |
| rs113698728 | G | 0.1054  |
| rs34225168  | A | 0.0482  |
| rs11602347  | G | -0.022  |
| rs7108699   | C | -0.0201 |
| rs916455    | T | 0.0802  |
| rs117278384 | T | 0.06    |
| rs78717683  | A | -0.0617 |
| rs56034076  | T | 0.0249  |
| rs140762486 | G | 0.0426  |
| rs11213881  | C | -0.0194 |
| rs2552516   | G | 0.0248  |
| rs552498    | G | -0.0179 |
| rs12806866  | T | 0.104   |
| rs1764532   | A | 0.0176  |
| rs4755257   | A | -0.0334 |
| rs12805664  | G | 0.0233  |
| rs111326306 | A | 0.0703  |
| rs17636424  | C | -0.035  |
| rs76923857  | T | 0.0762  |
| rs114749741 | T | 0.0537  |
| rs11212514  | T | -0.0265 |
| rs76952593  | C | 0.0746  |
| rs112123394 | T | -0.0605 |
| rs151211759 | A | 0.1254  |
| rs7114938   | G | -0.0946 |
| rs11222799  | T | -0.0664 |

|             |   |         |
|-------------|---|---------|
| rs74557389  | G | -0.051  |
| rs9804652   | C | 0.0308  |
| rs77135771  | C | 0.0494  |
| rs79585097  | A | 0.0881  |
| rs75642318  | G | 0.0295  |
| rs142418128 | C | -0.0923 |
| rs291163    | T | -0.0197 |
| rs111783230 | G | -0.0951 |
| rs10898157  | G | 0.0188  |
| rs11213262  | A | 0.0177  |
| rs138639699 | G | -0.0342 |
| rs11025344  | T | -0.0483 |
| rs35374828  | G | 0.066   |
| rs11823371  | G | 0.1014  |
| rs7483073   | G | -0.0314 |
| rs116846412 | A | -0.0708 |
| rs11824933  | C | -0.0193 |
| rs7950091   | T | 0.0183  |
| rs17508542  | C | 0.1172  |
| rs76680777  | A | 0.0392  |
| rs79345551  | A | 0.0418  |
| rs1793615   | G | -0.026  |
| rs732989    | A | 0.0249  |
| rs76380380  | G | -0.083  |
| rs7125961   | G | 0.0545  |
| rs10768168  | G | 0.0196  |
| rs78937786  | T | -0.0349 |
| rs891292    | G | -0.0175 |
| rs75770659  | A | -0.0753 |
| rs79652353  | G | -0.0602 |
| rs61899196  | G | 0.0233  |
| rs542650    | A | 0.0196  |
| rs12289156  | C | -0.0608 |
| rs77502299  | T | 0.0834  |
| rs117924866 | A | 0.0785  |
| rs12224582  | C | 0.0286  |
| rs2846072   | T | -0.043  |
| rs148236061 | C | -0.0622 |
| rs6578605   | G | 0.0286  |
| rs77438198  | T | -0.078  |
| rs139337744 | T | -0.0864 |
| rs1464896   | C | 0.0206  |
| rs1939638   | C | 0.0703  |
| rs11211907  | C | -0.0227 |
| rs11605109  | G | -0.0252 |
| rs4923364   | G | -0.0179 |
| rs34150296  | T | 0.069   |

|             |   |         |
|-------------|---|---------|
| rs113156376 | A | -0.0808 |
| rs77103304  | C | -0.0576 |
| rs34197183  | T | 0.116   |
| rs67693463  | A | -0.0258 |
| rs150348498 | G | 0.1097  |
| rs10835606  | C | -0.0367 |
| rs1787022   | T | -0.0287 |
| rs4936085   | C | 0.024   |
| rs17746556  | G | -0.1163 |
| rs12419758  | A | 0.0361  |
| rs138388841 | G | -0.1313 |
| rs3808996   | T | 0.0298  |
| rs4937496   | G | -0.0575 |
| rs12275034  | A | 0.0472  |
| rs116884018 | C | -0.1403 |
| rs502566    | G | 0.0209  |
| rs76195952  | T | 0.0801  |
| rs7120753   | A | -0.0197 |
| rs77403559  | A | 0.0351  |
| rs10792702  | T | -0.0238 |
| rs1216502   | A | -0.0233 |
| rs143454522 | C | 0.1191  |
| rs61913324  | A | 0.0272  |
| rs496825    | A | 0.0237  |
| rs10831639  | C | -0.0227 |
| rs4757341   | C | 0.04    |
| rs35371236  | A | -0.0924 |
| rs11238031  | T | -0.1069 |
| rs72963956  | C | -0.1147 |
| rs117021498 | G | 0.0706  |
| rs17245608  | C | -0.063  |
| rs78946483  | G | 0.0582  |
| rs79132234  | G | 0.0501  |
| rs77841249  | T | -0.0717 |
| rs79774694  | A | -0.0743 |
| rs142089808 | G | 0.0653  |
| rs35453564  | T | -0.0277 |
| rs76752201  | G | -0.1054 |
| rs117377431 | A | 0.0347  |
| rs10488697  | G | 0.0284  |
| rs542671    | A | 0.0272  |
| rs149581821 | C | 0.1278  |
| rs12419226  | T | 0.032   |
| rs75271160  | C | 0.0624  |
| rs72970296  | T | -0.12   |
| rs3912714   | C | -0.0763 |
| rs73531191  | C | 0.1228  |

|             |   |         |
|-------------|---|---------|
| rs78827683  | A | 0.1231  |
| rs10894405  | A | 0.0327  |
| rs3794014   | A | 0.0185  |
| rs10766625  | T | -0.0207 |
| rs61888511  | A | -0.0328 |
| rs6578584   | T | 0.0241  |
| rs112656142 | C | 0.0868  |
| rs117764115 | T | -0.1578 |
| rs3862607   | T | -0.0202 |
| rs149911640 | A | -0.0887 |
| rs143732490 | T | -0.0943 |
| rs56410112  | C | 0.0567  |
| rs75764337  | A | 0.0384  |
| rs4319528   | C | -0.0349 |
| rs7943256   | C | 0.0714  |
| rs12799274  | T | 0.0313  |
| rs72850947  | A | -0.0428 |
| rs664720    | T | 0.0434  |
| rs11820676  | A | 0.0258  |
| rs895563    | A | -0.0219 |
| rs145924639 | T | -0.076  |
| rs61882770  | C | -0.0904 |
| rs72862346  | T | -0.1018 |
| rs76954771  | A | 0.0304  |
| rs7952704   | G | -0.0221 |
| rs77775963  | T | -0.0338 |
| rs1986325   | A | 0.0205  |
| rs74925806  | T | -0.0792 |
| rs11037101  | T | -0.0233 |
| rs117808625 | T | 0.1011  |
| rs11212322  | A | -0.0524 |
| rs12289416  | A | -0.0209 |
| rs17660589  | A | -0.0441 |
| rs77283886  | A | 0.0375  |
| rs1783460   | A | 0.0711  |
| rs16916699  | T | -0.0305 |
| rs76597647  | A | 0.06    |
| rs584337    | A | 0.0384  |
| rs4128590   | C | 0.0295  |
| rs72987590  | C | -0.0597 |
| rs77542308  | A | -0.1443 |
| rs75503285  | A | -0.0757 |
| rs4373974   | G | 0.0188  |
| rs72854108  | C | -0.0716 |
| rs4370952   | C | -0.0702 |
| rs7944747   | C | -0.0301 |
| rs11036458  | T | 0.0867  |

|             |   |         |
|-------------|---|---------|
| rs77482422  | C | 0.1159  |
| rs10833066  | G | -0.0235 |
| rs16906377  | G | 0.0609  |
| rs7937322   | A | 0.0282  |
| rs59400787  | T | 0.04    |
| rs16907093  | C | -0.1246 |
| rs76188388  | T | 0.0669  |
| rs11019120  | C | 0.0241  |
| rs477550    | C | -0.0225 |
| rs11223242  | A | -0.0407 |
| rs10831607  | T | 0.0189  |
| rs217752    | C | 0.0203  |
| rs76742762  | T | 0.1436  |
| rs75961282  | T | -0.0366 |
| rs7102888   | G | -0.023  |
| rs584499    | T | 0.0259  |
| rs7939765   | A | 0.0221  |
| rs7941413   | C | -0.0351 |
| rs148413415 | T | -0.0785 |
| rs61878993  | T | 0.0782  |
| rs198469    | A | -0.0254 |
| rs78577270  | C | -0.091  |
| rs115060401 | G | -0.0993 |
| rs35327266  | A | 0.0203  |
| rs61875867  | T | -0.1055 |
| rs12286841  | G | -0.0271 |
| rs73600883  | A | 0.108   |
| rs117204111 | A | 0.0642  |
| rs117875964 | A | 0.0576  |
| rs528541    | G | -0.0377 |
| rs77356714  | T | -0.0398 |
| rs896618    | C | 0.0187  |
| rs17149329  | C | 0.0257  |
| rs11828775  | T | 0.0319  |
| rs35079431  | G | -0.0186 |
| rs61886174  | A | 0.0402  |
| rs11042886  | T | 0.061   |
| rs117354535 | G | 0.1406  |
| rs117362086 | A | -0.0872 |
| rs75213427  | A | 0.0433  |
| rs17554190  | T | -0.0612 |
| rs10741709  | T | -0.0207 |
| rs72868559  | G | -0.0959 |
| rs9666564   | T | 0.0662  |
| rs118140804 | G | -0.0562 |
| rs113439345 | C | 0.1136  |
| rs11022334  | T | -0.1025 |

|             |   |         |
|-------------|---|---------|
| rs150633834 | T | 0.0797  |
| rs73014505  | A | -0.0944 |
| rs1879230   | T | 0.026   |
| rs72991248  | T | -0.0758 |
| rs7115833   | A | -0.0187 |
| rs60899989  | C | 0.0644  |
| rs80056995  | A | -0.049  |
| rs16910432  | A | 0.0912  |
| rs80093907  | G | -0.0375 |
| rs11033750  | G | 0.0228  |
| rs61879026  | G | -0.078  |
| rs76300755  | G | -0.0373 |
| rs297517    | G | 0.018   |
| rs10430847  | C | 0.0405  |
| rs139237371 | T | 0.0354  |
| rs112259210 | T | 0.0346  |
| rs613587    | G | -0.0189 |
| rs78461980  | G | 0.0887  |
| rs115159835 | G | -0.0692 |
| rs77101028  | T | 0.0347  |
| rs116846504 | C | -0.0822 |
| rs948010    | G | 0.0353  |
| rs75012815  | C | 0.082   |
| rs116865164 | A | 0.136   |
| rs112357006 | A | 0.073   |
| rs621452    | C | -0.0263 |
| rs16906358  | A | 0.054   |
| rs11025422  | G | 0.017   |
| rs77028828  | A | 0.061   |
| rs10790256  | T | 0.0207  |
| rs7108039   | T | 0.029   |
| rs226121    | C | 0.0217  |
| rs59897545  | A | -0.0845 |
| rs10891997  | G | 0.0194  |
| rs554547    | C | -0.0254 |
| rs10840427  | A | -0.019  |
| rs1519414   | C | -0.0187 |
| rs7109636   | T | -0.0355 |
| rs260818    | A | 0.018   |
| rs77578600  | C | -0.1005 |
| rs2954153   | T | -0.0498 |
| rs75556752  | C | 0.0328  |
| rs11032754  | C | 0.0427  |
| rs17138024  | A | 0.042   |
| rs117769929 | A | 0.0637  |
| rs553344    | A | -0.0178 |
| rs11217583  | T | 0.0315  |



|             |   |         |
|-------------|---|---------|
| rs11223497  | G | 0.0654  |
| rs111595317 | T | 0.1146  |
| rs117979538 | G | 0.0878  |
| rs7483839   | C | 0.0204  |
| rs11038293  | C | -0.0218 |
| rs667129    | G | -0.04   |
| rs1487186   | C | -0.0458 |
| rs7930554   | C | -0.0222 |
| rs77072870  | A | 0.1109  |
| rs147821483 | T | -0.0943 |
| rs113614148 | T | -0.0326 |
| rs1516748   | C | 0.02    |
| rs7109825   | G | -0.0546 |
| rs138386502 | C | 0.0457  |
| rs78843071  | G | -0.0289 |
| rs117822848 | G | -0.0788 |
| rs4753038   | T | -0.033  |
| rs7946525   | A | 0.021   |
| rs71486379  | A | 0.0886  |
| rs4930109   | C | -0.0357 |
| rs1942109   | C | -0.074  |
| rs12364489  | C | 0.0344  |
| rs2245098   | A | -0.0395 |
| rs10838590  | G | 0.0206  |
| rs67796742  | G | -0.0214 |
| rs1196045   | C | -0.018  |
| rs12788818  | G | 0.0191  |
| rs146438508 | C | -0.0838 |
| rs6590780   | C | 0.0221  |
| rs113566878 | G | -0.0768 |
| rs3017084   | A | -0.0265 |
| rs7124006   | C | 0.0249  |
| rs61884288  | A | 0.0806  |
| rs73037813  | A | 0.0651  |
| rs16908748  | G | 0.0211  |
| rs138381170 | G | 0.0649  |
| rs79983599  | G | 0.0493  |
| rs1502259   | T | -0.0186 |
| rs73017324  | A | -0.0549 |
| rs73515558  | G | -0.0753 |
| rs117306854 | T | 0.0262  |
| rs630403    | A | -0.018  |
| rs145656231 | T | 0.0602  |
| rs117657703 | A | -0.0676 |
| rs56221909  | C | 0.0339  |
| rs11234697  | A | 0.0527  |
| rs117391123 | A | -0.0678 |

|             |   |         |
|-------------|---|---------|
| rs78554499  | G | -0.0585 |
| rs7951560   | G | -0.0304 |
| rs7116182   | C | -0.0379 |
| rs112908547 | T | 0.1126  |
| rs73569246  | A | -0.025  |
| rs4938440   | A | -0.0424 |
| rs7124361   | G | 0.0568  |
| rs10893475  | C | -0.0292 |
| rs1892988   | C | -0.0212 |
| rs117106743 | A | 0.1126  |
| rs79082656  | G | -0.0541 |
| rs10892189  | T | 0.017   |
| rs149476630 | G | -0.1285 |
| rs12419324  | T | -0.0386 |
| rs117940140 | T | 0.1082  |
| rs4755153   | A | -0.0211 |
| rs12146649  | A | 0.0406  |
| rs73011529  | G | 0.0536  |
| rs11234889  | T | -0.0303 |
| rs72992521  | G | 0.045   |
| rs4937320   | G | 0.0174  |
| rs74788739  | A | 0.0729  |
| rs12806874  | A | -0.0236 |
| rs72986529  | G | -0.0847 |
| rs1728905   | T | -0.0293 |
| rs11607952  | A | 0.0307  |
| rs57610338  | C | 0.0304  |
| rs17243650  | C | 0.0208  |
| rs11232924  | G | -0.0213 |
| rs361281    | T | 0.0182  |
| rs34583443  | C | -0.032  |
| rs150273520 | C | 0.1453  |
| rs518852    | A | -0.0174 |
| rs78194335  | C | 0.0648  |
| rs117818646 | G | -0.1294 |
| rs72867874  | C | -0.0785 |
| rs2168797   | T | 0.0174  |
| rs1943342   | T | -0.0191 |
| rs79430699  | A | 0.0466  |
| rs11602531  | T | 0.0245  |
| rs651146    | C | 0.1636  |
| rs140227132 | T | 0.1053  |
| rs79885042  | C | -0.1298 |
| rs72975267  | T | -0.0434 |
| rs74542833  | G | 0.079   |
| rs525999    | A | 0.0252  |
| rs41344744  | T | -0.1085 |

|             |   |         |
|-------------|---|---------|
| rs11030592  | G | -0.025  |
| rs11212268  | A | 0.0369  |
| rs34528912  | T | 0.0785  |
| rs140727983 | T | 0.1007  |
| rs641883    | C | 0.0171  |
| rs67530239  | A | 0.0294  |
| rs56186807  | G | -0.0441 |
| rs11512485  | A | 0.0192  |
| rs75742187  | T | 0.065   |
| rs118147287 | C | 0.0712  |
| rs139187785 | A | 0.0882  |
| rs117543097 | A | 0.1315  |
| rs72895225  | A | -0.03   |
| rs76059597  | C | -0.0656 |
| rs11263474  | T | 0.0493  |
| rs77035758  | T | -0.0907 |
| rs35107281  | A | 0.0465  |
| rs1557473   | T | -0.0679 |
| rs10765382  | T | 0.1024  |
| rs4085404   | A | -0.022  |
| rs112072415 | A | -0.0355 |
| rs7951683   | A | 0.0232  |
| rs7105701   | A | 0.0192  |
| rs112398109 | C | -0.1369 |
| rs76517460  | A | 0.0639  |
| rs74052975  | C | 0.0361  |
| rs117885206 | G | 0.0693  |
| rs12285280  | T | -0.0496 |
| rs858710    | T | 0.033   |
| rs34180855  | G | 0.032   |
| rs138283790 | T | 0.079   |
| rs662733    | C | 0.0195  |
| rs10834438  | T | -0.0219 |
| rs10742171  | A | -0.0235 |
| rs11602155  | T | -0.0213 |
| rs1892942   | C | 0.0167  |
| rs111306546 | G | -0.0907 |
| rs11232515  | A | 0.034   |
| rs4753542   | C | 0.017   |
| rs139831408 | T | -0.1064 |
| rs112346370 | G | 0.1277  |
| rs79304658  | A | -0.0587 |
| rs145559883 | G | -0.082  |
| rs80329144  | C | 0.0812  |
| rs73000191  | G | 0.0871  |
| rs111927106 | A | 0.0324  |
| rs75087922  | A | -0.0685 |

|             |   |         |
|-------------|---|---------|
| rs149690835 | G | -0.0731 |
| rs12577704  | C | -0.041  |
| rs16908233  | G | -0.0984 |
| rs34419699  | A | -0.0222 |
| rs61898801  | G | 0.0216  |
| rs117790160 | T | 0.058   |
| rs141626671 | T | -0.1075 |
| rs7102974   | T | 0.0826  |
| rs12363857  | T | -0.0225 |
| rs71475941  | A | -0.0993 |
| rs147096633 | A | 0.1074  |
| rs11032239  | G | -0.0386 |
| rs72940459  | T | 0.0252  |
| rs10790289  | C | 0.0204  |
| rs77797162  | A | 0.0476  |
| rs56395100  | C | 0.0183  |
| rs61903059  | C | 0.0309  |
| rs112839394 | A | 0.0718  |
| rs521241    | T | 0.0457  |
| rs4301751   | A | 0.1051  |
| rs77767485  | C | -0.0327 |
| rs11223081  | T | 0.028   |
| rs554961    | C | -0.0189 |
| rs146464336 | C | 0.0952  |
| rs72880701  | T | 0.0864  |
| rs3026379   | G | 0.024   |
| rs79877417  | T | -0.0299 |
| rs117556701 | A | -0.0809 |
| rs73510677  | C | 0.118   |
| rs1784204   | A | -0.0501 |
| rs113405706 | C | -0.0594 |
| rs7129066   | A | 0.0217  |
| rs4272815   | C | 0.0193  |
| rs116968673 | A | -0.0577 |
| rs73006770  | A | -0.0653 |
| rs41268205  | A | 0.0546  |
| rs6589732   | A | -0.0181 |
| rs10892826  | G | 0.1195  |
| rs72904393  | T | -0.0908 |
| rs12807388  | A | 0.035   |
| rs75358433  | C | -0.047  |
| rs12274491  | C | 0.1189  |
| rs146581026 | G | -0.066  |
| rs117833085 | T | -0.0814 |
| rs72969219  | T | 0.0755  |
| rs11603033  | G | -0.0248 |
| rs7951505   | T | -0.0203 |

|             |   |         |
|-------------|---|---------|
| rs78669477  | C | 0.0662  |
| rs10835070  | C | 0.0256  |
| rs117376786 | A | 0.0681  |
| rs80164632  | A | -0.0534 |
| rs77065326  | A | -0.069  |
| rs35839157  | A | -0.0822 |
| rs10836626  | T | -0.0397 |
| rs79602083  | T | 0.0998  |
| rs34002809  | A | 0.0616  |
| rs140697153 | A | 0.1153  |
| rs11038084  | T | -0.0373 |
| rs2100059   | T | 0.019   |
| rs73028946  | C | 0.0769  |
| rs80168649  | G | -0.1311 |
| rs3802902   | C | 0.0187  |
| rs12575595  | T | 0.0359  |
| rs2468849   | C | 0.0301  |
| rs61917843  | C | -0.047  |
| rs76781887  | T | 0.057   |
| rs145910270 | A | -0.0387 |
| rs61888794  | C | 0.0367  |
| rs4757846   | C | -0.0179 |
| rs674857    | T | -0.0211 |
| rs74629634  | G | 0.1117  |
| rs112382545 | A | -0.0556 |
| rs12288048  | G | -0.0424 |
| rs59736862  | G | -0.0312 |
| rs76113217  | T | 0.0501  |
| rs12792130  | C | -0.0736 |
| rs34125958  | C | 0.1352  |
| rs72917777  | A | -0.0249 |
| rs3741399   | A | -0.0399 |
| rs72844737  | C | 0.0825  |
| rs140841207 | G | -0.0711 |
| rs11600880  | G | 0.0579  |
| rs61908265  | A | -0.0283 |
| rs143840904 | T | 0.0876  |
| rs347776    | G | 0.0284  |
| rs10128646  | G | 0.0219  |
| rs116844760 | A | -0.0643 |
| rs10750683  | C | 0.0165  |
| rs11023064  | C | -0.0169 |
| rs12223081  | G | 0.0358  |
| rs117388289 | T | -0.1491 |
| rs73633206  | A | -0.0887 |
| rs4622277   | C | -0.0299 |
| rs118157425 | G | -0.0912 |

|             |   |         |
|-------------|---|---------|
| rs2461676   | A | -0.0186 |
| rs517960    | C | -0.0197 |
| rs117065527 | G | -0.0497 |
| rs75247236  | A | 0.0942  |
| rs117915325 | C | 0.1247  |
| rs11219835  | A | 0.0276  |
| rs79264642  | G | 0.0517  |
| rs4312055   | A | -0.018  |
| rs75300728  | A | -0.0872 |
| rs1674839   | A | -0.0211 |
| rs486616    | C | 0.0302  |
| rs12786254  | C | 0.0814  |
| rs77952721  | T | 0.0883  |
| rs1219459   | T | -0.0172 |
| rs11227025  | A | 0.0452  |
| rs77899339  | A | 0.0793  |
| rs16928040  | T | -0.1199 |
| rs4757465   | G | -0.0213 |
| rs149265662 | A | 0.102   |
| rs118100176 | A | 0.0639  |
| rs117583883 | G | -0.1206 |
| rs73428479  | G | 0.0456  |
| rs139862712 | T | 0.0949  |
| rs2433417   | G | 0.0174  |
| rs1145223   | T | -0.0247 |
| rs61875748  | A | 0.0414  |
| rs117284601 | A | -0.0518 |
| rs11236645  | A | 0.0557  |
| rs483046    | G | -0.018  |
| rs79056503  | A | -0.0584 |
| rs28690716  | G | -0.0251 |
| rs116981891 | G | -0.0996 |
| rs117055731 | C | 0.0837  |
| rs117699377 | A | -0.0533 |
| rs67232843  | T | -0.0276 |
| rs61888782  | G | 0.0708  |
| rs1723846   | T | -0.0339 |
| rs11214393  | C | -0.0251 |
| rs2852817   | T | 0.0651  |
| rs17242300  | A | -0.1113 |
| rs80086566  | C | -0.1621 |
| rs7118839   | C | -0.0246 |
| rs73028171  | T | -0.0918 |
| rs11220894  | A | 0.0756  |
| rs117635195 | A | 0.088   |
| rs16936546  | A | 0.0806  |
| rs140660952 | T | -0.12   |

|             |   |         |
|-------------|---|---------|
| rs61893836  | G | 0.0712  |
| rs11218250  | C | 0.0172  |
| rs78782623  | T | -0.0346 |
| rs75509134  | A | -0.0407 |
| rs142727117 | G | 0.1105  |
| rs10833520  | C | 0.0223  |
| rs34546457  | C | -0.0795 |
| rs10898807  | G | 0.0323  |
| rs151242153 | A | -0.1037 |
| rs76987532  | T | 0.0869  |
| rs75136202  | T | -0.0805 |
| rs71489907  | T | 0.0314  |
| rs35921055  | A | 0.0727  |
| rs116952565 | A | -0.1018 |
| rs117705784 | A | 0.1143  |
| rs10742381  | G | 0.017   |
| rs61897792  | T | 0.0425  |
| rs3759046   | G | -0.02   |
| rs11607130  | C | -0.0794 |
| rs79372072  | A | 0.0667  |
| rs10908200  | A | -0.0231 |
| rs12284762  | G | 0.0235  |
| rs116890873 | A | 0.0632  |
| rs11235689  | T | 0.0188  |
| rs10831114  | C | 0.0418  |
| rs631191    | T | 0.0668  |
| rs76047256  | C | 0.076   |
| rs117553016 | A | -0.1061 |
| rs75298242  | C | 0.1368  |
| rs7103146   | G | -0.0175 |
| rs6589209   | A | 0.0164  |
| rs59830164  | G | 0.0441  |
| rs72963620  | G | 0.0229  |
| rs142207714 | C | 0.0763  |
| rs1387488   | G | -0.0321 |
| rs11038181  | G | 0.0222  |
| rs11217539  | T | -0.1287 |
| rs12279199  | C | 0.0261  |
| rs17505163  | C | 0.0994  |
| rs10501316  | T | -0.0225 |
| rs11233481  | A | 0.0241  |
| rs71486980  | A | -0.0715 |
| rs4587752   | T | 0.0178  |
| rs1042577   | T | -0.0179 |
| rs2852183   | T | -0.023  |
| rs141934613 | T | 0.0729  |
| rs4910130   | A | 0.049   |

|             |   |         |
|-------------|---|---------|
| rs1013651   | C | -0.0204 |
| rs78324081  | T | 0.1115  |
| rs61879839  | G | -0.0395 |
| rs16916055  | C | -0.0921 |
| rs10891805  | G | -0.038  |
| rs7111257   | A | 0.02    |
| rs151186304 | T | 0.0551  |
| rs79790658  | T | -0.1589 |
| rs77639882  | C | -0.0355 |
| rs11033293  | G | 0.0249  |
| rs9736939   | A | -0.028  |
| rs2851116   | A | -0.0183 |
| rs142615395 | C | 0.159   |
| rs1377114   | T | -0.0672 |
| rs72926701  | A | -0.1188 |
| rs66733929  | T | 0.0193  |
| rs75058072  | T | -0.0313 |
| rs7103008   | T | -0.0392 |
| rs1945839   | T | 0.0204  |
| rs76389035  | A | -0.0729 |
| rs113446091 | A | 0.0604  |
| rs907609    | T | 0.0279  |
| rs139209349 | T | 0.1086  |
| rs117568902 | A | 0.1231  |
| rs10893121  | T | 0.0204  |
| rs117483183 | T | 0.0883  |
| rs77412627  | C | 0.0585  |
| rs605260    | C | -0.0229 |
| rs148822556 | T | 0.0621  |
| rs17608451  | A | -0.025  |
| rs71481912  | A | 0.0638  |
| rs72945112  | T | -0.0325 |
| rs2508678   | T | -0.0172 |
| rs61897153  | T | 0.0721  |
| rs3741122   | T | -0.0181 |
| rs1842921   | A | -0.0168 |
| rs718919    | A | -0.0239 |
| rs1457320   | T | -0.0193 |
| rs11236947  | C | -0.0526 |
| rs529911    | G | 0.0231  |
| rs117543587 | T | -0.0648 |
| rs10891864  | G | 0.0197  |
| rs11025977  | C | 0.024   |
| rs507745    | T | -0.0697 |
| rs7945677   | T | 0.0178  |
| rs10894376  | C | -0.0178 |
| rs1026345   | C | 0.0198  |



|             |   |         |
|-------------|---|---------|
| rs4143441   | C | 0.0194  |
| rs75985072  | C | -0.0696 |
| rs7942858   | A | 0.0201  |
| rs3740890   | T | 0.0198  |
| rs12146674  | T | -0.0837 |
| rs57257053  | A | 0.0279  |
| rs116906210 | T | -0.0501 |
| rs12806885  | T | 0.0219  |
| rs16928055  | C | 0.028   |
| rs149195525 | A | -0.1237 |
| rs482815    | A | -0.0456 |
| rs79627508  | G | 0.1182  |
| rs79349957  | C | -0.0947 |
| rs117156550 | A | 0.1012  |
| rs150792202 | A | -0.0515 |
| rs7126242   | A | -0.0484 |
| rs1351639   | A | 0.0166  |
| rs10830892  | T | 0.0305  |
| rs73015224  | C | 0.0571  |
| rs3812760   | T | -0.0184 |
| rs35408731  | C | -0.0169 |
| rs117883320 | A | 0.0503  |
| rs35841799  | T | 0.0393  |
| rs11827363  | T | -0.0169 |
| rs1144924   | T | 0.0225  |
| rs55822685  | C | 0.023   |
| rs72977876  | T | -0.094  |
| rs112117396 | T | -0.0392 |
| rs1297353   | A | 0.0222  |
| rs79044879  | G | -0.0812 |
| rs12291774  | A | 0.101   |
| rs1446197   | T | 0.0961  |
| rs9666962   | G | 0.0278  |
| rs10893893  | T | 0.0404  |
| rs12808132  | T | -0.029  |
| rs61884337  | T | -0.0476 |
| rs34271604  | T | 0.0407  |
| rs142117894 | A | -0.0283 |
| rs149776031 | T | -0.0922 |
| rs35543671  | G | 0.0708  |
| rs113867958 | T | -0.1024 |
| rs13447680  | C | -0.0714 |
| rs10840596  | C | -0.0291 |
| rs11022212  | C | 0.0353  |
| rs3136538   | A | 0.0252  |
| rs118125324 | A | -0.1014 |
| rs79778855  | G | 0.0415  |

|             |   |         |
|-------------|---|---------|
| rs4337016   | T | 0.0273  |
| rs12795264  | C | 0.0491  |
| rs72952671  | T | 0.1337  |
| rs2512483   | T | 0.0211  |
| rs584715    | A | -0.0181 |
| rs78091106  | G | -0.0736 |
| rs142787711 | G | -0.1398 |
| rs904551    | A | -0.0205 |
| rs111648564 | A | -0.0424 |
| rs117295955 | T | 0.065   |
| rs12271783  | T | 0.0427  |
| rs146704570 | A | -0.067  |
| rs476702    | C | 0.0259  |
| rs12803395  | T | 0.0199  |
| rs1106305   | T | 0.0488  |
| rs7483056   | G | -0.0204 |
| rs75338262  | T | -0.0958 |
| rs117548548 | A | 0.0697  |
| rs72972967  | C | -0.0557 |
| rs118118478 | T | -0.0298 |
| rs35987532  | T | -0.0656 |
| rs61884100  | G | 0.0332  |
| rs74238636  | T | 0.1013  |
| rs138269720 | C | -0.1149 |
| rs77605594  | T | 0.0519  |
| rs72889006  | T | -0.0516 |
| rs7102214   | A | -0.039  |
| rs4479000   | A | 0.1237  |
| rs75095289  | C | 0.0692  |
| rs61888516  | A | -0.0208 |
| rs12222935  | T | 0.0577  |
| rs2659615   | T | -0.0216 |
| rs7932160   | C | 0.0197  |
| rs477756    | C | 0.018   |
| rs73451401  | T | -0.0578 |
| rs79338889  | A | -0.0568 |
| rs34037274  | G | -0.0526 |
| rs61754772  | C | 0.0574  |
| rs145864091 | A | 0.0741  |
| rs4936818   | T | 0.0579  |
| rs10741557  | A | -0.0269 |
| rs10832711  | C | -0.0428 |
| rs35180589  | G | -0.0861 |
| rs75345748  | A | 0.032   |
| rs61896861  | A | -0.0861 |
| rs35714133  | T | -0.0371 |
| rs12802248  | C | -0.1002 |

|             |   |         |
|-------------|---|---------|
| rs10893932  | A | -0.022  |
| rs34670930  | C | -0.0821 |
| rs117704709 | T | -0.1326 |
| rs4988332   | T | 0.0862  |
| rs117248270 | A | -0.0599 |
| rs7926246   | T | -0.101  |
| rs2511842   | T | 0.1057  |
| rs77060567  | G | -0.0682 |
| rs11218038  | G | -0.023  |
| rs7109479   | G | -0.0396 |
| rs548046    | T | 0.0264  |
| rs16917237  | T | 0.0199  |
| rs7483929   | A | -0.0727 |
| rs36074402  | A | 0.0931  |
| rs540218    | A | -0.0232 |
| rs2513552   | G | -0.0192 |
| rs341064    | T | -0.028  |
| rs28381700  | T | -0.0738 |
| rs12287206  | T | 0.0357  |
| rs7936972   | C | -0.0343 |
| rs7938642   | C | -0.0245 |
| rs11028817  | G | 0.0214  |
| rs139348385 | T | 0.0602  |
| rs150589800 | T | 0.0949  |
| rs16906014  | T | 0.0499  |
| rs73525918  | T | 0.0786  |
| rs115549946 | A | -0.0884 |
| rs72997915  | A | -0.0669 |
| rs118047890 | A | 0.1473  |
| rs10770119  | G | -0.0165 |
| rs7934816   | G | -0.0743 |
| rs4122113   | A | 0.0709  |
| rs12794889  | A | 0.0242  |
| rs12799550  | T | 0.0664  |
| rs684102    | C | 0.0412  |
| rs4963159   | T | 0.0414  |
| rs7105094   | C | -0.019  |
| rs79894629  | C | -0.0436 |
| rs36095709  | A | 0.0528  |
| rs12804855  | G | 0.0286  |
| rs118046415 | T | -0.0761 |
| rs78832401  | T | -0.0571 |
| rs139964682 | A | 0.0865  |
| rs906824    | T | 0.0169  |
| rs676172    | A | 0.0291  |
| rs7106072   | G | -0.0251 |
| rs139116943 | C | 0.0648  |

|             |   |         |
|-------------|---|---------|
| rs117192267 | G | -0.0444 |
| rs76730063  | A | 0.0808  |
| rs11224349  | A | 0.0972  |
| rs34360926  | C | 0.0174  |
| rs56048736  | T | -0.0757 |
| rs1027712   | T | 0.0269  |
| rs71488428  | T | 0.0729  |
| rs56101844  | A | -0.0335 |
| rs2030095   | T | -0.0182 |
| rs61885477  | T | -0.0355 |
| rs72985262  | A | 0.0433  |
| rs66529968  | T | 0.0274  |
| rs111961631 | A | 0.0618  |
| rs146929030 | A | 0.0424  |
| rs1390680   | G | 0.0566  |
| rs7109758   | C | 0.0163  |
| rs10160598  | A | 0.0718  |
| rs11608158  | G | -0.0343 |
| rs116953085 | T | 0.0581  |
| rs685564    | C | 0.0198  |
| rs73005704  | G | -0.1269 |
| rs73406163  | G | -0.0954 |
| rs10831663  | C | 0.0171  |
| rs7929409   | A | 0.0223  |
| rs11214446  | C | 0.1135  |
| rs4938616   | T | 0.0165  |
| rs10832063  | C | 0.0216  |
| rs79050076  | C | 0.1044  |
| rs12276422  | C | 0.0495  |
| rs7931575   | A | 0.0294  |
| rs505350    | G | 0.0255  |
| rs10741954  | A | -0.0264 |
| rs4589296   | G | 0.0172  |
| rs11232573  | G | 0.0194  |
| rs143671198 | T | 0.1007  |
| rs640095    | A | -0.0275 |
| rs10750573  | A | 0.032   |
| rs113809168 | A | -0.0346 |
| rs11033958  | T | 0.0221  |
| rs11225324  | T | 0.0337  |
| rs117089927 | T | -0.0591 |
| rs76888577  | T | 0.1     |
| rs111430811 | G | -0.069  |
| rs77481023  | T | -0.0316 |
| rs60573180  | T | -0.0187 |
| rs73556464  | A | 0.0857  |
| rs77414189  | C | 0.0865  |

|             |   |         |
|-------------|---|---------|
| rs682254    | T | -0.0173 |
| rs11023629  | A | 0.092   |
| rs58810621  | T | 0.022   |
| rs80125553  | A | -0.0283 |
| rs899115    | G | 0.0273  |
| rs78431815  | C | 0.0817  |
| rs11223144  | T | 0.0507  |
| rs11246048  | T | -0.0224 |
| rs61885767  | T | -0.0903 |
| rs61876267  | A | -0.0642 |
| rs7117426   | T | 0.0653  |
| rs12275909  | T | -0.0721 |
| rs78142580  | T | 0.0774  |
| rs171271    | A | -0.0166 |
| rs77778909  | C | -0.1081 |
| rs473818    | A | 0.0193  |
| rs7937180   | A | -0.016  |
| rs117633361 | C | 0.0601  |
| rs11229550  | C | -0.1239 |
| rs10734398  | T | 0.0176  |
| rs2847485   | A | -0.0162 |
| rs78399207  | T | -0.1314 |
| rs11022385  | C | 0.0181  |
| rs80021234  | G | -0.0972 |
| rs61898345  | C | -0.0231 |
| rs74770106  | C | -0.0373 |
| rs17147354  | C | 0.037   |
| rs111712151 | T | 0.0698  |
| rs750271    | T | 0.0316  |
| rs2214286   | C | -0.0182 |
| rs55647653  | G | -0.0212 |
| rs16917685  | G | -0.0706 |
| rs145072618 | C | 0.0839  |
| rs117428458 | A | -0.1003 |
| rs74842303  | G | 0.0765  |
| rs147049750 | C | 0.0474  |
| rs115828669 | C | 0.1066  |
| rs2605579   | T | -0.0162 |
| rs1630553   | T | -0.0191 |
| rs1017275   | T | -0.0279 |
| rs118124325 | A | -0.1606 |
| rs79936733  | T | 0.048   |
| rs113505924 | T | 0.1142  |
| rs75534190  | G | -0.0462 |
| rs79994524  | C | -0.0999 |
| rs75509368  | C | 0.091   |
| rs12221866  | T | 0.062   |

|             |   |         |
|-------------|---|---------|
| rs1125206   | C | -0.0159 |
| rs144680066 | G | 0.1111  |
| rs72941612  | T | -0.0967 |
| rs662233    | T | -0.0169 |
| rs118161436 | C | 0.0872  |
| rs1006718   | T | 0.0239  |
| rs117023976 | T | 0.0923  |
| rs2001625   | T | 0.0187  |
| rs73410935  | T | 0.0704  |
| rs441613    | T | 0.0175  |
| rs11033682  | G | -0.0463 |
| rs79579192  | G | 0.0509  |
| rs111823021 | C | -0.0491 |
| rs61902188  | C | -0.1177 |
| rs56797102  | G | -0.0614 |
| rs72854309  | T | 0.0945  |
| rs34061353  | T | 0.0725  |
| rs1681464   | A | 0.0165  |
| rs1970738   | C | -0.0163 |
| rs74512832  | T | -0.0305 |
| rs12364918  | A | 0.0185  |
| rs71482300  | G | 0.0709  |
| rs11224137  | T | -0.0273 |
| rs4929981   | A | 0.0286  |
| rs4910294   | G | 0.0242  |
| rs78733282  | G | -0.098  |
| rs1426845   | G | 0.0574  |
| rs145428038 | G | 0.0715  |
| rs75231206  | C | 0.1291  |
| rs45519931  | A | -0.1347 |
| rs231899    | G | -0.018  |
| rs1881717   | A | 0.0282  |
| rs117096041 | C | -0.1224 |
| rs34176135  | A | 0.0174  |
| rs143387685 | G | -0.0475 |
| rs78425446  | G | 0.0501  |
| rs11230658  | T | 0.1349  |
| rs36013257  | A | 0.0422  |
| rs146138592 | G | -0.0739 |
| rs35850577  | T | 0.082   |
| rs78768620  | T | 0.1529  |
| rs468153    | G | -0.0295 |
| rs117002418 | C | 0.0571  |
| rs116890565 | A | 0.0983  |
| rs10895977  | A | -0.0317 |
| rs1447465   | G | 0.0164  |
| rs11217803  | A | -0.0454 |

|             |   |         |
|-------------|---|---------|
| rs890145    | T | 0.0333  |
| rs59251082  | C | 0.1391  |
| rs1231600   | T | 0.0578  |
| rs588808    | G | 0.0165  |
| rs34356287  | G | -0.0234 |
| rs7104324   | T | -0.0176 |
| rs1789377   | A | 0.0197  |
| rs751974    | G | -0.021  |
| rs118000541 | G | -0.1379 |
| rs16911558  | G | -0.0512 |
| rs77959253  | C | 0.1462  |
| rs151098793 | T | -0.0604 |
| rs11237626  | T | 0.0384  |
| rs78278994  | T | -0.028  |
| rs7106832   | A | 0.0415  |
| rs141509642 | G | -0.1198 |
| rs10501671  | G | 0.0327  |
| rs117319035 | A | 0.0737  |
| rs7342242   | C | 0.019   |
| rs17463794  | A | 0.0624  |
| rs113795980 | T | 0.075   |
| rs11037256  | T | -0.0169 |
| rs11230906  | A | -0.0188 |
| rs3781683   | A | -0.0204 |
| rs11234641  | T | 0.0185  |
| rs55787521  | T | 0.075   |
| rs7115727   | G | 0.0193  |
| rs17577608  | T | 0.0498  |
| rs10899201  | T | -0.0209 |
| rs79390313  | A | 0.1019  |
| rs1783673   | T | 0.1465  |
| rs75780250  | T | -0.0468 |
| rs118129662 | A | 0.0883  |
| rs34834193  | A | 0.0392  |
| rs909168    | T | 0.017   |
| rs35408135  | A | 0.0989  |
| rs6590788   | G | 0.0524  |
| rs73009091  | C | 0.0571  |
| rs144159369 | C | -0.0828 |
| rs640070    | C | -0.07   |
| rs10832911  | G | -0.0221 |
| rs4438046   | G | -0.0177 |
| rs118121010 | T | -0.0876 |
| rs60584339  | G | 0.1099  |
| rs11224459  | T | -0.0221 |
| rs117780284 | T | -0.1106 |
| rs17822155  | T | -0.0876 |

|             |   |         |
|-------------|---|---------|
| rs646513    | G | 0.0178  |
| rs78613190  | G | 0.0262  |
| rs17725930  | C | 0.0185  |
| rs141769277 | G | 0.0793  |
| rs10768160  | T | 0.0163  |
| rs1483400   | T | 0.0486  |
| rs740006    | C | -0.0353 |
| rs9651736   | C | 0.0294  |
| rs79374818  | A | -0.0862 |
| rs143040780 | G | -0.0918 |
| rs7113568   | T | -0.0755 |
| rs111630990 | G | 0.0707  |
| rs61867597  | A | -0.0673 |
| rs4370937   | T | -0.0196 |
| rs35664907  | G | 0.0279  |
| rs10898827  | A | 0.0238  |
| rs72852402  | C | -0.0214 |
| rs35571160  | C | -0.0414 |
| rs2510948   | G | 0.0169  |
| rs3852528   | G | 0.0404  |
| rs12278428  | A | -0.023  |
| rs117592720 | C | -0.0721 |
| rs74456974  | A | 0.0367  |
| rs7114176   | T | 0.0189  |
| rs17808749  | C | 0.0477  |
| rs148015410 | G | -0.1357 |
| rs146483938 | G | 0.0508  |
| rs35859077  | A | -0.0286 |
| rs113968937 | G | -0.1055 |
| rs142844925 | G | 0.1052  |
| rs116977016 | T | 0.0727  |
| rs116923136 | T | 0.0637  |
| rs12283830  | T | -0.0288 |
| rs149090782 | T | 0.1075  |
| rs78849178  | T | 0.0789  |
| rs7112550   | A | -0.0196 |
| rs116896039 | C | 0.0349  |
| rs12574682  | C | 0.0496  |
| rs78923422  | G | 0.0772  |
| rs78271736  | A | 0.0589  |
| rs34391693  | T | -0.0466 |
| rs2278845   | G | 0.0237  |
| rs76488039  | A | -0.0778 |
| rs149992523 | G | 0.0711  |
| rs7929943   | T | 0.0251  |
| rs150866727 | A | -0.0876 |
| rs11217304  | T | -0.0283 |



|             |   |         |
|-------------|---|---------|
| rs7128927   | A | -0.0739 |
| rs12272738  | C | 0.0257  |
| rs11237658  | C | -0.0202 |
| rs138598673 | T | -0.0227 |
| rs117936904 | T | 0.0637  |
| rs74805852  | C | -0.0301 |
| rs641392    | T | 0.0355  |
| rs7939415   | T | 0.0376  |
| rs78021764  | C | -0.058  |
| rs11233756  | C | 0.04    |
| rs118114177 | A | -0.0727 |
| rs1240660   | A | -0.0196 |
| rs11605749  | G | -0.021  |
| rs78677031  | T | 0.0668  |
| rs79066571  | A | -0.0692 |
| rs140632358 | A | -0.0821 |
| rs117779452 | C | -0.1021 |
| rs10793382  | C | -0.019  |
| rs10892548  | A | 0.0192  |
| rs61902184  | T | 0.0258  |
| rs1938770   | C | 0.0561  |
| rs3019776   | A | 0.0502  |
| rs11022338  | T | 0.08    |
| rs11600430  | G | -0.0197 |
| rs58210741  | G | -0.017  |
| rs11032572  | T | 0.0233  |
| rs56396869  | A | -0.035  |
| rs1648356   | C | 0.0287  |
| rs117220557 | C | -0.0596 |
| rs331485    | A | -0.0255 |
| rs12292966  | G | -0.0306 |
| rs4503512   | T | -0.0163 |
| rs145542878 | G | 0.0872  |
| rs2165662   | G | -0.0164 |
| rs11216566  | G | -0.0185 |
| rs61907924  | A | 0.0596  |
| rs530740    | A | -0.0239 |
| rs116992148 | G | -0.0898 |
| rs117610243 | A | -0.0656 |
| rs2631437   | G | -0.0162 |
| rs61909568  | C | -0.0927 |
| rs1290815   | A | 0.0324  |
| rs75314697  | G | 0.1018  |
| rs146687301 | T | 0.0877  |
| rs10835093  | T | 0.0309  |
| rs12577784  | G | 0.022   |
| rs117689213 | T | 0.1351  |

|             |   |         |
|-------------|---|---------|
| rs117216310 | A | -0.0567 |
| rs12796170  | A | -0.0482 |
| rs118050016 | A | -0.0771 |
| rs7109394   | T | -0.0197 |
| rs11037690  | A | 0.0165  |
| rs76778918  | T | 0.0688  |
| rs1531449   | G | -0.0224 |
| rs73012189  | A | 0.0873  |
| rs11237157  | A | 0.0264  |
| rs35188314  | A | 0.0558  |
| rs141772901 | A | 0.0492  |
| rs148692115 | A | -0.1306 |
| rs68176586  | T | -0.0327 |
| rs116904057 | C | -0.1304 |
| rs79109704  | G | -0.074  |
| rs1502276   | A | 0.0206  |
| rs12289682  | C | -0.0307 |
| rs12785545  | C | -0.045  |
| rs6590109   | G | 0.017   |
| rs4237677   | C | -0.02   |
| rs76501819  | A | 0.0433  |
| rs4245129   | A | -0.0326 |
| rs75608237  | G | 0.05    |
| rs55972551  | G | 0.023   |
| rs115649540 | T | 0.046   |
| rs10837343  | A | -0.0349 |
| rs1961578   | C | 0.0694  |
| rs10769858  | C | 0.0178  |
| rs61669782  | C | 0.0489  |
| rs7114184   | A | -0.0261 |
| rs11825935  | C | 0.0224  |
| rs117912008 | G | -0.1005 |
| rs77947017  | T | -0.0549 |
| rs10734222  | A | -0.0189 |
| rs2283170   | G | 0.0269  |
| rs1389346   | G | -0.0155 |
| rs76695592  | T | -0.1581 |
| rs840717    | C | 0.0175  |
| rs118081158 | G | 0.0928  |
| rs72928753  | T | -0.0966 |
| rs143116232 | A | -0.1344 |
| rs73598666  | T | 0.0416  |
| rs12803018  | G | 0.0329  |
| rs78414122  | T | -0.0687 |
| rs35904890  | T | 0.0678  |
| rs11022402  | A | -0.0271 |
| rs610966    | A | 0.0177  |

|             |   |         |
|-------------|---|---------|
| rs73516967  | T | -0.0428 |
| rs75147225  | T | -0.0794 |
| rs58136124  | G | -0.0158 |
| rs73017874  | T | 0.0456  |
| rs11221083  | T | -0.0234 |
| rs11038227  | C | 0.0523  |
| rs10834489  | T | -0.0174 |
| rs77797605  | A | 0.0704  |
| rs473394    | A | 0.0706  |
| rs6485511   | T | -0.0988 |
| rs75560388  | A | -0.0633 |
| rs1939536   | C | -0.0894 |
| rs73003075  | A | 0.0279  |
| rs142574442 | T | -0.1127 |
| rs6578880   | C | -0.0184 |
| rs75362892  | T | 0.0569  |
| rs148058401 | A | 0.0992  |
| rs17140784  | T | 0.0997  |
| rs117441822 | C | -0.1013 |
| rs592190    | A | -0.0159 |
| rs80244757  | A | -0.0223 |
| rs79713903  | T | -0.0658 |
| rs11025040  | C | 0.0236  |
| rs140120157 | T | -0.0651 |
| rs2924694   | C | -0.0223 |
| rs596171    | T | 0.0628  |
| rs74529420  | C | -0.0338 |
| rs68177612  | C | 0.0611  |
| rs11605294  | T | 0.0803  |
| rs78277055  | T | -0.041  |
| rs79563032  | A | 0.0482  |
| rs67413817  | A | -0.0452 |
| rs61878835  | G | 0.0417  |
| rs10793028  | C | 0.0177  |
| rs7121808   | A | 0.0856  |
| rs3776962   | A | -0.1008 |
| rs146971732 | C | 0.0751  |
| rs117541425 | C | -0.0399 |
| rs117796564 | G | 0.1018  |
| rs61904857  | C | 0.1366  |
| rs12788624  | T | 0.0317  |
| rs1841819   | T | 0.0204  |
| rs72945669  | C | 0.0284  |
| rs12272552  | A | 0.0241  |
| rs17405661  | T | 0.0269  |
| rs146170306 | T | 0.0667  |
| rs308343    | T | 0.0235  |

|             |   |         |
|-------------|---|---------|
| rs3794176   | T | -0.0203 |
| rs74498740  | T | -0.0484 |
| rs2155138   | T | 0.0459  |
| rs138262745 | G | 0.0615  |
| rs17703233  | C | -0.0304 |
| rs142870061 | A | -0.095  |
| rs353619    | A | -0.0185 |
| rs2622432   | G | -0.0314 |
| rs145383300 | T | 0.0863  |
| rs4935982   | C | 0.0158  |
| rs78582585  | T | 0.0601  |
| rs73518807  | C | 0.0184  |
| rs2729888   | G | 0.0168  |
| rs79684630  | C | 0.0332  |
| rs72981746  | T | -0.129  |
| rs74873512  | C | -0.0918 |
| rs10500882  | A | 0.0171  |
| rs118132858 | A | 0.0793  |
| rs12416948  | C | 0.0177  |
| rs75980958  | T | -0.0311 |
| rs680900    | A | -0.0254 |
| rs11606942  | G | -0.0283 |
| rs903212    | A | -0.0545 |
| rs36075284  | T | -0.0322 |
| rs12805294  | T | 0.0269  |
| rs75386899  | T | 0.0998  |
| rs79996587  | T | 0.0284  |
| rs147450405 | A | 0.101   |
| rs7926008   | C | 0.0205  |
| rs76450704  | C | -0.0562 |
| rs140346759 | A | 0.0907  |
| rs12787443  | G | -0.0303 |
| rs71475125  | T | 0.0647  |
| rs17500380  | C | -0.0384 |
| rs75875278  | A | 0.111   |
| rs78206388  | C | -0.0269 |
| rs7924357   | A | -0.0371 |
| rs148066866 | A | 0.1252  |
| rs60098285  | G | -0.0168 |
| rs1502985   | A | 0.0779  |
| rs140444798 | C | -0.0512 |
| rs112660184 | T | 0.0611  |
| rs117505007 | T | 0.1039  |
| rs76194871  | A | -0.0757 |
| rs142071106 | C | -0.0888 |
| rs114337026 | A | 0.0427  |
| rs117722667 | C | 0.0531  |

|             |   |         |
|-------------|---|---------|
| rs76176349  | T | -0.1026 |
| rs77893104  | T | -0.1643 |
| rs141013495 | T | 0.0419  |
| rs568769    | C | -0.0262 |
| rs113014013 | G | 0.0515  |
| rs1815890   | T | 0.0257  |
| rs151219    | T | 0.0194  |
| rs11041354  | C | 0.0367  |
| rs72910027  | C | -0.0229 |
| rs1038724   | A | -0.0168 |
| rs2411767   | C | 0.0325  |
| rs74346547  | A | 0.0748  |
| rs4579919   | T | -0.0185 |
| rs77343637  | A | 0.0651  |
| rs756926    | T | -0.0355 |
| rs10838312  | A | 0.0183  |
| rs137881640 | A | -0.0715 |
| rs112786765 | A | 0.0708  |
| rs7939779   | A | -0.0252 |
| rs73415946  | G | 0.0496  |
| rs4285907   | A | -0.029  |
| rs77203604  | A | -0.029  |
| rs76454170  | T | 0.0801  |
| rs74707770  | T | 0.1096  |
| rs146453114 | C | 0.1076  |
| rs72956000  | A | 0.0316  |
| rs75962665  | G | -0.052  |
| rs61899204  | C | 0.0891  |
| rs12271074  | G | 0.1198  |
| rs1487128   | C | 0.0172  |
| rs67485448  | G | 0.0204  |
| rs10898222  | C | -0.0176 |
| rs74365834  | C | -0.0597 |
| rs117153693 | C | -0.0949 |
| rs2232914   | C | -0.1159 |
| rs1944147   | G | -0.0173 |
| rs12421645  | T | 0.0407  |
| rs55661779  | A | 0.0155  |
| rs149140261 | C | 0.1197  |
| rs113937651 | T | 0.1123  |
| rs7115862   | A | -0.0411 |
| rs2018049   | G | -0.0217 |
| rs75676373  | G | -0.0955 |
| rs76382465  | G | -0.0633 |
| rs61892164  | C | 0.0193  |
| rs11211822  | C | -0.0161 |
| rs73580058  | C | 0.0977  |

|             |   |         |
|-------------|---|---------|
| rs77944184  | A | -0.0572 |
| rs7118693   | T | 0.0265  |
| rs7931178   | A | 0.0226  |
| rs113298336 | T | -0.0314 |
| rs3020103   | G | 0.0183  |
| rs12364944  | A | 0.0248  |
| rs7126485   | A | 0.0155  |
| rs7127451   | G | 0.0194  |
| rs139945292 | T | 0.0336  |
| rs79674371  | G | 0.0399  |
| rs139751257 | G | 0.0853  |
| rs11603007  | T | 0.0351  |
| rs4480556   | G | 0.0269  |
| rs76164081  | C | -0.0328 |
| rs77133751  | A | 0.0547  |
| rs143224722 | A | 0.068   |
| rs11042751  | C | -0.0234 |
| rs9804623   | G | 0.0186  |
| rs145683548 | A | 0.09    |
| rs10892624  | A | 0.025   |
| rs11034855  | T | 0.0215  |
| rs139990768 | T | -0.0693 |
| rs79842912  | T | -0.0974 |
| rs71479194  | G | 0.1222  |
| rs72930190  | T | 0.0339  |
| rs61894552  | A | -0.1063 |
| rs6590793   | A | -0.0158 |
| rs35705701  | A | -0.0681 |
| rs693245    | T | 0.0237  |
| rs1077812   | G | 0.0398  |
| rs111747030 | A | 0.0968  |
| rs150381847 | T | 0.0888  |
| rs11821721  | A | -0.0181 |
| rs117299784 | A | 0.105   |
| rs151284092 | C | -0.0716 |
| rs11230749  | T | -0.0241 |
| rs80137430  | T | -0.0268 |
| rs17881703  | A | 0.0721  |
| rs17758715  | T | 0.0883  |
| rs142943115 | T | -0.1232 |
| rs728648    | C | -0.0179 |
| rs2049621   | G | 0.0311  |
| rs7121743   | C | -0.0213 |
| rs142422309 | A | 0.1032  |
| rs77862266  | T | 0.0357  |
| rs7941205   | A | -0.0165 |
| rs139555931 | G | 0.0696  |

|             |   |         |
|-------------|---|---------|
| rs80352151  | C | 0.0884  |
| rs61879028  | T | 0.0199  |
| rs58389397  | G | -0.0577 |
| rs61887067  | A | 0.0192  |
| rs140483411 | C | -0.0518 |
| rs11246002  | A | 0.0394  |
| rs72557994  | C | 0.0887  |
| rs10899630  | A | -0.0287 |
| rs12799386  | C | -0.0287 |
| rs34017912  | T | -0.0393 |
| rs11022586  | T | -0.0374 |
| rs80341393  | T | 0.0691  |
| rs148856633 | G | -0.0809 |
| rs117398989 | T | -0.1277 |
| rs35917606  | T | -0.0713 |
| rs117791420 | A | 0.0911  |
| rs11212827  | G | 0.0183  |
| rs532150    | C | 0.0167  |
| rs78629921  | T | -0.0476 |
| rs73454605  | G | 0.0248  |
| rs35039974  | T | -0.0204 |
| rs78736654  | G | 0.1011  |
| rs16915167  | G | 0.0661  |
| rs78214132  | C | -0.0287 |
| rs77882974  | C | -0.0998 |
| rs61871200  | T | 0.016   |
| rs117377975 | C | 0.0616  |
| rs117434119 | T | -0.0682 |
| rs72993256  | C | -0.0272 |
| rs214086    | C | 0.016   |
| rs117482735 | A | -0.0959 |
| rs658888    | G | -0.0691 |
| rs7109965   | A | 0.0639  |
| rs74614290  | A | -0.0498 |
| rs16916714  | C | -0.077  |
| rs2848633   | T | -0.0152 |
| rs35736088  | T | -0.0944 |
| rs147990576 | A | 0.0933  |
| rs4627106   | G | -0.0185 |
| rs35653277  | A | -0.103  |
| rs60689637  | A | -0.0964 |
| rs11529412  | A | 0.023   |
| rs148713216 | T | -0.0883 |
| rs147907238 | A | -0.0647 |
| rs7928580   | C | 0.0411  |
| rs149124416 | A | 0.0803  |
| rs725925    | A | -0.0178 |

|             |   |         |
|-------------|---|---------|
| rs2521572   | T | 0.043   |
| rs6590458   | C | 0.0586  |
| rs72868797  | G | -0.0526 |
| rs2005459   | G | 0.045   |
| rs77864975  | G | -0.0888 |
| rs139867268 | T | -0.0816 |
| rs7130551   | A | 0.0275  |
| rs28720266  | C | 0.109   |
| rs3181327   | A | -0.03   |
| rs56172398  | T | 0.021   |
| rs117522951 | T | 0.1101  |
| rs72982879  | A | -0.1374 |
| rs71468372  | G | 0.0488  |
| rs11223357  | G | 0.0257  |
| rs150626634 | C | 0.0583  |
| rs115598916 | C | -0.044  |
| rs117236352 | A | -0.0534 |
| rs72939553  | C | 0.0477  |
| rs3781881   | G | 0.0176  |
| rs10831728  | T | 0.0482  |
| rs78205895  | C | 0.0574  |
| rs61908088  | G | -0.0813 |
| rs7106815   | C | 0.0207  |
| rs80089401  | A | 0.0578  |
| rs77758327  | G | 0.0939  |
| rs145964377 | T | -0.0588 |
| rs73018093  | G | 0.0828  |
| rs146987046 | T | -0.0655 |
| rs61903708  | G | -0.0227 |
| rs73000741  | A | -0.0537 |
| rs75328993  | A | 0.0841  |
| rs116851741 | T | 0.0712  |
| rs1010716   | A | 0.0823  |
| rs143793912 | T | 0.0819  |
| rs113724481 | T | -0.098  |
| rs7130671   | T | 0.0165  |
| rs12288210  | C | -0.0322 |
| rs11229049  | A | 0.0521  |
| rs12360845  | C | -0.0162 |
| rs148502789 | A | 0.0919  |
| rs11217528  | C | -0.0176 |
| rs11024356  | G | 0.0187  |
| rs949222    | A | -0.0176 |
| rs3902912   | C | -0.0199 |
| rs45506896  | A | 0.0446  |
| rs7948291   | C | 0.0496  |
| rs13377284  | A | 0.0654  |



|             |   |         |
|-------------|---|---------|
| rs117439605 | C | -0.1214 |
| rs117830244 | A | 0.0459  |
| rs10832710  | T | -0.016  |
| rs76590734  | C | -0.0558 |
| rs4754875   | T | 0.018   |
| rs150994710 | G | -0.0698 |
| rs141553693 | T | -0.0682 |
| rs76980607  | T | 0.0793  |
| rs17298656  | T | 0.0601  |
| rs12285344  | A | 0.0211  |
| rs72899681  | G | 0.0534  |
| rs78825663  | G | -0.0409 |
| rs1520910   | G | 0.0177  |
| rs117600371 | A | 0.0768  |
| rs56287450  | C | 0.0498  |
| rs147593751 | C | -0.1362 |
| rs12808517  | T | -0.0188 |
| rs492248    | T | 0.0165  |
| rs117554112 | A | -0.0907 |
| rs12285808  | C | 0.0213  |
| rs148841856 | A | -0.0606 |
| rs12363522  | A | 0.0366  |
| rs10890563  | T | 0.0294  |
| rs150294367 | C | -0.0275 |
| rs1386329   | G | 0.0211  |
| rs11218597  | C | 0.0159  |
| rs3741043   | A | -0.0379 |
| rs356245    | A | 0.0242  |
| rs76274312  | A | 0.0874  |
| rs143132183 | T | -0.0708 |
| rs117215048 | T | -0.1092 |
| rs2513526   | G | 0.0203  |
| rs17307215  | T | -0.0333 |
| rs7108072   | T | -0.0186 |
| rs6484569   | T | 0.0164  |
| rs145600616 | T | 0.1233  |
| rs7930145   | A | -0.0213 |
| rs117886403 | C | -0.0568 |
| rs145077406 | T | -0.0617 |
| rs61317300  | G | 0.0959  |
| rs12800533  | A | -0.0154 |
| rs113809260 | A | -0.0364 |
| rs149100878 | C | -0.0978 |
| rs1471757   | A | 0.0192  |
| rs79237885  | T | -0.0477 |
| rs35206616  | T | -0.0165 |
| rs1320349   | A | 0.018   |

|             |   |         |
|-------------|---|---------|
| rs148226690 | C | -0.0638 |
| rs74962221  | C | -0.0871 |
| rs61908733  | T | 0.0474  |
| rs7935946   | T | -0.0394 |
| rs11217648  | G | -0.0201 |
| rs4128665   | T | 0.0179  |
| rs2106465   | T | -0.0157 |
| rs73031356  | C | -0.0615 |
| rs80121021  | T | 0.1082  |
| rs75220080  | A | -0.0498 |
| rs75903070  | G | 0.1091  |
| rs118128242 | C | 0.0873  |
| rs12361913  | T | 0.0222  |
| rs61919164  | A | 0.0335  |
| rs12419366  | T | 0.0344  |
| rs115714535 | A | -0.1136 |
| rs10791091  | T | -0.0438 |
| rs73010650  | A | -0.0307 |
| rs71483659  | A | 0.0426  |
| rs80192254  | C | -0.0662 |
| rs11233220  | T | -0.067  |
| rs12577826  | T | 0.0247  |
| rs11024763  | A | -0.0366 |
| rs17245678  | C | -0.0595 |
| rs7111919   | T | 0.0556  |
| rs4573661   | A | 0.0163  |
| rs10128691  | A | -0.0294 |
| rs79824397  | A | -0.0964 |
| rs59379441  | T | -0.0756 |
| rs7939968   | A | -0.0164 |
| rs112298355 | C | 0.0858  |
| rs117759900 | A | 0.105   |
| rs75295976  | T | -0.04   |
| rs117337060 | T | 0.0472  |
| rs527554    | T | -0.0205 |
| rs34643760  | G | -0.0788 |
| rs149134555 | G | -0.0896 |
| rs17428526  | G | 0.0231  |
| rs34953153  | T | 0.0368  |
| rs494992    | A | 0.0184  |
| rs4937856   | A | 0.0174  |
| rs140788633 | T | 0.0887  |
| rs7949500   | G | 0.0444  |
| rs628041    | T | -0.0186 |
| rs77510550  | A | 0.0263  |
| rs72961422  | A | -0.0558 |
| rs147799316 | A | -0.0444 |

|             |   |         |
|-------------|---|---------|
| rs144620742 | A | 0.0533  |
| rs1711431   | T | -0.017  |
| rs35222189  | G | -0.0338 |
| rs3741061   | C | 0.0207  |
| rs111319463 | T | -0.098  |
| rs4929952   | T | 0.0208  |
| rs917276    | C | -0.051  |
| rs117902206 | T | -0.0341 |
| rs11213089  | A | 0.0985  |
| rs12272194  | C | 0.0194  |
| rs117359860 | A | 0.1153  |
| rs7943825   | C | 0.0207  |
| rs149840098 | C | -0.1141 |
| rs1676882   | T | -0.0196 |
| rs61882925  | C | 0.0964  |
| rs11232059  | A | -0.0223 |
| rs111649592 | C | -0.0733 |
| rs77723909  | A | -0.0831 |
| rs12274650  | T | -0.0768 |
| rs11032472  | A | 0.0292  |
| rs76941929  | A | 0.0944  |
| rs118011998 | T | -0.0728 |
| rs61872472  | C | 0.0574  |
| rs12289508  | C | -0.0173 |
| rs148060115 | G | -0.0694 |
| rs11213912  | T | 0.026   |
| rs75647801  | G | -0.0859 |
| rs11021021  | A | -0.028  |
| rs73540342  | A | 0.0627  |
| rs545657    | G | -0.0149 |
| rs1783195   | T | 0.0219  |
| rs35717264  | C | 0.0819  |
| rs16910878  | G | -0.0289 |
| rs139398229 | G | 0.1099  |
| rs75033949  | G | -0.0602 |
| rs2510708   | C | 0.0152  |
| rs554773    | A | 0.032   |
| rs138714897 | C | 0.0985  |
| rs72995548  | T | 0.0629  |
| rs75199173  | G | -0.0409 |
| rs77834877  | A | -0.0719 |
| rs12282254  | T | -0.0319 |
| rs117746507 | T | -0.0658 |
| rs117602336 | C | -0.0772 |
| rs61015848  | T | 0.041   |
| rs12223538  | A | 0.0198  |
| rs150254790 | C | -0.0768 |

|             |   |         |
|-------------|---|---------|
| rs76129172  | G | -0.0908 |
| rs74834885  | G | 0.1145  |
| rs144542383 | A | -0.0574 |
| rs76831420  | T | -0.0772 |
| rs35084312  | T | -0.0179 |
| rs71489921  | T | 0.0278  |
| rs55679016  | G | 0.0518  |
| rs80267960  | G | -0.0299 |
| rs11019603  | T | -0.0699 |
| rs117022167 | A | 0.0531  |
| rs112748280 | T | 0.0975  |
| rs75919952  | T | 0.039   |
| rs61882408  | A | 0.1187  |
| rs1943620   | A | 0.0156  |
| rs11216026  | G | -0.0176 |
| rs76814754  | T | -0.0574 |
| rs140599732 | T | 0.0693  |
| rs12803377  | A | -0.0166 |
| rs1698879   | A | -0.0151 |
| rs12016678  | C | 0.0189  |
| rs12365019  | G | 0.0242  |
| rs78137992  | G | 0.0555  |
| rs1994398   | G | -0.0197 |
| rs17234644  | C | -0.0862 |
| rs117976741 | A | 0.077   |
| rs4937731   | T | -0.0163 |
| rs56338557  | C | 0.0927  |
| rs77028773  | A | 0.0556  |
| rs76283911  | G | -0.0445 |
| rs289979    | C | -0.0535 |
| rs7942252   | A | 0.0332  |
| rs78374103  | C | 0.0495  |
| rs6592592   | G | 0.03    |
| rs11605952  | A | -0.0475 |
| rs73026346  | G | 0.0914  |
| rs4450184   | C | -0.0656 |
| rs73582317  | T | 0.0599  |
| rs73018499  | G | 0.0647  |
| rs79247973  | G | 0.0582  |
| rs66838503  | G | 0.0218  |
| rs79603699  | G | -0.1149 |
| rs61900472  | A | 0.1226  |
| rs2266630   | C | -0.056  |
| rs1948191   | G | 0.1041  |
| rs61891077  | A | -0.0518 |
| rs117180245 | A | 0.1149  |
| rs10792478  | T | 0.0164  |

|             |   |         |
|-------------|---|---------|
| rs4488202   | G | 0.0183  |
| rs80032940  | A | -0.0435 |
| rs11606832  | C | -0.0414 |
| rs56810451  | T | 0.1017  |
| rs72877029  | G | 0.0514  |
| rs2896670   | A | -0.0157 |
| rs117884485 | T | 0.0457  |
| rs34723406  | A | -0.0445 |
| rs4360730   | C | 0.0352  |
| rs116849993 | C | 0.1096  |
| rs11029462  | T | 0.0572  |
| rs41493045  | C | 0.032   |
| rs61876177  | G | 0.0222  |
| rs10743067  | A | 0.0186  |
| rs10160291  | C | -0.0207 |
| rs72989331  | A | 0.0919  |
| rs76141864  | G | 0.0738  |
| rs77659628  | T | -0.0722 |
| rs7104675   | G | 0.0149  |
| rs140230323 | A | -0.0894 |
| rs141001449 | A | -0.089  |
| rs11219928  | A | 0.1116  |
| rs11211988  | G | -0.0887 |
| rs722344    | T | 0.0384  |
| rs10765577  | A | 0.0152  |
| rs1531778   | T | 0.0255  |
| rs73009150  | T | 0.0577  |
| rs116954303 | A | 0.073   |
| rs117302185 | C | -0.0619 |
| rs72919107  | A | -0.0688 |
| rs7936606   | T | -0.029  |
| rs142881764 | G | -0.0799 |
| rs896335    | T | -0.0325 |
| rs112281302 | C | 0.1058  |
| rs7928484   | G | 0.0149  |
| rs7947714   | T | 0.0161  |
| rs76505035  | A | -0.0903 |
| rs3893083   | G | 0.0201  |
| rs72867493  | C | -0.0578 |
| rs10790898  | T | -0.0189 |
| rs71489909  | A | 0.0463  |
| rs74676680  | G | -0.0897 |
| rs6592774   | T | -0.033  |
| rs17099287  | C | 0.0306  |
| rs55732300  | G | 0.0441  |
| rs12278869  | C | 0.0398  |
| rs73566030  | T | -0.0252 |

|             |   |         |
|-------------|---|---------|
| rs59722096  | A | 0.0264  |
| rs143041020 | C | 0.0769  |
| rs835819    | G | 0.0425  |
| rs485645    | C | 0.0173  |
| rs17596129  | C | 0.0364  |
| rs10893363  | G | -0.0423 |
| rs56297151  | T | 0.0742  |
| rs61885790  | T | 0.0167  |
| rs607419    | C | -0.0168 |
| rs111885243 | T | 0.0177  |
| rs113879779 | A | -0.1446 |
| rs144347583 | T | -0.0647 |
| rs10831624  | G | -0.0148 |
| rs143665202 | T | 0.0819  |
| rs10894623  | T | 0.0175  |
| rs7478946   | C | -0.0165 |
| rs59406893  | G | -0.03   |
| rs11229065  | T | -0.0445 |
| rs17693733  | G | -0.0164 |
| rs11024779  | A | 0.0238  |
| rs10894161  | A | -0.0188 |
| rs11605016  | G | 0.0149  |
| rs899303    | A | 0.0153  |
| rs75336727  | C | 0.0667  |
| rs77083949  | T | 0.0336  |
| rs12280935  | C | 0.0148  |
| rs73003836  | T | 0.0348  |
| rs61912830  | T | -0.0341 |
| rs78093004  | T | -0.0975 |
| rs67508732  | T | 0.0193  |
| rs2464436   | G | 0.0165  |
| rs7114909   | C | -0.0227 |
| rs72969044  | A | -0.0945 |
| rs112909021 | C | 0.0599  |
| rs617977    | C | 0.0222  |
| rs4753979   | C | -0.018  |
| rs118007448 | T | 0.0884  |
| rs179486    | A | 0.0396  |
| rs11024968  | C | -0.0384 |
| rs147545129 | C | -0.0538 |
| rs1944875   | A | -0.0205 |
| rs7948900   | C | -0.0294 |
| rs4445597   | T | -0.026  |
| rs117663340 | T | 0.1186  |
| rs224630    | T | 0.0163  |
| rs117620646 | A | -0.0703 |
| rs117874375 | T | 0.088   |

|             |   |         |
|-------------|---|---------|
| rs76235142  | A | 0.0242  |
| rs149777408 | T | 0.104   |
| rs118037143 | C | -0.0778 |
| rs2460827   | C | 0.0679  |
| rs146387153 | G | -0.1079 |
| rs7106798   | A | 0.0392  |
| rs7942430   | C | 0.0158  |
| rs61889593  | C | 0.0447  |
| rs75662220  | T | 0.0747  |
| rs12283881  | T | -0.0253 |
| rs4609584   | G | 0.0277  |
| rs10892610  | G | 0.0217  |
| rs117673887 | T | -0.0837 |
| rs10831917  | A | -0.0159 |
| rs73605052  | G | 0.0611  |
| rs2091738   | T | 0.0183  |
| rs75824230  | T | 0.0326  |
| rs11041536  | C | 0.0254  |
| rs118073706 | A | -0.0563 |
| rs117334295 | T | -0.0713 |
| rs35636293  | A | -0.0298 |
| rs12146606  | G | -0.0337 |
| rs61425946  | G | -0.045  |
| rs12806668  | G | -0.1092 |
| rs78051535  | G | 0.0257  |
| rs115374587 | G | -0.0415 |
| rs4304747   | T | 0.0155  |
| rs11215724  | A | 0.0154  |
| rs73012301  | G | -0.0568 |
| rs7118819   | C | -0.0179 |
| rs61887619  | G | -0.0217 |
| rs150505844 | G | 0.0778  |
| rs34905096  | A | 0.027   |
| rs61884310  | C | 0.0224  |
| rs10892306  | A | 0.0359  |
| rs7949833   | G | 0.0601  |
| rs117552957 | T | -0.1115 |
| rs4753668   | T | -0.0173 |
| rs11222172  | A | 0.0424  |
| rs2927203   | A | -0.0228 |
| rs4517559   | C | -0.0154 |
| rs77404782  | T | 0.0621  |
| rs61895238  | C | -0.0834 |
| rs72843910  | T | -0.0623 |
| rs7105823   | T | 0.021   |
| rs74771917  | T | 0.0548  |
| rs10891566  | G | 0.0256  |

|             |   |         |
|-------------|---|---------|
| rs612823    | C | -0.0167 |
| rs17257330  | T | 0.0541  |
| rs73023222  | C | -0.0245 |
| rs116374789 | C | -0.0666 |
| rs118025421 | G | 0.0464  |
| rs12221968  | A | 0.0169  |
| rs1552447   | C | 0.0248  |
| rs79168180  | C | -0.0771 |
| rs12361573  | T | 0.0422  |
| rs72864645  | A | 0.032   |
| rs7938111   | T | -0.0168 |
| rs11223504  | A | 0.0221  |
| rs12275238  | G | -0.0185 |
| rs72872942  | T | 0.0658  |
| rs112954574 | T | -0.067  |
| rs2512683   | T | -0.0602 |
| rs140458782 | A | 0.0421  |
| rs138930523 | A | -0.0782 |
| rs35997501  | T | -0.0295 |
| rs111836942 | A | -0.065  |
| rs11029725  | T | 0.0589  |
| rs1020578   | C | -0.0184 |
| rs150923327 | A | -0.0743 |
| rs641418    | T | -0.025  |
| rs11026150  | T | -0.0697 |
| rs78607024  | T | 0.0582  |
| rs174569    | C | 0.07    |
| rs73502634  | C | -0.0356 |
| rs7106492   | A | -0.0263 |
| rs17828500  | A | 0.0341  |
| rs72907408  | T | -0.0449 |
| rs117585660 | G | -0.0535 |
| rs117358380 | T | 0.1094  |
| rs12418021  | C | 0.0598  |
| rs148211244 | A | -0.1099 |
| rs36067212  | C | 0.0152  |
| rs71479994  | A | 0.046   |
| rs2293241   | C | 0.0161  |
| rs78169211  | A | -0.0604 |
| rs10751655  | T | -0.0221 |
| rs117577496 | A | -0.0455 |
| rs117534091 | T | 0.1153  |
| rs12293331  | C | 0.0307  |
| rs56387340  | C | -0.0658 |
| rs117209876 | A | 0.0943  |
| rs17856376  | G | 0.0301  |
| rs11041435  | G | 0.0318  |



|             |   |         |
|-------------|---|---------|
| rs147029653 | C | 0.0889  |
| rs117451734 | G | 0.0878  |
| rs77584792  | T | 0.0792  |
| rs12804771  | C | -0.0178 |
| rs76509551  | C | -0.0192 |
| rs145888973 | A | 0.0556  |
| rs77337641  | A | -0.0732 |
| rs2708509   | G | 0.021   |
| rs12798277  | T | 0.0469  |
| rs1942885   | C | 0.0163  |
| rs117432011 | G | 0.0542  |
| rs112364237 | T | -0.1097 |
| rs144779019 | T | -0.0654 |
| rs482601    | C | -0.0176 |
| rs11827225  | C | 0.0233  |
| rs10741536  | T | 0.032   |
| rs10837638  | C | 0.0251  |
| rs10892637  | C | 0.0171  |
| rs61868364  | C | 0.021   |
| rs77721152  | G | 0.042   |
| rs74655209  | T | -0.0288 |
| rs56729851  | A | 0.0199  |
| rs11601815  | T | -0.0379 |
| rs75008443  | T | -0.1283 |
| rs117105094 | A | -0.0675 |
| rs11234579  | T | 0.0155  |
| rs10894862  | G | -0.0164 |
| rs11224098  | G | -0.0224 |
| rs7106223   | A | -0.0192 |
| rs4466848   | A | -0.0175 |
| rs75346522  | C | 0.0316  |
| rs80251407  | C | 0.0258  |
| rs78907061  | T | -0.0569 |
| rs139470729 | G | 0.1029  |
| rs72995678  | C | 0.0235  |
| rs117420229 | A | 0.0685  |
| rs11221432  | C | -0.0547 |
| rs79880613  | A | -0.0228 |
| rs10742614  | C | -0.0196 |
| rs61885257  | T | -0.1128 |
| rs144307663 | C | -0.0755 |
| rs72977423  | G | 0.0488  |
| rs78358306  | C | -0.0589 |
| rs72850951  | A | 0.0554  |
| rs74902508  | T | 0.0404  |
| rs6589538   | A | 0.0156  |
| rs117880051 | A | -0.0655 |

|             |   |         |
|-------------|---|---------|
| rs7482257   | T | 0.0164  |
| rs142808910 | C | -0.089  |
| rs117884294 | T | -0.0879 |
| rs7396026   | T | 0.0403  |
| rs34892008  | T | -0.0194 |
| rs17553192  | C | 0.1153  |
| rs2658575   | A | -0.015  |
| rs77349428  | G | 0.0604  |
| rs73010499  | A | 0.0271  |
| rs117222887 | A | -0.0675 |
| rs12574703  | A | -0.0347 |
| rs1881237   | G | -0.043  |
| rs11606056  | G | -0.0973 |
| rs11221339  | C | -0.0982 |
| rs118158147 | G | -0.0422 |
| rs76215014  | T | 0.1039  |
| rs3741123   | A | -0.0367 |
| rs17337418  | T | 0.0422  |
| rs79556432  | T | -0.0716 |
| rs12284250  | G | -0.0465 |
| rs11035247  | C | -0.0172 |
| rs146457656 | G | 0.0567  |
| rs139592124 | T | -0.068  |
| rs117006164 | C | 0.0502  |
| rs138755001 | T | -0.0964 |
| rs4756684   | T | 0.0171  |
| rs10792581  | T | -0.0165 |
| rs28713685  | A | -0.0269 |
| rs1606273   | A | 0.0156  |
| rs72908166  | T | -0.025  |
| rs60984775  | C | 0.052   |
| rs117087213 | T | 0.0511  |
| rs326740    | C | 0.0153  |
| rs77725975  | G | 0.0469  |
| rs1994318   | C | 0.0154  |
| rs11026047  | A | -0.022  |
| rs75920859  | C | 0.0896  |
| rs3937838   | T | 0.0416  |
| rs80021647  | T | 0.0452  |
| rs150259345 | G | 0.0553  |
| rs7116982   | C | 0.0238  |
| rs117627752 | T | -0.1254 |
| rs2729843   | C | 0.0168  |
| rs73020279  | T | -0.1015 |
| rs117413208 | A | -0.0815 |
| rs73031519  | T | -0.074  |
| rs117435403 | T | 0.1135  |

|             |   |         |
|-------------|---|---------|
| rs142874782 | A | -0.0864 |
| rs74468168  | A | 0.0496  |
| rs483313    | C | 0.0149  |
| rs72980431  | C | 0.0359  |
| rs12802026  | T | -0.0338 |
| rs117966147 | C | 0.058   |
| rs72864596  | T | 0.0606  |
| rs17142715  | G | 0.0736  |
| rs74996798  | C | -0.061  |
| rs576873    | T | 0.0155  |
| rs61897663  | A | 0.0231  |
| rs72965926  | T | -0.0238 |
| rs145971442 | T | 0.0711  |
| rs74874829  | A | -0.1083 |
| rs75435797  | T | -0.0313 |
| rs76581523  | C | 0.0818  |
| rs11827598  | G | 0.0209  |
| rs76327758  | A | -0.0304 |
| rs10837959  | T | 0.0196  |
| rs1600222   | T | -0.0294 |
| rs2037197   | T | 0.0185  |
| rs3781799   | G | 0.0234  |
| rs10839910  | T | 0.0284  |
| rs17860571  | G | 0.0163  |
| rs17106464  | T | 0.0328  |
| rs34394447  | C | 0.0815  |
| rs11221085  | C | -0.0181 |
| rs7116879   | C | 0.0222  |
| rs11601352  | A | 0.0378  |
| rs11226114  | A | -0.0449 |
| rs72862623  | G | -0.0444 |
| rs80150070  | A | 0.0755  |
| rs146690670 | T | 0.0578  |
| rs12797500  | C | -0.0634 |
| rs713216    | A | -0.0189 |
| rs61909977  | C | -0.06   |
| rs147805317 | T | -0.0799 |
| rs79379157  | C | -0.0399 |
| rs890146    | A | -0.0179 |
| rs754532    | A | -0.0156 |
| rs890129    | T | 0.0179  |
| rs11601236  | C | -0.0706 |
| rs1786708   | C | 0.0275  |
| rs78183139  | G | 0.0419  |
| rs3741259   | T | -0.0257 |
| rs1320646   | T | 0.0168  |
| rs34439245  | T | 0.0143  |

|             |   |         |
|-------------|---|---------|
| rs12785375  | G | 0.0146  |
| rs4459298   | A | 0.0238  |
| rs4938845   | A | -0.0154 |
| rs9971544   | C | -0.0155 |
| rs79783241  | C | 0.0631  |
| rs117090535 | C | 0.072   |
| rs11222339  | A | -0.0313 |
| rs10894831  | G | -0.0242 |
| rs12223897  | T | -0.0298 |
| rs117302342 | T | 0.0388  |
| rs35241181  | G | 0.0982  |
| rs16928387  | G | -0.0987 |
| rs74664498  | T | -0.0334 |
| rs61906368  | A | -0.0356 |
| rs11032438  | G | 0.0256  |
| rs79329251  | C | -0.0486 |
| rs17880914  | C | -0.0388 |
| rs2458773   | C | -0.062  |
| rs7127289   | A | 0.0149  |
| rs71463738  | G | -0.0167 |
| rs4300370   | A | 0.0649  |
| rs74560852  | A | 0.0521  |
| rs7928924   | A | 0.024   |
| rs61734215  | T | 0.1017  |
| rs10832517  | T | 0.0427  |
| rs12803733  | G | -0.0426 |
| rs12276295  | T | 0.0185  |
| rs644589    | T | 0.0231  |
| rs10834744  | G | 0.0192  |
| rs61914662  | T | 0.0205  |
| rs12289723  | C | -0.0155 |
| rs1939707   | C | 0.0166  |
| rs28663140  | C | 0.0162  |
| rs10790212  | T | -0.0171 |
| rs77346511  | T | 0.0721  |
| rs1032777   | C | 0.0152  |
| rs118172907 | A | -0.0632 |
| rs12417053  | G | 0.0682  |
| rs111920102 | A | 0.0677  |
| rs7129284   | A | -0.018  |
| rs116845272 | T | -0.0585 |
| rs78880444  | C | 0.0312  |
| rs60531578  | G | 0.057   |
| rs35181812  | T | -0.0159 |
| rs35929108  | A | -0.0324 |
| rs77257362  | C | -0.0447 |
| rs658623    | C | -0.0351 |

|             |   |         |
|-------------|---|---------|
| rs75782395  | A | -0.0326 |
| rs7128434   | A | 0.016   |
| rs11220358  | G | 0.0248  |
| rs697316    | G | -0.0162 |
| rs4485130   | G | 0.0435  |
| rs12791474  | T | -0.0182 |
| rs76282688  | G | -0.0297 |
| rs34619944  | T | 0.0375  |
| rs142092962 | T | 0.0524  |
| rs7931095   | T | -0.0182 |
| rs74378971  | G | 0.0915  |
| rs75053190  | G | -0.094  |
| rs11232902  | C | 0.0304  |
| rs11212911  | C | 0.0157  |
| rs4570592   | G | 0.0145  |
| rs71465403  | C | -0.0848 |
| rs55924390  | G | -0.0333 |
| rs7952713   | G | -0.0188 |
| rs117650775 | A | 0.151   |
| rs79174789  | A | -0.1201 |
| rs76736053  | C | 0.074   |
| rs7947746   | C | -0.0147 |
| rs150379279 | G | 0.0986  |
| rs138111261 | T | 0.0893  |
| rs78755140  | C | 0.0461  |
| rs11026582  | T | -0.0312 |
| rs149821610 | A | 0.0842  |
| rs308873    | T | 0.02    |
| rs11225103  | G | 0.0176  |
| rs146102556 | G | 0.0551  |
| rs17118714  | G | -0.0462 |
| rs117028992 | T | 0.1146  |
| rs2257198   | A | -0.0212 |
| rs78799917  | A | -0.0418 |
| rs117248558 | C | 0.0962  |
| rs416258    | C | 0.0154  |
| rs35420760  | A | -0.0272 |
| rs347784    | C | -0.0167 |
| rs12365956  | A | 0.0243  |
| rs10732847  | T | -0.0161 |
| rs56105259  | A | -0.0416 |
| rs145048844 | G | -0.0362 |
| rs117532258 | T | -0.1034 |
| rs72925042  | A | -0.1208 |
| rs485702    | C | -0.0896 |
| rs6590199   | A | 0.021   |
| rs77379042  | G | 0.033   |

|             |   |         |
|-------------|---|---------|
| rs74447856  | T | 0.0643  |
| rs81205     | C | -0.0169 |
| rs11230579  | A | 0.0426  |
| rs61901495  | T | -0.0186 |
| rs73465816  | A | 0.068   |
| rs117279020 | A | -0.0497 |
| rs1893361   | A | -0.0196 |
| rs117702486 | T | 0.1012  |
| rs78408156  | T | 0.0453  |
| rs116862845 | A | 0.0624  |
| rs117578765 | T | 0.0659  |
| rs117427476 | A | -0.084  |
| rs2140930   | G | 0.0159  |
| rs2724407   | T | 0.0235  |
| rs11246121  | A | 0.0297  |
| rs2755153   | G | -0.0234 |
| rs11606322  | G | -0.0526 |
| rs78431668  | T | 0.0482  |
| rs79095686  | A | -0.0838 |
| rs73032504  | A | 0.1148  |
| rs79926725  | T | -0.0314 |
| rs117607645 | T | -0.1155 |
| rs150815558 | T | -0.0898 |
| rs7119203   | A | 0.0194  |
| rs117675307 | C | 0.0872  |
| rs835993    | G | -0.0158 |
| rs75699309  | A | 0.0434  |
| rs1793025   | A | 0.0182  |
| rs10502116  | C | -0.0162 |
| rs12796979  | G | -0.0705 |
| rs117322632 | G | 0.0491  |
| rs7127078   | T | -0.0188 |
| rs17570295  | A | -0.0345 |
| rs11604461  | C | -0.0299 |
| rs17130119  | T | 0.0455  |
| rs146336253 | C | -0.0643 |
| rs616930    | C | -0.0142 |
| rs117028685 | A | -0.046  |
| rs77125023  | T | 0.0895  |
| rs113959093 | G | -0.0756 |
| rs10893811  | G | 0.0149  |
| rs76465283  | A | -0.0638 |
| rs56037551  | A | 0.0548  |
| rs2625335   | T | -0.0746 |
| rs117723062 | A | 0.0899  |
| rs77947712  | T | 0.0534  |
| rs6485485   | A | 0.0651  |

|             |   |         |
|-------------|---|---------|
| rs76861941  | G | 0.0544  |
| rs61909637  | T | 0.0511  |
| rs112916189 | C | -0.066  |
| rs4310575   | G | 0.0432  |
| rs7101378   | A | 0.014   |
| rs11602629  | C | -0.0447 |
| rs72964461  | T | 0.1292  |
| rs56132653  | T | 0.0707  |
| rs12800898  | G | -0.0155 |
| rs74685021  | G | 0.0447  |
| rs139920005 | C | -0.0582 |
| rs2303863   | C | -0.0154 |
| rs35478470  | A | 0.0319  |
| rs117553108 | A | 0.0586  |
| rs79566631  | T | 0.0766  |
| rs76199063  | A | -0.0296 |
| rs149072527 | T | 0.0834  |
| rs11571184  | A | -0.0609 |
| rs142474020 | A | 0.0817  |
| rs118069888 | A | 0.0701  |
| rs139954031 | A | 0.0681  |
| rs58706519  | G | 0.0299  |
| rs7120142   | T | -0.0181 |
| rs78880326  | T | 0.0782  |
| rs79100584  | C | 0.0922  |
| rs150276002 | A | -0.0539 |
| rs10769026  | C | -0.0212 |
| rs74047738  | C | -0.0337 |
| rs2640224   | T | -0.0496 |
| rs74647484  | C | -0.0955 |
| rs72916135  | G | -0.0723 |
| rs1792532   | A | 0.0217  |
| rs141353875 | A | 0.1118  |
| rs41302435  | A | -0.0892 |
| rs75842589  | T | -0.0804 |
| rs146664631 | T | 0.073   |
| rs80157879  | T | 0.1006  |
| rs146207771 | T | -0.0417 |
| rs116853135 | T | 0.1297  |
| rs78446629  | A | -0.0478 |
| rs117744208 | T | -0.0444 |
| rs2213887   | A | 0.0536  |
| rs79438405  | G | -0.0618 |
| rs113301831 | T | 0.1104  |
| rs2036065   | T | 0.0777  |
| rs60016486  | A | -0.0214 |
| rs117834121 | T | 0.1651  |

|             |   |         |
|-------------|---|---------|
| rs12805626  | T | 0.0269  |
| rs11221507  | C | -0.0298 |
| rs11603798  | C | 0.0872  |
| rs11021925  | T | 0.0415  |
| rs171269    | T | 0.0252  |
| rs2846797   | T | -0.0157 |
| rs139091555 | G | 0.0765  |
| rs4397827   | C | 0.0196  |
| rs72852112  | T | -0.1149 |
| rs4469890   | A | 0.0384  |
| rs34940361  | A | 0.0342  |
| rs112526546 | T | -0.0322 |
| rs1917496   | T | -0.0176 |
| rs139641310 | C | 0.0482  |
| rs7950276   | C | 0.0157  |
| rs17232653  | C | -0.0231 |
| rs4938293   | T | -0.0176 |
| rs72846309  | A | 0.0287  |
| rs12290514  | G | -0.0851 |
| rs10765863  | A | -0.0187 |
| rs11028833  | T | 0.0262  |
| rs73018778  | A | 0.0417  |
| rs55741400  | A | -0.1049 |
| rs67059717  | T | -0.0187 |
| rs72867529  | A | -0.073  |
| rs34180075  | T | 0.1063  |
| rs75646144  | A | -0.0971 |
| rs73009445  | A | 0.0401  |
| rs1522677   | C | -0.0141 |
| rs117225346 | T | 0.0943  |
| rs78272617  | C | -0.0622 |
| rs137931356 | C | 0.0586  |
| rs1122435   | G | -0.0171 |
| rs61901400  | A | -0.0389 |
| rs79962437  | A | -0.0662 |
| rs11038176  | C | -0.0172 |
| rs61908633  | G | 0.103   |
| rs117738999 | C | -0.0587 |
| rs4754652   | G | 0.0274  |
| rs11225894  | A | 0.0373  |
| rs35553134  | A | 0.0359  |
| rs11220347  | A | -0.0735 |
| rs695127    | A | 0.0178  |
| rs16928429  | C | 0.0332  |
| rs579078    | C | -0.0224 |
| rs4354672   | A | 0.0624  |
| rs146470594 | G | -0.0436 |



|             |   |         |
|-------------|---|---------|
| rs79613121  | G | 0.0448  |
| rs11033013  | C | -0.0157 |
| rs139335095 | T | 0.0415  |
| rs78335256  | C | 0.0523  |
| rs11037910  | G | -0.0599 |
| rs74793441  | G | -0.0904 |
| rs12796775  | C | 0.0394  |
| rs7112570   | G | 0.0479  |
| rs519218    | G | 0.0325  |
| rs10742978  | C | -0.0188 |
| rs79188579  | C | -0.0376 |
| rs11827379  | G | -0.056  |
| rs72971829  | G | -0.0568 |
| rs10501466  | G | -0.0477 |
| rs79930830  | G | -0.0633 |
| rs10791357  | A | -0.02   |
| rs9666212   | C | 0.0181  |
| rs12270283  | T | 0.0278  |
| rs149687208 | G | 0.0989  |
| rs10766378  | C | 0.0212  |
| rs116967717 | T | -0.1204 |
| rs2957497   | A | 0.0144  |
| rs77119012  | A | 0.0771  |
| rs56355354  | G | 0.023   |
| rs77494614  | G | 0.0567  |
| rs117370582 | G | -0.0854 |
| rs116943269 | G | -0.0545 |
| rs116880336 | T | -0.0976 |
| rs10830302  | C | -0.0403 |
| rs145469063 | T | 0.0657  |
| rs6578920   | T | 0.0333  |
| rs77015885  | A | -0.0533 |
| rs11218492  | A | 0.0137  |
| rs75575592  | T | -0.1187 |
| rs79165905  | A | 0.0847  |
| rs11223264  | T | -0.0161 |
| rs57547788  | C | -0.017  |
| rs2403580   | T | 0.0588  |
| rs117419690 | C | -0.0475 |
| rs1945418   | G | 0.0156  |
| rs6485453   | C | 0.0149  |
| rs1557456   | C | 0.0171  |
| rs117644106 | T | -0.0774 |
| rs508047    | A | 0.0168  |
| rs112002597 | C | 0.019   |
| rs1540121   | T | -0.0556 |
| rs11029948  | T | -0.0206 |

|             |   |         |
|-------------|---|---------|
| rs12421028  | T | -0.0727 |
| rs117254021 | G | 0.0473  |
| rs3892569   | A | -0.0407 |
| rs1452481   | T | -0.0819 |
| rs112697208 | C | -0.0289 |
| rs34661987  | C | -0.0773 |
| rs61905271  | A | -0.0496 |
| rs7109463   | C | -0.0401 |
| rs16932946  | A | -0.0249 |
| rs2905517   | G | 0.0138  |
| rs11216445  | T | 0.0582  |
| rs2403322   | A | 0.0225  |
| rs4237723   | C | 0.0149  |
| rs117784317 | A | 0.051   |
| rs2128118   | T | -0.0201 |
| rs11020917  | T | 0.0334  |
| rs11223404  | T | 0.0209  |
| rs12417677  | A | 0.0453  |
| rs61887548  | C | -0.0724 |
| rs61882049  | C | 0.029   |
| rs112183236 | T | 0.0316  |
| rs498931    | G | -0.0213 |
| rs11223299  | G | -0.0195 |
| rs72866839  | T | -0.1447 |
| rs76491641  | A | 0.0365  |
| rs117331926 | G | 0.0575  |
| rs4397837   | A | -0.014  |
| rs976946    | A | -0.0145 |
| rs117780024 | T | 0.1039  |
| rs1670620   | G | 0.0151  |
| rs77241001  | T | 0.0452  |
| rs726533    | C | -0.0155 |
| rs17425774  | C | 0.0824  |
| rs117673183 | G | -0.0662 |
| rs79314773  | T | -0.0686 |
| rs4245124   | A | -0.0166 |
| rs118132618 | G | -0.0819 |
| rs141495624 | A | 0.0907  |
| rs425126    | G | 0.1069  |
| rs16908711  | T | 0.0473  |
| rs80158073  | A | 0.0784  |
| rs34286087  | C | 0.137   |
| rs76788116  | G | -0.0426 |
| rs76591532  | A | 0.0362  |
| rs72945839  | T | -0.1109 |
| rs3847548   | G | -0.0185 |
| rs73020470  | C | 0.0421  |

|             |   |         |
|-------------|---|---------|
| rs12798276  | C | -0.0226 |
| rs1783920   | G | -0.0421 |
| rs61911650  | G | 0.0453  |
| rs117488501 | C | -0.068  |
| rs138404240 | A | -0.065  |
| rs17670852  | A | 0.0313  |
| rs77179017  | G | 0.0805  |
| rs117461218 | G | 0.0596  |
| rs79905194  | A | -0.0826 |
| rs17272751  | G | 0.02    |
| rs1881238   | A | 0.0217  |
| rs2197672   | A | 0.033   |
| rs145478334 | G | -0.1165 |
| rs7120763   | C | -0.0376 |
| rs35412270  | G | 0.0517  |
| rs56298814  | C | -0.0513 |
| rs61911251  | G | -0.0418 |
| rs11263651  | C | 0.0195  |
| rs7481343   | C | -0.0178 |
| rs7936016   | G | 0.0262  |
| rs11215465  | G | -0.0154 |
| rs74889859  | T | -0.0703 |
| rs118007926 | C | 0.053   |
| rs117829219 | T | 0.0294  |
| rs61900330  | A | 0.025   |
| rs117752934 | A | 0.0924  |
| rs73008834  | C | -0.0624 |
| rs79723893  | G | -0.0356 |
| rs1350418   | A | 0.0252  |
| rs11219644  | G | -0.0196 |
| rs2462166   | A | 0.0173  |
| rs34596362  | C | 0.0456  |
| rs34446357  | T | 0.0892  |
| rs72853326  | C | 0.112   |
| rs149575965 | G | 0.0907  |
| rs71456319  | G | 0.033   |
| rs11021828  | T | -0.1376 |
| rs72891868  | A | 0.0259  |
| rs16907456  | G | 0.0607  |
| rs16911848  | A | -0.0594 |
| rs77745853  | A | 0.0719  |
| rs74872104  | A | 0.0687  |
| rs590306    | A | 0.0164  |
| rs7929019   | T | 0.0149  |
| rs58281741  | C | 0.0146  |
| rs149375606 | G | 0.0781  |
| rs1108539   | C | 0.0168  |

|             |   |         |
|-------------|---|---------|
| rs77907294  | T | 0.0318  |
| rs117068162 | C | -0.0458 |
| rs145247878 | T | 0.0899  |
| rs116962591 | T | 0.0599  |
| rs117552856 | T | 0.0824  |
| rs80310558  | T | 0.0636  |
| rs12787263  | G | 0.0158  |
| rs12281809  | G | 0.0228  |
| rs4076157   | G | 0.0154  |
| rs79527470  | T | 0.075   |
| rs113906531 | G | -0.0388 |
| rs12272479  | G | 0.0162  |
| rs9736609   | A | 0.0227  |
| rs11040781  | G | -0.0925 |
| rs73024206  | A | -0.0466 |
| rs140991929 | G | 0.0281  |
| rs12283255  | T | -0.0144 |
| rs148635523 | C | -0.0475 |
| rs12288694  | C | -0.0963 |
| rs117291869 | T | 0.0477  |
| rs17144481  | C | -0.027  |
| rs56361518  | A | -0.1237 |
| rs80111499  | G | 0.1038  |
| rs117794084 | T | 0.0732  |
| rs10893761  | G | -0.0152 |
| rs11601503  | T | 0.0186  |
| rs9804460   | T | -0.0643 |
| rs10832183  | C | 0.015   |
| rs149917305 | T | -0.046  |
| rs11603948  | A | 0.0196  |
| rs113284798 | A | 0.0681  |
| rs147017689 | T | -0.1076 |
| rs145942565 | T | 0.1264  |
| rs75273786  | A | 0.0428  |
| rs11025117  | C | -0.0184 |
| rs12277860  | T | -0.0214 |
| rs4144867   | G | 0.0143  |
| rs2084308   | T | -0.0769 |
| rs11215517  | A | 0.0275  |
| rs35266957  | T | 0.0496  |
| rs55642630  | G | -0.0407 |
| rs514112    | G | 0.0177  |
| rs78529194  | A | -0.0861 |
| rs1818736   | T | 0.0171  |
| rs16916438  | C | 0.1037  |
| rs117267863 | G | -0.0533 |
| rs7944079   | A | -0.0236 |

|             |   |         |
|-------------|---|---------|
| rs4237606   | T | 0.0184  |
| rs450876    | A | -0.0136 |
| rs1150230   | A | 0.0139  |
| rs77102429  | A | 0.0563  |
| rs7112599   | G | -0.0409 |
| rs80310246  | T | -0.0364 |
| rs139912558 | G | 0.0607  |
| rs10501830  | T | 0.0938  |
| rs10497404  | A | 0.0197  |
| rs35950339  | C | 0.0259  |
| rs4363612   | G | 0.0194  |
| rs61881144  | T | -0.0276 |
| rs12282252  | G | 0.021   |
| rs7946311   | G | 0.0991  |
| rs10831461  | A | 0.0573  |
| rs57235399  | C | -0.0572 |
| rs2129531   | G | 0.0164  |
| rs3867277   | T | -0.0139 |
| rs637404    | C | 0.0206  |
| rs1939900   | T | -0.0266 |
| rs11022383  | G | -0.0253 |
| rs35478925  | T | -0.0208 |
| rs3751075   | A | 0.0216  |
| rs17654297  | C | -0.0605 |
| rs79936530  | A | -0.0268 |
| rs4237772   | T | -0.0148 |
| rs649196    | G | 0.0146  |
| rs73034503  | A | 0.041   |
| rs34034578  | T | 0.0231  |
| rs75723458  | C | 0.0623  |
| rs117933779 | T | 0.0641  |
| rs17566737  | C | -0.0322 |
| rs7102200   | A | -0.0139 |
| rs117462581 | T | 0.0942  |
| rs78392734  | A | 0.0594  |
| rs150439352 | A | -0.0824 |
| rs645935    | T | -0.0202 |
| rs35304163  | T | 0.071   |
| rs10792678  | A | 0.0143  |
| rs72958688  | C | 0.0245  |
| rs11605471  | C | 0.0431  |
| rs11238030  | T | 0.0214  |
| rs76015425  | A | 0.1386  |
| rs35706972  | A | 0.0714  |
| rs1044281   | T | -0.0215 |
| rs11229268  | G | -0.0276 |
| rs117462466 | T | 0.0452  |

|             |   |         |
|-------------|---|---------|
| rs11222717  | T | 0.0658  |
| rs901036    | C | 0.0378  |
| rs112828294 | T | -0.0394 |
| rs117823608 | T | 0.1288  |
| rs66886392  | A | 0.0335  |
| rs117311376 | T | -0.0648 |
| rs61912375  | G | -0.0162 |
| rs4945436   | T | 0.0364  |
| rs73014347  | A | -0.019  |
| rs12800906  | A | 0.0186  |
| rs113716419 | G | -0.0551 |
| rs10790210  | G | 0.0148  |
| rs11236270  | A | 0.0929  |
| rs7129006   | G | -0.0134 |
| rs10838383  | G | 0.0547  |
| rs4601790   | G | 0.0153  |
| rs149697995 | G | -0.13   |
| rs4757294   | T | -0.0213 |
| rs11603493  | T | 0.0431  |
| rs113031616 | T | 0.1205  |
| rs61875749  | G | -0.0364 |
| rs11212925  | G | 0.0315  |
| rs73576572  | A | -0.1104 |
| rs61908692  | T | 0.064   |
| rs61883790  | C | -0.078  |
| rs76200167  | A | 0.0756  |
| rs79675423  | G | 0.0395  |
| rs11222865  | G | 0.0442  |
| rs77245298  | A | -0.1039 |
| rs1000255   | G | 0.0153  |
| rs4281495   | A | 0.0327  |
| rs9988887   | G | -0.0684 |
| rs11263565  | C | -0.0414 |
| rs754934    | C | 0.0166  |
| rs75069565  | C | 0.0596  |
| rs11828484  | G | 0.0144  |
| rs151178852 | A | 0.0674  |
| rs112098193 | A | -0.0768 |
| rs143157108 | T | -0.0874 |
| rs34207405  | C | 0.054   |
| rs6606643   | G | 0.0655  |
| rs494463    | T | -0.0164 |
| rs76425189  | G | 0.0459  |
| rs76865178  | G | -0.0574 |
| rs72997454  | G | -0.0423 |
| rs11028637  | C | -0.0179 |
| rs76264184  | A | -0.0295 |

|             |   |         |
|-------------|---|---------|
| rs11212259  | T | 0.0276  |
| rs12278792  | C | -0.0539 |
| rs117516579 | T | -0.0223 |
| rs6589864   | G | -0.0297 |
| rs12284912  | A | -0.0152 |
| rs12721041  | T | 0.0984  |
| rs58961916  | A | 0.0558  |
| rs144671591 | A | 0.0915  |
| rs10893522  | T | 0.0516  |
| rs10894844  | T | 0.0234  |
| rs1106866   | A | 0.0185  |
| rs72886840  | A | 0.1101  |
| rs10837070  | G | 0.0143  |
| rs75153210  | T | 0.0429  |
| rs2246352   | A | -0.017  |
| rs1107255   | C | -0.0197 |
| rs78697829  | G | 0.0644  |
| rs113743142 | A | 0.0507  |
| rs10894343  | A | 0.015   |
| rs1994976   | G | 0.0144  |
| rs58481844  | C | 0.0225  |
| rs17438970  | G | 0.0454  |
| rs10450613  | G | -0.015  |
| rs73018230  | T | -0.031  |
| rs583638    | A | -0.0916 |
| rs7129426   | A | -0.0314 |
| rs11025123  | T | 0.0272  |
| rs143232875 | A | -0.1205 |
| rs12785467  | T | -0.0134 |
| rs80227365  | A | 0.0398  |
| rs11232255  | C | 0.0378  |
| rs2412382   | C | 0.0272  |
| rs72652900  | A | -0.0763 |
| rs55923122  | C | -0.0299 |
| rs75869178  | T | -0.09   |
| rs118188287 | T | -0.0711 |
| rs7106602   | T | 0.0556  |
| rs2445247   | C | -0.0137 |
| rs1817406   | C | 0.0137  |
| rs79228319  | C | -0.0425 |
| rs150106174 | A | 0.0972  |
| rs117761501 | G | 0.0906  |
| rs7942114   | G | -0.0208 |
| rs76212586  | A | 0.0627  |
| rs61746574  | A | 0.0366  |
| rs73000808  | T | -0.0783 |
| rs148860333 | C | 0.0888  |

|             |   |         |
|-------------|---|---------|
| rs76064409  | A | 0.0901  |
| rs2708531   | C | -0.0276 |
| rs1873081   | C | -0.0226 |
| rs117020218 | T | 0.09    |
| rs72936097  | A | -0.0224 |
| rs7125672   | A | 0.0143  |
| rs10766431  | C | -0.0135 |
| rs117829154 | T | 0.0651  |
| rs513249    | A | 0.0176  |
| rs76224360  | A | -0.0309 |
| rs10834369  | G | 0.0203  |
| rs34564056  | G | 0.0849  |
| rs12364243  | A | -0.0582 |
| rs11021223  | T | -0.0135 |
| rs78757276  | T | -0.0863 |
| rs11224017  | C | -0.0253 |
| rs144875655 | G | -0.0444 |
| rs292742    | A | -0.0236 |
| rs11019482  | T | -0.0243 |
| rs117533614 | G | -0.0488 |
| rs10743028  | T | 0.016   |
| rs77444348  | G | -0.0621 |
| rs729870    | T | -0.0243 |
| rs2741810   | A | -0.0677 |
| rs953126    | G | -0.0149 |
| rs12271338  | C | 0.0195  |
| rs7130208   | G | -0.0391 |
| rs11231937  | T | 0.0199  |
| rs12419122  | T | 0.0206  |
| rs6590691   | C | 0.0168  |
| rs74430742  | A | -0.0497 |
| rs117506691 | A | -0.0768 |
| rs116872243 | T | 0.1105  |
| rs1581281   | A | 0.086   |
| rs1901944   | T | 0.0529  |
| rs118015299 | T | 0.1075  |
| rs117817907 | G | -0.0478 |
| rs118081248 | A | -0.0755 |
| rs2514497   | T | 0.0695  |
| rs11021941  | C | 0.019   |
| rs145130502 | T | -0.061  |
| rs72866862  | T | -0.0651 |
| rs79463883  | A | -0.0318 |
| rs78210961  | A | 0.0541  |
| rs117666717 | T | -0.056  |
| rs7933739   | G | -0.0196 |
| rs4755783   | C | 0.0497  |



|             |   |         |
|-------------|---|---------|
| rs11602478  | A | -0.0328 |
| rs12276890  | G | 0.0179  |
| rs117981990 | A | 0.054   |
| rs17827918  | A | -0.0234 |
| rs146169332 | G | -0.0947 |
| rs11827153  | C | 0.0227  |
| rs11029812  | C | -0.016  |
| rs117505102 | A | 0.0851  |
| rs78547936  | T | 0.0629  |
| rs7931664   | T | -0.018  |
| rs7943198   | G | -0.0144 |
| rs11232563  | G | -0.0208 |
| rs34835978  | A | 0.0228  |
| rs11040394  | G | 0.0186  |
| rs4121863   | G | 0.0137  |
| rs117094824 | G | -0.1087 |
| rs75478243  | T | 0.0622  |
| rs11518264  | G | 0.0595  |
| rs1560996   | G | -0.0147 |
| rs4936330   | C | 0.0139  |
| rs4636656   | T | 0.0281  |
| rs72858920  | T | -0.1213 |
| rs991504    | G | -0.0409 |
| rs139311140 | T | 0.0394  |
| rs12799246  | T | -0.0143 |
| rs146680254 | G | -0.0843 |
| rs116891606 | A | -0.0664 |
| rs150588105 | T | 0.0393  |
| rs11038172  | G | 0.0977  |
| rs78576377  | C | 0.0644  |
| rs142837424 | A | 0.086   |
| rs149089148 | T | -0.0962 |
| rs78033785  | T | 0.0651  |
| rs72951675  | G | 0.0468  |
| rs1453420   | T | -0.0278 |
| rs2880829   | A | -0.0207 |
| rs494627    | C | -0.0132 |
| rs114019870 | G | -0.069  |
| rs76452846  | T | 0.0746  |
| rs55656225  | T | -0.0496 |
| rs17601014  | G | -0.064  |
| rs675944    | A | -0.024  |
| rs117610694 | T | 0.0907  |
| rs77836370  | A | 0.0292  |
| rs1783891   | T | 0.0347  |
| rs4608093   | C | 0.063   |
| rs6589850   | C | -0.0267 |

|             |   |         |
|-------------|---|---------|
| rs726785    | C | 0.0192  |
| rs10734271  | G | 0.0751  |
| rs80301021  | T | 0.054   |
| rs56393933  | A | -0.0719 |
| rs78868651  | A | 0.0509  |
| rs4755601   | G | -0.0153 |
| rs61903821  | G | -0.1015 |
| rs74678032  | C | -0.0422 |
| rs78406812  | A | -0.096  |
| rs147474477 | G | -0.0859 |
| rs627899    | T | -0.0149 |
| rs148213283 | T | 0.0908  |
| rs117839774 | T | 0.0602  |
| rs893947    | C | 0.0144  |
| rs10500621  | G | 0.042   |
| rs2845636   | G | 0.0273  |
| rs75431481  | T | 0.0967  |
| rs117578284 | T | 0.0362  |
| rs7946613   | G | -0.0212 |
| rs11225138  | C | 0.0241  |
| rs35361223  | G | 0.0587  |
| rs146788346 | T | 0.0287  |
| rs10749922  | T | 0.0131  |
| rs11025546  | T | -0.0335 |
| rs61880062  | T | 0.0631  |
| rs118050455 | T | -0.0374 |
| rs72973633  | A | -0.0282 |
| rs147910794 | A | -0.1097 |
| rs2846925   | A | 0.0191  |
| rs1636227   | A | -0.0275 |
| rs2446381   | C | -0.0262 |
| rs11245951  | T | -0.0265 |
| rs7945777   | A | -0.0768 |
| rs12796181  | C | -0.029  |
| rs949108    | T | -0.0306 |
| rs151231787 | A | -0.071  |
| rs144187602 | G | -0.1184 |
| rs11493908  | G | 0.0824  |
| rs72986304  | C | 0.0254  |
| rs75051526  | A | 0.0716  |
| rs75818155  | G | -0.0331 |
| rs7926502   | T | -0.0657 |
| rs870332    | C | 0.0237  |
| rs75344943  | A | -0.0511 |
| rs11214645  | A | 0.0193  |
| rs111490460 | T | 0.0411  |
| rs138797621 | C | 0.08    |

|             |   |         |
|-------------|---|---------|
| rs113723266 | T | 0.0746  |
| rs6578688   | G | 0.0402  |
| rs72872255  | A | 0.0693  |
| rs151283189 | C | -0.0755 |
| rs283313    | C | 0.0139  |
| rs116964505 | T | -0.1034 |
| rs7116774   | G | -0.0339 |
| rs113465191 | T | 0.0186  |
| rs6485479   | C | -0.016  |
| rs76897669  | G | -0.0288 |
| rs149876707 | A | 0.114   |
| rs11223894  | A | -0.0235 |
| rs72939223  | C | 0.0774  |
| rs138376969 | G | 0.1058  |
| rs117048510 | C | 0.107   |
| rs117206964 | T | 0.0576  |
| rs79605071  | T | -0.0329 |
| rs11827924  | C | -0.0243 |
| rs12282193  | A | 0.0205  |
| rs74759355  | C | 0.024   |
| rs72901795  | C | -0.1093 |
| rs12798146  | T | 0.0389  |
| rs10501377  | T | -0.016  |
| rs139322977 | G | 0.0978  |
| rs10895594  | C | 0.0801  |
| rs74618079  | C | -0.1416 |
| rs116968607 | T | -0.1254 |
| rs117002476 | A | -0.0862 |
| rs11606899  | A | 0.0465  |
| rs138567278 | A | 0.085   |
| rs10891867  | T | -0.0176 |
| rs1483130   | C | -0.0136 |
| rs76544613  | T | 0.0565  |
| rs11234888  | A | -0.0154 |
| rs11025345  | A | 0.0137  |
| rs12417663  | G | 0.019   |
| rs140468011 | A | 0.0967  |
| rs113554344 | A | 0.0495  |
| rs12802688  | G | 0.0296  |
| rs78453720  | A | 0.0795  |
| rs10767910  | G | -0.0131 |
| rs2276312   | G | -0.0198 |
| rs72875210  | C | 0.0661  |
| rs72935082  | T | -0.0259 |
| rs516752    | A | -0.0713 |
| rs66865033  | G | -0.029  |
| rs7118058   | T | -0.027  |

|             |   |         |
|-------------|---|---------|
| rs1790063   | A | 0.0183  |
| rs150853522 | G | 0.0485  |
| rs1031380   | T | -0.0416 |
| rs12269893  | A | 0.0464  |
| rs139551149 | A | 0.063   |
| rs113249705 | T | 0.0228  |
| rs11030780  | G | -0.0488 |
| rs7947358   | G | -0.022  |
| rs73019283  | T | 0.0317  |
| rs139977119 | C | 0.0744  |
| rs117061470 | T | 0.063   |
| rs3763880   | T | -0.0167 |
| rs12803998  | T | -0.0182 |
| rs143181428 | G | 0.1163  |
| rs77544923  | A | 0.0686  |
| rs649827    | T | 0.0131  |
| rs117563748 | A | 0.0779  |
| rs175123    | T | -0.03   |
| rs78029651  | A | 0.0312  |
| rs112217946 | T | -0.0208 |
| rs16914574  | C | 0.0573  |
| rs74926018  | T | -0.0707 |
| rs11228518  | A | -0.0214 |
| rs117353760 | C | -0.0617 |
| rs143266098 | C | -0.0746 |
| rs137970952 | A | -0.0557 |
| rs11602688  | T | -0.0131 |
| rs72937419  | T | 0.0365  |
| rs1852753   | T | -0.0147 |
| rs76457507  | A | -0.0268 |
| rs1349832   | A | 0.0251  |
| rs1837396   | A | 0.0128  |
| rs80216562  | A | -0.0398 |
| rs647837    | G | -0.0282 |
| rs2078239   | C | -0.0162 |
| rs61890163  | T | -0.04   |
| rs4939487   | G | -0.0768 |
| rs118026359 | G | 0.033   |
| rs12364193  | A | -0.0227 |
| rs113845321 | C | 0.0302  |
| rs117672018 | T | -0.0648 |
| rs61893829  | T | -0.0482 |
| rs144822944 | A | 0.0657  |
| rs111623182 | C | -0.0603 |
| rs11232018  | G | 0.0575  |
| rs111893457 | C | -0.0866 |
| rs67682808  | A | 0.0718  |

|             |   |         |
|-------------|---|---------|
| rs4938457   | T | -0.0187 |
| rs79375030  | G | -0.0387 |
| rs10894496  | C | -0.0143 |
| rs570724    | T | -0.0134 |
| rs117324199 | T | -0.1044 |
| rs117850532 | T | 0.0538  |
| rs117916633 | A | -0.0851 |
| rs1377776   | C | -0.0171 |
| rs76853730  | G | 0.1147  |
| rs11217903  | G | -0.0305 |
| rs7127373   | C | -0.0134 |
| rs2886654   | A | 0.0138  |
| rs117307565 | A | 0.1091  |
| rs143015376 | C | -0.0852 |
| rs3740891   | A | -0.0447 |
| rs4757331   | C | -0.0139 |
| rs11018889  | T | -0.0228 |
| rs1108340   | G | 0.0187  |
| rs2015633   | T | -0.0196 |
| rs1557763   | T | 0.1107  |
| rs76854298  | A | -0.0746 |
| rs118131593 | C | 0.0574  |
| rs12362653  | G | 0.0284  |
| rs118010894 | A | 0.0793  |
| rs34208519  | T | -0.058  |
| rs75181037  | C | 0.0586  |
| rs16907765  | T | -0.0305 |
| rs10765856  | C | 0.0129  |
| rs117710873 | T | 0.0608  |
| rs111949840 | A | -0.035  |
| rs77696239  | T | -0.054  |
| rs1445497   | C | -0.0136 |
| rs3858514   | C | 0.0309  |
| rs61903739  | T | 0.0304  |
| rs117086233 | A | 0.1138  |
| rs595522    | A | 0.0762  |
| rs878830    | A | 0.0209  |
| rs7131401   | A | 0.0177  |
| rs12285365  | A | -0.0162 |
| rs61912423  | A | -0.0207 |
| rs11225597  | A | -0.0324 |
| rs71484426  | A | 0.0297  |
| rs35484013  | A | -0.1082 |
| rs2513600   | C | 0.0172  |
| rs57363396  | A | 0.0874  |
| rs10894444  | C | -0.0148 |
| rs117646972 | T | 0.0602  |

|             |   |         |
|-------------|---|---------|
| rs11820326  | G | -0.0242 |
| rs17614161  | T | -0.0177 |
| rs145368317 | A | 0.0814  |
| rs1194863   | G | 0.0196  |
| rs1367308   | G | -0.0164 |
| rs75043930  | T | 0.0505  |
| rs7940638   | A | -0.0219 |
| rs10902225  | T | 0.0206  |
| rs10741830  | G | -0.016  |
| rs75910349  | G | 0.0491  |
| rs35578111  | T | -0.0333 |
| rs61875455  | C | -0.033  |
| rs117409684 | T | 0.0302  |
| rs11606281  | T | 0.0185  |
| rs2875369   | A | -0.0778 |
| rs77170212  | C | 0.0623  |
| rs7129154   | C | 0.0508  |
| rs7945641   | G | -0.016  |
| rs112055641 | G | -0.0273 |
| rs989595    | G | -0.02   |
| rs591635    | A | -0.0506 |
| rs1648178   | C | -0.0134 |
| rs11023456  | T | 0.0162  |
| rs4616002   | T | -0.0148 |
| rs4285884   | C | -0.0154 |
| rs142971210 | C | 0.0834  |
| rs72862131  | G | 0.0189  |
| rs148368382 | A | -0.0274 |
| rs78187739  | T | -0.0887 |
| rs1397591   | A | 0.024   |
| rs10894330  | T | -0.0219 |
| rs113289947 | A | 0.0731  |
| rs76100066  | T | 0.0499  |
| rs12419597  | T | 0.0353  |
| rs12269747  | A | 0.0298  |
| rs4758431   | G | 0.0235  |
| rs7947269   | C | 0.0168  |
| rs402479    | T | 0.0269  |
| rs1088991   | C | 0.0159  |
| rs10838371  | T | 0.0264  |
| rs144169662 | A | -0.0556 |
| rs151010120 | T | 0.0745  |
| rs10839551  | T | -0.1007 |
| rs113106362 | A | -0.06   |
| rs4296033   | T | 0.0199  |
| rs11601253  | T | 0.0385  |
| rs147927609 | A | -0.0923 |

|             |   |         |
|-------------|---|---------|
| rs17145887  | C | 0.0402  |
| rs77546336  | T | -0.0597 |
| rs117745461 | T | 0.0857  |
| rs71484151  | A | 0.0516  |
| rs118136338 | A | -0.0652 |
| rs286925    | A | -0.0167 |
| rs144442448 | C | 0.1018  |
| rs7942248   | C | -0.0142 |
| rs1944705   | C | 0.085   |
| rs79763056  | C | 0.0394  |
| rs1487857   | G | 0.0178  |
| rs76692878  | G | 0.0489  |
| rs61899166  | C | 0.0833  |
| rs78507661  | A | -0.0212 |
| rs113534305 | G | -0.0586 |
| rs11825579  | A | 0.0237  |
| rs7932034   | T | 0.0138  |
| rs80215442  | G | 0.0379  |
| rs7926191   | C | -0.014  |
| rs56078028  | G | -0.0142 |
| rs117932367 | A | 0.0854  |
| rs629580    | A | -0.099  |
| rs138677146 | T | 0.0529  |
| rs10501822  | G | 0.044   |
| rs146181668 | T | -0.0867 |
| rs12223368  | T | 0.0487  |
| rs1398284   | C | 0.0352  |
| rs113977029 | G | -0.1154 |
| rs4757421   | T | -0.0302 |
| rs77324027  | G | -0.0614 |
| rs77165242  | T | -0.0587 |
| rs12366011  | C | 0.0382  |
| rs79418536  | T | 0.0443  |
| rs72990952  | A | -0.1202 |
| rs11033520  | C | 0.0244  |
| rs578386    | C | -0.0139 |
| rs74924999  | A | 0.1087  |
| rs79297443  | T | -0.0545 |
| rs117921792 | T | -0.1166 |
| rs115845562 | G | 0.06    |
| rs78943594  | C | 0.0283  |
| rs583435    | T | 0.0455  |
| rs2460059   | A | -0.0137 |
| rs11215012  | A | 0.0162  |
| rs16928732  | G | -0.0156 |
| rs7947798   | T | 0.0196  |
| rs2239897   | G | -0.0318 |

|             |   |         |
|-------------|---|---------|
| rs552819    | T | -0.0167 |
| rs274493    | G | -0.0288 |
| rs140868342 | G | 0.0738  |
| rs72970132  | A | 0.0252  |
| rs322623    | C | -0.0171 |
| rs77581366  | T | -0.0249 |
| rs72893359  | G | -0.0268 |
| rs78002274  | G | -0.0432 |
| rs118170511 | C | 0.0644  |
| rs144685272 | A | -0.0716 |
| rs56084007  | G | -0.0994 |
| rs4944511   | T | 0.0141  |
| rs71469507  | T | -0.0354 |
| rs61905177  | T | 0.0166  |
| rs111463966 | G | 0.0455  |
| rs636831    | A | -0.0149 |
| rs7478728   | A | 0.0232  |
| rs151318831 | G | -0.0757 |
| rs76040534  | C | 0.0413  |
| rs11033555  | A | 0.047   |
| rs527077    | T | -0.0152 |
| rs4633466   | G | -0.0126 |
| rs78498981  | A | 0.0486  |
| rs7942802   | G | 0.0196  |
| rs10898721  | A | 0.0365  |
| rs117169667 | A | 0.0602  |
| rs1348944   | A | 0.0227  |
| rs76842416  | T | 0.0583  |
| rs67355686  | G | -0.0505 |
| rs117454745 | G | 0.0539  |
| rs73521130  | A | 0.03    |
| rs524526    | T | 0.0737  |
| rs112566509 | A | 0.0454  |
| rs75329634  | C | 0.0457  |
| rs115061019 | T | 0.0485  |
| rs75892510  | C | -0.0496 |
| rs75476113  | A | 0.0778  |
| rs79197260  | A | 0.0721  |
| rs113848350 | A | -0.0435 |
| rs503915    | G | -0.0188 |
| rs7116939   | C | 0.014   |
| rs116999242 | T | -0.0546 |
| rs2008960   | T | -0.0707 |
| rs141869721 | G | 0.0647  |
| rs59523070  | G | -0.083  |
| rs36122066  | C | -0.0205 |
| rs73602415  | A | 0.0293  |



|             |   |         |
|-------------|---|---------|
| rs45510391  | A | 0.0295  |
| rs12804458  | A | -0.0424 |
| rs11033440  | A | -0.0289 |
| rs1793263   | C | 0.0164  |
| rs72902224  | G | -0.0253 |
| rs11236708  | A | -0.0169 |
| rs17886371  | C | -0.0262 |
| rs75654687  | C | -0.1162 |
| rs12277563  | T | -0.0145 |
| rs77346371  | A | -0.059  |
| rs76169968  | A | 0.0275  |
| rs111982661 | T | -0.0479 |
| rs79367608  | G | 0.0339  |
| rs79915234  | A | 0.0597  |
| rs145137712 | T | -0.1286 |
| rs118074514 | G | 0.0211  |
| rs735045    | C | 0.0975  |
| rs2618070   | T | -0.0229 |
| rs35454982  | A | -0.0166 |
| rs78481184  | T | 0.0534  |
| rs12293377  | T | -0.054  |
| rs72971169  | A | -0.0344 |
| rs75279337  | A | 0.0785  |
| rs139372756 | C | 0.0683  |
| rs35134819  | G | -0.0568 |
| rs117337046 | G | -0.0934 |
| rs141866329 | A | -0.1283 |
| rs73030853  | A | -0.0435 |
| rs7115107   | G | -0.0524 |
| rs16915461  | T | -0.0256 |
| rs949285    | C | 0.0137  |
| rs3019253   | T | -0.0193 |
| rs34827446  | G | 0.0708  |
| rs78368469  | A | -0.051  |
| rs77663926  | C | -0.0602 |
| rs117152419 | G | 0.0353  |
| rs10831738  | A | -0.0212 |
| rs7948183   | C | 0.0283  |
| rs78781675  | T | -0.0555 |
| rs113872393 | A | -0.0718 |
| rs74855020  | T | 0.0216  |
| rs11235124  | A | -0.0209 |
| rs7113799   | T | 0.0276  |
| rs78284685  | G | -0.0982 |
| rs117421411 | T | -0.0584 |
| rs55898034  | A | -0.0193 |
| rs72852733  | C | -0.0391 |

|             |   |         |
|-------------|---|---------|
| rs77550847  | T | 0.1032  |
| rs78953519  | T | 0.0609  |
| rs11237573  | G | -0.0364 |
| rs78611978  | A | 0.0524  |
| rs11533190  | C | 0.0173  |
| rs118018867 | A | -0.1091 |
| rs75665380  | G | 0.0544  |
| rs114138529 | A | 0.0491  |
| rs11218095  | G | 0.0176  |
| rs7935643   | C | -0.0138 |
| rs76500006  | G | -0.0177 |
| rs78819144  | C | 0.046   |
| rs55663414  | C | 0.0809  |
| rs2155521   | T | 0.0127  |
| rs11607887  | C | -0.063  |
| rs117979486 | T | -0.029  |
| rs141010344 | T | 0.1072  |
| rs144065255 | T | -0.0598 |
| rs142028371 | T | -0.0973 |
| rs2682107   | A | -0.0165 |
| rs16907852  | A | -0.0216 |
| rs12792811  | T | -0.0179 |
| rs140397543 | A | -0.0662 |
| rs6483593   | T | 0.0143  |
| rs11216392  | T | 0.0222  |
| rs150426039 | G | 0.0755  |
| rs56017289  | G | 0.045   |
| rs142307459 | C | 0.0555  |
| rs117002557 | C | 0.059   |
| rs4756963   | T | -0.0971 |
| rs6416040   | G | -0.0175 |
| rs117171867 | C | 0.0399  |
| rs77499442  | T | 0.0461  |
| rs2513560   | G | 0.0177  |
| rs144697770 | T | 0.0817  |
| rs7104786   | T | -0.0156 |
| rs36086464  | G | -0.0496 |
| rs12794482  | A | -0.0201 |
| rs12793031  | C | 0.0251  |
| rs672496    | A | -0.0227 |
| rs77945288  | C | 0.0291  |
| rs116842826 | A | 0.0796  |
| rs117043755 | G | -0.1297 |
| rs4073197   | C | -0.028  |
| rs11223777  | C | 0.0352  |
| rs2667420   | T | 0.0219  |
| rs7925846   | C | -0.0452 |

|             |   |         |
|-------------|---|---------|
| rs117358788 | A | -0.0372 |
| rs1944605   | A | -0.043  |
| rs75154725  | T | -0.038  |
| rs7934520   | C | -0.015  |
| rs7940200   | G | 0.0547  |
| rs11600966  | T | -0.0691 |
| rs12279760  | T | -0.0157 |
| rs145387883 | A | 0.0549  |
| rs59697012  | A | -0.0317 |
| rs34554307  | A | -0.0434 |
| rs12806096  | C | 0.0503  |
| rs75918747  | A | 0.029   |
| rs11602157  | A | 0.0132  |
| rs76626256  | G | 0.0508  |
| rs75893551  | A | 0.0361  |
| rs2237998   | C | 0.0492  |
| rs79915131  | T | -0.0511 |
| rs7102786   | A | -0.0142 |
| rs11021033  | T | 0.0286  |
| rs12222663  | A | 0.0264  |
| rs114727664 | A | 0.0593  |
| rs79380240  | T | 0.1106  |
| rs58993018  | T | -0.0782 |
| rs11607115  | G | 0.0158  |
| rs116862104 | G | -0.0688 |
| rs293969    | T | 0.0153  |
| rs35893315  | A | -0.0369 |
| rs2017929   | A | -0.0373 |
| rs66918879  | T | -0.0252 |
| rs7948307   | A | 0.0157  |
| rs113572944 | G | -0.0218 |
| rs59023846  | G | 0.0645  |
| rs56343581  | C | 0.053   |
| rs117068331 | A | 0.0445  |
| rs73563181  | A | 0.0502  |
| rs7130967   | T | 0.0145  |
| rs11234100  | T | 0.0203  |
| rs76629122  | T | 0.0976  |
| rs117476601 | A | -0.0561 |
| rs116755798 | A | 0.0584  |
| rs148765648 | A | 0.1036  |
| rs12803674  | G | 0.0526  |
| rs17577622  | T | 0.0617  |
| rs79981895  | G | 0.0714  |
| rs622735    | T | -0.03   |
| rs566436    | G | -0.0133 |
| rs616214    | C | 0.0145  |

|             |   |         |
|-------------|---|---------|
| rs117339452 | G | 0.0485  |
| rs117634297 | A | -0.1153 |
| rs59356208  | T | 0.0973  |
| rs7942029   | G | -0.0158 |
| rs75736895  | T | 0.0248  |
| rs146337068 | A | -0.0978 |
| rs11607435  | G | -0.08   |
| rs78815774  | C | 0.0513  |
| rs113770106 | G | -0.0506 |
| rs2510852   | C | -0.0194 |
| rs11223261  | G | 0.0391  |
| rs118138183 | G | 0.0349  |
| rs78493981  | C | 0.0713  |
| rs61900223  | A | -0.0479 |
| rs1402954   | T | 0.0206  |
| rs111318016 | C | -0.0543 |
| rs609596    | T | 0.0146  |
| rs11020197  | T | -0.0207 |
| rs2511229   | A | -0.0227 |
| rs35447306  | G | 0.0489  |
| rs77237111  | C | 0.0365  |
| rs75489363  | A | 0.0327  |
| rs1789792   | G | -0.0158 |
| rs117001680 | G | -0.0949 |
| rs77018253  | C | -0.0312 |
| rs150001148 | T | 0.0704  |
| rs116586797 | C | -0.065  |
| rs477980    | G | 0.022   |
| rs72992103  | C | -0.0632 |
| rs2672549   | G | -0.0277 |
| rs11019712  | C | -0.0402 |
| rs72880823  | T | -0.0381 |
| rs4256968   | A | 0.0278  |
| rs4936510   | A | -0.0205 |
| rs4758203   | A | -0.0244 |
| rs7123339   | A | -0.0243 |
| rs12793036  | T | -0.0222 |
| rs3018473   | T | 0.0144  |
| rs117445890 | G | -0.065  |
| rs11222888  | G | 0.0177  |
| rs16909542  | A | -0.0365 |
| rs4575282   | C | 0.0309  |
| rs117888074 | T | 0.058   |
| rs2367873   | A | 0.02    |
| rs77634629  | C | 0.0531  |
| rs56371467  | T | 0.0567  |
| rs74326379  | A | 0.0338  |

|             |   |         |
|-------------|---|---------|
| rs17283762  | A | -0.0458 |
| rs77721353  | T | 0.0312  |
| rs79459678  | T | 0.0319  |
| rs12361674  | T | 0.073   |
| rs366066    | C | -0.0158 |
| rs513794    | A | -0.0279 |
| rs217090    | T | 0.0156  |
| rs10839863  | T | -0.074  |
| rs16928390  | C | 0.0163  |
| rs2281634   | T | -0.0253 |
| rs11021825  | G | 0.0159  |
| rs35849418  | T | 0.0278  |
| rs75245613  | T | -0.061  |
| rs138035788 | A | -0.0744 |
| rs901782    | C | 0.0137  |
| rs717676    | T | 0.0231  |
| rs568221    | T | -0.0138 |
| rs1119915   | G | -0.018  |
| rs11217420  | A | -0.0283 |
| rs470830    | G | -0.0619 |
| rs7931130   | C | -0.0147 |
| rs17124957  | A | -0.076  |
| rs11606535  | G | 0.0356  |
| rs150554218 | T | -0.0562 |
| rs117794242 | T | -0.0493 |
| rs117853495 | T | 0.0524  |
| rs12365862  | G | 0.0132  |
| rs4294587   | G | 0.0187  |
| rs76837351  | T | 0.0463  |
| rs78536618  | C | -0.0269 |
| rs34472659  | A | -0.0198 |
| rs61065873  | A | 0.0629  |
| rs494442    | T | -0.0129 |
| rs13377489  | G | -0.0809 |
| rs11042182  | G | 0.0133  |
| rs76007380  | C | 0.0481  |
| rs34233866  | C | 0.0361  |
| rs11032618  | A | -0.0232 |
| rs74925794  | T | -0.0272 |
| rs11608156  | T | -0.019  |
| rs572075    | T | 0.0211  |
| rs76542061  | T | 0.0505  |
| rs3842767   | T | -0.0281 |
| rs116889971 | G | 0.0508  |
| rs7127834   | A | -0.0139 |
| rs924643    | C | -0.0225 |
| rs12797091  | G | -0.0424 |

|             |   |         |
|-------------|---|---------|
| rs112746523 | A | -0.0553 |
| rs12361553  | T | -0.0131 |
| rs57908147  | A | -0.0343 |
| rs17134731  | T | 0.0671  |
| rs77419188  | A | 0.0691  |
| rs149056201 | G | 0.0813  |
| rs118126376 | T | 0.0518  |
| rs3849994   | G | -0.0258 |
| rs985292    | A | -0.0135 |
| rs141342554 | G | 0.053   |
| rs8808      | T | -0.0249 |
| rs2500035   | T | -0.0148 |
| rs151104286 | T | -0.0831 |
| rs59339851  | A | 0.0459  |
| rs117231270 | T | 0.1036  |
| rs11220964  | A | -0.0733 |
| rs35092832  | A | -0.0587 |
| rs117996958 | G | 0.0927  |
| rs138701654 | A | -0.0888 |
| rs1715295   | T | -0.0189 |
| rs10893608  | A | -0.0148 |
| rs630336    | A | -0.0568 |
| rs2945077   | A | -0.0925 |
| rs112323178 | A | -0.0469 |
| rs10838297  | G | -0.0136 |
| rs17118328  | G | 0.0639  |
| rs11601067  | C | 0.0375  |
| rs79447430  | C | 0.0866  |
| rs72964666  | T | 0.0521  |
| rs75828369  | G | 0.027   |
| rs11022705  | C | -0.0348 |
| rs78995203  | T | -0.0357 |
| rs17125985  | T | 0.0381  |
| rs78020328  | G | 0.0319  |
| rs4937977   | C | 0.0257  |
| rs113264182 | A | 0.076   |
| rs17530934  | G | 0.0532  |
| rs10836747  | C | 0.0195  |
| rs2846738   | G | -0.0132 |
| rs78125152  | G | 0.0791  |
| rs61910987  | G | 0.0357  |
| rs7109782   | C | -0.0167 |
| rs1857680   | G | 0.0129  |
| rs117039624 | A | 0.0648  |
| rs34214007  | T | 0.0751  |
| rs117972502 | T | -0.0413 |
| rs17788257  | A | 0.0652  |

|             |   |         |
|-------------|---|---------|
| rs117164546 | A | 0.0608  |
| rs11225332  | C | -0.0131 |
| rs72980504  | A | 0.0443  |
| rs11532043  | G | -0.0255 |
| rs111947457 | C | 0.0573  |
| rs35195855  | T | 0.0217  |
| rs10838694  | A | -0.018  |
| rs77865315  | T | 0.0896  |
| rs143362459 | G | -0.0254 |
| rs150059707 | G | 0.0705  |
| rs11218479  | T | -0.0188 |
| rs12365872  | A | 0.0553  |
| rs1146210   | G | -0.0839 |
| rs11823045  | T | 0.0667  |
| rs77138167  | A | 0.0601  |
| rs55976085  | G | -0.0963 |
| rs77074877  | A | 0.0249  |
| rs7124158   | A | 0.0567  |
| rs73004528  | T | -0.036  |
| rs79093027  | T | -0.0488 |
| rs80295752  | C | -0.0741 |
| rs117571469 | A | -0.0761 |
| rs117389929 | T | -0.0592 |
| rs77229351  | C | 0.0416  |
| rs11231521  | G | 0.0458  |
| rs141151466 | A | 0.0918  |
| rs7951242   | T | 0.0145  |
| rs12294354  | T | 0.0157  |
| rs76859702  | A | 0.0333  |
| rs5030442   | C | 0.0402  |
| rs137910312 | A | 0.0723  |
| rs4936102   | T | 0.0364  |
| rs75675125  | G | 0.0244  |
| rs1048932   | A | 0.0123  |
| rs895648    | C | -0.0128 |
| rs12785680  | A | 0.0183  |
| rs79352436  | C | -0.0213 |
| rs990337    | T | 0.0167  |
| rs148357959 | A | 0.1129  |
| rs56271335  | T | 0.0146  |
| rs55760428  | A | 0.0478  |
| rs140915514 | T | -0.1274 |
| rs17755323  | G | -0.0452 |
| rs76581393  | A | -0.0603 |
| rs71485709  | A | 0.0469  |
| rs12184421  | T | -0.0895 |
| rs476082    | G | 0.0275  |

|             |   |         |
|-------------|---|---------|
| rs11221067  | T | -0.0341 |
| rs77464696  | G | -0.0314 |
| rs28455833  | A | -0.0319 |
| rs56333178  | C | -0.0232 |
| rs77231599  | C | 0.0817  |
| rs11025110  | A | 0.0335  |
| rs17549982  | G | 0.0163  |
| rs117513890 | G | -0.0629 |
| rs59711149  | C | 0.0389  |
| rs149152722 | A | 0.0576  |
| rs72874794  | G | -0.0516 |
| rs145470191 | G | -0.0692 |
| rs117067006 | A | 0.0508  |
| rs61890479  | T | -0.035  |
| rs72935496  | T | 0.042   |
| rs4937824   | A | 0.0161  |
| rs139034795 | G | 0.0592  |
| rs10838319  | T | 0.0124  |
| rs76459618  | A | 0.0317  |
| rs61410409  | C | -0.0621 |
| rs117676764 | A | -0.0758 |
| rs143860760 | A | -0.0545 |
| rs10837407  | T | 0.0133  |
| rs10836656  | T | 0.0124  |
| rs77427114  | A | -0.0873 |
| rs72640805  | A | -0.0529 |
| rs12788923  | G | -0.0127 |
| rs142886296 | T | -0.0763 |
| rs7952628   | A | -0.029  |
| rs449460    | A | 0.0273  |
| rs76256598  | A | 0.0532  |
| rs2555345   | T | -0.0195 |
| rs3018736   | C | 0.0318  |
| rs117426860 | C | -0.0288 |
| rs79279607  | A | -0.0522 |
| rs116969249 | A | 0.0784  |
| rs3018644   | A | 0.0342  |
| rs7104170   | C | -0.0478 |
| rs10742706  | A | 0.0516  |
| rs61915573  | G | 0.0496  |
| rs2155169   | G | -0.0138 |
| rs72924001  | C | 0.0316  |
| rs2511840   | C | 0.0131  |
| rs1893351   | T | -0.0512 |
| rs76143023  | T | 0.0633  |
| rs4923019   | G | 0.0485  |
| rs17882441  | A | 0.0254  |



|             |   |         |
|-------------|---|---------|
| rs10466602  | G | 0.0125  |
| rs78641173  | C | 0.0497  |
| rs149970345 | C | -0.0193 |
| rs113343351 | A | 0.0331  |
| rs2433541   | C | -0.0125 |
| rs150433412 | A | 0.0644  |
| rs1454005   | T | -0.0686 |
| rs147274481 | G | 0.0799  |
| rs3133335   | T | -0.0328 |
| rs11215855  | C | 0.0152  |
| rs117271904 | T | 0.055   |
| rs146054756 | G | 0.0525  |
| rs142399864 | T | 0.0797  |
| rs118162031 | T | -0.0627 |
| rs11824683  | T | 0.025   |
| rs12417643  | C | 0.0494  |
| rs147040337 | T | -0.0425 |
| rs4122086   | A | -0.0599 |
| rs590082    | C | 0.0123  |
| rs148846219 | T | -0.0694 |
| rs149311320 | A | -0.045  |
| rs7120774   | A | 0.0137  |
| rs76570950  | A | 0.0685  |
| rs73040345  | T | 0.0746  |
| rs12285114  | A | -0.0208 |
| rs56063427  | A | -0.0141 |
| rs10742161  | A | 0.0127  |
| rs150585565 | T | -0.062  |
| rs11223625  | C | 0.0173  |
| rs145082340 | G | -0.0649 |
| rs12801144  | G | 0.0248  |
| rs73002554  | C | 0.0382  |
| rs72980787  | A | -0.0554 |
| rs11219210  | T | -0.0137 |
| rs11230827  | A | -0.0407 |
| rs1632302   | A | -0.0275 |
| rs145993004 | T | 0.129   |
| rs72902230  | C | 0.02    |
| rs1396951   | C | 0.0713  |
| rs2851712   | G | -0.0449 |
| rs80157288  | T | 0.0492  |
| rs145826847 | T | 0.0536  |
| rs644092    | A | 0.0154  |
| rs113807069 | T | -0.0696 |
| rs78540643  | C | 0.045   |
| rs139973334 | C | -0.0241 |
| rs56277883  | A | 0.0486  |

|             |   |         |
|-------------|---|---------|
| rs628993    | A | -0.0356 |
| rs75183845  | T | 0.0517  |
| rs34803332  | A | 0.08    |
| rs578446    | T | 0.0121  |
| rs118184950 | G | 0.0416  |
| rs12282543  | G | 0.0259  |
| rs140551822 | C | -0.0628 |
| rs10893525  | T | -0.0142 |
| rs231844    | A | 0.0219  |
| rs11235714  | C | 0.0217  |
| rs117466534 | A | 0.0484  |
| rs74853171  | T | 0.0877  |
| rs55909366  | C | -0.0574 |
| rs55887984  | A | -0.0433 |
| rs11042855  | A | -0.02   |
| rs78528738  | A | 0.0551  |
| rs11824914  | A | 0.0366  |
| rs3087923   | C | 0.0205  |
| rs71476973  | A | 0.0694  |
| rs1346690   | G | -0.0157 |
| rs75587169  | C | 0.0643  |
| rs75727669  | G | -0.0512 |
| rs117993229 | T | 0.0514  |
| rs118006862 | T | 0.0733  |
| rs10769378  | G | 0.0138  |
| rs59407682  | T | -0.0923 |
| rs2924671   | A | -0.0272 |
| rs35415980  | T | -0.0134 |
| rs1943505   | T | 0.0194  |
| rs147609050 | T | 0.1019  |
| rs148475372 | G | 0.0541  |
| rs72860153  | T | 0.076   |
| rs2282661   | G | 0.0143  |
| rs10897657  | A | 0.016   |
| rs12796215  | T | 0.0676  |
| rs113488707 | T | -0.0376 |
| rs111547348 | G | 0.0478  |
| rs117746947 | T | 0.1089  |
| rs61736992  | A | 0.0685  |
| rs2298459   | T | 0.0488  |
| rs6484804   | G | 0.0132  |
| rs34869754  | A | 0.033   |
| rs2745924   | G | -0.0128 |
| rs72975119  | T | -0.0864 |
| rs147942700 | A | -0.0737 |
| rs117290337 | C | -0.0775 |
| rs141551871 | A | -0.0575 |

|             |   |         |
|-------------|---|---------|
| rs61904735  | T | 0.0376  |
| rs78360647  | A | -0.0912 |
| rs10767568  | G | 0.0132  |
| rs76272857  | A | 0.0267  |
| rs11037431  | A | -0.0325 |
| rs145334492 | C | -0.0879 |
| rs56026335  | G | -0.0237 |
| rs141080596 | C | 0.0599  |
| rs55888004  | A | -0.0414 |
| rs75411138  | G | -0.0342 |
| rs669778    | T | -0.0172 |
| rs76311938  | A | 0.0594  |
| rs117954835 | C | 0.0648  |
| rs12223685  | C | -0.0717 |
| rs1690597   | T | 0.0141  |
| rs12184435  | C | -0.0381 |
| rs11219807  | A | -0.0192 |
| rs111589976 | G | -0.0425 |
| rs148411758 | T | 0.0523  |
| rs11215278  | T | 0.0168  |
| rs144789953 | T | -0.0635 |
| rs71465562  | T | -0.0673 |
| rs12808938  | T | -0.0211 |
| rs485030    | T | 0.0142  |
| rs7112926   | T | -0.016  |
| rs113943346 | T | -0.0667 |
| rs3925584   | C | 0.0123  |
| rs79191289  | C | 0.064   |
| rs649457    | A | 0.0128  |
| rs73529624  | T | 0.0491  |
| rs7926897   | A | 0.0226  |
| rs78019278  | T | 0.0471  |
| rs151033901 | T | 0.0564  |
| rs78388748  | G | 0.0242  |
| rs2433423   | C | 0.0325  |
| rs149013269 | A | 0.0596  |
| rs11043079  | G | -0.0172 |
| rs61889210  | A | -0.0715 |
| rs76347005  | T | -0.0786 |
| rs1448352   | A | 0.0163  |
| rs74795238  | G | -0.0836 |
| rs7110706   | C | -0.0399 |
| rs1037398   | G | 0.0121  |
| rs74892622  | G | -0.0611 |
| rs147907464 | T | 0.0494  |
| rs116857009 | C | 0.0528  |
| rs35800583  | A | -0.0293 |

|             |   |         |
|-------------|---|---------|
| rs117973349 | T | -0.0795 |
| rs58241661  | C | -0.0554 |
| rs74558672  | C | -0.0907 |
| rs116881614 | T | -0.0944 |
| rs79532235  | T | 0.034   |
| rs10835119  | A | -0.0129 |
| rs11033937  | T | 0.0154  |
| rs113704222 | A | -0.019  |
| rs55928867  | A | -0.0447 |
| rs79404398  | G | 0.0544  |
| rs147696335 | T | 0.101   |
| rs12098935  | T | 0.055   |
| rs12421402  | G | 0.0206  |
| rs12294153  | T | -0.0271 |
| rs11603672  | G | 0.0164  |
| rs2034322   | T | 0.0167  |
| rs204925    | C | 0.0168  |
| rs35078873  | A | -0.0143 |
| rs140683270 | C | -0.0755 |
| rs73038292  | T | -0.0289 |
| rs10895284  | G | 0.0142  |
| rs117979533 | G | 0.0724  |
| rs117307002 | C | -0.0382 |
| rs61886120  | C | -0.0169 |
| rs3026344   | G | 0.02    |
| rs10501441  | T | -0.017  |
| rs138177462 | G | 0.0581  |
| rs112640652 | A | 0.0849  |
| rs1478631   | A | 0.0132  |
| rs11604163  | G | 0.0529  |
| rs117287115 | T | -0.0502 |
| rs61876112  | G | -0.0304 |
| rs71478133  | C | -0.0425 |
| rs2846173   | T | -0.0145 |
| rs79658177  | T | 0.0457  |
| rs142102795 | A | -0.0924 |
| rs7114847   | T | -0.0223 |
| rs1478626   | T | 0.059   |
| rs6588946   | T | 0.0131  |
| rs12282938  | G | 0.0345  |
| rs17137998  | A | 0.0461  |
| rs117610613 | A | 0.0658  |
| rs6578864   | C | 0.0184  |
| rs45626943  | G | 0.0364  |
| rs10892888  | T | 0.0137  |
| rs11020894  | T | 0.0192  |
| rs117747972 | A | -0.0586 |

|             |   |         |
|-------------|---|---------|
| rs35582907  | T | 0.0519  |
| rs77660877  | T | 0.0314  |
| rs3782066   | G | 0.0158  |
| rs72934713  | T | 0.0228  |
| rs79454517  | C | 0.0567  |
| rs16907732  | T | 0.0417  |
| rs76742233  | T | -0.0312 |
| rs117593852 | T | -0.0341 |
| rs113621395 | G | -0.0848 |
| rs78966806  | T | 0.0258  |
| rs61906391  | T | -0.0793 |
| rs117606022 | A | 0.0423  |
| rs174602    | C | 0.0202  |
| rs13377199  | T | 0.0242  |
| rs492475    | A | 0.0222  |
| rs112521445 | C | 0.0417  |
| rs3763903   | A | 0.0577  |
| rs58930801  | T | 0.0154  |
| rs34401554  | T | -0.0556 |
| rs2615926   | G | 0.0173  |
| rs113239412 | T | -0.0637 |
| rs78738526  | T | -0.1136 |
| rs35113231  | T | 0.0404  |
| rs141344184 | A | -0.0607 |
| rs11018635  | C | -0.0188 |
| rs78210180  | T | -0.0827 |
| rs55910350  | A | -0.0167 |
| rs1858472   | T | -0.0123 |
| rs3017568   | C | -0.0127 |
| rs7952474   | G | 0.0127  |
| rs45559236  | A | -0.056  |
| rs10892154  | A | -0.012  |
| rs35225484  | C | -0.0483 |
| rs147460910 | G | -0.0634 |
| rs678776    | A | 0.0132  |
| rs7932214   | A | 0.0507  |
| rs79506361  | C | -0.0326 |
| rs2510150   | A | 0.0372  |
| rs540433    | C | 0.0143  |
| rs11030129  | A | 0.0123  |
| rs74325644  | T | -0.0235 |
| rs72985820  | T | -0.0577 |
| rs145487755 | T | -0.0601 |
| rs111408022 | T | 0.0756  |
| rs78844702  | C | 0.0571  |
| rs11212833  | C | 0.0139  |
| rs142599466 | T | 0.0907  |

|             |   |         |
|-------------|---|---------|
| rs518716    | A | 0.012   |
| rs7934444   | G | 0.0159  |
| rs17137917  | T | -0.0247 |
| rs17536268  | A | -0.0436 |
| rs75256341  | A | 0.0629  |
| rs143784037 | G | -0.0411 |
| rs111966496 | T | 0.0578  |
| rs74739178  | A | 0.0396  |
| rs117628232 | C | -0.0741 |
| rs10897275  | A | -0.013  |
| rs118088866 | A | 0.0707  |
| rs17382780  | T | 0.0233  |
| rs76203243  | T | 0.0534  |
| rs72873820  | C | 0.034   |
| rs216495    | G | -0.0125 |
| rs139655826 | C | -0.0987 |
| rs11025683  | C | -0.0131 |
| rs11220355  | A | -0.0259 |
| rs12362167  | A | -0.013  |
| rs4141121   | C | 0.0153  |
| rs79288929  | C | -0.0424 |
| rs143811078 | G | -0.0895 |
| rs2716521   | G | 0.0323  |
| rs1512376   | T | -0.0417 |
| rs59472562  | G | -0.0792 |
| rs117993393 | T | 0.043   |
| rs113663260 | G | -0.0892 |
| rs11021198  | G | 0.0202  |
| rs61879282  | G | 0.0495  |
| rs10833420  | T | -0.0128 |
| rs78969949  | G | 0.0258  |
| rs1458108   | C | -0.0221 |
| rs75328112  | G | -0.0582 |
| rs4756864   | C | -0.0128 |
| rs59040874  | G | -0.0212 |
| rs10791343  | T | -0.0149 |
| rs146887266 | C | -0.0834 |
| rs77065121  | C | 0.0371  |
| rs11213957  | T | 0.047   |
| rs7927542   | A | -0.0305 |
| rs11605819  | C | -0.0445 |
| rs79790477  | G | 0.0586  |
| rs11035382  | G | -0.0118 |
| rs74345261  | C | -0.0895 |
| rs12785453  | A | -0.0451 |
| rs138662774 | T | -0.0862 |
| rs2060745   | G | 0.0119  |

|             |   |         |
|-------------|---|---------|
| rs148103331 | T | 0.0546  |
| rs10897217  | G | 0.0201  |
| rs113138610 | A | -0.0948 |
| rs76279169  | A | 0.0549  |
| rs77375813  | C | 0.087   |
| rs78140269  | T | 0.0607  |
| rs704704    | G | 0.0247  |
| rs657320    | A | -0.018  |
| rs79435306  | A | 0.0326  |
| rs76057854  | T | -0.0863 |
| rs486055    | T | 0.0167  |
| rs77658621  | C | -0.0256 |
| rs12418845  | A | -0.0268 |
| rs142620491 | G | 0.08    |
| rs11025535  | A | -0.0119 |
| rs2238009   | T | -0.0172 |
| rs142732024 | C | -0.0131 |
| rs11493450  | A | 0.0128  |
| rs10160285  | T | 0.0174  |
| rs75505900  | T | -0.0464 |
| rs2403424   | G | 0.0137  |
| rs80257201  | T | -0.0599 |
| rs55798031  | G | 0.0451  |
| rs114641429 | A | 0.0366  |
| rs1915071   | G | -0.026  |
| rs139305042 | A | 0.0988  |
| rs12283321  | A | -0.0609 |
| rs11021135  | C | 0.0968  |
| rs56703842  | T | -0.0168 |
| rs150216062 | G | 0.0583  |
| rs77387025  | C | -0.0267 |
| rs35199514  | C | 0.0294  |
| rs117407021 | A | -0.0566 |
| rs1216747   | A | 0.0811  |
| rs1461667   | G | 0.0166  |
| rs2846062   | G | 0.0124  |
| rs117790096 | G | -0.093  |
| rs331536    | A | 0.0122  |
| rs117888740 | C | -0.0637 |
| rs517835    | C | 0.0141  |
| rs80263701  | G | 0.0576  |
| rs76766700  | C | -0.0823 |
| rs71481899  | A | 0.0266  |
| rs7483401   | C | 0.0626  |
| rs74052044  | G | -0.027  |
| rs17642218  | C | 0.0427  |
| rs34268295  | C | 0.0123  |

|             |   |         |
|-------------|---|---------|
| rs10894804  | T | 0.0138  |
| rs140812623 | G | -0.046  |
| rs116943227 | C | 0.0563  |
| rs2298475   | C | 0.0223  |
| rs111434355 | G | 0.0728  |
| rs17209457  | G | -0.0338 |
| rs77204866  | G | -0.0581 |
| rs7481076   | G | 0.0239  |
| rs115507593 | G | -0.0306 |
| rs4075412   | A | -0.0204 |
| rs7935881   | T | 0.0118  |
| rs12287811  | A | 0.0748  |
| rs150292682 | T | 0.0945  |
| rs111360343 | T | 0.0164  |
| rs116208395 | A | -0.0213 |
| rs72872425  | C | 0.0533  |
| rs539073    | A | -0.0157 |
| rs3802815   | C | 0.0151  |
| rs76226673  | T | -0.087  |
| rs2355017   | C | -0.0135 |
| rs7932348   | A | 0.0176  |
| rs77097586  | T | 0.0306  |
| rs147544103 | A | 0.0339  |
| rs10835858  | G | 0.0139  |
| rs12791203  | T | -0.0191 |
| rs144891065 | C | -0.0801 |
| rs79093668  | A | -0.0301 |
| rs77482368  | T | -0.0293 |
| rs150092556 | G | -0.0561 |
| rs72910039  | A | -0.021  |
| rs80153685  | T | 0.0329  |
| rs117371349 | T | -0.0276 |
| rs7102116   | G | -0.056  |
| rs7940843   | T | 0.0121  |
| rs4584610   | A | -0.0229 |
| rs1151205   | G | -0.0309 |
| rs7114645   | T | -0.0141 |
| rs506616    | T | -0.0126 |
| rs2882351   | T | 0.0121  |
| rs138831248 | T | -0.0538 |
| rs12786867  | A | 0.0502  |
| rs79714431  | T | 0.0511  |
| rs145630783 | T | 0.0533  |
| rs7125001   | C | -0.0146 |
| rs4630260   | T | 0.0143  |
| rs577043    | A | -0.0122 |
| rs112960529 | T | -0.0609 |



|             |   |         |
|-------------|---|---------|
| rs76844529  | G | -0.0227 |
| rs140188283 | A | -0.079  |
| rs4938796   | A | 0.0123  |
| rs7109305   | T | 0.0184  |
| rs78459567  | G | 0.0279  |
| rs117090053 | C | -0.0701 |
| rs4937933   | A | -0.0406 |
| rs75495070  | T | 0.0578  |
| rs117252404 | A | 0.0502  |
| rs28724581  | G | 0.0146  |
| rs12284382  | G | -0.0261 |
| rs148627201 | A | -0.0671 |
| rs72860501  | C | 0.0773  |
| rs72925956  | A | -0.0655 |
| rs12283287  | C | 0.0346  |
| rs11220418  | G | -0.0189 |
| rs573245    | T | 0.0173  |
| rs117286747 | T | 0.0571  |
| rs151156384 | T | -0.0627 |
| rs2165313   | C | -0.0151 |
| rs4754275   | T | -0.0122 |
| rs2278451   | T | 0.0116  |
| rs34659917  | A | 0.0703  |
| rs117463512 | A | 0.0396  |
| rs10833529  | A | -0.0125 |
| rs72844510  | G | 0.0561  |
| rs11603183  | T | -0.0402 |
| rs73003083  | T | 0.0362  |
| rs76664008  | A | -0.0238 |
| rs686567    | T | -0.0129 |
| rs882366    | C | 0.0155  |
| rs1792509   | C | 0.0116  |
| rs7119733   | A | -0.0138 |
| rs11227733  | G | 0.0499  |
| rs147557458 | G | 0.0746  |
| rs73018464  | A | 0.0164  |
| rs11217906  | C | -0.0416 |
| rs117817146 | T | 0.0961  |
| rs2869510   | T | -0.0506 |
| rs534421    | G | 0.0119  |
| rs118052337 | A | -0.0479 |
| rs117535087 | C | -0.0684 |
| rs117922884 | T | 0.0528  |
| rs147180180 | A | -0.0843 |
| rs12419032  | C | -0.0324 |
| rs11042889  | G | -0.0224 |
| rs7115718   | C | 0.0115  |

|             |   |         |
|-------------|---|---------|
| rs116928790 | A | 0.0515  |
| rs76332430  | A | -0.0225 |
| rs113288907 | C | 0.0172  |
| rs117327528 | C | 0.0739  |
| rs76766599  | G | -0.0582 |
| rs76548280  | T | -0.0517 |
| rs75327903  | A | -0.0593 |
| rs7117537   | A | 0.0969  |
| rs113923301 | T | 0.074   |
| rs10430836  | C | -0.0218 |
| rs3793964   | T | -0.012  |
| rs143790496 | T | 0.0435  |
| rs117281367 | A | 0.0332  |
| rs11601666  | T | 0.0366  |
| rs35627191  | A | -0.0131 |
| rs79904681  | A | 0.1042  |
| rs76032516  | C | -0.0316 |
| rs117677995 | A | 0.0662  |
| rs17504675  | A | 0.0624  |
| rs12795095  | G | 0.0542  |
| rs72933293  | G | 0.0572  |
| rs76111815  | T | -0.0218 |
| rs11604846  | C | 0.0263  |
| rs7106875   | A | 0.0216  |
| rs510955    | A | 0.0208  |
| rs75071656  | C | -0.0516 |
| rs17367342  | C | 0.0626  |
| rs7929803   | G | 0.0745  |
| rs11021152  | C | 0.0915  |
| rs16913144  | A | -0.0168 |
| rs12785863  | T | 0.0147  |
| rs117337119 | C | -0.0243 |
| rs34307357  | G | -0.0265 |
| rs72900590  | T | -0.0192 |
| rs4411290   | C | -0.0157 |
| rs73007089  | C | 0.0667  |
| rs1791459   | T | 0.0161  |
| rs7950181   | C | 0.0152  |
| rs74430282  | C | 0.047   |
| rs11213230  | A | -0.0436 |
| rs78927508  | C | -0.0289 |
| rs77806870  | C | 0.0344  |
| rs74529707  | T | 0.0476  |
| rs145132025 | T | 0.0753  |
| rs117501217 | T | 0.0392  |
| rs143262971 | G | -0.0688 |
| rs61895117  | G | 0.0939  |

|             |   |         |
|-------------|---|---------|
| rs11220543  | T | -0.012  |
| rs78521312  | G | 0.0675  |
| rs7925479   | A | 0.0124  |
| rs11021485  | A | -0.0189 |
| rs12270024  | C | -0.0194 |
| rs72858606  | A | -0.0483 |
| rs114366733 | C | -0.0828 |
| rs117200135 | A | 0.1002  |
| rs6416163   | C | 0.0143  |
| rs78864180  | A | -0.0558 |
| rs79453425  | A | 0.0249  |
| rs72989014  | T | -0.0745 |
| rs2136538   | G | 0.013   |
| rs6590759   | A | -0.0336 |
| rs11605646  | C | 0.014   |
| rs58990056  | A | 0.0245  |
| rs10766437  | A | -0.012  |
| rs118096138 | T | -0.0842 |
| rs12798244  | T | -0.0184 |
| rs34441025  | C | -0.0505 |
| rs78403783  | T | -0.0712 |
| rs3819080   | C | 0.0131  |
| rs2725439   | G | 0.0194  |
| rs34801068  | T | 0.0483  |
| rs111392490 | G | 0.0705  |
| rs74791697  | G | 0.0469  |
| rs146158119 | A | -0.0635 |
| rs2508374   | G | -0.0167 |
| rs4450197   | C | -0.0367 |
| rs139807638 | G | -0.0755 |
| rs11219182  | A | 0.0117  |
| rs12419783  | C | -0.0221 |
| rs118172129 | T | -0.0689 |
| rs535603    | A | -0.0182 |
| rs12282075  | A | 0.0741  |
| rs117417417 | A | 0.0462  |
| rs146765347 | T | 0.0372  |
| rs146450627 | C | -0.0403 |
| rs75520188  | A | -0.0611 |
| rs139590019 | A | -0.0497 |
| rs150206373 | T | -0.0672 |
| rs147470123 | A | -0.0404 |
| rs488903    | C | -0.0134 |
| rs4936765   | G | 0.0112  |
| rs11024832  | C | -0.035  |
| rs1631013   | G | -0.0168 |
| rs146051586 | T | 0.0801  |

|             |   |         |
|-------------|---|---------|
| rs71476938  | A | 0.0341  |
| rs7102858   | A | 0.0167  |
| rs11021359  | G | 0.0395  |
| rs3019647   | A | 0.0197  |
| rs605093    | T | 0.0114  |
| rs75360594  | A | -0.0759 |
| rs117285578 | C | -0.0583 |
| rs72915131  | T | -0.0309 |
| rs115704122 | T | -0.0333 |
| rs72976785  | A | 0.0309  |
| rs1511512   | C | -0.0131 |
| rs2155105   | T | -0.0116 |
| rs1944486   | G | -0.0135 |
| rs2725425   | A | -0.0447 |
| rs750130    | C | -0.0199 |
| rs77310206  | C | 0.0714  |
| rs78766829  | G | -0.0567 |
| rs11601272  | C | -0.013  |
| rs9300014   | C | -0.0442 |
| rs7924842   | C | 0.0294  |
| rs149921581 | T | 0.0339  |
| rs117728806 | A | -0.034  |
| rs1714354   | T | 0.0146  |
| rs142955205 | G | 0.0576  |
| rs12363701  | A | -0.0666 |
| rs35218522  | A | 0.0348  |
| rs61885874  | C | -0.0347 |
| rs138554907 | A | 0.0761  |
| rs11217450  | G | 0.0248  |
| rs78568462  | T | 0.0228  |
| rs72915592  | A | 0.0298  |
| rs10736563  | G | 0.0186  |
| rs117216383 | T | -0.0776 |
| rs7944986   | G | 0.0184  |
| rs4922866   | G | 0.093   |
| rs4936236   | G | 0.0288  |
| rs77001887  | G | 0.0606  |
| rs17439243  | T | -0.0592 |
| rs73020316  | C | 0.0352  |
| rs118068758 | G | -0.0498 |
| rs141494470 | G | 0.0565  |
| rs12363505  | A | 0.0122  |
| rs116982583 | A | 0.0432  |
| rs12293713  | A | -0.0183 |
| rs1498326   | T | 0.0262  |
| rs78034888  | T | -0.0366 |
| rs11822813  | G | 0.0205  |

|             |   |         |
|-------------|---|---------|
| rs7952557   | G | 0.0163  |
| rs10894737  | T | -0.0136 |
| rs76572700  | T | 0.0665  |
| rs674939    | T | 0.0283  |
| rs112180284 | C | 0.021   |
| rs117695718 | T | 0.0913  |
| rs7945313   | T | -0.0128 |
| rs4910716   | G | 0.0171  |
| rs61892117  | T | 0.0174  |
| rs28783217  | T | 0.0397  |
| rs11230230  | C | 0.0182  |
| rs79906560  | A | -0.023  |
| rs73028070  | A | 0.0256  |
| rs10082600  | G | -0.0176 |
| rs147628951 | C | 0.0649  |
| rs1401615   | C | -0.0156 |
| rs138886673 | A | -0.0749 |
| rs2412144   | A | -0.0163 |
| rs4402267   | C | 0.0462  |
| rs144012401 | G | -0.0732 |
| rs78988260  | A | -0.0671 |
| rs117409848 | C | 0.0488  |
| rs17475467  | T | -0.0274 |
| rs10501801  | T | 0.015   |
| rs10891241  | A | 0.0121  |
| rs117516944 | A | 0.0826  |
| rs148746917 | T | 0.0531  |
| rs117313862 | G | 0.044   |
| rs112908885 | T | -0.0421 |
| rs634885    | C | -0.0185 |
| rs61905806  | G | -0.1033 |
| rs10893757  | T | 0.015   |
| rs1352415   | C | -0.0127 |
| rs1518758   | C | -0.0114 |
| rs11225186  | C | 0.0303  |
| rs34536405  | A | -0.0274 |
| rs72912871  | C | 0.066   |
| rs7126677   | G | -0.0117 |
| rs45542138  | C | 0.067   |
| rs75421922  | A | 0.0397  |
| rs4757585   | C | 0.0504  |
| rs6578856   | G | 0.0157  |
| rs113859360 | T | -0.0316 |
| rs76525370  | T | -0.0644 |
| rs145718545 | A | 0.0543  |
| rs1063303   | G | -0.0236 |
| rs147268743 | T | 0.0913  |

|             |   |         |
|-------------|---|---------|
| rs73036335  | A | -0.0193 |
| rs73009621  | T | -0.0226 |
| rs150127892 | A | -0.0818 |
| rs10840264  | G | -0.0404 |
| rs10741883  | A | 0.0416  |
| rs74938975  | G | -0.0159 |
| rs11605930  | T | 0.0364  |
| rs116330780 | T | 0.0404  |
| rs10831259  | A | -0.0115 |
| rs117849885 | C | 0.0407  |
| rs147163944 | A | -0.0821 |
| rs74568444  | C | -0.037  |
| rs3016770   | T | 0.0236  |
| rs4757702   | G | 0.0119  |
| rs12792010  | T | -0.0174 |
| rs117970553 | T | -0.0446 |
| rs147904757 | A | 0.0929  |
| rs12575731  | G | -0.0124 |
| rs494379    | G | -0.0192 |
| rs1939305   | A | -0.0226 |
| rs10893425  | T | 0.0112  |
| rs56228504  | T | -0.0308 |
| rs141482433 | A | -0.071  |
| rs12420892  | T | -0.0127 |
| rs4923307   | C | -0.0193 |
| rs322624    | C | -0.0153 |
| rs11021464  | T | -0.0114 |
| rs117731500 | T | 0.0393  |
| rs118018535 | G | -0.0534 |
| rs61878662  | T | -0.0569 |
| rs61911183  | C | 0.0775  |
| rs11022541  | T | -0.0238 |
| rs117068902 | T | 0.0958  |
| rs78584583  | G | -0.0433 |
| rs55837824  | T | 0.0162  |
| rs931102    | C | 0.0124  |
| rs12789426  | C | 0.0614  |
| rs138996213 | T | 0.081   |
| rs117606334 | G | -0.0542 |
| rs117147335 | G | 0.0607  |
| rs61274404  | G | 0.0306  |
| rs17138705  | T | 0.0161  |
| rs147072206 | C | -0.0467 |
| rs4755844   | G | -0.0116 |
| rs7125172   | A | 0.0177  |
| rs1059091   | G | -0.0166 |
| rs117685451 | C | -0.0376 |

|             |   |         |
|-------------|---|---------|
| rs17302814  | G | 0.0517  |
| rs17246914  | A | -0.0259 |
| rs142088753 | A | -0.0575 |
| rs61901935  | T | -0.0324 |
| rs7952257   | A | 0.0259  |
| rs61479514  | T | 0.0693  |
| rs113992395 | A | 0.0452  |
| rs142987288 | A | 0.0491  |
| rs17645205  | G | -0.0275 |
| rs12793705  | C | 0.1094  |
| rs74762166  | G | -0.0756 |
| rs12417603  | T | -0.0228 |
| rs3862773   | A | -0.0169 |
| rs147291557 | G | 0.0627  |
| rs148330026 | G | -0.0337 |
| rs56263301  | A | -0.0207 |
| rs34512463  | A | -0.0514 |
| rs139090670 | C | 0.0645  |
| rs61889512  | T | 0.0216  |
| rs2850809   | T | -0.0153 |
| rs76560716  | A | 0.0346  |
| rs4757273   | G | 0.0281  |
| rs7111184   | G | -0.0127 |
| rs16913638  | G | -0.0145 |
| rs79211907  | A | 0.0485  |
| rs74358458  | A | 0.0269  |
| rs75871268  | A | 0.029   |
| rs145658765 | T | 0.0551  |
| rs77842754  | C | -0.0161 |
| rs72986893  | T | 0.068   |
| rs11223160  | A | -0.0228 |
| rs2084898   | A | -0.0159 |
| rs117826511 | G | 0.0417  |
| rs11223405  | A | -0.0722 |
| rs16926729  | A | 0.037   |
| rs12574348  | T | 0.0178  |
| rs72925935  | A | -0.0453 |
| rs11605469  | T | -0.0241 |
| rs78688752  | A | -0.0345 |
| rs78718247  | G | 0.0653  |
| rs142590650 | T | 0.044   |
| rs4938816   | A | -0.0635 |
| rs118127932 | G | 0.0867  |
| rs35260684  | A | -0.0399 |
| rs147129186 | A | 0.0481  |
| rs7123531   | C | 0.0209  |
| rs79301259  | G | 0.0582  |

|             |   |         |
|-------------|---|---------|
| rs11263623  | T | 0.0127  |
| rs117758811 | A | 0.0539  |
| rs4988037   | T | -0.0516 |
| rs10831885  | T | 0.0216  |
| rs56013057  | A | 0.0341  |
| rs7119941   | T | 0.0238  |
| rs34798612  | A | 0.0885  |
| rs117654829 | T | -0.0398 |
| rs117649895 | G | -0.0781 |
| rs7111254   | C | 0.0218  |
| rs3087563   | C | -0.0115 |
| rs10896314  | T | -0.011  |
| rs4930554   | A | 0.0391  |
| rs76501109  | C | 0.0615  |
| rs10894085  | C | -0.0126 |
| rs1114190   | A | 0.0129  |
| rs11217948  | C | -0.031  |
| rs4930003   | A | 0.0202  |
| rs117438324 | C | 0.0582  |
| rs117014671 | G | -0.0603 |
| rs4758066   | G | 0.0127  |
| rs10833525  | A | 0.0195  |
| rs12366086  | T | -0.0714 |
| rs11032570  | C | 0.0121  |
| rs61912410  | A | -0.0439 |
| rs537553    | G | 0.0145  |
| rs514075    | A | 0.0183  |
| rs11036408  | T | 0.0227  |
| rs17835798  | C | -0.0307 |
| rs11220042  | G | -0.0545 |
| rs11026018  | A | -0.0272 |
| rs11601294  | T | 0.0994  |
| rs142751902 | A | 0.1076  |
| rs511903    | T | 0.0173  |
| rs35353925  | A | 0.0476  |
| rs144968643 | A | 0.0125  |
| rs139518726 | T | 0.0613  |
| rs35365480  | A | 0.0605  |
| rs7131275   | A | 0.0125  |
| rs2155353   | C | 0.0196  |
| rs11823666  | G | -0.0184 |
| rs11215516  | G | -0.0115 |
| rs2016188   | A | 0.0182  |
| rs117854239 | T | -0.0246 |
| rs75250102  | T | 0.0508  |
| rs139297326 | G | -0.0463 |
| rs113915729 | G | 0.0796  |



|             |   |         |
|-------------|---|---------|
| rs2252520   | A | 0.0138  |
| rs1893062   | G | -0.0114 |
| rs10840110  | T | 0.0206  |
| rs12421213  | C | -0.0232 |
| rs12797891  | G | -0.0122 |
| rs61901459  | A | 0.0297  |
| rs4127488   | A | -0.0333 |
| rs112272479 | C | 0.0733  |
| rs75302101  | T | 0.047   |
| rs116992988 | A | -0.0637 |
| rs78715762  | A | -0.0623 |
| rs10766659  | A | -0.0255 |
| rs117529257 | G | -0.0705 |
| rs117285200 | T | -0.0523 |
| rs74513774  | G | -0.0108 |
| rs80261077  | T | 0.0651  |
| rs77954367  | T | 0.0711  |
| rs321395    | G | -0.0113 |
| rs74674490  | G | 0.0416  |
| rs685903    | C | -0.0111 |
| rs78106094  | G | 0.0487  |
| rs36086104  | C | -0.0147 |
| rs76554317  | G | -0.0266 |
| rs73595281  | G | -0.0194 |
| rs2852438   | G | -0.0179 |
| rs56338634  | A | -0.0198 |
| rs117300895 | T | 0.0301  |
| rs7129438   | G | -0.0123 |
| rs117237158 | C | 0.0899  |
| rs111882370 | T | -0.0568 |
| rs73016417  | C | 0.0351  |
| rs117598924 | A | 0.0989  |
| rs2957489   | C | 0.0179  |
| rs34543083  | T | -0.0251 |
| rs7932050   | G | 0.0962  |
| rs56014415  | A | -0.046  |
| rs2004650   | T | -0.0344 |
| rs143523940 | C | 0.077   |
| rs80129374  | T | 0.0494  |
| rs12799289  | A | -0.0135 |
| rs116942541 | A | 0.056   |
| rs11525368  | A | -0.0107 |
| rs7111911   | T | 0.0616  |
| rs117965770 | A | -0.0398 |
| rs55869750  | G | -0.0278 |
| rs61918906  | G | 0.068   |
| rs11821013  | G | 0.0622  |

|             |   |         |
|-------------|---|---------|
| rs76203247  | C | 0.0464  |
| rs12421447  | G | 0.0198  |
| rs11225922  | C | 0.021   |
| rs117875793 | T | -0.0385 |
| rs7115455   | T | 0.0215  |
| rs1232553   | A | 0.0239  |
| rs117906197 | A | 0.0659  |
| rs67916527  | G | -0.0231 |
| rs12421742  | T | 0.0143  |
| rs140548972 | A | -0.0862 |
| rs78889368  | T | 0.041   |
| rs10502246  | C | 0.0188  |
| rs117858865 | T | 0.0631  |
| rs117831801 | C | 0.0229  |
| rs1623316   | G | -0.0145 |
| rs80300973  | T | 0.0263  |
| rs142658571 | T | 0.0313  |
| rs11214868  | A | -0.0399 |
| rs151146306 | T | -0.0469 |
| rs118170182 | A | 0.0457  |
| rs34887827  | T | 0.0534  |
| rs1676517   | A | 0.0295  |
| rs2271079   | T | -0.0173 |
| rs61879374  | G | -0.016  |
| rs137954623 | T | -0.0592 |
| rs11220911  | A | -0.024  |
| rs117286844 | A | 0.0782  |
| rs1493297   | A | -0.0554 |
| rs76635531  | A | -0.0462 |
| rs6485631   | A | 0.0261  |
| rs1961758   | A | 0.0184  |
| rs117957720 | G | 0.0577  |
| rs536393    | G | -0.0109 |
| rs948006    | T | -0.0298 |
| rs76236406  | G | 0.0193  |
| rs1149576   | T | 0.0114  |
| rs2897199   | C | 0.0568  |
| rs4910033   | A | 0.0398  |
| rs145431788 | T | -0.0473 |
| rs75732772  | G | 0.0462  |
| rs11025093  | T | 0.0223  |
| rs137894378 | A | 0.0703  |
| rs12417568  | G | 0.0128  |
| rs12417641  | C | -0.0111 |
| rs147349048 | T | 0.0819  |
| rs11218556  | T | -0.0121 |
| rs11824538  | G | 0.0442  |

|             |   |         |
|-------------|---|---------|
| rs117595751 | A | 0.0684  |
| rs80136921  | C | -0.034  |
| rs111545158 | C | 0.0547  |
| rs147607611 | T | -0.0691 |
| rs115360788 | T | 0.0276  |
| rs75084671  | T | -0.0523 |
| rs11026301  | A | -0.0225 |
| rs72915178  | A | 0.045   |
| rs117777844 | G | 0.0577  |
| rs12288134  | G | -0.012  |
| rs3213229   | T | -0.0506 |
| rs117417603 | C | -0.0494 |
| rs4944081   | A | 0.0185  |
| rs78912802  | C | -0.0474 |
| rs7103671   | G | -0.0113 |
| rs74833118  | A | -0.0521 |
| rs118099451 | A | -0.05   |
| rs140793618 | G | -0.054  |
| rs61892472  | C | -0.0332 |
| rs79247135  | C | 0.0543  |
| rs142026245 | G | -0.0299 |
| rs73039381  | A | 0.0486  |
| rs17664162  | G | 0.0275  |
| rs118048619 | C | -0.0715 |
| rs7948432   | T | 0.0119  |
| rs11219712  | T | 0.0242  |
| rs117188441 | G | 0.0597  |
| rs56135790  | G | -0.0161 |
| rs7950334   | A | 0.046   |
| rs10501965  | T | 0.0298  |
| rs73392281  | A | -0.0267 |
| rs7128118   | T | 0.016   |
| rs117168596 | C | 0.0786  |
| rs1825155   | T | -0.0121 |
| rs4755318   | G | 0.0123  |
| rs1964456   | C | -0.0129 |
| rs117242643 | A | -0.0303 |
| rs512273    | G | 0.0211  |
| rs510720    | G | 0.0166  |
| rs144480413 | T | 0.0516  |
| rs78368496  | G | 0.0328  |
| rs73531261  | G | -0.0489 |
| rs117973008 | A | 0.0494  |
| rs963497    | C | -0.0122 |
| rs34758394  | T | 0.0503  |
| rs74956663  | T | -0.0517 |
| rs12270224  | G | -0.0127 |

|             |   |         |
|-------------|---|---------|
| rs72861147  | A | -0.0156 |
| rs11022580  | A | 0.043   |
| rs2846703   | G | -0.0116 |
| rs143794510 | T | -0.0474 |
| rs2853047   | T | 0.0153  |
| rs10840002  | A | -0.0113 |
| rs117928343 | A | 0.0306  |
| rs12574150  | A | -0.0188 |
| rs143659057 | A | 0.0639  |
| rs142786837 | C | -0.0547 |
| rs74586275  | G | 0.0253  |
| rs61879103  | C | -0.048  |
| rs637992    | C | 0.0124  |
| rs1557482   | C | -0.0115 |
| rs413708    | A | -0.0148 |
| rs34172484  | T | -0.0305 |
| rs74551717  | C | 0.0416  |
| rs17149130  | G | -0.0314 |
| rs118000676 | G | 0.0425  |
| rs11606692  | A | 0.0155  |
| rs6592511   | A | -0.0627 |
| rs12786343  | T | -0.0175 |
| rs117761868 | C | 0.0309  |
| rs59255385  | A | -0.0219 |
| rs73460466  | A | -0.0153 |
| rs79338069  | A | 0.0331  |
| rs12802926  | A | 0.0166  |
| rs35696005  | A | 0.0201  |
| rs117244685 | G | 0.0585  |
| rs112387837 | G | -0.0585 |
| rs547021    | C | 0.0168  |
| rs4937096   | T | -0.011  |
| rs116976762 | C | -0.0741 |
| rs11234039  | A | 0.0454  |
| rs117133993 | C | 0.0646  |
| rs2673331   | C | 0.0112  |
| rs118049519 | C | 0.0466  |
| rs2682484   | A | -0.088  |
| rs7131992   | G | -0.0989 |
| rs10848255  | C | 0.0739  |
| rs10847131  | G | 0.0716  |
| rs770369    | C | -0.0678 |
| rs1131454   | G | -0.1004 |
| rs11613210  | A | 0.0886  |
| rs11182826  | A | 0.2475  |
| rs73079818  | A | 0.444   |
| rs34196696  | C | 0.0781  |

|             |   |         |
|-------------|---|---------|
| rs144589720 | A | 0.2278  |
| rs10785447  | G | 0.0647  |
| rs59753713  | A | 0.3532  |
| rs17789655  | A | 0.0798  |
| rs11171077  | T | -0.0921 |
| rs4919705   | A | 0.261   |
| rs10860304  | A | -0.0644 |
| rs11180177  | T | 0.1101  |
| rs71461092  | T | 0.2012  |
| rs12824044  | C | 0.1661  |
| rs75822727  | A | -0.3744 |
| rs56229556  | T | -0.0778 |
| rs112347689 | T | 0.1013  |
| rs144779170 | T | 0.2942  |
| rs2249838   | A | 0.108   |
| rs60053128  | C | -0.3714 |
| rs10743893  | G | -0.0997 |
| rs139601006 | G | 0.2421  |
| rs113584176 | C | 0.1486  |
| rs11609798  | C | 0.0609  |
| rs147910225 | T | 0.3336  |
| rs16942518  | G | -0.1485 |
| rs983459    | G | 0.1037  |
| rs1975615   | T | 0.0733  |
| rs12296956  | A | 0.0889  |
| rs17821235  | C | -0.1495 |
| rs11182122  | A | -0.1275 |
| rs10784736  | G | 0.0596  |
| rs7972529   | G | 0.2224  |
| rs60427776  | T | -0.2693 |
| rs113121416 | T | 0.4134  |
| rs75503773  | C | 0.2446  |
| rs7301346   | T | -0.063  |
| rs11175943  | C | 0.0579  |
| rs10861632  | A | 0.0705  |
| rs79291447  | G | -0.104  |
| rs11062441  | A | 0.0747  |
| rs11067652  | T | -0.3423 |
| rs73115999  | T | -0.2586 |
| rs11174105  | A | -0.0564 |
| rs145448201 | C | 0.2999  |
| rs6746      | T | 0.2014  |
| rs2701623   | C | 0.0613  |
| rs117368572 | C | 0.1848  |
| rs8707      | G | 0.0775  |
| rs117784206 | T | 0.1576  |
| rs79146043  | G | 0.1376  |

|             |   |         |
|-------------|---|---------|
| rs7306031   | T | 0.0881  |
| rs117126372 | T | 0.2091  |
| rs74894449  | T | 0.09    |
| rs75191329  | A | 0.1868  |
| rs10875851  | A | -0.0585 |
| rs6538145   | A | -0.0767 |
| rs75621786  | A | -0.0757 |
| rs59869469  | T | 0.0718  |
| rs6488945   | A | 0.056   |
| rs118144642 | T | -0.172  |
| rs10772822  | T | -0.0835 |
| rs79875796  | C | 0.1799  |
| rs61935570  | C | 0.2102  |
| rs61936681  | A | 0.2796  |
| rs1427980   | G | -0.1898 |
| rs147172210 | T | 0.3621  |
| rs10777647  | C | -0.0551 |
| rs80335880  | T | 0.2493  |
| rs112685682 | C | -0.3397 |
| rs10082807  | C | 0.0589  |
| rs10778667  | T | 0.0588  |
| rs117348974 | T | 0.3408  |
| rs28755978  | G | 0.0746  |
| rs7973769   | G | 0.0787  |
| rs7962639   | C | 0.056   |
| rs11113416  | T | 0.0538  |
| rs10845433  | T | 0.0785  |
| rs111985454 | A | 0.0862  |
| rs3851645   | A | -0.0934 |
| rs12425072  | A | -0.0894 |
| rs77451327  | C | 0.1489  |
| rs75865259  | T | 0.311   |
| rs1527076   | G | 0.0861  |
| rs117060871 | T | -0.4212 |
| rs17108960  | T | -0.0661 |
| rs17660176  | A | 0.0786  |
| rs10876968  | T | -0.0641 |
| rs28376636  | G | 0.0993  |
| rs148661302 | G | 0.363   |
| rs11043785  | C | -0.081  |
| rs117253326 | A | 0.2528  |
| rs10846756  | T | -0.0679 |
| rs11045739  | C | 0.1209  |
| rs112163334 | A | -0.0896 |
| rs1989912   | A | -0.0528 |
| rs7977127   | G | -0.0917 |
| rs149201943 | G | 0.1912  |

|             |   |         |
|-------------|---|---------|
| rs4761728   | A | 0.0523  |
| rs112629934 | A | 0.2377  |
| rs11610209  | A | 0.0779  |
| rs4140768   | A | -0.0519 |
| rs310801    | G | -0.0522 |
| rs11147230  | G | 0.0581  |
| rs61921437  | T | -0.0883 |
| rs7136496   | T | 0.0561  |
| rs56294439  | T | -0.0599 |
| rs11064707  | G | 0.1278  |
| rs12227858  | A | 0.2444  |
| rs17376157  | A | -0.0718 |
| rs10843424  | T | -0.0548 |
| rs12313587  | G | 0.2755  |
| rs61922909  | A | 0.1704  |
| rs11055987  | G | 0.3322  |
| rs7133958   | A | 0.1207  |
| rs17101291  | G | 0.2513  |
| rs147953056 | A | -0.312  |
| rs7961593   | A | 0.0518  |
| rs7303746   | G | -0.06   |
| rs10771005  | G | 0.0507  |
| rs4764408   | A | -0.1158 |
| rs7956910   | T | 0.0813  |
| rs73277142  | T | 0.2215  |
| rs112771659 | C | 0.0884  |
| rs1195753   | T | 0.0854  |
| rs7306598   | A | 0.0542  |
| rs1482442   | C | 0.1126  |
| rs79529740  | G | 0.1945  |
| rs12296348  | A | -0.1063 |
| rs1354121   | G | -0.0885 |
| rs17102257  | C | 0.238   |
| rs3816382   | G | 0.1401  |
| rs61932022  | C | 0.2365  |
| rs75048880  | A | -0.1916 |
| rs77074888  | T | 0.1687  |
| rs12818282  | C | -0.0516 |
| rs118156615 | A | -0.1646 |
| rs4237948   | A | 0.2929  |
| rs12425507  | A | 0.4036  |
| rs10840614  | A | 0.0532  |
| rs4931594   | C | 0.066   |
| rs7978850   | T | 0.0581  |
| rs35407225  | A | 0.1598  |
| rs10860231  | A | 0.057   |
| rs11612015  | A | 0.321   |

|             |   |         |
|-------------|---|---------|
| rs1161108   | A | 0.0512  |
| rs139674340 | A | 0.1998  |
| rs10849134  | C | 0.0655  |
| rs57420222  | T | 0.1683  |
| rs59008700  | A | 0.2298  |
| rs11561489  | T | 0.0595  |
| rs11051686  | C | 0.0901  |
| rs143391248 | C | 0.152   |
| rs73305721  | A | 0.0941  |
| rs2346666   | G | -0.0498 |
| rs10847628  | T | -0.162  |
| rs11105360  | C | -0.0907 |
| rs10773352  | A | -0.0497 |
| rs6487366   | G | 0.0521  |
| rs907485    | A | -0.0985 |
| rs7980440   | C | -0.0556 |
| rs140200626 | C | -0.2605 |
| rs2881860   | T | -0.2087 |
| rs117533267 | G | 0.1868  |
| rs10875664  | A | 0.0664  |
| rs784858    | C | -0.0494 |
| rs10840931  | C | -0.0776 |
| rs7963681   | A | -0.0621 |
| rs77601604  | C | 0.2964  |
| rs10860097  | T | -0.1728 |
| rs7138715   | A | 0.0663  |
| rs11177731  | T | -0.0585 |
| rs10849644  | T | -0.0677 |
| rs73044796  | A | -0.1089 |
| rs17030333  | T | 0.1422  |
| rs117603936 | T | -0.1877 |
| rs7330      | C | 0.0578  |
| rs2189271   | C | -0.0476 |
| rs2730467   | C | 0.0505  |
| rs61925809  | T | 0.3249  |
| rs34770947  | T | 0.3404  |
| rs996850    | G | -0.0596 |
| rs117426714 | T | -0.2973 |
| rs17226486  | C | -0.0872 |
| rs140177417 | T | 0.1172  |
| rs10785579  | T | 0.0687  |
| rs12306227  | A | -0.0918 |
| rs7960249   | G | 0.1146  |
| rs10492144  | G | 0.0776  |
| rs11105270  | T | -0.0994 |
| rs3782141   | A | -0.1528 |
| rs75446108  | G | 0.41    |



|             |   |         |
|-------------|---|---------|
| rs10848445  | A | 0.0503  |
| rs7302122   | T | 0.0524  |
| rs140326517 | A | -0.2785 |
| rs2649960   | G | -0.0524 |
| rs201384    | T | 0.0654  |
| rs10880444  | C | 0.051   |
| rs6487583   | G | -0.0842 |
| rs7135506   | C | 0.049   |
| rs11065664  | G | 0.1663  |
| rs12822480  | T | 0.099   |
| rs143857827 | C | -0.2055 |
| rs7132236   | A | -0.1219 |
| rs112429558 | G | -0.1797 |
| rs17025408  | T | -0.0603 |
| rs7488554   | G | -0.0625 |
| rs117716897 | T | 0.2592  |
| rs116821988 | C | -0.0726 |
| rs33912216  | A | -0.0949 |
| rs73199409  | T | 0.2247  |
| rs77437585  | G | 0.1073  |
| rs117329978 | T | 0.1871  |
| rs11169105  | G | -0.0865 |
| rs143970182 | C | 0.312   |
| rs10849133  | G | -0.0519 |
| rs2303397   | T | 0.1643  |
| rs61918378  | C | 0.2265  |
| rs11113411  | G | -0.0742 |
| rs2734425   | A | 0.0773  |
| rs7301269   | G | -0.0478 |
| rs4627167   | T | 0.2736  |
| rs7972868   | C | -0.0602 |
| rs12304499  | G | 0.2287  |
| rs1426622   | T | -0.0831 |
| rs2191527   | G | -0.1304 |
| rs10842548  | T | 0.0598  |
| rs11615578  | T | 0.0565  |
| rs117864746 | T | -0.1364 |
| rs11066383  | A | -0.0653 |
| rs11609608  | T | -0.1108 |
| rs117537383 | G | -0.1582 |
| rs838947    | A | 0.0476  |
| rs4147686   | C | -0.2008 |
| rs1704912   | G | -0.0623 |
| rs1545495   | G | 0.1242  |
| rs12816932  | G | 0.0723  |
| rs2704757   | A | -0.0516 |
| rs7300209   | G | 0.0489  |

|             |   |         |
|-------------|---|---------|
| rs7960032   | C | 0.0518  |
| rs6487131   | T | 0.1997  |
| rs10848848  | T | -0.2328 |
| rs1245642   | T | 0.0793  |
| rs10047526  | T | -0.0674 |
| rs16930563  | T | 0.0953  |
| rs10870487  | A | 0.065   |
| rs76728072  | G | 0.2532  |
| rs6489078   | A | 0.0577  |
| rs17734375  | C | -0.1003 |
| rs78280798  | A | 0.1538  |
| rs78640564  | G | 0.2799  |
| rs74587896  | C | 0.1876  |
| rs11246916  | A | 0.3842  |
| rs11115628  | G | -0.0864 |
| rs57792817  | G | 0.1746  |
| rs117091460 | T | -0.2565 |
| rs56181326  | G | 0.0802  |
| rs7958302   | C | 0.2651  |
| rs1397534   | G | 0.1552  |
| rs7309212   | T | -0.0868 |
| rs111550257 | T | 0.0754  |
| rs76964726  | G | 0.1039  |
| rs73064556  | A | 0.1925  |
| rs12581778  | T | -0.0467 |
| rs12314925  | T | -0.066  |
| rs2920823   | C | 0.0506  |
| rs7309245   | C | 0.0711  |
| rs35682190  | G | 0.0963  |
| rs2370602   | C | 0.0661  |
| rs2917922   | C | 0.108   |
| rs1007709   | G | -0.0744 |
| rs699605    | C | 0.0729  |
| rs57709330  | A | -0.0499 |
| rs11059727  | T | 0.0487  |
| rs74769539  | C | 0.0664  |
| rs118105471 | T | -0.3406 |
| rs61926121  | C | -0.1127 |
| rs12369766  | G | 0.0789  |
| rs10849925  | G | -0.0487 |
| rs78483417  | A | 0.1069  |
| rs149225694 | A | -0.3346 |
| rs55849521  | G | -0.0609 |
| rs12313045  | T | -0.0695 |
| rs10848923  | C | 0.0685  |
| rs3809277   | T | 0.0828  |
| rs150181827 | A | -0.1807 |

|             |   |         |
|-------------|---|---------|
| rs77526173  | A | -0.1605 |
| rs10785049  | C | 0.0521  |
| rs77955493  | A | -0.3392 |
| rs60399623  | A | -0.0789 |
| rs74554917  | T | 0.1761  |
| rs4767004   | G | 0.1234  |
| rs10842701  | C | -0.0488 |
| rs145264695 | A | -0.3322 |
| rs79786886  | C | 0.2922  |
| rs10507238  | A | -0.068  |
| rs2337632   | A | -0.061  |
| rs143337912 | G | 0.222   |
| rs141112401 | C | -0.3741 |
| rs34806567  | T | 0.1803  |
| rs2647916   | T | -0.055  |
| rs11058840  | T | 0.0466  |
| rs11044893  | G | 0.1016  |
| rs12579053  | T | -0.1659 |
| rs113990800 | A | -0.142  |
| rs80327461  | A | 0.2076  |
| rs34330     | T | 0.0551  |
| rs78463148  | T | 0.0852  |
| rs874627    | T | 0.0503  |
| rs12579520  | A | 0.1026  |
| rs61943369  | T | 0.0588  |
| rs12228232  | T | -0.1403 |
| rs4883195   | T | 0.088   |
| rs7312789   | C | 0.0868  |
| rs419838    | C | -0.0452 |
| rs1561092   | C | 0.0452  |
| rs11830871  | G | -0.1426 |
| rs12307104  | T | -0.1339 |
| rs35962889  | A | 0.1516  |
| rs4765821   | T | -0.0533 |
| rs11177673  | A | -0.0916 |
| rs140255323 | C | 0.1801  |
| rs11062394  | A | 0.0985  |
| rs4271432   | A | 0.0796  |
| rs10743769  | T | 0.0477  |
| rs4766617   | T | -0.0464 |
| rs4439590   | T | 0.0819  |
| rs76566226  | T | -0.1591 |
| rs61912233  | T | 0.1651  |
| rs147788050 | G | 0.0935  |
| rs75259522  | T | -0.1122 |
| rs68142163  | T | -0.1343 |
| rs11176921  | A | 0.0688  |

|             |   |         |
|-------------|---|---------|
| rs117671818 | T | 0.2913  |
| rs78654827  | C | -0.1252 |
| rs73177719  | G | 0.2192  |
| rs1453700   | G | -0.0771 |
| rs7136488   | T | 0.0527  |
| rs146869084 | C | -0.1654 |
| rs7964216   | C | -0.0521 |
| rs73155352  | G | 0.156   |
| rs34116035  | T | -0.0581 |
| rs11616160  | T | 0.1953  |
| rs7979510   | T | -0.1546 |
| rs7139107   | G | -0.1025 |
| rs2638497   | A | 0.0473  |
| rs833830    | C | -0.0837 |
| rs11052075  | A | 0.1718  |
| rs71459127  | T | 0.0515  |
| rs78911505  | G | -0.0742 |
| rs7965538   | T | -0.0553 |
| rs11048455  | T | -0.0475 |
| rs76787248  | T | -0.172  |
| rs1011347   | T | -0.0518 |
| rs61913758  | A | 0.069   |
| rs12427023  | C | 0.0676  |
| rs10778520  | T | 0.0449  |
| rs11107914  | A | -0.0908 |
| rs143164350 | T | -0.1974 |
| rs10745979  | G | 0.0658  |
| rs11060087  | G | -0.1001 |
| rs141040328 | C | -0.1507 |
| rs74508180  | G | 0.1756  |
| rs11112727  | T | -0.1967 |
| rs34489192  | T | 0.1846  |
| rs75642435  | C | 0.2027  |
| rs758168    | C | -0.0498 |
| rs73343892  | C | 0.0873  |
| rs147440733 | A | 0.2744  |
| rs4980852   | T | -0.1109 |
| rs2342920   | T | 0.0486  |
| rs1960380   | T | 0.0648  |
| rs17112071  | C | -0.05   |
| rs35974573  | T | 0.2873  |
| rs686263    | C | 0.2417  |
| rs10859419  | G | 0.0577  |
| rs117789409 | A | 0.2368  |
| rs149877911 | A | 0.1165  |
| rs7134275   | C | 0.0452  |
| rs11068283  | A | -0.1714 |

|             |   |         |
|-------------|---|---------|
| rs76589409  | T | 0.183   |
| rs117086889 | G | 0.3561  |
| rs7953824   | C | -0.0448 |
| rs11176106  | T | 0.0958  |
| rs138048699 | A | -0.0753 |
| rs2254705   | C | 0.0949  |
| rs10848025  | A | 0.0655  |
| rs697633    | A | -0.0499 |
| rs56314457  | C | 0.0593  |
| rs10878925  | C | -0.0452 |
| rs78999542  | A | 0.1239  |
| rs11063070  | T | -0.1148 |
| rs117248061 | G | -0.1529 |
| rs142683380 | A | 0.2818  |
| rs10850121  | A | 0.0456  |
| rs2467120   | C | 0.0512  |
| rs7486834   | G | 0.0462  |
| rs11046997  | C | 0.0618  |
| rs78726213  | G | -0.2386 |
| rs74063803  | G | 0.2227  |
| rs930900    | T | -0.0482 |
| rs118134441 | C | 0.3832  |
| rs11115371  | A | 0.286   |
| rs79278833  | A | -0.1504 |
| rs73081121  | C | 0.1008  |
| rs61925674  | T | 0.216   |
| rs61941227  | A | 0.0582  |
| rs77134861  | C | 0.2385  |
| rs143621342 | T | 0.2081  |
| rs117028083 | A | -0.1288 |
| rs12315948  | C | 0.0735  |
| rs77885228  | G | 0.0751  |
| rs2710285   | G | 0.0534  |
| rs2438332   | A | 0.0908  |
| rs77401945  | C | 0.32    |
| rs78913991  | A | 0.1013  |
| rs61937269  | C | -0.1464 |
| rs10876654  | A | -0.0598 |
| rs147402868 | A | 0.056   |
| rs139927458 | G | 0.0934  |
| rs1166773   | G | -0.0643 |
| rs73046278  | A | 0.1004  |
| rs4766227   | T | -0.0477 |
| rs145220360 | C | -0.1664 |
| rs151289104 | C | 0.2302  |
| rs117577057 | A | -0.1127 |
| rs1596725   | C | 0.0432  |

|             |   |         |
|-------------|---|---------|
| rs118021813 | C | 0.1186  |
| rs797266    | C | 0.049   |
| rs11609546  | T | -0.0788 |
| rs144861892 | T | 0.1629  |
| rs12297038  | C | -0.3108 |
| rs75810558  | C | 0.0873  |
| rs7957611   | C | -0.1539 |
| rs117745126 | C | 0.1308  |
| rs2103360   | A | 0.0426  |
| rs149815361 | T | 0.1488  |
| rs11053828  | G | -0.049  |
| rs1800159   | A | 0.0456  |
| rs61378614  | C | 0.0625  |
| rs1532721   | C | -0.062  |
| rs12581131  | A | 0.0651  |
| rs1599851   | A | 0.0499  |
| rs139065568 | A | 0.4335  |
| rs11147304  | A | 0.0488  |
| rs17751196  | G | 0.0504  |
| rs77081360  | T | 0.2127  |
| rs1964607   | A | 0.059   |
| rs3847943   | C | 0.0596  |
| rs143663440 | T | -0.0468 |
| rs7302907   | A | 0.1181  |
| rs7302925   | A | 0.0523  |
| rs1056785   | C | 0.2504  |
| rs10492371  | C | 0.0736  |
| rs2407282   | A | -0.0496 |
| rs2888546   | T | 0.0498  |
| rs1244883   | A | 0.0441  |
| rs79330948  | A | 0.0913  |
| rs11068627  | G | -0.0974 |
| rs7314285   | G | 0.0868  |
| rs34942530  | G | -0.0533 |
| rs11113862  | G | 0.2453  |
| rs7295182   | C | 0.0497  |
| rs1689513   | G | -0.2119 |
| rs2417507   | G | 0.0596  |
| rs60476107  | T | -0.1859 |
| rs7398658   | G | -0.0469 |
| rs73107108  | C | -0.061  |
| rs142863747 | C | 0.2106  |
| rs149704101 | A | 0.1571  |
| rs11176078  | C | 0.0483  |
| rs10880220  | C | -0.0447 |
| rs10771891  | T | -0.044  |
| rs10772938  | C | 0.0441  |

|             |   |         |
|-------------|---|---------|
| rs117968806 | A | -0.1188 |
| rs17333658  | G | 0.1712  |
| rs5745855   | A | 0.0792  |
| rs17092665  | C | -0.0897 |
| rs11108170  | C | 0.0707  |
| rs112336823 | T | 0.188   |
| rs1155232   | C | -0.0631 |
| rs117789228 | C | 0.195   |
| rs11183116  | C | -0.0462 |
| rs10862940  | A | -0.0781 |
| rs77774272  | C | -0.1045 |
| rs73129642  | C | -0.0478 |
| rs79192040  | C | 0.2118  |
| rs117300028 | C | 0.2643  |
| rs111256065 | T | -0.2773 |
| rs73160952  | T | 0.1198  |
| rs117561176 | C | 0.1656  |
| rs7299837   | T | 0.0491  |
| rs146624843 | A | -0.2734 |
| rs7961945   | G | 0.1042  |
| rs4766529   | C | 0.0717  |
| rs17805891  | G | 0.0897  |
| rs7485441   | C | 0.101   |
| rs79338332  | C | 0.1936  |
| rs140139100 | A | 0.2025  |
| rs7301967   | T | 0.0467  |
| rs57336697  | A | 0.0883  |
| rs11049085  | G | -0.0509 |
| rs11609180  | G | -0.0485 |
| rs4766965   | A | 0.1316  |
| rs73138422  | A | 0.2353  |
| rs73111421  | G | -0.1032 |
| rs2176236   | C | 0.0413  |
| rs150922679 | G | -0.307  |
| rs11061978  | T | -0.0504 |
| rs11835006  | A | 0.0623  |
| rs11574529  | T | 0.1692  |
| rs17100898  | T | -0.2408 |
| rs73607853  | A | -0.0958 |
| rs117202026 | C | -0.134  |
| rs1345090   | G | -0.0478 |
| rs12301709  | C | -0.0517 |
| rs79625180  | C | 0.1215  |
| rs16908406  | C | 0.1414  |
| rs11065695  | C | 0.059   |
| rs10850668  | G | 0.0689  |
| rs35286038  | G | -0.0555 |

|             |   |         |
|-------------|---|---------|
| rs12371538  | T | 0.1564  |
| rs77302718  | G | -0.108  |
| rs76287543  | G | 0.107   |
| rs744691    | A | 0.0522  |
| rs17655673  | C | 0.2318  |
| rs10505763  | T | -0.1622 |
| rs143726418 | G | 0.1155  |
| rs56011342  | T | 0.0893  |
| rs34655157  | A | 0.3332  |
| rs2936838   | G | 0.0649  |
| rs112706153 | G | 0.187   |
| rs7303167   | C | -0.049  |
| rs7967642   | A | 0.0651  |
| rs112400217 | A | 0.2677  |
| rs2352746   | G | 0.1047  |
| rs2564581   | A | 0.1248  |
| rs117098985 | T | 0.2835  |
| rs4913287   | C | -0.0996 |
| rs143188022 | A | 0.3574  |
| rs149373710 | G | 0.0826  |
| rs12422753  | G | 0.0542  |
| rs61924613  | C | 0.0579  |
| rs111952657 | A | 0.2248  |
| rs10859800  | T | 0.0522  |
| rs117675249 | C | -0.1085 |
| rs11056231  | A | 0.07    |
| rs143610357 | C | 0.2685  |
| rs12580174  | A | 0.0431  |
| rs12810189  | T | -0.1285 |
| rs2433644   | A | -0.0436 |
| rs7978582   | G | -0.0534 |
| rs118078653 | T | -0.223  |
| rs73196963  | A | 0.196   |
| rs144019350 | C | 0.3537  |
| rs146826478 | C | 0.1102  |
| rs7958980   | T | -0.0732 |
| rs1467356   | G | 0.0486  |
| rs3020925   | G | -0.1729 |
| rs11104784  | T | 0.0591  |
| rs10850600  | G | 0.1364  |
| rs138429819 | T | 0.1517  |
| rs140708463 | G | -0.168  |
| rs11058469  | T | -0.1689 |
| rs76974754  | G | -0.2755 |
| rs78263043  | T | -0.156  |
| rs11574029  | C | -0.4161 |
| rs148830695 | A | 0.2646  |



|             |   |         |
|-------------|---|---------|
| rs12832870  | C | -0.0583 |
| rs822873    | T | -0.0435 |
| rs11610235  | A | -0.1017 |
| rs17097611  | A | -0.1299 |
| rs7962552   | A | -0.0453 |
| rs77104423  | T | 0.0813  |
| rs116863352 | G | 0.208   |
| rs140496017 | T | 0.0614  |
| rs7302068   | C | 0.0614  |
| rs61929273  | T | -0.194  |
| rs140777464 | G | 0.2124  |
| rs7136245   | G | 0.1035  |
| rs78881160  | T | 0.1454  |
| rs73305609  | G | -0.0686 |
| rs2857663   | A | 0.0712  |
| rs4764615   | C | -0.1239 |
| rs79303786  | T | -0.1882 |
| rs75708520  | C | -0.1983 |
| rs117801130 | A | 0.2635  |
| rs7137886   | T | 0.0414  |
| rs34291988  | T | -0.2981 |
| rs10848759  | C | 0.0634  |
| rs61942177  | C | 0.0812  |
| rs113002268 | A | 0.3402  |
| rs4766540   | G | 0.0641  |
| rs7956449   | C | -0.0501 |
| rs2384614   | C | -0.0516 |
| rs117601702 | A | 0.3187  |
| rs35005063  | A | -0.1073 |
| rs7965203   | T | 0.0487  |
| rs10161431  | A | 0.1607  |
| rs372601    | T | 0.0454  |
| rs116853276 | C | 0.1596  |
| rs144748961 | C | 0.2187  |
| rs11067821  | G | -0.0821 |
| rs12322518  | A | 0.1563  |
| rs2306701   | T | 0.0446  |
| rs74891472  | G | -0.2111 |
| rs10876969  | A | -0.1709 |
| rs6490243   | A | 0.0496  |
| rs55722209  | T | -0.041  |
| rs12299814  | A | 0.0482  |
| rs67114497  | C | -0.0561 |
| rs4964599   | T | 0.2964  |
| rs74239248  | A | 0.1396  |
| rs149061131 | T | 0.2027  |
| rs12822229  | T | 0.1422  |

|             |   |         |
|-------------|---|---------|
| rs7955954   | C | 0.0595  |
| rs2344685   | T | -0.0418 |
| rs7976742   | G | -0.041  |
| rs117220773 | C | -0.1385 |
| rs2161439   | G | 0.0428  |
| rs2287182   | T | 0.0752  |
| rs1496858   | T | 0.0854  |
| rs73101448  | T | 0.2037  |
| rs145939372 | A | 0.1756  |
| rs12371619  | G | 0.1032  |
| rs3819537   | C | 0.0532  |
| rs71436899  | A | -0.1279 |
| rs3736850   | T | -0.1318 |
| rs4761369   | T | -0.0532 |
| rs11613567  | C | 0.0569  |
| rs1148528   | G | -0.0806 |
| rs4762518   | C | 0.0421  |
| rs35435570  | A | 0.0814  |
| rs7306706   | G | 0.0422  |
| rs784563    | G | 0.041   |
| rs11612157  | T | 0.0794  |
| rs12829916  | C | -0.11   |
| rs145521729 | T | 0.2137  |
| rs34542078  | T | 0.054   |
| rs80336904  | A | 0.1857  |
| rs11829367  | A | -0.1703 |
| rs11613745  | T | 0.0718  |
| rs1706497   | T | 0.1181  |
| rs78761288  | T | -0.2366 |
| rs7305322   | G | -0.2781 |
| rs2235217   | T | 0.0443  |
| rs708336    | T | 0.0474  |
| rs12581013  | A | 0.1073  |
| rs579123    | C | 0.1171  |
| rs1819020   | T | -0.1638 |
| rs826836    | A | 0.0929  |
| rs6582210   | T | 0.0469  |
| rs7979466   | A | -0.0449 |
| rs74962111  | A | -0.0878 |
| rs7977942   | G | 0.1802  |
| rs117087256 | T | 0.2687  |
| rs75936148  | A | 0.0769  |
| rs17765253  | A | -0.0513 |
| rs78244967  | T | -0.1244 |
| rs200788    | C | 0.0428  |
| rs1557848   | G | 0.0634  |
| rs1396204   | T | -0.0508 |

|             |   |         |
|-------------|---|---------|
| rs12369123  | A | -0.0621 |
| rs78592736  | T | -0.2078 |
| rs79078147  | G | -0.1224 |
| rs146810532 | T | -0.1868 |
| rs12828350  | T | 0.2036  |
| rs10778958  | T | 0.0671  |
| rs117158575 | T | -0.2714 |
| rs139931570 | T | 0.3096  |
| rs11174360  | T | 0.0594  |
| rs117837047 | G | -0.087  |
| rs7963748   | A | 0.0459  |
| rs4766854   | A | -0.0758 |
| rs9651893   | T | -0.0585 |
| rs10492017  | A | 0.061   |
| rs1993067   | T | -0.0625 |
| rs11183822  | C | -0.0574 |
| rs644524    | A | 0.0454  |
| rs61918495  | G | -0.0961 |
| rs740852    | A | 0.1356  |
| rs10744180  | C | 0.0577  |
| rs10847147  | G | 0.1848  |
| rs7976313   | C | 0.053   |
| rs67417726  | T | 0.0587  |
| rs6488321   | C | -0.0395 |
| rs116943751 | T | 0.1765  |
| rs3892924   | C | 0.0782  |
| rs17110109  | C | -0.0426 |
| rs12231012  | G | 0.1576  |
| rs116974719 | T | 0.0977  |
| rs12817883  | C | 0.0681  |
| rs77086098  | T | -0.1418 |
| rs2942379   | A | 0.0404  |
| rs2407986   | A | 0.1259  |
| rs118096597 | C | 0.1328  |
| rs11834045  | T | -0.0433 |
| rs12425462  | T | -0.3621 |
| rs79178099  | C | 0.2219  |
| rs61939084  | A | 0.0455  |
| rs4930827   | G | -0.0923 |
| rs146935317 | T | -0.4307 |
| rs7962256   | C | 0.1024  |
| rs73146541  | G | -0.0914 |
| rs7967327   | A | -0.0416 |
| rs118124680 | T | -0.1478 |
| rs2138722   | T | 0.1458  |
| rs7956443   | A | 0.0599  |
| rs4768033   | A | -0.1096 |

|             |   |         |
|-------------|---|---------|
| rs7965971   | G | 0.0555  |
| rs150293420 | A | 0.1576  |
| rs1110034   | C | 0.0634  |
| rs35128337  | A | -0.2718 |
| rs7311094   | A | 0.0433  |
| rs282316    | T | 0.1492  |
| rs7314268   | G | -0.0691 |
| rs111550237 | T | 0.2156  |
| rs56247952  | G | 0.1542  |
| rs146833771 | G | 0.1207  |
| rs61931652  | G | 0.0477  |
| rs61911984  | T | -0.0436 |
| rs832726    | T | 0.0501  |
| rs3498      | G | -0.0758 |
| rs1717325   | A | -0.072  |
| rs71456575  | C | 0.1353  |
| rs3893975   | T | -0.0437 |
| rs78450721  | T | 0.0795  |
| rs111669765 | G | -0.1962 |
| rs73193626  | T | 0.0706  |
| rs501004    | G | 0.0481  |
| rs11169757  | C | -0.0432 |
| rs247336    | C | 0.073   |
| rs74893152  | C | -0.092  |
| rs139694673 | C | -0.1685 |
| rs73092956  | T | -0.1441 |
| rs2682332   | C | 0.0871  |
| rs4842416   | A | 0.1135  |
| rs149370137 | C | -0.2394 |
| rs34823840  | T | 0.204   |
| rs7301304   | G | 0.0475  |
| rs2418083   | A | 0.0453  |
| rs76023170  | A | -0.1099 |
| rs10845895  | G | -0.0556 |
| rs28644184  | T | -0.0609 |
| rs73156943  | T | -0.0656 |
| rs11063354  | G | 0.0809  |
| rs11169001  | G | 0.1919  |
| rs111533601 | C | -0.0442 |
| rs1388681   | G | -0.0429 |
| rs312137    | T | -0.0461 |
| rs2377094   | C | 0.045   |
| rs35642650  | C | 0.0594  |
| rs74580164  | C | -0.2226 |
| rs12824299  | C | -0.0487 |
| rs6489992   | A | -0.0413 |
| rs117900047 | T | -0.2749 |

|             |   |         |
|-------------|---|---------|
| rs7298967   | C | -0.1806 |
| rs1894306   | T | -0.0408 |
| rs10748319  | T | 0.0824  |
| rs4492896   | A | -0.0889 |
| rs66867812  | C | 0.1377  |
| rs7966132   | T | 0.1511  |
| rs55685136  | T | -0.111  |
| rs61908605  | C | 0.0725  |
| rs17116024  | A | -0.1154 |
| rs111309051 | G | 0.1558  |
| rs1245641   | T | -0.0563 |
| rs2270788   | C | -0.0684 |
| rs61915286  | C | 0.2689  |
| rs11065156  | G | -0.2711 |
| rs139899587 | T | -0.0993 |
| rs117436007 | C | 0.1126  |
| rs16947883  | C | -0.2492 |
| rs12314134  | A | 0.1399  |
| rs10507220  | A | 0.205   |
| rs76629482  | G | 0.0529  |
| rs1691627   | A | 0.0413  |
| rs117669383 | A | 0.1629  |
| rs7970400   | C | 0.0587  |
| rs138861933 | T | 0.178   |
| rs12827304  | A | 0.0988  |
| rs115585918 | A | 0.122   |
| rs1795811   | T | 0.0419  |
| rs35387762  | A | 0.0442  |
| rs33925480  | T | 0.0579  |
| rs117621335 | A | -0.1097 |
| rs76127038  | G | 0.0744  |
| rs2607894   | T | -0.0415 |
| rs7136385   | C | 0.125   |
| rs10862697  | C | -0.1855 |
| rs61938654  | A | -0.2134 |
| rs12228022  | T | 0.0624  |
| rs1076344   | G | 0.0471  |
| rs10770514  | T | -0.041  |
| rs1717399   | A | 0.0393  |
| rs2086674   | C | 0.075   |
| rs76222399  | T | 0.0912  |
| rs61933609  | C | -0.1279 |
| rs17407618  | G | 0.1293  |
| rs17037206  | G | 0.0645  |
| rs1463652   | C | 0.0414  |
| rs11063027  | A | 0.0779  |
| rs11059252  | T | 0.0799  |

|             |   |         |
|-------------|---|---------|
| rs77388553  | A | 0.1672  |
| rs11836973  | A | -0.1846 |
| rs10847216  | A | 0.0465  |
| rs112860699 | T | -0.1031 |
| rs11179056  | A | 0.074   |
| rs11114408  | A | -0.046  |
| rs10783990  | G | 0.0395  |
| rs75309645  | A | 0.0902  |
| rs741290    | T | -0.055  |
| rs11060970  | C | 0.0955  |
| rs79456507  | T | 0.2634  |
| rs1515557   | G | 0.0388  |
| rs10860604  | G | -0.054  |
| rs11054704  | A | 0.0531  |
| rs7974049   | C | -0.0724 |
| rs61936296  | A | -0.1079 |
| rs11178310  | C | 0.1455  |
| rs11059255  | C | -0.0455 |
| rs7303497   | C | 0.0683  |
| rs150302366 | A | 0.1541  |
| rs140777174 | T | 0.2617  |
| rs147541107 | G | -0.1716 |
| rs12297153  | C | -0.0445 |
| rs7132127   | G | 0.0432  |
| rs117887449 | C | -0.1918 |
| rs11109163  | G | -0.0884 |
| rs113183821 | G | 0.2095  |
| rs11174335  | G | -0.0427 |
| rs148740880 | G | 0.1827  |
| rs4762405   | G | -0.0439 |
| rs17769918  | A | -0.0806 |
| rs4768086   | G | -0.0383 |
| rs12311399  | C | -0.0861 |
| rs11044716  | C | -0.0632 |
| rs56024609  | T | -0.0965 |
| rs17604972  | A | -0.0981 |
| rs79182306  | A | 0.0694  |
| rs117135060 | A | 0.2223  |
| rs151201528 | G | -0.3208 |
| rs16931790  | C | 0.1028  |
| rs1386482   | T | 0.0388  |
| rs4134458   | A | 0.0848  |
| rs12822588  | T | 0.1289  |
| rs78966679  | T | 0.0972  |
| rs4842665   | A | 0.043   |
| rs34592443  | T | 0.1078  |
| rs2043624   | C | 0.122   |

|             |   |         |
|-------------|---|---------|
| rs76420646  | C | 0.1289  |
| rs7133547   | C | 0.1013  |
| rs60655408  | A | -0.0976 |
| rs11176012  | T | -0.0842 |
| rs116854032 | T | 0.1594  |
| rs6539174   | A | -0.038  |
| rs78241644  | A | 0.1085  |
| rs143287248 | A | -0.1354 |
| rs111509072 | C | 0.3152  |
| rs117495386 | C | -0.2764 |
| rs1498748   | C | 0.0441  |
| rs116121698 | C | -0.1355 |
| rs1860097   | T | -0.048  |
| rs2954981   | A | -0.117  |
| rs12826974  | C | 0.0456  |
| rs61926897  | A | 0.0429  |
| rs61937964  | T | -0.0591 |
| rs71460343  | A | 0.1056  |
| rs1419616   | T | 0.0516  |
| rs17505856  | A | -0.0799 |
| rs7953524   | G | 0.0435  |
| rs77587063  | A | -0.0801 |
| rs7962561   | C | 0.0539  |
| rs11832813  | C | -0.0953 |
| rs7977816   | A | 0.0441  |
| rs7132256   | C | 0.1048  |
| rs61015779  | G | -0.0821 |
| rs140797850 | C | 0.1767  |
| rs10506336  | C | 0.0701  |
| rs75722275  | T | 0.2129  |
| rs11564263  | G | 0.0391  |
| rs12304327  | A | -0.0425 |
| rs10841008  | A | 0.0375  |
| rs17809806  | T | 0.0512  |
| rs113397318 | G | 0.1753  |
| rs74493606  | G | 0.1992  |
| rs17547650  | A | -0.0436 |
| rs1122148   | C | 0.1042  |
| rs1445435   | T | 0.0701  |
| rs2701285   | C | 0.039   |
| rs10082967  | G | 0.0475  |
| rs149992069 | G | -0.253  |
| rs80166842  | T | 0.1387  |
| rs3886355   | A | -0.0782 |
| rs1833245   | A | -0.1272 |
| rs71455226  | A | 0.1858  |
| rs7134021   | T | -0.0396 |

|             |   |         |
|-------------|---|---------|
| rs1148412   | C | -0.0395 |
| rs10848875  | G | 0.1152  |
| rs1861487   | C | -0.0457 |
| rs11169943  | T | 0.075   |
| rs76087061  | A | 0.2023  |
| rs11061531  | A | -0.1136 |
| rs11524058  | T | 0.1324  |
| rs6490063   | T | -0.0404 |
| rs73111236  | C | -0.0818 |
| rs75175522  | T | 0.1194  |
| rs7975277   | G | 0.1107  |
| rs79131600  | A | 0.1564  |
| rs139995578 | G | -0.1365 |
| rs7133507   | C | 0.0739  |
| rs1396208   | T | -0.0395 |
| rs7959163   | C | 0.0554  |
| rs117874807 | T | 0.2933  |
| rs591992    | T | -0.0499 |
| rs73475574  | A | 0.1026  |
| rs11109810  | A | 0.0689  |
| rs59580770  | A | -0.0868 |
| rs10876525  | C | -0.0625 |
| rs146774219 | T | -0.1324 |
| rs4764754   | G | 0.2561  |
| rs79079378  | G | -0.0858 |
| rs75963431  | A | -0.0549 |
| rs1696326   | T | -0.1056 |
| rs869331    | T | -0.0441 |
| rs140050920 | C | 0.2073  |
| rs980365    | C | 0.0387  |
| rs7302326   | C | 0.0694  |
| rs4335617   | G | 0.0526  |
| rs2645900   | A | -0.054  |
| rs1049381   | A | 0.0504  |
| rs68071847  | G | 0.0784  |
| rs11047408  | C | 0.0527  |
| rs1461045   | G | -0.043  |
| rs117738722 | T | 0.1625  |
| rs4259894   | T | 0.1219  |
| rs2102294   | A | -0.0799 |
| rs1549412   | A | 0.0617  |
| rs7136353   | C | -0.0439 |
| rs73160980  | T | -0.0556 |
| rs2200743   | G | -0.0396 |
| rs11112850  | G | -0.1978 |
| rs11046126  | T | 0.1537  |
| rs7316397   | A | 0.0468  |



|             |   |         |
|-------------|---|---------|
| rs10161449  | T | 0.0925  |
| rs11057482  | T | 0.0366  |
| rs4766630   | T | 0.0997  |
| rs2090836   | T | 0.0442  |
| rs717995    | T | -0.1238 |
| rs6539137   | A | 0.0585  |
| rs710681    | C | -0.0373 |
| rs73216698  | T | 0.1447  |
| rs73130166  | A | 0.1453  |
| rs77237569  | C | 0.1105  |
| rs140297443 | G | 0.2778  |
| rs17118032  | C | 0.1778  |
| rs28758182  | G | 0.1913  |
| rs4930729   | T | 0.061   |
| rs111943990 | A | -0.3857 |
| rs4882273   | C | -0.1492 |
| rs7311910   | A | 0.0493  |
| rs7306923   | T | 0.0536  |
| rs117462747 | A | 0.1967  |
| rs7399006   | C | -0.0396 |
| rs117887720 | C | -0.3046 |
| rs79455332  | T | 0.2778  |
| rs117132536 | T | 0.1136  |
| rs11112997  | C | 0.0415  |
| rs6487294   | A | 0.0392  |
| rs10879428  | C | -0.0463 |
| rs141980366 | T | 0.1329  |
| rs10774689  | A | 0.0388  |
| rs78004438  | T | 0.3288  |
| rs77551688  | G | 0.0473  |
| rs1567163   | G | -0.0751 |
| rs76084902  | C | 0.2774  |
| rs76485363  | T | -0.185  |
| rs76869634  | T | 0.1685  |
| rs117093885 | A | -0.0592 |
| rs7299394   | A | 0.0798  |
| rs2366149   | T | 0.0454  |
| rs145121080 | G | 0.2649  |
| rs138423519 | C | 0.2042  |
| rs76043385  | A | 0.1539  |
| rs2131705   | G | -0.0374 |
| rs79686186  | G | -0.1807 |
| rs12812325  | C | -0.0423 |
| rs118135133 | G | 0.1759  |
| rs12423120  | G | -0.06   |
| rs73132999  | G | 0.147   |
| rs1035105   | C | -0.0389 |

|             |   |         |
|-------------|---|---------|
| rs7312385   | G | 0.0432  |
| rs61910038  | T | 0.1217  |
| rs35039890  | T | -0.0753 |
| rs78251066  | G | -0.3565 |
| rs11055852  | T | 0.0723  |
| rs6489691   | C | 0.1579  |
| rs10773966  | G | 0.0559  |
| rs1574157   | A | -0.0765 |
| rs10771279  | C | 0.0384  |
| rs147444527 | C | -0.1495 |
| rs74820622  | T | -0.1622 |
| rs141357113 | A | 0.1431  |
| rs1427988   | C | -0.0422 |
| rs888558    | G | 0.2591  |
| rs61940867  | G | 0.0976  |
| rs35424     | G | -0.0698 |
| rs73155380  | T | -0.2168 |
| rs17581068  | A | -0.0726 |
| rs13328968  | A | 0.1231  |
| rs140604982 | T | -0.1266 |
| rs11522342  | T | 0.0731  |
| rs35573730  | G | 0.0404  |
| rs74360584  | G | 0.142   |
| rs11178391  | T | -0.0484 |
| rs34564240  | C | -0.106  |
| rs36121433  | T | 0.1128  |
| rs12580078  | T | 0.0427  |
| rs76365233  | G | -0.0743 |
| rs7308588   | A | 0.0677  |
| rs73149911  | C | -0.1336 |
| rs1498885   | A | -0.0428 |
| rs61931637  | A | 0.1359  |
| rs11172824  | T | -0.0572 |
| rs11181634  | T | 0.0633  |
| rs77386503  | C | -0.2552 |
| rs112826760 | T | -0.1907 |
| rs66994330  | A | -0.0734 |
| rs139948460 | A | 0.234   |
| rs149004555 | A | 0.287   |
| rs10734850  | G | 0.04    |
| rs79753941  | T | -0.1694 |
| rs1552755   | G | 0.0374  |
| rs78105838  | T | -0.1587 |
| rs144358292 | T | -0.15   |
| rs11055323  | C | 0.0431  |
| rs141184582 | C | -0.1713 |
| rs61913549  | C | 0.0527  |

|             |   |         |
|-------------|---|---------|
| rs141326009 | T | 0.1947  |
| rs11065049  | A | -0.1945 |
| rs117947244 | A | -0.1954 |
| rs7112      | C | 0.13    |
| rs113223738 | T | 0.0504  |
| rs7306269   | A | -0.0655 |
| rs825085    | A | -0.0549 |
| rs150493888 | A | 0.2017  |
| rs7968740   | G | -0.0366 |
| rs10778284  | A | -0.0534 |
| rs12370537  | C | -0.1055 |
| rs117104353 | T | 0.1343  |
| rs3751191   | A | 0.1376  |
| rs4763961   | A | -0.0391 |
| rs1614888   | G | -0.0452 |
| rs7965182   | A | -0.0904 |
| rs146422126 | C | -0.1574 |
| rs79722647  | G | 0.0678  |
| rs117532831 | A | 0.0641  |
| rs76675543  | T | 0.0997  |
| rs149925413 | C | 0.2112  |
| rs11170118  | T | -0.0934 |
| rs17782050  | T | -0.0424 |
| rs55902604  | C | 0.06    |
| rs59000311  | C | -0.0763 |
| rs1548560   | A | -0.0405 |
| rs4465444   | T | -0.1962 |
| rs4400886   | C | 0.0598  |
| rs143737288 | T | -0.1249 |
| rs12367587  | A | 0.1718  |
| rs111694343 | C | -0.2141 |
| rs10849941  | A | 0.0452  |
| rs1717387   | C | -0.0482 |
| rs76737173  | A | 0.1241  |
| rs61939486  | C | -0.0657 |
| rs11178152  | C | -0.0598 |
| rs117148165 | C | 0.0958  |
| rs117701839 | C | 0.1378  |
| rs17014284  | T | -0.1794 |
| rs117443606 | T | 0.08    |
| rs74664522  | A | -0.1952 |
| rs10876228  | T | 0.0442  |
| rs12305483  | C | -0.0485 |
| rs10860066  | G | -0.0487 |
| rs36076328  | G | -0.0956 |
| rs4964982   | T | -0.0389 |
| rs56662293  | T | 0.0834  |

|             |   |         |
|-------------|---|---------|
| rs61915175  | A | 0.0805  |
| rs1732803   | T | -0.0389 |
| rs56974867  | T | 0.1035  |
| rs79407524  | T | 0.3037  |
| rs112899510 | A | -0.1421 |
| rs2283285   | G | -0.0433 |
| rs117694678 | A | 0.1725  |
| rs17807306  | A | 0.0715  |
| rs11246948  | A | 0.0531  |
| rs61943553  | G | 0.2664  |
| rs10862812  | T | 0.041   |
| rs55768952  | G | 0.1945  |
| rs76439304  | T | -0.0574 |
| rs35969410  | A | -0.0816 |
| rs55692509  | A | -0.1456 |
| rs859134    | A | -0.0377 |
| rs258418    | T | 0.0889  |
| rs11611634  | A | -0.1181 |
| rs74357082  | G | 0.1773  |
| rs10748452  | C | -0.1286 |
| rs10745486  | C | 0.0725  |
| rs61939808  | T | 0.0989  |
| rs117581417 | A | 0.1731  |
| rs2172276   | C | -0.0389 |
| rs12582726  | A | 0.0663  |
| rs149637240 | A | 0.2891  |
| rs74755127  | A | 0.1036  |
| rs7956318   | A | 0.0639  |
| rs146137539 | T | 0.1213  |
| rs10744459  | T | -0.0785 |
| rs143254896 | G | -0.2349 |
| rs10466808  | T | -0.0372 |
| rs116988674 | T | -0.1748 |
| rs11065711  | C | 0.0456  |
| rs7976986   | C | 0.0413  |
| rs7959990   | A | 0.0444  |
| rs77381836  | G | 0.135   |
| rs7312347   | C | 0.0489  |
| rs74436945  | C | -0.2197 |
| rs149842897 | T | -0.2448 |
| rs7955625   | A | 0.0747  |
| rs73090082  | T | -0.148  |
| rs56408642  | A | 0.0834  |
| rs77841044  | A | -0.1967 |
| rs11107532  | C | 0.0993  |
| rs873908    | A | 0.0376  |
| rs75364951  | G | 0.1644  |

|             |   |         |
|-------------|---|---------|
| rs73147043  | G | -0.0446 |
| rs924835    | A | -0.0362 |
| rs3861897   | A | -0.0353 |
| rs1639122   | A | -0.0374 |
| rs73085186  | A | -0.0742 |
| rs61939102  | T | -0.1201 |
| rs10845412  | A | -0.0539 |
| rs35607930  | T | -0.0635 |
| rs938031    | C | -0.0567 |
| rs11174530  | T | -0.0418 |
| rs7294770   | A | 0.0448  |
| rs150201519 | T | 0.2684  |
| rs79715714  | G | -0.0458 |
| rs73070657  | G | 0.0975  |
| rs12824290  | A | -0.0866 |
| rs138966349 | G | -0.2114 |
| rs12307334  | C | -0.1221 |
| rs7969100   | T | 0.0442  |
| rs73133988  | G | -0.092  |
| rs11180125  | C | 0.0951  |
| rs11064494  | T | -0.1688 |
| rs7959194   | A | -0.0563 |
| rs53025     | T | 0.0411  |
| rs1851084   | A | 0.043   |
| rs11059332  | C | 0.0624  |
| rs78411722  | A | 0.2269  |
| rs41329849  | G | 0.0879  |
| rs11172598  | G | 0.0353  |
| rs17628141  | T | -0.2848 |
| rs146552095 | C | 0.207   |
| rs142390503 | T | -0.151  |
| rs7305693   | G | -0.0373 |
| rs11177407  | G | -0.0394 |
| rs71453765  | G | -0.2125 |
| rs73112585  | T | 0.0869  |
| rs1882314   | T | -0.0425 |
| rs146148704 | T | 0.1818  |
| rs11107982  | T | 0.0841  |
| rs73039669  | A | 0.1129  |
| rs7301631   | T | 0.0375  |
| rs7964022   | A | -0.0585 |
| rs12810252  | A | -0.044  |
| rs10842203  | G | 0.0359  |
| rs6487834   | T | 0.0462  |
| rs117703564 | G | -0.1682 |
| rs11172769  | C | -0.1048 |
| rs1239917   | C | -0.036  |

|             |   |         |
|-------------|---|---------|
| rs7301168   | A | -0.252  |
| rs7303431   | A | 0.0363  |
| rs116859766 | A | 0.4027  |
| rs9669622   | A | 0.0699  |
| rs12314978  | G | 0.0363  |
| rs112920945 | A | -0.2673 |
| rs4767359   | C | 0.0355  |
| rs2657576   | G | 0.274   |
| rs75162007  | A | 0.0951  |
| rs4931222   | G | 0.0967  |
| rs57537954  | C | 0.0886  |
| rs1148407   | G | -0.04   |
| rs5742658   | G | -0.1282 |
| rs12368284  | G | -0.0397 |
| rs148855946 | C | -0.1155 |
| rs79572900  | G | -0.1875 |
| rs55664411  | C | -0.26   |
| rs4765723   | G | 0.0521  |
| rs117771651 | G | -0.1431 |
| rs11177228  | G | 0.0464  |
| rs10771792  | C | 0.0356  |
| rs146577532 | C | -0.1363 |
| rs7303965   | C | 0.1897  |
| rs10842235  | T | 0.1586  |
| rs118148371 | T | 0.229   |
| rs6489371   | C | -0.046  |
| rs35974564  | T | -0.0809 |
| rs17616683  | C | 0.2502  |
| rs117550470 | C | 0.2016  |
| rs73040424  | T | 0.1669  |
| rs138290369 | A | 0.1363  |
| rs4759206   | A | -0.0577 |
| rs1874902   | A | 0.0398  |
| rs4511317   | A | 0.222   |
| rs146192889 | C | 0.2086  |
| rs7956560   | G | 0.0489  |
| rs6538318   | C | -0.0477 |
| rs12322637  | G | 0.0592  |
| rs11116878  | C | 0.2485  |
| rs11066840  | T | 0.0631  |
| rs2280684   | G | 0.0367  |
| rs117402167 | A | 0.136   |
| rs78269518  | T | 0.0595  |
| rs4142700   | A | 0.1052  |
| rs11107412  | C | -0.0359 |
| rs2373201   | T | -0.0426 |
| rs7299785   | C | -0.2454 |

|             |   |         |
|-------------|---|---------|
| rs117445836 | T | 0.0752  |
| rs147396664 | G | 0.1768  |
| rs9658605   | C | -0.0839 |
| rs10861534  | G | 0.0366  |
| rs117617319 | T | -0.0954 |
| rs2217228   | T | -0.0374 |
| rs10878500  | C | -0.0488 |
| rs10744893  | G | -0.0401 |
| rs17811578  | G | 0.1613  |
| rs59210689  | A | 0.0454  |
| rs148914606 | C | -0.2286 |
| rs11045212  | G | 0.3244  |
| rs7976765   | T | 0.0552  |
| rs11609038  | C | 0.0908  |
| rs7135966   | G | -0.1085 |
| rs6488064   | G | 0.0419  |
| rs704083    | A | -0.072  |
| rs147593470 | C | 0.1677  |
| rs117597363 | C | 0.1901  |
| rs149619790 | T | -0.1433 |
| rs11612037  | T | -0.0995 |
| rs11112734  | G | -0.169  |
| rs3983739   | G | -0.0502 |
| rs17536158  | T | 0.0591  |
| rs111280479 | C | -0.062  |
| rs1898305   | G | -0.0401 |
| rs111365578 | A | 0.2179  |
| rs4436644   | T | 0.059   |
| rs76842971  | G | -0.1749 |
| rs17841963  | G | -0.3015 |
| rs10506594  | G | 0.0957  |
| rs10861497  | A | -0.0367 |
| rs61914380  | A | -0.2256 |
| rs11061318  | T | 0.138   |
| rs11170472  | T | 0.0696  |
| rs79730620  | T | 0.2276  |
| rs77995832  | T | 0.0965  |
| rs34187325  | T | -0.0495 |
| rs59665078  | C | -0.0826 |
| rs12368757  | T | 0.1323  |
| rs1682420   | A | 0.0465  |
| rs11069031  | A | 0.0373  |
| rs56200422  | G | -0.1729 |
| rs6582670   | C | 0.0965  |
| rs1580855   | T | -0.0551 |
| rs11048655  | C | 0.1148  |
| rs117454499 | C | 0.2496  |

|             |   |         |
|-------------|---|---------|
| rs112533542 | G | 0.1162  |
| rs73189803  | T | 0.1544  |
| rs12824102  | T | 0.1225  |
| rs28808573  | A | 0.0542  |
| rs117644523 | A | 0.1507  |
| rs150742581 | A | 0.1458  |
| rs1405973   | T | -0.059  |
| rs143614879 | C | 0.198   |
| rs142857974 | T | 0.1654  |
| rs7133031   | T | 0.0405  |
| rs11054347  | A | 0.078   |
| rs4346008   | T | -0.0429 |
| rs144759357 | A | 0.1159  |
| rs148408268 | G | 0.1317  |
| rs225506    | T | 0.0438  |
| rs66891956  | G | 0.0398  |
| rs2588340   | C | 0.0775  |
| rs12426988  | A | 0.0913  |
| rs11170178  | A | -0.113  |
| rs2470408   | T | -0.0441 |
| rs56771264  | G | 0.1134  |
| rs7307560   | A | -0.0518 |
| rs78164024  | C | -0.0991 |
| rs901700    | T | -0.0429 |
| rs113467777 | G | -0.0403 |
| rs12317340  | T | 0.0878  |
| rs35019336  | A | -0.1154 |
| rs76278674  | G | 0.1769  |
| rs12297221  | A | 0.0554  |
| rs150433075 | A | -0.1258 |
| rs140552304 | C | -0.1627 |
| rs142268646 | C | 0.1625  |
| rs117738257 | G | -0.1816 |
| rs78205332  | G | -0.1307 |
| rs11114086  | T | 0.0467  |
| rs36113608  | T | 0.0441  |
| rs7956157   | C | -0.0542 |
| rs952093    | C | 0.0846  |
| rs56245751  | C | 0.0767  |
| rs117097245 | C | 0.2243  |
| rs117954190 | C | 0.2601  |
| rs117287336 | T | 0.1228  |
| rs1249391   | G | 0.0381  |
| rs17034439  | A | 0.0542  |
| rs12366839  | G | 0.0538  |
| rs12369012  | T | -0.0529 |
| rs141785230 | G | 0.0997  |



|             |   |         |
|-------------|---|---------|
| rs7971470   | A | -0.0467 |
| rs1895985   | C | 0.1144  |
| rs77699071  | T | -0.0767 |
| rs147417633 | T | -0.2898 |
| rs6490295   | T | 0.0425  |
| rs73068604  | C | 0.1842  |
| rs1351331   | C | 0.0367  |
| rs111995809 | T | -0.19   |
| rs73181336  | A | 0.2426  |
| rs138153943 | A | 0.2577  |
| rs4758651   | G | -0.0408 |
| rs115903370 | G | -0.1488 |
| rs7299497   | T | 0.0521  |
| rs112114585 | T | -0.0988 |
| rs17098170  | A | 0.187   |
| rs117797527 | T | -0.1559 |
| rs7397684   | G | -0.0401 |
| rs61939371  | C | -0.1084 |
| rs117471059 | C | -0.1234 |
| rs78920496  | T | 0.1496  |
| rs12826603  | A | 0.0436  |
| rs2969086   | C | -0.0373 |
| rs138530718 | G | 0.2235  |
| rs76741274  | G | 0.0911  |
| rs78261580  | T | 0.1365  |
| rs2127532   | T | 0.0447  |
| rs12422949  | G | 0.0442  |
| rs12812637  | A | 0.0663  |
| rs10860525  | T | 0.0371  |
| rs997373    | A | 0.0521  |
| rs7975496   | G | 0.1859  |
| rs117940653 | C | -0.1805 |
| rs7297897   | T | 0.0435  |
| rs10842251  | T | 0.2119  |
| rs7297533   | G | -0.0641 |
| rs11836987  | C | -0.0385 |
| rs61926884  | T | 0.0501  |
| rs147120290 | A | -0.1407 |
| rs74795156  | C | -0.2146 |
| rs79187501  | G | -0.1848 |
| rs7970731   | C | -0.0363 |
| rs1356818   | G | -0.0412 |
| rs17092730  | C | -0.0415 |
| rs75719543  | C | -0.2325 |
| rs76131133  | T | 0.1381  |
| rs12424322  | A | -0.056  |
| rs61931406  | C | -0.0847 |

|             |   |         |
|-------------|---|---------|
| rs10843869  | A | 0.0353  |
| rs74615663  | C | 0.2717  |
| rs73160146  | G | 0.1036  |
| rs74942782  | T | 0.1613  |
| rs73346837  | A | 0.1193  |
| rs78430096  | A | -0.1242 |
| rs71441744  | A | 0.1444  |
| rs12811319  | A | 0.2265  |
| rs35351849  | G | -0.0496 |
| rs658604    | T | 0.0519  |
| rs10840764  | C | -0.0392 |
| rs78891206  | A | 0.0992  |
| rs79193093  | T | -0.1148 |
| rs2556510   | C | 0.0391  |
| rs2301333   | A | -0.0835 |
| rs17098851  | T | 0.0678  |
| rs12308700  | A | 0.0384  |
| rs7304237   | G | -0.0725 |
| rs76928216  | G | -0.1178 |
| rs75160373  | A | 0.2248  |
| rs74354194  | C | -0.1113 |
| rs149350184 | T | -0.2039 |
| rs10745715  | A | -0.0347 |
| rs61945400  | A | 0.2085  |
| rs12826413  | C | -0.0499 |
| rs28868112  | T | 0.0639  |
| rs16943097  | A | 0.1488  |
| rs35472876  | A | -0.1367 |
| rs17235923  | C | 0.0728  |
| rs11835409  | T | -0.1052 |
| rs7310979   | G | -0.1052 |
| rs73195085  | T | 0.0511  |
| rs10161197  | G | 0.0608  |
| rs117656917 | C | 0.1608  |
| rs61733025  | T | 0.1205  |
| rs4372527   | G | 0.0482  |
| rs7305247   | A | 0.0767  |
| rs143751422 | C | 0.0903  |
| rs7974523   | C | -0.1798 |
| rs7954112   | A | -0.0361 |
| rs1669947   | A | -0.0359 |
| rs7295520   | T | -0.0443 |
| rs4768441   | T | -0.0375 |
| rs75256191  | T | -0.1367 |
| rs1552421   | G | 0.1108  |
| rs2239137   | A | -0.1362 |
| rs10773632  | G | 0.0369  |

|             |   |         |
|-------------|---|---------|
| rs73337230  | T | 0.0747  |
| rs61933104  | C | 0.1099  |
| rs12811129  | C | -0.1004 |
| rs11061662  | A | 0.0351  |
| rs80265504  | C | 0.2051  |
| rs10748078  | A | 0.0426  |
| rs55937535  | C | 0.1462  |
| rs10876488  | G | 0.0374  |
| rs11053624  | C | 0.0616  |
| rs74111837  | T | -0.1246 |
| rs7485181   | T | 0.1479  |
| rs1169961   | C | 0.0512  |
| rs67041797  | C | -0.0406 |
| rs12230146  | A | -0.0793 |
| rs6580848   | G | 0.0478  |
| rs144594562 | T | 0.1708  |
| rs74356386  | A | 0.0802  |
| rs7952874   | C | 0.1071  |
| rs7958405   | C | 0.0476  |
| rs276080    | G | -0.0521 |
| rs2870957   | C | 0.0404  |
| rs117751027 | A | -0.2275 |
| rs117416600 | A | 0.1781  |
| rs11054373  | A | 0.0584  |
| rs7961443   | T | 0.1823  |
| rs75227212  | C | -0.1079 |
| rs74837783  | C | -0.0974 |
| rs148226777 | G | -0.1724 |
| rs6582630   | G | 0.0341  |
| rs117075373 | T | 0.1793  |
| rs10876535  | T | 0.0462  |
| rs11611771  | G | 0.2449  |
| rs4767413   | A | -0.041  |
| rs79135816  | T | 0.0792  |
| rs12369461  | A | -0.0379 |
| rs2417767   | G | 0.039   |
| rs76736959  | T | 0.2319  |
| rs2970824   | A | 0.0421  |
| rs2062494   | G | -0.0476 |
| rs12578852  | T | 0.0809  |
| rs75874281  | C | -0.0943 |
| rs75278326  | G | -0.1151 |
| rs11173686  | C | 0.043   |
| rs11495440  | C | 0.1205  |
| rs150377604 | A | 0.1943  |
| rs4963758   | C | -0.0488 |
| rs10847518  | A | 0.0583  |

|             |   |         |
|-------------|---|---------|
| rs2417797   | T | -0.0915 |
| rs76134062  | T | 0.1346  |
| rs12302592  | A | -0.0606 |
| rs116899747 | T | -0.2037 |
| rs112963305 | G | 0.0608  |
| rs12303865  | C | -0.043  |
| rs4036462   | G | 0.0394  |
| rs8285      | C | 0.2355  |
| rs79401334  | G | 0.2203  |
| rs10735337  | T | -0.0355 |
| rs11045164  | G | -0.0404 |
| rs7135320   | T | -0.1591 |
| rs4312136   | T | -0.0597 |
| rs10860170  | A | -0.0387 |
| rs17588249  | T | 0.0542  |
| rs80009783  | T | -0.0705 |
| rs117864303 | T | 0.1203  |
| rs113549340 | C | -0.0863 |
| rs143524112 | C | -0.1777 |
| rs2054437   | A | -0.0595 |
| rs714630    | T | -0.0679 |
| rs77038962  | C | -0.2139 |
| rs73211583  | T | 0.0981  |
| rs74342262  | G | 0.0707  |
| rs112264763 | C | -0.0632 |
| rs11054425  | A | 0.0384  |
| rs75227732  | G | -0.0871 |
| rs714844    | T | 0.1302  |
| rs3890838   | A | 0.0717  |
| rs76633920  | C | -0.0623 |
| rs10459123  | T | -0.0476 |
| rs76110960  | T | 0.1653  |
| rs10492034  | G | -0.0778 |
| rs148644076 | G | -0.0518 |
| rs708860    | G | -0.0373 |
| rs61926875  | A | -0.0463 |
| rs77554828  | A | -0.3139 |
| rs17114487  | C | 0.0615  |
| rs4760415   | T | -0.0453 |
| rs61912184  | C | 0.1363  |
| rs4469989   | T | 0.0391  |
| rs61922607  | C | -0.0923 |
| rs10844090  | A | 0.0362  |
| rs59936784  | T | -0.105  |
| rs76204681  | A | -0.1116 |
| rs11615731  | G | 0.0587  |
| rs61914506  | C | -0.2698 |

|             |   |         |
|-------------|---|---------|
| rs825960    | G | -0.077  |
| rs117503763 | T | -0.1324 |
| rs10492179  | T | -0.0361 |
| rs1517735   | C | 0.0486  |
| rs12829554  | C | -0.0513 |
| rs78912264  | C | 0.2106  |
| rs12371684  | T | 0.0596  |
| rs75505823  | T | 0.1146  |
| rs4931655   | G | -0.0662 |
| rs117058953 | A | -0.2322 |
| rs7958453   | A | 0.036   |
| rs2014130   | G | -0.0344 |
| rs146749383 | C | -0.1876 |
| rs117090560 | T | 0.1411  |
| rs11180726  | G | -0.036  |
| rs66484911  | C | -0.04   |
| rs6581228   | C | 0.0465  |
| rs118008293 | C | 0.0942  |
| rs78018855  | T | -0.098  |
| rs4760495   | C | -0.0556 |
| rs11613334  | G | -0.0859 |
| rs1672292   | T | 0.0568  |
| rs78871589  | C | 0.0617  |
| rs7976166   | G | -0.0508 |
| rs61939324  | A | 0.1521  |
| rs7135527   | T | -0.1438 |
| rs117324677 | T | -0.0836 |
| rs56803270  | A | 0.15    |
| rs10743556  | C | 0.1172  |
| rs11054830  | C | 0.0375  |
| rs117005488 | C | 0.1093  |
| rs12300409  | C | -0.0606 |
| rs1148540   | T | 0.0346  |
| rs939474    | T | 0.0344  |
| rs12297968  | C | 0.0976  |
| rs6582495   | G | 0.074   |
| rs35607532  | A | -0.1983 |
| rs17769699  | G | -0.0659 |
| rs77458703  | A | 0.2082  |
| rs12313073  | T | -0.0487 |
| rs4964475   | T | -0.0581 |
| rs117603493 | A | -0.1382 |
| rs118021329 | C | -0.1932 |
| rs7485817   | T | 0.0413  |
| rs7299526   | G | -0.2675 |
| rs118185239 | T | 0.0707  |
| rs139302800 | G | 0.1959  |

|             |   |         |
|-------------|---|---------|
| rs6489521   | A | 0.0408  |
| rs10877477  | A | 0.0407  |
| rs76819238  | A | 0.2214  |
| rs11522924  | T | -0.098  |
| rs1908667   | T | 0.0351  |
| rs79397970  | T | -0.076  |
| rs4931003   | A | 0.0522  |
| rs117643257 | A | 0.3447  |
| rs111233496 | T | 0.0426  |
| rs117040975 | A | -0.1496 |
| rs137899347 | T | -0.1205 |
| rs1641633   | C | 0.0452  |
| rs12307230  | T | -0.0348 |
| rs11057936  | T | 0.0363  |
| rs2196426   | T | 0.1163  |
| rs142284486 | A | 0.1719  |
| rs61918685  | C | -0.0974 |
| rs78211182  | C | -0.0987 |
| rs10047514  | A | 0.0371  |
| rs79457971  | A | -0.1512 |
| rs7135214   | A | 0.0664  |
| rs143563344 | A | 0.1511  |
| rs73119057  | A | -0.1724 |
| rs58914571  | A | 0.1967  |
| rs11068028  | G | -0.1838 |
| rs77639349  | T | -0.1783 |
| rs11061418  | T | -0.0482 |
| rs1641642   | A | -0.0342 |
| rs4964292   | C | -0.0745 |
| rs80094648  | G | 0.042   |
| rs11057570  | T | -0.0921 |
| rs150669591 | G | -0.109  |
| rs1949427   | T | -0.0357 |
| rs4408387   | A | 0.0416  |
| rs992720    | A | 0.1171  |
| rs4319556   | A | 0.128   |
| rs116243872 | C | -0.1939 |
| rs17860381  | T | 0.0869  |
| rs214660    | T | -0.0588 |
| rs73093163  | C | 0.131   |
| rs34071617  | T | 0.1069  |
| rs4761581   | G | 0.0458  |
| rs76365243  | T | 0.2093  |
| rs12372539  | T | -0.0618 |
| rs117494333 | A | 0.2413  |
| rs12582845  | T | 0.0584  |
| rs1153047   | T | -0.0358 |

|             |   |         |
|-------------|---|---------|
| rs10846949  | T | 0.0477  |
| rs116875637 | G | 0.157   |
| rs71465868  | A | 0.1573  |
| rs9645815   | C | 0.1341  |
| rs11065225  | G | 0.06    |
| rs145682770 | G | 0.2009  |
| rs150282259 | C | 0.0768  |
| rs77213757  | T | -0.1386 |
| rs149997604 | A | 0.1227  |
| rs61937252  | G | 0.0865  |
| rs4767735   | T | 0.0344  |
| rs74448667  | C | -0.0791 |
| rs61909651  | T | -0.0991 |
| rs17579603  | C | -0.0752 |
| rs7137478   | T | -0.0451 |
| rs79147336  | G | 0.1707  |
| rs2243588   | T | 0.044   |
| rs997358    | T | 0.0377  |
| rs113205216 | A | 0.0647  |
| rs12812413  | A | -0.0632 |
| rs7305947   | T | -0.0682 |
| rs73308015  | C | 0.1881  |
| rs11610884  | A | 0.0497  |
| rs750278    | G | 0.0374  |
| rs117418380 | T | -0.0616 |
| rs1247928   | C | 0.0337  |
| rs2669159   | T | 0.0549  |
| rs6582446   | A | -0.1664 |
| rs7296435   | G | 0.0608  |
| rs12230911  | C | -0.0401 |
| rs1865914   | G | 0.0778  |
| rs17807046  | A | -0.1137 |
| rs1961779   | C | 0.0521  |
| rs28449388  | G | -0.0512 |
| rs11065287  | T | 0.0367  |
| rs151068476 | C | 0.2984  |
| rs149666165 | G | 0.091   |
| rs117512999 | C | 0.1719  |
| rs1127448   | T | -0.0383 |
| rs10843215  | C | -0.0787 |
| rs7962884   | T | 0.0366  |
| rs1634821   | G | -0.0424 |
| rs117084968 | G | 0.2138  |
| rs7313153   | C | 0.0567  |
| rs113191310 | T | -0.0351 |
| rs7977472   | T | 0.0337  |
| rs112818250 | A | -0.0532 |

|             |   |         |
|-------------|---|---------|
| rs139339140 | A | -0.3603 |
| rs11106376  | A | 0.0767  |
| rs116877522 | T | -0.1418 |
| rs73106156  | A | 0.042   |
| rs6581895   | C | 0.0405  |
| rs73215568  | C | 0.0405  |
| rs7970581   | T | -0.0414 |
| rs143922416 | A | -0.2893 |
| rs7976208   | G | 0.0432  |
| rs7974561   | A | 0.0916  |
| rs10770659  | G | -0.0379 |
| rs76136576  | A | 0.1704  |
| rs7961259   | A | 0.0454  |
| rs117496515 | A | 0.0776  |
| rs116939269 | T | -0.1708 |
| rs4898533   | G | 0.0799  |
| rs7485093   | A | 0.1502  |
| rs10506910  | G | 0.0419  |
| rs6538465   | G | -0.0366 |
| rs12320027  | C | -0.0565 |
| rs2632635   | T | 0.2337  |
| rs7297761   | G | -0.0339 |
| rs10743980  | T | 0.0341  |
| rs4315134   | T | -0.0356 |
| rs11104467  | C | -0.1065 |
| rs61927435  | A | 0.0942  |
| rs1004207   | A | 0.0929  |
| rs11172506  | C | 0.0413  |
| rs113645269 | A | 0.1698  |
| rs61929870  | T | -0.2033 |
| rs10744371  | C | -0.0338 |
| rs147658093 | T | -0.1626 |
| rs11103960  | G | -0.0634 |
| rs34764275  | C | -0.167  |
| rs35285730  | A | -0.1741 |
| rs312145    | C | -0.0357 |
| rs2870938   | T | 0.0467  |
| rs78270683  | G | 0.1011  |
| rs11050945  | G | -0.0894 |
| rs112964516 | A | 0.1469  |
| rs73124589  | A | 0.2311  |
| rs4536277   | C | -0.0366 |
| rs345705    | G | -0.0374 |
| rs117262433 | T | -0.1918 |
| rs76168682  | G | 0.1853  |
| rs11044954  | T | 0.0349  |
| rs1147283   | C | 0.2197  |



|             |   |         |
|-------------|---|---------|
| rs6490188   | T | 0.0382  |
| rs12305678  | G | -0.068  |
| rs34052151  | A | -0.0517 |
| rs2203474   | G | -0.0974 |
| rs148930207 | A | -0.2933 |
| rs10843990  | A | -0.0356 |
| rs4762071   | A | 0.0775  |
| rs34013262  | T | -0.0955 |
| rs116873137 | G | -0.172  |
| rs55884314  | C | 0.0678  |
| rs1438996   | C | -0.0639 |
| rs17350601  | C | -0.0451 |
| rs555781    | G | 0.044   |
| rs12372138  | C | 0.0455  |
| rs141039008 | T | 0.2033  |
| rs827799    | A | 0.0434  |
| rs12228324  | A | 0.1148  |
| rs2717441   | G | -0.0468 |
| rs11046726  | A | -0.12   |
| rs4760806   | A | 0.1893  |
| rs7962484   | G | -0.0442 |
| rs76885547  | T | 0.075   |
| rs17756934  | C | -0.0829 |
| rs9645732   | C | -0.0774 |
| rs35295801  | A | 0.0583  |
| rs6486717   | T | 0.0355  |
| rs117498071 | G | -0.1531 |
| rs12814605  | T | -0.0507 |
| rs7300428   | T | 0.0372  |
| rs79734596  | T | -0.1783 |
| rs61916737  | T | -0.0355 |
| rs1458611   | T | 0.0689  |
| rs11063490  | G | 0.0742  |
| rs10845905  | G | -0.0342 |
| rs28362802  | G | 0.0593  |
| rs61651250  | C | -0.0641 |
| rs79687915  | A | 0.1098  |
| rs11112154  | A | -0.0589 |
| rs12426931  | T | -0.1068 |
| rs17836804  | T | 0.0811  |
| rs140360841 | C | 0.1782  |
| rs35499976  | G | 0.0486  |
| rs1259881   | C | -0.0339 |
| rs117510453 | A | 0.0804  |
| rs117744341 | G | -0.1915 |
| rs17193733  | G | 0.0496  |
| rs79479315  | G | -0.2365 |

|             |   |         |
|-------------|---|---------|
| rs144601208 | A | -0.213  |
| rs7965125   | T | 0.0347  |
| rs118147910 | A | 0.1504  |
| rs118048994 | A | -0.1515 |
| rs61929225  | G | -0.1485 |
| rs12368040  | T | 0.1293  |
| rs4015379   | G | 0.0487  |
| rs4763301   | T | -0.0429 |
| rs10743569  | C | 0.0489  |
| rs74694919  | C | 0.1186  |
| rs2385131   | G | 0.0665  |
| rs141321164 | A | -0.0739 |
| rs73095414  | G | -0.0437 |
| rs80350766  | A | -0.0829 |
| rs4453314   | G | -0.0945 |
| rs117907702 | G | -0.1566 |
| rs144058974 | G | -0.2672 |
| rs7963963   | C | 0.1169  |
| rs75588547  | G | 0.1504  |
| rs73112455  | C | 0.2872  |
| rs144349093 | A | -0.1968 |
| rs1215608   | A | 0.0323  |
| rs146148564 | G | 0.0716  |
| rs17024823  | A | 0.113   |
| rs7300455   | G | 0.0723  |
| rs11170660  | G | 0.0503  |
| rs78177289  | G | 0.231   |
| rs1167121   | T | 0.037   |
| rs7298431   | A | 0.0502  |
| rs1193384   | G | -0.0519 |
| rs61937008  | T | 0.144   |
| rs73039874  | A | -0.0983 |
| rs78010224  | T | 0.1769  |
| rs141199600 | A | -0.179  |
| rs11180170  | T | -0.034  |
| rs117598825 | G | 0.1362  |
| rs6598190   | A | 0.0641  |
| rs4406865   | T | -0.0354 |
| rs76323349  | C | -0.1799 |
| rs76334907  | A | 0.0575  |
| rs7487017   | G | 0.0389  |
| rs11061135  | A | 0.0676  |
| rs78008978  | T | 0.1311  |
| rs12425342  | A | 0.0874  |
| rs2662802   | T | -0.0334 |
| rs76204349  | C | 0.0606  |
| rs117321741 | G | -0.1762 |

|             |   |         |
|-------------|---|---------|
| rs112133274 | G | -0.2086 |
| rs143690594 | T | 0.1807  |
| rs112127843 | G | -0.1094 |
| rs1914361   | G | -0.0323 |
| rs34311349  | A | -0.1421 |
| rs17221899  | G | -0.0643 |
| rs4764106   | G | 0.0348  |
| rs2532501   | A | 0.036   |
| rs12367356  | G | 0.2217  |
| rs17370584  | G | 0.1168  |
| rs1797733   | A | -0.0322 |
| rs11831493  | A | -0.0396 |
| rs76001355  | A | -0.2866 |
| rs1193381   | C | -0.0359 |
| rs2907506   | T | 0.189   |
| rs118067023 | T | 0.1574  |
| rs11056992  | G | -0.0328 |
| rs1511959   | T | -0.0331 |
| rs61751318  | T | 0.1841  |
| rs113992547 | T | 0.0957  |
| rs56168957  | A | -0.1814 |
| rs76155771  | G | 0.1306  |
| rs117688935 | T | -0.1076 |
| rs4931290   | T | 0.0791  |
| rs111329535 | T | 0.2173  |
| rs77648802  | G | -0.0946 |
| rs112781231 | T | -0.2196 |
| rs34055636  | A | 0.0692  |
| rs12322021  | A | -0.0462 |
| rs2406426   | G | 0.0547  |
| rs78018641  | A | 0.1266  |
| rs11609740  | A | 0.0373  |
| rs76487044  | A | 0.2314  |
| rs116844395 | A | 0.1688  |
| rs7953155   | G | 0.073   |
| rs75195671  | C | -0.1015 |
| rs10744913  | A | -0.0335 |
| rs79737322  | T | -0.1716 |
| rs297932    | G | -0.0372 |
| rs80300811  | T | 0.1194  |
| rs117687288 | G | 0.1699  |
| rs10774168  | C | 0.0424  |
| rs116702323 | A | 0.1284  |
| rs3730503   | C | 0.1444  |
| rs10878640  | T | 0.0356  |
| rs17683624  | A | -0.0338 |
| rs11830316  | A | 0.0511  |

|             |   |         |
|-------------|---|---------|
| rs78739668  | G | -0.1628 |
| rs7310254   | G | 0.0368  |
| rs12814518  | C | 0.0386  |
| rs117177468 | A | 0.1745  |
| rs4509823   | G | -0.0369 |
| rs117799623 | C | 0.1486  |
| rs149514716 | T | -0.1576 |
| rs17651444  | G | 0.0465  |
| rs142488416 | T | -0.1327 |
| rs2532543   | C | 0.0932  |
| rs7294679   | T | 0.0393  |
| rs117517693 | T | 0.1757  |
| rs7971022   | G | -0.1456 |
| rs10773739  | G | -0.043  |
| rs1152917   | G | -0.0917 |
| rs71468249  | T | 0.2048  |
| rs11063667  | T | 0.043   |
| rs2717425   | T | 0.0402  |
| rs56121396  | T | 0.191   |
| rs35313400  | T | 0.0889  |
| rs79842763  | A | 0.1605  |
| rs77484540  | C | 0.2268  |
| rs111519585 | C | -0.1592 |
| rs12578950  | A | -0.0357 |
| rs61743451  | T | -0.1406 |
| rs824997    | T | 0.047   |
| rs10848960  | C | -0.0441 |
| rs138797255 | G | -0.206  |
| rs148726128 | A | -0.196  |
| rs10848894  | T | 0.0355  |
| rs117830333 | T | 0.0898  |
| rs16907990  | G | 0.0584  |
| rs73226670  | A | 0.1947  |
| rs11174820  | T | 0.0879  |
| rs56196231  | A | 0.1077  |
| rs10862167  | A | 0.0478  |
| rs73195834  | C | -0.1198 |
| rs117813559 | C | 0.1793  |
| rs143200688 | G | -0.2612 |
| rs2227910   | G | 0.0342  |
| rs11613793  | G | -0.0456 |
| rs80111274  | C | 0.1144  |
| rs12367723  | G | -0.0392 |
| rs76684599  | C | 0.1813  |
| rs11057793  | G | -0.0466 |
| rs7134512   | T | 0.0331  |
| rs7962738   | A | -0.0814 |

|             |   |         |
|-------------|---|---------|
| rs111257756 | A | -0.1535 |
| rs837511    | A | -0.0433 |
| rs117987004 | A | -0.1348 |
| rs79151082  | C | -0.1162 |
| rs76369590  | A | 0.1293  |
| rs34131162  | C | 0.1399  |
| rs74990172  | T | 0.1081  |
| rs1908123   | C | -0.0397 |
| rs8181713   | G | 0.0422  |
| rs2555253   | G | 0.0325  |
| rs855126    | A | 0.043   |
| rs12579816  | G | 0.0346  |
| rs12426372  | A | -0.0418 |
| rs11054933  | G | 0.1268  |
| rs7316148   | T | -0.0507 |
| rs1894307   | T | 0.0483  |
| rs79485880  | A | -0.0913 |
| rs150435651 | C | 0.1513  |
| rs117052858 | A | 0.2246  |
| rs16944877  | C | -0.058  |
| rs61951802  | T | -0.0772 |
| rs76084695  | T | 0.0792  |
| rs144254425 | A | 0.1731  |
| rs113752912 | A | 0.0627  |
| rs112203636 | G | -0.1629 |
| rs1510887   | G | 0.3328  |
| rs7485207   | T | -0.0417 |
| rs2898002   | G | -0.0405 |
| rs710706    | A | -0.0351 |
| rs77046691  | C | 0.102   |
| rs7486978   | T | -0.0403 |
| rs71465164  | A | 0.1643  |
| rs1587110   | T | 0.0363  |
| rs11171132  | C | 0.0635  |
| rs11056478  | A | 0.0537  |
| rs116923747 | C | -0.1498 |
| rs7310927   | G | -0.0328 |
| rs3847801   | G | -0.0399 |
| rs61941583  | G | 0.2021  |
| rs1185630   | A | 0.0689  |
| rs76737589  | G | 0.1612  |
| rs73086215  | G | 0.0857  |
| rs117925515 | C | 0.3165  |
| rs4759489   | A | -0.0367 |
| rs117018073 | T | 0.1811  |
| rs1293766   | G | 0.043   |
| rs12316859  | A | 0.0325  |

|             |   |         |
|-------------|---|---------|
| rs12809843  | G | -0.1472 |
| rs75369150  | G | 0.1076  |
| rs2398449   | C | -0.0382 |
| rs12827888  | A | 0.0405  |
| rs78193874  | A | 0.1806  |
| rs7967318   | T | 0.0426  |
| rs77384083  | T | -0.1304 |
| rs73116832  | T | -0.2591 |
| rs12298037  | T | -0.0425 |
| rs4762340   | A | -0.0342 |
| rs118171960 | C | -0.1982 |
| rs1713641   | A | 0.0382  |
| rs118186108 | T | -0.1646 |
| rs7980860   | A | 0.0441  |
| rs2730757   | A | 0.0654  |
| rs73166871  | A | 0.1259  |
| rs17842951  | T | -0.0504 |
| rs2113868   | T | -0.1039 |
| rs7488369   | G | 0.0515  |
| rs7307629   | G | 0.0353  |
| rs1641731   | G | 0.0403  |
| rs7296522   | G | -0.1108 |
| rs3759279   | T | 0.0814  |
| rs2042881   | C | -0.0643 |
| rs73150611  | T | 0.118   |
| rs11059052  | A | 0.0757  |
| rs7306356   | T | 0.0399  |
| rs118168496 | A | -0.1167 |
| rs2698082   | T | 0.0549  |
| rs73303061  | G | 0.1005  |
| rs117877405 | A | 0.1073  |
| rs7310405   | T | -0.0556 |
| rs12813682  | C | -0.0407 |
| rs2108340   | G | -0.0313 |
| rs61936106  | G | 0.1784  |
| rs2367563   | G | 0.0325  |
| rs12823760  | C | -0.0567 |
| rs11179944  | T | -0.0359 |
| rs12307904  | T | 0.084   |
| rs140544478 | T | -0.0954 |
| rs17097720  | G | 0.0679  |
| rs112853539 | G | 0.1983  |
| rs12820630  | G | 0.0329  |
| rs7963530   | A | -0.0446 |
| rs11172626  | T | 0.0334  |
| rs11608693  | A | -0.0558 |
| rs4764204   | T | -0.0393 |

|             |   |         |
|-------------|---|---------|
| rs118053490 | G | 0.2722  |
| rs77002297  | A | -0.2002 |
| rs6421235   | C | 0.0492  |
| rs7976956   | A | 0.041   |
| rs141434066 | A | 0.2309  |
| rs11172586  | C | 0.121   |
| rs4964450   | C | -0.0351 |
| rs11047075  | A | -0.0437 |
| rs10774828  | C | -0.0315 |
| rs7958679   | T | -0.0756 |
| rs118179197 | A | 0.2348  |
| rs1482281   | T | 0.0317  |
| rs150273968 | A | 0.2135  |
| rs112296798 | T | -0.1538 |
| rs2041906   | A | 0.0328  |
| rs4762566   | T | 0.049   |
| rs78203233  | G | -0.1986 |
| rs76336252  | A | 0.1562  |
| rs55676265  | G | 0.0608  |
| rs28413743  | A | -0.0411 |
| rs77801267  | A | -0.2036 |
| rs7972986   | A | 0.0463  |
| rs11106803  | C | -0.0372 |
| rs117671652 | T | -0.0992 |
| rs12308283  | C | -0.1644 |
| rs6490015   | T | -0.0356 |
| rs112494391 | A | 0.0608  |
| rs1861908   | C | -0.0402 |
| rs11062336  | A | 0.1118  |
| rs10772627  | C | 0.0377  |
| rs73226922  | T | 0.1149  |
| rs12297840  | T | -0.0373 |
| rs61954375  | A | 0.153   |
| rs79301462  | C | 0.1305  |
| rs117075314 | A | 0.1509  |
| rs76925519  | G | -0.0803 |
| rs60587284  | A | 0.0461  |
| rs17473510  | G | 0.0503  |
| rs6581711   | A | -0.0721 |
| rs146873419 | A | -0.2016 |
| rs3858587   | G | 0.0389  |
| rs3999404   | A | 0.0965  |
| rs17346071  | G | 0.0884  |
| rs1846581   | A | 0.0421  |
| rs2045877   | T | -0.1021 |
| rs11056763  | T | 0.0854  |
| rs10745856  | G | -0.0351 |

|             |   |         |
|-------------|---|---------|
| rs61942827  | A | 0.0398  |
| rs144094719 | A | -0.1645 |
| rs12312528  | C | 0.0394  |
| rs76309276  | T | -0.1843 |
| rs112161906 | C | 0.1168  |
| rs4762126   | C | -0.0382 |
| rs17552708  | T | -0.0395 |
| rs117549400 | C | 0.1002  |
| rs80009115  | A | -0.0801 |
| rs35920088  | T | -0.1091 |
| rs10459183  | A | 0.0349  |
| rs1517816   | A | -0.0317 |
| rs77125962  | C | -0.0633 |
| rs608418    | T | -0.0321 |
| rs10859694  | C | -0.0344 |
| rs10773476  | C | -0.0374 |
| rs12822418  | T | -0.0504 |
| rs11608712  | G | 0.0566  |
| rs10842447  | C | 0.034   |
| rs9634075   | T | 0.2538  |
| rs4359262   | C | 0.078   |
| rs12812392  | A | -0.057  |
| rs11178300  | A | 0.0377  |
| rs146156747 | A | 0.1277  |
| rs1387243   | C | -0.0388 |
| rs147499275 | A | -0.0887 |
| rs6582700   | C | -0.0965 |
| rs11105656  | T | 0.1372  |
| rs12581982  | C | 0.0592  |
| rs12711453  | T | -0.0572 |
| rs1690139   | C | 0.0483  |
| rs2231754   | C | -0.0385 |
| rs73148802  | C | 0.1876  |
| rs774399    | T | 0.1319  |
| rs10128955  | T | -0.0456 |
| rs17022476  | G | 0.1298  |
| rs1566667   | A | -0.066  |
| rs117304792 | G | 0.1487  |
| rs1461286   | T | 0.1088  |
| rs17217810  | A | -0.0854 |
| rs11174636  | A | 0.0426  |
| rs2555281   | A | 0.0318  |
| rs146277124 | T | -0.1236 |
| rs7296422   | T | -0.0507 |
| rs74658620  | C | -0.1155 |
| rs3741515   | T | 0.0992  |
| rs149539065 | T | -0.1301 |



|             |   |         |
|-------------|---|---------|
| rs79908018  | T | -0.0683 |
| rs76199356  | G | 0.1311  |
| rs11170974  | T | 0.1571  |
| rs10844058  | A | -0.0369 |
| rs115223816 | A | 0.156   |
| rs61923794  | T | -0.0672 |
| rs34924617  | A | -0.0594 |
| rs149492023 | T | 0.167   |
| rs2240766   | C | -0.0346 |
| rs7301036   | T | -0.0338 |
| rs405647    | G | 0.0597  |
| rs145678266 | A | 0.2     |
| rs77070824  | C | 0.1004  |
| rs12366850  | A | 0.0892  |
| rs79956954  | T | 0.0846  |
| rs117137043 | A | 0.158   |
| rs12582326  | T | 0.0446  |
| rs7979411   | C | -0.04   |
| rs937533    | G | -0.0776 |
| rs3892474   | T | 0.1165  |
| rs16931325  | T | 0.0599  |
| rs144370398 | T | 0.1723  |
| rs79268676  | T | 0.2751  |
| rs28365683  | A | 0.0652  |
| rs12580716  | G | -0.0327 |
| rs75443602  | C | -0.1831 |
| rs299454    | T | -0.0354 |
| rs118008065 | A | 0.1574  |
| rs4931248   | C | 0.0334  |
| rs11612466  | G | 0.0477  |
| rs112353027 | G | -0.1046 |
| rs1345355   | C | -0.0317 |
| rs76712231  | T | 0.1095  |
| rs7963144   | G | -0.0656 |
| rs2277339   | G | 0.0538  |
| rs75436485  | T | 0.0557  |
| rs4411337   | T | -0.0344 |
| rs75791002  | C | -0.1099 |
| rs1922260   | G | -0.0415 |
| rs28444248  | T | 0.0488  |
| rs12424177  | G | -0.0752 |
| rs73067674  | G | -0.0638 |
| rs11048046  | A | -0.0778 |
| rs145083048 | T | -0.2201 |
| rs2107612   | G | -0.0355 |
| rs61032567  | G | -0.0495 |
| rs73027420  | A | 0.0961  |

|             |   |         |
|-------------|---|---------|
| rs303764    | G | 0.0373  |
| rs111360882 | G | 0.1575  |
| rs73111692  | A | 0.1302  |
| rs56392173  | A | 0.0798  |
| rs60117100  | G | -0.1643 |
| rs11147005  | C | 0.0375  |
| rs148718954 | A | 0.264   |
| rs80087909  | G | -0.0969 |
| rs35860523  | C | 0.1497  |
| rs3759270   | G | -0.0321 |
| rs11103883  | A | 0.0398  |
| rs2660890   | C | -0.0714 |
| rs10777148  | A | 0.0399  |
| rs73181901  | A | 0.1131  |
| rs2629804   | C | 0.0395  |
| rs10860615  | G | -0.0427 |
| rs11829149  | A | 0.0349  |
| rs144218894 | T | -0.1849 |
| rs146968827 | T | 0.216   |
| rs61915720  | A | 0.0932  |
| rs117002394 | T | 0.2228  |
| rs2299657   | T | -0.0385 |
| rs7133936   | T | -0.0452 |
| rs116933780 | C | 0.1275  |
| rs118113927 | T | 0.1699  |
| rs17125929  | C | -0.0582 |
| rs76989821  | T | -0.0813 |
| rs10847469  | T | -0.0375 |
| rs4882510   | C | -0.0617 |
| rs35606023  | T | -0.0338 |
| rs12580375  | A | -0.1628 |
| rs144226119 | G | 0.2117  |
| rs11107128  | A | 0.1464  |
| rs76788573  | G | 0.2059  |
| rs7980938   | T | 0.0308  |
| rs73147621  | A | -0.0621 |
| rs9669117   | A | 0.0385  |
| rs7139076   | A | 0.1371  |
| rs79711511  | T | 0.1185  |
| rs954       | C | -0.0371 |
| rs11835606  | G | -0.063  |
| rs10842934  | G | -0.0317 |
| rs35051544  | A | 0.1675  |
| rs61936936  | T | 0.0581  |
| rs117422187 | A | 0.1958  |
| rs147734582 | C | 0.1419  |
| rs145461771 | A | 0.1176  |

|             |   |         |
|-------------|---|---------|
| rs118081848 | T | -0.1817 |
| rs708857    | T | -0.0341 |
| rs3217916   | C | -0.0381 |
| rs74619686  | G | 0.154   |
| rs2720174   | T | -0.0994 |
| rs80011985  | C | -0.0937 |
| rs78891626  | C | 0.1321  |
| rs6490299   | G | 0.036   |
| rs7305196   | T | 0.0905  |
| rs150902340 | T | -0.1967 |
| rs117646005 | C | 0.2074  |
| rs80002401  | A | 0.1087  |
| rs79754062  | C | 0.0979  |
| rs7963275   | A | 0.0967  |
| rs78288787  | T | 0.0922  |
| rs76879891  | A | -0.0465 |
| rs17549341  | A | 0.0802  |
| rs113517930 | G | -0.1976 |
| rs111951240 | A | 0.1347  |
| rs78079190  | A | -0.109  |
| rs10845623  | C | -0.0358 |
| rs140422295 | G | -0.1296 |
| rs138698315 | G | 0.1309  |
| rs7955101   | C | 0.0413  |
| rs11112679  | G | 0.0511  |
| rs117847562 | C | -0.1637 |
| rs669926    | T | -0.0397 |
| rs10744455  | T | 0.0475  |
| rs112551581 | A | -0.15   |
| rs1006571   | C | 0.0821  |
| rs11044906  | A | 0.1303  |
| rs113879376 | C | -0.0371 |
| rs11067811  | T | 0.0731  |
| rs75616713  | T | -0.0463 |
| rs113864314 | T | 0.1744  |
| rs4362207   | G | -0.0415 |
| rs61924616  | G | 0.0424  |
| rs73033481  | A | -0.1101 |
| rs141205060 | G | -0.219  |
| rs7304324   | T | -0.0419 |
| rs1705221   | G | 0.0551  |
| rs7957801   | G | -0.1412 |
| rs7131876   | G | 0.0378  |
| rs11246923  | T | 0.039   |
| rs74731044  | G | -0.1237 |
| rs35536133  | A | 0.1709  |
| rs79154563  | A | -0.0902 |

|             |   |         |
|-------------|---|---------|
| rs7313595   | A | -0.0326 |
| rs113301127 | T | 0.2089  |
| rs10082707  | C | -0.0353 |
| rs17814434  | T | -0.0947 |
| rs1669923   | A | 0.2148  |
| rs11615016  | G | -0.0622 |
| rs112335632 | T | 0.1125  |
| rs2132228   | A | -0.0319 |
| rs2189480   | T | -0.0337 |
| rs73118022  | A | 0.0591  |
| rs2291928   | G | -0.0364 |
| rs10844219  | A | -0.0327 |
| rs79124817  | G | -0.1839 |
| rs10849141  | T | 0.0355  |
| rs117382561 | G | -0.1024 |
| rs61928408  | T | 0.0439  |
| rs117005333 | C | 0.1695  |
| rs11174782  | T | -0.0447 |
| rs78767585  | T | -0.0939 |
| rs10770363  | T | -0.0308 |
| rs10841517  | G | -0.0467 |
| rs112997322 | A | 0.054   |
| rs76694118  | A | 0.1412  |
| rs116758357 | G | -0.08   |
| rs35270235  | T | -0.0959 |
| rs4765880   | C | -0.0796 |
| rs117117741 | T | 0.1523  |
| rs143533549 | G | 0.2007  |
| rs79472475  | G | 0.0752  |
| rs6490238   | C | 0.035   |
| rs10878989  | C | 0.0469  |
| rs79836621  | C | 0.103   |
| rs9739828   | A | 0.0917  |
| rs7305164   | C | -0.1081 |
| rs12824959  | G | 0.0727  |
| rs73064470  | T | 0.1373  |
| rs142013694 | T | 0.0877  |
| rs79954424  | T | 0.2044  |
| rs1707730   | T | 0.059   |
| rs4768750   | C | -0.0373 |
| rs11610395  | T | -0.2011 |
| rs12424004  | A | -0.052  |
| rs73141401  | G | 0.0337  |
| rs79491374  | G | -0.1472 |
| rs7959068   | G | -0.0508 |
| rs34117783  | C | 0.0321  |
| rs1074325   | T | 0.0372  |

|             |   |         |
|-------------|---|---------|
| rs78551078  | A | -0.2558 |
| rs73128394  | T | 0.1535  |
| rs12833413  | C | -0.0332 |
| rs10734977  | C | 0.0392  |
| rs17428184  | G | -0.1224 |
| rs118015760 | T | -0.2371 |
| rs2535419   | C | 0.0313  |
| rs76012752  | G | -0.1238 |
| rs144563349 | G | 0.0996  |
| rs1860423   | C | -0.0479 |
| rs7137339   | T | 0.0361  |
| rs2159347   | T | 0.062   |
| rs310881    | A | 0.1243  |
| rs79780786  | T | 0.1529  |
| rs17334962  | T | -0.0852 |
| rs61925944  | A | -0.1533 |
| rs140325041 | T | 0.1641  |
| rs76703730  | A | 0.1208  |
| rs148064281 | A | 0.141   |
| rs11053668  | C | -0.036  |
| rs12424570  | C | 0.0521  |
| rs117021579 | C | 0.1088  |
| rs145555704 | A | -0.2885 |
| rs12426843  | G | 0.0395  |
| rs1151874   | T | -0.0347 |
| rs111561819 | T | 0.2781  |
| rs78307561  | C | 0.1473  |
| rs12298695  | T | 0.0759  |
| rs771972    | A | 0.05    |
| rs77105569  | T | -0.078  |
| rs10082821  | G | 0.0408  |
| rs7133225   | T | 0.1267  |
| rs1992006   | A | -0.0346 |
| rs10842631  | T | -0.0401 |
| rs2853564   | G | -0.0325 |
| rs117090648 | A | 0.0503  |
| rs111248050 | G | -0.2048 |
| rs7298096   | G | -0.0313 |
| rs1351227   | A | 0.036   |
| rs117760274 | C | 0.1382  |
| rs3782314   | G | 0.0361  |
| rs111811843 | T | 0.1088  |
| rs75913220  | T | -0.1768 |
| rs12308368  | T | -0.0315 |
| rs10771400  | C | 0.0388  |
| rs78197180  | G | 0.1252  |
| rs56194639  | A | 0.0452  |

|             |   |         |
|-------------|---|---------|
| rs115392896 | A | -0.0722 |
| rs7313333   | A | -0.0763 |
| rs2287156   | A | -0.1213 |
| rs12303996  | C | 0.0463  |
| rs117005311 | T | 0.1334  |
| rs7398603   | A | -0.0346 |
| rs17625294  | A | -0.0422 |
| rs774042    | A | 0.0646  |
| rs57668910  | G | 0.0651  |
| rs56091106  | T | -0.0393 |
| rs117680633 | C | -0.1573 |
| rs1367352   | A | 0.0331  |
| rs75117283  | T | -0.1695 |
| rs12367990  | T | -0.0519 |
| rs653136    | T | 0.0328  |
| rs73047684  | C | -0.1654 |
| rs137924077 | C | 0.1883  |
| rs12300445  | C | -0.037  |
| rs2286033   | C | -0.0369 |
| rs78109481  | C | 0.0899  |
| rs10492347  | T | 0.0444  |
| rs2363504   | A | 0.0396  |
| rs12814901  | T | -0.047  |
| rs78380806  | A | 0.1376  |
| rs141878088 | T | 0.1668  |
| rs11176647  | G | -0.0392 |
| rs79042075  | C | 0.2111  |
| rs12427413  | A | -0.0413 |
| rs2694834   | A | -0.0337 |
| rs1367903   | T | -0.0433 |
| rs12231386  | C | -0.0397 |
| rs79307208  | G | -0.1879 |
| rs12318909  | C | 0.0338  |
| rs79887403  | A | 0.18    |
| rs7312681   | C | -0.0464 |
| rs151046825 | T | 0.1373  |
| rs145810693 | A | 0.077   |
| rs3742015   | C | 0.0304  |
| rs150043371 | A | 0.1759  |
| rs11056782  | G | -0.0322 |
| rs148419310 | T | 0.1968  |
| rs73149178  | T | 0.1194  |
| rs17652813  | C | 0.0684  |
| rs77987050  | T | 0.1532  |
| rs10160954  | T | -0.0873 |
| rs113711407 | G | -0.2336 |
| rs17121808  | C | 0.1962  |

|             |   |         |
|-------------|---|---------|
| rs55865296  | G | 0.1099  |
| rs77600955  | T | -0.1045 |
| rs7965041   | G | 0.0649  |
| rs138701204 | T | 0.2142  |
| rs11613542  | T | -0.1622 |
| rs11053901  | T | -0.0474 |
| rs78481870  | T | 0.1692  |
| rs7960429   | A | 0.0317  |
| rs12307812  | T | -0.048  |
| rs2879755   | T | -0.0406 |
| rs919209    | A | -0.0373 |
| rs145998210 | A | 0.1168  |
| rs17718358  | T | -0.0617 |
| rs2570555   | G | 0.0378  |
| rs17415953  | G | 0.073   |
| rs75882757  | G | -0.0793 |
| rs146221784 | C | 0.1109  |
| rs1515547   | G | -0.0558 |
| rs12829748  | T | -0.1501 |
| rs300525    | C | 0.1074  |
| rs1579240   | A | -0.0775 |
| rs1806202   | A | -0.041  |
| rs78105535  | G | 0.063   |
| rs78202953  | A | 0.1015  |
| rs2406871   | T | 0.0397  |
| rs79750494  | T | 0.1073  |
| rs116877264 | T | 0.1806  |
| rs141999553 | C | -0.0672 |
| rs138821093 | G | -0.1384 |
| rs117770324 | T | -0.1457 |
| rs118171667 | T | -0.1524 |
| rs12316219  | C | 0.0483  |
| rs12298882  | C | -0.0473 |
| rs78675963  | G | -0.0785 |
| rs34580     | C | 0.0489  |
| rs1875466   | A | -0.0301 |
| rs76007970  | A | -0.1411 |
| rs10744888  | A | 0.0378  |
| rs10845620  | A | 0.0559  |
| rs141420566 | G | 0.1424  |
| rs10794425  | G | 0.0321  |
| rs12809807  | A | -0.1237 |
| rs2799963   | G | 0.0344  |
| rs12425911  | A | 0.0404  |
| rs78796487  | T | -0.1361 |
| rs11175416  | T | -0.1759 |
| rs17804080  | T | -0.0517 |

|             |   |         |
|-------------|---|---------|
| rs140569513 | T | 0.154   |
| rs11106213  | C | -0.041  |
| rs7958377   | T | 0.0481  |
| rs4913357   | T | -0.0536 |
| rs116993466 | G | -0.0657 |
| rs11045812  | T | -0.0307 |
| rs7971437   | A | 0.0312  |
| rs116842815 | T | 0.1388  |
| rs4545634   | C | -0.0844 |
| rs1025949   | A | 0.0349  |
| rs2619140   | T | 0.0328  |
| rs34201935  | A | 0.0486  |
| rs789731    | T | -0.0317 |
| rs17615178  | C | -0.059  |
| rs117877326 | G | 0.1291  |
| rs17177977  | G | 0.0419  |
| rs78993992  | C | -0.1128 |
| rs33270     | G | -0.0438 |
| rs55685448  | G | 0.0574  |
| rs74980853  | T | -0.1456 |
| rs3829736   | T | 0.031   |
| rs117937827 | G | 0.124   |
| rs11613755  | T | 0.0545  |
| rs1194046   | G | -0.0315 |
| rs1354746   | G | -0.0333 |
| rs141517006 | G | 0.1803  |
| rs61933070  | T | 0.0393  |
| rs144822097 | T | 0.1152  |
| rs76924623  | C | 0.2556  |
| rs12297592  | T | -0.1144 |
| rs60426605  | G | 0.0756  |
| rs73088501  | A | -0.1149 |
| rs215992    | C | -0.0575 |
| rs35806565  | A | -0.1082 |
| rs3916142   | C | 0.0315  |
| rs145875238 | G | 0.2082  |
| rs77764712  | C | -0.2134 |
| rs11065732  | T | 0.0316  |
| rs7312985   | A | -0.0571 |
| rs10845973  | A | -0.0354 |
| rs59569785  | T | 0.0433  |
| rs73345662  | A | 0.1549  |
| rs865857    | A | 0.1792  |
| rs117853166 | G | 0.0892  |
| rs118182238 | G | 0.0713  |
| rs79791981  | G | 0.1374  |
| rs116967666 | A | 0.1452  |



|             |   |         |
|-------------|---|---------|
| rs35150529  | T | -0.0688 |
| rs140085270 | C | -0.2436 |
| rs11574044  | C | 0.0608  |
| rs668562    | C | -0.0347 |
| rs1163889   | C | 0.0352  |
| rs17498746  | T | 0.0913  |
| rs10846684  | A | -0.036  |
| rs17801760  | A | -0.078  |
| rs144207790 | T | 0.1932  |
| rs219017    | A | -0.0946 |
| rs7969455   | T | 0.0437  |
| rs11837682  | A | 0.0588  |
| rs111905088 | G | -0.1146 |
| rs10840849  | A | 0.0333  |
| rs114350209 | C | 0.0802  |
| rs73225777  | G | -0.0952 |
| rs73181841  | T | 0.07    |
| rs1918142   | G | 0.1347  |
| rs142048748 | G | 0.124   |
| rs73076582  | G | -0.177  |
| rs73228446  | A | -0.081  |
| rs117089640 | G | -0.2574 |
| rs10505810  | C | 0.0352  |
| rs78071580  | C | 0.0829  |
| rs1115958   | A | -0.0601 |
| rs117988770 | C | -0.1664 |
| rs7973905   | A | -0.0368 |
| rs76583882  | T | -0.1003 |
| rs2730744   | G | -0.0368 |
| rs140584763 | C | 0.216   |
| rs117621650 | A | -0.2345 |
| rs56097932  | C | 0.0332  |
| rs76444204  | G | -0.0653 |
| rs2466979   | C | -0.0344 |
| rs76545893  | G | -0.1483 |
| rs36048949  | T | -0.1015 |
| rs10778397  | G | -0.0323 |
| rs859200    | G | -0.1124 |
| rs145542494 | T | -0.2619 |
| rs75479266  | A | 0.1129  |
| rs78408672  | T | 0.2176  |
| rs67398797  | A | 0.1342  |
| rs7973951   | T | -0.2095 |
| rs727233    | G | 0.0347  |
| rs9739560   | A | -0.0338 |
| rs10459172  | C | 0.036   |
| rs7299240   | A | -0.0529 |

|             |   |         |
|-------------|---|---------|
| rs2052422   | T | 0.0874  |
| rs7304561   | G | 0.0319  |
| rs75436288  | A | 0.2099  |
| rs79766230  | A | -0.1247 |
| rs10847115  | G | 0.0519  |
| rs10863119  | A | -0.1007 |
| rs12817819  | T | 0.0457  |
| rs56914464  | C | -0.0789 |
| rs11179528  | G | 0.0412  |
| rs73158954  | A | 0.0768  |
| rs10778066  | T | 0.0578  |
| rs10860148  | T | 0.0684  |
| rs12829521  | C | 0.0417  |
| rs141280777 | A | -0.159  |
| rs10492181  | G | -0.0421 |
| rs117241561 | A | -0.1288 |
| rs10847555  | C | 0.0385  |
| rs145283973 | A | -0.2531 |
| rs56317822  | T | -0.0584 |
| rs9651791   | T | 0.0482  |
| rs138598585 | A | 0.1605  |
| rs35797815  | T | 0.2299  |
| rs36034432  | A | 0.0951  |
| rs148520134 | C | 0.1932  |
| rs11067591  | C | -0.0592 |
| rs12812273  | G | 0.0687  |
| rs225547    | C | -0.1239 |
| rs2272296   | T | 0.0424  |
| rs12309268  | C | -0.037  |
| rs12580005  | C | 0.0626  |
| rs11117081  | A | -0.0328 |
| rs2240108   | T | -0.045  |
| rs10876801  | T | 0.066   |
| rs7137475   | G | -0.0522 |
| rs76294120  | A | -0.16   |
| rs7137480   | G | 0.0317  |
| rs2731054   | C | 0.0306  |
| rs28376585  | T | 0.0632  |
| rs1659284   | A | -0.0449 |
| rs149448484 | T | 0.132   |
| rs78458681  | T | 0.0871  |
| rs6582324   | T | -0.0386 |
| rs143274738 | C | -0.1325 |
| rs7955439   | T | -0.0385 |
| rs73051926  | C | -0.1039 |
| rs73239709  | C | 0.0377  |
| rs10772526  | T | -0.0331 |

|             |   |         |
|-------------|---|---------|
| rs74541068  | A | 0.1406  |
| rs55646172  | G | -0.0626 |
| rs4763059   | T | -0.0467 |
| rs17765139  | G | 0.0297  |
| rs7970915   | T | -0.2396 |
| rs61937590  | G | 0.0304  |
| rs11615714  | C | 0.1129  |
| rs113377574 | A | 0.1675  |
| rs118014788 | T | -0.1476 |
| rs11615229  | G | 0.0599  |
| rs12422850  | T | 0.0508  |
| rs12368660  | G | -0.0898 |
| rs11171371  | A | -0.2268 |
| rs10859005  | T | -0.0313 |
| rs149678298 | C | -0.0813 |
| rs74371056  | C | 0.0584  |
| rs75422866  | T | -0.098  |
| rs12578337  | G | 0.0922  |
| rs71534222  | T | -0.1373 |
| rs35227403  | A | -0.1303 |
| rs10861725  | C | -0.0342 |
| rs113524285 | T | -0.0751 |
| rs61914581  | G | 0.044   |
| rs1316566   | A | -0.0303 |
| rs117531697 | C | -0.1989 |
| rs111904439 | T | 0.1324  |
| rs7962470   | T | -0.0338 |
| rs61908122  | G | 0.1524  |
| rs114573229 | G | 0.1278  |
| rs12316398  | T | -0.1702 |
| rs35505608  | T | -0.038  |
| rs10744655  | T | 0.0318  |
| rs7960944   | T | -0.0309 |
| rs1247937   | T | 0.0323  |
| rs61931720  | A | 0.175   |
| rs2401400   | C | 0.0369  |
| rs11114545  | G | 0.0405  |
| rs12304406  | G | 0.0453  |
| rs76233683  | C | -0.165  |
| rs4767015   | T | 0.0715  |
| rs7311123   | C | -0.0395 |
| rs11171021  | T | 0.0833  |
| rs111678271 | C | 0.1642  |
| rs1147281   | T | 0.059   |
| rs142158998 | C | 0.1641  |
| rs11610974  | A | 0.0528  |
| rs1920990   | A | 0.0357  |

|             |   |         |
|-------------|---|---------|
| rs77725841  | G | -0.072  |
| rs112056048 | C | 0.0771  |
| rs143647326 | T | -0.1377 |
| rs80067252  | A | -0.1204 |
| rs61912464  | T | 0.0529  |
| rs2393547   | T | -0.0339 |
| rs78623523  | G | 0.1004  |
| rs74891029  | C | 0.1422  |
| rs7969082   | A | 0.0541  |
| rs12819448  | C | -0.0379 |
| rs73233876  | C | 0.1007  |
| rs75217108  | G | -0.1128 |
| rs4763421   | T | 0.0359  |
| rs1452248   | C | 0.0325  |
| rs11829777  | C | -0.0369 |
| rs1471495   | T | 0.0632  |
| rs118093868 | A | -0.183  |
| rs1617236   | G | 0.1554  |
| rs11174220  | T | 0.0442  |
| rs12423577  | G | -0.1418 |
| rs117264642 | A | -0.1916 |
| rs4760791   | G | -0.0345 |
| rs78461522  | T | -0.192  |
| rs116902226 | T | 0.0795  |
| rs11571404  | T | 0.0394  |
| rs4257017   | T | -0.0422 |
| rs75284278  | T | 0.0747  |
| rs10859719  | A | -0.0352 |
| rs141081345 | A | 0.2415  |
| rs12817170  | A | -0.048  |
| rs1396205   | G | -0.0326 |
| rs58267004  | C | -0.0477 |
| rs11610747  | T | 0.0561  |
| rs7307641   | T | 0.035   |
| rs17021407  | C | 0.1052  |
| rs12820271  | A | -0.0572 |
| rs75372036  | G | 0.1252  |
| rs71463015  | A | 0.1098  |
| rs16930632  | A | -0.0429 |
| rs7965697   | G | 0.1822  |
| rs17805498  | G | -0.132  |
| rs56262690  | C | 0.1696  |
| rs139676460 | A | -0.1057 |
| rs2417862   | C | 0.0335  |
| rs1003550   | A | -0.0421 |
| rs2896465   | T | 0.1653  |
| rs12368304  | C | 0.0787  |

|             |   |         |
|-------------|---|---------|
| rs11112089  | T | 0.1814  |
| rs1796391   | G | -0.0368 |
| rs11610054  | C | 0.0707  |
| rs7961157   | A | 0.0377  |
| rs34375662  | G | 0.1069  |
| rs58133372  | A | 0.0467  |
| rs77268238  | A | 0.1409  |
| rs10774906  | C | 0.0421  |
| rs112683324 | A | 0.1574  |
| rs141061721 | T | 0.1908  |
| rs11046323  | A | -0.1108 |
| rs12367370  | G | -0.0306 |
| rs77375329  | T | 0.0998  |
| rs10844757  | T | -0.1028 |
| rs78777545  | A | -0.2146 |
| rs61913603  | G | 0.0428  |
| rs4764100   | T | 0.1715  |
| rs1846644   | C | -0.031  |
| rs6488334   | T | -0.0357 |
| rs114336251 | T | 0.1398  |
| rs10492249  | T | -0.1061 |
| rs11058802  | A | 0.1527  |
| rs10876200  | C | 0.0367  |
| rs10774234  | A | 0.0588  |
| rs368927    | A | -0.0466 |
| rs11106649  | G | 0.0734  |
| rs76529060  | A | 0.0719  |
| rs256180    | A | -0.043  |
| rs76334777  | T | 0.1057  |
| rs79393382  | G | 0.1821  |
| rs117743091 | G | 0.1695  |
| rs35280278  | A | -0.0427 |
| rs12049994  | T | 0.0418  |
| rs80175413  | T | -0.0691 |
| rs117825653 | A | 0.2239  |
| rs34116709  | A | -0.2159 |
| rs7296810   | G | -0.0464 |
| rs116835397 | T | 0.0718  |
| rs61944597  | T | -0.1319 |
| rs144652185 | A | -0.0403 |
| rs35487120  | T | 0.1824  |
| rs2951468   | A | 0.0328  |
| rs7963612   | G | -0.029  |
| rs1796337   | C | 0.0294  |
| rs3858625   | G | -0.0323 |
| rs28799341  | G | -0.0703 |
| rs112278046 | G | -0.1436 |

|             |   |         |
|-------------|---|---------|
| rs12302058  | A | 0.0693  |
| rs488192    | G | -0.0385 |
| rs60581590  | T | 0.1426  |
| rs73127979  | C | -0.2283 |
| rs117141287 | A | 0.2171  |
| rs11067307  | T | 0.0335  |
| rs11060508  | G | -0.032  |
| rs12423628  | A | -0.1308 |
| rs10858650  | G | -0.0376 |
| rs1546496   | T | 0.0444  |
| rs34663707  | G | -0.0459 |
| rs28375185  | G | 0.0367  |
| rs117632658 | G | 0.0981  |
| rs7294936   | A | 0.0299  |
| rs10841553  | A | 0.0304  |
| rs67007513  | G | 0.0393  |
| rs145986105 | T | 0.1014  |
| rs76930650  | G | -0.0806 |
| rs59269273  | G | 0.1617  |
| rs2593261   | A | 0.0308  |
| rs17414492  | G | 0.2205  |
| rs11175628  | C | 0.0664  |
| rs17544679  | C | 0.1065  |
| rs11066738  | A | 0.0324  |
| rs7967349   | G | -0.0315 |
| rs59968967  | C | 0.2187  |
| rs73233850  | T | 0.0775  |
| rs113230573 | T | -0.2165 |
| rs145443794 | T | -0.2025 |
| rs11117041  | T | 0.029   |
| rs12302957  | G | 0.0499  |
| rs147417993 | A | -0.2188 |
| rs11109760  | T | 0.0308  |
| rs12370234  | C | 0.036   |
| rs74788755  | C | -0.1721 |
| rs11175856  | C | -0.1536 |
| rs74627553  | G | 0.0982  |
| rs12830415  | G | -0.0429 |
| rs78992368  | C | 0.0698  |
| rs7305290   | C | 0.0366  |
| rs7309026   | T | -0.0528 |
| rs76329820  | A | -0.1655 |
| rs17109898  | G | -0.0595 |
| rs11832328  | A | 0.1298  |
| rs75408148  | T | -0.0755 |
| rs7301665   | G | -0.2491 |
| rs61935811  | A | 0.1221  |

|             |   |         |
|-------------|---|---------|
| rs78877951  | C | -0.1498 |
| rs144315323 | A | 0.0817  |
| rs12824164  | G | 0.0298  |
| rs74772842  | G | 0.0751  |
| rs55666113  | G | -0.1457 |
| rs1215762   | G | -0.0546 |
| rs79352754  | T | 0.1909  |
| rs112687682 | A | -0.1049 |
| rs929423    | C | -0.0328 |
| rs75739586  | T | 0.0774  |
| rs147291657 | A | 0.1268  |
| rs117871169 | G | 0.1031  |
| rs11054180  | G | -0.0325 |
| rs78641335  | A | 0.1067  |
| rs10748388  | G | 0.0835  |
| rs3782744   | A | 0.0348  |
| rs34165714  | G | -0.1386 |
| rs2035051   | C | 0.0291  |
| rs11109681  | A | -0.0738 |
| rs4762748   | T | -0.0593 |
| rs12810780  | T | 0.0562  |
| rs75146430  | T | 0.0647  |
| rs11835116  | T | -0.0521 |
| rs74862545  | T | 0.1046  |
| rs8181716   | T | 0.0375  |
| rs73184031  | C | 0.1809  |
| rs61937826  | G | 0.0676  |
| rs116867684 | C | -0.1312 |
| rs771653    | T | -0.0308 |
| rs1043156   | T | 0.0435  |
| rs10849820  | T | 0.0529  |
| rs73119282  | T | 0.0971  |
| rs75611255  | G | 0.0702  |
| rs140974745 | T | 0.1072  |
| rs113654674 | C | -0.0382 |
| rs7978370   | G | -0.058  |
| rs7487300   | A | -0.2287 |
| rs117298029 | G | -0.086  |
| rs139528246 | T | 0.1336  |
| rs12369702  | T | 0.0465  |
| rs2200254   | T | -0.0421 |
| rs7980289   | T | -0.1135 |
| rs145683793 | T | 0.1107  |
| rs76891460  | T | -0.0513 |
| rs74443467  | A | 0.0658  |
| rs11613533  | T | 0.0437  |
| rs76404715  | T | 0.1381  |

|             |   |         |
|-------------|---|---------|
| rs11061473  | C | -0.0397 |
| rs4767555   | C | -0.0296 |
| rs116866549 | C | -0.2504 |
| rs12821085  | C | 0.0319  |
| rs7309366   | A | 0.036   |
| rs73098346  | T | 0.2621  |
| rs2130401   | G | 0.0291  |
| rs117929597 | T | 0.1359  |
| rs78333610  | T | -0.1346 |
| rs12312047  | C | -0.0902 |
| rs7959839   | T | 0.0384  |
| rs6581789   | A | -0.0788 |
| rs116284895 | C | -0.1129 |
| rs11837999  | G | 0.0301  |
| rs145697087 | A | -0.0911 |
| rs75605489  | C | 0.0877  |
| rs7312184   | T | -0.0324 |
| rs3759191   | C | 0.0304  |
| rs11109017  | T | 0.0579  |
| rs80122782  | T | -0.1769 |
| rs10431255  | C | 0.0556  |
| rs112483119 | G | 0.1211  |
| rs112745917 | G | 0.1661  |
| rs819120    | A | 0.0328  |
| rs2588346   | G | 0.0397  |
| rs116966535 | A | -0.1289 |
| rs12369136  | G | 0.0912  |
| rs12424766  | T | 0.0309  |
| rs7300104   | T | 0.1309  |
| rs74546660  | C | -0.0882 |
| rs10861832  | G | -0.0288 |
| rs7299461   | C | 0.0305  |
| rs1642030   | T | 0.0708  |
| rs12809316  | G | 0.1108  |
| rs78249611  | T | 0.1034  |
| rs11176729  | T | 0.05    |
| rs7137336   | G | 0.043   |
| rs138282813 | C | 0.1193  |
| rs10849526  | C | -0.0619 |
| rs117465797 | T | 0.1227  |
| rs11611062  | C | 0.0388  |
| rs17221259  | C | -0.0384 |
| rs56900718  | C | 0.0327  |
| rs76319852  | A | -0.1396 |
| rs2193008   | G | 0.0296  |
| rs146583550 | A | 0.1311  |
| rs11052326  | T | 0.0559  |



|             |   |         |
|-------------|---|---------|
| rs7296688   | G | 0.0382  |
| rs10734895  | A | -0.0366 |
| rs145072049 | C | -0.2026 |
| rs10847815  | T | 0.0876  |
| rs76854788  | G | 0.0784  |
| rs10774764  | G | 0.0292  |
| rs76826534  | C | -0.0987 |
| rs145683829 | C | 0.1632  |
| rs7976436   | A | 0.0374  |
| rs117820100 | T | -0.058  |
| rs11043367  | T | 0.0526  |
| rs80321910  | G | 0.1009  |
| rs17702101  | A | 0.1153  |
| rs11059263  | C | -0.0329 |
| rs4391898   | T | 0.1407  |
| rs73205307  | T | -0.0345 |
| rs147333739 | C | 0.1916  |
| rs73207626  | G | 0.1408  |
| rs68011157  | C | 0.056   |
| rs11176421  | G | 0.0306  |
| rs75258935  | A | 0.0593  |
| rs10850331  | A | -0.0897 |
| rs79864186  | A | -0.1831 |
| rs149133237 | G | -0.0438 |
| rs34911011  | T | 0.1019  |
| rs116893295 | A | 0.0732  |
| rs11054168  | C | 0.0631  |
| rs74917912  | T | -0.1003 |
| rs2107525   | C | -0.0376 |
| rs12832364  | T | 0.0307  |
| rs9669644   | C | 0.1735  |
| rs76698003  | A | 0.1789  |
| rs16907207  | T | 0.0809  |
| rs55972466  | A | -0.0634 |
| rs7297998   | C | 0.0294  |
| rs11049939  | A | 0.051   |
| rs74413168  | A | -0.128  |
| rs401717    | T | -0.0314 |
| rs76744672  | G | 0.1573  |
| rs138936428 | C | 0.0562  |
| rs10778056  | T | 0.032   |
| rs1480070   | G | -0.1246 |
| rs73098554  | G | -0.1474 |
| rs149319392 | T | 0.1874  |
| rs117834356 | A | -0.1389 |
| rs55845279  | A | 0.0481  |
| rs17334222  | C | 0.0851  |

|             |   |         |
|-------------|---|---------|
| rs73220936  | T | 0.1491  |
| rs10844494  | T | -0.0307 |
| rs76460643  | A | -0.1632 |
| rs147483894 | C | -0.1436 |
| rs2398464   | A | -0.0557 |
| rs1946820   | A | -0.0473 |
| rs7963816   | C | -0.0498 |
| rs117838546 | T | -0.1615 |
| rs143432125 | C | 0.1636  |
| rs112461703 | A | 0.2263  |
| rs12366486  | A | -0.0696 |
| rs10774741  | A | 0.0298  |
| rs78827077  | T | 0.1187  |
| rs11058138  | G | 0.0485  |
| rs140251518 | G | -0.1499 |
| rs75538175  | T | 0.0576  |
| rs79345520  | G | 0.1507  |
| rs1095787   | G | 0.125   |
| rs837948    | A | 0.0342  |
| rs2619432   | G | 0.0934  |
| rs117497156 | C | 0.1516  |
| rs11063875  | T | 0.0328  |
| rs145326196 | G | 0.1749  |
| rs11174298  | C | -0.0412 |
| rs75518293  | A | 0.0693  |
| rs7301863   | T | -0.0356 |
| rs3850604   | T | -0.0298 |
| rs75469366  | A | 0.0439  |
| rs7960394   | T | 0.0399  |
| rs75935438  | G | 0.1888  |
| rs73207429  | A | -0.1394 |
| rs80200249  | T | -0.0785 |
| rs33222     | T | 0.038   |
| rs79555666  | A | 0.0932  |
| rs3782397   | G | 0.0415  |
| rs4964242   | G | -0.034  |
| rs10774652  | T | 0.1525  |
| rs1030120   | C | 0.0341  |
| rs145349006 | A | 0.1465  |
| rs7979612   | G | -0.0375 |
| rs11067371  | C | 0.1001  |
| rs116971938 | C | 0.2003  |
| rs4764241   | C | 0.0472  |
| rs11173095  | T | -0.0372 |
| rs74769488  | C | 0.1027  |
| rs11104969  | T | -0.0738 |
| rs4767251   | G | -0.0316 |

|             |   |         |
|-------------|---|---------|
| rs703638    | A | -0.1431 |
| rs79611018  | A | -0.1028 |
| rs4767724   | T | 0.0297  |
| rs10771281  | C | -0.0303 |
| rs148061634 | T | -0.2362 |
| rs74738520  | G | 0.0569  |
| rs141032270 | C | 0.0419  |
| rs547101    | G | -0.0389 |
| rs10860239  | C | 0.0406  |
| rs148113060 | G | 0.1589  |
| rs7967644   | C | 0.1739  |
| rs11613161  | G | -0.0956 |
| rs141505314 | G | 0.1667  |
| rs113022181 | A | -0.1027 |
| rs11046078  | T | -0.0285 |
| rs10506150  | T | -0.0463 |
| rs117049763 | C | -0.1577 |
| rs4073205   | C | -0.03   |
| rs55916253  | A | -0.0471 |
| rs140063995 | T | 0.134   |
| rs112704675 | T | 0.0571  |
| rs7316767   | C | 0.0545  |
| rs11050163  | T | 0.0297  |
| rs883079    | C | 0.0327  |
| rs139752366 | T | 0.078   |
| rs10431559  | T | -0.0294 |
| rs908154    | T | -0.131  |
| rs11067986  | A | -0.0334 |
| rs7954708   | C | 0.1164  |
| rs146778457 | G | 0.1698  |
| rs11172707  | A | -0.0505 |
| rs76144281  | A | -0.1058 |
| rs116973149 | G | 0.1527  |
| rs112449089 | A | -0.1036 |
| rs10505908  | C | 0.0325  |
| rs143724646 | G | -0.1899 |
| rs113704329 | A | 0.0934  |
| rs10861948  | T | -0.0383 |
| rs766977    | A | 0.0553  |
| rs116924693 | T | -0.0727 |
| rs140340754 | A | -0.1378 |
| rs139517772 | C | 0.1249  |
| rs11050258  | T | -0.0288 |
| rs3782327   | A | -0.1223 |
| rs8181615   | T | 0.0615  |
| rs11065422  | A | -0.0451 |
| rs140851198 | A | 0.2293  |

|             |   |         |
|-------------|---|---------|
| rs139495921 | T | 0.1941  |
| rs1988766   | T | 0.1281  |
| rs16910630  | C | -0.0445 |
| rs11110849  | G | -0.0494 |
| rs10770681  | G | 0.0284  |
| rs151044479 | A | -0.0605 |
| rs112365353 | A | -0.1017 |
| rs2532557   | C | -0.0361 |
| rs825953    | A | -0.0303 |
| rs140175844 | G | 0.1872  |
| rs11106840  | T | -0.0474 |
| rs17811302  | G | 0.0366  |
| rs3902094   | A | 0.1428  |
| rs17718599  | A | -0.1044 |
| rs12813160  | A | 0.0483  |
| rs117520382 | T | 0.1857  |
| rs75989713  | A | -0.1383 |
| rs12367660  | G | 0.0652  |
| rs7487036   | T | -0.0535 |
| rs7960775   | A | 0.0954  |
| rs7969958   | A | -0.0358 |
| rs74515021  | A | -0.1704 |
| rs1259778   | G | 0.0504  |
| rs78044686  | G | 0.0564  |
| rs505071    | A | 0.0415  |
| rs34834211  | T | -0.1451 |
| rs150713090 | A | -0.1397 |
| rs79968516  | T | 0.0793  |
| rs117056175 | T | -0.1023 |
| rs2140093   | G | -0.0333 |
| rs1707927   | T | 0.0389  |
| rs61923075  | G | 0.0827  |
| rs79316561  | A | -0.0826 |
| rs79144507  | A | -0.1088 |
| rs10777709  | A | -0.0339 |
| rs2442065   | G | -0.0368 |
| rs145585134 | C | -0.153  |
| rs117791138 | G | -0.0941 |
| rs118048073 | C | -0.1525 |
| rs4388928   | T | -0.0382 |
| rs12612     | G | -0.0295 |
| rs117102500 | C | -0.1125 |
| rs4760381   | A | 0.0368  |
| rs74933074  | G | -0.0747 |
| rs61912826  | T | -0.1425 |
| rs12813246  | G | -0.0286 |
| rs11060357  | A | 0.033   |

|             |   |         |
|-------------|---|---------|
| rs167490    | A | 0.0381  |
| rs151260018 | G | 0.0775  |
| rs1002100   | C | 0.0423  |
| rs77134245  | G | -0.0812 |
| rs73187351  | A | 0.1332  |
| rs11056808  | A | 0.0499  |
| rs11067112  | T | -0.0759 |
| rs226381    | T | -0.0288 |
| rs74919292  | C | 0.0432  |
| rs7966128   | G | -0.0311 |
| rs10877847  | C | 0.0284  |
| rs76128742  | T | 0.1154  |
| rs117264318 | T | 0.2553  |
| rs7294740   | G | 0.097   |
| rs11181850  | T | 0.0363  |
| rs61933399  | A | 0.0525  |
| rs142729063 | C | 0.153   |
| rs117245204 | A | -0.0938 |
| rs4453274   | G | 0.0409  |
| rs10880646  | T | 0.0749  |
| rs118017001 | G | -0.0692 |
| rs117744660 | C | -0.1072 |
| rs12366842  | T | 0.2522  |
| rs117258084 | T | 0.1015  |
| rs11060526  | G | -0.0529 |
| rs12308275  | T | -0.0385 |
| rs10734948  | C | 0.0414  |
| rs117376913 | C | -0.1676 |
| rs7973400   | C | -0.0812 |
| rs3809204   | A | 0.0314  |
| rs34543326  | C | 0.0428  |
| rs12832985  | C | -0.106  |
| rs68014110  | C | -0.0571 |
| rs60349835  | T | 0.2399  |
| rs4075954   | A | 0.0286  |
| rs35580153  | C | -0.0432 |
| rs117775298 | A | -0.0678 |
| rs61916633  | A | 0.0704  |
| rs4761496   | C | 0.052   |
| rs138744560 | C | -0.1048 |
| rs147350967 | T | 0.0594  |
| rs4149587   | G | 0.0302  |
| rs111924133 | G | 0.1425  |
| rs4762469   | G | -0.0297 |
| rs35455078  | T | -0.035  |
| rs10744212  | C | -0.0309 |
| rs56279168  | C | 0.0673  |

|             |   |         |
|-------------|---|---------|
| rs11061993  | T | -0.0598 |
| rs11612851  | C | -0.0356 |
| rs7970896   | C | 0.036   |
| rs2730939   | T | 0.1272  |
| rs150838545 | A | -0.0976 |
| rs10506053  | C | 0.0557  |
| rs2255797   | T | -0.0391 |
| rs12425275  | C | 0.0854  |
| rs11611556  | G | -0.0349 |
| rs150149498 | T | 0.1067  |
| rs118120323 | A | 0.0837  |
| rs1875059   | T | 0.056   |
| rs145155692 | G | -0.1483 |
| rs6582222   | T | 0.03    |
| rs76659134  | T | 0.1899  |
| rs142557042 | C | -0.1554 |
| rs11061840  | T | -0.0507 |
| rs12230113  | A | 0.182   |
| rs12817018  | T | -0.0364 |
| rs75419216  | G | -0.0491 |
| rs7132012   | G | 0.0308  |
| rs73403582  | C | 0.1037  |
| rs12372480  | T | 0.0445  |
| rs4763188   | A | -0.0289 |
| rs10773122  | G | -0.0432 |
| rs77282593  | T | 0.0917  |
| rs7979908   | G | 0.0387  |
| rs12425040  | G | 0.0939  |
| rs907350    | C | -0.0363 |
| rs117158416 | A | -0.2068 |
| rs661685    | A | 0.1604  |
| rs4964290   | C | -0.036  |
| rs609704    | C | 0.0321  |
| rs17193690  | G | -0.104  |
| rs16928354  | T | 0.094   |
| rs118113109 | T | -0.1565 |
| rs1446428   | T | 0.0639  |
| rs11564269  | T | 0.0975  |
| rs140932024 | T | 0.1319  |
| rs12226971  | A | 0.1557  |
| rs6488004   | C | -0.0305 |
| rs148051890 | G | 0.1525  |
| rs117198999 | A | 0.1528  |
| rs10847800  | G | -0.0283 |
| rs10785365  | A | 0.0303  |
| rs56959362  | G | 0.0429  |
| rs140135882 | C | -0.2426 |

|             |   |         |
|-------------|---|---------|
| rs55861849  | G | -0.0805 |
| rs7311244   | A | -0.0775 |
| rs74755643  | G | -0.0621 |
| rs11611941  | C | 0.0679  |
| rs117263018 | A | -0.1319 |
| rs10847415  | T | -0.0315 |
| rs137968919 | T | -0.1018 |
| rs4240730   | C | 0.0302  |
| rs76851022  | T | 0.062   |
| rs10771513  | A | 0.036   |
| rs1918942   | C | -0.0296 |
| rs77595911  | T | 0.0672  |
| rs12422785  | T | 0.0623  |
| rs10902475  | C | -0.0377 |
| rs143338675 | T | -0.231  |
| rs55745112  | A | 0.0689  |
| rs17030910  | C | 0.0924  |
| rs2466886   | T | -0.0563 |
| rs12579784  | G | -0.0625 |
| rs2091768   | C | -0.0917 |
| rs146112900 | A | 0.1447  |
| rs7304990   | T | -0.0407 |
| rs7303836   | T | 0.0412  |
| rs12303454  | T | -0.096  |
| rs12231248  | T | 0.1825  |
| rs60906495  | A | 0.0345  |
| rs61934876  | A | -0.1216 |
| rs10848833  | C | -0.0329 |
| rs11608508  | C | 0.0374  |
| rs4238059   | T | 0.0677  |
| rs12308051  | T | -0.0316 |
| rs338176    | C | 0.0282  |
| rs12308345  | T | -0.0637 |
| rs12304885  | A | 0.1698  |
| rs61294626  | G | 0.0665  |
| rs11613360  | C | -0.0507 |
| rs12368434  | A | -0.0278 |
| rs427908    | G | -0.1536 |
| rs10861156  | A | 0.03    |
| rs61912022  | C | 0.1148  |
| rs16912181  | G | 0.0716  |
| rs11113370  | A | -0.0346 |
| rs34075194  | A | -0.0424 |
| rs139749398 | T | -0.1643 |
| rs4272843   | C | 0.0292  |
| rs11613870  | A | 0.0605  |
| rs4334120   | T | -0.0354 |

|             |   |         |
|-------------|---|---------|
| rs11105979  | T | -0.0594 |
| rs10859678  | T | 0.0336  |
| rs34386538  | C | 0.0357  |
| rs10506554  | A | -0.0534 |
| rs3759380   | T | -0.0706 |
| rs117980756 | G | 0.1277  |
| rs814231    | C | -0.0339 |
| rs73236758  | T | 0.0737  |
| rs1897788   | T | 0.0502  |
| rs10747605  | T | -0.0485 |
| rs12829127  | C | -0.0546 |
| rs11046706  | G | -0.09   |
| rs4930740   | G | 0.0347  |
| rs59270299  | C | 0.1422  |
| rs60769929  | T | -0.1136 |
| rs118110714 | A | 0.0972  |
| rs145229697 | A | -0.2155 |
| rs1697477   | T | -0.0454 |
| rs4759676   | G | 0.0302  |
| rs60623134  | G | 0.067   |
| rs115180866 | T | 0.0806  |
| rs7137661   | C | 0.1334  |
| rs894011    | C | 0.1172  |
| rs144111200 | T | -0.126  |
| rs7965628   | G | -0.0288 |
| rs630114    | A | 0.1029  |
| rs11114574  | A | -0.1711 |
| rs11178396  | C | -0.03   |
| rs79965828  | C | -0.0752 |
| rs2408316   | C | 0.0299  |
| rs10161010  | T | -0.0467 |
| rs147789015 | A | 0.2134  |
| rs12819141  | T | -0.0504 |
| rs4627168   | C | -0.1229 |
| rs10444401  | T | -0.0378 |
| rs150053510 | T | -0.1574 |
| rs2544086   | G | 0.098   |
| rs61940961  | C | 0.1033  |
| rs117216122 | G | -0.1502 |
| rs10505985  | C | -0.0333 |
| rs118075389 | G | 0.1631  |
| rs55833872  | C | 0.0412  |
| rs11180763  | T | 0.19    |
| rs66469448  | G | 0.1177  |
| rs10734684  | A | 0.0518  |
| rs146507570 | T | 0.1586  |
| rs10845828  | G | 0.0395  |



|             |   |         |
|-------------|---|---------|
| rs75215421  | G | 0.1133  |
| rs76519463  | C | -0.1372 |
| rs151166702 | T | -0.1217 |
| rs34153409  | A | 0.0561  |
| rs4762467   | C | -0.0341 |
| rs71458527  | T | 0.0463  |
| rs118109703 | G | 0.1921  |
| rs149787282 | A | -0.1408 |
| rs17505799  | A | 0.1467  |
| rs7315082   | T | -0.1303 |
| rs12423871  | A | 0.0567  |
| rs1580853   | A | 0.1428  |
| rs7132282   | T | 0.0385  |
| rs61942305  | C | -0.0664 |
| rs11067848  | C | 0.0612  |
| rs117669359 | C | -0.0908 |
| rs7313015   | T | -0.1356 |
| rs139541178 | A | 0.1613  |
| rs7316491   | A | -0.0484 |
| rs1109725   | C | 0.0339  |
| rs118114059 | A | -0.1483 |
| rs145761741 | A | -0.1043 |
| rs58353182  | G | -0.0497 |
| rs4378454   | A | 0.1456  |
| rs76381250  | C | -0.0621 |
| rs611484    | A | 0.1492  |
| rs79531391  | T | -0.1063 |
| rs34459211  | G | -0.0527 |
| rs4246235   | A | 0.0667  |
| rs150054887 | C | 0.1302  |
| rs11175471  | C | 0.0448  |
| rs3830069   | A | -0.0793 |
| rs117464260 | A | 0.2337  |
| rs73089384  | T | -0.0431 |
| rs7953582   | T | -0.0322 |
| rs150953287 | C | 0.1371  |
| rs12829339  | A | 0.0334  |
| rs2304272   | G | 0.0645  |
| rs264501    | T | 0.0338  |
| rs1169738   | A | -0.084  |
| rs2467117   | C | -0.0294 |
| rs117748853 | C | -0.2075 |
| rs10772668  | A | 0.0302  |
| rs7308646   | G | 0.0425  |
| rs117499778 | A | 0.1163  |
| rs61933619  | T | 0.0763  |
| rs79704745  | T | -0.1553 |

|             |   |         |
|-------------|---|---------|
| rs77143836  | C | 0.0974  |
| rs113774454 | T | 0.2229  |
| rs11058387  | A | -0.028  |
| rs73207599  | C | 0.0737  |
| rs73182639  | C | 0.0722  |
| rs4767420   | A | 0.0605  |
| rs7979439   | T | -0.0496 |
| rs35294565  | C | -0.0999 |
| rs79156239  | A | 0.1442  |
| rs12300199  | C | -0.0872 |
| rs4766910   | T | 0.0318  |
| rs216241    | A | -0.0382 |
| rs116970198 | C | -0.0952 |
| rs75753659  | G | 0.0585  |
| rs118022163 | T | -0.1295 |
| rs76489124  | G | 0.053   |
| rs145057233 | T | 0.0347  |
| rs876534    | G | -0.0303 |
| rs3809115   | T | -0.0956 |
| rs2448051   | T | 0.029   |
| rs10846571  | A | 0.0306  |
| rs2132243   | A | 0.0429  |
| rs12832974  | T | 0.0957  |
| rs7970221   | C | 0.0414  |
| rs4931344   | C | 0.0354  |
| rs149267898 | A | -0.1544 |
| rs10849169  | T | 0.087   |
| rs34012476  | T | 0.0752  |
| rs75065331  | G | 0.1478  |
| rs10783362  | T | 0.0545  |
| rs138348326 | A | 0.114   |
| rs3931002   | T | -0.0298 |
| rs7309920   | T | 0.1488  |
| rs141194812 | T | -0.17   |
| rs76528076  | C | -0.1714 |
| rs7958836   | C | 0.0381  |
| rs3782637   | C | -0.0403 |
| rs2160586   | C | 0.0283  |
| rs138587382 | C | 0.0774  |
| rs148189281 | T | -0.1415 |
| rs75429729  | C | 0.0511  |
| rs117034287 | A | 0.1148  |
| rs10878096  | G | -0.0287 |
| rs80181885  | T | -0.0566 |
| rs7976594   | A | 0.0541  |
| rs12369228  | C | 0.0632  |
| rs58340984  | T | 0.0653  |

|             |   |         |
|-------------|---|---------|
| rs11614515  | A | 0.0885  |
| rs117284975 | T | -0.1227 |
| rs78744477  | A | -0.1189 |
| rs117560783 | T | -0.1866 |
| rs11610199  | A | 0.0441  |
| rs117739568 | C | 0.1639  |
| rs4486667   | C | 0.051   |
| rs75683420  | G | -0.2074 |
| rs73052455  | A | -0.1233 |
| rs11053604  | C | -0.1249 |
| rs112295215 | T | 0.1581  |
| rs11110834  | C | -0.0398 |
| rs77158226  | A | 0.1685  |
| rs10785663  | T | 0.0325  |
| rs12578117  | A | -0.0424 |
| rs10862751  | A | -0.0275 |
| rs12827073  | G | -0.0298 |
| rs7310197   | G | 0.0401  |
| rs34874447  | G | 0.0424  |
| rs78245257  | C | -0.1262 |
| rs10773249  | G | 0.0291  |
| rs143408102 | A | 0.2443  |
| rs57159034  | C | -0.0362 |
| rs139906508 | T | -0.1636 |
| rs117823600 | C | 0.0932  |
| rs4759729   | A | -0.1741 |
| rs116992827 | T | -0.2071 |
| rs3759265   | C | 0.0277  |
| rs78859078  | T | -0.2124 |
| rs253156    | A | 0.0277  |
| rs117352128 | T | -0.1078 |
| rs589619    | G | -0.0294 |
| rs4964147   | A | -0.0297 |
| rs75799006  | A | 0.1561  |
| rs146194784 | T | -0.1526 |
| rs1379966   | T | 0.0392  |
| rs2192799   | T | -0.0279 |
| rs4760387   | G | -0.0609 |
| rs55713940  | T | -0.0493 |
| rs2109125   | T | -0.0651 |
| rs117846975 | C | -0.1412 |
| rs7316898   | T | 0.0314  |
| rs773459    | T | -0.0412 |
| rs718522    | C | -0.0352 |
| rs11053104  | T | -0.0358 |
| rs75082010  | T | 0.1552  |
| rs4765959   | A | 0.0339  |

|             |   |         |
|-------------|---|---------|
| rs7132233   | G | -0.0312 |
| rs1026059   | G | 0.0282  |
| rs11051727  | T | -0.0404 |
| rs229988    | T | 0.0287  |
| rs61941101  | A | 0.1034  |
| rs4964671   | G | -0.0344 |
| rs117063497 | A | 0.0658  |
| rs12581302  | G | 0.0337  |
| rs7978288   | C | 0.0349  |
| rs1485856   | G | 0.0375  |
| rs73120065  | C | 0.0746  |
| rs117080167 | T | 0.0506  |
| rs79095623  | G | 0.2143  |
| rs79587879  | C | -0.0652 |
| rs150158755 | A | 0.1092  |
| rs11065387  | C | 0.151   |
| rs73030985  | T | 0.1055  |
| rs34909910  | T | -0.1314 |
| rs7977617   | G | -0.0411 |
| rs117613521 | A | -0.123  |
| rs144640984 | T | 0.1301  |
| rs117575035 | T | -0.1236 |
| rs7138736   | A | 0.0979  |
| rs1703078   | G | 0.0584  |
| rs74716531  | C | -0.1478 |
| rs11114798  | A | -0.032  |
| rs34592070  | A | 0.1173  |
| rs7956035   | T | 0.0309  |
| rs34932388  | G | -0.0546 |
| rs79740767  | A | -0.0648 |
| rs117246138 | G | -0.1768 |
| rs798396    | G | 0.028   |
| rs4761753   | A | 0.0446  |
| rs140667213 | G | -0.0904 |
| rs12300076  | T | -0.1009 |
| rs67602462  | C | -0.0428 |
| rs74934522  | T | -0.1465 |
| rs7137702   | T | -0.1228 |
| rs7980745   | A | 0.0574  |
| rs117697094 | T | -0.1152 |
| rs16944301  | A | -0.0726 |
| rs56223973  | A | -0.1202 |
| rs61940571  | C | -0.0368 |
| rs11060465  | T | -0.0344 |
| rs4514503   | T | -0.0318 |
| rs10842349  | A | 0.0747  |
| rs1274496   | C | 0.0573  |

|             |   |         |
|-------------|---|---------|
| rs12818395  | A | 0.0319  |
| rs17108861  | G | -0.029  |
| rs117705200 | A | 0.1774  |
| rs78744746  | C | 0.1472  |
| rs793159    | C | -0.0948 |
| rs117818043 | T | -0.0833 |
| rs3926666   | C | -0.0302 |
| rs643573    | G | -0.0641 |
| rs974799    | T | -0.0393 |
| rs220590    | A | -0.0289 |
| rs837944    | C | 0.0314  |
| rs140991532 | A | 0.0661  |
| rs10850667  | G | -0.0408 |
| rs142675029 | A | -0.088  |
| rs117502457 | T | -0.1179 |
| rs79820769  | T | 0.064   |
| rs11177502  | T | -0.0567 |
| rs2955522   | T | -0.0548 |
| rs73196010  | T | 0.2149  |
| rs225474    | C | -0.0398 |
| rs77663217  | C | 0.1755  |
| rs11177202  | C | 0.0339  |
| rs11049482  | G | 0.087   |
| rs117457372 | C | 0.1103  |
| rs113273906 | G | -0.1057 |
| rs74993037  | G | -0.0991 |
| rs7964368   | G | -0.0484 |
| rs998377    | A | 0.0279  |
| rs34344203  | C | 0.0406  |
| rs73115517  | T | -0.171  |
| rs75769111  | C | -0.1374 |
| rs2029851   | C | -0.0294 |
| rs797602    | T | 0.1329  |
| rs61944901  | C | 0.0976  |
| rs78483662  | C | -0.1555 |
| rs75730364  | C | -0.1298 |
| rs10773315  | A | 0.0548  |
| rs3014994   | G | 0.0267  |
| rs73082641  | G | -0.0578 |
| rs117688827 | T | -0.1107 |
| rs17749643  | C | -0.0443 |
| rs11836892  | C | -0.0435 |
| rs145779751 | A | -0.2808 |
| rs4768564   | C | -0.0284 |
| rs10876387  | T | 0.0576  |
| rs73117600  | A | 0.1098  |
| rs78460917  | C | -0.2133 |

|             |   |         |
|-------------|---|---------|
| rs4761405   | G | 0.0361  |
| rs11056359  | C | 0.0558  |
| rs2192137   | A | -0.0858 |
| rs79396940  | T | -0.1539 |
| rs7307677   | C | -0.0322 |
| rs1433363   | C | -0.05   |
| rs71462285  | T | 0.245   |
| rs790450    | A | 0.0458  |
| rs10777470  | T | -0.0506 |
| rs12423722  | T | 0.0489  |
| rs12829202  | A | 0.0813  |
| rs12580299  | A | 0.128   |
| rs12823126  | A | 0.0348  |
| rs74586970  | C | -0.1579 |
| rs59300837  | T | 0.1001  |
| rs117738802 | C | -0.042  |
| rs6486522   | G | -0.0476 |
| rs6488593   | A | -0.0426 |
| rs61925135  | T | -0.1077 |
| rs79542218  | A | 0.063   |
| rs76236534  | T | -0.2454 |
| rs2596143   | C | 0.0533  |
| rs11059268  | T | -0.0352 |
| rs75478501  | T | -0.1057 |
| rs11109541  | T | 0.0289  |
| rs1196791   | G | -0.0336 |
| rs155371    | G | 0.0441  |
| rs7307064   | C | 0.0386  |
| rs4761981   | T | -0.0402 |
| rs17176792  | T | 0.0435  |
| rs78031376  | G | 0.0575  |
| rs17249756  | C | -0.0975 |
| rs4766217   | A | -0.0342 |
| rs3794241   | T | -0.0477 |
| rs11609655  | A | -0.0511 |
| rs79651151  | C | 0.1162  |
| rs117335065 | G | 0.1873  |
| rs77739214  | T | -0.134  |
| rs17704825  | A | -0.1032 |
| rs11058936  | A | 0.0678  |
| rs10492341  | T | 0.0287  |
| rs12831055  | T | -0.0349 |
| rs17696207  | C | -0.1045 |
| rs11064003  | A | -0.0313 |
| rs61918071  | T | -0.0944 |
| rs12829483  | T | 0.0388  |
| rs12305743  | A | 0.0268  |

|             |   |         |
|-------------|---|---------|
| rs148506384 | T | -0.1824 |
| rs117928648 | A | -0.0656 |
| rs11177397  | G | -0.0396 |
| rs113822324 | T | -0.1558 |
| rs55770045  | A | 0.1847  |
| rs11176312  | G | 0.1035  |
| rs73137884  | A | -0.06   |
| rs3748265   | T | 0.077   |
| rs148711374 | C | 0.1697  |
| rs12815535  | T | 0.0338  |
| rs117889774 | A | -0.1566 |
| rs73062310  | T | 0.129   |
| rs73141031  | T | 0.075   |
| rs877868    | T | 0.1784  |
| rs79250609  | T | -0.0418 |
| rs117512311 | A | 0.0966  |
| rs17502807  | C | -0.1447 |
| rs73429686  | A | -0.0734 |
| rs1283172   | G | -0.0357 |
| rs61931366  | A | -0.0505 |
| rs7958562   | G | 0.028   |
| rs933744    | A | -0.0766 |
| rs10745793  | A | -0.0271 |
| rs80132740  | T | -0.1117 |
| rs12312261  | G | -0.0325 |
| rs11054761  | C | 0.0609  |
| rs2468200   | G | -0.0324 |
| rs4760014   | T | 0.0746  |
| rs117479060 | A | 0.1192  |
| rs78742197  | G | 0.1671  |
| rs139605151 | C | -0.1077 |
| rs874593    | T | 0.0329  |
| rs79551026  | A | -0.1209 |
| rs146945060 | T | 0.1865  |
| rs67032953  | G | 0.0356  |
| rs113752700 | G | 0.1906  |
| rs118007963 | A | 0.1708  |
| rs75302015  | T | 0.2117  |
| rs10859933  | C | -0.043  |
| rs148201777 | C | 0.1078  |
| rs73189303  | T | 0.1371  |
| rs11063324  | A | 0.1638  |
| rs1245442   | T | 0.0429  |
| rs1355553   | G | 0.0914  |
| rs2109144   | T | -0.0301 |
| rs7973864   | G | -0.0329 |
| rs12315390  | T | 0.0722  |

|             |   |         |
|-------------|---|---------|
| rs577958    | G | -0.028  |
| rs1861478   | A | 0.0269  |
| rs146105268 | T | -0.0807 |
| rs148703898 | T | -0.1695 |
| rs71582862  | T | 0.1067  |
| rs112067663 | G | -0.1633 |
| rs117558580 | G | 0.1208  |
| rs117911642 | G | 0.1563  |
| rs117502614 | T | -0.1622 |
| rs435956    | C | 0.0469  |
| rs5745874   | A | -0.0776 |
| rs73143715  | G | -0.094  |
| rs12305827  | A | 0.0341  |
| rs74350309  | T | -0.2318 |
| rs2886088   | T | 0.0989  |
| rs77681972  | G | -0.2398 |
| rs2005915   | T | 0.1469  |
| rs11044333  | C | 0.0323  |
| rs11169621  | G | -0.0406 |
| rs77492213  | C | -0.1214 |
| rs75220528  | C | 0.1432  |
| rs1901040   | A | -0.0299 |
| rs138315027 | A | -0.1061 |
| rs1245073   | T | -0.0288 |
| rs73195203  | G | -0.2336 |
| rs11612656  | C | -0.0831 |
| rs166570    | C | -0.0316 |
| rs146130766 | C | 0.0746  |
| rs17034372  | A | -0.0714 |
| rs11610739  | C | -0.0745 |
| rs6581847   | T | 0.0272  |
| rs2114317   | T | 0.0354  |
| rs11610782  | A | 0.1121  |
| rs73201776  | C | 0.0748  |
| rs10840677  | T | 0.0283  |
| rs12815023  | G | -0.2595 |
| rs55934056  | A | -0.1451 |
| rs73329645  | T | 0.1315  |
| rs76733979  | T | 0.1197  |
| rs79728994  | T | 0.1517  |
| rs12814947  | C | 0.0289  |
| rs79168022  | G | -0.104  |
| rs3764040   | G | -0.0395 |
| rs12820095  | C | -0.0319 |
| rs76954998  | G | 0.0601  |
| rs117693438 | A | 0.0909  |
| rs12372496  | G | 0.0626  |



|             |   |         |
|-------------|---|---------|
| rs710764    | G | 0.0285  |
| rs708887    | T | -0.0279 |
| rs150352767 | T | 0.1742  |
| rs75785593  | A | 0.0611  |
| rs59209664  | T | 0.1819  |
| rs17421687  | A | 0.0836  |
| rs74960071  | G | 0.1534  |
| rs140026518 | A | 0.227   |
| rs1427984   | A | -0.0423 |
| rs10746052  | T | -0.0433 |
| rs117744904 | T | -0.1712 |
| rs10219441  | G | -0.0391 |
| rs12313951  | T | 0.0704  |
| rs4293159   | T | 0.0381  |
| rs59809808  | G | -0.0406 |
| rs146994983 | A | -0.1688 |
| rs4963708   | A | -0.0278 |
| rs6245      | T | -0.091  |
| rs75558083  | T | -0.057  |
| rs4964426   | A | 0.0312  |
| rs12308026  | C | 0.0289  |
| rs7954938   | C | 0.1111  |
| rs147928546 | A | -0.0832 |
| rs11176498  | T | 0.0438  |
| rs112039107 | T | -0.1951 |
| rs77591080  | A | -0.092  |
| rs11106170  | T | 0.1303  |
| rs1009975   | G | 0.0307  |
| rs140701987 | C | 0.1793  |
| rs78549167  | G | -0.1187 |
| rs2710705   | A | 0.103   |
| rs7312585   | G | -0.0498 |
| rs11173305  | C | -0.0408 |
| rs73129320  | G | 0.1131  |
| rs12305455  | C | 0.0686  |
| rs61941207  | C | 0.0446  |
| rs139352538 | G | -0.0878 |
| rs73118636  | C | -0.1176 |
| rs55809246  | T | 0.1803  |
| rs10161149  | T | 0.0582  |
| rs2567984   | G | -0.0314 |
| rs7137682   | T | 0.0489  |
| rs7297136   | G | -0.0341 |
| rs71462216  | T | -0.0565 |
| rs7964353   | A | 0.1234  |
| rs1466332   | G | 0.0264  |
| rs10770669  | C | 0.0394  |

|             |   |         |
|-------------|---|---------|
| rs79718529  | A | -0.0645 |
| rs2086690   | T | -0.0279 |
| rs11178399  | T | -0.0472 |
| rs67600993  | C | 0.03    |
| rs138375032 | C | 0.0869  |
| rs697884    | G | 0.0323  |
| rs2241284   | T | -0.0343 |
| rs79219082  | T | 0.056   |
| rs12824991  | T | -0.1321 |
| rs2009391   | T | 0.0265  |
| rs11175829  | A | -0.0732 |
| rs10437923  | G | -0.0295 |
| rs7307656   | C | 0.1001  |
| rs7956750   | G | 0.0267  |
| rs4963621   | A | -0.0481 |
| rs7139047   | G | 0.0386  |
| rs200785    | T | 0.0618  |
| rs4882277   | C | -0.0501 |
| rs117107054 | A | 0.2292  |
| rs75935880  | G | 0.0774  |
| rs9971713   | A | 0.0466  |
| rs12366929  | G | 0.0335  |
| rs144814086 | C | 0.1197  |
| rs34255525  | A | -0.1343 |
| rs9634243   | T | 0.0451  |
| rs73370933  | T | 0.1252  |
| rs117028764 | C | 0.1294  |
| rs117440215 | G | 0.1363  |
| rs11060860  | A | 0.0356  |
| rs7306380   | C | -0.031  |
| rs139044263 | T | -0.1162 |
| rs148116621 | A | -0.1491 |
| rs17765594  | T | 0.1532  |
| rs11112715  | C | 0.0445  |
| rs16941414  | T | -0.0808 |
| rs35120348  | T | 0.0616  |
| rs2198490   | A | -0.0342 |
| rs7971499   | T | 0.03    |
| rs10505956  | C | 0.0417  |
| rs76076322  | C | 0.124   |
| rs61926983  | A | 0.1245  |
| rs11108039  | A | -0.047  |
| rs11049473  | G | 0.0513  |
| rs76728753  | G | -0.0488 |
| rs28638142  | A | 0.1466  |
| rs16929447  | T | 0.0316  |
| rs72648104  | A | 0.073   |

|             |   |         |
|-------------|---|---------|
| rs118069287 | A | -0.1731 |
| rs73346444  | A | 0.0482  |
| rs78357062  | T | 0.1427  |
| rs117516539 | C | 0.1152  |
| rs61931514  | C | 0.0413  |
| rs219875    | T | 0.0396  |
| rs75820070  | A | 0.0499  |
| rs61936778  | C | -0.0433 |
| rs11049852  | G | -0.0546 |
| rs61916657  | A | 0.0294  |
| rs11051392  | T | 0.0333  |
| rs11046741  | T | 0.0497  |
| rs3762111   | T | -0.0527 |
| rs1653371   | C | 0.0542  |
| rs79039026  | G | 0.0987  |
| rs74100626  | C | -0.1563 |
| rs2893758   | A | -0.0277 |
| rs111856825 | T | 0.1513  |
| rs11066974  | T | 0.0422  |
| rs631821    | C | 0.0534  |
| rs74080519  | C | -0.0485 |
| rs73130478  | A | 0.0893  |
| rs10746211  | C | 0.0263  |
| rs60912810  | T | 0.0842  |
| rs79619304  | T | 0.0503  |
| rs55818654  | C | -0.1479 |
| rs73043762  | C | -0.104  |
| rs1949176   | A | -0.0293 |
| rs117841447 | T | 0.092   |
| rs12828333  | G | 0.092   |
| rs112839090 | A | -0.0536 |
| rs111418504 | C | -0.0808 |
| rs1232978   | T | 0.0369  |
| rs1195581   | T | 0.0357  |
| rs143715927 | G | -0.173  |
| rs75309563  | C | -0.1172 |
| rs111453405 | T | -0.0526 |
| rs60876022  | A | 0.0573  |
| rs55865447  | A | 0.0462  |
| rs12228681  | A | 0.2109  |
| rs12579874  | C | 0.117   |
| rs12820581  | C | -0.126  |
| rs113743334 | T | 0.0522  |
| rs78959952  | T | -0.1439 |
| rs73246932  | T | 0.0646  |
| rs142227852 | T | -0.0634 |
| rs10784961  | A | 0.0322  |

|             |   |         |
|-------------|---|---------|
| rs7959147   | T | 0.1437  |
| rs7294697   | A | -0.1027 |
| rs3782667   | T | -0.0274 |
| rs10777793  | A | 0.0266  |
| rs10497386  | C | -0.038  |
| rs2232570   | C | 0.0549  |
| rs225466    | A | 0.0402  |
| rs17046190  | G | -0.0758 |
| rs10878510  | T | 0.0278  |
| rs144966930 | A | 0.0834  |
| rs2571344   | G | 0.0285  |
| rs117643112 | C | -0.1974 |
| rs7954180   | A | -0.0261 |
| rs10773093  | C | 0.0272  |
| rs11169819  | C | 0.0335  |
| rs10841281  | G | 0.0559  |
| rs60053534  | A | 0.0605  |
| rs76484919  | A | 0.1721  |
| rs7953354   | C | 0.0455  |
| rs11110476  | C | -0.031  |
| rs61910078  | T | 0.2401  |
| rs141063866 | C | -0.1277 |
| rs78073833  | T | 0.0642  |
| rs75315036  | G | 0.1165  |
| rs117592339 | G | 0.0924  |
| rs11609248  | G | 0.0501  |
| rs11062786  | A | -0.0282 |
| rs55816862  | A | 0.1551  |
| rs78076374  | T | -0.1454 |
| rs147918136 | C | -0.0891 |
| rs78678475  | T | 0.0818  |
| rs12426871  | C | 0.0631  |
| rs875809    | C | 0.0341  |
| rs11060828  | C | 0.0448  |
| rs56240045  | T | -0.1341 |
| rs7972104   | T | -0.0474 |
| rs7980170   | A | 0.028   |
| rs117094257 | G | 0.1193  |
| rs11047745  | A | 0.0379  |
| rs1881959   | A | 0.0269  |
| rs35960167  | G | -0.0295 |
| rs12320849  | C | 0.0539  |
| rs73148315  | T | -0.1103 |
| rs73199533  | A | 0.1036  |
| rs138275687 | A | 0.1377  |
| rs75594851  | G | -0.0763 |
| rs142125235 | A | 0.1037  |

|             |   |         |
|-------------|---|---------|
| rs77879814  | A | -0.13   |
| rs11058607  | G | -0.0306 |
| rs11059739  | A | 0.1114  |
| rs79791158  | T | -0.0875 |
| rs1490889   | G | 0.0277  |
| rs7133579   | G | 0.0661  |
| rs34157936  | G | 0.0852  |
| rs76054139  | A | 0.2177  |
| rs12809496  | G | -0.0268 |
| rs118187332 | T | 0.0671  |
| rs56868362  | A | 0.06    |
| rs10459061  | A | -0.0596 |
| rs11532363  | A | -0.0474 |
| rs7311026   | C | 0.0371  |
| rs151140204 | C | 0.0994  |
| rs226342    | A | -0.0295 |
| rs116864361 | T | -0.1183 |
| rs2368834   | G | 0.0287  |
| rs12310219  | C | -0.036  |
| rs4762642   | A | 0.0506  |
| rs832515    | G | 0.114   |
| rs111698319 | C | -0.0759 |
| rs118184961 | A | 0.1783  |
| rs9668409   | A | -0.1367 |
| rs4762864   | C | 0.1834  |
| rs10779106  | T | 0.0264  |
| rs10129002  | T | -0.0582 |
| rs7136364   | C | -0.0335 |
| rs73151099  | G | 0.1366  |
| rs76077512  | C | 0.0722  |
| rs12368061  | A | -0.1322 |
| rs147901559 | T | -0.0533 |
| rs10732648  | G | 0.0497  |
| rs2049765   | G | 0.0709  |
| rs113741239 | G | -0.1051 |
| rs1565801   | T | -0.031  |
| rs11610489  | T | 0.1097  |
| rs12305059  | A | -0.0267 |
| rs113460467 | T | -0.0919 |
| rs61910056  | T | 0.1672  |
| rs7311283   | C | 0.0276  |
| rs146482406 | C | 0.2314  |
| rs12422705  | A | 0.0459  |
| rs78381318  | A | 0.0581  |
| rs7302032   | A | -0.0507 |
| rs117661689 | G | -0.1354 |
| rs17769793  | G | -0.0428 |

|             |   |         |
|-------------|---|---------|
| rs71460351  | A | -0.043  |
| rs4300476   | C | 0.0456  |
| rs7488961   | T | 0.0632  |
| rs1796016   | C | 0.0293  |
| rs61928769  | G | 0.1518  |
| rs117068796 | A | -0.1376 |
| rs1153183   | C | 0.0357  |
| rs137979960 | T | -0.1212 |
| rs12580567  | A | -0.0671 |
| rs61943277  | T | 0.0585  |
| rs72653434  | G | 0.1398  |
| rs7294897   | C | -0.0451 |
| rs790455    | G | 0.0266  |
| rs56084591  | A | -0.0385 |
| rs10505888  | A | 0.0719  |
| rs11179328  | A | -0.057  |
| rs10849440  | T | -0.1383 |
| rs2163314   | G | 0.0274  |
| rs139514434 | G | 0.1506  |
| rs11115922  | C | 0.1219  |
| rs78609246  | C | -0.1399 |
| rs11178926  | C | 0.1202  |
| rs75830945  | C | 0.0845  |
| rs73108875  | T | -0.1756 |
| rs117933365 | C | 0.1328  |
| rs7301993   | C | -0.0269 |
| rs3741738   | G | -0.0286 |
| rs117082311 | A | -0.187  |
| rs2052256   | C | 0.0314  |
| rs7957263   | G | 0.0309  |
| rs80150249  | A | 0.1265  |
| rs205538    | C | -0.0263 |
| rs2369855   | A | -0.0347 |
| rs1108542   | G | 0.0468  |
| rs76559165  | G | 0.1291  |
| rs141067164 | C | -0.176  |
| rs3815368   | G | 0.0537  |
| rs113141475 | T | 0.1547  |
| rs634264    | A | 0.0332  |
| rs75079677  | G | 0.0692  |
| rs10846133  | A | 0.0375  |
| rs11171634  | T | -0.0274 |
| rs146490798 | C | -0.1192 |
| rs1036362   | C | 0.1206  |
| rs17464778  | A | 0.0806  |
| rs74879244  | G | 0.0789  |
| rs310798    | G | -0.0261 |

|             |   |         |
|-------------|---|---------|
| rs71459109  | G | -0.0349 |
| rs1280600   | G | 0.0295  |
| rs11057673  | C | 0.1052  |
| rs117255723 | C | 0.1262  |
| rs7972355   | A | 0.0411  |
| rs117988734 | C | 0.1267  |
| rs79236320  | G | -0.1286 |
| rs4963517   | T | 0.0288  |
| rs117873288 | C | 0.1351  |
| rs10878177  | A | -0.0289 |
| rs117080543 | T | 0.1418  |
| rs55855339  | T | 0.1865  |
| rs11614694  | A | 0.0895  |
| rs77288215  | C | -0.0975 |
| rs79870864  | A | -0.1079 |
| rs2662803   | T | 0.0382  |
| rs4622357   | T | -0.0842 |
| rs11061004  | A | -0.0885 |
| rs79542239  | G | 0.1838  |
| rs11834485  | T | -0.0332 |
| rs61924403  | A | 0.0516  |
| rs2239065   | A | -0.0269 |
| rs11046692  | A | 0.0451  |
| rs143499925 | G | 0.1801  |
| rs116991960 | T | 0.1574  |
| rs6489901   | G | 0.0728  |
| rs11060732  | T | 0.0343  |
| rs10849266  | A | -0.0271 |
| rs117664122 | T | 0.0702  |
| rs61759637  | C | 0.1417  |
| rs10743734  | A | -0.027  |
| rs73054832  | A | 0.2167  |
| rs117368206 | T | -0.1366 |
| rs60340314  | T | -0.0459 |
| rs10771436  | G | -0.1423 |
| rs7315229   | C | 0.0297  |
| rs61917243  | C | -0.046  |
| rs56378022  | C | -0.1048 |
| rs76950887  | T | 0.0306  |
| rs77724949  | G | -0.0843 |
| rs61909199  | C | 0.0368  |
| rs117668509 | T | -0.093  |
| rs73063437  | T | -0.045  |
| rs11048452  | C | -0.0459 |
| rs111710622 | A | -0.1254 |
| rs117156633 | T | -0.1165 |
| rs7314487   | C | -0.0288 |

|             |   |         |
|-------------|---|---------|
| rs12582277  | G | -0.0416 |
| rs61931139  | T | 0.041   |
| rs12297856  | A | 0.1915  |
| rs773476    | G | 0.0397  |
| rs143264827 | C | 0.1399  |
| rs2178710   | A | 0.0261  |
| rs12299847  | A | -0.1203 |
| rs1716427   | C | 0.0382  |
| rs77248811  | G | -0.2551 |
| rs17779680  | C | -0.0306 |
| rs2839722   | G | 0.0338  |
| rs4991095   | C | 0.1115  |
| rs75773271  | G | 0.2801  |
| rs117678996 | G | 0.1126  |
| rs11060157  | G | 0.0399  |
| rs143425695 | T | 0.0961  |
| rs73170787  | A | 0.0854  |
| rs17701871  | T | 0.0351  |
| rs61938115  | C | 0.0455  |
| rs10785035  | C | -0.038  |
| rs79429357  | C | 0.107   |
| rs116990210 | T | 0.0579  |
| rs1830210   | G | 0.1187  |
| rs60025090  | T | 0.1496  |
| rs17750662  | C | 0.1054  |
| rs111817854 | G | 0.1139  |
| rs76702475  | G | -0.0732 |
| rs116475931 | A | -0.1556 |
| rs34770468  | G | -0.0344 |
| rs112317769 | A | -0.0992 |
| rs7301185   | A | 0.0432  |
| rs1696390   | G | -0.0289 |
| rs116841060 | C | 0.1684  |
| rs73093493  | T | 0.1311  |
| rs73155614  | T | 0.1152  |
| rs117446095 | T | -0.0791 |
| rs73087779  | C | 0.1011  |
| rs4767563   | C | 0.0325  |
| rs138015148 | A | 0.1482  |
| rs4759483   | C | 0.0618  |
| rs61944607  | T | 0.0596  |
| rs11570927  | C | 0.1552  |
| rs7295066   | G | -0.0639 |
| rs115598110 | A | -0.1349 |
| rs10860503  | C | 0.0262  |
| rs117432074 | T | 0.115   |
| rs10845681  | C | 0.0315  |



|             |   |         |
|-------------|---|---------|
| rs12817642  | T | -0.1019 |
| rs75313057  | C | -0.1254 |
| rs113693842 | C | -0.036  |
| rs11176918  | A | -0.0374 |
| rs55733960  | A | -0.0457 |
| rs76667065  | A | -0.0976 |
| rs1813814   | C | 0.0586  |
| rs77715875  | G | -0.0799 |
| rs117453529 | A | -0.1115 |
| rs113815499 | G | -0.1109 |
| rs10845052  | T | 0.0357  |
| rs73296890  | T | -0.1473 |
| rs117396636 | G | 0.1385  |
| rs71455281  | A | 0.1224  |
| rs76454120  | T | -0.0293 |
| rs11610176  | C | -0.0795 |
| rs708845    | G | 0.0836  |
| rs242025    | G | 0.0312  |
| rs4409915   | A | 0.0478  |
| rs112493713 | C | -0.0752 |
| rs111270874 | T | 0.1192  |
| rs1018033   | G | -0.0263 |
| rs77370012  | G | -0.0534 |
| rs2103018   | T | -0.1121 |
| rs77581033  | A | 0.0835  |
| rs10860639  | A | 0.0276  |
| rs67790279  | T | -0.0327 |
| rs141844200 | C | 0.1722  |
| rs77657870  | T | -0.0628 |
| rs77770565  | A | 0.0545  |
| rs142236666 | T | 0.1657  |
| rs816358    | T | 0.0432  |
| rs12367061  | A | 0.1111  |
| rs12824488  | A | 0.0289  |
| rs113083379 | A | 0.1426  |
| rs12227172  | A | 0.0329  |
| rs4441060   | C | 0.0377  |
| rs706499    | C | -0.0279 |
| rs163684    | T | -0.0421 |
| rs139185740 | T | -0.1852 |
| rs143087656 | A | 0.239   |
| rs75320947  | C | 0.0791  |
| rs11115226  | A | 0.0853  |
| rs12297989  | G | -0.0454 |
| rs10850489  | C | 0.0303  |
| rs34151234  | A | 0.0715  |
| rs80044238  | T | 0.047   |

|             |   |         |
|-------------|---|---------|
| rs220563    | A | 0.0319  |
| rs12823749  | A | -0.0384 |
| rs1545494   | T | 0.1219  |
| rs5439      | C | -0.0498 |
| rs941196    | T | -0.0275 |
| rs73072104  | C | 0.1639  |
| rs73147366  | A | 0.1509  |
| rs12424497  | A | 0.0363  |
| rs2706267   | T | -0.1359 |
| rs10848510  | C | -0.0404 |
| rs11171556  | A | -0.0357 |
| rs57775641  | A | 0.1583  |
| rs1800378   | T | 0.0297  |
| rs12368276  | T | 0.0281  |
| rs11177548  | C | -0.0287 |
| rs117088123 | T | 0.1083  |
| rs248824    | C | -0.0286 |
| rs113384516 | C | 0.0976  |
| rs80253695  | T | -0.1322 |
| rs73065867  | C | -0.0675 |
| rs75845123  | A | 0.0899  |
| rs35100     | C | 0.0602  |
| rs116848362 | C | 0.1161  |
| rs17114649  | A | 0.0708  |
| rs11105147  | A | 0.0406  |
| rs11614838  | C | 0.1845  |
| rs76103439  | C | 0.1782  |
| rs143602278 | C | 0.2141  |
| rs145348943 | A | -0.1207 |
| rs1498662   | A | 0.0535  |
| rs12372725  | G | -0.1358 |
| rs2417503   | G | -0.0595 |
| rs11045246  | T | -0.0894 |
| rs12831243  | A | 0.0824  |
| rs11063069  | G | 0.0443  |
| rs4149000   | T | 0.0398  |
| rs11052033  | T | -0.0523 |
| rs11060653  | T | 0.0326  |
| rs73059443  | G | -0.0798 |
| rs55991347  | T | -0.1548 |
| rs116945253 | C | 0.1695  |
| rs1882299   | G | 0.0476  |
| rs11055109  | G | 0.0266  |
| rs4254128   | C | -0.0288 |
| rs1461567   | A | -0.031  |
| rs12829679  | G | 0.0687  |
| rs146157875 | G | -0.2043 |

|             |   |         |
|-------------|---|---------|
| rs78620380  | G | -0.1003 |
| rs10772456  | C | -0.0318 |
| rs11174689  | A | -0.0485 |
| rs10770881  | A | 0.1014  |
| rs11046914  | T | 0.0299  |
| rs74915233  | G | 0.183   |
| rs148154105 | G | 0.1402  |
| rs76164043  | G | 0.0712  |
| rs112276931 | G | -0.0528 |
| rs142621472 | A | -0.1304 |
| rs7968982   | T | 0.0513  |
| rs143923410 | A | 0.0918  |
| rs73114269  | C | 0.0427  |
| rs80102878  | A | -0.1218 |
| rs4399392   | G | 0.0548  |
| rs1515777   | G | -0.0321 |
| rs78093437  | C | -0.0382 |
| rs11174771  | T | 0.0258  |
| rs76907193  | C | 0.0928  |
| rs111851575 | A | -0.1275 |
| rs73131668  | T | 0.1688  |
| rs80319366  | A | -0.0864 |
| rs1038161   | A | 0.0268  |
| rs10744876  | C | -0.0259 |
| rs5744830   | T | -0.1287 |
| rs141044074 | T | 0.1517  |
| rs1305392   | G | 0.0337  |
| rs12830964  | C | 0.1486  |
| rs7302279   | C | 0.0317  |
| rs146295382 | G | -0.0566 |
| rs113326582 | T | -0.13   |
| rs73191457  | G | 0.066   |
| rs79468899  | T | 0.0836  |
| rs144273812 | G | 0.0845  |
| rs138854007 | G | 0.1595  |
| rs77319043  | G | -0.2325 |
| rs11836069  | C | 0.0419  |
| rs150697438 | A | 0.1841  |
| rs772572    | G | 0.0345  |
| rs116841868 | G | 0.1378  |
| rs2041136   | G | 0.1585  |
| rs60612846  | C | 0.0729  |
| rs77787001  | G | -0.1747 |
| rs10773559  | T | -0.0451 |
| rs11062712  | T | -0.1259 |
| rs2140218   | A | -0.0585 |
| rs75326067  | A | 0.1007  |

|             |   |         |
|-------------|---|---------|
| rs75676221  | C | -0.0715 |
| rs35220688  | T | 0.1895  |
| rs837464    | A | -0.0446 |
| rs11064092  | A | -0.1162 |
| rs2292688   | T | -0.0524 |
| rs77301399  | A | -0.0568 |
| rs12321047  | C | 0.071   |
| rs4764028   | C | 0.0359  |
| rs75189886  | T | 0.0843  |
| rs1826208   | C | 0.0288  |
| rs11058960  | T | 0.0468  |
| rs117493524 | C | 0.1856  |
| rs1731773   | T | 0.0541  |
| rs17842954  | T | -0.0946 |
| rs4135038   | G | 0.03    |
| rs7309815   | A | 0.1279  |
| rs74355565  | G | 0.073   |
| rs75652111  | G | -0.0548 |
| rs11108097  | G | 0.0376  |
| rs4964457   | T | 0.0401  |
| rs76441054  | G | 0.1102  |
| rs75266936  | G | -0.1346 |
| rs4768107   | G | -0.0335 |
| rs61762420  | G | -0.1085 |
| rs111961072 | C | 0.1455  |
| rs7301872   | G | -0.0817 |
| rs7133338   | A | 0.1163  |
| rs74381881  | C | 0.1236  |
| rs117548396 | A | 0.0841  |
| rs10870592  | A | -0.0327 |
| rs12302881  | G | 0.0372  |
| rs75440674  | A | -0.0937 |
| rs1549090   | A | -0.0415 |
| rs143221941 | A | 0.1457  |
| rs12578235  | A | 0.0775  |
| rs61942309  | T | -0.0624 |
| rs10880190  | A | -0.0491 |
| rs11170676  | A | 0.0632  |
| rs75389821  | T | 0.0622  |
| rs35755071  | T | 0.0391  |
| rs3782194   | C | 0.0914  |
| rs7960895   | G | -0.085  |
| rs74340065  | C | 0.0879  |
| rs780314    | G | -0.0495 |
| rs73228316  | C | 0.0376  |
| rs11063881  | T | -0.0613 |
| rs61923499  | A | 0.0414  |

|             |   |         |
|-------------|---|---------|
| rs145516208 | C | 0.1197  |
| rs112193976 | C | 0.1031  |
| rs696345    | G | 0.0751  |
| rs1684385   | A | -0.1143 |
| rs1520824   | T | 0.0464  |
| rs34602773  | G | 0.063   |
| rs1688546   | C | 0.0266  |
| rs143794057 | G | 0.1569  |
| rs78723950  | A | -0.1035 |
| rs1119059   | G | -0.0271 |
| rs11060731  | T | 0.0958  |
| rs145833948 | A | 0.1046  |
| rs12322423  | G | -0.0296 |
| rs774894    | T | -0.1048 |
| rs2001458   | A | 0.0627  |
| rs117510759 | G | -0.1379 |
| rs10773342  | T | -0.0267 |
| rs7295633   | T | 0.0933  |
| rs354122    | G | 0.1289  |
| rs2630593   | G | 0.0855  |
| rs12425095  | A | -0.0327 |
| rs74918182  | G | -0.1432 |
| rs422931    | T | -0.0286 |
| rs11060201  | A | -0.0336 |
| rs7953296   | A | -0.0266 |
| rs146350222 | A | -0.0714 |
| rs7979263   | G | -0.0448 |
| rs75940994  | G | 0.1033  |
| rs76746325  | T | -0.0477 |
| rs116298481 | T | 0.0808  |
| rs7305973   | T | 0.0433  |
| rs73043738  | A | 0.0517  |
| rs117062293 | T | 0.1946  |
| rs117560150 | T | -0.0746 |
| rs10848138  | A | -0.051  |
| rs2364493   | A | -0.0304 |
| rs144151752 | T | 0.0779  |
| rs111525235 | T | 0.0514  |
| rs1284883   | A | -0.0269 |
| rs145145497 | T | -0.0664 |
| rs11177192  | T | 0.0291  |
| rs1861835   | A | -0.0436 |
| rs2061869   | G | -0.058  |
| rs150886514 | T | 0.0922  |
| rs4768575   | C | 0.0283  |
| rs4429153   | A | 0.0787  |
| rs61957871  | C | -0.0293 |

|             |   |         |
|-------------|---|---------|
| rs73181886  | C | -0.0367 |
| rs2030130   | C | 0.0347  |
| rs34019668  | C | -0.1145 |
| rs7966895   | G | 0.028   |
| rs1270773   | G | 0.0333  |
| rs117975985 | T | -0.1507 |
| rs143115415 | A | 0.224   |
| rs75680399  | A | -0.15   |
| rs145605464 | C | 0.1445  |
| rs4768301   | C | -0.0435 |
| rs74486492  | G | -0.1497 |
| rs11174598  | A | 0.0421  |
| rs4763062   | G | 0.0475  |
| rs76980749  | G | 0.1035  |
| rs150944337 | T | -0.1677 |
| rs61761088  | G | -0.1326 |
| rs145539107 | T | 0.1375  |
| rs142794783 | A | -0.1962 |
| rs77348580  | T | 0.0973  |
| rs1791643   | T | 0.0261  |
| rs117711135 | C | -0.1174 |
| rs6539151   | C | -0.0505 |
| rs34223790  | C | 0.0441  |
| rs962656    | C | -0.0415 |
| rs7134189   | G | 0.0995  |
| rs2171718   | G | -0.0299 |
| rs151255922 | A | 0.1521  |
| rs7134467   | T | -0.0475 |
| rs10774043  | A | 0.0321  |
| rs4759185   | C | 0.042   |
| rs7963414   | T | -0.0264 |
| rs111826853 | T | -0.0805 |
| rs116891060 | A | 0.1142  |
| rs11611423  | C | -0.0382 |
| rs61922040  | G | -0.0269 |
| rs11831946  | C | -0.0327 |
| rs117831222 | C | 0.0721  |
| rs11068119  | A | -0.0694 |
| rs11831045  | C | -0.0926 |
| rs2695302   | A | -0.0262 |
| rs2248566   | A | 0.0355  |
| rs144337132 | G | 0.1911  |
| rs80280341  | A | 0.0702  |
| rs111832222 | T | 0.1131  |
| rs3136560   | A | -0.0334 |
| rs76917063  | A | -0.068  |
| rs144547022 | A | -0.1932 |

|             |   |         |
|-------------|---|---------|
| rs11044023  | T | -0.0743 |
| rs140696624 | T | 0.0964  |
| rs7296728   | A | 0.0327  |
| rs2349092   | T | 0.0885  |
| rs10773869  | T | 0.0326  |
| rs1066393   | C | 0.0834  |
| rs117941885 | C | -0.1146 |
| rs1797517   | G | 0.0292  |
| rs11063072  | G | -0.0812 |
| rs35308668  | G | 0.0334  |
| rs77352188  | A | -0.1236 |
| rs7958686   | C | 0.027   |
| rs7960489   | C | 0.0822  |
| rs61924168  | A | -0.0363 |
| rs73072186  | C | 0.1148  |
| rs10878977  | C | -0.03   |
| rs12816355  | T | 0.025   |
| rs72644834  | C | 0.0682  |
| rs149957654 | C | -0.1508 |
| rs10879836  | G | 0.033   |
| rs146580785 | C | -0.036  |
| rs75367760  | A | 0.0466  |
| rs111642243 | T | -0.1544 |
| rs148193541 | A | 0.1037  |
| rs296742    | C | -0.0344 |
| rs74540947  | G | 0.0872  |
| rs11177966  | A | 0.0286  |
| rs2373017   | T | 0.0308  |
| rs34059177  | A | -0.1414 |
| rs7313291   | T | -0.0329 |
| rs7307214   | A | -0.0368 |
| rs61118439  | A | 0.1867  |
| rs4964717   | A | 0.2147  |
| rs74463630  | G | -0.0998 |
| rs138493946 | A | 0.1278  |
| rs4765770   | T | 0.0418  |
| rs149407923 | C | 0.1571  |
| rs1059422   | C | 0.1321  |
| rs7311756   | A | -0.0389 |
| rs79515988  | C | 0.0492  |
| rs10774869  | G | 0.0252  |
| rs117530530 | G | -0.0628 |
| rs4768555   | A | -0.0268 |
| rs180435    | C | -0.0337 |
| rs2287161   | C | 0.0289  |
| rs140670195 | T | 0.1243  |
| rs146446580 | G | -0.1208 |

|             |   |         |
|-------------|---|---------|
| rs11112110  | G | -0.1172 |
| rs7975709   | G | -0.0366 |
| rs7303759   | T | 0.0393  |
| rs111820035 | T | 0.1814  |
| rs73116366  | T | -0.0678 |
| rs2567137   | A | 0.0261  |
| rs145306596 | T | 0.1235  |
| rs56057224  | C | 0.0445  |
| rs117320602 | G | -0.1113 |
| rs73187355  | T | 0.0394  |
| rs7295776   | C | -0.0834 |
| rs10774002  | T | -0.0271 |
| rs61927926  | T | -0.0917 |
| rs11067219  | A | -0.0719 |
| rs7970960   | C | 0.0371  |
| rs10842247  | T | -0.026  |
| rs4882760   | T | -0.0371 |
| rs73090732  | C | 0.1518  |
| rs12319547  | G | -0.0781 |
| rs138821224 | G | -0.1437 |
| rs73299801  | T | -0.0849 |
| rs144642925 | A | 0.1221  |
| rs117790215 | C | -0.0978 |
| rs7133481   | A | 0.0409  |
| rs79468509  | C | -0.1626 |
| rs73205207  | A | -0.1769 |
| rs147609427 | A | 0.0721  |
| rs1825515   | G | -0.0375 |
| rs11611632  | T | 0.0286  |
| rs12422915  | T | 0.0323  |
| rs77823212  | A | 0.086   |
| rs149419046 | C | -0.1278 |
| rs61935911  | C | 0.0823  |
| rs2108573   | C | 0.0882  |
| rs73309163  | A | -0.1162 |
| rs10778470  | A | -0.0296 |
| rs149992830 | T | 0.1438  |
| rs2258844   | G | 0.0312  |
| rs78809649  | G | 0.1189  |
| rs2166138   | C | 0.0276  |
| rs34739581  | A | 0.0923  |
| rs79353856  | T | 0.1883  |
| rs737479    | A | -0.0337 |
| rs61943121  | C | 0.0628  |
| rs75896330  | C | -0.1899 |
| rs77492856  | T | -0.078  |
| rs117259842 | G | 0.1312  |



|             |   |         |
|-------------|---|---------|
| rs73112444  | A | 0.0742  |
| rs1275633   | T | -0.0296 |
| rs148356111 | A | 0.1694  |
| rs35070158  | A | 0.0398  |
| rs141772878 | T | 0.1047  |
| rs80316721  | A | -0.1732 |
| rs117024567 | T | -0.1127 |
| rs144745382 | C | -0.1392 |
| rs7310287   | C | 0.0621  |
| rs138424135 | C | -0.1391 |
| rs7302318   | A | 0.0503  |
| rs78080032  | C | 0.0445  |
| rs144921132 | A | -0.1156 |
| rs465760    | G | -0.0582 |
| rs78035242  | T | 0.1204  |
| rs75193006  | T | 0.078   |
| rs7957648   | C | -0.0283 |
| rs113616050 | T | 0.1573  |
| rs1869892   | A | -0.0267 |
| rs12308682  | T | -0.0335 |
| rs11049328  | A | -0.0506 |
| rs73137390  | G | -0.216  |
| rs4447229   | A | -0.0267 |
| rs61912162  | C | 0.0329  |
| rs117806540 | A | 0.1535  |
| rs143630136 | T | 0.1985  |
| rs892491    | T | -0.0244 |
| rs61237524  | A | -0.0732 |
| rs118137000 | G | -0.1619 |
| rs11615894  | T | 0.0341  |
| rs73180564  | A | 0.0657  |
| rs2246353   | G | -0.0284 |
| rs11176267  | T | 0.037   |
| rs1381884   | C | 0.0288  |
| rs3764030   | T | 0.0325  |
| rs75632260  | G | -0.0456 |
| rs59134724  | T | -0.0382 |
| rs6488452   | A | -0.0336 |
| rs1067522   | T | -0.0262 |
| rs183014    | T | 0.0522  |
| rs74879269  | A | 0.1033  |
| rs112284330 | T | -0.1275 |
| rs4883270   | C | -0.1359 |
| rs112403212 | T | -0.0397 |
| rs4587772   | A | 0.0277  |
| rs17248053  | G | -0.1014 |
| rs139969521 | C | -0.1118 |

|             |   |         |
|-------------|---|---------|
| rs7312271   | T | -0.1693 |
| rs113173910 | A | 0.0764  |
| rs61943625  | A | -0.1559 |
| rs61732929  | T | 0.1904  |
| rs73037304  | G | 0.0406  |
| rs7963279   | T | 0.0305  |
| rs138939910 | A | 0.0899  |
| rs10506017  | T | -0.0297 |
| rs74581457  | T | 0.1888  |
| rs167316    | G | -0.0255 |
| rs4931586   | G | -0.0262 |
| rs57122759  | G | 0.1604  |
| rs6486527   | C | 0.0443  |
| rs112780211 | G | -0.1829 |
| rs7311923   | T | -0.0273 |
| rs117118281 | T | 0.1774  |
| rs73094999  | A | -0.195  |
| rs12312891  | G | -0.0895 |
| rs71460772  | T | -0.0624 |
| rs10747097  | G | -0.0378 |
| rs144301505 | A | -0.1275 |
| rs118141978 | C | 0.1638  |
| rs17044836  | G | 0.1097  |
| rs77674496  | G | -0.1162 |
| rs76568701  | A | -0.1397 |
| rs1797977   | G | -0.038  |
| rs138293783 | C | -0.0656 |
| rs17027262  | C | -0.0565 |
| rs7299169   | A | 0.0522  |
| rs117429682 | C | 0.0579  |
| rs142816626 | G | -0.1143 |
| rs73128821  | G | 0.0508  |
| rs61944683  | A | -0.0446 |
| rs56272941  | C | 0.1051  |
| rs79637330  | C | -0.05   |
| rs11114987  | T | -0.0801 |
| rs61938600  | G | -0.1398 |
| rs1696725   | T | -0.0294 |
| rs2628597   | G | -0.0364 |
| rs1863835   | A | 0.0749  |
| rs17254528  | T | 0.0259  |
| rs112011586 | G | -0.0851 |
| rs73205171  | A | -0.1008 |
| rs17422291  | T | 0.0391  |
| rs77741580  | C | 0.0418  |
| rs117674528 | C | 0.1121  |
| rs11613771  | T | 0.0965  |

|             |   |         |
|-------------|---|---------|
| rs10850953  | G | 0.034   |
| rs61918697  | G | -0.1016 |
| rs2366631   | A | 0.0262  |
| rs11048203  | C | 0.1449  |
| rs1814318   | A | 0.049   |
| rs558716    | T | 0.147   |
| rs10850894  | G | -0.0416 |
| rs73118014  | A | 0.0764  |
| rs17459979  | C | 0.0387  |
| rs11111882  | A | -0.0283 |
| rs3888586   | G | 0.0291  |
| rs75914624  | T | 0.0875  |
| rs75739143  | A | 0.1852  |
| rs80018723  | C | 0.0535  |
| rs28434767  | T | -0.0432 |
| rs7976928   | G | 0.0247  |
| rs4760835   | C | -0.0571 |
| rs2377092   | T | 0.0709  |
| rs1032302   | C | 0.0257  |
| rs12812831  | A | -0.0477 |
| rs4766888   | A | -0.0338 |
| rs826342    | T | -0.0288 |
| rs11050950  | T | 0.1033  |
| rs4760707   | A | 0.0249  |
| rs7302585   | T | 0.0257  |
| rs61926455  | G | -0.1941 |
| rs75648489  | C | 0.0724  |
| rs2240510   | T | -0.0506 |
| rs145977731 | G | 0.1817  |
| rs5007546   | A | 0.0328  |
| rs146994123 | A | -0.2113 |
| rs11834614  | C | -0.0351 |
| rs143226387 | A | -0.0938 |
| rs11108228  | A | -0.1029 |
| rs71458060  | A | -0.0725 |
| rs11182524  | G | 0.0705  |
| rs74328855  | T | -0.0663 |
| rs10444437  | T | 0.0472  |
| rs10842530  | C | -0.0277 |
| rs139316615 | G | 0.0775  |
| rs2540476   | A | -0.0435 |
| rs73203417  | C | -0.0833 |
| rs112857562 | T | -0.1232 |
| rs61924329  | G | 0.1233  |
| rs10773466  | T | 0.136   |
| rs11054403  | G | -0.0331 |
| rs75258581  | C | -0.0872 |

|             |   |         |
|-------------|---|---------|
| rs11115445  | T | -0.0679 |
| rs56110314  | A | 0.0342  |
| rs113924907 | T | 0.0903  |
| rs78698565  | A | 0.1416  |
| rs6487785   | T | 0.0281  |
| rs822878    | T | 0.0563  |
| rs73198634  | G | -0.1006 |
| rs75494810  | A | 0.1286  |
| rs140984450 | A | -0.1852 |
| rs17585365  | A | -0.0509 |
| rs10860819  | C | -0.0295 |
| rs3926689   | C | 0.0262  |
| rs2856315   | G | 0.044   |
| rs35561534  | T | -0.0457 |
| rs7970186   | C | -0.0268 |
| rs55884537  | G | 0.1092  |
| rs76520021  | G | -0.0816 |
| rs12319544  | G | -0.0409 |
| rs11064130  | G | 0.0458  |
| rs117759123 | T | -0.0811 |
| rs71459543  | A | -0.0629 |
| rs2036225   | T | 0.0253  |
| rs117654718 | A | 0.1087  |
| rs11113182  | C | -0.1077 |
| rs1016268   | T | -0.0275 |
| rs73072367  | A | -0.0989 |
| rs534487    | C | 0.0266  |
| rs142105055 | C | 0.0569  |
| rs56249149  | A | -0.1789 |
| rs78422744  | T | -0.0991 |
| rs2669878   | G | 0.1052  |
| rs61943774  | A | 0.0341  |
| rs7136861   | G | 0.072   |
| rs150899093 | A | 0.1819  |
| rs2893751   | G | 0.0375  |
| rs11063641  | G | -0.0487 |
| rs61924427  | C | -0.0699 |
| rs76132966  | A | 0.1194  |
| rs79091816  | G | -0.094  |
| rs3764028   | T | 0.1535  |
| rs12425237  | T | -0.053  |
| rs73097669  | C | -0.0908 |
| rs112470280 | A | 0.1135  |
| rs117726090 | C | 0.121   |
| rs148975688 | T | 0.1899  |
| rs113335858 | C | 0.0682  |
| rs76344357  | C | -0.1171 |

|             |   |         |
|-------------|---|---------|
| rs7297618   | C | 0.0251  |
| rs12579750  | C | 0.0289  |
| rs35786612  | A | -0.0655 |
| rs78382172  | C | 0.0845  |
| rs76275686  | G | -0.1812 |
| rs7962168   | T | -0.0271 |
| rs111735577 | G | 0.0656  |
| rs17698594  | C | 0.1532  |
| rs140341150 | A | -0.1132 |
| rs73116585  | A | -0.0506 |
| rs17028059  | C | 0.1855  |
| rs11834189  | G | 0.0437  |
| rs12581556  | G | -0.0295 |
| rs1479123   | A | 0.0267  |
| rs1151048   | T | 0.0249  |
| rs11829825  | T | -0.0282 |
| rs12318786  | C | 0.0517  |
| rs118114168 | A | -0.1053 |
| rs12831271  | T | -0.0866 |
| rs56178237  | A | 0.1415  |
| rs12312909  | G | -0.0365 |
| rs10847717  | A | 0.0322  |
| rs74458771  | A | 0.0695  |
| rs61914047  | C | -0.1308 |
| rs35436573  | A | -0.0441 |
| rs35206551  | G | 0.0861  |
| rs74561928  | T | 0.0899  |
| rs1484935   | G | 0.0294  |
| rs77106149  | A | -0.2745 |
| rs829042    | G | 0.0297  |
| rs76936522  | A | 0.0993  |
| rs75440764  | G | -0.0801 |
| rs17125155  | C | 0.1109  |
| rs140565666 | C | 0.0938  |
| rs75745886  | T | 0.1305  |
| rs147409471 | G | 0.1291  |
| rs7133431   | C | -0.0434 |
| rs77235667  | G | -0.141  |
| rs2222330   | G | 0.1589  |
| rs11176951  | A | -0.0889 |
| rs10849299  | T | -0.0362 |
| rs146465414 | G | 0.1387  |
| rs34110724  | A | 0.0551  |
| rs1873916   | T | -0.0276 |
| rs2728841   | A | -0.0327 |
| rs10745518  | A | -0.0257 |
| rs145022044 | T | 0.1965  |

|             |   |         |
|-------------|---|---------|
| rs79463378  | G | 0.0669  |
| rs2371690   | T | 0.0352  |
| rs61932091  | A | 0.1032  |
| rs4882417   | G | -0.1052 |
| rs118139921 | T | 0.0923  |
| rs55809569  | A | -0.0358 |
| rs11612302  | A | 0.1035  |
| rs3217901   | G | -0.0255 |
| rs74476121  | A | -0.0756 |
| rs2596774   | T | 0.0875  |
| rs17399987  | T | -0.0554 |
| rs10506072  | T | -0.0485 |
| rs1573612   | C | -0.0258 |
| rs144089807 | G | 0.1204  |
| rs71450829  | T | -0.0752 |
| rs10850843  | G | -0.0301 |
| rs2335332   | G | 0.0292  |
| rs117169950 | G | -0.1594 |
| rs17116870  | T | -0.1282 |
| rs117998492 | A | -0.1114 |
| rs7314773   | A | 0.1061  |
| rs73145286  | T | 0.0925  |
| rs10400531  | C | -0.1089 |
| rs137869479 | T | -0.0675 |
| rs73048064  | T | 0.0527  |
| rs146780586 | A | 0.0944  |
| rs76866468  | A | -0.1356 |
| rs1452241   | T | -0.0242 |
| rs11107199  | A | 0.0489  |
| rs828933    | T | -0.0435 |
| rs4760582   | C | -0.03   |
| rs61925147  | T | -0.0751 |
| rs10878187  | T | -0.0415 |
| rs7979382   | T | -0.0298 |
| rs12831587  | C | -0.0582 |
| rs73116047  | C | 0.0332  |
| rs1394598   | T | 0.0262  |
| rs12828447  | C | -0.0383 |
| rs2035300   | C | 0.1084  |
| rs142711156 | T | -0.0899 |
| rs117669221 | A | 0.0613  |
| rs61943065  | T | 0.1124  |
| rs11059475  | G | -0.0262 |
| rs116952390 | G | 0.0755  |
| rs7314288   | A | 0.0613  |
| rs117968197 | G | -0.092  |
| rs75143726  | T | -0.1137 |

|             |   |         |
|-------------|---|---------|
| rs10842321  | C | 0.0846  |
| rs746035    | C | -0.0258 |
| rs1796363   | T | 0.0277  |
| rs4763676   | A | 0.0332  |
| rs11043409  | G | 0.1363  |
| rs9795780   | C | -0.1334 |
| rs75116177  | C | 0.0398  |
| rs7309579   | T | -0.0469 |
| rs1075837   | A | 0.0258  |
| rs1362969   | T | -0.0271 |
| rs77538299  | A | 0.1753  |
| rs757644    | A | -0.0443 |
| rs143373200 | T | 0.1039  |
| rs79782126  | C | 0.1957  |
| rs10734897  | T | -0.0436 |
| rs17096327  | A | -0.0666 |
| rs10881086  | A | 0.0284  |
| rs10850606  | G | -0.032  |
| rs77770182  | C | 0.0955  |
| rs79730559  | T | -0.0351 |
| rs56088416  | T | -0.0515 |
| rs77222918  | G | 0.1008  |
| rs73141971  | T | -0.0564 |
| rs117538482 | G | 0.1276  |
| rs73141320  | A | 0.0556  |
| rs7962118   | G | 0.0286  |
| rs11613061  | A | -0.0278 |
| rs7300962   | C | 0.0415  |
| rs111810199 | G | 0.1019  |
| rs149546449 | G | -0.1628 |
| rs12821696  | A | 0.0427  |
| rs118141300 | T | -0.1154 |
| rs73036729  | A | -0.1344 |
| rs147827331 | A | 0.1094  |
| rs12581104  | A | 0.0277  |
| rs6538407   | C | 0.0851  |
| rs11059482  | A | 0.1296  |
| rs76595019  | G | 0.117   |
| rs76510980  | G | 0.0971  |
| rs78405090  | A | 0.1395  |
| rs61951843  | C | -0.0705 |
| rs112278111 | T | -0.1131 |
| rs377280    | A | -0.0264 |
| rs12810366  | T | 0.034   |
| rs55779338  | A | 0.0402  |
| rs10161070  | T | 0.0248  |
| rs776193    | A | -0.0256 |

|             |   |         |
|-------------|---|---------|
| rs7133699   | A | 0.029   |
| rs771002    | C | -0.0362 |
| rs7305424   | T | 0.0253  |
| rs839945    | A | 0.0362  |
| rs7959024   | T | -0.0315 |
| rs10507216  | T | -0.0311 |
| rs12427142  | C | 0.0483  |
| rs117065448 | T | 0.0991  |
| rs117580739 | A | -0.0798 |
| rs2851437   | C | -0.0313 |
| rs117539839 | C | -0.0946 |
| rs12372626  | A | 0.0285  |
| rs249153    | C | 0.0297  |
| rs75845252  | T | -0.0758 |
| rs73229538  | T | 0.0807  |
| rs12317396  | T | -0.0546 |
| rs11109427  | A | 0.0372  |
| rs78994985  | A | -0.0451 |
| rs741542    | T | -0.0285 |
| rs149207043 | G | -0.1028 |
| rs77866843  | A | -0.0779 |
| rs148822097 | G | 0.1413  |
| rs142421629 | A | -0.1581 |
| rs111898478 | C | 0.1268  |
| rs11613798  | T | 0.0662  |
| rs61940100  | A | 0.037   |
| rs75751883  | C | 0.0471  |
| rs73180152  | A | 0.1163  |
| rs16939769  | A | -0.0625 |
| rs17697855  | T | 0.0348  |
| rs7969016   | G | -0.0643 |
| rs56308218  | T | 0.0932  |
| rs79265864  | G | -0.064  |
| rs78347443  | T | 0.0772  |
| rs1381802   | G | 0.0284  |
| rs7978744   | A | 0.0319  |
| rs7302220   | C | 0.0977  |
| rs12824446  | T | -0.073  |
| rs10506086  | T | 0.0302  |
| rs144012325 | T | -0.2072 |
| rs1021759   | C | -0.0524 |
| rs73136298  | T | -0.0522 |
| rs61940027  | G | -0.0424 |
| rs11502464  | A | 0.0522  |
| rs12827282  | C | 0.0252  |
| rs35321503  | C | 0.0349  |
| rs71537691  | T | 0.147   |



|             |   |         |
|-------------|---|---------|
| rs10843531  | C | 0.0438  |
| rs34207804  | T | -0.0307 |
| rs79744569  | A | 0.0668  |
| rs7487148   | A | 0.1264  |
| rs4767242   | C | 0.0279  |
| rs4765422   | T | 0.0421  |
| rs12309147  | T | 0.0872  |
| rs1693614   | T | 0.026   |
| rs149821736 | A | 0.112   |
| rs79507597  | A | -0.0297 |
| rs149308454 | T | -0.0756 |
| rs113184264 | T | -0.1524 |
| rs149436455 | T | 0.0988  |
| rs201372    | T | -0.0309 |
| rs10850126  | G | 0.0693  |
| rs4762477   | C | -0.0395 |
| rs10861502  | A | -0.0401 |
| rs10773756  | A | -0.045  |
| rs11109081  | G | -0.0277 |
| rs17040655  | C | 0.0465  |
| rs78356591  | T | -0.1162 |
| rs117474528 | A | -0.1351 |
| rs17720767  | C | 0.0352  |
| rs75313312  | G | -0.0771 |
| rs78237507  | A | 0.0758  |
| rs75669000  | A | 0.08    |
| rs117753166 | C | 0.0962  |
| rs1726435   | C | -0.0247 |
| rs139593264 | A | -0.1788 |
| rs74588171  | T | -0.1022 |
| rs17387693  | C | 0.0386  |
| rs7965154   | A | 0.0259  |
| rs117912527 | G | 0.1249  |
| rs111606480 | C | -0.1458 |
| rs35511882  | T | -0.106  |
| rs138551256 | T | 0.1216  |
| rs1593848   | A | -0.0256 |
| rs73193448  | A | 0.0822  |
| rs10774615  | C | 0.0287  |
| rs4283046   | A | 0.0271  |
| rs7977149   | A | 0.0732  |
| rs7977653   | C | -0.044  |
| rs73081866  | C | -0.0838 |
| rs73208354  | A | -0.1088 |
| rs11048291  | A | -0.0319 |
| rs143107418 | T | 0.1401  |
| rs61935962  | G | 0.0533  |

|             |   |         |
|-------------|---|---------|
| rs10850971  | G | 0.0314  |
| rs78988714  | C | 0.1526  |
| rs1196857   | G | -0.1185 |
| rs10774048  | T | -0.0336 |
| rs144450919 | A | -0.1104 |
| rs7956808   | G | 0.0371  |
| rs3900145   | A | -0.0298 |
| rs56263662  | A | 0.1249  |
| rs7306419   | G | 0.025   |
| rs9634311   | G | -0.0256 |
| rs12372268  | A | 0.0872  |
| rs113659587 | A | 0.1231  |
| rs4766152   | T | 0.025   |
| rs592448    | A | -0.0313 |
| rs77095126  | C | -0.0756 |
| rs1167127   | C | -0.0643 |
| rs11181889  | A | 0.0528  |
| rs117484514 | C | 0.0695  |
| rs2406427   | A | 0.0262  |
| rs118135602 | G | -0.1563 |
| rs75460553  | A | -0.0572 |
| rs75168875  | G | 0.0366  |
| rs118143523 | C | 0.1418  |
| rs10842056  | G | -0.0473 |
| rs4761507   | C | -0.024  |
| rs4763816   | A | 0.106   |
| rs7960094   | A | -0.0536 |
| rs10880337  | G | -0.0252 |
| rs73109570  | C | -0.0704 |
| rs10847433  | C | 0.0452  |
| rs11835105  | G | 0.0302  |
| rs143266115 | C | -0.0431 |
| rs61932577  | A | 0.0739  |
| rs73066081  | T | 0.0376  |
| rs77677540  | C | 0.0828  |
| rs76309294  | C | 0.1426  |
| rs77165791  | G | 0.0347  |
| rs141314557 | A | 0.1482  |
| rs78001404  | A | -0.0486 |
| rs76596465  | G | 0.1111  |
| rs721156    | T | -0.058  |
| rs7954790   | T | 0.0336  |
| rs2222640   | C | 0.0401  |
| rs117832561 | T | 0.0721  |
| rs112018809 | T | 0.1694  |
| rs75107351  | T | -0.0578 |
| rs9634127   | A | 0.0288  |

|             |   |         |
|-------------|---|---------|
| rs77606895  | A | -0.117  |
| rs34512292  | C | -0.0851 |
| rs11178700  | C | -0.0533 |
| rs7964349   | G | -0.0734 |
| rs2279577   | G | 0.0239  |
| rs116875832 | T | -0.0922 |
| rs77071890  | T | 0.1322  |
| rs139157355 | T | 0.1687  |
| rs17175270  | A | 0.0766  |
| rs10771085  | C | 0.0265  |
| rs11609759  | T | 0.1143  |
| rs113961330 | G | 0.1583  |
| rs2627189   | T | 0.0242  |
| rs76622227  | A | -0.0432 |
| rs10843781  | C | 0.0331  |
| rs57263012  | A | -0.122  |
| rs117676716 | T | 0.1769  |
| rs34849501  | T | -0.0246 |
| rs73063914  | T | -0.0583 |
| rs11177660  | A | -0.0239 |
| rs141740212 | C | 0.1061  |
| rs11043362  | G | -0.0261 |
| rs12303303  | C | 0.0458  |
| rs117444881 | A | 0.068   |
| rs11836852  | C | 0.0408  |
| rs9738118   | T | 0.0243  |
| rs71462114  | G | 0.101   |
| rs722885    | G | 0.0244  |
| rs151240531 | T | 0.1796  |
| rs11057652  | C | 0.034   |
| rs56306595  | C | 0.0351  |
| rs12581552  | A | 0.0339  |
| rs118057318 | A | 0.087   |
| rs11112923  | T | -0.0566 |
| rs554984    | A | 0.0344  |
| rs77858741  | T | -0.0475 |
| rs77721277  | T | -0.0775 |
| rs116878472 | C | -0.0917 |
| rs7963618   | A | -0.0386 |
| rs117416565 | A | -0.1972 |
| rs1362651   | G | -0.0265 |
| rs7302979   | C | 0.0302  |
| rs11829716  | C | -0.0294 |
| rs79337629  | C | -0.1207 |
| rs11104726  | G | -0.0431 |
| rs73083246  | G | -0.0624 |
| rs11046760  | C | 0.0691  |

|             |   |         |
|-------------|---|---------|
| rs7978933   | A | 0.0623  |
| rs1826728   | A | -0.0365 |
| rs146737428 | T | 0.1651  |
| rs61942129  | T | -0.1014 |
| rs143782468 | A | 0.1753  |
| rs12819591  | T | -0.0422 |
| rs687448    | G | 0.0266  |
| rs10848891  | A | -0.0495 |
| rs116855407 | T | -0.0774 |
| rs150630578 | A | 0.169   |
| rs4015595   | T | -0.0978 |
| rs116910576 | C | -0.1358 |
| rs3825379   | T | -0.0356 |
| rs55896773  | C | -0.0347 |
| rs77916485  | A | 0.0802  |
| rs1012587   | A | 0.0286  |
| rs117295201 | C | -0.1497 |
| rs325080    | T | -0.0431 |
| rs9739320   | G | -0.0274 |
| rs33220     | C | 0.0429  |
| rs7136747   | C | -0.0258 |
| rs12309534  | T | -0.0858 |
| rs2126292   | T | -0.0393 |
| rs149994179 | T | 0.08    |
| rs147401789 | A | 0.1205  |
| rs71450992  | T | -0.0912 |
| rs77791687  | A | 0.1646  |
| rs74969055  | T | 0.0905  |
| rs12302883  | T | 0.0329  |
| rs7963404   | A | -0.0347 |
| rs148056379 | T | -0.1159 |
| rs11183146  | G | -0.0448 |
| rs1922254   | G | -0.0453 |
| rs138369383 | G | 0.1099  |
| rs71461448  | A | -0.0827 |
| rs11169690  | T | 0.0283  |
| rs117290984 | A | 0.133   |
| rs75465222  | T | 0.0775  |
| rs61932707  | C | 0.1304  |
| rs76219170  | T | 0.1669  |
| rs12425105  | T | -0.0417 |
| rs148367339 | T | 0.0808  |
| rs35222295  | C | 0.0339  |
| rs11062357  | C | 0.0258  |
| rs7968896   | G | -0.025  |
| rs2694974   | G | -0.0399 |
| rs1275645   | A | 0.0277  |

|             |   |         |
|-------------|---|---------|
| rs142366527 | A | -0.1003 |
| rs2040807   | A | 0.0305  |
| rs79927457  | G | 0.1184  |
| rs11609874  | T | 0.0356  |
| rs11181534  | A | 0.1986  |
| rs12230930  | T | 0.1102  |
| rs34094718  | T | 0.0496  |
| rs10878690  | C | 0.0491  |
| rs10777586  | C | 0.0236  |
| rs61915608  | T | -0.0779 |
| rs10846110  | G | -0.0376 |
| rs11046556  | C | 0.0284  |
| rs2712512   | A | -0.0347 |
| rs78555230  | C | 0.0677  |
| rs397135    | T | -0.0276 |
| rs11109827  | T | -0.0351 |
| rs4103620   | G | -0.0327 |
| rs12831779  | A | -0.1229 |
| rs12581428  | C | -0.1735 |
| rs17422573  | G | 0.0416  |
| rs138174047 | T | -0.2545 |
| rs145086940 | C | 0.107   |
| rs7134104   | A | -0.0232 |
| rs17581047  | A | 0.0584  |
| rs12809295  | A | 0.0319  |
| rs10847739  | T | 0.0273  |
| rs6581525   | G | 0.0269  |
| rs11113786  | A | 0.0247  |
| rs143353733 | C | 0.1717  |
| rs73408091  | T | -0.0327 |
| rs116992888 | A | 0.1742  |
| rs2286604   | G | 0.0328  |
| rs77129624  | G | -0.0419 |
| rs113646454 | T | 0.0704  |
| rs1593530   | A | 0.0415  |
| rs4459385   | T | -0.0294 |
| rs11055737  | G | -0.0296 |
| rs7308783   | A | -0.04   |
| rs7297309   | T | 0.1245  |
| rs71460791  | C | -0.0469 |
| rs3782561   | C | -0.0236 |
| rs11833223  | A | -0.059  |
| rs79219475  | T | 0.1547  |
| rs143873424 | G | 0.1248  |
| rs17757771  | G | -0.0662 |
| rs7133592   | T | 0.0249  |
| rs3809272   | A | 0.0285  |

|             |   |         |
|-------------|---|---------|
| rs1168667   | G | 0.0377  |
| rs11612209  | C | -0.105  |
| rs1900740   | T | -0.0255 |
| rs112454257 | G | 0.1292  |
| rs4409934   | G | -0.0415 |
| rs17016643  | C | 0.0707  |
| rs34220678  | A | -0.0953 |
| rs73159000  | A | 0.0664  |
| rs117329346 | T | -0.0762 |
| rs11050437  | G | -0.068  |
| rs111989534 | T | -0.0809 |
| rs150453998 | C | 0.1747  |
| rs148476617 | G | 0.118   |
| rs61934280  | T | 0.1521  |
| rs6538806   | C | -0.0294 |
| rs10774993  | G | -0.027  |
| rs77583334  | G | -0.1459 |
| rs12582230  | T | -0.0279 |
| rs77307654  | C | -0.0786 |
| rs10506664  | C | 0.1438  |
| rs12817773  | T | -0.033  |
| rs77453104  | A | 0.1216  |
| rs10492352  | T | 0.0261  |
| rs73238881  | A | 0.1879  |
| rs117851987 | G | 0.0984  |
| rs12229678  | A | 0.0515  |
| rs116989677 | T | -0.0851 |
| rs12823279  | C | 0.0278  |
| rs1283164   | C | 0.0699  |
| rs73330258  | G | -0.0558 |
| rs117993538 | A | -0.1375 |
| rs74790812  | C | 0.1589  |
| rs838897    | C | 0.0866  |
| rs117561283 | T | -0.1264 |
| rs117550448 | T | -0.1044 |
| rs61943698  | C | 0.1724  |
| rs57982083  | G | 0.0501  |
| rs11048118  | T | -0.0836 |
| rs871685    | C | 0.0311  |
| rs13378104  | A | 0.0624  |
| rs10875650  | C | -0.0272 |
| rs17356067  | T | 0.0332  |
| rs75045930  | C | -0.0966 |
| rs10778189  | A | 0.0841  |
| rs117849931 | G | -0.1149 |
| rs759394    | A | -0.0234 |
| rs77074373  | G | 0.093   |

|             |   |         |
|-------------|---|---------|
| rs117883139 | A | -0.107  |
| rs147894191 | A | -0.111  |
| rs11174628  | T | 0.0465  |
| rs73158866  | A | -0.1737 |
| rs1986977   | T | -0.0244 |
| rs1271671   | A | -0.0797 |
| rs73071053  | T | 0.1952  |
| rs117337583 | G | 0.1285  |
| rs6538510   | T | 0.0252  |
| rs2241214   | T | -0.0834 |
| rs112142794 | A | -0.0793 |
| rs73200372  | T | 0.1096  |
| rs369074    | G | 0.0279  |
| rs61936902  | A | -0.115  |
| rs12815760  | A | -0.0527 |
| rs10083001  | G | 0.0392  |
| rs79811379  | A | 0.066   |
| rs150199887 | C | -0.1302 |
| rs6490046   | T | -0.0445 |
| rs75876008  | G | -0.133  |
| rs61912127  | C | 0.069   |
| rs12320530  | G | 0.029   |
| rs117481343 | T | -0.0974 |
| rs73086676  | T | -0.0353 |
| rs77537598  | A | -0.0474 |
| rs145577382 | C | -0.0835 |
| rs138335918 | C | 0.0709  |
| rs111503359 | T | 0.0866  |
| rs3759174   | G | 0.0403  |
| rs55989908  | C | -0.058  |
| rs139289260 | T | -0.175  |
| rs117003806 | G | -0.1074 |
| rs118033110 | G | 0.118   |
| rs16931380  | A | 0.0376  |
| rs4258421   | A | -0.0369 |
| rs2230759   | T | 0.1033  |
| rs11608282  | C | 0.0282  |
| rs149059133 | A | 0.1599  |
| rs7954376   | C | 0.0243  |
| rs117193356 | A | -0.14   |
| rs1402279   | C | 0.0524  |
| rs73122148  | G | 0.1216  |
| rs118112734 | G | 0.1258  |
| rs74622505  | A | -0.066  |
| rs118117062 | T | -0.0975 |
| rs61761074  | C | 0.1353  |
| rs10842947  | C | 0.0249  |

|             |   |         |
|-------------|---|---------|
| rs118186488 | A | 0.0572  |
| rs11047912  | C | 0.0271  |
| rs59535902  | G | 0.0267  |
| rs17022494  | A | 0.0988  |
| rs11062320  | T | 0.061   |
| rs10747527  | T | 0.0253  |
| rs117879235 | G | -0.2345 |
| rs1099728   | A | -0.0683 |
| rs73229159  | G | 0.1319  |
| rs3843943   | T | 0.0946  |
| rs253837    | G | 0.0887  |
| rs146885219 | T | 0.1773  |
| rs11111421  | G | -0.0405 |
| rs12579827  | A | -0.0257 |
| rs6581547   | A | 0.0334  |
| rs76490678  | G | 0.1009  |
| rs1548947   | G | -0.023  |
| rs112962317 | C | 0.0821  |
| rs117758483 | A | -0.0691 |
| rs12231213  | T | 0.0512  |
| rs10858743  | A | 0.0274  |
| rs80239497  | G | -0.1061 |
| rs2614712   | C | 0.0572  |
| rs7968607   | A | -0.0376 |
| rs303774    | A | -0.0293 |
| rs61931175  | T | -0.044  |
| rs1351330   | C | 0.0303  |
| rs12368302  | G | -0.171  |
| rs1113292   | T | -0.0552 |
| rs2141192   | G | 0.0244  |
| rs12829367  | T | 0.0237  |
| rs12814512  | A | -0.0523 |
| rs12321209  | C | -0.0553 |
| rs10843441  | T | 0.047   |
| rs147467606 | G | 0.135   |
| rs80190585  | C | 0.0552  |
| rs141300575 | C | 0.1161  |
| rs149837349 | A | -0.1341 |
| rs547827    | G | 0.0251  |
| rs77398180  | C | 0.1482  |
| rs2222842   | T | 0.0371  |
| rs117206850 | T | -0.1289 |
| rs112886168 | C | -0.1993 |
| rs12810296  | G | -0.1255 |
| rs118025725 | A | 0.1182  |
| rs11829768  | C | 0.0445  |
| rs141246488 | A | -0.1062 |



|             |   |         |
|-------------|---|---------|
| rs9805127   | T | -0.0302 |
| rs12367049  | A | 0.1838  |
| rs61931649  | C | 0.1125  |
| rs6488497   | G | -0.0554 |
| rs75907151  | G | -0.0325 |
| rs4758839   | A | 0.0959  |
| rs11616165  | T | -0.0584 |
| rs75448266  | C | -0.0777 |
| rs12581578  | G | -0.0286 |
| rs11504083  | G | 0.0386  |
| rs1583315   | C | 0.1225  |
| rs4767664   | A | -0.0238 |
| rs10743363  | G | -0.1865 |
| rs770123    | C | -0.0237 |
| rs61937068  | T | 0.1549  |
| rs76547134  | A | 0.1574  |
| rs117893408 | G | -0.101  |
| rs77693898  | C | 0.0795  |
| rs118003810 | A | 0.1927  |
| rs11063832  | T | 0.0262  |
| rs11113768  | G | 0.0738  |
| rs11179124  | A | 0.0448  |
| rs117725819 | T | -0.1454 |
| rs12820502  | G | 0.0901  |
| rs113761508 | A | -0.1016 |
| rs34487978  | A | 0.0308  |
| rs34059913  | T | 0.0414  |
| rs73083292  | T | 0.0736  |
| rs11183786  | G | -0.1418 |
| rs2731502   | G | 0.032   |
| rs142894671 | G | 0.1555  |
| rs79276723  | G | -0.0833 |
| rs117122655 | T | -0.07   |
| rs146326505 | A | -0.1495 |
| rs11613732  | T | -0.1065 |
| rs12824693  | A | -0.0271 |
| rs117086722 | T | -0.1035 |
| rs117080608 | C | 0.1043  |
| rs12227358  | G | 0.024   |
| rs4980806   | G | -0.0379 |
| rs74995753  | T | -0.0874 |
| rs7955168   | G | -0.0396 |
| rs141439644 | A | 0.1236  |
| rs117106104 | A | 0.1224  |
| rs11110395  | T | -0.0657 |
| rs78589481  | A | 0.067   |
| rs7301090   | G | -0.0461 |

|             |   |         |
|-------------|---|---------|
| rs111687279 | T | 0.2095  |
| rs17181487  | C | -0.078  |
| rs11108565  | T | 0.0297  |
| rs10842765  | T | -0.0302 |
| rs77690672  | A | 0.0526  |
| rs34631206  | C | 0.0263  |
| rs148605706 | A | 0.1022  |
| rs145403184 | C | -0.0897 |
| rs11175735  | G | 0.0278  |
| rs7966172   | G | -0.0236 |
| rs1991296   | G | 0.0237  |
| rs11060212  | G | -0.0386 |
| rs112553624 | C | 0.0887  |
| rs75896548  | C | 0.0684  |
| rs10744373  | A | 0.0318  |
| rs57674411  | T | -0.039  |
| rs12828318  | G | -0.0426 |
| rs78870403  | T | 0.1208  |
| rs7966337   | C | -0.1392 |
| rs12817429  | T | 0.0481  |
| rs145193401 | A | 0.1296  |
| rs150685059 | G | -0.1072 |
| rs17609612  | T | 0.0702  |
| rs71462957  | T | -0.0815 |
| rs111922371 | G | -0.1747 |
| rs76448499  | A | 0.1347  |
| rs12314373  | A | -0.0318 |
| rs17724056  | A | 0.0881  |
| rs12371859  | C | 0.0751  |
| rs56043300  | C | -0.0821 |
| rs256191    | A | -0.0514 |
| rs618299    | G | 0.1048  |
| rs4842316   | C | 0.025   |
| rs11060551  | A | -0.0528 |
| rs10849180  | T | -0.0383 |
| rs77751560  | G | 0.1269  |
| rs74846330  | C | -0.0677 |
| rs60855277  | A | -0.0648 |
| rs10772847  | G | -0.0267 |
| rs12823888  | C | 0.0477  |
| rs79269047  | T | 0.0541  |
| rs117361920 | G | 0.1604  |
| rs78971695  | C | -0.0921 |
| rs61933418  | G | 0.0477  |
| rs74393819  | C | -0.0887 |
| rs76440580  | A | 0.1427  |
| rs7975354   | T | -0.029  |

|             |   |         |
|-------------|---|---------|
| rs75618509  | A | -0.0921 |
| rs7968403   | C | -0.0237 |
| rs77041748  | G | 0.0491  |
| rs76759213  | T | 0.0556  |
| rs73144782  | T | 0.0364  |
| rs1913200   | A | -0.0229 |
| rs10860631  | C | 0.0285  |
| rs11834300  | G | -0.0565 |
| rs73084535  | T | 0.0402  |
| rs78334131  | C | -0.0471 |
| rs1908535   | C | -0.0241 |
| rs76239429  | T | 0.1613  |
| rs117036266 | T | 0.1239  |
| rs17833581  | T | 0.0901  |
| rs10777082  | T | 0.0432  |
| rs77531759  | G | 0.0594  |
| rs10846018  | A | 0.0806  |
| rs56940775  | C | -0.0824 |
| rs146761598 | C | -0.0625 |
| rs117737059 | T | -0.1248 |
| rs113069905 | G | -0.0386 |
| rs12818490  | A | -0.0252 |
| rs73058001  | T | -0.0316 |
| rs1564871   | C | 0.0295  |
| rs117722096 | A | 0.1298  |
| rs11534970  | T | 0.1445  |
| rs56282590  | A | 0.112   |
| rs1700388   | T | 0.0404  |
| rs61940613  | C | 0.1245  |
| rs56402819  | C | 0.0265  |
| rs709240    | T | 0.0277  |
| rs78250896  | C | -0.1154 |
| rs4964285   | T | -0.0279 |
| rs117267037 | C | -0.172  |
| rs75744780  | T | 0.0905  |
| rs147462717 | A | -0.0899 |
| rs1500876   | A | -0.0246 |
| rs869046    | T | -0.0279 |
| rs61924049  | G | 0.0473  |
| rs148245007 | A | -0.1331 |
| rs17674009  | A | 0.0883  |
| rs1365428   | C | 0.1538  |
| rs17177298  | A | 0.0597  |
| rs77616200  | G | -0.1085 |
| rs36029544  | G | 0.038   |
| rs4423256   | T | 0.0333  |
| rs118043586 | G | 0.0718  |

|             |   |         |
|-------------|---|---------|
| rs7969292   | A | 0.0485  |
| rs11177129  | C | 0.0694  |
| rs12319533  | G | 0.0595  |
| rs79791808  | C | -0.1487 |
| rs79744961  | C | 0.0969  |
| rs7310854   | C | -0.0341 |
| rs61930385  | G | 0.0614  |
| rs17251458  | G | -0.0986 |
| rs36001570  | A | -0.051  |
| rs7964124   | C | -0.033  |
| rs3759086   | A | -0.0243 |
| rs12579421  | A | 0.0577  |
| rs117338462 | A | 0.1007  |
| rs11829269  | A | 0.0695  |
| rs80184793  | A | -0.0586 |
| rs17438276  | G | 0.03    |
| rs145063760 | T | 0.0632  |
| rs61907544  | T | 0.0322  |
| rs586399    | C | -0.0312 |
| rs1495344   | A | 0.1038  |
| rs78324805  | G | 0.1604  |
| rs1344666   | T | 0.0345  |
| rs73054124  | A | 0.0385  |
| rs11170951  | T | 0.1081  |
| rs10748053  | G | -0.0248 |
| rs12830521  | A | 0.0419  |
| rs75930377  | T | 0.0821  |
| rs12817046  | G | 0.0486  |
| rs11177058  | C | -0.1376 |
| rs76274200  | C | 0.0572  |
| rs2029093   | G | 0.0274  |
| rs12227661  | A | -0.0393 |
| rs11615512  | A | 0.1558  |
| rs16920480  | G | 0.0307  |
| rs11056382  | C | -0.04   |
| rs11837591  | G | 0.0335  |
| rs73351214  | C | 0.0785  |
| rs11613022  | C | 0.1035  |
| rs61914035  | T | 0.0737  |
| rs116896988 | A | 0.0814  |
| rs1806195   | G | 0.0231  |
| rs10743537  | C | 0.0358  |
| rs117361965 | T | 0.1315  |
| rs11177355  | T | 0.0448  |
| rs9668831   | A | 0.0264  |
| rs73224323  | T | 0.1     |
| rs12296671  | A | 0.038   |

|             |   |         |
|-------------|---|---------|
| rs4931545   | T | -0.0243 |
| rs2532497   | A | 0.0256  |
| rs61912820  | T | 0.0735  |
| rs17500053  | C | -0.0782 |
| rs118065882 | C | -0.1077 |
| rs151327291 | C | 0.1761  |
| rs1870566   | T | 0.0268  |
| rs117552525 | A | 0.1447  |
| rs75593698  | G | 0.0702  |
| rs142235569 | A | -0.0958 |
| rs112763594 | A | 0.0611  |
| rs11045928  | G | -0.1288 |
| rs7952965   | C | -0.1716 |
| rs73203283  | A | 0.1002  |
| rs76084832  | G | 0.0706  |
| rs60938166  | T | 0.0741  |
| rs117139781 | A | 0.129   |
| rs11116653  | G | -0.1149 |
| rs10860474  | A | 0.0274  |
| rs11068803  | G | -0.034  |
| rs75434529  | C | -0.0836 |
| rs74416281  | A | 0.0428  |
| rs10879399  | T | 0.1191  |
| rs10861827  | T | -0.0563 |
| rs780873    | G | -0.0537 |
| rs117677831 | G | 0.0602  |
| rs10878625  | A | -0.0256 |
| rs150347594 | A | 0.0575  |
| rs12426173  | T | -0.0281 |
| rs1381040   | G | -0.0232 |
| rs17772958  | T | -0.0526 |
| rs77317533  | T | 0.0824  |
| rs10860397  | G | -0.0341 |
| rs4964439   | G | 0.0268  |
| rs11113198  | G | -0.0233 |
| rs10505931  | T | -0.0232 |
| rs8648      | A | -0.0313 |
| rs60570181  | A | 0.0469  |
| rs11056593  | G | 0.0269  |
| rs4963666   | G | 0.0424  |
| rs1727326   | C | -0.0373 |
| rs117709493 | C | 0.0911  |
| rs74322448  | T | 0.1425  |
| rs117966728 | T | -0.0803 |
| rs11181285  | A | -0.0906 |
| rs12814260  | A | 0.066   |
| rs501123    | C | 0.0416  |

|             |   |         |
|-------------|---|---------|
| rs10128984  | T | 0.0407  |
| rs60650017  | A | -0.0626 |
| rs3794318   | G | -0.0438 |
| rs66590023  | C | -0.1731 |
| rs116534378 | A | 0.0679  |
| rs111478768 | C | 0.0805  |
| rs77472771  | C | 0.0656  |
| rs73130174  | A | -0.1132 |
| rs73136648  | C | 0.0952  |
| rs35359     | T | -0.0237 |
| rs12833265  | C | 0.0844  |
| rs138552287 | A | 0.1851  |
| rs117945355 | G | -0.0749 |
| rs2242357   | T | 0.0875  |
| rs117136070 | T | -0.0573 |
| rs7957561   | G | 0.0287  |
| rs55898931  | G | -0.0516 |
| rs17109275  | C | 0.1071  |
| rs112351838 | G | 0.1527  |
| rs4964438   | T | 0.0682  |
| rs57579413  | T | 0.043   |
| rs214648    | T | 0.0381  |
| rs77281774  | T | -0.1386 |
| rs35757629  | T | 0.0494  |
| rs11062987  | G | 0.074   |
| rs73110913  | A | 0.126   |
| rs1920604   | A | 0.0253  |
| rs150710020 | A | -0.0643 |
| rs17676826  | C | -0.0258 |
| rs10128893  | A | 0.0228  |
| rs76998291  | T | 0.0489  |
| rs10773894  | T | -0.0777 |
| rs7314913   | G | -0.0234 |
| rs76371651  | A | -0.1053 |
| rs149802513 | G | -0.1327 |
| rs111529655 | C | -0.107  |
| rs150918    | T | -0.0346 |
| rs73230573  | A | -0.0384 |
| rs118050627 | C | -0.1196 |
| rs71455286  | G | -0.134  |
| rs11064681  | G | -0.0248 |
| rs17046232  | T | 0.038   |
| rs140570367 | T | 0.0721  |
| rs10858630  | G | -0.0235 |
| rs78298596  | T | 0.098   |
| rs74675968  | T | -0.0386 |
| rs116964188 | G | -0.0908 |

|             |   |         |
|-------------|---|---------|
| rs78800349  | C | -0.1028 |
| rs143637261 | C | 0.0736  |
| rs55902815  | C | -0.0393 |
| rs11067162  | A | 0.0338  |
| rs117573278 | T | -0.1236 |
| rs116996207 | C | -0.1084 |
| rs77887132  | A | 0.0721  |
| rs10771717  | T | -0.0246 |
| rs473640    | C | -0.0297 |
| rs139679027 | T | -0.1043 |
| rs12313708  | A | 0.0757  |
| rs78180976  | T | 0.1069  |
| rs118138625 | T | -0.1232 |
| rs17114711  | T | 0.0828  |
| rs11047410  | G | -0.0441 |
| rs71459332  | T | 0.0465  |
| rs11176800  | G | 0.0316  |
| rs10861081  | A | -0.0415 |
| rs17225111  | C | -0.0252 |
| rs35774673  | C | 0.0966  |
| rs17778793  | T | 0.0309  |
| rs12309393  | A | 0.0665  |
| rs141656564 | A | 0.0511  |
| rs111458526 | T | 0.1585  |
| rs17023834  | G | -0.0341 |
| rs10783462  | G | 0.0318  |
| rs11172482  | C | 0.0237  |
| rs2359472   | A | 0.0444  |
| rs112353807 | T | -0.0944 |
| rs2541138   | T | -0.056  |
| rs2062733   | G | 0.1639  |
| rs74580352  | A | 0.1827  |
| rs114318257 | A | -0.0679 |
| rs4758964   | G | -0.0227 |
| rs17430842  | A | 0.0576  |
| rs11175568  | T | 0.1094  |
| rs10082804  | C | -0.0306 |
| rs7977027   | A | 0.0237  |
| rs11613447  | A | -0.0354 |
| rs10847838  | A | 0.0282  |
| rs61913997  | G | -0.0961 |
| rs140342616 | G | -0.0994 |
| rs117288494 | C | -0.1734 |
| rs111837437 | A | 0.074   |
| rs10847005  | G | 0.0345  |
| rs1075988   | G | 0.0239  |
| rs10771009  | A | 0.0232  |

|             |   |         |
|-------------|---|---------|
| rs17834867  | C | -0.0369 |
| rs147139584 | T | -0.1024 |
| rs2245906   | G | -0.0434 |
| rs10784282  | C | 0.0253  |
| rs146194595 | C | 0.0952  |
| rs143435133 | A | 0.1376  |
| rs117279028 | C | 0.0908  |
| rs146416383 | A | -0.1179 |
| rs77747027  | T | -0.0946 |
| rs11046711  | T | -0.0406 |
| rs2650039   | G | 0.0246  |
| rs141075160 | A | -0.1167 |
| rs7969007   | G | 0.0454  |
| rs77897505  | A | -0.0844 |
| rs11043716  | A | 0.0785  |
| rs12229613  | A | -0.041  |
| rs111691687 | A | -0.0485 |
| rs73108143  | G | 0.1473  |
| rs138275367 | A | -0.1231 |
| rs4763162   | C | 0.1366  |
| rs4760453   | A | -0.0608 |
| rs7303520   | A | 0.0409  |
| rs11051141  | T | -0.035  |
| rs117798896 | A | 0.1315  |
| rs10847427  | T | 0.0373  |
| rs73141873  | C | 0.1531  |
| rs7485263   | G | -0.0229 |
| rs35989854  | G | 0.0883  |
| rs216879    | C | -0.0399 |
| rs113282827 | G | -0.1839 |
| rs1487065   | C | -0.0665 |
| rs74637784  | T | 0.0396  |
| rs2955404   | C | -0.0254 |
| rs2544083   | T | -0.0362 |
| rs11613160  | C | 0.0384  |
| rs73235904  | C | -0.0408 |
| rs11044229  | C | -0.025  |
| rs11835188  | A | 0.0423  |
| rs59375604  | A | -0.1426 |
| rs11067758  | G | 0.0282  |
| rs61927332  | C | 0.035   |
| rs75389068  | G | 0.0737  |
| rs116930312 | T | 0.1199  |
| rs310871    | G | -0.025  |
| rs1631306   | G | 0.0472  |
| rs1140886   | C | -0.0262 |
| rs7963042   | T | 0.0407  |



|             |   |         |
|-------------|---|---------|
| rs77886736  | G | 0.1805  |
| rs235600    | A | -0.0641 |
| rs117247128 | A | -0.1222 |
| rs665300    | A | 0.0231  |
| rs76774915  | C | 0.0944  |
| rs12319153  | G | -0.0728 |
| rs16948000  | A | -0.0323 |
| rs2638414   | C | -0.0305 |
| rs2612067   | G | -0.0364 |
| rs78413140  | T | 0.0359  |
| rs75796163  | C | 0.0582  |
| rs11180918  | T | 0.0373  |
| rs2054150   | T | -0.0239 |
| rs117467426 | A | -0.1228 |
| rs117094111 | A | 0.0795  |
| rs76241182  | A | -0.0516 |
| rs10783436  | C | -0.0262 |
| rs149261425 | T | -0.1142 |
| rs17302049  | G | -0.0341 |
| rs116088408 | T | 0.1169  |
| rs148450560 | T | 0.1005  |
| rs9669529   | T | -0.0268 |
| rs78162417  | T | -0.1194 |
| rs11106538  | G | 0.0888  |
| rs7969873   | T | 0.0436  |
| rs2238104   | T | -0.0238 |
| rs11177252  | C | 0.0314  |
| rs79444767  | T | 0.0654  |
| rs76147273  | A | -0.1462 |
| rs1351404   | C | 0.0665  |
| rs79321567  | A | -0.0612 |
| rs11171393  | T | 0.1336  |
| rs12829836  | G | -0.0457 |
| rs4623998   | A | -0.0329 |
| rs118171933 | C | 0.0935  |
| rs2619133   | G | 0.023   |
| rs10845668  | T | -0.0349 |
| rs2133633   | G | -0.0604 |
| rs7973927   | C | -0.0269 |
| rs714480    | T | -0.0353 |
| rs727580    | A | -0.0299 |
| rs76250950  | A | -0.1643 |
| rs3103505   | T | -0.0798 |
| rs61937472  | A | 0.0258  |
| rs1375905   | C | -0.0296 |
| rs114241159 | C | 0.0749  |
| rs6538367   | A | 0.0485  |

|             |   |         |
|-------------|---|---------|
| rs11832133  | G | 0.0307  |
| rs79124632  | G | 0.0372  |
| rs74975729  | A | -0.1274 |
| rs142216926 | C | 0.1933  |
| rs498049    | A | -0.0467 |
| rs61920455  | A | 0.1258  |
| rs75435065  | G | 0.1868  |
| rs4766709   | A | 0.0227  |
| rs7136313   | G | -0.0493 |
| rs78598097  | G | 0.0842  |
| rs10743761  | A | -0.1571 |
| rs5745862   | C | 0.0473  |
| rs34091025  | G | 0.0421  |
| rs56144678  | C | 0.0348  |
| rs11060323  | C | 0.0538  |
| rs4763973   | T | -0.0226 |
| rs2936558   | A | -0.0591 |
| rs78354541  | G | -0.0357 |
| rs11608374  | A | -0.0672 |
| rs139442102 | G | -0.1123 |
| rs141198096 | A | 0.2122  |
| rs116883595 | C | 0.1086  |
| rs117719391 | T | 0.0644  |
| rs79755633  | A | -0.0864 |
| rs77261108  | C | -0.1287 |
| rs11060224  | C | 0.0632  |
| rs11049780  | G | -0.023  |
| rs71462946  | A | -0.051  |
| rs77817201  | A | 0.1099  |
| rs117309598 | C | -0.1017 |
| rs2001649   | A | -0.028  |
| rs10846666  | G | -0.0297 |
| rs150246066 | T | 0.1915  |
| rs76247991  | A | 0.1149  |
| rs11494738  | T | -0.1065 |
| rs73149094  | T | -0.0555 |
| rs61748072  | T | -0.151  |
| rs2521978   | C | 0.0262  |
| rs11168417  | T | 0.0321  |
| rs112533131 | C | 0.1138  |
| rs116897328 | G | -0.15   |
| rs76600952  | T | 0.0775  |
| rs11062095  | T | -0.0617 |
| rs17424033  | G | 0.0462  |
| rs12830530  | C | -0.0328 |
| rs10878208  | T | -0.0235 |
| rs117625927 | C | 0.1198  |

|             |   |         |
|-------------|---|---------|
| rs117990026 | A | 0.1034  |
| rs7978476   | G | 0.0507  |
| rs11051841  | A | -0.0548 |
| rs144269838 | T | -0.1188 |
| rs71452381  | G | 0.0365  |
| rs10492227  | A | 0.0252  |
| rs11056714  | T | 0.0433  |
| rs112550276 | A | -0.1276 |
| rs61912185  | T | -0.0344 |
| rs958131    | A | 0.0225  |
| rs11176924  | T | -0.1152 |
| rs117771479 | T | -0.1546 |
| rs77764206  | C | -0.0925 |
| rs113040597 | C | -0.0954 |
| rs10437800  | A | -0.025  |
| rs73230029  | A | -0.1658 |
| rs10082776  | G | 0.039   |
| rs117813327 | A | 0.0698  |
| rs797775    | T | -0.0241 |
| rs73117378  | T | -0.0593 |
| rs141987229 | G | -0.1609 |
| rs7967432   | A | 0.0398  |
| rs12579938  | G | 0.0243  |
| rs78345144  | A | 0.0597  |
| rs17688627  | A | -0.0298 |
| rs10444559  | T | -0.032  |
| rs146805242 | A | 0.1371  |
| rs4964206   | G | 0.1143  |
| rs3782269   | T | 0.1427  |
| rs73043672  | C | 0.0942  |
| rs35788843  | C | -0.0833 |
| rs299436    | C | -0.0261 |
| rs73101481  | T | -0.0953 |
| rs12812579  | G | -0.0732 |
| rs117485246 | A | -0.1033 |
| rs941133    | A | -0.0494 |
| rs10860685  | C | -0.0229 |
| rs16908444  | G | 0.0359  |
| rs2555317   | A | 0.028   |
| rs17733916  | G | -0.1072 |
| rs117456197 | A | 0.0989  |
| rs141158037 | T | 0.0944  |
| rs79824582  | C | 0.1053  |
| rs12320738  | C | 0.0232  |
| rs73159579  | T | 0.0831  |
| rs75024051  | A | 0.0375  |
| rs7980623   | C | -0.1015 |

|             |   |         |
|-------------|---|---------|
| rs17491536  | G | -0.0512 |
| rs7298991   | T | -0.0304 |
| rs35943236  | G | -0.0942 |
| rs279011    | C | -0.025  |
| rs141265888 | G | 0.0965  |
| rs12815215  | A | -0.1503 |
| rs67355568  | A | -0.0295 |
| rs7310577   | A | 0.1232  |
| rs7297271   | A | -0.0292 |
| rs77482127  | A | -0.0609 |
| rs1616906   | A | -0.0663 |
| rs10860179  | G | 0.0266  |
| rs34839199  | A | 0.0842  |
| rs7960323   | G | -0.0287 |
| rs112991183 | G | -0.1608 |
| rs7139414   | G | -0.1704 |
| rs12427105  | T | -0.1231 |
| rs523581    | C | -0.0353 |
| rs80295637  | T | -0.0649 |
| rs71450039  | A | -0.0431 |
| rs2122694   | T | 0.0402  |
| rs117761982 | A | 0.0707  |
| rs9645716   | A | -0.0557 |
| rs78838814  | G | 0.1791  |
| rs1263782   | C | -0.0278 |
| rs117960705 | G | 0.1345  |
| rs73258307  | A | -0.1205 |
| rs12299713  | C | -0.0369 |
| rs35694267  | T | 0.1178  |
| rs117422441 | T | -0.0442 |
| rs55688846  | G | -0.067  |
| rs7969590   | G | -0.0225 |
| rs75130088  | G | 0.0404  |
| rs10771145  | A | 0.0526  |
| rs11115613  | A | 0.0451  |
| rs56267304  | A | -0.0344 |
| rs76159952  | A | 0.0555  |
| rs146653832 | A | 0.1607  |
| rs7307315   | A | -0.0228 |
| rs117592833 | A | 0.1581  |
| rs12578623  | G | 0.0526  |
| rs7309452   | T | 0.0785  |
| rs2408376   | T | 0.0351  |
| rs10875770  | G | 0.0272  |
| rs12321659  | G | -0.0294 |
| rs78650054  | T | 0.0675  |
| rs2660845   | G | 0.0242  |

|             |   |         |
|-------------|---|---------|
| rs10860651  | T | -0.035  |
| rs61940837  | T | -0.0759 |
| rs140173611 | T | -0.1215 |
| rs76458663  | A | -0.0856 |
| rs78716617  | A | -0.1189 |
| rs1495778   | C | 0.0359  |
| rs149996684 | G | 0.1044  |
| rs4762263   | A | -0.023  |
| rs76134374  | C | 0.0635  |
| rs143213961 | T | 0.136   |
| rs17227409  | G | -0.0526 |
| rs35329     | A | 0.0838  |
| rs138870549 | T | 0.127   |
| rs71462973  | C | -0.0861 |
| rs4764624   | A | -0.0228 |
| rs56348732  | T | 0.0736  |
| rs117139065 | T | -0.0607 |
| rs1565731   | C | 0.0334  |
| rs7959782   | A | 0.0465  |
| rs11611018  | G | 0.0323  |
| rs475222    | G | 0.0227  |
| rs10844032  | A | 0.0243  |
| rs139967887 | A | 0.0715  |
| rs17422705  | G | -0.0491 |
| rs6421196   | C | -0.0325 |
| rs140275162 | T | -0.0934 |
| rs11045082  | C | 0.0331  |
| rs61924698  | G | -0.0309 |
| rs7964257   | A | -0.0597 |
| rs67543549  | T | -0.1027 |
| rs118141892 | G | 0.0785  |
| rs4767203   | G | -0.0219 |
| rs73047377  | G | 0.1146  |
| rs146531001 | T | -0.1016 |
| rs2126291   | G | 0.0324  |
| rs12370876  | G | -0.0525 |
| rs12582189  | C | -0.0548 |
| rs2398458   | A | 0.0315  |
| rs2230375   | C | -0.0236 |
| rs7976353   | A | -0.0441 |
| rs2519536   | G | -0.0304 |
| rs139243374 | A | 0.0968  |
| rs76904010  | G | -0.2358 |
| rs78141900  | A | 0.0743  |
| rs74996610  | G | 0.0543  |
| rs74237722  | T | 0.0488  |
| rs12299449  | A | 0.0303  |

|             |   |         |
|-------------|---|---------|
| rs11111622  | G | -0.0389 |
| rs4842423   | A | 0.0231  |
| rs80160971  | A | 0.0686  |
| rs117928690 | C | -0.1184 |
| rs7961580   | T | 0.0395  |
| rs117267609 | A | -0.1328 |
| rs141497407 | C | 0.0339  |
| rs73368744  | C | -0.083  |
| rs118159516 | G | -0.1131 |
| rs12827913  | A | -0.0977 |
| rs17759214  | C | 0.0328  |
| rs112942512 | T | 0.1188  |
| rs144780363 | T | -0.106  |
| rs4768331   | T | -0.0254 |
| rs2583994   | T | 0.0233  |
| rs12316546  | A | -0.0359 |
| rs73196261  | G | 0.1457  |
| rs61908034  | C | -0.1076 |
| rs80352492  | A | 0.0741  |
| rs144013783 | A | -0.0952 |
| rs71461106  | G | -0.0911 |
| rs10450796  | A | -0.1078 |
| rs11178739  | G | -0.0441 |
| rs74396244  | T | -0.0506 |
| rs117317799 | G | 0.1412  |
| rs146089250 | T | -0.1349 |
| rs10862472  | G | -0.1872 |
| rs115651556 | A | -0.1346 |
| rs75920669  | G | 0.0543  |
| rs114541842 | T | 0.187   |
| rs2730782   | C | 0.0692  |
| rs7960699   | C | 0.0402  |
| rs12314127  | G | -0.0299 |
| rs7138570   | G | -0.0437 |
| rs146961036 | A | -0.0401 |
| rs61930801  | A | -0.0321 |
| rs79794195  | A | -0.1371 |
| rs2698259   | G | -0.0221 |
| rs11109058  | C | -0.0751 |
| rs4764979   | T | 0.0603  |
| rs7967385   | A | 0.0347  |
| rs12582848  | A | -0.0236 |
| rs17028195  | A | 0.0342  |
| rs1961056   | C | -0.0249 |
| rs118061179 | G | -0.0776 |
| rs10783775  | G | -0.0295 |
| rs2117048   | C | -0.023  |

|             |   |         |
|-------------|---|---------|
| rs11105856  | A | 0.0454  |
| rs12426756  | A | -0.1568 |
| rs112826420 | G | -0.0967 |
| rs111247144 | A | 0.0928  |
| rs12820450  | C | 0.0559  |
| rs67436553  | A | 0.0787  |
| rs117721606 | A | 0.1153  |
| rs6539058   | T | 0.0259  |
| rs73062743  | T | -0.0689 |
| rs2088990   | A | 0.0594  |
| rs34031444  | A | 0.0319  |
| rs113387995 | C | -0.1172 |
| rs2120528   | A | -0.0325 |
| rs10506555  | G | 0.0242  |
| rs61922534  | C | -0.0735 |
| rs4272852   | T | 0.0639  |
| rs117687310 | T | -0.1555 |
| rs10845427  | C | 0.0344  |
| rs3887021   | T | 0.0536  |
| rs10841144  | A | -0.1606 |
| rs148707891 | C | -0.0924 |
| rs12814523  | G | 0.0508  |
| rs1133383   | G | -0.0961 |
| rs147062606 | A | -0.0504 |
| rs114756819 | A | -0.0482 |
| rs11067096  | C | -0.0719 |
| rs11612893  | T | -0.0466 |
| rs11613009  | G | 0.0246  |
| rs61908949  | A | -0.0501 |
| rs61928587  | T | -0.0706 |
| rs112711392 | A | -0.0596 |
| rs3858656   | G | 0.0334  |
| rs111798634 | T | 0.0647  |
| rs116858148 | C | 0.1293  |
| rs7308667   | T | 0.0741  |
| rs17012330  | G | -0.092  |
| rs1060712   | C | 0.0309  |
| rs141400245 | G | 0.1296  |
| rs142710889 | A | 0.049   |
| rs76567358  | C | -0.0486 |
| rs9705457   | A | -0.0399 |
| rs10459126  | C | 0.1256  |
| rs3958102   | T | -0.0466 |
| rs10859732  | A | 0.0276  |
| rs16920201  | A | 0.1194  |
| rs9804781   | A | 0.0615  |
| rs4463014   | A | -0.0324 |

|             |   |         |
|-------------|---|---------|
| rs34372463  | T | 0.0216  |
| rs111262149 | T | -0.0669 |
| rs7305346   | C | 0.0345  |
| rs117336490 | A | 0.0543  |
| rs1669943   | A | 0.0231  |
| rs2465618   | G | -0.0354 |
| rs2686355   | T | -0.0346 |
| rs12228890  | A | -0.0672 |
| rs6580874   | T | -0.0869 |
| rs144883548 | C | 0.0726  |
| rs114966165 | G | 0.0709  |
| rs77644918  | C | -0.0576 |
| rs770157    | A | 0.0234  |
| rs17037085  | A | 0.0278  |
| rs4759758   | G | -0.0278 |
| rs79330992  | T | 0.0378  |
| rs72648114  | T | 0.0363  |
| rs34582     | A | 0.0631  |
| rs5745895   | G | -0.0536 |
| rs11611673  | G | 0.1159  |
| rs75318300  | C | 0.0338  |
| rs17827209  | C | 0.1012  |
| rs17045878  | T | 0.0491  |
| rs117016904 | A | -0.1512 |
| rs111260183 | C | 0.095   |
| rs61920660  | A | -0.1507 |
| rs10880255  | T | -0.0597 |
| rs11054460  | C | 0.0668  |
| rs73068341  | C | -0.0725 |
| rs77158180  | C | -0.1304 |
| rs169294    | C | 0.0222  |
| rs3217892   | A | 0.0691  |
| rs117680812 | G | -0.0535 |
| rs75359098  | C | 0.1006  |
| rs1896003   | A | -0.0758 |
| rs78239445  | A | 0.065   |
| rs11111522  | G | -0.0409 |
| rs113750212 | A | -0.0954 |
| rs36018751  | T | 0.055   |
| rs76168123  | A | -0.0309 |
| rs12582531  | A | 0.0839  |
| rs61937884  | C | -0.0955 |
| rs75977598  | C | -0.1105 |
| rs11058956  | G | -0.0887 |
| rs12312467  | A | 0.1132  |
| rs11832841  | C | 0.092   |
| rs79577474  | A | -0.147  |



|             |   |         |
|-------------|---|---------|
| rs7133391   | A | -0.028  |
| rs4882549   | G | -0.0237 |
| rs10437899  | A | 0.0249  |
| rs1874521   | A | -0.0247 |
| rs2429131   | A | 0.0239  |
| rs73119794  | G | -0.1096 |
| rs11106853  | T | -0.1073 |
| rs4765492   | C | 0.0345  |
| rs117471128 | C | -0.039  |
| rs2177704   | C | -0.0702 |
| rs4421792   | C | 0.031   |
| rs7302917   | A | -0.0237 |
| rs9919751   | A | -0.0234 |
| rs142379556 | C | -0.1499 |
| rs11055356  | C | -0.0234 |
| rs2287573   | A | -0.035  |
| rs10774722  | A | 0.0213  |
| rs7300751   | A | 0.0296  |
| rs10844638  | C | 0.0228  |
| rs116935324 | T | -0.1519 |
| rs7300394   | G | 0.026   |
| rs7297532   | C | 0.0364  |
| rs1919719   | C | 0.0671  |
| rs142853831 | T | 0.1127  |
| rs10735440  | A | 0.0218  |
| rs1194029   | G | 0.0225  |
| rs1195939   | T | 0.0685  |
| rs10774119  | T | -0.0317 |
| rs117100889 | G | 0.0812  |
| rs2264769   | G | -0.0276 |
| rs61953500  | A | 0.1043  |
| rs7965462   | G | 0.0526  |
| rs4584625   | A | 0.0315  |
| rs12582544  | A | -0.1437 |
| rs118185710 | A | -0.1476 |
| rs117536290 | G | 0.1674  |
| rs147435428 | C | -0.1567 |
| rs1068928   | T | -0.0265 |
| rs3970421   | T | -0.0613 |
| rs141416513 | G | -0.1037 |
| rs78163848  | T | 0.1387  |
| rs145752326 | A | -0.102  |
| rs7953724   | A | -0.023  |
| rs61934886  | A | 0.0605  |
| rs56341513  | T | 0.1396  |
| rs1582335   | C | 0.0542  |
| rs34736867  | G | -0.0321 |

|             |   |         |
|-------------|---|---------|
| rs117329947 | C | -0.1093 |
| rs145462438 | A | -0.0733 |
| rs113380336 | A | 0.0942  |
| rs16907310  | G | -0.026  |
| rs11046719  | T | -0.0829 |
| rs112381160 | A | 0.0657  |
| rs34733845  | T | 0.1057  |
| rs117506648 | A | -0.095  |
| rs772232    | C | -0.1273 |
| rs12318261  | A | -0.0974 |
| rs79792410  | G | 0.1133  |
| rs61936467  | G | 0.1008  |
| rs142623670 | G | 0.0909  |
| rs79991267  | G | -0.054  |
| rs7964620   | A | 0.0235  |
| rs113438198 | T | 0.0867  |
| rs76490401  | G | 0.0587  |
| rs73085379  | A | 0.0371  |
| rs61737629  | G | 0.1349  |
| rs77897889  | G | -0.0715 |
| rs61923269  | A | 0.1263  |
| rs73149854  | C | 0.0652  |
| rs75191909  | G | -0.0629 |
| rs78273016  | T | 0.1192  |
| rs7978493   | T | 0.09    |
| rs10744458  | C | -0.0236 |
| rs11168620  | A | -0.0446 |
| rs10492031  | A | -0.0268 |
| rs59611034  | C | -0.089  |
| rs11068998  | G | 0.0505  |
| rs7315199   | C | 0.0889  |
| rs61931364  | C | 0.0595  |
| rs2264760   | T | 0.153   |
| rs11060938  | A | 0.0518  |
| rs11574798  | C | 0.1002  |
| rs146946237 | T | 0.1834  |
| rs10842318  | T | 0.0317  |
| rs1684224   | G | 0.056   |
| rs58081520  | A | -0.0732 |
| rs17098298  | C | -0.0373 |
| rs78855816  | A | -0.0779 |
| rs67312395  | C | -0.0249 |
| rs45562445  | C | 0.1045  |
| rs11059305  | A | -0.0235 |
| rs2174693   | A | 0.0625  |
| rs6538408   | T | 0.0322  |
| rs4764194   | C | 0.0228  |

|             |   |         |
|-------------|---|---------|
| rs11107741  | G | -0.1222 |
| rs1632493   | A | 0.1157  |
| rs117549626 | G | 0.0779  |
| rs80034114  | T | 0.1141  |
| rs73383274  | C | -0.1354 |
| rs56039516  | A | -0.0828 |
| rs277246    | C | -0.0416 |
| rs61942862  | A | 0.0448  |
| rs74980319  | T | 0.1257  |
| rs9669797   | T | -0.0764 |
| rs11064068  | A | 0.0335  |
| rs75498189  | C | 0.0414  |
| rs144849003 | A | -0.0596 |
| rs117797102 | T | 0.0865  |
| rs55770090  | T | 0.062   |
| rs7299842   | A | 0.0227  |
| rs73109136  | T | 0.0685  |
| rs7970479   | A | -0.0226 |
| rs930860    | A | -0.0359 |
| rs74080238  | G | -0.0963 |
| rs76429448  | G | 0.0752  |
| rs148775535 | A | -0.0752 |
| rs80155908  | A | 0.104   |
| rs141196020 | T | -0.0856 |
| rs12230616  | T | -0.0425 |
| rs11183403  | C | 0.0263  |
| rs2588343   | T | 0.0422  |
| rs681594    | C | 0.1598  |
| rs4639990   | A | -0.0361 |
| rs57382938  | C | 0.0378  |
| rs10842404  | C | 0.0364  |
| rs2088354   | T | 0.0693  |
| rs4765999   | T | -0.0241 |
| rs34355641  | A | -0.0277 |
| rs74754250  | C | 0.047   |
| rs61928115  | C | 0.1212  |
| rs141974802 | T | -0.0756 |
| rs11614173  | A | -0.0273 |
| rs4764411   | T | -0.0339 |
| rs60889510  | C | 0.0451  |
| rs4762058   | A | 0.0323  |
| rs61918590  | T | 0.0501  |
| rs11044762  | T | 0.0275  |
| rs147812327 | A | -0.1455 |
| rs79479663  | A | 0.0762  |
| rs1379963   | T | 0.0252  |
| rs113871655 | T | 0.0852  |

|             |   |         |
|-------------|---|---------|
| rs117405013 | C | 0.1097  |
| rs144983473 | T | 0.0727  |
| rs116891861 | G | -0.0862 |
| rs61933781  | T | 0.0282  |
| rs57351072  | G | -0.0334 |
| rs3887195   | T | -0.0298 |
| rs17616823  | T | 0.0769  |
| rs1463770   | T | 0.0243  |
| rs2295233   | T | 0.0439  |
| rs79404032  | A | -0.1065 |
| rs75453931  | C | -0.0673 |
| rs73204250  | A | 0.0939  |
| rs2674504   | T | -0.0233 |
| rs74668239  | C | 0.0553  |
| rs117414569 | T | -0.1312 |
| rs11060271  | A | -0.0224 |
| rs12831681  | G | 0.0366  |
| rs7974195   | C | -0.0274 |
| rs11110629  | T | 0.0992  |
| rs8181673   | A | 0.0255  |
| rs11609867  | A | -0.061  |
| rs112157835 | T | 0.1186  |
| rs10507123  | G | 0.1169  |
| rs1904551   | C | 0.0272  |
| rs2384637   | C | 0.0336  |
| rs3087864   | C | -0.0314 |
| rs77244171  | T | 0.0451  |
| rs11059733  | A | -0.0478 |
| rs10784413  | C | 0.0329  |
| rs117622479 | A | -0.0958 |
| rs143496855 | C | -0.1519 |
| rs73127134  | T | 0.0516  |
| rs10505912  | C | 0.045   |
| rs17443317  | G | 0.1812  |
| rs149424164 | G | 0.1623  |
| rs75501970  | T | -0.0893 |
| rs78506215  | C | -0.0895 |
| rs17547077  | T | 0.0724  |
| rs150674909 | C | 0.1445  |
| rs61940438  | G | 0.0563  |
| rs17216107  | C | 0.1005  |
| rs17445108  | A | 0.0409  |
| rs1146082   | G | -0.0213 |
| rs200791    | G | 0.0313  |
| rs116593173 | G | -0.0754 |
| rs77527504  | A | 0.1098  |
| rs34321498  | T | 0.0614  |

|             |   |         |
|-------------|---|---------|
| rs11835695  | C | 0.0222  |
| rs139271238 | A | 0.0973  |
| rs7955903   | C | -0.0275 |
| rs73073445  | G | -0.0406 |
| rs75649450  | G | -0.0691 |
| rs117293258 | T | -0.1471 |
| rs117830056 | A | 0.0947  |
| rs117593142 | A | 0.06    |
| rs11048143  | G | 0.0678  |
| rs2277350   | C | 0.0251  |
| rs10771375  | G | -0.0266 |
| rs117608842 | T | 0.1134  |
| rs12818428  | T | -0.0782 |
| rs7134843   | A | 0.0479  |
| rs73066806  | A | 0.1184  |
| rs17581334  | G | 0.0856  |
| rs61926583  | G | 0.166   |
| rs1353191   | C | 0.023   |
| rs143687866 | G | 0.1743  |
| rs10771571  | A | 0.024   |
| rs76545872  | A | 0.0282  |
| rs2358939   | G | 0.0521  |
| rs12310799  | G | -0.0311 |
| rs117475009 | A | 0.0754  |
| rs138647213 | C | 0.1441  |
| rs76207870  | G | -0.0973 |
| rs1313546   | A | 0.0221  |
| rs75890412  | C | -0.1543 |
| rs77569329  | G | 0.0585  |
| rs7488796   | C | -0.0888 |
| rs36105439  | G | 0.0285  |
| rs143655815 | T | -0.1101 |
| rs745848    | T | -0.062  |
| rs10880522  | C | 0.0218  |
| rs139675892 | T | -0.1664 |
| rs78299556  | T | -0.0528 |
| rs3762112   | G | -0.0243 |
| rs116963141 | A | 0.0943  |
| rs2360973   | C | 0.0313  |
| rs76168633  | A | 0.0989  |
| rs7139439   | C | 0.0346  |
| rs10848811  | C | -0.0568 |
| rs118043720 | T | 0.066   |
| rs71464268  | A | -0.1074 |
| rs71468259  | C | 0.0264  |
| rs550338    | A | 0.0247  |
| rs1683164   | T | -0.0212 |

|             |   |         |
|-------------|---|---------|
| rs116852977 | T | 0.1035  |
| rs73197353  | C | -0.088  |
| rs77186700  | A | -0.035  |
| rs28416447  | T | 0.04    |
| rs59505377  | C | -0.0247 |
| rs7977933   | G | 0.0688  |
| rs73134104  | C | -0.1491 |
| rs148716859 | T | -0.122  |
| rs1252276   | T | -0.031  |
| rs7304767   | A | 0.0364  |
| rs10862496  | C | -0.0239 |
| rs7303721   | G | 0.0234  |
| rs11063631  | G | 0.0229  |
| rs74435373  | C | 0.0492  |
| rs144337407 | A | -0.0382 |
| rs61939274  | T | -0.043  |
| rs7968049   | C | -0.0408 |
| rs61530056  | A | 0.1061  |
| rs76822258  | A | 0.1808  |
| rs7132011   | A | -0.0929 |
| rs75557124  | G | -0.0879 |
| rs141386400 | C | -0.1637 |
| rs2171216   | T | -0.0221 |
| rs73221222  | G | 0.0711  |
| rs10744720  | T | 0.03    |
| rs4149155   | A | 0.0853  |
| rs138195319 | T | 0.159   |
| rs4964211   | T | -0.0268 |
| rs79791743  | T | 0.0885  |
| rs11064841  | T | -0.0834 |
| rs72475449  | G | -0.1456 |
| rs76105006  | G | 0.0428  |
| rs115910862 | T | 0.1146  |
| rs79521420  | A | -0.0456 |
| rs3782415   | C | 0.0267  |
| rs201400    | G | 0.0213  |
| rs7956516   | A | -0.0332 |
| rs7954837   | A | 0.024   |
| rs117946977 | G | -0.1351 |
| rs117287072 | A | -0.0679 |
| rs118144016 | T | 0.1498  |
| rs117618830 | A | -0.0911 |
| rs116863024 | G | 0.1046  |
| rs78945869  | A | -0.029  |
| rs111617431 | C | -0.0766 |
| rs10877903  | A | 0.0417  |
| rs151195045 | A | -0.1251 |

|             |   |         |
|-------------|---|---------|
| rs117360609 | C | 0.1203  |
| rs79949482  | G | 0.1086  |
| rs1663579   | T | 0.1477  |
| rs17025215  | T | 0.0677  |
| rs76459387  | T | -0.1416 |
| rs80005920  | T | 0.0931  |
| rs117670446 | G | 0.0555  |
| rs117930541 | C | 0.1362  |
| rs16927450  | G | 0.0277  |
| rs145521278 | T | 0.1023  |
| rs80132620  | T | -0.1249 |
| rs7970684   | T | 0.0258  |
| rs73203407  | G | 0.0302  |
| rs150893153 | T | -0.1471 |
| rs10778437  | G | -0.0235 |
| rs150666174 | C | -0.1277 |
| rs73074666  | G | -0.1017 |
| rs6580862   | T | -0.0284 |
| rs10774875  | T | -0.0682 |
| rs2535394   | C | 0.0231  |
| rs76730401  | T | 0.1122  |
| rs996286    | T | -0.0265 |
| rs1534618   | C | -0.0265 |
| rs11057851  | A | -0.0415 |
| rs12229987  | T | -0.0242 |
| rs11060247  | T | 0.0447  |
| rs7133083   | G | -0.032  |
| rs590429    | G | 0.0346  |
| rs116595095 | A | -0.084  |
| rs142509678 | A | -0.1762 |
| rs147148179 | G | -0.1287 |
| rs28570444  | T | 0.0601  |
| rs1677193   | C | -0.0216 |
| rs4604969   | G | 0.0225  |
| rs1452254   | T | 0.0965  |
| rs771997    | A | -0.0232 |
| rs12314405  | T | 0.0492  |
| rs117976605 | C | 0.126   |
| rs73109131  | A | 0.0598  |
| rs78401813  | C | -0.0744 |
| rs11613766  | T | 0.036   |
| rs61929079  | C | -0.0783 |
| rs7979883   | T | 0.025   |
| rs138849569 | T | 0.0911  |
| rs117012356 | T | -0.1884 |
| rs34478626  | C | 0.084   |
| rs117510105 | T | 0.1075  |

|             |   |         |
|-------------|---|---------|
| rs75867074  | G | 0.0568  |
| rs143845814 | A | 0.0514  |
| rs11183847  | C | -0.0234 |
| rs117599658 | G | 0.1317  |
| rs2037406   | G | 0.0524  |
| rs11066719  | T | -0.0215 |
| rs10846599  | C | 0.0258  |
| rs146704699 | A | 0.1655  |
| rs73369490  | G | 0.0357  |
| rs79126221  | T | -0.0793 |
| rs6488536   | T | -0.1636 |
| rs7954123   | A | 0.0213  |
| rs12425490  | G | -0.1253 |
| rs10861132  | A | -0.021  |
| rs4589352   | T | 0.0231  |
| rs11050045  | T | 0.0528  |
| rs75142692  | A | -0.111  |
| rs140600577 | T | 0.1033  |
| rs35769     | T | 0.0511  |
| rs117488193 | A | -0.1642 |
| rs11045994  | C | 0.0268  |
| rs111235325 | T | -0.095  |
| rs73211415  | T | -0.0921 |
| rs73388588  | T | 0.0311  |
| rs76139825  | T | 0.1682  |
| rs143836821 | T | -0.1514 |
| rs3020815   | T | 0.0253  |
| rs7485624   | G | -0.0269 |
| rs113660344 | A | -0.0815 |
| rs6581485   | A | 0.0716  |
| rs116845523 | G | 0.1026  |
| rs12830099  | T | -0.1035 |
| rs117322672 | C | 0.1194  |
| rs35047     | T | -0.0317 |
| rs145430872 | G | 0.1284  |
| rs11112814  | A | -0.0464 |
| rs75270518  | A | 0.0342  |
| rs148936961 | T | -0.1712 |
| rs35976740  | T | 0.1392  |
| rs79221930  | T | 0.1164  |
| rs225533    | G | -0.0232 |
| rs80179001  | G | 0.1095  |
| rs74582725  | A | 0.1058  |
| rs144374169 | T | 0.1739  |
| rs116893659 | T | -0.1064 |
| rs4149579   | T | -0.0511 |
| rs1351828   | T | -0.0234 |



|             |   |         |
|-------------|---|---------|
| rs12301727  | A | -0.0718 |
| rs151079723 | T | -0.1173 |
| rs75988694  | A | 0.069   |
| rs117483419 | G | 0.1069  |
| rs11169838  | T | 0.026   |
| rs1920417   | G | 0.0526  |
| rs55996215  | A | 0.0218  |
| rs73118508  | A | 0.0478  |
| rs7489210   | T | -0.032  |
| rs201381    | A | 0.0574  |
| rs12579603  | G | 0.0226  |
| rs71438659  | A | -0.0686 |
| rs2471657   | A | -0.0211 |
| rs143727929 | T | 0.0802  |
| rs75041341  | G | 0.044   |
| rs41416545  | A | -0.0564 |
| rs17544033  | T | 0.1741  |
| rs766404    | A | -0.1166 |
| rs73233821  | G | -0.0768 |
| rs2398553   | A | -0.0239 |
| rs80150747  | T | 0.0854  |
| rs147300907 | T | -0.0746 |
| rs7316174   | T | -0.0208 |
| rs12371239  | C | -0.0692 |
| rs117934392 | C | -0.0729 |
| rs11176779  | A | 0.0228  |
| rs2724226   | C | -0.0271 |
| rs2896042   | G | 0.0325  |
| rs75239609  | T | 0.0777  |
| rs142212434 | C | -0.0584 |
| rs36098467  | T | 0.0219  |
| rs1878021   | C | 0.0341  |
| rs117214385 | G | 0.0987  |
| rs11045235  | G | 0.0281  |
| rs11046613  | T | -0.0458 |
| rs1659793   | T | -0.034  |
| rs12423891  | T | 0.037   |
| rs10771814  | T | -0.0248 |
| rs7973306   | A | -0.024  |
| rs225574    | T | 0.0297  |
| rs118088556 | G | -0.1276 |
| rs139138993 | G | -0.0897 |
| rs147981475 | T | 0.1724  |
| rs73060631  | A | 0.0748  |
| rs79098922  | T | -0.0306 |
| rs146439475 | T | 0.102   |
| rs1731666   | A | -0.022  |

|             |   |         |
|-------------|---|---------|
| rs11612697  | G | -0.0385 |
| rs1468697   | T | -0.1161 |
| rs117756423 | C | -0.0758 |
| rs118001270 | C | 0.0928  |
| rs10771151  | G | 0.0245  |
| rs59729815  | A | -0.0903 |
| rs11182954  | T | -0.0521 |
| rs12825391  | A | 0.0385  |
| rs4981031   | G | 0.024   |
| rs78622436  | C | -0.0847 |
| rs11057695  | T | 0.051   |
| rs146757928 | A | 0.1043  |
| rs10845430  | C | 0.0223  |
| rs71453721  | A | 0.141   |
| rs7342340   | T | 0.0229  |
| rs45448092  | T | 0.0272  |
| rs143818581 | A | -0.0615 |
| rs11064712  | A | -0.049  |
| rs4654      | C | -0.0215 |
| rs73406190  | C | -0.0383 |
| rs697871    | C | 0.0208  |
| rs470477    | T | -0.0227 |
| rs73121665  | A | -0.1373 |
| rs118121531 | T | 0.0963  |
| rs10400566  | G | -0.0203 |
| rs11114466  | C | -0.0294 |
| rs80137311  | C | 0.1528  |
| rs80168527  | C | -0.05   |
| rs61288717  | G | 0.051   |
| rs1383108   | A | 0.0334  |
| rs73390346  | G | 0.1516  |
| rs55931073  | G | 0.0553  |
| rs2174905   | G | -0.0307 |
| rs113780007 | A | -0.0818 |
| rs7961178   | A | 0.033   |
| rs11174029  | A | 0.0255  |
| rs6581553   | A | 0.0249  |
| rs117033749 | A | 0.0999  |
| rs111730516 | A | 0.0751  |
| rs7312706   | C | -0.1586 |
| rs148569996 | T | 0.0929  |
| rs142442623 | A | 0.0893  |
| rs61923521  | T | -0.0632 |
| rs35407271  | T | -0.075  |
| rs73383279  | C | -0.07   |
| rs73233337  | A | -0.0953 |
| rs117947541 | G | 0.0889  |

|             |   |         |
|-------------|---|---------|
| rs73053625  | A | -0.1098 |
| rs2302688   | T | 0.0275  |
| rs1870218   | A | -0.0665 |
| rs78420523  | A | 0.051   |
| rs78073362  | T | -0.0595 |
| rs9919677   | G | 0.0311  |
| rs10861431  | C | -0.0237 |
| rs1486636   | C | 0.0208  |
| rs12816145  | G | 0.0279  |
| rs117169748 | C | -0.1224 |
| rs79240623  | T | -0.0475 |
| rs1713625   | G | -0.0546 |
| rs11044057  | A | 0.0376  |
| rs1844950   | T | -0.025  |
| rs10773737  | T | -0.0551 |
| rs11063529  | A | -0.025  |
| rs73043023  | T | -0.0664 |
| rs11614711  | C | 0.0402  |
| rs1994192   | T | -0.0204 |
| rs78393972  | A | -0.0397 |
| rs118059199 | G | 0.0786  |
| rs7955288   | C | -0.1347 |
| rs141128804 | T | 0.1375  |
| rs73109221  | T | -0.0999 |
| rs7313139   | C | 0.0212  |
| rs111970901 | T | 0.0517  |
| rs10082716  | G | -0.0587 |
| rs2555003   | C | 0.0308  |
| rs550390    | T | -0.0247 |
| rs117302325 | T | 0.1065  |
| rs10843440  | T | -0.0213 |
| rs7960452   | A | -0.0374 |
| rs3217924   | T | 0.1581  |
| rs61924574  | A | 0.0557  |
| rs20843     | T | 0.023   |
| rs7132366   | C | 0.0224  |
| rs74963516  | T | 0.0606  |
| rs2596722   | T | -0.0229 |
| rs117465977 | T | -0.1131 |
| rs1598977   | T | 0.029   |
| rs116909798 | A | -0.0958 |
| rs141582035 | T | -0.0821 |
| rs1490887   | C | -0.0316 |
| rs11048667  | G | -0.0298 |
| rs34682942  | A | -0.0544 |
| rs75464063  | T | 0.0713  |
| rs10848772  | G | -0.0309 |

|             |   |         |
|-------------|---|---------|
| rs12815920  | A | -0.0564 |
| rs1354421   | T | 0.021   |
| rs2525055   | G | -0.0236 |
| rs10431583  | A | 0.0633  |
| rs1955366   | A | 0.1078  |
| rs117718179 | G | -0.1427 |
| rs6488262   | G | -0.031  |
| rs10774843  | T | 0.0226  |
| rs61938081  | A | -0.0895 |
| rs7300111   | C | -0.0213 |
| rs722153    | A | -0.096  |
| rs12229360  | G | 0.0719  |
| rs148381992 | C | 0.1298  |
| rs148424772 | A | -0.1173 |
| rs71458365  | A | 0.0362  |
| rs10862532  | A | 0.0268  |
| rs75225421  | T | 0.0853  |
| rs73072814  | T | 0.036   |
| rs17832942  | T | 0.0213  |
| rs12372636  | A | 0.0385  |
| rs997821    | A | 0.0218  |
| rs12422311  | A | -0.0448 |
| rs34112291  | T | 0.0921  |
| rs10878023  | G | -0.0313 |
| rs78861809  | G | 0.083   |
| rs4764181   | G | 0.0207  |
| rs113304668 | A | -0.0947 |
| rs117843794 | G | 0.1283  |
| rs2712536   | G | -0.0226 |
| rs2114567   | A | 0.0264  |
| rs4387391   | A | -0.0283 |
| rs77210491  | A | -0.0917 |
| rs2374469   | G | 0.0214  |
| rs77312011  | T | -0.0392 |
| rs1654940   | G | -0.0298 |
| rs112800946 | C | -0.0956 |
| rs151303127 | A | -0.1179 |
| rs17121643  | A | 0.0542  |
| rs1874314   | T | -0.0274 |
| rs7976210   | G | 0.0272  |
| rs1896354   | G | 0.0215  |
| rs11611962  | T | 0.104   |
| rs74770082  | A | -0.0785 |
| rs76779196  | T | 0.0848  |
| rs148514566 | G | 0.0609  |
| rs76239973  | A | -0.0626 |
| rs147592505 | G | -0.1885 |

|             |   |         |
|-------------|---|---------|
| rs76283306  | C | -0.074  |
| rs7960896   | A | -0.1663 |
| rs12309771  | T | 0.1483  |
| rs10860624  | T | 0.0229  |
| rs17618031  | T | -0.0406 |
| rs1012682   | G | 0.025   |
| rs1385567   | A | 0.0322  |
| rs11177210  | T | 0.0326  |
| rs117270282 | C | -0.1107 |
| rs61938378  | T | 0.1747  |
| rs73200446  | T | 0.0574  |
| rs11111142  | A | 0.1343  |
| rs632326    | A | 0.0418  |
| rs139103115 | G | 0.0699  |
| rs10778934  | A | -0.0254 |
| rs112959889 | C | -0.0703 |
| rs7298728   | G | -0.0219 |
| rs4765518   | C | -0.0283 |
| rs2301262   | T | -0.0359 |
| rs7956846   | C | 0.0221  |
| rs116973148 | T | -0.1223 |
| rs116902221 | T | -0.0599 |
| rs12320276  | C | -0.0741 |
| rs12809801  | G | 0.0574  |
| rs35879448  | A | 0.1194  |
| rs7132395   | C | -0.0344 |
| rs7300068   | A | 0.0318  |
| rs61940260  | T | 0.0687  |
| rs74526545  | T | -0.1297 |
| rs73096900  | A | 0.1111  |
| rs12821479  | G | -0.0427 |
| rs2463021   | T | -0.0398 |
| rs117023001 | A | 0.1146  |
| rs7485387   | T | 0.0296  |
| rs7297077   | T | 0.0682  |
| rs11176455  | C | -0.0268 |
| rs7297330   | A | -0.0253 |
| rs139489080 | T | 0.104   |
| rs117384990 | C | 0.1176  |
| rs1366041   | C | 0.0433  |
| rs719840    | C | 0.0415  |
| rs10841562  | T | 0.0212  |
| rs144392349 | G | 0.1102  |
| rs76465003  | A | 0.0931  |
| rs77959368  | C | -0.0753 |
| rs6488841   | C | -0.0241 |
| rs11107467  | C | 0.0224  |

|             |   |         |
|-------------|---|---------|
| rs73154707  | C | -0.0321 |
| rs11057765  | C | 0.0292  |
| rs4763701   | C | -0.0439 |
| rs151109080 | T | -0.1429 |
| rs61920343  | A | 0.1358  |
| rs3911786   | A | 0.0663  |
| rs10876202  | T | -0.0383 |
| rs11170033  | A | -0.0224 |
| rs56024853  | A | 0.0875  |
| rs61910951  | C | 0.0322  |
| rs11111350  | G | -0.0225 |
| rs75197622  | T | -0.0888 |
| rs150551901 | T | -0.1416 |
| rs4486720   | C | -0.0779 |
| rs78595509  | C | 0.0804  |
| rs117061484 | C | -0.1121 |
| rs143136946 | G | 0.1476  |
| rs10778218  | T | 0.0203  |
| rs11616012  | A | 0.1636  |
| rs61915661  | T | 0.0906  |
| rs75786813  | T | -0.1069 |
| rs12321957  | C | -0.0345 |
| rs73054799  | T | 0.0267  |
| rs75557932  | T | -0.0543 |
| rs143931609 | T | -0.061  |
| rs73186043  | T | -0.0538 |
| rs117415952 | A | -0.0773 |
| rs150387359 | A | -0.1373 |
| rs11060667  | T | 0.0315  |
| rs4766303   | T | 0.028   |
| rs145331154 | C | 0.1257  |
| rs901235    | G | 0.0456  |
| rs77645959  | T | 0.0848  |
| rs10851024  | A | -0.0228 |
| rs246084    | G | -0.0205 |
| rs7313588   | A | -0.0236 |
| rs11058038  | G | -0.04   |
| rs138628484 | A | 0.079   |
| rs142764518 | T | -0.1079 |
| rs6538164   | G | -0.0325 |
| rs148436189 | A | -0.0934 |
| rs2467462   | C | -0.0206 |
| rs7298143   | T | 0.049   |
| rs117894402 | G | -0.1067 |
| rs2042861   | T | -0.0232 |
| rs10735107  | C | 0.0226  |
| rs61706479  | C | 0.027   |

|             |   |         |
|-------------|---|---------|
| rs73104074  | C | 0.1031  |
| rs73086854  | G | -0.1121 |
| rs143893805 | T | 0.0939  |
| rs12809570  | A | -0.0365 |
| rs61686348  | C | -0.1222 |
| rs7316614   | C | -0.0204 |
| rs10745495  | G | -0.0245 |
| rs75929115  | A | -0.0962 |
| rs146325416 | A | 0.0906  |
| rs1031605   | A | -0.0359 |
| rs155689    | T | 0.1484  |
| rs5745066   | T | -0.0884 |
| rs34759455  | G | -0.0422 |
| rs149800174 | G | -0.0816 |
| rs7137757   | C | -0.0515 |
| rs758637    | A | -0.0221 |
| rs276013    | T | 0.0274  |
| rs75269774  | G | -0.1208 |
| rs925717    | T | -0.0276 |
| rs77019514  | C | -0.0363 |
| rs78433681  | A | -0.0958 |
| rs2369281   | C | 0.0333  |
| rs10743494  | A | 0.0219  |
| rs55881607  | C | -0.1346 |
| rs61913144  | G | 0.1205  |
| rs10777868  | G | -0.0207 |
| rs9645788   | A | 0.1541  |
| rs75784032  | G | -0.0702 |
| rs117942711 | T | 0.123   |
| rs3858698   | T | 0.0285  |
| rs17321986  | T | 0.0361  |
| rs2172953   | T | 0.0682  |
| rs4423230   | C | -0.0227 |
| rs144110899 | T | 0.1217  |
| rs12304486  | G | 0.0271  |
| rs12308165  | T | 0.0258  |
| rs140049925 | C | 0.0914  |
| rs11571070  | G | 0.1236  |
| rs12316701  | G | -0.0347 |
| rs759389    | T | 0.023   |
| rs11061320  | A | 0.0791  |
| rs730560    | G | 0.0217  |
| rs76503703  | C | -0.0949 |
| rs138991026 | G | -0.079  |
| rs2063239   | A | -0.0223 |
| rs1552227   | T | 0.0229  |
| rs1401985   | C | -0.0543 |

|             |   |         |
|-------------|---|---------|
| rs269160    | A | -0.022  |
| rs118139499 | C | -0.1084 |
| rs17764531  | C | 0.0306  |
| rs4762768   | A | -0.0498 |
| rs1842197   | T | -0.0232 |
| rs74701444  | G | -0.1299 |
| rs1252434   | T | 0.0283  |
| rs6538314   | C | 0.0218  |
| rs4994424   | T | -0.0291 |
| rs73047609  | A | 0.0694  |
| rs61582113  | A | 0.05    |
| rs5003834   | G | 0.0366  |
| rs75649817  | T | 0.0658  |
| rs117423450 | G | -0.1239 |
| rs504379    | T | 0.0495  |
| rs61910163  | A | -0.0489 |
| rs10506791  | A | -0.1173 |
| rs2340693   | G | 0.095   |
| rs7301148   | T | -0.0876 |
| rs10743611  | C | 0.0257  |
| rs149514400 | T | 0.0957  |
| rs11059925  | C | 0.0356  |
| rs653861    | A | 0.0297  |
| rs78169269  | A | 0.1064  |
| rs73202227  | C | 0.0889  |
| rs77951898  | C | 0.0547  |
| rs10779121  | C | 0.0215  |
| rs11111839  | A | 0.0405  |
| rs10431248  | C | -0.023  |
| rs73301065  | C | -0.0451 |
| rs8179110   | G | -0.044  |
| rs10845622  | T | 0.0301  |
| rs11048157  | G | 0.047   |
| rs7132507   | G | 0.0238  |
| rs78529822  | A | -0.103  |
| rs146839079 | A | 0.1605  |
| rs76629760  | A | 0.1624  |
| rs11615951  | C | 0.0265  |
| rs117960781 | C | -0.1172 |
| rs35904672  | G | -0.1526 |
| rs76367540  | C | 0.137   |
| rs11043221  | C | -0.0248 |
| rs75999642  | A | 0.0829  |
| rs10744768  | A | 0.0243  |
| rs112793510 | T | 0.1039  |
| rs117614381 | C | -0.0677 |
| rs117451726 | T | 0.0839  |



|             |   |         |
|-------------|---|---------|
| rs73489112  | A | 0.1022  |
| rs4963893   | C | -0.0403 |
| rs77757339  | T | 0.1299  |
| rs11169591  | A | 0.0825  |
| rs17295235  | T | 0.0734  |
| rs56246545  | G | -0.0295 |
| rs74708432  | C | 0.0757  |
| rs12812341  | C | 0.0273  |
| rs2889653   | T | -0.1047 |
| rs233724    | A | 0.0248  |
| rs117611588 | A | -0.0688 |
| rs12581167  | C | -0.0394 |
| rs10859536  | A | -0.0537 |
| rs150770891 | C | 0.0962  |
| rs112513447 | G | 0.1015  |
| rs4384443   | T | 0.1271  |
| rs56040016  | A | 0.0988  |
| rs114306    | A | -0.0228 |
| rs111620425 | A | 0.1527  |
| rs12368471  | T | -0.0364 |
| rs60181455  | A | 0.0352  |
| rs56410327  | A | -0.0427 |
| rs2522276   | G | -0.0339 |
| rs143872061 | G | -0.1312 |
| rs117322669 | C | -0.0511 |
| rs17784611  | T | -0.0226 |
| rs71456692  | T | -0.0357 |
| rs79865478  | C | 0.0951  |
| rs7398588   | G | 0.0254  |
| rs117595732 | A | -0.1054 |
| rs144904539 | A | -0.0959 |
| rs1405609   | A | 0.037   |
| rs12426020  | C | 0.0906  |
| rs12578731  | C | -0.0452 |
| rs11610520  | C | -0.0234 |
| rs112752561 | T | 0.1007  |
| rs214683    | A | -0.0287 |
| rs76468953  | T | 0.1268  |
| rs7959545   | G | -0.0282 |
| rs73114365  | G | 0.1223  |
| rs117012086 | A | -0.1368 |
| rs11056825  | G | 0.0274  |
| rs10841648  | C | -0.022  |
| rs76486998  | A | -0.0533 |
| rs6539684   | C | 0.0347  |
| rs118185557 | C | -0.0766 |
| rs12316703  | G | 0.0409  |

|             |   |         |
|-------------|---|---------|
| rs1038666   | G | 0.0208  |
| rs7953970   | A | -0.0245 |
| rs117579777 | T | -0.0967 |
| rs2694992   | G | -0.0309 |
| rs2173910   | A | -0.036  |
| rs34790441  | G | -0.0655 |
| rs11062021  | T | -0.0218 |
| rs147723687 | G | 0.1053  |
| rs79782169  | T | -0.1306 |
| rs34826417  | C | 0.0906  |
| rs148234385 | T | -0.1345 |
| rs10861183  | G | -0.0236 |
| rs12311934  | A | -0.0517 |
| rs35065     | C | 0.0347  |
| rs7965121   | G | 0.0204  |
| rs570162    | C | 0.0299  |
| rs116975628 | T | 0.0669  |
| rs78859196  | G | 0.0863  |
| rs11063950  | G | 0.1318  |
| rs4931263   | T | 0.0547  |
| rs145736613 | T | -0.1219 |
| rs10849652  | T | 0.0248  |
| rs17453719  | C | -0.0396 |
| rs1849780   | T | -0.0222 |
| rs11830497  | C | -0.0245 |
| rs78668878  | T | -0.1316 |
| rs58268363  | G | 0.0926  |
| rs115898245 | A | -0.0974 |
| rs76147150  | G | -0.113  |
| rs3913013   | G | 0.0247  |
| rs12811389  | C | -0.0318 |
| rs773126    | A | 0.0388  |
| rs117464487 | A | 0.1529  |
| rs147951872 | A | -0.0607 |
| rs4767303   | T | 0.0229  |
| rs9669266   | A | 0.0214  |
| rs144945702 | G | -0.0549 |
| rs140000655 | G | 0.1014  |
| rs73186234  | A | -0.1691 |
| rs75500485  | T | -0.072  |
| rs117118291 | A | 0.1194  |
| rs75440460  | C | 0.1217  |
| rs2219875   | T | -0.0554 |
| rs79050315  | G | -0.0338 |
| rs140203209 | C | 0.0663  |
| rs12367974  | C | 0.0272  |
| rs68046549  | G | -0.0206 |

|             |   |         |
|-------------|---|---------|
| rs118162036 | T | 0.1245  |
| rs61937046  | A | 0.0482  |
| rs12581822  | T | -0.0226 |
| rs1479458   | A | 0.0242  |
| rs149520932 | G | -0.0786 |
| rs74434244  | C | 0.0712  |
| rs7301497   | A | 0.1029  |
| rs12820376  | G | -0.0303 |
| rs71181446  | A | -0.0587 |
| rs117227894 | G | 0.0532  |
| rs10842281  | G | 0.0218  |
| rs113642891 | C | 0.1003  |
| rs7132481   | A | 0.079   |
| rs79252645  | T | 0.0736  |
| rs148043953 | A | -0.1679 |
| rs112651361 | G | 0.0542  |
| rs11106315  | T | -0.0371 |
| rs117608922 | C | -0.1465 |
| rs118095711 | T | -0.0964 |
| rs1532103   | A | -0.0322 |
| rs66463142  | C | -0.0226 |
| rs2733839   | C | 0.082   |
| rs7953523   | G | 0.1214  |
| rs4760606   | C | 0.0216  |
| rs10505952  | A | -0.0604 |
| rs56220052  | C | 0.074   |
| rs7138373   | G | -0.024  |
| rs11056762  | C | 0.0525  |
| rs144523221 | T | 0.1038  |
| rs7303681   | A | -0.0723 |
| rs4996094   | A | 0.0583  |
| rs12809581  | C | -0.0307 |
| rs758170    | T | 0.0225  |
| rs4426201   | G | 0.1163  |
| rs112211708 | A | -0.067  |
| rs141150811 | A | -0.0521 |
| rs75262846  | T | -0.0798 |
| rs78335055  | A | -0.1568 |
| rs77305839  | T | -0.1107 |
| rs12314123  | A | 0.036   |
| rs56951720  | A | 0.0646  |
| rs145425371 | G | 0.0921  |
| rs78432840  | G | 0.0838  |
| rs73166613  | A | 0.0728  |
| rs1499907   | C | 0.0244  |
| rs2727730   | C | 0.0206  |
| rs11183872  | T | -0.0608 |

|             |   |         |
|-------------|---|---------|
| rs112551636 | T | -0.133  |
| rs11062941  | C | 0.0311  |
| rs113620768 | G | -0.0537 |
| rs118155018 | A | -0.0945 |
| rs221103    | C | 0.0234  |
| rs76714924  | T | -0.07   |
| rs34058818  | A | 0.1177  |
| rs11060572  | G | 0.0715  |
| rs1731541   | G | 0.0197  |
| rs7315426   | G | 0.1254  |
| rs11111586  | T | -0.0352 |
| rs144982479 | A | -0.0697 |
| rs112035146 | C | -0.1375 |
| rs117308781 | T | 0.0694  |
| rs113000366 | G | -0.081  |
| rs139076549 | G | 0.1582  |
| rs117136477 | C | -0.1339 |
| rs1972067   | G | -0.0378 |
| rs61930262  | G | 0.0608  |
| rs117851314 | C | 0.1382  |
| rs56316323  | T | -0.0934 |
| rs2769449   | C | 0.0342  |
| rs825471    | G | 0.0314  |
| rs12424162  | C | -0.0218 |
| rs118184191 | T | -0.0688 |
| rs4303283   | C | 0.0269  |
| rs116845549 | T | 0.1278  |
| rs12307273  | C | -0.0242 |
| rs73075759  | A | 0.0293  |
| rs7980587   | T | -0.0302 |
| rs74822983  | A | 0.1038  |
| rs61923715  | A | 0.0793  |
| rs7315586   | G | 0.0226  |
| rs142165170 | G | 0.113   |
| rs117229752 | C | 0.1397  |
| rs1403389   | A | 0.0267  |
| rs59446606  | C | -0.0249 |
| rs76670952  | A | 0.0882  |
| rs1152954   | G | 0.0224  |
| rs60366862  | A | 0.0791  |
| rs78266652  | T | -0.0523 |
| rs75779186  | A | 0.053   |
| rs78369956  | T | 0.0592  |
| rs12813576  | A | 0.0281  |
| rs10843776  | G | -0.0294 |
| rs12425714  | G | 0.1457  |
| rs976308    | A | -0.0205 |

|             |   |         |
|-------------|---|---------|
| rs75786626  | T | 0.1036  |
| rs11113772  | A | -0.0291 |
| rs142099211 | C | 0.1288  |
| rs1991458   | A | -0.0529 |
| rs3853623   | T | 0.0312  |
| rs111725591 | T | -0.0983 |
| rs80301154  | A | 0.0733  |
| rs12581782  | A | 0.0624  |
| rs35038619  | T | 0.0765  |
| rs147324824 | G | 0.1308  |
| rs278902    | G | -0.0545 |
| rs4149578   | T | 0.0378  |
| rs1800973   | A | 0.0491  |
| rs146094919 | A | 0.1198  |
| rs4762075   | T | 0.0211  |
| rs10859966  | C | -0.0237 |
| rs17040551  | G | -0.0216 |
| rs2467466   | G | 0.0383  |
| rs75659023  | C | -0.0911 |
| rs4964534   | T | -0.0281 |
| rs75726013  | A | -0.0982 |
| rs1006338   | G | 0.0286  |
| rs17366764  | A | 0.0586  |
| rs11174480  | T | 0.1764  |
| rs12301767  | G | 0.0759  |
| rs11060741  | T | -0.0262 |
| rs12367250  | C | 0.0218  |
| rs10774962  | A | 0.0218  |
| rs7485690   | T | -0.0238 |
| rs1144958   | G | -0.0369 |
| rs118178871 | A | 0.1539  |
| rs7959876   | C | 0.0275  |
| rs16930331  | T | 0.0537  |
| rs77834373  | A | -0.0644 |
| rs75900967  | T | -0.0423 |
| rs75699069  | C | 0.1524  |
| rs1653608   | A | 0.132   |
| rs17819152  | G | -0.059  |
| rs12369004  | G | 0.0948  |
| rs73162612  | T | 0.0458  |
| rs3782631   | T | -0.0209 |
| rs11049355  | A | 0.0841  |
| rs9795918   | T | -0.0244 |
| rs117215173 | G | -0.1394 |
| rs2011637   | C | 0.0227  |
| rs117993290 | T | 0.1428  |
| rs1484008   | T | -0.02   |

|             |   |         |
|-------------|---|---------|
| rs4765710   | A | -0.0232 |
| rs144543878 | G | 0.0797  |
| rs12425247  | C | 0.0335  |
| rs11561325  | A | -0.1166 |
| rs113791197 | T | -0.0888 |
| rs55759660  | T | 0.0345  |
| rs200786    | C | -0.0335 |
| rs7486212   | C | -0.0251 |
| rs11047025  | C | -0.0639 |
| rs111833211 | C | -0.0855 |
| rs1265746   | A | 0.1083  |
| rs12310341  | A | -0.0376 |
| rs61943419  | T | -0.0856 |
| rs11060801  | A | 0.0333  |
| rs35934161  | A | -0.0806 |
| rs76412127  | T | -0.0443 |
| rs79218506  | T | 0.0474  |
| rs117469404 | C | 0.0803  |
| rs9668335   | C | -0.0276 |
| rs4763734   | A | 0.0372  |
| rs117064872 | A | -0.1323 |
| rs1258276   | A | -0.0206 |
| rs10849642  | T | 0.0332  |
| rs77966432  | T | 0.0431  |
| rs117374200 | A | 0.0954  |
| rs11053770  | C | 0.0255  |
| rs16930371  | G | -0.0254 |
| rs80190234  | A | -0.0883 |
| rs141342392 | T | 0.0712  |
| rs10773118  | G | -0.0221 |
| rs9658536   | A | 0.0345  |
| rs74528771  | C | -0.0486 |
| rs10880887  | T | 0.021   |
| rs77663311  | G | 0.0649  |
| rs12310930  | G | -0.0437 |
| rs10842181  | T | -0.0225 |
| rs1820497   | G | 0.0486  |
| rs7135672   | C | 0.0951  |
| rs7973427   | C | -0.0231 |
| rs10505904  | A | 0.0248  |
| rs2300141   | C | 0.0396  |
| rs4931150   | T | 0.0225  |
| rs17123362  | A | -0.0485 |
| rs12424263  | C | 0.0284  |
| rs1169289   | G | -0.0207 |
| rs4486711   | T | -0.0243 |
| rs150694247 | T | 0.0665  |

|             |   |         |
|-------------|---|---------|
| rs144352760 | A | 0.0711  |
| rs73063908  | A | 0.0495  |
| rs11044305  | C | -0.0461 |
| rs140278620 | C | 0.1296  |
| rs146393823 | T | -0.1217 |
| rs11045204  | A | -0.0729 |
| rs11052551  | A | 0.0643  |
| rs145067794 | C | 0.0645  |
| rs76849243  | G | 0.1055  |
| rs35989743  | A | 0.0904  |
| rs17223797  | A | 0.0778  |
| rs116895289 | A | -0.1003 |
| rs2304275   | C | 0.0235  |
| rs7955865   | A | -0.0219 |
| rs10850359  | C | 0.0324  |
| rs10849778  | A | -0.0288 |
| rs10862407  | C | 0.021   |
| rs150443880 | A | -0.1209 |
| rs73196089  | C | 0.0345  |
| rs1155457   | T | -0.0211 |
| rs117881774 | A | -0.0906 |
| rs11176201  | C | 0.0235  |
| rs56295500  | G | 0.0481  |
| rs3858691   | A | 0.0228  |
| rs740895    | C | -0.021  |
| rs141729633 | A | 0.1571  |
| rs79712123  | G | -0.1318 |
| rs117785369 | A | -0.1064 |
| rs147895606 | T | 0.0946  |
| rs74946240  | A | 0.1072  |
| rs701082    | G | 0.031   |
| rs112158683 | T | -0.0939 |
| rs78969031  | G | 0.0804  |
| rs7486402   | C | 0.0359  |
| rs17463507  | A | -0.1325 |
| rs113595963 | T | 0.111   |
| rs61946476  | T | -0.0265 |
| rs11180505  | T | -0.0384 |
| rs73103489  | T | 0.0409  |
| rs17653326  | A | 0.1026  |
| rs11055371  | C | 0.0418  |
| rs113817025 | T | 0.0457  |
| rs2887022   | G | -0.0242 |
| rs809794    | G | -0.0197 |
| rs7302306   | T | -0.023  |
| rs116442715 | T | 0.1527  |
| rs11049109  | C | -0.0543 |

|             |   |         |
|-------------|---|---------|
| rs76312693  | G | -0.0696 |
| rs112897518 | C | -0.0852 |
| rs147138891 | C | -0.0856 |
| rs11106461  | A | -0.023  |
| rs73156692  | A | 0.0239  |
| rs142147484 | T | -0.1112 |
| rs143442768 | G | 0.1378  |
| rs61940599  | G | -0.0567 |
| rs2462936   | T | -0.0368 |
| rs145174744 | A | 0.1088  |
| rs3751322   | C | -0.0294 |
| rs76814992  | A | 0.1248  |
| rs2124538   | C | 0.0374  |
| rs10161110  | T | -0.0545 |
| rs34906074  | G | 0.0818  |
| rs11109276  | G | -0.0933 |
| rs1650038   | A | -0.0552 |
| rs6582434   | C | -0.0246 |
| rs1468196   | C | 0.0305  |
| rs11066426  | T | 0.0988  |
| rs2388990   | C | 0.024   |
| rs142641190 | T | 0.1264  |
| rs117360077 | C | -0.1805 |
| rs148276076 | A | 0.0879  |
| rs73043366  | A | -0.0465 |
| rs61928260  | A | 0.0544  |
| rs116773219 | T | -0.1295 |
| rs10848380  | G | -0.0266 |
| rs144290688 | T | -0.1291 |
| rs118120436 | A | 0.1307  |
| rs3932884   | A | -0.0212 |
| rs137871566 | C | 0.0431  |
| rs4074773   | T | 0.0206  |
| rs7302771   | T | 0.1014  |
| rs61931188  | A | -0.0399 |
| rs10843858  | A | -0.0591 |
| rs142763468 | C | -0.0366 |
| rs12305097  | C | -0.0205 |
| rs6538075   | T | -0.0233 |
| rs35334720  | G | 0.0555  |
| rs76531168  | G | -0.032  |
| rs118164840 | A | -0.0695 |
| rs2291857   | G | 0.0238  |
| rs1380146   | A | 0.0204  |
| rs1153188   | T | -0.0236 |
| rs76781151  | G | -0.102  |
| rs1259722   | A | -0.0221 |



|             |   |         |
|-------------|---|---------|
| rs141789344 | A | -0.1611 |
| rs79169843  | T | 0.0465  |
| rs11059266  | T | 0.034   |
| rs4350408   | A | 0.0475  |
| rs11046751  | C | -0.0507 |
| rs76507201  | T | -0.0384 |
| rs113644849 | G | 0.1394  |
| rs17533220  | T | -0.0976 |
| rs4242897   | T | 0.0207  |
| rs61957795  | G | -0.0435 |
| rs11831131  | A | 0.0721  |
| rs117623286 | T | -0.0572 |
| rs7973708   | G | 0.0311  |
| rs73141693  | A | -0.0826 |
| rs113755531 | C | 0.118   |
| rs79897392  | A | 0.0971  |
| rs2695300   | G | -0.02   |
| rs4883278   | A | 0.0279  |
| rs146874663 | A | 0.0391  |
| rs4759044   | C | 0.0204  |
| rs61938400  | T | -0.1086 |
| rs7135281   | T | 0.0213  |
| rs116917670 | A | 0.1359  |
| rs117414714 | A | 0.0559  |
| rs7305326   | A | -0.0562 |
| rs145035636 | A | -0.1667 |
| rs17832390  | C | -0.0956 |
| rs74842086  | G | -0.0952 |
| rs35364810  | C | -0.0774 |
| rs34275919  | T | 0.0238  |
| rs117055390 | C | -0.0662 |
| rs75047192  | G | -0.0781 |
| rs73225455  | C | 0.0695  |
| rs78240911  | T | -0.0307 |
| rs78267018  | C | -0.1305 |
| rs73128041  | T | 0.0619  |
| rs146706381 | G | 0.0845  |
| rs12825501  | C | -0.0649 |
| rs77827196  | C | 0.0803  |
| rs117540283 | A | 0.1171  |
| rs79186269  | C | 0.0869  |
| rs112696980 | C | 0.0381  |
| rs13378019  | C | 0.0268  |
| rs7975942   | T | 0.0215  |
| rs141799959 | T | 0.0421  |
| rs11063699  | G | -0.0223 |
| rs115596217 | G | -0.0521 |

|             |   |         |
|-------------|---|---------|
| rs11180264  | A | -0.0202 |
| rs12815834  | A | 0.0206  |
| rs4379889   | A | 0.0224  |
| rs116850878 | A | 0.074   |
| rs117483361 | C | -0.1504 |
| rs1125920   | C | -0.0354 |
| rs12578114  | G | -0.0389 |
| rs3742088   | C | -0.0327 |
| rs61495985  | G | -0.1323 |
| rs17705552  | A | -0.0238 |
| rs11108884  | A | 0.0222  |
| rs77635569  | T | -0.0568 |
| rs140629435 | A | 0.0938  |
| rs11613643  | G | -0.0342 |
| rs7301525   | T | 0.1049  |
| rs56076700  | A | -0.0415 |
| rs11838137  | C | 0.0432  |
| rs7137136   | C | 0.0217  |
| rs117366976 | A | -0.1106 |
| rs12371237  | A | 0.0204  |
| rs56011442  | A | 0.0381  |
| rs11180650  | G | -0.047  |
| rs75989362  | G | 0.0337  |
| rs10875843  | A | -0.0431 |
| rs72648028  | A | 0.09    |
| rs12312044  | T | 0.026   |
| rs79352068  | A | -0.0602 |
| rs78196040  | A | -0.0581 |
| rs3886972   | A | 0.0521  |
| rs12422853  | A | 0.0218  |
| rs12582168  | C | 0.0327  |
| rs75616205  | G | -0.128  |
| rs140975913 | G | -0.1248 |
| rs138102313 | T | -0.154  |
| rs10842783  | T | 0.0192  |
| rs61908948  | G | -0.032  |
| rs71464253  | C | -0.0242 |
| rs12299509  | G | -0.0223 |
| rs143340249 | T | 0.0701  |
| rs138580076 | C | -0.102  |
| rs148671801 | T | 0.0902  |
| rs74641901  | A | 0.096   |
| rs10847413  | C | 0.0512  |
| rs77587378  | T | 0.1088  |
| rs10902517  | T | 0.0221  |
| rs10128775  | A | 0.024   |
| rs11061302  | A | 0.1387  |

|             |   |         |
|-------------|---|---------|
| rs2466566   | C | -0.0233 |
| rs12301440  | A | 0.0396  |
| rs142695069 | T | 0.1219  |
| rs113296670 | G | 0.0574  |
| rs2291327   | G | 0.0381  |
| rs117336370 | T | -0.0519 |
| rs78978155  | A | 0.1764  |
| rs73109020  | A | 0.0249  |
| rs10783802  | A | 0.0205  |
| rs79845230  | A | -0.0762 |
| rs12426028  | T | -0.085  |
| rs28815546  | T | 0.0896  |
| rs144303947 | A | 0.112   |
| rs75298995  | T | -0.0615 |
| rs809285    | A | -0.0203 |
| rs11613572  | G | -0.032  |
| rs117584874 | A | 0.0762  |
| rs11181062  | T | 0.0323  |
| rs145098651 | G | -0.1396 |
| rs2086777   | A | 0.035   |
| rs2933233   | G | 0.0203  |
| rs941225    | T | 0.0275  |
| rs2374508   | A | -0.0207 |
| rs59062775  | A | 0.0383  |
| rs2239032   | A | -0.0315 |
| rs2069732   | G | -0.0562 |
| rs77669574  | C | 0.1144  |
| rs12827126  | A | -0.0246 |
| rs117082972 | G | -0.0873 |
| rs73119219  | A | 0.0632  |
| rs116923619 | G | -0.1218 |
| rs11059265  | G | -0.0461 |
| rs117646836 | G | 0.0731  |
| rs73127665  | T | -0.0656 |
| rs12300705  | C | 0.1315  |
| rs117270443 | T | 0.0439  |
| rs12366396  | C | -0.0289 |
| rs402590    | C | -0.0314 |
| rs73095874  | C | 0.1144  |
| rs75356059  | A | 0.0385  |
| rs1805775   | C | -0.034  |
| rs148055757 | A | -0.0772 |
| rs74954076  | G | -0.0335 |
| rs12826659  | A | -0.0562 |
| rs148896036 | G | 0.145   |
| rs476087    | T | 0.0902  |
| rs149380228 | G | 0.0594  |

|             |   |         |
|-------------|---|---------|
| rs73229358  | T | -0.0447 |
| rs77577754  | G | 0.0741  |
| rs2579088   | C | 0.0217  |
| rs10849204  | A | -0.0207 |
| rs80341059  | A | -0.0837 |
| rs118006188 | T | -0.0771 |
| rs11183923  | A | -0.0274 |
| rs138157587 | T | 0.0799  |
| rs79512519  | A | 0.0485  |
| rs74625383  | G | 0.0534  |
| rs73065442  | G | -0.0702 |
| rs11067486  | T | -0.02   |
| rs117619884 | G | 0.1091  |
| rs686538    | A | -0.0304 |
| rs139611229 | G | 0.0873  |
| rs73041042  | C | 0.0657  |
| rs71452010  | A | 0.1258  |
| rs78908917  | C | -0.0958 |
| rs117101860 | A | 0.0578  |
| rs117295039 | T | 0.0668  |
| rs10774717  | A | 0.0224  |
| rs79134558  | G | -0.0402 |
| rs138865002 | C | -0.06   |
| rs10778080  | A | 0.0191  |
| rs11056671  | G | -0.0345 |
| rs144856564 | A | -0.0998 |
| rs146773651 | T | -0.129  |
| rs7968499   | A | 0.0201  |
| rs116871479 | C | -0.1089 |
| rs150546296 | T | 0.1108  |
| rs7980629   | A | 0.0372  |
| rs2345781   | C | -0.0513 |
| rs147972235 | C | 0.0976  |
| rs145469717 | T | 0.1802  |
| rs11108772  | A | -0.0213 |
| rs146561164 | T | 0.0719  |
| rs12318969  | G | 0.0606  |
| rs55994708  | A | -0.0757 |
| rs1550777   | A | 0.0212  |
| rs541452    | C | -0.0232 |
| rs117698795 | C | 0.127   |
| rs116988326 | C | 0.0807  |
| rs17779858  | T | -0.0493 |
| rs117044696 | G | 0.0908  |
| rs142909241 | G | -0.1252 |
| rs111715065 | A | 0.112   |
| rs149280643 | C | 0.1342  |

|             |   |         |
|-------------|---|---------|
| rs28460499  | C | -0.0296 |
| rs583766    | G | -0.0202 |
| rs11054799  | T | 0.0293  |
| rs9332955   | A | 0.1194  |
| rs6487491   | T | 0.0797  |
| rs11112057  | G | -0.0227 |
| rs76754530  | A | 0.0791  |
| rs11112522  | G | -0.0244 |
| rs74990107  | C | 0.1283  |
| rs141789068 | C | 0.0884  |
| rs73048822  | C | 0.0756  |
| rs2268122   | T | -0.0283 |
| rs12582959  | T | 0.0203  |
| rs75959604  | A | 0.0499  |
| rs78968191  | A | 0.1451  |
| rs34654441  | T | -0.0215 |
| rs10772678  | T | -0.0228 |
| rs142132833 | G | -0.1321 |
| rs149120924 | C | 0.0672  |
| rs2239040   | T | -0.1118 |
| rs4765882   | T | 0.0229  |
| rs140431457 | A | -0.1582 |
| rs7308198   | A | 0.0192  |
| rs76550606  | A | -0.082  |
| rs864893    | A | 0.098   |
| rs141898297 | C | -0.0924 |
| rs74567991  | A | -0.08   |
| rs116892571 | T | -0.1151 |
| rs117619854 | A | -0.0566 |
| rs78958072  | G | 0.1112  |
| rs11062468  | G | -0.0647 |
| rs149399016 | G | -0.0803 |
| rs10507253  | T | 0.0212  |
| rs11615031  | T | -0.0859 |
| rs7302869   | T | -0.1241 |
| rs4882806   | C | -0.1056 |
| rs11047506  | A | -0.1051 |
| rs3759097   | T | -0.0197 |
| rs79178170  | T | -0.098  |
| rs111683341 | T | 0.045   |
| rs117380055 | A | -0.1246 |
| rs61928473  | A | 0.0235  |
| rs7968735   | T | -0.0195 |
| rs12369637  | C | 0.072   |
| rs79654792  | A | 0.1837  |
| rs144397719 | T | -0.1021 |
| rs10784577  | C | 0.0197  |

|             |   |         |
|-------------|---|---------|
| rs76212083  | A | -0.057  |
| rs117474138 | G | -0.0961 |
| rs79848782  | T | -0.1035 |
| rs2671933   | A | -0.0197 |
| rs3847778   | C | 0.034   |
| rs142605349 | T | 0.1492  |
| rs117157793 | T | 0.056   |
| rs12426636  | G | -0.1116 |
| rs80132994  | T | -0.1409 |
| rs77370475  | C | -0.1539 |
| rs1546190   | T | 0.0246  |
| rs489618    | A | 0.0327  |
| rs1964599   | T | -0.0234 |
| rs7133127   | T | -0.0256 |
| rs11063362  | T | 0.0305  |
| rs61933469  | A | 0.0375  |
| rs75281758  | G | 0.0697  |
| rs74448529  | A | 0.1429  |
| rs76746060  | A | -0.1566 |
| rs112192686 | T | -0.0868 |
| rs10431323  | C | -0.0664 |
| rs117623390 | C | 0.1388  |
| rs80184708  | C | 0.0691  |
| rs2534780   | A | -0.0247 |
| rs12320250  | T | 0.0256  |
| rs16931939  | T | -0.0399 |
| rs76001232  | A | 0.0707  |
| rs141500666 | A | 0.1071  |
| rs12307712  | A | -0.0703 |
| rs35052     | G | 0.0226  |
| rs11182480  | C | 0.0668  |
| rs17026920  | T | -0.0252 |
| rs6488743   | C | 0.0234  |
| rs140180248 | T | 0.055   |
| rs145062351 | T | -0.0651 |
| rs2054724   | A | -0.0427 |
| rs117976000 | C | 0.0638  |
| rs117563983 | A | -0.0951 |
| rs73140118  | C | 0.084   |
| rs6538886   | C | -0.1414 |
| rs1009290   | G | -0.0204 |
| rs2120601   | G | -0.0373 |
| rs117409552 | T | 0.0959  |
| rs10879244  | T | 0.0236  |
| rs7299196   | G | 0.0347  |
| rs954200    | T | -0.0313 |
| rs11608953  | C | -0.0851 |

|             |   |         |
|-------------|---|---------|
| rs144520885 | A | -0.0446 |
| rs323854    | T | 0.0258  |
| rs73136164  | C | 0.0194  |
| rs61935493  | G | -0.0777 |
| rs117593271 | T | 0.0517  |
| rs111108574 | A | 0.028   |
| rs7976171   | T | -0.1099 |
| rs61933118  | A | -0.034  |
| rs7961991   | C | 0.0261  |
| rs841069    | C | -0.1386 |
| rs34316545  | A | 0.1045  |
| rs1671526   | G | -0.0207 |
| rs4130161   | A | -0.0427 |
| rs9330649   | A | -0.0417 |
| rs10777108  | A | -0.0693 |
| rs2374411   | T | 0.0203  |
| rs149952615 | C | -0.0933 |
| rs10784651  | A | -0.0202 |
| rs56339115  | A | 0.0328  |
| rs11610906  | G | 0.0328  |
| rs56199035  | G | -0.0442 |
| rs11063014  | G | -0.1092 |
| rs111675641 | A | 0.1114  |
| rs4963955   | C | 0.076   |
| rs10844086  | G | -0.0213 |
| rs7966311   | G | 0.0401  |
| rs258403    | T | -0.0594 |
| rs75296180  | T | 0.1137  |
| rs76575507  | G | 0.1446  |
| rs74401239  | T | -0.072  |
| rs117478833 | C | 0.116   |
| rs12367097  | C | -0.0258 |
| rs17649152  | C | 0.1423  |
| rs118090735 | G | 0.0775  |
| rs7953197   | T | 0.0659  |
| rs1234002   | T | 0.0226  |
| rs2466552   | G | -0.052  |
| rs6490005   | C | -0.0657 |
| rs3829316   | T | -0.0647 |
| rs4283063   | C | -0.02   |
| rs61919055  | T | -0.0511 |
| rs77369302  | T | 0.057   |
| rs714325    | A | -0.0361 |
| rs74908324  | A | 0.0395  |
| rs77653082  | G | -0.0763 |
| rs1520782   | A | -0.0318 |
| rs140440105 | A | 0.0812  |

|             |   |         |
|-------------|---|---------|
| rs11065730  | T | 0.0618  |
| rs1905421   | T | -0.0316 |
| rs146768325 | T | 0.1006  |
| rs2468303   | C | 0.0229  |
| rs61907782  | T | 0.1022  |
| rs10846175  | G | 0.0197  |
| rs112923360 | T | 0.0795  |
| rs12426376  | G | -0.0465 |
| rs150308651 | C | 0.0826  |
| rs113491111 | G | 0.1419  |
| rs6486806   | T | -0.0192 |
| rs148906932 | T | -0.1385 |
| rs1858886   | A | -0.0188 |
| rs7959319   | C | 0.0996  |
| rs141109475 | C | -0.1323 |
| rs216313    | G | -0.0436 |
| rs7972211   | G | 0.0257  |
| rs74745613  | C | 0.1151  |
| rs11833159  | T | 0.0622  |
| rs10734961  | A | 0.0231  |
| rs11057143  | G | -0.0234 |
| rs7138451   | G | 0.1955  |
| rs73088467  | T | 0.0361  |
| rs1586595   | A | -0.0417 |
| rs708335    | C | 0.0307  |
| rs74111183  | T | -0.0886 |
| rs142177117 | C | -0.0319 |
| rs74829985  | A | -0.0476 |
| rs117504443 | G | -0.1228 |
| rs11178881  | C | 0.1688  |
| rs75998698  | A | 0.0878  |
| rs73056746  | G | -0.0783 |
| rs12424464  | T | -0.0442 |
| rs145716079 | C | -0.1297 |
| rs118100998 | T | 0.0869  |
| rs77473253  | T | -0.064  |
| rs148991777 | G | 0.1293  |
| rs3741943   | A | -0.025  |
| rs11832034  | T | -0.0839 |
| rs76579051  | A | -0.0395 |
| rs12813703  | C | -0.0653 |
| rs10848533  | C | 0.0284  |
| rs117149507 | T | 0.0745  |
| rs55743626  | C | -0.0254 |
| rs630034    | A | -0.0304 |
| rs7316605   | C | 0.0286  |
| rs74950833  | C | -0.0987 |



|             |   |         |
|-------------|---|---------|
| rs10743380  | C | 0.0389  |
| rs145475610 | G | -0.1627 |
| rs2031055   | A | 0.0613  |
| rs7961089   | C | 0.0233  |
| rs73072463  | T | -0.0572 |
| rs7306332   | G | 0.0346  |
| rs11106053  | C | 0.1053  |
| rs11056368  | C | -0.0368 |
| rs146816039 | C | 0.0911  |
| rs7136012   | C | 0.085   |
| rs79114231  | A | -0.0497 |
| rs11109021  | T | -0.0309 |
| rs61937478  | G | 0.0811  |
| rs1534798   | G | -0.0385 |
| rs117842783 | A | 0.1375  |
| rs10773482  | G | -0.0429 |
| rs7306615   | G | -0.035  |
| rs76227078  | G | -0.0247 |
| rs116600481 | C | -0.0996 |
| rs11054489  | C | -0.0527 |
| rs118106076 | T | -0.0737 |
| rs1497241   | C | 0.0202  |
| rs73228155  | A | -0.0476 |
| rs137926455 | G | -0.1155 |
| rs10841858  | A | -0.0217 |
| rs10773971  | G | -0.087  |
| rs146839845 | T | 0.1751  |
| rs143570191 | C | -0.0981 |
| rs117232634 | T | -0.0771 |
| rs12830905  | T | -0.025  |
| rs112399022 | G | -0.039  |
| rs140665338 | A | 0.1186  |
| rs73219325  | A | -0.0458 |
| rs11060941  | T | 0.0216  |
| rs76005710  | C | -0.0748 |
| rs113830515 | G | 0.0579  |
| rs2063508   | T | -0.0193 |
| rs903185    | T | 0.0527  |
| rs6490033   | A | 0.0217  |
| rs55744298  | C | -0.0254 |
| rs79847885  | T | -0.0913 |
| rs11108499  | C | 0.0287  |
| rs7316328   | G | 0.0313  |
| rs75142779  | T | -0.0674 |
| rs12366742  | T | 0.0243  |
| rs11112132  | C | 0.0223  |
| rs10850672  | G | -0.019  |

|             |   |         |
|-------------|---|---------|
| rs78366106  | T | -0.0622 |
| rs61943941  | G | -0.0534 |
| rs7485934   | G | -0.0558 |
| rs73206280  | A | 0.0982  |
| rs61933380  | A | 0.0661  |
| rs10842099  | C | 0.0215  |
| rs726943    | G | -0.0386 |
| rs10784765  | C | -0.0293 |
| rs61935903  | T | -0.0857 |
| rs34353255  | A | -0.101  |
| rs150011876 | A | -0.1875 |
| rs4765231   | T | -0.0281 |
| rs73035260  | T | 0.1189  |
| rs1520836   | C | 0.0294  |
| rs1904552   | A | -0.0275 |
| rs12368829  | G | 0.0654  |
| rs61916033  | G | 0.0434  |
| rs76080889  | T | 0.0605  |
| rs112814955 | A | 0.0574  |
| rs79659566  | A | 0.0505  |
| rs7956259   | A | 0.0198  |
| rs345948    | G | 0.0259  |
| rs117237767 | G | -0.097  |
| rs4765598   | T | -0.0191 |
| rs7300297   | A | -0.0362 |
| rs4766362   | T | -0.0207 |
| rs7967283   | A | 0.0197  |
| rs2079864   | C | 0.0499  |
| rs214687    | T | -0.0807 |
| rs11175443  | G | 0.0186  |
| rs11058145  | T | -0.0591 |
| rs10848971  | A | 0.0287  |
| rs4583062   | A | -0.0431 |
| rs1351229   | A | 0.0185  |
| rs11169872  | T | 0.0367  |
| rs7972755   | C | -0.0598 |
| rs10744466  | G | 0.0204  |
| rs76120895  | A | 0.0415  |
| rs76218704  | A | -0.0815 |
| rs141619508 | T | 0.1868  |
| rs11178264  | G | -0.0762 |
| rs117167446 | T | 0.051   |
| rs180434    | T | 0.0259  |
| rs4767426   | T | 0.0196  |
| rs77006880  | A | 0.0635  |
| rs11045649  | T | -0.0212 |
| rs11612440  | T | -0.0283 |

|             |   |         |
|-------------|---|---------|
| rs4640007   | T | 0.0189  |
| rs59097587  | C | 0.0609  |
| rs77472605  | T | 0.0782  |
| rs718802    | A | 0.0918  |
| rs1630694   | G | 0.0637  |
| rs112664491 | G | -0.0311 |
| rs7961496   | G | 0.0243  |
| rs1796017   | C | 0.0228  |
| rs138004168 | G | -0.0797 |
| rs7302985   | A | -0.0197 |
| rs2163892   | G | -0.0236 |
| rs34290907  | T | 0.0187  |
| rs56258124  | G | 0.1299  |
| rs1996315   | G | 0.02    |
| rs55720226  | A | 0.0359  |
| rs117863863 | G | -0.0493 |
| rs2127549   | C | -0.0475 |
| rs10161104  | C | -0.0203 |
| rs10773514  | G | -0.02   |
| rs35728     | A | -0.0215 |
| rs10400542  | A | 0.0315  |
| rs11615880  | G | 0.0665  |
| rs118052319 | A | 0.1134  |
| rs148971615 | A | -0.0946 |
| rs12367892  | C | 0.0748  |
| rs34369666  | C | -0.0218 |
| rs11182978  | C | -0.0368 |
| rs56177950  | T | -0.1357 |
| rs71452644  | T | -0.0293 |
| rs76084431  | T | 0.0665  |
| rs75118615  | T | -0.0792 |
| rs11058417  | G | -0.0783 |
| rs28990724  | C | -0.0307 |
| rs57223688  | T | 0.0673  |
| rs1918144   | C | -0.0188 |
| rs150174108 | A | 0.0835  |
| rs117170737 | G | -0.0793 |
| rs1444206   | A | 0.0262  |
| rs139949576 | A | 0.0817  |
| rs956576    | C | -0.0213 |
| rs2286599   | A | 0.0343  |
| rs10842336  | C | 0.0259  |
| rs2730770   | A | 0.0279  |
| rs79810568  | G | 0.0923  |
| rs12582192  | G | 0.0688  |
| rs7972864   | T | -0.0326 |
| rs73057709  | T | 0.0701  |

|             |   |         |
|-------------|---|---------|
| rs11502959  | T | 0.0668  |
| rs11170867  | C | -0.0288 |
| rs144267759 | A | 0.0691  |
| rs58527124  | C | -0.0205 |
| rs61938844  | A | 0.0804  |
| rs11609521  | G | 0.0275  |
| rs141930600 | A | 0.0769  |
| rs79246548  | A | -0.0434 |
| rs584844    | T | -0.0455 |
| rs112947350 | T | 0.0865  |
| rs4981042   | A | 0.022   |
| rs4767238   | T | -0.02   |
| rs75839850  | C | -0.0596 |
| rs17318883  | A | 0.043   |
| rs147897203 | A | 0.1075  |
| rs75905196  | T | -0.1037 |
| rs74340456  | C | 0.1014  |
| rs117933676 | A | 0.0788  |
| rs10879975  | A | -0.1378 |
| rs12819853  | T | -0.0314 |
| rs12372417  | G | -0.0244 |
| rs11111024  | A | 0.0312  |
| rs17113809  | G | -0.0293 |
| rs4882714   | A | -0.0254 |
| rs17459725  | T | 0.0761  |
| rs117141360 | G | -0.0631 |
| rs17717761  | T | -0.0927 |
| rs78540170  | G | 0.0586  |
| rs34406152  | G | -0.0271 |
| rs631531    | C | 0.0235  |
| rs10773655  | T | -0.019  |
| rs76086858  | A | 0.0813  |
| rs10778450  | A | -0.0184 |
| rs1920943   | G | 0.0308  |
| rs969014    | C | 0.0426  |
| rs10877767  | T | -0.0237 |
| rs1078604   | T | -0.0373 |
| rs11110446  | G | -0.061  |
| rs7136752   | C | 0.0417  |
| rs79087694  | C | 0.0675  |
| rs11613055  | A | -0.0277 |
| rs139882264 | C | -0.1073 |
| rs117772492 | T | -0.0824 |
| rs10779130  | T | -0.0228 |
| rs73203745  | T | -0.1277 |
| rs142038633 | G | -0.0815 |
| rs343086    | C | -0.0209 |

|             |   |         |
|-------------|---|---------|
| rs150049982 | T | 0.0814  |
| rs77103948  | T | 0.0566  |
| rs7294433   | T | -0.0258 |
| rs10745929  | A | -0.0187 |
| rs7970550   | T | -0.0216 |
| rs7974402   | T | 0.027   |
| rs7962380   | A | -0.0192 |
| rs7295050   | G | -0.0242 |
| rs73033675  | A | -0.0559 |
| rs77160306  | T | -0.1296 |
| rs163691    | C | 0.0848  |
| rs77097822  | C | -0.0681 |
| rs1434703   | G | -0.0192 |
| rs7980066   | A | 0.0293  |
| rs11175254  | T | 0.077   |
| rs112135154 | T | -0.086  |
| rs117770114 | G | 0.0812  |
| rs2895790   | G | -0.0345 |
| rs35148504  | C | 0.0209  |
| rs1015287   | A | 0.0221  |
| rs55869310  | C | 0.1204  |
| rs61941876  | A | 0.0835  |
| rs1805472   | G | 0.0211  |
| rs74464155  | G | 0.1369  |
| rs11173460  | C | 0.0386  |
| rs74349579  | A | 0.0629  |
| rs11060614  | A | -0.0657 |
| rs12832793  | C | 0.0235  |
| rs11045355  | G | 0.0294  |
| rs7296248   | C | -0.019  |
| rs149941807 | G | 0.1542  |
| rs80127988  | A | 0.0542  |
| rs4765593   | A | -0.0568 |
| rs79256418  | T | 0.0554  |
| rs11047198  | A | 0.0199  |
| rs17541461  | A | -0.0897 |
| rs17034336  | A | -0.0697 |
| rs112235289 | C | 0.0728  |
| rs74090516  | T | 0.13    |
| rs7305679   | T | -0.0271 |
| rs10862476  | G | 0.0193  |
| rs10843439  | A | 0.0293  |
| rs11169962  | G | 0.0879  |
| rs12828249  | C | -0.0233 |
| rs2712531   | C | 0.0216  |
| rs111695520 | A | 0.0795  |
| rs34135424  | A | -0.0666 |

|             |   |         |
|-------------|---|---------|
| rs144283626 | A | 0.0882  |
| rs10876493  | A | 0.073   |
| rs75150070  | A | -0.068  |
| rs10841449  | C | 0.0379  |
| rs150953476 | G | -0.153  |
| rs7958974   | G | -0.0202 |
| rs76005250  | A | -0.0473 |
| rs7299771   | C | 0.0725  |
| rs12818826  | C | 0.0384  |
| rs11609420  | A | -0.0254 |
| rs113135748 | A | 0.1342  |
| rs117819266 | A | -0.0861 |
| rs117827897 | C | -0.1821 |
| rs117671741 | T | -0.0812 |
| rs146017060 | G | -0.0785 |
| rs7489169   | A | 0.019   |
| rs138417394 | C | 0.0608  |
| rs78580580  | C | -0.0817 |
| rs12231332  | A | 0.0245  |
| rs117460450 | T | 0.1015  |
| rs2686570   | A | 0.0253  |
| rs10735834  | T | 0.0189  |
| rs77222944  | C | 0.1261  |
| rs77601016  | C | -0.055  |
| rs520809    | C | -0.0199 |
| rs34537498  | G | -0.0846 |
| rs35805727  | T | 0.0821  |
| rs111738761 | A | -0.0793 |
| rs12370425  | G | 0.1103  |
| rs735010    | C | -0.0205 |
| rs145322726 | A | 0.1009  |
| rs117204135 | T | 0.1011  |
| rs4031159   | T | -0.0191 |
| rs35592690  | A | -0.025  |
| rs1513095   | T | -0.026  |
| rs79651079  | C | -0.1622 |
| rs55754570  | G | -0.0203 |
| rs147423408 | A | 0.0689  |
| rs71461359  | A | 0.0674  |
| rs1549503   | T | -0.0196 |
| rs12823068  | G | -0.0285 |
| rs73085294  | T | -0.0656 |
| rs11181165  | A | -0.0274 |
| rs117411228 | G | -0.0931 |
| rs10844866  | A | -0.0204 |
| rs141992408 | C | -0.0506 |
| rs7305769   | G | -0.0184 |

|             |   |         |
|-------------|---|---------|
| rs4759845   | G | 0.0232  |
| rs7970427   | A | 0.0258  |
| rs11052771  | C | -0.0224 |
| rs10879027  | A | 0.0546  |
| rs542689    | C | -0.0198 |
| rs11612124  | G | 0.0233  |
| rs3782540   | C | 0.0187  |
| rs11609130  | C | -0.0195 |
| rs141303581 | G | -0.0748 |
| rs2936654   | G | 0.0751  |
| rs2700062   | C | -0.0194 |
| rs147120636 | C | 0.127   |
| rs10848147  | T | 0.0214  |
| rs61941572  | C | 0.0277  |
| rs10878492  | G | -0.0233 |
| rs74992116  | G | 0.1353  |
| rs567486    | T | 0.0198  |
| rs11058241  | T | 0.0822  |
| rs7309149   | G | -0.0231 |
| rs11609345  | C | -0.1084 |
| rs7959190   | T | 0.0614  |
| rs61926266  | T | -0.0239 |
| rs313318    | G | 0.0197  |
| rs77763039  | G | 0.0593  |
| rs117991193 | G | -0.0977 |
| rs116358501 | G | -0.0697 |
| rs34907895  | T | -0.0307 |
| rs12315415  | C | 0.0804  |
| rs60203548  | C | 0.0374  |
| rs7958567   | T | 0.0945  |
| rs10860747  | T | 0.045   |
| rs61939069  | A | 0.0391  |
| rs1275582   | C | -0.0209 |
| rs7133703   | T | -0.0908 |
| rs3867152   | C | 0.1108  |
| rs9805114   | G | 0.0255  |
| rs73053523  | C | -0.0891 |
| rs11525539  | C | 0.0464  |
| rs1865172   | A | 0.0296  |
| rs76153056  | C | -0.0653 |
| rs76027544  | A | -0.0918 |
| rs117691441 | C | -0.0676 |
| rs10219485  | A | 0.0276  |
| rs7972506   | C | -0.0974 |
| rs78149599  | T | 0.0698  |
| rs5005942   | C | -0.0374 |
| rs11059338  | T | 0.0185  |

|             |   |         |
|-------------|---|---------|
| rs116849298 | A | -0.1378 |
| rs7957408   | G | 0.0239  |
| rs4760980   | C | -0.0212 |
| rs7969659   | C | -0.0185 |
| rs11062697  | A | -0.0293 |
| rs1116796   | G | 0.0653  |
| rs118074862 | G | 0.084   |
| rs79032386  | T | 0.1163  |
| rs2600935   | G | -0.0379 |
| rs74419978  | C | -0.0874 |
| rs73035911  | G | -0.0749 |
| rs146758586 | C | -0.0878 |
| rs831683    | C | 0.0218  |
| rs117806493 | A | 0.0667  |
| rs11615823  | C | -0.0593 |
| rs10735020  | C | -0.0205 |
| rs113021842 | C | 0.0372  |
| rs4764980   | G | -0.0184 |
| rs68091224  | A | 0.0598  |
| rs77932005  | C | 0.0317  |
| rs12320245  | A | 0.0252  |
| rs113676073 | A | -0.069  |
| rs140820682 | G | -0.1587 |
| rs1476733   | T | -0.0552 |
| rs61937871  | T | -0.0912 |
| rs149815552 | A | -0.0986 |
| rs79931264  | A | 0.0476  |
| rs11057529  | C | -0.0201 |
| rs17728942  | A | 0.0274  |
| rs76362380  | A | 0.0457  |
| rs61939395  | A | 0.1093  |
| rs5742696   | G | 0.0583  |
| rs138909522 | A | -0.1252 |
| rs61393412  | C | 0.0243  |
| rs2370411   | C | -0.0222 |
| rs16912867  | C | 0.0602  |
| rs73201935  | T | -0.0622 |
| rs146346305 | A | -0.1654 |
| rs2283280   | C | 0.0316  |
| rs2302365   | A | 0.0232  |
| rs4415826   | C | -0.0449 |
| rs4765862   | C | -0.0215 |
| rs73120395  | G | -0.0929 |
| rs117405110 | G | 0.0897  |
| rs34017628  | G | -0.0186 |
| rs79645135  | G | -0.0326 |
| rs140614684 | C | 0.1254  |



|             |   |         |
|-------------|---|---------|
| rs17836993  | A | -0.0531 |
| rs10773052  | G | 0.0292  |
| rs10848030  | A | 0.0272  |
| rs113577925 | A | -0.1073 |
| rs2013301   | G | -0.0192 |
| rs117675158 | C | 0.1261  |
| rs112268167 | A | 0.0653  |
| rs74503836  | C | 0.0402  |
| rs117190884 | G | -0.1014 |
| rs56214018  | G | -0.03   |
| rs117339363 | T | 0.1115  |
| rs11067521  | T | 0.0463  |
| rs10774301  | T | 0.0213  |
| rs117849181 | G | 0.0788  |
| rs118078120 | G | -0.0971 |
| rs1275652   | G | 0.0253  |
| rs117009883 | T | 0.1052  |
| rs1039303   | C | -0.0384 |
| rs10128796  | A | 0.0445  |
| rs1024132   | C | -0.0272 |
| rs112337855 | G | -0.1407 |
| rs555740    | G | -0.0187 |
| rs61933963  | A | 0.0343  |
| rs1480015   | T | 0.0558  |
| rs61932769  | C | 0.0308  |
| rs4765309   | C | -0.0261 |
| rs11060321  | T | 0.033   |
| rs73145709  | A | -0.1231 |
| rs73595909  | A | 0.1142  |
| rs1006792   | T | 0.0203  |
| rs7968638   | C | 0.0275  |
| rs79352446  | A | 0.1092  |
| rs7969065   | G | 0.0234  |
| rs7978515   | T | -0.1112 |
| rs6486494   | C | -0.0212 |
| rs112013258 | T | -0.0667 |
| rs79357412  | C | 0.0718  |
| rs80090151  | T | 0.0387  |
| rs59732187  | T | 0.0387  |
| rs10849447  | C | 0.0247  |
| rs78248089  | C | -0.0399 |
| rs10876351  | G | 0.0221  |
| rs1489418   | A | 0.019   |
| rs17827346  | A | 0.042   |
| rs11062557  | G | 0.0329  |
| rs73066681  | A | -0.0341 |
| rs73138320  | C | 0.0412  |

|             |   |         |
|-------------|---|---------|
| rs78704837  | G | -0.12   |
| rs143751011 | T | 0.1436  |
| rs76382809  | T | 0.0709  |
| rs146409234 | T | 0.1436  |
| rs117999707 | A | 0.1145  |
| rs111115332 | G | 0.0483  |
| rs4759430   | C | -0.022  |
| rs17776968  | A | 0.0315  |
| rs143267117 | G | 0.088   |
| rs73195863  | A | 0.0804  |
| rs147675483 | T | 0.0709  |
| rs61931863  | G | 0.0661  |
| rs673832    | A | 0.019   |
| rs12812403  | C | 0.0313  |
| rs76006697  | A | -0.0569 |
| rs138138217 | C | -0.0964 |
| rs1093313   | A | -0.033  |
| rs61926892  | C | -0.047  |
| rs1880699   | T | 0.0195  |
| rs12304912  | C | -0.0327 |
| rs11612472  | C | -0.0332 |
| rs77504664  | T | -0.1053 |
| rs1829720   | A | 0.0359  |
| rs79380551  | T | -0.1236 |
| rs56411627  | G | 0.0453  |
| rs79199336  | A | -0.0281 |
| rs35747957  | A | -0.0932 |
| rs6538762   | T | 0.092   |
| rs73050442  | A | 0.1     |
| rs2052425   | A | 0.0181  |
| rs77818752  | G | 0.0794  |
| rs73183154  | A | 0.1237  |
| rs7313883   | G | 0.0184  |
| rs74627460  | G | -0.1008 |
| rs1348514   | C | -0.0217 |
| rs117671888 | G | 0.1141  |
| rs12422327  | T | -0.0423 |
| rs112401712 | A | 0.1008  |
| rs73115658  | G | -0.107  |
| rs2433345   | G | 0.0259  |
| rs111466834 | G | -0.0365 |
| rs2203232   | G | 0.0206  |
| rs75755992  | G | -0.0702 |
| rs11051769  | C | -0.0359 |
| rs112404436 | A | -0.0817 |
| rs11104397  | G | 0.042   |
| rs12426707  | A | -0.0337 |

|             |   |         |
|-------------|---|---------|
| rs11111704  | C | -0.0221 |
| rs7306745   | C | -0.0298 |
| rs2048078   | C | -0.0193 |
| rs7960441   | C | 0.018   |
| rs140500108 | G | 0.0602  |
| rs11058166  | C | -0.0335 |
| rs2673740   | C | 0.0188  |
| rs66951847  | T | 0.033   |
| rs118158524 | T | 0.0349  |
| rs7134299   | G | 0.021   |
| rs117124249 | T | 0.0753  |
| rs7132171   | G | -0.0183 |
| rs73132540  | T | 0.0881  |
| rs116863803 | A | -0.1019 |
| rs2017021   | G | -0.0293 |
| rs77646610  | A | 0.0856  |
| rs2279664   | T | -0.0203 |
| rs17474705  | A | -0.1444 |
| rs59679368  | C | 0.0257  |
| rs139046818 | A | -0.1056 |
| rs74761965  | T | 0.0274  |
| rs905608    | A | 0.0514  |
| rs2239182   | T | -0.019  |
| rs7958849   | T | -0.0192 |
| rs7302753   | T | 0.0797  |
| rs77530612  | G | 0.1015  |
| rs143274958 | G | 0.1646  |
| rs74967192  | T | -0.0849 |
| rs56186101  | T | -0.0923 |
| rs140756858 | G | 0.0879  |
| rs34319231  | A | 0.0316  |
| rs143396177 | A | -0.1037 |
| rs7311164   | A | -0.0417 |
| rs1526845   | T | -0.0393 |
| rs4301870   | C | 0.0272  |
| rs10332     | T | 0.0219  |
| rs242000    | T | -0.0269 |
| rs59413167  | C | 0.021   |
| rs118049242 | T | 0.1304  |
| rs138371116 | G | 0.1024  |
| rs1021311   | A | -0.0316 |
| rs73148459  | C | -0.0361 |
| rs77292724  | A | -0.0528 |
| rs116843659 | T | 0.1608  |
| rs112467201 | T | -0.1002 |
| rs7960648   | C | 0.0195  |
| rs117905302 | A | 0.0718  |

|             |   |         |
|-------------|---|---------|
| rs78294571  | G | 0.085   |
| rs75376345  | A | -0.063  |
| rs116901033 | G | -0.0496 |
| rs117142218 | G | -0.1017 |
| rs73045359  | C | -0.0473 |
| rs117104215 | G | 0.0941  |
| rs76665660  | T | -0.0373 |
| rs59870578  | A | -0.0477 |
| rs225476    | A | -0.0235 |
| rs1731706   | C | 0.0185  |
| rs2305974   | T | -0.0351 |
| rs115350566 | T | 0.0602  |
| rs1921406   | C | 0.0441  |
| rs9788010   | G | -0.0278 |
| rs4454802   | G | -0.0299 |
| rs11177036  | A | 0.0313  |
| rs75110478  | T | 0.0865  |
| rs6416190   | A | -0.1557 |
| rs74913439  | A | -0.0694 |
| rs75754813  | C | 0.0795  |
| rs17778013  | A | 0.0211  |
| rs4760653   | C | -0.0275 |
| rs11105130  | A | -0.0598 |
| rs10859200  | C | 0.0183  |
| rs11066742  | C | 0.0207  |
| rs77926280  | C | -0.0913 |
| rs79528050  | G | 0.1231  |
| rs11613535  | A | 0.0337  |
| rs7305595   | A | 0.0324  |
| rs257949    | T | 0.0995  |
| rs17498815  | C | -0.054  |
| rs111279407 | G | 0.1201  |
| rs7311374   | T | 0.027   |
| rs11612530  | T | -0.045  |
| rs145668750 | A | -0.0405 |
| rs117707555 | C | -0.0853 |
| rs11046119  | A | 0.0458  |
| rs61936205  | T | 0.0368  |
| rs10849561  | G | -0.0186 |
| rs11067626  | A | 0.0758  |
| rs73061012  | T | 0.0887  |
| rs117667303 | T | 0.1075  |
| rs12426539  | T | -0.0807 |
| rs112872515 | A | 0.1287  |
| rs75998666  | G | -0.1221 |
| rs11837295  | T | 0.1382  |
| rs10848194  | A | -0.0206 |

|             |   |         |
|-------------|---|---------|
| rs73079183  | C | 0.0365  |
| rs7314434   | T | 0.0516  |
| rs150732818 | A | -0.0497 |
| rs735295    | C | 0.0214  |
| rs79845762  | C | -0.1235 |
| rs7350634   | T | -0.0278 |
| rs61913989  | G | 0.0517  |
| rs113193031 | A | 0.1419  |
| rs34189415  | T | -0.0481 |
| rs117312229 | G | 0.0683  |
| rs58494653  | G | 0.0383  |
| rs16917857  | A | 0.0465  |
| rs148249519 | G | -0.1221 |
| rs140704863 | A | 0.1137  |
| rs56180838  | T | -0.061  |
| rs77643120  | A | -0.0861 |
| rs7966874   | T | -0.0571 |
| rs78292397  | G | 0.056   |
| rs139599166 | G | -0.0784 |
| rs73047601  | T | 0.105   |
| rs74863093  | C | -0.1048 |
| rs2630772   | T | -0.0208 |
| rs10745790  | A | -0.0189 |
| rs12579384  | A | -0.0309 |
| rs11609746  | T | -0.0268 |
| rs79761074  | A | -0.0567 |
| rs17842374  | A | -0.0499 |
| rs12296289  | T | 0.0929  |
| rs7298228   | A | 0.0809  |
| rs11147132  | G | -0.0766 |
| rs10437971  | T | -0.0328 |
| rs1812382   | C | -0.0195 |
| rs80227102  | T | 0.0666  |
| rs7314687   | A | -0.0251 |
| rs11112452  | T | 0.0425  |
| rs116917848 | T | -0.0583 |
| rs1675584   | T | 0.0299  |
| rs144787788 | G | -0.0909 |
| rs7961110   | A | -0.0566 |
| rs80258551  | T | -0.0602 |
| rs117053076 | A | -0.1444 |
| rs73074854  | A | 0.0742  |
| rs11170481  | A | -0.0354 |
| rs144484173 | T | -0.0619 |
| rs2657904   | A | 0.0857  |
| rs73061885  | C | 0.0575  |
| rs2023447   | C | -0.0381 |

|             |   |         |
|-------------|---|---------|
| rs10770477  | C | -0.0342 |
| rs77451023  | A | -0.0625 |
| rs75324022  | T | 0.0622  |
| rs117715821 | G | -0.0954 |
| rs144606236 | T | 0.0959  |
| rs117069837 | T | 0.1316  |
| rs79294131  | A | -0.1418 |
| rs2358941   | T | -0.0544 |
| rs1905942   | C | -0.0296 |
| rs865505    | T | -0.0534 |
| rs1381141   | G | 0.0196  |
| rs337647    | T | 0.0198  |
| rs118167069 | A | 0.1167  |
| rs10771407  | A | 0.0321  |
| rs7294490   | G | 0.067   |
| rs78912173  | T | -0.2077 |
| rs10771283  | G | 0.0219  |
| rs117473279 | A | -0.1044 |
| rs10777373  | T | -0.0199 |
| rs34380884  | C | 0.0376  |
| rs10357     | T | 0.0225  |
| rs77424893  | C | 0.0485  |
| rs117273683 | A | 0.0982  |
| rs146710282 | A | 0.0854  |
| rs117948497 | T | -0.1451 |
| rs2191206   | C | 0.0313  |
| rs73117871  | T | -0.095  |
| rs7314748   | C | -0.0184 |
| rs10859742  | C | 0.0197  |
| rs7953410   | T | -0.0331 |
| rs11179078  | G | 0.063   |
| rs17226479  | G | 0.0418  |
| rs117163302 | G | -0.089  |
| rs34629874  | G | -0.0212 |
| rs12322745  | G | -0.0558 |
| rs11112920  | A | 0.0308  |
| rs17420518  | G | 0.0268  |
| rs1405785   | G | 0.0278  |
| rs138572952 | T | 0.1033  |
| rs10847548  | T | -0.0178 |
| rs11058174  | G | 0.0945  |
| rs7487398   | G | 0.0191  |
| rs7311560   | T | -0.023  |
| rs149755798 | T | 0.1141  |
| rs75088940  | T | 0.0331  |
| rs73234761  | T | -0.1563 |
| rs871059    | A | 0.045   |

|             |   |         |
|-------------|---|---------|
| rs117317921 | A | 0.1208  |
| rs34066708  | T | -0.0559 |
| rs78494756  | C | 0.0402  |
| rs12826364  | A | 0.0199  |
| rs11110491  | C | -0.031  |
| rs937642    | T | -0.0197 |
| rs11615774  | C | 0.0207  |
| rs1456234   | A | 0.0301  |
| rs76461010  | T | 0.1237  |
| rs34510523  | C | 0.0187  |
| rs11832527  | G | 0.0249  |
| rs76450399  | A | -0.1053 |
| rs12230719  | A | 0.0725  |
| rs2888732   | T | 0.1277  |
| rs117675000 | G | 0.0617  |
| rs117510478 | G | 0.1421  |
| rs117527020 | C | 0.062   |
| rs3810784   | C | 0.019   |
| rs73160298  | A | -0.088  |
| rs117766388 | A | -0.0487 |
| rs117811597 | A | -0.0984 |
| rs10784760  | G | -0.0192 |
| rs117036873 | C | 0.0609  |
| rs7139232   | C | -0.021  |
| rs71460123  | T | 0.044   |
| rs138905592 | T | -0.1451 |
| rs12422546  | C | 0.057   |
| rs73432098  | C | 0.0555  |
| rs299439    | G | -0.0729 |
| rs7138702   | A | -0.1445 |
| rs789121    | C | -0.0175 |
| rs138711700 | G | 0.121   |
| rs7485356   | C | -0.0256 |
| rs78690723  | T | -0.1214 |
| rs2608405   | G | -0.0177 |
| rs114558292 | T | -0.0905 |
| rs3825192   | G | -0.0178 |
| rs138237980 | A | -0.0973 |
| rs11062033  | G | 0.078   |
| rs75229271  | C | -0.0296 |
| rs116893340 | A | -0.1183 |
| rs7970679   | G | 0.0707  |
| rs74749237  | A | 0.0425  |
| rs2398444   | A | 0.0248  |
| rs7314826   | G | -0.0309 |
| rs7979149   | C | -0.0229 |
| rs17429188  | C | 0.1518  |

|             |   |         |
|-------------|---|---------|
| rs220584    | A | 0.0547  |
| rs33184     | T | 0.0249  |
| rs78431801  | C | -0.0799 |
| rs11833426  | A | -0.0531 |
| rs11064994  | G | -0.0375 |
| rs3852545   | T | -0.0803 |
| rs7965800   | A | -0.0185 |
| rs7955707   | A | 0.0225  |
| rs35922856  | A | 0.0265  |
| rs143500990 | A | 0.0534  |
| rs78865813  | T | -0.056  |
| rs10459194  | C | 0.0192  |
| rs1669944   | T | 0.0631  |
| rs78855289  | C | 0.1499  |
| rs10847553  | C | -0.0221 |
| rs2291254   | A | 0.0345  |
| rs1657054   | T | -0.021  |
| rs7307648   | A | -0.0241 |
| rs137878859 | C | 0.0776  |
| rs2268389   | G | -0.031  |
| rs7966431   | G | -0.0195 |
| rs34207056  | T | -0.0195 |
| rs140426491 | A | -0.158  |
| rs117281886 | A | 0.0608  |
| rs10860200  | A | 0.0189  |
| rs7304301   | A | 0.0712  |
| rs73218722  | G | 0.1109  |
| rs10746080  | T | -0.0175 |
| rs11174759  | T | 0.0272  |
| rs4762750   | A | -0.023  |
| rs61933800  | T | -0.0325 |
| rs111720218 | G | -0.085  |
| rs143129326 | A | -0.0506 |
| rs74347061  | A | -0.0951 |
| rs1825193   | T | -0.0193 |
| rs117193269 | C | -0.0685 |
| rs3923863   | A | 0.0183  |
| rs138428378 | A | 0.0539  |
| rs148816923 | A | -0.1195 |
| rs78947047  | A | -0.1013 |
| rs146921612 | A | 0.0575  |
| rs11068702  | T | 0.0283  |
| rs11058875  | A | 0.0246  |
| rs117887348 | C | 0.1283  |
| rs117854821 | C | 0.0954  |
| rs114715637 | G | 0.1322  |
| rs11063913  | G | 0.0218  |



|             |   |         |
|-------------|---|---------|
| rs7967752   | A | -0.0712 |
| rs79917672  | A | -0.0569 |
| rs72648150  | A | 0.0596  |
| rs141560291 | C | 0.1257  |
| rs10878636  | G | 0.0222  |
| rs35243417  | C | -0.0339 |
| rs11105200  | A | -0.0581 |
| rs76624987  | A | 0.0388  |
| rs77378872  | C | 0.0709  |
| rs11180235  | T | 0.0233  |
| rs73100320  | C | 0.0835  |
| rs11168248  | G | 0.025   |
| rs148345165 | C | -0.1081 |
| rs3847910   | T | -0.024  |
| rs148807053 | G | 0.1028  |
| rs55972133  | A | 0.0385  |
| rs12424442  | A | -0.0198 |
| rs116858620 | C | -0.0712 |
| rs74755539  | G | 0.1514  |
| rs766482    | G | 0.0288  |
| rs7963203   | T | 0.0379  |
| rs1564120   | G | 0.0183  |
| rs73206042  | A | -0.0544 |
| rs116532950 | A | -0.1    |
| rs7953605   | G | -0.0204 |
| rs12826219  | C | 0.065   |
| rs7972476   | C | 0.0651  |
| rs4759827   | T | 0.0212  |
| rs17770854  | A | 0.0535  |
| rs4597146   | G | 0.0267  |
| rs2625878   | C | 0.0184  |
| rs7298875   | T | 0.03    |
| rs35979574  | C | 0.0322  |
| rs73146873  | C | 0.0792  |
| rs74238461  | G | -0.0562 |
| rs78317676  | G | -0.0817 |
| rs143100843 | T | -0.1124 |
| rs112994230 | G | -0.1777 |
| rs34276383  | A | -0.0335 |
| rs11068350  | C | 0.0229  |
| rs3741905   | T | 0.0319  |
| rs1174509   | T | 0.019   |
| rs76314394  | A | -0.0365 |
| rs17098204  | C | -0.0458 |
| rs11116698  | T | 0.019   |
| rs11053623  | C | -0.0745 |
| rs11057092  | T | -0.0386 |

|             |   |         |
|-------------|---|---------|
| rs59147798  | C | 0.0248  |
| rs143077180 | T | -0.0754 |
| rs7303141   | C | 0.032   |
| rs71464431  | A | -0.0184 |
| rs2352738   | T | 0.0179  |
| rs145897319 | A | -0.0851 |
| rs61922023  | A | 0.0279  |
| rs11608732  | T | -0.0412 |
| rs1795874   | A | -0.0467 |
| rs10842366  | G | 0.0181  |
| rs10783284  | A | 0.02    |
| rs116899928 | A | 0.1208  |
| rs141175000 | G | 0.1005  |
| rs1513047   | G | -0.0216 |
| rs55943016  | T | 0.0731  |
| rs117125785 | T | 0.113   |
| rs61933275  | C | 0.0195  |
| rs12368895  | T | -0.0242 |
| rs139229234 | G | 0.0941  |
| rs56185927  | T | 0.0399  |
| rs2305865   | C | 0.0688  |
| rs76055896  | T | -0.0647 |
| rs149899500 | A | 0.1073  |
| rs116843005 | A | -0.0977 |
| rs36098273  | G | -0.038  |
| rs35103074  | T | -0.0208 |
| rs117996606 | A | 0.12    |
| rs77642666  | T | -0.0905 |
| rs10770742  | T | 0.0184  |
| rs4762080   | A | 0.0218  |
| rs73201562  | A | 0.0567  |
| rs149631712 | A | 0.0965  |
| rs2052790   | C | 0.0331  |
| rs10877020  | A | -0.0175 |
| rs12368610  | T | 0.0289  |
| rs1528287   | G | 0.0401  |
| rs73193464  | T | -0.0405 |
| rs7980534   | A | 0.0238  |
| rs1726237   | A | 0.0189  |
| rs12829042  | G | 0.022   |
| rs73056209  | A | 0.0405  |
| rs10862040  | A | 0.0182  |
| rs79071040  | T | 0.0406  |
| rs7961695   | C | -0.0258 |
| rs7137167   | G | -0.068  |
| rs34215385  | T | 0.0688  |
| rs73107290  | T | -0.1007 |

|             |   |         |
|-------------|---|---------|
| rs2287166   | T | 0.0187  |
| rs10774442  | C | -0.0242 |
| rs61752546  | T | -0.0736 |
| rs139372001 | T | 0.0893  |
| rs117315801 | T | 0.0491  |
| rs78276102  | T | -0.0953 |
| rs112038144 | T | 0.1554  |
| rs73053507  | T | -0.0238 |
| rs76522953  | T | -0.0945 |
| rs755461    | G | -0.0241 |
| rs10771121  | C | -0.0175 |
| rs16934692  | A | 0.0268  |
| rs61935715  | T | -0.0342 |
| rs7968170   | T | 0.0207  |
| rs117592950 | A | -0.0806 |
| rs35366311  | T | -0.0253 |
| rs61943976  | G | 0.0794  |
| rs2291854   | A | -0.0238 |
| rs35473213  | G | -0.0454 |
| rs12825370  | C | 0.0713  |
| rs35349730  | G | 0.0982  |
| rs79739018  | T | 0.0602  |
| rs7953860   | T | -0.0372 |
| rs12822196  | C | -0.0251 |
| rs59360370  | G | 0.0246  |
| rs77796279  | C | -0.1104 |
| rs113576981 | T | 0.1235  |
| rs1019727   | C | -0.0492 |
| rs55675144  | C | 0.0673  |
| rs149163030 | C | -0.0679 |
| rs71466044  | T | 0.0395  |
| rs7972603   | A | -0.0451 |
| rs74699088  | T | -0.0306 |
| rs17763601  | C | 0.0342  |
| rs6538507   | C | -0.0207 |
| rs111548332 | T | -0.0588 |
| rs7980166   | A | 0.0424  |
| rs4759050   | C | 0.0231  |
| rs10506774  | G | -0.1267 |
| rs10744772  | A | 0.0219  |
| rs4442632   | G | -0.0225 |
| rs138108996 | T | -0.0747 |
| rs75574167  | G | 0.0616  |
| rs11611873  | C | -0.0296 |
| rs142678820 | C | -0.0807 |
| rs78175509  | A | -0.0612 |
| rs4831937   | A | -0.0281 |

|             |   |         |
|-------------|---|---------|
| rs141134921 | C | 0.1242  |
| rs9888376   | C | 0.0173  |
| rs7299202   | A | 0.0247  |
| rs1566827   | G | 0.0414  |
| rs11107427  | A | -0.1049 |
| rs78072107  | A | 0.0764  |
| rs144600965 | T | 0.1105  |
| rs116921610 | A | -0.0795 |
| rs11168640  | G | 0.0305  |
| rs11611951  | T | 0.0332  |
| rs111112043 | T | -0.0402 |
| rs118014093 | T | -0.1364 |
| rs73219077  | A | 0.1561  |
| rs61940207  | T | 0.1271  |
| rs28438880  | G | 0.0259  |
| rs7957031   | A | -0.0251 |
| rs12424560  | A | 0.02    |
| rs75072820  | A | 0.0335  |
| rs12818715  | G | 0.0199  |
| rs12311857  | G | 0.0208  |
| rs7304494   | C | 0.0191  |
| rs148606147 | C | -0.0689 |
| rs2577308   | T | -0.0239 |
| rs73053808  | G | 0.0359  |
| rs12823258  | G | 0.0723  |
| rs3759171   | G | 0.019   |
| rs75392720  | A | -0.0588 |
| rs11615646  | C | -0.0538 |
| rs10859290  | T | -0.0802 |
| rs17723833  | T | -0.0815 |
| rs11113349  | T | 0.0195  |
| rs3741619   | A | -0.0214 |
| rs17766960  | T | 0.0213  |
| rs35054320  | G | -0.0474 |
| rs1678506   | C | 0.0596  |
| rs77229292  | A | 0.0394  |
| rs10880336  | G | -0.0185 |
| rs937309    | T | -0.0214 |
| rs12823195  | A | -0.0739 |
| rs7955259   | T | 0.0292  |
| rs11495100  | T | -0.0415 |
| rs7953370   | T | 0.0363  |
| rs1861484   | G | -0.0737 |
| rs2242383   | T | 0.0179  |
| rs10747657  | G | -0.0267 |
| rs56122389  | A | 0.0769  |
| rs11175858  | G | 0.0367  |

|             |   |         |
|-------------|---|---------|
| rs12308963  | C | 0.0314  |
| rs142085602 | G | 0.0882  |
| rs2619131   | T | -0.0535 |
| rs11059321  | G | -0.0226 |
| rs149117540 | T | -0.0282 |
| rs75100342  | G | -0.0694 |
| rs326632    | C | -0.0265 |
| rs12817201  | A | -0.0192 |
| rs67381046  | A | 0.0221  |
| rs10492061  | C | 0.0232  |
| rs118085779 | C | -0.1033 |
| rs143827771 | T | 0.1168  |
| rs144474565 | T | 0.1339  |
| rs147094749 | C | 0.1156  |
| rs117395519 | G | 0.1157  |
| rs116943909 | A | 0.0602  |
| rs12228847  | C | 0.0709  |
| rs470824    | T | -0.0244 |
| rs117312752 | T | -0.0738 |
| rs2650044   | A | -0.0397 |
| rs1506680   | T | 0.0246  |
| rs10778803  | C | 0.0192  |
| rs10859128  | A | -0.02   |
| rs75057013  | C | 0.0563  |
| rs140298773 | C | -0.0537 |
| rs3851597   | T | -0.0254 |
| rs73069591  | T | 0.047   |
| rs35128846  | C | 0.0297  |
| rs75590541  | A | 0.0505  |
| rs58908973  | A | 0.0362  |
| rs117419111 | T | -0.0899 |
| rs61930144  | T | -0.0973 |
| rs11055582  | T | -0.029  |
| rs117180159 | G | -0.0224 |
| rs12829641  | A | 0.0466  |
| rs4576864   | A | 0.0259  |
| rs61940889  | A | -0.0489 |
| rs113420674 | T | 0.07    |
| rs6581552   | G | -0.0406 |
| rs117135036 | C | -0.0662 |
| rs140975754 | T | -0.1417 |
| rs77937490  | T | 0.0712  |
| rs11615941  | T | -0.0283 |
| rs73219484  | A | 0.1163  |
| rs61933033  | T | 0.0663  |
| rs112945212 | C | -0.1057 |
| rs7980214   | C | 0.0182  |

|             |   |         |
|-------------|---|---------|
| rs75846646  | C | 0.1546  |
| rs11055523  | T | 0.024   |
| rs3741930   | T | -0.0192 |
| rs79278925  | A | 0.0291  |
| rs1024843   | C | 0.0195  |
| rs11833352  | A | -0.0718 |
| rs2720295   | C | 0.0223  |
| rs61937373  | T | 0.1527  |
| rs113867519 | A | 0.031   |
| rs1008948   | G | 0.0219  |
| rs10859747  | G | 0.0233  |
| rs73097672  | G | 0.0881  |
| rs61940787  | C | -0.0881 |
| rs7132808   | A | -0.0267 |
| rs4964427   | T | -0.095  |
| rs10773626  | T | -0.0197 |
| rs7979814   | A | -0.0667 |
| rs10771367  | T | 0.0213  |
| rs9788066   | C | -0.0226 |
| rs73225071  | A | 0.0986  |
| rs35601853  | T | -0.0944 |
| rs17537724  | G | -0.1196 |
| rs11835867  | A | -0.0311 |
| rs7979542   | C | 0.0194  |
| rs112654292 | A | 0.0935  |
| rs116955116 | T | 0.1049  |
| rs10734711  | G | 0.0276  |
| rs55745273  | T | 0.0658  |
| rs117181530 | C | 0.0658  |
| rs2632673   | C | 0.0276  |
| rs143836535 | A | 0.0774  |
| rs2283332   | A | 0.0316  |
| rs10450797  | A | 0.032   |
| rs79572503  | C | -0.1212 |
| rs2543753   | C | 0.0425  |
| rs11541440  | A | -0.1074 |
| rs118050999 | T | 0.1031  |
| rs11047171  | T | -0.0203 |
| rs12311948  | T | 0.0552  |
| rs117964979 | T | 0.0888  |
| rs79994912  | T | 0.0423  |
| rs11168305  | A | 0.072   |
| rs78241392  | G | 0.0589  |
| rs36099603  | C | 0.0603  |
| rs11064098  | T | 0.0674  |
| rs80188595  | T | -0.0551 |
| rs525631    | C | -0.0189 |

|             |   |         |
|-------------|---|---------|
| rs10860914  | T | -0.019  |
| rs116996074 | A | 0.0659  |
| rs7309332   | T | -0.0195 |
| rs151250036 | T | 0.0973  |
| rs75101901  | G | 0.1533  |
| rs11614599  | C | -0.0314 |
| rs10506505  | A | 0.0181  |
| rs1798294   | C | -0.0327 |
| rs76500728  | A | -0.0482 |
| rs1897636   | A | 0.0196  |
| rs73157668  | T | 0.0433  |
| rs7966010   | T | -0.0279 |
| rs57840035  | C | -0.1151 |
| rs140641040 | T | 0.0843  |
| rs1574503   | T | 0.0299  |
| rs73397288  | G | -0.0317 |
| rs7962165   | T | 0.0206  |
| rs78900942  | C | -0.0871 |
| rs11066607  | G | 0.0323  |
| rs56343453  | T | -0.0238 |
| rs71452331  | C | -0.0355 |
| rs76426982  | A | -0.1266 |
| rs117442408 | G | 0.0482  |
| rs3782468   | T | 0.0274  |
| rs2886828   | C | 0.0195  |
| rs1981758   | T | 0.0236  |
| rs117371285 | T | 0.087   |
| rs75481141  | C | -0.024  |
| rs12371427  | A | -0.0295 |
| rs117961863 | A | 0.0792  |
| rs118069859 | A | -0.0964 |
| rs10845573  | C | -0.0535 |
| rs28735279  | A | 0.0208  |
| rs76384738  | C | 0.1051  |
| rs2900390   | T | 0.0355  |
| rs2100208   | A | -0.0246 |
| rs74744310  | A | 0.0629  |
| rs1107130   | T | 0.0176  |
| rs7968755   | G | -0.0273 |
| rs78783790  | T | -0.0847 |
| rs34366     | C | -0.034  |
| rs36131847  | T | -0.0222 |
| rs1211609   | C | 0.0298  |
| rs78082749  | T | -0.0395 |
| rs11108614  | G | -0.0409 |
| rs7973921   | A | 0.0443  |
| rs621284    | T | -0.0226 |

|             |   |         |
|-------------|---|---------|
| rs77173345  | C | 0.0689  |
| rs117254616 | A | 0.0543  |
| rs116889370 | A | -0.0605 |
| rs138620522 | A | 0.0427  |
| rs73217910  | A | -0.1371 |
| rs16920411  | C | -0.0715 |
| rs17223651  | C | 0.0393  |
| rs77797217  | G | 0.0776  |
| rs11051993  | G | -0.026  |
| rs139550544 | T | 0.1381  |
| rs77904396  | C | 0.0857  |
| rs883665    | A | -0.0215 |
| rs11829199  | G | -0.0913 |
| rs1493765   | A | -0.0329 |
| rs79554440  | T | 0.0272  |
| rs10850365  | G | -0.0185 |
| rs75947805  | G | -0.0263 |
| rs34253375  | T | -0.044  |
| rs764377    | T | 0.0292  |
| rs142330171 | G | 0.0834  |
| rs73075713  | G | 0.0446  |
| rs2733642   | C | -0.0182 |
| rs150983807 | G | 0.081   |
| rs4767317   | A | 0.0252  |
| rs138423033 | G | 0.1262  |
| rs17109024  | G | 0.0827  |
| rs12309731  | T | 0.0652  |
| rs7398802   | T | -0.0498 |
| rs10848455  | G | -0.0208 |
| rs762722    | C | -0.0177 |
| rs147654919 | G | 0.144   |
| rs16931958  | G | 0.054   |
| rs140587031 | C | -0.082  |
| rs17012307  | G | -0.0182 |
| rs10771245  | T | 0.0248  |
| rs11055687  | C | -0.033  |
| rs148057593 | C | 0.1046  |
| rs11183167  | G | 0.0272  |
| rs7305298   | G | 0.0184  |
| rs116897661 | A | 0.0857  |
| rs1274498   | G | -0.111  |
| rs11174640  | T | 0.0311  |
| rs11061456  | T | 0.0273  |
| rs10843015  | T | -0.0323 |
| rs73102465  | T | -0.0968 |
| rs1546224   | T | -0.0187 |
| rs149717212 | C | 0.1213  |



|             |   |         |
|-------------|---|---------|
| rs11570905  | C | 0.0617  |
| rs118163553 | A | 0.0911  |
| rs58560266  | C | 0.0363  |
| rs76105028  | T | -0.0768 |
| rs4760169   | C | -0.0267 |
| rs78032941  | T | 0.0324  |
| rs16943412  | T | 0.0309  |
| rs147118684 | A | -0.1041 |
| rs76883696  | T | 0.1057  |
| rs7485691   | C | 0.0213  |
| rs73042497  | G | 0.0283  |
| rs75585048  | T | -0.1159 |
| rs61937392  | C | 0.0181  |
| rs11060410  | A | 0.0179  |
| rs4526837   | G | 0.0195  |
| rs112659891 | T | -0.0441 |
| rs12321693  | C | 0.0436  |
| rs188616    | G | 0.0303  |
| rs12810279  | G | 0.0346  |
| rs4964711   | C | -0.0188 |
| rs7966020   | A | 0.0169  |
| rs7308742   | A | 0.0413  |
| rs59002329  | T | -0.0837 |
| rs797771    | G | 0.1012  |
| rs117471444 | T | 0.063   |
| rs73063678  | C | -0.0568 |
| rs140623647 | T | -0.1074 |
| rs11054782  | A | -0.0258 |
| rs4131535   | C | 0.0191  |
| rs73192816  | A | -0.0866 |
| rs117620736 | G | 0.0651  |
| rs11057099  | C | 0.0798  |
| rs56118351  | A | -0.0954 |
| rs144800188 | G | -0.0604 |
| rs149899910 | A | -0.1066 |
| rs34929189  | G | -0.0992 |
| rs143378930 | T | -0.0493 |
| rs147892767 | G | 0.0683  |
| rs1857938   | A | 0.0225  |
| rs79688421  | G | 0.135   |
| rs6539903   | G | -0.0175 |
| rs117888408 | T | 0.0436  |
| rs34909368  | G | 0.0617  |
| rs76205362  | C | 0.0645  |
| rs78522504  | A | -0.0413 |
| rs142792286 | A | 0.0877  |
| rs74601167  | T | 0.07    |

|             |   |         |
|-------------|---|---------|
| rs7484309   | T | -0.0187 |
| rs78944194  | T | 0.046   |
| rs11177826  | T | -0.0697 |
| rs73454909  | A | 0.022   |
| rs10160955  | C | -0.0216 |
| rs78297588  | G | 0.0595  |
| rs78311805  | C | 0.0377  |
| rs117688836 | C | 0.0884  |
| rs4081018   | T | 0.0266  |
| rs2291925   | T | -0.0195 |
| rs7133607   | C | -0.0224 |
| rs56362920  | T | -0.0226 |
| rs77053059  | A | 0.0319  |
| rs80019947  | T | 0.0599  |
| rs9795596   | T | 0.0295  |
| rs1280831   | T | 0.0363  |
| rs10879344  | T | 0.0626  |
| rs117062745 | T | -0.0742 |
| rs35264716  | G | -0.0267 |
| rs61928683  | G | 0.0233  |
| rs113981818 | T | 0.0836  |
| rs117256451 | A | 0.0626  |
| rs75054935  | A | 0.0708  |
| rs138783218 | C | -0.0797 |
| rs140209908 | A | 0.1268  |
| rs7135393   | C | -0.0637 |
| rs12812431  | T | -0.0371 |
| rs138444739 | G | -0.0631 |
| rs143960014 | A | -0.074  |
| rs148257472 | T | -0.0796 |
| rs80014485  | G | -0.0759 |
| rs11058744  | T | -0.0303 |
| rs7133385   | G | 0.0211  |
| rs11060785  | A | 0.0525  |
| rs11835905  | G | -0.1021 |
| rs67974006  | C | 0.0213  |
| rs12299762  | T | 0.0271  |
| rs112996392 | A | -0.0442 |
| rs35447     | A | -0.0192 |
| rs10844564  | T | 0.0166  |
| rs79939682  | C | -0.0886 |
| rs11044235  | T | 0.0182  |
| rs2576969   | G | 0.0185  |
| rs4761056   | A | 0.0219  |
| rs148581215 | G | 0.0969  |
| rs4761651   | T | 0.0173  |
| rs79676492  | T | -0.0395 |

|             |   |         |
|-------------|---|---------|
| rs112671239 | A | 0.1241  |
| rs76723696  | C | -0.0631 |
| rs80086846  | G | -0.0876 |
| rs850946    | A | 0.0342  |
| rs76972936  | C | -0.0624 |
| rs73424046  | C | 0.057   |
| rs149643204 | T | 0.1254  |
| rs79002396  | A | -0.0235 |
| rs55681235  | G | -0.0431 |
| rs79511322  | C | -0.076  |
| rs953993    | G | 0.09    |
| rs75295440  | C | 0.0461  |
| rs80223511  | A | 0.0723  |
| rs112633616 | C | 0.0847  |
| rs35296434  | G | -0.0323 |
| rs982422    | T | 0.022   |
| rs138056946 | T | -0.0741 |
| rs10842983  | A | -0.0194 |
| rs7299387   | A | -0.0173 |
| rs11611788  | C | -0.0323 |
| rs12229466  | C | -0.0232 |
| rs77343213  | T | 0.0228  |
| rs7954956   | T | 0.0183  |
| rs80291072  | C | -0.0635 |
| rs2283270   | A | -0.0233 |
| rs7961612   | C | 0.0603  |
| rs150189612 | G | 0.0482  |
| rs10847919  | T | 0.0245  |
| rs1979592   | A | -0.0223 |
| rs337678    | C | 0.0179  |
| rs7310585   | C | -0.026  |
| rs117856975 | G | -0.0707 |
| rs7309897   | C | -0.0434 |
| rs17043424  | G | -0.0175 |
| rs148494534 | A | 0.0797  |
| rs146781033 | A | -0.1285 |
| rs117281278 | C | -0.0795 |
| rs2173441   | T | -0.0346 |
| rs117176259 | G | 0.0965  |
| rs56120606  | T | 0.0296  |
| rs12314968  | T | 0.0683  |
| rs147395373 | A | 0.0673  |
| rs137928449 | A | -0.079  |
| rs10843320  | A | 0.0288  |
| rs34939436  | A | -0.0489 |
| rs78219011  | A | -0.04   |
| rs34714686  | G | -0.0541 |

|             |   |         |
|-------------|---|---------|
| rs145623975 | G | 0.1055  |
| rs144121260 | A | -0.1017 |
| rs138834364 | A | -0.095  |
| rs2238014   | G | -0.0773 |
| rs137949575 | T | 0.0738  |
| rs7959393   | C | 0.0176  |
| rs8815      | G | -0.0228 |
| rs744348    | A | -0.0171 |
| rs79064005  | A | -0.0303 |
| rs17176610  | G | 0.0526  |
| rs11112542  | A | -0.02   |
| rs147906850 | A | 0.1237  |
| rs117575177 | G | -0.0727 |
| rs61926317  | C | -0.0224 |
| rs140202108 | T | -0.0493 |
| rs117885456 | A | -0.0657 |
| rs111793826 | T | -0.0675 |
| rs138053429 | A | -0.0496 |
| rs73097118  | T | -0.1321 |
| rs117433241 | A | 0.0662  |
| rs10862317  | A | 0.0345  |
| rs2947126   | C | -0.0189 |
| rs11109648  | A | -0.0294 |
| rs12317458  | G | -0.0174 |
| rs114861796 | T | 0.056   |
| rs35365     | A | -0.078  |
| rs7975838   | T | -0.0495 |
| rs264495    | T | 0.0176  |
| rs11610408  | T | 0.048   |
| rs11177055  | C | -0.0742 |
| rs79712694  | C | -0.0477 |
| rs11612237  | C | 0.1068  |
| rs59935356  | A | -0.0474 |
| rs76045580  | T | -0.0644 |
| rs7302795   | C | 0.0202  |
| rs249047    | C | 0.017   |
| rs56368010  | T | -0.0472 |
| rs2710299   | C | -0.0393 |
| rs145192212 | C | -0.0877 |
| rs7978047   | G | -0.0308 |
| rs10842188  | T | -0.0171 |
| rs12312119  | G | 0.0829  |
| rs4842739   | T | 0.022   |
| rs61925873  | T | -0.0379 |
| rs11063791  | T | -0.0193 |
| rs2110596   | C | -0.0327 |
| rs61929972  | G | -0.0332 |

|             |   |         |
|-------------|---|---------|
| rs78716423  | T | 0.0482  |
| rs118146314 | G | 0.0721  |
| rs12820398  | A | 0.1015  |
| rs1115154   | G | 0.0476  |
| rs2045171   | G | -0.0698 |
| rs117371230 | C | 0.0826  |
| rs4550291   | G | 0.022   |
| rs17805558  | G | 0.0169  |
| rs10774832  | A | 0.018   |
| rs753901    | G | -0.0206 |
| rs853516    | A | 0.0264  |
| rs4384444   | A | 0.0222  |
| rs80144910  | C | -0.0711 |
| rs35884286  | G | 0.1463  |
| rs11105940  | T | -0.0642 |
| rs7137803   | A | -0.064  |
| rs708225    | G | 0.0182  |
| rs10859977  | A | 0.0194  |
| rs77187454  | A | -0.0992 |
| rs141901610 | T | -0.1373 |
| rs137939919 | T | 0.0447  |
| rs9645721   | G | -0.0173 |
| rs61462363  | T | 0.0214  |
| rs2009495   | T | 0.0413  |
| rs117113525 | C | -0.0701 |
| rs2592285   | T | -0.0171 |
| rs3932409   | T | 0.0203  |
| rs74663951  | A | 0.1129  |
| rs56265404  | C | 0.0693  |
| rs1860427   | G | -0.0217 |
| rs117188929 | A | 0.0666  |
| rs76929436  | T | -0.1515 |
| rs11177794  | A | 0.0217  |
| rs1522328   | G | 0.0166  |
| rs1676431   | A | 0.0163  |
| rs2270382   | G | 0.0248  |
| rs7953013   | A | -0.018  |
| rs55981052  | T | -0.0233 |
| rs4764124   | T | -0.0169 |
| rs28523813  | C | 0.04    |
| rs12372573  | A | 0.0361  |
| rs117127338 | A | 0.0797  |
| rs112056498 | A | -0.1305 |
| rs2934410   | A | 0.0244  |
| rs10859598  | T | 0.0174  |
| rs75403899  | T | 0.0212  |
| rs145841850 | A | -0.0918 |

|             |   |         |
|-------------|---|---------|
| rs12812062  | G | -0.0356 |
| rs1027560   | A | -0.0183 |
| rs10772458  | G | 0.0563  |
| rs61920277  | G | -0.0849 |
| rs57747810  | A | 0.0626  |
| rs148678454 | T | 0.1253  |
| rs61762365  | A | 0.0676  |
| rs141839245 | A | 0.1219  |
| rs7302106   | A | 0.0607  |
| rs4766730   | A | -0.1072 |
| rs149708690 | G | 0.0879  |
| rs12314358  | T | 0.0361  |
| rs4765627   | T | -0.0332 |
| rs73075556  | A | -0.0807 |
| rs142205629 | A | 0.061   |
| rs73210919  | A | -0.0322 |
| rs11043466  | A | -0.0566 |
| rs11052609  | C | 0.0293  |
| rs56190972  | C | -0.0558 |
| rs856886    | C | -0.0191 |
| rs7980260   | T | -0.0216 |
| rs7954666   | G | -0.0212 |
| rs76718550  | A | 0.028   |
| rs10843465  | T | 0.0184  |
| rs74996712  | T | 0.0883  |
| rs80279219  | A | -0.0478 |
| rs7964593   | C | -0.0215 |
| rs142298991 | A | 0.1216  |
| rs7958830   | A | 0.0466  |
| rs12820151  | T | 0.0944  |
| rs61912334  | G | 0.0365  |
| rs140054034 | A | -0.0715 |
| rs28637803  | G | 0.0402  |
| rs75538375  | T | -0.0733 |
| rs11067920  | G | -0.1078 |
| rs1991189   | G | -0.0322 |
| rs1388741   | A | -0.0189 |
| rs11176288  | G | -0.0191 |
| rs10859058  | T | 0.017   |
| rs4761998   | A | 0.0181  |
| rs4759511   | C | 0.0238  |
| rs117011358 | T | -0.0925 |
| rs76513789  | A | 0.043   |
| rs12369326  | T | -0.033  |
| rs10743966  | G | 0.023   |
| rs10770888  | G | -0.0172 |
| rs79686706  | T | -0.0632 |

|             |   |         |
|-------------|---|---------|
| rs1693612   | G | 0.0257  |
| rs10748291  | A | -0.023  |
| rs61042743  | T | 0.0444  |
| rs1195747   | A | 0.0227  |
| rs35582570  | A | -0.0901 |
| rs12809390  | A | 0.0285  |
| rs11172921  | A | 0.066   |
| rs3759258   | T | 0.0219  |
| rs144984272 | C | 0.0564  |
| rs138629585 | T | 0.0742  |
| rs7314794   | C | -0.017  |
| rs111239232 | A | -0.0461 |
| rs141240938 | G | -0.1102 |
| rs11063453  | T | 0.0175  |
| rs10505939  | C | -0.0168 |
| rs12302875  | T | 0.0308  |
| rs7294734   | T | -0.022  |
| rs10732674  | G | 0.1112  |
| rs77833302  | T | 0.0785  |
| rs12369177  | T | 0.0182  |
| rs34017415  | A | -0.021  |
| rs11055108  | A | 0.0269  |
| rs73273539  | G | 0.0561  |
| rs79604540  | G | 0.0589  |
| rs11830037  | A | -0.0344 |
| rs77836554  | T | -0.0954 |
| rs55742375  | A | 0.0644  |
| rs146846171 | A | -0.0736 |
| rs75681804  | G | -0.0835 |
| rs7137538   | C | 0.0412  |
| rs73136477  | T | 0.0207  |
| rs61907810  | T | 0.0248  |
| rs34150059  | C | -0.0591 |
| rs10841414  | G | -0.0186 |
| rs73210698  | T | 0.0425  |
| rs149690518 | A | 0.0591  |
| rs117081124 | G | 0.0731  |
| rs4931394   | G | -0.0169 |
| rs11182367  | G | -0.0276 |
| rs73212674  | T | -0.0358 |
| rs79798982  | C | -0.0892 |
| rs302349    | A | 0.02    |
| rs10744614  | A | 0.0211  |
| rs16926713  | C | -0.0661 |
| rs4763021   | A | 0.0174  |
| rs111292567 | C | -0.0955 |
| rs11105542  | T | -0.0183 |

|             |   |         |
|-------------|---|---------|
| rs147472345 | A | -0.0493 |
| rs7968462   | T | -0.0476 |
| rs1880888   | C | 0.0247  |
| rs76722890  | C | 0.0678  |
| rs7304551   | C | 0.0257  |
| rs10744553  | C | -0.0182 |
| rs77433281  | A | 0.0791  |
| rs10862207  | T | -0.0173 |
| rs17528923  | C | 0.0216  |
| rs146655110 | A | 0.0465  |
| rs11046192  | A | 0.036   |
| rs148512581 | T | -0.0733 |
| rs75706182  | C | -0.0754 |
| rs2403010   | G | -0.0232 |
| rs117477203 | A | 0.0977  |
| rs11060220  | A | 0.1346  |
| rs1167125   | C | 0.0365  |
| rs7974292   | G | -0.0189 |
| rs7132140   | A | -0.0204 |
| rs9630283   | C | 0.0209  |
| rs73238023  | T | -0.0547 |
| rs112199889 | A | -0.0869 |
| rs61938405  | A | -0.1211 |
| rs17765755  | G | -0.0334 |
| rs78302917  | G | -0.0673 |
| rs11057554  | A | 0.0526  |
| rs10846570  | A | -0.018  |
| rs4765716   | G | -0.0434 |
| rs11615159  | T | 0.1241  |
| rs73217252  | T | 0.1589  |
| rs145962195 | A | 0.0545  |
| rs4363656   | A | 0.0188  |
| rs41361349  | A | -0.1104 |
| rs6486589   | G | 0.0578  |
| rs80046525  | A | 0.0722  |
| rs12812974  | T | -0.0276 |
| rs73412041  | C | -0.0249 |
| rs56193056  | A | -0.0571 |
| rs11116515  | A | -0.0293 |
| rs12579097  | A | -0.0355 |
| rs55653619  | G | 0.0426  |
| rs17037384  | A | -0.0469 |
| rs113086400 | A | -0.0673 |
| rs11182216  | T | 0.1025  |
| rs117893232 | T | 0.0589  |
| rs61921546  | A | -0.0265 |
| rs58385979  | G | 0.0775  |



|             |   |         |
|-------------|---|---------|
| rs34140345  | A | 0.0363  |
| rs75095582  | G | 0.082   |
| rs921894    | A | -0.0287 |
| rs73147678  | A | 0.0504  |
| rs75817422  | A | 0.0993  |
| rs74056228  | C | -0.1015 |
| rs80309378  | A | 0.0426  |
| rs12820793  | G | 0.023   |
| rs4767218   | C | -0.0207 |
| rs11057161  | A | 0.0766  |
| rs11608863  | C | 0.0824  |
| rs6487568   | C | 0.0173  |
| rs147351041 | G | -0.095  |
| rs80175428  | A | -0.0887 |
| rs74208430  | T | 0.0323  |
| rs118125452 | G | 0.0754  |
| rs572873    | A | -0.0168 |
| rs73145712  | T | -0.1295 |
| rs10431447  | G | 0.0249  |
| rs11055950  | T | -0.0203 |
| rs111428863 | G | 0.0496  |
| rs17287826  | A | 0.0744  |
| rs111335214 | T | 0.0686  |
| rs73105199  | A | 0.0283  |
| rs11178837  | A | -0.0379 |
| rs6538869   | A | 0.0177  |
| rs79472555  | G | 0.1178  |
| rs78095042  | C | -0.0623 |
| rs113052910 | T | -0.0933 |
| rs150786876 | C | 0.111   |
| rs17782302  | T | 0.0255  |
| rs1401879   | A | 0.0342  |
| rs2569987   | C | 0.0228  |
| rs336264    | C | -0.0241 |
| rs10861890  | T | 0.0226  |
| rs11049731  | A | -0.0577 |
| rs1922273   | A | 0.0651  |
| rs1976365   | T | -0.0641 |
| rs76059547  | T | -0.047  |
| rs78533933  | A | -0.0901 |
| rs76107538  | A | 0.0577  |
| rs61920230  | T | -0.0938 |
| rs117896330 | C | 0.0782  |
| rs58815511  | C | -0.0337 |
| rs140791855 | G | 0.0727  |
| rs11170787  | T | 0.0554  |
| rs6581709   | G | 0.0177  |

|             |   |         |
|-------------|---|---------|
| rs2028373   | G | 0.02    |
| rs12313805  | G | 0.0235  |
| rs77288816  | G | -0.0808 |
| rs11061763  | A | 0.0372  |
| rs140055266 | T | -0.0874 |
| rs17561707  | G | -0.0392 |
| rs150158559 | G | 0.0954  |
| rs59390688  | A | -0.0474 |
| rs12580418  | A | -0.0283 |
| rs73033653  | C | -0.035  |
| rs4372508   | C | 0.0657  |
| rs12310129  | C | 0.0347  |
| rs17726370  | G | 0.0418  |
| rs7295048   | A | -0.0309 |
| rs75157171  | T | -0.0674 |
| rs12831346  | G | -0.0697 |
| rs1398602   | A | 0.0293  |
| rs2454400   | G | -0.0581 |
| rs17713040  | C | 0.0649  |
| rs74916376  | A | -0.1039 |
| rs142018962 | T | 0.1003  |
| rs73184049  | G | -0.0532 |
| rs76229189  | C | -0.0384 |
| rs470597    | A | -0.0179 |
| rs78326584  | C | 0.0275  |
| rs11058964  | T | 0.0325  |
| rs11180117  | A | 0.1022  |
| rs7306410   | C | 0.0212  |
| rs12825400  | A | -0.0285 |
| rs11107342  | C | 0.0269  |
| rs73366669  | A | -0.0416 |
| rs73330401  | C | 0.1407  |
| rs112756120 | T | -0.0651 |
| rs704108    | G | -0.0523 |
| rs141323500 | T | -0.0955 |
| rs36081237  | T | 0.0663  |
| rs10732562  | G | -0.0195 |
| rs77070293  | C | 0.0894  |
| rs77879363  | G | -0.07   |
| rs2190733   | C | 0.0208  |
| rs73229928  | A | -0.1053 |
| rs117947825 | A | 0.0529  |
| rs79042428  | T | 0.0721  |
| rs144166520 | G | 0.0486  |
| rs12827636  | A | 0.0199  |
| rs112126161 | T | -0.0497 |
| rs79025097  | C | 0.0508  |

|             |   |         |
|-------------|---|---------|
| rs61945259  | A | -0.0543 |
| rs12318299  | T | -0.0202 |
| rs61911355  | A | -0.0884 |
| rs113009487 | G | 0.051   |
| rs80014589  | T | -0.0847 |
| rs10848954  | A | -0.0252 |
| rs10771350  | G | 0.0194  |
| rs35313     | T | -0.0182 |
| rs61932773  | T | -0.0192 |
| rs118101646 | A | 0.1001  |
| rs76584503  | C | 0.0797  |
| rs7136223   | G | 0.0276  |
| rs61941441  | G | 0.1215  |
| rs10771282  | C | -0.0227 |
| rs12579612  | G | -0.0194 |
| rs142505082 | A | -0.0588 |
| rs2541297   | C | -0.0291 |
| rs17544978  | T | 0.0416  |
| rs11609012  | T | 0.059   |
| rs117090836 | A | -0.0717 |
| rs113364770 | A | 0.0875  |
| rs10859299  | A | 0.0307  |
| rs145036268 | T | -0.0723 |
| rs117470581 | T | -0.111  |
| rs11611936  | T | -0.0187 |
| rs76057758  | T | 0.1023  |
| rs75281739  | A | 0.0813  |
| rs7973672   | T | -0.0245 |
| rs7299494   | C | 0.0209  |
| rs73330715  | A | 0.056   |
| rs7301365   | C | 0.0484  |
| rs35638129  | A | -0.0435 |
| rs11181553  | T | -0.0232 |
| rs2717426   | T | -0.0173 |
| rs144447613 | A | 0.1206  |
| rs7972240   | C | -0.0816 |
| rs28398990  | G | -0.0741 |
| rs79237038  | T | -0.046  |
| rs150628109 | C | 0.0612  |
| rs7958964   | C | 0.0195  |
| rs71454653  | G | 0.0486  |
| rs12811402  | C | 0.0393  |
| rs3741869   | A | 0.0234  |
| rs11610667  | T | 0.0167  |
| rs112572318 | G | -0.0906 |
| rs1986755   | A | 0.0172  |
| rs112692335 | G | 0.0343  |

|             |   |         |
|-------------|---|---------|
| rs10744007  | G | -0.0217 |
| rs117452271 | T | 0.0818  |
| rs11051493  | A | 0.0357  |
| rs1915292   | G | 0.0159  |
| rs11503165  | C | -0.0731 |
| rs555891    | G | -0.0208 |
| rs7955976   | T | 0.0159  |
| rs694265    | A | 0.0203  |
| rs73123651  | A | -0.0262 |
| rs76703333  | G | 0.0405  |
| rs148104016 | A | -0.0614 |
| rs11175807  | T | 0.082   |
| rs73203052  | A | 0.0207  |
| rs17759808  | C | 0.0322  |
| rs76062490  | C | 0.0974  |
| rs11058056  | T | 0.0281  |
| rs66509810  | C | -0.0194 |
| rs12372628  | T | 0.0256  |
| rs146155119 | C | -0.0818 |
| rs880054    | C | -0.017  |
| rs117492792 | A | -0.0645 |
| rs3136549   | C | -0.0207 |
| rs35020474  | C | 0.0259  |
| rs73207435  | C | -0.0663 |
| rs117748688 | C | -0.0918 |
| rs12809447  | C | 0.0338  |
| rs143041555 | C | 0.0742  |
| rs75634294  | T | -0.0822 |
| rs61921599  | A | -0.0601 |
| rs145224480 | T | 0.0713  |
| rs116976754 | C | 0.0671  |
| rs71450026  | A | 0.1102  |
| rs261872    | A | -0.0533 |
| rs117888716 | G | -0.0381 |
| rs151328906 | A | 0.0799  |
| rs6486559   | T | 0.0199  |
| rs11177661  | A | 0.0163  |
| rs9788021   | A | -0.0227 |
| rs12371499  | G | 0.0771  |
| rs76745718  | T | 0.1057  |
| rs2239080   | A | -0.017  |
| rs10746023  | A | 0.0223  |
| rs477623    | C | 0.0282  |
| rs116883094 | C | 0.1112  |
| rs116899355 | T | -0.1161 |
| rs17411508  | G | -0.0371 |
| rs17124362  | A | -0.0309 |

|             |   |         |
|-------------|---|---------|
| rs7316337   | G | -0.0304 |
| rs115703010 | G | -0.0683 |
| rs10858647  | A | -0.0165 |
| rs17811260  | C | 0.0863  |
| rs9738836   | G | -0.0167 |
| rs7980521   | A | -0.0217 |
| rs12315538  | C | -0.1046 |
| rs11175986  | T | 0.0628  |
| rs1169809   | A | 0.0183  |
| rs868121    | T | -0.019  |
| rs77260207  | T | 0.0643  |
| rs11054343  | C | -0.0227 |
| rs73219053  | A | -0.0795 |
| rs11043918  | C | -0.0188 |
| rs17704963  | G | 0.0262  |
| rs76893695  | G | -0.0881 |
| rs34815312  | A | -0.0342 |
| rs75634279  | T | -0.1282 |
| rs2270482   | T | 0.0234  |
| rs7139297   | C | -0.0477 |
| rs12425551  | T | -0.0197 |
| rs117455383 | G | -0.0852 |
| rs7139369   | C | -0.0853 |
| rs142545622 | T | -0.0854 |
| rs11178246  | C | 0.0917  |
| rs61934985  | T | 0.0587  |
| rs34815355  | T | 0.0189  |
| rs117990721 | T | -0.0372 |
| rs148202305 | A | -0.0857 |
| rs924078    | T | -0.0272 |
| rs78816536  | A | -0.0256 |
| rs78186799  | A | -0.1063 |
| rs117693103 | A | 0.0507  |
| rs73132866  | T | 0.0317  |
| rs61909598  | A | 0.039   |
| rs4525272   | G | 0.0182  |
| rs169303    | C | -0.0254 |
| rs140223643 | G | 0.1354  |
| rs11533653  | T | -0.0568 |
| rs11609755  | G | -0.0514 |
| rs901699    | A | -0.0689 |
| rs34775889  | T | -0.0874 |
| rs4357750   | T | 0.0241  |
| rs7960255   | C | 0.0275  |
| rs10785008  | A | 0.0214  |
| rs11115153  | T | -0.016  |
| rs117532680 | T | -0.0744 |

|             |   |         |
|-------------|---|---------|
| rs12810964  | A | -0.0385 |
| rs7974218   | T | 0.0235  |
| rs845753    | T | 0.0235  |
| rs76434788  | G | 0.0588  |
| rs17042465  | A | -0.0465 |
| rs11056851  | T | 0.0278  |
| rs11176712  | A | -0.0281 |
| rs11060051  | C | 0.0247  |
| rs7137223   | C | -0.0168 |
| rs803560    | C | 0.017   |
| rs73054751  | G | -0.0742 |
| rs67365162  | A | 0.0536  |
| rs2429173   | T | -0.0302 |
| rs74561400  | A | 0.0417  |
| rs117328282 | C | -0.0847 |
| rs55715282  | A | -0.0341 |
| rs7971552   | C | 0.0427  |
| rs11046232  | T | -0.0401 |
| rs11172084  | A | -0.0496 |
| rs7310562   | T | -0.0286 |
| rs11611619  | C | -0.033  |
| rs79203581  | A | -0.0856 |
| rs12426397  | A | -0.0225 |
| rs4759674   | A | 0.0216  |
| rs118006495 | T | 0.0778  |
| rs7967784   | T | 0.0338  |
| rs12321433  | T | -0.0975 |
| rs11112160  | A | -0.0592 |
| rs61934471  | T | 0.0809  |
| rs1920407   | A | -0.0209 |
| rs7968027   | C | 0.0642  |
| rs73185486  | A | 0.0516  |
| rs17627481  | A | 0.0453  |
| rs76399902  | C | 0.0354  |
| rs75000333  | C | 0.1155  |
| rs145960082 | T | 0.0795  |
| rs149832515 | A | -0.1054 |
| rs12319530  | G | 0.0243  |
| rs74810518  | G | 0.0402  |
| rs118069924 | G | -0.1267 |
| rs4883635   | T | 0.042   |
| rs11044468  | G | 0.1138  |
| rs34789750  | T | -0.0416 |
| rs61738833  | A | 0.1035  |
| rs61926873  | C | -0.0696 |
| rs77685546  | T | 0.1535  |
| rs874619    | A | 0.0232  |

|             |   |         |
|-------------|---|---------|
| rs17604448  | T | 0.0589  |
| rs17251432  | G | -0.0696 |
| rs150544433 | A | -0.0689 |
| rs75541298  | T | 0.1002  |
| rs961072    | T | -0.0169 |
| rs35049595  | C | -0.0185 |
| rs73156679  | G | 0.1568  |
| rs11175219  | T | 0.0282  |
| rs73342535  | T | 0.1045  |
| rs10862432  | C | 0.018   |
| rs10784714  | G | -0.0164 |
| rs149050358 | A | -0.1077 |
| rs75104614  | C | 0.0711  |
| rs675897    | C | 0.0258  |
| rs76750463  | G | -0.0268 |
| rs71457274  | T | 0.0695  |
| rs73125076  | C | 0.0364  |
| rs2695948   | G | 0.0207  |
| rs17770663  | C | 0.0201  |
| rs11110775  | G | 0.0178  |
| rs10507272  | G | 0.0171  |
| rs12425064  | C | -0.0181 |
| rs56330164  | A | -0.023  |
| rs117536340 | T | -0.0487 |
| rs41384747  | T | 0.0192  |
| rs12821071  | C | 0.0257  |
| rs1527092   | C | -0.0698 |
| rs75646155  | A | 0.0823  |
| rs117137935 | G | -0.0875 |
| rs35323818  | A | -0.0433 |
| rs79724585  | A | -0.0351 |
| rs908664    | A | -0.0159 |
| rs34255081  | T | 0.0505  |
| rs7968594   | T | 0.0328  |
| rs35614440  | C | 0.0431  |
| rs77090182  | T | -0.0469 |
| rs148591439 | A | -0.1584 |
| rs17115989  | C | 0.0447  |
| rs2340375   | T | -0.0211 |
| rs118143715 | G | 0.0546  |
| rs61945566  | T | 0.0681  |
| rs77543981  | A | -0.0772 |
| rs11614523  | C | -0.0177 |
| rs10860930  | C | -0.0205 |
| rs117110500 | T | -0.0545 |
| rs116987163 | G | 0.0923  |
| rs917600    | A | 0.0227  |

|             |   |         |
|-------------|---|---------|
| rs73223010  | T | 0.061   |
| rs148782173 | C | -0.1125 |
| rs117635116 | T | 0.0799  |
| rs79013108  | C | -0.038  |
| rs117249900 | A | 0.0576  |
| rs118104778 | G | -0.0292 |
| rs17544748  | C | -0.064  |
| rs74359215  | G | -0.0552 |
| rs75354759  | G | 0.1043  |
| rs7306783   | G | -0.072  |
| rs2723827   | A | 0.0202  |
| rs56059080  | T | -0.0409 |
| rs7973554   | G | 0.0166  |
| rs61942077  | T | -0.0357 |
| rs115055430 | T | -0.081  |
| rs1248925   | G | 0.0166  |
| rs7976230   | A | 0.016   |
| rs17109801  | G | 0.0243  |
| rs117955473 | T | 0.1018  |
| rs10847880  | C | -0.0169 |
| rs2855711   | A | 0.0249  |
| rs76991249  | G | -0.0614 |
| rs56064500  | G | 0.03    |
| rs12817141  | A | -0.0167 |
| rs17181375  | A | 0.0269  |
| rs144100949 | C | -0.0898 |
| rs77190971  | T | -0.1233 |
| rs117263507 | T | -0.1035 |
| rs7316033   | C | -0.0229 |
| rs10743675  | T | 0.0516  |
| rs74534605  | C | 0.0841  |
| rs6538270   | T | 0.0181  |
| rs7312945   | T | -0.0279 |
| rs148036027 | T | -0.0559 |
| rs6581513   | A | -0.0385 |
| rs7297908   | C | -0.0345 |
| rs11836367  | T | 0.0179  |
| rs61942027  | A | 0.1044  |
| rs73079123  | C | -0.0402 |
| rs56773257  | G | 0.0864  |
| rs140688358 | G | 0.0357  |
| rs138348048 | G | -0.0661 |
| rs117902861 | A | -0.099  |
| rs7309063   | T | 0.0181  |
| rs140218983 | G | -0.073  |
| rs35129388  | C | 0.0715  |
| rs78373422  | A | 0.0623  |



|             |   |         |
|-------------|---|---------|
| rs12321708  | G | 0.0365  |
| rs7978983   | G | 0.0175  |
| rs12099589  | C | -0.0307 |
| rs117408037 | G | -0.0664 |
| rs140369684 | A | -0.0655 |
| rs7965731   | A | 0.0227  |
| rs12581018  | T | 0.0381  |
| rs142768156 | G | -0.0777 |
| rs12301443  | C | -0.0197 |
| rs75774841  | A | -0.1335 |
| rs117160913 | T | -0.031  |
| rs77960318  | T | 0.0492  |
| rs11115592  | G | -0.0395 |
| rs11109673  | T | 0.0716  |
| rs117329354 | C | 0.0988  |
| rs17403340  | C | 0.0269  |
| rs17038342  | C | 0.0491  |
| rs17815179  | C | 0.035   |
| rs111682266 | A | 0.1004  |
| rs9788224   | T | 0.0192  |
| rs11053518  | G | 0.0194  |
| rs56267015  | G | -0.0321 |
| rs10845868  | C | -0.0166 |
| rs10778719  | T | 0.0167  |
| rs2551381   | G | -0.096  |
| rs12832744  | C | 0.1256  |
| rs417644    | A | 0.0263  |
| rs10841785  | G | 0.0188  |
| rs73310734  | A | -0.0242 |
| rs79020809  | T | -0.0347 |
| rs76663827  | T | 0.0709  |
| rs17569596  | A | 0.0204  |
| rs117381425 | G | -0.059  |
| rs10507180  | T | 0.0164  |
| rs145856256 | A | -0.0722 |
| rs73063478  | C | 0.0306  |
| rs11835814  | G | 0.0216  |
| rs11181628  | A | -0.0478 |
| rs148928469 | T | -0.0474 |
| rs117015676 | T | 0.1448  |
| rs17813263  | C | -0.0577 |
| rs7304375   | C | -0.0169 |
| rs10850367  | T | -0.021  |
| rs138606713 | G | -0.0315 |
| rs35506739  | G | 0.0299  |
| rs589202    | A | -0.0171 |
| rs7978011   | C | -0.0235 |

|             |   |         |
|-------------|---|---------|
| rs2164064   | T | 0.0208  |
| rs3751143   | C | -0.0205 |
| rs117819085 | T | 0.0979  |
| rs147821563 | C | 0.0907  |
| rs117222745 | A | -0.0964 |
| rs144593587 | T | 0.1402  |
| rs139664049 | T | 0.0772  |
| rs1044370   | C | -0.0166 |
| rs10859168  | C | -0.0364 |
| rs73409542  | G | -0.0747 |
| rs75517901  | A | -0.0616 |
| rs7959836   | G | -0.0168 |
| rs73342414  | T | 0.0269  |
| rs703642    | G | 0.0159  |
| rs10850306  | G | -0.0158 |
| rs79779040  | T | 0.093   |
| rs4387408   | G | -0.0187 |
| rs141444266 | C | -0.094  |
| rs117041720 | A | -0.0765 |
| rs10848934  | A | -0.0202 |
| rs11169067  | C | -0.024  |
| rs68177436  | C | 0.0349  |
| rs1849850   | A | 0.069   |
| rs11613906  | G | 0.0732  |
| rs4963910   | T | -0.0257 |
| rs7132672   | T | 0.0163  |
| rs80043219  | T | 0.068   |
| rs142500328 | G | 0.1261  |
| rs141117266 | T | 0.0708  |
| rs113635389 | T | -0.0345 |
| rs78393951  | C | 0.0906  |
| rs61942184  | C | -0.1348 |
| rs144182776 | A | -0.0291 |
| rs35486332  | G | 0.023   |
| rs1629826   | G | 0.0159  |
| rs150693984 | G | 0.073   |
| rs76751464  | C | 0.0489  |
| rs4762274   | G | -0.0287 |
| rs703712    | C | -0.0207 |
| rs11610540  | A | -0.0219 |
| rs80158678  | G | 0.1055  |
| rs11114671  | C | 0.0207  |
| rs4766897   | T | -0.0199 |
| rs11537468  | G | 0.0333  |
| rs76751511  | A | 0.0649  |
| rs2177933   | T | -0.0265 |
| rs4142771   | A | -0.0276 |

|             |   |         |
|-------------|---|---------|
| rs117900252 | A | -0.0704 |
| rs56382468  | G | 0.0229  |
| rs76377534  | T | 0.0893  |
| rs7310851   | G | -0.0232 |
| rs9738727   | A | -0.018  |
| rs12316191  | C | -0.0526 |
| rs4997966   | T | -0.0336 |
| rs17802555  | G | -0.0177 |
| rs60212684  | G | 0.0521  |
| rs12831673  | A | 0.0452  |
| rs141223197 | G | 0.0833  |
| rs144609873 | A | -0.1204 |
| rs78497144  | T | 0.0801  |
| rs7138673   | T | 0.0195  |
| rs117684842 | T | 0.0646  |
| rs80078355  | C | 0.0493  |
| rs56057649  | T | -0.0229 |
| rs111711298 | C | -0.0557 |
| rs73152375  | T | 0.1021  |
| rs61932188  | T | 0.0596  |
| rs885720    | A | -0.0195 |
| rs12368533  | A | 0.0526  |
| rs4964251   | T | -0.0306 |
| rs61922256  | G | 0.0918  |
| rs71465142  | C | 0.0857  |
| rs34107897  | A | 0.026   |
| rs10459159  | A | -0.0231 |
| rs2012894   | G | -0.0211 |
| rs113569939 | G | 0.0519  |
| rs77926416  | C | -0.0746 |
| rs816182    | T | -0.0161 |
| rs149188661 | T | -0.0809 |
| rs7302816   | C | 0.0198  |
| rs11113987  | C | 0.0244  |
| rs4435086   | G | -0.0238 |
| rs73218570  | T | -0.0264 |
| rs145350930 | T | 0.0686  |
| rs76049412  | A | -0.0431 |
| rs7296150   | G | 0.1104  |
| rs147917358 | T | -0.0959 |
| rs10859123  | C | 0.0189  |
| rs73427037  | C | 0.0398  |
| rs7964161   | G | -0.0169 |
| rs12230384  | G | -0.022  |
| rs794173    | G | 0.0157  |
| rs61956880  | C | -0.0665 |
| rs17579897  | A | 0.0666  |

|             |   |         |
|-------------|---|---------|
| rs7306187   | G | -0.0193 |
| rs116971493 | T | -0.0676 |
| rs73035462  | T | -0.0363 |
| rs117828300 | C | -0.0674 |
| rs140266360 | T | 0.0681  |
| rs7397745   | T | 0.0161  |
| rs2452806   | C | 0.0168  |
| rs10850492  | C | -0.0177 |
| rs34774896  | A | 0.0483  |
| rs138692022 | C | 0.0822  |
| rs144489306 | C | -0.0679 |
| rs166985    | C | 0.0209  |
| rs4761059   | C | 0.0163  |
| rs78007798  | A | 0.1316  |
| rs148652643 | C | 0.0625  |
| rs7968345   | A | -0.0298 |
| rs78790382  | T | -0.0361 |
| rs11183131  | A | 0.0459  |
| rs11062480  | A | 0.0318  |
| rs4761020   | T | 0.0208  |
| rs41276696  | A | -0.0466 |
| rs140954135 | T | -0.1098 |
| rs2306692   | T | 0.04    |
| rs549257    | C | -0.0201 |
| rs140991036 | A | -0.0595 |
| rs80351098  | C | 0.0523  |
| rs117593600 | T | -0.1168 |
| rs7316324   | G | 0.0171  |
| rs145632331 | A | -0.0547 |
| rs77477528  | C | -0.0614 |
| rs822640    | G | -0.0199 |
| rs7298575   | C | -0.0195 |
| rs10878867  | G | -0.1147 |
| rs12578482  | A | -0.0263 |
| rs112064175 | A | 0.1531  |
| rs113726329 | G | 0.1222  |
| rs10735359  | A | 0.0234  |
| rs9658368   | A | -0.0699 |
| rs149481529 | A | -0.0641 |
| rs1043810   | T | -0.0188 |
| rs7307323   | T | 0.0231  |
| rs11173046  | A | -0.0373 |
| rs484659    | T | -0.0191 |
| rs60723559  | T | -0.0328 |
| rs12708363  | C | 0.0333  |
| rs710705    | T | -0.0202 |
| rs138350573 | C | -0.072  |

|             |   |         |
|-------------|---|---------|
| rs112784168 | G | 0.0639  |
| rs12312224  | C | 0.0629  |
| rs4765016   | G | 0.0255  |
| rs11614278  | C | 0.0492  |
| rs76056309  | C | 0.0376  |
| rs616448    | T | 0.0224  |
| rs113551656 | A | -0.0552 |
| rs11112146  | T | -0.0168 |
| rs117639423 | C | 0.0802  |
| rs80332419  | T | -0.0634 |
| rs4238022   | A | -0.0285 |
| rs11051103  | C | -0.0224 |
| rs117329304 | A | -0.0883 |
| rs112283353 | A | -0.1041 |
| rs117808041 | A | 0.0661  |
| rs112567112 | T | -0.0469 |
| rs56099069  | C | -0.0621 |
| rs11110463  | A | 0.0206  |
| rs16943519  | C | -0.0283 |
| rs76169415  | C | -0.0715 |
| rs142918451 | G | 0.0669  |
| rs9668137   | G | -0.02   |
| rs143633401 | A | 0.0597  |
| rs117982226 | T | 0.1234  |
| rs7299840   | C | -0.0565 |
| rs7313416   | G | 0.041   |
| rs4765526   | G | 0.034   |
| rs7308081   | A | 0.0846  |
| rs116852836 | T | 0.1023  |
| rs11831476  | C | -0.0571 |
| rs11068734  | C | 0.0383  |
| rs75655648  | C | 0.1207  |
| rs3782403   | C | 0.0168  |
| rs80086574  | T | -0.1181 |
| rs80294517  | G | 0.0981  |
| rs143557535 | A | 0.1123  |
| rs118080535 | C | -0.0734 |
| rs11173322  | A | 0.0212  |
| rs1849816   | C | 0.0175  |
| rs11055434  | T | -0.0256 |
| rs12369820  | C | 0.0484  |
| rs10880835  | T | -0.0206 |
| rs61927692  | T | 0.1075  |
| rs61917217  | T | -0.0331 |
| rs76092615  | A | -0.0421 |
| rs117523200 | G | 0.0591  |
| rs73104499  | A | -0.0432 |

|             |   |         |
|-------------|---|---------|
| rs2303629   | C | 0.0162  |
| rs71450440  | G | 0.0731  |
| rs73085546  | A | 0.0965  |
| rs10860153  | G | -0.0159 |
| rs1498745   | A | -0.0248 |
| rs6538780   | T | -0.0158 |
| rs60185066  | A | -0.0535 |
| rs11611136  | T | 0.0195  |
| rs73113702  | T | 0.0639  |
| rs73128926  | T | -0.0914 |
| rs117752606 | A | 0.0892  |
| rs7970079   | A | 0.0349  |
| rs142959109 | C | -0.0838 |
| rs112655343 | T | 0.0316  |
| rs513272    | T | -0.0202 |
| rs7133686   | C | -0.0551 |
| rs76742390  | A | 0.0881  |
| rs4365136   | T | -0.0177 |
| rs73131929  | A | -0.0547 |
| rs61438791  | G | -0.0282 |
| rs117526157 | A | 0.0753  |
| rs216305    | T | -0.0201 |
| rs117663385 | G | 0.0466  |
| rs79448816  | C | 0.0766  |
| rs724346    | T | 0.0204  |
| rs35669271  | T | 0.0538  |
| rs145520445 | T | 0.0618  |
| rs11174337  | T | 0.0941  |
| rs10160844  | C | 0.0171  |
| rs7959900   | A | 0.0214  |
| rs4765057   | C | -0.0262 |
| rs140556350 | C | -0.1025 |
| rs73117248  | G | -0.0856 |
| rs7303919   | G | 0.0179  |
| rs17288199  | C | 0.0339  |
| rs7309369   | C | 0.0205  |
| rs59150896  | A | -0.0869 |
| rs919996    | T | 0.038   |
| rs10877905  | A | 0.0204  |
| rs2407808   | C | -0.0296 |
| rs145325789 | A | -0.0922 |
| rs10732739  | T | -0.0799 |
| rs1479114   | C | 0.0156  |
| rs35023953  | C | -0.0422 |
| rs80014272  | G | 0.0684  |
| rs149395538 | G | -0.0928 |
| rs7974138   | A | 0.074   |

|             |   |         |
|-------------|---|---------|
| rs74785858  | A | -0.0573 |
| rs3852538   | G | 0.0159  |
| rs7963127   | T | -0.0283 |
| rs7312381   | T | 0.0224  |
| rs58966224  | C | 0.0934  |
| rs34597826  | T | -0.0706 |
| rs139815485 | A | -0.0676 |
| rs11064955  | T | -0.0224 |
| rs10870511  | A | -0.0196 |
| rs146988205 | A | 0.0403  |
| rs11177434  | T | 0.0293  |
| rs1673857   | T | 0.0195  |
| rs7970179   | C | -0.0457 |
| rs11829800  | G | -0.0238 |
| rs77371628  | A | -0.0398 |
| rs7976650   | T | -0.0276 |
| rs56262489  | G | -0.018  |
| rs10862242  | A | -0.0234 |
| rs77264080  | T | -0.0435 |
| rs117551857 | G | -0.0733 |
| rs7306413   | T | 0.0156  |
| rs117892460 | C | 0.084   |
| rs78036267  | T | 0.0334  |
| rs34383617  | T | -0.0225 |
| rs12422520  | A | 0.0198  |
| rs78904262  | A | 0.0508  |
| rs78666558  | T | -0.0706 |
| rs73034111  | T | 0.0828  |
| rs73157216  | T | 0.0293  |
| rs79170570  | C | 0.0445  |
| rs117472403 | T | 0.0919  |
| rs142342556 | C | -0.0751 |
| rs141012342 | T | -0.0715 |
| rs312163    | T | 0.0154  |
| rs73157463  | T | 0.0571  |
| rs10744011  | T | 0.0165  |
| rs145771012 | A | 0.0601  |
| rs10845995  | C | -0.015  |
| rs17125021  | A | -0.0998 |
| rs56162539  | T | -0.0307 |
| rs6489669   | G | 0.0522  |
| rs11048000  | T | 0.0164  |
| rs117727388 | A | 0.0484  |
| rs141343641 | C | -0.0604 |
| rs17569638  | C | -0.0283 |
| rs79622186  | T | -0.0414 |
| rs3730607   | T | -0.0965 |

|             |   |         |
|-------------|---|---------|
| rs149868817 | G | 0.1082  |
| rs11063587  | A | -0.0797 |
| rs17182287  | G | 0.0876  |
| rs7961919   | C | 0.0288  |
| rs117209170 | G | 0.0526  |
| rs3741568   | T | 0.0196  |
| rs16908576  | T | -0.042  |
| rs73129635  | G | 0.0315  |
| rs75947414  | A | -0.0449 |
| rs10492074  | A | -0.0372 |
| rs11061544  | G | 0.0363  |
| rs34596600  | G | -0.053  |
| rs1019731   | A | -0.0224 |
| rs112259837 | T | 0.0952  |
| rs113859179 | G | -0.0629 |
| rs139102842 | T | -0.0765 |
| rs58261212  | G | -0.0321 |
| rs7974570   | C | 0.0252  |
| rs149390732 | T | -0.1064 |
| rs1123136   | C | 0.0171  |
| rs12829585  | T | -0.0235 |
| rs139711468 | A | -0.0516 |
| rs9657930   | A | 0.1223  |
| rs10466865  | C | 0.0311  |
| rs74705839  | G | -0.0321 |
| rs4761490   | T | 0.0243  |
| rs117786653 | T | -0.057  |
| rs77440173  | G | 0.0396  |
| rs1615257   | T | -0.0251 |
| rs16944538  | G | -0.0192 |
| rs10128918  | G | -0.0154 |
| rs7139264   | A | -0.0161 |
| rs112228359 | T | 0.0418  |
| rs4130827   | G | -0.0176 |
| rs11058404  | T | 0.0228  |
| rs4766237   | T | 0.0353  |
| rs61924834  | A | 0.064   |
| rs149909608 | T | -0.0984 |
| rs4237794   | T | 0.0185  |
| rs111891989 | G | 0.0353  |
| rs7295684   | A | 0.0348  |
| rs11834447  | T | -0.0463 |
| rs80155050  | G | -0.0741 |
| rs1558325   | T | -0.0161 |
| rs735637    | G | 0.0187  |
| rs11609958  | G | -0.0173 |
| rs2659837   | C | -0.0349 |



|             |   |         |
|-------------|---|---------|
| rs12810954  | T | -0.0282 |
| rs10877626  | G | -0.0183 |
| rs117050719 | A | -0.0627 |
| rs61912262  | G | -0.0783 |
| rs78076535  | A | -0.1241 |
| rs3847755   | C | -0.0183 |
| rs7979611   | C | 0.0171  |
| rs12809961  | C | 0.0604  |
| rs1688559   | T | -0.0166 |
| rs61915471  | C | -0.0428 |
| rs78995220  | A | 0.0813  |
| rs11534812  | G | 0.0523  |
| rs116857167 | T | -0.0716 |
| rs4763904   | A | 0.0176  |
| rs11049163  | A | 0.0233  |
| rs191093    | G | -0.0402 |
| rs17018712  | C | 0.0222  |
| rs4964173   | G | 0.0341  |
| rs76465767  | C | 0.0677  |
| rs12304676  | C | 0.1266  |
| rs73149021  | A | 0.0983  |
| rs11050869  | T | 0.031   |
| rs76166056  | C | -0.0899 |
| rs17107510  | T | 0.0245  |
| rs61927161  | A | 0.0563  |
| rs11109022  | T | -0.027  |
| rs7487262   | G | -0.0225 |
| rs10771024  | C | 0.0159  |
| rs78927598  | G | -0.0896 |
| rs148064593 | A | -0.0951 |
| rs7309384   | G | 0.0323  |
| rs78658195  | A | -0.0363 |
| rs147812597 | T | 0.0977  |
| rs4402333   | G | 0.0191  |
| rs701044    | G | 0.0186  |
| rs35107794  | G | 0.0203  |
| rs17605176  | G | -0.0593 |
| rs12303539  | C | -0.0591 |
| rs855224    | A | -0.0207 |
| rs1922574   | C | -0.0188 |
| rs4523741   | C | -0.0209 |
| rs147460028 | A | 0.0402  |
| rs7312020   | G | -0.0296 |
| rs12582196  | T | -0.0572 |
| rs4350435   | A | 0.0196  |
| rs12582340  | A | 0.067   |
| rs11612075  | A | 0.0398  |

|             |   |         |
|-------------|---|---------|
| rs7313107   | A | -0.0193 |
| rs7309718   | G | 0.0219  |
| rs117778590 | G | 0.0753  |
| rs12828734  | T | -0.0238 |
| rs4981002   | A | 0.0464  |
| rs117503496 | T | -0.026  |
| rs61925781  | T | 0.0754  |
| rs34929570  | T | 0.1112  |
| rs1961675   | A | -0.028  |
| rs7295859   | G | 0.0152  |
| rs11612244  | G | 0.0217  |
| rs9738077   | T | -0.0541 |
| rs10772598  | A | 0.0226  |
| rs58920866  | G | -0.0465 |
| rs7980589   | C | 0.0251  |
| rs144265595 | G | 0.0883  |
| rs746928    | C | -0.0192 |
| rs33219     | T | 0.0319  |
| rs12367514  | T | -0.0198 |
| rs12831504  | G | 0.0346  |
| rs148855350 | A | -0.0655 |
| rs77899486  | G | 0.0545  |
| rs10773592  | G | 0.0225  |
| rs58108997  | C | -0.0646 |
| rs7969006   | T | 0.0158  |
| rs73220756  | A | -0.0691 |
| rs11569370  | A | 0.0924  |
| rs17119494  | A | -0.0296 |
| rs7958715   | G | 0.0162  |
| rs138713661 | T | 0.0665  |
| rs11063133  | C | -0.0299 |
| rs10870514  | T | 0.0741  |
| rs2730592   | A | 0.0161  |
| rs1558825   | A | -0.0165 |
| rs1521372   | C | -0.0262 |
| rs4898541   | A | 0.0204  |
| rs12422631  | C | 0.0219  |
| rs7296163   | C | -0.017  |
| rs4129617   | T | 0.0224  |
| rs11178842  | C | -0.0309 |
| rs804461    | A | -0.0245 |
| rs7294738   | T | 0.0733  |
| rs112993968 | T | -0.0531 |
| rs60116929  | C | -0.0349 |
| rs1503767   | G | -0.0231 |
| rs112854609 | C | -0.0536 |
| rs10773776  | C | -0.0191 |

|             |   |         |
|-------------|---|---------|
| rs76877631  | G | 0.0677  |
| rs117640848 | A | -0.0623 |
| rs7313068   | A | -0.0185 |
| rs34016875  | C | -0.0394 |
| rs2271979   | T | 0.0287  |
| rs1614508   | C | -0.0172 |
| rs117975326 | A | -0.0791 |
| rs117545202 | C | 0.0619  |
| rs11062759  | A | -0.0357 |
| rs61922175  | A | 0.0219  |
| rs7296719   | A | 0.026   |
| rs117182187 | A | -0.0437 |
| rs12809281  | T | -0.0394 |
| rs151299102 | T | 0.0617  |
| rs61909785  | A | 0.0312  |
| rs150105243 | C | -0.098  |
| rs2723275   | A | -0.0167 |
| rs11110522  | A | 0.0325  |
| rs7134419   | A | -0.0201 |
| rs117928519 | T | -0.0877 |
| rs143453306 | G | -0.0781 |
| rs7959528   | C | 0.0309  |
| rs113854090 | G | -0.1009 |
| rs7311426   | G | -0.0183 |
| rs73159823  | A | 0.0702  |
| rs10770944  | A | -0.0157 |
| rs1893491   | C | 0.0348  |
| rs12830865  | A | 0.0614  |
| rs600916    | A | 0.0255  |
| rs74339818  | A | 0.0806  |
| rs10735321  | T | 0.0259  |
| rs79992593  | G | -0.0427 |
| rs61943679  | A | 0.021   |
| rs989231    | T | 0.0165  |
| rs4964654   | A | 0.022   |
| rs602474    | C | -0.024  |
| rs73154952  | C | -0.0459 |
| rs2730801   | T | -0.0621 |
| rs10735458  | A | -0.0287 |
| rs118084076 | G | -0.084  |
| rs11612029  | G | 0.0444  |
| rs138229646 | C | 0.065   |
| rs10774862  | A | 0.0155  |
| rs79287862  | C | -0.0431 |
| rs10846663  | C | -0.0194 |
| rs117671660 | T | 0.0484  |
| rs11110874  | T | 0.0526  |

|             |   |         |
|-------------|---|---------|
| rs2446990   | G | -0.0164 |
| rs139086943 | T | -0.0544 |
| rs11183396  | G | -0.0354 |
| rs2029166   | T | 0.0173  |
| rs73186255  | C | 0.0219  |
| rs11108104  | G | -0.0248 |
| rs631882    | G | -0.0294 |
| rs143756107 | A | -0.0328 |
| rs9658610   | T | 0.0696  |
| rs1551845   | G | -0.0265 |
| rs4072436   | G | 0.0152  |
| rs76939401  | A | -0.0936 |
| rs56391088  | T | -0.0236 |
| rs4760578   | T | 0.0291  |
| rs117135313 | T | -0.1394 |
| rs149115498 | T | -0.0663 |
| rs12303772  | T | 0.0267  |
| rs7295630   | G | -0.0235 |
| rs7968915   | C | -0.0178 |
| rs118032663 | G | 0.1109  |
| rs1533752   | G | 0.0709  |
| rs12228602  | C | -0.0236 |
| rs11610211  | C | 0.0839  |
| rs61907702  | T | -0.0707 |
| rs1480003   | G | -0.03   |
| rs310844    | C | 0.0203  |
| rs117282458 | T | 0.0569  |
| rs28508242  | G | 0.1215  |
| rs59316697  | C | -0.039  |
| rs111837731 | T | -0.0825 |
| rs79100503  | T | -0.07   |
| rs75019587  | T | 0.0482  |
| rs12371391  | C | -0.0148 |
| rs2887474   | C | 0.0156  |
| rs77220800  | A | 0.0502  |
| rs17609576  | T | 0.0309  |
| rs35479394  | A | 0.0416  |
| rs884256    | G | -0.0222 |
| rs145321080 | T | -0.0461 |
| rs117460788 | G | 0.0496  |
| rs78349600  | T | 0.0428  |
| rs73157021  | T | -0.1192 |
| rs117198289 | A | -0.0908 |
| rs10876498  | G | 0.0181  |
| rs67075297  | C | 0.0494  |
| rs2220686   | A | 0.0273  |
| rs943402    | C | 0.0203  |

|             |   |         |
|-------------|---|---------|
| rs114619033 | T | 0.025   |
| rs2730564   | G | 0.0151  |
| rs11043832  | A | 0.0157  |
| rs73306463  | G | 0.0168  |
| rs143803843 | A | -0.0852 |
| rs116867595 | C | 0.0517  |
| rs150775562 | A | 0.08    |
| rs7966049   | G | 0.032   |
| rs12307364  | T | 0.0175  |
| rs12301055  | G | -0.0338 |
| rs35022834  | C | 0.082   |
| rs117734063 | T | 0.0979  |
| rs55690151  | C | -0.0847 |
| rs10785308  | T | 0.0161  |
| rs10773168  | C | 0.0246  |
| rs140481354 | A | -0.0814 |
| rs10841993  | C | 0.0344  |
| rs146173833 | T | -0.0996 |
| rs56175780  | C | 0.0201  |
| rs141147614 | C | 0.067   |
| rs1014448   | C | -0.03   |
| rs117407215 | C | -0.0765 |
| rs61952934  | A | -0.0518 |
| rs11170675  | A | 0.0551  |
| rs61933189  | A | -0.0167 |
| rs139777065 | C | 0.0286  |
| rs73034862  | G | -0.0501 |
| rs78384994  | T | -0.0913 |
| rs7962636   | T | 0.0159  |
| rs150031288 | A | -0.134  |
| rs12423223  | A | -0.0253 |
| rs544767    | G | 0.0182  |
| rs12425089  | T | -0.023  |
| rs7297674   | G | 0.0264  |
| rs35049626  | A | 0.0472  |
| rs79172476  | T | -0.078  |
| rs118061849 | G | -0.0838 |
| rs75458243  | T | 0.0455  |
| rs11830209  | C | 0.0525  |
| rs77474622  | C | -0.0344 |
| rs77977581  | T | 0.022   |
| rs7963966   | G | -0.0158 |
| rs145589625 | C | -0.1272 |
| rs7963864   | T | -0.0593 |
| rs112215938 | A | 0.1152  |
| rs2252026   | C | 0.015   |
| rs7976781   | T | -0.0204 |

|             |   |         |
|-------------|---|---------|
| rs11609523  | A | -0.0233 |
| rs77395756  | T | 0.0594  |
| rs7970431   | A | 0.0622  |
| rs10846915  | C | -0.0162 |
| rs112949546 | A | 0.1613  |
| rs12303008  | G | 0.0387  |
| rs80330769  | T | 0.0739  |
| rs61573358  | G | 0.0335  |
| rs224773    | T | -0.0167 |
| rs17708529  | A | -0.0239 |
| rs12228756  | A | -0.0318 |
| rs76777294  | A | 0.0787  |
| rs1799464   | A | 0.0165  |
| rs256655    | T | 0.0151  |
| rs653972    | A | 0.0363  |
| rs73133877  | G | 0.0312  |
| rs4135106   | C | -0.0374 |
| rs11612328  | A | -0.0493 |
| rs470671    | A | 0.0322  |
| rs11067769  | G | 0.0151  |
| rs17619569  | G | 0.0942  |
| rs4980929   | C | -0.0156 |
| rs73072420  | T | -0.0646 |
| rs112173082 | A | 0.0518  |
| rs142421892 | A | -0.1258 |
| rs3759178   | G | 0.0161  |
| rs1549996   | A | 0.0162  |
| rs61541257  | C | -0.0538 |
| rs4767654   | G | 0.0164  |
| rs10773920  | C | 0.0311  |
| rs11116744  | T | -0.1196 |
| rs76914053  | C | 0.0477  |
| rs73187857  | A | 0.0208  |
| rs7316592   | T | -0.0322 |
| rs140001944 | T | 0.0817  |
| rs11046951  | T | 0.0261  |
| rs4898534   | G | -0.016  |
| rs2400842   | A | -0.0258 |
| rs34353492  | C | -0.032  |
| rs7980247   | A | 0.0152  |
| rs798224    | T | -0.0184 |
| rs11062730  | C | -0.029  |
| rs10506726  | T | 0.0382  |
| rs112918689 | A | -0.023  |
| rs17104190  | A | -0.0277 |
| rs11833552  | A | 0.0306  |
| rs11107680  | T | -0.0359 |

|             |   |         |
|-------------|---|---------|
| rs10773961  | C | -0.0367 |
| rs7133793   | G | 0.0168  |
| rs112795655 | T | 0.0616  |
| rs2373457   | G | 0.0154  |
| rs35224425  | T | 0.0861  |
| rs1036430   | C | 0.0762  |
| rs7135512   | T | 0.0326  |
| rs10774281  | G | 0.018   |
| rs17178877  | T | -0.0221 |
| rs145542121 | C | 0.1096  |
| rs2400693   | G | -0.1269 |
| rs55708135  | T | -0.0357 |
| rs112345711 | A | -0.0731 |
| rs10082891  | T | 0.0272  |
| rs1488056   | A | -0.0373 |
| rs9669403   | A | -0.0162 |
| rs112537817 | A | 0.0926  |
| rs117398524 | A | 0.0711  |
| rs147573737 | C | 0.0642  |
| rs7970632   | G | -0.0157 |
| rs11048961  | G | -0.0347 |
| rs60895982  | A | 0.0723  |
| rs17746603  | C | 0.0762  |
| rs12819287  | T | -0.0232 |
| rs7964240   | G | 0.0246  |
| rs6487668   | C | 0.0175  |
| rs73117792  | G | -0.0528 |
| rs117335824 | C | -0.0672 |
| rs145331843 | C | 0.0889  |
| rs145372273 | C | 0.0758  |
| rs72487574  | T | 0.0672  |
| rs10773094  | T | 0.0217  |
| rs75890988  | A | 0.0179  |
| rs974872    | G | 0.018   |
| rs78354453  | A | 0.0299  |
| rs79385743  | T | -0.083  |
| rs816183    | A | 0.0158  |
| rs113619434 | C | 0.0414  |
| rs11060202  | T | 0.0166  |
| rs138588701 | C | 0.0754  |
| rs17029487  | A | -0.06   |
| rs115607869 | G | 0.0339  |
| rs11060678  | T | -0.0232 |
| rs77893809  | A | 0.0364  |
| rs10850856  | G | -0.0223 |
| rs16928563  | C | -0.0362 |
| rs114582597 | G | -0.072  |

|             |   |         |
|-------------|---|---------|
| rs148699498 | C | 0.0766  |
| rs815874    | T | 0.0149  |
| rs148619817 | T | 0.0972  |
| rs141799222 | G | -0.0582 |
| rs74097641  | C | -0.0908 |
| rs79917200  | A | 0.0508  |
| rs61926357  | A | -0.0992 |
| rs80093766  | T | -0.0184 |
| rs6489708   | C | -0.028  |
| rs117734006 | C | -0.0747 |
| rs10845476  | A | -0.0242 |
| rs11613420  | G | 0.0237  |
| rs58482001  | T | -0.0405 |
| rs11064748  | A | 0.0517  |
| rs4761646   | T | -0.0491 |
| rs3815479   | T | -0.0153 |
| rs79738065  | A | 0.0505  |
| rs12099704  | T | 0.0209  |
| rs140485185 | A | 0.1063  |
| rs111732213 | A | 0.0324  |
| rs140377562 | G | -0.0746 |
| rs117640475 | A | -0.072  |
| rs111924686 | G | 0.0457  |
| rs10777392  | T | -0.0151 |
| rs7980688   | C | -0.0184 |
| rs1974710   | A | 0.0188  |
| rs141245459 | T | 0.0582  |
| rs6538450   | A | 0.0302  |
| rs75221748  | C | -0.0969 |
| rs2240798   | T | 0.0212  |
| rs149463228 | A | -0.0319 |
| rs2291268   | G | 0.0332  |
| rs17030480  | T | 0.0159  |
| rs146060683 | C | 0.092   |
| rs117602138 | T | 0.1053  |
| rs79150298  | A | 0.0297  |
| rs147729761 | T | 0.0628  |
| rs4931631   | T | 0.0152  |
| rs73179767  | G | -0.0902 |
| rs12366981  | A | -0.0177 |
| rs118047513 | T | 0.0789  |
| rs139727264 | G | -0.0487 |
| rs112341217 | A | -0.0171 |
| rs78313558  | A | -0.0299 |
| rs11057542  | C | 0.0181  |
| rs61937442  | A | 0.035   |
| rs117698362 | A | -0.0459 |



|             |   |         |
|-------------|---|---------|
| rs11046796  | A | -0.0174 |
| rs80062046  | G | 0.0969  |
| rs12302104  | A | -0.0965 |
| rs11049904  | T | 0.0197  |
| rs79005510  | T | -0.0901 |
| rs56080025  | G | -0.0362 |
| rs148405836 | G | 0.0557  |
| rs12320735  | G | -0.0155 |
| rs2128611   | C | -0.0225 |
| rs35692646  | C | 0.0568  |
| rs150035819 | A | 0.0795  |
| rs7308238   | A | 0.0152  |
| rs4759830   | A | 0.0241  |
| rs56300117  | T | 0.0267  |
| rs71579337  | C | -0.0779 |
| rs77481251  | C | 0.0619  |
| rs74351589  | G | -0.095  |
| rs7137355   | T | 0.0247  |
| rs117255725 | C | 0.0627  |
| rs7315278   | C | -0.0157 |
| rs7958163   | A | -0.0197 |
| rs11060140  | G | 0.0184  |
| rs79348063  | G | -0.0517 |
| rs10847760  | T | -0.0161 |
| rs10777472  | C | 0.0158  |
| rs12828089  | A | -0.0235 |
| rs75134025  | C | 0.0598  |
| rs150724481 | A | 0.1123  |
| rs111487765 | G | 0.0686  |
| rs79779686  | G | -0.0828 |
| rs2667478   | A | 0.0187  |
| rs117968441 | A | 0.0978  |
| rs10849031  | G | -0.0804 |
| rs4409895   | T | -0.0193 |
| rs11047303  | A | 0.0828  |
| rs57082141  | C | 0.0269  |
| rs73124816  | C | -0.1371 |
| rs75171325  | C | -0.059  |
| rs61926311  | G | -0.0638 |
| rs62640853  | A | 0.0332  |
| rs11047955  | G | -0.0302 |
| rs2062858   | A | 0.0272  |
| rs1997201   | T | 0.128   |
| rs2227491   | T | -0.0149 |
| rs12370262  | A | 0.029   |
| rs117836759 | G | 0.0487  |
| rs61099764  | C | 0.0142  |

|             |   |         |
|-------------|---|---------|
| rs10777611  | A | -0.0206 |
| rs61942423  | T | 0.0206  |
| rs148167261 | A | -0.1028 |
| rs147052551 | A | -0.0695 |
| rs73235943  | G | -0.0453 |
| rs73081065  | G | -0.043  |
| rs78165519  | T | 0.0612  |
| rs970095    | C | 0.0148  |
| rs4765091   | C | -0.015  |
| rs3924187   | C | 0.0212  |
| rs3213776   | G | -0.0177 |
| rs141337713 | T | 0.0884  |
| rs73195636  | G | 0.0451  |
| rs75844502  | T | 0.1097  |
| rs143658391 | C | 0.0722  |
| rs61945416  | C | 0.0711  |
| rs55834271  | G | -0.0243 |
| rs59560692  | C | -0.0655 |
| rs10771215  | T | 0.0165  |
| rs10878761  | A | -0.0392 |
| rs28557447  | C | 0.0636  |
| rs4964583   | G | -0.0208 |
| rs12820411  | C | -0.0159 |
| rs35543857  | G | -0.0353 |
| rs7137426   | T | 0.0156  |
| rs111989433 | A | -0.0303 |
| rs4251571   | G | 0.0868  |
| rs7134316   | A | 0.0161  |
| rs57294808  | C | 0.0306  |
| rs12229873  | G | 0.0195  |
| rs7135816   | T | -0.0271 |
| rs4760371   | T | 0.0205  |
| rs143200320 | T | -0.1256 |
| rs869992    | G | 0.0236  |
| rs144673668 | C | -0.0366 |
| rs76933021  | G | -0.0599 |
| rs117949939 | A | 0.0532  |
| rs1981672   | T | -0.0165 |
| rs147357428 | T | -0.0985 |
| rs61050251  | G | -0.0248 |
| rs7136534   | T | -0.0175 |
| rs17801265  | A | 0.0225  |
| rs61747565  | A | -0.0207 |
| rs145393359 | T | 0.0572  |
| rs345679    | T | 0.0322  |
| rs10861422  | C | 0.0198  |
| rs11116442  | G | -0.0179 |

|             |   |         |
|-------------|---|---------|
| rs73217401  | C | 0.095   |
| rs12819888  | T | -0.0434 |
| rs11614250  | T | 0.0215  |
| rs11612934  | A | 0.0339  |
| rs146544715 | T | -0.0954 |
| rs139965003 | T | 0.0682  |
| rs79880337  | G | 0.0722  |
| rs118129778 | T | -0.0377 |
| rs6598205   | G | 0.0176  |
| rs11608878  | T | 0.0252  |
| rs12368216  | G | -0.0145 |
| rs4760822   | T | -0.0197 |
| rs73156697  | C | -0.0404 |
| rs138769431 | T | -0.1208 |
| rs12099798  | C | 0.0832  |
| rs145623974 | A | 0.1043  |
| rs113825091 | A | 0.0295  |
| rs11112660  | G | -0.0148 |
| rs35308094  | G | -0.0369 |
| rs2300739   | T | -0.0173 |
| rs7301783   | A | -0.0207 |
| rs78068127  | T | -0.0817 |
| rs74650970  | T | -0.0751 |
| rs1064125   | T | 0.021   |
| rs33154     | G | 0.0153  |
| rs10841497  | G | -0.0164 |
| rs73284070  | T | 0.0248  |
| rs1239906   | C | 0.0331  |
| rs2468197   | C | -0.0147 |
| rs142373787 | C | 0.0717  |
| rs78317981  | G | -0.0822 |
| rs35044109  | A | -0.0796 |
| rs144106147 | A | 0.1044  |
| rs829066    | T | 0.0163  |
| rs17330412  | G | -0.034  |
| rs1546246   | C | 0.0152  |
| rs418105    | T | -0.0146 |
| rs144087653 | G | -0.0655 |
| rs61926151  | A | 0.0507  |
| rs140691569 | G | 0.1045  |
| rs78885704  | G | 0.0525  |
| rs2243512   | T | -0.0148 |
| rs117637419 | C | -0.0517 |
| rs2124476   | T | -0.0302 |
| rs7296761   | T | 0.0146  |
| rs17766408  | C | -0.0307 |
| rs12313324  | G | 0.0215  |

|             |   |         |
|-------------|---|---------|
| rs1522303   | T | 0.0261  |
| rs76703810  | G | 0.0738  |
| rs12426110  | A | 0.0435  |
| rs79598393  | T | 0.0788  |
| rs10778287  | G | -0.0238 |
| rs59020652  | C | -0.0478 |
| rs139277263 | A | -0.1001 |
| rs7960493   | G | 0.0181  |
| rs2138256   | A | -0.0151 |
| rs1567910   | G | 0.0145  |
| rs7979265   | A | 0.0406  |
| rs10842621  | G | -0.0268 |
| rs11057884  | G | -0.0239 |
| rs12423282  | T | 0.03    |
| rs117185511 | T | -0.0563 |
| rs7963412   | C | -0.0142 |
| rs117377641 | T | -0.0506 |
| rs10846167  | T | 0.0153  |
| rs11046625  | G | 0.0417  |
| rs141375906 | T | 0.0471  |
| rs78236500  | C | -0.143  |
| rs11612412  | A | -0.014  |
| rs73188510  | A | -0.03   |
| rs150922807 | A | 0.0429  |
| rs7959768   | T | 0.0156  |
| rs143878706 | G | 0.1066  |
| rs116891880 | T | 0.0792  |
| rs118119205 | T | -0.0676 |
| rs2569975   | G | 0.0189  |
| rs144510844 | T | -0.1045 |
| rs144424246 | T | -0.0581 |
| rs12822426  | T | 0.0421  |
| rs61923467  | T | -0.0634 |
| rs111117182 | G | -0.0152 |
| rs7974023   | T | -0.0147 |
| rs3782851   | T | 0.0304  |
| rs10841856  | C | -0.0151 |
| rs708204    | G | -0.0489 |
| rs146578911 | A | -0.1149 |
| rs75912947  | C | 0.0702  |
| rs4963584   | A | 0.0142  |
| rs3910533   | C | 0.0513  |
| rs117581785 | A | -0.057  |
| rs12314849  | C | 0.0146  |
| rs11111629  | C | 0.0142  |
| rs7487222   | T | 0.0226  |
| rs144694041 | G | 0.0702  |

|             |   |         |
|-------------|---|---------|
| rs117761455 | T | 0.071   |
| rs77834440  | G | -0.0561 |
| rs2895799   | C | -0.0277 |
| rs117765826 | T | 0.0511  |
| rs60456228  | A | 0.0176  |
| rs141708268 | A | 0.0818  |
| rs838916    | A | -0.0141 |
| rs4373988   | A | -0.0182 |
| rs9804823   | G | -0.0374 |
| rs61229924  | A | -0.0181 |
| rs992742    | A | 0.0179  |
| rs145028061 | T | 0.0859  |
| rs12820814  | T | 0.075   |
| rs61936009  | A | 0.0699  |
| rs3751254   | T | 0.0287  |
| rs1846018   | T | 0.0247  |
| rs151017217 | C | -0.0355 |
| rs10861453  | G | 0.014   |
| rs78011072  | G | 0.1519  |
| rs265638    | C | 0.019   |
| rs142314200 | T | -0.0672 |
| rs17027918  | T | 0.0404  |
| rs117547564 | T | 0.0668  |
| rs142662601 | T | -0.0599 |
| rs76243791  | T | 0.0299  |
| rs2418080   | G | -0.0183 |
| rs17120778  | A | -0.0672 |
| rs77617791  | T | -0.0895 |
| rs117342408 | A | -0.0563 |
| rs7956544   | T | 0.0154  |
| rs7294693   | A | 0.0263  |
| rs116910287 | T | -0.0581 |
| rs11114871  | G | -0.0185 |
| rs145640835 | T | -0.0454 |
| rs56151147  | T | 0.0143  |
| rs117226891 | T | -0.0612 |
| rs147175344 | T | 0.0594  |
| rs11055962  | A | -0.0208 |
| rs4761368   | A | 0.014   |
| rs117405401 | A | -0.0856 |
| rs7304587   | A | -0.0988 |
| rs7974784   | T | -0.0216 |
| rs9795791   | T | 0.0226  |
| rs1458186   | G | -0.0227 |
| rs142145511 | T | -0.1133 |
| rs60845443  | T | -0.0157 |
| rs75088786  | T | 0.0363  |

|             |   |         |
|-------------|---|---------|
| rs75814378  | T | 0.104   |
| rs7962773   | G | 0.0186  |
| rs117521692 | G | -0.0516 |
| rs7297487   | G | 0.056   |
| rs77009487  | G | -0.0179 |
| rs10778687  | A | -0.0388 |
| rs4519183   | T | -0.0585 |
| rs138646359 | G | 0.1104  |
| rs11106471  | C | 0.0338  |
| rs7300332   | T | -0.0634 |
| rs918168    | T | 0.0153  |
| rs75265469  | C | 0.0907  |
| rs116938923 | A | 0.1338  |
| rs4765583   | G | -0.0555 |
| rs74907797  | G | 0.0926  |
| rs61558853  | A | -0.0508 |
| rs6539417   | A | -0.0234 |
| rs17288073  | A | -0.0251 |
| rs76480705  | T | 0.0514  |
| rs12322859  | G | 0.016   |
| rs10862916  | A | 0.0219  |
| rs117378701 | G | 0.0681  |
| rs6489145   | A | -0.0151 |
| rs646707    | A | 0.016   |
| rs112526079 | C | 0.0565  |
| rs11110881  | T | -0.0537 |
| rs11111853  | A | 0.0418  |
| rs34572498  | G | 0.0471  |
| rs112850087 | G | 0.0165  |
| rs6539232   | C | -0.0194 |
| rs111322695 | G | -0.0771 |
| rs16907538  | A | 0.028   |
| rs55742883  | A | 0.0198  |
| rs75000107  | C | 0.1174  |
| rs77660584  | A | -0.0342 |
| rs112619335 | T | 0.0829  |
| rs118171527 | C | 0.0838  |
| rs117492858 | C | -0.0788 |
| rs2703063   | G | 0.0266  |
| rs1239933   | T | -0.0206 |
| rs117067935 | A | -0.1031 |
| rs73163125  | A | 0.0223  |
| rs117489454 | G | -0.0479 |
| rs150290092 | A | 0.0693  |
| rs12427077  | G | 0.0191  |
| rs77285646  | A | -0.0696 |
| rs76785442  | A | 0.0195  |

|             |   |         |
|-------------|---|---------|
| rs7308442   | T | -0.0168 |
| rs2619439   | C | -0.0169 |
| rs117961788 | T | -0.0342 |
| rs7485254   | A | -0.0183 |
| rs11059924  | T | -0.0149 |
| rs11047573  | T | 0.0646  |
| rs11064306  | C | 0.0199  |
| rs118164708 | A | 0.0636  |
| rs73423103  | T | 0.0767  |
| rs78613623  | T | 0.022   |
| rs11053489  | A | -0.0222 |
| rs117379012 | A | -0.0677 |
| rs2239204   | T | -0.0342 |
| rs17763571  | G | 0.0671  |
| rs113580100 | G | -0.0613 |
| rs74437822  | T | -0.0638 |
| rs12307079  | G | 0.0316  |
| rs2264864   | C | 0.0327  |
| rs2567978   | T | 0.0183  |
| rs12367378  | G | 0.0146  |
| rs146983427 | C | -0.0475 |
| rs16933513  | G | -0.0371 |
| rs4762492   | A | 0.0348  |
| rs2221096   | A | -0.0654 |
| rs10845716  | C | 0.0269  |
| rs79109875  | G | 0.0275  |
| rs143926433 | G | 0.0917  |
| rs7959125   | G | 0.0197  |
| rs74393821  | T | 0.054   |
| rs73148971  | C | -0.0473 |
| rs3819526   | C | 0.0151  |
| rs143572577 | A | -0.0983 |
| rs11106380  | G | 0.0315  |
| rs142893251 | C | 0.0768  |
| rs73061198  | A | 0.0327  |
| rs7956104   | C | -0.0408 |
| rs2540135   | A | 0.0701  |
| rs12310531  | C | 0.036   |
| rs300446    | T | 0.0151  |
| rs77403954  | T | -0.104  |
| rs111260356 | T | 0.0557  |
| rs7302341   | T | 0.0166  |
| rs78705232  | A | -0.0731 |
| rs73128398  | A | -0.0525 |
| rs113033740 | A | 0.0541  |
| rs117896918 | A | -0.0633 |
| rs74319995  | A | 0.0386  |

|             |   |         |
|-------------|---|---------|
| rs11057520  | A | 0.0222  |
| rs7965928   | T | 0.0148  |
| rs73049469  | A | -0.0321 |
| rs10744629  | G | 0.0217  |
| rs61751357  | T | 0.0709  |
| rs918089    | C | -0.0258 |
| rs116843788 | A | -0.0526 |
| rs112619767 | G | 0.0829  |
| rs117673338 | C | 0.033   |
| rs3751198   | A | -0.0146 |
| rs118001579 | A | 0.0698  |
| rs11564115  | G | 0.0452  |
| rs76135556  | A | -0.0681 |
| rs11613446  | A | 0.1222  |
| rs2888436   | T | 0.0404  |
| rs142821088 | C | -0.0641 |
| rs117148911 | T | -0.0774 |
| rs59512779  | G | 0.0231  |
| rs12371323  | C | 0.0651  |
| rs139457745 | T | 0.044   |
| rs138336835 | A | 0.0607  |
| rs865607    | G | 0.0172  |
| rs11054639  | A | -0.019  |
| rs75703797  | A | 0.053   |
| rs55659121  | A | 0.0211  |
| rs7973081   | C | -0.014  |
| rs117221067 | A | 0.0613  |
| rs11068156  | G | 0.0162  |
| rs73125005  | T | 0.0642  |
| rs145170603 | C | 0.0901  |
| rs146437037 | T | 0.0409  |
| rs661729    | T | -0.0368 |
| rs2046381   | C | -0.0173 |
| rs141742948 | C | 0.0805  |
| rs7131862   | A | -0.0252 |
| rs142811822 | A | -0.0273 |
| rs4765761   | C | -0.0192 |
| rs4764576   | G | -0.0193 |
| rs2733294   | G | -0.0192 |
| rs56073310  | T | 0.0331  |
| rs1383390   | T | 0.0232  |
| rs4414324   | A | 0.0256  |
| rs3217862   | G | -0.0199 |
| rs9739733   | T | -0.0291 |
| rs148709088 | C | -0.0593 |
| rs11608624  | A | -0.0561 |
| rs116962185 | A | -0.0663 |



|             |   |         |
|-------------|---|---------|
| rs4964832   | T | -0.0153 |
| rs2701607   | A | 0.0159  |
| rs35187840  | A | -0.0577 |
| rs11177516  | A | -0.0239 |
| rs78323196  | T | -0.0505 |
| rs73056668  | C | 0.023   |
| rs74089975  | C | -0.0339 |
| rs1049606   | C | 0.022   |
| rs139567637 | G | -0.0829 |
| rs6539609   | T | -0.0181 |
| rs117846170 | A | 0.053   |
| rs7969446   | A | -0.0142 |
| rs6486566   | T | -0.0163 |
| rs140970165 | T | -0.0767 |
| rs10859036  | G | -0.033  |
| rs35653459  | A | -0.0962 |
| rs56270948  | A | 0.0496  |
| rs11610114  | C | 0.0428  |
| rs142352793 | G | 0.0473  |
| rs11105236  | T | -0.081  |
| rs17037453  | T | 0.0299  |
| rs4766335   | G | -0.0142 |
| rs2033794   | C | 0.0161  |
| rs10842667  | T | -0.0175 |
| rs11047097  | A | -0.0271 |
| rs3742023   | T | 0.0145  |
| rs11049177  | C | 0.0158  |
| rs73221443  | A | -0.0469 |
| rs34375584  | T | 0.0187  |
| rs73148514  | C | -0.0401 |
| rs285550    | G | 0.0167  |
| rs73217776  | A | 0.0544  |
| rs1732493   | C | 0.0166  |
| rs1190508   | T | -0.0337 |
| rs140084656 | T | 0.0729  |
| rs117580657 | T | -0.041  |
| rs10848236  | A | 0.0181  |
| rs7967671   | C | 0.0161  |
| rs150057183 | T | -0.0977 |
| rs11106953  | T | 0.0187  |
| rs10785233  | G | -0.0361 |
| rs1587686   | A | -0.0196 |
| rs76569101  | G | -0.0476 |
| rs2887955   | T | 0.0151  |
| rs772738    | A | -0.0662 |
| rs10849916  | T | 0.015   |
| rs138923218 | T | 0.0727  |

|             |   |         |
|-------------|---|---------|
| rs116048088 | C | 0.117   |
| rs7298104   | T | 0.0603  |
| rs117322608 | A | 0.1091  |
| rs77085412  | A | 0.0261  |
| rs949911    | A | -0.0176 |
| rs73038056  | G | 0.0441  |
| rs2252993   | C | -0.035  |
| rs117746666 | A | -0.0494 |
| rs143795138 | A | 0.0771  |
| rs78358315  | G | -0.0886 |
| rs118037677 | A | -0.0451 |
| rs10160920  | T | 0.0196  |
| rs2728844   | G | -0.0194 |
| rs7313912   | C | -0.039  |
| rs12300920  | C | -0.0164 |
| rs11060042  | A | 0.0832  |
| rs7136708   | T | -0.0572 |
| rs141938947 | T | -0.1171 |
| rs12320788  | T | -0.053  |
| rs73039974  | C | -0.025  |
| rs111110694 | T | 0.1031  |
| rs12300548  | T | 0.0537  |
| rs11182514  | G | -0.0223 |
| rs5027903   | C | 0.0239  |
| rs149794157 | T | 0.0818  |
| rs11837658  | T | -0.0146 |
| rs61943445  | G | 0.0807  |
| rs56102355  | C | -0.0345 |
| rs143224048 | T | -0.0979 |
| rs7975512   | C | 0.014   |
| rs77896122  | C | -0.0855 |
| rs76063391  | G | 0.08    |
| rs7954818   | T | -0.023  |
| rs113794488 | G | -0.0953 |
| rs1310679   | G | 0.0137  |
| rs7297088   | C | 0.0592  |
| rs2418041   | C | -0.0397 |
| rs2216165   | G | 0.0651  |
| rs112505042 | C | -0.0816 |
| rs78527410  | C | -0.0559 |
| rs898158    | G | -0.015  |
| rs12322451  | A | -0.0158 |
| rs75021172  | C | 0.0381  |
| rs149617787 | C | 0.0969  |
| rs74603821  | C | 0.0564  |
| rs3217913   | G | -0.0483 |
| rs34588809  | A | -0.0276 |

|             |   |         |
|-------------|---|---------|
| rs117075935 | T | 0.074   |
| rs10861465  | A | -0.0161 |
| rs34757345  | T | 0.0347  |
| rs74459784  | A | -0.0605 |
| rs142217535 | G | -0.0865 |
| rs878962    | G | 0.0145  |
| rs117130947 | C | 0.132   |
| rs7975816   | A | 0.0371  |
| rs1882114   | T | 0.0172  |
| rs4763954   | G | 0.023   |
| rs10777286  | A | -0.0165 |
| rs10506999  | C | 0.0223  |
| rs75168003  | T | 0.0912  |
| rs117407263 | T | -0.1053 |
| rs145756280 | A | -0.0512 |
| rs61921798  | G | -0.0381 |
| rs79987515  | A | -0.0804 |
| rs55877914  | G | -0.0154 |
| rs999391    | A | 0.0688  |
| rs117237128 | G | -0.0599 |
| rs10773157  | G | 0.0201  |
| rs7135001   | A | 0.0324  |
| rs146733292 | T | -0.0293 |
| rs7974976   | T | 0.0151  |
| rs144359981 | A | 0.0654  |
| rs78807400  | T | 0.0614  |
| rs34793912  | A | -0.0749 |
| rs118135284 | G | -0.0558 |
| rs76494966  | T | 0.0345  |
| rs76460054  | T | 0.1009  |
| rs2164502   | A | 0.0166  |
| rs12426482  | T | 0.083   |
| rs11053893  | C | -0.0361 |
| rs112450338 | G | 0.0516  |
| rs71458590  | T | -0.0843 |
| rs3741761   | T | -0.0151 |
| rs77985887  | A | 0.0313  |
| rs10507028  | A | -0.0519 |
| rs11611721  | T | 0.029   |
| rs728906    | G | 0.016   |
| rs2698250   | C | 0.0498  |
| rs116861199 | A | -0.0541 |
| rs1048497   | A | 0.0184  |
| rs117764025 | T | 0.046   |
| rs73064459  | C | 0.0462  |
| rs10842207  | A | 0.0275  |
| rs118119949 | G | 0.1047  |

|             |   |         |
|-------------|---|---------|
| rs4554986   | G | 0.0251  |
| rs76500574  | G | 0.106   |
| rs73131721  | A | -0.0259 |
| rs78639745  | G | -0.0417 |
| rs10492224  | G | 0.0172  |
| rs555131    | A | 0.0377  |
| rs73341540  | T | 0.0886  |
| rs11063560  | A | 0.0462  |
| rs1634536   | T | 0.0141  |
| rs73224914  | A | -0.0429 |
| rs143357213 | C | 0.0712  |
| rs11065408  | C | 0.0333  |
| rs12368902  | A | 0.0718  |
| rs1607651   | T | 0.0164  |
| rs76718742  | G | 0.0162  |
| rs35531449  | C | 0.0443  |
| rs117872759 | G | 0.042   |
| rs117383222 | A | 0.1166  |
| rs12823728  | G | -0.0147 |
| rs4076729   | A | 0.0499  |
| rs145001823 | C | 0.0935  |
| rs12231242  | T | -0.0421 |
| rs111339777 | T | -0.0796 |
| rs117536841 | T | -0.1038 |
| rs12818182  | C | -0.0341 |
| rs147948774 | G | -0.059  |
| rs142242415 | G | -0.0804 |
| rs112650722 | T | -0.0564 |
| rs118087547 | A | 0.0962  |
| rs10773781  | G | -0.0416 |
| rs141926126 | G | -0.0892 |
| rs56351182  | G | -0.0389 |
| rs11178392  | A | 0.0221  |
| rs78398729  | T | 0.0568  |
| rs117106274 | T | -0.0922 |
| rs16919514  | G | 0.035   |
| rs75872593  | T | 0.0496  |
| rs61930885  | G | 0.066   |
| rs16947735  | A | 0.039   |
| rs77020377  | T | 0.0479  |
| rs10849163  | T | -0.0201 |
| rs148471372 | A | -0.0283 |
| rs113950715 | C | -0.0548 |
| rs73203044  | A | 0.0593  |
| rs76758036  | T | -0.0731 |
| rs850940    | T | 0.0154  |
| rs11168183  | C | -0.0187 |

|             |   |         |
|-------------|---|---------|
| rs7959280   | G | 0.022   |
| rs7132606   | C | 0.0289  |
| rs138094630 | G | -0.0743 |
| rs117072935 | T | -0.0382 |
| rs7961564   | T | 0.0336  |
| rs10777302  | A | 0.0328  |
| rs12228894  | C | 0.0181  |
| rs111415074 | T | 0.0632  |
| rs78028283  | A | 0.0714  |
| rs12811871  | C | 0.0562  |
| rs74722629  | T | 0.0391  |
| rs77254728  | G | -0.0299 |
| rs145406829 | G | 0.0865  |
| rs11613476  | C | 0.0136  |
| rs12303605  | G | 0.0458  |
| rs77383154  | T | -0.033  |
| rs1875767   | G | -0.015  |
| rs12427174  | A | -0.0389 |
| rs215397    | A | 0.0138  |
| rs473988    | C | 0.0138  |
| rs143075333 | C | -0.0461 |
| rs111385476 | C | 0.0598  |
| rs4590962   | C | -0.0208 |
| rs1355735   | A | 0.031   |
| rs10876068  | G | -0.0171 |
| rs117094207 | A | -0.0967 |
| rs117264861 | A | -0.0939 |
| rs75384646  | G | 0.0386  |
| rs7965233   | G | 0.0171  |
| rs59864454  | C | -0.0357 |
| rs2671438   | A | -0.0421 |
| rs111928810 | T | -0.0171 |
| rs4964009   | T | 0.0136  |
| rs75568480  | A | -0.0571 |
| rs144604262 | T | 0.0746  |
| rs35931983  | C | -0.0269 |
| rs76605293  | A | 0.0541  |
| rs76497469  | T | -0.0338 |
| rs544605    | C | -0.0151 |
| rs115816674 | T | 0.0377  |
| rs113082321 | G | -0.0617 |
| rs56304800  | T | -0.0648 |
| rs17035928  | C | 0.022   |
| rs74808306  | T | -0.0406 |
| rs75653285  | T | 0.0593  |
| rs145324424 | G | 0.0626  |
| rs75274385  | G | 0.078   |

|             |   |         |
|-------------|---|---------|
| rs76408242  | A | 0.0882  |
| rs3850599   | G | -0.0271 |
| rs1871769   | G | 0.0809  |
| rs113000708 | T | -0.0345 |
| rs71457113  | A | 0.0178  |
| rs4590937   | G | -0.02   |
| rs7965342   | C | 0.0147  |
| rs112887444 | C | -0.0598 |
| rs10083016  | G | 0.0922  |
| rs117999987 | G | 0.0836  |
| rs2300553   | C | -0.0137 |
| rs75765693  | A | 0.0474  |
| rs2160975   | G | -0.0134 |
| rs76997144  | G | -0.0657 |
| rs79727548  | T | 0.0767  |
| rs10773558  | T | -0.0155 |
| rs2393327   | T | -0.0194 |
| rs11168267  | A | 0.0261  |
| rs7304575   | T | -0.0133 |
| rs67053798  | T | -0.0444 |
| rs76696080  | T | 0.048   |
| rs117189363 | T | -0.0523 |
| rs75305693  | T | -0.0321 |
| rs117915868 | G | -0.0711 |
| rs11047243  | C | 0.0531  |
| rs79747671  | T | 0.0241  |
| rs759747    | A | 0.0369  |
| rs117051658 | C | -0.0762 |
| rs7488886   | T | -0.0155 |
| rs10771265  | A | 0.0152  |
| rs35053     | C | 0.0187  |
| rs11106526  | C | -0.0517 |
| rs146861482 | A | -0.1209 |
| rs10784366  | T | -0.019  |
| rs111833890 | T | -0.0561 |
| rs11170324  | A | 0.0689  |
| rs80217083  | A | 0.061   |
| rs147393606 | G | 0.0715  |
| rs143383875 | T | 0.0602  |
| rs73219409  | A | 0.0261  |
| rs1544631   | T | -0.0148 |
| rs142411939 | C | -0.0739 |
| rs326405    | A | -0.0464 |
| rs77516945  | A | 0.0634  |
| rs74653052  | A | 0.0592  |
| rs11610290  | G | 0.0363  |
| rs112494100 | C | 0.0404  |

|             |   |         |
|-------------|---|---------|
| rs7964549   | A | 0.0251  |
| rs7132238   | T | -0.0195 |
| rs79649390  | G | 0.0625  |
| rs11055660  | G | 0.0183  |
| rs75000433  | C | -0.0492 |
| rs139953800 | T | -0.0425 |
| rs75469337  | T | 0.0562  |
| rs147426618 | A | 0.0773  |
| rs7488389   | T | -0.0232 |
| rs140178594 | C | 0.0173  |
| rs80229175  | A | -0.0334 |
| rs80207108  | T | 0.0778  |
| rs74422750  | G | 0.0548  |
| rs11051737  | A | -0.0197 |
| rs1458188   | G | 0.0278  |
| rs55643156  | T | 0.0488  |
| rs2619062   | C | -0.0137 |
| rs73080989  | C | 0.0674  |
| rs144154568 | T | 0.0747  |
| rs7315539   | A | 0.0146  |
| rs75616013  | G | 0.0619  |
| rs7976792   | A | 0.0162  |
| rs4882509   | C | 0.0397  |
| rs149003910 | A | 0.0615  |
| rs11054787  | T | -0.04   |
| rs10843848  | C | 0.0157  |
| rs56262904  | T | -0.0388 |
| rs11614216  | G | 0.0265  |
| rs145911621 | C | -0.0583 |
| rs249065    | T | 0.0178  |
| rs73125857  | T | 0.0443  |
| rs56205738  | T | 0.0244  |
| rs76743450  | G | 0.0251  |
| rs7136058   | C | -0.0474 |
| rs146235041 | G | 0.0706  |
| rs1581563   | G | 0.0184  |
| rs11176822  | C | 0.0468  |
| rs12830360  | G | 0.0149  |
| rs17177865  | T | 0.1015  |
| rs139977220 | A | 0.0299  |
| rs11058421  | A | -0.0443 |
| rs117366671 | G | -0.0626 |
| rs12828298  | A | -0.02   |
| rs1274519   | C | -0.0326 |
| rs112797720 | C | -0.0222 |
| rs7979875   | T | -0.0172 |
| rs141657392 | G | 0.072   |

|             |   |         |
|-------------|---|---------|
| rs11835749  | C | 0.0811  |
| rs9332936   | G | -0.0617 |
| rs67228087  | A | 0.0291  |
| rs11106457  | T | 0.0427  |
| rs838329    | G | -0.0136 |
| rs10876863  | G | -0.0163 |
| rs75694217  | C | 0.0498  |
| rs34962571  | A | 0.0276  |
| rs73037588  | G | 0.093   |
| rs17718299  | T | 0.0629  |
| rs61940115  | T | 0.0279  |
| rs17547610  | A | -0.0188 |
| rs1906246   | G | 0.0139  |
| rs117969254 | C | 0.056   |
| rs10772693  | T | -0.0197 |
| rs10743687  | A | 0.0673  |
| rs113555569 | T | -0.0621 |
| rs34232954  | T | 0.0247  |
| rs12099933  | G | -0.0838 |
| rs12580240  | G | 0.0598  |
| rs148114740 | A | 0.0965  |
| rs73372114  | T | 0.0477  |
| rs73134093  | A | 0.024   |
| rs646923    | T | -0.0161 |
| rs61934796  | T | 0.032   |
| rs76466686  | T | -0.0979 |
| rs12825539  | T | 0.0754  |
| rs114479218 | T | -0.0623 |
| rs448508    | T | -0.0202 |
| rs77663363  | A | 0.0907  |
| rs7133812   | C | 0.0274  |
| rs12817388  | T | 0.022   |
| rs10505937  | C | -0.0207 |
| rs12302768  | A | 0.0697  |
| rs7974890   | T | -0.031  |
| rs73149018  | G | -0.0264 |
| rs139047344 | G | -0.0784 |
| rs2535404   | T | 0.0149  |
| rs10772530  | A | -0.0148 |
| rs4471472   | A | -0.0141 |
| rs7975690   | C | -0.0723 |
| rs4128857   | C | -0.0225 |
| rs11043995  | G | 0.0716  |
| rs150584840 | T | -0.0877 |
| rs116868087 | T | -0.0654 |
| rs1426466   | T | -0.0169 |
| rs897655    | A | 0.1007  |



|             |   |         |
|-------------|---|---------|
| rs150147929 | C | 0.0832  |
| rs77275020  | A | 0.0319  |
| rs73148325  | C | -0.0165 |
| rs34276792  | C | 0.0201  |
| rs77669894  | A | -0.07   |
| rs7299715   | T | 0.0138  |
| rs112471725 | A | 0.0667  |
| rs11043900  | A | 0.0287  |
| rs11048660  | C | 0.0307  |
| rs73419839  | T | -0.0216 |
| rs1389804   | T | -0.0311 |
| rs78613859  | T | 0.0716  |
| rs78212973  | C | 0.0825  |
| rs71461102  | G | 0.031   |
| rs28608562  | C | 0.0222  |
| rs143357627 | T | 0.0922  |
| rs2484599   | T | 0.0146  |
| rs7965534   | A | -0.0163 |
| rs11051920  | C | 0.0201  |
| rs75723404  | G | 0.0379  |
| rs78885473  | G | 0.0363  |
| rs11177324  | T | 0.0591  |
| rs17774188  | A | 0.0241  |
| rs6487379   | A | -0.0383 |
| rs11169748  | G | -0.0866 |
| rs61954590  | C | 0.075   |
| rs55756572  | T | 0.0386  |
| rs7300045   | C | -0.0191 |
| rs11834433  | G | -0.0809 |
| rs11107574  | C | -0.0186 |
| rs4238094   | A | -0.0159 |
| rs78145366  | G | -0.0422 |
| rs75649931  | A | -0.0459 |
| rs11048444  | C | -0.0557 |
| rs754297    | T | 0.0161  |
| rs1601401   | T | -0.0256 |
| rs10880307  | G | 0.0201  |
| rs11062738  | T | -0.1216 |
| rs7299031   | C | -0.0491 |
| rs58709994  | A | 0.0628  |
| rs73129033  | C | -0.0658 |
| rs61729287  | G | -0.0866 |
| rs10507084  | T | -0.0276 |
| rs78731931  | T | 0.0567  |
| rs2727717   | A | 0.0263  |
| rs113350495 | T | 0.0461  |
| rs78392849  | T | 0.0213  |

|             |   |         |
|-------------|---|---------|
| rs1163016   | C | -0.0136 |
| rs143252183 | A | 0.0913  |
| rs73130203  | C | -0.0341 |
| rs73177924  | T | 0.0289  |
| rs7309619   | C | -0.0164 |
| rs11108162  | A | 0.0185  |
| rs116447029 | T | -0.0356 |
| rs7316901   | G | 0.0149  |
| rs11110457  | A | 0.0926  |
| rs17548327  | T | 0.0482  |
| rs149714292 | T | -0.0766 |
| rs75930438  | A | -0.0492 |
| rs78401942  | T | -0.0886 |
| rs11179033  | A | 0.0146  |
| rs7956772   | C | 0.03    |
| rs111775137 | A | -0.0274 |
| rs61932677  | A | -0.0227 |
| rs74650738  | G | -0.0677 |
| rs7310591   | G | -0.0334 |
| rs76921257  | G | 0.0535  |
| rs145323206 | T | 0.073   |
| rs80100697  | G | 0.1118  |
| rs12820454  | G | 0.0398  |
| rs11107212  | A | 0.0423  |
| rs75530585  | T | 0.0314  |
| rs12366411  | C | -0.0655 |
| rs61939528  | A | -0.0788 |
| rs73054059  | C | -0.0208 |
| rs146780234 | T | 0.0446  |
| rs2643633   | T | -0.0262 |
| rs117452585 | G | 0.088   |
| rs34443871  | T | -0.0876 |
| rs10506233  | C | 0.0414  |
| rs11107351  | A | -0.0157 |
| rs11047093  | A | -0.1255 |
| rs75085268  | T | 0.0504  |
| rs2192975   | T | 0.0139  |
| rs73047666  | T | -0.0723 |
| rs7315428   | T | 0.017   |
| rs4408367   | A | 0.0317  |
| rs112588865 | A | -0.0548 |
| rs12822866  | A | -0.0547 |
| rs77575865  | T | -0.0463 |
| rs7315522   | T | 0.042   |
| rs117406407 | T | -0.0734 |
| rs1037153   | T | 0.0192  |
| rs10842656  | C | -0.0134 |

|             |   |         |
|-------------|---|---------|
| rs7970354   | A | 0.0133  |
| rs116984489 | T | -0.0416 |
| rs75016853  | A | -0.0451 |
| rs56409216  | T | 0.05    |
| rs6490245   | G | -0.0135 |
| rs11614607  | C | 0.0418  |
| rs76196329  | A | 0.0805  |
| rs551510    | C | -0.0144 |
| rs787835    | T | -0.0537 |
| rs4269991   | T | -0.0187 |
| rs73230438  | G | 0.0439  |
| rs10745677  | T | 0.0179  |
| rs116991255 | A | 0.0534  |
| rs11048994  | A | 0.0199  |
| rs74103432  | G | 0.0305  |
| rs78906708  | T | -0.0405 |
| rs78881745  | T | -0.0405 |
| rs137927190 | T | 0.0673  |
| rs74743483  | G | 0.0279  |
| rs61928379  | A | 0.0233  |
| rs4766918   | G | -0.0273 |
| rs885353    | T | -0.0733 |
| rs249063    | A | -0.021  |
| rs2197283   | T | -0.0153 |
| rs151149046 | T | 0.0471  |
| rs10878986  | C | 0.0142  |
| rs1072364   | G | -0.0257 |
| rs7306405   | T | 0.0248  |
| rs117233116 | T | -0.0809 |
| rs76904423  | A | 0.0505  |
| rs2710696   | T | -0.0137 |
| rs12831682  | A | 0.0377  |
| rs11063272  | G | 0.0157  |
| rs871686    | G | -0.0254 |
| rs11611889  | T | -0.0339 |
| rs74749000  | C | 0.0207  |
| rs77387179  | C | 0.065   |
| rs117794123 | A | 0.1102  |
| rs727527    | T | -0.0163 |
| rs71454851  | G | -0.0381 |
| rs76954143  | A | 0.123   |
| rs117420403 | C | -0.0324 |
| rs150091418 | T | -0.0993 |
| rs112055775 | T | 0.1217  |
| rs11106758  | G | -0.0137 |
| rs150122964 | T | 0.0903  |
| rs150493598 | T | 0.0453  |

|             |   |         |
|-------------|---|---------|
| rs7301620   | A | -0.0183 |
| rs117658432 | T | -0.0662 |
| rs117700434 | A | 0.0395  |
| rs11174356  | G | 0.0194  |
| rs117030121 | G | 0.0363  |
| rs73129545  | A | -0.0265 |
| rs78514324  | G | 0.0767  |
| rs11836577  | G | -0.0368 |
| rs10862585  | C | -0.0163 |
| rs10847998  | T | 0.0278  |
| rs61927736  | C | 0.0472  |
| rs117270399 | T | -0.0336 |
| rs10848522  | A | 0.0172  |
| rs117270000 | C | -0.0858 |
| rs74817683  | A | -0.0769 |
| rs73205049  | G | 0.0323  |
| rs7978758   | T | 0.0164  |
| rs73047256  | T | -0.0504 |
| rs7308274   | A | 0.0276  |
| rs17815510  | C | -0.0158 |
| rs140672587 | A | -0.0286 |
| rs275769    | T | -0.0148 |
| rs3847690   | C | 0.0178  |
| rs4964918   | T | -0.0225 |
| rs494330    | A | 0.0694  |
| rs12423734  | T | -0.0992 |
| rs79790419  | C | -0.0275 |
| rs7301614   | C | -0.0157 |
| rs937767    | T | -0.0147 |
| rs714324    | C | 0.0191  |
| rs11067247  | T | 0.068   |
| rs2856329   | T | -0.0199 |
| rs113764840 | A | -0.0595 |
| rs12579036  | G | -0.0195 |
| rs138321152 | A | 0.0872  |
| rs61929512  | A | 0.0318  |
| rs144507293 | C | 0.0584  |
| rs11170042  | G | -0.0183 |
| rs3882932   | C | 0.0568  |
| rs11054978  | T | 0.0178  |
| rs11612127  | T | -0.0961 |
| rs10843919  | C | 0.0146  |
| rs10161333  | C | 0.017   |
| rs117017853 | T | -0.062  |
| rs117457004 | C | 0.0916  |
| rs11614892  | T | 0.0605  |
| rs139350413 | T | 0.0403  |

|             |   |         |
|-------------|---|---------|
| rs12423279  | G | -0.0449 |
| rs997200    | C | -0.0134 |
| rs10859918  | T | -0.0231 |
| rs11058835  | C | 0.0129  |
| rs75802497  | A | -0.0343 |
| rs11613613  | A | 0.0463  |
| rs11614108  | T | 0.0265  |
| rs2900420   | A | -0.0171 |
| rs12812183  | A | -0.0199 |
| rs11831213  | T | 0.0642  |
| rs1003939   | G | 0.0154  |
| rs73103999  | C | -0.0655 |
| rs79106123  | G | 0.0659  |
| rs2540120   | C | -0.0271 |
| rs7306993   | T | 0.0244  |
| rs141961329 | G | 0.0906  |
| rs11049707  | A | -0.0314 |
| rs2120734   | G | -0.0893 |
| rs34955937  | A | 0.0174  |
| rs2900485   | T | 0.0471  |
| rs10778631  | C | -0.0143 |
| rs715120    | T | -0.0139 |
| rs75152930  | C | -0.0547 |
| rs7316401   | A | 0.0285  |
| rs2369464   | C | 0.0258  |
| rs55791404  | C | 0.0975  |
| rs17781792  | C | 0.0595  |
| rs78211484  | C | -0.036  |
| rs79825905  | A | -0.0474 |
| rs10849968  | A | -0.0148 |
| rs12424012  | T | -0.0389 |
| rs140391987 | G | 0.076   |
| rs118073656 | C | 0.0501  |
| rs2364154   | A | -0.0171 |
| rs78884307  | T | -0.039  |
| rs61944774  | A | -0.0356 |
| rs141491706 | T | 0.0554  |
| rs2010655   | C | -0.0133 |
| rs12814862  | C | -0.0635 |
| rs79347782  | T | 0.02    |
| rs144817954 | A | -0.0611 |
| rs78260592  | T | 0.0424  |
| rs116877351 | T | -0.0579 |
| rs150279052 | A | 0.0588  |
| rs73202428  | T | 0.0306  |
| rs12228128  | C | -0.0323 |
| rs12309664  | C | 0.0642  |

|             |   |         |
|-------------|---|---------|
| rs35140619  | G | -0.0404 |
| rs7956915   | A | -0.0142 |
| rs35742897  | C | -0.0197 |
| rs2544043   | G | 0.0475  |
| rs11110523  | T | -0.0428 |
| rs78343031  | G | -0.0921 |
| rs75655288  | T | -0.0641 |
| rs10770513  | G | 0.0154  |
| rs141320767 | A | -0.0681 |
| rs75023727  | A | 0.0778  |
| rs2448063   | T | -0.0162 |
| rs12813390  | C | -0.0413 |
| rs113871195 | C | 0.05    |
| rs11065983  | A | 0.1008  |
| rs12582908  | T | 0.0253  |
| rs117762418 | C | -0.0715 |
| rs137917150 | T | -0.0291 |
| rs1875137   | G | 0.0146  |
| rs3741829   | T | 0.0136  |
| rs12230765  | G | -0.0251 |
| rs6538752   | T | 0.0204  |
| rs41304351  | C | 0.0624  |
| rs9669718   | C | 0.0253  |
| rs7962446   | G | -0.0145 |
| rs11610592  | G | 0.0257  |
| rs4964619   | T | 0.0334  |
| rs139786614 | A | -0.0557 |
| rs34031102  | G | 0.0211  |
| rs143727610 | A | 0.063   |
| rs11067490  | C | -0.0163 |
| rs80355987  | T | 0.0459  |
| rs56235234  | C | 0.0213  |
| rs117694152 | C | 0.0678  |
| rs12371492  | A | -0.0436 |
| rs113868317 | T | 0.0964  |
| rs114607250 | A | 0.1015  |
| rs74072809  | G | 0.0609  |
| rs10492263  | A | 0.0165  |
| rs61926893  | T | -0.0306 |
| rs61940195  | G | 0.0477  |
| rs2240894   | A | 0.0131  |
| rs76829083  | T | -0.0224 |
| rs17111900  | C | 0.0176  |
| rs12810725  | T | 0.0259  |
| rs147868926 | G | -0.0644 |
| rs61936982  | A | 0.0248  |
| rs7301402   | A | 0.0143  |

|             |   |         |
|-------------|---|---------|
| rs11064432  | G | 0.0526  |
| rs77255906  | A | -0.0445 |
| rs73104008  | T | -0.0651 |
| rs1274536   | C | -0.0276 |
| rs67685846  | A | -0.0186 |
| rs7299395   | A | -0.0503 |
| rs57893833  | T | 0.0295  |
| rs73044606  | A | 0.0502  |
| rs148689957 | A | -0.0609 |
| rs74240149  | A | 0.0447  |
| rs7309820   | A | 0.0217  |
| rs112822931 | T | 0.1104  |
| rs77493783  | G | -0.033  |
| rs76307937  | T | 0.0359  |
| rs12824103  | T | 0.0172  |
| rs117595378 | G | 0.0327  |
| rs75036729  | T | 0.094   |
| rs1480010   | T | 0.0164  |
| rs74679374  | G | -0.024  |
| rs12302539  | A | -0.0805 |
| rs77500168  | T | -0.0386 |
| rs12425217  | A | -0.0273 |
| rs73436164  | G | 0.0254  |
| rs1404288   | T | -0.0203 |
| rs61936974  | A | 0.0232  |
| rs116982170 | G | 0.0352  |
| rs75874991  | G | 0.0462  |
| rs901232    | T | -0.0238 |
| rs10491958  | T | 0.0168  |
| rs8192697   | T | -0.0211 |
| rs11048433  | G | 0.0325  |
| rs117166700 | C | 0.037   |
| rs141349582 | A | -0.0949 |
| rs12824798  | A | -0.0162 |
| rs11608891  | T | 0.0156  |
| rs117113983 | A | -0.0782 |
| rs79361365  | T | 0.0688  |
| rs7296917   | C | 0.0207  |
| rs11246873  | C | 0.0837  |
| rs118086292 | T | 0.0607  |
| rs111903793 | T | -0.1111 |
| rs118143420 | G | 0.0326  |
| rs150221733 | C | 0.0639  |
| rs11109067  | A | -0.0589 |
| rs2063614   | T | 0.0374  |
| rs10840975  | A | 0.0134  |
| rs28524056  | C | -0.0411 |

|             |   |         |
|-------------|---|---------|
| rs12296253  | G | 0.0204  |
| rs11836872  | G | 0.072   |
| rs61931735  | G | -0.0438 |
| rs61927661  | T | 0.0231  |
| rs75765735  | G | 0.0717  |
| rs76385173  | A | -0.0382 |
| rs11068095  | A | -0.069  |
| rs35990721  | A | -0.0347 |
| rs79409162  | C | 0.0571  |
| rs74970284  | C | -0.0829 |
| rs150538368 | C | 0.0765  |
| rs2036772   | C | 0.0161  |
| rs116860269 | C | 0.0454  |
| rs141253015 | T | 0.0358  |
| rs73236505  | A | -0.0412 |
| rs112706806 | T | -0.0572 |
| rs1183180   | G | -0.0131 |
| rs11065764  | C | -0.0693 |
| rs7298912   | C | -0.0143 |
| rs686987    | T | -0.0436 |
| rs1490888   | C | -0.0669 |
| rs7296695   | C | 0.0153  |
| rs75313396  | G | -0.0823 |
| rs12321570  | C | -0.0311 |
| rs73226103  | G | -0.0455 |
| rs1844915   | T | 0.0344  |
| rs12816011  | A | 0.0175  |
| rs138820403 | C | -0.1028 |
| rs35136470  | G | 0.0574  |
| rs10846187  | C | 0.0136  |
| rs56030365  | T | 0.0145  |
| rs80033577  | C | 0.0323  |
| rs111871212 | T | -0.0405 |
| rs7953027   | A | 0.0203  |
| rs12302452  | A | -0.0198 |
| rs77832845  | G | -0.0582 |
| rs61228923  | G | 0.0482  |
| rs73223876  | A | 0.0129  |
| rs75651024  | A | 0.0896  |
| rs151096020 | T | -0.0385 |
| rs145992193 | T | 0.0834  |
| rs4415853   | G | -0.0814 |
| rs11615916  | G | -0.0189 |
| rs4767938   | C | -0.0132 |
| rs4980931   | G | -0.0151 |
| rs2254827   | T | -0.0176 |
| rs73070167  | C | -0.0476 |



|             |   |         |
|-------------|---|---------|
| rs7978993   | A | 0.0192  |
| rs117328080 | T | 0.0453  |
| rs73190128  | G | -0.0546 |
| rs73235113  | T | -0.0315 |
| rs1079575   | T | -0.0198 |
| rs117891592 | T | -0.0786 |
| rs74772619  | C | -0.0289 |
| rs77159100  | G | -0.0232 |
| rs7133594   | T | -0.0156 |
| rs55908837  | T | 0.0543  |
| rs11054973  | T | -0.0363 |
| rs12320389  | T | -0.0427 |
| rs12368877  | A | -0.0149 |
| rs147285094 | T | 0.0597  |
| rs78542180  | T | -0.0954 |
| rs4763808   | C | 0.0246  |
| rs116898171 | C | -0.0718 |
| rs11061546  | T | 0.0202  |
| rs2717434   | G | 0.0148  |
| rs7964507   | T | -0.0152 |
| rs139476284 | A | 0.0502  |
| rs7974704   | T | -0.03   |
| rs140272193 | G | -0.0547 |
| rs73062703  | G | 0.0169  |
| rs11055421  | T | -0.0176 |
| rs16929277  | G | 0.056   |
| rs144711553 | T | 0.0692  |
| rs144355242 | A | 0.0767  |
| rs112059524 | A | 0.0447  |
| rs12371387  | G | 0.0819  |
| rs112738762 | A | -0.0297 |
| rs10876175  | A | -0.0256 |
| rs74651633  | T | -0.0578 |
| rs11047479  | T | 0.016   |
| rs117262741 | A | -0.0607 |
| rs759475    | T | -0.0313 |
| rs77516149  | T | 0.0992  |
| rs7303227   | A | -0.0529 |
| rs3851667   | C | -0.0201 |
| rs77645660  | A | -0.0277 |
| rs61929686  | G | 0.0221  |
| rs10773524  | T | -0.0198 |
| rs143173736 | C | 0.0621  |
| rs74726803  | A | 0.0401  |
| rs7964773   | G | -0.0304 |
| rs2053628   | T | 0.0165  |
| rs113857818 | A | 0.0504  |

|             |   |         |
|-------------|---|---------|
| rs118101907 | A | -0.0551 |
| rs1861870   | C | 0.0131  |
| rs111626353 | T | 0.0918  |
| rs34879513  | T | -0.0196 |
| rs73061790  | A | 0.0143  |
| rs144571867 | C | -0.0904 |
| rs7307123   | C | -0.0798 |
| rs4765321   | C | -0.0141 |
| rs7971866   | T | 0.0156  |
| rs11183732  | A | -0.0565 |
| rs297937    | G | 0.0192  |
| rs474748    | G | 0.0163  |
| rs663247    | A | 0.0525  |
| rs11044917  | T | 0.0357  |
| rs146457244 | T | -0.0565 |
| rs2037744   | A | -0.02   |
| rs12832693  | G | 0.0206  |
| rs76040610  | A | -0.035  |
| rs2270134   | A | 0.0129  |
| rs143705289 | C | -0.0372 |
| rs34512620  | T | -0.0391 |
| rs117062324 | G | -0.0985 |
| rs148384881 | C | -0.053  |
| rs118096658 | A | 0.0387  |
| rs77834980  | A | 0.0381  |
| rs79496956  | C | -0.019  |
| rs12311520  | A | 0.0158  |
| rs61943667  | T | -0.0893 |
| rs139566522 | A | -0.0743 |
| rs12816474  | C | -0.103  |
| rs11063947  | C | -0.0148 |
| rs11104439  | A | 0.022   |
| rs2388965   | T | 0.0315  |
| rs17108605  | G | -0.0425 |
| rs11246826  | C | -0.0215 |
| rs7135991   | T | -0.0141 |
| rs75045438  | G | 0.0453  |
| rs75486437  | A | 0.0226  |
| rs7295739   | C | 0.0715  |
| rs6486821   | C | 0.0235  |
| rs12820598  | T | 0.0271  |
| rs12368283  | C | 0.0697  |
| rs11115899  | G | -0.0287 |
| rs11043299  | T | -0.0183 |
| rs4764001   | T | -0.023  |
| rs76982571  | C | -0.0781 |
| rs2166953   | A | 0.0155  |

|             |   |         |
|-------------|---|---------|
| rs77867197  | A | -0.1198 |
| rs7962631   | T | 0.0212  |
| rs74955639  | C | -0.0405 |
| rs148569924 | G | -0.0846 |
| rs61922663  | T | -0.0241 |
| rs112629456 | G | 0.0394  |
| rs657463    | T | -0.014  |
| rs10843048  | G | -0.0157 |
| rs35561777  | T | 0.0415  |
| rs61924971  | C | 0.0392  |
| rs12423554  | G | 0.014   |
| rs2268105   | T | 0.0238  |
| rs12831411  | C | -0.0237 |
| rs11054970  | T | -0.0171 |
| rs138162610 | T | -0.06   |
| rs35481774  | A | -0.0196 |
| rs12809841  | C | -0.043  |
| rs1879417   | C | -0.0129 |
| rs79195650  | G | -0.1019 |
| rs2291615   | A | 0.0171  |
| rs4393415   | G | 0.0154  |
| rs12580251  | T | -0.014  |
| rs10861550  | A | 0.0138  |
| rs73213453  | T | -0.032  |
| rs74059905  | T | 0.0535  |
| rs73191140  | C | -0.0671 |
| rs7305267   | C | -0.0208 |
| rs17402927  | G | -0.0676 |
| rs141010491 | C | 0.0605  |
| rs1520825   | T | -0.0647 |
| rs117997988 | A | 0.0663  |
| rs111501739 | A | 0.0527  |
| rs11616157  | C | -0.0196 |
| rs11048296  | G | 0.0287  |
| rs34382786  | T | 0.0408  |
| rs549948    | T | 0.0249  |
| rs36094040  | C | 0.0139  |
| rs56356157  | T | -0.0254 |
| rs6490026   | G | 0.0129  |
| rs113391964 | A | -0.0881 |
| rs117167441 | T | 0.0669  |
| rs148004790 | A | 0.0554  |
| rs244502    | C | 0.0147  |
| rs147345252 | G | 0.0504  |
| rs60515876  | G | 0.0895  |
| rs74739243  | C | 0.0567  |
| rs12829941  | T | -0.0364 |

|             |   |         |
|-------------|---|---------|
| rs10846351  | T | -0.0391 |
| rs58045008  | G | 0.0327  |
| rs79899792  | G | 0.0977  |
| rs2926800   | T | -0.0234 |
| rs2011134   | T | -0.0139 |
| rs6490114   | T | -0.0268 |
| rs73080195  | A | 0.045   |
| rs11059084  | G | 0.0158  |
| rs215227    | A | -0.0143 |
| rs57468930  | T | -0.0451 |
| rs148223317 | T | 0.0815  |
| rs117753329 | G | 0.0385  |
| rs17460744  | A | -0.0616 |
| rs11182882  | G | 0.0189  |
| rs7299725   | T | 0.0592  |
| rs11046610  | T | 0.0174  |
| rs11108491  | A | 0.0152  |
| rs1300085   | G | 0.0269  |
| rs71454104  | G | 0.0565  |
| rs11168644  | C | 0.0451  |
| rs11608858  | G | 0.0467  |
| rs116846970 | T | -0.0574 |
| rs112177944 | G | 0.0626  |
| rs73191162  | T | -0.0596 |
| rs10850576  | T | 0.0582  |
| rs12367293  | G | -0.0185 |
| rs1909143   | T | 0.0139  |
| rs79883211  | T | 0.0618  |
| rs4628738   | A | 0.0215  |
| rs117399247 | C | -0.0512 |
| rs12318401  | C | -0.0535 |
| rs111428231 | A | -0.0691 |
| rs59528239  | A | -0.0334 |
| rs986658    | C | -0.0557 |
| rs12318714  | T | 0.0202  |
| rs75028921  | G | 0.0233  |
| rs4907417   | A | -0.0145 |
| rs11064513  | T | -0.0274 |
| rs4762043   | A | 0.0436  |
| rs6581511   | G | 0.0336  |
| rs77983275  | A | -0.0449 |
| rs10849913  | G | -0.0145 |
| rs1947021   | G | -0.0153 |
| rs7296646   | C | 0.063   |
| rs278995    | C | -0.0455 |
| rs73215839  | T | -0.0372 |
| rs925462    | C | 0.0164  |

|             |   |         |
|-------------|---|---------|
| rs117848363 | C | 0.0499  |
| rs73119236  | C | -0.0557 |
| rs12371704  | A | 0.0275  |
| rs11613077  | T | 0.0256  |
| rs2239090   | C | 0.0641  |
| rs111960832 | T | -0.077  |
| rs10505728  | A | -0.0473 |
| rs150627923 | G | -0.0662 |
| rs76548853  | T | -0.0731 |
| rs140644058 | G | -0.0447 |
| rs877554    | T | 0.0125  |
| rs151301264 | G | -0.0806 |
| rs75761974  | C | 0.0416  |
| rs74576527  | T | 0.0506  |
| rs2625083   | G | -0.0453 |
| rs11044473  | A | -0.0188 |
| rs111961633 | C | -0.0698 |
| rs117192951 | A | -0.0326 |
| rs6486740   | A | 0.0131  |
| rs112892522 | A | 0.0377  |
| rs73200346  | T | 0.0541  |
| rs112426107 | T | -0.0774 |
| rs73093013  | T | 0.0418  |
| rs12317455  | A | -0.017  |
| rs11048402  | A | -0.024  |
| rs10861330  | A | 0.0126  |
| rs2393326   | T | 0.0155  |
| rs345653    | T | -0.0238 |
| rs117721228 | A | -0.0436 |
| rs735688    | T | 0.0988  |
| rs11050426  | C | 0.0186  |
| rs141157545 | C | 0.0484  |
| rs73183995  | T | -0.0919 |
| rs1916335   | A | -0.0148 |
| rs4354731   | G | -0.0146 |
| rs117134462 | T | 0.0366  |
| rs139707509 | A | 0.0559  |
| rs11067981  | A | -0.0191 |
| rs11614803  | A | 0.0573  |
| rs11054688  | G | -0.0244 |
| rs17813281  | A | -0.031  |
| rs80121045  | A | 0.0439  |
| rs79008615  | T | 0.0644  |
| rs117229933 | A | -0.0627 |
| rs140902750 | G | 0.0678  |
| rs71468225  | A | -0.0339 |
| rs73100836  | A | 0.0419  |

|             |   |         |
|-------------|---|---------|
| rs2077367   | A | 0.0248  |
| rs7137328   | A | 0.0594  |
| rs76979817  | T | -0.0332 |
| rs10851059  | C | -0.0144 |
| rs7308738   | T | -0.0319 |
| rs4913480   | A | 0.0172  |
| rs6489171   | G | -0.0133 |
| rs75617033  | A | -0.0474 |
| rs10877214  | C | -0.0149 |
| rs75693952  | T | -0.0893 |
| rs7138524   | C | 0.0434  |
| rs1082317   | G | -0.0241 |
| rs10492086  | G | -0.0158 |
| rs10751691  | C | 0.0331  |
| rs77314183  | A | 0.0689  |
| rs141697432 | A | -0.0667 |
| rs951354    | A | 0.0319  |
| rs112635069 | T | 0.0343  |
| rs10860948  | G | 0.0127  |
| rs12312623  | A | -0.0336 |
| rs10773712  | C | -0.0366 |
| rs80318173  | G | 0.0653  |
| rs56344966  | A | -0.0143 |
| rs116096268 | G | 0.0585  |
| rs60021223  | C | 0.0308  |
| rs6489703   | A | -0.0289 |
| rs1579997   | G | -0.0166 |
| rs17044955  | A | -0.0276 |
| rs77354885  | T | 0.0766  |
| rs7973711   | T | -0.0313 |
| rs74343147  | T | 0.0796  |
| rs77355202  | C | -0.0815 |
| rs147080532 | T | 0.049   |
| rs1862026   | T | 0.0132  |
| rs79389917  | C | -0.0837 |
| rs7133991   | A | -0.0145 |
| rs144327412 | A | -0.0781 |
| rs117665679 | G | 0.0931  |
| rs111850898 | A | -0.0668 |
| rs17836356  | A | 0.0181  |
| rs61937193  | T | -0.1134 |
| rs1534387   | C | -0.0252 |
| rs112874949 | C | -0.049  |
| rs118138449 | G | -0.0588 |
| rs61925707  | T | 0.031   |
| rs741365    | T | -0.0169 |
| rs138082772 | T | -0.0249 |

|             |   |         |
|-------------|---|---------|
| rs118000679 | G | -0.0433 |
| rs4764074   | A | -0.0124 |
| rs10878494  | T | 0.0165  |
| rs928936    | T | -0.0127 |
| rs2117778   | C | 0.0441  |
| rs1167052   | T | 0.0125  |
| rs144737017 | T | -0.0412 |
| rs76081993  | G | 0.0296  |
| rs470552    | T | 0.0191  |
| rs12826711  | G | -0.0296 |
| rs77044377  | G | -0.0825 |
| rs3847765   | G | 0.0277  |
| rs10844437  | A | 0.0129  |
| rs117520978 | A | -0.0862 |
| rs116852362 | T | -0.0234 |
| rs10732599  | A | -0.0227 |
| rs201404    | T | 0.0166  |
| rs16935010  | G | -0.0266 |
| rs7976292   | G | -0.0137 |
| rs78100021  | A | -0.0785 |
| rs12309594  | G | -0.0123 |
| rs79675814  | A | 0.0476  |
| rs11054653  | A | -0.0255 |
| rs78821536  | A | -0.0281 |
| rs11168980  | C | -0.0173 |
| rs116996532 | A | 0.0562  |
| rs11068480  | A | -0.0143 |
| rs10492070  | G | -0.0205 |
| rs45572941  | T | 0.082   |
| rs3759177   | C | 0.0154  |
| rs12582249  | A | 0.0151  |
| rs4072978   | C | 0.0139  |
| rs1072577   | A | 0.0139  |
| rs7136010   | C | 0.0228  |
| rs75187342  | T | 0.0326  |
| rs145981262 | A | 0.0625  |
| rs3782672   | G | 0.0148  |
| rs117480581 | A | 0.0316  |
| rs75142458  | C | -0.0767 |
| rs11048847  | T | -0.086  |
| rs79284840  | A | -0.0498 |
| rs116951124 | C | 0.0646  |
| rs146946871 | A | 0.094   |
| rs113079133 | T | -0.0971 |
| rs55952731  | T | 0.0679  |
| rs4765951   | T | -0.0237 |
| rs140232086 | G | -0.1016 |

|             |   |         |
|-------------|---|---------|
| rs35553305  | G | -0.075  |
| rs1513294   | T | -0.0879 |
| rs28659869  | A | 0.0309  |
| rs79870102  | G | -0.0812 |
| rs148580585 | C | -0.0554 |
| rs150737155 | A | 0.0616  |
| rs141096656 | C | -0.0434 |
| rs7305931   | G | -0.0146 |
| rs12823286  | A | -0.0681 |
| rs10861428  | G | -0.0122 |
| rs11068174  | G | -0.0645 |
| rs12315041  | A | 0.015   |
| rs147029295 | A | 0.0719  |
| rs140408312 | C | -0.0772 |
| rs146830932 | T | -0.114  |
| rs7963916   | A | -0.0244 |
| rs2054677   | T | -0.0123 |
| rs118052926 | A | -0.0425 |
| rs7970697   | C | -0.0407 |
| rs11106623  | T | 0.0139  |
| rs681867    | G | 0.0172  |
| rs78899782  | T | 0.0427  |
| rs148373616 | T | -0.0751 |
| rs2633414   | T | 0.0135  |
| rs11059688  | A | 0.0185  |
| rs11056734  | A | 0.0176  |
| rs12372290  | A | 0.0685  |
| rs146600962 | G | 0.0944  |
| rs1901240   | G | 0.0119  |
| rs11068746  | G | 0.0128  |
| rs61929189  | A | 0.059   |
| rs11053099  | C | -0.0134 |
| rs79743991  | G | -0.0598 |
| rs117114551 | T | 0.0725  |
| rs73427738  | T | 0.0444  |
| rs73127304  | C | -0.067  |
| rs147826680 | T | -0.0917 |
| rs2042726   | A | 0.013   |
| rs141333358 | G | -0.0684 |
| rs66473965  | A | 0.0191  |
| rs78880425  | G | 0.0388  |
| rs1894791   | A | -0.0138 |
| rs17670780  | G | 0.0384  |
| rs1488058   | C | 0.0227  |
| rs61911985  | G | -0.0547 |
| rs4514476   | A | 0.0282  |
| rs7961452   | A | 0.0401  |



|             |   |         |
|-------------|---|---------|
| rs61946471  | G | -0.0647 |
| rs11181170  | T | -0.0165 |
| rs10841514  | G | -0.034  |
| rs3093736   | A | -0.0366 |
| rs1489082   | C | -0.0156 |
| rs117553262 | T | 0.037   |
| rs60890066  | T | -0.0637 |
| rs2727700   | T | 0.0861  |
| rs11062651  | C | 0.018   |
| rs143743163 | A | 0.0906  |
| rs57245068  | T | 0.017   |
| rs79650471  | C | -0.0214 |
| rs10505752  | A | 0.0159  |
| rs118145179 | G | 0.0356  |
| rs148680376 | A | -0.0735 |
| rs143153363 | A | -0.0563 |
| rs56005705  | A | -0.0315 |
| rs12809555  | C | -0.0175 |
| rs112191960 | C | 0.0256  |
| rs7960985   | G | -0.0226 |
| rs1244084   | G | -0.0198 |
| rs117487026 | A | 0.04    |
| rs11059534  | T | -0.0221 |
| rs7303396   | C | -0.0131 |
| rs1909169   | A | 0.0123  |
| rs10879873  | T | 0.0132  |
| rs117782398 | A | 0.0514  |
| rs12310760  | T | -0.0408 |
| rs146889541 | A | -0.0629 |
| rs161714    | C | 0.0165  |
| rs17325011  | C | 0.0354  |
| rs141216696 | T | -0.0945 |
| rs3741775   | C | -0.0121 |
| rs11616159  | A | 0.0159  |
| rs11613365  | C | -0.0183 |
| rs10505757  | G | -0.0234 |
| rs73328481  | G | -0.0771 |
| rs73187058  | A | -0.0175 |
| rs10777338  | C | 0.0187  |
| rs12049985  | A | -0.0242 |
| rs117037316 | G | -0.0565 |
| rs150188379 | A | 0.1076  |
| rs79298107  | C | -0.0912 |
| rs865379    | A | 0.0203  |
| rs10850889  | C | 0.014   |
| rs17438129  | C | 0.0272  |
| rs10847024  | G | 0.0155  |

|             |   |         |
|-------------|---|---------|
| rs7968327   | A | 0.013   |
| rs10773831  | G | 0.0172  |
| rs7958630   | G | -0.1023 |
| rs34268027  | A | 0.0764  |
| rs73063248  | C | -0.0278 |
| rs74465245  | T | 0.0327  |
| rs117344691 | G | -0.0721 |
| rs12825930  | T | 0.0246  |
| rs392085    | G | -0.015  |
| rs12812393  | T | -0.0501 |
| rs4133074   | A | -0.0249 |
| rs61923296  | A | -0.0224 |
| rs11608329  | A | 0.0139  |
| rs1427764   | A | 0.0296  |
| rs71467196  | A | 0.032   |
| rs115837670 | C | 0.0492  |
| rs78128982  | T | -0.0577 |
| rs78013698  | T | 0.0673  |
| rs78721334  | G | -0.0464 |
| rs11108788  | G | 0.0282  |
| rs75801600  | G | -0.0846 |
| rs150231347 | T | -0.0944 |
| rs1526950   | A | -0.0189 |
| rs1996640   | A | 0.0165  |
| rs112188963 | T | -0.092  |
| rs61956095  | T | -0.0617 |
| rs117315167 | A | -0.0599 |
| rs76138259  | T | -0.0723 |
| rs10842304  | G | -0.0118 |
| rs78005692  | C | 0.0854  |
| rs7295072   | G | 0.0203  |
| rs7975532   | A | 0.0149  |
| rs61907267  | G | 0.0503  |
| rs7976566   | T | -0.0128 |
| rs12300149  | T | 0.0786  |
| rs116379190 | A | 0.0566  |
| rs11179534  | A | 0.0747  |
| rs73390928  | C | -0.0162 |
| rs143637126 | A | 0.076   |
| rs141064255 | A | -0.0555 |
| rs144689762 | T | 0.0615  |
| rs142274923 | A | 0.0859  |
| rs10774938  | T | 0.0129  |
| rs1076320   | A | -0.0247 |
| rs112804197 | G | 0.0348  |
| rs1553671   | T | -0.0128 |
| rs2708092   | G | 0.0179  |

|             |   |         |
|-------------|---|---------|
| rs75539341  | G | -0.0378 |
| rs61219280  | A | -0.0215 |
| rs59579344  | G | 0.0697  |
| rs67480136  | A | -0.0164 |
| rs12825170  | T | -0.0138 |
| rs7298384   | G | 0.0895  |
| rs61254002  | C | -0.0175 |
| rs16932783  | A | 0.0378  |
| rs6580869   | G | -0.0137 |
| rs147255199 | T | 0.0756  |
| rs838883    | T | 0.0324  |
| rs74808095  | A | 0.0502  |
| rs73202441  | T | 0.048   |
| rs117686631 | A | -0.0926 |
| rs144836853 | A | 0.113   |
| rs34214242  | G | -0.0286 |
| rs117180518 | A | -0.0507 |
| rs10846137  | A | -0.0118 |
| rs11051129  | G | -0.0513 |
| rs2860083   | G | -0.0193 |
| rs78933627  | T | -0.0458 |
| rs7307876   | G | -0.0187 |
| rs146739938 | T | -0.0486 |
| rs140527345 | C | 0.0368  |
| rs73409923  | G | 0.0825  |
| rs35430     | A | -0.0131 |
| rs7962235   | C | -0.0125 |
| rs74415361  | T | -0.053  |
| rs144969790 | G | 0.0644  |
| rs1492888   | T | 0.0139  |
| rs1488057   | G | 0.0124  |
| rs116971829 | T | 0.0846  |
| rs17728930  | G | 0.0195  |
| rs58782254  | A | -0.0157 |
| rs73216358  | C | -0.0548 |
| rs11053942  | T | 0.0186  |
| rs61934103  | G | 0.0223  |
| rs113440422 | G | -0.0707 |
| rs17042174  | T | -0.0775 |
| rs74959053  | T | -0.0282 |
| rs11052455  | C | -0.0632 |
| rs116172435 | C | -0.0268 |
| rs11175284  | A | 0.0159  |
| rs10507149  | T | 0.0226  |
| rs1009438   | C | -0.0173 |
| rs11111726  | T | 0.0249  |
| rs11045419  | T | -0.0484 |

|             |   |         |
|-------------|---|---------|
| rs149841999 | T | 0.0573  |
| rs145222560 | G | 0.1111  |
| rs7958289   | A | -0.0322 |
| rs7308366   | A | -0.0178 |
| rs138521705 | T | -0.0366 |
| rs28990727  | T | 0.0342  |
| rs11175888  | G | 0.0587  |
| rs2462120   | G | 0.0223  |
| rs61470271  | C | -0.0257 |
| rs142794225 | G | -0.0621 |
| rs1392351   | G | 0.018   |
| rs75450443  | C | -0.037  |
| rs4768458   | C | -0.0779 |
| rs73126338  | C | 0.0229  |
| rs117453824 | T | 0.0406  |
| rs2034483   | C | 0.0183  |
| rs12366841  | G | -0.0179 |
| rs1873633   | T | -0.0415 |
| rs7980650   | A | -0.0628 |
| rs641529    | A | -0.0132 |
| rs117989153 | T | -0.0988 |
| rs140961812 | A | -0.0401 |
| rs77767789  | A | 0.0827  |
| rs61928479  | A | -0.0317 |
| rs80261950  | A | -0.0252 |
| rs61952805  | A | -0.0603 |
| rs12832363  | T | -0.0183 |
| rs6487042   | A | -0.0115 |
| rs150487408 | G | 0.0835  |
| rs6581124   | A | -0.0145 |
| rs10877922  | G | 0.0206  |
| rs11175485  | G | -0.0203 |
| rs147366339 | T | -0.0835 |
| rs73141814  | C | 0.0832  |
| rs143285018 | A | -0.0752 |
| rs12818266  | T | -0.0532 |
| rs1610177   | T | -0.0158 |
| rs17421884  | G | -0.0291 |
| rs17175340  | T | 0.0192  |
| rs10783332  | C | 0.0172  |
| rs117330813 | A | 0.0743  |
| rs772735    | A | -0.013  |
| rs118158521 | T | 0.0746  |
| rs35979828  | T | 0.0236  |
| rs12812605  | A | -0.0253 |
| rs148106022 | A | -0.0438 |
| rs76494168  | T | 0.0426  |

|             |   |         |
|-------------|---|---------|
| rs79518888  | A | 0.0649  |
| rs12296462  | A | -0.0379 |
| rs2365090   | A | -0.0308 |
| rs17759887  | T | 0.0188  |
| rs4499057   | T | -0.0672 |
| rs2291974   | A | -0.0162 |
| rs73203820  | A | 0.0485  |
| rs76515736  | A | 0.0458  |
| rs17249481  | G | 0.0446  |
| rs1700376   | T | 0.0153  |
| rs1450981   | C | -0.0144 |
| rs61941200  | T | -0.059  |
| rs113654797 | T | -0.0743 |
| rs145105416 | T | 0.0705  |
| rs117913411 | A | -0.0387 |
| rs61330931  | A | -0.023  |
| rs2287541   | G | 0.024   |
| rs701039    | G | -0.0195 |
| rs117578217 | A | -0.0522 |
| rs141676775 | C | 0.0824  |
| rs7955184   | C | 0.0478  |
| rs117935971 | T | 0.0618  |
| rs1674103   | A | 0.0225  |
| rs117356039 | G | 0.0759  |
| rs76588801  | T | -0.035  |
| rs78075489  | T | 0.109   |
| rs12427251  | A | 0.0137  |
| rs117913959 | A | 0.0287  |
| rs71537693  | T | 0.0166  |
| rs74064706  | G | 0.0437  |
| rs117562055 | A | -0.0764 |
| rs117103665 | C | -0.0761 |
| rs144536957 | G | -0.0807 |
| rs3809316   | G | -0.0128 |
| rs117314570 | C | -0.0397 |
| rs55927238  | G | -0.0458 |
| rs2896826   | A | 0.0132  |
| rs1185198   | A | 0.0213  |
| rs10846259  | T | 0.0133  |
| rs80214251  | G | -0.1189 |
| rs11564161  | T | 0.0239  |
| rs74634576  | A | -0.0509 |
| rs74792936  | T | -0.0265 |
| rs2239158   | T | -0.0211 |
| rs76774132  | A | 0.0434  |
| rs3217858   | T | 0.0382  |
| rs704226    | T | 0.0166  |

|             |   |         |
|-------------|---|---------|
| rs149213142 | T | -0.0335 |
| rs17045175  | C | 0.0584  |
| rs117319545 | A | 0.0534  |
| rs78123962  | G | 0.0244  |
| rs141733936 | T | -0.0803 |
| rs73213225  | A | 0.0381  |
| rs17747199  | A | 0.016   |
| rs7971302   | T | 0.0132  |
| rs17777940  | G | 0.0903  |
| rs55642886  | T | -0.0198 |
| rs140690149 | T | 0.0592  |
| rs3885012   | G | 0.024   |
| rs77745131  | A | 0.0476  |
| rs11180440  | C | 0.0163  |
| rs12308116  | G | 0.0258  |
| rs75635052  | G | -0.0698 |
| rs1829825   | A | -0.0769 |
| rs117999098 | A | 0.0666  |
| rs12820159  | T | -0.0563 |
| rs9332876   | C | -0.0366 |
| rs2089975   | A | 0.015   |
| rs139942895 | A | 0.0529  |
| rs117922850 | C | -0.0353 |
| rs17110323  | T | 0.0536  |
| rs11106565  | C | 0.0146  |
| rs4761528   | C | -0.0172 |
| rs118013161 | A | 0.0953  |
| rs146804164 | T | 0.053   |
| rs7970138   | A | -0.089  |
| rs76523921  | A | 0.0301  |
| rs10845664  | C | 0.019   |
| rs117415811 | A | 0.0503  |
| rs118119462 | G | 0.063   |
| rs138157530 | A | -0.0608 |
| rs117507892 | A | -0.0702 |
| rs76035880  | T | 0.028   |
| rs137977097 | G | 0.072   |
| rs116789485 | A | 0.0698  |
| rs7136892   | A | 0.0146  |
| rs71449828  | G | -0.0435 |
| rs11610688  | T | 0.0129  |
| rs923078    | T | -0.0291 |
| rs139365452 | T | -0.0496 |
| rs3912631   | C | 0.0137  |
| rs78279323  | A | -0.0539 |
| rs4627140   | A | -0.0128 |
| rs73070000  | T | 0.0267  |

|             |   |         |
|-------------|---|---------|
| rs11107694  | A | 0.0261  |
| rs74781448  | A | -0.0593 |
| rs111649229 | G | 0.0518  |
| rs2912750   | T | 0.0129  |
| rs12824679  | A | 0.0626  |
| rs4435061   | A | 0.0127  |
| rs74062772  | G | -0.0429 |
| rs907352    | G | -0.0259 |
| rs74902462  | T | 0.0685  |
| rs1376990   | A | -0.0214 |
| rs61924413  | A | -0.0832 |
| rs597785    | A | 0.0123  |
| rs7134589   | T | -0.0116 |
| rs34035453  | A | -0.0367 |
| rs12302615  | A | -0.0395 |
| rs117404024 | A | 0.0424  |
| rs7957181   | G | -0.0316 |
| rs7964332   | T | 0.0133  |
| rs73076454  | A | -0.0224 |
| rs74371972  | G | 0.022   |
| rs11613646  | T | -0.1226 |
| rs886941    | T | 0.0215  |
| rs111244665 | T | -0.0204 |
| rs11610799  | C | -0.0217 |
| rs253802    | G | -0.0161 |
| rs79286704  | T | 0.0331  |
| rs6581512   | A | 0.0216  |
| rs11524933  | A | 0.0305  |
| rs35501619  | A | 0.0145  |
| rs6489314   | G | 0.0124  |
| rs139736025 | A | -0.0408 |
| rs139966291 | G | 0.0417  |
| rs74955195  | A | -0.0499 |
| rs145750572 | A | 0.0349  |
| rs17683246  | G | -0.0398 |
| rs7299880   | T | 0.02    |
| rs151235842 | T | -0.0634 |
| rs1163917   | T | 0.0121  |
| rs34853796  | T | -0.0135 |
| rs378862    | G | 0.0121  |
| rs4603386   | C | 0.0169  |
| rs75543436  | A | -0.03   |
| rs11046721  | G | 0.0258  |
| rs10842232  | A | -0.0169 |
| rs36103235  | G | -0.015  |
| rs73043559  | C | 0.0419  |
| rs4630340   | C | 0.0116  |

|             |   |         |
|-------------|---|---------|
| rs11062241  | T | 0.0519  |
| rs151012883 | A | -0.0802 |
| rs10847022  | G | 0.0166  |
| rs12426941  | A | -0.0187 |
| rs297941    | G | 0.0121  |
| rs76762850  | C | -0.0348 |
| rs113426869 | T | 0.0869  |
| rs11611143  | C | -0.0586 |
| rs1379513   | T | 0.0154  |
| rs4140777   | C | -0.0596 |
| rs7132914   | T | -0.0407 |
| rs147101789 | A | -0.1113 |
| rs11057692  | G | -0.0146 |
| rs61919472  | A | -0.0416 |
| rs11061812  | A | 0.0183  |
| rs117538777 | C | -0.0573 |
| rs11044946  | T | -0.0242 |
| rs79203018  | C | -0.0567 |
| rs75230856  | C | -0.0475 |
| rs7968902   | T | -0.012  |
| rs116510496 | C | 0.0793  |
| rs142298405 | T | 0.0497  |
| rs113675667 | C | 0.0663  |
| rs12228812  | A | -0.0353 |
| rs10732585  | G | 0.0242  |
| rs73152059  | T | 0.0465  |
| rs12320096  | G | -0.0136 |
| rs79135108  | T | -0.0365 |
| rs117769460 | C | 0.0986  |
| rs10860700  | C | 0.0151  |
| rs73165604  | T | -0.0504 |
| rs2014116   | C | 0.0129  |
| rs139819356 | G | 0.103   |
| rs146475551 | T | 0.0394  |
| rs2052738   | A | 0.0122  |
| rs1262402   | T | -0.0126 |
| rs77646191  | G | 0.0504  |
| rs145473038 | A | -0.0802 |
| rs143070721 | T | -0.0577 |
| rs4625560   | T | 0.0454  |
| rs79917565  | G | -0.0796 |
| rs75130342  | T | 0.0981  |
| rs7311528   | C | 0.0147  |
| rs75436938  | C | -0.0197 |
| rs76031115  | C | 0.0551  |
| rs4765771   | C | 0.0136  |
| rs7300328   | T | 0.0194  |



|             |   |         |
|-------------|---|---------|
| rs78264382  | C | 0.0386  |
| rs17413172  | A | -0.0471 |
| rs1358350   | T | 0.012   |
| rs12298685  | T | -0.0159 |
| rs763608    | C | -0.0114 |
| rs11168935  | T | -0.0232 |
| rs874389    | C | 0.0115  |
| rs61085645  | T | -0.0183 |
| rs111393687 | A | -0.0247 |
| rs75874633  | T | -0.0514 |
| rs73062424  | A | -0.0431 |
| rs75587126  | T | 0.0645  |
| rs75775989  | G | 0.0652  |
| rs34401373  | T | -0.0291 |
| rs7296130   | T | 0.0151  |
| rs35299693  | G | -0.0487 |
| rs1275551   | T | -0.0256 |
| rs73281496  | C | 0.0436  |
| rs28999107  | T | -0.0142 |
| rs118069294 | A | 0.0763  |
| rs118140185 | G | 0.0587  |
| rs4765996   | C | 0.0214  |
| rs76811966  | A | -0.0425 |
| rs79613664  | T | -0.0314 |
| rs140278138 | G | 0.0566  |
| rs73314241  | T | 0.0613  |
| rs1027401   | G | -0.0115 |
| rs17300728  | C | -0.0796 |
| rs56138825  | G | -0.0191 |
| rs117865109 | A | -0.081  |
| rs74474998  | T | 0.0126  |
| rs34203965  | T | 0.0386  |
| rs150443545 | T | -0.0703 |
| rs75422105  | C | -0.0384 |
| rs9804703   | G | -0.0149 |
| rs570644    | G | -0.015  |
| rs73092038  | C | 0.0794  |
| rs118003165 | T | -0.0756 |
| rs10082803  | A | -0.016  |
| rs78562302  | G | 0.0804  |
| rs57902222  | T | -0.0158 |
| rs149973408 | C | -0.0601 |
| rs11615674  | T | 0.0221  |
| rs138111392 | T | 0.0688  |
| rs73216997  | A | 0.0503  |
| rs73084611  | A | 0.0242  |
| rs78095501  | G | 0.0331  |

|             |   |         |
|-------------|---|---------|
| rs7304812   | A | 0.0169  |
| rs10842061  | T | -0.0155 |
| rs71469776  | C | -0.041  |
| rs79156128  | T | 0.038   |
| rs142368105 | C | 0.0738  |
| rs141434045 | G | -0.0479 |
| rs2360648   | G | -0.031  |
| rs75922794  | G | 0.0549  |
| rs2203027   | T | -0.0113 |
| rs10860878  | T | 0.0152  |
| rs11114066  | A | 0.0137  |
| rs78804337  | A | 0.0498  |
| rs12302850  | A | -0.0518 |
| rs112527063 | T | 0.0429  |
| rs1497259   | G | 0.0117  |
| rs61932682  | G | -0.0245 |
| rs145229739 | A | 0.0501  |
| rs111600767 | T | 0.0223  |
| rs61939990  | A | -0.0147 |
| rs12819276  | G | -0.0125 |
| rs56259586  | C | 0.0618  |
| rs55714654  | C | 0.0515  |
| rs34975077  | T | -0.0381 |
| rs148959667 | G | -0.0789 |
| rs61910002  | C | 0.0812  |
| rs150068593 | C | -0.0805 |
| rs10773561  | T | -0.0245 |
| rs17227325  | A | 0.0646  |
| rs76737918  | G | 0.0219  |
| rs78262736  | A | 0.0462  |
| rs73173953  | C | 0.0276  |
| rs117153106 | T | -0.037  |
| rs3924901   | A | -0.016  |
| rs804441    | T | 0.013   |
| rs11613525  | T | -0.0214 |
| rs7978809   | G | -0.0261 |
| rs837468    | C | 0.0158  |
| rs2239089   | A | 0.0116  |
| rs79101313  | A | -0.0638 |
| rs11043318  | C | 0.0357  |
| rs241965    | A | -0.0124 |
| rs11064116  | G | 0.0315  |
| rs16931437  | G | -0.0174 |
| rs12425617  | T | 0.0117  |
| rs4465437   | T | 0.0169  |
| rs117602465 | G | 0.0571  |
| rs73186018  | C | 0.034   |

|             |   |         |
|-------------|---|---------|
| rs10850679  | A | 0.0128  |
| rs3803148   | C | -0.017  |
| rs78438536  | A | -0.0322 |
| rs11107245  | A | 0.0165  |
| rs1863905   | G | 0.0156  |
| rs112571053 | A | 0.029   |
| rs35080156  | T | -0.0592 |
| rs78655609  | A | 0.0194  |
| rs2729646   | T | -0.0155 |
| rs822800    | G | 0.0135  |
| rs118087100 | G | 0.0633  |
| rs146238395 | A | 0.0496  |
| rs17788859  | G | -0.0154 |
| rs4331167   | C | 0.0127  |
| rs7136504   | C | 0.0138  |
| rs58463871  | A | 0.0133  |
| rs2198969   | C | -0.0174 |
| rs139831883 | T | -0.0262 |
| rs117754169 | G | 0.0453  |
| rs17028546  | G | 0.0693  |
| rs117478721 | T | 0.0437  |
| rs1531030   | A | 0.0536  |
| rs6488987   | C | 0.0129  |
| rs17765360  | G | 0.0132  |
| rs12315905  | G | 0.0439  |
| rs77949799  | G | 0.0404  |
| rs76545764  | C | 0.0501  |
| rs78743773  | A | 0.0395  |
| rs75253159  | G | 0.0377  |
| rs7303730   | G | 0.012   |
| rs1732278   | A | 0.0143  |
| rs7301227   | G | 0.0122  |
| rs4930759   | G | -0.0157 |
| rs11047405  | C | -0.057  |
| rs10879758  | A | -0.0112 |
| rs138081753 | T | -0.0775 |
| rs78145337  | C | 0.0771  |
| rs11614917  | T | -0.0319 |
| rs1667077   | C | 0.0143  |
| rs11110614  | T | 0.0355  |
| rs1106725   | G | -0.0122 |
| rs2238077   | A | -0.0171 |
| rs7969584   | G | -0.0113 |
| rs73146365  | A | -0.0607 |
| rs1024825   | G | -0.0138 |
| rs140097312 | T | -0.0744 |
| rs73286510  | G | 0.0373  |

|             |   |         |
|-------------|---|---------|
| rs118003677 | C | -0.0826 |
| rs147507060 | T | -0.0583 |
| rs11108525  | T | -0.0323 |
| rs34326180  | T | 0.0193  |
| rs111575734 | G | -0.0404 |
| rs12303833  | G | 0.0125  |
| rs11062544  | C | -0.0185 |
| rs12316815  | C | -0.0176 |
| rs150672391 | G | -0.0758 |
| rs11055226  | A | -0.0381 |
| rs2198787   | A | 0.0404  |
| rs73191435  | T | -0.0349 |
| rs117881990 | A | -0.0329 |
| rs470506    | A | -0.0124 |
| rs111682268 | A | -0.0831 |
| rs113448194 | A | 0.0511  |
| rs141763612 | A | -0.0742 |
| rs1874429   | G | -0.0127 |
| rs61925070  | C | 0.0661  |
| rs10777836  | G | -0.0119 |
| rs76388948  | A | 0.0398  |
| rs2578460   | T | -0.0149 |
| rs10878650  | T | 0.0152  |
| rs77389939  | C | -0.0257 |
| rs7311441   | T | -0.0212 |
| rs1193380   | A | 0.0112  |
| rs534275    | T | 0.0188  |
| rs9706255   | A | 0.0355  |
| rs7965999   | G | 0.015   |
| rs143366791 | A | -0.0626 |
| rs61932889  | G | 0.0263  |
| rs117428475 | T | 0.0637  |
| rs111865680 | A | -0.0379 |
| rs61938638  | A | 0.0163  |
| rs7962508   | G | -0.017  |
| rs11611173  | A | -0.0239 |
| rs12371750  | C | 0.0213  |
| rs11106763  | T | -0.0133 |
| rs11069218  | C | 0.0149  |
| rs75278212  | T | 0.0276  |
| rs7295904   | T | 0.0214  |
| rs34291586  | A | 0.0149  |
| rs9988925   | G | 0.0115  |
| rs117031413 | T | 0.0844  |
| rs7295321   | A | -0.0113 |
| rs73046344  | C | 0.0672  |
| rs3794240   | A | 0.0137  |

|             |   |         |
|-------------|---|---------|
| rs75710808  | C | 0.0329  |
| rs78004590  | A | -0.0317 |
| rs10860911  | A | 0.019   |
| rs7135558   | G | -0.0165 |
| rs15556     | G | 0.0136  |
| rs117631935 | C | 0.0394  |
| rs2544098   | G | 0.0222  |
| rs35814257  | A | -0.0219 |
| rs73223504  | A | -0.0652 |
| rs118124240 | T | -0.0332 |
| rs117371452 | C | 0.0562  |
| rs7308103   | C | -0.0136 |
| rs7968544   | G | 0.0191  |
| rs10845398  | T | -0.026  |
| rs17105179  | T | 0.0532  |
| rs12367716  | T | -0.0285 |
| rs11055487  | C | -0.0241 |
| rs11064834  | G | 0.0309  |
| rs11614932  | T | -0.0287 |
| rs117576445 | G | 0.0549  |
| rs11536207  | A | 0.0364  |
| rs11047037  | G | -0.0389 |
| rs28421662  | C | 0.0178  |
| rs111873468 | G | 0.0629  |
| rs117479107 | A | -0.0431 |
| rs2058778   | G | 0.0168  |
| rs12580740  | T | -0.0269 |
| rs78487415  | C | -0.0563 |
| rs73051015  | T | 0.0528  |
| rs75287613  | A | -0.088  |
| rs114003993 | T | 0.0555  |
| rs138017206 | T | 0.0343  |
| rs12424521  | C | 0.0549  |
| rs117902159 | A | 0.0727  |
| rs12427108  | C | -0.0328 |
| rs10744513  | T | -0.0669 |
| rs3910853   | T | 0.0186  |
| rs74563001  | A | -0.0569 |
| rs11114299  | G | -0.0279 |
| rs78041153  | G | 0.0501  |
| rs10492364  | T | -0.0134 |
| rs978341    | T | 0.0172  |
| rs56363146  | G | 0.0112  |
| rs140115675 | C | -0.0816 |
| rs150116383 | A | 0.0447  |
| rs77185978  | T | -0.068  |
| rs470404    | C | 0.0261  |

|             |   |         |
|-------------|---|---------|
| rs16945602  | A | -0.0972 |
| rs1166246   | A | 0.0184  |
| rs8186777   | C | 0.0195  |
| rs71462152  | G | 0.0293  |
| rs4931017   | A | -0.0128 |
| rs11608538  | A | 0.0293  |
| rs150072236 | G | -0.0483 |
| rs7967974   | C | -0.013  |
| rs140932099 | G | -0.0558 |
| rs17408578  | T | 0.032   |
| rs149443107 | A | -0.0892 |
| rs2011990   | G | -0.0128 |
| rs141404127 | C | 0.0645  |
| rs11064791  | A | 0.0213  |
| rs75326667  | T | 0.042   |
| rs872224    | C | -0.0192 |
| rs7967037   | C | -0.0148 |
| rs17732655  | T | 0.0537  |
| rs73166001  | C | -0.0303 |
| rs17791219  | G | 0.0565  |
| rs2723832   | G | 0.0391  |
| rs79222267  | C | 0.049   |
| rs825018    | G | -0.0271 |
| rs116959138 | C | -0.052  |
| rs79457104  | A | 0.0469  |
| rs12368790  | C | -0.0195 |
| rs12842     | T | 0.0209  |
| rs147537062 | A | -0.0786 |
| rs1109270   | A | -0.0275 |
| rs118032984 | T | 0.0991  |
| rs76384712  | C | 0.036   |
| rs113871052 | T | 0.0512  |
| rs7306021   | T | 0.0503  |
| rs73097723  | G | 0.0698  |
| rs597770    | C | 0.0144  |
| rs1795837   | A | -0.0296 |
| rs2520550   | A | 0.0133  |
| rs7298772   | C | -0.0201 |
| rs1618847   | G | -0.0114 |
| rs1949281   | T | -0.0215 |
| rs17817265  | G | 0.0295  |
| rs117399803 | T | -0.0461 |
| rs76827331  | A | -0.0814 |
| rs2019743   | G | -0.0501 |
| rs148838596 | G | -0.0492 |
| rs113648511 | C | 0.0356  |
| rs75498424  | T | 0.0364  |

|             |   |         |
|-------------|---|---------|
| rs138504875 | A | -0.0264 |
| rs117107811 | A | 0.0727  |
| rs138534536 | A | -0.0338 |
| rs12367364  | G | -0.0645 |
| rs12426384  | T | -0.0242 |
| rs12422878  | G | 0.0192  |
| rs10848919  | T | -0.0113 |
| rs78311614  | G | -0.0259 |
| rs12810402  | G | 0.0352  |
| rs4831954   | G | -0.0161 |
| rs117238783 | C | -0.0446 |
| rs75317905  | A | 0.016   |
| rs7296816   | G | 0.0161  |
| rs6581543   | G | 0.0113  |
| rs151285453 | C | 0.0636  |
| rs1385375   | C | 0.0139  |
| rs74775464  | G | 0.0833  |
| rs145320352 | T | 0.0672  |
| rs117953927 | C | -0.0408 |
| rs901837    | T | -0.0134 |
| rs7305813   | C | 0.0181  |
| rs11564281  | A | -0.0171 |
| rs117960644 | A | -0.0897 |
| rs7976773   | G | 0.0116  |
| rs2048182   | A | -0.0304 |
| rs17331210  | G | 0.0273  |
| rs206968    | G | -0.028  |
| rs146047416 | T | -0.0306 |
| rs2069086   | G | -0.019  |
| rs61935371  | G | -0.0493 |
| rs117592595 | C | 0.055   |
| rs77658245  | T | 0.0495  |
| rs61937898  | T | -0.0227 |
| rs77164738  | C | 0.0192  |
| rs10878322  | C | 0.0236  |
| rs146400306 | A | 0.0389  |
| rs10848665  | C | -0.0146 |
| rs7297184   | C | -0.0263 |
| rs4506737   | A | -0.0133 |
| rs111560940 | T | 0.0473  |
| rs142931808 | A | 0.0698  |
| rs77252023  | A | -0.0581 |
| rs76016824  | T | 0.0551  |
| rs7305226   | A | -0.0316 |
| rs112316293 | A | 0.0494  |
| rs77023105  | G | -0.0678 |
| rs6539337   | T | -0.0124 |

|             |   |         |
|-------------|---|---------|
| rs16931447  | A | 0.0302  |
| rs113568884 | T | 0.0504  |
| rs11614527  | C | 0.0189  |
| rs149614944 | T | 0.0896  |
| rs11048676  | C | -0.0119 |
| rs117193681 | A | -0.0816 |
| rs138336055 | C | 0.059   |
| rs12422413  | T | -0.0183 |
| rs12320412  | T | 0.0122  |
| rs61926890  | T | 0.0256  |
| rs10849428  | C | -0.0208 |
| rs11044056  | C | -0.0131 |
| rs10784169  | A | 0.0117  |
| rs11113797  | T | 0.015   |
| rs75703726  | T | 0.0369  |
| rs2303962   | C | -0.0133 |
| rs34719188  | A | -0.0142 |
| rs11110756  | G | 0.1031  |
| rs7484450   | T | -0.0176 |
| rs73099946  | T | 0.0855  |
| rs140801984 | T | -0.0575 |
| rs7976582   | C | -0.0135 |
| rs1731545   | C | 0.0125  |
| rs10850787  | C | -0.0229 |
| rs1882501   | A | -0.0281 |
| rs715167    | G | 0.0108  |
| rs35461485  | A | 0.0319  |
| rs34186966  | G | 0.0359  |
| rs75991028  | C | -0.0666 |
| rs143432184 | C | -0.037  |
| rs74975546  | A | -0.0406 |
| rs7959098   | C | -0.0499 |
| rs143437310 | A | 0.0571  |
| rs11064925  | A | 0.0112  |
| rs117807959 | G | 0.0631  |
| rs73129983  | C | 0.0485  |
| rs61936746  | G | 0.0232  |
| rs17768145  | G | 0.0339  |
| rs118114859 | A | -0.0762 |
| rs12367803  | G | 0.0243  |
| rs7315097   | G | 0.0136  |
| rs76975379  | A | -0.0346 |
| rs11112075  | A | -0.0322 |
| rs10744173  | A | -0.013  |
| rs1994474   | C | 0.011   |
| rs117246379 | G | -0.0448 |
| rs11177595  | C | -0.0507 |



|             |   |         |
|-------------|---|---------|
| rs139419964 | T | 0.0664  |
| rs11045913  | A | 0.0109  |
| rs61941641  | C | 0.0871  |
| rs1698855   | C | -0.0183 |
| rs77163942  | T | 0.0991  |
| rs68105025  | G | 0.0579  |
| rs337676    | G | 0.037   |
| rs11608281  | A | 0.0218  |
| rs115558197 | A | -0.0674 |
| rs2700151   | C | -0.0156 |
| rs12822442  | G | 0.0139  |
| rs57316347  | G | 0.0115  |
| rs117829917 | A | -0.0492 |
| rs4760607   | G | -0.0214 |
| rs113623172 | T | -0.056  |
| rs7307887   | C | -0.0151 |
| rs4882764   | G | 0.0116  |
| rs1103035   | C | -0.0131 |
| rs4269988   | A | 0.0118  |
| rs1252445   | G | -0.0444 |
| rs61923149  | G | -0.0472 |
| rs7297482   | T | 0.0153  |
| rs11065519  | C | 0.024   |
| rs876643    | T | 0.0126  |
| rs78036990  | T | 0.039   |
| rs1574315   | C | 0.0626  |
| rs10878903  | C | -0.0115 |
| rs56266228  | A | 0.0201  |
| rs17785372  | A | -0.0493 |
| rs61441341  | T | 0.0409  |
| rs11174267  | G | 0.0112  |
| rs11108046  | C | 0.0207  |
| rs12367731  | C | 0.0338  |
| rs115678109 | A | 0.0581  |
| rs10744433  | A | 0.0127  |
| rs77304919  | T | 0.0391  |
| rs1242999   | G | -0.0222 |
| rs143877583 | G | -0.0642 |
| rs1840083   | T | -0.0155 |
| rs73130978  | T | 0.0215  |
| rs147840763 | A | 0.0616  |
| rs34585     | A | 0.0266  |
| rs4388939   | G | -0.0216 |
| rs141682365 | G | -0.0536 |
| rs61917619  | C | -0.0117 |
| rs61933466  | G | -0.062  |
| rs139255873 | G | 0.0647  |

|             |   |         |
|-------------|---|---------|
| rs2727718   | G | -0.0209 |
| rs10491966  | T | 0.017   |
| rs33962952  | T | 0.0309  |
| rs59148775  | A | 0.0289  |
| rs11055297  | A | -0.0125 |
| rs146092169 | A | 0.0735  |
| rs324015    | T | -0.013  |
| rs73134075  | A | -0.0485 |
| rs112248730 | C | -0.0497 |
| rs7961806   | A | 0.0572  |
| rs112281161 | C | 0.0365  |
| rs399018    | A | -0.0196 |
| rs115492784 | A | -0.0537 |
| rs4762661   | C | -0.0157 |
| rs11065054  | T | 0.0368  |
| rs2058821   | C | -0.013  |
| rs74055529  | C | 0.0768  |
| rs34858644  | T | -0.072  |
| rs117734888 | A | -0.0433 |
| rs1498690   | A | -0.0664 |
| rs249182    | G | -0.0473 |
| rs11067502  | C | -0.0551 |
| rs3863381   | G | 0.0147  |
| rs3962536   | G | 0.0165  |
| rs76525859  | T | -0.0449 |
| rs77257630  | G | -0.0642 |
| rs10773989  | T | -0.0112 |
| rs145406238 | T | 0.07    |
| rs7297662   | A | -0.0118 |
| rs7294402   | G | 0.022   |
| rs6581244   | T | 0.0489  |
| rs34911076  | A | 0.0247  |
| rs55733287  | A | -0.0155 |
| rs144574211 | G | -0.0727 |
| rs113955527 | A | -0.0277 |
| rs113269425 | A | -0.028  |
| rs2445431   | C | 0.0676  |
| rs150207620 | T | 0.0313  |
| rs147654565 | A | -0.0428 |
| rs12422865  | A | -0.0351 |
| rs1961649   | T | -0.0159 |
| rs73207908  | T | -0.0526 |
| rs111750990 | C | -0.0698 |
| rs75020026  | T | 0.0369  |
| rs116947138 | A | 0.0871  |
| rs73289733  | T | 0.0441  |
| rs74082063  | T | 0.0184  |

|             |   |         |
|-------------|---|---------|
| rs143999261 | A | 0.0743  |
| rs7314994   | A | -0.0117 |
| rs1144948   | A | -0.0319 |
| rs7298858   | C | 0.0167  |
| rs1248039   | A | 0.018   |
| rs141486754 | T | -0.0481 |
| rs4765497   | G | -0.0131 |
| rs73217756  | A | -0.0811 |
| rs145242567 | T | -0.0472 |
| rs150116216 | A | -0.0713 |
| rs1283812   | G | 0.0139  |
| rs73066451  | A | -0.0479 |
| rs75360616  | A | 0.0426  |
| rs116915717 | C | -0.0748 |
| rs2956705   | C | -0.0129 |
| rs12580914  | T | -0.0128 |
| rs7962052   | G | -0.0482 |
| rs140598333 | A | -0.0601 |
| rs73340830  | C | 0.0188  |
| rs139350905 | C | 0.0428  |
| rs9520713   | A | -0.0778 |
| rs1018597   | C | 0.2274  |
| rs1218788   | A | 0.0858  |
| rs116964464 | T | 0.2329  |
| rs61957302  | T | 0.192   |
| rs144265943 | C | 0.2503  |
| rs145908562 | G | 0.3145  |
| rs3011479   | A | 0.069   |
| rs7981577   | C | -0.0739 |
| rs45495899  | C | -0.2666 |
| rs7323110   | A | 0.1374  |
| rs1011611   | C | -0.0839 |
| rs7986780   | C | -0.0959 |
| rs55804230  | A | -0.1068 |
| rs7339051   | C | -0.0779 |
| rs142317527 | T | -0.2576 |
| rs4771110   | G | -0.0704 |
| rs9598226   | G | -0.065  |
| rs9543862   | G | 0.0883  |
| rs612986    | A | -0.0613 |
| rs1359946   | A | 0.0747  |
| rs5744123   | T | 0.3364  |
| rs34902333  | C | 0.0899  |
| rs7327331   | A | -0.0649 |
| rs144374273 | T | 0.322   |
| rs77836175  | T | 0.1011  |
| rs532641    | C | 0.0753  |

|             |   |         |
|-------------|---|---------|
| rs9543643   | G | -0.3307 |
| rs9542714   | T | 0.4132  |
| rs142501328 | G | 0.3471  |
| rs73449267  | T | 0.0856  |
| rs2791271   | T | -0.0568 |
| rs9524525   | G | -0.0574 |
| rs113478374 | A | 0.0763  |
| rs72644576  | G | -0.3255 |
| rs61959259  | T | -0.1186 |
| rs111986502 | A | 0.1201  |
| rs9577315   | T | 0.103   |
| rs4485211   | C | 0.094   |
| rs9592444   | G | -0.1642 |
| rs117180150 | A | 0.2954  |
| rs9510242   | G | -0.0544 |
| rs9520653   | G | 0.0642  |
| rs7321531   | G | 0.0539  |
| rs7324017   | T | -0.0636 |
| rs9532494   | T | 0.0654  |
| rs3989131   | A | -0.0552 |
| rs1176286   | T | -0.0525 |
| rs17705750  | T | -0.0756 |
| rs6491866   | G | 0.0549  |
| rs7323652   | A | -0.0533 |
| rs9562683   | A | 0.0714  |
| rs150930276 | T | 0.4887  |
| rs72661770  | C | 0.081   |
| rs118005698 | T | 0.2733  |
| rs2230343   | G | -0.1046 |
| rs7317689   | G | 0.3051  |
| rs9560820   | G | -0.0564 |
| rs7331792   | A | 0.1158  |
| rs56029569  | T | 0.1291  |
| rs143605913 | C | -0.3706 |
| rs9316339   | G | 0.0694  |
| rs9507240   | T | 0.1583  |
| rs10507641  | C | -0.0973 |
| rs4450260   | C | 0.0521  |
| rs7992347   | C | 0.0544  |
| rs113343560 | A | 0.1065  |
| rs706595    | G | 0.2494  |
| rs9546961   | G | 0.1094  |
| rs9576469   | A | 0.0709  |
| rs9526785   | A | 0.0533  |
| rs34003364  | A | 0.1512  |
| rs147014069 | G | 0.2124  |
| rs17693263  | T | 0.1886  |

|             |   |         |
|-------------|---|---------|
| rs9547877   | G | -0.0829 |
| rs1467719   | G | -0.0566 |
| rs117235878 | C | -0.4628 |
| rs66518473  | A | 0.0725  |
| rs9567099   | T | -0.0599 |
| rs626277    | C | -0.0505 |
| rs35378188  | A | 0.0798  |
| rs2993332   | G | 0.0669  |
| rs7983776   | T | -0.0643 |
| rs113897317 | A | 0.2542  |
| rs931004    | T | 0.0515  |
| rs2094500   | T | -0.0518 |
| rs118069118 | T | -0.2053 |
| rs7337911   | G | 0.0559  |
| rs61950407  | A | 0.2003  |
| rs9506831   | C | -0.0493 |
| rs11619798  | C | 0.0602  |
| rs144700274 | G | 0.233   |
| rs9318064   | C | -0.0516 |
| rs117190428 | C | 0.1743  |
| rs78354456  | A | -0.1468 |
| rs10492669  | C | 0.137   |
| rs4633555   | C | -0.0676 |
| rs149986875 | G | -0.2509 |
| rs11618141  | T | -0.1858 |
| rs78132574  | A | 0.226   |
| rs7337819   | G | -0.0608 |
| rs2765760   | T | 0.0676  |
| rs74513431  | C | 0.2123  |
| rs9576603   | A | 0.0874  |
| rs17072788  | A | 0.2167  |
| rs1614102   | C | 0.0488  |
| rs73162524  | G | -0.271  |
| rs80274080  | A | 0.0654  |
| rs9555311   | A | -0.0487 |
| rs9541201   | G | 0.1393  |
| rs7334407   | C | 0.0626  |
| rs78589467  | T | -0.2071 |
| rs17284659  | T | -0.0841 |
| rs11838592  | C | 0.4312  |
| rs138628975 | A | 0.2537  |
| rs9551896   | G | 0.0512  |
| rs9579388   | C | -0.075  |
| rs9511600   | T | 0.0502  |
| rs9586195   | A | -0.0968 |
| rs7981249   | G | 0.1173  |
| rs9515331   | C | 0.0607  |

|             |   |         |
|-------------|---|---------|
| rs9600555   | A | 0.0486  |
| rs7324687   | C | -0.0632 |
| rs9598223   | G | 0.071   |
| rs7990733   | A | -0.0592 |
| rs9553510   | C | 0.0477  |
| rs1770356   | T | -0.095  |
| rs4408409   | G | 0.0467  |
| rs7999689   | C | 0.0568  |
| rs11617852  | G | 0.1723  |
| rs9585881   | A | 0.0838  |
| rs2485286   | C | 0.0648  |
| rs1170097   | T | 0.2499  |
| rs11839355  | A | -0.086  |
| rs73160005  | A | 0.2989  |
| rs139943690 | G | -0.3336 |
| rs138668947 | C | 0.1803  |
| rs1343188   | C | 0.0505  |
| rs17566454  | A | 0.0873  |
| rs73198964  | G | 0.2165  |
| rs143146489 | T | 0.1474  |
| rs60460946  | T | 0.1038  |
| rs9521462   | A | 0.0553  |
| rs17378723  | G | -0.1834 |
| rs157829    | T | 0.0948  |
| rs9519643   | G | -0.1201 |
| rs7326071   | A | -0.1207 |
| rs112226797 | T | 0.1674  |
| rs1970126   | G | -0.0528 |
| rs7337652   | C | 0.057   |
| rs285034    | T | -0.0949 |
| rs73456798  | G | -0.2214 |
| rs118087779 | G | -0.2448 |
| rs9536939   | C | 0.1484  |
| rs2329135   | T | -0.0525 |
| rs146784590 | A | -0.2835 |
| rs1504420   | C | -0.0602 |
| rs72639874  | G | -0.0877 |
| rs74091806  | A | -0.0622 |
| rs17586131  | C | 0.1788  |
| rs4772722   | G | -0.0638 |
| rs66709527  | C | -0.0605 |
| rs2993273   | C | -0.1495 |
| rs11841180  | G | -0.0507 |
| rs117102228 | A | 0.1207  |
| rs2256284   | G | -0.0669 |
| rs9553824   | C | 0.1119  |
| rs11617098  | A | -0.0637 |

|             |   |         |
|-------------|---|---------|
| rs2768524   | C | 0.2323  |
| rs4976846   | C | -0.0616 |
| rs2329175   | C | 0.0451  |
| rs2209091   | G | 0.1321  |
| rs28554147  | G | 0.0703  |
| rs111329412 | T | 0.1509  |
| rs7990013   | C | 0.0593  |
| rs2150228   | T | -0.0857 |
| rs12859017  | C | -0.0554 |
| rs7998924   | C | -0.0615 |
| rs2168687   | T | -0.0479 |
| rs145793199 | A | 0.365   |
| rs583704    | A | -0.0626 |
| rs1538225   | T | -0.0553 |
| rs112456535 | T | -0.3622 |
| rs9582793   | G | 0.0591  |
| rs1323174   | A | 0.2505  |
| rs673603    | A | 0.1081  |
| rs9532388   | T | 0.0537  |
| rs112616416 | G | 0.1296  |
| rs4770379   | T | -0.0608 |
| rs6561296   | C | 0.056   |
| rs11843612  | A | -0.0843 |
| rs754325    | C | 0.0508  |
| rs7331957   | T | -0.1871 |
| rs76151813  | G | 0.1028  |
| rs74759738  | C | -0.1617 |
| rs543019    | A | 0.0558  |
| rs55932625  | G | 0.0817  |
| rs113650764 | A | 0.18    |
| rs57710580  | C | 0.1842  |
| rs74114629  | C | -0.1542 |
| rs9582905   | G | -0.053  |
| rs76290716  | T | -0.1201 |
| rs4534694   | A | 0.2349  |
| rs9645922   | G | -0.053  |
| rs9524115   | G | -0.0919 |
| rs45505204  | G | -0.1334 |
| rs1924632   | T | -0.0455 |
| rs142865104 | A | -0.1034 |
| rs2312972   | C | 0.0448  |
| rs2349953   | C | -0.0574 |
| rs12870515  | A | 0.058   |
| rs117848081 | A | -0.1204 |
| rs9542617   | A | 0.0733  |
| rs9560797   | G | 0.0436  |
| rs139479490 | A | 0.2457  |

|             |   |         |
|-------------|---|---------|
| rs943048    | G | 0.0725  |
| rs11069293  | A | 0.0517  |
| rs7336554   | C | 0.109   |
| rs1414357   | G | 0.0447  |
| rs10508195  | T | 0.0641  |
| rs76706918  | G | 0.1109  |
| rs1290519   | C | 0.0674  |
| rs9542253   | T | 0.0456  |
| rs112438176 | T | 0.2565  |
| rs7990735   | G | -0.0635 |
| rs4324041   | T | 0.0901  |
| rs76027862  | T | 0.2033  |
| rs9581697   | G | 0.0491  |
| rs12874122  | C | -0.0651 |
| rs12858368  | T | 0.0956  |
| rs9555537   | C | -0.0544 |
| rs6491539   | G | -0.0551 |
| rs61965093  | T | 0.0864  |
| rs78066978  | T | 0.0959  |
| rs73171530  | T | -0.2629 |
| rs9572475   | A | -0.0819 |
| rs28436811  | G | 0.2062  |
| rs3117950   | T | -0.0843 |
| rs142128137 | A | -0.2843 |
| rs9522932   | C | -0.053  |
| rs1811904   | A | 0.0442  |
| rs912527    | G | 0.0553  |
| rs61414478  | A | 0.2546  |
| rs1927393   | A | 0.0517  |
| rs9542530   | C | 0.0624  |
| rs17086923  | T | -0.0743 |
| rs112184163 | A | 0.1522  |
| rs9517864   | A | 0.0545  |
| rs117972743 | C | -0.1449 |
| rs11839042  | T | 0.2374  |
| rs9553146   | A | 0.0822  |
| rs8002224   | A | -0.0587 |
| rs3751434   | T | 0.1934  |
| rs142137284 | T | 0.1721  |
| rs9564377   | G | 0.0752  |
| rs111664405 | A | 0.2702  |
| rs35825063  | G | 0.0603  |
| rs1457308   | G | 0.1666  |
| rs34373446  | C | 0.1245  |
| rs9571386   | T | 0.1722  |
| rs141427568 | T | -0.2488 |
| rs7997024   | G | -0.0713 |



|             |   |         |
|-------------|---|---------|
| rs2503687   | C | -0.068  |
| rs4943402   | G | 0.0696  |
| rs1853928   | A | -0.083  |
| rs76287812  | T | -0.4036 |
| rs17081131  | G | 0.0475  |
| rs73179213  | T | -0.1625 |
| rs117592204 | C | 0.1851  |
| rs74970087  | C | 0.0917  |
| rs56413959  | C | 0.089   |
| rs147547515 | A | -0.3219 |
| rs1576646   | T | 0.0435  |
| rs7334002   | C | 0.0814  |
| rs2185649   | G | 0.0446  |
| rs74480403  | C | -0.1831 |
| rs9581911   | A | 0.0656  |
| rs76617048  | A | 0.1737  |
| rs1974338   | G | -0.0635 |
| rs9316182   | T | -0.048  |
| rs9583489   | T | -0.0474 |
| rs17245404  | A | 0.1316  |
| rs571564    | G | 0.0531  |
| rs17078700  | A | -0.0917 |
| rs1115871   | A | 0.055   |
| rs59560414  | A | -0.1113 |
| rs12430353  | G | 0.0436  |
| rs79317015  | A | 0.1632  |
| rs17082210  | T | -0.4034 |
| rs1220601   | G | 0.0885  |
| rs9520081   | T | 0.0731  |
| rs116693986 | A | 0.2877  |
| rs9603429   | T | 0.0628  |
| rs346578    | A | -0.0711 |
| rs76144992  | G | 0.0476  |
| rs56680496  | T | 0.0943  |
| rs117279471 | G | 0.3151  |
| rs76891058  | G | 0.0794  |
| rs76965483  | T | 0.1655  |
| rs112701700 | T | 0.1664  |
| rs9564576   | C | -0.0433 |
| rs1373090   | C | 0.0441  |
| rs28560135  | T | -0.2593 |
| rs1927528   | A | 0.0726  |
| rs9520057   | T | 0.2103  |
| rs7337808   | T | 0.0436  |
| rs198565    | A | 0.2601  |
| rs34993272  | A | -0.1022 |
| rs56260004  | T | -0.2368 |

|             |   |         |
|-------------|---|---------|
| rs6562125   | T | -0.0624 |
| rs143920334 | G | -0.1297 |
| rs3812841   | T | -0.0449 |
| rs7332048   | G | -0.0436 |
| rs61950458  | C | 0.1667  |
| rs73179556  | T | 0.1356  |
| rs117755160 | T | -0.2214 |
| rs17063806  | T | 0.2444  |
| rs9573476   | T | -0.0476 |
| rs2181304   | G | -0.0427 |
| rs2146890   | A | -0.0582 |
| rs9599524   | C | -0.2573 |
| rs7328911   | C | -0.0416 |
| rs4772463   | C | 0.0465  |
| rs118188030 | T | -0.1485 |
| rs117007043 | T | 0.2321  |
| rs61624666  | T | -0.147  |
| rs6563492   | T | -0.0613 |
| rs61946579  | A | 0.081   |
| rs112877918 | C | -0.1273 |
| rs17069393  | C | -0.0521 |
| rs117235647 | G | 0.3697  |
| rs7983469   | G | -0.0415 |
| rs545228    | G | 0.2334  |
| rs9559183   | C | -0.0418 |
| rs35127771  | T | -0.0538 |
| rs73154272  | C | -0.0719 |
| rs1925058   | G | 0.0444  |
| rs74433501  | G | -0.1109 |
| rs61948304  | T | -0.1041 |
| rs141526960 | G | 0.3024  |
| rs7325233   | G | -0.0485 |
| rs9549679   | G | 0.0461  |
| rs2325295   | T | 0.1936  |
| rs1930793   | C | 0.0469  |
| rs55950535  | T | 0.0756  |
| rs113376190 | A | 0.1848  |
| rs17533412  | G | 0.1545  |
| rs9317146   | G | 0.1108  |
| rs17086609  | G | 0.0462  |
| rs142560217 | T | 0.1794  |
| rs7317855   | A | -0.2296 |
| rs7990019   | G | 0.0546  |
| rs9558118   | A | 0.0651  |
| rs34487937  | A | 0.0551  |
| rs17069290  | G | 0.1284  |
| rs117129696 | A | 0.1676  |

|             |   |         |
|-------------|---|---------|
| rs12584168  | A | 0.0568  |
| rs74095343  | T | 0.2398  |
| rs34730077  | T | -0.1121 |
| rs9538392   | C | 0.0651  |
| rs74080327  | A | 0.1353  |
| rs77837766  | T | 0.1106  |
| rs12877284  | A | 0.1157  |
| rs7981988   | A | -0.0465 |
| rs9599855   | C | -0.0881 |
| rs117611651 | C | -0.2819 |
| rs113089690 | A | 0.1605  |
| rs9559455   | T | 0.0465  |
| rs138505635 | C | 0.3597  |
| rs11617697  | A | 0.1336  |
| rs7992940   | G | -0.0429 |
| rs117194969 | G | 0.2153  |
| rs150613371 | A | 0.2154  |
| rs1570555   | G | -0.0471 |
| rs113269896 | T | -0.2086 |
| rs984111    | A | -0.0432 |
| rs4381447   | A | 0.0837  |
| rs7325340   | G | 0.2072  |
| rs9515282   | T | 0.0467  |
| rs9526538   | T | -0.0572 |
| rs4429165   | C | 0.0406  |
| rs9532680   | A | 0.1918  |
| rs116953213 | T | -0.1829 |
| rs12585032  | T | 0.0423  |
| rs9572346   | C | 0.0619  |
| rs79299031  | A | -0.1115 |
| rs2070040   | A | 0.0401  |
| rs9591402   | T | 0.1477  |
| rs148140411 | C | -0.1386 |
| rs9509213   | A | -0.0899 |
| rs17504752  | T | -0.0705 |
| rs2116998   | G | -0.0465 |
| rs117340193 | T | 0.1897  |
| rs9554728   | A | 0.0441  |
| rs9555835   | C | 0.046   |
| rs79125877  | A | -0.2519 |
| rs7985265   | T | 0.1511  |
| rs77610369  | A | -0.2012 |
| rs12428837  | T | 0.046   |
| rs17433719  | G | 0.0684  |
| rs117265055 | A | -0.2047 |
| rs117290941 | A | -0.1293 |
| rs9555105   | C | -0.0669 |

|             |   |         |
|-------------|---|---------|
| rs9552915   | A | 0.0509  |
| rs79874987  | C | 0.187   |
| rs12875913  | G | -0.0629 |
| rs56186958  | A | 0.1246  |
| rs9541921   | A | -0.0399 |
| rs75990591  | A | 0.1974  |
| rs149906948 | T | 0.0413  |
| rs9511484   | T | -0.0437 |
| rs117640454 | A | -0.2396 |
| rs9550223   | T | 0.0407  |
| rs117911405 | T | 0.1509  |
| rs12853957  | C | -0.1634 |
| rs7337795   | C | -0.0902 |
| rs1164500   | A | 0.0433  |
| rs17657154  | C | 0.0473  |
| rs10161800  | C | 0.1618  |
| rs2066700   | T | 0.0404  |
| rs12866031  | G | 0.1422  |
| rs146779675 | A | -0.2688 |
| rs9552164   | G | 0.0417  |
| rs113502315 | G | 0.0884  |
| rs9577634   | T | 0.0557  |
| rs9564799   | C | -0.1341 |
| rs9518506   | T | -0.0533 |
| rs79016072  | A | 0.1186  |
| rs61950496  | C | 0.1565  |
| rs36104484  | C | -0.0414 |
| rs11069856  | A | -0.06   |
| rs61948653  | T | -0.1165 |
| rs75546602  | A | -0.216  |
| rs75356154  | T | 0.1569  |
| rs9519726   | G | 0.0428  |
| rs7338387   | T | 0.1456  |
| rs12716687  | G | -0.0395 |
| rs117182054 | T | 0.3054  |
| rs35504048  | C | 0.1932  |
| rs1269974   | G | 0.1214  |
| rs149598233 | T | -0.2636 |
| rs118055164 | G | 0.2067  |
| rs9552499   | T | 0.0463  |
| rs2137842   | T | 0.121   |
| rs9591364   | G | 0.0827  |
| rs17310704  | A | 0.074   |
| rs2184592   | T | 0.0394  |
| rs9572529   | C | -0.0499 |
| rs149400240 | G | -0.2919 |
| rs12870452  | A | 0.0599  |

|             |   |         |
|-------------|---|---------|
| rs73156560  | A | -0.0609 |
| rs9592955   | G | -0.0409 |
| rs117910726 | C | -0.1919 |
| rs17069419  | T | 0.1877  |
| rs342589    | C | 0.0906  |
| rs2773971   | C | 0.0405  |
| rs79156791  | C | 0.1203  |
| rs9551939   | A | 0.1208  |
| rs9572975   | C | -0.2636 |
| rs9584994   | A | -0.1585 |
| rs9587469   | C | -0.0516 |
| rs61956680  | A | 0.1943  |
| rs7327037   | C | -0.0394 |
| rs117500781 | C | -0.1997 |
| rs2274759   | T | -0.1273 |
| rs9566460   | A | 0.0744  |
| rs4770519   | A | 0.0587  |
| rs9543670   | A | 0.0422  |
| rs9515431   | G | 0.043   |
| rs117142438 | C | 0.1793  |
| rs112660758 | A | 0.1251  |
| rs77319677  | C | 0.1542  |
| rs9540172   | C | -0.0448 |
| rs1578867   | C | 0.0928  |
| rs2260128   | G | -0.0389 |
| rs9522775   | T | 0.0803  |
| rs9599657   | A | 0.1905  |
| rs9556929   | T | -0.0417 |
| rs79318269  | T | -0.1521 |
| rs597746    | C | -0.0449 |
| rs144859058 | T | -0.2144 |
| rs9528687   | C | -0.0554 |
| rs11620382  | G | 0.0783  |
| rs336236    | G | -0.0421 |
| rs79699150  | C | 0.209   |
| rs772312    | C | -0.0753 |
| rs4150371   | G | 0.0854  |
| rs1555754   | T | 0.0662  |
| rs9545040   | A | -0.0407 |
| rs9548022   | G | -0.0445 |
| rs11619301  | C | -0.0962 |
| rs147076490 | G | 0.1684  |
| rs74890966  | C | -0.16   |
| rs12100068  | T | -0.0722 |
| rs73177509  | G | 0.1143  |
| rs7329071   | C | 0.1148  |
| rs9542529   | G | -0.1038 |

|             |   |         |
|-------------|---|---------|
| rs661228    | T | 0.0667  |
| rs2316119   | A | 0.2585  |
| rs9634510   | C | 0.0477  |
| rs58982785  | A | 0.0432  |
| rs9598227   | G | 0.0413  |
| rs144309858 | T | 0.3073  |
| rs72667744  | G | -0.1127 |
| rs112736841 | C | 0.1795  |
| rs76110489  | A | 0.1478  |
| rs111851081 | G | 0.1767  |
| rs139407395 | G | 0.1727  |
| rs12863816  | T | -0.0533 |
| rs7327162   | C | 0.1417  |
| rs17360458  | G | 0.0934  |
| rs61955516  | A | -0.1368 |
| rs4769706   | T | -0.1693 |
| rs143048284 | C | 0.1747  |
| rs145110980 | C | -0.333  |
| rs67133719  | A | -0.0504 |
| rs17537837  | T | -0.083  |
| rs4943566   | C | 0.051   |
| rs111767796 | T | -0.2314 |
| rs75973406  | T | 0.1661  |
| rs35824150  | A | -0.0539 |
| rs4770073   | G | -0.0842 |
| rs1535640   | T | -0.0395 |
| rs1886492   | T | -0.0393 |
| rs168518    | G | 0.0513  |
| rs9561704   | A | 0.0407  |
| rs9556857   | G | -0.1065 |
| rs143926323 | A | 0.2436  |
| rs11147457  | A | -0.0672 |
| rs17175056  | G | 0.1064  |
| rs975507    | C | -0.059  |
| rs4884356   | T | 0.0393  |
| rs2805954   | C | 0.0516  |
| rs61950170  | A | 0.0431  |
| rs72645892  | G | -0.0429 |
| rs3011552   | A | 0.0646  |
| rs73227898  | G | 0.2581  |
| rs57313044  | T | -0.0734 |
| rs12864736  | G | -0.0573 |
| rs17393929  | C | -0.1161 |
| rs9553904   | T | 0.0397  |
| rs516445    | T | 0.0558  |
| rs141601692 | C | 0.2116  |
| rs7323013   | G | -0.0817 |

|             |   |         |
|-------------|---|---------|
| rs7335965   | A | -0.1464 |
| rs9595078   | G | -0.1872 |
| rs1885764   | A | -0.047  |
| rs74036629  | C | -0.2322 |
| rs9569551   | T | 0.0567  |
| rs9546812   | C | -0.0621 |
| rs35405349  | G | -0.0975 |
| rs116848876 | A | 0.3345  |
| rs74414155  | G | -0.0855 |
| rs12584940  | G | 0.0434  |
| rs11620082  | T | 0.0627  |
| rs117133300 | A | 0.216   |
| rs4770153   | A | 0.0464  |
| rs61956689  | A | -0.1094 |
| rs142446797 | G | -0.3251 |
| rs2504221   | G | 0.0606  |
| rs9518716   | G | -0.1011 |
| rs78866819  | T | 0.0853  |
| rs4583072   | G | -0.2542 |
| rs9540660   | G | -0.0415 |
| rs9805578   | A | -0.0605 |
| rs7333268   | G | 0.0386  |
| rs147085501 | C | 0.2535  |
| rs9552790   | A | 0.0743  |
| rs7995647   | C | -0.0397 |
| rs143750917 | C | 0.2415  |
| rs11618974  | A | -0.0529 |
| rs9526765   | C | 0.0458  |
| rs117300920 | T | 0.127   |
| rs1854964   | T | -0.0394 |
| rs10507465  | C | 0.0462  |
| rs117066769 | G | -0.2917 |
| rs150705037 | C | 0.2501  |
| rs7996900   | A | 0.0373  |
| rs12429646  | G | 0.0593  |
| rs9570977   | A | 0.1887  |
| rs202091    | G | 0.0405  |
| rs74103452  | C | 0.06    |
| rs74109419  | T | 0.078   |
| rs145044284 | A | 0.2277  |
| rs17632230  | C | 0.0694  |
| rs288725    | T | 0.0591  |
| rs34174325  | G | -0.0538 |
| rs141072836 | A | -0.0669 |
| rs7339104   | C | 0.0403  |
| rs831170    | C | 0.0541  |
| rs11620240  | T | -0.1153 |

|             |   |         |
|-------------|---|---------|
| rs75691303  | A | -0.0952 |
| rs116979954 | T | 0.113   |
| rs943769    | A | 0.0382  |
| rs73168005  | T | -0.2353 |
| rs11616874  | T | -0.0434 |
| rs78759963  | A | 0.1388  |
| rs9516293   | T | 0.0502  |
| rs75157753  | G | -0.1791 |
| rs12867255  | C | 0.0391  |
| rs9565110   | T | 0.0381  |
| rs75313645  | G | -0.1713 |
| rs150592244 | A | 0.2025  |
| rs150597735 | T | -0.1427 |
| rs7400002   | G | -0.0623 |
| rs73233133  | C | -0.0798 |
| rs206141    | C | 0.0413  |
| rs4884317   | A | 0.0469  |
| rs3751419   | G | -0.0442 |
| rs1974025   | A | 0.1771  |
| rs9526485   | A | 0.1254  |
| rs117140165 | C | -0.1105 |
| rs1729752   | C | 0.0904  |
| rs12430215  | C | 0.0424  |
| rs9522474   | T | 0.0845  |
| rs9524278   | G | 0.093   |
| rs56721044  | A | 0.2695  |
| rs73190310  | C | -0.2069 |
| rs9594198   | T | -0.0424 |
| rs9549449   | G | 0.0379  |
| rs562553    | T | 0.2142  |
| rs117826674 | C | -0.1458 |
| rs75238954  | T | 0.2814  |
| rs11839232  | G | 0.0372  |
| rs73501718  | G | 0.3239  |
| rs9525890   | C | 0.0458  |
| rs1041512   | A | -0.0835 |
| rs140848801 | A | 0.106   |
| rs9566219   | A | 0.0966  |
| rs2476508   | C | -0.0476 |
| rs2992396   | C | 0.0804  |
| rs9602209   | G | -0.0374 |
| rs79787807  | G | 0.0871  |
| rs7998006   | A | 0.1028  |
| rs118184019 | A | 0.147   |
| rs9561538   | C | 0.0491  |
| rs9316971   | T | -0.0464 |
| rs61953870  | A | 0.0516  |



|             |   |         |
|-------------|---|---------|
| rs754168    | A | 0.0512  |
| rs72646376  | A | 0.125   |
| rs2210895   | T | -0.1847 |
| rs117428907 | G | 0.0723  |
| rs8001743   | G | -0.037  |
| rs78821772  | A | -0.0587 |
| rs76992530  | A | 0.1951  |
| rs599603    | C | 0.039   |
| rs68128212  | T | 0.0442  |
| rs118098535 | T | 0.1301  |
| rs7334626   | T | -0.0623 |
| rs17806624  | A | -0.0776 |
| rs7988481   | T | -0.0585 |
| rs6491398   | T | 0.0933  |
| rs9586701   | A | 0.0686  |
| rs12875713  | C | 0.0397  |
| rs2208987   | C | 0.0994  |
| rs9518423   | G | -0.116  |
| rs9507806   | G | -0.0996 |
| rs1354467   | A | -0.0403 |
| rs142426391 | T | -0.3098 |
| rs4773116   | C | -0.0392 |
| rs471005    | A | 0.064   |
| rs912439    | G | -0.0423 |
| rs79170238  | G | 0.0756  |
| rs9588175   | C | -0.0393 |
| rs7981258   | A | -0.0403 |
| rs9555963   | T | -0.0539 |
| rs9524504   | C | 0.0383  |
| rs77550846  | A | -0.1876 |
| rs9537262   | C | 0.0739  |
| rs142755265 | T | 0.1952  |
| rs74358181  | T | 0.1038  |
| rs79621826  | T | -0.2803 |
| rs149462810 | C | -0.304  |
| rs112222275 | G | -0.3406 |
| rs75800927  | C | 0.0421  |
| rs326525    | C | 0.1238  |
| rs79744738  | A | 0.1177  |
| rs12323106  | G | -0.141  |
| rs7992424   | C | 0.0423  |
| rs77104783  | A | 0.0872  |
| rs7990346   | G | 0.0887  |
| rs9547698   | A | 0.0378  |
| rs76874583  | A | 0.1119  |
| rs9563044   | T | 0.1371  |
| rs74674723  | C | 0.1752  |

|             |   |         |
|-------------|---|---------|
| rs9563857   | A | 0.2497  |
| rs12427475  | A | 0.0852  |
| rs2501203   | A | 0.0505  |
| rs1614209   | G | 0.0375  |
| rs139674967 | T | 0.0675  |
| rs17785077  | A | -0.0594 |
| rs9513538   | C | 0.0578  |
| rs7984789   | T | -0.1193 |
| rs35292266  | T | 0.0959  |
| rs512524    | A | 0.0465  |
| rs117357157 | C | -0.0986 |
| rs927864    | A | 0.0874  |
| rs117583384 | G | -0.2727 |
| rs9604189   | G | 0.1817  |
| rs140351291 | G | -0.2105 |
| rs117463888 | G | -0.1744 |
| rs9512006   | C | -0.0476 |
| rs73221122  | G | 0.1     |
| rs145523868 | A | -0.1448 |
| rs9523029   | G | -0.0873 |
| rs9515134   | T | 0.0449  |
| rs74037664  | A | -0.0489 |
| rs9570451   | A | 0.177   |
| rs79663005  | T | 0.2133  |
| rs7993587   | C | -0.0928 |
| rs9597445   | G | -0.1788 |
| rs141918577 | A | 0.2915  |
| rs73169172  | T | -0.0479 |
| rs2320809   | G | -0.0378 |
| rs138750984 | T | -0.3007 |
| rs1322725   | T | -0.1337 |
| rs17076585  | A | 0.2158  |
| rs9539498   | T | 0.2157  |
| rs11618379  | A | 0.0826  |
| rs816960    | T | 0.0452  |
| rs2497624   | A | 0.0617  |
| rs9521793   | T | 0.0616  |
| rs75093467  | T | -0.0747 |
| rs4885993   | T | 0.1294  |
| rs4907618   | A | 0.0388  |
| rs12877550  | A | 0.1637  |
| rs9539140   | G | 0.0433  |
| rs116358302 | G | 0.098   |
| rs9589624   | A | 0.1281  |
| rs1498265   | A | 0.0371  |
| rs9596772   | A | -0.0733 |
| rs9526155   | T | 0.1682  |

|             |   |         |
|-------------|---|---------|
| rs9593956   | G | -0.0842 |
| rs9551924   | T | -0.0376 |
| rs2038711   | T | -0.0375 |
| rs1536847   | G | 0.0732  |
| rs10492447  | G | -0.079  |
| rs6490700   | A | 0.0361  |
| rs61957061  | G | -0.0556 |
| rs9545745   | T | 0.0464  |
| rs1426      | C | 0.045   |
| rs146850129 | A | 0.1442  |
| rs60628525  | C | 0.1811  |
| rs7985254   | T | 0.0491  |
| rs2105035   | A | 0.0582  |
| rs76126718  | C | 0.1374  |
| rs7328533   | T | 0.0842  |
| rs17090322  | C | 0.123   |
| rs80098904  | C | 0.1946  |
| rs7996712   | G | 0.0453  |
| rs7996817   | T | -0.0939 |
| rs4769650   | C | 0.0362  |
| rs16969967  | T | -0.0886 |
| rs79359950  | T | -0.1807 |
| rs9554459   | G | -0.0483 |
| rs34219574  | T | 0.1815  |
| rs2317288   | G | -0.0374 |
| rs149481474 | C | -0.3085 |
| rs73595233  | T | -0.2079 |
| rs151323523 | A | 0.1624  |
| rs72666704  | C | 0.1015  |
| rs76893160  | C | 0.1522  |
| rs275959    | G | -0.0431 |
| rs10219792  | T | -0.1708 |
| rs7982754   | T | 0.0371  |
| rs79871111  | A | -0.1849 |
| rs7339173   | T | -0.0357 |
| rs117386554 | T | 0.0992  |
| rs78479256  | A | 0.1792  |
| rs111809639 | A | 0.2635  |
| rs4943280   | T | -0.0392 |
| rs3861121   | T | 0.0475  |
| rs74397515  | T | 0.1198  |
| rs4770836   | T | 0.0385  |
| rs74239657  | C | 0.1544  |
| rs11842053  | T | 0.1642  |
| rs79637130  | A | 0.1025  |
| rs9539867   | G | 0.1085  |
| rs71433137  | C | 0.0839  |

|             |   |         |
|-------------|---|---------|
| rs4773141   | G | -0.064  |
| rs111998355 | T | 0.1402  |
| rs116849167 | G | 0.1971  |
| rs17068016  | C | -0.1147 |
| rs117220407 | A | -0.2118 |
| rs9589534   | G | -0.0576 |
| rs9518474   | G | -0.051  |
| rs71442174  | C | 0.1501  |
| rs9558673   | A | 0.1967  |
| rs112682078 | T | -0.2533 |
| rs1703599   | G | 0.0473  |
| rs61957699  | G | 0.0372  |
| rs61962173  | A | -0.168  |
| rs75422102  | T | 0.1916  |
| rs777761    | A | 0.0422  |
| rs7994744   | T | 0.0723  |
| rs4772370   | G | -0.085  |
| rs4771195   | G | 0.0354  |
| rs9511906   | T | -0.0424 |
| rs9317962   | A | 0.0382  |
| rs11617377  | C | -0.0702 |
| rs1898277   | T | -0.0881 |
| rs150521969 | C | -0.1662 |
| rs9558862   | C | -0.0506 |
| rs117892565 | G | 0.0807  |
| rs9512466   | C | -0.0401 |
| rs7992811   | A | -0.0401 |
| rs4351950   | A | 0.1865  |
| rs28589375  | A | 0.0396  |
| rs73166425  | A | 0.05    |
| rs17054991  | T | -0.0855 |
| rs9592480   | A | -0.0482 |
| rs116726601 | G | -0.1459 |
| rs61962161  | A | -0.2939 |
| rs117897870 | G | -0.1596 |
| rs141512111 | G | 0.1887  |
| rs6492706   | A | 0.0394  |
| rs9511565   | C | 0.0555  |
| rs74329061  | G | 0.1027  |
| rs1536948   | A | 0.1888  |
| rs4886005   | T | 0.0503  |
| rs9315307   | A | 0.0587  |
| rs11839100  | T | 0.0698  |
| rs7990263   | A | 0.037   |
| rs71429680  | A | 0.062   |
| rs9514224   | C | 0.038   |
| rs4268626   | C | -0.0459 |

|             |   |         |
|-------------|---|---------|
| rs9579051   | C | 0.0642  |
| rs1927757   | G | 0.0377  |
| rs77608053  | G | 0.1828  |
| rs12870508  | T | 0.0454  |
| rs2105464   | G | -0.0412 |
| rs16975317  | T | -0.057  |
| rs9595168   | A | -0.0872 |
| rs4943292   | C | -0.0372 |
| rs61318536  | T | 0.0806  |
| rs9587046   | T | 0.0365  |
| rs17072243  | G | -0.1172 |
| rs1980992   | T | -0.0375 |
| rs75066526  | C | 0.064   |
| rs61945512  | C | 0.1292  |
| rs9551705   | G | 0.0381  |
| rs76934651  | A | 0.2977  |
| rs9509982   | A | 0.0419  |
| rs117986389 | A | -0.144  |
| rs7981120   | A | -0.0357 |
| rs9557603   | C | 0.1137  |
| rs144452706 | G | 0.2289  |
| rs77786180  | T | 0.2706  |
| rs149875190 | A | 0.2036  |
| rs9519184   | T | 0.0664  |
| rs113861005 | A | -0.0836 |
| rs1830976   | T | 0.0492  |
| rs1287510   | T | -0.0547 |
| rs117979563 | G | 0.2562  |
| rs9566839   | A | -0.0372 |
| rs9567416   | C | -0.0406 |
| rs75545492  | T | -0.2018 |
| rs35127691  | T | 0.1119  |
| rs9552947   | T | -0.0358 |
| rs3129599   | G | -0.0451 |
| rs138961466 | A | 0.1929  |
| rs77581393  | T | -0.1305 |
| rs117905176 | A | -0.1529 |
| rs111383524 | G | 0.2702  |
| rs61954142  | A | 0.0811  |
| rs12876740  | C | 0.062   |
| rs9523176   | G | -0.0795 |
| rs2580190   | T | 0.0656  |
| rs73194095  | G | 0.1032  |
| rs9564541   | G | 0.0382  |
| rs3783193   | G | 0.1791  |
| rs7327251   | T | 0.106   |
| rs72666949  | C | 0.1818  |

|             |   |         |
|-------------|---|---------|
| rs7984291   | T | -0.0685 |
| rs1991935   | G | -0.0351 |
| rs9533681   | G | 0.0564  |
| rs1225407   | A | -0.0493 |
| rs140938397 | G | 0.1756  |
| rs4770265   | C | -0.1336 |
| rs9551926   | A | 0.0489  |
| rs1352219   | T | 0.2139  |
| rs139451472 | A | 0.1418  |
| rs17054542  | A | -0.0492 |
| rs8000443   | G | -0.0383 |
| rs77136765  | T | -0.1294 |
| rs117706530 | T | 0.2166  |
| rs9519380   | T | -0.0518 |
| rs55721421  | G | 0.2051  |
| rs9545515   | C | 0.0542  |
| rs2487783   | C | 0.0535  |
| rs116053657 | C | 0.2233  |
| rs55812376  | T | 0.0535  |
| rs11619172  | A | 0.0773  |
| rs9571668   | C | -0.0976 |
| rs2334951   | G | -0.0743 |
| rs1805388   | A | 0.0475  |
| rs4772455   | C | -0.0446 |
| rs3014918   | C | -0.0364 |
| rs44969     | A | 0.0425  |
| rs73566176  | C | 0.0576  |
| rs1711179   | T | -0.0597 |
| rs138392397 | A | 0.1807  |
| rs1756948   | C | -0.1129 |
| rs9529580   | T | -0.0835 |
| rs12716677  | T | 0.0509  |
| rs35199257  | G | -0.0768 |
| rs2210008   | A | -0.0544 |
| rs116420781 | T | 0.1281  |
| rs76305358  | A | 0.1712  |
| rs146281815 | C | -0.2788 |
| rs73186359  | T | -0.0468 |
| rs72656483  | G | 0.0551  |
| rs1415707   | T | 0.036   |
| rs9568789   | T | -0.0356 |
| rs146997505 | G | -0.2177 |
| rs11618666  | A | 0.0357  |
| rs7335632   | C | -0.0746 |
| rs7987071   | G | -0.0465 |
| rs2275679   | A | 0.053   |
| rs115522255 | G | 0.1462  |

|             |   |         |
|-------------|---|---------|
| rs12860635  | T | 0.0516  |
| rs17077264  | A | 0.0816  |
| rs77156157  | A | -0.2561 |
| rs9522803   | C | -0.0543 |
| rs7327181   | G | -0.0798 |
| rs9530255   | T | 0.0528  |
| rs815177    | A | -0.0611 |
| rs7322213   | T | -0.0419 |
| rs3818379   | T | 0.0386  |
| rs4771589   | T | -0.0439 |
| rs2008197   | A | -0.219  |
| rs2391339   | A | 0.0616  |
| rs72664758  | T | 0.0545  |
| rs1537879   | C | 0.0375  |
| rs9301667   | A | 0.0447  |
| rs150036009 | C | 0.2093  |
| rs146008955 | G | 0.155   |
| rs117276254 | G | 0.2114  |
| rs75271678  | G | -0.1958 |
| rs117491444 | T | 0.2566  |
| rs1413154   | G | -0.0783 |
| rs78923127  | C | 0.1786  |
| rs79495700  | A | -0.2051 |
| rs118132384 | C | -0.3329 |
| rs9507720   | T | -0.0465 |
| rs9510464   | A | -0.0839 |
| rs9519562   | T | -0.0354 |
| rs61955495  | C | 0.0703  |
| rs73166497  | A | -0.1167 |
| rs113163140 | G | -0.1637 |
| rs3904629   | T | -0.0779 |
| rs9549896   | T | -0.0558 |
| rs80154020  | G | 0.2665  |
| rs111669829 | A | 0.2545  |
| rs72660167  | T | 0.1388  |
| rs1336685   | G | -0.0342 |
| rs9510715   | G | 0.0935  |
| rs117413500 | G | 0.2155  |
| rs112218211 | A | 0.0981  |
| rs76318856  | T | -0.1118 |
| rs6490795   | A | -0.0424 |
| rs1328352   | A | 0.0464  |
| rs34284652  | G | 0.0442  |
| rs11070025  | T | -0.0578 |
| rs7327245   | G | 0.036   |
| rs11843025  | G | 0.0542  |
| rs2039919   | C | 0.0537  |

|             |   |         |
|-------------|---|---------|
| rs2993271   | T | 0.184   |
| rs16969611  | T | 0.0829  |
| rs9318602   | A | -0.0757 |
| rs76376566  | A | 0.0907  |
| rs151333984 | A | -0.1757 |
| rs1570908   | G | -0.0411 |
| rs61960313  | G | 0.0441  |
| rs148812082 | G | 0.1265  |
| rs11617415  | T | 0.0464  |
| rs117103561 | C | -0.1686 |
| rs117875713 | T | 0.1382  |
| rs117974696 | A | 0.1068  |
| rs9575446   | A | 0.2199  |
| rs9561407   | T | -0.0527 |
| rs9521039   | A | -0.0436 |
| rs73209113  | T | 0.1463  |
| rs78826075  | C | 0.1478  |
| rs9578457   | G | -0.1026 |
| rs543264    | C | -0.0548 |
| rs166503    | C | 0.0963  |
| rs7490707   | A | -0.0491 |
| rs9592624   | T | 0.0483  |
| rs116927593 | A | 0.3006  |
| rs150326426 | G | 0.1862  |
| rs3812851   | C | 0.0568  |
| rs73227865  | C | 0.1914  |
| rs74781691  | A | -0.1037 |
| rs593947    | G | -0.0434 |
| rs1335587   | C | -0.0361 |
| rs4772526   | T | 0.1175  |
| rs9514526   | C | 0.084   |
| rs9635143   | A | 0.0496  |
| rs117886646 | C | -0.151  |
| rs2147667   | T | 0.0361  |
| rs60600902  | A | 0.1832  |
| rs112892328 | C | 0.1239  |
| rs9508833   | T | 0.1097  |
| rs117155938 | T | -0.1904 |
| rs73184184  | A | 0.1105  |
| rs113504889 | A | -0.1065 |
| rs35342510  | C | -0.1425 |
| rs7337602   | G | 0.1136  |
| rs9600989   | A | 0.2084  |
| rs113375990 | G | 0.2446  |
| rs4770058   | C | -0.0438 |
| rs9539008   | G | 0.0851  |
| rs113492975 | A | 0.1357  |



|             |   |         |
|-------------|---|---------|
| rs140883209 | C | 0.1289  |
| rs2786273   | C | 0.0426  |
| rs79154007  | G | 0.1557  |
| rs11842214  | A | 0.0655  |
| rs80147512  | A | 0.1746  |
| rs9586010   | T | 0.0413  |
| rs9557000   | T | 0.0737  |
| rs78235673  | T | -0.1478 |
| rs9525044   | C | 0.1327  |
| rs116964734 | C | -0.0893 |
| rs1325376   | G | 0.0383  |
| rs2880530   | C | -0.0591 |
| rs9584127   | T | 0.0605  |
| rs17189103  | A | 0.0472  |
| rs999631    | T | -0.2952 |
| rs7990601   | G | 0.0343  |
| rs71429656  | A | -0.066  |
| rs72657275  | A | 0.1445  |
| rs74556393  | T | -0.0635 |
| rs17066209  | T | 0.0521  |
| rs17516836  | T | 0.0462  |
| rs113214399 | A | -0.1438 |
| rs77377433  | G | 0.105   |
| rs80072884  | C | -0.1556 |
| rs116937752 | G | -0.1871 |
| rs2874620   | G | 0.0344  |
| rs9513443   | T | 0.0507  |
| rs10492700  | C | 0.0636  |
| rs3117915   | G | 0.0412  |
| rs2149132   | T | 0.047   |
| rs150786584 | A | 0.1247  |
| rs17495306  | G | 0.1912  |
| rs7317882   | T | 0.0345  |
| rs17504075  | T | 0.0849  |
| rs6562946   | C | 0.0551  |
| rs9575870   | A | 0.0652  |
| rs9583114   | G | 0.0465  |
| rs17189574  | A | 0.0363  |
| rs7324131   | A | 0.0442  |
| rs1335326   | T | 0.0813  |
| rs56259842  | G | -0.1623 |
| rs7323247   | G | -0.0574 |
| rs9587783   | G | 0.0816  |
| rs117389387 | T | 0.1227  |
| rs2994604   | C | 0.0399  |
| rs17346408  | G | -0.0875 |
| rs1766903   | A | -0.0424 |

|             |   |         |
|-------------|---|---------|
| rs7325766   | T | -0.0357 |
| rs7993310   | A | -0.083  |
| rs3803259   | G | -0.0363 |
| rs9559775   | A | 0.1037  |
| rs58556553  | G | 0.1165  |
| rs56197242  | C | -0.0402 |
| rs147993496 | G | -0.2094 |
| rs9514461   | C | 0.0727  |
| rs76286419  | T | 0.1184  |
| rs117878948 | A | -0.1277 |
| rs67760757  | A | 0.0524  |
| rs61958031  | G | 0.1038  |
| rs11618202  | G | 0.0686  |
| rs1111847   | A | -0.1296 |
| rs144329589 | G | 0.2777  |
| rs9577106   | T | 0.1995  |
| rs655676    | A | -0.0348 |
| rs722223    | T | 0.0996  |
| rs55717941  | T | -0.0827 |
| rs9595613   | G | 0.189   |
| rs150698232 | T | 0.1831  |
| rs4942407   | T | 0.0344  |
| rs656305    | G | -0.0349 |
| rs6490760   | A | -0.0518 |
| rs17082029  | C | 0.1484  |
| rs7336117   | A | 0.1197  |
| rs73174493  | A | 0.1756  |
| rs75349464  | T | 0.1417  |
| rs12874694  | C | -0.0627 |
| rs12876064  | A | -0.1444 |
| rs7335571   | G | 0.1439  |
| rs653871    | C | -0.1748 |
| rs73238826  | A | 0.0504  |
| rs78374881  | A | -0.0776 |
| rs9576418   | T | -0.0341 |
| rs34975344  | T | 0.0461  |
| rs58229841  | G | 0.038   |
| rs79964374  | A | -0.1485 |
| rs113147765 | A | 0.1356  |
| rs74471422  | A | 0.1422  |
| rs9578030   | T | 0.0368  |
| rs1298620   | C | 0.1039  |
| rs985740    | A | -0.0332 |
| rs772313    | C | -0.0336 |
| rs1170202   | G | -0.0343 |
| rs12184555  | C | 0.063   |
| rs73207700  | C | -0.1686 |

|             |   |         |
|-------------|---|---------|
| rs142932135 | T | -0.2629 |
| rs61974961  | G | 0.0442  |
| rs7320897   | G | 0.0964  |
| rs73188232  | G | -0.149  |
| rs2297192   | T | -0.0522 |
| rs79583632  | A | 0.1014  |
| rs9551645   | C | -0.0636 |
| rs117469802 | A | 0.1622  |
| rs79647986  | A | 0.1322  |
| rs9584712   | G | 0.0488  |
| rs150960325 | G | -0.2529 |
| rs35946791  | A | 0.0849  |
| rs77352107  | T | 0.16    |
| rs279913    | C | -0.0343 |
| rs35630115  | T | -0.0808 |
| rs147867908 | A | -0.2018 |
| rs77845752  | G | -0.0718 |
| rs9556481   | G | -0.0358 |
| rs76295925  | G | -0.1482 |
| rs9562905   | T | -0.1062 |
| rs117012334 | C | 0.1185  |
| rs73168605  | C | -0.1331 |
| rs17677294  | C | -0.0473 |
| rs73481129  | G | 0.0638  |
| rs1328612   | A | 0.0376  |
| rs12876589  | A | 0.2437  |
| rs4772939   | A | 0.0565  |
| rs4883908   | A | 0.0348  |
| rs71434828  | A | -0.1552 |
| rs79326373  | A | 0.1099  |
| rs17061270  | C | 0.1153  |
| rs77205049  | G | -0.0736 |
| rs9318951   | C | -0.0441 |
| rs72640578  | C | -0.0388 |
| rs140723984 | T | -0.1996 |
| rs140020544 | T | 0.1886  |
| rs9509059   | T | 0.0358  |
| rs78718684  | A | -0.1116 |
| rs7325923   | T | 0.0594  |
| rs79739818  | C | -0.1163 |
| rs113130848 | T | 0.1628  |
| rs298786    | T | 0.0362  |
| rs76506827  | C | 0.1403  |
| rs11618034  | G | 0.2905  |
| rs9527675   | G | 0.0345  |
| rs7985791   | A | 0.0374  |
| rs632810    | G | -0.0488 |

|             |   |         |
|-------------|---|---------|
| rs9519811   | C | 0.0971  |
| rs139075178 | G | 0.3319  |
| rs9594960   | G | 0.2115  |
| rs1385679   | C | -0.0445 |
| rs16957301  | C | 0.06    |
| rs17583080  | A | -0.1148 |
| rs2029766   | G | -0.1116 |
| rs7996305   | T | -0.0359 |
| rs9524685   | C | 0.0361  |
| rs141776877 | T | -0.1446 |
| rs117479124 | A | 0.1466  |
| rs3759458   | T | -0.1062 |
| rs17615729  | T | 0.0708  |
| rs9584295   | C | 0.2071  |
| rs9300622   | G | -0.0542 |
| rs117207040 | T | -0.2139 |
| rs56197654  | A | -0.0853 |
| rs9598800   | T | -0.1729 |
| rs9603215   | T | -0.058  |
| rs1041691   | C | -0.035  |
| rs74482994  | A | 0.126   |
| rs12863153  | T | 0.093   |
| rs501674    | T | 0.0595  |
| rs9556307   | T | 0.1241  |
| rs4943552   | C | -0.033  |
| rs7331401   | G | -0.0373 |
| rs2793283   | A | 0.0521  |
| rs146538329 | T | 0.171   |
| rs9543554   | A | -0.1322 |
| rs73185260  | T | 0.1363  |
| rs61697892  | G | -0.0349 |
| rs72652680  | C | 0.0944  |
| rs7992562   | G | -0.0361 |
| rs61187918  | T | -0.0593 |
| rs73241044  | A | -0.0677 |
| rs9544908   | C | -0.0435 |
| rs9582480   | C | -0.108  |
| rs117986878 | G | 0.1178  |
| rs139133541 | C | -0.184  |
| rs35887251  | T | -0.0346 |
| rs34072850  | A | -0.0521 |
| rs12874397  | T | 0.0525  |
| rs55900911  | T | 0.1611  |
| rs2298240   | G | 0.0504  |
| rs9578371   | A | 0.0406  |
| rs797509    | G | 0.0385  |
| rs409206    | G | 0.0478  |

|             |   |         |
|-------------|---|---------|
| rs2481875   | T | 0.0371  |
| rs79200217  | G | 0.202   |
| rs9518580   | T | -0.0609 |
| rs7317470   | T | -0.059  |
| rs79715479  | G | -0.1885 |
| rs7336189   | A | -0.0356 |
| rs146587064 | G | -0.1491 |
| rs12385856  | G | -0.0824 |
| rs73232857  | G | 0.0636  |
| rs17542491  | T | -0.1476 |
| rs72662025  | A | 0.0559  |
| rs45618933  | A | -0.1115 |
| rs9525598   | G | 0.0743  |
| rs78762125  | G | 0.1027  |
| rs9577542   | A | -0.0405 |
| rs12431230  | T | -0.0333 |
| rs1360983   | C | 0.0363  |
| rs138713975 | T | 0.2375  |
| rs78843668  | G | -0.1685 |
| rs6561265   | T | 0.0341  |
| rs9634837   | G | 0.1845  |
| rs958807    | A | 0.0324  |
| rs9558520   | C | 0.0364  |
| rs12583881  | C | 0.1     |
| rs117997876 | G | -0.2258 |
| rs4885742   | T | -0.0409 |
| rs12877920  | A | -0.035  |
| rs75998315  | C | -0.0707 |
| rs966081    | C | 0.0367  |
| rs4771594   | C | -0.0457 |
| rs3015354   | T | 0.0926  |
| rs7997770   | G | -0.0355 |
| rs4322510   | T | -0.0362 |
| rs79697030  | T | 0.1047  |
| rs77147879  | G | -0.1049 |
| rs72632632  | A | -0.1311 |
| rs73505198  | A | 0.0749  |
| rs9518260   | C | -0.0357 |
| rs9520635   | C | -0.1397 |
| rs78390842  | T | 0.0845  |
| rs9518703   | G | -0.0349 |
| rs6563700   | G | -0.0344 |
| rs72629540  | T | -0.0449 |
| rs9548068   | G | -0.1538 |
| rs963679    | T | 0.0329  |
| rs114836988 | A | 0.1418  |
| rs9516401   | T | -0.0652 |

|             |   |         |
|-------------|---|---------|
| rs76915919  | A | 0.1544  |
| rs148911124 | A | -0.16   |
| rs117107876 | C | -0.0875 |
| rs4303330   | G | -0.0993 |
| rs7139848   | C | -0.039  |
| rs9587442   | T | -0.1485 |
| rs12872871  | C | 0.0866  |
| rs9315231   | C | -0.2218 |
| rs111348226 | C | 0.1792  |
| rs12430361  | T | 0.0684  |
| rs8000561   | T | -0.0409 |
| rs61957240  | G | -0.1152 |
| rs34878650  | G | -0.108  |
| rs77909377  | T | -0.1044 |
| rs1830757   | A | -0.1569 |
| rs9506440   | A | -0.0983 |
| rs144709885 | A | -0.0782 |
| rs4772089   | G | 0.053   |
| rs773353    | A | -0.0553 |
| rs10492722  | T | -0.0567 |
| rs9601013   | C | -0.0583 |
| rs41275142  | C | 0.1481  |
| rs73476708  | C | -0.0514 |
| rs9601440   | G | 0.0589  |
| rs147607590 | G | 0.1298  |
| rs9601082   | C | 0.046   |
| rs117003989 | T | 0.1923  |
| rs3129591   | T | -0.0847 |
| rs9592924   | T | 0.1606  |
| rs75314166  | C | -0.0924 |
| rs78054414  | G | 0.061   |
| rs148567094 | T | 0.2175  |
| rs57323526  | G | 0.1799  |
| rs1555782   | A | 0.0661  |
| rs16964706  | C | 0.1814  |
| rs9512782   | A | 0.0775  |
| rs56134921  | T | 0.0708  |
| rs80257475  | G | -0.112  |
| rs9557491   | T | 0.0871  |
| rs76946979  | G | -0.2147 |
| rs58598010  | C | 0.0484  |
| rs1012693   | A | -0.0386 |
| rs111790623 | A | 0.1995  |
| rs2555615   | C | -0.0367 |
| rs9577246   | A | 0.1932  |
| rs7982791   | T | -0.0328 |
| rs12877637  | A | -0.0778 |

|             |   |         |
|-------------|---|---------|
| rs1023243   | G | -0.0316 |
| rs61534994  | T | 0.0707  |
| rs3751371   | A | -0.0323 |
| rs9521136   | T | 0.0782  |
| rs4322537   | A | 0.1551  |
| rs8000111   | C | -0.0363 |
| rs73594015  | G | 0.1348  |
| rs7999171   | G | -0.0354 |
| rs9530040   | T | -0.0357 |
| rs117776604 | T | -0.1175 |
| rs72649286  | A | -0.1479 |
| rs79132618  | T | 0.1555  |
| rs520469    | T | 0.0311  |
| rs143108096 | A | -0.2833 |
| rs9591555   | T | 0.0424  |
| rs9521181   | G | 0.0402  |
| rs9596596   | C | -0.032  |
| rs9315230   | G | -0.0823 |
| rs140764570 | A | -0.1132 |
| rs73546076  | G | 0.1533  |
| rs9509542   | G | -0.0372 |
| rs1570545   | C | -0.0556 |
| rs9545095   | G | -0.0691 |
| rs9577193   | T | 0.0435  |
| rs9600169   | T | -0.037  |
| rs117475040 | A | 0.1704  |
| rs1151389   | A | 0.0348  |
| rs1931465   | G | -0.0557 |
| rs73435754  | G | 0.0715  |
| rs140681424 | A | -0.2351 |
| rs9558563   | A | 0.0336  |
| rs141387808 | G | 0.179   |
| rs9515378   | A | 0.0393  |
| rs1359191   | C | 0.0331  |
| rs117347995 | T | 0.211   |
| rs9522892   | A | 0.0857  |
| rs144101867 | T | 0.2033  |
| rs1175192   | A | 0.0668  |
| rs71437848  | A | 0.1537  |
| rs61973886  | A | -0.1751 |
| rs7337854   | C | -0.0358 |
| rs150568956 | G | -0.16   |
| rs12397516  | G | 0.1347  |
| rs117921628 | G | 0.1636  |
| rs17066893  | T | 0.086   |
| rs11842607  | A | 0.035   |
| rs73578295  | A | 0.1614  |

|             |   |         |
|-------------|---|---------|
| rs9556459   | A | 0.073   |
| rs78818092  | C | 0.2956  |
| rs9533843   | A | 0.0316  |
| rs16958072  | G | 0.0732  |
| rs117454296 | A | 0.1343  |
| rs140449277 | G | 0.1402  |
| rs75763643  | G | 0.0562  |
| rs9547779   | G | 0.0321  |
| rs142320752 | T | 0.1231  |
| rs9552243   | A | 0.0458  |
| rs9527205   | T | -0.0394 |
| rs34667146  | A | -0.0416 |
| rs73227124  | G | -0.0538 |
| rs969803    | A | -0.0391 |
| rs116921976 | G | 0.1923  |
| rs11839644  | C | 0.1464  |
| rs78412364  | C | 0.0676  |
| rs7999954   | T | -0.0406 |
| rs114251382 | T | 0.1896  |
| rs117442379 | C | 0.1943  |
| rs895428    | A | 0.1172  |
| rs9559566   | T | 0.0334  |
| rs961762    | C | -0.0466 |
| rs456312    | C | 0.0325  |
| rs11619707  | T | -0.1278 |
| rs12585718  | G | -0.0445 |
| rs117503991 | A | 0.1321  |
| rs2320340   | T | -0.035  |
| rs76212866  | A | 0.1755  |
| rs9572197   | T | 0.0627  |
| rs4575402   | G | 0.0326  |
| rs7337948   | A | 0.0539  |
| rs117050203 | T | 0.1476  |
| rs9669993   | A | -0.0337 |
| rs56073254  | T | 0.1361  |
| rs2320808   | T | -0.0464 |
| rs292478    | G | 0.0963  |
| rs4083987   | G | -0.0319 |
| rs10507434  | C | 0.0512  |
| rs9541183   | C | 0.0522  |
| rs1751062   | T | -0.0329 |
| rs12866184  | G | -0.0322 |
| rs111525840 | A | 0.2013  |
| rs12585685  | T | 0.0591  |
| rs117918631 | A | 0.2545  |
| rs77061079  | A | -0.1368 |
| rs6492757   | G | -0.0366 |



|             |   |         |
|-------------|---|---------|
| rs78361177  | G | 0.2309  |
| rs138974246 | C | -0.1998 |
| rs9553177   | G | 0.0618  |
| rs1324012   | A | 0.0428  |
| rs17544012  | A | -0.1003 |
| rs146251438 | C | -0.1804 |
| rs147328157 | T | -0.224  |
| rs55828473  | C | 0.044   |
| rs80114541  | G | -0.1545 |
| rs55889418  | G | 0.1383  |
| rs1280914   | A | -0.055  |
| rs112683624 | G | 0.1025  |
| rs2025396   | T | -0.0357 |
| rs45540131  | T | -0.0502 |
| rs35386495  | T | 0.1431  |
| rs1330613   | C | -0.0349 |
| rs9584237   | A | 0.0865  |
| rs73543047  | A | 0.0942  |
| rs1164435   | C | -0.0394 |
| rs7333320   | C | -0.0393 |
| rs9568191   | T | 0.0561  |
| rs79888356  | C | -0.1264 |
| rs9543836   | T | 0.1508  |
| rs12865721  | C | -0.1926 |
| rs1576545   | T | 0.0434  |
| rs9551560   | G | 0.183   |
| rs17074216  | G | 0.0634  |
| rs77809332  | A | 0.2213  |
| rs7323415   | T | 0.098   |
| rs4316618   | T | -0.052  |
| rs80168003  | A | -0.0791 |
| rs117614666 | A | -0.1512 |
| rs9590520   | T | -0.0708 |
| rs117974454 | T | 0.0887  |
| rs10492736  | G | 0.0743  |
| rs12863392  | A | 0.0396  |
| rs7992218   | G | -0.0451 |
| rs117942913 | C | -0.279  |
| rs41291660  | A | 0.0543  |
| rs1617234   | G | 0.0324  |
| rs117419823 | T | -0.1011 |
| rs78339560  | A | -0.1378 |
| rs71436409  | G | -0.177  |
| rs7330840   | G | -0.0397 |
| rs17308151  | A | 0.126   |
| rs2040060   | T | 0.0335  |
| rs146877834 | T | -0.2494 |

|             |   |         |
|-------------|---|---------|
| rs149926750 | G | 0.2106  |
| rs7335627   | A | 0.124   |
| rs2389983   | G | 0.0616  |
| rs5024236   | A | 0.1272  |
| rs34004986  | A | -0.044  |
| rs17054038  | C | 0.0936  |
| rs9544469   | T | -0.0494 |
| rs34911280  | G | 0.0467  |
| rs9592755   | G | 0.0316  |
| rs146405639 | A | -0.1453 |
| rs117336057 | T | 0.1851  |
| rs611482    | C | 0.0619  |
| rs12323080  | C | -0.0467 |
| rs17252048  | C | 0.0411  |
| rs7317185   | C | -0.0436 |
| rs541678    | T | 0.0413  |
| rs113302933 | A | 0.1508  |
| rs138770342 | A | 0.234   |
| rs112068445 | T | 0.1759  |
| rs11616606  | T | -0.1465 |
| rs2218245   | A | -0.0394 |
| rs386042    | G | 0.0632  |
| rs6562421   | G | -0.0319 |
| rs151097953 | G | 0.1484  |
| rs74386542  | A | 0.0553  |
| rs78362449  | A | 0.2135  |
| rs9549555   | C | -0.046  |
| rs1538142   | T | 0.1005  |
| rs7996850   | G | -0.0377 |
| rs139303098 | G | -0.2746 |
| rs61967682  | C | 0.1542  |
| rs7994261   | A | -0.0327 |
| rs73164001  | T | 0.1046  |
| rs9530623   | A | -0.1729 |
| rs9544027   | T | 0.0317  |
| rs518231    | A | 0.0604  |
| rs9318059   | T | -0.0343 |
| rs586851    | C | 0.0535  |
| rs78577228  | A | 0.089   |
| rs73224051  | C | -0.0933 |
| rs656962    | A | -0.0308 |
| rs34692286  | C | 0.0333  |
| rs9584411   | C | 0.0376  |
| rs79382703  | T | 0.056   |
| rs9593824   | C | 0.0528  |
| rs2063910   | G | -0.0605 |
| rs9554696   | G | -0.0629 |

|             |   |         |
|-------------|---|---------|
| rs9586123   | C | -0.056  |
| rs75925921  | T | -0.2268 |
| rs67530930  | C | -0.0386 |
| rs73156780  | A | 0.1369  |
| rs6561600   | G | -0.0381 |
| rs6562021   | C | -0.0433 |
| rs76306511  | C | -0.0972 |
| rs73165015  | T | -0.0814 |
| rs7334115   | A | 0.039   |
| rs61966662  | G | 0.0305  |
| rs7981844   | A | 0.0713  |
| rs78504300  | C | 0.0404  |
| rs117644878 | A | -0.0969 |
| rs4770371   | T | -0.0315 |
| rs17631642  | A | 0.1059  |
| rs2329218   | A | -0.032  |
| rs332311    | T | 0.0694  |
| rs143784610 | G | 0.1078  |
| rs74472849  | C | 0.1355  |
| rs76766117  | T | 0.1336  |
| rs1228539   | T | -0.0306 |
| rs1756073   | T | -0.1631 |
| rs2329177   | G | 0.0458  |
| rs143347828 | G | 0.205   |
| rs9568631   | C | 0.0562  |
| rs11842552  | A | -0.0595 |
| rs11839643  | A | 0.0747  |
| rs9511316   | A | -0.0333 |
| rs118052221 | T | 0.0871  |
| rs9544597   | G | 0.187   |
| rs4911078   | T | 0.0323  |
| rs7995665   | T | 0.0537  |
| rs9576975   | G | 0.0362  |
| rs7321605   | C | 0.0329  |
| rs12857959  | C | 0.0592  |
| rs2117719   | T | -0.0343 |
| rs7324580   | T | 0.0489  |
| rs4941676   | T | -0.111  |
| rs7318392   | C | -0.0354 |
| rs113129004 | T | -0.1554 |
| rs7324958   | A | -0.0443 |
| rs150590960 | T | 0.1398  |
| rs17596131  | C | 0.2027  |
| rs117272893 | T | -0.1009 |
| rs816997    | C | 0.0841  |
| rs9514379   | C | -0.0337 |
| rs116938555 | T | -0.155  |

|             |   |         |
|-------------|---|---------|
| rs7322594   | T | 0.0393  |
| rs9514512   | A | -0.1285 |
| rs111652413 | A | -0.2159 |
| rs73509881  | T | 0.0959  |
| rs9537724   | C | -0.0781 |
| rs147480013 | C | -0.2191 |
| rs7321139   | A | -0.0916 |
| rs34422737  | C | -0.063  |
| rs3129622   | T | 0.0638  |
| rs17803537  | C | 0.1411  |
| rs60137149  | G | -0.0535 |
| rs118137249 | T | -0.1251 |
| rs73592832  | G | 0.2241  |
| rs11842104  | G | 0.0675  |
| rs12853952  | C | -0.1308 |
| rs73176811  | C | 0.0367  |
| rs35935686  | T | 0.0794  |
| rs143540413 | T | -0.1974 |
| rs188096    | A | 0.046   |
| rs1413555   | T | 0.1161  |
| rs61947066  | C | -0.0459 |
| rs9521924   | A | -0.0349 |
| rs9595365   | A | -0.0853 |
| rs4941710   | T | -0.055  |
| rs76641644  | G | -0.0655 |
| rs117526438 | A | -0.25   |
| rs112181127 | A | -0.1926 |
| rs73164350  | T | -0.1231 |
| rs79665621  | T | -0.0338 |
| rs117120874 | T | -0.1484 |
| rs6562029   | A | 0.0338  |
| rs9285110   | C | 0.0319  |
| rs117007161 | A | -0.2013 |
| rs7317159   | C | 0.0342  |
| rs1577417   | A | 0.078   |
| rs12720132  | T | -0.1248 |
| rs15121     | C | 0.2728  |
| rs1537384   | T | 0.0431  |
| rs146003760 | C | -0.1388 |
| rs9520258   | A | 0.0489  |
| rs72655872  | A | -0.0592 |
| rs6561292   | T | -0.0419 |
| rs56003638  | G | 0.0541  |
| rs117854946 | G | 0.1588  |
| rs4296126   | C | 0.0393  |
| rs12877566  | A | -0.1694 |
| rs79088925  | A | 0.1127  |

|             |   |         |
|-------------|---|---------|
| rs16945768  | T | 0.0608  |
| rs7325920   | T | 0.0313  |
| rs144078051 | T | -0.1942 |
| rs4097390   | A | 0.1403  |
| rs323449    | A | 0.0312  |
| rs9318796   | C | 0.0377  |
| rs141127906 | T | -0.136  |
| rs9534523   | C | 0.0316  |
| rs317959    | C | -0.0303 |
| rs7994852   | C | -0.0382 |
| rs3013664   | G | -0.0474 |
| rs9582505   | A | 0.04    |
| rs137976624 | C | 0.0868  |
| rs733703    | T | -0.0322 |
| rs1928906   | C | 0.143   |
| rs73187070  | G | 0.1663  |
| rs111266370 | T | -0.1762 |
| rs56276239  | A | -0.1444 |
| rs112197235 | A | 0.1309  |
| rs9543429   | T | 0.0997  |
| rs7991470   | A | 0.035   |
| rs117592316 | T | -0.1027 |
| rs12876272  | C | -0.2259 |
| rs117952029 | C | 0.1219  |
| rs80317676  | T | -0.0911 |
| rs76805698  | T | 0.1172  |
| rs3129594   | T | -0.0404 |
| rs12584983  | C | -0.1027 |
| rs148410868 | T | 0.2178  |
| rs9531126   | A | -0.0502 |
| rs71435272  | A | -0.1612 |
| rs9578440   | C | 0.0498  |
| rs79629465  | T | -0.2845 |
| rs75487620  | G | 0.0547  |
| rs7986767   | T | 0.2333  |
| rs72650524  | C | 0.2282  |
| rs113558302 | T | -0.239  |
| rs61966034  | G | -0.1912 |
| rs76489724  | C | -0.2718 |
| rs1224166   | T | -0.0508 |
| rs12585041  | A | -0.0325 |
| rs9516728   | G | -0.1498 |
| rs1444626   | T | -0.0314 |
| rs9526709   | A | 0.0515  |
| rs1889681   | T | -0.0368 |
| rs4770727   | T | 0.046   |
| rs12427643  | C | -0.1065 |

|             |   |         |
|-------------|---|---------|
| rs77329389  | T | 0.1164  |
| rs112834428 | T | -0.0333 |
| rs9568186   | T | -0.0721 |
| rs36039561  | G | -0.2218 |
| rs9571206   | G | 0.0347  |
| rs9520422   | C | -0.0317 |
| rs145795118 | T | -0.1328 |
| rs4491357   | A | -0.0307 |
| rs61951981  | A | -0.0963 |
| rs9519486   | C | 0.0393  |
| rs7333685   | C | 0.106   |
| rs1327950   | T | 0.0338  |
| rs368109    | T | 0.0352  |
| rs35932037  | A | -0.0421 |
| rs73559402  | C | -0.0648 |
| rs117310098 | A | 0.1406  |
| rs9530162   | G | 0.0322  |
| rs78279640  | C | -0.0586 |
| rs61947461  | G | -0.1204 |
| rs79898396  | T | -0.24   |
| rs113517717 | T | -0.1826 |
| rs80262054  | T | -0.1092 |
| rs9543305   | A | 0.0311  |
| rs3966879   | G | 0.0759  |
| rs75805582  | G | -0.1285 |
| rs79738503  | G | 0.0487  |
| rs111931193 | T | -0.0335 |
| rs583546    | T | -0.0356 |
| rs7986825   | G | 0.0512  |
| rs146693173 | A | 0.0793  |
| rs341499    | T | -0.031  |
| rs2149698   | G | 0.031   |
| rs117918732 | A | 0.139   |
| rs116982997 | T | 0.0846  |
| rs354440    | C | 0.0357  |
| rs117700791 | A | 0.1123  |
| rs2104320   | A | 0.0389  |
| rs78292191  | A | -0.0849 |
| rs61970805  | G | 0.1458  |
| rs145262312 | A | 0.191   |
| rs11619756  | G | 0.0298  |
| rs150120415 | A | 0.1353  |
| rs285122    | C | 0.044   |
| rs1889254   | C | 0.049   |
| rs77353959  | G | -0.1385 |
| rs7986970   | T | 0.0429  |
| rs9537062   | T | 0.0824  |

|             |   |         |
|-------------|---|---------|
| rs7995097   | A | -0.1024 |
| rs117199327 | G | 0.166   |
| rs484946    | A | -0.0322 |
| rs113649144 | G | -0.2062 |
| rs74073648  | T | -0.1697 |
| rs636345    | G | 0.1777  |
| rs61966766  | A | 0.2135  |
| rs7994271   | T | -0.0371 |
| rs79888688  | C | -0.1681 |
| rs78558140  | A | 0.1615  |
| rs3949248   | T | 0.1982  |
| rs58550112  | A | 0.067   |
| rs138903455 | G | -0.1392 |
| rs34634134  | G | 0.1336  |
| rs75794151  | G | 0.0821  |
| rs9545914   | T | -0.1269 |
| rs73247212  | C | 0.1077  |
| rs117615494 | T | 0.1245  |
| rs536338    | C | 0.0329  |
| rs35658637  | A | -0.0861 |
| rs61960197  | A | 0.1492  |
| rs59380005  | C | -0.1515 |
| rs73168659  | T | 0.0352  |
| rs34525095  | T | -0.1969 |
| rs465620    | T | 0.032   |
| rs74475378  | G | 0.0887  |
| rs2783223   | C | 0.0717  |
| rs61951065  | A | -0.1231 |
| rs17246799  | A | -0.0315 |
| rs16962661  | G | -0.274  |
| rs74371587  | C | -0.1361 |
| rs76091503  | T | 0.0827  |
| rs6490666   | C | -0.0327 |
| rs145589761 | T | -0.0767 |
| rs57906806  | T | 0.0739  |
| rs73175012  | A | 0.0656  |
| rs12875693  | G | -0.1065 |
| rs2775130   | A | 0.0312  |
| rs73516785  | A | 0.1266  |
| rs9329348   | T | -0.0744 |
| rs147177226 | G | 0.1887  |
| rs17633673  | C | 0.0974  |
| rs1361003   | C | 0.0469  |
| rs7337127   | T | 0.0438  |
| rs9317888   | G | 0.0352  |
| rs9506019   | A | -0.0495 |
| rs4562934   | T | 0.0693  |

|             |   |         |
|-------------|---|---------|
| rs117931473 | A | 0.2552  |
| rs117605767 | G | -0.1189 |
| rs76200959  | T | -0.118  |
| rs117774985 | A | 0.1113  |
| rs116900456 | G | -0.1902 |
| rs1547189   | C | 0.0382  |
| rs2780344   | C | 0.0768  |
| rs7998823   | T | 0.041   |
| rs142530402 | T | 0.197   |
| rs142510747 | T | -0.1693 |
| rs666352    | G | -0.0412 |
| rs1537418   | G | 0.0311  |
| rs111467036 | G | 0.1682  |
| rs17090101  | T | 0.086   |
| rs7985399   | G | 0.0463  |
| rs146041873 | G | -0.1402 |
| rs75452910  | G | -0.1192 |
| rs78296703  | T | -0.1251 |
| rs4769329   | C | -0.033  |
| rs111865272 | C | -0.0518 |
| rs7981357   | A | -0.031  |
| rs7987359   | G | -0.0436 |
| rs147229042 | G | 0.16    |
| rs4941969   | A | -0.1612 |
| rs75311290  | G | -0.136  |
| rs138396239 | T | 0.2121  |
| rs142579524 | T | 0.1402  |
| rs11619787  | C | 0.1965  |
| rs80289820  | C | 0.2157  |
| rs61970402  | G | -0.153  |
| rs4769185   | A | -0.0745 |
| rs1886531   | T | 0.0331  |
| rs151254405 | C | -0.2355 |
| rs7997510   | G | -0.0298 |
| rs9574198   | T | 0.0567  |
| rs142893767 | C | 0.1227  |
| rs1361576   | G | -0.0379 |
| rs113332310 | A | 0.0459  |
| rs57541225  | C | -0.0558 |
| rs55693018  | G | -0.0325 |
| rs4343125   | G | -0.051  |
| rs73169744  | G | -0.1122 |
| rs112422439 | T | 0.1512  |
| rs16968170  | T | 0.0571  |
| rs73203491  | A | 0.0855  |
| rs112994341 | C | 0.0525  |
| rs112630337 | C | 0.1136  |



|             |   |         |
|-------------|---|---------|
| rs117688988 | G | 0.1983  |
| rs7991888   | A | -0.0704 |
| rs116842493 | T | 0.0967  |
| rs78855063  | G | 0.1246  |
| rs17054944  | A | 0.1314  |
| rs17225334  | T | 0.0752  |
| rs9519556   | A | 0.0361  |
| rs74554325  | C | -0.2761 |
| rs4773060   | C | 0.0823  |
| rs9600699   | T | 0.0987  |
| rs6562685   | G | -0.1215 |
| rs61944757  | T | -0.0666 |
| rs116965341 | G | -0.1867 |
| rs17326608  | A | 0.1442  |
| rs12323056  | A | 0.1428  |
| rs146307519 | C | 0.1603  |
| rs9669866   | A | 0.131   |
| rs45510096  | C | -0.1899 |
| rs77117739  | A | 0.126   |
| rs79226554  | G | 0.1031  |
| rs80121275  | C | 0.1356  |
| rs116951995 | A | 0.1605  |
| rs9538590   | A | -0.2038 |
| rs7316939   | G | -0.0344 |
| rs55986405  | T | -0.1458 |
| rs73179218  | A | 0.0527  |
| rs73231086  | T | 0.0979  |
| rs4943281   | C | 0.0434  |
| rs912159    | T | -0.0397 |
| rs74078712  | C | -0.1362 |
| rs117885371 | T | 0.0606  |
| rs72652590  | C | -0.2016 |
| rs77498246  | G | -0.0882 |
| rs61964607  | G | -0.0726 |
| rs58400642  | A | 0.1085  |
| rs75576121  | G | -0.1985 |
| rs75185526  | G | 0.2477  |
| rs73505677  | T | 0.0527  |
| rs528218    | A | 0.0728  |
| rs9601854   | G | -0.0357 |
| rs12871758  | T | -0.0558 |
| rs17195862  | A | 0.0329  |
| rs61967179  | T | -0.158  |
| rs3102208   | C | -0.0318 |
| rs2390035   | T | -0.0503 |
| rs9603212   | T | -0.1505 |
| rs149281470 | T | -0.0661 |

|             |   |         |
|-------------|---|---------|
| rs34163162  | T | -0.0386 |
| rs615680    | A | 0.0361  |
| rs12430402  | G | 0.073   |
| rs9511299   | A | 0.1069  |
| rs75981464  | C | 0.1324  |
| rs9569998   | G | -0.0332 |
| rs76264253  | T | 0.1008  |
| rs9597855   | A | 0.0773  |
| rs118063121 | G | -0.0872 |
| rs9526773   | G | 0.0332  |
| rs4773883   | T | 0.0399  |
| rs7339414   | T | 0.0338  |
| rs502028    | A | 0.0329  |
| rs113151897 | T | -0.0639 |
| rs17072370  | A | -0.0599 |
| rs7139762   | T | -0.0294 |
| rs7319292   | A | 0.0345  |
| rs79130810  | A | 0.2084  |
| rs114175421 | C | -0.178  |
| rs598068    | A | -0.0341 |
| rs9634767   | C | 0.0349  |
| rs17066317  | C | 0.0876  |
| rs139519561 | C | 0.1872  |
| rs77853508  | C | 0.0968  |
| rs72663677  | C | 0.0723  |
| rs9523138   | G | 0.0324  |
| rs75467447  | C | 0.2733  |
| rs61947245  | G | 0.1181  |
| rs9561897   | T | 0.0487  |
| rs72660164  | G | -0.066  |
| rs9508790   | G | -0.0297 |
| rs72660136  | C | 0.1129  |
| rs11772307  | T | 0.1     |
| rs6562015   | C | -0.0302 |
| rs12856863  | A | -0.0757 |
| rs58775998  | T | 0.1155  |
| rs9516141   | T | 0.0977  |
| rs115781416 | C | 0.1619  |
| rs2244820   | G | 0.0292  |
| rs79982915  | G | -0.152  |
| rs7335067   | A | 0.0299  |
| rs80108651  | T | 0.1672  |
| rs9564485   | T | 0.0547  |
| rs117623047 | C | 0.2414  |
| rs1164506   | C | -0.0357 |
| rs17572186  | A | -0.2135 |
| rs7982556   | C | 0.0335  |

|             |   |         |
|-------------|---|---------|
| rs117924023 | T | -0.1162 |
| rs141148986 | A | 0.1576  |
| rs17087328  | C | -0.0636 |
| rs79559909  | A | 0.0847  |
| rs78363702  | T | -0.1667 |
| rs61960199  | A | 0.0874  |
| rs9601690   | T | 0.0588  |
| rs4943019   | A | -0.0852 |
| rs2621951   | C | -0.0577 |
| rs149844959 | T | 0.2069  |
| rs78544960  | G | -0.1185 |
| rs1410425   | T | -0.0873 |
| rs9573624   | T | -0.1219 |
| rs79824675  | A | 0.205   |
| rs117058225 | G | -0.1251 |
| rs9555791   | G | -0.0348 |
| rs1069767   | G | 0.0577  |
| rs60781382  | T | 0.0489  |
| rs11840402  | C | -0.1017 |
| rs12232053  | C | -0.0443 |
| rs75330252  | A | 0.1179  |
| rs6491316   | A | 0.0406  |
| rs9645905   | G | -0.0306 |
| rs1543659   | T | -0.101  |
| rs146276775 | G | 0.1731  |
| rs4942712   | A | -0.0307 |
| rs74475137  | A | -0.0989 |
| rs2314007   | G | 0.0393  |
| rs76248124  | G | 0.1869  |
| rs2225806   | C | 0.039   |
| rs2151237   | T | -0.0497 |
| rs2031156   | T | 0.0449  |
| rs76710683  | C | 0.0976  |
| rs9531917   | C | 0.0342  |
| rs1322751   | G | 0.0651  |
| rs77869959  | A | 0.0993  |
| rs9511383   | T | -0.0358 |
| rs78874055  | T | 0.0551  |
| rs79903666  | A | -0.1137 |
| rs117586878 | A | 0.2675  |
| rs76712071  | T | 0.081   |
| rs9599298   | A | 0.0302  |
| rs1041678   | C | 0.0425  |
| rs75918219  | T | 0.12    |
| rs9593424   | T | 0.1067  |
| rs12431187  | A | -0.0309 |
| rs144164516 | G | -0.1305 |

|             |   |         |
|-------------|---|---------|
| rs9588325   | G | 0.0323  |
| rs148285057 | A | 0.0428  |
| rs17505148  | A | 0.0361  |
| rs4148530   | T | -0.0312 |
| rs7330431   | C | -0.037  |
| rs117166622 | G | -0.1016 |
| rs113259882 | A | 0.0857  |
| rs4362239   | T | 0.0469  |
| rs77748382  | A | 0.1584  |
| rs114274163 | C | 0.1246  |
| rs113879146 | G | 0.1346  |
| rs61965601  | T | 0.2407  |
| rs79085185  | G | 0.1518  |
| rs6492383   | T | 0.0321  |
| rs76050785  | C | -0.0891 |
| rs7326881   | A | 0.0999  |
| rs9572215   | G | -0.032  |
| rs4942385   | T | 0.2025  |
| rs9514128   | G | -0.0486 |
| rs7994878   | G | -0.046  |
| rs3934818   | T | 0.0362  |
| rs9520396   | C | 0.038   |
| rs1475350   | A | -0.0543 |
| rs73241184  | T | 0.076   |
| rs17069694  | T | -0.1684 |
| rs72670619  | A | 0.0568  |
| rs943049    | T | 0.0296  |
| rs79748342  | A | 0.0927  |
| rs8001597   | G | 0.0307  |
| rs117596845 | A | 0.1601  |
| rs76574072  | C | 0.1274  |
| rs7317840   | G | 0.03    |
| rs77869001  | A | -0.1102 |
| rs7989110   | G | -0.0376 |
| rs1320519   | G | 0.0329  |
| rs1924965   | C | 0.0406  |
| rs2039574   | A | 0.0542  |
| rs78213177  | T | 0.1161  |
| rs9550472   | C | -0.0436 |
| rs4074271   | G | 0.0412  |
| rs8001997   | C | 0.033   |
| rs139156687 | C | -0.1998 |
| rs9520306   | G | 0.0407  |
| rs141247446 | G | 0.2666  |
| rs9509447   | C | -0.031  |
| rs117684413 | A | 0.2284  |
| rs76750172  | T | 0.1249  |

|             |   |         |
|-------------|---|---------|
| rs61961614  | T | -0.0372 |
| rs41283994  | T | 0.105   |
| rs7997141   | C | 0.0324  |
| rs73188690  | T | -0.1074 |
| rs117835045 | C | 0.1976  |
| rs17429111  | G | -0.2173 |
| rs4769954   | G | 0.108   |
| rs9526736   | C | -0.0309 |
| rs9317551   | A | 0.0301  |
| rs9634334   | A | 0.0577  |
| rs76776920  | A | -0.1452 |
| rs74396469  | A | 0.1063  |
| rs113616959 | A | 0.1196  |
| rs36119769  | T | -0.0338 |
| rs74102194  | C | 0.1064  |
| rs56203375  | C | 0.0587  |
| rs1325774   | G | -0.0312 |
| rs2528763   | T | -0.0295 |
| rs67298778  | A | -0.0369 |
| rs9586801   | C | 0.0309  |
| rs117107257 | T | -0.1393 |
| rs77408796  | T | 0.0668  |
| rs927667    | G | 0.0379  |
| rs12865573  | A | 0.1623  |
| rs2057490   | C | -0.0426 |
| rs75497778  | A | -0.153  |
| rs35348757  | T | 0.1296  |
| rs9510773   | A | 0.029   |
| rs331593    | A | 0.1072  |
| rs80304375  | G | -0.096  |
| rs9316154   | A | 0.0357  |
| rs73179126  | G | 0.0608  |
| rs9603921   | G | 0.0351  |
| rs79090843  | C | -0.1204 |
| rs117997057 | T | -0.2659 |
| rs790531    | G | 0.0578  |
| rs12874263  | C | 0.2428  |
| rs61246028  | T | 0.0551  |
| rs72655784  | A | -0.0651 |
| rs420387    | G | 0.0285  |
| rs17077712  | C | -0.0676 |
| rs112012446 | T | 0.2104  |
| rs3858734   | G | 0.0294  |
| rs61944153  | A | 0.2725  |
| rs151228688 | A | 0.1958  |
| rs12261     | T | 0.0296  |
| rs138766594 | A | 0.2608  |

|             |   |         |
|-------------|---|---------|
| rs4941698   | G | -0.0303 |
| rs11568682  | A | 0.0994  |
| rs116928474 | G | 0.1504  |
| rs79077819  | C | 0.0557  |
| rs11843075  | A | 0.1498  |
| rs12855484  | A | 0.0282  |
| rs4772253   | A | 0.0387  |
| rs117810979 | G | -0.187  |
| rs1331699   | G | -0.0485 |
| rs117372458 | C | 0.2127  |
| rs9513951   | G | -0.0403 |
| rs75234654  | C | -0.1453 |
| rs34706014  | C | -0.0453 |
| rs78087545  | T | -0.0801 |
| rs9524570   | T | -0.034  |
| rs9559629   | T | -0.0377 |
| rs7983367   | G | -0.0964 |
| rs77969808  | G | -0.174  |
| rs1275188   | T | -0.0389 |
| rs11842490  | G | 0.0629  |
| rs9511716   | T | -0.0647 |
| rs72642606  | G | 0.1166  |
| rs35065090  | A | 0.0891  |
| rs60461444  | C | 0.1623  |
| rs11840613  | G | 0.1614  |
| rs9530152   | C | -0.0296 |
| rs35410340  | A | -0.1436 |
| rs117984132 | T | 0.1344  |
| rs11620594  | A | 0.0482  |
| rs1937760   | G | -0.0444 |
| rs1330458   | T | -0.0589 |
| rs9576027   | G | -0.0308 |
| rs17328551  | G | -0.0818 |
| rs147880160 | T | 0.2451  |
| rs7985621   | C | 0.2156  |
| rs117332991 | A | 0.1727  |
| rs117662594 | A | -0.1678 |
| rs17070879  | T | 0.1046  |
| rs75093613  | T | -0.1478 |
| rs12871430  | T | -0.0371 |
| rs1952994   | G | -0.0593 |
| rs7331833   | A | -0.0309 |
| rs141146498 | A | -0.1371 |
| rs117614550 | G | 0.0826  |
| rs117089661 | G | -0.1445 |
| rs16958461  | T | -0.1244 |
| rs4942451   | C | -0.0292 |

|             |   |         |
|-------------|---|---------|
| rs1358668   | G | 0.0285  |
| rs11619503  | G | 0.0692  |
| rs74767266  | A | 0.0829  |
| rs7987467   | A | -0.0284 |
| rs139965720 | A | -0.1226 |
| rs149696736 | T | 0.1282  |
| rs34328626  | T | 0.0488  |
| rs3118917   | T | -0.0777 |
| rs111422021 | T | -0.0705 |
| rs142646162 | T | 0.1528  |
| rs139600214 | C | -0.2607 |
| rs9558242   | G | -0.0586 |
| rs72660186  | T | -0.0537 |
| rs1323870   | T | -0.0328 |
| rs9527458   | C | 0.0332  |
| rs61959530  | A | -0.0359 |
| rs77196499  | T | 0.177   |
| rs56227301  | A | 0.0802  |
| rs73222715  | G | -0.0982 |
| rs74781903  | T | 0.21    |
| rs1409901   | G | -0.0294 |
| rs9550518   | C | 0.045   |
| rs456263    | A | 0.0349  |
| rs61954576  | T | -0.1842 |
| rs9553968   | T | -0.0312 |
| rs9596994   | A | -0.028  |
| rs9551112   | G | 0.0456  |
| rs4771711   | G | 0.0286  |
| rs149658103 | T | -0.2592 |
| rs4385998   | A | -0.0325 |
| rs57486790  | C | 0.07    |
| rs117229957 | A | 0.1421  |
| rs12583834  | A | 0.106   |
| rs9565968   | A | -0.0282 |
| rs147957766 | G | -0.1434 |
| rs79996690  | T | -0.0763 |
| rs9603119   | A | 0.0804  |
| rs73208702  | A | 0.1628  |
| rs4942949   | A | 0.1326  |
| rs7139889   | T | 0.0608  |
| rs9513478   | A | -0.2045 |
| rs147583123 | C | -0.1066 |
| rs138407255 | A | -0.2025 |
| rs35115456  | T | -0.0824 |
| rs2497554   | A | 0.0634  |
| rs139911192 | C | 0.2002  |
| rs61954667  | C | -0.1103 |

|             |   |         |
|-------------|---|---------|
| rs79327894  | T | 0.0485  |
| rs148526057 | T | 0.1495  |
| rs76608954  | C | 0.1313  |
| rs7317810   | C | 0.0666  |
| rs4886221   | C | -0.0505 |
| rs9538172   | A | -0.0322 |
| rs7320684   | T | 0.0325  |
| rs9600031   | T | 0.1136  |
| rs9556636   | C | -0.0591 |
| rs77785709  | G | 0.0947  |
| rs9512407   | C | -0.0438 |
| rs9519425   | C | -0.0628 |
| rs6492219   | C | 0.0302  |
| rs9539818   | G | -0.0514 |
| rs4886305   | T | 0.0685  |
| rs73192420  | T | 0.0713  |
| rs117868088 | T | 0.072   |
| rs80332711  | A | -0.1264 |
| rs1876724   | C | -0.0284 |
| rs1063183   | G | 0.0411  |
| rs9516429   | T | -0.1001 |
| rs3929767   | T | -0.031  |
| rs7319010   | A | -0.1198 |
| rs11069734  | T | 0.0311  |
| rs1924181   | A | 0.0302  |
| rs2701856   | T | 0.1971  |
| rs7333147   | G | -0.0296 |
| rs111343619 | T | 0.0817  |
| rs55899419  | T | -0.0337 |
| rs1413144   | G | -0.0398 |
| rs7330054   | A | -0.0541 |
| rs9555910   | G | 0.1712  |
| rs12869307  | A | -0.0535 |
| rs9558064   | G | -0.0303 |
| rs327118    | C | 0.0294  |
| rs73628417  | A | 0.0838  |
| rs57274092  | A | 0.1445  |
| rs61966117  | C | -0.0989 |
| rs149806463 | A | -0.1534 |
| rs117982928 | A | 0.2096  |
| rs7323182   | A | 0.0304  |
| rs9523678   | T | 0.0385  |
| rs9590132   | T | 0.0872  |
| rs1571994   | T | -0.0397 |
| rs11840979  | C | 0.0317  |
| rs117197199 | A | 0.1227  |
| rs803749    | A | 0.0591  |



|             |   |         |
|-------------|---|---------|
| rs2017328   | C | -0.0292 |
| rs9524955   | C | 0.0395  |
| rs17589594  | G | -0.066  |
| rs80159452  | C | 0.0636  |
| rs1253464   | A | -0.0316 |
| rs75548938  | T | 0.0793  |
| rs117731200 | T | 0.2973  |
| rs7986861   | C | 0.0406  |
| rs75260074  | C | 0.1582  |
| rs1445256   | C | -0.1088 |
| rs140334137 | C | -0.1043 |
| rs9564755   | A | 0.1157  |
| rs116846964 | G | 0.0943  |
| rs78915924  | T | -0.1605 |
| rs13378669  | T | 0.0706  |
| rs1981300   | C | 0.2144  |
| rs9545726   | T | 0.0373  |
| rs2352029   | C | -0.0302 |
| rs150224242 | T | 0.2051  |
| rs112600131 | A | 0.0371  |
| rs35049550  | A | 0.1413  |
| rs17238955  | C | 0.134   |
| rs78182982  | C | 0.0758  |
| rs2388086   | T | -0.0665 |
| rs12865496  | C | 0.0359  |
| rs140976421 | A | 0.115   |
| rs9528277   | A | -0.0342 |
| rs4773628   | A | 0.0483  |
| rs147861723 | A | 0.112   |
| rs1928923   | G | 0.1661  |
| rs117564380 | T | 0.1858  |
| rs2806965   | A | -0.0294 |
| rs2762158   | C | 0.0326  |
| rs11147578  | G | -0.0432 |
| rs9301351   | T | -0.0441 |
| rs745679    | T | -0.0344 |
| rs2146368   | T | -0.0366 |
| rs78966323  | T | 0.2008  |
| rs147037586 | C | 0.0811  |
| rs8192880   | G | -0.071  |
| rs9568493   | C | -0.0953 |
| rs75262136  | A | 0.0944  |
| rs12584527  | T | 0.0398  |
| rs7331798   | G | -0.0881 |
| rs75385398  | T | -0.1444 |
| rs9529854   | C | 0.0511  |
| rs9551682   | C | -0.0345 |

|             |   |         |
|-------------|---|---------|
| rs7331878   | G | 0.0758  |
| rs78400771  | G | 0.0966  |
| rs71431772  | C | 0.092   |
| rs7982351   | G | 0.034   |
| rs9589191   | A | -0.0285 |
| rs12871866  | A | 0.0763  |
| rs141793360 | C | -0.1786 |
| rs61689117  | T | 0.104   |
| rs9548258   | A | -0.1248 |
| rs75505727  | C | 0.0635  |
| rs114484222 | G | -0.0427 |
| rs17057348  | C | 0.0881  |
| rs117598404 | T | 0.1563  |
| rs12430232  | G | -0.0332 |
| rs7325523   | T | -0.0295 |
| rs74851951  | T | -0.1115 |
| rs6562567   | A | 0.0406  |
| rs142443341 | C | 0.1711  |
| rs75713339  | G | -0.0655 |
| rs338748    | T | -0.0296 |
| rs2182260   | G | -0.0816 |
| rs9516271   | C | -0.0276 |
| rs4769764   | T | -0.0339 |
| rs12583357  | G | 0.1837  |
| rs1328679   | G | 0.0296  |
| rs12866320  | T | 0.2294  |
| rs72640691  | C | 0.0893  |
| rs9583798   | T | -0.1217 |
| rs79542551  | G | 0.1766  |
| rs908507    | C | -0.0513 |
| rs12871724  | A | 0.1821  |
| rs9518283   | A | -0.0283 |
| rs9315584   | T | 0.0378  |
| rs151079683 | A | 0.1357  |
| rs143355512 | C | 0.0729  |
| rs9527041   | A | -0.0601 |
| rs112411014 | C | -0.103  |
| rs12877547  | G | -0.0302 |
| rs150982861 | G | -0.2138 |
| rs6561630   | T | -0.03   |
| rs9574020   | C | 0.1492  |
| rs9508804   | A | 0.0334  |
| rs9595290   | C | 0.0783  |
| rs61974960  | A | 0.0617  |
| rs150494637 | A | -0.1367 |
| rs7986533   | C | -0.0304 |
| rs4942458   | C | -0.0443 |

|             |   |         |
|-------------|---|---------|
| rs2876725   | C | 0.0364  |
| rs117455834 | T | -0.2233 |
| rs75722246  | T | 0.0708  |
| rs148064644 | C | 0.2048  |
| rs9541923   | C | -0.2025 |
| rs9645840   | C | -0.044  |
| rs113318520 | T | 0.1451  |
| rs9603644   | T | 0.0729  |
| rs142725971 | G | -0.1234 |
| rs12427899  | C | -0.0997 |
| rs72664749  | G | 0.2095  |
| rs12876070  | T | -0.0388 |
| rs150157625 | T | -0.1089 |
| rs601210    | G | 0.0308  |
| rs78750227  | A | -0.0753 |
| rs1832106   | C | -0.035  |
| rs140449036 | A | -0.3019 |
| rs71439787  | T | 0.1254  |
| rs116932653 | T | 0.1278  |
| rs12428991  | T | 0.051   |
| rs113359606 | A | -0.1327 |
| rs72655533  | C | 0.0583  |
| rs310969    | G | -0.0349 |
| rs112284848 | T | 0.0832  |
| rs117088805 | T | -0.2189 |
| rs61972404  | A | -0.0583 |
| rs490747    | A | 0.0304  |
| rs9603888   | T | -0.0495 |
| rs140860568 | T | 0.1583  |
| rs78916128  | A | 0.1718  |
| rs79119110  | A | 0.0887  |
| rs17186110  | G | 0.0839  |
| rs6563757   | G | 0.0288  |
| rs142101424 | C | 0.1164  |
| rs9600113   | A | -0.0847 |
| rs11841788  | G | 0.0469  |
| rs9576033   | G | -0.0655 |
| rs950956    | C | -0.0313 |
| rs66467851  | C | 0.0473  |
| rs75356113  | A | -0.1528 |
| rs9530712   | G | 0.0538  |
| rs1551211   | A | -0.0415 |
| rs9563676   | G | 0.0283  |
| rs7994347   | A | -0.0391 |
| rs9315065   | A | 0.1017  |
| rs148527598 | C | 0.1746  |
| rs34330275  | A | 0.1826  |

|             |   |         |
|-------------|---|---------|
| rs9301086   | A | -0.0393 |
| rs619708    | C | 0.0358  |
| rs7330083   | C | 0.0426  |
| rs57465948  | A | -0.0471 |
| rs797472    | G | 0.0288  |
| rs9543357   | G | -0.0521 |
| rs9568094   | T | 0.0568  |
| rs7335465   | G | 0.0335  |
| rs117158878 | C | -0.0821 |
| rs2260728   | T | -0.0326 |
| rs75013769  | C | -0.0834 |
| rs118142970 | C | 0.0921  |
| rs75256427  | C | 0.0957  |
| rs76170004  | G | 0.1269  |
| rs16971843  | T | -0.157  |
| rs79997814  | C | 0.1448  |
| rs76179905  | C | -0.1222 |
| rs74060397  | A | 0.0666  |
| rs79555745  | A | 0.0351  |
| rs77833623  | A | -0.1222 |
| rs1341651   | C | 0.0299  |
| rs35782828  | T | 0.0942  |
| rs138263275 | A | -0.0859 |
| rs112172915 | T | -0.0557 |
| rs1005720   | T | -0.0428 |
| rs72652048  | G | 0.1791  |
| rs9317181   | C | -0.1233 |
| rs117004315 | G | -0.0957 |
| rs139227554 | T | -0.1147 |
| rs2762173   | A | -0.1272 |
| rs34388067  | G | 0.0292  |
| rs1876582   | A | -0.046  |
| rs9552628   | G | -0.0575 |
| rs79025709  | C | 0.1093  |
| rs12431329  | G | -0.0466 |
| rs9555417   | T | 0.0416  |
| rs7337832   | A | 0.059   |
| rs73227167  | T | 0.0997  |
| rs9527208   | A | 0.0349  |
| rs10507495  | C | 0.0494  |
| rs17196608  | A | 0.034   |
| rs9539143   | C | -0.0279 |
| rs79123680  | G | -0.0595 |
| rs9515572   | G | 0.0819  |
| rs11568643  | C | -0.0499 |
| rs75534048  | G | -0.0585 |
| rs364807    | A | 0.0607  |

|             |   |         |
|-------------|---|---------|
| rs144045658 | G | -0.1307 |
| rs1792      | A | 0.0349  |
| rs9575943   | G | 0.0346  |
| rs9520390   | G | 0.1064  |
| rs75591659  | A | -0.1961 |
| rs1536402   | C | 0.0885  |
| rs9577752   | T | 0.1523  |
| rs147964815 | C | -0.1469 |
| rs7336193   | C | -0.0408 |
| rs9539213   | T | -0.0331 |
| rs150430472 | T | -0.1223 |
| rs144932335 | A | 0.1345  |
| rs55703690  | C | 0.0539  |
| rs117137218 | A | -0.1304 |
| rs79055314  | C | 0.047   |
| rs9601362   | G | -0.0359 |
| rs7326738   | C | 0.0348  |
| rs142383988 | A | 0.1477  |
| rs140998827 | G | -0.114  |
| rs9592030   | A | 0.0456  |
| rs1280921   | C | -0.1113 |
| rs139196179 | T | 0.1653  |
| rs2772354   | A | 0.0414  |
| rs74129430  | T | 0.1204  |
| rs12856248  | A | 0.0492  |
| rs7332135   | T | 0.0326  |
| rs613285    | G | 0.0274  |
| rs11616738  | T | -0.1084 |
| rs17085484  | C | 0.0387  |
| rs117220861 | G | 0.0921  |
| rs1781553   | T | 0.0291  |
| rs116898958 | T | 0.1206  |
| rs60045148  | T | -0.0876 |
| rs566688    | T | -0.0313 |
| rs117348194 | A | 0.1144  |
| rs546370    | C | -0.0486 |
| rs150906733 | C | 0.0938  |
| rs75208699  | A | 0.0633  |
| rs7326064   | T | -0.0296 |
| rs117932446 | T | 0.2043  |
| rs9599121   | G | -0.0296 |
| rs9599924   | T | -0.0335 |
| rs2769924   | G | -0.0491 |
| rs11149462  | C | -0.0344 |
| rs139403695 | A | -0.1517 |
| rs9567921   | G | 0.1633  |
| rs72635802  | A | 0.177   |

|             |   |         |
|-------------|---|---------|
| rs2629858   | C | -0.0277 |
| rs143355870 | A | -0.1043 |
| rs34402465  | A | 0.197   |
| rs117342098 | A | -0.131  |
| rs12862444  | G | -0.0875 |
| rs7981061   | C | -0.0453 |
| rs9564267   | A | -0.0301 |
| rs117744712 | T | 0.1399  |
| rs2989989   | A | 0.0297  |
| rs75350737  | C | 0.188   |
| rs7986149   | C | 0.0277  |
| rs79673002  | G | -0.0854 |
| rs9546665   | C | 0.0464  |
| rs1077728   | T | -0.0325 |
| rs4941716   | T | -0.0461 |
| rs310913    | T | 0.2428  |
| rs150231434 | T | -0.1353 |
| rs11619435  | G | 0.0323  |
| rs9594864   | T | 0.0318  |
| rs77297479  | C | 0.1117  |
| rs78613944  | G | -0.1704 |
| rs654775    | C | -0.0427 |
| rs72643898  | T | 0.0617  |
| rs9600885   | A | 0.0366  |
| rs7333513   | T | 0.0321  |
| rs9526666   | A | -0.1927 |
| rs61949164  | T | -0.0436 |
| rs12427555  | G | -0.0413 |
| rs117569086 | A | 0.1469  |
| rs4438164   | T | 0.0282  |
| rs150644207 | A | 0.1447  |
| rs149845173 | T | 0.0607  |
| rs72665533  | A | 0.0945  |
| rs11620524  | T | 0.0572  |
| rs9559843   | A | 0.0747  |
| rs9508668   | A | -0.029  |
| rs117925487 | G | -0.111  |
| rs11839270  | T | -0.1534 |
| rs6563177   | A | -0.0287 |
| rs112749072 | C | 0.1001  |
| rs12857435  | G | -0.0774 |
| rs75822876  | A | -0.1456 |
| rs118016066 | G | 0.1714  |
| rs9549260   | A | 0.0327  |
| rs9568393   | G | 0.0819  |
| rs3119852   | T | -0.0273 |
| rs71436552  | A | 0.0795  |

|             |   |         |
|-------------|---|---------|
| rs544660    | A | -0.0946 |
| rs4390442   | A | -0.0277 |
| rs118175937 | C | -0.1337 |
| rs9554815   | A | 0.033   |
| rs66784265  | T | -0.033  |
| rs139118354 | A | 0.2009  |
| rs17371658  | T | -0.1409 |
| rs591732    | T | -0.0378 |
| rs2147563   | T | -0.1373 |
| rs12868944  | C | 0.0406  |
| rs118097524 | C | -0.1237 |
| rs141359020 | T | 0.0832  |
| rs2209852   | G | -0.0271 |
| rs79546691  | A | -0.1126 |
| rs9592174   | T | -0.0984 |
| rs1961495   | T | -0.0475 |
| rs17196184  | C | 0.0453  |
| rs117605449 | A | 0.2048  |
| rs9523672   | A | 0.0924  |
| rs147297494 | G | -0.0779 |
| rs2065197   | T | 0.0859  |
| rs111228055 | C | -0.1334 |
| rs78499786  | T | -0.2094 |
| rs112675981 | G | 0.2263  |
| rs11616347  | T | 0.0692  |
| rs4772328   | G | -0.1655 |
| rs117861831 | T | -0.1402 |
| rs9604511   | G | 0.0307  |
| rs74044567  | T | 0.1279  |
| rs7316967   | A | 0.0405  |
| rs7339096   | C | -0.0285 |
| rs2335356   | G | -0.0317 |
| rs599483    | G | 0.0395  |
| rs117408206 | C | -0.0753 |
| rs55968431  | C | -0.1276 |
| rs9572105   | A | -0.0614 |
| rs7985101   | C | -0.0292 |
| rs79446905  | C | 0.0487  |
| rs73234670  | A | -0.1469 |
| rs61962901  | G | 0.087   |
| rs35717281  | G | -0.0679 |
| rs72661056  | T | -0.037  |
| rs7990420   | C | 0.0288  |
| rs55997516  | A | 0.1141  |
| rs150370162 | T | 0.1384  |
| rs71427640  | A | -0.0428 |
| rs2391247   | T | 0.0298  |

|             |   |         |
|-------------|---|---------|
| rs74239375  | A | -0.0707 |
| rs140007151 | A | -0.1967 |
| rs11148848  | A | 0.0271  |
| rs117539652 | C | -0.066  |
| rs57565976  | G | -0.0507 |
| rs4771753   | G | 0.0277  |
| rs145485515 | G | -0.1197 |
| rs141949429 | G | 0.142   |
| rs111408325 | T | 0.1451  |
| rs9575105   | C | 0.0262  |
| rs55952201  | T | -0.1821 |
| rs12877605  | C | -0.0402 |
| rs73237459  | A | -0.0801 |
| rs202102    | T | 0.0283  |
| rs73165233  | A | -0.1707 |
| rs9588018   | G | -0.0867 |
| rs35041881  | A | 0.0381  |
| rs9574906   | G | -0.0376 |
| rs4245321   | G | -0.0417 |
| rs7319395   | C | -0.0308 |
| rs74988139  | C | 0.0893  |
| rs55687930  | A | 0.163   |
| rs56288617  | A | 0.0415  |
| rs77260008  | G | 0.0643  |
| rs9601084   | A | -0.0311 |
| rs61093123  | C | 0.1526  |
| rs139096283 | T | 0.1049  |
| rs9521729   | A | 0.0285  |
| rs644025    | G | -0.0293 |
| rs11839478  | T | 0.0301  |
| rs78403376  | C | 0.0479  |
| rs73162518  | A | -0.1417 |
| rs261402    | C | -0.029  |
| rs9652177   | G | -0.0849 |
| rs80259544  | T | 0.1274  |
| rs17294583  | C | 0.114   |
| rs77923316  | A | -0.0449 |
| rs9513782   | A | -0.0346 |
| rs9532546   | G | 0.0714  |
| rs2297204   | C | -0.028  |
| rs4770992   | C | -0.0711 |
| rs73173691  | T | 0.103   |
| rs9551906   | G | 0.0267  |
| rs7989114   | C | 0.0787  |
| rs336257    | C | -0.0311 |
| rs7985075   | C | 0.0378  |
| rs9586879   | T | 0.0263  |



|             |   |         |
|-------------|---|---------|
| rs145829196 | C | 0.1228  |
| rs17506081  | T | -0.1484 |
| rs8001751   | T | 0.0954  |
| rs9555448   | G | 0.0384  |
| rs9555012   | C | -0.0989 |
| rs8002643   | T | -0.0289 |
| rs12866680  | T | 0.0305  |
| rs61947504  | C | -0.1362 |
| rs61944522  | A | -0.1049 |
| rs2374013   | C | 0.0311  |
| rs9549162   | A | -0.0352 |
| rs7322191   | A | 0.0383  |
| rs9540189   | T | 0.1675  |
| rs9544716   | T | -0.0296 |
| rs61972028  | T | -0.1343 |
| rs3013647   | T | 0.0334  |
| rs9593289   | A | 0.0424  |
| rs117928251 | T | 0.1002  |
| rs11571592  | C | -0.099  |
| rs975797    | A | 0.0405  |
| rs117794006 | T | -0.1179 |
| rs147708877 | A | -0.2305 |
| rs72643019  | A | 0.1274  |
| rs1054438   | A | 0.0829  |
| rs1023168   | C | 0.0315  |
| rs76859198  | A | -0.0461 |
| rs34673420  | A | 0.1982  |
| rs1962705   | A | 0.0426  |
| rs76054600  | T | 0.12    |
| rs77033640  | A | -0.1164 |
| rs77051867  | A | -0.0807 |
| rs11839559  | A | -0.0398 |
| rs9536612   | C | 0.0477  |
| rs9599479   | T | -0.1158 |
| rs74878514  | G | -0.1487 |
| rs4375566   | G | -0.0302 |
| rs604532    | C | 0.0289  |
| rs114863770 | T | 0.1246  |
| rs73237412  | T | 0.1335  |
| rs78152141  | T | -0.1662 |
| rs78898182  | A | 0.0917  |
| rs4522303   | G | 0.1577  |
| rs117902758 | T | 0.1042  |
| rs9572778   | T | -0.1302 |
| rs72656122  | G | -0.0636 |
| rs74461258  | G | 0.14    |
| rs74403668  | A | -0.0658 |

|             |   |         |
|-------------|---|---------|
| rs117848071 | G | 0.0759  |
| rs9542918   | T | -0.0305 |
| rs12868786  | G | -0.0346 |
| rs73215226  | G | 0.0852  |
| rs77120854  | A | 0.1111  |
| rs141019404 | T | 0.114   |
| rs12868542  | C | -0.1005 |
| rs117559824 | T | 0.1571  |
| rs2044117   | A | 0.0321  |
| rs55686775  | A | 0.0431  |
| rs17677479  | G | 0.1086  |
| rs117761449 | C | -0.0871 |
| rs113387930 | T | -0.1045 |
| rs12585597  | T | 0.0647  |
| rs4943526   | T | -0.0594 |
| rs17824904  | C | 0.0595  |
| rs575536    | T | 0.0333  |
| rs2774080   | T | -0.0268 |
| rs2255870   | G | 0.0359  |
| rs12428233  | T | -0.0496 |
| rs116872481 | T | 0.1153  |
| rs147349052 | A | 0.1252  |
| rs2488376   | T | 0.0307  |
| rs75521495  | T | -0.0802 |
| rs74896874  | A | -0.083  |
| rs17546817  | C | -0.0767 |
| rs1927815   | T | -0.028  |
| rs77675700  | T | -0.1064 |
| rs143513230 | C | 0.1418  |
| rs79338630  | G | 0.124   |
| rs79878590  | G | -0.1311 |
| rs77909419  | G | -0.121  |
| rs6491533   | G | 0.0273  |
| rs12863716  | T | 0.0322  |
| rs4769989   | A | 0.0268  |
| rs72623487  | A | -0.0496 |
| rs117649719 | G | -0.1016 |
| rs9533063   | T | -0.0895 |
| rs1170183   | C | 0.0287  |
| rs61966458  | A | 0.1255  |
| rs117305425 | C | 0.129   |
| rs4771796   | G | 0.029   |
| rs117757370 | C | -0.1427 |
| rs4448786   | T | -0.04   |
| rs17355129  | G | 0.0414  |
| rs74380713  | C | 0.0876  |
| rs495392    | A | 0.0296  |

|             |   |         |
|-------------|---|---------|
| rs74652358  | G | -0.0529 |
| rs756350    | C | 0.0409  |
| rs78100324  | C | -0.0537 |
| rs302894    | C | -0.0435 |
| rs9512935   | G | -0.0544 |
| rs11147566  | C | 0.1635  |
| rs61965893  | A | 0.0285  |
| rs111932731 | G | 0.1064  |
| rs1333747   | A | 0.0909  |
| rs2116245   | T | -0.0275 |
| rs9554952   | G | -0.0904 |
| rs9554910   | A | 0.0537  |
| rs7997645   | T | 0.1527  |
| rs7333716   | T | 0.0519  |
| rs143109001 | C | 0.0476  |
| rs9599379   | T | 0.0281  |
| rs12100016  | C | -0.0284 |
| rs117420412 | A | -0.1035 |
| rs117459235 | A | -0.1482 |
| rs17055578  | G | 0.0461  |
| rs3900399   | A | 0.0363  |
| rs9600078   | G | -0.0278 |
| rs116946944 | C | -0.0735 |
| rs9556107   | T | -0.0302 |
| rs143980657 | C | 0.1078  |
| rs1331584   | T | -0.0441 |
| rs7333754   | T | -0.0467 |
| rs803831    | C | -0.0276 |
| rs4884959   | G | 0.0265  |
| rs73181186  | T | -0.1109 |
| rs117034092 | C | -0.0859 |
| rs141521596 | G | -0.1307 |
| rs9506356   | G | -0.0301 |
| rs146125012 | A | -0.1196 |
| rs73156288  | A | 0.1705  |
| rs1410644   | C | 0.0976  |
| rs2765100   | T | 0.0272  |
| rs118027443 | C | 0.187   |
| rs148365440 | C | 0.1347  |
| rs9989102   | C | -0.0343 |
| rs9535772   | C | 0.0268  |
| rs61963304  | G | 0.0367  |
| rs11616515  | T | 0.1052  |
| rs73467356  | T | 0.0955  |
| rs598646    | T | 0.0325  |
| rs9596024   | C | -0.064  |
| rs7995877   | G | -0.0522 |

|             |   |         |
|-------------|---|---------|
| rs78727383  | A | -0.0488 |
| rs7989081   | A | -0.0509 |
| rs2182532   | C | 0.0401  |
| rs1819340   | C | 0.026   |
| rs35054480  | G | -0.1743 |
| rs16960161  | G | -0.0662 |
| rs71439539  | T | -0.1062 |
| rs10492527  | G | 0.0579  |
| rs9573170   | C | 0.0741  |
| rs117305256 | C | 0.1177  |
| rs142419883 | C | 0.1288  |
| rs12585793  | T | 0.0636  |
| rs34900632  | A | -0.0986 |
| rs12583269  | C | 0.1154  |
| rs9506756   | G | 0.0446  |
| rs680860    | A | 0.031   |
| rs35843532  | C | 0.0672  |
| rs9315168   | C | 0.0527  |
| rs145718000 | T | 0.06    |
| rs80293082  | G | 0.0637  |
| rs9316311   | A | -0.0277 |
| rs7993270   | T | -0.0297 |
| rs9316448   | C | 0.0322  |
| rs9576131   | T | -0.0391 |
| rs9316058   | C | -0.0307 |
| rs1928957   | C | 0.0258  |
| rs61954001  | T | 0.0965  |
| rs9600747   | T | 0.1279  |
| rs117858199 | T | -0.1544 |
| rs585822    | A | 0.0265  |
| rs2985923   | G | 0.0282  |
| rs76126059  | C | 0.1171  |
| rs79140588  | A | -0.163  |
| rs117888852 | T | 0.0998  |
| rs9529585   | A | 0.0377  |
| rs183948    | T | 0.0717  |
| rs17663506  | G | 0.049   |
| rs9545110   | A | -0.0406 |
| rs9603416   | A | -0.0288 |
| rs144528381 | T | -0.1253 |
| rs12427472  | A | -0.0424 |
| rs117005600 | C | 0.0926  |
| rs348061    | A | -0.0452 |
| rs9582849   | G | -0.0328 |
| rs59994647  | C | -0.026  |
| rs9560692   | G | -0.0285 |
| rs117388238 | C | -0.0997 |

|             |   |         |
|-------------|---|---------|
| rs117166126 | C | -0.0874 |
| rs11619055  | C | 0.1647  |
| rs73220362  | C | 0.0924  |
| rs8002208   | T | -0.0308 |
| rs8000481   | A | 0.0286  |
| rs73499590  | C | 0.0891  |
| rs117171636 | A | 0.1665  |
| rs753708    | C | 0.047   |
| rs117366092 | T | 0.2636  |
| rs9551370   | C | 0.0387  |
| rs2104755   | C | 0.0307  |
| rs1125084   | T | 0.0305  |
| rs4386003   | T | -0.0299 |
| rs118148380 | A | -0.1585 |
| rs113793992 | T | -0.1506 |
| rs7326880   | C | -0.0263 |
| rs9540935   | G | -0.0532 |
| rs7981393   | T | 0.0441  |
| rs145517461 | T | -0.1115 |
| rs143629642 | T | -0.181  |
| rs111307617 | C | 0.1454  |
| rs75052235  | T | 0.2241  |
| rs118013392 | G | 0.1553  |
| rs17625019  | C | 0.1276  |
| rs7320502   | C | -0.0285 |
| rs1049669   | T | -0.0808 |
| rs7998551   | T | 0.0329  |
| rs74363207  | A | 0.1129  |
| rs145083163 | T | 0.103   |
| rs74403695  | G | -0.0923 |
| rs10508093  | T | -0.0632 |
| rs2793727   | A | 0.0437  |
| rs144534381 | T | 0.1366  |
| rs117085740 | T | -0.129  |
| rs55642774  | T | -0.0606 |
| rs72647607  | A | 0.0638  |
| rs79846486  | A | -0.0647 |
| rs73235312  | T | 0.1554  |
| rs17196468  | A | 0.051   |
| rs78419908  | T | -0.0853 |
| rs139587942 | G | 0.1087  |
| rs1929082   | G | 0.0923  |
| rs277828    | A | 0.0295  |
| rs117893833 | A | -0.1102 |
| rs80297783  | G | 0.1461  |
| rs9569160   | G | -0.1616 |
| rs76568985  | A | -0.0958 |

|             |   |         |
|-------------|---|---------|
| rs2094196   | C | 0.0331  |
| rs75140026  | A | -0.0932 |
| rs116851639 | G | 0.177   |
| rs9512281   | A | 0.0336  |
| rs140431101 | C | 0.1539  |
| rs7989683   | C | -0.061  |
| rs117020654 | C | 0.1382  |
| rs7987626   | G | 0.0345  |
| rs76828349  | G | -0.0397 |
| rs3013616   | A | 0.0258  |
| rs9523303   | C | -0.0592 |
| rs17821630  | G | -0.0487 |
| rs117145551 | C | -0.126  |
| rs78923922  | A | -0.07   |
| rs9634621   | G | 0.0619  |
| rs9514632   | C | 0.0741  |
| rs12863645  | G | 0.0656  |
| rs9598030   | G | -0.0523 |
| rs143480211 | G | 0.1726  |
| rs10047685  | A | 0.0346  |
| rs73154687  | T | -0.0888 |
| rs61947317  | T | 0.0545  |
| rs79503883  | T | 0.1162  |
| rs9529823   | C | 0.0501  |
| rs912150    | T | -0.0329 |
| rs111402947 | T | 0.085   |
| rs71449264  | A | 0.0278  |
| rs55949529  | G | 0.0441  |
| rs2035162   | G | 0.1493  |
| rs79497827  | C | 0.1202  |
| rs147175679 | T | -0.1475 |
| rs2219516   | T | -0.031  |
| rs77678213  | A | -0.1527 |
| rs7981151   | A | -0.0527 |
| rs12871200  | G | 0.0627  |
| rs148003337 | G | -0.2581 |
| rs9573712   | C | 0.0485  |
| rs12865178  | C | 0.0907  |
| rs146771676 | T | 0.1615  |
| rs61973368  | G | -0.0507 |
| rs61949059  | G | 0.1593  |
| rs1327946   | C | -0.0664 |
| rs9549706   | C | -0.0311 |
| rs9548994   | T | -0.0261 |
| rs12428146  | T | -0.0713 |
| rs9561464   | A | -0.1313 |
| rs9552733   | A | 0.0258  |

|             |   |         |
|-------------|---|---------|
| rs149009348 | G | -0.1762 |
| rs2005632   | G | -0.0329 |
| rs3794387   | G | 0.0311  |
| rs3803260   | C | -0.0436 |
| rs73249354  | G | 0.1152  |
| rs3011530   | T | -0.0442 |
| rs77028980  | T | 0.1052  |
| rs78849428  | T | -0.1384 |
| rs1927353   | A | -0.026  |
| rs4238179   | C | -0.0418 |
| rs113060174 | T | -0.1442 |
| rs7323569   | C | 0.0304  |
| rs9553021   | C | 0.0269  |
| rs56088819  | C | 0.0381  |
| rs117247340 | A | -0.1279 |
| rs17466543  | G | -0.0746 |
| rs60530557  | C | -0.0669 |
| rs113081092 | A | -0.0555 |
| rs71438028  | C | 0.0264  |
| rs78721645  | T | 0.0661  |
| rs78258341  | C | 0.1036  |
| rs9592818   | T | 0.0363  |
| rs3918319   | C | -0.033  |
| rs17053321  | A | 0.0836  |
| rs7326471   | C | 0.0303  |
| rs798964    | G | 0.0371  |
| rs7988801   | A | -0.0448 |
| rs9512995   | G | -0.0644 |
| rs117058999 | A | 0.2053  |
| rs9568662   | C | 0.0437  |
| rs73207673  | C | -0.1906 |
| rs113732511 | T | 0.076   |
| rs9550501   | C | 0.0504  |
| rs79333982  | A | 0.1786  |
| rs35547384  | G | 0.1415  |
| rs17053384  | C | 0.0264  |
| rs75597919  | T | -0.0435 |
| rs111751887 | C | 0.0647  |
| rs12876689  | C | 0.0478  |
| rs77943831  | T | 0.0363  |
| rs73160530  | A | -0.0405 |
| rs9579201   | T | 0.1008  |
| rs77061760  | G | -0.1089 |
| rs4941785   | C | 0.0267  |
| rs1890065   | C | 0.0301  |
| rs17575902  | C | 0.0518  |
| rs78779606  | G | 0.1246  |

|             |   |         |
|-------------|---|---------|
| rs75501645  | G | 0.0877  |
| rs9529804   | A | 0.0351  |
| rs80311316  | C | 0.1228  |
| rs9534188   | G | -0.048  |
| rs78921240  | G | 0.1222  |
| rs1415019   | T | 0.027   |
| rs2476503   | C | -0.1181 |
| rs766974    | A | -0.0272 |
| rs9553524   | A | -0.0282 |
| rs116672378 | C | 0.0547  |
| rs9510261   | C | -0.0394 |
| rs928001    | C | 0.0258  |
| rs56205391  | T | -0.1047 |
| rs9575376   | G | 0.1323  |
| rs1923712   | A | 0.1313  |
| rs61957589  | T | -0.1291 |
| rs55915951  | G | -0.0549 |
| rs4770218   | T | 0.0352  |
| rs9545485   | T | 0.0288  |
| rs6490494   | G | -0.0315 |
| rs111845874 | C | -0.1596 |
| rs35633278  | G | -0.0386 |
| rs111653132 | T | 0.1164  |
| rs73514719  | A | -0.0714 |
| rs75163927  | G | 0.1275  |
| rs9533790   | T | 0.0317  |
| rs9600964   | G | -0.108  |
| rs58933215  | A | -0.0777 |
| rs9526742   | A | 0.0475  |
| rs112065757 | A | 0.1009  |
| rs11842209  | C | 0.0442  |
| rs1051518   | A | 0.0258  |
| rs9578753   | T | 0.0431  |
| rs7320883   | C | 0.0505  |
| rs74775762  | T | 0.1639  |
| rs524566    | A | -0.0264 |
| rs10161646  | C | -0.0286 |
| rs9594986   | G | -0.0265 |
| rs1408683   | C | 0.0408  |
| rs2791229   | A | 0.0298  |
| rs118166288 | T | -0.1326 |
| rs112531467 | T | 0.1544  |
| rs80003102  | C | -0.1225 |
| rs76559139  | C | 0.1017  |
| rs74751573  | A | 0.1592  |
| rs3015364   | A | 0.0252  |
| rs9533312   | T | 0.0286  |



|             |   |         |
|-------------|---|---------|
| rs114848634 | T | -0.045  |
| rs1924958   | C | -0.0516 |
| rs9543559   | G | 0.0359  |
| rs9512376   | A | -0.032  |
| rs12428938  | G | 0.0299  |
| rs4265691   | A | 0.03    |
| rs61963431  | G | -0.1106 |
| rs117928552 | G | -0.107  |
| rs9531944   | T | -0.0336 |
| rs75004213  | G | 0.0915  |
| rs72631015  | G | -0.1668 |
| rs144339670 | G | 0.0998  |
| rs7319796   | A | -0.0262 |
| rs995292    | C | -0.0393 |
| rs116893356 | C | 0.1579  |
| rs2325405   | C | 0.0279  |
| rs17555115  | A | 0.0248  |
| rs12430285  | C | 0.0339  |
| rs73205499  | C | -0.1235 |
| rs10492548  | C | -0.0379 |
| rs79086961  | T | -0.1695 |
| rs117439427 | A | -0.0671 |
| rs78369654  | G | -0.1989 |
| rs7139744   | T | -0.0289 |
| rs35154575  | T | 0.0624  |
| rs12876202  | G | 0.0267  |
| rs74557576  | C | -0.0511 |
| rs144511228 | G | -0.268  |
| rs73172706  | A | -0.1352 |
| rs17822733  | C | -0.1135 |
| rs73164546  | C | -0.0578 |
| rs80005217  | T | 0.1002  |
| rs15639     | G | -0.0317 |
| rs117096824 | A | 0.1825  |
| rs16963877  | G | -0.1199 |
| rs609993    | C | -0.0268 |
| rs140773402 | A | 0.1899  |
| rs112668690 | C | 0.0372  |
| rs35673723  | T | -0.117  |
| rs7988162   | C | 0.0385  |
| rs143314948 | A | -0.103  |
| rs75594817  | A | 0.0471  |
| rs117705277 | A | -0.0655 |
| rs9301871   | A | 0.036   |
| rs1590520   | T | 0.0414  |
| rs1335781   | T | 0.0402  |
| rs143499400 | C | -0.113  |

|             |   |         |
|-------------|---|---------|
| rs118151325 | C | 0.1687  |
| rs2763430   | A | -0.0776 |
| rs76745499  | A | 0.1279  |
| rs72645817  | C | -0.0593 |
| rs79360453  | T | 0.0943  |
| rs9563051   | C | 0.0375  |
| rs9556486   | A | -0.0267 |
| rs34554595  | C | -0.0345 |
| rs12429346  | T | -0.0485 |
| rs642394    | C | -0.0273 |
| rs78567266  | T | -0.1723 |
| rs7999204   | A | -0.033  |
| rs35247299  | A | -0.1226 |
| rs2325154   | G | -0.0287 |
| rs117046351 | G | 0.1505  |
| rs9546952   | T | 0.026   |
| rs1547676   | T | 0.068   |
| rs117254280 | A | -0.0936 |
| rs7491397   | T | 0.0274  |
| rs35882646  | G | 0.0507  |
| rs9510820   | T | 0.0379  |
| rs9548964   | T | -0.051  |
| rs77635932  | T | 0.0872  |
| rs117471352 | T | -0.0874 |
| rs4091792   | C | -0.1534 |
| rs12020414  | C | 0.1114  |
| rs17373233  | C | -0.0612 |
| rs67646181  | G | 0.0316  |
| rs17062543  | C | 0.1067  |
| rs78379389  | A | 0.0308  |
| rs7992226   | G | 0.0268  |
| rs12865494  | T | -0.0307 |
| rs73227848  | G | 0.117   |
| rs143005212 | T | -0.1687 |
| rs7999760   | A | 0.118   |
| rs9534003   | G | -0.0458 |
| rs9569096   | T | -0.0299 |
| rs74563972  | T | -0.0847 |
| rs72657919  | A | 0.0545  |
| rs78406959  | C | -0.1028 |
| rs7331491   | G | -0.027  |
| rs7993919   | A | 0.0488  |
| rs9509962   | A | 0.0941  |
| rs139841865 | T | 0.1146  |
| rs151269042 | C | 0.2167  |
| rs9573767   | C | 0.0288  |
| rs1360051   | G | -0.0336 |

|             |   |         |
|-------------|---|---------|
| rs7334278   | A | -0.0334 |
| rs139900282 | C | -0.1327 |
| rs9518379   | T | 0.0382  |
| rs73171283  | G | -0.0739 |
| rs117812580 | G | 0.1756  |
| rs9645854   | T | 0.0491  |
| rs112322666 | C | 0.0817  |
| rs17063823  | G | 0.0416  |
| rs6492297   | C | -0.0263 |
| rs9548444   | G | 0.026   |
| rs17220870  | T | -0.0781 |
| rs9273      | A | 0.0276  |
| rs79696482  | G | 0.0871  |
| rs117821173 | T | 0.1414  |
| rs2039918   | C | -0.0487 |
| rs151013158 | T | 0.1926  |
| rs9567251   | C | -0.0493 |
| rs9596269   | T | -0.1324 |
| rs76286740  | T | -0.2041 |
| rs1985809   | G | 0.035   |
| rs57071728  | C | 0.0364  |
| rs9318719   | T | 0.0829  |
| rs78946530  | A | 0.0931  |
| rs74739154  | G | -0.1523 |
| rs9567823   | C | -0.0283 |
| rs11149173  | A | 0.075   |
| rs113910441 | T | 0.0525  |
| rs76558797  | C | -0.0544 |
| rs9511007   | C | -0.0348 |
| rs118040040 | G | -0.1278 |
| rs9535047   | A | -0.0374 |
| rs61965861  | T | 0.0272  |
| rs7996689   | A | 0.0271  |
| rs61945926  | C | -0.0511 |
| rs4636787   | T | -0.0274 |
| rs112157588 | A | -0.1636 |
| rs141421292 | T | 0.1888  |
| rs4551912   | C | -0.0941 |
| rs9520576   | A | -0.0402 |
| rs78258405  | T | 0.0562  |
| rs9597717   | C | 0.0256  |
| rs74864849  | A | 0.0458  |
| rs148201425 | G | -0.1674 |
| rs9567874   | G | 0.0397  |
| rs646169    | G | -0.0339 |
| rs17463556  | G | 0.0838  |
| rs61956678  | A | 0.0519  |

|             |   |         |
|-------------|---|---------|
| rs74913724  | A | -0.2344 |
| rs17070756  | G | 0.054   |
| rs2991010   | A | -0.0568 |
| rs2011847   | T | 0.028   |
| rs1556567   | A | -0.0285 |
| rs12864998  | C | -0.0365 |
| rs1278775   | G | 0.0511  |
| rs7988931   | A | -0.0274 |
| rs117671409 | G | -0.115  |
| rs117773044 | C | -0.1502 |
| rs117049820 | C | 0.1309  |
| rs2026160   | C | 0.0323  |
| rs77848566  | C | -0.057  |
| rs149406003 | A | 0.2046  |
| rs2503339   | C | 0.027   |
| rs144219823 | A | -0.0932 |
| rs9516176   | T | -0.1002 |
| rs9557473   | C | 0.0804  |
| rs141617049 | T | -0.211  |
| rs145494927 | T | 0.1204  |
| rs2066621   | G | 0.0651  |
| rs73204495  | T | 0.196   |
| rs9539478   | T | 0.0897  |
| rs142142164 | A | 0.2286  |
| rs117682988 | G | -0.0865 |
| rs138191811 | C | -0.1327 |
| rs17089636  | C | -0.0466 |
| rs72644716  | A | 0.0626  |
| rs147104101 | T | -0.0766 |
| rs378953    | G | 0.0331  |
| rs117815277 | G | -0.1327 |
| rs9510784   | T | -0.0272 |
| rs11616660  | A | -0.0282 |
| rs9543552   | T | -0.0315 |
| rs9601660   | T | 0.0282  |
| rs4641607   | G | -0.0373 |
| rs61944147  | T | 0.1423  |
| rs118138900 | T | 0.157   |
| rs3742254   | T | -0.0294 |
| rs4567565   | A | 0.031   |
| rs117872229 | G | 0.0571  |
| rs71440170  | A | 0.0512  |
| rs75647855  | G | -0.1501 |
| rs117482297 | A | 0.052   |
| rs9317638   | C | 0.0287  |
| rs9574236   | C | 0.0279  |
| rs73549805  | T | 0.1093  |

|             |   |         |
|-------------|---|---------|
| rs9634650   | A | 0.0939  |
| rs629792    | T | 0.0466  |
| rs9599813   | A | 0.0243  |
| rs117529504 | A | 0.0797  |
| rs116969557 | A | -0.1156 |
| rs17073815  | A | 0.1467  |
| rs9531872   | C | -0.096  |
| rs61965863  | T | 0.0555  |
| rs9590823   | T | -0.1444 |
| rs67576282  | G | 0.055   |
| rs117153009 | C | 0.1272  |
| rs9531436   | T | -0.0611 |
| rs17451747  | A | -0.1654 |
| rs9531889   | A | 0.0438  |
| rs57530609  | T | 0.0698  |
| rs9521372   | T | 0.0392  |
| rs76957519  | A | -0.0994 |
| rs61949185  | C | -0.0452 |
| rs79013293  | C | -0.1503 |
| rs1019865   | T | 0.0419  |
| rs599896    | G | 0.1534  |
| rs9544475   | A | -0.0845 |
| rs7328178   | C | 0.025   |
| rs17402485  | A | 0.1437  |
| rs9556967   | G | 0.0242  |
| rs75078792  | T | 0.0984  |
| rs144597041 | A | -0.0505 |
| rs7999142   | A | 0.0889  |
| rs76772078  | C | -0.0941 |
| rs2010997   | A | -0.0243 |
| rs9574299   | T | -0.0296 |
| rs35085905  | C | -0.1628 |
| rs36206505  | G | -0.1349 |
| rs7990839   | A | -0.0976 |
| rs41286955  | T | 0.0316  |
| rs111378000 | G | -0.0549 |
| rs75139820  | A | 0.1012  |
| rs2073994   | T | -0.0288 |
| rs78391032  | T | 0.0475  |
| rs145283631 | T | 0.1065  |
| rs73197829  | A | 0.1016  |
| rs11148421  | A | -0.0294 |
| rs2328974   | C | 0.0256  |
| rs73234640  | A | 0.1601  |
| rs12864807  | G | -0.1117 |
| rs7336303   | A | 0.0933  |
| rs7491772   | A | 0.0334  |

|             |   |         |
|-------------|---|---------|
| rs78814536  | G | 0.0658  |
| rs4257094   | T | -0.0295 |
| rs77419476  | C | 0.0569  |
| rs9581766   | T | 0.0672  |
| rs12868800  | T | -0.0642 |
| rs4771635   | A | -0.0244 |
| rs80316028  | G | -0.0844 |
| rs2242482   | T | -0.0298 |
| rs9563031   | C | 0.0505  |
| rs73535830  | T | 0.1358  |
| rs144684072 | A | 0.1401  |
| rs113612281 | T | 0.0835  |
| rs78806795  | G | -0.1228 |
| rs797195    | G | -0.0257 |
| rs2540524   | T | -0.0411 |
| rs139705800 | A | -0.1114 |
| rs141171075 | A | 0.1019  |
| rs78087011  | C | 0.0571  |
| rs75221064  | C | -0.1695 |
| rs118139249 | C | 0.1541  |
| rs1932628   | T | 0.0608  |
| rs17472169  | G | -0.0314 |
| rs117152293 | G | 0.1738  |
| rs76315059  | G | 0.1019  |
| rs9582651   | C | 0.0998  |
| rs113145329 | A | -0.0457 |
| rs7319375   | G | -0.0258 |
| rs78416037  | T | 0.0502  |
| rs61962729  | G | 0.0799  |
| rs7322822   | C | 0.0251  |
| rs9587551   | T | 0.0414  |
| rs35962897  | T | -0.0266 |
| rs148826807 | A | 0.1835  |
| rs7993500   | T | 0.0261  |
| rs9531254   | A | -0.0813 |
| rs77071503  | T | 0.0723  |
| rs147265812 | T | 0.0358  |
| rs11838441  | T | 0.05    |
| rs74112070  | A | 0.0351  |
| rs17070878  | C | 0.057   |
| rs9591115   | C | -0.0501 |
| rs74582065  | G | -0.0791 |
| rs4771962   | A | -0.0252 |
| rs56157242  | G | -0.0262 |
| rs9315962   | C | -0.0267 |
| rs141113969 | T | -0.222  |
| rs58680597  | T | 0.145   |

|             |   |         |
|-------------|---|---------|
| rs7325069   | G | -0.0285 |
| rs150304490 | A | -0.1491 |
| rs4942511   | C | 0.1212  |
| rs112721284 | G | 0.1422  |
| rs10507316  | T | 0.0277  |
| rs7987284   | A | 0.0374  |
| rs78510408  | A | 0.0467  |
| rs16953597  | T | 0.09    |
| rs9513379   | G | -0.0261 |
| rs9552151   | T | -0.0357 |
| rs7996510   | T | -0.0579 |
| rs9558842   | T | -0.0407 |
| rs117461248 | A | -0.1576 |
| rs4941458   | C | 0.0508  |
| rs2478298   | T | 0.0267  |
| rs61959636  | C | -0.1148 |
| rs1928928   | T | 0.028   |
| rs9521595   | C | -0.0408 |
| rs385748    | C | 0.1644  |
| rs2172725   | A | 0.0249  |
| rs11839824  | T | -0.0309 |
| rs9574265   | T | -0.0427 |
| rs138474644 | A | 0.225   |
| rs73554061  | G | -0.0717 |
| rs7995929   | G | -0.0283 |
| rs74338237  | C | -0.0486 |
| rs61961489  | G | 0.0641  |
| rs142468399 | A | -0.0994 |
| rs117794168 | A | -0.0994 |
| rs55877860  | G | 0.0823  |
| rs78256467  | G | 0.1363  |
| rs116864334 | T | 0.099   |
| rs7400001   | T | 0.0644  |
| rs17074223  | C | 0.0913  |
| rs2313626   | G | -0.0297 |
| rs75702440  | T | 0.086   |
| rs73155954  | T | 0.0812  |
| rs143407415 | A | -0.1811 |
| rs74920744  | A | -0.1568 |
| rs1781552   | C | -0.051  |
| rs139175376 | T | 0.0729  |
| rs117623735 | T | -0.081  |
| rs73182702  | T | 0.0865  |
| rs10507799  | T | 0.0801  |
| rs72638962  | A | -0.0495 |
| rs7993948   | A | 0.0399  |
| rs72656088  | A | -0.0678 |

|             |   |         |
|-------------|---|---------|
| rs4770360   | G | 0.0348  |
| rs9543454   | G | -0.0249 |
| rs41281116  | G | 0.0486  |
| rs2320968   | G | 0.035   |
| rs143708507 | A | -0.1099 |
| rs56345108  | G | -0.0886 |
| rs17681594  | T | -0.0405 |
| rs9562605   | T | 0.0323  |
| rs10507557  | A | 0.0739  |
| rs7337544   | C | 0.0302  |
| rs9543275   | T | 0.0363  |
| rs79781595  | C | -0.1479 |
| rs78440462  | A | -0.1457 |
| rs55826217  | C | -0.0314 |
| rs117144912 | A | 0.0724  |
| rs9572494   | G | -0.0584 |
| rs1759857   | A | -0.0365 |
| rs9529353   | T | 0.095   |
| rs9577599   | C | -0.0288 |
| rs2251904   | A | -0.0296 |
| rs1413191   | T | -0.0307 |
| rs9524542   | C | -0.1397 |
| rs4128358   | C | -0.0302 |
| rs1571070   | T | 0.0258  |
| rs66519412  | A | -0.0399 |
| rs77263004  | G | 0.0562  |
| rs4943364   | T | 0.0375  |
| rs77768806  | A | -0.0794 |
| rs61961954  | G | -0.1904 |
| rs9552595   | T | -0.0392 |
| rs11840149  | C | 0.0573  |
| rs12861586  | A | 0.0421  |
| rs117201520 | C | 0.1209  |
| rs1327731   | C | -0.0271 |
| rs73189549  | G | -0.0594 |
| rs9541348   | G | 0.055   |
| rs9318206   | G | -0.0334 |
| rs61965887  | A | 0.0655  |
| rs2491223   | T | 0.0301  |
| rs77978513  | C | 0.1379  |
| rs6563528   | C | -0.0435 |
| rs9588787   | C | -0.024  |
| rs8002289   | C | -0.0278 |
| rs9589933   | A | 0.0611  |
| rs76551508  | G | 0.0822  |
| rs9555329   | T | 0.0423  |
| rs149829813 | A | 0.13    |



|             |   |         |
|-------------|---|---------|
| rs9552092   | A | 0.0254  |
| rs9572813   | A | -0.1144 |
| rs2210078   | C | -0.035  |
| rs147106877 | G | 0.1409  |
| rs1867767   | A | -0.0628 |
| rs150962244 | G | 0.1287  |
| rs9589218   | G | 0.0791  |
| rs117526480 | G | -0.1219 |
| rs12583767  | C | 0.0658  |
| rs9597868   | C | 0.0279  |
| rs117080137 | C | -0.171  |
| rs9570581   | A | 0.0525  |
| rs9525577   | G | -0.0584 |
| rs117485850 | T | 0.1195  |
| rs142788815 | C | -0.1237 |
| rs9530364   | A | 0.0247  |
| rs1983981   | A | 0.0297  |
| rs141758128 | T | -0.0802 |
| rs143765635 | T | 0.1113  |
| rs9568988   | A | -0.1199 |
| rs117878781 | T | -0.1577 |
| rs17526316  | T | -0.0265 |
| rs61947277  | A | 0.038   |
| rs117782169 | A | 0.145   |
| rs7335658   | C | 0.0268  |
| rs72659254  | A | 0.1135  |
| rs150486428 | A | -0.094  |
| rs112666015 | G | 0.0929  |
| rs79606210  | A | 0.1165  |
| rs117421756 | A | -0.1539 |
| rs78045646  | C | 0.1749  |
| rs9564952   | C | -0.0291 |
| rs72643221  | T | 0.0428  |
| rs112912809 | T | 0.1704  |
| rs6560951   | G | 0.0462  |
| rs61946681  | A | -0.1447 |
| rs7324529   | G | 0.0322  |
| rs140427409 | C | 0.1174  |
| rs139666319 | A | -0.1387 |
| rs78755892  | G | -0.1521 |
| rs9519252   | T | 0.0428  |
| rs114236336 | G | 0.0806  |
| rs4770993   | T | -0.0284 |
| rs4074542   | T | -0.0458 |
| rs66522453  | C | -0.0448 |
| rs111558048 | G | -0.1563 |
| rs142197285 | T | 0.1448  |

|             |   |         |
|-------------|---|---------|
| rs9567377   | T | -0.0368 |
| rs117326002 | T | 0.172   |
| rs3936415   | A | -0.0317 |
| rs34425674  | G | 0.0922  |
| rs4771308   | G | -0.0274 |
| rs1274748   | G | -0.0245 |
| rs35926204  | C | -0.0499 |
| rs1536433   | T | -0.0373 |
| rs9538499   | G | 0.0262  |
| rs17070585  | A | -0.0486 |
| rs7984977   | C | -0.0437 |
| rs10492542  | G | -0.0297 |
| rs7325379   | C | -0.0293 |
| rs2993272   | G | 0.0319  |
| rs9591262   | A | -0.0836 |
| rs9509698   | A | -0.032  |
| rs9316735   | T | 0.0495  |
| rs1570614   | T | -0.0242 |
| rs79591795  | G | -0.091  |
| rs6561653   | C | 0.0488  |
| rs148532534 | G | -0.137  |
| rs79396923  | A | -0.1163 |
| rs11841375  | T | 0.0873  |
| rs73560539  | T | -0.0627 |
| rs9555041   | C | 0.0263  |
| rs72659617  | G | -0.0563 |
| rs77446044  | T | -0.0671 |
| rs61946617  | T | -0.2036 |
| rs113852029 | A | -0.0914 |
| rs9513352   | C | 0.0338  |
| rs75046731  | T | -0.0747 |
| rs117679960 | T | -0.1407 |
| rs116953185 | G | -0.1021 |
| rs9508623   | A | 0.0262  |
| rs314871    | A | 0.085   |
| rs73155935  | G | -0.0551 |
| rs9581881   | C | -0.0346 |
| rs12875771  | A | 0.103   |
| rs17573873  | G | 0.0904  |
| rs34303571  | C | -0.12   |
| rs113984974 | A | -0.0446 |
| rs1175964   | T | 0.0385  |
| rs9547362   | T | -0.037  |
| rs4771503   | G | -0.025  |
| rs149098395 | C | -0.1341 |
| rs7991515   | T | -0.0536 |
| rs117638478 | T | -0.1177 |

|             |   |         |
|-------------|---|---------|
| rs76095857  | A | 0.1736  |
| rs9561826   | A | -0.0355 |
| rs141851553 | C | -0.1508 |
| rs150889245 | G | 0.1253  |
| rs61963048  | A | 0.0271  |
| rs116904512 | A | 0.1185  |
| rs116867736 | T | 0.1443  |
| rs9604007   | G | -0.0309 |
| rs1571786   | A | -0.0247 |
| rs12869148  | T | -0.0366 |
| rs17326155  | A | -0.0448 |
| rs2121416   | A | 0.0415  |
| rs79591537  | G | 0.0792  |
| rs80233473  | G | -0.0682 |
| rs74899623  | A | 0.0638  |
| rs2151399   | T | 0.0241  |
| rs78779183  | A | -0.1339 |
| rs9557951   | G | -0.0337 |
| rs35670592  | G | 0.0686  |
| rs77657652  | C | -0.1403 |
| rs2325194   | G | -0.0243 |
| rs3825481   | C | 0.0529  |
| rs74463755  | T | -0.1385 |
| rs12874395  | G | 0.0997  |
| rs80268796  | A | -0.1998 |
| rs139810514 | G | -0.1293 |
| rs34188777  | A | -0.162  |
| rs141240681 | A | -0.1784 |
| rs72645975  | A | -0.0945 |
| rs4334138   | T | -0.0241 |
| rs71435117  | C | -0.1105 |
| rs147542244 | A | -0.0791 |
| rs1331697   | T | -0.0283 |
| rs79846263  | G | -0.1525 |
| rs55997914  | C | -0.0648 |
| rs7330529   | A | -0.0403 |
| rs116970645 | C | -0.0601 |
| rs11841892  | A | -0.0321 |
| rs117309590 | A | -0.1619 |
| rs146821922 | C | 0.1434  |
| rs111476490 | A | -0.0479 |
| rs117514356 | C | -0.1014 |
| rs1686806   | T | 0.0584  |
| rs4769620   | T | 0.0291  |
| rs112242303 | G | -0.1508 |
| rs9523516   | G | 0.0262  |
| rs73181234  | A | -0.1967 |

|             |   |         |
|-------------|---|---------|
| rs2765315   | A | 0.048   |
| rs263933    | G | 0.0401  |
| rs73169247  | T | 0.121   |
| rs7990212   | G | -0.0333 |
| rs142554904 | T | 0.1493  |
| rs11147445  | T | 0.0483  |
| rs9582680   | T | -0.0242 |
| rs2810436   | G | 0.0534  |
| rs7998070   | C | 0.0257  |
| rs9513878   | C | 0.0255  |
| rs9600221   | A | 0.0277  |
| rs359374    | T | 0.0289  |
| rs75462671  | T | 0.0909  |
| rs9521102   | A | 0.0375  |
| rs71427671  | T | -0.0557 |
| rs9586302   | A | -0.053  |
| rs61948361  | T | 0.1485  |
| rs75485808  | C | 0.1138  |
| rs9516920   | G | -0.0547 |
| rs75486606  | T | -0.043  |
| rs503116    | C | 0.0322  |
| rs56104457  | C | 0.112   |
| rs118081795 | A | 0.0819  |
| rs55726581  | C | -0.0557 |
| rs73545967  | T | -0.0512 |
| rs4341632   | A | 0.0398  |
| rs9541198   | G | 0.0641  |
| rs111826885 | T | -0.2071 |
| rs138972192 | C | -0.0935 |
| rs9551096   | T | 0.0423  |
| rs78808216  | C | -0.1159 |
| rs308641    | C | 0.0239  |
| rs56978466  | G | 0.0461  |
| rs61968656  | C | -0.0421 |
| rs7986336   | A | -0.0592 |
| rs117825906 | G | 0.0377  |
| rs783442    | G | -0.0545 |
| rs6492067   | A | 0.0242  |
| rs17571921  | G | -0.1482 |
| rs12856048  | G | 0.0325  |
| rs2324532   | T | 0.0304  |
| rs9584995   | G | -0.038  |
| rs75611254  | A | 0.1066  |
| rs4595655   | G | -0.0351 |
| rs17078481  | A | -0.1375 |
| rs79221725  | T | -0.0902 |
| rs12430098  | A | 0.0779  |

|             |   |         |
|-------------|---|---------|
| rs2994854   | A | -0.0288 |
| rs9519026   | G | 0.0926  |
| rs76314344  | A | 0.1131  |
| rs9600171   | A | 0.025   |
| rs113793727 | T | -0.0844 |
| rs117812823 | A | -0.0959 |
| rs9565053   | T | -0.0356 |
| rs9508776   | C | -0.0318 |
| rs4943649   | A | 0.0506  |
| rs76494798  | A | -0.1177 |
| rs9552345   | G | -0.0282 |
| rs114595966 | T | 0.1188  |
| rs17072510  | A | 0.0679  |
| rs55784866  | T | 0.0864  |
| rs2119758   | G | 0.0316  |
| rs17628662  | C | -0.0388 |
| rs117146448 | A | 0.0773  |
| rs117859657 | T | 0.0761  |
| rs17311299  | C | 0.1037  |
| rs117423498 | T | 0.16    |
| rs9318453   | C | -0.0246 |
| rs1075386   | A | 0.0307  |
| rs9319269   | G | 0.0257  |
| rs4769276   | A | -0.0234 |
| rs73211363  | C | 0.043   |
| rs117455241 | T | 0.1214  |
| rs9523484   | T | -0.0253 |
| rs78686405  | C | -0.153  |
| rs9575331   | A | -0.0243 |
| rs9603071   | T | -0.0388 |
| rs55788723  | C | 0.0476  |
| rs139733882 | T | -0.0971 |
| rs9557561   | A | -0.0426 |
| rs113886917 | C | 0.1976  |
| rs2765611   | G | -0.0384 |
| rs117532285 | A | 0.1019  |
| rs74111729  | G | 0.0345  |
| rs149475069 | T | 0.1919  |
| rs79062268  | C | -0.072  |
| rs9579298   | T | -0.0365 |
| rs9521456   | A | -0.0452 |
| rs142610412 | C | 0.1515  |
| rs9536185   | A | -0.0249 |
| rs2225376   | T | -0.0474 |
| rs80207445  | G | 0.0809  |
| rs9573156   | A | -0.0457 |
| rs116970161 | T | -0.1425 |

|             |   |         |
|-------------|---|---------|
| rs139713110 | C | -0.0849 |
| rs35350094  | T | 0.0528  |
| rs9534688   | C | -0.1444 |
| rs7319060   | G | 0.0683  |
| rs151127911 | C | -0.0721 |
| rs142215853 | T | 0.0591  |
| rs147379176 | T | -0.1233 |
| rs9512990   | T | -0.0295 |
| rs9551686   | C | 0.0473  |
| rs9540088   | T | -0.0239 |
| rs77355903  | C | 0.1553  |
| rs12430692  | T | 0.1048  |
| rs9510523   | T | 0.0315  |
| rs140392030 | T | -0.1613 |
| rs10507525  | T | 0.1721  |
| rs17592574  | T | 0.0643  |
| rs57959883  | A | 0.0322  |
| rs17614808  | C | 0.1717  |
| rs73165181  | G | -0.1023 |
| rs4770407   | A | 0.0244  |
| rs4770356   | T | -0.0844 |
| rs9551343   | A | -0.0242 |
| rs113088576 | G | 0.0533  |
| rs9566715   | A | -0.0334 |
| rs2893254   | G | 0.0242  |
| rs696788    | C | -0.0404 |
| rs17693926  | C | 0.0465  |
| rs118113302 | C | 0.1772  |
| rs9550817   | G | 0.0314  |
| rs7993549   | T | -0.114  |
| rs140544484 | A | 0.1447  |
| rs57146657  | G | 0.1648  |
| rs35177290  | C | -0.1125 |
| rs12864849  | C | 0.0568  |
| rs116912626 | A | -0.0992 |
| rs17524520  | T | -0.0927 |
| rs2106583   | G | -0.024  |
| rs117427810 | C | -0.1321 |
| rs79534864  | A | 0.0859  |
| rs4447265   | T | 0.0408  |
| rs117814941 | C | -0.1295 |
| rs9534380   | T | -0.1142 |
| rs7987313   | C | -0.0279 |
| rs72638451  | T | 0.0527  |
| rs1924372   | C | -0.0386 |
| rs74361890  | G | -0.0995 |
| rs75009624  | A | -0.1723 |

|             |   |         |
|-------------|---|---------|
| rs77184853  | T | 0.0997  |
| rs61951598  | G | 0.0468  |
| rs150002771 | A | 0.0919  |
| rs2607647   | A | -0.0436 |
| rs9574541   | A | -0.0281 |
| rs12430330  | T | 0.0546  |
| rs806318    | C | -0.097  |
| rs137888443 | T | 0.1516  |
| rs1888322   | T | 0.025   |
| rs71440059  | A | -0.054  |
| rs116904878 | A | -0.1316 |
| rs9521415   | T | -0.03   |
| rs9551543   | T | -0.1137 |
| rs9989106   | T | -0.0332 |
| rs73492556  | T | 0.081   |
| rs17055997  | G | 0.0365  |
| rs9534021   | A | 0.0607  |
| rs951095    | T | 0.0247  |
| rs7337570   | A | -0.0622 |
| rs667684    | C | 0.1057  |
| rs74930814  | A | 0.0641  |
| rs9582704   | A | -0.0376 |
| rs9515881   | A | -0.051  |
| rs12869952  | T | 0.1141  |
| rs184467    | G | 0.0242  |
| rs17343998  | A | 0.0905  |
| rs138669727 | A | 0.1179  |
| rs7320337   | C | -0.0243 |
| rs76661894  | A | 0.1001  |
| rs628669    | A | -0.0529 |
| rs56077446  | G | 0.0444  |
| rs7338303   | A | 0.034   |
| rs74436687  | G | 0.1179  |
| rs12430029  | C | -0.0972 |
| rs7328137   | C | -0.0234 |
| rs2503415   | A | -0.0252 |
| rs73208814  | T | -0.1364 |
| rs61973051  | G | 0.0701  |
| rs16969363  | A | 0.0522  |
| rs34879492  | A | 0.0272  |
| rs73557139  | A | -0.0727 |
| rs9558770   | A | 0.0587  |
| rs36106903  | G | -0.037  |
| rs71440031  | G | -0.1092 |
| rs7984206   | T | -0.0394 |
| rs78236301  | T | 0.0507  |
| rs7318008   | T | 0.131   |

|             |   |         |
|-------------|---|---------|
| rs9510675   | C | -0.0435 |
| rs117187433 | A | 0.0875  |
| rs17378869  | A | 0.0324  |
| rs140631042 | G | 0.1513  |
| rs1925096   | T | 0.0234  |
| rs3920599   | A | 0.0253  |
| rs148213172 | G | 0.1152  |
| rs142149245 | A | 0.1736  |
| rs61955165  | G | -0.1614 |
| rs71446654  | A | -0.0745 |
| rs73208264  | A | -0.0668 |
| rs1318007   | C | -0.04   |
| rs2657099   | T | 0.0707  |
| rs114124616 | G | -0.0558 |
| rs4551898   | C | -0.0584 |
| rs116883951 | A | -0.0915 |
| rs12430575  | T | -0.0813 |
| rs2329140   | G | 0.0808  |
| rs2876705   | T | 0.0262  |
| rs4772380   | C | 0.0232  |
| rs111781274 | G | -0.0583 |
| rs9523997   | T | -0.0281 |
| rs2985949   | T | 0.1987  |
| rs9316519   | C | 0.029   |
| rs9542322   | T | -0.0515 |
| rs34206943  | T | 0.0927  |
| rs77760113  | G | 0.1805  |
| rs9522318   | A | -0.0249 |
| rs554634    | C | 0.0253  |
| rs72658285  | T | -0.108  |
| rs9581232   | A | -0.0292 |
| rs9587346   | G | 0.024   |
| rs12861715  | T | -0.0274 |
| rs9515782   | G | -0.093  |
| rs61945794  | C | 0.0563  |
| rs73168478  | C | 0.0735  |
| rs77268764  | G | 0.1037  |
| rs67670273  | G | 0.2032  |
| rs146513369 | A | -0.1604 |
| rs76801500  | T | -0.0993 |
| rs3011528   | A | -0.0366 |
| rs9548162   | G | -0.1501 |
| rs17759716  | C | -0.0726 |
| rs61967723  | C | -0.085  |
| rs117268836 | T | 0.0689  |
| rs9538872   | G | 0.0253  |
| rs9547085   | A | 0.1877  |



|             |   |         |
|-------------|---|---------|
| rs117679409 | G | 0.1252  |
| rs876430    | A | 0.0249  |
| rs3903889   | A | 0.0389  |
| rs9548846   | T | -0.0276 |
| rs61945022  | A | -0.1273 |
| rs9507239   | T | 0.0254  |
| rs150599165 | T | 0.2045  |
| rs80070507  | T | 0.1126  |
| rs73469610  | C | 0.154   |
| rs77755822  | T | -0.1125 |
| rs72481778  | A | 0.1142  |
| rs9518279   | A | 0.0265  |
| rs7999318   | T | -0.0467 |
| rs56310407  | T | 0.1095  |
| rs2095534   | G | -0.0266 |
| rs2389159   | T | -0.0241 |
| rs9532405   | A | -0.027  |
| rs7994544   | A | 0.1283  |
| rs1778798   | A | 0.0372  |
| rs348050    | C | 0.0257  |
| rs12430878  | G | 0.0861  |
| rs116541633 | T | 0.0859  |
| rs7997659   | C | 0.0853  |
| rs78659388  | G | -0.0696 |
| rs112382281 | G | -0.1453 |
| rs118020746 | A | -0.0511 |
| rs58355632  | A | 0.0773  |
| rs117154624 | G | 0.1127  |
| rs11620331  | C | 0.0371  |
| rs61968016  | T | 0.1122  |
| rs113345980 | G | 0.0614  |
| rs78353093  | T | -0.1086 |
| rs658684    | T | -0.0285 |
| rs116933337 | T | 0.1586  |
| rs4728      | C | 0.0255  |
| rs77544227  | A | 0.0615  |
| rs678073    | T | -0.052  |
| rs4620866   | A | -0.0233 |
| rs7993745   | T | 0.0227  |
| rs76841531  | T | -0.1006 |
| rs2481950   | A | -0.0602 |
| rs74784569  | C | 0.0822  |
| rs2174503   | A | -0.0312 |
| rs139567150 | T | -0.0975 |
| rs7997120   | T | -0.0282 |
| rs143464224 | A | 0.2535  |
| rs7489353   | C | 0.0334  |

|             |   |         |
|-------------|---|---------|
| rs60377947  | G | 0.0974  |
| rs9525537   | G | 0.1218  |
| rs145280664 | A | -0.0662 |
| rs9532965   | C | -0.0298 |
| rs6562412   | C | -0.0234 |
| rs79656261  | T | -0.0356 |
| rs34622218  | G | 0.1111  |
| rs79193296  | A | 0.0491  |
| rs2150622   | A | 0.0251  |
| rs75823447  | T | -0.0586 |
| rs4769177   | C | -0.0281 |
| rs3764130   | T | 0.0255  |
| rs12720124  | A | -0.0502 |
| rs528538    | C | -0.0228 |
| rs78349858  | A | -0.1351 |
| rs17076333  | G | 0.0367  |
| rs9557986   | G | 0.0246  |
| rs9557987   | G | 0.0258  |
| rs117673465 | A | 0.1225  |
| rs267320    | G | 0.0953  |
| rs12428833  | A | 0.0442  |
| rs12428083  | G | -0.0428 |
| rs7324250   | A | -0.0254 |
| rs5002090   | T | -0.029  |
| rs71433015  | A | 0.0349  |
| rs112289761 | A | 0.1268  |
| rs77700109  | A | -0.0907 |
| rs9519822   | G | -0.0331 |
| rs117113690 | C | 0.113   |
| rs7982266   | A | -0.0263 |
| rs4941981   | T | 0.0348  |
| rs61963721  | T | -0.0496 |
| rs117166386 | G | -0.1212 |
| rs76058710  | T | 0.0924  |
| rs61963433  | A | 0.1511  |
| rs9520499   | T | -0.0295 |
| rs1999027   | C | 0.0423  |
| rs11841192  | G | 0.0238  |
| rs145931089 | C | -0.1459 |
| rs17078137  | T | 0.1133  |
| rs9530201   | C | -0.0225 |
| rs9559327   | C | -0.0509 |
| rs75987643  | C | -0.036  |
| rs9543719   | A | -0.0287 |
| rs35787279  | C | -0.0443 |
| rs7333539   | C | -0.0246 |
| rs77220976  | C | 0.0946  |

|             |   |         |
|-------------|---|---------|
| rs79784746  | T | -0.0739 |
| rs117625051 | A | 0.0865  |
| rs11619552  | C | 0.0307  |
| rs9574622   | C | -0.0229 |
| rs9538408   | C | 0.0324  |
| rs113242099 | G | -0.0508 |
| rs71438102  | A | -0.119  |
| rs9561948   | T | 0.0277  |
| rs17180873  | G | 0.1011  |
| rs76352577  | T | -0.0538 |
| rs1933777   | A | -0.1192 |
| rs1927382   | C | -0.0246 |
| rs7994473   | G | -0.0231 |
| rs73185394  | T | -0.0819 |
| rs6561319   | C | 0.0232  |
| rs78755726  | A | 0.1341  |
| rs9564791   | T | 0.0246  |
| rs35492271  | C | 0.0257  |
| rs36026515  | G | -0.0294 |
| rs111857422 | T | -0.1046 |
| rs72636483  | C | 0.0912  |
| rs118073403 | G | 0.1681  |
| rs61972942  | A | -0.0664 |
| rs17056765  | C | 0.0746  |
| rs142300063 | C | -0.0757 |
| rs1890202   | A | -0.0244 |
| rs9551408   | G | -0.0349 |
| rs9576852   | G | 0.0225  |
| rs76499695  | G | 0.1488  |
| rs145001329 | G | -0.1219 |
| rs1330987   | A | 0.027   |
| rs3825516   | G | -0.0271 |
| rs874731    | C | 0.034   |
| rs61945109  | C | 0.0381  |
| rs7326220   | T | 0.0546  |
| rs9575759   | A | -0.0608 |
| rs2994577   | T | -0.03   |
| rs753801    | C | -0.0264 |
| rs7327944   | T | 0.0227  |
| rs9546531   | C | -0.0287 |
| rs975590    | A | -0.0263 |
| rs55662131  | G | 0.0485  |
| rs35252889  | C | 0.1007  |
| rs80303940  | A | 0.1218  |
| rs117520007 | A | 0.0653  |
| rs117485890 | C | 0.0893  |
| rs7995317   | A | 0.0384  |

|             |   |         |
|-------------|---|---------|
| rs9595424   | G | 0.0821  |
| rs147049646 | G | 0.0922  |
| rs144810272 | T | -0.1005 |
| rs9554178   | T | -0.0256 |
| rs17072383  | C | 0.0427  |
| rs2202781   | G | 0.0271  |
| rs8001272   | T | 0.0274  |
| rs2582888   | A | -0.1049 |
| rs9579101   | T | 0.0243  |
| rs139343480 | G | 0.1241  |
| rs8002164   | A | -0.0784 |
| rs56171717  | T | -0.1512 |
| rs7999896   | A | 0.0224  |
| rs58143650  | G | 0.0411  |
| rs149070058 | T | 0.0684  |
| rs141429445 | T | -0.1459 |
| rs61966110  | A | 0.0721  |
| rs73170521  | A | 0.0288  |
| rs117554627 | G | 0.1597  |
| rs73178133  | T | 0.1393  |
| rs2876784   | G | -0.0223 |
| rs12429252  | G | 0.0873  |
| rs1831464   | A | -0.0414 |
| rs17646185  | G | 0.0717  |
| rs2504239   | C | -0.0333 |
| rs481952    | C | -0.0441 |
| rs12873648  | T | 0.1048  |
| rs72670641  | T | 0.0373  |
| rs80345711  | T | -0.1756 |
| rs138248239 | T | -0.1013 |
| rs111291807 | G | -0.0541 |
| rs113643534 | A | 0.04    |
| rs9518080   | G | 0.0411  |
| rs117323526 | T | 0.0934  |
| rs116863041 | T | 0.1426  |
| rs117613198 | A | -0.0885 |
| rs9534054   | G | 0.103   |
| rs74988623  | A | -0.0387 |
| rs76010743  | A | 0.0637  |
| rs71432904  | T | 0.2152  |
| rs9596161   | T | -0.0488 |
| rs61961041  | A | -0.0282 |
| rs1016518   | A | -0.0397 |
| rs17654765  | T | -0.0381 |
| rs12583631  | T | 0.0492  |
| rs116894761 | C | -0.0856 |
| rs117490774 | T | 0.1036  |

|             |   |         |
|-------------|---|---------|
| rs6650287   | C | 0.1336  |
| rs41327445  | C | -0.1383 |
| rs4769538   | A | -0.0234 |
| rs17084857  | C | 0.0397  |
| rs116974114 | A | 0.122   |
| rs117043858 | C | 0.0798  |
| rs4494418   | T | 0.0262  |
| rs9568759   | G | 0.0461  |
| rs1342607   | A | -0.0265 |
| rs9520037   | C | -0.026  |
| rs7985765   | A | -0.0274 |
| rs77690202  | C | 0.1205  |
| rs1747232   | T | -0.0373 |
| rs117581795 | T | 0.0944  |
| rs572954    | T | -0.0971 |
| rs7995717   | C | 0.0826  |
| rs79889849  | C | -0.0948 |
| rs9512873   | C | 0.023   |
| rs117440276 | T | 0.0764  |
| rs7990732   | G | 0.0269  |
| rs35470892  | C | 0.0421  |
| rs67744937  | T | 0.054   |
| rs78638546  | G | -0.0821 |
| rs74589835  | A | 0.0901  |
| rs12874831  | C | 0.0269  |
| rs61970887  | G | 0.2084  |
| rs55654055  | A | 0.1438  |
| rs61973692  | G | 0.0299  |
| rs4772993   | G | 0.0576  |
| rs17080164  | A | 0.0749  |
| rs464886    | C | -0.0224 |
| rs617198    | T | 0.0237  |
| rs288723    | T | -0.0258 |
| rs28548226  | G | -0.0397 |
| rs7322001   | G | -0.0424 |
| rs9586043   | A | 0.1315  |
| rs117742454 | C | 0.1501  |
| rs118091718 | A | -0.1493 |
| rs3002215   | A | -0.0253 |
| rs1782793   | G | 0.0339  |
| rs150064030 | A | 0.0782  |
| rs147369673 | C | 0.0641  |
| rs730747    | G | 0.0255  |
| rs12868277  | A | -0.0513 |
| rs117430476 | T | 0.0635  |
| rs2296890   | A | 0.0465  |
| rs145420441 | C | 0.1808  |

|             |   |         |
|-------------|---|---------|
| rs57580006  | A | -0.1147 |
| rs17749082  | A | 0.0525  |
| rs9590755   | T | -0.0255 |
| rs1572555   | T | 0.0242  |
| rs146809093 | A | -0.0679 |
| rs73154212  | T | 0.2086  |
| rs9314925   | A | 0.0315  |
| rs79421434  | A | 0.1779  |
| rs77391965  | A | -0.1007 |
| rs112317237 | A | 0.0586  |
| rs17293478  | G | 0.1296  |
| rs61970531  | T | -0.0671 |
| rs78604481  | T | -0.1247 |
| rs9645935   | T | 0.0232  |
| rs73176681  | G | 0.0957  |
| rs117450985 | C | -0.1637 |
| rs9517847   | T | -0.0307 |
| rs7990912   | C | 0.0246  |
| rs7335002   | A | -0.023  |
| rs4886111   | A | 0.0283  |
| rs9528773   | A | -0.0983 |
| rs117965898 | G | 0.0564  |
| rs9318210   | T | -0.0235 |
| rs148409871 | C | 0.1348  |
| rs9318156   | C | 0.0228  |
| rs55633365  | C | 0.1002  |
| rs74790550  | G | 0.0706  |
| rs9550266   | A | 0.0329  |
| rs16955087  | C | -0.1572 |
| rs4771650   | T | -0.0665 |
| rs997687    | G | 0.0231  |
| rs148721677 | G | 0.1352  |
| rs9580323   | T | -0.0258 |
| rs72649647  | A | -0.026  |
| rs7337941   | G | 0.0446  |
| rs112463214 | C | 0.1048  |
| rs140395979 | A | -0.1428 |
| rs75246393  | A | -0.1817 |
| rs80062922  | T | -0.0593 |
| rs77755215  | A | 0.0513  |
| rs11619944  | A | 0.034   |
| rs4770731   | T | -0.0262 |
| rs117177597 | T | -0.1132 |
| rs61947389  | A | 0.0487  |
| rs74336327  | A | 0.0962  |
| rs12856198  | T | -0.0336 |
| rs9535423   | G | 0.0936  |

|             |   |         |
|-------------|---|---------|
| rs7331772   | T | -0.0982 |
| rs9526309   | A | -0.0773 |
| rs4369549   | C | -0.0366 |
| rs73619962  | A | -0.1109 |
| rs147643978 | T | -0.1918 |
| rs143019828 | G | -0.1247 |
| rs4148518   | G | -0.0475 |
| rs9509047   | C | 0.0907  |
| rs9566697   | A | 0.0391  |
| rs77832362  | G | 0.1951  |
| rs9571599   | A | 0.0601  |
| rs7323466   | T | -0.0237 |
| rs117469165 | T | -0.0793 |
| rs816958    | G | 0.0237  |
| rs609919    | G | -0.0276 |
| rs9646033   | T | 0.0269  |
| rs72643813  | C | 0.065   |
| rs9513377   | T | -0.078  |
| rs11617266  | A | 0.0249  |
| rs56278037  | C | 0.0321  |
| rs17517286  | G | -0.0375 |
| rs9515260   | T | 0.0748  |
| rs9591369   | C | -0.0263 |
| rs138988571 | C | 0.1121  |
| rs1408676   | C | 0.0398  |
| rs73228833  | G | 0.0855  |
| rs117286275 | A | 0.0886  |
| rs9583102   | T | -0.034  |
| rs41275140  | T | 0.1816  |
| rs73199769  | C | 0.1096  |
| rs17826022  | C | 0.0846  |
| rs6490527   | T | -0.0474 |
| rs11616202  | A | 0.0612  |
| rs73498889  | C | 0.0413  |
| rs4769087   | A | 0.037   |
| rs77663771  | A | 0.1231  |
| rs114982014 | T | 0.0936  |
| rs9579652   | G | 0.0621  |
| rs7991928   | C | 0.0392  |
| rs142623880 | A | 0.0849  |
| rs146879779 | G | 0.1665  |
| rs9527135   | G | -0.0385 |
| rs11842080  | T | 0.0294  |
| rs12868291  | C | 0.0336  |
| rs35616348  | T | -0.023  |
| rs73172556  | T | -0.1994 |
| rs772694    | G | 0.0221  |

|             |   |         |
|-------------|---|---------|
| rs145622992 | C | -0.2365 |
| rs111383235 | G | -0.0891 |
| rs148995403 | T | -0.0836 |
| rs55800514  | C | 0.0433  |
| rs76710832  | C | 0.1233  |
| rs9599199   | C | 0.0461  |
| rs4377043   | C | 0.0291  |
| rs57306992  | A | -0.0329 |
| rs77523255  | C | -0.1053 |
| rs117487052 | G | 0.0948  |
| rs7990285   | A | 0.0637  |
| rs117433999 | T | 0.1625  |
| rs141182873 | C | 0.1181  |
| rs2039066   | T | -0.0247 |
| rs4770244   | C | -0.0248 |
| rs76829361  | C | 0.1869  |
| rs79539228  | G | 0.1376  |
| rs116922933 | T | 0.164   |
| rs9573109   | T | -0.1054 |
| rs73168618  | A | 0.0831  |
| rs12583829  | T | 0.0233  |
| rs17256020  | A | -0.0463 |
| rs9547231   | A | -0.0224 |
| rs78982742  | T | 0.1054  |
| rs1104904   | C | -0.0345 |
| rs378609    | C | -0.0272 |
| rs142096743 | T | 0.1018  |
| rs12161845  | G | -0.0344 |
| rs9564931   | G | -0.0287 |
| rs35749625  | T | 0.0934  |
| rs80305643  | G | -0.0411 |
| rs118028422 | G | -0.0789 |
| rs75539633  | C | -0.0288 |
| rs7988418   | C | 0.1534  |
| rs2818207   | C | -0.0352 |
| rs1041466   | G | 0.0247  |
| rs12585964  | C | -0.0367 |
| rs17078058  | T | 0.0873  |
| rs76108001  | C | -0.1105 |
| rs2390880   | A | -0.1534 |
| rs118164995 | T | -0.2003 |
| rs9599755   | C | -0.048  |
| rs72633945  | G | -0.0506 |
| rs77863411  | C | -0.0767 |
| rs7336849   | A | -0.0282 |
| rs117915686 | A | 0.0847  |
| rs9515183   | T | 0.0248  |



|             |   |         |
|-------------|---|---------|
| rs141330306 | T | -0.0526 |
| rs76672605  | G | -0.0875 |
| rs117471880 | T | 0.0984  |
| rs9554989   | G | -0.0555 |
| rs55847689  | G | -0.0371 |
| rs16955486  | T | 0.111   |
| rs117540001 | G | 0.1147  |
| rs17299897  | C | -0.0349 |
| rs56229669  | A | 0.1454  |
| rs8000417   | C | 0.0273  |
| rs9507153   | A | -0.1565 |
| rs74047695  | G | -0.0451 |
| rs17081622  | A | -0.0263 |
| rs11616597  | G | -0.0297 |
| rs8002439   | T | 0.0431  |
| rs78784492  | A | 0.0868  |
| rs117080173 | A | -0.097  |
| rs141016515 | C | 0.0912  |
| rs141059667 | G | 0.0931  |
| rs1455407   | T | 0.026   |
| rs9561691   | A | 0.0331  |
| rs12867914  | T | 0.0369  |
| rs61965886  | G | 0.024   |
| rs4576925   | C | 0.047   |
| rs9591831   | G | -0.1023 |
| rs117043870 | T | 0.0779  |
| rs75748108  | A | -0.061  |
| rs117177635 | A | 0.085   |
| rs9597010   | A | -0.0343 |
| rs34210944  | A | 0.054   |
| rs12583825  | G | -0.027  |
| rs9515537   | C | 0.0325  |
| rs2478053   | C | -0.067  |
| rs79528914  | T | -0.042  |
| rs41405744  | G | -0.0962 |
| rs277800    | A | 0.0377  |
| rs141442364 | G | -0.1528 |
| rs17255424  | T | -0.0222 |
| rs1470428   | C | -0.0428 |
| rs34625562  | G | -0.1132 |
| rs61960827  | T | 0.0481  |
| rs17432602  | C | -0.1288 |
| rs73246373  | G | -0.1426 |
| rs147542993 | T | 0.1757  |
| rs9555118   | T | 0.0708  |
| rs76373413  | A | 0.1321  |
| rs1543661   | C | 0.025   |

|             |   |         |
|-------------|---|---------|
| rs78545278  | G | 0.0395  |
| rs75075851  | A | -0.0439 |
| rs9317277   | A | -0.0244 |
| rs79476563  | G | 0.0942  |
| rs285048    | G | -0.0244 |
| rs57647348  | C | -0.1199 |
| rs75052395  | A | -0.1263 |
| rs117925427 | T | 0.0638  |
| rs9555707   | C | 0.0286  |
| rs7998188   | G | -0.0316 |
| rs72642326  | C | -0.0871 |
| rs28516772  | C | 0.0272  |
| rs142743948 | C | 0.1153  |
| rs139933785 | T | 0.1648  |
| rs2312982   | C | -0.0258 |
| rs9572196   | C | 0.0226  |
| rs1837970   | C | -0.0236 |
| rs17597613  | A | 0.0541  |
| rs4884293   | T | -0.0319 |
| rs76423331  | A | 0.0812  |
| rs112362383 | A | -0.0478 |
| rs117027922 | G | -0.1411 |
| rs17063992  | G | 0.1236  |
| rs117015820 | A | -0.1442 |
| rs142890703 | A | -0.1522 |
| rs4131131   | A | 0.0295  |
| rs4238137   | T | 0.132   |
| rs7994981   | T | -0.0457 |
| rs117183548 | A | 0.0789  |
| rs9519481   | G | -0.0285 |
| rs9519961   | T | -0.0228 |
| rs56162600  | G | -0.0604 |
| rs79998113  | G | 0.0884  |
| rs116547753 | T | 0.0949  |
| rs7327146   | G | 0.0321  |
| rs2762039   | T | -0.0249 |
| rs77999292  | C | -0.073  |
| rs79219592  | C | -0.1064 |
| rs1400902   | A | -0.0256 |
| rs3861141   | G | -0.0336 |
| rs7317049   | G | 0.0741  |
| rs117659133 | T | 0.1979  |
| rs71427660  | C | 0.0767  |
| rs151243329 | A | -0.1094 |
| rs9564991   | T | -0.1451 |
| rs73556023  | A | -0.0482 |
| rs9552962   | T | -0.0714 |

|             |   |         |
|-------------|---|---------|
| rs7981107   | G | 0.0244  |
| rs4536338   | G | 0.032   |
| rs72661475  | T | 0.0793  |
| rs116891865 | A | 0.1495  |
| rs4883965   | G | 0.0236  |
| rs117103233 | A | -0.1843 |
| rs1930855   | T | 0.0617  |
| rs12873231  | G | 0.0267  |
| rs114358183 | C | 0.068   |
| rs9546072   | G | 0.0381  |
| rs12864768  | A | -0.0797 |
| rs140993217 | C | -0.1716 |
| rs7329795   | C | -0.022  |
| rs17066313  | G | 0.0238  |
| rs138287204 | A | 0.1002  |
| rs61946413  | T | -0.0483 |
| rs116965579 | A | 0.1059  |
| rs118068892 | T | 0.1008  |
| rs7320214   | G | 0.0722  |
| rs9559215   | G | 0.0297  |
| rs74809109  | A | -0.0867 |
| rs9516239   | G | 0.0262  |
| rs79249395  | G | -0.0983 |
| rs1220593   | A | -0.0231 |
| rs111994603 | C | 0.144   |
| rs77000352  | C | 0.1933  |
| rs150546301 | A | -0.0804 |
| rs9602339   | C | -0.0688 |
| rs7989020   | C | -0.0239 |
| rs79500212  | C | 0.1038  |
| rs74500917  | A | 0.0364  |
| rs34121082  | A | -0.0324 |
| rs9515774   | T | 0.0238  |
| rs9589107   | C | -0.0396 |
| rs2810674   | A | -0.0742 |
| rs9557136   | T | 0.0283  |
| rs114238017 | C | 0.196   |
| rs56055512  | T | 0.0375  |
| rs667367    | A | 0.03    |
| rs11164164  | T | 0.0332  |
| rs117411521 | A | -0.1264 |
| rs655888    | C | 0.0246  |
| rs1418771   | T | 0.0229  |
| rs7330862   | C | -0.0231 |
| rs292461    | A | 0.0392  |
| rs74472951  | C | 0.114   |
| rs80001020  | A | -0.1134 |

|             |   |         |
|-------------|---|---------|
| rs12867736  | A | 0.0668  |
| rs112682523 | T | -0.0817 |
| rs35775797  | C | 0.0664  |
| rs9539817   | C | -0.0232 |
| rs7337227   | A | 0.1345  |
| rs112462858 | T | -0.0379 |
| rs117719342 | G | 0.1178  |
| rs9318984   | A | -0.0796 |
| rs112861080 | C | -0.1378 |
| rs9519443   | A | 0.0241  |
| rs4771176   | C | 0.0233  |
| rs77193704  | A | -0.1233 |
| rs150044709 | T | -0.0864 |
| rs79534076  | T | -0.1059 |
| rs61199144  | G | 0.0303  |
| rs9532820   | T | -0.0437 |
| rs272092    | T | 0.0751  |
| rs12184869  | T | -0.0378 |
| rs7331404   | C | 0.0312  |
| rs550985    | G | 0.032   |
| rs9603883   | A | -0.0456 |
| rs148441010 | T | 0.0706  |
| rs9521000   | T | 0.0265  |
| rs9555336   | A | 0.0249  |
| rs146979361 | C | 0.0872  |
| rs79316274  | C | 0.1681  |
| rs113129273 | T | -0.0774 |
| rs17221707  | C | 0.0315  |
| rs79608679  | G | -0.0746 |
| rs670180    | T | 0.0221  |
| rs34693231  | G | -0.0887 |
| rs17061637  | A | 0.0407  |
| rs144703198 | T | 0.0407  |
| rs75252395  | A | 0.0792  |
| rs112593386 | C | 0.1418  |
| rs149385227 | A | 0.1605  |
| rs145838433 | G | -0.0814 |
| rs9539123   | C | -0.1858 |
| rs9301172   | G | 0.0224  |
| rs76351188  | T | 0.1424  |
| rs9532751   | T | -0.0595 |
| rs1331525   | A | 0.0249  |
| rs79089579  | G | -0.0599 |
| rs17589035  | G | 0.135   |
| rs79681174  | G | 0.1236  |
| rs75610761  | T | -0.0439 |
| rs142334315 | A | 0.0664  |

|             |   |         |
|-------------|---|---------|
| rs9554995   | T | 0.1112  |
| rs71440067  | T | -0.0553 |
| rs117351616 | T | 0.1248  |
| rs12430561  | T | -0.0436 |
| rs73229823  | G | -0.0544 |
| rs80088417  | C | -0.0667 |
| rs12869545  | C | -0.0829 |
| rs12871165  | A | -0.1145 |
| rs77518972  | A | -0.0766 |
| rs55732512  | A | 0.0582  |
| rs59275990  | G | 0.0793  |
| rs60326461  | T | 0.0356  |
| rs73579872  | A | 0.0743  |
| rs9519253   | C | -0.0276 |
| rs67244967  | C | 0.0327  |
| rs118179261 | T | -0.0751 |
| rs35097494  | T | -0.1128 |
| rs76869103  | G | -0.0314 |
| rs17081918  | T | -0.0461 |
| rs77716308  | C | -0.0694 |
| rs74063237  | C | -0.0676 |
| rs7996111   | T | -0.0232 |
| rs55732367  | A | 0.1475  |
| rs77356701  | T | 0.0668  |
| rs3936015   | A | -0.0212 |
| rs9558405   | C | -0.0268 |
| rs7995633   | C | 0.0291  |
| rs142467530 | T | 0.0856  |
| rs117855288 | T | -0.0747 |
| rs7986988   | C | -0.1014 |
| rs9512507   | C | 0.0325  |
| rs568461    | C | -0.0242 |
| rs9521369   | A | -0.0287 |
| rs11620042  | C | 0.1457  |
| rs75342337  | T | 0.091   |
| rs112764489 | G | 0.0811  |
| rs140705346 | A | 0.089   |
| rs9523749   | T | -0.0253 |
| rs117960981 | C | 0.0755  |
| rs9519956   | C | 0.0644  |
| rs9523522   | T | -0.0275 |
| rs79021876  | G | 0.0429  |
| rs61971991  | A | -0.0956 |
| rs144673107 | C | -0.0976 |
| rs7996880   | G | -0.0653 |
| rs117219709 | A | -0.0338 |
| rs144814586 | C | -0.1364 |

|             |   |         |
|-------------|---|---------|
| rs1344130   | T | -0.0212 |
| rs9317447   | T | 0.0288  |
| rs140958216 | C | 0.0726  |
| rs2252594   | C | -0.0231 |
| rs11618941  | A | -0.0667 |
| rs7320156   | C | 0.045   |
| rs78395198  | A | 0.0621  |
| rs3848022   | T | -0.0211 |
| rs56282551  | C | -0.0452 |
| rs71442170  | C | 0.0289  |
| rs77469553  | G | -0.0941 |
| rs61960363  | C | 0.0741  |
| rs35251082  | T | 0.0972  |
| rs8001367   | G | 0.0327  |
| rs9316411   | G | -0.0388 |
| rs737461    | T | -0.0336 |
| rs7989328   | G | 0.0247  |
| rs9564622   | G | -0.0354 |
| rs117168439 | T | 0.1358  |
| rs77868869  | G | -0.0731 |
| rs2477469   | G | 0.0238  |
| rs2077054   | C | 0.0215  |
| rs12584881  | C | -0.0332 |
| rs9520799   | T | 0.0305  |
| rs148453499 | T | 0.0729  |
| rs61955541  | T | -0.1074 |
| rs73198095  | A | -0.0937 |
| rs61966778  | G | -0.0582 |
| rs17389451  | C | 0.0922  |
| rs2585557   | G | 0.0423  |
| rs12430401  | T | 0.1272  |
| rs9524501   | C | 0.0328  |
| rs9557788   | C | -0.0289 |
| rs7334739   | A | -0.0249 |
| rs729032    | G | -0.0226 |
| rs61959180  | A | -0.0567 |
| rs60535800  | A | -0.0372 |
| rs79063287  | A | -0.1243 |
| rs289962    | A | -0.0277 |
| rs2503419   | C | 0.0384  |
| rs1156896   | A | 0.0216  |
| rs1328106   | G | 0.0242  |
| rs56934236  | G | -0.0981 |
| rs112769261 | A | -0.0311 |
| rs76439905  | C | -0.0734 |
| rs118131161 | T | -0.1292 |
| rs3002185   | T | -0.0234 |

|             |   |         |
|-------------|---|---------|
| rs17076133  | G | 0.0321  |
| rs73515814  | G | -0.0379 |
| rs75834580  | C | -0.0902 |
| rs342720    | G | 0.0342  |
| rs72664936  | A | 0.0482  |
| rs9318345   | G | -0.024  |
| rs75648226  | C | -0.0641 |
| rs4391923   | G | 0.0363  |
| rs9527073   | T | -0.05   |
| rs77427303  | G | -0.0701 |
| rs9528250   | A | 0.0396  |
| rs9540682   | C | -0.0221 |
| rs7327537   | G | 0.032   |
| rs117155322 | C | -0.1583 |
| rs9516547   | C | 0.0379  |
| rs683247    | C | 0.0329  |
| rs1331962   | C | 0.0217  |
| rs55737426  | A | 0.1089  |
| rs17253773  | G | -0.0815 |
| rs1183184   | T | 0.0227  |
| rs7984281   | C | 0.0261  |
| rs117735705 | T | 0.0564  |
| rs2986982   | G | 0.0335  |
| rs9559624   | C | 0.0269  |
| rs117651341 | T | 0.1332  |
| rs1570453   | C | 0.1588  |
| rs9532130   | C | -0.0212 |
| rs9520144   | T | -0.0347 |
| rs9567265   | C | 0.0245  |
| rs1410276   | C | -0.0218 |
| rs56281756  | A | 0.0215  |
| rs73163498  | T | 0.1117  |
| rs117436902 | C | 0.1273  |
| rs139029418 | G | -0.042  |
| rs147924719 | C | -0.1627 |
| rs12428224  | T | -0.0768 |
| rs72638678  | T | -0.0998 |
| rs73221523  | T | 0.0531  |
| rs74919563  | T | 0.1163  |
| rs78486804  | T | 0.0741  |
| rs4885106   | G | 0.027   |
| rs117645117 | G | -0.0919 |
| rs72645932  | C | 0.1038  |
| rs148571951 | T | -0.0737 |
| rs9519357   | C | 0.12    |
| rs1028697   | C | 0.0246  |
| rs111869326 | T | 0.1457  |

|             |   |         |
|-------------|---|---------|
| rs17576632  | G | -0.0553 |
| rs143562963 | A | 0.097   |
| rs146085673 | G | -0.0813 |
| rs10507339  | A | 0.0505  |
| rs9581811   | C | 0.0336  |
| rs9508058   | A | -0.0286 |
| rs4883798   | A | 0.1109  |
| rs7320071   | T | -0.0221 |
| rs9316248   | A | 0.023   |
| rs1502067   | C | 0.0445  |
| rs4943349   | C | -0.0504 |
| rs111741301 | C | 0.0615  |
| rs2298237   | A | -0.0463 |
| rs73162774  | G | 0.0355  |
| rs77005467  | C | -0.1149 |
| rs9301029   | T | -0.0248 |
| rs6491008   | G | 0.047   |
| rs78325534  | C | 0.074   |
| rs2125316   | T | -0.0221 |
| rs9591253   | T | 0.0264  |
| rs17089367  | A | -0.1178 |
| rs9601765   | A | 0.0237  |
| rs144610797 | G | 0.1079  |
| rs1537538   | T | -0.0284 |
| rs9506765   | G | 0.0217  |
| rs117581693 | G | 0.1258  |
| rs4772056   | G | 0.0321  |
| rs12429315  | G | -0.0329 |
| rs78642460  | A | 0.0713  |
| rs117515445 | G | 0.1213  |
| rs9517296   | C | 0.0225  |
| rs9572678   | T | -0.0224 |
| rs9518366   | A | -0.0223 |
| rs149980396 | T | -0.0655 |
| rs1537568   | A | 0.0275  |
| rs1980708   | T | 0.0243  |
| rs7984946   | G | -0.0402 |
| rs9591114   | A | -0.0478 |
| rs7358855   | C | -0.0223 |
| rs11620616  | T | 0.1337  |
| rs9509895   | C | -0.0281 |
| rs1995967   | C | 0.063   |
| rs75997974  | A | 0.1058  |
| rs55633836  | A | 0.0447  |
| rs9518802   | T | -0.0246 |
| rs2296847   | T | -0.0844 |
| rs112608779 | T | -0.0457 |



|             |   |         |
|-------------|---|---------|
| rs148058474 | A | 0.1611  |
| rs117440787 | C | 0.0887  |
| rs12429798  | C | -0.036  |
| rs9519662   | C | -0.0331 |
| rs16950632  | A | 0.1071  |
| rs76168576  | C | -0.1079 |
| rs117334451 | T | 0.1633  |
| rs1711774   | T | 0.0227  |
| rs142412347 | G | 0.1042  |
| rs75161781  | C | -0.0964 |
| rs9545262   | A | 0.0225  |
| rs61956898  | T | 0.0583  |
| rs76010196  | G | 0.0779  |
| rs61944547  | G | -0.0422 |
| rs7991817   | C | 0.0229  |
| rs16947718  | C | -0.1166 |
| rs9300729   | C | 0.0303  |
| rs9583110   | C | 0.0273  |
| rs1926507   | T | -0.0217 |
| rs144022366 | T | -0.121  |
| rs4483743   | A | 0.0267  |
| rs77837873  | G | 0.078   |
| rs77052260  | A | -0.0759 |
| rs9557761   | G | -0.0288 |
| rs12872033  | C | -0.1096 |
| rs73166737  | A | 0.1555  |
| rs57387518  | C | -0.0475 |
| rs314873    | C | 0.0215  |
| rs74042592  | G | 0.0355  |
| rs61954874  | C | -0.0685 |
| rs67667949  | C | -0.0426 |
| rs9538348   | G | 0.0278  |
| rs145072883 | T | 0.1207  |
| rs73237437  | C | 0.0529  |
| rs1765737   | G | 0.1429  |
| rs75590369  | A | -0.0714 |
| rs117287058 | C | -0.1165 |
| rs61326032  | T | 0.0392  |
| rs79372968  | C | 0.0597  |
| rs55780966  | A | -0.0233 |
| rs7999326   | T | -0.0337 |
| rs72633073  | A | 0.1766  |
| rs17072214  | C | 0.0398  |
| rs79786667  | C | 0.0993  |
| rs4942450   | G | 0.0334  |
| rs11620425  | G | 0.1069  |
| rs146221424 | C | 0.1211  |

|             |   |         |
|-------------|---|---------|
| rs147288586 | A | -0.1029 |
| rs139533385 | C | -0.1374 |
| rs11618893  | G | -0.0762 |
| rs142666558 | G | -0.0915 |
| rs146017506 | A | 0.1458  |
| rs61944824  | T | 0.0809  |
| rs9579035   | T | -0.0507 |
| rs9591182   | G | -0.0884 |
| rs73162199  | T | -0.0851 |
| rs645084    | C | 0.0272  |
| rs74668197  | G | 0.0653  |
| rs555722    | C | 0.0292  |
| rs4943026   | T | -0.0219 |
| rs9579518   | A | -0.0381 |
| rs2892715   | A | -0.0207 |
| rs146755922 | G | 0.1152  |
| rs144792890 | T | -0.0869 |
| rs17056963  | T | -0.0558 |
| rs79017257  | A | 0.0719  |
| rs12866357  | T | -0.0342 |
| rs117801595 | C | 0.096   |
| rs9589960   | C | 0.0246  |
| rs17446928  | C | -0.0614 |
| rs79006638  | A | -0.141  |
| rs11070037  | G | -0.0636 |
| rs2236373   | T | 0.0403  |
| rs60740383  | G | -0.0265 |
| rs117981974 | G | -0.1066 |
| rs9544990   | C | -0.0315 |
| rs9594704   | C | -0.0228 |
| rs9554597   | G | -0.0828 |
| rs7999621   | T | 0.0344  |
| rs12584985  | C | -0.0492 |
| rs139613457 | A | -0.0776 |
| rs2065341   | G | 0.0223  |
| rs9530362   | C | 0.0222  |
| rs149786877 | C | 0.1022  |
| rs28435138  | A | -0.0313 |
| rs76078464  | A | -0.1122 |
| rs55736263  | C | -0.0815 |
| rs9533806   | T | -0.0335 |
| rs111692659 | G | -0.0832 |
| rs117315800 | G | -0.1419 |
| rs72659293  | A | 0.091   |
| rs17082213  | T | -0.0534 |
| rs9545761   | T | -0.0215 |
| rs9554467   | G | 0.0517  |

|             |   |         |
|-------------|---|---------|
| rs117749258 | T | -0.0829 |
| rs9528178   | G | -0.0967 |
| rs61963413  | T | 0.0375  |
| rs118021925 | A | 0.0749  |
| rs61953625  | A | -0.021  |
| rs9550215   | A | 0.0228  |
| rs538570    | G | -0.1496 |
| rs12428860  | T | -0.0362 |
| rs34310808  | A | -0.0373 |
| rs117429185 | G | -0.1113 |
| rs142131650 | T | 0.1381  |
| rs117168024 | G | -0.0788 |
| rs75932360  | G | -0.1323 |
| rs446460    | C | 0.0305  |
| rs9592897   | T | 0.0425  |
| rs9560769   | T | 0.0354  |
| rs74040997  | T | 0.0685  |
| rs117945072 | G | 0.0978  |
| rs17832446  | T | -0.0582 |
| rs2765127   | T | 0.0261  |
| rs75671497  | T | -0.0694 |
| rs117222209 | T | 0.1661  |
| rs1822750   | C | -0.0347 |
| rs1225409   | C | 0.022   |
| rs140527330 | T | 0.16    |
| rs117788446 | C | 0.1255  |
| rs9567144   | G | 0.031   |
| rs78619243  | A | -0.1905 |
| rs118063378 | A | -0.1509 |
| rs9548897   | C | -0.0289 |
| rs61950123  | C | -0.0737 |
| rs61965889  | C | -0.0404 |
| rs9652147   | G | 0.0306  |
| rs118035253 | C | 0.1399  |
| rs140046444 | T | -0.1461 |
| rs72657746  | C | -0.0828 |
| rs4457852   | G | 0.0442  |
| rs7997939   | C | 0.0269  |
| rs28673319  | A | 0.1503  |
| rs117992300 | T | -0.0725 |
| rs149823110 | C | -0.0451 |
| rs2760111   | C | -0.0253 |
| rs10507393  | C | -0.0228 |
| rs17181761  | C | -0.0227 |
| rs146660670 | A | 0.1063  |
| rs56012756  | T | -0.1148 |
| rs78506973  | T | 0.1543  |

|             |   |         |
|-------------|---|---------|
| rs76654671  | A | -0.1691 |
| rs112525972 | G | 0.1026  |
| rs76071977  | G | 0.0676  |
| rs34732943  | A | -0.0639 |
| rs55728203  | A | 0.0271  |
| rs61954000  | A | 0.0799  |
| rs9536663   | T | 0.0545  |
| rs1854228   | T | -0.0406 |
| rs78951637  | A | 0.0406  |
| rs138726940 | A | -0.099  |
| rs4943121   | C | 0.028   |
| rs11620330  | C | -0.0365 |
| rs61966322  | G | -0.0438 |
| rs7987231   | A | 0.0618  |
| rs76658165  | T | -0.0779 |
| rs9521701   | G | 0.0523  |
| rs144796821 | C | -0.1282 |
| rs4772405   | G | 0.03    |
| rs9511700   | A | 0.0383  |
| rs78380977  | T | 0.1128  |
| rs116984316 | C | 0.1183  |
| rs80287632  | C | -0.0465 |
| rs9549363   | A | 0.0307  |
| rs117942852 | T | 0.1655  |
| rs2874964   | G | 0.0313  |
| rs7996532   | A | -0.0216 |
| rs77051932  | A | -0.0715 |
| rs12428847  | T | 0.0504  |
| rs111466529 | T | -0.0508 |
| rs17222191  | C | -0.1602 |
| rs7996066   | G | 0.0563  |
| rs73174715  | T | -0.1187 |
| rs79177289  | G | -0.1501 |
| rs149823716 | G | 0.1602  |
| rs2225857   | G | 0.0206  |
| rs9561416   | T | 0.021   |
| rs72667768  | T | 0.0407  |
| rs73495462  | G | 0.0363  |
| rs56386479  | T | 0.0767  |
| rs56128564  | C | -0.0283 |
| rs61960010  | G | 0.0269  |
| rs17086900  | T | 0.0582  |
| rs2992391   | C | -0.0276 |
| rs1475262   | G | -0.072  |
| rs147796483 | A | -0.1086 |
| rs7997154   | G | -0.0289 |
| rs73155840  | A | 0.0243  |

|             |   |         |
|-------------|---|---------|
| rs9534170   | T | -0.0659 |
| rs9546806   | C | -0.0214 |
| rs35734605  | T | -0.0736 |
| rs112836253 | T | 0.0867  |
| rs56114258  | A | 0.036   |
| rs1391040   | T | -0.061  |
| rs3783124   | C | 0.0587  |
| rs73154650  | T | -0.1366 |
| rs17333428  | A | 0.0407  |
| rs117376266 | A | 0.1341  |
| rs61965542  | A | 0.0552  |
| rs60925199  | T | 0.0288  |
| rs7317084   | T | 0.0332  |
| rs73171130  | C | -0.034  |
| rs75122627  | A | -0.0769 |
| rs73180078  | A | -0.1363 |
| rs7334611   | T | 0.0238  |
| rs75105118  | T | -0.0243 |
| rs9510279   | C | 0.0221  |
| rs943385    | T | -0.0233 |
| rs2078326   | C | 0.0217  |
| rs7328376   | T | -0.0392 |
| rs12854177  | T | -0.0672 |
| rs9518861   | G | -0.032  |
| rs9515115   | G | -0.0231 |
| rs145866725 | C | 0.0703  |
| rs113720505 | A | -0.061  |
| rs113918587 | C | -0.0943 |
| rs17072355  | G | 0.0788  |
| rs1596937   | A | 0.0247  |
| rs10047705  | C | -0.0333 |
| rs143809884 | T | 0.0388  |
| rs56125049  | C | -0.1167 |
| rs9560941   | G | 0.1394  |
| rs55801427  | A | 0.0662  |
| rs4907562   | T | -0.0393 |
| rs73197995  | A | -0.0544 |
| rs117679086 | T | -0.1181 |
| rs9585961   | A | 0.0325  |
| rs61967477  | C | 0.1127  |
| rs11620481  | T | 0.0241  |
| rs9552195   | G | -0.0225 |
| rs56015229  | A | -0.0581 |
| rs77857824  | G | 0.1351  |
| rs12873049  | G | 0.11    |
| rs9520836   | G | 0.0253  |
| rs9580874   | C | 0.0737  |

|             |   |         |
|-------------|---|---------|
| rs7318131   | T | 0.0826  |
| rs117473621 | C | 0.0768  |
| rs35123525  | C | 0.056   |
| rs72650316  | A | 0.1284  |
| rs61957406  | T | -0.1161 |
| rs1886810   | C | -0.1468 |
| rs9530007   | C | -0.0203 |
| rs12856308  | A | 0.0223  |
| rs17060071  | G | 0.0376  |
| rs7331433   | C | -0.0212 |
| rs9590229   | T | 0.0221  |
| rs9514081   | C | 0.0591  |
| rs79893342  | A | 0.053   |
| rs2802514   | T | 0.0413  |
| rs41286135  | A | 0.0992  |
| rs17076104  | T | 0.0281  |
| rs61965313  | C | -0.0662 |
| rs4884892   | T | 0.029   |
| rs1953657   | A | -0.0327 |
| rs3962506   | T | -0.0545 |
| rs9529929   | A | 0.0264  |
| rs2389093   | G | 0.0215  |
| rs77784949  | C | 0.1162  |
| rs143454100 | G | 0.0506  |
| rs1409174   | A | 0.0202  |
| rs2770237   | C | -0.0215 |
| rs9535125   | T | -0.0295 |
| rs148742110 | C | -0.1115 |
| rs75274916  | T | 0.0752  |
| rs117799003 | C | 0.1314  |
| rs7997327   | G | -0.1336 |
| rs116855004 | A | 0.0859  |
| rs7983764   | T | 0.0222  |
| rs2480172   | T | 0.03    |
| rs79203507  | G | 0.1948  |
| rs79901787  | G | -0.1069 |
| rs7328279   | A | 0.0853  |
| rs146690111 | A | -0.0673 |
| rs71433159  | C | 0.0709  |
| rs17086031  | G | -0.0833 |
| rs61975861  | A | -0.0349 |
| rs9515116   | T | 0.0239  |
| rs76444292  | G | -0.1294 |
| rs875350    | A | 0.0727  |
| rs77745691  | T | -0.0973 |
| rs1929059   | A | -0.0224 |
| rs113977615 | G | -0.1365 |

|             |   |         |
|-------------|---|---------|
| rs4942845   | G | -0.0266 |
| rs9645867   | A | 0.0223  |
| rs420136    | C | -0.164  |
| rs117955501 | C | 0.0778  |
| rs78781995  | T | 0.0385  |
| rs77676799  | C | 0.0602  |
| rs144105730 | A | 0.1076  |
| rs238328    | C | -0.0209 |
| rs73167325  | G | -0.1066 |
| rs9563821   | G | 0.0226  |
| rs2066628   | C | 0.0363  |
| rs944092    | C | -0.0312 |
| rs9547043   | A | 0.1039  |
| rs75689443  | A | 0.0938  |
| rs79763908  | T | -0.0587 |
| rs1237332   | A | 0.0435  |
| rs9515527   | A | -0.0586 |
| rs9582000   | G | 0.0501  |
| rs73189674  | C | -0.1278 |
| rs912125    | G | -0.0235 |
| rs7992136   | C | -0.0749 |
| rs61962625  | T | 0.0404  |
| rs831172    | C | -0.0221 |
| rs9523651   | A | -0.021  |
| rs61955724  | C | 0.0884  |
| rs117594792 | A | -0.0619 |
| rs9548977   | G | -0.0363 |
| rs117449444 | G | 0.0736  |
| rs117880047 | A | 0.1661  |
| rs73169602  | G | 0.0606  |
| rs74061730  | T | -0.1222 |
| rs17457561  | A | -0.024  |
| rs9526277   | C | 0.0533  |
| rs7991569   | G | 0.0212  |
| rs12583965  | G | 0.0441  |
| rs35229925  | A | 0.0233  |
| rs9584426   | T | -0.0329 |
| rs140676013 | T | -0.1605 |
| rs117756160 | C | -0.0649 |
| rs61966226  | A | 0.1584  |
| rs76870174  | T | 0.0932  |
| rs12874274  | C | 0.0364  |
| rs17587446  | G | 0.0725  |
| rs60074257  | A | -0.0227 |
| rs79772176  | T | -0.0351 |
| rs73541875  | T | 0.0679  |
| rs9507221   | G | 0.0204  |

|             |   |         |
|-------------|---|---------|
| rs77170850  | T | -0.0575 |
| rs7333991   | C | -0.027  |
| rs117995507 | G | -0.0695 |
| rs9509458   | T | -0.0291 |
| rs4941784   | G | -0.0199 |
| rs9515959   | A | -0.0546 |
| rs117183896 | A | 0.1265  |
| rs56411758  | A | 0.0495  |
| rs11617073  | A | 0.1442  |
| rs76297476  | A | -0.102  |
| rs16950968  | T | 0.0504  |
| rs2389240   | C | 0.0218  |
| rs17624462  | C | 0.0404  |
| rs146776324 | G | -0.114  |
| rs117913165 | T | 0.0972  |
| rs659303    | T | 0.0488  |
| rs76615905  | A | 0.0806  |
| rs35606802  | T | -0.1394 |
| rs72632760  | G | -0.1349 |
| rs149637124 | C | 0.1018  |
| rs4553488   | C | -0.0301 |
| rs75276328  | C | -0.0981 |
| rs9566215   | T | 0.0208  |
| rs150390328 | T | -0.1272 |
| rs144755277 | T | -0.1625 |
| rs9599556   | G | -0.0239 |
| rs2031155   | A | 0.0531  |
| rs723067    | C | -0.0242 |
| rs55831801  | A | -0.0981 |
| rs112568283 | A | 0.1414  |
| rs9583484   | T | -0.0269 |
| rs2313975   | G | -0.0251 |
| rs11841260  | C | 0.0205  |
| rs79040327  | G | 0.0956  |
| rs117563009 | A | 0.0991  |
| rs2328975   | C | -0.0215 |
| rs112634401 | C | 0.0292  |
| rs7981996   | T | -0.0744 |
| rs144035638 | G | -0.1135 |
| rs74760075  | T | 0.0873  |
| rs9569743   | C | 0.0292  |
| rs655077    | T | -0.0218 |
| rs140804084 | T | -0.1315 |
| rs74397429  | G | 0.0633  |
| rs61953711  | A | 0.085   |
| rs1810707   | T | -0.0341 |
| rs6602910   | C | -0.0217 |



|             |   |         |
|-------------|---|---------|
| rs111324904 | A | 0.1473  |
| rs141399887 | T | -0.111  |
| rs1850536   | C | -0.0256 |
| rs9542208   | C | 0.0768  |
| rs79370479  | C | -0.1315 |
| rs61944080  | C | 0.0333  |
| rs9555684   | G | -0.1421 |
| rs7490803   | T | -0.0217 |
| rs78994837  | C | 0.0664  |
| rs61958569  | T | -0.0551 |
| rs143135226 | G | 0.0619  |
| rs9707096   | G | -0.0307 |
| rs9563834   | T | -0.0498 |
| rs4772202   | C | -0.0272 |
| rs77597454  | A | -0.0743 |
| rs4884961   | T | -0.1246 |
| rs9567718   | T | -0.0212 |
| rs117607646 | C | 0.0852  |
| rs3742270   | A | 0.0216  |
| rs117545424 | A | -0.1084 |
| rs77062418  | T | 0.083   |
| rs1594857   | T | -0.0393 |
| rs4907475   | G | -0.0239 |
| rs80039624  | T | 0.0312  |
| rs61964659  | T | 0.0568  |
| rs9507093   | A | 0.0421  |
| rs140019583 | T | -0.1034 |
| rs12867612  | T | -0.0291 |
| rs2311185   | A | 0.0241  |
| rs78389498  | G | -0.1234 |
| rs79115549  | G | 0.0503  |
| rs11839033  | G | -0.0201 |
| rs9518386   | T | -0.0224 |
| rs9575558   | A | -0.0266 |
| rs61970314  | A | -0.0751 |
| rs959027    | A | -0.0407 |
| rs75158340  | A | 0.0616  |
| rs9603729   | C | 0.1667  |
| rs147603248 | C | -0.1489 |
| rs113995317 | T | -0.0486 |
| rs586392    | A | -0.0237 |
| rs117350425 | G | 0.0691  |
| rs7994089   | C | -0.0211 |
| rs9515157   | A | -0.0252 |
| rs2755222   | C | -0.0224 |
| rs7326027   | G | 0.0642  |
| rs149498036 | T | 0.097   |

|             |   |         |
|-------------|---|---------|
| rs9569212   | T | 0.0246  |
| rs78982007  | T | -0.0743 |
| rs72638065  | G | 0.0825  |
| rs7333816   | G | -0.0215 |
| rs9551786   | A | -0.0557 |
| rs530275    | A | 0.0934  |
| rs113010787 | A | -0.0815 |
| rs35154663  | G | -0.1129 |
| rs117059461 | C | 0.0384  |
| rs140369925 | T | 0.1466  |
| rs150617081 | T | 0.0964  |
| rs9316422   | T | -0.0235 |
| rs9285181   | T | 0.0276  |
| rs12869005  | G | 0.0247  |
| rs35484007  | A | 0.0711  |
| rs117089195 | G | 0.1071  |
| rs423557    | C | -0.0524 |
| rs9589683   | T | -0.0343 |
| rs116903161 | A | 0.0902  |
| rs9577822   | C | -0.0278 |
| rs73452122  | T | 0.0484  |
| rs78109512  | T | -0.0612 |
| rs6563812   | C | 0.0217  |
| rs118065361 | T | 0.1055  |
| rs3895825   | G | -0.0248 |
| rs139351119 | G | -0.066  |
| rs12853170  | G | 0.0234  |
| rs9300978   | T | -0.0296 |
| rs117689312 | A | 0.0935  |
| rs7328175   | A | 0.0374  |
| rs2217141   | G | 0.0583  |
| rs79100625  | A | 0.0479  |
| rs12866453  | C | -0.0401 |
| rs77172362  | A | 0.0585  |
| rs111802403 | T | 0.0881  |
| rs58254804  | T | 0.0585  |
| rs35149197  | A | 0.1031  |
| rs149388281 | G | -0.1595 |
| rs9516978   | G | 0.0242  |
| rs1330776   | C | -0.045  |
| rs117509646 | C | 0.0701  |
| rs2770909   | T | -0.0263 |
| rs118158864 | A | 0.0736  |
| rs80349528  | C | -0.064  |
| rs58689179  | C | -0.0413 |
| rs77745516  | C | 0.0633  |
| rs9566432   | T | -0.0202 |

|             |   |         |
|-------------|---|---------|
| rs76792110  | A | -0.1421 |
| rs1336671   | A | 0.0213  |
| rs9543564   | A | -0.0911 |
| rs17072135  | A | -0.1485 |
| rs17472393  | G | 0.0827  |
| rs147065627 | T | -0.1172 |
| rs9537979   | C | 0.0211  |
| rs144952992 | T | -0.0359 |
| rs77468740  | C | 0.0493  |
| rs12020265  | A | -0.1476 |
| rs34102063  | A | -0.1748 |
| rs74921633  | C | 0.1135  |
| rs17623620  | C | 0.0216  |
| rs111409357 | T | 0.1607  |
| rs73200932  | T | -0.0471 |
| rs4238168   | G | 0.0196  |
| rs612836    | A | -0.0217 |
| rs9521411   | T | 0.0313  |
| rs76776453  | T | -0.0592 |
| rs73205823  | A | 0.0665  |
| rs117970730 | A | -0.0422 |
| rs73154424  | C | 0.155   |
| rs117027343 | G | 0.0796  |
| rs67620261  | A | -0.174  |
| rs2791241   | T | 0.0571  |
| rs9595431   | G | 0.1312  |
| rs80129728  | C | -0.1178 |
| rs67165452  | C | 0.0458  |
| rs77858481  | G | -0.0665 |
| rs9594700   | G | 0.0365  |
| rs61967758  | T | 0.0991  |
| rs57520383  | C | 0.0366  |
| rs111866861 | A | 0.0598  |
| rs80349010  | C | -0.0334 |
| rs78059569  | T | 0.1007  |
| rs4141774   | C | 0.0409  |
| rs149654633 | T | 0.1328  |
| rs4943739   | G | 0.0457  |
| rs9318068   | A | 0.1188  |
| rs144295695 | C | 0.0723  |
| rs75111882  | G | 0.0969  |
| rs75718276  | T | 0.1156  |
| rs9545024   | A | 0.0295  |
| rs7336441   | T | 0.0234  |
| rs1254236   | T | -0.0213 |
| rs56222732  | A | 0.0454  |
| rs76069111  | A | 0.1157  |

|             |   |         |
|-------------|---|---------|
| rs338706    | C | 0.0312  |
| rs76794738  | A | -0.0808 |
| rs7320698   | A | 0.1122  |
| rs115712880 | A | 0.081   |
| rs12873035  | C | 0.03    |
| rs61961322  | T | 0.1366  |
| rs9593419   | A | -0.0605 |
| rs2875315   | T | -0.0965 |
| rs9523057   | C | -0.0272 |
| rs139244429 | T | -0.0324 |
| rs1980696   | C | 0.026   |
| rs9587192   | G | 0.0456  |
| rs76152173  | A | -0.1506 |
| rs71436601  | A | 0.0426  |
| rs1408601   | A | 0.0244  |
| rs9576786   | T | -0.038  |
| rs9517460   | G | -0.0329 |
| rs7332924   | A | 0.0583  |
| rs55787324  | A | 0.0547  |
| rs4285994   | A | 0.0206  |
| rs9539691   | A | 0.0221  |
| rs74580234  | C | -0.0529 |
| rs17691989  | C | 0.0668  |
| rs75399408  | T | 0.0433  |
| rs7986669   | T | -0.0306 |
| rs7321226   | T | 0.0314  |
| rs7317083   | G | 0.0237  |
| rs17069858  | C | -0.0396 |
| rs9518363   | T | 0.0214  |
| rs66523812  | C | -0.0298 |
| rs9576981   | G | 0.028   |
| rs9515163   | G | -0.0229 |
| rs4942902   | T | -0.1132 |
| rs9557478   | A | 0.0244  |
| rs150623586 | T | -0.1324 |
| rs78772362  | G | -0.0472 |
| rs9531002   | T | -0.0218 |
| rs1336665   | C | 0.0388  |
| rs9553670   | G | 0.0638  |
| rs118191050 | G | -0.1413 |
| rs4941820   | G | 0.0263  |
| rs78477405  | G | -0.0977 |
| rs7983919   | T | 0.0196  |
| rs9596706   | T | -0.0526 |
| rs3904643   | T | 0.0945  |
| rs10507816  | T | 0.0349  |
| rs74605231  | A | 0.0631  |

|             |   |         |
|-------------|---|---------|
| rs148053312 | A | 0.0708  |
| rs11842621  | T | -0.0599 |
| rs17727926  | C | 0.0529  |
| rs61952801  | A | -0.0227 |
| rs12429981  | A | 0.0731  |
| rs3916938   | T | 0.0214  |
| rs60560195  | C | -0.0261 |
| rs9599940   | G | -0.1257 |
| rs117328101 | C | 0.093   |
| rs56233066  | C | 0.048   |
| rs141254657 | T | 0.1125  |
| rs77534450  | T | 0.0413  |
| rs12184842  | T | 0.0625  |
| rs7338307   | C | 0.0213  |
| rs73168453  | G | -0.0655 |
| rs1889353   | T | -0.0462 |
| rs9520842   | A | -0.0318 |
| rs1333347   | T | 0.0249  |
| rs9585636   | T | -0.0205 |
| rs11619641  | T | -0.0763 |
| rs9525692   | C | -0.0314 |
| rs9572356   | G | -0.0403 |
| rs74659495  | G | -0.0913 |
| rs2248689   | G | 0.0192  |
| rs2391246   | C | 0.1567  |
| rs77972371  | A | 0.1141  |
| rs78951281  | A | -0.0661 |
| rs2244071   | A | -0.0239 |
| rs78355229  | C | 0.0553  |
| rs117744083 | C | 0.1641  |
| rs17791409  | T | -0.0636 |
| rs1730652   | T | 0.0282  |
| rs12871828  | T | 0.0453  |
| rs4075532   | T | 0.0795  |
| rs478811    | G | 0.0775  |
| rs9526496   | A | -0.0371 |
| rs56771427  | C | 0.0424  |
| rs9525937   | A | -0.0291 |
| rs9575335   | C | -0.0286 |
| rs34453614  | G | -0.1273 |
| rs113357245 | A | -0.1419 |
| rs17531144  | A | 0.0753  |
| rs9537949   | A | 0.1972  |
| rs4387494   | G | 0.0423  |
| rs2699353   | G | -0.0344 |
| rs4772750   | C | 0.0228  |
| rs9551475   | G | -0.0335 |

|             |   |         |
|-------------|---|---------|
| rs73164315  | G | 0.0564  |
| rs56139521  | G | 0.0266  |
| rs78188574  | T | 0.0525  |
| rs4383022   | T | 0.0542  |
| rs9526720   | A | 0.0288  |
| rs7993027   | A | 0.0214  |
| rs76111988  | T | -0.0296 |
| rs9524396   | G | 0.043   |
| rs78981036  | A | 0.0506  |
| rs924483    | A | -0.0342 |
| rs61966237  | A | -0.0636 |
| rs9581143   | A | 0.0287  |
| rs73181261  | T | 0.0357  |
| rs6490671   | C | -0.0301 |
| rs733165    | T | 0.0606  |
| rs8001456   | A | 0.0367  |
| rs116893056 | C | 0.0608  |
| rs4769241   | C | -0.0241 |
| rs113219982 | G | -0.075  |
| rs142586336 | C | 0.097   |
| rs2216140   | A | -0.0746 |
| rs9314964   | T | 0.039   |
| rs117867238 | T | 0.0898  |
| rs9590859   | T | -0.0563 |
| rs77243548  | C | -0.117  |
| rs11840610  | T | -0.0847 |
| rs1417676   | A | -0.0324 |
| rs118057151 | G | -0.1047 |
| rs79214124  | A | 0.0751  |
| rs1625299   | C | 0.044   |
| rs75354138  | T | 0.0555  |
| rs12428424  | G | -0.0409 |
| rs10507431  | C | 0.0232  |
| rs1573217   | C | -0.0198 |
| rs117422539 | C | 0.0995  |
| rs17066636  | T | -0.0594 |
| rs7983225   | A | -0.0255 |
| rs279074    | C | -0.0207 |
| rs1927390   | A | 0.0272  |
| rs79893043  | G | -0.1304 |
| rs1341852   | A | 0.0198  |
| rs7317399   | C | 0.0477  |
| rs9583603   | T | -0.0304 |
| rs75713763  | C | 0.0814  |
| rs7318731   | A | 0.02    |
| rs78205205  | G | -0.0787 |
| rs2496761   | A | -0.0198 |

|             |   |         |
|-------------|---|---------|
| rs146563314 | T | 0.0783  |
| rs12864769  | T | -0.0207 |
| rs17087428  | C | -0.0683 |
| rs117830512 | T | 0.1196  |
| rs12876138  | T | 0.0771  |
| rs142645979 | A | -0.0996 |
| rs78719509  | A | 0.1534  |
| rs9553221   | G | 0.075   |
| rs143900232 | T | 0.1751  |
| rs17078425  | T | 0.0221  |
| rs75126372  | T | -0.0372 |
| rs9551859   | A | 0.022   |
| rs12583465  | T | 0.0191  |
| rs117656837 | T | -0.0861 |
| rs41275122  | G | -0.0728 |
| rs10507979  | G | -0.126  |
| rs118028380 | T | -0.1684 |
| rs2796866   | C | -0.0202 |
| rs4055938   | A | -0.0207 |
| rs80286178  | C | 0.0879  |
| rs9526457   | G | -0.0217 |
| rs75164808  | T | 0.0417  |
| rs117704247 | G | -0.0565 |
| rs2390914   | G | 0.0221  |
| rs34886117  | C | 0.0612  |
| rs4466944   | T | 0.0267  |
| rs75286852  | A | 0.0894  |
| rs9536424   | C | 0.0197  |
| rs2146441   | T | -0.0259 |
| rs1322794   | C | 0.1241  |
| rs139839769 | T | 0.101   |
| rs1163817   | A | -0.101  |
| rs4238220   | G | 0.0809  |
| rs9520952   | T | -0.1103 |
| rs17572130  | G | 0.1363  |
| rs117109354 | T | 0.0313  |
| rs73188791  | C | 0.1352  |
| rs7995390   | T | -0.0268 |
| rs9532815   | G | -0.033  |
| rs117302166 | A | -0.0991 |
| rs61950898  | A | -0.0963 |
| rs1161285   | G | -0.0622 |
| rs4773329   | C | -0.0234 |
| rs12583247  | T | 0.0425  |
| rs61941390  | G | 0.0429  |
| rs4943344   | C | 0.0315  |
| rs12875794  | T | 0.0204  |

|             |   |         |
|-------------|---|---------|
| rs9513673   | A | 0.0199  |
| rs12866531  | T | 0.0272  |
| rs74924307  | G | 0.036   |
| rs28369309  | C | -0.0215 |
| rs76938117  | A | -0.1108 |
| rs35806407  | A | -0.0339 |
| rs146264651 | A | 0.0954  |
| rs73215009  | C | -0.1363 |
| rs150471148 | G | 0.113   |
| rs2482089   | G | -0.0842 |
| rs12429676  | G | 0.0329  |
| rs9300504   | A | 0.088   |
| rs80178872  | A | 0.1217  |
| rs35510403  | T | 0.1093  |
| rs9595973   | A | -0.0539 |
| rs142269556 | C | 0.0818  |
| rs143742858 | C | 0.1352  |
| rs837333    | C | 0.0201  |
| rs79368031  | C | 0.042   |
| rs9583073   | C | -0.0405 |
| rs61975938  | T | -0.0236 |
| rs12876783  | T | 0.0331  |
| rs6490652   | T | 0.0402  |
| rs12428351  | G | 0.0283  |
| rs17532390  | C | 0.0626  |
| rs117618364 | T | -0.1165 |
| rs3135602   | A | 0.1266  |
| rs138195219 | A | -0.1001 |
| rs9508956   | G | 0.0386  |
| rs12873745  | A | -0.0487 |
| rs73241344  | G | 0.0868  |
| rs78962412  | T | 0.2214  |
| rs7333259   | G | 0.0756  |
| rs9559918   | A | -0.0515 |
| rs9554166   | G | -0.0232 |
| rs7338841   | A | -0.0192 |
| rs74901527  | G | -0.1027 |
| rs12874295  | T | 0.0426  |
| rs501244    | T | 0.0249  |
| rs73231524  | A | 0.1363  |
| rs148934532 | C | 0.0803  |
| rs116867630 | C | 0.0965  |
| rs117559524 | G | -0.0889 |
| rs35696540  | A | 0.0348  |
| rs1081796   | T | 0.0259  |
| rs11841886  | C | -0.123  |
| rs142937278 | A | -0.062  |



|             |   |         |
|-------------|---|---------|
| rs7998010   | G | 0.0214  |
| rs116928859 | T | -0.0912 |
| rs77277553  | A | -0.0238 |
| rs41424745  | T | -0.0609 |
| rs2065773   | T | -0.0887 |
| rs12863589  | G | 0.0333  |
| rs116869975 | A | -0.1715 |
| rs76105485  | T | 0.0403  |
| rs4773068   | A | -0.058  |
| rs117718764 | G | -0.0696 |
| rs9536654   | T | -0.0502 |
| rs10492682  | T | -0.0228 |
| rs138447227 | T | 0.0999  |
| rs76603681  | A | 0.133   |
| rs75101009  | G | -0.0738 |
| rs116844818 | C | 0.1013  |
| rs138566874 | C | 0.0796  |
| rs151152821 | A | -0.1436 |
| rs74239648  | T | 0.0398  |
| rs9561702   | G | 0.069   |
| rs61527672  | A | -0.0355 |
| rs73209082  | C | 0.0553  |
| rs9554826   | C | 0.0273  |
| rs17565502  | C | -0.0249 |
| rs144334404 | G | -0.1561 |
| rs35615357  | C | 0.0325  |
| rs1323662   | T | -0.0265 |
| rs113306025 | A | 0.0361  |
| rs9538142   | A | 0.0241  |
| rs9592526   | A | -0.0409 |
| rs73459130  | G | -0.0547 |
| rs9564737   | T | 0.1598  |
| rs74393057  | C | 0.0449  |
| rs946845    | A | 0.0495  |
| rs118003849 | T | 0.1271  |
| rs75039657  | A | -0.047  |
| rs76689542  | A | -0.1129 |
| rs61965224  | C | -0.0522 |
| rs144180069 | A | 0.1702  |
| rs3117790   | G | 0.0191  |
| rs79530839  | T | -0.0578 |
| rs17089574  | C | 0.0259  |
| rs140524161 | G | 0.0917  |
| rs347998    | G | -0.0219 |
| rs9564682   | A | -0.0238 |
| rs1398460   | T | 0.0233  |
| rs7319400   | T | 0.0206  |

|             |   |         |
|-------------|---|---------|
| rs9598311   | C | -0.0265 |
| rs78885555  | A | 0.0879  |
| rs17446768  | C | 0.0464  |
| rs118136643 | T | -0.0809 |
| rs112144828 | G | -0.082  |
| rs116285503 | A | 0.0524  |
| rs9590858   | A | -0.063  |
| rs147440751 | T | -0.1893 |
| rs59118983  | A | 0.0361  |
| rs143230571 | T | 0.1346  |
| rs17601039  | A | 0.0815  |
| rs145925195 | G | 0.0707  |
| rs150280819 | T | -0.0551 |
| rs113571893 | T | -0.1321 |
| rs116980783 | G | 0.1283  |
| rs2769901   | G | 0.0213  |
| rs2147006   | G | 0.024   |
| rs74051246  | G | 0.1252  |
| rs7997870   | A | -0.0205 |
| rs1390157   | A | 0.0238  |
| rs118008398 | A | -0.0496 |
| rs4769850   | G | 0.0231  |
| rs7329619   | C | 0.0222  |
| rs9528348   | C | 0.0208  |
| rs4144545   | C | 0.0381  |
| rs74046556  | A | -0.1138 |
| rs34679193  | G | -0.0223 |
| rs713548    | T | 0.0234  |
| rs11840483  | G | -0.0914 |
| rs60908277  | T | -0.0733 |
| rs117528308 | C | 0.1039  |
| rs7329761   | C | -0.0214 |
| rs9300809   | C | 0.0202  |
| rs113620874 | A | 0.1106  |
| rs9601020   | G | -0.0317 |
| rs34150250  | G | 0.0366  |
| rs9554449   | C | -0.0255 |
| rs143067192 | A | -0.1201 |
| rs140491482 | T | 0.0821  |
| rs2296189   | G | 0.0243  |
| rs9539716   | T | -0.0238 |
| rs142019525 | T | -0.0412 |
| rs28753804  | T | 0.0259  |
| rs61685412  | A | 0.0459  |
| rs9551462   | T | 0.0201  |
| rs12560803  | T | -0.0244 |
| rs7139811   | A | 0.0379  |

|             |   |         |
|-------------|---|---------|
| rs7982691   | T | 0.0302  |
| rs1323116   | A | 0.0196  |
| rs77704928  | A | 0.0407  |
| rs1418985   | G | -0.0255 |
| rs2281993   | G | 0.0814  |
| rs77199856  | A | 0.0244  |
| rs9528378   | A | 0.0452  |
| rs9552821   | C | -0.0198 |
| rs77942989  | G | -0.1132 |
| rs73158476  | A | 0.039   |
| rs9508207   | T | 0.0226  |
| rs112071502 | A | 0.1378  |
| rs12430408  | C | 0.1212  |
| rs954384    | A | 0.0329  |
| rs74551440  | G | 0.0496  |
| rs75787566  | G | 0.0868  |
| rs4773898   | A | -0.0368 |
| rs7338209   | A | 0.0223  |
| rs74619767  | A | 0.0328  |
| rs4770320   | C | -0.0321 |
| rs7996816   | C | -0.0288 |
| rs1417795   | C | 0.0193  |
| rs7334888   | A | 0.0318  |
| rs56184881  | A | -0.0733 |
| rs11617201  | A | -0.0189 |
| rs9554167   | T | 0.0204  |
| rs138182522 | G | 0.0793  |
| rs117690175 | C | 0.1945  |
| rs116876275 | C | 0.1031  |
| rs76080821  | A | -0.0685 |
| rs7325236   | C | -0.0249 |
| rs1627998   | G | -0.0682 |
| rs117284749 | C | 0.1672  |
| rs17064600  | C | 0.0217  |
| rs74728015  | T | 0.1357  |
| rs149091244 | A | 0.1062  |
| rs2806518   | A | -0.0204 |
| rs116864539 | T | 0.0969  |
| rs11838804  | A | 0.0268  |
| rs34864255  | C | -0.0464 |
| rs7994809   | A | -0.0187 |
| rs76274725  | T | -0.0254 |
| rs9317652   | T | -0.0284 |
| rs1326450   | T | -0.0212 |
| rs7139653   | C | 0.02    |
| rs9538150   | T | 0.0219  |
| rs72485647  | G | 0.0326  |

|             |   |         |
|-------------|---|---------|
| rs12429732  | A | -0.0368 |
| rs6490672   | T | -0.0281 |
| rs12855963  | G | -0.022  |
| rs142215947 | C | -0.0977 |
| rs12869939  | C | -0.0199 |
| rs296895    | C | 0.0335  |
| rs7991384   | G | 0.0259  |
| rs112163418 | C | -0.0649 |
| rs118143763 | A | 0.0422  |
| rs9597918   | C | -0.0767 |
| rs74372689  | G | -0.1124 |
| rs79420553  | C | -0.1078 |
| rs78083583  | T | 0.1316  |
| rs79167230  | G | 0.0776  |
| rs77186189  | A | -0.0604 |
| rs78955504  | C | -0.0526 |
| rs74388756  | C | 0.0966  |
| rs147159412 | G | -0.0843 |
| rs147653521 | G | -0.0998 |
| rs9509791   | T | 0.1225  |
| rs2073831   | T | -0.0221 |
| rs11616333  | G | 0.0397  |
| rs10492565  | C | -0.0342 |
| rs549058    | T | -0.0287 |
| rs9506193   | G | 0.0322  |
| rs148461715 | T | 0.0907  |
| rs3015376   | A | -0.0392 |
| rs10507839  | T | -0.0425 |
| rs4463939   | C | 0.0211  |
| rs117778740 | T | -0.0694 |
| rs76313784  | C | -0.0509 |
| rs2015360   | G | -0.0213 |
| rs61274568  | G | 0.072   |
| rs732158    | C | -0.025  |
| rs138660252 | T | 0.0853  |
| rs301660    | C | -0.1195 |
| rs4769603   | T | -0.0281 |
| rs118023855 | T | -0.1264 |
| rs2812230   | C | 0.1083  |
| rs34436998  | G | 0.0784  |
| rs11148273  | T | 0.0238  |
| rs71434724  | C | 0.0225  |
| rs4772053   | G | 0.0411  |
| rs147467768 | A | 0.0868  |
| rs113863197 | A | 0.1401  |
| rs146766750 | G | -0.1079 |
| rs73186318  | T | -0.0475 |

|             |   |         |
|-------------|---|---------|
| rs9566362   | G | -0.0323 |
| rs9562583   | C | -0.0579 |
| rs12871658  | G | 0.0345  |
| rs9517711   | G | -0.0189 |
| rs117330362 | A | 0.1084  |
| rs72643903  | A | 0.1012  |
| rs2181303   | A | -0.0289 |
| rs80168542  | A | 0.0791  |
| rs117001967 | A | 0.1362  |
| rs831157    | T | -0.044  |
| rs117955235 | A | -0.0846 |
| rs9522593   | G | 0.0416  |
| rs75925640  | T | 0.1106  |
| rs1052037   | A | -0.0447 |
| rs11842729  | C | 0.0255  |
| rs1887706   | C | -0.0195 |
| rs9514742   | C | 0.0251  |
| rs75468852  | C | 0.0727  |
| rs138778984 | A | -0.1157 |
| rs61946369  | A | 0.0706  |
| rs144760361 | T | 0.0853  |
| rs144146207 | G | 0.079   |
| rs9508456   | T | -0.022  |
| rs79597335  | A | 0.0418  |
| rs113560651 | C | 0.0241  |
| rs12871750  | G | -0.0794 |
| rs9543628   | A | -0.0289 |
| rs80324389  | C | 0.0636  |
| rs113541848 | T | 0.0337  |
| rs9592965   | C | 0.02    |
| rs9549684   | G | -0.0333 |
| rs73223122  | C | -0.0799 |
| rs7490856   | A | 0.0831  |
| rs80127573  | C | 0.0375  |
| rs9513665   | T | 0.0203  |
| rs11617370  | T | 0.0207  |
| rs77818152  | A | 0.1416  |
| rs9567295   | G | 0.0909  |
| rs117596581 | A | 0.0905  |
| rs141844977 | C | -0.0864 |
| rs111745315 | A | -0.132  |
| rs4519225   | C | -0.0203 |
| rs16968510  | A | -0.0504 |
| rs7318885   | G | -0.0332 |
| rs74835402  | C | -0.0627 |
| rs146726676 | G | -0.1078 |
| rs76287532  | G | 0.0921  |

|             |   |         |
|-------------|---|---------|
| rs12866780  | C | 0.072   |
| rs73222177  | A | -0.048  |
| rs9524655   | G | 0.1062  |
| rs17291339  | T | -0.0596 |
| rs151133603 | C | -0.1218 |
| rs117952203 | T | -0.1071 |
| rs117100591 | A | -0.0919 |
| rs9318555   | C | 0.0215  |
| rs77486240  | G | 0.0386  |
| rs117488196 | T | 0.0843  |
| rs79984659  | T | 0.0804  |
| rs77802035  | T | 0.1147  |
| rs9543860   | A | -0.03   |
| rs34610214  | C | -0.0815 |
| rs2210294   | G | -0.0259 |
| rs13378235  | G | 0.0286  |
| rs79974523  | A | -0.0562 |
| rs79807515  | G | 0.0675  |
| rs112285699 | G | -0.0978 |
| rs2174452   | T | -0.0219 |
| rs17705805  | T | 0.0344  |
| rs17217463  | A | 0.0466  |
| rs116234916 | G | -0.0649 |
| rs9573568   | C | -0.0201 |
| rs9532534   | T | 0.0241  |
| rs1890121   | C | -0.1374 |
| rs118140145 | A | 0.0852  |
| rs112972174 | A | 0.1356  |
| rs75073260  | G | -0.0287 |
| rs77064006  | A | 0.1759  |
| rs72651010  | T | -0.1046 |
| rs73174357  | A | -0.0421 |
| rs80232310  | C | -0.1084 |
| rs114732713 | A | 0.1562  |
| rs72657969  | A | -0.0258 |
| rs9553542   | T | -0.0284 |
| rs9532892   | A | 0.0198  |
| rs28407723  | C | 0.0538  |
| rs7982952   | A | -0.0193 |
| rs355351    | C | 0.0257  |
| rs113783605 | G | 0.0949  |
| rs77159072  | T | -0.0875 |
| rs10781703  | C | 0.024   |
| rs139258033 | C | 0.0563  |
| rs17082985  | A | -0.0529 |
| rs141705164 | C | 0.0946  |
| rs117966156 | A | -0.1124 |

|             |   |         |
|-------------|---|---------|
| rs117570312 | A | -0.07   |
| rs79344624  | C | 0.1096  |
| rs58358662  | A | 0.0839  |
| rs492869    | A | -0.0202 |
| rs1329325   | G | -0.0298 |
| rs117672001 | A | -0.0846 |
| rs138370147 | A | 0.123   |
| rs532067    | A | 0.0216  |
| rs141958049 | T | 0.0451  |
| rs1004938   | A | -0.0223 |
| rs150139683 | C | 0.1009  |
| rs71431563  | G | 0.0277  |
| rs10508108  | T | 0.0451  |
| rs2065748   | G | 0.0836  |
| rs9581679   | A | 0.0904  |
| rs1342348   | A | -0.0352 |
| rs12323228  | C | -0.1624 |
| rs118014470 | T | 0.0723  |
| rs118104941 | C | 0.0964  |
| rs7989027   | C | -0.0191 |
| rs144548576 | T | 0.0641  |
| rs9527198   | A | -0.0241 |
| rs308558    | A | 0.0623  |
| rs142294397 | A | -0.0556 |
| rs954371    | T | 0.0484  |
| rs9522927   | T | 0.0239  |
| rs73168531  | G | 0.0853  |
| rs4770945   | C | -0.0194 |
| rs74670243  | A | -0.1012 |
| rs35977141  | C | 0.0741  |
| rs1286887   | C | -0.1124 |
| rs79412661  | G | -0.0927 |
| rs56270734  | T | 0.0259  |
| rs7982801   | T | 0.1484  |
| rs2807481   | C | -0.0674 |
| rs2166242   | G | 0.0298  |
| rs9514445   | T | -0.019  |
| rs35833129  | G | 0.0198  |
| rs7992512   | A | -0.0234 |
| rs7325417   | T | 0.0331  |
| rs75795790  | G | -0.0533 |
| rs17337846  | C | -0.1515 |
| rs111787614 | A | -0.0793 |
| rs117273869 | T | -0.1619 |
| rs11617467  | C | -0.0257 |
| rs12870098  | T | 0.0332  |
| rs141636232 | T | -0.0999 |

|             |   |         |
|-------------|---|---------|
| rs2406429   | G | -0.0223 |
| rs9509057   | G | 0.0252  |
| rs4770866   | G | 0.0562  |
| rs117935199 | C | -0.1668 |
| rs2810681   | A | -0.0265 |
| rs157165    | T | -0.0219 |
| rs145701663 | A | 0.0785  |
| rs117970520 | C | -0.0955 |
| rs76179436  | T | 0.0906  |
| rs1928930   | T | -0.1088 |
| rs9586971   | T | -0.0344 |
| rs16971221  | G | -0.0294 |
| rs73482578  | G | 0.0841  |
| rs10507860  | A | -0.0296 |
| rs142437994 | C | 0.0978  |
| rs1105008   | T | 0.0641  |
| rs58128805  | A | -0.0484 |
| rs73190991  | T | -0.0836 |
| rs9535332   | A | -0.019  |
| rs12429433  | C | 0.0265  |
| rs12561118  | C | -0.0369 |
| rs10220266  | C | 0.0479  |
| rs17560110  | A | 0.069   |
| rs35300183  | T | -0.0386 |
| rs1409474   | A | 0.0357  |
| rs9549791   | A | 0.0444  |
| rs117271562 | G | -0.1155 |
| rs778331    | C | 0.0368  |
| rs6490975   | C | -0.0808 |
| rs118029375 | C | -0.1001 |
| rs7332835   | T | 0.0812  |
| rs9544392   | A | -0.1366 |
| rs17808936  | C | 0.0711  |
| rs6562789   | C | 0.0182  |
| rs359371    | C | 0.021   |
| rs17686644  | C | 0.0397  |
| rs142177454 | A | 0.1008  |
| rs4473042   | C | -0.083  |
| rs117377918 | G | -0.1077 |
| rs117777458 | G | 0.1035  |
| rs75508300  | A | -0.0403 |
| rs77567844  | A | -0.1047 |
| rs9564287   | T | 0.0232  |
| rs61952221  | G | 0.0329  |
| rs73212550  | C | 0.0847  |
| rs9580858   | T | 0.1229  |
| rs9542125   | T | 0.0304  |



|             |   |         |
|-------------|---|---------|
| rs79446345  | C | 0.1213  |
| rs9515278   | A | -0.0189 |
| rs79707842  | A | -0.0493 |
| rs9574056   | G | -0.0224 |
| rs828186    | C | -0.0222 |
| rs9569571   | A | -0.0196 |
| rs10454645  | G | 0.045   |
| rs78433414  | A | 0.0727  |
| rs2209847   | G | 0.1672  |
| rs586299    | G | -0.0183 |
| rs76877603  | A | -0.0911 |
| rs9564433   | A | -0.0547 |
| rs9530140   | A | -0.07   |
| rs116988987 | G | -0.099  |
| rs17581968  | G | 0.0473  |
| rs12876308  | A | 0.0253  |
| rs79844157  | A | 0.0425  |
| rs11841652  | C | 0.0192  |
| rs146054442 | G | -0.0914 |
| rs34020075  | A | -0.0572 |
| rs117720782 | G | 0.0936  |
| rs113369569 | T | 0.1282  |
| rs9549349   | G | -0.0264 |
| rs61970098  | T | 0.0915  |
| rs79497089  | C | 0.0685  |
| rs4886143   | T | 0.0498  |
| rs2182490   | T | 0.0228  |
| rs1986650   | T | -0.0198 |
| rs143686545 | T | 0.1194  |
| rs142989503 | T | 0.0763  |
| rs34067666  | T | 0.1129  |
| rs73216483  | A | -0.0259 |
| rs9557170   | G | 0.0262  |
| rs34771850  | A | 0.0618  |
| rs79342720  | C | -0.0657 |
| rs17081444  | A | -0.0229 |
| rs74099688  | C | 0.0355  |
| rs142468433 | C | -0.0844 |
| rs146586826 | T | -0.0654 |
| rs79072779  | T | 0.0382  |
| rs4411366   | T | 0.0201  |
| rs1577156   | C | 0.0211  |
| rs2818928   | A | 0.02    |
| rs9544187   | G | 0.0556  |
| rs73200111  | T | 0.074   |
| rs75255178  | A | -0.0609 |
| rs9561025   | C | -0.0326 |

|             |   |         |
|-------------|---|---------|
| rs142276107 | T | 0.0601  |
| rs35903463  | T | -0.0612 |
| rs11617072  | T | -0.0607 |
| rs79023027  | T | -0.0738 |
| rs7995192   | T | -0.0698 |
| rs60650492  | T | -0.0211 |
| rs73550061  | T | 0.0466  |
| rs9510194   | A | 0.0554  |
| rs1406441   | A | -0.0662 |
| rs140828515 | G | 0.1485  |
| rs1014611   | C | 0.0366  |
| rs1328818   | A | -0.0183 |
| rs9557856   | T | 0.0724  |
| rs140359038 | T | -0.1422 |
| rs73210587  | A | 0.0283  |
| rs61289056  | C | -0.0511 |
| rs4769950   | C | 0.0326  |
| rs117438037 | G | 0.0804  |
| rs1325802   | A | 0.0624  |
| rs75577528  | C | 0.2047  |
| rs66971513  | G | -0.0188 |
| rs632225    | G | -0.0192 |
| rs78274254  | G | 0.0755  |
| rs4601904   | G | 0.1247  |
| rs78175998  | C | -0.0644 |
| rs1330605   | T | 0.0224  |
| rs113200523 | G | 0.1016  |
| rs12876684  | C | -0.0918 |
| rs80005521  | G | 0.1376  |
| rs118051739 | A | 0.0541  |
| rs34813542  | C | 0.0684  |
| rs142103988 | T | -0.1271 |
| rs112992048 | G | 0.0953  |
| rs9560761   | C | 0.0248  |
| rs4150358   | A | -0.0477 |
| rs7323692   | T | 0.0498  |
| rs9560024   | G | -0.0746 |
| rs9324262   | A | -0.0279 |
| rs7985788   | C | 0.0228  |
| rs3790027   | A | -0.0298 |
| rs1361002   | C | -0.0196 |
| rs9565106   | T | 0.0231  |
| rs9516855   | G | -0.0444 |
| rs144490289 | C | 0.1122  |
| rs7336911   | G | 0.0451  |
| rs76545914  | T | -0.0458 |
| rs11619859  | G | -0.0198 |

|             |   |         |
|-------------|---|---------|
| rs10161578  | A | 0.0306  |
| rs1575900   | C | -0.0186 |
| rs2862239   | A | -0.0431 |
| rs2806517   | C | -0.0517 |
| rs61963224  | G | 0.1829  |
| rs140263630 | T | -0.1081 |
| rs73163953  | T | 0.1652  |
| rs73191944  | A | 0.0816  |
| rs9535151   | A | -0.0724 |
| rs1923867   | A | 0.0187  |
| rs76741680  | A | 0.1624  |
| rs1280915   | C | -0.0217 |
| rs17081227  | T | 0.0418  |
| rs9579254   | C | 0.0327  |
| rs73175595  | T | -0.0724 |
| rs12875287  | G | -0.0646 |
| rs148213549 | A | -0.0448 |
| rs7999360   | G | 0.0673  |
| rs79852950  | T | 0.113   |
| rs2476511   | C | -0.0209 |
| rs17062740  | T | 0.0349  |
| rs77192180  | A | -0.0964 |
| rs9510346   | G | 0.0753  |
| rs359354    | G | 0.0235  |
| rs78764380  | C | -0.0457 |
| rs3782995   | G | -0.0745 |
| rs56124941  | A | -0.0201 |
| rs77262532  | T | 0.0467  |
| rs117802632 | A | -0.0835 |
| rs73171150  | A | -0.0323 |
| rs148950110 | T | 0.1128  |
| rs140618476 | T | 0.1302  |
| rs426049    | A | -0.0203 |
| rs73184680  | C | 0.0984  |
| rs9561061   | G | 0.0198  |
| rs9506969   | G | -0.022  |
| rs72665784  | C | -0.0534 |
| rs3011501   | A | -0.0416 |
| rs73209906  | A | 0.0534  |
| rs78702124  | G | -0.063  |
| rs11843734  | T | 0.0432  |
| rs141330813 | T | 0.1306  |
| rs150666704 | A | 0.1795  |
| rs1175297   | T | -0.0188 |
| rs9586267   | C | 0.077   |
| rs17064399  | A | -0.0237 |
| rs61948722  | G | -0.1244 |

|             |   |         |
|-------------|---|---------|
| rs59683082  | C | -0.0598 |
| rs148969566 | C | 0.1255  |
| rs12863447  | T | -0.0297 |
| rs9552958   | T | -0.0408 |
| rs117665871 | C | -0.0782 |
| rs9567638   | C | -0.0829 |
| rs9539600   | T | 0.031   |
| rs75026201  | A | 0.0396  |
| rs74966833  | T | -0.0441 |
| rs55876237  | T | 0.0191  |
| rs117617891 | C | 0.0595  |
| rs117340899 | G | 0.0672  |
| rs9516377   | A | 0.0508  |
| rs12872160  | T | 0.0201  |
| rs146912048 | A | 0.1201  |
| rs9541664   | T | -0.0377 |
| rs79709416  | T | 0.0985  |
| rs7995709   | T | -0.0241 |
| rs9511099   | G | -0.0203 |
| rs142884643 | T | 0.1795  |
| rs9572447   | C | -0.0677 |
| rs913563    | A | 0.1274  |
| rs9525469   | G | -0.0377 |
| rs72653601  | T | -0.0867 |
| rs3916961   | G | 0.0189  |
| rs7329677   | G | 0.0799  |
| rs3995573   | G | 0.0181  |
| rs76742078  | T | 0.1003  |
| rs77893667  | G | 0.0526  |
| rs78442405  | T | 0.1121  |
| rs73166363  | A | -0.0592 |
| rs4586276   | T | -0.0272 |
| rs9511351   | A | -0.0349 |
| rs7328015   | G | 0.0193  |
| rs7321855   | G | 0.0554  |
| rs117365252 | T | 0.0627  |
| rs139182357 | T | -0.0479 |
| rs7322312   | A | -0.0243 |
| rs74097468  | T | -0.1559 |
| rs139158714 | G | 0.0681  |
| rs147404785 | A | -0.0677 |
| rs2390998   | T | -0.0194 |
| rs73165289  | C | 0.0418  |
| rs79991506  | T | 0.078   |
| rs7327500   | T | -0.023  |
| rs11571801  | G | 0.0589  |
| rs9316801   | T | -0.0605 |

|             |   |         |
|-------------|---|---------|
| rs117136390 | T | 0.075   |
| rs117956015 | A | -0.0733 |
| rs140929099 | C | 0.089   |
| rs78335817  | A | 0.0326  |
| rs9573948   | A | -0.0663 |
| rs139168771 | C | -0.0917 |
| rs149732759 | C | -0.0858 |
| rs7323757   | G | 0.0268  |
| rs11838868  | A | 0.0529  |
| rs76581454  | T | -0.1021 |
| rs117120050 | A | 0.0817  |
| rs11840932  | C | 0.0416  |
| rs531381    | C | -0.0389 |
| rs75297090  | T | 0.0783  |
| rs9634785   | C | -0.022  |
| rs9542766   | C | -0.029  |
| rs660359    | G | 0.0254  |
| rs117984024 | A | -0.0353 |
| rs17686973  | C | 0.0937  |
| rs9523248   | A | 0.0215  |
| rs323467    | C | 0.0253  |
| rs79475271  | T | 0.0956  |
| rs76719384  | C | -0.0457 |
| rs17588475  | C | -0.0386 |
| rs148612581 | A | 0.0897  |
| rs12431361  | C | -0.018  |
| rs1055145   | A | 0.018   |
| rs9555491   | A | -0.0745 |
| rs9559915   | C | -0.0214 |
| rs143237346 | T | 0.1271  |
| rs73200009  | C | -0.0278 |
| rs9530611   | A | -0.0429 |
| rs7990032   | C | 0.0197  |
| rs17834536  | C | -0.0474 |
| rs9513225   | T | 0.0186  |
| rs1925888   | A | -0.0308 |
| rs117935158 | G | 0.0537  |
| rs1924762   | C | 0.0383  |
| rs117062555 | T | -0.0672 |
| rs78299811  | T | -0.0813 |
| rs9600180   | A | -0.0699 |
| rs61972992  | C | -0.0476 |
| rs79807019  | C | 0.0252  |
| rs57264894  | G | -0.0325 |
| rs149426406 | A | 0.0835  |
| rs17073718  | A | 0.0427  |
| rs726039    | A | 0.0362  |

|             |   |         |
|-------------|---|---------|
| rs12875474  | T | -0.0614 |
| rs118012126 | A | -0.0595 |
| rs61961961  | C | -0.0502 |
| rs56192853  | T | -0.104  |
| rs3848058   | C | 0.0186  |
| rs61970473  | G | -0.08   |
| rs117722529 | G | -0.1748 |
| rs142517485 | T | -0.0851 |
| rs7317248   | T | -0.0327 |
| rs2325635   | C | 0.0224  |
| rs76376800  | T | 0.0306  |
| rs277836    | G | -0.0183 |
| rs8000358   | A | 0.0673  |
| rs9318610   | C | 0.0291  |
| rs34332452  | A | -0.0349 |
| rs79905748  | A | 0.1103  |
| rs9599130   | A | 0.0413  |
| rs80345287  | T | 0.07    |
| rs56401782  | T | -0.022  |
| rs139571700 | A | 0.1139  |
| rs9528682   | A | 0.0238  |
| rs9600963   | T | -0.0177 |
| rs77756593  | T | -0.0598 |
| rs41286973  | C | -0.0983 |
| rs12862123  | C | -0.0187 |
| rs9601964   | G | -0.0214 |
| rs60249166  | T | 0.0392  |
| rs4646211   | C | 0.0382  |
| rs73177134  | A | -0.0442 |
| rs117276473 | A | 0.1183  |
| rs77612909  | T | -0.0721 |
| rs150723247 | G | 0.1122  |
| rs73459757  | C | -0.0303 |
| rs140403056 | A | 0.1017  |
| rs7993964   | T | -0.0259 |
| rs149614773 | G | 0.1279  |
| rs140389462 | C | 0.1134  |
| rs9529975   | G | -0.0422 |
| rs9574586   | C | 0.0187  |
| rs112898991 | T | -0.0518 |
| rs73251352  | G | -0.0706 |
| rs77022343  | C | -0.0966 |
| rs9598018   | G | 0.0269  |
| rs2246130   | T | 0.0177  |
| rs73204565  | G | 0.077   |
| rs7999004   | C | -0.0199 |
| rs111458704 | G | 0.0586  |

|             |   |         |
|-------------|---|---------|
| rs150740905 | T | -0.0878 |
| rs117909164 | A | 0.1278  |
| rs76756837  | A | 0.0415  |
| rs116955429 | A | 0.0968  |
| rs1998560   | C | -0.0226 |
| rs9301443   | T | -0.0252 |
| rs7983698   | C | 0.0354  |
| rs1572068   | T | 0.0181  |
| rs61945827  | T | 0.1035  |
| rs1810779   | T | 0.0317  |
| rs72668197  | A | -0.0224 |
| rs12869090  | A | -0.0284 |
| rs73199366  | G | 0.0412  |
| rs9541939   | A | -0.0313 |
| rs9585303   | C | 0.0717  |
| rs9586532   | T | -0.0268 |
| rs10507433  | T | -0.0229 |
| rs143319458 | T | 0.0425  |
| rs117355283 | C | -0.1085 |
| rs2769920   | A | -0.0222 |
| rs2703087   | A | -0.0667 |
| rs77139046  | G | -0.0562 |
| rs7988505   | G | 0.0301  |
| rs35424345  | T | -0.075  |
| rs79447743  | A | -0.1154 |
| rs76088849  | C | 0.083   |
| rs9805583   | C | 0.0485  |
| rs12853977  | A | 0.0185  |
| rs9537488   | A | -0.0176 |
| rs1891234   | G | -0.0181 |
| rs56069123  | G | -0.137  |
| rs117804735 | T | 0.1104  |
| rs73169289  | T | 0.0323  |
| rs58010254  | A | 0.0237  |
| rs2050863   | T | 0.0757  |
| rs8002580   | G | -0.0174 |
| rs116952670 | T | -0.0441 |
| rs76655741  | C | 0.0471  |
| rs17276524  | C | 0.0625  |
| rs74659678  | T | -0.0677 |
| rs9526068   | G | -0.064  |
| rs73178125  | G | -0.089  |
| rs4616150   | A | -0.0382 |
| rs41483347  | C | -0.0299 |
| rs9514451   | A | -0.0748 |
| rs9603641   | G | 0.0182  |
| rs9319312   | G | 0.026   |

|             |   |         |
|-------------|---|---------|
| rs117145353 | G | -0.1176 |
| rs2860230   | A | 0.0204  |
| rs17072399  | G | 0.0458  |
| rs115108776 | A | 0.0666  |
| rs11568658  | A | -0.0583 |
| rs77306766  | C | 0.0828  |
| rs34897738  | T | 0.0206  |
| rs117298944 | T | -0.0881 |
| rs79226704  | C | 0.0249  |
| rs117324053 | A | 0.0585  |
| rs75572918  | A | -0.0234 |
| rs80286416  | A | 0.0529  |
| rs139189861 | G | 0.088   |
| rs12429893  | A | -0.0228 |
| rs79424971  | A | -0.0904 |
| rs61971309  | T | 0.0572  |
| rs9548651   | A | -0.1009 |
| rs73201606  | G | 0.0744  |
| rs9538747   | T | 0.0642  |
| rs75276536  | A | 0.1297  |
| rs17078163  | C | -0.034  |
| rs520313    | G | -0.0209 |
| rs12427813  | T | 0.035   |
| rs12877713  | C | 0.0241  |
| rs1329699   | C | -0.0187 |
| rs4773118   | C | 0.0223  |
| rs73181740  | A | 0.0562  |
| rs160816    | A | -0.0185 |
| rs2149119   | A | -0.0176 |
| rs1433231   | G | -0.024  |
| rs78469428  | T | -0.0477 |
| rs9565130   | T | 0.018   |
| rs117528286 | C | 0.113   |
| rs78929914  | T | 0.0335  |
| rs2701853   | C | -0.0191 |
| rs145312887 | G | -0.0708 |
| rs75256942  | A | 0.0492  |
| rs9590356   | C | -0.076  |
| rs16954665  | T | -0.0906 |
| rs7998270   | T | -0.0329 |
| rs1411755   | T | -0.0181 |
| rs75178612  | C | 0.0439  |
| rs117324558 | G | 0.1059  |
| rs7993232   | G | -0.026  |
| rs117324288 | T | 0.0718  |
| rs9591258   | T | 0.019   |
| rs9538323   | C | 0.0601  |



|             |   |         |
|-------------|---|---------|
| rs9520765   | T | 0.0452  |
| rs140005813 | C | 0.09    |
| rs111612751 | A | 0.0966  |
| rs12877201  | T | 0.0729  |
| rs655653    | T | 0.018   |
| rs77389395  | C | 0.041   |
| rs16943501  | A | 0.0378  |
| rs56038914  | C | -0.0512 |
| rs71434788  | T | -0.0642 |
| rs78309576  | T | 0.1049  |
| rs7334774   | C | -0.036  |
| rs117254646 | C | 0.0635  |
| rs3858803   | T | -0.0187 |
| rs141085707 | C | -0.0954 |
| rs12877281  | T | -0.0273 |
| rs9601340   | C | 0.1328  |
| rs77688668  | T | -0.0516 |
| rs1359220   | G | -0.0983 |
| rs71434526  | A | -0.0379 |
| rs9783555   | T | 0.0858  |
| rs117612589 | C | 0.137   |
| rs4611340   | T | -0.0328 |
| rs61974352  | A | 0.1237  |
| rs9510170   | G | -0.0471 |
| rs9553031   | C | 0.018   |
| rs7989382   | A | -0.028  |
| rs117655489 | C | -0.0585 |
| rs140175050 | T | -0.1282 |
| rs6562580   | C | 0.0172  |
| rs9533043   | T | 0.0734  |
| rs34768814  | C | 0.034   |
| rs17062732  | G | -0.0228 |
| rs77388566  | A | -0.0778 |
| rs116932083 | T | -0.1201 |
| rs1499488   | A | 0.0203  |
| rs17080609  | G | -0.0356 |
| rs11619043  | T | -0.0451 |
| rs12874626  | A | -0.0812 |
| rs17507119  | C | 0.0431  |
| rs56132923  | C | 0.0712  |
| rs1108755   | T | -0.0183 |
| rs9584198   | T | 0.0474  |
| rs17498731  | T | -0.0441 |
| rs9553681   | A | -0.0215 |
| rs9513183   | A | 0.1438  |
| rs980277    | C | 0.0195  |
| rs4884057   | T | -0.0188 |

|             |   |         |
|-------------|---|---------|
| rs9598553   | A | -0.0196 |
| rs118133193 | G | 0.1502  |
| rs9562512   | A | 0.0272  |
| rs74094704  | C | -0.0464 |
| rs73224463  | C | -0.0906 |
| rs9603756   | C | 0.0185  |
| rs78346125  | T | 0.0449  |
| rs9558933   | A | -0.0447 |
| rs116980512 | A | -0.0985 |
| rs75649637  | C | -0.081  |
| rs117786553 | T | -0.0761 |
| rs17446121  | G | -0.0254 |
| rs61965591  | C | 0.0636  |
| rs422663    | C | -0.0177 |
| rs55793217  | C | 0.0351  |
| rs4773844   | T | 0.0214  |
| rs9538621   | G | -0.0247 |
| rs2186130   | G | -0.066  |
| rs9514449   | G | 0.1284  |
| rs75291294  | A | -0.078  |
| rs9581263   | G | -0.0906 |
| rs1841160   | T | -0.039  |
| rs11619506  | G | 0.0242  |
| rs17480693  | C | 0.0676  |
| rs78315799  | T | -0.0458 |
| rs12874471  | T | -0.0241 |
| rs2010109   | C | 0.0309  |
| rs9538250   | T | -0.0474 |
| rs1323949   | T | 0.018   |
| rs9532069   | C | 0.0873  |
| rs113727663 | A | 0.1041  |
| rs61965675  | G | -0.1184 |
| rs73429559  | C | 0.0744  |
| rs7326283   | T | -0.0218 |
| rs146297236 | T | -0.0853 |
| rs7325835   | T | 0.0316  |
| rs17552047  | A | -0.0206 |
| rs138444208 | T | 0.1013  |
| rs11617095  | A | -0.0772 |
| rs7996538   | A | 0.0505  |
| rs2669460   | A | 0.02    |
| rs12184599  | G | 0.0762  |
| rs75165757  | T | -0.1019 |
| rs112159421 | C | -0.0887 |
| rs151047348 | A | 0.0786  |
| rs9540647   | A | -0.0275 |
| rs73569255  | T | 0.0442  |

|             |   |         |
|-------------|---|---------|
| rs61965673  | T | -0.0638 |
| rs60538560  | T | -0.0828 |
| rs78535031  | G | -0.0756 |
| rs1336850   | C | -0.0274 |
| rs76775559  | T | 0.0524  |
| rs34630949  | G | 0.0316  |
| rs4772857   | G | -0.0182 |
| rs73153918  | A | 0.1005  |
| rs73182564  | T | -0.0667 |
| rs9536430   | C | -0.0257 |
| rs77958508  | C | -0.0881 |
| rs113335061 | C | 0.0476  |
| rs150523191 | A | 0.1003  |
| rs75721817  | C | -0.0604 |
| rs3886176   | A | 0.0682  |
| rs17068843  | T | 0.0894  |
| rs1409444   | C | 0.0398  |
| rs12873317  | A | 0.0182  |
| rs78287951  | T | -0.0515 |
| rs78744003  | G | -0.1519 |
| rs75188657  | A | 0.0834  |
| rs9548456   | T | -0.021  |
| rs2802500   | A | 0.0526  |
| rs75397803  | T | -0.1148 |
| rs75098775  | T | -0.0458 |
| rs7983691   | C | 0.0189  |
| rs9519789   | G | -0.0471 |
| rs17077287  | T | -0.0306 |
| rs3858807   | A | -0.0191 |
| rs913955    | A | 0.0212  |
| rs9572782   | C | -0.0301 |
| rs75382140  | G | -0.0608 |
| rs113788332 | C | 0.0193  |
| rs17060959  | G | 0.0275  |
| rs7982110   | C | 0.0854  |
| rs11616507  | T | 0.02    |
| rs17077047  | A | -0.0621 |
| rs2391933   | C | -0.0216 |
| rs1815690   | A | 0.0684  |
| rs2324846   | A | 0.0169  |
| rs12866544  | C | 0.0241  |
| rs7987818   | T | -0.0225 |
| rs2876729   | T | 0.0737  |
| rs9545931   | G | -0.0365 |
| rs11842453  | C | -0.0194 |
| rs9522772   | T | -0.0252 |
| rs145106080 | G | -0.0814 |

|             |   |         |
|-------------|---|---------|
| rs79175232  | A | 0.0924  |
| rs73583332  | G | -0.1075 |
| rs4072773   | G | 0.0198  |
| rs9521841   | C | -0.0346 |
| rs17461635  | C | -0.0352 |
| rs59190871  | G | -0.0256 |
| rs117089347 | A | -0.0669 |
| rs11617881  | C | -0.0206 |
| rs79353592  | T | 0.0711  |
| rs2760359   | G | -0.0189 |
| rs7988386   | C | -0.0233 |
| rs3015391   | G | -0.0177 |
| rs61951826  | C | -0.0222 |
| rs56370825  | G | 0.0371  |
| rs55944555  | A | -0.0688 |
| rs9522771   | T | -0.0263 |
| rs79729870  | A | -0.0875 |
| rs1547708   | T | 0.0339  |
| rs1886929   | A | 0.0279  |
| rs138059552 | A | 0.132   |
| rs117858396 | T | 0.0674  |
| rs11620369  | A | -0.0306 |
| rs1360609   | A | 0.0304  |
| rs117175636 | C | 0.1218  |
| rs9510299   | C | -0.0179 |
| rs141002598 | G | -0.1196 |
| rs9520100   | A | -0.0173 |
| rs7989818   | G | 0.0206  |
| rs138931931 | A | -0.0963 |
| rs61960415  | A | -0.0623 |
| rs11616506  | T | 0.0215  |
| rs75933409  | A | 0.0411  |
| rs1006378   | A | 0.0211  |
| rs117279114 | A | 0.0983  |
| rs61948984  | C | -0.0367 |
| rs7991080   | C | 0.0174  |
| rs80135250  | T | 0.0733  |
| rs35226578  | T | -0.0213 |
| rs80021196  | G | 0.0333  |
| rs73564226  | C | 0.0257  |
| rs7333774   | A | 0.0382  |
| rs138700521 | A | -0.1146 |
| rs57408197  | G | -0.101  |
| rs3918312   | C | -0.0587 |
| rs9509337   | G | -0.033  |
| rs117766977 | T | 0.1507  |
| rs34570195  | C | -0.0607 |

|             |   |         |
|-------------|---|---------|
| rs10492413  | G | -0.0211 |
| rs145367314 | C | -0.0866 |
| rs9538642   | A | 0.0674  |
| rs1927544   | C | 0.0245  |
| rs11147430  | A | 0.0303  |
| rs73154191  | T | 0.0324  |
| rs113154410 | G | 0.0696  |
| rs6562786   | G | -0.0888 |
| rs9630319   | C | 0.0186  |
| rs7491500   | A | 0.0392  |
| rs60472952  | T | -0.0198 |
| rs58914154  | G | -0.0204 |
| rs13378548  | A | -0.0253 |
| rs9549865   | A | -0.0229 |
| rs74460120  | T | 0.0733  |
| rs9582036   | C | -0.0217 |
| rs9516450   | A | 0.0205  |
| rs3092875   | C | 0.0888  |
| rs117330215 | A | -0.0293 |
| rs7989419   | G | -0.0684 |
| rs4581597   | A | 0.0914  |
| rs7330752   | T | 0.0545  |
| rs78589465  | T | 0.094   |
| rs111237407 | C | 0.0933  |
| rs117308685 | C | 0.1289  |
| rs61952816  | T | -0.0886 |
| rs72640660  | A | 0.0804  |
| rs9563130   | T | -0.0179 |
| rs118027040 | T | 0.0823  |
| rs11164135  | T | 0.0358  |
| rs117750007 | G | -0.1276 |
| rs9543797   | G | 0.1308  |
| rs72663838  | C | 0.0207  |
| rs111596715 | A | -0.0556 |
| rs35783053  | T | -0.1147 |
| rs7988692   | G | -0.0168 |
| rs9592732   | A | 0.0716  |
| rs143082767 | A | 0.0499  |
| rs2580195   | T | -0.0185 |
| rs7998331   | A | -0.0211 |
| rs117097864 | A | -0.0997 |
| rs111862710 | T | 0.0951  |
| rs4369533   | C | 0.0169  |
| rs7982071   | C | 0.0171  |
| rs9524797   | A | 0.022   |
| rs73174372  | G | 0.0838  |
| rs113475555 | A | 0.1552  |

|             |   |         |
|-------------|---|---------|
| rs34084189  | C | 0.0229  |
| rs1821435   | A | -0.049  |
| rs9554468   | A | 0.0198  |
| rs60487689  | T | 0.0388  |
| rs9513268   | T | 0.0188  |
| rs117375009 | G | -0.0835 |
| rs7998278   | C | 0.0245  |
| rs1424313   | C | 0.0194  |
| rs73223938  | A | 0.056   |
| rs1927837   | T | -0.0167 |
| rs12586074  | A | -0.0451 |
| rs303951    | C | 0.0736  |
| rs78010746  | T | 0.0481  |
| rs71431525  | G | 0.0641  |
| rs28429889  | T | -0.1068 |
| rs289052    | T | -0.0179 |
| rs7327736   | A | -0.0625 |
| rs74536732  | A | -0.0762 |
| rs6563538   | T | 0.0179  |
| rs9534606   | G | 0.0702  |
| rs1228351   | G | 0.035   |
| rs35782826  | G | 0.0458  |
| rs2587602   | C | -0.0184 |
| rs74977649  | A | -0.0289 |
| rs118013055 | A | 0.0835  |
| rs117050276 | G | -0.0995 |
| rs10492742  | G | 0.0218  |
| rs9528845   | T | -0.0284 |
| rs73594127  | G | -0.0732 |
| rs112816948 | A | -0.1514 |
| rs1925995   | T | 0.0174  |
| rs4883829   | A | 0.0173  |
| rs35410533  | T | -0.0312 |
| rs328794    | C | -0.0255 |
| rs701540    | A | -0.019  |
| rs11620391  | C | -0.1027 |
| rs117030421 | G | 0.0921  |
| rs71434837  | C | 0.027   |
| rs117758570 | T | -0.0615 |
| rs72666510  | G | -0.0492 |
| rs12428148  | A | 0.023   |
| rs79056330  | G | -0.0248 |
| rs111337555 | A | 0.0648  |
| rs7328509   | C | -0.067  |
| rs11843462  | C | 0.0693  |
| rs77170867  | A | 0.0782  |
| rs9545644   | C | -0.0936 |

|             |   |         |
|-------------|---|---------|
| rs117987953 | T | -0.1014 |
| rs9587707   | C | -0.0208 |
| rs12877870  | C | 0.0189  |
| rs12861084  | T | -0.0712 |
| rs7990988   | C | -0.0173 |
| rs34136735  | T | 0.0609  |
| rs112331377 | G | -0.1129 |
| rs9550571   | A | -0.0333 |
| rs12859068  | T | 0.0307  |
| rs117060035 | G | -0.0764 |
| rs4884747   | G | 0.0265  |
| rs150493080 | T | 0.0663  |
| rs9574536   | T | -0.0287 |
| rs76030546  | T | 0.0786  |
| rs12100086  | G | 0.0337  |
| rs1678388   | G | -0.02   |
| rs9324291   | A | -0.0275 |
| rs7322873   | C | -0.0181 |
| rs116963765 | G | 0.0885  |
| rs113419493 | T | -0.0194 |
| rs73177590  | T | -0.1297 |
| rs11616434  | G | -0.0185 |
| rs2320207   | A | 0.0553  |
| rs140401724 | G | 0.1077  |
| rs12019513  | T | 0.0593  |
| rs74819724  | T | -0.0988 |
| rs9572401   | T | 0.0753  |
| rs35148622  | T | 0.0173  |
| rs148725257 | G | 0.1084  |
| rs149829494 | A | -0.1006 |
| rs79843656  | A | 0.0827  |
| rs79057720  | A | 0.0701  |
| rs1326447   | T | -0.0467 |
| rs73194134  | T | 0.1182  |
| rs76709166  | C | 0.0768  |
| rs12430895  | C | 0.0245  |
| rs113258947 | T | 0.0707  |
| rs76241567  | A | -0.0853 |
| rs139979252 | G | -0.0981 |
| rs118152133 | A | -0.0973 |
| rs77549056  | G | 0.0561  |
| rs17220832  | A | -0.0243 |
| rs113070975 | C | -0.0486 |
| rs11619029  | C | 0.0285  |
| rs9538312   | C | -0.0276 |
| rs117702919 | A | -0.0735 |
| rs298776    | C | -0.0269 |

|             |   |         |
|-------------|---|---------|
| rs9521060   | C | 0.0738  |
| rs113446621 | C | 0.0468  |
| rs2324878   | T | 0.0201  |
| rs7339032   | T | 0.1241  |
| rs78086049  | C | -0.0288 |
| rs10508034  | C | 0.0545  |
| rs7335905   | G | -0.0173 |
| rs288786    | T | 0.0374  |
| rs79386556  | A | -0.0684 |
| rs117969647 | A | 0.1306  |
| rs113985866 | G | 0.0525  |
| rs9521395   | T | 0.018   |
| rs9652203   | A | -0.0672 |
| rs117415218 | C | -0.0883 |
| rs4646215   | G | -0.0303 |
| rs12873946  | T | -0.0188 |
| rs142250329 | C | -0.0875 |
| rs73227641  | A | -0.045  |
| rs61964262  | T | -0.0242 |
| rs17611165  | C | 0.0717  |
| rs9542372   | C | -0.0191 |
| rs12429673  | T | -0.0175 |
| rs116936846 | C | 0.0631  |
| rs2149494   | G | -0.0184 |
| rs9567581   | G | -0.0238 |
| rs117576481 | C | 0.1363  |
| rs77836903  | A | -0.1271 |
| rs7335044   | C | 0.0355  |
| rs1323910   | T | -0.0216 |
| rs73207821  | A | 0.0967  |
| rs73228814  | T | 0.0925  |
| rs149630300 | T | -0.0821 |
| rs61957399  | C | 0.142   |
| rs75500073  | C | 0.0483  |
| rs7336469   | T | 0.0569  |
| rs78223024  | C | -0.1407 |
| rs1328644   | C | 0.0248  |
| rs7326799   | C | -0.017  |
| rs75989856  | T | 0.0267  |
| rs147790336 | G | 0.0876  |
| rs17620154  | C | 0.0199  |
| rs7994489   | C | -0.0222 |
| rs118037336 | C | 0.0876  |
| rs78029772  | A | 0.0994  |
| rs7993594   | T | -0.0201 |
| rs117682622 | G | 0.1099  |
| rs117782757 | T | 0.0535  |



|             |   |         |
|-------------|---|---------|
| rs2892496   | G | 0.0183  |
| rs9599968   | T | 0.0289  |
| rs4238254   | G | 0.0289  |
| rs72663688  | C | 0.0279  |
| rs76675758  | G | 0.0461  |
| rs143742948 | A | -0.0974 |
| rs75915340  | T | 0.0792  |
| rs1831302   | T | 0.0168  |
| rs9554288   | C | -0.0432 |
| rs61969916  | C | -0.0837 |
| rs146081629 | G | -0.1048 |
| rs117113767 | A | -0.1106 |
| rs9549186   | A | -0.0254 |
| rs9527870   | T | 0.021   |
| rs147874442 | T | -0.1099 |
| rs17305529  | A | 0.065   |
| rs79949846  | A | -0.1065 |
| rs34984278  | A | 0.0591  |
| rs9559203   | C | 0.0325  |
| rs4644760   | T | 0.021   |
| rs116942699 | C | 0.0711  |
| rs12867521  | T | 0.0199  |
| rs4386030   | T | -0.0175 |
| rs4436647   | G | 0.0397  |
| rs75995688  | T | 0.0485  |
| rs1886014   | T | 0.0284  |
| rs61043250  | C | -0.0607 |
| rs9301467   | C | 0.0594  |
| rs73207795  | G | -0.0302 |
| rs4769282   | T | -0.0258 |
| rs9551637   | A | -0.0943 |
| rs118170258 | A | -0.0953 |
| rs7325678   | A | -0.0176 |
| rs383       | C | 0.0198  |
| rs17067033  | C | -0.0457 |
| rs9537560   | A | -0.0212 |
| rs73476864  | A | -0.0561 |
| rs72634754  | T | -0.0747 |
| rs76417027  | T | -0.0614 |
| rs113737590 | A | -0.0705 |
| rs9574691   | T | -0.017  |
| rs61970410  | G | -0.0446 |
| rs142121452 | A | -0.1211 |
| rs77336726  | T | -0.1073 |
| rs138286046 | T | 0.0599  |
| rs9508796   | G | 0.0287  |
| rs9598129   | C | -0.0264 |

|             |   |         |
|-------------|---|---------|
| rs117437439 | T | 0.0941  |
| rs73204848  | T | 0.0567  |
| rs112814440 | C | -0.0891 |
| rs148649817 | A | 0.0533  |
| rs4769629   | A | 0.018   |
| rs77795805  | C | 0.0881  |
| rs76454137  | T | 0.1124  |
| rs117531020 | G | 0.0877  |
| rs74423421  | C | 0.0366  |
| rs13378390  | T | -0.0218 |
| rs75993435  | T | 0.0513  |
| rs1746103   | C | -0.0799 |
| rs4439609   | T | -0.0264 |
| rs78440707  | T | -0.0634 |
| rs112040001 | A | 0.0508  |
| rs56259880  | T | 0.0504  |
| rs1326407   | A | 0.0498  |
| rs117031693 | T | -0.0552 |
| rs1863470   | G | -0.0324 |
| rs76819913  | T | -0.0365 |
| rs9510756   | G | 0.0322  |
| rs4142811   | G | -0.0196 |
| rs8181889   | A | 0.0169  |
| rs117829778 | A | 0.0642  |
| rs55726235  | A | -0.0406 |
| rs1890124   | A | -0.0341 |
| rs9525993   | A | -0.0743 |
| rs73194463  | T | 0.0689  |
| rs12863059  | C | 0.0247  |
| rs9544083   | T | -0.0274 |
| rs7336657   | A | -0.0376 |
| rs4646219   | T | -0.0307 |
| rs117460993 | T | -0.1169 |
| rs9550193   | T | 0.0172  |
| rs1409082   | T | 0.0255  |
| rs9565249   | G | -0.0462 |
| rs118151430 | A | -0.0865 |
| rs113040729 | G | -0.1025 |
| rs9555438   | C | -0.0559 |
| rs11617198  | C | 0.035   |
| rs78931378  | C | 0.0267  |
| rs11619299  | A | 0.0352  |
| rs74689285  | A | -0.0532 |
| rs1413081   | G | 0.0186  |
| rs72636312  | G | 0.0498  |
| rs80297929  | G | -0.0222 |
| rs4885210   | A | -0.0289 |

|             |   |         |
|-------------|---|---------|
| rs9319223   | C | 0.0479  |
| rs7330730   | A | -0.0356 |
| rs7337228   | T | -0.0517 |
| rs9598601   | A | 0.0582  |
| rs116893032 | A | -0.0842 |
| rs4942375   | C | -0.0328 |
| rs73173331  | G | -0.1139 |
| rs9548972   | T | 0.0169  |
| rs116844606 | A | -0.1233 |
| rs404347    | G | -0.0297 |
| rs73184757  | A | -0.0937 |
| rs73174618  | C | -0.0543 |
| rs7982832   | G | 0.0279  |
| rs1459441   | A | 0.0393  |
| rs9559249   | G | -0.0466 |
| rs72657755  | A | -0.03   |
| rs1521258   | T | -0.0726 |
| rs72661444  | T | 0.1708  |
| rs35164787  | T | 0.0261  |
| rs20479     | A | 0.0332  |
| rs1886792   | A | 0.0172  |
| rs11616406  | C | -0.0649 |
| rs61956450  | A | 0.0285  |
| rs521569    | C | 0.0183  |
| rs78766936  | A | 0.0418  |
| rs117237524 | A | -0.0561 |
| rs150768012 | A | 0.0684  |
| rs17399664  | G | 0.0815  |
| rs144987007 | C | 0.1053  |
| rs16944706  | T | 0.0563  |
| rs2065850   | C | -0.0208 |
| rs9507503   | G | 0.0259  |
| rs73237811  | A | 0.0973  |
| rs9540681   | A | 0.0198  |
| rs12866475  | C | -0.0208 |
| rs79603758  | T | -0.0674 |
| rs17074619  | C | -0.0755 |
| rs74917511  | A | 0.0468  |
| rs17190434  | A | -0.0358 |
| rs78238191  | A | -0.1257 |
| rs58476700  | T | -0.0231 |
| rs9600247   | C | 0.0292  |
| rs1809671   | G | -0.0471 |
| rs9524008   | A | 0.1106  |
| rs235786    | T | -0.0166 |
| rs7983984   | A | -0.0179 |
| rs59606061  | C | 0.0322  |

|             |   |         |
|-------------|---|---------|
| rs61948374  | A | 0.0835  |
| rs1018619   | G | 0.0632  |
| rs57111056  | A | -0.0801 |
| rs79836482  | T | -0.1153 |
| rs77063359  | G | -0.075  |
| rs4561328   | T | 0.0193  |
| rs117342325 | G | -0.0554 |
| rs7998778   | A | -0.0168 |
| rs2314969   | G | 0.0199  |
| rs2921406   | A | 0.0976  |
| rs9582590   | G | 0.043   |
| rs9556420   | T | -0.0625 |
| rs113048274 | A | 0.0681  |
| rs76737333  | A | 0.0783  |
| rs9558198   | G | 0.037   |
| rs78089148  | A | 0.0867  |
| rs77116141  | C | -0.0209 |
| rs9525198   | C | -0.1037 |
| rs727344    | C | -0.0488 |
| rs149298729 | C | 0.1495  |
| rs17089570  | T | 0.0275  |
| rs597057    | T | -0.0517 |
| rs73169549  | A | -0.0427 |
| rs9598481   | T | 0.017   |
| rs78601420  | A | -0.1086 |
| rs61948676  | C | 0.0536  |
| rs12427481  | T | -0.063  |
| rs17363608  | C | -0.0326 |
| rs17054985  | C | 0.0799  |
| rs7320491   | A | -0.0452 |
| rs17175238  | A | -0.0574 |
| rs78892326  | A | 0.0502  |
| rs16963261  | C | 0.0471  |
| rs2343081   | A | -0.0451 |
| rs117927985 | A | 0.072   |
| rs7987291   | G | 0.0333  |
| rs7981033   | T | 0.024   |
| rs9537988   | A | -0.0575 |
| rs11616792  | T | 0.0204  |
| rs9318174   | T | 0.0211  |
| rs116855427 | C | -0.0647 |
| rs118148141 | C | 0.0673  |
| rs75638573  | C | 0.0953  |
| rs4436677   | A | -0.0169 |
| rs615057    | G | 0.0191  |
| rs3918327   | C | 0.0172  |
| rs117241859 | G | 0.0788  |

|             |   |         |
|-------------|---|---------|
| rs61953962  | G | 0.0358  |
| rs1327966   | G | -0.0323 |
| rs55751224  | C | -0.018  |
| rs61945520  | G | -0.0272 |
| rs75931480  | A | 0.0672  |
| rs2485785   | G | -0.1071 |
| rs151184659 | T | -0.1078 |
| rs141847977 | C | -0.1149 |
| rs61973228  | A | 0.0945  |
| rs2164080   | T | -0.0175 |
| rs9525717   | A | -0.0178 |
| rs7986811   | A | 0.0218  |
| rs1961326   | T | -0.0182 |
| rs4886250   | C | -0.0181 |
| rs11839320  | T | 0.0192  |
| rs912932    | T | 0.0243  |
| rs117878210 | A | 0.0928  |
| rs9531239   | G | -0.0186 |
| rs78035902  | A | -0.1098 |
| rs9509829   | C | 0.0166  |
| rs2298058   | T | 0.0175  |
| rs73159069  | G | -0.0399 |
| rs73181165  | C | 0.1299  |
| rs72664722  | G | 0.0378  |
| rs74936919  | A | 0.0371  |
| rs145132398 | C | -0.0565 |
| rs874497    | T | -0.0195 |
| rs139447113 | A | -0.0878 |
| rs7334194   | T | 0.0219  |
| rs72629495  | T | 0.04    |
| rs9582224   | A | 0.0245  |
| rs1335656   | A | -0.0158 |
| rs9315235   | T | 0.0424  |
| rs116346890 | C | -0.0536 |
| rs140288968 | G | 0.072   |
| rs148877415 | C | 0.0844  |
| rs116915105 | T | -0.0766 |
| rs1751003   | A | -0.0231 |
| rs9515107   | A | 0.0254  |
| rs78425537  | A | -0.0746 |
| rs61970768  | C | 0.088   |
| rs76784644  | A | 0.0547  |
| rs79373883  | T | 0.0557  |
| rs117984782 | A | -0.0614 |
| rs17679865  | G | -0.0509 |
| rs73200141  | G | 0.0562  |
| rs117772653 | C | -0.0594 |

|             |   |         |
|-------------|---|---------|
| rs140167809 | T | 0.0381  |
| rs115055335 | A | -0.1185 |
| rs9536334   | G | 0.0162  |
| rs451270    | T | -0.0242 |
| rs9888519   | G | 0.051   |
| rs995023    | T | 0.0232  |
| rs117862680 | G | -0.0807 |
| rs73237426  | T | -0.0783 |
| rs4773316   | A | -0.0354 |
| rs140109071 | A | -0.0891 |
| rs16959897  | G | 0.0324  |
| rs34798890  | T | -0.1389 |
| rs61965473  | T | -0.0859 |
| rs9332063   | G | 0.0771  |
| rs61961473  | T | 0.0688  |
| rs2050579   | C | -0.0448 |
| rs1782790   | C | 0.0285  |
| rs41481747  | T | 0.0186  |
| rs79724979  | C | -0.07   |
| rs112512242 | G | 0.0957  |
| rs35793695  | T | -0.0425 |
| rs9652256   | A | 0.0308  |
| rs142959067 | C | 0.0847  |
| rs7326084   | T | -0.0347 |
| rs2854344   | A | 0.0313  |
| rs17644289  | C | 0.0894  |
| rs1977709   | A | -0.0161 |
| rs7994097   | G | 0.0248  |
| rs61946763  | G | 0.022   |
| rs34484096  | T | 0.0193  |
| rs112291348 | T | -0.0577 |
| rs67894225  | G | 0.0418  |
| rs117145885 | T | -0.116  |
| rs77952988  | A | -0.0895 |
| rs55947539  | T | 0.0289  |
| rs61107407  | G | 0.099   |
| rs2721043   | A | 0.0261  |
| rs34038050  | C | -0.019  |
| rs118151364 | T | 0.0856  |
| rs111247644 | G | -0.0842 |
| rs112092158 | A | -0.0667 |
| rs1318389   | A | 0.1037  |
| rs2260462   | C | -0.0488 |
| rs141444097 | A | -0.0791 |
| rs11839110  | A | 0.1438  |
| rs12867747  | G | -0.0229 |
| rs73203674  | T | -0.0497 |

|             |   |         |
|-------------|---|---------|
| rs117330319 | T | 0.055   |
| rs147058261 | G | 0.1002  |
| rs74703501  | A | 0.0419  |
| rs9586995   | T | -0.031  |
| rs71434703  | G | 0.1104  |
| rs9569552   | G | -0.0216 |
| rs73220099  | A | 0.0629  |
| rs75501492  | G | 0.033   |
| rs9578971   | G | -0.0394 |
| rs7997094   | T | 0.0723  |
| rs2760316   | T | 0.0494  |
| rs9542167   | C | 0.0222  |
| rs882343    | A | -0.0701 |
| rs9524289   | C | 0.0518  |
| rs9318486   | T | 0.0212  |
| rs146554879 | C | 0.0546  |
| rs7993856   | A | -0.0357 |
| rs117716649 | T | -0.1024 |
| rs11839782  | C | -0.0441 |
| rs7336200   | C | 0.0246  |
| rs9594926   | G | -0.0481 |
| rs7335667   | A | -0.0191 |
| rs1398587   | C | -0.0196 |
| rs79250211  | C | -0.0833 |
| rs17517971  | A | 0.0368  |
| rs9535611   | T | -0.0411 |
| rs9556866   | A | -0.0486 |
| rs1853849   | C | -0.0212 |
| rs7321849   | T | 0.0241  |
| rs142366656 | C | 0.0729  |
| rs112076473 | G | -0.0601 |
| rs118180064 | A | 0.0797  |
| rs76210711  | A | -0.0484 |
| rs17052838  | T | -0.1173 |
| rs16967015  | G | 0.0379  |
| rs732082    | G | 0.0165  |
| rs113125970 | G | -0.0474 |
| rs78760613  | C | -0.0609 |
| rs396150    | G | -0.0156 |
| rs116989664 | A | -0.0956 |
| rs79752396  | A | -0.0727 |
| rs17475847  | T | 0.0258  |
| rs791989    | A | 0.0184  |
| rs77518533  | A | -0.083  |
| rs2388548   | T | 0.0169  |
| rs9571672   | G | 0.0171  |
| rs9557044   | T | 0.0472  |

|             |   |         |
|-------------|---|---------|
| rs9526848   | C | -0.0332 |
| rs2315312   | A | 0.0282  |
| rs74475861  | A | 0.1287  |
| rs80187936  | A | -0.0486 |
| rs77066028  | A | 0.0302  |
| rs9557878   | C | 0.0786  |
| rs406051    | T | -0.0475 |
| rs9568989   | G | 0.0268  |
| rs9507048   | C | -0.0187 |
| rs1928382   | G | -0.0176 |
| rs151066507 | T | -0.1005 |
| rs9531699   | C | -0.0194 |
| rs56366991  | A | 0.1515  |
| rs2806298   | C | -0.0212 |
| rs74796494  | T | -0.1305 |
| rs76808959  | A | 0.1019  |
| rs79347077  | C | 0.102   |
| rs141357679 | A | -0.0935 |
| rs118137757 | C | 0.1211  |
| rs2325304   | A | -0.0234 |
| rs12429089  | A | 0.0351  |
| rs2984842   | T | 0.0169  |
| rs111998719 | G | 0.0945  |
| rs2555611   | A | 0.0164  |
| rs34771966  | T | 0.0401  |
| rs7997831   | T | -0.0177 |
| rs7990932   | G | -0.0175 |
| rs117801148 | A | -0.0668 |
| rs7336325   | T | -0.0167 |
| rs6492752   | T | 0.0576  |
| rs2202359   | A | -0.016  |
| rs17269215  | A | -0.0577 |
| rs9591983   | A | -0.0355 |
| rs7996746   | T | 0.0255  |
| rs11840143  | C | 0.018   |
| rs149131345 | A | 0.0314  |
| rs12868692  | T | 0.0514  |
| rs1411545   | A | 0.0187  |
| rs56865928  | C | 0.0481  |
| rs117306125 | A | 0.0645  |
| rs4769306   | A | 0.053   |
| rs9571859   | G | -0.0334 |
| rs11841777  | A | 0.0209  |
| rs76215935  | C | 0.0544  |
| rs7337905   | G | -0.0184 |
| rs117981522 | G | -0.083  |
| rs141695005 | T | 0.0381  |



|             |   |         |
|-------------|---|---------|
| rs1169359   | T | 0.0586  |
| rs61958881  | G | -0.0579 |
| rs73160327  | T | 0.0332  |
| rs79062730  | A | 0.0745  |
| rs79036443  | C | 0.0549  |
| rs686323    | A | -0.0171 |
| rs72628027  | G | 0.0332  |
| rs9543290   | T | 0.0296  |
| rs1838557   | G | 0.0168  |
| rs9564197   | T | -0.0578 |
| rs78354294  | A | 0.0615  |
| rs61947220  | T | 0.0516  |
| rs12861843  | C | 0.0161  |
| rs117289364 | G | -0.0829 |
| rs72660312  | A | 0.0646  |
| rs72657764  | C | -0.1293 |
| rs75930991  | C | 0.0589  |
| rs118000447 | T | 0.0462  |
| rs9546322   | T | -0.0167 |
| rs9518040   | G | -0.1061 |
| rs9580635   | G | -0.039  |
| rs78019863  | C | 0.0578  |
| rs118162958 | C | 0.0629  |
| rs12429560  | A | 0.0878  |
| rs113651020 | G | 0.0908  |
| rs77283201  | A | 0.0725  |
| rs80285060  | A | -0.0945 |
| rs9574334   | C | -0.0606 |
| rs59737182  | C | -0.1407 |
| rs72667763  | T | -0.0608 |
| rs11069810  | A | -0.0249 |
| rs149213886 | C | 0.0803  |
| rs149929226 | A | -0.0705 |
| rs117337367 | G | -0.0537 |
| rs9315043   | A | 0.0632  |
| rs17238759  | T | 0.0752  |
| rs117259790 | G | -0.1558 |
| rs9517208   | G | -0.0211 |
| rs1047769   | G | -0.0529 |
| rs389998    | A | 0.0253  |
| rs9601606   | G | -0.102  |
| rs78010796  | C | 0.0249  |
| rs9574071   | G | -0.0157 |
| rs9507527   | C | -0.0381 |
| rs59135744  | G | -0.0473 |
| rs115141273 | T | -0.042  |
| rs143103781 | T | 0.1     |

|             |   |         |
|-------------|---|---------|
| rs9587439   | G | -0.0343 |
| rs7333164   | C | -0.0184 |
| rs111522881 | T | 0.088   |
| rs7329894   | C | -0.0624 |
| rs17580625  | G | -0.0316 |
| rs74780028  | A | -0.1175 |
| rs1808050   | G | -0.016  |
| rs1931470   | C | -0.0304 |
| rs9559422   | T | 0.0438  |
| rs9315411   | T | -0.0926 |
| rs12862787  | C | -0.0179 |
| rs72662936  | A | -0.1188 |
| rs73162320  | C | 0.1125  |
| rs74041405  | C | 0.0408  |
| rs12428023  | T | 0.0269  |
| rs142272426 | T | -0.0566 |
| rs17086824  | A | -0.0263 |
| rs111689935 | T | 0.0538  |
| rs1819766   | G | 0.0156  |
| rs921532    | T | 0.0257  |
| rs73611013  | C | 0.1482  |
| rs6562646   | C | -0.0185 |
| rs7986491   | T | 0.0159  |
| rs4133190   | A | -0.0695 |
| rs72652876  | T | -0.0294 |
| rs1760861   | C | -0.0517 |
| rs1330946   | C | -0.0183 |
| rs77503076  | C | -0.0917 |
| rs77361089  | T | 0.0492  |
| rs7328960   | T | 0.0166  |
| rs2298229   | G | 0.0187  |
| rs17380388  | C | -0.0574 |
| rs12864657  | G | -0.0648 |
| rs4941451   | C | 0.0153  |
| rs4941519   | T | 0.0456  |
| rs75142943  | T | 0.031   |
| rs9536794   | G | 0.0208  |
| rs754509    | A | 0.0534  |
| rs12428033  | A | 0.0616  |
| rs118024212 | A | -0.0807 |
| rs76156318  | G | -0.0718 |
| rs11618843  | C | 0.0308  |
| rs7337310   | C | 0.0177  |
| rs12427773  | A | -0.0856 |
| rs9544295   | T | 0.0253  |
| rs150807458 | C | -0.0882 |
| rs12877854  | C | 0.1201  |

|             |   |         |
|-------------|---|---------|
| rs117452318 | A | 0.0719  |
| rs117280701 | G | 0.1526  |
| rs116155634 | G | 0.0499  |
| rs72646405  | T | -0.0482 |
| rs73224691  | T | 0.0714  |
| rs797226    | A | 0.0165  |
| rs77814269  | A | 0.0872  |
| rs74776797  | C | -0.1244 |
| rs462954    | G | 0.0242  |
| rs61946396  | T | 0.0638  |
| rs60067514  | T | -0.0359 |
| rs9513455   | T | 0.1038  |
| rs16958205  | T | -0.0332 |
| rs74073007  | T | 0.0846  |
| rs75341370  | A | 0.061   |
| rs117373526 | T | -0.0847 |
| rs72656103  | A | -0.0501 |
| rs1928573   | T | 0.0388  |
| rs4772411   | C | 0.0173  |
| rs116928367 | T | 0.1195  |
| rs71432842  | T | 0.0522  |
| rs9520377   | C | 0.0273  |
| rs76072005  | G | 0.0386  |
| rs149822997 | A | -0.0723 |
| rs9544012   | G | 0.1237  |
| rs78339514  | A | -0.146  |
| rs7985488   | T | -0.02   |
| rs80126725  | A | 0.0493  |
| rs9741667   | A | 0.0399  |
| rs4886060   | A | 0.0255  |
| rs9558802   | G | 0.0308  |
| rs71446935  | A | -0.0219 |
| rs8001568   | C | 0.0272  |
| rs6561147   | C | -0.0551 |
| rs9556314   | G | -0.0166 |
| rs12429532  | T | -0.0841 |
| rs1320517   | T | 0.018   |
| rs1537333   | G | 0.034   |
| rs77185048  | A | 0.0521  |
| rs9533791   | G | -0.0204 |
| rs1449578   | C | 0.0169  |
| rs66495562  | C | -0.0232 |
| rs149785128 | G | 0.0629  |
| rs9519644   | G | -0.0241 |
| rs117589604 | A | 0.1324  |
| rs117977750 | T | 0.1131  |
| rs79219898  | A | -0.027  |

|             |   |         |
|-------------|---|---------|
| rs75883313  | C | 0.0654  |
| rs9510422   | C | 0.0195  |
| rs6561402   | C | -0.0156 |
| rs9599508   | T | 0.0158  |
| rs9517480   | C | -0.0839 |
| rs7331804   | T | 0.0194  |
| rs111805005 | A | -0.0386 |
| rs4943078   | C | -0.0187 |
| rs2028871   | T | -0.0231 |
| rs78378344  | T | -0.0382 |
| rs7994500   | C | 0.024   |
| rs140328019 | A | -0.0548 |
| rs73186316  | C | -0.0717 |
| rs116549025 | C | 0.0852  |
| rs2148647   | A | 0.0168  |
| rs142077273 | C | 0.1179  |
| rs75876142  | C | 0.028   |
| rs9539836   | C | -0.0177 |
| rs1279448   | C | 0.0214  |
| rs79700119  | G | -0.0572 |
| rs112570591 | T | -0.0642 |
| rs9562953   | G | -0.0273 |
| rs9573123   | C | -0.0516 |
| rs3825435   | G | 0.0161  |
| rs9559711   | G | -0.0284 |
| rs7985756   | T | 0.0184  |
| rs9561465   | G | 0.051   |
| rs145126365 | T | -0.1071 |
| rs546022    | A | -0.0169 |
| rs2447988   | C | -0.0521 |
| rs74426548  | T | -0.0492 |
| rs34587632  | C | 0.0956  |
| rs9521696   | G | 0.0234  |
| rs9520823   | G | -0.0176 |
| rs9508675   | G | 0.0211  |
| rs79806370  | C | 0.1234  |
| rs7331214   | G | -0.0477 |
| rs75704482  | A | -0.077  |
| rs34557598  | G | 0.0795  |
| rs11841556  | T | 0.0336  |
| rs140569602 | G | 0.1024  |
| rs78195742  | T | 0.0808  |
| rs17076258  | A | 0.0216  |
| rs4941919   | C | 0.0224  |
| rs9534678   | A | 0.0574  |
| rs9586805   | T | -0.0196 |
| rs35124164  | C | -0.0417 |

|             |   |         |
|-------------|---|---------|
| rs7994556   | T | -0.0179 |
| rs9560478   | T | -0.027  |
| rs78374630  | G | -0.092  |
| rs2476320   | G | -0.0471 |
| rs61964582  | T | 0.0599  |
| rs7335289   | C | 0.0162  |
| rs56060897  | G | -0.0245 |
| rs114247008 | C | -0.0398 |
| rs77424065  | G | 0.0726  |
| rs17209311  | C | -0.0394 |
| rs9592095   | C | -0.0336 |
| rs117398817 | A | -0.0836 |
| rs182977    | T | 0.0223  |
| rs117463969 | T | 0.1024  |
| rs55796606  | G | 0.0379  |
| rs61970304  | A | -0.0762 |
| rs11618747  | C | -0.0902 |
| rs9318309   | C | -0.0218 |
| rs17435472  | G | -0.0279 |
| rs61961480  | G | -0.045  |
| rs7324712   | G | -0.015  |
| rs73224429  | T | -0.0746 |
| rs117735245 | C | -0.0582 |
| rs75940869  | A | 0.072   |
| rs1333592   | G | -0.022  |
| rs117805076 | C | -0.0946 |
| rs9805154   | C | 0.0336  |
| rs138360090 | G | -0.1153 |
| rs4943514   | T | -0.02   |
| rs117533356 | A | -0.0823 |
| rs9515653   | T | -0.021  |
| rs112108436 | T | -0.0489 |
| rs72672434  | C | 0.0681  |
| rs78117244  | T | 0.0549  |
| rs9316867   | C | -0.0369 |
| rs9580557   | G | 0.0328  |
| rs9595531   | A | 0.0232  |
| rs9537938   | G | 0.0162  |
| rs1324015   | A | 0.0156  |
| rs9536946   | T | 0.0159  |
| rs7489550   | A | 0.0191  |
| rs146543759 | A | 0.0814  |
| rs7996092   | T | 0.0341  |
| rs9530251   | A | 0.0152  |
| rs116942915 | A | -0.1211 |
| rs7334319   | G | -0.0164 |
| rs79451686  | A | 0.0506  |

|             |   |         |
|-------------|---|---------|
| rs4772051   | G | 0.0336  |
| rs66774646  | A | 0.025   |
| rs148912634 | T | 0.1205  |
| rs117116200 | A | -0.0557 |
| rs73189641  | G | -0.0415 |
| rs287503    | A | 0.0782  |
| rs139890389 | A | -0.0545 |
| rs73181196  | A | -0.0442 |
| rs72638091  | A | -0.0171 |
| rs2765122   | A | -0.023  |
| rs4885988   | A | -0.0803 |
| rs1372456   | G | 0.1337  |
| rs34342493  | G | 0.0194  |
| rs17061133  | T | 0.0321  |
| rs17791450  | A | 0.0287  |
| rs142230859 | C | 0.0487  |
| rs9318673   | A | -0.0171 |
| rs78996156  | C | -0.0561 |
| rs78207021  | C | 0.079   |
| rs34096490  | A | 0.026   |
| rs73251365  | T | -0.0453 |
| rs75196618  | T | -0.0418 |
| rs147306037 | C | -0.0677 |
| rs75613923  | T | 0.0716  |
| rs997686    | T | 0.0709  |
| rs67869188  | G | -0.02   |
| rs9540463   | T | 0.0272  |
| rs9510016   | A | 0.018   |
| rs4299053   | A | -0.0151 |
| rs34955425  | A | 0.017   |
| rs79529354  | T | -0.0711 |
| rs9511838   | A | -0.0509 |
| rs116853410 | C | -0.0706 |
| rs77686265  | C | 0.1211  |
| rs72657819  | C | -0.0197 |
| rs142747148 | G | 0.0672  |
| rs7317059   | G | -0.0161 |
| rs914936    | A | 0.0224  |
| rs117402001 | G | 0.0822  |
| rs144272093 | G | -0.0574 |
| rs11620140  | C | -0.0318 |
| rs432701    | G | -0.0166 |
| rs78901714  | A | 0.0394  |
| rs12427572  | C | 0.1315  |
| rs76297369  | G | -0.0617 |
| rs147113003 | A | 0.0664  |
| rs9545838   | A | 0.0153  |

|             |   |         |
|-------------|---|---------|
| rs73173377  | A | 0.0353  |
| rs35613089  | G | 0.0199  |
| rs55747972  | T | 0.0451  |
| rs2497199   | G | 0.0414  |
| rs117920922 | A | 0.0392  |
| rs74129462  | T | 0.0817  |
| rs34914837  | G | -0.0736 |
| rs73551843  | T | -0.0309 |
| rs2021155   | G | 0.0153  |
| rs72639931  | C | -0.0804 |
| rs3901539   | G | 0.0307  |
| rs142400173 | G | -0.0899 |
| rs1970023   | C | 0.0213  |
| rs1891943   | A | 0.0221  |
| rs9537345   | G | 0.0252  |
| rs4254194   | A | 0.0152  |
| rs73171812  | A | -0.0344 |
| rs7490643   | T | -0.1142 |
| rs3803229   | A | 0.0161  |
| rs9565345   | A | -0.0196 |
| rs886347    | G | -0.0149 |
| rs7325217   | T | 0.0164  |
| rs9507775   | G | -0.0486 |
| rs116935656 | G | 0.0477  |
| rs78234607  | A | 0.0411  |
| rs9300766   | T | -0.0154 |
| rs9316531   | G | 0.0179  |
| rs907730    | T | 0.0228  |
| rs72656295  | G | 0.0302  |
| rs17488034  | G | 0.0308  |
| rs148739778 | G | -0.0756 |
| rs138345734 | T | -0.0807 |
| rs9558964   | T | -0.0211 |
| rs9535550   | G | 0.0215  |
| rs112189012 | G | -0.0737 |
| rs61955708  | A | 0.0883  |
| rs3790029   | C | -0.0296 |
| rs143306912 | C | -0.0685 |
| rs148098927 | A | -0.1003 |
| rs117431524 | T | -0.0957 |
| rs2151385   | C | 0.0174  |
| rs7336489   | T | 0.0245  |
| rs798958    | C | 0.0153  |
| rs9523793   | A | 0.017   |
| rs117088090 | A | -0.1119 |
| rs73442558  | G | 0.0753  |
| rs1327953   | A | -0.0181 |

|             |   |         |
|-------------|---|---------|
| rs1410338   | A | -0.0552 |
| rs72656468  | C | 0.0171  |
| rs113179795 | T | 0.0687  |
| rs9542174   | G | 0.0151  |
| rs34644481  | A | 0.0918  |
| rs9597178   | C | 0.0203  |
| rs9561658   | T | -0.0157 |
| rs9516991   | C | -0.0689 |
| rs7333246   | G | 0.0203  |
| rs9562299   | G | 0.03    |
| rs146203395 | T | 0.0763  |
| rs7330343   | T | 0.0245  |
| rs337956    | T | 0.0195  |
| rs11840596  | C | -0.0284 |
| rs9300812   | A | -0.0245 |
| rs7998310   | A | 0.0231  |
| rs76131108  | T | -0.0569 |
| rs285060    | G | -0.0169 |
| rs118093297 | T | 0.0756  |
| rs61946633  | G | -0.0203 |
| rs72641423  | A | 0.0214  |
| rs151131798 | A | 0.0762  |
| rs76601026  | C | -0.1068 |
| rs61944947  | A | 0.0314  |
| rs9919834   | A | 0.0507  |
| rs12865444  | A | 0.0238  |
| rs78067724  | G | -0.044  |
| rs4773830   | G | 0.0146  |
| rs76538806  | G | -0.1007 |
| rs716520    | G | 0.0271  |
| rs72652224  | T | -0.0438 |
| rs2898219   | A | -0.019  |
| rs4885017   | A | -0.0198 |
| rs9594071   | A | 0.015   |
| rs71440060  | T | 0.0829  |
| rs9537522   | G | 0.0204  |
| rs3121782   | C | -0.0196 |
| rs117953762 | C | -0.0687 |
| rs113384252 | C | 0.086   |
| rs9602061   | T | 0.0618  |
| rs9301404   | C | 0.0385  |
| rs17520245  | T | -0.0655 |
| rs9603772   | A | 0.0248  |
| rs9315550   | T | -0.0771 |
| rs9506713   | G | -0.0189 |
| rs7318413   | G | 0.0575  |
| rs183272    | T | 0.0173  |



|             |   |         |
|-------------|---|---------|
| rs2769289   | T | -0.0996 |
| rs6561620   | T | 0.0154  |
| rs9530422   | T | -0.0604 |
| rs139291714 | G | 0.1453  |
| rs16974351  | T | 0.0416  |
| rs2775151   | A | -0.0148 |
| rs74114232  | T | 0.0544  |
| rs78972779  | C | 0.0663  |
| rs729715    | C | 0.0305  |
| rs11148854  | G | -0.0385 |
| rs12872056  | G | -0.0406 |
| rs78041434  | T | 0.0499  |
| rs35793500  | C | 0.0512  |
| rs4489851   | T | 0.0167  |
| rs4770647   | G | -0.0188 |
| rs9634736   | A | 0.0295  |
| rs4150374   | G | -0.0484 |
| rs9600178   | T | 0.0314  |
| rs9533435   | C | -0.0151 |
| rs117493342 | G | 0.0535  |
| rs17062184  | G | 0.0283  |
| rs55929669  | C | -0.0272 |
| rs74085342  | C | 0.0914  |
| rs10507665  | T | 0.06    |
| rs269588    | G | 0.0163  |
| rs9510277   | T | 0.0468  |
| rs111962200 | G | -0.188  |
| rs78386548  | C | 0.0195  |
| rs114340424 | C | 0.0789  |
| rs1207952   | A | 0.0154  |
| rs13378283  | T | 0.0151  |
| rs117042390 | C | 0.103   |
| rs9518278   | C | -0.0206 |
| rs78450784  | C | -0.0393 |
| rs118056972 | A | -0.0499 |
| rs7328437   | G | 0.04    |
| rs4942047   | G | 0.0487  |
| rs118155209 | G | 0.0539  |
| rs9506323   | G | -0.0197 |
| rs9530340   | G | 0.0598  |
| rs80124057  | A | 0.0592  |
| rs61948272  | G | 0.078   |
| rs9516376   | C | 0.0233  |
| rs1078061   | A | -0.0192 |
| rs76289331  | G | -0.0632 |
| rs78149100  | A | -0.1187 |
| rs9541675   | G | -0.0156 |

|             |   |         |
|-------------|---|---------|
| rs4770642   | A | 0.0332  |
| rs2004552   | G | -0.0459 |
| rs73186708  | C | -0.0201 |
| rs11617228  | C | 0.0173  |
| rs118159758 | A | -0.0623 |
| rs1329701   | T | 0.0158  |
| rs61965327  | G | 0.0499  |
| rs73234112  | T | -0.0742 |
| rs9509596   | G | -0.0255 |
| rs61946577  | A | -0.0379 |
| rs139920913 | A | -0.0878 |
| rs117912798 | G | -0.1307 |
| rs2404598   | C | -0.0262 |
| rs72485607  | T | 0.0493  |
| rs79208989  | T | -0.0402 |
| rs9534493   | A | -0.0286 |
| rs138486696 | T | -0.107  |
| rs9513021   | C | -0.1073 |
| rs45461897  | T | -0.0636 |
| rs75566416  | T | -0.0177 |
| rs1924617   | C | 0.0931  |
| rs4885095   | T | -0.0175 |
| rs117709876 | G | 0.0704  |
| rs76745526  | A | -0.0506 |
| rs10492391  | G | 0.0247  |
| rs12716674  | T | 0.0176  |
| rs9517773   | G | 0.0274  |
| rs72641951  | A | -0.0484 |
| rs17284275  | C | 0.0498  |
| rs1333555   | T | 0.0223  |
| rs1407761   | A | -0.0147 |
| rs80172131  | A | 0.0518  |
| rs141358645 | T | -0.0733 |
| rs9546206   | T | 0.0165  |
| rs73252483  | A | 0.0815  |
| rs74582529  | T | 0.0412  |
| rs4942365   | G | 0.0324  |
| rs7990378   | A | -0.0277 |
| rs61967013  | T | 0.0398  |
| rs142676139 | T | -0.0868 |
| rs117097095 | T | -0.0941 |
| rs141908729 | A | 0.0858  |
| rs9533044   | G | -0.0233 |
| rs73177343  | T | 0.0174  |
| rs117219811 | T | 0.0579  |
| rs9546234   | T | 0.0639  |
| rs79893639  | G | -0.0282 |

|             |   |         |
|-------------|---|---------|
| rs71437884  | A | 0.0194  |
| rs112740347 | G | 0.0353  |
| rs147434330 | T | -0.0776 |
| rs595825    | T | 0.0252  |
| rs113082478 | C | 0.0172  |
| rs112254392 | A | 0.052   |
| rs10507748  | C | 0.0902  |
| rs72640667  | A | -0.0335 |
| rs61964212  | A | 0.033   |
| rs617478    | T | 0.0313  |
| rs111826184 | T | -0.0622 |
| rs9524673   | G | 0.0206  |
| rs118155534 | A | -0.1196 |
| rs138248637 | C | 0.0774  |
| rs9528821   | A | 0.0158  |
| rs73186529  | C | 0.1134  |
| rs9540740   | A | 0.0297  |
| rs73210750  | T | 0.0519  |
| rs117318203 | C | -0.0385 |
| rs56255874  | G | -0.0624 |
| rs111240762 | G | -0.0712 |
| rs13378828  | A | 0.0363  |
| rs9564187   | T | 0.0208  |
| rs34988218  | A | -0.0429 |
| rs3933244   | G | 0.0192  |
| rs9539162   | T | 0.0149  |
| rs213601    | T | 0.0151  |
| rs71431383  | T | -0.0571 |
| rs9594377   | C | 0.0828  |
| rs9528325   | A | -0.0241 |
| rs28688247  | T | 0.028   |
| rs9560117   | A | -0.0154 |
| rs2182881   | G | -0.015  |
| rs116992887 | A | -0.115  |
| rs12429134  | C | 0.0233  |
| rs9518513   | C | -0.0214 |
| rs2706230   | A | -0.016  |
| rs76471930  | A | 0.1061  |
| rs34769873  | C | -0.0285 |
| rs7331923   | G | -0.0289 |
| rs2755221   | A | 0.0212  |
| rs117274920 | A | -0.0828 |
| rs9573461   | A | 0.0413  |
| rs3783212   | G | 0.0177  |
| rs9558458   | A | -0.0316 |
| rs9315066   | G | 0.0198  |
| rs12863860  | A | -0.0871 |

|             |   |         |
|-------------|---|---------|
| rs116997389 | G | -0.1044 |
| rs9510565   | G | -0.0178 |
| rs7989554   | T | 0.0148  |
| rs73241671  | T | -0.0691 |
| rs9514481   | C | -0.1277 |
| rs9551089   | G | -0.0243 |
| rs116667405 | T | 0.043   |
| rs1327740   | C | 0.0148  |
| rs112522542 | T | 0.0829  |
| rs2096036   | A | 0.0572  |
| rs61966003  | A | 0.0741  |
| rs75543367  | A | 0.0573  |
| rs117633117 | T | -0.1239 |
| rs73186515  | G | 0.0624  |
| rs79315675  | A | 0.0334  |
| rs1445252   | T | -0.019  |
| rs11618867  | T | -0.0537 |
| rs58641810  | T | 0.0724  |
| rs9513476   | T | -0.0401 |
| rs56165879  | G | -0.0199 |
| rs117046242 | C | -0.0651 |
| rs75987550  | G | 0.0819  |
| rs3132356   | C | 0.0189  |
| rs77232105  | C | -0.0583 |
| rs8002688   | T | 0.0704  |
| rs17076714  | C | 0.066   |
| rs113188378 | T | -0.0233 |
| rs117817230 | C | -0.0568 |
| rs72651131  | T | 0.0996  |
| rs1414320   | G | -0.0257 |
| rs1927384   | G | -0.02   |
| rs76992192  | A | -0.0701 |
| rs9805255   | T | -0.0252 |
| rs319573    | T | -0.0147 |
| rs12430001  | T | 0.0352  |
| rs117761456 | T | 0.1074  |
| rs145739006 | A | 0.0947  |
| rs61003188  | T | 0.0269  |
| rs1337951   | T | -0.0856 |
| rs9534412   | A | -0.024  |
| rs72636493  | T | -0.0211 |
| rs9545296   | G | 0.0376  |
| rs74520663  | A | 0.0774  |
| rs9573143   | A | -0.0357 |
| rs76185184  | A | 0.0475  |
| rs6492315   | G | -0.0211 |
| rs73226026  | C | 0.0302  |

|             |   |         |
|-------------|---|---------|
| rs7317425   | A | 0.0618  |
| rs12870815  | G | -0.0227 |
| rs12430612  | C | 0.0643  |
| rs56004391  | T | 0.1139  |
| rs73205468  | C | -0.0691 |
| rs7332923   | C | -0.028  |
| rs74718766  | G | -0.0361 |
| rs672151    | A | 0.0172  |
| rs9518934   | T | -0.0776 |
| rs11839075  | T | 0.0277  |
| rs7337159   | T | -0.0246 |
| rs7321705   | C | -0.0214 |
| rs9579263   | C | 0.0546  |
| rs138798318 | G | -0.0861 |
| rs7491289   | T | 0.0151  |
| rs12428888  | T | 0.0223  |
| rs9520426   | T | 0.0273  |
| rs17213829  | T | 0.0533  |
| rs36048590  | A | 0.0926  |
| rs4566049   | C | -0.0161 |
| rs116852904 | A | 0.0598  |
| rs9517081   | G | -0.0143 |
| rs72638444  | A | 0.0313  |
| rs955783    | T | -0.0148 |
| rs9316569   | C | -0.0161 |
| rs1517894   | A | -0.0146 |
| rs77225858  | T | -0.0561 |
| rs9559300   | G | 0.0168  |
| rs72659584  | T | 0.0158  |
| rs138791233 | A | 0.0829  |
| rs12864409  | A | -0.0464 |
| rs112125906 | A | 0.0731  |
| rs34856963  | A | -0.0248 |
| rs7325833   | A | -0.0618 |
| rs9573096   | C | -0.0184 |
| rs7995527   | G | 0.0148  |
| rs9528116   | T | 0.0311  |
| rs9576996   | C | -0.0331 |
| rs141386488 | A | -0.095  |
| rs2325033   | T | 0.0165  |
| rs148819138 | C | 0.0778  |
| rs9571836   | T | -0.0169 |
| rs77050557  | A | -0.0627 |
| rs78887429  | C | 0.0302  |
| rs74571605  | G | -0.0619 |
| rs117822967 | T | -0.0705 |
| rs79731902  | G | 0.0713  |

|             |   |         |
|-------------|---|---------|
| rs79346234  | T | -0.0359 |
| rs9522292   | G | 0.0144  |
| rs9562400   | C | -0.0181 |
| rs76313649  | A | 0.0384  |
| rs146658265 | T | -0.0257 |
| rs1887260   | T | -0.024  |
| rs17058557  | A | 0.0295  |
| rs9569892   | A | -0.0261 |
| rs143997905 | T | 0.057   |
| rs150749538 | A | 0.022   |
| rs58977136  | G | -0.0313 |
| rs78941715  | C | 0.0427  |
| rs9547663   | A | -0.016  |
| rs78645586  | A | 0.0854  |
| rs76740716  | G | -0.0647 |
| rs141987255 | A | -0.1    |
| rs9557934   | G | -0.0666 |
| rs117811317 | C | 0.0483  |
| rs34494544  | C | 0.0539  |
| rs117836547 | T | 0.0532  |
| rs340582    | G | -0.0283 |
| rs8002177   | A | 0.0263  |
| rs9533346   | G | 0.0405  |
| rs80112166  | A | -0.0619 |
| rs1446784   | C | -0.0853 |
| rs9523336   | G | 0.0858  |
| rs140041880 | A | 0.0722  |
| rs6416361   | T | 0.0258  |
| rs17517037  | T | 0.0179  |
| rs1557023   | A | 0.0215  |
| rs78758263  | T | -0.0889 |
| rs4111022   | C | -0.0144 |
| rs7991693   | T | 0.0166  |
| rs76617118  | A | 0.0551  |
| rs41275066  | A | -0.0792 |
| rs213616    | A | 0.0198  |
| rs75101270  | C | -0.0603 |
| rs9315431   | C | 0.0159  |
| rs78513590  | G | 0.0525  |
| rs1327745   | G | 0.0144  |
| rs12430038  | A | 0.0347  |
| rs9514374   | C | 0.0151  |
| rs28446396  | C | 0.0324  |
| rs10161824  | A | 0.0633  |
| rs2806767   | T | 0.0217  |
| rs61968689  | G | 0.0172  |
| rs9555162   | G | 0.0223  |

|             |   |         |
|-------------|---|---------|
| rs12857048  | A | 0.0456  |
| rs9572797   | T | 0.0177  |
| rs56026430  | T | -0.0397 |
| rs7985739   | T | 0.0184  |
| rs11069344  | C | 0.0353  |
| rs9587318   | G | -0.0362 |
| rs146300723 | G | 0.0677  |
| rs11149004  | C | 0.0531  |
| rs117728287 | A | -0.074  |
| rs12585823  | G | -0.0285 |
| rs9521515   | C | -0.0145 |
| rs72644449  | C | 0.0421  |
| rs7981756   | T | -0.02   |
| rs2706240   | C | 0.0258  |
| rs78454047  | T | 0.0582  |
| rs2008104   | C | 0.0307  |
| rs11618504  | T | 0.0287  |
| rs554997    | C | 0.018   |
| rs4130407   | T | -0.053  |
| rs17770207  | T | 0.0155  |
| rs13313280  | C | -0.0428 |
| rs60498415  | A | -0.0304 |
| rs7320290   | A | -0.0159 |
| rs143315146 | C | -0.0656 |
| rs9509871   | C | -0.024  |
| rs80131705  | T | 0.0873  |
| rs7997951   | C | -0.0508 |
| rs144251629 | C | 0.0743  |
| rs9544220   | C | 0.0166  |
| rs76247971  | A | -0.0937 |
| rs145215122 | A | 0.0807  |
| rs117463805 | G | -0.0316 |
| rs12867411  | T | -0.0373 |
| rs79672407  | A | -0.1236 |
| rs73155893  | A | 0.0658  |
| rs61950362  | A | -0.0545 |
| rs113140122 | T | 0.0467  |
| rs496659    | C | -0.0243 |
| rs74042832  | A | 0.046   |
| rs111353382 | T | -0.099  |
| rs79028064  | A | 0.02    |
| rs78237275  | G | -0.0357 |
| rs932734    | C | -0.0164 |
| rs2768529   | A | -0.0862 |
| rs9516989   | C | -0.0351 |
| rs703217    | C | -0.0179 |
| rs11620398  | T | -0.0523 |

|             |   |         |
|-------------|---|---------|
| rs117232157 | C | -0.0952 |
| rs117915026 | T | 0.0303  |
| rs67326375  | A | 0.0171  |
| rs61968290  | A | -0.0564 |
| rs140799182 | T | -0.0928 |
| rs34046754  | A | 0.0501  |
| rs117555591 | C | 0.0539  |
| rs7318889   | G | -0.017  |
| rs61966451  | T | 0.0274  |
| rs142450222 | G | -0.0837 |
| rs61953320  | G | -0.0382 |
| rs9529657   | A | 0.0143  |
| rs9567814   | T | -0.0255 |
| rs337964    | C | 0.0153  |
| rs112938565 | T | 0.0861  |
| rs34161562  | T | 0.0372  |
| rs9558699   | A | -0.0209 |
| rs142311056 | C | -0.0374 |
| rs145754372 | C | 0.1089  |
| rs9319330   | C | -0.0165 |
| rs535367    | T | -0.0205 |
| rs4453339   | C | -0.0182 |
| rs117060314 | C | 0.0516  |
| rs72672431  | T | 0.0737  |
| rs117234198 | G | 0.0691  |
| rs76663873  | G | -0.0887 |
| rs145819767 | T | -0.0659 |
| rs11616699  | A | 0.0562  |
| rs66918117  | C | -0.0295 |
| rs138082457 | C | -0.0836 |
| rs112798819 | A | 0.0577  |
| rs11618091  | G | -0.0203 |
| rs4770185   | C | 0.0176  |
| rs7991253   | T | -0.07   |
| rs148691951 | A | 0.0668  |
| rs35964739  | T | 0.0684  |
| rs9579797   | T | 0.0769  |
| rs7490125   | G | 0.0189  |
| rs73244394  | A | -0.0162 |
| rs7999632   | A | 0.0152  |
| rs7999851   | T | -0.0273 |
| rs7324513   | G | -0.0163 |
| rs34579032  | G | -0.0247 |
| rs9516774   | A | 0.0141  |
| rs1340306   | T | -0.0183 |
| rs7333480   | G | 0.0417  |
| rs78255623  | T | 0.0422  |



|             |   |         |
|-------------|---|---------|
| rs61966019  | G | 0.0277  |
| rs60951040  | C | 0.0458  |
| rs3168693   | T | -0.0156 |
| rs61969302  | A | -0.0394 |
| rs484739    | T | -0.0281 |
| rs1146978   | G | -0.0307 |
| rs1433229   | A | 0.017   |
| rs7326691   | C | 0.0216  |
| rs61948600  | A | 0.0322  |
| rs9507810   | A | -0.0303 |
| rs76153530  | A | 0.0413  |
| rs9525928   | T | 0.0431  |
| rs74787825  | C | -0.0729 |
| rs150319492 | G | -0.1005 |
| rs75316456  | C | -0.0362 |
| rs147264099 | T | 0.039   |
| rs57727641  | T | 0.0178  |
| rs78908125  | G | -0.0976 |
| rs2786712   | A | 0.0149  |
| rs77566325  | T | -0.065  |
| rs7335916   | C | -0.016  |
| rs116913940 | T | 0.0977  |
| rs72640701  | G | 0.1064  |
| rs9537477   | G | -0.0137 |
| rs113980048 | A | 0.0832  |
| rs17276797  | T | -0.0163 |
| rs79274681  | T | -0.0622 |
| rs837290    | A | 0.0151  |
| rs117453117 | G | 0.0656  |
| rs144933946 | T | -0.1018 |
| rs591656    | T | -0.0495 |
| rs117373525 | T | -0.0505 |
| rs2095689   | T | 0.0148  |
| rs17300439  | T | -0.0231 |
| rs138173008 | G | 0.0394  |
| rs150133380 | A | -0.0735 |
| rs73234463  | C | -0.0319 |
| rs76656033  | C | 0.1215  |
| rs61963703  | T | -0.0333 |
| rs2382725   | C | 0.0167  |
| rs17067579  | C | 0.0525  |
| rs146893107 | T | -0.0447 |
| rs9522367   | T | 0.0577  |
| rs34437950  | A | -0.036  |
| rs9563270   | T | -0.0261 |
| rs76128521  | G | -0.0582 |
| rs7329892   | T | -0.0205 |

|             |   |         |
|-------------|---|---------|
| rs55651139  | A | 0.0464  |
| rs146570074 | T | -0.0707 |
| rs1886449   | T | 0.0196  |
| rs876473    | T | -0.024  |
| rs74241554  | T | -0.0656 |
| rs12428919  | G | 0.0147  |
| rs10507415  | G | -0.0327 |
| rs75314887  | G | -0.0312 |
| rs1962566   | G | 0.0292  |
| rs9599872   | T | -0.0479 |
| rs61964104  | T | 0.0526  |
| rs12870415  | T | 0.0144  |
| rs79518753  | C | 0.045   |
| rs9542637   | A | -0.0202 |
| rs7325460   | G | 0.0158  |
| rs75172784  | T | -0.0873 |
| rs9546696   | T | 0.0145  |
| rs55993373  | T | 0.0649  |
| rs8002509   | G | -0.0179 |
| rs113816067 | A | 0.0612  |
| rs9596913   | A | 0.0234  |
| rs7335884   | G | -0.0146 |
| rs144609111 | A | -0.0432 |
| rs117921997 | T | -0.0938 |
| rs111514145 | T | -0.0395 |
| rs142103172 | T | 0.1193  |
| rs12876946  | C | -0.0373 |
| rs9510048   | T | 0.0308  |
| rs76796444  | G | -0.0486 |
| rs73542920  | G | -0.0242 |
| rs78505918  | G | -0.0387 |
| rs9560281   | G | -0.0148 |
| rs9581333   | T | -0.0268 |
| rs7991374   | G | -0.0138 |
| rs9525528   | C | -0.0224 |
| rs146123476 | C | -0.0624 |
| rs3887157   | G | 0.0331  |
| rs76345939  | A | 0.0747  |
| rs9596898   | T | -0.0593 |
| rs1445202   | A | 0.0141  |
| rs72658600  | T | -0.0519 |
| rs9552558   | G | 0.0954  |
| rs58281684  | A | 0.0142  |
| rs78755797  | G | -0.0504 |
| rs117482586 | T | -0.101  |
| rs113010993 | T | -0.0663 |
| rs116947700 | A | 0.0683  |

|             |   |         |
|-------------|---|---------|
| rs78389896  | G | -0.0343 |
| rs138863040 | G | 0.0896  |
| rs138414325 | T | 0.0585  |
| rs9579479   | A | -0.014  |
| rs139236338 | A | 0.0526  |
| rs12429031  | G | -0.041  |
| rs9552662   | C | 0.0221  |
| rs66600916  | C | 0.0229  |
| rs35635842  | G | 0.0251  |
| rs2066668   | A | 0.0688  |
| rs17375878  | T | 0.0442  |
| rs60270107  | C | 0.0141  |
| rs117799470 | T | -0.0535 |
| rs73203118  | G | 0.1004  |
| rs80104582  | T | -0.0426 |
| rs1163810   | C | -0.0344 |
| rs75431029  | G | 0.0732  |
| rs9535106   | G | 0.0307  |
| rs143908450 | T | -0.067  |
| rs9557284   | A | 0.0205  |
| rs73184328  | A | 0.0203  |
| rs9553204   | C | -0.0343 |
| rs17218053  | C | -0.0924 |
| rs4770260   | C | 0.0247  |
| rs9539550   | T | -0.0362 |
| rs61946650  | T | -0.0322 |
| rs9553200   | A | 0.0371  |
| rs118067638 | T | 0.0631  |
| rs71433157  | G | 0.032   |
| rs644093    | A | -0.0146 |
| rs72659750  | T | 0.1033  |
| rs2137079   | C | -0.0503 |
| rs4943360   | A | -0.0156 |
| rs117460703 | A | 0.0776  |
| rs144761795 | C | 0.0861  |
| rs75337569  | G | -0.0791 |
| rs66895129  | G | -0.0158 |
| rs113901379 | A | 0.0754  |
| rs117888143 | A | -0.1072 |
| rs117290171 | G | 0.0459  |
| rs77259808  | A | 0.0713  |
| rs17578502  | C | 0.0757  |
| rs1852237   | G | -0.0138 |
| rs73224431  | A | -0.0317 |
| rs9571612   | G | -0.0218 |
| rs9521597   | C | -0.0184 |
| rs9525422   | T | 0.0193  |

|             |   |         |
|-------------|---|---------|
| rs2325527   | T | -0.0702 |
| rs17764707  | C | 0.0263  |
| rs613015    | C | 0.0223  |
| rs9539184   | A | -0.0289 |
| rs9577581   | A | 0.0189  |
| rs117915761 | T | 0.0645  |
| rs151099697 | G | 0.0473  |
| rs1325650   | A | -0.0161 |
| rs1886195   | C | 0.0187  |
| rs2481970   | G | -0.023  |
| rs116955731 | C | 0.0595  |
| rs7319774   | T | 0.1126  |
| rs2985928   | A | -0.0153 |
| rs145867613 | T | 0.0812  |
| rs9581282   | A | -0.0142 |
| rs7993240   | T | 0.0274  |
| rs1998567   | A | -0.05   |
| rs117271437 | C | -0.1485 |
| rs12429218  | C | -0.0316 |
| rs148301160 | G | 0.0674  |
| rs111835721 | T | 0.0469  |
| rs2183280   | G | -0.0199 |
| rs117016456 | G | -0.0539 |
| rs77992686  | A | 0.0632  |
| rs9315447   | T | -0.0397 |
| rs7988531   | A | 0.0348  |
| rs72628037  | T | 0.1063  |
| rs9525224   | A | -0.0376 |
| rs113355214 | C | 0.0559  |
| rs75024114  | A | 0.0453  |
| rs9530334   | A | -0.0171 |
| rs73605065  | C | 0.0438  |
| rs2993334   | T | 0.0163  |
| rs12429298  | C | -0.1085 |
| rs9534262   | T | 0.0139  |
| rs73185585  | G | -0.0302 |
| rs79375865  | T | -0.0709 |
| rs1473848   | G | -0.0559 |
| rs8192892   | C | -0.0247 |
| rs9529693   | C | 0.0148  |
| rs59149020  | T | 0.0301  |
| rs2991407   | G | 0.0247  |
| rs9520985   | G | -0.0142 |
| rs117185508 | C | -0.0974 |
| rs1581966   | T | 0.0694  |
| rs12871039  | T | 0.034   |
| rs4145023   | A | 0.0191  |

|             |   |         |
|-------------|---|---------|
| rs9595878   | A | -0.0778 |
| rs117322771 | T | 0.085   |
| rs117607746 | T | 0.0673  |
| rs9572740   | A | 0.0205  |
| rs55851570  | T | 0.0412  |
| rs73200115  | A | 0.0595  |
| rs4346088   | T | 0.0169  |
| rs139961978 | G | -0.1184 |
| rs17077384  | C | -0.0236 |
| rs9315432   | C | 0.0151  |
| rs34744049  | C | -0.0198 |
| rs9507606   | G | -0.0257 |
| rs17342953  | T | 0.0638  |
| rs77883532  | A | -0.1137 |
| rs10507305  | C | 0.0652  |
| rs80103717  | A | 0.0783  |
| rs1590377   | T | -0.0205 |
| rs117215187 | T | 0.0994  |
| rs111808548 | C | 0.0637  |
| rs6491112   | G | -0.0482 |
| rs149743702 | T | 0.058   |
| rs2244124   | T | 0.0455  |
| rs17677985  | C | -0.0182 |
| rs9316430   | G | -0.0321 |
| rs1854844   | T | 0.048   |
| rs12017982  | T | 0.0588  |
| rs12561345  | G | -0.0202 |
| rs7982293   | C | 0.0174  |
| rs76207902  | A | -0.0488 |
| rs12877064  | A | -0.0555 |
| rs79881209  | G | -0.063  |
| rs17307541  | C | 0.0456  |
| rs143547439 | C | 0.0307  |
| rs116607120 | A | -0.0209 |
| rs78939031  | A | -0.0777 |
| rs9564195   | A | -0.0248 |
| rs150774074 | C | -0.0471 |
| rs76166449  | T | -0.0501 |
| rs9514495   | A | 0.0206  |
| rs75906977  | T | -0.0594 |
| rs2116994   | T | -0.0258 |
| rs117090823 | A | -0.0541 |
| rs9565708   | A | -0.0172 |
| rs1412203   | C | -0.0233 |
| rs797209    | A | 0.0161  |
| rs17073134  | A | 0.0462  |
| rs9548448   | A | 0.0164  |

|             |   |         |
|-------------|---|---------|
| rs72670693  | A | 0.0493  |
| rs9578676   | G | -0.0281 |
| rs932879    | A | 0.0143  |
| rs9319424   | C | -0.0146 |
| rs9508766   | G | -0.0171 |
| rs75655697  | A | 0.093   |
| rs75538276  | C | 0.0595  |
| rs77681504  | T | -0.0346 |
| rs117323386 | G | 0.0884  |
| rs78017396  | A | 0.027   |
| rs74084886  | G | -0.0312 |
| rs77521247  | G | 0.0657  |
| rs9592943   | C | 0.0226  |
| rs116481864 | A | 0.0483  |
| rs144336383 | C | 0.0564  |
| rs117759051 | T | -0.0777 |
| rs9548422   | A | 0.0409  |
| rs79866084  | T | 0.1109  |
| rs144172403 | A | 0.065   |
| rs9600099   | T | 0.0298  |
| rs17539034  | T | -0.0284 |
| rs7996509   | T | 0.0505  |
| rs118004027 | G | -0.101  |
| rs9590709   | A | 0.0318  |
| rs72636441  | A | 0.0775  |
| rs77991888  | T | 0.0511  |
| rs138506806 | C | 0.097   |
| rs117182576 | T | -0.0221 |
| rs117264389 | G | 0.0321  |
| rs9575664   | A | 0.0465  |
| rs2248601   | T | -0.0223 |
| rs11618283  | T | -0.0582 |
| rs7981338   | C | 0.0273  |
| rs9519072   | C | 0.0187  |
| rs76875113  | T | 0.0983  |
| rs7338130   | G | 0.0138  |
| rs139956665 | G | -0.0477 |
| rs117465341 | C | 0.0887  |
| rs73504359  | T | 0.0286  |
| rs331984    | G | 0.0246  |
| rs34387812  | T | 0.0352  |
| rs4509875   | T | -0.0165 |
| rs61945072  | T | -0.0171 |
| rs1022960   | T | 0.0149  |
| rs9545612   | C | 0.014   |
| rs74108202  | A | 0.0565  |
| rs2483400   | A | 0.028   |

|             |   |         |
|-------------|---|---------|
| rs141344197 | C | -0.1026 |
| rs306416    | G | 0.0134  |
| rs78115669  | A | -0.0349 |
| rs9560087   | T | -0.0536 |
| rs73160654  | G | -0.0188 |
| rs17506931  | G | 0.0566  |
| rs61951861  | A | -0.0284 |
| rs77247836  | A | 0.0781  |
| rs58697658  | C | 0.0342  |
| rs9592887   | G | 0.1073  |
| rs1771137   | A | -0.0395 |
| rs74464799  | G | -0.0272 |
| rs117673047 | A | 0.1124  |
| rs76524418  | G | -0.0469 |
| rs116896942 | T | 0.0767  |
| rs10161705  | C | 0.0198  |
| rs9568497   | T | -0.0143 |
| rs117321208 | A | 0.0831  |
| rs9317727   | T | -0.0137 |
| rs117827655 | C | -0.0359 |
| rs61971527  | T | -0.0468 |
| rs9590239   | A | 0.0161  |
| rs12429647  | A | 0.0222  |
| rs17718845  | C | 0.0506  |
| rs116995314 | A | 0.0508  |
| rs112802750 | C | 0.0423  |
| rs1764410   | T | 0.0404  |
| rs61965864  | T | 0.0734  |
| rs78604432  | A | 0.0431  |
| rs111624853 | G | -0.0727 |
| rs17175020  | T | 0.0378  |
| rs117764870 | A | -0.078  |
| rs75866346  | A | 0.0884  |
| rs72647016  | A | -0.065  |
| rs61954408  | T | -0.0911 |
| rs12868549  | C | 0.0275  |
| rs7987863   | T | -0.0438 |
| rs6563662   | G | 0.0182  |
| rs17076837  | G | -0.0251 |
| rs56251264  | T | -0.025  |
| rs61965665  | T | -0.0172 |
| rs145763002 | A | 0.0598  |
| rs9510760   | G | -0.0147 |
| rs112669655 | T | -0.0568 |
| rs989092    | A | -0.1224 |
| rs34690813  | G | 0.0537  |
| rs9582093   | A | 0.0184  |

|             |   |         |
|-------------|---|---------|
| rs6490478   | G | 0.0164  |
| rs9669852   | G | 0.0811  |
| rs3924165   | C | -0.0136 |
| rs146566794 | T | -0.0772 |
| rs114920690 | A | 0.0599  |
| rs56012743  | T | -0.0404 |
| rs17735324  | T | -0.0561 |
| rs4769834   | A | -0.0278 |
| rs72635657  | A | 0.0727  |
| rs9510625   | G | -0.0441 |
| rs60409440  | T | -0.0613 |
| rs17837324  | C | 0.0584  |
| rs149318634 | G | 0.0465  |
| rs73170472  | T | 0.0588  |
| rs117218426 | A | -0.0679 |
| rs7984381   | A | 0.0159  |
| rs1926600   | T | 0.0171  |
| rs12430489  | C | 0.0218  |
| rs9542859   | T | 0.0744  |
| rs140676593 | T | -0.0686 |
| rs77997394  | A | -0.0479 |
| rs78901965  | A | -0.0408 |
| rs76861803  | G | 0.0306  |
| rs61948769  | T | -0.0246 |
| rs117789484 | T | -0.0889 |
| rs77182843  | G | 0.0783  |
| rs9318043   | A | -0.0177 |
| rs75776929  | A | -0.0573 |
| rs884313    | T | 0.0243  |
| rs7325829   | G | -0.0183 |
| rs1359483   | G | 0.0161  |
| rs17348886  | T | -0.033  |
| rs12856497  | T | 0.0213  |
| rs117842164 | A | -0.07   |
| rs72637775  | C | 0.0982  |
| rs17504394  | A | -0.0571 |
| rs7990265   | T | 0.0138  |
| rs1536684   | A | 0.0587  |
| rs1417480   | C | 0.0167  |
| rs11618598  | T | -0.0555 |
| rs2408987   | C | 0.0206  |
| rs4151532   | T | 0.0381  |
| rs56288774  | A | 0.0596  |
| rs117020184 | T | -0.0444 |
| rs144469117 | G | 0.0766  |
| rs142586110 | C | -0.0418 |
| rs76912295  | G | -0.0438 |



|             |   |         |
|-------------|---|---------|
| rs74039206  | G | 0.0494  |
| rs11841333  | A | -0.0224 |
| rs79475191  | T | -0.0535 |
| rs9574768   | T | -0.0244 |
| rs12869720  | T | -0.0612 |
| rs7994927   | G | 0.0503  |
| rs7324228   | C | -0.0154 |
| rs10454544  | G | 0.014   |
| rs9533301   | G | 0.0183  |
| rs9526740   | T | 0.0235  |
| rs11619168  | C | 0.0141  |
| rs9538352   | A | 0.09    |
| rs77271770  | A | 0.036   |
| rs9578259   | G | 0.0644  |
| rs562548    | A | 0.0144  |
| rs118150269 | A | -0.0621 |
| rs3102196   | C | 0.0167  |
| rs9519847   | T | -0.0133 |
| rs113281007 | G | -0.0406 |
| rs919165    | T | 0.0145  |
| rs17061921  | C | 0.0823  |
| rs7320913   | G | 0.0288  |
| rs80167915  | A | 0.0522  |
| rs111785014 | T | -0.0605 |
| rs11619911  | G | 0.0289  |
| rs141433198 | G | 0.0648  |
| rs654454    | G | 0.0143  |
| rs11618658  | C | -0.0154 |
| rs9523052   | A | -0.1002 |
| rs9561518   | C | -0.043  |
| rs77687323  | C | 0.0678  |
| rs77173882  | T | -0.0701 |
| rs113204721 | G | 0.0185  |
| rs9593698   | T | -0.0171 |
| rs9529426   | T | 0.0199  |
| rs76869618  | G | -0.0349 |
| rs72643628  | C | -0.1066 |
| rs9508660   | T | -0.0204 |
| rs146153011 | T | 0.0898  |
| rs9315086   | T | -0.0153 |
| rs751511    | C | -0.0138 |
| rs11618822  | T | 0.0414  |
| rs78743833  | A | 0.063   |
| rs118106483 | A | 0.0384  |
| rs563538    | T | 0.0642  |
| rs75828634  | A | 0.0689  |
| rs973837    | C | -0.0179 |

|             |   |         |
|-------------|---|---------|
| rs117114931 | G | -0.0687 |
| rs4769202   | C | -0.0629 |
| rs56046766  | T | -0.0159 |
| rs7331865   | G | -0.015  |
| rs73524128  | A | 0.0179  |
| rs75642610  | C | 0.0701  |
| rs319533    | T | -0.0187 |
| rs4283093   | A | -0.0198 |
| rs17301222  | G | -0.0746 |
| rs11069721  | C | -0.0184 |
| rs36206504  | C | 0.0697  |
| rs78494830  | T | -0.0404 |
| rs12429670  | A | 0.0221  |
| rs12872813  | T | -0.0795 |
| rs17754809  | G | 0.0364  |
| rs73443844  | G | 0.0325  |
| rs9531109   | A | -0.0216 |
| rs146057001 | C | -0.0662 |
| rs4609708   | G | -0.0156 |
| rs78774596  | A | 0.0297  |
| rs117793170 | T | -0.0649 |
| rs9539519   | A | 0.017   |
| rs76098997  | T | -0.0683 |
| rs117164344 | A | 0.0462  |
| rs79083026  | G | 0.0304  |
| rs11843657  | C | 0.0212  |
| rs73167366  | G | -0.0246 |
| rs73192349  | A | 0.0348  |
| rs3956362   | G | -0.0172 |
| rs112966562 | G | 0.042   |
| rs9535565   | T | -0.0167 |
| rs117431650 | G | 0.0766  |
| rs9583395   | C | 0.0327  |
| rs9510307   | G | -0.0154 |
| rs118119053 | C | 0.0905  |
| rs138828116 | A | -0.0535 |
| rs150399075 | T | -0.0407 |
| rs74238745  | A | 0.0401  |
| rs9565286   | C | -0.0164 |
| rs73190952  | T | 0.0821  |
| rs9540576   | C | 0.0399  |
| rs11619141  | T | -0.0605 |
| rs74494256  | A | -0.1002 |
| rs58602193  | A | -0.0256 |
| rs17325713  | T | 0.0373  |
| rs12869943  | G | -0.015  |
| rs79620920  | C | -0.0737 |

|             |   |         |
|-------------|---|---------|
| rs79765615  | C | -0.0408 |
| rs76749610  | A | 0.0497  |
| rs11069566  | C | 0.0221  |
| rs7321524   | A | 0.0379  |
| rs414792    | C | -0.036  |
| rs4770326   | A | 0.0232  |
| rs146061718 | T | -0.0902 |
| rs73208049  | C | -0.0339 |
| rs143032073 | G | 0.1147  |
| rs117958381 | A | -0.1024 |
| rs1855783   | C | -0.0449 |
| rs149856712 | T | -0.0385 |
| rs113407875 | T | -0.0406 |
| rs146026988 | T | 0.0724  |
| rs73154628  | A | 0.0439  |
| rs142751658 | C | -0.1092 |
| rs9599012   | G | -0.0254 |
| rs145142748 | A | -0.0465 |
| rs1631696   | A | 0.0324  |
| rs568414    | T | 0.0171  |
| rs9524810   | A | 0.0639  |
| rs112065802 | C | -0.0545 |
| rs57597292  | T | -0.0168 |
| rs112219219 | C | 0.0353  |
| rs9524362   | G | -0.0143 |
| rs1022947   | C | 0.0157  |
| rs117403336 | A | -0.0848 |
| rs111328681 | T | -0.0406 |
| rs113189301 | T | -0.0584 |
| rs546003    | A | -0.0581 |
| rs9514674   | A | 0.0691  |
| rs1753637   | T | 0.0146  |
| rs34774595  | A | 0.0318  |
| rs9507211   | T | -0.0144 |
| rs79046253  | C | 0.0429  |
| rs17080600  | G | 0.0617  |
| rs9537022   | T | -0.0163 |
| rs145974931 | A | 0.0824  |
| rs997271    | A | 0.018   |
| rs72666517  | A | -0.0305 |
| rs73165520  | C | -0.074  |
| rs9527038   | G | 0.0168  |
| rs1744588   | G | 0.0183  |
| rs72663539  | A | -0.0326 |
| rs72637444  | T | 0.0428  |
| rs80303948  | T | -0.0624 |
| rs1927847   | C | 0.0147  |

|             |   |         |
|-------------|---|---------|
| rs116872968 | T | -0.037  |
| rs9560335   | T | 0.0171  |
| rs9557217   | C | -0.0163 |
| rs12429630  | T | 0.0334  |
| rs112299334 | G | 0.0572  |
| rs71429613  | G | -0.0965 |
| rs12429105  | C | 0.0488  |
| rs78229869  | C | -0.055  |
| rs6563808   | T | -0.0149 |
| rs11620460  | A | -0.0455 |
| rs117630493 | G | 0.0538  |
| rs74085852  | C | 0.0306  |
| rs79363450  | A | 0.0275  |
| rs1175387   | G | -0.0585 |
| rs9516234   | A | -0.0133 |
| rs7324721   | G | -0.0137 |
| rs71436473  | G | -0.0191 |
| rs73244400  | A | -0.0955 |
| rs2245745   | C | -0.0317 |
| rs142946996 | A | 0.0948  |
| rs73582363  | C | -0.1299 |
| rs947076    | A | 0.0132  |
| rs138845601 | A | -0.0633 |
| rs9587320   | T | -0.0505 |
| rs2259398   | C | 0.0145  |
| rs7987020   | A | -0.0212 |
| rs2476726   | T | 0.013   |
| rs35445255  | G | -0.0179 |
| rs35827584  | T | -0.0146 |
| rs55842160  | C | -0.0192 |
| rs77896813  | G | -0.0734 |
| rs9514730   | T | -0.0522 |
| rs61952994  | C | -0.0639 |
| rs9584585   | G | 0.0165  |
| rs9319336   | C | 0.0287  |
| rs17233698  | A | 0.0685  |
| rs79009905  | A | -0.0492 |
| rs9532768   | A | 0.0172  |
| rs618715    | T | 0.0173  |
| rs117098580 | T | 0.0712  |
| rs8002846   | G | 0.0157  |
| rs8000335   | A | 0.0273  |
| rs73164747  | A | 0.0471  |
| rs78173087  | A | 0.0193  |
| rs11616447  | T | 0.0162  |
| rs147858492 | A | -0.0696 |
| rs17072389  | C | 0.0705  |

|             |   |         |
|-------------|---|---------|
| rs566996    | T | -0.0158 |
| rs144069448 | G | -0.0822 |
| rs1984603   | G | -0.0293 |
| rs77430019  | T | 0.0469  |
| rs9550964   | G | 0.0158  |
| rs1231054   | T | -0.0134 |
| rs77368063  | T | -0.0418 |
| rs117739522 | G | -0.0697 |
| rs113136205 | A | -0.0397 |
| rs17432440  | C | -0.0291 |
| rs9526691   | A | -0.0584 |
| rs117599804 | C | 0.0979  |
| rs116998250 | T | -0.1123 |
| rs60643096  | G | -0.0569 |
| rs35412697  | G | -0.1042 |
| rs7327952   | A | 0.0142  |
| rs9525843   | G | 0.0181  |
| rs79778409  | T | 0.0427  |
| rs9595629   | G | 0.0238  |
| rs112913402 | T | -0.0411 |
| rs2181619   | T | -0.0167 |
| rs11843007  | G | -0.0244 |
| rs142879602 | A | 0.0549  |
| rs9555163   | A | 0.0915  |
| rs113952123 | A | 0.0469  |
| rs142327778 | C | 0.0465  |
| rs2793488   | G | -0.0184 |
| rs117051420 | C | 0.0546  |
| rs78286133  | T | -0.0403 |
| rs149206168 | T | 0.0742  |
| rs61965540  | C | 0.0697  |
| rs117611611 | C | -0.051  |
| rs7986134   | G | -0.0153 |
| rs78250216  | T | 0.0731  |
| rs11617778  | G | -0.0227 |
| rs17548249  | C | 0.0372  |
| rs117832716 | A | 0.0603  |
| rs116858106 | A | -0.0374 |
| rs17470810  | A | 0.0288  |
| rs143144060 | T | -0.0986 |
| rs9594600   | A | -0.0382 |
| rs12585641  | T | 0.0273  |
| rs4468462   | A | -0.0315 |
| rs6491124   | T | 0.0173  |
| rs2755223   | T | 0.0169  |
| rs35485247  | A | -0.0166 |
| rs9542987   | T | -0.0165 |

|             |   |         |
|-------------|---|---------|
| rs117911332 | T | -0.0674 |
| rs7489430   | T | 0.0176  |
| rs656879    | A | -0.0147 |
| rs77846171  | T | -0.0455 |
| rs4771009   | G | 0.0247  |
| rs9527014   | T | -0.0249 |
| rs58169956  | T | 0.0332  |
| rs73206831  | C | -0.0934 |
| rs112221936 | T | -0.0801 |
| rs9522147   | G | 0.0155  |
| rs2038848   | T | -0.0773 |
| rs12430946  | A | 0.0203  |
| rs117946177 | G | 0.0348  |
| rs9562566   | C | 0.023   |
| rs4884321   | T | 0.0139  |
| rs7998729   | G | 0.017   |
| rs72652606  | C | 0.0251  |
| rs142185765 | C | 0.0539  |
| rs12428422  | A | -0.0191 |
| rs144614090 | C | 0.1075  |
| rs7317455   | G | 0.0826  |
| rs112737168 | T | 0.0987  |
| rs7998820   | C | -0.0299 |
| rs1415242   | T | 0.0148  |
| rs146569130 | A | 0.0632  |
| rs74671239  | T | -0.0422 |
| rs77693478  | A | 0.0194  |
| rs57640248  | G | -0.1456 |
| rs9547158   | T | -0.0157 |
| rs2893394   | T | 0.0148  |
| rs7991883   | G | -0.0245 |
| rs113541606 | T | -0.0884 |
| rs7330151   | G | -0.0257 |
| rs1328684   | C | -0.0134 |
| rs4885090   | T | 0.0245  |
| rs7321485   | C | -0.0204 |
| rs76276830  | T | -0.0371 |
| rs75396052  | G | -0.0731 |
| rs77275086  | C | -0.0839 |
| rs35274170  | A | -0.0544 |
| rs150928761 | A | -0.0566 |
| rs72658245  | T | 0.1081  |
| rs12864735  | T | -0.0209 |
| rs9316854   | A | 0.0156  |
| rs7322119   | A | 0.0177  |
| rs115829828 | T | 0.0178  |
| rs12875969  | T | -0.0243 |

|             |   |         |
|-------------|---|---------|
| rs914069    | C | 0.0194  |
| rs73154038  | A | -0.0775 |
| rs9576354   | C | 0.0147  |
| rs17073778  | A | -0.0283 |
| rs138591081 | G | -0.1001 |
| rs17243410  | A | -0.02   |
| rs77295016  | C | 0.074   |
| rs9573239   | T | -0.0508 |
| rs17612107  | A | -0.0242 |
| rs9580442   | T | 0.0138  |
| rs77370994  | A | 0.0458  |
| rs75900232  | G | 0.0674  |
| rs117571320 | C | -0.0592 |
| rs148629257 | G | 0.0729  |
| rs2148764   | A | 0.0176  |
| rs75622784  | T | -0.0232 |
| rs61974389  | G | -0.0418 |
| rs9554774   | G | 0.0259  |
| rs9533886   | G | -0.0136 |
| rs78734091  | G | -0.0933 |
| rs12100119  | A | -0.0398 |
| rs35765873  | C | -0.0543 |
| rs2819225   | T | 0.0153  |
| rs7332682   | A | 0.0158  |
| rs11617567  | T | -0.1032 |
| rs17061319  | G | -0.0172 |
| rs117571182 | T | -0.0453 |
| rs117450921 | A | -0.0432 |
| rs4567574   | A | -0.0245 |
| rs1509277   | A | 0.0128  |
| rs2793274   | T | 0.0747  |
| rs1924960   | A | -0.0182 |
| rs115150485 | C | -0.0311 |
| rs490763    | C | 0.0254  |
| rs77552333  | T | 0.0679  |
| rs147604422 | C | -0.1144 |
| rs150834596 | A | -0.1059 |
| rs485385    | T | -0.0629 |
| rs34682055  | T | 0.0264  |
| rs117100693 | T | -0.0852 |
| rs4274315   | T | 0.0744  |
| rs117776774 | A | -0.0679 |
| rs3129595   | T | 0.03    |
| rs112098398 | A | 0.0156  |
| rs2657132   | T | -0.0133 |
| rs141801666 | T | -0.0287 |
| rs11147961  | G | 0.0427  |

|             |   |         |
|-------------|---|---------|
| rs76473047  | A | 0.0858  |
| rs7988265   | T | 0.0167  |
| rs35169844  | A | -0.0572 |
| rs1576166   | C | 0.0131  |
| rs118075502 | A | -0.0504 |
| rs7331413   | G | -0.0164 |
| rs9529802   | C | 0.0514  |
| rs9514669   | C | 0.0245  |
| rs9301357   | G | -0.0141 |
| rs9508337   | G | 0.013   |
| rs139332989 | G | 0.0443  |
| rs10220201  | T | -0.037  |
| rs116930788 | A | 0.0515  |
| rs147737075 | G | 0.092   |
| rs4517638   | A | -0.0225 |
| rs117903529 | A | 0.0759  |
| rs9512519   | C | -0.0286 |
| rs117617434 | T | -0.0805 |
| rs77952707  | A | 0.0773  |
| rs6562828   | A | 0.0242  |
| rs117403321 | T | 0.044   |
| rs141108425 | T | -0.097  |
| rs150035049 | T | -0.0695 |
| rs117104087 | T | -0.0871 |
| rs117814706 | A | 0.0397  |
| rs12867125  | G | 0.0149  |
| rs148426756 | T | 0.0581  |
| rs111281841 | T | -0.0542 |
| rs11147964  | T | -0.0161 |
| rs10219784  | T | 0.0205  |
| rs117679690 | A | -0.0379 |
| rs11618335  | A | 0.0714  |
| rs16970623  | C | 0.0155  |
| rs56092541  | T | -0.0582 |
| rs34011931  | G | 0.0133  |
| rs7323925   | C | -0.0369 |
| rs80080384  | G | -0.0782 |
| rs140947194 | A | -0.0632 |
| rs9543565   | A | 0.0149  |
| rs141590359 | T | -0.067  |
| rs144501232 | C | 0.07    |
| rs56949730  | G | 0.0398  |
| rs12429836  | A | -0.0165 |
| rs876100    | C | -0.0249 |
| rs79454906  | G | -0.059  |
| rs76003798  | A | -0.0553 |
| rs9575791   | G | -0.0188 |



|             |   |         |
|-------------|---|---------|
| rs8002308   | C | 0.0307  |
| rs76941131  | C | 0.0189  |
| rs143482464 | A | -0.0901 |
| rs2391232   | C | -0.0171 |
| rs4773354   | T | -0.0174 |
| rs9536993   | A | 0.0627  |
| rs117877369 | C | -0.0779 |
| rs146499935 | T | -0.0415 |
| rs116535623 | A | 0.0986  |
| rs58460978  | T | -0.0289 |
| rs10459317  | C | 0.0188  |
| rs2391347   | C | -0.0134 |
| rs79839587  | G | 0.0495  |
| rs143147871 | T | 0.0945  |
| rs117396395 | T | 0.0528  |
| rs9592165   | C | -0.0519 |
| rs9524483   | A | 0.0257  |
| rs9598063   | A | 0.0908  |
| rs9567347   | T | -0.0254 |
| rs2210849   | C | 0.0179  |
| rs141671212 | G | -0.0448 |
| rs7335818   | C | 0.0153  |
| rs112401855 | T | 0.0734  |
| rs9318318   | A | 0.0126  |
| rs2493584   | G | -0.0558 |
| rs114641328 | A | 0.0546  |
| rs11618964  | A | 0.0188  |
| rs61954052  | G | 0.0569  |
| rs2019359   | G | 0.0125  |
| rs7997113   | A | -0.0163 |
| rs117355848 | A | -0.0715 |
| rs73174378  | C | 0.0205  |
| rs116941237 | C | -0.0462 |
| rs149654819 | C | 0.0661  |
| rs61941362  | G | -0.0447 |
| rs72652244  | A | -0.0164 |
| rs61955593  | A | -0.058  |
| rs113083165 | G | 0.0424  |
| rs61950465  | C | 0.0728  |
| rs117151731 | C | 0.0688  |
| rs1434349   | T | 0.018   |
| rs7337060   | G | 0.013   |
| rs1475142   | C | -0.0135 |
| rs12583467  | A | -0.0384 |
| rs76223050  | A | -0.0267 |
| rs9548307   | T | -0.0207 |
| rs117421874 | T | -0.078  |

|             |   |         |
|-------------|---|---------|
| rs8002113   | A | 0.0161  |
| rs7317338   | A | 0.0124  |
| rs138263783 | G | -0.0901 |
| rs4907719   | C | -0.0279 |
| rs146554171 | T | -0.0469 |
| rs113312250 | C | 0.0375  |
| rs75313109  | T | -0.0397 |
| rs9301384   | T | -0.0252 |
| rs9805554   | T | 0.0192  |
| rs56920028  | G | -0.0136 |
| rs75172178  | C | 0.0221  |
| rs4883970   | G | -0.0124 |
| rs56279029  | T | 0.0614  |
| rs1170994   | T | 0.0179  |
| rs72647448  | T | -0.0508 |
| rs76048985  | T | -0.0815 |
| rs9524374   | A | -0.0215 |
| rs12867694  | T | 0.0341  |
| rs4942423   | T | -0.0333 |
| rs117539543 | C | 0.0806  |
| rs117261888 | T | -0.065  |
| rs74086613  | G | 0.0257  |
| rs8000390   | G | -0.0164 |
| rs7992929   | A | -0.0131 |
| rs113023745 | A | -0.0375 |
| rs1451781   | C | -0.0202 |
| rs73182152  | G | 0.0489  |
| rs117674867 | A | 0.0832  |
| rs75359013  | C | 0.0505  |
| rs10508158  | T | 0.014   |
| rs9588138   | C | -0.0177 |
| rs118016055 | T | -0.1177 |
| rs11841875  | T | -0.0201 |
| rs78670586  | T | 0.0507  |
| rs9535604   | T | 0.0161  |
| rs77600269  | C | 0.0811  |
| rs1798967   | T | 0.0247  |
| rs2147989   | A | 0.0266  |
| rs1887413   | C | -0.0129 |
| rs147570987 | T | 0.0852  |
| rs72657974  | A | 0.0487  |
| rs74424395  | C | 0.0509  |
| rs1149830   | G | 0.0129  |
| rs17235614  | T | 0.0413  |
| rs78202809  | A | -0.0266 |
| rs3180699   | G | 0.0496  |
| rs117643903 | T | 0.0672  |

|             |   |         |
|-------------|---|---------|
| rs111422371 | C | 0.0744  |
| rs475303    | T | 0.0133  |
| rs61957273  | C | 0.068   |
| rs17076433  | T | -0.0216 |
| rs9510385   | G | -0.014  |
| rs17514320  | G | 0.0213  |
| rs1547329   | A | 0.0201  |
| rs73175365  | A | 0.0871  |
| rs45519734  | G | 0.0794  |
| rs4238226   | A | 0.0128  |
| rs61969578  | A | 0.1063  |
| rs61945033  | A | -0.0194 |
| rs4943765   | A | 0.0137  |
| rs1003093   | C | -0.0191 |
| rs9506242   | A | 0.0158  |
| rs9531978   | A | 0.0523  |
| rs9531508   | G | 0.016   |
| rs9549595   | G | 0.013   |
| rs61951878  | T | -0.0281 |
| rs9646061   | G | -0.0277 |
| rs111759134 | C | -0.0587 |
| rs9519815   | A | 0.0253  |
| rs151195016 | G | -0.0544 |
| rs76112369  | G | 0.0549  |
| rs73234113  | T | 0.0702  |
| rs72651193  | C | 0.0188  |
| rs7322849   | T | 0.0237  |
| rs7994555   | G | -0.0215 |
| rs11838775  | T | 0.0276  |
| rs79416796  | G | -0.0291 |
| rs114332183 | A | -0.0682 |
| rs117838470 | T | -0.058  |
| rs9527153   | C | -0.0152 |
| rs75752319  | C | 0.0166  |
| rs74319042  | A | 0.0706  |
| rs151338843 | A | -0.1223 |
| rs57076404  | T | -0.0153 |
| rs9541407   | G | -0.0129 |
| rs7982576   | T | -0.0196 |
| rs80097212  | C | 0.0813  |
| rs151081045 | T | 0.0458  |
| rs150676344 | G | -0.0809 |
| rs9552541   | G | 0.0143  |
| rs7332984   | T | 0.0923  |
| rs73439789  | T | -0.0368 |
| rs142579012 | A | 0.0838  |
| rs10747173  | T | 0.0134  |

|             |   |         |
|-------------|---|---------|
| rs13378814  | C | -0.0483 |
| rs9581847   | A | 0.0231  |
| rs73251347  | C | 0.0214  |
| rs79515118  | T | 0.0271  |
| rs77007882  | A | -0.0226 |
| rs9318684   | C | -0.0182 |
| rs9521310   | T | -0.0127 |
| rs9563026   | C | -0.0157 |
| rs3014932   | T | -0.0131 |
| rs17691046  | T | 0.0246  |
| rs117351836 | A | 0.0404  |
| rs117144470 | A | -0.0631 |
| rs2590168   | T | -0.0465 |
| rs141829508 | A | -0.0624 |
| rs75591565  | C | 0.0249  |
| rs74495446  | T | 0.0721  |
| rs142831959 | C | 0.0825  |
| rs9565396   | A | -0.0188 |
| rs9535415   | A | 0.0151  |
| rs7982249   | T | -0.0392 |
| rs117619804 | C | -0.0462 |
| rs137972730 | C | 0.1282  |
| rs138389222 | A | -0.0534 |
| rs16961614  | C | 0.0259  |
| rs75394946  | G | -0.0312 |
| rs2767575   | C | 0.0272  |
| rs56120102  | A | -0.0213 |
| rs9536565   | T | -0.0157 |
| rs17669330  | C | -0.0128 |
| rs146745898 | A | 0.0855  |
| rs79871575  | A | -0.075  |
| rs1341837   | T | 0.0138  |
| rs73245377  | A | 0.0246  |
| rs79334469  | A | -0.0614 |
| rs9317951   | A | 0.0138  |
| rs73530236  | C | 0.0225  |
| rs9601361   | A | 0.0148  |
| rs139712479 | A | -0.0483 |
| rs184828    | T | -0.0153 |
| rs7323029   | A | 0.0247  |
| rs9557345   | G | -0.0129 |
| rs659734    | G | -0.0268 |
| rs7139717   | C | -0.0125 |
| rs1924351   | T | -0.0145 |
| rs7999704   | T | 0.0462  |
| rs7490092   | C | -0.028  |
| rs117820106 | T | 0.0888  |

|             |   |         |
|-------------|---|---------|
| rs790323    | A | 0.0181  |
| rs34907271  | C | 0.0709  |
| rs12856232  | T | 0.056   |
| rs9562616   | C | -0.0146 |
| rs117860697 | C | -0.0508 |
| rs71438133  | G | 0.0438  |
| rs9300407   | A | 0.0124  |
| rs831159    | T | 0.0142  |
| rs73168291  | C | -0.0434 |
| rs78363189  | A | -0.0432 |
| rs1967799   | G | -0.0151 |
| rs143413147 | T | 0.0602  |
| rs116952121 | A | 0.0593  |
| rs559054    | T | -0.0165 |
| rs1570744   | T | 0.0153  |
| rs78217510  | C | -0.0507 |
| rs117809219 | A | -0.0383 |
| rs66736947  | A | 0.0247  |
| rs138725305 | A | -0.05   |
| rs1517882   | G | 0.0119  |
| rs138065539 | A | -0.0311 |
| rs72641906  | G | 0.0166  |
| rs9573319   | T | 0.0286  |
| rs17189306  | T | 0.1004  |
| rs61968657  | A | -0.0816 |
| rs113354892 | A | -0.0208 |
| rs72659259  | A | 0.0361  |
| rs9520976   | A | 0.0292  |
| rs9536412   | A | 0.0164  |
| rs12868110  | A | 0.0295  |
| rs9554807   | T | -0.0137 |
| rs142164628 | T | -0.0389 |
| rs7336815   | G | 0.0236  |
| rs72629477  | G | -0.0699 |
| rs12427608  | C | -0.0386 |
| rs61950398  | G | -0.0539 |
| rs9554472   | T | -0.0179 |
| rs17625232  | T | 0.0405  |
| rs17079019  | A | 0.0355  |
| rs1380336   | T | -0.0204 |
| rs17058126  | T | 0.0322  |
| rs141381836 | T | 0.0803  |
| rs117222438 | T | 0.0793  |
| rs117857989 | A | 0.0544  |
| rs1686660   | A | 0.0139  |
| rs6491985   | G | 0.0172  |
| rs9578438   | T | 0.0435  |

|             |   |         |
|-------------|---|---------|
| rs36094954  | A | -0.0597 |
| rs4771803   | A | 0.0212  |
| rs56204438  | T | -0.0454 |
| rs34464340  | T | -0.0355 |
| rs3117978   | G | 0.0246  |
| rs2184652   | G | 0.0156  |
| rs144280418 | G | -0.0692 |
| rs73234948  | G | -0.0372 |
| rs146325300 | T | 0.0619  |
| rs1604861   | G | -0.0145 |
| rs4770398   | C | -0.0187 |
| rs77898753  | T | -0.0811 |
| rs7335770   | A | 0.0618  |
| rs77352197  | C | 0.0389  |
| rs1340708   | C | -0.0273 |
| rs147862304 | G | 0.044   |
| rs79722196  | T | 0.0401  |
| rs139315204 | A | 0.0241  |
| rs9510791   | G | -0.012  |
| rs9599966   | G | 0.0213  |
| rs1410433   | G | -0.0162 |
| rs7327786   | G | 0.0192  |
| rs61952793  | G | 0.0722  |
| rs75257825  | T | 0.035   |
| rs117782111 | G | 0.0889  |
| rs138151917 | A | -0.0486 |
| rs9521700   | A | 0.0213  |
| rs138676125 | G | 0.0631  |
| rs73210561  | G | 0.0461  |
| rs9547078   | T | 0.0288  |
| rs138154693 | C | 0.0426  |
| rs78834816  | G | -0.0332 |
| rs75941446  | A | -0.0401 |
| rs1555595   | G | 0.0133  |
| rs2183213   | G | 0.0123  |
| rs12867712  | C | 0.0319  |
| rs7319984   | C | 0.0333  |
| rs77522452  | A | 0.0706  |
| rs9514072   | G | -0.0154 |
| rs4772545   | A | 0.0122  |
| rs117410592 | A | -0.0588 |
| rs142582528 | T | -0.0613 |
| rs2993571   | G | -0.0129 |
| rs4150729   | T | -0.0421 |
| rs235777    | T | -0.0169 |
| rs73210276  | C | -0.0436 |
| rs9315202   | T | -0.0133 |

|             |   |         |
|-------------|---|---------|
| rs61945332  | A | -0.0406 |
| rs17054277  | A | 0.0444  |
| rs2053440   | A | -0.0169 |
| rs60176388  | G | -0.0133 |
| rs1550669   | C | -0.0164 |
| rs8000233   | G | 0.0121  |
| rs7990462   | A | 0.0186  |
| rs1075082   | A | 0.0301  |
| rs9301259   | A | 0.0181  |
| rs11618366  | T | -0.0156 |
| rs9583361   | T | -0.0129 |
| rs17072022  | C | 0.029   |
| rs3904322   | C | 0.0133  |
| rs11843256  | A | 0.0185  |
| rs74586325  | A | -0.0317 |
| rs73194198  | T | -0.0179 |
| rs76107518  | A | 0.0871  |
| rs9575390   | G | -0.0351 |
| rs74679229  | A | -0.048  |
| rs34743317  | T | 0.0176  |
| rs34219917  | A | 0.012   |
| rs7338134   | G | 0.0209  |
| rs4592522   | T | -0.0162 |
| rs73184627  | T | 0.0423  |
| rs117772893 | A | 0.0744  |
| rs72646790  | G | 0.0407  |
| rs529349    | T | -0.0179 |
| rs111605263 | T | 0.0652  |
| rs72663954  | G | 0.0782  |
| rs60504393  | A | 0.0322  |
| rs17293303  | G | 0.02    |
| rs116847206 | A | 0.0495  |
| rs7140052   | G | -0.0158 |
| rs117965096 | T | -0.0291 |
| rs60923986  | T | 0.0284  |
| rs73224170  | G | -0.0187 |
| rs3007769   | T | 0.0194  |
| rs17314215  | A | -0.0179 |
| rs73212750  | G | -0.1143 |
| rs9560588   | T | 0.0278  |
| rs116875202 | C | 0.0812  |
| rs10161635  | T | 0.0142  |
| rs9555187   | C | 0.0235  |
| rs9568024   | T | -0.025  |
| rs12866098  | A | -0.0126 |
| rs9520874   | T | -0.0725 |
| rs143040028 | G | 0.0441  |

|             |   |         |
|-------------|---|---------|
| rs61969449  | A | -0.1004 |
| rs56074835  | A | -0.1145 |
| rs7334549   | G | 0.0792  |
| rs17530211  | A | -0.0221 |
| rs79381365  | T | 0.0662  |
| rs76632689  | C | -0.0398 |
| rs144148910 | T | -0.0749 |
| rs112384776 | T | 0.0476  |
| rs56737298  | T | 0.0176  |
| rs974420    | A | -0.0121 |
| rs55687338  | T | 0.0277  |
| rs66622606  | C | -0.0356 |
| rs4771521   | G | -0.0188 |
| rs9530254   | A | -0.0142 |
| rs7984799   | C | -0.012  |
| rs61945093  | G | 0.0268  |
| rs78609575  | C | -0.0378 |
| rs79525961  | G | 0.0747  |
| rs150263635 | C | 0.0715  |
| rs7331188   | T | -0.0288 |
| rs9508104   | C | 0.0156  |
| rs55885781  | A | -0.0333 |
| rs17674822  | A | 0.034   |
| rs9577454   | T | 0.0137  |
| rs116921945 | T | 0.0496  |
| rs2919684   | C | 0.0161  |
| rs137874516 | C | -0.058  |
| rs74650680  | G | -0.0493 |
| rs4393435   | A | -0.0134 |
| rs61973347  | G | 0.0638  |
| rs61954157  | A | -0.0642 |
| rs1979029   | G | -0.0127 |
| rs2875666   | C | -0.0182 |
| rs2902464   | C | -0.0176 |
| rs685167    | C | -0.0188 |
| rs74769371  | A | 0.0276  |
| rs117255454 | G | -0.056  |
| rs7989223   | T | -0.023  |
| rs74819337  | G | -0.0276 |
| rs7989101   | G | -0.0471 |
| rs12865449  | C | 0.0192  |
| rs9547938   | G | -0.0548 |
| rs9598164   | T | 0.0424  |
| rs74823477  | C | -0.0656 |
| rs118104214 | T | 0.0692  |
| rs17566090  | G | 0.066   |
| rs77160885  | T | 0.0329  |



|             |   |         |
|-------------|---|---------|
| rs79720602  | A | -0.0226 |
| rs1322946   | G | -0.0209 |
| rs73181242  | T | 0.043   |
| rs144404508 | A | -0.0756 |
| rs74113461  | A | 0.0366  |
| rs9554648   | G | 0.0158  |
| rs1340709   | T | -0.0148 |
| rs16963116  | A | 0.0397  |
| rs145187452 | C | 0.0646  |
| rs11839433  | T | -0.0328 |
| rs137965719 | T | -0.066  |
| rs35031160  | A | -0.0158 |
| rs7988219   | C | 0.0137  |
| rs79264064  | T | 0.0288  |
| rs76106569  | T | 0.0451  |
| rs144030715 | C | -0.0721 |
| rs9519919   | T | 0.0121  |
| rs73173118  | A | -0.0659 |
| rs117348826 | A | 0.0749  |
| rs61967871  | A | 0.0503  |
| rs1924778   | G | -0.016  |
| rs9558602   | C | 0.0131  |
| rs10507526  | G | 0.0597  |
| rs61730892  | T | -0.0611 |
| rs66572249  | A | -0.0217 |
| rs9544874   | T | 0.0799  |
| rs3903012   | G | 0.0137  |
| rs150108138 | G | 0.0342  |
| rs4941459   | C | -0.0135 |
| rs143534413 | T | 0.0485  |
| rs76922499  | T | -0.049  |
| rs118007541 | G | 0.0579  |
| rs719757    | A | -0.0702 |
| rs7992472   | A | -0.0116 |
| rs141294918 | T | 0.0766  |
| rs55839837  | A | -0.0301 |
| rs3121791   | G | 0.072   |
| rs9525275   | C | 0.0206  |
| rs74925281  | G | 0.0485  |
| rs397869    | T | 0.0142  |
| rs9550565   | C | 0.0151  |
| rs9564792   | A | -0.0152 |
| rs76724902  | T | 0.0334  |
| rs1163846   | A | -0.0198 |
| rs998507    | G | 0.0311  |
| rs117663765 | A | 0.0258  |
| rs75571225  | T | 0.0841  |

|             |   |         |
|-------------|---|---------|
| rs12873728  | C | -0.0762 |
| rs9511111   | A | 0.0204  |
| rs117236298 | A | 0.0841  |
| rs138841471 | G | 0.0547  |
| rs9590159   | T | -0.0445 |
| rs148658100 | T | 0.0441  |
| rs1003092   | G | -0.0117 |
| rs9560223   | C | -0.037  |
| rs7322443   | C | -0.0229 |
| rs1891156   | C | -0.021  |
| rs57485805  | A | -0.064  |
| rs9573333   | C | 0.0196  |
| rs145150132 | C | -0.0482 |
| rs9553234   | G | -0.013  |
| rs113426868 | A | 0.0401  |
| rs12428713  | T | 0.0693  |
| rs35048777  | C | -0.0732 |
| rs11619131  | C | -0.0143 |
| rs141965780 | A | 0.0436  |
| rs72647605  | T | 0.054   |
| rs4572246   | T | -0.0174 |
| rs73160540  | C | -0.0224 |
| rs35651558  | T | 0.0533  |
| rs117210176 | C | 0.0735  |
| rs117134719 | T | -0.0467 |
| rs140352474 | A | 0.0657  |
| rs61962284  | G | -0.0159 |
| rs55721280  | A | -0.073  |
| rs9527556   | C | -0.0493 |
| rs9604616   | A | 0.0222  |
| rs149889776 | G | 0.0582  |
| rs969858    | T | 0.013   |
| rs11616259  | T | -0.0508 |
| rs880165    | A | 0.0113  |
| rs9562582   | C | -0.04   |
| rs9522706   | A | -0.0142 |
| rs113602563 | G | -0.0633 |
| rs77097289  | G | -0.0549 |
| rs61952966  | G | 0.0608  |
| rs4941846   | C | -0.0226 |
| rs113956893 | C | -0.0249 |
| rs61950600  | T | 0.0503  |
| rs75363007  | C | 0.0251  |
| rs57444328  | C | 0.0615  |
| rs17791172  | C | 0.0187  |
| rs17326790  | T | -0.1104 |
| rs9544462   | C | 0.0179  |

|             |   |         |
|-------------|---|---------|
| rs9533216   | G | -0.0128 |
| rs9603088   | A | 0.0237  |
| rs61969980  | G | 0.0397  |
| rs80221514  | C | -0.0898 |
| rs4885435   | T | 0.0172  |
| rs9542278   | C | -0.013  |
| rs1869008   | C | 0.0506  |
| rs9514085   | G | 0.0302  |
| rs4291782   | T | 0.0291  |
| rs143846355 | G | -0.0605 |
| rs7992385   | C | -0.0155 |
| rs9583190   | T | 0.0157  |
| rs9511036   | G | -0.0173 |
| rs145477310 | T | -0.0588 |
| rs1830942   | A | 0.0173  |
| rs80259631  | A | 0.0316  |
| rs142066646 | C | -0.0693 |
| rs150316346 | C | 0.0389  |
| rs56266662  | C | -0.0512 |
| rs1998609   | C | 0.0148  |
| rs60288953  | A | 0.0745  |
| rs74813221  | T | 0.0533  |
| rs67994003  | T | 0.0182  |
| rs78144902  | T | -0.0266 |
| rs7326616   | C | -0.0147 |
| rs78377684  | A | 0.0297  |
| rs113071501 | C | 0.0296  |
| rs117713600 | T | -0.0809 |
| rs1394322   | G | 0.0189  |
| rs167750    | A | -0.0459 |
| rs35331237  | T | 0.0161  |
| rs79645674  | T | -0.0191 |
| rs150105476 | C | -0.0563 |
| rs2301578   | C | -0.0844 |
| rs113776857 | A | -0.0942 |
| rs78586648  | G | 0.0227  |
| rs113284211 | A | 0.0839  |
| rs7490757   | A | -0.0233 |
| rs77075058  | G | 0.0636  |
| rs111616110 | G | 0.0286  |
| rs79630691  | A | -0.0465 |
| rs915412    | C | -0.0175 |
| rs11620454  | G | -0.0293 |
| rs17656152  | T | 0.0449  |
| rs145411117 | T | -0.0435 |
| rs2862246   | A | -0.0121 |
| rs116465179 | G | 0.0472  |

|             |   |         |
|-------------|---|---------|
| rs117380723 | A | -0.0553 |
| rs16963188  | C | 0.0726  |
| rs9532263   | A | 0.0157  |
| rs2184199   | G | -0.0152 |
| rs112849404 | C | -0.076  |
| rs138593934 | T | 0.0421  |
| rs112110185 | C | -0.0582 |
| rs34092155  | C | 0.0264  |
| rs9545604   | T | -0.012  |
| rs9543492   | C | -0.0131 |
| rs17735330  | C | -0.0145 |
| rs9509170   | T | -0.013  |
| rs61964494  | C | -0.0191 |
| rs141782873 | C | 0.0355  |
| rs548332    | G | 0.0431  |
| rs3119857   | G | -0.0202 |
| rs7990379   | T | -0.014  |
| rs73165090  | C | -0.12   |
| rs77613050  | C | 0.0384  |
| rs8001902   | T | -0.0135 |
| rs138653125 | T | -0.0593 |
| rs117078917 | A | 0.0672  |
| rs9506126   | G | -0.0168 |
| rs73175125  | A | -0.0223 |
| rs76929201  | T | 0.0531  |
| rs113908791 | T | 0.0239  |
| rs77533386  | G | 0.0342  |
| rs17569833  | T | 0.0473  |
| rs1047768   | T | 0.0117  |
| rs66960416  | C | 0.0223  |
| rs9541696   | A | 0.0216  |
| rs149055661 | T | 0.0437  |
| rs117780601 | C | -0.0892 |
| rs75895755  | A | -0.0509 |
| rs9530349   | G | -0.0287 |
| rs9566328   | A | 0.0119  |
| rs147296213 | T | -0.0229 |
| rs61651420  | C | -0.0201 |
| rs13313321  | A | -0.0175 |
| rs78269601  | A | 0.0624  |
| rs73501761  | G | -0.0538 |
| rs141399157 | T | -0.0214 |
| rs116878743 | T | -0.0768 |
| rs9550771   | T | 0.0138  |
| rs6650254   | T | -0.0153 |
| rs877918    | A | 0.0179  |
| rs72646783  | T | -0.0462 |

|             |   |         |
|-------------|---|---------|
| rs117553146 | T | -0.0752 |
| rs9315000   | T | 0.0559  |
| rs79054289  | T | -0.0374 |
| rs7995502   | T | 0.024   |
| rs942351    | T | -0.0183 |
| rs140195999 | A | 0.0748  |
| rs72634677  | G | 0.018   |
| rs151165951 | C | -0.025  |
| rs146394135 | A | -0.0578 |
| rs35944970  | C | 0.0166  |
| rs147014877 | T | -0.0976 |
| rs150130196 | A | -0.0359 |
| rs744574    | C | 0.0152  |
| rs77649743  | A | 0.0586  |
| rs9530810   | G | -0.0131 |
| rs9518715   | G | 0.0136  |
| rs9519178   | C | -0.0114 |
| rs140496310 | A | 0.0601  |
| rs12870271  | G | 0.0261  |
| rs74036261  | A | 0.0533  |
| rs36071623  | A | 0.0349  |
| rs78465319  | T | 0.0737  |
| rs117671812 | C | 0.0945  |
| rs76990918  | T | 0.0222  |
| rs79728077  | A | 0.0568  |
| rs78344787  | T | 0.0262  |
| rs11839787  | G | -0.0111 |
| rs145328535 | A | 0.0569  |
| rs146746062 | T | 0.0665  |
| rs117391534 | T | 0.037   |
| rs9542354   | T | -0.0287 |
| rs1932298   | G | 0.0111  |
| rs9602741   | A | 0.0348  |
| rs17628712  | T | -0.0637 |
| rs7328172   | C | -0.0238 |
| rs147601419 | C | -0.0659 |
| rs117186991 | T | -0.0891 |
| rs7335106   | A | 0.0694  |
| rs35518298  | T | -0.0522 |
| rs140620403 | G | -0.0473 |
| rs73192659  | C | -0.0134 |
| rs1218836   | T | 0.0187  |
| rs9599410   | A | 0.0142  |
| rs9518721   | A | -0.0308 |
| rs142511966 | A | 0.0699  |
| rs11547466  | G | -0.0197 |
| rs1972228   | T | -0.0158 |

|             |   |         |
|-------------|---|---------|
| rs9516411   | C | -0.017  |
| rs942343    | A | 0.0131  |
| rs117486770 | T | -0.0381 |
| rs7987325   | T | -0.0117 |
| rs55704291  | C | -0.0762 |
| rs11620579  | C | -0.0215 |
| rs79378695  | A | 0.0549  |
| rs6492697   | T | -0.0122 |
| rs17206382  | G | 0.0651  |
| rs74879687  | C | 0.0305  |
| rs8000455   | C | -0.0271 |
| rs7329379   | G | 0.013   |
| rs9536477   | T | -0.0183 |
| rs77375871  | A | -0.0489 |
| rs79590717  | C | 0.0324  |
| rs116906133 | G | 0.0482  |
| rs6563634   | A | -0.0267 |
| rs117634431 | A | -0.0641 |
| rs7338569   | G | 0.0253  |
| rs79909142  | T | -0.045  |
| rs4145891   | A | 0.0239  |
| rs113566355 | A | -0.047  |
| rs9588754   | T | -0.0172 |
| rs112797401 | T | -0.0535 |
| rs73160093  | A | -0.0577 |
| rs72665852  | A | 0.0661  |
| rs147790256 | A | -0.0621 |
| rs7988470   | A | -0.0358 |
| rs71442152  | G | 0.0857  |
| rs144186091 | G | 0.0637  |
| rs9550642   | A | 0.0225  |
| rs72641654  | A | 0.1197  |
| rs12869757  | T | 0.0242  |
| rs56332853  | C | 0.1173  |
| rs7990294   | T | 0.0376  |
| rs140553908 | T | 0.0945  |
| rs117667875 | T | -0.0416 |
| rs867482    | G | -0.014  |
| rs17281886  | G | -0.0156 |
| rs74322650  | A | -0.0535 |
| rs2289898   | G | -0.0135 |
| rs113467349 | C | 0.0548  |
| rs72660030  | T | 0.0383  |
| rs79831254  | G | 0.0651  |
| rs797489    | T | 0.0387  |
| rs2146439   | T | -0.0116 |
| rs61975890  | G | -0.0472 |

|             |   |         |
|-------------|---|---------|
| rs77030742  | A | 0.0434  |
| rs118183076 | G | -0.0311 |
| rs9556264   | G | 0.0405  |
| rs74708061  | T | 0.0314  |
| rs111940023 | A | 0.062   |
| rs3014937   | C | 0.0125  |
| rs9519874   | G | -0.0301 |
| rs117119350 | A | -0.1066 |
| rs4772985   | T | 0.0127  |
| rs9580924   | A | 0.0185  |
| rs4771051   | A | 0.0317  |
| rs117876177 | C | 0.0485  |
| rs55939363  | A | -0.0159 |
| rs9591501   | T | 0.0215  |
| rs9573547   | A | -0.0381 |
| rs7328236   | G | -0.0146 |
| rs79392328  | A | 0.0329  |
| rs11069366  | C | 0.0152  |
| rs9511682   | G | 0.0133  |
| rs9511659   | T | -0.0147 |
| rs113658693 | A | 0.0401  |
| rs1412821   | G | 0.0171  |
| rs150892080 | T | 0.0745  |
| rs2404725   | G | -0.0186 |
| rs149243274 | A | 0.0554  |
| rs9552685   | A | 0.043   |
| rs118069598 | G | -0.046  |
| rs74980211  | G | 0.026   |
| rs16961271  | T | 0.0162  |
| rs118061276 | A | -0.0675 |
| rs9522002   | C | 0.0161  |
| rs56395966  | T | 0.0146  |
| rs7999437   | A | -0.0218 |
| rs142017276 | G | 0.0757  |
| rs9544287   | C | 0.0626  |
| rs78535105  | A | -0.0435 |
| rs7997760   | A | 0.0471  |
| rs6491353   | G | 0.0266  |
| rs78804331  | T | -0.0249 |
| rs139746969 | T | -0.0566 |
| rs141665788 | G | 0.0898  |
| rs17073650  | G | -0.0589 |
| rs117108012 | A | -0.0697 |
| rs147190079 | T | 0.1079  |
| rs117905204 | A | -0.0677 |
| rs61966720  | T | -0.0299 |
| rs1359311   | G | -0.0148 |

|             |   |         |
|-------------|---|---------|
| rs73161828  | C | 0.0283  |
| rs77650570  | A | 0.0313  |
| rs145193640 | C | -0.0459 |
| rs7321559   | C | -0.0117 |
| rs141548923 | T | 0.0814  |
| rs61947387  | A | -0.0498 |
| rs79587940  | T | 0.0688  |
| rs75879385  | G | -0.0899 |
| rs77830717  | G | 0.0557  |
| rs117115635 | T | -0.0456 |
| rs1412939   | G | 0.0135  |
| rs79484776  | G | 0.0215  |
| rs9543569   | A | -0.0209 |
| rs943923    | A | -0.011  |
| rs117645385 | C | 0.0481  |
| rs10467512  | C | 0.0215  |
| rs142244071 | A | 0.0462  |
| rs1751025   | G | 0.0115  |
| rs55956613  | C | -0.0257 |
| rs9598029   | C | -0.0661 |
| rs17491680  | C | 0.0149  |
| rs139827118 | A | -0.0642 |
| rs9603776   | T | 0.047   |
| rs139284434 | C | 0.0673  |
| rs77977614  | A | 0.0497  |
| rs7994950   | G | 0.0485  |
| rs9567028   | T | -0.0147 |
| rs2096091   | C | -0.0301 |
| rs118167689 | C | 0.0493  |
| rs61965640  | T | 0.038   |
| rs72646787  | T | -0.0193 |
| rs79619116  | A | -0.0592 |
| rs78148966  | T | 0.0943  |
| rs2002022   | C | -0.0179 |
| rs78688794  | T | 0.0425  |
| rs73173341  | C | -0.0168 |
| rs61142600  | C | -0.0465 |
| rs4885480   | A | 0.0124  |
| rs9543351   | G | 0.0126  |
| rs7985042   | C | -0.0143 |
| rs12429082  | G | 0.0119  |
| rs75667235  | A | 0.025   |
| rs1730643   | A | 0.0217  |
| rs17080603  | G | 0.029   |
| rs76596114  | T | 0.0579  |
| rs9598343   | G | -0.0445 |
| rs9554017   | G | -0.0128 |



|             |   |         |
|-------------|---|---------|
| rs3790023   | C | -0.0157 |
| rs79681682  | G | 0.0155  |
| rs9545349   | C | -0.0132 |
| rs1220605   | G | -0.0113 |
| rs9549218   | A | -0.0228 |
| rs12583809  | C | 0.0138  |
| rs11619307  | A | 0.026   |
| rs12585074  | T | -0.0245 |
| rs117835960 | T | 0.0493  |
| rs4772063   | C | -0.0144 |
| rs12869244  | T | -0.0579 |
| rs78849436  | T | 0.0404  |
| rs4143549   | C | 0.0113  |
| rs117447627 | A | -0.0577 |
| rs11620228  | G | -0.0144 |
| rs113808518 | G | -0.0547 |
| rs138720150 | C | 0.0496  |
| rs61971832  | T | -0.0682 |
| rs9571720   | T | -0.0139 |
| rs147221563 | C | -0.0761 |
| rs28657402  | A | -0.0121 |
| rs79492415  | T | 0.0439  |
| rs9526160   | G | -0.0355 |
| rs9548411   | A | -0.0193 |
| rs11616500  | A | -0.0203 |
| rs1332592   | C | 0.0189  |
| rs75949349  | A | -0.0468 |
| rs113231593 | C | -0.0658 |
| rs114932522 | G | -0.0256 |
| rs3930804   | T | 0.057   |
| rs9519303   | G | 0.0699  |
| rs11619302  | A | -0.0126 |
| rs7993194   | G | -0.0188 |
| rs137974868 | G | 0.0476  |
| rs77890543  | C | 0.032   |
| rs79140589  | G | 0.062   |
| rs9515104   | G | 0.0146  |
| rs12867510  | A | -0.0124 |
| rs117810965 | A | 0.0695  |
| rs145461961 | C | 0.0587  |
| rs73205683  | A | 0.0479  |
| rs61962269  | C | 0.0493  |
| rs118100342 | A | 0.0429  |
| rs61143544  | T | -0.0213 |
| rs117163394 | C | 0.0455  |
| rs140870347 | T | -0.0802 |
| rs80161195  | T | 0.0318  |

|             |   |         |
|-------------|---|---------|
| rs138165925 | C | -0.061  |
| rs17084522  | A | -0.023  |
| rs112814402 | A | -0.0332 |
| rs117451330 | C | 0.0427  |
| rs2478205   | A | 0.0375  |
| rs678658    | A | 0.0178  |
| rs149874296 | A | -0.0504 |
| rs2858822   | A | -0.0128 |
| rs9551672   | A | -0.0142 |
| rs76519883  | G | -0.0416 |
| rs148881740 | G | 0.0525  |
| rs4769026   | C | 0.0113  |
| rs1536937   | C | -0.0221 |
| rs2104276   | G | -0.0109 |
| rs9533820   | A | -0.0438 |
| rs73219528  | C | -0.0114 |
| rs77094283  | A | -0.0396 |
| rs9574174   | T | -0.0106 |
| rs112052794 | A | -0.028  |
| rs6491727   | G | -0.0113 |
| rs9315026   | C | 0.0108  |
| rs58541587  | T | -0.0265 |
| rs117193997 | A | -0.0648 |
| rs4075251   | A | -0.0338 |
| rs111259849 | A | 0.0861  |
| rs139682078 | G | -0.0503 |
| rs4544103   | T | 0.0226  |
| rs806309    | T | 0.0657  |
| rs17368877  | C | -0.0573 |
| rs9530271   | T | -0.0111 |
| rs78473166  | A | -0.0281 |
| rs141004959 | T | 0.0511  |
| rs117385475 | A | 0.0547  |
| rs34799117  | G | 0.0133  |
| rs16963096  | T | -0.0385 |
| rs144073682 | C | 0.0888  |
| rs9564878   | A | 0.0181  |
| rs61047302  | A | -0.0251 |
| rs73214872  | G | -0.0432 |
| rs73154551  | A | -0.0161 |
| rs111263971 | A | 0.0499  |
| rs61749897  | G | -0.022  |
| rs73522896  | C | 0.0545  |
| rs7350657   | T | 0.02    |
| rs143038084 | C | 0.0408  |
| rs11148193  | T | 0.0282  |
| rs116932018 | T | -0.0695 |

|             |   |         |
|-------------|---|---------|
| rs67272988  | T | -0.0235 |
| rs73525536  | T | 0.0633  |
| rs112130633 | C | 0.0408  |
| rs140279392 | A | -0.0447 |
| rs61957720  | C | -0.0223 |
| rs55864343  | C | -0.0122 |
| rs622715    | T | 0.0161  |
| rs143380075 | G | 0.0746  |
| rs111308465 | T | -0.0463 |
| rs16952130  | G | -0.0164 |
| rs143271833 | G | 0.0466  |
| rs1537994   | C | -0.0176 |
| rs7326188   | C | 0.0505  |
| rs12864811  | T | -0.0168 |
| rs140446625 | G | 0.0958  |
| rs147586210 | T | -0.0448 |
| rs114604888 | T | 0.0532  |
| rs1752136   | G | -0.0354 |
| rs117392936 | T | -0.0513 |
| rs113113533 | C | -0.0374 |
| rs150563299 | G | 0.1023  |
| rs6563500   | A | 0.0203  |
| rs146345213 | T | -0.0394 |
| rs672905    | T | 0.0128  |
| rs74395661  | T | -0.0862 |
| rs143637858 | T | -0.0678 |
| rs985288    | G | 0.0109  |
| rs56028927  | A | -0.0231 |
| rs9516502   | A | 0.0112  |
| rs1283200   | T | -0.0116 |
| rs148047697 | T | 0.0723  |
| rs61946876  | C | 0.0208  |
| rs79011253  | T | -0.0401 |
| rs73571087  | C | 0.0217  |
| rs145495627 | A | -0.0715 |
| rs75694973  | A | 0.1278  |
| rs9520047   | T | -0.0338 |
| rs1935174   | A | 0.0151  |
| rs117434733 | G | 0.0623  |
| rs68132773  | C | 0.0265  |
| rs117283037 | T | 0.0358  |
| rs9526495   | G | -0.0656 |
| rs1417309   | G | 0.0324  |
| rs80296482  | T | 0.0318  |
| rs111336063 | C | 0.0766  |
| rs654865    | T | -0.0192 |
| rs117774118 | A | 0.054   |

|             |   |         |
|-------------|---|---------|
| rs12590654  | A | -0.0965 |
| rs10143128  | C | 0.2091  |
| rs8008388   | G | 0.0878  |
| rs17125944  | C | 0.1223  |
| rs71429055  | T | 0.1806  |
| rs2337406   | T | -0.1535 |
| rs12888850  | T | 0.1853  |
| rs28690092  | T | -0.1108 |
| rs10134526  | T | 0.0859  |
| rs76225752  | A | -0.1509 |
| rs8005894   | A | 0.063   |
| rs1680666   | C | -0.0813 |
| rs61983300  | G | 0.0716  |
| rs144562853 | C | -0.1999 |
| rs148127671 | T | -0.2648 |
| rs55633859  | T | -0.4159 |
| rs4981292   | A | 0.1009  |
| rs76897734  | G | 0.1441  |
| rs11624224  | G | 0.1547  |
| rs10130238  | T | 0.1172  |
| rs146696765 | C | 0.3015  |
| rs17184096  | T | 0.1328  |
| rs111714884 | T | -0.0895 |
| rs8019306   | C | 0.1768  |
| rs1891548   | C | 0.1161  |
| rs79395676  | C | 0.2693  |
| rs10483461  | T | 0.1927  |
| rs4981971   | G | -0.0611 |
| rs12323423  | C | 0.0637  |
| rs56228962  | T | 0.2258  |
| rs4140798   | G | 0.0613  |
| rs2242629   | T | -0.0592 |
| rs8018896   | T | 0.0584  |
| rs1271558   | C | 0.0578  |
| rs1956825   | G | 0.0566  |
| rs8022236   | A | 0.0605  |
| rs10498429  | A | 0.128   |
| rs17718015  | G | 0.2269  |
| rs12434646  | C | 0.0533  |
| rs12882226  | T | -0.2033 |
| rs76806262  | C | 0.3631  |
| rs118155582 | C | -0.1926 |
| rs10143842  | T | 0.1751  |
| rs8004500   | A | 0.0566  |
| rs74905608  | T | 0.2205  |
| rs45487597  | T | -0.3606 |
| rs2014563   | T | -0.1092 |

|             |   |         |
|-------------|---|---------|
| rs61996704  | A | 0.0638  |
| rs12431798  | C | 0.0651  |
| rs10131766  | A | -0.0741 |
| rs74545386  | T | -0.1329 |
| rs17125186  | G | 0.068   |
| rs113200633 | A | -0.1383 |
| rs8008001   | C | 0.1305  |
| rs28684512  | C | 0.1874  |
| rs10483936  | A | 0.0972  |
| rs79401508  | G | 0.142   |
| rs72675688  | G | 0.1481  |
| rs57437663  | G | 0.0707  |
| rs17123684  | C | 0.0767  |
| rs58046800  | A | -0.0774 |
| rs113417629 | A | 0.0931  |
| rs117677916 | G | -0.2925 |
| rs11849055  | A | 0.083   |
| rs7143348   | C | 0.0715  |
| rs112735980 | C | -0.2388 |
| rs11623887  | T | -0.0536 |
| rs227432    | A | 0.0552  |
| rs4902175   | G | 0.0583  |
| rs75264628  | A | -0.0859 |
| rs8021616   | G | 0.0671  |
| rs742887    | A | -0.0667 |
| rs17631065  | A | -0.0681 |
| rs2693684   | C | -0.0909 |
| rs45440200  | G | 0.1369  |
| rs1680678   | A | -0.1026 |
| rs117712652 | A | 0.2234  |
| rs117865147 | A | 0.1663  |
| rs145019692 | C | -0.2868 |
| rs75414283  | A | 0.1928  |
| rs62007687  | T | -0.0528 |
| rs76910145  | G | -0.16   |
| rs57277711  | A | 0.2546  |
| rs8004851   | G | 0.0751  |
| rs10145325  | G | -0.0511 |
| rs2165300   | T | -0.0664 |
| rs117344337 | T | 0.1843  |
| rs12587158  | A | -0.057  |
| rs142593266 | A | 0.3116  |
| rs35129024  | T | 0.0634  |
| rs34125578  | T | -0.1628 |
| rs111351339 | C | 0.1011  |
| rs11848092  | A | -0.0784 |
| rs1887064   | T | 0.0721  |

|             |   |         |
|-------------|---|---------|
| rs79918194  | G | 0.3907  |
| rs1325541   | T | -0.0527 |
| rs764350    | A | 0.0493  |
| rs2081379   | G | 0.2571  |
| rs958016    | G | 0.2039  |
| rs144125746 | C | 0.2246  |
| rs58593591  | G | 0.2432  |
| rs1241920   | A | -0.0693 |
| rs4981421   | A | -0.0549 |
| rs41301457  | A | 0.1592  |
| rs72688548  | T | 0.142   |
| rs1373097   | T | -0.1949 |
| rs1959316   | G | -0.0504 |
| rs10138116  | T | 0.1202  |
| rs56229066  | G | -0.1692 |
| rs6574292   | A | 0.0509  |
| rs113006341 | G | -0.1992 |
| rs116507506 | A | 0.2477  |
| rs7142049   | T | -0.0548 |
| rs2358078   | A | 0.0576  |
| rs77814731  | G | 0.0757  |
| rs117605197 | A | 0.3006  |
| rs74069450  | C | -0.094  |
| rs848096    | A | 0.0607  |
| rs115010768 | T | 0.2671  |
| rs8022093   | T | 0.0895  |
| rs151070677 | C | 0.2315  |
| rs11159712  | G | 0.0691  |
| rs117870627 | G | -0.2045 |
| rs74777646  | A | -0.166  |
| rs34885968  | G | -0.0696 |
| rs141624295 | A | 0.2267  |
| rs4904273   | T | 0.1495  |
| rs11621966  | T | 0.3688  |
| rs1091964   | G | -0.1334 |
| rs11849204  | G | 0.1157  |
| rs1769623   | A | -0.0564 |
| rs61989578  | C | -0.2393 |
| rs78859862  | A | -0.2326 |
| rs45490995  | C | 0.2723  |
| rs12890244  | A | 0.0581  |
| rs112986795 | A | -0.1406 |
| rs11847674  | G | -0.0489 |
| rs77102522  | T | -0.2697 |
| rs77103147  | C | -0.2229 |
| rs35242483  | G | -0.2104 |
| rs2236283   | A | -0.0938 |

|             |   |         |
|-------------|---|---------|
| rs76794199  | T | 0.092   |
| rs35981389  | G | 0.062   |
| rs113333430 | C | 0.2685  |
| rs117773808 | A | -0.3948 |
| rs6574166   | T | 0.0683  |
| rs144483170 | A | 0.2102  |
| rs146735655 | C | -0.1969 |
| rs117576848 | T | -0.1546 |
| rs34180624  | T | -0.0542 |
| rs1745736   | A | 0.0511  |
| rs1242093   | C | 0.0553  |
| rs878578    | A | 0.071   |
| rs150172846 | A | 0.3545  |
| rs147284834 | C | -0.2977 |
| rs172900    | T | 0.1171  |
| rs8018930   | T | 0.0496  |
| rs117948473 | T | 0.253   |
| rs4551942   | T | 0.0501  |
| rs75478143  | C | -0.3073 |
| rs8007394   | T | 0.137   |
| rs2615437   | T | -0.0862 |
| rs74060944  | T | -0.2455 |
| rs17129088  | A | 0.0912  |
| rs9788451   | G | -0.0672 |
| rs75404686  | C | 0.221   |
| rs148053350 | T | -0.1291 |
| rs116988868 | G | -0.2124 |
| rs148086608 | G | 0.2407  |
| rs74801882  | C | 0.1422  |
| rs10148262  | C | -0.049  |
| rs116868913 | T | -0.2242 |
| rs12436129  | T | 0.288   |
| rs117499193 | A | 0.2572  |
| rs12323816  | A | 0.0469  |
| rs17116389  | G | 0.0987  |
| rs4904785   | C | 0.1425  |
| rs4632065   | T | 0.0552  |
| rs2104568   | C | -0.0485 |
| rs117322871 | T | 0.1903  |
| rs2891268   | G | -0.0477 |
| rs56790127  | T | 0.2181  |
| rs8020806   | C | -0.0798 |
| rs72690887  | G | 0.0972  |
| rs72671469  | G | 0.0992  |
| rs9323093   | T | 0.0587  |
| rs7144473   | T | 0.0713  |
| rs2020996   | G | -0.0484 |

|             |   |         |
|-------------|---|---------|
| rs1540269   | A | -0.1212 |
| rs715043    | T | -0.0539 |
| rs17091776  | C | -0.2401 |
| rs1204993   | A | -0.0696 |
| rs7146437   | A | -0.07   |
| rs72733548  | A | -0.0538 |
| rs116861890 | T | -0.0905 |
| rs56151002  | A | -0.0841 |
| rs146621337 | G | 0.1651  |
| rs12323869  | A | 0.1473  |
| rs6575670   | A | 0.0461  |
| rs8007777   | T | 0.0533  |
| rs10143848  | C | 0.0507  |
| rs2681724   | A | -0.0507 |
| rs8021311   | C | 0.0738  |
| rs17796541  | T | -0.0744 |
| rs11465523  | A | 0.2015  |
| rs12897230  | C | 0.0768  |
| rs6575167   | G | -0.1389 |
| rs57001391  | C | -0.0714 |
| rs12897333  | T | -0.1167 |
| rs76207561  | G | 0.1489  |
| rs10145269  | T | 0.1113  |
| rs11848060  | C | 0.059   |
| rs117194725 | T | 0.1709  |
| rs10438208  | A | 0.1941  |
| rs10438211  | G | -0.1115 |
| rs1958540   | C | 0.0672  |
| rs79937668  | T | 0.1827  |
| rs8020751   | C | 0.0668  |
| rs8011255   | C | -0.084  |
| rs61982600  | A | 0.0575  |
| rs11848471  | C | -0.1149 |
| rs944052    | A | 0.0664  |
| rs10133972  | T | -0.0549 |
| rs117912966 | T | 0.1607  |
| rs10132872  | A | 0.0628  |
| rs1345980   | A | -0.0476 |
| rs2286836   | T | -0.0755 |
| rs73276857  | T | 0.2005  |
| rs2057115   | C | 0.0599  |
| rs2792116   | T | -0.1017 |
| rs2102232   | A | 0.0437  |
| rs17105095  | G | 0.0512  |
| rs72697253  | T | -0.113  |
| rs10144265  | C | 0.0656  |
| rs17109935  | C | 0.061   |



|             |   |         |
|-------------|---|---------|
| rs2498847   | G | 0.0453  |
| rs75739129  | G | 0.1394  |
| rs61983373  | T | 0.059   |
| rs74659241  | G | -0.2625 |
| rs66520955  | C | 0.1863  |
| rs7150264   | G | 0.0736  |
| rs146443885 | A | -0.3495 |
| rs35627364  | T | -0.0525 |
| rs10137996  | C | -0.0734 |
| rs113768326 | C | 0.1217  |
| rs8021922   | A | -0.0949 |
| rs8021652   | T | 0.0466  |
| rs55820801  | A | 0.0448  |
| rs17104036  | A | 0.0983  |
| rs7144884   | A | 0.1298  |
| rs67232936  | A | -0.0959 |
| rs12890727  | T | -0.0714 |
| rs12147431  | G | 0.0775  |
| rs3759602   | C | 0.0453  |
| rs1953241   | G | -0.0497 |
| rs160459    | C | -0.0445 |
| rs8008473   | T | -0.0435 |
| rs2273708   | C | -0.1081 |
| rs6575237   | A | 0.0451  |
| rs7142406   | C | -0.0525 |
| rs4904040   | T | -0.0465 |
| rs61978098  | T | -0.1199 |
| rs61995108  | A | 0.33    |
| rs8015929   | G | 0.0574  |
| rs12879559  | A | -0.0483 |
| rs1075856   | G | 0.0511  |
| rs149342643 | G | -0.162  |
| rs77116452  | A | 0.0864  |
| rs7149525   | A | 0.186   |
| rs10135595  | T | -0.0441 |
| rs35832722  | G | -0.1615 |
| rs61989304  | T | -0.1646 |
| rs761502    | T | 0.1129  |
| rs12890277  | C | 0.0435  |
| rs8009922   | A | 0.049   |
| rs7141505   | C | 0.0542  |
| rs1957356   | T | -0.0529 |
| rs11623322  | A | -0.0444 |
| rs7144419   | A | -0.046  |
| rs75894643  | A | 0.2955  |
| rs12147669  | C | -0.0572 |
| rs36087206  | C | 0.0614  |

|             |   |         |
|-------------|---|---------|
| rs2022568   | C | 0.0426  |
| rs148364304 | A | 0.1733  |
| rs4536381   | A | 0.068   |
| rs113640977 | A | -0.067  |
| rs45500097  | A | 0.0517  |
| rs77945159  | A | 0.1354  |
| rs60353528  | A | -0.06   |
| rs12147802  | A | -0.0545 |
| rs117489557 | A | -0.1715 |
| rs118044588 | G | 0.3633  |
| rs74972342  | T | 0.2255  |
| rs17127407  | G | 0.2249  |
| rs72681611  | T | -0.0929 |
| rs12886018  | T | 0.1778  |
| rs117689996 | C | 0.2858  |
| rs57311642  | G | -0.2665 |
| rs7160968   | C | 0.1321  |
| rs117705485 | C | 0.1914  |
| rs142815942 | A | 0.1845  |
| rs7153670   | C | -0.0427 |
| rs2239228   | G | 0.053   |
| rs7154707   | C | -0.0651 |
| rs876746    | A | -0.0814 |
| rs12881046  | T | 0.0544  |
| rs111895429 | A | -0.3639 |
| rs78513517  | A | 0.1607  |
| rs78116598  | C | -0.1655 |
| rs80233900  | C | -0.1615 |
| rs77069096  | G | 0.0683  |
| rs79666164  | T | -0.0823 |
| rs117497177 | T | 0.306   |
| rs146846092 | T | -0.2772 |
| rs1950630   | T | -0.0774 |
| rs75224365  | C | 0.2346  |
| rs12431453  | C | 0.0449  |
| rs10459584  | A | -0.0486 |
| rs11157020  | C | -0.0445 |
| rs35746773  | C | 0.053   |
| rs117369545 | T | 0.1669  |
| rs1957901   | T | -0.0479 |
| rs17099565  | G | -0.0924 |
| rs117588845 | C | 0.0974  |
| rs10498649  | C | 0.0588  |
| rs61326103  | C | 0.0697  |
| rs113868171 | G | 0.1247  |
| rs72726359  | C | 0.1484  |
| rs77924489  | C | -0.2842 |

|             |   |         |
|-------------|---|---------|
| rs2607044   | A | 0.0632  |
| rs1667528   | G | 0.2553  |
| rs12433317  | A | -0.0438 |
| rs112182866 | G | 0.1698  |
| rs227390    | G | 0.1853  |
| rs8006233   | G | -0.0494 |
| rs72719856  | T | 0.1825  |
| rs1763559   | A | 0.055   |
| rs34795575  | C | 0.2767  |
| rs7148708   | T | -0.0447 |
| rs118005233 | T | -0.1707 |
| rs79224743  | G | 0.0812  |
| rs61985126  | G | 0.0626  |
| rs12897835  | A | -0.0494 |
| rs3811223   | T | -0.2417 |
| rs12881881  | A | 0.0508  |
| rs117138393 | G | -0.2244 |
| rs7142319   | T | 0.0461  |
| rs72677634  | A | 0.2024  |
| rs79019719  | A | 0.064   |
| rs10483756  | T | 0.0531  |
| rs1612367   | C | 0.0478  |
| rs3126174   | C | -0.0634 |
| rs34608773  | T | 0.0704  |
| rs10147885  | T | 0.0621  |
| rs10149077  | A | -0.0893 |
| rs12588555  | C | -0.1214 |
| rs8016748   | C | 0.0422  |
| rs73354410  | C | -0.1608 |
| rs11622416  | G | 0.0917  |
| rs113258328 | C | -0.2126 |
| rs28639694  | G | -0.0426 |
| rs1263814   | A | -0.0573 |
| rs12435444  | T | 0.055   |
| rs1882842   | A | 0.0569  |
| rs28670404  | C | -0.1226 |
| rs67963622  | C | -0.1148 |
| rs117171514 | T | -0.2224 |
| rs55649568  | T | -0.156  |
| rs8013551   | T | 0.1358  |
| rs78001532  | C | 0.1174  |
| rs74320578  | A | -0.2305 |
| rs1256543   | A | -0.0554 |
| rs61981382  | A | 0.124   |
| rs17832891  | A | -0.1883 |
| rs8010397   | T | 0.0431  |
| rs1152775   | C | -0.0886 |

|             |   |         |
|-------------|---|---------|
| rs78242704  | G | 0.3983  |
| rs75042637  | T | -0.2671 |
| rs12881897  | C | -0.0571 |
| rs1885143   | G | 0.0407  |
| rs76726490  | A | 0.1957  |
| rs35095833  | C | 0.165   |
| rs1555405   | A | -0.0491 |
| rs8007052   | A | -0.0473 |
| rs12885784  | A | -0.0438 |
| rs74431728  | T | -0.1088 |
| rs1950706   | T | -0.0837 |
| rs80140444  | G | -0.22   |
| rs117799279 | T | -0.2445 |
| rs7154251   | C | -0.1961 |
| rs1956173   | A | 0.0614  |
| rs944051    | C | -0.1457 |
| rs61976262  | G | -0.2146 |
| rs61978897  | C | 0.0805  |
| rs854392    | C | 0.077   |
| rs12433784  | G | -0.093  |
| rs80183828  | A | -0.0785 |
| rs11845173  | C | 0.0868  |
| rs10130751  | T | -0.0728 |
| rs243183    | A | -0.0449 |
| rs62013167  | A | -0.1564 |
| rs74939303  | T | 0.1388  |
| rs12883549  | G | 0.2097  |
| rs6575425   | A | 0.0528  |
| rs12050451  | C | -0.0588 |
| rs406280    | T | 0.0408  |
| rs80298513  | A | -0.1239 |
| rs148244070 | C | 0.1558  |
| rs147093827 | G | 0.2057  |
| rs74244882  | A | 0.049   |
| rs34227440  | C | -0.044  |
| rs7159928   | A | -0.0551 |
| rs79732256  | T | -0.1952 |
| rs148668237 | C | -0.249  |
| rs74883747  | T | 0.1102  |
| rs142221574 | G | -0.1675 |
| rs6574730   | A | -0.041  |
| rs61988434  | T | 0.0683  |
| rs2272549   | C | -0.0622 |
| rs72704583  | C | -0.1071 |
| rs76322163  | A | -0.1161 |
| rs11442653  | T | 0.0805  |
| rs139346145 | C | 0.2042  |

|             |   |         |
|-------------|---|---------|
| rs12896283  | T | -0.0493 |
| rs75811850  | A | -0.2889 |
| rs141237669 | C | -0.2183 |
| rs10141242  | C | 0.0558  |
| rs117305390 | A | 0.1983  |
| rs2278687   | C | -0.0491 |
| rs2044748   | T | 0.0754  |
| rs229745    | G | 0.0916  |
| rs10149765  | A | 0.1697  |
| rs17092373  | C | 0.1776  |
| rs117017082 | T | 0.2185  |
| rs72721692  | A | -0.1422 |
| rs11624174  | T | 0.1369  |
| rs2236306   | C | 0.0621  |
| rs28715334  | T | 0.072   |
| rs118065343 | T | 0.1871  |
| rs139559704 | C | 0.1909  |
| rs113053299 | A | -0.2129 |
| rs57645873  | G | 0.0477  |
| rs72681847  | C | 0.1693  |
| rs117124902 | T | 0.2035  |
| rs117717278 | T | 0.2143  |
| rs117930465 | T | 0.1664  |
| rs75692985  | C | -0.2688 |
| rs17545631  | A | -0.0525 |
| rs10143231  | G | 0.0414  |
| rs7140768   | C | 0.0419  |
| rs17834322  | C | -0.0803 |
| rs10131983  | C | 0.0912  |
| rs17186225  | A | -0.0534 |
| rs117050671 | A | -0.1874 |
| rs77139355  | G | -0.042  |
| rs113320706 | G | 0.195   |
| rs117372682 | G | -0.2099 |
| rs72672750  | C | -0.0512 |
| rs112238158 | A | 0.1185  |
| rs117333883 | C | 0.141   |
| rs75768235  | G | 0.1503  |
| rs56365284  | G | -0.0799 |
| rs12436107  | C | -0.0393 |
| rs12590590  | G | -0.0586 |
| rs11625043  | G | 0.0822  |
| rs10145668  | G | 0.1403  |
| rs3759589   | T | 0.0418  |
| rs117386714 | T | -0.1856 |
| rs4983517   | G | 0.0533  |
| rs140758250 | G | 0.2334  |

|             |   |         |
|-------------|---|---------|
| rs78210841  | T | -0.1562 |
| rs34180745  | C | 0.0876  |
| rs12434881  | A | 0.0413  |
| rs1953374   | A | 0.1086  |
| rs8018669   | C | 0.0399  |
| rs74050255  | A | -0.1243 |
| rs8021632   | T | 0.0883  |
| rs55832106  | G | 0.0406  |
| rs1882705   | C | -0.0407 |
| rs117487418 | C | 0.1461  |
| rs7143013   | A | 0.0472  |
| rs34647735  | T | 0.0575  |
| rs79982872  | G | -0.1185 |
| rs146090463 | A | 0.2534  |
| rs114692116 | A | 0.1168  |
| rs113516773 | G | 0.1929  |
| rs8017344   | C | 0.0863  |
| rs79881755  | T | 0.2002  |
| rs1343740   | T | -0.0611 |
| rs17110258  | C | 0.086   |
| rs807370    | T | 0.0398  |
| rs1950356   | T | -0.0468 |
| rs77114708  | C | -0.1366 |
| rs8009107   | C | -0.0415 |
| rs117299440 | A | 0.1778  |
| rs1681598   | T | 0.1445  |
| rs72682484  | T | 0.0921  |
| rs8018960   | A | -0.0429 |
| rs10144853  | A | -0.0461 |
| rs1465163   | T | -0.089  |
| rs1959792   | T | -0.0728 |
| rs113099720 | G | 0.0848  |
| rs10139340  | G | 0.1032  |
| rs11620675  | T | -0.0535 |
| rs10131293  | A | 0.0703  |
| rs61977978  | G | -0.0859 |
| rs35170353  | T | 0.1239  |
| rs2814461   | G | 0.0731  |
| rs17602628  | A | 0.0956  |
| rs910337    | T | -0.0432 |
| rs144057354 | G | 0.1406  |
| rs10142582  | T | 0.0466  |
| rs140585927 | A | 0.3519  |
| rs848045    | C | 0.0394  |
| rs142621185 | A | -0.2017 |
| rs72660232  | C | 0.0882  |
| rs1032582   | A | -0.1446 |

|             |   |         |
|-------------|---|---------|
| rs77803288  | T | -0.0925 |
| rs117015396 | A | -0.1643 |
| rs17098749  | A | 0.0855  |
| rs72675245  | A | 0.1018  |
| rs72718022  | G | 0.1519  |
| rs10131949  | G | 0.2236  |
| rs68165911  | A | 0.0642  |
| rs78641811  | C | 0.1141  |
| rs1952298   | G | -0.0441 |
| rs72705285  | G | -0.104  |
| rs4899677   | G | 0.0395  |
| rs12586353  | C | -0.0524 |
| rs72711028  | T | 0.1071  |
| rs74035013  | T | -0.2223 |
| rs2273912   | T | -0.0674 |
| rs117843233 | C | 0.2584  |
| rs8007666   | T | -0.1206 |
| rs74203101  | T | -0.0914 |
| rs75270249  | A | -0.1493 |
| rs35590716  | A | 0.0794  |
| rs117782839 | A | 0.1215  |
| rs4898745   | T | -0.0405 |
| rs146641307 | T | 0.2087  |
| rs2540890   | A | -0.0748 |
| rs148338661 | T | -0.1521 |
| rs146954467 | C | -0.1905 |
| rs117680626 | C | 0.1709  |
| rs77890674  | G | 0.0925  |
| rs141396681 | A | 0.0539  |
| rs78610745  | T | -0.1555 |
| rs12590249  | T | 0.121   |
| rs11159497  | A | 0.0811  |
| rs1191388   | C | 0.0393  |
| rs34816272  | C | 0.1856  |
| rs7158883   | C | 0.0564  |
| rs34327077  | T | 0.0548  |
| rs146840540 | C | 0.2096  |
| rs12895249  | C | 0.0483  |
| rs6571509   | C | -0.0393 |
| rs17121933  | A | 0.0763  |
| rs73332255  | G | 0.1661  |
| rs12885659  | A | -0.056  |
| rs11624995  | G | 0.0568  |
| rs138586023 | T | -0.1731 |
| rs72717766  | G | -0.2755 |
| rs61392811  | A | -0.1198 |
| rs76725931  | T | 0.0981  |

|             |   |         |
|-------------|---|---------|
| rs117437005 | G | 0.2561  |
| rs145529026 | A | 0.2051  |
| rs60478967  | C | 0.1112  |
| rs7494271   | G | -0.0483 |
| rs10148709  | T | -0.1425 |
| rs3007062   | G | -0.0416 |
| rs141231126 | G | -0.1748 |
| rs12896116  | T | -0.0611 |
| rs72700841  | A | -0.1561 |
| rs118026981 | G | 0.1595  |
| rs7146158   | A | 0.0395  |
| rs1676248   | G | -0.0417 |
| rs77279035  | A | 0.1224  |
| rs11158061  | C | -0.0515 |
| rs1459705   | C | 0.1587  |
| rs138322672 | G | 0.183   |
| rs1243527   | T | 0.0916  |
| rs78500693  | A | 0.0811  |
| rs35980666  | G | -0.0398 |
| rs2883765   | C | -0.0713 |
| rs143326833 | G | 0.2706  |
| rs77755307  | G | 0.1881  |
| rs34881026  | C | 0.105   |
| rs917833    | C | 0.0552  |
| rs11850670  | T | 0.1296  |
| rs75209566  | T | -0.1121 |
| rs2415864   | C | -0.0539 |
| rs76963937  | T | 0.1888  |
| rs138297907 | G | -0.3447 |
| rs12882811  | A | 0.061   |
| rs139623715 | T | 0.2618  |
| rs2016851   | T | 0.0431  |
| rs17127785  | G | -0.041  |
| rs1152455   | C | 0.0374  |
| rs17179393  | A | 0.1326  |
| rs28676781  | A | 0.1198  |
| rs7158865   | T | 0.0814  |
| rs17573767  | T | 0.0902  |
| rs12883861  | G | 0.038   |
| rs141878097 | C | 0.1718  |
| rs61992695  | G | -0.177  |
| rs910791    | A | 0.0376  |
| rs4981485   | G | -0.0754 |
| rs114776296 | T | 0.2335  |
| rs78993547  | C | 0.112   |
| rs1051718   | G | -0.1764 |
| rs3898724   | C | 0.0487  |



|             |   |         |
|-------------|---|---------|
| rs11845169  | G | 0.0372  |
| rs10132031  | C | -0.0388 |
| rs17127496  | C | -0.118  |
| rs56042050  | G | -0.1171 |
| rs17107154  | T | 0.0459  |
| rs76540474  | G | 0.1909  |
| rs142893792 | A | 0.1622  |
| rs17098279  | G | -0.0998 |
| rs75726582  | T | 0.2222  |
| rs7140616   | C | -0.042  |
| rs2318891   | G | 0.0701  |
| rs147067431 | T | 0.1634  |
| rs115344106 | A | 0.0751  |
| rs1256064   | G | 0.0612  |
| rs761958    | C | 0.148   |
| rs146063499 | C | 0.1711  |
| rs28362567  | T | 0.1002  |
| rs12892750  | G | -0.0394 |
| rs2268957   | T | 0.0706  |
| rs117252551 | G | 0.1948  |
| rs2369421   | T | 0.0436  |
| rs1959506   | A | 0.037   |
| rs79265763  | G | -0.1303 |
| rs11624987  | T | -0.0855 |
| rs117845304 | T | -0.1565 |
| rs1078451   | A | 0.0512  |
| rs4903393   | G | -0.0396 |
| rs10149824  | T | -0.0414 |
| rs74723169  | A | 0.1844  |
| rs117257353 | C | 0.2727  |
| rs1951188   | T | 0.0442  |
| rs9323450   | G | 0.0397  |
| rs149114613 | C | 0.2001  |
| rs17803546  | A | -0.0468 |
| rs72677897  | T | 0.132   |
| rs4243645   | C | 0.0375  |
| rs117420080 | T | -0.1638 |
| rs17092090  | C | -0.0947 |
| rs1953447   | T | -0.0564 |
| rs10139051  | A | 0.0368  |
| rs116971554 | G | 0.3772  |
| rs433410    | T | -0.0385 |
| rs144042329 | G | 0.2633  |
| rs141982550 | A | 0.1465  |
| rs4904046   | A | -0.0677 |
| rs10142728  | A | -0.0681 |
| rs118016739 | G | -0.179  |

|             |   |         |
|-------------|---|---------|
| rs8016417   | C | -0.0374 |
| rs2272587   | C | -0.0378 |
| rs8017062   | A | 0.0388  |
| rs79250780  | C | 0.1952  |
| rs75319650  | G | 0.1344  |
| rs11623741  | G | -0.0388 |
| rs73373954  | G | 0.1367  |
| rs2144775   | C | -0.0387 |
| rs11850195  | T | -0.056  |
| rs2223928   | C | -0.0408 |
| rs6572912   | T | 0.0461  |
| rs17115708  | G | 0.1285  |
| rs7144506   | C | -0.0594 |
| rs138870042 | A | 0.1478  |
| rs1255989   | A | 0.0851  |
| rs10483406  | A | -0.0449 |
| rs79646961  | T | -0.0895 |
| rs1940564   | C | 0.0422  |
| rs1959775   | G | 0.0376  |
| rs4438231   | C | 0.1238  |
| rs17738966  | A | -0.0558 |
| rs72709128  | T | 0.2271  |
| rs1003349   | T | -0.0449 |
| rs61377624  | T | 0.0844  |
| rs10220686  | G | -0.037  |
| rs2110116   | G | 0.042   |
| rs117479451 | A | 0.1014  |
| rs76603588  | T | -0.1393 |
| rs74036429  | G | -0.0479 |
| rs384491    | A | 0.0455  |
| rs2207240   | G | 0.1504  |
| rs10484208  | G | -0.0381 |
| rs1958973   | G | 0.0819  |
| rs12437015  | T | 0.0982  |
| rs8010361   | C | 0.05    |
| rs7154855   | C | 0.072   |
| rs710263    | T | 0.0416  |
| rs10137060  | G | -0.0384 |
| rs139289250 | A | 0.2408  |
| rs61979446  | A | -0.0432 |
| rs61979278  | C | -0.0737 |
| rs117752547 | T | 0.1977  |
| rs72704942  | C | 0.0505  |
| rs140824169 | T | -0.0684 |
| rs45515394  | T | -0.0645 |
| rs113481803 | A | -0.2002 |
| rs17123606  | G | 0.1299  |

|             |   |         |
|-------------|---|---------|
| rs7156200   | C | 0.0436  |
| rs6572957   | C | 0.0368  |
| rs148483440 | C | 0.2053  |
| rs7143653   | C | 0.1     |
| rs1950935   | G | -0.0433 |
| rs79373890  | C | 0.0535  |
| rs11156848  | C | -0.0389 |
| rs74602037  | A | 0.0791  |
| rs4347559   | G | 0.0468  |
| rs10147390  | C | -0.0779 |
| rs78357955  | G | -0.1357 |
| rs75085390  | A | -0.0462 |
| rs72679968  | T | 0.2944  |
| rs969915    | T | -0.0383 |
| rs117270106 | T | 0.1227  |
| rs17093887  | A | -0.0519 |
| rs112347064 | G | -0.21   |
| rs1756662   | T | -0.0365 |
| rs113732705 | T | 0.1235  |
| rs4899650   | A | 0.0372  |
| rs4075105   | A | -0.0469 |
| rs950197    | T | -0.0649 |
| rs11159163  | A | -0.0434 |
| rs76978901  | G | 0.1771  |
| rs2098322   | G | -0.0371 |
| rs17393547  | G | -0.0385 |
| rs72732168  | T | -0.1505 |
| rs141031153 | T | 0.078   |
| rs4899715   | T | 0.1456  |
| rs1474477   | T | -0.0538 |
| rs216516    | A | -0.039  |
| rs74080880  | C | -0.114  |
| rs3967867   | T | -0.0428 |
| rs116975652 | T | -0.2112 |
| rs8010253   | T | 0.0376  |
| rs11159817  | T | -0.1192 |
| rs28687910  | A | 0.0894  |
| rs7146668   | T | 0.039   |
| rs117865729 | C | -0.2071 |
| rs8013774   | C | 0.066   |
| rs111524268 | T | -0.0769 |
| rs7160771   | G | -0.0504 |
| rs140664623 | T | 0.13    |
| rs12050431  | A | 0.0694  |
| rs4899208   | A | 0.0583  |
| rs149036651 | A | 0.1425  |
| rs764162    | A | -0.1738 |

|             |   |         |
|-------------|---|---------|
| rs12886378  | A | 0.054   |
| rs17629301  | G | 0.1324  |
| rs117555425 | G | 0.0601  |
| rs140086780 | A | -0.1638 |
| rs79893570  | G | 0.2006  |
| rs7149536   | T | 0.048   |
| rs1177560   | C | -0.0445 |
| rs117990343 | C | 0.1485  |
| rs17102265  | A | 0.0472  |
| rs74723574  | A | 0.1466  |
| rs72681278  | T | 0.114   |
| rs61975652  | A | 0.0557  |
| rs34357047  | T | -0.0967 |
| rs17120641  | G | -0.0662 |
| rs139856543 | C | 0.2366  |
| rs61972449  | T | 0.1703  |
| rs72713137  | C | 0.0435  |
| rs1255573   | A | 0.1602  |
| rs117572496 | T | 0.1678  |
| rs10454680  | T | -0.0631 |
| rs79776860  | C | 0.1336  |
| rs76587790  | C | -0.2274 |
| rs76623500  | G | -0.1686 |
| rs79699632  | C | 0.1951  |
| rs12881866  | A | -0.1463 |
| rs56348431  | A | 0.0701  |
| rs11846874  | A | 0.0359  |
| rs117626732 | G | 0.1634  |
| rs35015392  | T | 0.0864  |
| rs111512048 | T | 0.2424  |
| rs66479315  | C | 0.0509  |
| rs8008044   | C | 0.1333  |
| rs8012997   | C | 0.0509  |
| rs8021007   | T | 0.037   |
| rs77953148  | T | 0.2439  |
| rs60411253  | T | -0.0975 |
| rs74863902  | T | -0.2095 |
| rs4981693   | G | -0.0429 |
| rs78267107  | T | 0.1675  |
| rs57346352  | C | 0.0667  |
| rs10148272  | C | 0.0371  |
| rs55830080  | C | 0.1136  |
| rs73602471  | A | -0.1036 |
| rs17094248  | T | -0.0365 |
| rs12431574  | A | 0.0604  |
| rs72691441  | A | -0.0892 |
| rs4899998   | C | -0.1038 |

|             |   |         |
|-------------|---|---------|
| rs10136077  | C | 0.18    |
| rs10143236  | T | -0.0403 |
| rs12437268  | G | 0.0943  |
| rs12896618  | A | -0.0365 |
| rs10144260  | A | 0.2007  |
| rs34820107  | T | 0.2109  |
| rs10138194  | G | 0.0365  |
| rs854359    | T | 0.0707  |
| rs7150342   | T | 0.0744  |
| rs1558857   | G | 0.0678  |
| rs880536    | C | -0.0368 |
| rs17180056  | A | 0.0951  |
| rs2105230   | A | 0.0491  |
| rs7144806   | A | -0.0479 |
| rs77658190  | A | -0.0851 |
| rs77712551  | T | -0.0771 |
| rs35986644  | T | -0.1848 |
| rs17099960  | T | 0.197   |
| rs8021689   | A | -0.0677 |
| rs78263036  | A | 0.0974  |
| rs79342207  | G | 0.1781  |
| rs10132709  | C | -0.0823 |
| rs2004448   | G | 0.0521  |
| rs72728640  | T | 0.112   |
| rs8021411   | A | -0.1325 |
| rs141232522 | G | 0.1528  |
| rs72684268  | G | 0.0891  |
| rs17257152  | A | 0.1013  |
| rs11848165  | C | 0.0651  |
| rs59099675  | C | -0.1633 |
| rs5871      | C | -0.0605 |
| rs1621025   | T | 0.0514  |
| rs8019143   | T | 0.076   |
| rs61999074  | C | -0.0848 |
| rs11628818  | T | -0.046  |
| rs10144799  | T | 0.0659  |
| rs4141719   | C | 0.0654  |
| rs1255576   | T | 0.0582  |
| rs974074    | T | 0.046   |
| rs79632046  | G | -0.2327 |
| rs11848583  | T | -0.0383 |
| rs1285859   | T | -0.1725 |
| rs138239941 | C | 0.2158  |
| rs78729611  | C | -0.1349 |
| rs72696261  | T | 0.0924  |
| rs7158455   | C | 0.0726  |
| rs17831700  | A | 0.0406  |

|             |   |         |
|-------------|---|---------|
| rs2224155   | G | 0.1957  |
| rs4981441   | C | 0.1477  |
| rs66490913  | A | 0.0405  |
| rs33993630  | T | -0.0727 |
| rs12884206  | G | 0.045   |
| rs117319215 | T | 0.1496  |
| rs113401921 | T | 0.2471  |
| rs4900468   | A | 0.0665  |
| rs17808556  | G | -0.0838 |
| rs1286336   | C | -0.0516 |
| rs75582247  | T | 0.123   |
| rs74040972  | T | -0.1524 |
| rs17122349  | C | -0.0973 |
| rs804931    | A | -0.0348 |
| rs225866    | C | 0.0432  |
| rs17183863  | A | -0.0785 |
| rs78478998  | T | -0.1191 |
| rs12894788  | A | 0.0549  |
| rs17119994  | G | 0.1628  |
| rs61986156  | A | 0.2743  |
| rs2877912   | G | 0.2392  |
| rs1474802   | C | 0.056   |
| rs6571934   | C | -0.0745 |
| rs61609357  | T | 0.1587  |
| rs7153719   | T | 0.037   |
| rs117037620 | C | -0.1419 |
| rs74600270  | T | 0.1117  |
| rs74584605  | A | -0.1042 |
| rs1116539   | G | -0.0886 |
| rs138513295 | A | -0.1916 |
| rs2173738   | G | 0.0522  |
| rs12586943  | G | -0.0416 |
| rs79780876  | T | -0.2415 |
| rs62008986  | C | 0.0387  |
| rs60020877  | C | -0.1989 |
| rs58853114  | A | -0.1125 |
| rs72679614  | T | 0.0846  |
| rs1187756   | A | 0.0374  |
| rs10136484  | A | -0.0919 |
| rs17097900  | G | -0.1143 |
| rs112413680 | T | -0.1474 |
| rs6572466   | T | -0.0423 |
| rs961096    | T | -0.0413 |
| rs74414878  | G | 0.1633  |
| rs61982301  | C | -0.1098 |
| rs144966237 | T | 0.1097  |
| rs112113919 | T | 0.165   |

|             |   |         |
|-------------|---|---------|
| rs1400745   | A | 0.0345  |
| rs2110706   | T | -0.0461 |
| rs2093      | A | -0.0348 |
| rs116087767 | C | 0.1535  |
| rs10149701  | A | 0.0805  |
| rs12882001  | C | -0.095  |
| rs35851357  | A | -0.0793 |
| rs11847075  | T | -0.0374 |
| rs12587001  | T | -0.0604 |
| rs76360097  | C | -0.0779 |
| rs1610403   | C | 0.0404  |
| rs72701150  | G | 0.0908  |
| rs4899039   | T | -0.0415 |
| rs77088056  | A | 0.1636  |
| rs17252768  | C | 0.146   |
| rs4533204   | T | 0.078   |
| rs1999610   | A | 0.0373  |
| rs142094978 | T | 0.1603  |
| rs113662029 | A | 0.252   |
| rs77608579  | T | -0.1558 |
| rs7142035   | T | -0.0348 |
| rs78685527  | A | 0.154   |
| rs78793419  | T | -0.1176 |
| rs8019370   | T | 0.0632  |
| rs61978001  | C | 0.214   |
| rs117263763 | C | 0.1827  |
| rs79605683  | C | 0.0924  |
| rs165932    | G | -0.0346 |
| rs1684714   | G | -0.0392 |
| rs60503057  | A | 0.2326  |
| rs12147219  | G | 0.0782  |
| rs2807769   | C | 0.0419  |
| rs78158348  | G | -0.196  |
| rs12100588  | G | -0.1255 |
| rs10132693  | C | -0.0479 |
| rs9743516   | T | -0.1606 |
| rs72700762  | T | 0.0579  |
| rs1169030   | G | -0.0777 |
| rs117299001 | G | -0.1929 |
| rs755102    | C | -0.0357 |
| rs35458303  | G | 0.0475  |
| rs116990057 | A | 0.1625  |
| rs117588440 | T | -0.1567 |
| rs34754649  | G | -0.0535 |
| rs10143614  | G | 0.0362  |
| rs34725674  | C | 0.1053  |
| rs34141355  | C | 0.0365  |

|             |   |         |
|-------------|---|---------|
| rs57790930  | T | 0.0813  |
| rs4354858   | T | -0.0482 |
| rs138153914 | C | 0.1822  |
| rs8006506   | A | 0.0964  |
| rs7156382   | A | -0.0409 |
| rs142789623 | C | -0.1313 |
| rs76234538  | A | 0.0929  |
| rs73255188  | A | -0.064  |
| rs59304179  | C | -0.1316 |
| rs12323421  | C | 0.0466  |
| rs1886083   | A | 0.0811  |
| rs77113171  | C | -0.1164 |
| rs11160420  | A | 0.0389  |
| rs62014288  | A | 0.142   |
| rs10142208  | A | 0.0601  |
| rs12437218  | A | -0.1524 |
| rs7141653   | C | 0.0353  |
| rs2034990   | T | 0.0358  |
| rs4901450   | A | -0.0512 |
| rs10148448  | A | -0.0404 |
| rs7160262   | T | 0.0753  |
| rs12886872  | T | 0.0364  |
| rs67212507  | C | 0.0465  |
| rs7154755   | G | 0.113   |
| rs12436798  | A | -0.0338 |
| rs11847413  | A | 0.0395  |
| rs77970950  | G | 0.082   |
| rs10151543  | G | 0.0597  |
| rs145656052 | A | -0.0705 |
| rs113944592 | A | -0.122  |
| rs74781805  | A | 0.0918  |
| rs61992426  | G | -0.2214 |
| rs117159624 | T | -0.0935 |
| rs138908369 | T | -0.2325 |
| rs74530399  | T | -0.2374 |
| rs2160672   | C | 0.1057  |
| rs10139630  | T | -0.0652 |
| rs11160676  | T | -0.1025 |
| rs11623707  | G | 0.1674  |
| rs12434011  | T | 0.0753  |
| rs55994456  | T | 0.1527  |
| rs1253703   | G | 0.0665  |
| rs7152438   | G | -0.059  |
| rs141575963 | G | 0.22    |
| rs62002023  | G | -0.0481 |
| rs74528497  | T | 0.1015  |
| rs2346674   | A | -0.0524 |



|             |   |         |
|-------------|---|---------|
| rs7140841   | C | -0.0364 |
| rs41317306  | G | -0.1698 |
| rs2208597   | C | -0.0354 |
| rs142950934 | A | 0.1551  |
| rs17406989  | A | 0.057   |
| rs11568429  | G | 0.0448  |
| rs1681586   | A | 0.0395  |
| rs4083451   | G | 0.1386  |
| rs2273150   | C | -0.0383 |
| rs140523706 | T | -0.1117 |
| rs10141724  | A | 0.0465  |
| rs36035154  | G | -0.0481 |
| rs10498571  | A | 0.0608  |
| rs2037935   | G | -0.0365 |
| rs75448526  | A | -0.0399 |
| rs12590050  | C | 0.0864  |
| rs10136242  | A | 0.0475  |
| rs72715548  | A | 0.068   |
| rs11158669  | A | -0.0428 |
| rs13343241  | A | 0.0831  |
| rs1953866   | A | -0.0431 |
| rs113352735 | G | 0.2298  |
| rs4548794   | C | 0.0421  |
| rs112048970 | T | -0.1863 |
| rs2037934   | G | 0.0371  |
| rs79191782  | C | 0.0933  |
| rs946056    | G | -0.0389 |
| rs56262081  | A | 0.1249  |
| rs10483826  | G | -0.04   |
| rs7151227   | T | 0.0739  |
| rs8020899   | G | -0.0531 |
| rs11851893  | T | -0.1221 |
| rs2154050   | G | -0.0642 |
| rs10132370  | G | -0.042  |
| rs12895382  | T | 0.0395  |
| rs7149267   | A | 0.0337  |
| rs11621426  | T | 0.0381  |
| rs2163092   | C | 0.0703  |
| rs72726173  | C | -0.0862 |
| rs10132203  | A | -0.1982 |
| rs118094108 | G | -0.094  |
| rs2268952   | T | 0.0714  |
| rs56059563  | T | 0.0655  |
| rs77527535  | A | -0.1454 |
| rs140672131 | A | -0.1426 |
| rs8019368   | C | -0.0348 |
| rs4902208   | T | 0.0374  |

|             |   |         |
|-------------|---|---------|
| rs34071769  | A | -0.0426 |
| rs2319195   | A | 0.0375  |
| rs79625981  | C | 0.0852  |
| rs73243542  | A | 0.2331  |
| rs11159058  | G | 0.1105  |
| rs78781429  | A | 0.2602  |
| rs2761880   | T | -0.1755 |
| rs80283857  | C | -0.1303 |
| rs7140760   | T | 0.0394  |
| rs74532124  | T | -0.1868 |
| rs1269049   | C | 0.1273  |
| rs9805972   | T | -0.0336 |
| rs150437439 | T | -0.1294 |
| rs146753714 | T | 0.2417  |
| rs74898596  | C | -0.0862 |
| rs75661976  | G | -0.2104 |
| rs7152065   | C | 0.0659  |
| rs141485772 | G | 0.141   |
| rs28441090  | G | -0.0443 |
| rs11625252  | T | -0.1776 |
| rs11628169  | A | 0.0778  |
| rs117122267 | A | 0.1454  |
| rs8004630   | A | -0.1112 |
| rs77473578  | T | 0.0886  |
| rs61990430  | G | -0.0839 |
| rs8018830   | A | -0.0378 |
| rs117809120 | A | -0.1605 |
| rs12894050  | T | -0.0414 |
| rs55834485  | A | 0.0534  |
| rs77854560  | T | 0.1118  |
| rs1120177   | A | 0.0416  |
| rs3790036   | G | -0.0456 |
| rs74076254  | G | -0.062  |
| rs17097036  | C | 0.2331  |
| rs7156293   | A | -0.0552 |
| rs10142676  | T | 0.1525  |
| rs80138696  | G | 0.2197  |
| rs117465819 | G | 0.2222  |
| rs60172509  | T | -0.0829 |
| rs61985440  | A | 0.1547  |
| rs862037    | A | 0.0344  |
| rs78416284  | G | 0.1184  |
| rs35903938  | A | -0.2179 |
| rs67388738  | A | 0.0566  |
| rs72693430  | A | 0.0622  |
| rs11627515  | T | 0.07    |
| rs145590735 | T | -0.1517 |

|             |   |         |
|-------------|---|---------|
| rs20546     | A | -0.123  |
| rs34347761  | C | -0.1441 |
| rs12891882  | C | -0.0447 |
| rs1243705   | A | -0.0462 |
| rs28396120  | G | -0.0337 |
| rs8003392   | A | 0.0365  |
| rs175901    | G | 0.0618  |
| rs730105    | T | -0.0511 |
| rs4573868   | C | 0.035   |
| rs1431068   | C | -0.0588 |
| rs17782112  | C | 0.068   |
| rs17764262  | T | 0.0984  |
| rs17752900  | T | 0.0353  |
| rs719484    | C | -0.0405 |
| rs72721031  | T | -0.0871 |
| rs4901254   | T | -0.0356 |
| rs145050072 | A | -0.2438 |
| rs112503576 | T | -0.1062 |
| rs1749704   | G | -0.0351 |
| rs79535587  | G | -0.1581 |
| rs11159863  | A | -0.0452 |
| rs75653764  | A | 0.0626  |
| rs113833947 | G | -0.1458 |
| rs7153309   | G | -0.0448 |
| rs117019393 | A | 0.0806  |
| rs75211954  | T | -0.1441 |
| rs78649252  | G | 0.259   |
| rs1475407   | G | 0.0349  |
| rs75871122  | A | -0.0768 |
| rs17689842  | T | 0.0376  |
| rs61980119  | A | 0.0507  |
| rs79600572  | C | 0.0704  |
| rs11626934  | A | -0.1529 |
| rs142053629 | A | -0.0394 |
| rs61980985  | C | 0.1833  |
| rs116898829 | A | -0.0565 |
| rs2333424   | C | 0.0453  |
| rs76343458  | G | -0.0606 |
| rs1253639   | A | -0.034  |
| rs79515329  | T | 0.1199  |
| rs117577222 | T | 0.1671  |
| rs117955567 | C | -0.1341 |
| rs10137285  | T | 0.0397  |
| rs2225995   | C | 0.0598  |
| rs35861667  | T | -0.0642 |
| rs1958228   | T | -0.0332 |
| rs4467008   | C | -0.0364 |

|             |   |         |
|-------------|---|---------|
| rs1295830   | A | 0.0419  |
| rs76357200  | C | -0.1634 |
| rs12589868  | C | -0.1824 |
| rs17199955  | A | -0.0539 |
| rs7147892   | T | -0.037  |
| rs17097164  | C | 0.0794  |
| rs78013287  | A | -0.077  |
| rs77160555  | G | 0.2279  |
| rs60604490  | C | 0.0335  |
| rs7142272   | T | -0.0378 |
| rs142893681 | A | 0.1872  |
| rs763932    | A | -0.0528 |
| rs12884729  | T | -0.1411 |
| rs116881452 | A | 0.1392  |
| rs61977331  | C | 0.1154  |
| rs17106513  | A | 0.0595  |
| rs117632803 | A | 0.1527  |
| rs2003181   | C | 0.0384  |
| rs7141541   | A | -0.0449 |
| rs11157507  | A | -0.0702 |
| rs17121458  | C | 0.0544  |
| rs61994504  | A | 0.0664  |
| rs7147797   | C | 0.0438  |
| rs111719845 | G | 0.1885  |
| rs8019051   | A | 0.0335  |
| rs150543773 | A | 0.0846  |
| rs140902507 | A | 0.2402  |
| rs67357132  | A | 0.1088  |
| rs1952588   | C | -0.0346 |
| rs138646818 | A | 0.1237  |
| rs8023190   | G | -0.0394 |
| rs1388773   | A | 0.0468  |
| rs117177426 | A | 0.1285  |
| rs210374    | A | -0.037  |
| rs77295487  | G | 0.0419  |
| rs10146480  | T | 0.0626  |
| rs1431062   | A | -0.0362 |
| rs80258513  | A | 0.1686  |
| rs2750134   | T | 0.065   |
| rs148286811 | T | 0.1362  |
| rs10136659  | A | 0.1473  |
| rs61982985  | T | 0.0837  |
| rs9323328   | A | 0.0356  |
| rs17104310  | G | 0.1456  |
| rs848051    | C | -0.0372 |
| rs11847956  | G | 0.1205  |
| rs11624985  | G | 0.0373  |

|             |   |         |
|-------------|---|---------|
| rs56120861  | G | 0.0914  |
| rs8022888   | T | 0.0346  |
| rs3742908   | A | 0.1081  |
| rs57696657  | A | -0.0505 |
| rs61993496  | C | 0.0453  |
| rs3825581   | A | 0.0403  |
| rs12435993  | C | -0.0387 |
| rs117718160 | G | 0.2109  |
| rs145338067 | A | 0.2728  |
| rs7147114   | G | 0.0414  |
| rs10150444  | G | 0.0555  |
| rs2236264   | T | 0.0464  |
| rs221454    | C | 0.0348  |
| rs7161487   | C | -0.0677 |
| rs227023    | A | 0.0412  |
| rs17191170  | T | 0.0937  |
| rs117451817 | T | -0.2129 |
| rs7141524   | C | -0.0654 |
| rs146977412 | G | -0.1744 |
| rs9658649   | C | -0.1463 |
| rs113984040 | A | -0.1567 |
| rs72705333  | T | -0.1355 |
| rs10133256  | T | -0.1734 |
| rs731347    | C | 0.0405  |
| rs17506736  | A | 0.0985  |
| rs77878673  | T | 0.1513  |
| rs12431854  | T | 0.08    |
| rs1257633   | C | -0.0486 |
| rs117195243 | C | -0.1183 |
| rs141799227 | G | 0.2016  |
| rs143674013 | A | -0.1723 |
| rs149664711 | G | -0.1178 |
| rs117658249 | C | 0.132   |
| rs144938064 | A | 0.2611  |
| rs7147908   | C | 0.0756  |
| rs7142427   | T | -0.1006 |
| rs762097    | T | -0.0484 |
| rs1241515   | G | -0.0348 |
| rs72697919  | G | -0.2704 |
| rs10151019  | A | -0.0413 |
| rs8013988   | T | 0.0791  |
| rs75369632  | T | -0.1551 |
| rs1953849   | C | -0.0334 |
| rs1285767   | G | -0.0334 |
| rs6575209   | C | 0.0409  |
| rs78489930  | A | 0.0937  |
| rs117015812 | C | -0.185  |

|             |   |         |
|-------------|---|---------|
| rs117529030 | C | 0.1351  |
| rs1570211   | T | 0.0519  |
| rs17199254  | A | -0.0376 |
| rs71418153  | G | -0.1079 |
| rs8003240   | A | 0.0338  |
| rs77026144  | T | -0.1554 |
| rs77055620  | C | 0.1139  |
| rs118083914 | T | -0.1591 |
| rs75494875  | T | 0.1314  |
| rs78624908  | A | 0.1306  |
| rs176917    | T | 0.0682  |
| rs1971458   | G | -0.0331 |
| rs113357461 | C | 0.133   |
| rs8004702   | G | 0.0361  |
| rs55813952  | G | -0.0952 |
| rs75667138  | T | 0.1463  |
| rs144798687 | G | -0.1343 |
| rs117532269 | A | -0.2747 |
| rs6571411   | G | -0.0405 |
| rs17794137  | A | 0.0913  |
| rs4904211   | A | -0.0916 |
| rs76173749  | C | -0.1007 |
| rs58555510  | G | 0.0407  |
| rs58798938  | T | -0.0888 |
| rs175463    | A | 0.0569  |
| rs144764607 | C | 0.1877  |
| rs12432244  | G | 0.0326  |
| rs10145258  | G | 0.0332  |
| rs17120578  | G | -0.0369 |
| rs113334731 | G | 0.1055  |
| rs60077759  | C | 0.1986  |
| rs34105469  | T | -0.0337 |
| rs117638016 | A | 0.151   |
| rs113102005 | C | 0.0588  |
| rs2293840   | C | 0.033   |
| rs12435152  | T | 0.0537  |
| rs139547934 | A | 0.1883  |
| rs72683018  | A | 0.1018  |
| rs112081231 | C | -0.0536 |
| rs8022175   | T | 0.041   |
| rs116869892 | T | -0.1546 |
| rs34350221  | T | 0.1366  |
| rs2301121   | C | 0.0549  |
| rs8018637   | C | -0.0333 |
| rs7155561   | G | -0.0478 |
| rs886599    | T | -0.0429 |
| rs8015791   | T | 0.1426  |

|             |   |         |
|-------------|---|---------|
| rs76037811  | A | 0.0668  |
| rs8009939   | A | -0.0953 |
| rs10149044  | G | 0.0618  |
| rs1695779   | C | 0.0882  |
| rs17631957  | G | 0.0327  |
| rs151285672 | A | 0.1055  |
| rs7144481   | C | 0.0522  |
| rs12880675  | T | 0.0522  |
| rs8012740   | G | 0.0515  |
| rs67490748  | C | 0.2142  |
| rs28624282  | C | -0.1863 |
| rs12889176  | A | -0.0424 |
| rs146379019 | A | -0.1287 |
| rs12882330  | A | -0.0549 |
| rs76741123  | G | 0.0807  |
| rs116966948 | A | 0.1333  |
| rs74077062  | T | -0.0583 |
| rs7158860   | A | 0.1316  |
| rs12894204  | A | 0.0415  |
| rs11157969  | C | 0.0319  |
| rs149795560 | T | 0.1176  |
| rs7160521   | G | -0.0322 |
| rs112422934 | C | -0.0589 |
| rs10134540  | G | 0.0351  |
| rs75556859  | A | 0.1205  |
| rs734028    | T | -0.036  |
| rs17182140  | A | 0.0917  |
| rs75073548  | A | -0.0926 |
| rs77075600  | T | -0.0732 |
| rs28622485  | T | 0.0954  |
| rs150306765 | G | -0.1418 |
| rs143288249 | C | 0.0346  |
| rs138365003 | G | 0.1484  |
| rs8004344   | A | 0.0393  |
| rs72691112  | T | -0.086  |
| rs17125031  | G | 0.0375  |
| rs2297615   | T | 0.0387  |
| rs141344266 | C | -0.1692 |
| rs77617907  | A | 0.0676  |
| rs141539299 | G | -0.2205 |
| rs142300615 | A | 0.2033  |
| rs8007427   | T | -0.0426 |
| rs140821580 | T | 0.2415  |
| rs7152636   | T | -0.0376 |
| rs2924099   | T | 0.0324  |
| rs139175555 | G | 0.2284  |
| rs113341693 | T | -0.0947 |

|             |   |         |
|-------------|---|---------|
| rs3811328   | G | 0.0486  |
| rs17616128  | T | -0.0384 |
| rs77086208  | T | 0.1453  |
| rs7157079   | G | -0.0603 |
| rs116960727 | T | -0.1048 |
| rs76745467  | T | 0.1215  |
| rs2360991   | A | 0.0325  |
| rs61997862  | T | -0.1783 |
| rs74064865  | G | 0.0809  |
| rs734151    | T | 0.0345  |
| rs117438404 | A | 0.1571  |
| rs61990167  | T | 0.0568  |
| rs75624458  | A | 0.1116  |
| rs8011778   | A | -0.0349 |
| rs117471247 | C | -0.1581 |
| rs17103118  | G | -0.0405 |
| rs10162349  | T | 0.0427  |
| rs73325411  | T | 0.0819  |
| rs79703658  | A | 0.1245  |
| rs17827374  | A | 0.0771  |
| rs4017390   | A | -0.0398 |
| rs72669120  | G | -0.1153 |
| rs12435939  | T | -0.1128 |
| rs12433821  | C | 0.0407  |
| rs7150671   | G | 0.0337  |
| rs17446154  | C | 0.0389  |
| rs75924037  | A | 0.1402  |
| rs1417597   | C | -0.0421 |
| rs148352454 | T | -0.1839 |
| rs10483974  | C | 0.0807  |
| rs61991871  | T | -0.1421 |
| rs2360993   | C | 0.0863  |
| rs77682543  | C | 0.2293  |
| rs12435167  | A | 0.0341  |
| rs79994987  | A | -0.0685 |
| rs56123497  | T | -0.1125 |
| rs143541414 | G | 0.1076  |
| rs11628055  | C | -0.0322 |
| rs12880138  | C | -0.0457 |
| rs10138657  | T | -0.1219 |
| rs11628408  | A | 0.0569  |
| rs17114828  | A | -0.1662 |
| rs79963551  | A | 0.1296  |
| rs740535    | T | 0.0317  |
| rs11626891  | C | 0.0489  |
| rs78806431  | A | -0.1358 |
| rs11847164  | G | 0.0457  |



|             |   |         |
|-------------|---|---------|
| rs61977263  | C | 0.0334  |
| rs2145472   | T | -0.0865 |
| rs12323826  | T | -0.0443 |
| rs4243751   | G | -0.0315 |
| rs118168613 | T | -0.0797 |
| rs7151768   | T | -0.0362 |
| rs10140031  | C | 0.0498  |
| rs139976674 | G | 0.2109  |
| rs117984360 | G | 0.2827  |
| rs1254607   | G | -0.0463 |
| rs1034536   | T | -0.0324 |
| rs112741344 | T | 0.1438  |
| rs72673483  | T | 0.1602  |
| rs118093967 | G | 0.1752  |
| rs145077815 | C | 0.1426  |
| rs2402214   | C | 0.0324  |
| rs150360688 | T | -0.1544 |
| rs17100890  | C | 0.0989  |
| rs140002525 | G | -0.1797 |
| rs6575022   | A | -0.0313 |
| rs72704754  | A | 0.1172  |
| rs117209651 | A | -0.0935 |
| rs1997908   | A | 0.0955  |
| rs76121036  | C | -0.0959 |
| rs11557208  | A | -0.0439 |
| rs7401907   | T | 0.0329  |
| rs112292330 | T | -0.1    |
| rs75525918  | T | -0.2808 |
| rs73249760  | G | -0.1088 |
| rs8006330   | T | 0.059   |
| rs139703300 | T | 0.1312  |
| rs12435887  | G | 0.1666  |
| rs76520063  | C | -0.0446 |
| rs72690224  | T | 0.1318  |
| rs12881908  | G | 0.0402  |
| rs3784024   | G | 0.0394  |
| rs12433973  | A | 0.0487  |
| rs7160685   | T | -0.0343 |
| rs77097775  | G | 0.0604  |
| rs60288596  | T | 0.1015  |
| rs55653788  | G | 0.0431  |
| rs147786644 | C | -0.1277 |
| rs118187055 | C | -0.1818 |
| rs7143114   | G | -0.1652 |
| rs139705157 | T | -0.1741 |
| rs12886788  | C | -0.0695 |
| rs4900246   | A | -0.0335 |

|             |   |         |
|-------------|---|---------|
| rs7159678   | G | 0.0333  |
| rs17103219  | T | 0.055   |
| rs113625614 | T | 0.064   |
| rs41310338  | T | -0.121  |
| rs72671448  | C | 0.0353  |
| rs17470464  | A | 0.1032  |
| rs7146814   | G | 0.0723  |
| rs11627764  | T | -0.0349 |
| rs140761376 | T | 0.1249  |
| rs7149030   | G | 0.0329  |
| rs17099187  | C | 0.162   |
| rs77264593  | T | -0.1596 |
| rs78792840  | C | -0.085  |
| rs78032294  | C | 0.0704  |
| rs116908832 | C | -0.1141 |
| rs59664106  | G | 0.1809  |
| rs80041283  | T | -0.0974 |
| rs8005092   | T | 0.1169  |
| rs140632471 | G | -0.2662 |
| rs7160467   | A | 0.038   |
| rs112963793 | C | 0.1333  |
| rs8008058   | C | 0.0378  |
| rs17102279  | C | -0.1714 |
| rs170886    | G | 0.0356  |
| rs139576479 | C | 0.1632  |
| rs1760963   | C | -0.0353 |
| rs17485152  | C | -0.0789 |
| rs12893371  | C | 0.1564  |
| rs148333638 | T | 0.3076  |
| rs118062179 | C | -0.1702 |
| rs142690740 | A | -0.1403 |
| rs72682958  | C | -0.0378 |
| rs61976021  | A | -0.1902 |
| rs10139831  | C | -0.0489 |
| rs78066180  | T | 0.0904  |
| rs76545164  | A | -0.1819 |
| rs7146677   | A | 0.0337  |
| rs61979786  | T | -0.1524 |
| rs2984274   | T | -0.0479 |
| rs73346213  | T | -0.0729 |
| rs72721364  | T | -0.0976 |
| rs76419297  | T | 0.2642  |
| rs73359455  | T | -0.2497 |
| rs74943140  | T | 0.0647  |
| rs12050438  | C | 0.1147  |
| rs4900878   | C | -0.0515 |
| rs8007741   | G | 0.0457  |

|             |   |         |
|-------------|---|---------|
| rs8010446   | A | -0.0374 |
| rs10145240  | T | -0.044  |
| rs17783300  | A | -0.0838 |
| rs879801    | C | -0.0459 |
| rs11629297  | C | 0.0354  |
| rs34495944  | G | 0.1054  |
| rs57355770  | G | 0.0655  |
| rs6575627   | A | -0.0383 |
| rs72686055  | G | 0.1555  |
| rs140932840 | A | 0.1656  |
| rs12882295  | C | -0.0949 |
| rs10151763  | A | -0.0626 |
| rs147785228 | C | -0.1263 |
| rs12437072  | C | -0.0433 |
| rs61982586  | A | 0.0679  |
| rs140220994 | T | -0.223  |
| rs4904445   | G | 0.0561  |
| rs74470600  | A | -0.0738 |
| rs72699271  | T | 0.1685  |
| rs61997568  | T | 0.1603  |
| rs8007549   | G | -0.0317 |
| rs4904346   | C | 0.0627  |
| rs57221296  | T | 0.0673  |
| rs74244226  | C | 0.0869  |
| rs11160318  | A | 0.0338  |
| rs74421261  | G | 0.1253  |
| rs57748792  | T | -0.057  |
| rs17669975  | T | 0.0497  |
| rs4561383   | C | -0.0441 |
| rs72691254  | A | 0.0662  |
| rs2180873   | A | 0.0419  |
| rs4900163   | G | 0.0686  |
| rs72683131  | A | -0.0478 |
| rs11626637  | G | -0.059  |
| rs3742871   | C | 0.0324  |
| rs10129913  | C | -0.0407 |
| rs76037108  | C | -0.1635 |
| rs117744837 | A | -0.1561 |
| rs117665377 | A | 0.1347  |
| rs112143751 | A | -0.0498 |
| rs4901203   | A | -0.0307 |
| rs76395392  | A | -0.1051 |
| rs2983417   | C | -0.2059 |
| rs12586141  | C | 0.1708  |
| rs73249797  | C | -0.0518 |
| rs117270202 | T | 0.1142  |
| rs2025211   | G | 0.0318  |

|             |   |         |
|-------------|---|---------|
| rs56174406  | A | -0.1109 |
| rs76960239  | A | -0.1574 |
| rs17109654  | G | 0.1632  |
| rs4363781   | G | -0.2121 |
| rs72731689  | A | 0.1402  |
| rs1885185   | T | -0.0353 |
| rs10133794  | T | 0.0352  |
| rs79996084  | C | -0.2287 |
| rs71416610  | A | 0.0752  |
| rs35679080  | C | -0.0766 |
| rs12892365  | G | -0.0325 |
| rs62006275  | A | -0.1    |
| rs78168817  | A | 0.1235  |
| rs12437374  | A | -0.0466 |
| rs1257312   | C | 0.0974  |
| rs117539607 | T | -0.1302 |
| rs34961543  | G | 0.2163  |
| rs146514269 | T | 0.1581  |
| rs72691494  | A | -0.0453 |
| rs2041962   | A | 0.0546  |
| rs12879991  | A | -0.0421 |
| rs73366135  | A | 0.2198  |
| rs11158772  | G | -0.0475 |
| rs2180538   | C | 0.0324  |
| rs8016775   | T | 0.052   |
| rs117120518 | T | 0.219   |
| rs8020575   | A | 0.0325  |
| rs1628501   | C | 0.0329  |
| rs12894474  | T | 0.0432  |
| rs1951995   | A | 0.1708  |
| rs12878668  | A | 0.0778  |
| rs8022616   | G | 0.0506  |
| rs6573852   | G | -0.0326 |
| rs77617357  | G | 0.1003  |
| rs62003684  | C | 0.2132  |
| rs117996739 | T | 0.1461  |
| rs116881997 | G | 0.1127  |
| rs4904359   | G | 0.0779  |
| rs61972186  | A | -0.0463 |
| rs11621827  | C | 0.0313  |
| rs34771877  | G | -0.0449 |
| rs72672915  | T | 0.1172  |
| rs73308635  | C | 0.0616  |
| rs28451453  | C | 0.0888  |
| rs8015447   | C | -0.0614 |
| rs7146547   | A | 0.0436  |
| rs116919181 | A | 0.0558  |

|             |   |         |
|-------------|---|---------|
| rs151140022 | T | -0.1218 |
| rs145531531 | G | 0.1881  |
| rs11849435  | T | -0.0971 |
| rs11847974  | T | -0.0455 |
| rs79115721  | C | -0.1602 |
| rs78756042  | G | 0.0372  |
| rs35916062  | A | -0.0477 |
| rs12884033  | C | 0.1105  |
| rs10135885  | A | 0.2059  |
| rs2293727   | T | -0.057  |
| rs10142105  | C | -0.0584 |
| rs2183541   | T | 0.0507  |
| rs77271827  | A | -0.0971 |
| rs17113455  | C | 0.0561  |
| rs6573638   | C | -0.0423 |
| rs17104402  | A | -0.0384 |
| rs11624439  | T | 0.0388  |
| rs150066180 | G | 0.1577  |
| rs75357641  | G | 0.0515  |
| rs2146971   | T | -0.0509 |
| rs2239646   | G | 0.166   |
| rs77662582  | T | -0.0668 |
| rs72675899  | A | 0.1072  |
| rs76181108  | T | 0.1925  |
| rs145974583 | T | -0.382  |
| rs175711    | A | 0.0594  |
| rs61974191  | A | -0.0438 |
| rs72733609  | A | 0.0572  |
| rs61990399  | A | -0.1436 |
| rs9323444   | C | 0.0325  |
| rs11160802  | T | 0.0361  |
| rs10143963  | C | 0.0503  |
| rs2273518   | A | -0.0471 |
| rs35259162  | T | 0.0491  |
| rs10137053  | A | 0.0453  |
| rs172842    | C | -0.0327 |
| rs28497363  | T | 0.0383  |
| rs12893435  | A | 0.0306  |
| rs56310039  | T | 0.0431  |
| rs117492232 | C | -0.1364 |
| rs7157198   | G | 0.0332  |
| rs8016185   | T | -0.0592 |
| rs117902696 | A | 0.1538  |
| rs117488971 | T | -0.1247 |
| rs143798584 | C | -0.1683 |
| rs1983521   | A | -0.0313 |
| rs61976269  | A | -0.0331 |

|             |   |         |
|-------------|---|---------|
| rs12897647  | G | 0.0306  |
| rs72686066  | C | 0.0399  |
| rs61986073  | C | 0.0412  |
| rs877506    | T | -0.0354 |
| rs17648281  | C | -0.1085 |
| rs2748145   | T | -0.0653 |
| rs35382723  | A | 0.0347  |
| rs11160789  | T | -0.0331 |
| rs61991659  | T | -0.0348 |
| rs84044     | T | 0.0343  |
| rs61994896  | G | -0.0331 |
| rs2661819   | A | 0.0811  |
| rs61995005  | G | 0.0716  |
| rs72631605  | T | 0.1601  |
| rs10132476  | T | -0.0341 |
| rs117741019 | A | 0.2088  |
| rs7152408   | A | 0.0937  |
| rs79300185  | T | 0.1041  |
| rs62006392  | T | 0.086   |
| rs12891677  | T | 0.0604  |
| rs72694245  | A | 0.1398  |
| rs2361291   | T | -0.0568 |
| rs58057794  | T | -0.1285 |
| rs1956248   | C | -0.067  |
| rs12589003  | T | 0.0491  |
| rs2031981   | C | -0.0539 |
| rs17111920  | T | -0.1647 |
| rs34496850  | C | 0.0332  |
| rs143465542 | G | 0.2238  |
| rs7155748   | A | -0.0315 |
| rs72689680  | T | 0.1271  |
| rs4429212   | C | 0.0426  |
| rs1241478   | G | -0.0595 |
| rs73291246  | T | -0.0467 |
| rs61972496  | A | 0.1433  |
| rs1367332   | C | 0.0781  |
| rs2810082   | A | -0.0311 |
| rs145605437 | T | 0.1112  |
| rs11628019  | G | -0.0354 |
| rs72642544  | G | 0.1258  |
| rs72684513  | G | 0.0798  |
| rs116979344 | T | -0.1271 |
| rs12895078  | C | 0.0512  |
| rs45526332  | G | 0.0562  |
| rs56147515  | T | 0.0824  |
| rs147502410 | C | 0.1408  |
| rs12050289  | A | -0.0304 |

|             |   |         |
|-------------|---|---------|
| rs970786    | G | 0.1231  |
| rs1384962   | A | 0.0353  |
| rs58530041  | T | -0.1024 |
| rs11850043  | C | 0.0335  |
| rs10152049  | A | 0.0312  |
| rs117207226 | T | -0.0952 |
| rs1909837   | A | -0.0397 |
| rs12887490  | G | -0.0354 |
| rs35178030  | C | 0.2166  |
| rs10132346  | C | -0.0525 |
| rs11157231  | T | 0.033   |
| rs138168089 | A | 0.1768  |
| rs1242521   | T | 0.1732  |
| rs79569869  | T | -0.103  |
| rs10151253  | T | 0.0372  |
| rs143093439 | T | 0.1554  |
| rs7150901   | G | -0.0309 |
| rs77729710  | A | -0.0501 |
| rs17126241  | G | -0.1569 |
| rs55809234  | C | 0.2     |
| rs12587724  | T | 0.0519  |
| rs1953842   | A | -0.1217 |
| rs17182203  | A | 0.2929  |
| rs10149043  | A | -0.1341 |
| rs80221756  | A | -0.1728 |
| rs847269    | G | -0.031  |
| rs79007202  | C | 0.0806  |
| rs11850442  | G | 0.0988  |
| rs1241480   | G | -0.0312 |
| rs78677915  | T | 0.0785  |
| rs10142114  | C | 0.0302  |
| rs77994094  | A | -0.1244 |
| rs28704699  | A | 0.1903  |
| rs17414154  | A | 0.0808  |
| rs79695431  | A | -0.0709 |
| rs11849893  | C | -0.0428 |
| rs61978360  | G | 0.1058  |
| rs7142978   | A | 0.0393  |
| rs72690656  | G | -0.1111 |
| rs8022032   | G | 0.0309  |
| rs10483838  | T | 0.072   |
| rs167481    | T | 0.035   |
| rs77749885  | A | 0.129   |
| rs10146616  | C | -0.0375 |
| rs72682354  | A | -0.0803 |
| rs1763208   | A | 0.1452  |
| rs17588658  | G | 0.136   |

|             |   |         |
|-------------|---|---------|
| rs79991257  | C | -0.0678 |
| rs78101451  | T | 0.1579  |
| rs117199168 | A | 0.1305  |
| rs9672117   | G | 0.0671  |
| rs958729    | T | -0.0592 |
| rs118077997 | G | -0.1705 |
| rs4636825   | C | -0.0619 |
| rs72710229  | A | -0.0445 |
| rs17115506  | A | 0.093   |
| rs114303120 | T | -0.2269 |
| rs7144772   | A | -0.0883 |
| rs61990159  | G | -0.0592 |
| rs28532502  | C | -0.1415 |
| rs4905757   | C | 0.0785  |
| rs12590429  | A | 0.0614  |
| rs4905100   | C | -0.0402 |
| rs58340417  | C | -0.0657 |
| rs7151158   | A | 0.1377  |
| rs12890590  | G | -0.0456 |
| rs79071435  | A | -0.0817 |
| rs10147996  | T | 0.0661  |
| rs140798814 | A | 0.276   |
| rs8013675   | C | 0.1063  |
| rs1383      | A | 0.0444  |
| rs117181578 | A | -0.1852 |
| rs4981360   | T | -0.0344 |
| rs11845867  | C | 0.0378  |
| rs118166848 | A | 0.0748  |
| rs8013657   | T | 0.0365  |
| rs2064970   | C | 0.0754  |
| rs148925835 | G | -0.1471 |
| rs10483655  | C | 0.0838  |
| rs61990097  | T | -0.046  |
| rs11621243  | A | 0.0385  |
| rs111547342 | A | 0.185   |
| rs11625406  | C | 0.031   |
| rs12880768  | T | 0.0854  |
| rs34311671  | T | 0.0342  |
| rs1956512   | C | 0.0334  |
| rs3751485   | T | 0.0445  |
| rs11626428  | T | -0.0408 |
| rs72672913  | C | -0.1109 |
| rs113328011 | T | -0.0976 |
| rs10139964  | T | 0.0308  |
| rs2064546   | T | -0.0321 |
| rs117543225 | T | -0.0841 |
| rs112784149 | T | 0.0361  |



|             |   |         |
|-------------|---|---------|
| rs7143634   | A | -0.0328 |
| rs8011317   | A | 0.0824  |
| rs7160701   | T | -0.206  |
| rs10144612  | C | -0.0401 |
| rs112081699 | G | 0.1392  |
| rs74348362  | C | 0.053   |
| rs17096088  | G | -0.0425 |
| rs12879393  | C | 0.0341  |
| rs142271229 | T | 0.1857  |
| rs141883238 | C | 0.2199  |
| rs11626103  | C | 0.1495  |
| rs144460688 | T | 0.1546  |
| rs17098106  | C | 0.0369  |
| rs61980629  | A | 0.0511  |
| rs8022107   | A | -0.1252 |
| rs17103321  | C | -0.0304 |
| rs2295846   | T | -0.031  |
| rs993859    | A | -0.0488 |
| rs117167308 | C | 0.1699  |
| rs79388145  | T | 0.0748  |
| rs116893912 | G | -0.17   |
| rs954784    | C | -0.0552 |
| rs12878333  | A | 0.0309  |
| rs2205166   | G | -0.0694 |
| rs12431519  | G | 0.0315  |
| rs1950486   | A | -0.0333 |
| rs4905470   | A | 0.0391  |
| rs6574837   | T | 0.059   |
| rs72692994  | T | -0.0725 |
| rs113087747 | G | 0.1415  |
| rs76584614  | G | -0.1431 |
| rs117085744 | G | -0.1157 |
| rs144634898 | A | -0.2003 |
| rs10138807  | T | -0.0412 |
| rs115653832 | C | 0.062   |
| rs9707717   | T | 0.1597  |
| rs7148369   | A | 0.0364  |
| rs76015340  | G | -0.0686 |
| rs75567303  | A | 0.0486  |
| rs56213532  | G | 0.1507  |
| rs1289358   | A | 0.0401  |
| rs117713809 | G | -0.2278 |
| rs210360    | T | -0.0363 |
| rs10444692  | A | 0.0607  |
| rs10139908  | A | -0.0698 |
| rs12884994  | A | -0.0613 |
| rs11627996  | G | 0.0481  |

|             |   |         |
|-------------|---|---------|
| rs117573898 | G | -0.1129 |
| rs45618241  | A | -0.0958 |
| rs117788434 | C | -0.0856 |
| rs77087798  | T | -0.1248 |
| rs2152365   | G | 0.0761  |
| rs7161730   | G | 0.0303  |
| rs74958972  | G | -0.1592 |
| rs77748318  | C | 0.1666  |
| rs72693589  | T | -0.0528 |
| rs28459312  | A | -0.0316 |
| rs77149800  | T | 0.1327  |
| rs140754386 | G | 0.1187  |
| rs17100339  | T | 0.0475  |
| rs1431031   | C | 0.033   |
| rs4900314   | C | -0.036  |
| rs36113832  | A | -0.046  |
| rs11850224  | C | -0.0371 |
| rs7342527   | C | 0.1454  |
| rs1595833   | C | -0.0871 |
| rs35810200  | C | 0.2289  |
| rs76629348  | T | 0.0944  |
| rs34477135  | C | 0.032   |
| rs198245    | A | -0.176  |
| rs10136400  | A | 0.0452  |
| rs146223688 | C | 0.1423  |
| rs1261795   | G | 0.0311  |
| rs61977008  | C | 0.0623  |
| rs8022428   | G | 0.038   |
| rs142392609 | C | 0.0894  |
| rs149009705 | A | 0.1381  |
| rs10148739  | T | -0.0332 |
| rs10498329  | G | 0.0311  |
| rs4900509   | C | -0.0403 |
| rs117566760 | A | -0.1248 |
| rs113266364 | C | 0.0558  |
| rs2748824   | A | -0.0342 |
| rs117752773 | G | 0.1882  |
| rs117256203 | T | -0.0733 |
| rs2816738   | T | -0.0483 |
| rs11848645  | T | 0.0359  |
| rs61977293  | C | -0.0552 |
| rs942320    | G | 0.0389  |
| rs11627491  | A | -0.032  |
| rs4575459   | G | -0.1705 |
| rs143612890 | T | -0.1499 |
| rs17882191  | G | 0.0678  |
| rs72692982  | T | 0.1178  |

|             |   |         |
|-------------|---|---------|
| rs118091477 | A | 0.1345  |
| rs12434366  | T | 0.0578  |
| rs8023171   | A | 0.1127  |
| rs78360801  | A | -0.0381 |
| rs10135692  | T | -0.0293 |
| rs8006935   | G | 0.0318  |
| rs61978009  | T | -0.1397 |
| rs78836131  | G | 0.1232  |
| rs2145862   | C | 0.0452  |
| rs1956829   | C | 0.0627  |
| rs35074688  | C | 0.1108  |
| rs138248895 | T | 0.1613  |
| rs77454678  | G | -0.1017 |
| rs1760904   | G | 0.0283  |
| rs78340779  | T | -0.1843 |
| rs4254219   | G | 0.0318  |
| rs2145444   | G | 0.1085  |
| rs117099974 | A | -0.1372 |
| rs61667993  | A | 0.1309  |
| rs61994004  | G | -0.0516 |
| rs1036571   | A | 0.0303  |
| rs61996499  | A | 0.069   |
| rs79181155  | C | -0.1312 |
| rs77952538  | T | 0.1656  |
| rs112092988 | A | -0.0998 |
| rs117090450 | A | -0.1449 |
| rs34966037  | T | -0.0443 |
| rs7148630   | C | -0.0444 |
| rs194756    | T | -0.0296 |
| rs72698886  | A | 0.1683  |
| rs78163570  | T | 0.1061  |
| rs1627411   | T | 0.0379  |
| rs117929893 | G | -0.1738 |
| rs76630934  | A | 0.0733  |
| rs4906222   | A | -0.0311 |
| rs17174862  | C | -0.0482 |
| rs8021854   | C | -0.0604 |
| rs12434558  | T | -0.0488 |
| rs17127374  | C | -0.0479 |
| rs111800240 | A | -0.0815 |
| rs61977107  | G | 0.0355  |
| rs77650075  | G | 0.1012  |
| rs116991309 | A | -0.1438 |
| rs1964857   | T | 0.0284  |
| rs17107342  | A | -0.0974 |
| rs17716481  | C | 0.0407  |
| rs145231492 | A | 0.0976  |

|             |   |         |
|-------------|---|---------|
| rs1257330   | G | 0.0701  |
| rs8022719   | C | 0.0342  |
| rs1678008   | C | 0.0376  |
| rs146773690 | G | 0.1223  |
| rs8005999   | A | -0.0532 |
| rs55950945  | C | -0.0472 |
| rs141136505 | T | 0.0856  |
| rs35409141  | C | 0.0565  |
| rs1953186   | C | 0.036   |
| rs1868637   | A | 0.1892  |
| rs35170217  | T | 0.1364  |
| rs6574361   | A | 0.0459  |
| rs1950841   | T | 0.1272  |
| rs17102132  | C | 0.0528  |
| rs76462613  | C | -0.0878 |
| rs142343755 | A | 0.1468  |
| rs114048764 | T | 0.1513  |
| rs12433602  | G | 0.0385  |
| rs72697379  | T | 0.1911  |
| rs77456457  | C | -0.0524 |
| rs17120423  | A | -0.0427 |
| rs117031746 | A | 0.2131  |
| rs79532939  | A | 0.0588  |
| rs11621571  | T | 0.037   |
| rs2771342   | T | -0.0313 |
| rs1241513   | G | 0.072   |
| rs144760654 | A | 0.1018  |
| rs61691504  | A | -0.1082 |
| rs7161013   | A | -0.0463 |
| rs144909852 | G | 0.1835  |
| rs76268340  | C | 0.1665  |
| rs139807724 | G | -0.1525 |
| rs75037357  | A | 0.143   |
| rs11850769  | G | 0.0639  |
| rs35605107  | G | 0.1788  |
| rs146790294 | T | 0.1522  |
| rs1958324   | A | -0.0335 |
| rs4898725   | T | 0.0423  |
| rs7152826   | C | -0.0295 |
| rs12885224  | T | 0.0304  |
| rs11621014  | T | 0.0302  |
| rs6572567   | G | -0.0292 |
| rs8018677   | T | 0.0351  |
| rs55820001  | C | 0.0486  |
| rs76590693  | A | 0.2528  |
| rs10139554  | T | -0.0776 |
| rs2415541   | G | 0.0598  |

|             |   |         |
|-------------|---|---------|
| rs8022750   | G | -0.0338 |
| rs79904930  | A | -0.0887 |
| rs2731148   | G | -0.0609 |
| rs1638721   | T | 0.0302  |
| rs2146937   | A | -0.0344 |
| rs62010476  | C | 0.1779  |
| rs1951438   | A | -0.0998 |
| rs71416889  | G | 0.0527  |
| rs7154028   | A | -0.0305 |
| rs11851081  | G | -0.0307 |
| rs175990    | C | 0.0331  |
| rs117710628 | G | 0.1165  |
| rs11625593  | C | -0.0604 |
| rs1950552   | C | -0.0436 |
| rs17277368  | T | 0.0648  |
| rs79824592  | G | 0.0572  |
| rs11626387  | A | 0.0505  |
| rs12587451  | T | 0.0531  |
| rs17105005  | A | 0.092   |
| rs114714793 | T | -0.1196 |
| rs112349863 | T | 0.2171  |
| rs12434015  | C | 0.0315  |
| rs117670334 | C | 0.0427  |
| rs17093935  | C | -0.04   |
| rs62009399  | A | 0.0447  |
| rs145041172 | T | -0.1023 |
| rs28576468  | A | -0.043  |
| rs72716138  | T | 0.0801  |
| rs146223832 | C | -0.0805 |
| rs17635457  | A | 0.11    |
| rs4470055   | A | 0.0319  |
| rs77066467  | T | 0.104   |
| rs117655474 | G | 0.2256  |
| rs885820    | A | 0.0505  |
| rs61976815  | G | 0.0705  |
| rs77374154  | C | 0.1344  |
| rs57461655  | T | 0.0935  |
| rs5013569   | T | -0.0438 |
| rs6573057   | C | -0.034  |
| rs59049472  | G | 0.0563  |
| rs1285823   | T | 0.0962  |
| rs1958653   | G | 0.144   |
| rs10133874  | T | 0.0297  |
| rs145069165 | A | -0.0634 |
| rs112943476 | C | -0.1017 |
| rs1980616   | T | 0.036   |
| rs11629444  | G | 0.037   |

|             |   |         |
|-------------|---|---------|
| rs1468373   | C | -0.0305 |
| rs142051919 | C | -0.2042 |
| rs118182381 | T | -0.1094 |
| rs77011728  | C | -0.089  |
| rs12589157  | C | 0.0576  |
| rs1252027   | C | -0.0323 |
| rs78368295  | A | -0.0961 |
| rs17112996  | T | 0.0431  |
| rs117538365 | C | 0.1538  |
| rs7140212   | T | -0.0441 |
| rs72678155  | T | -0.1134 |
| rs117963169 | G | 0.0835  |
| rs6573859   | A | 0.0409  |
| rs116994678 | C | -0.0906 |
| rs139554006 | A | 0.2283  |
| rs117710463 | T | -0.098  |
| rs1889773   | G | 0.032   |
| rs4144657   | A | -0.0579 |
| rs7151236   | G | -0.0856 |
| rs8018703   | G | -0.038  |
| rs45492302  | C | 0.037   |
| rs17776763  | A | 0.1354  |
| rs116890935 | T | 0.1987  |
| rs45505795  | C | 0.1139  |
| rs76049048  | C | 0.206   |
| rs1253686   | C | -0.099  |
| rs117419440 | C | -0.1086 |
| rs79872163  | T | -0.1195 |
| rs141865481 | T | 0.1115  |
| rs225857    | G | -0.0458 |
| rs8012914   | A | -0.0313 |
| rs12891860  | G | -0.0373 |
| rs117058979 | T | -0.1638 |
| rs17127685  | C | -0.0789 |
| rs7151298   | C | 0.0788  |
| rs151193149 | T | 0.1828  |
| rs10400692  | G | 0.0385  |
| rs848035    | A | -0.0654 |
| rs17101150  | C | -0.0686 |
| rs79984824  | C | 0.0774  |
| rs8021363   | A | 0.0337  |
| rs75611587  | G | 0.1243  |
| rs117693660 | T | 0.251   |
| rs74348032  | G | -0.0799 |
| rs148144195 | A | 0.1196  |
| rs10047925  | T | 0.0526  |
| rs61980677  | T | 0.0584  |

|             |   |         |
|-------------|---|---------|
| rs142486673 | T | 0.0745  |
| rs10483647  | G | -0.0361 |
| rs1956816   | T | -0.0301 |
| rs147297419 | G | -0.1637 |
| rs2416181   | A | 0.0359  |
| rs77989307  | A | -0.0927 |
| rs726768    | G | -0.0767 |
| rs148013479 | C | 0.2595  |
| rs10137810  | G | 0.0365  |
| rs1187601   | T | -0.0467 |
| rs6575292   | C | 0.0309  |
| rs12431482  | A | 0.0575  |
| rs10136349  | T | -0.0302 |
| rs61984906  | T | -0.0576 |
| rs80319562  | G | -0.0663 |
| rs2236132   | C | -0.0717 |
| rs76826315  | A | 0.1178  |
| rs57715422  | A | -0.1412 |
| rs111239689 | A | -0.0283 |
| rs74635668  | G | -0.1421 |
| rs1860138   | T | 0.0281  |
| rs7359067   | C | -0.0335 |
| rs1697293   | C | -0.0676 |
| rs79217997  | A | 0.084   |
| rs112391531 | A | 0.0591  |
| rs9783666   | T | 0.0571  |
| rs12435853  | C | 0.0322  |
| rs76954286  | T | 0.134   |
| rs17425323  | A | 0.0714  |
| rs140535582 | T | 0.1611  |
| rs141139360 | C | -0.072  |
| rs4905673   | C | 0.0387  |
| rs1515411   | T | -0.1457 |
| rs17100559  | C | -0.1679 |
| rs10483967  | G | -0.0404 |
| rs79374586  | T | 0.1045  |
| rs61997476  | G | -0.048  |
| rs1263438   | A | 0.0908  |
| rs72702260  | T | -0.136  |
| rs72689995  | G | -0.0936 |
| rs75474405  | A | 0.052   |
| rs17129121  | T | 0.0428  |
| rs66482382  | C | 0.0518  |
| rs12434358  | G | 0.029   |
| rs34441860  | C | -0.191  |
| rs2223017   | A | -0.0301 |
| rs117530762 | C | 0.1103  |

|             |   |         |
|-------------|---|---------|
| rs117869281 | A | 0.1596  |
| rs17512676  | T | -0.0694 |
| rs34544841  | T | -0.0325 |
| rs55700852  | A | -0.0381 |
| rs79166502  | A | -0.069  |
| rs71416024  | G | -0.1449 |
| rs55893992  | A | -0.0814 |
| rs11621154  | A | 0.0338  |
| rs111841525 | C | 0.1692  |
| rs17100993  | G | 0.062   |
| rs17751272  | T | 0.1653  |
| rs7161406   | T | -0.2242 |
| rs77973469  | T | 0.1362  |
| rs10143188  | C | -0.052  |
| rs144525261 | A | -0.089  |
| rs76465436  | G | -0.1834 |
| rs145677369 | G | 0.1769  |
| rs11160534  | G | 0.0509  |
| rs112734439 | T | 0.1024  |
| rs140080736 | A | 0.2236  |
| rs74054641  | C | 0.0705  |
| rs12100617  | A | -0.0927 |
| rs4903081   | C | 0.035   |
| rs71419914  | C | -0.042  |
| rs57041461  | G | -0.0449 |
| rs8005316   | A | -0.0469 |
| rs112013204 | T | 0.1277  |
| rs1380429   | T | 0.0296  |
| rs4902195   | C | 0.0282  |
| rs78485296  | T | -0.1779 |
| rs8021548   | T | 0.0312  |
| rs72722868  | C | 0.0825  |
| rs2761338   | C | -0.0298 |
| rs71407707  | A | 0.0561  |
| rs8012913   | G | 0.0582  |
| rs17690975  | T | -0.0892 |
| rs144206847 | C | -0.1425 |
| rs2255146   | A | 0.0534  |
| rs7141835   | C | -0.0282 |
| rs12435934  | C | 0.0991  |
| rs76051691  | T | 0.1445  |
| rs149309975 | T | 0.1791  |
| rs76580676  | A | -0.1235 |
| rs10140091  | C | 0.1244  |
| rs743257    | C | 0.0306  |
| rs146722479 | C | 0.1889  |
| rs7142788   | C | 0.0289  |



|             |   |         |
|-------------|---|---------|
| rs7148410   | T | 0.0292  |
| rs10152106  | T | 0.0324  |
| rs116239561 | C | 0.0606  |
| rs75665537  | G | 0.1138  |
| rs117738029 | T | 0.1603  |
| rs17124250  | G | 0.1469  |
| rs77409088  | G | 0.073   |
| rs116881616 | T | 0.0854  |
| rs72679641  | A | 0.042   |
| rs57893931  | T | -0.0487 |
| rs61972666  | G | -0.0303 |
| rs10873066  | T | 0.0353  |
| rs111673119 | C | 0.0404  |
| rs1957638   | A | 0.0442  |
| rs116877899 | C | 0.1442  |
| rs144808732 | A | -0.0892 |
| rs28397006  | T | -0.0398 |
| rs147678286 | G | -0.2033 |
| rs4905011   | A | 0.0485  |
| rs6574622   | T | -0.0433 |
| rs17104525  | T | 0.0951  |
| rs709958    | C | -0.0301 |
| rs148782293 | C | 0.1438  |
| rs12587955  | C | -0.0276 |
| rs77809250  | T | 0.1749  |
| rs17128957  | C | -0.0684 |
| rs4505228   | C | -0.0387 |
| rs17784096  | T | -0.03   |
| rs1566394   | T | 0.0555  |
| rs8021097   | G | 0.04    |
| rs139135370 | T | -0.1555 |
| rs118125849 | T | -0.1463 |
| rs61984284  | A | 0.034   |
| rs74766922  | A | 0.0718  |
| rs1956578   | G | -0.0863 |
| rs10139476  | T | 0.0503  |
| rs17104863  | C | 0.1584  |
| rs76403556  | A | 0.1253  |
| rs35268989  | C | -0.0317 |
| rs1315132   | A | 0.0395  |
| rs17103396  | A | -0.0321 |
| rs1712355   | T | 0.0279  |
| rs71418974  | A | 0.0529  |
| rs1253685   | C | 0.0522  |
| rs1241633   | G | 0.0274  |
| rs72666468  | A | -0.1022 |
| rs61998384  | C | 0.0995  |

|             |   |         |
|-------------|---|---------|
| rs17090949  | A | 0.0569  |
| rs117619037 | T | -0.1532 |
| rs17176566  | A | -0.1322 |
| rs12890903  | T | 0.0278  |
| rs7147909   | C | -0.0295 |
| rs2013228   | A | 0.0789  |
| rs74075617  | A | 0.1365  |
| rs12586625  | C | -0.0543 |
| rs17127282  | A | -0.0504 |
| rs6575729   | T | -0.0461 |
| rs113798463 | T | -0.0305 |
| rs117729781 | C | 0.1805  |
| rs7147528   | T | -0.0296 |
| rs8022610   | A | -0.0441 |
| rs79747865  | T | -0.0969 |
| rs2661832   | A | 0.2016  |
| rs8018360   | T | -0.0477 |
| rs74328431  | T | -0.1251 |
| rs3925139   | A | 0.0395  |
| rs72669622  | A | -0.0393 |
| rs72664333  | A | 0.2327  |
| rs72718263  | G | 0.2672  |
| rs79229600  | T | 0.2001  |
| rs116724152 | A | 0.1032  |
| rs10484183  | T | -0.0502 |
| rs36453     | A | 0.0278  |
| rs10144501  | T | -0.0761 |
| rs17198981  | C | -0.0396 |
| rs7401710   | T | 0.0871  |
| rs12434144  | C | -0.0284 |
| rs8181914   | C | -0.1478 |
| rs797352    | A | 0.0339  |
| rs11846075  | A | 0.0547  |
| rs7153842   | A | -0.0342 |
| rs4900408   | A | 0.0306  |
| rs1289253   | A | 0.0319  |
| rs57680592  | G | -0.0607 |
| rs9783629   | C | -0.0311 |
| rs10151968  | A | -0.0361 |
| rs76788674  | A | 0.0728  |
| rs8021839   | G | 0.0412  |
| rs8003575   | T | -0.0944 |
| rs1952743   | A | -0.0487 |
| rs10133118  | A | 0.1096  |
| rs12587926  | G | 0.0295  |
| rs72700921  | A | -0.0358 |
| rs17126387  | C | 0.0536  |

|             |   |         |
|-------------|---|---------|
| rs4898998   | T | -0.0286 |
| rs12433702  | T | -0.1004 |
| rs78058740  | T | 0.0911  |
| rs395470    | C | -0.0325 |
| rs117797744 | C | -0.2604 |
| rs11624240  | C | 0.0277  |
| rs138172343 | C | 0.0719  |
| rs61977394  | C | 0.0474  |
| rs2761340   | G | 0.0285  |
| rs17181120  | A | 0.112   |
| rs139425493 | C | 0.13    |
| rs61983228  | A | -0.0597 |
| rs17112431  | G | -0.0372 |
| rs12323936  | C | -0.0427 |
| rs10483297  | C | -0.0803 |
| rs78223089  | A | 0.1734  |
| rs4072256   | G | 0.0474  |
| rs79668460  | C | -0.1576 |
| rs11622621  | C | -0.0613 |
| rs75622716  | G | -0.1669 |
| rs10142807  | C | -0.0334 |
| rs58182317  | A | 0.0388  |
| rs12436128  | T | -0.0867 |
| rs12880252  | A | 0.0312  |
| rs4561396   | G | -0.0367 |
| rs61982029  | G | 0.0916  |
| rs57885816  | C | -0.2106 |
| rs9323852   | T | -0.0282 |
| rs77036148  | G | -0.0902 |
| rs12590856  | A | 0.0436  |
| rs92070     | T | -0.0403 |
| rs76220028  | G | -0.1834 |
| rs2356900   | T | 0.1158  |
| rs76177525  | C | 0.1178  |
| rs8011890   | A | -0.0469 |
| rs754631    | T | -0.0274 |
| rs17735425  | A | 0.1111  |
| rs78455333  | A | 0.143   |
| rs56058013  | T | 0.0423  |
| rs75563018  | A | 0.0841  |
| rs76564570  | A | 0.1301  |
| rs17767225  | T | -0.0392 |
| rs140548022 | G | -0.0833 |
| rs113817161 | T | -0.128  |
| rs2005133   | T | 0.0861  |
| rs113339051 | A | 0.1113  |
| rs114849075 | A | -0.1709 |

|             |   |         |
|-------------|---|---------|
| rs57840012  | C | -0.0646 |
| rs1018550   | G | 0.1012  |
| rs12887210  | C | 0.0373  |
| rs3938669   | G | 0.0995  |
| rs75344446  | T | 0.2554  |
| rs113656414 | A | -0.1882 |
| rs2591080   | T | -0.0425 |
| rs61991151  | A | -0.0854 |
| rs77154095  | T | -0.1605 |
| rs75950510  | A | 0.1407  |
| rs4902216   | G | 0.1572  |
| rs146162815 | A | 0.1411  |
| rs74070919  | A | 0.1279  |
| rs17117446  | G | 0.0471  |
| rs117002247 | G | -0.2012 |
| rs79917834  | G | 0.1733  |
| rs72711688  | A | 0.0966  |
| rs116998099 | A | -0.19   |
| rs7152946   | C | 0.0386  |
| rs112423570 | T | 0.0869  |
| rs2274080   | C | 0.0338  |
| rs116890804 | C | 0.1353  |
| rs41438045  | A | 0.0414  |
| rs179545    | A | 0.0333  |
| rs146219016 | T | -0.1289 |
| rs4901617   | T | -0.1103 |
| rs141630389 | C | -0.267  |
| rs34330500  | G | 0.045   |
| rs61993074  | A | 0.1205  |
| rs139734883 | G | -0.2163 |
| rs117349925 | T | -0.1637 |
| rs4900486   | G | 0.0553  |
| rs11621997  | T | 0.039   |
| rs17106556  | G | 0.0637  |
| rs139635689 | A | 0.0844  |
| rs77105380  | T | 0.0447  |
| rs1680704   | G | 0.0772  |
| rs117236109 | A | 0.1308  |
| rs2269304   | A | -0.0353 |
| rs4903127   | C | -0.0571 |
| rs151187833 | C | -0.0917 |
| rs150664278 | A | -0.1736 |
| rs61973376  | T | 0.1127  |
| rs4243557   | G | 0.0267  |
| rs118164185 | A | 0.0933  |
| rs2284339   | G | -0.0268 |
| rs142960116 | G | 0.0832  |

|             |   |         |
|-------------|---|---------|
| rs61981689  | A | 0.0552  |
| rs5001880   | A | 0.0322  |
| rs3729992   | A | -0.0512 |
| rs72730339  | T | 0.0754  |
| rs10130881  | G | -0.0271 |
| rs111715673 | C | -0.102  |
| rs10498322  | T | 0.1338  |
| rs36094690  | T | -0.1355 |
| rs17117825  | A | -0.0419 |
| rs58133778  | G | -0.0591 |
| rs4143989   | G | -0.0438 |
| rs142277549 | T | -0.1467 |
| rs8003626   | T | -0.1988 |
| rs311840    | G | -0.0274 |
| rs11628027  | T | 0.0313  |
| rs71422077  | T | -0.0727 |
| rs10137879  | C | -0.0272 |
| rs1275730   | A | 0.0436  |
| rs77847288  | C | -0.1274 |
| rs7151526   | A | 0.0667  |
| rs8021600   | G | 0.0857  |
| rs11621857  | T | -0.0937 |
| rs77792270  | A | 0.1262  |
| rs8018809   | T | 0.0395  |
| rs1958590   | G | 0.056   |
| rs1270631   | A | -0.0346 |
| rs718362    | C | -0.039  |
| rs7159711   | G | 0.0304  |
| rs145190683 | C | 0.034   |
| rs854339    | T | 0.0716  |
| rs7149233   | T | 0.0974  |
| rs8022781   | A | 0.1329  |
| rs11848056  | C | 0.0407  |
| rs61982475  | A | 0.0372  |
| rs1243450   | G | 0.0698  |
| rs117202797 | G | -0.1914 |
| rs74765861  | A | 0.0961  |
| rs2104089   | C | -0.042  |
| rs2887642   | T | -0.0597 |
| rs17114839  | T | 0.1209  |
| rs143619197 | C | -0.1341 |
| rs78531451  | G | 0.0815  |
| rs8018659   | T | 0.0565  |
| rs145730801 | C | 0.0766  |
| rs12889552  | C | -0.0524 |
| rs78094872  | T | 0.0876  |
| rs11845021  | G | 0.04    |

|             |   |         |
|-------------|---|---------|
| rs10145182  | A | 0.0291  |
| rs10483463  | G | 0.0291  |
| rs142116921 | C | -0.2312 |
| rs75487228  | A | -0.1212 |
| rs7143468   | A | 0.0291  |
| rs11158025  | C | -0.0295 |
| rs79908404  | A | 0.1135  |
| rs78488122  | T | 0.0686  |
| rs226998    | A | 0.0286  |
| rs4981438   | T | -0.0482 |
| rs138115450 | T | 0.085   |
| rs144239789 | C | 0.09    |
| rs2765915   | C | -0.0278 |
| rs76843263  | A | -0.0847 |
| rs113590149 | G | 0.1134  |
| rs1315731   | A | -0.0358 |
| rs117148134 | G | -0.0771 |
| rs12880040  | A | 0.0372  |
| rs7143137   | C | 0.0641  |
| rs7149682   | C | 0.0415  |
| rs4406982   | G | 0.0436  |
| rs12586841  | A | -0.0517 |
| rs4488373   | G | 0.0399  |
| rs150251571 | C | 0.1093  |
| rs60131530  | C | -0.0901 |
| rs3909623   | A | -0.028  |
| rs2626606   | G | -0.0373 |
| rs75941356  | A | 0.1104  |
| rs11622363  | C | -0.0414 |
| rs2093291   | A | 0.0304  |
| rs77696112  | T | -0.0934 |
| rs4127756   | A | 0.0953  |
| rs111920927 | T | 0.1233  |
| rs72675705  | T | 0.0681  |
| rs7150526   | T | -0.0299 |
| rs8010058   | T | -0.0529 |
| rs141210153 | G | 0.1209  |
| rs935340    | C | 0.0347  |
| rs118098180 | T | 0.0589  |
| rs11850238  | A | 0.0605  |
| rs10131485  | A | -0.1254 |
| rs113675051 | A | 0.2267  |
| rs1243673   | T | 0.0406  |
| rs11846601  | A | 0.0894  |
| rs146310212 | T | 0.1631  |
| rs72719728  | C | -0.1421 |
| rs142144986 | G | 0.1577  |

|             |   |         |
|-------------|---|---------|
| rs140178109 | A | -0.1143 |
| rs117255031 | C | -0.0922 |
| rs946627    | G | -0.0349 |
| rs11849670  | C | 0.0305  |
| rs4904132   | A | 0.0317  |
| rs112761822 | T | -0.0926 |
| rs75113600  | G | -0.0606 |
| rs117901134 | G | 0.0761  |
| rs145465916 | G | -0.1555 |
| rs147189131 | G | -0.1531 |
| rs2400998   | A | -0.0535 |
| rs7147298   | T | 0.0902  |
| rs75508863  | A | -0.0785 |
| rs1240986   | C | 0.0377  |
| rs72708433  | C | 0.0936  |
| rs77010980  | T | 0.1008  |
| rs76238241  | C | -0.0477 |
| rs17224089  | G | -0.0393 |
| rs78689848  | T | -0.1256 |
| rs140539358 | G | -0.2302 |
| rs11627305  | G | -0.0333 |
| rs12889116  | C | -0.0494 |
| rs76904544  | A | 0.1024  |
| rs3811251   | T | 0.029   |
| rs10150171  | A | 0.1021  |
| rs55920391  | A | -0.0433 |
| rs7145195   | C | -0.0778 |
| rs12883938  | T | 0.0906  |
| rs56202324  | C | -0.1559 |
| rs17098884  | G | 0.0793  |
| rs1266469   | G | -0.028  |
| rs145419828 | C | 0.1253  |
| rs34305514  | C | 0.1335  |
| rs10151811  | C | 0.1323  |
| rs72673283  | C | -0.2091 |
| rs76332539  | G | 0.0412  |
| rs143449038 | G | -0.1924 |
| rs12589796  | C | -0.0571 |
| rs151162396 | A | 0.1479  |
| rs2369523   | A | -0.028  |
| rs149588088 | T | -0.2026 |
| rs34203771  | A | -0.0831 |
| rs1958134   | G | -0.0406 |
| rs141879672 | T | 0.1444  |
| rs17710253  | A | -0.1503 |
| rs143952294 | A | 0.2919  |
| rs117060466 | T | -0.1378 |

|             |   |         |
|-------------|---|---------|
| rs2498786   | C | -0.0321 |
| rs4353433   | C | 0.0302  |
| rs74057564  | T | -0.057  |
| rs1005354   | A | -0.0696 |
| rs847300    | A | -0.09   |
| rs7151201   | C | 0.0378  |
| rs117375175 | A | -0.1422 |
| rs77689120  | A | 0.2443  |
| rs10872877  | T | 0.0374  |
| rs798844    | T | -0.0481 |
| rs72695625  | G | 0.1873  |
| rs75895959  | A | 0.1264  |
| rs4904588   | T | 0.0597  |
| rs71431117  | G | 0.1578  |
| rs72675795  | T | -0.1502 |
| rs78467598  | G | 0.1443  |
| rs117860774 | G | -0.1266 |
| rs10131678  | C | -0.0475 |
| rs72659910  | T | -0.0322 |
| rs10144189  | T | 0.0485  |
| rs62000303  | T | 0.0448  |
| rs56405333  | T | 0.045   |
| rs8012218   | A | 0.03    |
| rs113357081 | A | 0.1835  |
| rs1243485   | A | -0.0508 |
| rs12586664  | C | -0.0342 |
| rs751688    | C | -0.0551 |
| rs143579261 | C | -0.0534 |
| rs17826925  | C | -0.0274 |
| rs78042613  | T | -0.1505 |
| rs12891547  | A | 0.1501  |
| rs11621560  | C | -0.027  |
| rs116868024 | T | 0.1226  |
| rs57475476  | C | -0.1489 |
| rs73586420  | T | -0.0508 |
| rs146825904 | A | 0.0401  |
| rs117119530 | G | 0.0795  |
| rs1257636   | A | 0.0504  |
| rs140550077 | T | 0.1267  |
| rs60892486  | T | -0.0412 |
| rs11848726  | C | -0.0291 |
| rs80320385  | G | 0.0896  |
| rs7152165   | A | -0.0312 |
| rs111587129 | A | 0.0356  |
| rs144481505 | G | -0.152  |
| rs35254825  | G | 0.086   |
| rs10137893  | C | -0.038  |



|             |   |         |
|-------------|---|---------|
| rs117307336 | T | 0.0841  |
| rs2038350   | G | -0.0264 |
| rs7159547   | C | 0.1663  |
| rs145125525 | C | 0.1305  |
| rs61969850  | T | -0.078  |
| rs11159001  | A | 0.0469  |
| rs116261083 | T | 0.0876  |
| rs78283011  | T | -0.1383 |
| rs2148334   | A | 0.0423  |
| rs1483968   | T | 0.0646  |
| rs11627774  | T | 0.0266  |
| rs888475    | G | 0.0384  |
| rs12590098  | A | -0.1328 |
| rs4982352   | C | -0.0298 |
| rs4078415   | A | -0.0267 |
| rs72683535  | C | -0.1139 |
| rs7146338   | T | 0.0284  |
| rs77522579  | A | 0.1134  |
| rs56336325  | A | -0.0912 |
| rs1107599   | G | -0.0316 |
| rs142577882 | T | -0.146  |
| rs11623755  | A | -0.034  |
| rs6575095   | C | -0.1056 |
| rs35880188  | G | 0.0911  |
| rs113437270 | G | 0.1173  |
| rs10147314  | A | 0.0306  |
| rs61982620  | T | -0.0308 |
| rs111944489 | C | 0.0905  |
| rs148314870 | C | 0.1916  |
| rs2145466   | T | -0.0664 |
| rs76646901  | A | 0.0942  |
| rs10139345  | T | -0.026  |
| rs55960294  | C | -0.044  |
| rs12895105  | C | -0.0293 |
| rs10131010  | C | 0.0984  |
| rs118045770 | T | -0.1666 |
| rs113341833 | G | -0.0329 |
| rs117254281 | A | 0.101   |
| rs2402171   | A | -0.0281 |
| rs117180260 | G | -0.1217 |
| rs10146820  | G | -0.045  |
| rs141232514 | T | 0.2243  |
| rs7143212   | A | 0.0478  |
| rs61976295  | G | 0.0642  |
| rs113350330 | A | 0.1165  |
| rs142771906 | T | 0.1458  |
| rs141340953 | C | 0.1706  |

|             |   |         |
|-------------|---|---------|
| rs7141930   | T | 0.0314  |
| rs1980617   | T | -0.0272 |
| rs8003280   | A | 0.0699  |
| rs17214317  | C | 0.0735  |
| rs45479501  | T | 0.1205  |
| rs60097283  | A | 0.047   |
| rs12897354  | A | 0.0413  |
| rs147268230 | T | 0.149   |
| rs118133224 | A | -0.2207 |
| rs113550751 | T | 0.1027  |
| rs8015514   | A | -0.0469 |
| rs116870336 | C | -0.1054 |
| rs1056704   | C | 0.0678  |
| rs17092105  | G | -0.162  |
| rs77317139  | A | 0.1239  |
| rs76614406  | A | 0.0989  |
| rs17197170  | G | -0.0374 |
| rs7142484   | G | 0.0278  |
| rs149624756 | A | 0.1751  |
| rs117684211 | T | -0.1694 |
| rs143329701 | C | -0.0601 |
| rs12590067  | T | -0.0584 |
| rs11627631  | A | -0.0913 |
| rs2150305   | C | 0.0302  |
| rs3818251   | G | 0.033   |
| rs74720901  | C | -0.1106 |
| rs1955491   | C | -0.0315 |
| rs75034180  | T | -0.1058 |
| rs140702931 | C | 0.2171  |
| rs17099623  | C | -0.0327 |
| rs12434021  | G | 0.0343  |
| rs75285011  | C | -0.1435 |
| rs76639905  | A | -0.0511 |
| rs15795     | C | -0.0316 |
| rs59661501  | G | 0.0426  |
| rs17202465  | A | -0.0341 |
| rs8021895   | T | -0.0258 |
| rs140487157 | G | 0.1255  |
| rs61979975  | C | -0.0269 |
| rs72668438  | G | 0.1418  |
| rs56044811  | A | -0.049  |
| rs149530626 | C | 0.1258  |
| rs7145619   | T | 0.028   |
| rs138072236 | T | 0.1127  |
| rs142510652 | G | -0.1163 |
| rs59771829  | C | 0.0339  |
| rs17105586  | G | -0.027  |

|             |   |         |
|-------------|---|---------|
| rs1681579   | T | 0.0499  |
| rs941750    | T | 0.0452  |
| rs10131921  | A | -0.057  |
| rs35855701  | C | 0.0303  |
| rs10148982  | C | 0.0279  |
| rs118160016 | A | 0.1458  |
| rs113695602 | C | -0.0972 |
| rs28427534  | C | -0.1116 |
| rs150909496 | T | -0.0916 |
| rs72680630  | A | 0.1191  |
| rs4900482   | T | 0.0431  |
| rs76142477  | T | 0.1987  |
| rs986877    | T | 0.0333  |
| rs4903579   | A | -0.0468 |
| rs142542107 | C | 0.1619  |
| rs12588898  | G | 0.0449  |
| rs17576004  | T | 0.1622  |
| rs79774278  | G | 0.1948  |
| rs12890577  | C | 0.0289  |
| rs144343297 | A | 0.1026  |
| rs12589875  | T | 0.0255  |
| rs1769450   | A | 0.0271  |
| rs150415710 | G | -0.2031 |
| rs113000402 | T | -0.0782 |
| rs111713178 | C | -0.1481 |
| rs12879874  | A | 0.0398  |
| rs75009322  | G | 0.1097  |
| rs1007731   | A | 0.0522  |
| rs79337453  | C | -0.0894 |
| rs150809399 | A | -0.1105 |
| rs141241299 | T | 0.1034  |
| rs77078520  | C | 0.1695  |
| rs76574539  | A | -0.0788 |
| rs73285006  | A | 0.0263  |
| rs2281651   | T | 0.0304  |
| rs1676049   | C | -0.0287 |
| rs118054664 | C | 0.0814  |
| rs72700703  | C | 0.0772  |
| rs1257586   | A | -0.0255 |
| rs10135444  | C | -0.031  |
| rs141834861 | A | 0.0985  |
| rs142464256 | T | 0.1126  |
| rs117880750 | C | -0.0905 |
| rs61753893  | G | 0.1523  |
| rs78505988  | T | -0.1787 |
| rs140378741 | T | 0.1034  |
| rs3811209   | G | -0.0279 |

|             |   |         |
|-------------|---|---------|
| rs116856824 | T | -0.0569 |
| rs35613825  | C | 0.0434  |
| rs113176950 | A | -0.1441 |
| rs77568988  | C | 0.0659  |
| rs111672158 | A | 0.0528  |
| rs17260625  | C | 0.05    |
| rs17120302  | C | -0.0592 |
| rs3886483   | A | 0.0295  |
| rs116989552 | A | 0.1256  |
| rs67848433  | T | -0.0468 |
| rs34612764  | A | -0.0477 |
| rs144092787 | T | -0.0331 |
| rs35329678  | G | -0.0361 |
| rs35278358  | A | 0.2288  |
| rs12880015  | G | 0.1158  |
| rs7143477   | G | -0.0375 |
| rs61981499  | A | 0.0272  |
| rs3803318   | C | -0.0292 |
| rs1695770   | T | 0.0346  |
| rs79979502  | G | -0.1455 |
| rs1955981   | G | -0.026  |
| rs8004546   | C | 0.0618  |
| rs60708257  | C | 0.0373  |
| rs10143554  | G | 0.0252  |
| rs7148894   | C | 0.0275  |
| rs75591173  | C | 0.1968  |
| rs138194441 | T | -0.1254 |
| rs75524963  | C | 0.0985  |
| rs57575501  | A | -0.0461 |
| rs77007861  | T | 0.1111  |
| rs117028140 | C | 0.1537  |
| rs781377    | T | -0.0343 |
| rs17257605  | G | 0.1037  |
| rs76307797  | A | -0.1155 |
| rs10483748  | T | 0.0294  |
| rs10144809  | C | 0.1541  |
| rs145637119 | A | 0.1015  |
| rs7155723   | A | 0.0752  |
| rs111526079 | A | 0.0875  |
| rs61981996  | G | 0.0319  |
| rs112445094 | T | -0.0987 |
| rs60622880  | C | -0.0256 |
| rs72727949  | A | -0.06   |
| rs80072789  | T | 0.0829  |
| rs141664582 | G | 0.0894  |
| rs17280296  | T | -0.0698 |
| rs72625684  | C | 0.0681  |

|             |   |         |
|-------------|---|---------|
| rs1642819   | A | 0.0343  |
| rs141926757 | T | 0.0788  |
| rs1273868   | C | -0.0412 |
| rs17097766  | A | 0.1422  |
| rs144354774 | T | 0.1229  |
| rs7149898   | G | -0.0325 |
| rs12892352  | C | 0.0378  |
| rs117771587 | A | -0.0857 |
| rs1298208   | C | 0.0616  |
| rs146872404 | A | 0.0768  |
| rs8019982   | G | -0.0333 |
| rs147169300 | C | -0.1209 |
| rs12894592  | T | 0.1344  |
| rs6575350   | C | 0.0308  |
| rs8012945   | A | 0.028   |
| rs1243571   | T | 0.0718  |
| rs4983592   | A | -0.052  |
| rs4246978   | G | -0.0286 |
| rs78846399  | C | 0.0787  |
| rs8019082   | A | -0.0318 |
| rs117843563 | C | -0.129  |
| rs4381499   | C | 0.104   |
| rs76344925  | T | -0.0856 |
| rs11621227  | C | 0.0392  |
| rs149167215 | A | -0.1598 |
| rs1007288   | T | -0.0293 |
| rs17827902  | A | -0.0606 |
| rs1279002   | C | 0.0261  |
| rs8009560   | C | 0.0649  |
| rs12890417  | C | 0.1038  |
| rs4981138   | C | 0.0538  |
| rs67019141  | C | -0.0347 |
| rs75685458  | A | 0.0901  |
| rs117012699 | T | -0.2209 |
| rs17128653  | G | -0.1021 |
| rs12883673  | G | 0.039   |
| rs61252072  | C | 0.1118  |
| rs721979    | A | 0.0357  |
| rs114900272 | A | 0.1075  |
| rs62010981  | C | -0.0557 |
| rs11623864  | T | 0.2022  |
| rs142596183 | C | 0.1541  |
| rs17723597  | T | 0.0259  |
| rs10133582  | G | 0.0417  |
| rs72664644  | T | -0.1491 |
| rs118146650 | G | 0.0993  |
| rs61981352  | T | 0.0882  |

|             |   |         |
|-------------|---|---------|
| rs4906423   | A | -0.0277 |
| rs139720996 | G | 0.1307  |
| rs2883558   | C | -0.0266 |
| rs12437149  | C | -0.0704 |
| rs73576096  | G | -0.0362 |
| rs117781882 | T | -0.0799 |
| rs117612960 | C | 0.0801  |
| rs76470617  | T | 0.0738  |
| rs17122882  | T | -0.0518 |
| rs72660602  | A | -0.0811 |
| rs55777436  | C | 0.2381  |
| rs78518350  | A | -0.118  |
| rs8008032   | A | 0.0684  |
| rs118145836 | A | -0.0528 |
| rs73332551  | T | 0.0792  |
| rs75045877  | T | 0.0576  |
| rs1958654   | T | 0.0388  |
| rs117735227 | G | 0.1261  |
| rs11570782  | G | -0.0372 |
| rs2239214   | G | 0.0446  |
| rs17104194  | A | 0.1671  |
| rs117187949 | G | 0.1611  |
| rs75947546  | A | -0.0778 |
| rs17101661  | A | 0.1563  |
| rs77046985  | G | -0.0642 |
| rs847501    | C | 0.0265  |
| rs79109521  | A | -0.1645 |
| rs17439529  | T | 0.0263  |
| rs68090074  | A | -0.0267 |
| rs113523434 | T | 0.042   |
| rs4903592   | A | 0.1151  |
| rs17309665  | A | 0.0762  |
| rs76145532  | C | -0.0721 |
| rs118062107 | C | 0.0887  |
| rs138543059 | G | 0.1106  |
| rs77176196  | C | -0.1019 |
| rs2498827   | G | -0.0257 |
| rs2273913   | T | 0.0432  |
| rs74839727  | C | -0.0699 |
| rs12589208  | G | 0.0363  |
| rs56058890  | C | -0.0401 |
| rs1092014   | G | 0.1355  |
| rs727350    | A | -0.0285 |
| rs143564082 | T | 0.1646  |
| rs7161555   | T | 0.0249  |
| rs117323093 | G | 0.0764  |
| rs36017936  | T | -0.0332 |

|             |   |         |
|-------------|---|---------|
| rs118074246 | T | 0.1183  |
| rs2402226   | C | 0.0256  |
| rs76089046  | G | -0.0593 |
| rs12433322  | A | 0.0375  |
| rs59776165  | T | 0.0415  |
| rs10129297  | C | -0.0324 |
| rs1953439   | T | -0.0634 |
| rs10151972  | T | 0.0261  |
| rs1957572   | C | -0.0481 |
| rs72691237  | T | 0.0709  |
| rs2987962   | A | 0.0249  |
| rs28544920  | G | -0.0385 |
| rs79942275  | A | 0.1176  |
| rs72709582  | T | -0.0593 |
| rs12588812  | G | -0.0521 |
| rs2142183   | C | 0.0303  |
| rs1285824   | G | -0.0256 |
| rs1242105   | C | -0.0275 |
| rs10133245  | A | -0.0286 |
| rs12435571  | T | 0.0491  |
| rs148814019 | A | 0.1308  |
| rs929609    | T | 0.0261  |
| rs72672914  | G | -0.1006 |
| rs2231797   | G | 0.0278  |
| rs117009841 | C | 0.1236  |
| rs146973333 | A | -0.0761 |
| rs6572324   | T | -0.0506 |
| rs7149326   | C | -0.0824 |
| rs35383833  | A | 0.063   |
| rs111781133 | A | -0.1248 |
| rs4901119   | A | 0.0248  |
| rs115146802 | A | 0.0607  |
| rs4898922   | A | -0.0409 |
| rs7147249   | T | -0.1222 |
| rs17654303  | A | -0.158  |
| rs115857354 | T | -0.1251 |
| rs10133637  | G | -0.0283 |
| rs143095195 | T | -0.1143 |
| rs17090892  | G | -0.045  |
| rs113234018 | T | 0.0398  |
| rs35613673  | T | -0.0267 |
| rs10149108  | T | -0.0468 |
| rs4904003   | G | -0.0262 |
| rs4901592   | C | 0.0261  |
| rs61975084  | A | 0.0295  |
| rs62005105  | A | -0.0862 |
| rs147746003 | A | -0.211  |

|             |   |         |
|-------------|---|---------|
| rs113131223 | A | 0.1013  |
| rs2909436   | A | 0.1331  |
| rs739321    | C | -0.0914 |
| rs72685473  | C | -0.0619 |
| rs117013051 | C | -0.1716 |
| rs61998355  | C | 0.0644  |
| rs1748948   | T | -0.0277 |
| rs12587865  | T | 0.0292  |
| rs17114787  | G | 0.0338  |
| rs7143383   | T | 0.0342  |
| rs7146435   | T | 0.0345  |
| rs11622224  | C | -0.0254 |
| rs17277907  | G | -0.0693 |
| rs58839744  | A | -0.081  |
| rs116437200 | T | 0.1412  |
| rs76567590  | A | 0.1448  |
| rs75417347  | A | 0.0826  |
| rs117516552 | C | -0.067  |
| rs12882499  | C | 0.0275  |
| rs74551590  | C | -0.0895 |
| rs28396435  | C | 0.1339  |
| rs12881245  | T | -0.0432 |
| rs140514603 | G | -0.1866 |
| rs7144460   | A | 0.06    |
| rs150030919 | C | -0.1248 |
| rs146364509 | T | -0.0907 |
| rs12435238  | A | 0.0318  |
| rs140814958 | T | -0.1044 |
| rs138980163 | A | -0.0386 |
| rs62000678  | T | 0.1069  |
| rs11847044  | G | 0.0302  |
| rs60019916  | C | 0.0458  |
| rs79818851  | G | 0.0805  |
| rs12587607  | C | 0.0328  |
| rs116844836 | C | -0.1431 |
| rs61981971  | T | -0.0639 |
| rs72662250  | A | -0.2123 |
| rs59042733  | A | 0.0347  |
| rs144330682 | C | 0.0834  |
| rs11851965  | T | 0.0264  |
| rs72724658  | T | 0.095   |
| rs17782153  | T | -0.0288 |
| rs56003946  | A | 0.099   |
| rs45608034  | T | 0.1222  |
| rs143678942 | A | 0.1102  |
| rs12586447  | G | -0.1413 |
| rs4902806   | G | 0.0343  |



|             |   |         |
|-------------|---|---------|
| rs146607429 | T | 0.1631  |
| rs17100296  | T | 0.15    |
| rs150857407 | C | -0.1398 |
| rs8013122   | C | -0.0392 |
| rs56326314  | T | 0.0648  |
| rs4903716   | C | -0.0247 |
| rs215499    | G | -0.0739 |
| rs8016889   | A | 0.0265  |
| rs116582638 | A | -0.1144 |
| rs12432477  | A | 0.0288  |
| rs116852014 | C | -0.0695 |
| rs17772793  | G | 0.0276  |
| rs79259702  | C | -0.101  |
| rs28668993  | T | 0.0379  |
| rs1957321   | A | 0.0495  |
| rs17123832  | G | 0.0881  |
| rs7157928   | T | 0.0537  |
| rs3742680   | A | -0.0378 |
| rs78757355  | A | -0.1522 |
| rs139944740 | T | -0.1005 |
| rs10132512  | A | 0.0273  |
| rs8193034   | G | 0.17    |
| rs78833210  | T | 0.1708  |
| rs150062273 | T | 0.1445  |
| rs4904761   | A | -0.0268 |
| rs2281823   | G | -0.0242 |
| rs187481630 | A | 0.1243  |
| rs10146791  | G | 0.0271  |
| rs78768242  | T | -0.1603 |
| rs117887875 | C | -0.0836 |
| rs117345107 | T | -0.1833 |
| rs1744269   | A | -0.039  |
| rs1189135   | A | -0.0566 |
| rs12586448  | T | 0.0478  |
| rs72682917  | G | 0.0831  |
| rs117656438 | A | 0.1023  |
| rs8007247   | A | -0.0284 |
| rs78769565  | T | 0.0448  |
| rs17108071  | G | -0.029  |
| rs10143721  | A | 0.0311  |
| rs10137977  | C | -0.0437 |
| rs75100402  | A | -0.0611 |
| rs12590800  | G | -0.0311 |
| rs6571651   | T | -0.0306 |
| rs17105573  | T | 0.0764  |
| rs8012258   | C | -0.0253 |
| rs8006849   | G | -0.0252 |

|             |   |         |
|-------------|---|---------|
| rs12897621  | A | 0.0252  |
| rs77782666  | C | -0.1015 |
| rs115649731 | A | 0.1226  |
| rs854314    | T | 0.0267  |
| rs17255451  | C | 0.0253  |
| rs117630951 | A | -0.121  |
| rs113143430 | C | 0.1942  |
| rs78640165  | T | 0.1726  |
| rs79939941  | T | -0.1062 |
| rs77339508  | A | 0.1027  |
| rs7144405   | A | 0.0259  |
| rs150187316 | G | -0.1914 |
| rs11626300  | A | 0.0837  |
| rs2236133   | A | 0.0333  |
| rs140912477 | C | -0.1749 |
| rs117762559 | T | -0.1215 |
| rs12884695  | C | 0.0298  |
| rs79494771  | A | -0.1538 |
| rs10139432  | G | -0.0244 |
| rs17093069  | C | -0.0374 |
| rs17103360  | A | -0.0327 |
| rs2275556   | A | -0.0366 |
| rs75680625  | C | -0.055  |
| rs874284    | T | 0.0686  |
| rs10141764  | G | -0.0313 |
| rs34564902  | A | -0.0408 |
| rs61989817  | T | -0.0783 |
| rs1257427   | T | 0.0523  |
| rs10132198  | A | -0.0459 |
| rs35690663  | G | 0.0271  |
| rs34803930  | A | 0.2119  |
| rs72705243  | A | 0.1039  |
| rs11621097  | G | 0.1423  |
| rs2284651   | C | -0.0261 |
| rs62001570  | A | -0.1393 |
| rs17104278  | C | 0.0622  |
| rs61979494  | A | 0.0434  |
| rs61979341  | T | -0.0465 |
| rs1951470   | T | -0.0295 |
| rs2318305   | G | -0.041  |
| rs990962    | C | 0.0335  |
| rs12435734  | A | 0.0241  |
| rs138398741 | C | 0.1515  |
| rs56270364  | C | 0.0301  |
| rs61975159  | A | 0.0502  |
| rs11159379  | T | 0.0288  |
| rs71415062  | T | 0.1944  |

|             |   |         |
|-------------|---|---------|
| rs11628228  | G | 0.0611  |
| rs115080749 | A | 0.1197  |
| rs144386241 | A | 0.1152  |
| rs1315139   | A | 0.0241  |
| rs1950931   | T | 0.0252  |
| rs75527370  | A | -0.0851 |
| rs79946579  | T | -0.1366 |
| rs80316165  | G | -0.1084 |
| rs76962697  | C | 0.0818  |
| rs12891207  | A | 0.0258  |
| rs4516137   | A | -0.0332 |
| rs71412047  | G | -0.03   |
| rs143293593 | T | 0.273   |
| rs4410014   | C | 0.0354  |
| rs78534041  | C | -0.0463 |
| rs12586193  | T | 0.0335  |
| rs2355661   | G | -0.0326 |
| rs8019423   | T | -0.0256 |
| rs61975354  | A | 0.0635  |
| rs7150077   | T | -0.0318 |
| rs55732934  | C | 0.0288  |
| rs9323202   | C | 0.0346  |
| rs140571313 | A | 0.158   |
| rs117743356 | G | -0.0593 |
| rs79475164  | G | -0.157  |
| rs72720291  | T | -0.0547 |
| rs7160137   | G | 0.0743  |
| rs8004468   | A | -0.0343 |
| rs116462862 | G | 0.1624  |
| rs138775648 | T | 0.049   |
| rs17751454  | A | -0.0286 |
| rs11620754  | T | 0.1051  |
| rs61981363  | T | 0.0299  |
| rs12894321  | T | 0.024   |
| rs56161910  | G | 0.0863  |
| rs117604848 | C | -0.2123 |
| rs146115354 | G | -0.0973 |
| rs11851067  | A | -0.082  |
| rs12895477  | G | -0.0356 |
| rs148290822 | T | 0.1167  |
| rs2332819   | T | 0.0794  |
| rs6650512   | A | -0.1336 |
| rs8003356   | C | 0.0705  |
| rs76281060  | C | -0.0873 |
| rs7160349   | T | -0.1675 |
| rs75597341  | T | -0.1024 |
| rs35755034  | T | 0.1748  |

|             |   |         |
|-------------|---|---------|
| rs12880688  | C | -0.0331 |
| rs17280422  | C | 0.0436  |
| rs9919884   | C | 0.0428  |
| rs1285815   | T | 0.0326  |
| rs56002524  | T | -0.0318 |
| rs7147013   | G | 0.0312  |
| rs12431477  | A | 0.029   |
| rs78087542  | T | 0.085   |
| rs2184671   | G | -0.0424 |
| rs2014829   | T | 0.04    |
| rs10133087  | T | -0.0346 |
| rs61988424  | T | 0.0453  |
| rs3025762   | T | 0.1605  |
| rs2093759   | T | -0.0713 |
| rs10149586  | A | -0.0752 |
| rs7141384   | G | -0.0262 |
| rs72725154  | T | 0.1485  |
| rs12435096  | A | 0.0948  |
| rs111304500 | A | 0.0578  |
| rs12880795  | C | 0.0268  |
| rs35265415  | T | -0.1361 |
| rs117849514 | A | 0.1365  |
| rs60278229  | T | 0.0677  |
| rs117140981 | T | -0.1789 |
| rs76593431  | T | -0.1205 |
| rs2069970   | A | -0.039  |
| rs2145641   | C | -0.0358 |
| rs58617685  | T | 0.0486  |
| rs117487780 | C | -0.0884 |
| rs55939985  | T | -0.1962 |
| rs145373489 | A | 0.1091  |
| rs72727454  | G | 0.0961  |
| rs7141006   | G | -0.0263 |
| rs141127214 | T | -0.1277 |
| rs187945619 | C | 0.085   |
| rs7141798   | G | -0.0449 |
| rs116849609 | C | -0.1843 |
| rs79229764  | T | -0.0733 |
| rs2874057   | G | -0.0333 |
| rs59167088  | G | 0.0417  |
| rs10138542  | G | 0.0259  |
| rs12432969  | A | -0.1016 |
| rs72680088  | C | -0.1047 |
| rs72728998  | G | 0.026   |
| rs1257441   | A | -0.026  |
| rs59600678  | T | -0.0354 |
| rs2011882   | C | 0.036   |

|             |   |         |
|-------------|---|---------|
| rs10145883  | A | 0.0323  |
| rs4310777   | A | -0.0439 |
| rs2069587   | C | -0.0735 |
| rs45565635  | C | 0.092   |
| rs11622536  | A | -0.0333 |
| rs12436161  | G | 0.0398  |
| rs1998021   | A | -0.1181 |
| rs55802468  | A | 0.1436  |
| rs732912    | A | 0.0298  |
| rs2069209   | C | 0.1219  |
| rs73317466  | A | 0.1047  |
| rs150663550 | A | -0.0921 |
| rs56139318  | G | -0.0241 |
| rs72672799  | A | -0.041  |
| rs61982135  | C | 0.0671  |
| rs72714459  | A | -0.1215 |
| rs72708523  | T | -0.081  |
| rs8010752   | A | 0.0307  |
| rs11160251  | G | -0.0278 |
| rs72724646  | T | -0.03   |
| rs55912831  | G | 0.0247  |
| rs61981972  | C | -0.0432 |
| rs111310138 | C | -0.043  |
| rs8007546   | T | -0.0387 |
| rs2583341   | C | 0.0332  |
| rs750273    | G | 0.0255  |
| rs117913708 | T | -0.2014 |
| rs7142386   | G | 0.024   |
| rs79237179  | G | 0.0673  |
| rs7151113   | T | -0.0327 |
| rs74884751  | T | -0.1166 |
| rs1956620   | G | 0.1322  |
| rs6574836   | A | 0.0335  |
| rs147425199 | A | 0.0971  |
| rs61979915  | T | -0.1261 |
| rs2900015   | A | 0.1053  |
| rs76309775  | T | 0.0897  |
| rs68094819  | C | -0.1507 |
| rs1548818   | A | 0.0311  |
| rs114133265 | A | 0.0734  |
| rs139528923 | A | -0.1385 |
| rs28446570  | T | -0.0802 |
| rs117600027 | C | 0.1449  |
| rs160472    | C | -0.0254 |
| rs75655413  | G | -0.0796 |
| rs76694886  | G | -0.0896 |
| rs11849038  | A | -0.0553 |

|             |   |         |
|-------------|---|---------|
| rs4377066   | T | -0.0479 |
| rs114684732 | C | 0.1465  |
| rs11625058  | A | 0.0669  |
| rs77895101  | T | -0.1879 |
| rs1956855   | A | 0.0264  |
| rs113420785 | A | 0.0394  |
| rs61994176  | C | 0.0309  |
| rs34072148  | G | -0.1146 |
| rs60842069  | T | 0.0668  |
| rs202960    | C | -0.0367 |
| rs7159334   | C | -0.0316 |
| rs74062834  | A | 0.0488  |
| rs61992824  | G | 0.0341  |
| rs117687327 | T | -0.0714 |
| rs7141420   | C | 0.024   |
| rs17253890  | G | 0.0274  |
| rs75864941  | C | -0.1114 |
| rs17718544  | G | 0.0452  |
| rs34167556  | T | 0.0283  |
| rs71418989  | T | 0.1622  |
| rs34147959  | C | -0.0753 |
| rs149378382 | T | -0.1298 |
| rs1243664   | A | 0.0433  |
| rs118077224 | C | 0.0959  |
| rs61975585  | A | 0.148   |
| rs71420470  | A | -0.0401 |
| rs35483531  | T | -0.0333 |
| rs9888619   | T | 0.0336  |
| rs74886757  | T | -0.1181 |
| rs1998136   | A | -0.0275 |
| rs807439    | G | 0.0651  |
| rs17256357  | C | -0.041  |
| rs117075035 | G | 0.0936  |
| rs8013662   | G | -0.0447 |
| rs113078302 | T | 0.0643  |
| rs913742    | A | -0.0281 |
| rs74751401  | T | -0.1271 |
| rs1692041   | T | -0.0253 |
| rs11626120  | G | -0.0744 |
| rs2402172   | C | 0.0336  |
| rs34367846  | T | 0.0674  |
| rs77957932  | C | -0.047  |
| rs1553500   | A | -0.0502 |
| rs149108558 | T | 0.0703  |
| rs4905528   | A | 0.0237  |
| rs72666407  | T | 0.0527  |
| rs79309235  | A | 0.1137  |

|             |   |         |
|-------------|---|---------|
| rs11624422  | C | 0.0766  |
| rs1887943   | T | -0.0293 |
| rs10498408  | T | 0.0617  |
| rs117593252 | A | 0.1139  |
| rs1053900   | C | -0.0261 |
| rs72724208  | A | 0.0607  |
| rs145214439 | T | 0.0894  |
| rs12890179  | T | -0.0662 |
| rs113012323 | A | -0.0643 |
| rs2766      | T | 0.0703  |
| rs10138876  | T | 0.0285  |
| rs111902397 | G | -0.0618 |
| rs75585956  | A | -0.084  |
| rs78942973  | T | -0.0965 |
| rs1698528   | A | 0.0271  |
| rs79072784  | T | -0.0837 |
| rs1187886   | C | 0.0519  |
| rs1698537   | T | -0.0306 |
| rs114613038 | G | 0.1289  |
| rs17123971  | G | 0.0926  |
| rs2038502   | G | 0.0488  |
| rs78701040  | G | -0.0434 |
| rs77253648  | T | 0.1025  |
| rs234136    | T | -0.0261 |
| rs77286073  | T | -0.1325 |
| rs977606    | T | -0.0507 |
| rs34439941  | G | 0.0254  |
| rs34034077  | A | -0.0266 |
| rs117097246 | T | 0.0988  |
| rs12717560  | A | -0.0269 |
| rs117182365 | T | -0.1347 |
| rs11628554  | T | 0.0767  |
| rs3784095   | G | -0.0436 |
| rs850742    | T | -0.026  |
| rs75857200  | A | -0.0372 |
| rs17097458  | A | 0.0572  |
| rs12886427  | A | 0.0646  |
| rs140729811 | G | -0.1465 |
| rs117322124 | G | -0.0649 |
| rs79409415  | A | 0.1154  |
| rs11160642  | T | -0.0328 |
| rs74316352  | A | 0.0568  |
| rs141788395 | A | 0.1243  |
| rs117446972 | T | 0.0662  |
| rs77487624  | T | 0.1479  |
| rs3814816   | A | -0.0416 |
| rs80000572  | T | 0.0808  |

|             |   |         |
|-------------|---|---------|
| rs78982354  | G | -0.1565 |
| rs118116418 | G | 0.1462  |
| rs72720805  | G | 0.1086  |
| rs4447317   | A | 0.0991  |
| rs1953705   | C | 0.1518  |
| rs72729528  | C | -0.1041 |
| rs12436690  | A | 0.0464  |
| rs2275009   | A | 0.0375  |
| rs17557187  | G | -0.0543 |
| rs73291460  | C | 0.0736  |
| rs73341019  | G | -0.0419 |
| rs7158526   | C | -0.0272 |
| rs72731520  | G | -0.0439 |
| rs145825218 | T | 0.2199  |
| rs34109120  | C | 0.0299  |
| rs7159942   | T | 0.042   |
| rs12147632  | T | -0.0451 |
| rs1745721   | C | 0.0277  |
| rs113538578 | G | 0.0875  |
| rs1257643   | A | -0.0373 |
| rs7141515   | G | -0.0258 |
| rs10144263  | C | -0.028  |
| rs117656496 | G | -0.1099 |
| rs17794251  | T | -0.0289 |
| rs9671397   | C | 0.0946  |
| rs138380516 | G | -0.1135 |
| rs79089643  | A | 0.0735  |
| rs28697216  | C | -0.0272 |
| rs61996981  | A | -0.0262 |
| rs17249299  | T | -0.0426 |
| rs117885021 | A | -0.1023 |
| rs75165909  | T | 0.1038  |
| rs60737664  | A | -0.1245 |
| rs2025258   | C | 0.0258  |
| rs7146181   | A | -0.0255 |
| rs77282669  | C | -0.0832 |
| rs138901059 | G | 0.068   |
| rs146190335 | G | 0.0973  |
| rs111774468 | A | -0.2096 |
| rs34753032  | T | -0.0351 |
| rs753681    | C | -0.0897 |
| rs1548584   | C | 0.0289  |
| rs34312657  | A | 0.1356  |
| rs72700180  | A | -0.1815 |
| rs10872875  | T | -0.0235 |
| rs117631257 | G | -0.1127 |
| rs10144974  | G | -0.0261 |



|             |   |         |
|-------------|---|---------|
| rs10483842  | C | -0.0529 |
| rs10142808  | T | -0.0551 |
| rs4899759   | T | 0.0299  |
| rs117759611 | T | -0.1396 |
| rs10498302  | T | 0.0412  |
| rs148379659 | G | 0.172   |
| rs117236280 | T | -0.1799 |
| rs80207522  | A | 0.1363  |
| rs57711557  | A | 0.1804  |
| rs17174953  | A | 0.1046  |
| rs143872900 | A | 0.1181  |
| rs116282947 | G | -0.0946 |
| rs149271605 | A | 0.139   |
| rs61981489  | C | -0.0801 |
| rs12888573  | T | 0.0353  |
| rs2184600   | G | -0.0263 |
| rs12147926  | A | 0.0762  |
| rs74065246  | A | 0.1685  |
| rs143468986 | T | 0.0538  |
| rs117085224 | T | 0.1055  |
| rs3212102   | T | -0.0882 |
| rs2332279   | C | -0.0258 |
| rs117350778 | T | -0.0876 |
| rs12881999  | G | 0.1206  |
| rs79973508  | G | -0.1261 |
| rs12885519  | T | 0.2001  |
| rs6575834   | G | 0.0424  |
| rs34444394  | T | -0.1702 |
| rs17118221  | A | 0.104   |
| rs10144411  | A | -0.0247 |
| rs56843045  | A | -0.0304 |
| rs807449    | C | -0.044  |
| rs7140661   | A | 0.0325  |
| rs77356706  | A | 0.0958  |
| rs1956573   | G | -0.0272 |
| rs62003384  | G | 0.0524  |
| rs2180539   | C | -0.0336 |
| rs4905172   | C | 0.0763  |
| rs147258956 | A | 0.0723  |
| rs11160155  | A | -0.0477 |
| rs2767355   | A | -0.0395 |
| rs34078091  | T | 0.0715  |
| rs11847589  | G | 0.0965  |
| rs67587874  | T | -0.0388 |
| rs138160736 | A | 0.0969  |
| rs11626878  | C | -0.0482 |
| rs198246    | C | -0.0537 |

|             |   |         |
|-------------|---|---------|
| rs17095237  | G | -0.0301 |
| rs2717217   | A | -0.0252 |
| rs111538231 | C | -0.0352 |
| rs72732422  | T | 0.0538  |
| rs72673375  | G | 0.0366  |
| rs8008086   | A | -0.028  |
| rs12897152  | T | -0.0263 |
| rs10145308  | C | -0.0367 |
| rs11627364  | C | 0.0243  |
| rs113884483 | A | 0.1253  |
| rs117949281 | G | -0.0931 |
| rs10483951  | G | 0.0249  |
| rs7149078   | A | -0.0272 |
| rs77984256  | T | 0.1105  |
| rs113325647 | T | 0.128   |
| rs2236317   | T | 0.0327  |
| rs115943027 | G | 0.0694  |
| rs12892922  | A | -0.0253 |
| rs112648887 | A | -0.0842 |
| rs1951635   | A | -0.0412 |
| rs140783387 | C | 0.0754  |
| rs17095915  | C | 0.0408  |
| rs142456798 | G | 0.1177  |
| rs1254974   | T | 0.0236  |
| rs12890524  | G | 0.0491  |
| rs17831313  | G | 0.0296  |
| rs149482736 | T | -0.2837 |
| rs117979171 | T | -0.1064 |
| rs2024861   | T | 0.06    |
| rs75413288  | T | -0.0929 |
| rs146483441 | T | -0.156  |
| rs1335515   | C | 0.0278  |
| rs118173218 | A | 0.0711  |
| rs79189272  | T | -0.0523 |
| rs75254254  | G | 0.0642  |
| rs11624164  | T | 0.0275  |
| rs149033827 | C | 0.1315  |
| rs8009522   | G | 0.0499  |
| rs147773101 | T | -0.1976 |
| rs17724306  | A | -0.1244 |
| rs4899667   | T | 0.0235  |
| rs4316682   | G | -0.0313 |
| rs111774953 | G | 0.1364  |
| rs1565615   | A | -0.0451 |
| rs7155831   | C | -0.0323 |
| rs12879775  | A | 0.0291  |
| rs11622481  | C | -0.0352 |

|             |   |         |
|-------------|---|---------|
| rs140522978 | T | -0.1763 |
| rs57317656  | C | -0.1218 |
| rs142943306 | T | 0.1893  |
| rs117898262 | T | -0.1368 |
| rs72676014  | T | -0.1028 |
| rs17765593  | T | 0.0604  |
| rs76904778  | C | 0.1413  |
| rs8016182   | A | -0.0305 |
| rs77732984  | A | 0.0537  |
| rs4904225   | G | 0.0232  |
| rs10143551  | A | 0.0265  |
| rs144197689 | C | 0.113   |
| rs4903744   | G | -0.0252 |
| rs74534455  | A | 0.0895  |
| rs12435276  | C | -0.1422 |
| rs10133519  | G | 0.0908  |
| rs1072181   | T | -0.0231 |
| rs118036535 | C | 0.1373  |
| rs112249089 | T | 0.1434  |
| rs8013313   | T | 0.0261  |
| rs10498648  | C | -0.0246 |
| rs2411813   | G | 0.0384  |
| rs76692293  | A | 0.1241  |
| rs2817539   | G | 0.0248  |
| rs1959838   | C | -0.0316 |
| rs117129152 | A | 0.1105  |
| rs61988575  | A | -0.0306 |
| rs34937476  | G | 0.0624  |
| rs12588353  | A | -0.0244 |
| rs34084997  | T | 0.0701  |
| rs7159322   | C | -0.0308 |
| rs17705073  | G | -0.0517 |
| rs12591005  | T | 0.0284  |
| rs140671009 | A | -0.1579 |
| rs17252483  | C | -0.1322 |
| rs7141562   | C | 0.027   |
| rs10130805  | C | -0.0329 |
| rs2254205   | C | 0.046   |
| rs4899704   | T | -0.0442 |
| rs117848934 | A | 0.1394  |
| rs113025579 | T | -0.1016 |
| rs1957203   | T | -0.1515 |
| rs390230    | C | 0.0413  |
| rs12883550  | C | -0.0331 |
| rs149928022 | T | 0.1595  |
| rs117868579 | G | -0.1379 |
| rs17098316  | C | 0.023   |

|             |   |         |
|-------------|---|---------|
| rs35479733  | G | -0.0238 |
| rs4982892   | C | -0.0235 |
| rs12590844  | A | -0.0313 |
| rs11851219  | T | -0.0437 |
| rs36093510  | A | 0.0542  |
| rs6571576   | A | 0.0765  |
| rs77098665  | T | 0.05    |
| rs2885232   | T | 0.0325  |
| rs72680148  | A | 0.0889  |
| rs139630560 | C | 0.1391  |
| rs17091497  | C | 0.0771  |
| rs72683527  | G | 0.0877  |
| rs116993813 | A | 0.0886  |
| rs145891735 | T | 0.0561  |
| rs5742761   | G | -0.0325 |
| rs118180943 | T | 0.1347  |
| rs12433856  | A | 0.0299  |
| rs10873364  | G | -0.0239 |
| rs6575358   | C | -0.0361 |
| rs72675450  | T | -0.1168 |
| rs1539213   | G | -0.0253 |
| rs1956328   | C | -0.0245 |
| rs76512764  | C | 0.0497  |
| rs12588562  | A | -0.0832 |
| rs116872516 | A | 0.0695  |
| rs111827361 | G | 0.1385  |
| rs17826482  | T | 0.0331  |
| rs111925674 | C | -0.077  |
| rs17092893  | C | 0.1063  |
| rs117392062 | T | -0.1566 |
| rs3934272   | T | -0.0377 |
| rs11626413  | A | 0.1072  |
| rs72723590  | G | -0.0642 |
| rs113871236 | C | 0.058   |
| rs117654977 | A | -0.0846 |
| rs1126132   | C | 0.0261  |
| rs58843572  | C | 0.1213  |
| rs76833300  | A | 0.1028  |
| rs117107246 | T | -0.1755 |
| rs77999792  | T | -0.0609 |
| rs225009    | C | 0.0472  |
| rs60059373  | A | 0.0454  |
| rs17108907  | G | -0.078  |
| rs77578629  | A | -0.0443 |
| rs11626897  | A | -0.0581 |
| rs10149250  | A | -0.0718 |
| rs118014920 | G | -0.1379 |

|             |   |         |
|-------------|---|---------|
| rs117736245 | G | -0.0791 |
| rs8007684   | T | 0.0335  |
| rs117404126 | T | -0.1362 |
| rs72720188  | C | 0.1172  |
| rs143966441 | T | -0.1489 |
| rs137894720 | G | 0.1483  |
| rs17784090  | G | 0.1086  |
| rs35898659  | A | 0.0589  |
| rs17096262  | T | -0.042  |
| rs1278875   | A | -0.044  |
| rs75196557  | C | -0.1094 |
| rs8022718   | C | -0.115  |
| rs141152411 | A | -0.2422 |
| rs55961305  | G | -0.0323 |
| rs72731588  | G | 0.0573  |
| rs117648752 | A | 0.1566  |
| rs61989119  | G | -0.1261 |
| rs80102403  | C | -0.1355 |
| rs74995338  | T | 0.0702  |
| rs35459649  | T | 0.0901  |
| rs117404487 | G | -0.0969 |
| rs2400942   | A | -0.0253 |
| rs61988516  | C | 0.0451  |
| rs10148858  | T | 0.0606  |
| rs17091446  | A | 0.0848  |
| rs4982238   | C | 0.067   |
| rs12323912  | A | -0.0347 |
| rs61995278  | C | -0.0387 |
| rs4898703   | A | -0.0583 |
| rs4902718   | T | 0.0377  |
| rs117264282 | T | 0.0977  |
| rs2180391   | A | -0.0487 |
| rs11849338  | T | -0.0235 |
| rs143423310 | T | 0.1577  |
| rs12884512  | A | -0.1107 |
| rs74078518  | A | 0.0569  |
| rs1772020   | G | 0.0446  |
| rs7157278   | C | 0.0237  |
| rs12232210  | T | 0.1115  |
| rs749647    | A | -0.0243 |
| rs56114299  | G | 0.0878  |
| rs74589552  | A | -0.0783 |
| rs72691220  | G | -0.0298 |
| rs8021274   | G | 0.0266  |
| rs28890023  | A | 0.048   |
| rs1485474   | G | -0.0225 |
| rs143337234 | A | 0.1005  |

|             |   |         |
|-------------|---|---------|
| rs1631871   | G | 0.0368  |
| rs11628630  | A | 0.027   |
| rs117627474 | A | 0.1369  |
| rs2163412   | T | 0.1016  |
| rs117693999 | A | 0.1736  |
| rs147886217 | A | -0.1109 |
| rs2184282   | C | 0.0382  |
| rs149923338 | A | 0.1152  |
| rs1885153   | T | -0.0479 |
| rs945353    | C | -0.143  |
| rs118145236 | G | -0.0986 |
| rs77756190  | G | -0.132  |
| rs78280089  | G | 0.1237  |
| rs1160163   | T | -0.0299 |
| rs2070343   | C | -0.0568 |
| rs77332596  | A | 0.1921  |
| rs229660    | C | -0.032  |
| rs7141760   | G | -0.045  |
| rs4982138   | G | -0.0303 |
| rs76188354  | G | -0.0391 |
| rs117787247 | A | 0.1048  |
| rs149731447 | T | -0.1641 |
| rs4494467   | C | -0.0251 |
| rs72731013  | A | 0.1436  |
| rs8022364   | A | -0.0294 |
| rs61975063  | C | -0.1419 |
| rs147081176 | A | 0.2312  |
| rs6575612   | G | 0.0332  |
| rs140278357 | T | 0.1911  |
| rs112041113 | C | -0.1083 |
| rs79951939  | T | 0.0808  |
| rs56762167  | G | -0.0357 |
| rs72719851  | G | 0.0347  |
| rs7146767   | C | 0.0825  |
| rs1303451   | T | 0.104   |
| rs2402405   | C | 0.0237  |
| rs138266868 | C | 0.1371  |
| rs4405484   | C | -0.0536 |
| rs2185942   | C | -0.0247 |
| rs11625990  | A | 0.0326  |
| rs145676769 | T | 0.0419  |
| rs117314552 | A | 0.0653  |
| rs4899518   | A | -0.0273 |
| rs58791530  | T | 0.0956  |
| rs11850399  | C | -0.0347 |
| rs148312693 | A | -0.1953 |
| rs1957913   | C | 0.024   |

|             |   |         |
|-------------|---|---------|
| rs2415463   | G | 0.0228  |
| rs73290927  | T | 0.0309  |
| rs10146989  | A | -0.0297 |
| rs8004632   | A | 0.0375  |
| rs78588993  | G | -0.0847 |
| rs61994508  | G | -0.0296 |
| rs117936856 | T | 0.1415  |
| rs12880515  | T | 0.0592  |
| rs117522048 | A | 0.1477  |
| rs66522440  | A | 0.0346  |
| rs1778366   | T | 0.0776  |
| rs139124542 | G | -0.1423 |
| rs72691376  | A | -0.1251 |
| rs77762131  | C | -0.0828 |
| rs11157934  | T | 0.0231  |
| rs210334    | T | -0.0314 |
| rs4389083   | G | 0.0855  |
| rs7142563   | C | -0.0232 |
| rs61976546  | C | 0.0846  |
| rs56402275  | A | 0.0314  |
| rs141757694 | T | -0.0434 |
| rs11620694  | C | -0.027  |
| rs143245570 | G | -0.1488 |
| rs118006623 | A | 0.1254  |
| rs868519    | G | -0.1363 |
| rs11628394  | T | -0.0981 |
| rs7148794   | T | 0.0379  |
| rs61977367  | A | 0.0463  |
| rs77056814  | T | -0.1004 |
| rs3945994   | A | -0.0726 |
| rs7146815   | A | 0.0307  |
| rs61988180  | A | 0.0436  |
| rs17516681  | T | 0.095   |
| rs8015412   | G | -0.0369 |
| rs10145656  | G | 0.0225  |
| rs61974592  | T | -0.0774 |
| rs12590792  | T | 0.0513  |
| rs8012188   | T | -0.0274 |
| rs10484167  | C | -0.0346 |
| rs61740027  | A | -0.0526 |
| rs12433665  | G | -0.0305 |
| rs4509933   | T | -0.0262 |
| rs62000275  | A | -0.1239 |
| rs149566062 | G | 0.1048  |
| rs75957436  | A | 0.0268  |
| rs59001256  | C | -0.0313 |
| rs150623758 | T | -0.1766 |

|             |   |         |
|-------------|---|---------|
| rs12879000  | C | -0.0356 |
| rs146927493 | C | 0.1116  |
| rs7143279   | G | -0.0901 |
| rs1954196   | G | 0.0289  |
| rs76929801  | A | 0.0737  |
| rs2753583   | A | -0.0238 |
| rs140473266 | A | 0.1618  |
| rs36039812  | T | -0.0756 |
| rs4638487   | T | 0.0392  |
| rs28374587  | T | -0.0434 |
| rs12884970  | C | -0.0857 |
| rs139605498 | C | -0.0868 |
| rs143588344 | G | -0.1196 |
| rs78219991  | A | 0.0592  |
| rs181484    | T | 0.0283  |
| rs1190906   | C | -0.0275 |
| rs75235317  | A | 0.0719  |
| rs78430208  | T | 0.0501  |
| rs17524039  | G | 0.0676  |
| rs10131080  | C | -0.1185 |
| rs11626728  | T | -0.0389 |
| rs113036960 | C | 0.0346  |
| rs146532947 | A | 0.083   |
| rs7158945   | G | -0.0518 |
| rs142438235 | G | -0.128  |
| rs202956    | C | -0.0319 |
| rs140675465 | G | -0.1256 |
| rs75956239  | T | -0.0821 |
| rs61997640  | T | 0.0323  |
| rs114481767 | A | 0.101   |
| rs141298582 | T | 0.1826  |
| rs4902632   | A | 0.0318  |
| rs8021261   | C | -0.0225 |
| rs8016044   | C | -0.1367 |
| rs8016947   | T | 0.0226  |
| rs11622391  | T | -0.0808 |
| rs3742865   | T | -0.0369 |
| rs78387951  | C | 0.1059  |
| rs3809403   | C | -0.0239 |
| rs8018407   | T | 0.0233  |
| rs1756649   | G | 0.0296  |
| rs1951867   | C | -0.054  |
| rs17114002  | A | -0.1401 |
| rs148214828 | A | -0.1025 |
| rs17176845  | T | 0.087   |
| rs1954007   | A | -0.0285 |
| rs2678685   | T | 0.0285  |



|             |   |         |
|-------------|---|---------|
| rs11624681  | A | 0.0225  |
| rs61479420  | T | 0.0291  |
| rs7155793   | C | -0.0299 |
| rs79637165  | T | -0.0851 |
| rs8022196   | A | 0.0322  |
| rs78252443  | T | -0.047  |
| rs1958574   | C | -0.0686 |
| rs145993599 | C | 0.1191  |
| rs75923831  | G | 0.0726  |
| rs151193961 | A | -0.1098 |
| rs10131805  | G | -0.0278 |
| rs17834941  | T | 0.068   |
| rs1307775   | T | 0.0727  |
| rs7158195   | G | 0.0227  |
| rs74634519  | A | 0.1358  |
| rs1243648   | A | 0.1198  |
| rs78480954  | C | 0.046   |
| rs10141995  | T | -0.0602 |
| rs4900047   | A | -0.1403 |
| rs144848069 | T | -0.0939 |
| rs7158729   | T | 0.0332  |
| rs17093460  | T | -0.0347 |
| rs142493971 | T | 0.0748  |
| rs11157327  | T | -0.0288 |
| rs35890032  | T | -0.1398 |
| rs35124919  | G | 0.0458  |
| rs17127067  | G | 0.0718  |
| rs72686904  | A | 0.1742  |
| rs4982279   | G | 0.0272  |
| rs113642053 | G | 0.0273  |
| rs11629144  | T | -0.0265 |
| rs75666450  | T | -0.0794 |
| rs144128779 | G | -0.0957 |
| rs77112992  | A | 0.0919  |
| rs8021388   | G | -0.0272 |
| rs8019477   | G | 0.0233  |
| rs950136    | C | -0.0314 |
| rs1957010   | C | -0.0686 |
| rs145988452 | C | 0.1909  |
| rs113277000 | G | 0.0978  |
| rs112184311 | C | -0.1284 |
| rs11623996  | G | 0.0259  |
| rs60700036  | A | 0.0295  |
| rs149218963 | T | 0.0664  |
| rs34285851  | C | -0.0434 |
| rs140291030 | G | 0.1359  |
| rs117866563 | T | -0.1098 |

|             |   |         |
|-------------|---|---------|
| rs142614806 | T | -0.124  |
| rs117264247 | T | -0.1744 |
| rs76409162  | T | 0.0808  |
| rs17095704  | C | -0.0424 |
| rs8013491   | A | 0.0469  |
| rs80346732  | A | 0.1111  |
| rs1950192   | T | 0.0261  |
| rs8012084   | T | 0.0532  |
| rs74883938  | T | -0.0664 |
| rs78363642  | C | 0.1497  |
| rs12890031  | G | 0.0422  |
| rs7155496   | C | -0.0237 |
| rs145602442 | A | -0.1494 |
| rs138278807 | A | -0.0814 |
| rs7142118   | G | 0.0434  |
| rs77282621  | A | -0.101  |
| rs4145675   | G | -0.0254 |
| rs66911379  | T | 0.0626  |
| rs10135801  | C | 0.0266  |
| rs77731463  | C | 0.0995  |
| rs146522093 | T | 0.1144  |
| rs1953557   | A | 0.144   |
| rs12885035  | C | 0.0465  |
| rs139795817 | T | 0.0881  |
| rs1955659   | T | 0.0264  |
| rs11625662  | A | 0.0332  |
| rs10130196  | C | -0.0291 |
| rs12590668  | C | 0.0533  |
| rs7158162   | C | 0.0436  |
| rs60854116  | A | 0.0288  |
| rs765998    | G | 0.0277  |
| rs79200476  | G | -0.0874 |
| rs139713954 | G | 0.1247  |
| rs10139588  | C | -0.0693 |
| rs2082167   | G | 0.0222  |
| rs142830571 | G | -0.1385 |
| rs221495    | C | -0.0268 |
| rs111604539 | T | 0.0737  |
| rs954134    | G | 0.0321  |
| rs72695138  | T | 0.08    |
| rs12880846  | C | 0.0273  |
| rs75700151  | C | -0.1034 |
| rs74036537  | G | 0.0967  |
| rs4981192   | A | 0.0311  |
| rs61985536  | A | -0.0533 |
| rs71430777  | C | 0.0512  |
| rs7154058   | T | 0.1254  |

|             |   |         |
|-------------|---|---------|
| rs60908740  | A | -0.0408 |
| rs848694    | T | 0.0256  |
| rs4640088   | A | 0.0314  |
| rs142205301 | C | 0.1133  |
| rs1010116   | A | 0.0389  |
| rs78640703  | C | 0.067   |
| rs850658    | T | 0.0325  |
| rs2498850   | T | 0.1638  |
| rs8020049   | C | -0.0403 |
| rs17106500  | T | -0.0494 |
| rs11629216  | G | -0.0241 |
| rs2018404   | T | -0.0417 |
| rs75119570  | A | -0.0628 |
| rs79094433  | G | 0.0383  |
| rs1899147   | T | -0.0229 |
| rs878869    | G | -0.0285 |
| rs117400020 | C | -0.2135 |
| rs113038604 | T | 0.0566  |
| rs117012614 | C | -0.1037 |
| rs137858115 | G | 0.1576  |
| rs12372852  | G | 0.0711  |
| rs117771224 | T | -0.1428 |
| rs60162554  | A | -0.1507 |
| rs12897668  | A | -0.1294 |
| rs73299176  | C | 0.1003  |
| rs117456026 | G | -0.0749 |
| rs77332352  | A | -0.0815 |
| rs77872984  | T | 0.1595  |
| rs17126206  | C | 0.0844  |
| rs8008113   | T | 0.0396  |
| rs77404654  | C | 0.113   |
| rs4983594   | G | 0.0576  |
| rs7151622   | A | -0.0293 |
| rs8009219   | G | -0.0433 |
| rs11627074  | G | 0.0229  |
| rs2144447   | T | 0.0216  |
| rs117383972 | T | 0.1237  |
| rs17781492  | G | 0.0236  |
| rs12588519  | C | -0.0505 |
| rs117475533 | G | 0.1189  |
| rs112295990 | A | 0.0941  |
| rs11850341  | C | -0.0284 |
| rs1955830   | T | -0.0504 |
| rs75664388  | G | 0.0491  |
| rs8023106   | C | 0.0618  |
| rs36216226  | C | -0.1408 |
| rs56090949  | A | -0.1054 |

|             |   |         |
|-------------|---|---------|
| rs10498478  | G | 0.1558  |
| rs2269318   | A | -0.0342 |
| rs146836390 | G | -0.0916 |
| rs80028771  | A | -0.0493 |
| rs117850402 | T | 0.0643  |
| rs57143238  | C | -0.1234 |
| rs117411108 | A | -0.1361 |
| rs61985936  | A | 0.0849  |
| rs4904621   | T | 0.0325  |
| rs17098424  | A | 0.0277  |
| rs17109976  | T | 0.0512  |
| rs10147034  | T | -0.0233 |
| rs1190233   | G | 0.0452  |
| rs111949122 | A | -0.0712 |
| rs79594005  | A | 0.052   |
| rs71420197  | G | -0.0776 |
| rs150666057 | A | -0.1422 |
| rs78819610  | A | -0.0598 |
| rs80219569  | A | -0.1082 |
| rs72721304  | G | -0.0621 |
| rs34281449  | T | -0.028  |
| rs72728157  | A | -0.1509 |
| rs698340    | C | 0.0226  |
| rs177376    | T | -0.0601 |
| rs1483973   | T | 0.0222  |
| rs144517891 | G | 0.1004  |
| rs234210    | C | 0.1542  |
| rs7158811   | T | -0.0614 |
| rs7147443   | A | 0.0222  |
| rs41354245  | A | 0.041   |
| rs61978208  | G | -0.026  |
| rs78724062  | C | 0.0885  |
| rs146407048 | A | 0.1391  |
| rs7149877   | G | -0.0495 |
| rs142577362 | G | 0.0724  |
| rs7160088   | A | -0.083  |
| rs142283868 | A | 0.1246  |
| rs7158863   | A | 0.028   |
| rs76053977  | T | 0.0891  |
| rs1986680   | C | 0.0268  |
| rs58207268  | C | 0.0783  |
| rs2228035   | C | 0.0719  |
| rs7153525   | A | -0.0226 |
| rs2223930   | C | -0.0245 |
| rs72708221  | T | -0.0366 |
| rs4243626   | C | 0.0289  |
| rs74835047  | T | 0.1041  |

|             |   |         |
|-------------|---|---------|
| rs12892549  | T | -0.1025 |
| rs45438596  | A | -0.1048 |
| rs8015735   | T | -0.1191 |
| rs142031158 | A | 0.1051  |
| rs11158735  | T | -0.0272 |
| rs56187520  | A | -0.0555 |
| rs10140638  | T | -0.0441 |
| rs72731570  | T | 0.0901  |
| rs77786675  | T | -0.0559 |
| rs1984696   | A | -0.0998 |
| rs34046667  | C | 0.079   |
| rs9788538   | A | -0.0412 |
| rs113903573 | C | -0.0873 |
| rs75608310  | T | -0.13   |
| rs149670060 | C | -0.108  |
| rs11626350  | A | -0.0267 |
| rs142084664 | T | 0.1009  |
| rs12887697  | G | -0.0236 |
| rs11624440  | C | -0.027  |
| rs1286923   | C | 0.0221  |
| rs35699748  | A | -0.0612 |
| rs17094950  | T | -0.0804 |
| rs59336187  | A | 0.0966  |
| rs10131632  | A | 0.0258  |
| rs7156613   | A | -0.0396 |
| rs111615110 | G | 0.1014  |
| rs7154908   | T | 0.0624  |
| rs116937169 | C | 0.0908  |
| rs76379123  | A | -0.0697 |
| rs77448485  | C | -0.0508 |
| rs35194129  | A | -0.0935 |
| rs79804804  | G | 0.1327  |
| rs74832004  | A | 0.1284  |
| rs78614634  | G | 0.1364  |
| rs78090068  | C | 0.0724  |
| rs1861891   | T | 0.0232  |
| rs80119298  | C | 0.0881  |
| rs139112447 | T | -0.078  |
| rs17177041  | T | -0.0305 |
| rs72711948  | T | -0.0499 |
| rs4981263   | C | 0.049   |
| rs72621076  | C | 0.0818  |
| rs118004703 | A | -0.0572 |
| rs10133264  | T | 0.0257  |
| rs11157016  | A | -0.0348 |
| rs12433020  | G | -0.0276 |
| rs61995100  | T | 0.0396  |

|             |   |         |
|-------------|---|---------|
| rs17120196  | C | 0.0991  |
| rs1951102   | C | 0.0843  |
| rs61992671  | G | 0.0357  |
| rs11626524  | C | -0.0416 |
| rs113580417 | T | -0.0824 |
| rs12588061  | C | 0.0251  |
| rs113724579 | G | 0.0571  |
| rs146434983 | C | -0.1136 |
| rs79572735  | T | -0.1077 |
| rs7160705   | A | -0.0225 |
| rs12432262  | C | 0.0235  |
| rs11851809  | A | 0.0578  |
| rs111306060 | C | -0.0982 |
| rs12894060  | A | 0.0236  |
| rs61989601  | A | 0.2157  |
| rs76130552  | C | 0.0719  |
| rs2268966   | T | 0.025   |
| rs1642818   | C | -0.0238 |
| rs150834200 | A | 0.1922  |
| rs12147557  | A | 0.0407  |
| rs57140492  | A | 0.0213  |
| rs58235798  | G | -0.0335 |
| rs56112547  | G | 0.0344  |
| rs138786847 | A | -0.129  |
| rs75124592  | A | -0.1293 |
| rs75386645  | A | -0.0577 |
| rs11628905  | A | 0.0666  |
| rs17758321  | A | -0.0635 |
| rs142253856 | C | 0.0852  |
| rs10083438  | C | 0.0213  |
| rs12889598  | G | -0.0278 |
| rs12050332  | C | 0.0323  |
| rs76461812  | T | -0.1643 |
| rs57287838  | C | -0.0283 |
| rs61988407  | T | 0.0332  |
| rs112330654 | G | 0.1161  |
| rs9630389   | A | 0.0353  |
| rs76472207  | G | 0.1543  |
| rs74433719  | C | 0.1222  |
| rs117962882 | C | 0.1278  |
| rs234459    | C | 0.0234  |
| rs3929904   | C | -0.1119 |
| rs1642850   | A | -0.0969 |
| rs61994232  | T | 0.0596  |
| rs1079188   | G | 0.041   |
| rs143682916 | A | -0.102  |
| rs77674653  | A | 0.0778  |

|             |   |         |
|-------------|---|---------|
| rs17470694  | G | -0.0349 |
| rs141641106 | T | -0.132  |
| rs17108415  | G | 0.0225  |
| rs11850420  | G | -0.0377 |
| rs3861500   | G | -0.024  |
| rs1205059   | A | -0.1091 |
| rs78203819  | T | 0.1785  |
| rs79250329  | C | -0.0917 |
| rs45473602  | A | 0.0996  |
| rs151299541 | G | -0.0837 |
| rs7157457   | T | 0.0542  |
| rs17109940  | A | 0.0374  |
| rs118022133 | A | -0.1065 |
| rs74801448  | T | 0.0717  |
| rs117352495 | A | 0.1513  |
| rs1241925   | A | -0.024  |
| rs178240    | T | -0.0304 |
| rs74375263  | G | 0.0933  |
| rs149282847 | T | -0.0547 |
| rs73589794  | C | 0.0339  |
| rs4983328   | T | 0.0213  |
| rs1959175   | C | -0.0254 |
| rs78418505  | T | -0.1535 |
| rs1955706   | G | 0.1168  |
| rs34350598  | A | -0.0425 |
| rs150930983 | A | 0.1198  |
| rs12432128  | G | 0.0454  |
| rs4020115   | T | -0.0241 |
| rs11850762  | T | 0.0664  |
| rs12433785  | A | -0.0393 |
| rs11621053  | C | -0.1067 |
| rs17107987  | A | 0.0283  |
| rs11845882  | C | -0.0435 |
| rs141989442 | G | 0.0827  |
| rs41449149  | T | 0.0492  |
| rs113898788 | A | 0.0925  |
| rs147351968 | G | 0.1245  |
| rs77009787  | T | -0.1422 |
| rs140004963 | T | -0.1048 |
| rs62004911  | C | -0.04   |
| rs147843612 | T | 0.0733  |
| rs144054654 | A | -0.1263 |
| rs1279329   | T | 0.0219  |
| rs117601430 | A | -0.1093 |
| rs12885749  | T | -0.0258 |
| rs76953066  | G | 0.1004  |
| rs7156787   | A | -0.0362 |

|             |   |         |
|-------------|---|---------|
| rs12891343  | G | 0.0254  |
| rs1743104   | A | 0.0264  |
| rs7158752   | C | -0.0349 |
| rs72714511  | A | 0.0968  |
| rs76396089  | A | 0.0778  |
| rs2064827   | C | -0.0251 |
| rs28455944  | T | -0.0865 |
| rs117028145 | C | -0.0741 |
| rs79354949  | T | 0.0697  |
| rs74690303  | G | 0.0733  |
| rs11846774  | T | 0.0214  |
| rs7156281   | C | 0.0221  |
| rs12894098  | A | -0.0305 |
| rs11847550  | T | -0.0248 |
| rs1947547   | A | 0.0357  |
| rs35226928  | A | -0.0865 |
| rs7144502   | A | -0.023  |
| rs1275673   | A | -0.0281 |
| rs4477602   | A | -0.0422 |
| rs1189277   | A | -0.0276 |
| rs8013771   | T | -0.0513 |
| rs7151275   | T | -0.0287 |
| rs7148715   | A | 0.0219  |
| rs7160324   | G | 0.0233  |
| rs111814228 | T | 0.0552  |
| rs80134415  | T | -0.0914 |
| rs72726568  | C | -0.0993 |
| rs11622382  | G | -0.0294 |
| rs7147556   | C | 0.022   |
| rs78877835  | A | 0.0466  |
| rs35601515  | A | -0.0241 |
| rs118118089 | G | 0.1038  |
| rs78546897  | C | 0.0877  |
| rs2019982   | C | -0.0211 |
| rs1004783   | G | -0.0241 |
| rs28624607  | A | 0.0307  |
| rs2597088   | C | 0.0239  |
| rs113949119 | T | -0.1488 |
| rs55952371  | G | -0.061  |
| rs7140271   | C | -0.0529 |
| rs61994479  | C | -0.0441 |
| rs79730092  | G | -0.0909 |
| rs73318174  | C | 0.0436  |
| rs76788920  | C | 0.1756  |
| rs56282300  | A | 0.0373  |
| rs72690783  | G | 0.0758  |
| rs1964126   | G | -0.0255 |



|             |   |         |
|-------------|---|---------|
| rs75828197  | T | 0.0527  |
| rs118102316 | T | -0.1141 |
| rs34159642  | A | -0.1513 |
| rs60526338  | G | 0.0383  |
| rs114482890 | T | 0.071   |
| rs150911667 | A | -0.0506 |
| rs149205218 | T | 0.1097  |
| rs113322050 | C | -0.1033 |
| rs72714688  | G | 0.0609  |
| rs10149047  | T | -0.0279 |
| rs61510935  | T | -0.0432 |
| rs12147615  | A | -0.0293 |
| rs910313    | G | -0.0357 |
| rs10136540  | A | 0.0792  |
| rs4901032   | A | 0.0232  |
| rs11851397  | A | 0.1332  |
| rs76322263  | A | 0.0683  |
| rs149877400 | T | -0.1197 |
| rs162665    | A | 0.0251  |
| rs7143236   | T | -0.0286 |
| rs10498619  | C | -0.0216 |
| rs983449    | A | 0.0371  |
| rs17539349  | C | -0.0533 |
| rs17836172  | A | -0.0458 |
| rs116854045 | A | 0.0926  |
| rs79119698  | A | -0.1508 |
| rs10138873  | T | -0.0311 |
| rs61996771  | C | 0.0495  |
| rs79199571  | A | 0.1177  |
| rs17102161  | A | 0.0419  |
| rs1286252   | C | -0.023  |
| rs2999392   | C | -0.0233 |
| rs56105039  | T | -0.1331 |
| rs72696281  | T | 0.0548  |
| rs11851060  | T | -0.1427 |
| rs150699482 | T | -0.1574 |
| rs8007719   | C | 0.0229  |
| rs11625868  | G | -0.0686 |
| rs9322925   | C | 0.0279  |
| rs116906529 | T | -0.1254 |
| rs116861132 | A | -0.0849 |
| rs75536656  | G | -0.0794 |
| rs61977797  | T | 0.0362  |
| rs6572634   | A | 0.021   |
| rs150497706 | C | 0.0585  |
| rs8018399   | C | 0.0209  |
| rs76573423  | T | 0.0632  |

|             |   |         |
|-------------|---|---------|
| rs17782603  | T | -0.0211 |
| rs78581799  | C | 0.1013  |
| rs148772904 | T | 0.0493  |
| rs62011950  | A | -0.118  |
| rs75883966  | G | 0.1224  |
| rs3007060   | A | -0.0241 |
| rs76100765  | C | -0.0716 |
| rs77950414  | G | -0.0479 |
| rs73249226  | T | 0.0905  |
| rs7141922   | T | 0.0422  |
| rs17127183  | A | 0.0604  |
| rs75342409  | C | 0.0712  |
| rs151029527 | C | 0.1313  |
| rs117325869 | T | -0.1029 |
| rs1779573   | T | -0.1097 |
| rs113065532 | T | 0.048   |
| rs17103235  | C | -0.0466 |
| rs62013168  | A | -0.0628 |
| rs911667    | T | 0.0225  |
| rs76593307  | G | 0.1138  |
| rs12147915  | T | 0.1892  |
| rs1950871   | G | 0.0334  |
| rs118154817 | G | 0.1846  |
| rs1274940   | C | -0.022  |
| rs1157500   | A | -0.0226 |
| rs8015630   | G | -0.0758 |
| rs62016732  | T | 0.0876  |
| rs10431720  | G | -0.0424 |
| rs76424179  | T | -0.0305 |
| rs3742766   | A | 0.0497  |
| rs111726657 | G | 0.0929  |
| rs72687504  | A | -0.0682 |
| rs141157749 | T | -0.1601 |
| rs944400    | A | 0.0998  |
| rs79735023  | G | 0.1934  |
| rs80284222  | C | 0.1609  |
| rs55913719  | A | -0.0963 |
| rs77305991  | T | 0.1341  |
| rs34410418  | A | 0.0876  |
| rs1287612   | C | -0.0322 |
| rs139426168 | A | 0.0934  |
| rs2623139   | T | -0.0246 |
| rs1078053   | C | 0.0251  |
| rs8018887   | C | -0.041  |
| rs12892249  | A | 0.0331  |
| rs10138779  | G | 0.0746  |
| rs72706331  | A | 0.0851  |

|             |   |         |
|-------------|---|---------|
| rs76568600  | T | -0.0798 |
| rs72683476  | A | 0.0333  |
| rs8021858   | A | 0.0212  |
| rs17795034  | A | -0.0304 |
| rs117608947 | C | -0.0479 |
| rs12884979  | C | -0.0312 |
| rs1950287   | G | -0.0254 |
| rs56912715  | C | -0.0623 |
| rs10498597  | A | -0.1224 |
| rs11621152  | G | 0.1229  |
| rs138434930 | A | 0.1214  |
| rs10498525  | G | 0.0313  |
| rs145948245 | C | 0.1386  |
| rs142781154 | G | -0.1161 |
| rs77556983  | G | 0.0524  |
| rs74400971  | T | 0.0914  |
| rs80048337  | A | 0.1369  |
| rs112077530 | C | -0.1001 |
| rs72704737  | G | -0.0279 |
| rs762088    | G | -0.1207 |
| rs12879395  | A | 0.0379  |
| rs148140473 | T | -0.0899 |
| rs461991    | C | -0.0342 |
| rs1041076   | A | -0.0295 |
| rs148047381 | T | -0.0723 |
| rs8018146   | G | -0.0215 |
| rs72662297  | A | -0.0889 |
| rs243293    | T | 0.0719  |
| rs7161208   | G | 0.1333  |
| rs17536192  | A | 0.0288  |
| rs77183091  | A | 0.1019  |
| rs11625724  | T | 0.0332  |
| rs116980300 | G | -0.0501 |
| rs11627025  | T | -0.0481 |
| rs138650350 | T | 0.128   |
| rs68157336  | A | -0.1002 |
| rs61995189  | G | -0.0888 |
| rs80116223  | A | 0.1312  |
| rs17406568  | A | 0.0296  |
| rs10142087  | C | 0.0479  |
| rs72678497  | T | -0.0425 |
| rs7143462   | G | -0.0376 |
| rs10133102  | A | 0.0219  |
| rs17735026  | A | 0.0414  |
| rs12896077  | T | 0.0245  |
| rs12886144  | A | 0.0342  |
| rs2402386   | T | -0.0213 |

|             |   |         |
|-------------|---|---------|
| rs11628908  | T | 0.087   |
| rs12434899  | A | -0.0398 |
| rs7492591   | T | -0.0439 |
| rs116885841 | C | -0.088  |
| rs710017    | C | 0.0358  |
| rs55657336  | T | -0.0575 |
| rs4906264   | T | -0.0277 |
| rs8004365   | C | -0.023  |
| rs17768871  | T | 0.0389  |
| rs3784013   | G | 0.0628  |
| rs61990854  | C | 0.0227  |
| rs61975797  | G | 0.1508  |
| rs58670065  | T | 0.054   |
| rs2297889   | A | 0.0232  |
| rs55692400  | T | 0.0782  |
| rs113707054 | G | -0.0858 |
| rs34639031  | C | 0.0389  |
| rs34948528  | A | -0.1183 |
| rs2525504   | G | 0.0235  |
| rs7148556   | T | 0.0248  |
| rs117194101 | C | 0.1009  |
| rs10498299  | A | 0.0321  |
| rs2214650   | A | -0.0311 |
| rs56323605  | G | -0.1468 |
| rs951136    | T | 0.0227  |
| rs10483817  | T | 0.0233  |
| rs113728897 | C | 0.0261  |
| rs2044747   | A | 0.0239  |
| rs10151225  | C | 0.0209  |
| rs10140024  | C | -0.0224 |
| rs76368463  | G | -0.1108 |
| rs234604    | T | 0.0311  |
| rs1270493   | A | -0.0459 |
| rs61993167  | G | -0.0933 |
| rs111753241 | G | 0.0862  |
| rs8013501   | C | 0.1452  |
| rs72682621  | G | -0.1432 |
| rs72703634  | C | 0.0269  |
| rs75541050  | C | -0.0588 |
| rs76857975  | T | 0.0522  |
| rs17101871  | C | -0.0419 |
| rs1713439   | C | 0.0235  |
| rs77047163  | T | 0.0575  |
| rs113404990 | T | 0.0758  |
| rs113402958 | T | -0.0639 |
| rs12893068  | A | -0.0986 |
| rs12589327  | A | -0.0279 |

|             |   |         |
|-------------|---|---------|
| rs11160753  | C | -0.0278 |
| rs10484012  | C | 0.0235  |
| rs72675277  | C | -0.0733 |
| rs139582922 | A | 0.0882  |
| rs61991466  | A | 0.1146  |
| rs2899924   | A | -0.0258 |
| rs8021453   | C | 0.1206  |
| rs7150655   | A | -0.025  |
| rs72723170  | T | -0.1564 |
| rs113907248 | C | -0.0717 |
| rs145843200 | T | 0.0985  |
| rs10873219  | T | -0.0258 |
| rs11625574  | C | 0.0291  |
| rs71423308  | T | -0.0812 |
| rs77795135  | T | -0.0608 |
| rs2581481   | A | -0.0412 |
| rs76188331  | G | 0.0752  |
| rs80184878  | G | 0.0697  |
| rs79586898  | T | -0.0687 |
| rs11845203  | G | 0.0242  |
| rs76894183  | A | 0.046   |
| rs75335391  | C | -0.0337 |
| rs9635188   | T | -0.0489 |
| rs148431892 | G | -0.1047 |
| rs117096840 | T | -0.0393 |
| rs112427418 | C | 0.0915  |
| rs59635880  | G | 0.0265  |
| rs10143240  | C | -0.0305 |
| rs76566760  | T | -0.0733 |
| rs1955466   | G | -0.0214 |
| rs141920257 | T | -0.0799 |
| rs17100062  | T | -0.0543 |
| rs10483871  | C | 0.0273  |
| rs4983557   | A | -0.0454 |
| rs17490717  | C | 0.0717  |
| rs17638977  | C | -0.1324 |
| rs11624792  | C | -0.0305 |
| rs59978510  | C | 0.1568  |
| rs17211005  | G | 0.0404  |
| rs1152363   | C | -0.0243 |
| rs12881660  | G | -0.0307 |
| rs17880290  | A | 0.0752  |
| rs142011758 | G | -0.0884 |
| rs72622488  | A | 0.0424  |
| rs76263849  | T | 0.0985  |
| rs75839839  | T | 0.1181  |
| rs62000232  | T | -0.0664 |

|             |   |         |
|-------------|---|---------|
| rs151070217 | T | -0.1163 |
| rs11848088  | T | 0.0232  |
| rs10141961  | G | 0.0222  |
| rs76694417  | C | -0.0469 |
| rs72718568  | A | -0.0371 |
| rs72731627  | C | -0.0449 |
| rs59465322  | T | 0.0449  |
| rs10143053  | T | 0.0267  |
| rs17768792  | T | 0.1318  |
| rs142702908 | T | -0.1154 |
| rs10134003  | C | 0.0859  |
| rs1315126   | T | 0.0311  |
| rs80200240  | T | -0.0518 |
| rs59499462  | T | -0.0922 |
| rs1074529   | A | -0.0769 |
| rs740079    | G | 0.0536  |
| rs4128810   | G | -0.029  |
| rs13379090  | A | 0.0478  |
| rs118144727 | A | -0.1047 |
| rs118084410 | T | 0.1232  |
| rs34200637  | G | 0.1124  |
| rs67791045  | C | 0.0268  |
| rs2158992   | T | -0.032  |
| rs78669973  | C | -0.0681 |
| rs150629946 | G | 0.1009  |
| rs79103623  | T | -0.0328 |
| rs62011007  | A | -0.0535 |
| rs115520044 | A | 0.1206  |
| rs1951154   | A | 0.0221  |
| rs62000274  | G | 0.0996  |
| rs147529355 | T | -0.1652 |
| rs74045909  | A | 0.0415  |
| rs10148180  | G | 0.0506  |
| rs139618329 | A | 0.1177  |
| rs78818922  | T | 0.0453  |
| rs2296316   | C | 0.0204  |
| rs1290434   | A | 0.0321  |
| rs86990     | A | 0.0255  |
| rs72696206  | G | -0.1012 |
| rs77749492  | T | 0.0566  |
| rs12887821  | G | 0.0247  |
| rs61974972  | A | 0.0744  |
| rs8010115   | T | -0.0412 |
| rs61981301  | A | -0.1683 |
| rs1212911   | T | -0.0236 |
| rs17105913  | C | -0.1169 |
| rs2191457   | C | 0.0354  |

|             |   |         |
|-------------|---|---------|
| rs11159448  | A | -0.0322 |
| rs12884697  | G | -0.0324 |
| rs72691230  | T | -0.1883 |
| rs116852819 | T | -0.0699 |
| rs12435536  | C | 0.0249  |
| rs61995819  | G | 0.1054  |
| rs2019010   | C | -0.0301 |
| rs2283382   | A | -0.0226 |
| rs980470    | C | 0.0206  |
| rs11157573  | C | 0.0306  |
| rs117366759 | G | 0.0738  |
| rs7161376   | C | 0.0317  |
| rs61977368  | A | 0.0707  |
| rs1951348   | G | -0.0223 |
| rs9652325   | T | 0.0364  |
| rs74739931  | A | -0.161  |
| rs2781368   | A | 0.0408  |
| rs4900639   | C | 0.0214  |
| rs8022222   | T | 0.0857  |
| rs4983526   | T | -0.0518 |
| rs149957462 | G | 0.0957  |
| rs11621217  | C | -0.0549 |
| rs112177224 | T | 0.0309  |
| rs77978534  | T | 0.05    |
| rs17547382  | T | 0.0233  |
| rs118000931 | A | -0.0485 |
| rs117155530 | A | -0.0989 |
| rs1244373   | C | 0.0262  |
| rs10129218  | C | 0.1055  |
| rs10083401  | T | -0.0354 |
| rs150408228 | G | 0.1554  |
| rs117068664 | C | 0.1263  |
| rs1481371   | A | -0.0338 |
| rs111948865 | A | -0.0632 |
| rs113310617 | A | -0.1156 |
| rs72693586  | A | 0.0491  |
| rs8007093   | T | -0.0973 |
| rs55726184  | A | 0.0809  |
| rs1951994   | A | 0.0216  |
| rs117994841 | T | 0.0945  |
| rs113863816 | C | -0.1111 |
| rs8006882   | T | 0.0302  |
| rs75437599  | A | 0.0629  |
| rs12432274  | A | -0.0551 |
| rs117487501 | C | 0.1318  |
| rs57205792  | C | -0.1347 |
| rs117143783 | A | -0.0741 |

|             |   |         |
|-------------|---|---------|
| rs117901086 | C | 0.08    |
| rs79221224  | C | 0.0892  |
| rs117885496 | G | 0.1146  |
| rs1953242   | A | 0.03    |
| rs72698727  | T | 0.0281  |
| rs4453407   | A | 0.0853  |
| rs57111096  | T | -0.0252 |
| rs11847635  | A | 0.0535  |
| rs10483263  | C | -0.0382 |
| rs8022102   | T | 0.0859  |
| rs116842636 | T | -0.1367 |
| rs1257493   | T | 0.0224  |
| rs1958918   | C | -0.0218 |
| rs72729948  | A | -0.0458 |
| rs11844999  | T | 0.0339  |
| rs61989787  | C | 0.0746  |
| rs111795528 | A | 0.0938  |
| rs117401073 | G | -0.05   |
| rs72681130  | A | -0.091  |
| rs74883275  | G | -0.0612 |
| rs61977514  | C | 0.1059  |
| rs2268457   | T | -0.0229 |
| rs75493035  | C | 0.1047  |
| rs11622665  | G | 0.0258  |
| rs117735871 | A | -0.1121 |
| rs74566408  | A | 0.117   |
| rs117807673 | T | 0.0705  |
| rs72694825  | G | -0.127  |
| rs144223759 | G | 0.1171  |
| rs77673799  | G | -0.0962 |
| rs2332486   | C | -0.0349 |
| rs117445837 | A | 0.0798  |
| rs117837801 | A | 0.0421  |
| rs140708216 | A | -0.108  |
| rs12147119  | G | -0.0288 |
| rs117160086 | T | -0.1193 |
| rs17108417  | G | -0.0718 |
| rs17829192  | C | 0.0342  |
| rs34353715  | A | -0.1046 |
| rs1956834   | T | -0.0241 |
| rs17124948  | T | -0.0935 |
| rs75523540  | T | -0.0989 |
| rs117268667 | T | -0.1005 |
| rs75229360  | T | -0.0868 |
| rs17109827  | G | 0.0316  |
| rs57544429  | G | 0.0552  |
| rs113163438 | T | 0.0947  |



|             |   |         |
|-------------|---|---------|
| rs6574547   | A | 0.0205  |
| rs140814516 | G | 0.0775  |
| rs6575857   | T | -0.0229 |
| rs76399500  | G | 0.1274  |
| rs2809139   | C | 0.0304  |
| rs74624686  | G | -0.0587 |
| rs57136326  | T | 0.0232  |
| rs2526901   | A | -0.0256 |
| rs140826095 | A | -0.1281 |
| rs149220838 | A | 0.1875  |
| rs59831177  | T | 0.0529  |
| rs117633944 | T | -0.1009 |
| rs2403199   | A | 0.0647  |
| rs28676300  | A | -0.0223 |
| rs117995989 | T | -0.1327 |
| rs1956121   | C | 0.0402  |
| rs77767201  | A | -0.1179 |
| rs57934221  | A | 0.0648  |
| rs80007698  | G | -0.1006 |
| rs138694634 | T | 0.1462  |
| rs79857297  | G | -0.0261 |
| rs2888428   | C | -0.0274 |
| rs1956378   | G | -0.0221 |
| rs61990269  | G | 0.0714  |
| rs80315836  | G | -0.1192 |
| rs1273780   | A | -0.032  |
| rs1285865   | G | -0.0243 |
| rs1077412   | G | -0.0282 |
| rs12050130  | G | 0.0238  |
| rs34446045  | G | -0.0816 |
| rs77982977  | G | -0.1423 |
| rs78570253  | T | 0.0408  |
| rs116441328 | G | -0.049  |
| rs6571608   | G | -0.0203 |
| rs12885400  | C | -0.0715 |
| rs1189898   | T | 0.0213  |
| rs148044116 | C | 0.1352  |
| rs66475326  | A | -0.0381 |
| rs77371629  | A | -0.0534 |
| rs11845760  | A | -0.0241 |
| rs12590041  | T | 0.0289  |
| rs141826946 | C | 0.0885  |
| rs111834907 | G | -0.1147 |
| rs1168415   | T | -0.062  |
| rs117781579 | A | -0.1084 |
| rs61997090  | T | 0.1001  |
| rs145589517 | T | 0.1032  |

|             |   |         |
|-------------|---|---------|
| rs1198013   | T | 0.0419  |
| rs4904075   | C | -0.0344 |
| rs7161317   | T | -0.0218 |
| rs2518660   | G | -0.1013 |
| rs74402205  | C | 0.0402  |
| rs797358    | A | 0.1049  |
| rs34891424  | C | 0.0344  |
| rs10444758  | C | -0.0431 |
| rs8011329   | A | -0.0233 |
| rs12884802  | A | 0.0222  |
| rs11621975  | G | -0.0343 |
| rs7157195   | T | 0.0234  |
| rs117896222 | G | 0.1079  |
| rs8022871   | G | -0.0241 |
| rs140715733 | T | 0.1462  |
| rs61979113  | C | 0.0464  |
| rs73257280  | A | 0.0385  |
| rs4902761   | G | -0.023  |
| rs17127562  | C | 0.0363  |
| rs72718361  | G | -0.1135 |
| rs117573691 | T | 0.1125  |
| rs112458724 | C | 0.0919  |
| rs112781456 | G | 0.0568  |
| rs58015510  | A | -0.0309 |
| rs113665990 | A | -0.0646 |
| rs117451562 | G | 0.0968  |
| rs2689102   | G | 0.0233  |
| rs116919479 | T | 0.1351  |
| rs72701829  | T | 0.0707  |
| rs75208350  | T | 0.0954  |
| rs78604214  | A | 0.1547  |
| rs117477396 | A | -0.081  |
| rs4905804   | G | 0.0247  |
| rs1253035   | G | 0.0321  |
| rs117690013 | A | 0.1163  |
| rs7146871   | C | -0.0283 |
| rs78163128  | G | 0.1194  |
| rs74887377  | G | 0.0915  |
| rs61976928  | T | 0.0228  |
| rs117820569 | A | 0.0923  |
| rs56049650  | A | -0.0791 |
| rs857232    | A | 0.0237  |
| rs76972373  | A | -0.1494 |
| rs2810046   | A | 0.0204  |
| rs10150794  | G | -0.0208 |
| rs8019056   | A | 0.0206  |
| rs1679806   | G | 0.0204  |

|             |   |         |
|-------------|---|---------|
| rs17102318  | G | -0.043  |
| rs61976287  | T | -0.0201 |
| rs4903750   | A | -0.0209 |
| rs150047653 | G | -0.143  |
| rs10135311  | G | 0.0209  |
| rs7148746   | A | 0.101   |
| rs4322571   | G | -0.0238 |
| rs61991057  | G | -0.0475 |
| rs4904947   | T | 0.029   |
| rs147192758 | G | -0.1195 |
| rs118155603 | T | 0.0535  |
| rs7155641   | G | 0.025   |
| rs17767761  | T | -0.0571 |
| rs3813539   | A | -0.0291 |
| rs34744336  | A | 0.0235  |
| rs75641217  | A | 0.035   |
| rs1115700   | A | -0.022  |
| rs4905108   | A | -0.0204 |
| rs4981262   | G | -0.0218 |
| rs72675112  | C | -0.0402 |
| rs112000147 | C | 0.0693  |
| rs61977106  | C | 0.1111  |
| rs2781411   | G | 0.0263  |
| rs36018089  | T | -0.1061 |
| rs210330    | C | -0.0207 |
| rs112639827 | G | -0.0421 |
| rs10142601  | G | 0.0303  |
| rs112816377 | A | -0.1195 |
| rs58422914  | C | -0.042  |
| rs1188540   | C | -0.0529 |
| rs17749780  | A | 0.0629  |
| rs141293055 | T | -0.1489 |
| rs1951440   | T | -0.0229 |
| rs150481219 | A | 0.135   |
| rs1890712   | C | 0.1255  |
| rs56074521  | T | -0.0574 |
| rs117826491 | T | -0.0725 |
| rs116950095 | G | -0.1161 |
| rs17090693  | C | -0.0226 |
| rs35550467  | T | 0.1095  |
| rs8013614   | C | -0.03   |
| rs7141947   | A | -0.0665 |
| rs10143243  | T | -0.0404 |
| rs72674036  | T | -0.031  |
| rs55679280  | G | -0.0325 |
| rs12887287  | G | -0.0255 |
| rs114272008 | C | -0.0522 |

|             |   |         |
|-------------|---|---------|
| rs74727144  | C | 0.0555  |
| rs67194929  | C | 0.0206  |
| rs72670596  | A | -0.0573 |
| rs8020826   | T | 0.08    |
| rs61989869  | C | 0.1074  |
| rs117665195 | T | -0.0797 |
| rs11622845  | T | -0.0629 |
| rs61040989  | A | -0.0446 |
| rs73353099  | T | -0.1278 |
| rs78545497  | G | 0.0666  |
| rs12589699  | G | 0.0281  |
| rs78399965  | C | -0.077  |
| rs117670996 | A | 0.0677  |
| rs76700354  | A | -0.0646 |
| rs12437222  | G | 0.0492  |
| rs1243082   | T | -0.0391 |
| rs61985889  | A | 0.0229  |
| rs7155435   | C | -0.0234 |
| rs10782382  | A | -0.0321 |
| rs4901109   | T | 0.0591  |
| rs116968611 | A | -0.0701 |
| rs7145539   | A | -0.0252 |
| rs1713457   | G | 0.0839  |
| rs72675544  | A | -0.1186 |
| rs12147813  | C | -0.0988 |
| rs146200258 | C | -0.0877 |
| rs17092459  | C | -0.0301 |
| rs146067227 | G | 0.1209  |
| rs36030742  | T | -0.0516 |
| rs118033797 | T | -0.1012 |
| rs1958912   | G | 0.02    |
| rs2152283   | C | -0.039  |
| rs1956120   | C | -0.0284 |
| rs117458929 | C | 0.0358  |
| rs1642815   | C | -0.0396 |
| rs2888445   | A | 0.0222  |
| rs60847032  | T | 0.0252  |
| rs8010537   | T | -0.0285 |
| rs28469591  | A | -0.0215 |
| rs72693770  | T | -0.0337 |
| rs116928719 | A | -0.0866 |
| rs45487099  | A | 0.0884  |
| rs1505172   | T | 0.0228  |
| rs17689900  | T | 0.0723  |
| rs8004273   | A | 0.0262  |
| rs1953743   | C | -0.0202 |
| rs4904574   | A | 0.0215  |

|             |   |         |
|-------------|---|---------|
| rs117200339 | A | 0.0494  |
| rs66902607  | T | -0.0267 |
| rs116923063 | G | 0.0892  |
| rs72671534  | T | -0.0276 |
| rs118154399 | T | -0.0856 |
| rs12437032  | T | -0.0248 |
| rs61984394  | C | -0.0383 |
| rs2295139   | C | 0.0279  |
| rs75446124  | A | -0.0413 |
| rs999165    | A | -0.0411 |
| rs28831511  | T | 0.0946  |
| rs74733659  | T | 0.0563  |
| rs3742837   | C | -0.0286 |
| rs7150108   | G | -0.039  |
| rs149455924 | C | -0.117  |
| rs17104428  | G | 0.0954  |
| rs1957693   | T | 0.0229  |
| rs229275    | A | 0.0202  |
| rs12588256  | T | -0.0336 |
| rs146061004 | G | 0.0749  |
| rs56296306  | T | -0.0892 |
| rs4902887   | C | -0.0825 |
| rs76818375  | G | -0.1801 |
| rs58361653  | T | 0.1376  |
| rs117291421 | T | 0.1109  |
| rs145966731 | G | 0.0779  |
| rs1285795   | C | 0.1063  |
| rs8022130   | C | 0.0279  |
| rs77095136  | T | -0.0871 |
| rs8019892   | C | 0.0208  |
| rs2370876   | G | -0.0532 |
| rs138414965 | A | -0.1593 |
| rs12587228  | T | -0.0561 |
| rs2402444   | G | 0.0292  |
| rs141001108 | T | 0.0741  |
| rs59808119  | C | 0.0644  |
| rs2064834   | G | 0.0208  |
| rs1056436   | T | 0.023   |
| rs12897986  | A | -0.0347 |
| rs9707463   | T | 0.0384  |
| rs144592639 | T | -0.0402 |
| rs11624675  | C | 0.02    |
| rs10140306  | C | -0.0223 |
| rs36032061  | C | 0.0211  |
| rs17734780  | T | -0.1347 |
| rs17764944  | A | -0.0274 |
| rs7156553   | C | 0.0252  |

|             |   |         |
|-------------|---|---------|
| rs79854568  | T | 0.1071  |
| rs116973817 | C | 0.0948  |
| rs1877044   | T | 0.0215  |
| rs116874037 | G | 0.0899  |
| rs7140229   | C | -0.0198 |
| rs7150477   | A | 0.0209  |
| rs36568     | T | 0.0653  |
| rs2487507   | T | -0.0266 |
| rs9671481   | T | 0.0272  |
| rs1257906   | A | 0.0238  |
| rs9788560   | C | -0.0851 |
| rs61995264  | C | -0.0658 |
| rs12147560  | C | -0.0345 |
| rs111991693 | A | 0.0433  |
| rs7146165   | T | 0.0787  |
| rs116867817 | C | 0.1033  |
| rs946615    | T | -0.0221 |
| rs6574091   | T | 0.1298  |
| rs61731179  | A | -0.0511 |
| rs60477777  | G | 0.0321  |
| rs116561324 | A | 0.0753  |
| rs117233354 | T | -0.0646 |
| rs78261908  | T | 0.1689  |
| rs117258586 | G | 0.0764  |
| rs945044    | A | -0.0204 |
| rs1953740   | G | -0.0204 |
| rs9322973   | A | 0.0564  |
| rs11626043  | T | 0.042   |
| rs55727535  | C | 0.0634  |
| rs149905118 | G | -0.0868 |
| rs144366176 | G | -0.087  |
| rs118074233 | C | -0.1467 |
| rs145698831 | T | -0.0704 |
| rs2372467   | A | 0.059   |
| rs147471231 | A | 0.0687  |
| rs117829294 | G | -0.1399 |
| rs151288446 | T | -0.0613 |
| rs112491618 | G | -0.0954 |
| rs28599651  | C | -0.0674 |
| rs2038607   | G | -0.0239 |
| rs61151703  | T | -0.12   |
| rs12147270  | G | -0.0916 |
| rs78071882  | T | -0.0367 |
| rs35773034  | T | 0.0255  |
| rs72697701  | G | 0.0487  |
| rs57395461  | C | -0.0571 |
| rs72731608  | C | -0.0378 |

|             |   |         |
|-------------|---|---------|
| rs150768478 | T | -0.136  |
| rs10131708  | C | -0.0807 |
| rs114599330 | C | 0.0201  |
| rs17125074  | G | -0.0274 |
| rs1547763   | T | -0.0229 |
| rs117117282 | G | 0.0846  |
| rs72705664  | A | -0.1061 |
| rs117969390 | T | -0.1501 |
| rs56012312  | T | -0.0202 |
| rs1245795   | A | -0.0195 |
| rs144920096 | G | -0.1047 |
| rs12878367  | A | 0.0298  |
| rs145906171 | T | -0.1138 |
| rs150625191 | T | -0.0631 |
| rs67758626  | T | 0.0291  |
| rs35119082  | T | 0.0555  |
| rs117790240 | T | -0.0364 |
| rs77540044  | C | -0.0788 |
| rs117353870 | T | -0.0734 |
| rs73242919  | T | 0.0788  |
| rs28700923  | T | 0.0588  |
| rs8021126   | G | -0.0358 |
| rs11629005  | C | -0.0244 |
| rs145499137 | A | -0.0758 |
| rs11849353  | C | -0.0375 |
| rs72691862  | A | -0.0751 |
| rs56168984  | A | 0.0207  |
| rs8005270   | G | 0.0198  |
| rs116966304 | A | -0.0923 |
| rs72668468  | C | -0.0262 |
| rs11156924  | T | 0.0361  |
| rs12897166  | G | -0.0255 |
| rs8022629   | T | -0.1098 |
| rs66883325  | C | 0.0561  |
| rs72685835  | T | 0.1268  |
| rs1952512   | A | -0.0336 |
| rs12879859  | G | -0.0246 |
| rs149101379 | T | -0.0369 |
| rs2318309   | G | -0.028  |
| rs111560148 | A | 0.18    |
| rs149977700 | A | -0.1052 |
| rs4981361   | C | 0.0275  |
| rs112594490 | T | 0.0794  |
| rs2474033   | C | -0.0706 |
| rs4981221   | G | 0.0469  |
| rs4903163   | T | -0.0289 |
| rs1652042   | C | -0.0483 |

|             |   |         |
|-------------|---|---------|
| rs139896908 | G | 0.0839  |
| rs2288496   | C | -0.0203 |
| rs4900075   | C | 0.0226  |
| rs10137824  | G | -0.0204 |
| rs76783188  | T | -0.107  |
| rs116964338 | T | -0.1448 |
| rs10137953  | C | -0.0222 |
| rs117344138 | A | -0.0827 |
| rs10133059  | T | -0.0268 |
| rs7147410   | G | 0.0452  |
| rs8020608   | C | -0.0433 |
| rs10148988  | G | -0.0369 |
| rs75081808  | T | -0.0558 |
| rs56220001  | G | 0.0251  |
| rs11628416  | C | 0.1242  |
| rs78626856  | T | 0.1037  |
| rs17126347  | G | 0.1014  |
| rs4902814   | T | -0.0218 |
| rs10147560  | T | -0.0235 |
| rs11623564  | C | -0.0215 |
| rs1041171   | C | -0.0242 |
| rs4243749   | C | 0.0224  |
| rs6572351   | T | 0.0201  |
| rs74832512  | T | -0.1181 |
| rs12431782  | A | -0.0519 |
| rs118098341 | A | 0.1452  |
| rs78371621  | A | -0.1048 |
| rs8009802   | A | -0.0424 |
| rs6574123   | T | 0.0223  |
| rs4902762   | A | 0.0268  |
| rs146986741 | T | -0.0527 |
| rs10145644  | A | -0.0201 |
| rs748686    | G | -0.0202 |
| rs970338    | A | -0.0313 |
| rs2999378   | C | 0.0255  |
| rs4900086   | A | -0.0832 |
| rs60204120  | T | 0.0302  |
| rs8013398   | T | -0.0351 |
| rs117513489 | C | -0.0597 |
| rs56187455  | T | 0.0669  |
| rs966835    | G | 0.0355  |
| rs10133560  | A | -0.0318 |
| rs76816178  | A | -0.0517 |
| rs79049461  | C | 0.0334  |
| rs139367592 | A | -0.1599 |
| rs138596295 | A | -0.0784 |
| rs10483379  | A | 0.0199  |



|             |   |         |
|-------------|---|---------|
| rs80288607  | C | -0.1688 |
| rs72691982  | T | -0.0773 |
| rs12323884  | A | 0.0262  |
| rs10150620  | T | 0.0255  |
| rs4983245   | T | -0.0237 |
| rs79840378  | T | -0.0647 |
| rs7159017   | T | -0.0295 |
| rs78918116  | A | 0.1479  |
| rs149431929 | T | -0.0817 |
| rs71416838  | C | -0.0724 |
| rs8004059   | G | 0.0206  |
| rs78794323  | C | -0.112  |
| rs8022854   | T | 0.0839  |
| rs76743110  | C | -0.0447 |
| rs149974946 | T | -0.1021 |
| rs73344440  | T | -0.0693 |
| rs117032121 | T | -0.093  |
| rs4902420   | G | -0.0265 |
| rs7142990   | G | 0.0239  |
| rs116969260 | C | -0.1303 |
| rs12147391  | G | -0.0787 |
| rs2356899   | T | 0.0261  |
| rs9671290   | G | -0.0765 |
| rs11629174  | C | -0.0221 |
| rs146961728 | C | 0.0669  |
| rs1953419   | G | -0.0599 |
| rs116866636 | A | 0.0926  |
| rs74326053  | A | 0.1104  |
| rs11623927  | T | -0.0382 |
| rs17111211  | C | 0.1099  |
| rs74398227  | G | -0.0341 |
| rs12147200  | A | -0.0789 |
| rs11156825  | A | 0.0203  |
| rs221478    | A | 0.0854  |
| rs144160338 | G | 0.0329  |
| rs7150327   | C | 0.0235  |
| rs118076352 | C | 0.0816  |
| rs36052232  | G | -0.0802 |
| rs56308217  | T | 0.0462  |
| rs77631082  | A | -0.0643 |
| rs72692728  | A | -0.0283 |
| rs12434113  | T | -0.0321 |
| rs75286392  | C | 0.0634  |
| rs3861633   | C | -0.0192 |
| rs1940561   | A | 0.0208  |
| rs142831477 | T | 0.1335  |
| rs10137199  | T | -0.0738 |

|             |   |         |
|-------------|---|---------|
| rs117896354 | A | -0.0325 |
| rs75420242  | A | -0.0992 |
| rs79875973  | C | -0.1288 |
| rs66463003  | G | 0.0336  |
| rs118098365 | T | 0.138   |
| rs11846949  | T | -0.0376 |
| rs12895543  | C | 0.0282  |
| rs8005630   | A | 0.0203  |
| rs145511238 | C | 0.106   |
| rs7161588   | T | 0.0384  |
| rs146341380 | A | 0.1213  |
| rs11156764  | A | 0.02    |
| rs4898785   | T | -0.02   |
| rs142057183 | T | -0.0971 |
| rs1353373   | T | 0.0218  |
| rs1743081   | A | -0.0198 |
| rs1188554   | C | 0.0416  |
| rs34785007  | A | 0.0307  |
| rs3811322   | T | 0.0207  |
| rs11621972  | G | 0.0201  |
| rs58784678  | G | 0.0934  |
| rs222623    | T | 0.0199  |
| rs12436340  | G | -0.0489 |
| rs113137338 | G | -0.1398 |
| rs198234    | T | 0.0213  |
| rs4982766   | G | -0.0225 |
| rs12887880  | A | 0.0537  |
| rs75520792  | G | 0.079   |
| rs1629937   | G | 0.0843  |
| rs75570983  | G | -0.0622 |
| rs4905476   | A | 0.0187  |
| rs28610956  | C | 0.0409  |
| rs17124300  | C | -0.1286 |
| rs11847575  | A | 0.0269  |
| rs72704287  | T | -0.0483 |
| rs117872215 | A | -0.083  |
| rs1186307   | G | -0.0258 |
| rs117948256 | T | -0.088  |
| rs111516386 | T | -0.0976 |
| rs117683031 | T | 0.069   |
| rs142525054 | A | -0.0392 |
| rs2145566   | C | 0.0225  |
| rs12435618  | A | 0.0998  |
| rs74056688  | G | 0.0471  |
| rs10141201  | A | -0.0349 |
| rs72695421  | A | 0.0601  |
| rs7158842   | C | 0.0233  |

|             |   |         |
|-------------|---|---------|
| rs139820996 | A | 0.1202  |
| rs117948490 | G | -0.0642 |
| rs72726132  | G | -0.0249 |
| rs117798801 | A | -0.0897 |
| rs118136970 | C | 0.0638  |
| rs138083547 | C | -0.0958 |
| rs7149931   | C | 0.02    |
| rs17212065  | G | 0.0358  |
| rs8011662   | T | -0.0193 |
| rs7147471   | G | -0.0198 |
| rs8013375   | T | 0.0224  |
| rs11160230  | A | -0.029  |
| rs61983840  | T | -0.0905 |
| rs59807660  | A | -0.039  |
| rs712453    | T | -0.0189 |
| rs8010777   | C | -0.0187 |
| rs998520    | T | 0.0312  |
| rs72673826  | T | 0.0553  |
| rs7141372   | A | 0.0659  |
| rs117652755 | C | 0.1263  |
| rs2980896   | C | -0.0262 |
| rs872810    | C | -0.0313 |
| rs7152250   | A | -0.0198 |
| rs17525100  | G | 0.0699  |
| rs72727904  | G | 0.0894  |
| rs76905609  | T | -0.0577 |
| rs4077520   | G | 0.0257  |
| rs7154010   | G | 0.0247  |
| rs78883868  | C | 0.0454  |
| rs72701283  | C | 0.025   |
| rs72671112  | T | 0.0226  |
| rs117990873 | G | -0.1495 |
| rs111524420 | A | -0.0606 |
| rs61976379  | A | -0.1133 |
| rs139619550 | C | -0.1837 |
| rs7158302   | C | 0.0308  |
| rs1769577   | T | 0.0352  |
| rs145236816 | G | -0.1303 |
| rs1951228   | G | -0.0229 |
| rs10138622  | G | 0.0583  |
| rs75977510  | T | 0.065   |
| rs12434466  | G | -0.0671 |
| rs7151919   | G | -0.0292 |
| rs10146865  | A | -0.0188 |
| rs74052987  | A | -0.078  |
| rs730959    | A | -0.0236 |
| rs7145904   | G | 0.0342  |

|             |   |         |
|-------------|---|---------|
| rs71415968  | C | -0.0623 |
| rs61998479  | G | -0.0398 |
| rs35675176  | A | -0.1152 |
| rs75141892  | T | 0.1158  |
| rs11627462  | T | 0.0637  |
| rs11157080  | T | -0.0217 |
| rs12435428  | T | -0.0365 |
| rs117853183 | T | -0.063  |
| rs79515159  | A | -0.1254 |
| rs6572159   | A | 0.0184  |
| rs78674989  | T | -0.0742 |
| rs75273705  | A | -0.0974 |
| rs1959040   | T | -0.019  |
| rs12897991  | T | -0.0304 |
| rs2182472   | T | 0.019   |
| rs4640110   | G | 0.0212  |
| rs10144770  | C | 0.0451  |
| rs113235271 | C | -0.0721 |
| rs9323006   | C | 0.0194  |
| rs996164    | C | 0.0228  |
| rs8008744   | C | 0.0386  |
| rs59043659  | G | -0.0187 |
| rs143827489 | C | -0.1378 |
| rs117420118 | G | -0.1037 |
| rs229674    | C | -0.0197 |
| rs75913581  | A | 0.0238  |
| rs78500358  | C | 0.0699  |
| rs12896914  | A | -0.0553 |
| rs2205210   | C | 0.03    |
| rs12889969  | C | 0.0247  |
| rs80016229  | C | 0.0494  |
| rs17733808  | G | 0.0605  |
| rs8019152   | A | -0.0316 |
| rs75980157  | C | -0.1041 |
| rs4906424   | G | 0.0302  |
| rs802994    | C | -0.0427 |
| rs79538407  | T | -0.0838 |
| rs12888839  | T | -0.091  |
| rs4902750   | A | 0.0253  |
| rs7155939   | T | 0.041   |
| rs56150943  | G | -0.0516 |
| rs7154602   | C | -0.0193 |
| rs79877046  | T | -0.0515 |
| rs72723171  | C | 0.029   |
| rs117728278 | T | 0.0918  |
| rs76452646  | T | 0.0955  |
| rs112693453 | C | 0.0318  |

|             |   |         |
|-------------|---|---------|
| rs17663972  | G | -0.0511 |
| rs7160403   | A | -0.0304 |
| rs117641411 | A | -0.1282 |
| rs146351794 | G | 0.0461  |
| rs17104357  | T | -0.0296 |
| rs17183663  | A | -0.0266 |
| rs12888531  | C | 0.042   |
| rs17182244  | G | 0.0503  |
| rs111675057 | T | 0.0835  |
| rs8021814   | C | 0.0192  |
| rs4483776   | A | 0.0202  |
| rs4981284   | C | -0.0216 |
| rs7156531   | G | 0.0451  |
| rs75591345  | T | 0.0404  |
| rs8011016   | C | 0.0261  |
| rs4290394   | T | -0.1051 |
| rs8018259   | T | -0.0198 |
| rs12895361  | C | 0.0872  |
| rs12436717  | A | 0.055   |
| rs8003382   | A | 0.0185  |
| rs57672161  | T | -0.0918 |
| rs72700088  | A | -0.0208 |
| rs3177954   | C | 0.0262  |
| rs10146082  | C | -0.0258 |
| rs61741592  | T | -0.0585 |
| rs74621980  | G | -0.0743 |
| rs117295650 | T | 0.1314  |
| rs7158966   | A | -0.0222 |
| rs12431623  | C | -0.082  |
| rs35654973  | C | -0.045  |
| rs12148043  | A | -0.0256 |
| rs11626736  | A | -0.0308 |
| rs72666610  | A | 0.0736  |
| rs17125437  | T | 0.0406  |
| rs6572755   | A | 0.0298  |
| rs17091106  | A | -0.0717 |
| rs17100088  | G | -0.0228 |
| rs1950932   | G | 0.0454  |
| rs150587356 | A | 0.0592  |
| rs118155288 | T | 0.0719  |
| rs8022970   | A | 0.0279  |
| rs75669501  | A | 0.0371  |
| rs117614371 | T | -0.0677 |
| rs10873406  | G | 0.0203  |
| rs79714671  | G | 0.097   |
| rs10150038  | C | 0.0198  |
| rs7154769   | A | -0.0226 |

|             |   |         |
|-------------|---|---------|
| rs1187588   | T | 0.02    |
| rs75692904  | T | 0.0261  |
| rs79120919  | A | -0.05   |
| rs145534264 | G | 0.111   |
| rs117871982 | T | 0.0906  |
| rs12887179  | A | 0.1013  |
| rs11629199  | T | -0.0363 |
| rs7155507   | A | 0.0229  |
| rs1243533   | G | -0.0344 |
| rs56024142  | G | 0.0706  |
| rs113563077 | T | -0.0903 |
| rs1189840   | T | 0.043   |
| rs111409915 | C | -0.0789 |
| rs139811449 | T | -0.0661 |
| rs10147495  | C | 0.0486  |
| rs1956681   | T | -0.0816 |
| rs2057202   | T | -0.0374 |
| rs117446958 | G | -0.0639 |
| rs55900327  | C | -0.0744 |
| rs35812904  | A | -0.0612 |
| rs143297238 | G | -0.1648 |
| rs143212488 | A | -0.1086 |
| rs8013710   | A | 0.05    |
| rs75258294  | T | 0.0613  |
| rs1837681   | C | -0.0216 |
| rs17097017  | G | -0.028  |
| rs11844393  | C | -0.0197 |
| rs79152574  | C | 0.0643  |
| rs7158128   | G | -0.0252 |
| rs71417962  | G | -0.0332 |
| rs116895642 | A | -0.0472 |
| rs4144131   | C | 0.0294  |
| rs10140234  | A | -0.0229 |
| rs72664397  | C | 0.0739  |
| rs75916761  | G | 0.1227  |
| rs17096015  | C | -0.0237 |
| rs138662949 | C | -0.1694 |
| rs76107923  | G | 0.1339  |
| rs116127575 | C | 0.0944  |
| rs1799722   | T | -0.0246 |
| rs1950443   | A | 0.0294  |
| rs75376331  | T | -0.0703 |
| rs149481082 | C | -0.1292 |
| rs77196095  | A | 0.1163  |
| rs79168741  | G | -0.0573 |
| rs17753165  | G | -0.0307 |
| rs8013100   | G | 0.1199  |

|             |   |         |
|-------------|---|---------|
| rs4620897   | C | 0.1084  |
| rs17199275  | G | -0.0286 |
| rs72667969  | T | 0.0594  |
| rs117014045 | T | -0.0754 |
| rs7143039   | A | 0.0199  |
| rs74692030  | A | -0.0293 |
| rs1955627   | C | -0.0222 |
| rs2060608   | G | 0.0301  |
| rs111291850 | T | 0.0346  |
| rs2055590   | G | -0.0897 |
| rs11849716  | C | 0.091   |
| rs117110180 | G | 0.0943  |
| rs35981069  | G | -0.0283 |
| rs17753771  | A | 0.0988  |
| rs72680794  | T | -0.1133 |
| rs76869700  | G | 0.0883  |
| rs10141340  | G | -0.0367 |
| rs10142971  | C | 0.0398  |
| rs8013347   | G | 0.0262  |
| rs35701421  | T | -0.1117 |
| rs61973036  | T | -0.0374 |
| rs150196590 | C | 0.0816  |
| rs117461044 | T | 0.0486  |
| rs61986645  | G | -0.0422 |
| rs117836338 | C | -0.0744 |
| rs7159562   | A | 0.0658  |
| rs79158928  | C | 0.1274  |
| rs144566311 | C | -0.1173 |
| rs67762931  | T | -0.0222 |
| rs141756261 | G | -0.1328 |
| rs1151579   | A | 0.0231  |
| rs9323631   | T | 0.0209  |
| rs7140570   | A | -0.0195 |
| rs17118130  | A | -0.0437 |
| rs143550404 | C | -0.055  |
| rs117363257 | T | 0.0497  |
| rs2022816   | T | 0.0242  |
| rs113186904 | A | 0.0472  |
| rs117731062 | C | 0.1037  |
| rs74715482  | A | -0.0967 |
| rs117891377 | A | 0.0679  |
| rs116918623 | T | 0.0968  |
| rs1483111   | G | -0.0193 |
| rs74061506  | A | 0.0477  |
| rs61982361  | C | 0.1218  |
| rs74881682  | G | 0.0962  |
| rs79967911  | G | -0.0411 |

|             |   |         |
|-------------|---|---------|
| rs17101006  | T | 0.0377  |
| rs73283214  | G | 0.0411  |
| rs61988355  | C | -0.0291 |
| rs60410550  | T | 0.0378  |
| rs79419206  | A | 0.0622  |
| rs1189037   | A | 0.0279  |
| rs138499039 | C | 0.1125  |
| rs12886690  | C | -0.0254 |
| rs76341008  | A | 0.0564  |
| rs117709154 | G | -0.1317 |
| rs17812819  | C | 0.0833  |
| rs61401709  | A | 0.1136  |
| rs77193664  | G | -0.0724 |
| rs117281113 | T | -0.1276 |
| rs11621953  | T | 0.0322  |
| rs724701    | G | -0.0212 |
| rs72697180  | T | 0.0958  |
| rs2400463   | C | -0.0317 |
| rs75208264  | T | -0.0873 |
| rs8003811   | C | 0.0183  |
| rs4900510   | A | -0.0531 |
| rs1953200   | A | -0.0182 |
| rs7154507   | T | -0.0805 |
| rs10130058  | A | 0.0471  |
| rs12323658  | G | -0.0203 |
| rs7141800   | T | 0.0238  |
| rs148815501 | T | 0.1448  |
| rs77209041  | G | -0.0794 |
| rs12431756  | A | 0.0557  |
| rs1030975   | A | -0.0274 |
| rs77287122  | T | -0.049  |
| rs78819700  | C | -0.0579 |
| rs61978458  | G | 0.0638  |
| rs75801226  | A | 0.0779  |
| rs72645010  | T | -0.0661 |
| rs7154586   | A | -0.0235 |
| rs28833814  | G | 0.1391  |
| rs35205405  | G | -0.0225 |
| rs7151602   | C | 0.1235  |
| rs1950993   | T | 0.0196  |
| rs116976182 | A | -0.0377 |
| rs4901069   | A | -0.0179 |
| rs28477819  | A | -0.0226 |
| rs12881247  | A | -0.0184 |
| rs74449691  | A | -0.0642 |
| rs799103    | C | -0.0232 |
| rs194721    | C | 0.0227  |



|             |   |         |
|-------------|---|---------|
| rs58530709  | T | -0.0333 |
| rs113001304 | A | 0.0365  |
| rs10132905  | T | -0.0181 |
| rs72725310  | C | 0.0198  |
| rs17100147  | T | 0.0422  |
| rs75628381  | C | 0.1012  |
| rs77366373  | G | -0.0302 |
| rs8006359   | C | 0.0215  |
| rs76637178  | T | 0.0298  |
| rs78176387  | A | 0.0846  |
| rs143156303 | C | 0.1082  |
| rs1278914   | T | 0.0384  |
| rs12147576  | T | -0.0374 |
| rs74643431  | T | -0.0296 |
| rs61990496  | A | 0.0848  |
| rs117654028 | G | -0.1452 |
| rs77206508  | T | -0.0939 |
| rs72696782  | T | 0.1217  |
| rs8021321   | T | -0.1312 |
| rs10131337  | T | -0.023  |
| rs10498644  | C | 0.0502  |
| rs78259873  | C | -0.0941 |
| rs79983810  | T | 0.0244  |
| rs966918    | A | -0.0183 |
| rs34342663  | C | 0.0242  |
| rs10132534  | T | 0.0295  |
| rs78639510  | T | 0.0614  |
| rs61975113  | G | 0.104   |
| rs148880878 | G | -0.0371 |
| rs112517961 | A | 0.0856  |
| rs61989195  | G | -0.0466 |
| rs887404    | C | 0.0787  |
| rs2148333   | G | 0.0211  |
| rs59208121  | T | 0.0823  |
| rs115174749 | T | 0.0661  |
| rs12888512  | C | -0.019  |
| rs28663607  | T | -0.0473 |
| rs150190825 | T | 0.0631  |
| rs77491889  | T | -0.0664 |
| rs78715774  | A | 0.0644  |
| rs242768    | C | -0.0675 |
| rs1042704   | A | -0.0234 |
| rs68008083  | A | 0.0197  |
| rs17834514  | G | 0.0463  |
| rs60088288  | T | -0.1441 |
| rs73359933  | G | -0.0222 |
| rs117843774 | G | -0.0268 |

|             |   |         |
|-------------|---|---------|
| rs75820593  | T | -0.0403 |
| rs160469    | A | -0.0367 |
| rs11159934  | G | 0.0257  |
| rs9671544   | C | -0.0762 |
| rs7161483   | G | 0.0442  |
| rs4344631   | T | -0.0191 |
| rs451925    | T | -0.0232 |
| rs7149890   | C | -0.0225 |
| rs2319386   | G | 0.0546  |
| rs1270756   | A | 0.0359  |
| rs76456332  | G | 0.0865  |
| rs77190401  | G | -0.0546 |
| rs12050460  | G | -0.0488 |
| rs1667647   | G | 0.0203  |
| rs11848429  | T | 0.0249  |
| rs142413048 | A | -0.0607 |
| rs7152070   | T | 0.0708  |
| rs10140117  | T | 0.0193  |
| rs141916653 | T | -0.1025 |
| rs145530505 | G | -0.0917 |
| rs12890201  | A | -0.0242 |
| rs727447    | T | 0.0242  |
| rs61989812  | T | 0.025   |
| rs71429027  | G | -0.0252 |
| rs943997    | T | 0.0222  |
| rs945032    | T | 0.0251  |
| rs2018772   | A | -0.0186 |
| rs4902832   | G | 0.0249  |
| rs115500003 | C | 0.1012  |
| rs2807815   | T | 0.0193  |
| rs12147758  | G | -0.02   |
| rs77366689  | T | -0.0683 |
| rs213569    | T | 0.018   |
| rs2007824   | T | -0.0213 |
| rs7155440   | A | -0.0897 |
| rs7150885   | G | 0.0456  |
| rs113024237 | T | -0.0511 |
| rs1088768   | T | 0.055   |
| rs110742    | A | 0.022   |
| rs2819426   | C | 0.0699  |
| rs12896403  | A | 0.0897  |
| rs117780646 | T | -0.0835 |
| rs17231711  | A | -0.0383 |
| rs61987474  | T | 0.0189  |
| rs61977093  | T | 0.1165  |
| rs11550543  | A | 0.0319  |
| rs79137249  | T | 0.1017  |

|             |   |         |
|-------------|---|---------|
| rs1449432   | T | -0.0203 |
| rs11849958  | C | -0.0594 |
| rs117974334 | T | 0.05    |
| rs150900568 | T | 0.0799  |
| rs72712463  | T | 0.034   |
| rs11625225  | A | -0.0961 |
| rs1315115   | G | 0.0271  |
| rs116935783 | A | -0.0851 |
| rs7140377   | A | -0.0975 |
| rs10220556  | G | 0.0202  |
| rs117549157 | T | -0.0796 |
| rs118041421 | G | -0.0614 |
| rs2180267   | C | -0.0197 |
| rs28417532  | A | -0.0274 |
| rs73270934  | A | -0.0423 |
| rs28710847  | T | 0.0254  |
| rs1959636   | T | 0.0186  |
| rs17794119  | T | 0.1436  |
| rs17094372  | T | 0.0346  |
| rs141373851 | T | -0.1206 |
| rs77139578  | T | 0.057   |
| rs8018026   | C | -0.0204 |
| rs1315130   | T | 0.03    |
| rs900362    | C | 0.0192  |
| rs73319799  | C | 0.0783  |
| rs10137789  | T | 0.0201  |
| rs61993937  | T | 0.0195  |
| rs61979706  | A | 0.055   |
| rs114963549 | T | 0.0668  |
| rs11160334  | G | 0.1153  |
| rs12881592  | C | 0.0196  |
| rs7140782   | T | 0.0307  |
| rs10220316  | G | -0.0179 |
| rs143129191 | G | -0.0994 |
| rs1028972   | A | -0.0358 |
| rs12887086  | G | -0.0985 |
| rs76534436  | A | -0.0526 |
| rs17125931  | T | 0.0455  |
| rs911294    | T | 0.0257  |
| rs80067417  | A | 0.0329  |
| rs6574215   | A | -0.0225 |
| rs12895232  | T | 0.0785  |
| rs35736913  | T | 0.0455  |
| rs61035315  | G | 0.0269  |
| rs1885750   | T | 0.0449  |
| rs1254916   | G | -0.0184 |
| rs7152787   | C | -0.0182 |

|             |   |         |
|-------------|---|---------|
| rs74044295  | G | -0.0717 |
| rs1357041   | C | 0.0262  |
| rs112459273 | G | -0.0531 |
| rs139601191 | T | -0.1188 |
| rs145391262 | T | 0.1169  |
| rs11849470  | A | 0.0925  |
| rs10145795  | T | 0.0294  |
| rs7153062   | T | -0.1301 |
| rs8019734   | T | 0.0217  |
| rs150138734 | C | -0.1033 |
| rs7150844   | A | 0.0219  |
| rs117365428 | G | 0.0946  |
| rs75907081  | T | 0.0824  |
| rs2184599   | A | -0.023  |
| rs1951811   | T | 0.0694  |
| rs117887832 | T | 0.0559  |
| rs61986111  | A | 0.0306  |
| rs113710956 | A | -0.1632 |
| rs118148639 | T | 0.0995  |
| rs61976531  | T | 0.0678  |
| rs4262879   | C | 0.0286  |
| rs57826114  | A | 0.0444  |
| rs118060829 | G | -0.1008 |
| rs1998314   | G | -0.0225 |
| rs17107825  | C | -0.0181 |
| rs55870181  | T | 0.0353  |
| rs7154079   | A | 0.0251  |
| rs148251525 | G | -0.0288 |
| rs61971846  | A | -0.0354 |
| rs17126976  | G | -0.0305 |
| rs2233406   | A | 0.0204  |
| rs72671079  | A | -0.0652 |
| rs74424148  | C | 0.0288  |
| rs972528    | A | 0.0236  |
| rs10130885  | C | -0.0174 |
| rs1054200   | T | -0.1143 |
| rs75099148  | C | 0.0758  |
| rs1187740   | G | -0.0218 |
| rs1959309   | A | -0.0193 |
| rs1257671   | T | 0.02    |
| rs60895458  | A | -0.0614 |
| rs41422147  | T | -0.0804 |
| rs768532    | T | -0.0337 |
| rs718654    | A | 0.0878  |
| rs8003606   | T | 0.0233  |
| rs10151509  | G | -0.0183 |
| rs8013044   | T | 0.0594  |

|             |   |         |
|-------------|---|---------|
| rs9671307   | C | -0.019  |
| rs5017217   | G | 0.0225  |
| rs74963344  | A | -0.0592 |
| rs117009054 | C | -0.0961 |
| rs72668102  | A | -0.0957 |
| rs11626977  | A | -0.0388 |
| rs116872859 | T | -0.1306 |
| rs11629409  | G | -0.0261 |
| rs78212965  | A | -0.0611 |
| rs117193271 | C | -0.1214 |
| rs141903327 | A | 0.1065  |
| rs61416230  | T | 0.0972  |
| rs1677999   | C | 0.0212  |
| rs34721398  | A | 0.1401  |
| rs148474329 | T | -0.0625 |
| rs1212968   | C | 0.0237  |
| rs112431791 | T | -0.0429 |
| rs10134231  | G | -0.0216 |
| rs5008274   | T | -0.0278 |
| rs150956521 | T | 0.1275  |
| rs10083361  | G | 0.0184  |
| rs4902603   | A | -0.0191 |
| rs2765932   | G | 0.0189  |
| rs941767    | A | 0.0269  |
| rs8015273   | G | 0.0388  |
| rs1022725   | A | -0.1215 |
| rs10135399  | C | 0.0238  |
| rs1824578   | A | -0.0511 |
| rs12883755  | G | 0.0202  |
| rs35080242  | C | 0.0403  |
| rs2332469   | C | -0.0501 |
| rs12879817  | C | -0.0709 |
| rs72704153  | C | 0.1525  |
| rs8019199   | C | 0.0184  |
| rs6571612   | G | 0.0223  |
| rs8015058   | A | -0.0192 |
| rs146539145 | T | 0.0884  |
| rs72676140  | G | 0.0637  |
| rs71422024  | T | -0.0398 |
| rs17100849  | G | -0.0278 |
| rs143649587 | A | -0.1101 |
| rs7152097   | G | -0.0193 |
| rs1279324   | T | 0.0429  |
| rs4074325   | T | -0.0395 |
| rs1188535   | G | 0.0192  |
| rs35397299  | G | -0.0713 |
| rs147873467 | A | -0.1458 |

|             |   |         |
|-------------|---|---------|
| rs28547458  | T | 0.0307  |
| rs112220397 | A | 0.0427  |
| rs77428922  | C | 0.0734  |
| rs112382458 | A | -0.0597 |
| rs146273069 | T | -0.1067 |
| rs4902612   | C | 0.0243  |
| rs111439524 | A | 0.0794  |
| rs116907320 | G | 0.0668  |
| rs72700706  | A | 0.0809  |
| rs8006120   | G | -0.1009 |
| rs10162441  | G | 0.0332  |
| rs808233    | T | 0.0194  |
| rs150174710 | A | -0.0719 |
| rs11621049  | A | -0.0173 |
| rs5005388   | A | 0.0176  |
| rs74333689  | A | -0.0652 |
| rs77244167  | A | 0.0857  |
| rs144875367 | G | -0.1123 |
| rs3811262   | A | -0.0203 |
| rs71424459  | A | 0.0209  |
| rs1999279   | G | 0.0172  |
| rs78160636  | C | 0.0832  |
| rs12894234  | A | 0.0331  |
| rs34512536  | A | -0.0274 |
| rs11846930  | A | 0.0339  |
| rs117697112 | A | -0.0659 |
| rs900681    | C | -0.0249 |
| rs8013858   | G | -0.0305 |
| rs17512600  | C | -0.0724 |
| rs113477669 | T | -0.0633 |
| rs4981088   | G | 0.0173  |
| rs4470065   | C | 0.0222  |
| rs116921775 | C | 0.0743  |
| rs117255228 | A | -0.0759 |
| rs7148181   | C | -0.0287 |
| rs8008719   | C | 0.0222  |
| rs75214369  | A | -0.0285 |
| rs10133424  | G | -0.0204 |
| rs74593521  | A | -0.0777 |
| rs7144110   | T | -0.0911 |
| rs12587645  | C | -0.0185 |
| rs72692924  | C | -0.0264 |
| rs210348    | A | 0.0259  |
| rs1462351   | C | 0.1054  |
| rs72692313  | T | -0.0639 |
| rs116932501 | T | 0.0574  |
| rs11846938  | G | -0.0212 |

|             |   |         |
|-------------|---|---------|
| rs1950551   | A | 0.02    |
| rs8017640   | C | -0.0182 |
| rs874226    | A | -0.0347 |
| rs1889387   | T | -0.0181 |
| rs147887191 | T | -0.0847 |
| rs76970421  | A | 0.098   |
| rs2076735   | T | -0.0351 |
| rs117376328 | A | 0.1039  |
| rs75997850  | T | 0.0461  |
| rs8019661   | C | 0.044   |
| rs75384799  | G | 0.0651  |
| rs141624256 | A | -0.0744 |
| rs147591641 | T | -0.0704 |
| rs149535064 | G | 0.0982  |
| rs116933760 | A | 0.068   |
| rs3898605   | G | -0.0359 |
| rs4346126   | G | -0.0383 |
| rs12897517  | A | 0.0742  |
| rs17701459  | A | -0.0207 |
| rs76210027  | T | 0.0527  |
| rs11845502  | A | -0.022  |
| rs72673908  | G | -0.0518 |
| rs12434934  | C | -0.0254 |
| rs12588564  | A | -0.0201 |
| rs10132733  | G | 0.0223  |
| rs113988810 | G | 0.1423  |
| rs72687121  | A | 0.0456  |
| rs117804066 | C | 0.0949  |
| rs76419171  | G | -0.1832 |
| rs114434164 | G | -0.1084 |
| rs76557856  | A | 0.034   |
| rs74889246  | C | 0.0903  |
| rs154316    | T | -0.032  |
| rs35584647  | C | -0.0343 |
| rs8021994   | C | -0.0374 |
| rs116918262 | G | 0.0638  |
| rs10150484  | A | 0.0395  |
| rs17096572  | T | 0.0395  |
| rs151248112 | G | -0.0911 |
| rs140309645 | C | 0.0576  |
| rs723840    | T | 0.0193  |
| rs17465485  | G | 0.0823  |
| rs1356838   | T | 0.0856  |
| rs12587894  | A | -0.0249 |
| rs74734574  | C | 0.0861  |
| rs12878926  | G | 0.0526  |
| rs7143479   | A | -0.0227 |

|             |   |         |
|-------------|---|---------|
| rs112956036 | A | -0.0646 |
| rs4899599   | A | 0.024   |
| rs875799    | T | -0.0287 |
| rs58564811  | C | 0.0326  |
| rs56113814  | C | -0.0182 |
| rs10135183  | T | -0.0182 |
| rs71422784  | T | 0.0745  |
| rs72664665  | G | 0.0582  |
| rs4982127   | C | 0.0214  |
| rs61977726  | C | -0.0688 |
| rs1956482   | C | -0.0238 |
| rs118161214 | G | 0.1332  |
| rs10132204  | A | -0.029  |
| rs993043    | C | 0.0382  |
| rs1299403   | A | 0.0186  |
| rs1040812   | T | 0.0783  |
| rs72694992  | C | 0.0471  |
| rs1997910   | G | 0.0241  |
| rs118116605 | G | 0.1059  |
| rs61312215  | A | 0.0274  |
| rs113821525 | T | -0.0578 |
| rs77694540  | A | 0.0996  |
| rs4905623   | C | 0.0184  |
| rs3759608   | A | -0.0298 |
| rs149634959 | A | 0.0414  |
| rs117457484 | T | 0.0641  |
| rs17111750  | T | -0.0185 |
| rs1379142   | G | 0.0811  |
| rs117907422 | T | 0.0807  |
| rs1959053   | A | -0.0194 |
| rs6575859   | T | 0.0185  |
| rs78276159  | A | 0.0916  |
| rs12589282  | C | -0.018  |
| rs76964623  | C | -0.0292 |
| rs73348645  | T | -0.025  |
| rs2998316   | C | 0.0176  |
| rs4620892   | T | -0.0387 |
| rs117942446 | G | 0.073   |
| rs12888084  | A | 0.0186  |
| rs117663230 | A | -0.101  |
| rs11158673  | T | 0.0296  |
| rs138834970 | G | -0.1162 |
| rs76423229  | G | 0.0639  |
| rs74900882  | G | -0.0831 |
| rs2535918   | T | -0.0342 |
| rs4251587   | G | 0.0887  |
| rs9658667   | A | 0.0988  |



|             |   |         |
|-------------|---|---------|
| rs10145289  | T | 0.0912  |
| rs117430951 | C | 0.0956  |
| rs150212120 | A | -0.1161 |
| rs11626979  | G | 0.0346  |
| rs74757805  | G | 0.0509  |
| rs113197524 | T | -0.1173 |
| rs8018786   | G | -0.0282 |
| rs7156411   | T | -0.023  |
| rs117492617 | A | 0.1135  |
| rs1106957   | A | 0.0189  |
| rs11846818  | A | 0.0703  |
| rs116952432 | T | -0.0867 |
| rs140786210 | A | -0.0561 |
| rs1243496   | T | -0.0234 |
| rs34885974  | G | -0.0229 |
| rs150800152 | T | 0.1151  |
| rs1315151   | G | 0.0224  |
| rs116847921 | T | -0.0661 |
| rs117751541 | G | -0.1193 |
| rs4981439   | C | 0.0356  |
| rs118115930 | C | -0.1254 |
| rs111320486 | T | 0.0889  |
| rs78303180  | T | -0.0474 |
| rs141219819 | A | 0.0673  |
| rs145164459 | G | -0.1073 |
| rs138659219 | C | -0.0971 |
| rs17256401  | T | 0.0354  |
| rs117712785 | T | 0.0576  |
| rs78420694  | T | -0.0866 |
| rs17184233  | G | 0.0219  |
| rs72692302  | A | 0.027   |
| rs118163595 | A | 0.0651  |
| rs7143025   | A | 0.0201  |
| rs74656347  | G | 0.0238  |
| rs139285724 | G | 0.0236  |
| rs142056210 | G | 0.1278  |
| rs117114022 | G | -0.0836 |
| rs143967843 | A | 0.0977  |
| rs79254088  | A | 0.0755  |
| rs3783929   | G | -0.0274 |
| rs28548899  | T | -0.0732 |
| rs149168248 | C | 0.0685  |
| rs8019356   | C | 0.0206  |
| rs72691406  | A | -0.0455 |
| rs200338    | C | -0.0338 |
| rs12587608  | G | 0.0215  |
| rs1956183   | G | -0.0233 |

|             |   |         |
|-------------|---|---------|
| rs9788624   | A | 0.0752  |
| rs75294567  | T | -0.019  |
| rs35116375  | T | 0.1183  |
| rs61576554  | A | 0.1531  |
| rs7148782   | A | 0.0669  |
| rs1962751   | T | 0.0185  |
| rs117410836 | C | 0.0573  |
| rs113337019 | T | -0.0889 |
| rs114984391 | T | 0.0757  |
| rs1349573   | G | -0.0553 |
| rs12887244  | G | -0.0214 |
| rs138860492 | A | -0.1086 |
| rs61980275  | A | 0.039   |
| rs79381691  | C | 0.0639  |
| rs77643214  | A | 0.1081  |
| rs4991307   | A | 0.0332  |
| rs116955029 | G | 0.0842  |
| rs11625857  | T | -0.025  |
| rs74054933  | A | 0.0286  |
| rs2093746   | C | 0.0344  |
| rs142332756 | T | 0.1085  |
| rs1973150   | G | -0.0186 |
| rs12587770  | C | 0.0236  |
| rs1958664   | G | 0.017   |
| rs4905607   | G | 0.0229  |
| rs10873540  | T | 0.0257  |
| rs117726164 | T | -0.0483 |
| rs117842903 | C | -0.0862 |
| rs1077430   | C | -0.0188 |
| rs80070889  | T | 0.0512  |
| rs79048260  | A | -0.0398 |
| rs55843983  | G | 0.0434  |
| rs55745133  | G | 0.0211  |
| rs7160031   | G | 0.0485  |
| rs140747756 | A | 0.1286  |
| rs11626570  | A | -0.1027 |
| rs1713455   | A | 0.0269  |
| rs234215    | A | 0.0199  |
| rs140427261 | T | -0.1627 |
| rs1286107   | C | 0.0186  |
| rs75568398  | A | 0.1188  |
| rs75244392  | T | -0.0424 |
| rs140787618 | T | -0.0596 |
| rs77251127  | A | -0.0395 |
| rs17200526  | T | -0.0202 |
| rs12883019  | A | -0.019  |
| rs75312226  | G | 0.0244  |

|             |   |         |
|-------------|---|---------|
| rs112373288 | C | 0.0931  |
| rs117488712 | C | 0.1371  |
| rs7149433   | G | 0.0172  |
| rs117203921 | T | -0.0433 |
| rs34635675  | A | 0.0181  |
| rs2197465   | G | 0.0171  |
| rs72698689  | A | 0.0504  |
| rs4982620   | A | -0.0185 |
| rs149720369 | T | 0.0712  |
| rs72729702  | G | -0.0515 |
| rs141309221 | A | 0.1295  |
| rs10162318  | C | 0.0251  |
| rs77958215  | C | 0.0634  |
| rs10134421  | G | 0.018   |
| rs117134921 | G | -0.0746 |
| rs1007284   | A | 0.0261  |
| rs117897393 | A | 0.0484  |
| rs8016619   | C | -0.0182 |
| rs12886733  | T | 0.0387  |
| rs111576262 | G | -0.078  |
| rs72677519  | T | -0.1047 |
| rs11627694  | T | -0.0425 |
| rs76912488  | A | 0.0771  |
| rs79697239  | A | 0.1623  |
| rs147554358 | G | 0.0687  |
| rs1843074   | G | 0.0224  |
| rs113903066 | C | 0.0825  |
| rs200341    | T | 0.0182  |
| rs17096094  | C | 0.0545  |
| rs76619404  | C | -0.0442 |
| rs45572033  | C | -0.1074 |
| rs111468419 | G | 0.0569  |
| rs12432400  | T | 0.075   |
| rs77405177  | G | 0.0455  |
| rs77656392  | G | 0.0761  |
| rs10134663  | G | -0.0173 |
| rs2151760   | A | 0.0602  |
| rs147490809 | T | -0.0616 |
| rs77043816  | G | 0.0401  |
| rs10151340  | A | -0.0566 |
| rs112944764 | G | 0.1118  |
| rs56327952  | G | -0.0275 |
| rs144647167 | G | -0.0896 |
| rs10130992  | C | -0.0252 |
| rs8022382   | T | -0.0194 |
| rs143957650 | A | 0.1699  |
| rs222728    | A | -0.0213 |

|             |   |         |
|-------------|---|---------|
| rs1002579   | T | -0.018  |
| rs12886819  | G | 0.0649  |
| rs8014275   | A | -0.0269 |
| rs74748748  | G | 0.0386  |
| rs12881399  | C | 0.0168  |
| rs141882282 | G | -0.0743 |
| rs78199803  | G | 0.0451  |
| rs34932536  | G | 0.0221  |
| rs710010    | A | 0.0176  |
| rs12895060  | A | -0.02   |
| rs117482812 | A | 0.0741  |
| rs3783910   | G | -0.0189 |
| rs71414152  | G | 0.0813  |
| rs872187    | A | 0.0271  |
| rs78351773  | C | 0.0455  |
| rs8006004   | T | -0.0174 |
| rs144322064 | T | -0.1506 |
| rs10135707  | G | -0.0635 |
| rs55970531  | G | 0.0474  |
| rs117484373 | G | -0.0319 |
| rs72720836  | T | 0.0179  |
| rs4899835   | T | 0.0268  |
| rs3958014   | A | -0.0179 |
| rs12886059  | A | -0.0476 |
| rs1956784   | C | -0.0246 |
| rs71415078  | T | -0.0667 |
| rs111555    | G | -0.0212 |
| rs8007820   | A | -0.0169 |
| rs11624191  | T | -0.0376 |
| rs39716     | C | -0.0284 |
| rs140636946 | T | 0.0841  |
| rs1113590   | C | 0.027   |
| rs111785083 | A | -0.0532 |
| rs17726727  | A | 0.0247  |
| rs181311    | T | -0.0166 |
| rs77659514  | A | -0.1247 |
| rs117517149 | A | -0.1174 |
| rs2299911   | T | 0.0192  |
| rs7154433   | T | -0.036  |
| rs8005597   | G | -0.0466 |
| rs2148160   | G | -0.0297 |
| rs12884280  | C | -0.0175 |
| rs74315875  | G | -0.1045 |
| rs7148640   | G | 0.0182  |
| rs79637767  | T | -0.0801 |
| rs11156787  | A | 0.0166  |
| rs58731325  | G | 0.0206  |

|             |   |         |
|-------------|---|---------|
| rs73332684  | G | -0.0711 |
| rs72672959  | T | -0.121  |
| rs2841211   | T | -0.0249 |
| rs55728716  | C | 0.0346  |
| rs117597012 | A | 0.0773  |
| rs117465404 | C | -0.088  |
| rs61989797  | A | 0.1019  |
| rs17117878  | T | 0.0561  |
| rs12883443  | C | -0.0251 |
| rs71421895  | C | -0.0557 |
| rs116198692 | C | 0.0658  |
| rs17601703  | C | -0.0418 |
| rs74919671  | T | -0.0361 |
| rs117746795 | A | -0.1089 |
| rs8013541   | A | -0.0178 |
| rs34940985  | A | -0.064  |
| rs1959536   | G | 0.0996  |
| rs8012725   | G | 0.0309  |
| rs117886255 | T | 0.0899  |
| rs10132545  | G | 0.0194  |
| rs4904703   | C | -0.0166 |
| rs1958960   | A | 0.0189  |
| rs12431612  | A | 0.0345  |
| rs17112462  | G | 0.0384  |
| rs149185738 | T | -0.1069 |
| rs1561193   | A | 0.0404  |
| rs2526904   | A | 0.0166  |
| rs12147816  | G | 0.0556  |
| rs10138986  | C | -0.0167 |
| rs4899173   | T | -0.0197 |
| rs1974298   | G | -0.0346 |
| rs143227945 | A | -0.0845 |
| rs1680665   | A | -0.0439 |
| rs12100741  | A | 0.0248  |
| rs147120991 | A | 0.0748  |
| rs149764572 | G | 0.0696  |
| rs61972981  | C | 0.0378  |
| rs12892358  | T | -0.03   |
| rs1343870   | C | 0.0197  |
| rs442402    | G | -0.035  |
| rs78159423  | C | 0.0991  |
| rs79099449  | C | -0.0846 |
| rs146887411 | C | 0.0907  |
| rs225977    | A | 0.0199  |
| rs76772737  | C | 0.0876  |
| rs11621043  | C | 0.0288  |
| rs76844901  | G | 0.0905  |

|             |   |         |
|-------------|---|---------|
| rs2170233   | C | 0.0696  |
| rs4901115   | A | 0.089   |
| rs80050540  | A | 0.0374  |
| rs12883017  | T | 0.0164  |
| rs118049178 | C | -0.0537 |
| rs147897377 | A | -0.0775 |
| rs12432138  | T | -0.02   |
| rs4899829   | G | 0.0245  |
| rs4903875   | G | 0.0167  |
| rs28588570  | T | 0.0312  |
| rs78973415  | T | -0.0857 |
| rs74892922  | C | 0.0372  |
| rs117838191 | A | 0.0712  |
| rs10142622  | T | -0.1137 |
| rs59614373  | G | -0.023  |
| rs78656039  | A | 0.0595  |
| rs142259791 | A | 0.0559  |
| rs61973019  | A | 0.0429  |
| rs1399524   | T | 0.0465  |
| rs17782466  | A | 0.0383  |
| rs4356403   | C | 0.0193  |
| rs28547895  | G | -0.0403 |
| rs8013737   | G | -0.0295 |
| rs55721115  | G | 0.0391  |
| rs59213402  | T | 0.0486  |
| rs35919189  | C | -0.0533 |
| rs11158612  | C | 0.0197  |
| rs243221    | C | -0.0197 |
| rs79063692  | A | -0.0796 |
| rs753361    | A | 0.0178  |
| rs61989860  | G | -0.0976 |
| rs140503338 | G | -0.0611 |
| rs79156967  | T | 0.0472  |
| rs17126117  | C | -0.0639 |
| rs12893940  | A | -0.0324 |
| rs1257332   | T | -0.036  |
| rs12885353  | C | 0.0452  |
| rs9671842   | T | -0.0229 |
| rs78104306  | C | 0.0327  |
| rs79647551  | A | 0.0398  |
| rs112995490 | C | 0.0484  |
| rs1242538   | G | 0.0293  |
| rs34281246  | T | 0.147   |
| rs72701157  | T | -0.0747 |
| rs72687113  | T | 0.0528  |
| rs112751856 | T | -0.0851 |
| rs8004345   | G | 0.087   |

|             |   |         |
|-------------|---|---------|
| rs75340802  | C | 0.0752  |
| rs140382550 | A | 0.0851  |
| rs61971837  | C | -0.0221 |
| rs73300965  | A | -0.1348 |
| rs76073421  | G | 0.0643  |
| rs117188095 | C | 0.0923  |
| rs75806022  | T | 0.0372  |
| rs11626456  | A | 0.0176  |
| rs56387608  | A | 0.0327  |
| rs1742083   | G | 0.0178  |
| rs61976507  | T | -0.0709 |
| rs55743101  | T | 0.0216  |
| rs28568603  | C | 0.0307  |
| rs762002    | C | -0.0239 |
| rs145974708 | T | -0.0819 |
| rs143653233 | T | -0.1041 |
| rs848084    | G | 0.0228  |
| rs76668162  | A | 0.0463  |
| rs9339      | T | 0.018   |
| rs144897235 | A | 0.1019  |
| rs56375945  | A | 0.0254  |
| rs2810085   | T | 0.0274  |
| rs75953456  | C | 0.0809  |
| rs59551280  | A | -0.0396 |
| rs74046048  | C | 0.0491  |
| rs10162364  | T | 0.0331  |
| rs1197382   | C | 0.0285  |
| rs3742658   | T | 0.0336  |
| rs75931403  | T | 0.1605  |
| rs75170127  | T | -0.0396 |
| rs74034614  | C | -0.0801 |
| rs8010032   | T | -0.0175 |
| rs8126      | C | -0.0183 |
| rs141502833 | T | -0.0333 |
| rs117018335 | G | 0.0682  |
| rs72692105  | A | -0.1211 |
| rs76255841  | G | 0.0562  |
| rs61985962  | T | 0.0214  |
| rs2415444   | C | -0.0205 |
| rs6572913   | G | 0.0177  |
| rs45528638  | C | -0.0366 |
| rs72698138  | C | 0.0262  |
| rs56154991  | T | -0.0304 |
| rs34468732  | C | -0.1029 |
| rs2372424   | C | 0.0184  |
| rs17094678  | A | 0.0459  |
| rs77165353  | T | 0.0625  |

|             |   |         |
|-------------|---|---------|
| rs12432697  | T | -0.0241 |
| rs80343029  | T | -0.075  |
| rs113899415 | A | -0.0691 |
| rs11622149  | A | 0.0239  |
| rs1156170   | G | -0.0185 |
| rs1045842   | C | -0.0347 |
| rs1957514   | A | 0.0174  |
| rs7159556   | A | 0.0179  |
| rs118044059 | C | 0.0516  |
| rs1824319   | G | -0.0411 |
| rs143475345 | C | 0.0847  |
| rs59762490  | A | 0.0554  |
| rs7142363   | A | 0.0178  |
| rs150100504 | T | -0.0397 |
| rs73345596  | T | -0.0319 |
| rs2031063   | C | 0.0184  |
| rs73317331  | A | 0.0664  |
| rs1958601   | T | -0.0173 |
| rs149150251 | C | 0.1299  |
| rs1955658   | A | -0.0177 |
| rs8014258   | G | 0.0323  |
| rs75202967  | T | 0.0319  |
| rs61985278  | C | -0.0794 |
| rs149894528 | A | -0.1319 |
| rs11624106  | G | 0.0465  |
| rs117920691 | T | -0.0673 |
| rs72703661  | A | 0.0254  |
| rs78334049  | A | -0.0336 |
| rs112552819 | A | 0.0419  |
| rs1108140   | C | -0.0207 |
| rs4646286   | G | 0.0182  |
| rs175718    | G | -0.0161 |
| rs72677336  | A | -0.0473 |
| rs55989864  | A | 0.0192  |
| rs2991523   | A | 0.0196  |
| rs111272567 | T | -0.0432 |
| rs111950656 | A | 0.0393  |
| rs116849775 | T | -0.0538 |
| rs72666686  | A | 0.0437  |
| rs12890803  | G | -0.0258 |
| rs138801661 | A | -0.0371 |
| rs17127744  | A | 0.1031  |
| rs67401203  | T | -0.0234 |
| rs11621506  | T | 0.0194  |
| rs78125161  | A | -0.0906 |
| rs117085262 | G | -0.0367 |
| rs34344413  | G | -0.0202 |



|             |   |         |
|-------------|---|---------|
| rs146660419 | T | 0.047   |
| rs138409863 | A | -0.0825 |
| rs4457900   | T | -0.0175 |
| rs11621104  | G | -0.0159 |
| rs10139775  | C | -0.0173 |
| rs72682046  | T | -0.0908 |
| rs2282037   | C | 0.0258  |
| rs139635568 | T | -0.1028 |
| rs111471508 | T | -0.0703 |
| rs143826891 | C | -0.1261 |
| rs28715676  | G | 0.0179  |
| rs158100    | G | -0.018  |
| rs78564852  | T | -0.0485 |
| rs12434634  | A | 0.0282  |
| rs10151178  | T | -0.0167 |
| rs61988507  | A | 0.0248  |
| rs113357814 | T | 0.0469  |
| rs1263811   | G | -0.025  |
| rs4906383   | T | -0.0183 |
| rs117428996 | A | -0.0869 |
| rs8015337   | G | -0.0165 |
| rs17833095  | A | -0.0909 |
| rs17765269  | G | -0.0627 |
| rs4444250   | A | -0.1302 |
| rs17096673  | A | 0.0359  |
| rs7149252   | C | 0.0195  |
| rs1191357   | A | 0.024   |
| rs12879960  | G | 0.0402  |
| rs117744201 | G | 0.0899  |
| rs113466741 | T | -0.0467 |
| rs12147419  | G | 0.0174  |
| rs11624116  | G | 0.0427  |
| rs57581750  | G | 0.053   |
| rs4906038   | T | 0.0196  |
| rs12590136  | A | 0.0236  |
| rs4904204   | G | 0.0266  |
| rs75677478  | T | 0.0582  |
| rs117552259 | C | -0.0584 |
| rs8019619   | G | 0.0337  |
| rs7144454   | T | 0.0195  |
| rs117406095 | T | 0.1257  |
| rs10139187  | A | 0.0591  |
| rs10873098  | T | -0.0167 |
| rs74323791  | G | 0.0271  |
| rs9125      | A | -0.0196 |
| rs2158532   | T | 0.0165  |
| rs10873302  | T | 0.0182  |

|             |   |         |
|-------------|---|---------|
| rs6574692   | T | -0.0205 |
| rs78032993  | G | 0.0565  |
| rs117514569 | T | 0.1344  |
| rs8003369   | A | 0.0174  |
| rs12887763  | G | -0.0288 |
| rs76377637  | T | -0.0516 |
| rs10146130  | C | 0.0223  |
| rs17469416  | T | 0.0249  |
| rs12894750  | T | -0.0163 |
| rs8017601   | G | -0.0602 |
| rs74043218  | A | -0.0724 |
| rs77383570  | T | -0.0464 |
| rs77078740  | A | 0.0571  |
| rs113528971 | T | -0.0236 |
| rs117332297 | C | 0.0915  |
| rs78703581  | A | 0.0233  |
| rs2623120   | G | -0.018  |
| rs74086799  | T | 0.04    |
| rs735745    | A | 0.0492  |
| rs10143711  | A | -0.0219 |
| rs7144494   | T | -0.0183 |
| rs12050439  | A | -0.016  |
| rs12147729  | G | -0.0216 |
| rs11160285  | A | 0.0671  |
| rs111870112 | G | -0.0929 |
| rs7146443   | T | 0.0207  |
| rs116994099 | T | -0.0966 |
| rs72682875  | C | 0.0938  |
| rs856217    | T | -0.0305 |
| rs112421059 | G | 0.092   |
| rs17590347  | G | -0.0285 |
| rs61994042  | A | -0.074  |
| rs75787795  | A | 0.0626  |
| rs35543799  | G | -0.0653 |
| rs116058988 | T | -0.1408 |
| rs11158422  | C | -0.0206 |
| rs72734283  | G | -0.0444 |
| rs11845486  | A | 0.0775  |
| rs1285649   | G | 0.0236  |
| rs12432606  | T | -0.0277 |
| rs182580    | C | 0.0164  |
| rs12590127  | T | 0.0481  |
| rs423429    | G | -0.0315 |
| rs4905612   | T | 0.0275  |
| rs112051058 | T | -0.0709 |
| rs72478810  | G | 0.0292  |
| rs61980199  | T | 0.0164  |

|             |   |         |
|-------------|---|---------|
| rs6571563   | T | 0.0219  |
| rs35675256  | C | -0.0421 |
| rs11849748  | A | -0.0879 |
| rs4503724   | G | -0.0217 |
| rs1198412   | G | -0.036  |
| rs141338650 | A | 0.0245  |
| rs117584774 | T | 0.0659  |
| rs72664587  | G | 0.0291  |
| rs943655    | C | -0.0167 |
| rs117382186 | A | -0.0465 |
| rs118025675 | A | 0.0754  |
| rs35291807  | T | 0.0355  |
| rs56994090  | C | 0.0183  |
| rs150285980 | A | 0.0991  |
| rs60150385  | A | 0.039   |
| rs147037985 | A | -0.1068 |
| rs117406323 | T | 0.0577  |
| rs57561951  | G | 0.1379  |
| rs79050575  | G | -0.0615 |
| rs62010899  | T | 0.0759  |
| rs149859195 | G | -0.1693 |
| rs7157717   | G | -0.0248 |
| rs2105229   | A | -0.0255 |
| rs72682961  | G | 0.0647  |
| rs72660424  | T | 0.0213  |
| rs116988818 | A | -0.0948 |
| rs139869664 | T | 0.1092  |
| rs61986575  | C | 0.0984  |
| rs79541715  | T | -0.0926 |
| rs141620039 | T | -0.0701 |
| rs8009215   | G | 0.022   |
| rs17834394  | C | 0.0336  |
| rs8018549   | G | 0.083   |
| rs113589632 | T | 0.1594  |
| rs142013515 | T | -0.1374 |
| rs79135510  | T | 0.0769  |
| rs11846336  | T | 0.0165  |
| rs1617356   | T | -0.0204 |
| rs76050278  | C | -0.0651 |
| rs11626740  | A | 0.0435  |
| rs8017951   | T | -0.0341 |
| rs60469115  | A | -0.0627 |
| rs1763737   | C | 0.0302  |
| rs10141533  | G | -0.0165 |
| rs1955511   | C | 0.0313  |
| rs34204001  | C | 0.0251  |
| rs12587089  | C | 0.0266  |

|             |   |         |
|-------------|---|---------|
| rs116842619 | T | 0.0783  |
| rs148174661 | T | -0.0651 |
| rs8006846   | A | -0.0244 |
| rs7154460   | A | -0.0662 |
| rs10150465  | T | -0.027  |
| rs118125736 | G | -0.0544 |
| rs72696762  | C | -0.0693 |
| rs3748312   | T | 0.0232  |
| rs17092489  | A | 0.0879  |
| rs1243642   | G | 0.1206  |
| rs4997997   | A | 0.0581  |
| rs17833131  | A | -0.0255 |
| rs139868848 | T | 0.1543  |
| rs145435243 | T | -0.0768 |
| rs61985831  | C | 0.0321  |
| rs79871225  | T | -0.0531 |
| rs10131298  | A | 0.0214  |
| rs75282033  | A | -0.0965 |
| rs10146757  | G | 0.021   |
| rs117904875 | C | -0.0561 |
| rs8007176   | G | 0.0174  |
| rs11628071  | C | 0.0337  |
| rs55683211  | T | -0.0974 |
| rs12436783  | T | 0.1019  |
| rs1954326   | G | -0.0183 |
| rs72701611  | G | 0.0941  |
| rs117450401 | A | 0.0864  |
| rs4982747   | G | 0.0168  |
| rs1257663   | C | -0.0484 |
| rs12893321  | T | -0.0225 |
| rs8009836   | T | -0.0445 |
| rs12436026  | C | -0.0735 |
| rs61987982  | G | 0.0646  |
| rs11624645  | A | 0.0317  |
| rs12890532  | C | -0.0203 |
| rs4904981   | A | 0.0215  |
| rs8014171   | A | 0.0704  |
| rs31408     | T | 0.0953  |
| rs116933443 | T | 0.0522  |
| rs76702916  | A | 0.0734  |
| rs11158581  | A | -0.0235 |
| rs80028357  | T | 0.0941  |
| rs74539351  | T | -0.0688 |
| rs150913052 | T | -0.1073 |
| rs117772163 | T | 0.0746  |
| rs76004191  | T | -0.0263 |
| rs80058176  | G | 0.0964  |

|             |   |         |
|-------------|---|---------|
| rs9323854   | A | 0.0294  |
| rs17102535  | A | 0.0438  |
| rs3784018   | G | 0.0197  |
| rs74551816  | T | 0.0525  |
| rs116947851 | A | 0.0567  |
| rs750678    | G | 0.0179  |
| rs2236241   | G | -0.0199 |
| rs72706178  | T | -0.0288 |
| rs71423384  | G | 0.0292  |
| rs35701404  | C | 0.0163  |
| rs150971918 | C | 0.1101  |
| rs10129254  | G | -0.0345 |
| rs117752557 | T | -0.0605 |
| rs79376553  | G | 0.0849  |
| rs4900255   | A | 0.0281  |
| rs144703783 | C | -0.0774 |
| rs139466195 | A | -0.1136 |
| rs11158760  | G | 0.0209  |
| rs11159779  | A | -0.0192 |
| rs2111782   | A | -0.0302 |
| rs117994029 | G | 0.058   |
| rs9635172   | T | -0.0194 |
| rs11628622  | C | 0.0187  |
| rs76138730  | A | 0.0808  |
| rs1152573   | G | -0.0242 |
| rs74333506  | T | 0.135   |
| rs148987100 | G | 0.0247  |
| rs118101297 | G | 0.1377  |
| rs8006139   | G | -0.0166 |
| rs17278202  | A | -0.0186 |
| rs142011749 | T | 0.0704  |
| rs1255261   | C | -0.0173 |
| rs35939120  | A | 0.0241  |
| rs117133855 | T | -0.1002 |
| rs10138062  | A | 0.0175  |
| rs60217181  | T | 0.02    |
| rs138899774 | G | 0.0502  |
| rs56138896  | G | 0.0383  |
| rs1240989   | C | 0.0307  |
| rs7158545   | C | -0.0165 |
| rs72680751  | T | -0.0468 |
| rs61971814  | T | -0.05   |
| rs11157275  | G | 0.019   |
| rs111628324 | A | 0.0642  |
| rs55722931  | A | -0.0702 |
| rs4580076   | G | -0.017  |
| rs76925119  | T | -0.0709 |

|             |   |         |
|-------------|---|---------|
| rs117750014 | G | 0.1238  |
| rs4901530   | G | -0.0224 |
| rs11627824  | C | 0.0246  |
| rs10138982  | C | 0.0205  |
| rs77196389  | G | 0.0664  |
| rs143123975 | T | 0.0739  |
| rs1998241   | T | -0.0314 |
| rs7144699   | T | -0.0345 |
| rs7152058   | T | -0.0192 |
| rs77012148  | T | -0.0753 |
| rs71420502  | C | 0.1081  |
| rs75381513  | A | 0.0337  |
| rs111389949 | G | -0.0358 |
| rs61982618  | T | 0.0594  |
| rs2295174   | C | -0.0186 |
| rs8017429   | G | 0.016   |
| rs1072947   | T | -0.041  |
| rs149360378 | C | 0.0264  |
| rs149524924 | A | -0.0877 |
| rs117084735 | T | 0.0681  |
| rs2069966   | C | 0.0215  |
| rs149584558 | G | 0.0726  |
| rs117584895 | C | 0.0721  |
| rs10132462  | T | 0.0419  |
| rs17766799  | G | -0.0335 |
| rs147630796 | T | -0.0586 |
| rs7145948   | G | 0.0503  |
| rs78327602  | C | 0.0734  |
| rs74036905  | C | -0.0461 |
| rs80175580  | C | 0.0527  |
| rs35617019  | G | 0.1168  |
| rs8015889   | A | 0.0155  |
| rs112203900 | A | -0.0984 |
| rs17100933  | C | -0.0392 |
| rs4901622   | C | -0.02   |
| rs12879016  | G | 0.0198  |
| rs8007449   | T | -0.026  |
| rs17123972  | G | 0.0219  |
| rs7150544   | G | 0.0172  |
| rs80183827  | T | -0.0424 |
| rs2401022   | T | 0.0185  |
| rs117313189 | T | 0.0615  |
| rs8021576   | T | -0.0172 |
| rs7158115   | C | -0.0231 |
| rs115313686 | A | 0.0773  |
| rs137894726 | A | 0.0634  |
| rs74834851  | T | 0.0337  |

|             |   |         |
|-------------|---|---------|
| rs8015044   | G | 0.0173  |
| rs61996379  | T | 0.0216  |
| rs113007508 | A | -0.0648 |
| rs10483306  | T | 0.0319  |
| rs117409115 | A | 0.0844  |
| rs10130494  | G | 0.0217  |
| rs8014220   | T | 0.0582  |
| rs1325530   | T | -0.0272 |
| rs76809467  | G | -0.1317 |
| rs114551829 | C | -0.0682 |
| rs117258155 | A | -0.0642 |
| rs116977139 | A | -0.0491 |
| rs1024512   | A | -0.031  |
| rs10130769  | G | -0.0172 |
| rs147301975 | T | -0.0868 |
| rs12436720  | C | -0.0562 |
| rs4902100   | G | 0.0175  |
| rs1950348   | T | 0.0164  |
| rs4905261   | G | -0.0216 |
| rs17112096  | C | 0.0229  |
| rs72715827  | T | -0.0362 |
| rs12589050  | G | 0.0464  |
| rs78360810  | A | -0.034  |
| rs1275692   | C | 0.0211  |
| rs77061396  | G | -0.0727 |
| rs117880795 | C | -0.0606 |
| rs61746391  | G | 0.0633  |
| rs7144579   | C | 0.0255  |
| rs12883524  | A | 0.0526  |
| rs10147042  | C | -0.0159 |
| rs12100964  | G | -0.0346 |
| rs117276357 | T | 0.0395  |
| rs112707515 | T | -0.0945 |
| rs141262943 | G | -0.0271 |
| rs2144045   | A | 0.0224  |
| rs11622366  | T | 0.0229  |
| rs116959771 | T | 0.0608  |
| rs7151852   | A | -0.0742 |
| rs117953897 | T | -0.0923 |
| rs61976288  | A | -0.043  |
| rs116987982 | T | 0.0695  |
| rs139946774 | T | 0.0544  |
| rs78465899  | C | 0.0692  |
| rs61989022  | G | 0.0304  |
| rs17111534  | A | -0.0198 |
| rs116953125 | A | -0.0853 |
| rs17128090  | T | 0.0839  |

|             |   |         |
|-------------|---|---------|
| rs61985994  | G | 0.0278  |
| rs118032166 | T | -0.1046 |
| rs7158654   | C | -0.0389 |
| rs35135652  | C | -0.0302 |
| rs4982335   | G | -0.0209 |
| rs71414705  | C | -0.0514 |
| rs142827459 | T | -0.036  |
| rs72681698  | C | 0.1007  |
| rs1294563   | A | -0.0183 |
| rs111283525 | A | 0.0997  |
| rs117196032 | T | -0.0811 |
| rs72702754  | G | -0.0477 |
| rs12888886  | C | -0.0578 |
| rs17121069  | A | -0.0738 |
| rs71414080  | C | 0.0359  |
| rs11852187  | A | 0.0256  |
| rs2208446   | T | -0.0257 |
| rs75277049  | A | -0.0518 |
| rs72701112  | T | 0.0751  |
| rs34610326  | C | -0.0422 |
| rs150539226 | T | -0.1145 |
| rs17796197  | C | -0.0233 |
| rs17129117  | T | -0.0195 |
| rs2842328   | C | 0.0166  |
| rs117249570 | G | 0.0855  |
| rs11160791  | G | -0.0572 |
| rs10132295  | C | 0.1065  |
| rs4904529   | T | 0.0432  |
| rs139688434 | A | -0.0982 |
| rs76214151  | T | 0.0644  |
| rs7153260   | G | 0.0169  |
| rs117900254 | T | 0.048   |
| rs4898668   | T | -0.0298 |
| rs148010767 | G | 0.0401  |
| rs77425375  | T | 0.0329  |
| rs146134985 | A | 0.0786  |
| rs138770559 | C | 0.0622  |
| rs10145681  | A | 0.047   |
| rs887506    | G | 0.016   |
| rs150634726 | T | 0.0811  |
| rs78185793  | T | 0.044   |
| rs234584    | A | -0.0158 |
| rs116943761 | A | -0.0409 |
| rs56166355  | A | 0.0612  |
| rs140472045 | A | -0.1076 |
| rs11625516  | G | -0.0171 |
| rs45539232  | A | 0.0282  |



|             |   |         |
|-------------|---|---------|
| rs74814475  | G | 0.0489  |
| rs17828494  | T | 0.0239  |
| rs55638195  | G | -0.0499 |
| rs10162452  | C | -0.0178 |
| rs8017982   | C | 0.0159  |
| rs56102241  | T | 0.0613  |
| rs12879608  | C | -0.0451 |
| rs61983833  | A | -0.0363 |
| rs117771822 | T | -0.0738 |
| rs1950988   | C | -0.0221 |
| rs116952677 | A | 0.0602  |
| rs79427850  | C | -0.0298 |
| rs61981847  | A | -0.0549 |
| rs56175668  | C | -0.0295 |
| rs2184594   | C | 0.0155  |
| rs75288747  | G | -0.1004 |
| rs113132195 | T | -0.1013 |
| rs74556509  | A | -0.098  |
| rs58352951  | A | -0.0666 |
| rs139892352 | G | -0.0492 |
| rs144346769 | G | 0.0918  |
| rs17094128  | C | -0.0353 |
| rs10873193  | T | -0.0163 |
| rs113077191 | G | 0.1131  |
| rs151207481 | A | -0.0771 |
| rs3850420   | T | -0.0167 |
| rs12881080  | G | 0.0243  |
| rs78795547  | C | 0.0772  |
| rs113234133 | G | -0.0182 |
| rs1287604   | A | -0.0658 |
| rs77671225  | T | -0.0684 |
| rs78355135  | T | 0.1119  |
| rs79624907  | G | 0.0745  |
| rs74926439  | T | 0.0798  |
| rs12433924  | G | -0.0533 |
| rs79258259  | T | -0.0975 |
| rs78637399  | G | 0.1071  |
| rs117118633 | C | 0.0448  |
| rs10151349  | C | 0.0193  |
| rs35077741  | G | 0.0446  |
| rs2250772   | G | 0.0193  |
| rs17834779  | C | 0.0165  |
| rs1959014   | A | 0.0597  |
| rs797349    | A | 0.0228  |
| rs79869477  | G | -0.0771 |
| rs3783642   | C | -0.0158 |
| rs76954168  | A | 0.0977  |

|             |   |         |
|-------------|---|---------|
| rs78142959  | G | -0.0305 |
| rs17810066  | T | 0.0683  |
| rs146826500 | T | -0.0708 |
| rs7156231   | T | 0.0684  |
| rs76893196  | G | -0.0634 |
| rs1160674   | G | 0.018   |
| rs4903166   | A | 0.0828  |
| rs998208    | G | 0.0649  |
| rs2357112   | C | 0.0204  |
| rs113766474 | G | 0.0743  |
| rs142198269 | G | 0.0813  |
| rs10139691  | T | -0.0461 |
| rs111435614 | T | 0.023   |
| rs77219677  | T | 0.0895  |
| rs12881206  | C | 0.0167  |
| rs76809835  | G | 0.1067  |
| rs112509847 | C | 0.0546  |
| rs145897695 | T | 0.1041  |
| rs75212452  | C | -0.0853 |
| rs434273    | T | -0.0208 |
| rs10131382  | G | -0.0312 |
| rs1152468   | G | 0.0154  |
| rs17096278  | G | 0.038   |
| rs139115565 | A | -0.1118 |
| rs140406690 | T | -0.1181 |
| rs1738895   | C | 0.0755  |
| rs143133177 | A | -0.1077 |
| rs117022252 | T | -0.0879 |
| rs11852157  | G | -0.0344 |
| rs2365681   | T | -0.0156 |
| rs766298    | C | -0.0209 |
| rs79843108  | C | -0.0502 |
| rs78732934  | T | -0.0717 |
| rs72731577  | T | -0.0209 |
| rs7142408   | G | 0.0184  |
| rs56168057  | T | 0.0508  |
| rs1506760   | A | 0.0181  |
| rs116851732 | A | 0.074   |
| rs117030769 | A | -0.0773 |
| rs113134194 | T | 0.103   |
| rs80184975  | T | 0.0424  |
| rs4983511   | T | -0.0248 |
| rs72727497  | C | 0.1033  |
| rs61982757  | A | 0.1293  |
| rs72718434  | G | -0.0562 |
| rs58570040  | T | -0.0204 |
| rs175984    | A | -0.0189 |

|             |   |         |
|-------------|---|---------|
| rs13379210  | C | 0.0187  |
| rs117556181 | T | -0.0362 |
| rs117806763 | A | -0.0775 |
| rs61996634  | A | 0.0895  |
| rs12883884  | G | -0.0159 |
| rs77618336  | T | -0.0354 |
| rs80292861  | G | 0.0306  |
| rs78012412  | C | 0.0546  |
| rs138623791 | G | -0.0746 |
| rs112272686 | G | -0.0994 |
| rs147624810 | T | -0.1027 |
| rs61970739  | G | -0.0153 |
| rs2064928   | A | -0.0305 |
| rs8009525   | T | -0.0488 |
| rs7151531   | C | 0.0168  |
| rs79899753  | A | 0.0445  |
| rs142489916 | T | 0.0301  |
| rs1243598   | C | -0.0152 |
| rs72688272  | C | 0.028   |
| rs1885152   | T | 0.0176  |
| rs112281955 | A | -0.047  |
| rs11160186  | A | 0.0238  |
| rs4526940   | T | -0.0155 |
| rs112626633 | A | -0.0758 |
| rs71430769  | A | 0.0697  |
| rs55865473  | T | 0.0717  |
| rs17345162  | G | -0.0336 |
| rs12586901  | C | -0.0272 |
| rs2816690   | T | -0.0965 |
| rs1133834   | C | -0.0216 |
| rs148119207 | T | 0.0895  |
| rs9324082   | T | -0.033  |
| rs143888053 | A | 0.1131  |
| rs56844246  | G | -0.0268 |
| rs112973687 | C | 0.0561  |
| rs17828632  | A | -0.023  |
| rs35097957  | G | -0.0662 |
| rs7159682   | A | 0.0191  |
| rs34403654  | A | -0.1096 |
| rs60862193  | A | 0.0676  |
| rs78611282  | G | -0.0874 |
| rs11851152  | C | 0.0159  |
| rs11157831  | G | 0.0319  |
| rs78421876  | T | 0.0353  |
| rs1885585   | T | 0.0174  |
| rs17105685  | T | -0.0202 |
| rs7147868   | T | 0.0297  |

|             |   |         |
|-------------|---|---------|
| rs117345552 | T | 0.0939  |
| rs79696323  | C | -0.0614 |
| rs112119259 | A | -0.0888 |
| rs10152022  | C | -0.017  |
| rs10145152  | G | 0.0581  |
| rs72671110  | T | -0.0546 |
| rs7141885   | A | -0.0234 |
| rs1760986   | C | 0.0202  |
| rs78861269  | G | 0.0369  |
| rs17105098  | A | -0.0249 |
| rs76249699  | C | 0.0854  |
| rs74041756  | G | -0.0321 |
| rs10146800  | T | -0.022  |
| rs114220129 | A | -0.0962 |
| rs4904163   | A | -0.0653 |
| rs1564060   | A | 0.0175  |
| rs6574227   | T | -0.0209 |
| rs111574060 | T | -0.1002 |
| rs17546005  | T | -0.0534 |
| rs2153081   | C | -0.0892 |
| rs8003767   | A | -0.0189 |
| rs813337    | G | -0.0653 |
| rs4048233   | G | -0.0166 |
| rs77529104  | C | -0.0316 |
| rs10484168  | A | 0.0397  |
| rs55664804  | G | 0.0337  |
| rs117226520 | C | -0.0558 |
| rs117381464 | A | 0.0552  |
| rs61979236  | C | -0.0249 |
| rs1889684   | T | 0.0182  |
| rs11158690  | A | -0.0235 |
| rs61979226  | C | -0.0623 |
| rs61991230  | A | -0.0268 |
| rs61737404  | T | -0.0577 |
| rs234605    | C | -0.0163 |
| rs61978262  | T | -0.0965 |
| rs116959214 | T | -0.0466 |
| rs8005354   | C | -0.0157 |
| rs7148694   | G | 0.071   |
| rs74528596  | G | -0.0889 |
| rs117307486 | C | 0.0594  |
| rs77945653  | C | 0.085   |
| rs116849377 | G | -0.0727 |
| rs76084672  | G | -0.0525 |
| rs1254600   | A | 0.0206  |
| rs8010391   | A | -0.0207 |
| rs151216230 | G | -0.1174 |

|             |   |         |
|-------------|---|---------|
| rs140427322 | A | -0.0725 |
| rs79589957  | G | -0.0712 |
| rs74709608  | T | -0.0231 |
| rs117793147 | G | 0.0621  |
| rs11844763  | A | 0.0329  |
| rs78850505  | A | 0.0568  |
| rs17832137  | A | -0.0571 |
| rs150999455 | C | 0.094   |
| rs17106046  | T | 0.047   |
| rs2249620   | A | 0.0603  |
| rs78783856  | T | 0.0639  |
| rs79815502  | T | 0.0868  |
| rs8181931   | G | 0.0282  |
| rs140094122 | G | 0.0645  |
| rs12431514  | G | 0.0153  |
| rs17098415  | C | 0.0427  |
| rs116845325 | A | -0.0515 |
| rs8022918   | C | -0.0221 |
| rs10873220  | G | 0.0192  |
| rs67426629  | G | 0.1     |
| rs12172817  | A | -0.015  |
| rs17715699  | C | -0.0182 |
| rs117282893 | C | 0.0946  |
| rs11848297  | C | -0.0818 |
| rs74607692  | A | 0.0684  |
| rs17279640  | A | -0.0872 |
| rs72693014  | C | -0.0353 |
| rs7148554   | T | 0.021   |
| rs75007737  | T | 0.069   |
| rs72698032  | A | -0.0688 |
| rs72706489  | A | 0.0476  |
| rs112501591 | G | 0.1043  |
| rs78194536  | T | -0.0697 |
| rs140339233 | C | 0.0667  |
| rs854423    | T | -0.0277 |
| rs762009    | A | -0.0168 |
| rs11622604  | T | 0.0702  |
| rs734335    | G | -0.0217 |
| rs60669045  | A | 0.0457  |
| rs10137729  | C | -0.0355 |
| rs6574405   | T | 0.017   |
| rs12879371  | T | -0.0158 |
| rs1977243   | G | -0.0157 |
| rs17700958  | A | -0.0835 |
| rs10484119  | A | 0.019   |
| rs150718173 | T | -0.0634 |
| rs148633448 | A | 0.0812  |

|             |   |         |
|-------------|---|---------|
| rs1275681   | T | -0.0148 |
| rs10146172  | G | -0.0327 |
| rs61976944  | C | -0.0159 |
| rs116007472 | T | 0.0819  |
| rs57917059  | A | -0.0252 |
| rs8015878   | T | 0.0184  |
| rs115766855 | T | 0.0653  |
| rs8015056   | C | -0.0183 |
| rs11621221  | C | -0.0151 |
| rs11160156  | A | 0.0981  |
| rs75299033  | C | -0.0343 |
| rs78278315  | T | 0.0769  |
| rs78655325  | A | 0.0743  |
| rs75031303  | G | -0.0837 |
| rs8006873   | A | -0.0831 |
| rs150912993 | G | 0.0863  |
| rs7159908   | C | -0.0149 |
| rs118126045 | G | -0.0695 |
| rs17767332  | G | 0.0244  |
| rs72695275  | G | 0.0205  |
| rs57141766  | G | -0.0654 |
| rs80207282  | A | 0.0456  |
| rs77805057  | T | -0.0361 |
| rs55989869  | C | -0.0732 |
| rs113968172 | T | -0.0374 |
| rs4981674   | C | -0.0145 |
| rs6573823   | A | 0.0152  |
| rs145754553 | A | -0.0762 |
| rs12889089  | A | 0.0171  |
| rs78948583  | T | -0.0789 |
| rs34772727  | A | -0.0428 |
| rs59358068  | G | 0.0155  |
| rs34986192  | T | 0.0664  |
| rs144196374 | C | 0.1287  |
| rs17105951  | A | 0.0191  |
| rs142910139 | A | -0.1095 |
| rs117180345 | A | -0.1599 |
| rs79752583  | C | -0.0217 |
| rs143675278 | A | -0.053  |
| rs11621540  | G | -0.0286 |
| rs56280987  | T | -0.1084 |
| rs72684492  | A | -0.1337 |
| rs72665965  | C | -0.0586 |
| rs72686106  | T | 0.0294  |
| rs8006803   | T | 0.0199  |
| rs145821101 | C | 0.0798  |
| rs12589331  | A | -0.0184 |

|             |   |         |
|-------------|---|---------|
| rs1683112   | G | 0.0436  |
| rs117279567 | A | 0.0566  |
| rs2749539   | C | -0.0147 |
| rs11159339  | C | -0.0186 |
| rs144112063 | A | -0.1269 |
| rs76552190  | C | 0.1052  |
| rs35878881  | G | 0.022   |
| rs10873070  | A | -0.0194 |
| rs145657051 | A | -0.0522 |
| rs8012408   | A | 0.0246  |
| rs150449976 | A | 0.0751  |
| rs11623363  | T | -0.1006 |
| rs117507520 | T | -0.0655 |
| rs75213662  | T | 0.0381  |
| rs112672938 | G | -0.1209 |
| rs712372    | T | -0.0156 |
| rs2354320   | T | 0.0276  |
| rs4905413   | A | -0.0292 |
| rs80116832  | C | -0.0933 |
| rs149720940 | A | 0.1182  |
| rs718545    | G | -0.0245 |
| rs4904863   | A | 0.0189  |
| rs1951757   | T | 0.0247  |
| rs77483962  | A | -0.0247 |
| rs76353839  | A | -0.0796 |
| rs858876    | C | -0.0156 |
| rs117027373 | T | 0.0539  |
| rs79807191  | A | 0.048   |
| rs75973834  | T | -0.091  |
| rs117437408 | T | -0.0832 |
| rs150616001 | C | 0.0781  |
| rs17118178  | A | -0.029  |
| rs140958739 | G | 0.1089  |
| rs34874929  | A | -0.0297 |
| rs112027845 | G | -0.0698 |
| rs35997537  | T | 0.0499  |
| rs74394317  | T | -0.0931 |
| rs11627297  | T | -0.0166 |
| rs77948181  | G | 0.0355  |
| rs10483872  | T | 0.0226  |
| rs2005292   | A | -0.0156 |
| rs80191028  | A | 0.0752  |
| rs10132309  | T | 0.042   |
| rs10141366  | C | -0.0234 |
| rs143376051 | G | -0.0324 |
| rs4902833   | G | 0.0465  |
| rs1159240   | T | -0.0335 |

|             |   |         |
|-------------|---|---------|
| rs1018449   | G | -0.0144 |
| rs8013633   | T | -0.0272 |
| rs11629344  | C | 0.0161  |
| rs112274115 | T | 0.026   |
| rs1910692   | G | -0.0153 |
| rs75142643  | T | -0.0915 |
| rs1004520   | G | -0.0312 |
| rs111317412 | C | -0.0384 |
| rs72717156  | A | 0.0572  |
| rs55867224  | C | -0.0502 |
| rs7151876   | T | 0.0184  |
| rs72729562  | C | -0.0201 |
| rs138562896 | T | -0.0361 |
| rs12888262  | T | 0.0252  |
| rs72622036  | C | 0.0679  |
| rs149814883 | A | -0.0946 |
| rs76219256  | G | 0.0183  |
| rs72697369  | T | -0.0511 |
| rs8017893   | A | -0.016  |
| rs4982407   | C | -0.0454 |
| rs17832861  | A | -0.0156 |
| rs151219080 | T | -0.0266 |
| rs78931811  | A | -0.079  |
| rs12893463  | A | 0.0269  |
| rs17278405  | T | -0.0211 |
| rs35306772  | T | -0.0932 |
| rs34415417  | A | 0.0237  |
| rs17756036  | T | -0.0659 |
| rs75167229  | C | 0.1133  |
| rs7151630   | T | 0.0361  |
| rs6573928   | C | -0.0228 |
| rs8011820   | T | -0.0209 |
| rs11557769  | A | -0.1049 |
| rs10140242  | G | 0.0202  |
| rs8013199   | C | -0.0203 |
| rs162634    | G | -0.0157 |
| rs3809437   | A | -0.019  |
| rs144213514 | A | 0.0677  |
| rs143611738 | G | 0.0764  |
| rs1279213   | G | 0.0226  |
| rs12894026  | A | -0.0162 |
| rs10873518  | T | 0.0163  |
| rs143720254 | A | 0.0976  |
| rs116977232 | G | -0.0413 |
| rs11627144  | T | -0.0524 |
| rs1963327   | A | 0.0174  |
| rs116998482 | A | -0.0741 |



|             |   |         |
|-------------|---|---------|
| rs111946933 | T | 0.0944  |
| rs7152356   | C | -0.0191 |
| rs76313842  | C | 0.0352  |
| rs142013931 | G | -0.0882 |
| rs243225    | A | 0.0158  |
| rs80194793  | T | -0.0315 |
| rs112769245 | T | -0.0551 |
| rs8022910   | C | -0.0185 |
| rs10140051  | G | -0.0145 |
| rs1204982   | C | 0.0151  |
| rs2293712   | C | 0.0161  |
| rs72675555  | T | 0.0248  |
| rs77567092  | T | -0.0563 |
| rs2623114   | C | 0.0701  |
| rs111667896 | C | -0.0996 |
| rs1469839   | A | 0.0253  |
| rs34543685  | A | -0.1066 |
| rs74735796  | A | -0.0469 |
| rs222609    | T | 0.0464  |
| rs28531843  | G | 0.0196  |
| rs17828361  | G | 0.0187  |
| rs3827902   | T | 0.0179  |
| rs8011267   | T | -0.0187 |
| rs147794924 | T | -0.068  |
| rs143771075 | C | -0.0935 |
| rs4981494   | G | -0.0155 |
| rs1761071   | C | 0.0175  |
| rs11626472  | T | -0.017  |
| rs147967628 | G | -0.1236 |
| rs17094938  | A | 0.0443  |
| rs76761167  | A | 0.0697  |
| rs10147805  | T | -0.0163 |
| rs140726611 | G | -0.0218 |
| rs72710130  | C | -0.1288 |
| rs7152276   | C | 0.0167  |
| rs749782    | C | 0.031   |
| rs146047778 | G | 0.0834  |
| rs8014953   | G | 0.0258  |
| rs10142785  | C | 0.0193  |
| rs62011041  | T | 0.0173  |
| rs61995425  | C | -0.0635 |
| rs11621356  | C | -0.0553 |
| rs1511320   | A | -0.0202 |
| rs10150908  | C | 0.0453  |
| rs2145639   | T | -0.0144 |
| rs74355390  | T | -0.0878 |
| rs144772459 | T | 0.1001  |

|             |   |         |
|-------------|---|---------|
| rs77220969  | A | -0.0639 |
| rs55952264  | T | -0.0224 |
| rs114659620 | T | -0.042  |
| rs1289467   | C | 0.0177  |
| rs797378    | A | -0.0157 |
| rs1890982   | T | -0.0181 |
| rs34594917  | C | -0.0666 |
| rs141724599 | A | -0.0662 |
| rs75602869  | A | -0.0904 |
| rs77372995  | A | 0.0372  |
| rs75408556  | T | 0.051   |
| rs12435953  | A | -0.0414 |
| rs75123192  | T | 0.0696  |
| rs75934842  | A | -0.0439 |
| rs79414664  | A | -0.0989 |
| rs11628534  | C | -0.0302 |
| rs146230687 | A | -0.032  |
| rs79208441  | T | -0.0636 |
| rs140183412 | T | -0.0606 |
| rs79976513  | T | -0.0775 |
| rs34362363  | T | 0.0142  |
| rs80019451  | T | 0.0215  |
| rs116891593 | C | -0.0379 |
| rs139751576 | T | -0.0676 |
| rs112698034 | A | -0.0513 |
| rs76675929  | T | -0.1181 |
| rs80182036  | A | -0.0558 |
| rs62014494  | C | 0.028   |
| rs146989558 | T | -0.097  |
| rs4547272   | T | -0.0148 |
| rs17096403  | G | -0.031  |
| rs11623358  | A | 0.0776  |
| rs149058031 | A | 0.0941  |
| rs10151517  | C | -0.0163 |
| rs62011420  | A | 0.0605  |
| rs117090482 | G | -0.0597 |
| rs61994777  | G | -0.0981 |
| rs4902438   | G | -0.0142 |
| rs148734157 | C | 0.0316  |
| rs3784016   | A | 0.061   |
| rs4906016   | G | -0.0186 |
| rs11628275  | A | 0.0702  |
| rs10140363  | G | 0.021   |
| rs28755405  | T | 0.0259  |
| rs72676435  | T | 0.0397  |
| rs116878868 | A | 0.0874  |
| rs116928967 | G | 0.0811  |

|             |   |         |
|-------------|---|---------|
| rs145853512 | T | 0.0577  |
| rs117457013 | T | -0.1205 |
| rs146100588 | C | -0.1313 |
| rs117730338 | G | -0.0615 |
| rs718060    | G | -0.0167 |
| rs2107685   | G | 0.0521  |
| rs79990107  | T | -0.0637 |
| rs116919191 | T | -0.0641 |
| rs56083431  | A | 0.0389  |
| rs140225396 | T | 0.1081  |
| rs78705091  | A | 0.0722  |
| rs17523653  | G | -0.0497 |
| rs147383744 | A | 0.067   |
| rs1740692   | C | -0.0183 |
| rs17176657  | C | 0.083   |
| rs148420064 | C | -0.0739 |
| rs78041238  | C | 0.0271  |
| rs113161731 | A | -0.0872 |
| rs78171731  | G | -0.0846 |
| rs35843682  | T | -0.0769 |
| rs73318621  | A | 0.0229  |
| rs10484228  | G | 0.0214  |
| rs7159321   | G | -0.0545 |
| rs8021487   | T | 0.0333  |
| rs12436961  | C | 0.0184  |
| rs4906289   | A | 0.0642  |
| rs7147946   | C | 0.0183  |
| rs12880414  | G | -0.022  |
| rs8012690   | T | -0.0254 |
| rs75723864  | G | 0.0808  |
| rs72710279  | T | 0.06    |
| rs73600433  | C | 0.0296  |
| rs149239445 | C | 0.0559  |
| rs10137814  | G | -0.0202 |
| rs242739    | A | -0.0574 |
| rs34720103  | A | 0.0407  |
| rs118122451 | C | -0.0494 |
| rs145971827 | T | -0.0824 |
| rs139990976 | A | 0.0712  |
| rs78048677  | A | -0.0582 |
| rs4901890   | A | 0.0166  |
| rs77322676  | G | 0.051   |
| rs11625342  | A | -0.0682 |
| rs55698428  | G | -0.0275 |
| rs11158679  | A | -0.0206 |
| rs17630716  | C | 0.0285  |
| rs74700885  | T | 0.066   |

|              |   |         |
|--------------|---|---------|
| rs148489117  | C | 0.035   |
| rs61992705   | T | 0.0545  |
| rs8009653    | T | -0.0565 |
| rs7150966    | G | 0.0352  |
| rs1954256    | T | -0.0282 |
| rs8008176    | A | 0.0164  |
| rs148575021  | T | -0.1138 |
| rs6575728    | C | 0.0878  |
| rs117603297  | A | -0.0353 |
| rs61996770   | T | 0.0377  |
| rs76190431   | G | -0.0617 |
| rs12588124   | T | -0.0166 |
| rs1640246    | G | -0.0253 |
| rs59912232   | T | 0.0864  |
| rs61986131   | A | -0.032  |
| rs72677461   | G | 0.0982  |
| rs143228053  | C | -0.0785 |
| rs2333660    | T | 0.0146  |
| rs112150875  | A | -0.0356 |
| rs75103339   | C | -0.0577 |
| rs6111       | T | 0.0304  |
| rs1152796    | T | 0.0168  |
| rs112653656  | T | 0.0412  |
| rs1111704146 | T | -0.0323 |
| rs17125347   | A | 0.0187  |
| rs4144603    | T | 0.0145  |
| rs2158526    | G | -0.023  |
| rs11625812   | G | -0.062  |
| rs1275831    | G | 0.0192  |
| rs56172761   | A | 0.0614  |
| rs183266     | C | 0.022   |
| rs61982383   | T | -0.0228 |
| rs28398007   | C | -0.0267 |
| rs113271083  | T | 0.0503  |
| rs2254354    | C | 0.0144  |
| rs112473970  | A | 0.0196  |
| rs78888470   | C | 0.0461  |
| rs1449415    | G | 0.0229  |
| rs28712300   | T | 0.0331  |
| rs145513308  | C | 0.0746  |
| rs17097278   | A | 0.03    |
| rs1570874    | C | -0.0511 |
| rs17199373   | G | 0.0294  |
| rs141102578  | C | 0.1093  |
| rs61978089   | T | -0.0786 |
| rs145538890  | T | -0.042  |
| rs78686073   | C | -0.0432 |

|             |   |         |
|-------------|---|---------|
| rs117629077 | G | 0.0325  |
| rs9806019   | A | 0.0144  |
| rs1289427   | T | -0.0139 |
| rs10131897  | T | -0.0528 |
| rs1956801   | C | -0.0153 |
| rs12431801  | A | -0.0239 |
| rs78952003  | G | -0.0298 |
| rs114665728 | T | -0.0521 |
| rs72720179  | G | 0.0457  |
| rs138982699 | C | 0.0992  |
| rs147884458 | T | -0.0695 |
| rs75601869  | G | -0.1151 |
| rs1289248   | A | 0.0139  |
| rs1889771   | T | 0.0211  |
| rs1956607   | C | 0.0219  |
| rs7150761   | T | -0.0205 |
| rs78942574  | T | 0.0168  |
| rs10144176  | A | 0.0177  |
| rs178916    | G | 0.0321  |
| rs117091524 | A | 0.1135  |
| rs6575162   | A | -0.0884 |
| rs227014    | G | 0.0448  |
| rs8009197   | G | 0.042   |
| rs112828279 | T | 0.0703  |
| rs17757294  | C | 0.062   |
| rs117347619 | A | -0.0626 |
| rs140317425 | T | -0.0397 |
| rs77017733  | A | 0.0323  |
| rs12886370  | T | 0.02    |
| rs117799428 | C | -0.0943 |
| rs61990304  | C | 0.0308  |
| rs61981518  | C | 0.0276  |
| rs872960    | A | -0.0928 |
| rs8010294   | G | 0.0138  |
| rs3748361   | C | -0.0194 |
| rs79122706  | C | -0.0986 |
| rs12897262  | T | -0.0276 |
| rs6571626   | T | -0.0275 |
| rs148960672 | G | 0.0905  |
| rs7141881   | A | -0.0144 |
| rs112653711 | A | 0.0475  |
| rs80265448  | T | 0.0465  |
| rs1286464   | T | 0.0232  |
| rs75190483  | G | 0.1246  |
| rs11626810  | G | -0.0172 |
| rs17099653  | G | -0.1149 |
| rs2174239   | T | 0.02    |

|             |   |         |
|-------------|---|---------|
| rs45440293  | C | -0.0297 |
| rs1956626   | A | -0.0151 |
| rs79767280  | A | -0.0905 |
| rs61989042  | T | 0.0354  |
| rs7149650   | A | 0.0294  |
| rs61978749  | A | -0.0673 |
| rs4982089   | G | 0.0202  |
| rs78797696  | T | -0.1108 |
| rs1951633   | G | -0.0201 |
| rs178954    | A | -0.0156 |
| rs61985537  | A | 0.0557  |
| rs149541654 | G | -0.0607 |
| rs117571814 | A | -0.1062 |
| rs179674    | C | -0.0152 |
| rs151212431 | G | -0.1038 |
| rs12882346  | A | -0.0197 |
| rs117163689 | C | 0.0545  |
| rs113463470 | T | -0.0751 |
| rs111888147 | A | -0.0765 |
| rs150272308 | C | 0.0845  |
| rs1288322   | G | -0.026  |
| rs71414171  | T | 0.0436  |
| rs116963868 | T | -0.056  |
| rs943322    | C | 0.0758  |
| rs17120531  | C | 0.0416  |
| rs17091867  | G | 0.0978  |
| rs79920746  | T | -0.0368 |
| rs117218925 | G | 0.0952  |
| rs117962013 | G | 0.1048  |
| rs12889912  | T | 0.0277  |
| rs71419929  | C | -0.0226 |
| rs118011007 | C | -0.0741 |
| rs8013918   | T | -0.0141 |
| rs8016324   | T | -0.0156 |
| rs1169463   | A | 0.07    |
| rs78326232  | T | 0.0229  |
| rs117186178 | T | -0.0782 |
| rs12432015  | C | 0.0207  |
| rs75408790  | G | 0.0378  |
| rs73313647  | T | 0.0186  |
| rs139933676 | G | -0.0717 |
| rs77387806  | G | -0.0449 |
| rs56318677  | A | 0.0507  |
| rs11157542  | A | 0.0153  |
| rs56266371  | G | -0.0874 |
| rs75354072  | A | 0.0799  |
| rs78658675  | C | 0.0627  |

|             |   |         |
|-------------|---|---------|
| rs12586828  | T | 0.0222  |
| rs111588285 | A | 0.0342  |
| rs76000506  | G | -0.0311 |
| rs2268969   | G | -0.0194 |
| rs148680952 | G | -0.0707 |
| rs17092749  | A | -0.041  |
| rs10146906  | A | -0.0145 |
| rs77599703  | A | -0.0507 |
| rs117349787 | A | -0.0547 |
| rs79524307  | T | -0.0777 |
| rs117034324 | A | 0.1231  |
| rs7156353   | C | 0.032   |
| rs2181050   | C | -0.0144 |
| rs11620652  | T | 0.0188  |
| rs12434295  | T | 0.0489  |
| rs148306358 | A | 0.0477  |
| rs2816679   | A | 0.0323  |
| rs9672058   | A | 0.014   |
| rs118006171 | T | 0.0772  |
| rs76497249  | T | 0.0285  |
| rs1698241   | A | -0.0157 |
| rs73281053  | T | -0.0241 |
| rs2098028   | C | -0.0149 |
| rs116364789 | A | -0.0802 |
| rs61049379  | T | -0.0239 |
| rs76742361  | A | -0.0539 |
| rs11159967  | G | -0.0404 |
| rs1076757   | T | -0.014  |
| rs11621312  | C | -0.0165 |
| rs35002771  | T | -0.0231 |
| rs1950588   | G | 0.0157  |
| rs147496447 | C | -0.0622 |
| rs12435388  | C | 0.0248  |
| rs149876811 | A | 0.1015  |
| rs62005393  | T | 0.0679  |
| rs2754063   | A | -0.0198 |
| rs138248890 | A | 0.0576  |
| rs17110870  | C | 0.0198  |
| rs3759519   | C | 0.0238  |
| rs10144150  | A | -0.0534 |
| rs17091095  | T | -0.0247 |
| rs28884013  | A | 0.0513  |
| rs139364717 | A | 0.1149  |
| rs74049844  | T | 0.044   |
| rs3783892   | G | 0.0253  |
| rs74998509  | G | -0.0743 |
| rs883760    | A | 0.0233  |

|             |   |         |
|-------------|---|---------|
| rs1424885   | G | 0.0212  |
| rs2873831   | G | 0.0586  |
| rs2077557   | G | 0.0155  |
| rs7154054   | T | -0.0362 |
| rs72680100  | G | -0.0495 |
| rs2789384   | A | 0.0236  |
| rs7158186   | T | -0.016  |
| rs4077165   | T | -0.0412 |
| rs75634015  | A | 0.1067  |
| rs8006116   | A | 0.0144  |
| rs10138860  | C | -0.0171 |
| rs117353567 | G | -0.0514 |
| rs12590121  | A | -0.053  |
| rs10146566  | G | 0.0348  |
| rs117289426 | C | -0.0444 |
| rs77880844  | A | 0.0601  |
| rs12884464  | C | 0.0224  |
| rs144560692 | A | 0.0736  |
| rs113513550 | C | -0.0521 |
| rs148294734 | A | 0.0637  |
| rs117245644 | T | 0.0701  |
| rs1947393   | C | -0.0137 |
| rs17110681  | G | -0.0324 |
| rs72698945  | A | 0.0339  |
| rs77602390  | A | 0.0359  |
| rs2895890   | G | -0.0169 |
| rs9972278   | T | 0.0396  |
| rs144337280 | G | 0.101   |
| rs7142966   | G | -0.037  |
| rs77841346  | A | -0.0256 |
| rs17091674  | T | 0.0234  |
| rs2025357   | G | -0.0167 |
| rs112433101 | C | 0.0334  |
| rs59071933  | A | -0.0218 |
| rs8017598   | G | -0.0606 |
| rs198263    | A | 0.0147  |
| rs8005907   | C | 0.0258  |
| rs8009902   | C | 0.0158  |
| rs8016033   | A | 0.036   |
| rs145786277 | A | -0.118  |
| rs57148883  | G | -0.0219 |
| rs140857980 | T | -0.0749 |
| rs4906422   | C | -0.0178 |
| rs61983962  | C | 0.0395  |
| rs45580231  | A | -0.0584 |
| rs79833822  | A | 0.0331  |
| rs34393407  | C | -0.0203 |



|             |   |         |
|-------------|---|---------|
| rs3093878   | C | 0.0258  |
| rs79261742  | A | -0.0589 |
| rs66727721  | A | 0.0146  |
| rs76745602  | T | 0.0678  |
| rs35383727  | T | 0.0243  |
| rs10498479  | G | 0.0308  |
| rs72697047  | T | -0.018  |
| rs17124166  | T | 0.0227  |
| rs61340848  | T | 0.0298  |
| rs12881800  | C | -0.0201 |
| rs71427112  | A | -0.0904 |
| rs58783707  | A | 0.0288  |
| rs906933    | C | 0.0158  |
| rs11625375  | C | 0.0479  |
| rs35745506  | G | 0.0133  |
| rs141194975 | G | 0.0646  |
| rs10148036  | T | -0.0179 |
| rs61989760  | C | 0.0965  |
| rs2110697   | C | -0.0148 |
| rs58663838  | A | 0.0249  |
| rs79584445  | C | -0.0745 |
| rs34929630  | C | -0.0434 |
| rs117351054 | T | -0.0663 |
| rs74427070  | C | -0.0257 |
| rs76189841  | C | -0.0463 |
| rs138304083 | C | -0.0639 |
| rs112593182 | T | 0.0713  |
| rs35949304  | A | 0.0591  |
| rs73346690  | A | 0.0281  |
| rs12889412  | T | 0.0152  |
| rs8014021   | C | -0.0206 |
| rs61744857  | T | -0.0353 |
| rs11844159  | T | -0.0209 |
| rs75987516  | T | -0.038  |
| rs17101773  | T | 0.0223  |
| rs10150732  | G | 0.0674  |
| rs74091119  | G | 0.0271  |
| rs117400580 | A | 0.0456  |
| rs113574894 | T | -0.0604 |
| rs76574367  | C | -0.0488 |
| rs917069    | C | 0.0162  |
| rs73349365  | T | -0.0454 |
| rs60189618  | T | -0.0257 |
| rs17095231  | G | -0.0457 |
| rs41507344  | T | 0.0297  |
| rs28673869  | G | 0.0216  |
| rs17833329  | T | -0.0158 |

|             |   |         |
|-------------|---|---------|
| rs117608670 | G | -0.0556 |
| rs17519834  | A | -0.0351 |
| rs17098943  | T | 0.0249  |
| rs1190916   | C | -0.0185 |
| rs139232700 | A | 0.0955  |
| rs117275379 | C | 0.0766  |
| rs117941552 | C | -0.0727 |
| rs12435092  | G | 0.0175  |
| rs11625222  | G | -0.1181 |
| rs78097224  | C | 0.0275  |
| rs183302    | A | -0.0211 |
| rs11622364  | T | -0.018  |
| rs941636    | A | 0.0209  |
| rs76878383  | T | 0.0966  |
| rs72722652  | T | -0.0855 |
| rs75644893  | A | -0.0489 |
| rs72721903  | G | 0.0306  |
| rs36085999  | T | -0.0229 |
| rs56202161  | A | -0.068  |
| rs72713425  | A | -0.0772 |
| rs117092223 | C | -0.0388 |
| rs2242618   | A | 0.0181  |
| rs77801902  | G | -0.0627 |
| rs56007278  | A | -0.0176 |
| rs151199076 | A | -0.0386 |
| rs1676235   | A | 0.0166  |
| rs143200059 | T | -0.0616 |
| rs117702811 | T | 0.0891  |
| rs78764019  | A | -0.0612 |
| rs72728241  | A | 0.0205  |
| rs72687396  | A | -0.0238 |
| rs11626317  | A | 0.0381  |
| rs78428688  | A | 0.0927  |
| rs61992802  | C | 0.0768  |
| rs58721247  | A | 0.0301  |
| rs76690205  | C | -0.0272 |
| rs7159563   | C | 0.0138  |
| rs1058327   | G | -0.0236 |
| rs74674485  | C | -0.0704 |
| rs139356755 | T | -0.0673 |
| rs67684188  | C | 0.0207  |
| rs60808852  | G | -0.0152 |
| rs1959091   | G | -0.0216 |
| rs34631533  | T | -0.0904 |
| rs77421433  | C | 0.0677  |
| rs1533357   | T | -0.0229 |
| rs117080544 | A | -0.0474 |

|             |   |         |
|-------------|---|---------|
| rs79643370  | T | -0.0419 |
| rs72716489  | A | -0.0523 |
| rs10139973  | A | 0.0149  |
| rs61989413  | T | 0.0197  |
| rs17120368  | A | 0.0358  |
| rs58538445  | G | 0.0198  |
| rs61980370  | A | -0.0229 |
| rs79926180  | A | 0.0397  |
| rs28417404  | A | 0.0206  |
| rs74593981  | A | 0.0395  |
| rs34563123  | T | -0.0417 |
| rs77534171  | T | -0.023  |
| rs2883051   | A | 0.0297  |
| rs111650618 | G | 0.1114  |
| rs60724295  | G | -0.0407 |
| rs850261    | A | -0.0134 |
| rs34936049  | A | 0.0165  |
| rs17117038  | C | 0.0371  |
| rs8015750   | A | -0.0243 |
| rs117534404 | T | -0.0891 |
| rs67850238  | G | 0.0282  |
| rs78659153  | G | 0.0664  |
| rs9658629   | T | 0.023   |
| rs118054019 | C | 0.0497  |
| rs7153853   | A | -0.0497 |
| rs74562530  | T | -0.0594 |
| rs9919924   | T | 0.0181  |
| rs142610491 | G | 0.0729  |
| rs4982508   | C | -0.0136 |
| rs72694230  | C | 0.0885  |
| rs74751684  | G | -0.0418 |
| rs11850806  | G | 0.0473  |
| rs111423879 | A | -0.021  |
| rs2181663   | C | -0.0167 |
| rs140907722 | T | -0.1029 |
| rs7158025   | G | 0.014   |
| rs140589147 | T | -0.0561 |
| rs74902155  | C | -0.0697 |
| rs11620733  | A | 0.0144  |
| rs17555271  | G | -0.0317 |
| rs75133067  | G | -0.0695 |
| rs74624233  | A | -0.0626 |
| rs6571611   | C | 0.0139  |
| rs61257813  | A | 0.0432  |
| rs76544000  | G | -0.1211 |
| rs77004161  | C | 0.0208  |
| rs72682936  | A | 0.0785  |

|             |   |         |
|-------------|---|---------|
| rs147112707 | G | 0.087   |
| rs61990396  | C | -0.0487 |
| rs79509351  | T | -0.0777 |
| rs7144470   | T | 0.0256  |
| rs147637797 | A | 0.0467  |
| rs932484    | T | -0.0241 |
| rs17098834  | T | 0.0629  |
| rs77808563  | C | 0.0474  |
| rs12435483  | T | -0.0183 |
| rs7143690   | C | -0.0154 |
| rs79465765  | C | -0.0794 |
| rs111798677 | T | 0.0637  |
| rs61975601  | A | -0.0278 |
| rs4904899   | C | -0.0131 |
| rs35863119  | C | -0.0266 |
| rs117654472 | T | -0.0961 |
| rs8023177   | T | 0.0223  |
| rs17114743  | G | -0.0749 |
| rs991550    | G | -0.025  |
| rs117950772 | A | 0.0562  |
| rs79124945  | T | 0.0931  |
| rs80009857  | C | -0.049  |
| rs74536787  | A | 0.0451  |
| rs2810055   | A | 0.0156  |
| rs7143818   | T | -0.0466 |
| rs56189879  | G | -0.0773 |
| rs12590630  | C | -0.0274 |
| rs11626568  | C | -0.0223 |
| rs17100963  | A | 0.0247  |
| rs111875515 | T | 0.0543  |
| rs78415763  | T | 0.0322  |
| rs17097165  | T | 0.0375  |
| rs4598819   | C | 0.063   |
| rs117348149 | A | 0.1016  |
| rs7141174   | T | 0.0223  |
| rs34976846  | T | 0.0144  |
| rs28735841  | C | -0.0953 |
| rs146539464 | T | 0.069   |
| rs145124894 | A | -0.0504 |
| rs7150804   | C | 0.0298  |
| rs116915205 | A | 0.1204  |
| rs8007797   | T | -0.0156 |
| rs742897    | T | -0.015  |
| rs117031069 | C | 0.0823  |
| rs74755385  | G | -0.0697 |
| rs72734078  | A | -0.1129 |
| rs141706091 | A | -0.0637 |

|             |   |         |
|-------------|---|---------|
| rs176903    | A | 0.0137  |
| rs78208274  | C | -0.066  |
| rs55876213  | T | 0.0309  |
| rs1984507   | C | 0.0283  |
| rs117932795 | T | -0.078  |
| rs1152401   | G | 0.0159  |
| rs150651146 | C | -0.0583 |
| rs11156732  | C | 0.0137  |
| rs6571577   | A | 0.0138  |
| rs79600573  | T | -0.0827 |
| rs9671833   | G | -0.0154 |
| rs10872856  | T | 0.029   |
| rs12434436  | A | 0.0135  |
| rs2022879   | G | -0.0647 |
| rs72672234  | C | -0.0246 |
| rs75057562  | T | -0.0171 |
| rs61996507  | T | 0.0545  |
| rs55896096  | A | -0.034  |
| rs12587772  | G | -0.0368 |
| rs28440126  | T | -0.0165 |
| rs17107644  | T | 0.0465  |
| rs17093357  | C | -0.0242 |
| rs139435306 | A | 0.1049  |
| rs11627338  | G | -0.0153 |
| rs17676085  | A | 0.0449  |
| rs17763289  | T | -0.0314 |
| rs117870589 | A | -0.0328 |
| rs75120210  | T | -0.079  |
| rs932261    | A | -0.0222 |
| rs1952832   | A | 0.0584  |
| rs8013197   | T | -0.0164 |
| rs117897065 | G | 0.1436  |
| rs12882996  | A | 0.0137  |
| rs4900000   | C | -0.0141 |
| rs144209558 | A | -0.0408 |
| rs141021148 | G | -0.1072 |
| rs111364917 | G | 0.0394  |
| rs61988684  | A | -0.0337 |
| rs7156806   | A | -0.0211 |
| rs464306    | G | 0.0451  |
| rs147866636 | T | -0.0821 |
| rs10139701  | G | -0.042  |
| rs117101324 | A | -0.0406 |
| rs114354741 | A | -0.0483 |
| rs56262266  | G | 0.034   |
| rs61995621  | C | 0.0189  |
| rs11157836  | A | -0.0203 |

|             |   |         |
|-------------|---|---------|
| rs77729313  | C | 0.063   |
| rs2273742   | T | -0.0298 |
| rs59358210  | A | 0.0469  |
| rs941504    | C | -0.0283 |
| rs117740473 | G | 0.0405  |
| rs34532009  | C | -0.0607 |
| rs17255129  | A | 0.0177  |
| rs10138717  | C | -0.0273 |
| rs56102397  | A | -0.0453 |
| rs723113    | T | 0.0132  |
| rs35476026  | G | 0.0572  |
| rs10498539  | G | -0.0532 |
| rs79488434  | G | -0.0712 |
| rs2144052   | T | 0.0169  |
| rs72686266  | C | -0.0369 |
| rs117230172 | A | -0.0673 |
| rs150842300 | G | -0.1107 |
| rs1475002   | A | 0.0349  |
| rs61982145  | G | 0.0247  |
| rs36176094  | G | 0.0585  |
| rs148443991 | A | 0.1342  |
| rs139339441 | G | -0.0605 |
| rs117172337 | C | -0.0487 |
| rs17792790  | G | -0.0922 |
| rs10484188  | T | 0.0131  |
| rs113291338 | C | 0.0299  |
| rs1381596   | T | -0.0707 |
| rs943992    | C | -0.0308 |
| rs73269048  | A | 0.0139  |
| rs2186074   | C | -0.0258 |
| rs75408695  | A | 0.045   |
| rs35812616  | A | -0.0452 |
| rs10150710  | T | 0.0144  |
| rs12435203  | A | -0.0148 |
| rs141194204 | T | -0.0636 |
| rs1189279   | G | 0.0137  |
| rs117395222 | A | 0.0466  |
| rs17105533  | T | -0.064  |
| rs147357089 | G | 0.0358  |
| rs117431498 | T | -0.0379 |
| rs7157674   | A | -0.0168 |
| rs1268411   | G | 0.0184  |
| rs17499818  | A | -0.0625 |
| rs80090448  | C | 0.045   |
| rs144512259 | T | 0.1037  |
| rs116929511 | C | -0.0452 |
| rs72664843  | A | 0.0309  |

|             |   |         |
|-------------|---|---------|
| rs141758102 | T | -0.0829 |
| rs2771369   | T | 0.0176  |
| rs77357396  | T | -0.0974 |
| rs139668460 | T | 0.082   |
| rs72685713  | T | -0.054  |
| rs7153857   | C | -0.045  |
| rs150967906 | G | -0.0652 |
| rs2333108   | G | -0.0195 |
| rs4905639   | T | -0.0164 |
| rs12891666  | G | -0.0147 |
| rs77083672  | C | 0.0604  |
| rs11621658  | G | 0.015   |
| rs78365688  | T | -0.0495 |
| rs12589609  | T | -0.0246 |
| rs117959454 | A | -0.0728 |
| rs111983953 | A | -0.0495 |
| rs12436090  | A | -0.0239 |
| rs61986018  | G | 0.0919  |
| rs3954286   | C | 0.0154  |
| rs112641267 | A | 0.0292  |
| rs958213    | G | 0.0479  |
| rs11156834  | C | -0.0215 |
| rs78339424  | T | 0.0416  |
| rs12881408  | T | 0.0294  |
| rs55637245  | G | 0.0202  |
| rs7143796   | A | 0.0133  |
| rs35390425  | C | -0.0319 |
| rs11847993  | C | -0.0135 |
| rs11159891  | T | -0.0138 |
| rs72667380  | A | 0.0198  |
| rs117026794 | T | -0.0674 |
| rs113885810 | T | 0.0447  |
| rs6575276   | C | 0.0147  |
| rs179079    | T | -0.0192 |
| rs117639348 | G | -0.0804 |
| rs112193335 | T | -0.102  |
| rs17093844  | C | 0.0349  |
| rs1257677   | T | -0.0132 |
| rs116190485 | T | -0.0444 |
| rs118054391 | A | -0.0587 |
| rs144750526 | G | 0.0809  |
| rs12437014  | C | 0.0846  |
| rs117527709 | A | -0.0786 |
| rs72728055  | C | 0.0477  |
| rs148870304 | A | 0.0956  |
| rs146616132 | T | 0.0703  |
| rs17740973  | A | -0.0441 |

|             |   |         |
|-------------|---|---------|
| rs11156737  | C | 0.0141  |
| rs10142876  | G | 0.0148  |
| rs8009575   | T | -0.0152 |
| rs4898651   | T | 0.0139  |
| rs57533370  | A | -0.0219 |
| rs7141242   | A | 0.0151  |
| rs144177274 | A | 0.0953  |
| rs867402    | A | 0.0185  |
| rs11159614  | A | 0.0198  |
| rs113016477 | A | 0.0362  |
| rs75857744  | C | 0.0333  |
| rs10147857  | C | -0.0158 |
| rs117023038 | T | -0.0559 |
| rs112761415 | T | -0.0278 |
| rs4898984   | A | 0.0127  |
| rs7143602   | T | 0.0268  |
| rs59623620  | T | 0.0171  |
| rs139517889 | T | 0.0794  |
| rs7157963   | A | 0.0155  |
| rs1080069   | C | -0.0482 |
| rs117911063 | T | -0.066  |
| rs140701275 | A | 0.0627  |
| rs61989805  | C | -0.0255 |
| rs7145739   | A | 0.0212  |
| rs142247335 | T | 0.0714  |
| rs118129238 | T | -0.0638 |
| rs77006525  | C | 0.0638  |
| rs75090250  | A | 0.0609  |
| rs75581265  | G | -0.0637 |
| rs80085411  | A | -0.0461 |
| rs8014119   | C | 0.0253  |
| rs75514241  | T | -0.0199 |
| rs143372756 | A | -0.0508 |
| rs141190050 | A | 0.0628  |
| rs74345955  | A | -0.0589 |
| rs78248524  | C | -0.0578 |
| rs114474759 | G | -0.062  |
| rs11847845  | A | 0.0196  |
| rs12890988  | G | 0.016   |
| rs143486944 | A | 0.0219  |
| rs34084623  | T | 0.0304  |
| rs138420041 | T | 0.0433  |
| rs117414938 | A | -0.0824 |
| rs1245194   | C | 0.023   |
| rs3742758   | A | 0.0498  |
| rs117928977 | T | 0.0544  |
| rs76957836  | A | -0.093  |



|             |   |         |
|-------------|---|---------|
| rs2318860   | C | -0.0129 |
| rs12884912  | C | 0.0135  |
| rs1189106   | T | -0.013  |
| rs10141794  | A | -0.0127 |
| rs76308563  | A | 0.0292  |
| rs10143898  | G | 0.0143  |
| rs11160321  | T | -0.032  |
| rs17117690  | C | 0.0249  |
| rs8010674   | T | 0.0128  |
| rs8009006   | A | -0.0335 |
| rs7143080   | A | -0.0493 |
| rs17121241  | A | 0.0466  |
| rs4899970   | A | 0.0138  |
| rs72705390  | T | 0.0824  |
| rs883350    | T | -0.0505 |
| rs61985541  | C | -0.0454 |
| rs75854470  | T | -0.0351 |
| rs1243489   | C | 0.0139  |
| rs72683267  | C | 0.0264  |
| rs2775269   | T | -0.0331 |
| rs1315995   | C | -0.0145 |
| rs150103168 | T | 0.0607  |
| rs980691    | C | -0.0195 |
| rs79610051  | C | 0.0978  |
| rs77730612  | T | -0.0957 |
| rs145209138 | A | 0.0539  |
| rs11158879  | G | 0.0236  |
| rs17128989  | C | 0.0413  |
| rs12885205  | A | -0.0151 |
| rs61979062  | T | -0.0636 |
| rs12586570  | G | 0.0224  |
| rs434161    | C | -0.0228 |
| rs8018270   | A | -0.0219 |
| rs12887841  | A | 0.0213  |
| rs74959604  | A | -0.0547 |
| rs7155504   | C | 0.0226  |
| rs35125160  | C | -0.0159 |
| rs78697441  | A | 0.0621  |
| rs760247    | G | -0.0148 |
| rs72671155  | G | 0.0828  |
| rs78426230  | A | -0.0604 |
| rs234151    | G | -0.0143 |
| rs118083570 | T | -0.0735 |
| rs12889358  | G | -0.0135 |
| rs11623498  | G | -0.0376 |
| rs79759267  | C | -0.0564 |
| rs139240460 | A | 0.0786  |

|             |   |         |
|-------------|---|---------|
| rs194772    | A | 0.0123  |
| rs66508743  | A | 0.0196  |
| rs141110501 | T | 0.1092  |
| rs1430479   | A | -0.0213 |
| rs11627543  | T | 0.0625  |
| rs113691775 | A | -0.1003 |
| rs76964549  | G | -0.0553 |
| rs77364669  | G | -0.0901 |
| rs10146812  | T | -0.0144 |
| rs76434884  | A | 0.0373  |
| rs79751812  | T | 0.045   |
| rs150525871 | T | 0.0693  |
| rs11847897  | C | -0.0159 |
| rs28595154  | C | -0.0137 |
| rs2789385   | C | -0.0463 |
| rs77005097  | T | 0.0305  |
| rs1120033   | C | -0.0128 |
| rs9943997   | A | -0.0136 |
| rs8012921   | T | 0.026   |
| rs117646263 | T | 0.0546  |
| rs2693677   | G | -0.0145 |
| rs74873209  | C | 0.0486  |
| rs17438210  | G | 0.0189  |
| rs141813526 | T | 0.051   |
| rs10146642  | T | 0.0449  |
| rs12888763  | C | 0.0138  |
| rs112147100 | A | 0.0395  |
| rs79974986  | T | 0.0618  |
| rs76482268  | A | 0.0348  |
| rs117331481 | T | -0.0882 |
| rs35629402  | G | -0.0156 |
| rs61998981  | A | 0.0531  |
| rs117688148 | T | -0.0724 |
| rs143488542 | C | 0.0647  |
| rs76291966  | T | -0.0941 |
| rs150009758 | C | 0.0793  |
| rs12432049  | T | 0.013   |
| rs61984879  | A | -0.0294 |
| rs117581570 | A | 0.0328  |
| rs143804056 | C | -0.0415 |
| rs112813371 | A | -0.0421 |
| rs113276094 | G | 0.0534  |
| rs79331072  | C | 0.0148  |
| rs149552268 | T | 0.0477  |
| rs8016998   | C | -0.0127 |
| rs57066261  | C | -0.0234 |
| rs118158492 | A | 0.0675  |

|             |   |         |
|-------------|---|---------|
| rs10129964  | T | -0.0554 |
| rs4906066   | C | 0.013   |
| rs1191552   | C | 0.0439  |
| rs111371607 | A | -0.0616 |
| rs117830389 | A | -0.1115 |
| rs17096307  | T | 0.0359  |
| rs61992471  | C | -0.026  |
| rs148238833 | A | -0.0787 |
| rs4567639   | G | 0.0126  |
| rs61983085  | G | -0.0599 |
| rs77049796  | A | -0.0258 |
| rs12587255  | T | -0.0162 |
| rs117207394 | A | 0.0685  |
| rs864033    | C | 0.0313  |
| rs78425357  | C | 0.0485  |
| rs117691185 | A | 0.097   |
| rs4356397   | A | -0.0536 |
| rs1950663   | T | 0.0143  |
| rs1683095   | G | -0.0166 |
| rs118078467 | T | 0.0552  |
| rs7152222   | G | 0.0236  |
| rs74819206  | T | 0.0665  |
| rs2293713   | T | 0.0781  |
| rs1958048   | G | -0.0526 |
| rs111324789 | T | -0.0389 |
| rs2332911   | G | -0.04   |
| rs17094860  | A | -0.0972 |
| rs222675    | A | -0.0172 |
| rs28706858  | A | 0.0155  |
| rs145104950 | T | 0.0653  |
| rs75968520  | G | -0.0665 |
| rs6572840   | A | 0.0176  |
| rs111453093 | C | 0.02    |
| rs2536142   | G | -0.0192 |
| rs78867094  | T | 0.0742  |
| rs35365725  | C | 0.0193  |
| rs11160222  | T | -0.0221 |
| rs74342550  | A | 0.0416  |
| rs28529220  | T | 0.0173  |
| rs17602677  | C | -0.0721 |
| rs76096984  | G | 0.0525  |
| rs55731113  | T | 0.1048  |
| rs35606240  | C | 0.0415  |
| rs4904736   | A | 0.019   |
| rs28497920  | C | -0.0166 |
| rs77774273  | A | 0.0415  |
| rs145664949 | A | -0.0202 |

|             |   |         |
|-------------|---|---------|
| rs80191891  | C | 0.0794  |
| rs111878356 | T | -0.0452 |
| rs75258126  | A | -0.077  |
| rs12887059  | T | 0.0128  |
| rs7150516   | G | -0.0353 |
| rs144717887 | A | 0.0598  |
| rs138128533 | A | 0.0633  |
| rs117334896 | A | 0.053   |
| rs713109    | T | 0.0199  |
| rs10150203  | T | -0.0174 |
| rs116889152 | C | 0.0641  |
| rs17884694  | G | -0.0364 |
| rs143046104 | G | 0.0295  |
| rs11159206  | C | -0.0307 |
| rs7148611   | C | 0.0257  |
| rs141497892 | C | -0.068  |
| rs2099275   | C | 0.0128  |
| rs3813543   | A | -0.0122 |
| rs7141707   | C | -0.0135 |
| rs12147088  | G | 0.0157  |
| rs112256822 | C | 0.0583  |
| rs76684539  | T | 0.0595  |
| rs78658913  | A | -0.0596 |
| rs4905999   | A | -0.0164 |
| rs9323621   | A | -0.0147 |
| rs210304    | T | -0.0386 |
| rs58991082  | C | 0.0647  |
| rs56291641  | T | -0.0129 |
| rs1951030   | G | -0.0406 |
| rs434181    | G | -0.0126 |
| rs11159701  | T | 0.0258  |
| rs112824593 | A | 0.03    |
| rs111559949 | A | -0.0727 |
| rs12896166  | C | -0.0556 |
| rs118156139 | C | 0.0557  |
| rs78407258  | A | -0.098  |
| rs1292008   | T | 0.0684  |
| rs7155613   | C | -0.0122 |
| rs68062833  | A | -0.0171 |
| rs11620719  | C | 0.018   |
| rs142125191 | A | -0.0612 |
| rs73350470  | C | 0.0238  |
| rs17806459  | G | 0.0264  |
| rs117044927 | A | 0.0649  |
| rs75205153  | A | -0.0707 |
| rs11627833  | G | 0.0269  |
| rs78065194  | G | -0.0842 |

|             |   |         |
|-------------|---|---------|
| rs2896137   | A | -0.0124 |
| rs8021570   | T | 0.0385  |
| rs8018167   | T | -0.0865 |
| rs1998057   | C | -0.0128 |
| rs9944127   | G | -0.0127 |
| rs72726303  | T | -0.0185 |
| rs151101    | C | -0.037  |
| rs117774272 | C | -0.0836 |
| rs7359088   | G | 0.013   |
| rs7150887   | T | 0.022   |
| rs36092299  | G | 0.0482  |
| rs28520688  | G | 0.0197  |
| rs78873849  | A | 0.0398  |
| rs117086746 | G | 0.0487  |
| rs17255329  | A | -0.0406 |
| rs55961676  | G | -0.0321 |
| rs61976965  | A | 0.0192  |
| rs74041793  | C | -0.0277 |
| rs113246377 | A | -0.0597 |
| rs74792371  | G | -0.029  |
| rs1159998   | G | 0.0212  |
| rs10483541  | C | -0.0411 |
| rs1045863   | C | 0.0382  |
| rs77154201  | C | -0.0234 |
| rs73290538  | T | 0.0308  |
| rs7153206   | A | 0.0218  |
| rs945017    | A | 0.0209  |
| rs117990403 | C | -0.0742 |
| rs4255724   | G | -0.0259 |
| rs10148158  | T | 0.014   |
| rs12885365  | T | 0.0166  |
| rs10140464  | G | 0.0167  |
| rs78292244  | C | 0.0524  |
| rs117800998 | C | 0.0331  |
| rs61977150  | T | 0.0827  |
| rs8018390   | T | -0.0314 |
| rs76860291  | A | 0.076   |
| rs76532736  | C | -0.0547 |
| rs117911262 | A | -0.07   |
| rs117711795 | G | 0.0471  |
| rs117951008 | G | 0.0535  |
| rs117726183 | T | 0.0605  |
| rs111335485 | A | 0.0571  |
| rs11159090  | C | 0.0125  |
| rs72678228  | A | 0.0571  |
| rs116857941 | C | 0.0434  |
| rs17116326  | C | -0.0138 |

|             |   |         |
|-------------|---|---------|
| rs77488561  | C | -0.0627 |
| rs35265133  | C | -0.038  |
| rs7160869   | T | -0.0138 |
| rs79032800  | A | 0.0597  |
| rs78379675  | G | -0.0726 |
| rs142020496 | G | 0.0477  |
| rs60612595  | C | 0.0307  |
| rs962119    | G | 0.0136  |
| rs113779911 | T | 0.0667  |
| rs1959993   | A | 0.0292  |
| rs117695852 | T | 0.051   |
| rs76618809  | T | 0.0455  |
| rs8003016   | A | -0.0152 |
| rs78908056  | A | 0.0509  |
| rs944123    | A | 0.0272  |
| rs7146512   | C | -0.0128 |
| rs8005548   | C | 0.0199  |
| rs59251010  | A | -0.0786 |
| rs17199380  | G | 0.0448  |
| rs60332364  | C | 0.031   |
| rs76596936  | C | -0.0717 |
| rs79097248  | G | -0.0541 |
| rs10444675  | A | 0.0627  |
| rs61342200  | A | 0.0506  |
| rs12897838  | A | 0.0459  |
| rs17115605  | C | -0.0242 |
| rs1073778   | T | 0.0134  |
| rs2753616   | G | 0.0121  |
| rs12890887  | T | -0.0142 |
| rs10132572  | G | -0.031  |
| rs12434407  | G | 0.0124  |
| rs74088310  | G | 0.0236  |
| rs75434431  | A | -0.0644 |
| rs144335491 | T | 0.0715  |
| rs55855318  | A | -0.0275 |
| rs1955851   | G | -0.0131 |
| rs2254817   | T | -0.0169 |
| rs61988300  | G | -0.0207 |
| rs79755583  | A | 0.0453  |
| rs11159918  | G | 0.0244  |
| rs1335525   | T | -0.0133 |
| rs111820782 | T | -0.0729 |
| rs225954    | T | -0.0123 |
| rs976147    | T | -0.0249 |
| rs1285835   | C | -0.012  |
| rs117784289 | T | -0.0839 |
| rs75304266  | A | 0.0391  |

|             |   |         |
|-------------|---|---------|
| rs4902073   | T | -0.0484 |
| rs60764762  | A | 0.0489  |
| rs74062013  | T | -0.0686 |
| rs151117479 | T | 0.0442  |
| rs74379011  | C | 0.0463  |
| rs112639902 | T | -0.0403 |
| rs17091448  | C | 0.0148  |
| rs10129700  | A | 0.0129  |
| rs111238409 | G | -0.048  |
| rs58321573  | C | -0.0724 |
| rs862141    | G | 0.0154  |
| rs61993619  | A | -0.0186 |
| rs12434868  | A | -0.0243 |
| rs73253341  | A | 0.0874  |
| rs74434001  | A | 0.0207  |
| rs116854560 | T | 0.0506  |
| rs76511386  | A | 0.0898  |
| rs117933773 | A | -0.041  |
| rs7142876   | T | 0.096   |
| rs7150367   | A | -0.0719 |
| rs1263793   | G | -0.0123 |
| rs118025328 | T | 0.0658  |
| rs74793565  | C | 0.0489  |
| rs72667870  | G | -0.0157 |
| rs8016776   | T | 0.0144  |
| rs17712565  | C | -0.0374 |
| rs117884592 | A | -0.0541 |
| rs117939544 | G | -0.0532 |
| rs12431724  | A | 0.0191  |
| rs74080254  | A | -0.0195 |
| rs74382458  | G | 0.074   |
| rs1257297   | A | 0.0174  |
| rs117180235 | A | -0.076  |
| rs58028684  | A | -0.0368 |
| rs61979245  | T | -0.0316 |
| rs76892622  | G | -0.0592 |
| rs76069159  | T | 0.0284  |
| rs34648344  | T | 0.1099  |
| rs1190965   | G | -0.0176 |
| rs142522794 | C | 0.0478  |
| rs10149170  | A | 0.0138  |
| rs77184935  | T | -0.0949 |
| rs141775380 | T | 0.0346  |
| rs60849954  | T | -0.0319 |
| rs144723379 | G | 0.0642  |
| rs1257331   | T | -0.0184 |
| rs4982362   | G | 0.0268  |

|             |   |         |
|-------------|---|---------|
| rs60168438  | C | -0.0176 |
| rs75857862  | G | 0.0452  |
| rs138949716 | T | -0.0694 |
| rs35620033  | G | -0.0255 |
| rs61988752  | A | 0.0194  |
| rs140959954 | A | -0.0795 |
| rs7152347   | C | -0.0141 |
| rs148925427 | C | 0.0632  |
| rs76627628  | A | -0.0408 |
| rs7145891   | A | 0.0202  |
| rs117767723 | A | 0.0755  |
| rs148749533 | T | 0.049   |
| rs9646172   | T | -0.0252 |
| rs142327544 | C | 0.0368  |
| rs77836807  | T | 0.0206  |
| rs17121550  | G | -0.0127 |
| rs112145150 | A | -0.0347 |
| rs141275165 | G | 0.0384  |
| rs9646166   | C | 0.0135  |
| rs28489163  | A | -0.0182 |
| rs74644698  | T | 0.0552  |
| rs17277025  | T | -0.024  |
| rs144936054 | G | -0.0162 |
| rs2274081   | A | -0.0158 |
| rs17179588  | A | -0.0671 |
| rs17722054  | T | 0.0397  |
| rs1009295   | G | 0.0277  |
| rs149166745 | T | -0.0833 |
| rs57579264  | T | -0.0139 |
| rs72676785  | T | 0.0583  |
| rs12878167  | T | 0.0163  |
| rs61985024  | C | 0.0521  |
| rs12893528  | C | 0.0204  |
| rs34591858  | A | 0.0345  |
| rs76055590  | G | 0.0726  |
| rs61975762  | T | -0.0336 |
| rs173383    | G | -0.0127 |
| rs11157049  | G | -0.0306 |
| rs143966465 | T | -0.0958 |
| rs138780553 | G | -0.0804 |
| rs150386758 | G | -0.0521 |
| rs2204942   | A | 0.0736  |
| rs72684308  | G | -0.0157 |
| rs17093860  | G | -0.0659 |
| rs138639208 | A | 0.0526  |
| rs2362862   | T | 0.0119  |
| rs138566474 | G | -0.0806 |



|             |   |         |
|-------------|---|---------|
| rs117263938 | G | 0.0593  |
| rs117732703 | G | 0.0661  |
| rs117278987 | T | 0.097   |
| rs2145528   | A | 0.0153  |
| rs17650363  | A | 0.0183  |
| rs8008354   | T | -0.0204 |
| rs1844510   | T | 0.0116  |
| rs142720930 | T | -0.0795 |
| rs72677211  | A | -0.0501 |
| rs143014046 | A | 0.0712  |
| rs850274    | A | 0.0117  |
| rs1959167   | T | -0.0543 |
| rs6573412   | G | 0.0139  |
| rs2236742   | T | -0.0165 |
| rs79023778  | G | 0.0245  |
| rs74062122  | T | -0.0332 |
| rs41286574  | A | 0.0652  |
| rs1713446   | C | -0.0151 |
| rs1956430   | C | 0.0298  |
| rs117995474 | C | -0.0954 |
| rs17100852  | C | 0.0397  |
| rs12433022  | C | 0.0332  |
| rs28888084  | A | -0.0154 |
| rs72724064  | T | 0.0505  |
| rs142358270 | T | 0.0584  |
| rs1270516   | A | -0.0247 |
| rs72699072  | T | -0.026  |
| rs977047    | A | -0.0143 |
| rs143395211 | A | 0.0911  |
| rs2516592   | T | -0.0143 |
| rs76683768  | C | 0.0706  |
| rs72660469  | G | 0.0637  |
| rs12436410  | A | -0.0859 |
| rs78610959  | G | -0.0278 |
| rs34916093  | A | 0.0145  |
| rs112679955 | G | 0.0395  |
| rs112876642 | G | 0.065   |
| rs12433276  | G | 0.0171  |
| rs117807231 | T | 0.0722  |
| rs12883497  | G | 0.0203  |
| rs956264    | A | 0.0119  |
| rs142657823 | A | 0.0586  |
| rs117038069 | T | -0.0413 |
| rs4542577   | T | -0.0143 |
| rs112085721 | A | 0.0414  |
| rs77916778  | A | 0.0209  |
| rs72710251  | T | 0.0524  |

|             |   |         |
|-------------|---|---------|
| rs72675706  | G | -0.0364 |
| rs28679793  | G | -0.0145 |
| rs117655019 | T | -0.0915 |
| rs721867    | G | 0.0173  |
| rs2006647   | T | -0.0184 |
| rs61997833  | T | 0.0735  |
| rs139444749 | A | 0.0584  |
| rs2022773   | T | 0.0219  |
| rs4983375   | T | 0.022   |
| rs113771914 | G | 0.061   |
| rs35688580  | A | 0.0159  |
| rs113040544 | A | -0.0572 |
| rs6574512   | G | -0.0168 |
| rs61981059  | C | 0.0554  |
| rs150949427 | A | 0.0247  |
| rs117189402 | G | 0.0452  |
| rs75413618  | C | 0.0249  |
| rs142141031 | G | -0.045  |
| rs77882510  | T | -0.0208 |
| rs6575188   | G | 0.0186  |
| rs112529243 | C | -0.0169 |
| rs12147614  | C | 0.018   |
| rs370080    | A | 0.0646  |
| rs11160566  | G | 0.027   |
| rs3945419   | G | 0.0132  |
| rs74242275  | A | 0.0511  |
| rs11847263  | G | -0.0124 |
| rs79820977  | G | 0.0308  |
| rs12882879  | G | -0.0252 |
| rs7154981   | C | 0.014   |
| rs58608023  | T | 0.05    |
| rs72674304  | A | 0.0138  |
| rs1028536   | A | -0.0223 |
| rs4903222   | T | -0.0156 |
| rs141485830 | C | 0.0753  |
| rs72667939  | C | -0.0385 |
| rs4258526   | G | 0.0129  |
| rs77860969  | C | 0.0523  |
| rs17098131  | A | -0.0498 |
| rs4902836   | G | -0.0206 |
| rs2104982   | G | -0.0201 |
| rs112595353 | A | 0.0752  |
| rs149391212 | T | -0.0582 |
| rs61997694  | T | -0.0402 |
| rs111824809 | T | -0.0515 |
| rs8012511   | C | 0.0155  |
| rs140968728 | A | -0.0558 |

|             |   |         |
|-------------|---|---------|
| rs7160583   | C | -0.0124 |
| rs144965225 | A | 0.0405  |
| rs17223607  | C | 0.0417  |
| rs118175624 | G | -0.0308 |
| rs111850798 | A | 0.0431  |
| rs17092802  | G | 0.0116  |
| rs74080298  | A | -0.0315 |
| rs117712454 | A | 0.0382  |
| rs149622194 | C | -0.0591 |
| rs17095160  | G | -0.0129 |
| rs79669475  | A | 0.0562  |
| rs78443435  | A | 0.0478  |
| rs4586355   | C | 0.0154  |
| rs4905091   | T | -0.0122 |
| rs112799115 | T | 0.0631  |
| rs8020028   | A | 0.0336  |
| rs139012072 | T | -0.0693 |
| rs113150480 | C | 0.0474  |
| rs74410517  | C | 0.052   |
| rs147071162 | T | -0.0647 |
| rs77570945  | T | 0.081   |
| rs111786641 | C | -0.0596 |
| rs10444701  | C | 0.0193  |
| rs17757383  | C | -0.04   |
| rs11626909  | G | 0.0403  |
| rs146193189 | A | -0.0364 |
| rs73354264  | G | -0.0164 |
| rs10220507  | G | 0.0214  |
| rs4902069   | A | 0.0874  |
| rs72707585  | T | 0.0327  |
| rs1952532   | G | -0.0665 |
| rs76222085  | T | -0.0531 |
| rs75836976  | T | 0.0388  |
| rs2151747   | T | 0.0125  |
| rs72685764  | A | -0.0231 |
| rs4905682   | G | -0.0152 |
| rs76102338  | T | 0.0424  |
| rs10137088  | T | -0.0154 |
| rs1241650   | A | -0.0201 |
| rs150164830 | T | 0.0631  |
| rs76915279  | C | 0.0546  |
| rs8021587   | T | -0.0158 |
| rs74645434  | T | 0.0485  |
| rs17100040  | G | -0.0183 |
| rs138789810 | A | 0.078   |
| rs112904053 | C | 0.0527  |
| rs113263423 | T | -0.1236 |

|             |   |         |
|-------------|---|---------|
| rs17098609  | A | -0.014  |
| rs10144504  | A | 0.0115  |
| rs55793422  | A | 0.0319  |
| rs149754662 | A | -0.0841 |
| rs61978895  | G | -0.043  |
| rs117353281 | T | 0.052   |
| rs76828844  | C | -0.0972 |
| rs61986311  | T | 0.0358  |
| rs35095262  | C | -0.0136 |
| rs17833053  | A | -0.0176 |
| rs76559581  | A | -0.0257 |
| rs1956803   | T | -0.0113 |
| rs45469294  | C | 0.1018  |
| rs73286407  | T | -0.0221 |
| rs11848250  | G | -0.0198 |
| rs74844467  | T | 0.0615  |
| rs35056731  | T | -0.016  |
| rs71426959  | A | -0.0157 |
| rs141276653 | T | 0.0411  |
| rs55856990  | T | 0.0138  |
| rs7150306   | A | -0.0197 |
| rs71423396  | A | -0.0907 |
| rs148346750 | A | 0.0767  |
| rs150502739 | A | 0.0381  |
| rs117369541 | A | -0.0676 |
| rs1997987   | T | 0.0129  |
| rs150542944 | C | 0.075   |
| rs112540366 | A | 0.0775  |
| rs117786923 | T | 0.0863  |
| rs8015793   | C | 0.0152  |
| rs111231192 | G | 0.0758  |
| rs79986622  | A | 0.0823  |
| rs115024289 | T | -0.0523 |
| rs7147996   | A | 0.0117  |
| rs145427243 | T | -0.0997 |
| rs75816037  | C | 0.0345  |
| rs117381499 | T | -0.0247 |
| rs148000404 | G | 0.0896  |
| rs1805061   | G | 0.0197  |
| rs12892220  | A | 0.014   |
| rs57506042  | A | -0.0525 |
| rs72682304  | G | -0.0503 |
| rs141835834 | A | -0.0542 |
| rs10129691  | T | 0.0186  |
| rs11160031  | T | -0.0114 |
| rs145818861 | A | -0.0119 |
| rs10138661  | C | -0.0255 |

|             |   |         |
|-------------|---|---------|
| rs17833416  | T | 0.0385  |
| rs117560825 | G | 0.0629  |
| rs17126013  | A | 0.0406  |
| rs61990075  | C | -0.0349 |
| rs2242541   | C | -0.0289 |
| rs12895527  | T | 0.0538  |
| rs77475314  | A | -0.0367 |
| rs73606341  | T | -0.0384 |
| rs178642    | G | 0.0138  |
| rs57755216  | G | -0.0406 |
| rs61983030  | G | -0.0517 |
| rs116646101 | T | -0.0886 |
| rs17101030  | C | 0.0191  |
| rs35835206  | A | -0.0156 |
| rs11156793  | C | -0.0232 |
| rs17779499  | A | 0.0288  |
| rs138267523 | T | 0.0485  |
| rs117403584 | A | 0.0482  |
| rs118191417 | T | 0.0466  |
| rs144361907 | G | 0.0835  |
| rs113765137 | T | -0.0313 |
| rs149713722 | A | 0.0613  |
| rs12878169  | C | -0.0238 |
| rs7145227   | T | 0.0261  |
| rs17803121  | G | 0.0409  |
| rs17100248  | G | 0.039   |
| rs1241496   | A | -0.0113 |
| rs72681347  | G | -0.0225 |
| rs10148644  | T | 0.02    |
| rs11628060  | T | -0.0154 |
| rs117958441 | T | 0.0445  |
| rs111665913 | T | -0.08   |
| rs2073205   | A | 0.0153  |
| rs221467    | G | -0.02   |
| rs72724484  | T | -0.0559 |
| rs191940    | T | -0.0198 |
| rs76944880  | G | 0.0602  |
| rs111248515 | C | 0.0523  |
| rs35133190  | C | 0.0121  |
| rs10144484  | A | -0.0127 |
| rs10144537  | G | 0.0191  |
| rs142126888 | A | 0.0437  |
| rs78926146  | A | -0.0326 |
| rs4904692   | A | 0.0222  |
| rs140550800 | T | -0.0615 |
| rs77484063  | C | 0.0792  |
| rs111813315 | C | -0.0506 |

|             |   |         |
|-------------|---|---------|
| rs12587502  | C | 0.0146  |
| rs58781996  | G | -0.0634 |
| rs117018224 | C | -0.0767 |
| rs11624540  | G | 0.0225  |
| rs35596668  | G | 0.0228  |
| rs1958721   | A | 0.022   |
| rs76277562  | G | -0.0301 |
| rs14076     | C | -0.0308 |
| rs35819956  | C | 0.0456  |
| rs76536290  | A | 0.0204  |
| rs76620315  | C | -0.0575 |
| rs77662617  | A | 0.0481  |
| rs17776519  | A | 0.0231  |
| rs36122378  | T | -0.0462 |
| rs7146194   | A | 0.016   |
| rs116854293 | A | 0.0568  |
| rs12896969  | T | 0.0123  |
| rs118121795 | A | 0.0583  |
| rs12896517  | T | 0.0311  |
| rs113985411 | A | 0.0295  |
| rs139533037 | T | -0.0361 |
| rs11847791  | G | -0.0848 |
| rs2273633   | C | 0.0417  |
| rs34166498  | C | -0.0204 |
| rs10141099  | A | -0.0146 |
| rs77517547  | T | -0.026  |
| rs113982416 | A | 0.0687  |
| rs111237872 | A | -0.05   |
| rs72685556  | C | 0.0685  |
| rs61979289  | A | 0.0216  |
| rs117880299 | G | 0.0816  |
| rs79037153  | A | 0.0175  |
| rs1279316   | G | -0.0128 |
| rs986876    | A | -0.0421 |
| rs143232703 | T | -0.0753 |
| rs71430742  | A | -0.0444 |
| rs72681101  | A | -0.0543 |
| rs17461067  | G | -0.0339 |
| rs34606524  | T | -0.0514 |
| rs8005505   | A | -0.0249 |
| rs117190104 | T | 0.0614  |
| rs1950202   | A | 0.0121  |
| rs57185948  | T | -0.0276 |
| rs11159992  | G | -0.0144 |
| rs7158517   | G | 0.041   |
| rs80294466  | G | 0.0357  |
| rs147334106 | G | 0.0843  |

|             |   |         |
|-------------|---|---------|
| rs7155966   | G | 0.0856  |
| rs61984754  | T | -0.0313 |
| rs28555416  | T | 0.0151  |
| rs74080337  | G | -0.0199 |
| rs55908072  | T | 0.0366  |
| rs67124534  | A | -0.0165 |
| rs78149822  | A | -0.0518 |
| rs75842223  | C | 0.053   |
| rs938884    | C | -0.0128 |
| rs76517184  | A | 0.0294  |
| rs76676935  | C | 0.0549  |
| rs112820013 | A | -0.0795 |
| rs75459295  | G | -0.0285 |
| rs10132226  | T | -0.0135 |
| rs200353    | G | 0.0361  |
| rs8020422   | T | -0.054  |
| rs17752932  | A | -0.0118 |
| rs12433541  | T | 0.0565  |
| rs10137036  | G | 0.0123  |
| rs3949543   | T | 0.0161  |
| rs139160011 | C | -0.019  |
| rs117110376 | T | -0.0643 |
| rs79136909  | T | 0.0203  |
| rs1631191   | A | 0.013   |
| rs79546529  | T | -0.0663 |
| rs113435694 | A | 0.046   |
| rs7155441   | T | 0.0563  |
| rs12884141  | T | -0.011  |
| rs117255495 | C | -0.0358 |
| rs61984862  | T | -0.0688 |
| rs8007153   | C | -0.016  |
| rs2029575   | G | -0.0144 |
| rs2596116   | C | 0.0142  |
| rs2352988   | T | -0.0208 |
| rs146085779 | G | 0.0373  |
| rs11158220  | A | -0.0143 |
| rs11848409  | C | 0.0193  |
| rs61980180  | T | -0.0417 |
| rs79400575  | G | 0.0647  |
| rs138566684 | A | 0.0775  |
| rs118185074 | T | -0.0398 |
| rs150016422 | A | 0.0525  |
| rs2333695   | A | -0.0299 |
| rs17097500  | A | -0.0174 |
| rs17795094  | T | -0.0178 |
| rs1748950   | G | -0.0515 |
| rs2108759   | G | -0.0215 |

|             |   |         |
|-------------|---|---------|
| rs1429847   | T | -0.0209 |
| rs7144771   | C | -0.0224 |
| rs856214    | C | 0.0114  |
| rs17105444  | G | 0.0238  |
| rs78320125  | G | -0.0205 |
| rs6575589   | A | 0.0166  |
| rs10483304  | G | 0.0187  |
| rs79552719  | A | -0.0259 |
| rs45502891  | G | -0.0275 |
| rs76970682  | A | 0.0265  |
| rs78009249  | C | 0.0421  |
| rs77852537  | T | -0.0407 |
| rs79713567  | T | -0.0585 |
| rs710306    | C | 0.0221  |
| rs72671039  | A | -0.0443 |
| rs7145300   | G | 0.0159  |
| rs75210839  | C | 0.0314  |
| rs7151414   | T | 0.0496  |
| rs2887878   | C | 0.0173  |
| rs150653905 | C | -0.0544 |
| rs17541540  | C | -0.0149 |
| rs113201911 | A | 0.0651  |
| rs150188710 | T | 0.0553  |
| rs117341158 | C | 0.0561  |
| rs75682006  | T | 0.0221  |
| rs28582534  | A | -0.0223 |
| rs116882402 | T | 0.0696  |
| rs113437438 | T | 0.0543  |
| rs1257490   | A | 0.0192  |
| rs10138473  | G | 0.0115  |
| rs7159025   | G | 0.0188  |
| rs75841719  | A | 0.0457  |
| rs78895491  | G | 0.0467  |
| rs4901062   | G | -0.013  |
| rs72688253  | C | -0.0782 |
| rs61979307  | A | 0.0204  |
| rs1044502   | A | -0.0121 |
| rs61981945  | G | -0.0269 |
| rs10467756  | C | 0.0154  |
| rs150870855 | A | -0.0313 |
| rs8014070   | T | 0.0117  |
| rs142068514 | C | -0.0502 |
| rs113973020 | C | -0.0261 |
| rs7141906   | A | 0.0119  |
| rs143145963 | T | -0.071  |
| rs117334169 | A | 0.0986  |
| rs12879019  | C | 0.0156  |



|             |   |         |
|-------------|---|---------|
| rs8008975   | C | -0.0181 |
| rs10133275  | C | -0.0126 |
| rs79150770  | T | -0.1205 |
| rs4143894   | A | -0.011  |
| rs28522347  | A | -0.0116 |
| rs2333606   | T | -0.0593 |
| rs698020    | G | 0.0178  |
| rs10483366  | T | 0.0157  |
| rs1984239   | C | -0.0145 |
| rs79585442  | A | 0.0624  |
| rs1483109   | C | 0.0125  |
| rs142182836 | G | -0.0407 |
| rs8021910   | C | -0.0851 |
| rs1772025   | A | -0.0125 |
| rs1465635   | T | 0.0181  |
| rs724023    | C | -0.0143 |
| rs10498462  | A | 0.0564  |
| rs111612099 | G | 0.0242  |
| rs117387656 | T | -0.0975 |
| rs12147414  | A | 0.0219  |
| rs74735254  | A | -0.0166 |
| rs12147578  | T | 0.0134  |
| rs118052049 | G | 0.0712  |
| rs6573757   | A | 0.0144  |
| rs61990326  | A | -0.0321 |
| rs17457610  | T | -0.0157 |
| rs2022596   | C | 0.0113  |
| rs117445998 | A | -0.0905 |
| rs4547256   | C | -0.0117 |
| rs79886351  | T | -0.0229 |
| rs77359395  | T | -0.0224 |
| rs4899993   | T | -0.0218 |
| rs147118726 | G | 0.0568  |
| rs112190985 | A | 0.0346  |
| rs75635162  | C | -0.0291 |
| rs77754484  | G | -0.0756 |
| rs4900470   | G | 0.0164  |
| rs117585087 | A | 0.0301  |
| rs59355307  | C | 0.0278  |
| rs17716594  | C | -0.0146 |
| rs61748277  | A | -0.0432 |
| rs2093010   | A | 0.0223  |
| rs58348526  | A | 0.0558  |
| rs10134935  | C | -0.0126 |
| rs116959602 | T | -0.0629 |
| rs10131049  | A | 0.0643  |
| rs8007140   | T | -0.0112 |

|             |   |         |
|-------------|---|---------|
| rs1748963   | T | 0.0113  |
| rs9671696   | G | -0.0146 |
| rs145728269 | G | -0.0706 |
| rs142639926 | T | 0.0496  |
| rs55924511  | A | 0.0171  |
| rs7150152   | A | 0.0187  |
| rs11624468  | C | -0.0164 |
| rs113494246 | C | 0.0156  |
| rs7156273   | C | -0.0109 |
| rs141660506 | A | 0.0783  |
| rs77173676  | A | 0.017   |
| rs10151850  | G | -0.0116 |
| rs117259846 | A | 0.0657  |
| rs729184    | A | -0.0215 |
| rs56327799  | A | -0.0763 |
| rs12589834  | G | -0.0155 |
| rs79210613  | A | -0.0625 |
| rs1285651   | C | -0.0149 |
| rs7156224   | G | -0.0111 |
| rs76847589  | A | -0.035  |
| rs78790576  | C | -0.0762 |
| rs35675334  | T | 0.0212  |
| rs4982732   | G | 0.0191  |
| rs144277492 | A | -0.0163 |
| rs17796813  | A | -0.0271 |
| rs12878498  | T | 0.0409  |
| rs57813737  | A | -0.0142 |
| rs61981475  | T | -0.0174 |
| rs117755536 | C | 0.0285  |
| rs61973598  | G | -0.0209 |
| rs34522487  | C | 0.0162  |
| rs28666002  | G | -0.0456 |
| rs58545888  | A | -0.0165 |
| rs149760621 | A | 0.0673  |
| rs112285851 | A | 0.0553  |
| rs78678256  | A | 0.0529  |
| rs79849564  | T | -0.0166 |
| rs117315615 | C | 0.0371  |
| rs2277512   | G | -0.0107 |
| rs4900533   | C | -0.0151 |
| rs79288025  | T | -0.0427 |
| rs78323721  | G | 0.0901  |
| rs72703283  | T | 0.0413  |
| rs75941833  | C | 0.0698  |
| rs111558072 | G | -0.0188 |
| rs72678956  | A | 0.0572  |
| rs34562553  | A | 0.0524  |

|             |   |         |
|-------------|---|---------|
| rs1959687   | T | 0.0118  |
| rs138649947 | A | 0.0526  |
| rs72686135  | A | 0.0538  |
| rs75896188  | G | 0.0691  |
| rs17824437  | A | -0.0241 |
| rs117523210 | A | 0.0456  |
| rs12432280  | C | 0.0163  |
| rs72697669  | C | 0.0251  |
| rs76478922  | T | 0.0444  |
| rs141260780 | T | 0.0556  |
| rs114808606 | C | -0.0627 |
| rs58424886  | A | -0.0133 |
| rs117455373 | G | 0.0545  |
| rs1483904   | A | 0.0219  |
| rs78781416  | T | -0.0607 |
| rs222699    | G | -0.0231 |
| rs74409588  | G | -0.0424 |
| rs7156250   | C | 0.0118  |
| rs79711857  | A | 0.0334  |
| rs76568656  | A | -0.0397 |
| rs11627376  | A | 0.0175  |
| rs148515519 | G | -0.0552 |
| rs61975591  | T | 0.026   |
| rs4262882   | T | -0.0257 |
| rs166542    | C | -0.0107 |
| rs910348    | T | -0.0111 |
| rs12586631  | C | 0.0378  |
| rs61985272  | T | -0.0114 |
| rs139181052 | G | 0.0953  |
| rs114405954 | G | -0.062  |
| rs6573596   | T | 0.0198  |
| rs7148107   | A | -0.0211 |
| rs72733669  | C | 0.0143  |
| rs2209806   | A | 0.0124  |
| rs74976084  | T | 0.0363  |
| rs2012750   | C | -0.0125 |
| rs117264193 | A | 0.0564  |
| rs17108225  | T | -0.0421 |
| rs1977233   | A | -0.0145 |
| rs74590432  | T | -0.0235 |
| rs118046606 | T | 0.0298  |
| rs1278930   | A | -0.0133 |
| rs55937206  | A | 0.0139  |
| rs116460911 | T | 0.0477  |
| rs117980309 | G | 0.0652  |
| rs118021952 | G | 0.0851  |
| rs61996376  | C | 0.0363  |

|             |   |         |
|-------------|---|---------|
| rs11159525  | T | 0.0173  |
| rs35539405  | A | -0.0474 |
| rs2228233   | T | -0.0119 |
| rs1886156   | T | -0.0164 |
| rs56123038  | G | 0.0182  |
| rs4021330   | G | -0.0113 |
| rs149720917 | G | 0.3357  |
| rs905450    | A | -0.0869 |
| rs113294283 | A | 0.1887  |
| rs72752746  | C | 0.1892  |
| rs147806167 | T | -0.4791 |
| rs17646025  | T | -0.0897 |
| rs72757489  | C | -0.3642 |
| rs17237984  | G | -0.1461 |
| rs17526269  | T | -0.0731 |
| rs59158066  | A | 0.3807  |
| rs72751481  | A | -0.1541 |
| rs10438390  | T | 0.1613  |
| rs596379    | C | -0.0653 |
| rs75607373  | T | 0.6456  |
| rs140814209 | A | 0.3621  |
| rs72731137  | G | -0.1288 |
| rs16954437  | G | -0.1625 |
| rs6496619   | A | -0.0789 |
| rs4144948   | C | 0.0968  |
| rs76918937  | G | 0.2792  |
| rs4932350   | A | 0.0641  |
| rs72751596  | A | -0.1735 |
| rs6496730   | T | -0.0831 |
| rs141966013 | C | -0.3066 |
| rs2414750   | T | -0.061  |
| rs11858909  | T | -0.0571 |
| rs72758324  | G | 0.2653  |
| rs34876473  | C | 0.0605  |
| rs7496078   | C | -0.0783 |
| rs3803406   | G | 0.0583  |
| rs56241653  | G | 0.0622  |
| rs3947042   | A | 0.2671  |
| rs981820    | A | -0.0625 |
| rs8025296   | A | -0.0659 |
| rs1145090   | A | -0.2779 |
| rs11070906  | C | -0.0798 |
| rs11629676  | C | 0.1034  |
| rs34859229  | T | -0.0589 |
| rs11631899  | G | 0.0549  |
| rs55746684  | A | 0.1825  |
| rs8032746   | G | 0.0923  |

|             |   |         |
|-------------|---|---------|
| rs75496606  | T | 0.3923  |
| rs144054970 | T | 0.3527  |
| rs11071706  | C | 0.0616  |
| rs9944277   | C | 0.087   |
| rs117187697 | T | 0.3354  |
| rs55703462  | A | -0.0571 |
| rs113550916 | T | 0.2582  |
| rs28712354  | C | -0.0867 |
| rs58666371  | G | -0.0584 |
| rs2554389   | T | -0.0619 |
| rs2049511   | G | 0.066   |
| rs62019687  | A | 0.2126  |
| rs4777603   | C | 0.2132  |
| rs36045564  | C | 0.2173  |
| rs4887480   | A | -0.0613 |
| rs6493385   | C | -0.0548 |
| rs12372942  | C | -0.0603 |
| rs12900875  | A | -0.0846 |
| rs338527    | G | 0.0561  |
| rs8036526   | C | 0.0608  |
| rs12101641  | T | -0.0674 |
| rs2925239   | C | -0.0549 |
| rs1052035   | C | -0.1925 |
| rs2676181   | A | 0.1669  |
| rs2647683   | A | -0.0694 |
| rs147030865 | T | -0.2145 |
| rs72744440  | A | -0.1708 |
| rs55710762  | A | 0.2126  |
| rs111763856 | A | -0.1313 |
| rs11071559  | T | -0.0807 |
| rs12439507  | T | 0.0935  |
| rs11073733  | G | 0.0873  |
| rs139978445 | C | 0.2148  |
| rs9920602   | A | -0.247  |
| rs80156053  | G | 0.1642  |
| rs66597610  | T | -0.1343 |
| rs3843702   | A | -0.068  |
| rs75187468  | C | 0.1978  |
| rs12592311  | G | -0.0654 |
| rs12595483  | C | -0.0566 |
| rs2141260   | A | 0.1825  |
| rs76870347  | T | -0.1806 |
| rs7175737   | T | -0.0541 |
| rs113929974 | G | -0.0709 |
| rs139950012 | C | 0.1086  |
| rs17393601  | C | -0.0779 |
| rs8031664   | A | 0.0684  |

|             |   |         |
|-------------|---|---------|
| rs1501371   | A | 0.0513  |
| rs1693531   | T | -0.0607 |
| rs149812364 | A | -0.4316 |
| rs72731483  | G | -0.1394 |
| rs12912021  | A | 0.0545  |
| rs2037448   | T | -0.1259 |
| rs146657638 | G | -0.1846 |
| rs11636491  | T | 0.0547  |
| rs1801449   | A | -0.1095 |
| rs7178631   | G | -0.0571 |
| rs149709095 | T | 0.3854  |
| rs62020459  | G | 0.2004  |
| rs2681990   | G | 0.0839  |
| rs139100459 | T | 0.2172  |
| rs112440995 | T | -0.086  |
| rs117294977 | T | -0.2159 |
| rs139528238 | T | -0.2001 |
| rs12907463  | A | -0.0633 |
| rs12906047  | C | 0.0491  |
| rs2572172   | A | 0.0967  |
| rs1522641   | A | 0.1499  |
| rs117571094 | G | -0.3427 |
| rs74697794  | C | -0.1002 |
| rs2414559   | G | 0.0961  |
| rs148644092 | T | 0.4427  |
| rs62019424  | A | -0.087  |
| rs72752111  | C | 0.1405  |
| rs137957800 | G | 0.2219  |
| rs11548681  | G | 0.1704  |
| rs7177611   | A | 0.0536  |
| rs78230878  | T | 0.19    |
| rs56668844  | G | -0.0556 |
| rs1816161   | A | -0.0498 |
| rs59180773  | T | 0.1976  |
| rs79835109  | A | 0.1586  |
| rs72767030  | A | 0.1114  |
| rs139015880 | G | -0.3309 |
| rs112008490 | T | 0.1188  |
| rs1469834   | C | -0.124  |
| rs138545490 | G | 0.2267  |
| rs8033362   | T | 0.0518  |
| rs284891    | C | 0.0505  |
| rs12916878  | T | 0.1451  |
| rs8182041   | C | -0.048  |
| rs12439189  | C | -0.0582 |
| rs1037782   | C | -0.0761 |
| rs2087352   | C | -0.1743 |

|             |   |         |
|-------------|---|---------|
| rs8038692   | T | 0.2156  |
| rs878100    | A | -0.0672 |
| rs34211907  | G | 0.1006  |
| rs16942884  | C | 0.2662  |
| rs11633218  | A | -0.0782 |
| rs117542265 | A | -0.1558 |
| rs72727263  | T | 0.3385  |
| rs12913391  | T | 0.0765  |
| rs1075845   | T | 0.0716  |
| rs67185399  | A | 0.1369  |
| rs10518863  | T | -0.0893 |
| rs113943413 | A | -0.0738 |
| rs80177529  | G | 0.1892  |
| rs966223    | C | 0.0652  |
| rs12593976  | T | 0.0549  |
| rs340023    | T | 0.0544  |
| rs782912    | C | 0.1078  |
| rs117653485 | A | 0.3147  |
| rs77340812  | T | -0.1822 |
| rs16974536  | C | 0.1066  |
| rs1911154   | T | -0.0815 |
| rs55856713  | G | 0.2523  |
| rs144882330 | T | 0.1848  |
| rs1365586   | A | 0.0746  |
| rs3098167   | C | -0.0483 |
| rs148363797 | G | -0.3041 |
| rs144096460 | C | -0.1892 |
| rs2899624   | G | -0.0674 |
| rs17115710  | C | 0.1188  |
| rs12592999  | A | -0.052  |
| rs72743158  | C | -0.0503 |
| rs920915    | G | -0.0474 |
| rs61601293  | C | -0.0731 |
| rs1992875   | G | 0.0743  |
| rs7402625   | C | -0.0567 |
| rs34279718  | A | -0.1713 |
| rs147849924 | G | -0.1797 |
| rs79756143  | C | 0.0598  |
| rs79214024  | C | -0.1162 |
| rs12912371  | C | 0.0775  |
| rs4775351   | C | 0.0649  |
| rs62001854  | T | 0.1141  |
| rs140562169 | C | 0.3365  |
| rs139489589 | A | 0.1403  |
| rs12912542  | C | -0.0526 |
| rs61997151  | A | -0.2291 |
| rs12905527  | T | 0.0494  |

|             |   |         |
|-------------|---|---------|
| rs12443015  | T | 0.1614  |
| rs7162117   | A | -0.0813 |
| rs8040582   | T | 0.2494  |
| rs72756147  | A | -0.1725 |
| rs1690387   | T | 0.0533  |
| rs7171888   | C | 0.0515  |
| rs35858485  | A | 0.0779  |
| rs2584233   | G | 0.0472  |
| rs11630705  | C | 0.0471  |
| rs2246383   | T | -0.0519 |
| rs4544212   | A | 0.0511  |
| rs56109250  | T | 0.1319  |
| rs6495056   | G | 0.0858  |
| rs2631717   | A | 0.0478  |
| rs1005972   | C | 0.3691  |
| rs4924109   | A | 0.1027  |
| rs150126575 | C | 0.1429  |
| rs151257686 | A | 0.2359  |
| rs57625688  | A | 0.0863  |
| rs1042630   | A | 0.0514  |
| rs72744346  | A | 0.1932  |
| rs11632524  | C | 0.0588  |
| rs17295457  | T | -0.0778 |
| rs55729424  | T | -0.0549 |
| rs147672320 | A | 0.2718  |
| rs934937    | T | 0.0508  |
| rs150496964 | A | -0.1644 |
| rs16945203  | T | 0.0746  |
| rs12901379  | G | 0.0646  |
| rs4775969   | A | 0.0476  |
| rs959167    | G | 0.0695  |
| rs1962180   | T | -0.0744 |
| rs1712428   | G | -0.0618 |
| rs71469685  | T | 0.2156  |
| rs34361729  | A | -0.1025 |
| rs2304721   | A | -0.0956 |
| rs9972327   | A | 0.0645  |
| rs145853627 | T | 0.3505  |
| rs75716876  | A | -0.2233 |
| rs73391553  | A | 0.0729  |
| rs9972330   | C | 0.0649  |
| rs10852141  | T | 0.0472  |
| rs56210840  | T | 0.2177  |
| rs9921022   | T | -0.0481 |
| rs1197704   | C | 0.0649  |
| rs10519292  | A | -0.0753 |
| rs1122453   | T | -0.0606 |



|             |   |         |
|-------------|---|---------|
| rs435293    | T | -0.047  |
| rs72745346  | A | 0.0626  |
| rs2924769   | C | 0.0969  |
| rs113469530 | A | 0.1816  |
| rs12915023  | A | 0.0486  |
| rs12593015  | G | 0.0452  |
| rs77365632  | G | 0.2743  |
| rs347120    | T | 0.155   |
| rs118110169 | C | 0.2203  |
| rs71469678  | C | -0.0574 |
| rs12148357  | T | 0.0485  |
| rs2163194   | A | 0.1344  |
| rs12324711  | T | -0.0753 |
| rs7498065   | C | -0.0737 |
| rs12914434  | G | 0.0579  |
| rs150609953 | A | -0.1806 |
| rs16941725  | C | -0.1146 |
| rs12917529  | C | 0.0444  |
| rs144999082 | G | 0.0656  |
| rs74442141  | A | -0.2464 |
| rs71476790  | T | -0.4003 |
| rs55966779  | C | 0.1874  |
| rs10152939  | G | -0.1916 |
| rs151164129 | A | 0.155   |
| rs11629484  | A | -0.1124 |
| rs117469193 | C | -0.2212 |
| rs4886851   | C | -0.0799 |
| rs142534344 | A | 0.1793  |
| rs11638756  | A | 0.0507  |
| rs79399761  | T | -0.1174 |
| rs35360843  | A | -0.0856 |
| rs8025271   | C | -0.0724 |
| rs2344847   | C | 0.0454  |
| rs2553231   | A | 0.3677  |
| rs6576527   | T | -0.0734 |
| rs62022262  | A | 0.0522  |
| rs11072876  | C | 0.0652  |
| rs1021152   | A | 0.0458  |
| rs61413848  | A | 0.0916  |
| rs139001259 | A | 0.3342  |
| rs146080008 | T | 0.2007  |
| rs72758037  | A | -0.1082 |
| rs10519758  | G | -0.0541 |
| rs72754076  | C | 0.1551  |
| rs74032301  | A | -0.1162 |
| rs59428809  | C | -0.0619 |
| rs115956835 | T | 0.4623  |

|             |   |         |
|-------------|---|---------|
| rs76168848  | G | 0.4086  |
| rs982932    | C | 0.0444  |
| rs12899642  | A | 0.1571  |
| rs2044311   | T | -0.0631 |
| rs117460534 | A | 0.1348  |
| rs151044548 | G | 0.2937  |
| rs169329    | A | 0.0453  |
| rs7175391   | A | 0.0914  |
| rs74628013  | A | -0.1427 |
| rs117321272 | G | -0.1172 |
| rs10519172  | G | -0.1195 |
| rs7169248   | T | 0.0872  |
| rs9672177   | A | 0.0769  |
| rs6495438   | C | 0.0598  |
| rs16974632  | G | 0.0734  |
| rs16975796  | A | -0.0947 |
| rs12909771  | A | 0.0776  |
| rs7168274   | T | 0.0567  |
| rs72732662  | T | -0.0776 |
| rs8025217   | T | -0.0469 |
| rs877650    | C | -0.0459 |
| rs7172445   | G | -0.0487 |
| rs72752797  | T | 0.1644  |
| rs10083567  | T | 0.0904  |
| rs7179392   | T | 0.0427  |
| rs10083629  | T | 0.0737  |
| rs78015020  | C | 0.098   |
| rs12900284  | A | 0.0557  |
| rs79703711  | T | 0.2018  |
| rs817958    | A | 0.0607  |
| rs6606803   | A | -0.048  |
| rs61999136  | T | -0.0507 |
| rs12440300  | G | 0.1832  |
| rs17398554  | T | 0.131   |
| rs67158965  | C | 0.3078  |
| rs954292    | C | 0.0421  |
| rs62000501  | G | 0.1626  |
| rs2139924   | C | -0.0632 |
| rs1871361   | C | 0.0576  |
| rs60211807  | C | -0.0533 |
| rs3812940   | C | -0.0786 |
| rs79625977  | A | 0.1694  |
| rs62019207  | C | 0.0751  |
| rs12324157  | C | 0.1693  |
| rs1484286   | A | -0.0838 |
| rs8027260   | T | -0.0432 |
| rs28886346  | C | -0.1099 |

|             |   |         |
|-------------|---|---------|
| rs4778117   | T | -0.0497 |
| rs78782812  | C | 0.2106  |
| rs35964710  | A | -0.1046 |
| rs79755294  | T | 0.1055  |
| rs7162714   | T | 0.2479  |
| rs11636091  | T | 0.1039  |
| rs7181191   | G | -0.057  |
| rs890008    | G | -0.0614 |
| rs2353497   | G | 0.0998  |
| rs4778972   | A | 0.0493  |
| rs149750012 | G | 0.0919  |
| rs117202092 | C | -0.2396 |
| rs75467612  | A | -0.2511 |
| rs117873014 | T | 0.2251  |
| rs62011995  | T | -0.121  |
| rs117791156 | C | 0.2755  |
| rs16977683  | G | 0.0767  |
| rs7166977   | G | 0.0429  |
| rs8033427   | T | 0.0466  |
| rs11073362  | A | 0.0897  |
| rs56336805  | A | -0.044  |
| rs10520082  | A | 0.043   |
| rs78660221  | C | -0.0958 |
| rs144102514 | C | 0.2304  |
| rs76076489  | G | 0.1047  |
| rs17523880  | A | 0.0614  |
| rs112732813 | C | -0.2665 |
| rs142066831 | C | -0.2101 |
| rs8026268   | T | 0.1633  |
| rs9652431   | C | 0.0575  |
| rs73391463  | A | -0.1574 |
| rs76230942  | T | -0.0928 |
| rs72761468  | T | 0.0671  |
| rs34672825  | T | -0.0485 |
| rs72763845  | T | 0.1445  |
| rs140458703 | C | 0.2019  |
| rs7180731   | C | 0.045   |
| rs4777257   | T | 0.0769  |
| rs76553150  | G | -0.4007 |
| rs58912384  | T | -0.0516 |
| rs117021038 | T | -0.2047 |
| rs1876743   | G | -0.0852 |
| rs55656727  | C | 0.1445  |
| rs899672    | T | -0.0437 |
| rs3784412   | C | 0.048   |
| rs72739660  | A | 0.2068  |
| rs56272184  | G | 0.0467  |

|             |   |         |
|-------------|---|---------|
| rs76467952  | A | 0.1174  |
| rs143288355 | A | -0.1214 |
| rs62014212  | A | 0.1543  |
| rs11630342  | T | -0.0572 |
| rs4775230   | C | -0.0565 |
| rs338538    | T | -0.0466 |
| rs28412395  | C | 0.1382  |
| rs16972667  | G | -0.1175 |
| rs79240849  | C | 0.0842  |
| rs17115431  | C | 0.1939  |
| rs117204713 | A | -0.3221 |
| rs10220845  | C | 0.0607  |
| rs7164811   | T | 0.0594  |
| rs16975681  | G | 0.1174  |
| rs12592051  | C | 0.0647  |
| rs75530524  | T | -0.0707 |
| rs4965469   | T | 0.0415  |
| rs76882184  | G | 0.1253  |
| rs12912805  | A | 0.059   |
| rs61179258  | A | -0.1668 |
| rs2865831   | T | 0.0436  |
| rs140534754 | G | -0.259  |
| rs17116286  | C | 0.1135  |
| rs78690077  | C | 0.1304  |
| rs345799    | A | 0.139   |
| rs4435230   | T | 0.088   |
| rs113509565 | A | -0.1114 |
| rs147094286 | T | -0.1696 |
| rs8027599   | T | 0.103   |
| rs8034493   | T | 0.054   |
| rs11072660  | A | -0.0407 |
| rs1079043   | T | 0.0513  |
| rs79074110  | T | -0.1108 |
| rs8036172   | G | -0.0735 |
| rs77894675  | C | -0.275  |
| rs77289267  | T | 0.1918  |
| rs117118453 | T | 0.1328  |
| rs17628925  | T | 0.1154  |
| rs5018786   | G | -0.0475 |
| rs12232264  | C | 0.2901  |
| rs12903357  | G | -0.0458 |
| rs151214346 | T | 0.1944  |
| rs12592463  | C | 0.0628  |
| rs143755928 | T | 0.1287  |
| rs77230321  | G | 0.0692  |
| rs17817084  | C | -0.1937 |
| rs72764521  | A | -0.2088 |

|             |   |         |
|-------------|---|---------|
| rs144804393 | T | 0.1846  |
| rs116642008 | C | -0.1594 |
| rs4984613   | T | 0.1247  |
| rs35624749  | C | -0.0623 |
| rs10873641  | G | 0.1695  |
| rs149814044 | C | 0.1137  |
| rs28757589  | A | -0.0589 |
| rs12438966  | T | 0.1196  |
| rs16960230  | G | 0.1481  |
| rs13379594  | C | 0.0457  |
| rs1112679   | G | 0.0398  |
| rs79911686  | G | 0.1157  |
| rs3098543   | G | -0.0477 |
| rs899927    | T | 0.043   |
| rs11857245  | A | -0.0494 |
| rs75278458  | A | 0.1416  |
| rs112855710 | T | 0.2813  |
| rs78440823  | C | 0.1034  |
| rs12902395  | G | 0.049   |
| rs182253    | A | 0.0766  |
| rs16977635  | G | 0.1939  |
| rs11073766  | G | 0.1438  |
| rs4499191   | G | 0.0456  |
| rs12911999  | A | 0.045   |
| rs75726724  | T | 0.1416  |
| rs8038785   | C | -0.0479 |
| rs141390373 | C | -0.3205 |
| rs34915669  | T | -0.0587 |
| rs11635163  | G | -0.0434 |
| rs117784942 | G | -0.278  |
| rs16955938  | C | -0.1112 |
| rs8029150   | T | 0.0776  |
| rs4777859   | C | 0.0577  |
| rs117457297 | T | -0.1902 |
| rs7169699   | T | 0.0417  |
| rs1668562   | A | 0.0486  |
| rs12916680  | G | 0.185   |
| rs72760055  | G | 0.0651  |
| rs74519172  | T | 0.0883  |
| rs8038032   | G | 0.0423  |
| rs62026634  | A | 0.0602  |
| rs72757987  | T | 0.1876  |
| rs55735416  | T | 0.0467  |
| rs2047476   | A | -0.0669 |
| rs149421435 | A | 0.1382  |
| rs28576090  | C | 0.1629  |
| rs62001262  | C | 0.0537  |

|             |   |         |
|-------------|---|---------|
| rs7178620   | G | 0.0783  |
| rs8026473   | A | -0.0505 |
| rs112162746 | C | 0.0924  |
| rs142346076 | A | -0.1551 |
| rs2289816   | T | -0.0521 |
| rs117595643 | A | -0.1255 |
| rs117533205 | C | -0.2188 |
| rs12904805  | T | 0.2644  |
| rs145706353 | A | 0.1631  |
| rs75263483  | A | -0.1948 |
| rs57487387  | A | -0.0629 |
| rs8042428   | A | 0.1554  |
| rs7170515   | G | 0.1522  |
| rs11636908  | A | 0.0543  |
| rs4965075   | G | -0.0862 |
| rs894499    | A | 0.0535  |
| rs62019073  | C | 0.1925  |
| rs77494339  | G | 0.3319  |
| rs11634452  | G | -0.095  |
| rs7181726   | G | 0.047   |
| rs1560976   | G | -0.0397 |
| rs75138490  | A | 0.0864  |
| rs7166685   | C | -0.0783 |
| rs7173413   | C | 0.0504  |
| rs7172532   | A | 0.0401  |
| rs77031375  | T | -0.1472 |
| rs117489939 | A | 0.2972  |
| rs28862017  | G | -0.0952 |
| rs72749974  | G | -0.1052 |
| rs72744938  | T | -0.0497 |
| rs151297468 | A | -0.2346 |
| rs35411464  | C | -0.2918 |
| rs11857435  | G | -0.049  |
| rs141259685 | T | -0.1745 |
| rs112677781 | G | -0.2058 |
| rs74536119  | C | -0.1236 |
| rs7174440   | G | 0.0406  |
| rs11636162  | C | 0.067   |
| rs11639025  | G | -0.212  |
| rs114214638 | T | -0.2333 |
| rs28582250  | A | 0.0555  |
| rs62001852  | T | 0.0992  |
| rs35017463  | A | -0.0688 |
| rs17114720  | C | 0.051   |
| rs12591702  | C | -0.0966 |
| rs3825915   | C | -0.0513 |
| rs34716886  | A | -0.0744 |

|             |   |         |
|-------------|---|---------|
| rs17204559  | C | 0.1653  |
| rs149171669 | A | -0.0676 |
| rs61300393  | C | 0.0692  |
| rs11073885  | C | 0.0783  |
| rs17116512  | A | 0.2438  |
| rs117420247 | T | 0.1974  |
| rs78494348  | C | 0.2505  |
| rs62012365  | A | 0.0488  |
| rs7162864   | G | 0.0746  |
| rs149633549 | G | 0.2437  |
| rs79619381  | A | -0.0752 |
| rs28438985  | A | -0.0805 |
| rs55832004  | A | -0.1524 |
| rs73469297  | T | 0.1645  |
| rs76904260  | G | -0.0721 |
| rs586558    | A | 0.0599  |
| rs143357964 | A | -0.1578 |
| rs4778114   | G | -0.042  |
| rs148770338 | T | 0.1755  |
| rs76042640  | A | 0.1392  |
| rs117360934 | T | 0.0864  |
| rs9806578   | C | 0.1247  |
| rs3743017   | C | 0.0575  |
| rs4778031   | C | -0.0425 |
| rs11638575  | T | -0.0441 |
| rs75820112  | A | -0.2078 |
| rs12185124  | C | -0.0405 |
| rs117013919 | C | 0.1052  |
| rs141023407 | C | -0.2913 |
| rs7497790   | A | -0.0434 |
| rs112297944 | A | 0.154   |
| rs139368271 | G | -0.1201 |
| rs12900197  | A | 0.0709  |
| rs8039875   | G | -0.1102 |
| rs56204373  | G | 0.211   |
| rs8038964   | A | -0.0392 |
| rs8026587   | T | 0.046   |
| rs77172970  | A | 0.0565  |
| rs2649680   | G | 0.0411  |
| rs117159646 | A | -0.2797 |
| rs118064941 | A | 0.1189  |
| rs1441475   | C | 0.0577  |
| rs11247299  | C | 0.0555  |
| rs142609537 | G | 0.1775  |
| rs117521738 | C | 0.1582  |
| rs58824810  | C | 0.0625  |
| rs2464692   | C | -0.1387 |

|             |   |         |
|-------------|---|---------|
| rs77871609  | A | -0.0787 |
| rs731597    | T | -0.0413 |
| rs7166730   | A | -0.0771 |
| rs2067685   | T | -0.0564 |
| rs12050717  | T | 0.116   |
| rs936214    | A | 0.0703  |
| rs117637543 | T | 0.2791  |
| rs141112307 | A | -0.3019 |
| rs7171917   | G | 0.0396  |
| rs8041324   | T | -0.0388 |
| rs67623602  | C | 0.0862  |
| rs62025582  | C | 0.0508  |
| rs75741232  | C | 0.0794  |
| rs2554041   | C | -0.0564 |
| rs17786206  | C | 0.0517  |
| rs4924102   | C | 0.0856  |
| rs76276977  | T | -0.1457 |
| rs1348759   | C | -0.1654 |
| rs117897646 | T | -0.2819 |
| rs12906898  | A | 0.0427  |
| rs72705024  | T | 0.0439  |
| rs4776876   | A | -0.0583 |
| rs2684785   | T | 0.0456  |
| rs11638847  | T | 0.0435  |
| rs12438849  | T | -0.064  |
| rs17527156  | G | -0.0402 |
| rs142886526 | G | 0.2093  |
| rs145640653 | C | 0.2665  |
| rs144202089 | T | -0.2056 |
| rs11630929  | A | 0.0466  |
| rs4778032   | C | 0.0473  |
| rs55663307  | A | 0.0855  |
| rs117922127 | G | -0.0854 |
| rs75760454  | T | 0.0976  |
| rs11630650  | G | 0.0516  |
| rs746861    | C | 0.0486  |
| rs8031441   | G | -0.0373 |
| rs304126    | A | -0.0549 |
| rs142820879 | G | 0.1961  |
| rs142177961 | G | 0.1827  |
| rs12903464  | T | -0.0541 |
| rs78917401  | T | -0.0552 |
| rs76155180  | C | 0.0565  |
| rs72749555  | A | 0.0593  |
| rs17356118  | G | -0.0433 |
| rs35332077  | C | 0.0931  |
| rs117395891 | C | -0.1654 |



|             |   |         |
|-------------|---|---------|
| rs146509793 | T | 0.2881  |
| rs17663138  | A | 0.0533  |
| rs72767008  | T | 0.2433  |
| rs1553927   | A | -0.0424 |
| rs28713308  | A | 0.211   |
| rs73484534  | T | 0.1094  |
| rs12148789  | C | 0.1485  |
| rs73468730  | C | -0.1229 |
| rs112227566 | T | -0.1564 |
| rs1387383   | A | -0.0403 |
| rs74436193  | T | 0.1566  |
| rs34400095  | T | 0.0988  |
| rs690337    | T | -0.0449 |
| rs4132535   | T | 0.0385  |
| rs36024806  | A | -0.1057 |
| rs1797314   | A | 0.0679  |
| rs2187576   | C | -0.0395 |
| rs4539561   | A | -0.0764 |
| rs568920    | G | 0.0944  |
| rs11636988  | G | -0.0368 |
| rs117566601 | C | 0.2069  |
| rs145485897 | A | 0.2651  |
| rs12593910  | T | -0.0382 |
| rs12912813  | C | -0.1678 |
| rs34346567  | G | 0.0426  |
| rs28663672  | A | -0.0401 |
| rs76617259  | G | 0.0915  |
| rs28617199  | G | -0.0621 |
| rs10467974  | G | -0.0723 |
| rs8043258   | C | -0.0415 |
| rs79098649  | C | -0.1819 |
| rs72744450  | T | -0.1959 |
| rs7167068   | T | 0.0372  |
| rs17669395  | G | -0.0675 |
| rs62006839  | T | 0.0969  |
| rs7177080   | A | 0.0595  |
| rs72758801  | A | 0.1055  |
| rs12914478  | T | 0.0396  |
| rs17736971  | T | -0.0653 |
| rs41373647  | C | -0.0908 |
| rs72745268  | T | 0.0537  |
| rs78442219  | A | -0.1527 |
| rs733238    | C | 0.0409  |
| rs12912676  | G | -0.0397 |
| rs2445739   | T | 0.1046  |
| rs116875281 | G | -0.114  |
| rs62023327  | C | 0.0911  |

|             |   |         |
|-------------|---|---------|
| rs138392380 | C | 0.2417  |
| rs10519107  | C | -0.0368 |
| rs11634318  | T | -0.091  |
| rs140636803 | C | -0.3224 |
| rs7169971   | T | 0.0408  |
| rs17158916  | C | 0.089   |
| rs76994642  | G | 0.1614  |
| rs62025237  | T | 0.1686  |
| rs7165165   | G | 0.0371  |
| rs8030037   | G | 0.0378  |
| rs140765824 | C | -0.2613 |
| rs78549884  | C | -0.1034 |
| rs2414437   | T | 0.1562  |
| rs1008109   | C | 0.0469  |
| rs113061963 | T | 0.1911  |
| rs75598935  | A | -0.1916 |
| rs117340151 | A | -0.2185 |
| rs113787558 | G | -0.1666 |
| rs72740878  | A | 0.173   |
| rs141048125 | G | 0.1802  |
| rs690487    | A | -0.0428 |
| rs7496426   | C | -0.0422 |
| rs756143    | A | 0.043   |
| rs75966038  | A | 0.104   |
| rs11853033  | C | 0.0558  |
| rs35572544  | C | 0.0501  |
| rs7182043   | A | 0.0743  |
| rs12443239  | G | 0.0374  |
| rs569861    | C | -0.0621 |
| rs2089709   | G | -0.0384 |
| rs77379665  | T | 0.1425  |
| rs12594952  | C | 0.0481  |
| rs12442430  | T | -0.0375 |
| rs12440833  | G | -0.1616 |
| rs113531358 | C | 0.1628  |
| rs77904849  | T | -0.1205 |
| rs11074128  | A | 0.0447  |
| rs8031736   | C | -0.2962 |
| rs2467338   | C | -0.0677 |
| rs79278825  | A | 0.2129  |
| rs4906667   | G | 0.0375  |
| rs75136467  | T | -0.0834 |
| rs7164916   | C | 0.0372  |
| rs4984396   | T | 0.1309  |
| rs34059658  | C | 0.0478  |
| rs73446825  | A | -0.0801 |
| rs56121419  | G | 0.0611  |

|             |   |         |
|-------------|---|---------|
| rs117341216 | A | -0.2708 |
| rs72750009  | C | 0.1513  |
| rs11854354  | G | -0.0376 |
| rs77132386  | A | 0.2631  |
| rs3858959   | G | 0.038   |
| rs11636583  | A | 0.0435  |
| rs56101048  | A | -0.0836 |
| rs62017780  | T | -0.1322 |
| rs74381521  | A | 0.1087  |
| rs116853819 | A | 0.1474  |
| rs8023398   | C | 0.0384  |
| rs8041505   | A | -0.1224 |
| rs118076664 | A | -0.0996 |
| rs2958961   | G | -0.0492 |
| rs118071792 | C | -0.2236 |
| rs72736856  | A | 0.1235  |
| rs117694348 | C | 0.1831  |
| rs62019157  | A | 0.2441  |
| rs11636486  | G | -0.0408 |
| rs7166591   | C | 0.0545  |
| rs55874209  | A | -0.0661 |
| rs56222259  | T | 0.0829  |
| rs11857333  | T | 0.041   |
| rs77434078  | G | -0.1888 |
| rs77663823  | T | -0.1632 |
| rs112741951 | G | 0.1051  |
| rs96243     | A | 0.036   |
| rs1520941   | C | -0.041  |
| rs34410148  | C | 0.0937  |
| rs139933295 | A | 0.1965  |
| rs72712943  | A | -0.0971 |
| rs8031835   | A | 0.2095  |
| rs7166942   | G | -0.0595 |
| rs1679012   | C | -0.0468 |
| rs77331020  | T | -0.159  |
| rs9783681   | T | -0.0417 |
| rs893726    | C | -0.0398 |
| rs11637604  | C | -0.0452 |
| rs118007243 | C | 0.1184  |
| rs995744    | A | 0.0752  |
| rs75387822  | A | 0.0729  |
| rs4932250   | A | 0.0689  |
| rs111999787 | G | 0.1085  |
| rs117776652 | T | 0.148   |
| rs6496132   | G | -0.0425 |
| rs798084    | A | -0.0399 |
| rs141765084 | T | 0.1537  |

|             |   |         |
|-------------|---|---------|
| rs3743262   | T | -0.0971 |
| rs4775308   | C | 0.0471  |
| rs62012944  | A | 0.0361  |
| rs75631984  | C | -0.1752 |
| rs55689052  | T | 0.0415  |
| rs17240268  | A | -0.0736 |
| rs140681    | A | 0.0766  |
| rs16942409  | G | -0.0426 |
| rs35853493  | T | 0.0909  |
| rs77292559  | T | 0.0716  |
| rs4277318   | A | 0.0545  |
| rs118109855 | C | -0.1331 |
| rs12906332  | G | 0.0433  |
| rs72715112  | G | -0.1152 |
| rs2616915   | T | -0.037  |
| rs17737592  | G | -0.0515 |
| rs11857259  | C | 0.0387  |
| rs8025651   | G | 0.0405  |
| rs72707804  | A | 0.0906  |
| rs77452076  | C | 0.0486  |
| rs67518514  | C | 0.0544  |
| rs3995835   | C | 0.0428  |
| rs147675846 | C | -0.179  |
| rs114986801 | G | 0.1136  |
| rs117629517 | G | 0.1836  |
| rs115094589 | A | 0.1797  |
| rs28431312  | A | 0.0471  |
| rs11631442  | G | 0.1104  |
| rs111436781 | C | -0.15   |
| rs8035569   | C | -0.0412 |
| rs12439073  | A | 0.212   |
| rs1500635   | G | -0.0363 |
| rs61341389  | T | -0.1141 |
| rs2463380   | C | 0.0457  |
| rs76434445  | T | -0.1414 |
| rs7171655   | G | -0.0549 |
| rs11634247  | T | -0.0456 |
| rs77787348  | C | -0.1142 |
| rs11247174  | A | 0.0429  |
| rs72754490  | T | -0.2345 |
| rs78547437  | C | 0.0569  |
| rs12102117  | G | 0.0373  |
| rs79994485  | A | -0.0739 |
| rs117959395 | A | -0.1031 |
| rs2647672   | G | 0.0518  |
| rs744152    | T | -0.1688 |
| rs16958081  | T | -0.1999 |

|             |   |         |
|-------------|---|---------|
| rs62022386  | G | -0.1161 |
| rs4774419   | T | -0.0405 |
| rs4396507   | G | 0.0983  |
| rs117955738 | A | 0.1545  |
| rs12910780  | T | -0.0946 |
| rs7178017   | T | -0.0366 |
| rs8034033   | C | 0.0384  |
| rs79974176  | C | 0.1483  |
| rs41424644  | A | 0.0462  |
| rs8040256   | G | -0.0935 |
| rs12915482  | A | -0.0489 |
| rs2204222   | T | -0.0472 |
| rs117388689 | A | -0.2195 |
| rs1873815   | C | 0.0935  |
| rs2256109   | C | -0.0371 |
| rs28875605  | C | 0.1874  |
| rs17515485  | G | 0.0725  |
| rs59752567  | T | -0.0761 |
| rs4146836   | G | 0.0353  |
| rs28706927  | A | 0.0369  |
| rs117794890 | A | 0.1611  |
| rs8028692   | C | -0.0402 |
| rs12148762  | G | -0.0382 |
| rs4906929   | C | 0.0385  |
| rs906420    | C | 0.0723  |
| rs12443115  | T | -0.0495 |
| rs4465554   | G | -0.0404 |
| rs144603843 | G | 0.2199  |
| rs144351791 | C | 0.1709  |
| rs7163843   | A | 0.0558  |
| rs12595534  | G | 0.0375  |
| rs7165274   | G | -0.0756 |
| rs60103704  | A | -0.0634 |
| rs7169854   | T | 0.0369  |
| rs66577031  | G | -0.0405 |
| rs11634019  | C | -0.04   |
| rs117035204 | C | -0.1148 |
| rs138023397 | A | 0.0715  |
| rs28414670  | A | -0.1447 |
| rs78215351  | T | 0.1349  |
| rs113605828 | T | 0.2296  |
| rs117061984 | A | 0.1474  |
| rs8030159   | T | -0.1711 |
| rs7173662   | A | -0.1006 |
| rs75372489  | A | 0.1211  |
| rs17816465  | A | 0.0451  |
| rs10444863  | C | -0.0441 |

|             |   |         |
|-------------|---|---------|
| rs60147733  | C | 0.0838  |
| rs6496530   | T | 0.0371  |
| rs2028200   | T | -0.0461 |
| rs62034294  | A | -0.0471 |
| rs8036693   | T | 0.1788  |
| rs1996360   | G | 0.0346  |
| rs35651862  | G | -0.0515 |
| rs1107461   | C | 0.0626  |
| rs7164245   | G | 0.0378  |
| rs35539490  | A | 0.1381  |
| rs36062094  | C | 0.0465  |
| rs4924454   | C | -0.0508 |
| rs34020515  | T | -0.0505 |
| rs75857753  | T | -0.1796 |
| rs16977239  | T | 0.1713  |
| rs4238512   | T | 0.0355  |
| rs113973866 | G | -0.1657 |
| rs77857904  | A | 0.1812  |
| rs1699486   | C | 0.0786  |
| rs28668228  | T | -0.0463 |
| rs76789421  | T | -0.1259 |
| rs11853527  | G | 0.0369  |
| rs12902693  | A | 0.1427  |
| rs79815754  | T | 0.2279  |
| rs17651945  | G | 0.1272  |
| rs1972832   | C | 0.0522  |
| rs138641655 | T | -0.1951 |
| rs117346427 | A | 0.2259  |
| rs4965399   | T | 0.1652  |
| rs12148647  | C | 0.1027  |
| rs140130255 | T | -0.2312 |
| rs74556314  | T | -0.2504 |
| rs16952958  | G | 0.044   |
| rs117939133 | T | -0.1663 |
| rs558626    | C | 0.0416  |
| rs150569128 | T | -0.1312 |
| rs4447398   | A | -0.0508 |
| rs75053031  | T | 0.1363  |
| rs8025212   | G | -0.0379 |
| rs12442917  | C | -0.0746 |
| rs75468126  | A | -0.1845 |
| rs78654242  | C | -0.0781 |
| rs6496658   | G | -0.0393 |
| rs28825821  | A | 0.1156  |
| rs138660808 | A | -0.2265 |
| rs12908504  | T | -0.0439 |
| rs72744476  | A | 0.1591  |

|             |   |         |
|-------------|---|---------|
| rs17526520  | C | 0.1494  |
| rs75539046  | T | -0.1374 |
| rs57494645  | A | 0.2372  |
| rs62027164  | C | -0.0474 |
| rs77810163  | G | 0.1866  |
| rs78734056  | G | -0.1118 |
| rs28537680  | G | 0.0696  |
| rs11559060  | T | -0.0572 |
| rs6497213   | G | -0.0385 |
| rs4338756   | C | 0.0454  |
| rs75775665  | A | 0.1364  |
| rs72734176  | T | -0.135  |
| rs117041776 | A | 0.1141  |
| rs113605253 | C | -0.0474 |
| rs117393736 | A | 0.1252  |
| rs16960482  | T | -0.0497 |
| rs138305899 | A | 0.1649  |
| rs7178800   | T | -0.0395 |
| rs8042833   | C | 0.0363  |
| rs144882349 | G | -0.2104 |
| rs922781    | C | 0.035   |
| rs80200212  | A | -0.2203 |
| rs140112638 | A | 0.2252  |
| rs11072122  | G | 0.0365  |
| rs117433275 | T | -0.0825 |
| rs12440407  | A | -0.0349 |
| rs1009176   | T | -0.052  |
| rs35619798  | C | -0.0601 |
| rs72732812  | C | -0.0962 |
| rs117198848 | T | 0.1656  |
| rs11853132  | T | -0.0368 |
| rs28540038  | T | -0.2094 |
| rs7166062   | C | -0.0752 |
| rs1155871   | G | 0.0441  |
| rs77690521  | T | -0.1253 |
| rs12902643  | A | 0.0553  |
| rs61561548  | T | 0.0984  |
| rs12437667  | T | -0.0739 |
| rs75931581  | C | -0.1045 |
| rs116862602 | G | 0.1412  |
| rs78738855  | T | -0.0791 |
| rs12439250  | C | 0.1265  |
| rs11073397  | C | -0.0451 |
| rs145655043 | T | -0.1534 |
| rs1994196   | G | -0.0456 |
| rs34458502  | A | -0.1347 |
| rs4594196   | C | -0.0473 |

|             |   |         |
|-------------|---|---------|
| rs28470181  | T | 0.0367  |
| rs1197658   | A | 0.0511  |
| rs80118152  | A | 0.1251  |
| rs77901480  | C | 0.1632  |
| rs78278275  | T | 0.0677  |
| rs55743926  | C | 0.0513  |
| rs140646001 | A | -0.0662 |
| rs35144566  | A | -0.0392 |
| rs7182946   | G | 0.0356  |
| rs2654217   | G | 0.0374  |
| rs59469256  | A | -0.0851 |
| rs148588091 | A | -0.1467 |
| rs117682697 | T | 0.2356  |
| rs77655065  | A | 0.0653  |
| rs56028454  | C | 0.2051  |
| rs74556657  | C | -0.1085 |
| rs8182025   | T | 0.0343  |
| rs74680507  | G | 0.0612  |
| rs111531829 | T | -0.0664 |
| rs2619691   | T | 0.0375  |
| rs12915244  | A | -0.1031 |
| rs3825803   | A | 0.196   |
| rs117772246 | A | 0.1711  |
| rs61741295  | A | -0.0836 |
| rs8029878   | T | -0.0362 |
| rs2399646   | A | 0.034   |
| rs28557276  | T | 0.1305  |
| rs8042185   | G | 0.0611  |
| rs12911483  | C | 0.0747  |
| rs2925201   | T | -0.0817 |
| rs4646585   | A | 0.104   |
| rs11636806  | C | -0.055  |
| rs12050724  | G | -0.0419 |
| rs7165539   | C | -0.0375 |
| rs4774879   | A | 0.0434  |
| rs11072563  | G | 0.0436  |
| rs12910093  | A | 0.0511  |
| rs79375085  | C | 0.2773  |
| rs145542228 | A | -0.1926 |
| rs17632070  | C | -0.0763 |
| rs34231574  | T | 0.0381  |
| rs78981596  | T | 0.211   |
| rs6496467   | G | 0.0383  |
| rs2202885   | C | -0.0394 |
| rs17322978  | G | -0.0908 |
| rs12593761  | C | 0.1     |
| rs17793601  | C | 0.0697  |



|             |   |         |
|-------------|---|---------|
| rs79434560  | T | 0.2155  |
| rs11247162  | G | -0.0523 |
| rs61456320  | T | -0.0761 |
| rs11072642  | C | 0.0344  |
| rs2121212   | C | 0.0564  |
| rs28402904  | T | 0.0563  |
| rs17269545  | G | 0.0825  |
| rs12148829  | T | 0.0593  |
| rs148081642 | A | 0.0785  |
| rs117952620 | T | -0.1401 |
| rs62000003  | C | -0.0471 |
| rs1479831   | T | -0.0349 |
| rs62022770  | C | 0.0528  |
| rs61998105  | G | 0.075   |
| rs1838490   | A | -0.1723 |
| rs34444589  | A | 0.0634  |
| rs35540030  | C | 0.0476  |
| rs28455137  | C | 0.3048  |
| rs2337253   | C | 0.0378  |
| rs12901741  | A | 0.128   |
| rs117056179 | A | 0.1208  |
| rs189420    | A | -0.0377 |
| rs117769984 | T | -0.0931 |
| rs4310815   | C | 0.0373  |
| rs6496965   | C | 0.037   |
| rs997204    | C | 0.0363  |
| rs117895482 | A | -0.2082 |
| rs72734789  | A | 0.0911  |
| rs76242288  | C | 0.1578  |
| rs71462833  | C | 0.0977  |
| rs2879406   | C | 0.0643  |
| rs1393425   | T | -0.0774 |
| rs113357170 | T | 0.1547  |
| rs141174224 | A | 0.1055  |
| rs72625752  | A | 0.1335  |
| rs1437467   | C | -0.0343 |
| rs147243229 | T | -0.2055 |
| rs75943844  | C | 0.2349  |
| rs16959401  | A | 0.0712  |
| rs4299103   | C | 0.0631  |
| rs28362004  | A | 0.0473  |
| rs146496204 | G | 0.1809  |
| rs1552098   | T | 0.064   |
| rs8031559   | C | -0.0386 |
| rs140269476 | T | 0.1974  |
| rs16976450  | G | 0.0441  |
| rs57680389  | T | -0.2253 |

|             |   |         |
|-------------|---|---------|
| rs75991252  | A | -0.1308 |
| rs148571674 | C | 0.0442  |
| rs4886870   | C | -0.1954 |
| rs689652    | A | 0.0778  |
| rs79973254  | A | 0.0959  |
| rs2414519   | A | -0.042  |
| rs7178487   | G | 0.0333  |
| rs140256841 | T | 0.0971  |
| rs78286139  | A | -0.0992 |
| rs147752526 | G | 0.1483  |
| rs11636460  | C | 0.0474  |
| rs16972945  | G | 0.0711  |
| rs875339    | T | -0.0472 |
| rs12439461  | C | 0.042   |
| rs143351568 | G | -0.3135 |
| rs6495986   | T | 0.0393  |
| rs75536233  | A | 0.0547  |
| rs72743052  | A | 0.0655  |
| rs16972947  | C | -0.0458 |
| rs117704437 | T | 0.1643  |
| rs12901259  | A | -0.0395 |
| rs11858789  | A | -0.0617 |
| rs146583832 | T | -0.1189 |
| rs11634983  | C | -0.2708 |
| rs9286390   | G | -0.0697 |
| rs7166254   | A | 0.1232  |
| rs2543674   | C | 0.0759  |
| rs72732749  | T | 0.0927  |
| rs1081230   | A | -0.0337 |
| rs73455853  | G | 0.1758  |
| rs2936479   | T | -0.0821 |
| rs1107965   | G | 0.0608  |
| rs1724611   | G | -0.0549 |
| rs7495310   | C | -0.044  |
| rs1947219   | G | 0.0448  |
| rs117275234 | G | -0.0781 |
| rs55973132  | A | -0.0914 |
| rs8033465   | T | 0.0558  |
| rs1863495   | G | -0.1895 |
| rs11852353  | A | 0.0605  |
| rs75763893  | T | 0.0992  |
| rs12899579  | G | -0.0358 |
| rs745576    | A | -0.1538 |
| rs11632649  | G | -0.0413 |
| rs75583442  | A | -0.1661 |
| rs75259723  | G | -0.0877 |
| rs12908787  | T | 0.1464  |

|             |   |         |
|-------------|---|---------|
| rs12907677  | T | 0.0519  |
| rs2130988   | A | 0.0451  |
| rs266303    | C | 0.0487  |
| rs275728    | T | 0.0871  |
| rs12915565  | A | -0.0339 |
| rs56190996  | T | -0.0516 |
| rs208123    | T | 0.0463  |
| rs72630498  | A | 0.0511  |
| rs8034405   | G | -0.0341 |
| rs140379017 | A | 0.2402  |
| rs146116020 | C | -0.1326 |
| rs3934907   | A | -0.0464 |
| rs4779868   | A | 0.0334  |
| rs117099638 | A | -0.0843 |
| rs8609      | C | -0.0356 |
| rs11635541  | A | 0.0609  |
| rs113551275 | A | 0.1139  |
| rs2927397   | C | 0.0688  |
| rs147995573 | A | 0.1864  |
| rs35671787  | G | 0.1477  |
| rs7171749   | C | -0.0379 |
| rs77096063  | C | -0.0628 |
| rs117299940 | G | -0.1435 |
| rs492940    | A | 0.043   |
| rs56145327  | T | 0.1181  |
| rs1899741   | C | -0.0338 |
| rs143556116 | A | -0.1874 |
| rs890510    | C | -0.0619 |
| rs936227    | A | -0.0334 |
| rs56199567  | A | 0.1058  |
| rs12441936  | T | -0.0413 |
| rs4984419   | T | 0.0338  |
| rs574923    | G | -0.0347 |
| rs436913    | G | -0.0425 |
| rs55645655  | C | 0.0334  |
| rs8034612   | C | -0.0613 |
| rs75742797  | T | 0.0748  |
| rs4371104   | T | 0.0412  |
| rs112442542 | A | -0.2315 |
| rs140451907 | G | 0.2616  |
| rs12438597  | G | 0.0477  |
| rs7496834   | T | -0.1759 |
| rs7172156   | A | -0.0333 |
| rs2879263   | G | 0.0335  |
| rs141186147 | T | 0.0648  |
| rs3104506   | A | -0.0432 |
| rs1093542   | T | -0.0592 |

|             |   |         |
|-------------|---|---------|
| rs72753866  | T | 0.0838  |
| rs77947358  | C | 0.1589  |
| rs72750082  | T | -0.1496 |
| rs6496210   | C | -0.0384 |
| rs61999139  | A | -0.0626 |
| rs8023639   | G | 0.0334  |
| rs12441536  | T | 0.1179  |
| rs118167195 | G | -0.0996 |
| rs72765938  | A | -0.1158 |
| rs74008945  | T | 0.097   |
| rs138258046 | T | 0.1807  |
| rs7163194   | A | -0.0393 |
| rs12439656  | T | 0.0414  |
| rs146681637 | C | 0.0799  |
| rs4774197   | C | -0.0772 |
| rs117474129 | A | 0.1681  |
| rs58822225  | G | 0.0463  |
| rs79211764  | A | -0.1857 |
| rs113478191 | A | 0.1208  |
| rs74430162  | A | 0.2464  |
| rs7166032   | A | -0.0491 |
| rs2581337   | A | -0.1005 |
| rs1384727   | G | 0.0665  |
| rs435137    | T | -0.1659 |
| rs71397875  | T | 0.1609  |
| rs11629966  | G | 0.0447  |
| rs113327140 | T | 0.1775  |
| rs12906623  | G | -0.0343 |
| rs4238354   | T | -0.0482 |
| rs74874994  | T | -0.0827 |
| rs79081371  | A | -0.2439 |
| rs11633241  | G | 0.1398  |
| rs139106063 | C | 0.1377  |
| rs72755305  | A | -0.1814 |
| rs138792283 | A | 0.091   |
| rs111916202 | T | -0.152  |
| rs1659563   | A | -0.0342 |
| rs4775920   | A | 0.0418  |
| rs12911644  | G | 0.0342  |
| rs143991533 | T | -0.2048 |
| rs3784539   | T | -0.0519 |
| rs7171712   | T | -0.0469 |
| rs11854649  | T | 0.0672  |
| rs2577011   | C | -0.0339 |
| rs139905673 | A | -0.1558 |
| rs4965136   | T | 0.0347  |
| rs11073150  | T | 0.1274  |

|             |   |         |
|-------------|---|---------|
| rs56007454  | C | 0.1359  |
| rs56979833  | G | 0.0401  |
| rs2016546   | T | -0.188  |
| rs80012905  | T | 0.0974  |
| rs17666578  | C | -0.081  |
| rs72749804  | A | 0.1231  |
| rs11633285  | C | 0.0392  |
| rs12908614  | T | -0.0505 |
| rs6080      | A | -0.1135 |
| rs77641619  | T | -0.1338 |
| rs56152793  | G | 0.0617  |
| rs143865045 | T | -0.2733 |
| rs11073272  | A | 0.0723  |
| rs117819825 | T | -0.141  |
| rs74989098  | G | -0.1029 |
| rs62045515  | T | -0.0392 |
| rs148217915 | T | 0.1191  |
| rs67669586  | C | -0.0371 |
| rs140829342 | A | 0.193   |
| rs76195986  | G | -0.1209 |
| rs12899685  | G | 0.0505  |
| rs79988457  | T | 0.1517  |
| rs77306418  | C | -0.0649 |
| rs62040994  | A | -0.2513 |
| rs79097747  | G | 0.1125  |
| rs7173558   | A | 0.0585  |
| rs11856106  | T | -0.0626 |
| rs1521625   | C | -0.0445 |
| rs546292    | C | 0.0741  |
| rs897487    | C | -0.2076 |
| rs79994695  | T | 0.1553  |
| rs753074    | T | -0.0704 |
| rs112394508 | T | 0.2848  |
| rs8030369   | A | -0.1143 |
| rs72717679  | G | -0.1115 |
| rs2047656   | T | -0.0507 |
| rs72739546  | T | 0.152   |
| rs111630327 | A | 0.1943  |
| rs77625534  | G | 0.115   |
| rs79648239  | A | 0.069   |
| rs748891    | G | -0.0336 |
| rs73424357  | T | 0.1105  |
| rs1533309   | A | -0.0379 |
| rs4774815   | T | 0.0543  |
| rs60001770  | A | -0.1249 |
| rs7166038   | G | -0.0555 |
| rs62017664  | C | -0.0428 |

|             |   |         |
|-------------|---|---------|
| rs11637628  | C | 0.0778  |
| rs57209367  | T | -0.1117 |
| rs79431016  | G | -0.2265 |
| rs1047552   | G | -0.1177 |
| rs62019066  | A | 0.1166  |
| rs34298001  | A | 0.0806  |
| rs4401028   | C | -0.0551 |
| rs4775787   | C | 0.0589  |
| rs10520661  | A | -0.0748 |
| rs56278535  | T | 0.0331  |
| rs12148853  | T | -0.067  |
| rs16959674  | A | -0.0636 |
| rs11854463  | G | -0.0381 |
| rs57239225  | G | 0.0536  |
| rs11856394  | G | -0.0927 |
| rs78016763  | A | 0.1741  |
| rs62023600  | T | 0.1436  |
| rs4331298   | T | 0.0333  |
| rs17520224  | G | -0.1395 |
| rs6416519   | C | -0.0444 |
| rs147531092 | G | 0.1271  |
| rs144527354 | C | 0.1843  |
| rs74036225  | A | -0.0592 |
| rs74950169  | C | -0.1203 |
| rs60019407  | C | 0.0878  |
| rs148486063 | A | -0.1386 |
| rs17708391  | T | 0.0661  |
| rs17192905  | A | 0.2281  |
| rs35819582  | G | 0.0675  |
| rs144968978 | T | 0.1724  |
| rs145157844 | T | -0.1348 |
| rs921506    | T | 0.0383  |
| rs144402747 | T | -0.1399 |
| rs34445138  | A | 0.1387  |
| rs9282613   | A | -0.1332 |
| rs12911275  | G | -0.0744 |
| rs28679413  | C | -0.0382 |
| rs8036030   | A | -0.0323 |
| rs4775469   | G | 0.0324  |
| rs140767538 | C | 0.176   |
| rs57102039  | T | 0.1678  |
| rs117377275 | A | -0.0942 |
| rs16975951  | T | -0.0377 |
| rs80015997  | T | -0.0715 |
| rs142992900 | T | -0.254  |
| rs12908809  | A | -0.0776 |
| rs75010547  | A | -0.0803 |

|             |   |         |
|-------------|---|---------|
| rs4984460   | G | -0.0376 |
| rs148180119 | G | -0.2067 |
| rs1510372   | T | -0.0332 |
| rs11630647  | A | -0.0381 |
| rs1437590   | C | -0.0391 |
| rs17817650  | T | 0.0394  |
| rs72745946  | T | -0.0604 |
| rs138306576 | C | 0.1377  |
| rs343918    | C | 0.0342  |
| rs60826218  | T | -0.0447 |
| rs5007158   | T | 0.1778  |
| rs11634620  | C | 0.1902  |
| rs78155170  | T | 0.2238  |
| rs4433753   | A | 0.1185  |
| rs1879155   | A | 0.0719  |
| rs12916437  | T | 0.0376  |
| rs1983354   | G | 0.051   |
| rs8039510   | C | 0.0493  |
| rs11631292  | T | -0.077  |
| rs76243922  | A | -0.0795 |
| rs8026456   | C | -0.0357 |
| rs6495589   | A | -0.0507 |
| rs77352294  | C | 0.0728  |
| rs2880972   | T | 0.0318  |
| rs1509401   | T | -0.0374 |
| rs111528932 | A | -0.1733 |
| rs9282715   | C | -0.0619 |
| rs7180310   | A | -0.0578 |
| rs7173954   | G | -0.0337 |
| rs11073524  | A | -0.0539 |
| rs8036935   | C | 0.0409  |
| rs10438324  | T | -0.0519 |
| rs7161937   | G | 0.0569  |
| rs62022457  | C | 0.099   |
| rs1450112   | G | -0.036  |
| rs117299685 | A | 0.1507  |
| rs208129    | T | 0.0537  |
| rs4984288   | C | 0.0328  |
| rs17115734  | C | -0.0841 |
| rs2453531   | G | 0.0347  |
| rs17137285  | G | 0.0781  |
| rs72633225  | A | -0.116  |
| rs7174584   | C | 0.0395  |
| rs147301446 | T | 0.1275  |
| rs28704520  | G | -0.0671 |
| rs675262    | C | -0.115  |
| rs12101667  | C | 0.173   |

|             |   |         |
|-------------|---|---------|
| rs113504621 | T | 0.0362  |
| rs11558579  | A | -0.1523 |
| rs7162628   | G | -0.0388 |
| rs12441889  | A | -0.061  |
| rs112295759 | A | -0.2277 |
| rs1319145   | G | -0.0331 |
| rs28624578  | C | -0.0472 |
| rs2911855   | A | -0.0795 |
| rs4965306   | G | -0.0762 |
| rs145442032 | A | -0.1528 |
| rs12438479  | A | 0.0482  |
| rs1823718   | A | 0.0309  |
| rs80082236  | C | -0.2658 |
| rs1824244   | T | 0.0544  |
| rs11857136  | T | 0.0344  |
| rs56221518  | A | 0.2451  |
| rs10520727  | C | 0.0721  |
| rs877228    | A | 0.0308  |
| rs78243360  | G | -0.0991 |
| rs34040889  | A | -0.0728 |
| rs11630228  | A | 0.0354  |
| rs12917598  | C | -0.0478 |
| rs7177912   | G | -0.0618 |
| rs143792535 | G | 0.185   |
| rs80178014  | C | -0.1893 |
| rs142405709 | C | 0.0701  |
| rs34949187  | A | -0.0566 |
| rs78994380  | A | -0.0619 |
| rs147691100 | T | 0.2217  |
| rs2622779   | A | -0.2033 |
| rs10431843  | C | -0.0518 |
| rs117430101 | G | 0.2246  |
| rs10152725  | T | 0.0431  |
| rs12908142  | T | 0.0566  |
| rs145257013 | T | -0.1872 |
| rs4774779   | G | -0.1797 |
| rs3109388   | A | 0.0322  |
| rs140685    | T | -0.0321 |
| rs12591732  | T | -0.0338 |
| rs8029919   | G | -0.0318 |
| rs16977814  | G | 0.0473  |
| rs16975423  | A | 0.0418  |
| rs79030890  | T | 0.1855  |
| rs2119695   | T | 0.033   |
| rs149746554 | A | 0.1511  |
| rs8026116   | G | 0.0506  |
| rs28524922  | T | -0.0614 |



|             |   |         |
|-------------|---|---------|
| rs74981122  | C | 0.1138  |
| rs145292885 | T | -0.2678 |
| rs8033761   | T | 0.0404  |
| rs72731099  | G | -0.0506 |
| rs116940419 | G | 0.1446  |
| rs10083700  | T | 0.0456  |
| rs12591748  | C | -0.043  |
| rs8038611   | A | -0.0393 |
| rs74800607  | T | 0.0929  |
| rs55837158  | C | 0.0636  |
| rs139632509 | T | 0.1965  |
| rs12442255  | C | -0.0427 |
| rs34070219  | G | 0.1709  |
| rs939586    | A | 0.0338  |
| rs147962900 | G | 0.1005  |
| rs872332    | G | -0.0589 |
| rs62032630  | G | -0.0365 |
| rs1435397   | G | 0.0381  |
| rs78961189  | G | -0.1487 |
| rs17237054  | C | 0.121   |
| rs12050875  | A | -0.0347 |
| rs72731256  | A | 0.0362  |
| rs16977603  | C | 0.0922  |
| rs112778236 | C | 0.1272  |
| rs79059908  | G | -0.0526 |
| rs28626328  | G | 0.1232  |
| rs118191466 | A | 0.2899  |
| rs72753805  | T | 0.0894  |
| rs62045833  | T | -0.0446 |
| rs35407497  | C | 0.0409  |
| rs4780157   | G | -0.2115 |
| rs4778075   | T | -0.0569 |
| rs16975070  | G | 0.0591  |
| rs151143097 | A | 0.1253  |
| rs4843134   | T | -0.0337 |
| rs150007692 | A | -0.2163 |
| rs34377177  | A | -0.0383 |
| rs76010336  | G | 0.164   |
| rs8034881   | G | -0.0395 |
| rs12910030  | G | 0.0637  |
| rs74006937  | G | -0.0698 |
| rs73387555  | T | -0.0407 |
| rs7171363   | A | 0.0311  |
| rs12916252  | G | 0.0311  |
| rs137976626 | C | 0.1547  |
| rs4932245   | T | 0.0322  |
| rs17637170  | C | -0.0339 |

|             |   |         |
|-------------|---|---------|
| rs118172169 | A | 0.1572  |
| rs10083625  | A | 0.0492  |
| rs8037338   | A | -0.1175 |
| rs12593016  | T | 0.1091  |
| rs79114847  | C | -0.1698 |
| rs148164494 | A | 0.1085  |
| rs142512885 | A | -0.2377 |
| rs148361096 | A | -0.1626 |
| rs17184851  | C | -0.0419 |
| rs12898879  | G | -0.0557 |
| rs67020211  | T | -0.0327 |
| rs62014766  | T | 0.0905  |
| rs16973963  | G | 0.0482  |
| rs289165    | G | -0.0331 |
| rs7182108   | T | 0.1504  |
| rs78977483  | A | 0.1625  |
| rs8025032   | T | -0.1102 |
| rs4350551   | G | -0.051  |
| rs111742024 | T | -0.1522 |
| rs526110    | T | 0.0498  |
| rs75353393  | T | -0.0641 |
| rs4778340   | G | 0.0323  |
| rs892467    | T | 0.0823  |
| rs150447136 | A | 0.1878  |
| rs74327526  | T | 0.1314  |
| rs1425948   | A | 0.0333  |
| rs75410958  | G | -0.0739 |
| rs62002345  | G | 0.0351  |
| rs72691553  | A | 0.1829  |
| rs10152911  | G | -0.1682 |
| rs146821981 | T | 0.2526  |
| rs16970392  | T | 0.052   |
| rs890317    | A | -0.0351 |
| rs1500646   | A | 0.058   |
| rs12898298  | A | -0.0403 |
| rs111252635 | G | -0.2125 |
| rs1602457   | G | -0.072  |
| rs7175507   | T | 0.0312  |
| rs4778756   | T | -0.0382 |
| rs6495503   | A | 0.1277  |
| rs117448777 | T | -0.1692 |
| rs12908951  | G | 0.034   |
| rs8033490   | T | 0.0941  |
| rs4775656   | T | 0.0339  |
| rs7170052   | C | 0.0364  |
| rs77856019  | T | 0.1293  |
| rs117292516 | T | -0.1965 |

|             |   |         |
|-------------|---|---------|
| rs149673964 | T | -0.0904 |
| rs11073495  | G | -0.0502 |
| rs146609109 | G | -0.2772 |
| rs73433958  | A | -0.1479 |
| rs1379347   | T | 0.0328  |
| rs116979587 | T | 0.0645  |
| rs11631755  | T | -0.0411 |
| rs75596873  | C | 0.2145  |
| rs117785937 | T | -0.0802 |
| rs55724559  | A | -0.0311 |
| rs58590130  | T | -0.0781 |
| rs4537960   | C | 0.1076  |
| rs4966057   | A | -0.0408 |
| rs6494018   | G | -0.0363 |
| rs1372607   | C | 0.0371  |
| rs371606    | T | 0.0313  |
| rs2647675   | T | 0.1093  |
| rs2131738   | C | -0.0339 |
| rs75576656  | T | 0.0441  |
| rs1896796   | G | -0.0306 |
| rs78956703  | A | 0.0841  |
| rs7178341   | T | 0.0463  |
| rs12903736  | C | -0.0322 |
| rs11247282  | C | -0.0371 |
| rs16964815  | C | -0.1777 |
| rs117245847 | A | -0.1326 |
| rs149297378 | T | -0.2006 |
| rs72727783  | A | 0.1404  |
| rs12905005  | C | 0.0396  |
| rs111503861 | G | -0.0552 |
| rs77071602  | T | -0.0523 |
| rs78450030  | T | 0.0823  |
| rs1563009   | A | -0.0326 |
| rs12910991  | G | -0.0347 |
| rs72750012  | A | 0.1405  |
| rs57742857  | A | -0.1631 |
| rs9783699   | A | -0.2106 |
| rs117522857 | C | 0.1806  |
| rs145498972 | A | -0.1658 |
| rs7167008   | T | 0.0921  |
| rs7180790   | T | 0.0759  |
| rs12148836  | G | -0.0408 |
| rs56726277  | T | 0.2097  |
| rs75508465  | C | -0.0524 |
| rs62020055  | T | 0.1666  |
| rs61993580  | T | 0.0457  |
| rs72745934  | T | -0.1382 |

|             |   |         |
|-------------|---|---------|
| rs12899210  | C | 0.0372  |
| rs11635468  | A | -0.0351 |
| rs28643357  | A | 0.0474  |
| rs74667037  | A | -0.1309 |
| rs975985    | C | 0.0625  |
| rs28647217  | C | -0.1496 |
| rs62008793  | G | 0.0408  |
| rs12593877  | T | 0.0609  |
| rs144791272 | T | -0.2166 |
| rs2414301   | T | -0.0454 |
| rs80220919  | T | -0.0579 |
| rs62025980  | A | 0.0471  |
| rs12592962  | A | -0.1246 |
| rs11161154  | A | -0.0347 |
| rs10153006  | C | 0.0608  |
| rs8023268   | T | -0.0359 |
| rs3848166   | A | 0.0344  |
| rs11637083  | C | 0.0568  |
| rs147573238 | T | -0.2868 |
| rs141732004 | A | 0.1671  |
| rs16948769  | T | -0.1094 |
| rs56372426  | G | -0.039  |
| rs76160920  | G | 0.2759  |
| rs7173234   | T | -0.0314 |
| rs12372980  | A | 0.0754  |
| rs145368568 | T | -0.1463 |
| rs1991897   | C | 0.0349  |
| rs115168491 | A | 0.245   |
| rs77274766  | C | 0.1477  |
| rs147018638 | A | -0.1608 |
| rs7164195   | G | -0.0387 |
| rs144983615 | A | 0.12    |
| rs144741119 | A | -0.0826 |
| rs7342574   | T | -0.0367 |
| rs149542283 | T | -0.1634 |
| rs8030069   | C | -0.1484 |
| rs74019428  | T | -0.1237 |
| rs62009064  | C | 0.0871  |
| rs76059106  | G | -0.1612 |
| rs28488334  | A | 0.167   |
| rs2255235   | T | -0.0506 |
| rs17249287  | G | 0.0393  |
| rs76471550  | T | -0.092  |
| rs117767952 | A | 0.1473  |
| rs4390566   | C | 0.1284  |
| rs3743476   | G | 0.0357  |
| rs117475983 | A | 0.2447  |

|             |   |         |
|-------------|---|---------|
| rs118088981 | T | -0.061  |
| rs55864624  | T | -0.1251 |
| rs35626559  | C | -0.1237 |
| rs117196177 | A | 0.1588  |
| rs2304381   | A | 0.0388  |
| rs9806371   | A | 0.0822  |
| rs12232304  | A | -0.0549 |
| rs140018955 | T | 0.1497  |
| rs148491765 | A | -0.1533 |
| rs35998318  | C | 0.0365  |
| rs16970598  | T | -0.1482 |
| rs79663035  | T | -0.1019 |
| rs12440044  | T | 0.0819  |
| rs59335599  | C | -0.0704 |
| rs59902230  | G | -0.2757 |
| rs8041685   | A | 0.0404  |
| rs2399653   | A | -0.0412 |
| rs55674454  | C | 0.1124  |
| rs166869    | T | 0.09    |
| rs12899299  | G | 0.03    |
| rs7166631   | G | -0.0958 |
| rs55869358  | C | -0.1175 |
| rs2555490   | A | 0.0422  |
| rs8029493   | C | -0.075  |
| rs12592926  | T | 0.1089  |
| rs67488334  | T | 0.0696  |
| rs139273769 | C | -0.1345 |
| rs34169909  | C | -0.0599 |
| rs11633615  | G | -0.1081 |
| rs79985453  | T | 0.0839  |
| rs8028370   | T | -0.0743 |
| rs8034464   | T | -0.0465 |
| rs1899630   | A | 0.0786  |
| rs3784704   | C | 0.0502  |
| rs16977961  | A | 0.0327  |
| rs4906717   | A | -0.0498 |
| rs1690322   | A | 0.1308  |
| rs141671482 | C | 0.0933  |
| rs4306482   | A | 0.0315  |
| rs1455765   | G | 0.0362  |
| rs1046156   | C | -0.0319 |
| rs16954413  | G | -0.0664 |
| rs12102183  | T | 0.1299  |
| rs2684792   | G | -0.0303 |
| rs12905736  | A | -0.0416 |
| rs114714246 | G | 0.1311  |
| rs16975467  | T | -0.0497 |

|             |   |         |
|-------------|---|---------|
| rs35352245  | G | 0.0429  |
| rs62002512  | T | 0.2904  |
| rs7177436   | A | -0.1203 |
| rs10873605  | G | -0.036  |
| rs4887028   | G | 0.1328  |
| rs16975262  | G | 0.0758  |
| rs75831225  | A | -0.2467 |
| rs61557975  | T | 0.0891  |
| rs12904399  | A | 0.064   |
| rs11633943  | A | 0.1409  |
| rs75328025  | C | -0.0469 |
| rs143688464 | A | 0.1039  |
| rs117044596 | G | 0.1165  |
| rs75449553  | C | -0.106  |
| rs67835375  | A | 0.1037  |
| rs294548    | C | 0.0459  |
| rs140822783 | C | -0.1594 |
| rs62005590  | T | 0.1007  |
| rs11631591  | C | 0.0337  |
| rs72753955  | G | -0.2252 |
| rs75840326  | A | 0.123   |
| rs76582486  | C | -0.0488 |
| rs2277557   | T | 0.0609  |
| rs28742136  | C | -0.1101 |
| rs4774376   | G | 0.0524  |
| rs2647676   | A | 0.0417  |
| rs11071587  | A | -0.0312 |
| rs28564108  | C | 0.202   |
| rs5030784   | T | -0.1915 |
| rs8025065   | G | -0.0678 |
| rs1372258   | T | -0.0888 |
| rs2899639   | A | -0.0644 |
| rs117578794 | C | 0.2117  |
| rs62046489  | A | 0.0963  |
| rs12906287  | C | 0.0344  |
| rs78104480  | T | -0.1343 |
| rs11161147  | A | -0.1073 |
| rs8182091   | G | -0.0365 |
| rs146334221 | T | 0.1407  |
| rs72747851  | C | -0.1574 |
| rs1032639   | G | -0.0732 |
| rs12439840  | A | -0.0492 |
| rs4261519   | T | -0.106  |
| rs148431811 | T | 0.1315  |
| rs80238324  | A | 0.1819  |
| rs12594612  | A | -0.0675 |
| rs2175268   | C | -0.0676 |

|             |   |         |
|-------------|---|---------|
| rs2280345   | G | 0.0498  |
| rs55901772  | A | 0.2496  |
| rs72756832  | A | 0.1555  |
| rs12916780  | G | 0.0334  |
| rs4777341   | A | -0.0337 |
| rs117235512 | G | 0.0717  |
| rs899943    | G | 0.0702  |
| rs62014768  | A | -0.048  |
| rs1002907   | T | 0.0409  |
| rs1356410   | T | 0.0341  |
| rs35971971  | A | 0.039   |
| rs28557453  | C | 0.0616  |
| rs12148264  | G | -0.0376 |
| rs12907172  | A | -0.1814 |
| rs12914188  | A | -0.0325 |
| rs2654194   | C | 0.0422  |
| rs2472297   | T | 0.037   |
| rs75918741  | G | 0.0658  |
| rs8027647   | A | -0.0398 |
| rs3110484   | C | 0.0673  |
| rs35841315  | T | -0.0837 |
| rs11858496  | T | 0.1276  |
| rs765320    | T | -0.0363 |
| rs62012005  | A | -0.0951 |
| rs78794722  | G | 0.1868  |
| rs144263860 | T | 0.0492  |
| rs6495426   | G | -0.0318 |
| rs77193856  | G | 0.1827  |
| rs11073097  | G | 0.1196  |
| rs7163965   | C | -0.0307 |
| rs782919    | T | 0.0359  |
| rs61075944  | T | 0.2327  |
| rs10851933  | A | 0.0561  |
| rs113905409 | G | -0.0357 |
| rs76761168  | T | 0.1556  |
| rs17700030  | A | -0.0447 |
| rs2934444   | C | -0.0327 |
| rs34058682  | G | 0.0446  |
| rs142354201 | A | 0.0876  |
| rs11634896  | C | 0.0302  |
| rs17439687  | C | 0.0367  |
| rs1852029   | G | -0.0325 |
| rs72759803  | T | -0.1636 |
| rs71468856  | A | 0.1144  |
| rs965313    | A | 0.0764  |
| rs62002012  | T | -0.0559 |
| rs2415069   | A | -0.0323 |

|             |   |         |
|-------------|---|---------|
| rs139253558 | T | -0.1298 |
| rs2439412   | A | -0.0324 |
| rs34590613  | G | -0.0982 |
| rs4641675   | C | -0.0454 |
| rs72715124  | G | 0.1115  |
| rs117120687 | T | -0.0919 |
| rs55656001  | T | 0.0859  |
| rs78443607  | T | 0.0953  |
| rs10519816  | G | -0.0425 |
| rs72755205  | T | 0.1743  |
| rs55700704  | C | -0.1202 |
| rs2247558   | T | -0.0379 |
| rs117778875 | T | 0.1251  |
| rs141474124 | G | -0.2071 |
| rs142824951 | C | 0.1481  |
| rs12593568  | T | -0.0528 |
| rs62005639  | A | -0.0421 |
| rs142100021 | A | -0.1543 |
| rs76994314  | A | 0.0592  |
| rs139043784 | A | 0.0799  |
| rs12915846  | A | 0.0329  |
| rs80189677  | G | -0.0877 |
| rs72704412  | T | 0.0458  |
| rs1822889   | A | -0.0566 |
| rs28460727  | G | -0.0314 |
| rs145893016 | G | -0.0955 |
| rs62010542  | G | 0.1135  |
| rs139902291 | T | 0.0939  |
| rs2448326   | T | -0.105  |
| rs72752397  | T | 0.0412  |
| rs7164855   | T | -0.0345 |
| rs4932273   | G | -0.0537 |
| rs4887014   | G | -0.0329 |
| rs4420510   | A | 0.0308  |
| rs11072423  | G | -0.1159 |
| rs6416593   | A | -0.0807 |
| rs12899591  | G | 0.1151  |
| rs12443170  | A | 0.053   |
| rs6493834   | T | 0.0292  |
| rs71402276  | A | 0.0338  |
| rs74219856  | T | 0.0727  |
| rs80232799  | A | -0.1876 |
| rs72715242  | C | -0.085  |
| rs12899128  | T | -0.0462 |
| rs3784729   | A | -0.0371 |
| rs2955748   | C | 0.0287  |
| rs66665972  | A | -0.0914 |



|             |   |         |
|-------------|---|---------|
| rs12898325  | A | -0.1594 |
| rs78893610  | C | -0.1869 |
| rs117251505 | T | -0.1885 |
| rs80241084  | G | -0.123  |
| rs7178176   | T | -0.0385 |
| rs34449200  | T | -0.055  |
| rs28523936  | G | 0.1381  |
| rs2714767   | G | -0.0689 |
| rs9788707   | C | 0.1063  |
| rs4924016   | T | -0.0433 |
| rs4886921   | T | 0.0377  |
| rs79850091  | C | -0.1992 |
| rs117383176 | C | 0.1677  |
| rs920114    | T | -0.0463 |
| rs17482833  | C | -0.0314 |
| rs56124652  | C | -0.0469 |
| rs17753089  | T | -0.0376 |
| rs113763117 | A | 0.0696  |
| rs28431191  | A | -0.0652 |
| rs8038708   | G | 0.031   |
| rs62013838  | G | 0.0968  |
| rs11632923  | G | -0.0326 |
| rs35203187  | C | 0.0354  |
| rs140600378 | T | 0.1289  |
| rs147566078 | A | -0.1564 |
| rs146414239 | T | 0.1908  |
| rs908044    | C | -0.0359 |
| rs1046053   | C | -0.0301 |
| rs78045630  | A | 0.0504  |
| rs79978230  | C | -0.1301 |
| rs4078458   | A | 0.053   |
| rs77132964  | C | -0.1298 |
| rs4776812   | G | 0.0378  |
| rs79396620  | T | -0.1293 |
| rs72739591  | T | -0.1108 |
| rs76930157  | T | 0.1062  |
| rs72753746  | G | -0.1137 |
| rs7182906   | T | 0.0326  |
| rs11636232  | T | -0.043  |
| rs72763007  | C | 0.0717  |
| rs149534172 | G | 0.1902  |
| rs62005992  | A | -0.0794 |
| rs138990147 | T | 0.1161  |
| rs146952468 | T | -0.2342 |
| rs141480734 | T | -0.1937 |
| rs28576596  | G | -0.0361 |
| rs116847130 | A | 0.1461  |

|             |   |         |
|-------------|---|---------|
| rs12910016  | C | -0.0349 |
| rs77578164  | A | 0.1489  |
| rs2912598   | A | -0.0323 |
| rs2924770   | A | -0.0439 |
| rs10520033  | T | 0.1528  |
| rs146859566 | G | 0.2126  |
| rs61993178  | G | -0.1373 |
| rs144904660 | A | 0.1359  |
| rs12593253  | C | -0.0328 |
| rs61286201  | G | 0.034   |
| rs56082641  | T | 0.0543  |
| rs117618886 | C | -0.1654 |
| rs2004969   | G | -0.0299 |
| rs12909357  | C | 0.0938  |
| rs144621485 | T | -0.1607 |
| rs117686413 | T | -0.1428 |
| rs2007180   | A | -0.0326 |
| rs28625267  | C | -0.0631 |
| rs72546361  | T | 0.1363  |
| rs12898828  | T | -0.075  |
| rs8043356   | T | -0.0454 |
| rs72753058  | A | 0.031   |
| rs71403594  | G | -0.1205 |
| rs117637627 | T | 0.196   |
| rs3812923   | A | 0.0724  |
| rs2592092   | A | -0.0394 |
| rs117734725 | G | -0.1379 |
| rs7183842   | G | -0.0322 |
| rs57283776  | A | 0.0333  |
| rs1532761   | G | -0.0302 |
| rs147809576 | A | 0.1611  |
| rs11072757  | A | 0.0324  |
| rs12443185  | C | -0.0404 |
| rs4350540   | G | -0.0384 |
| rs72754740  | A | 0.0697  |
| rs1872049   | G | -0.0288 |
| rs7183784   | T | -0.0912 |
| rs77850876  | G | -0.1089 |
| rs16971049  | T | 0.0486  |
| rs139661283 | A | -0.1129 |
| rs11639366  | T | -0.1597 |
| rs4906947   | G | -0.0327 |
| rs2398225   | A | -0.0634 |
| rs140666562 | G | -0.1879 |
| rs11631860  | G | -0.0757 |
| rs77582710  | T | -0.104  |
| rs72716817  | A | -0.1539 |

|             |   |         |
|-------------|---|---------|
| rs10518769  | G | -0.0345 |
| rs1256433   | A | 0.0381  |
| rs74017420  | A | -0.0491 |
| rs8033456   | G | 0.0481  |
| rs143590455 | C | 0.0977  |
| rs78025493  | A | 0.1356  |
| rs76879229  | A | -0.1075 |
| rs72711422  | T | 0.0326  |
| rs113635381 | A | -0.0943 |
| rs8042426   | A | 0.0333  |
| rs1866396   | C | -0.1061 |
| rs116910648 | A | -0.2369 |
| rs17730347  | G | 0.0406  |
| rs8023412   | T | 0.0458  |
| rs140191172 | A | 0.1121  |
| rs1453857   | T | -0.0291 |
| rs76347986  | T | -0.1297 |
| rs118149475 | A | -0.2248 |
| rs117981770 | G | -0.1427 |
| rs4777306   | G | 0.044   |
| rs57769495  | G | -0.054  |
| rs2759307   | A | -0.0306 |
| rs74589282  | T | 0.1205  |
| rs16976015  | T | -0.0403 |
| rs4503771   | T | 0.0402  |
| rs28714412  | A | -0.1491 |
| rs142553395 | T | -0.1306 |
| rs112289494 | A | -0.2374 |
| rs148304937 | C | 0.2045  |
| rs76375505  | T | 0.1237  |
| rs1719339   | C | 0.0848  |
| rs6226      | G | -0.0331 |
| rs141774598 | A | 0.1398  |
| rs2289739   | T | 0.0322  |
| rs74940130  | C | -0.1666 |
| rs60669307  | G | 0.2272  |
| rs10851820  | G | -0.0305 |
| rs8023928   | A | -0.1445 |
| rs2255410   | A | -0.0312 |
| rs142774719 | A | 0.1115  |
| rs3923763   | C | -0.0365 |
| rs78053087  | C | -0.1123 |
| rs75674610  | A | 0.089   |
| rs8035166   | G | -0.0316 |
| rs906428    | T | -0.0398 |
| rs2162221   | T | 0.1358  |
| rs113259401 | A | -0.0393 |

|             |   |         |
|-------------|---|---------|
| rs72740643  | A | -0.0596 |
| rs117515292 | T | -0.0956 |
| rs12916793  | G | -0.0606 |
| rs35445532  | T | -0.1571 |
| rs4357922   | A | 0.0342  |
| rs3784730   | G | -0.0286 |
| rs117422407 | G | 0.1622  |
| rs290549    | C | -0.0803 |
| rs8032860   | T | 0.099   |
| rs4598886   | C | -0.0541 |
| rs150689276 | C | -0.1624 |
| rs146791359 | A | -0.0948 |
| rs11856355  | C | 0.1478  |
| rs79475978  | A | -0.1843 |
| rs117280013 | A | -0.1213 |
| rs1821583   | T | 0.0309  |
| rs141365560 | C | -0.1507 |
| rs58205014  | T | 0.0957  |
| rs8187746   | A | 0.1655  |
| rs113159970 | A | -0.0316 |
| rs151107880 | G | 0.1689  |
| rs10519060  | G | -0.0289 |
| rs77375407  | A | -0.1184 |
| rs117331687 | A | -0.1943 |
| rs60294887  | A | 0.0777  |
| rs145649011 | C | 0.235   |
| rs2715795   | A | -0.031  |
| rs12595331  | T | -0.0327 |
| rs12912207  | G | 0.0619  |
| rs4842976   | C | -0.106  |
| rs6493360   | A | -0.0812 |
| rs28580239  | C | -0.034  |
| rs16954809  | G | 0.0501  |
| rs142735148 | C | 0.2174  |
| rs4426325   | G | 0.0445  |
| rs76464938  | C | -0.1279 |
| rs12906693  | A | -0.1515 |
| rs72751537  | A | 0.2336  |
| rs140413715 | C | -0.1896 |
| rs117221088 | T | 0.2663  |
| rs10519978  | G | -0.032  |
| rs12899662  | A | -0.0366 |
| rs72746688  | C | 0.2065  |
| rs35421679  | G | -0.2063 |
| rs75220565  | G | 0.08    |
| rs1002881   | A | 0.0476  |
| rs285773    | C | 0.0377  |

|             |   |         |
|-------------|---|---------|
| rs146181104 | A | 0.1691  |
| rs11074270  | C | 0.0774  |
| rs55757218  | T | 0.1836  |
| rs72760536  | C | 0.1134  |
| rs12441095  | A | -0.1442 |
| rs1550329   | C | 0.0307  |
| rs117296430 | C | 0.1636  |
| rs77979266  | C | -0.1468 |
| rs12442705  | A | -0.0374 |
| rs62006048  | C | -0.0419 |
| rs35598712  | A | 0.0734  |
| rs4778177   | T | 0.0455  |
| rs61608816  | T | -0.0313 |
| rs12592861  | A | -0.0292 |
| rs12913662  | T | -0.029  |
| rs74917061  | A | -0.0987 |
| rs62007572  | G | 0.0667  |
| rs12438569  | T | -0.0464 |
| rs11635789  | G | 0.0358  |
| rs12441151  | C | -0.0369 |
| rs58890367  | C | -0.0841 |
| rs28842183  | G | 0.0362  |
| rs17552102  | A | 0.0355  |
| rs8026200   | T | 0.0637  |
| rs925480    | T | 0.0515  |
| rs10520788  | C | -0.0622 |
| rs72752686  | A | 0.059   |
| rs8027298   | G | -0.0403 |
| rs77602844  | T | -0.1396 |
| rs74558764  | A | 0.2178  |
| rs59419458  | A | -0.152  |
| rs117712006 | A | -0.1297 |
| rs117486267 | C | 0.1004  |
| rs17822913  | T | -0.0432 |
| rs72739866  | C | -0.0342 |
| rs2446415   | G | 0.1055  |
| rs72753288  | C | -0.0804 |
| rs12903092  | A | 0.0768  |
| rs4380018   | A | 0.0373  |
| rs77322056  | C | -0.0709 |
| rs117844539 | T | 0.1102  |
| rs72741934  | C | -0.1432 |
| rs117160096 | C | -0.1767 |
| rs147447903 | A | 0.0769  |
| rs285767    | A | 0.1358  |
| rs62009542  | G | -0.0649 |
| rs6496217   | A | -0.0328 |

|             |   |         |
|-------------|---|---------|
| rs16967626  | T | -0.0479 |
| rs11632605  | C | 0.032   |
| rs146372618 | C | -0.1476 |
| rs11070662  | A | 0.0317  |
| rs3522      | T | 0.0303  |
| rs923529    | C | 0.0614  |
| rs112397651 | G | -0.2053 |
| rs17228571  | T | -0.0308 |
| rs75505261  | C | -0.1292 |
| rs145684770 | A | -0.2104 |
| rs3794513   | T | -0.0473 |
| rs79382620  | A | -0.0458 |
| rs28408346  | G | -0.0471 |
| rs117045698 | A | 0.126   |
| rs61999919  | C | -0.0816 |
| rs72737351  | T | -0.2083 |
| rs12904280  | C | 0.0469  |
| rs4377103   | A | 0.0301  |
| rs7174511   | C | -0.0702 |
| rs62006664  | A | -0.0599 |
| rs72704013  | C | -0.0538 |
| rs28700179  | C | -0.2056 |
| rs4477641   | T | -0.0441 |
| rs72759702  | T | -0.0495 |
| rs117492305 | A | 0.1206  |
| rs72739009  | A | -0.0531 |
| rs34394300  | G | -0.0355 |
| rs34783287  | C | -0.1041 |
| rs7171268   | C | -0.0739 |
| rs141917233 | A | -0.2155 |
| rs12442048  | G | -0.0343 |
| rs55997353  | T | 0.05    |
| rs12904695  | C | -0.028  |
| rs272807    | T | -0.1157 |
| rs12439705  | A | 0.3038  |
| rs8043101   | T | -0.0993 |
| rs1797225   | G | -0.0309 |
| rs10519046  | G | -0.0517 |
| rs9652481   | T | 0.0567  |
| rs61069875  | A | -0.0338 |
| rs79582330  | G | -0.1002 |
| rs62026001  | T | -0.1001 |
| rs146256943 | T | 0.1985  |
| rs4775371   | A | -0.0358 |
| rs2119261   | T | 0.0302  |
| rs28895415  | T | 0.0541  |
| rs11074277  | A | 0.0749  |

|             |   |         |
|-------------|---|---------|
| rs11071654  | G | 0.0294  |
| rs6494949   | A | -0.0449 |
| rs12437542  | T | -0.032  |
| rs72724253  | T | 0.0569  |
| rs72744124  | G | -0.158  |
| rs74034132  | C | 0.0895  |
| rs6494983   | G | -0.0484 |
| rs72705898  | T | 0.1062  |
| rs166723    | C | 0.0702  |
| rs3096464   | A | 0.0275  |
| rs73426793  | T | -0.0442 |
| rs1551344   | A | -0.0561 |
| rs150307241 | G | 0.269   |
| rs11635939  | T | 0.0547  |
| rs12594998  | G | -0.0333 |
| rs147537403 | C | 0.1519  |
| rs4461027   | C | -0.0291 |
| rs12442830  | C | -0.0427 |
| rs12441502  | T | 0.0287  |
| rs79123952  | T | 0.0906  |
| rs149910949 | A | 0.124   |
| rs78680551  | A | -0.0486 |
| rs141695505 | T | 0.1544  |
| rs62024997  | A | 0.0985  |
| rs142862053 | A | 0.1161  |
| rs77258991  | A | 0.1214  |
| rs55650725  | G | -0.0699 |
| rs447217    | T | 0.0913  |
| rs67600894  | G | -0.0681 |
| rs62016368  | C | 0.1174  |
| rs56343105  | A | 0.0499  |
| rs112234691 | T | -0.0646 |
| rs12914491  | T | 0.0726  |
| rs56003347  | C | -0.1533 |
| rs8034354   | C | 0.0288  |
| rs28689666  | A | -0.0587 |
| rs61066974  | T | 0.0705  |
| rs1351308   | T | 0.0327  |
| rs2470194   | T | 0.0276  |
| rs16966185  | T | 0.0296  |
| rs12442405  | A | -0.0398 |
| rs397896    | C | 0.0279  |
| rs4598887   | A | -0.0274 |
| rs117396914 | T | 0.1276  |
| rs141259628 | T | -0.1857 |
| rs139781790 | T | 0.1013  |
| rs3935404   | T | -0.0342 |

|             |   |         |
|-------------|---|---------|
| rs11635391  | G | 0.0377  |
| rs111860416 | C | 0.0864  |
| rs76693972  | A | 0.0969  |
| rs79883421  | A | -0.0451 |
| rs8029286   | T | 0.0316  |
| rs2576091   | C | 0.075   |
| rs4359383   | C | 0.0402  |
| rs4887372   | A | 0.0878  |
| rs62008442  | A | -0.0323 |
| rs77719589  | T | -0.1479 |
| rs12592178  | C | -0.0302 |
| rs28602342  | C | -0.0408 |
| rs12917505  | A | -0.0288 |
| rs2456465   | T | -0.029  |
| rs11856855  | T | -0.03   |
| rs141660949 | C | 0.072   |
| rs117738548 | G | -0.1572 |
| rs117302315 | C | 0.0682  |
| rs78666090  | C | -0.2041 |
| rs12442339  | A | -0.0525 |
| rs11637772  | T | 0.0305  |
| rs16965871  | A | 0.0981  |
| rs71394511  | A | -0.0498 |
| rs9788738   | T | -0.0407 |
| rs55690905  | T | 0.028   |
| rs619436    | A | 0.0336  |
| rs7168401   | G | 0.1199  |
| rs62001666  | T | 0.0799  |
| rs79251729  | T | 0.1208  |
| rs72747943  | T | -0.0373 |
| rs549368    | T | 0.0357  |
| rs35456624  | A | -0.0691 |
| rs12901179  | G | -0.0349 |
| rs7182813   | A | 0.0411  |
| rs12898870  | G | 0.0726  |
| rs55961527  | C | 0.1399  |
| rs66951930  | T | -0.0664 |
| rs140746088 | T | -0.1092 |
| rs145796065 | C | -0.1023 |
| rs35483472  | T | 0.0328  |
| rs28373661  | A | -0.0427 |
| rs147272363 | T | 0.1304  |
| rs10851900  | A | -0.0416 |
| rs74810749  | G | 0.1958  |
| rs10852188  | A | 0.0293  |
| rs2130106   | G | -0.0347 |
| rs1822945   | C | -0.0594 |



|             |   |         |
|-------------|---|---------|
| rs1915215   | A | -0.0352 |
| rs7183890   | G | -0.0281 |
| rs2718932   | A | -0.1317 |
| rs9806539   | G | 0.0351  |
| rs139286044 | A | -0.1675 |
| rs113549869 | A | 0.1151  |
| rs12905383  | G | 0.0341  |
| rs58670156  | A | 0.1172  |
| rs72741100  | A | -0.1078 |
| rs754343    | G | 0.0321  |
| rs4778137   | G | -0.044  |
| rs73520042  | T | 0.0701  |
| rs60514164  | T | -0.1012 |
| rs79081528  | A | 0.0636  |
| rs117704426 | A | -0.1228 |
| rs78335824  | G | -0.1418 |
| rs12903437  | G | -0.0492 |
| rs72748039  | T | -0.0807 |
| rs6496244   | G | -0.0289 |
| rs16947688  | G | 0.0774  |
| rs4906965   | C | 0.0391  |
| rs12232317  | A | 0.0745  |
| rs117351242 | T | -0.1967 |
| rs2930580   | T | 0.0545  |
| rs560766    | A | -0.0271 |
| rs149036601 | A | 0.1013  |
| rs67131622  | T | -0.2295 |
| rs12910930  | G | -0.0275 |
| rs28496041  | T | 0.105   |
| rs1719900   | G | 0.0272  |
| rs55858165  | A | 0.1005  |
| rs4503766   | C | 0.0276  |
| rs56285427  | A | 0.0465  |
| rs146106066 | T | -0.1669 |
| rs11629815  | T | -0.0404 |
| rs79263071  | C | -0.0502 |
| rs144789039 | A | -0.1283 |
| rs12901627  | T | 0.0284  |
| rs11633214  | G | 0.0331  |
| rs112180177 | G | -0.1057 |
| rs11072824  | C | -0.0285 |
| rs112951473 | A | -0.1026 |
| rs74638787  | G | 0.1564  |
| rs72767250  | A | -0.0452 |
| rs9888712   | G | 0.0283  |
| rs72751943  | G | 0.0807  |
| rs1598909   | G | -0.0281 |

|             |   |         |
|-------------|---|---------|
| rs12708515  | G | -0.0301 |
| rs137979439 | A | -0.0463 |
| rs8037008   | A | -0.0428 |
| rs2414007   | C | 0.0563  |
| rs7166815   | G | -0.0346 |
| rs75693992  | C | -0.1017 |
| rs1865754   | G | 0.0565  |
| rs72770780  | G | -0.0358 |
| rs1711029   | C | 0.1147  |
| rs141600894 | C | 0.1136  |
| rs4492997   | G | 0.044   |
| rs8043105   | T | 0.0599  |
| rs72740241  | T | 0.0589  |
| rs2257259   | A | 0.179   |
| rs150962    | A | 0.0556  |
| rs11635833  | C | -0.0785 |
| rs34551627  | C | -0.0299 |
| rs2596187   | T | -0.0276 |
| rs12901487  | C | -0.0976 |
| rs333585    | C | -0.0307 |
| rs76699127  | A | 0.1042  |
| rs2414658   | G | 0.1242  |
| rs6497026   | A | 0.033   |
| rs2912109   | T | -0.0427 |
| rs77350662  | G | 0.0823  |
| rs12899913  | G | 0.0353  |
| rs56969464  | T | 0.0881  |
| rs112693980 | T | 0.0949  |
| rs12594214  | T | 0.053   |
| rs11631754  | A | -0.1254 |
| rs2012101   | C | -0.063  |
| rs113343385 | A | -0.1612 |
| rs72757591  | T | 0.0776  |
| rs2623466   | C | 0.1778  |
| rs1026672   | T | 0.0301  |
| rs3851680   | A | -0.1821 |
| rs16977754  | A | -0.1951 |
| rs72743277  | T | 0.0474  |
| rs72734919  | C | -0.1893 |
| rs289151    | G | -0.0344 |
| rs4776036   | G | -0.0908 |
| rs117154034 | A | 0.1862  |
| rs149737692 | A | 0.0835  |
| rs7169682   | G | -0.0443 |
| rs12593921  | G | 0.0595  |
| rs78183761  | A | 0.1192  |
| rs117283364 | T | 0.0897  |

|             |   |         |
|-------------|---|---------|
| rs12914819  | C | 0.0737  |
| rs34901823  | G | -0.0554 |
| rs146271710 | C | 0.1436  |
| rs113963993 | C | 0.1647  |
| rs118054459 | C | -0.1634 |
| rs116862686 | T | 0.1406  |
| rs11634425  | C | -0.0322 |
| rs12899629  | G | -0.0356 |
| rs12439163  | A | -0.0407 |
| rs72756084  | A | -0.0732 |
| rs113302600 | T | -0.1211 |
| rs112123875 | T | -0.131  |
| rs6496534   | A | 0.0288  |
| rs143994476 | G | -0.1546 |
| rs2623998   | T | -0.0344 |
| rs10431796  | A | 0.0278  |
| rs76664534  | G | -0.2252 |
| rs117039032 | G | 0.0917  |
| rs60439837  | A | -0.0717 |
| rs111742439 | T | -0.1564 |
| rs7167332   | T | 0.078   |
| rs75304275  | C | 0.1242  |
| rs1722832   | G | 0.0308  |
| rs143926840 | C | 0.1333  |
| rs11630462  | C | -0.0304 |
| rs79747514  | C | -0.1299 |
| rs2445743   | A | -0.032  |
| rs4965073   | T | 0.2141  |
| rs55690209  | T | -0.1742 |
| rs2291534   | T | -0.0374 |
| rs62017973  | T | -0.0577 |
| rs142954587 | A | -0.209  |
| rs11637044  | C | 0.0325  |
| rs12593523  | T | 0.0277  |
| rs77402078  | A | 0.1052  |
| rs6497164   | G | 0.0673  |
| rs2271163   | C | 0.0504  |
| rs4906637   | C | -0.0646 |
| rs4300594   | G | 0.0505  |
| rs7164039   | G | 0.0425  |
| rs8030132   | A | -0.0681 |
| rs149161404 | T | -0.1402 |
| rs117204605 | A | -0.1312 |
| rs145962496 | A | 0.0709  |
| rs74028094  | A | 0.2061  |
| rs60704223  | C | 0.0848  |
| rs77363831  | T | 0.0596  |

|             |   |         |
|-------------|---|---------|
| rs28463870  | C | 0.1127  |
| rs12904863  | C | 0.0502  |
| rs10852101  | C | 0.0405  |
| rs16948223  | A | -0.1136 |
| rs149917824 | T | 0.1021  |
| rs11639066  | G | 0.05    |
| rs11073466  | C | 0.0284  |
| rs28694402  | A | 0.0353  |
| rs11634556  | A | 0.0317  |
| rs76465975  | A | 0.1735  |
| rs12439137  | G | -0.045  |
| rs1498307   | G | -0.0375 |
| rs1280400   | G | -0.0282 |
| rs76174598  | T | 0.2106  |
| rs7174067   | A | 0.0394  |
| rs28550224  | A | 0.1055  |
| rs75501161  | C | -0.0648 |
| rs4586373   | T | 0.0312  |
| rs1504629   | A | 0.0435  |
| rs77687947  | T | 0.1188  |
| rs8039883   | C | 0.0732  |
| rs1124446   | T | 0.035   |
| rs12913206  | C | -0.0586 |
| rs2598464   | G | 0.0341  |
| rs141735635 | C | -0.1437 |
| rs11635088  | C | -0.1248 |
| rs76029207  | T | 0.1595  |
| rs72753981  | C | -0.1087 |
| rs138214095 | A | 0.1727  |
| rs117713534 | A | -0.0811 |
| rs62004099  | T | 0.1448  |
| rs117544562 | A | -0.0807 |
| rs62001277  | G | 0.0313  |
| rs145031687 | T | 0.128   |
| rs11854586  | A | 0.0536  |
| rs77166950  | C | -0.124  |
| rs72732780  | C | -0.0819 |
| rs62003083  | C | -0.0754 |
| rs79416651  | T | 0.0595  |
| rs59704551  | C | -0.0457 |
| rs2715440   | T | -0.0341 |
| rs57082966  | A | 0.0442  |
| rs11637525  | C | -0.0327 |
| rs973214    | T | 0.0292  |
| rs11637072  | G | -0.0962 |
| rs149535782 | G | 0.156   |
| rs113144758 | T | 0.1244  |

|             |   |         |
|-------------|---|---------|
| rs76453161  | C | -0.1073 |
| rs6496234   | T | 0.028   |
| rs75336871  | A | 0.1329  |
| rs58788554  | A | 0.0407  |
| rs72755025  | T | -0.0614 |
| rs2647364   | T | -0.0318 |
| rs28566671  | C | 0.0332  |
| rs4776292   | T | -0.0293 |
| rs8030342   | T | -0.1004 |
| rs72752604  | C | -0.0271 |
| rs79165205  | C | -0.1163 |
| rs34331320  | G | -0.1224 |
| rs112528384 | T | 0.0735  |
| rs78180804  | T | 0.0626  |
| rs72735088  | A | 0.0343  |
| rs4780118   | C | 0.0289  |
| rs142235195 | C | 0.0633  |
| rs16965830  | C | 0.0402  |
| rs78907666  | C | 0.0866  |
| rs78347867  | A | -0.1495 |
| rs438230    | A | -0.0398 |
| rs7173858   | A | -0.0329 |
| rs117284376 | T | -0.0955 |
| rs74371943  | A | -0.1025 |
| rs1534596   | C | -0.0268 |
| rs12592149  | T | 0.1441  |
| rs80094612  | C | 0.0358  |
| rs117992107 | G | 0.1044  |
| rs11638941  | C | 0.0389  |
| rs2921136   | T | 0.0378  |
| rs35169602  | T | 0.0551  |
| rs4366665   | C | -0.0288 |
| rs1019860   | G | -0.0724 |
| rs74945691  | T | 0.1054  |
| rs8039714   | A | -0.1142 |
| rs17237668  | A | 0.0755  |
| rs1977034   | T | 0.0334  |
| rs72729460  | G | 0.0434  |
| rs12591332  | C | -0.0668 |
| rs113091124 | T | 0.1173  |
| rs2280468   | T | -0.0379 |
| rs68083075  | A | -0.086  |
| rs71401697  | A | 0.1763  |
| rs11858960  | T | -0.0301 |
| rs12912538  | G | -0.0297 |
| rs16948623  | C | 0.038   |
| rs144094905 | C | -0.1849 |

|             |   |         |
|-------------|---|---------|
| rs112615647 | G | -0.1812 |
| rs1393941   | T | 0.0598  |
| rs117319052 | A | 0.1191  |
| rs6598556   | G | 0.0306  |
| rs4426303   | T | 0.0394  |
| rs117143514 | C | -0.1273 |
| rs8030479   | T | -0.0365 |
| rs113217232 | G | -0.0368 |
| rs1501377   | C | 0.0397  |
| rs115814365 | T | 0.1912  |
| rs8034490   | C | 0.0451  |
| rs782956    | G | 0.1058  |
| rs11855990  | A | 0.0425  |
| rs149928005 | C | 0.1436  |
| rs7182641   | C | 0.0522  |
| rs2670955   | A | 0.0319  |
| rs117606920 | C | -0.1693 |
| rs79609275  | T | 0.1214  |
| rs79225996  | G | -0.1096 |
| rs4270125   | G | -0.0413 |
| rs2136305   | C | -0.0336 |
| rs59876911  | A | -0.0591 |
| rs148019303 | A | 0.0924  |
| rs7182385   | A | 0.0269  |
| rs140611512 | A | 0.1439  |
| rs139514549 | T | -0.156  |
| rs484256    | G | -0.0474 |
| rs4886678   | G | 0.1462  |
| rs333542    | G | 0.0576  |
| rs75219016  | T | -0.0548 |
| rs118001416 | T | 0.199   |
| rs55826617  | G | -0.0969 |
| rs144763642 | T | -0.1347 |
| rs1452452   | G | -0.0717 |
| rs77494054  | G | -0.1122 |
| rs148282046 | G | 0.1324  |
| rs8029901   | T | 0.0622  |
| rs145109268 | T | -0.0731 |
| rs28588011  | G | -0.0284 |
| rs10152506  | C | 0.1142  |
| rs80257719  | C | 0.1205  |
| rs59285941  | G | -0.0361 |
| rs74016055  | A | -0.1822 |
| rs72735345  | A | -0.1186 |
| rs12901313  | T | -0.075  |
| rs62007767  | T | -0.1161 |
| rs4319750   | T | 0.0336  |

|             |   |         |
|-------------|---|---------|
| rs116986568 | T | 0.0738  |
| rs7173200   | G | 0.0277  |
| rs2937954   | C | -0.0262 |
| rs71475211  | T | 0.0626  |
| rs118085218 | T | 0.1175  |
| rs117061099 | T | 0.1742  |
| rs11634897  | A | -0.13   |
| rs11072187  | T | 0.0269  |
| rs2291736   | T | 0.0324  |
| rs78150971  | G | -0.0721 |
| rs80025285  | T | -0.1403 |
| rs72740101  | A | 0.0455  |
| rs10467988  | T | 0.031   |
| rs35093850  | T | 0.0361  |
| rs260539    | C | 0.064   |
| rs12594537  | A | 0.0427  |
| rs76403784  | A | -0.098  |
| rs78024728  | A | 0.1692  |
| rs8035024   | A | -0.0376 |
| rs4608277   | T | 0.1164  |
| rs72749009  | C | 0.0781  |
| rs2259998   | A | -0.0256 |
| rs60371470  | T | 0.0557  |
| rs62022952  | T | 0.0491  |
| rs59507824  | G | 0.0355  |
| rs145992439 | T | 0.1297  |
| rs17177729  | C | -0.1412 |
| rs139478892 | A | -0.064  |
| rs7163993   | T | -0.0314 |
| rs113015746 | T | -0.1696 |
| rs79500798  | C | -0.0507 |
| rs61998965  | C | -0.1574 |
| rs142235536 | A | -0.1359 |
| rs72757522  | A | -0.032  |
| rs8032853   | T | -0.0366 |
| rs1897033   | T | -0.0464 |
| rs117887116 | A | 0.1517  |
| rs973932    | G | -0.0308 |
| rs11247133  | C | 0.0802  |
| rs34216268  | G | 0.0739  |
| rs146499985 | C | 0.1354  |
| rs11858407  | G | 0.039   |
| rs994243    | T | -0.0278 |
| rs74836446  | C | 0.0781  |
| rs28612692  | A | -0.0455 |
| rs78873611  | C | -0.1239 |
| rs4528506   | A | 0.0432  |

|             |   |         |
|-------------|---|---------|
| rs79404119  | T | 0.1138  |
| rs2381932   | T | 0.0316  |
| rs12898723  | T | -0.1146 |
| rs294558    | T | -0.0285 |
| rs116443262 | G | 0.0329  |
| rs7183615   | G | 0.1503  |
| rs4776344   | A | 0.0385  |
| rs28600184  | A | -0.0274 |
| rs55980115  | T | -0.0897 |
| rs4924583   | T | 0.0467  |
| rs56340611  | C | 0.0812  |
| rs72722070  | A | 0.1547  |
| rs11852639  | C | -0.1432 |
| rs12148362  | T | 0.0501  |
| rs140013223 | T | 0.1596  |
| rs141087027 | T | -0.0596 |
| rs144220597 | A | -0.1995 |
| rs8025312   | G | 0.041   |
| rs3812907   | T | 0.0448  |
| rs7177870   | T | 0.027   |
| rs74838747  | G | 0.168   |
| rs71398249  | G | 0.0663  |
| rs901003    | A | 0.0271  |
| rs143738020 | T | 0.0885  |
| rs116911119 | T | 0.1117  |
| rs114941847 | G | 0.0872  |
| rs17236252  | A | -0.2082 |
| rs117703650 | T | -0.1955 |
| rs112580922 | T | -0.0654 |
| rs11637862  | G | -0.0617 |
| rs116858574 | C | 0.1382  |
| rs12905216  | A | 0.0652  |
| rs117451460 | A | 0.1092  |
| rs117822070 | A | -0.2025 |
| rs7162666   | C | 0.0434  |
| rs10782509  | T | 0.0619  |
| rs7176011   | G | 0.0533  |
| rs77886544  | T | 0.0516  |
| rs150636060 | A | 0.1971  |
| rs2245049   | T | -0.0293 |
| rs77408857  | T | 0.1274  |
| rs112878346 | T | 0.0457  |
| rs116959528 | T | -0.1341 |
| rs117041619 | C | 0.0595  |
| rs8027305   | T | -0.0618 |
| rs11630130  | A | -0.0358 |
| rs61751106  | A | 0.123   |



|             |   |         |
|-------------|---|---------|
| rs77637278  | C | -0.0677 |
| rs77873907  | G | 0.0873  |
| rs12908383  | G | 0.1595  |
| rs16953607  | A | 0.0992  |
| rs77828071  | C | 0.1601  |
| rs76838462  | T | 0.0345  |
| rs11639253  | C | 0.0324  |
| rs79044457  | T | 0.0799  |
| rs76466022  | A | -0.0728 |
| rs8028233   | T | -0.0289 |
| rs28620857  | A | -0.0561 |
| rs34257570  | T | 0.1121  |
| rs890267    | T | -0.0288 |
| rs12898576  | A | -0.0378 |
| rs8036389   | C | 0.0276  |
| rs11631622  | C | -0.1681 |
| rs16966205  | C | 0.1798  |
| rs62011687  | A | 0.2246  |
| rs116995057 | C | -0.0697 |
| rs276858    | C | -0.033  |
| rs6494344   | A | 0.046   |
| rs11072342  | T | 0.0337  |
| rs11071611  | C | -0.0637 |
| rs76819055  | C | 0.1206  |
| rs16949541  | A | 0.0302  |
| rs74522625  | G | 0.1308  |
| rs147115526 | A | -0.1142 |
| rs117250292 | A | -0.265  |
| rs35483397  | A | -0.0826 |
| rs12910772  | A | -0.0388 |
| rs79303026  | A | 0.0981  |
| rs1437547   | G | 0.0433  |
| rs12440572  | T | 0.0805  |
| rs116938427 | A | 0.1627  |
| rs142807485 | A | -0.1329 |
| rs117366148 | C | -0.0952 |
| rs7182912   | T | -0.0394 |
| rs72622091  | A | -0.1033 |
| rs143798143 | A | -0.122  |
| rs12905920  | T | -0.1192 |
| rs138822641 | T | 0.1094  |
| rs36067451  | T | -0.0428 |
| rs10518953  | C | -0.0685 |
| rs1668592   | T | -0.0382 |
| rs62027277  | G | -0.1122 |
| rs62023347  | T | -0.1082 |
| rs151171353 | A | 0.1563  |

|             |   |         |
|-------------|---|---------|
| rs35555379  | G | 0.0726  |
| rs3946789   | T | 0.0287  |
| rs146792430 | G | 0.0886  |
| rs1814539   | C | -0.0547 |
| rs117789581 | C | 0.1057  |
| rs112877478 | G | 0.0955  |
| rs1606119   | A | -0.0281 |
| rs8028010   | A | -0.1142 |
| rs9673075   | T | -0.0643 |
| rs7166190   | C | -0.0472 |
| rs8027524   | T | -0.0275 |
| rs9920455   | T | -0.0295 |
| rs7162909   | G | 0.0683  |
| rs75762061  | G | 0.0483  |
| rs62006145  | C | 0.0627  |
| rs117927254 | A | -0.1806 |
| rs113329253 | T | 0.1651  |
| rs75354525  | G | -0.1036 |
| rs79491103  | A | -0.0534 |
| rs782906    | A | -0.0423 |
| rs2903411   | C | -0.0303 |
| rs10152960  | T | -0.0902 |
| rs28538507  | C | 0.0479  |
| rs139788985 | A | -0.1407 |
| rs116884230 | A | -0.1129 |
| rs7179630   | C | -0.0271 |
| rs6494212   | T | 0.0382  |
| rs141517823 | A | -0.1541 |
| rs74008419  | T | 0.1684  |
| rs8037443   | C | 0.0656  |
| rs17204475  | A | 0.0434  |
| rs75810423  | A | -0.0799 |
| rs12903535  | A | -0.1458 |
| rs6495731   | C | 0.0665  |
| rs931776    | A | 0.0826  |
| rs1915190   | G | -0.0372 |
| rs8037699   | C | -0.0356 |
| rs59712011  | C | -0.077  |
| rs117800533 | A | 0.1311  |
| rs142680442 | A | -0.1582 |
| rs142174848 | G | 0.1354  |
| rs138294288 | C | -0.211  |
| rs17205722  | G | 0.0898  |
| rs111816210 | A | -0.0692 |
| rs874941    | C | -0.0297 |
| rs55976787  | C | -0.0472 |
| rs11073674  | T | -0.0259 |

|             |   |         |
|-------------|---|---------|
| rs149710958 | T | 0.1345  |
| rs77972530  | G | -0.112  |
| rs7161816   | G | 0.0762  |
| rs12324330  | C | 0.0574  |
| rs1094840   | T | -0.0298 |
| rs11638084  | C | 0.0289  |
| rs78369747  | T | 0.2024  |
| rs112159138 | G | -0.0559 |
| rs6493653   | T | -0.0464 |
| rs115909569 | G | 0.1062  |
| rs79052622  | C | -0.0678 |
| rs16964586  | T | -0.0371 |
| rs1388258   | A | 0.0321  |
| rs28407295  | C | 0.0318  |
| rs2270634   | C | -0.0298 |
| rs117834653 | T | 0.1741  |
| rs4369595   | T | -0.0399 |
| rs11855963  | A | -0.0289 |
| rs62025669  | C | 0.1675  |
| rs12592616  | G | 0.0275  |
| rs8034205   | C | 0.0313  |
| rs8037733   | C | 0.1588  |
| rs11639055  | T | -0.0284 |
| rs335777    | G | 0.0249  |
| rs4569227   | C | -0.0349 |
| rs10468118  | A | 0.0263  |
| rs4523881   | G | 0.032   |
| rs149201978 | G | -0.0969 |
| rs78456757  | C | -0.0992 |
| rs7168760   | A | -0.0277 |
| rs61998563  | A | 0.0853  |
| rs72717668  | C | -0.0504 |
| rs12903555  | G | 0.0396  |
| rs7164037   | C | -0.0575 |
| rs7176389   | A | -0.0341 |
| rs75173187  | T | -0.1045 |
| rs588655    | C | 0.0278  |
| rs8025057   | T | 0.0381  |
| rs79685458  | A | 0.188   |
| rs4776135   | G | -0.0252 |
| rs143666454 | C | -0.1922 |
| rs62020716  | C | -0.0545 |
| rs76738861  | T | 0.167   |
| rs75868131  | A | 0.0704  |
| rs10162990  | A | 0.037   |
| rs4965985   | T | 0.1349  |
| rs75035787  | A | -0.0777 |

|             |   |         |
|-------------|---|---------|
| rs72727382  | A | 0.1342  |
| rs11852323  | G | 0.0604  |
| rs11631627  | A | -0.0952 |
| rs16952742  | A | -0.1752 |
| rs118004187 | T | 0.1028  |
| rs11072481  | A | 0.0423  |
| rs7173544   | T | 0.0534  |
| rs7164968   | T | 0.0471  |
| rs11073234  | G | 0.0275  |
| rs117742221 | A | 0.1342  |
| rs11855942  | C | -0.0249 |
| rs7161844   | G | 0.0276  |
| rs7179783   | T | -0.079  |
| rs59051662  | C | 0.0421  |
| rs72761026  | G | 0.1285  |
| rs34668774  | G | -0.0459 |
| rs10851685  | T | -0.0459 |
| rs17303670  | C | -0.1257 |
| rs7167235   | A | 0.0644  |
| rs72745007  | C | -0.1447 |
| rs4552006   | T | 0.0283  |
| rs72750758  | T | -0.18   |
| rs74020083  | G | -0.0408 |
| rs8024850   | G | -0.0326 |
| rs117443990 | T | 0.1304  |
| rs139730772 | A | 0.1463  |
| rs112079445 | C | -0.1656 |
| rs56387971  | G | 0.1167  |
| rs8029514   | A | 0.0521  |
| rs7495174   | G | -0.0481 |
| rs481234    | G | -0.1312 |
| rs75791299  | G | 0.0672  |
| rs144221057 | T | 0.2541  |
| rs17526239  | C | 0.0379  |
| rs16959015  | A | 0.1206  |
| rs1722794   | T | -0.071  |
| rs75043276  | T | -0.038  |
| rs35402974  | A | 0.0413  |
| rs28609605  | T | 0.0645  |
| rs11634829  | T | 0.0487  |
| rs2469094   | G | 0.0248  |
| rs1400785   | A | 0.1338  |
| rs79932915  | G | 0.157   |
| rs34278216  | A | -0.0662 |
| rs115363851 | A | 0.0533  |
| rs72489216  | T | 0.0402  |
| rs11547966  | T | -0.032  |

|             |   |         |
|-------------|---|---------|
| rs62007832  | G | -0.03   |
| rs117246726 | G | -0.1337 |
| rs1238245   | A | 0.079   |
| rs140776839 | C | -0.1039 |
| rs111416797 | T | 0.0978  |
| rs7178168   | C | -0.1167 |
| rs144045049 | C | -0.1134 |
| rs78565784  | T | -0.0731 |
| rs10163021  | T | 0.0779  |
| rs117588122 | A | -0.0578 |
| rs7171883   | C | 0.0252  |
| rs78732773  | A | -0.0957 |
| rs11637837  | A | -0.0258 |
| rs4776849   | A | 0.033   |
| rs113633822 | C | -0.1765 |
| rs147668492 | T | 0.1246  |
| rs600957    | G | -0.0247 |
| rs148501521 | A | 0.1633  |
| rs72726085  | T | -0.0669 |
| rs12916744  | A | -0.0252 |
| rs7171638   | T | 0.0421  |
| rs149806248 | A | 0.131   |
| rs10163023  | G | -0.1561 |
| rs62037080  | T | -0.0858 |
| rs28640908  | G | 0.047   |
| rs75263782  | A | -0.0938 |
| rs2679631   | A | -0.0736 |
| rs1545189   | T | 0.0303  |
| rs17405259  | C | -0.0314 |
| rs62007823  | C | -0.0675 |
| rs145064630 | T | 0.1352  |
| rs7182422   | A | 0.0781  |
| rs55746986  | C | -0.0521 |
| rs147992438 | C | -0.1678 |
| rs11629523  | G | 0.0371  |
| rs77390924  | C | -0.0973 |
| rs79899148  | T | -0.1025 |
| rs141844777 | A | 0.0966  |
| rs7169021   | G | 0.0299  |
| rs118037555 | A | 0.1367  |
| rs35353483  | A | 0.0565  |
| rs1500633   | T | 0.0777  |
| rs75310666  | G | 0.1485  |
| rs2114712   | C | -0.0268 |
| rs2719881   | T | -0.0774 |
| rs11854514  | A | -0.0716 |
| rs8036232   | G | 0.0521  |

|             |   |         |
|-------------|---|---------|
| rs7165568   | T | 0.0864  |
| rs1037846   | A | 0.0247  |
| rs8024327   | T | 0.0611  |
| rs113392410 | A | -0.1078 |
| rs4774641   | T | 0.0453  |
| rs971804    | G | 0.0498  |
| rs73469203  | G | 0.0969  |
| rs2684804   | C | 0.0386  |
| rs2289439   | T | 0.0429  |
| rs8023301   | T | 0.1263  |
| rs4613025   | T | -0.034  |
| rs8042764   | A | 0.0282  |
| rs901966    | G | 0.0459  |
| rs67446529  | A | 0.0334  |
| rs144243745 | T | -0.1486 |
| rs11635099  | T | -0.048  |
| rs2339101   | A | 0.0567  |
| rs111752031 | T | -0.107  |
| rs151092641 | C | -0.0902 |
| rs880716    | A | -0.0292 |
| rs56400908  | C | 0.0468  |
| rs62004155  | T | 0.0566  |
| rs140304554 | G | 0.0994  |
| rs76870030  | T | -0.0793 |
| rs145612519 | G | 0.1064  |
| rs146965289 | T | 0.2194  |
| rs72741202  | T | -0.0336 |
| rs73462225  | A | 0.1712  |
| rs74005183  | G | 0.1062  |
| rs74494854  | A | 0.1059  |
| rs8029427   | T | 0.0632  |
| rs57278163  | G | 0.1121  |
| rs4777174   | T | -0.0557 |
| rs8040603   | A | 0.0398  |
| rs7172816   | C | -0.0317 |
| rs17586985  | C | 0.0534  |
| rs2518968   | C | -0.0316 |
| rs72649536  | A | -0.0523 |
| rs77014830  | G | -0.0393 |
| rs332269    | G | 0.039   |
| rs8036119   | C | 0.0352  |
| rs1980268   | G | -0.0388 |
| rs117206795 | C | -0.1499 |
| rs112428254 | A | -0.1314 |
| rs8923      | C | 0.0427  |
| rs72761434  | A | -0.0456 |
| rs345889    | A | 0.0412  |

|             |   |         |
|-------------|---|---------|
| rs1522779   | A | 0.051   |
| rs148025835 | G | -0.1324 |
| rs746673    | A | 0.0358  |
| rs9652461   | A | 0.0268  |
| rs72761418  | G | 0.1501  |
| rs12906109  | C | 0.0279  |
| rs8034012   | C | -0.0266 |
| rs7171639   | T | 0.04    |
| rs11633709  | A | -0.0495 |
| rs2611792   | A | -0.0256 |
| rs12906468  | T | -0.0445 |
| rs72729074  | T | -0.1294 |
| rs8039603   | C | 0.0333  |
| rs60520476  | C | 0.1154  |
| rs113841230 | T | 0.0769  |
| rs11073124  | A | -0.04   |
| rs1384129   | T | -0.038  |
| rs75386768  | G | 0.0324  |
| rs57381713  | C | -0.0289 |
| rs8024755   | A | -0.0456 |
| rs4965210   | A | 0.0438  |
| rs17301739  | G | 0.0489  |
| rs116928838 | G | -0.1496 |
| rs112281195 | T | 0.0953  |
| rs72736911  | G | 0.0477  |
| rs8042406   | C | 0.0352  |
| rs11857175  | C | 0.0558  |
| rs11856496  | T | -0.0483 |
| rs6496364   | C | 0.0354  |
| rs62023778  | T | -0.0526 |
| rs1873282   | G | -0.0299 |
| rs8026882   | C | 0.0605  |
| rs59141095  | G | 0.0417  |
| rs75248116  | C | 0.1313  |
| rs11071522  | G | 0.0374  |
| rs117990941 | C | 0.1082  |
| rs58266050  | G | 0.0344  |
| rs4776890   | G | 0.0282  |
| rs67877911  | A | -0.0361 |
| rs117849714 | G | 0.1175  |
| rs79907450  | A | 0.1866  |
| rs79457393  | C | -0.0906 |
| rs145879943 | C | -0.127  |
| rs1060529   | C | 0.0494  |
| rs76336281  | C | 0.1281  |
| rs7168070   | T | -0.0291 |
| rs62041070  | T | -0.1688 |

|             |   |         |
|-------------|---|---------|
| rs80142747  | C | -0.0552 |
| rs62008558  | A | 0.1143  |
| rs8026332   | C | -0.1263 |
| rs140913877 | T | 0.0693  |
| rs138236730 | A | 0.0886  |
| rs12148296  | G | -0.0305 |
| rs55723376  | T | 0.0785  |
| rs12324715  | G | -0.075  |
| rs11630332  | T | -0.0377 |
| rs2676019   | T | 0.0441  |
| rs12324236  | T | 0.0523  |
| rs78652649  | G | 0.0948  |
| rs11638667  | T | 0.0265  |
| rs62024399  | C | -0.2154 |
| rs634744    | A | 0.0469  |
| rs74971812  | A | 0.0975  |
| rs11635083  | A | 0.0264  |
| rs62012582  | T | -0.1042 |
| rs2242056   | T | -0.0335 |
| rs112928311 | A | 0.1461  |
| rs55736601  | A | -0.0807 |
| rs16947230  | G | -0.035  |
| rs3743299   | T | 0.0329  |
| rs9744376   | A | -0.0325 |
| rs1546270   | A | 0.0481  |
| rs664177    | A | 0.0329  |
| rs4774829   | C | -0.0407 |
| rs17270876  | C | 0.0322  |
| rs2415029   | A | -0.0682 |
| rs7171697   | A | -0.041  |
| rs12911022  | T | -0.0739 |
| rs117482967 | A | 0.1157  |
| rs17815869  | A | 0.0484  |
| rs77951476  | T | -0.0945 |
| rs2739818   | T | -0.0379 |
| rs7171723   | T | -0.0347 |
| rs16971429  | C | 0.0329  |
| rs1433944   | G | 0.0267  |
| rs117823680 | G | -0.0809 |
| rs145984702 | T | 0.0817  |
| rs2126698   | T | 0.0481  |
| rs143751810 | G | 0.0824  |
| rs2054717   | C | -0.0321 |
| rs118048928 | T | -0.0711 |
| rs3907904   | T | -0.0344 |
| rs34610018  | A | -0.1139 |
| rs77455556  | C | 0.0522  |



|             |   |         |
|-------------|---|---------|
| rs1159988   | T | -0.0393 |
| rs17285778  | T | 0.0272  |
| rs17657561  | T | 0.0991  |
| rs12904826  | C | 0.0841  |
| rs62001840  | C | 0.0387  |
| rs2278296   | C | -0.0325 |
| rs2917840   | A | 0.1631  |
| rs55833717  | T | -0.0325 |
| rs72759037  | A | 0.0668  |
| rs28466568  | A | -0.0335 |
| rs61024165  | T | 0.0361  |
| rs11854046  | C | -0.0871 |
| rs12441504  | G | 0.0265  |
| rs62014181  | A | -0.1053 |
| rs57156757  | T | -0.1267 |
| rs10438410  | T | -0.0933 |
| rs146080662 | T | -0.151  |
| rs12908766  | G | 0.0313  |
| rs11852299  | T | -0.0253 |
| rs10163031  | T | 0.0575  |
| rs6606885   | G | -0.0241 |
| rs11636337  | G | 0.0277  |
| rs6496651   | T | -0.027  |
| rs769762    | G | 0.0258  |
| rs75554891  | A | -0.1153 |
| rs7171025   | T | 0.0799  |
| rs1377088   | A | -0.0249 |
| rs8026446   | C | 0.033   |
| rs56004465  | T | 0.0406  |
| rs1319873   | C | 0.0404  |
| rs2677409   | C | -0.0244 |
| rs72747617  | A | -0.0359 |
| rs2133126   | G | -0.0392 |
| rs11630821  | T | 0.0376  |
| rs67616875  | A | -0.0423 |
| rs118042195 | A | 0.0524  |
| rs1004724   | T | 0.0452  |
| rs689695    | C | 0.0375  |
| rs12901653  | T | 0.0518  |
| rs117132711 | A | 0.1049  |
| rs72695683  | C | -0.031  |
| rs35325037  | T | 0.1238  |
| rs142723262 | T | 0.1161  |
| rs34117505  | T | 0.0316  |
| rs2937284   | G | 0.0311  |
| rs112113314 | T | -0.0592 |
| rs75405049  | G | 0.1373  |

|             |   |         |
|-------------|---|---------|
| rs1392160   | G | -0.0365 |
| rs604689    | T | -0.0359 |
| rs145822435 | G | -0.129  |
| rs4489957   | A | -0.0696 |
| rs16971712  | C | 0.1286  |
| rs34814882  | T | 0.1459  |
| rs7180564   | T | -0.0306 |
| rs73414887  | T | -0.035  |
| rs67482297  | A | 0.0397  |
| rs2554437   | C | -0.0249 |
| rs2444966   | T | -0.0245 |
| rs2414367   | G | 0.1321  |
| rs8026410   | T | -0.0288 |
| rs34272384  | A | 0.1038  |
| rs2554313   | A | 0.1343  |
| rs113596309 | G | 0.122   |
| rs12592822  | C | 0.0283  |
| rs117331576 | A | -0.1499 |
| rs143815615 | T | 0.1084  |
| rs113206875 | C | -0.089  |
| rs142577588 | C | -0.1402 |
| rs71409236  | T | 0.0497  |
| rs293352    | G | -0.0244 |
| rs35572469  | G | 0.1368  |
| rs2460641   | C | -0.0257 |
| rs117766208 | A | 0.1412  |
| rs60723032  | A | -0.0601 |
| rs79972309  | C | -0.0568 |
| rs375606    | C | 0.0371  |
| rs12324083  | C | 0.0901  |
| rs3848186   | G | 0.0419  |
| rs11630437  | A | -0.1153 |
| rs117330224 | C | 0.0839  |
| rs79345527  | A | 0.1069  |
| rs6496301   | C | 0.0521  |
| rs74009726  | C | 0.1042  |
| rs72754715  | T | -0.0536 |
| rs75577625  | T | -0.1459 |
| rs782926    | A | -0.0254 |
| rs117210658 | T | 0.1054  |
| rs117823089 | C | 0.1251  |
| rs7174604   | G | 0.031   |
| rs62016997  | T | 0.088   |
| rs2271405   | C | 0.029   |
| rs118024851 | A | -0.0836 |
| rs34146646  | T | 0.1113  |
| rs6598358   | A | -0.0523 |

|             |   |         |
|-------------|---|---------|
| rs111416412 | G | 0.1604  |
| rs289107    | C | -0.0247 |
| rs2445741   | G | 0.0279  |
| rs969908    | A | 0.0259  |
| rs77625147  | T | 0.0949  |
| rs118028915 | A | -0.1163 |
| rs8030058   | C | 0.0254  |
| rs35035223  | G | -0.0777 |
| rs11263700  | A | 0.027   |
| rs435224    | C | 0.1319  |
| rs61528005  | A | 0.0648  |
| rs144957564 | C | -0.1657 |
| rs2651511   | G | -0.0343 |
| rs75088295  | A | 0.1221  |
| rs9302287   | A | -0.0381 |
| rs4887401   | T | 0.0319  |
| rs72742821  | A | 0.0895  |
| rs12050581  | A | -0.0293 |
| rs141487913 | G | -0.1137 |
| rs10908270  | A | -0.0878 |
| rs118191814 | T | 0.1336  |
| rs2598470   | T | -0.0323 |
| rs117223994 | T | 0.0718  |
| rs62040963  | C | -0.0456 |
| rs904213    | C | -0.0257 |
| rs9708101   | G | -0.031  |
| rs35964798  | T | -0.1606 |
| rs28618157  | G | -0.0556 |
| rs62022762  | G | -0.0526 |
| rs71474497  | C | 0.1077  |
| rs7174505   | A | 0.0277  |
| rs8026788   | C | -0.0506 |
| rs16974989  | G | 0.1708  |
| rs7162752   | G | 0.0649  |
| rs4523884   | C | -0.0518 |
| rs12911531  | C | -0.0935 |
| rs12050606  | C | 0.0493  |
| rs117451853 | G | 0.1373  |
| rs16943484  | C | -0.0525 |
| rs56108733  | A | -0.083  |
| rs12902797  | G | 0.0817  |
| rs77154007  | T | 0.1072  |
| rs8030691   | A | -0.031  |
| rs76568612  | C | 0.1649  |
| rs111421106 | T | -0.1234 |
| rs62003287  | G | 0.126   |
| rs28426996  | A | -0.0358 |

|             |   |         |
|-------------|---|---------|
| rs142394214 | C | 0.1304  |
| rs4525436   | T | -0.0247 |
| rs12050883  | T | 0.0913  |
| rs9744087   | T | -0.1619 |
| rs78937319  | G | 0.1542  |
| rs11633495  | T | 0.0325  |
| rs149800418 | T | -0.1199 |
| rs113152888 | G | 0.1704  |
| rs117420183 | T | 0.2072  |
| rs140715333 | C | -0.098  |
| rs4287518   | A | -0.0242 |
| rs75487106  | C | 0.078   |
| rs4906654   | T | 0.0364  |
| rs72741477  | T | 0.1132  |
| rs7171473   | G | -0.0313 |
| rs11070764  | T | -0.0237 |
| rs141474793 | T | 0.1326  |
| rs12442260  | C | 0.0394  |
| rs12910599  | A | 0.0561  |
| rs62020464  | A | -0.0355 |
| rs2899439   | A | -0.0324 |
| rs118059661 | A | -0.1226 |
| rs117559123 | G | 0.0828  |
| rs11074077  | G | 0.0297  |
| rs7182684   | A | 0.0314  |
| rs117872151 | T | -0.1326 |
| rs55692706  | C | -0.0475 |
| rs147133924 | T | 0.1144  |
| rs34494382  | A | -0.1419 |
| rs140117312 | A | 0.1291  |
| rs8033895   | G | -0.0294 |
| rs8028759   | C | -0.0261 |
| rs28861470  | A | -0.0983 |
| rs137968634 | A | -0.0894 |
| rs72708642  | G | 0.0531  |
| rs117617844 | G | 0.1125  |
| rs117629768 | C | -0.0947 |
| rs3866550   | C | -0.0239 |
| rs4522399   | A | -0.0269 |
| rs76442439  | C | 0.1126  |
| rs111735100 | C | 0.09    |
| rs79295766  | T | 0.0552  |
| rs2175372   | T | 0.0466  |
| rs338513    | A | 0.0363  |
| rs113322598 | T | 0.1384  |
| rs17589523  | A | 0.0303  |
| rs72699709  | G | 0.0416  |

|             |   |         |
|-------------|---|---------|
| rs17646847  | G | 0.0554  |
| rs118109104 | T | -0.1001 |
| rs12438675  | A | -0.0404 |
| rs7164176   | G | 0.0263  |
| rs79030891  | T | 0.0646  |
| rs16946054  | C | 0.0577  |
| rs61480315  | T | 0.0948  |
| rs112103506 | G | -0.1369 |
| rs28468472  | G | -0.0274 |
| rs11856978  | G | 0.0403  |
| rs66536006  | A | 0.0718  |
| rs11858014  | A | -0.0259 |
| rs12592432  | A | -0.1146 |
| rs140857051 | T | -0.1087 |
| rs113434665 | T | -0.116  |
| rs79638843  | G | -0.179  |
| rs11161198  | A | 0.0835  |
| rs144500865 | A | 0.1119  |
| rs78176913  | T | -0.0529 |
| rs13313514  | T | -0.043  |
| rs1453184   | A | -0.0256 |
| rs75938518  | T | 0.1594  |
| rs73442025  | T | -0.1189 |
| rs1500639   | A | -0.0252 |
| rs3935339   | T | -0.0319 |
| rs8038077   | C | 0.0465  |
| rs11263698  | T | -0.0521 |
| rs2036815   | T | 0.0344  |
| rs12912660  | T | 0.0456  |
| rs28385905  | A | -0.0824 |
| rs72758775  | C | 0.0767  |
| rs117403031 | A | 0.1517  |
| rs72755086  | T | -0.1066 |
| rs78733205  | T | 0.1508  |
| rs75287105  | C | 0.1183  |
| rs77747948  | C | 0.1364  |
| rs17509779  | C | 0.037   |
| rs7162160   | G | 0.1846  |
| rs74865241  | G | -0.0426 |
| rs7180919   | A | -0.0236 |
| rs117310215 | T | 0.1083  |
| rs290652    | G | 0.0298  |
| rs62038570  | G | -0.0354 |
| rs145580584 | G | -0.0692 |
| rs151189767 | T | -0.0871 |
| rs16942758  | G | 0.0384  |
| rs17634916  | G | 0.0267  |

|             |   |         |
|-------------|---|---------|
| rs55886839  | A | -0.0495 |
| rs4887515   | G | -0.0514 |
| rs17504257  | G | -0.0288 |
| rs4350553   | A | 0.1261  |
| rs10400882  | C | -0.0247 |
| rs4887345   | G | 0.0256  |
| rs1995879   | A | -0.0338 |
| rs71471590  | T | -0.091  |
| rs8025737   | C | -0.0295 |
| rs117046709 | G | 0.1893  |
| rs9806758   | C | 0.0345  |
| rs75134513  | C | 0.1206  |
| rs117218446 | G | 0.1621  |
| rs874897    | A | 0.0247  |
| rs142073082 | T | -0.1106 |
| rs141101943 | G | 0.047   |
| rs149095335 | G | 0.1427  |
| rs11074280  | G | 0.0441  |
| rs76262695  | G | -0.1299 |
| rs7165507   | C | 0.0245  |
| rs1904892   | A | -0.0628 |
| rs1496875   | A | 0.0274  |
| rs16948512  | G | 0.0374  |
| rs62006532  | A | -0.0653 |
| rs718674    | A | 0.0298  |
| rs61994488  | T | -0.0438 |
| rs117076446 | A | 0.1113  |
| rs16961767  | T | 0.0817  |
| rs2624276   | G | 0.0745  |
| rs61991503  | C | 0.0294  |
| rs117951944 | T | -0.1407 |
| rs142511876 | T | 0.1048  |
| rs75893595  | C | -0.1723 |
| rs11558807  | A | 0.0559  |
| rs12903813  | G | -0.1038 |
| rs4924178   | G | -0.044  |
| rs142491282 | G | 0.1229  |
| rs1901581   | A | 0.1989  |
| rs8040306   | C | 0.0414  |
| rs8026343   | T | 0.087   |
| rs77270943  | A | 0.0508  |
| rs17328684  | G | 0.07    |
| rs111455511 | A | -0.0878 |
| rs7181975   | T | -0.0251 |
| rs111855809 | G | -0.0669 |
| rs75917862  | G | 0.1525  |
| rs28432786  | T | 0.159   |

|             |   |         |
|-------------|---|---------|
| rs28378329  | C | 0.0996  |
| rs58313667  | A | -0.0374 |
| rs79201154  | A | -0.1717 |
| rs145183564 | A | 0.1131  |
| rs7166484   | G | -0.0353 |
| rs776714    | G | -0.0354 |
| rs118017186 | T | -0.1113 |
| rs1470983   | A | -0.0312 |
| rs111286009 | A | 0.08    |
| rs11633987  | A | -0.025  |
| rs11638935  | A | 0.0278  |
| rs2446804   | C | -0.037  |
| rs28630729  | A | 0.0552  |
| rs10851691  | T | 0.024   |
| rs4774921   | A | 0.0354  |
| rs117035148 | C | 0.0666  |
| rs12906879  | C | -0.0258 |
| rs4622493   | G | 0.131   |
| rs140193748 | A | 0.0465  |
| rs77174423  | G | -0.1075 |
| rs142453246 | T | -0.089  |
| rs7168782   | A | -0.0308 |
| rs2867933   | C | -0.0409 |
| rs11631151  | A | 0.0341  |
| rs35790860  | T | 0.0346  |
| rs142472543 | G | -0.0867 |
| rs76752491  | T | 0.1295  |
| rs12914579  | G | -0.0532 |
| rs17584591  | C | 0.0292  |
| rs56313612  | G | 0.0368  |
| rs79674484  | C | 0.1039  |
| rs111293726 | G | -0.0405 |
| rs17644708  | C | 0.026   |
| rs77127192  | C | -0.0326 |
| rs58020644  | A | 0.0575  |
| rs58709835  | C | 0.0738  |
| rs7170825   | A | -0.0395 |
| rs74024091  | A | -0.0333 |
| rs6606829   | A | -0.0243 |
| rs76040373  | A | 0.1079  |
| rs7183884   | C | 0.1266  |
| rs76703891  | A | 0.0461  |
| rs8040839   | T | -0.0378 |
| rs12905883  | A | -0.0917 |
| rs62010843  | G | -0.1037 |
| rs11630753  | G | -0.0339 |
| rs1446336   | A | 0.0252  |

|             |   |         |
|-------------|---|---------|
| rs28438695  | G | 0.0264  |
| rs28451047  | A | 0.0407  |
| rs7175312   | C | 0.0323  |
| rs78594163  | T | 0.0819  |
| rs4923852   | A | 0.0249  |
| rs34933825  | T | 0.211   |
| rs12912808  | T | -0.0381 |
| rs59906014  | T | -0.0521 |
| rs12594571  | A | -0.041  |
| rs1980230   | C | 0.0351  |
| rs117942942 | A | -0.057  |
| rs12442352  | G | -0.0407 |
| rs56126978  | T | -0.0663 |
| rs56117602  | C | 0.0274  |
| rs11638670  | T | -0.0332 |
| rs28661610  | A | 0.0273  |
| rs142260071 | T | 0.1191  |
| rs1316743   | A | 0.0236  |
| rs12101889  | C | -0.0471 |
| rs62025436  | A | 0.0673  |
| rs7182936   | G | -0.0263 |
| rs34206273  | C | 0.0318  |
| rs2082858   | T | 0.0411  |
| rs117958632 | T | 0.1927  |
| rs72705736  | C | -0.1423 |
| rs66500340  | G | 0.0435  |
| rs141107350 | A | -0.0733 |
| rs921845    | T | 0.028   |
| rs72633218  | A | -0.0657 |
| rs4965789   | T | -0.0695 |
| rs139703829 | A | -0.163  |
| rs7174755   | C | 0.0245  |
| rs78207408  | A | 0.13    |
| rs78747182  | G | 0.0866  |
| rs17773784  | C | 0.032   |
| rs8041033   | A | 0.1486  |
| rs79436392  | T | -0.1652 |
| rs77366805  | C | 0.0895  |
| rs17785279  | G | -0.1329 |
| rs56336520  | A | 0.0796  |
| rs76793636  | G | 0.0462  |
| rs34194816  | T | 0.0973  |
| rs7181559   | T | 0.0254  |
| rs28536117  | A | -0.0316 |
| rs34330936  | G | -0.0295 |
| rs72764122  | T | 0.0959  |
| rs117341374 | A | 0.142   |



|             |   |         |
|-------------|---|---------|
| rs62003790  | T | 0.128   |
| rs72734111  | C | -0.1095 |
| rs4774942   | A | -0.035  |
| rs61998710  | A | -0.1216 |
| rs72703141  | C | -0.1144 |
| rs17709876  | A | -0.0508 |
| rs145881749 | T | 0.1599  |
| rs11634668  | A | -0.04   |
| rs28701902  | C | 0.0369  |
| rs8026009   | T | -0.0352 |
| rs138423034 | T | -0.2075 |
| rs35381354  | C | 0.0804  |
| rs34151560  | T | 0.0425  |
| rs17293408  | A | 0.0673  |
| rs75249485  | G | -0.1082 |
| rs72703904  | T | 0.1637  |
| rs7175237   | G | -0.0506 |
| rs35064685  | A | 0.0667  |
| rs1872050   | T | -0.0322 |
| rs55698343  | T | -0.1839 |
| rs59784184  | T | 0.0638  |
| rs7171721   | C | -0.0253 |
| rs7166121   | G | -0.0296 |
| rs72712038  | G | 0.0924  |
| rs77178975  | T | 0.0572  |
| rs75961269  | T | -0.1255 |
| rs111845410 | T | 0.0628  |
| rs7183344   | G | -0.088  |
| rs73377027  | T | 0.0628  |
| rs3848196   | T | -0.0291 |
| rs62009299  | A | 0.1448  |
| rs57004829  | G | 0.0302  |
| rs118114900 | T | 0.1448  |
| rs17428029  | C | 0.1025  |
| rs143264544 | C | -0.1155 |
| rs345857    | A | -0.0232 |
| rs146780977 | T | 0.1181  |
| rs75695245  | A | -0.1023 |
| rs72705912  | A | -0.1009 |
| rs8033759   | A | -0.0376 |
| rs11632278  | C | 0.0413  |
| rs9806369   | A | 0.0347  |
| rs4779510   | A | -0.0339 |
| rs7179052   | C | 0.0383  |
| rs7176637   | A | -0.0227 |
| rs7166811   | C | 0.0918  |
| rs75442799  | C | -0.0775 |

|             |   |         |
|-------------|---|---------|
| rs35740613  | C | -0.0231 |
| rs149390595 | A | -0.0935 |
| rs146779750 | T | 0.0538  |
| rs2164622   | T | 0.0301  |
| rs147320552 | G | 0.1369  |
| rs76617788  | A | -0.1016 |
| rs714716    | C | -0.0438 |
| rs143815610 | T | 0.1068  |
| rs2219816   | A | 0.0225  |
| rs4442782   | G | 0.0701  |
| rs117139372 | T | -0.1096 |
| rs72745755  | G | 0.085   |
| rs2129795   | A | -0.0436 |
| rs2009404   | T | 0.0241  |
| rs7176180   | C | -0.0332 |
| rs7169918   | G | -0.0293 |
| rs141492964 | C | 0.1114  |
| rs815165    | T | 0.0309  |
| rs73435701  | G | 0.0645  |
| rs36116683  | G | -0.0279 |
| rs17780818  | T | 0.1173  |
| rs7177957   | C | -0.0295 |
| rs16973512  | T | -0.0894 |
| rs7177918   | A | 0.0283  |
| rs11637441  | T | -0.0285 |
| rs116920153 | A | 0.0803  |
| rs117798556 | G | 0.2014  |
| rs11637608  | T | -0.0235 |
| rs41280048  | A | 0.1991  |
| rs905451    | C | 0.0249  |
| rs1045699   | G | 0.0267  |
| rs80117966  | T | 0.1011  |
| rs2259707   | C | -0.0274 |
| rs75334553  | T | -0.0763 |
| rs8039702   | T | -0.0329 |
| rs71476746  | T | -0.0337 |
| rs76673272  | A | -0.1109 |
| rs506259    | C | 0.0435  |
| rs79260486  | G | 0.0739  |
| rs11853044  | T | 0.0518  |
| rs150707431 | A | -0.0738 |
| rs17816633  | A | -0.1125 |
| rs12911435  | C | 0.1921  |
| rs113838593 | G | 0.109   |
| rs1002612   | G | -0.0275 |
| rs62045811  | A | -0.12   |
| rs17826767  | C | 0.1428  |

|             |   |         |
|-------------|---|---------|
| rs2562769   | T | -0.0233 |
| rs62003910  | A | 0.0308  |
| rs34133591  | A | 0.029   |
| rs112291746 | T | -0.0385 |
| rs148256114 | A | -0.1237 |
| rs79578412  | G | 0.0643  |
| rs72765016  | C | 0.0345  |
| rs118020484 | T | -0.0898 |
| rs11638450  | T | -0.0251 |
| rs868122    | C | 0.0477  |
| rs4008148   | A | 0.0256  |
| rs141426727 | C | 0.1268  |
| rs11247207  | A | -0.0273 |
| rs7175114   | T | 0.0451  |
| rs7170666   | A | -0.0646 |
| rs62027978  | A | 0.0572  |
| rs12439226  | C | -0.0239 |
| rs2593028   | T | -0.0466 |
| rs79303605  | A | 0.0847  |
| rs117244395 | G | -0.1104 |
| rs2238353   | A | -0.0534 |
| rs938076    | A | -0.0224 |
| rs79927613  | A | -0.0771 |
| rs16947141  | C | 0.0749  |
| rs62027207  | A | -0.0301 |
| rs117210124 | A | 0.1332  |
| rs147030620 | G | -0.0608 |
| rs72760612  | T | -0.1031 |
| rs891343    | T | -0.0254 |
| rs117584784 | T | 0.1861  |
| rs55895132  | A | -0.0628 |
| rs965696    | C | 0.0297  |
| rs958759    | G | -0.0277 |
| rs3743332   | C | -0.0254 |
| rs12911852  | C | -0.0266 |
| rs28645333  | C | 0.025   |
| rs72746055  | T | 0.0697  |
| rs10468147  | G | 0.0309  |
| rs16948638  | C | 0.0975  |
| rs62025320  | T | -0.0501 |
| rs2714770   | C | -0.0673 |
| rs8037829   | C | -0.041  |
| rs145553134 | T | 0.0782  |
| rs2679622   | G | 0.0245  |
| rs112786475 | A | -0.0863 |
| rs144030056 | A | 0.0853  |
| rs28716419  | C | -0.0326 |

|             |   |         |
|-------------|---|---------|
| rs62048173  | G | -0.0244 |
| rs1719348   | T | -0.029  |
| rs4777388   | G | -0.0493 |
| rs3784721   | C | -0.0556 |
| rs8043199   | G | -0.0662 |
| rs34124020  | G | -0.0744 |
| rs12324674  | A | -0.0236 |
| rs9989308   | G | -0.0323 |
| rs71468846  | C | 0.1581  |
| rs149163518 | G | 0.1088  |
| rs139941060 | T | -0.1302 |
| rs151276028 | A | -0.1256 |
| rs141981217 | T | 0.1025  |
| rs2725578   | C | 0.0317  |
| rs150212864 | C | 0.1569  |
| rs117058984 | A | 0.146   |
| rs12324194  | T | 0.1611  |
| rs58180668  | A | 0.0301  |
| rs2019121   | G | -0.0361 |
| rs79252865  | A | 0.138   |
| rs78231863  | G | 0.0763  |
| rs11638111  | C | -0.0319 |
| rs28778704  | T | -0.1167 |
| rs72735829  | T | -0.096  |
| rs117138143 | G | 0.1289  |
| rs55685171  | G | -0.0813 |
| rs881536    | A | -0.0348 |
| rs8029967   | G | -0.0292 |
| rs117933277 | G | 0.0909  |
| rs28569959  | A | 0.0362  |
| rs76443071  | T | -0.0755 |
| rs55738821  | G | -0.1049 |
| rs4778565   | C | 0.0297  |
| rs12909773  | T | -0.0339 |
| rs72749944  | A | 0.1199  |
| rs1377730   | T | 0.0226  |
| rs118141855 | G | -0.0828 |
| rs1829673   | C | 0.0245  |
| rs56223005  | G | -0.0434 |
| rs62002124  | A | 0.0898  |
| rs319895    | G | -0.0311 |
| rs66917351  | C | 0.1209  |
| rs4965808   | C | -0.0262 |
| rs16939816  | G | -0.0607 |
| rs10851562  | A | -0.028  |
| rs140895722 | G | -0.1427 |
| rs35180855  | G | 0.0306  |

|             |   |         |
|-------------|---|---------|
| rs1810246   | T | 0.0308  |
| rs7166552   | T | -0.0722 |
| rs1450417   | C | 0.0247  |
| rs28497202  | T | -0.2083 |
| rs9989307   | C | 0.0707  |
| rs7176736   | A | 0.0349  |
| rs75715461  | C | -0.1088 |
| rs8037268   | A | 0.084   |
| rs28650396  | T | 0.0528  |
| rs59044616  | T | 0.1246  |
| rs72630428  | A | 0.0875  |
| rs72761948  | T | 0.0878  |
| rs12439105  | G | -0.0367 |
| rs138994873 | C | -0.1167 |
| rs145764000 | A | -0.0888 |
| rs4566130   | T | 0.0968  |
| rs1995972   | C | -0.0345 |
| rs12903939  | A | -0.036  |
| rs11636681  | C | -0.0265 |
| rs1496922   | A | 0.0247  |
| rs11631301  | A | 0.0584  |
| rs77976268  | T | -0.0256 |
| rs6496528   | C | -0.0318 |
| rs4577066   | C | -0.0261 |
| rs895444    | G | 0.0333  |
| rs57783949  | T | -0.0276 |
| rs10438362  | T | -0.0271 |
| rs60606735  | T | 0.0357  |
| rs137910498 | A | 0.1042  |
| rs28529039  | G | -0.1584 |
| rs140884831 | G | -0.0537 |
| rs7173247   | T | -0.0347 |
| rs112694082 | A | 0.0485  |
| rs76884482  | T | -0.208  |
| rs4778298   | T | 0.0241  |
| rs145227358 | T | -0.1387 |
| rs150013068 | A | 0.0514  |
| rs2639187   | A | 0.0287  |
| rs3803478   | A | -0.0273 |
| rs112307782 | C | -0.0914 |
| rs893287    | A | 0.0224  |
| rs62019458  | G | 0.0959  |
| rs12442900  | C | -0.0225 |
| rs116341094 | T | -0.0888 |
| rs890266    | T | 0.0239  |
| rs7179958   | A | -0.023  |
| rs114903147 | A | 0.1058  |

|             |   |         |
|-------------|---|---------|
| rs7173718   | A | -0.0221 |
| rs1020180   | T | 0.0263  |
| rs7181993   | A | -0.0423 |
| rs78113709  | T | -0.1935 |
| rs4305001   | C | 0.1479  |
| rs3784463   | A | -0.0315 |
| rs7172228   | T | -0.0605 |
| rs117165548 | A | -0.1554 |
| rs62023383  | A | -0.0973 |
| rs16964853  | G | -0.0437 |
| rs4776602   | G | 0.0604  |
| rs16971223  | G | 0.0234  |
| rs6494278   | C | -0.0415 |
| rs115789093 | A | -0.0818 |
| rs140288505 | A | 0.0977  |
| rs12899177  | G | -0.0856 |
| rs11073954  | G | -0.0316 |
| rs75110365  | T | 0.0673  |
| rs16947884  | A | 0.0785  |
| rs62005123  | C | -0.03   |
| rs150215516 | G | -0.1375 |
| rs3985787   | A | 0.0663  |
| rs111937096 | A | 0.0862  |
| rs144515058 | C | -0.1008 |
| rs79552368  | G | 0.0794  |
| rs8027027   | T | -0.0278 |
| rs117987223 | A | -0.0865 |
| rs7183801   | C | 0.0237  |
| rs149211150 | T | 0.1012  |
| rs117871283 | G | -0.1167 |
| rs7180063   | T | 0.0309  |
| rs7173522   | A | 0.0486  |
| rs730556    | A | 0.0254  |
| rs4365246   | T | 0.0229  |
| rs3812934   | C | -0.0242 |
| rs677413    | C | -0.0233 |
| rs56921963  | T | 0.1244  |
| rs112779770 | G | -0.0337 |
| rs117972215 | C | 0.0829  |
| rs76981970  | C | 0.0651  |
| rs7403417   | G | -0.0602 |
| rs4906781   | T | -0.024  |
| rs75702839  | A | 0.0329  |
| rs148811660 | C | 0.1063  |
| rs8029811   | C | -0.028  |
| rs1871016   | T | -0.0575 |
| rs11630314  | A | -0.0592 |

|             |   |         |
|-------------|---|---------|
| rs9989259   | G | 0.0227  |
| rs116427854 | C | -0.1458 |
| rs2229691   | G | -0.0271 |
| rs118186078 | T | 0.0987  |
| rs8029844   | T | -0.094  |
| rs111923513 | C | 0.1073  |
| rs144744323 | T | 0.0495  |
| rs2046925   | T | 0.0256  |
| rs7182137   | T | -0.0445 |
| rs12909039  | T | -0.0255 |
| rs1503287   | A | 0.0271  |
| rs62009271  | T | 0.0255  |
| rs117278988 | A | -0.0746 |
| rs2440336   | C | 0.0245  |
| rs16971354  | G | -0.0883 |
| rs111879823 | T | 0.1291  |
| rs79047684  | T | -0.0757 |
| rs7164711   | G | -0.0269 |
| rs11854227  | T | 0.1168  |
| rs7175207   | G | 0.0513  |
| rs36005289  | A | 0.039   |
| rs2228531   | A | -0.1681 |
| rs116869754 | C | 0.1746  |
| rs77804961  | A | 0.0829  |
| rs56026891  | A | -0.0907 |
| rs79742014  | T | 0.0903  |
| rs7176424   | A | 0.0267  |
| rs2013359   | G | -0.0334 |
| rs138964335 | T | 0.0608  |
| rs2288603   | C | 0.1109  |
| rs62006053  | G | -0.0309 |
| rs2606154   | A | 0.0257  |
| rs3743137   | T | -0.0393 |
| rs17273380  | A | 0.0622  |
| rs61993795  | A | 0.0672  |
| rs11638148  | T | 0.0441  |
| rs2562767   | G | -0.0228 |
| rs7164054   | G | 0.0289  |
| rs8040423   | G | 0.1028  |
| rs35325894  | G | -0.0414 |
| rs28510702  | A | 0.0583  |
| rs111392236 | T | -0.1106 |
| rs877045    | C | 0.0438  |
| rs11856397  | T | -0.0529 |
| rs28735520  | C | -0.0486 |
| rs55757606  | T | -0.0322 |
| rs716390    | G | 0.0279  |

|             |   |         |
|-------------|---|---------|
| rs139516447 | C | 0.1222  |
| rs28540281  | C | 0.0326  |
| rs12443448  | C | 0.0941  |
| rs10518941  | C | 0.0561  |
| rs78580592  | G | -0.1026 |
| rs78941921  | A | 0.0543  |
| rs2083454   | G | -0.028  |
| rs4775615   | G | 0.0292  |
| rs7181146   | A | 0.0754  |
| rs56168656  | C | -0.0999 |
| rs1343102   | G | 0.0215  |
| rs72745747  | A | -0.0665 |
| rs77368862  | T | -0.085  |
| rs11858820  | T | 0.0723  |
| rs4965600   | G | 0.0253  |
| rs17652495  | A | -0.0811 |
| rs28463173  | C | -0.0833 |
| rs8042093   | C | -0.0325 |
| rs59929543  | T | 0.067   |
| rs8041377   | G | -0.0888 |
| rs75812735  | T | 0.0718  |
| rs111488993 | G | -0.0917 |
| rs76580790  | A | 0.0731  |
| rs2004512   | G | 0.0302  |
| rs4072803   | A | -0.0225 |
| rs8023333   | A | 0.0285  |
| rs10518750  | A | 0.0346  |
| rs58675308  | A | -0.0756 |
| rs4778360   | A | -0.0329 |
| rs58461136  | T | -0.1405 |
| rs62006484  | A | 0.1821  |
| rs11858217  | C | 0.0239  |
| rs16950210  | G | -0.0754 |
| rs140410782 | A | 0.0793  |
| rs2759314   | A | -0.0399 |
| rs12904857  | A | 0.0752  |
| rs4887181   | C | -0.033  |
| rs8030078   | C | -0.0572 |
| rs537848    | G | -0.0219 |
| rs7182653   | G | -0.0217 |
| rs28514332  | G | 0.1456  |
| rs80242818  | C | -0.0358 |
| rs8025505   | T | 0.0298  |
| rs72733102  | T | 0.1612  |
| rs67176189  | A | 0.0259  |
| rs11855900  | G | -0.0629 |
| rs76688285  | A | 0.1165  |



|             |   |         |
|-------------|---|---------|
| rs116943053 | G | -0.0976 |
| rs117549503 | C | 0.0676  |
| rs1564693   | C | 0.0452  |
| rs150273749 | G | -0.1181 |
| rs77748036  | A | 0.0768  |
| rs117244336 | T | -0.14   |
| rs5030697   | T | 0.1372  |
| rs147903483 | T | -0.1077 |
| rs7170561   | C | 0.0232  |
| rs72752941  | C | -0.0317 |
| rs35515716  | C | 0.0466  |
| rs9920555   | C | 0.1309  |
| rs17875583  | A | 0.095   |
| rs11633125  | A | 0.0822  |
| rs75368021  | G | 0.0769  |
| rs8028507   | C | -0.037  |
| rs116973082 | T | -0.085  |
| rs56192863  | A | 0.0273  |
| rs56065022  | G | -0.0531 |
| rs72760260  | A | 0.0899  |
| rs61732346  | A | 0.1385  |
| rs11635599  | C | 0.0296  |
| rs17586255  | C | -0.0322 |
| rs76763121  | T | -0.0433 |
| rs72760342  | G | 0.0737  |
| rs112541666 | C | -0.0817 |
| rs7176561   | C | 0.0328  |
| rs17200392  | A | -0.1045 |
| rs35769013  | G | 0.0611  |
| rs78060089  | G | -0.0614 |
| rs139402847 | C | -0.1974 |
| rs17235805  | G | -0.0724 |
| rs61019979  | T | -0.0549 |
| rs77947038  | T | -0.0877 |
| rs1689938   | T | 0.0346  |
| rs62004411  | G | 0.1004  |
| rs117114481 | A | 0.1397  |
| rs62011693  | T | -0.0387 |
| rs12899836  | A | 0.032   |
| rs148077173 | C | -0.1516 |
| rs2249312   | T | -0.0223 |
| rs11633774  | A | 0.0451  |
| rs148684390 | C | -0.0989 |
| rs72740140  | T | -0.0716 |
| rs59269598  | T | -0.0226 |
| rs74614863  | A | 0.0805  |
| rs55673204  | T | 0.1112  |

|             |   |         |
|-------------|---|---------|
| rs77362367  | G | 0.0534  |
| rs79321970  | G | 0.0714  |
| rs141271015 | T | 0.1356  |
| rs117136097 | A | -0.2222 |
| rs72732753  | A | 0.1952  |
| rs11856730  | C | -0.0704 |
| rs73391315  | A | 0.0708  |
| rs78721842  | G | -0.0481 |
| rs13329152  | T | -0.0425 |
| rs4102909   | C | 0.0284  |
| rs11635377  | A | -0.0718 |
| rs11630120  | T | 0.1003  |
| rs1975754   | G | 0.0246  |
| rs12909366  | G | 0.0327  |
| rs16944505  | A | 0.1041  |
| rs4779583   | G | 0.1079  |
| rs147421249 | T | 0.1322  |
| rs4777085   | A | -0.0432 |
| rs79393267  | A | -0.0783 |
| rs1560779   | G | 0.022   |
| rs12901951  | A | 0.0907  |
| rs4614674   | C | 0.0545  |
| rs113492848 | A | -0.149  |
| rs12907930  | C | 0.0222  |
| rs305019    | G | 0.0237  |
| rs10438450  | C | 0.0857  |
| rs148720406 | A | -0.0737 |
| rs12593847  | T | -0.0263 |
| rs12911184  | T | -0.0239 |
| rs921505    | C | -0.0495 |
| rs2283438   | T | -0.0232 |
| rs75558051  | T | 0.153   |
| rs873393    | T | 0.023   |
| rs16947535  | C | 0.0285  |
| rs3649      | C | 0.0354  |
| rs75451877  | C | 0.0348  |
| rs11638510  | A | -0.051  |
| rs7164460   | T | 0.1258  |
| rs117721795 | G | -0.0907 |
| rs2278708   | T | -0.0669 |
| rs34592087  | A | -0.1131 |
| rs115851102 | C | 0.1335  |
| rs62021053  | A | 0.0293  |
| rs12594483  | A | -0.0371 |
| rs1342522   | T | 0.0225  |
| rs67674051  | A | -0.0385 |
| rs2562784   | G | -0.0254 |

|             |   |         |
|-------------|---|---------|
| rs76215143  | A | -0.0805 |
| rs148678592 | T | 0.0651  |
| rs6495384   | G | 0.0328  |
| rs62016792  | G | -0.1068 |
| rs147851815 | T | -0.0417 |
| rs150365087 | A | 0.081   |
| rs80100837  | T | -0.1287 |
| rs79762334  | G | 0.0488  |
| rs17740607  | A | 0.0356  |
| rs16961348  | C | -0.0499 |
| rs12899152  | G | -0.0966 |
| rs1115505   | G | -0.095  |
| rs35837677  | T | 0.0281  |
| rs4598890   | T | -0.0319 |
| rs55764737  | C | -0.0665 |
| rs141971853 | A | 0.1181  |
| rs112014904 | A | 0.05    |
| rs2589231   | T | -0.0337 |
| rs72747352  | C | 0.0598  |
| rs117815642 | T | 0.0908  |
| rs117848155 | C | -0.0563 |
| rs118138745 | C | 0.1434  |
| rs79532033  | C | 0.0591  |
| rs7176353   | C | -0.0427 |
| rs76345533  | G | -0.0684 |
| rs74609861  | G | -0.067  |
| rs4243769   | G | 0.0251  |
| rs55849417  | A | -0.0291 |
| rs79804987  | C | 0.081   |
| rs72751371  | C | 0.1261  |
| rs76172385  | G | -0.1147 |
| rs74777346  | G | 0.0341  |
| rs77982247  | A | 0.0536  |
| rs2016395   | G | -0.0279 |
| rs147294178 | A | -0.1576 |
| rs117792125 | A | -0.1018 |
| rs936310    | A | 0.0826  |
| rs751103    | G | 0.0385  |
| rs142252057 | A | 0.0642  |
| rs1134444   | G | -0.043  |
| rs117325051 | A | 0.0564  |
| rs72546309  | T | -0.0471 |
| rs28845580  | G | -0.0597 |
| rs77103696  | A | 0.0766  |
| rs8031224   | C | 0.034   |
| rs3110483   | T | -0.0238 |
| rs12901449  | G | -0.1667 |

|             |   |         |
|-------------|---|---------|
| rs12900331  | C | 0.0238  |
| rs6496263   | T | -0.0526 |
| rs4966230   | A | 0.0928  |
| rs156658    | G | 0.0337  |
| rs12906856  | T | -0.0259 |
| rs870929    | T | 0.0864  |
| rs62021287  | G | 0.0918  |
| rs76285454  | G | 0.1168  |
| rs3784589   | A | 0.0465  |
| rs1357470   | C | 0.0263  |
| rs117439795 | T | -0.0866 |
| rs117844477 | C | -0.1275 |
| rs7167433   | A | -0.0924 |
| rs77313612  | C | 0.1807  |
| rs1722827   | T | -0.0402 |
| rs149300899 | T | -0.1437 |
| rs74539715  | C | -0.1721 |
| rs147975533 | A | 0.1155  |
| rs28401427  | C | -0.0225 |
| rs118092507 | A | 0.1057  |
| rs4541012   | A | 0.0223  |
| rs56279213  | G | 0.0311  |
| rs138620779 | T | -0.1532 |
| rs149353885 | T | 0.151   |
| rs75595038  | T | -0.0866 |
| rs3098550   | T | 0.0835  |
| rs844034    | T | -0.0368 |
| rs113613078 | A | 0.0397  |
| rs2278966   | C | -0.023  |
| rs12148859  | A | -0.0265 |
| rs76444515  | A | 0.1077  |
| rs2381819   | T | -0.0357 |
| rs144404525 | T | 0.1318  |
| rs11073271  | C | -0.0499 |
| rs78106502  | G | 0.0759  |
| rs11070879  | G | -0.0314 |
| rs56378114  | T | 0.0241  |
| rs12917252  | T | -0.0277 |
| rs117017655 | C | -0.1181 |
| rs77217125  | C | -0.1427 |
| rs1036304   | C | -0.0268 |
| rs77967207  | A | 0.139   |
| rs16941568  | A | 0.0682  |
| rs12916823  | A | 0.0288  |
| rs3934604   | A | -0.0242 |
| rs6494230   | C | -0.0327 |
| rs2016133   | A | 0.025   |

|             |   |         |
|-------------|---|---------|
| rs76617833  | G | 0.0941  |
| rs294538    | G | -0.0218 |
| rs16945735  | T | -0.0871 |
| rs8039047   | T | 0.0361  |
| rs11636290  | A | 0.0514  |
| rs17524415  | A | 0.0283  |
| rs62008631  | A | 0.0652  |
| rs8036467   | G | 0.0333  |
| rs34544879  | T | -0.0402 |
| rs72738710  | T | 0.117   |
| rs9672351   | A | 0.0385  |
| rs137919035 | T | -0.1572 |
| rs7168486   | T | -0.0248 |
| rs117801799 | A | -0.1381 |
| rs79361303  | T | 0.0567  |
| rs76578273  | A | 0.1036  |
| rs143054943 | G | 0.0972  |
| rs1441355   | T | 0.023   |
| rs75990009  | G | 0.0777  |
| rs7495974   | C | -0.0301 |
| rs1973063   | G | -0.1868 |
| rs12441320  | A | -0.0271 |
| rs62019196  | T | 0.0516  |
| rs7177287   | A | -0.0558 |
| rs117149746 | T | 0.0502  |
| rs11638064  | A | -0.0245 |
| rs4906848   | G | 0.097   |
| rs72737781  | A | 0.0521  |
| rs117107968 | A | -0.0854 |
| rs2413899   | A | -0.0339 |
| rs79370723  | A | 0.1174  |
| rs10851962  | G | -0.0226 |
| rs112754882 | C | -0.1169 |
| rs12592679  | G | -0.0276 |
| rs6495980   | A | -0.0442 |
| rs7173996   | T | -0.028  |
| rs16945582  | G | 0.0296  |
| rs4132684   | A | 0.1256  |
| rs62007560  | G | -0.0471 |
| rs16972208  | A | -0.1291 |
| rs139668133 | A | 0.1033  |
| rs9920971   | T | -0.03   |
| rs56344664  | G | -0.0583 |
| rs1846923   | T | -0.0541 |
| rs117328796 | A | 0.0662  |
| rs117203432 | A | -0.1052 |
| rs112609301 | C | -0.0711 |

|             |   |         |
|-------------|---|---------|
| rs1394757   | A | 0.0441  |
| rs76425549  | G | -0.0961 |
| rs117620816 | T | -0.0565 |
| rs147558758 | C | 0.0864  |
| rs16975307  | G | -0.0293 |
| rs150918436 | T | 0.0976  |
| rs62001428  | T | 0.0396  |
| rs141655944 | G | 0.1449  |
| rs145675357 | A | 0.0632  |
| rs1992730   | A | 0.0264  |
| rs1864755   | T | -0.0814 |
| rs10438374  | C | -0.0322 |
| rs8031045   | A | 0.0285  |
| rs1545124   | T | 0.1047  |
| rs73485936  | C | -0.0424 |
| rs35849583  | T | 0.0737  |
| rs12442591  | A | -0.0398 |
| rs12594187  | C | 0.023   |
| rs78646212  | G | -0.038  |
| rs11161255  | T | 0.0241  |
| rs12899593  | A | 0.0717  |
| rs116967101 | A | 0.1033  |
| rs75390830  | C | -0.0734 |
| rs11635477  | C | 0.0209  |
| rs4611418   | C | 0.0261  |
| rs11629627  | T | -0.0297 |
| rs16966665  | C | -0.035  |
| rs304982    | C | -0.0357 |
| rs148716246 | C | 0.0696  |
| rs28685740  | A | 0.026   |
| rs112029509 | G | -0.1511 |
| rs7165436   | T | -0.021  |
| rs146540153 | C | 0.106   |
| rs35868429  | C | -0.0823 |
| rs10468030  | G | 0.0249  |
| rs12148910  | G | -0.0654 |
| rs78750464  | G | -0.0955 |
| rs5014755   | G | 0.0444  |
| rs78801903  | G | -0.0407 |
| rs117696866 | T | 0.1015  |
| rs1038235   | C | -0.0316 |
| rs2639676   | C | -0.0249 |
| rs138272444 | T | -0.168  |
| rs12441274  | T | 0.0423  |
| rs144105388 | T | -0.0935 |
| rs79833436  | T | -0.0963 |
| rs35871195  | A | 0.1591  |

|             |   |         |
|-------------|---|---------|
| rs924551    | G | 0.0352  |
| rs13329421  | T | -0.0367 |
| rs56994546  | A | -0.1362 |
| rs12904128  | A | -0.0292 |
| rs150654618 | T | 0.1802  |
| rs1994379   | C | -0.022  |
| rs112835635 | G | -0.115  |
| rs282789    | G | 0.0211  |
| rs62019409  | T | 0.1561  |
| rs12443390  | T | 0.0483  |
| rs112963899 | T | -0.0743 |
| rs345829    | C | 0.0373  |
| rs2113680   | G | 0.0212  |
| rs12595136  | G | -0.0237 |
| rs726193    | C | -0.0232 |
| rs7359232   | G | -0.0281 |
| rs55649144  | A | 0.0295  |
| rs17650623  | G | 0.0682  |
| rs11637841  | C | 0.0642  |
| rs4778006   | C | -0.0257 |
| rs4779958   | G | -0.0269 |
| rs16964713  | T | -0.026  |
| rs11631014  | G | -0.0299 |
| rs1973402   | C | 0.0231  |
| rs11635770  | T | 0.0249  |
| rs347933    | C | -0.0245 |
| rs142986251 | A | 0.1021  |
| rs77561221  | A | 0.0881  |
| rs16940995  | A | 0.0535  |
| rs111938667 | T | 0.1085  |
| rs77022860  | C | -0.0571 |
| rs111779620 | G | -0.1856 |
| rs143190801 | G | 0.1017  |
| rs144641246 | A | -0.1752 |
| rs1529889   | A | -0.0247 |
| rs8023334   | C | -0.0332 |
| rs10048035  | G | 0.0416  |
| rs16977629  | T | 0.0481  |
| rs74347030  | C | 0.0524  |
| rs73445993  | T | -0.0733 |
| rs117710985 | T | -0.1092 |
| rs55969110  | C | -0.0321 |
| rs7174923   | G | -0.0357 |
| rs145852438 | G | 0.0668  |
| rs113591466 | A | -0.1183 |
| rs79154036  | A | -0.0446 |
| rs118161884 | C | 0.2257  |

|             |   |         |
|-------------|---|---------|
| rs79037950  | A | 0.0817  |
| rs785448    | A | 0.0411  |
| rs72705933  | C | 0.0661  |
| rs12594784  | T | 0.041   |
| rs117348940 | A | 0.0687  |
| rs28392550  | C | -0.0366 |
| rs12906649  | C | -0.1611 |
| rs143925889 | A | -0.0967 |
| rs4386090   | A | -0.0375 |
| rs138141434 | C | -0.0775 |
| rs111787648 | A | -0.0677 |
| rs75838403  | T | -0.071  |
| rs75447968  | C | -0.0515 |
| rs11633931  | T | 0.0217  |
| rs12440317  | A | 0.034   |
| rs72729442  | G | -0.0718 |
| rs78656316  | G | -0.0417 |
| rs117304104 | A | -0.0814 |
| rs2164249   | G | -0.0211 |
| rs6598542   | G | 0.0222  |
| rs16958087  | G | -0.0245 |
| rs11910     | T | 0.0245  |
| rs138624326 | T | 0.0941  |
| rs75339512  | C | -0.0871 |
| rs1973733   | G | 0.1025  |
| rs8032724   | T | 0.0209  |
| rs71393487  | G | -0.0257 |
| rs28734820  | C | 0.0295  |
| rs75551315  | T | 0.0608  |
| rs117552034 | T | 0.1167  |
| rs72704410  | A | 0.0464  |
| rs2319751   | G | 0.1488  |
| rs8031894   | G | 0.0425  |
| rs76491337  | A | 0.0658  |
| rs77592885  | A | -0.0467 |
| rs114331850 | T | -0.0518 |
| rs2165249   | A | -0.0395 |
| rs3784605   | C | 0.0239  |
| rs4432209   | A | -0.0296 |
| rs145798246 | C | 0.1423  |
| rs4906809   | C | -0.0725 |
| rs113033943 | T | -0.0885 |
| rs7162845   | A | -0.0392 |
| rs56246032  | C | 0.0791  |
| rs4775557   | C | 0.0673  |
| rs117225496 | A | -0.1542 |
| rs12907488  | G | -0.0517 |



|             |   |         |
|-------------|---|---------|
| rs1722816   | G | -0.0721 |
| rs12910901  | A | -0.0308 |
| rs147173821 | C | -0.0588 |
| rs11634491  | G | 0.0211  |
| rs7170650   | C | 0.0356  |
| rs28547012  | G | 0.0237  |
| rs62009456  | G | -0.1234 |
| rs28576300  | A | 0.0451  |
| rs16945328  | C | -0.0491 |
| rs72731207  | T | 0.1006  |
| rs111429592 | G | 0.063   |
| rs28470590  | T | 0.028   |
| rs12903469  | T | -0.021  |
| rs112012183 | C | 0.1102  |
| rs854160    | T | 0.0207  |
| rs118008392 | T | 0.0838  |
| rs4405531   | G | -0.0242 |
| rs143692029 | C | -0.0923 |
| rs118092058 | T | -0.0762 |
| rs144535834 | C | -0.1003 |
| rs34873869  | G | -0.0351 |
| rs75224639  | G | -0.0982 |
| rs12901168  | A | 0.0715  |
| rs972531    | C | -0.0213 |
| rs35202794  | A | -0.0919 |
| rs77287639  | G | -0.074  |
| rs117363784 | A | -0.0763 |
| rs117441972 | T | -0.0449 |
| rs894297    | A | 0.0466  |
| rs112000452 | C | -0.0466 |
| rs116938310 | G | -0.0707 |
| rs112416661 | A | -0.1183 |
| rs113265068 | G | 0.069   |
| rs8034842   | G | -0.0248 |
| rs2934177   | C | 0.1094  |
| rs28517433  | G | -0.0615 |
| rs2684796   | T | -0.0333 |
| rs12904771  | A | -0.0309 |
| rs75231995  | G | 0.0559  |
| rs3743466   | C | 0.0231  |
| rs12440264  | T | 0.1149  |
| rs113455304 | A | 0.0748  |
| rs62022437  | C | 0.0457  |
| rs8028588   | C | -0.0395 |
| rs10519571  | C | 0.0252  |
| rs141353095 | T | -0.0896 |
| rs12437676  | T | -0.0221 |

|             |   |         |
|-------------|---|---------|
| rs4775480   | G | 0.0212  |
| rs79971153  | G | -0.1454 |
| rs7175704   | T | -0.057  |
| rs4360877   | G | 0.0228  |
| rs72747779  | A | -0.0558 |
| rs12439286  | T | -0.0324 |
| rs2047661   | C | -0.0363 |
| rs4924347   | T | 0.0502  |
| rs78336256  | T | 0.0475  |
| rs11072899  | C | 0.0232  |
| rs28572152  | T | 0.061   |
| rs79599491  | C | -0.1007 |
| rs139136580 | T | 0.1619  |
| rs16952287  | T | -0.0262 |
| rs35483922  | A | -0.0267 |
| rs145660324 | T | 0.0448  |
| rs112461537 | A | 0.1382  |
| rs4779514   | C | -0.0669 |
| rs140357061 | A | 0.1633  |
| rs139912749 | T | -0.1368 |
| rs78113165  | G | 0.0646  |
| rs11855182  | T | -0.0238 |
| rs8023978   | G | 0.046   |
| rs62024536  | G | -0.0597 |
| rs7174713   | A | -0.022  |
| rs7179078   | G | 0.0241  |
| rs2176868   | C | -0.0397 |
| rs80208468  | C | 0.125   |
| rs1863462   | T | 0.0531  |
| rs117974015 | A | -0.0968 |
| rs10459634  | G | 0.0335  |
| rs112049176 | T | -0.0707 |
| rs28485952  | T | -0.0222 |
| rs141722859 | T | -0.1168 |
| rs79858020  | A | -0.0743 |
| rs17204496  | C | -0.0585 |
| rs7174471   | G | -0.0312 |
| rs7174749   | A | 0.0263  |
| rs11630761  | A | -0.0217 |
| rs117604403 | T | -0.0585 |
| rs3751583   | C | -0.0399 |
| rs71397234  | T | -0.1074 |
| rs4932415   | G | -0.0338 |
| rs59843228  | A | -0.077  |
| rs12898292  | A | -0.0212 |
| rs9919978   | A | -0.048  |
| rs11632951  | G | -0.0266 |

|             |   |         |
|-------------|---|---------|
| rs936859    | A | 0.059   |
| rs151118057 | A | -0.1738 |
| rs13329264  | T | 0.0825  |
| rs1906160   | A | 0.0302  |
| rs11635537  | G | 0.0216  |
| rs1870301   | T | 0.029   |
| rs12440037  | T | -0.0292 |
| rs1404582   | C | -0.0241 |
| rs2135890   | T | -0.0204 |
| rs11632858  | T | 0.0629  |
| rs146904576 | T | 0.1634  |
| rs112043456 | A | -0.0343 |
| rs78959615  | T | 0.1099  |
| rs79153015  | T | 0.0292  |
| rs150863559 | G | 0.1181  |
| rs72760673  | A | -0.0634 |
| rs1387277   | T | -0.0343 |
| rs11631531  | C | 0.0216  |
| rs28750405  | A | -0.0837 |
| rs74400697  | T | -0.1662 |
| rs11073457  | G | 0.0357  |
| rs80078557  | T | -0.1086 |
| rs61703807  | T | 0.1062  |
| rs7163981   | T | 0.0598  |
| rs1435741   | A | 0.0202  |
| rs6494849   | A | 0.0389  |
| rs28620510  | C | 0.0505  |
| rs4886727   | T | 0.0355  |
| rs2034180   | T | 0.0252  |
| rs72712694  | C | -0.0532 |
| rs13379728  | C | 0.0247  |
| rs4509970   | A | -0.0422 |
| rs66800537  | G | 0.0205  |
| rs16978050  | T | 0.0275  |
| rs151186739 | A | -0.0978 |
| rs116982201 | A | -0.1164 |
| rs4616250   | G | 0.0287  |
| rs902033    | C | 0.0242  |
| rs113675468 | G | 0.0272  |
| rs12905866  | T | 0.0223  |
| rs57602907  | T | -0.0212 |
| rs17269733  | G | -0.0375 |
| rs139787202 | G | 0.0461  |
| rs4932450   | A | -0.0237 |
| rs8027453   | T | 0.091   |
| rs2280198   | G | 0.0199  |
| rs67827628  | C | 0.031   |

|             |   |         |
|-------------|---|---------|
| rs62014194  | G | -0.0452 |
| rs12898820  | G | -0.0554 |
| rs4774371   | A | -0.0252 |
| rs7170611   | A | -0.1124 |
| rs736554    | C | 0.0273  |
| rs28385048  | A | 0.2039  |
| rs117310365 | G | -0.0668 |
| rs735983    | G | 0.0366  |
| rs4545770   | G | -0.0238 |
| rs74727202  | C | -0.0768 |
| rs17696730  | T | 0.0338  |
| rs8036154   | G | 0.143   |
| rs12903717  | T | -0.0501 |
| rs12549     | A | 0.1468  |
| rs4627317   | A | -0.0227 |
| rs8035056   | A | -0.0434 |
| rs79555420  | G | 0.1537  |
| rs77415958  | T | 0.0953  |
| rs2899440   | A | 0.0252  |
| rs2865216   | C | 0.0209  |
| rs75154580  | T | -0.1293 |
| rs4473146   | A | -0.0314 |
| rs61999922  | A | -0.0811 |
| rs77978423  | G | 0.1031  |
| rs144220331 | G | 0.0611  |
| rs150555151 | G | -0.1439 |
| rs61751119  | T | -0.0768 |
| rs8026089   | A | 0.0669  |
| rs4779892   | T | 0.0377  |
| rs17819282  | C | 0.033   |
| rs10152370  | A | 0.0461  |
| rs72719330  | A | 0.1075  |
| rs2292548   | C | -0.0484 |
| rs79785042  | C | 0.0778  |
| rs4334279   | C | 0.0236  |
| rs7183372   | T | 0.0236  |
| rs34677394  | G | 0.0415  |
| rs62023882  | C | -0.0972 |
| rs35499037  | A | 0.054   |
| rs142551207 | G | -0.1886 |
| rs72710565  | A | 0.0794  |
| rs78748660  | T | 0.0422  |
| rs79819993  | C | -0.1864 |
| rs146623204 | G | -0.1166 |
| rs2169460   | A | 0.0251  |
| rs4984593   | T | -0.0228 |
| rs28565890  | C | 0.0482  |

|             |   |         |
|-------------|---|---------|
| rs12907563  | T | 0.0231  |
| rs34471404  | T | 0.0264  |
| rs7175539   | C | -0.0213 |
| rs12595699  | A | 0.0207  |
| rs79008474  | A | 0.0809  |
| rs1159325   | C | 0.173   |
| rs143314553 | T | -0.1037 |
| rs8032690   | A | -0.0474 |
| rs12910527  | C | 0.1255  |
| rs72751930  | T | 0.0828  |
| rs4776040   | G | -0.0231 |
| rs112079885 | T | -0.0581 |
| rs7172044   | G | -0.0359 |
| rs12905461  | G | -0.0287 |
| rs2613616   | A | 0.1403  |
| rs12148879  | T | -0.0318 |
| rs28450044  | A | -0.0706 |
| rs79689375  | T | 0.0501  |
| rs7182026   | C | 0.0257  |
| rs4442780   | C | 0.0411  |
| rs9972588   | T | 0.038   |
| rs62013399  | A | 0.0214  |
| rs998020    | C | -0.021  |
| rs4778100   | C | 0.0223  |
| rs12443300  | C | 0.0216  |
| rs7166986   | C | -0.0585 |
| rs11639229  | T | 0.0534  |
| rs149451788 | C | 0.1219  |
| rs11636746  | A | 0.0393  |
| rs2337233   | T | 0.0216  |
| rs997941    | G | 0.0619  |
| rs118105440 | C | 0.0977  |
| rs12910785  | C | 0.0343  |
| rs3825973   | G | -0.0332 |
| rs12443471  | G | 0.0227  |
| rs55796688  | A | 0.0674  |
| rs12906957  | G | -0.055  |
| rs12914008  | A | 0.0507  |
| rs117170491 | C | -0.1024 |
| rs146136679 | T | -0.0449 |
| rs11635934  | C | 0.0465  |
| rs2468744   | A | 0.0269  |
| rs11632802  | T | 0.0219  |
| rs58987117  | T | -0.0863 |
| rs62021047  | A | -0.0467 |
| rs4417522   | A | -0.0209 |
| rs117516846 | T | -0.1675 |

|             |   |         |
|-------------|---|---------|
| rs962289    | C | -0.0267 |
| rs733952    | A | 0.0734  |
| rs56401926  | G | 0.0259  |
| rs579178    | A | -0.0245 |
| rs76113767  | G | 0.0695  |
| rs3742996   | T | 0.1142  |
| rs142073825 | T | 0.1399  |
| rs58397815  | A | 0.1571  |
| rs386220    | T | 0.09    |
| rs117180612 | A | 0.0859  |
| rs12912393  | G | -0.0219 |
| rs66875728  | C | -0.0332 |
| rs12148526  | T | -0.0298 |
| rs3115881   | A | -0.0209 |
| rs7179573   | C | 0.0408  |
| rs147745262 | C | 0.1872  |
| rs62025830  | T | 0.0216  |
| rs2292069   | G | 0.0417  |
| rs62019715  | G | 0.0385  |
| rs139040195 | C | 0.0965  |
| rs12910328  | T | -0.0327 |
| rs117470874 | A | -0.1798 |
| rs56044881  | G | -0.0655 |
| rs4633697   | C | 0.0607  |
| rs28470766  | A | 0.0333  |
| rs782951    | G | -0.0294 |
| rs75145098  | G | 0.1044  |
| rs140684257 | T | 0.1077  |
| rs146213948 | A | -0.0645 |
| rs138706350 | G | 0.087   |
| rs28593352  | T | -0.021  |
| rs74838709  | A | 0.0687  |
| rs117578017 | G | 0.0796  |
| rs73480621  | T | -0.0813 |
| rs11633925  | G | -0.021  |
| rs111908240 | C | 0.1241  |
| rs8032463   | C | -0.0281 |
| rs12148916  | G | 0.0206  |
| rs71470552  | C | 0.0563  |
| rs74635708  | A | -0.0926 |
| rs17631756  | A | 0.0744  |
| rs150341374 | A | 0.0966  |
| rs143223833 | G | -0.1511 |
| rs35204548  | A | 0.104   |
| rs7166781   | A | -0.0312 |
| rs72755203  | C | -0.1133 |
| rs80100418  | A | 0.041   |

|             |   |         |
|-------------|---|---------|
| rs149994251 | C | 0.1129  |
| rs117831634 | A | 0.1156  |
| rs72750932  | C | 0.0342  |
| rs1596161   | G | 0.0324  |
| rs588739    | C | -0.0271 |
| rs4617804   | G | 0.0347  |
| rs117298213 | T | 0.0566  |
| rs116975338 | G | -0.1008 |
| rs72703478  | A | 0.1072  |
| rs61503805  | C | -0.0793 |
| rs117949415 | T | 0.099   |
| rs72759630  | A | -0.0396 |
| rs10519274  | T | -0.0553 |
| rs4923728   | C | 0.0223  |
| rs140754419 | G | -0.0841 |
| rs11854174  | C | 0.0263  |
| rs143722294 | T | -0.0648 |
| rs4965212   | G | 0.0235  |
| rs36111622  | T | 0.0471  |
| rs8031801   | A | -0.0242 |
| rs142331120 | C | 0.1127  |
| rs9646215   | A | 0.0419  |
| rs8031071   | T | 0.0195  |
| rs11072268  | G | 0.0197  |
| rs138418229 | A | -0.0958 |
| rs7180998   | C | 0.0496  |
| rs75051468  | T | 0.1635  |
| rs12592592  | C | -0.0237 |
| rs74797124  | A | -0.1732 |
| rs8023281   | A | -0.0205 |
| rs77129652  | T | 0.0659  |
| rs12442540  | T | -0.0215 |
| rs35324064  | G | -0.0269 |
| rs79499117  | A | 0.0386  |
| rs75549711  | T | -0.1216 |
| rs4609787   | A | 0.0647  |
| rs7176056   | G | -0.1226 |
| rs9806279   | C | 0.1602  |
| rs118065291 | T | 0.0782  |
| rs4776734   | G | -0.025  |
| rs1722831   | T | 0.0548  |
| rs1346151   | T | 0.0251  |
| rs2089476   | A | 0.0225  |
| rs4984446   | G | 0.0818  |
| rs79987512  | C | 0.1506  |
| rs77535456  | G | 0.0891  |
| rs78702417  | A | 0.1119  |

|             |   |         |
|-------------|---|---------|
| rs11857846  | T | 0.0206  |
| rs149873981 | A | -0.0927 |
| rs78076086  | T | 0.041   |
| rs60506149  | A | 0.036   |
| rs8035006   | A | -0.0314 |
| rs11853726  | G | 0.0255  |
| rs140515970 | A | 0.0522  |
| rs8032694   | G | 0.1229  |
| rs76284772  | T | 0.1266  |
| rs11852510  | G | -0.0681 |
| rs139396918 | C | -0.0966 |
| rs28760993  | C | -0.0769 |
| rs8042994   | A | 0.0577  |
| rs10152729  | T | 0.0339  |
| rs2526597   | T | 0.0195  |
| rs716368    | C | 0.0213  |
| rs8035389   | T | -0.0292 |
| rs2681309   | G | -0.0226 |
| rs72752101  | A | 0.0311  |
| rs78313320  | G | -0.0783 |
| rs146077731 | A | 0.1155  |
| rs7164623   | C | -0.0826 |
| rs2701505   | C | 0.0329  |
| rs55940969  | T | -0.0429 |
| rs2733094   | A | 0.023   |
| rs11634887  | T | 0.0273  |
| rs2305646   | C | 0.0934  |
| rs269866    | G | 0.0201  |
| rs58221152  | A | 0.0702  |
| rs72762046  | A | 0.0362  |
| rs12913061  | C | -0.077  |
| rs149733890 | G | 0.1434  |
| rs34920603  | C | 0.0266  |
| rs112485659 | T | 0.1159  |
| rs900542    | A | 0.0221  |
| rs117302889 | G | 0.0848  |
| rs72707404  | A | -0.0545 |
| rs75989231  | T | -0.1253 |
| rs8043091   | G | -0.0232 |
| rs8027120   | G | 0.0796  |
| rs12912067  | C | -0.0443 |
| rs62032643  | A | -0.0285 |
| rs3825929   | A | 0.0209  |
| rs12912995  | C | 0.0264  |
| rs290364    | A | 0.0394  |
| rs17558254  | C | 0.0202  |
| rs8023313   | T | 0.0334  |



|             |   |         |
|-------------|---|---------|
| rs35932751  | A | -0.0489 |
| rs28698322  | A | -0.0204 |
| rs117077400 | A | 0.0874  |
| rs2937988   | T | -0.0261 |
| rs72736945  | A | -0.0432 |
| rs140973822 | T | -0.1756 |
| rs17651892  | A | -0.0244 |
| rs41277708  | T | 0.0838  |
| rs56305111  | T | -0.1062 |
| rs9783733   | T | 0.0484  |
| rs1530837   | G | -0.0262 |
| rs1134352   | T | -0.0565 |
| rs138916801 | G | -0.0935 |
| rs78074892  | A | -0.0518 |
| rs12901610  | A | 0.0429  |
| rs2054151   | C | -0.0304 |
| rs111911048 | A | -0.0489 |
| rs76085048  | G | -0.0566 |
| rs66920037  | T | -0.0258 |
| rs72749506  | C | -0.0515 |
| rs4611425   | G | 0.0294  |
| rs2439712   | T | -0.1162 |
| rs74364368  | T | 0.1171  |
| rs2437800   | G | -0.044  |
| rs897951    | A | -0.0211 |
| rs75099274  | A | -0.0495 |
| rs62010962  | A | 0.0363  |
| rs55983432  | A | -0.0273 |
| rs150198200 | A | 0.094   |
| rs117298981 | T | 0.088   |
| rs61753617  | T | -0.0461 |
| rs2447325   | G | -0.0453 |
| rs118166665 | G | -0.0933 |
| rs7497607   | T | 0.0509  |
| rs11857913  | C | -0.055  |
| rs75236462  | T | 0.1147  |
| rs12442989  | G | -0.0437 |
| rs12903880  | A | 0.0229  |
| rs4775419   | A | 0.0224  |
| rs56086449  | T | 0.0215  |
| rs4594222   | A | 0.0205  |
| rs2431041   | A | -0.022  |
| rs78354284  | G | 0.1055  |
| rs58760912  | T | 0.0522  |
| rs139732850 | C | -0.1636 |
| rs2924564   | C | 0.0561  |
| rs75463836  | A | -0.0417 |

|             |   |         |
|-------------|---|---------|
| rs111799015 | T | -0.0952 |
| rs1871017   | T | -0.0195 |
| rs140501940 | G | 0.1437  |
| rs78990970  | A | 0.0967  |
| rs28833912  | G | 0.0445  |
| rs12910386  | A | 0.0199  |
| rs117530124 | T | 0.0753  |
| rs28670189  | G | 0.0681  |
| rs16953427  | T | 0.031   |
| rs6493333   | T | -0.0274 |
| rs117465320 | G | 0.0828  |
| rs118104563 | C | -0.0986 |
| rs28529464  | C | 0.0667  |
| rs16940233  | C | -0.0418 |
| rs9302355   | A | 0.0256  |
| rs76074981  | A | -0.171  |
| rs10152319  | G | -0.0238 |
| rs12899075  | T | 0.02    |
| rs137892731 | A | -0.057  |
| rs2118612   | C | -0.0243 |
| rs72767005  | A | 0.0356  |
| rs139441817 | C | 0.1075  |
| rs117889772 | T | 0.0912  |
| rs117554755 | A | 0.0777  |
| rs111371454 | G | -0.0482 |
| rs10851930  | G | 0.0221  |
| rs7168617   | A | 0.0198  |
| rs10467971  | G | -0.063  |
| rs111579337 | C | -0.1167 |
| rs383880    | T | -0.0324 |
| rs72751253  | C | 0.043   |
| rs4556745   | T | -0.0205 |
| rs11633163  | T | 0.0739  |
| rs141767325 | A | 0.0981  |
| rs7178610   | T | -0.0316 |
| rs35098067  | A | 0.1365  |
| rs12593171  | A | -0.0228 |
| rs12901173  | A | -0.0209 |
| rs7166734   | G | 0.0242  |
| rs62015299  | A | 0.1403  |
| rs7181819   | A | 0.1477  |
| rs113360434 | A | 0.0467  |
| rs1369590   | A | -0.0227 |
| rs11856096  | T | -0.0283 |
| rs2448607   | C | -0.0207 |
| rs7342676   | C | -0.0194 |
| rs7162489   | T | 0.027   |

|             |   |         |
|-------------|---|---------|
| rs76451767  | T | 0.0957  |
| rs34165908  | C | 0.0461  |
| rs10162901  | T | 0.0347  |
| rs2012983   | G | -0.0247 |
| rs16954508  | C | 0.0433  |
| rs11635714  | G | 0.0356  |
| rs4454925   | C | -0.033  |
| rs149443428 | T | -0.0933 |
| rs11635991  | G | -0.0394 |
| rs7496643   | A | 0.0379  |
| rs4965459   | C | -0.0243 |
| rs9920861   | C | 0.0298  |
| rs117474060 | G | -0.1142 |
| rs113771304 | T | -0.0703 |
| rs16976299  | C | -0.0709 |
| rs80182958  | C | 0.0539  |
| rs12595028  | A | 0.0286  |
| rs11858732  | T | 0.0189  |
| rs78811279  | A | 0.0495  |
| rs10519496  | A | 0.0558  |
| rs2577000   | T | 0.0237  |
| rs2611605   | T | 0.0258  |
| rs62021494  | G | -0.0349 |
| rs71407265  | G | 0.0961  |
| rs8043036   | A | -0.0315 |
| rs35666824  | C | 0.0821  |
| rs112238703 | T | -0.0936 |
| rs985042    | C | 0.0236  |
| rs58897738  | C | -0.0501 |
| rs8042947   | G | -0.0219 |
| rs72743696  | G | 0.1406  |
| rs12914810  | A | -0.0338 |
| rs71405394  | G | -0.0541 |
| rs150067918 | T | 0.1142  |
| rs139930342 | C | -0.0974 |
| rs933812    | C | -0.0202 |
| rs75556676  | A | -0.1022 |
| rs142010625 | A | 0.0451  |
| rs79336418  | C | -0.0744 |
| rs11071630  | T | 0.0228  |
| rs60463122  | A | -0.035  |
| rs73490823  | A | 0.1096  |
| rs7167743   | C | 0.0422  |
| rs76394989  | T | 0.107   |
| rs117840260 | T | 0.0841  |
| rs12911494  | T | 0.0201  |
| rs9672854   | A | -0.0422 |

|             |   |         |
|-------------|---|---------|
| rs75976392  | T | 0.0701  |
| rs77459947  | A | -0.1066 |
| rs75601584  | A | -0.0613 |
| rs112016629 | A | 0.0228  |
| rs56366941  | T | 0.0647  |
| rs7172034   | A | 0.0242  |
| rs8039237   | C | -0.0229 |
| rs72749762  | G | -0.1312 |
| rs2651517   | C | -0.0512 |
| rs2733214   | C | -0.0243 |
| rs55864865  | G | -0.1407 |
| rs34013592  | C | 0.0738  |
| rs11635093  | C | -0.0568 |
| rs138285410 | A | 0.0836  |
| rs17525764  | T | 0.0312  |
| rs34344942  | T | -0.0329 |
| rs62007609  | A | -0.133  |
| rs78070258  | C | -0.1436 |
| rs2714718   | G | 0.0277  |
| rs142125986 | G | -0.1139 |
| rs62010136  | T | -0.024  |
| rs930002    | A | -0.0869 |
| rs4776381   | A | -0.0266 |
| rs75739978  | C | 0.084   |
| rs79275768  | T | 0.1189  |
| rs17828501  | C | -0.0643 |
| rs7170642   | C | -0.0353 |
| rs2414382   | C | -0.0192 |
| rs4419043   | G | 0.0257  |
| rs62045932  | T | 0.0864  |
| rs2244040   | T | -0.0201 |
| rs74432703  | C | -0.0521 |
| rs6493247   | A | -0.02   |
| rs28444822  | G | -0.1213 |
| rs76173415  | T | -0.0254 |
| rs117633166 | T | -0.0865 |
| rs138360469 | A | -0.1434 |
| rs2460847   | G | 0.0212  |
| rs118078616 | T | -0.0518 |
| rs281221    | A | -0.0202 |
| rs11633388  | A | -0.0642 |
| rs72729319  | G | 0.0739  |
| rs75317321  | G | -0.1282 |
| rs117498969 | T | 0.0971  |
| rs79465968  | T | 0.0831  |
| rs12898338  | T | -0.0262 |
| rs11634132  | C | 0.0228  |

|             |   |         |
|-------------|---|---------|
| rs139194653 | C | -0.1345 |
| rs7495845   | C | -0.0234 |
| rs12904429  | A | 0.0242  |
| rs62003777  | A | 0.0393  |
| rs141403828 | T | 0.1339  |
| rs80203337  | A | 0.039   |
| rs74013349  | G | 0.1008  |
| rs12592377  | G | -0.0212 |
| rs111906383 | G | 0.0817  |
| rs117454641 | C | -0.1029 |
| rs79954659  | A | 0.0608  |
| rs139352055 | T | 0.086   |
| rs3803535   | G | 0.0217  |
| rs1080340   | G | 0.022   |
| rs12595398  | A | 0.0507  |
| rs11635747  | A | -0.0187 |
| rs10519773  | C | 0.026   |
| rs144032492 | T | 0.0909  |
| rs115312741 | C | 0.0656  |
| rs1442788   | G | -0.0194 |
| rs76877490  | A | -0.0515 |
| rs7167430   | C | -0.0351 |
| rs684406    | A | -0.0208 |
| rs76286315  | T | 0.1544  |
| rs766716    | C | 0.0252  |
| rs150321391 | T | -0.0565 |
| rs651684    | A | 0.0246  |
| rs75986855  | G | -0.0799 |
| rs74409536  | A | -0.0534 |
| rs2446405   | T | -0.0248 |
| rs10163003  | A | 0.027   |
| rs12595479  | A | -0.032  |
| rs62005934  | T | 0.0613  |
| rs17816236  | C | 0.0191  |
| rs1106508   | G | 0.0347  |
| rs17551182  | T | 0.0351  |
| rs2452527   | G | 0.0755  |
| rs333591    | G | -0.0626 |
| rs72623942  | A | 0.0783  |
| rs75737522  | A | -0.1372 |
| rs56112286  | T | -0.0821 |
| rs4965395   | A | -0.0292 |
| rs12912040  | A | -0.027  |
| rs4383094   | T | -0.0319 |
| rs12901358  | C | 0.0209  |
| rs7177998   | T | -0.0191 |
| rs76105807  | T | -0.0648 |

|             |   |         |
|-------------|---|---------|
| rs147102263 | A | 0.1473  |
| rs8026069   | G | 0.0198  |
| rs11632125  | A | 0.1061  |
| rs2584809   | A | -0.0499 |
| rs72723468  | G | -0.1198 |
| rs62011241  | A | -0.0317 |
| rs146477947 | A | -0.0874 |
| rs12915571  | T | 0.1145  |
| rs8036730   | G | -0.0194 |
| rs62004984  | G | -0.0401 |
| rs3960824   | C | -0.0315 |
| rs77950388  | A | 0.1209  |
| rs62015955  | A | -0.0541 |
| rs72769141  | T | -0.0511 |
| rs893129    | A | 0.0235  |
| rs117858103 | C | 0.0746  |
| rs72703517  | G | -0.0375 |
| rs55726191  | T | 0.0212  |
| rs2958403   | T | 0.0191  |
| rs78631958  | A | -0.0668 |
| rs4319713   | T | -0.0205 |
| rs1661812   | T | 0.0231  |
| rs16942341  | T | 0.0654  |
| rs148288957 | C | 0.0481  |
| rs12592426  | A | 0.0193  |
| rs1350092   | C | -0.0249 |
| rs12905496  | G | 0.0301  |
| rs78750548  | T | -0.042  |
| rs147337504 | A | -0.1429 |
| rs730617    | C | 0.0377  |
| rs4286065   | A | -0.0213 |
| rs78070624  | A | 0.0809  |
| rs16966334  | G | -0.0557 |
| rs62024293  | G | -0.1418 |
| rs74008108  | T | -0.0448 |
| rs28674802  | A | -0.0486 |
| rs12101384  | G | 0.023   |
| rs2292862   | A | 0.0217  |
| rs80314264  | T | 0.0967  |
| rs138283444 | A | 0.0708  |
| rs12438442  | T | -0.0468 |
| rs145995680 | A | -0.1488 |
| rs9920954   | T | -0.0189 |
| rs16968518  | C | 0.0393  |
| rs11071577  | G | -0.0188 |
| rs532598    | A | -0.0193 |
| rs117838331 | G | -0.0947 |

|             |   |         |
|-------------|---|---------|
| rs74509358  | G | 0.0434  |
| rs12442348  | G | -0.0378 |
| rs4476133   | G | 0.0209  |
| rs17231661  | G | 0.0214  |
| rs35985694  | G | 0.0422  |
| rs74413555  | T | -0.0406 |
| rs12441596  | C | 0.0694  |
| rs4924185   | T | 0.0745  |
| rs62043651  | C | 0.0596  |
| rs9635424   | A | 0.0272  |
| rs147589493 | A | -0.0972 |
| rs79982247  | A | -0.1004 |
| rs10162860  | C | 0.0315  |
| rs832878    | G | 0.0532  |
| rs12898770  | G | -0.0328 |
| rs146791321 | A | 0.1132  |
| rs4775283   | T | 0.0483  |
| rs8026531   | T | 0.0251  |
| rs2959055   | A | 0.0257  |
| rs12916927  | C | 0.0364  |
| rs3212341   | T | -0.0911 |
| rs399119    | G | -0.0235 |
| rs6496074   | G | 0.0185  |
| rs74025471  | T | 0.0734  |
| rs79090127  | C | -0.1266 |
| rs140429379 | A | -0.0843 |
| rs11074005  | T | 0.0193  |
| rs77555307  | A | -0.0785 |
| rs74406831  | A | 0.0572  |
| rs3743123   | A | -0.0198 |
| rs12901781  | A | 0.0191  |
| rs28591329  | C | 0.033   |
| rs72741391  | G | -0.0273 |
| rs77992281  | T | 0.0515  |
| rs78361231  | A | 0.0297  |
| rs10518840  | G | 0.0259  |
| rs148972420 | A | 0.1229  |
| rs113247463 | G | 0.1148  |
| rs2679625   | G | -0.0513 |
| rs147105936 | C | -0.1279 |
| rs143270530 | C | 0.1586  |
| rs12901294  | T | -0.0277 |
| rs75853206  | A | -0.0499 |
| rs9921042   | A | -0.0439 |
| rs4775008   | T | 0.0476  |
| rs77210675  | T | 0.0685  |
| rs141575507 | T | 0.0918  |

|             |   |         |
|-------------|---|---------|
| rs11636829  | C | 0.0253  |
| rs16947053  | G | 0.0727  |
| rs17302247  | C | -0.0271 |
| rs8029249   | A | 0.0398  |
| rs79287283  | G | 0.0566  |
| rs553338    | A | -0.0401 |
| rs8028055   | G | -0.0212 |
| rs79745150  | C | 0.0966  |
| rs143983791 | T | -0.1601 |
| rs35028949  | A | 0.0794  |
| rs12438338  | C | 0.0315  |
| rs62000793  | C | -0.0352 |
| rs4470102   | G | -0.0269 |
| rs9920012   | C | -0.0284 |
| rs9806587   | T | 0.0405  |
| rs7170407   | A | -0.0211 |
| rs28691111  | C | -0.0613 |
| rs11247231  | C | 0.0226  |
| rs28670663  | C | 0.0551  |
| rs148212129 | T | 0.0731  |
| rs11854069  | G | -0.0432 |
| rs2596191   | A | 0.0213  |
| rs55722037  | A | 0.1216  |
| rs655632    | T | 0.019   |
| rs28704858  | G | 0.0197  |
| rs2654534   | G | 0.0186  |
| rs12898881  | C | 0.0406  |
| rs4965914   | T | 0.0246  |
| rs3784457   | A | -0.0451 |
| rs117792336 | T | 0.075   |
| rs62004625  | C | -0.0398 |
| rs28878599  | C | 0.0504  |
| rs12437790  | C | 0.0202  |
| rs57583649  | G | -0.0319 |
| rs1372755   | A | -0.0211 |
| rs143210590 | A | -0.1255 |
| rs11637289  | A | -0.0426 |
| rs55741843  | C | -0.0222 |
| rs150481410 | C | 0.0934  |
| rs28635679  | C | -0.0643 |
| rs12593663  | T | 0.0271  |
| rs75830155  | G | -0.0659 |
| rs3743268   | A | 0.0255  |
| rs145790111 | A | 0.1066  |
| rs10220768  | T | 0.0212  |
| rs80326787  | G | -0.0614 |
| rs77462993  | A | 0.0394  |



|             |   |         |
|-------------|---|---------|
| rs976273    | C | -0.0214 |
| rs11853205  | A | 0.0485  |
| rs144339192 | C | -0.0718 |
| rs2701513   | A | 0.0316  |
| rs12148272  | T | -0.0335 |
| rs7183916   | G | -0.0229 |
| rs28661713  | T | 0.0609  |
| rs79800920  | A | -0.0335 |
| rs72760639  | G | -0.0883 |
| rs10520772  | G | 0.1121  |
| rs56344140  | C | 0.0727  |
| rs1484209   | C | -0.0192 |
| rs8026358   | T | 0.1049  |
| rs62020331  | G | -0.0746 |
| rs28396254  | A | 0.0223  |
| rs17702674  | G | -0.0196 |
| rs75329718  | C | -0.0527 |
| rs116936536 | A | -0.0616 |
| rs117333992 | C | -0.1224 |
| rs75663614  | C | 0.068   |
| rs74027979  | G | -0.0695 |
| rs78903341  | C | 0.0756  |
| rs10220769  | A | -0.0211 |
| rs1865923   | C | -0.0198 |
| rs4887141   | A | -0.0372 |
| rs7167580   | T | -0.0219 |
| rs73389609  | T | -0.0698 |
| rs12591683  | G | 0.0408  |
| rs78792143  | A | -0.0685 |
| rs2437425   | T | 0.1043  |
| rs74782411  | C | -0.1148 |
| rs11637891  | G | 0.0842  |
| rs66771281  | C | 0.0524  |
| rs150199416 | G | -0.0702 |
| rs71462863  | A | 0.1183  |
| rs4779088   | G | 0.0221  |
| rs60356854  | A | 0.0979  |
| rs116853971 | G | -0.1242 |
| rs1445014   | C | 0.0403  |
| rs118167322 | C | 0.1457  |
| rs3751592   | C | 0.0203  |
| rs2013580   | C | -0.0187 |
| rs11161254  | T | -0.0199 |
| rs117095192 | A | 0.1599  |
| rs10220766  | A | -0.019  |
| rs141390691 | G | -0.0758 |
| rs6493573   | T | 0.0197  |

|             |   |         |
|-------------|---|---------|
| rs11639143  | A | 0.0219  |
| rs79658680  | T | -0.0927 |
| rs75322782  | C | -0.0564 |
| rs34307191  | A | 0.0928  |
| rs10520107  | A | 0.019   |
| rs12915695  | A | 0.0191  |
| rs78446721  | T | -0.1032 |
| rs35698763  | G | -0.0208 |
| rs589759    | C | -0.031  |
| rs117345604 | A | 0.0678  |
| rs145372417 | A | -0.1762 |
| rs717411    | A | -0.0392 |
| rs2725566   | T | 0.0183  |
| rs145966721 | C | 0.1336  |
| rs4147358   | A | 0.0215  |
| rs74848625  | T | 0.0533  |
| rs11635223  | T | -0.0202 |
| rs1869142   | T | 0.0433  |
| rs4310796   | A | 0.0751  |
| rs4776859   | G | -0.0277 |
| rs117963321 | A | -0.0664 |
| rs12438155  | A | 0.0215  |
| rs7182829   | C | -0.0194 |
| rs12915848  | A | 0.1128  |
| rs16965642  | C | 0.0503  |
| rs74524866  | A | -0.0851 |
| rs17208249  | A | 0.0501  |
| rs4288968   | G | -0.0298 |
| rs62023531  | T | -0.0366 |
| rs11072744  | T | 0.022   |
| rs12148265  | A | -0.0194 |
| rs138746853 | C | 0.0953  |
| rs61998996  | G | 0.0265  |
| rs76526636  | A | 0.0691  |
| rs12442422  | T | -0.0292 |
| rs78715963  | A | -0.1361 |
| rs117312480 | A | 0.0727  |
| rs1848706   | G | -0.0199 |
| rs141207441 | A | 0.1317  |
| rs2045160   | A | 0.0341  |
| rs11632071  | A | -0.0528 |
| rs142734375 | C | -0.1275 |
| rs79653017  | A | 0.0451  |
| rs117783669 | A | -0.0844 |
| rs4906798   | G | -0.0354 |
| rs12438932  | A | 0.0354  |
| rs9806349   | A | 0.0972  |

|             |   |         |
|-------------|---|---------|
| rs2727172   | T | 0.023   |
| rs80312407  | T | -0.0392 |
| rs112528259 | A | -0.0908 |
| rs77798986  | T | 0.0397  |
| rs17740510  | G | -0.0381 |
| rs1564328   | A | -0.0659 |
| rs12441495  | C | 0.0306  |
| rs72757132  | A | -0.0498 |
| rs4243095   | A | 0.0298  |
| rs62009764  | C | 0.0611  |
| rs149713297 | T | 0.1278  |
| rs78828848  | C | -0.0631 |
| rs11854529  | C | -0.0436 |
| rs116993896 | T | -0.1144 |
| rs117573728 | C | -0.1135 |
| rs6494846   | A | 0.0226  |
| rs139405872 | A | 0.0944  |
| rs234530    | A | -0.0182 |
| rs61999057  | A | 0.1114  |
| rs2702312   | G | -0.0237 |
| rs149713668 | T | 0.1155  |
| rs12441373  | G | 0.0599  |
| rs146154714 | C | -0.1268 |
| rs1258804   | T | 0.0237  |
| rs8025992   | T | -0.0321 |
| rs78215960  | T | -0.1168 |
| rs12595358  | G | 0.0241  |
| rs138045272 | T | 0.1211  |
| rs144088867 | A | -0.0891 |
| rs28545730  | A | -0.0292 |
| rs76247836  | A | -0.0572 |
| rs2024313   | C | 0.0231  |
| rs12914565  | T | 0.0282  |
| rs16965657  | T | -0.0323 |
| rs8028543   | A | 0.0194  |
| rs12914727  | G | 0.0188  |
| rs2342114   | C | -0.0677 |
| rs143174443 | T | -0.1113 |
| rs138129621 | A | -0.0854 |
| rs28602680  | G | 0.0774  |
| rs78837565  | G | -0.0488 |
| rs74015888  | C | -0.0573 |
| rs28697876  | T | -0.0655 |
| rs72742270  | A | 0.0959  |
| rs1822104   | T | 0.0333  |
| rs4965294   | A | -0.028  |
| rs2727200   | A | 0.0552  |

|             |   |         |
|-------------|---|---------|
| rs79761293  | G | -0.0965 |
| rs7495737   | T | 0.0194  |
| rs145951477 | A | 0.1926  |
| rs72758391  | T | 0.0431  |
| rs35978617  | A | 0.03    |
| rs72742842  | T | 0.0959  |
| rs145792257 | T | 0.0704  |
| rs662592    | T | -0.0219 |
| rs67846115  | C | 0.0295  |
| rs75061731  | C | -0.0673 |
| rs117374782 | G | 0.0752  |
| rs34627780  | G | -0.051  |
| rs6494844   | A | -0.0266 |
| rs36051366  | G | 0.0381  |
| rs731380    | T | -0.0518 |
| rs55804815  | A | 0.0277  |
| rs72752721  | C | -0.0692 |
| rs79625092  | T | 0.0548  |
| rs113266528 | C | 0.0829  |
| rs1902618   | G | 0.0225  |
| rs79749678  | A | -0.1187 |
| rs7177786   | A | -0.0206 |
| rs4923796   | G | 0.0226  |
| rs138271602 | A | -0.1117 |
| rs146505108 | A | -0.053  |
| rs16953757  | T | 0.0345  |
| rs2454209   | A | 0.061   |
| rs28482421  | A | 0.1209  |
| rs55645294  | A | 0.0427  |
| rs7173969   | T | 0.0189  |
| rs115217537 | A | 0.0842  |
| rs10152309  | T | -0.0316 |
| rs17527073  | A | -0.071  |
| rs76654758  | T | -0.0836 |
| rs2903333   | T | 0.0184  |
| rs17280556  | C | -0.0399 |
| rs4965454   | C | 0.0269  |
| rs11634179  | G | -0.0309 |
| rs7168093   | G | -0.0597 |
| rs11247305  | G | 0.0731  |
| rs1470811   | T | -0.0192 |
| rs76807094  | C | -0.1022 |
| rs62028374  | C | -0.095  |
| rs17218165  | A | -0.0176 |
| rs60601076  | T | -0.0488 |
| rs113894461 | A | -0.1364 |
| rs721184    | T | -0.0359 |

|             |   |         |
|-------------|---|---------|
| rs1898448   | C | -0.0534 |
| rs11638114  | C | 0.122   |
| rs7494844   | C | 0.0289  |
| rs35697671  | C | 0.0244  |
| rs78521794  | T | -0.0599 |
| rs12900743  | G | -0.0304 |
| rs4646      | A | -0.0202 |
| rs77245046  | C | 0.0623  |
| rs28472483  | T | -0.0701 |
| rs12908126  | T | 0.0201  |
| rs146320306 | C | -0.0643 |
| rs71403456  | G | 0.0551  |
| rs60799196  | C | 0.0264  |
| rs113025993 | C | 0.0798  |
| rs148726474 | A | -0.0798 |
| rs11247264  | C | -0.029  |
| rs2879243   | C | 0.0182  |
| rs11632791  | A | -0.0183 |
| rs11854439  | C | -0.0299 |
| rs55655315  | T | 0.09    |
| rs2924834   | G | 0.0234  |
| rs78153571  | G | 0.0433  |
| rs12372976  | C | -0.0435 |
| rs112170732 | A | 0.1084  |
| rs141396882 | A | -0.1229 |
| rs138644642 | G | -0.1449 |
| rs56176161  | T | -0.0202 |
| rs149301410 | C | -0.135  |
| rs7166244   | A | 0.0192  |
| rs1348758   | T | -0.0239 |
| rs149843727 | T | -0.1373 |
| rs11637883  | T | -0.0323 |
| rs111929109 | G | -0.0456 |
| rs17752263  | C | 0.073   |
| rs117163902 | C | -0.1359 |
| rs66479411  | A | -0.0895 |
| rs72728899  | G | 0.1245  |
| rs6494217   | A | 0.022   |
| rs11553762  | T | 0.063   |
| rs12911211  | A | -0.0649 |
| rs7165389   | C | -0.0283 |
| rs2725611   | C | 0.031   |
| rs117177154 | A | 0.1155  |
| rs36034702  | T | 0.031   |
| rs17521544  | T | -0.128  |
| rs35203740  | A | 0.0877  |
| rs2879378   | C | -0.0419 |

|             |   |         |
|-------------|---|---------|
| rs117151647 | G | -0.0967 |
| rs112896131 | C | -0.047  |
| rs5742915   | C | -0.0185 |
| rs79605464  | G | 0.0566  |
| rs28610140  | A | 0.0575  |
| rs11636816  | G | 0.0425  |
| rs77681287  | C | -0.0333 |
| rs147712541 | T | 0.0917  |
| rs4775339   | A | -0.0528 |
| rs7166343   | T | 0.0231  |
| rs7173770   | A | -0.025  |
| rs9806425   | G | 0.0428  |
| rs1482050   | C | 0.0229  |
| rs4774378   | C | -0.02   |
| rs150525284 | C | -0.09   |
| rs7170688   | T | -0.0178 |
| rs66882933  | C | 0.0199  |
| rs953098    | T | 0.0241  |
| rs79673556  | A | 0.1171  |
| rs11858171  | C | 0.0252  |
| rs4030474   | T | 0.0246  |
| rs79729898  | C | -0.054  |
| rs1435737   | A | 0.0357  |
| rs11072996  | C | 0.0547  |
| rs71463441  | A | 0.0699  |
| rs959611    | G | -0.0277 |
| rs28808651  | G | 0.0561  |
| rs112660730 | A | -0.0506 |
| rs12912920  | G | 0.0654  |
| rs12907837  | C | -0.0782 |
| rs8043031   | A | 0.0472  |
| rs79743671  | A | -0.0371 |
| rs72484845  | G | -0.0206 |
| rs2929652   | A | -0.0411 |
| rs75688327  | A | -0.0425 |
| rs16962345  | C | -0.0325 |
| rs2388774   | T | -0.0426 |
| rs9806406   | T | -0.025  |
| rs985226    | C | 0.025   |
| rs12914626  | C | 0.0196  |
| rs61408561  | A | -0.0273 |
| rs17271123  | T | 0.0286  |
| rs8043290   | T | -0.0251 |
| rs1850887   | G | -0.0189 |
| rs75902835  | C | -0.0813 |
| rs74013336  | G | -0.0543 |
| rs143832632 | T | 0.1247  |

|             |   |         |
|-------------|---|---------|
| rs28484656  | A | -0.0428 |
| rs149091684 | T | 0.0619  |
| rs77539355  | T | -0.0356 |
| rs12443461  | A | -0.0265 |
| rs4965573   | G | 0.0378  |
| rs1568679   | C | 0.0326  |
| rs141860141 | C | 0.114   |
| rs62625677  | T | -0.072  |
| rs1879612   | C | -0.0184 |
| rs11072742  | C | -0.0182 |
| rs117572861 | A | 0.0685  |
| rs3743135   | G | -0.0348 |
| rs2437807   | G | 0.0212  |
| rs1567810   | G | 0.0713  |
| rs137937509 | C | -0.0741 |
| rs72737943  | G | -0.0548 |
| rs117978103 | C | -0.1442 |
| rs1626180   | A | 0.0345  |
| rs14280     | G | 0.0318  |
| rs17633184  | A | -0.0403 |
| rs117327685 | A | -0.0825 |
| rs72737620  | T | 0.0583  |
| rs12437787  | T | 0.0212  |
| rs1554289   | G | -0.0181 |
| rs3923926   | T | 0.0281  |
| rs4608312   | G | 0.0247  |
| rs117258744 | C | 0.0671  |
| rs118105177 | C | 0.0875  |
| rs117164465 | C | -0.1312 |
| rs10519150  | A | 0.0315  |
| rs35692936  | A | -0.0236 |
| rs55860410  | G | 0.1069  |
| rs11857595  | T | -0.019  |
| rs151230880 | C | -0.1006 |
| rs146776092 | G | -0.1186 |
| rs55810958  | C | -0.0236 |
| rs76144520  | T | -0.0524 |
| rs35707069  | A | 0.0726  |
| rs72734874  | G | -0.0782 |
| rs117900547 | T | -0.096  |
| rs8025933   | T | -0.0214 |
| rs1995989   | G | -0.0179 |
| rs11636413  | C | 0.0179  |
| rs2871864   | G | -0.0322 |
| rs11638539  | A | -0.0229 |
| rs62024893  | T | -0.0529 |
| rs7173968   | C | 0.0543  |

|             |   |         |
|-------------|---|---------|
| rs62006548  | G | -0.0547 |
| rs117267883 | A | -0.0845 |
| rs2605453   | A | -0.0203 |
| rs2444976   | C | -0.0405 |
| rs12912730  | T | -0.0239 |
| rs2899723   | A | 0.0211  |
| rs28379265  | G | -0.0237 |
| rs117649019 | C | 0.0438  |
| rs4477642   | A | 0.0277  |
| rs76703415  | G | -0.0683 |
| rs2903414   | T | 0.0202  |
| rs6496265   | C | 0.0189  |
| rs11638592  | T | 0.0258  |
| rs16953426  | A | 0.0214  |
| rs62012921  | T | 0.0709  |
| rs28464614  | C | -0.0223 |
| rs3803463   | A | 0.0332  |
| rs4144691   | C | -0.0215 |
| rs12591895  | C | -0.0295 |
| rs77704192  | C | -0.0627 |
| rs8025139   | C | 0.0194  |
| rs72691548  | G | 0.0877  |
| rs4778772   | T | -0.0256 |
| rs75550590  | G | 0.086   |
| rs12909294  | T | -0.0331 |
| rs77799361  | T | -0.0242 |
| rs75441947  | C | 0.0393  |
| rs28510215  | A | 0.0261  |
| rs72703933  | C | 0.0809  |
| rs117161053 | A | 0.1056  |
| rs72647729  | A | -0.0783 |
| rs34421498  | T | 0.0879  |
| rs7168008   | T | 0.0186  |
| rs6493629   | C | 0.0185  |
| rs117827019 | G | 0.0745  |
| rs117356489 | G | 0.0809  |
| rs72753010  | C | 0.067   |
| rs146901832 | C | -0.0709 |
| rs34091722  | A | 0.061   |
| rs74483450  | G | 0.0341  |
| rs2292745   | A | -0.0241 |
| rs12708521  | T | 0.0237  |
| rs11638959  | A | -0.0414 |
| rs76528553  | T | 0.0845  |
| rs1968686   | A | -0.0181 |
| rs62046487  | C | -0.053  |
| rs12324820  | T | 0.0307  |



|             |   |         |
|-------------|---|---------|
| rs11263662  | C | -0.0262 |
| rs8023253   | T | 0.0259  |
| rs75524333  | A | -0.0886 |
| rs8028284   | G | -0.0239 |
| rs117600532 | A | 0.1405  |
| rs113954442 | C | -0.0624 |
| rs10518916  | C | 0.0495  |
| rs111550309 | A | -0.0889 |
| rs2289263   | G | -0.0177 |
| rs72742523  | A | -0.0945 |
| rs9788635   | T | 0.0298  |
| rs4886647   | T | -0.0286 |
| rs80218382  | A | 0.05    |
| rs73412617  | C | 0.0586  |
| rs4316725   | T | -0.0877 |
| rs2932200   | T | 0.0272  |
| rs36123861  | C | -0.1275 |
| rs148326808 | A | -0.0978 |
| rs79976571  | A | -0.074  |
| rs80254549  | C | -0.0767 |
| rs17191582  | G | 0.0276  |
| rs12323993  | T | -0.0465 |
| rs112816833 | T | -0.0731 |
| rs4505261   | C | 0.0183  |
| rs150341718 | T | 0.0554  |
| rs2056501   | A | -0.0174 |
| rs2469126   | T | 0.0922  |
| rs4984418   | A | 0.0883  |
| rs28584673  | C | 0.0241  |
| rs75330175  | A | 0.1118  |
| rs114706749 | T | -0.088  |
| rs117246977 | T | -0.0608 |
| rs115241741 | A | -0.0549 |
| rs28695864  | G | -0.0626 |
| rs145200989 | G | -0.1278 |
| rs899462    | A | 0.0182  |
| rs58633384  | A | 0.0654  |
| rs74368507  | C | -0.0915 |
| rs1480958   | T | -0.0841 |
| rs11854877  | C | 0.0189  |
| rs12441451  | C | 0.0206  |
| rs75647453  | A | -0.0856 |
| rs75548168  | C | -0.0619 |
| rs28716778  | G | 0.0186  |
| rs28532095  | G | 0.0347  |
| rs79612456  | G | -0.0876 |
| rs4777218   | T | -0.0241 |

|             |   |         |
|-------------|---|---------|
| rs62020617  | T | 0.1211  |
| rs74901529  | A | -0.0851 |
| rs73473492  | A | -0.1066 |
| rs35815647  | T | -0.0273 |
| rs74863372  | G | -0.0945 |
| rs17583428  | C | -0.0658 |
| rs2004301   | A | 0.0208  |
| rs746655    | A | 0.0262  |
| rs118186721 | T | -0.0362 |
| rs4329901   | T | 0.0308  |
| rs12591554  | T | -0.0179 |
| rs4774386   | C | -0.0266 |
| rs1197662   | T | 0.0222  |
| rs2585223   | T | -0.0289 |
| rs776724    | G | -0.0223 |
| rs365540    | A | 0.0247  |
| rs117627931 | T | -0.1623 |
| rs77648678  | A | -0.0461 |
| rs60251329  | C | 0.0687  |
| rs12591320  | A | 0.0299  |
| rs142004961 | C | 0.0496  |
| rs4275832   | G | 0.0239  |
| rs75178758  | T | -0.0848 |
| rs71414392  | A | -0.0938 |
| rs1135911   | T | 0.0357  |
| rs111500727 | C | -0.1371 |
| rs117142058 | A | -0.0667 |
| rs1822066   | A | 0.033   |
| rs56194026  | T | 0.0363  |
| rs61756301  | A | -0.1053 |
| rs55931857  | T | 0.1813  |
| rs2123927   | A | 0.0207  |
| rs11629683  | C | 0.0343  |
| rs8031246   | G | 0.0177  |
| rs35880321  | A | -0.04   |
| rs4778820   | G | 0.02    |
| rs11638568  | A | -0.0249 |
| rs76246436  | T | -0.0919 |
| rs7180615   | G | 0.0246  |
| rs72753405  | A | -0.0976 |
| rs2958996   | A | -0.0514 |
| rs12913423  | C | -0.0278 |
| rs11634953  | T | 0.0254  |
| rs35925086  | C | -0.0197 |
| rs55804632  | A | 0.052   |
| rs12912687  | A | -0.0238 |
| rs11631390  | T | -0.0233 |

|             |   |         |
|-------------|---|---------|
| rs80164103  | A | -0.0989 |
| rs74573526  | G | -0.0544 |
| rs140586425 | A | -0.0865 |
| rs12594695  | C | -0.0316 |
| rs56996174  | A | 0.0671  |
| rs117452847 | A | -0.0837 |
| rs28687130  | T | 0.0432  |
| rs8030786   | T | -0.0806 |
| rs113731386 | T | 0.0791  |
| rs74844064  | A | -0.1115 |
| rs62023973  | T | -0.1264 |
| rs2581339   | T | 0.0323  |
| rs12902675  | C | -0.0529 |
| rs117829039 | T | 0.1275  |
| rs72741579  | T | -0.0364 |
| rs2100899   | A | 0.0227  |
| rs118100937 | A | -0.0871 |
| rs75440391  | T | 0.0713  |
| rs59156643  | T | -0.0232 |
| rs12908843  | C | -0.0407 |
| rs4334280   | A | 0.0174  |
| rs116939920 | A | -0.1173 |
| rs55702518  | C | 0.0571  |
| rs56132840  | T | 0.0923  |
| rs17238580  | A | -0.0181 |
| rs11852861  | T | 0.0183  |
| rs145227806 | A | 0.0945  |
| rs991349    | A | -0.1452 |
| rs76131938  | C | -0.0631 |
| rs8038880   | A | -0.0203 |
| rs61997916  | G | -0.0361 |
| rs2194958   | C | 0.0181  |
| rs17137192  | T | 0.0263  |
| rs35731182  | T | -0.0438 |
| rs1996671   | A | -0.0225 |
| rs473422    | T | 0.0182  |
| rs143058355 | A | 0.1158  |
| rs12903426  | G | -0.0532 |
| rs146259412 | T | 0.0908  |
| rs4776882   | T | 0.0206  |
| rs62016788  | G | -0.089  |
| rs116958215 | A | -0.072  |
| rs7497524   | C | 0.0194  |
| rs12907607  | C | -0.0257 |
| rs12901807  | T | 0.0555  |
| rs11630259  | C | -0.0199 |
| rs116866809 | T | 0.1159  |

|             |   |         |
|-------------|---|---------|
| rs76700998  | C | 0.0179  |
| rs112114041 | T | 0.0548  |
| rs75401296  | C | -0.0907 |
| rs10519050  | G | -0.0503 |
| rs16972780  | T | -0.0221 |
| rs12912692  | C | -0.0278 |
| rs112592012 | A | 0.1052  |
| rs36107824  | C | 0.0264  |
| rs11637846  | C | 0.0297  |
| rs12593044  | T | -0.0608 |
| rs138233974 | C | 0.0636  |
| rs117856472 | A | -0.0835 |
| rs117141449 | A | 0.1227  |
| rs2248235   | G | -0.0182 |
| rs35415636  | G | 0.1583  |
| rs16973216  | G | 0.0411  |
| rs12101703  | C | 0.0175  |
| rs28861539  | C | -0.0435 |
| rs4886560   | T | 0.0252  |
| rs117327758 | T | 0.0544  |
| rs4932167   | T | -0.035  |
| rs7171031   | T | 0.0274  |
| rs149789064 | G | 0.1443  |
| rs146259399 | A | 0.0817  |
| rs118167892 | A | 0.0703  |
| rs16973229  | G | -0.047  |
| rs146585864 | T | 0.0562  |
| rs113147742 | G | -0.0859 |
| rs112070752 | C | 0.0776  |
| rs79092213  | A | -0.1219 |
| rs62006429  | T | -0.0286 |
| rs77603273  | A | 0.05    |
| rs1036521   | T | 0.0228  |
| rs12438196  | T | 0.043   |
| rs113084686 | G | -0.0497 |
| rs117027425 | G | 0.1358  |
| rs139003549 | T | -0.1053 |
| rs17653242  | T | 0.0777  |
| rs77796692  | A | -0.0844 |
| rs1551466   | C | 0.019   |
| rs80018293  | G | -0.0882 |
| rs16960212  | A | 0.1007  |
| rs2623179   | G | -0.1328 |
| rs899947    | G | -0.1009 |
| rs148431232 | C | -0.1343 |
| rs2082976   | G | 0.0794  |
| rs72723448  | A | 0.0264  |

|             |   |         |
|-------------|---|---------|
| rs117799876 | A | -0.092  |
| rs11638197  | T | -0.0469 |
| rs4384564   | A | -0.0326 |
| rs11636614  | T | -0.1211 |
| rs4984580   | A | -0.0383 |
| rs13329238  | C | 0.0173  |
| rs1916645   | A | 0.0288  |
| rs144788609 | C | -0.0757 |
| rs143000845 | C | -0.1082 |
| rs208165    | T | -0.0167 |
| rs2554001   | A | 0.0181  |
| rs4622471   | C | 0.0174  |
| rs4777910   | G | 0.0707  |
| rs146637240 | A | 0.0464  |
| rs142671635 | G | 0.0545  |
| rs76494839  | A | -0.0496 |
| rs147274083 | C | -0.0744 |
| rs151235092 | A | 0.0459  |
| rs112845369 | C | -0.0755 |
| rs2586158   | A | -0.0286 |
| rs28887925  | T | -0.018  |
| rs117991624 | G | 0.0855  |
| rs8024954   | A | 0.0773  |
| rs75129862  | A | -0.1027 |
| rs142414452 | G | -0.0699 |
| rs3784813   | C | 0.0199  |
| rs7168384   | T | 0.0188  |
| rs11639346  | C | 0.1193  |
| rs117746221 | G | -0.0505 |
| rs72748061  | G | -0.1226 |
| rs149332814 | T | -0.0774 |
| rs1023780   | A | 0.0303  |
| rs78383909  | C | -0.0596 |
| rs76887536  | A | 0.0558  |
| rs10520702  | G | 0.0166  |
| rs12911626  | T | -0.0181 |
| rs2439426   | A | 0.0255  |
| rs2935989   | C | 0.022   |
| rs7178178   | C | -0.0705 |
| rs117408186 | G | -0.0554 |
| rs148484431 | C | 0.1164  |
| rs17642276  | A | -0.0285 |
| rs12903846  | A | -0.0182 |
| rs114733323 | T | -0.0884 |
| rs2898984   | G | 0.0319  |
| rs2934441   | C | 0.0704  |
| rs112485216 | T | -0.0519 |

|             |   |         |
|-------------|---|---------|
| rs150502667 | C | 0.0932  |
| rs537025    | T | -0.0347 |
| rs80355480  | T | 0.0728  |
| rs16950377  | A | 0.0602  |
| rs1439616   | T | -0.0176 |
| rs72708994  | G | -0.0841 |
| rs147082386 | T | -0.0558 |
| rs633220    | T | 0.0198  |
| rs72744203  | A | 0.0631  |
| rs1848610   | T | -0.0167 |
| rs8028295   | T | -0.0172 |
| rs28846449  | T | 0.0382  |
| rs35072731  | T | 0.0994  |
| rs1863095   | T | -0.0186 |
| rs11858393  | G | 0.0875  |
| rs8023715   | A | -0.0296 |
| rs144022795 | A | 0.0951  |
| rs118031484 | A | -0.0585 |
| rs1514003   | G | 0.0169  |
| rs144513905 | G | 0.1109  |
| rs871078    | T | 0.0179  |
| rs77043146  | A | -0.079  |
| rs146958001 | C | -0.0687 |
| rs7162989   | A | 0.0588  |
| rs111610759 | T | -0.0919 |
| rs75128991  | T | -0.0939 |
| rs112356129 | C | -0.0807 |
| rs79522172  | C | 0.0809  |
| rs5004819   | A | -0.0218 |
| rs2928719   | C | -0.0173 |
| rs4421936   | A | 0.0191  |
| rs12592185  | C | -0.0228 |
| rs142268313 | G | 0.0674  |
| rs2306934   | C | 0.0351  |
| rs77505156  | G | 0.1005  |
| rs28880972  | T | -0.0288 |
| rs4924017   | G | 0.0209  |
| rs145642983 | C | -0.1205 |
| rs62017916  | T | -0.0499 |
| rs11636579  | G | -0.0901 |
| rs72749892  | G | 0.0536  |
| rs511092    | C | -0.0181 |
| rs7176171   | A | -0.0552 |
| rs55904609  | G | 0.0301  |
| rs117003451 | A | -0.1034 |
| rs3825924   | A | -0.0242 |
| rs7167426   | G | 0.0203  |

|             |   |         |
|-------------|---|---------|
| rs12913406  | G | 0.0235  |
| rs17759548  | C | 0.0425  |
| rs74625442  | A | -0.0835 |
| rs12101368  | T | 0.0215  |
| rs2310789   | T | 0.0296  |
| rs28497744  | G | -0.0296 |
| rs35725016  | G | -0.0234 |
| rs141960871 | T | 0.0701  |
| rs8040832   | A | 0.0279  |
| rs79801325  | C | 0.0645  |
| rs12916069  | A | -0.0194 |
| rs145631790 | A | -0.0611 |
| rs34166780  | C | 0.0959  |
| rs143624584 | T | -0.1034 |
| rs28716884  | T | -0.1051 |
| rs77308725  | T | 0.0314  |
| rs72721207  | T | 0.0712  |
| rs4780135   | T | -0.0412 |
| rs142036369 | C | 0.0813  |
| rs1014921   | G | 0.1198  |
| rs76628565  | A | -0.0483 |
| rs952121    | C | 0.0169  |
| rs935319    | C | -0.0192 |
| rs4776562   | G | -0.0186 |
| rs56265943  | C | 0.0274  |
| rs144970550 | A | 0.0965  |
| rs2170700   | G | 0.0443  |
| rs2576078   | C | 0.0487  |
| rs8032068   | C | -0.0367 |
| rs2351000   | G | -0.0253 |
| rs2643350   | G | -0.0272 |
| rs8040212   | T | 0.0248  |
| rs74682581  | A | -0.0885 |
| rs80120194  | G | 0.033   |
| rs74735171  | G | -0.0382 |
| rs6494382   | A | 0.0275  |
| rs79943855  | T | 0.0314  |
| rs146084993 | C | -0.0852 |
| rs7182311   | G | 0.0302  |
| rs62012615  | T | -0.0198 |
| rs4965847   | T | 0.0279  |
| rs72728886  | A | -0.0441 |
| rs12595720  | C | -0.0244 |
| rs10152620  | C | 0.0358  |
| rs79429958  | T | -0.1351 |
| rs60070713  | A | 0.0845  |
| rs4965129   | G | -0.0337 |

|             |   |         |
|-------------|---|---------|
| rs148008937 | A | -0.0721 |
| rs17161155  | A | 0.0194  |
| rs143249257 | T | 0.05    |
| rs144946229 | T | 0.1037  |
| rs74016847  | C | -0.0591 |
| rs34140538  | G | -0.0801 |
| rs73362857  | G | 0.0271  |
| rs16957055  | T | 0.0819  |
| rs117298258 | T | 0.087   |
| rs1669834   | A | -0.0754 |
| rs72691763  | A | 0.0959  |
| rs73422465  | T | 0.0325  |
| rs1383483   | T | 0.0721  |
| rs139860232 | A | -0.1019 |
| rs117408217 | T | -0.0862 |
| rs58649578  | T | -0.0544 |
| rs2414299   | A | -0.0183 |
| rs2059466   | G | 0.0207  |
| rs72738968  | C | 0.0553  |
| rs76739565  | A | -0.0948 |
| rs146023829 | T | -0.1111 |
| rs58714675  | A | -0.1138 |
| rs140209584 | A | -0.0387 |
| rs4776062   | C | 0.0261  |
| rs16977815  | G | -0.036  |
| rs117564198 | T | 0.036   |
| rs117578063 | T | -0.0433 |
| rs17158821  | G | -0.0412 |
| rs11633878  | G | 0.0187  |
| rs77098671  | A | -0.0501 |
| rs59754529  | C | 0.0229  |
| rs115567310 | A | -0.0671 |
| rs16963311  | C | -0.026  |
| rs62007948  | C | -0.0888 |
| rs72742446  | T | -0.078  |
| rs117793215 | T | -0.0763 |
| rs56340165  | T | 0.0546  |
| rs7161747   | C | -0.0241 |
| rs117436140 | G | -0.0893 |
| rs74930183  | G | 0.0495  |
| rs7165244   | C | 0.0351  |
| rs4410051   | C | -0.1202 |
| rs8032568   | C | -0.0188 |
| rs12439749  | A | -0.0183 |
| rs8035030   | T | -0.018  |
| rs1337566   | T | -0.022  |
| rs2040578   | T | -0.0167 |



|             |   |         |
|-------------|---|---------|
| rs148542490 | T | -0.0452 |
| rs28454347  | G | -0.0196 |
| rs147229860 | C | -0.0908 |
| rs12911421  | C | -0.019  |
| rs16975160  | C | -0.1185 |
| rs75358228  | G | -0.1002 |
| rs138162392 | G | -0.1123 |
| rs55747820  | A | -0.062  |
| rs854151    | G | -0.0187 |
| rs11630113  | G | 0.0901  |
| rs1426715   | A | -0.0613 |
| rs76950524  | T | 0.1208  |
| rs17468155  | C | -0.0255 |
| rs72754216  | T | 0.1146  |
| rs7163982   | C | -0.032  |
| rs7179812   | A | 0.0996  |
| rs2059594   | G | -0.0175 |
| rs144470442 | A | 0.0723  |
| rs4777260   | T | -0.0175 |
| rs76207262  | C | 0.0636  |
| rs2651730   | G | 0.0164  |
| rs4924499   | G | -0.021  |
| rs56397022  | G | 0.0558  |
| rs144532920 | A | 0.109   |
| rs1479884   | T | -0.0169 |
| rs143233414 | A | 0.0664  |
| rs118031258 | T | 0.0848  |
| rs16961937  | G | -0.0316 |
| rs8025706   | G | -0.0183 |
| rs28499439  | T | -0.057  |
| rs7167451   | A | -0.0183 |
| rs117840313 | C | 0.0764  |
| rs75262153  | C | -0.0463 |
| rs34220624  | C | 0.0199  |
| rs1038551   | T | -0.0214 |
| rs28663647  | G | 0.0654  |
| rs75336123  | G | 0.0821  |
| rs1446119   | G | -0.0196 |
| rs76194867  | G | -0.1072 |
| rs79654256  | A | -0.0813 |
| rs111346846 | A | -0.0933 |
| rs72761393  | T | -0.0509 |
| rs4965495   | T | 0.0558  |
| rs1459958   | C | -0.0165 |
| rs141443027 | C | -0.0439 |
| rs7170730   | C | -0.04   |
| rs7171228   | T | 0.0921  |

|             |   |         |
|-------------|---|---------|
| rs12904384  | G | 0.0165  |
| rs1384121   | A | 0.083   |
| rs17269971  | C | 0.1348  |
| rs75218541  | G | -0.0832 |
| rs12324723  | A | -0.0866 |
| rs11638647  | A | -0.0244 |
| rs79311347  | T | -0.0628 |
| rs62017667  | C | -0.0448 |
| rs112855302 | A | 0.1453  |
| rs113527080 | C | -0.0889 |
| rs7183338   | C | 0.0424  |
| rs8042149   | T | -0.0169 |
| rs10152200  | A | 0.0209  |
| rs72738431  | T | -0.0194 |
| rs1807348   | A | 0.0184  |
| rs141445047 | A | -0.0831 |
| rs4932383   | A | -0.0256 |
| rs72736582  | T | -0.0281 |
| rs4592619   | T | -0.0218 |
| rs12909437  | C | -0.0201 |
| rs77244697  | A | -0.0787 |
| rs147723860 | T | 0.092   |
| rs8024156   | G | 0.0161  |
| rs17217049  | T | -0.0229 |
| rs79054860  | G | 0.0436  |
| rs11854254  | A | 0.04    |
| rs16958237  | A | -0.0229 |
| rs61630157  | C | 0.0378  |
| rs2211401   | G | 0.0176  |
| rs150602006 | T | 0.0313  |
| rs79366338  | G | 0.0586  |
| rs6495765   | G | -0.0243 |
| rs61304639  | A | 0.0516  |
| rs140269866 | T | 0.0335  |
| rs4776733   | A | -0.0212 |
| rs950667    | C | -0.0195 |
| rs78027310  | C | 0.108   |
| rs113333445 | T | -0.0506 |
| rs117892958 | A | 0.1205  |
| rs75603318  | T | -0.0241 |
| rs148931336 | C | 0.1155  |
| rs11639487  | C | 0.0595  |
| rs76796473  | T | -0.0875 |
| rs73477167  | T | 0.0382  |
| rs147215232 | T | -0.0993 |
| rs78231478  | A | -0.1509 |
| rs62025130  | A | 0.0191  |

|             |   |         |
|-------------|---|---------|
| rs1031563   | A | -0.0171 |
| rs79721917  | G | -0.1054 |
| rs142910929 | G | -0.0835 |
| rs11070160  | A | 0.0164  |
| rs62025951  | G | -0.0436 |
| rs11638250  | T | -0.0178 |
| rs12324536  | T | -0.0221 |
| rs143927273 | A | 0.073   |
| rs682359    | G | -0.0164 |
| rs11630337  | A | -0.0305 |
| rs16977601  | T | -0.0375 |
| rs75961102  | T | -0.0802 |
| rs79373894  | C | -0.0621 |
| rs112098784 | C | 0.1316  |
| rs4779071   | C | -0.0767 |
| rs10162972  | G | 0.1197  |
| rs117576505 | T | -0.0717 |
| rs117962779 | T | -0.0903 |
| rs78656483  | C | -0.0856 |
| rs117034591 | T | 0.0703  |
| rs117308403 | C | 0.0491  |
| rs2577030   | T | -0.0292 |
| rs1462171   | T | 0.0185  |
| rs12914950  | T | 0.1216  |
| rs7181690   | A | 0.0425  |
| rs2063275   | C | 0.0393  |
| rs118085338 | A | -0.0966 |
| rs74817667  | T | -0.0186 |
| rs78759462  | C | 0.0574  |
| rs17632336  | C | 0.0204  |
| rs17817440  | C | 0.0203  |
| rs8034964   | G | 0.02    |
| rs138776947 | T | 0.0772  |
| rs74632889  | A | 0.0753  |
| rs8025177   | A | -0.0971 |
| rs395184    | C | -0.0829 |
| rs8030368   | A | 0.066   |
| rs79859599  | G | 0.0464  |
| rs77048790  | C | -0.0207 |
| rs8041244   | A | 0.0509  |
| rs144867549 | T | -0.0852 |
| rs75983256  | T | 0.0708  |
| rs8029048   | T | -0.0164 |
| rs117741946 | T | -0.0997 |
| rs7180165   | A | -0.0537 |
| rs56068447  | C | 0.0355  |
| rs1398873   | T | 0.0744  |

|             |   |         |
|-------------|---|---------|
| rs304952    | C | -0.019  |
| rs116843395 | T | -0.0536 |
| rs117021912 | G | 0.0332  |
| rs2339341   | C | -0.0183 |
| rs76954110  | A | 0.0719  |
| rs150803623 | C | -0.0943 |
| rs78303418  | C | 0.0503  |
| rs77555977  | A | -0.0471 |
| rs12912013  | G | -0.0159 |
| rs11070617  | C | -0.0166 |
| rs80045169  | T | 0.0588  |
| rs79590842  | A | 0.107   |
| rs35278132  | C | -0.0242 |
| rs12904039  | G | -0.0267 |
| rs1006694   | G | 0.0251  |
| rs2127250   | G | 0.0206  |
| rs61999931  | A | 0.0572  |
| rs78009226  | A | -0.0632 |
| rs71474654  | G | -0.1514 |
| rs117499428 | A | -0.0516 |
| rs10431855  | G | -0.0175 |
| rs1562806   | C | -0.0604 |
| rs149825929 | T | 0.0565  |
| rs74702525  | T | -0.036  |
| rs76712048  | A | 0.0705  |
| rs140328577 | T | 0.0898  |
| rs28402807  | A | -0.0849 |
| rs117689555 | T | 0.0532  |
| rs28609464  | G | -0.0219 |
| rs79969586  | T | 0.0437  |
| rs141283136 | C | 0.1063  |
| rs61694639  | C | -0.0342 |
| rs17269691  | A | -0.0418 |
| rs78349944  | T | 0.0544  |
| rs144557444 | C | 0.1134  |
| rs75177654  | C | -0.0795 |
| rs34938934  | C | 0.0262  |
| rs7183199   | T | -0.0227 |
| rs143367450 | T | 0.0646  |
| rs7497214   | A | -0.0195 |
| rs305030    | C | -0.0224 |
| rs2736696   | A | -0.0253 |
| rs12593245  | C | -0.0205 |
| rs55714391  | T | -0.0354 |
| rs2733251   | G | -0.0418 |
| rs117328057 | A | -0.053  |
| rs112774720 | A | -0.1435 |

|             |   |         |
|-------------|---|---------|
| rs7163937   | G | -0.0265 |
| rs2946543   | C | 0.0189  |
| rs143174211 | C | -0.0287 |
| rs10519864  | A | 0.0189  |
| rs17622532  | G | -0.0155 |
| rs12593438  | G | -0.0318 |
| rs7170031   | C | 0.0217  |
| rs10518873  | A | -0.0168 |
| rs78020351  | C | 0.1029  |
| rs2899050   | A | -0.1143 |
| rs28485994  | C | -0.0285 |
| rs1054259   | C | -0.0375 |
| rs142830491 | A | 0.1409  |
| rs1389379   | G | -0.0164 |
| rs74413504  | G | 0.096   |
| rs28429209  | A | -0.0366 |
| rs7495864   | C | 0.0229  |
| rs79793740  | G | -0.0544 |
| rs149727088 | G | 0.1089  |
| rs4775254   | T | -0.0273 |
| rs8025811   | A | 0.0221  |
| rs117559575 | G | 0.0684  |
| rs76327192  | T | 0.077   |
| rs12908004  | G | 0.022   |
| rs79240632  | G | -0.1342 |
| rs113327401 | C | -0.0365 |
| rs76800217  | T | -0.0349 |
| rs11635982  | T | 0.0227  |
| rs117693485 | A | 0.075   |
| rs75359538  | C | 0.0841  |
| rs117351706 | C | 0.0387  |
| rs1545820   | G | -0.0172 |
| rs76813158  | C | 0.0741  |
| rs77796241  | A | 0.0561  |
| rs58791769  | A | -0.0175 |
| rs8023763   | T | -0.0173 |
| rs61049932  | T | 0.0837  |
| rs149926212 | T | -0.0451 |
| rs12441259  | T | -0.0159 |
| rs79191126  | G | 0.1213  |
| rs11637617  | G | -0.0196 |
| rs66597437  | A | -0.0513 |
| rs446184    | C | 0.0163  |
| rs6602974   | A | -0.0166 |
| rs117174250 | A | 0.0872  |
| rs116907180 | C | -0.0393 |
| rs1507659   | C | 0.0268  |

|             |   |         |
|-------------|---|---------|
| rs111308770 | G | 0.1166  |
| rs117464855 | A | -0.0604 |
| rs3890854   | A | 0.032   |
| rs117989361 | A | 0.0817  |
| rs78555601  | T | -0.0546 |
| rs117788219 | C | -0.0487 |
| rs4777114   | A | 0.0273  |
| rs150612586 | C | -0.1048 |
| rs76686333  | T | 0.0641  |
| rs4306473   | T | -0.0348 |
| rs76780903  | G | -0.0547 |
| rs12593344  | T | -0.0215 |
| rs140200399 | A | -0.0794 |
| rs74620738  | G | 0.0802  |
| rs17270369  | T | 0.0463  |
| rs77879093  | T | -0.0428 |
| rs62021260  | C | 0.0482  |
| rs16949669  | T | -0.0413 |
| rs62007779  | A | -0.0921 |
| rs59749929  | A | -0.028  |
| rs7162672   | G | -0.0325 |
| rs28396828  | C | -0.0264 |
| rs147693361 | A | -0.1315 |
| rs12439191  | C | 0.0204  |
| rs17703890  | T | 0.0204  |
| rs2161937   | T | 0.0365  |
| rs72708980  | A | -0.0509 |
| rs149185028 | C | -0.0761 |
| rs61993163  | A | -0.0258 |
| rs7172042   | C | -0.0216 |
| rs4906770   | A | -0.0166 |
| rs7497631   | G | -0.0178 |
| rs4381552   | G | -0.0165 |
| rs74030140  | A | -0.0851 |
| rs150730305 | T | 0.1007  |
| rs117891159 | T | -0.0644 |
| rs77277118  | G | 0.0807  |
| rs117912791 | A | 0.06    |
| rs1495278   | C | -0.0559 |
| rs74011223  | G | 0.0264  |
| rs144998313 | G | -0.1302 |
| rs74010917  | A | -0.1148 |
| rs11634079  | A | 0.0233  |
| rs34696300  | G | 0.0271  |
| rs145909150 | A | 0.0801  |
| rs11632296  | A | -0.0664 |
| rs7176052   | C | 0.0526  |

|             |   |         |
|-------------|---|---------|
| rs117581405 | T | 0.0852  |
| rs142284127 | C | 0.1676  |
| rs2554343   | A | -0.0271 |
| rs149698262 | A | -0.0868 |
| rs75862239  | G | -0.0636 |
| rs148073886 | T | 0.0955  |
| rs2703596   | C | -0.0155 |
| rs34178839  | A | -0.0556 |
| rs72740272  | A | 0.0553  |
| rs8037214   | C | 0.0308  |
| rs72725395  | A | 0.0185  |
| rs138883815 | C | -0.0625 |
| rs74544474  | C | -0.0814 |
| rs76711855  | T | 0.0575  |
| rs2078875   | T | -0.0184 |
| rs17707693  | G | 0.0211  |
| rs1498580   | G | 0.0165  |
| rs117024061 | T | -0.0941 |
| rs4776741   | T | 0.017   |
| rs138557343 | T | -0.106  |
| rs117778582 | T | -0.0963 |
| rs78835046  | A | 0.0868  |
| rs117092649 | A | -0.1445 |
| rs12907824  | C | -0.0222 |
| rs35731132  | A | 0.0306  |
| rs2219876   | G | -0.036  |
| rs12101602  | C | -0.0218 |
| rs79897900  | G | -0.1239 |
| rs117530107 | T | 0.0608  |
| rs117690782 | T | 0.0809  |
| rs145768051 | G | -0.0788 |
| rs11638075  | C | 0.0243  |
| rs28603061  | C | 0.0221  |
| rs4965484   | A | 0.0217  |
| rs17117565  | C | 0.0324  |
| rs11630208  | T | -0.0447 |
| rs147754022 | T | -0.1051 |
| rs139552993 | A | 0.0996  |
| rs876626    | G | -0.0203 |
| rs74432776  | A | -0.0414 |
| rs1476222   | A | -0.0245 |
| rs55845155  | T | 0.0743  |
| rs10902604  | A | 0.018   |
| rs112322156 | A | -0.0315 |
| rs17236875  | C | 0.0273  |
| rs118046627 | G | -0.1073 |
| rs62027509  | A | 0.0188  |

|             |   |         |
|-------------|---|---------|
| rs4887216   | A | -0.0692 |
| rs427564    | A | 0.0159  |
| rs148421969 | G | -0.0506 |
| rs80262440  | C | -0.0384 |
| rs6494933   | C | -0.0252 |
| rs57535585  | T | 0.057   |
| rs77644131  | C | 0.0776  |
| rs3743462   | G | -0.0225 |
| rs16950402  | C | -0.0431 |
| rs72748805  | A | -0.0339 |
| rs12439393  | A | 0.016   |
| rs117492954 | T | 0.0468  |
| rs28408666  | G | 0.1077  |
| rs78832204  | T | 0.0524  |
| rs12916413  | A | -0.0177 |
| rs749230    | G | 0.0158  |
| rs149159845 | A | 0.0755  |
| rs17271256  | G | -0.1106 |
| rs117127859 | C | -0.1141 |
| rs72757703  | A | 0.0663  |
| rs147036078 | C | -0.0251 |
| rs78408813  | T | 0.0618  |
| rs117843931 | C | 0.1     |
| rs325383    | G | -0.0209 |
| rs116841551 | G | 0.095   |
| rs7179755   | G | -0.0212 |
| rs12438941  | A | 0.0577  |
| rs4078927   | T | -0.032  |
| rs141261516 | G | -0.0677 |
| rs61053099  | G | -0.0613 |
| rs7163689   | C | 0.0157  |
| rs78056275  | T | -0.0569 |
| rs7172623   | C | 0.108   |
| rs17591758  | T | -0.0356 |
| rs7174548   | A | -0.0207 |
| rs55917611  | G | 0.0213  |
| rs8042962   | A | -0.0204 |
| rs12373002  | T | -0.0156 |
| rs79843940  | T | 0.0947  |
| rs1980242   | G | 0.0237  |
| rs880151    | C | 0.0189  |
| rs8037928   | C | -0.0255 |
| rs11638862  | T | 0.0167  |
| rs7180520   | G | -0.02   |
| rs56377033  | A | 0.0449  |
| rs4775340   | A | -0.0156 |
| rs4775360   | G | -0.0212 |



|             |   |         |
|-------------|---|---------|
| rs2056497   | A | -0.0192 |
| rs1369689   | A | 0.068   |
| rs144538960 | T | -0.1032 |
| rs141596647 | T | -0.0891 |
| rs28579393  | G | 0.0296  |
| rs4144951   | T | 0.0242  |
| rs35060814  | C | -0.0477 |
| rs66491321  | G | -0.019  |
| rs4777990   | C | -0.0176 |
| rs7167272   | C | 0.0188  |
| rs116921168 | G | -0.1288 |
| rs111586566 | C | 0.1072  |
| rs117646141 | C | 0.0853  |
| rs11630395  | T | -0.0163 |
| rs72730882  | C | 0.1082  |
| rs12593080  | G | 0.1186  |
| rs61752833  | G | 0.1014  |
| rs12906843  | T | -0.0217 |
| rs12913080  | G | -0.0662 |
| rs8034077   | A | 0.0456  |
| rs11631171  | G | -0.0253 |
| rs11857393  | T | -0.0174 |
| rs3736491   | A | 0.063   |
| rs6495294   | G | -0.023  |
| rs2121207   | T | -0.0239 |
| rs8027820   | T | 0.0773  |
| rs72741101  | C | 0.0787  |
| rs112085978 | T | 0.0511  |
| rs75930669  | T | 0.0354  |
| rs12913978  | A | 0.0174  |
| rs3784468   | G | -0.029  |
| rs59808396  | G | -0.0518 |
| rs4778745   | G | -0.0268 |
| rs28385061  | G | 0.0673  |
| rs898213    | A | 0.0155  |
| rs112593659 | C | -0.0387 |
| rs9630437   | C | -0.0207 |
| rs72749608  | G | 0.0522  |
| rs75592908  | G | 0.0295  |
| rs80314518  | G | 0.0893  |
| rs76611558  | C | -0.1014 |
| rs16976428  | A | 0.027   |
| rs17633290  | A | 0.0343  |
| rs76065080  | G | 0.0486  |
| rs118023532 | T | 0.0699  |
| rs7174390   | T | -0.0159 |
| rs148781951 | T | -0.0784 |

|             |   |         |
|-------------|---|---------|
| rs10520745  | C | 0.025   |
| rs79302728  | G | -0.0556 |
| rs62010994  | T | 0.0885  |
| rs55705742  | C | 0.066   |
| rs72748359  | A | 0.0429  |
| rs76881819  | T | -0.053  |
| rs74622023  | C | 0.0658  |
| rs62016367  | G | 0.0455  |
| rs62009005  | T | -0.0387 |
| rs62009555  | C | 0.0622  |
| rs143569302 | T | 0.0451  |
| rs150832236 | A | 0.0429  |
| rs56144647  | A | 0.0335  |
| rs113047832 | T | 0.0339  |
| rs28869768  | C | 0.0301  |
| rs7179592   | A | -0.0804 |
| rs4144950   | T | 0.0168  |
| rs11073890  | A | -0.0207 |
| rs78959317  | C | -0.1421 |
| rs80324456  | T | 0.1127  |
| rs12324126  | T | -0.0548 |
| rs16945938  | C | -0.0225 |
| rs12438555  | A | -0.0155 |
| rs35436576  | T | 0.0211  |
| rs11634928  | A | 0.0268  |
| rs75639978  | A | 0.1582  |
| rs62004799  | T | 0.0305  |
| rs62020858  | T | 0.0228  |
| rs148240988 | A | 0.0671  |
| rs138856284 | A | -0.071  |
| rs16963122  | A | 0.0151  |
| rs117683336 | T | 0.0416  |
| rs72743665  | C | -0.0384 |
| rs7183444   | A | -0.0281 |
| rs150569701 | A | 0.0213  |
| rs12592021  | C | -0.0479 |
| rs117995353 | G | -0.1073 |
| rs148166610 | T | -0.0736 |
| rs117532960 | A | -0.0791 |
| rs118017457 | C | 0.0884  |
| rs12438903  | G | -0.0464 |
| rs72739086  | G | -0.1064 |
| rs79998391  | A | -0.031  |
| rs62007862  | C | -0.0184 |
| rs294560    | C | 0.0196  |
| rs72743058  | A | -0.0892 |
| rs4281683   | A | 0.0194  |

|             |   |         |
|-------------|---|---------|
| rs75978333  | G | 0.1095  |
| rs62022522  | C | -0.0217 |
| rs28613744  | C | -0.0288 |
| rs824183    | C | 0.0194  |
| rs11074055  | A | 0.101   |
| rs142596776 | A | -0.101  |
| rs117331323 | T | 0.0499  |
| rs78097900  | A | 0.094   |
| rs72710425  | A | 0.1152  |
| rs2278072   | T | -0.029  |
| rs8034246   | T | -0.0238 |
| rs62025535  | T | -0.0173 |
| rs16944721  | C | 0.0219  |
| rs72757148  | A | -0.04   |
| rs34471356  | T | 0.0183  |
| rs62032589  | A | 0.0714  |
| rs56186062  | A | 0.0336  |
| rs140077939 | T | 0.06    |
| rs111682679 | T | -0.0441 |
| rs7178297   | A | 0.044   |
| rs9920143   | G | -0.017  |
| rs28469802  | G | -0.0608 |
| rs149725724 | G | 0.1231  |
| rs72763026  | T | -0.0399 |
| rs746216    | A | -0.0346 |
| rs74854826  | C | 0.0287  |
| rs144217657 | G | -0.085  |
| rs11071375  | A | 0.0639  |
| rs8024951   | C | -0.0252 |
| rs80180665  | A | -0.1112 |
| rs8028378   | T | 0.0192  |
| rs112204273 | T | -0.0715 |
| rs111602019 | A | -0.0851 |
| rs74434593  | G | -0.0163 |
| rs74641601  | G | 0.1043  |
| rs36066134  | A | 0.0878  |
| rs11247301  | T | 0.0218  |
| rs149649259 | T | 0.0358  |
| rs11630560  | G | -0.0421 |
| rs77001129  | T | 0.0389  |
| rs16964146  | T | -0.0859 |
| rs77413145  | A | 0.0361  |
| rs751084    | C | 0.0161  |
| rs36110199  | A | 0.0444  |
| rs72744926  | A | 0.0629  |
| rs305024    | T | -0.0246 |
| rs77139127  | T | 0.0709  |

|             |   |         |
|-------------|---|---------|
| rs74740981  | A | 0.0867  |
| rs72751207  | C | 0.0526  |
| rs10782522  | T | 0.0221  |
| rs72739721  | A | -0.0539 |
| rs80211336  | A | -0.0653 |
| rs12185106  | A | 0.0597  |
| rs74621720  | A | 0.0695  |
| rs12441883  | A | -0.0254 |
| rs2925297   | G | -0.0157 |
| rs113470697 | T | -0.0703 |
| rs72725020  | G | -0.0519 |
| rs2445738   | T | 0.0159  |
| rs11072551  | A | 0.0164  |
| rs76065397  | C | 0.0986  |
| rs2647354   | G | 0.0189  |
| rs76403198  | T | -0.0439 |
| rs35012161  | A | -0.0805 |
| rs2109571   | A | -0.0165 |
| rs72731758  | A | -0.0706 |
| rs990226    | G | 0.0177  |
| rs16949076  | A | 0.0242  |
| rs112973870 | A | 0.09    |
| rs73374058  | A | 0.072   |
| rs2854438   | G | -0.026  |
| rs74509803  | A | 0.0411  |
| rs112943405 | T | -0.1005 |
| rs8027980   | A | -0.0329 |
| rs72761793  | C | 0.0607  |
| rs117462861 | A | -0.1128 |
| rs146606314 | G | 0.0812  |
| rs9630454   | G | 0.0425  |
| rs10152202  | G | 0.0216  |
| rs112815338 | A | 0.0248  |
| rs28704517  | A | -0.017  |
| rs55718107  | A | 0.0165  |
| rs17558620  | C | -0.0188 |
| rs117478613 | T | 0.0414  |
| rs8026709   | C | -0.0166 |
| rs72764161  | C | 0.0443  |
| rs141038494 | T | 0.0532  |
| rs4779008   | C | 0.0257  |
| rs77370542  | T | -0.0469 |
| rs117184043 | G | -0.0918 |
| rs11631140  | G | -0.0244 |
| rs691558    | G | 0.0268  |
| rs62022289  | C | -0.0266 |
| rs4984433   | T | -0.0189 |

|             |   |         |
|-------------|---|---------|
| rs12443294  | T | -0.0631 |
| rs59774431  | T | -0.0341 |
| rs72747867  | C | 0.0801  |
| rs144785648 | T | 0.0932  |
| rs74340038  | A | 0.1418  |
| rs117587518 | A | -0.1014 |
| rs4778953   | G | -0.015  |
| rs8034595   | A | 0.0163  |
| rs74713263  | G | -0.1266 |
| rs7173889   | T | -0.016  |
| rs12915866  | A | -0.0378 |
| rs12594385  | C | -0.0391 |
| rs72702744  | T | 0.0382  |
| rs57096955  | C | 0.0361  |
| rs116974294 | C | -0.088  |
| rs11855948  | C | 0.0654  |
| rs4553604   | T | 0.0729  |
| rs305000    | T | 0.0155  |
| rs62009363  | G | -0.0466 |
| rs7171479   | G | 0.0188  |
| rs17587205  | T | 0.0287  |
| rs479153    | T | -0.0578 |
| rs76528300  | T | 0.0653  |
| rs116854703 | A | 0.1206  |
| rs80044496  | A | 0.091   |
| rs117797867 | T | 0.112   |
| rs78674770  | C | -0.0834 |
| rs115847233 | C | -0.1009 |
| rs76874578  | T | 0.0764  |
| rs4399517   | T | 0.016   |
| rs75282705  | C | 0.082   |
| rs4777268   | C | 0.0185  |
| rs62008389  | C | 0.1189  |
| rs62011318  | A | -0.0282 |
| rs8031093   | G | 0.0215  |
| rs76687060  | C | -0.0609 |
| rs4646637   | T | -0.0289 |
| rs72736777  | G | -0.101  |
| rs2684803   | T | -0.0154 |
| rs6494518   | G | -0.0237 |
| rs208147    | T | 0.0218  |
| rs1948821   | A | 0.0174  |
| rs141706783 | C | 0.0783  |
| rs12904169  | G | 0.0192  |
| rs41497346  | A | -0.0227 |
| rs28385019  | C | 0.0709  |
| rs11638514  | C | -0.0495 |

|             |   |         |
|-------------|---|---------|
| rs117629515 | A | 0.0396  |
| rs12916381  | A | -0.0224 |
| rs173272    | T | -0.0217 |
| rs71472361  | C | -0.0703 |
| rs35561592  | G | 0.0207  |
| rs4984359   | G | -0.0179 |
| rs2388438   | C | -0.022  |
| rs12901185  | A | 0.0171  |
| rs62004164  | C | 0.0175  |
| rs117230572 | A | -0.0781 |
| rs260110    | G | 0.0216  |
| rs12440889  | G | 0.0215  |
| rs747327    | G | -0.022  |
| rs12437773  | G | -0.0297 |
| rs55756714  | T | -0.0685 |
| rs17649619  | A | -0.0171 |
| rs7162712   | C | -0.0157 |
| rs8023983   | T | 0.0542  |
| rs118122124 | G | 0.1039  |
| rs4468582   | G | 0.0683  |
| rs899084    | T | 0.0764  |
| rs35874463  | G | -0.0661 |
| rs8039435   | G | 0.0181  |
| rs79787951  | A | 0.0279  |
| rs73411370  | A | -0.0533 |
| rs28613351  | T | -0.0349 |
| rs72748537  | A | 0.0442  |
| rs62020354  | T | -0.0149 |
| rs28427330  | T | -0.081  |
| rs62011933  | T | -0.0297 |
| rs17787630  | T | 0.0726  |
| rs117540232 | T | -0.053  |
| rs11858665  | C | -0.0404 |
| rs7176128   | G | -0.066  |
| rs6151479   | T | -0.0292 |
| rs12909306  | C | -0.0302 |
| rs11636369  | C | -0.0737 |
| rs8039136   | A | 0.0451  |
| rs11073056  | C | -0.0166 |
| rs72747219  | C | -0.0524 |
| rs1602538   | C | -0.0153 |
| rs141728803 | T | -0.1009 |
| rs17240748  | G | 0.0255  |
| rs78583674  | T | 0.08    |
| rs9672555   | T | 0.0521  |
| rs75150887  | T | -0.0674 |
| rs76873460  | A | -0.0359 |

|             |   |         |
|-------------|---|---------|
| rs1827489   | G | 0.0185  |
| rs1704083   | T | -0.0605 |
| rs2899498   | G | 0.0154  |
| rs34945147  | T | 0.023   |
| rs117775603 | T | 0.074   |
| rs74601873  | C | 0.0375  |
| rs62009419  | C | 0.017   |
| rs57506932  | T | 0.0266  |
| rs1546074   | A | 0.0174  |
| rs9672537   | C | 0.0179  |
| rs2317228   | T | 0.0162  |
| rs12912592  | G | -0.015  |
| rs61336929  | T | 0.0505  |
| rs72739944  | C | 0.0483  |
| rs12915794  | G | 0.0149  |
| rs7165293   | G | -0.023  |
| rs143338735 | A | -0.0628 |
| rs7171795   | G | -0.0168 |
| rs76725     | C | 0.0166  |
| rs28636541  | C | -0.0387 |
| rs113697601 | A | 0.0152  |
| rs418984    | G | -0.0216 |
| rs116906779 | A | 0.0756  |
| rs6496481   | T | 0.0184  |
| rs11858934  | T | -0.0295 |
| rs28427272  | A | 0.0172  |
| rs80313172  | C | 0.0599  |
| rs2869036   | G | -0.0184 |
| rs55792173  | G | 0.0415  |
| rs112263555 | G | 0.1354  |
| rs8036059   | C | 0.0517  |
| rs28634813  | A | -0.0256 |
| rs62024247  | T | 0.021   |
| rs117509815 | T | 0.0828  |
| rs78706572  | T | 0.0599  |
| rs2960795   | A | 0.0171  |
| rs11633947  | G | 0.0153  |
| rs7181140   | A | -0.026  |
| rs526971    | T | -0.0363 |
| rs4777854   | A | -0.0159 |
| rs72759899  | T | 0.0983  |
| rs11856972  | A | 0.0517  |
| rs34429312  | T | 0.0193  |
| rs12906483  | G | 0.0318  |
| rs17646637  | G | 0.0155  |
| rs111597843 | T | 0.0888  |
| rs77828400  | C | 0.0642  |

|             |   |         |
|-------------|---|---------|
| rs112507747 | T | -0.0633 |
| rs7176051   | C | 0.0252  |
| rs4273018   | T | 0.0167  |
| rs75893575  | A | 0.0477  |
| rs79759141  | G | 0.0172  |
| rs72757720  | C | -0.0435 |
| rs75927608  | A | 0.0655  |
| rs141299637 | T | 0.1129  |
| rs11855154  | T | 0.0211  |
| rs11161276  | G | -0.0248 |
| rs1370155   | G | -0.0298 |
| rs730154    | C | 0.0206  |
| rs2017617   | C | 0.0154  |
| rs3101607   | A | -0.0147 |
| rs62020305  | T | -0.0552 |
| rs55908413  | T | -0.0277 |
| rs10520070  | G | 0.0174  |
| rs149165730 | T | -0.0887 |
| rs72745373  | T | 0.0312  |
| rs117894215 | A | -0.1229 |
| rs4965595   | G | -0.0188 |
| rs12595297  | G | 0.0216  |
| rs72738101  | C | -0.0187 |
| rs74918950  | C | -0.0332 |
| rs62024267  | G | 0.0503  |
| rs79407621  | T | -0.0428 |
| rs3890116   | T | -0.0388 |
| rs111808086 | A | 0.0469  |
| rs35605625  | A | 0.0526  |
| rs7183633   | A | 0.0336  |
| rs1898885   | C | -0.0154 |
| rs74630575  | A | -0.1015 |
| rs3905275   | C | -0.0192 |
| rs16946318  | G | 0.0498  |
| rs74415750  | T | -0.1273 |
| rs34161372  | C | 0.0957  |
| rs1020145   | T | 0.0171  |
| rs3097532   | T | 0.0641  |
| rs12438482  | A | 0.0226  |
| rs7179722   | T | -0.0149 |
| rs17515533  | C | -0.0178 |
| rs4965211   | T | 0.0166  |
| rs116881774 | T | 0.0601  |
| rs80081529  | T | -0.0216 |
| rs11853341  | G | 0.0253  |
| rs75550918  | A | 0.0645  |
| rs386357    | T | 0.0215  |



|             |   |         |
|-------------|---|---------|
| rs28372213  | A | 0.1047  |
| rs75061869  | T | 0.0255  |
| rs13379978  | T | 0.0282  |
| rs34808173  | A | 0.0272  |
| rs72721480  | C | -0.0565 |
| rs112884435 | T | 0.0877  |
| rs112597754 | G | -0.0686 |
| rs147570586 | A | 0.1447  |
| rs4465565   | G | 0.0175  |
| rs73442943  | G | -0.0464 |
| rs1550027   | C | 0.0193  |
| rs11259907  | G | -0.0154 |
| rs75089265  | A | 0.0625  |
| rs7173262   | T | 0.016   |
| rs111727644 | T | -0.0918 |
| rs74029274  | A | -0.1179 |
| rs34460697  | G | 0.0903  |
| rs72748427  | G | -0.0559 |
| rs11635749  | C | -0.0174 |
| rs8042302   | T | 0.0177  |
| rs10459614  | C | 0.0154  |
| rs4777806   | G | -0.021  |
| rs4778213   | T | -0.0301 |
| rs11636617  | C | 0.0247  |
| rs77516282  | T | -0.0462 |
| rs117751867 | A | 0.0456  |
| rs146827692 | T | 0.0821  |
| rs2928704   | T | -0.0282 |
| rs4924440   | A | 0.0226  |
| rs11632781  | A | 0.0665  |
| rs117054130 | T | -0.0901 |
| rs146064123 | C | 0.0672  |
| rs11631071  | A | 0.0209  |
| rs145423336 | T | 0.0821  |
| rs12904099  | G | -0.0177 |
| rs2444004   | T | 0.0165  |
| rs140788045 | A | 0.0555  |
| rs7179970   | G | 0.0356  |
| rs117963522 | A | 0.0973  |
| rs2338806   | G | -0.0234 |
| rs62017979  | A | 0.0163  |
| rs9806203   | T | -0.0154 |
| rs12324745  | A | 0.0301  |
| rs72705031  | A | 0.0754  |
| rs80037024  | G | 0.0954  |
| rs149388282 | T | 0.0744  |
| rs9920660   | A | 0.0183  |

|             |   |         |
|-------------|---|---------|
| rs7169146   | T | 0.0201  |
| rs140913878 | C | 0.0844  |
| rs144179538 | C | -0.1256 |
| rs57369878  | C | -0.0956 |
| rs12900283  | T | -0.0248 |
| rs4454950   | A | 0.0213  |
| rs12148308  | C | 0.0423  |
| rs76315808  | C | -0.1425 |
| rs12438714  | T | 0.036   |
| rs11247268  | G | 0.0176  |
| rs12591927  | A | -0.0261 |
| rs72730539  | A | -0.0453 |
| rs6496808   | G | 0.0169  |
| rs35689309  | G | -0.0297 |
| rs10852033  | C | -0.0144 |
| rs2912595   | A | 0.0609  |
| rs4980344   | A | 0.0142  |
| rs3784350   | A | 0.0166  |
| rs2469206   | G | 0.017   |
| rs7174445   | G | 0.0153  |
| rs1081213   | C | 0.0157  |
| rs151308813 | A | 0.075   |
| rs76669796  | A | 0.065   |
| rs7179677   | T | 0.0276  |
| rs17557081  | T | -0.0261 |
| rs79098946  | A | 0.0538  |
| rs35734996  | T | -0.0701 |
| rs2665104   | T | 0.0241  |
| rs4965640   | G | -0.0213 |
| rs7181293   | C | -0.0529 |
| rs74437732  | G | 0.0644  |
| rs9920161   | A | -0.0161 |
| rs967064    | T | 0.0428  |
| rs145183299 | A | -0.1088 |
| rs28474745  | T | 0.0608  |
| rs150691478 | T | 0.0493  |
| rs12907887  | C | -0.0262 |
| rs11635852  | A | 0.0385  |
| rs67418059  | T | 0.0461  |
| rs72713294  | C | -0.0198 |
| rs1659300   | T | 0.029   |
| rs75353685  | A | 0.0492  |
| rs17652266  | C | 0.0307  |
| rs77415317  | A | 0.0656  |
| rs143825603 | C | 0.0498  |
| rs17816071  | C | -0.0216 |
| rs80331223  | A | -0.0506 |

|             |   |         |
|-------------|---|---------|
| rs12915643  | A | -0.0878 |
| rs2220176   | G | -0.0184 |
| rs150164042 | A | -0.0809 |
| rs2045267   | A | 0.042   |
| rs5001649   | T | 0.0211  |
| rs3098539   | A | 0.0228  |
| rs4886566   | A | 0.0194  |
| rs74471732  | T | 0.0451  |
| rs6598525   | T | -0.022  |
| rs34176382  | A | 0.0586  |
| rs45545736  | T | 0.0424  |
| rs56311511  | A | 0.0323  |
| rs62017772  | C | -0.1209 |
| rs117380401 | C | 0.0748  |
| rs61998619  | C | -0.0596 |
| rs71414383  | T | -0.0692 |
| rs150525711 | C | -0.0834 |
| rs116862695 | A | 0.0842  |
| rs72710486  | T | -0.0364 |
| rs16964765  | A | 0.0444  |
| rs11630452  | G | -0.051  |
| rs17240756  | A | 0.0235  |
| rs4775489   | G | -0.0651 |
| rs11857107  | A | 0.0688  |
| rs8038174   | T | 0.0229  |
| rs785437    | G | 0.0167  |
| rs28870157  | G | -0.0153 |
| rs8033183   | A | 0.0213  |
| rs517562    | T | -0.0168 |
| rs117936868 | A | 0.0731  |
| rs895137    | A | -0.1049 |
| rs4356457   | G | -0.0221 |
| rs116870018 | T | 0.0159  |
| rs74794218  | C | 0.0721  |
| rs11074125  | G | -0.0152 |
| rs2414522   | A | 0.0143  |
| rs12906576  | C | 0.0158  |
| rs1372833   | T | 0.0152  |
| rs146521218 | A | 0.0989  |
| rs116129341 | T | -0.0291 |
| rs113454042 | G | 0.123   |
| rs62005930  | T | 0.0279  |
| rs116960524 | A | 0.0893  |
| rs74535214  | T | -0.0502 |
| rs72744443  | T | 0.0852  |
| rs2440943   | T | 0.0176  |
| rs72716242  | T | -0.041  |

|             |   |         |
|-------------|---|---------|
| rs75444270  | C | 0.0545  |
| rs76548254  | A | 0.0477  |
| rs17784142  | T | 0.0253  |
| rs12438734  | C | 0.0463  |
| rs117900811 | T | 0.1045  |
| rs117985059 | T | -0.1159 |
| rs12905311  | T | -0.0162 |
| rs11634165  | G | -0.0269 |
| rs35756086  | C | -0.0149 |
| rs1532113   | T | -0.0202 |
| rs6494066   | A | 0.0426  |
| rs1483326   | G | -0.0368 |
| rs8025849   | G | 0.0167  |
| rs112031693 | G | 0.0711  |
| rs78492817  | T | 0.0635  |
| rs11632336  | T | 0.0492  |
| rs16964074  | G | -0.018  |
| rs115083636 | T | 0.0474  |
| rs56035902  | T | 0.0174  |
| rs12442659  | T | 0.0462  |
| rs6497185   | C | 0.0175  |
| rs3887640   | T | 0.0558  |
| rs145605584 | A | 0.0843  |
| rs113521760 | A | 0.1339  |
| rs146561017 | A | 0.1101  |
| rs141053189 | T | -0.0862 |
| rs116926770 | C | -0.0788 |
| rs117806402 | T | 0.1024  |
| rs138189253 | G | -0.1189 |
| rs143364029 | A | 0.0988  |
| rs117601949 | A | -0.0283 |
| rs12438229  | A | 0.0354  |
| rs12440100  | A | 0.0216  |
| rs7170849   | G | -0.0403 |
| rs35782557  | G | -0.017  |
| rs145977313 | T | 0.0595  |
| rs77189993  | T | -0.046  |
| rs117350029 | A | -0.0657 |
| rs145094750 | A | 0.0608  |
| rs62023719  | A | -0.0229 |
| rs80308551  | C | 0.0562  |
| rs56181764  | A | -0.053  |
| rs340002    | A | -0.0175 |
| rs11073377  | G | -0.0244 |
| rs142578186 | C | -0.0777 |
| rs824189    | C | 0.0185  |
| rs77483016  | A | 0.0316  |

|             |   |         |
|-------------|---|---------|
| rs1371387   | T | 0.045   |
| rs72704409  | T | -0.0853 |
| rs138631939 | G | 0.0509  |
| rs2161936   | C | -0.0205 |
| rs59200474  | C | 0.049   |
| rs56184454  | C | 0.0163  |
| rs117088846 | G | -0.0535 |
| rs28437614  | A | 0.035   |
| rs1822170   | T | 0.0259  |
| rs11855920  | T | 0.0435  |
| rs75332828  | A | -0.0631 |
| rs146533408 | A | -0.0678 |
| rs35446117  | T | -0.0875 |
| rs74869668  | C | 0.119   |
| rs113717271 | A | -0.0519 |
| rs75476994  | G | 0.0273  |
| rs62022705  | A | 0.0356  |
| rs76009181  | C | 0.0718  |
| rs142036330 | G | 0.0751  |
| rs112024736 | A | 0.1017  |
| rs1470003   | G | -0.0155 |
| rs118074818 | G | 0.0822  |
| rs6576428   | A | 0.0249  |
| rs77590474  | A | -0.0388 |
| rs117600047 | T | -0.0669 |
| rs150085588 | A | -0.0952 |
| rs72740258  | G | -0.0818 |
| rs35346656  | C | 0.0144  |
| rs139784116 | C | 0.0653  |
| rs62045872  | G | 0.0424  |
| rs75750077  | C | -0.0618 |
| rs12906370  | C | -0.072  |
| rs9920397   | A | 0.016   |
| rs10163016  | C | -0.0919 |
| rs824200    | T | 0.016   |
| rs73362493  | A | 0.0369  |
| rs8025349   | C | 0.016   |
| rs2340006   | T | 0.0344  |
| rs1223954   | C | 0.0152  |
| rs72715513  | T | 0.0381  |
| rs4887337   | A | 0.0225  |
| rs8041532   | T | 0.0158  |
| rs12148092  | T | -0.0272 |
| rs2932205   | G | -0.0143 |
| rs72759228  | T | 0.0791  |
| rs12050843  | T | 0.0251  |
| rs11631593  | A | -0.0193 |

|             |   |         |
|-------------|---|---------|
| rs1719264   | C | -0.0141 |
| rs17179666  | C | -0.0637 |
| rs76778133  | G | 0.0452  |
| rs28558770  | A | -0.0181 |
| rs7167134   | C | -0.0187 |
| rs117275442 | A | -0.0628 |
| rs11072921  | G | 0.0145  |
| rs1457849   | T | 0.039   |
| rs139306786 | T | 0.055   |
| rs77944201  | T | 0.03    |
| rs11855110  | G | -0.0147 |
| rs117342694 | C | 0.0731  |
| rs4778052   | T | -0.0189 |
| rs11639127  | C | 0.077   |
| rs149766823 | A | -0.0899 |
| rs12910040  | C | -0.0193 |
| rs34222688  | G | -0.0469 |
| rs78523617  | A | -0.0389 |
| rs12439732  | G | -0.017  |
| rs72732882  | A | 0.0895  |
| rs143892337 | G | 0.0836  |
| rs341396    | G | -0.0455 |
| rs76284591  | C | 0.0258  |
| rs7167175   | T | 0.0421  |
| rs117656733 | T | -0.0424 |
| rs11630201  | C | 0.0204  |
| rs79511315  | A | 0.0881  |
| rs4464040   | T | 0.0194  |
| rs117212126 | T | -0.0612 |
| rs111623761 | C | -0.0447 |
| rs7403605   | C | 0.046   |
| rs16956149  | G | 0.0217  |
| rs7165502   | T | -0.0161 |
| rs62020264  | C | 0.0165  |
| rs141649048 | T | 0.0455  |
| rs1350090   | A | 0.0159  |
| rs2587735   | T | -0.0844 |
| rs12595272  | C | 0.0137  |
| rs72743611  | A | -0.0472 |
| rs305035    | G | -0.0146 |
| rs66613151  | C | -0.0384 |
| rs2591056   | A | 0.0261  |
| rs2724937   | T | 0.0598  |
| rs1280383   | G | 0.0565  |
| rs2070664   | C | 0.0187  |
| rs8030388   | C | 0.0154  |
| rs138257917 | G | 0.0535  |

|             |   |         |
|-------------|---|---------|
| rs10518976  | A | 0.0289  |
| rs8035538   | A | 0.0293  |
| rs75908835  | T | -0.0605 |
| rs8025806   | G | -0.0151 |
| rs17268471  | T | -0.0154 |
| rs12323953  | A | 0.0167  |
| rs7177393   | G | 0.0184  |
| rs140143983 | G | 0.047   |
| rs6496037   | G | 0.0143  |
| rs62044073  | G | 0.0942  |
| rs78315414  | A | -0.0371 |
| rs74679793  | C | 0.0796  |
| rs16954747  | G | 0.0548  |
| rs16952153  | G | -0.049  |
| rs75655494  | A | 0.0961  |
| rs75048099  | T | 0.1213  |
| rs12593458  | A | 0.0567  |
| rs17228662  | A | 0.0503  |
| rs10518737  | C | -0.0372 |
| rs146246605 | A | 0.0428  |
| rs7164531   | T | -0.0181 |
| rs62026520  | A | -0.0183 |
| rs78701168  | T | -0.059  |
| rs76791821  | A | 0.0894  |
| rs78592653  | G | -0.0773 |
| rs28629347  | T | 0.0213  |
| rs12442869  | A | -0.0188 |
| rs11247235  | G | -0.0206 |
| rs1534780   | G | -0.0174 |
| rs116841286 | C | -0.0851 |
| rs75264248  | T | -0.0409 |
| rs7176055   | A | -0.0409 |
| rs76126912  | C | -0.0443 |
| rs115861160 | G | -0.064  |
| rs144719426 | C | 0.0276  |
| rs2614658   | A | -0.0143 |
| rs28706610  | C | -0.0675 |
| rs79430825  | C | 0.0538  |
| rs76814821  | C | -0.0743 |
| rs7175383   | T | 0.1111  |
| rs72712984  | T | -0.0947 |
| rs79413522  | C | -0.0503 |
| rs145965078 | C | 0.0969  |
| rs1516849   | A | 0.0528  |
| rs16957167  | T | 0.023   |
| rs28415039  | A | 0.0145  |
| rs34573964  | G | -0.0162 |

|             |   |         |
|-------------|---|---------|
| rs34884018  | A | 0.0156  |
| rs12438236  | C | 0.0155  |
| rs150952063 | A | 0.0469  |
| rs1874278   | C | -0.0263 |
| rs12906408  | A | -0.0191 |
| rs72752029  | T | 0.0472  |
| rs4776108   | A | 0.0157  |
| rs17550768  | C | 0.079   |
| rs1113556   | A | 0.0198  |
| rs62010321  | C | 0.0735  |
| rs142965534 | G | -0.0638 |
| rs144315096 | T | 0.0724  |
| rs17825866  | C | -0.0449 |
| rs616687    | A | 0.0427  |
| rs28835384  | T | 0.0515  |
| rs74011969  | C | -0.1137 |
| rs78424241  | T | 0.0297  |
| rs80306494  | C | 0.1161  |
| rs11633832  | G | 0.0189  |
| rs76881639  | T | 0.0223  |
| rs118019212 | T | 0.0505  |
| rs11072944  | C | 0.0189  |
| rs8041762   | A | 0.0149  |
| rs80146165  | T | -0.0576 |
| rs35758952  | C | -0.029  |
| rs112459071 | T | 0.0498  |
| rs17238559  | A | 0.0391  |
| rs7169390   | T | -0.1186 |
| rs72744025  | A | -0.0393 |
| rs8027533   | T | 0.0148  |
| rs4410035   | C | -0.0792 |
| rs8041054   | A | 0.0164  |
| rs11074261  | G | 0.0217  |
| rs56820588  | C | 0.0157  |
| rs62023648  | G | 0.0456  |
| rs34080199  | G | 0.0597  |
| rs78227022  | A | -0.0711 |
| rs35294489  | G | 0.0766  |
| rs36108380  | G | -0.1012 |
| rs11630670  | A | 0.0134  |
| rs3104509   | G | 0.0165  |
| rs117713789 | T | 0.0572  |
| rs17817476  | G | 0.0176  |
| rs71395022  | A | -0.0972 |
| rs35636804  | A | 0.0557  |
| rs2222299   | C | 0.0183  |
| rs117016506 | C | 0.0365  |



|             |   |         |
|-------------|---|---------|
| rs17766979  | T | 0.034   |
| rs6495467   | C | 0.0138  |
| rs117639251 | T | -0.0388 |
| rs117246690 | C | -0.0608 |
| rs78565953  | A | 0.1254  |
| rs55730535  | C | -0.0153 |
| rs10520795  | T | 0.0762  |
| rs74030724  | A | 0.0919  |
| rs56280996  | A | 0.0152  |
| rs138159328 | C | 0.0708  |
| rs117863532 | G | 0.0497  |
| rs11629844  | T | 0.0173  |
| rs78376747  | A | 0.0563  |
| rs12439166  | A | -0.0136 |
| rs3817428   | G | 0.0162  |
| rs10851997  | C | -0.0642 |
| rs11161252  | A | -0.0218 |
| rs34804115  | G | -0.0823 |
| rs113858023 | A | -0.0783 |
| rs78361369  | T | -0.026  |
| rs965372    | G | -0.0159 |
| rs4924220   | G | 0.0152  |
| rs12148063  | G | -0.0265 |
| rs78439607  | A | -0.0724 |
| rs2440323   | C | -0.0377 |
| rs35909931  | G | 0.0529  |
| rs76638324  | C | 0.0958  |
| rs117785398 | G | 0.0595  |
| rs73419199  | G | 0.0617  |
| rs898126    | C | -0.0178 |
| rs117059212 | A | 0.0554  |
| rs138991337 | A | 0.0737  |
| rs149553122 | C | 0.0517  |
| rs7178220   | G | 0.0156  |
| rs28522113  | C | 0.0139  |
| rs118099827 | T | 0.0495  |
| rs12439595  | A | -0.0605 |
| rs28451449  | A | -0.0789 |
| rs7162266   | C | 0.014   |
| rs11637211  | G | 0.0175  |
| rs113489994 | G | -0.1019 |
| rs907801    | C | 0.0273  |
| rs2866104   | C | -0.0136 |
| rs7179088   | T | 0.0148  |
| rs72725471  | A | 0.0443  |
| rs80190498  | G | 0.0253  |
| rs6493946   | C | -0.077  |

|             |   |         |
|-------------|---|---------|
| rs7172901   | G | -0.024  |
| rs1078512   | T | 0.0194  |
| rs79267042  | G | 0.0702  |
| rs17697066  | C | 0.0198  |
| rs68174118  | A | 0.0156  |
| rs12912177  | C | -0.0183 |
| rs72760675  | T | -0.0434 |
| rs141070453 | G | 0.0629  |
| rs76246801  | C | 0.0581  |
| rs79447309  | C | -0.0495 |
| rs16974946  | C | -0.0225 |
| rs79552837  | T | 0.0603  |
| rs12439636  | G | -0.0187 |
| rs11634453  | G | 0.0497  |
| rs117544936 | A | 0.0289  |
| rs72765097  | C | -0.0554 |
| rs7170748   | G | -0.0739 |
| rs4984523   | T | 0.0141  |
| rs9920378   | T | -0.0135 |
| rs62016178  | T | 0.0356  |
| rs12905450  | T | 0.0444  |
| rs117997754 | T | 0.0672  |
| rs116946064 | A | 0.0312  |
| rs117652349 | T | -0.1031 |
| rs117651917 | A | 0.1074  |
| rs8035098   | T | 0.0356  |
| rs72625128  | T | 0.0172  |
| rs4614679   | C | 0.0338  |
| rs2651424   | T | -0.0191 |
| rs78854416  | A | -0.0499 |
| rs76270950  | C | -0.0696 |
| rs4390543   | G | -0.019  |
| rs4238440   | G | -0.0344 |
| rs7174702   | C | 0.0179  |
| rs3759911   | T | 0.0167  |
| rs1838541   | A | 0.0564  |
| rs80033931  | A | -0.0896 |
| rs72758232  | T | -0.0196 |
| rs11639068  | G | 0.0189  |
| rs117888755 | C | -0.0837 |
| rs74320127  | G | 0.075   |
| rs150326315 | T | -0.0921 |
| rs28480039  | C | 0.0243  |
| rs62008553  | A | -0.089  |
| rs8025949   | G | 0.0541  |
| rs78200805  | A | 0.0249  |
| rs2277533   | A | 0.0194  |

|             |   |         |
|-------------|---|---------|
| rs143814365 | T | -0.0348 |
| rs59841314  | C | 0.0556  |
| rs35808913  | T | 0.0183  |
| rs149899029 | T | 0.0466  |
| rs116951989 | A | 0.0442  |
| rs144445593 | C | -0.0887 |
| rs75129099  | C | 0.0753  |
| rs117529862 | A | 0.0477  |
| rs17551882  | G | -0.0517 |
| rs77243456  | T | 0.0879  |
| rs117095774 | A | 0.0572  |
| rs10520058  | T | 0.0391  |
| rs16954589  | G | 0.0171  |
| rs17536553  | A | -0.0229 |
| rs28607836  | C | 0.0271  |
| rs138134049 | A | 0.1187  |
| rs225588    | G | -0.014  |
| rs79970375  | C | 0.0307  |
| rs3784604   | C | 0.0242  |
| rs71407218  | T | -0.0432 |
| rs12441453  | T | 0.0161  |
| rs1908194   | G | 0.0183  |
| rs76344240  | G | -0.0639 |
| rs74753905  | G | 0.0555  |
| rs117641888 | G | 0.0708  |
| rs4581683   | G | -0.0252 |
| rs117007907 | C | 0.0669  |
| rs79843667  | G | -0.0244 |
| rs142927108 | C | -0.0244 |
| rs11639369  | T | 0.0166  |
| rs7168676   | C | -0.0144 |
| rs57089730  | T | -0.0736 |
| rs112528667 | G | 0.052   |
| rs67971088  | G | -0.0427 |
| rs112215760 | A | 0.0508  |
| rs276863    | C | -0.0164 |
| rs12324778  | G | 0.0557  |
| rs79109566  | T | -0.061  |
| rs76897740  | C | -0.0426 |
| rs2912111   | C | -0.0331 |
| rs148628329 | A | -0.071  |
| rs16945302  | T | -0.0363 |
| rs117542787 | T | 0.1068  |
| rs1031912   | C | -0.0366 |
| rs11854633  | C | 0.0184  |
| rs73455325  | G | 0.0146  |
| rs28720730  | A | 0.0601  |

|             |   |         |
|-------------|---|---------|
| rs74667645  | T | -0.0693 |
| rs4349128   | G | 0.0304  |
| rs1797221   | T | -0.0273 |
| rs72750970  | G | 0.0483  |
| rs2415075   | A | 0.0176  |
| rs72760525  | A | 0.0437  |
| rs531747    | A | 0.016   |
| rs76450208  | C | -0.0448 |
| rs149575163 | C | 0.0364  |
| rs76726332  | T | -0.0528 |
| rs12440695  | C | 0.0139  |
| rs75048759  | A | 0.0461  |
| rs12915364  | A | -0.0781 |
| rs28772945  | G | -0.0137 |
| rs641563    | A | -0.0141 |
| rs72751957  | T | -0.0251 |
| rs75870050  | T | 0.1038  |
| rs603787    | T | 0.0235  |
| rs11072724  | T | 0.026   |
| rs148349061 | T | -0.0561 |
| rs10468123  | G | -0.0313 |
| rs12592227  | A | 0.0147  |
| rs11855458  | C | -0.015  |
| rs145176550 | T | 0.0685  |
| rs6493609   | G | -0.0164 |
| rs143857439 | G | -0.0564 |
| rs870196    | C | -0.0186 |
| rs1367959   | T | 0.0145  |
| rs4932489   | A | 0.0191  |
| rs17695404  | A | 0.0205  |
| rs7176238   | C | -0.0274 |
| rs76963384  | A | -0.0932 |
| rs17179826  | G | 0.032   |
| rs11630205  | A | 0.0213  |
| rs116959503 | A | 0.0516  |
| rs113478092 | T | 0.052   |
| rs56027313  | G | -0.019  |
| rs421098    | C | -0.0131 |
| rs11070671  | C | -0.0146 |
| rs2415081   | C | 0.0202  |
| rs17630989  | C | -0.0321 |
| rs7174853   | G | 0.0155  |
| rs17800976  | G | 0.0398  |
| rs289496    | G | -0.0605 |
| rs118070272 | T | -0.1079 |
| rs74027627  | G | 0.0942  |
| rs142602490 | A | -0.0785 |

|             |   |         |
|-------------|---|---------|
| rs150215335 | T | -0.0614 |
| rs7167939   | G | 0.0143  |
| rs111513452 | C | -0.0467 |
| rs140066779 | A | 0.0583  |
| rs78436158  | A | -0.0477 |
| rs140469028 | A | 0.0817  |
| rs4238497   | A | 0.0329  |
| rs73462719  | T | -0.062  |
| rs1369283   | T | 0.0164  |
| rs35907575  | A | 0.0339  |
| rs34680639  | G | -0.0363 |
| rs11070256  | C | 0.0198  |
| rs55809667  | T | 0.0146  |
| rs143600625 | T | -0.0716 |
| rs55670524  | A | 0.0964  |
| rs117356244 | T | 0.0556  |
| rs74839140  | G | 0.0358  |
| rs72732875  | A | -0.0804 |
| rs79163406  | C | 0.0278  |
| rs75592780  | A | -0.0322 |
| rs16940459  | T | -0.0241 |
| rs7178736   | G | 0.0171  |
| rs149390506 | T | -0.0294 |
| rs1456417   | T | 0.0241  |
| rs2173288   | T | 0.0132  |
| rs114785947 | T | 0.077   |
| rs72698061  | T | 0.1441  |
| rs34713985  | G | -0.0293 |
| rs2141435   | A | -0.0574 |
| rs1443656   | G | 0.0219  |
| rs11633191  | C | -0.0227 |
| rs2047659   | A | -0.0135 |
| rs12148326  | T | -0.0173 |
| rs79400013  | A | -0.0594 |
| rs17271570  | G | -0.0649 |
| rs111454832 | A | -0.0617 |
| rs55809501  | T | -0.0273 |
| rs12438287  | G | 0.0248  |
| rs4774261   | G | -0.0152 |
| rs72745484  | G | -0.0977 |
| rs6602977   | A | 0.0224  |
| rs72763160  | C | 0.0245  |
| rs28672262  | T | 0.0712  |
| rs117771455 | G | 0.0626  |
| rs80218258  | A | -0.0706 |
| rs2955742   | A | 0.0175  |
| rs117177159 | C | -0.0491 |

|             |   |         |
|-------------|---|---------|
| rs754399    | C | -0.0211 |
| rs4924175   | A | -0.0155 |
| rs12907953  | C | -0.027  |
| rs77704387  | T | -0.0628 |
| rs72625131  | G | -0.0237 |
| rs2068199   | A | 0.024   |
| rs72767936  | T | 0.0496  |
| rs1497815   | C | -0.0126 |
| rs73409373  | T | -0.0425 |
| rs151174946 | A | 0.0401  |
| rs28754610  | G | -0.0744 |
| rs8038405   | C | -0.0152 |
| rs583420    | C | -0.0134 |
| rs7178946   | A | -0.021  |
| rs289394    | G | 0.0143  |
| rs28668138  | T | 0.0869  |
| rs75028387  | C | -0.0329 |
| rs76229101  | C | -0.0282 |
| rs150960453 | C | -0.074  |
| rs7167446   | C | 0.0154  |
| rs12914871  | T | 0.0717  |
| rs1565409   | A | 0.0446  |
| rs117808074 | C | 0.1039  |
| rs148027321 | A | -0.0757 |
| rs35457052  | C | 0.0211  |
| rs75345216  | G | 0.0594  |
| rs72757038  | C | -0.0719 |
| rs4774607   | G | -0.0346 |
| rs8038117   | G | -0.0485 |
| rs17817830  | T | -0.0465 |
| rs34765730  | A | -0.0149 |
| rs3784334   | G | 0.0572  |
| rs7169441   | T | -0.0137 |
| rs10400858  | C | -0.0975 |
| rs4923806   | T | -0.0184 |
| rs75712029  | A | 0.0482  |
| rs117064051 | T | -0.0623 |
| rs67774488  | T | -0.0201 |
| rs80185399  | C | 0.0334  |
| rs2003924   | T | 0.0129  |
| rs6495079   | C | 0.0377  |
| rs2203646   | A | -0.0137 |
| rs59017311  | G | 0.0155  |
| rs71396847  | C | -0.09   |
| rs8037185   | A | 0.0185  |
| rs7182594   | T | 0.0281  |
| rs62006806  | A | -0.0254 |

|             |   |         |
|-------------|---|---------|
| rs34296746  | A | -0.0479 |
| rs76939322  | A | 0.0475  |
| rs78912720  | T | 0.0507  |
| rs78596469  | T | 0.031   |
| rs74704972  | G | 0.0478  |
| rs36057952  | T | 0.0424  |
| rs76776694  | T | 0.0963  |
| rs2271162   | C | 0.0207  |
| rs76525915  | T | 0.0635  |
| rs141961639 | G | -0.0186 |
| rs118184036 | A | 0.0522  |
| rs4924310   | G | 0.023   |
| rs17748187  | A | 0.1057  |
| rs8026042   | T | 0.0138  |
| rs56331059  | A | -0.0149 |
| rs8033821   | C | 0.0381  |
| rs117916334 | T | -0.0878 |
| rs56252788  | C | 0.1142  |
| rs35138338  | T | -0.0251 |
| rs79947648  | A | 0.0329  |
| rs145425362 | A | -0.0581 |
| rs16965225  | T | -0.029  |
| rs117704624 | G | -0.0941 |
| rs11638706  | T | -0.0139 |
| rs139952184 | T | -0.0907 |
| rs77829526  | A | -0.0589 |
| rs12917037  | G | -0.0158 |
| rs11073344  | T | 0.0133  |
| rs75867937  | C | 0.076   |
| rs12914497  | T | -0.0628 |
| rs79908203  | C | -0.0752 |
| rs34152137  | G | -0.0172 |
| rs148691448 | G | -0.062  |
| rs62008300  | G | -0.0292 |
| rs79434076  | T | 0.0698  |
| rs28438814  | A | -0.0244 |
| rs76466466  | G | -0.0436 |
| rs139839882 | T | 0.0501  |
| rs1458252   | T | 0.0159  |
| rs933999    | T | -0.0168 |
| rs12440512  | T | -0.029  |
| rs62003349  | G | -0.091  |
| rs2066707   | G | -0.0129 |
| rs117267429 | G | 0.0657  |
| rs719715    | G | -0.0214 |
| rs1563099   | G | 0.0443  |
| rs12911508  | T | -0.0595 |

|             |   |         |
|-------------|---|---------|
| rs2102383   | G | 0.0136  |
| rs139676222 | G | -0.0757 |
| rs968137    | A | -0.0232 |
| rs28795785  | A | -0.0386 |
| rs56061702  | A | 0.0454  |
| rs4932322   | G | 0.0175  |
| rs141721117 | G | 0.0851  |
| rs149819667 | A | 0.1004  |
| rs139412183 | A | -0.081  |
| rs117707176 | A | 0.0617  |
| rs897174    | G | -0.021  |
| rs12441608  | T | 0.0203  |
| rs11073447  | T | -0.0485 |
| rs79476880  | C | -0.0499 |
| rs7175635   | G | -0.0205 |
| rs12909626  | C | 0.0204  |
| rs16949386  | G | -0.0368 |
| rs4886578   | T | 0.034   |
| rs78523318  | C | -0.0651 |
| rs6496582   | C | 0.015   |
| rs60171894  | T | 0.0224  |
| rs137925307 | G | -0.058  |
| rs17629693  | A | -0.0386 |
| rs142616214 | G | -0.0775 |
| rs17633423  | C | 0.0451  |
| rs28719983  | C | -0.0163 |
| rs143915845 | A | -0.1225 |
| rs76432367  | G | 0.0344  |
| rs144560798 | C | -0.058  |
| rs16959968  | T | 0.1005  |
| rs145624294 | T | -0.075  |
| rs12915651  | A | 0.0138  |
| rs3825895   | T | -0.0152 |
| rs117209258 | T | -0.09   |
| rs11855688  | A | -0.0177 |
| rs150271229 | G | 0.0923  |
| rs117382813 | T | -0.1484 |
| rs72747753  | G | 0.0551  |
| rs12440850  | G | 0.0885  |
| rs28680207  | G | -0.039  |
| rs1842266   | C | 0.0146  |
| rs79714835  | T | -0.0313 |
| rs74013029  | G | 0.0611  |
| rs111568020 | G | 0.0311  |
| rs11633475  | G | -0.0294 |
| rs140425526 | A | -0.0263 |
| rs142126418 | T | 0.0405  |



|             |   |         |
|-------------|---|---------|
| rs79319640  | A | 0.0448  |
| rs138117863 | G | 0.0953  |
| rs8818      | C | -0.0257 |
| rs117762624 | A | -0.0641 |
| rs7497018   | T | -0.0161 |
| rs62020807  | A | -0.022  |
| rs62036579  | G | -0.0231 |
| rs62006189  | G | -0.0258 |
| rs62010065  | A | 0.035   |
| rs80076207  | T | 0.0315  |
| rs79408686  | G | -0.082  |
| rs2880910   | A | -0.0195 |
| rs7167300   | T | 0.0125  |
| rs78779592  | A | 0.0649  |
| rs7162853   | C | 0.0475  |
| rs141713641 | C | -0.0218 |
| rs74356279  | A | 0.0938  |
| rs35529102  | T | 0.0475  |
| rs12911623  | T | 0.0149  |
| rs77112865  | G | 0.0722  |
| rs2575418   | C | -0.0129 |
| rs113617946 | A | -0.0847 |
| rs1841875   | C | 0.0236  |
| rs8036552   | A | 0.0225  |
| rs16948431  | G | 0.0737  |
| rs74994674  | T | -0.0177 |
| rs150050462 | T | -0.0913 |
| rs9806404   | T | -0.0127 |
| rs8036815   | C | -0.0147 |
| rs77107283  | C | 0.0381  |
| rs1386772   | T | -0.0297 |
| rs143265474 | C | -0.0461 |
| rs2018558   | T | -0.0688 |
| rs11636530  | G | -0.0216 |
| rs11633874  | T | -0.013  |
| rs8042402   | G | 0.0172  |
| rs12232337  | G | -0.0163 |
| rs75699407  | T | 0.0599  |
| rs6495529   | A | -0.0143 |
| rs62025930  | A | -0.0412 |
| rs545024    | C | -0.017  |
| rs35850115  | T | 0.0163  |
| rs76823508  | T | -0.1137 |
| rs72708685  | T | -0.0192 |
| rs145253519 | G | 0.0804  |
| rs2005063   | G | -0.0182 |
| rs4613011   | T | -0.0176 |

|             |   |         |
|-------------|---|---------|
| rs34862034  | G | -0.0163 |
| rs147444602 | T | -0.0407 |
| rs62008760  | G | 0.0166  |
| rs72758434  | A | 0.064   |
| rs56139943  | C | -0.074  |
| rs149375237 | T | 0.0779  |
| rs150875827 | T | -0.0841 |
| rs11638949  | A | 0.0819  |
| rs1719321   | A | 0.0442  |
| rs4775532   | T | -0.0366 |
| rs35374001  | T | 0.0236  |
| rs2124135   | A | -0.0494 |
| rs117093571 | A | 0.0497  |
| rs145804714 | A | -0.0773 |
| rs74977623  | C | 0.0513  |
| rs76389394  | G | -0.052  |
| rs11852708  | T | -0.0232 |
| rs12324226  | G | -0.0374 |
| rs7170619   | C | -0.0751 |
| rs117957796 | A | -0.0745 |
| rs41444346  | A | -0.0194 |
| rs34546324  | G | 0.0128  |
| rs34706893  | A | 0.016   |
| rs62025080  | A | 0.0651  |
| rs7176910   | T | 0.0269  |
| rs72735358  | C | 0.0279  |
| rs139620349 | T | 0.0647  |
| rs668850    | T | 0.0162  |
| rs67980216  | C | 0.0168  |
| rs7162385   | T | 0.0547  |
| rs6494007   | T | 0.0565  |
| rs17288827  | T | 0.0736  |
| rs72736560  | A | -0.0653 |
| rs17470404  | C | 0.0655  |
| rs151136050 | T | 0.0678  |
| rs113378225 | T | 0.0561  |
| rs12440923  | C | -0.018  |
| rs111889606 | G | -0.0633 |
| rs74563378  | T | -0.022  |
| rs4508402   | A | 0.0166  |
| rs73406454  | T | 0.0527  |
| rs79027632  | C | 0.0373  |
| rs2278659   | C | 0.0296  |
| rs78847454  | C | 0.0695  |
| rs4932552   | T | 0.0157  |
| rs72759398  | A | 0.0396  |
| rs11073070  | T | -0.0139 |

|             |   |         |
|-------------|---|---------|
| rs12437968  | C | -0.0154 |
| rs12050627  | T | -0.0321 |
| rs116965509 | A | 0.0513  |
| rs8023872   | A | 0.0281  |
| rs35306921  | A | 0.0164  |
| rs115530132 | C | 0.0302  |
| rs35008505  | A | -0.0291 |
| rs112740365 | A | -0.0841 |
| rs76526429  | A | -0.0492 |
| rs75015854  | A | 0.0593  |
| rs72735361  | C | -0.0182 |
| rs7183687   | T | 0.0189  |
| rs12913071  | A | -0.0235 |
| rs2697330   | A | 0.019   |
| rs12901926  | C | 0.0146  |
| rs56409529  | G | 0.0378  |
| rs1880029   | T | 0.0313  |
| rs143326941 | A | 0.0468  |
| rs150293860 | C | 0.0395  |
| rs56327354  | T | 0.0412  |
| rs568760    | T | 0.045   |
| rs12324742  | C | -0.0701 |
| rs28701165  | G | -0.0296 |
| rs2689352   | C | -0.0127 |
| rs117824192 | C | 0.1077  |
| rs111240196 | C | -0.0568 |
| rs146088373 | A | 0.053   |
| rs7182062   | A | -0.0176 |
| rs8035866   | T | 0.0725  |
| rs10519209  | G | -0.053  |
| rs111675004 | T | -0.0519 |
| rs62026669  | A | 0.0437  |
| rs11636343  | G | -0.0164 |
| rs7175202   | C | -0.0996 |
| rs172351    | T | 0.0201  |
| rs76079408  | G | 0.0606  |
| rs77897527  | A | 0.0667  |
| rs140143645 | A | 0.0459  |
| rs4777769   | C | 0.0134  |
| rs11631550  | T | 0.0143  |
| rs139185418 | G | 0.0613  |
| rs16975755  | G | -0.019  |
| rs11855696  | T | -0.0176 |
| rs74020273  | G | 0.0597  |
| rs76779911  | A | 0.1013  |
| rs142043302 | C | -0.0425 |
| rs6494731   | A | 0.049   |

|             |   |         |
|-------------|---|---------|
| rs79015880  | T | 0.0124  |
| rs75812656  | A | 0.0373  |
| rs17759061  | A | -0.0269 |
| rs558333    | C | -0.0411 |
| rs1581361   | C | 0.0755  |
| rs12438472  | A | 0.0133  |
| rs75836903  | C | -0.0617 |
| rs79115699  | G | 0.0574  |
| rs144254350 | A | 0.0367  |
| rs7171957   | A | -0.0194 |
| rs56359304  | T | 0.0276  |
| rs61012855  | T | -0.0214 |
| rs11071954  | A | -0.0726 |
| rs60114944  | G | 0.0435  |
| rs117719066 | C | 0.0333  |
| rs59315812  | C | -0.0266 |
| rs72734689  | T | -0.0234 |
| rs11630559  | T | -0.0225 |
| rs148997339 | A | -0.0568 |
| rs75881500  | T | -0.0366 |
| rs117078908 | A | -0.0348 |
| rs72732571  | C | -0.0562 |
| rs80061741  | A | 0.0228  |
| rs4923734   | A | 0.0227  |
| rs146642916 | G | -0.0745 |
| rs304985    | C | -0.0198 |
| rs73361516  | G | 0.0213  |
| rs79842477  | C | 0.0432  |
| rs2672691   | C | -0.0266 |
| rs74482817  | A | 0.0259  |
| rs28607625  | G | -0.0832 |
| rs11639322  | T | -0.0225 |
| rs1562253   | C | 0.0199  |
| rs72717127  | C | 0.023   |
| rs207952    | G | -0.0152 |
| rs2439371   | C | 0.0166  |
| rs148834673 | C | -0.0703 |
| rs80123182  | G | 0.0273  |
| rs4396487   | A | -0.0166 |
| rs28878478  | G | -0.0148 |
| rs71463468  | T | -0.0608 |
| rs17729887  | C | 0.0693  |
| rs11070211  | A | 0.014   |
| rs34825924  | A | -0.0203 |
| rs112062836 | G | -0.0409 |
| rs35598660  | T | 0.0718  |
| rs71463464  | T | 0.0469  |

|             |   |         |
|-------------|---|---------|
| rs1565934   | G | -0.0208 |
| rs151179592 | T | 0.04    |
| rs80335077  | A | 0.0338  |
| rs1018324   | T | 0.0126  |
| rs6494554   | T | -0.0186 |
| rs12591548  | C | 0.0205  |
| rs3985921   | T | 0.0216  |
| rs16975863  | C | 0.0233  |
| rs967467    | A | -0.014  |
| rs147761575 | A | 0.0286  |
| rs2943227   | G | 0.0121  |
| rs71398291  | A | -0.0645 |
| rs117618575 | A | 0.0558  |
| rs72730748  | C | -0.0229 |
| rs1602907   | C | -0.0149 |
| rs117610138 | T | -0.0407 |
| rs72727615  | T | -0.0201 |
| rs143198447 | T | 0.055   |
| rs139485865 | T | -0.1053 |
| rs149166400 | A | 0.0557  |
| rs117864190 | T | 0.0488  |
| rs72753626  | G | -0.0245 |
| rs8026716   | A | 0.0138  |
| rs77488738  | A | 0.073   |
| rs7184010   | T | -0.0174 |
| rs2651850   | A | -0.021  |
| rs7177039   | T | -0.0123 |
| rs141370209 | A | -0.1135 |
| rs117597915 | G | 0.0639  |
| rs117363831 | T | 0.1207  |
| rs62023062  | G | -0.0151 |
| rs1947782   | C | 0.0133  |
| rs8027921   | C | -0.0173 |
| rs151309059 | G | 0.0972  |
| rs12437572  | G | 0.0159  |
| rs58934940  | C | -0.0588 |
| rs8040807   | T | -0.0146 |
| rs72755551  | C | -0.0341 |
| rs72745830  | A | 0.0332  |
| rs116902449 | C | -0.1107 |
| rs882959    | G | -0.0141 |
| rs117941816 | G | 0.0699  |
| rs117822771 | A | 0.0606  |
| rs62017773  | T | -0.051  |
| rs117222848 | A | -0.0968 |
| rs35966712  | C | 0.0363  |
| rs17532319  | T | -0.0237 |

|             |   |         |
|-------------|---|---------|
| rs7183325   | G | -0.0126 |
| rs934741    | A | 0.0132  |
| rs111799083 | A | -0.0294 |
| rs144139149 | A | -0.0715 |
| rs117090774 | T | 0.0342  |
| rs17781350  | T | 0.0655  |
| rs4906624   | T | -0.0194 |
| rs16965511  | G | -0.029  |
| rs56654055  | A | -0.0202 |
| rs77036264  | G | -0.0508 |
| rs11631752  | C | 0.0145  |
| rs150387952 | C | 0.0719  |
| rs77869728  | G | 0.0602  |
| rs561507    | G | -0.0442 |
| rs75816310  | G | 0.0457  |
| rs117283585 | T | 0.0994  |
| rs74858594  | A | -0.0394 |
| rs7165333   | A | 0.0356  |
| rs141747311 | A | -0.075  |
| rs2398098   | G | -0.1005 |
| rs4261479   | C | -0.0133 |
| rs144334873 | T | -0.0727 |
| rs66584611  | A | -0.026  |
| rs77313716  | C | -0.0189 |
| rs117943186 | C | -0.0471 |
| rs76734019  | G | 0.0779  |
| rs1533858   | G | -0.051  |
| rs6497038   | T | -0.0236 |
| rs4984530   | C | 0.0123  |
| rs1426206   | G | -0.0137 |
| rs118081750 | T | 0.0548  |
| rs8032052   | T | -0.0201 |
| rs62046686  | A | -0.0999 |
| rs117127307 | A | 0.0445  |
| rs79557669  | T | 0.0257  |
| rs73434831  | T | -0.0344 |
| rs183505    | C | -0.0185 |
| rs75621695  | A | -0.0321 |
| rs72715941  | A | -0.0294 |
| rs690125    | T | -0.085  |
| rs58469372  | A | -0.016  |
| rs1528417   | C | -0.0144 |
| rs17304157  | G | 0.0265  |
| rs34738049  | C | 0.0243  |
| rs73465643  | T | -0.0707 |
| rs56281609  | C | 0.0279  |
| rs682567    | A | 0.0129  |

|             |   |         |
|-------------|---|---------|
| rs62011023  | T | 0.0649  |
| rs140635417 | A | 0.072   |
| rs7179857   | C | 0.0352  |
| rs117425475 | C | -0.0835 |
| rs7169953   | C | 0.0142  |
| rs17556903  | C | 0.0233  |
| rs79335799  | T | 0.0207  |
| rs1513855   | A | -0.0137 |
| rs72753900  | G | 0.0271  |
| rs116250922 | T | -0.0626 |
| rs28838061  | T | -0.0293 |
| rs2199727   | G | -0.0434 |
| rs2593034   | T | -0.0227 |
| rs9920189   | A | -0.0127 |
| rs117342284 | C | -0.067  |
| rs4613005   | A | 0.0125  |
| rs2679080   | C | 0.0475  |
| rs140522489 | A | 0.0442  |
| rs75131657  | T | 0.0578  |
| rs79297833  | A | 0.092   |
| rs28791223  | C | -0.0226 |
| rs77068980  | G | -0.0375 |
| rs139811046 | C | 0.0403  |
| rs4777746   | T | -0.0144 |
| rs234526    | A | -0.012  |
| rs144347091 | A | 0.0779  |
| rs17556833  | C | -0.0482 |
| rs16956563  | T | 0.0152  |
| rs1836700   | T | 0.0184  |
| rs16962772  | T | -0.0716 |
| rs146808768 | C | 0.0679  |
| rs2732155   | T | 0.0179  |
| rs74028402  | C | 0.0279  |
| rs147663430 | C | -0.0882 |
| rs72763340  | C | -0.0372 |
| rs2955704   | G | 0.0157  |
| rs78682273  | C | -0.0274 |
| rs72739104  | T | 0.0125  |
| rs114433903 | A | 0.0359  |
| rs76141078  | T | 0.0493  |
| rs8038490   | A | 0.0261  |
| rs113004814 | A | 0.0675  |
| rs72649561  | A | -0.026  |
| rs12905338  | A | -0.0384 |
| rs8038897   | A | 0.0133  |
| rs62027549  | A | 0.0164  |
| rs2346697   | G | 0.0153  |

|             |   |         |
|-------------|---|---------|
| rs76833488  | G | -0.027  |
| rs77215296  | C | -0.0373 |
| rs2702313   | A | -0.0267 |
| rs79208099  | A | 0.0724  |
| rs2075      | G | 0.0125  |
| rs147888408 | T | 0.0608  |
| rs117591191 | T | 0.0763  |
| rs74668433  | G | 0.0653  |
| rs12913113  | G | 0.022   |
| rs156778    | G | 0.0496  |
| rs12915037  | T | -0.0217 |
| rs7168433   | A | -0.036  |
| rs144281288 | A | -0.1476 |
| rs11073773  | A | -0.0411 |
| rs116905492 | A | 0.0658  |
| rs4321148   | T | 0.0146  |
| rs72751260  | T | -0.0594 |
| rs690074    | T | -0.0115 |
| rs16945239  | A | -0.024  |
| rs12902966  | A | 0.0136  |
| rs2881638   | G | 0.0116  |
| rs138394944 | A | 0.0254  |
| rs16963644  | C | -0.0809 |
| rs74624432  | G | 0.0334  |
| rs12908103  | A | 0.0206  |
| rs79003715  | T | -0.038  |
| rs117384388 | T | -0.0644 |
| rs7494994   | G | -0.0256 |
| rs72729391  | A | 0.0289  |
| rs28392847  | A | 0.036   |
| rs148467642 | G | -0.0914 |
| rs115184849 | T | 0.0839  |
| rs2459899   | C | 0.0129  |
| rs1993471   | A | -0.0366 |
| rs61999914  | T | -0.0226 |
| rs4965065   | T | 0.0201  |
| rs117000314 | A | -0.0832 |
| rs72764015  | T | -0.0127 |
| rs78409105  | T | -0.1051 |
| rs76132981  | T | -0.0659 |
| rs62014025  | T | 0.0209  |
| rs75112656  | G | -0.0631 |
| rs2047350   | T | 0.0115  |
| rs11631023  | C | -0.0227 |
| rs6606819   | A | -0.0122 |
| rs12905987  | A | 0.0138  |
| rs2471030   | T | -0.0133 |



|             |   |         |
|-------------|---|---------|
| rs151035205 | C | 0.0562  |
| rs76168202  | A | -0.0534 |
| rs143891344 | A | 0.0465  |
| rs59369287  | C | 0.0246  |
| rs112918809 | A | 0.059   |
| rs4041983   | C | -0.0359 |
| rs17816007  | A | -0.017  |
| rs56047771  | C | -0.0276 |
| rs143020264 | T | 0.0349  |
| rs1871986   | T | -0.0159 |
| rs11855551  | C | -0.025  |
| rs8035826   | T | 0.012   |
| rs17831280  | T | 0.0253  |
| rs117324669 | A | 0.049   |
| rs4965518   | G | 0.016   |
| rs75415265  | G | -0.028  |
| rs151247298 | C | -0.081  |
| rs1370395   | T | 0.0468  |
| rs57057855  | A | -0.0444 |
| rs140134875 | A | 0.0504  |
| rs2447250   | A | -0.0114 |
| rs521504    | T | -0.0284 |
| rs7166417   | T | 0.012   |
| rs8043034   | C | -0.0501 |
| rs6496611   | C | -0.048  |
| rs140810638 | A | -0.0677 |
| rs2643363   | G | 0.0131  |
| rs150574542 | T | 0.0679  |
| rs7173019   | C | 0.0181  |
| rs62002705  | G | -0.0149 |
| rs10438366  | G | -0.0182 |
| rs113073522 | T | -0.0866 |
| rs870306    | G | 0.0192  |
| rs12439640  | G | -0.0254 |
| rs16969681  | T | -0.0211 |
| rs72707416  | G | 0.045   |
| rs149004806 | G | 0.1007  |
| rs6598488   | A | -0.0144 |
| rs3784491   | C | -0.0199 |
| rs11632624  | A | 0.0749  |
| rs66742869  | C | -0.0194 |
| rs72738070  | T | 0.02    |
| rs141668138 | G | 0.0475  |
| rs72713193  | C | 0.0775  |
| rs8040255   | A | 0.0143  |
| rs141795224 | A | 0.0615  |
| rs117007183 | C | 0.0585  |

|             |   |         |
|-------------|---|---------|
| rs12911715  | T | -0.0116 |
| rs7172826   | T | -0.0165 |
| rs76111261  | A | -0.0441 |
| rs76842236  | C | 0.0404  |
| rs977589    | T | -0.0122 |
| rs56013767  | A | 0.0124  |
| rs12903401  | C | 0.0117  |
| rs78943597  | G | 0.0497  |
| rs66793829  | C | 0.0157  |
| rs147825669 | T | 0.0775  |
| rs11637000  | A | -0.0171 |
| rs147861146 | T | 0.0956  |
| rs117671325 | T | 0.0293  |
| rs681484    | G | 0.0123  |
| rs35739485  | T | -0.0207 |
| rs77318162  | C | 0.0664  |
| rs35202529  | A | 0.0268  |
| rs80214343  | T | -0.0727 |
| rs148014516 | G | -0.0457 |
| rs72737361  | G | 0.0696  |
| rs35891934  | A | -0.0261 |
| rs4778868   | T | 0.0157  |
| rs62023309  | A | 0.0376  |
| rs7170305   | G | 0.0136  |
| rs16948375  | A | 0.0339  |
| rs78476641  | T | 0.0722  |
| rs116980371 | G | -0.0315 |
| rs59065311  | T | -0.0483 |
| rs16945614  | T | 0.0281  |
| rs727702    | A | 0.0186  |
| rs4265779   | C | -0.0178 |
| rs9652478   | G | 0.0226  |
| rs72743901  | G | 0.0378  |
| rs4029934   | T | 0.0693  |
| rs7172583   | T | -0.0434 |
| rs341402    | T | 0.0265  |
| rs78567450  | T | 0.1072  |
| rs16970495  | A | 0.0135  |
| rs148169239 | T | 0.0624  |
| rs8033603   | G | 0.021   |
| rs72719021  | A | -0.0525 |
| rs75966616  | A | -0.0456 |
| rs28735994  | A | 0.0223  |
| rs71412290  | G | -0.0301 |
| rs117161605 | T | 0.0491  |
| rs1545246   | T | -0.0215 |
| rs12901591  | T | 0.0153  |

|             |   |         |
|-------------|---|---------|
| rs78675714  | A | 0.0436  |
| rs61021634  | G | -0.0205 |
| rs7169716   | T | 0.0307  |
| rs4923799   | C | -0.0271 |
| rs7172732   | A | 0.0124  |
| rs117144041 | G | -0.0354 |
| rs72751725  | T | 0.0437  |
| rs113964395 | C | 0.035   |
| rs72723442  | C | -0.0313 |
| rs140067789 | T | -0.0613 |
| rs1158075   | A | 0.011   |
| rs17301822  | A | 0.0506  |
| rs17317027  | G | -0.0948 |
| rs62009524  | C | -0.0907 |
| rs150672730 | G | 0.0417  |
| rs4520801   | C | -0.0632 |
| rs12441056  | A | 0.0766  |
| rs4774941   | G | 0.0226  |
| rs56188061  | T | 0.0116  |
| rs117944366 | A | 0.0458  |
| rs138878080 | T | -0.0851 |
| rs75830587  | C | -0.0375 |
| rs4779508   | T | -0.013  |
| rs62020865  | A | 0.0173  |
| rs1711045   | G | -0.0161 |
| rs2677725   | A | 0.0487  |
| rs137897913 | A | 0.1158  |
| rs3825990   | T | 0.0388  |
| rs117914098 | A | -0.04   |
| rs12439499  | C | 0.0181  |
| rs75252668  | G | 0.042   |
| rs7162855   | G | -0.0206 |
| rs1023642   | A | 0.0429  |
| rs138206536 | T | -0.0725 |
| rs117969959 | A | -0.1066 |
| rs1051287   | A | -0.0158 |
| rs62001324  | A | -0.0354 |
| rs79213347  | C | -0.0391 |
| rs149724023 | A | -0.0189 |
| rs6496180   | G | -0.0128 |
| rs11631315  | T | 0.0319  |
| rs28525672  | G | 0.0145  |
| rs140956756 | T | -0.073  |
| rs2593053   | A | -0.0125 |
| rs28673024  | T | -0.0184 |
| rs72705865  | A | 0.0397  |
| rs75134557  | C | -0.0314 |

|             |   |         |
|-------------|---|---------|
| rs117264037 | T | -0.0556 |
| rs116962999 | A | 0.0575  |
| rs117609528 | A | -0.0521 |
| rs12902362  | A | -0.0921 |
| rs75067533  | G | -0.1025 |
| rs2218342   | T | -0.0334 |
| rs28612945  | T | -0.021  |
| rs77096950  | A | -0.046  |
| rs145395179 | T | 0.0602  |
| rs7497640   | T | 0.0117  |
| rs16949091  | G | 0.0214  |
| rs734635    | T | 0.0136  |
| rs72705156  | A | -0.0267 |
| rs149316549 | G | 0.0195  |
| rs16949741  | A | 0.0224  |
| rs79321819  | A | 0.0431  |
| rs17254697  | A | -0.0332 |
| rs141055667 | A | -0.0373 |
| rs12324909  | T | -0.012  |
| rs62003773  | C | 0.0209  |
| rs7179063   | A | 0.0149  |
| rs76632816  | T | -0.04   |
| rs79795828  | G | 0.0573  |
| rs117641017 | T | 0.0603  |
| rs2733100   | A | -0.0171 |
| rs7177806   | A | 0.0273  |
| rs12593706  | T | 0.0122  |
| rs2292116   | C | -0.0152 |
| rs795471    | G | -0.0173 |
| rs34705030  | A | 0.0239  |
| rs12902360  | C | 0.0123  |
| rs7183564   | G | -0.0166 |
| rs144144632 | G | 0.0536  |
| rs10163164  | C | -0.0126 |
| rs4777644   | G | -0.0321 |
| rs4492992   | C | 0.0135  |
| rs9672398   | G | -0.0111 |
| rs12905758  | A | 0.0244  |
| rs138664152 | A | 0.0653  |
| rs7164773   | T | -0.0113 |
| rs12917595  | T | -0.0141 |
| rs28689929  | T | -0.0119 |
| rs6494311   | T | -0.0114 |
| rs111932982 | G | 0.0795  |
| rs12595784  | T | -0.0182 |
| rs117697929 | T | 0.0889  |
| rs655579    | G | 0.0303  |

|             |   |         |
|-------------|---|---------|
| rs76141337  | T | 0.0717  |
| rs708679    | C | 0.0211  |
| rs142854721 | T | 0.0587  |
| rs12913946  | T | -0.0143 |
| rs28420588  | A | -0.0256 |
| rs72755787  | A | -0.0216 |
| rs34453246  | G | 0.0178  |
| rs140104360 | A | -0.0388 |
| rs151270869 | G | -0.0981 |
| rs3959554   | G | -0.0112 |
| rs71478312  | C | -0.0207 |
| rs55741428  | G | -0.0224 |
| rs62023700  | A | -0.0675 |
| rs10444814  | T | -0.0338 |
| rs12910352  | C | 0.0126  |
| rs144115458 | T | 0.0612  |
| rs8023917   | C | 0.0464  |
| rs11637910  | A | -0.0132 |
| rs925759    | T | 0.0117  |
| rs6493208   | G | 0.0471  |
| rs56966047  | C | -0.054  |
| rs117806191 | T | 0.048   |
| rs76772355  | A | -0.0292 |
| rs35512484  | G | 0.0303  |
| rs148241116 | G | 0.0974  |
| rs140166752 | G | -0.0402 |
| rs141322066 | C | -0.1008 |
| rs4530078   | A | 0.0161  |
| rs4777810   | A | 0.0121  |
| rs77397211  | C | -0.0238 |
| rs17235996  | A | -0.0178 |
| rs11072922  | T | -0.0137 |
| rs7168734   | C | 0.0244  |
| rs7168956   | A | -0.0276 |
| rs145858971 | T | 0.0743  |
| rs12592921  | C | -0.0255 |
| rs6496141   | A | -0.0496 |
| rs79431920  | T | -0.0428 |
| rs58896958  | C | 0.0165  |
| rs146938812 | G | -0.0592 |
| rs75683540  | G | -0.0286 |
| rs56898898  | C | -0.0207 |
| rs12439316  | T | -0.0166 |
| rs111358886 | A | -0.0397 |
| rs10152644  | G | -0.0227 |
| rs4924110   | G | -0.0615 |
| rs76727460  | C | 0.0467  |

|             |   |         |
|-------------|---|---------|
| rs8033873   | A | -0.0122 |
| rs149649828 | T | -0.0721 |
| rs62005628  | G | 0.0236  |
| rs74788285  | G | -0.0136 |
| rs5000770   | A | -0.0117 |
| rs4620934   | T | 0.0115  |
| rs12148530  | C | 0.0118  |
| rs2727145   | C | 0.0129  |
| rs12909022  | C | -0.012  |
| rs10851596  | A | 0.0124  |
| rs7183772   | G | 0.0223  |
| rs34130844  | C | -0.0151 |
| rs16960833  | C | 0.0178  |
| rs78080265  | T | -0.0265 |
| rs111789844 | G | -0.0263 |
| rs60760826  | G | -0.0123 |
| rs3797      | G | -0.0259 |
| rs35398985  | G | 0.0707  |
| rs8041675   | T | -0.0111 |
| rs3107674   | C | 0.0202  |
| rs144500600 | A | 0.078   |
| rs7403557   | A | 0.0133  |
| rs35798799  | T | -0.0181 |
| rs145676627 | T | -0.0715 |
| rs4779877   | G | -0.0314 |
| rs12592815  | A | 0.0131  |
| rs56245413  | T | 0.0166  |
| rs7174521   | C | 0.023   |
| rs150380361 | C | 0.0766  |
| rs56282408  | A | -0.0143 |
| rs74028941  | C | -0.0196 |
| rs12324298  | G | 0.0245  |
| rs62044310  | G | -0.0204 |
| rs118103489 | A | -0.0388 |
| rs12915329  | T | -0.0394 |
| rs1850480   | C | 0.0111  |
| rs2928023   | A | 0.0137  |
| rs16949216  | T | -0.0138 |
| rs117185798 | A | 0.0568  |
| rs12907018  | A | -0.0196 |
| rs12439818  | C | -0.0134 |
| rs74979270  | C | -0.0332 |
| rs16964268  | C | 0.0162  |
| rs146176108 | G | -0.0699 |
| rs142125552 | T | -0.0825 |
| rs149704304 | T | -0.0407 |
| rs76331697  | G | 0.024   |

|             |   |         |
|-------------|---|---------|
| rs900825    | C | -0.0147 |
| rs35876677  | T | 0.0446  |
| rs78520403  | C | 0.0323  |
| rs62001858  | G | 0.0203  |
| rs117186662 | T | -0.0756 |
| rs62001693  | A | 0.0433  |
| rs10520623  | C | -0.0328 |
| rs72767973  | C | -0.0243 |
| rs35591537  | G | 0.0741  |
| rs981473    | A | -0.0106 |
| rs4776754   | A | -0.0133 |
| rs12901919  | C | 0.0149  |
| rs76551941  | T | -0.0608 |
| rs112559885 | A | -0.0749 |
| rs74700439  | G | 0.0323  |
| rs80119424  | G | -0.0233 |
| rs1656637   | G | 0.0132  |
| rs77476383  | C | -0.0515 |
| rs75750246  | T | 0.0434  |
| rs16953351  | A | 0.0517  |
| rs78246813  | G | -0.0385 |
| rs2414512   | G | 0.0118  |
| rs12440480  | A | -0.0183 |
| rs589390    | A | -0.0146 |
| rs13379803  | T | -0.0153 |
| rs869556    | C | -0.0127 |
| rs2290187   | T | 0.0751  |
| rs117348679 | A | -0.0993 |
| rs28461423  | T | 0.0219  |
| rs11632248  | T | 0.0161  |
| rs72727381  | T | 0.0583  |
| rs79174377  | A | 0.0422  |
| rs12439830  | G | -0.0108 |
| rs76886283  | G | -0.0251 |
| rs72712237  | T | 0.0337  |
| rs57921317  | A | 0.0269  |
| rs2008780   | A | -0.0135 |
| rs7203209   | T | 0.0756  |
| rs12597717  | A | 0.0732  |
| rs78335918  | G | 0.1324  |
| rs16959146  | T | 0.1594  |
| rs12920300  | T | 0.0959  |
| rs1861199   | T | 0.1083  |
| rs17726745  | G | 0.4667  |
| rs3103810   | A | 0.065   |
| rs12600118  | C | 0.2854  |
| rs12929358  | A | 0.1051  |

|             |   |         |
|-------------|---|---------|
| rs74901350  | T | 0.153   |
| rs4889625   | A | -0.0718 |
| rs35441874  | A | -0.0703 |
| rs62030834  | G | -0.0675 |
| rs80124781  | G | 0.302   |
| rs16953089  | C | -0.0682 |
| rs4530119   | A | 0.2805  |
| rs117984432 | C | 0.2069  |
| rs62044062  | G | -0.0895 |
| rs2291937   | G | -0.161  |
| rs9941245   | G | -0.0757 |
| rs77749545  | C | -0.0993 |
| rs141436390 | A | 0.3399  |
| rs75714645  | G | 0.2472  |
| rs149849264 | T | 0.4974  |
| rs1155876   | C | -0.1007 |
| rs1345436   | C | 0.0939  |
| rs7201287   | G | 0.2747  |
| rs117581736 | A | -0.1985 |
| rs16944172  | C | -0.0607 |
| rs4787982   | T | 0.0876  |
| rs9931998   | A | -0.0792 |
| rs11641627  | T | -0.0812 |
| rs3852728   | A | 0.1147  |
| rs78789589  | T | 0.4403  |
| rs12149010  | T | 0.0752  |
| rs7499012   | G | 0.0691  |
| rs117144048 | G | -0.3455 |
| rs13335830  | C | 0.082   |
| rs3931036   | G | 0.1134  |
| rs2002640   | T | -0.0586 |
| rs145767144 | T | 0.1814  |
| rs17616300  | G | -0.068  |
| rs173474    | A | -0.0659 |
| rs142078611 | G | 0.2514  |
| rs45599241  | G | 0.3651  |
| rs116957626 | A | 0.221   |
| rs72800564  | G | 0.1165  |
| rs117606575 | T | 0.4764  |
| rs77062788  | A | 0.221   |
| rs1845855   | A | -0.0544 |
| rs1875941   | C | -0.0714 |
| rs17855121  | C | -0.0771 |
| rs139337054 | T | -0.1143 |
| rs11149808  | T | -0.0571 |
| rs142838338 | A | -0.3842 |
| rs1701111   | G | 0.0582  |



|             |   |         |
|-------------|---|---------|
| rs7200027   | G | -0.077  |
| rs112093224 | A | 0.0636  |
| rs34248870  | T | 0.057   |
| rs72789386  | G | -0.1005 |
| rs4843586   | C | 0.0548  |
| rs28866501  | T | 0.1097  |
| rs28757743  | T | 0.1258  |
| rs241376    | T | 0.0574  |
| rs117971134 | G | -0.3905 |
| rs62033642  | A | 0.1921  |
| rs7190269   | A | 0.0574  |
| rs140937465 | A | -0.4063 |
| rs62034408  | G | -0.2147 |
| rs117583475 | T | -0.2824 |
| rs17633346  | A | -0.0999 |
| rs6497986   | T | 0.0762  |
| rs291042    | A | 0.0711  |
| rs56207126  | C | 0.1012  |
| rs11643640  | C | 0.0762  |
| rs13338706  | G | 0.1013  |
| rs36035351  | T | 0.0765  |
| rs1902815   | A | -0.0611 |
| rs30126     | T | 0.1149  |
| rs1420228   | G | 0.0766  |
| rs4887926   | T | -0.0534 |
| rs3751753   | A | 0.0718  |
| rs16960950  | G | -0.0713 |
| rs9922185   | A | -0.0507 |
| rs4076155   | G | -0.0961 |
| rs759323    | T | -0.081  |
| rs8049931   | G | 0.0585  |
| rs36013478  | T | 0.3802  |
| rs8062895   | G | 0.0556  |
| rs10492839  | T | -0.0937 |
| rs111899846 | A | -0.3729 |
| rs117999573 | A | -0.1481 |
| rs149941417 | A | 0.2093  |
| rs12924952  | C | -0.0603 |
| rs30240     | A | 0.0749  |
| rs35677339  | T | -0.2427 |
| rs40147     | A | -0.0581 |
| rs74977702  | A | 0.322   |
| rs12595955  | G | -0.0638 |
| rs171090    | T | -0.1511 |
| rs73576609  | T | -0.0831 |
| rs79541706  | G | 0.3158  |
| rs7359361   | T | 0.1111  |

|             |   |         |
|-------------|---|---------|
| rs3743795   | G | -0.0623 |
| rs2689244   | C | -0.0585 |
| rs16949276  | A | -0.0804 |
| rs11076856  | T | -0.0521 |
| rs1110893   | G | -0.0522 |
| rs9935917   | C | -0.0562 |
| rs12930264  | A | 0.0681  |
| rs7191005   | G | -0.0486 |
| rs76376361  | G | 0.0882  |
| rs445862    | C | -0.0507 |
| rs11117229  | T | 0.0555  |
| rs8063118   | T | -0.0872 |
| rs3096309   | C | 0.0668  |
| rs4783368   | C | 0.0606  |
| rs2397775   | A | 0.0802  |
| rs12925125  | G | 0.0508  |
| rs17696938  | A | 0.1388  |
| rs1139897   | A | -0.0575 |
| rs3736377   | T | -0.1535 |
| rs138721301 | C | 0.3091  |
| rs62044061  | T | 0.1078  |
| rs16974049  | C | 0.0615  |
| rs78284242  | A | 0.2578  |
| rs3916698   | C | -0.0602 |
| rs9931710   | A | -0.0592 |
| rs2434865   | G | 0.0813  |
| rs6564904   | A | 0.0516  |
| rs11866169  | A | -0.0699 |
| rs17411006  | T | -0.068  |
| rs117123329 | A | 0.2636  |
| rs9923009   | G | -0.2751 |
| rs4843399   | G | 0.1002  |
| rs111599845 | A | 0.0796  |
| rs299973    | A | -0.1369 |
| rs140105397 | A | 0.2657  |
| rs148603263 | C | -0.2292 |
| rs12446461  | T | 0.051   |
| rs62017676  | A | -0.0575 |
| rs4781024   | A | -0.065  |
| rs8055398   | T | -0.0973 |
| rs77535779  | C | 0.3312  |
| rs9923820   | A | -0.1033 |
| rs75025260  | C | -0.111  |
| rs79202793  | A | 0.0793  |
| rs1127133   | C | 0.0964  |
| rs117193773 | T | 0.2774  |
| rs2347567   | A | -0.0483 |

|             |   |         |
|-------------|---|---------|
| rs16965999  | A | -0.0905 |
| rs78903779  | C | 0.1331  |
| rs750516    | A | -0.0664 |
| rs12447439  | A | 0.0842  |
| rs141787965 | G | 0.3094  |
| rs3096414   | G | 0.049   |
| rs111657053 | C | -0.1051 |
| rs2019249   | A | -0.0473 |
| rs2068355   | G | -0.0731 |
| rs75154037  | T | 0.1097  |
| rs74461564  | C | 0.1554  |
| rs196012    | G | -0.0614 |
| rs56146347  | C | 0.2146  |
| rs1126145   | A | -0.2587 |
| rs55997116  | C | 0.0585  |
| rs117436249 | A | -0.2702 |
| rs8046386   | C | -0.0583 |
| rs1684621   | T | -0.0565 |
| rs9939794   | C | 0.0469  |
| rs76390674  | A | 0.1774  |
| rs60492691  | T | 0.1809  |
| rs117959699 | C | 0.0872  |
| rs72763795  | C | -0.168  |
| rs139976822 | A | 0.0523  |
| rs7499679   | A | -0.0552 |
| rs7193267   | T | 0.3083  |
| rs2038128   | T | -0.0767 |
| rs43142     | T | -0.0508 |
| rs1713486   | C | 0.0857  |
| rs7763      | C | -0.0794 |
| rs61098049  | A | 0.0736  |
| rs72834723  | T | 0.1368  |
| rs117667271 | A | 0.2292  |
| rs12924092  | A | 0.0631  |
| rs12449188  | G | -0.0505 |
| rs76830324  | G | 0.1686  |
| rs7186325   | A | 0.1079  |
| rs72802517  | G | -0.0903 |
| rs56109913  | A | -0.3203 |
| rs12927804  | A | 0.0911  |
| rs145221094 | T | -0.4146 |
| rs4500748   | G | -0.0582 |
| rs72798514  | T | -0.1127 |
| rs2270843   | G | -0.051  |
| rs2098744   | G | -0.0534 |
| rs35951069  | A | 0.0701  |
| rs289716    | T | 0.0513  |

|             |   |         |
|-------------|---|---------|
| rs1366658   | A | -0.1074 |
| rs117670070 | T | 0.1521  |
| rs36063822  | T | -0.0608 |
| rs8046424   | C | 0.0536  |
| rs147688930 | A | 0.145   |
| rs35029439  | T | -0.0642 |
| rs2575388   | T | -0.0727 |
| rs11862871  | G | 0.0576  |
| rs248829    | G | 0.0513  |
| rs75786062  | G | 0.1314  |
| rs71387152  | T | -0.1825 |
| rs9923767   | G | 0.0707  |
| rs1423886   | A | -0.0519 |
| rs2541598   | C | 0.0752  |
| rs60809043  | G | -0.1004 |
| rs140290238 | T | -0.2256 |
| rs9302863   | T | -0.0708 |
| rs11643741  | G | 0.047   |
| rs11645728  | A | 0.0497  |
| rs11558903  | C | 0.0905  |
| rs140797214 | T | -0.2805 |
| rs4383128   | G | 0.1277  |
| rs8054008   | A | -0.0874 |
| rs7196854   | A | -0.0762 |
| rs77764977  | G | 0.159   |
| rs2011287   | T | 0.0537  |
| rs75606626  | A | 0.1313  |
| rs112863661 | T | 0.1982  |
| rs56208392  | G | -0.1048 |
| rs117891757 | T | 0.1794  |
| rs77417474  | T | 0.1752  |
| rs74869698  | A | -0.3436 |
| rs72794646  | A | -0.0736 |
| rs12448926  | G | 0.0448  |
| rs1009956   | C | -0.0688 |
| rs35042463  | C | -0.0547 |
| rs35886152  | A | -0.1374 |
| rs12930151  | T | 0.0487  |
| rs16945930  | T | -0.2582 |
| rs115116665 | A | -0.1364 |
| rs72636272  | C | 0.0884  |
| rs74405269  | T | 0.1337  |
| rs55886111  | T | -0.1022 |
| rs16941783  | T | -0.1017 |
| rs62049896  | C | 0.0923  |
| rs111463024 | T | -0.2841 |
| rs72798546  | A | -0.0659 |

|             |   |         |
|-------------|---|---------|
| rs10500403  | C | 0.1579  |
| rs35137323  | T | 0.0521  |
| rs12598406  | C | -0.1051 |
| rs10514402  | T | -0.2151 |
| rs12933139  | A | 0.077   |
| rs28688707  | G | 0.07    |
| rs72783239  | C | -0.0662 |
| rs12447938  | C | -0.0797 |
| rs72815871  | G | 0.2674  |
| rs143979412 | A | -0.2215 |
| rs78288030  | G | 0.1596  |
| rs117682692 | C | 0.2014  |
| rs8055791   | C | -0.0475 |
| rs74024796  | T | 0.1848  |
| rs4433823   | A | 0.0829  |
| rs11864795  | T | -0.2716 |
| rs12930385  | A | 0.1486  |
| rs74577750  | C | -0.2178 |
| rs142892094 | G | 0.1626  |
| rs4240782   | G | 0.0855  |
| rs3859153   | C | -0.0726 |
| rs16948599  | T | 0.2466  |
| rs62031750  | C | -0.0867 |
| rs62051025  | T | -0.0609 |
| rs4238935   | C | 0.0447  |
| rs11649617  | T | -0.0498 |
| rs7403987   | C | 0.1068  |
| rs6498409   | T | 0.1618  |
| rs4888617   | T | 0.2808  |
| rs80119098  | G | 0.1259  |
| rs10871304  | G | 0.0569  |
| rs9924670   | G | -0.052  |
| rs7203305   | T | 0.0515  |
| rs7194238   | T | 0.0632  |
| rs75503767  | G | -0.1772 |
| rs72795497  | A | -0.076  |
| rs300021    | G | -0.0464 |
| rs112711584 | T | -0.1616 |
| rs11150408  | T | -0.0577 |
| rs117108847 | C | -0.2482 |
| rs9935755   | T | -0.0689 |
| rs7204817   | C | 0.0477  |
| rs2904347   | G | 0.0584  |
| rs4785644   | T | 0.0539  |
| rs4782677   | G | -0.0439 |
| rs146192907 | G | 0.2099  |
| rs933561    | G | -0.0461 |

|             |   |         |
|-------------|---|---------|
| rs76888401  | G | -0.1094 |
| rs112028581 | G | 0.1851  |
| rs4888352   | T | 0.1013  |
| rs4430718   | A | -0.0574 |
| rs17137364  | G | -0.0827 |
| rs10153156  | G | 0.0448  |
| rs1471142   | G | 0.0946  |
| rs28552961  | T | 0.1013  |
| rs34540219  | A | -0.0657 |
| rs17212347  | C | 0.2151  |
| rs7206055   | C | -0.0918 |
| rs12598415  | G | 0.2646  |
| rs2914453   | A | -0.0527 |
| rs11642887  | T | -0.0638 |
| rs117305262 | T | -0.1318 |
| rs2345440   | A | -0.0484 |
| rs1971880   | T | -0.0724 |
| rs11863400  | C | 0.0507  |
| rs4265793   | T | 0.1064  |
| rs72481081  | G | 0.1306  |
| rs117474799 | T | 0.2128  |
| rs117849365 | G | 0.2175  |
| rs72779663  | A | 0.071   |
| rs60216234  | A | 0.0552  |
| rs144649993 | T | 0.3044  |
| rs111933452 | A | -0.1576 |
| rs11640509  | G | -0.0482 |
| rs34529746  | C | 0.0902  |
| rs7204569   | C | -0.0471 |
| rs1073617   | G | -0.0431 |
| rs75763572  | C | 0.0801  |
| rs146715959 | A | -0.4319 |
| rs6564054   | C | 0.044   |
| rs62029963  | T | -0.0789 |
| rs77201668  | G | 0.1435  |
| rs113719697 | A | -0.2273 |
| rs72786528  | T | 0.0888  |
| rs117615199 | G | -0.2062 |
| rs75142433  | T | -0.1098 |
| rs407146    | A | 0.0446  |
| rs116235638 | A | -0.1112 |
| rs11863601  | A | 0.0479  |
| rs17694688  | A | -0.0652 |
| rs117033866 | T | 0.2396  |
| rs28618260  | A | -0.1474 |
| rs8064188   | C | -0.0697 |
| rs3785383   | A | 0.0425  |

|             |   |         |
|-------------|---|---------|
| rs57766039  | A | 0.0578  |
| rs13333858  | G | 0.2239  |
| rs77313983  | G | 0.0662  |
| rs7192724   | G | 0.0507  |
| rs74702312  | C | 0.2306  |
| rs75798522  | A | -0.253  |
| rs1155054   | C | 0.0466  |
| rs1562107   | T | 0.0427  |
| rs41280905  | T | -0.0503 |
| rs112706680 | T | 0.1279  |
| rs77192186  | A | -0.2706 |
| rs72776415  | A | -0.0603 |
| rs1690429   | T | -0.0842 |
| rs74019905  | A | 0.1653  |
| rs78651647  | A | 0.2541  |
| rs1816595   | C | 0.0422  |
| rs66476009  | T | 0.0634  |
| rs9928727   | T | -0.0622 |
| rs4595799   | C | -0.0546 |
| rs113561891 | T | 0.1083  |
| rs1974492   | T | 0.0621  |
| rs72780914  | A | 0.1112  |
| rs11858991  | A | 0.045   |
| rs3812970   | A | -0.0644 |
| rs2369842   | T | 0.05    |
| rs74354079  | T | -0.3246 |
| rs11643440  | G | -0.0551 |
| rs4017431   | A | 0.1887  |
| rs16973771  | C | -0.0444 |
| rs11644709  | T | -0.0606 |
| rs9302437   | C | -0.0618 |
| rs12925134  | A | 0.053   |
| rs75441601  | C | 0.1357  |
| rs79605036  | C | -0.1703 |
| rs2029923   | C | 0.0425  |
| rs117750022 | A | 0.1182  |
| rs77008839  | T | 0.075   |
| rs150713575 | A | -0.316  |
| rs74019283  | T | 0.1888  |
| rs9635482   | G | 0.085   |
| rs143621598 | C | 0.2618  |
| rs34561641  | T | 0.2101  |
| rs141790448 | G | -0.3191 |
| rs117530427 | T | -0.104  |
| rs612901    | A | -0.307  |
| rs229014    | T | -0.0478 |
| rs16970437  | C | 0.124   |

|             |   |         |
|-------------|---|---------|
| rs12922796  | G | -0.0567 |
| rs117563071 | A | 0.2804  |
| rs80326958  | G | 0.2645  |
| rs115837176 | A | -0.1056 |
| rs8055646   | C | -0.0435 |
| rs78703482  | G | -0.17   |
| rs17345313  | C | -0.0449 |
| rs55770507  | A | 0.3081  |
| rs28651254  | T | -0.0511 |
| rs77328631  | T | -0.1079 |
| rs195992    | C | -0.1004 |
| rs75355115  | A | 0.1074  |
| rs12444457  | T | 0.0444  |
| rs450787    | C | -0.049  |
| rs4340321   | C | 0.0726  |
| rs1731062   | C | 0.0502  |
| rs116732890 | A | 0.1157  |
| rs67335251  | T | 0.0864  |
| rs1109290   | G | 0.0555  |
| rs139638529 | G | 0.29    |
| rs117210898 | T | -0.2174 |
| rs9928611   | A | -0.0541 |
| rs8062006   | C | 0.0724  |
| rs62047866  | T | -0.1141 |
| rs45591839  | A | 0.1394  |
| rs442619    | C | -0.0424 |
| rs11150484  | C | -0.0594 |
| rs4784655   | C | 0.0449  |
| rs7404505   | C | 0.0601  |
| rs77803639  | G | 0.1756  |
| rs664637    | C | 0.0682  |
| rs11859904  | A | 0.1882  |
| rs4889411   | T | -0.0687 |
| rs12149660  | A | -0.0654 |
| rs75184227  | T | 0.2082  |
| rs7201989   | G | 0.0499  |
| rs2238455   | A | -0.0426 |
| rs9921849   | T | -0.046  |
| rs2017010   | C | -0.055  |
| rs4254322   | G | 0.0506  |
| rs34595424  | C | -0.1062 |
| rs72816426  | T | 0.1839  |
| rs4949156   | G | -0.0464 |
| rs11117235  | G | 0.0505  |
| rs72761063  | G | 0.1401  |
| rs11644336  | T | -0.0429 |
| rs34566488  | A | -0.102  |



|             |   |         |
|-------------|---|---------|
| rs72824235  | A | -0.0812 |
| rs4786652   | G | -0.0478 |
| rs150083146 | G | 0.2633  |
| rs112378035 | T | -0.1286 |
| rs145925094 | A | -0.2174 |
| rs117756119 | A | 0.1113  |
| rs3785261   | T | 0.09    |
| rs4787985   | T | 0.0455  |
| rs8061648   | T | -0.0436 |
| rs117183989 | A | -0.3388 |
| rs2561033   | C | 0.0544  |
| rs8058353   | A | 0.1144  |
| rs4533311   | T | -0.0739 |
| rs62051072  | A | -0.3114 |
| rs74958492  | C | 0.3075  |
| rs1062210   | T | 0.0407  |
| rs41278144  | A | -0.2213 |
| rs9673361   | C | 0.063   |
| rs79009379  | C | -0.1164 |
| rs205160    | A | -0.0507 |
| rs59468406  | T | -0.2043 |
| rs76888998  | T | -0.1    |
| rs7195834   | A | 0.0416  |
| rs78394504  | G | 0.1602  |
| rs118127254 | A | -0.2469 |
| rs117160484 | G | -0.0713 |
| rs72824930  | G | 0.2609  |
| rs117821154 | T | 0.2347  |
| rs1139565   | T | -0.0493 |
| rs494116    | T | -0.0611 |
| rs235799    | C | -0.0509 |
| rs17248492  | C | 0.1218  |
| rs140148731 | A | 0.0804  |
| rs112430802 | A | -0.2005 |
| rs112955816 | T | -0.2811 |
| rs56228312  | T | 0.0581  |
| rs11865355  | C | -0.0545 |
| rs145445728 | C | 0.1376  |
| rs1071644   | T | 0.0412  |
| rs77206885  | G | -0.094  |
| rs560941    | G | 0.0404  |
| rs7193566   | T | -0.0437 |
| rs62027195  | G | 0.0765  |
| rs9935659   | A | 0.0527  |
| rs3829507   | T | -0.2286 |
| rs56329348  | A | 0.161   |
| rs112233725 | C | 0.1232  |

|             |   |         |
|-------------|---|---------|
| rs7198906   | T | 0.1542  |
| rs1529496   | T | 0.0408  |
| rs16953081  | C | -0.0764 |
| rs288647    | G | 0.1142  |
| rs117796312 | A | 0.1751  |
| rs12448076  | A | 0.1433  |
| rs12923414  | A | 0.0613  |
| rs282996    | T | 0.0407  |
| rs12598149  | C | -0.0784 |
| rs28742230  | C | 0.0464  |
| rs78192875  | A | -0.156  |
| rs2016521   | G | -0.0474 |
| rs13330325  | G | -0.0454 |
| rs6501176   | T | 0.0468  |
| rs9931578   | G | 0.0461  |
| rs34136914  | T | -0.0761 |
| rs74031967  | G | 0.066   |
| rs76699460  | T | 0.1251  |
| rs9932650   | A | 0.0657  |
| rs1847844   | T | -0.2412 |
| rs3759982   | C | 0.0605  |
| rs9925284   | T | 0.0462  |
| rs11863559  | T | 0.104   |
| rs78242037  | T | 0.055   |
| rs76973855  | G | 0.2978  |
| rs3096415   | C | -0.0666 |
| rs114453524 | A | -0.1029 |
| rs9925208   | A | -0.0912 |
| rs35265135  | G | -0.0484 |
| rs75063913  | T | 0.2017  |
| rs117205966 | G | -0.1424 |
| rs113784988 | G | -0.1348 |
| rs548927    | A | -0.0903 |
| rs17859927  | A | 0.1663  |
| rs10514410  | C | 0.0482  |
| rs62052364  | T | 0.0966  |
| rs4782641   | T | -0.0556 |
| rs116958602 | T | -0.1538 |
| rs7199388   | G | 0.0954  |
| rs16940229  | T | -0.0573 |
| rs12600304  | C | 0.0417  |
| rs60358915  | T | 0.0521  |
| rs7200298   | G | -0.0433 |
| rs11642642  | C | -0.0502 |
| rs1592547   | T | 0.0392  |
| rs28778981  | C | 0.1048  |
| rs4787731   | A | 0.0443  |

|             |   |         |
|-------------|---|---------|
| rs8049549   | C | 0.0401  |
| rs113193563 | T | 0.3107  |
| rs62048234  | A | -0.1901 |
| rs1011938   | A | -0.0461 |
| rs72790280  | T | 0.1304  |
| rs8047597   | A | -0.0399 |
| rs11643656  | A | -0.0491 |
| rs75362623  | C | -0.1072 |
| rs7198546   | G | -0.0451 |
| rs35213849  | G | 0.0621  |
| rs62036874  | T | 0.0838  |
| rs114559834 | A | -0.3679 |
| rs11648849  | G | -0.0643 |
| rs2911047   | A | 0.0764  |
| rs62029677  | C | -0.0501 |
| rs4787958   | C | -0.055  |
| rs76429410  | A | 0.2017  |
| rs72789205  | A | 0.064   |
| rs1985776   | C | 0.0862  |
| rs7191395   | G | 0.0451  |
| rs17769245  | G | -0.0467 |
| rs11075138  | G | 0.0721  |
| rs55896056  | T | 0.0721  |
| rs9930794   | T | -0.0486 |
| rs246188    | G | 0.0712  |
| rs78901835  | G | 0.0447  |
| rs11862587  | C | 0.053   |
| rs75868160  | A | -0.1289 |
| rs71387195  | A | -0.0951 |
| rs1684578   | T | -0.0425 |
| rs62036224  | A | 0.0429  |
| rs75373663  | T | -0.2641 |
| rs12449192  | G | -0.0431 |
| rs8061386   | T | -0.0547 |
| rs80110284  | G | 0.2874  |
| rs9936355   | A | 0.1854  |
| rs72776569  | G | -0.0643 |
| rs2011668   | C | -0.0434 |
| rs72800277  | T | -0.1512 |
| rs59877022  | T | 0.172   |
| rs3180279   | G | 0.0466  |
| rs8052286   | A | 0.2049  |
| rs7199190   | G | -0.0995 |
| rs140118079 | T | 0.2212  |
| rs13332276  | T | -0.0461 |
| rs79837659  | A | 0.3158  |
| rs35612586  | T | 0.2881  |

|             |   |         |
|-------------|---|---------|
| rs6498981   | A | 0.0451  |
| rs12920392  | G | 0.063   |
| rs9921461   | C | -0.0712 |
| rs196001    | G | -0.0408 |
| rs1079348   | C | 0.043   |
| rs79912852  | A | -0.077  |
| rs8044340   | G | 0.0588  |
| rs7190918   | T | 0.0816  |
| rs117475606 | C | 0.1386  |
| rs4888151   | A | -0.0483 |
| rs147532276 | T | 0.3698  |
| rs2172065   | T | 0.0388  |
| rs8055977   | T | 0.062   |
| rs2883052   | A | -0.0545 |
| rs116990236 | A | 0.2595  |
| rs72800416  | A | 0.0713  |
| rs6499206   | C | 0.0504  |
| rs113677885 | C | -0.303  |
| rs12933413  | G | -0.1386 |
| rs35760290  | T | -0.044  |
| rs11074789  | A | 0.0871  |
| rs11642001  | A | 0.0496  |
| rs72775655  | G | 0.104   |
| rs72801265  | C | 0.1662  |
| rs2908654   | T | 0.0526  |
| rs4375681   | T | -0.0525 |
| rs2278052   | T | -0.0917 |
| rs34158555  | A | 0.161   |
| rs9923706   | C | -0.0418 |
| rs78253604  | C | 0.2904  |
| rs6500955   | A | -0.0407 |
| rs77735973  | C | 0.3709  |
| rs79925106  | T | 0.1432  |
| rs8049404   | G | 0.0453  |
| rs77712586  | G | 0.2768  |
| rs111987795 | T | -0.1923 |
| rs74903865  | C | 0.2409  |
| rs2036800   | T | -0.0408 |
| rs72797382  | A | 0.1515  |
| rs77840440  | T | 0.0617  |
| rs58151657  | A | 0.0791  |
| rs62035167  | T | 0.2282  |
| rs56268866  | T | 0.2665  |
| rs66744209  | G | 0.0466  |
| rs79777749  | A | 0.0844  |
| rs10153130  | C | 0.0973  |
| rs74038226  | C | -0.1082 |

|             |   |         |
|-------------|---|---------|
| rs34717903  | T | -0.0487 |
| rs35454747  | T | 0.0628  |
| rs28671256  | A | -0.0509 |
| rs7195990   | A | 0.0423  |
| rs16968223  | T | 0.1442  |
| rs4468629   | G | 0.1967  |
| rs117225182 | G | 0.2152  |
| rs152736    | G | -0.1517 |
| rs118186690 | C | -0.1466 |
| rs117141441 | G | -0.3738 |
| rs116868526 | T | 0.1107  |
| rs56064458  | A | -0.0383 |
| rs153050    | T | -0.041  |
| rs1386066   | C | -0.0921 |
| rs1730971   | T | 0.047   |
| rs235996    | A | -0.0554 |
| rs1828518   | C | 0.0492  |
| rs115473149 | A | -0.1669 |
| rs129988    | A | -0.0713 |
| rs249941    | A | 0.0661  |
| rs62046245  | C | -0.0959 |
| rs75112002  | G | 0.1235  |
| rs74671353  | A | 0.0985  |
| rs80161537  | T | -0.2077 |
| rs116949665 | C | -0.1585 |
| rs10431967  | G | 0.0437  |
| rs79138515  | C | 0.1226  |
| rs72773536  | G | -0.0442 |
| rs72790150  | A | -0.156  |
| rs117807951 | T | 0.2021  |
| rs12598288  | A | -0.0378 |
| rs11117361  | A | 0.056   |
| rs11644330  | G | 0.085   |
| rs149715055 | A | -0.2435 |
| rs8054999   | A | 0.0402  |
| rs9926882   | C | -0.1084 |
| rs11075116  | G | -0.0388 |
| rs4438296   | A | -0.0861 |
| rs411327    | A | -0.0816 |
| rs7188763   | C | -0.0401 |
| rs79814466  | A | 0.2624  |
| rs2193098   | T | 0.0486  |
| rs7198829   | G | -0.0392 |
| rs183009    | T | 0.0821  |
| rs145907329 | A | 0.3606  |
| rs77681757  | G | 0.127   |
| rs117367183 | T | 0.1405  |

|             |   |         |
|-------------|---|---------|
| rs16951056  | C | 0.0743  |
| rs72766584  | C | 0.2185  |
| rs4293378   | C | 0.0489  |
| rs4784996   | C | -0.046  |
| rs9933256   | G | 0.046   |
| rs12933704  | C | 0.0462  |
| rs11641003  | C | 0.1013  |
| rs77839660  | G | -0.1582 |
| rs4500754   | A | -0.0687 |
| rs237208    | A | -0.0529 |
| rs8056040   | G | -0.0566 |
| rs117042565 | A | 0.1029  |
| rs17199756  | T | -0.149  |
| rs12926840  | T | 0.0534  |
| rs148164310 | G | -0.2236 |
| rs72782098  | A | 0.1027  |
| rs11642412  | C | 0.0412  |
| rs113443718 | A | -0.0423 |
| rs146553313 | A | 0.1265  |
| rs56229525  | G | 0.0573  |
| rs11646101  | A | 0.0493  |
| rs74834733  | T | 0.1936  |
| rs270436    | C | -0.0518 |
| rs67509034  | A | 0.0957  |
| rs72810185  | G | 0.0829  |
| rs2897315   | T | -0.0565 |
| rs344364    | A | 0.0536  |
| rs112049296 | T | -0.1303 |
| rs2010383   | G | -0.0407 |
| rs9922023   | A | -0.043  |
| rs4421994   | A | -0.0869 |
| rs7189350   | C | 0.0523  |
| rs17668644  | C | 0.1427  |
| rs7194997   | A | 0.0933  |
| rs140588683 | G | -0.1733 |
| rs62068712  | G | -0.0707 |
| rs11644561  | A | 0.0712  |
| rs11859733  | C | 0.0598  |
| rs7199641   | T | 0.0919  |
| rs4240787   | A | -0.0391 |
| rs34824516  | C | 0.1488  |
| rs1018949   | C | 0.3071  |
| rs12922750  | T | 0.0441  |
| rs9922889   | T | -0.1217 |
| rs12922393  | G | -0.1068 |
| rs11862078  | G | -0.0398 |
| rs117159335 | G | 0.1407  |

|             |   |         |
|-------------|---|---------|
| rs8051200   | T | 0.0504  |
| rs212067    | G | -0.0845 |
| rs890846    | A | -0.0659 |
| rs61747984  | A | -0.0574 |
| rs62044972  | T | 0.1555  |
| rs802762    | A | -0.053  |
| rs35673018  | G | -0.1277 |
| rs7196177   | A | 0.0488  |
| rs4131625   | A | 0.072   |
| rs56160047  | G | -0.0573 |
| rs8052823   | T | 0.196   |
| rs8044237   | G | 0.0654  |
| rs11859731  | G | -0.0683 |
| rs142294076 | A | 0.0716  |
| rs149808784 | T | 0.279   |
| rs12445330  | A | 0.0677  |
| rs280883    | T | -0.1739 |
| rs7199337   | T | -0.0469 |
| rs7190442   | A | -0.2172 |
| rs148916630 | A | 0.1961  |
| rs4396517   | T | -0.0728 |
| rs78571963  | G | 0.0988  |
| rs4016919   | T | -0.0602 |
| rs143880760 | G | 0.2862  |
| rs9888980   | G | 0.0554  |
| rs111967208 | T | -0.2327 |
| rs78468461  | C | 0.0866  |
| rs75057745  | T | 0.091   |
| rs12923226  | A | 0.0503  |
| rs215891    | A | 0.198   |
| rs7194046   | G | -0.09   |
| rs12925779  | G | -0.0508 |
| rs1834023   | T | -0.1826 |
| rs76532135  | G | 0.1209  |
| rs8059231   | T | -0.0375 |
| rs889574    | A | 0.0401  |
| rs139573016 | T | 0.1786  |
| rs111911285 | G | -0.1433 |
| rs11248940  | C | 0.0478  |
| rs11149846  | G | -0.202  |
| rs8055054   | C | -0.0511 |
| rs26870     | A | -0.0392 |
| rs1139564   | T | 0.0516  |
| rs7194889   | T | -0.0431 |
| rs11649653  | G | 0.0407  |
| rs145324600 | T | -0.1856 |
| rs74918514  | T | -0.1016 |

|             |   |         |
|-------------|---|---------|
| rs6499643   | C | 0.0631  |
| rs12932484  | T | 0.0553  |
| rs117264025 | C | -0.1294 |
| rs147578732 | A | -0.2554 |
| rs117642407 | A | -0.2607 |
| rs142359748 | T | -0.1992 |
| rs75545395  | G | 0.1783  |
| rs111500388 | A | -0.1671 |
| rs62054757  | C | 0.0598  |
| rs35146603  | T | -0.0798 |
| rs145033655 | G | 0.1297  |
| rs2550564   | G | -0.1169 |
| rs77076281  | G | 0.0661  |
| rs1609847   | C | 0.0392  |
| rs78419871  | T | -0.271  |
| rs1834072   | T | 0.0385  |
| rs78931180  | A | -0.0969 |
| rs146470254 | C | 0.1474  |
| rs152657    | C | -0.0539 |
| rs12919747  | T | -0.0441 |
| rs78731084  | A | -0.0998 |
| rs72788988  | T | 0.1258  |
| rs148154521 | A | 0.1511  |
| rs1012075   | G | -0.0414 |
| rs117841824 | G | -0.2434 |
| rs555812    | G | 0.048   |
| rs78354760  | G | 0.1809  |
| rs8062449   | A | 0.1201  |
| rs6540259   | T | -0.0718 |
| rs153032    | A | 0.0688  |
| rs9940488   | T | 0.0713  |
| rs55666769  | T | -0.0718 |
| rs61163132  | C | -0.0945 |
| rs11641230  | G | -0.0424 |
| rs4888966   | G | -0.1307 |
| rs7198274   | C | -0.0932 |
| rs79422663  | T | 0.155   |
| rs12935562  | G | 0.1165  |
| rs75240993  | C | -0.1914 |
| rs147589647 | T | -0.1111 |
| rs9939948   | T | -0.0585 |
| rs71374905  | G | 0.187   |
| rs4985058   | C | 0.1018  |
| rs140843918 | G | 0.1525  |
| rs80112345  | G | -0.0596 |
| rs74502259  | T | 0.107   |
| rs8044720   | G | 0.0756  |



|             |   |         |
|-------------|---|---------|
| rs4968029   | T | 0.1765  |
| rs1651001   | T | 0.1054  |
| rs78033801  | A | -0.0924 |
| rs79283389  | T | -0.1211 |
| rs142230029 | A | -0.2488 |
| rs173839    | C | 0.0391  |
| rs76643293  | A | -0.1261 |
| rs9935882   | T | 0.0617  |
| rs7189853   | G | 0.0675  |
| rs12325409  | G | -0.0821 |
| rs12935645  | C | 0.0598  |
| rs7501417   | A | -0.047  |
| rs2003583   | T | -0.0467 |
| rs77988280  | A | -0.1348 |
| rs72622281  | T | 0.2027  |
| rs1029966   | C | -0.0548 |
| rs78791475  | T | -0.2115 |
| rs2903233   | C | 0.0957  |
| rs34782316  | C | -0.1071 |
| rs247819    | T | 0.068   |
| rs112456687 | T | 0.1911  |
| rs12444883  | T | 0.0524  |
| rs1128432   | T | -0.0458 |
| rs76092969  | G | -0.1971 |
| rs74613568  | A | -0.1167 |
| rs6500568   | A | 0.0439  |
| rs77573303  | A | -0.1779 |
| rs4788426   | G | 0.0372  |
| rs9932192   | T | -0.0597 |
| rs76311751  | A | -0.1665 |
| rs962929    | T | -0.037  |
| rs7184656   | G | 0.0458  |
| rs147286407 | C | 0.3057  |
| rs233177    | G | -0.0436 |
| rs2967337   | G | 0.0529  |
| rs11150582  | C | -0.0991 |
| rs2870146   | T | 0.042   |
| rs4238911   | A | -0.0669 |
| rs7188285   | A | -0.0882 |
| rs2647988   | G | -0.0392 |
| rs117069901 | C | 0.1605  |
| rs3859052   | C | 0.172   |
| rs3851729   | C | -0.0374 |
| rs35427954  | C | -0.0726 |
| rs78709419  | T | 0.2014  |
| rs62053115  | T | -0.2641 |
| rs72773724  | T | -0.2279 |

|             |   |         |
|-------------|---|---------|
| rs1436050   | T | 0.0377  |
| rs59900658  | A | -0.0819 |
| rs11861784  | G | 0.0684  |
| rs72806154  | C | -0.1383 |
| rs876592    | C | -0.066  |
| rs75411985  | A | 0.1049  |
| rs113034914 | G | 0.1958  |
| rs12924002  | A | 0.0532  |
| rs143608994 | T | 0.0913  |
| rs77396851  | G | -0.1365 |
| rs150486727 | T | 0.2249  |
| rs79525314  | G | 0.1044  |
| rs11074645  | G | 0.0383  |
| rs12919936  | G | -0.0427 |
| rs3902078   | G | 0.1765  |
| rs4783597   | T | -0.0674 |
| rs76977517  | T | -0.1779 |
| rs78641696  | T | -0.2442 |
| rs4444329   | G | 0.0808  |
| rs12448116  | C | -0.1698 |
| rs8045342   | T | -0.068  |
| rs74627916  | T | 0.1042  |
| rs111900538 | A | -0.0445 |
| rs9930339   | A | 0.1115  |
| rs9929832   | T | -0.0392 |
| rs11641361  | C | 0.0443  |
| rs1659493   | C | -0.0384 |
| rs12447309  | A | -0.0409 |
| rs2911305   | C | 0.0507  |
| rs10852562  | T | -0.0428 |
| rs141530281 | G | 0.2552  |
| rs116408797 | A | 0.1333  |
| rs2541675   | A | 0.0427  |
| rs118046956 | C | -0.1789 |
| rs58124292  | A | -0.0483 |
| rs72800757  | A | -0.0647 |
| rs139319931 | A | -0.1697 |
| rs8058830   | T | 0.2561  |
| rs12443849  | G | -0.0573 |
| rs66470159  | G | -0.0599 |
| rs2966843   | A | -0.0543 |
| rs7199654   | C | -0.1757 |
| rs16964499  | C | 0.0918  |
| rs13331657  | A | -0.0483 |
| rs889488    | G | 0.048   |
| rs11075221  | C | -0.0779 |
| rs72776810  | C | 0.15    |

|             |   |         |
|-------------|---|---------|
| rs72811734  | G | 0.0724  |
| rs9308339   | C | -0.0905 |
| rs7189799   | C | -0.0364 |
| rs4889568   | T | -0.1416 |
| rs117768652 | T | -0.2561 |
| rs13333056  | T | 0.0661  |
| rs73524325  | A | 0.1869  |
| rs17338091  | T | -0.0763 |
| rs116934757 | C | 0.1615  |
| rs11641731  | A | 0.063   |
| rs113761075 | C | -0.1209 |
| rs146845916 | T | -0.2919 |
| rs4786107   | C | -0.0392 |
| rs76662748  | A | 0.1163  |
| rs117230138 | T | 0.1833  |
| rs4787746   | C | 0.0445  |
| rs73606816  | G | -0.0819 |
| rs28408837  | C | 0.1002  |
| rs113968734 | A | -0.0514 |
| rs72800903  | A | -0.0392 |
| rs9937879   | A | -0.046  |
| rs4843401   | T | 0.0377  |
| rs2345131   | G | 0.043   |
| rs4888767   | C | -0.0657 |
| rs56105726  | G | 0.0591  |
| rs9928601   | C | -0.0824 |
| rs79202144  | G | -0.2994 |
| rs149227    | C | 0.0753  |
| rs117706547 | T | 0.2038  |
| rs4565      | G | -0.0382 |
| rs9937257   | A | 0.0446  |
| rs2356739   | G | -0.0431 |
| rs9939380   | G | 0.0423  |
| rs28699975  | A | 0.1707  |
| rs982784    | A | -0.0561 |
| rs116915212 | T | 0.1764  |
| rs4782574   | C | 0.0528  |
| rs9924471   | A | -0.0465 |
| rs4784834   | G | 0.0399  |
| rs12929322  | G | -0.1726 |
| rs143548309 | G | 0.2238  |
| rs7206408   | C | -0.0378 |
| rs8044808   | C | -0.0445 |
| rs28403558  | A | 0.0961  |
| rs12933152  | A | 0.0502  |
| rs116883801 | T | -0.1677 |
| rs4337299   | A | 0.0817  |

|             |   |         |
|-------------|---|---------|
| rs11649062  | T | 0.0397  |
| rs3794684   | A | -0.0358 |
| rs204028    | C | -0.0464 |
| rs2344151   | C | 0.0396  |
| rs8050912   | T | 0.0384  |
| rs73507961  | C | -0.0529 |
| rs116648635 | C | -0.1531 |
| rs390980    | G | 0.0351  |
| rs4887952   | A | 0.0442  |
| rs12103110  | C | -0.0353 |
| rs57132529  | G | -0.0567 |
| rs2544628   | A | 0.0737  |
| rs150237070 | C | -0.1682 |
| rs76798425  | T | -0.0947 |
| rs138374829 | G | -0.1507 |
| rs72788682  | C | 0.1221  |
| rs1433157   | C | 0.0395  |
| rs7191880   | A | 0.0539  |
| rs71404022  | G | -0.069  |
| rs13332748  | G | 0.0404  |
| rs117699573 | G | 0.1188  |
| rs271013    | T | -0.0391 |
| rs79171950  | G | 0.1193  |
| rs4889165   | C | 0.0888  |
| rs11077308  | G | 0.0475  |
| rs4787243   | G | -0.0464 |
| rs3752435   | G | 0.1012  |
| rs57974014  | A | 0.0777  |
| rs918723    | C | 0.1993  |
| rs76948437  | C | 0.1269  |
| rs11861415  | G | -0.0379 |
| rs147735718 | A | -0.2485 |
| rs74531323  | G | 0.1124  |
| rs58999333  | G | 0.0453  |
| rs4260044   | A | -0.036  |
| rs112203796 | G | 0.0955  |
| rs9635493   | G | -0.0364 |
| rs289709    | G | -0.0365 |
| rs145205608 | C | -0.1784 |
| rs976201    | A | -0.152  |
| rs79797437  | T | -0.0761 |
| rs2625428   | G | 0.0923  |
| rs4783025   | C | -0.0623 |
| rs2072587   | A | -0.117  |
| rs114776028 | A | 0.1207  |
| rs4888831   | C | -0.0396 |
| rs219600    | G | 0.1109  |

|             |   |         |
|-------------|---|---------|
| rs4787169   | A | -0.0645 |
| rs140059522 | T | 0.1785  |
| rs62038750  | T | 0.0451  |
| rs13335676  | A | 0.0693  |
| rs12716993  | A | -0.0635 |
| rs62033372  | T | 0.0361  |
| rs62048133  | C | 0.0546  |
| rs366929    | G | -0.0363 |
| rs6498757   | G | 0.0517  |
| rs4843789   | T | -0.0504 |
| rs11075273  | T | -0.039  |
| rs12446823  | T | -0.0583 |
| rs4243208   | T | -0.0425 |
| rs7197668   | T | -0.0693 |
| rs117618632 | C | 0.0832  |
| rs35503340  | A | -0.0619 |
| rs4843534   | A | -0.0374 |
| rs79711283  | G | -0.0989 |
| rs12149769  | T | 0.0598  |
| rs75338298  | C | 0.1254  |
| rs8051784   | G | 0.1252  |
| rs12931307  | T | -0.0389 |
| rs11646672  | C | 0.0526  |
| rs1273415   | T | 0.1816  |
| rs7195308   | A | -0.1661 |
| rs55987136  | C | 0.1902  |
| rs233542    | G | 0.0392  |
| rs8062610   | G | -0.0459 |
| rs153794    | G | 0.0369  |
| rs8054909   | T | -0.0709 |
| rs8046196   | G | 0.0357  |
| rs34316879  | A | -0.0872 |
| rs10438627  | A | -0.0399 |
| rs12448365  | T | 0.0384  |
| rs56017145  | G | 0.0779  |
| rs71388374  | G | -0.0526 |
| rs12443651  | C | 0.0401  |
| rs57613349  | G | -0.0345 |
| rs12708902  | G | 0.0409  |
| rs244792    | C | 0.0813  |
| rs117233183 | T | 0.1325  |
| rs143691340 | T | 0.209   |
| rs118155214 | C | 0.1441  |
| rs75613292  | T | -0.0989 |
| rs79866383  | C | 0.2487  |
| rs382077    | G | -0.0418 |
| rs2647997   | T | 0.0585  |

|             |   |         |
|-------------|---|---------|
| rs12931673  | T | 0.069   |
| rs74791040  | C | 0.0937  |
| rs13339414  | A | 0.075   |
| rs10852506  | C | -0.0345 |
| rs4889010   | G | -0.0822 |
| rs62031961  | T | 0.2837  |
| rs35668435  | C | 0.0532  |
| rs16961293  | T | 0.1123  |
| rs9934292   | T | 0.0678  |
| rs34580187  | G | -0.0646 |
| rs10514528  | C | 0.0407  |
| rs9944361   | A | -0.0343 |
| rs16941859  | G | -0.0652 |
| rs56288226  | A | 0.1871  |
| rs4967873   | A | -0.0392 |
| rs147784626 | G | 0.1404  |
| rs9922472   | T | -0.1237 |
| rs7195206   | A | 0.0537  |
| rs34003714  | C | -0.0808 |
| rs8045775   | C | -0.0357 |
| rs7193109   | G | -0.0367 |
| rs112955749 | A | 0.1644  |
| rs8045139   | A | 0.0449  |
| rs112869911 | A | 0.1939  |
| rs8049156   | C | -0.0402 |
| rs56266350  | T | 0.1551  |
| rs28655022  | C | 0.096   |
| rs7188098   | T | 0.071   |
| rs9940803   | C | 0.04    |
| rs138799424 | C | 0.1057  |
| rs11646593  | C | 0.059   |
| rs6500918   | G | -0.0409 |
| rs8063357   | T | -0.1035 |
| rs10863169  | T | -0.0747 |
| rs3096426   | T | 0.0352  |
| rs72797400  | G | 0.1567  |
| rs2042402   | G | 0.0353  |
| rs243840    | G | 0.0436  |
| rs7199179   | G | 0.0359  |
| rs4888749   | C | -0.0367 |
| rs6416641   | T | 0.0349  |
| rs113169729 | A | -0.1942 |
| rs35467854  | G | 0.0563  |
| rs76750340  | G | 0.2455  |
| rs62039990  | A | -0.0488 |
| rs7201962   | G | -0.0406 |
| rs72778608  | T | 0.1256  |

|             |   |         |
|-------------|---|---------|
| rs385518    | A | -0.0574 |
| rs4888877   | T | -0.2208 |
| rs117606263 | A | 0.1253  |
| rs116542849 | G | -0.1041 |
| rs4284636   | G | 0.0474  |
| rs112831577 | A | 0.213   |
| rs148797335 | G | 0.1399  |
| rs602651    | A | -0.0348 |
| rs79276345  | A | -0.1739 |
| rs116936021 | T | 0.3212  |
| rs78190611  | T | -0.1994 |
| rs11649428  | T | 0.0401  |
| rs889510    | G | 0.1131  |
| rs9935381   | G | -0.1386 |
| rs77394452  | A | -0.2299 |
| rs4843483   | A | -0.0776 |
| rs4558437   | G | 0.0447  |
| rs117549391 | C | 0.1238  |
| rs72794089  | T | -0.1579 |
| rs72797436  | T | 0.0571  |
| rs34115176  | C | -0.0423 |
| rs73497697  | C | 0.113   |
| rs72783491  | T | 0.1727  |
| rs16963276  | A | 0.2326  |
| rs30414     | C | -0.0961 |
| rs234279    | T | -0.0376 |
| rs79360255  | G | -0.1781 |
| rs2239305   | A | -0.0403 |
| rs12921195  | A | 0.1237  |
| rs17681520  | G | 0.1527  |
| rs117979936 | T | 0.1318  |
| rs1076572   | A | 0.0511  |
| rs11644623  | G | -0.0355 |
| rs1004867   | A | -0.0437 |
| rs118132698 | A | 0.1575  |
| rs77981494  | C | 0.1699  |
| rs12926685  | C | -0.036  |
| rs12599233  | T | 0.0579  |
| rs79020028  | A | -0.2197 |
| rs2258700   | C | -0.0559 |
| rs7187055   | C | 0.0493  |
| rs12444493  | C | 0.1258  |
| rs12448361  | A | 0.0421  |
| rs12596450  | T | 0.043   |
| rs80237434  | G | -0.1716 |
| rs5883      | T | 0.0787  |
| rs113699477 | T | 0.0541  |

|             |   |         |
|-------------|---|---------|
| rs146296290 | G | -0.2857 |
| rs881562    | G | -0.0374 |
| rs8045680   | A | 0.0565  |
| rs2923137   | G | 0.0634  |
| rs58825105  | C | -0.1862 |
| rs12923574  | T | -0.1807 |
| rs75160682  | C | 0.1701  |
| rs111559096 | A | -0.0763 |
| rs72795149  | A | 0.1605  |
| rs2270256   | T | 0.0347  |
| rs12934920  | G | 0.1206  |
| rs9929317   | T | 0.0556  |
| rs4785367   | T | -0.035  |
| rs9927884   | T | 0.0529  |
| rs34291902  | A | 0.055   |
| rs7500655   | C | 0.0398  |
| rs79786625  | G | -0.0669 |
| rs16964792  | T | 0.07    |
| rs11555907  | T | 0.0413  |
| rs1436117   | C | -0.1546 |
| rs891056    | A | 0.0889  |
| rs1058967   | C | 0.0355  |
| rs112250250 | A | -0.06   |
| rs963999    | G | -0.0365 |
| rs117479788 | G | -0.1805 |
| rs75740027  | C | 0.1141  |
| rs78174881  | T | 0.1451  |
| rs9931684   | G | 0.1188  |
| rs76169029  | T | 0.1656  |
| rs17474196  | G | -0.0495 |
| rs80157344  | G | 0.2446  |
| rs1078465   | A | 0.0475  |
| rs9929174   | G | 0.0388  |
| rs72780754  | G | -0.0936 |
| rs142265941 | A | -0.1633 |
| rs2241032   | A | 0.0657  |
| rs7201617   | C | -0.0781 |
| rs113817676 | A | 0.1736  |
| rs76118802  | A | 0.1015  |
| rs8044056   | G | -0.0804 |
| rs8047616   | T | -0.2031 |
| rs72791543  | C | 0.0448  |
| rs10514553  | G | 0.1909  |
| rs73628707  | C | 0.1805  |
| rs28591572  | G | 0.0623  |
| rs233560    | T | 0.0356  |
| rs142947029 | G | -0.2164 |



|             |   |         |
|-------------|---|---------|
| rs16947641  | C | -0.1282 |
| rs431820    | A | -0.0415 |
| rs6564749   | T | -0.1086 |
| rs12930986  | C | 0.0368  |
| rs79266273  | A | 0.281   |
| rs114996600 | A | 0.2745  |
| rs113919609 | C | 0.2752  |
| rs34537105  | T | 0.0625  |
| rs2081271   | C | 0.0379  |
| rs149683847 | C | -0.0868 |
| rs8043874   | T | -0.0693 |
| rs77877720  | T | -0.1377 |
| rs16968480  | A | 0.038   |
| rs8048990   | C | -0.0365 |
| rs11641659  | G | 0.0386  |
| rs72778696  | C | 0.1658  |
| rs61183042  | T | 0.0754  |
| rs1065832   | T | -0.0418 |
| rs12595894  | T | -0.0855 |
| rs198156    | T | 0.0464  |
| rs116865693 | A | -0.1789 |
| rs7198615   | A | -0.0641 |
| rs7186277   | G | -0.2401 |
| rs17880377  | T | -0.1451 |
| rs68008053  | C | -0.0773 |
| rs9935302   | G | 0.0366  |
| rs111278227 | T | -0.1551 |
| rs16941200  | T | 0.0841  |
| rs62034240  | T | -0.0478 |
| rs79299652  | A | 0.1078  |
| rs78889395  | T | -0.1252 |
| rs4073722   | T | -0.0743 |
| rs79589654  | A | 0.1669  |
| rs71390339  | A | -0.0478 |
| rs7194279   | T | -0.1331 |
| rs77675321  | A | -0.1082 |
| rs1110268   | C | 0.0493  |
| rs77102042  | T | -0.0762 |
| rs62048425  | C | 0.1941  |
| rs145439264 | T | 0.317   |
| rs12926449  | C | 0.0828  |
| rs143789212 | T | 0.1354  |
| rs3803645   | C | -0.0851 |
| rs9931067   | A | -0.1306 |
| rs36077290  | G | 0.096   |
| rs75865815  | A | -0.1603 |
| rs1420676   | C | -0.0337 |

|             |   |         |
|-------------|---|---------|
| rs780161    | T | -0.0537 |
| rs117544769 | A | 0.1184  |
| rs79274759  | C | -0.1289 |
| rs9989365   | T | 0.0376  |
| rs11643717  | A | 0.0454  |
| rs8059645   | T | -0.035  |
| rs7201063   | G | -0.0345 |
| rs55745137  | C | 0.1632  |
| rs113344218 | G | 0.0811  |
| rs112940615 | A | -0.177  |
| rs111332953 | T | -0.1231 |
| rs117485150 | A | -0.2618 |
| rs3785380   | A | 0.1204  |
| rs9941143   | T | 0.0942  |
| rs9937757   | A | 0.0425  |
| rs78162647  | A | -0.074  |
| rs33977706  | A | -0.0378 |
| rs117319560 | C | -0.0636 |
| rs45540935  | A | -0.0566 |
| rs149427956 | G | -0.1754 |
| rs8052916   | T | -0.033  |
| rs34074350  | T | 0.0482  |
| rs146646441 | A | 0.1543  |
| rs12598091  | G | 0.0512  |
| rs8063013   | C | 0.0553  |
| rs9928989   | T | 0.034   |
| rs9935514   | T | -0.1256 |
| rs4786936   | C | 0.0377  |
| rs8045510   | C | 0.1051  |
| rs75367350  | G | -0.0588 |
| rs147322585 | T | 0.1148  |
| rs1604953   | G | -0.0423 |
| rs12447686  | T | -0.0414 |
| rs113062367 | C | -0.1183 |
| rs1548925   | C | -0.0374 |
| rs34798481  | A | 0.0547  |
| rs28455476  | T | 0.1607  |
| rs153090    | A | 0.038   |
| rs111443495 | G | 0.2155  |
| rs111279855 | C | 0.1036  |
| rs750166    | T | 0.0595  |
| rs76814503  | C | 0.0763  |
| rs9922324   | A | 0.0707  |
| rs178400    | C | 0.0403  |
| rs78426691  | T | -0.1251 |
| rs7202895   | G | -0.0964 |
| rs36122340  | C | 0.0955  |

|             |   |         |
|-------------|---|---------|
| rs212082    | G | -0.0421 |
| rs75817718  | A | -0.182  |
| rs76530296  | A | 0.2011  |
| rs78290845  | G | 0.0555  |
| rs4788115   | A | 0.0608  |
| rs78383019  | A | 0.0808  |
| rs4567700   | T | -0.1373 |
| rs2279408   | G | 0.0419  |
| rs28765981  | T | -0.0654 |
| rs77339989  | T | -0.1682 |
| rs3764299   | C | 0.0412  |
| rs56141137  | T | 0.1597  |
| rs8049638   | T | -0.1148 |
| rs113112794 | A | -0.1065 |
| rs57570380  | T | -0.0863 |
| rs62052423  | T | 0.0362  |
| rs117609440 | T | -0.1095 |
| rs9924369   | G | -0.0414 |
| rs12445635  | G | 0.0378  |
| rs74764506  | A | 0.1814  |
| rs62053193  | A | -0.0675 |
| rs11640578  | G | 0.1305  |
| rs76384263  | T | -0.1534 |
| rs7205144   | T | 0.0896  |
| rs113002440 | T | 0.1543  |
| rs17276523  | C | 0.1458  |
| rs72803276  | T | -0.0957 |
| rs72774570  | T | 0.1187  |
| rs7193031   | G | -0.0344 |
| rs12927603  | A | -0.1189 |
| rs4264410   | C | -0.0764 |
| rs118041719 | A | 0.1996  |
| rs117548180 | A | 0.2439  |
| rs138642423 | G | 0.1495  |
| rs739581    | A | 0.0337  |
| rs8046437   | C | 0.0345  |
| rs11465497  | T | 0.0987  |
| rs142947386 | A | 0.2057  |
| rs72779836  | T | 0.0942  |
| rs2938718   | A | -0.042  |
| rs305086    | A | 0.0611  |
| rs3764293   | T | 0.033   |
| rs6564553   | A | -0.1628 |
| rs77846868  | G | -0.0877 |
| rs141957540 | A | -0.1417 |
| rs142475956 | T | 0.1325  |
| rs9925855   | A | 0.1061  |

|             |   |         |
|-------------|---|---------|
| rs16975072  | T | 0.1132  |
| rs55675932  | A | 0.1219  |
| rs112612688 | C | 0.1373  |
| rs76710433  | T | 0.1792  |
| rs1391348   | T | 0.045   |
| rs7201008   | T | -0.0351 |
| rs12920783  | C | 0.0382  |
| rs71403855  | G | 0.1304  |
| rs80151246  | T | 0.0952  |
| rs117552433 | A | -0.1589 |
| rs35852446  | A | 0.0494  |
| rs7206074   | G | 0.0427  |
| rs62033591  | C | 0.1952  |
| rs12443553  | A | -0.0679 |
| rs112291875 | T | 0.1209  |
| rs8049795   | T | 0.0338  |
| rs56037832  | T | 0.0465  |
| rs17241760  | A | -0.0353 |
| rs77881911  | G | -0.064  |
| rs12932068  | G | -0.0335 |
| rs113595906 | G | 0.1919  |
| rs7203086   | T | -0.0353 |
| rs77858800  | A | 0.0527  |
| rs7187377   | T | 0.0371  |
| rs59552315  | A | 0.2084  |
| rs117444088 | C | 0.0976  |
| rs17680354  | G | 0.1053  |
| rs56069754  | A | 0.0371  |
| rs74869990  | A | 0.1176  |
| rs62038901  | T | -0.1848 |
| rs56178741  | C | -0.0774 |
| rs12925931  | T | 0.0348  |
| rs74009093  | T | 0.1381  |
| rs74491673  | G | 0.1809  |
| rs1231098   | G | -0.0716 |
| rs2923143   | A | 0.0389  |
| rs8045584   | G | -0.0605 |
| rs117650272 | A | -0.2122 |
| rs8044018   | A | 0.0343  |
| rs7205540   | C | 0.2036  |
| rs77446194  | G | 0.0665  |
| rs9934475   | A | 0.0325  |
| rs11644537  | C | -0.043  |
| rs57646953  | G | 0.0962  |
| rs42197     | T | 0.0369  |
| rs138649553 | A | 0.1604  |
| rs150077    | T | -0.0392 |

|             |   |         |
|-------------|---|---------|
| rs77369333  | T | -0.1908 |
| rs118047758 | G | -0.0997 |
| rs1541555   | A | -0.044  |
| rs11863558  | G | 0.0594  |
| rs3848286   | A | -0.1932 |
| rs9929614   | G | 0.0622  |
| rs12445450  | T | 0.051   |
| rs117843153 | C | 0.0681  |
| rs28548414  | T | -0.039  |
| rs4888619   | T | 0.0378  |
| rs2534763   | T | 0.0372  |
| rs116555315 | C | -0.0866 |
| rs17730711  | G | -0.0344 |
| rs10514432  | G | 0.0444  |
| rs17682835  | T | -0.1776 |
| rs141668450 | G | -0.1478 |
| rs8044151   | A | 0.0519  |
| rs276981    | A | 0.0345  |
| rs951925    | A | 0.123   |
| rs2908873   | T | -0.0421 |
| rs111640544 | G | 0.1479  |
| rs118118936 | A | 0.0829  |
| rs118031121 | A | 0.103   |
| rs112132304 | T | -0.0682 |
| rs8052279   | G | 0.0571  |
| rs17773540  | T | -0.0904 |
| rs6497981   | A | 0.0331  |
| rs117235507 | C | -0.1963 |
| rs2019604   | G | 0.0445  |
| rs6500249   | A | 0.0376  |
| rs72483446  | T | 0.107   |
| rs55972806  | T | -0.0848 |
| rs16943885  | C | 0.137   |
| rs79600205  | G | -0.1957 |
| rs77188097  | A | -0.0469 |
| rs7189692   | C | -0.0366 |
| rs57130516  | C | -0.2947 |
| rs9922607   | T | 0.0406  |
| rs3849248   | A | 0.0321  |
| rs16962776  | C | -0.1625 |
| rs74009104  | A | -0.0899 |
| rs55919245  | C | 0.1451  |
| rs208570    | A | -0.0567 |
| rs79387700  | T | -0.1451 |
| rs11648354  | G | -0.0594 |
| rs17686420  | T | 0.2961  |
| rs1872686   | C | 0.0641  |

|             |   |         |
|-------------|---|---------|
| rs35952736  | G | 0.0476  |
| rs144160773 | C | 0.1506  |
| rs4786448   | G | -0.0624 |
| rs72774792  | A | -0.0631 |
| rs74391137  | C | 0.1378  |
| rs750739    | G | -0.0536 |
| rs2641898   | C | -0.04   |
| rs12448216  | C | 0.0834  |
| rs4641738   | G | 0.0342  |
| rs77574320  | T | -0.1777 |
| rs11639570  | C | -0.0371 |
| rs16952623  | C | 0.0495  |
| rs12597064  | G | 0.0359  |
| rs3112650   | C | 0.0384  |
| rs147718730 | G | 0.1399  |
| rs2967855   | G | -0.0436 |
| rs75017503  | G | 0.2473  |
| rs9933632   | T | 0.0386  |
| rs74657250  | A | 0.1481  |
| rs62060164  | A | 0.0442  |
| rs139053518 | T | 0.2042  |
| rs145510859 | A | 0.1475  |
| rs9922261   | C | -0.0779 |
| rs149092184 | T | 0.0635  |
| rs147801483 | G | 0.1978  |
| rs1568389   | T | -0.0338 |
| rs8049722   | A | 0.049   |
| rs78053652  | C | 0.0999  |
| rs12597888  | G | 0.0484  |
| rs117940370 | T | -0.1352 |
| rs116954754 | A | -0.2582 |
| rs117455984 | A | 0.1407  |
| rs419722    | T | -0.0339 |
| rs7197991   | G | 0.0415  |
| rs8044259   | G | -0.033  |
| rs16946029  | A | -0.0342 |
| rs12921798  | A | -0.0715 |
| rs3103627   | T | 0.0382  |
| rs1728393   | T | 0.0425  |
| rs78871303  | G | 0.088   |
| rs56138315  | T | 0.1254  |
| rs76904318  | G | -0.0875 |
| rs8052566   | T | -0.0406 |
| rs17790434  | T | -0.0403 |
| rs74029929  | G | -0.0858 |
| rs1366521   | T | -0.0393 |
| rs152745    | A | -0.0336 |

|             |   |         |
|-------------|---|---------|
| rs112259566 | A | 0.1522  |
| rs4122231   | T | 0.0816  |
| rs4843875   | T | -0.0552 |
| rs7189514   | C | 0.1178  |
| rs729430    | C | -0.0363 |
| rs9921180   | C | 0.0415  |
| rs80256547  | T | 0.1052  |
| rs12597696  | G | -0.033  |
| rs11640308  | G | 0.0516  |
| rs79147159  | A | -0.1413 |
| rs150990265 | T | -0.1109 |
| rs3862476   | C | 0.0737  |
| rs143366325 | A | -0.1748 |
| rs12444680  | G | -0.113  |
| rs12931857  | G | 0.0411  |
| rs80138482  | C | -0.1859 |
| rs139376654 | G | -0.1976 |
| rs148093800 | A | 0.1531  |
| rs9806981   | G | -0.0393 |
| rs35787926  | A | 0.2546  |
| rs4312321   | T | 0.0592  |
| rs11077090  | G | -0.0526 |
| rs77075791  | C | 0.2319  |
| rs75464742  | A | 0.1238  |
| rs72798716  | C | 0.1402  |
| rs34628943  | A | 0.1588  |
| rs75896968  | G | 0.1045  |
| rs138780091 | C | 0.152   |
| rs77909259  | G | 0.1538  |
| rs3105688   | A | 0.0317  |
| rs75733148  | A | -0.098  |
| rs11866714  | T | 0.0484  |
| rs9930478   | C | 0.0422  |
| rs141995922 | C | 0.1282  |
| rs16952517  | A | 0.0753  |
| rs143992901 | A | 0.1988  |
| rs80063661  | T | -0.1586 |
| rs117328627 | A | 0.1052  |
| rs10048098  | G | -0.0458 |
| rs78150346  | C | -0.1266 |
| rs7202597   | T | 0.0459  |
| rs2315510   | T | 0.0539  |
| rs78530389  | A | -0.159  |
| rs4605180   | T | -0.0392 |
| rs77995020  | A | 0.0986  |
| rs12930439  | T | -0.061  |
| rs140949681 | T | 0.1666  |

|             |   |         |
|-------------|---|---------|
| rs76434416  | T | -0.049  |
| rs75000022  | G | 0.0978  |
| rs79896560  | G | 0.1316  |
| rs148102937 | T | -0.1633 |
| rs8051180   | T | 0.0316  |
| rs4786039   | A | -0.0325 |
| rs57793127  | G | -0.109  |
| rs143846722 | T | -0.2266 |
| rs733616    | G | 0.0357  |
| rs2562109   | C | -0.0451 |
| rs9925734   | A | -0.0508 |
| rs113695036 | T | 0.275   |
| rs11645410  | C | 0.0345  |
| rs142590936 | A | -0.1746 |
| rs79035621  | C | -0.1269 |
| rs4238948   | G | 0.0334  |
| rs3759984   | C | 0.0364  |
| rs1861527   | T | -0.0347 |
| rs748552    | T | -0.0329 |
| rs35967259  | A | 0.1497  |
| rs11648508  | G | 0.0353  |
| rs3784945   | G | 0.1006  |
| rs144737652 | G | -0.2092 |
| rs11643253  | T | -0.0482 |
| rs72797618  | C | -0.0415 |
| rs2352952   | T | 0.0373  |
| rs142983211 | G | -0.1404 |
| rs144247868 | A | -0.1582 |
| rs215034    | C | -0.0369 |
| rs6564177   | C | -0.0391 |
| rs72806398  | A | 0.1404  |
| rs4325575   | C | -0.0365 |
| rs72818498  | A | -0.0717 |
| rs114823418 | C | 0.1813  |
| rs149780314 | T | 0.1134  |
| rs147895248 | C | -0.1382 |
| rs62032190  | C | -0.0493 |
| rs17657399  | C | 0.0467  |
| rs6564915   | T | 0.0477  |
| rs6499096   | A | -0.0309 |
| rs12600115  | C | 0.1021  |
| rs1077970   | A | 0.033   |
| rs4888196   | A | 0.0419  |
| rs4627344   | G | 0.0895  |
| rs11864654  | C | 0.0633  |
| rs28437085  | T | 0.1372  |
| rs17198722  | T | 0.0473  |



|             |   |         |
|-------------|---|---------|
| rs143646981 | C | 0.1812  |
| rs117044159 | C | -0.2049 |
| rs59321904  | G | 0.0528  |
| rs11644635  | T | -0.0374 |
| rs111861589 | T | 0.2304  |
| rs74016545  | T | 0.2279  |
| rs34009001  | T | 0.0369  |
| rs117577302 | G | 0.1114  |
| rs72788369  | T | 0.2132  |
| rs117536890 | C | 0.1307  |
| rs57178794  | G | -0.1168 |
| rs889779    | G | -0.1279 |
| rs9924404   | C | -0.0643 |
| rs7197253   | A | 0.0646  |
| rs12596698  | T | -0.0963 |
| rs78788633  | A | 0.0553  |
| rs148528913 | G | -0.1507 |
| rs57524590  | G | 0.0519  |
| rs74020549  | T | 0.1366  |
| rs11866322  | C | 0.035   |
| rs2550363   | T | 0.0373  |
| rs4416033   | G | 0.0983  |
| rs117146915 | A | 0.1671  |
| rs11643345  | A | -0.057  |
| rs4781566   | T | -0.0947 |
| rs4148363   | C | 0.0414  |
| rs75932981  | T | -0.1259 |
| rs6498991   | A | 0.1637  |
| rs13332999  | C | -0.0469 |
| rs72783314  | T | 0.0405  |
| rs7193733   | G | -0.0322 |
| rs34397362  | C | -0.0846 |
| rs4787759   | G | -0.1541 |
| rs11866507  | A | -0.0318 |
| rs11639933  | T | 0.0455  |
| rs60466599  | G | 0.1114  |
| rs2028      | G | 0.053   |
| rs80027158  | C | 0.0936  |
| rs146070248 | A | 0.1409  |
| rs9937062   | C | 0.0364  |
| rs56723413  | A | -0.0444 |
| rs8046650   | T | -0.054  |
| rs74704709  | T | 0.1766  |
| rs12918987  | T | 0.0329  |
| rs73252705  | A | -0.0524 |
| rs16948286  | A | 0.0492  |
| rs72789768  | C | 0.0709  |

|             |   |         |
|-------------|---|---------|
| rs9932394   | A | 0.0377  |
| rs72794923  | A | 0.1327  |
| rs111813229 | T | 0.1156  |
| rs1364152   | T | -0.0323 |
| rs284964    | A | 0.0427  |
| rs79702534  | T | -0.1529 |
| rs4786182   | A | 0.0335  |
| rs62046630  | T | -0.0401 |
| rs118003520 | G | 0.1262  |
| rs146225072 | A | -0.1742 |
| rs4243125   | T | 0.0328  |
| rs6565104   | G | 0.0409  |
| rs2238436   | T | 0.0361  |
| rs16959623  | T | 0.0593  |
| rs74638071  | T | -0.1551 |
| rs163273    | C | -0.0535 |
| rs118101021 | T | 0.1389  |
| rs72776180  | T | 0.1362  |
| rs12917826  | T | -0.0504 |
| rs55822382  | G | -0.068  |
| rs1131933   | T | 0.0339  |
| rs146268299 | G | 0.1499  |
| rs112386182 | T | -0.2004 |
| rs74535306  | A | -0.1343 |
| rs17429195  | A | -0.0463 |
| rs11866369  | C | 0.0356  |
| rs1566885   | C | -0.0366 |
| rs16961749  | C | -0.0351 |
| rs11076680  | A | -0.0348 |
| rs62043285  | G | -0.0957 |
| rs4255770   | T | 0.0322  |
| rs2298847   | A | -0.053  |
| rs5029090   | A | 0.0419  |
| rs77053769  | G | 0.1967  |
| rs4782873   | T | -0.0335 |
| rs1560250   | C | -0.0322 |
| rs8053693   | T | -0.0537 |
| rs36511     | C | 0.0652  |
| rs140326470 | C | -0.1898 |
| rs216153    | C | -0.0604 |
| rs75488540  | C | -0.0703 |
| rs719952    | A | 0.0616  |
| rs142528348 | C | 0.2391  |
| rs2881689   | G | -0.0346 |
| rs118099326 | A | 0.2835  |
| rs6564695   | C | -0.0499 |
| rs385237    | A | 0.031   |

|             |   |         |
|-------------|---|---------|
| rs8182155   | G | -0.0755 |
| rs17378109  | G | 0.0644  |
| rs34463162  | A | -0.0623 |
| rs117503929 | A | -0.1974 |
| rs17763532  | A | 0.0362  |
| rs62042613  | T | 0.0463  |
| rs72626166  | G | -0.102  |
| rs9302830   | G | 0.063   |
| rs8054105   | G | -0.0355 |
| rs78948008  | T | -0.093  |
| rs751979    | G | 0.0336  |
| rs1017314   | T | 0.0733  |
| rs114570049 | A | 0.1927  |
| rs116894290 | A | -0.118  |
| rs75289134  | C | 0.2777  |
| rs2549151   | G | 0.0319  |
| rs62041774  | A | -0.0846 |
| rs3815584   | T | -0.0423 |
| rs117210582 | A | 0.0801  |
| rs146199257 | C | 0.1946  |
| rs7184208   | C | -0.0541 |
| rs140900779 | G | 0.1649  |
| rs1012273   | A | -0.0323 |
| rs57865154  | G | 0.0466  |
| rs9940558   | T | 0.0407  |
| rs118014211 | A | -0.1199 |
| rs34676698  | A | -0.1573 |
| rs1437112   | T | -0.1777 |
| rs11647753  | A | 0.0324  |
| rs12444055  | G | 0.0748  |
| rs244883    | T | 0.036   |
| rs2738713   | C | 0.0366  |
| rs112928354 | C | 0.1052  |
| rs8043987   | C | -0.0549 |
| rs111801732 | T | 0.0995  |
| rs141155381 | C | 0.2637  |
| rs7190139   | T | 0.0314  |
| rs72784138  | A | -0.0986 |
| rs117367706 | T | 0.3368  |
| rs4079379   | C | 0.0454  |
| rs4889294   | C | 0.0319  |
| rs76630793  | C | -0.1268 |
| rs11646446  | G | 0.1132  |
| rs73565833  | T | 0.1164  |
| rs8058000   | T | -0.033  |
| rs12149077  | G | -0.0435 |
| rs1076255   | G | 0.0673  |

|             |   |         |
|-------------|---|---------|
| rs276982    | G | 0.1603  |
| rs137971731 | T | 0.1835  |
| rs72802134  | A | 0.1574  |
| rs7190386   | C | -0.0309 |
| rs72810343  | T | 0.0712  |
| rs61408858  | G | -0.0361 |
| rs7197197   | G | -0.0337 |
| rs1094980   | C | -0.0306 |
| rs1437198   | A | 0.1102  |
| rs4530133   | A | 0.0431  |
| rs12447028  | C | 0.0777  |
| rs35049517  | A | -0.2307 |
| rs28756318  | G | 0.1027  |
| rs406363    | T | 0.0952  |
| rs58451246  | G | 0.0772  |
| rs58026476  | G | 0.0552  |
| rs12929343  | G | -0.042  |
| rs77176073  | A | 0.2206  |
| rs1345312   | G | -0.031  |
| rs117616258 | T | 0.1129  |
| rs146112168 | G | -0.1973 |
| rs72783525  | A | 0.0743  |
| rs111855262 | T | -0.0762 |
| rs11077101  | T | -0.0326 |
| rs141218664 | C | 0.1592  |
| rs8047255   | T | 0.0433  |
| rs149395859 | C | 0.1662  |
| rs72778969  | G | -0.046  |
| rs7189700   | A | -0.0483 |
| rs62013472  | C | 0.1897  |
| rs114461508 | T | 0.1033  |
| rs79999976  | C | -0.1068 |
| rs166011    | A | -0.0308 |
| rs117873985 | A | -0.1861 |
| rs13306665  | C | 0.1261  |
| rs13339586  | G | -0.0308 |
| rs9934761   | G | -0.0551 |
| rs75514860  | G | 0.1281  |
| rs11076406  | A | 0.1011  |
| rs224199    | T | 0.0662  |
| rs35089339  | A | 0.0657  |
| rs78562826  | G | -0.0619 |
| rs12445420  | A | 0.0412  |
| rs3891920   | C | 0.0507  |
| rs12933790  | G | 0.041   |
| rs75567824  | T | -0.118  |
| rs12444291  | C | -0.0373 |

|             |   |         |
|-------------|---|---------|
| rs56086350  | A | -0.0663 |
| rs78395209  | A | 0.1391  |
| rs7184995   | C | 0.0436  |
| rs11647700  | T | -0.0645 |
| rs118109329 | T | 0.1541  |
| rs923871    | A | -0.0368 |
| rs12918413  | T | -0.0364 |
| rs12149177  | C | -0.0335 |
| rs72762909  | T | -0.0789 |
| rs77648390  | A | -0.0773 |
| rs111258114 | A | 0.0954  |
| rs112437424 | A | 0.0796  |
| rs11644690  | G | 0.2222  |
| rs117105655 | G | 0.1099  |
| rs7190898   | T | 0.0429  |
| rs28379217  | C | 0.0575  |
| rs73585611  | A | -0.1127 |
| rs2911290   | T | 0.1098  |
| rs12599111  | A | 0.0416  |
| rs117320245 | C | -0.1266 |
| rs117654189 | T | -0.107  |
| rs10871288  | A | -0.0365 |
| rs4553626   | C | 0.1391  |
| rs117978924 | C | 0.2382  |
| rs72769909  | T | -0.057  |
| rs7500399   | C | -0.0377 |
| rs9646285   | C | 0.2213  |
| rs62042989  | A | 0.052   |
| rs12051154  | G | -0.2254 |
| rs74030209  | T | 0.1636  |
| rs9921318   | T | -0.0349 |
| rs62036113  | C | 0.0933  |
| rs9932213   | C | 0.0974  |
| rs12599599  | A | -0.1168 |
| rs62036081  | C | 0.1982  |
| rs4784867   | G | -0.0302 |
| rs11149598  | A | -0.0423 |
| rs3785272   | A | 0.039   |
| rs4785833   | C | -0.0307 |
| rs1420546   | C | -0.0326 |
| rs11649423  | G | -0.031  |
| rs117380470 | T | -0.1048 |
| rs72784085  | G | 0.1215  |
| rs78440534  | G | 0.0855  |
| rs372197    | A | 0.0304  |
| rs79469322  | G | -0.1523 |
| rs2040795   | C | 0.0373  |

|             |   |         |
|-------------|---|---------|
| rs77801921  | A | 0.0571  |
| rs8049038   | C | 0.0626  |
| rs28454865  | A | -0.0459 |
| rs6499091   | T | -0.0308 |
| rs9927857   | C | 0.0307  |
| rs148281175 | A | 0.1589  |
| rs55917861  | A | 0.2167  |
| rs72788169  | T | -0.0813 |
| rs9934672   | T | 0.0365  |
| rs146930702 | A | -0.1382 |
| rs4787384   | G | 0.0604  |
| rs17210738  | C | -0.0937 |
| rs3759953   | C | -0.0536 |
| rs249296    | C | -0.0494 |
| rs6499543   | G | -0.0408 |
| rs4641752   | G | -0.0634 |
| rs825860    | T | 0.0313  |
| rs62057531  | T | 0.0354  |
| rs62039560  | A | 0.0962  |
| rs9934740   | C | 0.0321  |
| rs149186867 | G | -0.1369 |
| rs72801241  | G | 0.055   |
| rs62048013  | C | 0.0966  |
| rs74562350  | C | -0.1625 |
| rs10852264  | T | 0.1313  |
| rs72797139  | A | 0.0638  |
| rs62028312  | T | 0.1972  |
| rs2560910   | C | -0.0382 |
| rs149492838 | G | -0.1448 |
| rs148861585 | C | -0.1373 |
| rs28385574  | T | 0.0883  |
| rs11643365  | T | -0.0722 |
| rs79282103  | A | 0.0877  |
| rs34538398  | A | -0.1038 |
| rs145037093 | G | -0.1456 |
| rs111887274 | T | -0.1788 |
| rs12919015  | C | -0.1176 |
| rs11643699  | C | -0.0329 |
| rs286681    | T | -0.0804 |
| rs8057953   | C | 0.0526  |
| rs1034391   | T | 0.0356  |
| rs7190471   | G | 0.0916  |
| rs75499972  | T | -0.0453 |
| rs8060467   | A | -0.0491 |
| rs142142311 | G | -0.2685 |
| rs12923688  | C | -0.0506 |
| rs4530122   | C | -0.0307 |

|             |   |         |
|-------------|---|---------|
| rs117182217 | A | 0.2436  |
| rs4783665   | G | 0.0323  |
| rs11644694  | A | -0.0736 |
| rs3809622   | T | -0.0923 |
| rs72776706  | G | -0.0606 |
| rs78295427  | G | 0.1356  |
| rs72770997  | A | 0.0593  |
| rs1728406   | T | -0.0362 |
| rs811054    | C | 0.0308  |
| rs7206583   | G | -0.0333 |
| rs62036916  | A | 0.2147  |
| rs17257857  | T | 0.0375  |
| rs77997550  | G | 0.1929  |
| rs12598635  | C | 0.0305  |
| rs35501383  | T | -0.0378 |
| rs3093361   | C | -0.1372 |
| rs80158238  | G | -0.1783 |
| rs117378424 | C | 0.1006  |
| rs62019965  | G | 0.1427  |
| rs139917573 | T | 0.1883  |
| rs60637108  | C | 0.0567  |
| rs72802049  | A | -0.0476 |
| rs4520849   | C | 0.0318  |
| rs35199162  | T | 0.0677  |
| rs117922892 | T | -0.1884 |
| rs7192342   | A | -0.0416 |
| rs7190385   | T | 0.1356  |
| rs35522997  | T | 0.0346  |
| rs55808475  | T | 0.0691  |
| rs7199646   | C | 0.0297  |
| rs9925859   | C | 0.0316  |
| rs72815234  | T | 0.0774  |
| rs12149656  | G | -0.0536 |
| rs117483491 | A | 0.1032  |
| rs56120607  | C | 0.0621  |
| rs143317956 | C | 0.267   |
| rs72802761  | A | 0.1181  |
| rs1019190   | G | 0.0934  |
| rs138729361 | A | -0.1344 |
| rs72832064  | A | -0.1754 |
| rs73255084  | G | 0.1053  |
| rs112691560 | C | 0.0782  |
| rs16939824  | A | 0.0957  |
| rs113992716 | A | 0.0882  |
| rs117334798 | A | -0.1877 |
| rs113882720 | A | 0.1692  |
| rs8046912   | T | 0.0972  |

|             |   |         |
|-------------|---|---------|
| rs2111123   | T | -0.0452 |
| rs147829142 | T | 0.1535  |
| rs149159114 | C | 0.1513  |
| rs2189782   | G | 0.0463  |
| rs17794023  | T | -0.0627 |
| rs4081747   | G | 0.033   |
| rs9935079   | A | -0.0551 |
| rs45442496  | T | 0.1501  |
| rs2055840   | G | -0.0355 |
| rs79515825  | A | 0.1107  |
| rs8050322   | G | 0.04    |
| rs1317406   | T | 0.038   |
| rs62033500  | A | 0.1285  |
| rs10492907  | C | -0.0441 |
| rs117543206 | G | 0.2001  |
| rs12449148  | C | -0.0339 |
| rs67163422  | C | 0.0379  |
| rs117826643 | T | 0.207   |
| rs758452    | G | 0.0643  |
| rs215897    | T | 0.0305  |
| rs12449011  | T | 0.2615  |
| rs9923267   | G | -0.0379 |
| rs73560687  | G | -0.0433 |
| rs948705    | G | 0.042   |
| rs74456766  | T | 0.1662  |
| rs77243711  | G | -0.1353 |
| rs12931213  | G | 0.0499  |
| rs79932288  | A | -0.0857 |
| rs8055259   | G | -0.0332 |
| rs34421693  | T | 0.052   |
| rs113413614 | A | -0.0835 |
| rs28836604  | G | -0.0467 |
| rs11643299  | C | 0.1517  |
| rs1530790   | G | 0.0479  |
| rs1110917   | C | -0.1545 |
| rs112029634 | T | 0.104   |
| rs77408284  | G | 0.1751  |
| rs7198576   | C | 0.034   |
| rs12447908  | G | -0.0335 |
| rs13334917  | G | -0.1206 |
| rs75281946  | T | -0.0484 |
| rs72802340  | T | 0.1372  |
| rs113755361 | A | -0.1727 |
| rs12446987  | A | -0.0456 |
| rs116964940 | G | -0.1471 |
| rs1993020   | G | -0.0301 |
| rs147414369 | G | 0.1855  |



|             |   |         |
|-------------|---|---------|
| rs7192960   | T | -0.0416 |
| rs57565725  | A | -0.1134 |
| rs117804407 | G | -0.1204 |
| rs9934952   | G | 0.0454  |
| rs73257030  | T | 0.1468  |
| rs113711424 | C | -0.1543 |
| rs12932746  | A | -0.0661 |
| rs401326    | G | -0.0348 |
| rs78237759  | T | -0.2537 |
| rs143701639 | T | -0.14   |
| rs79661685  | C | 0.0788  |
| rs117226581 | T | 0.358   |
| rs138421017 | C | 0.1384  |
| rs116970436 | T | 0.1388  |
| rs66702808  | T | 0.0473  |
| rs74428496  | C | -0.1325 |
| rs71400124  | A | -0.1126 |
| rs16862     | C | -0.0325 |
| rs7201819   | A | 0.0393  |
| rs28706003  | A | -0.0321 |
| rs13339646  | C | -0.0438 |
| rs4780957   | T | -0.0359 |
| rs35030877  | A | -0.0687 |
| rs11074462  | G | 0.0753  |
| rs16961083  | A | 0.1134  |
| rs747762    | T | -0.0486 |
| rs7205430   | A | 0.0422  |
| rs80224729  | C | -0.1229 |
| rs61503528  | G | -0.0344 |
| rs147319769 | G | -0.0463 |
| rs4148343   | A | -0.0388 |
| rs2581289   | C | -0.1551 |
| rs11076163  | G | 0.03    |
| rs117272211 | G | 0.1166  |
| rs9923358   | G | 0.031   |
| rs17257468  | A | -0.1509 |
| rs56189700  | T | -0.0381 |
| rs138009511 | T | 0.0603  |
| rs4076548   | T | 0.0334  |
| rs67576240  | G | 0.0897  |
| rs7193150   | G | -0.0616 |
| rs112100485 | A | 0.1859  |
| rs117777238 | A | 0.143   |
| rs72777888  | A | -0.0801 |
| rs4558403   | C | 0.0426  |
| rs2191098   | A | 0.0344  |
| rs117546211 | T | -0.1423 |

|             |   |         |
|-------------|---|---------|
| rs113378527 | T | 0.2008  |
| rs35283641  | T | 0.0434  |
| rs2908784   | A | 0.0399  |
| rs6499709   | G | 0.038   |
| rs75513651  | C | 0.083   |
| rs11074930  | T | 0.0524  |
| rs138457907 | T | -0.1029 |
| rs78019598  | G | 0.1443  |
| rs56269214  | T | -0.034  |
| rs11074430  | A | -0.0568 |
| rs77923338  | C | 0.1378  |
| rs12598822  | G | 0.1284  |
| rs722396    | T | 0.0797  |
| rs12597705  | T | -0.0645 |
| rs11642511  | C | 0.0346  |
| rs233561    | T | -0.0394 |
| rs72801471  | C | 0.0886  |
| rs11642259  | T | 0.03    |
| rs173593    | T | 0.0524  |
| rs117900989 | A | 0.1688  |
| rs4888913   | G | 0.0331  |
| rs117670871 | T | -0.1755 |
| rs73594838  | C | 0.1755  |
| rs1991067   | C | 0.0471  |
| rs7498601   | T | -0.0704 |
| rs77933736  | G | 0.0655  |
| rs1059857   | A | 0.0722  |
| rs117158379 | C | -0.2257 |
| rs28627551  | A | 0.0514  |
| rs1364236   | A | 0.0312  |
| rs1005482   | C | -0.0383 |
| rs112276443 | T | 0.1531  |
| rs138488857 | A | 0.1239  |
| rs9889107   | A | 0.0379  |
| rs6497559   | T | -0.1143 |
| rs9933711   | C | -0.036  |
| rs75539409  | T | -0.1548 |
| rs11860316  | T | -0.0457 |
| rs9939751   | G | 0.038   |
| rs74641280  | A | 0.1145  |
| rs74023931  | T | -0.1035 |
| rs62038852  | G | -0.039  |
| rs62046824  | T | 0.0947  |
| rs215566    | G | 0.0609  |
| rs79290323  | T | 0.1404  |
| rs117219276 | T | 0.149   |
| rs7194136   | C | 0.0454  |

|             |   |         |
|-------------|---|---------|
| rs6500746   | A | 0.0441  |
| rs12930048  | T | -0.1008 |
| rs111988277 | A | -0.199  |
| rs111892698 | T | -0.1623 |
| rs4888161   | G | 0.035   |
| rs8062353   | A | 0.1959  |
| rs2058300   | T | -0.0301 |
| rs9935751   | A | 0.0457  |
| rs56373624  | A | 0.2597  |
| rs1076158   | A | -0.0358 |
| rs35345720  | A | 0.1447  |
| rs138679720 | C | -0.1377 |
| rs12923991  | G | 0.0424  |
| rs8059135   | A | 0.0704  |
| rs12926063  | T | -0.1108 |
| rs3093313   | G | 0.0302  |
| rs9932500   | G | 0.0449  |
| rs4843470   | G | 0.0495  |
| rs72791754  | G | 0.0675  |
| rs8046503   | T | 0.1216  |
| rs117993374 | A | -0.2712 |
| rs140425204 | A | 0.136   |
| rs4788696   | C | -0.0477 |
| rs150474599 | C | -0.1173 |
| rs12929497  | C | -0.0451 |
| rs16952522  | G | -0.1247 |
| rs144870269 | A | -0.0872 |
| rs3765265   | T | -0.0885 |
| rs34254561  | A | -0.0664 |
| rs10492789  | A | -0.0842 |
| rs117699901 | G | -0.129  |
| rs6498573   | T | 0.0436  |
| rs12148990  | A | -0.03   |
| rs142079617 | T | 0.1256  |
| rs7198001   | A | -0.0442 |
| rs4783055   | C | -0.0331 |
| rs75911530  | A | -0.115  |
| rs16943711  | G | -0.1465 |
| rs759983    | C | 0.0958  |
| rs12149802  | T | 0.0469  |
| rs12927508  | A | 0.0752  |
| rs1677311   | A | -0.0293 |
| rs10852265  | C | 0.0505  |
| rs328332    | G | -0.0323 |
| rs62038970  | C | -0.057  |
| rs62052381  | C | 0.2026  |
| rs74409977  | T | -0.0888 |

|             |   |         |
|-------------|---|---------|
| rs8063887   | T | -0.0359 |
| rs7197857   | A | -0.0523 |
| rs118048472 | A | 0.1313  |
| rs145016175 | A | 0.1756  |
| rs112750046 | C | 0.0541  |
| rs72776474  | A | -0.1259 |
| rs35241658  | G | -0.099  |
| rs147122152 | G | 0.1611  |
| rs8043901   | G | 0.0994  |
| rs117156949 | C | -0.1663 |
| rs8044047   | G | -0.0388 |
| rs78463945  | T | 0.0618  |
| rs8057613   | A | -0.0555 |
| rs72807789  | G | 0.1654  |
| rs8061707   | T | 0.0615  |
| rs79855682  | G | 0.0597  |
| rs10500358  | T | 0.0475  |
| rs58124158  | T | 0.0307  |
| rs114671001 | A | 0.0836  |
| rs7404454   | C | 0.0496  |
| rs78977855  | T | 0.1538  |
| rs73551060  | C | 0.0714  |
| rs117156265 | G | -0.1753 |
| rs62057975  | G | 0.0785  |
| rs61555075  | A | -0.0627 |
| rs4783155   | A | 0.0304  |
| rs117173072 | C | 0.1135  |
| rs76190911  | A | 0.2568  |
| rs74041324  | C | -0.0694 |
| rs9929803   | G | 0.0412  |
| rs824398    | T | -0.0726 |
| rs3789033   | C | 0.034   |
| rs60689879  | T | 0.0694  |
| rs1597296   | A | -0.033  |
| rs11642200  | G | 0.0407  |
| rs75668634  | G | -0.1028 |
| rs75206709  | A | -0.0787 |
| rs12926301  | A | 0.0311  |
| rs117677314 | A | 0.1534  |
| rs56185247  | A | -0.0929 |
| rs117772992 | A | 0.1149  |
| rs79432202  | A | -0.1591 |
| rs78431933  | T | -0.0638 |
| rs2926003   | T | -0.0305 |
| rs2923147   | C | -0.0363 |
| rs11647468  | G | 0.062   |
| rs11076063  | G | 0.0404  |

|             |   |         |
|-------------|---|---------|
| rs2520136   | G | 0.0368  |
| rs17503657  | C | 0.1359  |
| rs45453598  | A | 0.0662  |
| rs4985421   | A | -0.1059 |
| rs55840176  | A | -0.1712 |
| rs12927897  | T | 0.1425  |
| rs117618795 | A | 0.1341  |
| rs4783935   | T | -0.0355 |
| rs76215119  | C | -0.0831 |
| rs79135867  | A | -0.1603 |
| rs8057063   | T | -0.0437 |
| rs4781330   | A | -0.0287 |
| rs13335453  | G | -0.038  |
| rs11649422  | A | -0.0298 |
| rs34607492  | A | 0.1415  |
| rs34508555  | G | -0.0448 |
| rs8047876   | G | 0.0461  |
| rs8056227   | A | -0.039  |
| rs56073031  | C | -0.1315 |
| rs57797311  | C | -0.0339 |
| rs118043812 | A | -0.1533 |
| rs74336125  | A | 0.0799  |
| rs117575247 | C | 0.1665  |
| rs28700197  | T | -0.0502 |
| rs9921344   | C | 0.0486  |
| rs2550219   | C | 0.0298  |
| rs1833944   | T | 0.0513  |
| rs138498474 | T | -0.1775 |
| rs117879661 | A | -0.2119 |
| rs118062898 | G | -0.1589 |
| rs11864395  | A | 0.0855  |
| rs79099148  | G | 0.0824  |
| rs13336708  | T | -0.0324 |
| rs146421192 | A | 0.1688  |
| rs112522622 | T | 0.0938  |
| rs9938506   | G | -0.0304 |
| rs35367523  | G | 0.0289  |
| rs3213423   | T | -0.0322 |
| rs9328928   | T | -0.0669 |
| rs12927729  | A | 0.037   |
| rs4510019   | G | -0.0289 |
| rs28555469  | A | -0.0476 |
| rs13331770  | A | -0.0649 |
| rs72771858  | G | -0.072  |
| rs143635270 | A | 0.2771  |
| rs2764776   | T | 0.0309  |
| rs76494924  | T | 0.1301  |

|             |   |         |
|-------------|---|---------|
| rs11641236  | G | -0.0431 |
| rs34957005  | T | 0.0542  |
| rs72811777  | T | 0.1362  |
| rs4591164   | A | 0.0477  |
| rs12448720  | C | -0.045  |
| rs300006    | C | 0.0759  |
| rs7205171   | G | -0.0297 |
| rs78420553  | G | -0.2716 |
| rs12444117  | G | 0.0426  |
| rs153048    | T | 0.2095  |
| rs2062898   | C | 0.0411  |
| rs321463    | G | 0.0335  |
| rs117903303 | A | 0.3057  |
| rs28653507  | A | 0.0831  |
| rs2547415   | A | 0.0284  |
| rs12929867  | T | 0.0349  |
| rs111587900 | G | -0.0932 |
| rs34767448  | T | -0.1951 |
| rs9927411   | T | 0.0519  |
| rs13337056  | A | 0.1055  |
| rs35723088  | T | -0.0292 |
| rs116226547 | T | 0.1598  |
| rs11865197  | C | 0.0289  |
| rs76670560  | C | -0.1584 |
| rs72801660  | G | -0.091  |
| rs117094105 | A | 0.0968  |
| rs9933420   | C | 0.0717  |
| rs129968    | A | -0.0298 |
| rs11645060  | A | -0.0654 |
| rs12919925  | T | 0.0524  |
| rs112542467 | C | -0.0953 |
| rs4417561   | C | 0.0309  |
| rs77096862  | C | -0.1685 |
| rs28361559  | C | 0.042   |
| rs2079873   | A | -0.1937 |
| rs17256727  | A | -0.0563 |
| rs13337854  | A | -0.0481 |
| rs117947036 | C | 0.1013  |
| rs440984    | A | 0.0421  |
| rs77733759  | A | 0.0509  |
| rs1532825   | G | -0.0291 |
| rs146649498 | C | 0.1126  |
| rs11861178  | G | -0.0449 |
| rs77776193  | A | -0.1719 |
| rs12600092  | G | -0.0354 |
| rs2716590   | A | 0.0308  |
| rs3784921   | T | 0.0551  |

|             |   |         |
|-------------|---|---------|
| rs2269433   | G | -0.0368 |
| rs2195435   | C | 0.0301  |
| rs3785423   | T | 0.092   |
| rs2279868   | T | 0.0571  |
| rs35084376  | C | 0.0759  |
| rs59524139  | T | 0.0452  |
| rs72805499  | T | 0.0665  |
| rs140676499 | A | 0.2008  |
| rs35060794  | G | 0.0375  |
| rs2160315   | G | 0.0357  |
| rs115164149 | T | 0.1018  |
| rs75564323  | T | 0.0822  |
| rs72770811  | A | 0.1102  |
| rs1903621   | G | 0.0389  |
| rs74740428  | T | -0.1139 |
| rs17508399  | A | 0.0617  |
| rs3118236   | C | -0.0415 |
| rs11075160  | T | -0.0329 |
| rs16962019  | G | 0.1109  |
| rs144759050 | T | 0.154   |
| rs4985082   | G | 0.05    |
| rs1465349   | A | -0.0306 |
| rs112049821 | G | -0.1768 |
| rs76963908  | T | -0.1025 |
| rs148416704 | C | 0.0335  |
| rs4785755   | G | -0.0345 |
| rs75128596  | G | -0.1195 |
| rs9925367   | G | -0.0315 |
| rs77010377  | C | 0.1167  |
| rs118052093 | T | -0.1302 |
| rs117954671 | A | -0.1189 |
| rs6500815   | G | -0.048  |
| rs58017430  | G | 0.1302  |
| rs72774217  | C | -0.0884 |
| rs72828387  | G | 0.2081  |
| rs62037804  | A | -0.1565 |
| rs12919357  | C | -0.0976 |
| rs7191763   | A | -0.2051 |
| rs28440814  | G | 0.0353  |
| rs9806941   | C | -0.0281 |
| rs1077655   | G | 0.0342  |
| rs35929052  | T | 0.0474  |
| rs9673384   | T | -0.0301 |
| rs12149550  | C | -0.0367 |
| rs9931113   | C | 0.0414  |
| rs78219435  | C | 0.0682  |
| rs8058948   | C | -0.0292 |

|             |   |         |
|-------------|---|---------|
| rs6501141   | A | 0.0283  |
| rs75066007  | A | 0.0811  |
| rs34557213  | T | -0.0304 |
| rs1550498   | C | -0.0292 |
| rs8054066   | G | -0.0284 |
| rs837763    | C | 0.0296  |
| rs7498154   | G | 0.0381  |
| rs6564031   | A | 0.1754  |
| rs12596172  | A | -0.055  |
| rs9921619   | T | 0.0499  |
| rs62039297  | A | -0.0411 |
| rs13330000  | C | -0.1698 |
| rs11645148  | G | -0.0327 |
| rs2716549   | C | 0.0375  |
| rs12597711  | T | 0.0344  |
| rs75026856  | G | 0.1337  |
| rs12051346  | T | 0.0571  |
| rs117296012 | T | 0.0701  |
| rs1006733   | C | -0.0279 |
| rs72781450  | A | -0.1148 |
| rs77825292  | T | 0.0863  |
| rs658559    | G | -0.0304 |
| rs130023    | G | 0.0895  |
| rs2471431   | T | 0.0974  |
| rs146982387 | G | -0.132  |
| rs1510206   | A | 0.116   |
| rs117311295 | G | -0.051  |
| rs72781544  | A | -0.0706 |
| rs75014418  | T | -0.0559 |
| rs7195548   | C | 0.044   |
| rs12919956  | C | -0.0342 |
| rs1874700   | C | -0.0305 |
| rs772860    | G | -0.036  |
| rs7192498   | T | 0.0282  |
| rs2540783   | C | -0.0951 |
| rs9788916   | A | 0.0474  |
| rs76927639  | A | 0.076   |
| rs56692591  | C | 0.1131  |
| rs76529341  | T | 0.1612  |
| rs111539356 | G | -0.1303 |
| rs17828898  | G | -0.1795 |
| rs4785262   | A | -0.1177 |
| rs138444153 | A | -0.1215 |
| rs12934894  | G | 0.0323  |
| rs8045395   | C | 0.0318  |
| rs129123    | T | -0.0582 |
| rs11861548  | G | 0.0475  |



|             |   |         |
|-------------|---|---------|
| rs7188212   | A | -0.0376 |
| rs12443564  | T | -0.0357 |
| rs72772080  | T | 0.0361  |
| rs17802269  | C | 0.069   |
| rs9928659   | C | 0.035   |
| rs4782347   | G | -0.0322 |
| rs1345389   | G | -0.0273 |
| rs12932511  | T | 0.0332  |
| rs12924641  | A | -0.0301 |
| rs1593138   | T | -0.0285 |
| rs62029761  | A | -0.0961 |
| rs117256941 | T | 0.1012  |
| rs118177371 | C | 0.1104  |
| rs9925420   | C | -0.0529 |
| rs11641913  | C | 0.091   |
| rs2601797   | T | 0.0589  |
| rs62031313  | T | 0.0542  |
| rs28707427  | C | -0.0279 |
| rs1133238   | A | 0.1104  |
| rs7200597   | A | 0.0287  |
| rs4984764   | A | -0.0708 |
| rs274074    | T | -0.0394 |
| rs12596877  | G | 0.2673  |
| rs149485219 | C | -0.1441 |
| rs2172311   | C | 0.037   |
| rs116997405 | A | -0.126  |
| rs72810315  | T | 0.115   |
| rs12448137  | G | 0.0382  |
| rs244825    | A | -0.0401 |
| rs8056929   | G | 0.0423  |
| rs3934987   | G | -0.0304 |
| rs79030012  | G | 0.1846  |
| rs17650189  | T | 0.0287  |
| rs9933675   | C | 0.0547  |
| rs113472188 | C | -0.1814 |
| rs16965571  | T | -0.0763 |
| rs11859525  | A | -0.0446 |
| rs78769578  | T | 0.0594  |
| rs16962458  | A | 0.0322  |
| rs117544538 | G | 0.0813  |
| rs117570718 | T | 0.1196  |
| rs2753324   | A | -0.0598 |
| rs17659759  | G | 0.0301  |
| rs12596607  | A | -0.0484 |
| rs16958912  | G | 0.07    |
| rs12929741  | A | -0.0399 |
| rs138485917 | G | 0.1926  |

|             |   |         |
|-------------|---|---------|
| rs78669234  | G | -0.1479 |
| rs11646130  | C | 0.0301  |
| rs68144045  | G | 0.0322  |
| rs62057584  | G | -0.0354 |
| rs117000984 | T | -0.1526 |
| rs75744506  | G | 0.0363  |
| rs7197077   | T | -0.1475 |
| rs112178432 | T | -0.0424 |
| rs2526060   | A | -0.0444 |
| rs360783    | C | -0.0311 |
| rs79104408  | A | -0.0516 |
| rs7186735   | T | -0.0887 |
| rs78908758  | T | 0.2171  |
| rs7201479   | T | -0.0292 |
| rs56069843  | C | 0.0312  |
| rs28374158  | A | 0.0284  |
| rs34756541  | A | 0.0315  |
| rs7194513   | G | -0.04   |
| rs16957568  | G | -0.0366 |
| rs79155407  | T | 0.0665  |
| rs4522409   | G | 0.1925  |
| rs9938195   | C | 0.0988  |
| rs141859233 | G | -0.1433 |
| rs62044970  | C | -0.1142 |
| rs2968420   | C | 0.0412  |
| rs57517721  | T | 0.1135  |
| rs58071743  | T | 0.1599  |
| rs118099348 | T | 0.1096  |
| rs4786844   | A | -0.0333 |
| rs112089506 | T | 0.0723  |
| rs1019959   | A | -0.0291 |
| rs8043560   | C | -0.0301 |
| rs150917077 | T | 0.219   |
| rs145250958 | G | 0.1925  |
| rs12149732  | C | 0.0312  |
| rs118008621 | G | 0.0507  |
| rs117537971 | T | 0.15    |
| rs12921807  | T | -0.0269 |
| rs6498475   | A | 0.0431  |
| rs139300961 | A | -0.1833 |
| rs4786785   | C | 0.0293  |
| rs8047363   | C | -0.0404 |
| rs72778553  | A | -0.1711 |
| rs147487572 | T | -0.2092 |
| rs117891062 | A | 0.0939  |
| rs4448924   | C | 0.0307  |
| rs117535985 | T | 0.1149  |

|             |   |         |
|-------------|---|---------|
| rs147694763 | A | 0.1602  |
| rs4128131   | T | -0.1408 |
| rs11510264  | C | -0.0287 |
| rs4580179   | A | 0.1409  |
| rs34375505  | G | 0.0326  |
| rs117350910 | T | -0.1832 |
| rs4786216   | G | -0.0422 |
| rs1627524   | C | -0.0371 |
| rs3859161   | A | 0.0456  |
| rs12925077  | A | 0.1208  |
| rs35749112  | T | 0.0422  |
| rs8051954   | T | -0.0343 |
| rs147028609 | T | 0.1755  |
| rs7204950   | A | 0.0326  |
| rs138863685 | G | -0.1685 |
| rs3794638   | A | -0.0604 |
| rs76590460  | G | -0.1797 |
| rs277503    | C | -0.0341 |
| rs62048676  | T | 0.0636  |
| rs140676786 | T | 0.095   |
| rs8053416   | A | 0.0316  |
| rs3093391   | T | 0.0933  |
| rs117164740 | T | 0.0783  |
| rs148520386 | A | 0.1375  |
| rs142798167 | C | -0.1044 |
| rs6498990   | G | 0.0337  |
| rs6500101   | C | 0.0326  |
| rs241378    | A | 0.0486  |
| rs28526595  | T | -0.1485 |
| rs78500230  | G | -0.0719 |
| rs7187656   | G | -0.0398 |
| rs8047527   | T | 0.0415  |
| rs556584    | G | 0.0538  |
| rs62041961  | T | -0.0754 |
| rs2346607   | C | 0.0394  |
| rs72789430  | G | 0.1735  |
| rs11642422  | G | -0.0273 |
| rs215901    | C | 0.0295  |
| rs117296262 | A | 0.1123  |
| rs1500287   | T | -0.0355 |
| rs11642216  | A | -0.0315 |
| rs1529522   | C | 0.0375  |
| rs441574    | G | -0.0378 |
| rs76081613  | A | -0.0664 |
| rs4075601   | C | -0.0569 |
| rs79875430  | T | 0.1193  |
| rs140331890 | C | -0.1763 |

|             |   |         |
|-------------|---|---------|
| rs72805229  | T | -0.0834 |
| rs142202189 | T | 0.155   |
| rs79141649  | G | -0.1256 |
| rs147942722 | T | 0.0949  |
| rs16946521  | C | -0.0422 |
| rs2192347   | T | -0.0275 |
| rs141626637 | T | -0.1151 |
| rs58585798  | T | -0.1035 |
| rs12447516  | T | -0.0318 |
| rs12921519  | A | 0.0348  |
| rs4435255   | C | 0.052   |
| rs28597909  | C | -0.0556 |
| rs867131    | T | 0.0555  |
| rs28701029  | G | 0.1057  |
| rs34704079  | A | -0.2314 |
| rs1615164   | G | -0.0373 |
| rs114835359 | A | -0.1475 |
| rs7202381   | G | 0.1462  |
| rs12932756  | G | 0.0506  |
| rs16948659  | T | -0.0668 |
| rs11642627  | T | 0.0404  |
| rs12325586  | G | -0.0506 |
| rs62029368  | A | 0.1277  |
| rs76245618  | G | 0.0844  |
| rs7195259   | G | 0.0666  |
| rs117178136 | T | 0.1061  |
| rs28712100  | T | -0.1335 |
| rs39568     | G | 0.0483  |
| rs34753304  | C | -0.032  |
| rs71383744  | C | 0.1089  |
| rs113623712 | A | -0.1545 |
| rs71386688  | A | -0.054  |
| rs77576388  | T | 0.1114  |
| rs16954259  | A | -0.0331 |
| rs78628719  | A | -0.0975 |
| rs116851593 | C | 0.1801  |
| rs80215561  | T | -0.2534 |
| rs2013800   | A | -0.0273 |
| rs237162    | T | 0.0997  |
| rs72776539  | A | -0.1003 |
| rs11150366  | A | 0.0953  |
| rs2239976   | C | 0.0625  |
| rs72814429  | C | 0.0473  |
| rs74805390  | A | -0.1376 |
| rs60309343  | T | -0.0718 |
| rs9927630   | G | 0.097   |
| rs7198149   | T | -0.0515 |

|             |   |         |
|-------------|---|---------|
| rs72786917  | G | 0.2257  |
| rs72640453  | A | -0.1287 |
| rs77393147  | G | -0.1164 |
| rs12149571  | G | -0.0487 |
| rs77695261  | G | 0.0585  |
| rs7198402   | G | 0.0325  |
| rs150975442 | C | -0.1995 |
| rs117425470 | A | 0.1329  |
| rs113834973 | G | 0.1282  |
| rs9302683   | T | -0.0282 |
| rs73605154  | T | -0.0424 |
| rs56178552  | A | -0.0318 |
| rs62043357  | G | -0.0588 |
| rs116907285 | G | 0.0704  |
| rs9922120   | T | -0.0371 |
| rs35594082  | C | 0.0328  |
| rs11643934  | T | -0.0312 |
| rs209459    | T | 0.0285  |
| rs80021133  | C | -0.0612 |
| rs4511552   | G | -0.0777 |
| rs79070103  | A | 0.2438  |
| rs12597549  | C | -0.0331 |
| rs75066389  | A | 0.0637  |
| rs1972654   | G | 0.0304  |
| rs11646069  | A | -0.0899 |
| rs4889437   | T | 0.0476  |
| rs117080093 | T | -0.1207 |
| rs72796315  | G | -0.0757 |
| rs4375669   | C | -0.0348 |
| rs1453516   | G | -0.0401 |
| rs191784    | T | 0.0329  |
| rs73579833  | A | 0.0799  |
| rs76698875  | G | 0.1063  |
| rs9924469   | A | -0.0709 |
| rs11862371  | A | 0.0375  |
| rs11074954  | A | -0.0347 |
| rs62023757  | G | 0.1069  |
| rs17672305  | C | 0.0695  |
| rs55902237  | T | 0.1386  |
| rs117894504 | A | -0.1363 |
| rs9936426   | A | 0.1141  |
| rs62033343  | A | 0.0343  |
| rs205358    | T | -0.08   |
| rs35016682  | C | -0.0299 |
| rs77206008  | G | -0.0894 |
| rs75223219  | A | 0.052   |
| rs150355    | C | 0.0547  |

|             |   |         |
|-------------|---|---------|
| rs62044385  | C | 0.0429  |
| rs17708876  | C | -0.0356 |
| rs12599743  | C | -0.098  |
| rs149026259 | A | -0.1788 |
| rs117157368 | C | -0.0836 |
| rs11647968  | G | 0.027   |
| rs143056913 | A | -0.2123 |
| rs197069    | G | -0.0529 |
| rs116912370 | A | 0.115   |
| rs239352    | A | 0.0906  |
| rs117133676 | A | -0.1899 |
| rs71403839  | C | 0.0592  |
| rs2897832   | G | 0.037   |
| rs116854787 | T | -0.0726 |
| rs3862473   | C | 0.0579  |
| rs2029921   | T | 0.0422  |
| rs78414856  | G | -0.1266 |
| rs146323713 | A | -0.1654 |
| rs825838    | G | 0.0304  |
| rs78690904  | A | 0.1706  |
| rs6498272   | G | -0.0275 |
| rs145784716 | G | 0.1521  |
| rs75609019  | G | 0.0679  |
| rs2106671   | T | 0.0271  |
| rs139388571 | T | -0.1823 |
| rs34230267  | G | 0.0775  |
| rs28520605  | A | 0.1733  |
| rs28713295  | A | -0.0636 |
| rs113462046 | A | -0.0349 |
| rs61287756  | G | 0.0722  |
| rs7201307   | C | -0.0272 |
| rs4499238   | T | 0.0354  |
| rs2018257   | T | 0.0284  |
| rs10048117  | G | 0.0296  |
| rs78620090  | T | -0.1188 |
| rs1016902   | T | 0.028   |
| rs4322664   | A | -0.0374 |
| rs34869093  | G | 0.0281  |
| rs4784500   | G | 0.0347  |
| rs116095843 | T | -0.1788 |
| rs6540282   | G | -0.0328 |
| rs34179719  | T | -0.0264 |
| rs7185890   | A | 0.0265  |
| rs34460084  | G | 0.0799  |
| rs5006896   | T | -0.036  |
| rs6500988   | T | -0.0547 |
| rs141986524 | G | 0.2318  |

|             |   |         |
|-------------|---|---------|
| rs765413    | T | 0.0518  |
| rs1875220   | T | -0.0319 |
| rs1037000   | G | -0.0544 |
| rs1438701   | T | 0.0373  |
| rs2126336   | C | 0.0827  |
| rs117890091 | G | 0.103   |
| rs17245906  | T | -0.0357 |
| rs56117891  | T | -0.1093 |
| rs139247949 | A | -0.1345 |
| rs16958305  | C | 0.0676  |
| rs80303830  | G | -0.0443 |
| rs9921090   | A | 0.0323  |
| rs28533213  | C | 0.0519  |
| rs139720516 | T | -0.2548 |
| rs11648207  | T | 0.029   |
| rs117866083 | T | -0.1365 |
| rs117703326 | G | 0.1481  |
| rs56691021  | C | 0.0382  |
| rs72814598  | T | -0.0859 |
| rs139282126 | G | -0.1402 |
| rs116925818 | T | -0.2245 |
| rs11076964  | G | 0.0333  |
| rs148356002 | C | 0.1053  |
| rs117926511 | T | 0.0611  |
| rs75919643  | T | 0.0869  |
| rs137889509 | G | 0.1672  |
| rs12598616  | T | 0.0303  |
| rs2519438   | C | 0.0536  |
| rs35182     | A | 0.0668  |
| rs117543558 | T | 0.1477  |
| rs8063171   | T | -0.0286 |
| rs113559535 | T | -0.1651 |
| rs117523217 | C | 0.1168  |
| rs146188521 | C | 0.1961  |
| rs270433    | A | 0.0266  |
| rs116951500 | A | 0.0956  |
| rs12918215  | A | -0.0335 |
| rs6498022   | C | -0.0887 |
| rs145715365 | A | 0.1434  |
| rs34005634  | A | 0.0466  |
| rs8053172   | A | -0.028  |
| rs144927264 | A | 0.1719  |
| rs4784657   | T | 0.0454  |
| rs2326211   | T | 0.039   |
| rs4888488   | C | 0.0323  |
| rs111826559 | T | -0.2096 |
| rs4843339   | T | 0.0511  |

|             |   |         |
|-------------|---|---------|
| rs9922707   | A | 0.0994  |
| rs8052539   | C | -0.0319 |
| rs75137527  | C | 0.0478  |
| rs4076826   | T | 0.0764  |
| rs2059819   | T | 0.0386  |
| rs12934959  | A | 0.0723  |
| rs12924372  | A | -0.0611 |
| rs3729889   | G | -0.108  |
| rs145964978 | A | -0.1932 |
| rs77910873  | C | 0.07    |
| rs59175623  | A | 0.0597  |
| rs11149991  | T | 0.0384  |
| rs4334325   | A | 0.0313  |
| rs11859316  | G | 0.0412  |
| rs1466763   | A | 0.032   |
| rs224234    | C | 0.0256  |
| rs8046708   | G | -0.0497 |
| rs149702301 | A | -0.1503 |
| rs59968382  | A | 0.0494  |
| rs13332743  | T | -0.0267 |
| rs74368558  | A | -0.0745 |
| rs7198032   | A | 0.0277  |
| rs933391    | G | 0.0879  |
| rs77827243  | G | 0.0681  |
| rs7195207   | A | 0.0434  |
| rs7193999   | A | 0.1065  |
| rs77142395  | A | 0.0328  |
| rs62025428  | G | -0.0548 |
| rs113829328 | T | 0.1344  |
| rs11640940  | A | -0.0267 |
| rs8056544   | C | 0.1047  |
| rs2239329   | A | 0.0293  |
| rs534319    | T | 0.0471  |
| rs11074739  | A | -0.0314 |
| rs72776681  | C | 0.1317  |
| rs80217822  | G | 0.0619  |
| rs77246816  | A | 0.0382  |
| rs30427     | G | -0.0253 |
| rs4787865   | T | -0.0975 |
| rs11863411  | G | 0.1002  |
| rs2520054   | G | 0.0617  |
| rs76783376  | T | -0.056  |
| rs11864688  | A | -0.0292 |
| rs8053266   | T | 0.0723  |
| rs75241984  | C | -0.1345 |
| rs78144838  | C | 0.036   |
| rs111571869 | G | -0.2109 |



|             |   |         |
|-------------|---|---------|
| rs78241241  | T | 0.0801  |
| rs71389824  | A | 0.0437  |
| rs79836685  | A | -0.1453 |
| rs73234036  | C | -0.0348 |
| rs1014632   | T | -0.0266 |
| rs5010105   | C | -0.0308 |
| rs864750    | G | -0.033  |
| rs139975231 | T | 0.1838  |
| rs12933032  | G | 0.0578  |
| rs841184    | C | 0.1092  |
| rs11075111  | A | 0.0615  |
| rs8044635   | A | 0.2033  |
| rs58101491  | A | 0.0402  |
| rs8062542   | C | -0.0848 |
| rs7195004   | T | -0.1694 |
| rs34030213  | G | -0.0317 |
| rs73531443  | A | 0.0503  |
| rs1579333   | T | 0.0294  |
| rs62016435  | T | -0.0566 |
| rs28605141  | A | -0.0373 |
| rs1080481   | A | -0.0268 |
| rs72802667  | A | 0.0536  |
| rs809091    | G | 0.0321  |
| rs2549722   | G | 0.0563  |
| rs74390824  | T | 0.0927  |
| rs11860786  | A | -0.0443 |
| rs139393742 | T | 0.101   |
| rs4490004   | G | -0.0297 |
| rs77751805  | A | -0.1138 |
| rs33339     | A | 0.0282  |
| rs6499156   | A | 0.0729  |
| rs55998113  | C | -0.133  |
| rs179767    | C | 0.0286  |
| rs113246797 | G | -0.2923 |
| rs10852513  | T | -0.0278 |
| rs11641538  | T | -0.1323 |
| rs59872536  | A | 0.0485  |
| rs3114386   | C | -0.0651 |
| rs28505805  | G | 0.0386  |
| rs11640068  | T | -0.0802 |
| rs117306778 | T | 0.0537  |
| rs12597883  | A | 0.0558  |
| rs11074644  | T | -0.1035 |
| rs34549561  | A | -0.0692 |
| rs142844957 | T | 0.1819  |
| rs74385679  | G | 0.0569  |
| rs59485676  | G | -0.0567 |

|             |   |         |
|-------------|---|---------|
| rs67628484  | A | -0.0341 |
| rs8046002   | A | -0.1103 |
| rs79654650  | C | -0.047  |
| rs17224504  | G | -0.0485 |
| rs35412209  | A | -0.0623 |
| rs4782373   | A | -0.0313 |
| rs16963773  | T | 0.0844  |
| rs146997275 | A | -0.1098 |
| rs7185676   | G | 0.027   |
| rs7192314   | G | -0.0429 |
| rs142237670 | G | -0.1017 |
| rs117843219 | T | -0.0733 |
| rs143182527 | C | -0.2087 |
| rs9937893   | C | 0.0507  |
| rs117122157 | T | -0.1726 |
| rs146320664 | C | 0.0889  |
| rs74955362  | T | 0.0849  |
| rs41138     | A | -0.0652 |
| rs4318209   | G | 0.0387  |
| rs75351195  | T | 0.0369  |
| rs2562185   | A | -0.0273 |
| rs113834139 | T | -0.2168 |
| rs59365850  | A | -0.0513 |
| rs67137846  | T | 0.0551  |
| rs74822080  | T | -0.0863 |
| rs11640483  | C | -0.0309 |
| rs62046136  | C | -0.091  |
| rs79880974  | T | -0.0835 |
| rs117083372 | T | 0.1556  |
| rs142016753 | T | -0.1508 |
| rs9927723   | T | -0.0279 |
| rs12444356  | T | -0.0585 |
| rs74998944  | A | 0.0807  |
| rs6498722   | T | -0.0284 |
| rs12148934  | C | 0.1015  |
| rs17886060  | A | -0.1762 |
| rs72791317  | G | -0.1142 |
| rs714181    | A | 0.05    |
| rs9923639   | C | -0.0471 |
| rs4785414   | T | 0.1202  |
| rs2066842   | T | -0.028  |
| rs148679652 | A | 0.118   |
| rs112002004 | C | 0.1022  |
| rs118063295 | A | -0.1568 |
| rs322560    | G | -0.0286 |
| rs75957893  | A | 0.066   |
| rs7194646   | C | -0.0309 |

|             |   |         |
|-------------|---|---------|
| rs8049227   | G | -0.0644 |
| rs179773    | A | 0.0696  |
| rs3813009   | C | -0.0322 |
| rs7189979   | C | -0.0411 |
| rs71396197  | A | 0.049   |
| rs148210416 | C | 0.1657  |
| rs12930158  | A | -0.1026 |
| rs2041276   | A | -0.0379 |
| rs7198995   | C | 0.0293  |
| rs7197139   | C | 0.0413  |
| rs34626151  | G | -0.0356 |
| rs4595826   | G | -0.0288 |
| rs12918989  | C | 0.0321  |
| rs117658655 | T | 0.0953  |
| rs143552022 | C | 0.0931  |
| rs12716918  | C | -0.0267 |
| rs112104896 | C | -0.088  |
| rs1399998   | C | 0.1933  |
| rs3115449   | A | 0.0411  |
| rs16943265  | A | -0.1479 |
| rs12925430  | A | 0.0453  |
| rs7185320   | G | -0.0629 |
| rs3943418   | A | 0.0318  |
| rs72787944  | G | -0.0584 |
| rs149885178 | A | -0.0845 |
| rs11866251  | A | 0.0329  |
| rs12448384  | G | 0.0421  |
| rs17765870  | A | 0.2009  |
| rs12720897  | G | 0.0722  |
| rs10852515  | C | 0.0451  |
| rs16942118  | G | -0.1074 |
| rs117059723 | G | -0.1505 |
| rs113031282 | A | 0.12    |
| rs72786081  | C | 0.1317  |
| rs8051957   | A | 0.0278  |
| rs2967871   | C | 0.0428  |
| rs112604915 | T | -0.0799 |
| rs11074764  | A | 0.0309  |
| rs113700862 | T | 0.1236  |
| rs3815963   | G | -0.0345 |
| rs111276420 | C | 0.134   |
| rs4517813   | G | -0.0265 |
| rs1403134   | A | -0.0403 |
| rs74357553  | A | 0.1308  |
| rs4985010   | A | -0.0462 |
| rs74363889  | T | -0.1385 |
| rs11640298  | C | -0.0436 |

|             |   |         |
|-------------|---|---------|
| rs139403228 | G | -0.1255 |
| rs12446048  | A | -0.1001 |
| rs4783020   | T | 0.081   |
| rs9939607   | A | 0.0257  |
| rs78184585  | A | -0.0912 |
| rs8046657   | A | 0.0275  |
| rs117603260 | C | -0.0755 |
| rs35449889  | T | 0.0804  |
| rs117365239 | T | -0.0619 |
| rs1037369   | G | 0.063   |
| rs113046909 | A | -0.1255 |
| rs62030325  | T | 0.0514  |
| rs12598778  | C | 0.0576  |
| rs147388598 | T | 0.1747  |
| rs55881379  | G | 0.1005  |
| rs7196063   | C | -0.0542 |
| rs17369468  | T | -0.0316 |
| rs111418956 | T | -0.0521 |
| rs148030266 | G | 0.0917  |
| rs117608737 | T | -0.1506 |
| rs142319636 | G | -0.0606 |
| rs11075762  | T | 0.0433  |
| rs11640711  | G | -0.0258 |
| rs4781482   | A | 0.0455  |
| rs8054093   | A | 0.0266  |
| rs113599296 | A | -0.0735 |
| rs12925226  | T | 0.0572  |
| rs2037175   | T | 0.0317  |
| rs78854321  | C | -0.1815 |
| rs10871285  | G | -0.0297 |
| rs8059474   | A | -0.0499 |
| rs6499655   | G | 0.0703  |
| rs117292896 | A | 0.1403  |
| rs56239412  | A | -0.1101 |
| rs2241216   | C | 0.0429  |
| rs17201385  | A | 0.0803  |
| rs8048274   | C | -0.0268 |
| rs113763620 | A | 0.0761  |
| rs11077030  | G | 0.0589  |
| rs55663818  | T | 0.0503  |
| rs55680316  | T | 0.0587  |
| rs11649335  | T | 0.0318  |
| rs9937099   | C | 0.0274  |
| rs12932291  | G | -0.0485 |
| rs111936524 | A | 0.1018  |
| rs36008476  | A | -0.0549 |
| rs12597026  | C | -0.0559 |

|             |   |         |
|-------------|---|---------|
| rs6499771   | G | 0.0326  |
| rs11642771  | G | 0.0265  |
| rs142286326 | C | -0.2128 |
| rs8050819   | G | -0.0372 |
| rs117082319 | C | 0.0971  |
| rs4786548   | T | -0.0371 |
| rs8048145   | C | -0.0339 |
| rs4985092   | G | -0.0441 |
| rs72770449  | T | -0.0599 |
| rs12445707  | C | -0.0269 |
| rs12921490  | A | -0.0681 |
| rs77384025  | G | 0.0773  |
| rs116882329 | T | 0.112   |
| rs72788798  | A | 0.1566  |
| rs753286    | A | 0.0415  |
| rs4787862   | A | 0.0374  |
| rs29861     | T | -0.0579 |
| rs116953613 | T | 0.1762  |
| rs444804    | T | -0.0295 |
| rs1593113   | A | 0.0274  |
| rs59062800  | A | -0.051  |
| rs62049427  | A | -0.1065 |
| rs40384     | C | 0.1539  |
| rs56364740  | C | -0.0363 |
| rs9930491   | A | 0.0341  |
| rs111591122 | G | -0.1843 |
| rs60209796  | G | 0.0777  |
| rs118130287 | T | 0.0903  |
| rs143870102 | G | 0.0346  |
| rs1025067   | A | 0.082   |
| rs12929202  | T | -0.0677 |
| rs11149713  | A | 0.0478  |
| rs145502206 | T | 0.1742  |
| rs12449156  | C | 0.0383  |
| rs371800    | T | 0.0771  |
| rs4780441   | T | 0.0319  |
| rs11646943  | T | 0.0343  |
| rs56159307  | T | -0.1749 |
| rs4888255   | T | 0.026   |
| rs8054941   | A | -0.0267 |
| rs72779617  | A | 0.0601  |
| rs12324975  | T | -0.0347 |
| rs1807439   | A | -0.0286 |
| rs56143722  | A | -0.0692 |
| rs274544    | G | 0.0258  |
| rs11642644  | C | -0.0416 |
| rs28479301  | G | 0.0342  |

|             |   |         |
|-------------|---|---------|
| rs140256556 | G | -0.0802 |
| rs7404253   | T | 0.0372  |
| rs2238482   | A | 0.0372  |
| rs78332158  | T | 0.1089  |
| rs71404050  | G | 0.077   |
| rs7193741   | T | -0.0291 |
| rs72771359  | C | 0.0601  |
| rs9924304   | C | -0.0263 |
| rs57900082  | G | 0.0405  |
| rs55919276  | C | -0.0251 |
| rs139638064 | G | 0.145   |
| rs30259     | T | 0.0525  |
| rs12445465  | C | 0.0651  |
| rs179219    | G | 0.0255  |
| rs35567564  | A | -0.151  |
| rs115070375 | A | -0.0746 |
| rs10514491  | C | 0.0276  |
| rs8047316   | G | 0.0351  |
| rs74508589  | T | 0.1133  |
| rs145701815 | C | 0.1677  |
| rs147990141 | T | -0.0955 |
| rs79530020  | T | -0.1471 |
| rs140462686 | A | -0.0914 |
| rs13334655  | T | -0.0709 |
| rs12917943  | C | 0.0289  |
| rs116461035 | A | 0.1857  |
| rs12595995  | T | 0.0308  |
| rs17822894  | T | 0.0745  |
| rs247859    | A | 0.0437  |
| rs75304492  | T | -0.1796 |
| rs72774999  | G | 0.048   |
| rs79311032  | T | 0.1009  |
| rs71384892  | C | 0.0819  |
| rs72806738  | T | -0.1204 |
| rs7201597   | T | -0.0272 |
| rs11646953  | T | -0.0312 |
| rs74351303  | A | -0.127  |
| rs61695212  | A | 0.067   |
| rs17619927  | A | 0.1141  |
| rs62036306  | T | -0.0474 |
| rs57582465  | C | 0.0719  |
| rs142325894 | T | 0.1643  |
| rs34539405  | T | 0.0918  |
| rs117685833 | G | -0.099  |
| rs56412059  | C | 0.0905  |
| rs208610    | C | 0.0259  |
| rs72788911  | A | 0.1576  |

|             |   |         |
|-------------|---|---------|
| rs147475978 | G | 0.1709  |
| rs113054091 | A | 0.1179  |
| rs2966075   | C | 0.0254  |
| rs62013895  | A | 0.0366  |
| rs7192493   | C | 0.0342  |
| rs72804459  | T | 0.0708  |
| rs173547    | T | -0.0304 |
| rs8049045   | A | 0.0461  |
| rs149092813 | T | -0.1208 |
| rs17626349  | C | 0.0371  |
| rs112280034 | G | -0.2233 |
| rs17705051  | T | 0.0609  |
| rs4635357   | C | 0.0288  |
| rs61022573  | A | -0.0533 |
| rs1553720   | C | -0.04   |
| rs111820099 | G | -0.0588 |
| rs117908982 | A | -0.1431 |
| rs1124356   | C | 0.0252  |
| rs112414296 | C | 0.1278  |
| rs12927443  | T | -0.0285 |
| rs141937527 | T | -0.1798 |
| rs2541462   | A | -0.0522 |
| rs4781442   | T | -0.0677 |
| rs169516    | A | 0.0316  |
| rs693323    | G | -0.059  |
| rs117881106 | A | -0.1482 |
| rs1967309   | A | 0.0258  |
| rs58516395  | A | 0.0512  |
| rs1641826   | C | 0.0316  |
| rs79409336  | T | -0.0452 |
| rs2911317   | A | -0.0321 |
| rs117555556 | T | 0.1058  |
| rs224223    | T | -0.0253 |
| rs3794699   | C | -0.0324 |
| rs10500522  | C | -0.0441 |
| rs4782720   | T | 0.0344  |
| rs74348516  | A | -0.0993 |
| rs150223591 | A | 0.1567  |
| rs9673857   | C | 0.0272  |
| rs73504504  | C | -0.079  |
| rs42221     | A | 0.034   |
| rs35512815  | C | 0.0293  |
| rs72785741  | A | -0.0584 |
| rs288603    | T | -0.0256 |
| rs2035492   | T | -0.0468 |
| rs148936165 | A | 0.0819  |
| rs4781946   | A | -0.0303 |

|             |   |         |
|-------------|---|---------|
| rs149739163 | A | 0.1463  |
| rs7206806   | A | -0.0381 |
| rs77695820  | C | -0.0486 |
| rs112217583 | T | -0.1555 |
| rs9930233   | T | -0.0264 |
| rs1423921   | G | -0.0304 |
| rs17794609  | G | 0.0327  |
| rs149026089 | G | -0.0695 |
| rs12932962  | G | -0.0937 |
| rs117376624 | T | -0.101  |
| rs72783241  | A | -0.175  |
| rs139329960 | C | 0.0703  |
| rs80157594  | G | 0.158   |
| rs9932884   | A | -0.0755 |
| rs4984869   | A | -0.0989 |
| rs11076445  | A | -0.027  |
| rs12928375  | T | -0.0517 |
| rs117254086 | A | 0.1428  |
| rs12925867  | C | -0.0627 |
| rs148083153 | G | -0.1596 |
| rs6500340   | G | 0.0428  |
| rs77836683  | A | -0.0901 |
| rs149308623 | T | 0.0975  |
| rs7189557   | C | 0.034   |
| rs117598649 | T | 0.1745  |
| rs8044447   | G | 0.0347  |
| rs143567838 | T | 0.1868  |
| rs117978822 | A | 0.1722  |
| rs62043898  | A | -0.0725 |
| rs12443522  | C | -0.0277 |
| rs28688877  | C | 0.0505  |
| rs72796387  | C | -0.2791 |
| rs143543493 | C | 0.0591  |
| rs422965    | G | -0.0452 |
| rs17686883  | G | 0.1565  |
| rs11866301  | G | -0.0263 |
| rs11150292  | C | 0.0448  |
| rs3826231   | A | 0.0755  |
| rs141179816 | T | 0.1611  |
| rs140769968 | A | -0.1173 |
| rs216608    | C | -0.105  |
| rs9932167   | T | -0.0781 |
| rs138491090 | C | -0.0999 |
| rs75031813  | C | -0.0853 |
| rs11076803  | T | 0.0282  |
| rs141056231 | A | -0.0425 |
| rs11649180  | C | -0.037  |



|             |   |         |
|-------------|---|---------|
| rs36187309  | A | -0.0463 |
| rs4783124   | C | 0.0629  |
| rs12929458  | G | 0.0254  |
| rs28641637  | C | -0.0399 |
| rs143145402 | A | 0.1109  |
| rs77124803  | A | -0.0789 |
| rs4786736   | A | 0.0553  |
| rs78953497  | T | -0.0688 |
| rs116847261 | T | -0.1335 |
| rs62028334  | C | 0.0356  |
| rs2326253   | C | 0.0256  |
| rs4888924   | A | -0.0249 |
| rs117617905 | C | 0.1643  |
| rs78245187  | G | -0.0898 |
| rs116942339 | A | 0.0934  |
| rs78484236  | G | 0.0756  |
| rs143766565 | C | -0.1821 |
| rs113565874 | T | 0.1084  |
| rs3803651   | G | 0.0288  |
| rs71378301  | T | 0.1262  |
| rs17810367  | C | 0.0392  |
| rs34914753  | C | -0.0513 |
| rs55986698  | A | -0.0472 |
| rs111469125 | G | 0.106   |
| rs56120232  | G | -0.0433 |
| rs2248128   | G | -0.0316 |
| rs2360168   | T | -0.0272 |
| rs147280973 | C | 0.1184  |
| rs10492761  | T | 0.0256  |
| rs62033190  | T | -0.0837 |
| rs72790327  | A | -0.0679 |
| rs116907567 | T | 0.0512  |
| rs4783169   | G | -0.0281 |
| rs145422203 | G | -0.0769 |
| rs79281631  | T | -0.0389 |
| rs72792716  | T | -0.0382 |
| rs2550615   | G | -0.0354 |
| rs16949733  | G | -0.0485 |
| rs11643232  | G | 0.0674  |
| rs13337795  | T | -0.1513 |
| rs4786701   | A | 0.0331  |
| rs7192817   | G | 0.0281  |
| rs28612891  | A | -0.036  |
| rs12596486  | T | 0.0255  |
| rs11644665  | T | -0.0939 |
| rs13332095  | A | -0.0422 |
| rs13333992  | T | 0.1432  |

|             |   |         |
|-------------|---|---------|
| rs74813648  | T | -0.0452 |
| rs72803943  | T | 0.1331  |
| rs3095638   | A | 0.027   |
| rs8047853   | A | -0.0298 |
| rs7193053   | T | 0.0348  |
| rs78921437  | T | 0.1224  |
| rs58307394  | C | 0.0654  |
| rs1267579   | A | 0.0598  |
| rs2911345   | C | 0.0286  |
| rs8045919   | A | 0.0297  |
| rs12444468  | A | -0.0432 |
| rs117568820 | A | -0.0669 |
| rs36229787  | C | 0.0321  |
| rs4630566   | A | 0.1415  |
| rs7201337   | G | -0.0277 |
| rs116980256 | A | -0.1615 |
| rs8063113   | T | -0.0423 |
| rs77945293  | C | 0.0896  |
| rs12928663  | A | 0.0361  |
| rs143758215 | T | 0.1436  |
| rs17405026  | G | 0.0572  |
| rs73590743  | T | -0.0887 |
| rs11862885  | C | 0.0627  |
| rs11150556  | T | 0.0264  |
| rs79871874  | A | 0.0567  |
| rs116936417 | T | -0.1171 |
| rs76892612  | G | -0.1398 |
| rs2531210   | A | 0.0489  |
| rs62013936  | A | -0.0436 |
| rs145475208 | T | 0.1228  |
| rs141869940 | G | 0.2106  |
| rs146278684 | T | 0.0853  |
| rs16954412  | A | 0.0535  |
| rs16945679  | G | 0.0802  |
| rs4598908   | G | 0.0328  |
| rs117678683 | A | -0.1449 |
| rs117626414 | A | 0.1253  |
| rs8058874   | G | -0.0243 |
| rs76378498  | C | -0.124  |
| rs74032583  | A | 0.1254  |
| rs112210037 | C | -0.113  |
| rs8062115   | T | 0.0341  |
| rs12925035  | G | -0.0493 |
| rs112184722 | T | -0.0895 |
| rs212080    | G | -0.1608 |
| rs7204986   | C | 0.0286  |
| rs8049279   | G | 0.0265  |

|             |   |         |
|-------------|---|---------|
| rs113292189 | A | -0.0723 |
| rs2030985   | T | 0.0258  |
| rs117378820 | A | 0.1338  |
| rs71378510  | G | -0.0962 |
| rs73523109  | A | -0.0395 |
| rs75717289  | A | -0.0846 |
| rs117004486 | C | -0.1175 |
| rs16955383  | G | 0.0509  |
| rs62041430  | G | -0.1554 |
| rs72792080  | T | -0.04   |
| rs59052989  | G | -0.131  |
| rs7200548   | C | 0.0345  |
| rs62033428  | A | -0.077  |
| rs861389    | G | -0.0243 |
| rs145204938 | G | 0.2106  |
| rs1424184   | C | -0.0395 |
| rs34101172  | A | -0.1078 |
| rs72767876  | A | -0.0745 |
| rs75486541  | T | 0.0575  |
| rs75080401  | G | 0.146   |
| rs117844795 | C | -0.1243 |
| rs113708492 | A | -0.0575 |
| rs74427954  | A | 0.0697  |
| rs4477750   | G | -0.0353 |
| rs117600825 | G | 0.1485  |
| rs12149018  | A | 0.0309  |
| rs117830753 | A | 0.1144  |
| rs4780950   | T | -0.0487 |
| rs1273394   | T | -0.0266 |
| rs62047160  | C | -0.0678 |
| rs12922061  | T | -0.0291 |
| rs6499646   | C | 0.044   |
| rs9937546   | C | -0.0268 |
| rs12443851  | T | -0.0253 |
| rs150149145 | T | 0.1381  |
| rs62049452  | G | -0.1112 |
| rs138537215 | A | 0.0981  |
| rs12598314  | A | -0.0836 |
| rs12596139  | A | -0.0527 |
| rs8061878   | G | 0.0383  |
| rs28667662  | G | 0.0339  |
| rs111423259 | A | -0.1155 |
| rs4372677   | A | -0.0667 |
| rs11077022  | T | -0.0256 |
| rs753988    | C | 0.0277  |
| rs117716305 | G | 0.1649  |
| rs12448728  | C | 0.2113  |

|             |   |         |
|-------------|---|---------|
| rs144653223 | T | 0.2118  |
| rs7500576   | T | 0.0436  |
| rs4417556   | T | 0.1144  |
| rs72776789  | A | 0.1085  |
| rs75196746  | C | -0.0835 |
| rs118176502 | T | -0.057  |
| rs4302032   | A | -0.0312 |
| rs40256     | A | -0.036  |
| rs71384569  | A | 0.0989  |
| rs74011168  | A | -0.0928 |
| rs2729567   | A | -0.0578 |
| rs34012042  | T | -0.0613 |
| rs79414612  | A | -0.0526 |
| rs80316914  | A | -0.1455 |
| rs4066744   | C | -0.0329 |
| rs17664900  | A | -0.0354 |
| rs79790560  | C | 0.0839  |
| rs8055414   | G | -0.1449 |
| rs3729904   | T | -0.0304 |
| rs80206231  | C | -0.0412 |
| rs79081332  | A | -0.0926 |
| rs16954751  | T | -0.0387 |
| rs62052475  | C | 0.082   |
| rs4787325   | A | 0.025   |
| rs75271290  | T | 0.0901  |
| rs77717784  | C | 0.0797  |
| rs78288195  | T | 0.2038  |
| rs113286162 | A | -0.2031 |
| rs3112568   | A | -0.0947 |
| rs7189122   | C | -0.0323 |
| rs8061700   | T | -0.047  |
| rs8050599   | C | -0.0251 |
| rs117139488 | C | -0.0921 |
| rs4843577   | C | -0.0422 |
| rs73543176  | C | 0.1379  |
| rs118030546 | A | -0.1628 |
| rs16975879  | C | 0.0321  |
| rs34652933  | C | 0.032   |
| rs6499600   | T | -0.0276 |
| rs35940339  | T | -0.1057 |
| rs1074368   | T | -0.0301 |
| rs117642929 | A | 0.1615  |
| rs1895028   | A | 0.1342  |
| rs59229739  | G | 0.0812  |
| rs117828729 | C | -0.1337 |
| rs116552957 | A | -0.1029 |
| rs318217    | G | 0.0241  |

|             |   |         |
|-------------|---|---------|
| rs9940945   | G | -0.0285 |
| rs12448358  | C | -0.0517 |
| rs62031284  | A | 0.0393  |
| rs12443806  | G | -0.0571 |
| rs146655840 | A | 0.1376  |
| rs112391152 | A | -0.0717 |
| rs34093607  | A | 0.0271  |
| rs147313147 | T | 0.2291  |
| rs79130803  | T | -0.0908 |
| rs2966060   | C | -0.0882 |
| rs78895964  | A | -0.0918 |
| rs56360928  | T | -0.0608 |
| rs62625010  | C | 0.0875  |
| rs1812004   | T | -0.0356 |
| rs79638823  | T | -0.0552 |
| rs7185496   | A | 0.0477  |
| rs35231914  | G | -0.0693 |
| rs1602962   | G | 0.0293  |
| rs117959600 | C | 0.206   |
| rs11641539  | A | 0.0812  |
| rs11644311  | T | 0.0356  |
| rs11540891  | T | -0.1744 |
| rs34831621  | T | -0.0307 |
| rs113221239 | A | -0.1139 |
| rs11149968  | C | 0.0273  |
| rs407759    | A | 0.0659  |
| rs28654747  | G | 0.0243  |
| rs62039953  | G | 0.0417  |
| rs149406195 | A | 0.1641  |
| rs1983223   | A | 0.0773  |
| rs139867086 | C | 0.1089  |
| rs74334049  | A | 0.0615  |
| rs804896    | A | -0.0295 |
| rs881803    | C | -0.026  |
| rs1567151   | T | -0.0986 |
| rs9972728   | G | 0.0238  |
| rs79010711  | C | 0.0329  |
| rs1548842   | T | -0.0255 |
| rs4024489   | A | -0.0844 |
| rs78252350  | T | 0.0718  |
| rs3760080   | G | 0.029   |
| rs7197547   | T | -0.0243 |
| rs116863617 | G | 0.0952  |
| rs1273408   | G | -0.0273 |
| rs35936065  | T | -0.156  |
| rs79613350  | T | -0.0802 |
| rs4072556   | G | 0.0253  |

|             |   |         |
|-------------|---|---------|
| rs138242721 | G | 0.1635  |
| rs62029829  | G | -0.0538 |
| rs76059163  | C | 0.0988  |
| rs205437    | A | -0.0865 |
| rs11574947  | T | 0.0366  |
| rs2113245   | T | 0.0247  |
| rs140963620 | A | -0.1224 |
| rs117346875 | G | 0.0524  |
| rs77875773  | A | 0.0284  |
| rs7193251   | T | -0.0377 |
| rs149110230 | A | -0.0871 |
| rs56033857  | G | 0.032   |
| rs6564824   | C | 0.0937  |
| rs205120    | A | 0.0239  |
| rs117773559 | C | -0.075  |
| rs8046354   | A | 0.0242  |
| rs113883131 | A | -0.1849 |
| rs60857094  | C | -0.0568 |
| rs16952608  | C | -0.0641 |
| rs79237418  | A | -0.0373 |
| rs75121478  | G | -0.0664 |
| rs112135308 | G | -0.1118 |
| rs7187668   | T | -0.0414 |
| rs11641493  | C | -0.0255 |
| rs36003999  | A | -0.1395 |
| rs8058501   | G | 0.1183  |
| rs72794054  | T | 0.0679  |
| rs144488242 | G | 0.1226  |
| rs4784700   | C | -0.0321 |
| rs140217649 | A | 0.1644  |
| rs625108    | C | -0.0267 |
| rs12599985  | C | 0.1296  |
| rs76366251  | T | -0.0815 |
| rs142336835 | T | -0.108  |
| rs62038962  | T | 0.1694  |
| rs17794435  | C | -0.1632 |
| rs10468331  | C | -0.1065 |
| rs6564524   | T | 0.0265  |
| rs250524    | T | -0.0295 |
| rs11643481  | C | -0.0276 |
| rs72771287  | A | -0.1018 |
| rs4784534   | G | -0.031  |
| rs139976363 | A | 0.1378  |
| rs11646015  | C | 0.0332  |
| rs4436775   | A | 0.0244  |
| rs72804070  | C | -0.0608 |
| rs34212526  | T | 0.0324  |

|             |   |         |
|-------------|---|---------|
| rs72783621  | T | 0.1006  |
| rs12922516  | A | -0.0352 |
| rs1381509   | T | 0.0299  |
| rs13333829  | C | 0.1178  |
| rs117159984 | T | 0.2288  |
| rs144063182 | G | 0.096   |
| rs8045253   | C | -0.0256 |
| rs62059414  | C | 0.0743  |
| rs147047616 | T | 0.1553  |
| rs9939718   | T | -0.029  |
| rs8059250   | G | -0.0341 |
| rs2302805   | A | -0.0337 |
| rs12444773  | G | 0.0254  |
| rs72633299  | G | 0.0492  |
| rs79101720  | A | -0.0728 |
| rs143270703 | C | -0.1964 |
| rs11860848  | T | 0.0468  |
| rs111979871 | G | -0.1532 |
| rs118121569 | G | -0.1488 |
| rs4641739   | A | -0.0413 |
| rs3812982   | T | 0.1017  |
| rs247810    | G | 0.0397  |
| rs1982968   | C | 0.0445  |
| rs117037259 | T | 0.0616  |
| rs8046753   | A | 0.0302  |
| rs56834409  | G | -0.0431 |
| rs75134935  | G | -0.0369 |
| rs2870470   | A | 0.0506  |
| rs16974684  | G | -0.0336 |
| rs74919798  | T | -0.0536 |
| rs10468344  | C | 0.0247  |
| rs79030220  | T | 0.1032  |
| rs141947717 | T | 0.0769  |
| rs78547392  | T | -0.0495 |
| rs118161119 | A | -0.1488 |
| rs143205503 | G | 0.0856  |
| rs143123512 | A | -0.093  |
| rs112409984 | T | 0.1517  |
| rs2863973   | C | -0.0309 |
| rs77153843  | T | 0.1529  |
| rs149910403 | C | -0.1502 |
| rs2178712   | G | 0.0411  |
| rs142425406 | T | -0.0969 |
| rs146223021 | A | 0.1963  |
| rs9930480   | A | -0.0354 |
| rs62029369  | G | -0.1032 |
| rs7193437   | T | 0.0516  |

|             |   |         |
|-------------|---|---------|
| rs78197175  | A | -0.1506 |
| rs71391587  | C | 0.0764  |
| rs142329036 | G | 0.2188  |
| rs78743515  | T | -0.1832 |
| rs9944321   | A | -0.1655 |
| rs35038459  | C | -0.069  |
| rs148234641 | A | -0.1669 |
| rs143100685 | T | 0.1155  |
| rs138954020 | T | 0.0689  |
| rs140593511 | G | -0.1047 |
| rs72773023  | C | -0.141  |
| rs11647572  | C | -0.0283 |
| rs7204515   | C | -0.0291 |
| rs62030253  | T | 0.0405  |
| rs77034146  | A | -0.1665 |
| rs79632740  | A | 0.1005  |
| rs4129043   | A | -0.0246 |
| rs6497390   | G | -0.0247 |
| rs8060302   | T | 0.0301  |
| rs75106972  | T | -0.1111 |
| rs77174545  | A | 0.1021  |
| rs12445621  | C | 0.0245  |
| rs74533265  | T | 0.0792  |
| rs12934797  | T | 0.0346  |
| rs415452    | C | 0.0268  |
| rs2473467   | C | 0.0278  |
| rs3751711   | T | 0.1702  |
| rs1868465   | C | 0.0281  |
| rs12448811  | C | -0.1073 |
| rs4887740   | C | 0.0496  |
| rs1423812   | G | 0.0413  |
| rs12927802  | G | -0.0334 |
| rs80276995  | T | -0.068  |
| rs60534711  | T | -0.116  |
| rs141310707 | T | -0.0972 |
| rs62055072  | T | 0.0919  |
| rs8053491   | C | 0.0239  |
| rs143741293 | G | 0.1106  |
| rs150639453 | C | 0.1062  |
| rs56894242  | C | 0.089   |
| rs117369393 | T | -0.1964 |
| rs118048842 | T | 0.142   |
| rs75749622  | A | 0.0951  |
| rs117155375 | A | 0.1157  |
| rs2226993   | T | 0.04    |
| rs11149611  | G | -0.0267 |
| rs76268349  | C | -0.1237 |



|             |   |         |
|-------------|---|---------|
| rs2192856   | G | 0.1256  |
| rs7200091   | T | 0.03    |
| rs78001017  | T | -0.0955 |
| rs72811472  | A | -0.0392 |
| rs11075951  | A | 0.0518  |
| rs8056345   | C | -0.0313 |
| rs7193360   | A | 0.0584  |
| rs117425920 | C | 0.1254  |
| rs9929808   | T | -0.0618 |
| rs11649198  | A | -0.0487 |
| rs12446984  | C | -0.0309 |
| rs12926897  | T | 0.0374  |
| rs145846575 | A | -0.1448 |
| rs113472510 | T | 0.0407  |
| rs12446160  | G | -0.0253 |
| rs75412142  | T | 0.0402  |
| rs147976549 | C | 0.1911  |
| rs7201847   | C | -0.0241 |
| rs1138429   | T | -0.0445 |
| rs6564616   | A | 0.0235  |
| rs113966472 | A | -0.1241 |
| rs112979127 | T | 0.0727  |
| rs140556148 | A | -0.1446 |
| rs16952547  | T | 0.0365  |
| rs71390902  | C | 0.0462  |
| rs76280905  | A | 0.1732  |
| rs55642622  | A | 0.0783  |
| rs113871032 | A | 0.1319  |
| rs2011209   | T | -0.0268 |
| rs28450391  | G | 0.0311  |
| rs8047268   | G | 0.0243  |
| rs2412091   | C | -0.0269 |
| rs152143    | G | -0.1153 |
| rs60744680  | A | 0.1712  |
| rs17176182  | C | 0.0492  |
| rs78847386  | A | -0.0699 |
| rs62037030  | G | 0.1402  |
| rs80185479  | T | 0.0518  |
| rs10852602  | A | 0.0324  |
| rs11862167  | C | 0.0345  |
| rs72794352  | A | 0.0336  |
| rs72785935  | G | 0.057   |
| rs7192551   | A | 0.0842  |
| rs113275301 | T | -0.1752 |
| rs198150    | T | -0.0311 |
| rs11860424  | G | -0.0432 |
| rs60150294  | A | 0.1096  |

|             |   |         |
|-------------|---|---------|
| rs11860367  | C | 0.0254  |
| rs12444900  | T | -0.0304 |
| rs112524733 | A | 0.0895  |
| rs8057719   | C | 0.0304  |
| rs4888826   | T | 0.0244  |
| rs75208110  | G | 0.0858  |
| rs8059299   | G | -0.0808 |
| rs80223412  | A | 0.1549  |
| rs17261378  | A | -0.0534 |
| rs145924510 | G | -0.0849 |
| rs2550892   | T | 0.0501  |
| rs13331081  | T | -0.0421 |
| rs11570158  | T | -0.0887 |
| rs78810264  | G | 0.0823  |
| rs62054588  | G | 0.0596  |
| rs7198971   | G | 0.0395  |
| rs79596704  | A | 0.1497  |
| rs118041016 | A | -0.1443 |
| rs12931591  | G | 0.0735  |
| rs76209847  | T | 0.0778  |
| rs71392451  | T | -0.0679 |
| rs76148001  | A | 0.0916  |
| rs145583003 | A | -0.1095 |
| rs79724330  | T | -0.1017 |
| rs146180447 | A | -0.1668 |
| rs37360     | C | -0.0809 |
| rs117943515 | T | 0.1125  |
| rs9928228   | C | -0.0366 |
| rs139354453 | C | 0.1432  |
| rs7193729   | A | -0.1002 |
| rs72768619  | T | 0.0589  |
| rs10852344  | C | -0.0249 |
| rs72795251  | A | 0.0502  |
| rs11716     | G | 0.0296  |
| rs117714844 | T | -0.0902 |
| rs62034689  | A | 0.0353  |
| rs62037167  | T | 0.0483  |
| rs62042205  | A | -0.0462 |
| rs4786368   | C | -0.0248 |
| rs17144399  | T | 0.0374  |
| rs147591313 | T | -0.1376 |
| rs12445085  | T | 0.0269  |
| rs12600142  | C | -0.0284 |
| rs4784853   | A | 0.0238  |
| rs113619973 | A | -0.0491 |
| rs72775798  | C | 0.1518  |
| rs4438302   | T | -0.0293 |

|             |   |         |
|-------------|---|---------|
| rs8061605   | T | 0.0802  |
| rs8059862   | C | -0.0295 |
| rs1423847   | T | -0.0255 |
| rs145642207 | T | -0.0652 |
| rs72791169  | A | 0.0829  |
| rs678792    | T | -0.0339 |
| rs12447155  | C | -0.0401 |
| rs1011135   | A | 0.0228  |
| rs1124611   | A | -0.026  |
| rs9924997   | T | 0.0283  |
| rs72760827  | A | -0.1115 |
| rs117735884 | A | -0.1091 |
| rs6500506   | G | -0.093  |
| rs4784851   | A | 0.1222  |
| rs71381200  | A | 0.1058  |
| rs60665544  | G | -0.0595 |
| rs77678693  | C | 0.1923  |
| rs12927850  | A | 0.0329  |
| rs35513017  | G | 0.0443  |
| rs5030708   | T | 0.1198  |
| rs61527565  | A | 0.0398  |
| rs7189172   | T | 0.0292  |
| rs139757426 | G | 0.1487  |
| rs77745791  | A | -0.1477 |
| rs7184846   | T | 0.0236  |
| rs434939    | T | -0.1406 |
| rs936305    | A | -0.0245 |
| rs138121511 | T | -0.1381 |
| rs77461303  | C | 0.105   |
| rs6540170   | A | -0.0379 |
| rs9935367   | T | -0.1487 |
| rs889606    | G | 0.0317  |
| rs79260508  | A | -0.1116 |
| rs62039094  | G | -0.0431 |
| rs16976880  | A | 0.1262  |
| rs117965541 | C | -0.0947 |
| rs75782114  | A | -0.0374 |
| rs6500824   | T | 0.0833  |
| rs148419741 | A | 0.0826  |
| rs310023    | C | -0.0484 |
| rs1876708   | G | -0.0281 |
| rs78044532  | T | -0.217  |
| rs2285452   | A | -0.0266 |
| rs8062023   | G | -0.0874 |
| rs141305998 | C | 0.1132  |
| rs56320921  | T | -0.0727 |
| rs5006645   | G | 0.0378  |

|             |   |         |
|-------------|---|---------|
| rs1478702   | A | 0.0242  |
| rs142260603 | A | 0.1289  |
| rs72801947  | G | 0.1777  |
| rs17603186  | G | -0.0289 |
| rs79389160  | A | -0.0477 |
| rs1704494   | A | 0.0246  |
| rs12922676  | A | -0.0489 |
| rs114616600 | T | -0.202  |
| rs80248889  | C | -0.0777 |
| rs9930666   | A | -0.0273 |
| rs117051586 | C | 0.134   |
| rs13338237  | C | -0.0667 |
| rs12716868  | A | -0.0285 |
| rs139487889 | C | -0.0815 |
| rs114889561 | C | -0.0874 |
| rs28695873  | C | -0.0341 |
| rs2075520   | A | 0.0252  |
| rs1076939   | G | -0.0373 |
| rs76805481  | T | 0.143   |
| rs4783861   | T | -0.0247 |
| rs117442179 | C | 0.0694  |
| rs142658264 | T | -0.0759 |
| rs8059669   | C | -0.0396 |
| rs75126993  | T | -0.073  |
| rs117371680 | T | -0.0877 |
| rs9673539   | A | 0.054   |
| rs11647990  | T | -0.1333 |
| rs7197409   | T | 0.024   |
| rs919864    | T | 0.069   |
| rs62037304  | G | 0.1677  |
| rs144354721 | A | -0.0978 |
| rs8050703   | T | -0.0452 |
| rs62042220  | T | 0.0986  |
| rs2158036   | G | -0.0865 |
| rs7200825   | A | 0.0344  |
| rs151322196 | T | 0.0568  |
| rs34984817  | T | -0.1391 |
| rs62035732  | C | 0.0771  |
| rs117522759 | T | 0.0731  |
| rs77586504  | T | 0.0911  |
| rs111359735 | A | 0.0782  |
| rs2738606   | A | 0.0237  |
| rs147946109 | G | -0.034  |
| rs117594529 | C | 0.09    |
| rs74378993  | G | 0.1704  |
| rs117034137 | T | -0.0841 |
| rs1911493   | A | -0.0411 |

|             |   |         |
|-------------|---|---------|
| rs17714435  | A | -0.032  |
| rs112377408 | A | 0.1337  |
| rs1077177   | G | -0.0264 |
| rs16941971  | A | -0.0322 |
| rs2079743   | T | -0.0481 |
| rs78537387  | G | -0.0905 |
| rs9924260   | G | -0.0975 |
| rs17476905  | A | 0.0355  |
| rs75998753  | G | 0.0865  |
| rs752843    | T | -0.0368 |
| rs148782730 | A | -0.0807 |
| rs113640986 | T | 0.0861  |
| rs117786989 | T | 0.1231  |
| rs7196894   | C | 0.0978  |
| rs62047122  | C | -0.0414 |
| rs79298713  | G | 0.0816  |
| rs150456450 | A | -0.1013 |
| rs11860053  | A | 0.0772  |
| rs12446529  | A | -0.0564 |
| rs117409403 | T | 0.1766  |
| rs41292394  | A | -0.0368 |
| rs247035    | T | -0.0614 |
| rs143222906 | A | 0.1298  |
| rs112346722 | G | -0.0559 |
| rs12929404  | T | 0.0334  |
| rs113204774 | G | -0.0745 |
| rs36062074  | A | -0.195  |
| rs1564435   | G | 0.0323  |
| rs145195513 | T | -0.1521 |
| rs7198660   | T | 0.0694  |
| rs12103157  | A | 0.0392  |
| rs117115183 | T | 0.1157  |
| rs144959354 | T | 0.1352  |
| rs113848625 | C | -0.1126 |
| rs7498498   | C | -0.0238 |
| rs113723033 | G | 0.0944  |
| rs34789135  | A | -0.0741 |
| rs145413418 | T | 0.1074  |
| rs150745    | T | 0.0246  |
| rs11649206  | T | 0.0226  |
| rs78042822  | T | -0.113  |
| rs71384888  | T | 0.066   |
| rs568778    | C | -0.1107 |
| rs71375907  | G | -0.0709 |
| rs78921144  | G | -0.0671 |
| rs3790108   | A | 0.0704  |
| rs116914735 | C | 0.1407  |

|             |   |         |
|-------------|---|---------|
| rs78973850  | A | 0.0797  |
| rs74918927  | A | 0.0545  |
| rs56074704  | T | -0.1012 |
| rs149194020 | T | 0.1546  |
| rs11641944  | C | -0.0336 |
| rs117850959 | T | 0.0948  |
| rs10852637  | T | -0.0241 |
| rs113816145 | G | 0.0233  |
| rs112417364 | C | 0.0842  |
| rs72800753  | T | 0.14    |
| rs6500515   | G | 0.0323  |
| rs12933315  | T | 0.0344  |
| rs11640143  | C | -0.053  |
| rs56095050  | T | 0.0264  |
| rs1345858   | T | 0.099   |
| rs6498708   | C | -0.0559 |
| rs8050140   | C | -0.0325 |
| rs72795157  | A | 0.1379  |
| rs78394436  | A | 0.0777  |
| rs4786727   | C | 0.1602  |
| rs112156128 | G | 0.1291  |
| rs117868017 | G | -0.1127 |
| rs17342621  | C | 0.0701  |
| rs59036912  | G | -0.0542 |
| rs564386    | A | 0.031   |
| rs9931109   | A | 0.0572  |
| rs17833133  | C | 0.0252  |
| rs74000555  | A | -0.1088 |
| rs62021074  | C | 0.1142  |
| rs2937134   | G | -0.0258 |
| rs77445350  | A | -0.1227 |
| rs77567757  | C | -0.0446 |
| rs11646217  | A | -0.037  |
| rs45515097  | C | -0.1408 |
| rs1559406   | C | -0.0359 |
| rs8055309   | A | -0.0228 |
| rs113587860 | A | -0.0623 |
| rs79497887  | G | -0.0961 |
| rs117331156 | C | 0.1738  |
| rs55752757  | G | 0.0463  |
| rs8055647   | T | -0.0438 |
| rs12449090  | C | 0.0233  |
| rs59036958  | T | -0.043  |
| rs142248381 | A | -0.1538 |
| rs141705406 | T | -0.0678 |
| rs8045354   | C | -0.0272 |
| rs58577879  | T | 0.0409  |

|             |   |         |
|-------------|---|---------|
| rs34207959  | T | 0.0475  |
| rs59575378  | T | -0.026  |
| rs117616796 | G | -0.1196 |
| rs11646242  | A | 0.026   |
| rs72809228  | A | -0.0718 |
| rs144443351 | A | 0.086   |
| rs9932698   | G | -0.1351 |
| rs149451223 | A | 0.1195  |
| rs116911900 | T | -0.0842 |
| rs34832413  | G | 0.0627  |
| rs140143959 | C | 0.0527  |
| rs4280228   | A | -0.0244 |
| rs118186897 | G | -0.1375 |
| rs150779981 | C | 0.1085  |
| rs74595350  | A | 0.0904  |
| rs75789721  | G | 0.1518  |
| rs77245739  | T | -0.0365 |
| rs6500080   | C | -0.0287 |
| rs117504951 | T | 0.1209  |
| rs247873    | A | 0.0458  |
| rs12448436  | T | -0.0686 |
| rs72837074  | A | -0.0378 |
| rs4843249   | A | -0.0263 |
| rs243845    | A | -0.023  |
| rs117491074 | A | -0.1018 |
| rs4785286   | T | 0.0354  |
| rs233523    | A | -0.0327 |
| rs118006985 | T | 0.1302  |
| rs56179545  | G | 0.075   |
| rs112871206 | T | -0.1027 |
| rs7498282   | G | 0.0231  |
| rs17146086  | A | 0.051   |
| rs409575    | A | 0.0463  |
| rs143931973 | A | -0.1819 |
| rs34753377  | G | -0.0314 |
| rs72782373  | A | -0.0919 |
| rs1891325   | C | -0.0363 |
| rs144663675 | C | -0.1387 |
| rs78894722  | A | 0.0387  |
| rs17772016  | C | 0.0433  |
| rs12102503  | A | 0.0878  |
| rs9927035   | A | -0.0353 |
| rs1364344   | T | -0.028  |
| rs117596524 | T | -0.0563 |
| rs8059855   | T | 0.0678  |
| rs78667306  | A | -0.086  |
| rs78712590  | T | -0.0421 |

|             |   |         |
|-------------|---|---------|
| rs149551174 | G | 0.11    |
| rs12927351  | A | -0.0308 |
| rs9936860   | C | 0.0295  |
| rs7498519   | T | -0.0316 |
| rs4564573   | C | -0.0239 |
| rs140000449 | T | -0.1293 |
| rs117097988 | G | 0.089   |
| rs72814453  | T | 0.0985  |
| rs78390789  | C | -0.1459 |
| rs12925731  | C | 0.0859  |
| rs12598659  | G | 0.04    |
| rs117656972 | T | -0.1144 |
| rs384690    | T | 0.0259  |
| rs4541091   | C | -0.1019 |
| rs3810801   | A | -0.024  |
| rs2656660   | T | -0.0311 |
| rs7195655   | C | 0.0242  |
| rs1401207   | G | -0.0269 |
| rs12928254  | A | 0.0322  |
| rs2058186   | A | -0.051  |
| rs11643578  | C | 0.0356  |
| rs71376720  | A | -0.0551 |
| rs12443917  | C | -0.0475 |
| rs16947208  | A | 0.0629  |
| rs257882    | A | 0.0367  |
| rs112638224 | G | 0.1069  |
| rs74792333  | T | -0.0925 |
| rs28429817  | A | -0.0702 |
| rs8059179   | A | -0.0254 |
| rs55650225  | T | -0.0366 |
| rs117556566 | C | 0.0987  |
| rs72793348  | C | 0.0931  |
| rs62041785  | A | 0.0827  |
| rs8057286   | G | -0.1077 |
| rs58642908  | A | -0.0834 |
| rs148709404 | G | 0.1928  |
| rs2689248   | T | 0.0222  |
| rs35768703  | C | -0.0408 |
| rs12921178  | T | 0.0234  |
| rs17691190  | A | 0.0389  |
| rs75529606  | C | 0.0478  |
| rs55995508  | A | -0.0862 |
| rs117350940 | T | -0.0947 |
| rs11648267  | A | -0.1144 |
| rs1790650   | A | -0.0229 |
| rs1303874   | C | 0.0895  |
| rs2738626   | G | -0.0586 |



|             |   |         |
|-------------|---|---------|
| rs8056559   | G | 0.022   |
| rs7188975   | T | 0.0411  |
| rs9788828   | T | -0.0259 |
| rs117115473 | G | -0.1266 |
| rs7188359   | A | 0.0284  |
| rs40553     | A | -0.0658 |
| rs7200477   | T | -0.0629 |
| rs12447614  | G | 0.025   |
| rs74249049  | T | 0.0726  |
| rs118141407 | C | -0.1107 |
| rs78089243  | A | -0.115  |
| rs12449223  | A | 0.0251  |
| rs72774859  | T | 0.0738  |
| rs77239190  | C | 0.0976  |
| rs35950258  | C | 0.102   |
| rs72787796  | T | 0.1299  |
| rs4078491   | T | 0.0291  |
| rs4786568   | C | -0.0222 |
| rs111676738 | T | 0.0609  |
| rs111744743 | C | 0.0384  |
| rs8061752   | C | 0.0274  |
| rs17669916  | A | 0.0303  |
| rs11647711  | C | -0.0585 |
| rs12935459  | C | 0.1622  |
| rs72814581  | T | 0.0419  |
| rs139893382 | G | 0.1463  |
| rs61444075  | T | 0.1758  |
| rs2283479   | A | 0.0224  |
| rs12708669  | A | 0.0423  |
| rs35083305  | G | 0.1265  |
| rs148695213 | G | -0.1141 |
| rs146291454 | A | 0.0999  |
| rs34961562  | T | -0.1943 |
| rs6564310   | T | 0.0402  |
| rs11865234  | T | 0.0299  |
| rs17435687  | G | -0.1045 |
| rs143202512 | C | 0.1014  |
| rs72777738  | G | -0.0309 |
| rs79960333  | T | 0.0616  |
| rs12929017  | G | 0.0253  |
| rs6540278   | C | -0.0333 |
| rs117234704 | A | 0.1486  |
| rs12933377  | G | -0.0257 |
| rs11643016  | A | 0.0592  |
| rs118093387 | A | 0.0639  |
| rs8063642   | T | -0.0293 |
| rs12447933  | A | -0.0326 |

|             |   |         |
|-------------|---|---------|
| rs147907186 | T | 0.1429  |
| rs12449121  | C | 0.035   |
| rs7206048   | C | 0.0853  |
| rs112822448 | C | -0.0666 |
| rs3803625   | T | -0.0373 |
| rs7200390   | T | -0.0763 |
| rs78445729  | C | 0.0963  |
| rs73503981  | C | -0.1485 |
| rs3751804   | C | 0.0539  |
| rs117000213 | C | 0.1062  |
| rs72636225  | T | 0.0302  |
| rs17560124  | C | -0.0313 |
| rs1559438   | T | -0.0251 |
| rs80215844  | A | 0.1489  |
| rs13330891  | G | 0.0458  |
| rs7190785   | G | 0.0232  |
| rs4888695   | C | -0.0256 |
| rs117962112 | A | 0.0656  |
| rs111646114 | G | 0.1719  |
| rs8044089   | T | 0.0576  |
| rs12445640  | G | 0.0229  |
| rs4513093   | A | -0.031  |
| rs34723309  | C | -0.0526 |
| rs4887807   | A | 0.039   |
| rs1364300   | C | 0.0221  |
| rs62068511  | G | 0.0332  |
| rs12444186  | A | -0.0463 |
| rs79942085  | T | -0.0873 |
| rs17670782  | C | -0.0486 |
| rs4578658   | T | 0.0437  |
| rs76625877  | C | 0.1167  |
| rs12149360  | A | -0.0949 |
| rs11866716  | T | -0.0265 |
| rs6499089   | T | -0.0237 |
| rs112539166 | T | -0.1454 |
| rs148680328 | C | 0.0808  |
| rs61284845  | A | 0.0586  |
| rs138897062 | T | -0.0896 |
| rs506914    | A | 0.0263  |
| rs151284681 | T | -0.0995 |
| rs149933135 | T | 0.1658  |
| rs9939129   | T | -0.058  |
| rs62042212  | A | 0.0796  |
| rs2113307   | C | -0.0486 |
| rs9889120   | A | -0.0298 |
| rs56177656  | A | -0.0229 |
| rs2018540   | T | -0.0239 |

|             |   |         |
|-------------|---|---------|
| rs74677115  | C | 0.0532  |
| rs117966261 | C | -0.0807 |
| rs76129277  | T | -0.1303 |
| rs2892190   | C | -0.0458 |
| rs7185239   | C | -0.0225 |
| rs118096567 | G | -0.1151 |
| rs76350137  | A | -0.0835 |
| rs117430654 | A | -0.0566 |
| rs11643956  | C | 0.0299  |
| rs117411422 | G | 0.116   |
| rs27337     | G | -0.0348 |
| rs113322051 | T | 0.1749  |
| rs9936214   | G | -0.0403 |
| rs928963    | A | 0.0219  |
| rs62036939  | T | 0.0269  |
| rs55734749  | T | 0.0661  |
| rs4843679   | T | 0.0424  |
| rs79193646  | G | -0.0944 |
| rs62033738  | G | -0.104  |
| rs6500380   | A | -0.0351 |
| rs1548373   | A | -0.025  |
| rs72798333  | G | -0.0284 |
| rs4995111   | A | -0.0325 |
| rs143235261 | A | -0.1109 |
| rs4145655   | C | 0.0237  |
| rs17621932  | T | 0.057   |
| rs274104    | C | -0.1032 |
| rs4458026   | G | 0.0244  |
| rs11248906  | C | 0.0281  |
| rs8051081   | A | 0.0647  |
| rs79526293  | C | 0.0758  |
| rs72803098  | C | 0.0291  |
| rs144204405 | C | -0.0856 |
| rs8059230   | G | -0.0251 |
| rs112384011 | C | -0.1076 |
| rs1825190   | T | 0.0376  |
| rs74039248  | C | 0.0359  |
| rs7185897   | A | -0.0242 |
| rs369694    | T | -0.0238 |
| rs76812808  | A | 0.0361  |
| rs35631     | A | -0.0659 |
| rs77483330  | G | -0.0357 |
| rs150441536 | C | 0.1197  |
| rs4783001   | T | -0.0566 |
| rs141536427 | T | -0.183  |
| rs117643148 | T | 0.0604  |
| rs116863325 | T | -0.1106 |

|             |   |         |
|-------------|---|---------|
| rs9928205   | C | -0.13   |
| rs9931799   | C | -0.0241 |
| rs10521302  | G | 0.0241  |
| rs113668652 | T | 0.1037  |
| rs11865832  | T | 0.0344  |
| rs8053994   | G | 0.0367  |
| rs145947886 | G | 0.1071  |
| rs4787926   | G | -0.0246 |
| rs66505116  | G | 0.0261  |
| rs141695488 | A | 0.1109  |
| rs75715084  | A | -0.1021 |
| rs78823600  | G | -0.0861 |
| rs1589697   | G | -0.0224 |
| rs145396867 | A | 0.0882  |
| rs142354317 | G | 0.0423  |
| rs117409240 | A | 0.067   |
| rs76381441  | A | 0.09    |
| rs4787786   | C | -0.0425 |
| rs17742148  | G | -0.0384 |
| rs8055117   | T | 0.0581  |
| rs7185826   | G | -0.0406 |
| rs11076367  | C | 0.0263  |
| rs146626127 | T | -0.1809 |
| rs4238735   | A | 0.0895  |
| rs4490001   | A | -0.0304 |
| rs57671402  | C | -0.0691 |
| rs10500529  | T | -0.0348 |
| rs2311380   | T | 0.0251  |
| rs77543963  | G | 0.1017  |
| rs78934214  | A | 0.0884  |
| rs11643652  | A | -0.0278 |
| rs3114901   | C | 0.0698  |
| rs59976419  | C | 0.0399  |
| rs7403939   | G | 0.0284  |
| rs7205629   | C | -0.0267 |
| rs77835338  | T | 0.1734  |
| rs13333029  | C | 0.0401  |
| rs6500024   | G | 0.022   |
| rs62044560  | A | -0.1271 |
| rs8052440   | A | 0.0863  |
| rs150129456 | A | -0.1771 |
| rs205367    | G | -0.0436 |
| rs12599685  | G | 0.0507  |
| rs139454143 | G | -0.1626 |
| rs12931518  | A | -0.0477 |
| rs77453742  | G | -0.1777 |
| rs935754    | G | 0.0227  |

|             |   |         |
|-------------|---|---------|
| rs116871557 | C | -0.1071 |
| rs72778468  | G | -0.0331 |
| rs74353243  | G | -0.0967 |
| rs74449711  | G | 0.1106  |
| rs9939590   | A | 0.0213  |
| rs56029905  | A | -0.1107 |
| rs7195597   | T | -0.0315 |
| rs8049463   | C | 0.0839  |
| rs116971887 | T | -0.064  |
| rs112184736 | A | -0.0308 |
| rs16949286  | C | 0.0218  |
| rs7198973   | A | -0.032  |
| rs146331000 | T | -0.0732 |
| rs144486960 | T | 0.1203  |
| rs118106518 | T | 0.0764  |
| rs4380043   | T | 0.0266  |
| rs1567145   | G | 0.0423  |
| rs7188701   | G | -0.0334 |
| rs12446552  | C | -0.0261 |
| rs7199411   | T | 0.0622  |
| rs116983115 | T | -0.109  |
| rs9934320   | T | 0.0574  |
| rs4889313   | G | 0.023   |
| rs1865834   | G | 0.0319  |
| rs12926172  | A | -0.0219 |
| rs146330109 | C | 0.1775  |
| rs75160553  | C | -0.0449 |
| rs77308190  | T | 0.0921  |
| rs9940311   | T | 0.033   |
| rs78952867  | T | -0.0923 |
| rs16958275  | T | 0.0975  |
| rs7196882   | G | 0.0674  |
| rs145501395 | T | -0.0595 |
| rs705921    | A | -0.0434 |
| rs72779215  | A | -0.1075 |
| rs78216383  | C | -0.2045 |
| rs4785326   | C | -0.023  |
| rs80162955  | A | -0.1104 |
| rs4366703   | A | 0.0913  |
| rs34152595  | G | -0.057  |
| rs9673543   | G | -0.0306 |
| rs146126135 | A | 0.1458  |
| rs12924988  | G | -0.0792 |
| rs78297852  | C | 0.195   |
| rs4780773   | G | 0.0349  |
| rs61631820  | C | -0.2067 |
| rs34241435  | A | 0.0579  |

|             |   |         |
|-------------|---|---------|
| rs11646441  | G | 0.0362  |
| rs7195557   | A | -0.0235 |
| rs12600272  | C | 0.0224  |
| rs28428694  | A | -0.0432 |
| rs77442987  | T | 0.1278  |
| rs77503487  | T | -0.168  |
| rs415789    | C | 0.0556  |
| rs1363749   | G | 0.0255  |
| rs72809237  | T | 0.0786  |
| rs72765332  | G | -0.0753 |
| rs11867113  | G | 0.0263  |
| rs74612817  | G | 0.0358  |
| rs1991027   | G | -0.0385 |
| rs62050681  | T | 0.022   |
| rs117737162 | T | -0.0675 |
| rs142103093 | A | 0.1199  |
| rs117218257 | T | 0.128   |
| rs72777499  | T | -0.0509 |
| rs112928761 | A | 0.0876  |
| rs2908899   | G | 0.0217  |
| rs1816108   | C | 0.0213  |
| rs247843    | A | 0.032   |
| rs140581858 | A | -0.0975 |
| rs11647726  | G | -0.0269 |
| rs2647998   | T | 0.0751  |
| rs117386269 | C | -0.1098 |
| rs2221099   | C | -0.0265 |
| rs76458474  | G | 0.1017  |
| rs143689149 | G | 0.1013  |
| rs7184965   | A | 0.1262  |
| rs72792874  | T | 0.0568  |
| rs2907363   | A | -0.0316 |
| rs12325434  | T | -0.0361 |
| rs7195500   | T | -0.0567 |
| rs2388643   | A | -0.0273 |
| rs79980064  | T | -0.0632 |
| rs80351341  | A | -0.1583 |
| rs56176954  | C | 0.0472  |
| rs62054206  | T | 0.0886  |
| rs72763770  | G | 0.12    |
| rs17411816  | C | -0.1537 |
| rs12920357  | C | -0.1509 |
| rs111774228 | T | -0.1109 |
| rs59107319  | T | -0.0749 |
| rs72811370  | A | -0.0238 |
| rs77229248  | C | 0.0405  |
| rs74249430  | T | -0.0808 |

|             |   |         |
|-------------|---|---------|
| rs4784195   | T | -0.0505 |
| rs112100932 | A | -0.1591 |
| rs56242360  | T | 0.0718  |
| rs1592561   | T | -0.0352 |
| rs3024692   | G | 0.1053  |
| rs144309862 | T | -0.0294 |
| rs116986667 | C | 0.0948  |
| rs12930566  | T | 0.031   |
| rs113370020 | C | -0.122  |
| rs12598800  | T | -0.1163 |
| rs2716562   | T | -0.0277 |
| rs147178194 | A | 0.12    |
| rs77053792  | A | 0.0574  |
| rs62010246  | T | 0.1131  |
| rs882650    | A | -0.0444 |
| rs4780277   | C | -0.078  |
| rs12446658  | A | 0.0281  |
| rs7499305   | C | -0.0427 |
| rs76994333  | G | -0.0562 |
| rs36510     | A | 0.0241  |
| rs9929700   | G | 0.0241  |
| rs111643840 | A | 0.131   |
| rs145881252 | C | 0.0846  |
| rs60427389  | T | -0.0616 |
| rs9928358   | A | -0.0261 |
| rs999022    | G | -0.0272 |
| rs113220435 | T | -0.0985 |
| rs16945493  | A | 0.0397  |
| rs10500408  | A | -0.0226 |
| rs111323780 | G | -0.0703 |
| rs75989022  | A | -0.0591 |
| rs16947165  | G | -0.0235 |
| rs6565062   | A | -0.0217 |
| rs417190    | C | -0.0265 |
| rs2875950   | G | 0.0853  |
| rs12447249  | G | 0.0565  |
| rs4780515   | T | -0.0222 |
| rs138654770 | A | 0.1649  |
| rs2745098   | T | -0.0231 |
| rs146055273 | C | 0.0668  |
| rs11074404  | G | -0.023  |
| rs16949326  | T | 0.0633  |
| rs2103284   | A | -0.0312 |
| rs34946683  | C | 0.0294  |
| rs9783781   | A | -0.0327 |
| rs147767876 | C | 0.0409  |
| rs113700549 | T | 0.0293  |

|             |   |         |
|-------------|---|---------|
| rs34039447  | T | 0.0767  |
| rs9928107   | A | -0.0269 |
| rs71392147  | C | -0.0777 |
| rs113590617 | T | 0.1428  |
| rs11640561  | G | -0.0248 |
| rs252326    | T | -0.0336 |
| rs112264988 | T | -0.0902 |
| rs17372800  | T | -0.0396 |
| rs145289780 | A | 0.1238  |
| rs2334189   | A | 0.0333  |
| rs1273395   | A | 0.0807  |
| rs8064111   | T | -0.0307 |
| rs12051223  | A | 0.0565  |
| rs139734339 | C | 0.1023  |
| rs75845171  | A | 0.054   |
| rs7191852   | T | -0.0304 |
| rs16963115  | C | 0.0444  |
| rs755215    | T | -0.0453 |
| rs16951388  | A | -0.0389 |
| rs138311010 | A | 0.0907  |
| rs4787781   | G | -0.0274 |
| rs72780139  | C | -0.0859 |
| rs11074940  | T | -0.0726 |
| rs9302384   | C | 0.0923  |
| rs142425952 | C | 0.1016  |
| rs142612649 | G | -0.0547 |
| rs728646    | A | -0.0308 |
| rs72804715  | A | -0.0548 |
| rs11860717  | C | -0.0247 |
| rs117395021 | A | 0.0602  |
| rs7206142   | A | -0.0282 |
| rs117871519 | G | -0.0825 |
| rs117706450 | A | 0.1495  |
| rs9929107   | C | 0.1474  |
| rs117023413 | C | 0.1222  |
| rs17195563  | A | 0.0367  |
| rs4782856   | T | -0.027  |
| rs2731772   | A | 0.0228  |
| rs11077320  | A | 0.0362  |
| rs11641724  | A | -0.0437 |
| rs3937500   | A | 0.0309  |
| rs75608280  | T | -0.0544 |
| rs17700451  | G | 0.0314  |
| rs372627    | C | -0.0257 |
| rs72793459  | A | 0.0818  |
| rs116926120 | A | -0.126  |
| rs75049026  | T | 0.1004  |



|             |   |         |
|-------------|---|---------|
| rs17257437  | C | -0.0476 |
| rs12102679  | G | -0.0277 |
| rs57707083  | A | -0.0552 |
| rs80253441  | C | 0.1415  |
| rs57504325  | T | -0.0413 |
| rs8044946   | A | -0.0251 |
| rs2285824   | T | 0.0871  |
| rs7193698   | G | 0.1018  |
| rs12922161  | T | -0.0338 |
| rs7201451   | T | 0.1016  |
| rs938900    | A | 0.026   |
| rs9921669   | T | 0.0488  |
| rs147992506 | A | 0.2112  |
| rs300014    | C | -0.027  |
| rs141527770 | T | 0.0893  |
| rs117599701 | A | -0.1575 |
| rs395792    | T | -0.0528 |
| rs8063364   | T | 0.1058  |
| rs4550468   | G | -0.0327 |
| rs139899669 | G | 0.1067  |
| rs117958549 | T | 0.0823  |
| rs72640489  | G | 0.0665  |
| rs61584134  | G | 0.0815  |
| rs7193417   | G | -0.0226 |
| rs61354915  | C | -0.0272 |
| rs117664234 | A | 0.0744  |
| rs62050489  | G | -0.0942 |
| rs16956174  | C | 0.101   |
| rs4445890   | C | 0.0428  |
| rs8054937   | A | 0.0235  |
| rs9937916   | G | -0.0818 |
| rs2967301   | T | -0.0263 |
| rs72791328  | G | -0.0442 |
| rs146523700 | T | 0.1222  |
| rs12103335  | T | -0.0268 |
| rs11859694  | G | 0.0751  |
| rs2908910   | G | 0.0228  |
| rs73550108  | T | -0.0333 |
| rs9921853   | G | 0.0282  |
| rs247832    | T | 0.0241  |
| rs1273409   | A | 0.0748  |
| rs836994    | C | 0.0224  |
| rs12325085  | A | -0.031  |
| rs2550598   | G | 0.0579  |
| rs7193013   | C | 0.022   |
| rs474503    | A | 0.044   |
| rs1463460   | A | 0.0314  |

|             |   |         |
|-------------|---|---------|
| rs71402046  | T | 0.0751  |
| rs76477961  | G | -0.1123 |
| rs11643715  | G | 0.0236  |
| rs17718107  | C | 0.0653  |
| rs138893371 | G | 0.0796  |
| rs62040378  | T | 0.0555  |
| rs916768    | A | -0.0253 |
| rs4264398   | A | -0.0305 |
| rs2447782   | C | 0.0231  |
| rs2118016   | A | 0.1269  |
| rs34824941  | C | -0.1277 |
| rs7193500   | A | 0.0435  |
| rs142834247 | A | -0.1147 |
| rs12924158  | C | -0.0336 |
| rs149682199 | C | 0.0838  |
| rs17757350  | C | -0.0256 |
| rs72794213  | C | 0.0504  |
| rs80325744  | C | -0.1527 |
| rs36011627  | T | 0.0339  |
| rs9933989   | A | -0.0302 |
| rs55932605  | T | 0.0472  |
| rs73602954  | T | -0.0345 |
| rs4586435   | A | -0.0363 |
| rs13331544  | G | 0.0231  |
| rs7205704   | G | 0.024   |
| rs17773634  | C | 0.0535  |
| rs117596297 | T | 0.2232  |
| rs1423799   | A | 0.0219  |
| rs4781236   | T | -0.0214 |
| rs72768244  | T | -0.0599 |
| rs117484935 | A | -0.0647 |
| rs7202477   | G | -0.0245 |
| rs145393017 | G | 0.0748  |
| rs61709866  | T | -0.0618 |
| rs1874494   | G | 0.0298  |
| rs141441780 | T | 0.0866  |
| rs7189508   | C | -0.0392 |
| rs11649613  | T | -0.0218 |
| rs2907356   | C | 0.1223  |
| rs148276185 | A | -0.074  |
| rs11864535  | G | 0.0318  |
| rs17705128  | C | -0.0227 |
| rs244791    | C | 0.036   |
| rs179769    | C | -0.0341 |
| rs139223175 | A | 0.1251  |
| rs71382762  | C | 0.0403  |
| rs13332387  | A | 0.1075  |

|             |   |         |
|-------------|---|---------|
| rs76466516  | C | -0.0408 |
| rs55852809  | C | -0.0228 |
| rs62038098  | C | 0.0345  |
| rs117785180 | T | -0.1688 |
| rs13380600  | C | 0.0444  |
| rs62028311  | G | 0.0794  |
| rs71389811  | C | 0.0438  |
| rs17270950  | C | 0.1567  |
| rs80191129  | G | -0.1035 |
| rs78122098  | T | -0.0845 |
| rs12919267  | T | -0.0371 |
| rs6500882   | G | 0.022   |
| rs77520617  | C | 0.0956  |
| rs147370439 | T | 0.1349  |
| rs146712251 | C | 0.1768  |
| rs4419063   | G | -0.0228 |
| rs115978336 | T | -0.0508 |
| rs223831    | A | -0.0329 |
| rs77176789  | A | -0.0836 |
| rs7190289   | A | -0.0253 |
| rs226866    | C | 0.023   |
| rs4786730   | T | -0.0545 |
| rs4643311   | C | 0.0222  |
| rs145436257 | G | 0.0732  |
| rs8047589   | A | 0.0215  |
| rs17145410  | C | 0.0493  |
| rs17820875  | G | -0.0354 |
| rs57610970  | A | 0.0338  |
| rs8057362   | A | -0.0222 |
| rs78751740  | A | 0.1374  |
| rs288579    | G | -0.036  |
| rs80340955  | G | -0.0597 |
| rs57255286  | G | 0.0665  |
| rs7205244   | C | 0.0379  |
| rs12930430  | G | -0.0372 |
| rs4843437   | C | 0.0218  |
| rs111622963 | G | 0.0978  |
| rs71386709  | A | -0.102  |
| rs7203861   | T | 0.0292  |
| rs140591601 | T | 0.1633  |
| rs111780745 | G | -0.1607 |
| rs2030360   | G | -0.0409 |
| rs2519966   | T | -0.0217 |
| rs1344490   | T | 0.0219  |
| rs4782680   | G | 0.026   |
| rs4984924   | A | 0.0286  |
| rs148124420 | T | -0.127  |

|             |   |         |
|-------------|---|---------|
| rs2161598   | G | 0.0788  |
| rs4245624   | T | 0.0238  |
| rs78500504  | G | -0.0311 |
| rs8059003   | C | 0.0307  |
| rs378904    | G | 0.022   |
| rs8043756   | T | 0.0307  |
| rs149931860 | A | -0.1543 |
| rs34836534  | T | -0.073  |
| rs55657927  | G | 0.0469  |
| rs577543    | A | 0.0511  |
| rs1424203   | T | -0.0225 |
| rs78864981  | A | -0.08   |
| rs9924443   | A | -0.0236 |
| rs34854437  | C | 0.0475  |
| rs79834454  | C | 0.1758  |
| rs72778851  | C | -0.1464 |
| rs138367898 | A | -0.0846 |
| rs145952790 | T | 0.1132  |
| rs112864363 | C | 0.1559  |
| rs72812709  | A | -0.0651 |
| rs2617840   | G | -0.0336 |
| rs80174230  | C | 0.1007  |
| rs76148553  | A | 0.0791  |
| rs2576562   | A | -0.0245 |
| rs8044288   | C | -0.0323 |
| rs72771657  | T | -0.1237 |
| rs4082277   | T | 0.1133  |
| rs71393072  | T | 0.0608  |
| rs72810188  | C | -0.1081 |
| rs10492775  | C | 0.0376  |
| rs117908869 | T | -0.115  |
| rs9797003   | G | 0.0262  |
| rs11643958  | A | -0.0439 |
| rs74015744  | C | 0.0425  |
| rs78728849  | A | -0.0554 |
| rs111611909 | A | 0.1343  |
| rs118160895 | T | 0.1     |
| rs1978452   | A | 0.028   |
| rs34473833  | G | -0.0916 |
| rs12446592  | T | 0.0268  |
| rs11860019  | T | 0.0384  |
| rs12935467  | G | 0.0287  |
| rs28690127  | C | -0.0687 |
| rs149382350 | A | -0.1411 |
| rs17794645  | T | -0.0339 |
| rs3093318   | A | 0.1241  |
| rs365760    | T | 0.0234  |

|             |   |         |
|-------------|---|---------|
| rs146457245 | A | 0.0798  |
| rs4785257   | T | 0.0583  |
| rs75608783  | C | -0.0724 |
| rs7185561   | A | -0.0255 |
| rs117312299 | T | 0.0935  |
| rs79022074  | A | -0.1052 |
| rs11642440  | C | 0.055   |
| rs148494284 | T | -0.1517 |
| rs58928072  | G | -0.0726 |
| rs34193553  | A | 0.1159  |
| rs112766425 | G | -0.0445 |
| rs72765506  | G | 0.1004  |
| rs76256164  | C | -0.1091 |
| rs12931220  | T | 0.0345  |
| rs2966870   | T | 0.0267  |
| rs78850934  | T | 0.0507  |
| rs2967321   | T | 0.0278  |
| rs75942350  | G | -0.054  |
| rs142887631 | G | -0.0353 |
| rs6500965   | G | 0.0922  |
| rs30243     | C | -0.025  |
| rs75041265  | T | -0.0744 |
| rs4782876   | C | 0.0375  |
| rs59996655  | C | -0.0262 |
| rs79525118  | T | 0.101   |
| rs4782493   | T | -0.0458 |
| rs13332138  | T | 0.0251  |
| rs117390654 | G | -0.0477 |
| rs3743712   | G | -0.061  |
| rs2113294   | C | 0.0417  |
| rs78460606  | T | 0.0496  |
| rs149185773 | T | -0.1424 |
| rs141512454 | A | 0.0876  |
| rs7196038   | A | 0.0297  |
| rs7197168   | T | 0.0943  |
| rs35350587  | T | 0.0385  |
| rs28645166  | G | 0.044   |
| rs730168    | T | -0.0274 |
| rs144903910 | T | 0.0649  |
| rs141739774 | T | -0.1708 |
| rs820808    | G | 0.0216  |
| rs8053127   | A | -0.0531 |
| rs9927305   | T | 0.0356  |
| rs117350883 | A | -0.0868 |
| rs12448778  | G | 0.0687  |
| rs13338041  | T | 0.0878  |
| rs75756373  | T | 0.1794  |

|             |   |         |
|-------------|---|---------|
| rs35017145  | G | 0.0786  |
| rs74249526  | A | -0.0498 |
| rs9932106   | G | -0.0543 |
| rs7198804   | C | -0.0232 |
| rs55752917  | G | 0.0595  |
| rs8044555   | C | -0.0243 |
| rs12599290  | A | -0.0481 |
| rs77011746  | G | 0.0791  |
| rs112445081 | T | 0.0832  |
| rs1559308   | A | 0.0248  |
| rs58109550  | C | -0.0326 |
| rs75365338  | A | 0.1524  |
| rs666301    | T | -0.1528 |
| rs72775989  | C | -0.0341 |
| rs75510753  | G | -0.0949 |
| rs1364153   | T | 0.0299  |
| rs7184396   | G | 0.1083  |
| rs111500568 | C | 0.0657  |
| rs67080212  | C | 0.0315  |
| rs12599590  | T | 0.0512  |
| rs8044675   | C | -0.0349 |
| rs117303400 | C | 0.1819  |
| rs179602    | A | 0.0429  |
| rs150166355 | T | 0.1076  |
| rs17281013  | A | 0.0467  |
| rs77115810  | A | 0.1256  |
| rs147450029 | T | -0.1372 |
| rs457464    | T | 0.0233  |
| rs73577088  | A | 0.0877  |
| rs113064008 | A | 0.0806  |
| rs75320636  | G | -0.113  |
| rs16950653  | T | 0.031   |
| rs35141413  | G | -0.0675 |
| rs2408351   | G | -0.0253 |
| rs12444053  | T | 0.0234  |
| rs75881827  | C | -0.0736 |
| rs117635034 | A | 0.0528  |
| rs141070498 | C | -0.1232 |
| rs1498053   | T | 0.0549  |
| rs7206606   | A | -0.0831 |
| rs35434925  | G | -0.0325 |
| rs9928081   | A | -0.1166 |
| rs9931810   | G | -0.0502 |
| rs8060693   | C | 0.022   |
| rs12932391  | A | 0.1123  |
| rs112380442 | T | 0.0341  |
| rs17708413  | T | -0.0485 |

|             |   |         |
|-------------|---|---------|
| rs17719975  | C | 0.0569  |
| rs116841226 | A | 0.1053  |
| rs12325467  | A | -0.0379 |
| rs75826174  | A | -0.1202 |
| rs56133944  | T | -0.0708 |
| rs4785218   | T | -0.0219 |
| rs2216063   | G | 0.0332  |
| rs7196241   | A | -0.05   |
| rs117704157 | A | 0.1025  |
| rs148374997 | C | 0.0606  |
| rs12444604  | A | 0.0238  |
| rs2656662   | T | -0.0267 |
| rs143758242 | C | 0.1219  |
| rs150679890 | T | 0.0757  |
| rs150280552 | A | 0.1265  |
| rs117100768 | T | -0.0792 |
| rs142572165 | A | -0.1139 |
| rs2550798   | A | 0.0578  |
| rs113299139 | C | -0.053  |
| rs146474075 | T | -0.1145 |
| rs11646211  | G | 0.0212  |
| rs56028961  | T | -0.0287 |
| rs12325541  | A | -0.0566 |
| rs111582866 | G | -0.0395 |
| rs117887363 | C | -0.0381 |
| rs16967960  | G | -0.0224 |
| rs43223     | C | -0.0237 |
| rs117281768 | G | -0.0636 |
| rs4788050   | T | 0.0302  |
| rs34466066  | G | 0.0339  |
| rs8060172   | A | -0.0252 |
| rs11640327  | C | -0.031  |
| rs111652642 | G | 0.0568  |
| rs117184494 | G | -0.0862 |
| rs12925322  | G | 0.0399  |
| rs208944    | T | -0.0255 |
| rs80090926  | A | 0.0856  |
| rs58528224  | C | 0.0232  |
| rs7201893   | T | -0.0243 |
| rs12931901  | C | -0.0219 |
| rs1108663   | A | 0.0215  |
| rs9926794   | C | 0.0224  |
| rs72628268  | A | -0.033  |
| rs2883153   | A | 0.0212  |
| rs204037    | G | -0.0228 |
| rs716447    | C | -0.0279 |
| rs6501083   | G | 0.0218  |

|             |   |         |
|-------------|---|---------|
| rs35219243  | A | -0.0353 |
| rs117947374 | A | 0.0949  |
| rs72808951  | T | -0.1202 |
| rs7185912   | T | 0.0248  |
| rs7185655   | T | -0.038  |
| rs11648775  | G | 0.0456  |
| rs77459543  | T | -0.0403 |
| rs71390878  | A | 0.0519  |
| rs79139081  | G | -0.0853 |
| rs35688801  | G | 0.0565  |
| rs72802991  | A | -0.1414 |
| rs8062917   | G | -0.0983 |
| rs117087559 | G | -0.0987 |
| rs62034440  | T | 0.1084  |
| rs59501952  | G | -0.0326 |
| rs1078346   | G | 0.048   |
| rs7203866   | T | -0.0235 |
| rs6993      | A | 0.021   |
| rs4787106   | A | -0.023  |
| rs72802734  | T | 0.0618  |
| rs7196370   | A | -0.0652 |
| rs1961287   | G | 0.0637  |
| rs62017086  | G | 0.0224  |
| rs75091009  | A | -0.0597 |
| rs17822720  | G | -0.1086 |
| rs75838737  | T | 0.1265  |
| rs151008861 | A | 0.1247  |
| rs72776389  | C | 0.0825  |
| rs116849014 | A | -0.0808 |
| rs74031605  | C | -0.0268 |
| rs8063617   | T | 0.0247  |
| rs80309645  | A | 0.0699  |
| rs9931166   | A | 0.0236  |
| rs74729030  | A | 0.0673  |
| rs17795503  | T | 0.026   |
| rs141361103 | T | 0.0808  |
| rs12931629  | G | -0.0244 |
| rs12922800  | G | -0.024  |
| rs59520809  | A | 0.0481  |
| rs11647146  | G | 0.0219  |
| rs11641881  | G | -0.023  |
| rs76948577  | T | 0.0529  |
| rs12931708  | T | -0.0217 |
| rs73595308  | T | 0.0809  |
| rs4595791   | A | 0.0669  |
| rs8047573   | T | -0.0341 |
| rs9928342   | T | -0.0339 |



|             |   |         |
|-------------|---|---------|
| rs72819315  | T | 0.0627  |
| rs78053876  | A | 0.0876  |
| rs8054271   | T | 0.0487  |
| rs78593031  | A | -0.0639 |
| rs78637605  | C | -0.058  |
| rs75741426  | T | -0.0586 |
| rs117131231 | A | -0.053  |
| rs7185200   | T | 0.0209  |
| rs72791138  | T | -0.1818 |
| rs73261990  | A | 0.0902  |
| rs7189582   | T | 0.0516  |
| rs72785421  | C | 0.0551  |
| rs903881    | T | -0.0321 |
| rs34026420  | T | 0.0425  |
| rs141348096 | A | 0.0962  |
| rs74653514  | G | 0.0872  |
| rs328319    | T | -0.0205 |
| rs60173313  | G | 0.0318  |
| rs7498610   | G | 0.0269  |
| rs2106862   | T | 0.0259  |
| rs12928035  | T | -0.0774 |
| rs79631433  | G | 0.0313  |
| rs9302805   | C | -0.0365 |
| rs78208662  | T | -0.0442 |
| rs16959796  | C | 0.0519  |
| rs55687117  | G | -0.1739 |
| rs59784607  | T | 0.0583  |
| rs28787880  | T | -0.0472 |
| rs144528311 | A | 0.1175  |
| rs75793911  | T | 0.0389  |
| rs1860321   | A | 0.0355  |
| rs2226994   | A | 0.0205  |
| rs11640116  | A | 0.0296  |
| rs112462306 | A | -0.0316 |
| rs6564756   | A | -0.0215 |
| rs76836959  | C | 0.1369  |
| rs12932976  | C | 0.0581  |
| rs8047900   | T | -0.0376 |
| rs147440249 | A | -0.0706 |
| rs17678927  | A | 0.0736  |
| rs11645605  | T | -0.0284 |
| rs11077225  | C | 0.0235  |
| rs41305757  | T | 0.0912  |
| rs7200905   | A | 0.0657  |
| rs2191133   | G | -0.0228 |
| rs28722935  | A | 0.0388  |
| rs1862772   | G | -0.0248 |

|             |   |         |
|-------------|---|---------|
| rs10163389  | G | 0.0212  |
| rs150537432 | C | -0.127  |
| rs72779946  | T | 0.0677  |
| rs150532914 | C | 0.1004  |
| rs56280134  | A | 0.0466  |
| rs78090050  | T | 0.0355  |
| rs75646959  | T | 0.1047  |
| rs8051300   | T | 0.0794  |
| rs74028706  | C | 0.0439  |
| rs11646964  | T | -0.0617 |
| rs117664258 | A | 0.1663  |
| rs117494473 | T | -0.0999 |
| rs80128944  | T | 0.0714  |
| rs79392712  | A | -0.0759 |
| rs36043091  | T | -0.0506 |
| rs7185593   | A | 0.0395  |
| rs62033205  | C | 0.0224  |
| rs74733906  | T | 0.0953  |
| rs146914358 | T | 0.0497  |
| rs8047267   | C | 0.0223  |
| rs12926474  | G | 0.0272  |
| rs117564698 | G | 0.1483  |
| rs151156428 | A | -0.1489 |
| rs75251102  | T | -0.1755 |
| rs117645644 | A | -0.1337 |
| rs1424076   | C | 0.0346  |
| rs16944321  | T | 0.0393  |
| rs2665315   | C | -0.0231 |
| rs117787884 | C | -0.1661 |
| rs12445976  | G | 0.0297  |
| rs3104820   | A | -0.0202 |
| rs244867    | G | 0.0202  |
| rs117579642 | A | -0.098  |
| rs169735    | A | 0.0367  |
| rs140165056 | A | -0.1096 |
| rs113413364 | T | -0.0633 |
| rs73574279  | C | 0.0387  |
| rs12928583  | G | -0.0214 |
| rs7199301   | G | 0.0309  |
| rs1862858   | A | -0.0576 |
| rs2550904   | T | -0.0222 |
| rs78695860  | C | 0.0264  |
| rs111524569 | C | -0.1081 |
| rs299948    | T | 0.0307  |
| rs111667932 | A | -0.0472 |
| rs77245867  | G | 0.0691  |
| rs9928176   | T | 0.0546  |

|             |   |         |
|-------------|---|---------|
| rs4468636   | C | 0.0241  |
| rs80329709  | A | -0.0762 |
| rs28698953  | A | 0.0957  |
| rs79561945  | T | -0.1574 |
| rs8053937   | T | -0.0268 |
| rs4888153   | G | 0.0242  |
| rs9302767   | C | 0.0329  |
| rs17141619  | G | -0.1209 |
| rs61482648  | C | 0.0386  |
| rs9925645   | C | 0.0251  |
| rs117192795 | A | -0.0712 |
| rs35047890  | T | 0.1292  |
| rs117555212 | A | 0.0982  |
| rs995036    | A | 0.0447  |
| rs67301704  | A | 0.0376  |
| rs3785227   | G | -0.0226 |
| rs1437185   | G | 0.023   |
| rs72799734  | T | 0.1193  |
| rs10153150  | T | -0.033  |
| rs825846    | G | -0.0265 |
| rs149630890 | G | -0.0537 |
| rs16974272  | A | 0.0589  |
| rs7501409   | A | -0.0233 |
| rs9806817   | G | 0.0303  |
| rs11649507  | G | -0.0222 |
| rs30211     | A | 0.0213  |
| rs2113301   | G | 0.0252  |
| rs2216187   | C | 0.039   |
| rs11861717  | A | 0.0331  |
| rs77030134  | A | -0.0938 |
| rs30958     | T | -0.0266 |
| rs2118011   | C | -0.0698 |
| rs16968846  | A | 0.064   |
| rs4888447   | C | -0.0316 |
| rs74943801  | C | 0.0758  |
| rs117275099 | T | -0.0919 |
| rs42763     | C | 0.0204  |
| rs8059445   | C | 0.0288  |
| rs8048403   | T | 0.0479  |
| rs10492908  | G | 0.0438  |
| rs80097795  | A | 0.1368  |
| rs1946152   | T | 0.0636  |
| rs8057423   | G | -0.0264 |
| rs112711550 | A | 0.0913  |
| rs7190104   | T | -0.0279 |
| rs12447365  | A | 0.0243  |
| rs35209530  | G | 0.0232  |

|             |   |         |
|-------------|---|---------|
| rs11862192  | G | 0.0266  |
| rs8054265   | A | -0.0243 |
| rs150581502 | C | 0.0926  |
| rs7206012   | C | 0.0429  |
| rs150080592 | C | 0.0886  |
| rs68030152  | G | 0.0425  |
| rs9926875   | C | 0.0312  |
| rs144853768 | A | 0.0778  |
| rs11150590  | T | -0.0225 |
| rs907052    | C | -0.0365 |
| rs118149895 | C | 0.0864  |
| rs138868802 | A | -0.1179 |
| rs62044008  | A | 0.0199  |
| rs72779724  | T | -0.0417 |
| rs16974202  | C | -0.0244 |
| rs143752018 | T | 0.0469  |
| rs8057701   | G | -0.0637 |
| rs140086094 | G | 0.1305  |
| rs4781390   | A | -0.0246 |
| rs77552203  | G | -0.1363 |
| rs117648798 | A | 0.0899  |
| rs72804554  | C | 0.0669  |
| rs11864170  | C | -0.0246 |
| rs1972403   | T | -0.0682 |
| rs117382792 | T | -0.1467 |
| rs4787922   | T | 0.0407  |
| rs12596135  | C | -0.062  |
| rs75335891  | A | -0.048  |
| rs138771231 | C | 0.0787  |
| rs34762134  | G | 0.1075  |
| rs72638298  | T | 0.0302  |
| rs72789426  | C | 0.072   |
| rs4786081   | G | 0.0362  |
| rs11639780  | T | -0.0759 |
| rs12447998  | A | -0.0255 |
| rs4528601   | T | 0.0569  |
| rs16942939  | G | -0.1458 |
| rs35065910  | C | -0.1142 |
| rs466598    | A | 0.0395  |
| rs116162329 | T | 0.0946  |
| rs148236745 | C | 0.1477  |
| rs16960416  | G | 0.0313  |
| rs28409870  | T | -0.0606 |
| rs77911937  | C | 0.0942  |
| rs35319173  | T | 0.0369  |
| rs145115415 | T | -0.0954 |
| rs10521030  | T | 0.1315  |

|             |   |         |
|-------------|---|---------|
| rs138861718 | A | 0.0882  |
| rs12445438  | C | 0.0602  |
| rs12447106  | A | -0.1057 |
| rs11645822  | C | -0.102  |
| rs60876041  | T | 0.051   |
| rs16952434  | G | -0.0217 |
| rs6499594   | A | -0.0325 |
| rs145433562 | C | -0.0896 |
| rs60415374  | T | 0.0219  |
| rs142427895 | T | 0.0441  |
| rs113923745 | A | 0.0309  |
| rs1805012   | C | -0.0319 |
| rs71387129  | A | -0.0534 |
| rs12444295  | A | -0.0218 |
| rs62049416  | A | -0.0692 |
| rs34045448  | G | -0.0868 |
| rs60550343  | A | -0.0196 |
| rs12932332  | A | -0.0437 |
| rs274111    | A | 0.0217  |
| rs2608176   | A | 0.0252  |
| rs1118653   | C | 0.033   |
| rs113668891 | C | -0.1815 |
| rs3765317   | T | 0.0285  |
| rs1035530   | A | -0.0209 |
| rs74673761  | C | -0.0829 |
| rs1109545   | T | 0.0268  |
| rs2581297   | T | -0.0525 |
| rs117583829 | A | -0.0648 |
| rs34841234  | G | 0.0308  |
| rs12448634  | T | -0.0893 |
| rs147228232 | C | 0.0963  |
| rs3936367   | C | 0.0204  |
| rs144965654 | T | 0.0799  |
| rs72787910  | T | 0.0353  |
| rs7194384   | A | 0.0355  |
| rs149693681 | G | -0.1233 |
| rs62059357  | T | 0.1355  |
| rs115215048 | A | -0.0838 |
| rs59482817  | G | 0.0336  |
| rs144496705 | T | 0.1001  |
| rs8061519   | A | -0.0374 |
| rs117044247 | A | -0.1099 |
| rs4785100   | G | -0.0265 |
| rs2408012   | A | -0.0211 |
| rs62039118  | T | -0.0432 |
| rs77595829  | C | -0.0592 |
| rs144184593 | G | -0.0946 |

|             |   |         |
|-------------|---|---------|
| rs1989806   | C | -0.0266 |
| rs116983423 | A | -0.0567 |
| rs78693703  | T | -0.1209 |
| rs7191822   | A | -0.0213 |
| rs59086517  | C | 0.1175  |
| rs115446865 | G | -0.0814 |
| rs9673909   | T | 0.0309  |
| rs56285139  | A | -0.0882 |
| rs79694343  | A | -0.0427 |
| rs75500141  | C | 0.0679  |
| rs113742972 | A | -0.1564 |
| rs9929729   | G | 0.0298  |
| rs545448    | C | -0.0364 |
| rs150345    | G | -0.0634 |
| rs113361007 | A | -0.0761 |
| rs149496739 | A | -0.1979 |
| rs117824271 | G | 0.1046  |
| rs1698230   | A | 0.062   |
| rs144076959 | C | -0.0445 |
| rs4786734   | T | 0.0369  |
| rs147091470 | G | -0.0975 |
| rs9989429   | C | 0.0474  |
| rs10852284  | T | -0.0213 |
| rs75146217  | T | 0.028   |
| rs35716843  | A | 0.1142  |
| rs4238922   | A | -0.0232 |
| rs226790    | T | -0.0472 |
| rs34249329  | G | -0.0395 |
| rs116988221 | T | 0.0561  |
| rs77267589  | A | -0.0642 |
| rs77166887  | T | 0.0875  |
| rs111819819 | T | 0.0828  |
| rs12918345  | G | 0.1054  |
| rs12596374  | A | -0.066  |
| rs34436074  | G | 0.0864  |
| rs2191421   | C | -0.0201 |
| rs1364309   | A | 0.0202  |
| rs144915923 | A | 0.1366  |
| rs62029750  | T | 0.0247  |
| rs12932768  | G | -0.0251 |
| rs13332249  | C | 0.0217  |
| rs117178556 | T | -0.0851 |
| rs11640282  | T | -0.0602 |
| rs151233044 | A | -0.1501 |
| rs4784090   | C | -0.0258 |
| rs7196279   | A | -0.0212 |
| rs11865162  | A | 0.0297  |

|             |   |         |
|-------------|---|---------|
| rs118040676 | T | 0.0857  |
| rs117675483 | T | -0.1236 |
| rs74034244  | G | 0.0483  |
| rs150451298 | T | 0.1084  |
| rs8047896   | G | 0.0937  |
| rs56261892  | G | -0.0417 |
| rs837356    | C | -0.0222 |
| rs149361073 | G | 0.0749  |
| rs77414710  | A | -0.0817 |
| rs310011    | A | 0.0201  |
| rs35784     | T | 0.0262  |
| rs42188     | G | 0.0231  |
| rs2521669   | A | -0.0607 |
| rs118176311 | A | -0.2155 |
| rs72782460  | A | -0.0504 |
| rs17766975  | C | 0.0273  |
| rs71395879  | A | 0.133   |
| rs11076693  | G | 0.0358  |
| rs72794443  | G | 0.0465  |
| rs78298600  | G | -0.1004 |
| rs4074055   | T | 0.0424  |
| rs117095943 | A | 0.1223  |
| rs11866401  | A | -0.0199 |
| rs1561219   | A | 0.0273  |
| rs17676758  | G | -0.0321 |
| rs74659422  | A | -0.0723 |
| rs72774248  | A | 0.1357  |
| rs825589    | G | -0.0322 |
| rs11862306  | C | 0.0272  |
| rs28437587  | T | 0.0911  |
| rs146539209 | C | 0.0628  |
| rs62031064  | T | -0.1934 |
| rs72780703  | T | -0.0309 |
| rs7199574   | A | -0.0926 |
| rs72780015  | G | 0.0374  |
| rs4536480   | T | 0.0251  |
| rs142809510 | A | 0.138   |
| rs77656258  | A | 0.088   |
| rs11640817  | A | 0.0462  |
| rs80204559  | A | -0.0314 |
| rs57735823  | T | 0.0235  |
| rs6499196   | T | 0.0212  |
| rs7195268   | A | -0.0202 |
| rs12446146  | A | -0.0276 |
| rs117086921 | G | 0.1001  |
| rs3093406   | T | -0.049  |
| rs6564771   | G | -0.0232 |

|             |   |         |
|-------------|---|---------|
| rs111764445 | T | 0.1345  |
| rs140049091 | T | -0.1165 |
| rs28636593  | T | -0.039  |
| rs1541646   | G | 0.0291  |
| rs75003587  | G | -0.034  |
| rs116861767 | T | -0.17   |
| rs62043236  | T | -0.037  |
| rs8063355   | A | 0.0224  |
| rs149520540 | G | 0.0756  |
| rs2966321   | T | 0.0401  |
| rs7187869   | A | -0.0278 |
| rs9972773   | T | 0.0346  |
| rs12933971  | T | -0.0215 |
| rs13334846  | G | -0.0475 |
| rs209445    | A | -0.021  |
| rs117741666 | G | -0.0556 |
| rs9939778   | C | 0.0749  |
| rs117372390 | A | -0.109  |
| rs16948912  | A | -0.0295 |
| rs73577642  | A | -0.1011 |
| rs147432851 | T | 0.0717  |
| rs61616536  | T | -0.0426 |
| rs17139207  | G | -0.0332 |
| rs76397856  | T | -0.0701 |
| rs118126830 | G | 0.1986  |
| rs77737484  | C | -0.0367 |
| rs74020097  | G | 0.036   |
| rs11648147  | G | -0.021  |
| rs8057452   | T | -0.0234 |
| rs60966172  | C | 0.0403  |
| rs142851958 | C | -0.1402 |
| rs376490    | T | 0.0201  |
| rs7204882   | A | -0.0306 |
| rs117585987 | T | -0.0688 |
| rs112089458 | A | 0.0545  |
| rs4078469   | A | 0.0227  |
| rs2238510   | A | -0.0235 |
| rs118171190 | C | -0.0774 |
| rs2238484   | T | -0.0284 |
| rs980778    | G | -0.0198 |
| rs62048243  | C | 0.0741  |
| rs8056042   | A | -0.0291 |
| rs12149201  | C | -0.0849 |
| rs3865197   | A | -0.0368 |
| rs79703673  | C | 0.142   |
| rs55778557  | A | 0.1343  |
| rs80121840  | C | -0.1074 |



|             |   |         |
|-------------|---|---------|
| rs118025904 | A | -0.1367 |
| rs8051558   | G | 0.0343  |
| rs72796400  | G | 0.0849  |
| rs11640249  | T | -0.0201 |
| rs76854997  | T | -0.0512 |
| rs7199631   | T | -0.0271 |
| rs112996786 | T | -0.0972 |
| rs117492053 | T | 0.118   |
| rs118070122 | C | 0.094   |
| rs117894131 | T | -0.0933 |
| rs13339159  | T | 0.1122  |
| rs898965    | T | -0.0195 |
| rs142012974 | T | -0.0616 |
| rs72806631  | A | -0.1056 |
| rs11865650  | T | -0.1414 |
| rs4519348   | C | 0.0271  |
| rs9939802   | G | 0.0229  |
| rs12932055  | C | 0.0981  |
| rs142659346 | A | 0.0977  |
| rs145355551 | T | 0.1596  |
| rs9940989   | G | -0.0291 |
| rs35316276  | T | -0.024  |
| rs809377    | T | 0.0751  |
| rs8044504   | G | 0.0306  |
| rs11150439  | C | -0.0343 |
| rs150159823 | G | -0.1248 |
| rs75434134  | A | 0.1449  |
| rs34062199  | A | -0.0462 |
| rs62015538  | A | 0.0802  |
| rs35090860  | T | -0.0289 |
| rs35025581  | T | -0.024  |
| rs8057993   | C | 0.0815  |
| rs62029896  | A | 0.0223  |
| rs28671389  | G | -0.0936 |
| rs11150387  | T | -0.0378 |
| rs74025914  | T | 0.0801  |
| rs4786120   | C | -0.0281 |
| rs117063739 | C | -0.0966 |
| rs28473390  | G | -0.1403 |
| rs767888    | T | 0.0329  |
| rs78561658  | A | 0.043   |
| rs148470727 | T | 0.1238  |
| rs34838583  | T | 0.0688  |
| rs117711077 | C | -0.1716 |
| rs118152460 | C | 0.1297  |
| rs62015933  | G | -0.12   |
| rs2248002   | T | 0.0199  |

|             |   |         |
|-------------|---|---------|
| rs116928705 | T | 0.0743  |
| rs2271300   | G | -0.0295 |
| rs11648111  | T | -0.0449 |
| rs72791248  | T | 0.0342  |
| rs117072811 | A | 0.1393  |
| rs204030    | A | 0.0216  |
| rs16945581  | A | 0.0327  |
| rs74339830  | T | -0.0741 |
| rs111431473 | C | 0.0342  |
| rs62036185  | C | 0.0243  |
| rs78691040  | C | 0.1142  |
| rs11643155  | T | -0.0263 |
| rs4787914   | C | 0.0289  |
| rs34210843  | G | -0.0324 |
| rs12923401  | G | 0.026   |
| rs16952029  | A | -0.0251 |
| rs62051668  | A | 0.0276  |
| rs72776134  | G | -0.1327 |
| rs34576796  | G | 0.0197  |
| rs12928782  | C | 0.0344  |
| rs149467820 | A | -0.1469 |
| rs72769559  | C | -0.035  |
| rs12444753  | A | 0.0732  |
| rs572481    | G | 0.0278  |
| rs72813981  | T | -0.023  |
| rs9939603   | C | -0.0702 |
| rs7198372   | T | 0.0229  |
| rs117412673 | A | -0.0985 |
| rs11644698  | T | 0.0257  |
| rs79536181  | A | 0.0944  |
| rs35867147  | A | 0.0222  |
| rs34071766  | G | -0.0337 |
| rs113629870 | T | -0.0264 |
| rs10431969  | T | -0.066  |
| rs724185    | C | -0.0252 |
| rs4782559   | G | -0.0242 |
| rs113613943 | G | 0.0565  |
| rs62038601  | G | -0.0202 |
| rs72768767  | A | 0.0564  |
| rs141163053 | G | -0.1219 |
| rs8050983   | T | 0.0753  |
| rs72779912  | T | 0.065   |
| rs144153814 | C | -0.1362 |
| rs9938849   | A | 0.035   |
| rs9674333   | C | -0.0277 |
| rs17774701  | C | 0.0483  |
| rs74786645  | C | -0.0892 |

|             |   |         |
|-------------|---|---------|
| rs76267236  | T | 0.0658  |
| rs147355871 | A | -0.09   |
| rs9924099   | G | -0.0436 |
| rs12446360  | T | -0.0254 |
| rs4783024   | C | -0.0203 |
| rs112120196 | A | 0.1119  |
| rs9937113   | T | -0.0338 |
| rs117386293 | C | -0.0706 |
| rs2052578   | G | -0.0268 |
| rs77270648  | T | 0.0689  |
| rs28529286  | T | -0.0471 |
| rs143085796 | A | -0.1477 |
| rs3859109   | A | 0.0203  |
| rs2644990   | C | 0.0298  |
| rs7498798   | G | 0.0247  |
| rs74029545  | G | 0.0511  |
| rs76365120  | C | -0.0439 |
| rs143300670 | C | 0.069   |
| rs148078996 | G | -0.0722 |
| rs1060253   | C | -0.022  |
| rs2194278   | G | -0.0252 |
| rs7204471   | T | -0.0343 |
| rs9933058   | T | -0.062  |
| rs8045981   | T | -0.0355 |
| rs150083236 | C | -0.0713 |
| rs4602043   | T | 0.0215  |
| rs12918434  | T | -0.0427 |
| rs8048286   | G | 0.0208  |
| rs4432259   | A | 0.0255  |
| rs62048398  | A | 0.047   |
| rs55876907  | T | 0.0613  |
| rs80171712  | T | 0.0632  |
| rs72797912  | C | 0.0478  |
| rs11645317  | T | -0.0308 |
| rs2858055   | G | 0.0313  |
| rs113930590 | T | -0.0336 |
| rs12444397  | C | -0.0215 |
| rs60699388  | C | 0.1131  |
| rs79314300  | G | 0.0483  |
| rs12596655  | C | -0.0279 |
| rs74410132  | T | 0.0701  |
| rs117295513 | T | -0.0549 |
| rs2457192   | C | -0.0226 |
| rs72768997  | G | 0.046   |
| rs62031387  | G | 0.0556  |
| rs17821532  | A | -0.0833 |
| rs1530883   | G | -0.0262 |

|             |   |         |
|-------------|---|---------|
| rs143484448 | T | 0.099   |
| rs147801602 | A | -0.0686 |
| rs117032784 | T | -0.0423 |
| rs117415697 | C | -0.1029 |
| rs9972661   | T | -0.02   |
| rs12930451  | G | 0.0263  |
| rs78792101  | T | 0.0668  |
| rs1486443   | T | 0.0313  |
| rs117025877 | T | -0.048  |
| rs2068142   | A | 0.022   |
| rs62057532  | G | 0.0493  |
| rs111573254 | A | 0.0395  |
| rs251796    | G | 0.0203  |
| rs117903220 | C | 0.1299  |
| rs75739718  | C | -0.0458 |
| rs2549733   | T | -0.0567 |
| rs62040065  | A | -0.0302 |
| rs117369753 | T | -0.1445 |
| rs111931917 | G | -0.0442 |
| rs9934119   | G | -0.047  |
| rs7359389   | C | -0.025  |
| rs34191163  | T | 0.0556  |
| rs12448841  | T | 0.0229  |
| rs7204306   | T | 0.0202  |
| rs139588566 | G | -0.1287 |
| rs28529246  | C | 0.0636  |
| rs140222202 | A | -0.1282 |
| rs3747579   | C | 0.0214  |
| rs2073917   | A | 0.021   |
| rs117418436 | C | -0.0996 |
| rs3849255   | C | 0.0199  |
| rs742460    | T | 0.0222  |
| rs17680152  | T | -0.0415 |
| rs113167560 | G | -0.069  |
| rs4784733   | C | -0.0218 |
| rs73510369  | A | 0.1132  |
| rs2859627   | T | 0.0208  |
| rs3784942   | A | -0.0194 |
| rs72792049  | T | 0.0425  |
| rs4785434   | T | 0.0468  |
| rs34955050  | T | -0.0205 |
| rs117006362 | T | -0.1219 |
| rs13332556  | G | 0.027   |
| rs59727684  | T | 0.1285  |
| rs17249128  | G | 0.0198  |
| rs4949122   | T | 0.0803  |
| rs3859032   | G | 0.0349  |

|             |   |         |
|-------------|---|---------|
| rs17834603  | T | -0.0498 |
| rs146633294 | C | 0.072   |
| rs1437441   | A | 0.0523  |
| rs137891146 | C | -0.111  |
| rs183645    | A | -0.0856 |
| rs9931775   | T | -0.0202 |
| rs7199247   | A | -0.0424 |
| rs3785059   | T | -0.0233 |
| rs3809678   | T | -0.0366 |
| rs57156891  | A | -0.0314 |
| rs76481247  | G | 0.0925  |
| rs11117266  | G | 0.0283  |
| rs7188882   | G | 0.02    |
| rs1641831   | A | 0.023   |
| rs8051360   | G | -0.0761 |
| rs1975909   | C | 0.0243  |
| rs74003890  | C | -0.0339 |
| rs11647140  | A | -0.0213 |
| rs150962081 | T | 0.2073  |
| rs145149925 | C | -0.0543 |
| rs138619337 | G | -0.0987 |
| rs151179233 | A | 0.1637  |
| rs11645564  | A | 0.0607  |
| rs6501157   | C | 0.033   |
| rs150732    | T | 0.0196  |
| rs4786811   | G | -0.0903 |
| rs7189018   | C | 0.1244  |
| rs117404369 | C | 0.0947  |
| rs1420281   | C | 0.0366  |
| rs17673191  | A | 0.0437  |
| rs13330994  | A | -0.0188 |
| rs760024    | C | 0.086   |
| rs6499660   | A | -0.019  |
| rs114206112 | T | -0.1281 |
| rs8048662   | A | 0.0354  |
| rs7202635   | C | -0.0689 |
| rs76341824  | C | 0.0881  |
| rs1477023   | A | -0.0215 |
| rs78202217  | G | 0.0574  |
| rs117925494 | T | 0.0534  |
| rs117952968 | A | -0.1029 |
| rs77301479  | G | 0.0742  |
| rs7501371   | G | 0.023   |
| rs12932003  | G | 0.0267  |
| rs11865264  | G | -0.093  |
| rs60618653  | C | 0.0862  |
| rs6564676   | C | -0.0397 |

|             |   |         |
|-------------|---|---------|
| rs76921510  | A | 0.0748  |
| rs34338444  | C | -0.0318 |
| rs76684685  | C | -0.0623 |
| rs79570627  | G | 0.0293  |
| rs8191489   | G | -0.0254 |
| rs16957419  | G | 0.1191  |
| rs7200514   | C | -0.0187 |
| rs249280    | A | 0.024   |
| rs2136662   | G | -0.0321 |
| rs79411261  | T | 0.083   |
| rs9788880   | C | -0.0187 |
| rs74691614  | T | -0.0616 |
| rs8052723   | T | 0.0205  |
| rs1895515   | G | 0.019   |
| rs42762     | G | 0.0246  |
| rs117818985 | A | -0.1055 |
| rs11640479  | T | 0.0291  |
| rs76361179  | A | -0.0624 |
| rs35988762  | C | 0.0952  |
| rs145457103 | G | -0.1615 |
| rs237199    | C | -0.021  |
| rs12931065  | A | -0.0204 |
| rs149412001 | T | -0.1429 |
| rs76371409  | G | 0.1096  |
| rs3093298   | T | -0.0431 |
| rs1424034   | C | -0.0202 |
| rs12927600  | A | -0.0216 |
| rs141398300 | C | 0.0878  |
| rs57095566  | G | -0.0285 |
| rs12598455  | A | -0.0326 |
| rs28460707  | G | -0.0355 |
| rs7200759   | G | 0.0192  |
| rs78372968  | G | 0.0716  |
| rs13336997  | C | 0.0262  |
| rs75570973  | A | -0.0397 |
| rs112836251 | A | 0.0309  |
| rs56050013  | C | 0.0526  |
| rs11643780  | A | -0.0457 |
| rs215037    | G | 0.0668  |
| rs72770968  | G | 0.0344  |
| rs2967315   | C | -0.0338 |
| rs35387179  | A | 0.0553  |
| rs12930556  | C | 0.0195  |
| rs148964336 | G | -0.0823 |
| rs17617419  | A | 0.0879  |
| rs6564673   | A | -0.0263 |
| rs4843584   | A | -0.0802 |

|             |   |         |
|-------------|---|---------|
| rs11643080  | C | -0.0214 |
| rs57536244  | C | 0.0749  |
| rs112966684 | C | 0.1133  |
| rs113316939 | T | 0.0565  |
| rs12932116  | T | -0.0201 |
| rs16956040  | T | 0.0253  |
| rs118159134 | A | 0.1429  |
| rs56134451  | T | -0.0212 |
| rs140735622 | A | 0.1095  |
| rs74655261  | T | 0.1394  |
| rs72774630  | C | -0.0228 |
| rs13332660  | T | 0.0271  |
| rs72766650  | A | 0.0376  |
| rs17223484  | G | 0.0502  |
| rs812418    | T | 0.0267  |
| rs11640472  | A | 0.0453  |
| rs117134614 | C | -0.0995 |
| rs9936273   | T | 0.0188  |
| rs141511974 | A | 0.1473  |
| rs35574953  | T | -0.0675 |
| rs4843680   | T | -0.0234 |
| rs78442210  | C | 0.0494  |
| rs61403714  | T | -0.1309 |
| rs8060252   | A | 0.0428  |
| rs113841112 | C | -0.0828 |
| rs7198517   | T | 0.0242  |
| rs117577852 | C | -0.1187 |
| rs8052414   | C | -0.02   |
| rs8061297   | A | 0.0217  |
| rs7204028   | A | 0.0256  |
| rs323070    | T | 0.0251  |
| rs111343819 | G | 0.1234  |
| rs1344524   | A | 0.0521  |
| rs16957487  | C | -0.0661 |
| rs889527    | G | 0.0769  |
| rs35524209  | G | 0.0305  |
| rs115308643 | G | -0.121  |
| rs4783276   | C | -0.0188 |
| rs146074236 | G | 0.084   |
| rs11076659  | G | -0.0336 |
| rs4036      | A | -0.033  |
| rs2615009   | T | -0.03   |
| rs75520381  | G | -0.1096 |
| rs8058892   | A | 0.0318  |
| rs17680796  | T | 0.0199  |
| rs61743547  | T | 0.1549  |
| rs111397090 | G | 0.0861  |

|             |   |         |
|-------------|---|---------|
| rs4843914   | C | -0.023  |
| rs72622245  | A | 0.0254  |
| rs118123311 | T | 0.1057  |
| rs17823439  | T | -0.0912 |
| rs12599779  | G | 0.1206  |
| rs79540293  | A | -0.094  |
| rs118172847 | G | -0.1285 |
| rs34593825  | A | 0.1339  |
| rs8051996   | C | 0.0211  |
| rs78422124  | C | 0.0823  |
| rs4325553   | C | 0.063   |
| rs9929225   | T | 0.0302  |
| rs143518743 | T | 0.1154  |
| rs7184264   | T | 0.0877  |
| rs78580335  | C | -0.0642 |
| rs3790095   | T | 0.0262  |
| rs436838    | A | 0.0188  |
| rs75652260  | A | 0.1217  |
| rs62057899  | C | -0.0195 |
| rs1875935   | A | -0.033  |
| rs2238499   | A | -0.0203 |
| rs113247865 | C | 0.081   |
| rs72784359  | C | -0.0935 |
| rs79748267  | T | 0.0866  |
| rs62033230  | C | -0.0743 |
| rs28562171  | C | -0.0523 |
| rs112771053 | A | -0.0854 |
| rs74541430  | A | 0.171   |
| rs11646103  | C | 0.0304  |
| rs4783191   | T | -0.0388 |
| rs112486543 | C | -0.0389 |
| rs2745007   | G | -0.0188 |
| rs143160729 | T | 0.0633  |
| rs140928160 | G | 0.0851  |
| rs118179729 | C | 0.1434  |
| rs62035972  | T | -0.0838 |
| rs74489952  | A | -0.0659 |
| rs139446836 | A | -0.0938 |
| rs79446191  | G | -0.1058 |
| rs9928754   | G | 0.0257  |
| rs10492795  | A | -0.0433 |
| rs147965979 | C | -0.1332 |
| rs510862    | T | -0.0259 |
| rs11646264  | T | 0.0381  |
| rs62049825  | C | 0.0333  |
| rs8055393   | A | -0.0244 |
| rs147311206 | C | -0.064  |



|             |   |         |
|-------------|---|---------|
| rs76490247  | T | 0.0542  |
| rs79401427  | C | 0.0682  |
| rs406233    | G | -0.0246 |
| rs79883682  | T | 0.0901  |
| rs145094100 | C | 0.0845  |
| rs111877891 | T | 0.1085  |
| rs11860379  | C | 0.0249  |
| rs72773159  | A | 0.0982  |
| rs73583372  | C | -0.0592 |
| rs770764    | T | 0.0637  |
| rs59177125  | G | -0.0253 |
| rs72790186  | C | 0.0264  |
| rs442725    | G | -0.0342 |
| rs115032148 | G | 0.0877  |
| rs11645314  | G | -0.0617 |
| rs8055953   | C | -0.0195 |
| rs11864226  | T | 0.0716  |
| rs17241676  | T | -0.0212 |
| rs9932704   | G | 0.0205  |
| rs116951427 | T | 0.0697  |
| rs34203488  | T | -0.0245 |
| rs138624246 | G | 0.0725  |
| rs144959997 | C | 0.1061  |
| rs149910877 | C | 0.1206  |
| rs75285889  | G | 0.0616  |
| rs117240558 | G | -0.0617 |
| rs113395428 | A | 0.0682  |
| rs73589415  | T | 0.1113  |
| rs889489    | A | 0.0592  |
| rs4783163   | C | 0.0296  |
| rs7196744   | C | -0.0241 |
| rs4784388   | T | -0.0242 |
| rs138564395 | C | -0.1387 |
| rs146050680 | T | -0.1446 |
| rs117649453 | C | -0.1476 |
| rs7499133   | C | -0.0226 |
| rs117947475 | G | 0.0414  |
| rs28510931  | G | 0.0445  |
| rs72791560  | T | 0.1069  |
| rs13332200  | T | 0.0213  |
| rs2054700   | C | 0.034   |
| rs16949558  | T | -0.0464 |
| rs78581868  | G | -0.08   |
| rs11077111  | C | -0.0236 |
| rs12922722  | C | -0.0652 |
| rs55915882  | G | -0.1357 |
| rs72787379  | G | 0.0363  |

|             |   |         |
|-------------|---|---------|
| rs972896    | T | 0.052   |
| rs55802298  | A | -0.0483 |
| rs117160776 | T | 0.0421  |
| rs78690039  | A | -0.0352 |
| rs13332362  | G | -0.0192 |
| rs77103795  | T | -0.0629 |
| rs148986720 | T | 0.1217  |
| rs10514475  | A | 0.0358  |
| rs11646607  | G | 0.0224  |
| rs7185577   | A | -0.0825 |
| rs62033597  | G | -0.044  |
| rs7201177   | C | 0.021   |
| rs112503049 | G | -0.0496 |
| rs4556811   | C | -0.0189 |
| rs62036196  | G | 0.0203  |
| rs2299672   | C | -0.0206 |
| rs4464071   | C | 0.0192  |
| rs11863412  | A | -0.0316 |
| rs4782645   | A | 0.0675  |
| rs11548970  | G | -0.058  |
| rs77380151  | A | -0.1395 |
| rs11647535  | G | 0.0475  |
| rs9929530   | C | -0.0252 |
| rs72777339  | T | 0.0821  |
| rs117370715 | G | 0.0958  |
| rs6564577   | A | -0.021  |
| rs117801845 | C | -0.0906 |
| rs17324665  | G | -0.048  |
| rs7189129   | G | -0.0751 |
| rs16956811  | G | 0.0326  |
| rs7190987   | T | -0.0281 |
| rs62040176  | T | 0.058   |
| rs11640968  | A | 0.0325  |
| rs4784198   | A | -0.1039 |
| rs141962607 | A | -0.0694 |
| rs7195120   | T | -0.0815 |
| rs11866313  | C | -0.048  |
| rs117703072 | T | 0.0848  |
| rs7202603   | A | -0.0239 |
| rs113531885 | T | -0.0754 |
| rs247038    | C | 0.0218  |
| rs4150168   | A | -0.0403 |
| rs143760364 | C | -0.0983 |
| rs10492855  | T | 0.0566  |
| rs12928265  | C | 0.0188  |
| rs17288766  | T | -0.0224 |
| rs17748572  | C | -0.0379 |

|             |   |         |
|-------------|---|---------|
| rs4783768   | G | -0.02   |
| rs62041533  | G | 0.0248  |
| rs10514545  | A | -0.0182 |
| rs11646540  | A | 0.0422  |
| rs1592543   | G | -0.0229 |
| rs2271947   | A | 0.0771  |
| rs34810494  | G | 0.1298  |
| rs117609228 | A | -0.0747 |
| rs8056831   | G | 0.0206  |
| rs12933652  | A | 0.0224  |
| rs150727    | A | -0.0343 |
| rs13334594  | C | -0.0336 |
| rs118046876 | G | 0.096   |
| rs62016218  | T | -0.0669 |
| rs62030403  | G | 0.0274  |
| rs56395055  | T | 0.0555  |
| rs12926092  | T | 0.0254  |
| rs143610282 | A | -0.0683 |
| rs2326282   | A | 0.0369  |
| rs12446711  | G | -0.0379 |
| rs11558171  | A | -0.0638 |
| rs8044280   | G | -0.0265 |
| rs142367768 | T | -0.1049 |
| rs13333249  | C | 0.0277  |
| rs11640700  | G | 0.0196  |
| rs149388569 | A | -0.0956 |
| rs4787896   | A | -0.023  |
| rs9939045   | A | 0.0238  |
| rs28368111  | C | 0.0694  |
| rs117723630 | T | 0.0508  |
| rs75996403  | G | -0.0799 |
| rs4374193   | A | -0.0387 |
| rs3991716   | A | -0.0205 |
| rs276987    | C | -0.0211 |
| rs1553284   | G | 0.034   |
| rs9940714   | G | 0.02    |
| rs35467625  | A | 0.0295  |
| rs480474    | C | 0.0447  |
| rs4780959   | A | 0.0272  |
| rs144111857 | G | 0.0809  |
| rs9930961   | A | -0.0752 |
| rs117411473 | C | -0.0926 |
| rs76977980  | T | 0.0984  |
| rs117740671 | G | -0.1167 |
| rs2914448   | T | -0.0238 |
| rs71404153  | C | 0.1562  |
| rs113012856 | A | -0.046  |

|             |   |         |
|-------------|---|---------|
| rs149410341 | C | 0.1101  |
| rs149628663 | A | 0.1328  |
| rs5743263   | C | 0.0569  |
| rs116892893 | C | -0.1073 |
| rs758456    | T | 0.0315  |
| rs9674088   | T | -0.0259 |
| rs8051083   | T | 0.0481  |
| rs9923775   | G | 0.0231  |
| rs75582920  | G | -0.0735 |
| rs140529673 | T | 0.0714  |
| rs4780754   | C | 0.0377  |
| rs34676612  | C | -0.043  |
| rs55906624  | T | 0.0268  |
| rs117557528 | C | 0.1078  |
| rs35349949  | C | 0.0246  |
| rs3815805   | T | 0.0336  |
| rs11647637  | G | 0.0272  |
| rs274113    | A | -0.0219 |
| rs80177630  | G | 0.0996  |
| rs34457954  | G | 0.0499  |
| rs4260059   | G | 0.0246  |
| rs140405111 | A | -0.1314 |
| rs117910159 | T | 0.0679  |
| rs7201297   | A | -0.0188 |
| rs79054096  | A | -0.0284 |
| rs79611374  | T | -0.0726 |
| rs76076890  | C | 0.088   |
| rs7206587   | G | 0.0415  |
| rs112372529 | A | -0.0972 |
| rs79704612  | G | 0.0496  |
| rs250294    | C | 0.0231  |
| rs111518155 | T | 0.0436  |
| rs35375024  | G | 0.0255  |
| rs16947716  | G | -0.0348 |
| rs1502425   | A | 0.0228  |
| rs4148356   | A | 0.0903  |
| rs78062191  | T | 0.0721  |
| rs7202860   | T | 0.0547  |
| rs139732721 | G | 0.1421  |
| rs147829463 | T | -0.094  |
| rs74941592  | C | -0.0735 |
| rs9940601   | A | 0.0223  |
| rs29594     | T | 0.0246  |
| rs74363672  | G | 0.1261  |
| rs7199364   | T | 0.0235  |
| rs1450360   | A | 0.0231  |
| rs352939    | A | 0.0193  |

|             |   |         |
|-------------|---|---------|
| rs146113884 | A | 0.0879  |
| rs17670718  | C | -0.0268 |
| rs17370142  | T | 0.0314  |
| rs149849576 | G | -0.065  |
| rs74544634  | T | 0.0819  |
| rs968461    | T | 0.0239  |
| rs11647014  | T | 0.0604  |
| rs57645029  | G | -0.0303 |
| rs111903897 | G | -0.0598 |
| rs58190835  | G | -0.0361 |
| rs1268753   | A | 0.0495  |
| rs7184322   | G | -0.0206 |
| rs2285053   | T | -0.0417 |
| rs7189096   | A | -0.0431 |
| rs12930780  | T | -0.0713 |
| rs4534865   | C | 0.0198  |
| rs1167513   | T | 0.0433  |
| rs2098740   | C | 0.079   |
| rs1052167   | T | -0.1103 |
| rs144472366 | G | 0.0977  |
| rs4347618   | A | 0.0323  |
| rs2070896   | C | -0.0196 |
| rs117722333 | T | 0.1236  |
| rs12920353  | T | 0.0179  |
| rs150926283 | T | 0.1102  |
| rs62015748  | C | 0.0758  |
| rs11641364  | A | -0.1273 |
| rs80298407  | T | 0.0554  |
| rs56147428  | T | 0.0616  |
| rs28695848  | T | 0.0692  |
| rs8053589   | T | 0.0188  |
| rs8044673   | A | 0.0347  |
| rs4371152   | A | -0.0819 |
| rs7188622   | A | -0.0183 |
| rs17312221  | C | 0.0318  |
| rs112610654 | C | -0.068  |
| rs247409    | C | -0.071  |
| rs12922902  | C | -0.0279 |
| rs145310323 | T | 0.0877  |
| rs117121893 | T | 0.0988  |
| rs1424075   | A | 0.0453  |
| rs76445584  | A | 0.0863  |
| rs148516722 | C | 0.1238  |
| rs7185721   | A | 0.0673  |
| rs7197677   | G | 0.0181  |
| rs72774604  | A | 0.0327  |
| rs146496186 | C | 0.1035  |

|             |   |         |
|-------------|---|---------|
| rs117281996 | T | -0.0503 |
| rs116942064 | A | -0.155  |
| rs78234457  | T | 0.059   |
| rs112940907 | G | -0.0793 |
| rs7192286   | G | 0.0221  |
| rs246240    | G | -0.0236 |
| rs118058843 | T | -0.0524 |
| rs117566631 | G | 0.1151  |
| rs60038949  | A | -0.1323 |
| rs34142641  | G | 0.0207  |
| rs111247004 | T | 0.086   |
| rs150634487 | C | 0.123   |
| rs113061699 | G | 0.0754  |
| rs79912986  | A | 0.0748  |
| rs2234897   | C | 0.057   |
| rs74995659  | C | -0.0674 |
| rs77571541  | C | -0.0923 |
| rs139739157 | C | 0.1358  |
| rs116992649 | G | 0.1538  |
| rs16953948  | A | 0.0236  |
| rs12444207  | G | 0.1006  |
| rs74245966  | T | 0.1042  |
| rs113317695 | C | -0.0377 |
| rs216937    | T | -0.0819 |
| rs9930436   | G | -0.0692 |
| rs11647162  | G | 0.0336  |
| rs111868199 | T | -0.0409 |
| rs111965935 | C | -0.1054 |
| rs142213419 | T | 0.1013  |
| rs2550590   | C | -0.0196 |
| rs113166960 | G | -0.0432 |
| rs2032909   | T | -0.0228 |
| rs9928721   | A | 0.0465  |
| rs215066    | A | -0.0363 |
| rs110367    | T | 0.0416  |
| rs72788205  | C | 0.0305  |
| rs77050553  | G | -0.0365 |
| rs75898183  | T | -0.0699 |
| rs35593502  | T | -0.0329 |
| rs71387113  | T | 0.0566  |
| rs10500343  | T | -0.0328 |
| rs149992613 | T | 0.2349  |
| rs73498813  | C | 0.05    |
| rs57235061  | G | 0.0464  |
| rs112153499 | G | 0.0522  |
| rs56396178  | G | -0.0643 |
| rs79768219  | A | -0.0596 |

|             |   |         |
|-------------|---|---------|
| rs116918604 | G | 0.0576  |
| rs139230348 | C | -0.1161 |
| rs9938266   | C | 0.0182  |
| rs140091359 | T | 0.0966  |
| rs4334283   | G | -0.019  |
| rs77592518  | T | 0.0882  |
| rs11644242  | T | -0.0581 |
| rs244827    | A | 0.0337  |
| rs145877260 | T | -0.1374 |
| rs45506492  | C | 0.0729  |
| rs35268137  | C | 0.0751  |
| rs7194212   | G | -0.0556 |
| rs142054454 | G | 0.0534  |
| rs11646969  | C | -0.0311 |
| rs74981560  | G | 0.15    |
| rs113351865 | C | -0.0802 |
| rs2911357   | G | 0.0244  |
| rs4528554   | G | 0.0183  |
| rs114185095 | C | 0.0857  |
| rs57070651  | G | -0.081  |
| rs62045913  | A | -0.0717 |
| rs11645556  | C | 0.0222  |
| rs111481738 | C | -0.1277 |
| rs4783158   | G | -0.0226 |
| rs72793298  | G | -0.1178 |
| rs10514497  | A | 0.0176  |
| rs11861938  | A | 0.0344  |
| rs72622274  | T | -0.0949 |
| rs9635555   | T | -0.0644 |
| rs8063771   | T | -0.0306 |
| rs12599440  | A | -0.0556 |
| rs12918168  | G | -0.0292 |
| rs117035805 | G | 0.0659  |
| rs117228896 | T | -0.0778 |
| rs4451952   | T | 0.0178  |
| rs6499773   | A | -0.0238 |
| rs36014053  | G | -0.0248 |
| rs139424629 | C | 0.1042  |
| rs9935597   | A | -0.0761 |
| rs4784961   | T | -0.16   |
| rs11862333  | C | 0.0592  |
| rs75317373  | A | -0.1051 |
| rs4785177   | C | -0.0316 |
| rs34729950  | T | 0.0856  |
| rs76988908  | G | -0.0283 |
| rs117540650 | T | -0.0559 |
| rs117074052 | C | -0.062  |

|             |   |         |
|-------------|---|---------|
| rs116960152 | C | -0.0881 |
| rs4788007   | T | -0.0193 |
| rs36229786  | C | -0.0236 |
| rs337285    | C | 0.0214  |
| rs141685981 | T | -0.1198 |
| rs57146646  | G | 0.0546  |
| rs56240109  | G | -0.0376 |
| rs72762799  | C | 0.0254  |
| rs72781990  | T | 0.0994  |
| rs2122488   | A | -0.0245 |
| rs34342908  | T | -0.0901 |
| rs117162470 | C | -0.1021 |
| rs725457    | T | -0.0237 |
| rs12447847  | A | 0.0282  |
| rs11644866  | A | 0.0982  |
| rs7192572   | A | 0.0176  |
| rs14272     | A | 0.0406  |
| rs56041628  | T | 0.027   |
| rs59931527  | C | -0.0729 |
| rs117253760 | A | 0.1524  |
| rs7195898   | C | -0.075  |
| rs72810521  | T | 0.0885  |
| rs78413347  | G | 0.0843  |
| rs147343933 | A | 0.0795  |
| rs117102033 | G | -0.061  |
| rs13339424  | T | 0.0334  |
| rs8048521   | T | 0.0223  |
| rs4427834   | C | -0.0528 |
| rs11862201  | C | -0.0178 |
| rs117704451 | T | 0.1534  |
| rs12928573  | A | 0.0186  |
| rs2110815   | G | 0.0195  |
| rs79142258  | G | 0.0741  |
| rs16948429  | C | 0.1273  |
| rs72769038  | A | -0.0771 |
| rs2966231   | T | -0.0236 |
| rs2550752   | C | 0.0444  |
| rs113867180 | T | 0.0943  |
| rs4782398   | G | -0.0214 |
| rs145938986 | A | 0.1453  |
| rs4785329   | A | 0.0177  |
| rs75160718  | T | 0.0769  |
| rs78838998  | G | -0.0772 |
| rs12711491  | C | 0.0189  |
| rs8049845   | T | 0.0182  |
| rs321480    | A | 0.0231  |
| rs60379919  | A | -0.0218 |



|             |   |         |
|-------------|---|---------|
| rs12598105  | G | 0.025   |
| rs79617279  | A | -0.0754 |
| rs117990410 | T | 0.1255  |
| rs9937123   | A | 0.0259  |
| rs117008474 | C | -0.1058 |
| rs80212822  | T | 0.119   |
| rs114175600 | A | -0.0583 |
| rs78128108  | T | 0.0818  |
| rs7405164   | A | 0.0876  |
| rs77158487  | G | 0.0299  |
| rs79574448  | G | 0.0604  |
| rs117415724 | C | 0.0889  |
| rs28642088  | T | -0.0179 |
| rs72778825  | A | 0.0362  |
| rs75806692  | G | 0.1351  |
| rs12923615  | G | 0.0307  |
| rs9924336   | T | 0.0304  |
| rs2531982   | G | 0.0223  |
| rs77206483  | C | -0.0947 |
| rs9921508   | T | 0.0806  |
| rs72802281  | A | -0.0188 |
| rs146178587 | A | -0.1267 |
| rs7201113   | A | 0.0906  |
| rs73546877  | T | 0.0742  |
| rs72797610  | T | -0.0223 |
| rs7198150   | T | -0.0355 |
| rs34032619  | A | -0.0599 |
| rs8049570   | G | -0.0231 |
| rs13334400  | T | -0.0177 |
| rs72789742  | A | 0.0294  |
| rs141856111 | T | -0.0892 |
| rs1530787   | G | -0.0181 |
| rs10500510  | G | 0.0222  |
| rs7189059   | C | 0.0249  |
| rs76931085  | T | -0.063  |
| rs113553685 | G | 0.0782  |
| rs17233378  | C | -0.1042 |
| rs12447867  | A | 0.0773  |
| rs56106828  | T | 0.0273  |
| rs117072577 | A | -0.0919 |
| rs117832727 | C | -0.0725 |
| rs12051199  | C | 0.0324  |
| rs117349012 | A | 0.1068  |
| rs74033340  | A | 0.128   |
| rs144801506 | A | 0.0383  |
| rs60030426  | C | 0.0623  |
| rs9929613   | A | -0.0266 |

|             |   |         |
|-------------|---|---------|
| rs72792759  | C | -0.0588 |
| rs117125661 | T | 0.0728  |
| rs113896694 | T | 0.0448  |
| rs62026374  | T | -0.0497 |
| rs111419313 | T | 0.0688  |
| rs149614636 | T | 0.0774  |
| rs71386462  | T | -0.119  |
| rs145066034 | A | 0.0847  |
| rs116892824 | T | 0.0632  |
| rs12443693  | C | 0.0255  |
| rs11150049  | A | 0.0226  |
| rs150130614 | A | -0.1026 |
| rs74525577  | A | 0.0858  |
| rs16964980  | G | -0.0728 |
| rs76949764  | T | 0.0371  |
| rs8059570   | A | -0.0301 |
| rs72778432  | C | 0.1276  |
| rs2741897   | G | -0.0596 |
| rs75755709  | A | 0.0474  |
| rs113237131 | C | -0.0497 |
| rs117872337 | T | -0.095  |
| rs148170541 | G | -0.1274 |
| rs871066    | T | -0.0917 |
| rs143366572 | T | 0.1192  |
| rs4533312   | G | -0.0575 |
| rs61052748  | T | -0.0316 |
| rs12921740  | C | -0.0174 |
| rs139213523 | G | 0.0499  |
| rs16972157  | C | 0.0248  |
| rs9923515   | C | -0.0238 |
| rs12925538  | T | -0.0439 |
| rs143264471 | T | 0.0558  |
| rs117604214 | C | -0.132  |
| rs118127265 | A | 0.0711  |
| rs12598688  | C | 0.0175  |
| rs76625591  | C | -0.0374 |
| rs117423433 | C | 0.0843  |
| rs11150437  | C | 0.0882  |
| rs7188960   | A | -0.0325 |
| rs1794236   | T | 0.0175  |
| rs141745387 | G | 0.0847  |
| rs62050090  | T | -0.0249 |
| rs4786938   | T | -0.0194 |
| rs11074970  | A | -0.0219 |
| rs78668131  | C | -0.084  |
| rs34405083  | A | -0.0231 |
| rs62027380  | C | -0.059  |

|             |   |         |
|-------------|---|---------|
| rs117744184 | A | -0.0895 |
| rs11648800  | A | -0.0247 |
| rs117150769 | A | 0.072   |
| rs1919045   | G | 0.0178  |
| rs66546652  | G | 0.0265  |
| rs79146877  | A | 0.0704  |
| rs139168126 | G | -0.1288 |
| rs28812625  | G | 0.0556  |
| rs10083745  | A | 0.0357  |
| rs6498461   | T | 0.0249  |
| rs79144925  | T | -0.0432 |
| rs4781249   | C | 0.0308  |
| rs149352669 | A | 0.0637  |
| rs35859010  | T | -0.0354 |
| rs7188563   | T | 0.0773  |
| rs1862806   | C | 0.0218  |
| rs34869810  | A | -0.0492 |
| rs116968489 | T | 0.0836  |
| rs13336250  | G | 0.02    |
| rs4072700   | C | 0.0229  |
| rs77152809  | C | -0.1194 |
| rs112118283 | T | 0.0835  |
| rs143643371 | G | -0.1477 |
| rs35159009  | T | 0.0186  |
| rs138712433 | G | 0.1437  |
| rs114282573 | C | 0.0513  |
| rs2580287   | C | 0.0195  |
| rs2729594   | C | 0.0328  |
| rs10444993  | A | 0.1788  |
| rs72789321  | A | 0.1038  |
| rs17138415  | G | 0.0253  |
| rs150748    | C | -0.0781 |
| rs143583195 | G | 0.0751  |
| rs116144755 | T | -0.0993 |
| rs4538030   | A | -0.0192 |
| rs116437534 | C | 0.0792  |
| rs11646857  | A | -0.0203 |
| rs7200617   | G | 0.0536  |
| rs58600013  | T | -0.0548 |
| rs8057273   | G | 0.0321  |
| rs1123925   | C | -0.0175 |
| rs2868584   | A | -0.0703 |
| rs113031876 | A | 0.0731  |
| rs12934742  | C | 0.0218  |
| rs117663276 | C | -0.0718 |
| rs10852427  | T | 0.0416  |
| rs8055891   | C | -0.0402 |

|             |   |         |
|-------------|---|---------|
| rs143292206 | C | -0.0839 |
| rs78014902  | T | -0.069  |
| rs2646141   | C | -0.0308 |
| rs35895237  | A | -0.0336 |
| rs60084658  | G | 0.1149  |
| rs11547311  | T | 0.0803  |
| rs11646409  | A | 0.0176  |
| rs116951809 | T | 0.0483  |
| rs12599865  | A | 0.0331  |
| rs9924210   | C | 0.0343  |
| rs28488717  | T | 0.0756  |
| rs17652120  | G | 0.0243  |
| rs58340675  | G | 0.053   |
| rs8050048   | C | -0.0213 |
| rs16941627  | G | -0.0252 |
| rs62051175  | G | -0.0573 |
| rs8054206   | C | -0.0932 |
| rs7194361   | T | 0.0365  |
| rs1903623   | G | -0.0186 |
| rs204022    | T | -0.0241 |
| rs117668572 | T | 0.0936  |
| rs146738020 | G | -0.0803 |
| rs112145218 | T | -0.0609 |
| rs148053833 | T | 0.0669  |
| rs75428580  | G | -0.0629 |
| rs113428225 | G | 0.0425  |
| rs141136123 | A | 0.0885  |
| rs149589156 | C | 0.0779  |
| rs2520007   | C | 0.0336  |
| rs62043281  | G | 0.0255  |
| rs12934400  | C | -0.0227 |
| rs117621851 | T | -0.0926 |
| rs475513    | A | -0.0213 |
| rs10521303  | T | -0.017  |
| rs12930607  | T | -0.024  |
| rs974576    | T | -0.0206 |
| rs146064211 | T | 0.1259  |
| rs78944018  | T | -0.0775 |
| rs11648592  | A | 0.0683  |
| rs80204300  | G | 0.0843  |
| rs12922830  | T | -0.0231 |
| rs148158724 | G | 0.1335  |
| rs78765188  | G | -0.1116 |
| rs12926924  | C | 0.02    |
| rs8049662   | C | -0.0195 |
| rs75032475  | C | -0.1635 |
| rs66533783  | A | -0.0801 |

|             |   |         |
|-------------|---|---------|
| rs72814499  | C | 0.0206  |
| rs112433356 | G | 0.0823  |
| rs56785408  | C | -0.0704 |
| rs62057890  | T | -0.107  |
| rs12598704  | A | -0.0333 |
| rs116926826 | T | 0.0783  |
| rs4786099   | A | -0.0328 |
| rs117174171 | C | -0.0425 |
| rs142803978 | T | -0.0885 |
| rs138582413 | C | -0.0996 |
| rs145364028 | T | 0.0798  |
| rs12927771  | C | -0.0306 |
| rs1032267   | A | -0.0252 |
| rs11642752  | G | -0.0253 |
| rs142044268 | A | -0.1271 |
| rs247389    | G | 0.042   |
| rs34205151  | A | -0.0511 |
| rs17831015  | A | -0.0204 |
| rs76808759  | C | -0.0541 |
| rs8053333   | G | -0.0181 |
| rs61285389  | A | -0.0479 |
| rs619994    | C | -0.0201 |
| rs66898937  | C | -0.0456 |
| rs57648581  | C | 0.117   |
| rs79869481  | T | -0.0709 |
| rs62056527  | C | 0.0942  |
| rs117060478 | A | -0.0711 |
| rs77749886  | A | 0.1069  |
| rs78356736  | A | 0.0662  |
| rs116744735 | T | -0.1484 |
| rs4780946   | G | -0.0273 |
| rs195867    | C | -0.027  |
| rs8053694   | C | -0.0222 |
| rs4967999   | T | 0.0197  |
| rs116808690 | C | 0.0829  |
| rs117030214 | C | -0.0855 |
| rs16947741  | T | -0.0529 |
| rs7199000   | C | -0.0218 |
| rs78755201  | T | -0.0428 |
| rs78388360  | G | -0.0978 |
| rs72775600  | A | 0.0469  |
| rs2107118   | A | -0.0193 |
| rs1423826   | T | 0.025   |
| rs1646073   | G | -0.018  |
| rs117999051 | T | 0.0538  |
| rs2319723   | C | -0.0212 |
| rs8048383   | C | -0.0171 |

|             |   |         |
|-------------|---|---------|
| rs117384511 | G | -0.0664 |
| rs8182131   | A | 0.0261  |
| rs62051537  | T | 0.0418  |
| rs8046826   | G | -0.0193 |
| rs58141561  | T | 0.0351  |
| rs72633298  | A | 0.0464  |
| rs114323062 | T | -0.1078 |
| rs74785046  | T | -0.0957 |
| rs35130291  | C | 0.0189  |
| rs2230428   | A | 0.0236  |
| rs35708934  | T | 0.0826  |
| rs76099643  | C | -0.1051 |
| rs288609    | T | 0.021   |
| rs9933610   | C | -0.0281 |
| rs141267743 | T | -0.0731 |
| rs62035801  | T | -0.0451 |
| rs39542     | A | -0.0246 |
| rs12444388  | C | -0.0173 |
| rs77382666  | T | -0.1245 |
| rs7204041   | C | -0.0308 |
| rs41305763  | A | 0.0596  |
| rs4784335   | T | -0.0181 |
| rs6420412   | C | 0.0342  |
| rs17678811  | T | 0.0308  |
| rs72791654  | A | -0.1396 |
| rs72798612  | G | 0.0541  |
| rs76065136  | A | -0.0731 |
| rs55963616  | C | -0.0181 |
| rs117543333 | A | -0.0583 |
| rs117647255 | T | 0.0804  |
| rs17624311  | G | -0.0509 |
| rs75159109  | G | -0.0341 |
| rs2428136   | T | -0.0396 |
| rs117733880 | A | -0.0603 |
| rs141462423 | A | 0.0529  |
| rs113984487 | G | -0.0239 |
| rs1971678   | A | 0.0295  |
| rs4843542   | A | 0.022   |
| rs1981763   | C | 0.0243  |
| rs1016713   | G | -0.0182 |
| rs58436692  | G | -0.0177 |
| rs4888428   | C | 0.0206  |
| rs62042709  | A | -0.0385 |
| rs12932493  | A | 0.0187  |
| rs7185803   | A | 0.0202  |
| rs141652736 | C | -0.0651 |
| rs146160507 | G | -0.0768 |

|             |   |         |
|-------------|---|---------|
| rs79503983  | C | -0.0655 |
| rs148993892 | A | 0.1049  |
| rs11149609  | G | 0.0207  |
| rs2869599   | T | 0.0285  |
| rs12925602  | A | -0.0296 |
| rs140808005 | C | -0.126  |
| rs158479    | G | -0.0173 |
| rs11074787  | C | -0.0242 |
| rs11074732  | G | 0.0184  |
| rs12446433  | A | -0.0425 |
| rs113856130 | C | -0.0701 |
| rs722314    | A | -0.0171 |
| rs56776509  | G | 0.0806  |
| rs144831606 | C | 0.0428  |
| rs142399152 | C | -0.1883 |
| rs620942    | T | -0.0256 |
| rs9889087   | C | -0.0862 |
| rs17668674  | G | 0.0279  |
| rs117342986 | T | -0.0551 |
| rs12102279  | A | 0.0359  |
| rs62036796  | C | -0.0306 |
| rs117904451 | A | 0.1009  |
| rs13333957  | C | -0.0178 |
| rs3935368   | T | 0.0223  |
| rs62059501  | A | 0.0231  |
| rs17752649  | A | 0.1187  |
| rs72792516  | C | -0.0539 |
| rs139510680 | C | 0.0967  |
| rs13336525  | T | 0.0713  |
| rs41286695  | T | -0.0381 |
| rs62033296  | T | 0.0436  |
| rs9931377   | G | 0.0183  |
| rs57063756  | G | 0.0242  |
| rs3730405   | T | 0.0717  |
| rs3852736   | C | 0.0178  |
| rs78419836  | C | 0.0873  |
| rs16959943  | C | 0.0325  |
| rs8054462   | A | -0.0237 |
| rs72485966  | G | 0.0726  |
| rs4786025   | G | -0.0302 |
| rs76120220  | T | 0.0489  |
| rs4784842   | T | -0.0231 |
| rs1167960   | T | 0.0306  |
| rs116977116 | G | 0.094   |
| rs4786721   | T | -0.0234 |
| rs62056196  | A | -0.0754 |
| rs4078331   | T | 0.0184  |

|             |   |         |
|-------------|---|---------|
| rs142747102 | C | -0.0873 |
| rs11640201  | T | 0.0272  |
| rs6499936   | A | -0.0602 |
| rs137873456 | A | -0.0746 |
| rs56143008  | A | -0.0317 |
| rs10163313  | G | -0.0273 |
| rs62030625  | G | 0.0953  |
| rs9938450   | G | 0.0607  |
| rs73485893  | A | 0.0358  |
| rs7197199   | C | -0.0352 |
| rs355954    | T | 0.0429  |
| rs75608581  | G | -0.1506 |
| rs41211     | G | -0.0214 |
| rs6563978   | C | 0.0433  |
| rs13338958  | A | 0.026   |
| rs74628103  | C | 0.049   |
| rs77222582  | C | 0.0973  |
| rs72784276  | T | 0.1205  |
| rs72789940  | G | 0.1087  |
| rs62033290  | C | 0.1067  |
| rs9936395   | T | 0.0235  |
| rs17260427  | T | 0.0289  |
| rs1125496   | C | 0.022   |
| rs62042250  | A | -0.0603 |
| rs237138    | C | 0.0179  |
| rs16944687  | G | -0.0375 |
| rs11639576  | T | 0.0186  |
| rs9935759   | T | 0.0568  |
| rs62027020  | A | -0.0245 |
| rs71387012  | C | 0.0364  |
| rs11646554  | T | 0.0333  |
| rs6563944   | A | 0.0179  |
| rs4782511   | T | 0.0203  |
| rs7404695   | G | -0.0379 |
| rs8051606   | T | 0.0172  |
| rs111343643 | G | 0.0862  |
| rs385883    | G | 0.0212  |
| rs117300597 | T | 0.1048  |
| rs12448952  | G | -0.0218 |
| rs11864457  | C | 0.0733  |
| rs77691550  | A | -0.105  |
| rs9941112   | A | 0.0169  |
| rs2042405   | G | 0.0369  |
| rs79058539  | T | 0.1568  |
| rs4782640   | C | -0.0229 |
| rs72780846  | T | 0.0323  |
| rs12931892  | T | -0.0205 |



|             |   |         |
|-------------|---|---------|
| rs148655435 | T | -0.0645 |
| rs77754249  | G | -0.0748 |
| rs79499137  | A | -0.0458 |
| rs117677039 | A | -0.1076 |
| rs62060339  | T | 0.0327  |
| rs2432541   | T | 0.0732  |
| rs75021996  | G | -0.0381 |
| rs11639900  | T | -0.0284 |
| rs79118815  | A | 0.0515  |
| rs11649290  | T | 0.0233  |
| rs117365265 | A | 0.0752  |
| rs79418449  | C | 0.0705  |
| rs143174500 | A | 0.0489  |
| rs17139955  | G | -0.0639 |
| rs149171179 | T | -0.072  |
| rs72830285  | C | 0.0333  |
| rs1806488   | C | -0.023  |
| rs55781181  | G | 0.0217  |
| rs2229317   | G | -0.1224 |
| rs885157    | T | -0.0248 |
| rs13338180  | T | -0.0184 |
| rs148653936 | G | 0.0696  |
| rs11640651  | A | -0.0317 |
| rs57759319  | T | 0.032   |
| rs28621604  | T | 0.0564  |
| rs75271667  | A | -0.082  |
| rs3785057   | T | -0.0303 |
| rs118085768 | G | 0.0665  |
| rs142656671 | A | 0.1057  |
| rs72767145  | A | 0.0697  |
| rs79804524  | T | 0.0461  |
| rs117911950 | G | -0.0462 |
| rs4783095   | G | -0.0161 |
| rs56847822  | T | 0.0283  |
| rs41205     | A | 0.0197  |
| rs77182920  | A | 0.0744  |
| rs72807635  | T | -0.0398 |
| rs142253471 | T | -0.082  |
| rs142039542 | T | 0.1189  |
| rs117834606 | G | -0.1131 |
| rs72788290  | A | 0.0796  |
| rs7204236   | C | 0.0168  |
| rs237193    | T | 0.0242  |
| rs78279944  | A | 0.1442  |
| rs112552900 | C | 0.075   |
| rs2187675   | G | -0.0237 |
| rs2326169   | C | -0.0168 |

|             |   |         |
|-------------|---|---------|
| rs35795524  | C | 0.0368  |
| rs1981642   | A | 0.0169  |
| rs12595886  | A | 0.0325  |
| rs76230500  | T | 0.0805  |
| rs141300895 | T | -0.0876 |
| rs72770929  | G | 0.0493  |
| rs17539320  | T | -0.0904 |
| rs12596789  | C | 0.0183  |
| rs1143688   | T | -0.0181 |
| rs4354918   | T | 0.0168  |
| rs908990    | A | 0.0492  |
| rs76288247  | T | -0.0667 |
| rs1994653   | C | -0.0198 |
| rs9934057   | A | -0.0178 |
| rs36019     | T | -0.0217 |
| rs12935838  | A | 0.0192  |
| rs208964    | A | 0.027   |
| rs74381076  | T | 0.0568  |
| rs77950672  | G | 0.0839  |
| rs12931681  | G | -0.0227 |
| rs142947526 | A | -0.0648 |
| rs4781392   | A | -0.0494 |
| rs117845101 | G | -0.0431 |
| rs17704330  | T | -0.0185 |
| rs4784903   | G | 0.0587  |
| rs74024602  | A | 0.0851  |
| rs8051114   | T | 0.022   |
| rs144702881 | G | -0.1057 |
| rs9937932   | A | -0.026  |
| rs12149630  | A | -0.0334 |
| rs729318    | T | -0.0248 |
| rs12918438  | T | -0.0807 |
| rs4264397   | A | -0.0174 |
| rs384971    | T | -0.0236 |
| rs111621111 | A | -0.1234 |
| rs12928362  | T | 0.0182  |
| rs12708983  | C | 0.079   |
| rs11074722  | A | 0.0264  |
| rs1946151   | A | -0.0193 |
| rs11076844  | T | -0.0185 |
| rs10744990  | A | -0.0232 |
| rs111980838 | G | -0.1215 |
| rs118134831 | A | -0.0589 |
| rs3830141   | T | 0.0309  |
| rs113688919 | C | 0.0934  |
| rs1861536   | T | -0.0318 |
| rs11859573  | A | 0.0219  |

|             |   |         |
|-------------|---|---------|
| rs34563066  | T | -0.0734 |
| rs117767612 | T | 0.0633  |
| rs35806118  | A | 0.018   |
| rs61136571  | C | 0.0275  |
| rs9929140   | T | 0.0677  |
| rs35245120  | G | -0.0253 |
| rs17722231  | T | 0.1105  |
| rs147624206 | A | -0.0786 |
| rs8062522   | G | -0.0622 |
| rs138011928 | T | -0.0782 |
| rs12923539  | C | -0.0167 |
| rs7192232   | T | -0.0311 |
| rs6497876   | G | 0.0192  |
| rs8056847   | G | 0.0588  |
| rs148008239 | T | -0.1433 |
| rs142385204 | G | -0.0809 |
| rs113082179 | A | 0.0771  |
| rs57497992  | C | -0.0169 |
| rs4485340   | G | -0.018  |
| rs2018703   | A | 0.0201  |
| rs113124588 | C | -0.0516 |
| rs12596780  | T | 0.0252  |
| rs28567490  | A | 0.0424  |
| rs148804103 | A | 0.1069  |
| rs13335835  | C | -0.019  |
| rs117791401 | A | 0.0918  |
| rs117347161 | A | -0.0778 |
| rs12920443  | T | -0.0197 |
| rs139711758 | T | 0.0852  |
| rs75039646  | A | -0.0743 |
| rs140130592 | C | 0.1204  |
| rs77635331  | T | 0.0607  |
| rs1868285   | C | 0.0702  |
| rs7206058   | G | 0.0315  |
| rs8044418   | G | -0.0201 |
| rs76833880  | G | 0.0924  |
| rs112221113 | G | -0.097  |
| rs116849464 | G | 0.0595  |
| rs71391557  | A | 0.0573  |
| rs116862121 | T | 0.0423  |
| rs62016890  | G | 0.0347  |
| rs74962564  | G | 0.1493  |
| rs9930152   | T | -0.0169 |
| rs36053784  | C | -0.0263 |
| rs74017762  | T | -0.0715 |
| rs62018367  | T | -0.0275 |
| rs61404008  | G | -0.0843 |

|             |   |         |
|-------------|---|---------|
| rs117709863 | A | -0.0633 |
| rs213659    | C | -0.0201 |
| rs8044444   | T | 0.0234  |
| rs11076494  | G | -0.0209 |
| rs12325226  | G | 0.0191  |
| rs9925471   | G | 0.0804  |
| rs148158019 | G | -0.0663 |
| rs59945160  | G | 0.0235  |
| rs10438526  | C | 0.0241  |
| rs12325505  | A | -0.0316 |
| rs56329314  | A | 0.066   |
| rs4889127   | G | -0.0466 |
| rs12447346  | T | 0.0225  |
| rs8061768   | A | -0.0287 |
| rs66690883  | G | 0.0225  |
| rs10852603  | C | -0.0175 |
| rs4984937   | A | -0.0196 |
| rs3784870   | T | -0.0198 |
| rs2059296   | C | -0.0166 |
| rs117951878 | C | -0.0843 |
| rs142075993 | T | 0.0746  |
| rs11149616  | A | 0.0203  |
| rs113131147 | A | 0.0297  |
| rs113718420 | G | 0.0763  |
| rs145161023 | A | -0.0681 |
| rs66929757  | T | -0.0501 |
| rs1493881   | A | -0.0413 |
| rs62034236  | A | 0.0321  |
| rs147652118 | A | -0.0414 |
| rs77349495  | G | 0.045   |
| rs7195066   | T | -0.0182 |
| rs150757413 | A | 0.0899  |
| rs3025697   | T | -0.0957 |
| rs79783762  | A | 0.1091  |
| rs16947905  | A | -0.0347 |
| rs76475900  | A | 0.1185  |
| rs4150176   | T | -0.0368 |
| rs1391101   | C | -0.0163 |
| rs118010546 | C | 0.0857  |
| rs139913752 | A | 0.131   |
| rs8049432   | G | -0.0194 |
| rs179208    | C | 0.0526  |
| rs111447245 | G | 0.0811  |
| rs79965215  | G | -0.0565 |
| rs76708936  | G | 0.0896  |
| rs11644348  | G | -0.0533 |
| rs151136512 | G | -0.117  |

|             |   |         |
|-------------|---|---------|
| rs138947048 | A | -0.0843 |
| rs1076479   | C | -0.0175 |
| rs62015863  | C | 0.0754  |
| rs77980228  | G | 0.0812  |
| rs144230062 | T | -0.0649 |
| rs7189512   | A | 0.0386  |
| rs55646301  | A | 0.0304  |
| rs149606877 | A | 0.0855  |
| rs118077274 | A | -0.0761 |
| rs802321    | C | -0.1047 |
| rs117922506 | A | 0.0556  |
| rs61388649  | C | -0.0163 |
| rs2731759   | A | -0.0226 |
| rs56305844  | T | 0.0994  |
| rs1990684   | T | 0.027   |
| rs77789938  | G | 0.0689  |
| rs6500361   | A | 0.0207  |
| rs1604118   | A | -0.0958 |
| rs9934960   | C | -0.0173 |
| rs196006    | T | 0.0998  |
| rs17823223  | T | 0.0338  |
| rs76891223  | G | 0.0627  |
| rs80280439  | A | 0.1459  |
| rs17688054  | C | -0.0261 |
| rs144451877 | T | 0.077   |
| rs289724    | G | 0.0197  |
| rs77166762  | T | 0.0332  |
| rs11076660  | G | 0.0245  |
| rs72769467  | A | -0.05   |
| rs147974405 | T | -0.1048 |
| rs117049956 | T | -0.1214 |
| rs847208    | C | -0.0175 |
| rs117857165 | A | -0.1053 |
| rs117973336 | G | 0.0508  |
| rs9938705   | C | 0.0163  |
| rs8064077   | T | -0.0176 |
| rs9938913   | G | -0.016  |
| rs62039938  | T | -0.0221 |
| rs10514501  | C | -0.0256 |
| rs11864930  | A | -0.0306 |
| rs8044317   | A | 0.073   |
| rs75633816  | G | 0.0202  |
| rs139679237 | A | 0.0708  |
| rs8047140   | T | 0.0291  |
| rs12447168  | C | -0.0279 |
| rs11150448  | G | 0.0249  |
| rs74663444  | G | 0.0451  |

|             |   |         |
|-------------|---|---------|
| rs1986047   | T | 0.0222  |
| rs117845028 | G | -0.0344 |
| rs117688477 | G | 0.0301  |
| rs78623058  | C | 0.0635  |
| rs138444849 | G | 0.0976  |
| rs7198062   | C | 0.0165  |
| rs142531519 | G | -0.11   |
| rs12920654  | T | 0.025   |
| rs117108013 | A | 0.0536  |
| rs12931141  | A | -0.0288 |
| rs79581940  | T | -0.0643 |
| rs9924720   | G | 0.0299  |
| rs149031719 | C | 0.1033  |
| rs16940325  | C | 0.0298  |
| rs12934484  | T | 0.021   |
| rs7197923   | A | 0.0309  |
| rs28831175  | C | -0.0392 |
| rs7201009   | G | -0.0236 |
| rs34646562  | A | 0.0387  |
| rs144170208 | G | -0.0586 |
| rs7200179   | A | -0.0441 |
| rs12443713  | T | 0.1417  |
| rs9941033   | C | -0.0256 |
| rs4491515   | T | 0.0186  |
| rs434508    | C | -0.0177 |
| rs79617808  | A | 0.0293  |
| rs67717829  | C | -0.0167 |
| rs9926833   | T | 0.0216  |
| rs76713711  | C | 0.0882  |
| rs12918744  | T | -0.0273 |
| rs4307972   | G | 0.0211  |
| rs13333064  | G | -0.0348 |
| rs62034521  | A | -0.0247 |
| rs55904632  | T | 0.0274  |
| rs113695122 | C | 0.0475  |
| rs35975323  | A | -0.062  |
| rs17766853  | C | -0.0303 |
| rs1397143   | T | 0.0727  |
| rs117027325 | C | -0.0414 |
| rs75153709  | A | 0.068   |
| rs111287949 | A | -0.0692 |
| rs235119    | A | 0.0414  |
| rs2968482   | C | -0.0177 |
| rs78778192  | G | 0.0915  |
| rs289708    | A | 0.0222  |
| rs77639714  | T | -0.0872 |
| rs55968394  | C | 0.0189  |

|             |   |         |
|-------------|---|---------|
| rs74563815  | T | -0.1335 |
| rs141475921 | G | -0.079  |
| rs56666273  | G | -0.0214 |
| rs116977922 | C | 0.0495  |
| rs139177618 | C | 0.0948  |
| rs59189321  | A | -0.0486 |
| rs1881321   | A | -0.0187 |
| rs28692808  | A | -0.0298 |
| rs111979635 | A | 0.06    |
| rs4072443   | A | -0.0161 |
| rs117786422 | T | -0.1118 |
| rs10514480  | T | 0.0202  |
| rs7205796   | G | -0.0249 |
| rs117714662 | T | 0.1451  |
| rs12932535  | A | 0.0211  |
| rs57450992  | G | 0.0806  |
| rs11642207  | C | 0.016   |
| rs62039360  | A | 0.0584  |
| rs77998554  | A | -0.035  |
| rs78365473  | G | -0.0237 |
| rs4787247   | T | 0.0176  |
| rs17198911  | C | 0.0259  |
| rs173236    | T | 0.0161  |
| rs11642662  | T | -0.0513 |
| rs3087783   | C | -0.0188 |
| rs59979038  | C | 0.0335  |
| rs11643441  | A | 0.0456  |
| rs111327501 | A | 0.0554  |
| rs77486219  | C | -0.067  |
| rs72794582  | G | -0.036  |
| rs8059655   | G | 0.021   |
| rs62035969  | G | 0.0214  |
| rs147565602 | A | -0.0881 |
| rs113881705 | A | 0.0694  |
| rs62041453  | G | -0.0631 |
| rs62048787  | C | 0.0244  |
| rs62048672  | T | 0.0326  |
| rs146721781 | T | 0.0606  |
| rs11862500  | A | 0.0214  |
| rs11645661  | A | -0.0712 |
| rs146748033 | C | -0.1131 |
| rs117844067 | G | -0.0419 |
| rs2970093   | T | 0.0254  |
| rs1964340   | A | -0.022  |
| rs11649689  | A | -0.0289 |
| rs111935180 | G | -0.0723 |
| rs78517747  | A | -0.0529 |

|             |   |         |
|-------------|---|---------|
| rs61738710  | T | 0.0362  |
| rs75259821  | C | 0.0425  |
| rs12149169  | T | 0.0605  |
| rs2729616   | T | 0.0701  |
| rs4352032   | T | -0.0204 |
| rs6563966   | T | 0.0175  |
| rs7199449   | T | 0.0285  |
| rs9928573   | T | 0.0183  |
| rs117494219 | T | -0.0464 |
| rs763148    | C | 0.017   |
| rs72647553  | T | 0.084   |
| rs420583    | C | 0.018   |
| rs12925424  | G | -0.0158 |
| rs11540497  | A | -0.0576 |
| rs3784893   | T | 0.0343  |
| rs75400583  | C | 0.0972  |
| rs117971985 | G | -0.0703 |
| rs6600233   | T | -0.0172 |
| rs2516734   | G | 0.026   |
| rs117474573 | C | -0.0231 |
| rs11645938  | C | -0.0344 |
| rs79365144  | C | -0.0674 |
| rs117136035 | A | 0.0805  |
| rs75986053  | G | -0.0813 |
| rs7192086   | T | 0.0195  |
| rs79674556  | A | 0.0624  |
| rs148567393 | T | 0.06    |
| rs75416198  | A | 0.0586  |
| rs9319496   | G | -0.0157 |
| rs4622527   | T | 0.0673  |
| rs117898578 | G | -0.0872 |
| rs7193709   | C | 0.0212  |
| rs8059768   | T | 0.1107  |
| rs11641544  | A | -0.0194 |
| rs72792182  | A | 0.0503  |
| rs999210    | T | 0.0932  |
| rs7195468   | A | 0.0226  |
| rs34051612  | A | -0.0255 |
| rs117740172 | T | 0.0849  |
| rs113339946 | T | 0.0433  |
| rs12929213  | A | -0.0473 |
| rs76865045  | A | 0.0529  |
| rs117212835 | T | -0.1127 |
| rs182511    | G | 0.0778  |
| rs12933928  | G | 0.0253  |
| rs1566441   | G | 0.0161  |
| rs72793223  | C | -0.0606 |



|             |   |         |
|-------------|---|---------|
| rs35196     | T | -0.0275 |
| rs9302506   | C | 0.0843  |
| rs117254618 | G | 0.1202  |
| rs72808312  | G | 0.1042  |
| rs77233162  | C | 0.0601  |
| rs75248767  | A | -0.0656 |
| rs117792988 | G | 0.1557  |
| rs56079714  | C | -0.0941 |
| rs12232443  | G | 0.0265  |
| rs112291945 | C | -0.0616 |
| rs139518146 | A | -0.1796 |
| rs117081707 | C | 0.0788  |
| rs78697019  | C | 0.0696  |
| rs16958363  | G | 0.108   |
| rs75309495  | G | 0.0568  |
| rs4787916   | A | -0.0263 |
| rs56243633  | T | -0.0387 |
| rs117032168 | T | -0.0676 |
| rs78030383  | T | 0.0263  |
| rs8053649   | A | -0.0572 |
| rs80204879  | T | 0.0719  |
| rs74747456  | T | 0.1019  |
| rs72790775  | A | -0.0372 |
| rs3108686   | A | -0.1345 |
| rs72811802  | A | 0.0832  |
| rs4411497   | T | -0.0594 |
| rs62050919  | A | 0.0329  |
| rs77947269  | A | -0.1001 |
| rs6498127   | A | -0.0253 |
| rs77106554  | A | 0.0294  |
| rs4781671   | T | 0.0178  |
| rs246212    | G | 0.0178  |
| rs7350872   | T | 0.0202  |
| rs78410737  | T | -0.0641 |
| rs150861740 | T | -0.1028 |
| rs7203807   | T | 0.0198  |
| rs148985690 | C | -0.1387 |
| rs62047232  | C | 0.0681  |
| rs79052960  | C | 0.0642  |
| rs1477406   | C | -0.0362 |
| rs113509770 | T | -0.0694 |
| rs117693622 | A | 0.0867  |
| rs78707936  | C | -0.0905 |
| rs2589001   | T | -0.016  |
| rs146048597 | A | -0.0234 |
| rs72797570  | G | -0.0621 |
| rs4129576   | T | -0.0179 |

|             |   |         |
|-------------|---|---------|
| rs72628261  | C | -0.0656 |
| rs1436384   | T | -0.0292 |
| rs161141    | C | 0.0158  |
| rs12716954  | C | 0.0259  |
| rs151073818 | T | 0.1147  |
| rs62028852  | T | -0.0806 |
| rs4843381   | C | -0.0156 |
| rs79408408  | C | 0.114   |
| rs116576599 | T | -0.0431 |
| rs77774901  | T | 0.0826  |
| rs11866418  | G | 0.0182  |
| rs9921998   | C | -0.0155 |
| rs964372    | C | -0.0257 |
| rs3743975   | C | -0.0177 |
| rs72802790  | C | 0.0327  |
| rs13333910  | A | -0.0206 |
| rs113256927 | A | -0.106  |
| rs417053    | T | -0.0211 |
| rs2071334   | G | -0.0761 |
| rs4783710   | A | -0.0224 |
| rs2650417   | G | -0.0256 |
| rs8060007   | A | -0.0451 |
| rs7500042   | A | 0.0382  |
| rs12448256  | C | -0.0258 |
| rs138331267 | A | 0.0745  |
| rs11074841  | C | -0.072  |
| rs179604    | T | 0.0157  |
| rs11644729  | G | 0.0263  |
| rs75021582  | T | -0.0742 |
| rs74786805  | C | 0.059   |
| rs66881004  | C | 0.0153  |
| rs7203458   | C | -0.0186 |
| rs56071143  | A | 0.0359  |
| rs41278174  | A | 0.0843  |
| rs118127284 | T | 0.0485  |
| rs78477527  | T | 0.032   |
| rs1437188   | C | 0.0174  |
| rs7192179   | A | 0.0406  |
| rs7187068   | G | 0.0226  |
| rs204042    | G | -0.0229 |
| rs2005820   | A | 0.019   |
| rs74707086  | T | 0.0728  |
| rs79903321  | T | 0.0614  |
| rs62032755  | C | -0.026  |
| rs74752164  | G | -0.0623 |
| rs143623322 | C | -0.1074 |
| rs74884497  | G | 0.041   |

|             |   |         |
|-------------|---|---------|
| rs28461399  | G | 0.0356  |
| rs76084416  | A | -0.0748 |
| rs143903665 | G | -0.0595 |
| rs1844709   | C | 0.0189  |
| rs12051137  | G | -0.0194 |
| rs145017203 | C | 0.0934  |
| rs62051901  | C | -0.0352 |
| rs7200441   | T | -0.0309 |
| rs12926255  | T | 0.0169  |
| rs16971384  | G | 0.0178  |
| rs79199156  | G | -0.0911 |
| rs11077288  | C | 0.0231  |
| rs34574317  | T | -0.0319 |
| rs114558720 | T | 0.1061  |
| rs28667669  | A | 0.0292  |
| rs72801982  | A | -0.0394 |
| rs34213592  | T | 0.0516  |
| rs1352148   | G | 0.0278  |
| rs11150550  | A | 0.0199  |
| rs9923909   | C | -0.1566 |
| rs117326651 | T | -0.0619 |
| rs8059685   | G | 0.0392  |
| rs145755870 | T | 0.0565  |
| rs146746415 | A | -0.0697 |
| rs62042428  | C | -0.0243 |
| rs78089095  | A | -0.0454 |
| rs78747450  | C | 0.0202  |
| rs17703121  | T | -0.0509 |
| rs1970838   | A | -0.0357 |
| rs117232116 | T | 0.0365  |
| rs2941326   | G | 0.0268  |
| rs143425659 | A | 0.0793  |
| rs78131410  | C | 0.0184  |
| rs149100018 | T | -0.0771 |
| rs117602909 | C | -0.0655 |
| rs139355271 | A | 0.1022  |
| rs398176    | C | 0.1105  |
| rs139406394 | G | -0.0485 |
| rs10514444  | G | -0.0225 |
| rs17855750  | C | -0.0419 |
| rs7500408   | C | 0.022   |
| rs6500309   | T | -0.0501 |
| rs116793720 | A | 0.083   |
| rs117745801 | A | -0.0841 |
| rs76728532  | A | -0.1009 |
| rs111443517 | T | 0.045   |
| rs152737    | C | -0.0183 |

|             |   |         |
|-------------|---|---------|
| rs17139596  | T | -0.0224 |
| rs12448944  | G | 0.07    |
| rs12926669  | G | -0.0245 |
| rs67935101  | T | 0.0726  |
| rs1693957   | G | 0.0475  |
| rs150755640 | T | 0.1051  |
| rs12599288  | C | -0.0173 |
| rs62036055  | T | 0.0307  |
| rs28419404  | G | -0.0184 |
| rs7204574   | C | 0.0376  |
| rs62036332  | C | 0.0339  |
| rs78120818  | G | 0.0944  |
| rs13380539  | T | -0.0617 |
| rs55924396  | C | 0.0755  |
| rs72774202  | C | 0.0822  |
| rs116854658 | A | 0.0193  |
| rs28694021  | C | -0.0219 |
| rs117948289 | T | 0.066   |
| rs4843456   | C | -0.0439 |
| rs1377549   | A | -0.0165 |
| rs62031995  | A | -0.0171 |
| rs74705774  | G | -0.0588 |
| rs117751534 | G | -0.0731 |
| rs35600     | G | -0.0222 |
| rs16964168  | A | -0.0376 |
| rs6497652   | T | 0.0205  |
| rs7192432   | G | 0.0303  |
| rs4780952   | C | 0.0219  |
| rs117718611 | G | 0.0544  |
| rs75744176  | C | 0.063   |
| rs4513088   | A | 0.0298  |
| rs4843266   | C | 0.0233  |
| rs12595990  | A | -0.0242 |
| rs62015468  | C | 0.0415  |
| rs12934684  | A | -0.036  |
| rs17794301  | G | 0.0568  |
| rs72776975  | G | 0.0401  |
| rs8046805   | C | 0.0615  |
| rs55958429  | C | -0.0347 |
| rs1800777   | A | -0.0424 |
| rs16956649  | A | -0.0667 |
| rs7203412   | T | 0.0315  |
| rs62035188  | T | -0.0167 |
| rs35080324  | A | 0.0763  |
| rs77732009  | G | -0.079  |
| rs150926    | G | 0.0155  |
| rs141731825 | G | -0.0602 |

|             |   |         |
|-------------|---|---------|
| rs198135    | C | -0.033  |
| rs76878912  | A | 0.046   |
| rs111117441 | T | -0.0295 |
| rs112557806 | T | 0.0775  |
| rs140917353 | T | 0.0479  |
| rs2729614   | T | 0.0174  |
| rs8059866   | C | 0.0209  |
| rs12921780  | T | 0.0205  |
| rs7193120   | G | 0.1191  |
| rs28425562  | T | -0.0338 |
| rs13337314  | T | -0.0741 |
| rs10871319  | T | 0.0323  |
| rs12595934  | A | 0.0153  |
| rs12446226  | G | -0.0204 |
| rs12924026  | C | 0.0246  |
| rs57570588  | G | -0.0235 |
| rs2239349   | A | 0.0281  |
| rs12926439  | A | 0.0615  |
| rs148590663 | A | -0.1021 |
| rs117930325 | T | 0.0987  |
| rs72772728  | C | -0.0184 |
| rs12923138  | C | -0.0171 |
| rs55642214  | A | -0.0329 |
| rs17822666  | T | 0.0923  |
| rs112299420 | C | -0.0725 |
| rs9932635   | T | -0.0218 |
| rs17782826  | C | 0.0464  |
| rs77070143  | T | -0.0753 |
| rs11641947  | G | -0.0209 |
| rs9940973   | G | 0.0226  |
| rs62034881  | T | 0.0688  |
| rs59326031  | G | 0.06    |
| rs79971965  | C | 0.1254  |
| rs116959112 | G | 0.075   |
| rs76655127  | G | 0.0549  |
| rs77229437  | G | -0.0581 |
| rs17702971  | G | -0.0676 |
| rs9925501   | C | -0.0645 |
| rs11488914  | C | -0.0605 |
| rs35970950  | C | -0.0169 |
| rs17201719  | T | 0.0165  |
| rs77476554  | T | -0.0628 |
| rs117943901 | A | -0.075  |
| rs1641931   | T | 0.0255  |
| rs1522441   | C | 0.0202  |
| rs381312    | C | -0.0191 |
| rs117940684 | T | -0.049  |

|             |   |         |
|-------------|---|---------|
| rs7499976   | T | -0.0228 |
| rs78711822  | A | 0.1     |
| rs12597482  | T | 0.0478  |
| rs147555911 | G | 0.0938  |
| rs76515582  | A | -0.1111 |
| rs56886863  | T | 0.0341  |
| rs8053674   | T | -0.0431 |
| rs74905426  | A | -0.0936 |
| rs117469893 | G | 0.0188  |
| rs79670849  | C | -0.0498 |
| rs74025615  | A | -0.0647 |
| rs11640877  | T | -0.0305 |
| rs9924878   | T | 0.0399  |
| rs138258607 | T | -0.123  |
| rs12148970  | C | 0.0456  |
| rs12932737  | G | 0.0166  |
| rs11861543  | T | 0.0253  |
| rs146461485 | A | 0.0909  |
| rs10514530  | T | 0.0573  |
| rs1547991   | G | 0.0165  |
| rs2280381   | C | 0.0163  |
| rs62039260  | T | 0.0855  |
| rs74530260  | A | -0.1137 |
| rs12102281  | T | 0.0398  |
| rs880764    | G | -0.0229 |
| rs8047445   | T | 0.0274  |
| rs141182324 | A | 0.0651  |
| rs12444032  | C | -0.0298 |
| rs7202110   | C | 0.046   |
| rs7197619   | T | -0.0231 |
| rs56761374  | T | -0.0282 |
| rs112798217 | A | -0.0618 |
| rs77923569  | C | -0.0291 |
| rs80139892  | T | 0.0616  |
| rs117712647 | T | 0.0326  |
| rs145651458 | T | -0.0787 |
| rs60050831  | T | -0.075  |
| rs11642723  | T | -0.0946 |
| rs7189011   | T | -0.0233 |
| rs9940116   | T | 0.0455  |
| rs12597439  | C | 0.0225  |
| rs111348092 | G | -0.0571 |
| rs137897580 | A | 0.0735  |
| rs111670531 | C | 0.0176  |
| rs118121724 | T | 0.0441  |
| rs144402837 | T | -0.0772 |
| rs117159123 | T | -0.1324 |

|             |   |         |
|-------------|---|---------|
| rs28526585  | G | 0.0191  |
| rs76455559  | G | -0.0297 |
| rs77622502  | T | 0.057   |
| rs72770991  | G | -0.067  |
| rs17768064  | C | 0.0312  |
| rs78671333  | T | 0.0673  |
| rs2192641   | G | -0.0206 |
| rs75812226  | T | -0.0332 |
| rs62041624  | T | 0.0296  |
| rs143437800 | T | -0.1135 |
| rs145223680 | A | -0.0627 |
| rs4255791   | A | 0.0177  |
| rs16955381  | G | -0.1031 |
| rs116874155 | G | 0.0483  |
| rs11644351  | T | 0.0165  |
| rs8191332   | A | 0.0554  |
| rs11150537  | C | -0.0456 |
| rs2526057   | C | 0.0155  |
| rs145197577 | G | 0.0815  |
| rs146947523 | A | 0.1017  |
| rs7203280   | G | 0.0581  |
| rs12926740  | G | 0.0166  |
| rs62049091  | A | 0.0211  |
| rs17706689  | G | 0.0364  |
| rs2531974   | G | 0.0163  |
| rs111564463 | G | -0.1106 |
| rs34750941  | C | 0.0332  |
| rs62043323  | A | -0.0471 |
| rs72800328  | A | 0.052   |
| rs4073333   | C | 0.0164  |
| rs4456497   | C | -0.0166 |
| rs12933466  | C | -0.0249 |
| rs76061265  | G | -0.0854 |
| rs11643141  | T | 0.0188  |
| rs4787442   | T | 0.0244  |
| rs12925241  | T | 0.021   |
| rs72806604  | T | -0.0307 |
| rs117817592 | C | 0.1114  |
| rs113137978 | T | -0.0945 |
| rs11075208  | C | 0.103   |
| rs143662876 | A | -0.0692 |
| rs12596568  | G | -0.0212 |
| rs2088746   | C | -0.0226 |
| rs143933928 | G | -0.1054 |
| rs113526317 | A | 0.0738  |
| rs16975819  | T | -0.0218 |
| rs3785036   | G | -0.0284 |

|             |   |         |
|-------------|---|---------|
| rs72769074  | C | -0.0204 |
| rs35603254  | T | -0.0267 |
| rs35900362  | A | 0.0564  |
| rs78740137  | A | 0.0357  |
| rs12925865  | G | -0.0761 |
| rs2950867   | T | -0.0909 |
| rs111464641 | C | 0.0679  |
| rs60354270  | G | -0.022  |
| rs79819065  | A | -0.06   |
| rs3136215   | C | -0.0617 |
| rs72800537  | C | -0.0596 |
| rs78460491  | G | -0.055  |
| rs16957517  | T | -0.0173 |
| rs12444007  | C | 0.0229  |
| rs62042227  | A | 0.0541  |
| rs77670747  | C | 0.0278  |
| rs55747856  | T | 0.0266  |
| rs78650126  | T | 0.1022  |
| rs2219657   | G | -0.0224 |
| rs2738540   | T | -0.0214 |
| rs8057798   | G | -0.0174 |
| rs8060591   | A | 0.0238  |
| rs142915747 | T | -0.0644 |
| rs1548850   | T | -0.0279 |
| rs1713466   | T | -0.0342 |
| rs8057123   | T | 0.0152  |
| rs12931308  | G | -0.0682 |
| rs149528979 | C | 0.0548  |
| rs2903407   | G | -0.0256 |
| rs11643453  | T | 0.0462  |
| rs148210165 | A | 0.0601  |
| rs16970748  | C | 0.0585  |
| rs12919666  | G | -0.0259 |
| rs11075995  | A | 0.0179  |
| rs7198133   | A | -0.0894 |
| rs77883240  | C | 0.0681  |
| rs45554137  | C | 0.0558  |
| rs12927590  | G | 0.038   |
| rs74019766  | T | 0.0346  |
| rs58035862  | T | -0.0865 |
| rs149656227 | A | -0.0812 |
| rs7194678   | T | 0.0167  |
| rs111252271 | A | 0.0853  |
| rs7192748   | T | 0.0172  |
| rs2194305   | C | -0.0454 |
| rs55683592  | C | -0.0564 |
| rs2965812   | A | -0.0267 |



|             |   |         |
|-------------|---|---------|
| rs144078072 | C | -0.0674 |
| rs138026745 | A | -0.0657 |
| rs4395099   | C | -0.0179 |
| rs17137827  | G | -0.0988 |
| rs146938894 | T | -0.0436 |
| rs17262787  | C | 0.0264  |
| rs139531554 | A | -0.1119 |
| rs118027139 | T | -0.0656 |
| rs77995964  | A | 0.0696  |
| rs62044301  | C | 0.0156  |
| rs78626142  | A | 0.1105  |
| rs58569666  | C | 0.0696  |
| rs117549275 | A | -0.0248 |
| rs142616270 | T | 0.0962  |
| rs6498496   | A | -0.0209 |
| rs2719724   | C | -0.0167 |
| rs149968970 | A | 0.0577  |
| rs113219401 | G | 0.0842  |
| rs7197665   | A | -0.0785 |
| rs801995    | G | 0.063   |
| rs72786242  | T | 0.0201  |
| rs6564311   | A | -0.026  |
| rs62044087  | T | 0.0394  |
| rs1358492   | C | -0.0493 |
| rs12918915  | C | -0.0238 |
| rs11642988  | A | -0.0728 |
| rs2352947   | G | 0.0488  |
| rs7199597   | A | 0.0222  |
| rs11864787  | A | -0.0244 |
| rs224163    | G | -0.0251 |
| rs2937114   | G | 0.0406  |
| rs12708655  | T | -0.0289 |
| rs8057687   | T | 0.0221  |
| rs146003275 | C | 0.1162  |
| rs72802798  | A | 0.1135  |
| rs17231534  | A | -0.0386 |
| rs17638171  | G | -0.0918 |
| rs113522753 | G | 0.0762  |
| rs77904589  | G | 0.0399  |
| rs172643    | T | 0.0215  |
| rs17676532  | A | 0.0228  |
| rs28488563  | A | -0.0844 |
| rs72790123  | A | 0.0623  |
| rs11149702  | C | 0.0237  |
| rs111838685 | A | 0.0863  |
| rs74914372  | A | -0.0346 |
| rs34776182  | C | 0.0178  |

|             |   |         |
|-------------|---|---------|
| rs11642856  | T | -0.0223 |
| rs1974862   | G | 0.0284  |
| rs1420085   | A | -0.0169 |
| rs143018702 | A | 0.042   |
| rs141581113 | G | 0.0603  |
| rs72806802  | G | 0.0315  |
| rs8047252   | A | 0.0517  |
| rs1369784   | T | 0.0381  |
| rs36055034  | A | -0.0165 |
| rs1544607   | A | -0.0831 |
| rs9934406   | T | 0.0211  |
| rs76196490  | A | -0.026  |
| rs34571005  | T | -0.0383 |
| rs2066845   | C | 0.0918  |
| rs79622230  | A | 0.0467  |
| rs148890386 | C | -0.0621 |
| rs113313796 | A | -0.1084 |
| rs117106695 | C | 0.1451  |
| rs139665313 | T | -0.081  |
| rs7186631   | T | -0.056  |
| rs113400434 | A | 0.0792  |
| rs2738632   | C | -0.0166 |
| rs1366211   | A | -0.0169 |
| rs3095573   | G | -0.0256 |
| rs11649487  | A | 0.0241  |
| rs4444336   | C | -0.0153 |
| rs17484429  | G | -0.0933 |
| rs145982584 | A | -0.0575 |
| rs164753    | C | 0.0233  |
| rs9923737   | C | -0.0816 |
| rs76880178  | T | 0.0452  |
| rs62049081  | A | 0.026   |
| rs142778247 | A | 0.0542  |
| rs143711361 | T | -0.0857 |
| rs75930132  | G | 0.1026  |
| rs72790813  | A | 0.0326  |
| rs57532680  | G | 0.0223  |
| rs4287571   | G | -0.0155 |
| rs62031305  | T | 0.043   |
| rs17179132  | A | 0.0975  |
| rs140990619 | C | 0.1112  |
| rs9931078   | G | 0.0152  |
| rs141495768 | G | 0.0762  |
| rs11860793  | G | -0.0158 |
| rs17823453  | G | -0.0397 |
| rs79604417  | T | -0.0765 |
| rs62037312  | T | 0.0299  |

|             |   |         |
|-------------|---|---------|
| rs2270935   | T | 0.0509  |
| rs17633044  | G | -0.0214 |
| rs4608356   | A | 0.0257  |
| rs3859124   | C | 0.015   |
| rs12931742  | A | -0.0335 |
| rs117287840 | A | -0.0851 |
| rs74035977  | A | -0.0226 |
| rs114022137 | A | 0.0554  |
| rs12444724  | T | -0.0343 |
| rs142067587 | A | 0.0999  |
| rs118148611 | G | -0.1151 |
| rs71392462  | C | 0.028   |
| rs610327    | A | 0.0157  |
| rs73572257  | C | 0.0294  |
| rs80136737  | T | -0.0857 |
| rs71392025  | T | -0.0613 |
| rs2962467   | G | 0.0145  |
| rs144105254 | A | 0.0994  |
| rs75809390  | T | 0.0659  |
| rs7193190   | C | 0.0702  |
| rs147248881 | C | -0.0698 |
| rs58266997  | A | 0.0177  |
| rs1962375   | C | -0.0163 |
| rs77534407  | A | -0.0416 |
| rs112478378 | T | -0.0285 |
| rs7203142   | G | -0.0174 |
| rs17289669  | T | -0.0214 |
| rs141357510 | C | 0.0772  |
| rs113452131 | C | 0.0749  |
| rs62051893  | C | 0.0532  |
| rs705914    | A | 0.0286  |
| rs13336519  | G | -0.0218 |
| rs17144234  | T | 0.0654  |
| rs4788042   | A | 0.0234  |
| rs62047471  | C | 0.0226  |
| rs72814001  | T | 0.0303  |
| rs2334142   | C | 0.0344  |
| rs2384936   | A | 0.0161  |
| rs72803134  | C | 0.0379  |
| rs76319480  | T | 0.071   |
| rs11648052  | G | 0.0352  |
| rs79508330  | T | 0.0659  |
| rs145977168 | A | 0.0874  |
| rs16954348  | A | 0.0663  |
| rs141421858 | G | 0.0537  |
| rs12051440  | C | -0.0187 |
| rs77644771  | G | 0.0505  |

|             |   |         |
|-------------|---|---------|
| rs79948936  | G | -0.0361 |
| rs77549649  | A | 0.0229  |
| rs118087764 | C | 0.0955  |
| rs74714163  | A | -0.0607 |
| rs77732921  | A | 0.063   |
| rs3764278   | C | 0.022   |
| rs75784980  | A | 0.0991  |
| rs4483864   | G | -0.0869 |
| rs2867048   | C | -0.0379 |
| rs147309745 | T | -0.0604 |
| rs55951263  | C | -0.027  |
| rs34208842  | A | -0.0349 |
| rs10521036  | C | 0.0356  |
| rs79660163  | G | -0.0281 |
| rs1476980   | T | -0.0242 |
| rs12445796  | A | -0.0154 |
| rs12920445  | A | -0.0848 |
| rs117419006 | T | 0.0951  |
| rs112869008 | G | -0.0319 |
| rs67575900  | A | 0.0197  |
| rs34261419  | T | 0.1022  |
| rs11863911  | C | -0.0166 |
| rs4045136   | C | -0.0338 |
| rs728962    | T | 0.017   |
| rs117865749 | C | -0.053  |
| rs17739607  | A | 0.0295  |
| rs62024448  | A | 0.0235  |
| rs10459808  | C | -0.0796 |
| rs1114620   | C | 0.0252  |
| rs74006763  | A | 0.0562  |
| rs10500516  | T | 0.0203  |
| rs56282241  | A | -0.0528 |
| rs12445633  | T | 0.0329  |
| rs72781712  | T | -0.035  |
| rs75245102  | G | -0.0575 |
| rs4888021   | G | -0.0183 |
| rs78531928  | A | 0.1107  |
| rs10852376  | A | -0.0177 |
| rs12927005  | G | -0.0634 |
| rs141696834 | A | 0.0759  |
| rs73501127  | G | 0.0226  |
| rs118190027 | T | 0.0665  |
| rs76437091  | A | 0.0618  |
| rs741593    | T | -0.0165 |
| rs117723710 | A | -0.0366 |
| rs6500959   | G | 0.0263  |
| rs412209    | A | 0.0493  |

|             |   |         |
|-------------|---|---------|
| rs77807576  | G | 0.0547  |
| rs76181705  | G | 0.0738  |
| rs2172623   | T | -0.0202 |
| rs8052199   | G | -0.0197 |
| rs117711220 | A | 0.1048  |
| rs59169244  | T | 0.0573  |
| rs74002255  | T | 0.0856  |
| rs75158572  | A | -0.1007 |
| rs10163230  | C | 0.0151  |
| rs72770536  | T | -0.0785 |
| rs28571077  | A | 0.0321  |
| rs117546433 | T | 0.0539  |
| rs62028536  | C | -0.0478 |
| rs213664    | T | 0.0201  |
| rs76800760  | C | 0.0359  |
| rs146968744 | T | -0.1227 |
| rs74472435  | T | 0.0206  |
| rs12925972  | T | 0.0146  |
| rs1533418   | C | 0.0184  |
| rs11648079  | G | -0.0219 |
| rs72774802  | A | 0.0619  |
| rs4787035   | A | 0.0208  |
| rs79762284  | C | -0.0437 |
| rs7192394   | T | -0.0172 |
| rs10852598  | C | 0.0145  |
| rs111758800 | G | -0.0561 |
| rs13334167  | G | 0.019   |
| rs2191387   | T | 0.0207  |
| rs62052967  | G | 0.0176  |
| rs117855554 | T | -0.0554 |
| rs116914125 | T | -0.0521 |
| rs10492798  | C | 0.0381  |
| rs62041779  | T | -0.051  |
| rs72762937  | G | 0.0491  |
| rs28683564  | C | 0.0675  |
| rs12172835  | G | -0.0216 |
| rs75686592  | A | 0.0614  |
| rs75623060  | A | 0.0185  |
| rs113153079 | T | 0.0722  |
| rs146532237 | G | 0.0652  |
| rs80068856  | T | 0.0513  |
| rs6499608   | A | 0.0405  |
| rs113980523 | A | 0.0301  |
| rs9931378   | C | -0.0248 |
| rs17697705  | A | 0.0251  |
| rs3924153   | G | -0.0216 |
| rs11649419  | C | -0.0883 |

|             |   |         |
|-------------|---|---------|
| rs247822    | G | -0.0248 |
| rs7184921   | C | 0.0164  |
| rs2601817   | T | 0.0303  |
| rs7405184   | T | 0.0402  |
| rs13337080  | T | 0.0226  |
| rs7192254   | T | 0.0146  |
| rs34053564  | A | -0.0274 |
| rs4843884   | C | 0.0907  |
| rs75799357  | T | 0.0564  |
| rs78954327  | C | -0.0896 |
| rs137964763 | G | 0.0821  |
| rs280862    | G | 0.0142  |
| rs78029059  | A | -0.0261 |
| rs144798661 | C | -0.0749 |
| rs12923922  | G | -0.0177 |
| rs140368865 | T | 0.0505  |
| rs4423438   | C | 0.0275  |
| rs232076    | G | -0.1034 |
| rs12446473  | C | 0.0199  |
| rs920219    | T | -0.0143 |
| rs12598067  | C | -0.0225 |
| rs149541139 | T | -0.0481 |
| rs112285408 | T | 0.0664  |
| rs62033306  | A | -0.0156 |
| rs33965115  | A | 0.0598  |
| rs55653890  | T | 0.0247  |
| rs113922418 | G | 0.1498  |
| rs59995194  | C | 0.0465  |
| rs2343566   | A | 0.0702  |
| rs1345340   | G | 0.0197  |
| rs75170164  | C | -0.0866 |
| rs1433156   | C | 0.0204  |
| rs1436378   | A | 0.0225  |
| rs74004314  | G | 0.0533  |
| rs254326    | A | -0.0149 |
| rs79689771  | T | -0.0371 |
| rs247820    | C | -0.0158 |
| rs62032537  | C | -0.016  |
| rs9922306   | G | -0.019  |
| rs72791680  | C | -0.056  |
| rs113430018 | A | -0.0316 |
| rs74011942  | T | -0.0616 |
| rs2004103   | T | 0.0512  |
| rs111530436 | A | -0.0359 |
| rs55676547  | A | -0.0678 |
| rs7204115   | G | -0.1149 |
| rs743967    | C | -0.0438 |

|             |   |         |
|-------------|---|---------|
| rs12443697  | G | 0.0382  |
| rs4781459   | A | -0.0158 |
| rs12051384  | A | 0.0316  |
| rs79672113  | T | 0.0519  |
| rs11640681  | G | 0.0259  |
| rs12445146  | G | 0.0189  |
| rs117327142 | A | 0.0826  |
| rs112548986 | T | 0.1188  |
| rs4341744   | T | -0.0247 |
| rs12927924  | A | 0.02    |
| rs139176828 | T | -0.0571 |
| rs12934787  | A | 0.08    |
| rs143279928 | T | -0.0842 |
| rs72775286  | A | -0.0709 |
| rs142569765 | A | 0.0722  |
| rs4786783   | C | 0.0225  |
| rs76758447  | G | 0.0783  |
| rs13337763  | C | 0.0182  |
| rs11074956  | T | 0.0146  |
| rs34969047  | G | 0.1112  |
| rs1859201   | G | -0.0147 |
| rs12446380  | G | 0.0275  |
| rs78573178  | T | 0.0438  |
| rs9924811   | C | 0.0221  |
| rs17138992  | T | 0.024   |
| rs13338696  | A | -0.0209 |
| rs4485351   | C | 0.0153  |
| rs138999802 | G | -0.0651 |
| rs8054430   | A | 0.0451  |
| rs34939979  | T | -0.0412 |
| rs2362556   | T | -0.0159 |
| rs16944061  | T | 0.0405  |
| rs7187376   | C | -0.025  |
| rs56324453  | G | 0.0155  |
| rs4077825   | A | -0.0196 |
| rs4783493   | A | -0.0249 |
| rs56253328  | C | -0.0175 |
| rs17385564  | C | -0.067  |
| rs62048801  | G | 0.0803  |
| rs2937137   | G | 0.0235  |
| rs118188507 | T | 0.0536  |
| rs72802054  | A | -0.1015 |
| rs12447887  | G | 0.0517  |
| rs35254998  | A | -0.0274 |
| rs1466769   | A | -0.0484 |
| rs78040493  | G | 0.0614  |
| rs7199557   | T | -0.0256 |

|             |   |         |
|-------------|---|---------|
| rs117241582 | T | 0.0818  |
| rs12920186  | C | 0.0178  |
| rs74820883  | T | 0.0523  |
| rs75157714  | A | 0.0449  |
| rs72772416  | T | -0.0469 |
| rs75451096  | A | -0.0578 |
| rs4786750   | A | 0.0363  |
| rs118064539 | T | -0.0689 |
| rs4889001   | A | 0.0163  |
| rs78149933  | T | 0.0284  |
| rs1582324   | C | -0.0224 |
| rs27802     | T | -0.1242 |
| rs1493907   | G | 0.0435  |
| rs57623948  | A | 0.0612  |
| rs12930990  | G | 0.0881  |
| rs8053806   | A | 0.0137  |
| rs72782835  | T | -0.0399 |
| rs3784940   | A | -0.0551 |
| rs117111790 | T | 0.056   |
| rs825698    | T | 0.0149  |
| rs9932968   | A | 0.0341  |
| rs77178187  | G | 0.0549  |
| rs7206453   | C | -0.0262 |
| rs1493874   | T | -0.0153 |
| rs144165481 | A | -0.0907 |
| rs117464239 | T | -0.0651 |
| rs117046133 | T | 0.0852  |
| rs1394565   | C | -0.0172 |
| rs9926849   | T | 0.0336  |
| rs11076129  | C | 0.0165  |
| rs4788692   | C | 0.0248  |
| rs1067716   | T | 0.0405  |
| rs1971751   | A | -0.0146 |
| rs12443593  | A | -0.049  |
| rs57552582  | C | 0.0798  |
| rs1317756   | A | -0.0177 |
| rs12597786  | T | 0.0545  |
| rs10514618  | T | -0.0333 |
| rs76710611  | A | 0.0451  |
| rs78185736  | T | -0.0225 |
| rs79013468  | T | 0.0642  |
| rs80254456  | A | 0.036   |
| rs436536    | C | 0.0204  |
| rs72805462  | A | -0.0414 |
| rs111875646 | A | 0.0455  |
| rs117641741 | A | -0.0726 |
| rs12935531  | C | -0.0194 |



|             |   |         |
|-------------|---|---------|
| rs112215421 | C | -0.0567 |
| rs143936335 | T | -0.0954 |
| rs8057260   | G | -0.1009 |
| rs56050471  | C | -0.0598 |
| rs112573881 | A | 0.0976  |
| rs76288685  | G | -0.1256 |
| rs59195934  | C | 0.019   |
| rs75537959  | A | -0.033  |
| rs148908099 | T | -0.068  |
| rs62030317  | G | 0.0215  |
| rs78628882  | C | -0.0424 |
| rs74004346  | G | 0.0806  |
| rs151134498 | A | 0.1372  |
| rs76553948  | C | -0.0684 |
| rs388905    | G | -0.0149 |
| rs140384238 | T | -0.0799 |
| rs111956155 | A | -0.0636 |
| rs112220650 | C | -0.0377 |
| rs6500586   | C | 0.0326  |
| rs76467360  | T | 0.0728  |
| rs77250474  | A | -0.0249 |
| rs78910009  | T | 0.0456  |
| rs77391136  | A | 0.0373  |
| rs4783108   | A | 0.0184  |
| rs34943209  | C | 0.0168  |
| rs140438017 | G | -0.0425 |
| rs78283523  | T | 0.064   |
| rs118114542 | A | 0.0857  |
| rs117469683 | T | 0.0845  |
| rs76170857  | T | -0.0409 |
| rs140004458 | G | 0.0804  |
| rs28510778  | T | -0.0341 |
| rs2716598   | C | -0.021  |
| rs143675147 | G | -0.0785 |
| rs138329562 | C | 0.0927  |
| rs144646964 | A | 0.116   |
| rs62037235  | G | -0.0212 |
| rs17189653  | C | 0.0147  |
| rs76837213  | G | 0.0567  |
| rs149735375 | T | -0.0476 |
| rs11642935  | G | 0.0382  |
| rs7206549   | C | 0.0231  |
| rs150993479 | A | -0.0767 |
| rs1876970   | A | -0.0192 |
| rs12921085  | A | -0.0196 |
| rs7198054   | G | -0.0283 |
| rs12931864  | A | -0.0152 |

|             |   |         |
|-------------|---|---------|
| rs12921496  | T | 0.0286  |
| rs11865503  | C | -0.0615 |
| rs7204495   | A | 0.014   |
| rs3096191   | T | 0.0256  |
| rs6499762   | A | 0.0215  |
| rs117606481 | G | -0.0817 |
| rs117906848 | C | -0.1033 |
| rs145437132 | A | -0.0283 |
| rs112548374 | C | 0.0413  |
| rs117090245 | T | -0.0331 |
| rs111634911 | T | -0.0867 |
| rs71390811  | A | -0.0487 |
| rs12599645  | G | -0.0147 |
| rs74651519  | C | -0.0324 |
| rs139724325 | T | -0.0418 |
| rs67276071  | T | 0.023   |
| rs9937702   | C | 0.015   |
| rs117043951 | C | -0.0768 |
| rs76781615  | C | 0.1151  |
| rs755466    | A | 0.1195  |
| rs8047011   | A | 0.0171  |
| rs144010943 | T | -0.108  |
| rs7499966   | A | 0.0143  |
| rs78391458  | A | -0.0645 |
| rs74832380  | G | 0.0396  |
| rs2639313   | T | -0.0249 |
| rs138515721 | T | -0.0936 |
| rs112591452 | T | -0.041  |
| rs1862813   | A | -0.0215 |
| rs72770312  | T | -0.0696 |
| rs79314905  | T | -0.0954 |
| rs4889459   | C | 0.0144  |
| rs2051738   | C | -0.015  |
| rs10468261  | G | 0.0578  |
| rs16959572  | T | 0.0284  |
| rs8058267   | C | -0.0167 |
| rs79706995  | G | -0.0288 |
| rs72765821  | T | -0.0236 |
| rs16946583  | T | 0.0221  |
| rs4784681   | A | 0.0369  |
| rs4243227   | C | 0.0212  |
| rs142019380 | A | 0.0886  |
| rs117214654 | G | 0.0938  |
| rs28490191  | C | 0.0164  |
| rs35708016  | A | 0.0313  |
| rs62012735  | G | 0.0237  |
| rs1971879   | A | -0.0144 |

|             |   |         |
|-------------|---|---------|
| rs148491338 | A | -0.0733 |
| rs28507806  | C | 0.0472  |
| rs141401405 | A | 0.0701  |
| rs35359694  | C | 0.0247  |
| rs78241137  | T | -0.0403 |
| rs7191520   | G | -0.0148 |
| rs117637377 | A | 0.1255  |
| rs118069357 | G | 0.0447  |
| rs143345668 | C | -0.0149 |
| rs1876344   | C | -0.0139 |
| rs12935025  | A | 0.0183  |
| rs11865885  | G | 0.0215  |
| rs4785891   | A | -0.0135 |
| rs117000590 | T | 0.0749  |
| rs117313605 | T | -0.1159 |
| rs79161751  | G | -0.0424 |
| rs72787542  | A | 0.0426  |
| rs74449656  | T | 0.0877  |
| rs12185167  | T | -0.0229 |
| rs73497289  | A | 0.043   |
| rs75111129  | G | 0.0755  |
| rs169644    | C | -0.0648 |
| rs115056926 | G | -0.0616 |
| rs1021478   | A | 0.036   |
| rs76520398  | T | -0.0436 |
| rs2052231   | G | 0.0375  |
| rs9923036   | G | -0.0156 |
| rs116972011 | T | -0.0576 |
| rs113170192 | C | 0.0421  |
| rs16966937  | T | 0.0284  |
| rs145970593 | C | -0.1119 |
| rs76660912  | G | -0.0359 |
| rs11646484  | A | 0.0136  |
| rs11648675  | C | 0.0201  |
| rs75316545  | C | -0.0651 |
| rs118008654 | A | -0.0485 |
| rs8060673   | G | 0.0136  |
| rs75926039  | G | 0.0485  |
| rs143984838 | A | -0.055  |
| rs618976    | A | 0.0159  |
| rs27817     | A | -0.0723 |
| rs12597648  | G | -0.0318 |
| rs112018017 | C | -0.0767 |
| rs1876340   | C | 0.0215  |
| rs7499944   | A | -0.0145 |
| rs62043240  | A | 0.0649  |
| rs1839854   | T | -0.0182 |

|             |   |         |
|-------------|---|---------|
| rs72776511  | G | -0.0564 |
| rs72767575  | G | -0.0359 |
| rs4591143   | A | -0.0202 |
| rs62017866  | C | 0.034   |
| rs9931021   | A | 0.0224  |
| rs4784265   | G | 0.0158  |
| rs17671869  | A | -0.0134 |
| rs2333773   | A | 0.0183  |
| rs12373039  | G | -0.0233 |
| rs72788827  | C | 0.0468  |
| rs77438245  | T | 0.0597  |
| rs11150075  | T | 0.0226  |
| rs61746912  | T | -0.0435 |
| rs257885    | C | -0.0362 |
| rs6499842   | A | -0.0506 |
| rs74988980  | G | -0.039  |
| rs75533087  | A | 0.0593  |
| rs34093172  | G | 0.0467  |
| rs74011370  | A | 0.0606  |
| rs17638585  | C | 0.0183  |
| rs76140499  | C | 0.0333  |
| rs247392    | A | -0.0213 |
| rs458544    | G | 0.0168  |
| rs4785419   | T | 0.0163  |
| rs36112963  | C | 0.0176  |
| rs118132852 | T | -0.0386 |
| rs117713333 | C | 0.059   |
| rs62024965  | T | -0.0423 |
| rs12444544  | G | 0.0153  |
| rs232080    | A | -0.0184 |
| rs77588067  | C | -0.0217 |
| rs4786803   | G | 0.0169  |
| rs4783954   | A | 0.0134  |
| rs8055931   | A | 0.0189  |
| rs79197571  | G | 0.0714  |
| rs11643692  | C | -0.0992 |
| rs78450932  | T | -0.0982 |
| rs2074801   | G | 0.0174  |
| rs117551250 | C | -0.085  |
| rs7498806   | C | -0.0602 |
| rs12923577  | T | 0.0578  |
| rs57025386  | C | -0.1013 |
| rs2665328   | C | 0.0198  |
| rs8051041   | A | -0.0224 |
| rs113751215 | G | 0.0332  |
| rs117315143 | G | -0.0812 |
| rs113571946 | G | 0.0219  |

|             |   |         |
|-------------|---|---------|
| rs10514595  | G | -0.0166 |
| rs129989    | T | 0.0498  |
| rs79305536  | G | 0.0655  |
| rs62035365  | A | -0.0176 |
| rs76508128  | C | -0.0429 |
| rs72790915  | C | 0.0639  |
| rs41325148  | G | -0.0355 |
| rs72770087  | G | 0.053   |
| rs72770838  | G | 0.0345  |
| rs77819201  | G | 0.1317  |
| rs1423851   | G | 0.0189  |
| rs10083806  | G | -0.0196 |
| rs4506892   | A | 0.0161  |
| rs4577103   | A | 0.0394  |
| rs115720863 | A | -0.0411 |
| rs58392751  | T | -0.0482 |
| rs7191934   | T | -0.0537 |
| rs80057717  | C | -0.0294 |
| rs138959556 | T | -0.0533 |
| rs151694    | T | -0.0348 |
| rs13336936  | T | -0.0471 |
| rs1582976   | C | -0.016  |
| rs138914755 | T | -0.0933 |
| rs253141    | A | 0.0305  |
| rs111908928 | T | -0.07   |
| rs11646979  | T | -0.0792 |
| rs117845943 | G | 0.047   |
| rs72802178  | C | -0.0945 |
| rs17212761  | T | 0.0542  |
| rs187715    | C | -0.0315 |
| rs11465486  | T | -0.0463 |
| rs17139200  | G | -0.0141 |
| rs112941302 | A | -0.082  |
| rs117760181 | C | -0.072  |
| rs4984702   | C | 0.0484  |
| rs62048555  | T | 0.0383  |
| rs12599425  | G | 0.0258  |
| rs11648740  | C | -0.0261 |
| rs74630995  | C | 0.1029  |
| rs11645238  | A | 0.0273  |
| rs1909332   | T | 0.0175  |
| rs117458916 | A | 0.0199  |
| rs12919591  | G | -0.02   |
| rs7206825   | C | 0.0171  |
| rs7197878   | C | 0.0165  |
| rs55734405  | G | 0.151   |
| rs11648295  | T | -0.0236 |

|             |   |         |
|-------------|---|---------|
| rs1976497   | T | 0.0458  |
| rs4786808   | A | 0.0314  |
| rs13338616  | T | -0.0236 |
| rs74808067  | T | 0.0377  |
| rs7184728   | T | 0.0229  |
| rs247844    | G | 0.0196  |
| rs140300237 | T | -0.0848 |
| rs12598305  | T | -0.0197 |
| rs115424610 | G | -0.1104 |
| rs74030367  | G | 0.0329  |
| rs1895520   | C | 0.0217  |
| rs2608185   | C | 0.0168  |
| rs145339816 | C | -0.0538 |
| rs147349839 | C | 0.04    |
| rs4541067   | C | -0.0269 |
| rs2729585   | A | -0.0167 |
| rs4073313   | G | -0.0468 |
| rs77130697  | T | 0.0207  |
| rs138965217 | A | -0.0606 |
| rs2550413   | A | -0.0151 |
| rs58568604  | C | 0.0443  |
| rs34416434  | T | -0.0356 |
| rs4785765   | T | -0.0216 |
| rs213653    | A | -0.0171 |
| rs900759    | C | 0.0298  |
| rs62028787  | G | 0.021   |
| rs8062056   | G | 0.014   |
| rs150934379 | A | 0.0878  |
| rs16961631  | C | 0.0156  |
| rs74561415  | T | -0.0569 |
| rs142547096 | G | 0.0815  |
| rs62030280  | C | -0.0698 |
| rs57937157  | C | -0.0471 |
| rs59635223  | T | -0.0152 |
| rs56094665  | A | 0.0163  |
| rs7359465   | G | -0.1057 |
| rs4888945   | A | -0.0154 |
| rs76616385  | A | -0.06   |
| rs72807060  | G | 0.0472  |
| rs821220    | A | 0.0184  |
| rs1423797   | G | -0.0141 |
| rs930094    | G | -0.014  |
| rs72791208  | T | 0.1055  |
| rs143470    | C | -0.0134 |
| rs62032308  | G | 0.0192  |
| rs72775823  | C | 0.0596  |
| rs55732292  | T | 0.0277  |

|             |   |         |
|-------------|---|---------|
| rs144282094 | T | -0.1058 |
| rs34046256  | A | -0.0794 |
| rs369444    | C | -0.0276 |
| rs62029773  | A | 0.0233  |
| rs2014633   | A | -0.0479 |
| rs9673568   | T | 0.0831  |
| rs17833272  | C | -0.0399 |
| rs78524469  | G | -0.0289 |
| rs7194409   | A | 0.0208  |
| rs11075962  | T | -0.0148 |
| rs76924295  | C | 0.0349  |
| rs149921569 | G | 0.0364  |
| rs151781    | T | -0.0643 |
| rs734309    | T | 0.0193  |
| rs6539964   | A | 0.0869  |
| rs56143939  | T | -0.0348 |
| rs75206545  | T | 0.0726  |
| rs143060430 | T | 0.0581  |
| rs11640971  | A | 0.0203  |
| rs62048141  | C | 0.0503  |
| rs7189651   | G | 0.0134  |
| rs79697483  | T | -0.0804 |
| rs561058    | G | 0.0392  |
| rs11640126  | T | 0.0467  |
| rs55776423  | T | 0.0443  |
| rs12445527  | A | -0.0356 |
| rs7206309   | C | -0.0158 |
| rs4595798   | T | -0.0141 |
| rs11863978  | A | 0.0549  |
| rs12599535  | C | 0.032   |
| rs7189175   | A | -0.02   |
| rs75532289  | T | -0.0674 |
| rs116969413 | A | -0.0438 |
| rs243866    | A | 0.0154  |
| rs10871431  | C | -0.0142 |
| rs12444142  | A | -0.02   |
| rs8062674   | T | -0.0327 |
| rs116437101 | A | 0.0472  |
| rs17854132  | A | 0.023   |
| rs1084545   | A | 0.0156  |
| rs117591612 | G | 0.0285  |
| rs117431729 | G | -0.0613 |
| rs72776587  | T | 0.0671  |
| rs11642633  | C | -0.0176 |
| rs141572029 | T | 0.0471  |
| rs118029542 | A | -0.0773 |
| rs4783333   | C | -0.0873 |

|             |   |         |
|-------------|---|---------|
| rs8058168   | G | -0.0138 |
| rs16957019  | A | 0.0651  |
| rs116994841 | G | 0.0738  |
| rs149901472 | T | 0.0409  |
| rs66463231  | T | 0.0186  |
| rs322582    | C | 0.0441  |
| rs36546     | C | -0.013  |
| rs144458449 | A | -0.0716 |
| rs10521045  | T | 0.043   |
| rs35538490  | G | -0.025  |
| rs12445218  | C | 0.0302  |
| rs144729088 | A | -0.0628 |
| rs2968421   | C | 0.017   |
| rs117019078 | G | -0.093  |
| rs7193693   | G | 0.0197  |
| rs7192119   | T | -0.0306 |
| rs58865364  | A | 0.0368  |
| rs4303487   | G | -0.0802 |
| rs12924548  | G | -0.07   |
| rs62025432  | G | -0.0322 |
| rs111775775 | A | -0.0329 |
| rs12920537  | G | 0.0162  |
| rs141573948 | A | 0.0876  |
| rs1012149   | G | -0.0134 |
| rs711757    | G | 0.0139  |
| rs9929790   | G | 0.0568  |
| rs138027128 | T | -0.0534 |
| rs146077425 | T | -0.0614 |
| rs9926767   | G | 0.027   |
| rs77791905  | A | 0.0382  |
| rs1436116   | A | -0.044  |
| rs79745453  | T | -0.0622 |
| rs112334289 | T | 0.1141  |
| rs1125270   | G | 0.013   |
| rs77939280  | A | 0.028   |
| rs149437266 | T | 0.0508  |
| rs78050824  | G | -0.0524 |
| rs72783071  | T | -0.0698 |
| rs78177670  | G | -0.0949 |
| rs59028085  | T | 0.035   |
| rs4888035   | G | -0.0173 |
| rs71395331  | G | -0.0916 |
| rs12922668  | C | 0.0133  |
| rs58458111  | A | 0.0193  |
| rs17820328  | G | -0.0328 |
| rs117047936 | T | 0.0735  |
| rs79354072  | A | -0.0495 |



|             |   |         |
|-------------|---|---------|
| rs72833370  | C | 0.0588  |
| rs74955633  | A | 0.0431  |
| rs35006402  | A | 0.029   |
| rs12928333  | C | 0.0656  |
| rs34721885  | C | -0.0947 |
| rs8061359   | T | -0.0134 |
| rs34186827  | G | -0.0204 |
| rs7202491   | A | -0.0454 |
| rs116853950 | T | -0.0604 |
| rs9652580   | T | -0.0134 |
| rs72808553  | C | 0.0321  |
| rs117010271 | T | -0.1021 |
| rs62023831  | G | 0.018   |
| rs9925929   | C | 0.0315  |
| rs147464145 | T | -0.0914 |
| rs9302542   | G | -0.0131 |
| rs2872713   | G | -0.017  |
| rs73580099  | G | 0.0405  |
| rs214242    | A | 0.0435  |
| rs12385992  | C | 0.0166  |
| rs141485426 | T | -0.0842 |
| rs116895602 | G | 0.0919  |
| rs117473575 | A | -0.0345 |
| rs7193804   | G | 0.0132  |
| rs117060514 | A | -0.0757 |
| rs80176212  | T | -0.0693 |
| rs118066802 | T | -0.0567 |
| rs138856939 | A | 0.0733  |
| rs147984054 | C | -0.0396 |
| rs72796381  | T | -0.0773 |
| rs12934188  | A | 0.0168  |
| rs59808819  | A | 0.0209  |
| rs62030839  | T | -0.0312 |
| rs59117682  | A | -0.0579 |
| rs145314599 | G | 0.0967  |
| rs4486873   | A | 0.0135  |
| rs78061275  | T | -0.0463 |
| rs56385136  | A | 0.0233  |
| rs3095514   | G | 0.0214  |
| rs72778454  | A | 0.0174  |
| rs74960539  | G | -0.0269 |
| rs11643432  | G | 0.0151  |
| rs72811460  | T | -0.0927 |
| rs60098295  | C | 0.0387  |
| rs55941514  | T | -0.0563 |
| rs55729304  | T | -0.046  |
| rs28533008  | T | -0.0167 |

|             |   |         |
|-------------|---|---------|
| rs117399047 | A | 0.0806  |
| rs138345143 | G | 0.064   |
| rs142937161 | T | -0.0718 |
| rs75416041  | T | 0.0557  |
| rs151249241 | C | -0.0266 |
| rs76834203  | T | -0.0316 |
| rs76204932  | A | -0.055  |
| rs17497384  | T | 0.019   |
| rs12922605  | A | 0.0435  |
| rs113965872 | C | -0.0791 |
| rs117443101 | A | -0.0486 |
| rs28475555  | C | -0.023  |
| rs78778730  | A | 0.0232  |
| rs145010223 | C | -0.0798 |
| rs2344565   | C | 0.0163  |
| rs28655843  | G | -0.0288 |
| rs4787747   | T | -0.014  |
| rs118040734 | A | 0.0498  |
| rs11643841  | C | -0.0179 |
| rs113579348 | A | 0.0484  |
| rs71390829  | A | -0.025  |
| rs79408723  | C | -0.091  |
| rs11645133  | A | -0.0247 |
| rs4784441   | G | -0.0133 |
| rs4783016   | A | -0.0164 |
| rs149465683 | C | -0.0674 |
| rs3751877   | C | -0.0208 |
| rs74545004  | T | 0.0441  |
| rs1833990   | G | -0.0191 |
| rs7201128   | T | 0.0135  |
| rs880312    | A | 0.0391  |
| rs143948970 | C | -0.0723 |
| rs7200753   | C | -0.0244 |
| rs28634651  | C | 0.0144  |
| rs77335867  | A | -0.0597 |
| rs149000635 | A | 0.1011  |
| rs149902547 | G | -0.0537 |
| rs117496362 | C | 0.0873  |
| rs62027458  | A | -0.0477 |
| rs79858173  | G | 0.056   |
| rs2279407   | A | -0.0401 |
| rs2925999   | C | 0.0136  |
| rs61472141  | A | 0.0738  |
| rs1291716   | G | -0.0241 |
| rs146967911 | G | 0.0361  |
| rs10451087  | A | -0.0167 |
| rs56003624  | C | 0.0516  |

|             |   |         |
|-------------|---|---------|
| rs113897180 | G | 0.0376  |
| rs9937838   | T | 0.028   |
| rs72783027  | C | 0.0648  |
| rs117512375 | C | -0.0813 |
| rs75654981  | T | 0.0461  |
| rs2617841   | G | -0.014  |
| rs12923273  | G | 0.0169  |
| rs117604838 | A | -0.0606 |
| rs12926800  | A | 0.0364  |
| rs144952624 | T | 0.0868  |
| rs2560917   | T | 0.0182  |
| rs75825892  | T | 0.0469  |
| rs9937403   | C | 0.0134  |
| rs76707698  | T | 0.0633  |
| rs117177303 | C | -0.0788 |
| rs117571586 | T | -0.0823 |
| rs8060861   | G | -0.0144 |
| rs68129860  | G | 0.0216  |
| rs12447408  | A | 0.0181  |
| rs3923445   | T | 0.032   |
| rs2966316   | T | -0.0335 |
| rs77407451  | A | 0.0254  |
| rs7184472   | T | -0.0188 |
| rs11864552  | C | -0.0137 |
| rs11641877  | T | 0.0149  |
| rs55805707  | A | 0.046   |
| rs74809323  | G | 0.0601  |
| rs145832776 | A | 0.0679  |
| rs12232423  | A | -0.028  |
| rs118111365 | A | 0.0309  |
| rs117246740 | T | -0.0651 |
| rs150839028 | G | 0.0856  |
| rs117131367 | T | 0.0391  |
| rs13331007  | T | -0.013  |
| rs12921168  | T | -0.0409 |
| rs8047061   | C | -0.014  |
| rs117175876 | G | -0.04   |
| rs77636060  | C | 0.0784  |
| rs72791398  | C | -0.0777 |
| rs7195620   | A | -0.0162 |
| rs75547528  | A | 0.0448  |
| rs117297911 | A | 0.0462  |
| rs2925050   | A | -0.0145 |
| rs9937853   | C | 0.0193  |
| rs1849239   | T | -0.0157 |
| rs16975889  | C | 0.0153  |
| rs16948642  | G | -0.027  |

|             |   |         |
|-------------|---|---------|
| rs75749740  | A | -0.078  |
| rs11076699  | G | 0.0259  |
| rs117015620 | T | -0.0431 |
| rs4335776   | C | -0.021  |
| rs146988770 | C | -0.0576 |
| rs2269786   | C | 0.0182  |
| rs147228103 | A | 0.0686  |
| rs117535546 | C | 0.0734  |
| rs1981886   | C | -0.0398 |
| rs62051952  | G | 0.0311  |
| rs138253174 | T | 0.0995  |
| rs13336538  | G | 0.0151  |
| rs66909108  | A | -0.0172 |
| rs117206583 | A | 0.0731  |
| rs9935274   | A | 0.0725  |
| rs12923917  | G | -0.0146 |
| rs12599043  | A | -0.0166 |
| rs4781693   | T | -0.0161 |
| rs12924361  | T | -0.0168 |
| rs117002386 | A | 0.0895  |
| rs139081703 | A | -0.0965 |
| rs74028318  | A | -0.0221 |
| rs821212    | G | -0.0155 |
| rs112967633 | G | -0.033  |
| rs55865837  | A | 0.0232  |
| rs4782026   | A | 0.0159  |
| rs75196212  | T | 0.0242  |
| rs76664696  | T | -0.0593 |
| rs76637010  | C | -0.0538 |
| rs1476955   | A | -0.0167 |
| rs215580    | G | 0.0618  |
| rs198178    | C | 0.013   |
| rs12926446  | T | -0.017  |
| rs1445451   | C | -0.0204 |
| rs117274198 | T | -0.0275 |
| rs117963628 | C | 0.0581  |
| rs79543848  | T | -0.0307 |
| rs75018645  | G | -0.0238 |
| rs71390714  | G | -0.1137 |
| rs79030237  | G | 0.0301  |
| rs35823763  | A | 0.0816  |
| rs4486936   | T | -0.0231 |
| rs55704077  | A | 0.0237  |
| rs73519272  | T | -0.0657 |
| rs4783992   | G | 0.0152  |
| rs148157402 | T | -0.0491 |
| rs71404074  | C | -0.0882 |

|             |   |         |
|-------------|---|---------|
| rs118056133 | A | -0.0833 |
| rs76040349  | A | -0.0825 |
| rs1054002   | T | 0.095   |
| rs1966512   | G | -0.02   |
| rs12919005  | G | 0.0342  |
| rs76708035  | G | 0.0719  |
| rs55656608  | A | -0.0147 |
| rs80214069  | T | 0.0457  |
| rs17136316  | G | 0.0199  |
| rs11649615  | A | -0.0201 |
| rs62030298  | A | -0.0716 |
| rs35058114  | A | 0.0187  |
| rs117036043 | A | 0.0675  |
| rs76279628  | T | 0.0773  |
| rs80311620  | C | 0.0339  |
| rs77512330  | T | -0.0525 |
| rs11642176  | A | 0.0142  |
| rs144078509 | T | 0.1222  |
| rs78959735  | G | -0.0768 |
| rs17677211  | G | -0.0276 |
| rs34220937  | T | 0.0135  |
| rs17501331  | G | -0.0213 |
| rs139622147 | A | 0.0591  |
| rs4788595   | A | 0.0148  |
| rs41503549  | A | 0.0175  |
| rs4393563   | T | 0.0356  |
| rs117800443 | A | 0.0742  |
| rs8054788   | T | -0.0229 |
| rs61747750  | T | 0.0874  |
| rs55862943  | C | 0.0629  |
| rs144660294 | T | 0.0738  |
| rs2550736   | A | -0.0181 |
| rs61997250  | T | -0.0441 |
| rs11647578  | C | 0.0481  |
| rs11644892  | G | 0.039   |
| rs74638417  | G | -0.069  |
| rs11074976  | A | -0.021  |
| rs118003907 | C | -0.0475 |
| rs7187230   | G | -0.0142 |
| rs7186634   | G | -0.0129 |
| rs77411993  | C | -0.0253 |
| rs57103409  | C | 0.0141  |
| rs4887934   | A | -0.0155 |
| rs9928191   | T | 0.0127  |
| rs76696192  | T | 0.0443  |
| rs60664927  | G | 0.0356  |
| rs71386860  | T | -0.0711 |

|             |   |         |
|-------------|---|---------|
| rs76825359  | C | 0.0292  |
| rs12447746  | A | -0.023  |
| rs117185371 | T | 0.0701  |
| rs12925084  | C | 0.0145  |
| rs256593    | A | 0.076   |
| rs117833061 | T | 0.0426  |
| rs142264806 | A | -0.0798 |
| rs9922187   | A | 0.0143  |
| rs75629078  | G | 0.0635  |
| rs2966117   | T | 0.0128  |
| rs244824    | C | -0.0179 |
| rs12447368  | A | 0.0171  |
| rs35902855  | T | 0.0521  |
| rs111679101 | A | -0.0545 |
| rs112570731 | G | -0.0494 |
| rs118057590 | A | 0.0823  |
| rs28683646  | A | 0.0186  |
| rs144187087 | A | -0.0776 |
| rs117329105 | C | -0.0506 |
| rs12102448  | A | 0.0134  |
| rs1362630   | G | 0.0153  |
| rs34429025  | A | 0.061   |
| rs79769349  | C | -0.0338 |
| rs3909529   | C | 0.065   |
| rs1110474   | T | -0.0268 |
| rs74713459  | C | -0.0207 |
| rs10500521  | C | 0.0201  |
| rs75499067  | C | 0.0306  |
| rs117186856 | T | -0.079  |
| rs140929816 | T | -0.0551 |
| rs138194494 | C | -0.0847 |
| rs9941092   | A | 0.018   |
| rs763800    | G | -0.0288 |
| rs117399237 | A | 0.0943  |
| rs12930421  | T | 0.013   |
| rs1109876   | C | 0.0136  |
| rs11864970  | G | -0.0256 |
| rs55762309  | T | -0.0213 |
| rs140724868 | G | -0.0279 |
| rs72804693  | G | 0.0322  |
| rs113969595 | A | -0.0523 |
| rs4784599   | C | 0.032   |
| rs12598271  | C | -0.0136 |
| rs13334441  | A | 0.0332  |
| rs75099244  | A | 0.0421  |
| rs62050282  | T | -0.0468 |
| rs77087243  | A | 0.089   |

|             |   |         |
|-------------|---|---------|
| rs6497791   | T | 0.0127  |
| rs11648997  | A | 0.0583  |
| rs150763239 | T | 0.0674  |
| rs141854787 | T | -0.0508 |
| rs146922947 | A | -0.0576 |
| rs117231356 | A | -0.0814 |
| rs17273402  | T | 0.0486  |
| rs9635572   | G | 0.0166  |
| rs77878563  | G | 0.0651  |
| rs9923255   | T | 0.0144  |
| rs62040879  | G | -0.02   |
| rs72802318  | C | -0.0224 |
| rs137938669 | G | -0.0428 |
| rs8063045   | C | 0.0144  |
| rs9931811   | G | -0.0172 |
| rs4368160   | A | 0.0141  |
| rs117645803 | C | 0.0901  |
| rs2239331   | A | 0.0128  |
| rs143448250 | A | 0.0609  |
| rs11117207  | C | -0.0608 |
| rs57326241  | A | 0.0293  |
| rs7198504   | C | -0.0193 |
| rs115845274 | T | -0.0404 |
| rs116975277 | C | -0.0603 |
| rs62039775  | T | -0.0218 |
| rs1873423   | C | -0.0206 |
| rs55814618  | C | 0.0928  |
| rs62030969  | A | -0.0201 |
| rs72787590  | T | -0.0632 |
| rs1023627   | A | -0.0183 |
| rs872963    | C | -0.0415 |
| rs4781997   | A | -0.0275 |
| rs11859021  | T | 0.0211  |
| rs2235579   | T | 0.0136  |
| rs7196097   | C | 0.0151  |
| rs4784018   | A | -0.0236 |
| rs4788807   | T | -0.0271 |
| rs7203166   | G | 0.0192  |
| rs16953969  | G | 0.0363  |
| rs147721208 | C | 0.0549  |
| rs76238468  | C | -0.0198 |
| rs79500103  | G | -0.0693 |
| rs77622927  | A | -0.0708 |
| rs74966730  | G | -0.0718 |
| rs77649101  | C | 0.0696  |
| rs60339402  | A | -0.0656 |
| rs114509319 | G | -0.03   |

|             |   |         |
|-------------|---|---------|
| rs72789141  | T | -0.0462 |
| rs12446305  | G | 0.0668  |
| rs142075276 | C | -0.0603 |
| rs11075521  | T | 0.0174  |
| rs8058615   | T | 0.0125  |
| rs17674860  | T | -0.0167 |
| rs145565470 | A | 0.0676  |
| rs2925058   | G | 0.0312  |
| rs151690    | C | 0.0339  |
| rs17742774  | G | 0.0139  |
| rs35021625  | T | 0.0682  |
| rs150164272 | G | -0.1054 |
| rs143770835 | T | 0.0846  |
| rs117545075 | A | 0.0495  |
| rs35697347  | A | -0.0409 |
| rs117527684 | G | -0.0878 |
| rs62027733  | A | 0.0284  |
| rs139684715 | T | 0.0649  |
| rs62053580  | G | 0.0203  |
| rs78392079  | G | -0.0315 |
| rs78189354  | A | -0.0632 |
| rs67064051  | C | -0.0231 |
| rs13338118  | C | 0.0142  |
| rs111668544 | G | 0.0602  |
| rs958999    | T | -0.016  |
| rs114178038 | T | 0.0297  |
| rs10153117  | T | -0.0477 |
| rs7199607   | G | 0.0488  |
| rs7500772   | A | -0.0243 |
| rs12598130  | G | -0.0392 |
| rs76097811  | C | -0.042  |
| rs2541709   | T | 0.0262  |
| rs71386438  | T | -0.0133 |
| rs9930132   | A | 0.0131  |
| rs62037247  | T | 0.0256  |
| rs970856    | T | -0.0121 |
| rs141647926 | G | 0.0727  |
| rs62054759  | A | -0.0202 |
| rs34674046  | G | -0.0479 |
| rs12921654  | G | -0.0547 |
| rs11149837  | T | -0.0201 |
| rs115172853 | C | 0.0291  |
| rs11648829  | G | 0.0154  |
| rs16948645  | A | -0.0521 |
| rs45518731  | T | 0.0522  |
| rs72805903  | T | 0.0337  |
| rs62046951  | T | 0.0286  |



|             |   |         |
|-------------|---|---------|
| rs117587551 | G | 0.0292  |
| rs3176415   | A | 0.0241  |
| rs72806994  | T | -0.0637 |
| rs11861701  | T | 0.0507  |
| rs74671663  | G | -0.0205 |
| rs72788013  | G | -0.0206 |
| rs299955    | G | -0.0199 |
| rs62044715  | T | 0.0994  |
| rs111939922 | A | 0.0296  |
| rs761059    | A | -0.0213 |
| rs9922150   | T | -0.0173 |
| rs62041963  | T | 0.0166  |
| rs118122877 | G | 0.0524  |
| rs7204846   | A | -0.0178 |
| rs11648594  | T | -0.0261 |
| rs78769777  | T | -0.0197 |
| rs6501015   | A | -0.0171 |
| rs16939945  | T | 0.055   |
| rs80256258  | G | -0.0303 |
| rs2873562   | G | -0.021  |
| rs9936574   | G | 0.0322  |
| rs12599334  | A | 0.0325  |
| rs147409759 | T | -0.0805 |
| rs541912    | T | 0.0289  |
| rs4074240   | T | -0.0274 |
| rs76593010  | T | -0.0771 |
| rs78538440  | A | -0.0375 |
| rs72807747  | G | 0.0543  |
| rs749674    | C | 0.0287  |
| rs31070     | T | 0.0144  |
| rs28534725  | A | -0.0557 |
| rs138016528 | A | -0.0431 |
| rs2968430   | G | -0.0237 |
| rs34015424  | T | -0.0289 |
| rs148225977 | A | 0.0659  |
| rs149458216 | A | 0.0553  |
| rs179049    | C | 0.0356  |
| rs10521219  | C | 0.0254  |
| rs138043508 | A | -0.0382 |
| rs2005100   | T | -0.0184 |
| rs72795702  | T | -0.0381 |
| rs13339222  | C | -0.0318 |
| rs4782706   | T | -0.0441 |
| rs76785746  | A | -0.0533 |
| rs8052743   | C | -0.0132 |
| rs4636916   | T | -0.0425 |
| rs1806865   | T | 0.0196  |

|             |   |         |
|-------------|---|---------|
| rs117766418 | G | 0.0626  |
| rs76205205  | G | -0.0388 |
| rs4072925   | A | 0.0124  |
| rs11641578  | G | 0.016   |
| rs143581801 | C | 0.0837  |
| rs78610190  | T | 0.0749  |
| rs76547808  | T | -0.0633 |
| rs74393439  | A | 0.043   |
| rs11860845  | C | 0.0143  |
| rs80214318  | G | -0.0588 |
| rs11648890  | A | 0.0169  |
| rs34890241  | A | 0.0296  |
| rs34170408  | T | -0.0229 |
| rs1122794   | A | -0.0192 |
| rs6497959   | G | 0.0209  |
| rs112069596 | A | 0.0178  |
| rs140133389 | C | 0.0337  |
| rs117765256 | C | 0.1061  |
| rs8053739   | T | -0.0366 |
| rs4888977   | T | 0.0182  |
| rs146711895 | T | 0.0789  |
| rs1362330   | A | 0.0127  |
| rs1038888   | T | -0.0119 |
| rs113119427 | T | -0.0672 |
| rs2266205   | T | -0.0169 |
| rs112300527 | T | -0.0427 |
| rs301627    | G | 0.0124  |
| rs4553621   | G | -0.012  |
| rs77335772  | A | -0.1347 |
| rs74902078  | T | 0.1116  |
| rs79463251  | G | -0.0809 |
| rs77276051  | C | 0.0337  |
| rs147503320 | T | 0.0953  |
| rs72790026  | A | -0.0412 |
| rs3852750   | T | -0.0162 |
| rs4782509   | T | -0.0132 |
| rs77712507  | A | -0.0255 |
| rs139469216 | G | -0.0816 |
| rs28716110  | C | 0.0416  |
| rs200277    | A | 0.0475  |
| rs7195893   | T | 0.0394  |
| rs73604744  | A | 0.0472  |
| rs2738717   | C | 0.0174  |
| rs146347288 | A | 0.0637  |
| rs79645868  | C | -0.0922 |
| rs61692027  | C | -0.0229 |
| rs8059175   | C | -0.0267 |

|             |   |         |
|-------------|---|---------|
| rs72790338  | T | -0.0734 |
| rs72780195  | A | 0.0521  |
| rs9924457   | G | -0.0136 |
| rs4785147   | G | -0.1112 |
| rs117737476 | A | -0.1025 |
| rs72777831  | G | 0.018   |
| rs2336439   | G | 0.0624  |
| rs2416375   | C | -0.0119 |
| rs11641762  | G | -0.0143 |
| rs11640666  | A | 0.0316  |
| rs138131206 | A | 0.065   |
| rs10775350  | G | 0.0143  |
| rs56242879  | A | -0.0622 |
| rs34733313  | T | -0.0818 |
| rs76378162  | T | 0.0614  |
| rs3042      | C | -0.0202 |
| rs7196573   | G | 0.0249  |
| rs17201036  | T | 0.0523  |
| rs144517634 | C | -0.0881 |
| rs7188833   | C | -0.0138 |
| rs79181444  | C | 0.0445  |
| rs72785707  | C | -0.033  |
| rs55860715  | T | 0.0696  |
| rs2034563   | C | 0.0557  |
| rs11074449  | C | 0.0884  |
| rs11645448  | A | 0.0135  |
| rs79149457  | C | -0.0763 |
| rs9652588   | C | -0.0121 |
| rs118044362 | A | -0.0859 |
| rs1629      | T | -0.0319 |
| rs58105937  | T | 0.0554  |
| rs62030982  | A | -0.0694 |
| rs72808613  | C | 0.0188  |
| rs737637    | T | 0.013   |
| rs151240411 | A | 0.0521  |
| rs76711645  | C | -0.0334 |
| rs150013167 | C | -0.078  |
| rs12598994  | A | 0.0697  |
| rs11648003  | G | -0.0145 |
| rs11644077  | T | -0.031  |
| rs12935020  | T | 0.0549  |
| rs140290367 | G | -0.0669 |
| rs146382876 | A | 0.0863  |
| rs8059354   | C | -0.0123 |
| rs745385    | C | -0.0585 |
| rs117468730 | A | 0.0449  |
| rs144897822 | T | -0.0703 |

|             |   |         |
|-------------|---|---------|
| rs72797836  | A | 0.0238  |
| rs117089608 | A | -0.0641 |
| rs116977227 | T | 0.082   |
| rs9936054   | C | -0.0194 |
| rs300004    | A | -0.0387 |
| rs12919014  | T | -0.0196 |
| rs117044449 | A | -0.074  |
| rs7186148   | A | -0.0263 |
| rs16963868  | C | 0.0713  |
| rs4592663   | T | 0.012   |
| rs116936233 | T | 0.0433  |
| rs1962736   | A | 0.0125  |
| rs143367262 | A | 0.0352  |
| rs74766709  | A | 0.0445  |
| rs6499632   | C | 0.0148  |
| rs12595986  | C | -0.0254 |
| rs2388752   | T | -0.0148 |
| rs7195753   | C | -0.0128 |
| rs62047167  | A | -0.0464 |
| rs12324995  | T | 0.023   |
| rs4785839   | G | -0.0122 |
| rs117447152 | G | 0.057   |
| rs8061749   | A | 0.0119  |
| rs12597306  | G | -0.0154 |
| rs62029998  | C | -0.0146 |
| rs4354964   | A | 0.019   |
| rs11642914  | T | 0.0169  |
| rs76173302  | A | -0.033  |
| rs117033824 | A | 0.0621  |
| rs118079775 | T | 0.0875  |
| rs12919222  | T | 0.0864  |
| rs9928052   | A | 0.0117  |
| rs9923528   | C | -0.032  |
| rs194435    | A | 0.0146  |
| rs16949366  | A | 0.0205  |
| rs77415328  | G | -0.0435 |
| rs8053254   | A | 0.0225  |
| rs2744995   | G | 0.0806  |
| rs78127800  | T | 0.0922  |
| rs4843909   | G | 0.0234  |
| rs12933299  | A | -0.0254 |
| rs79515662  | A | 0.0866  |
| rs72780324  | T | 0.0812  |
| rs72787890  | T | -0.0261 |
| rs56400542  | A | -0.012  |
| rs72768603  | A | -0.0227 |
| rs118010356 | C | 0.0555  |

|             |   |         |
|-------------|---|---------|
| rs138150491 | G | -0.1012 |
| rs140281307 | T | 0.0328  |
| rs12929658  | A | -0.0265 |
| rs986842    | T | -0.0522 |
| rs142985474 | A | 0.0607  |
| rs11643855  | C | 0.0136  |
| rs118190104 | T | 0.0605  |
| rs71390812  | C | -0.0201 |
| rs2343567   | T | 0.0218  |
| rs147449361 | A | 0.0905  |
| rs62030271  | A | 0.0265  |
| rs117484906 | C | 0.068   |
| rs116456718 | T | -0.0239 |
| rs143534693 | T | -0.0463 |
| rs2696841   | G | -0.037  |
| rs62033374  | A | -0.014  |
| rs143093927 | C | 0.0756  |
| rs13332133  | G | 0.0319  |
| rs4408557   | G | -0.015  |
| rs8047869   | C | 0.0119  |
| rs140060433 | A | -0.0672 |
| rs76382178  | G | 0.0429  |
| rs761068    | G | -0.0136 |
| rs12921952  | A | -0.0389 |
| rs117803319 | A | 0.0766  |
| rs74559176  | T | -0.0424 |
| rs8047437   | C | 0.0179  |
| rs7200415   | T | -0.0551 |
| rs146404195 | A | 0.0905  |
| rs56831596  | A | -0.0737 |
| rs7204819   | G | -0.0232 |
| rs12930148  | T | 0.0141  |
| rs4889291   | G | -0.0144 |
| rs35393762  | G | -0.0599 |
| rs7192447   | C | -0.0191 |
| rs62041984  | G | 0.0258  |
| rs117995116 | C | -0.0337 |
| rs244810    | A | -0.0139 |
| rs17436582  | G | 0.0878  |
| rs193652    | C | 0.0163  |
| rs12917647  | G | 0.0167  |
| rs6500419   | G | -0.012  |
| rs7190015   | G | -0.0187 |
| rs62050768  | T | 0.1102  |
| rs60777234  | T | 0.0259  |
| rs173589    | C | -0.0121 |
| rs80030798  | T | 0.0656  |

|             |   |         |
|-------------|---|---------|
| rs79548139  | A | -0.0659 |
| rs875527    | A | -0.0603 |
| rs79357091  | A | -0.0851 |
| rs78781548  | G | -0.0528 |
| rs7193944   | C | -0.0534 |
| rs11643838  | A | 0.0132  |
| rs71384865  | G | 0.0483  |
| rs2576566   | A | 0.0626  |
| rs744972    | C | -0.0139 |
| rs80350728  | G | 0.0529  |
| rs10048132  | A | -0.0131 |
| rs10163253  | T | -0.0205 |
| rs9939793   | T | -0.0158 |
| rs9797037   | A | 0.0137  |
| rs12928193  | A | 0.0217  |
| rs74016020  | T | -0.0648 |
| rs112358314 | G | 0.0226  |
| rs17676610  | A | -0.0127 |
| rs35604113  | G | 0.0178  |
| rs11859719  | C | 0.0141  |
| rs140149997 | G | 0.0558  |
| rs74392462  | G | 0.0662  |
| rs3965781   | T | -0.0959 |
| rs1032451   | A | 0.0173  |
| rs75681432  | A | -0.058  |
| rs28370546  | A | 0.0554  |
| rs117568059 | A | -0.0704 |
| rs12924078  | T | 0.0467  |
| rs8060055   | C | -0.0126 |
| rs75563459  | C | -0.1045 |
| rs8063474   | T | 0.0122  |
| rs17822317  | T | 0.0411  |
| rs141977876 | A | -0.0541 |
| rs187679    | C | 0.0118  |
| rs8059639   | G | 0.0158  |
| rs7405378   | A | -0.0131 |
| rs16973865  | G | 0.0477  |
| rs77446798  | G | -0.0569 |
| rs62052447  | A | 0.0462  |
| rs75461591  | T | -0.0352 |
| rs8055199   | G | -0.0147 |
| rs4787180   | A | 0.0148  |
| rs112818457 | A | -0.0466 |
| rs880380    | A | 0.024   |
| rs112002026 | T | -0.0653 |
| rs143060339 | G | 0.0569  |
| rs12446507  | A | 0.0166  |

|             |   |         |
|-------------|---|---------|
| rs3743773   | A | -0.0119 |
| rs75168050  | A | 0.0649  |
| rs8044516   | A | 0.018   |
| rs117049453 | C | 0.0382  |
| rs12445797  | G | 0.0435  |
| rs117914655 | A | 0.033   |
| rs2277892   | T | 0.0261  |
| rs6500664   | G | -0.0222 |
| rs72834728  | A | -0.0256 |
| rs13330520  | T | 0.0221  |
| rs4782695   | G | 0.0218  |
| rs78425396  | G | 0.0548  |
| rs11649580  | A | -0.0732 |
| rs77563448  | C | -0.0818 |
| rs11641004  | A | -0.0302 |
| rs7200660   | A | 0.0149  |
| rs143200754 | T | -0.037  |
| rs2240146   | T | -0.0779 |
| rs4470137   | A | -0.0189 |
| rs78915094  | T | 0.062   |
| rs148830516 | G | 0.0576  |
| rs12923825  | C | 0.0317  |
| rs9929115   | C | 0.0128  |
| rs36074930  | T | -0.0305 |
| rs59648726  | G | -0.0436 |
| rs13334533  | T | -0.053  |
| rs3751788   | C | 0.0136  |
| rs31983     | G | -0.0121 |
| rs144161484 | T | -0.0778 |
| rs79642548  | C | -0.0517 |
| rs11862740  | G | 0.0335  |
| rs147258092 | T | 0.0279  |
| rs117020619 | A | 0.0352  |
| rs112391144 | T | 0.0622  |
| rs16976341  | C | 0.0219  |
| rs12929319  | G | 0.0163  |
| rs66993176  | C | -0.0314 |
| rs17559149  | G | 0.0396  |
| rs143293564 | C | -0.062  |
| rs62025676  | T | -0.0133 |
| rs139905800 | A | 0.0153  |
| rs7204933   | C | -0.0361 |
| rs2541536   | T | 0.0292  |
| rs421959    | T | -0.0297 |
| rs113386606 | T | 0.0285  |
| rs150273737 | G | 0.0496  |
| rs148830949 | C | 0.0623  |

|             |   |         |
|-------------|---|---------|
| rs28495848  | G | 0.0185  |
| rs62045430  | A | -0.0216 |
| rs4442794   | C | -0.0123 |
| rs1072123   | T | -0.0168 |
| rs117308585 | A | 0.0771  |
| rs11644982  | C | 0.0177  |
| rs7200230   | G | 0.0376  |
| rs149194    | T | 0.016   |
| rs9936352   | T | -0.0303 |
| rs17720649  | A | 0.0197  |
| rs1974896   | T | 0.0123  |
| rs76206848  | A | 0.0456  |
| rs145883517 | T | -0.0426 |
| rs72779829  | T | -0.0186 |
| rs34842369  | G | -0.0145 |
| rs150390841 | T | -0.0673 |
| rs9938125   | A | 0.0566  |
| rs11649096  | G | 0.0341  |
| rs72781844  | T | 0.0346  |
| rs2288581   | T | -0.0165 |
| rs76852585  | T | -0.0619 |
| rs76748865  | G | -0.0905 |
| rs117592845 | G | -0.0757 |
| rs9923573   | G | 0.0164  |
| rs11645189  | A | -0.042  |
| rs138779818 | A | 0.0754  |
| rs80023992  | C | -0.0775 |
| rs117145198 | T | 0.02    |
| rs145791081 | G | -0.066  |
| rs116903007 | A | -0.05   |
| rs4843958   | G | -0.0187 |
| rs76358913  | C | 0.0306  |
| rs79380030  | C | -0.0245 |
| rs16966614  | C | -0.0619 |
| rs2022174   | A | -0.0187 |
| rs117476866 | A | 0.0308  |
| rs74825741  | A | -0.0326 |
| rs7186606   | G | 0.0321  |
| rs75631901  | G | 0.0618  |
| rs117786706 | A | -0.0464 |
| rs117767991 | T | 0.0678  |
| rs139138900 | A | -0.033  |
| rs77782633  | T | -0.0582 |
| rs78299044  | G | 0.0273  |
| rs55730016  | T | 0.0131  |
| rs7190182   | C | 0.0307  |
| rs16971906  | G | -0.03   |



|             |   |         |
|-------------|---|---------|
| rs11865882  | A | 0.0138  |
| rs37038     | G | -0.0271 |
| rs113912728 | T | 0.0925  |
| rs16950622  | A | 0.0327  |
| rs74527958  | A | -0.0392 |
| rs78135017  | G | 0.0631  |
| rs11642396  | A | 0.014   |
| rs7184490   | T | -0.0117 |
| rs146052037 | G | 0.046   |
| rs78030312  | G | -0.0584 |
| rs72797948  | C | -0.0541 |
| rs111742588 | G | 0.0737  |
| rs1423825   | T | -0.0752 |
| rs76879440  | A | -0.0298 |
| rs1709786   | A | 0.0327  |
| rs75418231  | C | 0.0558  |
| rs1074540   | T | -0.0158 |
| rs34929330  | C | 0.0807  |
| rs143513876 | G | 0.0768  |
| rs10468251  | A | -0.0301 |
| rs34843513  | G | 0.0326  |
| rs1553722   | C | -0.0264 |
| rs3760043   | A | 0.0183  |
| rs2113268   | G | 0.0119  |
| rs17691408  | A | -0.0409 |
| rs138991155 | C | -0.0448 |
| rs145164243 | C | -0.063  |
| rs7405037   | T | 0.0193  |
| rs11866600  | G | -0.0374 |
| rs35476050  | A | -0.0645 |
| rs72800467  | G | -0.0622 |
| rs16952537  | A | -0.0119 |
| rs77519742  | A | -0.0705 |
| rs118064029 | C | 0.0698  |
| rs12924282  | G | 0.02    |
| rs1876944   | T | -0.0124 |
| rs57898246  | A | -0.029  |
| rs8049980   | C | -0.0512 |
| rs146046980 | G | 0.0438  |
| rs2302759   | A | 0.0146  |
| rs194329    | A | 0.0129  |
| rs62030354  | T | -0.022  |
| rs4889008   | C | 0.0153  |
| rs17801812  | A | -0.0164 |
| rs11646910  | A | -0.0233 |
| rs9939912   | C | 0.0203  |
| rs111533242 | T | -0.0638 |

|             |   |         |
|-------------|---|---------|
| rs4624187   | T | 0.0322  |
| rs78458246  | A | -0.0416 |
| rs34515858  | A | 0.0221  |
| rs148785786 | A | -0.0785 |
| rs12446319  | C | -0.0123 |
| rs115987233 | G | 0.0683  |
| rs78368124  | C | -0.0611 |
| rs62048432  | C | 0.0669  |
| rs1364001   | T | -0.0126 |
| rs72786433  | T | -0.0751 |
| rs1559396   | C | -0.0214 |
| rs139473331 | A | 0.0595  |
| rs117092937 | T | 0.0686  |
| rs11864374  | A | -0.0126 |
| rs142003194 | A | -0.0823 |
| rs9936224   | G | -0.0111 |
| rs3852758   | A | -0.0181 |
| rs670962    | T | 0.0142  |
| rs8044270   | G | -0.0118 |
| rs11640586  | C | -0.0133 |
| rs75283091  | A | -0.0292 |
| rs144284118 | T | -0.0218 |
| rs72771007  | A | -0.0398 |
| rs12444064  | A | 0.0122  |
| rs9921664   | A | 0.0143  |
| rs56050046  | T | 0.0554  |
| rs145405497 | A | -0.0693 |
| rs992507    | C | 0.0119  |
| rs72640404  | T | 0.0159  |
| rs8051088   | C | 0.057   |
| rs78788884  | A | 0.0573  |
| rs117526569 | T | -0.0454 |
| rs112649664 | A | 0.0649  |
| rs72797097  | A | -0.0273 |
| rs4785807   | G | 0.0378  |
| rs16966671  | G | -0.014  |
| rs116855785 | T | 0.0601  |
| rs8057026   | T | -0.0117 |
| rs7202575   | T | -0.0306 |
| rs75608240  | A | 0.0505  |
| rs2035490   | G | -0.0123 |
| rs12917899  | A | -0.0122 |
| rs116969507 | G | 0.0469  |
| rs1119754   | A | -0.0114 |
| rs117006559 | G | 0.082   |
| rs8052096   | G | 0.0491  |
| rs142195340 | A | -0.0584 |

|             |   |         |
|-------------|---|---------|
| rs215900    | C | -0.0392 |
| rs58426835  | A | 0.0362  |
| rs9935809   | A | 0.0343  |
| rs2216667   | C | 0.0434  |
| rs1555001   | A | -0.0225 |
| rs79227246  | T | -0.0247 |
| rs74013048  | C | 0.0316  |
| rs233516    | A | -0.0906 |
| rs71404007  | C | -0.0234 |
| rs78972877  | T | 0.0731  |
| rs7190491   | A | -0.0123 |
| rs72778605  | G | -0.0599 |
| rs66517528  | T | -0.0275 |
| rs78965501  | C | -0.0737 |
| rs7498403   | C | 0.0224  |
| rs8059703   | C | -0.0117 |
| rs7499710   | C | 0.0165  |
| rs77329653  | G | -0.0983 |
| rs10514482  | T | 0.0243  |
| rs76187616  | C | -0.0604 |
| rs34780135  | A | -0.0178 |
| rs41433148  | T | 0.0358  |
| rs6497331   | G | 0.0124  |
| rs9922775   | A | 0.0195  |
| rs141447723 | T | 0.0301  |
| rs4129177   | C | -0.0123 |
| rs111636938 | A | -0.0134 |
| rs10775267  | T | -0.0111 |
| rs80062355  | A | -0.02   |
| rs74918308  | C | -0.0465 |
| rs78223724  | G | 0.0462  |
| rs11644855  | C | -0.0414 |
| rs77435000  | T | 0.037   |
| rs7188008   | A | -0.0137 |
| rs62034062  | C | 0.0579  |
| rs57538453  | C | 0.0716  |
| rs117752502 | G | 0.0511  |
| rs17822235  | G | -0.0389 |
| rs17782553  | C | -0.016  |
| rs74527613  | A | -0.0677 |
| rs74507751  | T | 0.0763  |
| rs111878960 | C | 0.0503  |
| rs316377    | G | 0.0173  |
| rs150376878 | T | -0.0472 |
| rs62036895  | G | 0.0338  |
| rs12924156  | A | 0.0424  |
| rs142054618 | G | -0.0517 |

|             |   |         |
|-------------|---|---------|
| rs11642272  | A | -0.013  |
| rs112109564 | G | -0.0874 |
| rs11076799  | A | -0.0116 |
| rs12926425  | T | -0.0174 |
| rs11862321  | A | 0.0127  |
| rs138776600 | T | 0.0507  |
| rs9923518   | G | 0.0182  |
| rs11641432  | G | -0.0329 |
| rs4442813   | C | -0.0118 |
| rs1421090   | G | 0.0124  |
| rs62036297  | A | -0.0131 |
| rs72785604  | G | -0.0316 |
| rs9937968   | G | 0.016   |
| rs57288890  | A | -0.0191 |
| rs16949197  | C | 0.0358  |
| rs78224412  | C | 0.0565  |
| rs57943154  | A | 0.0544  |
| rs8050038   | C | -0.0115 |
| rs4888121   | C | -0.0113 |
| rs12919187  | T | -0.0343 |
| rs4548845   | G | -0.0407 |
| rs8054887   | A | 0.0217  |
| rs4782888   | A | 0.0236  |
| rs79028902  | T | 0.0391  |
| rs77270006  | C | -0.0364 |
| rs143700749 | A | -0.0301 |
| rs111855061 | C | -0.0589 |
| rs29572     | C | -0.0201 |
| rs79244940  | T | -0.0423 |
| rs79152737  | A | -0.0774 |
| rs76792418  | G | -0.0544 |
| rs11077091  | G | 0.0679  |
| rs251790    | A | 0.0681  |
| rs196014    | T | 0.0173  |
| rs964932    | T | 0.0552  |
| rs933569    | T | 0.0188  |
| rs11647003  | T | 0.0161  |
| rs10863210  | A | -0.0255 |
| rs145222624 | G | 0.0823  |
| rs79382425  | T | 0.0357  |
| rs113508033 | C | -0.0371 |
| rs8054696   | C | -0.0117 |
| rs118111347 | T | 0.0269  |
| rs34426494  | T | -0.024  |
| rs34515795  | A | 0.0665  |
| rs8058743   | T | 0.0155  |
| rs4471666   | G | -0.0287 |

|             |   |         |
|-------------|---|---------|
| rs11645947  | T | 0.0137  |
| rs72787084  | T | -0.0386 |
| rs9931646   | A | 0.013   |
| rs56387835  | A | -0.0192 |
| rs12445283  | G | -0.0276 |
| rs80035226  | A | 0.0402  |
| rs73618831  | C | 0.0614  |
| rs12917774  | A | -0.0219 |
| rs145713123 | G | -0.0882 |
| rs139457838 | G | -0.0947 |
| rs147873690 | G | 0.0498  |
| rs3112586   | C | -0.0245 |
| rs112047304 | C | 0.0363  |
| rs138520737 | C | 0.0265  |
| rs1183964   | C | 0.0135  |
| rs8063742   | C | -0.0106 |
| rs147030501 | A | 0.0402  |
| rs7192270   | T | -0.0213 |
| rs139552981 | G | 0.0494  |
| rs78821328  | A | -0.0727 |
| rs12933574  | C | 0.0336  |
| rs12924962  | C | -0.016  |
| rs756411    | A | 0.0147  |
| rs4785024   | A | 0.0124  |
| rs117586700 | G | 0.0477  |
| rs74378471  | C | -0.0278 |
| rs3934986   | A | -0.0204 |
| rs1812750   | A | -0.0239 |
| rs79754142  | G | 0.0782  |
| rs4783187   | T | 0.0191  |
| rs1881220   | G | -0.016  |
| rs80027786  | T | -0.0308 |
| rs57576928  | T | -0.0223 |
| rs77365704  | A | 0.0554  |
| rs2539999   | C | 0.0162  |
| rs12598182  | C | 0.0258  |
| rs4076875   | T | 0.015   |
| rs1548915   | T | 0.012   |
| rs117932830 | T | 0.0557  |
| rs8051877   | G | 0.0157  |
| rs142539117 | T | 0.0405  |
| rs17141404  | C | -0.0737 |
| rs16949621  | T | 0.0175  |
| rs12149654  | A | -0.0508 |
| rs12446321  | G | 0.0122  |
| rs244851    | G | -0.015  |
| rs112926321 | T | 0.0584  |

|             |   |         |
|-------------|---|---------|
| rs9927564   | T | -0.0134 |
| rs79699742  | A | -0.0605 |
| rs55653375  | G | 0.025   |
| rs11640818  | A | 0.0217  |
| rs1420292   | A | 0.0131  |
| rs17728207  | T | 0.022   |
| rs138916074 | G | 0.0632  |
| rs62039681  | T | 0.0155  |
| rs7185074   | G | 0.0242  |
| rs78380053  | T | 0.0192  |
| rs301137    | G | -0.0125 |
| rs2911293   | T | 0.0113  |
| rs4523912   | A | 0.0151  |
| rs117267681 | A | 0.0615  |
| rs117556015 | A | 0.0992  |
| rs79074263  | G | -0.0782 |
| rs146978365 | C | -0.0495 |
| rs146530002 | T | 0.0545  |
| rs12921822  | T | 0.013   |
| rs72789706  | G | 0.0223  |
| rs78397580  | C | 0.0484  |
| rs111888233 | T | -0.0429 |
| rs78268165  | G | 0.0282  |
| rs74970438  | A | -0.0524 |
| rs62035538  | G | -0.0138 |
| rs6499032   | G | 0.0108  |
| rs16974723  | G | 0.0735  |
| rs80225010  | A | 0.0632  |
| rs7203079   | C | -0.0492 |
| rs111526313 | T | -0.0695 |
| rs12934021  | A | 0.0294  |
| rs74332379  | C | -0.0398 |
| rs4888884   | T | 0.0126  |
| rs112595681 | A | 0.0519  |
| rs8061866   | T | -0.0177 |
| rs2632516   | C | -0.0782 |
| rs8078173   | C | 0.1279  |
| rs113260531 | A | 0.1073  |
| rs7222902   | A | 0.216   |
| rs9896800   | C | -0.078  |
| rs4794973   | T | 0.2558  |
| rs146351285 | T | 0.3686  |
| rs117639581 | A | 0.3386  |
| rs2696501   | T | -0.1109 |
| rs17687054  | T | -0.0795 |
| rs12450340  | C | 0.0983  |
| rs73316435  | T | 0.0763  |

|             |   |         |
|-------------|---|---------|
| rs2906100   | T | -0.0657 |
| rs62060097  | C | -0.2978 |
| rs1583390   | G | 0.3542  |
| rs115597167 | T | 0.4672  |
| rs4791218   | C | 0.1286  |
| rs142138608 | G | 0.3866  |
| rs79324548  | G | -0.1703 |
| rs7210846   | A | 0.0575  |
| rs1971662   | C | -0.0618 |
| rs35166593  | G | 0.0963  |
| rs12450585  | C | -0.0755 |
| rs13341542  | C | -0.0702 |
| rs34867153  | T | -0.0977 |
| rs113368712 | A | 0.0782  |
| rs3760372   | T | 0.0616  |
| rs2671655   | C | -0.1351 |
| rs11656774  | A | 0.0843  |
| rs1548681   | T | -0.0771 |
| rs9906088   | A | 0.0872  |
| rs3744189   | T | -0.0868 |
| rs12150662  | A | -0.0652 |
| rs60379759  | C | 0.0613  |
| rs4792075   | C | 0.0712  |
| rs9897429   | G | -0.0751 |
| rs9893551   | G | 0.3232  |
| rs59779517  | G | -0.113  |
| rs147747231 | A | -0.4878 |
| rs9892013   | A | 0.2185  |
| rs79314188  | A | -0.1567 |
| rs72852302  | A | -0.2851 |
| rs112136529 | G | 0.1081  |
| rs9909716   | A | -0.0965 |
| rs11655630  | T | 0.0759  |
| rs4638624   | A | -0.1416 |
| rs138872789 | T | 0.2523  |
| rs61753104  | T | 0.1622  |
| rs11655227  | G | -0.0745 |
| rs17783142  | G | -0.109  |
| rs4968748   | A | 0.0617  |
| rs28967     | A | -0.0631 |
| rs117661293 | C | 0.2626  |
| rs12326035  | A | -0.1095 |
| rs2958896   | T | -0.0896 |
| rs79000376  | C | 0.2237  |
| rs1490927   | C | 0.0699  |
| rs72828767  | A | 0.1677  |
| rs8081598   | C | 0.126   |

|             |   |         |
|-------------|---|---------|
| rs74812937  | A | -0.1641 |
| rs4796679   | C | 0.0524  |
| rs4293      | G | -0.0513 |
| rs8081117   | T | -0.1015 |
| rs1137449   | C | -0.0609 |
| rs9911873   | G | 0.0886  |
| rs75200848  | C | -0.1502 |
| rs4635386   | G | 0.0559  |
| rs3751956   | A | -0.0525 |
| rs2036171   | T | -0.0531 |
| rs3785928   | A | 0.1305  |
| rs75650002  | G | -0.0805 |
| rs34984504  | C | 0.1174  |
| rs7216806   | G | -0.0601 |
| rs141073699 | A | 0.2027  |
| rs2671676   | T | -0.0924 |
| rs77799382  | G | 0.1455  |
| rs17820725  | A | -0.0923 |
| rs76518619  | C | -0.1076 |
| rs74476245  | G | 0.1938  |
| rs118191569 | T | 0.1321  |
| rs161624    | A | -0.0938 |
| rs11079571  | A | -0.0712 |
| rs11871360  | G | 0.3992  |
| rs62068263  | A | -0.1395 |
| rs72624990  | C | 0.0551  |
| rs56366200  | C | 0.0512  |
| rs66955829  | G | -0.0568 |
| rs114636930 | C | 0.2037  |
| rs4078690   | C | 0.0666  |
| rs7223655   | T | -0.0654 |
| rs4793649   | G | 0.0629  |
| rs16957299  | A | 0.1143  |
| rs67020881  | T | -0.0563 |
| rs150542839 | T | -0.0784 |
| rs6501851   | C | 0.0507  |
| rs76538025  | C | 0.1491  |
| rs4789638   | A | 0.0628  |
| rs116966909 | T | -0.2455 |
| rs12941864  | T | -0.0539 |
| rs9907544   | G | -0.0626 |
| rs9908921   | G | 0.0526  |
| rs3744353   | A | -0.1027 |
| rs8072875   | A | -0.0665 |
| rs4791927   | A | 0.0534  |
| rs11652138  | G | -0.0643 |
| rs118020794 | T | 0.2817  |



|             |   |         |
|-------------|---|---------|
| rs79141987  | A | -0.0801 |
| rs8078026   | T | 0.0577  |
| rs117303388 | T | 0.1842  |
| rs9898910   | T | -0.0477 |
| rs2286560   | A | -0.0619 |
| rs9903045   | G | 0.0693  |
| rs72809349  | T | 0.0879  |
| rs880266    | A | 0.0549  |
| rs76027743  | C | 0.173   |
| rs55633105  | G | 0.1765  |
| rs11649853  | T | -0.0879 |
| rs1046632   | G | -0.0721 |
| rs141658744 | C | 0.3184  |
| rs6501661   | G | -0.1024 |
| rs2663344   | C | -0.1074 |
| rs62068381  | G | 0.0534  |
| rs79525110  | A | 0.3309  |
| rs4789626   | T | -0.0502 |
| rs73995240  | C | 0.283   |
| rs6503905   | A | 0.0524  |
| rs73326345  | G | 0.2061  |
| rs8078980   | A | -0.0768 |
| rs9916450   | T | 0.0579  |
| rs66967287  | T | 0.0891  |
| rs117061241 | A | -0.2035 |
| rs8069126   | C | -0.0546 |
| rs1861573   | C | -0.0493 |
| rs4793695   | T | 0.0559  |
| rs116244861 | G | -0.1624 |
| rs1369102   | T | 0.0475  |
| rs117811037 | A | 0.2109  |
| rs11868867  | A | -0.1559 |
| rs4889990   | A | -0.0468 |
| rs1972605   | T | -0.0797 |
| rs410384    | C | -0.0577 |
| rs78666792  | C | 0.2806  |
| rs8067860   | A | 0.0587  |
| rs4638634   | T | -0.054  |
| rs2189757   | G | 0.0905  |
| rs929477    | A | -0.0839 |
| rs28651696  | C | -0.1622 |
| rs34497316  | A | 0.0667  |
| rs9303646   | T | -0.0713 |
| rs80314763  | T | 0.1637  |
| rs8070213   | C | 0.0481  |
| rs34205394  | A | -0.0963 |
| rs9894262   | A | -0.0521 |

|             |   |         |
|-------------|---|---------|
| rs60613596  | A | -0.2913 |
| rs8072068   | G | 0.0468  |
| rs6504631   | T | 0.1227  |
| rs12452554  | C | -0.1112 |
| rs12948758  | A | 0.1064  |
| rs231448    | A | -0.0489 |
| rs226223    | A | 0.0507  |
| rs62086348  | A | -0.0508 |
| rs79945904  | G | -0.1156 |
| rs7207590   | C | -0.0497 |
| rs6501248   | T | 0.1564  |
| rs4793119   | A | -0.0467 |
| rs35421226  | G | 0.0698  |
| rs34275510  | A | -0.0857 |
| rs11658145  | C | 0.0722  |
| rs146051378 | G | 0.1627  |
| rs117566655 | C | 0.2213  |
| rs118126262 | C | -0.2791 |
| rs6504310   | C | 0.2544  |
| rs139566238 | A | 0.2837  |
| rs7406439   | A | 0.0611  |
| rs7225308   | T | 0.049   |
| rs6607284   | C | -0.0472 |
| rs11077607  | G | -0.046  |
| rs62058287  | C | 0.233   |
| rs3926423   | C | 0.1946  |
| rs74000615  | T | 0.3079  |
| rs60005475  | T | 0.3535  |
| rs12185281  | A | -0.175  |
| rs117912230 | A | -0.2134 |
| rs138808125 | T | -0.2615 |
| rs9903959   | G | 0.045   |
| rs12952952  | G | 0.0652  |
| rs7207574   | A | 0.0671  |
| rs117801968 | T | 0.1238  |
| rs72834191  | A | 0.0585  |
| rs34169093  | T | 0.2332  |
| rs28675025  | C | 0.142   |
| rs11657599  | A | -0.1374 |
| rs6501517   | G | 0.062   |
| rs9900553   | T | -0.2364 |
| rs62071206  | T | 0.0955  |
| rs2526372   | A | -0.0559 |
| rs11204419  | G | 0.0473  |
| rs2003457   | G | 0.06    |
| rs75814967  | T | 0.1935  |
| rs2215238   | A | 0.057   |

|             |   |         |
|-------------|---|---------|
| rs145998384 | A | 0.1323  |
| rs9898889   | T | 0.049   |
| rs36049013  | T | -0.1594 |
| rs2073667   | T | 0.1686  |
| rs73980929  | C | 0.1346  |
| rs565977    | T | -0.05   |
| rs1029757   | A | -0.0468 |
| rs9909219   | C | 0.0486  |
| rs117174999 | T | 0.3968  |
| rs72823853  | T | 0.0906  |
| rs34033742  | C | -0.2077 |
| rs75620046  | A | 0.2071  |
| rs77450252  | G | -0.1968 |
| rs62073077  | A | 0.1043  |
| rs1741272   | A | -0.1573 |
| rs16960381  | T | -0.0741 |
| rs112855442 | C | 0.1822  |
| rs62067003  | A | 0.133   |
| rs34709305  | T | 0.3006  |
| rs118191038 | G | -0.2611 |
| rs7210082   | C | -0.0631 |
| rs56182592  | T | -0.0719 |
| rs117065579 | T | -0.2992 |
| rs117452130 | C | -0.1331 |
| rs77041491  | T | -0.3272 |
| rs72844465  | T | 0.0784  |
| rs146703950 | T | 0.3586  |
| rs117632785 | T | 0.2338  |
| rs111894889 | C | -0.1694 |
| rs3024298   | C | 0.1447  |
| rs9900291   | T | -0.0537 |
| rs72844270  | A | 0.1241  |
| rs61745194  | T | 0.1977  |
| rs9891116   | C | -0.044  |
| rs6504124   | G | 0.1601  |
| rs17052352  | C | -0.0573 |
| rs9913319   | A | -0.0466 |
| rs2683201   | C | 0.0691  |
| rs8080520   | A | 0.1189  |
| rs112852338 | C | 0.1933  |
| rs117107082 | T | 0.2263  |
| rs145091396 | C | 0.1763  |
| rs1263875   | A | 0.1087  |
| rs111481861 | C | 0.276   |
| rs11655481  | T | -0.0471 |
| rs4634      | A | 0.0469  |
| rs9915468   | A | 0.0531  |

|             |   |         |
|-------------|---|---------|
| rs72813143  | G | -0.1215 |
| rs71368590  | T | 0.1166  |
| rs62069950  | G | -0.0473 |
| rs11656636  | A | -0.1421 |
| rs2109239   | C | 0.0546  |
| rs7223099   | T | 0.0615  |
| rs4439812   | A | 0.0542  |
| rs62084913  | T | -0.055  |
| rs9912927   | G | -0.0464 |
| rs1032070   | T | 0.0481  |
| rs887524    | A | -0.1034 |
| rs72843243  | G | -0.0626 |
| rs77692739  | G | 0.1245  |
| rs9891717   | G | 0.0769  |
| rs147648382 | G | 0.1552  |
| rs7219150   | T | -0.0577 |
| rs9908668   | C | -0.0478 |
| rs12936006  | C | 0.061   |
| rs8073366   | G | -0.0436 |
| rs141236186 | A | -0.1073 |
| rs117771722 | C | -0.2495 |
| rs7214983   | T | -0.0478 |
| rs8081573   | T | 0.0759  |
| rs3096      | G | -0.0458 |
| rs117282482 | C | -0.1724 |
| rs9889614   | A | 0.0555  |
| rs917518    | G | -0.0469 |
| rs11654944  | G | -0.0595 |
| rs75716493  | G | -0.3694 |
| rs1574525   | G | 0.0553  |
| rs12936361  | C | 0.0593  |
| rs1974701   | T | -0.0433 |
| rs111942199 | T | 0.0836  |
| rs11653687  | G | 0.0809  |
| rs72847154  | C | 0.0564  |
| rs77623718  | G | -0.2682 |
| rs11656586  | C | -0.0675 |
| rs138616537 | T | 0.1348  |
| rs12450705  | T | 0.0446  |
| rs2079719   | T | -0.06   |
| rs8065691   | T | 0.0417  |
| rs7212783   | T | 0.0454  |
| rs72833746  | T | 0.078   |
| rs72854796  | T | -0.1035 |
| rs140357168 | G | -0.366  |
| rs17246804  | A | 0.168   |
| rs143098225 | C | -0.2134 |

|             |   |         |
|-------------|---|---------|
| rs73271750  | C | 0.0985  |
| rs10512554  | G | -0.0488 |
| rs16952454  | T | 0.1042  |
| rs997652    | T | -0.043  |
| rs8068186   | C | -0.0424 |
| rs11870189  | C | 0.047   |
| rs72847231  | A | -0.0596 |
| rs71373875  | T | 0.0715  |
| rs17590228  | A | -0.0645 |
| rs9904116   | C | -0.0496 |
| rs2714025   | C | 0.0622  |
| rs7220432   | G | 0.1061  |
| rs73987708  | G | 0.0976  |
| rs2158512   | C | -0.1019 |
| rs2642043   | A | 0.0617  |
| rs7503542   | C | -0.062  |
| rs8078571   | C | -0.0426 |
| rs117311539 | A | -0.251  |
| rs146311928 | C | 0.0887  |
| rs77291317  | A | -0.1379 |
| rs8065634   | C | -0.0502 |
| rs9900218   | C | -0.0525 |
| rs72818204  | A | 0.0963  |
| rs7207128   | A | -0.0663 |
| rs8076157   | T | -0.0483 |
| rs6504248   | G | -0.0545 |
| rs4073526   | A | 0.0455  |
| rs113172054 | A | 0.0712  |
| rs138003729 | A | 0.3191  |
| rs139692409 | A | 0.2925  |
| rs2605142   | T | 0.0477  |
| rs1964310   | G | 0.0947  |
| rs223140    | C | 0.0759  |
| rs7211065   | T | 0.0939  |
| rs11658696  | G | -0.0456 |
| rs74424015  | G | -0.1953 |
| rs1662574   | G | 0.051   |
| rs11649804  | A | -0.0439 |
| rs12453522  | G | -0.0513 |
| rs10521280  | G | 0.0613  |
| rs2058210   | C | -0.055  |
| rs12453007  | A | 0.0515  |
| rs17679086  | G | 0.2349  |
| rs4968916   | T | -0.2831 |
| rs11651695  | C | -0.0414 |
| rs118058402 | A | 0.157   |
| rs113713386 | C | -0.1201 |

|             |   |         |
|-------------|---|---------|
| rs73976286  | C | 0.1096  |
| rs77827373  | T | -0.2309 |
| rs150910880 | T | 0.1874  |
| rs117732254 | C | 0.187   |
| rs111344964 | G | 0.1528  |
| rs9916457   | C | -0.0488 |
| rs111815788 | C | 0.0713  |
| rs61742229  | A | 0.1312  |
| rs117920061 | A | 0.1411  |
| rs8065642   | T | -0.042  |
| rs12603796  | C | -0.0641 |
| rs4073940   | C | 0.1194  |
| rs1734972   | A | -0.0788 |
| rs35928207  | G | 0.078   |
| rs1482105   | A | 0.0644  |
| rs1132934   | G | 0.0735  |
| rs4147997   | A | -0.0492 |
| rs145213882 | T | 0.1901  |
| rs111922124 | T | 0.2512  |
| rs8080955   | C | -0.0415 |
| rs12326003  | A | 0.2353  |
| rs74951924  | T | 0.1025  |
| rs2021754   | T | 0.0437  |
| rs116977281 | C | -0.1824 |
| rs140728284 | G | -0.2902 |
| rs17782405  | G | -0.0633 |
| rs144133346 | G | -0.1812 |
| rs7211557   | G | 0.0675  |
| rs6503966   | T | -0.0854 |
| rs144043117 | G | 0.2596  |
| rs75237415  | C | 0.1202  |
| rs111689642 | A | -0.2535 |
| rs714894    | G | -0.0434 |
| rs4793074   | T | 0.0944  |
| rs77889472  | G | -0.1013 |
| rs17645265  | G | 0.0552  |
| rs4788963   | T | 0.062   |
| rs899799    | G | -0.0445 |
| rs210826    | A | -0.0578 |
| rs72822140  | A | 0.1426  |
| rs4794222   | A | 0.0474  |
| rs116654184 | A | 0.1762  |
| rs11655165  | C | 0.041   |
| rs56364001  | C | -0.0707 |
| rs117190130 | T | 0.1457  |
| rs28510139  | T | -0.0942 |
| rs12946776  | G | -0.0403 |

|             |   |         |
|-------------|---|---------|
| rs5848      | T | 0.0534  |
| rs12453430  | A | 0.048   |
| rs73232402  | T | 0.1258  |
| rs141137162 | C | -0.2804 |
| rs9903673   | C | 0.052   |
| rs7222956   | A | -0.0499 |
| rs9907575   | A | 0.096   |
| rs4060775   | A | 0.1057  |
| rs112092423 | G | 0.0618  |
| rs10852732  | T | 0.0414  |
| rs16951866  | A | -0.128  |
| rs7226141   | G | 0.0884  |
| rs10445399  | A | 0.1143  |
| rs62080330  | G | -0.0502 |
| rs147276702 | T | -0.1597 |
| rs143617271 | A | -0.1602 |
| rs3809830   | T | -0.0586 |
| rs16970972  | A | -0.0574 |
| rs62088045  | T | -0.1502 |
| rs111985490 | A | -0.174  |
| rs9909065   | A | -0.0499 |
| rs12945069  | A | -0.0466 |
| rs2366016   | G | -0.0872 |
| rs111618475 | T | 0.2759  |
| rs274906    | C | 0.2592  |
| rs62082731  | C | 0.09    |
| rs142714793 | T | 0.1589  |
| rs8071060   | T | 0.1913  |
| rs34339689  | A | 0.0535  |
| rs12162165  | T | 0.0508  |
| rs11651269  | C | -0.0587 |
| rs6504058   | G | -0.0517 |
| rs17577327  | T | 0.0588  |
| rs75681799  | C | -0.1047 |
| rs73281123  | T | 0.0704  |
| rs78934119  | T | 0.1651  |
| rs78368910  | A | 0.2294  |
| rs147854426 | G | 0.1228  |
| rs72836770  | C | 0.1061  |
| rs142793506 | A | 0.1138  |
| rs8076725   | A | 0.0433  |
| rs76776645  | A | 0.2161  |
| rs6416892   | G | 0.0397  |
| rs62070756  | A | -0.1317 |
| rs117798223 | T | 0.1806  |
| rs11079329  | G | -0.0534 |
| rs55997369  | C | -0.2296 |

|             |   |         |
|-------------|---|---------|
| rs77777291  | G | 0.077   |
| rs77804211  | T | 0.2598  |
| rs9906315   | A | 0.0635  |
| rs118075579 | T | 0.184   |
| rs7406722   | A | -0.0388 |
| rs12945511  | A | 0.0613  |
| rs78294214  | A | -0.1274 |
| rs4988343   | T | 0.2229  |
| rs2306508   | A | -0.0397 |
| rs78734298  | C | 0.1947  |
| rs62069794  | T | 0.0909  |
| rs8081589   | A | 0.0863  |
| rs17225109  | A | 0.1082  |
| rs62069343  | T | -0.1159 |
| rs76515704  | A | 0.1828  |
| rs34067662  | G | -0.0923 |
| rs76653886  | A | -0.1544 |
| rs28787599  | G | 0.1164  |
| rs7218488   | A | 0.0569  |
| rs7225521   | A | 0.0444  |
| rs4796760   | G | -0.1165 |
| rs2072653   | A | -0.0604 |
| rs62062384  | T | 0.061   |
| rs62072750  | A | -0.0424 |
| rs140564516 | G | 0.2058  |
| rs8068946   | A | -0.0425 |
| rs62057836  | C | 0.0702  |
| rs74586391  | C | 0.2743  |
| rs1606610   | A | -0.051  |
| rs17182658  | T | -0.0995 |
| rs1617685   | G | 0.0403  |
| rs36102671  | A | -0.0756 |
| rs115075297 | A | 0.2047  |
| rs8074793   | G | 0.0464  |
| rs7221614   | C | 0.0486  |
| rs35535031  | T | 0.2397  |
| rs113352672 | C | 0.3255  |
| rs12603841  | C | 0.2682  |
| rs4054867   | G | 0.133   |
| rs62051420  | A | -0.0597 |
| rs117195891 | A | -0.0947 |
| rs12449856  | T | 0.084   |
| rs147529200 | A | 0.1054  |
| rs113050467 | G | -0.1483 |
| rs4793456   | G | -0.0488 |
| rs9899950   | T | -0.0787 |
| rs6565539   | G | 0.0644  |



|             |   |         |
|-------------|---|---------|
| rs2277618   | T | -0.0643 |
| rs77771777  | T | -0.1741 |
| rs117065066 | T | 0.155   |
| rs118169492 | A | 0.2435  |
| rs72847916  | T | 0.1899  |
| rs62063157  | C | 0.0747  |
| rs8079967   | A | 0.1354  |
| rs138153523 | T | -0.0807 |
| rs141415334 | C | 0.2704  |
| rs80075032  | C | -0.0483 |
| rs116905672 | T | -0.1842 |
| rs72811909  | T | 0.061   |
| rs77026717  | C | -0.0632 |
| rs76938002  | T | -0.1086 |
| rs56340216  | T | 0.1745  |
| rs12951187  | G | 0.0606  |
| rs79773639  | G | 0.1645  |
| rs145906389 | A | 0.2203  |
| rs4795330   | A | -0.0439 |
| rs1442833   | C | -0.0399 |
| rs80102940  | T | -0.0808 |
| rs139569868 | A | 0.242   |
| rs11655038  | A | 0.0713  |
| rs8076771   | T | 0.2228  |
| rs72832284  | A | 0.0839  |
| rs12453749  | C | -0.0389 |
| rs441695    | A | 0.0394  |
| rs9900321   | T | 0.111   |
| rs112865118 | A | 0.2699  |
| rs41299816  | T | -0.0556 |
| rs12941180  | C | -0.0403 |
| rs74367802  | C | 0.1899  |
| rs78409943  | C | -0.0909 |
| rs139083683 | A | -0.1235 |
| rs147921388 | C | 0.1821  |
| rs112179957 | A | -0.098  |
| rs1367950   | C | -0.0389 |
| rs8079995   | A | -0.0384 |
| rs4082919   | T | 0.0398  |
| rs118166304 | G | -0.3445 |
| rs12944165  | C | 0.0681  |
| rs9891336   | C | -0.2352 |
| rs2301353   | G | -0.0424 |
| rs2215029   | A | -0.0699 |
| rs12942445  | C | -0.0567 |
| rs117465925 | A | 0.1481  |
| rs4794732   | C | -0.04   |

|             |   |         |
|-------------|---|---------|
| rs4790408   | A | -0.0616 |
| rs17658398  | A | 0.0416  |
| rs56394403  | C | 0.1142  |
| rs143514563 | A | 0.1811  |
| rs11872083  | T | 0.0526  |
| rs35429751  | G | 0.123   |
| rs75003668  | G | -0.1448 |
| rs11649879  | T | -0.0651 |
| rs111645998 | A | -0.0972 |
| rs2671649   | A | -0.0686 |
| rs138617950 | T | 0.2961  |
| rs4271640   | G | 0.0409  |
| rs66498906  | G | 0.0419  |
| rs12942033  | T | -0.1227 |
| rs11652601  | G | -0.041  |
| rs72842223  | A | -0.1501 |
| rs12948632  | T | -0.0448 |
| rs2240083   | T | -0.0485 |
| rs12453207  | A | -0.0943 |
| rs150566854 | T | -0.1314 |
| rs8078857   | A | -0.0383 |
| rs118189300 | T | -0.2645 |
| rs55897641  | C | 0.2235  |
| rs7218178   | A | -0.0605 |
| rs11650165  | T | -0.0402 |
| rs883251    | T | -0.0463 |
| rs111873142 | T | -0.1736 |
| rs894967    | T | -0.1872 |
| rs146167547 | A | -0.3274 |
| rs5638      | G | -0.1389 |
| rs170210    | T | -0.0738 |
| rs883286    | T | 0.0384  |
| rs77993972  | T | -0.3043 |
| rs9890352   | C | -0.0643 |
| rs16960114  | C | 0.0484  |
| rs113313630 | A | -0.0656 |
| rs72811656  | C | 0.069   |
| rs77692797  | C | -0.1914 |
| rs9895498   | G | 0.0545  |
| rs1038651   | C | -0.0413 |
| rs74426883  | T | -0.164  |
| rs12951487  | T | 0.1333  |
| rs17599639  | A | -0.0937 |
| rs9911690   | C | 0.047   |
| rs1476774   | A | 0.0474  |
| rs11869711  | A | -0.0545 |
| rs144297900 | A | -0.1562 |

|             |   |         |
|-------------|---|---------|
| rs222852    | G | 0.0373  |
| rs8070414   | G | 0.0604  |
| rs28642775  | A | -0.0406 |
| rs11651653  | G | 0.0655  |
| rs113002539 | T | 0.1964  |
| rs12450540  | A | 0.0514  |
| rs78511019  | A | -0.0678 |
| rs118000689 | G | -0.2549 |
| rs7208460   | C | 0.0409  |
| rs73997582  | A | 0.1115  |
| rs2165705   | A | 0.0484  |
| rs72833154  | C | -0.1056 |
| rs112421851 | G | 0.1496  |
| rs80224341  | A | 0.0871  |
| rs2344339   | T | 0.0424  |
| rs28692633  | T | 0.1266  |
| rs8064645   | G | -0.0582 |
| rs118036166 | G | -0.1772 |
| rs79677613  | T | 0.169   |
| rs35747764  | G | -0.1223 |
| rs149568517 | A | 0.1737  |
| rs4383191   | A | 0.0382  |
| rs6502257   | G | 0.0705  |
| rs667026    | C | 0.0513  |
| rs116846789 | G | -0.1584 |
| rs12942740  | A | -0.0658 |
| rs9893689   | G | 0.0499  |
| rs4968889   | T | -0.0384 |
| rs10512474  | G | -0.0644 |
| rs112097489 | C | 0.3059  |
| rs4795755   | T | -0.1267 |
| rs111834285 | T | -0.0716 |
| rs56224221  | T | 0.1469  |
| rs2367501   | C | 0.0438  |
| rs2109248   | G | -0.0397 |
| rs34778863  | A | 0.1799  |
| rs744166    | G | 0.0366  |
| rs56005409  | T | 0.0846  |
| rs143809034 | A | 0.2816  |
| rs9906551   | A | -0.0463 |
| rs138777331 | T | -0.2004 |
| rs62069670  | T | 0.0379  |
| rs62072836  | A | -0.1307 |
| rs4792542   | C | 0.04    |
| rs17762314  | G | -0.041  |
| rs4794899   | C | -0.0703 |
| rs72844074  | C | 0.196   |

|             |   |         |
|-------------|---|---------|
| rs80026188  | T | -0.2761 |
| rs35570313  | G | -0.0453 |
| rs147308018 | T | 0.1269  |
| rs7219674   | G | 0.0985  |
| rs9893515   | T | 0.072   |
| rs111721971 | T | 0.1211  |
| rs2935428   | A | 0.0514  |
| rs151116767 | G | 0.1716  |
| rs61641128  | G | 0.138   |
| rs8079781   | T | 0.0443  |
| rs145153543 | A | 0.2139  |
| rs117666552 | G | 0.165   |
| rs117531258 | A | 0.2224  |
| rs111656919 | A | 0.2011  |
| rs76877955  | C | -0.2544 |
| rs8080896   | A | -0.0501 |
| rs75332081  | C | -0.1099 |
| rs11868982  | G | -0.0603 |
| rs72832757  | A | 0.0675  |
| rs55788506  | T | 0.2407  |
| rs6565465   | A | 0.0385  |
| rs147830853 | T | 0.1048  |
| rs391271    | G | -0.0984 |
| rs143938222 | G | 0.1666  |
| rs79294765  | C | 0.0885  |
| rs111698893 | T | 0.1141  |
| rs79927765  | G | -0.116  |
| rs62062553  | C | -0.1722 |
| rs7211860   | A | 0.0607  |
| rs116982636 | T | 0.217   |
| rs11658031  | A | 0.1442  |
| rs9916791   | C | 0.053   |
| rs141412655 | T | 0.2146  |
| rs117593295 | G | 0.1604  |
| rs757416    | C | 0.039   |
| rs6587211   | G | -0.0536 |
| rs11649977  | T | 0.0573  |
| rs117994016 | A | -0.0906 |
| rs75740380  | G | 0.0656  |
| rs12948970  | A | 0.0417  |
| rs142139541 | T | -0.0692 |
| rs7223723   | C | 0.0374  |
| rs9911197   | G | 0.0362  |
| rs118046709 | T | 0.2898  |
| rs9892932   | T | -0.0497 |
| rs2714035   | G | 0.0402  |
| rs7212955   | G | 0.0415  |

|             |   |         |
|-------------|---|---------|
| rs9897923   | G | 0.0724  |
| rs6502941   | T | -0.0387 |
| rs139296776 | G | -0.1766 |
| rs117521260 | A | 0.2128  |
| rs78393724  | T | 0.1658  |
| rs59234820  | C | -0.0508 |
| rs141599162 | G | -0.0922 |
| rs3930968   | G | -0.0683 |
| rs56404472  | C | 0.1353  |
| rs77307908  | G | -0.1557 |
| rs141321280 | A | -0.1463 |
| rs9896379   | C | 0.0693  |
| rs144746382 | T | 0.1543  |
| rs1017090   | A | -0.0992 |
| rs28823963  | T | 0.2095  |
| rs139423949 | A | -0.151  |
| rs57808111  | T | -0.0441 |
| rs76844890  | T | 0.1576  |
| rs75511415  | C | 0.1552  |
| rs4793645   | A | -0.0602 |
| rs78035938  | T | 0.2624  |
| rs980248    | G | 0.3662  |
| rs56013850  | G | -0.1613 |
| rs11077353  | G | -0.0391 |
| rs140760578 | A | 0.1264  |
| rs12945614  | A | -0.1056 |
| rs11658301  | T | -0.0458 |
| rs11651483  | A | -0.0631 |
| rs11867306  | C | 0.0525  |
| rs35233508  | A | -0.174  |
| rs72634303  | T | -0.1082 |
| rs118103788 | C | 0.1218  |
| rs73984056  | A | 0.1323  |
| rs4131402   | A | 0.0667  |
| rs2644700   | T | -0.0613 |
| rs2165706   | T | -0.0455 |
| rs76200965  | T | 0.1171  |
| rs8074012   | C | 0.1303  |
| rs150143112 | A | 0.2254  |
| rs8064368   | C | 0.0361  |
| rs144723231 | T | -0.2022 |
| rs150781713 | A | 0.1232  |
| rs4791792   | A | -0.0381 |
| rs55660228  | A | -0.0365 |
| rs111638927 | A | 0.2202  |
| rs112408504 | A | -0.1047 |
| rs76606195  | C | -0.0832 |

|             |   |         |
|-------------|---|---------|
| rs6416841   | G | 0.0599  |
| rs4569342   | T | 0.1277  |
| rs28802291  | G | -0.1169 |
| rs218722    | T | -0.0489 |
| rs9901675   | A | -0.0828 |
| rs9890475   | C | 0.0399  |
| rs8064626   | A | -0.0449 |
| rs9904001   | G | 0.0471  |
| rs112254449 | G | 0.2591  |
| rs7213034   | T | -0.0775 |
| rs146195631 | A | -0.2199 |
| rs4790980   | C | -0.0582 |
| rs9890060   | C | 0.0418  |
| rs79814358  | A | -0.0577 |
| rs3103303   | C | -0.037  |
| rs35477639  | C | -0.0833 |
| rs11653874  | T | -0.0937 |
| rs7218656   | A | -0.0646 |
| rs72848237  | T | -0.158  |
| rs73988748  | C | -0.1171 |
| rs60315948  | G | 0.0989  |
| rs8066902   | G | 0.0862  |
| rs112812801 | T | -0.1487 |
| rs72637309  | C | 0.0542  |
| rs78211928  | C | 0.1445  |
| rs17646290  | T | -0.0871 |
| rs77752353  | G | -0.1794 |
| rs77735926  | G | -0.0725 |
| rs227730    | C | -0.0398 |
| rs56046658  | T | 0.0643  |
| rs62062196  | C | -0.0956 |
| rs112088212 | C | 0.1894  |
| rs3785569   | T | 0.0452  |
| rs12942232  | G | -0.1226 |
| rs112222521 | G | -0.0743 |
| rs854667    | T | -0.0371 |
| rs73982623  | C | -0.2571 |
| rs111412358 | T | 0.2262  |
| rs4790881   | C | 0.0385  |
| rs73973823  | T | 0.0761  |
| rs2034945   | A | -0.0474 |
| rs435699    | C | -0.0438 |
| rs75552063  | T | -0.0759 |
| rs61689046  | A | 0.21    |
| rs8066248   | G | -0.0542 |
| rs79057723  | T | 0.2268  |
| rs112180005 | A | -0.2877 |

|             |   |         |
|-------------|---|---------|
| rs11658503  | C | -0.0977 |
| rs4404112   | G | -0.0466 |
| rs4791613   | C | -0.05   |
| rs111860392 | A | 0.1289  |
| rs118124362 | T | 0.1865  |
| rs9894131   | A | 0.0588  |
| rs75202278  | T | -0.0775 |
| rs73365920  | A | -0.1157 |
| rs2257540   | C | -0.0404 |
| rs225218    | A | 0.0415  |
| rs78355686  | T | -0.1046 |
| rs149058972 | T | 0.2308  |
| rs3102033   | C | -0.0909 |
| rs2871766   | T | 0.1266  |
| rs11650787  | T | 0.0522  |
| rs58897082  | C | -0.0668 |
| rs9902475   | A | -0.0376 |
| rs1477065   | G | -0.0381 |
| rs140827633 | T | -0.2223 |
| rs146885263 | G | -0.1497 |
| rs11652329  | A | -0.1406 |
| rs6505262   | C | -0.0448 |
| rs75715316  | T | 0.0944  |
| rs144753909 | T | 0.2656  |
| rs34692262  | A | 0.1553  |
| rs8075740   | A | 0.0348  |
| rs9891362   | G | 0.0607  |
| rs991108    | G | -0.0619 |
| rs7219969   | C | 0.0375  |
| rs112744959 | G | 0.0555  |
| rs79851078  | A | 0.1208  |
| rs486287    | T | -0.0352 |
| rs62069514  | C | -0.0423 |
| rs8082184   | G | 0.0457  |
| rs12952990  | T | -0.0391 |
| rs4611488   | T | -0.0434 |
| rs60110245  | T | -0.0845 |
| rs9891060   | C | 0.0548  |
| rs2159331   | C | 0.0349  |
| rs75442133  | C | -0.1791 |
| rs4054823   | C | -0.0384 |
| rs62066451  | G | -0.1436 |
| rs117299868 | C | 0.2729  |
| rs12936897  | A | 0.0368  |
| rs7225779   | T | 0.0487  |
| rs76071867  | T | 0.1316  |
| rs9905522   | A | 0.0593  |

|             |   |         |
|-------------|---|---------|
| rs140083252 | G | 0.2183  |
| rs144412689 | C | -0.1572 |
| rs117496094 | A | 0.2209  |
| rs79372300  | G | 0.0532  |
| rs112070202 | G | 0.1301  |
| rs118058613 | A | 0.1188  |
| rs75005306  | A | -0.139  |
| rs12951439  | G | -0.0677 |
| rs17585033  | C | -0.1172 |
| rs11657236  | T | -0.0469 |
| rs9915181   | T | -0.0707 |
| rs2215049   | T | 0.1491  |
| rs79266399  | G | -0.2329 |
| rs144152732 | A | 0.3196  |
| rs139840027 | T | 0.1955  |
| rs2642059   | T | 0.0456  |
| rs62084586  | C | -0.0475 |
| rs8075211   | A | -0.0476 |
| rs4243256   | C | -0.1148 |
| rs8072360   | T | -0.0369 |
| rs8078054   | G | 0.0347  |
| rs12451120  | C | 0.0897  |
| rs111569409 | A | -0.0975 |
| rs17760475  | C | 0.0402  |
| rs11658253  | T | 0.2073  |
| rs112259557 | A | 0.2167  |
| rs12944752  | T | -0.0503 |
| rs4024016   | C | 0.0447  |
| rs72822066  | A | -0.1418 |
| rs1242472   | A | 0.2916  |
| rs7209588   | G | 0.038   |
| rs140503127 | C | -0.1641 |
| rs71383094  | A | 0.0612  |
| rs421809    | C | 0.0386  |
| rs17663816  | T | -0.1302 |
| rs75268102  | A | 0.1831  |
| rs112331156 | G | 0.0496  |
| rs74644618  | T | 0.2532  |
| rs8069587   | C | -0.0432 |
| rs77732314  | T | -0.1175 |
| rs79910491  | C | 0.1438  |
| rs75639624  | C | 0.1236  |
| rs2009679   | G | -0.0349 |
| rs78758528  | T | 0.1873  |
| rs117780636 | C | 0.1201  |
| rs35256812  | G | 0.0387  |
| rs12450498  | G | 0.0799  |



|             |   |         |
|-------------|---|---------|
| rs112108842 | C | 0.084   |
| rs117453874 | T | 0.1528  |
| rs117998118 | A | 0.3364  |
| rs76685442  | G | 0.1166  |
| rs138317007 | T | 0.0557  |
| rs112695278 | A | -0.1551 |
| rs62076165  | A | 0.2361  |
| rs58798467  | C | 0.0406  |
| rs78278295  | T | 0.1277  |
| rs75852367  | A | 0.1797  |
| rs12942172  | A | 0.0553  |
| rs12943620  | T | -0.0451 |
| rs1795957   | A | -0.0404 |
| rs9913345   | A | 0.1173  |
| rs4789950   | A | 0.0373  |
| rs12451779  | A | 0.093   |
| rs79614251  | A | -0.1265 |
| rs2585830   | T | -0.0468 |
| rs147997011 | G | -0.2661 |
| rs62055182  | C | -0.0494 |
| rs141893998 | T | -0.1552 |
| rs9972911   | T | -0.0358 |
| rs11652453  | A | -0.0365 |
| rs7222177   | T | 0.2351  |
| rs55801908  | T | -0.0473 |
| rs12603406  | C | -0.0402 |
| rs8077853   | C | 0.0463  |
| rs11656006  | C | 0.0607  |
| rs74319518  | T | 0.0738  |
| rs4968810   | C | 0.0337  |
| rs967676    | C | -0.035  |
| rs145509717 | T | 0.2362  |
| rs57619518  | G | -0.1655 |
| rs236807    | G | -0.0839 |
| rs12945909  | C | -0.0395 |
| rs7214193   | G | 0.0419  |
| rs11868065  | C | -0.0353 |
| rs118136964 | C | -0.2132 |
| rs111230142 | A | 0.1711  |
| rs4968481   | T | 0.0511  |
| rs9901834   | A | 0.1102  |
| rs74441611  | G | -0.1183 |
| rs116955162 | C | 0.1829  |
| rs11655373  | A | 0.0567  |
| rs11655988  | C | 0.0395  |
| rs60758680  | G | 0.1595  |
| rs57834781  | T | 0.0493  |

|             |   |         |
|-------------|---|---------|
| rs2659014   | A | 0.0354  |
| rs76919246  | G | 0.1249  |
| rs2286532   | C | -0.0359 |
| rs151036546 | C | -0.1656 |
| rs75024378  | T | 0.1647  |
| rs11078712  | A | 0.0562  |
| rs11867865  | A | 0.2509  |
| rs3027200   | C | 0.2784  |
| rs79439235  | G | 0.1065  |
| rs147292354 | A | 0.153   |
| rs16942526  | C | -0.0767 |
| rs2280493   | G | 0.0474  |
| rs2585845   | G | -0.0479 |
| rs55842605  | C | 0.0346  |
| rs9901910   | G | 0.0663  |
| rs8074113   | A | 0.0379  |
| rs112253292 | A | 0.1173  |
| rs117211584 | G | 0.1397  |
| rs141394922 | C | -0.1541 |
| rs12941976  | G | 0.0573  |
| rs6607290   | G | 0.0413  |
| rs7224874   | T | -0.0377 |
| rs3785977   | A | -0.0381 |
| rs34933374  | C | -0.2104 |
| rs11150892  | T | 0.1182  |
| rs75921220  | T | 0.0986  |
| rs142255415 | C | 0.1111  |
| rs62059671  | A | 0.1499  |
| rs4789956   | C | 0.0559  |
| rs62053093  | C | 0.0382  |
| rs16958233  | A | 0.1498  |
| rs74755026  | A | 0.0892  |
| rs117334067 | A | -0.0729 |
| rs301344    | T | -0.0961 |
| rs11656302  | A | 0.0553  |
| rs1177981   | C | -0.0349 |
| rs2015031   | A | 0.0409  |
| rs55758932  | C | 0.0974  |
| rs111940569 | G | 0.2093  |
| rs16953011  | A | 0.1423  |
| rs8079889   | G | -0.204  |
| rs1996710   | G | 0.0556  |
| rs9908517   | A | 0.05    |
| rs11869103  | T | -0.0486 |
| rs118182942 | T | 0.2117  |
| rs4985768   | T | -0.0842 |
| rs73995127  | G | -0.203  |

|             |   |         |
|-------------|---|---------|
| rs41556717  | T | -0.2383 |
| rs60955824  | A | 0.0834  |
| rs34075872  | A | -0.0751 |
| rs34293835  | T | 0.1915  |
| rs8079039   | G | -0.0399 |
| rs11649824  | G | -0.3241 |
| rs2332311   | C | -0.036  |
| rs4024017   | A | -0.0538 |
| rs9902527   | A | -0.2131 |
| rs143250328 | A | 0.1108  |
| rs144931466 | T | -0.1052 |
| rs74672725  | T | 0.0605  |
| rs7219780   | T | -0.0415 |
| rs56093915  | G | 0.0725  |
| rs79481082  | C | 0.1735  |
| rs56174997  | T | -0.1111 |
| rs11649901  | G | -0.0364 |
| rs79672383  | T | -0.1018 |
| rs72880512  | A | 0.0635  |
| rs9899082   | C | -0.1425 |
| rs28711376  | T | 0.0876  |
| rs118095810 | G | -0.0908 |
| rs2700831   | T | 0.0351  |
| rs12940425  | T | 0.0441  |
| rs9911671   | G | 0.0351  |
| rs1344547   | A | 0.0708  |
| rs148500229 | G | 0.0501  |
| rs140239793 | C | 0.1641  |
| rs7220103   | G | -0.093  |
| rs77842597  | A | -0.0806 |
| rs73993407  | A | 0.1438  |
| rs56356609  | G | -0.157  |
| rs141504402 | G | -0.1921 |
| rs62064008  | A | 0.0885  |
| rs851059    | T | 0.0346  |
| rs11868854  | G | 0.0488  |
| rs35984077  | T | -0.0673 |
| rs12449698  | A | 0.0486  |
| rs3826414   | A | 0.05    |
| rs77322846  | G | 0.2146  |
| rs139338418 | A | -0.2286 |
| rs7214770   | T | 0.0866  |
| rs9904970   | A | 0.0399  |
| rs3744252   | T | -0.0601 |
| rs7218252   | C | 0.1065  |
| rs1024609   | A | 0.0563  |
| rs2916153   | A | 0.0397  |

|             |   |         |
|-------------|---|---------|
| rs117306448 | G | 0.17    |
| rs55699368  | G | 0.0447  |
| rs62053097  | A | 0.1128  |
| rs116985228 | T | 0.1702  |
| rs72840094  | A | -0.0404 |
| rs9893168   | C | 0.0352  |
| rs55687030  | G | 0.1149  |
| rs7214655   | A | 0.0434  |
| rs4968780   | C | 0.1229  |
| rs79261414  | C | 0.1155  |
| rs12453468  | T | 0.0346  |
| rs854462    | G | 0.0484  |
| rs4793656   | A | -0.0683 |
| rs350009    | T | 0.0338  |
| rs141452526 | A | 0.1343  |
| rs75920405  | C | -0.2145 |
| rs9747888   | T | 0.048   |
| rs117991963 | C | 0.1533  |
| rs146431408 | G | 0.2244  |
| rs117646490 | C | 0.1529  |
| rs1076393   | A | 0.0806  |
| rs2239921   | C | 0.0743  |
| rs2889386   | A | 0.0588  |
| rs28464494  | G | 0.0547  |
| rs71359153  | A | 0.0704  |
| rs111474967 | G | -0.2261 |
| rs140530853 | G | -0.1187 |
| rs138370835 | A | -0.25   |
| rs12600608  | G | 0.0884  |
| rs74895717  | T | -0.158  |
| rs9903763   | T | 0.0453  |
| rs17746094  | T | 0.079   |
| rs12948827  | T | 0.0383  |
| rs72822111  | A | -0.0664 |
| rs6503376   | T | 0.0618  |
| rs117107208 | T | -0.2125 |
| rs72896149  | G | 0.0803  |
| rs9892540   | C | -0.0339 |
| rs2344973   | A | 0.0453  |
| rs201601    | T | 0.0504  |
| rs3026155   | A | -0.0909 |
| rs72828524  | T | 0.1766  |
| rs9903469   | T | -0.052  |
| rs8077247   | T | -0.0627 |
| rs4796765   | A | -0.0813 |
| rs12943647  | A | -0.0491 |
| rs72848715  | T | 0.1101  |

|             |   |         |
|-------------|---|---------|
| rs36051821  | A | -0.1042 |
| rs12450436  | A | 0.0486  |
| rs7503229   | A | -0.038  |
| rs6505468   | C | 0.1722  |
| rs7217663   | T | -0.0637 |
| rs9900928   | A | 0.086   |
| rs55789569  | A | 0.0513  |
| rs61749867  | T | 0.0912  |
| rs511806    | T | 0.0488  |
| rs72815336  | A | -0.1149 |
| rs137880864 | A | 0.1152  |
| rs112219332 | C | -0.0349 |
| rs2193002   | A | 0.0474  |
| rs9905034   | G | 0.0327  |
| rs2439998   | T | 0.1221  |
| rs58654829  | G | -0.0443 |
| rs149981851 | C | -0.1376 |
| rs2323241   | A | -0.0693 |
| rs117348742 | C | -0.1854 |
| rs139667480 | T | 0.1161  |
| rs2158519   | A | 0.0334  |
| rs635874    | A | 0.0675  |
| rs72828434  | T | -0.108  |
| rs12944858  | A | -0.0386 |
| rs2526534   | T | -0.037  |
| rs66490177  | C | 0.0428  |
| rs35998513  | C | -0.2798 |
| rs61349812  | C | -0.1404 |
| rs7210601   | T | 0.0877  |
| rs16956336  | A | -0.1092 |
| rs78767809  | T | 0.0947  |
| rs12942097  | A | 0.0433  |
| rs9674917   | T | 0.0523  |
| rs11649741  | C | 0.037   |
| rs12453520  | C | 0.0475  |
| rs13306775  | A | -0.05   |
| rs117534564 | C | -0.2593 |
| rs117477933 | A | -0.1253 |
| rs8067186   | G | 0.038   |
| rs740441    | A | -0.0409 |
| rs35112109  | T | 0.1836  |
| rs61744818  | A | 0.1196  |
| rs77193509  | T | 0.0776  |
| rs9906381   | G | -0.0851 |
| rs11655598  | G | 0.0423  |
| rs62069158  | A | -0.0684 |
| rs12940890  | A | 0.0985  |

|             |   |         |
|-------------|---|---------|
| rs7222897   | G | 0.0513  |
| rs34742396  | T | 0.0994  |
| rs75174305  | G | -0.2336 |
| rs11077901  | T | 0.0375  |
| rs112408054 | A | 0.0717  |
| rs146750352 | C | 0.2506  |
| rs73292969  | C | 0.1494  |
| rs2586085   | C | -0.0457 |
| rs4969248   | C | -0.0413 |
| rs16968252  | A | 0.1374  |
| rs2158293   | A | -0.1192 |
| rs117135209 | A | -0.1155 |
| rs74445229  | C | 0.2943  |
| rs4889777   | C | -0.0364 |
| rs34867724  | T | -0.0644 |
| rs7225682   | C | -0.0341 |
| rs12185272  | T | 0.0496  |
| rs236514    | G | 0.0351  |
| rs9896319   | T | 0.0338  |
| rs76800732  | G | -0.0441 |
| rs2102408   | A | 0.0584  |
| rs7217437   | C | 0.0346  |
| rs12451871  | G | 0.0392  |
| rs799923    | A | -0.0385 |
| rs12450758  | A | -0.0325 |
| rs117899905 | A | -0.13   |
| rs55989631  | A | -0.0437 |
| rs1078544   | A | 0.0677  |
| rs58606391  | A | -0.1446 |
| rs113492700 | A | 0.0643  |
| rs11651313  | C | -0.0599 |
| rs117631149 | C | -0.1706 |
| rs62069116  | G | -0.2159 |
| rs12452207  | A | 0.0356  |
| rs2526532   | T | 0.0611  |
| rs76274035  | T | -0.1392 |
| rs113600793 | A | -0.1634 |
| rs2001810   | T | 0.0399  |
| rs61229126  | A | -0.0478 |
| rs3785902   | C | -0.0516 |
| rs61599616  | T | 0.2483  |
| rs220470    | A | 0.037   |
| rs4792454   | C | -0.0558 |
| rs17508667  | C | -0.1293 |
| rs57571978  | T | -0.0868 |
| rs9902971   | A | -0.0372 |
| rs57160458  | G | 0.0488  |

|             |   |         |
|-------------|---|---------|
| rs74824939  | G | 0.1469  |
| rs2286303   | G | -0.0349 |
| rs140403721 | T | -0.2302 |
| rs2958914   | A | -0.0368 |
| rs10491135  | T | 0.0585  |
| rs76534481  | G | 0.1079  |
| rs2960089   | C | -0.0443 |
| rs7220081   | C | 0.1741  |
| rs80323574  | G | 0.1653  |
| rs2071167   | T | 0.0377  |
| rs12937472  | A | 0.0701  |
| rs75443266  | A | 0.1878  |
| rs149738586 | A | -0.1804 |
| rs34969726  | C | 0.039   |
| rs11658413  | T | 0.0569  |
| rs62066365  | T | 0.0893  |
| rs77789697  | G | 0.1556  |
| rs16956534  | A | -0.0686 |
| rs113644109 | T | -0.0358 |
| rs62072722  | G | -0.1358 |
| rs1873589   | A | -0.0364 |
| rs11655255  | C | -0.0529 |
| rs28421292  | T | -0.0927 |
| rs8075046   | C | -0.0386 |
| rs116903076 | T | 0.1593  |
| rs144714755 | G | 0.0702  |
| rs62066152  | C | 0.0531  |
| rs148282124 | G | 0.1074  |
| rs9902386   | T | 0.0361  |
| rs9900173   | A | -0.0336 |
| rs34069225  | A | -0.17   |
| rs12603671  | G | -0.0942 |
| rs12944887  | T | 0.1423  |
| rs77132591  | G | 0.349   |
| rs9909404   | C | 0.0595  |
| rs3794756   | T | 0.1837  |
| rs7218226   | T | 0.032   |
| rs75930470  | G | -0.1383 |
| rs62071725  | G | -0.2169 |
| rs4447485   | T | -0.0468 |
| rs56193061  | C | -0.0347 |
| rs149869131 | A | 0.1627  |
| rs12946881  | C | 0.035   |
| rs117415797 | A | 0.1409  |
| rs66499319  | C | 0.1146  |
| rs113197157 | T | 0.1235  |
| rs117547935 | T | 0.3065  |

|             |   |         |
|-------------|---|---------|
| rs12946755  | T | 0.0409  |
| rs74937284  | A | 0.0784  |
| rs117684733 | A | 0.2244  |
| rs8080186   | G | 0.0343  |
| rs12941150  | A | 0.0459  |
| rs149799622 | A | 0.1076  |
| rs113052957 | C | -0.2034 |
| rs10871503  | A | 0.0351  |
| rs12940357  | A | -0.0327 |
| rs72911057  | T | 0.0879  |
| rs9914723   | A | -0.0497 |
| rs72820163  | C | -0.0574 |
| rs117089602 | T | 0.1655  |
| rs2103273   | T | -0.0445 |
| rs79554797  | A | 0.1798  |
| rs116990501 | T | 0.0873  |
| rs79182583  | T | 0.0966  |
| rs74481425  | A | -0.114  |
| rs74987042  | C | -0.1885 |
| rs7502233   | G | 0.036   |
| rs16944657  | A | 0.083   |
| rs117633773 | A | 0.1157  |
| rs11654222  | C | -0.0621 |
| rs146341624 | T | -0.2195 |
| rs3884646   | T | 0.0494  |
| rs72842725  | C | -0.1314 |
| rs3887005   | A | -0.1233 |
| rs867156    | T | 0.1051  |
| rs59638977  | C | 0.1206  |
| rs2996025   | T | 0.0479  |
| rs117859452 | T | -0.1746 |
| rs1037257   | T | 0.0345  |
| rs6565532   | C | 0.0417  |
| rs1806551   | C | -0.036  |
| rs56653742  | C | -0.1094 |
| rs62071691  | A | -0.0624 |
| rs12453149  | C | -0.0399 |
| rs9899680   | G | -0.0418 |
| rs62074506  | G | -0.1273 |
| rs59170636  | T | -0.0523 |
| rs36043979  | A | 0.0822  |
| rs11870386  | T | -0.0829 |
| rs7224443   | G | 0.0534  |
| rs2586076   | T | 0.0396  |
| rs112839269 | A | 0.1861  |
| rs62056331  | C | -0.0764 |
| rs59025485  | T | -0.1334 |



|             |   |         |
|-------------|---|---------|
| rs11654701  | C | 0.1815  |
| rs74316239  | C | -0.1668 |
| rs792762    | G | 0.0364  |
| rs7224969   | T | -0.0773 |
| rs886079    | A | 0.0558  |
| rs74620303  | T | 0.0528  |
| rs35337153  | A | -0.1789 |
| rs35190120  | C | 0.0722  |
| rs62090081  | T | 0.0692  |
| rs4794125   | T | 0.1853  |
| rs7210053   | C | -0.036  |
| rs936018    | C | 0.1325  |
| rs112057771 | A | -0.2591 |
| rs1126642   | T | -0.0773 |
| rs78857101  | C | 0.1729  |
| rs161364    | T | 0.035   |
| rs78403836  | G | -0.0751 |
| rs9913232   | C | 0.0979  |
| rs7217756   | A | -0.0328 |
| rs10451315  | A | 0.1125  |
| rs118099743 | T | 0.155   |
| rs72842395  | A | -0.0847 |
| rs12601545  | T | 0.0556  |
| rs79980471  | A | 0.1026  |
| rs1242492   | T | -0.0331 |
| rs75219857  | C | 0.0389  |
| rs2447094   | A | 0.0317  |
| rs10852712  | T | 0.0492  |
| rs76305463  | C | -0.1831 |
| rs2661679   | G | 0.0766  |
| rs72842328  | C | -0.0881 |
| rs4985603   | G | 0.0642  |
| rs9893328   | G | 0.0491  |
| rs11870350  | A | 0.0712  |
| rs12936768  | A | 0.0589  |
| rs8068277   | T | 0.0381  |
| rs12951780  | A | 0.1334  |
| rs2135845   | A | 0.0342  |
| rs985626    | T | -0.0612 |
| rs11655323  | G | 0.2034  |
| rs138070145 | C | 0.2358  |
| rs77868763  | G | 0.1571  |
| rs78874864  | T | -0.0569 |
| rs7209752   | A | -0.0782 |
| rs147183429 | T | 0.1437  |
| rs1982272   | G | -0.0327 |
| rs10459965  | T | 0.0601  |

|             |   |         |
|-------------|---|---------|
| rs114101526 | T | -0.0745 |
| rs211981    | C | 0.0503  |
| rs4789601   | T | 0.0803  |
| rs150704510 | G | -0.2257 |
| rs117969637 | G | 0.1848  |
| rs73980711  | A | 0.1468  |
| rs887259    | T | -0.0614 |
| rs11655069  | C | 0.0498  |
| rs3094515   | T | 0.037   |
| rs149019155 | A | 0.2151  |
| rs11652338  | C | -0.0341 |
| rs78287236  | A | 0.1401  |
| rs12942225  | G | 0.0468  |
| rs78666273  | C | 0.1391  |
| rs3744166   | A | 0.1465  |
| rs113132917 | T | -0.1009 |
| rs2715808   | A | -0.1727 |
| rs7217268   | A | -0.035  |
| rs75020760  | G | 0.1262  |
| rs36036543  | A | 0.0734  |
| rs2058843   | A | 0.0324  |
| rs1563450   | T | 0.0448  |
| rs10491186  | G | -0.0474 |
| rs17338990  | C | -0.075  |
| rs76334049  | T | 0.0582  |
| rs11653705  | T | 0.0317  |
| rs4790255   | C | -0.0392 |
| rs138044713 | T | -0.1586 |
| rs8078266   | G | 0.0576  |
| rs75131029  | G | -0.1995 |
| rs9911269   | A | 0.0448  |
| rs17184573  | A | -0.0376 |
| rs140516694 | C | -0.121  |
| rs16943288  | A | -0.0456 |
| rs12603949  | G | -0.0313 |
| rs78707095  | C | -0.1709 |
| rs2218362   | G | 0.0433  |
| rs13380814  | T | -0.0768 |
| rs41315064  | A | -0.2186 |
| rs71358293  | A | 0.1142  |
| rs4793260   | A | -0.0544 |
| rs78857404  | C | -0.0911 |
| rs78414096  | A | 0.1139  |
| rs12946673  | A | 0.067   |
| rs116966690 | T | 0.1     |
| rs58869707  | C | 0.147   |
| rs72844125  | T | 0.0435  |

|             |   |         |
|-------------|---|---------|
| rs9910322   | A | 0.036   |
| rs8076366   | C | -0.0647 |
| rs117979815 | T | 0.0783  |
| rs17770949  | C | 0.0424  |
| rs34018373  | T | 0.0547  |
| rs9911986   | G | -0.0611 |
| rs2952275   | A | 0.033   |
| rs17184594  | A | -0.0582 |
| rs146770855 | G | 0.1329  |
| rs11079991  | G | 0.0689  |
| rs111596287 | T | -0.1024 |
| rs3027238   | T | -0.0863 |
| rs12449858  | A | -0.1017 |
| rs12602313  | T | -0.0851 |
| rs17683107  | A | -0.0448 |
| rs226423    | A | 0.0646  |
| rs171038    | C | -0.0344 |
| rs62086789  | A | 0.0744  |
| rs76299801  | T | 0.1047  |
| rs4365      | A | -0.2142 |
| rs62066594  | A | -0.0452 |
| rs61757652  | T | 0.0662  |
| rs145163606 | A | 0.2205  |
| rs72847177  | T | 0.1126  |
| rs11655781  | C | 0.0401  |
| rs111539503 | G | 0.0461  |
| rs75096475  | T | -0.226  |
| rs12602505  | G | -0.1668 |
| rs55775915  | T | -0.1898 |
| rs143697270 | T | 0.139   |
| rs4890109   | T | 0.0924  |
| rs142362168 | T | -0.1197 |
| rs117541203 | A | 0.1766  |
| rs9909477   | A | -0.0635 |
| rs11869066  | T | 0.0623  |
| rs73985887  | T | -0.172  |
| rs77247345  | C | -0.1265 |
| rs12937958  | A | -0.0404 |
| rs5011489   | T | 0.1437  |
| rs72813079  | A | 0.1773  |
| rs60810599  | G | 0.0546  |
| rs3867173   | G | 0.0385  |
| rs113122595 | T | -0.0586 |
| rs118065335 | T | 0.0898  |
| rs76498976  | G | -0.0781 |
| rs4791770   | T | 0.1006  |
| rs4790811   | C | -0.0458 |

|             |   |         |
|-------------|---|---------|
| rs623323    | T | -0.0479 |
| rs2289640   | T | 0.032   |
| rs117202870 | T | 0.164   |
| rs12944954  | G | 0.1018  |
| rs16950966  | T | 0.0801  |
| rs61567868  | G | 0.0731  |
| rs7222249   | A | -0.0323 |
| rs73977930  | A | 0.092   |
| rs72844550  | G | -0.1233 |
| rs149570333 | A | 0.2044  |
| rs75479859  | A | -0.2191 |
| rs333937    | C | 0.0499  |
| rs75049490  | A | -0.1552 |
| rs12949129  | G | -0.0451 |
| rs7222657   | C | 0.0344  |
| rs2586088   | C | -0.0369 |
| rs2912553   | T | -0.0432 |
| rs55924840  | C | -0.0933 |
| rs224514    | A | 0.0863  |
| rs56237951  | A | -0.0807 |
| rs62087072  | C | 0.0391  |
| rs6504508   | T | 0.0411  |
| rs72838197  | A | -0.1351 |
| rs7220278   | G | -0.031  |
| rs7218662   | A | -0.1094 |
| rs140211501 | C | 0.1651  |
| rs79315956  | C | -0.2608 |
| rs4790348   | A | -0.1082 |
| rs111817563 | T | -0.0973 |
| rs9897185   | A | -0.0351 |
| rs3785819   | C | 0.0354  |
| rs62069853  | A | 0.2281  |
| rs11868671  | T | 0.163   |
| rs79737704  | A | -0.0905 |
| rs6502555   | C | 0.0373  |
| rs72628382  | A | -0.0476 |
| rs6503102   | G | -0.1004 |
| rs34686969  | G | 0.0301  |
| rs72828777  | T | 0.1031  |
| rs11869872  | C | -0.032  |
| rs7211507   | C | 0.0324  |
| rs12600582  | C | 0.0353  |
| rs79229088  | G | -0.2603 |
| rs11867803  | C | -0.0317 |
| rs11078971  | A | -0.1001 |
| rs76529191  | A | -0.1858 |
| rs12600758  | C | 0.0411  |

|             |   |         |
|-------------|---|---------|
| rs9907100   | G | -0.0918 |
| rs7359698   | T | 0.0972  |
| rs2642048   | C | -0.1297 |
| rs9891121   | C | 0.0337  |
| rs73319048  | G | 0.2591  |
| rs658591    | G | -0.044  |
| rs76552057  | T | -0.1177 |
| rs140292889 | T | -0.1504 |
| rs12935880  | A | 0.1571  |
| rs144979972 | T | -0.1132 |
| rs62068661  | A | 0.0575  |
| rs117431947 | C | 0.1662  |
| rs35634464  | A | -0.0567 |
| rs28698582  | A | 0.0405  |
| rs1357108   | G | 0.0395  |
| rs71381488  | C | -0.1061 |
| rs147507380 | G | -0.1368 |
| rs7212120   | C | -0.0336 |
| rs2854205   | T | -0.0341 |
| rs4794556   | C | -0.041  |
| rs139869772 | C | -0.1238 |
| rs2140252   | G | -0.0388 |
| rs77396849  | G | 0.1008  |
| rs17709690  | G | 0.0369  |
| rs117871954 | C | -0.1487 |
| rs1531565   | G | 0.0342  |
| rs78703872  | T | 0.0931  |
| rs62081793  | G | -0.1277 |
| rs16971539  | G | 0.0357  |
| rs35906474  | A | 0.0596  |
| rs17782835  | T | -0.0558 |
| rs41274294  | C | 0.153   |
| rs963955    | G | -0.0308 |
| rs78108792  | G | -0.1517 |
| rs312697    | T | -0.0362 |
| rs72831437  | A | 0.0958  |
| rs1541352   | C | -0.0585 |
| rs8082504   | C | -0.0378 |
| rs117839099 | A | -0.1176 |
| rs28575272  | A | -0.1001 |
| rs4793154   | T | 0.0357  |
| rs111252163 | A | -0.0989 |
| rs79939670  | T | -0.1528 |
| rs113991812 | G | -0.1559 |
| rs11651897  | G | 0.216   |
| rs4791022   | T | 0.0349  |
| rs1510075   | G | 0.04    |

|             |   |         |
|-------------|---|---------|
| rs111475501 | G | 0.0508  |
| rs9890892   | C | 0.04    |
| rs9912887   | A | -0.0308 |
| rs8072392   | G | 0.0495  |
| rs57081347  | G | -0.0358 |
| rs1519255   | G | -0.0459 |
| rs11870423  | A | -0.1158 |
| rs72837670  | G | -0.0661 |
| rs4793262   | A | 0.0469  |
| rs55829039  | T | -0.1425 |
| rs1032130   | T | 0.0482  |
| rs111341925 | T | 0.1179  |
| rs12600940  | A | -0.0334 |
| rs2306752   | C | -0.0626 |
| rs9899879   | G | 0.059   |
| rs2191377   | T | -0.0343 |
| rs16967866  | G | -0.07   |
| rs12950579  | A | -0.0612 |
| rs9901743   | T | -0.0441 |
| rs72834231  | G | -0.0574 |
| rs78377103  | C | 0.2781  |
| rs117050847 | T | -0.1187 |
| rs77177480  | C | -0.0319 |
| rs9896300   | C | 0.0907  |
| rs12451385  | A | 0.0928  |
| rs7220316   | T | 0.0369  |
| rs9903099   | C | 0.0308  |
| rs77593888  | T | -0.1452 |
| rs1696756   | C | 0.0411  |
| rs140495649 | C | 0.1524  |
| rs5029583   | T | -0.2256 |
| rs74425838  | T | -0.115  |
| rs72625913  | T | 0.1851  |
| rs7216635   | A | 0.0312  |
| rs55827554  | T | 0.0381  |
| rs62636635  | T | -0.0661 |
| rs8075579   | G | -0.0461 |
| rs12450580  | C | 0.1469  |
| rs9912036   | C | 0.0772  |
| rs72853549  | T | -0.0342 |
| rs6505243   | A | 0.0351  |
| rs12602536  | C | -0.0396 |
| rs3785843   | A | 0.0774  |
| rs11079849  | T | -0.0324 |
| rs113887955 | T | -0.0386 |
| rs982899    | C | -0.033  |
| rs1873880   | A | -0.0439 |

|             |   |         |
|-------------|---|---------|
| rs72845778  | T | 0.0512  |
| rs28415667  | C | -0.2122 |
| rs60756397  | G | -0.0606 |
| rs117071709 | A | 0.1491  |
| rs72844030  | A | -0.1125 |
| rs17590660  | G | 0.1888  |
| rs116937448 | C | 0.1828  |
| rs1992666   | T | -0.1338 |
| rs17594273  | G | -0.0908 |
| rs1010269   | A | 0.0424  |
| rs35511573  | A | -0.1538 |
| rs12946933  | T | -0.1366 |
| rs4794017   | A | -0.0508 |
| rs72883121  | A | 0.0444  |
| rs9896857   | G | 0.0388  |
| rs8072799   | T | 0.032   |
| rs2191195   | T | 0.035   |
| rs11655930  | C | 0.0602  |
| rs1224542   | T | 0.1795  |
| rs12449957  | G | 0.0326  |
| rs77585155  | A | -0.0862 |
| rs2612799   | G | 0.032   |
| rs3744536   | T | -0.098  |
| rs11654032  | C | -0.0404 |
| rs75573122  | A | -0.1869 |
| rs117293206 | A | -0.1203 |
| rs7405799   | T | 0.0316  |
| rs16959128  | G | 0.0507  |
| rs9898137   | A | 0.0589  |
| rs7209242   | C | 0.0466  |
| rs77721094  | A | 0.0977  |
| rs138897124 | A | -0.2047 |
| rs11651756  | T | 0.0343  |
| rs8069260   | A | -0.0786 |
| rs199141    | G | 0.0634  |
| rs6503760   | A | -0.0347 |
| rs185561    | A | 0.0572  |
| rs75677726  | C | 0.0655  |
| rs143627858 | T | -0.1531 |
| rs9912196   | T | -0.1388 |
| rs11078875  | G | -0.0628 |
| rs117376633 | T | -0.2843 |
| rs12453984  | C | -0.0363 |
| rs72827668  | G | 0.2091  |
| rs17181050  | A | -0.0951 |
| rs55887627  | A | 0.2014  |
| rs1124886   | C | 0.104   |

|             |   |         |
|-------------|---|---------|
| rs9972930   | G | 0.0323  |
| rs1263971   | A | -0.0297 |
| rs77034523  | T | -0.1985 |
| rs734194    | G | -0.0514 |
| rs8082457   | G | 0.1131  |
| rs112164880 | T | 0.1846  |
| rs2672893   | A | 0.0395  |
| rs76423127  | G | 0.1325  |
| rs1014697   | T | 0.0607  |
| rs7209589   | A | 0.0492  |
| rs7224680   | T | 0.1036  |
| rs9891084   | T | -0.0319 |
| rs56342880  | C | 0.1949  |
| rs62622790  | C | 0.0923  |
| rs80337333  | T | 0.167   |
| rs147430022 | A | -0.1271 |
| rs140117950 | A | 0.2436  |
| rs151311184 | A | 0.2333  |
| rs7214091   | C | 0.0372  |
| rs7222542   | T | -0.0604 |
| rs11204417  | C | -0.163  |
| rs117843447 | C | -0.1429 |
| rs76971077  | A | -0.1368 |
| rs79180700  | T | -0.1271 |
| rs7208188   | T | -0.0611 |
| rs62087202  | A | 0.0829  |
| rs6504729   | T | 0.0702  |
| rs74750766  | A | 0.0678  |
| rs6565702   | G | -0.0567 |
| rs117846228 | G | -0.2409 |
| rs150041383 | T | -0.246  |
| rs41303558  | T | 0.1263  |
| rs76892496  | T | -0.1942 |
| rs227911    | A | 0.0346  |
| rs1013123   | T | -0.0389 |
| rs145164322 | G | 0.1001  |
| rs7211460   | C | 0.0495  |
| rs2586531   | A | -0.0626 |
| rs144382041 | A | -0.1791 |
| rs7406114   | A | -0.0312 |
| rs79082774  | C | -0.0457 |
| rs62052134  | A | -0.0504 |
| rs11870228  | A | 0.0637  |
| rs141559802 | A | 0.0595  |
| rs150853    | A | 0.0314  |
| rs55693130  | T | -0.167  |
| rs12451335  | A | 0.0314  |



|             |   |         |
|-------------|---|---------|
| rs7209738   | T | 0.0344  |
| rs79940956  | A | 0.192   |
| rs11078096  | T | -0.045  |
| rs9892366   | G | -0.0831 |
| rs2716900   | A | -0.032  |
| rs220036    | G | -0.0586 |
| rs1870987   | C | 0.0308  |
| rs9896317   | T | -0.0349 |
| rs9913436   | C | -0.0352 |
| rs12936051  | G | 0.0999  |
| rs4074505   | T | -0.0354 |
| rs11656206  | A | 0.0296  |
| rs117123705 | A | -0.1814 |
| rs12952104  | A | -0.0679 |
| rs139330504 | T | -0.0906 |
| rs118180507 | A | 0.105   |
| rs72834878  | T | -0.063  |
| rs112514019 | A | 0.0771  |
| rs2232839   | T | -0.0395 |
| rs78129009  | T | 0.0918  |
| rs12949992  | T | 0.0673  |
| rs76836581  | T | -0.1227 |
| rs66863998  | C | 0.0466  |
| rs62060503  | C | -0.0699 |
| rs77875559  | C | -0.1516 |
| rs145588693 | A | 0.0683  |
| rs75090760  | G | -0.1191 |
| rs10512608  | C | -0.0768 |
| rs573556    | A | 0.0408  |
| rs2332185   | C | 0.0605  |
| rs2108605   | C | 0.0758  |
| rs225186    | C | 0.0331  |
| rs9903342   | G | -0.0576 |
| rs76906435  | C | 0.0557  |
| rs12946416  | C | -0.0286 |
| rs17431753  | A | -0.0625 |
| rs2367119   | C | 0.0357  |
| rs75362614  | T | 0.1136  |
| rs9891361   | G | -0.0579 |
| rs78849743  | T | 0.1324  |
| rs35694818  | A | -0.0438 |
| rs11871243  | G | 0.1461  |
| rs933374    | C | 0.034   |
| rs4794124   | T | -0.0598 |
| rs9903639   | T | -0.0394 |
| rs9913144   | G | 0.0301  |
| rs2078308   | T | -0.1799 |

|             |   |         |
|-------------|---|---------|
| rs72819651  | T | 0.0792  |
| rs7207921   | G | -0.134  |
| rs34800030  | T | -0.0373 |
| rs117029704 | T | -0.1508 |
| rs76676363  | T | -0.067  |
| rs8072698   | C | -0.0293 |
| rs72844518  | G | -0.0732 |
| rs2073284   | A | -0.0608 |
| rs744281    | A | -0.0288 |
| rs117461778 | A | -0.1555 |
| rs66797950  | T | -0.0669 |
| rs112784281 | T | -0.1232 |
| rs113330012 | T | -0.0862 |
| rs12603956  | T | 0.0387  |
| rs11078269  | T | -0.0459 |
| rs2159132   | G | -0.0298 |
| rs12450512  | T | 0.0332  |
| rs143132376 | A | -0.054  |
| rs7220817   | T | 0.0303  |
| rs12453132  | G | -0.0619 |
| rs7210733   | G | -0.032  |
| rs3813024   | A | 0.0417  |
| rs16966398  | C | -0.0985 |
| rs144661702 | A | 0.1524  |
| rs721597    | C | 0.0304  |
| rs12602545  | A | -0.0431 |
| rs12450869  | T | 0.0408  |
| rs3094508   | C | -0.0304 |
| rs72856064  | G | 0.0652  |
| rs1579523   | T | 0.0391  |
| rs1541392   | G | 0.0443  |
| rs117906392 | T | 0.1574  |
| rs2309444   | C | 0.0452  |
| rs1120385   | C | 0.0397  |
| rs77379367  | C | 0.0466  |
| rs4792144   | A | 0.0297  |
| rs7208297   | C | -0.0543 |
| rs882703    | A | -0.059  |
| rs2321707   | C | -0.0506 |
| rs111981689 | T | 0.0757  |
| rs146756176 | T | 0.1916  |
| rs79809399  | C | -0.0703 |
| rs78648359  | T | -0.1653 |
| rs146226963 | A | 0.1472  |
| rs2721868   | T | -0.0347 |
| rs76307479  | A | -0.0752 |
| rs80094379  | A | -0.1658 |

|             |   |         |
|-------------|---|---------|
| rs79221226  | A | 0.2378  |
| rs9914955   | A | -0.0333 |
| rs73974665  | C | 0.2026  |
| rs9903518   | G | -0.0367 |
| rs2585842   | C | -0.034  |
| rs8064794   | G | -0.1426 |
| rs75168694  | A | -0.1735 |
| rs117298709 | A | 0.1043  |
| rs2139893   | G | -0.0427 |
| rs2228128   | C | 0.0375  |
| rs2981617   | G | -0.0405 |
| rs898526    | C | -0.0356 |
| rs111811667 | C | -0.1592 |
| rs111616169 | T | -0.0424 |
| rs6505358   | T | 0.0291  |
| rs78630052  | T | 0.0949  |
| rs9897300   | A | 0.0373  |
| rs12947012  | T | 0.0454  |
| rs4795080   | A | -0.0326 |
| rs71359697  | T | 0.0408  |
| rs112914438 | A | 0.3075  |
| rs62065079  | T | -0.1059 |
| rs365853    | T | 0.0307  |
| rs12951564  | G | -0.0352 |
| rs79711323  | T | -0.0966 |
| rs9890133   | G | 0.0437  |
| rs149121265 | T | 0.2014  |
| rs75359963  | T | 0.107   |
| rs78405808  | T | -0.0522 |
| rs7218718   | G | 0.0364  |
| rs4072746   | T | 0.0476  |
| rs77200870  | G | -0.1243 |
| rs150008408 | G | 0.1772  |
| rs1868916   | A | -0.0475 |
| rs79093081  | A | 0.0734  |
| rs112050990 | T | 0.1987  |
| rs77761939  | C | -0.1441 |
| rs12943447  | T | 0.1221  |
| rs6504456   | C | -0.0351 |
| rs11657040  | C | -0.0516 |
| rs35383405  | T | 0.0447  |
| rs12939268  | C | 0.131   |
| rs8069792   | A | 0.0346  |
| rs16952540  | C | -0.0392 |
| rs62079111  | T | -0.1591 |
| rs7212516   | T | 0.1658  |
| rs28905     | A | 0.0619  |

|             |   |         |
|-------------|---|---------|
| rs61466394  | T | 0.1547  |
| rs2270716   | C | -0.1048 |
| rs34261247  | G | -0.0358 |
| rs8076162   | C | 0.0504  |
| rs311766    | T | -0.097  |
| rs62069663  | A | -0.1306 |
| rs7222327   | T | 0.0794  |
| rs62070102  | T | 0.1119  |
| rs4796290   | T | 0.0395  |
| rs55838060  | G | 0.0355  |
| rs6501688   | A | -0.0451 |
| rs35580425  | C | 0.2192  |
| rs9896072   | A | 0.1686  |
| rs7217130   | G | 0.0813  |
| rs28704757  | T | 0.036   |
| rs10445281  | T | 0.0808  |
| rs80027550  | A | 0.1668  |
| rs11650185  | G | -0.0381 |
| rs208018    | G | -0.1006 |
| rs139413519 | C | -0.1669 |
| rs11870428  | A | 0.0368  |
| rs1548356   | T | -0.0332 |
| rs7217323   | T | -0.1148 |
| rs62077761  | T | 0.0911  |
| rs2870774   | T | 0.0334  |
| rs137964275 | C | 0.2053  |
| rs148955037 | T | 0.1546  |
| rs1567838   | C | 0.0327  |
| rs147589115 | T | -0.1909 |
| rs12453516  | A | 0.1088  |
| rs7502087   | C | -0.0489 |
| rs2158972   | T | 0.0383  |
| rs75682304  | C | 0.1472  |
| rs12951717  | G | -0.0501 |
| rs8080548   | T | 0.0683  |
| rs74843076  | A | -0.2426 |
| rs149157044 | T | -0.1896 |
| rs75707186  | A | -0.1411 |
| rs62079773  | G | 0.0472  |
| rs2024072   | C | 0.0429  |
| rs117638255 | A | -0.0702 |
| rs117648159 | C | 0.1446  |
| rs1490917   | T | 0.0486  |
| rs968580    | T | -0.033  |
| rs1401539   | T | 0.0507  |
| rs72835492  | A | -0.1402 |
| rs35641439  | A | -0.075  |

|             |   |         |
|-------------|---|---------|
| rs3785975   | T | -0.0502 |
| rs8075076   | C | -0.1395 |
| rs8077460   | A | -0.0349 |
| rs4968926   | T | 0.0363  |
| rs9900289   | C | -0.0415 |
| rs211632    | A | -0.0434 |
| rs9303131   | C | -0.036  |
| rs143070091 | T | -0.18   |
| rs78162789  | C | -0.0408 |
| rs145713658 | A | 0.1339  |
| rs75737125  | A | -0.1874 |
| rs140412338 | T | 0.1751  |
| rs79731228  | G | 0.0477  |
| rs72813173  | T | -0.2354 |
| rs9906472   | A | -0.0327 |
| rs11263802  | G | -0.0323 |
| rs146112269 | G | 0.1556  |
| rs6502751   | A | 0.0524  |
| rs72819109  | A | -0.0361 |
| rs9890937   | G | -0.0294 |
| rs74721961  | T | 0.059   |
| rs12103888  | T | 0.1219  |
| rs9910019   | G | -0.0405 |
| rs139846172 | T | 0.1427  |
| rs9908267   | C | -0.03   |
| rs117726752 | A | -0.0748 |
| rs9890736   | T | 0.032   |
| rs7211433   | C | 0.0325  |
| rs75535728  | T | 0.0852  |
| rs4603617   | C | -0.0297 |
| rs117378910 | T | -0.1881 |
| rs17711944  | T | -0.0323 |
| rs77344641  | A | -0.2295 |
| rs11657404  | C | 0.0676  |
| rs74456742  | A | -0.0951 |
| rs60611645  | C | 0.0913  |
| rs56036644  | T | 0.0573  |
| rs72821891  | T | -0.1247 |
| rs35610199  | T | 0.1264  |
| rs59919146  | T | 0.0465  |
| rs139303000 | A | -0.1416 |
| rs62053851  | T | 0.1012  |
| rs17178718  | C | -0.0445 |
| rs74361457  | A | 0.145   |
| rs17609738  | A | -0.028  |
| rs319771    | A | -0.0326 |
| rs34094467  | T | 0.1306  |

|             |   |         |
|-------------|---|---------|
| rs9905450   | C | 0.0759  |
| rs2706708   | C | -0.0436 |
| rs4789398   | T | -0.0304 |
| rs11869555  | C | -0.105  |
| rs12938100  | G | 0.0629  |
| rs62075206  | T | -0.1188 |
| rs9907422   | A | -0.029  |
| rs34252006  | C | -0.0513 |
| rs2302837   | A | -0.0565 |
| rs117337485 | T | 0.2257  |
| rs7212256   | A | -0.0432 |
| rs9789059   | C | -0.0483 |
| rs117220837 | T | -0.1361 |
| rs7225996   | C | 0.0874  |
| rs3826539   | C | -0.0318 |
| rs8070973   | C | -0.0332 |
| rs11650506  | G | -0.0446 |
| rs11655966  | T | -0.0361 |
| rs112409849 | G | 0.1055  |
| rs11263765  | G | 0.0347  |
| rs4788998   | C | -0.0386 |
| rs9895376   | C | 0.0857  |
| rs62064766  | G | -0.043  |
| rs11568125  | A | 0.1838  |
| rs17562516  | A | -0.0341 |
| rs12950362  | G | -0.1401 |
| rs11656311  | G | -0.0343 |
| rs12150212  | G | -0.0462 |
| rs62065291  | T | 0.0461  |
| rs16977108  | C | 0.1619  |
| rs1443464   | C | 0.0431  |
| rs1263956   | C | 0.0506  |
| rs17728437  | A | 0.048   |
| rs6504246   | G | -0.0425 |
| rs62065108  | G | 0.1021  |
| rs4795018   | T | 0.0895  |
| rs73268600  | T | -0.0451 |
| rs11870010  | T | -0.0349 |
| rs12602965  | C | -0.057  |
| rs77154762  | A | 0.0588  |
| rs144750090 | C | -0.1905 |
| rs3136027   | T | 0.1109  |
| rs80263380  | A | -0.1765 |
| rs17686640  | T | -0.0547 |
| rs117991338 | C | 0.1767  |
| rs78153232  | C | 0.0644  |
| rs9898958   | G | 0.039   |

|             |   |         |
|-------------|---|---------|
| rs72819095  | T | 0.0356  |
| rs7213918   | A | -0.0341 |
| rs140127928 | A | -0.1459 |
| rs35024060  | C | 0.0485  |
| rs17665206  | C | 0.1482  |
| rs80107648  | C | -0.1204 |
| rs12946750  | G | -0.029  |
| rs11657444  | A | -0.0326 |
| rs72878690  | G | -0.0392 |
| rs75758038  | G | 0.0431  |
| rs9914484   | C | -0.0308 |
| rs9896250   | T | -0.0297 |
| rs11080363  | A | -0.0682 |
| rs2168858   | G | 0.0761  |
| rs74252429  | T | 0.24    |
| rs12452166  | T | -0.0698 |
| rs118016048 | A | 0.122   |
| rs1561976   | T | -0.1623 |
| rs12945936  | C | 0.0337  |
| rs184918    | C | -0.036  |
| rs112000892 | G | -0.0605 |
| rs9902267   | G | -0.0422 |
| rs978416    | A | -0.0301 |
| rs11651840  | G | -0.0437 |
| rs11652803  | A | -0.0463 |
| rs7502906   | C | 0.0565  |
| rs62077369  | C | 0.0741  |
| rs78103697  | C | -0.1465 |
| rs72828953  | A | -0.151  |
| rs407281    | T | -0.0305 |
| rs3094521   | A | -0.046  |
| rs739921    | C | -0.0356 |
| rs113432729 | A | -0.0791 |
| rs4794172   | A | -0.0289 |
| rs75243150  | T | 0.18    |
| rs77618918  | T | 0.103   |
| rs113860114 | A | 0.1498  |
| rs218691    | C | -0.0401 |
| rs80284452  | C | 0.1278  |
| rs112482396 | T | 0.0761  |
| rs45594438  | T | -0.0832 |
| rs1036854   | A | -0.0641 |
| rs79076201  | G | -0.0634 |
| rs4890196   | C | 0.0344  |
| rs3926150   | C | 0.0813  |
| rs11871034  | C | 0.0299  |
| rs78234391  | T | 0.0632  |

|             |   |         |
|-------------|---|---------|
| rs714422    | A | -0.0445 |
| rs443141    | T | 0.0354  |
| rs62085151  | G | 0.0337  |
| rs1849359   | C | -0.0283 |
| rs2098086   | T | 0.0371  |
| rs55808034  | G | -0.1782 |
| rs7225317   | A | -0.1274 |
| rs17811017  | T | -0.1027 |
| rs61753098  | C | 0.2106  |
| rs237292    | G | -0.0471 |
| rs55944442  | T | 0.1508  |
| rs2598443   | A | -0.0355 |
| rs56246951  | A | -0.0659 |
| rs2740753   | T | -0.0869 |
| rs7223713   | T | -0.1074 |
| rs7221631   | T | -0.0392 |
| rs12449835  | C | 0.0369  |
| rs7359670   | G | -0.0378 |
| rs3809765   | A | 0.0277  |
| rs7502384   | G | 0.0335  |
| rs117331479 | C | -0.1232 |
| rs2048137   | T | 0.0293  |
| rs56085050  | C | 0.1033  |
| rs11652239  | T | -0.06   |
| rs72896276  | G | -0.0339 |
| rs148940475 | T | 0.1863  |
| rs148847962 | G | 0.1141  |
| rs1879265   | A | 0.0308  |
| rs7350970   | A | 0.0451  |
| rs12947571  | T | -0.0384 |
| rs143275150 | T | -0.2259 |
| rs117358906 | T | -0.1453 |
| rs2078152   | T | 0.0404  |
| rs9674752   | C | 0.042   |
| rs11655305  | T | -0.0302 |
| rs72832341  | A | 0.1501  |
| rs78121064  | T | 0.0589  |
| rs7225023   | C | 0.1471  |
| rs8079597   | G | 0.065   |
| rs72844663  | T | -0.1509 |
| rs2344570   | C | -0.0579 |
| rs4794585   | C | -0.0351 |
| rs9910597   | C | 0.0345  |
| rs4789962   | G | -0.0303 |
| rs219439    | T | -0.0927 |
| rs12948642  | C | 0.0669  |
| rs9906111   | A | 0.0448  |



|             |   |         |
|-------------|---|---------|
| rs74804082  | C | 0.0832  |
| rs11077876  | T | 0.0401  |
| rs62078155  | T | 0.0465  |
| rs7218899   | C | 0.0278  |
| rs7225503   | C | 0.0735  |
| rs9901648   | A | -0.0281 |
| rs8075432   | G | 0.0403  |
| rs142543845 | A | -0.1094 |
| rs7210166   | C | 0.1106  |
| rs62060107  | C | -0.0393 |
| rs8079433   | G | -0.0356 |
| rs917606    | C | -0.0331 |
| rs77449858  | C | -0.2772 |
| rs195775    | C | 0.043   |
| rs36088946  | G | 0.0381  |
| rs9915275   | T | 0.1269  |
| rs198547    | A | -0.0442 |
| rs138613300 | T | 0.1974  |
| rs67522045  | G | 0.0765  |
| rs117904628 | A | 0.2231  |
| rs854658    | G | 0.0274  |
| rs61153373  | A | -0.0358 |
| rs12951440  | C | -0.0565 |
| rs2292544   | A | -0.1637 |
| rs73321773  | T | -0.0917 |
| rs73273764  | A | 0.1169  |
| rs2240215   | T | -0.031  |
| rs9895883   | C | -0.0413 |
| rs11871790  | C | 0.0985  |
| rs147893443 | A | 0.0764  |
| rs149051006 | A | -0.1048 |
| rs57081717  | C | 0.0493  |
| rs12150591  | C | -0.0384 |
| rs10871512  | C | 0.0592  |
| rs73278050  | G | 0.1276  |
| rs11658819  | A | -0.0332 |
| rs67774676  | C | 0.031   |
| rs117372014 | T | -0.1248 |
| rs9896202   | C | 0.0291  |
| rs7218366   | A | -0.0648 |
| rs55962646  | C | 0.0632  |
| rs59613972  | A | -0.1922 |
| rs4793323   | A | -0.027  |
| rs8073182   | T | -0.0363 |
| rs72845740  | T | -0.1356 |
| rs151298157 | T | -0.1093 |
| rs150269648 | G | -0.1284 |

|             |   |         |
|-------------|---|---------|
| rs28604312  | A | -0.0451 |
| rs62063005  | C | 0.1413  |
| rs1558724   | C | 0.0475  |
| rs2872615   | C | 0.0329  |
| rs12936618  | A | 0.0425  |
| rs426553    | T | 0.0403  |
| rs16957691  | C | -0.0737 |
| rs7224505   | G | 0.0403  |
| rs76221837  | C | 0.1196  |
| rs735311    | A | 0.0812  |
| rs8080856   | C | -0.0439 |
| rs2537832   | T | -0.0433 |
| rs78776396  | C | -0.0994 |
| rs117120704 | G | -0.2352 |
| rs12941386  | C | -0.0302 |
| rs60227069  | T | -0.0569 |
| rs11079573  | G | -0.0293 |
| rs2290924   | G | -0.063  |
| rs76217810  | G | 0.2205  |
| rs7220546   | C | -0.0309 |
| rs117504211 | C | 0.0699  |
| rs9894393   | A | -0.061  |
| rs117399000 | A | 0.1427  |
| rs116465838 | A | 0.0835  |
| rs80099994  | C | 0.1205  |
| rs4969249   | A | 0.1258  |
| rs147222892 | C | 0.193   |
| rs2132829   | G | 0.0573  |
| rs17715862  | A | -0.0768 |
| rs9903554   | C | -0.0291 |
| rs4968905   | G | -0.0334 |
| rs78809149  | C | 0.069   |
| rs2269459   | A | 0.0349  |
| rs11655483  | G | -0.034  |
| rs145770388 | T | -0.0408 |
| rs144764591 | T | 0.2467  |
| rs10338     | G | -0.0349 |
| rs9906544   | C | -0.0406 |
| rs223149    | A | 0.0404  |
| rs59946015  | G | 0.2434  |
| rs11078089  | A | -0.0277 |
| rs16593     | T | 0.0317  |
| rs9912674   | C | 0.0384  |
| rs7207780   | T | 0.0491  |
| rs116972327 | C | 0.082   |
| rs139303063 | T | 0.1588  |
| rs73995130  | A | 0.1674  |

|             |   |         |
|-------------|---|---------|
| rs147912937 | T | 0.1216  |
| rs28499357  | T | 0.0345  |
| rs12949053  | A | -0.086  |
| rs74006315  | G | -0.1051 |
| rs79253593  | A | 0.0923  |
| rs9894518   | G | 0.0274  |
| rs62082972  | T | 0.09    |
| rs149081389 | T | -0.1064 |
| rs150194877 | T | 0.0951  |
| rs142147903 | C | 0.0556  |
| rs2880563   | C | 0.0348  |
| rs72822597  | A | 0.2098  |
| rs62058412  | T | -0.0795 |
| rs12602729  | T | 0.0474  |
| rs72490435  | A | 0.0547  |
| rs12150623  | A | 0.0753  |
| rs77625860  | C | -0.0689 |
| rs75913502  | T | 0.0971  |
| rs2215118   | C | 0.0707  |
| rs35036083  | A | 0.1036  |
| rs11656819  | T | -0.0353 |
| rs150841918 | A | 0.1941  |
| rs146827613 | C | -0.1357 |
| rs9910190   | C | 0.0385  |
| rs7214592   | G | 0.044   |
| rs146665235 | T | 0.0955  |
| rs146656293 | G | 0.2033  |
| rs7503914   | A | 0.0501  |
| rs7206953   | T | -0.0316 |
| rs187883    | G | 0.0721  |
| rs2713964   | T | 0.0296  |
| rs3843735   | G | 0.0275  |
| rs34391516  | A | -0.1061 |
| rs146780193 | A | 0.134   |
| rs76879347  | A | -0.1242 |
| rs75610441  | C | 0.0803  |
| rs572415    | A | -0.0287 |
| rs12450826  | T | 0.0584  |
| rs11871062  | C | 0.0924  |
| rs4508477   | G | -0.0276 |
| rs56690337  | C | -0.0395 |
| rs74927416  | T | -0.1257 |
| rs145282674 | G | 0.1357  |
| rs2027997   | C | 0.0289  |
| rs144833860 | T | -0.1485 |
| rs11650798  | G | 0.0316  |
| rs2360110   | C | -0.0524 |

|             |   |         |
|-------------|---|---------|
| rs143460595 | G | 0.1411  |
| rs2714023   | A | -0.0316 |
| rs11870327  | G | -0.095  |
| rs8073615   | A | -0.0384 |
| rs4968796   | C | 0.034   |
| rs1029680   | G | -0.0401 |
| rs1777752   | C | -0.1734 |
| rs17640958  | G | -0.0426 |
| rs12944393  | T | -0.0402 |
| rs11077898  | G | -0.0282 |
| rs11657900  | A | 0.1016  |
| rs76818834  | A | 0.0555  |
| rs117282161 | A | 0.1291  |
| rs62090871  | C | -0.2137 |
| rs12939398  | T | 0.1333  |
| rs72828643  | T | -0.0462 |
| rs117076215 | T | 0.0605  |
| rs12600435  | T | -0.0561 |
| rs178581    | C | 0.0278  |
| rs12051585  | T | -0.029  |
| rs76361517  | G | -0.1113 |
| rs7211038   | C | -0.0528 |
| rs78012551  | G | -0.0366 |
| rs72848246  | C | 0.0523  |
| rs148441477 | A | 0.1266  |
| rs2726135   | T | -0.0415 |
| rs80287354  | T | -0.0923 |
| rs75705105  | T | -0.123  |
| rs34537540  | G | -0.1162 |
| rs3859180   | C | -0.0287 |
| rs62063901  | T | 0.0392  |
| rs1865995   | G | 0.0273  |
| rs16954306  | G | 0.0758  |
| rs1825734   | C | 0.0374  |
| rs1985778   | C | 0.1032  |
| rs242936    | A | 0.0447  |
| rs2644706   | C | -0.04   |
| rs324079    | T | 0.0395  |
| rs2292107   | T | -0.0397 |
| rs8078554   | T | 0.0375  |
| rs2706513   | T | -0.0271 |
| rs280045    | T | -0.0309 |
| rs8178826   | G | 0.1276  |
| rs112639072 | T | -0.0791 |
| rs78517666  | T | -0.054  |
| rs73288660  | G | 0.1313  |
| rs56086968  | A | -0.0746 |

|             |   |         |
|-------------|---|---------|
| rs12937212  | T | 0.0431  |
| rs2074271   | A | -0.0704 |
| rs17712617  | G | -0.0471 |
| rs118077919 | G | 0.0932  |
| rs2455940   | C | 0.0424  |
| rs62000424  | T | 0.0454  |
| rs117371597 | A | -0.1429 |
| rs8077392   | T | 0.0284  |
| rs9908887   | G | -0.0306 |
| rs77584070  | T | -0.1016 |
| rs80157392  | A | -0.0637 |
| rs117911018 | T | -0.1819 |
| rs12603789  | C | -0.1333 |
| rs8079885   | G | 0.1349  |
| rs62080017  | C | -0.0285 |
| rs8068982   | G | 0.0362  |
| rs9910389   | T | -0.0506 |
| rs587842    | G | -0.0447 |
| rs117561003 | C | -0.1435 |
| rs16978106  | T | 0.1608  |
| rs2707053   | T | 0.0344  |
| rs10515101  | G | -0.0347 |
| rs34260932  | T | 0.051   |
| rs9894085   | C | -0.0323 |
| rs11658082  | T | -0.0404 |
| rs35435268  | T | -0.0987 |
| rs147877128 | C | 0.0724  |
| rs117255763 | A | 0.1714  |
| rs412611    | T | -0.0779 |
| rs1023545   | G | 0.036   |
| rs7223178   | T | 0.0673  |
| rs142849437 | T | -0.1295 |
| rs8066124   | C | 0.0313  |
| rs9894566   | T | -0.0269 |
| rs11655406  | T | 0.0584  |
| rs78714116  | A | 0.102   |
| rs7214374   | A | -0.0274 |
| rs12453418  | G | 0.0274  |
| rs195769    | G | 0.113   |
| rs11656361  | A | 0.0518  |
| rs117328936 | C | 0.2082  |
| rs4110067   | G | -0.0477 |
| rs78107101  | T | 0.0352  |
| rs11653820  | A | 0.0447  |
| rs7209950   | G | -0.0463 |
| rs140040425 | A | -0.1458 |
| rs8072785   | T | 0.0477  |

|             |   |         |
|-------------|---|---------|
| rs11655498  | C | -0.0289 |
| rs12946230  | A | 0.2195  |
| rs3785710   | T | -0.029  |
| rs60416101  | A | -0.0454 |
| rs7212228   | A | 0.0327  |
| rs55993512  | G | 0.2273  |
| rs196954    | A | 0.0301  |
| rs79751796  | C | -0.0756 |
| rs117740851 | G | -0.1374 |
| rs4790931   | C | -0.1033 |
| rs77502473  | T | 0.1471  |
| rs73351962  | A | 0.0941  |
| rs9902343   | C | -0.0499 |
| rs72836603  | A | -0.1342 |
| rs118013016 | T | 0.1532  |
| rs8073130   | A | 0.1492  |
| rs4791571   | A | 0.0285  |
| rs847682    | C | 0.0271  |
| rs2331554   | T | 0.0991  |
| rs72840502  | T | 0.0449  |
| rs143797388 | T | 0.1511  |
| rs113927006 | T | -0.1552 |
| rs57037680  | T | 0.0446  |
| rs118026022 | C | -0.1078 |
| rs117106621 | A | 0.1545  |
| rs16948633  | G | -0.069  |
| rs544198    | G | -0.0336 |
| rs6504570   | T | -0.0338 |
| rs80249065  | T | -0.0731 |
| rs4790161   | A | 0.0509  |
| rs56008948  | G | 0.0785  |
| rs148094507 | A | -0.0581 |
| rs117253863 | C | -0.1265 |
| rs28477462  | C | 0.0688  |
| rs7211547   | C | 0.0492  |
| rs57237747  | C | -0.0617 |
| rs117464165 | T | -0.0819 |
| rs9900761   | G | 0.0826  |
| rs117354644 | A | 0.1902  |
| rs138725957 | T | -0.2207 |
| rs4341789   | T | 0.0297  |
| rs1795953   | A | -0.0273 |
| rs11653487  | C | -0.0266 |
| rs12453901  | C | 0.0427  |
| rs4792804   | T | -0.1481 |
| rs9896131   | A | -0.0611 |
| rs2874994   | G | -0.0264 |

|             |   |         |
|-------------|---|---------|
| rs9895217   | T | 0.0354  |
| rs147276433 | G | 0.1469  |
| rs17605038  | A | 0.0394  |
| rs116917950 | C | 0.2837  |
| rs511902    | G | -0.0688 |
| rs3744311   | T | -0.0308 |
| rs62064076  | T | 0.1154  |
| rs12948478  | G | 0.0299  |
| rs80281848  | C | -0.0947 |
| rs149252098 | C | 0.1121  |
| rs7207514   | A | -0.0437 |
| rs475298    | G | 0.0557  |
| rs117721431 | C | -0.0749 |
| rs12452736  | G | 0.0325  |
| rs58544026  | A | 0.0799  |
| rs34005202  | A | -0.0424 |
| rs71357144  | A | 0.0563  |
| rs312752    | G | 0.0283  |
| rs2440030   | G | -0.0315 |
| rs75573684  | C | 0.115   |
| rs118103841 | G | -0.2258 |
| rs1013120   | A | 0.0338  |
| rs117210760 | T | 0.1081  |
| rs4969153   | G | -0.0411 |
| rs9898812   | G | 0.0282  |
| rs2875094   | T | -0.0274 |
| rs4267379   | T | -0.0271 |
| rs11654055  | C | 0.0377  |
| rs9907913   | T | 0.0486  |
| rs4889804   | A | -0.0349 |
| rs150209287 | G | -0.1785 |
| rs62060695  | A | 0.1295  |
| rs2165875   | T | 0.0267  |
| rs2289632   | T | -0.0441 |
| rs12449507  | T | 0.0533  |
| rs75557806  | T | -0.0913 |
| rs34544488  | A | 0.0716  |
| rs11078776  | T | 0.0279  |
| rs7216896   | C | -0.0277 |
| rs1564821   | A | 0.0311  |
| rs35315133  | A | 0.0401  |
| rs317418    | C | 0.029   |
| rs2326063   | T | 0.0397  |
| rs117867814 | A | 0.1338  |
| rs4889839   | G | -0.0284 |
| rs12602039  | G | -0.0268 |
| rs2532433   | T | 0.0445  |

|             |   |         |
|-------------|---|---------|
| rs806939    | A | -0.0654 |
| rs12449788  | A | 0.0376  |
| rs62070129  | T | 0.0543  |
| rs58776799  | G | 0.0582  |
| rs17721223  | T | 0.1472  |
| rs13204     | A | 0.1304  |
| rs111738839 | A | -0.1563 |
| rs76448060  | A | 0.1857  |
| rs1867204   | G | 0.0267  |
| rs9908917   | T | -0.0386 |
| rs73354339  | C | 0.1257  |
| rs74882388  | G | 0.0865  |
| rs79732257  | A | 0.039   |
| rs2958905   | G | -0.028  |
| rs74772684  | T | 0.2107  |
| rs758488    | A | 0.0602  |
| rs116253080 | C | -0.1665 |
| rs8070275   | C | 0.0277  |
| rs16959655  | C | 0.075   |
| rs76650363  | A | -0.0645 |
| rs11079277  | A | -0.035  |
| rs17713682  | T | 0.0462  |
| rs7221298   | A | -0.0618 |
| rs7218351   | A | -0.031  |
| rs4794253   | C | 0.0292  |
| rs2306755   | A | -0.0285 |
| rs58800162  | C | 0.0325  |
| rs9898176   | T | -0.0419 |
| rs2725394   | G | -0.0557 |
| rs8077882   | T | -0.0326 |
| rs6502803   | C | 0.0443  |
| rs140194435 | T | -0.0955 |
| rs72819164  | T | -0.0998 |
| rs145584358 | A | -0.1497 |
| rs76905139  | T | -0.0915 |
| rs57724104  | C | 0.0319  |
| rs78125306  | A | 0.1672  |
| rs117790524 | G | 0.0787  |
| rs76728781  | G | 0.162   |
| rs113613506 | A | 0.1154  |
| rs145497895 | G | -0.0484 |
| rs76679417  | C | 0.0525  |
| rs9893480   | C | 0.0306  |
| rs894628    | T | 0.0297  |
| rs60551779  | G | -0.0307 |
| rs112391538 | T | -0.144  |
| rs74528226  | C | 0.1145  |



|             |   |         |
|-------------|---|---------|
| rs9909625   | T | 0.063   |
| rs76846670  | A | -0.0277 |
| rs11867500  | G | -0.0288 |
| rs2274892   | G | -0.027  |
| rs3020877   | T | -0.0337 |
| rs77054119  | C | 0.087   |
| rs11658104  | T | -0.0767 |
| rs218677    | A | -0.0724 |
| rs2004755   | T | 0.0324  |
| rs17175726  | T | 0.13    |
| rs11652004  | T | 0.0754  |
| rs10521214  | A | 0.0383  |
| rs144365599 | G | 0.1818  |
| rs8073805   | G | -0.0409 |
| rs72820261  | C | 0.1065  |
| rs76324518  | A | 0.2265  |
| rs4791974   | A | 0.0316  |
| rs112024554 | T | 0.0772  |
| rs12451928  | A | -0.0368 |
| rs9914220   | T | -0.0472 |
| rs117555511 | A | -0.1527 |
| rs77144095  | T | 0.1067  |
| rs72828638  | A | 0.1289  |
| rs146513180 | A | -0.1687 |
| rs4644888   | T | -0.026  |
| rs4442859   | G | -0.0344 |
| rs9915695   | A | -0.0786 |
| rs140915602 | A | 0.1589  |
| rs320642    | A | 0.0359  |
| rs77841617  | T | 0.0693  |
| rs62080679  | A | 0.0922  |
| rs77409243  | A | 0.054   |
| rs73983148  | G | 0.0533  |
| rs76833827  | C | -0.1236 |
| rs147779486 | T | 0.1465  |
| rs62065770  | A | 0.0971  |
| rs6503352   | A | 0.1093  |
| rs16968925  | G | 0.0654  |
| rs2197159   | C | -0.0284 |
| rs76345714  | T | 0.0881  |
| rs77981506  | C | 0.0812  |
| rs4793855   | A | 0.0308  |
| rs11871522  | T | 0.0327  |
| rs34856222  | A | 0.0315  |
| rs116923381 | T | -0.1062 |
| rs117136486 | G | 0.11    |
| rs80226206  | C | -0.0744 |

|             |   |         |
|-------------|---|---------|
| rs142071944 | T | -0.1384 |
| rs118007602 | G | 0.0678  |
| rs2359215   | T | -0.0462 |
| rs35528570  | G | -0.056  |
| rs11868879  | A | -0.0458 |
| rs4130510   | A | 0.0304  |
| rs8066479   | T | 0.0261  |
| rs8071287   | T | -0.0664 |
| rs9907431   | A | -0.0353 |
| rs11657986  | C | 0.0547  |
| rs16955211  | G | 0.0405  |
| rs77562445  | A | 0.0358  |
| rs73990417  | G | 0.0991  |
| rs17682084  | T | 0.0436  |
| rs9901444   | T | -0.0784 |
| rs2332297   | G | 0.0288  |
| rs58012751  | G | -0.0674 |
| rs4889793   | T | -0.1757 |
| rs72856572  | G | -0.0893 |
| rs9898416   | C | 0.0257  |
| rs12452363  | A | 0.0254  |
| rs145472073 | T | 0.1599  |
| rs2661598   | T | -0.028  |
| rs11078139  | A | -0.0266 |
| rs11653768  | G | 0.051   |
| rs16956138  | C | 0.1134  |
| rs9941388   | A | -0.0329 |
| rs7218893   | G | 0.1208  |
| rs138562138 | G | -0.136  |
| rs3025280   | T | 0.0893  |
| rs80170629  | A | 0.0801  |
| rs11650492  | A | -0.03   |
| rs17843015  | G | -0.0563 |
| rs117056610 | T | 0.0936  |
| rs4319830   | T | 0.0374  |
| rs894868    | G | -0.0555 |
| rs145326705 | G | 0.1114  |
| rs143495343 | T | -0.1136 |
| rs144256189 | T | 0.0811  |
| rs148996190 | C | 0.1565  |
| rs140183833 | A | -0.1773 |
| rs4889979   | T | 0.0271  |
| rs76676891  | G | 0.181   |
| rs12450505  | A | 0.0527  |
| rs2125962   | T | -0.158  |
| rs35257788  | T | -0.0838 |
| rs9909984   | A | 0.0331  |

|             |   |         |
|-------------|---|---------|
| rs9913689   | G | 0.0898  |
| rs113757163 | A | -0.1393 |
| rs3760524   | T | 0.0272  |
| rs62084482  | C | -0.0611 |
| rs12452364  | C | -0.033  |
| rs1469604   | A | 0.0523  |
| rs146139633 | T | 0.1432  |
| rs2303466   | T | 0.0353  |
| rs4890114   | G | 0.0298  |
| rs117035590 | T | -0.1527 |
| rs7224219   | C | -0.0324 |
| rs62060045  | G | -0.0388 |
| rs16947058  | A | 0.0261  |
| rs2301823   | C | 0.0265  |
| rs2304969   | T | -0.0424 |
| rs2874155   | G | -0.0302 |
| rs72819695  | T | -0.0582 |
| rs35820493  | A | -0.1696 |
| rs17608925  | C | 0.0435  |
| rs148278971 | T | 0.1327  |
| rs112096788 | T | 0.1077  |
| rs12940941  | T | 0.0456  |
| rs62064088  | T | -0.0481 |
| rs1531008   | A | -0.1077 |
| rs2735476   | C | 0.0567  |
| rs7215916   | T | -0.0327 |
| rs116133272 | G | -0.1449 |
| rs113804199 | A | 0.1969  |
| rs11078713  | G | 0.0266  |
| rs73978294  | C | 0.0774  |
| rs9908656   | A | 0.0406  |
| rs72839154  | T | -0.073  |
| rs2875077   | T | -0.0743 |
| rs8075884   | A | 0.104   |
| rs8076501   | G | -0.03   |
| rs72849428  | T | -0.0331 |
| rs17825467  | G | 0.099   |
| rs12941004  | T | 0.0484  |
| rs123059    | T | -0.0328 |
| rs7211851   | T | -0.0368 |
| rs137916093 | T | 0.1523  |
| rs78914862  | C | 0.0919  |
| rs8078257   | C | 0.037   |
| rs148703209 | C | -0.0804 |
| rs17782141  | T | 0.0541  |
| rs79875459  | T | -0.0854 |
| rs78523360  | T | -0.0548 |

|             |   |         |
|-------------|---|---------|
| rs1544501   | T | 0.0546  |
| rs726502    | T | -0.027  |
| rs11657645  | G | 0.0322  |
| rs8073513   | T | 0.0385  |
| rs2242375   | C | 0.0273  |
| rs170209    | A | 0.0256  |
| rs9901734   | G | -0.0315 |
| rs11658680  | T | 0.0273  |
| rs59843717  | C | 0.1111  |
| rs72840988  | T | -0.03   |
| rs1594542   | A | 0.0273  |
| rs112686693 | A | -0.0622 |
| rs74000017  | G | -0.0461 |
| rs3111836   | G | 0.0314  |
| rs9895634   | C | -0.0365 |
| rs12051588  | A | -0.0261 |
| rs149744    | G | -0.0292 |
| rs34474954  | T | 0.1032  |
| rs12150025  | T | -0.0397 |
| rs9891809   | G | -0.0309 |
| rs62088209  | A | 0.0436  |
| rs111253723 | T | 0.0518  |
| rs111624955 | A | 0.1706  |
| rs3744581   | G | 0.0294  |
| rs35855335  | C | 0.0511  |
| rs60882131  | A | -0.0418 |
| rs143083852 | A | -0.1326 |
| rs12950638  | T | -0.0446 |
| rs364569    | G | -0.0279 |
| rs9906680   | T | 0.0529  |
| rs12452320  | A | 0.0621  |
| rs8082651   | G | 0.0297  |
| rs11653824  | A | 0.0487  |
| rs62065409  | A | 0.0585  |
| rs11658292  | G | -0.1038 |
| rs56354307  | G | 0.1331  |
| rs112944916 | T | 0.0282  |
| rs77879357  | G | 0.1997  |
| rs8077626   | G | -0.028  |
| rs2377309   | T | -0.0364 |
| rs11078823  | A | 0.0259  |
| rs112689088 | C | 0.0514  |
| rs11657323  | G | 0.03    |
| rs8067925   | T | -0.038  |
| rs1049848   | C | -0.1699 |
| rs3809877   | C | -0.0271 |
| rs72834492  | A | 0.0604  |

|             |   |         |
|-------------|---|---------|
| rs4436834   | T | -0.0341 |
| rs6502404   | T | 0.0257  |
| rs8073083   | G | -0.0248 |
| rs116995945 | A | -0.1072 |
| rs12938596  | C | 0.038   |
| rs11870930  | T | -0.0499 |
| rs112997854 | A | 0.1896  |
| rs2233369   | A | -0.0572 |
| rs77315935  | A | 0.0795  |
| rs9901952   | T | -0.0389 |
| rs79728355  | G | -0.1205 |
| rs55916822  | C | 0.057   |
| rs8082345   | C | 0.0328  |
| rs4796153   | A | -0.0417 |
| rs111516403 | G | 0.0257  |
| rs72631343  | G | 0.0422  |
| rs141697095 | T | -0.0923 |
| rs73367023  | T | 0.0984  |
| rs145503279 | A | 0.1315  |
| rs2521786   | T | -0.0402 |
| rs6501997   | T | 0.0326  |
| rs75405130  | A | 0.0556  |
| rs117506848 | G | 0.1954  |
| rs141702033 | A | 0.1413  |
| rs8074170   | C | -0.0355 |
| rs112695630 | T | 0.0703  |
| rs117887944 | C | -0.0618 |
| rs17724695  | A | -0.0543 |
| rs11650037  | T | -0.06   |
| rs62060708  | G | 0.0463  |
| rs117380567 | T | 0.1055  |
| rs12449645  | T | 0.0343  |
| rs17817797  | T | 0.1023  |
| rs68177983  | C | -0.0332 |
| rs117797035 | A | -0.1015 |
| rs35942424  | C | -0.0548 |
| rs73361457  | A | 0.1158  |
| rs117657112 | A | 0.1372  |
| rs72830090  | A | 0.0478  |
| rs11651577  | A | -0.1446 |
| rs55877868  | A | 0.0471  |
| rs10083867  | T | 0.027   |
| rs7222964   | C | 0.0401  |
| rs61576608  | A | -0.028  |
| rs178885    | A | -0.1244 |
| rs7225247   | C | 0.0253  |
| rs9894552   | A | 0.0467  |

|             |   |         |
|-------------|---|---------|
| rs75102551  | C | -0.1573 |
| rs2671672   | A | -0.035  |
| rs280051    | T | -0.0319 |
| rs115872616 | T | -0.125  |
| rs9898781   | C | 0.0246  |
| rs76460797  | C | -0.0443 |
| rs150616931 | G | -0.0642 |
| rs78758760  | C | 0.0832  |
| rs143449624 | C | -0.1357 |
| rs9898073   | T | 0.072   |
| rs117990338 | T | 0.0776  |
| rs59561463  | T | 0.0475  |
| rs139362087 | A | 0.1411  |
| rs75671588  | G | 0.1005  |
| rs73993458  | A | 0.0459  |
| rs72827079  | T | -0.0951 |
| rs1979132   | G | -0.0336 |
| rs78625380  | C | 0.0785  |
| rs1468834   | G | -0.0283 |
| rs2291189   | T | 0.0577  |
| rs3760168   | C | -0.0685 |
| rs56083305  | T | -0.05   |
| rs140446155 | T | -0.2031 |
| rs72834951  | G | 0.0448  |
| rs62062087  | C | 0.0358  |
| rs9905479   | G | 0.0494  |
| rs115485458 | A | -0.1009 |
| rs72839967  | A | 0.0512  |
| rs76627186  | G | -0.1106 |
| rs4790738   | T | -0.0319 |
| rs11655279  | G | -0.0717 |
| rs2241008   | C | 0.0413  |
| rs7503175   | T | 0.026   |
| rs7217946   | A | 0.0522  |
| rs11079872  | T | -0.0748 |
| rs117301606 | G | -0.2205 |
| rs11869620  | G | 0.0246  |
| rs150092494 | T | -0.1125 |
| rs7213100   | C | 0.0256  |
| rs10775385  | T | -0.0599 |
| rs6503319   | T | 0.044   |
| rs113663563 | T | 0.0837  |
| rs28914829  | A | -0.1461 |
| rs16959062  | G | 0.0375  |
| rs917505    | C | -0.0728 |
| rs78389815  | T | 0.0963  |
| rs16956192  | T | 0.0416  |

|             |   |         |
|-------------|---|---------|
| rs12601280  | G | 0.0303  |
| rs1469731   | T | -0.0606 |
| rs75939704  | A | -0.1291 |
| rs7215805   | A | 0.0264  |
| rs138454800 | T | 0.1269  |
| rs72828858  | T | 0.0703  |
| rs61093326  | A | -0.0405 |
| rs111571648 | A | 0.1846  |
| rs141406416 | T | 0.1571  |
| rs75689345  | T | -0.0871 |
| rs11077571  | A | -0.0324 |
| rs35713482  | A | 0.0268  |
| rs76250678  | A | 0.1754  |
| rs16954648  | C | 0.1785  |
| rs7503726   | T | 0.0259  |
| rs7215812   | A | 0.0299  |
| rs11650491  | A | -0.0463 |
| rs151116873 | T | -0.1578 |
| rs62065668  | T | 0.0763  |
| rs78570009  | T | -0.1111 |
| rs9915530   | C | -0.0257 |
| rs11656646  | C | -0.0256 |
| rs146430889 | A | 0.1044  |
| rs117589326 | G | 0.1679  |
| rs62068282  | A | -0.2303 |
| rs7211107   | G | -0.0284 |
| rs117825341 | A | 0.1677  |
| rs62067360  | T | 0.1352  |
| rs111453277 | A | 0.176   |
| rs11655542  | T | 0.1301  |
| rs2707050   | T | 0.0401  |
| rs77420162  | A | 0.114   |
| rs4792425   | T | 0.0251  |
| rs77321515  | G | -0.1428 |
| rs6503191   | A | -0.0278 |
| rs150472706 | T | 0.1527  |
| rs16959280  | A | 0.054   |
| rs6502302   | T | 0.1073  |
| rs148449897 | A | 0.1273  |
| rs78568387  | T | 0.1396  |
| rs117351674 | A | 0.1767  |
| rs12951612  | A | 0.0296  |
| rs4790329   | T | -0.0299 |
| rs8072344   | C | 0.0312  |
| rs76341044  | G | 0.1994  |
| rs645991    | T | 0.0396  |
| rs9900067   | A | -0.03   |

|             |   |         |
|-------------|---|---------|
| rs7501932   | C | -0.0518 |
| rs2898941   | A | -0.0602 |
| rs7208192   | C | 0.0244  |
| rs12943376  | G | -0.0446 |
| rs78545831  | A | 0.0887  |
| rs9915064   | A | 0.1773  |
| rs113374750 | A | 0.0576  |
| rs117709610 | A | -0.1009 |
| rs8075188   | T | 0.029   |
| rs9908715   | C | 0.0263  |
| rs28363288  | T | -0.1252 |
| rs17544947  | G | -0.0281 |
| rs4794659   | T | 0.0388  |
| rs35577836  | T | -0.0438 |
| rs151022275 | T | 0.1928  |
| rs73977632  | G | -0.0456 |
| rs36082066  | C | 0.1028  |
| rs9902544   | A | 0.1058  |
| rs7223681   | C | 0.0377  |
| rs76963738  | C | 0.0813  |
| rs8067081   | T | 0.035   |
| rs8076034   | T | 0.0358  |
| rs7213584   | G | -0.0248 |
| rs4436838   | G | -0.0283 |
| rs17766990  | C | -0.0276 |
| rs138590904 | T | -0.0517 |
| rs16968472  | G | 0.0784  |
| rs72846248  | C | -0.0518 |
| rs55990280  | G | 0.0291  |
| rs783251    | A | 0.0741  |
| rs79619630  | T | -0.2057 |
| rs12450561  | C | -0.1236 |
| rs113238806 | A | 0.075   |
| rs2916131   | T | 0.0283  |
| rs9905036   | G | 0.0263  |
| rs55636927  | G | 0.0245  |
| rs118121100 | T | 0.09    |
| rs142057056 | T | 0.079   |
| rs115583872 | T | 0.1922  |
| rs12451722  | C | -0.0255 |
| rs1465243   | A | 0.0392  |
| rs72844523  | G | 0.1114  |
| rs138185844 | C | 0.1575  |
| rs11078868  | A | 0.0314  |
| rs143164525 | C | -0.0878 |
| rs16953208  | A | 0.0788  |
| rs80288474  | G | 0.0561  |



|             |   |         |
|-------------|---|---------|
| rs57593093  | C | 0.0254  |
| rs11654061  | C | -0.1312 |
| rs7213702   | A | 0.0466  |
| rs2309487   | G | -0.0286 |
| rs11868805  | C | -0.0295 |
| rs1604547   | G | -0.0319 |
| rs142798191 | G | -0.1757 |
| rs80312478  | A | 0.0321  |
| rs142511067 | G | -0.155  |
| rs12451298  | A | 0.044   |
| rs75613774  | A | -0.145  |
| rs58862628  | T | -0.0322 |
| rs12450302  | T | -0.0354 |
| rs112914051 | A | 0.1121  |
| rs727882    | G | 0.0454  |
| rs72815076  | T | -0.0804 |
| rs2715813   | T | -0.025  |
| rs9909401   | A | 0.054   |
| rs7211253   | A | -0.1288 |
| rs195771    | G | -0.0252 |
| rs2726546   | C | 0.0498  |
| rs9897020   | A | 0.0376  |
| rs66491052  | A | -0.0328 |
| rs11079647  | T | 0.0261  |
| rs62075918  | A | 0.1837  |
| rs222853    | A | -0.0616 |
| rs76207825  | G | 0.0519  |
| rs12453150  | C | 0.0242  |
| rs57051682  | G | 0.0637  |
| rs10445211  | G | 0.0272  |
| rs76156634  | T | -0.0698 |
| rs7218591   | A | 0.0336  |
| rs62072189  | A | 0.0392  |
| rs10048172  | C | -0.0294 |
| rs77050237  | A | 0.1722  |
| rs7210402   | G | 0.0387  |
| rs76499171  | C | 0.1257  |
| rs117510770 | T | -0.1742 |
| rs12943931  | T | 0.226   |
| rs244393    | C | 0.0392  |
| rs72834690  | T | 0.0647  |
| rs141370275 | T | 0.1545  |
| rs62077157  | G | -0.0409 |
| rs55633414  | G | 0.0764  |
| rs58079959  | C | -0.0355 |
| rs62072415  | G | 0.1142  |
| rs11077372  | A | -0.0259 |

|             |   |         |
|-------------|---|---------|
| rs71366103  | T | -0.2048 |
| rs613495    | C | -0.0308 |
| rs57016894  | G | -0.0665 |
| rs113769236 | A | -0.156  |
| rs4648343   | G | 0.0261  |
| rs71367982  | C | 0.0587  |
| rs111818159 | G | 0.0525  |
| rs118010914 | C | 0.174   |
| rs58089352  | C | -0.1424 |
| rs117107591 | C | -0.1066 |
| rs2286528   | T | -0.0709 |
| rs143827048 | T | 0.1416  |
| rs11656239  | T | 0.0331  |
| rs11659029  | A | 0.0278  |
| rs12602453  | C | 0.0808  |
| rs139526897 | C | 0.1611  |
| rs2005809   | G | -0.0315 |
| rs113903339 | T | 0.0783  |
| rs72488576  | A | -0.2102 |
| rs16968020  | A | -0.0307 |
| rs80169802  | A | -0.1037 |
| rs76666366  | C | -0.1483 |
| rs6501931   | C | -0.0449 |
| rs7208022   | T | 0.0266  |
| rs6501645   | C | 0.025   |
| rs11870457  | G | -0.116  |
| rs75156581  | G | -0.0565 |
| rs35712175  | C | -0.0755 |
| rs1233854   | T | -0.0344 |
| rs139290266 | A | 0.0958  |
| rs78439530  | A | -0.0668 |
| rs117674070 | T | 0.1341  |
| rs17745201  | A | 0.0506  |
| rs2589141   | C | 0.0421  |
| rs9895011   | T | -0.0408 |
| rs2137143   | T | 0.0546  |
| rs378149    | A | -0.0612 |
| rs112498122 | G | 0.0287  |
| rs9894704   | C | 0.0377  |
| rs62076460  | G | 0.102   |
| rs12943506  | A | -0.0241 |
| rs138815617 | A | -0.1492 |
| rs4074991   | G | 0.0425  |
| rs3786094   | C | -0.0249 |
| rs116681311 | T | 0.1214  |
| rs7221929   | A | 0.024   |
| rs4995288   | C | 0.0274  |

|             |   |         |
|-------------|---|---------|
| rs8072673   | C | 0.0442  |
| rs35131893  | G | 0.0252  |
| rs9891602   | T | -0.0412 |
| rs77134702  | T | -0.0483 |
| rs146630421 | A | 0.1961  |
| rs9912225   | G | -0.0513 |
| rs11658795  | A | -0.0276 |
| rs78166995  | T | -0.2636 |
| rs11651251  | G | 0.0562  |
| rs1634504   | C | 0.0252  |
| rs76007550  | T | -0.1338 |
| rs3809761   | A | -0.0401 |
| rs4889931   | C | -0.0582 |
| rs1663194   | T | 0.0342  |
| rs12944087  | A | 0.0275  |
| rs148847171 | A | -0.1347 |
| rs9908114   | A | -0.0579 |
| rs1983490   | A | -0.0252 |
| rs1544989   | G | 0.0235  |
| rs2290454   | T | 0.0448  |
| rs2286874   | G | 0.0703  |
| rs117103710 | A | -0.1015 |
| rs34363598  | C | 0.09    |
| rs111597713 | T | 0.0557  |
| rs7359499   | T | -0.1191 |
| rs11658005  | C | 0.0584  |
| rs142394296 | C | 0.1372  |
| rs11077661  | A | 0.0304  |
| rs12948376  | G | -0.0255 |
| rs11654427  | T | 0.1752  |
| rs4263000   | T | 0.0466  |
| rs117513483 | T | 0.0822  |
| rs8073884   | A | 0.1292  |
| rs12603701  | A | -0.0244 |
| rs118080805 | C | 0.1636  |
| rs112258612 | A | 0.1219  |
| rs11653744  | T | -0.0254 |
| rs11079256  | A | 0.0323  |
| rs6501551   | G | 0.0373  |
| rs8080993   | G | 0.0256  |
| rs12952694  | T | 0.0444  |
| rs1233855   | A | 0.0285  |
| rs6503589   | C | 0.0267  |
| rs1514239   | C | -0.0267 |
| rs117683710 | C | 0.1076  |
| rs8066894   | A | 0.0591  |
| rs12452593  | C | 0.0265  |

|             |   |         |
|-------------|---|---------|
| rs62069327  | G | 0.0279  |
| rs72836886  | T | -0.052  |
| rs72820111  | A | 0.0715  |
| rs113646636 | A | -0.0428 |
| rs12450835  | G | 0.0462  |
| rs118184955 | T | -0.1409 |
| rs138414361 | C | -0.029  |
| rs62067902  | G | 0.0382  |
| rs8070815   | T | 0.0267  |
| rs2714029   | C | -0.044  |
| rs78844067  | A | 0.063   |
| rs12939011  | G | 0.026   |
| rs78578708  | A | 0.0512  |
| rs981577    | C | 0.025   |
| rs73338795  | G | 0.0885  |
| rs7220080   | T | 0.0241  |
| rs3760144   | A | 0.0933  |
| rs140837785 | T | 0.1291  |
| rs1074637   | C | 0.0511  |
| rs34217155  | G | -0.0395 |
| rs12600344  | T | -0.0264 |
| rs76902443  | A | 0.0927  |
| rs118066732 | T | 0.0575  |
| rs140976490 | A | 0.0845  |
| rs113094786 | T | 0.1201  |
| rs62079539  | T | 0.0936  |
| rs55638481  | G | 0.2459  |
| rs614455    | C | 0.0268  |
| rs62058101  | C | -0.0448 |
| rs916910    | A | -0.0283 |
| rs8064365   | G | 0.0654  |
| rs35804067  | C | 0.0814  |
| rs34055624  | A | 0.067   |
| rs139611609 | C | 0.0969  |
| rs17761467  | A | 0.0421  |
| rs3891720   | A | 0.0424  |
| rs72829547  | A | -0.0462 |
| rs62072200  | C | -0.052  |
| rs854675    | T | 0.0403  |
| rs117254625 | G | -0.2394 |
| rs59692040  | T | -0.0251 |
| rs56049417  | G | -0.0886 |
| rs1019054   | G | 0.1313  |
| rs2079663   | G | 0.0324  |
| rs34402473  | T | -0.0359 |
| rs60968356  | C | 0.1027  |
| rs2453000   | C | -0.0446 |

|             |   |         |
|-------------|---|---------|
| rs74824031  | T | -0.0766 |
| rs12602160  | A | 0.0481  |
| rs56383674  | C | 0.0422  |
| rs10515149  | G | 0.0473  |
| rs12450248  | G | -0.0364 |
| rs77894595  | C | 0.0978  |
| rs144993221 | A | 0.0911  |
| rs9889858   | A | -0.0258 |
| rs7220136   | G | 0.0294  |
| rs12952241  | C | -0.0323 |
| rs60017501  | T | 0.0359  |
| rs12947431  | A | 0.0802  |
| rs75263840  | A | 0.0664  |
| rs9912976   | C | -0.0318 |
| rs76726425  | C | -0.037  |
| rs72850936  | A | 0.1407  |
| rs4796407   | G | 0.0246  |
| rs12952544  | G | -0.0379 |
| rs4789646   | T | -0.0342 |
| rs73286306  | T | -0.1308 |
| rs145669577 | T | -0.0391 |
| rs660413    | G | -0.0278 |
| rs75502650  | A | -0.0351 |
| rs2993355   | G | -0.0483 |
| rs7210735   | A | -0.0421 |
| rs116966175 | A | 0.0367  |
| rs9914831   | A | 0.0297  |
| rs7210514   | T | -0.0284 |
| rs113714895 | T | -0.0506 |
| rs8072149   | T | 0.0249  |
| rs58850579  | G | 0.1237  |
| rs8072890   | T | 0.0278  |
| rs117083077 | A | 0.0556  |
| rs117281509 | C | 0.1455  |
| rs72841250  | A | -0.0629 |
| rs11869387  | T | -0.0305 |
| rs75380519  | T | -0.1212 |
| rs8073903   | C | -0.0257 |
| rs4496206   | A | -0.0344 |
| rs114400335 | T | -0.0535 |
| rs2302867   | G | -0.0247 |
| rs73274291  | G | 0.1883  |
| rs1971      | A | 0.0265  |
| rs62073141  | T | 0.0359  |
| rs4128516   | A | -0.0632 |
| rs11871923  | T | -0.0359 |
| rs295842    | T | 0.0481  |

|             |   |         |
|-------------|---|---------|
| rs116992020 | T | -0.0637 |
| rs8082378   | A | 0.0246  |
| rs56150035  | A | -0.0475 |
| rs868432    | A | -0.0299 |
| rs139841118 | G | -0.0951 |
| rs75911077  | A | 0.0503  |
| rs16950905  | C | 0.0882  |
| rs112586313 | C | 0.1495  |
| rs12326008  | C | 0.081   |
| rs67377315  | A | -0.0424 |
| rs150980271 | T | -0.1061 |
| rs7225755   | C | 0.0261  |
| rs11653138  | T | 0.024   |
| rs117609123 | T | 0.1354  |
| rs142763757 | A | 0.1001  |
| rs8070671   | C | 0.0372  |
| rs2270115   | G | -0.0294 |
| rs34979580  | T | -0.1436 |
| rs79558243  | G | -0.0646 |
| rs62058030  | T | 0.0344  |
| rs55711288  | G | -0.1181 |
| rs145409770 | A | -0.1467 |
| rs3027210   | C | 0.0295  |
| rs56303708  | G | -0.0309 |
| rs3889146   | G | 0.0299  |
| rs72809338  | A | 0.1215  |
| rs4366752   | T | -0.0297 |
| rs75549785  | T | -0.0574 |
| rs62077678  | A | 0.1075  |
| rs3744678   | C | 0.0286  |
| rs35243111  | A | -0.0784 |
| rs111930688 | G | 0.1172  |
| rs7224763   | A | -0.028  |
| rs12948243  | G | -0.0345 |
| rs2474686   | A | -0.0561 |
| rs112672463 | T | 0.0441  |
| rs28864758  | C | -0.024  |
| rs17735400  | A | 0.1021  |
| rs72880521  | A | -0.0561 |
| rs161358    | A | 0.0312  |
| rs12601674  | T | 0.0353  |
| rs113865680 | C | -0.0439 |
| rs76510397  | G | -0.0759 |
| rs8065798   | C | -0.0278 |
| rs7208257   | C | -0.0521 |
| rs113767537 | A | 0.0571  |
| rs34016093  | C | -0.0758 |

|             |   |         |
|-------------|---|---------|
| rs56112103  | A | -0.027  |
| rs7217392   | T | 0.0245  |
| rs4968821   | T | -0.0472 |
| rs62071868  | C | 0.0779  |
| rs12937333  | T | -0.0322 |
| rs74784782  | C | 0.0868  |
| rs8068256   | T | -0.0304 |
| rs12940551  | G | 0.058   |
| rs62062328  | C | 0.0541  |
| rs2271156   | A | 0.0394  |
| rs886161    | C | 0.0238  |
| rs34411818  | A | 0.0806  |
| rs118008676 | A | -0.1579 |
| rs55811648  | T | -0.0665 |
| rs11077558  | C | -0.0407 |
| rs6503176   | T | 0.0353  |
| rs113938217 | C | 0.0455  |
| rs72814104  | T | 0.032   |
| rs9747612   | G | -0.0561 |
| rs7209420   | C | -0.0442 |
| rs7209785   | T | -0.0284 |
| rs76916739  | A | -0.1631 |
| rs77829360  | T | 0.1056  |
| rs4796494   | G | 0.0247  |
| rs72824462  | C | 0.0582  |
| rs111734310 | T | -0.1041 |
| rs6505413   | C | 0.0233  |
| rs79321384  | A | -0.1005 |
| rs7209263   | A | 0.0253  |
| rs11658113  | A | -0.1054 |
| rs118187839 | C | 0.1038  |
| rs117454625 | A | -0.1673 |
| rs117289252 | C | 0.2042  |
| rs80125374  | C | -0.0919 |
| rs7220807   | G | -0.0284 |
| rs111239046 | T | 0.0575  |
| rs9896748   | T | 0.0618  |
| rs9900959   | C | 0.0249  |
| rs1558214   | G | -0.0233 |
| rs2779252   | T | -0.0552 |
| rs223148    | C | 0.0302  |
| rs17183537  | C | 0.0619  |
| rs416438    | T | 0.0303  |
| rs12600879  | G | 0.028   |
| rs16977420  | A | -0.0258 |
| rs218676    | A | -0.0299 |
| rs34926696  | A | 0.0713  |

|             |   |         |
|-------------|---|---------|
| rs9891306   | A | -0.0255 |
| rs117872203 | T | 0.0995  |
| rs144987797 | T | -0.0747 |
| rs75882126  | C | -0.0431 |
| rs72843265  | C | -0.0632 |
| rs116690895 | T | 0.0794  |
| rs8073577   | T | 0.0234  |
| rs148165153 | G | 0.1337  |
| rs632058    | A | -0.0249 |
| rs117382854 | G | 0.1198  |
| rs147134872 | A | 0.0892  |
| rs72814941  | T | -0.0914 |
| rs75730104  | T | 0.1194  |
| rs12602329  | A | 0.0428  |
| rs2429383   | A | -0.1132 |
| rs4476235   | G | 0.0272  |
| rs9675150   | T | 0.0312  |
| rs8079577   | A | -0.027  |
| rs4496207   | G | -0.0264 |
| rs7211029   | T | 0.0256  |
| rs60798788  | T | -0.0912 |
| rs7217060   | C | 0.0386  |
| rs116985849 | C | 0.0972  |
| rs118018018 | G | 0.2081  |
| rs77812225  | A | -0.1032 |
| rs11077515  | G | -0.0581 |
| rs4969438   | G | 0.0393  |
| rs59927312  | T | 0.0579  |
| rs146734524 | C | 0.1741  |
| rs4795301   | G | 0.0545  |
| rs144980563 | A | -0.0563 |
| rs2159014   | T | -0.0349 |
| rs79419750  | T | 0.1493  |
| rs9898481   | A | 0.0231  |
| rs147348023 | T | -0.1837 |
| rs111943449 | A | -0.121  |
| rs62070211  | A | -0.0283 |
| rs150424074 | G | 0.0833  |
| rs62064234  | A | -0.081  |
| rs11651987  | A | 0.0258  |
| rs76084405  | A | 0.1512  |
| rs116902199 | C | -0.1009 |
| rs2716934   | T | -0.0335 |
| rs602351    | T | 0.0456  |
| rs11247575  | A | -0.0296 |
| rs72846682  | T | 0.0778  |
| rs7219901   | C | 0.0314  |



|             |   |         |
|-------------|---|---------|
| rs112622849 | C | 0.1321  |
| rs6501557   | G | -0.0438 |
| rs145698791 | A | -0.1293 |
| rs9890585   | G | 0.0304  |
| rs112002325 | C | 0.1871  |
| rs72851749  | A | 0.1136  |
| rs149741850 | C | -0.0524 |
| rs314253    | C | 0.0244  |
| rs138978779 | C | -0.1024 |
| rs11653587  | A | -0.029  |
| rs117419336 | G | 0.0718  |
| rs4794700   | C | -0.0674 |
| rs2306270   | A | 0.0435  |
| rs145701909 | C | 0.1373  |
| rs9901246   | G | -0.0384 |
| rs77399433  | T | 0.1244  |
| rs72868308  | G | -0.0933 |
| rs1065768   | T | -0.0365 |
| rs145941550 | C | -0.1311 |
| rs117326035 | C | 0.0697  |
| rs113402439 | C | 0.0891  |
| rs77855512  | G | -0.0533 |
| rs2287299   | T | 0.0813  |
| rs117676160 | C | -0.1416 |
| rs117566571 | C | 0.0774  |
| rs16948721  | G | 0.0308  |
| rs161374    | A | 0.0253  |
| rs2108461   | G | -0.0235 |
| rs72854324  | A | -0.0746 |
| rs9303003   | A | 0.0449  |
| rs3899058   | A | 0.0242  |
| rs1663188   | T | -0.0258 |
| rs9915381   | A | 0.0311  |
| rs72807135  | A | -0.0925 |
| rs117704776 | C | 0.0901  |
| rs147716295 | A | -0.1451 |
| rs11658216  | C | -0.0526 |
| rs17761746  | T | -0.1869 |
| rs2248358   | C | 0.0315  |
| rs62058128  | T | -0.0706 |
| rs11541650  | A | 0.1001  |
| rs71358290  | A | -0.0445 |
| rs62072921  | T | 0.1277  |
| rs117099109 | A | -0.2073 |
| rs2725399   | C | 0.0295  |
| rs58788694  | G | 0.0923  |
| rs35079661  | A | 0.0892  |

|             |   |         |
|-------------|---|---------|
| rs12940509  | A | 0.048   |
| rs3744410   | T | -0.0568 |
| rs147856429 | C | -0.162  |
| rs11649917  | T | 0.0435  |
| rs28421019  | T | 0.067   |
| rs79754868  | A | 0.1205  |
| rs1870429   | T | 0.024   |
| rs118104363 | A | -0.0773 |
| rs28713496  | C | -0.0428 |
| rs4790698   | A | 0.0306  |
| rs11871742  | C | -0.0418 |
| rs295092    | G | 0.0525  |
| rs9916390   | T | -0.0447 |
| rs17670876  | G | 0.0736  |
| rs148681244 | T | -0.0669 |
| rs34373928  | T | 0.0684  |
| rs112655617 | C | -0.1067 |
| rs9914522   | G | 0.0315  |
| rs4464142   | A | 0.211   |
| rs9904511   | T | 0.026   |
| rs143006871 | C | -0.1349 |
| rs74440765  | G | 0.0836  |
| rs143077453 | C | 0.072   |
| rs72812844  | A | 0.1124  |
| rs11649927  | G | 0.0306  |
| rs8067942   | C | -0.0501 |
| rs8070869   | A | 0.0245  |
| rs7225292   | G | 0.1157  |
| rs4792477   | T | -0.0248 |
| rs7219949   | T | -0.0295 |
| rs61753142  | T | 0.0858  |
| rs117871282 | T | 0.1149  |
| rs147569846 | T | 0.1565  |
| rs7211678   | G | 0.0485  |
| rs28611065  | C | 0.0371  |
| rs111800319 | C | -0.0942 |
| rs3209587   | A | -0.0494 |
| rs8078354   | G | -0.024  |
| rs35394067  | T | -0.0425 |
| rs117759052 | C | -0.0554 |
| rs62065887  | A | -0.0471 |
| rs6502144   | C | 0.0235  |
| rs12948800  | T | -0.0305 |
| rs11078072  | C | 0.0316  |
| rs9905813   | G | 0.0493  |
| rs113723473 | G | 0.0506  |
| rs74492633  | A | -0.1194 |

|             |   |         |
|-------------|---|---------|
| rs34684777  | A | -0.1682 |
| rs4969205   | C | 0.0242  |
| rs79063783  | A | -0.1831 |
| rs11651505  | T | 0.0361  |
| rs12451854  | A | 0.0978  |
| rs4310915   | C | -0.0259 |
| rs79666594  | T | -0.0457 |
| rs76835946  | C | -0.0753 |
| rs117250514 | A | -0.1293 |
| rs117903468 | A | -0.0522 |
| rs9807014   | T | 0.0318  |
| rs8915      | C | 0.0292  |
| rs2411053   | A | 0.0277  |
| rs72811977  | A | 0.0255  |
| rs2570052   | C | 0.0328  |
| rs62071087  | G | -0.027  |
| rs77005411  | C | -0.053  |
| rs148948189 | A | 0.0571  |
| rs2586063   | C | 0.0715  |
| rs62062413  | A | 0.1076  |
| rs11651624  | A | 0.0292  |
| rs8071497   | C | -0.0233 |
| rs9894352   | G | -0.06   |
| rs150476910 | A | 0.126   |
| rs9915987   | C | 0.0296  |
| rs11652129  | C | -0.1403 |
| rs7213785   | G | -0.0814 |
| rs2864881   | T | -0.0232 |
| rs7207216   | T | 0.0248  |
| rs45558533  | A | -0.0658 |
| rs6502980   | G | 0.0586  |
| rs72839036  | A | -0.0719 |
| rs80314171  | T | 0.1535  |
| rs145672924 | A | -0.1653 |
| rs112114694 | T | 0.0539  |
| rs117631740 | T | -0.115  |
| rs16950540  | G | -0.1177 |
| rs61393816  | A | 0.0433  |
| rs142732771 | T | 0.1083  |
| rs143417053 | C | -0.1028 |
| rs2077470   | G | -0.0317 |
| rs9902978   | C | 0.0334  |
| rs62078712  | T | -0.035  |
| rs7212390   | A | -0.0298 |
| rs16958968  | A | 0.0497  |
| rs144210385 | A | -0.1509 |
| rs236581    | T | 0.0871  |

|             |   |         |
|-------------|---|---------|
| rs72825075  | T | -0.0481 |
| rs112911537 | T | 0.1654  |
| rs144852096 | A | -0.2117 |
| rs146778604 | A | 0.0488  |
| rs74721111  | C | -0.1884 |
| rs12449950  | G | 0.0225  |
| rs7216198   | C | 0.0736  |
| rs66559434  | A | 0.025   |
| rs76253868  | G | 0.052   |
| rs732928    | G | -0.0238 |
| rs11078885  | A | -0.0271 |
| rs2411190   | G | -0.0275 |
| rs2271309   | G | -0.0271 |
| rs75370516  | A | 0.0698  |
| rs74766434  | C | 0.1046  |
| rs117631786 | A | -0.1558 |
| rs74857489  | A | 0.0572  |
| rs55804472  | G | -0.0456 |
| rs72631379  | A | 0.0533  |
| rs79762965  | G | -0.087  |
| rs76004683  | A | -0.1367 |
| rs9913946   | T | 0.0501  |
| rs78279880  | A | -0.0672 |
| rs75499973  | A | 0.1301  |
| rs11654144  | T | -0.0312 |
| rs73993962  | T | 0.0798  |
| rs112230002 | T | 0.1558  |
| rs2521717   | C | 0.0287  |
| rs9898636   | G | 0.0256  |
| rs2958908   | C | -0.031  |
| rs4283258   | C | -0.0282 |
| rs9889673   | C | -0.035  |
| rs76613467  | G | 0.0561  |
| rs673784    | T | 0.0649  |
| rs7224172   | A | 0.0404  |
| rs60913102  | T | 0.0529  |
| rs62068273  | A | 0.0954  |
| rs117341978 | T | -0.0905 |
| rs78366148  | G | -0.0839 |
| rs58234823  | C | -0.0262 |
| rs8073669   | G | 0.0501  |
| rs76456134  | G | 0.06    |
| rs4354994   | T | 0.0275  |
| rs78516248  | C | -0.0438 |
| rs16954495  | C | 0.0541  |
| rs112791051 | G | -0.0625 |
| rs62066662  | A | -0.1601 |

|             |   |         |
|-------------|---|---------|
| rs17716015  | A | 0.037   |
| rs4795715   | C | 0.0481  |
| rs1557668   | G | 0.1613  |
| rs141948566 | T | -0.1133 |
| rs8073065   | C | -0.0596 |
| rs75290623  | G | 0.058   |
| rs16976490  | C | 0.0462  |
| rs4794687   | T | 0.0259  |
| rs9892096   | T | 0.1141  |
| rs1992507   | T | 0.1183  |
| rs72862401  | T | -0.0698 |
| rs140088610 | T | 0.136   |
| rs197916    | T | -0.0305 |
| rs145755349 | C | 0.0751  |
| rs4789861   | T | 0.0532  |
| rs7210155   | T | -0.0561 |
| rs2271315   | T | -0.0661 |
| rs111694990 | A | -0.0392 |
| rs7501777   | G | -0.0315 |
| rs11869102  | T | 0.042   |
| rs11654099  | A | 0.0312  |
| rs79882528  | T | 0.1211  |
| rs4795930   | C | -0.0718 |
| rs151114485 | A | 0.1012  |
| rs113616468 | A | 0.0721  |
| rs10521147  | C | 0.0842  |
| rs149048042 | A | -0.0483 |
| rs838374    | A | -0.1228 |
| rs73981911  | T | 0.0487  |
| rs115389272 | T | 0.1005  |
| rs226234    | G | 0.1186  |
| rs11656323  | C | 0.0638  |
| rs76839196  | G | -0.1122 |
| rs117798487 | G | -0.1371 |
| rs9912487   | A | 0.0384  |
| rs79082648  | A | -0.1105 |
| rs9905399   | C | 0.0451  |
| rs8066848   | T | 0.0711  |
| rs12451693  | T | -0.0279 |
| rs820162    | A | -0.0271 |
| rs7406014   | G | -0.0279 |
| rs3924207   | T | -0.0725 |
| rs113560100 | G | -0.0888 |
| rs1131610   | T | -0.0995 |
| rs2047774   | A | 0.0252  |
| rs12601331  | T | 0.025   |
| rs117440845 | T | 0.1398  |

|             |   |         |
|-------------|---|---------|
| rs865429    | G | -0.0346 |
| rs4792806   | G | 0.0252  |
| rs145018927 | G | 0.1277  |
| rs919109    | C | -0.0325 |
| rs9901864   | G | 0.0288  |
| rs118175220 | C | -0.1348 |
| rs222859    | C | 0.0371  |
| rs60486271  | T | 0.0699  |
| rs12942589  | C | -0.0281 |
| rs28505351  | A | 0.0234  |
| rs117258099 | G | 0.1392  |
| rs3764425   | G | 0.0243  |
| rs1990463   | T | 0.0263  |
| rs754577    | T | -0.0888 |
| rs281360    | A | 0.0449  |
| rs226418    | C | 0.0403  |
| rs118185891 | A | 0.118   |
| rs79253045  | G | 0.1185  |
| rs76420517  | A | 0.099   |
| rs77921683  | C | 0.0355  |
| rs4239275   | T | 0.0351  |
| rs7504026   | G | -0.0258 |
| rs78863474  | A | -0.1077 |
| rs80004736  | C | 0.1565  |
| rs35940931  | A | -0.0275 |
| rs11649902  | C | -0.0258 |
| rs8065626   | T | 0.0574  |
| rs34564116  | T | 0.1071  |
| rs2940636   | A | -0.024  |
| rs7212097   | T | 0.0885  |
| rs149725893 | C | 0.1086  |
| rs689487    | T | -0.0313 |
| rs117593216 | G | -0.1455 |
| rs10775375  | A | -0.0322 |
| rs4795064   | C | 0.0225  |
| rs117646332 | A | 0.0576  |
| rs117075781 | A | -0.0835 |
| rs9905228   | C | -0.0443 |
| rs75222123  | C | -0.1277 |
| rs56100872  | T | -0.0501 |
| rs4794571   | C | -0.0419 |
| rs2134633   | T | 0.0277  |
| rs17712157  | C | 0.0364  |
| rs9896862   | G | 0.0399  |
| rs34289840  | C | 0.0362  |
| rs16946355  | A | -0.0835 |
| rs12325738  | C | 0.0404  |

|             |   |         |
|-------------|---|---------|
| rs17652686  | A | 0.0576  |
| rs117232481 | A | 0.1073  |
| rs79048109  | T | 0.0373  |
| rs149278453 | A | -0.064  |
| rs111258052 | C | -0.0851 |
| rs11657203  | G | -0.0255 |
| rs62056074  | T | 0.1088  |
| rs212493    | C | 0.0247  |
| rs11867960  | A | -0.0384 |
| rs141167917 | T | 0.144   |
| rs1847577   | C | 0.0576  |
| rs59184023  | A | -0.0756 |
| rs9893974   | T | 0.0316  |
| rs12937478  | T | -0.0301 |
| rs2877631   | A | -0.0317 |
| rs138197003 | C | -0.128  |
| rs11650611  | A | 0.0469  |
| rs111346516 | A | 0.0743  |
| rs72810692  | T | 0.1089  |
| rs142906547 | G | -0.1076 |
| rs117345200 | T | 0.1048  |
| rs8081438   | A | -0.0307 |
| rs58864227  | T | 0.0314  |
| rs2952311   | G | -0.0392 |
| rs57282943  | A | 0.0424  |
| rs8065815   | A | -0.0817 |
| rs80117280  | G | -0.0424 |
| rs9912522   | T | 0.0236  |
| rs2134808   | G | 0.0264  |
| rs74000903  | T | 0.0669  |
| rs6565538   | A | 0.0829  |
| rs2086247   | C | 0.0268  |
| rs116971671 | G | 0.1742  |
| rs78732898  | A | -0.039  |
| rs113301975 | T | 0.0382  |
| rs79050436  | A | -0.1049 |
| rs117470364 | C | 0.1034  |
| rs79677589  | G | 0.0386  |
| rs3859254   | C | 0.0285  |
| rs12938335  | G | -0.0848 |
| rs74932577  | T | 0.0802  |
| rs75209654  | A | 0.1097  |
| rs9907413   | C | -0.0615 |
| rs74323364  | G | 0.0432  |
| rs78247247  | G | 0.077   |
| rs118155273 | C | 0.0953  |
| rs9907806   | C | -0.0891 |

|             |   |         |
|-------------|---|---------|
| rs74744301  | A | 0.0651  |
| rs117262720 | A | -0.0384 |
| rs71369665  | G | -0.0383 |
| rs145543056 | T | 0.1551  |
| rs17710     | T | -0.0331 |
| rs59372725  | T | 0.0446  |
| rs12601443  | C | -0.1113 |
| rs62068848  | C | 0.0404  |
| rs11079957  | T | -0.048  |
| rs62062524  | C | -0.0325 |
| rs9303510   | A | 0.0261  |
| rs61758028  | G | -0.0664 |
| rs6503496   | C | -0.081  |
| rs35595363  | C | 0.1545  |
| rs11077404  | A | 0.0311  |
| rs112348361 | G | -0.1152 |
| rs117940828 | C | 0.1991  |
| rs73974645  | A | -0.1285 |
| rs113548008 | A | -0.1045 |
| rs144508531 | T | -0.1469 |
| rs79207839  | T | 0.1273  |
| rs1532749   | A | 0.0538  |
| rs9892959   | G | 0.0837  |
| rs3786102   | A | 0.0315  |
| rs142939791 | A | -0.0682 |
| rs144198596 | T | -0.1191 |
| rs12150371  | G | -0.0653 |
| rs236525    | C | 0.0279  |
| rs12603036  | T | 0.0358  |
| rs7208244   | T | 0.0293  |
| rs111369349 | A | 0.0789  |
| rs12948390  | C | 0.0487  |
| rs7210915   | C | 0.0235  |
| rs117463276 | T | 0.092   |
| rs56192323  | T | -0.0917 |
| rs61753102  | A | 0.1417  |
| rs57508443  | C | 0.0377  |
| rs138244195 | G | -0.1137 |
| rs146871023 | A | -0.1052 |
| rs77788327  | C | 0.2076  |
| rs390589    | T | -0.0459 |
| rs146101836 | A | -0.1414 |
| rs34804551  | G | -0.1256 |
| rs2644707   | A | 0.1282  |
| rs34759637  | A | -0.1443 |
| rs56217813  | T | -0.1644 |
| rs118174517 | A | -0.1786 |



|             |   |         |
|-------------|---|---------|
| rs72827096  | A | 0.0868  |
| rs72850106  | A | 0.0705  |
| rs72852216  | G | 0.0304  |
| rs72831252  | C | 0.0662  |
| rs8074097   | A | -0.026  |
| rs73338811  | T | 0.0652  |
| rs667233    | G | -0.0306 |
| rs3794714   | A | 0.0326  |
| rs117488696 | T | -0.065  |
| rs72841443  | A | 0.0511  |
| rs4924974   | A | 0.1476  |
| rs76377723  | C | 0.069   |
| rs145222242 | T | 0.1015  |
| rs113399245 | A | 0.1604  |
| rs117161176 | C | -0.0818 |
| rs75962094  | T | 0.0583  |
| rs67143796  | C | 0.1138  |
| rs76201407  | C | -0.0955 |
| rs12944983  | C | 0.0283  |
| rs9896435   | T | -0.1384 |
| rs117543116 | C | 0.0992  |
| rs34250950  | C | -0.0679 |
| rs117278345 | T | 0.0795  |
| rs117417725 | T | 0.1514  |
| rs79232103  | T | 0.0731  |
| rs10515099  | A | 0.0289  |
| rs4555197   | G | -0.0317 |
| rs117755414 | A | -0.125  |
| rs73298862  | C | 0.0556  |
| rs6502800   | A | 0.0965  |
| rs112955894 | G | -0.1276 |
| rs35540785  | T | -0.0863 |
| rs62062359  | T | 0.0301  |
| rs17625073  | T | 0.0306  |
| rs6504215   | T | -0.0359 |
| rs141023888 | T | 0.1095  |
| rs111236642 | T | 0.0944  |
| rs62621831  | A | 0.0565  |
| rs78076914  | T | 0.0438  |
| rs79846181  | C | 0.0439  |
| rs17804611  | C | 0.087   |
| rs1420803   | T | -0.0236 |
| rs75158606  | T | -0.0982 |
| rs4794715   | C | -0.0257 |
| rs9912936   | G | -0.0215 |
| rs74791161  | C | 0.0767  |
| rs113077881 | T | -0.136  |

|             |   |         |
|-------------|---|---------|
| rs2411153   | G | 0.0253  |
| rs116976555 | G | -0.0866 |
| rs113614047 | A | 0.0337  |
| rs117232197 | G | -0.0845 |
| rs11650704  | C | 0.0597  |
| rs16955632  | T | 0.1473  |
| rs112489646 | G | -0.1169 |
| rs199496    | A | -0.048  |
| rs75290103  | T | -0.0704 |
| rs118005818 | G | 0.0768  |
| rs117362920 | C | -0.1408 |
| rs199146    | T | 0.0367  |
| rs147129491 | T | -0.091  |
| rs78882993  | T | 0.0883  |
| rs62074362  | T | 0.096   |
| rs1114532   | C | 0.0229  |
| rs149830096 | A | 0.0952  |
| rs4054866   | G | 0.0234  |
| rs9303616   | G | 0.023   |
| rs117407921 | G | -0.0936 |
| rs68007436  | A | 0.0374  |
| rs62071580  | A | 0.0844  |
| rs17621546  | G | 0.0905  |
| rs11868894  | C | 0.0285  |
| rs59040440  | G | 0.035   |
| rs75708547  | A | -0.0579 |
| rs6504930   | C | 0.0412  |
| rs55728731  | A | 0.1324  |
| rs116527475 | T | 0.0948  |
| rs78645527  | C | 0.1628  |
| rs754639    | A | -0.0504 |
| rs72829504  | T | -0.2572 |
| rs117583179 | A | -0.177  |
| rs145583729 | C | -0.0725 |
| rs1859933   | T | 0.03    |
| rs9906327   | C | 0.0226  |
| rs117296695 | C | 0.089   |
| rs78746738  | T | -0.0748 |
| rs74401893  | C | 0.1835  |
| rs73380861  | A | -0.0565 |
| rs2958919   | C | -0.0342 |
| rs6504959   | T | -0.0223 |
| rs71385924  | T | -0.0841 |
| rs72848124  | T | 0.1027  |
| rs7217735   | G | -0.0254 |
| rs145228997 | A | -0.1578 |
| rs12051600  | G | -0.0367 |

|             |   |         |
|-------------|---|---------|
| rs225185    | C | 0.0342  |
| rs12938395  | T | -0.0258 |
| rs141964250 | C | -0.1563 |
| rs35250332  | A | 0.0996  |
| rs317387    | A | -0.037  |
| rs62069566  | C | 0.1066  |
| rs144631292 | T | -0.1386 |
| rs35837030  | C | 0.0363  |
| rs8069150   | T | -0.1213 |
| rs117753860 | A | -0.1682 |
| rs111968713 | A | -0.0695 |
| rs118039108 | G | 0.0338  |
| rs80094834  | C | 0.0895  |
| rs12603060  | A | -0.0269 |
| rs138132626 | T | -0.0599 |
| rs58203906  | A | 0.0379  |
| rs78336490  | T | 0.0528  |
| rs143800938 | A | -0.1776 |
| rs4792208   | T | -0.0544 |
| rs12450969  | A | 0.0362  |
| rs931795    | A | 0.0633  |
| rs2197240   | C | -0.0236 |
| rs12453107  | G | -0.0227 |
| rs753514    | T | 0.0489  |
| rs4795881   | T | 0.0399  |
| rs34216592  | A | -0.0462 |
| rs77575614  | A | 0.1361  |
| rs75097049  | T | 0.052   |
| rs149073675 | C | 0.0707  |
| rs6501415   | G | 0.0271  |
| rs17679115  | A | -0.0838 |
| rs76442168  | A | 0.0492  |
| rs7222104   | G | 0.0241  |
| rs72848293  | A | 0.0751  |
| rs113316833 | T | 0.057   |
| rs1877645   | T | -0.0238 |
| rs2159122   | T | -0.0254 |
| rs75019737  | A | 0.1205  |
| rs144966680 | C | -0.1733 |
| rs57952858  | G | -0.0668 |
| rs11653193  | C | -0.1098 |
| rs12451286  | A | -0.0282 |
| rs11658283  | T | 0.0593  |
| rs757022    | G | -0.0278 |
| rs112855463 | T | -0.0676 |
| rs16958320  | T | 0.0231  |
| rs117982112 | T | 0.167   |

|             |   |         |
|-------------|---|---------|
| rs4789981   | A | 0.0232  |
| rs743646    | C | -0.0454 |
| rs8080886   | G | 0.0333  |
| rs9892301   | T | -0.0683 |
| rs8074674   | A | -0.0379 |
| rs2107132   | C | -0.0301 |
| rs71368581  | A | 0.0392  |
| rs72826265  | G | 0.0553  |
| rs75376718  | A | -0.1364 |
| rs2661601   | A | 0.0519  |
| rs137987886 | A | 0.1465  |
| rs35524093  | G | 0.0222  |
| rs62069151  | A | 0.0448  |
| rs4148405   | G | -0.0326 |
| rs117963063 | C | 0.146   |
| rs10073     | C | -0.0326 |
| rs80063615  | G | -0.0481 |
| rs8080747   | C | -0.0223 |
| rs12953216  | A | 0.0529  |
| rs36007920  | A | -0.0275 |
| rs9911362   | A | -0.0252 |
| rs35596313  | C | -0.0235 |
| rs117842166 | A | 0.0759  |
| rs143980810 | A | -0.1126 |
| rs11868943  | G | 0.0251  |
| rs17732024  | T | -0.0357 |
| rs57664724  | A | 0.1824  |
| rs76896815  | G | -0.0476 |
| rs79786033  | T | 0.0605  |
| rs9892577   | C | -0.027  |
| rs147871629 | C | 0.044   |
| rs60894380  | T | -0.0297 |
| rs56794927  | G | 0.0439  |
| rs7217041   | C | 0.0609  |
| rs9914547   | A | -0.0308 |
| rs72886994  | G | 0.0738  |
| rs1132114   | G | -0.0276 |
| rs62063127  | A | -0.1062 |
| rs9898902   | A | 0.0236  |
| rs9902896   | G | 0.0688  |
| rs8070004   | A | 0.0308  |
| rs12942019  | A | -0.0251 |
| rs2671663   | A | 0.0275  |
| rs148650969 | A | -0.1388 |
| rs143059129 | T | 0.0966  |
| rs9894768   | T | 0.0757  |
| rs8070481   | T | 0.0218  |

|             |   |         |
|-------------|---|---------|
| rs117846479 | T | -0.1108 |
| rs894669    | T | 0.0247  |
| rs79870576  | T | -0.1204 |
| rs7213992   | T | -0.0395 |
| rs34397155  | A | 0.0744  |
| rs3859193   | A | -0.0227 |
| rs78135460  | A | -0.1264 |
| rs34392252  | T | 0.0241  |
| rs17848956  | C | 0.044   |
| rs12150069  | C | -0.0412 |
| rs34476531  | G | 0.0785  |
| rs115785832 | G | -0.0575 |
| rs139095933 | A | 0.1051  |
| rs11651183  | A | 0.0281  |
| rs75193889  | G | -0.0491 |
| rs8080416   | C | 0.0268  |
| rs7220903   | C | 0.0866  |
| rs17647731  | C | 0.0995  |
| rs76536586  | A | 0.0485  |
| rs149390120 | A | -0.0816 |
| rs78552757  | T | -0.0854 |
| rs2256020   | C | 0.0266  |
| rs4622541   | T | 0.0569  |
| rs75292794  | G | 0.0982  |
| rs147351948 | T | -0.174  |
| rs4788995   | T | 0.0235  |
| rs117178009 | G | -0.1049 |
| rs1076399   | G | -0.0249 |
| rs1110491   | T | 0.0355  |
| rs4791206   | A | 0.0512  |
| rs4789549   | C | -0.0525 |
| rs117097051 | A | -0.1631 |
| rs4366773   | T | -0.0464 |
| rs548795    | C | -0.105  |
| rs66851854  | G | 0.0396  |
| rs72820637  | A | 0.0507  |
| rs4791580   | C | 0.1175  |
| rs116877766 | T | 0.1516  |
| rs12150494  | T | 0.0546  |
| rs76160849  | A | 0.1004  |
| rs117462365 | T | -0.0696 |
| rs117004818 | T | 0.1555  |
| rs73408686  | C | -0.0238 |
| rs76187514  | A | 0.1121  |
| rs11654974  | A | 0.0308  |
| rs2099971   | T | -0.0396 |
| rs9910716   | C | 0.0579  |

|             |   |         |
|-------------|---|---------|
| rs80005241  | A | 0.1372  |
| rs2706661   | G | 0.0604  |
| rs71366201  | G | 0.0611  |
| rs11658979  | G | 0.0279  |
| rs7220992   | G | 0.0218  |
| rs11657345  | T | 0.0218  |
| rs11655361  | A | 0.0531  |
| rs57491051  | C | 0.1248  |
| rs78484873  | C | 0.0916  |
| rs2323466   | T | -0.0587 |
| rs17721992  | C | -0.1754 |
| rs72837153  | C | -0.0978 |
| rs1009728   | C | -0.0255 |
| rs2586240   | T | -0.0238 |
| rs112145574 | G | -0.0964 |
| rs4792739   | C | 0.1119  |
| rs77320578  | T | 0.0502  |
| rs11078732  | T | -0.0219 |
| rs12451319  | T | 0.022   |
| rs62065866  | T | -0.0746 |
| rs9783811   | G | -0.0328 |
| rs118136269 | A | -0.1547 |
| rs145278785 | A | 0.089   |
| rs13380807  | G | 0.0978  |
| rs9302900   | C | 0.0241  |
| rs117375689 | G | -0.0628 |
| rs7406123   | A | -0.0423 |
| rs3809719   | G | 0.0848  |
| rs906422    | T | -0.0297 |
| rs161370    | G | 0.0254  |
| rs138219461 | A | 0.0823  |
| rs3843246   | C | -0.0484 |
| rs114469358 | C | 0.0337  |
| rs72832099  | A | 0.1591  |
| rs72846354  | C | -0.0428 |
| rs79448557  | C | -0.0928 |
| rs138087118 | T | 0.1101  |
| rs62077109  | T | -0.0521 |
| rs76427467  | A | 0.1305  |
| rs149657869 | C | 0.1159  |
| rs16945325  | T | 0.0492  |
| rs138824620 | T | 0.0761  |
| rs16943861  | T | 0.028   |
| rs11655431  | C | 0.0324  |
| rs147513995 | G | 0.1366  |
| rs72819123  | T | 0.1027  |
| rs62089718  | G | 0.0581  |

|             |   |         |
|-------------|---|---------|
| rs9889820   | A | 0.022   |
| rs17206871  | G | 0.0531  |
| rs74359781  | A | 0.0911  |
| rs73345528  | T | -0.0752 |
| rs471943    | C | 0.0759  |
| rs117886541 | C | 0.1822  |
| rs60970041  | G | 0.1507  |
| rs7219981   | A | 0.0265  |
| rs2270228   | T | 0.0463  |
| rs11650141  | G | -0.036  |
| rs740395    | G | -0.025  |
| rs1457820   | G | -0.0312 |
| rs9908627   | T | 0.0529  |
| rs1034840   | G | -0.0372 |
| rs4600523   | T | -0.0239 |
| rs35653922  | C | -0.0488 |
| rs75023614  | C | -0.0605 |
| rs797993    | A | 0.0243  |
| rs6504314   | T | 0.04    |
| rs3785993   | T | -0.0264 |
| rs62058061  | T | 0.1138  |
| rs75212854  | G | -0.1462 |
| rs78864337  | A | -0.1406 |
| rs4793297   | A | -0.0254 |
| rs9905464   | C | -0.0565 |
| rs35532197  | A | -0.1283 |
| rs11870241  | A | -0.024  |
| rs117181637 | A | 0.1448  |
| rs12451683  | T | 0.0467  |
| rs17804092  | T | -0.0351 |
| rs9898746   | C | -0.0608 |
| rs12602968  | A | -0.0745 |
| rs2779188   | T | -0.027  |
| rs4006798   | A | 0.0498  |
| rs4541139   | G | 0.0421  |
| rs10451281  | G | -0.0392 |
| rs11868481  | A | -0.0536 |
| rs77449990  | C | -0.0789 |
| rs117349326 | T | 0.136   |
| rs145531313 | G | 0.1132  |
| rs77688102  | A | -0.1276 |
| rs280043    | C | 0.0257  |
| rs17681776  | C | 0.0869  |
| rs34255910  | C | 0.0423  |
| rs150478988 | T | 0.1054  |
| rs73999319  | C | 0.061   |
| rs140529142 | A | -0.1224 |

|             |   |         |
|-------------|---|---------|
| rs8068747   | T | -0.0239 |
| rs3091328   | G | 0.022   |
| rs9895468   | C | -0.023  |
| rs8081475   | A | -0.0458 |
| rs11867599  | T | 0.0725  |
| rs76338997  | A | -0.0449 |
| rs620562    | T | -0.0253 |
| rs12951350  | G | -0.0341 |
| rs6501659   | T | 0.0442  |
| rs847695    | T | 0.0242  |
| rs17820808  | C | 0.0415  |
| rs117789338 | A | -0.1444 |
| rs7220482   | T | 0.0254  |
| rs139217380 | C | 0.1365  |
| rs2706682   | G | -0.0596 |
| rs71375716  | A | -0.0865 |
| rs2672887   | T | -0.0224 |
| rs3885020   | A | -0.043  |
| rs62070064  | A | -0.1065 |
| rs4796805   | C | 0.0233  |
| rs72868939  | A | 0.18    |
| rs1304660   | C | -0.0233 |
| rs117983822 | G | 0.102   |
| rs9303041   | T | -0.0288 |
| rs79448911  | T | 0.127   |
| rs113364399 | A | 0.0579  |
| rs8067789   | G | -0.0267 |
| rs111881544 | A | 0.0935  |
| rs7219315   | A | -0.0206 |
| rs117419776 | T | 0.1001  |
| rs56112292  | A | 0.0835  |
| rs16945729  | T | -0.0346 |
| rs595306    | T | -0.0384 |
| rs7221052   | A | 0.0241  |
| rs76415179  | C | -0.0847 |
| rs73338112  | G | 0.063   |
| rs9914151   | C | -0.0208 |
| rs12947428  | C | -0.0406 |
| rs17600516  | A | 0.0585  |
| rs74810901  | A | 0.0505  |
| rs72839759  | T | -0.0754 |
| rs67391512  | T | 0.0404  |
| rs12601956  | A | 0.0378  |
| rs2127994   | T | 0.0618  |
| rs147214221 | A | 0.1493  |
| rs11656082  | C | 0.022   |
| rs2313146   | T | 0.0287  |



|             |   |         |
|-------------|---|---------|
| rs56314182  | T | -0.0312 |
| rs3110569   | T | 0.1343  |
| rs79376923  | A | -0.0453 |
| rs55931340  | T | -0.0587 |
| rs113688928 | T | 0.0546  |
| rs12601313  | C | 0.0294  |
| rs315490    | G | -0.0258 |
| rs117691053 | A | 0.0925  |
| rs4416078   | A | 0.0226  |
| rs72849306  | A | -0.032  |
| rs74000000  | T | -0.1174 |
| rs17548645  | T | 0.0422  |
| rs140608974 | T | -0.1235 |
| rs17809663  | A | 0.035   |
| rs11651772  | C | -0.0574 |
| rs79421907  | A | -0.0557 |
| rs76027845  | A | 0.0866  |
| rs2779256   | G | 0.0243  |
| rs62065901  | G | 0.075   |
| rs73973274  | C | 0.0784  |
| rs71366199  | G | 0.0454  |
| rs2191228   | C | -0.0774 |
| rs28365846  | A | -0.1407 |
| rs72840229  | T | 0.0674  |
| rs4791530   | C | -0.0215 |
| rs62075826  | G | -0.0748 |
| rs56994118  | C | 0.0275  |
| rs72812610  | C | -0.0367 |
| rs146461922 | T | -0.1198 |
| rs74982506  | A | 0.0444  |
| rs148855419 | G | 0.1898  |
| rs79454566  | A | -0.0745 |
| rs12940247  | G | -0.0336 |
| rs4451997   | G | 0.0209  |
| rs16970025  | T | -0.0238 |
| rs9916149   | C | -0.0264 |
| rs11651006  | T | 0.0456  |
| rs11871524  | A | -0.1357 |
| rs7208679   | C | 0.0375  |
| rs67866552  | C | -0.0761 |
| rs117467633 | T | -0.0691 |
| rs2877809   | G | -0.0281 |
| rs17772608  | C | 0.0419  |
| rs12936230  | G | -0.0243 |
| rs7225732   | A | 0.0877  |
| rs34062186  | C | 0.0342  |
| rs62061692  | T | -0.1012 |

|             |   |         |
|-------------|---|---------|
| rs34036967  | A | 0.0437  |
| rs12943564  | A | 0.0257  |
| rs1177962   | T | -0.0287 |
| rs2131048   | A | 0.0299  |
| rs675916    | A | 0.0552  |
| rs150159805 | A | -0.0735 |
| rs9907366   | G | 0.0761  |
| rs9895413   | T | 0.0405  |
| rs72832428  | C | 0.137   |
| rs150018646 | T | 0.127   |
| rs74579703  | T | 0.1224  |
| rs146158647 | C | 0.1038  |
| rs477031    | C | 0.0441  |
| rs137901287 | T | 0.1469  |
| rs11080170  | T | -0.0305 |
| rs9914139   | A | 0.0226  |
| rs4790732   | C | 0.0282  |
| rs117300852 | T | 0.0909  |
| rs35276234  | A | -0.1409 |
| rs35667337  | C | -0.1122 |
| rs9905515   | C | -0.0277 |
| rs147134846 | G | -0.0815 |
| rs111357160 | T | 0.035   |
| rs12945571  | A | -0.0233 |
| rs62058070  | G | 0.1369  |
| rs58794808  | T | 0.0225  |
| rs12952731  | G | 0.0313  |
| rs78914238  | C | -0.0638 |
| rs62061168  | A | 0.0275  |
| rs76525880  | T | 0.0391  |
| rs16969774  | G | -0.0429 |
| rs7220520   | C | 0.0258  |
| rs147293039 | A | 0.0909  |
| rs7501817   | T | 0.0289  |
| rs117332412 | C | -0.1463 |
| rs139246813 | A | -0.1081 |
| rs76645480  | T | 0.0744  |
| rs78496972  | T | -0.0293 |
| rs12452654  | G | -0.0692 |
| rs11869206  | C | -0.0501 |
| rs4796485   | C | 0.0239  |
| rs8082056   | C | -0.0303 |
| rs4239169   | T | -0.0219 |
| rs9908823   | T | 0.0416  |
| rs75350494  | A | 0.0537  |
| rs74970574  | A | -0.139  |
| rs12948729  | A | -0.1276 |

|             |   |         |
|-------------|---|---------|
| rs9910060   | T | 0.0308  |
| rs35906052  | A | -0.0961 |
| rs79095053  | A | -0.051  |
| rs151292385 | C | 0.165   |
| rs17833884  | C | -0.0363 |
| rs8067387   | A | 0.029   |
| rs144701507 | T | -0.1321 |
| rs10840     | A | 0.0358  |
| rs78529706  | G | 0.1153  |
| rs7350932   | T | -0.0206 |
| rs9894841   | C | 0.0223  |
| rs4424950   | C | -0.0289 |
| rs71360295  | G | -0.0395 |
| rs148318977 | T | -0.1752 |
| rs117525535 | G | 0.0724  |
| rs55930786  | G | 0.0953  |
| rs10853017  | C | -0.0347 |
| rs740558    | G | -0.0301 |
| rs139388911 | A | -0.0794 |
| rs55811005  | A | 0.1892  |
| rs34594369  | T | -0.0239 |
| rs72846201  | G | 0.0819  |
| rs72849701  | A | -0.0405 |
| rs11080290  | A | -0.0262 |
| rs768624    | C | 0.0225  |
| rs117503517 | T | 0.1004  |
| rs146048026 | T | -0.0996 |
| rs4791450   | A | -0.0978 |
| rs9906473   | A | -0.0236 |
| rs4517852   | T | -0.0305 |
| rs9891815   | A | 0.0722  |
| rs7208260   | C | 0.0407  |
| rs116875773 | A | 0.0937  |
| rs117341962 | C | -0.112  |
| rs143828168 | T | -0.1004 |
| rs73286795  | A | -0.0349 |
| rs75404486  | G | -0.0849 |
| rs12939928  | G | -0.0704 |
| rs324075    | G | -0.0331 |
| rs80168221  | T | 0.0635  |
| rs3744045   | G | 0.0722  |
| rs4789892   | T | 0.0283  |
| rs117500794 | C | -0.1104 |
| rs74491716  | A | 0.0649  |
| rs16968745  | C | -0.0306 |
| rs77283009  | T | 0.0598  |
| rs61759657  | T | -0.0604 |

|             |   |         |
|-------------|---|---------|
| rs12942257  | C | -0.0501 |
| rs225206    | T | 0.0204  |
| rs2412159   | T | -0.0234 |
| rs74723537  | T | 0.0529  |
| rs925615    | G | -0.0387 |
| rs7213878   | C | -0.0444 |
| rs965215    | A | -0.0266 |
| rs147616781 | A | 0.0217  |
| rs117741449 | T | 0.147   |
| rs6505107   | A | -0.0467 |
| rs76222695  | G | 0.104   |
| rs62072713  | C | -0.0223 |
| rs11654554  | G | -0.0448 |
| rs4789915   | G | 0.0541  |
| rs12601151  | G | 0.0496  |
| rs12941141  | C | 0.0654  |
| rs143672743 | C | -0.052  |
| rs4247113   | T | 0.0468  |
| rs8078631   | T | 0.0363  |
| rs112029254 | A | -0.1423 |
| rs9898797   | G | 0.0255  |
| rs75009751  | G | -0.1176 |
| rs12943724  | T | -0.0314 |
| rs11650828  | C | 0.1025  |
| rs113395372 | T | -0.0675 |
| rs77426760  | A | 0.0505  |
| rs8074809   | A | -0.0244 |
| rs9747557   | G | 0.0228  |
| rs35687304  | A | 0.0832  |
| rs55892624  | C | 0.0268  |
| rs216455    | T | -0.0218 |
| rs17781949  | C | -0.0302 |
| rs12937453  | A | -0.0292 |
| rs117139505 | A | 0.0889  |
| rs150982700 | T | 0.1286  |
| rs13342029  | G | -0.0296 |
| rs117103440 | A | 0.0794  |
| rs77084481  | C | -0.0967 |
| rs116959661 | C | 0.1308  |
| rs76237288  | G | -0.1016 |
| rs2322858   | T | 0.0305  |
| rs16976574  | G | 0.1009  |
| rs140126971 | A | -0.0753 |
| rs34734117  | A | 0.0486  |
| rs9898593   | T | 0.0459  |
| rs147638061 | T | -0.1036 |
| rs12150444  | C | 0.0379  |

|             |   |         |
|-------------|---|---------|
| rs117978438 | A | -0.0901 |
| rs75085064  | C | 0.0966  |
| rs112935779 | A | 0.1169  |
| rs74578441  | A | -0.1109 |
| rs10491111  | A | 0.041   |
| rs114815795 | G | -0.0943 |
| rs72846329  | A | 0.0254  |
| rs75669369  | G | -0.0267 |
| rs12945211  | C | 0.0476  |
| rs7222770   | G | 0.0496  |
| rs55805524  | T | -0.0379 |
| rs72844816  | G | 0.1106  |
| rs62063642  | T | -0.0223 |
| rs6504338   | C | -0.0222 |
| rs12950509  | G | 0.0321  |
| rs2671683   | T | -0.0353 |
| rs62080890  | T | 0.1206  |
| rs2332263   | A | 0.0238  |
| rs145906234 | T | 0.138   |
| rs12940728  | T | -0.0248 |
| rs144618566 | T | -0.1126 |
| rs76108620  | A | 0.0431  |
| rs78352452  | A | 0.0553  |
| rs76317988  | T | 0.0869  |
| rs78591747  | G | -0.0916 |
| rs1472180   | A | 0.0247  |
| rs6503016   | C | 0.0231  |
| rs7207466   | C | 0.0231  |
| rs117787091 | T | 0.0716  |
| rs4461115   | C | -0.0314 |
| rs112979152 | C | 0.0942  |
| rs144829468 | A | 0.0988  |
| rs322197    | G | -0.0259 |
| rs12951654  | T | 0.0208  |
| rs34609776  | A | 0.0213  |
| rs141372926 | T | 0.1717  |
| rs146951351 | A | -0.092  |
| rs77976223  | A | 0.0295  |
| rs3803800   | A | -0.0247 |
| rs314254    | T | -0.0325 |
| rs75583996  | G | 0.0535  |
| rs79177936  | T | 0.0905  |
| rs35359504  | G | -0.0251 |
| rs73273277  | T | 0.0246  |
| rs12449795  | T | -0.0282 |
| rs145739808 | A | 0.1114  |
| rs7222348   | C | 0.0399  |

|             |   |         |
|-------------|---|---------|
| rs139857312 | G | 0.1567  |
| rs141975149 | T | 0.0843  |
| rs9903496   | G | 0.026   |
| rs117689766 | C | -0.1185 |
| rs73284773  | A | -0.0428 |
| rs956984    | G | -0.0345 |
| rs60865756  | A | -0.1233 |
| rs139330487 | T | -0.1319 |
| rs72637323  | A | 0.1191  |
| rs117819658 | T | -0.0731 |
| rs11652708  | G | 0.0217  |
| rs35646762  | T | -0.044  |
| rs9797146   | T | -0.0303 |
| rs62066362  | G | -0.145  |
| rs218684    | T | -0.1075 |
| rs34121330  | T | -0.027  |
| rs112619413 | G | -0.0474 |
| rs242244    | G | 0.0366  |
| rs62079142  | A | -0.0632 |
| rs59155213  | A | 0.0211  |
| rs141570579 | G | 0.109   |
| rs56381634  | G | -0.0382 |
| rs150352158 | A | -0.0973 |
| rs116953998 | A | -0.0915 |
| rs4148413   | G | 0.0284  |
| rs4924949   | A | 0.0279  |
| rs8064414   | A | -0.0424 |
| rs3848445   | C | -0.0525 |
| rs9892617   | T | 0.0201  |
| rs150426521 | T | 0.1353  |
| rs77408475  | T | 0.063   |
| rs8065836   | A | -0.0205 |
| rs7214073   | C | -0.0251 |
| rs117067616 | G | 0.1917  |
| rs148143047 | G | 0.1201  |
| rs12450297  | G | 0.0308  |
| rs28498113  | C | 0.0208  |
| rs11078523  | C | -0.0211 |
| rs7214863   | C | 0.0235  |
| rs148188587 | A | 0.0976  |
| rs9901658   | A | -0.1087 |
| rs918080    | A | 0.0251  |
| rs118153439 | A | 0.0383  |
| rs74833757  | C | -0.0363 |
| rs16954357  | T | -0.0375 |
| rs58813009  | C | 0.0408  |
| rs10491130  | A | 0.0363  |

|             |   |         |
|-------------|---|---------|
| rs925616    | T | -0.0214 |
| rs146388015 | G | 0.0891  |
| rs147554077 | T | 0.0639  |
| rs117520267 | A | -0.1173 |
| rs12449588  | G | -0.023  |
| rs146560884 | C | -0.0684 |
| rs2320230   | G | -0.0358 |
| rs72849639  | A | -0.1031 |
| rs8069303   | G | 0.0925  |
| rs78514368  | G | 0.0572  |
| rs62072224  | A | -0.0451 |
| rs1105813   | A | 0.0343  |
| rs78195747  | A | 0.0626  |
| rs17683844  | C | -0.0259 |
| rs76731851  | G | -0.0503 |
| rs757075    | A | -0.0628 |
| rs2586048   | G | 0.02    |
| rs1698225   | C | -0.0702 |
| rs10221275  | T | -0.0412 |
| rs117387059 | C | 0.1157  |
| rs148098720 | T | 0.1063  |
| rs9911541   | C | 0.0318  |
| rs12941396  | A | 0.0475  |
| rs72841770  | C | -0.0448 |
| rs77022455  | A | -0.0357 |
| rs77290713  | C | 0.096   |
| rs71372399  | A | 0.0704  |
| rs199140    | G | -0.0323 |
| rs2429931   | G | 0.0976  |
| rs12232511  | G | -0.0327 |
| rs78553021  | C | 0.1007  |
| rs72830475  | G | -0.0406 |
| rs62084940  | C | 0.027   |
| rs1089800   | G | 0.0207  |
| rs146018916 | T | -0.1519 |
| rs4889994   | C | 0.0328  |
| rs72841430  | G | 0.0876  |
| rs12450346  | T | -0.0335 |
| rs74875553  | C | -0.1762 |
| rs112657887 | A | 0.1099  |
| rs9903623   | G | 0.0318  |
| rs71381430  | A | 0.0225  |
| rs62085026  | A | -0.1369 |
| rs7216737   | T | 0.0307  |
| rs72827494  | T | 0.0474  |
| rs1881138   | C | -0.0205 |
| rs9895586   | C | -0.0222 |

|             |   |         |
|-------------|---|---------|
| rs12948091  | A | -0.0774 |
| rs72859227  | A | 0.1     |
| rs12937033  | C | 0.0629  |
| rs8065435   | A | 0.0216  |
| rs1996631   | T | -0.0325 |
| rs75948927  | C | 0.1458  |
| rs72831233  | T | -0.0355 |
| rs7225873   | T | -0.0426 |
| rs118039212 | T | -0.0723 |
| rs62072878  | A | -0.0305 |
| rs9904724   | A | 0.022   |
| rs145855873 | G | -0.1487 |
| rs34021262  | C | -0.0572 |
| rs113294055 | T | 0.0561  |
| rs16975150  | C | 0.041   |
| rs4789644   | A | 0.0534  |
| rs8064961   | T | -0.137  |
| rs8068641   | G | 0.0347  |
| rs8066534   | C | -0.0286 |
| rs9908225   | A | 0.0356  |
| rs112460278 | T | 0.0452  |
| rs12943223  | G | 0.0213  |
| rs56758968  | T | -0.0269 |
| rs17138522  | G | -0.051  |
| rs12602590  | T | -0.0691 |
| rs62063886  | T | 0.0915  |
| rs4795507   | T | 0.0646  |
| rs77449141  | A | -0.0549 |
| rs3744371   | C | 0.0207  |
| rs143712817 | A | -0.117  |
| rs35643020  | T | 0.0225  |
| rs75969126  | T | 0.1028  |
| rs75795164  | G | 0.1386  |
| rs12452993  | C | 0.0463  |
| rs74251463  | C | -0.0459 |
| rs6259      | A | 0.0295  |
| rs117430623 | A | 0.0967  |
| rs56184661  | T | -0.0295 |
| rs8068703   | A | 0.0977  |
| rs2286515   | A | -0.048  |
| rs75799830  | T | -0.0723 |
| rs116972558 | T | -0.089  |
| rs35015687  | C | -0.0397 |
| rs148731719 | A | -0.0686 |
| rs13342692  | C | -0.0951 |
| rs74668668  | T | -0.0915 |
| rs9900660   | C | -0.1131 |



|             |   |         |
|-------------|---|---------|
| rs12601252  | A | 0.0436  |
| rs80313334  | T | -0.0596 |
| rs7212582   | A | 0.0293  |
| rs35782948  | C | 0.1128  |
| rs9911288   | G | -0.0785 |
| rs236584    | A | 0.0262  |
| rs11657426  | T | 0.0277  |
| rs11651939  | C | 0.0203  |
| rs145752565 | A | -0.2115 |
| rs11077586  | C | 0.0251  |
| rs16955309  | A | 0.0518  |
| rs12602751  | A | -0.0206 |
| rs28698781  | G | 0.0288  |
| rs34212119  | A | -0.0322 |
| rs6503815   | G | -0.0231 |
| rs12937771  | T | -0.0388 |
| rs12949974  | C | 0.0342  |
| rs76964448  | T | -0.1359 |
| rs17741011  | C | -0.0513 |
| rs7209365   | G | 0.0234  |
| rs9891941   | A | -0.0336 |
| rs72817398  | T | 0.0371  |
| rs28386961  | A | 0.021   |
| rs75792852  | A | 0.1731  |
| rs8834      | C | -0.026  |
| rs11870749  | C | 0.0276  |
| rs79571873  | T | 0.1488  |
| rs140452879 | C | 0.0952  |
| rs35628368  | T | -0.123  |
| rs1014774   | G | -0.0292 |
| rs9906089   | A | 0.0387  |
| rs71381356  | C | -0.0489 |
| rs72824813  | G | -0.0364 |
| rs79785774  | A | 0.0808  |
| rs112005971 | A | 0.0458  |
| rs482529    | A | 0.0249  |
| rs145028185 | T | 0.0599  |
| rs68015079  | A | 0.0391  |
| rs112317149 | T | -0.0298 |
| rs77048878  | A | 0.0595  |
| rs143400180 | T | 0.1018  |
| rs1801761   | T | -0.1531 |
| rs9909068   | G | -0.0285 |
| rs9906940   | T | -0.0355 |
| rs138390237 | C | -0.0977 |
| rs139643273 | T | 0.1278  |
| rs6504955   | A | -0.0197 |

|             |   |         |
|-------------|---|---------|
| rs77918991  | A | 0.0238  |
| rs12943370  | T | 0.0203  |
| rs8078893   | T | 0.0358  |
| rs2440166   | G | 0.0214  |
| rs28999370  | C | -0.0676 |
| rs72828169  | T | 0.1544  |
| rs17181466  | C | -0.039  |
| rs9893651   | T | 0.0351  |
| rs56205527  | T | -0.0223 |
| rs12950620  | G | 0.0308  |
| rs118109172 | A | 0.0683  |
| rs11656673  | T | 0.0315  |
| rs12950022  | C | 0.021   |
| rs67713242  | C | -0.0254 |
| rs237362    | A | 0.0203  |
| rs72832915  | A | 0.0304  |
| rs12602640  | T | -0.0334 |
| rs77744848  | G | 0.0483  |
| rs8070223   | A | -0.0322 |
| rs34909197  | C | -0.0241 |
| rs72818718  | C | -0.0348 |
| rs72844685  | C | 0.0718  |
| rs10853146  | G | 0.0213  |
| rs75657362  | T | -0.1234 |
| rs72878035  | C | 0.099   |
| rs6598848   | C | -0.026  |
| rs9915288   | G | 0.0371  |
| rs76943668  | T | -0.0925 |
| rs117958166 | T | 0.0944  |
| rs907948    | G | 0.0215  |
| rs55637064  | G | 0.0439  |
| rs77347192  | G | 0.109   |
| rs75896404  | A | -0.0403 |
| rs16949449  | T | 0.0528  |
| rs148167439 | A | 0.1189  |
| rs11077912  | C | -0.0342 |
| rs140670560 | A | 0.1084  |
| rs76210604  | T | -0.1107 |
| rs12939116  | G | -0.0207 |
| rs12940567  | G | 0.0197  |
| rs139148737 | G | -0.0897 |
| rs11656128  | T | 0.0269  |
| rs62067002  | A | 0.0846  |
| rs34410992  | T | -0.1585 |
| rs77462363  | T | 0.0456  |
| rs55718314  | A | -0.0247 |
| rs2109178   | A | 0.0958  |

|             |   |         |
|-------------|---|---------|
| rs2612753   | T | 0.0266  |
| rs74742081  | T | -0.0551 |
| rs3785466   | T | -0.0388 |
| rs757060    | T | 0.0479  |
| rs3178300   | C | -0.0216 |
| rs115930978 | G | 0.0676  |
| rs11653920  | T | -0.0219 |
| rs12948496  | A | 0.0811  |
| rs62086354  | T | -0.0526 |
| rs68138326  | G | -0.0513 |
| rs77042501  | T | -0.162  |
| rs7223154   | A | 0.0539  |
| rs7207490   | G | 0.0199  |
| rs2898655   | T | -0.0427 |
| rs2873468   | T | 0.0663  |
| rs75280411  | A | -0.0822 |
| rs148144957 | C | 0.1238  |
| rs34841611  | A | 0.0288  |
| rs317325    | T | 0.025   |
| rs157404    | C | -0.0205 |
| rs4789581   | G | -0.03   |
| rs12601161  | T | 0.0671  |
| rs9913698   | C | -0.0271 |
| rs76516290  | T | 0.0714  |
| rs12602763  | T | -0.0197 |
| rs143128771 | G | 0.1254  |
| rs28447581  | T | 0.1401  |
| rs11650597  | T | 0.0235  |
| rs12450778  | A | 0.0558  |
| rs17591972  | G | 0.0449  |
| rs145930897 | T | 0.1376  |
| rs11654480  | T | -0.0364 |
| rs140037375 | C | -0.1602 |
| rs56901260  | G | 0.1095  |
| rs11655226  | A | 0.0204  |
| rs9898837   | C | -0.0284 |
| rs8064833   | C | -0.0373 |
| rs16942354  | G | 0.0831  |
| rs73326393  | C | 0.0382  |
| rs2620069   | C | -0.021  |
| rs79983436  | T | 0.0753  |
| rs78314089  | A | 0.0561  |
| rs79086207  | A | 0.057   |
| rs2341310   | A | -0.0262 |
| rs7215784   | T | -0.0229 |
| rs77172773  | C | 0.0403  |
| rs78986329  | T | 0.0745  |

|             |   |         |
|-------------|---|---------|
| rs76687793  | C | -0.1056 |
| rs150375417 | C | 0.0852  |
| rs790092    | C | 0.0235  |
| rs16947392  | G | 0.0324  |
| rs8078274   | T | 0.0332  |
| rs56203833  | A | 0.0259  |
| rs9630726   | G | 0.022   |
| rs138552145 | A | -0.1546 |
| rs117964409 | T | 0.1504  |
| rs72834650  | A | -0.1114 |
| rs117545724 | T | 0.081   |
| rs17781867  | C | -0.0424 |
| rs11652617  | A | -0.0522 |
| rs445683    | T | 0.0214  |
| rs61456029  | T | 0.0569  |
| rs78842505  | T | 0.1087  |
| rs2344336   | G | 0.0272  |
| rs2452918   | C | 0.0277  |
| rs146818217 | T | -0.1483 |
| rs78959570  | C | -0.0432 |
| rs12945425  | G | -0.0646 |
| rs150641787 | A | 0.1225  |
| rs7501761   | T | -0.0323 |
| rs79629076  | A | 0.0833  |
| rs75726242  | C | -0.072  |
| rs12449542  | C | -0.0366 |
| rs11871670  | A | 0.0329  |
| rs117790891 | A | -0.1136 |
| rs112521998 | A | 0.0725  |
| rs112732792 | A | 0.1387  |
| rs878119    | G | -0.0294 |
| rs7213364   | T | -0.0601 |
| rs117285791 | A | -0.0709 |
| rs71371418  | T | 0.039   |
| rs36109880  | G | 0.0818  |
| rs36080394  | T | 0.146   |
| rs150565342 | C | 0.0793  |
| rs4792213   | A | 0.0458  |
| rs117171461 | A | 0.0972  |
| rs4792597   | A | 0.0298  |
| rs9903393   | G | 0.0267  |
| rs11650650  | A | 0.0257  |
| rs138923390 | C | -0.0926 |
| rs79193518  | G | 0.081   |
| rs11869470  | T | 0.0193  |
| rs494310    | A | 0.112   |
| rs9892044   | A | -0.0229 |

|             |   |         |
|-------------|---|---------|
| rs142937051 | G | 0.0855  |
| rs117532250 | A | 0.1642  |
| rs74338914  | T | 0.0609  |
| rs17821691  | T | -0.0238 |
| rs79133278  | A | 0.0338  |
| rs149224880 | T | -0.0682 |
| rs61495339  | C | 0.0361  |
| rs72838410  | A | 0.1069  |
| rs4239214   | A | 0.0313  |
| rs78263131  | T | 0.1413  |
| rs2535609   | G | -0.0231 |
| rs11568581  | A | -0.0574 |
| rs171509    | A | -0.0239 |
| rs9909857   | T | 0.1104  |
| rs72856017  | A | 0.0777  |
| rs8067465   | A | 0.054   |
| rs78299233  | G | 0.0332  |
| rs146248069 | A | -0.0402 |
| rs11079151  | A | -0.019  |
| rs111262624 | G | 0.0528  |
| rs6416961   | A | -0.0702 |
| rs113162403 | T | 0.0317  |
| rs56241521  | A | -0.0332 |
| rs35882307  | C | 0.0396  |
| rs2934914   | T | 0.0377  |
| rs112058867 | A | 0.0791  |
| rs2452914   | A | 0.0447  |
| rs117679416 | A | -0.1132 |
| rs8080307   | A | 0.0353  |
| rs34185510  | A | -0.0552 |
| rs10438743  | A | 0.0411  |
| rs72845820  | A | 0.0837  |
| rs34697307  | C | -0.0218 |
| rs11871409  | T | 0.0254  |
| rs35701443  | T | -0.0299 |
| rs72896206  | G | -0.0845 |
| rs139492487 | C | 0.1027  |
| rs740664    | G | -0.0199 |
| rs6504480   | A | -0.0667 |
| rs75375654  | T | -0.0508 |
| rs149954084 | T | -0.0737 |
| rs28799053  | G | -0.0347 |
| rs4790151   | A | -0.021  |
| rs112785478 | T | 0.0505  |
| rs2524300   | G | 0.019   |
| rs71366155  | T | -0.0541 |
| rs4789506   | T | -0.0299 |

|             |   |         |
|-------------|---|---------|
| rs3138032   | A | -0.0389 |
| rs2058129   | A | -0.1683 |
| rs7211089   | A | -0.0191 |
| rs62066495  | A | 0.0335  |
| rs4792867   | T | 0.0211  |
| rs79950710  | T | 0.138   |
| rs11870887  | T | 0.0605  |
| rs148473958 | G | -0.1301 |
| rs11870566  | T | -0.0582 |
| rs78248867  | T | 0.0721  |
| rs79607716  | A | 0.0734  |
| rs35408797  | A | -0.0438 |
| rs79003316  | A | 0.0948  |
| rs138228676 | T | -0.1381 |
| rs11654583  | C | -0.046  |
| rs72809193  | T | 0.0576  |
| rs151329924 | C | -0.0295 |
| rs4889782   | C | 0.0194  |
| rs7207332   | G | -0.0228 |
| rs2098084   | A | -0.0468 |
| rs35035542  | A | -0.0858 |
| rs6502139   | G | -0.0273 |
| rs72850708  | A | 0.0306  |
| rs61277217  | G | 0.0212  |
| rs140686227 | T | -0.2426 |
| rs9904252   | G | -0.0472 |
| rs117872393 | A | 0.0662  |
| rs12709439  | T | -0.1775 |
| rs9303032   | G | -0.0285 |
| rs6504151   | T | -0.0364 |
| rs62071072  | T | -0.1007 |
| rs4792938   | C | 0.021   |
| rs59719992  | T | -0.0252 |
| rs7210634   | T | -0.0828 |
| rs9907104   | T | -0.0517 |
| rs758152    | C | -0.0257 |
| rs2190626   | A | -0.0193 |
| rs9894443   | T | -0.0192 |
| rs78500787  | C | -0.0797 |
| rs148337135 | G | -0.1225 |
| rs4517834   | G | 0.0438  |
| rs4567763   | G | -0.0252 |
| rs185677    | C | -0.0259 |
| rs12602575  | C | 0.0556  |
| rs117911671 | T | -0.1429 |
| rs76015754  | G | -0.0299 |
| rs74412058  | T | 0.1539  |

|             |   |         |
|-------------|---|---------|
| rs118091257 | T | -0.0571 |
| rs113644060 | G | 0.0657  |
| rs76044434  | T | 0.0276  |
| rs62071132  | G | -0.0192 |
| rs73265277  | T | 0.0774  |
| rs11658440  | C | -0.0219 |
| rs35013359  | G | 0.022   |
| rs12938214  | A | 0.0413  |
| rs72853344  | A | 0.027   |
| rs113069857 | C | 0.0834  |
| rs1003916   | T | -0.0261 |
| rs76201168  | G | -0.1092 |
| rs11651880  | T | -0.0185 |
| rs35625124  | A | -0.0235 |
| rs117824782 | A | 0.1526  |
| rs112300280 | T | -0.1321 |
| rs76415785  | A | -0.0741 |
| rs75522336  | C | 0.0507  |
| rs8074746   | A | 0.0365  |
| rs11650308  | T | 0.0864  |
| rs78337941  | A | 0.0626  |
| rs147979122 | A | -0.1045 |
| rs4505390   | A | -0.0201 |
| rs145558065 | C | 0.1111  |
| rs80160464  | T | 0.1296  |
| rs903102    | G | 0.0262  |
| rs79260661  | A | 0.0839  |
| rs117400621 | G | 0.1129  |
| rs77690308  | A | -0.0626 |
| rs4790391   | C | -0.0437 |
| rs1057123   | T | -0.0921 |
| rs11080094  | C | 0.0197  |
| rs2277617   | G | -0.0217 |
| rs111232296 | G | -0.03   |
| rs111366571 | G | -0.0259 |
| rs11080209  | G | 0.0223  |
| rs17655792  | C | 0.057   |
| rs28570375  | G | -0.0541 |
| rs112708226 | T | 0.1312  |
| rs9899708   | A | 0.1278  |
| rs35042136  | C | 0.0196  |
| rs72809394  | G | -0.056  |
| rs147575883 | T | 0.0812  |
| rs9910232   | G | 0.0192  |
| rs4794582   | A | -0.027  |
| rs8076244   | T | -0.0268 |
| rs8123      | G | -0.0235 |

|             |   |         |
|-------------|---|---------|
| rs4792148   | T | 0.0208  |
| rs9916229   | C | 0.018   |
| rs79854202  | A | -0.0579 |
| rs12938456  | A | -0.0273 |
| rs28635001  | T | -0.0356 |
| rs11656514  | T | 0.0318  |
| rs75415544  | T | 0.1213  |
| rs78165269  | C | -0.0213 |
| rs74438024  | A | -0.0668 |
| rs62066569  | A | 0.0328  |
| rs62078489  | G | 0.0768  |
| rs7207877   | A | -0.0417 |
| rs142007538 | A | 0.0485  |
| rs11657661  | T | 0.0262  |
| rs3744531   | T | 0.04    |
| rs57460926  | G | -0.0346 |
| rs71379422  | G | 0.0627  |
| rs72834517  | G | 0.1234  |
| rs2077590   | G | 0.0204  |
| rs56097137  | C | -0.0759 |
| rs56066519  | A | 0.0218  |
| rs73997920  | T | -0.1925 |
| rs112526656 | T | -0.0584 |
| rs9913342   | T | -0.0251 |
| rs11570507  | A | -0.0502 |
| rs62063614  | C | -0.0412 |
| rs117333996 | T | 0.0732  |
| rs10521269  | G | 0.025   |
| rs80064478  | G | 0.0426  |
| rs2290065   | A | -0.0501 |
| rs150435316 | A | 0.1215  |
| rs11658697  | A | 0.0913  |
| rs117924121 | C | 0.083   |
| rs76743965  | T | 0.1057  |
| rs140450946 | C | -0.1141 |
| rs2260717   | A | 0.0231  |
| rs34809908  | A | 0.0372  |
| rs17879386  | A | -0.0763 |
| rs1991680   | G | -0.0204 |
| rs2214259   | T | 0.0653  |
| rs9916185   | A | 0.1074  |
| rs8078991   | G | 0.1088  |
| rs78702317  | G | 0.0662  |
| rs112117550 | G | 0.1207  |
| rs11653674  | T | 0.04    |
| rs8082551   | T | 0.0462  |
| rs141847935 | A | -0.0902 |



|             |   |         |
|-------------|---|---------|
| rs7218448   | G | 0.032   |
| rs35714695  | A | -0.0243 |
| rs7218399   | T | -0.0321 |
| rs12936441  | A | -0.0362 |
| rs75560844  | C | -0.0478 |
| rs149990196 | A | -0.0948 |
| rs117385130 | C | 0.1134  |
| rs8075082   | G | 0.0209  |
| rs36080800  | C | 0.0226  |
| rs139297547 | T | -0.0863 |
| rs115865259 | G | -0.1138 |
| rs10871508  | C | -0.0242 |
| rs8079983   | G | 0.0201  |
| rs74783836  | T | -0.0723 |
| rs76299544  | T | -0.035  |
| rs58765829  | T | -0.1333 |
| rs2317467   | A | -0.03   |
| rs9904211   | C | -0.0194 |
| rs118056076 | T | -0.1011 |
| rs10521116  | A | -0.0752 |
| rs4556838   | C | -0.0179 |
| rs3093718   | A | -0.106  |
| rs55784846  | T | 0.1144  |
| rs2364323   | T | 0.0789  |
| rs78888796  | A | -0.0569 |
| rs17705982  | C | -0.1179 |
| rs117788842 | G | -0.0782 |
| rs116933867 | C | -0.0925 |
| rs117469153 | A | 0.1346  |
| rs72822935  | T | -0.0746 |
| rs7214258   | G | -0.026  |
| rs920941    | C | -0.0197 |
| rs17691723  | A | 0.057   |
| rs78296301  | T | -0.028  |
| rs218693    | C | 0.018   |
| rs2215290   | T | -0.0304 |
| rs16977337  | C | -0.0286 |
| rs147804221 | T | 0.087   |
| rs111625815 | G | 0.0282  |
| rs9915423   | G | -0.0334 |
| rs74619376  | T | 0.039   |
| rs4791460   | A | 0.0958  |
| rs982985    | C | -0.0213 |
| rs4969245   | C | -0.0218 |
| rs148937454 | T | 0.1197  |
| rs2107438   | C | 0.0244  |
| rs4077127   | G | 0.0227  |

|             |   |         |
|-------------|---|---------|
| rs138884830 | G | -0.0795 |
| rs67824129  | G | 0.0281  |
| rs9897438   | A | 0.0681  |
| rs79986813  | A | 0.107   |
| rs117340325 | C | -0.077  |
| rs76054956  | A | 0.0536  |
| rs10083849  | T | -0.0328 |
| rs12938695  | G | 0.0517  |
| rs111879206 | T | 0.0258  |
| rs78260319  | C | -0.0767 |
| rs116897419 | A | 0.0715  |
| rs11655569  | A | 0.0224  |
| rs73277100  | C | 0.0604  |
| rs17791488  | G | -0.0875 |
| rs964538    | C | -0.0188 |
| rs17221733  | C | -0.0336 |
| rs72819670  | G | 0.1065  |
| rs78889662  | A | 0.0749  |
| rs9893492   | A | -0.195  |
| rs7342970   | C | -0.0236 |
| rs117913873 | T | -0.0608 |
| rs2663322   | T | 0.0269  |
| rs147333031 | T | -0.1627 |
| rs9912513   | C | -0.0228 |
| rs79888654  | A | -0.0737 |
| rs9915128   | T | -0.0207 |
| rs7221329   | T | -0.0394 |
| rs368308    | C | -0.0191 |
| rs117189520 | G | -0.0893 |
| rs1986145   | G | 0.0219  |
| rs148027163 | A | 0.1248  |
| rs4985639   | G | 0.049   |
| rs4456550   | A | 0.0398  |
| rs117204320 | G | 0.0983  |
| rs12453784  | G | 0.1185  |
| rs9900328   | G | -0.0193 |
| rs3786009   | C | 0.0346  |
| rs11869926  | T | -0.0777 |
| rs117640301 | A | 0.1237  |
| rs16953766  | A | 0.0701  |
| rs67959066  | A | -0.029  |
| rs76044224  | T | 0.0693  |
| rs2008515   | A | -0.0569 |
| rs2954756   | C | -0.0319 |
| rs144274616 | C | -0.1035 |
| rs1642592   | C | 0.0236  |
| rs2952281   | T | -0.0188 |

|             |   |         |
|-------------|---|---------|
| rs79355535  | C | -0.1554 |
| rs61075345  | G | 0.0292  |
| rs61296437  | G | -0.0693 |
| rs113730699 | A | 0.0489  |
| rs12451560  | C | -0.0284 |
| rs12600939  | T | -0.0195 |
| rs2945535   | G | 0.0342  |
| rs72810944  | C | -0.0533 |
| rs9898557   | A | 0.0217  |
| rs72856427  | A | -0.0739 |
| rs34638589  | G | 0.0329  |
| rs12944342  | T | 0.0655  |
| rs12951120  | G | 0.023   |
| rs11651112  | G | -0.0228 |
| rs971430    | C | 0.0376  |
| rs6502873   | T | 0.0217  |
| rs72833976  | T | 0.0346  |
| rs11654995  | A | -0.0534 |
| rs11657023  | A | -0.0298 |
| rs202594    | T | -0.02   |
| rs11657187  | A | 0.0276  |
| rs10775410  | T | 0.0184  |
| rs3853830   | A | 0.0234  |
| rs72825988  | A | -0.0936 |
| rs11867843  | G | -0.0193 |
| rs12449880  | G | -0.028  |
| rs74707512  | A | 0.0794  |
| rs7221916   | G | -0.0786 |
| rs72833069  | A | -0.0978 |
| rs117810088 | A | 0.0636  |
| rs12949493  | A | 0.0724  |
| rs5019588   | G | 0.0238  |
| rs150699772 | T | -0.1308 |
| rs117077613 | T | 0.049   |
| rs12452421  | G | -0.0264 |
| rs7212815   | G | -0.0203 |
| rs77387273  | G | 0.0658  |
| rs144815852 | T | 0.0404  |
| rs4075838   | G | -0.0298 |
| rs116973805 | A | -0.0575 |
| rs74517252  | A | 0.086   |
| rs752060    | T | 0.106   |
| rs112340021 | A | 0.1435  |
| rs9902273   | T | -0.0216 |
| rs8072204   | T | -0.0208 |
| rs117013264 | T | 0.0948  |
| rs76065512  | T | -0.0727 |

|             |   |         |
|-------------|---|---------|
| rs13339673  | C | 0.0244  |
| rs8072720   | T | 0.0386  |
| rs8070264   | G | 0.0186  |
| rs76857789  | T | -0.11   |
| rs1139405   | G | -0.0235 |
| rs1972453   | T | 0.0596  |
| rs79525262  | A | -0.0788 |
| rs117923446 | T | 0.106   |
| rs78983579  | A | 0.1034  |
| rs112950213 | G | 0.0308  |
| rs62078068  | G | -0.0237 |
| rs113870902 | A | -0.0419 |
| rs2471630   | C | 0.022   |
| rs885633    | T | 0.0888  |
| rs67340844  | T | -0.0429 |
| rs60866885  | G | -0.0321 |
| rs34189505  | A | 0.0324  |
| rs12451648  | A | -0.0751 |
| rs11078258  | A | 0.0403  |
| rs117140019 | T | 0.1079  |
| rs72845213  | G | 0.0452  |
| rs57300638  | G | 0.0193  |
| rs111725922 | T | 0.0725  |
| rs4795410   | G | -0.0206 |
| rs111472888 | T | 0.1554  |
| rs72823425  | A | 0.0228  |
| rs76573593  | T | -0.0371 |
| rs73329834  | G | -0.0206 |
| rs141647575 | C | 0.1104  |
| rs72823743  | A | 0.0361  |
| rs12451898  | G | -0.0261 |
| rs1696772   | T | 0.0397  |
| rs74674317  | T | 0.0391  |
| rs117209275 | C | 0.1005  |
| rs114477642 | T | -0.0836 |
| rs77143129  | A | -0.0286 |
| rs1558207   | G | -0.0243 |
| rs34458955  | T | 0.0497  |
| rs117612730 | T | 0.0864  |
| rs6504797   | C | -0.0196 |
| rs117132087 | G | -0.0706 |
| rs1431314   | G | 0.028   |
| rs3785990   | G | -0.0278 |
| rs6502236   | T | 0.0187  |
| rs11653054  | T | 0.0593  |
| rs73251875  | C | -0.0546 |
| rs34641682  | A | -0.0296 |

|             |   |         |
|-------------|---|---------|
| rs74896799  | A | -0.0483 |
| rs72822772  | T | 0.1797  |
| rs140980459 | A | -0.1093 |
| rs8077765   | T | -0.0504 |
| rs1124485   | G | 0.0347  |
| rs141820712 | T | 0.0796  |
| rs113754837 | C | -0.0909 |
| rs148175793 | C | -0.1188 |
| rs72832885  | C | 0.069   |
| rs12952215  | A | 0.0542  |
| rs11077754  | T | 0.0789  |
| rs9912168   | G | -0.0203 |
| rs16958002  | T | 0.0788  |
| rs34407362  | G | -0.0774 |
| rs145563516 | A | -0.032  |
| rs57402164  | T | -0.0301 |
| rs149786254 | A | -0.0833 |
| rs111666810 | C | 0.1237  |
| rs8079279   | G | 0.0211  |
| rs2079749   | T | 0.0393  |
| rs138168269 | A | -0.0667 |
| rs62085865  | A | -0.0228 |
| rs113498273 | C | 0.0687  |
| rs12450261  | A | 0.0263  |
| rs56138245  | C | 0.0489  |
| rs75878310  | A | -0.1212 |
| rs2662970   | T | 0.0337  |
| rs112339612 | C | -0.0827 |
| rs76405439  | T | -0.0249 |
| rs145823814 | C | -0.1066 |
| rs79514045  | T | -0.0306 |
| rs75475562  | C | -0.0856 |
| rs62068169  | A | -0.0411 |
| rs34488033  | G | -0.0777 |
| rs62059741  | G | -0.1939 |
| rs80292039  | A | -0.0881 |
| rs11651746  | T | 0.0217  |
| rs9903254   | C | 0.0244  |
| rs2685492   | G | 0.0182  |
| rs1983464   | T | -0.0187 |
| rs17708194  | T | -0.0271 |
| rs12451322  | C | -0.0222 |
| rs77528874  | A | -0.0582 |
| rs62055346  | T | -0.0836 |
| rs78057891  | A | 0.0897  |
| rs56307755  | T | 0.0315  |
| rs8071029   | T | 0.018   |

|             |   |         |
|-------------|---|---------|
| rs3794717   | G | 0.027   |
| rs72827627  | T | -0.0595 |
| rs2010208   | A | 0.0539  |
| rs28719058  | G | 0.0286  |
| rs12450257  | T | -0.0466 |
| rs2036537   | G | -0.0174 |
| rs62075158  | T | 0.0559  |
| rs138986545 | A | 0.1196  |
| rs4793324   | G | 0.0273  |
| rs4969140   | T | 0.0314  |
| rs12944789  | G | 0.0227  |
| rs11655958  | G | -0.0289 |
| rs9895958   | A | 0.0359  |
| rs35663743  | A | 0.0871  |
| rs9897052   | C | 0.0413  |
| rs9891313   | C | 0.0776  |
| rs142303598 | C | -0.1409 |
| rs111858721 | T | 0.0463  |
| rs7503953   | A | -0.0251 |
| rs425309    | T | -0.0377 |
| rs74943641  | T | -0.0559 |
| rs62076123  | C | -0.1268 |
| rs9907710   | G | 0.0204  |
| rs4793247   | G | -0.0264 |
| rs72845219  | C | 0.0393  |
| rs111571736 | C | -0.0521 |
| rs1901997   | C | -0.0306 |
| rs8067785   | G | -0.0269 |
| rs117855876 | T | 0.0696  |
| rs62068880  | A | 0.0375  |
| rs9895412   | G | -0.0222 |
| rs1183141   | T | 0.0333  |
| rs3098946   | A | -0.0329 |
| rs148472794 | C | 0.0711  |
| rs4796604   | T | 0.0196  |
| rs2332851   | T | 0.0211  |
| rs11654027  | T | -0.0499 |
| rs1024660   | G | -0.0196 |
| rs146705997 | A | -0.1626 |
| rs1989956   | T | 0.0347  |
| rs72828670  | A | 0.0297  |
| rs416544    | G | 0.0456  |
| rs78904135  | A | 0.0653  |
| rs113752763 | C | -0.1021 |
| rs62057032  | T | 0.1421  |
| rs2271610   | G | -0.0269 |
| rs61738821  | T | 0.0322  |

|             |   |         |
|-------------|---|---------|
| rs147183782 | C | 0.0299  |
| rs143213085 | T | 0.0741  |
| rs80320673  | T | -0.076  |
| rs72843364  | C | -0.0581 |
| rs10454094  | A | -0.0362 |
| rs490044    | G | 0.1136  |
| rs58798676  | T | -0.0562 |
| rs141345449 | T | -0.0614 |
| rs112058601 | T | -0.1175 |
| rs7216020   | A | -0.038  |
| rs2567535   | A | 0.0192  |
| rs12944439  | C | 0.0252  |
| rs117557530 | A | -0.0811 |
| rs112423881 | C | -0.0536 |
| rs72825077  | A | -0.0443 |
| rs75380339  | C | -0.0714 |
| rs56325073  | C | -0.1478 |
| rs140727729 | A | 0.1035  |
| rs4287611   | G | 0.0302  |
| rs3928278   | T | -0.0753 |
| rs7407026   | T | -0.0222 |
| rs12939901  | T | -0.0511 |
| rs271658    | G | -0.0406 |
| rs144515557 | G | 0.0976  |
| rs66631904  | T | 0.0581  |
| rs72859145  | G | -0.0585 |
| rs80014614  | A | 0.0888  |
| rs117945544 | C | -0.0907 |
| rs111991244 | T | 0.1392  |
| rs16959257  | A | 0.0472  |
| rs9789067   | C | -0.0215 |
| rs9906046   | G | -0.0723 |
| rs147679420 | G | 0.0704  |
| rs77381997  | A | 0.097   |
| rs7223120   | C | -0.0214 |
| rs75945161  | G | 0.1185  |
| rs76376123  | G | 0.0648  |
| rs9905262   | A | 0.0387  |
| rs12451051  | C | 0.0284  |
| rs28556319  | T | 0.0766  |
| rs117828926 | C | 0.1329  |
| rs62065254  | T | 0.0363  |
| rs62076090  | G | 0.0268  |
| rs138798330 | A | -0.0638 |
| rs2706703   | C | 0.0215  |
| rs7502713   | A | -0.0518 |
| rs72833039  | C | -0.0848 |

|             |   |         |
|-------------|---|---------|
| rs7221596   | A | -0.0767 |
| rs3764899   | A | -0.0203 |
| rs75459938  | A | 0.0766  |
| rs111716174 | G | 0.0971  |
| rs140736530 | C | -0.1243 |
| rs71382163  | A | 0.0585  |
| rs748873    | A | -0.0202 |
| rs4646407   | G | 0.0256  |
| rs4790361   | A | -0.0221 |
| rs16495     | T | 0.0328  |
| rs4789062   | G | 0.0203  |
| rs9909126   | A | 0.0231  |
| rs4324172   | C | -0.0173 |
| rs8066630   | G | -0.0194 |
| rs17472506  | C | -0.0438 |
| rs10512462  | G | -0.0361 |
| rs76642121  | G | 0.093   |
| rs801234    | C | 0.0359  |
| rs3935874   | A | -0.0403 |
| rs145502060 | T | -0.097  |
| rs12185228  | A | -0.0619 |
| rs151112670 | C | 0.1285  |
| rs146530845 | A | 0.0997  |
| rs9890445   | C | 0.0494  |
| rs73309596  | T | 0.0397  |
| rs8753      | T | -0.1774 |
| rs228271    | A | -0.0214 |
| rs2159218   | A | 0.0287  |
| rs8073883   | A | 0.0227  |
| rs117582108 | C | 0.0798  |
| rs60802810  | A | 0.0241  |
| rs76807532  | C | -0.103  |
| rs12939964  | G | -0.0308 |
| rs6565524   | T | -0.0379 |
| rs2662      | T | 0.0245  |
| rs113186669 | T | -0.0652 |
| rs79378105  | C | 0.0776  |
| rs116992969 | T | 0.1112  |
| rs6503408   | C | 0.0188  |
| rs2108913   | T | 0.0194  |
| rs312842    | A | 0.0826  |
| rs8080233   | C | -0.02   |
| rs62077164  | G | 0.0287  |
| rs111933666 | T | 0.1188  |
| rs12936911  | T | 0.0746  |
| rs11871848  | C | -0.0331 |
| rs72839971  | G | 0.0831  |



|             |   |         |
|-------------|---|---------|
| rs35585710  | A | 0.0722  |
| rs180165    | C | 0.0175  |
| rs6598837   | T | 0.0231  |
| rs9893372   | T | 0.0245  |
| rs74900103  | A | -0.0437 |
| rs75614017  | A | -0.069  |
| rs138175055 | C | -0.0787 |
| rs8078116   | G | 0.0198  |
| rs7223533   | T | -0.0222 |
| rs10515130  | G | -0.0185 |
| rs80025683  | T | 0.0754  |
| rs72828758  | G | 0.0268  |
| rs117406324 | G | 0.1204  |
| rs6501692   | C | -0.0291 |
| rs2531852   | A | 0.0267  |
| rs12103609  | A | 0.0261  |
| rs2165702   | A | -0.019  |
| rs12943505  | C | -0.0194 |
| rs16957703  | G | 0.0618  |
| rs752811    | G | 0.0174  |
| rs72840996  | A | -0.0638 |
| rs12150523  | A | 0.0194  |
| rs8068991   | G | -0.0288 |
| rs75460377  | C | 0.0207  |
| rs78225362  | T | -0.0798 |
| rs117131729 | T | 0.0825  |
| rs981684    | A | -0.0168 |
| rs113714450 | A | 0.0584  |
| rs9904673   | G | 0.0445  |
| rs17823633  | G | 0.072   |
| rs28678743  | C | -0.0379 |
| rs78491961  | T | 0.0747  |
| rs140017356 | T | 0.0951  |
| rs78214552  | T | 0.0538  |
| rs35603572  | C | -0.0369 |
| rs57932203  | C | -0.0213 |
| rs35498905  | C | -0.0999 |
| rs73286098  | G | 0.0354  |
| rs142723343 | C | -0.0787 |
| rs117261251 | T | -0.087  |
| rs62069789  | T | 0.0272  |
| rs138304801 | A | -0.0683 |
| rs11650614  | T | 0.0289  |
| rs150598969 | G | 0.0826  |
| rs147222331 | A | -0.0629 |
| rs34818373  | A | -0.0827 |
| rs12602153  | T | -0.0184 |

|             |   |         |
|-------------|---|---------|
| rs17884004  | T | 0.0936  |
| rs112875318 | T | 0.1061  |
| rs11078522  | T | -0.0299 |
| rs4796249   | A | 0.0253  |
| rs12948217  | T | -0.0193 |
| rs356055    | T | 0.0201  |
| rs76940148  | G | 0.0677  |
| rs148620006 | C | 0.0712  |
| rs72851723  | T | 0.1089  |
| rs77511746  | T | -0.0235 |
| rs117157214 | A | 0.0594  |
| rs7209544   | A | -0.0491 |
| rs8066817   | C | 0.018   |
| rs111884876 | G | -0.0406 |
| rs7501939   | T | 0.0189  |
| rs138273512 | A | -0.1074 |
| rs77294638  | T | -0.1264 |
| rs16966294  | C | 0.0252  |
| rs72900421  | T | 0.0604  |
| rs11870033  | C | 0.018   |
| rs71358511  | T | -0.0262 |
| rs12452645  | A | 0.0221  |
| rs72814684  | T | 0.0268  |
| rs3744374   | A | 0.0212  |
| rs7406916   | T | -0.0184 |
| rs4464125   | A | -0.02   |
| rs77487500  | C | -0.066  |
| rs78652172  | G | -0.0447 |
| rs4791463   | C | -0.0183 |
| rs142230075 | T | 0.0493  |
| rs2585843   | G | -0.042  |
| rs9303126   | G | 0.0178  |
| rs4794848   | C | 0.0174  |
| rs117848351 | A | 0.1454  |
| rs9908993   | G | 0.0248  |
| rs143476580 | G | 0.1124  |
| rs4792444   | G | -0.0353 |
| rs741074    | C | 0.0217  |
| rs9910637   | G | 0.0395  |
| rs76345349  | C | -0.0836 |
| rs75402205  | A | -0.077  |
| rs11658129  | C | -0.0729 |
| rs147834530 | T | -0.1185 |
| rs8080518   | C | -0.0196 |
| rs612720    | G | -0.0167 |
| rs1822428   | T | 0.025   |
| rs11650135  | T | 0.0514  |

|             |   |         |
|-------------|---|---------|
| rs4794574   | C | 0.0422  |
| rs12602849  | T | -0.0431 |
| rs2551801   | C | -0.025  |
| rs60855896  | C | 0.0661  |
| rs4789886   | A | 0.0358  |
| rs12941828  | T | -0.0184 |
| rs141015675 | A | 0.0457  |
| rs74696259  | C | 0.0642  |
| rs12941776  | C | 0.0332  |
| rs75868674  | T | 0.1304  |
| rs117224340 | T | 0.0952  |
| rs7209451   | A | -0.0557 |
| rs7406502   | T | 0.0305  |
| rs3744755   | A | -0.0229 |
| rs12449972  | A | -0.0375 |
| rs12150263  | A | -0.0394 |
| rs55841788  | C | 0.049   |
| rs12603395  | A | -0.0232 |
| rs112323046 | T | -0.0452 |
| rs8081785   | C | 0.0208  |
| rs2904907   | A | 0.0323  |
| rs8079654   | A | 0.028   |
| rs78473282  | T | 0.1072  |
| rs4794297   | G | 0.0262  |
| rs113013719 | A | -0.0577 |
| rs62066827  | T | 0.0525  |
| rs183596    | T | 0.0337  |
| rs17670584  | C | -0.0292 |
| rs12450493  | T | -0.0353 |
| rs7212838   | T | 0.0191  |
| rs72807263  | G | 0.0415  |
| rs8064415   | A | 0.0386  |
| rs55867306  | A | -0.028  |
| rs79002248  | T | 0.1184  |
| rs1107828   | A | 0.035   |
| rs1467258   | G | 0.0297  |
| rs1160027   | T | 0.0215  |
| rs138356399 | C | -0.038  |
| rs1197079   | C | 0.0512  |
| rs11658890  | C | -0.0376 |
| rs147232424 | A | 0.1264  |
| rs57104561  | T | 0.0222  |
| rs79831836  | C | 0.0727  |
| rs8064513   | A | 0.018   |
| rs75943544  | C | 0.0974  |
| rs117375920 | C | -0.159  |
| rs9905461   | T | 0.0219  |

|             |   |         |
|-------------|---|---------|
| rs59235468  | C | 0.0326  |
| rs73287372  | T | -0.101  |
| rs56061536  | G | 0.0756  |
| rs78544161  | G | -0.1135 |
| rs117309517 | T | 0.0651  |
| rs72838240  | A | 0.0691  |
| rs117899464 | A | 0.1584  |
| rs55661426  | T | 0.0274  |
| rs7209090   | T | -0.0268 |
| rs79986032  | A | -0.0705 |
| rs28417923  | T | 0.0789  |
| rs17514207  | A | -0.0661 |
| rs35621923  | G | 0.0606  |
| rs11870583  | A | 0.0778  |
| rs2715824   | A | -0.0171 |
| rs2315582   | A | 0.0212  |
| rs8071932   | C | -0.0186 |
| rs112829124 | T | -0.0691 |
| rs4412998   | C | 0.029   |
| rs34961067  | C | 0.0237  |
| rs71389753  | T | 0.0646  |
| rs58294803  | T | 0.0449  |
| rs2702961   | A | -0.0254 |
| rs145863033 | T | -0.1106 |
| rs11657114  | A | 0.0352  |
| rs12326016  | C | 0.0293  |
| rs115411847 | T | 0.0869  |
| rs72849020  | T | -0.0367 |
| rs2114877   | C | -0.0296 |
| rs79126498  | T | -0.1028 |
| rs9900492   | G | -0.0462 |
| rs117608420 | T | -0.0934 |
| rs143303749 | T | -0.0715 |
| rs113539426 | A | 0.0567  |
| rs62078607  | T | -0.0422 |
| rs112376654 | C | 0.0343  |
| rs35857899  | T | 0.0193  |
| rs4790307   | C | 0.0193  |
| rs79225822  | C | -0.0913 |
| rs11650763  | C | 0.0239  |
| rs78763692  | G | -0.0376 |
| rs4969010   | C | 0.0987  |
| rs2945413   | A | -0.0585 |
| rs35513882  | C | 0.0247  |
| rs149538276 | T | -0.0401 |
| rs79461089  | A | -0.0919 |
| rs9889896   | C | -0.0228 |

|             |   |         |
|-------------|---|---------|
| rs1558284   | G | 0.0404  |
| rs17630902  | C | 0.0239  |
| rs8070809   | T | -0.0215 |
| rs10305298  | T | -0.0657 |
| rs144584471 | G | -0.0831 |
| rs72845017  | G | 0.0224  |
| rs12947579  | G | -0.0192 |
| rs7225228   | T | -0.0244 |
| rs139068585 | A | 0.0983  |
| rs11658743  | C | 0.0239  |
| rs2375914   | A | -0.0169 |
| rs144223570 | T | 0.1151  |
| rs11868673  | A | 0.0195  |
| rs2429991   | G | 0.0823  |
| rs9894815   | C | -0.0301 |
| rs2292633   | A | -0.0229 |
| rs12603684  | T | -0.0218 |
| rs7219419   | A | -0.0292 |
| rs322941    | A | -0.0187 |
| rs12453970  | C | 0.0186  |
| rs74866084  | T | -0.0797 |
| rs9899658   | G | -0.0339 |
| rs111653372 | C | 0.1668  |
| rs75239923  | C | 0.0668  |
| rs56027815  | A | 0.0406  |
| rs903097    | T | 0.0674  |
| rs16950089  | T | -0.0416 |
| rs147395328 | C | 0.112   |
| rs145994492 | G | -0.1303 |
| rs62071008  | C | -0.1336 |
| rs443112    | A | 0.0466  |
| rs76879390  | A | 0.0777  |
| rs146040462 | T | 0.0686  |
| rs975576    | G | 0.0299  |
| rs62060393  | A | 0.0422  |
| rs1663211   | C | -0.0809 |
| rs117521680 | A | -0.0908 |
| rs12451653  | T | 0.0207  |
| rs4794325   | G | 0.0223  |
| rs7219603   | G | 0.0398  |
| rs72825701  | T | 0.066   |
| rs2726530   | G | 0.0348  |
| rs10445293  | T | 0.0169  |
| rs11654049  | T | -0.0326 |
| rs2586435   | A | -0.0216 |
| rs6501581   | G | -0.0169 |
| rs9912730   | T | -0.0239 |

|             |   |         |
|-------------|---|---------|
| rs35490951  | C | 0.045   |
| rs34356918  | A | -0.0329 |
| rs139181826 | T | 0.0781  |
| rs140283381 | A | -0.048  |
| rs4243248   | A | 0.0275  |
| rs2585284   | C | -0.0461 |
| rs4646785   | T | 0.0204  |
| rs62064893  | T | -0.0552 |
| rs76018634  | A | -0.0398 |
| rs9890489   | G | 0.0219  |
| rs117243595 | G | 0.1323  |
| rs72845669  | T | 0.0439  |
| rs118064073 | C | -0.1481 |
| rs7502976   | A | 0.0235  |
| rs79062105  | T | 0.0864  |
| rs111483011 | C | 0.1082  |
| rs2159989   | C | -0.0329 |
| rs34379292  | G | -0.0645 |
| rs140786034 | C | 0.1417  |
| rs7221736   | A | 0.0262  |
| rs9747031   | C | 0.0303  |
| rs4344784   | C | 0.0273  |
| rs34368900  | A | 0.0308  |
| rs75581000  | A | 0.0766  |
| rs35886652  | A | 0.0796  |
| rs12950910  | C | 0.0383  |
| rs142363341 | A | 0.1018  |
| rs78673657  | A | -0.0667 |
| rs12453081  | T | 0.0207  |
| rs16977190  | C | -0.0352 |
| rs17879350  | T | 0.0817  |
| rs75874977  | T | -0.0454 |
| rs9908126   | A | -0.1445 |
| rs78436252  | A | 0.0433  |
| rs76556890  | G | 0.0604  |
| rs28411684  | A | 0.0389  |
| rs141586407 | A | -0.1831 |
| rs76264708  | A | -0.1182 |
| rs112003011 | C | 0.0899  |
| rs934340    | T | 0.0436  |
| rs2173429   | T | 0.0176  |
| rs3169733   | C | -0.0187 |
| rs6504016   | G | -0.0333 |
| rs12952047  | C | -0.0166 |
| rs62058369  | T | 0.0312  |
| rs117816918 | C | 0.0347  |
| rs79877850  | A | 0.0436  |

|             |   |         |
|-------------|---|---------|
| rs138642613 | G | -0.1038 |
| rs141316000 | A | 0.0717  |
| rs79786350  | A | -0.0403 |
| rs139242742 | G | -0.1006 |
| rs7370      | A | -0.0181 |
| rs17740182  | G | -0.0191 |
| rs184568    | A | -0.0293 |
| rs80135683  | A | -0.0278 |
| rs9913889   | G | 0.0839  |
| rs6502938   | T | 0.0215  |
| rs113667813 | A | -0.0555 |
| rs55768604  | T | 0.0182  |
| rs9897598   | A | -0.0239 |
| rs366259    | A | 0.0188  |
| rs139403658 | A | -0.0495 |
| rs55803650  | A | 0.0842  |
| rs62061841  | G | 0.0602  |
| rs140560502 | A | -0.0914 |
| rs1473905   | T | 0.028   |
| rs716391    | C | -0.0296 |
| rs62069119  | C | -0.0528 |
| rs9907079   | T | 0.0665  |
| rs140529521 | T | -0.0696 |
| rs9905619   | C | -0.0237 |
| rs62076528  | G | -0.0177 |
| rs117519689 | T | 0.052   |
| rs12600858  | A | 0.0194  |
| rs651600    | T | -0.0764 |
| rs73338905  | A | 0.0871  |
| rs8082249   | G | -0.0179 |
| rs2909222   | T | 0.0707  |
| rs16966878  | A | 0.0276  |
| rs8073901   | A | 0.021   |
| rs77633587  | G | 0.087   |
| rs929998    | G | -0.0283 |
| rs67552299  | A | -0.0605 |
| rs4795936   | G | 0.0302  |
| rs62064474  | C | 0.0319  |
| rs11078731  | C | 0.0434  |
| rs8064753   | C | -0.0167 |
| rs113880099 | A | 0.0512  |
| rs11651720  | T | -0.0253 |
| rs80141869  | A | 0.0275  |
| rs75674348  | T | 0.1045  |
| rs12450862  | A | 0.0718  |
| rs62079089  | A | 0.0373  |
| rs147336961 | T | -0.1481 |

|             |   |         |
|-------------|---|---------|
| rs16946568  | T | 0.0187  |
| rs72829783  | T | -0.0179 |
| rs74796445  | T | 0.0409  |
| rs55646995  | T | -0.0536 |
| rs118055751 | G | 0.1128  |
| rs8078697   | A | 0.0315  |
| rs4792417   | G | -0.0532 |
| rs72839193  | G | 0.0207  |
| rs7207299   | T | -0.0179 |
| rs117506196 | A | 0.1185  |
| rs117136407 | A | 0.0649  |
| rs1399064   | T | 0.0278  |
| rs4794683   | A | 0.0302  |
| rs80226935  | C | -0.0301 |
| rs1355005   | T | -0.0267 |
| rs62070601  | G | 0.0264  |
| rs59201881  | T | 0.0558  |
| rs12943881  | C | 0.0179  |
| rs441174    | T | 0.0277  |
| rs78210068  | C | -0.0641 |
| rs35867023  | A | 0.0219  |
| rs111821862 | T | 0.0337  |
| rs11657491  | A | 0.089   |
| rs34933096  | G | -0.05   |
| rs903       | C | 0.0256  |
| rs62058662  | A | 0.0744  |
| rs854786    | G | -0.0187 |
| rs118141221 | C | 0.0695  |
| rs2307011   | C | 0.0777  |
| rs11654324  | G | 0.0196  |
| rs12939296  | T | 0.076   |
| rs7224724   | T | -0.0178 |
| rs11078587  | T | -0.0166 |
| rs4795924   | C | -0.0175 |
| rs116302937 | T | 0.1282  |
| rs75223164  | A | 0.0366  |
| rs1045280   | C | -0.0187 |
| rs112296650 | G | 0.0469  |
| rs1617347   | C | -0.0849 |
| rs4796105   | C | -0.0219 |
| rs12450361  | T | -0.0788 |
| rs76842834  | T | -0.0683 |
| rs78133126  | T | -0.07   |
| rs141401079 | T | -0.0545 |
| rs9896635   | C | 0.1101  |
| rs600158    | A | 0.0207  |
| rs17586092  | T | -0.1203 |



|             |   |         |
|-------------|---|---------|
| rs77066761  | A | 0.0839  |
| rs852324    | A | 0.1042  |
| rs6502573   | T | -0.0173 |
| rs12941068  | A | 0.0232  |
| rs2074429   | C | 0.0202  |
| rs140067824 | T | -0.107  |
| rs4076037   | A | 0.0186  |
| rs72830097  | C | -0.0197 |
| rs62059814  | T | 0.0602  |
| rs72829231  | T | -0.0488 |
| rs812800    | T | -0.019  |
| rs141888372 | T | 0.048   |
| rs28496397  | A | 0.0378  |
| rs141085391 | G | 0.0721  |
| rs55825486  | A | 0.0387  |
| rs4389183   | T | 0.0974  |
| rs1029675   | C | 0.0182  |
| rs12150207  | G | -0.0239 |
| rs62075191  | A | 0.1274  |
| rs2671639   | A | -0.0409 |
| rs4536507   | G | -0.0185 |
| rs12937835  | A | -0.0192 |
| rs4141124   | T | 0.0232  |
| rs8075977   | C | -0.0181 |
| rs80055006  | A | -0.0606 |
| rs62062617  | T | 0.0766  |
| rs116956822 | C | 0.0895  |
| rs55687905  | C | 0.0784  |
| rs11658349  | G | -0.0352 |
| rs113330941 | G | -0.0565 |
| rs16953837  | C | -0.043  |
| rs79461688  | C | 0.0601  |
| rs7211442   | T | -0.0278 |
| rs76084480  | G | -0.0552 |
| rs2613513   | T | 0.031   |
| rs1508206   | C | -0.0562 |
| rs7220985   | G | 0.0165  |
| rs55922449  | A | -0.0659 |
| rs323397    | A | -0.1149 |
| rs140686409 | G | -0.0959 |
| rs117778474 | T | 0.1128  |
| rs149095038 | T | 0.0212  |
| rs12940520  | T | -0.0189 |
| rs867133    | A | 0.0597  |
| rs11079431  | C | 0.0211  |
| rs2286531   | G | 0.0236  |
| rs1548470   | A | -0.0173 |

|             |   |         |
|-------------|---|---------|
| rs7223526   | T | 0.0165  |
| rs35092670  | G | 0.0187  |
| rs205095    | T | 0.04    |
| rs17779592  | A | 0.0845  |
| rs2258355   | A | 0.0189  |
| rs77814639  | G | 0.0292  |
| rs28845012  | A | -0.0174 |
| rs9903448   | T | 0.0444  |
| rs116785948 | A | 0.0865  |
| rs4985692   | A | 0.0159  |
| rs62064368  | A | -0.0419 |
| rs74726087  | T | -0.0869 |
| rs150274680 | A | -0.0928 |
| rs8082455   | A | 0.0176  |
| rs2159543   | A | -0.0588 |
| rs12949898  | A | -0.0326 |
| rs17510939  | A | -0.0358 |
| rs114263199 | G | 0.0637  |
| rs4793907   | T | -0.0207 |
| rs2250088   | T | 0.0285  |
| rs2898834   | T | -0.0212 |
| rs672446    | A | -0.0165 |
| rs74381720  | T | -0.0447 |
| rs145273451 | T | -0.062  |
| rs223128    | G | -0.0174 |
| rs16951072  | C | -0.0604 |
| rs9908045   | G | 0.0184  |
| rs72818318  | C | 0.0651  |
| rs2642162   | G | -0.0188 |
| rs3095502   | G | 0.0159  |
| rs62061498  | A | 0.0564  |
| rs79415517  | G | 0.0841  |
| rs1509638   | A | 0.016   |
| rs4538052   | G | 0.02    |
| rs117081576 | A | 0.0582  |
| rs79777439  | A | -0.0614 |
| rs440919    | T | -0.0183 |
| rs77074825  | C | -0.0473 |
| rs112841811 | A | -0.0634 |
| rs4968568   | A | -0.0178 |
| rs2586546   | G | -0.0195 |
| rs2028048   | T | 0.0229  |
| rs62077162  | C | 0.1241  |
| rs34760070  | A | 0.0503  |
| rs11867696  | G | -0.1086 |
| rs16945068  | G | 0.1186  |
| rs117245129 | A | 0.0891  |

|             |   |         |
|-------------|---|---------|
| rs56283539  | G | 0.0269  |
| rs118149544 | T | 0.0527  |
| rs140634473 | T | 0.1079  |
| rs4794077   | T | 0.0208  |
| rs17178907  | C | 0.0175  |
| rs79542810  | G | -0.0535 |
| rs75881746  | T | -0.086  |
| rs2620002   | T | 0.0185  |
| rs111650999 | T | 0.092   |
| rs74194418  | A | 0.0772  |
| rs8065125   | G | 0.0205  |
| rs34295344  | A | -0.0183 |
| rs150784477 | T | -0.0982 |
| rs736932    | T | 0.0234  |
| rs11871657  | G | 0.0158  |
| rs79809096  | A | -0.0674 |
| rs3786065   | C | -0.0189 |
| rs11078517  | A | 0.0301  |
| rs78316167  | A | 0.1107  |
| rs117743976 | A | 0.0994  |
| rs117588718 | A | 0.0412  |
| rs939543    | A | -0.0159 |
| rs2586497   | C | -0.033  |
| rs76277921  | C | -0.0786 |
| rs73331290  | G | -0.0303 |
| rs77211925  | T | 0.1111  |
| rs333135    | G | 0.0184  |
| rs997977    | G | 0.0271  |
| rs111679868 | T | 0.1011  |
| rs78223934  | T | -0.0759 |
| rs117316972 | A | 0.0769  |
| rs11077795  | G | 0.0188  |
| rs7218932   | A | 0.0188  |
| rs4470206   | G | -0.0519 |
| rs7503418   | T | -0.0241 |
| rs143820710 | G | 0.0831  |
| rs8071440   | C | -0.0323 |
| rs4791965   | A | -0.0472 |
| rs1877644   | A | 0.023   |
| rs117272702 | A | 0.0855  |
| rs8066388   | T | -0.0529 |
| rs73303620  | A | 0.0479  |
| rs76784094  | G | 0.108   |
| rs79506809  | A | 0.0345  |
| rs9893693   | A | -0.0225 |
| rs8072419   | A | -0.0201 |
| rs3809711   | A | -0.0487 |

|             |   |         |
|-------------|---|---------|
| rs8081550   | C | 0.018   |
| rs77668982  | A | -0.0722 |
| rs11654599  | C | -0.0203 |
| rs17211346  | A | 0.0165  |
| rs8064400   | C | -0.0201 |
| rs36107109  | T | 0.0298  |
| rs140659449 | G | 0.0723  |
| rs2326016   | G | -0.0175 |
| rs12162116  | G | -0.0186 |
| rs112437747 | T | 0.0809  |
| rs116845478 | C | -0.0953 |
| rs116311592 | C | -0.0585 |
| rs55836227  | G | 0.0481  |
| rs9907981   | T | -0.029  |
| rs79305156  | G | -0.0286 |
| rs144875584 | T | 0.0723  |
| rs35804464  | T | 0.0212  |
| rs79830835  | C | -0.0298 |
| rs72834980  | C | 0.0843  |
| rs9913994   | T | 0.017   |
| rs8074353   | T | -0.0202 |
| rs118172956 | A | -0.1058 |
| rs71368073  | C | 0.0722  |
| rs4790076   | T | 0.0273  |
| rs62065985  | T | -0.0428 |
| rs377959    | C | -0.0181 |
| rs12942815  | T | 0.03    |
| rs4793556   | G | 0.0235  |
| rs72852228  | A | -0.0322 |
| rs17624490  | G | 0.0231  |
| rs117412492 | T | 0.0643  |
| rs79522014  | T | 0.0415  |
| rs9896854   | A | 0.1206  |
| rs78829766  | A | -0.0869 |
| rs11656367  | A | -0.0361 |
| rs72844781  | T | 0.0291  |
| rs72900492  | A | -0.0494 |
| rs62067222  | T | 0.0788  |
| rs76845539  | G | 0.0325  |
| rs78813648  | T | -0.0406 |
| rs149783814 | A | -0.1672 |
| rs60763683  | A | -0.0195 |
| rs56195589  | C | 0.0304  |
| rs929466    | C | -0.0164 |
| rs28579049  | T | -0.0182 |
| rs7207781   | C | 0.0329  |
| rs1348396   | G | -0.0164 |

|             |   |         |
|-------------|---|---------|
| rs114407384 | G | 0.0794  |
| rs4790044   | G | -0.0167 |
| rs951284    | T | 0.0162  |
| rs333125    | T | -0.0212 |
| rs295864    | A | -0.0221 |
| rs2246563   | T | -0.0195 |
| rs12942043  | T | 0.0812  |
| rs118138526 | T | -0.0464 |
| rs34889949  | G | 0.0276  |
| rs76855425  | T | 0.1182  |
| rs113148199 | T | -0.0997 |
| rs4789587   | T | -0.0206 |
| rs35140765  | A | 0.0244  |
| rs72863234  | C | 0.1677  |
| rs7359554   | T | -0.022  |
| rs2125353   | C | 0.0225  |
| rs9944461   | C | -0.0162 |
| rs80004349  | A | -0.0749 |
| rs72840004  | G | -0.114  |
| rs2188947   | G | 0.0185  |
| rs72846279  | A | 0.0596  |
| rs10521278  | A | 0.0345  |
| rs11654515  | A | 0.025   |
| rs2083798   | G | -0.0178 |
| rs178867    | T | -0.0183 |
| rs7406355   | A | -0.0233 |
| rs75897233  | C | -0.0576 |
| rs11650261  | A | -0.0693 |
| rs17621950  | G | 0.02    |
| rs1979496   | C | 0.0196  |
| rs12603503  | G | -0.0514 |
| rs8074535   | A | -0.0847 |
| rs34809889  | A | 0.0513  |
| rs11651306  | C | 0.0746  |
| rs115040770 | G | -0.0632 |
| rs35313569  | T | -0.0177 |
| rs76912389  | A | 0.0944  |
| rs12451573  | T | -0.0289 |
| rs17834539  | T | -0.036  |
| rs72821173  | T | 0.0583  |
| rs8064564   | T | -0.0351 |
| rs77993099  | T | -0.0778 |
| rs117917019 | C | -0.0698 |
| rs62058361  | A | -0.0462 |
| rs9905770   | G | 0.0304  |
| rs74761354  | C | -0.0978 |
| rs66657306  | C | -0.03   |

|             |   |         |
|-------------|---|---------|
| rs56179246  | G | 0.038   |
| rs56011844  | G | 0.0255  |
| rs7211809   | A | 0.0338  |
| rs56170682  | T | -0.0366 |
| rs60290464  | A | -0.0428 |
| rs6504732   | G | 0.0184  |
| rs61424570  | T | 0.0476  |
| rs2661586   | C | -0.0169 |
| rs76976293  | T | 0.0395  |
| rs62070120  | T | 0.0267  |
| rs77640081  | G | 0.0854  |
| rs11078592  | C | -0.0299 |
| rs4792617   | A | -0.0316 |
| rs146413346 | A | 0.0319  |
| rs79723842  | T | -0.0961 |
| rs4479316   | C | -0.0712 |
| rs150578302 | T | 0.0651  |
| rs142009867 | T | 0.1397  |
| rs4788964   | C | -0.019  |
| rs117790039 | T | 0.0412  |
| rs73283624  | G | -0.0776 |
| rs77777149  | A | 0.0953  |
| rs11659070  | A | -0.0288 |
| rs4795436   | C | -0.0446 |
| rs56107545  | C | -0.0198 |
| rs11657979  | A | 0.0196  |
| rs2452920   | C | 0.0171  |
| rs76456640  | G | -0.0336 |
| rs78765524  | A | 0.0519  |
| rs59339380  | A | 0.0631  |
| rs8071166   | C | 0.0267  |
| rs12944401  | T | -0.0755 |
| rs148409754 | T | -0.0767 |
| rs36092792  | T | -0.0408 |
| rs72849427  | G | 0.0734  |
| rs117683762 | A | 0.0911  |
| rs34699971  | G | -0.0574 |
| rs7226145   | T | -0.0298 |
| rs7501662   | G | 0.0312  |
| rs117217967 | T | -0.1314 |
| rs79305109  | G | -0.1073 |
| rs73425308  | A | -0.0412 |
| rs13641     | C | 0.0577  |
| rs271657    | T | 0.0201  |
| rs7219797   | C | 0.0305  |
| rs148381451 | T | -0.1117 |
| rs113282601 | G | 0.025   |

|             |   |         |
|-------------|---|---------|
| rs71368518  | A | -0.033  |
| rs77992432  | G | -0.0672 |
| rs59122102  | A | -0.0272 |
| rs319758    | A | -0.0185 |
| rs75121829  | T | 0.078   |
| rs12450280  | A | -0.0188 |
| rs147681682 | T | -0.0942 |
| rs72838177  | G | -0.0274 |
| rs12103876  | C | -0.0487 |
| rs56102102  | G | 0.0298  |
| rs116974197 | T | -0.0472 |
| rs75868271  | A | 0.0561  |
| rs1378904   | T | 0.0168  |
| rs79604574  | A | -0.088  |
| rs10931     | G | -0.0183 |
| rs28680997  | G | -0.0395 |
| rs144140739 | G | 0.0891  |
| rs12953168  | T | -0.0357 |
| rs2109160   | A | -0.0179 |
| rs117755721 | A | 0.1144  |
| rs2525997   | C | -0.0272 |
| rs138335195 | T | -0.0721 |
| rs75149419  | G | -0.0942 |
| rs17654999  | A | 0.0168  |
| rs72825436  | C | -0.0414 |
| rs16964261  | C | 0.0435  |
| rs72815036  | C | -0.08   |
| rs75075518  | T | 0.0685  |
| rs902569    | T | 0.0319  |
| rs8071815   | C | 0.0168  |
| rs8069860   | T | 0.0193  |
| rs62080198  | T | 0.0859  |
| rs78944701  | C | -0.0523 |
| rs7219458   | C | -0.0227 |
| rs17733724  | G | 0.0475  |
| rs9905981   | C | -0.0305 |
| rs142837673 | C | 0.0522  |
| rs4485423   | T | -0.0261 |
| rs4793332   | T | 0.0327  |
| rs116968827 | T | -0.0686 |
| rs9907608   | T | 0.0205  |
| rs1985645   | T | -0.0173 |
| rs76278241  | C | 0.0844  |
| rs4968376   | A | -0.0372 |
| rs9891539   | T | 0.1067  |
| rs76636473  | G | -0.0698 |
| rs7209311   | C | 0.0177  |

|             |   |         |
|-------------|---|---------|
| rs2671644   | T | -0.0214 |
| rs11656955  | G | 0.0359  |
| rs7216764   | A | 0.0463  |
| rs4791356   | T | 0.0214  |
| rs4570898   | G | 0.0425  |
| rs72844747  | T | 0.0699  |
| rs11871832  | A | -0.0281 |
| rs62064292  | A | -0.0407 |
| rs8066371   | A | 0.0165  |
| rs9897336   | A | -0.0421 |
| rs1989145   | C | 0.0271  |
| rs6502727   | T | -0.0174 |
| rs148857737 | A | -0.0342 |
| rs56823394  | C | 0.0524  |
| rs72896129  | A | -0.0181 |
| rs4630616   | A | 0.0219  |
| rs140490609 | T | 0.0826  |
| rs72840375  | C | -0.0376 |
| rs150546082 | A | 0.0553  |
| rs111660712 | A | -0.0506 |
| rs9890591   | T | 0.0156  |
| rs55646445  | T | -0.0336 |
| rs72842205  | A | -0.0322 |
| rs9302962   | C | -0.0237 |
| rs7223986   | T | 0.0189  |
| rs58959690  | T | 0.0186  |
| rs72813125  | T | -0.105  |
| rs35367147  | A | 0.0511  |
| rs9892236   | G | 0.0929  |
| rs115300884 | G | 0.056   |
| rs3892641   | A | -0.0332 |
| rs2071427   | T | 0.0183  |
| rs151137484 | A | -0.0991 |
| rs4792036   | A | 0.0175  |
| rs76859386  | C | 0.0792  |
| rs57448521  | C | 0.0195  |
| rs117135050 | A | -0.1471 |
| rs2666013   | T | 0.0314  |
| rs75811035  | A | 0.0378  |
| rs143484049 | C | 0.0957  |
| rs16958037  | T | -0.1053 |
| rs7223682   | T | -0.109  |
| rs28431306  | C | -0.0272 |
| rs2671651   | A | 0.0183  |
| rs118106544 | C | -0.0541 |
| rs9890834   | A | 0.0546  |
| rs77565447  | A | -0.0571 |



|             |   |         |
|-------------|---|---------|
| rs117429738 | A | -0.0721 |
| rs9906819   | A | -0.0259 |
| rs17222551  | G | 0.0507  |
| rs112573780 | T | 0.0194  |
| rs145860160 | A | 0.1103  |
| rs1544427   | T | -0.0175 |
| rs2344302   | G | 0.0164  |
| rs8065829   | T | 0.0165  |
| rs11652700  | G | 0.0206  |
| rs73411194  | T | -0.0465 |
| rs12949853  | G | 0.0208  |
| rs73346359  | C | -0.039  |
| rs146381769 | A | 0.0791  |
| rs35082251  | T | 0.0222  |
| rs8072199   | T | -0.0158 |
| rs112620851 | T | -0.0416 |
| rs145506467 | T | 0.0576  |
| rs16958408  | T | 0.0178  |
| rs9904498   | T | -0.0206 |
| rs2303992   | A | 0.052   |
| rs12600409  | T | 0.0199  |
| rs3194491   | G | -0.029  |
| rs8070356   | A | -0.0219 |
| rs148237937 | C | 0.0692  |
| rs8077571   | T | -0.029  |
| rs7224274   | G | -0.0868 |
| rs113485769 | G | -0.0316 |
| rs113766603 | G | 0.0397  |
| rs16967835  | C | 0.0309  |
| rs141082348 | A | -0.0881 |
| rs4890122   | T | -0.0191 |
| rs34445077  | T | -0.0949 |
| rs17572446  | T | 0.0372  |
| rs169889    | G | 0.0164  |
| rs75316409  | A | 0.0772  |
| rs6504094   | G | -0.0255 |
| rs145342665 | C | 0.1015  |
| rs72840805  | A | 0.0252  |
| rs7211307   | T | 0.0314  |
| rs75178438  | A | -0.0468 |
| rs144983626 | G | -0.0354 |
| rs74635272  | T | -0.1196 |
| rs73990107  | A | -0.0353 |
| rs112641260 | A | -0.0564 |
| rs10163487  | G | 0.0719  |
| rs17706245  | A | 0.0367  |
| rs9916180   | C | 0.0345  |

|             |   |         |
|-------------|---|---------|
| rs72830845  | C | -0.0932 |
| rs4789409   | A | 0.0174  |
| rs747256    | C | -0.0264 |
| rs34485310  | G | -0.0246 |
| rs4258683   | T | 0.0263  |
| rs7215182   | C | 0.016   |
| rs117620031 | C | -0.0772 |
| rs75176327  | A | -0.077  |
| rs2259393   | T | 0.0568  |
| rs9892531   | G | -0.0345 |
| rs1873061   | A | -0.0252 |
| rs61601846  | T | 0.0321  |
| rs236578    | T | 0.0229  |
| rs56137100  | T | -0.0208 |
| rs8079477   | T | -0.0577 |
| rs9893512   | C | -0.0268 |
| rs62074169  | A | 0.1063  |
| rs9303115   | G | 0.0227  |
| rs77381129  | A | 0.0368  |
| rs72840139  | G | -0.0551 |
| rs2240648   | G | 0.0156  |
| rs7219636   | G | -0.0221 |
| rs62055604  | A | -0.0436 |
| rs72821988  | T | -0.0386 |
| rs140207513 | A | 0.1415  |
| rs117536947 | C | -0.0753 |
| rs1108759   | A | -0.0343 |
| rs8075035   | T | -0.0164 |
| rs727546    | G | 0.0161  |
| rs76664292  | A | 0.0705  |
| rs116943378 | G | 0.0666  |
| rs147058785 | T | -0.083  |
| rs4147990   | T | 0.0398  |
| rs35038156  | C | 0.0353  |
| rs7218065   | T | 0.0256  |
| rs111233471 | A | -0.045  |
| rs7218227   | C | -0.022  |
| rs60788805  | T | 0.06    |
| rs144250663 | C | 0.0641  |
| rs150483007 | G | -0.0647 |
| rs2304853   | C | -0.0173 |
| rs205499    | A | 0.0182  |
| rs62636944  | A | -0.0228 |
| rs16962207  | C | 0.0637  |
| rs146644295 | C | 0.0761  |
| rs73323624  | A | 0.0214  |
| rs140388865 | A | 0.1146  |

|             |   |         |
|-------------|---|---------|
| rs60731677  | T | -0.042  |
| rs142723371 | A | -0.1027 |
| rs62066706  | T | 0.0884  |
| rs17762434  | G | 0.0298  |
| rs111356918 | G | -0.0556 |
| rs118068031 | C | 0.0652  |
| rs231509    | T | 0.0452  |
| rs1968124   | A | 0.0795  |
| rs72842504  | A | -0.0232 |
| rs12450269  | T | -0.0271 |
| rs9890964   | A | -0.0487 |
| rs117165722 | A | -0.091  |
| rs315500    | G | -0.0151 |
| rs76194458  | A | 0.0717  |
| rs73325374  | T | -0.0255 |
| rs77255478  | A | 0.0847  |
| rs139035696 | A | 0.0452  |
| rs79174157  | C | 0.0992  |
| rs11651903  | A | 0.0503  |
| rs111277854 | T | -0.0401 |
| rs146970756 | A | -0.0504 |
| rs56789328  | A | 0.0181  |
| rs2243087   | T | -0.0582 |
| rs72828965  | T | 0.0198  |
| rs540281    | T | 0.0175  |
| rs113409681 | A | 0.0343  |
| rs2877824   | T | 0.0177  |
| rs2887011   | G | -0.0305 |
| rs11077918  | A | -0.0197 |
| rs79749090  | G | -0.0389 |
| rs3752041   | A | 0.0218  |
| rs34064336  | C | 0.0468  |
| rs58888596  | A | -0.0657 |
| rs727972    | C | -0.0274 |
| rs11656163  | A | 0.0278  |
| rs35807245  | T | -0.0669 |
| rs7225245   | G | -0.0151 |
| rs2041173   | C | -0.016  |
| rs118187045 | G | -0.0403 |
| rs79509077  | C | 0.0251  |
| rs10852799  | G | 0.0523  |
| rs414658    | C | 0.0494  |
| rs2259727   | T | 0.0602  |
| rs740640    | G | 0.0183  |
| rs74421778  | A | -0.0951 |
| rs55756157  | A | 0.0715  |
| rs12602262  | A | -0.0394 |

|             |   |         |
|-------------|---|---------|
| rs7216024   | A | -0.0174 |
| rs141817411 | A | -0.0872 |
| rs138827981 | C | -0.0985 |
| rs684690    | G | -0.0222 |
| rs2053597   | A | 0.0234  |
| rs4791394   | T | -0.0239 |
| rs72834922  | A | -0.0322 |
| rs74840637  | G | 0.0727  |
| rs1809832   | A | -0.0364 |
| rs9911046   | A | -0.0182 |
| rs7208981   | G | -0.0419 |
| rs1605443   | C | -0.016  |
| rs55781800  | A | 0.0973  |
| rs1000820   | T | 0.0723  |
| rs77148255  | G | -0.0675 |
| rs1076187   | G | 0.0407  |
| rs74483411  | A | -0.0513 |
| rs7220778   | A | 0.0236  |
| rs75996430  | A | -0.0331 |
| rs8067357   | G | -0.0214 |
| rs6501845   | T | -0.0156 |
| rs757508    | T | -0.0151 |
| rs312462    | A | 0.0249  |
| rs145362670 | A | 0.0998  |
| rs74695075  | C | -0.0716 |
| rs55853189  | G | 0.0399  |
| rs62072192  | T | 0.03    |
| rs4969171   | A | 0.0164  |
| rs17728479  | G | -0.0763 |
| rs9897342   | A | 0.0147  |
| rs62086000  | A | 0.0407  |
| rs148742403 | A | -0.0975 |
| rs8077558   | C | 0.0528  |
| rs62063644  | G | 0.0563  |
| rs9904554   | T | -0.0881 |
| rs17741706  | A | -0.0639 |
| rs7212229   | A | -0.0159 |
| rs1420420   | A | 0.0395  |
| rs2323048   | A | -0.0177 |
| rs6565564   | G | -0.0566 |
| rs77994442  | C | -0.1164 |
| rs17569760  | C | 0.0631  |
| rs8072096   | G | 0.0175  |
| rs7224239   | G | -0.0152 |
| rs142143930 | G | -0.0692 |
| rs149717701 | A | 0.0306  |
| rs114747013 | A | 0.0725  |

|             |   |         |
|-------------|---|---------|
| rs11652391  | A | -0.0219 |
| rs140706459 | T | 0.1137  |
| rs75840124  | T | -0.0672 |
| rs7208097   | T | -0.0173 |
| rs60801662  | T | -0.0269 |
| rs74878829  | T | 0.0365  |
| rs72848751  | T | -0.0657 |
| rs35580567  | T | -0.0332 |
| rs7220057   | T | -0.016  |
| rs149847304 | T | -0.074  |
| rs118041059 | G | -0.0953 |
| rs149089941 | T | 0.0947  |
| rs11653110  | T | 0.0157  |
| rs111897219 | C | 0.0372  |
| rs12603917  | T | 0.0205  |
| rs79752215  | C | 0.0625  |
| rs74875486  | A | 0.0513  |
| rs2076562   | T | 0.0155  |
| rs11077813  | C | 0.0179  |
| rs10445233  | A | -0.0367 |
| rs111628752 | T | 0.0813  |
| rs76330759  | A | -0.1294 |
| rs180102    | A | 0.0164  |
| rs74714128  | G | -0.0372 |
| rs944725    | T | -0.0153 |
| rs78272784  | G | -0.0324 |
| rs9652842   | C | -0.0848 |
| rs28753855  | C | -0.0341 |
| rs4793363   | G | -0.0152 |
| rs8072823   | G | 0.0148  |
| rs59788647  | G | -0.0372 |
| rs75431541  | A | -0.0251 |
| rs56204110  | A | 0.0583  |
| rs56385816  | A | 0.0545  |
| rs79511276  | T | -0.0199 |
| rs144039421 | A | 0.0308  |
| rs138040293 | T | -0.0922 |
| rs77583464  | T | 0.0411  |
| rs79393766  | C | 0.0505  |
| rs4048446   | A | 0.0401  |
| rs9889313   | T | 0.0392  |
| rs60236734  | A | 0.0735  |
| rs34647727  | G | -0.0318 |
| rs145729014 | C | -0.0214 |
| rs74611643  | T | -0.0261 |
| rs12949533  | A | 0.0205  |
| rs195776    | T | -0.0193 |

|             |   |         |
|-------------|---|---------|
| rs117054667 | A | -0.0527 |
| rs61569183  | T | -0.0168 |
| rs117793014 | A | -0.0664 |
| rs16944856  | T | 0.0266  |
| rs271672    | C | 0.0334  |
| rs141344422 | A | 0.1651  |
| rs4795885   | G | 0.0204  |
| rs7212652   | A | -0.0327 |
| rs78670978  | T | -0.0381 |
| rs8066012   | C | 0.0637  |
| rs72838407  | T | -0.0774 |
| rs75483128  | A | 0.0578  |
| rs55831872  | A | -0.023  |
| rs3921965   | C | 0.0155  |
| rs56054749  | T | 0.0435  |
| rs62057448  | T | 0.0209  |
| rs77158902  | T | -0.0862 |
| rs113488041 | T | -0.0252 |
| rs117829161 | G | 0.1042  |
| rs12938775  | G | 0.0152  |
| rs2713991   | T | -0.0176 |
| rs2085350   | T | 0.016   |
| rs9904808   | C | -0.0905 |
| rs3744561   | G | 0.0145  |
| rs2290456   | C | 0.0695  |
| rs74894182  | G | 0.1192  |
| rs62062029  | T | 0.0688  |
| rs117962058 | T | 0.0578  |
| rs117752818 | A | 0.064   |
| rs17781651  | G | -0.016  |
| rs16958506  | T | 0.0213  |
| rs11871270  | C | -0.0262 |
| rs9635758   | A | 0.0157  |
| rs146479561 | A | 0.0932  |
| rs1318097   | T | -0.0148 |
| rs6503134   | A | 0.0202  |
| rs1563011   | C | 0.0521  |
| rs55762738  | A | 0.0355  |
| rs2241094   | A | -0.0203 |
| rs4491579   | T | -0.0241 |
| rs11869887  | C | 0.0736  |
| rs2519865   | A | 0.0191  |
| rs76883461  | C | 0.0443  |
| rs2009046   | G | 0.0437  |
| rs7226077   | T | 0.0282  |
| rs12449597  | C | 0.0186  |
| rs2106340   | A | -0.0296 |

|             |   |         |
|-------------|---|---------|
| rs17806303  | C | 0.0248  |
| rs138836510 | T | 0.0475  |
| rs11657453  | C | 0.0232  |
| rs146398028 | T | 0.0724  |
| rs77725110  | G | -0.0415 |
| rs138078136 | A | -0.0712 |
| rs2430514   | C | -0.0164 |
| rs73982024  | G | 0.1244  |
| rs17707404  | C | -0.0183 |
| rs190202    | A | -0.0312 |
| rs8072896   | G | -0.0149 |
| rs145678922 | G | -0.0706 |
| rs71385947  | A | -0.0269 |
| rs9915647   | C | -0.0271 |
| rs8081407   | G | -0.0191 |
| rs1075927   | G | -0.0319 |
| rs1624922   | G | 0.0249  |
| rs67168721  | G | 0.0325  |
| rs73989413  | G | -0.0207 |
| rs74006104  | C | 0.07    |
| rs59957906  | T | -0.0387 |
| rs116994742 | T | -0.0867 |
| rs11150780  | G | -0.0154 |
| rs12945197  | T | 0.0463  |
| rs12948186  | G | -0.0296 |
| rs1530372   | T | -0.0251 |
| rs79995639  | C | -0.0431 |
| rs148361271 | T | 0.0871  |
| rs141122120 | G | 0.0377  |
| rs7213811   | A | 0.0164  |
| rs7221164   | C | -0.0162 |
| rs11652613  | A | -0.1004 |
| rs61348173  | A | -0.0165 |
| rs6503487   | G | 0.0242  |
| rs12944620  | C | 0.0296  |
| rs118088034 | A | 0.0336  |
| rs113715096 | A | 0.0447  |
| rs58278001  | C | -0.0285 |
| rs317343    | G | 0.0177  |
| rs141373032 | T | 0.0695  |
| rs1859401   | A | -0.0178 |
| rs78853674  | T | 0.0396  |
| rs2707037   | A | -0.0399 |
| rs181535    | A | 0.0269  |
| rs140489235 | G | 0.0624  |
| rs12601185  | G | -0.058  |
| rs142100003 | A | 0.0484  |

|             |   |         |
|-------------|---|---------|
| rs3736204   | T | -0.0157 |
| rs117600348 | A | -0.0861 |
| rs2240219   | A | 0.0147  |
| rs143620169 | G | 0.036   |
| rs62079504  | A | -0.0156 |
| rs118182877 | T | -0.0378 |
| rs80314051  | A | -0.0827 |
| rs117154568 | T | -0.0278 |
| rs12947009  | T | -0.0368 |
| rs17716244  | A | -0.0334 |
| rs79209027  | G | 0.0247  |
| rs16957748  | C | 0.0495  |
| rs9910122   | C | -0.0275 |
| rs6504991   | C | -0.0206 |
| rs1860040   | A | 0.0262  |
| rs1399063   | T | 0.0254  |
| rs73285444  | A | 0.0377  |
| rs71372857  | A | 0.0612  |
| rs8069248   | A | -0.0467 |
| rs79797022  | A | -0.0346 |
| rs12602019  | G | -0.0264 |
| rs58746560  | A | 0.0213  |
| rs72860173  | T | -0.0703 |
| rs35186465  | A | -0.0168 |
| rs145455488 | G | 0.0338  |
| rs2106329   | A | 0.0206  |
| rs117758013 | T | 0.0978  |
| rs145047107 | C | 0.1017  |
| rs4793317   | A | -0.0161 |
| rs6503203   | T | -0.0163 |
| rs11653574  | T | -0.038  |
| rs76712286  | G | -0.0383 |
| rs117766353 | A | 0.0601  |
| rs2331865   | C | 0.0159  |
| rs72823673  | C | 0.0477  |
| rs713102    | A | 0.0201  |
| rs74565805  | A | 0.0292  |
| rs117390397 | T | 0.0816  |
| rs7212577   | T | -0.0207 |
| rs12938002  | T | 0.0234  |
| rs12453655  | T | -0.0188 |
| rs72850036  | A | 0.0811  |
| rs144007639 | G | -0.0869 |
| rs140826550 | A | 0.0638  |
| rs137891648 | A | 0.0582  |
| rs12603183  | A | 0.0202  |
| rs62073382  | T | -0.0312 |



|             |   |         |
|-------------|---|---------|
| rs2077976   | A | -0.0499 |
| rs142151027 | T | 0.0677  |
| rs117831264 | G | -0.1147 |
| rs17623317  | C | 0.0195  |
| rs1357366   | C | -0.0375 |
| rs60194973  | C | 0.0668  |
| rs112801214 | C | 0.0992  |
| rs138217577 | A | -0.0621 |
| rs4371196   | A | 0.0149  |
| rs4239261   | T | -0.0392 |
| rs75836788  | T | 0.0461  |
| rs7209117   | A | 0.0751  |
| rs12103792  | A | -0.0427 |
| rs16948651  | G | 0.0426  |
| rs12103521  | A | 0.0155  |
| rs35898478  | T | 0.036   |
| rs4795004   | T | 0.0188  |
| rs4239175   | G | 0.0827  |
| rs72851893  | T | 0.0462  |
| rs4523991   | T | 0.0165  |
| rs56008637  | A | -0.0152 |
| rs4792569   | G | 0.0185  |
| rs4792545   | T | 0.0185  |
| rs72828579  | T | -0.0362 |
| rs9899072   | A | -0.0667 |
| rs75230966  | A | -0.0229 |
| rs150343889 | T | -0.0782 |
| rs365654    | A | 0.0213  |
| rs112894877 | G | -0.0887 |
| rs8066936   | A | -0.0185 |
| rs118156685 | A | -0.0548 |
| rs12940146  | C | -0.0174 |
| rs3744635   | A | 0.0462  |
| rs11080286  | C | -0.0183 |
| rs78058618  | T | 0.0782  |
| rs1014375   | G | 0.0196  |
| rs75641606  | G | -0.0886 |
| rs117432794 | G | 0.089   |
| rs11655394  | A | -0.0184 |
| rs872346    | A | 0.0163  |
| rs9630739   | T | 0.038   |
| rs2740345   | A | 0.0506  |
| rs3883321   | G | 0.0147  |
| rs117059497 | T | -0.0921 |
| rs62080163  | C | 0.0212  |
| rs315456    | C | -0.0194 |
| rs77950878  | G | 0.1129  |

|             |   |         |
|-------------|---|---------|
| rs139263463 | T | -0.1225 |
| rs143657492 | A | 0.0848  |
| rs2097727   | A | -0.0247 |
| rs66891153  | T | -0.0217 |
| rs17779263  | A | -0.0447 |
| rs113347218 | C | -0.0174 |
| rs146759149 | A | 0.1194  |
| rs113455436 | A | 0.0381  |
| rs10459951  | C | 0.0206  |
| rs35655648  | A | -0.031  |
| rs139137032 | G | 0.085   |
| rs4790519   | C | -0.0153 |
| rs16946582  | T | -0.0248 |
| rs117097648 | A | 0.0278  |
| rs712048    | A | 0.0212  |
| rs73985889  | T | -0.0277 |
| rs72842527  | G | 0.0583  |
| rs73290707  | T | -0.0875 |
| rs12951661  | C | 0.0212  |
| rs146318237 | T | -0.0809 |
| rs111226581 | A | -0.027  |
| rs9912576   | G | 0.0208  |
| rs2286513   | T | -0.0277 |
| rs1526603   | T | 0.0225  |
| rs28396732  | T | 0.054   |
| rs145519069 | A | 0.1192  |
| rs2190984   | T | -0.0246 |
| rs79587977  | T | 0.0362  |
| rs11657647  | A | -0.0556 |
| rs6503063   | C | 0.0251  |
| rs9902986   | C | -0.0143 |
| rs62067146  | T | 0.0322  |
| rs145648014 | A | 0.0281  |
| rs17684593  | T | -0.0302 |
| rs112434786 | G | 0.041   |
| rs7213454   | A | 0.0218  |
| rs55742293  | A | 0.0532  |
| rs877414    | T | 0.0161  |
| rs6503765   | G | -0.0149 |
| rs16969893  | C | -0.026  |
| rs425083    | A | 0.0151  |
| rs17808142  | A | -0.022  |
| rs7225744   | C | 0.0146  |
| rs2343823   | G | 0.0217  |
| rs147026290 | C | 0.0445  |
| rs7405731   | A | -0.0198 |
| rs33932099  | A | -0.0938 |

|             |   |         |
|-------------|---|---------|
| rs118084185 | A | -0.0839 |
| rs78090381  | T | -0.0619 |
| rs76299666  | T | -0.045  |
| rs75280739  | T | -0.069  |
| rs12946781  | T | 0.0376  |
| rs8064938   | A | -0.0197 |
| rs17833741  | C | 0.0282  |
| rs17762121  | A | -0.0176 |
| rs72830523  | T | -0.0491 |
| rs62079906  | A | -0.1305 |
| rs57248161  | T | 0.018   |
| rs112074499 | T | -0.0511 |
| rs2015294   | T | 0.0176  |
| rs56019347  | A | -0.0203 |
| rs117011520 | T | 0.0593  |
| rs4539642   | T | -0.0166 |
| rs150899893 | C | -0.0872 |
| rs62052803  | C | 0.0396  |
| rs12450690  | T | -0.0176 |
| rs150700430 | A | 0.0556  |
| rs9912143   | G | 0.0154  |
| rs295849    | T | 0.0147  |
| rs55967434  | T | 0.0352  |
| rs72820120  | C | 0.0452  |
| rs7220979   | C | 0.0218  |
| rs9916799   | C | -0.0248 |
| rs16960550  | C | 0.052   |
| rs5014327   | A | 0.1042  |
| rs12709242  | A | -0.0341 |
| rs4793426   | C | -0.0139 |
| rs8065994   | A | -0.014  |
| rs117246333 | C | 0.0872  |
| rs72892290  | A | -0.0476 |
| rs669228    | T | 0.0997  |
| rs11655956  | C | -0.0619 |
| rs62053890  | T | -0.0264 |
| rs682083    | T | 0.0205  |
| rs140018385 | T | -0.0538 |
| rs333620    | T | 0.0237  |
| rs112443430 | T | -0.0463 |
| rs7220920   | C | 0.0249  |
| rs117904976 | A | -0.0575 |
| rs12947081  | C | -0.0179 |
| rs45583834  | A | 0.0286  |
| rs113522962 | A | -0.0342 |
| rs117465569 | T | 0.0454  |
| rs28944232  | A | 0.0201  |

|             |   |         |
|-------------|---|---------|
| rs8070465   | G | 0.0162  |
| rs11652810  | A | -0.0172 |
| rs72925850  | T | 0.0713  |
| rs8075494   | T | -0.0181 |
| rs959835    | G | 0.0527  |
| rs34663097  | A | -0.0191 |
| rs7207011   | G | 0.0394  |
| rs72813104  | T | -0.0271 |
| rs11871568  | A | 0.0898  |
| rs4790549   | C | -0.0266 |
| rs72813757  | T | -0.0235 |
| rs751862    | T | 0.0139  |
| rs1471454   | A | -0.0184 |
| rs4969475   | C | -0.0188 |
| rs2529380   | G | 0.0178  |
| rs17673406  | T | 0.0902  |
| rs79158907  | C | 0.0545  |
| rs7225419   | T | 0.0227  |
| rs6503821   | C | 0.0153  |
| rs7221278   | A | -0.0524 |
| rs77779487  | A | -0.0976 |
| rs148450112 | A | -0.0559 |
| rs66646912  | A | -0.0346 |
| rs113310167 | G | -0.0496 |
| rs72849661  | T | -0.0643 |
| rs7211493   | C | -0.0154 |
| rs550816    | C | 0.0146  |
| rs36020025  | C | 0.1497  |
| rs72881298  | T | 0.1044  |
| rs7225799   | A | -0.0194 |
| rs118185397 | T | 0.0539  |
| rs61669747  | C | -0.0236 |
| rs11868483  | C | -0.016  |
| rs8075535   | C | -0.0209 |
| rs34793669  | G | 0.0371  |
| rs9915416   | A | -0.0219 |
| rs28914827  | T | -0.0686 |
| rs6503064   | A | 0.0222  |
| rs111622455 | C | 0.0497  |
| rs11652407  | A | 0.0267  |
| rs112327222 | T | -0.0797 |
| rs117316454 | C | 0.072   |
| rs35942282  | T | 0.0263  |
| rs56356606  | G | -0.0321 |
| rs142338787 | G | 0.0577  |
| rs12946440  | A | 0.0921  |
| rs75980081  | G | 0.0781  |

|             |   |         |
|-------------|---|---------|
| rs7211097   | A | -0.0207 |
| rs117011183 | G | -0.0897 |
| rs144026686 | G | 0.0825  |
| rs138063723 | T | 0.0576  |
| rs16962220  | A | 0.0222  |
| rs4793473   | C | -0.0167 |
| rs75700992  | T | -0.0473 |
| rs75571438  | G | -0.0324 |
| rs61380210  | C | 0.0481  |
| rs7503557   | C | -0.0375 |
| rs78938138  | C | -0.1012 |
| rs28651858  | A | -0.0224 |
| rs76168949  | A | 0.0479  |
| rs147829438 | T | -0.0898 |
| rs3760454   | C | -0.0138 |
| rs117553620 | G | 0.0531  |
| rs72812892  | G | -0.0176 |
| rs7210922   | A | -0.021  |
| rs72832969  | A | -0.0827 |
| rs117732009 | A | 0.0541  |
| rs76915199  | G | 0.0309  |
| rs140342905 | T | -0.1006 |
| rs6501983   | G | 0.0138  |
| rs4792182   | T | 0.0162  |
| rs2674948   | T | -0.0171 |
| rs35359180  | G | 0.0563  |
| rs227666    | C | -0.0156 |
| rs147348309 | C | -0.074  |
| rs733532    | G | 0.1248  |
| rs1002327   | C | 0.0138  |
| rs11077708  | A | 0.0137  |
| rs76380031  | A | -0.0789 |
| rs8079139   | A | -0.0709 |
| rs62063876  | T | 0.0482  |
| rs113385942 | G | 0.0832  |
| rs34316510  | T | -0.0358 |
| rs17760172  | C | 0.0512  |
| rs142652929 | A | 0.1052  |
| rs72856728  | A | 0.0368  |
| rs1514236   | G | 0.0179  |
| rs4316792   | T | -0.0262 |
| rs67618179  | T | 0.0871  |
| rs77092397  | C | -0.0577 |
| rs9903252   | C | -0.016  |
| rs924024    | A | -0.0145 |
| rs34710884  | A | 0.0634  |
| rs2916147   | T | -0.0473 |

|             |   |         |
|-------------|---|---------|
| rs117076320 | A | 0.107   |
| rs74526302  | A | 0.059   |
| rs34040038  | T | -0.0154 |
| rs149247724 | A | -0.0755 |
| rs112538348 | A | -0.0263 |
| rs72865861  | A | -0.0781 |
| rs72810993  | G | 0.0253  |
| rs12936614  | A | -0.014  |
| rs66942451  | T | -0.0258 |
| rs12452881  | T | 0.0762  |
| rs11079305  | T | 0.0181  |
| rs11653947  | T | 0.0587  |
| rs4569338   | C | -0.08   |
| rs62071757  | G | -0.0247 |
| rs150068425 | C | -0.0932 |
| rs9903517   | G | 0.0152  |
| rs117278719 | G | 0.0703  |
| rs2567510   | C | -0.0271 |
| rs75132750  | T | -0.0424 |
| rs62065098  | A | -0.0181 |
| rs80071684  | C | -0.0627 |
| rs62076101  | A | -0.1056 |
| rs2543539   | T | -0.0198 |
| rs117867046 | A | -0.0702 |
| rs3818147   | G | -0.0202 |
| rs79525527  | T | -0.0544 |
| rs117528947 | T | 0.0676  |
| rs12600342  | A | -0.0589 |
| rs117162268 | A | 0.0831  |
| rs62068379  | T | -0.0317 |
| rs112250599 | C | 0.0713  |
| rs8067341   | C | -0.0149 |
| rs8074491   | G | 0.0823  |
| rs118009033 | G | 0.0347  |
| rs2244280   | A | 0.0166  |
| rs116869127 | G | 0.0851  |
| rs72819761  | T | -0.0519 |
| rs140972446 | T | -0.0837 |
| rs56771336  | T | 0.0301  |
| rs117732767 | A | -0.0502 |
| rs71387954  | G | 0.0228  |
| rs149783533 | T | -0.0689 |
| rs16956264  | G | 0.0206  |
| rs75721474  | T | 0.0844  |
| rs12452239  | G | -0.018  |
| rs111611948 | C | -0.0873 |
| rs75450582  | T | 0.0796  |

|             |   |         |
|-------------|---|---------|
| rs149184372 | C | 0.0976  |
| rs56987623  | A | -0.067  |
| rs34366600  | G | -0.0601 |
| rs4789977   | A | -0.0315 |
| rs55883231  | C | -0.0298 |
| rs8071806   | A | -0.0222 |
| rs2857655   | A | -0.0649 |
| rs4789630   | T | -0.0197 |
| rs57094167  | C | 0.0322  |
| rs67843016  | T | 0.0157  |
| rs7220894   | C | -0.0139 |
| rs11263824  | T | -0.0773 |
| rs2060095   | C | -0.0567 |
| rs34520486  | G | 0.0165  |
| rs9891411   | A | -0.0178 |
| rs74453681  | C | -0.0545 |
| rs61160858  | T | -0.0225 |
| rs67984133  | G | -0.0163 |
| rs62066678  | G | 0.0225  |
| rs145199563 | A | -0.0489 |
| rs3744394   | T | -0.0203 |
| rs11656334  | T | -0.0229 |
| rs999716    | C | -0.016  |
| rs16976223  | C | 0.0238  |
| rs28530507  | A | 0.0462  |
| rs9916004   | C | -0.0195 |
| rs60204437  | T | -0.0147 |
| rs9892731   | T | -0.0146 |
| rs2482984   | G | 0.0287  |
| rs74362175  | C | -0.0673 |
| rs117473735 | T | -0.0805 |
| rs113369483 | A | 0.093   |
| rs76012308  | A | -0.0468 |
| rs35635583  | G | 0.0816  |
| rs61638683  | G | -0.0146 |
| rs117751948 | A | 0.0435  |
| rs7350910   | T | 0.0419  |
| rs2859612   | A | 0.0156  |
| rs117130892 | T | -0.0422 |
| rs76349908  | A | -0.0668 |
| rs61735242  | T | 0.0288  |
| rs62061496  | G | -0.0162 |
| rs74913438  | A | -0.0293 |
| rs116628291 | C | -0.0392 |
| rs55982591  | T | -0.0235 |
| rs74419753  | A | 0.0681  |
| rs28707044  | G | -0.037  |

|             |   |         |
|-------------|---|---------|
| rs2236752   | A | -0.0156 |
| rs6503253   | A | 0.0201  |
| rs11657890  | G | -0.0135 |
| rs62065288  | C | 0.0204  |
| rs139048305 | A | 0.0714  |
| rs72820604  | C | 0.0455  |
| rs4791382   | C | 0.0233  |
| rs72845099  | A | 0.0362  |
| rs11659121  | A | 0.0264  |
| rs34449704  | A | 0.0139  |
| rs41307948  | C | 0.0598  |
| rs76597414  | C | 0.0919  |
| rs55865440  | T | 0.0494  |
| rs117881621 | T | -0.0743 |
| rs118141187 | T | 0.0598  |
| rs4319831   | A | 0.0558  |
| rs75319758  | T | 0.0745  |
| rs9902911   | T | -0.0289 |
| rs11079311  | C | -0.0186 |
| rs3848454   | G | 0.0237  |
| rs6502542   | T | 0.0152  |
| rs2014285   | T | 0.0191  |
| rs12103522  | T | -0.0215 |
| rs9904782   | T | 0.0147  |
| rs3744170   | A | -0.0342 |
| rs11871265  | C | 0.0193  |
| rs4791398   | G | 0.0206  |
| rs117705001 | A | 0.0773  |
| rs150712746 | T | 0.0879  |
| rs112632533 | T | -0.0722 |
| rs748075    | G | 0.0241  |
| rs11868772  | C | -0.0143 |
| rs16950704  | C | 0.0519  |
| rs117003109 | T | -0.0955 |
| rs139489742 | T | -0.0529 |
| rs2286338   | C | -0.0184 |
| rs75258876  | A | 0.0681  |
| rs4795886   | G | 0.0843  |
| rs11654392  | A | -0.0323 |
| rs4789454   | T | -0.0133 |
| rs72829467  | A | -0.0667 |
| rs17882627  | A | -0.0873 |
| rs144753516 | G | -0.0626 |
| rs57810612  | T | -0.0336 |
| rs146538343 | C | 0.0496  |
| rs28401620  | A | -0.0242 |
| rs17773518  | T | 0.0192  |



|             |   |         |
|-------------|---|---------|
| rs62070969  | T | -0.0373 |
| rs8069341   | A | 0.0248  |
| rs11867552  | T | -0.0151 |
| rs74995106  | A | 0.0605  |
| rs7225709   | C | 0.0143  |
| rs242247    | A | -0.0646 |
| rs146473976 | T | -0.0461 |
| rs4598957   | C | 0.0439  |
| rs111868656 | G | -0.0194 |
| rs57387458  | C | -0.1055 |
| rs4598952   | G | 0.0578  |
| rs740698    | C | 0.0139  |
| rs12952184  | T | 0.0319  |
| rs1382779   | T | 0.0156  |
| rs1048701   | T | 0.0134  |
| rs7406899   | A | 0.0909  |
| rs147763467 | T | -0.0639 |
| rs4792107   | G | -0.0161 |
| rs34846071  | T | 0.0224  |
| rs28485793  | A | 0.0322  |
| rs62075913  | C | -0.0426 |
| rs79582711  | C | -0.0631 |
| rs16976376  | G | -0.0362 |
| rs117198798 | T | 0.0551  |
| rs8077523   | G | 0.0319  |
| rs77161475  | A | -0.0647 |
| rs76865302  | T | -0.0349 |
| rs9900748   | T | 0.0167  |
| rs139980769 | A | 0.077   |
| rs11871891  | T | -0.0154 |
| rs79751177  | C | -0.0181 |
| rs74456512  | G | -0.0207 |
| rs34824166  | T | -0.0547 |
| rs117875230 | G | 0.0391  |
| rs12453364  | T | -0.0205 |
| rs12950688  | T | -0.015  |
| rs2132255   | A | -0.0194 |
| rs8081054   | T | -0.0177 |
| rs78064546  | G | -0.0298 |
| rs59004510  | A | 0.0522  |
| rs9788997   | T | -0.0293 |
| rs72845869  | A | -0.0335 |
| rs4598958   | T | 0.0737  |
| rs34240787  | C | -0.0422 |
| rs7225991   | A | 0.0426  |
| rs2726547   | G | -0.0145 |
| rs34140914  | T | -0.0776 |

|             |   |         |
|-------------|---|---------|
| rs9915005   | G | 0.031   |
| rs8069881   | C | 0.0305  |
| rs72815124  | G | 0.036   |
| rs145430184 | G | -0.0961 |
| rs113987806 | G | 0.1072  |
| rs34455313  | A | 0.0171  |
| rs8072303   | T | -0.0243 |
| rs17184825  | G | 0.033   |
| rs2191147   | T | -0.0172 |
| rs149698655 | T | -0.0575 |
| rs7207662   | A | 0.0337  |
| rs938299    | A | -0.0146 |
| rs74838174  | A | 0.044   |
| rs72847498  | C | -0.0372 |
| rs3751938   | C | 0.0158  |
| rs12943905  | T | 0.047   |
| rs75565283  | T | -0.0548 |
| rs72839916  | T | 0.0353  |
| rs143407879 | C | -0.0886 |
| rs117902375 | T | 0.0196  |
| rs8038      | A | -0.0249 |
| rs77669221  | T | 0.0185  |
| rs12453479  | A | -0.0369 |
| rs117217172 | T | 0.0446  |
| rs139923818 | T | 0.1004  |
| rs9900808   | A | 0.0341  |
| rs62066618  | T | 0.0707  |
| rs111711742 | G | -0.0161 |
| rs76898433  | C | 0.0669  |
| rs111317810 | C | 0.0476  |
| rs9904113   | A | 0.0141  |
| rs4791981   | T | -0.0176 |
| rs8072575   | A | 0.0324  |
| rs5007061   | T | 0.0166  |
| rs17193410  | A | 0.0218  |
| rs148254124 | T | -0.0634 |
| rs2098100   | G | -0.017  |
| rs57197682  | T | -0.0354 |
| rs8067518   | G | -0.0171 |
| rs7210582   | T | 0.014   |
| rs16951823  | G | -0.0438 |
| rs72843545  | G | -0.0765 |
| rs28636029  | G | 0.0239  |
| rs137940468 | T | 0.0583  |
| rs8078312   | C | 0.023   |
| rs111226986 | C | -0.0925 |
| rs73308018  | G | 0.0506  |

|             |   |         |
|-------------|---|---------|
| rs3809752   | G | -0.0176 |
| rs2052011   | C | 0.0265  |
| rs12937932  | G | 0.0131  |
| rs113452405 | A | -0.0284 |
| rs56078966  | T | 0.082   |
| rs9908209   | G | -0.0151 |
| rs2519863   | A | -0.0253 |
| rs116867115 | A | 0.0572  |
| rs17821518  | C | 0.0161  |
| rs9899924   | G | 0.0203  |
| rs8081435   | C | 0.0149  |
| rs7219502   | T | -0.0423 |
| rs12940897  | A | -0.0285 |
| rs2323499   | G | -0.0158 |
| rs7503780   | A | 0.014   |
| rs36111993  | T | -0.0418 |
| rs2107573   | T | -0.0229 |
| rs4968135   | T | 0.0215  |
| rs149610608 | A | -0.0388 |
| rs59209118  | G | -0.0526 |
| rs76004682  | G | 0.0792  |
| rs2120192   | G | -0.0149 |
| rs16970090  | A | 0.0287  |
| rs17637018  | A | 0.0245  |
| rs75332086  | T | 0.046   |
| rs72827850  | T | -0.0617 |
| rs67995811  | A | 0.022   |
| rs321603    | C | 0.0131  |
| rs150177671 | A | -0.0511 |
| rs116899173 | T | 0.0594  |
| rs62058069  | T | -0.0541 |
| rs77200360  | G | -0.0525 |
| rs3809805   | A | -0.0212 |
| rs35765946  | T | 0.0146  |
| rs72818052  | A | 0.0208  |
| rs7216166   | A | -0.0154 |
| rs117948258 | A | -0.0758 |
| rs11658976  | G | 0.0159  |
| rs118149279 | A | 0.0636  |
| rs7208788   | A | 0.0192  |
| rs1545273   | C | -0.0175 |
| rs12948240  | A | 0.016   |
| rs139702034 | C | -0.0767 |
| rs12947190  | T | 0.0801  |
| rs12949259  | A | -0.0277 |
| rs11658358  | C | -0.0148 |
| rs9891642   | G | -0.0596 |

|             |   |         |
|-------------|---|---------|
| rs7211719   | C | -0.0548 |
| rs112965362 | T | 0.0422  |
| rs11656071  | T | -0.0196 |
| rs11574824  | A | 0.1018  |
| rs12452928  | A | 0.0159  |
| rs12452567  | G | 0.0161  |
| rs75800572  | G | 0.0239  |
| rs12603463  | T | -0.0579 |
| rs58143126  | T | -0.0171 |
| rs12952876  | T | 0.034   |
| rs117925953 | C | 0.0709  |
| rs72838645  | T | -0.027  |
| rs11652998  | G | -0.027  |
| rs8068796   | C | 0.0154  |
| rs142966231 | A | -0.0789 |
| rs8067807   | C | 0.0225  |
| rs179903    | A | -0.0137 |
| rs60323863  | G | -0.0188 |
| rs17714734  | T | 0.0135  |
| rs4622557   | G | 0.0179  |
| rs9912391   | T | 0.017   |
| rs72840023  | A | 0.0699  |
| rs11869702  | T | 0.021   |
| rs111501431 | T | -0.0386 |
| rs117459319 | T | 0.0863  |
| rs113069854 | G | 0.068   |
| rs4459584   | T | 0.0158  |
| rs72634088  | T | -0.0171 |
| rs7220054   | T | 0.0376  |
| rs76065211  | A | 0.0373  |
| rs11656601  | T | -0.0257 |
| rs34722237  | T | 0.0231  |
| rs71372813  | A | 0.0891  |
| rs60259284  | T | 0.0175  |
| rs75336467  | A | 0.0665  |
| rs9893886   | T | 0.0214  |
| rs79350162  | T | -0.0631 |
| rs78742276  | G | 0.0465  |
| rs7219820   | G | 0.0222  |
| rs17623512  | T | -0.0153 |
| rs151246947 | A | 0.0908  |
| rs12451059  | A | -0.0577 |
| rs971310    | A | -0.0639 |
| rs148441870 | T | -0.0651 |
| rs2163450   | A | -0.0171 |
| rs62077683  | C | 0.0181  |
| rs146891    | T | -0.0145 |

|             |   |         |
|-------------|---|---------|
| rs148347637 | T | -0.0481 |
| rs1242507   | G | 0.0151  |
| rs145107782 | T | -0.0644 |
| rs12103721  | T | -0.0152 |
| rs6587161   | C | 0.0189  |
| rs35841085  | T | 0.0684  |
| rs4793865   | G | -0.0219 |
| rs1177999   | T | 0.015   |
| rs6503656   | G | -0.0226 |
| rs76960659  | A | 0.0619  |
| rs74417051  | A | -0.0472 |
| rs1963088   | A | 0.015   |
| rs55666909  | C | 0.0407  |
| rs117014247 | T | -0.0869 |
| rs11657397  | A | -0.0254 |
| rs57616830  | C | -0.0427 |
| rs12452443  | T | -0.0173 |
| rs12601841  | T | -0.0151 |
| rs117442223 | T | -0.0367 |
| rs1513747   | A | -0.0135 |
| rs62079658  | A | 0.0273  |
| rs77827772  | T | -0.0248 |
| rs34067422  | A | 0.0144  |
| rs79382725  | C | -0.0232 |
| rs78051721  | A | -0.0692 |
| rs75092420  | T | 0.0562  |
| rs72842903  | T | 0.0351  |
| rs11655550  | C | 0.0174  |
| rs62073039  | G | -0.0198 |
| rs139042407 | T | 0.1072  |
| rs112168618 | A | -0.0274 |
| rs113389394 | A | -0.0682 |
| rs72836045  | T | 0.057   |
| rs2671645   | C | -0.0211 |
| rs11655992  | C | 0.0489  |
| rs4795954   | A | 0.0215  |
| rs112408376 | C | -0.0465 |
| rs79806428  | T | 0.0265  |
| rs73991579  | G | -0.0316 |
| rs11870240  | T | 0.0147  |
| rs4151122   | C | -0.0129 |
| rs117041785 | T | 0.0509  |
| rs113425487 | A | -0.0211 |
| rs35852093  | G | 0.0782  |
| rs72807147  | A | 0.0528  |
| rs76364945  | A | 0.0245  |
| rs77794389  | A | 0.0581  |

|             |   |         |
|-------------|---|---------|
| rs2671636   | A | 0.019   |
| rs147813634 | A | -0.0429 |
| rs117062976 | T | 0.053   |
| rs9916520   | C | -0.0172 |
| rs72850341  | A | -0.0782 |
| rs117803856 | A | -0.0884 |
| rs72823745  | G | 0.0577  |
| rs117161996 | T | 0.0903  |
| rs35593157  | C | 0.0347  |
| rs62053895  | A | 0.0126  |
| rs74608381  | A | 0.0334  |
| rs12939266  | A | -0.0229 |
| rs12602813  | A | -0.0315 |
| rs12946079  | C | 0.0207  |
| rs4889933   | G | 0.0175  |
| rs4792261   | G | -0.0178 |
| rs62066488  | G | -0.0333 |
| rs75646348  | C | 0.0326  |
| rs11652868  | C | -0.0142 |
| rs117623693 | A | 0.0507  |
| rs2570035   | A | 0.019   |
| rs12450418  | T | 0.0362  |
| rs79204186  | C | -0.0918 |
| rs55909719  | A | -0.0147 |
| rs66954791  | G | 0.0208  |
| rs8073599   | T | -0.0145 |
| rs112837295 | G | -0.0735 |
| rs72635520  | A | -0.0445 |
| rs12951126  | G | 0.0422  |
| rs8079205   | T | -0.0157 |
| rs117636485 | T | 0.0607  |
| rs9914656   | G | 0.0153  |
| rs7218974   | A | -0.0134 |
| rs76398592  | A | 0.0455  |
| rs76672544  | A | 0.061   |
| rs4789569   | G | -0.0612 |
| rs111849622 | G | -0.0761 |
| rs75536614  | G | 0.0647  |
| rs9897905   | T | 0.0234  |
| rs60949168  | C | -0.0267 |
| rs115468275 | T | -0.0372 |
| rs11653711  | A | 0.0145  |
| rs147384792 | C | -0.1031 |
| rs112659429 | G | 0.0672  |
| rs113644316 | A | -0.0322 |
| rs148796276 | G | -0.0744 |
| rs149448680 | T | 0.0493  |

|             |   |         |
|-------------|---|---------|
| rs145295162 | C | 0.0503  |
| rs56265426  | A | -0.0803 |
| rs12451970  | T | 0.0227  |
| rs8064996   | G | 0.0145  |
| rs3760381   | A | 0.0144  |
| rs12603709  | T | 0.028   |
| rs8070911   | T | -0.0309 |
| rs141090300 | C | -0.065  |
| rs418387    | A | 0.018   |
| rs79817091  | A | 0.0638  |
| rs150651501 | T | 0.046   |
| rs11080228  | A | 0.0169  |
| rs75675330  | A | 0.0504  |
| rs2551799   | G | 0.0134  |
| rs11078142  | C | -0.0133 |
| rs17742923  | C | -0.0161 |
| rs3729925   | A | 0.0899  |
| rs59747253  | T | 0.0489  |
| rs62062574  | G | -0.0177 |
| rs77219596  | A | -0.0739 |
| rs4968431   | G | -0.0143 |
| rs7220544   | T | 0.0124  |
| rs17250097  | C | -0.0438 |
| rs79149118  | G | -0.059  |
| rs12942146  | T | 0.0775  |
| rs34544955  | C | -0.0431 |
| rs62081792  | C | 0.0349  |
| rs6503271   | A | 0.0185  |
| rs55801133  | A | -0.0393 |
| rs72823343  | T | 0.0398  |
| rs3214067   | A | 0.0407  |
| rs75867867  | A | 0.0467  |
| rs139704838 | T | 0.0717  |
| rs2190550   | A | 0.0129  |
| rs143722714 | A | -0.0455 |
| rs6503290   | G | -0.0137 |
| rs1558246   | A | 0.0155  |
| rs2472692   | A | 0.0212  |
| rs139204153 | T | 0.0358  |
| rs8071956   | G | -0.1216 |
| rs56163349  | G | 0.0279  |
| rs62085659  | A | 0.028   |
| rs35818147  | C | 0.0969  |
| rs77627231  | T | -0.0177 |
| rs8079914   | G | -0.0152 |
| rs12601494  | A | -0.0258 |
| rs7406286   | C | -0.018  |

|             |   |         |
|-------------|---|---------|
| rs2075051   | T | -0.0137 |
| rs2953014   | G | -0.0157 |
| rs78987679  | T | -0.0762 |
| rs28730824  | C | -0.033  |
| rs11079793  | T | 0.0236  |
| rs79247330  | T | -0.0565 |
| rs11466129  | G | -0.0168 |
| rs61429510  | C | -0.0185 |
| rs41465546  | A | 0.0514  |
| rs113369600 | A | -0.0586 |
| rs7209949   | G | 0.0237  |
| rs35787376  | C | 0.0185  |
| rs8070427   | T | -0.0149 |
| rs72833704  | T | 0.044   |
| rs205042    | G | -0.0125 |
| rs62084828  | A | -0.039  |
| rs34279954  | T | 0.0215  |
| rs11867711  | T | 0.0622  |
| rs495713    | C | 0.0353  |
| rs79020344  | C | -0.0518 |
| rs76146401  | A | 0.0479  |
| rs3923086   | A | -0.0126 |
| rs8066872   | G | 0.0208  |
| rs55664849  | A | 0.1035  |
| rs144051030 | T | 0.0439  |
| rs62079901  | C | -0.0387 |
| rs77058519  | T | 0.0267  |
| rs2344340   | T | 0.0202  |
| rs9915313   | T | 0.0182  |
| rs4968225   | T | -0.0372 |
| rs77042512  | C | -0.1091 |
| rs17662433  | A | -0.049  |
| rs62062005  | A | -0.0242 |
| rs35875280  | T | 0.0384  |
| rs118125184 | A | 0.0545  |
| rs112362496 | T | -0.044  |
| rs71358287  | C | 0.0497  |
| rs9675172   | A | 0.0415  |
| rs34438714  | A | 0.0365  |
| rs11659093  | A | 0.0159  |
| rs116937641 | G | -0.0664 |
| rs3809872   | A | -0.014  |
| rs633506    | G | -0.0278 |
| rs930525    | T | 0.0178  |
| rs17645437  | G | -0.0269 |
| rs6501186   | T | -0.015  |
| rs34742354  | A | 0.1111  |



|             |   |         |
|-------------|---|---------|
| rs11650481  | T | -0.0552 |
| rs12150376  | G | 0.0141  |
| rs141222888 | G | 0.0559  |
| rs1632673   | T | 0.0173  |
| rs3760503   | A | 0.0495  |
| rs4968857   | C | 0.0279  |
| rs12451543  | A | 0.1097  |
| rs12939139  | T | -0.0159 |
| rs8068170   | T | 0.0629  |
| rs142097331 | C | -0.1053 |
| rs76310576  | C | -0.0308 |
| rs2227725   | A | 0.0279  |
| rs74789213  | A | 0.0257  |
| rs76213393  | C | -0.0223 |
| rs3786112   | T | 0.0555  |
| rs7211875   | C | -0.0174 |
| rs113873648 | C | 0.0528  |
| rs76411329  | C | -0.0547 |
| rs60627542  | T | 0.0164  |
| rs79951827  | C | 0.0471  |
| rs55649994  | T | 0.0397  |
| rs9302934   | C | -0.0182 |
| rs9906084   | A | 0.0131  |
| rs886897    | G | -0.012  |
| rs11868257  | C | 0.0121  |
| rs7221938   | C | 0.0927  |
| rs35941175  | A | -0.0673 |
| rs118100944 | T | -0.0604 |
| rs34590165  | T | 0.0171  |
| rs62066359  | C | 0.0201  |
| rs113400824 | A | 0.0506  |
| rs144675725 | A | -0.0748 |
| rs425694    | C | -0.0134 |
| rs12452084  | T | 0.0137  |
| rs144068225 | C | 0.0662  |
| rs180531    | G | -0.0183 |
| rs17578725  | T | 0.0715  |
| rs111911315 | C | -0.0402 |
| rs3785847   | C | 0.0421  |
| rs4889808   | T | -0.0141 |
| rs8073112   | G | -0.0185 |
| rs76457900  | C | 0.0262  |
| rs66737880  | T | 0.0145  |
| rs11657711  | T | 0.0333  |
| rs72821889  | A | -0.0394 |
| rs3809698   | G | 0.0178  |
| rs138538686 | A | -0.0761 |

|             |   |         |
|-------------|---|---------|
| rs73344136  | C | 0.024   |
| rs35544910  | A | -0.0207 |
| rs113461621 | A | -0.026  |
| rs721411    | T | -0.0276 |
| rs8075565   | T | -0.0247 |
| rs74726423  | G | 0.0295  |
| rs117868327 | T | 0.0405  |
| rs9909412   | A | 0.012   |
| rs9912511   | G | -0.0149 |
| rs9913366   | C | 0.0125  |
| rs7217100   | T | 0.0592  |
| rs112391223 | G | 0.0289  |
| rs117334055 | A | -0.0847 |
| rs117983735 | C | -0.0389 |
| rs140697373 | A | -0.0699 |
| rs866974    | A | 0.0175  |
| rs148579627 | A | -0.0679 |
| rs79348288  | T | -0.0768 |
| rs73358138  | T | -0.0677 |
| rs143207098 | C | -0.1104 |
| rs141062774 | T | -0.0868 |
| rs8081081   | A | 0.0163  |
| rs17564279  | G | -0.0184 |
| rs7225086   | G | 0.0132  |
| rs117386636 | C | -0.0651 |
| rs9908330   | G | 0.0121  |
| rs60089918  | T | -0.0215 |
| rs8071867   | C | -0.0151 |
| rs1552385   | C | 0.0127  |
| rs77413492  | C | 0.0963  |
| rs62070779  | A | 0.0809  |
| rs7502691   | A | 0.0431  |
| rs151011422 | A | -0.0564 |
| rs11868368  | C | 0.0201  |
| rs11870986  | T | 0.0177  |
| rs6502888   | A | 0.0241  |
| rs11655539  | G | 0.0255  |
| rs7218159   | C | 0.0147  |
| rs35517172  | G | 0.0312  |
| rs8079634   | G | -0.0153 |
| rs8077322   | G | 0.02    |
| rs12946841  | A | -0.0249 |
| rs7211583   | G | 0.0194  |
| rs4791972   | C | -0.0177 |
| rs28850346  | A | -0.0394 |
| rs111236730 | T | 0.0225  |
| rs117045964 | A | -0.0527 |

|             |   |         |
|-------------|---|---------|
| rs113402032 | A | -0.0178 |
| rs113747190 | T | -0.0403 |
| rs74415837  | C | -0.0422 |
| rs146672545 | A | -0.0749 |
| rs75750811  | G | 0.0899  |
| rs117013541 | T | -0.0959 |
| rs898536    | T | -0.0169 |
| rs148628289 | C | -0.0756 |
| rs117599834 | A | -0.0958 |
| rs73325955  | C | -0.0634 |
| rs140992783 | C | 0.0402  |
| rs11656860  | T | -0.0632 |
| rs80162003  | G | -0.0608 |
| rs146765575 | A | -0.0659 |
| rs113988901 | A | -0.0395 |
| rs12600359  | T | -0.0191 |
| rs112570995 | A | 0.0245  |
| rs141254535 | T | -0.0431 |
| rs12603077  | G | -0.0135 |
| rs149965864 | G | -0.0442 |
| rs118097466 | T | -0.0606 |
| rs35750614  | C | -0.0422 |
| rs715778    | G | 0.0211  |
| rs12952319  | A | 0.0701  |
| rs4408577   | G | 0.0244  |
| rs113811824 | A | 0.0499  |
| rs74256761  | G | -0.0258 |
| rs9895615   | A | 0.0433  |
| rs72816633  | T | 0.0167  |
| rs4789383   | T | -0.0149 |
| rs57432230  | T | 0.0338  |
| rs11868186  | C | 0.0184  |
| rs11870884  | T | 0.0149  |
| rs61179855  | T | 0.0164  |
| rs2051985   | C | -0.0131 |
| rs150522    | G | -0.0171 |
| rs12949338  | T | 0.0784  |
| rs79743842  | T | 0.1018  |
| rs112269503 | A | 0.0436  |
| rs12952038  | A | -0.0179 |
| rs117527434 | T | 0.0475  |
| rs2075061   | C | -0.0131 |
| rs75053167  | A | 0.0329  |
| rs12938735  | G | 0.0205  |
| rs35807760  | T | 0.0798  |
| rs139151737 | C | 0.064   |
| rs73974618  | C | -0.0964 |

|             |   |         |
|-------------|---|---------|
| rs116921034 | A | 0.0732  |
| rs145372333 | A | -0.0537 |
| rs12939430  | C | 0.0184  |
| rs138638578 | G | -0.0668 |
| rs12604002  | T | -0.0504 |
| rs7217938   | A | 0.0292  |
| rs56677491  | T | -0.0444 |
| rs62059848  | G | 0.0366  |
| rs820214    | A | -0.0433 |
| rs145222459 | A | -0.056  |
| rs113365418 | A | 0.0779  |
| rs79040621  | C | -0.061  |
| rs62058729  | C | 0.0548  |
| rs9899506   | C | -0.021  |
| rs111558882 | T | -0.0802 |
| rs8078223   | T | 0.0123  |
| rs999338    | C | -0.0122 |
| rs117710402 | T | -0.0432 |
| rs72845788  | C | 0.0599  |
| rs78651327  | C | 0.0433  |
| rs150295445 | G | 0.0395  |
| rs117627862 | T | -0.052  |
| rs820387    | T | 0.0288  |
| rs34503845  | T | -0.0219 |
| rs12450696  | C | 0.0164  |
| rs17783695  | A | 0.0245  |
| rs12943069  | T | 0.0142  |
| rs77866971  | G | -0.081  |
| rs80018508  | C | 0.0323  |
| rs116888803 | T | 0.0506  |
| rs9907377   | T | 0.0143  |
| rs1978104   | A | -0.0127 |
| rs117861000 | T | -0.0373 |
| rs12452761  | A | 0.0252  |
| rs7211903   | T | -0.02   |
| rs34507250  | T | -0.0166 |
| rs163383    | G | 0.0249  |
| rs3829283   | G | -0.0213 |
| rs6598839   | C | -0.0183 |
| rs78624212  | T | 0.015   |
| rs57886565  | A | 0.0288  |
| rs34387214  | C | -0.0285 |
| rs9893331   | A | -0.0146 |
| rs141628094 | A | -0.0254 |
| rs117682809 | T | 0.0289  |
| rs16970816  | A | -0.0192 |
| rs139119668 | C | -0.052  |

|             |   |         |
|-------------|---|---------|
| rs60278634  | T | 0.0363  |
| rs11868161  | G | 0.0347  |
| rs11079303  | G | 0.0134  |
| rs1468473   | T | 0.0138  |
| rs56871222  | A | -0.0327 |
| rs144356683 | T | 0.042   |
| rs4795154   | A | 0.0385  |
| rs6501562   | A | 0.0714  |
| rs8079736   | C | 0.017   |
| rs1532457   | A | -0.0129 |
| rs35868629  | T | 0.0672  |
| rs8066678   | A | -0.0125 |
| rs139485090 | A | -0.0807 |
| rs148977707 | A | -0.0461 |
| rs62054003  | T | -0.0139 |
| rs73294604  | A | -0.0635 |
| rs9906578   | T | 0.0254  |
| rs11541133  | T | 0.0353  |
| rs117104858 | A | -0.0561 |
| rs117993381 | T | 0.0497  |
| rs17339382  | A | -0.036  |
| rs73974697  | A | -0.0281 |
| rs34785521  | G | 0.0177  |
| rs34670978  | A | -0.0782 |
| rs11867485  | A | 0.015   |
| rs117089326 | A | 0.0573  |
| rs62079722  | A | -0.0169 |
| rs138628526 | C | -0.0499 |
| rs6565689   | C | -0.0163 |
| rs145005294 | T | 0.0805  |
| rs143271775 | A | -0.0718 |
| rs60249275  | G | 0.0138  |
| rs3813440   | G | 0.0202  |
| rs141337572 | T | -0.0374 |
| rs7502977   | T | 0.0133  |
| rs139657281 | T | 0.0553  |
| rs12603570  | T | 0.0137  |
| rs7225259   | A | 0.0172  |
| rs9910214   | T | -0.0213 |
| rs118012610 | C | -0.0783 |
| rs35656980  | C | 0.014   |
| rs139152059 | A | 0.085   |
| rs13905     | C | 0.0461  |
| rs80052830  | C | -0.0263 |
| rs142861453 | A | 0.0505  |
| rs28664662  | T | -0.0173 |
| rs12601606  | G | -0.015  |

|             |   |         |
|-------------|---|---------|
| rs4366774   | C | 0.0163  |
| rs1817415   | G | 0.0156  |
| rs11651437  | A | -0.0234 |
| rs71375753  | G | 0.0149  |
| rs8067165   | C | -0.0126 |
| rs11658648  | A | -0.0151 |
| rs55637846  | T | 0.0231  |
| rs112708345 | A | 0.0778  |
| rs4060716   | A | 0.0218  |
| rs78774943  | T | 0.0198  |
| rs17879371  | G | -0.0723 |
| rs2040555   | T | -0.0225 |
| rs77770153  | A | -0.0316 |
| rs7221560   | T | -0.0149 |
| rs117763980 | T | -0.043  |
| rs78427353  | C | 0.0247  |
| rs3902104   | C | -0.0178 |
| rs73333222  | A | -0.022  |
| rs67023438  | T | -0.0336 |
| rs11652243  | C | -0.0249 |
| rs36024971  | A | -0.0121 |
| rs146091072 | A | 0.0632  |
| rs80200367  | T | 0.0776  |
| rs150672227 | T | -0.0383 |
| rs12951223  | G | -0.0181 |
| rs12947709  | C | 0.0125  |
| rs79806280  | A | -0.0559 |
| rs142489515 | A | -0.078  |
| rs77477703  | T | 0.0532  |
| rs78739013  | G | 0.0571  |
| rs9913292   | G | -0.0135 |
| rs113221995 | A | -0.0779 |
| rs17501071  | G | -0.039  |
| rs12600793  | A | 0.0565  |
| rs7211034   | C | 0.0165  |
| rs59064355  | A | -0.0218 |
| rs111616126 | C | -0.0338 |
| rs117153127 | A | -0.0661 |
| rs161394    | A | -0.0137 |
| rs111566547 | A | -0.0537 |
| rs117790102 | G | 0.0888  |
| rs142181185 | C | 0.0914  |
| rs12600420  | C | -0.0124 |
| rs10853114  | A | 0.0354  |
| rs3954036   | A | -0.0182 |
| rs8082005   | T | 0.0165  |
| rs4968894   | A | -0.0175 |

|             |   |         |
|-------------|---|---------|
| rs9905576   | T | 0.023   |
| rs9897788   | A | -0.0165 |
| rs11079300  | A | -0.0151 |
| rs139728368 | T | -0.026  |
| rs117093891 | T | -0.07   |
| rs111393274 | A | 0.0386  |
| rs12947203  | G | -0.012  |
| rs886236    | G | -0.0181 |
| rs77719504  | T | 0.0599  |
| rs12451455  | A | 0.0208  |
| rs9900249   | A | -0.0206 |
| rs9908714   | G | 0.0137  |
| rs113005632 | A | -0.0352 |
| rs113753171 | A | 0.083   |
| rs117910261 | G | -0.0276 |
| rs60241805  | A | -0.0279 |
| rs8075412   | T | -0.019  |
| rs111565436 | A | 0.015   |
| rs78253155  | G | 0.0636  |
| rs11871981  | C | 0.0191  |
| rs12449408  | A | -0.0253 |
| rs17291773  | C | 0.0213  |
| rs9896039   | C | -0.0131 |
| rs12601154  | A | 0.0285  |
| rs9897786   | A | 0.0178  |
| rs9895209   | C | -0.0327 |
| rs2716867   | A | 0.0162  |
| rs140597931 | T | -0.0861 |
| rs72817831  | C | 0.0261  |
| rs8073667   | T | -0.0204 |
| rs317326    | C | 0.0151  |
| rs56204604  | T | -0.0675 |
| rs78693897  | T | 0.0263  |
| rs6504319   | A | 0.0347  |
| rs16944727  | T | 0.0251  |
| rs11654812  | A | 0.0364  |
| rs12602832  | T | 0.0311  |
| rs34073586  | T | 0.0293  |
| rs142618071 | T | 0.0589  |
| rs118015720 | T | 0.0655  |
| rs12051563  | C | 0.0196  |
| rs117744454 | T | -0.062  |
| rs9891218   | T | -0.013  |
| rs77038344  | T | -0.0235 |
| rs12602216  | C | 0.0538  |
| rs80004755  | T | 0.0738  |
| rs3752008   | A | 0.0152  |

|             |   |         |
|-------------|---|---------|
| rs12603414  | A | 0.0167  |
| rs112764703 | A | 0.0699  |
| rs72820888  | C | -0.0754 |
| rs75661304  | C | -0.0501 |
| rs56086050  | A | -0.0222 |
| rs141901301 | G | -0.0687 |
| rs35231764  | G | 0.0228  |
| rs2107131   | A | 0.0168  |
| rs35546945  | G | 0.0308  |
| rs8178373   | A | -0.09   |
| rs34351775  | T | -0.0293 |
| rs74715846  | A | 0.0453  |
| rs4583295   | C | -0.0216 |
| rs75721851  | A | 0.0482  |
| rs115590810 | G | 0.0878  |
| rs73979191  | A | -0.0247 |
| rs9906273   | A | 0.03    |
| rs74396171  | C | 0.0649  |
| rs35335406  | T | 0.0235  |
| rs6504449   | G | -0.0518 |
| rs2241918   | A | -0.0145 |
| rs138066517 | T | 0.0462  |
| rs80222167  | C | 0.0374  |
| rs115572681 | G | 0.0275  |
| rs2361723   | T | 0.0696  |
| rs7209533   | A | 0.0145  |
| rs7218571   | G | -0.0173 |
| rs7215957   | G | 0.0154  |
| rs148323933 | T | 0.0691  |
| rs74887187  | T | -0.0258 |
| rs76888303  | G | -0.0338 |
| rs7224212   | G | 0.0143  |
| rs57632586  | T | -0.0229 |
| rs78102228  | A | 0.0453  |
| rs241773    | G | 0.0125  |
| rs147881440 | A | 0.0615  |
| rs7207327   | T | -0.0133 |
| rs116903464 | A | -0.0789 |
| rs62076611  | A | -0.0785 |
| rs149887327 | G | -0.0515 |
| rs56272814  | T | -0.0123 |
| rs2916146   | G | 0.0135  |
| rs117138288 | A | -0.0656 |
| rs113365712 | A | 0.046   |
| rs242245    | G | 0.0152  |
| rs9913532   | T | 0.0182  |
| rs7209596   | T | 0.0126  |



|             |   |         |
|-------------|---|---------|
| rs3760215   | T | 0.0121  |
| rs3213713   | C | -0.0202 |
| rs3809739   | A | -0.0281 |
| rs55648134  | T | 0.0198  |
| rs6504298   | T | -0.0173 |
| rs58104591  | G | -0.015  |
| rs117844431 | T | 0.0346  |
| rs2525089   | A | -0.0505 |
| rs8081534   | G | 0.0129  |
| rs73294357  | T | 0.0227  |
| rs7225218   | T | -0.0117 |
| rs295068    | C | 0.014   |
| rs8082003   | G | 0.0173  |
| rs11655537  | C | -0.0201 |
| rs17655302  | A | 0.0159  |
| rs4789106   | T | -0.0126 |
| rs4147988   | T | -0.013  |
| rs1010636   | G | -0.0136 |
| rs4791445   | C | -0.0303 |
| rs117988144 | C | -0.0641 |
| rs17052305  | G | 0.0689  |
| rs71382134  | A | 0.0338  |
| rs9911133   | T | 0.0212  |
| rs77315130  | A | -0.0727 |
| rs12603998  | C | -0.0258 |
| rs11657390  | T | 0.0217  |
| rs659739    | C | 0.0182  |
| rs8067585   | A | -0.0144 |
| rs117011300 | G | -0.0473 |
| rs79730821  | T | -0.0147 |
| rs116984122 | T | 0.0609  |
| rs72816945  | C | -0.0148 |
| rs75227416  | G | 0.0527  |
| rs6502186   | C | -0.013  |
| rs112055822 | T | -0.0807 |
| rs12944899  | A | 0.0513  |
| rs28648797  | T | -0.0222 |
| rs9894676   | G | 0.0116  |
| rs150054934 | A | -0.0285 |
| rs117595150 | T | -0.0648 |
| rs2056131   | A | -0.0125 |
| rs117909628 | T | -0.0489 |
| rs118025604 | T | -0.071  |
| rs9910905   | A | -0.0187 |
| rs80291427  | C | -0.0152 |
| rs11654234  | A | 0.0212  |
| rs10853031  | C | 0.0115  |

|             |   |         |
|-------------|---|---------|
| rs138842856 | G | 0.073   |
| rs75556842  | G | 0.0537  |
| rs6501859   | C | -0.0162 |
| rs118143196 | T | 0.0307  |
| rs72819574  | A | 0.0369  |
| rs34387241  | T | 0.0201  |
| rs36045580  | A | 0.0192  |
| rs1509123   | T | -0.0239 |
| rs3809738   | C | 0.0166  |
| rs72848066  | A | -0.0404 |
| rs12937985  | C | -0.0119 |
| rs62068202  | T | 0.0345  |
| rs74879422  | A | 0.0799  |
| rs9901427   | G | 0.0134  |
| rs73997493  | T | 0.0262  |
| rs68061490  | C | -0.0316 |
| rs8068892   | C | 0.0318  |
| rs75883746  | G | 0.052   |
| rs3115682   | C | 0.0285  |
| rs7217110   | A | 0.0141  |
| rs34139298  | A | -0.0157 |
| rs117074406 | A | -0.0762 |
| rs145322555 | A | 0.0324  |
| rs12952209  | G | 0.0153  |
| rs142921971 | G | 0.0538  |
| rs758857    | G | 0.0151  |
| rs11077670  | A | 0.0208  |
| rs117936595 | G | -0.0589 |
| rs7213314   | T | 0.0245  |
| rs205060    | T | 0.0115  |
| rs117561452 | G | 0.0674  |
| rs2740354   | T | 0.0117  |
| rs117716434 | T | 0.0988  |
| rs8069356   | C | 0.0133  |
| rs4147994   | A | -0.0146 |
| rs34879184  | C | -0.0256 |
| rs11654254  | C | 0.0476  |
| rs113510814 | A | 0.0207  |
| rs4790699   | G | 0.0243  |
| rs34997192  | T | 0.0392  |
| rs7213624   | C | 0.0521  |
| rs117117100 | A | -0.035  |
| rs11654632  | C | -0.0122 |
| rs7221438   | T | 0.0145  |
| rs4377216   | C | -0.0172 |
| rs142827413 | A | -0.0846 |
| rs12937852  | C | -0.0167 |

|             |   |         |
|-------------|---|---------|
| rs144179108 | G | 0.0599  |
| rs10221239  | T | 0.0771  |
| rs3094271   | C | 0.014   |
| rs56331035  | C | 0.0205  |
| rs142251609 | G | 0.0552  |
| rs1262619   | A | -0.0119 |
| rs9899869   | T | -0.0135 |
| rs118031641 | T | 0.0645  |
| rs56702013  | A | -0.0179 |
| rs71382482  | T | -0.0416 |
| rs1964480   | A | 0.0264  |
| rs78515320  | T | -0.0427 |
| rs62066639  | A | 0.0371  |
| rs62070755  | T | -0.0177 |
| rs62086566  | C | -0.0131 |
| rs2377397   | C | 0.0185  |
| rs150333964 | T | -0.0537 |
| rs4985699   | C | 0.0118  |
| rs78780583  | T | 0.0236  |
| rs9900532   | C | -0.0115 |
| rs116959643 | A | -0.0539 |
| rs117911016 | A | 0.0611  |
| rs12936796  | A | -0.0271 |
| rs7225916   | G | 0.0131  |
| rs2970062   | A | -0.0275 |
| rs140575634 | A | -0.0436 |
| rs118182534 | G | -0.0515 |
| rs79913477  | T | 0.0556  |
| rs7210686   | C | -0.0124 |
| rs117555997 | T | 0.0728  |
| rs72920931  | A | -0.029  |
| rs8077641   | T | 0.0591  |
| rs12943838  | A | 0.0233  |
| rs11655575  | A | -0.0259 |
| rs8065459   | T | 0.017   |
| rs138171670 | G | -0.049  |
| rs113258835 | C | 0.037   |
| rs77643165  | T | -0.0145 |
| rs880316    | T | -0.0187 |
| rs56127676  | A | 0.0346  |
| rs8082043   | T | 0.0119  |
| rs12943984  | A | 0.0205  |
| rs150928695 | A | 0.0282  |
| rs17732672  | T | 0.0241  |
| rs881563    | G | -0.0156 |
| rs227703    | A | -0.0248 |
| rs118104110 | T | 0.0444  |

|             |   |         |
|-------------|---|---------|
| rs113826291 | G | -0.0898 |
| rs112199238 | T | 0.0312  |
| rs74649011  | G | -0.0259 |
| rs72812872  | T | 0.0874  |
| rs10852965  | A | 0.0148  |
| rs150755563 | T | -0.0642 |
| rs77804554  | A | 0.0252  |
| rs62060679  | A | 0.0683  |
| rs56152626  | A | -0.0584 |
| rs12602322  | T | -0.0188 |
| rs2168787   | T | -0.0131 |
| rs71369690  | A | 0.0364  |
| rs8075438   | A | 0.0373  |
| rs4790021   | C | 0.0114  |
| rs7214466   | C | -0.0126 |
| rs117473221 | C | 0.0536  |
| rs7217996   | A | 0.0221  |
| rs111325162 | C | 0.0646  |
| rs113110483 | T | 0.0481  |
| rs35488441  | G | -0.0316 |
| rs148058621 | C | 0.0321  |
| rs28515863  | G | -0.0246 |
| rs34711409  | A | -0.0157 |
| rs117614435 | G | -0.0796 |
| rs111467802 | G | -0.0212 |
| rs117242199 | T | 0.0489  |
| rs875213    | A | -0.0167 |
| rs35207503  | T | 0.019   |
| rs4925097   | A | 0.0385  |
| rs7220125   | A | 0.0468  |
| rs7214744   | A | 0.0145  |
| rs72808043  | A | 0.0433  |
| rs117596754 | A | 0.0449  |
| rs12951527  | T | 0.0664  |
| rs17681503  | C | 0.0214  |
| rs10775405  | T | -0.0122 |
| rs58611856  | T | -0.0409 |
| rs78798301  | T | 0.0452  |
| rs8072031   | A | 0.0196  |
| rs78840286  | G | 0.0567  |
| rs3744314   | T | 0.0148  |
| rs112269217 | T | -0.0399 |
| rs140658668 | A | 0.0463  |
| rs139958144 | A | -0.0794 |
| rs117320651 | G | -0.0405 |
| rs117183340 | T | 0.0474  |
| rs138697057 | T | 0.0563  |

|             |   |         |
|-------------|---|---------|
| rs16944998  | G | -0.0308 |
| rs34142002  | C | 0.0162  |
| rs7216149   | A | -0.0162 |
| rs9902327   | T | -0.0402 |
| rs78876140  | C | 0.0883  |
| rs55884267  | T | -0.0443 |
| rs113754618 | T | 0.0271  |
| rs36092443  | A | 0.0424  |
| rs11077378  | C | 0.0108  |
| rs117987990 | T | -0.0797 |
| rs766556    | C | 0.0739  |
| rs3935538   | T | -0.0236 |
| rs116877375 | T | 0.0513  |
| rs11871247  | T | -0.0117 |
| rs758658    | C | -0.0118 |
| rs76285187  | C | -0.046  |
| rs9914775   | T | 0.0439  |
| rs1051443   | G | -0.0154 |
| rs4985680   | C | -0.015  |
| rs9901248   | T | 0.0133  |
| rs4796029   | G | 0.0264  |
| rs9890581   | T | -0.0112 |
| rs74706498  | C | -0.0686 |
| rs148341624 | A | -0.0824 |
| rs56386157  | C | -0.0155 |
| rs75316528  | A | 0.0159  |
| rs12941152  | C | 0.0142  |
| rs7216398   | T | 0.043   |
| rs1552846   | T | 0.0145  |
| rs8068117   | C | 0.0248  |
| rs113787204 | C | 0.0499  |
| rs78113792  | T | -0.0555 |
| rs138375775 | A | 0.0793  |
| rs1805431   | G | 0.0158  |
| rs116847799 | C | 0.0295  |
| rs35683939  | G | -0.0199 |
| rs7502013   | A | 0.0268  |
| rs16950626  | T | 0.0266  |
| rs66479497  | A | 0.014   |
| rs112702496 | C | 0.0657  |
| rs112853504 | G | 0.0321  |
| rs77234976  | G | -0.0156 |
| rs112988153 | A | 0.0275  |
| rs111895257 | A | 0.0359  |
| rs141016192 | T | -0.03   |
| rs6502374   | A | -0.0127 |
| rs4273102   | C | 0.0215  |

|             |   |         |
|-------------|---|---------|
| rs36105864  | C | 0.0137  |
| rs4889801   | C | -0.0162 |
| rs76263310  | A | 0.0623  |
| rs74575241  | C | 0.0826  |
| rs591436    | A | 0.0143  |
| rs4796406   | C | -0.0256 |
| rs2674955   | T | -0.0391 |
| rs11650999  | A | 0.0191  |
| rs205033    | G | -0.027  |
| rs12453853  | A | -0.0191 |
| rs10445383  | G | -0.0188 |
| rs72816159  | T | -0.0418 |
| rs116388827 | A | 0.0639  |
| rs117648276 | C | 0.063   |
| rs142484805 | C | 0.0697  |
| rs7212329   | A | 0.0197  |
| rs8070906   | T | 0.0631  |
| rs77265918  | T | 0.0779  |
| rs9895992   | A | -0.0104 |
| rs11654705  | T | 0.04    |
| rs8093731   | T | -0.6136 |
| rs3745091   | C | 0.2649  |
| rs8096036   | T | 0.0718  |
| rs35549878  | C | 0.083   |
| rs604476    | A | 0.1613  |
| rs77152522  | A | 0.1354  |
| rs17809911  | T | -0.0881 |
| rs614793    | T | -0.0905 |
| rs113474397 | C | 0.1517  |
| rs10853370  | C | -0.0654 |
| rs79848479  | C | 0.3678  |
| rs8099773   | G | 0.078   |
| rs118192075 | C | 0.2342  |
| rs503331    | A | -0.062  |
| rs9965841   | A | 0.1787  |
| rs12957496  | A | 0.2103  |
| rs2156500   | A | -0.0595 |
| rs113732589 | G | -0.1172 |
| rs605022    | T | -0.3577 |
| rs72890974  | A | 0.0974  |
| rs2849448   | C | 0.1501  |
| rs57730400  | G | 0.0858  |
| rs3110689   | T | -0.0684 |
| rs112878622 | A | 0.3428  |
| rs28671262  | A | 0.096   |
| rs7240967   | A | -0.0548 |
| rs8095585   | A | 0.0567  |

|             |   |         |
|-------------|---|---------|
| rs11080501  | C | -0.0567 |
| rs78180796  | A | -0.0849 |
| rs76529369  | A | 0.2383  |
| rs146982359 | T | 0.0642  |
| rs117513982 | T | -0.3226 |
| rs1813488   | T | 0.2256  |
| rs1129621   | T | -0.0601 |
| rs7230696   | G | 0.0587  |
| rs35124878  | T | 0.2135  |
| rs11080702  | G | 0.0741  |
| rs34396332  | C | 0.225   |
| rs9944579   | A | 0.0606  |
| rs74354143  | T | 0.1004  |
| rs113418797 | T | -0.0909 |
| rs59842805  | A | 0.0976  |
| rs72913705  | A | 0.1407  |
| rs7244521   | C | 0.1401  |
| rs113575060 | C | 0.1931  |
| rs76848715  | T | 0.2315  |
| rs62096861  | A | -0.1509 |
| rs4578736   | C | 0.0524  |
| rs1598665   | A | 0.0828  |
| rs487908    | G | 0.065   |
| rs79968498  | T | -0.2035 |
| rs117677078 | C | 0.125   |
| rs34928562  | A | -0.0927 |
| rs141007034 | T | -0.2696 |
| rs117212859 | A | 0.2574  |
| rs74369630  | C | 0.1616  |
| rs141805652 | T | 0.1563  |
| rs991654    | T | -0.0567 |
| rs151108266 | T | -0.2818 |
| rs988213    | G | -0.0505 |
| rs56680461  | G | -0.3419 |
| rs9959162   | C | 0.0661  |
| rs7230434   | C | 0.0648  |
| rs72933641  | A | 0.0784  |
| rs7242253   | C | -0.0544 |
| rs1261131   | C | 0.2233  |
| rs16941292  | C | 0.1345  |
| rs12967300  | G | -0.055  |
| rs79521916  | A | 0.139   |
| rs8083956   | T | -0.07   |
| rs1657419   | T | 0.051   |
| rs117601169 | A | -0.2841 |
| rs9789148   | T | -0.0797 |
| rs9948961   | A | 0.1762  |

|             |   |         |
|-------------|---|---------|
| rs4799419   | T | 0.0904  |
| rs2051268   | C | -0.0681 |
| rs111571108 | A | 0.073   |
| rs17759405  | A | 0.2278  |
| rs6566901   | A | 0.0633  |
| rs72952683  | G | 0.2882  |
| rs12954227  | A | 0.2239  |
| rs1598786   | T | -0.0547 |
| rs145838864 | T | -0.3125 |
| rs7232412   | A | -0.0497 |
| rs16950778  | G | -0.1823 |
| rs79917891  | G | 0.1911  |
| rs155324    | A | -0.0494 |
| rs140613527 | T | 0.2557  |
| rs76045891  | A | 0.1911  |
| rs34560823  | T | 0.0632  |
| rs118073081 | A | -0.2494 |
| rs9962202   | T | 0.2489  |
| rs74438194  | C | -0.3154 |
| rs74364514  | A | -0.3427 |
| rs112754109 | T | 0.0957  |
| rs4456599   | G | -0.053  |
| rs77486888  | T | 0.1641  |
| rs76448124  | A | -0.0817 |
| rs143745456 | A | 0.3147  |
| rs2655363   | C | -0.1051 |
| rs35046856  | T | -0.0637 |
| rs4372771   | T | 0.1316  |
| rs61681561  | G | 0.2473  |
| rs12955790  | G | 0.0595  |
| rs77002808  | C | -0.2627 |
| rs7237894   | C | 0.052   |
| rs73951733  | G | 0.2615  |
| rs117186093 | G | 0.1949  |
| rs79176334  | A | -0.1142 |
| rs4390677   | A | 0.1594  |
| rs12959233  | A | -0.065  |
| rs4325641   | T | 0.0538  |
| rs73423188  | A | 0.2259  |
| rs138499647 | G | -0.2982 |
| rs117688008 | A | -0.3198 |
| rs13380891  | A | 0.0509  |
| rs111310158 | C | 0.0924  |
| rs66637603  | A | 0.0484  |
| rs683277    | G | -0.0856 |
| rs9954239   | A | -0.0502 |
| rs77462933  | T | 0.2229  |



|             |   |         |
|-------------|---|---------|
| rs12967215  | G | -0.0958 |
| rs11150985  | G | -0.0466 |
| rs73960530  | T | -0.1574 |
| rs151214390 | T | -0.3759 |
| rs77945863  | C | 0.1617  |
| rs117131598 | T | 0.3842  |
| rs8088984   | C | 0.0721  |
| rs72998152  | T | -0.174  |
| rs1258132   | T | 0.0593  |
| rs8095826   | C | -0.046  |
| rs34866675  | G | 0.11    |
| rs34496489  | A | 0.1184  |
| rs28580641  | C | -0.0556 |
| rs117436225 | G | -0.2552 |
| rs147730652 | G | 0.195   |
| rs139011587 | T | 0.2137  |
| rs12965201  | T | 0.052   |
| rs62098900  | T | -0.0709 |
| rs16969380  | T | -0.0616 |
| rs35416770  | G | -0.0844 |
| rs113411219 | A | -0.06   |
| rs4798539   | C | -0.0884 |
| rs12956123  | G | -0.0618 |
| rs4263031   | G | -0.0476 |
| rs117631167 | G | -0.2659 |
| rs1382128   | A | -0.0453 |
| rs12965248  | C | -0.0826 |
| rs3786203   | A | 0.0531  |
| rs61755362  | A | 0.2134  |
| rs3891810   | C | -0.0736 |
| rs17824665  | C | 0.0624  |
| rs9954180   | A | 0.0985  |
| rs138808547 | T | 0.2009  |
| rs529630    | A | -0.2187 |
| rs10853684  | T | 0.074   |
| rs7227485   | A | -0.0456 |
| rs7235456   | A | -0.1498 |
| rs576735    | T | -0.0492 |
| rs17704953  | C | 0.152   |
| rs68020096  | G | -0.059  |
| rs17073555  | G | 0.0572  |
| rs75796562  | T | 0.1052  |
| rs12456077  | C | -0.0481 |
| rs35582361  | G | -0.0987 |
| rs71353250  | C | 0.1509  |
| rs1784624   | C | 0.0902  |
| rs35822778  | A | -0.0477 |

|             |   |         |
|-------------|---|---------|
| rs2017581   | A | -0.0641 |
| rs4797313   | A | -0.0503 |
| rs7226659   | T | -0.1062 |
| rs17058339  | T | 0.0613  |
| rs17668835  | G | 0.0825  |
| rs45556134  | A | 0.1063  |
| rs9952901   | C | 0.054   |
| rs78125443  | A | -0.1797 |
| rs17716461  | A | 0.0688  |
| rs75533121  | T | -0.1362 |
| rs481060    | G | 0.0537  |
| rs149598694 | C | 0.2263  |
| rs9319723   | A | -0.0453 |
| rs1290366   | T | -0.0496 |
| rs117014189 | G | 0.1322  |
| rs150745925 | G | -0.2512 |
| rs4940167   | A | 0.046   |
| rs73459502  | C | 0.1342  |
| rs74635960  | G | -0.2138 |
| rs6505550   | T | 0.0722  |
| rs76763577  | G | -0.084  |
| rs80187959  | G | 0.0995  |
| rs35439231  | A | 0.131   |
| rs9945548   | T | -0.0747 |
| rs150212939 | A | -0.388  |
| rs60262423  | A | 0.0527  |
| rs6423428   | T | -0.0919 |
| rs115192343 | G | 0.2221  |
| rs2924329   | A | -0.0479 |
| rs35093221  | C | -0.0779 |
| rs75632100  | A | 0.1716  |
| rs35710301  | A | -0.0542 |
| rs7239596   | G | -0.0546 |
| rs578026    | G | -0.0476 |
| rs3971135   | A | -0.0966 |
| rs433620    | C | -0.0446 |
| rs2741004   | C | -0.045  |
| rs516154    | C | 0.0474  |
| rs117892634 | A | 0.1961  |
| rs17081569  | G | 0.0921  |
| rs12961647  | G | -0.0454 |
| rs138219379 | A | 0.2431  |
| rs77142322  | C | 0.1426  |
| rs12458245  | G | 0.0635  |
| rs150125641 | G | 0.2701  |
| rs1376201   | G | 0.0515  |
| rs144786859 | G | 0.1628  |

|             |   |         |
|-------------|---|---------|
| rs144105405 | T | 0.1387  |
| rs9958194   | C | -0.0451 |
| rs113009125 | A | 0.1698  |
| rs6506537   | C | 0.0509  |
| rs12959958  | C | -0.1899 |
| rs117537599 | A | -0.1846 |
| rs8098755   | A | -0.0519 |
| rs29067     | G | -0.0451 |
| rs12969536  | C | 0.0469  |
| rs11661385  | G | 0.0511  |
| rs12967992  | A | -0.0511 |
| rs8099745   | T | -0.0728 |
| rs12967619  | G | -0.2177 |
| rs16943278  | C | 0.1506  |
| rs283230    | T | -0.2294 |
| rs7230886   | C | 0.0681  |
| rs78151580  | C | -0.0765 |
| rs142475111 | C | -0.4826 |
| rs11082785  | T | -0.16   |
| rs749452    | T | -0.047  |
| rs61647957  | C | -0.117  |
| rs1848358   | T | -0.0581 |
| rs34280986  | A | -0.1801 |
| rs17084337  | T | 0.0699  |
| rs17088399  | C | 0.0477  |
| rs8086175   | T | 0.0462  |
| rs12605373  | C | 0.2604  |
| rs6506680   | T | -0.0533 |
| rs541218    | C | -0.2168 |
| rs12956842  | A | 0.1266  |
| rs148556071 | T | -0.1675 |
| rs7234371   | T | -0.0449 |
| rs1648275   | G | 0.0522  |
| rs12954567  | T | -0.1894 |
| rs2156209   | T | -0.0941 |
| rs12956477  | C | -0.1742 |
| rs4798137   | T | 0.0498  |
| rs72913771  | A | -0.0661 |
| rs2614992   | T | -0.0579 |
| rs117954526 | C | -0.3703 |
| rs117146285 | T | 0.2215  |
| rs72875879  | G | 0.0839  |
| rs4798198   | T | 0.0497  |
| rs75518760  | C | 0.105   |
| rs4417623   | G | 0.0454  |
| rs4591235   | G | -0.0488 |
| rs72941624  | T | -0.2744 |

|             |   |         |
|-------------|---|---------|
| rs6508576   | C | -0.062  |
| rs72895304  | G | -0.2001 |
| rs76723717  | C | 0.3316  |
| rs1694253   | A | 0.2918  |
| rs113616882 | A | 0.0869  |
| rs115181045 | T | -0.2757 |
| rs34086801  | C | -0.1091 |
| rs75097822  | C | -0.2348 |
| rs17062940  | A | 0.156   |
| rs74993368  | A | 0.2939  |
| rs627777    | T | -0.0463 |
| rs72911693  | C | 0.1609  |
| rs113916252 | C | 0.0969  |
| rs115707461 | T | 0.183   |
| rs77577588  | C | 0.1618  |
| rs9635962   | A | -0.0431 |
| rs12456841  | C | -0.0452 |
| rs115566958 | T | 0.2887  |
| rs36000971  | T | -0.2568 |
| rs77700730  | T | 0.273   |
| rs1893233   | C | -0.0518 |
| rs2957292   | A | -0.0567 |
| rs8082777   | C | -0.1285 |
| rs35808965  | C | 0.044   |
| rs141934986 | T | -0.1862 |
| rs34946503  | G | 0.0421  |
| rs58787712  | A | -0.0711 |
| rs75336002  | G | 0.065   |
| rs149557275 | T | 0.2567  |
| rs140051388 | T | 0.2161  |
| rs8084765   | A | 0.0518  |
| rs592718    | T | -0.0422 |
| rs11152350  | A | 0.0405  |
| rs307119    | A | -0.0419 |
| rs74523103  | A | -0.1637 |
| rs1431786   | T | -0.1254 |
| rs6565911   | A | -0.0447 |
| rs1623269   | A | -0.062  |
| rs17502523  | A | 0.0439  |
| rs72910389  | C | -0.1331 |
| rs117223232 | C | 0.1827  |
| rs62082384  | G | -0.0797 |
| rs11082726  | G | 0.0425  |
| rs72942809  | C | 0.2395  |
| rs12956229  | T | -0.0474 |
| rs6508123   | A | 0.0528  |
| rs143179518 | A | -0.2184 |

|             |   |         |
|-------------|---|---------|
| rs7239412   | A | -0.0568 |
| rs80202899  | A | 0.0739  |
| rs56714488  | A | 0.056   |
| rs72957601  | T | -0.1727 |
| rs16945645  | C | 0.1077  |
| rs7228963   | G | 0.0524  |
| rs6566946   | G | 0.0612  |
| rs1217560   | C | 0.0724  |
| rs727875    | A | -0.0441 |
| rs11663067  | C | -0.0683 |
| rs11872275  | C | 0.1577  |
| rs28505076  | A | -0.1811 |
| rs17445798  | T | -0.1567 |
| rs34902666  | G | 0.0813  |
| rs7230589   | C | 0.0811  |
| rs77412132  | C | -0.212  |
| rs62076967  | G | 0.1084  |
| rs118154552 | A | 0.1245  |
| rs1942363   | A | 0.0558  |
| rs4941279   | T | -0.0434 |
| rs16964973  | G | 0.0863  |
| rs75567719  | T | 0.2172  |
| rs139630401 | A | -0.1401 |
| rs16960373  | G | 0.0776  |
| rs481522    | C | -0.0565 |
| rs10460086  | A | -0.0456 |
| rs75982245  | A | -0.1608 |
| rs4800676   | T | 0.1379  |
| rs4439837   | T | -0.1265 |
| rs117373160 | T | 0.1207  |
| rs117636141 | A | -0.0778 |
| rs117885634 | T | -0.0888 |
| rs72879665  | A | 0.2472  |
| rs112275653 | C | 0.1498  |
| rs72936308  | T | 0.0834  |
| rs12962028  | A | 0.1639  |
| rs6567267   | C | -0.0409 |
| rs3744951   | C | 0.1229  |
| rs137968892 | T | 0.2314  |
| rs77111568  | T | -0.2498 |
| rs67057979  | A | 0.0449  |
| rs1789598   | A | -0.0485 |
| rs2849358   | A | -0.0534 |
| rs117963832 | C | 0.2325  |
| rs73966675  | A | -0.2373 |
| rs2053248   | T | -0.0413 |
| rs117682361 | T | 0.1221  |

|             |   |         |
|-------------|---|---------|
| rs11083280  | A | -0.0566 |
| rs9636010   | C | 0.0397  |
| rs113051364 | G | 0.2356  |
| rs1424454   | A | 0.0475  |
| rs631721    | T | -0.0767 |
| rs80153767  | A | 0.0984  |
| rs2881248   | G | -0.0613 |
| rs143327906 | G | -0.0419 |
| rs4239325   | C | 0.0726  |
| rs116902813 | A | 0.1885  |
| rs28724274  | C | 0.0488  |
| rs117330917 | A | -0.2623 |
| rs80081038  | A | 0.1713  |
| rs138766897 | T | 0.3052  |
| rs8095987   | G | 0.0394  |
| rs11151807  | A | 0.2027  |
| rs58245208  | T | 0.3027  |
| rs62098988  | A | -0.3142 |
| rs12606626  | C | 0.0671  |
| rs8088296   | A | 0.0398  |
| rs75590461  | T | 0.0794  |
| rs11662944  | G | 0.0682  |
| rs17069572  | C | -0.0776 |
| rs9948841   | G | -0.0426 |
| rs17747839  | T | 0.0862  |
| rs4940996   | T | -0.0536 |
| rs12454718  | T | 0.1754  |
| rs11872219  | A | -0.0392 |
| rs12605346  | G | -0.0429 |
| rs35578052  | T | -0.0394 |
| rs75023429  | C | -0.1037 |
| rs12607154  | A | 0.0719  |
| rs55810244  | A | 0.0509  |
| rs117207105 | T | 0.1709  |
| rs62094888  | A | -0.0652 |
| rs55710939  | C | -0.2093 |
| rs238112    | A | 0.0894  |
| rs55642665  | G | 0.0478  |
| rs142639427 | G | 0.1939  |
| rs497999    | G | 0.0426  |
| rs79416003  | A | 0.1966  |
| rs73446999  | T | 0.0687  |
| rs11082040  | G | -0.0833 |
| rs662164    | T | -0.0414 |
| rs117115340 | A | -0.1035 |
| rs16945404  | C | -0.0434 |
| rs140690533 | G | 0.2533  |

|             |   |         |
|-------------|---|---------|
| rs78201974  | A | 0.0841  |
| rs77647210  | T | -0.1432 |
| rs9960408   | A | -0.0687 |
| rs62101540  | T | 0.1626  |
| rs75090126  | G | 0.0701  |
| rs7241978   | T | -0.0464 |
| rs9952355   | G | 0.0411  |
| rs1791504   | T | 0.1019  |
| rs72854890  | G | -0.0667 |
| rs75903411  | C | -0.1692 |
| rs146515002 | T | 0.2048  |
| rs117346288 | T | -0.2465 |
| rs9961221   | T | -0.0521 |
| rs72965012  | G | 0.0689  |
| rs72942776  | G | -0.0534 |
| rs77585373  | A | -0.1176 |
| rs117498114 | T | -0.1646 |
| rs66943313  | T | 0.0972  |
| rs4346287   | A | 0.0564  |
| rs151144980 | G | -0.2378 |
| rs76417242  | A | -0.2584 |
| rs112018958 | G | -0.1611 |
| rs17088258  | T | 0.0448  |
| rs7231041   | C | 0.0453  |
| rs4430841   | A | 0.0708  |
| rs2732216   | T | -0.0401 |
| rs79787722  | C | 0.1876  |
| rs117506580 | T | 0.2331  |
| rs143183817 | C | -0.2043 |
| rs4891319   | C | -0.0408 |
| rs3851145   | T | -0.1352 |
| rs611776    | G | -0.0482 |
| rs3786429   | G | 0.1733  |
| rs80163443  | A | 0.055   |
| rs2621183   | A | -0.0802 |
| rs142643929 | A | -0.2237 |
| rs4516308   | T | -0.0726 |
| rs12606957  | T | -0.0433 |
| rs75186979  | A | -0.0628 |
| rs74551425  | C | -0.1217 |
| rs4462702   | C | 0.069   |
| rs28628885  | G | -0.0382 |
| rs59514449  | T | 0.1477  |
| rs72918338  | C | -0.1446 |
| rs34433741  | G | 0.0491  |
| rs11081497  | C | -0.0878 |
| rs75041495  | T | 0.3091  |

|             |   |         |
|-------------|---|---------|
| rs9807153   | T | 0.0544  |
| rs8095699   | T | 0.1364  |
| rs78130776  | T | -0.1128 |
| rs74824416  | T | 0.2637  |
| rs4940875   | T | 0.0811  |
| rs1347012   | G | 0.131   |
| rs80287313  | T | -0.0458 |
| rs330310    | A | 0.0575  |
| rs1374642   | C | 0.0558  |
| rs73943403  | G | 0.1908  |
| rs7226576   | C | -0.0859 |
| rs76443844  | C | 0.1401  |
| rs12454019  | T | -0.1383 |
| rs34081062  | C | -0.0582 |
| rs7237165   | C | 0.0442  |
| rs143309495 | C | -0.1888 |
| rs34117424  | A | -0.1204 |
| rs1979321   | T | 0.044   |
| rs60180725  | T | 0.1065  |
| rs8093777   | C | -0.0399 |
| rs76550020  | T | 0.0787  |
| rs28422970  | G | 0.0479  |
| rs894759    | T | -0.1604 |
| rs558848    | T | 0.0642  |
| rs76338374  | A | 0.0723  |
| rs55939561  | T | 0.051   |
| rs11082280  | G | -0.0433 |
| rs2119547   | T | 0.0618  |
| rs604565    | A | -0.044  |
| rs57655388  | G | -0.0874 |
| rs73370359  | A | -0.0727 |
| rs34390112  | A | 0.1474  |
| rs55645701  | A | -0.0669 |
| rs1893215   | C | -0.0465 |
| rs77321447  | T | 0.2549  |
| rs8096946   | G | -0.0664 |
| rs12605231  | A | -0.0609 |
| rs8092495   | T | 0.0569  |
| rs333105    | T | -0.0574 |
| rs117405767 | G | 0.1467  |
| rs74915550  | A | 0.2052  |
| rs9966109   | C | 0.0808  |
| rs112864481 | C | 0.2412  |
| rs117257222 | A | -0.1363 |
| rs7229745   | A | 0.0473  |
| rs8085980   | G | -0.0398 |
| rs11875744  | T | 0.0708  |



|             |   |         |
|-------------|---|---------|
| rs2660250   | T | 0.0448  |
| rs9958585   | C | 0.052   |
| rs7228157   | C | -0.0395 |
| rs9958386   | T | -0.0397 |
| rs35606926  | C | 0.0795  |
| rs8099547   | T | 0.0643  |
| rs4941185   | G | -0.0422 |
| rs78192384  | A | 0.2745  |
| rs11663294  | C | -0.0401 |
| rs10514013  | G | -0.069  |
| rs74488692  | C | 0.1646  |
| rs28446733  | A | -0.0424 |
| rs142687243 | T | 0.1665  |
| rs33999846  | T | 0.1592  |
| rs594714    | T | -0.0383 |
| rs80207284  | T | -0.0495 |
| rs111559901 | C | -0.2931 |
| rs112448139 | A | -0.0555 |
| rs78064496  | A | 0.0621  |
| rs75182916  | A | -0.1732 |
| rs4890567   | G | -0.041  |
| rs595287    | A | -0.042  |
| rs113586506 | T | -0.1571 |
| rs62079938  | G | -0.0579 |
| rs1623173   | C | 0.0594  |
| rs11664596  | A | -0.0377 |
| rs2140719   | C | 0.0676  |
| rs117173497 | G | -0.2066 |
| rs142641974 | C | 0.226   |
| rs56303724  | C | 0.0935  |
| rs6507078   | A | -0.0544 |
| rs4940643   | A | 0.0933  |
| rs4890336   | T | 0.0422  |
| rs3813115   | A | 0.0676  |
| rs9950643   | A | 0.0453  |
| rs755163    | A | -0.0752 |
| rs7239044   | G | -0.1686 |
| rs593234    | A | 0.0416  |
| rs116916620 | T | -0.3357 |
| rs72865419  | A | 0.0709  |
| rs79421398  | C | 0.1209  |
| rs140272419 | A | 0.0873  |
| rs12458107  | C | 0.0718  |
| rs1523233   | C | 0.0493  |
| rs118150554 | A | 0.1169  |
| rs11151027  | A | 0.0462  |
| rs2584733   | T | -0.0437 |

|             |   |         |
|-------------|---|---------|
| rs1705515   | T | 0.0397  |
| rs74870326  | T | 0.0753  |
| rs7234978   | A | 0.046   |
| rs4290560   | A | 0.0444  |
| rs1466374   | T | -0.0379 |
| rs80238164  | A | 0.0912  |
| rs276933    | T | -0.0405 |
| rs9953533   | C | 0.0929  |
| rs72949010  | A | 0.0855  |
| rs111611442 | A | 0.1771  |
| rs4346293   | T | -0.0549 |
| rs2510534   | C | -0.1185 |
| rs12958697  | C | 0.0459  |
| rs139490426 | C | 0.2376  |
| rs8088869   | T | 0.0818  |
| rs8085707   | T | 0.0526  |
| rs218550    | T | -0.0478 |
| rs75027453  | T | 0.1131  |
| rs73963076  | T | 0.1406  |
| rs11877280  | C | 0.0956  |
| rs75780925  | C | 0.0781  |
| rs140567980 | T | -0.2305 |
| rs62091988  | C | 0.0625  |
| rs74777030  | C | 0.1803  |
| rs112925811 | A | 0.173   |
| rs150323540 | A | 0.1671  |
| rs1893619   | A | -0.0649 |
| rs13381538  | A | 0.0583  |
| rs9945057   | C | -0.0382 |
| rs16977161  | G | 0.0599  |
| rs4427891   | G | -0.0709 |
| rs17410847  | C | 0.0484  |
| rs11665528  | A | -0.0411 |
| rs75014244  | A | 0.2124  |
| rs7230289   | C | -0.0377 |
| rs11660181  | T | -0.0527 |
| rs80090252  | A | -0.181  |
| rs113423362 | G | 0.2465  |
| rs117055022 | C | -0.1609 |
| rs7229266   | C | 0.0424  |
| rs72876194  | C | -0.0653 |
| rs72954617  | G | 0.0568  |
| rs71361310  | C | -0.0926 |
| rs56157834  | G | -0.0546 |
| rs1582789   | A | -0.0833 |
| rs2120321   | T | 0.0473  |
| rs7226979   | T | -0.0366 |

|             |   |         |
|-------------|---|---------|
| rs2056015   | G | -0.0385 |
| rs11152355  | A | 0.1146  |
| rs9954217   | G | 0.0421  |
| rs1241078   | T | 0.1577  |
| rs62081853  | G | 0.0792  |
| rs9304251   | T | -0.0655 |
| rs35615892  | G | -0.0893 |
| rs117883203 | A | 0.0693  |
| rs9954480   | A | -0.0509 |
| rs1785124   | A | 0.1856  |
| rs17265639  | A | 0.0752  |
| rs62104280  | T | -0.0563 |
| rs11873805  | A | -0.055  |
| rs11661218  | A | -0.0464 |
| rs11082498  | C | -0.0432 |
| rs142782544 | A | -0.2498 |
| rs8091635   | T | -0.0375 |
| rs76779320  | T | 0.1985  |
| rs17187605  | A | -0.0924 |
| rs72985679  | A | 0.1167  |
| rs17684642  | T | 0.2272  |
| rs884906    | G | -0.0522 |
| rs72890923  | G | 0.1021  |
| rs140208753 | C | -0.1938 |
| rs60409321  | C | 0.1789  |
| rs76927498  | A | 0.132   |
| rs62097857  | A | 0.1551  |
| rs77603765  | T | 0.2429  |
| rs12326448  | A | -0.0764 |
| rs117080744 | C | -0.2689 |
| rs17061749  | G | 0.2569  |
| rs1684985   | T | 0.123   |
| rs7240119   | T | 0.0369  |
| rs2306163   | G | -0.0387 |
| rs687722    | G | 0.0379  |
| rs79766242  | T | -0.1846 |
| rs495960    | C | -0.0816 |
| rs434304    | G | 0.0645  |
| rs3851132   | T | -0.0426 |
| rs2315257   | T | 0.0852  |
| rs4459616   | T | -0.1334 |
| rs34567042  | G | -0.0427 |
| rs4941149   | T | -0.0519 |
| rs17813045  | G | 0.1132  |
| rs151053303 | A | -0.2828 |
| rs57940982  | G | 0.069   |
| rs142864059 | T | -0.1674 |

|             |   |         |
|-------------|---|---------|
| rs138613802 | T | 0.222   |
| rs6507336   | C | -0.069  |
| rs117821921 | C | 0.2185  |
| rs734011    | C | -0.0445 |
| rs9946413   | T | -0.0682 |
| rs2705362   | T | 0.0415  |
| rs4798732   | A | -0.0591 |
| rs140096396 | C | -0.1357 |
| rs7244109   | G | -0.0426 |
| rs673251    | C | 0.0404  |
| rs518023    | C | 0.038   |
| rs784240    | C | 0.0895  |
| rs2851752   | T | -0.0894 |
| rs12958254  | A | 0.0493  |
| rs74977064  | G | -0.0759 |
| rs116953349 | C | 0.1235  |
| rs147338809 | G | -0.237  |
| rs8090006   | G | 0.0358  |
| rs113015631 | A | -0.0859 |
| rs61052677  | C | 0.0515  |
| rs79523616  | C | 0.1129  |
| rs1528832   | G | -0.0483 |
| rs112386610 | C | 0.1078  |
| rs357892    | G | -0.0415 |
| rs16947273  | C | 0.1268  |
| rs17505217  | A | 0.0474  |
| rs72861632  | G | -0.246  |
| rs411056    | T | 0.096   |
| rs1963826   | A | 0.0459  |
| rs1272845   | G | -0.038  |
| rs17273765  | G | -0.0667 |
| rs148838146 | G | -0.1148 |
| rs503754    | C | 0.091   |
| rs8097011   | T | 0.1524  |
| rs12458532  | C | -0.0382 |
| rs118016448 | T | 0.1511  |
| rs4941056   | G | 0.1823  |
| rs142982145 | T | 0.1888  |
| rs6567288   | G | -0.0356 |
| rs12455125  | C | 0.049   |
| rs1617856   | T | 0.0398  |
| rs118094842 | A | -0.0652 |
| rs16946560  | G | 0.1917  |
| rs7240339   | T | -0.0366 |
| rs1421203   | C | -0.0457 |
| rs62095695  | A | 0.1914  |
| rs76782175  | A | 0.1164  |

|             |   |         |
|-------------|---|---------|
| rs8088409   | T | -0.1822 |
| rs7242047   | A | 0.1156  |
| rs72634385  | C | 0.1045  |
| rs117301192 | A | 0.1478  |
| rs4476254   | A | 0.044   |
| rs4280345   | C | 0.0976  |
| rs34323378  | C | -0.0518 |
| rs9951369   | T | -0.2376 |
| rs112137673 | G | 0.181   |
| rs7237973   | A | -0.0447 |
| rs1077155   | A | 0.0387  |
| rs591272    | G | -0.0513 |
| rs12373231  | A | 0.1181  |
| rs112154505 | C | 0.1545  |
| rs60423170  | T | -0.0678 |
| rs117827783 | A | -0.1826 |
| rs145942256 | T | 0.0927  |
| rs11082903  | A | 0.0376  |
| rs9952931   | G | 0.0385  |
| rs16978354  | T | 0.0743  |
| rs76009760  | C | -0.136  |
| rs8192595   | G | -0.0686 |
| rs10514883  | T | -0.0446 |
| rs2298504   | A | -0.0531 |
| rs112081515 | G | 0.1155  |
| rs656008    | T | 0.0388  |
| rs4407156   | T | -0.0359 |
| rs900966    | T | -0.0373 |
| rs147708674 | A | -0.0459 |
| rs78211908  | C | 0.0847  |
| rs76371719  | C | 0.0896  |
| rs74470089  | C | -0.1517 |
| rs7236598   | T | 0.1664  |
| rs11082105  | G | 0.0705  |
| rs4799906   | T | 0.0355  |
| rs17077752  | A | 0.0484  |
| rs79126854  | T | -0.1207 |
| rs8091043   | C | -0.0395 |
| rs6566896   | T | 0.0465  |
| rs1256725   | A | 0.0442  |
| rs8097577   | C | 0.037   |
| rs77864724  | G | 0.3466  |
| rs74255565  | G | -0.1188 |
| rs9963328   | C | -0.0709 |
| rs149424    | T | 0.0922  |
| rs72915293  | C | 0.2289  |
| rs59324311  | G | -0.1164 |

|             |   |         |
|-------------|---|---------|
| rs79164653  | A | 0.0942  |
| rs4243316   | T | -0.0376 |
| rs1873126   | T | 0.0372  |
| rs79305938  | T | 0.1319  |
| rs72955117  | T | -0.0607 |
| rs62092140  | C | -0.1381 |
| rs12969215  | G | 0.0398  |
| rs17263755  | T | 0.1196  |
| rs112686821 | A | 0.1212  |
| rs9807212   | G | -0.0701 |
| rs60293714  | A | -0.0765 |
| rs55890229  | T | -0.0437 |
| rs60610464  | A | -0.0463 |
| rs72887316  | A | -0.0468 |
| rs72909503  | C | 0.1661  |
| rs72935435  | A | -0.1642 |
| rs75062505  | A | 0.1609  |
| rs11663318  | G | 0.0377  |
| rs72867160  | G | 0.0587  |
| rs12454870  | T | -0.1174 |
| rs7506430   | C | 0.138   |
| rs76649144  | A | 0.0573  |
| rs117038868 | A | -0.2028 |
| rs72928778  | G | 0.0448  |
| rs62091545  | G | -0.0578 |
| rs17669035  | T | 0.0384  |
| rs55671496  | C | 0.2611  |
| rs12963959  | T | 0.1814  |
| rs118155518 | C | 0.0619  |
| rs34802337  | C | -0.0379 |
| rs149418841 | A | 0.2829  |
| rs79740269  | A | -0.1261 |
| rs72861295  | T | 0.08    |
| rs8097115   | G | -0.1209 |
| rs56408816  | G | 0.1028  |
| rs62081250  | T | 0.0406  |
| rs11663697  | T | 0.1275  |
| rs117137608 | C | -0.1084 |
| rs17700058  | A | -0.1909 |
| rs72977416  | C | -0.2374 |
| rs12327023  | A | -0.269  |
| rs4310941   | A | 0.0389  |
| rs78243510  | T | 0.2469  |
| rs72953158  | C | 0.159   |
| rs7227027   | T | 0.0378  |
| rs77168173  | G | 0.067   |
| rs4890818   | A | 0.0812  |

|             |   |         |
|-------------|---|---------|
| rs78061178  | A | 0.0942  |
| rs79653726  | A | -0.1565 |
| rs117133307 | G | -0.1871 |
| rs4149603   | A | 0.2648  |
| rs75547571  | A | 0.1607  |
| rs79768001  | G | -0.2228 |
| rs682565    | C | -0.0386 |
| rs143143214 | T | -0.2335 |
| rs1442664   | G | 0.0362  |
| rs117684850 | C | -0.1454 |
| rs74928586  | A | -0.1439 |
| rs1523877   | G | -0.0634 |
| rs149931591 | G | 0.2166  |
| rs12455464  | C | -0.0365 |
| rs147269070 | G | 0.2109  |
| rs10468763  | C | 0.0447  |
| rs72878740  | G | -0.0788 |
| rs74611586  | G | -0.1562 |
| rs8097951   | C | 0.247   |
| rs556447    | G | 0.043   |
| rs116847803 | A | -0.0482 |
| rs59570002  | T | 0.1178  |
| rs9952837   | T | -0.0468 |
| rs630320    | C | 0.1182  |
| rs4798108   | C | 0.0466  |
| rs55823308  | T | 0.1274  |
| rs12607229  | G | 0.0352  |
| rs113129886 | G | -0.2278 |
| rs17351537  | T | 0.0957  |
| rs78718877  | T | -0.193  |
| rs77610518  | A | 0.101   |
| rs56173310  | G | 0.0458  |
| rs1789137   | G | -0.0924 |
| rs74588321  | G | -0.1688 |
| rs116737980 | A | 0.1715  |
| rs8094072   | G | 0.0339  |
| rs79703952  | A | -0.1692 |
| rs56061367  | T | -0.0518 |
| rs12604264  | C | 0.047   |
| rs17498301  | G | 0.0586  |
| rs7227024   | A | -0.0435 |
| rs476191    | T | 0.0343  |
| rs1196945   | A | -0.036  |
| rs117662383 | A | 0.1756  |
| rs12456915  | G | 0.0384  |
| rs12457335  | A | 0.1362  |
| rs7238026   | G | 0.0382  |

|             |   |         |
|-------------|---|---------|
| rs138314139 | A | 0.1784  |
| rs35734270  | T | -0.0445 |
| rs17192737  | T | -0.0501 |
| rs144811869 | T | 0.172   |
| rs118137986 | C | -0.2697 |
| rs2442007   | C | 0.0647  |
| rs114730635 | C | -0.2037 |
| rs6505540   | A | 0.0393  |
| rs28808324  | T | 0.1966  |
| rs7241198   | T | -0.0474 |
| rs142930830 | T | -0.1307 |
| rs72887927  | C | 0.0928  |
| rs118155119 | C | -0.0991 |
| rs8089868   | A | -0.0521 |
| rs12185442  | G | 0.058   |
| rs148740449 | G | 0.1501  |
| rs1785177   | C | -0.0512 |
| rs8091374   | A | -0.0508 |
| rs12454351  | T | -0.0357 |
| rs9989612   | T | -0.0362 |
| rs613326    | C | -0.042  |
| rs12957534  | C | -0.0497 |
| rs12970933  | G | 0.0452  |
| rs74829817  | G | -0.17   |
| rs17204192  | A | -0.0479 |
| rs77352683  | A | 0.0803  |
| rs148334051 | T | 0.1615  |
| rs74819146  | A | 0.11    |
| rs8083753   | T | 0.038   |
| rs11660313  | T | 0.0535  |
| rs113022020 | G | 0.1862  |
| rs1563497   | G | -0.0455 |
| rs600589    | A | -0.0366 |
| rs9950594   | T | -0.0894 |
| rs145830670 | C | -0.0781 |
| rs11081564  | G | -0.0491 |
| rs11664134  | T | -0.0589 |
| rs8094981   | C | 0.0367  |
| rs118175918 | G | 0.1748  |
| rs1893792   | T | 0.0467  |
| rs7240833   | T | 0.0495  |
| rs117723936 | G | -0.2071 |
| rs12957397  | C | 0.0892  |
| rs28407910  | A | -0.0434 |
| rs8093948   | C | 0.0578  |
| rs35228655  | G | 0.0399  |
| rs118135994 | T | -0.1522 |



|             |   |         |
|-------------|---|---------|
| rs9635977   | C | -0.044  |
| rs8095790   | G | 0.0439  |
| rs564975    | C | -0.0605 |
| rs10164171  | A | 0.0498  |
| rs12605252  | A | 0.0645  |
| rs118101714 | A | -0.1838 |
| rs1786812   | G | -0.0374 |
| rs16950739  | T | -0.1081 |
| rs1708699   | T | -0.0377 |
| rs9965347   | G | 0.0373  |
| rs78805746  | C | -0.1165 |
| rs163063    | A | -0.1158 |
| rs8087034   | A | 0.0442  |
| rs34092067  | A | -0.091  |
| rs13313691  | A | 0.1455  |
| rs17068242  | G | -0.0835 |
| rs2850912   | G | -0.0351 |
| rs72889428  | G | -0.0484 |
| rs79093588  | A | 0.1326  |
| rs7237262   | C | 0.1461  |
| rs9748332   | A | 0.0917  |
| rs78152995  | T | -0.1599 |
| rs76097394  | C | -0.1975 |
| rs9944542   | C | 0.1453  |
| rs17798885  | T | 0.049   |
| rs464439    | T | 0.0475  |
| rs8095525   | T | 0.0352  |
| rs58736086  | T | 0.1675  |
| rs75116453  | T | 0.0774  |
| rs79483009  | T | 0.1693  |
| rs4422049   | A | -0.0504 |
| rs75547147  | C | -0.128  |
| rs3974646   | G | 0.038   |
| rs148055593 | A | 0.1308  |
| rs4798141   | T | -0.0696 |
| rs9959465   | T | -0.044  |
| rs78051101  | A | -0.1647 |
| rs117768092 | G | 0.1944  |
| rs1221890   | G | 0.0825  |
| rs9807674   | T | 0.0494  |
| rs17719026  | T | 0.1265  |
| rs140696867 | T | -0.2192 |
| rs72884421  | C | 0.207   |
| rs59960839  | C | 0.0506  |
| rs79560368  | C | -0.2037 |
| rs317809    | A | 0.0334  |
| rs681725    | C | -0.0329 |

|             |   |         |
|-------------|---|---------|
| rs9946285   | T | -0.0712 |
| rs72965968  | T | -0.3137 |
| rs117950536 | C | 0.2462  |
| rs77032811  | G | -0.1126 |
| rs74781300  | C | 0.129   |
| rs7231052   | T | -0.0507 |
| rs11659373  | C | -0.1591 |
| rs72877614  | G | -0.0745 |
| rs8094791   | A | 0.059   |
| rs112103097 | G | 0.1098  |
| rs12454712  | C | -0.0393 |
| rs13313662  | T | 0.0415  |
| rs62102338  | G | 0.0478  |
| rs12457050  | A | -0.0689 |
| rs9951226   | A | -0.1026 |
| rs75624036  | C | -0.1538 |
| rs900745    | G | -0.2086 |
| rs34962860  | T | 0.087   |
| rs35181921  | A | -0.0402 |
| rs12957300  | G | -0.0663 |
| rs11660968  | T | 0.1964  |
| rs62101913  | C | 0.1513  |
| rs12966184  | T | 0.0567  |
| rs12959988  | T | -0.0408 |
| rs4799719   | C | 0.059   |
| rs12958711  | C | 0.1528  |
| rs9956661   | A | 0.0483  |
| rs116099297 | G | -0.0647 |
| rs77536980  | A | 0.062   |
| rs56341525  | T | 0.1871  |
| rs58299713  | G | 0.0824  |
| rs8094026   | A | 0.0866  |
| rs143535681 | T | -0.2183 |
| rs471207    | G | -0.0453 |
| rs148185409 | T | -0.1871 |
| rs72920536  | T | 0.1563  |
| rs72894872  | G | -0.207  |
| rs151204838 | G | 0.1394  |
| rs6566963   | A | 0.033   |
| rs67414368  | T | 0.0583  |
| rs147423948 | G | 0.2158  |
| rs2052661   | C | -0.0365 |
| rs16943989  | A | -0.0513 |
| rs12232675  | A | -0.0401 |
| rs34363291  | G | 0.0423  |
| rs62085790  | T | 0.0398  |
| rs13382005  | G | -0.0659 |

|             |   |         |
|-------------|---|---------|
| rs1618609   | A | 0.1067  |
| rs62101150  | G | 0.1971  |
| rs62087121  | A | 0.1099  |
| rs72917638  | A | 0.1532  |
| rs7242147   | C | 0.0419  |
| rs113863887 | C | 0.1982  |
| rs58703063  | C | -0.035  |
| rs146621932 | T | -0.1926 |
| rs8096586   | A | 0.0386  |
| rs138215167 | A | 0.1448  |
| rs79729142  | C | -0.1718 |
| rs78992342  | C | -0.2482 |
| rs1815956   | A | 0.0344  |
| rs8093433   | A | 0.0361  |
| rs72921663  | T | -0.1056 |
| rs72925079  | C | 0.0721  |
| rs9957141   | T | 0.1319  |
| rs7242580   | G | -0.0374 |
| rs7237191   | A | -0.039  |
| rs1481041   | C | 0.1244  |
| rs117389919 | A | -0.1557 |
| rs75558494  | T | 0.0691  |
| rs62086119  | G | 0.1007  |
| rs11080574  | T | -0.0665 |
| rs74766228  | T | -0.1032 |
| rs8090516   | A | 0.034   |
| rs62098864  | A | -0.0484 |
| rs72918820  | A | -0.0523 |
| rs11659751  | A | -0.079  |
| rs8093691   | T | -0.0855 |
| rs72909389  | G | 0.1482  |
| rs74876334  | C | -0.2188 |
| rs72892159  | G | -0.0616 |
| rs139913227 | T | 0.109   |
| rs138525419 | G | -0.2433 |
| rs4426445   | T | 0.0339  |
| rs2931018   | A | -0.036  |
| rs75388705  | T | 0.1415  |
| rs117832653 | A | 0.2038  |
| rs8093551   | T | -0.0382 |
| rs12607548  | A | 0.0663  |
| rs920308    | A | -0.0399 |
| rs77710391  | A | -0.0651 |
| rs77248273  | G | 0.0598  |
| rs4891169   | T | -0.0381 |
| rs72898593  | A | -0.1031 |
| rs645223    | C | 0.047   |

|             |   |         |
|-------------|---|---------|
| rs35882474  | A | 0.0494  |
| rs117478708 | G | 0.1148  |
| rs79426764  | A | -0.113  |
| rs4302142   | T | 0.0693  |
| rs79128284  | T | 0.2336  |
| rs77704560  | A | 0.1777  |
| rs78527339  | G | -0.1069 |
| rs146287497 | C | -0.2091 |
| rs7505352   | T | 0.1228  |
| rs143146653 | A | -0.238  |
| rs12455229  | C | -0.0487 |
| rs17090219  | C | -0.0651 |
| rs17642617  | G | -0.0397 |
| rs118043171 | G | 0.1379  |
| rs149434798 | A | 0.1355  |
| rs7242937   | T | 0.0471  |
| rs17785131  | T | -0.2122 |
| rs7239604   | T | 0.0326  |
| rs74905903  | A | 0.2265  |
| rs80150469  | A | 0.1022  |
| rs76388122  | C | 0.0651  |
| rs7242428   | G | -0.0444 |
| rs113907672 | A | 0.1146  |
| rs2847282   | G | -0.0379 |
| rs4940723   | G | -0.0328 |
| rs29102     | C | 0.0652  |
| rs9960380   | G | 0.0427  |
| rs112137921 | A | 0.1283  |
| rs72886034  | G | 0.0667  |
| rs8089434   | T | 0.1818  |
| rs139250389 | A | 0.1664  |
| rs144329090 | G | 0.1403  |
| rs35814220  | A | 0.0391  |
| rs328998    | A | -0.0567 |
| rs9303900   | A | 0.0341  |
| rs11151770  | A | 0.0606  |
| rs117458977 | A | 0.1225  |
| rs150791026 | T | -0.1873 |
| rs71358406  | A | -0.0627 |
| rs75680805  | T | 0.1159  |
| rs1967012   | T | -0.0538 |
| rs117091910 | A | -0.137  |
| rs17669699  | G | 0.0492  |
| rs1579590   | G | 0.1466  |
| rs12607056  | A | 0.0478  |
| rs9957494   | C | 0.0369  |
| rs78569732  | C | -0.0667 |

|             |   |         |
|-------------|---|---------|
| rs17074963  | C | -0.0717 |
| rs12969816  | A | 0.1667  |
| rs17078587  | G | 0.0527  |
| rs140267277 | T | -0.195  |
| rs35719335  | T | 0.1349  |
| rs1623345   | C | -0.0707 |
| rs950408    | G | 0.0321  |
| rs75147276  | A | -0.1359 |
| rs77088204  | A | 0.0993  |
| rs728080    | G | 0.0331  |
| rs891311    | T | 0.0533  |
| rs154929    | A | -0.0401 |
| rs76344079  | T | -0.1002 |
| rs8096673   | T | 0.0949  |
| rs1196591   | T | 0.0418  |
| rs148831528 | T | 0.1264  |
| rs116925431 | A | 0.1051  |
| rs112907934 | A | 0.125   |
| rs112118513 | A | -0.1591 |
| rs72905665  | G | -0.0502 |
| rs75056758  | G | 0.1567  |
| rs605818    | T | 0.0334  |
| rs35525973  | A | -0.2076 |
| rs74908113  | T | 0.1233  |
| rs111297421 | G | -0.1696 |
| rs12458308  | G | -0.0444 |
| rs56685665  | G | 0.166   |
| rs2118628   | C | 0.0696  |
| rs56001630  | A | -0.0689 |
| rs149913752 | G | 0.1544  |
| rs6505829   | A | 0.0349  |
| rs8097398   | A | -0.1012 |
| rs9954156   | A | 0.0862  |
| rs72939864  | T | 0.0766  |
| rs117568352 | T | -0.1351 |
| rs9963424   | C | 0.0558  |
| rs384802    | A | 0.0507  |
| rs35330488  | T | 0.1575  |
| rs9947389   | G | 0.0418  |
| rs144136422 | T | 0.1172  |
| rs62076823  | C | 0.1017  |
| rs2177857   | C | -0.0487 |
| rs28807688  | A | 0.0983  |
| rs111463102 | T | 0.195   |
| rs112847805 | T | -0.0712 |
| rs1154775   | A | 0.1454  |
| rs2125538   | A | -0.0397 |

|             |   |         |
|-------------|---|---------|
| rs4799801   | C | -0.1979 |
| rs12961839  | A | -0.0476 |
| rs4329999   | A | 0.0459  |
| rs62089547  | A | 0.3037  |
| rs7233851   | T | 0.1106  |
| rs8087444   | A | 0.0392  |
| rs28449865  | G | -0.2    |
| rs62092942  | G | -0.1049 |
| rs2702592   | T | 0.04    |
| rs55928970  | A | -0.0838 |
| rs1400397   | C | -0.0326 |
| rs72955242  | A | -0.0465 |
| rs422182    | T | 0.0835  |
| rs7226703   | C | 0.0704  |
| rs115117749 | A | 0.1453  |
| rs2113746   | T | -0.0442 |
| rs80013270  | C | -0.1433 |
| rs504442    | T | 0.0586  |
| rs76015144  | T | -0.1326 |
| rs34972994  | C | -0.0597 |
| rs79658777  | G | 0.1245  |
| rs1785234   | C | 0.0329  |
| rs12965084  | A | -0.0328 |
| rs41335044  | C | 0.1257  |
| rs79244489  | A | 0.2193  |
| rs150781671 | A | 0.1453  |
| rs117011420 | A | 0.0791  |
| rs147868733 | C | 0.1924  |
| rs76182966  | C | 0.0982  |
| rs7351012   | C | -0.0326 |
| rs56371042  | A | 0.0428  |
| rs117788325 | T | 0.1071  |
| rs78105028  | G | 0.042   |
| rs150841364 | T | -0.1139 |
| rs117066005 | C | -0.1114 |
| rs138890012 | T | -0.2309 |
| rs117893932 | G | 0.1924  |
| rs78661325  | A | 0.1017  |
| rs73972483  | G | 0.1753  |
| rs143026088 | A | 0.1657  |
| rs78783680  | C | -0.0926 |
| rs117339315 | G | -0.1834 |
| rs330985    | A | 0.0361  |
| rs7233624   | T | 0.1238  |
| rs12955939  | T | -0.0321 |
| rs62089153  | T | 0.1536  |
| rs620979    | G | -0.0388 |

|             |   |         |
|-------------|---|---------|
| rs11082527  | T | 0.0327  |
| rs77543730  | T | -0.181  |
| rs162001    | A | 0.0565  |
| rs11877723  | T | 0.0783  |
| rs11661970  | T | 0.193   |
| rs1917930   | G | 0.0937  |
| rs1812680   | C | -0.035  |
| rs17205450  | C | -0.1326 |
| rs71359630  | T | 0.1528  |
| rs74432758  | A | 0.0863  |
| rs72985518  | A | 0.0491  |
| rs76624894  | T | -0.1376 |
| rs76791979  | A | -0.2374 |
| rs149975091 | T | -0.2105 |
| rs61732473  | T | 0.2249  |
| rs76184502  | C | -0.0756 |
| rs62096891  | T | 0.071   |
| rs60550057  | T | -0.1437 |
| rs79226737  | T | 0.1769  |
| rs148225159 | T | 0.1825  |
| rs7234150   | C | 0.0477  |
| rs948769    | G | -0.0577 |
| rs17230195  | C | -0.0665 |
| rs75499741  | G | 0.1698  |
| rs1893516   | G | 0.0816  |
| rs117034650 | C | 0.355   |
| rs17087627  | T | -0.0504 |
| rs66659467  | G | -0.0441 |
| rs11081179  | G | 0.035   |
| rs11152293  | G | -0.0362 |
| rs76824432  | T | 0.1683  |
| rs72927038  | T | 0.1646  |
| rs17768374  | T | 0.0414  |
| rs9949687   | C | -0.0321 |
| rs8088802   | A | -0.043  |
| rs78348761  | T | 0.1656  |
| rs11873837  | C | -0.0693 |
| rs139104269 | A | 0.1267  |
| rs655485    | C | 0.0679  |
| rs950430    | A | 0.036   |
| rs77333924  | G | -0.1244 |
| rs117193316 | A | 0.1974  |
| rs35249347  | T | 0.0375  |
| rs73473473  | C | 0.034   |
| rs111337328 | G | 0.1997  |
| rs62096558  | T | 0.092   |
| rs118080615 | G | -0.1852 |

|             |   |         |
|-------------|---|---------|
| rs72995917  | T | -0.0594 |
| rs3017362   | A | -0.0315 |
| rs74623514  | G | -0.093  |
| rs114750320 | T | -0.0871 |
| rs557659    | G | -0.0329 |
| rs62081349  | G | -0.0371 |
| rs55997349  | T | -0.0324 |
| rs11659973  | G | -0.0363 |
| rs531018    | A | -0.0578 |
| rs36027089  | A | 0.0718  |
| rs7232679   | C | -0.0373 |
| rs4494641   | T | -0.1147 |
| rs149253463 | G | -0.1349 |
| rs77377440  | T | -0.1674 |
| rs117427115 | T | -0.1094 |
| rs16978564  | T | 0.1928  |
| rs78425582  | G | 0.051   |
| rs12605628  | T | 0.0605  |
| rs117801355 | C | 0.1459  |
| rs138878811 | G | 0.1492  |
| rs493609    | T | -0.0329 |
| rs148723011 | C | -0.148  |
| rs4308047   | G | 0.0619  |
| rs112413678 | C | 0.2093  |
| rs79248622  | A | 0.1258  |
| rs11151376  | A | 0.0587  |
| rs7242802   | T | 0.1805  |
| rs56668873  | G | 0.0923  |
| rs1786670   | A | -0.0698 |
| rs80089611  | G | -0.0382 |
| rs4239281   | C | -0.0429 |
| rs4801012   | A | 0.1131  |
| rs28705237  | C | 0.114   |
| rs16945863  | T | 0.1156  |
| rs143239597 | G | 0.2105  |
| rs77309482  | C | 0.1851  |
| rs9960652   | T | 0.0689  |
| rs6507980   | A | -0.0312 |
| rs34197256  | G | -0.0792 |
| rs7231053   | C | -0.1748 |
| rs111676499 | G | -0.1333 |
| rs73474396  | A | 0.0748  |
| rs59342243  | A | 0.0342  |
| rs79591361  | C | -0.1171 |
| rs7505939   | C | 0.0392  |
| rs9959139   | T | 0.0309  |
| rs3752069   | T | 0.0626  |



|             |   |         |
|-------------|---|---------|
| rs9960516   | T | 0.0411  |
| rs55941236  | A | 0.0908  |
| rs73001800  | G | -0.0597 |
| rs74843743  | G | -0.2202 |
| rs10438965  | C | -0.0675 |
| rs79841648  | C | 0.0968  |
| rs75764515  | A | -0.1482 |
| rs117549601 | A | -0.1337 |
| rs78969229  | G | 0.0694  |
| rs1943337   | T | 0.0393  |
| rs61331015  | T | -0.0712 |
| rs12455869  | T | 0.087   |
| rs118086754 | A | -0.1126 |
| rs72948765  | G | -0.0583 |
| rs7239522   | T | 0.0322  |
| rs116890417 | A | -0.104  |
| rs8094190   | A | 0.0887  |
| rs4940535   | T | 0.0615  |
| rs80248589  | T | -0.1261 |
| rs116945514 | C | -0.1911 |
| rs9960190   | G | -0.0828 |
| rs2305885   | T | 0.1106  |
| rs7243487   | A | 0.0799  |
| rs967053    | G | 0.1128  |
| rs8087505   | T | 0.035   |
| rs11660805  | C | 0.0625  |
| rs12185474  | T | 0.0352  |
| rs1456602   | C | -0.0306 |
| rs148026083 | G | 0.1233  |
| rs76326598  | T | 0.057   |
| rs142232569 | G | 0.1647  |
| rs1708693   | A | -0.0447 |
| rs158866    | C | 0.0315  |
| rs75449708  | G | -0.0979 |
| rs10164009  | C | 0.0677  |
| rs17647607  | G | -0.0411 |
| rs61586702  | T | -0.2008 |
| rs950777    | T | -0.0315 |
| rs62097831  | T | 0.0597  |
| rs2610525   | G | 0.0405  |
| rs34260508  | C | -0.1119 |
| rs77661528  | G | 0.2453  |
| rs77704986  | C | 0.1008  |
| rs3910708   | G | 0.0881  |
| rs1391450   | A | 0.0313  |
| rs117031066 | C | 0.1823  |
| rs4316840   | T | -0.0324 |

|             |   |         |
|-------------|---|---------|
| rs163062    | G | -0.0364 |
| rs17568569  | T | -0.0998 |
| rs79565382  | T | -0.1472 |
| rs4801053   | A | -0.0326 |
| rs12709788  | G | -0.0522 |
| rs28589700  | G | -0.1251 |
| rs4797234   | C | 0.0599  |
| rs11660407  | C | 0.1239  |
| rs145154425 | C | 0.1313  |
| rs9944732   | G | 0.0327  |
| rs147214414 | C | -0.2175 |
| rs8083684   | C | -0.0718 |
| rs4939720   | G | -0.0418 |
| rs4939642   | A | 0.0821  |
| rs72943960  | C | -0.0769 |
| rs9965158   | G | -0.1133 |
| rs1893963   | C | -0.0564 |
| rs872035    | T | 0.041   |
| rs62100498  | C | 0.0706  |
| rs117346487 | T | -0.0646 |
| rs117088887 | G | 0.2036  |
| rs72872990  | T | -0.2091 |
| rs114864269 | C | -0.0614 |
| rs7241695   | G | -0.1965 |
| rs4800027   | G | 0.0682  |
| rs117713992 | T | -0.2167 |
| rs113046192 | A | 0.1961  |
| rs7227835   | C | 0.0321  |
| rs72946593  | T | 0.1143  |
| rs7231546   | C | 0.0453  |
| rs8088632   | A | 0.0507  |
| rs117360456 | G | 0.1033  |
| rs77829442  | T | 0.0916  |
| rs77564907  | A | -0.0429 |
| rs1480920   | T | -0.0366 |
| rs2156102   | G | -0.0329 |
| rs78549380  | G | 0.066   |
| rs8097743   | G | 0.0305  |
| rs59868802  | T | -0.0606 |
| rs7231666   | G | 0.0494  |
| rs73947293  | C | -0.1091 |
| rs148171716 | A | 0.093   |
| rs149467020 | T | 0.1377  |
| rs72479862  | C | 0.1196  |
| rs118154751 | A | -0.189  |
| rs28857851  | A | -0.0365 |
| rs112801893 | A | 0.0552  |

|             |   |         |
|-------------|---|---------|
| rs4796984   | G | 0.039   |
| rs1595368   | G | -0.0338 |
| rs1677017   | G | 0.0438  |
| rs78906951  | G | 0.0996  |
| rs79541752  | G | -0.1072 |
| rs55781106  | A | 0.1359  |
| rs10502383  | A | 0.0341  |
| rs8084638   | G | -0.0599 |
| rs75630034  | A | -0.1144 |
| rs2020164   | C | 0.0525  |
| rs7504737   | A | -0.0313 |
| rs12956948  | A | 0.0321  |
| rs34871003  | T | -0.1042 |
| rs55937314  | A | -0.0389 |
| rs1452791   | A | 0.0328  |
| rs8098861   | C | 0.0807  |
| rs116889569 | G | -0.1222 |
| rs72968090  | G | 0.0782  |
| rs76063141  | T | -0.1409 |
| rs74649788  | A | 0.1026  |
| rs9963529   | T | 0.0343  |
| rs140542218 | A | -0.2357 |
| rs28520201  | G | 0.0598  |
| rs117247052 | G | -0.1283 |
| rs76504366  | A | 0.162   |
| rs35524777  | T | -0.0771 |
| rs12454152  | A | 0.2422  |
| rs45576836  | G | -0.126  |
| rs72629887  | G | -0.0933 |
| rs1942375   | A | -0.0347 |
| rs12966950  | C | -0.0391 |
| rs17829286  | T | 0.0466  |
| rs74524767  | A | 0.0693  |
| rs1380713   | T | 0.0312  |
| rs72963984  | T | -0.0693 |
| rs76686327  | C | -0.2101 |
| rs17067728  | G | 0.1408  |
| rs59677474  | C | -0.0418 |
| rs4458076   | C | 0.034   |
| rs62105187  | T | 0.1402  |
| rs12970409  | C | 0.0321  |
| rs76431570  | A | -0.0622 |
| rs4624280   | C | 0.0827  |
| rs76352457  | G | 0.1075  |
| rs148576989 | G | 0.1401  |
| rs78371023  | A | 0.1093  |
| rs4892217   | A | -0.0488 |

|             |   |         |
|-------------|---|---------|
| rs13313637  | A | -0.0402 |
| rs435439    | C | -0.0729 |
| rs62093805  | A | 0.0755  |
| rs72908395  | A | 0.0983  |
| rs11080895  | A | -0.0551 |
| rs75429260  | C | 0.1126  |
| rs16956918  | A | 0.0847  |
| rs569953    | T | 0.0526  |
| rs79419384  | G | 0.0673  |
| rs56183091  | T | 0.0803  |
| rs8091596   | T | -0.0934 |
| rs10084062  | G | 0.0352  |
| rs76908000  | G | 0.1311  |
| rs78589163  | T | -0.1662 |
| rs438282    | C | 0.2933  |
| rs72901596  | T | 0.07    |
| rs8096720   | C | 0.1441  |
| rs78138914  | G | -0.0844 |
| rs7243330   | T | 0.0339  |
| rs12454419  | T | -0.0841 |
| rs7244825   | C | 0.1123  |
| rs7240921   | C | 0.1616  |
| rs481377    | G | 0.039   |
| rs55927401  | A | -0.0551 |
| rs1472762   | T | 0.0496  |
| rs17644286  | G | -0.1414 |
| rs35016470  | A | 0.0464  |
| rs76589836  | T | -0.0406 |
| rs74605489  | T | -0.2876 |
| rs117133393 | T | -0.1854 |
| rs7228334   | T | -0.1727 |
| rs1403755   | T | 0.075   |
| rs79931841  | C | -0.1    |
| rs9966010   | G | -0.0859 |
| rs11151031  | T | -0.0365 |
| rs9944695   | C | 0.0849  |
| rs451983    | A | 0.0593  |
| rs72948054  | A | -0.0306 |
| rs9807759   | T | 0.0551  |
| rs116911120 | G | 0.1459  |
| rs8093282   | C | 0.1957  |
| rs17816861  | T | -0.0428 |
| rs72629896  | T | 0.079   |
| rs117164849 | G | 0.2104  |
| rs72979949  | C | -0.0584 |
| rs140686639 | T | 0.1018  |
| rs4891590   | T | -0.0326 |

|             |   |         |
|-------------|---|---------|
| rs7243737   | C | -0.0555 |
| rs34855066  | T | 0.1232  |
| rs78278500  | G | 0.1761  |
| rs75039586  | C | 0.0592  |
| rs34326063  | T | -0.0534 |
| rs62095706  | A | 0.1836  |
| rs78264315  | C | 0.0592  |
| rs112279611 | T | 0.1074  |
| rs138136736 | T | -0.1007 |
| rs62079922  | A | -0.1832 |
| rs60508122  | A | 0.0852  |
| rs11659566  | A | 0.2538  |
| rs1977953   | C | 0.0325  |
| rs78099133  | T | 0.1211  |
| rs72993154  | T | 0.0749  |
| rs29047     | C | 0.0755  |
| rs603659    | T | -0.0314 |
| rs12454915  | T | -0.0463 |
| rs8087763   | T | -0.0329 |
| rs10782062  | T | 0.0409  |
| rs62092669  | T | 0.2193  |
| rs59279568  | T | -0.0864 |
| rs8085100   | G | -0.0313 |
| rs4405637   | C | 0.0562  |
| rs55714694  | G | 0.0989  |
| rs80334414  | T | -0.2006 |
| rs967044    | C | 0.0306  |
| rs12608069  | G | 0.0583  |
| rs79547063  | A | -0.1715 |
| rs75268231  | A | 0.1551  |
| rs117353490 | G | -0.1631 |
| rs145198481 | A | 0.1517  |
| rs145586933 | T | 0.1283  |
| rs79456896  | A | 0.2488  |
| rs17830589  | T | 0.0589  |
| rs8095523   | C | -0.0604 |
| rs4940544   | G | -0.032  |
| rs12605528  | G | 0.0903  |
| rs117880545 | G | 0.1167  |
| rs77432991  | T | -0.0878 |
| rs76529678  | A | -0.1045 |
| rs67894943  | C | -0.0455 |
| rs138227044 | G | 0.1985  |
| rs75011790  | C | -0.1007 |
| rs8085414   | G | 0.0626  |
| rs10502902  | C | 0.0346  |
| rs4940194   | T | -0.0307 |

|             |   |         |
|-------------|---|---------|
| rs1604557   | G | -0.0293 |
| rs2060137   | A | -0.1026 |
| rs17080116  | T | 0.0899  |
| rs72898000  | C | 0.0889  |
| rs10503077  | T | 0.0752  |
| rs112903316 | A | 0.1987  |
| rs118059080 | C | 0.1911  |
| rs2646941   | T | 0.0451  |
| rs470320    | C | 0.0319  |
| rs8093083   | T | -0.0395 |
| rs11082541  | C | 0.0912  |
| rs111521599 | T | 0.0784  |
| rs2584466   | C | 0.0417  |
| rs11151135  | G | -0.0604 |
| rs1667707   | A | -0.0394 |
| rs1893489   | T | 0.0302  |
| rs8084516   | G | 0.131   |
| rs625361    | T | 0.0367  |
| rs17688770  | G | 0.0532  |
| rs4941170   | T | -0.0305 |
| rs17065849  | C | -0.0344 |
| rs74776396  | T | -0.2132 |
| rs4449035   | G | 0.0427  |
| rs72930285  | C | -0.132  |
| rs4798736   | A | -0.0313 |
| rs116850915 | A | 0.1522  |
| rs6567310   | G | 0.0337  |
| rs72939957  | A | 0.0995  |
| rs72869991  | G | 0.0653  |
| rs2009217   | C | -0.0338 |
| rs149146218 | A | 0.0975  |
| rs12954160  | T | 0.0447  |
| rs73461437  | A | -0.0403 |
| rs57325971  | T | -0.0389 |
| rs116861814 | T | -0.2208 |
| rs4939566   | A | 0.0349  |
| rs4121688   | A | -0.0418 |
| rs12953447  | T | -0.2241 |
| rs11150973  | A | -0.0438 |
| rs635654    | T | 0.0359  |
| rs35799969  | G | -0.1251 |
| rs13745     | A | -0.0536 |
| rs4797273   | C | -0.1622 |
| rs117785217 | A | 0.0873  |
| rs12955378  | A | 0.182   |
| rs78376754  | A | -0.1681 |
| rs1590106   | G | -0.0429 |

|             |   |         |
|-------------|---|---------|
| rs568774    | G | -0.0378 |
| rs2576419   | A | 0.0332  |
| rs12956481  | T | -0.1478 |
| rs11082718  | G | 0.0522  |
| rs7242877   | C | -0.0455 |
| rs3133202   | G | -0.0392 |
| rs12606373  | C | 0.036   |
| rs77996666  | T | 0.1373  |
| rs1582761   | T | -0.0397 |
| rs11080397  | G | 0.0375  |
| rs1942565   | T | -0.0422 |
| rs62078269  | G | 0.0911  |
| rs16951199  | C | 0.0644  |
| rs1941562   | G | 0.033   |
| rs9961704   | T | 0.0352  |
| rs141565555 | T | 0.078   |
| rs35241223  | G | 0.0571  |
| rs28583417  | C | 0.0829  |
| rs117476958 | A | -0.2235 |
| rs17766061  | T | 0.0942  |
| rs2421643   | G | 0.0779  |
| rs112301585 | G | -0.1822 |
| rs9955442   | C | 0.0367  |
| rs7236481   | G | -0.0475 |
| rs62095036  | A | -0.0415 |
| rs78597177  | G | 0.0461  |
| rs2741173   | G | 0.0322  |
| rs5004851   | G | 0.1024  |
| rs117620461 | T | -0.1768 |
| rs11873772  | C | 0.032   |
| rs441569    | G | 0.1166  |
| rs117062981 | C | -0.1564 |
| rs28428915  | A | -0.072  |
| rs7239852   | G | -0.0728 |
| rs79582319  | A | 0.1143  |
| rs2332673   | C | -0.0863 |
| rs17658536  | T | 0.0538  |
| rs2036735   | G | -0.0307 |
| rs75816706  | G | -0.0651 |
| rs74699370  | A | -0.1492 |
| rs76856822  | C | -0.2069 |
| rs11081638  | C | -0.0546 |
| rs619957    | C | 0.0426  |
| rs4461153   | A | 0.038   |
| rs73397836  | A | -0.2625 |
| rs2848466   | C | -0.0345 |
| rs144449208 | T | -0.1268 |

|             |   |         |
|-------------|---|---------|
| rs76412704  | C | 0.1115  |
| rs12963535  | T | -0.039  |
| rs72954396  | C | 0.1347  |
| rs12454438  | A | 0.0357  |
| rs145147711 | C | -0.1857 |
| rs2852103   | A | 0.0382  |
| rs11659173  | A | 0.0605  |
| rs4891744   | C | -0.0308 |
| rs7236364   | G | 0.0288  |
| rs5013567   | G | 0.1774  |
| rs17189067  | C | 0.0407  |
| rs890327    | G | -0.0532 |
| rs1791320   | T | -0.0304 |
| rs72882695  | C | 0.1363  |
| rs11663320  | G | -0.0301 |
| rs78529747  | T | -0.1617 |
| rs62100502  | A | 0.0408  |
| rs561312    | T | -0.0506 |
| rs7505661   | T | 0.0381  |
| rs111510094 | C | -0.1499 |
| rs11876789  | A | 0.0329  |
| rs78149888  | A | -0.2601 |
| rs2689395   | T | 0.0288  |
| rs9748615   | G | 0.0588  |
| rs76304618  | T | -0.1046 |
| rs62093175  | C | -0.0772 |
| rs62102248  | C | 0.0476  |
| rs658836    | C | -0.0397 |
| rs741399    | G | 0.035   |
| rs7505815   | G | -0.1404 |
| rs113326785 | T | 0.1537  |
| rs661373    | T | 0.0399  |
| rs7235792   | A | 0.0317  |
| rs62085167  | A | 0.1705  |
| rs9957185   | T | 0.0378  |
| rs57486902  | T | -0.0491 |
| rs3924163   | C | -0.0286 |
| rs148140512 | C | 0.22    |
| rs151160308 | G | 0.1366  |
| rs117403100 | A | 0.0922  |
| rs62087462  | T | 0.043   |
| rs16942145  | G | 0.1757  |
| rs603435    | T | -0.0617 |
| rs78691268  | G | -0.0643 |
| rs7239007   | G | 0.0553  |
| rs11151636  | G | 0.0353  |
| rs10782054  | G | -0.0369 |



|             |   |         |
|-------------|---|---------|
| rs7231046   | G | -0.0298 |
| rs62084463  | C | 0.053   |
| rs7407506   | T | -0.0303 |
| rs72918688  | A | 0.0587  |
| rs56366092  | C | 0.1586  |
| rs145050443 | G | 0.2037  |
| rs17660030  | T | -0.0855 |
| rs72911893  | T | -0.0614 |
| rs116966578 | T | 0.1358  |
| rs9955387   | C | 0.032   |
| rs3826619   | A | 0.0461  |
| rs12605400  | T | 0.0755  |
| rs143272249 | C | -0.1634 |
| rs78026276  | G | -0.0822 |
| rs55856981  | A | -0.1879 |
| rs2222570   | G | -0.0356 |
| rs28499123  | T | -0.0643 |
| rs506479    | T | 0.0402  |
| rs76094759  | G | 0.1849  |
| rs11662606  | T | 0.0726  |
| rs61096133  | A | -0.0329 |
| rs74450598  | T | 0.1196  |
| rs17763239  | T | -0.0295 |
| rs117066979 | T | 0.1698  |
| rs16954339  | T | 0.0909  |
| rs12957758  | G | 0.0358  |
| rs77471091  | C | 0.0656  |
| rs147773846 | G | -0.1278 |
| rs117560135 | T | 0.2032  |
| rs72954863  | T | 0.2767  |
| rs72927797  | G | -0.1496 |
| rs9319829   | C | -0.0567 |
| rs143600062 | A | -0.1094 |
| rs8093052   | C | 0.0335  |
| rs7242757   | C | -0.1061 |
| rs4890621   | C | 0.1597  |
| rs965174    | A | -0.0362 |
| rs118020270 | A | -0.0566 |
| rs1904806   | C | 0.0284  |
| rs9955005   | G | -0.0286 |
| rs2440516   | A | 0.0321  |
| rs957001    | T | 0.045   |
| rs117286293 | C | 0.1426  |
| rs72954893  | A | -0.1928 |
| rs73413293  | T | 0.1806  |
| rs57046219  | A | 0.0835  |
| rs80170050  | C | -0.1146 |

|             |   |         |
|-------------|---|---------|
| rs117224312 | A | 0.184   |
| rs12959842  | T | -0.1367 |
| rs11877832  | T | -0.0756 |
| rs139417897 | T | 0.1343  |
| rs148282763 | C | 0.1601  |
| rs7243663   | C | 0.1025  |
| rs111939778 | G | 0.1398  |
| rs4547429   | T | 0.0685  |
| rs78582178  | C | 0.1397  |
| rs139443352 | C | 0.1852  |
| rs4500815   | A | 0.0346  |
| rs2595361   | C | 0.0421  |
| rs73439210  | T | 0.0682  |
| rs1196599   | C | -0.0487 |
| rs4398183   | T | 0.04    |
| rs28680473  | C | 0.1253  |
| rs71358077  | A | -0.082  |
| rs148535648 | T | -0.1897 |
| rs11663056  | T | 0.0651  |
| rs151310688 | A | 0.1204  |
| rs72958995  | T | -0.2135 |
| rs17562811  | T | -0.1616 |
| rs71354493  | C | -0.1324 |
| rs74927360  | T | 0.1378  |
| rs144242046 | A | -0.1962 |
| rs73457616  | T | 0.1474  |
| rs148183875 | A | -0.1677 |
| rs117421239 | A | -0.0513 |
| rs17056717  | C | 0.1     |
| rs9967216   | G | -0.1043 |
| rs1942400   | T | -0.0333 |
| rs116875415 | A | 0.1721  |
| rs4798532   | C | -0.0359 |
| rs62101855  | G | -0.0632 |
| rs2850235   | T | 0.0414  |
| rs148824072 | A | 0.1924  |
| rs113035232 | A | 0.1602  |
| rs77967804  | A | -0.0747 |
| rs139806567 | T | 0.2363  |
| rs12957671  | A | -0.0566 |
| rs151244    | C | 0.0379  |
| rs35765215  | G | -0.0398 |
| rs10469030  | T | 0.0316  |
| rs73485731  | T | -0.0708 |
| rs72971973  | C | 0.1686  |
| rs55934149  | T | -0.1126 |
| rs12454238  | C | 0.0356  |

|             |   |         |
|-------------|---|---------|
| rs1537422   | C | 0.0501  |
| rs1992344   | G | 0.0502  |
| rs6506325   | T | 0.0295  |
| rs74586912  | T | 0.1765  |
| rs8099392   | C | 0.0576  |
| rs16976055  | A | 0.1754  |
| rs8098926   | C | 0.0611  |
| rs117386699 | T | 0.1981  |
| rs56341906  | T | 0.1432  |
| rs8095562   | C | 0.0289  |
| rs151160547 | T | -0.1653 |
| rs7243853   | G | -0.0285 |
| rs7231438   | C | 0.05    |
| rs112743054 | C | -0.0437 |
| rs72943558  | G | -0.0726 |
| rs4890743   | A | -0.0407 |
| rs74517391  | A | -0.051  |
| rs16946883  | A | -0.107  |
| rs1706320   | G | 0.0552  |
| rs11151787  | A | -0.0287 |
| rs144560227 | G | 0.0429  |
| rs328118    | T | -0.126  |
| rs12955834  | T | -0.051  |
| rs73402737  | T | 0.0936  |
| rs9807320   | C | 0.0651  |
| rs11661606  | A | 0.0452  |
| rs142319283 | C | 0.1344  |
| rs118030856 | C | 0.1123  |
| rs12373370  | A | -0.0921 |
| rs143978306 | A | -0.0939 |
| rs9946339   | C | -0.0406 |
| rs9957276   | G | -0.0862 |
| rs11872703  | A | -0.0912 |
| rs2289687   | G | 0.0392  |
| rs117413545 | T | 0.151   |
| rs117113977 | G | -0.1506 |
| rs1943912   | G | 0.0752  |
| rs291648    | T | -0.0313 |
| rs509050    | A | -0.061  |
| rs113188147 | A | -0.2984 |
| rs9807545   | G | 0.0721  |
| rs12373358  | T | 0.0294  |
| rs139905602 | A | 0.2017  |
| rs616938    | A | 0.0459  |
| rs117170617 | A | -0.0749 |
| rs937829    | T | -0.155  |
| rs12456016  | T | 0.0375  |

|             |   |         |
|-------------|---|---------|
| rs76341020  | T | 0.1115  |
| rs17633053  | T | 0.0594  |
| rs74975924  | T | -0.0934 |
| rs639803    | T | 0.0348  |
| rs7239582   | G | -0.031  |
| rs62097666  | T | -0.0352 |
| rs16944040  | G | -0.0938 |
| rs183374    | A | 0.0365  |
| rs75082674  | G | 0.1557  |
| rs11664270  | G | 0.1038  |
| rs2931052   | G | -0.0316 |
| rs1648609   | A | -0.0616 |
| rs1518017   | T | -0.0288 |
| rs1430538   | T | 0.0333  |
| rs9807772   | T | 0.0316  |
| rs56334910  | T | -0.1025 |
| rs9945206   | T | 0.0372  |
| rs13381856  | C | -0.0304 |
| rs74703395  | T | 0.1042  |
| rs9652930   | A | 0.0382  |
| rs10083897  | T | 0.1004  |
| rs78370377  | A | -0.0781 |
| rs4491597   | C | -0.0643 |
| rs8099095   | C | -0.037  |
| rs8083251   | G | -0.0604 |
| rs6566998   | C | 0.031   |
| rs1840435   | A | 0.0312  |
| rs7231543   | C | -0.0283 |
| rs116852077 | A | 0.1548  |
| rs148562629 | C | 0.1296  |
| rs117156120 | T | 0.1731  |
| rs59605737  | A | 0.0818  |
| rs76519884  | C | 0.187   |
| rs115604006 | A | -0.0821 |
| rs73937185  | T | 0.1425  |
| rs72926908  | C | 0.114   |
| rs9966612   | A | 0.0315  |
| rs149647218 | G | 0.096   |
| rs78383951  | G | -0.1031 |
| rs113379555 | A | 0.1189  |
| rs75755349  | T | -0.203  |
| rs2156545   | T | -0.0289 |
| rs118060616 | A | -0.1641 |
| rs981243    | A | -0.2344 |
| rs76166410  | A | 0.1175  |
| rs8096378   | C | -0.0351 |
| rs117615156 | C | 0.1405  |

|             |   |         |
|-------------|---|---------|
| rs1145264   | G | 0.0622  |
| rs2218862   | A | -0.0315 |
| rs149749949 | T | -0.203  |
| rs113067518 | T | 0.1018  |
| rs8086971   | A | -0.0306 |
| rs57083541  | C | 0.0998  |
| rs79126399  | G | -0.1481 |
| rs72919252  | T | 0.1916  |
| rs117059709 | T | -0.1873 |
| rs12386116  | G | -0.0468 |
| rs147045247 | C | -0.1053 |
| rs144891539 | G | 0.0943  |
| rs72901360  | A | -0.0619 |
| rs11081903  | A | -0.0365 |
| rs78812590  | G | 0.1086  |
| rs74445753  | C | 0.169   |
| rs2714390   | G | 0.0334  |
| rs12957524  | G | 0.1555  |
| rs149192411 | A | 0.0806  |
| rs76599014  | G | 0.0846  |
| rs9950597   | C | -0.0329 |
| rs11665492  | T | 0.0449  |
| rs8087499   | C | 0.0358  |
| rs9960098   | C | 0.035   |
| rs3809975   | G | 0.1251  |
| rs9954047   | C | 0.035   |
| rs114352449 | A | 0.1092  |
| rs17668418  | C | 0.0949  |
| rs9957482   | C | 0.0293  |
| rs71358031  | A | 0.2026  |
| rs1849416   | T | -0.0586 |
| rs10853672  | T | -0.0315 |
| rs117013515 | A | -0.171  |
| rs6508259   | A | -0.0312 |
| rs151112626 | A | -0.234  |
| rs10083971  | T | 0.0309  |
| rs9951594   | A | -0.0664 |
| rs79800814  | A | -0.156  |
| rs72880550  | A | 0.1149  |
| rs8086056   | G | -0.1241 |
| rs139238018 | T | -0.0531 |
| rs76321471  | C | 0.1214  |
| rs73446118  | A | 0.1584  |
| rs7235760   | C | -0.0789 |
| rs12956578  | C | 0.0911  |
| rs4570960   | T | -0.0321 |
| rs7505365   | A | 0.0279  |

|             |   |         |
|-------------|---|---------|
| rs6506156   | C | 0.0346  |
| rs116862261 | G | 0.1092  |
| rs894798    | A | 0.0629  |
| rs4940563   | G | -0.0295 |
| rs75389569  | A | 0.1614  |
| rs144901445 | C | -0.1581 |
| rs116356087 | A | 0.0995  |
| rs149733010 | C | -0.196  |
| rs12964619  | A | -0.0315 |
| rs79020713  | T | 0.0551  |
| rs6506198   | A | 0.0748  |
| rs146261822 | T | -0.0637 |
| rs9960610   | A | -0.0368 |
| rs7229555   | A | 0.0386  |
| rs9960460   | C | -0.0495 |
| rs62081472  | G | 0.0953  |
| rs139608385 | C | -0.1169 |
| rs7238314   | G | -0.1162 |
| rs643449    | A | -0.0313 |
| rs78865262  | A | -0.0877 |
| rs12965830  | T | 0.0404  |
| rs80013888  | A | 0.1018  |
| rs138240715 | G | 0.1101  |
| rs112160401 | A | -0.1938 |
| rs7242331   | T | 0.1061  |
| rs11664773  | A | -0.0778 |
| rs77708948  | G | -0.1716 |
| rs117871518 | T | -0.0812 |
| rs16967156  | T | 0.0357  |
| rs11661728  | T | -0.1103 |
| rs148292044 | A | -0.1391 |
| rs150407812 | T | -0.1828 |
| rs72948039  | C | -0.0534 |
| rs4128813   | A | 0.0355  |
| rs2879266   | G | 0.0278  |
| rs7243789   | A | -0.0348 |
| rs1274283   | C | 0.0468  |
| rs357854    | C | -0.0384 |
| rs4940905   | A | -0.0289 |
| rs116580944 | T | -0.1255 |
| rs117347162 | G | 0.2264  |
| rs77597105  | A | -0.0695 |
| rs17603101  | C | -0.0309 |
| rs72918473  | C | -0.1589 |
| rs11083073  | G | 0.0348  |
| rs80042716  | T | -0.0989 |
| rs11661932  | A | 0.048   |

|             |   |         |
|-------------|---|---------|
| rs78218129  | A | -0.1304 |
| rs9950018   | G | 0.0483  |
| rs150145611 | A | -0.0954 |
| rs10503070  | A | 0.0345  |
| rs72963171  | G | -0.0696 |
| rs12964396  | T | 0.0951  |
| rs140860440 | T | 0.1496  |
| rs72993009  | A | -0.1273 |
| rs206595    | A | 0.0547  |
| rs12960996  | T | 0.0378  |
| rs12185461  | T | -0.0399 |
| rs7228029   | C | 0.0295  |
| rs117484159 | C | -0.1262 |
| rs525218    | A | 0.0279  |
| rs145957878 | C | -0.1686 |
| rs117206739 | T | 0.1344  |
| rs17720074  | C | 0.0395  |
| rs79314586  | G | 0.1209  |
| rs12963704  | C | 0.0701  |
| rs937831    | T | 0.0281  |
| rs9945916   | T | -0.0512 |
| rs113062405 | A | 0.1596  |
| rs78955682  | A | 0.0644  |
| rs61188878  | T | -0.0776 |
| rs647077    | C | 0.038   |
| rs149645489 | G | 0.2107  |
| rs34469824  | T | -0.1619 |
| rs9950867   | C | -0.0654 |
| rs4890304   | T | 0.0651  |
| rs76512812  | C | -0.2194 |
| rs1944331   | G | 0.0315  |
| rs3901403   | C | 0.0284  |
| rs74360615  | T | 0.1549  |
| rs112351264 | G | -0.1878 |
| rs144123555 | C | -0.1771 |
| rs4798469   | G | 0.0325  |
| rs645350    | T | 0.0371  |
| rs144059059 | C | 0.1689  |
| rs77673728  | A | 0.151   |
| rs80022578  | A | 0.1175  |
| rs74525370  | T | -0.2562 |
| rs1858126   | A | 0.0432  |
| rs1085995   | T | -0.0998 |
| rs9807727   | T | 0.0403  |
| rs117536080 | C | -0.15   |
| rs12458866  | G | -0.0711 |
| rs11663227  | A | 0.0489  |

|             |   |         |
|-------------|---|---------|
| rs1720840   | T | -0.0388 |
| rs79144617  | A | 0.109   |
| rs905443    | A | 0.0311  |
| rs4800995   | G | 0.0324  |
| rs8086612   | G | -0.0764 |
| rs58859854  | T | -0.0418 |
| rs72627232  | A | 0.0432  |
| rs4940769   | A | -0.1928 |
| rs72904132  | A | 0.2568  |
| rs146638171 | T | -0.0549 |
| rs4800706   | C | 0.0509  |
| rs7230732   | A | 0.0324  |
| rs140860481 | G | 0.158   |
| rs79452580  | G | 0.036   |
| rs75249711  | T | -0.0887 |
| rs72904779  | G | 0.098   |
| rs75217824  | C | 0.1345  |
| rs117049236 | T | 0.1284  |
| rs76715435  | C | 0.2025  |
| rs11873737  | T | 0.0435  |
| rs9966358   | A | 0.0352  |
| rs140827440 | C | 0.0699  |
| rs141988468 | T | 0.0984  |
| rs67133687  | A | 0.0382  |
| rs1964500   | C | 0.0342  |
| rs3218786   | C | 0.157   |
| rs60332932  | T | 0.0866  |
| rs9959654   | C | 0.1234  |
| rs4352141   | C | -0.0447 |
| rs9964530   | T | -0.0446 |
| rs12606485  | A | 0.0404  |
| rs7229603   | C | 0.0515  |
| rs10871595  | C | -0.1502 |
| rs62076808  | C | -0.1776 |
| rs7228644   | C | 0.032   |
| rs9948328   | T | 0.0335  |
| rs78797974  | G | 0.1077  |
| rs4627473   | G | -0.0556 |
| rs11664798  | G | 0.0505  |
| rs17463119  | A | 0.1124  |
| rs12956547  | A | 0.1029  |
| rs117127635 | T | 0.0751  |
| rs2509468   | A | 0.0407  |
| rs7240348   | G | -0.0269 |
| rs1221859   | G | -0.0427 |
| rs8085939   | T | 0.0316  |
| rs76722480  | A | -0.1285 |



|             |   |         |
|-------------|---|---------|
| rs112573533 | C | 0.2261  |
| rs10502292  | T | -0.0466 |
| rs55842833  | G | 0.0333  |
| rs9962283   | G | -0.0354 |
| rs1443600   | T | 0.2242  |
| rs1662823   | G | -0.0303 |
| rs12606893  | T | 0.0442  |
| rs112324361 | T | -0.1266 |
| rs112238106 | A | -0.0281 |
| rs147975836 | C | -0.2474 |
| rs1943999   | C | -0.0352 |
| rs117394130 | A | -0.0669 |
| rs79821597  | A | -0.2185 |
| rs11876004  | G | 0.2181  |
| rs117583076 | A | -0.0892 |
| rs72861296  | T | 0.1201  |
| rs34204914  | A | -0.0514 |
| rs7244087   | T | 0.0282  |
| rs144399500 | G | -0.0859 |
| rs78639572  | T | 0.1621  |
| rs62092199  | A | 0.0686  |
| rs146632500 | A | -0.1741 |
| rs117820766 | A | -0.1103 |
| rs12456560  | T | -0.0389 |
| rs9963891   | A | -0.1734 |
| rs8094398   | A | 0.2106  |
| rs118184408 | A | -0.1532 |
| rs116416992 | A | -0.0657 |
| rs80239011  | C | 0.0557  |
| rs117310268 | T | 0.0894  |
| rs34904350  | T | 0.0288  |
| rs10163808  | C | -0.0473 |
| rs111278782 | C | -0.0969 |
| rs76726049  | C | 0.1749  |
| rs636373    | G | 0.0431  |
| rs7233604   | C | -0.0885 |
| rs117445747 | T | 0.1652  |
| rs72913109  | T | -0.1097 |
| rs6506844   | A | 0.0664  |
| rs13313701  | T | 0.2018  |
| rs16973351  | C | 0.0978  |
| rs34618378  | T | -0.0445 |
| rs57604897  | T | -0.039  |
| rs76295473  | C | 0.0973  |
| rs8083970   | A | 0.0342  |
| rs80152962  | T | -0.1953 |
| rs117624401 | G | -0.1058 |

|             |   |         |
|-------------|---|---------|
| rs4800043   | C | -0.0432 |
| rs17446134  | A | 0.0977  |
| rs16956377  | C | 0.0555  |
| rs75875006  | C | -0.0514 |
| rs112367039 | A | 0.1397  |
| rs79525691  | A | -0.1062 |
| rs77482669  | A | -0.0367 |
| rs11662927  | C | -0.0324 |
| rs117563618 | A | 0.2176  |
| rs8099374   | C | -0.0382 |
| rs11081440  | T | -0.1466 |
| rs61557961  | T | -0.0361 |
| rs663774    | C | -0.0429 |
| rs72634395  | T | -0.0335 |
| rs12606777  | T | 0.0458  |
| rs1473279   | G | -0.0299 |
| rs1785249   | T | -0.0348 |
| rs80294015  | A | -0.1705 |
| rs72984789  | T | -0.1826 |
| rs118059339 | G | -0.0877 |
| rs9956990   | C | 0.0368  |
| rs35222995  | T | -0.0377 |
| rs117059809 | A | -0.1694 |
| rs113180835 | T | -0.088  |
| rs2897195   | T | 0.0267  |
| rs118172357 | T | -0.1755 |
| rs116871032 | C | -0.1189 |
| rs58188281  | A | 0.1779  |
| rs145396517 | A | 0.1235  |
| rs11083025  | T | -0.0548 |
| rs9807226   | T | 0.0291  |
| rs1974964   | G | -0.0452 |
| rs7505159   | A | 0.0426  |
| rs28814006  | T | 0.1464  |
| rs148798732 | A | 0.1075  |
| rs117548743 | C | -0.1017 |
| rs71362717  | T | 0.0831  |
| rs341233    | T | -0.0279 |
| rs55864896  | G | 0.05    |
| rs72939664  | T | 0.0966  |
| rs12969937  | A | 0.0339  |
| rs17236101  | A | 0.0282  |
| rs62096559  | A | 0.087   |
| rs990049    | C | -0.0342 |
| rs2111564   | G | 0.0266  |
| rs8094591   | T | -0.0406 |
| rs75958468  | T | -0.22   |

|             |   |         |
|-------------|---|---------|
| rs34377847  | G | -0.0337 |
| rs1940680   | T | -0.0894 |
| rs111770869 | A | -0.0921 |
| rs112196529 | G | -0.0544 |
| rs62097389  | T | -0.0554 |
| rs8097275   | C | 0.038   |
| rs78561910  | C | 0.077   |
| rs28605370  | A | 0.0473  |
| rs7230060   | A | 0.0276  |
| rs80230832  | A | -0.1423 |
| rs8087363   | T | -0.0343 |
| rs1812125   | G | 0.0319  |
| rs115727444 | T | -0.2268 |
| rs140707223 | T | 0.1315  |
| rs117348899 | C | 0.1961  |
| rs72896553  | T | 0.1904  |
| rs62086405  | G | 0.0954  |
| rs111614269 | A | -0.2008 |
| rs1138828   | A | -0.0467 |
| rs1443604   | A | 0.0363  |
| rs1144087   | G | -0.154  |
| rs8095804   | G | 0.0653  |
| rs62082863  | A | 0.0325  |
| rs75258275  | C | 0.1476  |
| rs1037534   | G | 0.0319  |
| rs74526734  | G | -0.1385 |
| rs12955986  | G | -0.0265 |
| rs12458236  | T | 0.0642  |
| rs75495408  | G | -0.1898 |
| rs79782479  | A | -0.0654 |
| rs62110869  | G | -0.0528 |
| rs17400671  | A | -0.0827 |
| rs79563117  | A | 0.0772  |
| rs75941710  | C | 0.0328  |
| rs73944365  | T | -0.0486 |
| rs58194965  | T | -0.1446 |
| rs117121188 | A | -0.1146 |
| rs12454650  | C | -0.0302 |
| rs112470907 | T | 0.1325  |
| rs2860295   | T | 0.0612  |
| rs4145170   | G | -0.0302 |
| rs2040215   | T | -0.0271 |
| rs78554423  | C | 0.1041  |
| rs12957795  | T | 0.0524  |
| rs8090126   | C | 0.0336  |
| rs4890891   | C | -0.0284 |
| rs78613330  | G | 0.2102  |

|             |   |         |
|-------------|---|---------|
| rs79027793  | C | 0.0578  |
| rs77088650  | C | -0.0814 |
| rs11564380  | A | 0.0295  |
| rs141839644 | A | -0.204  |
| rs11876297  | T | 0.0483  |
| rs489310    | G | 0.043   |
| rs72941506  | A | -0.0574 |
| rs2040225   | G | 0.0436  |
| rs2000698   | A | 0.0265  |
| rs112892299 | C | -0.1361 |
| rs34499684  | T | 0.0851  |
| rs72918830  | G | 0.0553  |
| rs78736356  | A | 0.0717  |
| rs35904552  | C | 0.087   |
| rs8091855   | T | -0.0535 |
| rs113721498 | G | -0.2615 |
| rs12458915  | C | -0.1481 |
| rs12605682  | A | 0.0767  |
| rs6567246   | G | 0.0269  |
| rs4485452   | G | -0.0664 |
| rs114789545 | C | 0.0921  |
| rs12327041  | G | -0.0864 |
| rs117504727 | A | -0.1546 |
| rs9959134   | T | 0.0277  |
| rs9956234   | A | 0.0903  |
| rs948457    | A | -0.0335 |
| rs12969051  | A | -0.0488 |
| rs17752881  | G | -0.0331 |
| rs7350994   | G | 0.05    |
| rs1344235   | G | 0.0267  |
| rs11875289  | G | -0.0558 |
| rs12957839  | C | 0.0761  |
| rs115953658 | C | 0.2175  |
| rs113777805 | C | 0.1949  |
| rs76386391  | C | 0.157   |
| rs7229866   | A | -0.1155 |
| rs566309    | T | 0.0477  |
| rs78426686  | C | 0.089   |
| rs9958110   | T | 0.034   |
| rs2712745   | G | 0.0508  |
| rs79156064  | A | 0.0525  |
| rs12150853  | C | -0.103  |
| rs9951080   | T | 0.0406  |
| rs12965382  | T | 0.0291  |
| rs139118181 | G | -0.1542 |
| rs73001246  | G | 0.0524  |
| rs10164026  | C | -0.0497 |

|             |   |         |
|-------------|---|---------|
| rs4941161   | T | -0.0958 |
| rs12458990  | T | 0.0307  |
| rs7243316   | G | 0.0273  |
| rs62095984  | C | 0.1882  |
| rs117677512 | T | 0.1476  |
| rs4113942   | A | 0.0378  |
| rs1056088   | C | 0.0289  |
| rs79789755  | G | 0.0821  |
| rs115673375 | T | -0.2086 |
| rs1244858   | C | -0.0581 |
| rs2045442   | C | 0.0315  |
| rs72994922  | A | 0.1681  |
| rs11875257  | C | 0.0295  |
| rs78884139  | C | -0.178  |
| rs728714    | A | 0.0327  |
| rs62083978  | C | 0.0703  |
| rs206630    | A | -0.0299 |
| rs627966    | A | 0.0268  |
| rs117089031 | C | -0.0626 |
| rs140597587 | T | 0.1216  |
| rs4890562   | T | 0.0587  |
| rs1529533   | A | -0.0346 |
| rs77932321  | A | -0.0806 |
| rs41306968  | A | -0.0661 |
| rs117935729 | T | -0.1013 |
| rs403381    | A | 0.0463  |
| rs77455191  | C | 0.0923  |
| rs35763378  | C | -0.0627 |
| rs8088240   | G | -0.0557 |
| rs78409679  | C | -0.0625 |
| rs17057745  | T | 0.0798  |
| rs140093394 | T | -0.1215 |
| rs78243859  | C | 0.1595  |
| rs8092036   | C | 0.0386  |
| rs79370124  | G | -0.0665 |
| rs4435341   | T | 0.0442  |
| rs4287646   | C | -0.0411 |
| rs4245299   | C | -0.0385 |
| rs56064470  | A | 0.0974  |
| rs17070100  | C | 0.0394  |
| rs18485     | A | 0.0282  |
| rs117012943 | T | 0.1955  |
| rs1618268   | A | 0.1181  |
| rs626187    | G | 0.0334  |
| rs112713428 | T | -0.1185 |
| rs117838329 | T | -0.1627 |
| rs139451499 | G | 0.0908  |

|             |   |         |
|-------------|---|---------|
| rs8084762   | G | 0.036   |
| rs1617037   | C | -0.0321 |
| rs12953739  | C | -0.0448 |
| rs56212809  | T | 0.0751  |
| rs76514600  | G | -0.0643 |
| rs74679512  | A | -0.0913 |
| rs4442909   | G | 0.0513  |
| rs77951918  | T | 0.1529  |
| rs11662661  | C | -0.0814 |
| rs948717    | G | 0.0331  |
| rs76603237  | T | 0.1466  |
| rs3897006   | G | 0.0329  |
| rs147178662 | C | -0.0899 |
| rs1786747   | G | -0.0254 |
| rs139117027 | G | 0.1281  |
| rs10514090  | T | -0.044  |
| rs74477938  | T | -0.0873 |
| rs117104623 | G | 0.1908  |
| rs4129657   | C | -0.0276 |
| rs74664743  | T | -0.0763 |
| rs8091142   | T | -0.0321 |
| rs17719278  | G | 0.0555  |
| rs2112059   | T | 0.0452  |
| rs139863524 | C | 0.1496  |
| rs1940636   | A | 0.0363  |
| rs17717763  | C | 0.0322  |
| rs111381241 | A | 0.1126  |
| rs116845744 | C | -0.1369 |
| rs117026490 | A | -0.0896 |
| rs7241786   | C | 0.0337  |
| rs7226986   | A | -0.0289 |
| rs72642417  | T | 0.0433  |
| rs144588802 | T | -0.0728 |
| rs117388016 | T | -0.1157 |
| rs34368689  | G | 0.1643  |
| rs113163956 | A | -0.1162 |
| rs72876075  | A | 0.0357  |
| rs8086297   | T | 0.0274  |
| rs111479911 | C | -0.0621 |
| rs62097347  | C | 0.0369  |
| rs56305630  | A | -0.0332 |
| rs76863384  | A | 0.1663  |
| rs12962067  | C | 0.1174  |
| rs145690179 | T | -0.0836 |
| rs78140969  | A | 0.118   |
| rs1788131   | A | -0.0603 |
| rs79005378  | T | 0.0873  |

|             |   |         |
|-------------|---|---------|
| rs80334831  | C | -0.1499 |
| rs2000644   | C | 0.028   |
| rs8089491   | A | 0.0981  |
| rs76736804  | G | -0.1348 |
| rs62085477  | C | -0.0388 |
| rs7237760   | T | -0.0492 |
| rs72986397  | T | 0.0821  |
| rs2715281   | G | 0.0263  |
| rs72982557  | C | -0.1857 |
| rs28415166  | G | -0.0312 |
| rs144744355 | C | -0.1506 |
| rs113172689 | A | 0.1083  |
| rs72944660  | T | 0.0411  |
| rs28454850  | C | -0.1803 |
| rs592305    | G | -0.0326 |
| rs113426127 | A | 0.0495  |
| rs3851151   | T | -0.0265 |
| rs12607802  | T | -0.0266 |
| rs2615613   | T | -0.0529 |
| rs9652983   | G | 0.121   |
| rs56811952  | T | 0.031   |
| rs34060927  | A | -0.075  |
| rs12456589  | C | -0.0432 |
| rs55890060  | A | 0.0489  |
| rs78126055  | A | -0.1841 |
| rs62080106  | C | 0.1184  |
| rs1662820   | A | -0.0277 |
| rs11664289  | A | -0.034  |
| rs206491    | G | -0.0262 |
| rs58198803  | C | 0.0423  |
| rs144092233 | G | 0.1304  |
| rs145827079 | C | -0.0973 |
| rs9952469   | T | 0.0296  |
| rs16973076  | G | 0.0269  |
| rs12457398  | C | 0.0434  |
| rs147743749 | A | 0.1304  |
| rs143233961 | A | -0.1926 |
| rs117719395 | A | -0.1305 |
| rs1786059   | A | -0.0279 |
| rs72909772  | A | 0.056   |
| rs118143823 | C | 0.1529  |
| rs71353381  | C | 0.0342  |
| rs4798658   | C | 0.0289  |
| rs66586228  | G | 0.0701  |
| rs77097141  | G | 0.1456  |
| rs12454483  | G | -0.0345 |
| rs1943969   | A | -0.0279 |

|             |   |         |
|-------------|---|---------|
| rs487202    | C | 0.0258  |
| rs11664566  | T | 0.0383  |
| rs34933763  | A | -0.0779 |
| rs7227230   | C | -0.0277 |
| rs352133    | G | -0.0323 |
| rs6565904   | T | 0.0299  |
| rs725068    | C | -0.0967 |
| rs17281729  | T | 0.1045  |
| rs118013756 | C | -0.077  |
| rs62098602  | A | -0.1132 |
| rs142695151 | C | 0.1844  |
| rs16947335  | A | -0.1302 |
| rs75129028  | C | -0.2138 |
| rs7230503   | C | -0.0352 |
| rs515874    | T | -0.0327 |
| rs2098484   | G | -0.0338 |
| rs79083800  | C | 0.1511  |
| rs35275842  | T | -0.0273 |
| rs34055304  | G | 0.0791  |
| rs111362831 | G | 0.1612  |
| rs55778361  | A | -0.0793 |
| rs11874426  | T | 0.0277  |
| rs7232516   | A | 0.0377  |
| rs16970563  | T | 0.0418  |
| rs608127    | T | -0.0283 |
| rs4940703   | A | 0.0301  |
| rs77956049  | A | 0.1636  |
| rs12604386  | A | -0.0452 |
| rs111836770 | A | -0.17   |
| rs1791264   | G | -0.0352 |
| rs7233512   | A | -0.0282 |
| rs1861805   | C | 0.0345  |
| rs9304011   | G | -0.0328 |
| rs78625069  | T | -0.129  |
| rs117703875 | C | -0.1123 |
| rs113253475 | C | -0.1485 |
| rs9748638   | C | 0.0645  |
| rs118037709 | A | -0.2398 |
| rs118008231 | A | -0.1188 |
| rs112374372 | G | 0.1123  |
| rs2156334   | C | -0.0399 |
| rs78648089  | A | 0.1123  |
| rs749676    | A | 0.0262  |
| rs72909614  | G | -0.0466 |
| rs80231184  | A | 0.0514  |
| rs75365020  | G | -0.1878 |
| rs117756297 | A | 0.0707  |



|             |   |         |
|-------------|---|---------|
| rs585808    | C | 0.0324  |
| rs62090607  | C | 0.0441  |
| rs11660554  | A | 0.0284  |
| rs140527040 | A | 0.0853  |
| rs149311341 | T | -0.2608 |
| rs635089    | G | -0.0702 |
| rs112729431 | A | -0.0381 |
| rs4073568   | A | 0.0315  |
| rs78699989  | G | 0.0749  |
| rs77408485  | C | 0.1363  |
| rs118051762 | A | -0.0686 |
| rs1809398   | A | -0.0553 |
| rs7228095   | A | 0.0286  |
| rs617206    | T | -0.0262 |
| rs1244822   | T | -0.0651 |
| rs76385091  | C | -0.131  |
| rs4890890   | T | -0.0317 |
| rs2902766   | G | 0.0411  |
| rs10871769  | G | -0.0269 |
| rs17696396  | T | 0.1676  |
| rs71371771  | T | -0.047  |
| rs677737    | A | -0.0328 |
| rs1546413   | G | -0.0312 |
| rs1231267   | T | -0.029  |
| rs150417539 | C | 0.1576  |
| rs2046241   | A | 0.0258  |
| rs12969046  | G | -0.0329 |
| rs117127566 | A | 0.1051  |
| rs72947553  | A | 0.0463  |
| rs62102110  | T | -0.1456 |
| rs74565506  | A | 0.1955  |
| rs1866733   | A | 0.0355  |
| rs614297    | C | -0.0302 |
| rs2625345   | A | 0.112   |
| rs117372777 | C | 0.1417  |
| rs78949788  | T | 0.193   |
| rs11081025  | G | -0.0269 |
| rs4798043   | T | 0.0314  |
| rs9748248   | T | 0.1139  |
| rs62094102  | C | -0.0324 |
| rs17755403  | T | 0.0569  |
| rs565822    | G | -0.0467 |
| rs117108484 | A | 0.1244  |
| rs7244872   | G | -0.1316 |
| rs540570    | T | 0.1274  |
| rs9945515   | C | -0.0251 |
| rs58832029  | A | -0.0301 |

|             |   |         |
|-------------|---|---------|
| rs6505583   | G | 0.0482  |
| rs77431559  | T | -0.123  |
| rs145653104 | A | -0.2341 |
| rs1239966   | C | -0.0329 |
| rs9966889   | A | 0.0254  |
| rs17263435  | A | 0.0556  |
| rs8088617   | G | 0.0338  |
| rs11664861  | A | -0.0268 |
| rs10469072  | G | -0.0988 |
| rs4798089   | A | -0.0276 |
| rs79928125  | G | 0.1071  |
| rs1982285   | T | 0.083   |
| rs8097691   | G | -0.0256 |
| rs141000406 | G | 0.1722  |
| rs11661837  | G | -0.0419 |
| rs4485466   | G | 0.0814  |
| rs9965712   | C | 0.044   |
| rs9953827   | A | -0.0317 |
| rs147927975 | T | 0.1648  |
| rs150022358 | T | -0.1165 |
| rs56299055  | T | -0.0269 |
| rs113523801 | G | 0.1808  |
| rs3845247   | A | -0.0306 |
| rs7227820   | C | 0.0323  |
| rs6567350   | A | -0.0288 |
| rs78670536  | T | 0.1446  |
| rs9951788   | A | -0.0487 |
| rs57007173  | C | -0.083  |
| rs10853278  | T | 0.0416  |
| rs10502334  | A | 0.0317  |
| rs113230657 | G | -0.1417 |
| rs2176319   | G | -0.1526 |
| rs75983905  | T | 0.0658  |
| rs1942458   | C | 0.0789  |
| rs79125053  | A | -0.1351 |
| rs117752879 | C | 0.1532  |
| rs148682060 | G | 0.1007  |
| rs7239688   | T | -0.0433 |
| rs59740748  | T | 0.0346  |
| rs12969125  | C | 0.0889  |
| rs1789071   | A | 0.0352  |
| rs80292279  | A | -0.0761 |
| rs145846491 | G | -0.1569 |
| rs1787827   | A | 0.0597  |
| rs2585710   | T | -0.0369 |
| rs117635615 | T | 0.171   |
| rs117977808 | T | 0.0948  |

|             |   |         |
|-------------|---|---------|
| rs45623738  | T | -0.1171 |
| rs80188549  | T | -0.2579 |
| rs73488014  | G | 0.048   |
| rs118172414 | A | 0.0956  |
| rs16947470  | C | 0.1745  |
| rs79097526  | C | 0.1045  |
| rs12456065  | T | 0.0301  |
| rs75093098  | T | -0.0513 |
| rs117504245 | A | -0.2031 |
| rs79265248  | T | 0.073   |
| rs56247434  | A | -0.0618 |
| rs72979392  | T | -0.1071 |
| rs75898678  | A | -0.0704 |
| rs9961307   | C | -0.1503 |
| rs117479004 | A | -0.0933 |
| rs7228419   | T | -0.0477 |
| rs324325    | T | -0.0406 |
| rs57657125  | C | 0.0451  |
| rs8098410   | T | -0.0781 |
| rs16939801  | T | 0.0396  |
| rs118179906 | A | -0.1691 |
| rs117627257 | T | -0.1067 |
| rs9955441   | C | 0.0894  |
| rs12457271  | G | 0.0471  |
| rs146955472 | G | -0.1667 |
| rs8093368   | G | -0.031  |
| rs12963432  | T | 0.0252  |
| rs12150778  | G | 0.0405  |
| rs75303010  | C | 0.065   |
| rs72936352  | C | 0.0644  |
| rs78127447  | A | 0.0776  |
| rs4366777   | C | -0.031  |
| rs78804977  | G | -0.0903 |
| rs8083545   | G | 0.0417  |
| rs6507730   | G | 0.0249  |
| rs4940621   | C | 0.0318  |
| rs17067835  | G | -0.1132 |
| rs62083252  | A | 0.0505  |
| rs6506666   | G | -0.0399 |
| rs117278980 | T | -0.0981 |
| rs117605170 | G | 0.1092  |
| rs78161885  | C | -0.1684 |
| rs80192690  | A | 0.2027  |
| rs80037169  | T | -0.0769 |
| rs62078271  | G | -0.0348 |
| rs72957395  | A | -0.1305 |
| rs34253559  | C | 0.0773  |

|             |   |         |
|-------------|---|---------|
| rs17735417  | G | -0.0686 |
| rs72907853  | G | 0.0926  |
| rs149038976 | A | 0.1058  |
| rs117426264 | G | 0.1007  |
| rs3866988   | T | 0.0272  |
| rs118025521 | G | 0.1145  |
| rs55825524  | C | -0.1045 |
| rs151187951 | T | -0.0832 |
| rs9948562   | T | -0.0504 |
| rs74858991  | T | -0.083  |
| rs78237863  | A | 0.2313  |
| rs77967634  | T | -0.1055 |
| rs79422320  | C | -0.0516 |
| rs2284140   | T | 0.0296  |
| rs2043961   | G | 0.0302  |
| rs999330    | T | -0.031  |
| rs117052653 | T | -0.1602 |
| rs73968510  | T | 0.0453  |
| rs145400829 | G | 0.1508  |
| rs148232247 | A | -0.1845 |
| rs7244511   | A | -0.0778 |
| rs77152396  | A | -0.1019 |
| rs146680902 | G | 0.1702  |
| rs12373268  | T | -0.1255 |
| rs17462421  | T | -0.2265 |
| rs684079    | T | 0.131   |
| rs1787922   | C | -0.0389 |
| rs141663748 | A | -0.1917 |
| rs4633812   | A | -0.0409 |
| rs514253    | T | 0.0261  |
| rs78683500  | T | -0.1339 |
| rs73942642  | G | 0.0665  |
| rs35784456  | A | -0.0546 |
| rs55973677  | G | -0.0921 |
| rs76879959  | G | -0.1305 |
| rs17701204  | C | -0.0769 |
| rs78797217  | G | 0.1608  |
| rs17195443  | C | 0.0461  |
| rs114249643 | A | 0.1334  |
| rs117605782 | A | 0.1042  |
| rs141198578 | A | 0.12    |
| rs138311663 | A | 0.1137  |
| rs150594165 | G | 0.1187  |
| rs75238704  | G | -0.1386 |
| rs1426306   | A | -0.0293 |
| rs11080972  | T | -0.0321 |
| rs76484874  | G | 0.0458  |

|             |   |         |
|-------------|---|---------|
| rs16978345  | G | -0.0459 |
| rs1790852   | C | 0.0335  |
| rs11081759  | C | -0.0284 |
| rs75032904  | C | 0.1975  |
| rs117954097 | T | 0.0436  |
| rs8093521   | G | -0.0564 |
| rs71362074  | T | 0.0333  |
| rs4940195   | C | -0.0261 |
| rs8096419   | C | -0.0421 |
| rs111977833 | C | 0.0831  |
| rs11082419  | A | -0.0296 |
| rs628229    | A | 0.0257  |
| rs117638808 | C | 0.0958  |
| rs11875977  | T | 0.0386  |
| rs112244584 | A | -0.074  |
| rs80227146  | G | -0.1531 |
| rs1349386   | T | -0.0405 |
| rs8099410   | G | 0.0413  |
| rs57765889  | G | 0.0826  |
| rs1112273   | T | -0.0331 |
| rs117645595 | T | -0.0991 |
| rs77573904  | A | 0.0445  |
| rs12966212  | T | -0.0487 |
| rs72902882  | C | 0.1872  |
| rs4465662   | A | 0.1183  |
| rs7234924   | C | -0.0316 |
| rs8097909   | G | -0.0652 |
| rs117520022 | A | -0.1237 |
| rs62076878  | G | -0.1148 |
| rs45608743  | A | -0.0711 |
| rs76039048  | A | 0.1487  |
| rs78622964  | T | 0.0942  |
| rs7233480   | A | 0.0296  |
| rs4627476   | T | 0.0612  |
| rs325369    | G | 0.0493  |
| rs8083461   | A | -0.0826 |
| rs8098353   | A | -0.0423 |
| rs75840791  | C | 0.1757  |
| rs271469    | T | 0.0615  |
| rs117911676 | T | -0.0991 |
| rs10502357  | A | 0.0358  |
| rs34705576  | T | 0.1632  |
| rs421544    | G | 0.0248  |
| rs12963756  | A | -0.037  |
| rs17462504  | T | -0.0482 |
| rs2684857   | A | -0.0258 |
| rs66920840  | A | -0.0444 |

|             |   |         |
|-------------|---|---------|
| rs113988795 | G | 0.1079  |
| rs7237863   | G | 0.0286  |
| rs35348163  | G | -0.0259 |
| rs41378153  | T | 0.1026  |
| rs34117399  | A | -0.0762 |
| rs1791290   | T | 0.0319  |
| rs16962825  | T | 0.0504  |
| rs4583327   | A | 0.1858  |
| rs8091664   | G | -0.0397 |
| rs878912    | T | 0.0444  |
| rs11152006  | C | 0.03    |
| rs117896399 | G | -0.1963 |
| rs357889    | C | 0.0309  |
| rs9944886   | G | 0.0265  |
| rs57621979  | G | 0.0672  |
| rs56201851  | C | 0.1706  |
| rs12457419  | T | 0.0568  |
| rs1981355   | A | 0.0245  |
| rs11873913  | T | 0.0407  |
| rs9319835   | A | 0.0271  |
| rs117694679 | A | 0.0496  |
| rs11664567  | T | -0.0455 |
| rs238540    | G | -0.0279 |
| rs12969615  | C | 0.0488  |
| rs72977369  | C | 0.079   |
| rs12605083  | G | 0.0472  |
| rs117859931 | G | 0.202   |
| rs1893623   | C | 0.0323  |
| rs73379594  | G | 0.155   |
| rs138388421 | A | 0.05    |
| rs79108885  | A | -0.1222 |
| rs520618    | T | 0.0812  |
| rs79132766  | G | 0.062   |
| rs56748350  | C | -0.0302 |
| rs62096906  | G | -0.1067 |
| rs118093646 | T | -0.0813 |
| rs11081382  | C | -0.0359 |
| rs60092669  | A | -0.0878 |
| rs17414126  | C | -0.0265 |
| rs8087073   | C | 0.1228  |
| rs148675840 | T | 0.1326  |
| rs478582    | C | -0.0249 |
| rs139492069 | A | 0.1366  |
| rs150615947 | G | 0.162   |
| rs79828856  | A | 0.0486  |
| rs138364637 | T | 0.1145  |
| rs9953344   | T | 0.0661  |

|             |   |         |
|-------------|---|---------|
| rs11659606  | C | 0.0371  |
| rs117620465 | C | 0.1495  |
| rs12458297  | A | 0.1651  |
| rs1530390   | T | 0.0332  |
| rs72927361  | T | -0.1919 |
| rs112507245 | T | 0.0615  |
| rs76067468  | G | 0.1268  |
| rs2732230   | T | -0.0292 |
| rs6506105   | T | 0.1012  |
| rs76057677  | T | 0.1161  |
| rs72931881  | T | 0.0972  |
| rs9959226   | G | -0.0903 |
| rs149027736 | A | 0.1669  |
| rs9953092   | T | 0.0583  |
| rs12956417  | A | 0.0767  |
| rs11150956  | T | -0.0261 |
| rs74947695  | C | -0.2213 |
| rs145950617 | T | 0.1252  |
| rs7237098   | T | 0.0877  |
| rs145335045 | G | 0.0909  |
| rs12960988  | C | -0.0281 |
| rs502951    | G | 0.0384  |
| rs644694    | A | 0.0498  |
| rs77350617  | T | 0.133   |
| rs80257410  | A | -0.0441 |
| rs9964959   | G | 0.0261  |
| rs17669125  | A | 0.0932  |
| rs17566463  | G | -0.0423 |
| rs118033520 | A | 0.0846  |
| rs9807598   | A | 0.0284  |
| rs8097715   | A | -0.0534 |
| rs9956021   | A | -0.029  |
| rs11664751  | C | 0.0345  |
| rs206592    | C | -0.0283 |
| rs7232992   | T | 0.0287  |
| rs117356208 | C | 0.1272  |
| rs62091913  | T | 0.028   |
| rs145576285 | A | 0.0858  |
| rs11080456  | T | 0.0353  |
| rs34632975  | C | 0.0781  |
| rs12457911  | T | 0.0474  |
| rs149465    | T | 0.09    |
| rs17659822  | C | -0.0252 |
| rs148329134 | C | 0.107   |
| rs12967469  | G | -0.0259 |
| rs8095638   | G | -0.0707 |
| rs139409329 | A | -0.0825 |

|             |   |         |
|-------------|---|---------|
| rs144706428 | A | -0.1477 |
| rs7228266   | A | -0.0259 |
| rs17067762  | C | -0.0845 |
| rs1460281   | T | 0.0356  |
| rs11659485  | C | -0.0363 |
| rs139214593 | A | -0.0504 |
| rs34732739  | A | -0.0393 |
| rs118148419 | T | -0.0851 |
| rs4539670   | G | -0.0602 |
| rs8089116   | T | -0.0886 |
| rs150537469 | T | 0.0795  |
| rs72949726  | T | 0.0878  |
| rs147013247 | G | -0.0751 |
| rs34395492  | T | 0.0779  |
| rs1521421   | A | 0.0395  |
| rs2289630   | A | 0.055   |
| rs16940502  | G | 0.0865  |
| rs2615003   | C | 0.024   |
| rs62099770  | T | -0.0809 |
| rs8090286   | T | -0.0281 |
| rs28528836  | T | 0.0644  |
| rs8099076   | A | -0.0252 |
| rs72886804  | C | 0.1258  |
| rs11660785  | A | 0.0351  |
| rs8098004   | G | -0.0467 |
| rs111951855 | T | 0.1739  |
| rs9960620   | T | -0.0256 |
| rs74813455  | T | -0.1158 |
| rs138495492 | A | 0.1116  |
| rs1291181   | T | 0.0303  |
| rs11665643  | T | 0.0283  |
| rs78537788  | G | 0.054   |
| rs72885970  | C | 0.0462  |
| rs62087348  | A | -0.0642 |
| rs72958049  | C | 0.0351  |
| rs76009439  | A | -0.1414 |
| rs62076848  | G | 0.1784  |
| rs16956224  | A | 0.092   |
| rs72931539  | G | 0.0724  |
| rs147424657 | G | 0.0912  |
| rs144864949 | C | 0.112   |
| rs34878736  | A | 0.0248  |
| rs72928796  | G | -0.0408 |
| rs10469093  | G | -0.0405 |
| rs77617826  | G | 0.0617  |
| rs587742    | A | -0.0283 |
| rs12967904  | G | -0.097  |



|             |   |         |
|-------------|---|---------|
| rs141974266 | C | -0.1326 |
| rs9957425   | C | 0.0284  |
| rs9961965   | C | 0.0254  |
| rs2341747   | C | 0.0251  |
| rs568365    | C | -0.0355 |
| rs1662289   | C | -0.0896 |
| rs142373070 | C | 0.042   |
| rs7231729   | T | 0.0763  |
| rs56316171  | C | 0.1494  |
| rs7229384   | A | 0.0281  |
| rs80275686  | T | 0.1883  |
| rs78609763  | C | 0.0976  |
| rs17743292  | C | -0.086  |
| rs2160913   | C | 0.0282  |
| rs148932040 | G | -0.1401 |
| rs138561968 | C | 0.0749  |
| rs335921    | G | 0.0237  |
| rs1125113   | T | 0.0353  |
| rs9966499   | C | 0.0247  |
| rs17595959  | C | -0.0384 |
| rs1818148   | T | 0.0379  |
| rs149317432 | T | 0.1695  |
| rs8094360   | A | 0.0389  |
| rs77735572  | G | -0.1243 |
| rs9956685   | A | 0.0889  |
| rs57144231  | C | 0.0367  |
| rs72963578  | A | -0.0381 |
| rs58191032  | A | 0.0442  |
| rs9948821   | A | 0.0292  |
| rs117637007 | T | 0.0497  |
| rs4986224   | G | -0.0275 |
| rs80215169  | T | -0.0616 |
| rs12967381  | A | -0.0649 |
| rs11876970  | C | 0.0271  |
| rs8096242   | A | -0.0315 |
| rs77185859  | G | 0.0606  |
| rs7234181   | C | 0.0326  |
| rs117761481 | C | 0.0762  |
| rs147531993 | G | 0.0841  |
| rs145899337 | T | -0.1689 |
| rs55699115  | A | 0.1575  |
| rs73939855  | A | 0.0698  |
| rs1424413   | A | 0.0266  |
| rs74377072  | C | -0.0963 |
| rs1316513   | C | 0.0366  |
| rs4798716   | C | -0.0348 |
| rs1573361   | G | -0.1388 |

|             |   |         |
|-------------|---|---------|
| rs117328372 | C | -0.13   |
| rs16977703  | A | 0.0542  |
| rs8089980   | T | 0.0243  |
| rs7232502   | T | 0.0251  |
| rs206531    | T | -0.0262 |
| rs17755337  | G | -0.0854 |
| rs75972613  | T | -0.1433 |
| rs7245124   | C | -0.0314 |
| rs1941184   | C | 0.0261  |
| rs588895    | T | -0.1613 |
| rs116067668 | G | 0.1346  |
| rs55869240  | A | -0.0496 |
| rs111641747 | C | 0.11    |
| rs146868544 | T | 0.1487  |
| rs73966505  | T | -0.1977 |
| rs72629871  | T | 0.0916  |
| rs1505999   | T | -0.034  |
| rs117041134 | C | 0.1074  |
| rs35366426  | A | -0.0305 |
| rs55762828  | A | 0.1226  |
| rs12605044  | G | 0.031   |
| rs12959463  | C | -0.0262 |
| rs7244648   | G | 0.0246  |
| rs62082828  | C | -0.1245 |
| rs145799622 | A | -0.0667 |
| rs6506363   | C | -0.0253 |
| rs11665124  | A | -0.0461 |
| rs118004404 | C | 0.0951  |
| rs12962772  | A | -0.0347 |
| rs76636134  | T | -0.0959 |
| rs138066862 | C | -0.1154 |
| rs144286063 | C | 0.1398  |
| rs12326199  | G | 0.0376  |
| rs12960757  | A | -0.0272 |
| rs66726814  | G | 0.0382  |
| rs111543530 | T | 0.0972  |
| rs2703167   | A | 0.0401  |
| rs9964575   | T | 0.0465  |
| rs79814770  | C | -0.0936 |
| rs12970127  | G | 0.104   |
| rs74887344  | T | -0.0847 |
| rs72956868  | A | 0.0317  |
| rs118055291 | A | -0.1481 |
| rs57401351  | G | -0.0464 |
| rs7239888   | T | -0.0553 |
| rs9951142   | C | 0.1014  |
| rs72947373  | A | 0.064   |

|             |   |         |
|-------------|---|---------|
| rs112910045 | A | -0.0667 |
| rs62101788  | T | 0.0538  |
| rs117380113 | T | -0.1125 |
| rs694006    | A | 0.0251  |
| rs12185447  | C | -0.0952 |
| rs9948951   | A | 0.0309  |
| rs57810236  | A | 0.1024  |
| rs7233295   | T | 0.0266  |
| rs1942720   | T | -0.0323 |
| rs78008841  | T | -0.1106 |
| rs149259132 | T | -0.1099 |
| rs140654665 | G | 0.0533  |
| rs213085    | A | 0.0371  |
| rs2115706   | G | 0.0315  |
| rs12966050  | G | -0.0719 |
| rs80002967  | G | 0.1222  |
| rs10438879  | A | 0.0258  |
| rs118093870 | G | 0.1645  |
| rs9947511   | T | 0.0243  |
| rs11151175  | C | -0.0765 |
| rs1284056   | T | 0.0328  |
| rs7243509   | T | 0.0343  |
| rs77487584  | A | 0.0802  |
| rs137977908 | A | 0.1329  |
| rs2298778   | T | -0.0235 |
| rs114146122 | G | -0.158  |
| rs34693543  | A | -0.046  |
| rs28665989  | A | -0.0365 |
| rs78741579  | G | 0.057   |
| rs71358418  | G | -0.0859 |
| rs118129791 | C | 0.0935  |
| rs111413989 | C | -0.1439 |
| rs62103375  | A | -0.0278 |
| rs138309069 | A | -0.1647 |
| rs79467233  | G | 0.1374  |
| rs12458088  | T | -0.0734 |
| rs7237801   | G | 0.0295  |
| rs12962428  | T | 0.1586  |
| rs150268070 | G | -0.1684 |
| rs111745392 | T | 0.0483  |
| rs143342913 | T | 0.1972  |
| rs62083885  | A | -0.0653 |
| rs11151061  | A | 0.0441  |
| rs7242954   | C | -0.0366 |
| rs73399060  | G | -0.0519 |
| rs2033103   | T | 0.0241  |
| rs67332958  | A | 0.0671  |

|             |   |         |
|-------------|---|---------|
| rs4799198   | C | -0.0256 |
| rs4798432   | C | 0.0424  |
| rs479141    | T | 0.1065  |
| rs3893676   | C | -0.0424 |
| rs17619782  | G | -0.0792 |
| rs6565854   | G | 0.0266  |
| rs148882323 | A | 0.1715  |
| rs559391    | T | 0.0403  |
| rs77450211  | T | 0.1311  |
| rs79194717  | C | -0.2404 |
| rs116841240 | G | 0.0767  |
| rs12386101  | C | -0.0298 |
| rs56346218  | G | 0.1167  |
| rs11663972  | C | -0.0393 |
| rs4534943   | C | -0.0378 |
| rs8087137   | T | 0.0333  |
| rs1015834   | T | -0.0707 |
| rs953697    | T | -0.0421 |
| rs2187372   | C | -0.0333 |
| rs16952507  | T | -0.0452 |
| rs11662849  | A | -0.0365 |
| rs9944769   | A | -0.0458 |
| rs11660188  | C | -0.0734 |
| rs79081276  | T | 0.0892  |
| rs141891809 | C | 0.1379  |
| rs8093828   | T | -0.1096 |
| rs9950795   | A | 0.027   |
| rs72975318  | T | 0.0936  |
| rs2282630   | C | 0.0367  |
| rs9965737   | C | -0.0298 |
| rs146781516 | T | 0.1619  |
| rs76459099  | G | 0.1202  |
| rs72948534  | T | -0.0727 |
| rs149857944 | G | -0.0798 |
| rs75666203  | T | -0.1623 |
| rs78928478  | G | -0.0745 |
| rs2120124   | T | 0.0276  |
| rs7227687   | G | 0.0445  |
| rs116014524 | T | 0.0736  |
| rs28709065  | G | -0.0374 |
| rs114086607 | T | 0.1136  |
| rs141974368 | A | -0.0883 |
| rs10853319  | A | -0.0806 |
| rs9958057   | C | 0.0737  |
| rs141246879 | A | 0.1208  |
| rs4392150   | A | 0.05    |
| rs536765    | G | 0.0271  |

|             |   |         |
|-------------|---|---------|
| rs2850878   | G | 0.0291  |
| rs238142    | A | 0.0371  |
| rs640981    | C | -0.0278 |
| rs566381    | C | 0.0245  |
| rs62089050  | T | -0.0407 |
| rs2850757   | A | 0.1098  |
| rs8182389   | A | 0.1123  |
| rs12968769  | C | 0.0416  |
| rs12961129  | T | 0.1567  |
| rs8093135   | T | -0.0449 |
| rs72870338  | G | 0.0302  |
| rs11659391  | A | 0.0728  |
| rs17194666  | C | -0.0258 |
| rs117390852 | A | 0.1649  |
| rs56899333  | T | 0.1061  |
| rs1941496   | A | -0.0475 |
| rs72877651  | A | -0.0597 |
| rs9948561   | A | -0.0306 |
| rs4293485   | A | 0.0347  |
| rs73965555  | G | -0.1271 |
| rs78496386  | C | -0.0288 |
| rs117682790 | C | 0.1941  |
| rs17056775  | T | -0.1128 |
| rs62086166  | G | -0.1337 |
| rs117729536 | A | 0.2168  |
| rs80167287  | G | 0.0615  |
| rs78366905  | A | -0.0627 |
| rs12455766  | A | 0.0402  |
| rs16940481  | T | 0.1151  |
| rs2096902   | C | 0.0253  |
| rs2928953   | G | 0.0243  |
| rs17086730  | G | 0.0322  |
| rs12455648  | C | 0.0266  |
| rs111359626 | T | 0.1333  |
| rs117792085 | T | 0.0486  |
| rs149725678 | A | -0.1164 |
| rs17080293  | C | -0.0981 |
| rs9966137   | T | -0.0274 |
| rs13381553  | T | -0.0405 |
| rs7230489   | T | 0.0351  |
| rs2172097   | T | -0.0237 |
| rs9947840   | T | 0.0415  |
| rs867708    | C | 0.0334  |
| rs17446847  | C | 0.0798  |
| rs140570854 | G | 0.1222  |
| rs1378142   | A | 0.0287  |
| rs9954033   | C | 0.0428  |

|             |   |         |
|-------------|---|---------|
| rs79439691  | T | -0.1264 |
| rs892406    | G | 0.1139  |
| rs11873758  | A | -0.0522 |
| rs34619612  | C | 0.0534  |
| rs75645377  | T | 0.0647  |
| rs73947997  | T | 0.0497  |
| rs117980961 | G | -0.0775 |
| rs56161617  | T | -0.0294 |
| rs138974951 | T | -0.1126 |
| rs11660343  | A | 0.0402  |
| rs118099078 | T | 0.1679  |
| rs62081900  | C | -0.0368 |
| rs12606742  | A | 0.0298  |
| rs3914786   | G | 0.0381  |
| rs2572270   | T | 0.1093  |
| rs77341576  | C | 0.0383  |
| rs7240772   | G | -0.0298 |
| rs76400174  | A | 0.0552  |
| rs57140639  | G | 0.1089  |
| rs75150502  | T | -0.0698 |
| rs75021781  | G | -0.0868 |
| rs72939222  | C | -0.046  |
| rs1652355   | A | 0.0252  |
| rs140510189 | C | 0.1528  |
| rs112064665 | G | -0.0972 |
| rs1354876   | G | -0.0388 |
| rs35620628  | T | 0.1083  |
| rs142714404 | A | -0.1491 |
| rs1790636   | T | 0.0579  |
| rs9960415   | C | -0.0319 |
| rs8094334   | C | -0.094  |
| rs149683399 | T | -0.1643 |
| rs8093690   | T | 0.0285  |
| rs144389193 | T | 0.115   |
| rs11662328  | A | 0.0292  |
| rs1292301   | A | -0.0537 |
| rs77479788  | C | 0.0612  |
| rs117991312 | C | 0.0492  |
| rs4561564   | G | -0.0396 |
| rs1683380   | A | 0.0255  |
| rs78282708  | T | -0.0446 |
| rs894732    | G | -0.024  |
| rs150670189 | G | -0.1071 |
| rs111704076 | T | -0.0917 |
| rs1460516   | C | 0.0389  |
| rs11877272  | G | -0.0414 |
| rs17803557  | C | -0.1427 |

|             |   |         |
|-------------|---|---------|
| rs80159927  | G | -0.0728 |
| rs76608997  | A | 0.1015  |
| rs11151050  | T | 0.0568  |
| rs72969723  | A | 0.0306  |
| rs62078685  | C | 0.0476  |
| rs62098065  | T | -0.0337 |
| rs78607494  | T | 0.0676  |
| rs56251333  | T | -0.0287 |
| rs16950875  | C | 0.1285  |
| rs62090936  | T | -0.0581 |
| rs71367589  | T | 0.0687  |
| rs3786455   | T | -0.0236 |
| rs117669930 | G | -0.1231 |
| rs1972045   | A | 0.0621  |
| rs7233389   | G | 0.0826  |
| rs117802590 | A | -0.2312 |
| rs75095140  | T | 0.063   |
| rs9958286   | A | 0.07    |
| rs117349905 | T | -0.1723 |
| rs17651357  | T | 0.1365  |
| rs7243103   | C | -0.0323 |
| rs62082003  | T | 0.0724  |
| rs146247909 | A | 0.15    |
| rs143916141 | A | 0.0957  |
| rs12327056  | G | 0.0231  |
| rs138711006 | A | -0.153  |
| rs4800001   | T | -0.037  |
| rs11659412  | A | -0.0237 |
| rs336279    | G | -0.0235 |
| rs11665329  | T | 0.0352  |
| rs8087953   | T | -0.0492 |
| rs28661488  | A | -0.0889 |
| rs8093359   | G | 0.0266  |
| rs17828503  | A | 0.0985  |
| rs12967733  | C | -0.0358 |
| rs17669793  | G | 0.0443  |
| rs2941807   | G | 0.0636  |
| rs146243727 | C | 0.1359  |
| rs12967247  | A | 0.2082  |
| rs11876031  | T | 0.0985  |
| rs116512617 | A | 0.0904  |
| rs77377840  | G | -0.1207 |
| rs2581651   | C | -0.0414 |
| rs897999    | A | -0.0283 |
| rs12326986  | G | -0.0405 |
| rs72920415  | T | -0.083  |
| rs17758948  | A | 0.04    |

|             |   |         |
|-------------|---|---------|
| rs141820789 | A | -0.0581 |
| rs1993532   | G | -0.0245 |
| rs72913755  | G | 0.0414  |
| rs75848716  | G | -0.1228 |
| rs9962082   | C | 0.0242  |
| rs73950702  | A | -0.0391 |
| rs146774536 | T | 0.0776  |
| rs1541618   | C | -0.0335 |
| rs2156649   | A | 0.0972  |
| rs72913910  | T | -0.0602 |
| rs12957107  | T | 0.0489  |
| rs75532026  | G | 0.0805  |
| rs17678294  | G | 0.0279  |
| rs71357643  | T | -0.0722 |
| rs4603632   | T | -0.0268 |
| rs72898051  | A | -0.0945 |
| rs72932190  | A | -0.1618 |
| rs28406916  | G | 0.169   |
| rs12604637  | T | -0.0446 |
| rs78371278  | A | -0.0311 |
| rs72954420  | G | -0.0768 |
| rs1979227   | C | 0.0296  |
| rs7505668   | A | -0.0344 |
| rs478608    | A | 0.0317  |
| rs112184524 | G | -0.1748 |
| rs58186817  | C | 0.0599  |
| rs76024151  | T | 0.0678  |
| rs56303882  | C | -0.1753 |
| rs79705333  | G | 0.1905  |
| rs72931875  | C | -0.1348 |
| rs78423739  | A | -0.1394 |
| rs62088099  | A | -0.0381 |
| rs34131900  | G | -0.062  |
| rs9951108   | A | -0.0267 |
| rs11874922  | G | 0.0373  |
| rs72973942  | G | 0.1689  |
| rs17687475  | G | -0.0482 |
| rs117684378 | C | 0.0971  |
| rs17649254  | A | -0.0386 |
| rs117422283 | A | -0.1715 |
| rs17220527  | A | -0.0313 |
| rs116844899 | A | 0.0877  |
| rs79056087  | C | 0.1356  |
| rs75963700  | G | 0.114   |
| rs2000793   | T | 0.0272  |
| rs1539815   | T | -0.1137 |
| rs613691    | C | -0.0245 |



|             |   |         |
|-------------|---|---------|
| rs12954515  | T | 0.1806  |
| rs9807542   | A | -0.0744 |
| rs7227804   | C | 0.0295  |
| rs17718307  | G | 0.1257  |
| rs9945716   | C | -0.1301 |
| rs138263207 | A | -0.1879 |
| rs77231791  | A | 0.0665  |
| rs72906966  | A | 0.0306  |
| rs1370910   | T | -0.0798 |
| rs113582701 | A | 0.083   |
| rs72924821  | A | 0.1535  |
| rs12953809  | T | 0.0418  |
| rs10401115  | G | -0.0276 |
| rs1833300   | G | -0.0696 |
| rs8098307   | C | 0.0354  |
| rs7236060   | G | 0.0243  |
| rs4987774   | G | 0.0957  |
| rs510573    | G | -0.0254 |
| rs9959024   | A | 0.0636  |
| rs35976083  | C | -0.0384 |
| rs79909512  | C | -0.0419 |
| rs79262907  | A | -0.0613 |
| rs62087038  | A | 0.0395  |
| rs16973101  | G | -0.0642 |
| rs77528544  | T | -0.08   |
| rs117186977 | A | 0.0879  |
| rs74361151  | A | -0.0822 |
| rs12608044  | A | -0.0351 |
| rs12955697  | A | -0.023  |
| rs2155703   | G | -0.1433 |
| rs1991893   | C | 0.1509  |
| rs55855238  | T | 0.0243  |
| rs668296    | T | -0.0303 |
| rs8093434   | C | 0.0692  |
| rs62093967  | A | -0.0632 |
| rs11663188  | G | -0.073  |
| rs57185637  | A | 0.0708  |
| rs77156390  | C | -0.045  |
| rs145209622 | G | 0.1118  |
| rs141390096 | C | -0.0903 |
| rs117453249 | T | -0.1166 |
| rs1621364   | A | 0.0265  |
| rs2111927   | G | 0.0283  |
| rs6566600   | T | -0.0297 |
| rs12959619  | T | 0.0325  |
| rs12150762  | C | -0.0311 |
| rs61524155  | A | 0.0418  |

|             |   |         |
|-------------|---|---------|
| rs11151641  | G | -0.0255 |
| rs12455524  | A | 0.0398  |
| rs80238093  | T | -0.0711 |
| rs78742842  | A | -0.1013 |
| rs75121472  | A | -0.1205 |
| rs17206573  | A | 0.1054  |
| rs1551003   | G | 0.0235  |
| rs117860207 | G | 0.0863  |
| rs1541860   | C | -0.0274 |
| rs35531140  | A | 0.0959  |
| rs1370827   | A | 0.0252  |
| rs7227648   | A | -0.0625 |
| rs113437311 | T | 0.0465  |
| rs117299285 | A | 0.1028  |
| rs146742211 | C | 0.1859  |
| rs11663857  | T | 0.0617  |
| rs117504759 | T | -0.1221 |
| rs2192584   | G | 0.0298  |
| rs78218754  | T | -0.0803 |
| rs62093611  | C | 0.0261  |
| rs2156641   | G | -0.0707 |
| rs577454    | T | 0.0236  |
| rs75890328  | T | -0.0576 |
| rs8095036   | T | -0.0235 |
| rs59397037  | C | -0.0468 |
| rs62098130  | T | 0.0458  |
| rs28405552  | T | -0.057  |
| rs74482840  | T | 0.072   |
| rs17234724  | A | 0.0901  |
| rs72966552  | G | -0.033  |
| rs7243825   | A | 0.0229  |
| rs9959662   | G | 0.0226  |
| rs2322096   | C | 0.024   |
| rs4797469   | T | -0.0289 |
| rs9973023   | C | -0.0405 |
| rs74407593  | A | -0.125  |
| rs11152060  | G | 0.023   |
| rs12961648  | T | 0.0815  |
| rs16948331  | A | 0.0266  |
| rs12962359  | G | 0.0261  |
| rs117189267 | T | -0.1232 |
| rs17498113  | A | 0.0705  |
| rs60283184  | T | 0.0385  |
| rs117864796 | T | 0.1023  |
| rs9952935   | G | 0.0661  |
| rs12454933  | G | 0.1144  |
| rs11665175  | A | 0.0263  |

|             |   |         |
|-------------|---|---------|
| rs72912673  | C | 0.058   |
| rs150269099 | T | 0.1092  |
| rs76095859  | T | 0.0558  |
| rs72642423  | A | -0.0484 |
| rs139405462 | A | 0.1337  |
| rs11873936  | A | 0.0273  |
| rs143752494 | T | -0.1071 |
| rs9789209   | A | -0.0701 |
| rs1899126   | A | -0.0547 |
| rs9646505   | G | -0.026  |
| rs616290    | G | -0.0234 |
| rs35469954  | T | -0.1434 |
| rs76482679  | T | -0.0713 |
| rs6508087   | A | -0.0311 |
| rs558320    | T | 0.0414  |
| rs11080532  | A | -0.0256 |
| rs73413474  | A | -0.1011 |
| rs77198819  | G | -0.0827 |
| rs150960954 | C | -0.1087 |
| rs9953181   | G | -0.2117 |
| rs7229963   | G | 0.0416  |
| rs144524162 | A | -0.1687 |
| rs7240429   | C | 0.027   |
| rs4798233   | T | -0.0238 |
| rs148462858 | C | -0.11   |
| rs58680865  | G | 0.1794  |
| rs77905661  | A | -0.0745 |
| rs4077610   | T | 0.0568  |
| rs62092600  | A | 0.2033  |
| rs11662578  | A | -0.0245 |
| rs79617728  | C | -0.094  |
| rs116953370 | G | -0.1453 |
| rs112007315 | A | -0.0413 |
| rs140067734 | A | 0.1272  |
| rs75496586  | G | -0.1302 |
| rs72998206  | A | 0.1307  |
| rs148838692 | T | 0.0937  |
| rs77325028  | C | 0.0401  |
| rs74882570  | T | 0.04    |
| rs74524160  | C | -0.0535 |
| rs12606685  | A | 0.0941  |
| rs34545028  | T | 0.0229  |
| rs62093526  | C | -0.1021 |
| rs76382984  | T | 0.1064  |
| rs9961954   | T | -0.0254 |
| rs117904786 | G | -0.1687 |
| rs117035405 | C | -0.085  |

|             |   |         |
|-------------|---|---------|
| rs112560576 | A | 0.1056  |
| rs80018649  | A | 0.0516  |
| rs4450498   | G | -0.061  |
| rs11660923  | A | 0.0358  |
| rs76713908  | A | -0.0599 |
| rs139168358 | T | -0.0609 |
| rs35600602  | A | -0.1661 |
| rs12953409  | A | 0.0702  |
| rs12957365  | C | 0.0245  |
| rs11659512  | A | -0.0582 |
| rs12955509  | T | 0.1727  |
| rs584788    | A | 0.084   |
| rs689827    | T | 0.0792  |
| rs72901058  | T | 0.1907  |
| rs607374    | T | 0.0242  |
| rs9957768   | C | 0.0268  |
| rs7230653   | A | -0.0223 |
| rs11660373  | T | 0.022   |
| rs76491762  | C | -0.074  |
| rs139161694 | A | 0.0982  |
| rs62101981  | G | 0.078   |
| rs8095718   | T | 0.0525  |
| rs76420385  | A | -0.0449 |
| rs62104542  | A | 0.0403  |
| rs11659484  | T | -0.029  |
| rs72890426  | C | -0.1697 |
| rs11875173  | C | -0.0255 |
| rs75250946  | C | 0.1567  |
| rs113895039 | A | -0.0273 |
| rs75104750  | A | 0.1241  |
| rs626034    | C | 0.0229  |
| rs115453557 | T | -0.0898 |
| rs1426022   | T | 0.0228  |
| rs75330487  | A | -0.1102 |
| rs72943035  | A | 0.1121  |
| rs56077505  | T | -0.0317 |
| rs10853488  | C | 0.0708  |
| rs72937465  | G | -0.036  |
| rs58469377  | A | 0.077   |
| rs113225380 | G | -0.1078 |
| rs56679510  | A | -0.0363 |
| rs34099738  | A | -0.1374 |
| rs111961476 | T | 0.082   |
| rs28445265  | C | 0.0482  |
| rs8098608   | C | -0.0447 |
| rs602201    | A | 0.033   |
| rs111961512 | C | -0.1204 |

|             |   |         |
|-------------|---|---------|
| rs117637412 | T | -0.1083 |
| rs58571470  | G | 0.0399  |
| rs28493419  | A | -0.0352 |
| rs1395858   | T | -0.0258 |
| rs73971236  | A | 0.1624  |
| rs149047270 | A | 0.1302  |
| rs75573512  | G | 0.1191  |
| rs150318902 | A | 0.0918  |
| rs643652    | C | 0.0359  |
| rs138617911 | G | -0.0733 |
| rs2359593   | C | 0.0255  |
| rs7230501   | G | 0.0228  |
| rs55953943  | A | -0.0826 |
| rs117115222 | C | -0.1634 |
| rs111612748 | T | 0.0442  |
| rs118026835 | G | 0.1352  |
| rs72981719  | T | 0.0381  |
| rs1954833   | C | 0.0793  |
| rs76620499  | A | -0.1177 |
| rs77132696  | C | -0.0806 |
| rs470497    | C | -0.0233 |
| rs11151434  | C | 0.0423  |
| rs2856966   | G | -0.0273 |
| rs17203328  | C | 0.081   |
| rs77811712  | G | 0.0547  |
| rs75395026  | C | -0.052  |
| rs13381292  | C | -0.0381 |
| rs16958643  | C | 0.0678  |
| rs4940484   | G | 0.1758  |
| rs111467462 | C | 0.0906  |
| rs73394576  | T | -0.1753 |
| rs35682897  | A | -0.071  |
| rs9967532   | T | -0.0292 |
| rs72936695  | T | 0.1262  |
| rs56118402  | G | 0.1045  |
| rs2852945   | C | -0.0232 |
| rs73376270  | A | 0.0598  |
| rs58867668  | G | -0.1246 |
| rs28472558  | G | 0.0828  |
| rs79435461  | C | -0.1778 |
| rs894761    | A | 0.0242  |
| rs9965777   | T | 0.0255  |
| rs146533583 | C | -0.1828 |
| rs4245244   | A | -0.0562 |
| rs77861985  | A | 0.0953  |
| rs1484220   | G | 0.0281  |
| rs61021766  | A | 0.0527  |

|             |   |         |
|-------------|---|---------|
| rs8097304   | A | 0.0361  |
| rs2865138   | C | -0.041  |
| rs9304496   | C | 0.0261  |
| rs4799155   | T | 0.0708  |
| rs62103761  | C | -0.1474 |
| rs12604419  | C | -0.0238 |
| rs76672930  | G | -0.0892 |
| rs73952158  | T | 0.0611  |
| rs73939206  | T | 0.038   |
| rs11876683  | C | 0.0909  |
| rs12605180  | G | -0.0264 |
| rs118072886 | G | 0.105   |
| rs62093546  | A | -0.0408 |
| rs9952048   | C | -0.0378 |
| rs117929949 | G | 0.1272  |
| rs72916872  | C | 0.0553  |
| rs79661170  | C | -0.0669 |
| rs147163076 | A | -0.2094 |
| rs12966370  | G | -0.0266 |
| rs142924844 | A | -0.115  |
| rs12960129  | G | -0.0278 |
| rs118175831 | T | 0.0707  |
| rs111706442 | T | -0.1659 |
| rs6507871   | T | -0.0559 |
| rs10468741  | A | -0.0245 |
| rs8099193   | A | 0.0231  |
| rs117168099 | A | -0.1143 |
| rs4986216   | A | -0.1155 |
| rs57850826  | T | 0.064   |
| rs11661139  | G | 0.0374  |
| rs112736345 | A | 0.1107  |
| rs112216635 | A | -0.1845 |
| rs12604641  | C | -0.1668 |
| rs9304332   | T | -0.0252 |
| rs75127496  | T | -0.0259 |
| rs9955167   | T | 0.0841  |
| rs8083214   | G | -0.0427 |
| rs9957121   | T | 0.0307  |
| rs58165771  | C | 0.0331  |
| rs8084470   | C | -0.0648 |
| rs317813    | A | 0.0216  |
| rs34619405  | G | -0.0411 |
| rs76689648  | T | 0.0844  |
| rs7240977   | A | -0.0587 |
| rs72968222  | C | -0.1434 |
| rs78321800  | A | 0.0334  |
| rs17803584  | A | 0.0226  |

|             |   |         |
|-------------|---|---------|
| rs4797292   | C | 0.0252  |
| rs6505532   | G | 0.0379  |
| rs75591954  | A | -0.1721 |
| rs60736471  | G | 0.0289  |
| rs6507292   | A | -0.024  |
| rs16972875  | A | -0.03   |
| rs2337149   | T | -0.025  |
| rs10432229  | C | 0.0497  |
| rs1595365   | T | 0.0317  |
| rs72868368  | T | -0.1575 |
| rs143396158 | T | 0.1144  |
| rs76389262  | G | 0.0969  |
| rs72926686  | A | -0.0349 |
| rs35614896  | G | 0.0276  |
| rs884435    | G | 0.026   |
| rs75490981  | A | -0.0563 |
| rs17569491  | A | 0.0556  |
| rs11663367  | T | 0.0298  |
| rs618787    | C | 0.113   |
| rs73399578  | A | -0.0824 |
| rs62104628  | G | 0.0487  |
| rs145015168 | A | 0.0485  |
| rs11663031  | C | 0.0488  |
| rs9964529   | T | 0.0289  |
| rs11872992  | A | 0.0324  |
| rs78762655  | C | -0.0422 |
| rs7237675   | A | 0.0258  |
| rs11665624  | A | -0.0228 |
| rs45574534  | T | -0.0389 |
| rs357896    | A | 0.0241  |
| rs117483877 | G | 0.1453  |
| rs111924824 | G | 0.1526  |
| rs7226608   | T | -0.0384 |
| rs2000893   | C | -0.0228 |
| rs7241477   | C | -0.1236 |
| rs3786343   | T | -0.0226 |
| rs9967368   | C | 0.0298  |
| rs17090076  | C | -0.0571 |
| rs71361336  | A | 0.0384  |
| rs78720623  | A | 0.0516  |
| rs11664561  | C | 0.1174  |
| rs206424    | G | -0.118  |
| rs115908751 | G | -0.0949 |
| rs8091955   | G | -0.0217 |
| rs117203015 | A | 0.1084  |
| rs8088174   | G | -0.0277 |
| rs146900981 | G | -0.1513 |

|             |   |         |
|-------------|---|---------|
| rs11660849  | T | 0.029   |
| rs12968544  | A | -0.0301 |
| rs118191381 | C | 0.1198  |
| rs72892585  | A | 0.1078  |
| rs12968214  | C | 0.029   |
| rs517716    | C | -0.0401 |
| rs2909274   | T | -0.0323 |
| rs61683946  | A | 0.0521  |
| rs150532400 | G | 0.094   |
| rs12968691  | A | -0.0484 |
| rs4799425   | T | 0.0227  |
| rs11875777  | G | 0.0391  |
| rs79245301  | G | 0.0948  |
| rs72878296  | G | -0.1194 |
| rs117100383 | T | -0.0987 |
| rs140972096 | T | -0.1457 |
| rs11082827  | T | 0.0648  |
| rs646285    | G | -0.0415 |
| rs501564    | A | 0.1045  |
| rs56387261  | T | -0.0224 |
| rs62103113  | C | -0.0916 |
| rs76547238  | T | -0.0467 |
| rs150471944 | G | -0.1254 |
| rs57977092  | T | -0.0342 |
| rs4797318   | G | 0.0253  |
| rs145333366 | A | 0.1452  |
| rs74671490  | A | 0.0382  |
| rs111421049 | A | -0.1453 |
| rs1530349   | A | 0.0399  |
| rs1943596   | C | -0.0455 |
| rs62092934  | T | 0.042   |
| rs142944433 | G | 0.1209  |
| rs339848    | G | -0.0256 |
| rs7233413   | C | 0.0232  |
| rs1559903   | T | 0.0224  |
| rs117882947 | T | 0.1286  |
| rs476897    | A | 0.0599  |
| rs80022557  | C | 0.0443  |
| rs80184008  | A | -0.0997 |
| rs1485803   | G | -0.0225 |
| rs11659817  | A | 0.0214  |
| rs12457401  | G | -0.0223 |
| rs74529094  | A | 0.1867  |
| rs5002055   | A | -0.0668 |
| rs118128982 | A | -0.0758 |
| rs72873878  | C | 0.0412  |
| rs117204231 | T | -0.1439 |



|             |   |         |
|-------------|---|---------|
| rs4483946   | A | -0.025  |
| rs118167569 | A | -0.1153 |
| rs78493123  | G | -0.0689 |
| rs117652141 | G | -0.1152 |
| rs9952655   | T | -0.037  |
| rs6506075   | T | -0.0852 |
| rs9956673   | C | -0.0601 |
| rs150568224 | A | 0.1721  |
| rs113699313 | T | 0.0355  |
| rs75214992  | A | 0.1256  |
| rs144132086 | A | 0.1088  |
| rs12962194  | C | -0.0328 |
| rs34394544  | A | 0.1089  |
| rs2615550   | T | 0.0227  |
| rs4531810   | A | 0.0764  |
| rs4525596   | T | 0.0248  |
| rs8093395   | G | -0.0227 |
| rs16974035  | G | -0.0257 |
| rs55935074  | A | 0.0676  |
| rs596996    | C | -0.04   |
| rs12959087  | G | 0.0865  |
| rs505290    | T | -0.0236 |
| rs12606567  | T | 0.0254  |
| rs139344665 | A | 0.1913  |
| rs4528655   | C | 0.0281  |
| rs12607645  | C | -0.0412 |
| rs12954229  | C | -0.0438 |
| rs117833456 | C | -0.0795 |
| rs16940692  | G | 0.0293  |
| rs150383418 | G | 0.0903  |
| rs2053519   | T | 0.0242  |
| rs113063624 | A | -0.0665 |
| rs113839816 | A | -0.0787 |
| rs1057251   | C | -0.0354 |
| rs9953257   | A | -0.0489 |
| rs117533598 | T | 0.0945  |
| rs72882932  | A | 0.0367  |
| rs146919316 | C | 0.1966  |
| rs1501037   | G | 0.0274  |
| rs113596564 | A | 0.111   |
| rs9646463   | T | -0.0287 |
| rs72973181  | G | -0.049  |
| rs2980968   | T | 0.0369  |
| rs141265726 | A | 0.1338  |
| rs35453062  | A | -0.0643 |
| rs10853343  | G | -0.0268 |
| rs117449295 | C | 0.057   |

|             |   |         |
|-------------|---|---------|
| rs9965239   | T | 0.0326  |
| rs11876907  | A | -0.0452 |
| rs149482901 | A | 0.1316  |
| rs28575051  | A | 0.0712  |
| rs8090083   | T | 0.0267  |
| rs72954524  | C | 0.0742  |
| rs73942630  | C | -0.1317 |
| rs79924911  | C | 0.0896  |
| rs150944187 | T | 0.0943  |
| rs73486421  | C | -0.057  |
| rs143288319 | T | -0.2032 |
| rs72917375  | T | 0.071   |
| rs7244215   | A | 0.0247  |
| rs72963300  | A | -0.0574 |
| rs17759167  | C | 0.0437  |
| rs78066667  | A | 0.1144  |
| rs77669160  | T | -0.0621 |
| rs147617387 | G | -0.1018 |
| rs2584765   | A | 0.0246  |
| rs9963318   | A | 0.0235  |
| rs11875142  | A | -0.1346 |
| rs62091377  | A | -0.0262 |
| rs146931379 | A | -0.0753 |
| rs74821035  | C | -0.1161 |
| rs146583979 | C | 0.1451  |
| rs1539851   | A | -0.0277 |
| rs117362100 | G | 0.1272  |
| rs147056352 | A | -0.0771 |
| rs4344844   | G | 0.0424  |
| rs62087991  | T | 0.0806  |
| rs62081771  | T | 0.0704  |
| rs9959302   | A | 0.0318  |
| rs144044095 | A | -0.043  |
| rs145774479 | A | 0.123   |
| rs1320674   | T | 0.0226  |
| rs139225446 | G | 0.1146  |
| rs9959532   | G | 0.024   |
| rs7240959   | A | -0.0217 |
| rs2068616   | C | -0.0586 |
| rs35439116  | T | 0.0574  |
| rs73965521  | T | 0.0314  |
| rs206604    | G | 0.0214  |
| rs112091287 | G | -0.1442 |
| rs72926337  | A | -0.067  |
| rs75725499  | A | -0.0549 |
| rs111591397 | T | -0.1627 |
| rs76586387  | A | -0.097  |

|             |   |         |
|-------------|---|---------|
| rs62080410  | G | 0.0648  |
| rs62087104  | C | 0.0915  |
| rs12959905  | A | -0.0816 |
| rs57957593  | A | 0.086   |
| rs77698690  | C | 0.1039  |
| rs79474680  | A | -0.0821 |
| rs77140448  | A | -0.1501 |
| rs9959492   | G | 0.0793  |
| rs62083565  | T | -0.0506 |
| rs2230167   | A | -0.0276 |
| rs7238405   | G | 0.094   |
| rs17562974  | C | -0.0999 |
| rs2083846   | C | 0.0262  |
| rs11874341  | A | -0.0252 |
| rs162000    | C | -0.0238 |
| rs12971246  | A | -0.0231 |
| rs4798729   | G | -0.0325 |
| rs4799526   | C | 0.0373  |
| rs4800350   | T | -0.0247 |
| rs572614    | T | -0.0444 |
| rs4497773   | A | 0.0299  |
| rs9960707   | C | 0.0367  |
| rs7228861   | G | 0.0236  |
| rs11665116  | T | 0.0337  |
| rs117817571 | T | -0.0664 |
| rs111719372 | A | -0.1009 |
| rs77358893  | A | -0.1069 |
| rs72876359  | T | 0.1071  |
| rs72961293  | T | 0.0861  |
| rs3764481   | T | -0.0325 |
| rs72970859  | A | -0.1405 |
| rs12606127  | T | 0.0222  |
| rs56152681  | A | -0.0364 |
| rs117904262 | A | -0.1373 |
| rs11876086  | C | 0.0277  |
| rs141361288 | T | -0.1415 |
| rs140927581 | C | -0.1519 |
| rs75591948  | T | -0.1545 |
| rs147870275 | C | 0.0981  |
| rs948655    | T | -0.0225 |
| rs1470829   | G | 0.022   |
| rs1791351   | G | -0.0248 |
| rs28405607  | T | -0.1306 |
| rs838050    | T | -0.028  |
| rs7407368   | G | -0.023  |
| rs74408409  | A | 0.0484  |
| rs8088407   | T | -0.0427 |

|             |   |         |
|-------------|---|---------|
| rs11083109  | T | 0.0264  |
| rs1564070   | C | 0.0297  |
| rs8097949   | G | -0.0251 |
| rs11664407  | T | -0.0731 |
| rs72984321  | G | 0.0699  |
| rs12457981  | A | -0.1709 |
| rs9319757   | C | -0.031  |
| rs658594    | C | 0.0242  |
| rs9947240   | T | 0.0328  |
| rs929525    | G | -0.024  |
| rs77237436  | A | 0.161   |
| rs79879712  | T | -0.0471 |
| rs8086644   | A | 0.0282  |
| rs35035711  | T | 0.1097  |
| rs8084210   | G | -0.0419 |
| rs146225340 | A | -0.1694 |
| rs62094260  | A | -0.0243 |
| rs12607097  | G | 0.0291  |
| rs72867273  | G | 0.072   |
| rs1284429   | G | -0.0229 |
| rs17650693  | T | -0.0439 |
| rs72917237  | G | -0.0419 |
| rs117958137 | C | 0.0562  |
| rs4254394   | T | 0.0246  |
| rs139494588 | G | -0.0619 |
| rs280996    | A | -0.0375 |
| rs4797330   | A | -0.0277 |
| rs17446169  | A | -0.0848 |
| rs71357638  | T | -0.0911 |
| rs12604822  | A | -0.0883 |
| rs12960899  | T | -0.0469 |
| rs1787624   | A | -0.0482 |
| rs149171071 | T | -0.1041 |
| rs76471336  | C | 0.0408  |
| rs72963481  | A | 0.0709  |
| rs77424858  | C | 0.1412  |
| rs17447035  | G | 0.1065  |
| rs4488537   | A | 0.0299  |
| rs2564500   | G | -0.0217 |
| rs12604331  | T | 0.0311  |
| rs28545346  | C | 0.1672  |
| rs117181950 | T | 0.1095  |
| rs8087060   | T | 0.0234  |
| rs7504573   | G | 0.0285  |
| rs67211564  | C | -0.0279 |
| rs11081496  | C | -0.0242 |
| rs11151010  | A | -0.0382 |

|             |   |         |
|-------------|---|---------|
| rs631422    | G | 0.0421  |
| rs3017255   | T | -0.0502 |
| rs77344390  | A | 0.192   |
| rs34154304  | G | 0.0246  |
| rs71364459  | T | 0.0624  |
| rs8087307   | G | 0.0249  |
| rs4438376   | T | -0.0235 |
| rs1965808   | C | -0.0229 |
| rs12953557  | A | -0.0842 |
| rs4800316   | A | 0.1648  |
| rs17728625  | G | 0.0624  |
| rs643444    | A | -0.0251 |
| rs75678489  | A | -0.0805 |
| rs12966280  | G | -0.1693 |
| rs62083658  | A | 0.0509  |
| rs142211214 | G | -0.1048 |
| rs78379543  | A | 0.0461  |
| rs78434772  | T | 0.063   |
| rs1237238   | C | 0.026   |
| rs72970510  | G | 0.0329  |
| rs6505982   | C | -0.0233 |
| rs112318482 | T | -0.0575 |
| rs11662160  | T | -0.0461 |
| rs144573241 | T | 0.0917  |
| rs4302145   | C | -0.0251 |
| rs118124156 | A | -0.1333 |
| rs4891255   | C | -0.0241 |
| rs888294    | T | -0.0312 |
| rs6507301   | A | 0.0444  |
| rs12604221  | T | 0.038   |
| rs7238528   | G | 0.0214  |
| rs1484221   | A | -0.0267 |
| rs714789    | G | 0.0223  |
| rs10853567  | A | -0.0409 |
| rs34381968  | T | -0.0467 |
| rs7243052   | A | 0.0254  |
| rs4534922   | T | -0.0237 |
| rs144674634 | C | 0.0953  |
| rs1433928   | T | 0.0226  |
| rs75019912  | C | -0.1289 |
| rs75131917  | A | -0.0636 |
| rs117607381 | T | 0.092   |
| rs7236398   | A | -0.143  |
| rs11664313  | G | 0.0286  |
| rs76217920  | A | 0.0624  |
| rs578372    | T | 0.0226  |
| rs148879358 | T | 0.138   |

|             |   |         |
|-------------|---|---------|
| rs75104423  | C | 0.0383  |
| rs112960771 | A | -0.1099 |
| rs11664274  | G | 0.1031  |
| rs12709667  | C | -0.028  |
| rs118008476 | C | 0.0677  |
| rs355321    | T | 0.0276  |
| rs28639965  | C | 0.093   |
| rs146885212 | G | 0.25    |
| rs28625290  | T | -0.0326 |
| rs118139936 | G | 0.079   |
| rs139372497 | C | 0.1954  |
| rs59391140  | T | 0.0702  |
| rs62089546  | T | 0.1298  |
| rs36031691  | C | 0.0434  |
| rs4447498   | T | -0.041  |
| rs9957100   | C | 0.0322  |
| rs17671611  | T | -0.0324 |
| rs76772780  | G | 0.0428  |
| rs4372787   | C | -0.0509 |
| rs2688998   | G | 0.024   |
| rs8094745   | C | 0.0216  |
| rs7230641   | G | -0.0712 |
| rs138024699 | A | 0.1526  |
| rs2460078   | A | 0.0341  |
| rs75157950  | T | -0.0513 |
| rs34877234  | A | 0.0232  |
| rs140390396 | A | -0.0892 |
| rs11665151  | T | -0.0248 |
| rs72940905  | C | 0.0868  |
| rs144868925 | C | 0.0952  |
| rs141602527 | G | 0.069   |
| rs34010348  | A | -0.0646 |
| rs74731745  | T | -0.0516 |
| rs79350200  | A | 0.113   |
| rs9945729   | A | -0.03   |
| rs3889769   | T | 0.0214  |
| rs76294415  | T | 0.0667  |
| rs8089679   | A | 0.0234  |
| rs17436205  | G | -0.0236 |
| rs9950855   | T | 0.0875  |
| rs57141605  | A | 0.1198  |
| rs420866    | A | -0.0326 |
| rs115506422 | A | -0.1532 |
| rs66477403  | T | 0.1486  |
| rs111340471 | A | 0.0552  |
| rs17681502  | A | -0.043  |
| rs9956333   | T | -0.0473 |

|             |   |         |
|-------------|---|---------|
| rs148825316 | A | 0.1022  |
| rs6506776   | G | -0.0472 |
| rs117958002 | A | 0.084   |
| rs74448815  | C | -0.0985 |
| rs68545     | C | -0.0214 |
| rs16974014  | C | 0.0799  |
| rs62097967  | T | 0.0429  |
| rs41370148  | C | 0.1136  |
| rs79131845  | G | 0.0456  |
| rs117435616 | C | 0.1528  |
| rs12956253  | C | -0.0392 |
| rs12458418  | G | 0.0279  |
| rs77197250  | A | -0.1216 |
| rs117914719 | C | -0.1029 |
| rs8097984   | A | 0.0264  |
| rs71364239  | T | 0.0763  |
| rs76055182  | C | 0.0321  |
| rs893316    | C | 0.0255  |
| rs17663253  | C | -0.0363 |
| rs72973460  | T | -0.0929 |
| rs1456605   | C | -0.028  |
| rs2156336   | T | 0.0243  |
| rs117167766 | C | 0.122   |
| rs142055155 | T | -0.1241 |
| rs17089706  | C | 0.0744  |
| rs4375766   | T | 0.0225  |
| rs2733118   | C | 0.0318  |
| rs8090349   | C | -0.0359 |
| rs139175454 | A | 0.0976  |
| rs118073339 | C | -0.0611 |
| rs35229742  | C | -0.052  |
| rs8091391   | C | 0.0856  |
| rs2219281   | G | 0.0214  |
| rs150157641 | A | -0.0716 |
| rs582576    | A | 0.0303  |
| rs7229880   | A | -0.0301 |
| rs12968929  | G | -0.0371 |
| rs7230764   | G | -0.0301 |
| rs13339701  | A | 0.0249  |
| rs1893668   | A | -0.0742 |
| rs10432249  | C | 0.0221  |
| rs149891247 | A | 0.1048  |
| rs140028407 | T | -0.1611 |
| rs34246918  | A | -0.0623 |
| rs12956202  | C | 0.0292  |
| rs1582790   | C | -0.0218 |
| rs7242971   | A | 0.1542  |

|             |   |         |
|-------------|---|---------|
| rs117787982 | T | -0.1025 |
| rs141938369 | G | 0.1121  |
| rs2653622   | G | -0.0529 |
| rs17056720  | A | -0.0226 |
| rs74643174  | T | 0.0642  |
| rs118134297 | A | 0.0646  |
| rs13381664  | T | 0.125   |
| rs12456277  | C | -0.0322 |
| rs113187313 | T | 0.1256  |
| rs6566629   | T | -0.0323 |
| rs1785394   | T | -0.0357 |
| rs145119835 | T | 0.1197  |
| rs72858624  | G | -0.0372 |
| rs206631    | T | -0.0237 |
| rs78118558  | C | -0.0514 |
| rs13381942  | G | -0.036  |
| rs113962390 | G | -0.0581 |
| rs149068973 | T | -0.116  |
| rs4798950   | T | 0.0258  |
| rs11665491  | A | 0.0242  |
| rs143645109 | C | -0.1302 |
| rs77512254  | G | 0.0704  |
| rs11661106  | A | -0.04   |
| rs35523669  | C | 0.0264  |
| rs79615847  | G | -0.1291 |
| rs78362169  | C | -0.0538 |
| rs622479    | T | 0.0375  |
| rs117744436 | A | -0.0962 |
| rs78021572  | C | 0.0374  |
| rs57942264  | G | 0.0285  |
| rs78059169  | T | 0.0488  |
| rs117260532 | C | 0.1301  |
| rs8098963   | C | 0.0263  |
| rs11662812  | A | 0.0412  |
| rs117246633 | C | 0.1335  |
| rs34245610  | C | 0.0319  |
| rs8093211   | C | -0.0394 |
| rs117713434 | A | 0.0388  |
| rs8088082   | C | 0.0519  |
| rs9941441   | A | 0.0309  |
| rs9953430   | A | 0.0769  |
| rs72904570  | C | 0.025   |
| rs203180    | G | -0.0257 |
| rs470349    | A | -0.0288 |
| rs60356596  | A | -0.1711 |
| rs7244106   | G | 0.0234  |
| rs115210847 | T | 0.1231  |



|             |   |         |
|-------------|---|---------|
| rs117645497 | G | 0.1044  |
| rs111262255 | G | 0.041   |
| rs7236582   | C | -0.1015 |
| rs117354154 | C | 0.161   |
| rs117814495 | G | 0.162   |
| rs78688511  | C | 0.094   |
| rs73002025  | G | -0.1682 |
| rs138475358 | A | -0.1775 |
| rs12965001  | C | 0.0696  |
| rs62089106  | G | -0.0458 |
| rs79607484  | G | 0.0678  |
| rs400441    | T | 0.0271  |
| rs78436314  | A | -0.0385 |
| rs72980571  | T | -0.0856 |
| rs72909819  | A | 0.1211  |
| rs28489676  | G | 0.0219  |
| rs141298385 | G | 0.1144  |
| rs80288634  | A | -0.075  |
| rs145415896 | A | 0.1224  |
| rs113080546 | C | 0.086   |
| rs17752911  | C | 0.0204  |
| rs71355349  | G | 0.0324  |
| rs17596974  | T | -0.0505 |
| rs150535798 | A | -0.08   |
| rs35984124  | C | 0.0363  |
| rs75165842  | A | -0.0458 |
| rs12605292  | G | -0.0308 |
| rs9953829   | T | 0.0214  |
| rs17813291  | A | -0.0314 |
| rs11659893  | A | 0.0606  |
| rs62097224  | T | 0.046   |
| rs144757250 | C | -0.1541 |
| rs56145940  | T | -0.0469 |
| rs113529152 | A | -0.0669 |
| rs56824559  | C | -0.0226 |
| rs35766965  | T | -0.1289 |
| rs17812788  | A | 0.0735  |
| rs4143509   | C | -0.0216 |
| rs11663009  | A | -0.0263 |
| rs1943994   | T | -0.0418 |
| rs1349626   | T | 0.0204  |
| rs76783433  | T | -0.081  |
| rs34135627  | A | -0.1159 |
| rs1785149   | T | -0.0221 |
| rs642237    | G | 0.0258  |
| rs11082774  | G | 0.042   |
| rs62092419  | A | -0.1151 |

|             |   |         |
|-------------|---|---------|
| rs11660494  | G | 0.0227  |
| rs116891216 | A | -0.1319 |
| rs117081865 | C | -0.0981 |
| rs17823706  | A | -0.0371 |
| rs2616761   | A | -0.0255 |
| rs12604092  | T | 0.1269  |
| rs66664234  | A | -0.0368 |
| rs9948864   | G | -0.0208 |
| rs62086263  | T | 0.0305  |
| rs145562478 | G | -0.1971 |
| rs2099866   | A | -0.0281 |
| rs73449162  | A | 0.1067  |
| rs2851197   | G | 0.0711  |
| rs75919536  | A | 0.0927  |
| rs7228952   | T | 0.0345  |
| rs79767236  | A | -0.0816 |
| rs1660278   | A | 0.0778  |
| rs78380887  | A | 0.0491  |
| rs9965162   | G | -0.0248 |
| rs72861410  | T | -0.0719 |
| rs12104055  | T | -0.1072 |
| rs17762618  | A | -0.1016 |
| rs17662554  | T | 0.0226  |
| rs72915710  | C | 0.0437  |
| rs77707319  | T | 0.067   |
| rs150775410 | T | -0.086  |
| rs1380907   | T | 0.0224  |
| rs117274844 | C | 0.0715  |
| rs34815680  | A | -0.0376 |
| rs17263902  | C | -0.0268 |
| rs1785163   | T | 0.0352  |
| rs2085635   | A | -0.0343 |
| rs9957695   | T | -0.0207 |
| rs2850463   | T | 0.021   |
| rs62089607  | C | -0.0733 |
| rs73399584  | A | -0.0293 |
| rs13380921  | T | -0.0221 |
| rs4145796   | A | 0.0368  |
| rs74565725  | A | 0.0618  |
| rs9952987   | A | 0.036   |
| rs17810856  | C | -0.0289 |
| rs9950807   | G | -0.1141 |
| rs72927308  | G | -0.0735 |
| rs55683685  | G | -0.1129 |
| rs72885405  | C | 0.0479  |
| rs28520178  | T | -0.0203 |
| rs7245144   | C | 0.0221  |

|             |   |         |
|-------------|---|---------|
| rs17377124  | A | 0.0663  |
| rs3892391   | T | -0.082  |
| rs149817754 | C | -0.0894 |
| rs6565889   | T | -0.0443 |
| rs113565654 | A | -0.0781 |
| rs9304266   | T | 0.029   |
| rs1402630   | A | 0.0213  |
| rs2099931   | C | 0.1194  |
| rs522276    | C | 0.026   |
| rs146328111 | A | -0.1169 |
| rs1940989   | A | -0.0439 |
| rs7228492   | T | 0.0294  |
| rs7230580   | G | 0.0227  |
| rs74562519  | T | 0.0814  |
| rs76108624  | T | 0.1158  |
| rs11659772  | G | -0.0361 |
| rs62088306  | T | -0.0265 |
| rs7242131   | T | 0.0763  |
| rs118175110 | T | 0.1344  |
| rs9964143   | A | 0.0293  |
| rs143011694 | G | 0.0928  |
| rs225025    | C | 0.02    |
| rs34915368  | T | 0.1603  |
| rs12456880  | C | 0.0373  |
| rs3786381   | A | -0.0229 |
| rs328177    | A | -0.0202 |
| rs72917632  | T | 0.0886  |
| rs72878245  | T | -0.1264 |
| rs36095938  | A | -0.05   |
| rs1893251   | T | 0.0463  |
| rs55780358  | C | 0.0206  |
| rs75837709  | T | 0.037   |
| rs151074772 | A | 0.1869  |
| rs7245138   | C | 0.0449  |
| rs16952004  | A | -0.0489 |
| rs34558855  | G | 0.0306  |
| rs62084507  | A | 0.0428  |
| rs3786194   | G | 0.0354  |
| rs117715629 | T | -0.1346 |
| rs73373164  | G | 0.0274  |
| rs3865408   | T | 0.031   |
| rs7230216   | A | -0.0428 |
| rs56289638  | A | 0.0226  |
| rs12606075  | A | 0.0891  |
| rs11152188  | G | 0.0247  |
| rs4239443   | T | 0.0519  |
| rs76279420  | T | -0.1024 |

|             |   |         |
|-------------|---|---------|
| rs34855386  | G | 0.0914  |
| rs2927260   | A | -0.0683 |
| rs2617928   | T | -0.0219 |
| rs12606884  | C | 0.0237  |
| rs4797662   | A | 0.0301  |
| rs988736    | G | 0.0792  |
| rs116858966 | A | 0.0963  |
| rs3853683   | T | -0.0374 |
| rs116975991 | T | 0.0693  |
| rs34205361  | A | 0.047   |
| rs4798354   | T | -0.0368 |
| rs77868392  | G | -0.0252 |
| rs35693789  | G | 0.0804  |
| rs4353549   | G | -0.026  |
| rs117519855 | T | 0.0817  |
| rs76864933  | T | 0.0275  |
| rs116769702 | A | -0.0773 |
| rs7239790   | G | -0.1283 |
| rs73373062  | C | -0.0321 |
| rs11549285  | C | -0.1214 |
| rs79380316  | T | 0.0487  |
| rs11082682  | T | 0.036   |
| rs1792707   | A | 0.0222  |
| rs35103299  | A | -0.1506 |
| rs117296342 | A | -0.1368 |
| rs11872667  | C | -0.0276 |
| rs6566587   | A | 0.0247  |
| rs8089424   | T | -0.0243 |
| rs2901364   | G | -0.1291 |
| rs4798030   | T | -0.0473 |
| rs9965494   | A | -0.027  |
| rs112292082 | G | -0.1144 |
| rs4941055   | T | 0.0244  |
| rs60037239  | G | 0.0262  |
| rs13381661  | T | 0.0453  |
| rs7230083   | T | -0.0273 |
| rs9948307   | G | 0.0949  |
| rs72923692  | C | -0.0765 |
| rs74716554  | A | -0.0571 |
| rs62081690  | A | -0.0535 |
| rs77375240  | G | 0.121   |
| rs4294892   | T | 0.0446  |
| rs8098272   | G | -0.0278 |
| rs291640    | C | -0.0209 |
| rs4940441   | G | -0.0237 |
| rs11660453  | C | 0.0353  |
| rs146075657 | A | 0.034   |

|             |   |         |
|-------------|---|---------|
| rs11663651  | G | 0.0336  |
| rs6506879   | C | 0.0348  |
| rs12326831  | G | -0.0431 |
| rs34751112  | G | 0.0568  |
| rs7229186   | T | -0.0224 |
| rs12969256  | T | -0.0238 |
| rs9961265   | A | 0.0479  |
| rs17665516  | A | 0.0228  |
| rs77872556  | T | -0.0465 |
| rs72892546  | A | -0.0923 |
| rs1954966   | C | -0.0372 |
| rs112417235 | C | -0.1107 |
| rs12326449  | T | -0.0201 |
| rs72966340  | T | 0.1449  |
| rs12456017  | A | 0.0212  |
| rs139720541 | G | 0.0596  |
| rs74624318  | C | -0.1126 |
| rs9966604   | A | -0.0264 |
| rs62085368  | A | -0.1638 |
| rs72859039  | T | -0.0246 |
| rs138672366 | C | 0.1254  |
| rs78154884  | C | 0.0378  |
| rs79359283  | T | 0.1185  |
| rs11661615  | G | -0.0239 |
| rs116656138 | T | -0.0634 |
| rs55897801  | A | 0.0267  |
| rs117259641 | A | -0.1017 |
| rs58627548  | T | -0.0363 |
| rs56079168  | G | 0.0864  |
| rs80228183  | G | -0.1163 |
| rs17084336  | G | -0.0254 |
| rs140664356 | G | 0.057   |
| rs3925018   | G | -0.0238 |
| rs150800286 | G | 0.1988  |
| rs146511508 | G | -0.0542 |
| rs78635817  | T | 0.0771  |
| rs8085126   | C | -0.037  |
| rs148877322 | G | -0.121  |
| rs12955325  | T | 0.0539  |
| rs9959756   | T | -0.0267 |
| rs11661753  | G | 0.0209  |
| rs16950743  | G | 0.0824  |
| rs34293216  | T | -0.0284 |
| rs11873328  | C | -0.1205 |
| rs117864112 | C | -0.1654 |
| rs8089581   | T | -0.1343 |
| rs34548902  | G | 0.096   |

|             |   |         |
|-------------|---|---------|
| rs73963895  | C | 0.0778  |
| rs72869583  | T | 0.0351  |
| rs1942803   | C | -0.0204 |
| rs4891181   | G | 0.0203  |
| rs145152873 | T | 0.1193  |
| rs113583067 | T | -0.1262 |
| rs144407890 | T | -0.1237 |
| rs150458388 | G | -0.2101 |
| rs78788227  | G | 0.1027  |
| rs17521554  | T | 0.0771  |
| rs3747899   | G | 0.0272  |
| rs78034542  | C | -0.0408 |
| rs111695959 | C | 0.1688  |
| rs79417726  | C | -0.118  |
| rs7233189   | G | 0.0221  |
| rs76160578  | A | 0.0686  |
| rs138842766 | T | -0.0632 |
| rs4800277   | A | 0.1157  |
| rs71371785  | C | 0.0306  |
| rs406756    | A | -0.0363 |
| rs76410951  | T | 0.0937  |
| rs4940438   | C | 0.0665  |
| rs75435265  | T | 0.069   |
| rs62086604  | T | 0.0967  |
| rs12969690  | T | -0.0992 |
| rs17702543  | T | 0.0906  |
| rs112603824 | G | -0.0698 |
| rs113985359 | C | 0.0588  |
| rs76710855  | T | 0.0664  |
| rs59191736  | G | -0.0632 |
| rs9950490   | C | -0.0279 |
| rs79756656  | A | -0.0923 |
| rs8099689   | G | 0.0214  |
| rs6506687   | A | -0.0226 |
| rs13381407  | T | -0.0291 |
| rs16975252  | A | 0.1101  |
| rs9966948   | T | 0.0485  |
| rs4278814   | A | 0.0224  |
| rs79635323  | A | -0.0348 |
| rs73486487  | T | -0.1644 |
| rs1995608   | G | 0.0545  |
| rs12458383  | C | -0.0327 |
| rs1786734   | A | -0.0369 |
| rs72912564  | T | 0.1024  |
| rs111308565 | G | -0.0582 |
| rs76510874  | T | -0.0568 |
| rs76555057  | C | 0.1153  |

|             |   |         |
|-------------|---|---------|
| rs9948175   | T | 0.0296  |
| rs17738806  | T | 0.1217  |
| rs72861108  | G | -0.031  |
| rs1025602   | C | -0.0295 |
| rs3809901   | C | 0.025   |
| rs522919    | G | 0.0212  |
| rs11151008  | C | 0.0244  |
| rs78418917  | A | -0.1284 |
| rs113167607 | G | -0.0472 |
| rs78251958  | G | -0.1067 |
| rs113929735 | G | 0.0536  |
| rs78247778  | G | 0.1155  |
| rs676147    | A | -0.0262 |
| rs1527436   | T | 0.0198  |
| rs60590923  | C | -0.0413 |
| rs12966139  | C | 0.0548  |
| rs11151202  | A | -0.0209 |
| rs9959771   | T | 0.1181  |
| rs56044012  | T | -0.0786 |
| rs116972685 | T | 0.0894  |
| rs614661    | T | 0.0205  |
| rs62102874  | C | -0.0391 |
| rs117565016 | G | -0.1914 |
| rs13382001  | C | -0.0456 |
| rs4344843   | A | -0.1062 |
| rs8084857   | G | -0.0343 |
| rs117642515 | T | -0.0986 |
| rs651357    | T | -0.0389 |
| rs118180071 | T | -0.0924 |
| rs76558198  | G | -0.0462 |
| rs10438985  | A | -0.0244 |
| rs4268827   | G | -0.0289 |
| rs673819    | T | 0.0326  |
| rs17692578  | G | -0.0813 |
| rs17070659  | C | -0.0293 |
| rs2278156   | T | -0.0269 |
| rs55979049  | T | -0.0195 |
| rs148039193 | T | 0.0794  |
| rs71357208  | T | -0.149  |
| rs62104693  | C | 0.041   |
| rs111495043 | A | 0.0902  |
| rs142605748 | G | 0.117   |
| rs57144775  | A | 0.1614  |
| rs7227690   | T | -0.0766 |
| rs11875340  | G | -0.0539 |
| rs75687188  | T | -0.0659 |
| rs117413186 | G | 0.0937  |

|             |   |         |
|-------------|---|---------|
| rs11151437  | A | -0.1072 |
| rs116957744 | T | 0.1099  |
| rs72871021  | A | -0.0811 |
| rs7230473   | G | -0.0565 |
| rs60776846  | A | -0.0361 |
| rs606105    | G | -0.0211 |
| rs143116863 | T | 0.1312  |
| rs1261093   | T | 0.0198  |
| rs8084039   | A | -0.027  |
| rs71371744  | T | 0.0232  |
| rs9319827   | T | -0.0209 |
| rs7236909   | A | 0.0365  |
| rs34959056  | A | -0.0279 |
| rs112293845 | T | -0.0453 |
| rs78782284  | T | 0.0238  |
| rs28594272  | C | -0.0351 |
| rs11663030  | T | 0.0328  |
| rs17057297  | G | -0.1137 |
| rs113277672 | T | -0.1051 |
| rs1074036   | G | -0.0233 |
| rs144985301 | T | -0.0895 |
| rs138692868 | A | 0.1746  |
| rs74666072  | G | -0.0461 |
| rs17548980  | A | 0.026   |
| rs67186433  | A | 0.0292  |
| rs78155543  | C | -0.0637 |
| rs12456367  | G | 0.0339  |
| rs117340513 | G | 0.1301  |
| rs66827086  | C | -0.0214 |
| rs76949643  | T | 0.0847  |
| rs9964729   | A | -0.0404 |
| rs117655000 | A | -0.0657 |
| rs8094014   | G | 0.0596  |
| rs11082362  | C | -0.0214 |
| rs9748803   | T | -0.0246 |
| rs8097438   | G | -0.0374 |
| rs117051617 | G | -0.0747 |
| rs17816329  | A | 0.043   |
| rs28702776  | G | -0.0219 |
| rs355994    | A | 0.0197  |
| rs11080581  | G | 0.0255  |
| rs12373292  | G | 0.0391  |
| rs72909276  | T | 0.0649  |
| rs12963345  | G | 0.0286  |
| rs9635876   | G | 0.0325  |
| rs142510802 | G | 0.071   |
| rs150763278 | G | 0.1003  |



|             |   |         |
|-------------|---|---------|
| rs61266200  | A | 0.0707  |
| rs12457983  | G | -0.0213 |
| rs16974039  | C | -0.0362 |
| rs1187229   | C | 0.0248  |
| rs9964399   | C | 0.0519  |
| rs77961866  | G | 0.0719  |
| rs117169014 | T | -0.0827 |
| rs1790458   | T | 0.0213  |
| rs143458170 | C | 0.0737  |
| rs76246868  | T | 0.0755  |
| rs6506525   | C | 0.0233  |
| rs9954200   | C | -0.0218 |
| rs9963326   | A | -0.0384 |
| rs4940929   | C | 0.0214  |
| rs75164359  | T | 0.0394  |
| rs9967580   | C | 0.0247  |
| rs9948711   | A | -0.0226 |
| rs75852649  | A | -0.0806 |
| rs117062518 | T | -0.1012 |
| rs116875267 | G | -0.1143 |
| rs647241    | A | -0.0293 |
| rs10502405  | A | 0.0319  |
| rs62094411  | A | -0.0273 |
| rs80116494  | G | 0.1595  |
| rs76341471  | A | 0.0795  |
| rs12969070  | C | -0.0437 |
| rs677850    | T | -0.0403 |
| rs79313891  | G | -0.1652 |
| rs62090571  | C | -0.0547 |
| rs12963717  | A | 0.0254  |
| rs117956858 | T | 0.0577  |
| rs78615931  | T | -0.0841 |
| rs75915376  | G | 0.058   |
| rs2135415   | A | 0.057   |
| rs139833975 | A | 0.1004  |
| rs7228004   | A | -0.0385 |
| rs142441847 | A | 0.1462  |
| rs139657047 | G | 0.0636  |
| rs280997    | T | 0.0327  |
| rs78695739  | A | -0.1231 |
| rs118096905 | T | -0.0655 |
| rs117465627 | G | 0.0898  |
| rs4121854   | T | -0.0201 |
| rs7244682   | G | 0.0214  |
| rs80238768  | T | -0.0832 |
| rs71364220  | A | -0.1319 |
| rs4121822   | G | 0.0639  |

|             |   |         |
|-------------|---|---------|
| rs7233695   | T | 0.0215  |
| rs2588468   | A | 0.0207  |
| rs113720753 | G | 0.0929  |
| rs62090741  | G | 0.1122  |
| rs72968125  | G | 0.0212  |
| rs116950412 | G | 0.1311  |
| rs1785424   | T | 0.1228  |
| rs1397954   | T | 0.0297  |
| rs138000360 | A | -0.1282 |
| rs74417878  | C | -0.0634 |
| rs145308579 | C | 0.0942  |
| rs117372041 | G | -0.0672 |
| rs75112068  | G | 0.0835  |
| rs150420674 | T | -0.1837 |
| rs12953449  | G | -0.0292 |
| rs141069285 | G | -0.1138 |
| rs111476810 | T | 0.0973  |
| rs2717097   | C | -0.0245 |
| rs56404226  | A | 0.0289  |
| rs206503    | A | -0.0212 |
| rs73444389  | A | 0.0301  |
| rs4584936   | G | -0.0263 |
| rs7243434   | G | -0.0575 |
| rs75158829  | G | 0.0759  |
| rs117177201 | T | 0.0719  |
| rs79278897  | C | -0.0583 |
| rs11662613  | A | 0.0883  |
| rs12456211  | T | -0.0793 |
| rs56172008  | C | 0.0308  |
| rs6506627   | C | -0.024  |
| rs12962847  | T | 0.044   |
| rs117390292 | A | -0.0742 |
| rs7244563   | T | 0.0502  |
| rs2429727   | T | 0.0269  |
| rs77108552  | A | -0.0602 |
| rs59561972  | A | -0.0816 |
| rs75612281  | G | -0.0812 |
| rs713578    | T | 0.0215  |
| rs17757368  | C | -0.0299 |
| rs149323677 | T | 0.1479  |
| rs113767704 | A | 0.0837  |
| rs2850512   | T | 0.0287  |
| rs11660405  | C | -0.0267 |
| rs142634091 | G | -0.0722 |
| rs28661835  | T | -0.057  |
| rs56052409  | T | 0.0324  |
| rs4796973   | T | -0.0336 |

|             |   |         |
|-------------|---|---------|
| rs78044508  | G | 0.0355  |
| rs116328470 | C | -0.0306 |
| rs117052000 | C | 0.0568  |
| rs17842596  | G | 0.0206  |
| rs4430852   | C | -0.0241 |
| rs113047186 | T | 0.0724  |
| rs10502542  | A | 0.0281  |
| rs117764821 | T | -0.118  |
| rs2074321   | A | 0.0662  |
| rs76917159  | C | -0.0672 |
| rs140596101 | G | 0.0695  |
| rs56040248  | C | 0.1188  |
| rs35720843  | T | 0.0265  |
| rs6506355   | C | 0.0483  |
| rs10432217  | C | 0.0275  |
| rs76962909  | G | 0.0902  |
| rs76532494  | C | -0.0655 |
| rs148766600 | G | 0.0692  |
| rs62085087  | G | -0.1089 |
| rs12963861  | T | 0.0317  |
| rs470508    | G | -0.0214 |
| rs117206078 | T | -0.1035 |
| rs9951005   | G | -0.0767 |
| rs1941584   | C | -0.038  |
| rs34763266  | T | -0.148  |
| rs78809598  | T | 0.0791  |
| rs12150841  | T | 0.0457  |
| rs16978452  | A | 0.025   |
| rs8092136   | G | -0.0237 |
| rs8091414   | A | 0.0939  |
| rs12970496  | G | -0.0303 |
| rs73455278  | C | 0.1369  |
| rs11662355  | C | 0.026   |
| rs9963644   | T | -0.0361 |
| rs72974529  | A | 0.0449  |
| rs7238339   | T | 0.053   |
| rs4410187   | G | -0.0309 |
| rs12605227  | T | 0.0211  |
| rs8093200   | C | -0.0331 |
| rs79117759  | A | 0.1142  |
| rs4798619   | C | 0.0194  |
| rs77617352  | T | 0.0824  |
| rs71357654  | T | 0.0583  |
| rs10438983  | T | -0.0375 |
| rs11564298  | G | 0.023   |
| rs589568    | G | -0.0628 |
| rs1917910   | A | -0.1165 |

|             |   |         |
|-------------|---|---------|
| rs35592049  | T | 0.0818  |
| rs145771123 | C | -0.0531 |
| rs71364565  | A | 0.0753  |
| rs35437834  | G | -0.0359 |
| rs7504492   | C | -0.0201 |
| rs4940571   | G | -0.0441 |
| rs8089741   | C | -0.0275 |
| rs9955723   | T | -0.0241 |
| rs9948498   | T | -0.0216 |
| rs1786819   | A | 0.0343  |
| rs118174674 | T | -0.1117 |
| rs60892860  | C | 0.0349  |
| rs34069908  | G | -0.1269 |
| rs146799823 | T | -0.1437 |
| rs62086552  | A | -0.0225 |
| rs2957978   | T | -0.0246 |
| rs11150923  | A | -0.1107 |
| rs8099782   | G | -0.0243 |
| rs7230063   | C | 0.0499  |
| rs147234434 | A | 0.0709  |
| rs118057599 | T | -0.1164 |
| rs12967944  | G | 0.0437  |
| rs56012539  | C | -0.0225 |
| rs117085532 | A | 0.1502  |
| rs4890682   | C | 0.0276  |
| rs56078702  | A | -0.0304 |
| rs7227331   | A | -0.0209 |
| rs76315104  | G | 0.0959  |
| rs12962805  | C | 0.02    |
| rs2005099   | G | -0.0417 |
| rs78252721  | T | 0.0384  |
| rs117495067 | C | 0.0547  |
| rs74366314  | A | -0.0597 |
| rs144894229 | A | 0.1472  |
| rs28444608  | C | 0.0272  |
| rs8094717   | A | -0.17   |
| rs16951179  | T | 0.0909  |
| rs7235450   | C | 0.0229  |
| rs62081330  | G | -0.0589 |
| rs111896047 | A | -0.0777 |
| rs117902998 | T | 0.0496  |
| rs75503778  | A | 0.0241  |
| rs17252748  | T | -0.0342 |
| rs76759521  | T | 0.1069  |
| rs16941694  | G | 0.0571  |
| rs77280338  | G | 0.0471  |
| rs117971173 | A | 0.0989  |

|             |   |         |
|-------------|---|---------|
| rs1365256   | T | 0.0654  |
| rs74714630  | G | -0.0559 |
| rs12962521  | T | -0.0378 |
| rs7229175   | T | -0.0343 |
| rs299749    | G | 0.0241  |
| rs113619550 | T | -0.0345 |
| rs76058923  | T | 0.1422  |
| rs72858906  | C | -0.0941 |
| rs117236391 | A | 0.1366  |
| rs1943940   | C | 0.024   |
| rs56113721  | A | -0.0268 |
| rs9950572   | T | -0.0198 |
| rs117874427 | T | -0.1125 |
| rs6506823   | A | 0.0308  |
| rs2420207   | A | 0.0321  |
| rs10502875  | A | -0.0402 |
| rs117779952 | T | 0.0872  |
| rs8094412   | A | -0.0285 |
| rs79342110  | G | -0.0565 |
| rs74923399  | A | 0.0764  |
| rs2096817   | A | 0.0188  |
| rs275857    | G | 0.0478  |
| rs73423853  | T | -0.0748 |
| rs8090411   | T | 0.1338  |
| rs147901508 | T | 0.0874  |
| rs17068185  | A | -0.0437 |
| rs117149340 | C | 0.1123  |
| rs58962084  | A | -0.0291 |
| rs34784622  | T | -0.0825 |
| rs7233454   | G | -0.0203 |
| rs78367656  | T | 0.1268  |
| rs140437966 | C | 0.1215  |
| rs62092441  | T | 0.0457  |
| rs62092666  | T | -0.1047 |
| rs72972089  | T | -0.0305 |
| rs609577    | G | 0.0336  |
| rs144293091 | T | 0.0685  |
| rs76807877  | C | -0.1365 |
| rs78107752  | C | -0.0866 |
| rs1626617   | T | 0.0382  |
| rs112828298 | G | 0.1148  |
| rs34688724  | A | -0.0718 |
| rs118004778 | G | -0.1066 |
| rs76139300  | G | -0.081  |
| rs62102242  | A | 0.0196  |
| rs1115563   | T | -0.0216 |
| rs1950068   | A | 0.0243  |

|             |   |         |
|-------------|---|---------|
| rs735254    | A | -0.0225 |
| rs17798851  | C | 0.0197  |
| rs12605694  | G | -0.1189 |
| rs8099189   | T | 0.0242  |
| rs34589386  | A | 0.083   |
| rs118114425 | T | -0.1486 |
| rs8085069   | T | 0.0376  |
| rs8094575   | T | -0.0292 |
| rs149629159 | G | 0.0984  |
| rs11080525  | T | -0.0227 |
| rs11872685  | T | 0.0211  |
| rs1077388   | T | -0.0222 |
| rs981121    | G | 0.0202  |
| rs117194116 | A | 0.0649  |
| rs150658517 | C | -0.0623 |
| rs7227471   | A | 0.0368  |
| rs77934724  | A | 0.0332  |
| rs4614805   | T | -0.0241 |
| rs17439829  | A | -0.0351 |
| rs1849887   | T | -0.0557 |
| rs118058602 | G | -0.0845 |
| rs72871691  | A | -0.0472 |
| rs62081859  | C | 0.113   |
| rs72899372  | C | 0.0826  |
| rs75440575  | C | 0.0557  |
| rs79933577  | A | 0.0988  |
| rs2543028   | C | 0.0287  |
| rs4891965   | G | -0.0361 |
| rs11504783  | G | -0.0464 |
| rs1437002   | A | 0.0191  |
| rs113296711 | A | 0.0876  |
| rs76748736  | G | 0.0955  |
| rs117929270 | G | 0.1893  |
| rs58365922  | C | -0.0237 |
| rs1942878   | T | 0.0765  |
| rs117688889 | A | -0.0928 |
| rs75181543  | C | 0.0965  |
| rs17518135  | C | 0.0724  |
| rs78096776  | C | -0.1139 |
| rs1962672   | T | 0.0213  |
| rs112527930 | T | 0.0814  |
| rs55651909  | G | -0.0597 |
| rs80116285  | A | 0.0835  |
| rs930698    | C | -0.0184 |
| rs72916849  | A | 0.0595  |
| rs9966271   | A | -0.036  |
| rs12953740  | T | 0.0201  |

|             |   |         |
|-------------|---|---------|
| rs12958815  | T | -0.1454 |
| rs79603180  | A | -0.0895 |
| rs74857495  | G | -0.0679 |
| rs656585    | G | 0.0408  |
| rs17707032  | A | -0.0308 |
| rs79799750  | C | 0.0992  |
| rs1031555   | G | -0.0274 |
| rs74899732  | G | 0.1556  |
| rs72973643  | C | 0.0366  |
| rs10163938  | C | -0.0856 |
| rs1371279   | A | -0.0197 |
| rs78576745  | T | -0.0895 |
| rs62093381  | T | -0.0575 |
| rs76701583  | A | -0.0923 |
| rs72957415  | G | 0.0596  |
| rs3897588   | C | 0.0217  |
| rs1662925   | A | 0.0224  |
| rs12455054  | T | 0.0191  |
| rs75250406  | T | -0.0687 |
| rs34039285  | C | 0.0252  |
| rs4563117   | T | 0.0191  |
| rs4940377   | T | -0.0234 |
| rs77721849  | G | -0.0751 |
| rs10871526  | A | 0.0296  |
| rs117555415 | G | -0.1005 |
| rs111840334 | T | -0.0269 |
| rs78303824  | A | -0.0986 |
| rs1869734   | A | -0.0365 |
| rs34878160  | A | 0.0443  |
| rs17799852  | C | -0.0226 |
| rs141552018 | T | 0.0973  |
| rs16943425  | C | -0.0336 |
| rs113662640 | T | 0.0258  |
| rs35622459  | A | 0.0295  |
| rs17561091  | A | -0.0796 |
| rs72915931  | G | -0.0227 |
| rs9319956   | C | -0.018  |
| rs116517425 | C | 0.108   |
| rs4890926   | T | 0.0252  |
| rs607660    | C | 0.0205  |
| rs1539825   | A | 0.067   |
| rs7239579   | G | -0.0189 |
| rs17497272  | C | 0.0282  |
| rs146112622 | A | 0.0607  |
| rs138429301 | A | 0.1253  |
| rs8096381   | A | 0.0189  |
| rs77882664  | C | -0.0929 |

|             |   |         |
|-------------|---|---------|
| rs74582077  | C | 0.0513  |
| rs117913952 | A | -0.0971 |
| rs4586542   | T | 0.0243  |
| rs118079439 | T | 0.1135  |
| rs321664    | T | -0.0205 |
| rs693927    | A | 0.0518  |
| rs754825    | G | 0.0245  |
| rs9947160   | T | 0.1051  |
| rs67666665  | T | -0.0727 |
| rs1942816   | T | -0.0659 |
| rs1430542   | T | -0.0212 |
| rs76650737  | T | 0.0596  |
| rs4892113   | T | 0.0192  |
| rs115841049 | G | 0.1208  |
| rs144558202 | T | 0.0556  |
| rs17785065  | G | 0.0966  |
| rs8095716   | C | -0.0251 |
| rs139675555 | G | 0.1044  |
| rs12967120  | G | -0.0204 |
| rs28609012  | A | 0.1065  |
| rs12965995  | C | 0.0361  |
| rs11661907  | G | -0.029  |
| rs59850616  | G | 0.0243  |
| rs949023    | A | -0.0194 |
| rs4797943   | G | 0.0187  |
| rs10513906  | A | 0.0215  |
| rs116919627 | A | -0.0677 |
| rs67999204  | G | 0.035   |
| rs2644197   | A | 0.0199  |
| rs28485249  | C | 0.0917  |
| rs1595356   | G | -0.0192 |
| rs59587703  | A | 0.0284  |
| rs118006598 | A | 0.037   |
| rs768214    | G | 0.0237  |
| rs55979576  | C | 0.0883  |
| rs148143469 | T | 0.0722  |
| rs2347273   | A | -0.0228 |
| rs1982152   | G | -0.0794 |
| rs2040202   | G | -0.0264 |
| rs141238812 | A | -0.1158 |
| rs149954881 | A | 0.1256  |
| rs118009741 | C | 0.076   |
| rs76176864  | G | 0.0335  |
| rs1943799   | C | -0.0381 |
| rs689896    | C | 0.0223  |
| rs16947808  | T | 0.0351  |
| rs7241927   | T | 0.0279  |



|             |   |         |
|-------------|---|---------|
| rs112952141 | T | 0.1555  |
| rs8095876   | A | -0.0847 |
| rs242720    | G | 0.02    |
| rs4987852   | C | 0.0397  |
| rs3745051   | T | -0.0369 |
| rs75445982  | A | 0.0855  |
| rs11661364  | T | 0.1169  |
| rs671764    | T | 0.0353  |
| rs77825808  | G | 0.1351  |
| rs72920058  | A | -0.0322 |
| rs2518060   | A | -0.0473 |
| rs7239922   | A | 0.0508  |
| rs4239336   | A | -0.0219 |
| rs17187695  | T | -0.0298 |
| rs2851760   | T | -0.0803 |
| rs141046380 | A | -0.1041 |
| rs11564288  | T | 0.0817  |
| rs150606919 | C | 0.1627  |
| rs148673797 | A | -0.1043 |
| rs9676158   | T | 0.0414  |
| rs12456024  | T | -0.0321 |
| rs1506413   | C | -0.0775 |
| rs34430354  | C | -0.0261 |
| rs12455254  | C | -0.0653 |
| rs75937431  | G | 0.0393  |
| rs12970631  | C | -0.0268 |
| rs79242778  | G | -0.0925 |
| rs118138038 | C | -0.1202 |
| rs113712251 | A | 0.123   |
| rs948292    | G | -0.0192 |
| rs630525    | A | 0.0212  |
| rs75832112  | T | -0.0934 |
| rs141686682 | T | 0.0741  |
| rs75589202  | T | 0.072   |
| rs4796873   | G | -0.0335 |
| rs8095436   | A | -0.0351 |
| rs12103991  | C | -0.0429 |
| rs59299361  | A | 0.1312  |
| rs74713163  | G | -0.022  |
| rs12604684  | G | -0.0285 |
| rs1943214   | A | 0.0275  |
| rs11663219  | G | 0.0214  |
| rs149230714 | T | -0.0538 |
| rs11873200  | C | 0.0762  |
| rs1149882   | A | 0.0379  |
| rs12604795  | G | 0.0404  |
| rs80134597  | G | -0.1218 |

|             |   |         |
|-------------|---|---------|
| rs4798247   | T | 0.0254  |
| rs8084789   | A | -0.0318 |
| rs36046989  | A | -0.0664 |
| rs8090960   | G | -0.0229 |
| rs79222067  | T | -0.0752 |
| rs957818    | G | -0.0634 |
| rs5009392   | C | -0.1021 |
| rs115068610 | T | -0.1153 |
| rs1893755   | C | -0.024  |
| rs7233030   | A | 0.0268  |
| rs150695305 | T | 0.0694  |
| rs62094778  | A | -0.0882 |
| rs2028523   | C | 0.0197  |
| rs4801078   | T | -0.0196 |
| rs77948526  | A | 0.0751  |
| rs2155543   | A | -0.0413 |
| rs117770206 | A | -0.1254 |
| rs73971351  | T | -0.0618 |
| rs35528848  | C | 0.0927  |
| rs12966432  | G | 0.0934  |
| rs140157429 | T | 0.0946  |
| rs75369730  | T | -0.0425 |
| rs74473069  | A | -0.0797 |
| rs10502723  | C | 0.0399  |
| rs116997450 | C | -0.1241 |
| rs1443328   | G | 0.1015  |
| rs76952457  | A | 0.0441  |
| rs117798509 | T | 0.0932  |
| rs17725762  | T | -0.1412 |
| rs56266791  | T | 0.033   |
| rs17811077  | G | -0.0252 |
| rs72856972  | A | 0.0332  |
| rs1667914   | G | -0.0242 |
| rs80253522  | T | 0.1065  |
| rs117099074 | T | 0.0931  |
| rs9958028   | G | 0.0195  |
| rs72871805  | C | -0.0257 |
| rs72921201  | A | -0.0944 |
| rs61351059  | T | 0.0616  |
| rs62100268  | T | -0.0196 |
| rs72955219  | G | -0.1211 |
| rs111956882 | T | -0.0789 |
| rs9962486   | A | 0.0358  |
| rs61455548  | C | 0.1236  |
| rs3875035   | T | 0.0275  |
| rs138732709 | A | 0.1231  |
| rs150781920 | A | -0.1111 |

|             |   |         |
|-------------|---|---------|
| rs34457987  | C | 0.0446  |
| rs10513912  | C | 0.0727  |
| rs11661634  | A | 0.0214  |
| rs12454944  | G | 0.0953  |
| rs80284527  | T | -0.0724 |
| rs10513966  | T | -0.0267 |
| rs16949968  | C | -0.0494 |
| rs3914793   | T | -0.0459 |
| rs72960765  | A | -0.0325 |
| rs12457055  | C | 0.1113  |
| rs12964767  | A | 0.0572  |
| rs1823592   | T | 0.0189  |
| rs78739907  | C | -0.0668 |
| rs17204255  | T | 0.0215  |
| rs16958610  | C | -0.092  |
| rs2931051   | G | 0.025   |
| rs594334    | C | -0.0293 |
| rs145423343 | T | -0.1323 |
| rs71362726  | C | -0.0448 |
| rs12150810  | C | 0.0515  |
| rs34323541  | A | -0.0834 |
| rs7239838   | G | 0.0789  |
| rs114198955 | A | 0.137   |
| rs7359820   | T | 0.0369  |
| rs141416997 | T | 0.0795  |
| rs12605192  | A | 0.0418  |
| rs1789497   | G | -0.0502 |
| rs9963146   | T | -0.0222 |
| rs56384833  | T | -0.0368 |
| rs13353238  | C | -0.0639 |
| rs4940716   | T | 0.0183  |
| rs17089246  | C | 0.0583  |
| rs17088278  | T | -0.0516 |
| rs117642458 | T | 0.0748  |
| rs1667944   | G | -0.0252 |
| rs113343536 | G | -0.0258 |
| rs6506007   | G | -0.0309 |
| rs59747816  | G | -0.1319 |
| rs9944823   | A | 0.04    |
| rs17058944  | C | -0.0389 |
| rs3786284   | A | -0.0256 |
| rs9953730   | G | 0.0184  |
| rs148170907 | G | 0.0511  |
| rs28660339  | C | 0.1013  |
| rs11661003  | A | -0.1499 |
| rs72868678  | G | -0.0591 |
| rs115528039 | C | -0.0731 |

|             |   |         |
|-------------|---|---------|
| rs9947527   | G | -0.025  |
| rs62103445  | A | 0.0202  |
| rs2163385   | G | -0.0403 |
| rs2602152   | A | 0.0361  |
| rs62103349  | C | -0.0266 |
| rs60729765  | A | -0.019  |
| rs150315156 | A | -0.0609 |
| rs73406595  | C | -0.1077 |
| rs1791239   | C | -0.018  |
| rs116954276 | C | -0.1547 |
| rs12970870  | T | 0.0272  |
| rs117597000 | A | -0.0842 |
| rs62080078  | T | -0.1148 |
| rs9967018   | G | 0.0488  |
| rs73402834  | A | 0.0365  |
| rs12456811  | G | -0.0341 |
| rs11151576  | G | 0.039   |
| rs72889365  | T | 0.0533  |
| rs2342195   | T | -0.0227 |
| rs71362067  | C | -0.0696 |
| rs17080662  | A | -0.0361 |
| rs34149182  | A | 0.0208  |
| rs75650744  | A | -0.1268 |
| rs2575178   | G | 0.0254  |
| rs7229727   | G | -0.0303 |
| rs60257752  | A | 0.0525  |
| rs1035000   | A | 0.0412  |
| rs77400956  | T | 0.0934  |
| rs147825084 | G | 0.08    |
| rs35630063  | C | 0.0894  |
| rs71355327  | G | 0.0189  |
| rs16960216  | A | 0.0836  |
| rs882964    | G | 0.0598  |
| rs7241207   | C | -0.0918 |
| rs139183776 | C | 0.0436  |
| rs28624785  | C | 0.0184  |
| rs62098867  | A | 0.086   |
| rs143388054 | G | 0.1424  |
| rs79972732  | T | -0.0306 |
| rs55683681  | C | 0.0585  |
| rs28605755  | T | 0.0486  |
| rs8091460   | A | -0.0256 |
| rs116914360 | T | -0.1184 |
| rs79878952  | A | -0.0913 |
| rs17726268  | A | -0.0793 |
| rs150972382 | A | 0.123   |
| rs9957203   | T | 0.0658  |

|             |   |         |
|-------------|---|---------|
| rs1122762   | T | 0.0236  |
| rs116875040 | A | -0.0711 |
| rs148649415 | G | -0.0976 |
| rs72893228  | T | 0.147   |
| rs76940017  | G | 0.0541  |
| rs17824054  | G | -0.0563 |
| rs17719020  | G | -0.0756 |
| rs117177064 | T | -0.1853 |
| rs490854    | T | -0.0184 |
| rs8098594   | G | -0.0256 |
| rs140168649 | A | 0.0589  |
| rs12458547  | C | -0.018  |
| rs7235429   | C | 0.0488  |
| rs76097212  | C | 0.0962  |
| rs1320665   | A | -0.0205 |
| rs4798560   | T | 0.0335  |
| rs78431144  | A | 0.0887  |
| rs9949592   | A | 0.024   |
| rs1463389   | A | 0.0291  |
| rs11659420  | G | -0.0205 |
| rs144154718 | C | -0.0628 |
| rs12150813  | G | -0.0195 |
| rs7244238   | G | 0.0203  |
| rs4892181   | T | -0.0297 |
| rs117211209 | T | 0.1041  |
| rs117530970 | A | 0.0994  |
| rs4798825   | T | 0.0676  |
| rs78342406  | C | 0.0483  |
| rs117490070 | C | 0.0825  |
| rs76019603  | T | 0.072   |
| rs12456207  | T | -0.0402 |
| rs17801555  | A | -0.0394 |
| rs77906266  | T | -0.0952 |
| rs7239303   | G | 0.0235  |
| rs79377341  | C | -0.0405 |
| rs72993721  | A | -0.0651 |
| rs117111446 | G | -0.0546 |
| rs35698243  | T | -0.0481 |
| rs77977779  | G | 0.0321  |
| rs118118674 | T | 0.1207  |
| rs117289482 | C | -0.0387 |
| rs4797118   | A | -0.0407 |
| rs7239646   | A | -0.0257 |
| rs75713301  | T | 0.0349  |
| rs140372248 | T | -0.0917 |
| rs149766446 | C | -0.0386 |
| rs972697    | G | -0.0215 |

|             |   |         |
|-------------|---|---------|
| rs116914137 | A | 0.057   |
| rs118118363 | G | 0.1021  |
| rs77736876  | A | 0.0996  |
| rs1298240   | A | -0.0282 |
| rs141273302 | T | 0.1351  |
| rs118026992 | A | -0.1545 |
| rs75890206  | A | 0.0559  |
| rs6506939   | T | 0.0226  |
| rs34704156  | A | 0.0314  |
| rs72919389  | T | -0.0716 |
| rs7232372   | C | 0.037   |
| rs7234733   | G | -0.0412 |
| rs17195541  | G | -0.0497 |
| rs6566989   | G | -0.0211 |
| rs11151169  | T | -0.035  |
| rs143058505 | A | -0.1613 |
| rs117918069 | C | 0.1359  |
| rs60547948  | A | 0.031   |
| rs144471047 | T | -0.1267 |
| rs7243873   | T | 0.0337  |
| rs3133206   | C | -0.0181 |
| rs77065473  | T | 0.0997  |
| rs117701324 | G | -0.0521 |
| rs45451293  | A | -0.0988 |
| rs1657406   | C | 0.0757  |
| rs74546409  | G | -0.0844 |
| rs77705894  | G | 0.0756  |
| rs112738046 | G | -0.0526 |
| rs72911553  | G | -0.0298 |
| rs1942162   | T | -0.0634 |
| rs12960619  | T | -0.097  |
| rs118166532 | A | 0.1509  |
| rs17763644  | A | 0.0368  |
| rs7231415   | A | -0.0283 |
| rs11874612  | T | -0.0199 |
| rs4891993   | G | 0.0295  |
| rs142624306 | T | -0.1018 |
| rs116884723 | T | -0.0834 |
| rs9956444   | A | 0.0697  |
| rs906516    | G | -0.0181 |
| rs55928096  | A | -0.0774 |
| rs62086982  | A | -0.0262 |
| rs75666527  | T | 0.0894  |
| rs17083217  | A | 0.0305  |
| rs1261094   | G | 0.0384  |
| rs138499801 | G | -0.0614 |
| rs10460009  | T | -0.0288 |

|             |   |         |
|-------------|---|---------|
| rs79328727  | G | 0.1229  |
| rs7236648   | G | -0.0585 |
| rs2197531   | A | -0.0236 |
| rs1492811   | C | 0.0322  |
| rs7235188   | T | 0.0682  |
| rs75467115  | G | 0.0821  |
| rs77109245  | T | 0.0492  |
| rs60767930  | A | 0.0424  |
| rs1786818   | T | 0.0178  |
| rs75005570  | G | -0.0399 |
| rs75874178  | A | -0.0338 |
| rs12961355  | G | 0.0297  |
| rs62078641  | G | -0.0682 |
| rs79647888  | C | 0.1285  |
| rs12454802  | G | 0.0196  |
| rs4414560   | A | -0.1002 |
| rs117251175 | A | 0.1012  |
| rs17754585  | A | -0.0788 |
| rs4798127   | G | 0.0211  |
| rs12968085  | A | -0.0357 |
| rs117254920 | A | 0.0609  |
| rs238113    | C | 0.0256  |
| rs117887778 | A | 0.0931  |
| rs146610815 | G | 0.1376  |
| rs117446586 | C | -0.1666 |
| rs28502575  | T | -0.036  |
| rs17188877  | C | -0.0653 |
| rs2612384   | A | -0.0209 |
| rs74429350  | A | -0.1465 |
| rs72937606  | G | 0.0724  |
| rs79534517  | C | 0.0986  |
| rs73944550  | A | -0.0271 |
| rs35541683  | G | 0.0383  |
| rs80060413  | G | -0.0496 |
| rs12967949  | T | -0.0274 |
| rs9945345   | G | -0.044  |
| rs2446502   | C | 0.0194  |
| rs117665781 | A | 0.0483  |
| rs112203374 | T | -0.0397 |
| rs151472    | T | 0.0234  |
| rs114960451 | A | -0.1099 |
| rs56677594  | C | 0.0261  |
| rs12959354  | C | 0.0349  |
| rs139162018 | T | -0.0649 |
| rs12968662  | T | -0.0883 |
| rs78542360  | A | 0.083   |
| rs726688    | T | 0.0208  |

|             |   |         |
|-------------|---|---------|
| rs17229961  | A | 0.0638  |
| rs9961123   | C | 0.1077  |
| rs76134551  | C | -0.0724 |
| rs34367921  | A | 0.077   |
| rs117150675 | C | 0.1542  |
| rs142925441 | C | 0.1316  |
| rs76732221  | A | -0.0382 |
| rs71352702  | T | 0.0339  |
| rs11661007  | A | 0.0612  |
| rs2000847   | A | -0.0185 |
| rs75408759  | T | -0.0778 |
| rs142787273 | A | -0.0735 |
| rs66469107  | A | 0.0577  |
| rs80111940  | T | 0.0476  |
| rs114617469 | A | -0.0659 |
| rs72991860  | A | 0.1063  |
| rs1546368   | C | -0.0268 |
| rs62087105  | G | 0.0514  |
| rs16953662  | C | 0.0431  |
| rs79469230  | C | 0.121   |
| rs10853329  | T | -0.0224 |
| rs72908168  | C | 0.049   |
| rs117448671 | C | 0.0527  |
| rs34551689  | A | -0.0244 |
| rs8097515   | C | -0.028  |
| rs77505810  | T | 0.0853  |
| rs12606284  | G | 0.037   |
| rs79540439  | T | 0.1474  |
| rs9967116   | A | 0.0184  |
| rs76656473  | C | -0.0954 |
| rs9962181   | G | 0.0309  |
| rs12607692  | C | -0.021  |
| rs4077090   | C | 0.0201  |
| rs17804730  | A | -0.0182 |
| rs77443187  | T | 0.0677  |
| rs9675924   | A | 0.0203  |
| rs8085361   | G | -0.1051 |
| rs72901957  | G | -0.1014 |
| rs1539912   | C | -0.0246 |
| rs9965242   | G | -0.0493 |
| rs882965    | A | -0.0206 |
| rs77042374  | T | -0.0883 |
| rs498285    | C | -0.0192 |
| rs12386070  | G | 0.0405  |
| rs9967409   | C | 0.0189  |
| rs8086298   | A | 0.0905  |
| rs75619274  | G | -0.0331 |



|             |   |         |
|-------------|---|---------|
| rs1085977   | C | -0.0275 |
| rs12969516  | C | -0.0173 |
| rs62082174  | C | -0.0519 |
| rs72939535  | T | -0.055  |
| rs79206023  | A | -0.0987 |
| rs56390414  | A | 0.0181  |
| rs79744324  | A | 0.0447  |
| rs6507602   | A | 0.0179  |
| rs142083770 | G | -0.0631 |
| rs7245104   | T | 0.0172  |
| rs2430853   | G | -0.0222 |
| rs658504    | A | -0.0423 |
| rs2277729   | C | -0.0231 |
| rs78649920  | A | 0.1018  |
| rs12969264  | C | 0.0307  |
| rs559814    | G | 0.0172  |
| rs9948558   | T | -0.032  |
| rs11081279  | G | -0.0373 |
| rs149448194 | A | 0.055   |
| rs72935980  | T | 0.0627  |
| rs28370576  | G | -0.0274 |
| rs74388646  | C | -0.1213 |
| rs8093915   | C | 0.0204  |
| rs72979142  | A | -0.1254 |
| rs112831465 | A | 0.0732  |
| rs732780    | T | 0.0974  |
| rs77343156  | G | -0.0659 |
| rs8088065   | T | 0.024   |
| rs62098951  | T | -0.0192 |
| rs489104    | C | 0.0264  |
| rs7232514   | A | 0.0184  |
| rs117322463 | A | 0.0445  |
| rs73959053  | A | 0.1094  |
| rs11659643  | C | 0.0615  |
| rs34724061  | T | -0.086  |
| rs12454372  | G | 0.0551  |
| rs1717548   | A | -0.0225 |
| rs117557104 | A | -0.0506 |
| rs1196589   | T | -0.0182 |
| rs62093974  | T | 0.0356  |
| rs12960989  | C | 0.0254  |
| rs11660770  | T | -0.0429 |
| rs11664248  | G | 0.0383  |
| rs17807127  | C | -0.0445 |
| rs11664090  | G | 0.0382  |
| rs58809616  | A | -0.027  |
| rs113710329 | A | -0.0915 |

|             |   |         |
|-------------|---|---------|
| rs150089724 | T | -0.052  |
| rs117718757 | A | 0.0474  |
| rs11663912  | C | -0.0251 |
| rs117954143 | A | 0.1222  |
| rs12607954  | G | -0.0572 |
| rs8095203   | A | -0.0254 |
| rs1942314   | C | -0.0224 |
| rs1876486   | A | -0.0342 |
| rs13381678  | T | 0.0312  |
| rs80169936  | C | -0.0703 |
| rs12966158  | A | -0.0209 |
| rs9636087   | C | 0.1021  |
| rs1630958   | C | 0.0183  |
| rs12969166  | C | -0.0174 |
| rs147963773 | G | -0.1156 |
| rs74812449  | C | 0.0435  |
| rs749787    | G | -0.0343 |
| rs75028042  | A | -0.0306 |
| rs6506839   | C | 0.0341  |
| rs681202    | A | 0.019   |
| rs41537545  | A | -0.0354 |
| rs17386475  | C | -0.0337 |
| rs1940675   | C | 0.025   |
| rs34094237  | G | 0.024   |
| rs12954672  | C | 0.03    |
| rs72941321  | G | 0.0295  |
| rs55811982  | T | -0.0423 |
| rs1943677   | T | -0.0242 |
| rs523927    | T | 0.0407  |
| rs59223542  | A | 0.0235  |
| rs55991326  | G | 0.0742  |
| rs113172068 | A | -0.1371 |
| rs684964    | C | 0.0177  |
| rs143374422 | A | -0.1054 |
| rs78928912  | T | 0.0585  |
| rs117298032 | T | -0.0758 |
| rs28548882  | A | -0.0658 |
| rs55879017  | G | 0.0727  |
| rs74966994  | A | -0.0499 |
| rs7238197   | T | 0.0258  |
| rs17071470  | T | 0.023   |
| rs8092501   | A | 0.0203  |
| rs76282601  | T | 0.0258  |
| rs17743658  | A | -0.0196 |
| rs62087985  | T | 0.0302  |
| rs75603094  | G | 0.0372  |
| rs111368883 | T | -0.0517 |

|             |   |         |
|-------------|---|---------|
| rs1519135   | T | 0.0206  |
| rs610573    | A | -0.0171 |
| rs147113307 | A | 0.1169  |
| rs117684595 | T | -0.1533 |
| rs146018080 | G | -0.0708 |
| rs17585022  | A | 0.0285  |
| rs12456063  | T | 0.0939  |
| rs62102353  | T | 0.0473  |
| rs143698793 | A | -0.1256 |
| rs12962427  | T | 0.0209  |
| rs116905222 | G | 0.057   |
| rs12958813  | G | 0.0187  |
| rs111425157 | G | 0.0717  |
| rs2238536   | T | 0.0373  |
| rs113844872 | T | 0.0672  |
| rs62087031  | A | -0.031  |
| rs148079494 | C | 0.0827  |
| rs1986841   | G | 0.0174  |
| rs7233289   | C | 0.0512  |
| rs118132944 | G | -0.0291 |
| rs117079986 | T | -0.079  |
| rs117636570 | T | -0.0735 |
| rs60635153  | T | -0.0807 |
| rs75522004  | C | 0.0574  |
| rs7237834   | T | 0.0189  |
| rs12606154  | A | 0.0739  |
| rs79941936  | T | 0.0994  |
| rs28715557  | T | -0.0268 |
| rs17070818  | G | 0.1021  |
| rs203192    | T | 0.1005  |
| rs118052451 | G | 0.0889  |
| rs896651    | T | 0.0199  |
| rs113180034 | C | 0.0364  |
| rs8087858   | G | 0.0188  |
| rs77100388  | A | 0.0494  |
| rs117021102 | T | -0.066  |
| rs79395910  | A | -0.0821 |
| rs79625557  | A | -0.0401 |
| rs79608331  | A | 0.0973  |
| rs1982673   | C | -0.0237 |
| rs57533619  | T | -0.0196 |
| rs9959934   | G | -0.0255 |
| rs55820593  | T | -0.0358 |
| rs57972550  | G | -0.069  |
| rs12956449  | C | -0.0198 |
| rs75822045  | C | 0.0562  |
| rs80179522  | A | -0.113  |

|             |   |         |
|-------------|---|---------|
| rs660914    | T | 0.1473  |
| rs9966537   | G | 0.0173  |
| rs72858057  | T | -0.0621 |
| rs4800361   | A | -0.0383 |
| rs12958565  | T | -0.0421 |
| rs9959895   | A | 0.0468  |
| rs118154569 | A | -0.0577 |
| rs166658    | T | -0.0809 |
| rs34429051  | G | -0.0333 |
| rs34743250  | A | -0.0278 |
| rs2083451   | A | 0.0195  |
| rs35436395  | A | 0.0527  |
| rs142723205 | A | 0.0975  |
| rs2051423   | T | -0.0175 |
| rs1155993   | T | -0.0183 |
| rs62094475  | A | 0.0481  |
| rs117416190 | G | 0.0951  |
| rs67261204  | C | 0.0202  |
| rs17383710  | T | -0.0505 |
| rs113239544 | A | -0.0952 |
| rs80177516  | A | 0.1272  |
| rs71357694  | T | 0.0566  |
| rs463209    | C | -0.0355 |
| rs141200952 | T | -0.095  |
| rs7231283   | T | 0.0444  |
| rs9951897   | C | -0.0211 |
| rs77917204  | T | 0.0938  |
| rs117027052 | A | 0.1117  |
| rs28591677  | T | 0.0191  |
| rs74993976  | T | -0.0612 |
| rs145246727 | G | 0.0433  |
| rs4243278   | G | 0.0255  |
| rs117900298 | T | 0.057   |
| rs75396572  | C | -0.0922 |
| rs11151109  | A | 0.0192  |
| rs62100465  | T | 0.0213  |
| rs11151742  | T | 0.0302  |
| rs3894048   | G | -0.0375 |
| rs12966917  | C | 0.0207  |
| rs2850528   | C | -0.0267 |
| rs76734406  | A | -0.0704 |
| rs144638881 | G | -0.1057 |
| rs8087736   | A | 0.0198  |
| rs2848604   | G | 0.02    |
| rs7243724   | A | 0.0189  |
| rs79430775  | A | 0.1064  |
| rs12607063  | T | 0.0288  |

|             |   |         |
|-------------|---|---------|
| rs111956375 | A | 0.0683  |
| rs17238585  | G | 0.0283  |
| rs559687    | A | 0.025   |
| rs1237177   | A | -0.0899 |
| rs28609320  | T | 0.0729  |
| rs62095781  | C | -0.0955 |
| rs12457636  | C | 0.0762  |
| rs62078231  | T | 0.0757  |
| rs118025605 | A | 0.1274  |
| rs1431385   | G | 0.0198  |
| rs7241310   | T | -0.0444 |
| rs9945690   | T | -0.0442 |
| rs118188438 | C | -0.1286 |
| rs59864262  | T | -0.0361 |
| rs644082    | C | -0.0169 |
| rs9951331   | A | -0.0192 |
| rs144214719 | G | -0.1129 |
| rs62102309  | T | -0.0316 |
| rs1667905   | A | 0.0236  |
| rs56385957  | A | -0.0259 |
| rs1599911   | G | 0.0188  |
| rs7506608   | C | 0.0317  |
| rs12326678  | T | 0.0346  |
| rs72889875  | A | 0.0426  |
| rs144076848 | T | 0.0447  |
| rs75816914  | G | 0.0269  |
| rs3744825   | A | -0.0243 |
| rs4606830   | C | 0.0249  |
| rs62105164  | T | 0.0218  |
| rs142890493 | G | 0.0567  |
| rs1791230   | T | -0.018  |
| rs7226973   | C | -0.0175 |
| rs118039281 | G | 0.1417  |
| rs72938810  | C | 0.0606  |
| rs118116156 | A | 0.1583  |
| rs17066842  | A | 0.0484  |
| rs12964919  | T | -0.0169 |
| rs11660773  | T | -0.0223 |
| rs11665592  | A | 0.074   |
| rs111918203 | A | -0.0631 |
| rs12962020  | T | 0.0294  |
| rs41274312  | A | 0.0835  |
| rs78060680  | G | 0.0979  |
| rs2212684   | G | -0.0178 |
| rs71356502  | A | 0.052   |
| rs72874109  | C | 0.05    |
| rs112510988 | T | -0.1493 |

|             |   |         |
|-------------|---|---------|
| rs17782556  | G | 0.022   |
| rs72958562  | C | -0.0391 |
| rs678570    | A | 0.0217  |
| rs74916996  | G | 0.0545  |
| rs76376918  | G | 0.0654  |
| rs72943696  | T | -0.0245 |
| rs12458750  | T | -0.0189 |
| rs35205459  | A | 0.034   |
| rs55942843  | G | -0.0559 |
| rs79584450  | A | 0.0447  |
| rs11875404  | A | 0.048   |
| rs4799769   | G | -0.0361 |
| rs78090727  | A | 0.0533  |
| rs17586712  | T | -0.0237 |
| rs150678726 | A | -0.0476 |
| rs1692507   | G | -0.0182 |
| rs78646007  | T | 0.0472  |
| rs140141183 | C | 0.0639  |
| rs34802661  | A | -0.0316 |
| rs1791379   | A | -0.0219 |
| rs7233475   | A | -0.0273 |
| rs62079455  | C | 0.029   |
| rs10513876  | C | 0.0279  |
| rs7236090   | T | -0.0183 |
| rs76764576  | G | -0.0233 |
| rs147462679 | A | 0.0763  |
| rs12965919  | C | 0.024   |
| rs10460073  | T | 0.0198  |
| rs509497    | C | 0.0182  |
| rs7236592   | A | 0.0168  |
| rs117682421 | G | -0.0621 |
| rs142656042 | A | 0.0918  |
| rs76806659  | A | 0.0601  |
| rs148570609 | G | -0.0952 |
| rs144762714 | T | 0.082   |
| rs62092636  | T | -0.0934 |
| rs1977942   | T | 0.0173  |
| rs113654806 | A | 0.0296  |
| rs117333449 | C | -0.0447 |
| rs62095778  | C | 0.0204  |
| rs62093048  | A | -0.0283 |
| rs62093445  | A | 0.0778  |
| rs75883954  | G | 0.043   |
| rs17662563  | C | -0.0389 |
| rs9950057   | T | -0.0172 |
| rs7504906   | T | -0.0903 |
| rs116847653 | A | 0.0753  |

|             |   |         |
|-------------|---|---------|
| rs78982693  | T | -0.0611 |
| rs4940807   | C | -0.0206 |
| rs9964965   | G | 0.0412  |
| rs117334682 | C | -0.0882 |
| rs16954792  | C | 0.0236  |
| rs79914669  | T | -0.0869 |
| rs12458281  | A | 0.0442  |
| rs74694561  | T | 0.0202  |
| rs73945997  | A | -0.0622 |
| rs917932    | C | 0.0184  |
| rs111504222 | C | 0.082   |
| rs117499442 | C | -0.1119 |
| rs138340381 | T | -0.0921 |
| rs11661656  | C | 0.0213  |
| rs2000749   | G | 0.0371  |
| rs12970800  | G | 0.0261  |
| rs17725345  | C | -0.0606 |
| rs62099508  | A | 0.0793  |
| rs72979983  | C | -0.019  |
| rs80058573  | G | 0.0554  |
| rs34491046  | A | 0.0234  |
| rs17175006  | C | 0.0334  |
| rs1221866   | G | 0.0302  |
| rs141985305 | T | -0.0648 |
| rs4291999   | T | -0.0174 |
| rs146019272 | G | 0.076   |
| rs77018914  | T | -0.0696 |
| rs117384724 | T | -0.1235 |
| rs117785103 | G | -0.0885 |
| rs2448714   | G | 0.0203  |
| rs1426343   | C | 0.0178  |
| rs117253950 | T | -0.0644 |
| rs12964135  | A | 0.0335  |
| rs57855289  | G | 0.0201  |
| rs76212511  | G | 0.0434  |
| rs117599304 | G | 0.1454  |
| rs80309522  | A | 0.0452  |
| rs74773070  | A | -0.0511 |
| rs35051233  | G | -0.1632 |
| rs80007932  | T | -0.1447 |
| rs9963476   | C | -0.0203 |
| rs74556324  | C | 0.0331  |
| rs3879738   | T | -0.0302 |
| rs75855784  | T | 0.0472  |
| rs76063130  | C | 0.0798  |
| rs145522416 | C | -0.0943 |
| rs142327569 | G | -0.0678 |

|             |   |         |
|-------------|---|---------|
| rs11663127  | A | -0.0931 |
| rs7407614   | C | 0.0268  |
| rs2217070   | C | 0.0293  |
| rs17748357  | A | 0.0172  |
| rs9646579   | A | 0.0231  |
| rs4801016   | T | -0.0404 |
| rs138122013 | A | -0.0816 |
| rs147632870 | A | -0.0548 |
| rs79209887  | T | -0.0343 |
| rs12960081  | G | 0.017   |
| rs77137848  | G | -0.076  |
| rs116999727 | A | 0.0717  |
| rs78055265  | A | 0.0659  |
| rs1841793   | T | -0.0206 |
| rs112003862 | A | 0.0555  |
| rs72977800  | G | 0.0378  |
| rs72890609  | T | 0.0388  |
| rs151313213 | C | 0.1367  |
| rs75983315  | G | -0.1344 |
| rs7238255   | G | 0.0428  |
| rs11662439  | A | -0.1036 |
| rs11872303  | G | 0.1004  |
| rs139286228 | A | -0.128  |
| rs12456881  | T | -0.0185 |
| rs34931259  | A | -0.0946 |
| rs17082725  | T | 0.0383  |
| rs1630956   | G | -0.0164 |
| rs9676191   | C | -0.0592 |
| rs2586772   | T | 0.0219  |
| rs12961831  | A | -0.1085 |
| rs2848917   | C | 0.0401  |
| rs60727559  | C | 0.0747  |
| rs62097177  | T | -0.095  |
| rs11151721  | A | -0.0168 |
| rs62081489  | A | -0.0761 |
| rs35409822  | A | -0.017  |
| rs12959473  | A | -0.0469 |
| rs1350552   | T | 0.0268  |
| rs111948683 | T | -0.0369 |
| rs76980757  | A | -0.0647 |
| rs75735594  | T | 0.0841  |
| rs11877075  | G | 0.0787  |
| rs4494649   | A | 0.0177  |
| rs75959999  | T | -0.0599 |
| rs3105602   | T | -0.0171 |
| rs2644265   | A | -0.0212 |
| rs78473669  | A | 0.0669  |



|             |   |         |
|-------------|---|---------|
| rs1037905   | G | 0.0215  |
| rs141271845 | C | 0.093   |
| rs1356648   | A | 0.1062  |
| rs112039615 | T | 0.0837  |
| rs9964732   | T | 0.0271  |
| rs8094785   | G | -0.0171 |
| rs59218798  | T | 0.019   |
| rs77920955  | A | -0.0777 |
| rs10164203  | G | -0.0249 |
| rs117297539 | C | -0.0687 |
| rs62101975  | C | 0.0531  |
| rs12959987  | C | -0.0989 |
| rs2848782   | A | -0.0172 |
| rs117510506 | G | 0.0552  |
| rs112485150 | T | -0.0434 |
| rs1510057   | C | 0.0271  |
| rs11152195  | C | -0.0217 |
| rs12185423  | T | 0.0508  |
| rs7244642   | T | 0.017   |
| rs62075777  | A | 0.0491  |
| rs74876717  | G | 0.0741  |
| rs139381997 | G | -0.1116 |
| rs12960341  | G | -0.0438 |
| rs9948583   | T | 0.018   |
| rs73381996  | G | 0.0274  |
| rs7239591   | T | -0.0434 |
| rs140546434 | A | 0.0661  |
| rs112393618 | T | -0.0745 |
| rs72962964  | G | -0.0276 |
| rs4799823   | C | 0.0308  |
| rs10153390  | T | 0.0167  |
| rs12961459  | G | -0.0191 |
| rs789024    | A | -0.0184 |
| rs74634754  | C | -0.0687 |
| rs80070527  | T | -0.0493 |
| rs78598167  | T | -0.1077 |
| rs146968466 | G | 0.1098  |
| rs4797245   | C | -0.0223 |
| rs112193831 | A | -0.1071 |
| rs116952221 | C | -0.1286 |
| rs117693596 | A | -0.1144 |
| rs116929166 | G | -0.0985 |
| rs77771902  | T | -0.1193 |
| rs72880641  | C | -0.0253 |
| rs118162903 | A | 0.0622  |
| rs138302856 | G | 0.0851  |
| rs118155945 | C | -0.0727 |

|             |   |         |
|-------------|---|---------|
| rs78895434  | C | -0.0475 |
| rs10469232  | T | 0.1179  |
| rs28863503  | T | -0.0259 |
| rs77860579  | C | -0.1358 |
| rs34871097  | G | 0.0635  |
| rs11874694  | C | 0.0171  |
| rs12327332  | T | -0.0198 |
| rs11663523  | T | 0.0168  |
| rs117151040 | T | -0.104  |
| rs9955283   | C | -0.0332 |
| rs11660742  | A | 0.0217  |
| rs1785390   | G | 0.0242  |
| rs76450929  | A | 0.0931  |
| rs17740157  | T | 0.0303  |
| rs117728775 | A | 0.0695  |
| rs2676672   | T | 0.0396  |
| rs17088439  | G | 0.0414  |
| rs73439847  | T | -0.0891 |
| rs1979473   | A | -0.0285 |
| rs75905506  | T | -0.048  |
| rs117342554 | T | -0.1182 |
| rs4890332   | A | 0.0192  |
| rs1815847   | T | 0.0215  |
| rs10853217  | T | 0.0174  |
| rs17188242  | T | 0.0566  |
| rs117965398 | G | 0.1003  |
| rs117343814 | T | 0.0835  |
| rs78396863  | C | -0.0695 |
| rs566821    | G | 0.0202  |
| rs62087381  | G | 0.0201  |
| rs7240170   | A | -0.0163 |
| rs78871555  | C | 0.0655  |
| rs78851964  | T | 0.0841  |
| rs75530005  | A | -0.0811 |
| rs60509755  | G | 0.0208  |
| rs140038306 | T | -0.136  |
| rs1453038   | G | -0.0284 |
| rs72881360  | A | -0.0719 |
| rs116895832 | T | 0.0772  |
| rs62100014  | G | 0.101   |
| rs72987367  | G | 0.0264  |
| rs12458581  | A | -0.03   |
| rs2033076   | T | -0.0472 |
| rs117240912 | G | -0.1134 |
| rs144302777 | G | -0.0854 |
| rs117890246 | T | -0.1081 |
| rs56126732  | T | 0.0272  |

|             |   |         |
|-------------|---|---------|
| rs9966647   | G | 0.0327  |
| rs6507957   | C | 0.0185  |
| rs9964442   | A | 0.0429  |
| rs2298574   | G | 0.0289  |
| rs4799803   | A | 0.0273  |
| rs79616829  | C | 0.0617  |
| rs12606334  | G | 0.0293  |
| rs648161    | G | 0.0169  |
| rs117100902 | A | 0.0623  |
| rs7240539   | T | -0.0177 |
| rs79891419  | T | 0.1179  |
| rs9954563   | C | -0.0168 |
| rs146284392 | G | -0.0794 |
| rs141158316 | C | 0.0563  |
| rs118123748 | G | -0.0623 |
| rs17088346  | T | -0.0213 |
| rs11664541  | C | 0.0379  |
| rs151053790 | A | -0.1063 |
| rs3764459   | T | -0.0319 |
| rs78401912  | C | -0.1104 |
| rs35600054  | A | 0.135   |
| rs1552090   | G | -0.0407 |
| rs907278    | C | 0.0189  |
| rs75334728  | C | 0.1326  |
| rs9949100   | T | 0.0166  |
| rs72957178  | C | -0.0595 |
| rs11659791  | C | -0.0216 |
| rs11082000  | A | -0.0195 |
| rs6507668   | G | 0.0194  |
| rs10871668  | C | 0.0187  |
| rs35460851  | C | -0.0206 |
| rs12961025  | C | -0.0276 |
| rs7236708   | A | 0.0176  |
| rs79583975  | C | 0.1041  |
| rs9951047   | C | -0.0403 |
| rs11660748  | G | 0.0281  |
| rs73468914  | T | -0.0488 |
| rs72900353  | G | -0.0435 |
| rs635342    | A | -0.0256 |
| rs2850244   | G | -0.0181 |
| rs306212    | T | -0.0165 |
| rs9953840   | G | 0.0819  |
| rs7226381   | A | -0.0205 |
| rs143827205 | A | 0.0897  |
| rs117586293 | C | 0.0743  |
| rs113817061 | T | 0.0901  |
| rs583991    | T | -0.0314 |

|             |   |         |
|-------------|---|---------|
| rs80051604  | T | 0.0492  |
| rs139765005 | A | 0.0966  |
| rs72949710  | A | 0.0448  |
| rs143565070 | C | 0.124   |
| rs75362371  | C | 0.1031  |
| rs80224515  | G | 0.1244  |
| rs78737180  | G | 0.1141  |
| rs264160    | C | 0.016   |
| rs117923242 | C | 0.0862  |
| rs9944761   | T | 0.0384  |
| rs12958390  | G | 0.0195  |
| rs55956201  | C | -0.045  |
| rs637451    | T | 0.0182  |
| rs73444940  | G | -0.0934 |
| rs75830879  | T | 0.0521  |
| rs56224236  | T | 0.0432  |
| rs206513    | T | 0.0169  |
| rs116213494 | T | 0.0857  |
| rs640279    | A | 0.0391  |
| rs56166463  | T | -0.0341 |
| rs2551436   | A | -0.0461 |
| rs72956218  | T | 0.0602  |
| rs117395525 | G | 0.1478  |
| rs9646590   | A | -0.0222 |
| rs117371013 | G | -0.0487 |
| rs582149    | A | -0.0167 |
| rs76575953  | A | -0.0707 |
| rs12968969  | T | 0.0446  |
| rs149784750 | T | 0.066   |
| rs672217    | G | -0.024  |
| rs1037419   | C | 0.0165  |
| rs58261051  | A | -0.0478 |
| rs117694473 | G | 0.0739  |
| rs17069981  | A | -0.0629 |
| rs4390695   | T | -0.1108 |
| rs72957059  | A | -0.0492 |
| rs62102403  | A | 0.0329  |
| rs16947191  | G | 0.0357  |
| rs55775858  | C | -0.0363 |
| rs3859365   | A | 0.0183  |
| rs112324116 | T | -0.1175 |
| rs80214540  | A | -0.0464 |
| rs11664121  | T | 0.04    |
| rs117110087 | T | 0.0728  |
| rs751355    | C | -0.0163 |
| rs9957441   | C | 0.0192  |
| rs1790683   | T | -0.018  |

|             |   |         |
|-------------|---|---------|
| rs11660808  | G | -0.0353 |
| rs11659939  | A | -0.0287 |
| rs111315269 | A | 0.0963  |
| rs146401520 | C | -0.1285 |
| rs72948962  | A | 0.0265  |
| rs4939999   | T | 0.0188  |
| rs77087714  | A | -0.0268 |
| rs139623879 | A | -0.0971 |
| rs1313577   | G | 0.0178  |
| rs144687846 | A | -0.1027 |
| rs117215929 | C | -0.0882 |
| rs146156310 | A | -0.0629 |
| rs12327352  | A | 0.1485  |
| rs73004415  | A | -0.0494 |
| rs333084    | T | -0.0218 |
| rs661059    | G | 0.0191  |
| rs146762099 | T | 0.0418  |
| rs75214456  | A | 0.1052  |
| rs145468198 | A | 0.0841  |
| rs1786205   | T | -0.0174 |
| rs113658462 | G | 0.0376  |
| rs28666936  | T | -0.0918 |
| rs117865288 | C | 0.0842  |
| rs139238687 | G | -0.0829 |
| rs9960109   | T | 0.0173  |
| rs56190504  | T | 0.0663  |
| rs117295589 | A | 0.1187  |
| rs4799153   | C | -0.0185 |
| rs1377813   | A | -0.0565 |
| rs115968669 | C | -0.0245 |
| rs9951777   | C | -0.0353 |
| rs117504131 | G | 0.112   |
| rs75584356  | C | -0.055  |
| rs4890770   | G | -0.022  |
| rs148406653 | A | 0.0713  |
| rs1025442   | T | 0.0393  |
| rs144170024 | G | -0.0885 |
| rs1893835   | G | -0.0158 |
| rs9965277   | T | 0.0175  |
| rs139015922 | T | 0.0914  |
| rs9955082   | T | -0.0255 |
| rs148062085 | T | 0.1047  |
| rs62094347  | T | -0.0233 |
| rs111443688 | G | 0.0899  |
| rs151117523 | C | 0.0807  |
| rs80082651  | C | -0.0491 |
| rs9675446   | C | 0.0223  |

|             |   |         |
|-------------|---|---------|
| rs55940331  | T | 0.0235  |
| rs11663451  | T | -0.0217 |
| rs8091526   | G | -0.0198 |
| rs28470464  | G | -0.0511 |
| rs71365687  | T | 0.0539  |
| rs138245320 | A | -0.0172 |
| rs997890    | A | 0.0178  |
| rs112502784 | T | -0.0396 |
| rs75480308  | A | -0.0726 |
| rs1791078   | C | -0.023  |
| rs35317256  | A | 0.0264  |
| rs72972243  | C | 0.0946  |
| rs957771    | A | 0.0246  |
| rs16950878  | T | 0.0721  |
| rs11874598  | C | 0.0156  |
| rs3819222   | G | 0.0253  |
| rs7407217   | A | 0.0191  |
| rs77779262  | A | 0.0608  |
| rs77986929  | A | -0.0298 |
| rs55636005  | A | -0.0204 |
| rs77408027  | A | -0.0672 |
| rs292301    | T | -0.0234 |
| rs549476    | G | -0.0163 |
| rs62099212  | T | 0.0414  |
| rs79699200  | T | 0.0704  |
| rs117194068 | T | 0.0304  |
| rs7238472   | A | -0.0231 |
| rs78266255  | A | 0.0867  |
| rs4798067   | G | 0.024   |
| rs7238086   | A | -0.0956 |
| rs3752088   | A | 0.0177  |
| rs4798816   | C | 0.0201  |
| rs117609725 | G | 0.08    |
| rs17087020  | G | 0.1084  |
| rs4797775   | G | -0.0228 |
| rs283255    | G | 0.0177  |
| rs117028303 | A | 0.1459  |
| rs75427330  | A | 0.1121  |
| rs1470324   | G | -0.0164 |
| rs151075308 | A | -0.0999 |
| rs9966289   | A | -0.0173 |
| rs66467030  | T | -0.0164 |
| rs12327356  | G | 0.0237  |
| rs7227843   | G | 0.0236  |
| rs1250171   | T | -0.0176 |
| rs7226983   | A | 0.026   |
| rs59068082  | G | 0.0361  |

|             |   |         |
|-------------|---|---------|
| rs1420942   | T | -0.0236 |
| rs9948570   | A | 0.0238  |
| rs478766    | C | 0.0239  |
| rs9958640   | A | -0.0319 |
| rs10153353  | C | 0.0327  |
| rs4799860   | T | 0.0563  |
| rs1893948   | G | 0.0162  |
| rs28516453  | C | -0.0621 |
| rs608493    | G | -0.0411 |
| rs113035076 | A | 0.0667  |
| rs17246117  | G | -0.1048 |
| rs149800332 | T | -0.0294 |
| rs17706951  | T | 0.084   |
| rs68008340  | T | 0.0432  |
| rs11659295  | G | -0.0164 |
| rs11659443  | A | 0.0432  |
| rs4799594   | G | -0.0316 |
| rs78792591  | A | -0.0359 |
| rs17668777  | T | -0.0365 |
| rs4127404   | C | 0.02    |
| rs117728475 | T | -0.0887 |
| rs114658020 | T | 0.0583  |
| rs62090924  | T | -0.0501 |
| rs34615483  | G | -0.0201 |
| rs112684575 | T | 0.0896  |
| rs4503902   | C | 0.019   |
| rs111740004 | C | -0.1234 |
| rs79863383  | A | -0.0523 |
| rs9957063   | G | -0.0194 |
| rs76254077  | G | -0.058  |
| rs12604583  | G | -0.0582 |
| rs117167447 | C | -0.1272 |
| rs17738361  | T | -0.0257 |
| rs12967971  | G | -0.0271 |
| rs1421193   | T | 0.0345  |
| rs140177012 | A | 0.0707  |
| rs9961232   | G | 0.0382  |
| rs76980944  | C | -0.0421 |
| rs7243373   | T | 0.0545  |
| rs2852958   | T | -0.0205 |
| rs73969356  | T | 0.1067  |
| rs4797414   | G | -0.0163 |
| rs9956067   | T | -0.016  |
| rs17081507  | T | 0.0788  |
| rs117527089 | C | 0.0818  |
| rs112044250 | T | -0.0495 |
| rs2717110   | A | -0.0385 |

|             |   |         |
|-------------|---|---------|
| rs62083541  | T | 0.1084  |
| rs114205395 | A | 0.0831  |
| rs56898955  | G | -0.0181 |
| rs2028455   | T | 0.0182  |
| rs79419282  | A | -0.0499 |
| rs111580523 | C | 0.0867  |
| rs7228002   | A | 0.0324  |
| rs71355056  | A | 0.0671  |
| rs9957844   | G | -0.0158 |
| rs62079918  | T | 0.0368  |
| rs11081470  | C | 0.1185  |
| rs12326464  | A | -0.1075 |
| rs79976373  | T | 0.1185  |
| rs683351    | C | 0.085   |
| rs78258173  | G | -0.085  |
| rs12455520  | T | 0.0437  |
| rs9789175   | C | -0.0272 |
| rs138424361 | A | -0.1044 |
| rs8087114   | C | 0.0427  |
| rs607411    | C | -0.0262 |
| rs112495352 | C | 0.0413  |
| rs1791204   | C | 0.0305  |
| rs12957448  | C | 0.0289  |
| rs4248      | T | 0.0176  |
| rs2187379   | A | 0.0219  |
| rs12103972  | T | -0.023  |
| rs1792743   | T | -0.0628 |
| rs306219    | C | -0.0194 |
| rs72978154  | T | -0.0191 |
| rs79458929  | C | 0.0339  |
| rs11872939  | A | -0.0271 |
| rs77461124  | A | -0.087  |
| rs17089188  | G | 0.0169  |
| rs7238117   | A | -0.0186 |
| rs2116282   | A | -0.0174 |
| rs7238997   | C | -0.0165 |
| rs80066120  | C | 0.0628  |
| rs34615781  | C | -0.0551 |
| rs147750308 | A | 0.1182  |
| rs12457758  | T | -0.0225 |
| rs12965353  | C | -0.0238 |
| rs1788932   | T | -0.0321 |
| rs76845490  | A | 0.0617  |
| rs9954058   | C | 0.0299  |
| rs75958942  | A | -0.0621 |
| rs74401788  | T | 0.073   |
| rs12956534  | T | 0.0368  |



|             |   |         |
|-------------|---|---------|
| rs80249510  | T | -0.0582 |
| rs538073    | A | 0.0274  |
| rs2186887   | G | 0.0156  |
| rs4798496   | A | -0.0226 |
| rs6506895   | A | -0.0159 |
| rs117943921 | T | 0.0721  |
| rs9957318   | G | -0.0162 |
| rs149489473 | C | -0.0782 |
| rs58949207  | G | -0.0778 |
| rs78820067  | C | -0.0697 |
| rs9951319   | G | -0.0171 |
| rs76367762  | T | -0.0754 |
| rs117015489 | G | 0.0418  |
| rs62087493  | A | 0.0411  |
| rs11151762  | T | -0.0155 |
| rs117659255 | T | -0.0511 |
| rs7233464   | A | -0.062  |
| rs41416645  | T | -0.0697 |
| rs9950686   | G | 0.0212  |
| rs631506    | C | -0.0177 |
| rs76553890  | C | 0.0619  |
| rs11877111  | A | 0.0209  |
| rs117009020 | A | -0.0925 |
| rs117354041 | T | 0.078   |
| rs78241594  | G | 0.0324  |
| rs7243793   | G | 0.0214  |
| rs141512993 | A | -0.1087 |
| rs7238082   | T | 0.0283  |
| rs138836564 | T | 0.0892  |
| rs78654431  | C | 0.0267  |
| rs12954536  | C | -0.0922 |
| rs72970135  | G | 0.0373  |
| rs7233561   | T | -0.0204 |
| rs35922794  | C | -0.0332 |
| rs17798754  | C | 0.0811  |
| rs111530035 | G | -0.0613 |
| rs16952379  | T | 0.0429  |
| rs75199371  | T | -0.0617 |
| rs76903175  | G | 0.0556  |
| rs147869025 | G | 0.0578  |
| rs2290932   | T | 0.0223  |
| rs79502301  | C | 0.0826  |
| rs62094722  | T | -0.0874 |
| rs1019435   | G | 0.0569  |
| rs73961284  | A | 0.0435  |
| rs72923538  | C | -0.032  |
| rs75032823  | A | 0.0261  |

|             |   |         |
|-------------|---|---------|
| rs111840287 | T | -0.0522 |
| rs11661981  | A | -0.1564 |
| rs4239322   | C | 0.0189  |
| rs1894002   | A | 0.0211  |
| rs648907    | C | 0.0186  |
| rs12953436  | C | -0.0184 |
| rs16946816  | A | -0.0821 |
| rs8086681   | T | -0.0736 |
| rs74444049  | A | -0.064  |
| rs35705754  | A | 0.0981  |
| rs8089812   | T | 0.0575  |
| rs74968339  | G | 0.0781  |
| rs9957300   | G | -0.0187 |
| rs9960718   | A | 0.017   |
| rs149412803 | A | -0.0664 |
| rs10514144  | C | -0.0269 |
| rs9948315   | C | -0.0218 |
| rs9960777   | T | 0.0725  |
| rs117371420 | C | -0.0614 |
| rs118022348 | T | -0.0803 |
| rs12953968  | T | 0.0298  |
| rs62085728  | T | 0.1022  |
| rs72893445  | A | -0.0214 |
| rs17667966  | C | -0.121  |
| rs2045230   | T | 0.0291  |
| rs113977167 | G | 0.0276  |
| rs12969989  | G | 0.0206  |
| rs12605477  | G | 0.0205  |
| rs139118481 | G | 0.0589  |
| rs74546971  | C | -0.0687 |
| rs1943875   | T | -0.0173 |
| rs304921    | C | 0.0197  |
| rs4258695   | G | 0.0456  |
| rs77646603  | C | 0.0839  |
| rs72634478  | C | 0.0606  |
| rs62100360  | T | -0.0365 |
| rs12606778  | A | 0.0262  |
| rs4800535   | C | -0.0209 |
| rs17437990  | C | 0.0245  |
| rs12455968  | G | -0.0189 |
| rs75026433  | C | 0.0795  |
| rs9960660   | T | -0.019  |
| rs12373190  | A | -0.0328 |
| rs9953410   | C | -0.0729 |
| rs72870944  | T | -0.031  |
| rs9956905   | G | 0.0896  |
| rs55902031  | T | 0.0406  |

|             |   |         |
|-------------|---|---------|
| rs34183391  | A | 0.048   |
| rs149026392 | C | -0.0656 |
| rs2186848   | A | -0.0222 |
| rs9948897   | G | 0.0246  |
| rs16971831  | T | -0.023  |
| rs111405330 | T | 0.052   |
| rs1961458   | C | 0.0236  |
| rs6505660   | G | 0.0326  |
| rs145927649 | G | -0.0806 |
| rs17087812  | T | -0.0226 |
| rs28626906  | T | -0.027  |
| rs4797529   | T | -0.0166 |
| rs1792658   | C | 0.0193  |
| rs145596898 | A | -0.1    |
| rs78404150  | T | 0.0426  |
| rs7237163   | G | 0.0161  |
| rs1241986   | G | -0.0211 |
| rs12960272  | A | -0.0253 |
| rs9955757   | C | 0.0186  |
| rs12966975  | G | -0.0618 |
| rs216549    | C | -0.0255 |
| rs74946151  | T | -0.0488 |
| rs7237683   | G | -0.017  |
| rs78928813  | A | -0.0298 |
| rs117627538 | T | 0.076   |
| rs4414576   | C | 0.0289  |
| rs71359042  | A | -0.0338 |
| rs11659453  | A | -0.0182 |
| rs74965372  | C | -0.0378 |
| rs1817232   | A | 0.0174  |
| rs72858712  | T | 0.0532  |
| rs11665106  | A | -0.015  |
| rs112719042 | C | -0.0228 |
| rs359745    | T | 0.0174  |
| rs56385737  | C | 0.0253  |
| rs111701111 | C | 0.0608  |
| rs717054    | A | -0.0236 |
| rs79219463  | G | 0.0825  |
| rs66464140  | A | 0.0441  |
| rs150639956 | A | 0.0379  |
| rs77094941  | T | -0.0425 |
| rs77421205  | G | -0.0534 |
| rs2174896   | C | -0.0179 |
| rs56036078  | G | -0.0262 |
| rs948311    | G | -0.017  |
| rs117305550 | G | -0.1004 |
| rs79266466  | A | 0.1002  |

|             |   |         |
|-------------|---|---------|
| rs4799559   | G | 0.0223  |
| rs78732579  | A | 0.1004  |
| rs79301837  | A | 0.058   |
| rs62095669  | G | -0.0186 |
| rs35969244  | C | 0.0243  |
| rs11660051  | C | -0.0266 |
| rs77375800  | G | 0.074   |
| rs60350327  | G | -0.0758 |
| rs75285445  | C | 0.0759  |
| rs2156337   | C | 0.0424  |
| rs56163657  | T | -0.0276 |
| rs9945657   | T | -0.0167 |
| rs111470430 | A | 0.0721  |
| rs149314557 | C | 0.0771  |
| rs603762    | T | -0.0231 |
| rs149889558 | C | -0.1144 |
| rs5011966   | G | -0.089  |
| rs73413521  | A | 0.0456  |
| rs488190    | G | -0.0574 |
| rs74826332  | G | 0.0805  |
| rs12958985  | A | -0.0256 |
| rs1877055   | C | -0.0208 |
| rs34550629  | A | 0.1373  |
| rs17790483  | T | 0.0373  |
| rs118052669 | A | -0.0993 |
| rs12457200  | C | -0.0226 |
| rs9958543   | A | 0.0374  |
| rs76289699  | T | 0.0934  |
| rs4239364   | A | 0.0233  |
| rs149950004 | C | -0.1098 |
| rs113023921 | A | -0.0285 |
| rs1945476   | G | 0.0331  |
| rs62092240  | C | 0.0214  |
| rs35915804  | C | -0.0413 |
| rs17773507  | G | 0.0922  |
| rs76136438  | T | -0.0341 |
| rs731890    | G | -0.0165 |
| rs7243786   | A | -0.0198 |
| rs76828150  | C | 0.0506  |
| rs8087123   | A | -0.0174 |
| rs2246646   | A | 0.0494  |
| rs4940789   | T | -0.0262 |
| rs489295    | A | 0.0222  |
| rs117849219 | C | -0.0581 |
| rs4511633   | A | 0.0653  |
| rs58905260  | A | 0.0564  |
| rs10514042  | C | -0.0244 |

|             |   |         |
|-------------|---|---------|
| rs11873750  | A | -0.0149 |
| rs6507877   | A | 0.0154  |
| rs72922517  | T | 0.0363  |
| rs4426427   | T | 0.0374  |
| rs151031359 | T | -0.0611 |
| rs34405794  | C | -0.0157 |
| rs8085092   | C | 0.1338  |
| rs56850047  | A | 0.0176  |
| rs7235851   | C | -0.023  |
| rs62095209  | C | -0.0234 |
| rs7231860   | A | -0.033  |
| rs75394272  | C | -0.0535 |
| rs1421048   | G | 0.0529  |
| rs4556859   | T | 0.0159  |
| rs12953489  | T | -0.1266 |
| rs61733889  | A | -0.0708 |
| rs111591006 | T | -0.0692 |
| rs75784498  | A | 0.076   |
| rs578667    | C | -0.0152 |
| rs1229585   | C | -0.0164 |
| rs4302135   | C | -0.019  |
| rs4891023   | C | 0.0171  |
| rs28364842  | T | -0.0358 |
| rs78431500  | C | -0.1234 |
| rs2581682   | C | -0.0293 |
| rs72890877  | T | 0.0488  |
| rs62093367  | A | -0.0294 |
| rs73489464  | T | 0.1052  |
| rs7407225   | G | 0.0151  |
| rs144802477 | C | -0.0923 |
| rs113851227 | T | 0.0941  |
| rs73972134  | A | 0.0687  |
| rs9963206   | C | -0.0197 |
| rs1147408   | C | 0.0168  |
| rs206460    | C | 0.0151  |
| rs71353272  | A | -0.056  |
| rs1787323   | T | 0.0238  |
| rs11081216  | G | 0.0218  |
| rs12608027  | A | -0.0225 |
| rs8099616   | C | 0.017   |
| rs77394723  | A | -0.0534 |
| rs1903324   | A | -0.0501 |
| rs72867541  | A | 0.0191  |
| rs5025392   | A | 0.069   |
| rs483775    | A | -0.0164 |
| rs2135273   | G | -0.0224 |
| rs117970725 | T | -0.0681 |

|             |   |         |
|-------------|---|---------|
| rs9949977   | C | 0.0477  |
| rs9952799   | A | -0.0228 |
| rs11545506  | C | -0.0329 |
| rs7229491   | G | -0.0159 |
| rs149985820 | G | -0.1155 |
| rs141212282 | T | 0.0586  |
| rs72860681  | T | -0.0556 |
| rs79206616  | C | 0.0827  |
| rs16950310  | A | 0.0321  |
| rs9807710   | T | -0.0749 |
| rs9783892   | G | 0.03    |
| rs72946284  | G | -0.0192 |
| rs72870489  | C | 0.0212  |
| rs148508102 | T | 0.0957  |
| rs17715980  | C | 0.0225  |
| rs113182847 | G | -0.0472 |
| rs118046026 | T | -0.0407 |
| rs12608247  | A | 0.0189  |
| rs1393722   | T | -0.0159 |
| rs625990    | A | -0.0674 |
| rs4800613   | G | 0.0159  |
| rs142559284 | A | 0.0437  |
| rs577183    | T | -0.0209 |
| rs41523748  | C | -0.0496 |
| rs78183575  | C | 0.0317  |
| rs582022    | T | 0.0191  |
| rs9959281   | T | -0.0199 |
| rs79369498  | A | 0.0946  |
| rs1667911   | G | 0.0717  |
| rs78066963  | A | -0.0384 |
| rs7242928   | C | 0.0234  |
| rs8087500   | C | -0.0213 |
| rs117450912 | G | 0.1709  |
| rs67552652  | G | -0.0296 |
| rs9952168   | G | -0.0672 |
| rs139869139 | G | -0.0411 |
| rs74502394  | A | -0.0438 |
| rs77309141  | G | -0.0285 |
| rs75217237  | T | 0.0502  |
| rs4377250   | A | 0.024   |
| rs1941016   | T | 0.0157  |
| rs145859381 | G | -0.0603 |
| rs79452515  | A | -0.0807 |
| rs9963939   | A | 0.0325  |
| rs72925679  | T | 0.0646  |
| rs2048352   | T | -0.0236 |
| rs12954222  | C | -0.016  |

|             |   |         |
|-------------|---|---------|
| rs7506646   | A | -0.0199 |
| rs138912932 | G | -0.1161 |
| rs11082936  | C | 0.0301  |
| rs111988158 | C | -0.0755 |
| rs72884885  | G | -0.0503 |
| rs147881617 | T | 0.0597  |
| rs55922541  | T | -0.0648 |
| rs948430    | A | -0.0239 |
| rs4486982   | T | 0.0514  |
| rs7233920   | A | 0.0172  |
| rs78473511  | C | 0.0293  |
| rs144119881 | C | -0.1062 |
| rs9989587   | A | 0.0193  |
| rs3786307   | C | -0.0254 |
| rs8093684   | G | 0.0903  |
| rs8098085   | C | 0.0356  |
| rs17069001  | C | 0.0266  |
| rs145211315 | A | -0.0982 |
| rs9944786   | T | -0.0216 |
| rs2195572   | C | -0.0145 |
| rs10853559  | A | 0.0153  |
| rs78547779  | T | 0.0786  |
| rs513459    | C | -0.021  |
| rs79098244  | A | 0.0657  |
| rs118133802 | T | 0.0575  |
| rs111448946 | G | -0.0603 |
| rs76615485  | T | 0.0379  |
| rs9961159   | C | 0.0219  |
| rs118118831 | T | -0.1119 |
| rs62094674  | A | -0.0329 |
| rs1395953   | T | 0.0351  |
| rs56207971  | A | -0.0218 |
| rs76139623  | C | -0.0751 |
| rs72958728  | C | -0.0191 |
| rs1397956   | T | 0.0177  |
| rs77169990  | T | -0.0414 |
| rs117168644 | A | -0.079  |
| rs55650437  | C | 0.021   |
| rs7240490   | T | 0.0163  |
| rs11081958  | G | -0.0201 |
| rs12953877  | A | -0.0154 |
| rs1472764   | G | -0.0255 |
| rs56146941  | T | 0.0203  |
| rs17244903  | G | 0.0389  |
| rs113854727 | A | -0.0574 |
| rs149512735 | G | 0.1247  |
| rs61544204  | A | 0.0465  |

|             |   |         |
|-------------|---|---------|
| rs118149176 | A | 0.0864  |
| rs8088568   | T | 0.0176  |
| rs6506569   | C | 0.0153  |
| rs7238773   | A | 0.035   |
| rs7231669   | C | 0.0165  |
| rs76032236  | A | 0.0283  |
| rs11081068  | A | 0.0209  |
| rs77591216  | T | 0.096   |
| rs11083233  | G | -0.0255 |
| rs17599264  | T | 0.0847  |
| rs72886639  | T | -0.0788 |
| rs28671358  | A | 0.029   |
| rs116196949 | T | -0.0666 |
| rs118127964 | G | -0.1051 |
| rs148113042 | T | -0.1334 |
| rs7236997   | G | 0.0186  |
| rs1369365   | C | 0.0624  |
| rs138987657 | C | 0.0617  |
| rs74422611  | T | 0.0832  |
| rs72957226  | T | -0.0284 |
| rs7244495   | G | -0.0304 |
| rs17616687  | T | 0.1021  |
| rs117605828 | G | -0.0733 |
| rs8088189   | T | 0.0246  |
| rs117803410 | T | -0.0495 |
| rs112795617 | A | 0.033   |
| rs606196    | C | 0.1087  |
| rs112891545 | C | -0.0244 |
| rs58866709  | A | -0.0677 |
| rs17232800  | G | -0.0355 |
| rs55707749  | G | -0.0228 |
| rs58112781  | A | 0.023   |
| rs17799838  | A | 0.0668  |
| rs12458782  | C | -0.0146 |
| rs117974621 | C | 0.1371  |
| rs2365754   | C | -0.0193 |
| rs113394883 | A | 0.0666  |
| rs117150565 | C | 0.0903  |
| rs11659645  | T | 0.0271  |
| rs115986749 | A | 0.0188  |
| rs238114    | G | -0.0232 |
| rs1442358   | T | 0.0159  |
| rs17330231  | T | 0.0484  |
| rs778777    | T | 0.0159  |
| rs4798682   | A | -0.0173 |
| rs146549373 | C | 0.1201  |
| rs112097410 | G | 0.0585  |



|             |   |         |
|-------------|---|---------|
| rs12965656  | T | -0.0177 |
| rs1395860   | G | -0.0206 |
| rs4892218   | T | 0.0249  |
| rs118191327 | A | -0.066  |
| rs341246    | C | 0.0158  |
| rs77244558  | T | 0.0395  |
| rs7506556   | C | 0.03    |
| rs4800476   | C | 0.0286  |
| rs1261951   | C | 0.0218  |
| rs76818841  | G | -0.037  |
| rs144218506 | G | -0.123  |
| rs78980995  | C | -0.0756 |
| rs10502652  | G | -0.0283 |
| rs12955803  | T | 0.0648  |
| rs116851133 | T | -0.1107 |
| rs6506423   | G | -0.0158 |
| rs116901666 | T | 0.0551  |
| rs1289998   | A | 0.0278  |
| rs112738146 | T | 0.0592  |
| rs142362232 | C | -0.0774 |
| rs7407598   | A | 0.0184  |
| rs11152097  | C | -0.015  |
| rs3862732   | G | 0.0169  |
| rs2298530   | C | 0.0495  |
| rs116907056 | C | -0.0862 |
| rs72987269  | T | -0.0659 |
| rs112965180 | A | -0.086  |
| rs116969097 | G | 0.111   |
| rs111285212 | T | 0.0427  |
| rs79537484  | A | 0.0837  |
| rs117244865 | T | -0.0943 |
| rs56137770  | C | -0.0297 |
| rs73002428  | T | -0.0209 |
| rs149817903 | G | 0.0545  |
| rs78764716  | T | 0.0833  |
| rs113115105 | T | -0.0332 |
| rs17090169  | C | 0.0336  |
| rs79593392  | T | -0.079  |
| rs75242501  | T | 0.0376  |
| rs17446826  | G | 0.0562  |
| rs8089976   | T | -0.0584 |
| rs79622941  | T | -0.1136 |
| rs34416492  | C | 0.0229  |
| rs62096010  | A | 0.0825  |
| rs12967276  | T | 0.0192  |
| rs17564521  | G | -0.017  |
| rs16978404  | T | 0.031   |

|             |   |         |
|-------------|---|---------|
| rs28576223  | C | -0.023  |
| rs7244467   | G | 0.0153  |
| rs9966910   | T | -0.0169 |
| rs72988505  | A | 0.0704  |
| rs34616439  | T | 0.0327  |
| rs117826447 | G | -0.1243 |
| rs2664174   | T | 0.0209  |
| rs7230269   | G | 0.0209  |
| rs144828186 | G | -0.0671 |
| rs11080561  | C | 0.0563  |
| rs17089390  | C | -0.0382 |
| rs117268166 | A | -0.053  |
| rs7244967   | G | -0.041  |
| rs9962999   | C | -0.0149 |
| rs2897285   | G | -0.0197 |
| rs11663462  | A | 0.0182  |
| rs141224440 | T | 0.0462  |
| rs9949743   | A | 0.0645  |
| rs78285677  | A | -0.0546 |
| rs75622670  | T | 0.1003  |
| rs976090    | A | -0.0172 |
| rs55682777  | T | -0.0362 |
| rs12456213  | T | -0.0181 |
| rs72968321  | T | 0.0179  |
| rs670682    | A | -0.0185 |
| rs9989529   | C | -0.0213 |
| rs72965384  | G | 0.0958  |
| rs62095757  | T | 0.0271  |
| rs9949020   | T | 0.0144  |
| rs117390344 | C | 0.0657  |
| rs12965055  | C | 0.0164  |
| rs66811005  | G | 0.038   |
| rs73363948  | A | -0.0986 |
| rs139646671 | T | 0.105   |
| rs145239745 | C | 0.0405  |
| rs2212985   | C | -0.0154 |
| rs11872808  | T | -0.0273 |
| rs11083221  | A | -0.0142 |
| rs71367275  | T | -0.0208 |
| rs6506414   | C | -0.0286 |
| rs75487331  | T | -0.0388 |
| rs12454086  | T | 0.0148  |
| rs118136362 | T | 0.0685  |
| rs11873916  | A | 0.0256  |
| rs72904673  | G | -0.0457 |
| rs117712097 | T | 0.037   |
| rs58327735  | A | -0.0409 |

|             |   |         |
|-------------|---|---------|
| rs73963526  | G | -0.1241 |
| rs78946823  | A | -0.0799 |
| rs55801637  | C | 0.0207  |
| rs17594610  | G | 0.0743  |
| rs1788113   | T | 0.0251  |
| rs8087337   | A | -0.0705 |
| rs2187545   | T | -0.0199 |
| rs28591408  | T | 0.0182  |
| rs117964644 | C | -0.0489 |
| rs72954922  | A | 0.0502  |
| rs77503605  | T | -0.0388 |
| rs112154894 | G | 0.0443  |
| rs993766    | A | -0.0618 |
| rs113792110 | C | 0.0447  |
| rs78819182  | T | 0.1063  |
| rs79027133  | C | -0.0271 |
| rs679464    | A | -0.0215 |
| rs12454711  | T | -0.0149 |
| rs72639470  | C | -0.0424 |
| rs77690705  | A | 0.0441  |
| rs9954320   | G | -0.05   |
| rs112958331 | G | -0.0619 |
| rs9951153   | T | -0.0252 |
| rs145036686 | T | 0.0615  |
| rs3786441   | G | -0.0229 |
| rs472262    | A | -0.0167 |
| rs117736720 | G | 0.0631  |
| rs3848519   | A | 0.0514  |
| rs116915241 | T | 0.1145  |
| rs72990064  | T | -0.1711 |
| rs17832032  | G | 0.0557  |
| rs34261279  | C | -0.0166 |
| rs16940811  | A | -0.0187 |
| rs151337535 | G | -0.1303 |
| rs151110305 | T | -0.046  |
| rs71354472  | A | 0.0678  |
| rs148970279 | G | -0.0893 |
| rs117470708 | T | 0.1079  |
| rs4798610   | C | 0.0319  |
| rs147455372 | C | 0.0732  |
| rs145667496 | A | -0.0776 |
| rs9948573   | G | 0.017   |
| rs73445966  | T | -0.1261 |
| rs80140229  | G | 0.0838  |
| rs10432085  | C | -0.0511 |
| rs35462218  | C | 0.0292  |
| rs7238561   | T | -0.0194 |

|             |   |         |
|-------------|---|---------|
| rs118027532 | G | 0.0723  |
| rs17819720  | G | 0.0171  |
| rs72961450  | A | 0.0516  |
| rs8099659   | A | -0.0454 |
| rs76672104  | C | -0.0722 |
| rs34846217  | A | 0.0229  |
| rs141603855 | G | 0.0792  |
| rs1789222   | G | 0.0509  |
| rs8097709   | C | 0.0381  |
| rs72953382  | A | -0.0195 |
| rs9807144   | C | 0.0182  |
| rs76724349  | T | -0.0551 |
| rs4395175   | T | 0.0215  |
| rs8095197   | T | 0.0234  |
| rs213075    | A | -0.0194 |
| rs117108469 | T | -0.1006 |
| rs76477970  | G | 0.0271  |
| rs4890603   | C | -0.0144 |
| rs72888020  | A | -0.0335 |
| rs17658363  | G | 0.0317  |
| rs117607737 | C | -0.0667 |
| rs11873464  | A | -0.0155 |
| rs9962479   | A | 0.0194  |
| rs75732522  | T | -0.0222 |
| rs79319846  | A | -0.0586 |
| rs72876960  | T | 0.1001  |
| rs78384399  | G | 0.0688  |
| rs145741744 | G | -0.0436 |
| rs77371393  | T | 0.042   |
| rs62081777  | T | -0.1402 |
| rs117516592 | G | 0.1123  |
| rs62098614  | T | 0.0242  |
| rs60833213  | A | 0.0258  |
| rs470534    | G | 0.0156  |
| rs142046955 | A | -0.1172 |
| rs72947095  | C | 0.0342  |
| rs7245199   | A | -0.0214 |
| rs292346    | A | 0.0153  |
| rs35640999  | T | -0.0502 |
| rs17564381  | G | -0.0145 |
| rs2635515   | C | 0.0668  |
| rs35581034  | G | 0.0709  |
| rs75364852  | C | -0.0221 |
| rs17204101  | A | 0.0365  |
| rs113388871 | A | -0.0644 |
| rs118039650 | A | -0.059  |
| rs143221405 | G | 0.0572  |

|             |   |         |
|-------------|---|---------|
| rs7233462   | C | 0.0688  |
| rs1954984   | C | -0.0192 |
| rs80047773  | C | -0.0401 |
| rs10163556  | A | 0.0563  |
| rs9961762   | A | 0.0152  |
| rs11663276  | T | 0.0144  |
| rs118115661 | C | 0.0402  |
| rs4530251   | A | 0.0174  |
| rs72931116  | A | -0.0155 |
| rs9652934   | A | -0.024  |
| rs7241992   | T | -0.0143 |
| rs9948743   | A | 0.0189  |
| rs12964903  | T | 0.0256  |
| rs78669124  | C | 0.1031  |
| rs12955016  | T | -0.0745 |
| rs2339192   | C | 0.0851  |
| rs1432400   | C | -0.0472 |
| rs142538705 | A | -0.1202 |
| rs9953527   | G | 0.0272  |
| rs1159399   | A | -0.022  |
| rs117896058 | C | -0.0869 |
| rs12954049  | C | -0.0331 |
| rs12606614  | T | 0.0224  |
| rs79138247  | T | 0.0547  |
| rs11152364  | A | -0.0168 |
| rs12957856  | C | -0.0264 |
| rs76036180  | C | -0.0548 |
| rs1377189   | C | -0.0215 |
| rs1105290   | A | -0.0274 |
| rs9304048   | C | 0.0149  |
| rs76972022  | G | 0.0588  |
| rs7232529   | C | 0.0229  |
| rs7237652   | G | 0.0188  |
| rs423340    | G | -0.0182 |
| rs8097988   | T | -0.0375 |
| rs113317653 | C | -0.0551 |
| rs77149930  | T | -0.0816 |
| rs59493681  | G | -0.1154 |
| rs476792    | A | 0.0141  |
| rs142575143 | T | 0.0541  |
| rs74876665  | A | 0.0657  |
| rs155325    | A | -0.0441 |
| rs12965379  | C | 0.0236  |
| rs62085049  | A | 0.0391  |
| rs7233676   | T | 0.0155  |
| rs2303375   | T | -0.073  |
| rs79875550  | A | -0.1031 |

|             |   |         |
|-------------|---|---------|
| rs4798719   | G | -0.0153 |
| rs35591469  | T | 0.0947  |
| rs334428    | T | -0.0155 |
| rs72989847  | C | 0.112   |
| rs115159339 | T | 0.0891  |
| rs10163859  | T | 0.0145  |
| rs113904195 | A | 0.04    |
| rs11877231  | T | -0.0355 |
| rs6567080   | T | 0.0189  |
| rs140461207 | A | 0.079   |
| rs117243126 | A | 0.046   |
| rs75851723  | T | 0.0854  |
| rs789029    | C | -0.0183 |
| rs117724976 | C | 0.0586  |
| rs59661341  | T | 0.0179  |
| rs2953249   | G | 0.0167  |
| rs140313524 | T | -0.0174 |
| rs149393465 | C | 0.0796  |
| rs11659982  | T | -0.0145 |
| rs58160181  | C | -0.0276 |
| rs117373539 | A | 0.0824  |
| rs17267851  | G | -0.0793 |
| rs17084788  | G | 0.0214  |
| rs675806    | A | 0.0146  |
| rs75579006  | G | -0.0523 |
| rs56321746  | C | -0.0358 |
| rs149358868 | A | -0.1049 |
| rs117658650 | G | 0.0526  |
| rs72983972  | C | 0.0286  |
| rs17570088  | A | 0.0275  |
| rs76737849  | A | -0.0354 |
| rs2542716   | C | 0.0223  |
| rs76554100  | C | 0.0967  |
| rs79172437  | G | 0.0842  |
| rs149839214 | T | 0.1087  |
| rs140986553 | A | 0.0697  |
| rs1982037   | T | 0.0192  |
| rs6566158   | T | 0.0503  |
| rs145858432 | C | 0.0646  |
| rs117487982 | A | 0.1007  |
| rs12958739  | C | -0.0205 |
| rs1560433   | C | -0.0275 |
| rs9948128   | C | 0.0146  |
| rs117128022 | G | 0.0581  |
| rs56659627  | T | -0.0289 |
| rs72859297  | A | 0.0369  |
| rs55646160  | A | -0.0423 |

|             |   |         |
|-------------|---|---------|
| rs62087798  | G | 0.0441  |
| rs138908318 | A | 0.08    |
| rs11665215  | T | 0.0449  |
| rs8098301   | G | 0.0353  |
| rs144216029 | A | -0.0806 |
| rs1668848   | C | 0.026   |
| rs12962730  | C | 0.0138  |
| rs34338499  | C | -0.0565 |
| rs9303932   | A | -0.0236 |
| rs117826315 | C | 0.0737  |
| rs1652067   | T | 0.0958  |
| rs524641    | A | 0.0717  |
| rs77937801  | T | -0.0295 |
| rs1371856   | A | 0.0149  |
| rs4349228   | G | 0.0215  |
| rs1942103   | G | 0.0637  |
| rs117429384 | T | 0.041   |
| rs41274304  | G | -0.0455 |
| rs78236691  | T | -0.0421 |
| rs10468923  | C | 0.0177  |
| rs2590400   | G | 0.0215  |
| rs143631503 | C | 0.0723  |
| rs684417    | T | 0.0163  |
| rs6505771   | G | -0.0149 |
| rs28401562  | C | 0.0735  |
| rs76520062  | G | 0.036   |
| rs12959970  | T | 0.0432  |
| rs9946497   | C | 0.0205  |
| rs117485671 | G | -0.0872 |
| rs116996249 | A | -0.0796 |
| rs1628233   | A | -0.0154 |
| rs11150998  | A | 0.0896  |
| rs116805062 | T | -0.0442 |
| rs80185450  | A | -0.0843 |
| rs148478052 | T | 0.0435  |
| rs722809    | A | -0.027  |
| rs143105094 | A | -0.1112 |
| rs11664141  | G | -0.0335 |
| rs1550598   | A | -0.014  |
| rs7227545   | C | 0.0169  |
| rs9957312   | A | 0.0148  |
| rs116877061 | T | -0.0721 |
| rs2851860   | A | -0.0253 |
| rs117170814 | A | 0.1049  |
| rs72922196  | G | 0.0404  |
| rs73444428  | C | -0.0335 |
| rs72618580  | A | 0.0667  |

|             |   |         |
|-------------|---|---------|
| rs62079232  | C | -0.0548 |
| rs117526269 | T | 0.0994  |
| rs34027362  | T | 0.0168  |
| rs9964915   | C | 0.0236  |
| rs8090962   | G | 0.0147  |
| rs60411157  | G | -0.0863 |
| rs76880745  | A | -0.0559 |
| rs16949636  | T | -0.0415 |
| rs4552100   | C | 0.0167  |
| rs9949553   | G | 0.0779  |
| rs7243518   | T | 0.0275  |
| rs4892018   | T | 0.0166  |
| rs985492    | G | 0.0142  |
| rs77832186  | A | 0.0495  |
| rs7244955   | T | 0.0215  |
| rs117625497 | T | -0.0701 |
| rs116741570 | A | -0.0643 |
| rs11152168  | T | -0.021  |
| rs12454000  | G | -0.0152 |
| rs79493304  | C | 0.0582  |
| rs117783260 | A | 0.1099  |
| rs79567497  | T | 0.0538  |
| rs71367283  | C | -0.0975 |
| rs80338448  | T | -0.0152 |
| rs62097238  | A | 0.0917  |
| rs9952361   | A | -0.0233 |
| rs74555690  | C | 0.0735  |
| rs7227886   | G | -0.0321 |
| rs7236952   | C | 0.0243  |
| rs75980048  | G | 0.0563  |
| rs1944022   | C | 0.0188  |
| rs12454244  | T | 0.0199  |
| rs1791161   | T | 0.014   |
| rs9963363   | T | -0.0257 |
| rs483060    | C | 0.0203  |
| rs9973116   | T | 0.0462  |
| rs2733147   | A | -0.0201 |
| rs6507703   | A | -0.0287 |
| rs2032724   | C | 0.0306  |
| rs1822266   | C | -0.0235 |
| rs117469229 | T | -0.0744 |
| rs12965374  | C | 0.017   |
| rs145164583 | T | -0.0646 |
| rs117450722 | A | 0.0432  |
| rs79795896  | A | 0.0333  |
| rs113026422 | A | -0.0263 |
| rs603942    | A | -0.0222 |



|             |   |         |
|-------------|---|---------|
| rs7227307   | T | -0.0606 |
| rs111388625 | T | -0.027  |
| rs118079176 | T | 0.0696  |
| rs16976886  | A | -0.0241 |
| rs117546454 | T | -0.0494 |
| rs79467882  | A | 0.0769  |
| rs75036948  | T | 0.0303  |
| rs1967428   | G | 0.0443  |
| rs17696757  | C | 0.0213  |
| rs112038672 | A | 0.0284  |
| rs112936242 | G | 0.0681  |
| rs13381339  | T | 0.0454  |
| rs10221446  | T | -0.05   |
| rs79380751  | T | -0.0266 |
| rs77297054  | G | 0.0189  |
| rs7240222   | T | -0.014  |
| rs146800163 | G | 0.0457  |
| rs141613071 | A | 0.0865  |
| rs1918681   | A | 0.0429  |
| rs9950275   | G | -0.0359 |
| rs78041383  | C | -0.0574 |
| rs117807499 | A | -0.0865 |
| rs2846607   | A | -0.0245 |
| rs1995708   | A | -0.02   |
| rs2009296   | A | -0.014  |
| rs72966053  | A | 0.0453  |
| rs57686490  | T | 0.076   |
| rs149534248 | C | 0.0775  |
| rs339879    | C | 0.0136  |
| rs72878794  | T | -0.0414 |
| rs1401462   | T | -0.0238 |
| rs2678792   | T | -0.0137 |
| rs77489949  | C | -0.0659 |
| rs117180961 | A | 0.0584  |
| rs139052361 | T | 0.039   |
| rs139850579 | A | 0.1126  |
| rs62091286  | C | 0.055   |
| rs145295754 | G | -0.07   |
| rs2282651   | A | 0.0234  |
| rs17070798  | G | -0.0356 |
| rs1375967   | T | -0.0177 |
| rs77222081  | A | -0.0658 |
| rs2676675   | C | -0.0152 |
| rs76786081  | A | -0.0683 |
| rs62094274  | G | 0.0462  |
| rs7245212   | C | 0.0444  |
| rs35737016  | A | -0.0728 |

|             |   |         |
|-------------|---|---------|
| rs8098316   | T | -0.0226 |
| rs11151064  | G | -0.0143 |
| rs9963764   | C | -0.0152 |
| rs111651454 | G | 0.0665  |
| rs1402627   | T | 0.0174  |
| rs148027080 | T | 0.0496  |
| rs75156275  | T | -0.101  |
| rs521409    | A | 0.0195  |
| rs6508374   | A | 0.0334  |
| rs9956408   | G | 0.0172  |
| rs9952738   | A | -0.0393 |
| rs115877020 | T | 0.0486  |
| rs498496    | C | 0.0147  |
| rs56194068  | T | -0.027  |
| rs16941505  | T | -0.0352 |
| rs2366373   | G | 0.0146  |
| rs163225    | A | -0.0134 |
| rs12971229  | A | -0.0348 |
| rs1944355   | A | 0.0146  |
| rs906517    | T | -0.0179 |
| rs58934498  | C | 0.0158  |
| rs6506005   | C | 0.0161  |
| rs116898306 | A | -0.0454 |
| rs722383    | C | 0.0152  |
| rs147761062 | T | 0.1131  |
| rs62087671  | G | -0.0895 |
| rs9954493   | A | -0.0186 |
| rs144828546 | A | 0.067   |
| rs61133591  | C | 0.0914  |
| rs116999168 | C | -0.0352 |
| rs17188953  | G | 0.0204  |
| rs144427432 | T | -0.0459 |
| rs35119840  | T | -0.0357 |
| rs118184502 | C | 0.0732  |
| rs74551893  | T | 0.0244  |
| rs17753142  | T | 0.0288  |
| rs12959413  | T | 0.0158  |
| rs753639    | A | 0.0197  |
| rs36201538  | T | -0.0168 |
| rs112991002 | G | 0.0609  |
| rs144195999 | T | 0.0745  |
| rs12955724  | T | 0.025   |
| rs532241    | G | -0.0181 |
| rs146435854 | A | 0.0874  |
| rs28453996  | A | 0.0795  |
| rs594044    | G | -0.0173 |
| rs694785    | G | -0.015  |

|             |   |         |
|-------------|---|---------|
| rs9966317   | C | 0.0214  |
| rs148885875 | A | -0.0363 |
| rs4530255   | A | 0.0134  |
| rs146049246 | C | -0.0548 |
| rs74490877  | C | 0.0375  |
| rs4107900   | C | -0.0353 |
| rs117085661 | A | -0.0508 |
| rs112566546 | G | 0.0557  |
| rs57091267  | A | 0.0177  |
| rs45444991  | T | -0.0895 |
| rs17057012  | T | -0.0366 |
| rs118171805 | A | -0.0696 |
| rs12961411  | A | -0.0173 |
| rs10514233  | G | -0.0198 |
| rs1037733   | A | -0.0262 |
| rs71362798  | T | 0.0639  |
| rs7226959   | C | -0.0162 |
| rs149772068 | A | -0.117  |
| rs611297    | T | 0.0306  |
| rs73967236  | C | 0.0319  |
| rs4800113   | G | 0.0142  |
| rs4099980   | C | 0.0182  |
| rs72993257  | T | -0.0916 |
| rs76165115  | G | -0.0286 |
| rs4567801   | G | 0.0327  |
| rs12956285  | G | -0.0204 |
| rs12606144  | A | 0.0158  |
| rs2299843   | C | -0.106  |
| rs789062    | A | -0.0535 |
| rs1868653   | C | -0.0236 |
| rs4799069   | T | -0.0261 |
| rs17187445  | C | -0.0766 |
| rs28549720  | T | -0.0403 |
| rs138932253 | A | -0.0823 |
| rs7232668   | G | 0.0415  |
| rs117959355 | G | 0.0832  |
| rs2320211   | A | 0.0143  |
| rs7236958   | A | -0.0239 |
| rs117959992 | T | 0.0775  |
| rs4939828   | C | 0.019   |
| rs472633    | A | 0.0132  |
| rs6508248   | C | 0.0173  |
| rs73953194  | A | 0.0766  |
| rs11660719  | A | 0.0369  |
| rs117448206 | T | 0.0399  |
| rs17090158  | G | -0.0196 |
| rs75712761  | C | -0.0737 |

|             |   |         |
|-------------|---|---------|
| rs12454303  | T | 0.0386  |
| rs12454943  | T | -0.0471 |
| rs74638851  | C | -0.082  |
| rs9949593   | T | -0.0145 |
| rs59753081  | A | 0.0424  |
| rs16977950  | G | -0.0269 |
| rs117960112 | A | 0.0841  |
| rs112829527 | G | 0.0523  |
| rs117084181 | C | 0.0763  |
| rs16949229  | C | 0.0321  |
| rs833511    | C | -0.019  |
| rs603313    | C | -0.0184 |
| rs72857601  | G | 0.051   |
| rs7244700   | A | -0.0402 |
| rs79516914  | G | -0.0521 |
| rs28753905  | C | -0.0226 |
| rs1021946   | T | 0.0569  |
| rs2082098   | A | 0.0138  |
| rs141466869 | A | -0.0674 |
| rs10163905  | A | 0.0139  |
| rs76790281  | T | 0.0677  |
| rs41505449  | A | 0.0356  |
| rs17769805  | G | -0.0343 |
| rs7227010   | G | -0.0185 |
| rs62086586  | A | 0.0205  |
| rs72941932  | T | -0.0173 |
| rs8087481   | G | 0.0142  |
| rs117575058 | T | -0.047  |
| rs2191640   | T | 0.0173  |
| rs116969645 | T | -0.0458 |
| rs75093271  | C | 0.0572  |
| rs67918319  | C | 0.0366  |
| rs76470249  | G | 0.0282  |
| rs74827956  | A | 0.0311  |
| rs60455398  | C | 0.0657  |
| rs9950729   | C | -0.0216 |
| rs6506628   | C | -0.0164 |
| rs12604423  | C | 0.0787  |
| rs10221410  | T | 0.0237  |
| rs8091482   | A | 0.0229  |
| rs1624032   | T | 0.0167  |
| rs11873985  | T | 0.0295  |
| rs11872167  | A | 0.0594  |
| rs8085923   | T | 0.0179  |
| rs75236284  | C | -0.0602 |
| rs79417512  | T | -0.0513 |
| rs28684482  | G | 0.0203  |

|             |   |         |
|-------------|---|---------|
| rs75416195  | T | 0.0522  |
| rs62085281  | A | -0.0199 |
| rs76460744  | T | -0.0687 |
| rs78232074  | G | 0.0448  |
| rs117041010 | T | 0.0831  |
| rs77654131  | G | 0.0598  |
| rs73443134  | C | 0.0362  |
| rs4369778   | A | 0.0369  |
| rs12457166  | A | -0.0252 |
| rs10163878  | C | -0.0152 |
| rs1397062   | A | 0.0155  |
| rs113398160 | A | -0.0694 |
| rs6507540   | T | 0.013   |
| rs71356456  | T | 0.0766  |
| rs470473    | T | -0.0154 |
| rs12455961  | C | -0.0419 |
| rs58802425  | C | -0.0311 |
| rs9963300   | T | -0.0357 |
| rs1164      | C | 0.0171  |
| rs10502715  | T | -0.0313 |
| rs1972607   | A | -0.0144 |
| rs78648525  | T | -0.0792 |
| rs112458760 | T | 0.0488  |
| rs55727210  | C | 0.0891  |
| rs117592303 | C | -0.0712 |
| rs17066597  | C | -0.0464 |
| rs111875305 | A | -0.1092 |
| rs12326750  | A | 0.026   |
| rs28547149  | T | -0.0155 |
| rs17738219  | T | 0.0189  |
| rs17754048  | C | 0.0182  |
| rs17056922  | G | -0.0297 |
| rs2105728   | A | 0.0133  |
| rs4939826   | A | 0.022   |
| rs1221972   | T | 0.0838  |
| rs77008331  | A | -0.0476 |
| rs12458154  | C | -0.0168 |
| rs62101375  | A | 0.0435  |
| rs117828788 | A | -0.062  |
| rs17769495  | C | -0.0174 |
| rs118137324 | T | -0.1106 |
| rs721565    | C | 0.0148  |
| rs80149682  | G | 0.0823  |
| rs72969736  | T | -0.0366 |
| rs145402288 | T | 0.1052  |
| rs62092708  | A | -0.055  |
| rs1787593   | T | 0.0144  |

|             |   |         |
|-------------|---|---------|
| rs79150349  | A | -0.0725 |
| rs34026507  | C | -0.0519 |
| rs117013920 | C | 0.07    |
| rs8093205   | A | -0.0238 |
| rs55829991  | C | -0.0166 |
| rs55658959  | G | -0.0268 |
| rs1121211   | A | -0.015  |
| rs1562000   | T | 0.0137  |
| rs1368786   | G | 0.0289  |
| rs1954855   | C | 0.0248  |
| rs145132282 | T | -0.1028 |
| rs17071630  | C | -0.0293 |
| rs6508340   | C | 0.015   |
| rs16978163  | A | 0.0274  |
| rs149914041 | A | 0.0962  |
| rs144284077 | T | 0.0811  |
| rs16949934  | A | 0.0237  |
| rs148181219 | G | -0.0789 |
| rs1789078   | A | -0.0328 |
| rs8099704   | A | -0.0272 |
| rs4798775   | A | 0.0131  |
| rs653919    | A | 0.0184  |
| rs56132809  | T | -0.0514 |
| rs80056553  | G | -0.0884 |
| rs888433    | T | -0.0136 |
| rs8089841   | C | -0.0436 |
| rs75729340  | T | 0.0726  |
| rs79040515  | G | 0.1026  |
| rs1790692   | A | -0.0192 |
| rs77870478  | T | -0.0348 |
| rs58194008  | C | -0.0285 |
| rs117103149 | A | -0.0923 |
| rs4556891   | C | -0.0229 |
| rs117267069 | G | -0.0525 |
| rs72964885  | G | 0.021   |
| rs523312    | T | 0.0158  |
| rs74440646  | T | -0.0363 |
| rs2588465   | A | 0.0685  |
| rs583523    | G | -0.0178 |
| rs3900805   | C | 0.0215  |
| rs72985206  | T | 0.0886  |
| rs9958662   | T | -0.0161 |
| rs57080481  | A | 0.019   |
| rs72994494  | A | 0.0663  |
| rs116906728 | A | -0.0568 |
| rs35442828  | G | 0.0197  |
| rs10853484  | C | 0.0141  |

|             |   |         |
|-------------|---|---------|
| rs72957200  | C | -0.0523 |
| rs77619037  | C | 0.0376  |
| rs77432064  | T | -0.0759 |
| rs12604490  | T | -0.0427 |
| rs11662143  | A | -0.029  |
| rs671680    | T | 0.0142  |
| rs11662622  | G | 0.0214  |
| rs144724146 | A | 0.0967  |
| rs117691458 | T | -0.0968 |
| rs2941394   | T | -0.0146 |
| rs117442315 | A | -0.0835 |
| rs112406774 | A | -0.0572 |
| rs7237464   | T | 0.0159  |
| rs7228418   | T | -0.0144 |
| rs34502573  | T | 0.0264  |
| rs117208392 | T | -0.0698 |
| rs117272216 | A | 0.066   |
| rs9953582   | A | 0.0163  |
| rs117823974 | A | 0.0844  |
| rs566087    | G | 0.0346  |
| rs2032165   | C | 0.0166  |
| rs75607127  | G | -0.0291 |
| rs1356479   | A | 0.0134  |
| rs142587181 | A | -0.0703 |
| rs149851450 | T | -0.0651 |
| rs75043779  | A | 0.0468  |
| rs149423327 | A | -0.0512 |
| rs9957264   | A | -0.0176 |
| rs139075675 | A | -0.0815 |
| rs12607297  | G | 0.0149  |
| rs17664307  | A | -0.0398 |
| rs8086646   | C | -0.0129 |
| rs141918139 | T | 0.0684  |
| rs59736845  | A | 0.0183  |
| rs9950078   | T | -0.0136 |
| rs3097642   | G | 0.0141  |
| rs35499452  | G | -0.051  |
| rs80261783  | T | -0.0579 |
| rs149580728 | T | -0.045  |
| rs8086421   | T | -0.0196 |
| rs16954205  | T | -0.0283 |
| rs74909890  | A | 0.0236  |
| rs1562004   | G | -0.0134 |
| rs8086588   | T | 0.0169  |
| rs116907649 | C | -0.1056 |
| rs619348    | T | 0.0134  |
| rs141954310 | C | 0.1029  |

|             |   |         |
|-------------|---|---------|
| rs12970954  | A | -0.0444 |
| rs11665440  | G | 0.0338  |
| rs8093084   | G | -0.0466 |
| rs4271669   | A | 0.0315  |
| rs9807599   | C | -0.0312 |
| rs117297185 | T | 0.0917  |
| rs12965176  | G | -0.0194 |
| rs35025965  | G | -0.022  |
| rs7229225   | T | -0.0136 |
| rs585580    | C | -0.0322 |
| rs55690751  | G | -0.0261 |
| rs11662691  | C | 0.0263  |
| rs17773370  | A | -0.0402 |
| rs8090864   | G | -0.0156 |
| rs80305476  | C | -0.055  |
| rs12967669  | A | -0.0133 |
| rs62083196  | A | -0.0169 |
| rs4940005   | A | 0.0159  |
| rs519309    | G | 0.0203  |
| rs8096364   | G | -0.0214 |
| rs111270911 | A | 0.1086  |
| rs112833448 | C | -0.0292 |
| rs7234020   | C | 0.0226  |
| rs1984915   | G | -0.0165 |
| rs6566815   | G | -0.0139 |
| rs28499407  | A | 0.0413  |
| rs34450274  | T | -0.0395 |
| rs80251722  | A | 0.0589  |
| rs112285783 | A | -0.0227 |
| rs9948016   | T | 0.0332  |
| rs75152146  | T | 0.0842  |
| rs2045232   | G | 0.0133  |
| rs1788931   | T | -0.0232 |
| rs77939509  | T | 0.0622  |
| rs3859320   | G | -0.0366 |
| rs112294339 | C | 0.0701  |
| rs9950799   | C | -0.0252 |
| rs72960160  | C | -0.029  |
| rs138419135 | G | 0.048   |
| rs1313958   | C | 0.0429  |
| rs113078533 | A | -0.0901 |
| rs76124644  | A | -0.0792 |
| rs138532409 | T | -0.0662 |
| rs77708288  | A | -0.0477 |
| rs80309336  | A | -0.0352 |
| rs1241987   | A | -0.0129 |
| rs117665159 | T | -0.08   |



|             |   |         |
|-------------|---|---------|
| rs7231501   | A | 0.0246  |
| rs149240572 | T | 0.0736  |
| rs4800089   | T | 0.014   |
| rs72878659  | T | 0.038   |
| rs7235681   | A | 0.0169  |
| rs7238497   | C | 0.025   |
| rs72926846  | A | 0.0311  |
| rs4890674   | C | 0.0147  |
| rs7232741   | C | -0.0257 |
| rs12959903  | A | 0.0129  |
| rs34151822  | A | 0.0676  |
| rs540291    | C | 0.0142  |
| rs17078752  | A | -0.0371 |
| rs12956736  | C | 0.0195  |
| rs9959890   | C | 0.0165  |
| rs17087823  | C | 0.0388  |
| rs117518958 | A | 0.1029  |
| rs57914615  | C | -0.0167 |
| rs12966814  | C | 0.0212  |
| rs112877924 | C | -0.0183 |
| rs143786002 | C | 0.0793  |
| rs74985296  | A | -0.0583 |
| rs79441032  | G | 0.0687  |
| rs151062029 | T | -0.0608 |
| rs2042062   | A | -0.0224 |
| rs7234113   | T | 0.0171  |
| rs76145526  | A | 0.0323  |
| rs72988007  | A | 0.053   |
| rs78192978  | T | 0.0376  |
| rs7227395   | C | 0.0129  |
| rs117866902 | C | -0.0602 |
| rs8084060   | T | -0.0136 |
| rs11873134  | A | 0.0338  |
| rs2654174   | C | 0.0149  |
| rs144269829 | T | 0.0918  |
| rs77496389  | C | -0.023  |
| rs17641592  | G | -0.0341 |
| rs118005146 | G | 0.0723  |
| rs117956492 | G | 0.0697  |
| rs61117536  | A | 0.0208  |
| rs55936258  | C | -0.0976 |
| rs75263898  | A | 0.0974  |
| rs141787630 | T | 0.0847  |
| rs12962142  | G | -0.0195 |
| rs117162761 | G | -0.057  |
| rs2847612   | C | -0.025  |
| rs4798519   | A | -0.0131 |

|             |   |         |
|-------------|---|---------|
| rs116929806 | C | 0.0737  |
| rs62618698  | A | 0.0454  |
| rs77279216  | T | 0.0468  |
| rs74529945  | T | 0.0523  |
| rs117840077 | G | -0.0576 |
| rs1941148   | A | -0.027  |
| rs9951030   | C | 0.117   |
| rs2231563   | T | 0.0228  |
| rs73485430  | G | -0.0203 |
| rs57054619  | G | 0.0232  |
| rs2138178   | A | 0.0262  |
| rs117600193 | G | 0.0648  |
| rs8097066   | G | 0.0187  |
| rs140526496 | A | 0.0431  |
| rs60348005  | C | -0.0351 |
| rs17816792  | G | 0.0165  |
| rs143177720 | C | 0.022   |
| rs142668775 | G | 0.1127  |
| rs1941658   | C | 0.0522  |
| rs12604657  | T | -0.0136 |
| rs60535345  | T | -0.0292 |
| rs145714750 | A | 0.0638  |
| rs139269391 | T | 0.0484  |
| rs12971102  | C | 0.0397  |
| rs112607304 | G | -0.0297 |
| rs9304157   | C | -0.0349 |
| rs143353843 | T | -0.0597 |
| rs117381066 | A | -0.0287 |
| rs62083214  | T | -0.0201 |
| rs34393749  | G | 0.0132  |
| rs17778154  | T | -0.0173 |
| rs11874807  | G | -0.0197 |
| rs116858912 | T | 0.0764  |
| rs117123349 | A | 0.0708  |
| rs76056222  | A | 0.0283  |
| rs79157443  | T | -0.026  |
| rs34493149  | G | 0.076   |
| rs4891824   | T | 0.0394  |
| rs35017159  | G | -0.0683 |
| rs117151973 | G | 0.0562  |
| rs72919436  | T | 0.0776  |
| rs75936759  | A | 0.0439  |
| rs7229018   | G | 0.0305  |
| rs77856670  | A | -0.0501 |
| rs9948901   | G | 0.014   |
| rs4796982   | C | -0.0214 |
| rs949022    | G | 0.0164  |

|             |   |         |
|-------------|---|---------|
| rs9952133   | A | 0.0286  |
| rs76515994  | T | -0.0655 |
| rs111687718 | A | -0.0276 |
| rs117382973 | A | -0.0414 |
| rs141499140 | T | -0.0525 |
| rs16956987  | T | 0.0659  |
| rs2541874   | A | 0.0168  |
| rs62093192  | T | -0.0185 |
| rs140946759 | T | -0.0209 |
| rs10502569  | G | 0.0269  |
| rs1942371   | G | 0.0202  |
| rs115114076 | G | 0.0492  |
| rs2849257   | G | 0.0153  |
| rs11663209  | T | 0.0875  |
| rs66780221  | A | 0.0407  |
| rs146042968 | G | 0.053   |
| rs76079008  | A | 0.0554  |
| rs9948520   | T | -0.0149 |
| rs476858    | G | -0.0197 |
| rs117848936 | C | -0.0876 |
| rs17827804  | A | -0.0665 |
| rs8097697   | C | -0.0429 |
| rs10853325  | A | 0.0158  |
| rs113872527 | G | 0.0671  |
| rs147895498 | G | -0.1125 |
| rs11660584  | A | 0.0161  |
| rs12104044  | T | 0.0206  |
| rs4417607   | T | -0.0359 |
| rs2881288   | T | -0.0193 |
| rs111494523 | A | -0.1    |
| rs117842499 | C | 0.084   |
| rs79253221  | A | -0.0747 |
| rs79714360  | G | 0.0377  |
| rs12959006  | T | -0.0165 |
| rs62094194  | C | 0.0375  |
| rs35041077  | G | 0.0189  |
| rs79409440  | A | -0.1066 |
| rs8083156   | G | -0.0136 |
| rs9947632   | A | 0.0198  |
| rs79890897  | C | 0.039   |
| rs8084658   | C | -0.032  |
| rs9961683   | T | 0.0162  |
| rs148212371 | T | 0.0516  |
| rs141614991 | T | -0.0606 |
| rs524047    | C | 0.0217  |
| rs56732665  | T | 0.016   |
| rs77278100  | C | 0.0428  |

|             |   |         |
|-------------|---|---------|
| rs1995446   | G | 0.0149  |
| rs113945797 | T | 0.0288  |
| rs11878137  | C | -0.037  |
| rs35609091  | C | 0.071   |
| rs117991250 | T | 0.0421  |
| rs117543671 | G | -0.0433 |
| rs79646752  | A | -0.0249 |
| rs78230861  | C | 0.0291  |
| rs6567287   | C | 0.0149  |
| rs12963371  | T | 0.0154  |
| rs147205939 | G | 0.0894  |
| rs12969605  | A | -0.0124 |
| rs79626538  | T | 0.0305  |
| rs41452747  | A | 0.0255  |
| rs80033208  | A | -0.0395 |
| rs76459109  | T | 0.0878  |
| rs6507607   | C | -0.0154 |
| rs12969729  | A | 0.0123  |
| rs2058345   | A | -0.058  |
| rs1791113   | C | 0.0183  |
| rs75508272  | A | -0.0616 |
| rs10782028  | C | 0.0126  |
| rs62099252  | A | 0.0222  |
| rs608161    | T | 0.0206  |
| rs117188523 | T | -0.0605 |
| rs538257    | T | -0.0235 |
| rs142002334 | G | -0.0409 |
| rs75104201  | T | 0.0365  |
| rs72973107  | C | -0.0164 |
| rs9944979   | G | -0.014  |
| rs80166638  | C | -0.0824 |
| rs117542959 | T | -0.0757 |
| rs2912332   | G | 0.0216  |
| rs77518617  | C | 0.0581  |
| rs2156648   | A | -0.0733 |
| rs147174421 | C | 0.0497  |
| rs8088470   | A | 0.0234  |
| rs78798716  | T | -0.0644 |
| rs12960046  | G | -0.0173 |
| rs3912267   | C | -0.0134 |
| rs12970451  | C | -0.0338 |
| rs74491954  | T | 0.0421  |
| rs72900301  | C | -0.0218 |
| rs28482978  | A | 0.0236  |
| rs675150    | G | -0.0143 |
| rs78354784  | C | -0.036  |
| rs880132    | T | -0.0158 |

|             |   |         |
|-------------|---|---------|
| rs75418319  | A | 0.0379  |
| rs117396803 | C | -0.0665 |
| rs111881119 | A | -0.0254 |
| rs17470795  | G | -0.0727 |
| rs7243897   | A | 0.0262  |
| rs150544650 | C | -0.1065 |
| rs11661904  | A | 0.0233  |
| rs62091991  | G | 0.0561  |
| rs77784260  | A | 0.0217  |
| rs80135005  | C | -0.0458 |
| rs117900297 | A | 0.0823  |
| rs12605544  | C | 0.0164  |
| rs8099151   | T | -0.0244 |
| rs149078224 | C | 0.0599  |
| rs116240244 | A | 0.0743  |
| rs7242015   | G | 0.0143  |
| rs2959486   | T | 0.0174  |
| rs17811812  | T | -0.0244 |
| rs62094369  | A | 0.0317  |
| rs7229899   | C | 0.014   |
| rs12607146  | C | 0.0242  |
| rs9951738   | G | -0.0171 |
| rs529342    | G | 0.0144  |
| rs1247920   | A | 0.0121  |
| rs118126931 | T | 0.0376  |
| rs112975019 | T | -0.0585 |
| rs6566532   | T | -0.0216 |
| rs4798125   | C | -0.0179 |
| rs145089381 | G | -0.0585 |
| rs1561653   | G | 0.0148  |
| rs9946136   | C | 0.0162  |
| rs78318225  | G | -0.0451 |
| rs80049715  | T | -0.0686 |
| rs35904567  | A | 0.0153  |
| rs6565965   | C | -0.0134 |
| rs62094559  | A | -0.0157 |
| rs12458466  | A | -0.0171 |
| rs9945594   | G | -0.013  |
| rs3794848   | T | 0.0139  |
| rs148497324 | A | 0.0418  |
| rs16943541  | C | 0.0508  |
| rs113117521 | T | 0.0956  |
| rs150516407 | A | -0.022  |
| rs9946212   | G | -0.0126 |
| rs3862176   | G | 0.0779  |
| rs77200433  | T | 0.0477  |
| rs291654    | A | 0.0243  |

|             |   |         |
|-------------|---|---------|
| rs76120571  | G | -0.0761 |
| rs143767737 | G | 0.0713  |
| rs72927749  | C | -0.0628 |
| rs62083985  | A | -0.0278 |
| rs1945004   | T | 0.0157  |
| rs17660776  | A | 0.0159  |
| rs75323122  | A | -0.0352 |
| rs142198921 | T | 0.0853  |
| rs80087105  | A | 0.0902  |
| rs117914392 | C | -0.046  |
| rs76517301  | A | 0.0405  |
| rs7242516   | C | -0.0163 |
| rs34468881  | A | 0.0292  |
| rs72917489  | C | -0.0431 |
| rs77857012  | A | -0.0651 |
| rs76496419  | G | 0.0412  |
| rs148546387 | C | -0.1094 |
| rs72985379  | A | -0.0248 |
| rs35078374  | T | -0.0203 |
| rs60367294  | T | 0.0143  |
| rs4340399   | C | 0.0136  |
| rs62096183  | T | -0.0709 |
| rs12957918  | C | 0.0417  |
| rs72974959  | C | 0.0306  |
| rs78052066  | A | 0.0653  |
| rs72954220  | T | -0.048  |
| rs78897305  | A | 0.0236  |
| rs12457632  | T | -0.0197 |
| rs2174899   | C | -0.0178 |
| rs77807581  | A | -0.0646 |
| rs139108042 | C | 0.0579  |
| rs140194027 | A | -0.0467 |
| rs77822858  | G | 0.0835  |
| rs72895169  | T | -0.0667 |
| rs79554684  | A | -0.0738 |
| rs3760613   | C | 0.0551  |
| rs62100563  | G | 0.0851  |
| rs677136    | C | -0.0135 |
| rs10460021  | A | 0.0393  |
| rs9944976   | A | -0.0214 |
| rs148523343 | T | 0.0568  |
| rs77053242  | C | -0.0956 |
| rs8082903   | C | 0.0359  |
| rs9957642   | C | 0.0146  |
| rs7359752   | T | -0.0236 |
| rs34127588  | T | 0.0706  |
| rs118051442 | A | -0.0318 |

|             |   |         |
|-------------|---|---------|
| rs11152236  | C | -0.0124 |
| rs566655    | G | 0.0145  |
| rs9962338   | C | -0.0155 |
| rs77599684  | A | -0.0488 |
| rs78996556  | T | -0.0733 |
| rs78688056  | A | -0.0283 |
| rs144032783 | T | 0.0564  |
| rs11082667  | G | 0.0531  |
| rs7235469   | A | -0.0181 |
| rs112251004 | A | -0.0722 |
| rs72977865  | G | 0.0712  |
| rs1039721   | A | 0.0128  |
| rs77256596  | G | 0.0464  |
| rs75148758  | C | -0.0221 |
| rs72995632  | A | 0.0479  |
| rs118084374 | T | -0.0699 |
| rs12605998  | C | -0.0176 |
| rs11664796  | C | -0.0256 |
| rs17056723  | A | 0.0727  |
| rs77336523  | A | -0.0292 |
| rs11081378  | A | -0.0148 |
| rs76600051  | A | -0.064  |
| rs4940291   | T | -0.016  |
| rs147167929 | T | 0.0277  |
| rs12966713  | C | -0.0136 |
| rs55705322  | A | -0.0191 |
| rs8092966   | C | 0.0122  |
| rs137947188 | A | 0.0819  |
| rs117003358 | G | 0.0556  |
| rs11660835  | C | 0.0142  |
| rs590911    | A | -0.0286 |
| rs9949357   | G | -0.0149 |
| rs56140727  | G | -0.0607 |
| rs7241714   | T | -0.023  |
| rs2290826   | T | -0.0287 |
| rs147768726 | T | -0.101  |
| rs150067673 | T | 0.0872  |
| rs76699997  | C | -0.0357 |
| rs76542501  | G | 0.0658  |
| rs16942962  | A | -0.0236 |
| rs78977185  | T | -0.0379 |
| rs79853803  | A | -0.0255 |
| rs323125    | G | -0.019  |
| rs9956106   | A | 0.014   |
| rs147130379 | A | 0.0945  |
| rs145221290 | C | -0.0884 |
| rs117830852 | G | 0.1144  |

|             |   |         |
|-------------|---|---------|
| rs36081634  | C | -0.0668 |
| rs9953631   | C | -0.0135 |
| rs644529    | T | -0.0889 |
| rs62096485  | A | -0.0308 |
| rs79112239  | C | 0.1007  |
| rs16946317  | T | 0.0345  |
| rs150301854 | G | 0.0612  |
| rs2911621   | T | -0.022  |
| rs150658670 | T | 0.0579  |
| rs9953010   | T | -0.0142 |
| rs17692276  | T | 0.0258  |
| rs117096480 | T | 0.0431  |
| rs17735714  | A | -0.0153 |
| rs75001222  | A | 0.0697  |
| rs1893250   | A | 0.0125  |
| rs76462335  | C | 0.0384  |
| rs62101078  | T | -0.0328 |
| rs9964804   | C | -0.0367 |
| rs75892562  | T | 0.0161  |
| rs7227942   | G | -0.0129 |
| rs62079879  | C | 0.0154  |
| rs9963214   | C | 0.0391  |
| rs145126645 | T | 0.0516  |
| rs117901278 | C | 0.0728  |
| rs116879885 | G | 0.1028  |
| rs117354958 | G | 0.0395  |
| rs4800151   | A | 0.0159  |
| rs62103350  | T | 0.0595  |
| rs7232180   | A | 0.0469  |
| rs11665521  | C | 0.0127  |
| rs72862185  | C | 0.0195  |
| rs9319649   | A | 0.0479  |
| rs7240739   | C | 0.0427  |
| rs72642404  | G | 0.0255  |
| rs1145266   | G | -0.0126 |
| rs148155792 | T | 0.062   |
| rs949029    | A | -0.015  |
| rs111328066 | T | -0.0833 |
| rs1703823   | T | 0.0165  |
| rs118035118 | C | -0.0352 |
| rs1073581   | C | -0.0118 |
| rs16960494  | C | 0.0231  |
| rs12185294  | G | -0.0159 |
| rs77531379  | G | -0.063  |
| rs12606001  | T | 0.0127  |
| rs1719979   | T | -0.0133 |
| rs3975315   | T | -0.0141 |



|             |   |         |
|-------------|---|---------|
| rs72886772  | G | 0.0552  |
| rs146204538 | T | 0.1093  |
| rs9963629   | T | 0.0142  |
| rs78857247  | A | 0.0281  |
| rs8096632   | C | 0.0164  |
| rs8083023   | T | 0.016   |
| rs1557351   | C | 0.0147  |
| rs1861906   | G | 0.0122  |
| rs16967993  | T | 0.0611  |
| rs11082704  | C | 0.0142  |
| rs138263361 | T | -0.0534 |
| rs12458286  | A | -0.0258 |
| rs80226779  | A | -0.0544 |
| rs75782335  | G | 0.0453  |
| rs117462840 | T | -0.0275 |
| rs498461    | A | 0.0127  |
| rs72914964  | A | 0.0305  |
| rs111297422 | T | -0.0587 |
| rs4890585   | A | 0.0716  |
| rs7233136   | G | -0.0117 |
| rs7232639   | T | -0.0236 |
| rs9949946   | A | 0.0123  |
| rs76680428  | T | -0.0468 |
| rs441668    | T | 0.014   |
| rs71160961  | G | 0.0136  |
| rs112167885 | A | 0.0702  |
| rs117557462 | C | 0.0388  |
| rs7229118   | G | 0.041   |
| rs78138818  | T | 0.0555  |
| rs645257    | T | -0.0129 |
| rs139506349 | A | 0.0848  |
| rs142179280 | C | 0.0547  |
| rs116911862 | A | 0.0767  |
| rs2069083   | T | -0.0172 |
| rs117787013 | C | 0.053   |
| rs2032232   | G | 0.0125  |
| rs62086988  | G | 0.0694  |
| rs17651456  | T | 0.0494  |
| rs9948716   | G | 0.0157  |
| rs77661143  | T | 0.034   |
| rs80075759  | G | 0.0467  |
| rs1792744   | G | 0.0214  |
| rs12960602  | T | 0.0168  |
| rs649530    | G | 0.0119  |
| rs9964178   | T | -0.0133 |
| rs7237415   | C | 0.0321  |
| rs3744860   | T | 0.015   |

|             |   |         |
|-------------|---|---------|
| rs141493714 | A | -0.0879 |
| rs7227646   | T | -0.0245 |
| rs112813185 | C | -0.0619 |
| rs117358990 | G | -0.0538 |
| rs111709047 | T | -0.0424 |
| rs59929798  | T | -0.0131 |
| rs59413854  | G | -0.0717 |
| rs7233541   | C | 0.0266  |
| rs75321103  | C | -0.0519 |
| rs524685    | G | -0.0246 |
| rs78694830  | A | 0.0567  |
| rs117925057 | G | 0.0361  |
| rs6505987   | T | 0.0774  |
| rs61061802  | A | -0.0274 |
| rs1790992   | A | -0.0248 |
| rs72924733  | T | 0.045   |
| rs17088317  | C | 0.017   |
| rs117109798 | T | 0.0543  |
| rs74385484  | A | 0.0407  |
| rs11081091  | G | -0.0236 |
| rs117500900 | C | -0.0775 |
| rs112922600 | G | 0.0612  |
| rs12962505  | G | -0.0205 |
| rs7229901   | T | 0.0228  |
| rs73956029  | A | 0.0296  |
| rs150252103 | G | 0.0824  |
| rs474743    | A | -0.0121 |
| rs9956834   | C | -0.0364 |
| rs10445471  | A | -0.0132 |
| rs118126577 | T | -0.05   |
| rs56364571  | C | -0.0191 |
| rs755776    | G | -0.0201 |
| rs62091381  | A | 0.0172  |
| rs118100458 | A | 0.0818  |
| rs34143551  | T | -0.055  |
| rs12958827  | T | -0.0127 |
| rs28594778  | G | -0.0343 |
| rs6508086   | C | -0.0334 |
| rs17089360  | T | -0.0866 |
| rs56277837  | T | 0.0137  |
| rs77048583  | C | -0.09   |
| rs62106138  | A | -0.0139 |
| rs79617054  | G | -0.0248 |
| rs630174    | G | 0.0145  |
| rs7229088   | T | -0.0175 |
| rs2002248   | T | 0.055   |
| rs113568918 | A | 0.0345  |

|             |   |         |
|-------------|---|---------|
| rs1260722   | T | 0.0131  |
| rs67107156  | G | 0.032   |
| rs118069429 | G | -0.0709 |
| rs35326929  | C | 0.0276  |
| rs2658049   | T | 0.0204  |
| rs1365294   | G | -0.0163 |
| rs9963707   | G | 0.0253  |
| rs12964726  | T | -0.0677 |
| rs75925408  | T | -0.0411 |
| rs117384534 | A | 0.1032  |
| rs10502937  | T | 0.0357  |
| rs79234024  | C | 0.0236  |
| rs76495109  | T | 0.0687  |
| rs144375996 | C | 0.0563  |
| rs57088749  | T | -0.0129 |
| rs112741143 | T | 0.0329  |
| rs2052416   | A | -0.0296 |
| rs11873286  | A | 0.0216  |
| rs12969179  | G | 0.0373  |
| rs4799553   | G | 0.0663  |
| rs62079401  | C | 0.0427  |
| rs75461825  | A | 0.0377  |
| rs9951492   | G | 0.0222  |
| rs2510022   | A | 0.0116  |
| rs72872909  | G | 0.035   |
| rs11873701  | A | 0.0127  |
| rs11081916  | G | -0.0192 |
| rs12966133  | G | 0.0251  |
| rs117608103 | T | -0.0624 |
| rs12456124  | T | -0.0192 |
| rs148665420 | T | -0.0774 |
| rs78051698  | C | -0.0252 |
| rs75933567  | T | 0.0568  |
| rs9951584   | A | -0.0847 |
| rs117155990 | T | -0.078  |
| rs28709753  | T | -0.0345 |
| rs72963110  | A | -0.0445 |
| rs76966570  | T | -0.03   |
| rs7236330   | T | -0.0156 |
| rs17256808  | G | -0.0558 |
| rs62081533  | C | 0.0141  |
| rs9952060   | C | 0.0129  |
| rs77068691  | T | 0.0473  |
| rs505145    | A | 0.0124  |
| rs2865143   | G | -0.017  |
| rs117799943 | G | -0.0439 |
| rs148858632 | C | 0.0442  |

|             |   |         |
|-------------|---|---------|
| rs73004445  | T | 0.0422  |
| rs28641595  | T | 0.0132  |
| rs8084582   | A | 0.0155  |
| rs534675    | G | -0.0232 |
| rs117370474 | C | -0.0222 |
| rs7232967   | T | -0.0317 |
| rs4941040   | T | 0.0337  |
| rs111826765 | C | -0.065  |
| rs7229614   | A | -0.0169 |
| rs34392232  | G | -0.0348 |
| rs527383    | G | 0.0133  |
| rs11877199  | A | 0.0204  |
| rs117940983 | C | 0.0373  |
| rs2846766   | C | 0.0173  |
| rs112472590 | T | 0.1013  |
| rs62095616  | C | -0.0652 |
| rs78145437  | T | -0.0436 |
| rs72917213  | T | 0.019   |
| rs12963257  | A | -0.014  |
| rs141472663 | T | -0.0839 |
| rs4940412   | A | 0.0208  |
| rs60662653  | G | -0.0198 |
| rs77493404  | A | 0.0623  |
| rs139295223 | A | 0.055   |
| rs3848498   | A | -0.0165 |
| rs78719462  | A | 0.0227  |
| rs12958384  | T | 0.0131  |
| rs62082948  | T | -0.016  |
| rs145156973 | A | -0.0763 |
| rs9965900   | C | -0.0129 |
| rs75527198  | C | -0.0502 |
| rs12455713  | T | 0.0209  |
| rs62096181  | T | 0.0156  |
| rs74803650  | C | 0.0566  |
| rs118190878 | T | 0.0442  |
| rs141261503 | T | -0.0393 |
| rs149070427 | G | 0.0571  |
| rs16946958  | A | -0.0326 |
| rs16944952  | A | 0.0223  |
| rs140773496 | A | -0.0264 |
| rs140694861 | C | 0.0618  |
| rs73455289  | C | 0.0735  |
| rs75364985  | A | -0.034  |
| rs17479650  | G | -0.0378 |
| rs10515975  | A | -0.0319 |
| rs117452443 | A | -0.1076 |
| rs303753    | A | 0.0121  |

|             |   |         |
|-------------|---|---------|
| rs62089627  | T | -0.0234 |
| rs140801656 | T | -0.0543 |
| rs145031466 | G | 0.0782  |
| rs1249488   | G | 0.0139  |
| rs16978159  | C | 0.0338  |
| rs147719058 | A | 0.0822  |
| rs2048884   | T | 0.0491  |
| rs9964994   | G | -0.0234 |
| rs74980163  | T | -0.0542 |
| rs548362    | A | -0.0111 |
| rs62090479  | A | 0.0411  |
| rs16942091  | G | 0.0211  |
| rs118023207 | T | -0.0552 |
| rs116260140 | T | 0.0514  |
| rs118054209 | C | 0.0493  |
| rs28391643  | T | 0.0277  |
| rs1786721   | T | -0.0513 |
| rs2510192   | A | -0.0117 |
| rs7242279   | A | 0.0182  |
| rs12103960  | T | 0.0586  |
| rs34639724  | A | -0.063  |
| rs117862146 | A | -0.0501 |
| rs8098360   | T | -0.0261 |
| rs9304308   | A | -0.017  |
| rs9958651   | G | -0.0157 |
| rs72874225  | T | 0.0202  |
| rs117047595 | A | 0.0675  |
| rs17460370  | G | 0.0694  |
| rs116569842 | G | -0.066  |
| rs482497    | C | 0.0183  |
| rs79077535  | G | 0.0133  |
| rs28673782  | G | 0.0221  |
| rs78192102  | G | -0.023  |
| rs117034358 | C | -0.0672 |
| rs34826949  | A | 0.0261  |
| rs17698652  | A | -0.0148 |
| rs2846761   | T | 0.0175  |
| rs58925983  | C | -0.0382 |
| rs1369061   | C | -0.0118 |
| rs76745423  | T | 0.0223  |
| rs117300951 | A | -0.0842 |
| rs111420517 | T | 0.0508  |
| rs145744014 | T | 0.06    |
| rs75582642  | T | 0.0323  |
| rs79098264  | C | -0.0224 |
| rs74560640  | G | -0.0545 |
| rs6566464   | G | -0.0207 |

|             |   |         |
|-------------|---|---------|
| rs61731921  | T | 0.0308  |
| rs8094095   | A | -0.0167 |
| rs112460735 | T | 0.0615  |
| rs62082096  | A | -0.0744 |
| rs76589324  | A | 0.0435  |
| rs72911371  | C | -0.054  |
| rs34174335  | T | -0.0122 |
| rs12956914  | G | 0.0113  |
| rs2625381   | T | -0.014  |
| rs7233975   | G | 0.0138  |
| rs72856329  | G | -0.0556 |
| rs117466055 | C | 0.0449  |
| rs28616756  | C | -0.0411 |
| rs2580128   | T | 0.0135  |
| rs72973248  | A | 0.0488  |
| rs8299      | T | 0.0118  |
| rs77156984  | T | -0.0444 |
| rs117219734 | C | 0.0407  |
| rs75086708  | A | -0.0455 |
| rs140306288 | A | 0.0497  |
| rs4940370   | C | -0.0165 |
| rs7234333   | T | -0.0147 |
| rs71355685  | G | -0.0606 |
| rs35435727  | G | 0.0139  |
| rs7241838   | T | 0.034   |
| rs116846781 | A | 0.062   |
| rs73376926  | G | 0.0445  |
| rs80166024  | A | -0.0321 |
| rs35726590  | G | -0.0376 |
| rs55947782  | A | -0.0149 |
| rs11876188  | T | 0.015   |
| rs61743119  | T | 0.0222  |
| rs922185    | G | 0.0146  |
| rs74951270  | T | 0.024   |
| rs143761079 | A | 0.0522  |
| rs9964480   | G | -0.0113 |
| rs2385480   | A | 0.0143  |
| rs8084631   | G | -0.0407 |
| rs906982    | C | 0.0205  |
| rs142974767 | A | 0.0861  |
| rs4798726   | C | -0.0456 |
| rs17818562  | G | 0.0396  |
| rs28514917  | C | 0.0401  |
| rs11083411  | G | 0.0116  |
| rs118069190 | G | 0.0485  |
| rs78929336  | T | -0.0529 |
| rs139441575 | T | -0.0488 |

|             |   |         |
|-------------|---|---------|
| rs62079234  | C | -0.0333 |
| rs58101710  | T | -0.0605 |
| rs74898217  | A | 0.0318  |
| rs689178    | G | 0.0153  |
| rs12960344  | T | -0.0415 |
| rs75835857  | T | 0.0609  |
| rs74744623  | C | -0.0592 |
| rs12953761  | C | 0.0315  |
| rs1667223   | C | 0.0111  |
| rs79676158  | C | 0.0899  |
| rs56380432  | A | 0.0428  |
| rs74584201  | A | 0.0973  |
| rs7233032   | A | 0.0125  |
| rs117717683 | A | 0.0697  |
| rs79973834  | T | -0.0668 |
| rs76171344  | A | 0.0582  |
| rs79552569  | G | -0.0713 |
| rs74617606  | A | -0.0422 |
| rs117918521 | A | 0.0644  |
| rs12457904  | T | 0.03    |
| rs4239401   | G | -0.0664 |
| rs2432832   | C | 0.0121  |
| rs72867363  | C | -0.0646 |
| rs56228920  | C | -0.0225 |
| rs117782496 | T | -0.0735 |
| rs626549    | T | -0.0229 |
| rs117057567 | A | 0.0271  |
| rs36078707  | G | -0.0715 |
| rs72882537  | G | 0.0271  |
| rs617573    | C | 0.0155  |
| rs146187762 | G | -0.0607 |
| rs74945060  | C | 0.0697  |
| rs6508608   | T | 0.0128  |
| rs9964224   | A | 0.0164  |
| rs7235993   | T | 0.0321  |
| rs9946794   | G | 0.0139  |
| rs11663548  | C | -0.0197 |
| rs151236310 | A | 0.0612  |
| rs28821273  | C | -0.0196 |
| rs11665110  | A | 0.0323  |
| rs11660674  | A | -0.0306 |
| rs77684190  | G | 0.034   |
| rs55990567  | A | -0.0461 |
| rs117117966 | A | 0.0505  |
| rs4797095   | A | -0.0329 |
| rs78149774  | A | 0.0338  |
| rs76912150  | G | -0.0302 |

|             |   |         |
|-------------|---|---------|
| rs16943915  | G | 0.0223  |
| rs206580    | C | -0.0125 |
| rs141594031 | A | 0.0434  |
| rs78348139  | T | -0.0415 |
| rs78779298  | A | 0.0245  |
| rs138303505 | G | -0.0587 |
| rs1465509   | C | -0.0131 |
| rs16978537  | A | -0.0364 |
| rs1833284   | G | 0.0125  |
| rs587274    | A | 0.0139  |
| rs62074942  | A | -0.0294 |
| rs117622899 | A | -0.0603 |
| rs55778364  | C | -0.0271 |
| rs192775    | C | -0.0148 |
| rs9962307   | A | 0.0413  |
| rs143849941 | C | -0.0499 |
| rs2612092   | T | -0.0187 |
| rs76528996  | T | -0.0547 |
| rs75355389  | T | -0.0248 |
| rs117185595 | A | 0.0903  |
| rs9964613   | A | -0.0161 |
| rs17640680  | T | 0.025   |
| rs149308878 | T | -0.0709 |
| rs138031963 | G | 0.0608  |
| rs77871595  | T | 0.0439  |
| rs1511932   | C | 0.0127  |
| rs116980487 | T | -0.0396 |
| rs78883928  | C | -0.0438 |
| rs2015832   | A | -0.0215 |
| rs8096052   | C | 0.0124  |
| rs117636962 | C | 0.0542  |
| rs112735296 | G | -0.0451 |
| rs12971010  | C | 0.0272  |
| rs117034606 | T | 0.0397  |
| rs11665097  | T | -0.0189 |
| rs62086500  | G | 0.0335  |
| rs146786618 | G | -0.034  |
| rs77878935  | T | 0.0835  |
| rs72866630  | T | -0.0492 |
| rs73384616  | A | 0.0595  |
| rs59998287  | A | -0.0358 |
| rs111292758 | C | -0.0284 |
| rs8094089   | T | 0.0115  |
| rs72900649  | C | 0.0431  |
| rs62087385  | T | 0.029   |
| rs56393300  | G | 0.0164  |
| rs148801943 | T | 0.0654  |



|             |   |         |
|-------------|---|---------|
| rs11665341  | G | 0.0159  |
| rs2000840   | G | 0.011   |
| rs73449060  | A | -0.0404 |
| rs75494747  | G | 0.0468  |
| rs34908092  | G | 0.0178  |
| rs1531055   | C | -0.045  |
| rs117625345 | A | 0.0833  |
| rs76858417  | T | -0.0523 |
| rs117984057 | G | 0.0643  |
| rs72973240  | A | -0.0138 |
| rs637809    | C | -0.0618 |
| rs80336853  | C | -0.0294 |
| rs6566725   | T | -0.0111 |
| rs11662773  | T | 0.0405  |
| rs17187730  | C | -0.0181 |
| rs72964682  | T | 0.0304  |
| rs143601907 | G | -0.0617 |
| rs77159513  | G | -0.0377 |
| rs12458576  | G | -0.0115 |
| rs9304393   | C | -0.0122 |
| rs1430551   | T | -0.0137 |
| rs17799844  | A | -0.0221 |
| rs72890911  | A | -0.0972 |
| rs73375278  | T | -0.0733 |
| rs1032630   | T | 0.0189  |
| rs72880357  | T | -0.0739 |
| rs118117920 | A | -0.0549 |
| rs12967320  | A | 0.0123  |
| rs690191    | C | 0.0131  |
| rs4619493   | G | 0.012   |
| rs144630658 | A | -0.0682 |
| rs2850323   | T | -0.0132 |
| rs114508131 | C | -0.0784 |
| rs74406843  | T | 0.0265  |
| rs17221361  | T | -0.0741 |
| rs75364447  | A | -0.0443 |
| rs8084714   | T | 0.0186  |
| rs11659732  | A | 0.0337  |
| rs17082318  | T | 0.027   |
| rs12963836  | C | 0.0243  |
| rs11660303  | T | 0.0135  |
| rs6506319   | G | 0.0242  |
| rs73946010  | G | 0.0326  |
| rs117026720 | A | -0.0675 |
| rs2535725   | G | -0.0171 |
| rs7242425   | C | -0.0155 |
| rs116925803 | T | 0.0754  |

|             |   |         |
|-------------|---|---------|
| rs6506314   | G | -0.0381 |
| rs113114656 | T | 0.0473  |
| rs12606687  | T | 0.0168  |
| rs1942528   | T | 0.0214  |
| rs4318291   | G | 0.0246  |
| rs138163458 | C | 0.0959  |
| rs11663779  | A | -0.0151 |
| rs35977497  | A | -0.0274 |
| rs79859108  | G | -0.0519 |
| rs34285397  | T | -0.0611 |
| rs113809986 | A | -0.0527 |
| rs6506053   | T | -0.0138 |
| rs148410041 | G | 0.0539  |
| rs9953889   | T | 0.0127  |
| rs557952    | C | -0.0133 |
| rs117189896 | G | -0.0556 |
| rs72632203  | A | -0.0129 |
| rs8085754   | G | -0.0137 |
| rs116980927 | T | -0.0414 |
| rs72887333  | T | -0.0119 |
| rs78822698  | C | -0.0687 |
| rs75783528  | G | 0.0284  |
| rs9948124   | G | -0.0435 |
| rs111772192 | A | -0.1055 |
| rs748938    | A | 0.0166  |
| rs62085724  | A | -0.0193 |
| rs17682436  | A | 0.0583  |
| rs17468143  | A | -0.014  |
| rs13381971  | C | -0.0608 |
| rs6506188   | A | -0.0232 |
| rs74316971  | C | -0.0546 |
| rs17059541  | T | -0.0164 |
| rs117741304 | G | 0.0541  |
| rs899968    | G | -0.0121 |
| rs116957432 | A | -0.0337 |
| rs713242    | C | -0.0108 |
| rs77953009  | T | -0.0634 |
| rs998993    | C | 0.0118  |
| rs72966627  | A | 0.0366  |
| rs4455051   | A | -0.0118 |
| rs10468829  | C | 0.0264  |
| rs10438979  | G | -0.033  |
| rs12454386  | G | 0.0312  |
| rs1318792   | A | 0.0118  |
| rs140724611 | A | 0.0501  |
| rs80162671  | A | -0.0574 |
| rs71354497  | A | -0.0358 |

|             |   |         |
|-------------|---|---------|
| rs3809940   | T | 0.0268  |
| rs981532    | T | 0.0192  |
| rs894910    | G | 0.0116  |
| rs59595970  | G | -0.0317 |
| rs6417039   | A | -0.0144 |
| rs11876383  | C | -0.0495 |
| rs62086519  | A | -0.0282 |
| rs78697548  | G | -0.0266 |
| rs117073321 | C | -0.0528 |
| rs75560528  | G | 0.0189  |
| rs143840470 | G | -0.0739 |
| rs12954485  | C | -0.0471 |
| rs78162056  | A | -0.0392 |
| rs9946000   | C | -0.0328 |
| rs8085620   | T | -0.0115 |
| rs117288289 | A | -0.0473 |
| rs1274280   | T | -0.0173 |
| rs9957779   | G | 0.0169  |
| rs73467618  | G | -0.0607 |
| rs550801    | G | 0.0113  |
| rs7226446   | A | -0.0147 |
| rs556955    | C | 0.0137  |
| rs117002544 | C | -0.0314 |
| rs4340391   | C | 0.0398  |
| rs77665194  | T | 0.0837  |
| rs12972156  | G | 1.1399  |
| rs41289512  | G | 1.6384  |
| rs760136    | G | -0.4118 |
| rs3925681   | A | -0.5339 |
| rs157595    | A | -0.4518 |
| rs6859      | A | 0.334   |
| rs4803763   | C | 0.3972  |
| rs77301115  | A | 1.1051  |
| rs73052307  | C | -0.5696 |
| rs2889414   | G | 0.4276  |
| rs12459810  | T | 0.3269  |
| rs10407439  | A | -0.2483 |
| rs76692773  | T | -0.4382 |
| rs2927437   | A | 0.2437  |
| rs2972558   | C | -0.2174 |
| rs2927435   | T | -0.1876 |
| rs1135062   | G | -0.2688 |
| rs141622900 | A | -0.6791 |
| rs113321260 | A | 0.2726  |
| rs116949436 | A | 0.9385  |
| rs35336243  | T | 0.1727  |
| rs10856     | T | 0.3611  |

|             |   |         |
|-------------|---|---------|
| rs1160984   | T | -0.3398 |
| rs62117160  | A | -0.5474 |
| rs346773    | T | 0.3146  |
| rs34874378  | A | 0.3606  |
| rs28615360  | A | 0.9857  |
| rs595290    | C | 0.1619  |
| rs56261258  | T | 0.1971  |
| rs111371860 | T | -0.3496 |
| rs12461065  | T | 0.1247  |
| rs73035597  | T | 0.1777  |
| rs75348771  | C | 0.2137  |
| rs2927477   | C | -0.2607 |
| rs150685845 | G | 0.8189  |
| rs34583389  | T | -0.1253 |
| rs141864196 | A | -0.5308 |
| rs138235833 | G | -0.4072 |
| rs112262807 | T | -0.1345 |
| rs7255066   | C | -0.1118 |
| rs35194383  | T | 0.1153  |
| rs8112526   | A | 0.1877  |
| rs4147929   | A | 0.1348  |
| rs80307900  | C | -0.3208 |
| rs73046410  | A | -0.1275 |
| rs846881    | C | -0.1597 |
| rs41290100  | T | -0.5702 |
| rs3865444   | A | -0.0954 |
| rs17878252  | A | 0.0964  |
| rs11083749  | T | -0.0977 |
| rs117187726 | T | 0.2414  |
| rs74924179  | C | -0.5128 |
| rs4622634   | C | -0.1145 |
| rs62118504  | G | -0.1227 |
| rs78986976  | A | -0.3719 |
| rs111278892 | G | 0.1867  |
| rs35194062  | A | 0.2212  |
| rs12461144  | T | 0.2191  |
| rs2965164   | T | -0.0867 |
| rs10415949  | G | -0.0901 |
| rs62120575  | G | 0.102   |
| rs4147920   | C | -0.2029 |
| rs283814    | A | -0.177  |
| rs769446    | C | -0.2406 |
| rs34399924  | A | -0.0969 |
| rs2965162   | T | -0.1355 |
| rs79736061  | A | -0.243  |
| rs76320948  | T | 0.2501  |
| rs10419669  | A | -0.1389 |

|             |   |         |
|-------------|---|---------|
| rs10408290  | T | 0.0729  |
| rs62109650  | T | 0.0855  |
| rs72618590  | T | 0.2304  |
| rs846892    | C | -0.2614 |
| rs11083772  | T | 0.0926  |
| rs2919847   | A | -0.076  |
| rs1661200   | T | -0.1091 |
| rs62112767  | A | -0.0863 |
| rs117737673 | T | -0.351  |
| rs2547238   | C | 0.0905  |
| rs62120485  | G | 0.0746  |
| rs12974310  | G | -0.0793 |
| rs140829879 | G | 0.3535  |
| rs12982061  | A | -0.1029 |
| rs4398192   | G | -0.1124 |
| rs45466892  | C | -0.3673 |
| rs4803784   | G | 0.0846  |
| rs111624380 | A | -0.1751 |
| rs10408907  | G | -0.0634 |
| rs11671606  | T | 0.06    |
| rs116943372 | A | 0.1797  |
| rs731170    | A | 0.0683  |
| rs1077161   | G | 0.1625  |
| rs62116021  | G | 0.0866  |
| rs7254282   | G | -0.0632 |
| rs7247401   | C | 0.1253  |
| rs1654436   | C | 0.0621  |
| rs204907    | G | -0.1787 |
| rs73550637  | C | 0.223   |
| rs2159089   | A | 0.0849  |
| rs12982331  | A | -0.0717 |
| rs8102625   | C | -0.0824 |
| rs302827    | T | 0.0678  |
| rs175530    | A | 0.074   |
| rs11880444  | A | -0.0864 |
| rs147802163 | G | 0.2852  |
| rs296376    | A | -0.0797 |
| rs62111576  | C | 0.1461  |
| rs111255249 | A | 0.3654  |
| rs10402797  | C | -0.1169 |
| rs57195546  | A | -0.0814 |
| rs11669713  | T | 0.0811  |
| rs303998    | G | -0.0574 |
| rs3760743   | G | -0.1101 |
| rs4805222   | T | 0.054   |
| rs75375271  | T | 0.1187  |
| rs59572086  | T | 0.0843  |

|             |   |         |
|-------------|---|---------|
| rs8101891   | T | 0.2086  |
| rs59449468  | G | 0.1081  |
| rs62127938  | A | -0.0934 |
| rs912734    | G | -0.075  |
| rs62122620  | T | 0.2237  |
| rs76292782  | A | -0.1423 |
| rs930232    | A | -0.092  |
| rs2270939   | C | -0.0708 |
| rs3745843   | A | -0.0866 |
| rs56149652  | G | 0.0657  |
| rs3745826   | G | -0.0545 |
| rs146390218 | G | -0.2601 |
| rs11672985  | C | 0.0957  |
| rs7258704   | T | 0.1961  |
| rs4802861   | C | 0.0576  |
| rs2277748   | A | -0.0596 |
| rs2052241   | C | 0.0789  |
| rs79552142  | T | 0.1585  |
| rs34086257  | G | -0.1751 |
| rs74202573  | C | 0.1387  |
| rs72975505  | A | -0.0584 |
| rs28399642  | T | 0.3031  |
| rs57079243  | A | -0.0897 |
| rs116999393 | T | 0.1014  |
| rs8112108   | T | -0.0644 |
| rs76081019  | G | -0.196  |
| rs9585      | T | 0.0652  |
| rs12977451  | C | 0.0802  |
| rs2965156   | G | 0.0528  |
| rs11667711  | T | 0.3675  |
| rs75251473  | G | 0.2365  |
| rs35429366  | T | 0.0536  |
| rs80058612  | A | -0.45   |
| rs4012784   | G | 0.0825  |
| rs115946586 | C | -0.0844 |
| rs283526    | T | -0.0528 |
| rs11666650  | C | 0.0568  |
| rs113691355 | T | 0.2505  |
| rs1654448   | A | -0.1084 |
| rs1058402   | A | -0.1229 |
| rs73045960  | G | -0.277  |
| rs2734459   | C | -0.0727 |
| rs11670906  | T | -0.1991 |
| rs79179496  | T | -0.2556 |
| rs75854015  | G | -0.2955 |
| rs45616834  | A | -0.2286 |
| rs28733115  | G | -0.2455 |

|             |   |         |
|-------------|---|---------|
| rs2190798   | T | 0.0549  |
| rs4802566   | T | 0.0526  |
| rs8102495   | A | 0.0519  |
| rs117498809 | C | 0.3714  |
| rs73035918  | C | 0.085   |
| rs3745333   | A | -0.0767 |
| rs56931055  | A | 0.1151  |
| rs7247451   | C | -0.0811 |
| rs8111216   | A | 0.0549  |
| rs1048801   | G | 0.0802  |
| rs12609193  | T | 0.192   |
| rs6509634   | A | -0.0617 |
| rs112584470 | T | 0.2354  |
| rs1130426   | G | -0.0684 |
| rs7250430   | G | 0.1057  |
| rs77997571  | G | -0.2598 |
| rs1468703   | C | -0.0566 |
| rs147026109 | C | -0.3002 |
| rs1985905   | C | 0.1277  |
| rs71355881  | A | 0.0813  |
| rs117685871 | A | 0.1907  |
| rs117249411 | T | 0.2011  |
| rs875553    | T | -0.102  |
| rs12979580  | G | -0.0541 |
| rs11086007  | T | 0.0547  |
| rs1284537   | G | -0.0576 |
| rs3848528   | G | -0.05   |
| rs79961820  | G | 0.1881  |
| rs142725544 | G | -0.2424 |
| rs2240160   | A | -0.0908 |
| rs11881948  | T | 0.0617  |
| rs7255660   | A | 0.0567  |
| rs4422092   | A | 0.1039  |
| rs16992381  | C | 0.2554  |
| rs8106047   | A | 0.0828  |
| rs4807907   | A | 0.0649  |
| rs111272489 | C | 0.0649  |
| rs80257887  | A | 0.1592  |
| rs147555396 | C | -0.0746 |
| rs80234796  | T | 0.2373  |
| rs12981080  | T | -0.1702 |
| rs60594036  | C | 0.0924  |
| rs75075660  | T | 0.0689  |
| rs140263308 | G | 0.1783  |
| rs4807269   | T | -0.0547 |
| rs3848561   | T | -0.0557 |
| rs12971962  | G | 0.0494  |

|             |   |         |
|-------------|---|---------|
| rs137952694 | G | 0.1274  |
| rs73014410  | T | 0.0566  |
| rs116972073 | C | -0.1487 |
| rs381588    | G | -0.0869 |
| rs16979231  | C | 0.0636  |
| rs35767704  | G | -0.3479 |
| rs7258015   | C | 0.0573  |
| rs147910350 | T | -0.1586 |
| rs756903    | C | 0.0838  |
| rs61024853  | C | -0.3017 |
| rs60286743  | C | 0.1282  |
| rs142596073 | T | 0.0766  |
| rs311358    | G | -0.0527 |
| rs6510605   | A | -0.0766 |
| rs310684    | C | -0.1058 |
| rs12462114  | G | 0.2462  |
| rs74963241  | A | 0.1293  |
| rs138943940 | A | -0.3273 |
| rs79032244  | T | -0.0716 |
| rs60199162  | G | -0.1619 |
| rs62135083  | A | -0.1757 |
| rs7248382   | C | 0.0964  |
| rs2303701   | T | -0.2429 |
| rs35043884  | T | 0.086   |
| rs78389250  | T | -0.1007 |
| rs756904    | T | -0.067  |
| rs286290    | G | -0.1798 |
| rs2124902   | A | 0.1361  |
| rs117521081 | T | -0.1271 |
| rs8099845   | T | 0.0837  |
| rs62126258  | A | 0.0664  |
| rs73029011  | C | 0.1283  |
| rs393569    | G | 0.0453  |
| rs419010    | C | -0.0481 |
| rs3213247   | A | 0.1106  |
| rs7248383   | A | 0.0682  |
| rs138642320 | T | 0.3251  |
| rs74982068  | T | 0.0831  |
| rs12972863  | C | 0.1151  |
| rs12460388  | T | -0.1546 |
| rs77633920  | C | 0.2074  |
| rs3947947   | T | 0.0512  |
| rs7256116   | C | -0.0846 |
| rs28640938  | A | -0.0626 |
| rs3760994   | A | -0.0598 |
| rs10407051  | G | -0.0768 |
| rs36717     | G | 0.1219  |



|             |   |         |
|-------------|---|---------|
| rs12980797  | G | 0.2514  |
| rs151214813 | T | 0.1933  |
| rs61563008  | C | -0.0547 |
| rs79000313  | T | 0.0829  |
| rs117723781 | T | 0.1209  |
| rs76260948  | C | -0.2139 |
| rs62108012  | A | 0.0727  |
| rs34746896  | C | 0.0627  |
| rs41276846  | T | -0.1368 |
| rs2569575   | A | -0.1843 |
| rs79853693  | T | 0.1629  |
| rs34307181  | T | 0.0758  |
| rs4308052   | T | -0.0495 |
| rs4808883   | C | -0.0528 |
| rs113777171 | T | -0.2723 |
| rs34677175  | A | -0.054  |
| rs73633709  | T | 0.1981  |
| rs149251122 | A | -0.1747 |
| rs10411862  | C | 0.0572  |
| rs16996320  | T | -0.0575 |
| rs117265909 | C | 0.2183  |
| rs78455130  | G | -0.078  |
| rs2267582   | A | -0.0867 |
| rs8110679   | G | -0.0466 |
| rs42316     | A | 0.2216  |
| rs75637371  | G | 0.1927  |
| rs11669073  | T | -0.0467 |
| rs7250800   | G | -0.0722 |
| rs311382    | G | 0.1232  |
| rs10416517  | A | -0.0995 |
| rs117866688 | T | -0.2701 |
| rs34403874  | A | 0.1175  |
| rs12985378  | C | -0.0841 |
| rs8108501   | A | -0.0729 |
| rs3786830   | G | -0.1862 |
| rs10407872  | G | 0.0535  |
| rs112015997 | C | -0.3958 |
| rs62132807  | A | -0.1317 |
| rs4802720   | G | 0.0515  |
| rs61739930  | T | -0.1892 |
| rs8100481   | G | 0.0638  |
| rs55919407  | T | 0.0914  |
| rs11881896  | A | 0.1641  |
| rs12979175  | A | -0.0881 |
| rs7245994   | C | 0.0437  |
| rs10418739  | G | -0.053  |
| rs2972610   | T | -0.0745 |

|             |   |         |
|-------------|---|---------|
| rs8109402   | A | -0.1455 |
| rs56336136  | T | -0.0813 |
| rs4327177   | T | -0.2611 |
| rs398244    | C | 0.1038  |
| rs79050709  | T | -0.0803 |
| rs11879933  | A | 0.0551  |
| rs3745540   | A | -0.0443 |
| rs3107911   | C | 0.0683  |
| rs1620082   | T | -0.0457 |
| rs7925      | G | -0.0604 |
| rs7256145   | C | 0.1824  |
| rs428755    | G | -0.0468 |
| rs17220343  | C | -0.0738 |
| rs279448    | G | -0.0733 |
| rs56303292  | T | 0.0508  |
| rs7259762   | T | -0.0552 |
| rs7253296   | C | -0.0772 |
| rs113574595 | A | -0.2138 |
| rs7247711   | A | 0.2377  |
| rs138890359 | A | -0.2893 |
| rs143308351 | A | -0.1962 |
| rs7408940   | G | 0.0866  |
| rs148609134 | C | 0.2093  |
| rs77264230  | T | -0.2422 |
| rs3752241   | G | -0.0776 |
| rs11673388  | G | 0.0625  |
| rs78006641  | T | -0.0676 |
| rs77345544  | T | -0.1484 |
| rs12462333  | A | 0.1142  |
| rs8106001   | T | 0.0499  |
| rs718202    | T | -0.053  |
| rs75985022  | A | 0.1011  |
| rs3786744   | G | 0.0647  |
| rs12609269  | C | -0.1127 |
| rs11879243  | A | 0.085   |
| rs2277973   | A | -0.0584 |
| rs8100196   | G | 0.2005  |
| rs7255086   | G | -0.0472 |
| rs3760819   | G | 0.0438  |
| rs140584112 | T | 0.2206  |
| rs10419742  | C | -0.0782 |
| rs6509783   | A | -0.0481 |
| rs2006133   | T | 0.0542  |
| rs7255941   | T | -0.056  |
| rs8110493   | C | 0.0622  |
| rs74174308  | A | 0.1025  |
| rs2070745   | G | -0.0551 |

|             |   |         |
|-------------|---|---------|
| rs10412499  | A | 0.0881  |
| rs12985737  | A | -0.0874 |
| rs1864010   | C | 0.1422  |
| rs12459641  | G | -0.0714 |
| rs2569728   | T | -0.0571 |
| rs11669532  | A | -0.0653 |
| rs142078862 | A | 0.262   |
| rs111696229 | T | 0.1519  |
| rs10402714  | A | 0.0491  |
| rs35929524  | T | -0.0532 |
| rs73050005  | G | -0.1661 |
| rs254808    | T | -0.0613 |
| rs16980975  | A | -0.156  |
| rs35602205  | A | -0.2258 |
| rs7256767   | A | 0.0437  |
| rs2074453   | C | -0.0511 |
| rs11083841  | G | 0.0553  |
| rs3745936   | T | 0.0506  |
| rs7256590   | A | -0.0458 |
| rs7250483   | A | 0.1116  |
| rs150077447 | G | 0.3076  |
| rs150577929 | A | 0.3107  |
| rs149750310 | G | 0.2922  |
| rs34098928  | A | 0.1315  |
| rs12971937  | A | 0.0515  |
| rs4805666   | T | -0.0495 |
| rs11115     | T | -0.047  |
| rs1003887   | C | 0.0507  |
| rs10411709  | C | 0.0712  |
| rs35001809  | T | -0.1787 |
| rs2042296   | C | 0.0412  |
| rs7255302   | T | -0.2638 |
| rs112389439 | T | 0.0932  |
| rs35750728  | A | -0.1302 |
| rs112717323 | G | 0.1697  |
| rs57985642  | G | 0.1076  |
| rs11882538  | G | 0.0482  |
| rs7259428   | C | 0.0425  |
| rs150163812 | A | -0.1667 |
| rs12609767  | T | 0.0793  |
| rs797869    | G | -0.0443 |
| rs117564334 | G | -0.1045 |
| rs143712775 | A | -0.1607 |
| rs7252949   | C | -0.0453 |
| rs292830    | A | 0.2479  |
| rs12978570  | G | -0.0798 |
| rs11672145  | G | 0.0534  |

|             |   |         |
|-------------|---|---------|
| rs11673250  | T | 0.0432  |
| rs73046854  | C | -0.0624 |
| rs4808608   | C | 0.088   |
| rs77691016  | C | -0.203  |
| rs3916891   | G | -0.1937 |
| rs339405    | A | 0.0695  |
| rs140343754 | A | -0.1587 |
| rs36101414  | C | -0.2838 |
| rs111316593 | A | -0.142  |
| rs146889968 | G | -0.1929 |
| rs3826896   | C | -0.042  |
| rs58596688  | A | -0.1572 |
| rs74718615  | A | 0.1232  |
| rs4803825   | G | 0.0419  |
| rs74451235  | T | -0.1189 |
| rs45485892  | G | 0.1362  |
| rs73523943  | T | -0.1886 |
| rs6510987   | A | -0.0901 |
| rs118071824 | G | 0.3071  |
| rs35205401  | A | -0.0899 |
| rs148253629 | C | -0.1636 |
| rs57887481  | T | 0.0524  |
| rs45478502  | A | 0.1576  |
| rs76207128  | C | 0.2888  |
| rs117379894 | A | 0.1607  |
| rs62114101  | C | 0.1382  |
| rs118070825 | T | 0.1611  |
| rs75345935  | A | -0.1671 |
| rs35982135  | C | 0.0493  |
| rs73064080  | C | -0.052  |
| rs2384941   | T | 0.2203  |
| rs144153300 | A | 0.0873  |
| rs8102164   | G | 0.0593  |
| rs1551551   | T | -0.11   |
| rs76618306  | T | 0.2856  |
| rs8101981   | G | -0.0399 |
| rs10413761  | G | -0.0571 |
| rs203717    | T | 0.0486  |
| rs2914439   | A | -0.0422 |
| rs11878278  | T | -0.0517 |
| rs58108288  | C | 0.0805  |
| rs73028855  | A | -0.057  |
| rs8109933   | G | 0.0423  |
| rs111779128 | C | 0.0882  |
| rs8106416   | C | -0.049  |
| rs11085877  | C | -0.099  |
| rs1273505   | G | -0.0589 |

|             |   |         |
|-------------|---|---------|
| rs10410836  | C | 0.0541  |
| rs59293899  | G | -0.1009 |
| rs17220371  | T | -0.2014 |
| rs2974190   | T | 0.0915  |
| rs147403841 | T | -0.0449 |
| rs3795004   | G | 0.0631  |
| rs28443478  | T | -0.0915 |
| rs62116891  | T | 0.1053  |
| rs4416149   | T | -0.0484 |
| rs7258069   | T | -0.0502 |
| rs10402124  | C | 0.0764  |
| rs115666743 | G | 0.1565  |
| rs117751029 | C | -0.1942 |
| rs3136654   | G | -0.0652 |
| rs140977069 | A | -0.2025 |
| rs62125996  | A | -0.1155 |
| rs73013863  | T | -0.208  |
| rs12459418  | T | 0.0479  |
| rs147848367 | T | -0.0488 |
| rs34243734  | C | -0.0449 |
| rs7246743   | C | 0.139   |
| rs115629263 | A | -0.1692 |
| rs1693294   | A | -0.0422 |
| rs11670765  | T | -0.0505 |
| rs113684717 | C | 0.0873  |
| rs10405589  | A | 0.2236  |
| rs148178666 | T | 0.2146  |
| rs34995718  | T | -0.0656 |
| rs10401518  | T | 0.1166  |
| rs113901498 | T | 0.0831  |
| rs74747585  | C | -0.206  |
| rs117252589 | G | 0.1722  |
| rs10402413  | G | 0.039   |
| rs8106803   | A | 0.0536  |
| rs1592841   | G | -0.1343 |
| rs28695898  | T | -0.0746 |
| rs7251792   | A | 0.0569  |
| rs117598141 | C | 0.086   |
| rs7253654   | A | 0.096   |
| rs164632    | T | -0.0457 |
| rs10413450  | A | 0.1608  |
| rs140650114 | A | 0.2265  |
| rs117442633 | A | -0.2259 |
| rs8107100   | A | 0.2155  |
| rs74182589  | T | 0.072   |
| rs117746398 | G | 0.1888  |
| rs144278677 | C | -0.1657 |

|             |   |         |
|-------------|---|---------|
| rs35146110  | T | 0.0808  |
| rs77366659  | T | 0.146   |
| rs2231862   | T | 0.2016  |
| rs10421947  | A | -0.0399 |
| rs7260417   | T | 0.043   |
| rs148552124 | C | 0.1853  |
| rs1716274   | G | 0.07    |
| rs80115619  | A | -0.1558 |
| rs11085119  | T | 0.0787  |
| rs62105698  | T | 0.1604  |
| rs10410800  | T | -0.1011 |
| rs2682542   | T | 0.1052  |
| rs34465381  | G | 0.0538  |
| rs1867055   | A | 0.0435  |
| rs11083636  | T | 0.0445  |
| rs117973068 | C | -0.1631 |
| rs34743413  | C | 0.0634  |
| rs12981803  | C | -0.0694 |
| rs71358823  | G | 0.121   |
| rs115416981 | G | 0.1208  |
| rs76981979  | G | 0.2254  |
| rs149752185 | T | 0.2349  |
| rs10411120  | T | -0.1065 |
| rs117154473 | A | -0.2424 |
| rs10407448  | A | 0.107   |
| rs34966794  | T | 0.0832  |
| rs74628226  | T | -0.0615 |
| rs312926    | T | -0.0433 |
| rs2278442   | G | -0.0424 |
| rs78813111  | T | 0.114   |
| rs7507376   | C | 0.1097  |
| rs71363968  | A | -0.2163 |
| rs79170326  | A | 0.1368  |
| rs113428378 | G | 0.204   |
| rs111269903 | A | -0.1052 |
| rs2269757   | T | 0.0415  |
| rs117295109 | G | -0.2606 |
| rs117234263 | G | 0.2528  |
| rs12974620  | G | -0.046  |
| rs11667976  | G | 0.1421  |
| rs34145256  | A | -0.1167 |
| rs2456163   | T | -0.1023 |
| rs62108919  | A | -0.1897 |
| rs10423027  | A | 0.0408  |
| rs151007869 | C | 0.2504  |
| rs10417565  | C | -0.0377 |
| rs7249819   | C | 0.08    |

|             |   |         |
|-------------|---|---------|
| rs34604695  | T | 0.0685  |
| rs145779866 | G | 0.226   |
| rs7253955   | G | 0.0495  |
| rs12973526  | T | -0.1035 |
| rs62121811  | T | 0.1001  |
| rs77893602  | T | 0.169   |
| rs2041194   | T | -0.0434 |
| rs740404    | A | -0.0781 |
| rs111898760 | C | -0.1367 |
| rs77771822  | T | 0.1717  |
| rs12460479  | G | -0.0828 |
| rs17714761  | T | 0.0719  |
| rs10419287  | T | -0.3502 |
| rs78295196  | T | -0.1294 |
| rs2078491   | G | -0.0418 |
| rs145168086 | G | 0.1673  |
| rs62114097  | A | 0.1623  |
| rs2546051   | G | 0.0391  |
| rs8103919   | C | -0.1564 |
| rs4807664   | G | 0.0629  |
| rs28446882  | A | 0.0632  |
| rs912733    | C | -0.0491 |
| rs10407505  | C | 0.0396  |
| rs7254202   | C | 0.0864  |
| rs76792679  | A | -0.2478 |
| rs7246871   | G | 0.0999  |
| rs117192923 | C | -0.1502 |
| rs2314670   | A | 0.0478  |
| rs76734319  | T | -0.1405 |
| rs28605919  | G | -0.0499 |
| rs10408058  | T | 0.0589  |
| rs479486    | G | -0.0383 |
| rs35929247  | A | 0.0426  |
| rs8112894   | T | 0.1736  |
| rs76501855  | G | 0.1631  |
| rs7247498   | A | -0.0596 |
| rs12974291  | G | -0.0535 |
| rs2099356   | C | -0.0387 |
| rs147969639 | T | -0.2177 |
| rs12983699  | G | -0.056  |
| rs2293166   | A | 0.0377  |
| rs35592366  | A | -0.1197 |
| rs2290284   | T | -0.0584 |
| rs145712278 | G | -0.1626 |
| rs2657934   | C | 0.0578  |
| rs62118336  | C | -0.1095 |
| rs57766816  | T | 0.1369  |

|             |   |         |
|-------------|---|---------|
| rs34518977  | A | 0.074   |
| rs11670097  | C | -0.0387 |
| rs73056959  | A | 0.1877  |
| rs4019962   | T | -0.0524 |
| rs117696760 | C | -0.1455 |
| rs833909    | G | -0.0512 |
| rs759818    | A | -0.0391 |
| rs62116888  | A | -0.0532 |
| rs1046268   | T | 0.0404  |
| rs12459336  | T | 0.1537  |
| rs2296371   | A | 0.0411  |
| rs1061684   | T | 0.0859  |
| rs10405621  | T | 0.05    |
| rs299168    | A | 0.0726  |
| rs143782846 | C | -0.2829 |
| rs4802791   | T | -0.0616 |
| rs11083541  | T | -0.0684 |
| rs79789351  | C | 0.1386  |
| rs692364    | A | -0.0381 |
| rs62120671  | T | -0.1676 |
| rs75683806  | G | 0.1392  |
| rs302476    | C | -0.07   |
| rs8104195   | T | 0.0494  |
| rs10404257  | G | 0.0384  |
| rs112387158 | T | -0.0815 |
| rs11666986  | T | -0.0414 |
| rs10408515  | T | 0.0499  |
| rs10410722  | T | 0.0394  |
| rs4806712   | T | -0.0581 |
| rs10422751  | G | -0.0388 |
| rs73048457  | C | -0.2494 |
| rs13346314  | T | -0.1446 |
| rs141767135 | G | 0.2177  |
| rs7253369   | A | 0.0578  |
| rs893546    | T | -0.0393 |
| rs79781366  | A | 0.0887  |
| rs114978274 | A | 0.259   |
| rs73613432  | T | 0.053   |
| rs4239498   | A | -0.0745 |
| rs12610973  | T | -0.0396 |
| rs62129140  | A | 0.1209  |
| rs35276077  | G | -0.0447 |
| rs12462513  | A | -0.0507 |
| rs78769803  | T | 0.1766  |
| rs117183681 | G | 0.1504  |
| rs2078584   | A | -0.0476 |
| rs11667666  | G | -0.0408 |



|             |   |         |
|-------------|---|---------|
| rs73029194  | T | 0.1998  |
| rs12974606  | T | -0.1034 |
| rs579161    | C | 0.2425  |
| rs117871617 | A | 0.2313  |
| rs62119918  | T | -0.0567 |
| rs35948867  | C | 0.1406  |
| rs4584952   | A | 0.0976  |
| rs2124930   | T | 0.1056  |
| rs12976164  | C | -0.1744 |
| rs9807812   | A | -0.0499 |
| rs752718    | T | 0.0424  |
| rs35396196  | T | -0.0628 |
| rs77561492  | C | -0.1391 |
| rs12162225  | A | -0.1214 |
| rs11668544  | C | -0.0957 |
| rs28463847  | A | -0.0628 |
| rs112227086 | C | 0.0971  |
| rs7257526   | A | -0.0385 |
| rs2060238   | A | -0.2117 |
| rs9636139   | A | -0.0397 |
| rs74726110  | G | 0.1517  |
| rs117829523 | T | -0.1977 |
| rs139431713 | T | -0.3078 |
| rs112986631 | C | 0.1306  |
| rs7255011   | C | 0.0404  |
| rs75853349  | T | -0.1167 |
| rs1961721   | G | 0.1867  |
| rs144040984 | A | -0.2484 |
| rs2972585   | A | 0.0566  |
| rs10405294  | A | 0.0439  |
| rs8109800   | A | -0.052  |
| rs62111927  | C | 0.1952  |
| rs1654271   | G | -0.0468 |
| rs10406151  | C | -0.0408 |
| rs150026473 | A | 0.2255  |
| rs73030120  | G | -0.047  |
| rs118088828 | C | -0.206  |
| rs16964157  | G | -0.0982 |
| rs28859427  | G | 0.0966  |
| rs141092538 | C | -0.2004 |
| rs12609992  | G | 0.0388  |
| rs7248203   | A | -0.0423 |
| rs4132069   | C | -0.0478 |
| rs45473393  | A | -0.0915 |
| rs80252508  | C | 0.0995  |
| rs73007134  | A | 0.1404  |
| rs775848    | T | 0.089   |

|             |   |         |
|-------------|---|---------|
| rs2060259   | T | 0.0453  |
| rs34342452  | G | -0.0493 |
| rs16997771  | C | 0.1806  |
| rs56076914  | A | -0.0575 |
| rs10424656  | C | -0.1002 |
| rs12983058  | T | 0.0439  |
| rs34742044  | A | -0.0581 |
| rs11667070  | A | -0.0489 |
| rs12981770  | A | -0.0461 |
| rs112545413 | A | -0.1614 |
| rs59705998  | C | 0.0462  |
| rs144203594 | C | -0.1889 |
| rs11668137  | A | -0.1198 |
| rs72490747  | A | 0.1483  |
| rs113091386 | C | 0.0442  |
| rs74497425  | C | 0.2708  |
| rs144658491 | T | -0.2725 |
| rs17271883  | T | -0.04   |
| rs7250423   | T | -0.0794 |
| rs8110829   | T | -0.0387 |
| rs117579800 | T | -0.249  |
| rs7248036   | T | 0.039   |
| rs2914442   | T | -0.042  |
| rs11537922  | T | 0.278   |
| rs113811594 | T | 0.085   |
| rs339526    | T | -0.0457 |
| rs117773347 | A | 0.2249  |
| rs73627234  | C | -0.0455 |
| rs2385181   | C | 0.0356  |
| rs1543923   | T | -0.0397 |
| rs1465697   | T | -0.0404 |
| rs3786619   | A | 0.037   |
| rs7247115   | A | -0.0495 |
| rs2967500   | A | 0.179   |
| rs8110249   | T | 0.0757  |
| rs10402787  | C | 0.0469  |
| rs146577305 | A | 0.2857  |
| rs144786420 | T | 0.1911  |
| rs2193502   | A | 0.0508  |
| rs35889412  | T | -0.1134 |
| rs79230373  | T | 0.1452  |
| rs12461943  | C | -0.1073 |
| rs74803676  | T | -0.2278 |
| rs117917538 | T | 0.2092  |
| rs11878858  | T | -0.1258 |
| rs4804179   | G | -0.0468 |
| rs35835993  | T | 0.106   |

|             |   |         |
|-------------|---|---------|
| rs56278122  | T | 0.0426  |
| rs2079604   | C | -0.0455 |
| rs4804401   | C | -0.0379 |
| rs113029369 | T | -0.0496 |
| rs62123152  | A | -0.241  |
| rs156674    | C | 0.0362  |
| rs6511207   | G | 0.0372  |
| rs76517609  | T | 0.286   |
| rs329966    | A | 0.0394  |
| rs143467207 | A | -0.1811 |
| rs4806895   | C | 0.0545  |
| rs12984051  | C | -0.0664 |
| rs117080441 | C | -0.2548 |
| rs2387343   | A | 0.0476  |
| rs11883251  | C | 0.0788  |
| rs7257539   | T | -0.2311 |
| rs399338    | A | 0.0662  |
| rs138750865 | T | -0.2417 |
| rs4801166   | C | 0.0476  |
| rs17625504  | T | -0.1455 |
| rs10417818  | A | 0.0709  |
| rs6511612   | A | -0.0425 |
| rs8101605   | A | 0.0508  |
| rs12980469  | A | -0.0501 |
| rs1683564   | A | -0.0421 |
| rs8110732   | C | -0.2234 |
| rs117078498 | G | -0.1374 |
| rs17717333  | T | 0.087   |
| rs144769382 | A | 0.1726  |
| rs113565485 | A | -0.2738 |
| rs3810297   | G | 0.0692  |
| rs114337082 | A | -0.2409 |
| rs35555615  | C | -0.2196 |
| rs407243    | A | -0.0562 |
| rs7258382   | C | -0.0546 |
| rs74178306  | T | 0.0665  |
| rs62122657  | G | -0.0591 |
| rs117984776 | T | 0.1888  |
| rs34206793  | T | -0.0542 |
| rs34432766  | T | 0.0446  |
| rs3745793   | A | -0.038  |
| rs8107758   | T | 0.113   |
| rs62117992  | C | -0.047  |
| rs11881987  | A | 0.0469  |
| rs10419121  | G | -0.0448 |
| rs117501850 | C | 0.1401  |
| rs10418839  | A | -0.0435 |

|             |   |         |
|-------------|---|---------|
| rs4355036   | G | 0.1016  |
| rs73031732  | C | -0.0569 |
| rs11574580  | G | -0.1015 |
| rs1009158   | C | -0.0415 |
| rs78580830  | T | 0.1921  |
| rs117133732 | T | 0.1526  |
| rs876692    | A | -0.1022 |
| rs79673015  | C | 0.1366  |
| rs57098159  | G | -0.1416 |
| rs75869727  | T | -0.2339 |
| rs2918300   | T | 0.037   |
| rs2082012   | C | -0.0472 |
| rs8103945   | C | -0.0492 |
| rs12461975  | A | -0.1124 |
| rs142162635 | T | -0.2108 |
| rs11666443  | A | 0.0933  |
| rs34442291  | A | 0.1356  |
| rs1284535   | C | 0.0541  |
| rs11667293  | T | 0.0401  |
| rs7245680   | A | 0.0568  |
| rs4926306   | T | 0.2037  |
| rs112275618 | T | -0.0764 |
| rs17179181  | A | -0.0704 |
| rs2168632   | C | -0.0362 |
| rs4801309   | C | 0.1537  |
| rs7343093   | A | 0.0586  |
| rs148789692 | A | -0.146  |
| rs149901522 | C | -0.14   |
| rs1558134   | C | 0.0698  |
| rs118064054 | A | -0.1877 |
| rs4802466   | A | -0.0405 |
| rs117385980 | T | 0.1366  |
| rs117647194 | T | 0.2021  |
| rs142588234 | A | 0.1594  |
| rs11673503  | C | 0.0466  |
| rs1177823   | A | 0.0757  |
| rs11671180  | C | 0.1605  |
| rs140063342 | A | -0.1333 |
| rs3826786   | C | 0.1138  |
| rs112756467 | C | 0.0415  |
| rs117605524 | A | 0.112   |
| rs34588456  | A | -0.3509 |
| rs7259008   | C | -0.0412 |
| rs11668593  | A | -0.0756 |
| rs78685900  | T | 0.1092  |
| rs10416550  | T | -0.047  |
| rs12609055  | G | -0.0408 |

|             |   |         |
|-------------|---|---------|
| rs4808814   | T | 0.0417  |
| rs12460111  | G | 0.0525  |
| rs7409239   | G | 0.0908  |
| rs7251341   | G | 0.0655  |
| rs10420591  | C | 0.0531  |
| rs749259    | T | 0.0633  |
| rs111406374 | A | 0.1684  |
| rs8105279   | T | -0.0559 |
| rs73014464  | A | 0.1571  |
| rs11882442  | C | -0.0586 |
| rs75837893  | T | 0.2281  |
| rs143814920 | G | 0.0675  |
| rs72981487  | C | -0.2165 |
| rs73520840  | G | 0.0516  |
| rs140250740 | T | 0.1281  |
| rs387219    | T | -0.056  |
| rs11666603  | T | -0.0495 |
| rs11669674  | G | 0.2733  |
| rs10413024  | G | 0.0434  |
| rs56220834  | T | 0.0377  |
| rs4801849   | G | -0.0495 |
| rs4808066   | T | 0.0413  |
| rs11668412  | A | 0.0524  |
| rs74499708  | T | 0.095   |
| rs11666201  | A | 0.0864  |
| rs76374006  | G | 0.103   |
| rs35603020  | G | 0.1062  |
| rs434755    | C | -0.0416 |
| rs11085837  | A | 0.0369  |
| rs79116425  | C | 0.1344  |
| rs917707    | G | 0.0516  |
| rs10401445  | G | 0.0379  |
| rs73039383  | A | -0.1303 |
| rs145097436 | G | -0.2674 |
| rs74763333  | A | -0.1088 |
| rs11880688  | C | -0.0449 |
| rs12977524  | G | 0.0468  |
| rs76818092  | T | -0.1793 |
| rs73052602  | A | 0.257   |
| rs144026674 | T | -0.1254 |
| rs149720657 | C | -0.1459 |
| rs79282330  | G | 0.1297  |
| rs139031801 | T | 0.096   |
| rs75339357  | T | -0.0758 |
| rs60476644  | T | -0.2396 |
| rs141090447 | C | -0.1579 |
| rs117268622 | T | -0.2144 |

|             |   |         |
|-------------|---|---------|
| rs11672814  | T | 0.0874  |
| rs142038976 | G | 0.2237  |
| rs143122559 | G | -0.1445 |
| rs2307213   | T | -0.0421 |
| rs33998519  | C | -0.0603 |
| rs73545276  | T | 0.1353  |
| rs61351330  | T | -0.0643 |
| rs62115394  | G | -0.0601 |
| rs77624057  | G | 0.3583  |
| rs1749316   | T | -0.0617 |
| rs10405921  | T | 0.0654  |
| rs34105     | A | 0.0454  |
| rs115125903 | T | -0.0807 |
| rs72987091  | C | 0.0643  |
| rs2779180   | G | -0.036  |
| rs58050657  | A | -0.034  |
| rs55741859  | C | -0.1293 |
| rs117775198 | T | 0.1243  |
| rs56264987  | A | 0.1424  |
| rs12611065  | G | 0.0659  |
| rs117074748 | C | 0.1985  |
| rs80157981  | T | -0.1357 |
| rs8112208   | T | -0.0527 |
| rs12462060  | G | 0.0387  |
| rs111769937 | T | 0.1078  |
| rs57882484  | C | 0.0532  |
| rs2140112   | T | -0.1745 |
| rs4807784   | T | 0.0827  |
| rs8108050   | C | -0.0987 |
| rs4806771   | A | -0.0762 |
| rs10500234  | C | 0.0494  |
| rs74182220  | G | 0.0449  |
| rs1152239   | C | 0.0367  |
| rs17728296  | A | 0.0492  |
| rs58258919  | G | 0.1086  |
| rs145342516 | A | -0.128  |
| rs8106216   | A | 0.035   |
| rs117288213 | T | 0.1007  |
| rs117346446 | G | 0.1433  |
| rs4801181   | C | 0.0856  |
| rs112068153 | G | 0.0608  |
| rs245110    | T | 0.0596  |
| rs2232004   | G | -0.1062 |
| rs3046      | C | 0.0341  |
| rs12981432  | G | -0.0577 |
| rs79702979  | A | 0.1283  |
| rs16007     | T | -0.069  |

|             |   |         |
|-------------|---|---------|
| rs61515781  | G | 0.1653  |
| rs62123716  | A | -0.0431 |
| rs73011458  | G | -0.0433 |
| rs138953053 | G | -0.1505 |
| rs1987411   | A | 0.0663  |
| rs113554192 | A | -0.2204 |
| rs8105276   | G | 0.0341  |
| rs73059190  | A | -0.0572 |
| rs118083560 | A | 0.1701  |
| rs10412765  | C | -0.038  |
| rs73057809  | A | -0.044  |
| rs73053554  | T | 0.0969  |
| rs145550792 | T | -0.1723 |
| rs139539106 | C | 0.1412  |
| rs28422180  | A | 0.0633  |
| rs73042510  | T | 0.051   |
| rs117736331 | T | -0.107  |
| rs55837303  | C | -0.1055 |
| rs720922    | G | -0.0658 |
| rs55686100  | A | -0.1513 |
| rs3786953   | A | -0.08   |
| rs4801661   | C | 0.0878  |
| rs78381908  | C | 0.1297  |
| rs4807702   | A | -0.0403 |
| rs2042289   | T | 0.0612  |
| rs8103698   | G | 0.053   |
| rs113464261 | C | -0.1871 |
| rs34512401  | A | -0.0552 |
| rs12608820  | A | 0.0432  |
| rs7249606   | C | 0.0425  |
| rs113451515 | A | -0.0842 |
| rs62112768  | C | 0.0647  |
| rs6510628   | T | 0.0547  |
| rs73940129  | A | 0.0685  |
| rs150316282 | C | 0.2186  |
| rs2283585   | T | 0.1018  |
| rs12979908  | G | 0.0824  |
| rs10407144  | C | -0.0447 |
| rs11880384  | T | 0.0748  |
| rs6509489   | C | 0.0584  |
| rs11669754  | G | 0.0373  |
| rs7508108   | G | 0.0727  |
| rs62133455  | A | -0.0606 |
| rs74512438  | G | -0.1429 |
| rs143930822 | A | 0.2117  |
| rs1234975   | A | -0.0366 |
| rs11084945  | G | -0.0427 |

|             |   |         |
|-------------|---|---------|
| rs3760775   | T | -0.0726 |
| rs10422532  | G | -0.0405 |
| rs78183035  | A | 0.1568  |
| rs4625830   | G | -0.198  |
| rs2431869   | A | 0.1176  |
| rs148812642 | C | -0.2346 |
| rs12973221  | A | 0.0634  |
| rs73045399  | A | 0.0566  |
| rs8109751   | C | 0.0691  |
| rs113290987 | G | 0.0984  |
| rs60214906  | A | 0.2331  |
| rs10416491  | A | 0.1249  |
| rs73504949  | G | -0.1759 |
| rs4808220   | T | 0.05    |
| rs10415081  | G | -0.036  |
| rs146660853 | T | -0.2908 |
| rs6509331   | G | -0.0367 |
| rs140919235 | C | -0.2151 |
| rs9636197   | A | -0.0913 |
| rs397281    | T | 0.1006  |
| rs350820    | T | -0.038  |
| rs999560    | T | 0.0354  |
| rs116991122 | A | 0.0845  |
| rs79793764  | T | -0.0601 |
| rs813531    | T | 0.053   |
| rs75814442  | A | -0.0849 |
| rs10403830  | A | 0.0463  |
| rs7259173   | G | 0.0357  |
| rs17755118  | T | 0.0554  |
| rs5027755   | C | 0.0417  |
| rs45533637  | C | 0.269   |
| rs62120352  | G | -0.0735 |
| rs10412167  | G | 0.1122  |
| rs4805031   | C | 0.0424  |
| rs11670348  | T | -0.0357 |
| rs12985180  | C | -0.0673 |
| rs8109074   | C | -0.0409 |
| rs642842    | C | -0.0656 |
| rs117379662 | C | -0.2353 |
| rs79001257  | G | 0.1749  |
| rs17663607  | C | 0.0357  |
| rs79456666  | A | -0.1526 |
| rs142011848 | T | 0.2316  |
| rs150000686 | T | 0.1693  |
| rs149022640 | A | 0.185   |
| rs76054521  | A | 0.0411  |
| rs111518971 | C | -0.0545 |



|             |   |         |
|-------------|---|---------|
| rs17657025  | C | -0.0712 |
| rs56333177  | G | 0.1839  |
| rs12462664  | C | -0.0527 |
| rs35925872  | T | -0.0373 |
| rs3810091   | T | -0.0552 |
| rs633236    | T | -0.07   |
| rs60265749  | C | -0.0554 |
| rs8100435   | T | -0.0498 |
| rs142443097 | T | -0.1284 |
| rs34569811  | T | 0.1832  |
| rs8106747   | C | 0.0317  |
| rs11880140  | A | 0.0338  |
| rs117904274 | C | -0.1931 |
| rs3745784   | G | 0.0556  |
| rs35299463  | G | 0.0531  |
| rs4808977   | A | -0.1372 |
| rs3786663   | T | 0.037   |
| rs1077829   | T | 0.0499  |
| rs12980486  | G | 0.0463  |
| rs11084527  | T | 0.038   |
| rs10425256  | G | 0.0407  |
| rs2061776   | T | -0.0539 |
| rs28506894  | G | -0.0888 |
| rs2569482   | G | 0.0378  |
| rs807950    | A | -0.0334 |
| rs11880065  | C | 0.0653  |
| rs112352083 | T | 0.1414  |
| rs77056435  | G | 0.1711  |
| rs62105541  | G | -0.115  |
| rs73613404  | T | 0.0421  |
| rs13382036  | C | 0.0924  |
| rs77384304  | C | -0.0638 |
| rs117807559 | A | 0.2004  |
| rs73012738  | G | -0.0588 |
| rs11668429  | G | -0.0357 |
| rs35405329  | G | 0.0492  |
| rs76997502  | A | -0.12   |
| rs892141    | A | -0.0418 |
| rs4577202   | G | 0.0817  |
| rs6510001   | G | -0.0362 |
| rs11084754  | C | 0.0357  |
| rs11879657  | A | -0.0432 |
| rs2107230   | G | 0.0362  |
| rs116118527 | C | -0.1409 |
| rs11085037  | G | 0.0475  |
| rs117879579 | A | -0.1262 |
| rs76662694  | A | 0.2514  |

|             |   |         |
|-------------|---|---------|
| rs113020707 | T | 0.0992  |
| rs73561848  | C | 0.0618  |
| rs10409599  | G | -0.0683 |
| rs77053301  | A | -0.0588 |
| rs60950473  | A | -0.0729 |
| rs797889    | A | 0.051   |
| rs12973672  | C | -0.0385 |
| rs73022501  | A | 0.038   |
| rs117483679 | A | 0.1282  |
| rs773916    | T | -0.0705 |
| rs2228069   | G | -0.0329 |
| rs1670724   | T | 0.0384  |
| rs10418220  | G | -0.0548 |
| rs74842552  | T | 0.1067  |
| rs2560875   | T | -0.0338 |
| rs1366245   | T | -0.0393 |
| rs3810113   | A | 0.041   |
| rs62127952  | T | -0.0755 |
| rs78626419  | T | -0.1361 |
| rs2884487   | C | 0.0394  |
| rs57557929  | C | -0.0598 |
| rs11564538  | A | 0.0718  |
| rs118035065 | T | 0.1372  |
| rs118189273 | A | -0.1419 |
| rs16970487  | T | -0.0372 |
| rs116102400 | A | 0.1141  |
| rs4804038   | C | 0.0448  |
| rs111571999 | G | 0.0475  |
| rs7408569   | A | 0.0512  |
| rs73026775  | A | -0.0569 |
| rs4809191   | T | -0.0694 |
| rs118125020 | T | -0.1671 |
| rs11882479  | A | -0.0632 |
| rs73033437  | A | -0.0439 |
| rs3087582   | T | 0.1403  |
| rs117919866 | A | -0.102  |
| rs7259943   | G | 0.0508  |
| rs118163475 | T | -0.2477 |
| rs73038640  | T | 0.0731  |
| rs11671872  | A | -0.0343 |
| rs145025827 | T | -0.1862 |
| rs10414875  | C | -0.0552 |
| rs77505197  | T | -0.1227 |
| rs8113802   | G | 0.0368  |
| rs62109562  | G | 0.1244  |
| rs143284488 | A | -0.2192 |
| rs35720624  | T | 0.2115  |

|             |   |         |
|-------------|---|---------|
| rs8102192   | T | 0.0362  |
| rs62144060  | G | 0.0422  |
| rs7246472   | A | -0.0576 |
| rs71351726  | T | -0.095  |
| rs144141939 | A | -0.2241 |
| rs138267340 | C | 0.2207  |
| rs1727740   | T | 0.0468  |
| rs4383259   | A | 0.0463  |
| rs78437803  | G | -0.1428 |
| rs35139016  | C | -0.0325 |
| rs75331415  | A | 0.0573  |
| rs4630665   | G | -0.035  |
| rs2248265   | A | -0.0515 |
| rs79684932  | C | 0.1195  |
| rs10416395  | C | 0.0474  |
| rs62109205  | A | 0.0665  |
| rs77656144  | G | -0.0701 |
| rs57523558  | T | -0.0901 |
| rs41290110  | A | -0.1644 |
| rs1859948   | T | -0.1068 |
| rs139220941 | G | -0.1988 |
| rs117758647 | A | 0.0834  |
| rs74636811  | A | 0.0935  |
| rs75522428  | T | 0.2149  |
| rs80096436  | T | 0.0528  |
| rs73609070  | G | 0.0733  |
| rs117979175 | T | 0.133   |
| rs76912381  | A | 0.2072  |
| rs8100600   | A | -0.0529 |
| rs73046859  | C | -0.1582 |
| rs12609530  | T | -0.0361 |
| rs145684261 | G | -0.3086 |
| rs117204018 | A | -0.1441 |
| rs1862496   | T | -0.0952 |
| rs10413919  | A | -0.0377 |
| rs12980996  | A | 0.0332  |
| rs17625222  | T | -0.0308 |
| rs62110432  | A | -0.1044 |
| rs16960199  | A | 0.0917  |
| rs34095853  | T | 0.0832  |
| rs77626230  | T | -0.0939 |
| rs149529419 | A | -0.1901 |
| rs10405477  | C | 0.0677  |
| rs61703163  | T | -0.0847 |
| rs140734698 | A | 0.1666  |
| rs55846117  | A | 0.1833  |
| rs62101949  | A | 0.0558  |

|             |   |         |
|-------------|---|---------|
| rs550471    | A | -0.1281 |
| rs117789739 | T | -0.2289 |
| rs74390573  | T | 0.208   |
| rs147812172 | C | 0.1029  |
| rs1812307   | A | 0.0346  |
| rs34541442  | A | -0.2515 |
| rs79178101  | T | 0.0988  |
| rs4802306   | T | -0.0522 |
| rs35844933  | C | -0.0565 |
| rs79860339  | C | -0.1144 |
| rs75415216  | G | 0.0624  |
| rs11667638  | A | 0.0327  |
| rs372332    | G | 0.0362  |
| rs10416636  | A | 0.0716  |
| rs9305039   | C | -0.05   |
| rs111695636 | A | 0.2938  |
| rs403526    | C | -0.0556 |
| rs62120859  | A | -0.1008 |
| rs144643540 | T | 0.264   |
| rs118133597 | A | -0.0763 |
| rs3852876   | G | 0.0342  |
| rs13344919  | T | -0.0833 |
| rs115017227 | A | -0.1379 |
| rs2742061   | A | 0.065   |
| rs2656929   | C | -0.0637 |
| rs11673488  | C | -0.0378 |
| rs7253459   | G | 0.0807  |
| rs73516072  | T | -0.1401 |
| rs7256714   | C | 0.048   |
| rs9304745   | A | -0.0985 |
| rs140469219 | A | 0.1252  |
| rs74602839  | A | 0.1604  |
| rs73006036  | C | 0.0927  |
| rs78509894  | A | 0.097   |
| rs1013441   | T | 0.05    |
| rs35624673  | T | 0.0332  |
| rs4807251   | G | 0.0497  |
| rs8112380   | G | -0.0349 |
| rs2249782   | G | -0.0314 |
| rs1363938   | C | -0.0688 |
| rs10425428  | A | -0.0439 |
| rs112464508 | A | -0.1617 |
| rs1800471   | G | -0.0672 |
| rs34469429  | C | -0.0368 |
| rs7508393   | C | 0.0322  |
| rs1077667   | T | 0.0419  |
| rs4806741   | G | 0.0386  |

|             |   |         |
|-------------|---|---------|
| rs34912475  | A | 0.1005  |
| rs113885738 | T | -0.1233 |
| rs16962968  | G | 0.0556  |
| rs2305107   | A | 0.0524  |
| rs10414212  | C | -0.0746 |
| rs10500256  | G | 0.0464  |
| rs7259542   | G | 0.0373  |
| rs141195430 | A | 0.1629  |
| rs71354019  | C | -0.067  |
| rs73015298  | C | 0.096   |
| rs466452    | A | -0.0435 |
| rs72998661  | A | 0.1533  |
| rs62109961  | T | 0.0864  |
| rs73592891  | A | 0.1339  |
| rs2659091   | A | 0.0333  |
| rs116979442 | G | -0.1709 |
| rs117197234 | A | 0.2652  |
| rs11672738  | C | 0.0328  |
| rs10419832  | C | 0.0607  |
| rs34975661  | A | -0.2061 |
| rs79713772  | T | 0.0835  |
| rs17716220  | A | -0.0936 |
| rs12610043  | A | 0.0424  |
| rs8100418   | T | -0.0342 |
| rs34907579  | A | -0.0354 |
| rs12609890  | G | -0.0719 |
| rs308198    | T | -0.0503 |
| rs73028454  | A | -0.0821 |
| rs1560099   | C | -0.0433 |
| rs16974961  | T | 0.0714  |
| rs73016572  | T | -0.0941 |
| rs11671497  | T | -0.071  |
| rs2335133   | C | -0.0349 |
| rs117376574 | T | -0.0976 |
| rs2946844   | C | -0.0449 |
| rs117242472 | A | 0.2511  |
| rs6512147   | T | -0.0452 |
| rs2080621   | A | 0.0483  |
| rs6508770   | A | 0.0392  |
| rs4897961   | A | 0.04    |
| rs117422340 | A | 0.1808  |
| rs114197427 | T | 0.1115  |
| rs2049785   | G | -0.0345 |
| rs11878528  | G | -0.0388 |
| rs76068669  | G | -0.0422 |
| rs400914    | A | 0.0613  |
| rs150675940 | G | 0.0661  |

|             |   |         |
|-------------|---|---------|
| rs112475085 | G | -0.0386 |
| rs62117667  | A | -0.0941 |
| rs8102902   | G | -0.0411 |
| rs73029691  | T | 0.1909  |
| rs2082420   | G | -0.0439 |
| rs4803259   | T | 0.0353  |
| rs7258505   | A | -0.0374 |
| rs117244518 | G | 0.1238  |
| rs6509757   | T | 0.0416  |
| rs4803847   | C | -0.2003 |
| rs13345980  | A | 0.0824  |
| rs11547760  | A | -0.1153 |
| rs8111930   | A | 0.0501  |
| rs114264188 | C | -0.1221 |
| rs62143163  | T | -0.0496 |
| rs67483025  | T | -0.0364 |
| rs2547318   | G | 0.0347  |
| rs77406303  | G | 0.1052  |
| rs149425860 | T | 0.1816  |
| rs7257395   | A | -0.2288 |
| rs2010172   | A | 0.0536  |
| rs17325358  | T | 0.0603  |
| rs73935209  | A | 0.1047  |
| rs113167793 | C | -0.1145 |
| rs79522004  | C | -0.1266 |
| rs909137    | T | -0.0541 |
| rs77568177  | T | 0.0747  |
| rs6509613   | C | -0.0812 |
| rs4371271   | C | -0.0357 |
| rs60199045  | A | 0.0395  |
| rs11084906  | G | -0.0405 |
| rs917415    | C | 0.0363  |
| rs117188971 | C | -0.1503 |
| rs321961    | T | 0.0334  |
| rs564973    | A | 0.2294  |
| rs62122441  | C | -0.0902 |
| rs10084116  | G | 0.0489  |
| rs4801283   | T | -0.0332 |
| rs62116492  | T | -0.0373 |
| rs1799788   | A | -0.0763 |
| rs118052092 | T | 0.1614  |
| rs77377417  | G | 0.0796  |
| rs79775625  | G | -0.1308 |
| rs142236807 | T | 0.1627  |
| rs10423092  | G | 0.0604  |
| rs886137    | G | 0.0319  |
| rs4803297   | T | -0.03   |

|             |   |         |
|-------------|---|---------|
| rs2301742   | T | -0.032  |
| rs8105530   | C | -0.0338 |
| rs2305775   | T | -0.0376 |
| rs12971444  | C | -0.0545 |
| rs12984126  | G | -0.0306 |
| rs56195015  | T | -0.06   |
| rs34822862  | A | -0.0464 |
| rs11880997  | G | 0.0775  |
| rs11881130  | G | 0.1179  |
| rs10406324  | G | 0.0984  |
| rs12609411  | G | 0.0458  |
| rs1042728   | G | -0.0581 |
| rs61732905  | C | -0.2593 |
| rs149108931 | T | 0.2351  |
| rs73033934  | T | 0.1136  |
| rs10411082  | A | -0.0379 |
| rs4239552   | T | 0.0399  |
| rs117665563 | T | 0.0882  |
| rs4570994   | A | -0.0352 |
| rs173428    | A | -0.0309 |
| rs2561567   | C | -0.0322 |
| rs11666789  | T | -0.0312 |
| rs11671874  | C | 0.0405  |
| rs73045278  | G | -0.0831 |
| rs149745801 | T | -0.1724 |
| rs34501799  | G | 0.0557  |
| rs8104304   | G | -0.0557 |
| rs10854135  | C | -0.0342 |
| rs4807663   | T | 0.1137  |
| rs696839    | G | -0.0485 |
| rs79837859  | G | -0.0481 |
| rs12983810  | C | 0.0362  |
| rs76888071  | T | 0.1868  |
| rs142014070 | G | 0.2448  |
| rs35801806  | G | 0.0753  |
| rs78454035  | A | 0.2566  |
| rs7259090   | A | -0.0613 |
| rs430092    | T | -0.0428 |
| rs71339160  | T | -0.066  |
| rs138401884 | T | -0.1408 |
| rs144042125 | A | -0.086  |
| rs11879910  | T | 0.053   |
| rs55954014  | T | -0.114  |
| rs150089640 | C | 0.0695  |
| rs1865956   | T | -0.0578 |
| rs144867969 | T | 0.1975  |
| rs113069710 | G | 0.0918  |

|             |   |         |
|-------------|---|---------|
| rs12972533  | G | 0.0958  |
| rs10420328  | G | -0.0421 |
| rs7256985   | G | -0.03   |
| rs148805903 | T | 0.1151  |
| rs10425725  | C | -0.0322 |
| rs4805229   | T | -0.0338 |
| rs73005286  | G | 0.1114  |
| rs146037066 | A | 0.3059  |
| rs7408396   | C | 0.0532  |
| rs12985250  | A | 0.0401  |
| rs4808673   | C | -0.0648 |
| rs11085497  | C | -0.041  |
| rs12974636  | G | 0.0499  |
| rs8105149   | T | -0.11   |
| rs62113179  | A | 0.0589  |
| rs78754690  | A | 0.1817  |
| rs77472192  | T | -0.091  |
| rs117419635 | G | 0.1636  |
| rs12980105  | T | 0.0369  |
| rs145200171 | T | 0.0914  |
| rs28385470  | A | 0.0588  |
| rs12463356  | T | 0.0673  |
| rs4353573   | A | 0.0646  |
| rs79391487  | T | -0.0795 |
| rs506425    | C | -0.0332 |
| rs10418842  | T | 0.0527  |
| rs74809203  | T | -0.1005 |
| rs4805289   | A | -0.031  |
| rs77981981  | T | 0.1013  |
| rs7250371   | T | -0.0333 |
| rs143708689 | T | 0.1986  |
| rs10439152  | T | -0.0392 |
| rs11673142  | C | 0.0314  |
| rs56319338  | C | -0.1044 |
| rs7257342   | T | 0.0526  |
| rs11879893  | C | -0.0565 |
| rs148402278 | A | 0.1791  |
| rs2335859   | G | 0.047   |
| rs148033824 | T | 0.282   |
| rs71333232  | A | 0.0521  |
| rs75544600  | A | -0.2415 |
| rs12459949  | G | 0.0502  |
| rs34077313  | T | -0.0447 |
| rs17654300  | C | 0.0345  |
| rs117240340 | T | -0.1356 |
| rs73010720  | G | -0.0923 |
| rs117651296 | T | 0.1444  |



|             |   |         |
|-------------|---|---------|
| rs73006337  | C | 0.0989  |
| rs2287869   | G | 0.0298  |
| rs12977065  | T | 0.0983  |
| rs9305002   | G | -0.0644 |
| rs28526481  | G | 0.0599  |
| rs4804998   | C | 0.0384  |
| rs7246559   | A | 0.0662  |
| rs35551419  | T | -0.0404 |
| rs112331796 | T | -0.0492 |
| rs55989964  | G | -0.1185 |
| rs7253180   | G | 0.0858  |
| rs12978912  | C | 0.0306  |
| rs62122570  | A | -0.0571 |
| rs75645652  | C | -0.0669 |
| rs113830047 | A | -0.2228 |
| rs144734748 | A | 0.0932  |
| rs324126    | T | 0.0298  |
| rs887279    | A | 0.0583  |
| rs116992561 | C | 0.0923  |
| rs150972971 | G | 0.1363  |
| rs17763599  | T | -0.0358 |
| rs1270262   | T | -0.0445 |
| rs78382468  | T | 0.0496  |
| rs140861063 | A | 0.1522  |
| rs8100302   | T | 0.0473  |
| rs56388321  | T | 0.033   |
| rs4802080   | A | 0.086   |
| rs80124263  | G | -0.099  |
| rs139109387 | T | 0.1177  |
| rs12104159  | A | -0.1133 |
| rs4047206   | T | -0.0575 |
| rs2738461   | T | 0.0401  |
| rs62112149  | T | 0.0509  |
| rs34481423  | A | -0.0405 |
| rs2913968   | C | -0.0351 |
| rs1048909   | A | 0.0394  |
| rs138475720 | A | -0.182  |
| rs151259580 | C | 0.1922  |
| rs35878582  | T | -0.0768 |
| rs7257150   | A | -0.1412 |
| rs150932585 | A | -0.344  |
| rs703477    | T | -0.048  |
| rs34500002  | A | 0.0363  |
| rs146835980 | G | 0.184   |
| rs7253860   | T | 0.0386  |
| rs7254318   | A | 0.0302  |
| rs9304619   | G | 0.0371  |

|             |   |         |
|-------------|---|---------|
| rs1041992   | T | 0.0929  |
| rs74921826  | T | 0.0624  |
| rs75058377  | A | -0.1543 |
| rs143180616 | C | -0.159  |
| rs4805400   | A | -0.0356 |
| rs17247661  | C | 0.0484  |
| rs2651077   | T | -0.0332 |
| rs4801994   | G | 0.0334  |
| rs3212783   | C | -0.0462 |
| rs12460000  | G | 0.0871  |
| rs61486719  | C | 0.1039  |
| rs72987150  | T | -0.0571 |
| rs2290650   | G | 0.0434  |
| rs7254007   | G | 0.0325  |
| rs7254487   | G | -0.0439 |
| rs117982956 | A | -0.1938 |
| rs113641878 | T | -0.0593 |
| rs76044809  | T | 0.1567  |
| rs8110228   | A | -0.0415 |
| rs11880491  | G | -0.0818 |
| rs35267146  | G | 0.0364  |
| rs12462817  | A | -0.0302 |
| rs80047999  | T | -0.1829 |
| rs113529123 | C | 0.143   |
| rs113541354 | C | -0.1268 |
| rs60676836  | C | 0.079   |
| rs141826060 | A | -0.0618 |
| rs10409720  | C | -0.0524 |
| rs2072561   | G | 0.0689  |
| rs12459953  | A | 0.0621  |
| rs116945279 | A | -0.0936 |
| rs3930885   | T | -0.1145 |
| rs11669191  | A | -0.1071 |
| rs7246516   | T | -0.0537 |
| rs12978289  | A | 0.0378  |
| rs2023528   | T | 0.041   |
| rs1996423   | C | 0.0735  |
| rs148696544 | A | -0.1552 |
| rs73608677  | A | -0.0456 |
| rs116889697 | A | 0.149   |
| rs11672399  | A | -0.0579 |
| rs146995981 | T | 0.0714  |
| rs78219104  | T | -0.0955 |
| rs75874901  | A | 0.0584  |
| rs77974138  | T | 0.1861  |
| rs140061860 | C | -0.158  |
| rs12980559  | T | 0.2207  |

|             |   |         |
|-------------|---|---------|
| rs34483923  | T | -0.1691 |
| rs11666980  | G | 0.0597  |
| rs11666114  | T | 0.0312  |
| rs7256201   | C | -0.0397 |
| rs968698    | A | 0.0541  |
| rs58129651  | T | -0.066  |
| rs71335301  | A | 0.0958  |
| rs2562510   | C | -0.0364 |
| rs1236711   | C | 0.0287  |
| rs4439888   | A | 0.1991  |
| rs73020490  | A | -0.0718 |
| rs2617698   | A | 0.0449  |
| rs62112647  | G | 0.0492  |
| rs62134663  | G | -0.0425 |
| rs113518563 | T | 0.0708  |
| rs140175288 | G | 0.1325  |
| rs3745601   | A | -0.0453 |
| rs2708838   | G | 0.0471  |
| rs6512204   | T | 0.0368  |
| rs12983109  | A | -0.0351 |
| rs308039    | T | -0.0402 |
| rs2312584   | C | -0.0367 |
| rs12972624  | A | -0.0785 |
| rs35209882  | C | -0.075  |
| rs75294874  | T | 0.1002  |
| rs55942656  | T | 0.0368  |
| rs73536723  | A | -0.2701 |
| rs8102090   | G | -0.0689 |
| rs73070113  | T | 0.0771  |
| rs12610376  | A | -0.0521 |
| rs117684291 | T | 0.0799  |
| rs329708    | T | 0.0389  |
| rs72989022  | T | 0.0688  |
| rs11671472  | A | 0.2033  |
| rs10408671  | A | 0.0776  |
| rs950712    | C | -0.1366 |
| rs6509405   | C | -0.0326 |
| rs8109066   | C | -0.0873 |
| rs12463334  | G | -0.0311 |
| rs78083808  | T | 0.053   |
| rs77524195  | C | -0.0825 |
| rs2231935   | G | -0.0326 |
| rs8105497   | T | -0.0368 |
| rs886243    | A | 0.0436  |
| rs77014405  | T | -0.1131 |
| rs3795051   | A | 0.1045  |
| rs73015225  | T | -0.1078 |

|             |   |         |
|-------------|---|---------|
| rs142439534 | T | -0.1349 |
| rs149875761 | C | 0.0997  |
| rs35101205  | A | 0.0293  |
| rs4802323   | T | -0.055  |
| rs17265865  | G | 0.1119  |
| rs11085745  | A | -0.1541 |
| rs73044104  | G | -0.088  |
| rs2547437   | C | -0.0711 |
| rs4802527   | G | 0.0445  |
| rs12983268  | A | -0.0306 |
| rs2335076   | C | -0.0322 |
| rs73015030  | A | 0.1009  |
| rs73056645  | T | 0.0483  |
| rs16960092  | A | -0.0868 |
| rs114713026 | A | 0.0415  |
| rs78592212  | A | 0.0541  |
| rs16983230  | G | 0.139   |
| rs113545020 | T | 0.1474  |
| rs118114113 | T | -0.1389 |
| rs429740    | T | 0.0366  |
| rs7252558   | C | -0.0324 |
| rs450819    | G | -0.0535 |
| rs159867    | C | 0.0773  |
| rs117317981 | A | -0.1098 |
| rs60877783  | A | -0.0335 |
| rs33851     | C | 0.0323  |
| rs118094257 | A | -0.155  |
| rs452410    | A | -0.1398 |
| rs62106165  | T | 0.0346  |
| rs8113398   | G | 0.0457  |
| rs8108920   | A | 0.1026  |
| rs117109209 | C | -0.1738 |
| rs11555272  | C | -0.101  |
| rs62116769  | C | -0.1106 |
| rs12979442  | G | 0.0371  |
| rs55836620  | C | -0.1522 |
| rs9630876   | T | -0.0601 |
| rs8112774   | A | 0.0648  |
| rs137977709 | G | -0.1911 |
| rs143752962 | A | -0.1635 |
| rs117009455 | C | 0.1538  |
| rs571791    | T | -0.057  |
| rs149612378 | C | -0.1519 |
| rs67970852  | A | -0.2303 |
| rs36024941  | G | -0.0433 |
| rs28529466  | T | -0.1797 |
| rs28718349  | G | -0.0414 |

|             |   |         |
|-------------|---|---------|
| rs73522859  | A | 0.2021  |
| rs35867611  | A | -0.0573 |
| rs283158    | A | 0.0589  |
| rs10420775  | G | 0.083   |
| rs149103351 | A | -0.0669 |
| rs111647441 | A | -0.2072 |
| rs1834986   | T | 0.1202  |
| rs117453761 | C | 0.1101  |
| rs3729767   | A | 0.0671  |
| rs113296064 | C | 0.1692  |
| rs6509262   | G | -0.0299 |
| rs77597568  | A | 0.0616  |
| rs76757527  | C | 0.0696  |
| rs2683030   | T | -0.0706 |
| rs565801    | T | -0.0289 |
| rs10405171  | A | -0.0356 |
| rs1835987   | T | -0.174  |
| rs7256275   | A | 0.103   |
| rs16973403  | A | -0.0653 |
| rs34536443  | C | -0.0789 |
| rs142766525 | T | 0.1761  |
| rs2009341   | A | -0.2766 |
| rs8104142   | T | 0.1938  |
| rs56796910  | C | -0.0414 |
| rs11667330  | A | -0.0448 |
| rs118155315 | T | -0.1051 |
| rs12462702  | T | -0.0408 |
| rs344559    | C | -0.0475 |
| rs113625260 | T | -0.1262 |
| rs142906702 | T | 0.1323  |
| rs10425205  | C | 0.0471  |
| rs35851152  | A | -0.0615 |
| rs58857187  | C | 0.0282  |
| rs80308538  | A | 0.0449  |
| rs346524    | C | -0.0331 |
| rs2524358   | T | -0.0417 |
| rs116875033 | C | -0.0677 |
| rs117490768 | A | -0.1044 |
| rs28513     | A | 0.0286  |
| rs10408385  | G | 0.0411  |
| rs79747498  | A | -0.1486 |
| rs6511357   | A | 0.0294  |
| rs149719748 | G | 0.1499  |
| rs2230611   | A | -0.052  |
| rs73940679  | G | -0.0538 |
| rs62119310  | G | -0.0389 |
| rs6509596   | T | -0.0348 |

|             |   |         |
|-------------|---|---------|
| rs7255945   | T | -0.0787 |
| rs139523609 | A | -0.1214 |
| rs735318    | A | -0.0863 |
| rs114168991 | T | -0.1557 |
| rs73029679  | C | -0.1295 |
| rs71354198  | C | 0.0803  |
| rs2043328   | C | -0.1381 |
| rs73048047  | A | 0.1431  |
| rs2967693   | C | -0.0549 |
| rs117937144 | T | 0.1139  |
| rs34852629  | C | -0.0286 |
| rs1989721   | C | 0.0328  |
| rs111271029 | C | 0.0706  |
| rs43211     | T | -0.0352 |
| rs2288956   | T | 0.0409  |
| rs4808689   | G | 0.0304  |
| rs117745740 | G | -0.0976 |
| rs2271055   | C | -0.0379 |
| rs8110698   | G | -0.0355 |
| rs113844540 | C | 0.12    |
| rs62103089  | T | -0.038  |
| rs55895523  | T | 0.0444  |
| rs145819982 | A | -0.0671 |
| rs117726696 | A | 0.1033  |
| rs17638167  | T | -0.0682 |
| rs961499    | T | -0.0311 |
| rs12608980  | A | 0.0699  |
| rs11666601  | A | 0.0472  |
| rs76428105  | T | -0.1175 |
| rs7255692   | T | -0.1056 |
| rs4804058   | T | -0.0393 |
| rs58683379  | A | 0.0596  |
| rs77962916  | A | 0.1888  |
| rs138238959 | G | 0.1632  |
| rs143979135 | C | 0.1623  |
| rs149436861 | C | -0.1442 |
| rs12975006  | T | -0.0491 |
| rs77158894  | G | 0.1278  |
| rs3786802   | T | 0.1053  |
| rs150580855 | T | -0.1765 |
| rs3786664   | T | -0.0414 |
| rs2613778   | T | 0.0571  |
| rs7246110   | G | -0.0417 |
| rs1165840   | T | -0.0299 |
| rs10423396  | C | -0.1034 |
| rs7259011   | A | -0.1237 |
| rs242574    | T | 0.0277  |

|             |   |         |
|-------------|---|---------|
| rs474724    | C | 0.1585  |
| rs12461743  | A | -0.1291 |
| rs112655142 | G | 0.0515  |
| rs1140828   | A | 0.048   |
| rs8105988   | T | 0.0317  |
| rs28411318  | T | 0.0876  |
| rs62108181  | A | 0.1932  |
| rs12151172  | A | 0.0602  |
| rs144969793 | G | -0.0943 |
| rs111925319 | A | -0.1925 |
| rs78203559  | C | 0.133   |
| rs76107209  | T | -0.0725 |
| rs111485053 | T | -0.0707 |
| rs58823991  | A | 0.0417  |
| rs73063458  | T | -0.189  |
| rs59157740  | T | -0.0723 |
| rs405443    | A | -0.0394 |
| rs10403788  | C | -0.0753 |
| rs387083    | A | -0.0294 |
| rs167386    | G | -0.0424 |
| rs10416724  | A | -0.0475 |
| rs62135330  | T | 0.0404  |
| rs111566976 | C | -0.1978 |
| rs28815307  | G | 0.0444  |
| rs11490542  | A | -0.038  |
| rs401522    | A | -0.0669 |
| rs55704503  | A | 0.0758  |
| rs28684537  | T | -0.0742 |
| rs78739451  | A | 0.0679  |
| rs2240931   | A | -0.0652 |
| rs2913981   | T | 0.0343  |
| rs11879978  | A | 0.077   |
| rs150811410 | T | -0.0973 |
| rs73054899  | T | -0.0885 |
| rs2708740   | G | 0.0381  |
| rs112692483 | T | 0.1127  |
| rs7256672   | G | -0.0308 |
| rs637011    | T | 0.0329  |
| rs1127821   | C | 0.0342  |
| rs1645788   | G | 0.051   |
| rs166252    | T | -0.0425 |
| rs76894839  | A | 0.1143  |
| rs4803689   | T | 0.033   |
| rs13866     | T | -0.032  |
| rs74767226  | A | 0.1563  |
| rs12971298  | T | 0.0475  |
| rs8111163   | A | -0.0332 |

|             |   |         |
|-------------|---|---------|
| rs111316975 | C | -0.0807 |
| rs3897851   | C | 0.0949  |
| rs111974302 | T | -0.0855 |
| rs12983389  | A | 0.0308  |
| rs2311004   | T | 0.0284  |
| rs73052441  | T | 0.0848  |
| rs7258582   | T | -0.0317 |
| rs1749318   | A | -0.082  |
| rs148950464 | T | -0.1576 |
| rs11084310  | C | 0.0397  |
| rs2905565   | G | -0.0379 |
| rs7249537   | C | 0.0475  |
| rs6510522   | G | -0.0348 |
| rs116917825 | T | -0.0946 |
| rs17836409  | T | -0.0523 |
| rs35582075  | A | 0.0592  |
| rs392720    | G | -0.0683 |
| rs77994389  | G | 0.0842  |
| rs10854117  | A | 0.0301  |
| rs11084182  | G | 0.0293  |
| rs3786949   | A | -0.0532 |
| rs79182125  | T | 0.1124  |
| rs552163    | C | -0.0337 |
| rs4805038   | T | -0.0283 |
| rs8109438   | G | 0.0692  |
| rs78137572  | C | -0.0628 |
| rs112964754 | A | -0.1686 |
| rs34998417  | A | -0.0441 |
| rs77975482  | A | -0.041  |
| rs147255904 | T | 0.1497  |
| rs3761041   | T | -0.0436 |
| rs117552735 | T | 0.2168  |
| rs8101486   | C | 0.0469  |
| rs7256393   | T | 0.0314  |
| rs9749200   | T | -0.0385 |
| rs73016437  | T | 0.1026  |
| rs7252743   | T | 0.0329  |
| rs138281685 | A | 0.167   |
| rs10420817  | C | 0.041   |
| rs1661929   | C | 0.0477  |
| rs145160155 | A | -0.0673 |
| rs74784672  | T | 0.0978  |
| rs57750296  | A | 0.0774  |
| rs2957327   | G | -0.0869 |
| rs8101727   | T | -0.0298 |
| rs145155733 | T | 0.087   |
| rs1991723   | A | -0.0302 |



|             |   |         |
|-------------|---|---------|
| rs149181943 | T | 0.1534  |
| rs1671168   | C | -0.0307 |
| rs139480937 | C | 0.148   |
| rs7255438   | T | -0.0495 |
| rs59194140  | G | -0.0936 |
| rs8106589   | A | -0.1574 |
| rs117672278 | G | 0.1313  |
| rs2360006   | T | -0.0341 |
| rs62108895  | G | 0.1246  |
| rs73028824  | A | 0.1282  |
| rs141297677 | C | -0.1746 |
| rs35880269  | C | 0.0408  |
| rs79307501  | G | 0.0937  |
| rs10846     | A | -0.0445 |
| rs35203778  | A | 0.1415  |
| rs7507610   | A | 0.0463  |
| rs147675829 | A | -0.1408 |
| rs4805801   | T | -0.0374 |
| rs2305802   | A | -0.0269 |
| rs12461630  | A | 0.0516  |
| rs4806754   | G | 0.0474  |
| rs8107130   | C | 0.0346  |
| rs75853494  | C | -0.0389 |
| rs10412737  | C | 0.0408  |
| rs6511903   | C | 0.0299  |
| rs111636222 | A | -0.1057 |
| rs140235990 | T | -0.1001 |
| rs2082450   | G | 0.0583  |
| rs1962979   | T | 0.0326  |
| rs73040239  | A | 0.0589  |
| rs8104821   | A | 0.0316  |
| rs10415328  | T | -0.05   |
| rs11084426  | A | -0.0341 |
| rs6509899   | A | 0.0505  |
| rs58115495  | T | 0.0636  |
| rs118038269 | T | 0.0847  |
| rs12462372  | A | 0.0681  |
| rs10409916  | G | -0.1125 |
| rs7256786   | T | 0.0272  |
| rs34913708  | C | -0.0501 |
| rs117572168 | A | -0.1358 |
| rs35428586  | T | 0.0375  |
| rs350859    | T | 0.0407  |
| rs8100802   | A | 0.0351  |
| rs112227592 | A | -0.0603 |
| rs7250362   | C | 0.0325  |
| rs113355760 | T | 0.0695  |

|             |   |         |
|-------------|---|---------|
| rs77036225  | A | 0.0324  |
| rs755000    | G | -0.142  |
| rs41517950  | A | -0.1916 |
| rs75900619  | T | -0.0776 |
| rs3810374   | T | -0.0585 |
| rs17438280  | C | -0.0847 |
| rs3746118   | T | -0.0327 |
| rs113541609 | C | 0.1911  |
| rs2250978   | T | 0.0643  |
| rs7259981   | A | -0.035  |
| rs12463344  | C | 0.0596  |
| rs7251717   | C | -0.0692 |
| rs35692207  | G | 0.0278  |
| rs7257109   | A | 0.028   |
| rs71358943  | T | -0.1015 |
| rs75255098  | G | 0.0647  |
| rs12459321  | A | -0.0334 |
| rs78029818  | A | 0.0418  |
| rs12608549  | T | 0.1289  |
| rs62129317  | A | -0.1244 |
| rs1027453   | C | -0.0277 |
| rs34605692  | A | 0.106   |
| rs7248417   | T | 0.0466  |
| rs2974216   | A | -0.0413 |
| rs62116189  | A | -0.0665 |
| rs75340134  | A | -0.137  |
| rs111793091 | A | -0.044  |
| rs432643    | C | 0.0597  |
| rs74874129  | C | 0.0503  |
| rs1644728   | A | 0.0346  |
| rs147419599 | T | 0.1254  |
| rs144097942 | A | -0.1942 |
| rs60469528  | G | 0.0562  |
| rs311789    | G | -0.043  |
| rs73550322  | A | -0.08   |
| rs11882898  | G | 0.0864  |
| rs35387182  | G | 0.0849  |
| rs138820087 | T | 0.1241  |
| rs35150881  | G | -0.064  |
| rs118043010 | T | 0.1033  |
| rs550535    | A | 0.0795  |
| rs67321966  | T | -0.0504 |
| rs59278521  | G | 0.1108  |
| rs62107379  | A | -0.1293 |
| rs57387991  | A | 0.0728  |
| rs2286435   | T | -0.0547 |
| rs34884678  | C | -0.0289 |

|             |   |         |
|-------------|---|---------|
| rs2082476   | T | -0.1176 |
| rs34380919  | T | -0.0679 |
| rs62127287  | A | 0.081   |
| rs56227655  | C | 0.0492  |
| rs77840289  | T | -0.1278 |
| rs10421907  | A | -0.0326 |
| rs75465285  | T | -0.0776 |
| rs7252735   | A | 0.0429  |
| rs9789319   | T | 0.0274  |
| rs144642188 | C | -0.1306 |
| rs7246856   | T | 0.0296  |
| rs4316879   | G | -0.0446 |
| rs147706800 | A | -0.2326 |
| rs34912772  | C | -0.0581 |
| rs62108531  | G | -0.0451 |
| rs58046024  | A | 0.0364  |
| rs62132207  | T | -0.0553 |
| rs635711    | T | 0.0427  |
| rs1465557   | A | -0.0279 |
| rs34823013  | T | 0.0363  |
| rs2190832   | T | 0.0267  |
| rs58580682  | G | 0.1277  |
| rs117297812 | A | 0.1075  |
| rs3889147   | T | -0.034  |
| rs2278260   | T | -0.0264 |
| rs11668191  | A | 0.0481  |
| rs3826793   | T | -0.0786 |
| rs113393290 | G | 0.0522  |
| rs35902786  | T | -0.0401 |
| rs78727418  | A | 0.0475  |
| rs62115395  | T | -0.0757 |
| rs62118302  | T | 0.1528  |
| rs150060081 | A | 0.0816  |
| rs8104877   | G | 0.0384  |
| rs117425400 | C | 0.1027  |
| rs11670339  | G | -0.0681 |
| rs4341854   | A | -0.0695 |
| rs10402813  | G | -0.0384 |
| rs72989977  | T | 0.0388  |
| rs113297982 | C | 0.0772  |
| rs117261063 | C | -0.0788 |
| rs11670447  | A | -0.0731 |
| rs6510502   | C | 0.0464  |
| rs314669    | A | -0.0268 |
| rs8111710   | T | 0.0344  |
| rs62114259  | A | 0.0984  |
| rs10420517  | C | 0.0439  |

|             |   |         |
|-------------|---|---------|
| rs61742630  | T | 0.0767  |
| rs151285628 | T | 0.1018  |
| rs62130270  | T | -0.0305 |
| rs4806718   | C | 0.0389  |
| rs117088198 | A | 0.0772  |
| rs12608903  | G | 0.0467  |
| rs57162402  | A | -0.1514 |
| rs1978612   | G | 0.0283  |
| rs2866461   | A | 0.057   |
| rs143861034 | T | -0.097  |
| rs254261    | A | 0.1374  |
| rs62135324  | A | 0.1398  |
| rs9304881   | T | -0.031  |
| rs2170013   | A | 0.0637  |
| rs12609937  | A | 0.0673  |
| rs113066557 | C | 0.0507  |
| rs7258272   | A | -0.1231 |
| rs147915889 | C | 0.1838  |
| rs2241592   | A | -0.0344 |
| rs116867738 | A | 0.1192  |
| rs12981632  | A | 0.1618  |
| rs11883325  | T | -0.0398 |
| rs112769637 | C | 0.0782  |
| rs28620329  | G | -0.0352 |
| rs75653026  | A | -0.0976 |
| rs329726    | C | 0.1325  |
| rs3810136   | A | -0.0518 |
| rs117734617 | T | -0.1782 |
| rs73554696  | T | 0.1623  |
| rs2301617   | T | -0.0343 |
| rs56720508  | G | 0.048   |
| rs4808735   | G | -0.0402 |
| rs34447090  | A | 0.112   |
| rs73629827  | A | 0.1684  |
| rs11671925  | A | -0.0392 |
| rs73514167  | G | -0.0588 |
| rs2074917   | C | 0.0788  |
| rs10409981  | T | 0.0636  |
| rs118024974 | C | 0.1061  |
| rs117375362 | G | -0.0804 |
| rs10422666  | A | 0.1106  |
| rs8107411   | T | 0.0327  |
| rs117003019 | A | 0.0719  |
| rs12971321  | C | -0.0276 |
| rs272415    | A | -0.0867 |
| rs16968855  | A | -0.0611 |
| rs78389728  | C | 0.0797  |

|             |   |         |
|-------------|---|---------|
| rs1978223   | A | -0.0414 |
| rs2302219   | A | 0.0647  |
| rs8100862   | A | 0.0452  |
| rs72618589  | T | -0.1437 |
| rs149789362 | T | 0.0723  |
| rs7248022   | G | 0.0545  |
| rs11666258  | G | -0.0278 |
| rs145745626 | T | 0.0657  |
| rs2139720   | T | 0.0302  |
| rs62116845  | T | -0.136  |
| rs112979903 | G | -0.106  |
| rs17001450  | A | 0.0609  |
| rs116875108 | G | -0.1805 |
| rs62121065  | A | -0.0503 |
| rs279223    | G | 0.0605  |
| rs10330     | A | -0.0427 |
| rs77038859  | A | 0.1079  |
| rs73034152  | C | -0.0848 |
| rs3111573   | T | -0.0635 |
| rs13250187  | G | -0.1086 |
| rs8101550   | G | 0.0305  |
| rs2159561   | A | -0.0331 |
| rs72985483  | A | 0.0331  |
| rs73506161  | T | -0.037  |
| rs2353205   | A | -0.0481 |
| rs140965448 | A | 0.177   |
| rs62117400  | G | 0.1528  |
| rs10415225  | C | 0.1033  |
| rs76943613  | A | 0.0535  |
| rs113223750 | G | -0.0447 |
| rs112414575 | C | 0.0302  |
| rs75011115  | T | 0.1836  |
| rs12985607  | G | -0.0276 |
| rs10406350  | C | -0.0541 |
| rs11881002  | T | -0.0939 |
| rs114268653 | T | -0.0959 |
| rs11881888  | A | 0.0323  |
| rs11083620  | G | 0.0365  |
| rs73009436  | A | -0.0339 |
| rs8109890   | C | 0.0273  |
| rs115576840 | G | -0.106  |
| rs10409868  | G | -0.0326 |
| rs11670020  | G | -0.0371 |
| rs4427936   | T | -0.0284 |
| rs79871265  | G | -0.0863 |
| rs60089155  | G | 0.1207  |
| rs58212111  | T | 0.2439  |

|             |   |         |
|-------------|---|---------|
| rs759073    | C | -0.0351 |
| rs12462747  | C | -0.0955 |
| rs8100345   | T | -0.0406 |
| rs55893269  | C | 0.0951  |
| rs73035895  | C | 0.0428  |
| rs740871    | G | 0.0269  |
| rs11673539  | A | 0.0457  |
| rs56283881  | T | 0.0403  |
| rs6509986   | C | 0.0382  |
| rs116930831 | T | -0.2111 |
| rs4575643   | G | 0.1288  |
| rs16983744  | G | 0.0599  |
| rs111752090 | A | 0.183   |
| rs117283285 | T | 0.179   |
| rs12985718  | C | 0.0404  |
| rs61743955  | A | 0.0686  |
| rs56388602  | A | 0.0647  |
| rs117527073 | T | 0.1643  |
| rs11083635  | T | -0.0287 |
| rs60504640  | T | -0.0702 |
| rs10421639  | A | 0.0456  |
| rs45545635  | C | -0.0321 |
| rs79548089  | T | -0.1395 |
| rs117998318 | T | 0.1305  |
| rs117306842 | G | -0.0823 |
| rs4804272   | C | -0.0548 |
| rs62121329  | G | 0.0336  |
| rs353977    | G | 0.0291  |
| rs10405038  | G | -0.0411 |
| rs78800097  | A | -0.099  |
| rs2656915   | C | -0.0367 |
| rs2967738   | A | -0.0521 |
| rs62115030  | G | 0.0403  |
| rs10413142  | G | -0.0694 |
| rs10423119  | C | 0.0268  |
| rs141498529 | A | 0.0893  |
| rs117263078 | A | 0.0941  |
| rs75400449  | A | -0.1725 |
| rs112272593 | C | 0.1     |
| rs1651544   | T | -0.0479 |
| rs2362140   | T | -0.0517 |
| rs11666521  | C | -0.0293 |
| rs111590167 | T | -0.0765 |
| rs35289788  | T | 0.1031  |
| rs723669    | A | -0.0392 |
| rs61320246  | T | 0.0696  |
| rs138105821 | A | -0.113  |

|             |   |         |
|-------------|---|---------|
| rs595748    | A | 0.0529  |
| rs12463136  | G | 0.104   |
| rs117348772 | A | -0.1545 |
| rs606851    | A | 0.0427  |
| rs16966806  | G | 0.148   |
| rs113286222 | T | 0.0522  |
| rs74615878  | G | -0.1054 |
| rs10417017  | T | -0.0314 |
| rs144555266 | A | 0.1821  |
| rs8099879   | A | -0.0329 |
| rs56683608  | T | 0.0466  |
| rs10422185  | C | 0.0261  |
| rs41290988  | C | 0.146   |
| rs59729005  | A | -0.061  |
| rs142986394 | C | -0.0524 |
| rs34785289  | G | 0.0346  |
| rs76569620  | T | 0.0839  |
| rs56238830  | T | -0.0553 |
| rs147950657 | A | 0.0699  |
| rs12150965  | A | -0.0407 |
| rs8102805   | C | -0.1588 |
| rs35337531  | T | -0.1173 |
| rs146536834 | T | -0.0656 |
| rs60589787  | C | 0.1915  |
| rs4802436   | G | 0.0316  |
| rs72997581  | A | 0.0742  |
| rs8100582   | T | 0.0311  |
| rs73045035  | A | -0.0303 |
| rs6511701   | A | -0.0363 |
| rs4803098   | T | -0.0708 |
| rs247769    | C | -0.1504 |
| rs112466356 | G | 0.1861  |
| rs7257505   | C | 0.0493  |
| rs72996172  | T | 0.1042  |
| rs4804806   | A | 0.0411  |
| rs12977273  | C | -0.0315 |
| rs10426550  | C | -0.0344 |
| rs204552    | C | 0.1238  |
| rs2098633   | C | -0.0517 |
| rs77463324  | T | 0.1079  |
| rs2708706   | C | -0.0485 |
| rs35648008  | C | -0.0416 |
| rs117876972 | A | 0.0632  |
| rs111266174 | T | 0.0325  |
| rs1467941   | T | 0.0361  |
| rs143285302 | G | 0.0491  |
| rs11880223  | T | -0.0372 |

|             |   |         |
|-------------|---|---------|
| rs111958515 | T | 0.2044  |
| rs28398273  | G | -0.0337 |
| rs8108116   | A | 0.0293  |
| rs75080963  | T | -0.1747 |
| rs10415156  | A | 0.0297  |
| rs4405674   | G | -0.0391 |
| rs117932891 | T | 0.1566  |
| rs2965174   | A | -0.0259 |
| rs12983310  | C | 0.1035  |
| rs145024979 | C | -0.1366 |
| rs8106832   | C | -0.0267 |
| rs1390753   | C | 0.0369  |
| rs2162891   | C | 0.0335  |
| rs147996165 | T | 0.0644  |
| rs61147844  | A | -0.041  |
| rs58016316  | T | -0.0293 |
| rs3810282   | A | -0.0988 |
| rs11541648  | T | -0.1198 |
| rs57683526  | T | 0.0454  |
| rs4803969   | T | 0.0329  |
| rs35665378  | A | 0.0603  |
| rs2073898   | T | -0.0395 |
| rs62118211  | A | 0.067   |
| rs78974166  | C | -0.0457 |
| rs4807089   | C | 0.0327  |
| rs7508123   | A | -0.0798 |
| rs117967160 | C | 0.1135  |
| rs2363863   | T | -0.031  |
| rs12460096  | A | -0.0983 |
| rs10419476  | C | 0.0828  |
| rs142930583 | C | 0.0791  |
| rs7251357   | A | 0.0317  |
| rs111962098 | A | -0.0443 |
| rs62125969  | T | -0.0563 |
| rs73000800  | T | -0.0735 |
| rs78900208  | A | 0.0585  |
| rs35523266  | G | -0.0339 |
| rs12986267  | G | -0.0504 |
| rs12151350  | T | 0.0489  |
| rs142405810 | T | -0.0637 |
| rs73036937  | T | -0.0397 |
| rs25480     | T | -0.1577 |
| rs12978785  | C | -0.0495 |
| rs75451727  | G | -0.0658 |
| rs8109621   | A | -0.0338 |
| rs74258171  | C | 0.0376  |
| rs10401277  | C | 0.147   |



|             |   |         |
|-------------|---|---------|
| rs4801686   | A | 0.0807  |
| rs111277992 | A | 0.0925  |
| rs6510715   | C | -0.0965 |
| rs12460816  | C | 0.0429  |
| rs138062921 | A | -0.1871 |
| rs117101346 | A | 0.1328  |
| rs4001941   | A | 0.0325  |
| rs10418836  | G | -0.0479 |
| rs11670518  | A | 0.0446  |
| rs8103958   | T | 0.0569  |
| rs141989097 | T | -0.0533 |
| rs7249963   | C | -0.1041 |
| rs12985441  | G | -0.0259 |
| rs117765308 | T | -0.0823 |
| rs111353814 | A | -0.1237 |
| rs6509677   | C | 0.0365  |
| rs7258156   | G | 0.0263  |
| rs7258655   | C | 0.0275  |
| rs75267999  | T | -0.0595 |
| rs59785584  | C | -0.0613 |
| rs34621703  | T | 0.1065  |
| rs17597505  | T | -0.1167 |
| rs1865043   | T | -0.0819 |
| rs75601326  | T | -0.0961 |
| rs16968313  | C | 0.0497  |
| rs78944208  | A | 0.0738  |
| rs140724071 | T | -0.1576 |
| rs62119016  | C | 0.0764  |
| rs61373376  | T | 0.0348  |
| rs1001281   | C | 0.0325  |
| rs413628    | G | -0.1557 |
| rs4804375   | A | 0.0394  |
| rs116982584 | A | 0.1267  |
| rs4806370   | A | -0.0751 |
| rs78675029  | A | 0.1097  |
| rs74804009  | A | -0.1206 |
| rs11666966  | C | 0.0331  |
| rs117588404 | A | -0.1309 |
| rs4808787   | G | -0.0496 |
| rs1476707   | A | -0.118  |
| rs78235251  | G | -0.1194 |
| rs12975938  | C | 0.0355  |
| rs2392769   | G | 0.0379  |
| rs12611259  | G | -0.0312 |
| rs11667861  | G | -0.0526 |
| rs62124650  | A | 0.0745  |
| rs11667669  | G | -0.0747 |

|             |   |         |
|-------------|---|---------|
| rs116857887 | T | 0.0866  |
| rs150621305 | C | -0.1018 |
| rs11879819  | A | 0.0753  |
| rs6511432   | C | -0.0756 |
| rs111698085 | C | 0.1097  |
| rs12462131  | T | 0.0668  |
| rs58217040  | T | 0.0501  |
| rs8106720   | T | 0.0722  |
| rs12461113  | A | -0.1752 |
| rs878685    | T | -0.027  |
| rs111508420 | T | -0.0843 |
| rs148190307 | C | 0.1598  |
| rs7258339   | C | 0.0416  |
| rs76837703  | T | -0.0558 |
| rs61743049  | G | 0.1062  |
| rs2604880   | T | 0.0275  |
| rs12980122  | C | 0.0639  |
| rs62122592  | G | -0.029  |
| rs1030688   | A | -0.0265 |
| rs2571173   | C | -0.0298 |
| rs13346555  | T | -0.0754 |
| rs8106487   | A | 0.118   |
| rs12459842  | T | -0.047  |
| rs10421179  | A | -0.0298 |
| rs10407741  | T | -0.1252 |
| rs10418767  | A | 0.0807  |
| rs117478805 | A | -0.1251 |
| rs72975361  | G | 0.0291  |
| rs10422150  | T | 0.0322  |
| rs116975974 | T | -0.1253 |
| rs2384693   | G | -0.0362 |
| rs150798174 | G | 0.1202  |
| rs862709    | A | 0.1145  |
| rs2078949   | A | 0.1919  |
| rs138320769 | A | -0.1331 |
| rs72626245  | G | -0.0827 |
| rs12982472  | T | -0.0315 |
| rs4804850   | T | -0.1606 |
| rs12984962  | C | 0.0348  |
| rs1423053   | G | -0.071  |
| rs112290142 | A | -0.0281 |
| rs4807793   | G | 0.0296  |
| rs75353720  | T | -0.0739 |
| rs329742    | G | -0.0633 |
| rs73010977  | A | 0.046   |
| rs142184850 | T | -0.1677 |
| rs73031844  | T | 0.0565  |

|             |   |         |
|-------------|---|---------|
| rs76483217  | A | 0.1529  |
| rs66715357  | T | -0.055  |
| rs12462650  | G | -0.0437 |
| rs10412317  | T | 0.0254  |
| rs12610638  | T | 0.0451  |
| rs34254049  | T | -0.0618 |
| rs80198180  | T | 0.1297  |
| rs75856262  | A | 0.106   |
| rs4760      | G | -0.0569 |
| rs2098003   | G | -0.0396 |
| rs4803974   | A | 0.0297  |
| rs2238595   | A | -0.1035 |
| rs62123342  | C | -0.0809 |
| rs62120572  | T | -0.0602 |
| rs111356009 | T | -0.1235 |
| rs61036582  | T | -0.0444 |
| rs34854395  | A | -0.0885 |
| rs73038402  | G | -0.0395 |
| rs56066695  | G | -0.0523 |
| rs34570675  | A | -0.1068 |
| rs17195267  | T | 0.027   |
| rs12974834  | C | 0.0395  |
| rs77733024  | T | 0.1494  |
| rs8110367   | C | 0.027   |
| rs75253028  | G | -0.0427 |
| rs115765377 | G | 0.0887  |
| rs1946249   | C | -0.0397 |
| rs4926264   | T | -0.0521 |
| rs144696853 | G | 0.0513  |
| rs146067264 | A | -0.0566 |
| rs10407266  | A | 0.0279  |
| rs62111200  | C | 0.0483  |
| rs266868    | A | -0.0259 |
| rs116527097 | T | 0.145   |
| rs138019547 | G | -0.1132 |
| rs144144745 | T | -0.1167 |
| rs73027125  | T | 0.2006  |
| rs11548457  | C | -0.071  |
| rs76335303  | G | 0.1034  |
| rs138950008 | T | -0.0883 |
| rs2967619   | T | 0.0285  |
| rs7249588   | A | 0.0734  |
| rs74719458  | A | -0.0646 |
| rs7249477   | G | 0.0397  |
| rs145204812 | A | 0.0937  |
| rs55947631  | T | 0.0868  |
| rs73039004  | C | 0.1344  |

|             |   |         |
|-------------|---|---------|
| rs10416432  | T | -0.0516 |
| rs108295    | A | -0.0248 |
| rs1862476   | C | 0.0279  |
| rs34006614  | T | 0.0352  |
| rs4464193   | T | 0.0251  |
| rs11673675  | C | 0.0749  |
| rs35291369  | G | -0.0481 |
| rs141817848 | G | -0.1225 |
| rs145594221 | G | -0.2156 |
| rs17775427  | T | 0.0798  |
| rs16982895  | T | 0.0313  |
| rs1465701   | T | -0.0299 |
| rs17227680  | A | -0.0623 |
| rs7247399   | G | 0.0367  |
| rs794072    | G | 0.0379  |
| rs66509630  | G | -0.1048 |
| rs35564975  | A | 0.1206  |
| rs74319726  | G | -0.0861 |
| rs35416389  | A | -0.0988 |
| rs62119932  | A | -0.0387 |
| rs75247917  | A | -0.1191 |
| rs7351085   | C | 0.0334  |
| rs8100707   | G | 0.0396  |
| rs113341342 | C | -0.1089 |
| rs77511825  | A | 0.1135  |
| rs591040    | T | 0.0473  |
| rs4239526   | C | 0.0364  |
| rs149345909 | T | -0.1887 |
| rs3101742   | T | 0.0395  |
| rs74439972  | A | -0.0513 |
| rs7258916   | T | 0.0587  |
| rs79054271  | T | 0.2468  |
| rs10417473  | G | 0.0279  |
| rs80079695  | G | -0.0429 |
| rs76469860  | T | 0.1365  |
| rs2885444   | T | -0.044  |
| rs142031485 | T | 0.1634  |
| rs73526011  | C | 0.0357  |
| rs12459312  | C | 0.056   |
| rs11669943  | G | 0.0277  |
| rs1079162   | A | 0.0361  |
| rs150898859 | C | 0.1016  |
| rs112387307 | C | 0.1335  |
| rs34914886  | T | 0.155   |
| rs2249152   | T | -0.0264 |
| rs12150929  | G | -0.037  |
| rs138849807 | G | 0.151   |

|             |   |         |
|-------------|---|---------|
| rs12972000  | C | 0.0249  |
| rs73036066  | C | -0.0703 |
| rs4803447   | G | -0.0404 |
| rs7248189   | T | -0.0473 |
| rs13343526  | C | 0.045   |
| rs11672342  | A | 0.0387  |
| rs7247523   | C | -0.0397 |
| rs117167543 | T | 0.0465  |
| rs75943012  | T | 0.0759  |
| rs7256811   | A | -0.0239 |
| rs112330399 | A | -0.0299 |
| rs260487    | G | -0.0283 |
| rs57126032  | A | -0.0841 |
| rs62106177  | T | -0.172  |
| rs143569504 | A | 0.0924  |
| rs10426326  | T | -0.0378 |
| rs10404378  | C | -0.0284 |
| rs80199352  | T | 0.1052  |
| rs35207600  | T | -0.0778 |
| rs112651861 | G | 0.1186  |
| rs8107540   | C | 0.0503  |
| rs11670784  | C | 0.0578  |
| rs4807511   | A | -0.027  |
| rs11666904  | G | 0.0722  |
| rs58166924  | T | 0.0526  |
| rs10423293  | A | -0.0259 |
| rs11083789  | A | -0.0455 |
| rs76240122  | C | -0.039  |
| rs9653123   | A | 0.0456  |
| rs287105    | T | 0.0544  |
| rs10411244  | C | -0.0692 |
| rs78219867  | T | 0.094   |
| rs62116935  | C | -0.0379 |
| rs117594958 | G | 0.1132  |
| rs141590554 | C | -0.0965 |
| rs62131297  | A | -0.0433 |
| rs7257243   | C | 0.0765  |
| rs730428    | T | -0.0257 |
| rs142161535 | A | 0.113   |
| rs11086069  | T | 0.0923  |
| rs75255203  | T | 0.0706  |
| rs76858863  | A | 0.054   |
| rs140890549 | A | -0.0706 |
| rs10421934  | G | -0.0949 |
| rs12978178  | T | 0.0631  |
| rs6509301   | G | -0.0419 |
| rs8102766   | A | 0.0618  |

|             |   |         |
|-------------|---|---------|
| rs1982772   | C | 0.0644  |
| rs60674091  | A | 0.0637  |
| rs4802850   | G | -0.0285 |
| rs10420130  | C | 0.0749  |
| rs117796363 | C | 0.1104  |
| rs150895832 | G | 0.1769  |
| rs117608697 | C | 0.1006  |
| rs3810317   | T | 0.0318  |
| rs117503839 | C | 0.1576  |
| rs113368510 | C | 0.1339  |
| rs11665992  | A | 0.0316  |
| rs11084482  | A | 0.04    |
| rs8106869   | A | -0.0332 |
| rs56397626  | G | 0.0436  |
| rs77528482  | C | -0.1073 |
| rs10405768  | A | 0.0337  |
| rs78783295  | T | 0.0635  |
| rs73935340  | A | -0.1215 |
| rs11667211  | T | -0.0421 |
| rs8192733   | C | 0.036   |
| rs73511187  | C | -0.036  |
| rs35913516  | T | -0.0292 |
| rs117986390 | T | 0.1497  |
| rs8108601   | T | 0.029   |
| rs59168469  | T | -0.1168 |
| rs62135271  | A | 0.0441  |
| rs77506072  | A | 0.0652  |
| rs150968520 | A | 0.1495  |
| rs73009926  | G | -0.0404 |
| rs35991147  | A | -0.0528 |
| rs35061212  | A | -0.0272 |
| rs2434421   | T | -0.0299 |
| rs660871    | A | -0.0394 |
| rs8106773   | C | 0.029   |
| rs78200960  | C | -0.0526 |
| rs55637640  | C | -0.1547 |
| rs111340732 | A | -0.0827 |
| rs73031608  | A | -0.0276 |
| rs11084235  | C | -0.0896 |
| rs3760923   | C | -0.0369 |
| rs112961006 | A | -0.1362 |
| rs10409594  | T | -0.1556 |
| rs12972119  | A | -0.0429 |
| rs112913349 | T | 0.0576  |
| rs10419891  | A | -0.024  |
| rs151022556 | T | 0.1172  |
| rs2396293   | C | -0.0364 |

|             |   |         |
|-------------|---|---------|
| rs144054864 | T | -0.1036 |
| rs11084422  | T | 0.0299  |
| rs9304791   | G | -0.0592 |
| rs34282976  | G | 0.0873  |
| rs2619200   | T | -0.0279 |
| rs138534980 | C | -0.1074 |
| rs1615970   | T | -0.0283 |
| rs80067474  | C | 0.14    |
| rs6510603   | A | 0.0314  |
| rs17704510  | C | -0.1332 |
| rs73070130  | A | 0.0667  |
| rs139015660 | A | -0.1457 |
| rs10404168  | A | 0.0308  |
| rs706763    | T | -0.0617 |
| rs73058127  | A | 0.0799  |
| rs7249635   | C | -0.0638 |
| rs11668845  | T | 0.1093  |
| rs112410987 | A | -0.1004 |
| rs7245964   | C | -0.0842 |
| rs7260484   | A | 0.0413  |
| rs34156998  | G | 0.0701  |
| rs3852896   | T | 0.0323  |
| rs60344502  | C | -0.0732 |
| rs11672731  | G | 0.0384  |
| rs11880905  | G | -0.0345 |
| rs389029    | G | -0.1627 |
| rs1203009   | G | -0.1582 |
| rs2616946   | T | -0.0289 |
| rs117773107 | C | -0.1607 |
| rs4252568   | T | -0.0408 |
| rs2616940   | A | -0.03   |
| rs60528995  | C | 0.1821  |
| rs112735447 | A | 0.0825  |
| rs11666574  | A | 0.0381  |
| rs60941879  | T | 0.0436  |
| rs148037950 | T | 0.1565  |
| rs2002713   | A | 0.0523  |
| rs111888282 | T | -0.0936 |
| rs11665864  | G | -0.0349 |
| rs504211    | T | 0.0549  |
| rs62143164  | T | -0.0464 |
| rs8100959   | T | -0.0273 |
| rs73003512  | G | 0.0894  |
| rs7256354   | T | 0.0407  |
| rs77746756  | A | 0.1643  |
| rs306429    | C | 0.0433  |
| rs10419122  | A | -0.0478 |

|             |   |         |
|-------------|---|---------|
| rs150896709 | T | 0.1322  |
| rs60076988  | G | 0.0249  |
| rs648180    | G | 0.0239  |
| rs75500878  | G | 0.1042  |
| rs35307376  | G | 0.0771  |
| rs12980259  | G | -0.0308 |
| rs7246914   | T | 0.0299  |
| rs4803043   | G | -0.0744 |
| rs17207579  | A | -0.0259 |
| rs61216411  | T | -0.0837 |
| rs12461390  | T | -0.0833 |
| rs10416841  | A | 0.0919  |
| rs3746006   | T | 0.0264  |
| rs61678563  | T | 0.0293  |
| rs79535781  | A | 0.061   |
| rs4801988   | C | 0.0324  |
| rs3739193   | C | -0.1428 |
| rs10419572  | A | -0.0448 |
| rs1235784   | A | 0.0545  |
| rs117938843 | A | 0.1025  |
| rs66477257  | C | 0.0298  |
| rs7257986   | T | -0.0251 |
| rs73050830  | T | 0.1418  |
| rs17271827  | A | -0.0272 |
| rs111633710 | A | -0.047  |
| rs11881460  | T | -0.0286 |
| rs34195752  | T | 0.0294  |
| rs57811164  | T | 0.1619  |
| rs1477269   | T | -0.0346 |
| rs113861425 | T | 0.1541  |
| rs12151295  | A | -0.119  |
| rs62111308  | G | -0.1552 |
| rs147414783 | A | 0.1157  |
| rs76220089  | T | 0.1362  |
| rs34170158  | A | 0.0379  |
| rs112291080 | G | 0.1316  |
| rs745845    | C | 0.024   |
| rs77485145  | T | 0.0522  |
| rs2040737   | A | 0.0824  |
| rs35765800  | A | 0.0336  |
| rs4808797   | A | -0.0456 |
| rs76807188  | A | 0.0742  |
| rs4803336   | T | -0.0319 |
| rs347033    | C | -0.032  |
| rs28492070  | G | -0.0922 |
| rs28547526  | A | -0.193  |
| rs145182523 | A | 0.1914  |



|             |   |         |
|-------------|---|---------|
| rs12461919  | G | 0.0404  |
| rs11666259  | G | 0.037   |
| rs10518274  | G | -0.0305 |
| rs1052131   | T | -0.0356 |
| rs3760961   | G | 0.0294  |
| rs79143240  | C | -0.116  |
| rs7257662   | C | -0.034  |
| rs113781412 | A | 0.1316  |
| rs10520416  | A | -0.066  |
| rs145058438 | A | 0.0519  |
| rs7252293   | T | -0.0322 |
| rs34692122  | T | 0.0983  |
| rs8105907   | C | -0.0348 |
| rs12463345  | A | -0.0502 |
| rs41360944  | A | -0.1052 |
| rs59618592  | C | 0.0278  |
| rs17755379  | G | 0.0373  |
| rs691539    | G | 0.0957  |
| rs8107081   | C | 0.0502  |
| rs55773378  | T | -0.0463 |
| rs12459345  | A | -0.0309 |
| rs78046512  | G | -0.1152 |
| rs17227533  | T | 0.0359  |
| rs4807263   | G | -0.0348 |
| rs140425781 | T | 0.1324  |
| rs4499352   | G | -0.0245 |
| rs71365418  | A | 0.0683  |
| rs2694065   | G | -0.0252 |
| rs117124528 | T | 0.1106  |
| rs56369375  | A | -0.027  |
| rs7257191   | G | -0.0444 |
| rs7255334   | A | 0.0233  |
| rs892120    | C | -0.0328 |
| rs345596    | T | 0.0362  |
| rs75600179  | G | 0.0764  |
| rs4808073   | A | 0.0895  |
| rs1894309   | A | 0.0418  |
| rs73588017  | C | 0.0515  |
| rs117255762 | C | -0.0603 |
| rs58124266  | G | -0.0423 |
| rs79332591  | G | 0.1044  |
| rs112183520 | T | -0.0718 |
| rs517503    | A | 0.0274  |
| rs10419982  | A | -0.0234 |
| rs8107216   | A | -0.0356 |
| rs41354744  | G | 0.0635  |
| rs117945000 | T | 0.105   |

|             |   |         |
|-------------|---|---------|
| rs148995365 | T | 0.0625  |
| rs12973012  | T | -0.026  |
| rs12978176  | C | 0.0447  |
| rs11670988  | T | 0.0392  |
| rs115851052 | G | -0.0303 |
| rs6510760   | A | -0.1196 |
| rs4805531   | G | -0.0257 |
| rs75116578  | T | -0.0414 |
| rs35429660  | G | 0.0284  |
| rs56392124  | G | -0.1537 |
| rs1860324   | C | 0.0383  |
| rs75672167  | A | -0.113  |
| rs3826772   | C | 0.0347  |
| rs56154436  | G | -0.053  |
| rs112833880 | T | 0.1614  |
| rs7250851   | T | 0.0237  |
| rs7258081   | T | -0.0791 |
| rs17760904  | T | 0.1046  |
| rs4803206   | C | -0.0271 |
| rs17271952  | A | 0.0369  |
| rs55647066  | C | 0.0563  |
| rs12459875  | T | -0.0318 |
| rs62112227  | A | 0.0559  |
| rs117302736 | G | -0.1371 |
| rs16982097  | C | 0.0443  |
| rs139973550 | T | 0.173   |
| rs73049687  | A | 0.11    |
| rs2290642   | C | 0.0391  |
| rs79693947  | C | -0.0829 |
| rs4803688   | T | 0.1083  |
| rs117844928 | T | -0.0915 |
| rs116868184 | A | -0.164  |
| rs11669242  | G | 0.0302  |
| rs55858266  | T | -0.1325 |
| rs740873    | A | -0.0514 |
| rs3746161   | T | -0.0696 |
| rs3745500   | A | 0.0341  |
| rs75314806  | T | 0.1036  |
| rs11671413  | A | -0.0276 |
| rs138572354 | A | 0.0598  |
| rs117968357 | A | 0.069   |
| rs2241400   | T | -0.0248 |
| rs41304768  | A | -0.0903 |
| rs10419493  | T | 0.0659  |
| rs878493    | A | 0.0444  |
| rs12974200  | G | -0.0418 |
| rs116945343 | A | -0.1568 |

|             |   |         |
|-------------|---|---------|
| rs77611858  | G | -0.099  |
| rs117018559 | A | 0.2174  |
| rs2099349   | A | 0.0286  |
| rs7247458   | A | 0.0432  |
| rs78484848  | T | -0.0463 |
| rs150843808 | C | -0.1193 |
| rs35525630  | C | -0.0313 |
| rs60651468  | G | 0.0804  |
| rs138926167 | A | -0.1841 |
| rs144485154 | G | -0.1496 |
| rs117236506 | T | -0.1364 |
| rs61540452  | A | -0.1459 |
| rs144377865 | A | 0.0732  |
| rs12463281  | T | -0.0244 |
| rs10422190  | C | -0.0524 |
| rs1990301   | T | 0.0286  |
| rs34600749  | T | 0.202   |
| rs116921103 | T | 0.1263  |
| rs8107828   | C | -0.0246 |
| rs146890196 | A | -0.1197 |
| rs892139    | T | -0.0304 |
| rs12459247  | C | -0.0572 |
| rs78796001  | C | -0.1059 |
| rs4570986   | G | 0.0319  |
| rs2072350   | T | 0.0866  |
| rs62116172  | C | -0.0314 |
| rs117753351 | T | 0.1309  |
| rs34982882  | C | -0.0732 |
| rs56358268  | C | -0.053  |
| rs34190750  | T | -0.0333 |
| rs8109555   | G | 0.0468  |
| rs34263076  | C | 0.0298  |
| rs11666803  | T | 0.0575  |
| rs35507112  | G | -0.0641 |
| rs7247578   | T | 0.0396  |
| rs12975019  | G | 0.0374  |
| rs140982243 | C | 0.064   |
| rs8102672   | T | 0.053   |
| rs148011973 | A | 0.1288  |
| rs3786656   | T | -0.0257 |
| rs73017293  | A | 0.0656  |
| rs117111001 | A | 0.1498  |
| rs35385804  | T | 0.0531  |
| rs2864906   | C | -0.0343 |
| rs10403940  | A | -0.0647 |
| rs73515075  | A | 0.0774  |
| rs2286802   | A | -0.0234 |

|             |   |         |
|-------------|---|---------|
| rs74174203  | G | -0.0268 |
| rs3786757   | G | -0.0227 |
| rs17606167  | A | 0.0412  |
| rs8101816   | G | -0.0294 |
| rs1544929   | A | -0.0247 |
| rs2214183   | C | 0.0253  |
| rs147692863 | T | -0.1357 |
| rs61500773  | C | 0.1183  |
| rs61396597  | C | -0.0357 |
| rs11670586  | T | -0.0402 |
| rs11667420  | A | -0.0274 |
| rs4807822   | C | 0.0235  |
| rs3852908   | C | -0.0378 |
| rs61391973  | T | 0.0918  |
| rs139576493 | T | 0.1223  |
| rs58073810  | T | -0.0356 |
| rs78265344  | G | 0.0792  |
| rs62111467  | A | -0.0395 |
| rs12981259  | A | 0.024   |
| rs4926286   | A | -0.0236 |
| rs145188277 | A | -0.0788 |
| rs77858500  | A | 0.0555  |
| rs16993239  | T | 0.0289  |
| rs62132542  | A | -0.1644 |
| rs2370134   | T | 0.0339  |
| rs7250590   | C | 0.0273  |
| rs198974    | G | 0.0388  |
| rs73020411  | G | 0.0247  |
| rs114778771 | T | 0.0894  |
| rs62114257  | C | -0.0429 |
| rs892210    | C | 0.0282  |
| rs67564305  | C | 0.0405  |
| rs2192244   | C | -0.0631 |
| rs7258390   | C | -0.0533 |
| rs146898772 | T | -0.1361 |
| rs62121480  | C | -0.0864 |
| rs117994198 | T | 0.0936  |
| rs11668734  | A | 0.1021  |
| rs79373632  | A | -0.1726 |
| rs11668570  | A | -0.1548 |
| rs142212375 | T | -0.0637 |
| rs76151643  | T | -0.1654 |
| rs2903648   | C | 0.0827  |
| rs4807523   | A | 0.0485  |
| rs4488592   | G | 0.0299  |
| rs117651942 | A | -0.1297 |
| rs73047370  | T | 0.1923  |

|             |   |         |
|-------------|---|---------|
| rs10414694  | T | 0.0373  |
| rs11669354  | A | 0.091   |
| rs302824    | T | -0.035  |
| rs35407007  | A | -0.0798 |
| rs142304095 | C | 0.1283  |
| rs10408118  | T | -0.0251 |
| rs3745511   | A | 0.056   |
| rs77736886  | T | 0.0925  |
| rs7248217   | G | 0.1271  |
| rs118086520 | C | 0.1202  |
| rs67023356  | G | 0.0334  |
| rs141224304 | C | -0.1195 |
| rs113697518 | C | 0.1143  |
| rs112547681 | T | 0.0526  |
| rs12082     | T | 0.0794  |
| rs76779682  | T | -0.1817 |
| rs8108461   | T | -0.0235 |
| rs62109947  | T | -0.0401 |
| rs117212300 | G | -0.0743 |
| rs12972795  | C | -0.0323 |
| rs11878620  | A | 0.043   |
| rs929777    | T | 0.0272  |
| rs68073118  | G | 0.041   |
| rs34731234  | C | -0.0958 |
| rs143255117 | A | 0.1491  |
| rs7248222   | G | -0.0237 |
| rs150990495 | A | 0.1112  |
| rs2293424   | A | 0.023   |
| rs74468606  | T | 0.0468  |
| rs1030687   | A | -0.0241 |
| rs12979467  | T | 0.0264  |
| rs7254852   | A | -0.042  |
| rs76384150  | A | -0.0448 |
| rs6509803   | C | -0.0399 |
| rs508740    | G | -0.0234 |
| rs74479793  | T | 0.0604  |
| rs11878862  | G | -0.0404 |
| rs80076900  | T | 0.0713  |
| rs62102723  | C | -0.1174 |
| rs12710097  | G | -0.0326 |
| rs62126009  | C | 0.0391  |
| rs138628958 | C | -0.1093 |
| rs56411022  | A | -0.0448 |
| rs7252752   | C | -0.046  |
| rs2562496   | C | 0.0285  |
| rs3826784   | A | 0.0232  |
| rs117088717 | A | 0.1058  |

|             |   |         |
|-------------|---|---------|
| rs142795304 | A | -0.0876 |
| rs17242677  | T | 0.1421  |
| rs73055456  | C | -0.0607 |
| rs10414064  | T | 0.0595  |
| rs117745617 | T | 0.089   |
| rs17523547  | G | -0.1076 |
| rs76265504  | G | -0.0887 |
| rs1051784   | A | -0.0329 |
| rs17752196  | T | 0.0275  |
| rs138593323 | T | 0.1065  |
| rs12982294  | T | 0.0398  |
| rs10413566  | A | 0.0294  |
| rs6510908   | A | -0.0479 |
| rs111787128 | A | 0.0859  |
| rs17273491  | T | -0.054  |
| rs62113937  | G | -0.0397 |
| rs73537994  | T | 0.0301  |
| rs4805440   | T | 0.0259  |
| rs79117065  | T | -0.0635 |
| rs60617890  | G | 0.0263  |
| rs7253473   | A | -0.0222 |
| rs117309435 | C | 0.1482  |
| rs8105205   | A | -0.0391 |
| rs140154009 | T | -0.0677 |
| rs12974873  | C | -0.0236 |
| rs72981922  | C | 0.1142  |
| rs7251878   | C | 0.023   |
| rs10413821  | G | 0.0304  |
| rs145582715 | A | -0.1515 |
| rs750456    | C | -0.0253 |
| rs34497180  | C | 0.0901  |
| rs10153467  | C | -0.0232 |
| rs4804931   | T | 0.1233  |
| rs16973374  | G | -0.0517 |
| rs845380    | A | 0.0292  |
| rs73933714  | G | 0.1427  |
| rs12980750  | C | 0.0303  |
| rs10416497  | G | -0.0405 |
| rs57784658  | A | 0.0401  |
| rs7250259   | G | -0.0424 |
| rs72486385  | T | 0.0612  |
| rs75042583  | A | 0.1     |
| rs10408949  | T | 0.0254  |
| rs71353338  | G | 0.0446  |
| rs56230484  | G | -0.0344 |
| rs117503618 | A | -0.1033 |
| rs56232137  | G | -0.0709 |

|             |   |         |
|-------------|---|---------|
| rs4640295   | A | 0.1476  |
| rs74398580  | T | -0.1428 |
| rs566476    | A | -0.0237 |
| rs117477770 | T | -0.0548 |
| rs11668906  | A | 0.0411  |
| rs3745568   | G | -0.0378 |
| rs117818454 | T | 0.0856  |
| rs111460067 | T | 0.0737  |
| rs2377077   | T | -0.0271 |
| rs7256299   | G | 0.0337  |
| rs366337    | A | 0.0736  |
| rs11666389  | G | -0.0478 |
| rs4807590   | A | 0.0249  |
| rs8109934   | A | 0.028   |
| rs142146862 | T | 0.1254  |
| rs55916171  | T | -0.0396 |
| rs1487573   | A | 0.0417  |
| rs13343659  | C | 0.0747  |
| rs77073981  | G | -0.1426 |
| rs305947    | T | -0.0339 |
| rs111578464 | G | -0.179  |
| rs34554523  | G | 0.0404  |
| rs11666413  | A | -0.0363 |
| rs881877    | C | -0.0256 |
| rs73004312  | C | -0.1382 |
| rs3786661   | T | -0.0271 |
| rs4804918   | T | 0.0237  |
| rs891038    | A | -0.0356 |
| rs58391974  | A | -0.0475 |
| rs4299259   | C | 0.0474  |
| rs75954764  | G | 0.0862  |
| rs78928146  | A | 0.0965  |
| rs11085244  | A | -0.0244 |
| rs17759130  | T | -0.073  |
| rs147462238 | T | 0.158   |
| rs62126448  | T | -0.0572 |
| rs150370340 | T | 0.0557  |
| rs55769436  | A | -0.0358 |
| rs34336739  | G | -0.1221 |
| rs11671617  | T | -0.0498 |
| rs7253685   | G | 0.0247  |
| rs73009507  | G | -0.0917 |
| rs139433335 | G | -0.1378 |
| rs11671244  | A | -0.0317 |
| rs12608741  | C | 0.0231  |
| rs163365    | A | -0.0291 |
| rs62111491  | C | -0.0989 |

|             |   |         |
|-------------|---|---------|
| rs117575534 | G | 0.0589  |
| rs149685336 | C | -0.0705 |
| rs11666516  | G | 0.0646  |
| rs3900716   | A | 0.034   |
| rs75055583  | C | -0.0429 |
| rs4141337   | A | -0.0486 |
| rs112696237 | T | 0.1239  |
| rs112762476 | A | 0.0407  |
| rs113473675 | T | -0.0799 |
| rs12976646  | A | 0.022   |
| rs142968410 | T | 0.1685  |
| rs116995991 | A | 0.0977  |
| rs183708    | A | -0.0259 |
| rs62120423  | A | 0.0657  |
| rs56855322  | C | 0.0419  |
| rs45579944  | T | 0.0658  |
| rs73924268  | C | -0.0707 |
| rs117561596 | A | -0.1019 |
| rs45490098  | T | -0.0662 |
| rs77068563  | C | 0.0711  |
| rs77354136  | T | -0.1363 |
| rs143815583 | C | 0.0725  |
| rs117239072 | T | -0.0871 |
| rs13343619  | C | -0.0632 |
| rs80301512  | C | -0.0954 |
| rs11673358  | C | 0.0313  |
| rs118032196 | A | -0.0957 |
| rs111314347 | T | -0.1586 |
| rs73025658  | G | 0.0567  |
| rs6508935   | G | -0.0702 |
| rs73042387  | A | 0.039   |
| rs2869480   | A | 0.023   |
| rs7253255   | C | 0.0249  |
| rs60922906  | A | -0.0545 |
| rs12985955  | C | -0.028  |
| rs35407808  | T | 0.0628  |
| rs2098626   | C | -0.0431 |
| rs75096376  | T | 0.1096  |
| rs1325155   | C | 0.0238  |
| rs113409189 | T | -0.0512 |
| rs17727145  | T | 0.0474  |
| rs11673557  | G | -0.0229 |
| rs1009881   | C | -0.0455 |
| rs117026598 | A | 0.1653  |
| rs1017382   | T | -0.0234 |
| rs2304218   | T | 0.0618  |
| rs35917214  | G | 0.0486  |



|             |   |         |
|-------------|---|---------|
| rs148854414 | A | 0.0971  |
| rs72997768  | A | -0.0586 |
| rs143245613 | G | 0.1062  |
| rs117507267 | T | 0.0855  |
| rs2163857   | C | -0.0235 |
| rs162823    | G | 0.0279  |
| rs10407866  | T | -0.0419 |
| rs10401672  | T | 0.0266  |
| rs13345951  | G | -0.0309 |
| rs3951363   | A | -0.0307 |
| rs11083824  | C | -0.0261 |
| rs34881512  | T | -0.0596 |
| rs77348731  | C | -0.13   |
| rs251896    | A | 0.0282  |
| rs28480458  | A | -0.0675 |
| rs118027723 | T | -0.0704 |
| rs73007799  | C | 0.0532  |
| rs79153864  | A | 0.1679  |
| rs678975    | C | -0.033  |
| rs74757134  | A | 0.0576  |
| rs10422264  | T | 0.0614  |
| rs113692602 | C | -0.0467 |
| rs7248052   | C | -0.0279 |
| rs138471905 | A | -0.1076 |
| rs9304887   | C | 0.0305  |
| rs138972974 | A | 0.1308  |
| rs57432701  | A | 0.0288  |
| rs72979023  | C | 0.0862  |
| rs62122499  | G | -0.0311 |
| rs71334734  | C | 0.0942  |
| rs452126    | G | -0.0526 |
| rs139379137 | C | -0.0977 |
| rs9676610   | C | 0.0546  |
| rs76572021  | G | -0.119  |
| rs34654929  | G | -0.0378 |
| rs79007747  | A | 0.128   |
| rs11550017  | T | -0.042  |
| rs78567612  | A | -0.0607 |
| rs145134289 | T | -0.0847 |
| rs17206303  | A | -0.0226 |
| rs7258185   | A | -0.0252 |
| rs2613792   | T | -0.0233 |
| rs4808547   | T | -0.0268 |
| rs73030297  | T | -0.0393 |
| rs117032596 | G | 0.1227  |
| rs7254465   | T | -0.0892 |
| rs75190430  | G | -0.1905 |

|             |   |         |
|-------------|---|---------|
| rs2354475   | A | 0.0311  |
| rs62112651  | A | 0.0257  |
| rs116951801 | A | -0.1387 |
| rs8104376   | G | 0.0724  |
| rs34914384  | A | -0.0285 |
| rs6511904   | C | -0.0353 |
| rs4801232   | T | 0.0372  |
| rs72981056  | T | 0.095   |
| rs60490563  | A | -0.0549 |
| rs11670257  | G | 0.0295  |
| rs391381    | T | -0.0478 |
| rs10405962  | T | 0.0249  |
| rs138013773 | C | 0.1634  |
| rs118120887 | T | 0.1415  |
| rs10221516  | G | -0.0291 |
| rs147130540 | A | -0.0801 |
| rs10402343  | T | 0.137   |
| rs77469549  | T | 0.0827  |
| rs4147937   | A | -0.0519 |
| rs10417870  | T | 0.0442  |
| rs116280534 | G | -0.1111 |
| rs61759827  | G | -0.0632 |
| rs62137077  | G | -0.0992 |
| rs150276961 | T | -0.1815 |
| rs67847967  | A | -0.0669 |
| rs10421964  | C | -0.0346 |
| rs78331666  | T | 0.0744  |
| rs76933487  | G | -0.1569 |
| rs111445447 | T | -0.1604 |
| rs150339651 | T | 0.0996  |
| rs117989304 | G | -0.0749 |
| rs17710677  | C | -0.049  |
| rs148356565 | C | -0.1414 |
| rs4802559   | T | 0.0489  |
| rs75090531  | A | 0.1512  |
| rs17542947  | T | 0.075   |
| rs10405048  | C | -0.0404 |
| rs117748533 | T | 0.0895  |
| rs3786721   | T | 0.0223  |
| rs117726429 | A | 0.0942  |
| rs17708130  | G | -0.0254 |
| rs364691    | T | 0.0232  |
| rs1688267   | C | -0.0256 |
| rs12610534  | C | 0.0553  |
| rs12975007  | T | 0.035   |
| rs12463038  | T | -0.0617 |
| rs8104954   | T | -0.0464 |

|             |   |         |
|-------------|---|---------|
| rs76218096  | A | 0.0558  |
| rs28602630  | A | -0.0504 |
| rs58235777  | G | -0.0295 |
| rs348337    | T | 0.0305  |
| rs45533236  | A | -0.0654 |
| rs2283600   | A | -0.033  |
| rs149761739 | C | 0.066   |
| rs117139170 | G | -0.0606 |
| rs28449186  | T | 0.0258  |
| rs8110482   | G | 0.0692  |
| rs73064093  | G | -0.1201 |
| rs56239923  | A | 0.0914  |
| rs76424926  | G | -0.0379 |
| rs1638708   | G | 0.0252  |
| rs28371490  | G | 0.0311  |
| rs17326700  | A | -0.0404 |
| rs138924833 | T | -0.1302 |
| rs2708733   | A | -0.0284 |
| rs7259625   | C | 0.043   |
| rs4806074   | C | -0.0302 |
| rs55936501  | T | -0.0732 |
| rs149410183 | G | -0.132  |
| rs12104181  | G | -0.1237 |
| rs723352    | G | -0.0639 |
| rs4804960   | C | -0.0249 |
| rs74720555  | T | -0.0737 |
| rs111980498 | A | 0.1871  |
| rs56154727  | G | 0.1745  |
| rs379309    | C | 0.0229  |
| rs66903881  | C | -0.0435 |
| rs6509397   | G | -0.0214 |
| rs62124111  | C | 0.0517  |
| rs3745140   | T | 0.024   |
| rs144906110 | C | -0.1443 |
| rs148761247 | A | 0.1868  |
| rs28676290  | G | 0.0295  |
| rs4330034   | C | 0.041   |
| rs78175222  | T | 0.1145  |
| rs2303744   | C | -0.0273 |
| rs78239049  | A | -0.0668 |
| rs10853971  | A | 0.0287  |
| rs7246637   | A | -0.0224 |
| rs12986362  | T | 0.0366  |
| rs8113086   | T | 0.0436  |
| rs41311971  | T | -0.0794 |
| rs67602088  | A | 0.1039  |
| rs111380962 | A | 0.064   |

|             |   |         |
|-------------|---|---------|
| rs8110792   | C | 0.0332  |
| rs62101172  | T | -0.1223 |
| rs6512034   | T | -0.0252 |
| rs9789251   | G | -0.0795 |
| rs45575734  | G | 0.1377  |
| rs147121676 | C | -0.2351 |
| rs35365926  | T | -0.0824 |
| rs12462203  | C | -0.0234 |
| rs7256495   | T | 0.0215  |
| rs10411347  | C | 0.0224  |
| rs2250982   | A | -0.0237 |
| rs2656924   | C | 0.0397  |
| rs117292022 | A | 0.0723  |
| rs60890488  | G | 0.0294  |
| rs143249624 | T | -0.1436 |
| rs143985646 | C | -0.1566 |
| rs28664859  | G | -0.0488 |
| rs10425374  | T | 0.0377  |
| rs111309869 | C | 0.078   |
| rs117994528 | G | -0.1617 |
| rs358547    | C | 0.0302  |
| rs140044996 | T | 0.1181  |
| rs12610145  | C | -0.0415 |
| rs1583310   | T | 0.0385  |
| rs149962335 | A | 0.1185  |
| rs117699791 | G | 0.0904  |
| rs12460001  | G | 0.1079  |
| rs73013159  | T | -0.0531 |
| rs60447818  | G | 0.0373  |
| rs16960768  | C | 0.0634  |
| rs10420317  | C | 0.0247  |
| rs7258934   | C | 0.0323  |
| rs77298627  | C | 0.1287  |
| rs57686237  | C | -0.0463 |
| rs7248750   | T | 0.1201  |
| rs11670254  | T | -0.0219 |
| rs73017087  | T | 0.0598  |
| rs2215707   | A | -0.0936 |
| rs117379988 | T | -0.0772 |
| rs4803410   | C | -0.0333 |
| rs1545037   | G | -0.0241 |
| rs3826886   | A | -0.0369 |
| rs12150952  | G | -0.0325 |
| rs73030299  | T | 0.0763  |
| rs8109396   | C | 0.0375  |
| rs113803913 | T | 0.0335  |
| rs117482759 | G | 0.1932  |

|             |   |         |
|-------------|---|---------|
| rs8100838   | G | 0.0246  |
| rs77949196  | T | 0.1371  |
| rs111797993 | A | 0.104   |
| rs112340956 | T | 0.1194  |
| rs80320621  | C | 0.0405  |
| rs4926207   | C | 0.0239  |
| rs4926128   | G | -0.1586 |
| rs118179019 | T | -0.1148 |
| rs67218028  | A | 0.0382  |
| rs79453214  | A | 0.0652  |
| rs1558133   | C | 0.0376  |
| rs61342719  | T | -0.0384 |
| rs17715087  | T | 0.0222  |
| rs12461196  | T | 0.0597  |
| rs116854528 | A | 0.1827  |
| rs17304639  | T | -0.0276 |
| rs74413584  | C | -0.0472 |
| rs34466575  | T | 0.0393  |
| rs7250749   | A | 0.0443  |
| rs77099980  | A | 0.1188  |
| rs145545627 | A | 0.1411  |
| rs3021329   | T | -0.1042 |
| rs1710378   | G | -0.0396 |
| rs843780    | T | -0.0215 |
| rs4143973   | C | -0.0216 |
| rs11085928  | C | -0.0288 |
| rs34666550  | T | 0.1217  |
| rs143992390 | G | -0.1877 |
| rs115378814 | C | 0.0508  |
| rs346054    | G | -0.0265 |
| rs923240    | G | -0.0292 |
| rs351101    | C | -0.0422 |
| rs74435511  | A | 0.1171  |
| rs73016824  | C | -0.0389 |
| rs73070936  | G | 0.0322  |
| rs73067310  | T | -0.0333 |
| rs12946     | T | 0.0323  |
| rs147728875 | T | 0.0965  |
| rs117335934 | T | -0.1248 |
| rs10409317  | T | 0.0861  |
| rs10410552  | A | -0.0353 |
| rs35725629  | A | 0.1494  |
| rs117371070 | T | 0.1792  |
| rs12973239  | A | 0.0216  |
| rs10419648  | C | 0.0366  |
| rs4805086   | G | 0.1194  |
| rs144035471 | A | -0.0606 |

|             |   |         |
|-------------|---|---------|
| rs56192892  | C | 0.0602  |
| rs8182519   | A | 0.0901  |
| rs12972774  | A | 0.0268  |
| rs74770749  | T | 0.043   |
| rs143114206 | T | -0.0756 |
| rs4366834   | T | -0.0388 |
| rs8104122   | T | 0.0268  |
| rs13382137  | A | 0.0411  |
| rs12609752  | T | 0.123   |
| rs7254765   | A | -0.0395 |
| rs1560732   | T | 0.022   |
| rs113702251 | T | 0.0564  |
| rs11880724  | T | -0.0224 |
| rs76442916  | T | 0.0575  |
| rs117110627 | C | -0.0873 |
| rs11672123  | A | 0.0707  |
| rs75539352  | A | -0.0524 |
| rs10422045  | G | 0.0368  |
| rs73028150  | A | 0.1126  |
| rs7260093   | C | -0.0421 |
| rs150822335 | A | 0.1151  |
| rs57625625  | C | 0.0357  |
| rs7250679   | T | -0.0258 |
| rs6511008   | C | 0.0475  |
| rs73588015  | A | 0.1241  |
| rs10426776  | C | -0.0281 |
| rs4802896   | T | 0.0239  |
| rs34549443  | T | 0.038   |
| rs142119131 | T | 0.1148  |
| rs1476739   | A | -0.0225 |
| rs148541543 | A | 0.1068  |
| rs67338290  | T | 0.0639  |
| rs1020723   | G | 0.0347  |
| rs11878397  | T | -0.0265 |
| rs283523    | A | 0.0586  |
| rs78976793  | A | -0.039  |
| rs77063121  | A | 0.1076  |
| rs139012629 | C | 0.1132  |
| rs142013643 | C | 0.1278  |
| rs34343917  | G | -0.0732 |
| rs56908507  | T | -0.0326 |
| rs9973206   | C | -0.0291 |
| rs77336124  | A | 0.1469  |
| rs16986427  | A | 0.0696  |
| rs57844599  | G | 0.0266  |
| rs740670    | T | -0.0328 |
| rs73044824  | A | -0.0574 |

|             |   |         |
|-------------|---|---------|
| rs4807308   | A | -0.0327 |
| rs11670417  | T | -0.0685 |
| rs3096616   | T | 0.0279  |
| rs543992    | A | 0.0246  |
| rs11540761  | T | -0.0526 |
| rs12973733  | A | 0.0217  |
| rs118188708 | C | -0.1053 |
| rs112489377 | G | 0.0578  |
| rs78635159  | C | -0.0479 |
| rs11878235  | G | -0.0258 |
| rs116871670 | C | 0.0632  |
| rs12985183  | C | -0.0705 |
| rs113409132 | C | -0.0936 |
| rs77594511  | C | 0.0749  |
| rs2016429   | G | -0.0398 |
| rs4417638   | A | 0.0411  |
| rs2081879   | T | 0.0402  |
| rs11084612  | C | -0.0222 |
| rs2974231   | G | -0.0205 |
| rs78624829  | C | -0.0314 |
| rs113112379 | A | -0.0463 |
| rs10401594  | A | 0.0202  |
| rs2074460   | T | 0.0318  |
| rs36219972  | A | -0.0819 |
| rs13346871  | T | -0.0383 |
| rs77080188  | C | 0.0843  |
| rs145146040 | G | 0.0926  |
| rs72629154  | T | -0.0359 |
| rs1654383   | A | -0.0769 |
| rs117285127 | A | -0.0884 |
| rs10414079  | T | 0.1257  |
| rs113570232 | T | 0.0352  |
| rs2438508   | C | 0.0346  |
| rs56116812  | A | 0.0468  |
| rs11667229  | C | 0.0216  |
| rs10405023  | C | -0.0356 |
| rs10775588  | C | 0.0329  |
| rs148224635 | C | 0.1459  |
| rs2739491   | C | 0.0382  |
| rs77550222  | T | 0.1066  |
| rs141376419 | A | 0.1009  |
| rs190997    | T | 0.0312  |
| rs137938785 | G | -0.0605 |
| rs62135079  | T | 0.0609  |
| rs59280563  | G | 0.0296  |
| rs72995445  | A | 0.0769  |
| rs148371405 | A | -0.1094 |

|             |   |         |
|-------------|---|---------|
| rs12104249  | T | 0.0257  |
| rs77294690  | T | 0.0618  |
| rs17604088  | G | 0.0288  |
| rs3786586   | G | -0.0279 |
| rs1044747   | C | -0.0354 |
| rs140540025 | T | 0.1158  |
| rs1009629   | T | -0.0509 |
| rs322147    | A | -0.0212 |
| rs75800093  | T | -0.0725 |
| rs77020325  | A | 0.138   |
| rs77235242  | T | -0.105  |
| rs150716022 | T | 0.1441  |
| rs12461586  | C | 0.1095  |
| rs12611251  | T | -0.0394 |
| rs10427037  | T | 0.0723  |
| rs142028118 | A | 0.1227  |
| rs11672892  | G | 0.0352  |
| rs5011658   | A | -0.0263 |
| rs73025139  | C | 0.0874  |
| rs138160825 | T | -0.0802 |
| rs73045113  | T | 0.0356  |
| rs6510138   | G | -0.0228 |
| rs72973288  | G | 0.0532  |
| rs111405555 | A | -0.0786 |
| rs111427431 | T | 0.0632  |
| rs113361281 | A | -0.0649 |
| rs2604885   | C | -0.0212 |
| rs1184398   | A | 0.0218  |
| rs4251841   | C | -0.0339 |
| rs117311577 | A | 0.1422  |
| rs12971607  | T | 0.1071  |
| rs140064353 | G | 0.1221  |
| rs113583309 | A | -0.0992 |
| rs147787497 | G | 0.0355  |
| rs17281945  | T | -0.0299 |
| rs149803608 | C | 0.0395  |
| rs2972521   | G | 0.0202  |
| rs78738804  | A | 0.0769  |
| rs117234107 | T | 0.1106  |
| rs111847006 | G | 0.0392  |
| rs118060147 | G | 0.0965  |
| rs117855970 | T | 0.1089  |
| rs150315221 | C | 0.1677  |
| rs4897965   | T | 0.0701  |
| rs1862486   | T | 0.0772  |
| rs8103489   | A | 0.0251  |
| rs117473400 | T | 0.1209  |



|             |   |         |
|-------------|---|---------|
| rs1146126   | T | 0.0566  |
| rs34231843  | C | -0.065  |
| rs146759858 | A | -0.0871 |
| rs11557488  | A | 0.0368  |
| rs117657305 | T | 0.0768  |
| rs10425080  | A | 0.0374  |
| rs1010679   | C | -0.0276 |
| rs139816173 | C | 0.0998  |
| rs117960796 | A | -0.1172 |
| rs6511996   | G | -0.0279 |
| rs79866735  | T | 0.0659  |
| rs150519785 | C | 0.0946  |
| rs351994    | C | 0.041   |
| rs2313048   | G | 0.0257  |
| rs75202584  | T | -0.0839 |
| rs35052289  | C | 0.0371  |
| rs7253052   | A | -0.0221 |
| rs73052139  | C | -0.092  |
| rs9304788   | T | -0.022  |
| rs12460780  | A | 0.0216  |
| rs73022121  | T | -0.1083 |
| rs3853880   | T | -0.0907 |
| rs76843143  | T | 0.1444  |
| rs113867594 | C | -0.1063 |
| rs4805870   | A | 0.0381  |
| rs79183029  | T | -0.0976 |
| rs9676331   | C | 0.0235  |
| rs147933623 | G | -0.1254 |
| rs12611398  | T | 0.0289  |
| rs8112257   | C | 0.0248  |
| rs2241250   | G | -0.1076 |
| rs2298881   | A | -0.0291 |
| rs116925602 | A | 0.0623  |
| rs78958726  | T | -0.1144 |
| rs34557917  | C | 0.1336  |
| rs56655605  | T | 0.025   |
| rs420613    | G | 0.0789  |
| rs118021988 | A | 0.0937  |
| rs78862777  | T | -0.0591 |
| rs71353949  | A | -0.1009 |
| rs11883057  | A | 0.0259  |
| rs12327556  | C | -0.0396 |
| rs10418756  | T | 0.1715  |
| rs62121743  | C | 0.0308  |
| rs28521780  | A | -0.1591 |
| rs299172    | C | -0.0266 |
| rs11669793  | T | -0.0741 |

|             |   |         |
|-------------|---|---------|
| rs34640515  | G | -0.0921 |
| rs4808946   | T | -0.0485 |
| rs76248948  | A | 0.0974  |
| rs45513592  | T | 0.1297  |
| rs4804662   | G | -0.0241 |
| rs73054411  | G | 0.0244  |
| rs78276164  | T | 0.0409  |
| rs111520561 | T | -0.0294 |
| rs62124463  | G | 0.0242  |
| rs11539822  | T | 0.0242  |
| rs691633    | G | 0.0268  |
| rs1799269   | A | -0.1633 |
| rs10412569  | G | 0.0561  |
| rs2291473   | C | 0.0347  |
| rs886204    | T | 0.0265  |
| rs9749118   | C | -0.1311 |
| rs75085835  | T | 0.1011  |
| rs11673189  | A | -0.0249 |
| rs10414010  | C | 0.037   |
| rs4806802   | A | 0.0316  |
| rs147826292 | C | -0.0334 |
| rs66506016  | T | 0.0754  |
| rs312930    | C | -0.0293 |
| rs4530278   | G | -0.0213 |
| rs1859224   | G | -0.0228 |
| rs73484429  | C | 0.093   |
| rs117419016 | A | -0.093  |
| rs62120530  | T | -0.107  |
| rs60009274  | T | -0.0516 |
| rs899565    | C | -0.024  |
| rs62129302  | C | 0.0731  |
| rs17304632  | G | 0.0348  |
| rs7258432   | G | -0.0214 |
| rs4474799   | A | 0.0239  |
| rs7251409   | T | 0.0433  |
| rs2159029   | A | 0.0332  |
| rs12977462  | C | -0.0357 |
| rs2162791   | C | -0.0231 |
| rs80271437  | C | 0.0576  |
| rs78233024  | T | -0.0346 |
| rs118016019 | C | -0.0957 |
| rs35625597  | C | -0.0389 |
| rs141739665 | A | -0.1305 |
| rs62105543  | A | 0.0586  |
| rs62115867  | T | 0.0496  |
| rs73034360  | C | 0.0669  |
| rs11670464  | T | 0.0271  |

|             |   |         |
|-------------|---|---------|
| rs8101739   | C | -0.0465 |
| rs2868047   | G | -0.0251 |
| rs55771789  | A | 0.066   |
| rs139296555 | C | 0.1216  |
| rs78850150  | C | -0.0397 |
| rs141325605 | A | 0.1832  |
| rs79668907  | T | 0.0308  |
| rs661676    | G | 0.0452  |
| rs147384704 | G | -0.0949 |
| rs8105908   | G | 0.0236  |
| rs73016838  | G | -0.0858 |
| rs77590703  | T | 0.0498  |
| rs114168346 | T | -0.0743 |
| rs35055171  | T | -0.0237 |
| rs112596421 | A | 0.0411  |
| rs77711399  | A | 0.1043  |
| rs111772781 | G | 0.0415  |
| rs142843133 | T | -0.0852 |
| rs34641022  | T | -0.0986 |
| rs12985956  | T | 0.0257  |
| rs11670728  | A | -0.0219 |
| rs2905572   | T | -0.0273 |
| rs8100658   | G | 0.0225  |
| rs41275832  | T | -0.0608 |
| rs11666132  | T | 0.0349  |
| rs6512254   | G | 0.023   |
| rs142189369 | G | 0.1391  |
| rs9304956   | T | -0.0276 |
| rs10407520  | T | 0.0264  |
| rs75964774  | T | -0.0552 |
| rs159680    | A | 0.0307  |
| rs4809120   | C | 0.0239  |
| rs16986672  | T | -0.0613 |
| rs55651616  | T | 0.0385  |
| rs111397327 | G | 0.0472  |
| rs150851615 | T | 0.0949  |
| rs4561589   | T | 0.0325  |
| rs67256980  | T | -0.0211 |
| rs7253232   | A | -0.0439 |
| rs9989629   | A | -0.0447 |
| rs73060216  | C | 0.1283  |
| rs11466353  | T | 0.0741  |
| rs56899951  | A | 0.0446  |
| rs55986737  | T | -0.0414 |
| rs112917606 | T | -0.0399 |
| rs931646    | G | -0.0235 |
| rs17755100  | A | -0.0344 |

|             |   |         |
|-------------|---|---------|
| rs659255    | T | -0.0365 |
| rs35294934  | A | 0.0223  |
| rs57745388  | T | -0.0207 |
| rs45439595  | A | -0.078  |
| rs12976953  | T | 0.0544  |
| rs564622    | A | 0.0276  |
| rs4468742   | C | -0.0263 |
| rs10420357  | T | -0.0528 |
| rs7258962   | T | -0.0427 |
| rs140742114 | T | -0.1068 |
| rs118167470 | A | 0.0592  |
| rs76559758  | G | -0.0866 |
| rs12982419  | A | 0.027   |
| rs73066689  | G | -0.0486 |
| rs146508012 | C | -0.0707 |
| rs7250836   | C | -0.0259 |
| rs11668783  | A | -0.0383 |
| rs73031770  | A | -0.1039 |
| rs8101563   | C | -0.0242 |
| rs11669841  | G | 0.0236  |
| rs116604425 | A | -0.0767 |
| rs2311220   | T | 0.0399  |
| rs2870099   | C | -0.0294 |
| rs255773    | T | 0.0256  |
| rs142200928 | T | 0.1168  |
| rs55767880  | G | 0.0286  |
| rs77719434  | T | 0.116   |
| rs4808214   | A | 0.0242  |
| rs2359385   | G | -0.0273 |
| rs75727214  | C | 0.1091  |
| rs118048815 | A | -0.0539 |
| rs73018067  | C | -0.0335 |
| rs75985775  | G | -0.0592 |
| rs1005254   | C | 0.0231  |
| rs11673227  | T | 0.1234  |
| rs4389234   | G | -0.0247 |
| rs35084473  | G | -0.0709 |
| rs62116166  | A | -0.0455 |
| rs112735728 | C | -0.0877 |
| rs112743753 | G | 0.0265  |
| rs76953315  | C | -0.1045 |
| rs35287116  | C | -0.0199 |
| rs149813215 | A | -0.0797 |
| rs1868944   | G | 0.0239  |
| rs10418030  | G | -0.0237 |
| rs72996710  | G | -0.0724 |
| rs1688005   | G | -0.0234 |

|             |   |         |
|-------------|---|---------|
| rs80023698  | T | 0.0307  |
| rs28625081  | C | -0.0811 |
| rs56691323  | A | 0.0975  |
| rs62116856  | A | 0.0947  |
| rs3803904   | T | 0.0362  |
| rs62109902  | A | -0.0528 |
| rs76469489  | C | -0.1368 |
| rs73046449  | T | -0.1079 |
| rs8108544   | A | -0.0246 |
| rs12971320  | G | 0.0214  |
| rs111358833 | T | 0.0407  |
| rs402969    | C | -0.0212 |
| rs17882125  | T | -0.0512 |
| rs117267347 | A | 0.152   |
| rs17589988  | G | -0.0593 |
| rs142088382 | T | 0.0866  |
| rs2079550   | A | -0.0541 |
| rs7246978   | G | 0.0322  |
| rs74172610  | T | -0.0622 |
| rs447991    | A | -0.0242 |
| rs58501529  | C | 0.0555  |
| rs149693662 | G | 0.1111  |
| rs2303098   | T | -0.0288 |
| rs268905    | T | 0.0245  |
| rs8104554   | G | 0.0221  |
| rs12980182  | T | -0.0267 |
| rs78802494  | A | -0.129  |
| rs59537494  | G | 0.041   |
| rs76608947  | A | -0.0809 |
| rs80298408  | A | -0.0976 |
| rs150888326 | T | -0.0925 |
| rs56872598  | G | -0.0444 |
| rs78202354  | C | -0.0911 |
| rs2532059   | G | 0.0259  |
| rs34237656  | A | -0.0283 |
| rs77923659  | G | -0.0833 |
| rs746668    | A | 0.0212  |
| rs5030393   | T | -0.1018 |
| rs13347058  | T | -0.0266 |
| rs11667477  | A | 0.0267  |
| rs12459446  | A | 0.0358  |
| rs62115445  | A | -0.031  |
| rs7247503   | G | -0.0235 |
| rs17589011  | C | 0.0416  |
| rs79404105  | A | 0.1211  |
| rs8113739   | T | -0.0212 |
| rs62124746  | C | 0.0271  |

|             |   |         |
|-------------|---|---------|
| rs55760141  | A | 0.0545  |
| rs10426003  | G | 0.0237  |
| rs117556589 | C | 0.0636  |
| rs138582232 | C | 0.1315  |
| rs35732035  | A | 0.1488  |
| rs79010341  | A | 0.0746  |
| rs12608912  | A | -0.0482 |
| rs35056955  | G | 0.0914  |
| rs2930883   | T | 0.0391  |
| rs8110787   | T | -0.0212 |
| rs145639768 | A | -0.1188 |
| rs114758003 | A | -0.0889 |
| rs10853990  | G | 0.0223  |
| rs2886742   | T | -0.0228 |
| rs76403080  | T | -0.0372 |
| rs60717340  | A | -0.0767 |
| rs117473991 | A | 0.0843  |
| rs580372    | A | -0.0294 |
| rs4805568   | G | -0.0316 |
| rs118054030 | A | -0.081  |
| rs149836722 | A | 0.0836  |
| rs7246278   | T | -0.027  |
| rs2303810   | A | 0.0439  |
| rs12971608  | C | 0.0286  |
| rs12984050  | C | 0.0479  |
| rs895342    | T | -0.0808 |
| rs28635562  | T | 0.0215  |
| rs12461790  | A | -0.0359 |
| rs76648517  | T | -0.0508 |
| rs78453805  | G | 0.1244  |
| rs115075761 | T | -0.0758 |
| rs2691235   | C | 0.0288  |
| rs10412459  | C | -0.0412 |
| rs395892    | A | -0.0197 |
| rs13346129  | A | 0.0253  |
| rs76979894  | G | 0.1066  |
| rs12973697  | A | 0.0252  |
| rs1687996   | G | -0.0226 |
| rs112226575 | T | 0.0286  |
| rs140887488 | T | 0.1629  |
| rs78917411  | G | 0.0272  |
| rs197156    | G | -0.0204 |
| rs73047318  | T | 0.0416  |
| rs12327597  | A | -0.0708 |
| rs759299    | A | 0.0292  |
| rs1749282   | G | 0.0312  |
| rs62125397  | A | -0.08   |

|             |   |         |
|-------------|---|---------|
| rs4801809   | T | -0.0431 |
| rs61732552  | G | 0.0966  |
| rs3212791   | C | 0.0319  |
| rs112813367 | T | 0.14    |
| rs7249982   | A | -0.0231 |
| rs7251033   | G | 0.0398  |
| rs56177646  | G | 0.0195  |
| rs112625475 | T | -0.1295 |
| rs11669745  | G | 0.021   |
| rs11085099  | T | -0.0231 |
| rs269938    | T | 0.0214  |
| rs117458172 | T | 0.1386  |
| rs8111416   | G | 0.072   |
| rs2072689   | T | 0.019   |
| rs1207132   | T | -0.0476 |
| rs73024215  | C | 0.052   |
| rs112716684 | A | 0.106   |
| rs12980596  | A | 0.0222  |
| rs74183035  | A | -0.027  |
| rs62121714  | A | -0.0369 |
| rs61593631  | G | 0.0486  |
| rs11556992  | A | -0.046  |
| rs59559467  | A | -0.0557 |
| rs4802319   | G | -0.0815 |
| rs11673703  | A | 0.0877  |
| rs34269817  | A | 0.1085  |
| rs73030958  | A | -0.0462 |
| rs2354225   | A | 0.0229  |
| rs11669897  | T | 0.0464  |
| rs149341744 | A | 0.0971  |
| rs10417873  | A | 0.0207  |
| rs16988845  | A | 0.047   |
| rs61360090  | G | -0.028  |
| rs61742027  | A | -0.077  |
| rs75599624  | T | 0.0258  |
| rs369880    | T | -0.0269 |
| rs672265    | C | -0.0625 |
| rs78069863  | T | -0.109  |
| rs142737073 | T | 0.024   |
| rs140898754 | A | -0.0535 |
| rs4801774   | C | -0.0225 |
| rs139707358 | A | 0.0938  |
| rs112887894 | C | 0.1523  |
| rs34967856  | T | 0.0288  |
| rs58389022  | G | -0.0557 |
| rs998973    | C | -0.0243 |
| rs11879740  | A | -0.0248 |

|             |   |         |
|-------------|---|---------|
| rs150551433 | T | 0.1185  |
| rs8108212   | G | -0.0223 |
| rs10421326  | C | 0.0268  |
| rs45583840  | A | -0.0587 |
| rs10413743  | A | -0.0327 |
| rs148457515 | A | 0.0918  |
| rs8100637   | C | 0.0246  |
| rs77664073  | T | 0.0278  |
| rs59085822  | C | -0.0207 |
| rs12151093  | G | 0.0491  |
| rs2192630   | G | -0.0218 |
| rs2722756   | T | -0.0457 |
| rs8110275   | G | -0.0312 |
| rs62126282  | A | 0.1205  |
| rs3760823   | T | -0.0214 |
| rs112566570 | A | -0.0555 |
| rs4804781   | T | 0.0854  |
| rs8102680   | T | 0.0191  |
| rs8107574   | T | -0.0607 |
| rs1433076   | G | 0.0189  |
| rs11083888  | C | 0.0855  |
| rs7258816   | G | -0.0192 |
| rs117243211 | T | 0.0462  |
| rs10408600  | T | -0.0333 |
| rs113843153 | C | -0.0247 |
| rs76653224  | T | -0.0309 |
| rs118153039 | A | 0.1227  |
| rs62116850  | A | 0.0339  |
| rs12974629  | T | 0.0383  |
| rs143492438 | A | -0.1384 |
| rs11878193  | G | -0.0574 |
| rs62123283  | G | -0.0216 |
| rs74738587  | T | 0.0372  |
| rs405120    | C | -0.0353 |
| rs41275824  | T | 0.0426  |
| rs6512191   | A | -0.0204 |
| rs138388238 | A | -0.0968 |
| rs141383381 | C | -0.0826 |
| rs12985106  | T | 0.0294  |
| rs6510988   | A | 0.0401  |
| rs60466689  | G | -0.0437 |
| rs2045388   | C | 0.0288  |
| rs11083846  | A | 0.0219  |
| rs6509499   | T | -0.0234 |
| rs4804922   | G | -0.0231 |
| rs73052997  | T | -0.0521 |
| rs77358356  | C | 0.1279  |



|             |   |         |
|-------------|---|---------|
| rs77445319  | G | -0.0387 |
| rs8182621   | T | 0.0215  |
| rs117181797 | T | 0.1353  |
| rs62105299  | T | -0.0318 |
| rs2303690   | G | -0.0183 |
| rs3786772   | C | -0.0572 |
| rs10422852  | T | 0.0198  |
| rs61039198  | A | -0.0336 |
| rs34811765  | T | -0.0941 |
| rs41470347  | A | -0.0491 |
| rs111619143 | C | -0.0394 |
| rs56034494  | G | 0.0752  |
| rs75256931  | G | -0.0578 |
| rs1009794   | T | -0.0192 |
| rs3848605   | C | 0.0222  |
| rs11668975  | G | -0.0258 |
| rs1710386   | A | -0.081  |
| rs118114303 | G | -0.1237 |
| rs117708364 | G | -0.1553 |
| rs11665996  | T | 0.0224  |
| rs12462391  | T | 0.0784  |
| rs75527493  | A | -0.0322 |
| rs28411321  | A | 0.0264  |
| rs118073786 | A | 0.0791  |
| rs7259393   | A | -0.0353 |
| rs145265974 | C | 0.1284  |
| rs12461309  | G | 0.0191  |
| rs7257013   | C | 0.0718  |
| rs7256281   | G | 0.0285  |
| rs10417465  | T | 0.0612  |
| rs149667386 | T | 0.039   |
| rs11085133  | G | 0.0284  |
| rs77080457  | T | -0.119  |
| rs6509339   | G | 0.0198  |
| rs118060761 | G | -0.0804 |
| rs8106238   | A | -0.1325 |
| rs71351171  | T | -0.0214 |
| rs3826782   | A | 0.0359  |
| rs256338    | G | -0.0703 |
| rs60178395  | G | -0.0336 |
| rs3731037   | A | 0.0287  |
| rs437933    | G | -0.0209 |
| rs7254744   | C | 0.0239  |
| rs138828382 | C | -0.0482 |
| rs12972552  | A | -0.0196 |
| rs11084424  | A | 0.0349  |
| rs10405036  | A | 0.022   |

|             |   |         |
|-------------|---|---------|
| rs2668838   | C | -0.0339 |
| rs74878460  | G | 0.103   |
| rs34826052  | A | 0.0834  |
| rs140626011 | T | 0.0608  |
| rs79220153  | T | 0.1078  |
| rs247795    | T | 0.0219  |
| rs12975976  | G | -0.0212 |
| rs8109737   | G | 0.021   |
| rs78199605  | T | -0.0651 |
| rs3745651   | A | -0.0185 |
| rs117979004 | G | -0.0868 |
| rs3826830   | A | -0.0233 |
| rs138833981 | G | 0.1195  |
| rs117679371 | C | -0.0373 |
| rs55706332  | T | 0.094   |
| rs117790352 | T | 0.066   |
| rs11549920  | C | 0.0524  |
| rs56387942  | A | -0.0429 |
| rs34807860  | A | 0.0288  |
| rs6509364   | T | 0.0197  |
| rs12982187  | G | 0.022   |
| rs6510770   | C | 0.0277  |
| rs10406943  | T | -0.0363 |
| rs2099101   | C | 0.0224  |
| rs1820128   | A | 0.0392  |
| rs55669463  | T | 0.0444  |
| rs11668969  | T | 0.0225  |
| rs117460129 | T | 0.064   |
| rs74942924  | A | -0.0742 |
| rs73023592  | A | 0.1252  |
| rs2279011   | G | -0.0186 |
| rs35859939  | C | -0.0234 |
| rs28505906  | G | -0.0265 |
| rs138227746 | C | 0.1258  |
| rs455476    | C | -0.0225 |
| rs45609140  | T | 0.1068  |
| rs35544031  | T | 0.0212  |
| rs73532960  | A | 0.0776  |
| rs148493345 | T | -0.0726 |
| rs77315797  | A | 0.0261  |
| rs72487112  | A | 0.0267  |
| rs35040936  | T | 0.0205  |
| rs71365473  | C | 0.0583  |
| rs6512198   | A | 0.0405  |
| rs116844973 | C | 0.0651  |
| rs142888784 | G | 0.0831  |
| rs62109959  | C | -0.0491 |

|             |   |         |
|-------------|---|---------|
| rs77526707  | C | -0.0374 |
| rs17239607  | T | 0.0268  |
| rs145693736 | A | 0.096   |
| rs276721    | C | 0.0245  |
| rs142657579 | T | 0.0868  |
| rs113347471 | G | -0.0234 |
| rs55848295  | T | -0.0353 |
| rs117952969 | A | -0.0668 |
| rs73034029  | G | 0.0349  |
| rs77569647  | T | 0.0314  |
| rs4806927   | A | 0.0806  |
| rs41278194  | C | 0.1381  |
| rs35823523  | A | 0.1036  |
| rs2010457   | G | -0.0201 |
| rs75887392  | T | -0.125  |
| rs116902738 | C | -0.136  |
| rs147313454 | A | 0.0328  |
| rs8112725   | G | -0.0318 |
| rs113581699 | A | 0.1221  |
| rs889108    | T | -0.0226 |
| rs11878187  | T | -0.0307 |
| rs12982592  | A | 0.0209  |
| rs62109907  | T | -0.1109 |
| rs148219800 | T | -0.0896 |
| rs4801408   | G | -0.0313 |
| rs3761048   | A | 0.0343  |
| rs62125944  | A | -0.0208 |
| rs1354137   | G | -0.0204 |
| rs77400969  | C | -0.0716 |
| rs731362    | G | 0.0216  |
| rs2523170   | A | -0.0266 |
| rs12611193  | T | -0.053  |
| rs149902060 | C | -0.1124 |
| rs8100739   | A | 0.0767  |
| rs144387265 | G | 0.0786  |
| rs36004828  | G | 0.0301  |
| rs113407367 | T | -0.0824 |
| rs10419785  | T | 0.0774  |
| rs149854919 | A | -0.1741 |
| rs2379618   | G | -0.0283 |
| rs59034334  | G | -0.0828 |
| rs73057387  | A | 0.0991  |
| rs113106728 | T | -0.1368 |
| rs80216638  | A | -0.0579 |
| rs12974548  | G | -0.0206 |
| rs28757810  | A | -0.0255 |
| rs117474735 | C | 0.1229  |

|             |   |         |
|-------------|---|---------|
| rs78870969  | T | -0.08   |
| rs117710489 | A | 0.1022  |
| rs10405192  | A | -0.0338 |
| rs11672205  | T | -0.1095 |
| rs146710477 | T | 0.0797  |
| rs62131571  | A | 0.0493  |
| rs142017083 | A | -0.122  |
| rs274172    | A | 0.0242  |
| rs4807971   | A | -0.023  |
| rs116874700 | A | -0.1257 |
| rs148221668 | T | -0.0701 |
| rs77192097  | C | 0.0602  |
| rs117860472 | C | 0.1074  |
| rs11085023  | G | 0.0188  |
| rs118038920 | G | 0.1291  |
| rs9797788   | T | 0.0229  |
| rs2285851   | G | -0.0237 |
| rs2075604   | T | 0.0479  |
| rs59595912  | G | 0.0346  |
| rs7253456   | C | 0.0284  |
| rs11670610  | C | -0.0233 |
| rs150868432 | T | 0.1246  |
| rs76916283  | T | -0.1122 |
| rs16990450  | T | -0.0386 |
| rs56023130  | A | 0.0454  |
| rs3730904   | T | -0.0919 |
| rs7257277   | G | -0.049  |
| rs12977572  | A | -0.0578 |
| rs113753067 | G | -0.0591 |
| rs116988145 | A | -0.0804 |
| rs17227288  | T | -0.0222 |
| rs2241790   | T | 0.0196  |
| rs11665816  | A | 0.0227  |
| rs12977037  | A | -0.0208 |
| rs4804075   | A | -0.0219 |
| rs73507341  | C | 0.0426  |
| rs117854561 | A | 0.0607  |
| rs140132959 | T | 0.1083  |
| rs10409194  | C | 0.0242  |
| rs78588089  | T | -0.0304 |
| rs8107817   | T | -0.0236 |
| rs380764    | T | 0.0638  |
| rs3745474   | T | -0.024  |
| rs281432    | G | -0.0224 |
| rs62111574  | C | 0.0416  |
| rs78248456  | C | -0.026  |
| rs8103052   | G | 0.021   |

|             |   |         |
|-------------|---|---------|
| rs12463004  | A | -0.0612 |
| rs12985211  | C | 0.108   |
| rs144486549 | G | 0.1392  |
| rs2872113   | C | 0.1463  |
| rs1661931   | C | 0.02    |
| rs35080285  | A | 0.0224  |
| rs7246860   | T | 0.0339  |
| rs78576944  | C | -0.0623 |
| rs8104384   | G | 0.0234  |
| rs8102662   | A | 0.0192  |
| rs8106048   | G | -0.0289 |
| rs312935    | A | -0.0325 |
| rs62117795  | A | -0.1805 |
| rs3745836   | G | 0.0696  |
| rs2620841   | G | 0.0238  |
| rs2304523   | T | -0.0253 |
| rs17304450  | A | 0.0462  |
| rs10424882  | C | 0.0272  |
| rs8111157   | A | 0.0332  |
| rs4804805   | G | 0.0227  |
| rs117680809 | A | 0.0597  |
| rs117602337 | T | -0.0694 |
| rs405566    | A | 0.0444  |
| rs116956578 | T | -0.0513 |
| rs16963159  | A | -0.023  |
| rs73000673  | T | -0.0481 |
| rs2286756   | G | -0.0195 |
| rs112827507 | A | 0.1067  |
| rs14268     | T | 0.0233  |
| rs75981480  | T | -0.0453 |
| rs306458    | C | -0.0349 |
| rs78735733  | T | -0.0379 |
| rs12327602  | A | -0.0277 |
| rs736926    | T | -0.0306 |
| rs12489     | A | 0.0243  |
| rs113611644 | T | -0.0568 |
| rs10406069  | A | 0.0223  |
| rs28501668  | G | 0.05    |
| rs324125    | G | -0.0265 |
| rs76496263  | A | -0.0804 |
| rs148464328 | T | -0.0888 |
| rs73010021  | A | 0.0894  |
| rs12462776  | G | 0.069   |
| rs118158115 | T | 0.0917  |
| rs62113223  | C | -0.081  |
| rs146238447 | A | 0.1785  |
| rs10401750  | C | -0.0534 |

|             |   |         |
|-------------|---|---------|
| rs55702269  | A | -0.0676 |
| rs117665802 | A | -0.0642 |
| rs113547998 | T | 0.0777  |
| rs113632670 | T | 0.0548  |
| rs75200917  | T | -0.1048 |
| rs62117269  | A | 0.0293  |
| rs36078717  | A | -0.0652 |
| rs10425427  | C | -0.063  |
| rs117890356 | A | 0.1407  |
| rs10404292  | A | 0.0272  |
| rs79307628  | A | -0.0948 |
| rs10420909  | C | 0.0256  |
| rs117455213 | A | -0.0858 |
| rs144581040 | G | -0.0926 |
| rs117935688 | A | 0.1044  |
| rs146948980 | T | -0.0296 |
| rs277118    | T | 0.0265  |
| rs62132178  | A | 0.1493  |
| rs12982096  | T | -0.038  |
| rs73054887  | T | -0.0579 |
| rs17249376  | T | 0.0375  |
| rs140859570 | A | 0.0522  |
| rs34089525  | A | -0.0704 |
| rs111977118 | A | -0.0204 |
| rs55749214  | A | -0.0227 |
| rs11259989  | G | -0.0197 |
| rs117724297 | G | -0.049  |
| rs66479618  | T | 0.0306  |
| rs799184    | C | 0.0186  |
| rs117524660 | A | 0.0966  |
| rs7249675   | G | -0.053  |
| rs149640471 | T | -0.0543 |
| rs4444453   | G | -0.0531 |
| rs78318811  | T | 0.0483  |
| rs10416659  | A | -0.0284 |
| rs2739451   | C | -0.0188 |
| rs1974832   | G | 0.0335  |
| rs138754027 | C | -0.0646 |
| rs2463246   | C | 0.1152  |
| rs79582406  | A | -0.0615 |
| rs3745648   | C | -0.0217 |
| rs4807461   | G | 0.0218  |
| rs141003824 | G | -0.1086 |
| rs143341377 | A | -0.0924 |
| rs74827019  | T | 0.0531  |
| rs77020040  | A | -0.1335 |
| rs12975254  | A | 0.0264  |

|             |   |         |
|-------------|---|---------|
| rs2485257   | T | 0.0316  |
| rs8109640   | C | -0.0195 |
| rs2067104   | T | 0.0256  |
| rs140388093 | C | 0.0603  |
| rs254803    | C | 0.0179  |
| rs890865    | T | 0.0638  |
| rs4433936   | T | 0.0485  |
| rs2304191   | C | 0.0303  |
| rs79382977  | A | -0.1128 |
| rs62133664  | C | 0.0381  |
| rs12104361  | T | 0.0495  |
| rs77290097  | A | -0.0473 |
| rs12976419  | A | 0.0177  |
| rs57897227  | A | -0.0216 |
| rs140637033 | G | -0.0852 |
| rs73588928  | A | 0.0776  |
| rs7246420   | C | -0.0656 |
| rs117477245 | G | -0.1527 |
| rs4806829   | C | 0.0265  |
| rs9749567   | C | -0.0324 |
| rs2436506   | T | -0.0208 |
| rs4995732   | T | -0.0275 |
| rs12978559  | A | 0.1081  |
| rs75555164  | A | 0.1019  |
| rs17533903  | A | 0.0227  |
| rs231228    | T | 0.0223  |
| rs12981073  | A | -0.0289 |
| rs11666992  | C | 0.0428  |
| rs7257071   | T | 0.0579  |
| rs8108179   | T | 0.0402  |
| rs4251928   | G | -0.1043 |
| rs77711521  | C | 0.0754  |
| rs13345127  | T | 0.0294  |
| rs351108    | A | 0.043   |
| rs276184    | A | -0.0988 |
| rs117772217 | C | 0.1153  |
| rs7249464   | G | -0.0322 |
| rs658168    | T | -0.0255 |
| rs58265572  | T | -0.0391 |
| rs71351796  | T | 0.1039  |
| rs62116773  | T | -0.0995 |
| rs77311876  | A | -0.0607 |
| rs10406463  | A | 0.0194  |
| rs6512043   | T | -0.0505 |
| rs7256409   | C | 0.0398  |
| rs8103220   | C | 0.0492  |
| rs1529717   | A | 0.0185  |

|             |   |         |
|-------------|---|---------|
| rs346140    | A | 0.0213  |
| rs12981749  | G | -0.019  |
| rs12461897  | C | -0.0483 |
| rs147745696 | A | 0.046   |
| rs2915912   | C | -0.0333 |
| rs8102901   | A | 0.0212  |
| rs1077445   | G | -0.0226 |
| rs117909459 | G | -0.072  |
| rs73046569  | A | 0.0455  |
| rs34997741  | C | 0.0286  |
| rs8105105   | C | -0.052  |
| rs12609309  | G | -0.0573 |
| rs16975302  | C | -0.1052 |
| rs62113374  | T | -0.0279 |
| rs10424911  | T | 0.0467  |
| rs4807450   | T | 0.0249  |
| rs888932    | T | -0.0213 |
| rs11881897  | G | 0.0263  |
| rs55924070  | A | -0.0281 |
| rs302459    | G | 0.0661  |
| rs141511412 | A | 0.1392  |
| rs117981921 | A | -0.075  |
| rs454421    | T | 0.0192  |
| rs11882581  | A | 0.0386  |
| rs473464    | C | -0.0219 |
| rs140147746 | A | 0.0554  |
| rs111425704 | T | -0.091  |
| rs2298885   | T | 0.0231  |
| rs8099974   | C | -0.025  |
| rs28665094  | T | 0.0469  |
| rs7251280   | A | -0.0639 |
| rs12972335  | A | -0.0974 |
| rs72990111  | T | 0.0937  |
| rs147333556 | G | 0.1377  |
| rs62130467  | T | 0.0804  |
| rs12986130  | A | 0.02    |
| rs7258679   | T | -0.0278 |
| rs4991027   | T | 0.0312  |
| rs34533749  | T | 0.0185  |
| rs8105262   | A | 0.0202  |
| rs117395202 | A | 0.0814  |
| rs3760687   | T | 0.0587  |
| rs77738931  | C | 0.0439  |
| rs522669    | T | -0.0519 |
| rs117304181 | A | 0.092   |
| rs9941465   | A | 0.0271  |
| rs113840429 | T | -0.0619 |



|             |   |         |
|-------------|---|---------|
| rs3848579   | T | -0.0397 |
| rs79491172  | A | -0.044  |
| rs10500308  | C | 0.0176  |
| rs4801664   | C | -0.0301 |
| rs13345108  | G | -0.0229 |
| rs113500195 | A | -0.0428 |
| rs12463340  | A | 0.0397  |
| rs12986405  | C | -0.0595 |
| rs78464136  | T | 0.0619  |
| rs12611022  | C | 0.0191  |
| rs45570234  | C | 0.047   |
| rs4801670   | T | 0.032   |
| rs72971463  | G | 0.0489  |
| rs6510035   | G | 0.0847  |
| rs78269670  | C | 0.0342  |
| rs11883160  | G | 0.0268  |
| rs117114279 | T | -0.1162 |
| rs149811283 | C | 0.0752  |
| rs8182543   | G | -0.0312 |
| rs112550406 | A | -0.0231 |
| rs10424747  | A | -0.0216 |
| rs55731954  | T | 0.0231  |
| rs78235771  | C | -0.0866 |
| rs116889903 | A | 0.1009  |
| rs56309547  | G | -0.0172 |
| rs12461370  | T | 0.0302  |
| rs11671745  | T | 0.0817  |
| rs3810291   | G | 0.0197  |
| rs2227357   | A | -0.0275 |
| rs149711329 | T | 0.0779  |
| rs146527392 | T | 0.0762  |
| rs75944215  | A | -0.0943 |
| rs7246629   | T | 0.0194  |
| rs112826302 | G | 0.0409  |
| rs309194    | T | 0.0234  |
| rs73504416  | A | 0.0533  |
| rs148784272 | A | -0.0991 |
| rs117090316 | T | 0.0718  |
| rs3787041   | T | 0.0261  |
| rs144283671 | T | -0.0731 |
| rs12974444  | T | 0.0406  |
| rs62126981  | C | 0.0496  |
| rs117596621 | A | -0.0601 |
| rs3097336   | T | 0.0175  |
| rs10445632  | T | 0.0251  |
| rs72995963  | A | 0.0337  |
| rs76169512  | A | -0.0388 |

|             |   |         |
|-------------|---|---------|
| rs2283616   | A | 0.0174  |
| rs2866069   | G | 0.017   |
| rs11669330  | G | 0.0298  |
| rs55853951  | T | -0.0286 |
| rs56828911  | G | -0.0321 |
| rs62136916  | A | -0.0203 |
| rs4808773   | C | 0.0179  |
| rs4805084   | G | -0.0342 |
| rs148953443 | A | -0.0587 |
| rs138782856 | A | -0.068  |
| rs78664571  | A | 0.1219  |
| rs10420013  | A | -0.0176 |
| rs73030942  | T | -0.0811 |
| rs7257434   | C | 0.0227  |
| rs35689410  | T | 0.027   |
| rs4803517   | A | -0.0272 |
| rs61065024  | G | 0.0242  |
| rs57250854  | A | 0.0408  |
| rs10414565  | T | -0.0309 |
| rs11465397  | A | -0.0346 |
| rs76527008  | A | 0.0225  |
| rs45500293  | T | -0.0664 |
| rs78150198  | A | -0.1427 |
| rs116939191 | T | 0.1064  |
| rs117132773 | G | 0.1091  |
| rs149013406 | C | 0.0818  |
| rs10414779  | C | 0.019   |
| rs12462244  | C | 0.0212  |
| rs11666868  | T | -0.0244 |
| rs4897932   | A | -0.0695 |
| rs78204669  | C | 0.0372  |
| rs143726454 | T | -0.0938 |
| rs115359026 | T | 0.1018  |
| rs75280324  | A | -0.0568 |
| rs12979768  | G | -0.0247 |
| rs285283    | A | 0.0369  |
| rs3888176   | A | -0.056  |
| rs11671647  | T | -0.0401 |
| rs10419074  | T | 0.0514  |
| rs16962592  | C | -0.0345 |
| rs3097297   | T | -0.0651 |
| rs75749687  | G | 0.0731  |
| rs62120533  | G | -0.064  |
| rs141002134 | A | -0.109  |
| rs77136875  | C | -0.0483 |
| rs77552159  | G | 0.1087  |
| rs8100484   | C | 0.0203  |

|             |   |         |
|-------------|---|---------|
| rs6509412   | T | -0.0207 |
| rs112363595 | C | 0.0327  |
| rs7247926   | C | -0.0191 |
| rs76625697  | C | 0.0716  |
| rs147143138 | T | 0.1201  |
| rs691713    | A | -0.0297 |
| rs75951249  | A | 0.0392  |
| rs116972702 | A | 0.1019  |
| rs4801480   | T | 0.0609  |
| rs1664690   | A | -0.0309 |
| rs141546683 | A | -0.0642 |
| rs4280373   | T | 0.0276  |
| rs73619261  | A | 0.033   |
| rs11084561  | T | 0.0212  |
| rs149818350 | T | -0.0658 |
| rs73033073  | C | -0.0735 |
| rs10412773  | T | -0.0398 |
| rs78041344  | T | -0.0301 |
| rs4807024   | C | -0.0304 |
| rs7256233   | A | 0.0198  |
| rs35743451  | T | 0.0693  |
| rs11553092  | A | -0.0211 |
| rs367527    | A | 0.0459  |
| rs10414528  | A | 0.0229  |
| rs6509623   | C | 0.0169  |
| rs145737553 | T | -0.125  |
| rs17305227  | T | 0.0466  |
| rs11667108  | T | -0.0212 |
| rs112638842 | G | 0.0588  |
| rs73028769  | C | -0.0278 |
| rs4805579   | G | -0.0181 |
| rs4802176   | A | -0.025  |
| rs35715002  | G | 0.0363  |
| rs8111205   | A | 0.0202  |
| rs4482400   | T | 0.0337  |
| rs2915947   | C | 0.0284  |
| rs2619199   | A | 0.0337  |
| rs73067189  | G | 0.0309  |
| rs12984086  | A | 0.1427  |
| rs117421926 | C | -0.1226 |
| rs3746251   | A | 0.0894  |
| rs55784934  | C | 0.0626  |
| rs56274434  | C | -0.0266 |
| rs7788      | C | 0.0336  |
| rs11667974  | G | -0.0265 |
| rs77686360  | A | 0.0626  |
| rs10412124  | A | -0.0614 |

|             |   |         |
|-------------|---|---------|
| rs116900565 | T | 0.088   |
| rs6509671   | T | 0.0275  |
| rs12611395  | A | -0.0447 |
| rs117780632 | A | 0.0535  |
| rs116996466 | G | -0.0904 |
| rs62109711  | A | 0.0348  |
| rs7247922   | T | 0.0293  |
| rs17249001  | A | 0.0608  |
| rs2075145   | T | 0.0208  |
| rs138732197 | C | -0.115  |
| rs8102908   | T | 0.1026  |
| rs71339174  | A | -0.0299 |
| rs997703    | A | -0.0231 |
| rs7247141   | A | 0.0179  |
| rs740683    | C | -0.0196 |
| rs16968399  | T | 0.0211  |
| rs9304931   | A | -0.0219 |
| rs114973975 | G | 0.0588  |
| rs73919195  | C | 0.0608  |
| rs77673324  | G | -0.0645 |
| rs62119882  | G | -0.0345 |
| rs117440287 | A | 0.0558  |
| rs11086079  | T | -0.0355 |
| rs117049049 | T | -0.103  |
| rs10420670  | A | -0.0346 |
| rs62107099  | T | -0.0702 |
| rs11668328  | C | -0.0996 |
| rs118184479 | A | 0.1319  |
| rs149511709 | A | 0.1108  |
| rs148169821 | T | 0.0577  |
| rs148540338 | G | -0.0988 |
| rs3136642   | G | 0.0188  |
| rs464398    | T | -0.0173 |
| rs111476307 | A | 0.1596  |
| rs11673553  | G | 0.1276  |
| rs12983273  | T | 0.0386  |
| rs4807188   | A | -0.0846 |
| rs11666089  | C | 0.0309  |
| rs6509714   | T | 0.0391  |
| rs141474870 | A | -0.0535 |
| rs62131898  | G | 0.0397  |
| rs12608523  | C | 0.0238  |
| rs73010185  | C | 0.0946  |
| rs10406145  | C | 0.019   |
| rs12462913  | T | 0.0401  |
| rs10402472  | G | -0.0198 |
| rs75557930  | T | 0.0302  |

|             |   |         |
|-------------|---|---------|
| rs8110155   | A | -0.0693 |
| rs55986794  | A | -0.0333 |
| rs74675399  | A | 0.0345  |
| rs398650    | A | -0.0351 |
| rs1671207   | C | -0.0231 |
| rs117689640 | G | 0.1111  |
| rs4807778   | G | -0.0258 |
| rs12975001  | C | -0.0352 |
| rs116967514 | T | 0.0676  |
| rs28440959  | C | -0.0696 |
| rs35537830  | T | -0.0416 |
| rs144184232 | T | 0.1106  |
| rs6509798   | G | -0.0312 |
| rs1628793   | C | -0.0482 |
| rs113744405 | C | -0.0436 |
| rs7255306   | G | -0.022  |
| rs8111139   | T | 0.0192  |
| rs117512546 | A | -0.0566 |
| rs74457132  | C | -0.0709 |
| rs11881075  | C | 0.0839  |
| rs141230104 | G | 0.1151  |
| rs17728644  | G | 0.0689  |
| rs55892843  | T | -0.0253 |
| rs61545816  | G | 0.0463  |
| rs2288404   | C | 0.0183  |
| rs55790431  | C | -0.0214 |
| rs61742136  | T | -0.0845 |
| rs7252097   | T | -0.0214 |
| rs12980372  | G | 0.0523  |
| rs118013260 | T | -0.1176 |
| rs146541941 | G | 0.1179  |
| rs35840591  | G | -0.0229 |
| rs73549066  | T | -0.0299 |
| rs74675346  | A | 0.0789  |
| rs4808105   | T | -0.0189 |
| rs11672094  | A | 0.0331  |
| rs12980134  | A | -0.0212 |
| rs117190701 | A | -0.0408 |
| rs73004006  | C | 0.1432  |
| rs62113693  | G | 0.0246  |
| rs137887476 | T | 0.0675  |
| rs117855218 | C | 0.05    |
| rs1560727   | C | 0.0208  |
| rs7255674   | C | 0.0211  |
| rs451367    | T | 0.028   |
| rs79808496  | T | -0.0855 |
| rs4804623   | G | -0.0516 |

|             |   |         |
|-------------|---|---------|
| rs149262789 | T | 0.1009  |
| rs34281600  | T | -0.1233 |
| rs77029922  | G | 0.0697  |
| rs4999880   | G | -0.0257 |
| rs4808526   | T | -0.0673 |
| rs146688773 | A | 0.095   |
| rs4809019   | A | -0.0567 |
| rs7252407   | C | -0.0224 |
| rs117127048 | A | -0.0919 |
| rs35382994  | G | 0.0907  |
| rs7248453   | A | 0.0401  |
| rs117981612 | T | -0.0709 |
| rs12973245  | C | -0.0171 |
| rs4805550   | C | 0.0199  |
| rs266867    | A | 0.0334  |
| rs8111553   | C | 0.0417  |
| rs36687     | A | -0.0257 |
| rs117267421 | G | -0.1218 |
| rs8108262   | A | -0.1215 |
| rs11882243  | A | -0.0432 |
| rs117542029 | T | -0.0917 |
| rs2239374   | T | 0.021   |
| rs115627114 | T | 0.0448  |
| rs7253253   | G | -0.0547 |
| rs7250715   | A | 0.0211  |
| rs55951194  | A | -0.0335 |
| rs62119282  | T | 0.0396  |
| rs144715171 | T | 0.1327  |
| rs62131618  | C | 0.0406  |
| rs73570937  | T | -0.0672 |
| rs1445851   | A | -0.0272 |
| rs73547912  | A | -0.1129 |
| rs60388064  | C | -0.0993 |
| rs3859454   | C | 0.1323  |
| rs7254967   | A | -0.0191 |
| rs73062673  | C | 0.0264  |
| rs10421853  | C | -0.0167 |
| rs1363364   | A | 0.0164  |
| rs17774599  | A | -0.0253 |
| rs62111428  | A | 0.0278  |
| rs148685538 | A | 0.0516  |
| rs118004394 | C | 0.0868  |
| rs8104810   | T | 0.021   |
| rs2957848   | G | 0.0973  |
| rs12973255  | A | 0.02    |
| rs10425568  | G | 0.0418  |
| rs11882592  | A | -0.0351 |

|             |   |         |
|-------------|---|---------|
| rs150032686 | C | -0.1298 |
| rs112176687 | T | 0.0561  |
| rs145486998 | A | 0.0398  |
| rs142335773 | G | -0.0606 |
| rs10424351  | G | 0.0227  |
| rs11880750  | C | 0.0649  |
| rs117196978 | C | -0.0974 |
| rs111624989 | A | -0.0624 |
| rs113327157 | A | -0.0611 |
| rs484121    | G | 0.0163  |
| rs56999463  | A | 0.0934  |
| rs73035410  | G | 0.0614  |
| rs651555    | T | 0.0598  |
| rs117249960 | A | -0.0571 |
| rs80113335  | A | -0.1084 |
| rs149499271 | A | 0.0566  |
| rs73047580  | A | -0.1057 |
| rs7255683   | G | -0.0231 |
| rs3786712   | A | 0.0183  |
| rs79902448  | C | 0.0712  |
| rs12052184  | A | -0.0269 |
| rs10412316  | T | 0.0286  |
| rs12608756  | T | 0.0556  |
| rs76657538  | A | -0.0205 |
| rs10405432  | G | 0.0238  |
| rs117794399 | T | -0.0962 |
| rs55767504  | G | -0.0454 |
| rs6417192   | G | 0.0538  |
| rs75021556  | T | 0.1301  |
| rs10406215  | C | -0.0239 |
| rs139356083 | T | -0.1593 |
| rs273627    | A | -0.0323 |
| rs79487637  | A | -0.0515 |
| rs12463225  | A | 0.0381  |
| rs72996468  | G | 0.047   |
| rs117480526 | A | -0.0829 |
| rs12610011  | C | -0.0233 |
| rs12978395  | T | -0.0934 |
| rs1053377   | T | 0.026   |
| rs7251700   | A | -0.031  |
| rs75707753  | A | 0.0392  |
| rs117111055 | G | 0.1152  |
| rs1978616   | G | -0.0196 |
| rs112511886 | A | 0.1033  |
| rs74466458  | C | 0.0766  |
| rs145319303 | T | 0.0795  |
| rs35483143  | T | -0.0784 |

|             |   |         |
|-------------|---|---------|
| rs77972155  | A | 0.1249  |
| rs117435018 | A | -0.0764 |
| rs117148804 | T | -0.0452 |
| rs148279123 | A | -0.035  |
| rs736128    | A | -0.019  |
| rs116835305 | T | 0.0488  |
| rs138260807 | A | -0.0715 |
| rs12611010  | G | -0.088  |
| rs8107142   | A | -0.0245 |
| rs59805819  | A | 0.0506  |
| rs36095067  | T | 0.1306  |
| rs4804149   | C | 0.0221  |
| rs78382850  | C | 0.034   |
| rs1614559   | T | -0.0178 |
| rs1985579   | A | -0.0177 |
| rs56162770  | C | -0.0958 |
| rs466115    | C | -0.0175 |
| rs77869359  | C | 0.0557  |
| rs143658954 | A | 0.061   |
| rs117969022 | T | 0.0815  |
| rs138780384 | A | -0.0636 |
| rs73568026  | G | -0.0215 |
| rs113382075 | T | 0.025   |
| rs9304911   | C | -0.023  |
| rs306478    | C | 0.0177  |
| rs17715394  | C | 0.0202  |
| rs34257179  | G | -0.091  |
| rs11085784  | T | 0.0255  |
| rs4802456   | A | -0.0181 |
| rs2691215   | A | -0.0243 |
| rs11085051  | T | 0.0198  |
| rs117131291 | T | 0.0761  |
| rs388310    | T | -0.0175 |
| rs4806061   | A | -0.0166 |
| rs79835743  | C | -0.0354 |
| rs78312646  | T | 0.0561  |
| rs59422992  | A | -0.0361 |
| rs12459103  | C | -0.0172 |
| rs11670329  | C | 0.0898  |
| rs78987925  | C | 0.1039  |
| rs4805158   | T | 0.0386  |
| rs7254279   | A | 0.0217  |
| rs148293536 | T | -0.0988 |
| rs73934406  | A | 0.0586  |
| rs1108697   | C | -0.0165 |
| rs548658    | A | 0.0719  |
| rs2288515   | A | -0.0257 |



|             |   |         |
|-------------|---|---------|
| rs111403438 | A | -0.0658 |
| rs12974085  | T | -0.0173 |
| rs12976035  | C | -0.0527 |
| rs1275221   | T | 0.0182  |
| rs57026198  | C | 0.0353  |
| rs2056397   | T | 0.0643  |
| rs11666216  | G | -0.052  |
| rs117328298 | G | 0.0807  |
| rs113390133 | T | 0.0634  |
| rs7249538   | A | 0.0169  |
| rs17605360  | T | 0.0977  |
| rs34223005  | C | -0.0305 |
| rs113443039 | G | 0.0273  |
| rs4438413   | G | -0.0162 |
| rs114560011 | T | 0.0885  |
| rs382410    | G | -0.0182 |
| rs117388345 | A | -0.0791 |
| rs113836077 | C | 0.0924  |
| rs8108940   | G | 0.0172  |
| rs28573687  | A | 0.0197  |
| rs3730837   | C | -0.0569 |
| rs138062667 | G | 0.1018  |
| rs73004683  | A | -0.0357 |
| rs34188753  | C | 0.0476  |
| rs11878489  | A | 0.0186  |
| rs12983193  | A | 0.0232  |
| rs112839524 | G | -0.0232 |
| rs7246366   | G | -0.0625 |
| rs346056    | C | 0.0192  |
| rs62112966  | G | 0.1505  |
| rs3745530   | A | -0.0162 |
| rs12461153  | C | 0.0169  |
| rs11879454  | T | 0.0266  |
| rs73926853  | A | -0.0461 |
| rs55796368  | T | -0.0731 |
| rs73005538  | A | -0.0897 |
| rs149892518 | C | 0.1051  |
| rs111487833 | T | -0.0433 |
| rs926026    | G | -0.0185 |
| rs73048855  | G | 0.0441  |
| rs7252525   | T | 0.0307  |
| rs78334009  | C | -0.0413 |
| rs78597559  | C | 0.0625  |
| rs77151859  | C | -0.1333 |
| rs77206031  | A | 0.0969  |
| rs8112191   | A | -0.0183 |
| rs144244431 | C | 0.058   |

|             |   |         |
|-------------|---|---------|
| rs77995042  | T | 0.0433  |
| rs76721557  | T | 0.1381  |
| rs62126440  | A | -0.0376 |
| rs62108466  | T | -0.0309 |
| rs10404042  | C | 0.0289  |
| rs8110522   | A | 0.0782  |
| rs8112524   | G | 0.0257  |
| rs28412860  | T | -0.0302 |
| rs10408812  | A | -0.0179 |
| rs143944636 | T | -0.0398 |
| rs79054960  | G | -0.0461 |
| rs77488532  | C | 0.0288  |
| rs112633747 | T | 0.0388  |
| rs11881467  | C | 0.0594  |
| rs73631784  | C | 0.0267  |
| rs636567    | G | -0.0363 |
| rs112698954 | G | 0.0432  |
| rs45574836  | T | -0.0492 |
| rs146363295 | A | 0.0547  |
| rs150443549 | T | 0.0478  |
| rs62116188  | T | -0.0839 |
| rs258581    | A | -0.0319 |
| rs4804139   | T | -0.0494 |
| rs17699030  | G | 0.0488  |
| rs1046273   | T | -0.0788 |
| rs113376455 | G | 0.068   |
| rs12609457  | C | -0.0203 |
| rs34076427  | A | -0.0256 |
| rs8103610   | G | -0.0381 |
| rs2659062   | C | -0.0227 |
| rs146797502 | T | -0.1248 |
| rs34150343  | G | 0.0162  |
| rs111755913 | A | -0.0374 |
| rs60664277  | C | 0.0323  |
| rs142833554 | C | 0.0826  |
| rs71362673  | G | 0.066   |
| rs2288518   | G | 0.0555  |
| rs150473648 | A | 0.092   |
| rs10775585  | T | -0.0332 |
| rs35071395  | G | 0.023   |
| rs71361971  | G | -0.0822 |
| rs78313190  | A | -0.0311 |
| rs12984761  | T | -0.0228 |
| rs145756297 | C | 0.0676  |
| rs7246380   | T | 0.0294  |
| rs73043069  | G | 0.0288  |
| rs117630756 | A | -0.0844 |

|             |   |         |
|-------------|---|---------|
| rs72983135  | A | 0.0236  |
| rs112488306 | A | 0.0747  |
| rs117633619 | T | -0.0909 |
| rs8110925   | G | 0.0537  |
| rs12608928  | A | -0.0173 |
| rs139002845 | G | -0.0836 |
| rs111506697 | G | 0.0604  |
| rs1080669   | T | 0.0232  |
| rs147717700 | T | 0.0302  |
| rs144804890 | A | 0.1181  |
| rs11881980  | T | -0.0324 |
| rs2868466   | A | -0.017  |
| rs2230748   | A | -0.0235 |
| rs56937966  | C | 0.0345  |
| rs1290647   | A | 0.0184  |
| rs3097879   | T | 0.0208  |
| rs8109160   | T | 0.0179  |
| rs118088049 | A | -0.1115 |
| rs344571    | T | 0.0201  |
| rs11673239  | T | 0.0536  |
| rs3745925   | A | -0.0201 |
| rs145041057 | A | -0.1197 |
| rs76237680  | C | 0.0924  |
| rs150170689 | G | -0.0961 |
| rs117863960 | C | -0.0579 |
| rs12610503  | T | 0.044   |
| rs11085107  | T | -0.0267 |
| rs10402091  | A | 0.0199  |
| rs139339684 | G | 0.0692  |
| rs55864313  | A | -0.0541 |
| rs7255401   | A | -0.0256 |
| rs1054623   | A | -0.0203 |
| rs59328331  | A | 0.0563  |
| rs4239631   | T | 0.0293  |
| rs78828368  | T | -0.0714 |
| rs8100350   | G | -0.0205 |
| rs111749552 | A | 0.0898  |
| rs116857198 | A | -0.0555 |
| rs116853154 | C | 0.0432  |
| rs4251831   | G | 0.0246  |
| rs16964470  | C | -0.0227 |
| rs3764596   | G | -0.0188 |
| rs75499840  | A | 0.0436  |
| rs78419989  | T | -0.0234 |
| rs75301706  | A | 0.1086  |
| rs113545131 | T | 0.0288  |
| rs112491222 | A | 0.0304  |

|             |   |         |
|-------------|---|---------|
| rs10423446  | G | 0.0184  |
| rs6509758   | A | -0.025  |
| rs143717853 | A | 0.0597  |
| rs2967775   | T | 0.0204  |
| rs147809250 | A | 0.0704  |
| rs7258327   | C | 0.0365  |
| rs308037    | A | 0.0173  |
| rs833912    | C | 0.0262  |
| rs10413597  | A | 0.0167  |
| rs7246838   | A | 0.033   |
| rs3826759   | C | 0.0306  |
| rs28738983  | G | 0.0816  |
| rs73922142  | C | 0.0468  |
| rs247755    | A | 0.0186  |
| rs57178594  | C | -0.0507 |
| rs1155506   | G | -0.0174 |
| rs149173729 | T | 0.0685  |
| rs2240150   | C | -0.0411 |
| rs11880134  | A | 0.0218  |
| rs72993544  | G | 0.0269  |
| rs318699    | A | -0.016  |
| rs139596014 | A | 0.0544  |
| rs147321547 | T | -0.0206 |
| rs11673583  | T | 0.025   |
| rs8102122   | A | -0.0195 |
| rs148785445 | C | 0.099   |
| rs117224236 | G | 0.0916  |
| rs35128221  | A | 0.0214  |
| rs17775666  | T | -0.0309 |
| rs73047763  | A | -0.0535 |
| rs9304923   | T | -0.0306 |
| rs113483883 | T | 0.053   |
| rs117579730 | T | 0.0867  |
| rs10424688  | T | 0.022   |
| rs142467778 | G | -0.1107 |
| rs112778073 | C | 0.0393  |
| rs55786704  | G | 0.0193  |
| rs2860163   | C | -0.0535 |
| rs12979590  | C | -0.0225 |
| rs4569396   | T | 0.0163  |
| rs144843211 | G | -0.074  |
| rs4022311   | T | 0.0167  |
| rs2241393   | C | 0.0206  |
| rs4490110   | A | 0.0325  |
| rs167519    | T | -0.0295 |
| rs35759402  | A | 0.0212  |
| rs11881124  | G | -0.0182 |

|             |   |         |
|-------------|---|---------|
| rs73016307  | C | -0.0438 |
| rs142296430 | A | -0.0998 |
| rs146604202 | A | -0.0709 |
| rs79309113  | T | -0.0816 |
| rs74699092  | C | -0.0627 |
| rs118074688 | T | 0.0709  |
| rs7249292   | C | -0.0289 |
| rs572840    | A | -0.0177 |
| rs260428    | C | 0.0277  |
| rs7260060   | A | 0.019   |
| rs2301236   | A | -0.0232 |
| rs77623030  | T | 0.0527  |
| rs73067369  | C | 0.0311  |
| rs113718949 | T | 0.039   |
| rs7257486   | G | 0.069   |
| rs7260552   | G | 0.0238  |
| rs476922    | A | -0.022  |
| rs7258039   | C | 0.022   |
| rs118176136 | A | -0.0651 |
| rs72982393  | C | 0.0263  |
| rs8102891   | G | 0.026   |
| rs10413441  | G | 0.0305  |
| rs2865164   | G | 0.0361  |
| rs2682560   | T | -0.0201 |
| rs138281532 | G | -0.0279 |
| rs79859128  | G | -0.0332 |
| rs8102899   | C | -0.0187 |
| rs7250425   | T | -0.0155 |
| rs77356507  | C | -0.1017 |
| rs6509424   | A | 0.037   |
| rs138593008 | G | -0.0891 |
| rs113469967 | C | 0.0996  |
| rs62117996  | C | 0.036   |
| rs12609208  | A | 0.0363  |
| rs146656592 | A | -0.0987 |
| rs116933142 | A | -0.1412 |
| rs10412771  | T | 0.0212  |
| rs6509985   | T | -0.0341 |
| rs111623191 | C | 0.0658  |
| rs149210322 | G | -0.0836 |
| rs111817467 | T | -0.0983 |
| rs12983334  | C | 0.0165  |
| rs73056862  | T | 0.0265  |
| rs117752742 | A | 0.1278  |
| rs2609897   | T | 0.0158  |
| rs73021656  | C | -0.0734 |
| rs113744797 | G | 0.0698  |

|             |   |         |
|-------------|---|---------|
| rs58204333  | A | 0.0181  |
| rs11670656  | C | -0.0152 |
| rs1645678   | A | 0.0268  |
| rs12982381  | T | 0.0224  |
| rs116953663 | G | -0.0975 |
| rs78794494  | C | 0.0851  |
| rs8100891   | G | 0.0168  |
| rs10409160  | G | -0.0242 |
| rs12609190  | A | -0.0323 |
| rs650262    | G | -0.0221 |
| rs56151501  | C | -0.0309 |
| rs2305777   | T | 0.0175  |
| rs146176851 | C | 0.0995  |
| rs150818197 | A | 0.0734  |
| rs138371650 | T | 0.0842  |
| rs28666483  | A | -0.0359 |
| rs75089343  | T | -0.0464 |
| rs75840015  | A | 0.0929  |
| rs79567667  | G | -0.0926 |
| rs77268298  | A | -0.0402 |
| rs11879046  | G | -0.1077 |
| rs5030398   | G | 0.0466  |
| rs17834186  | G | 0.0193  |
| rs307717    | T | 0.0219  |
| rs10403459  | C | -0.0173 |
| rs7255134   | A | -0.0336 |
| rs2004270   | C | 0.0285  |
| rs35089861  | T | 0.0474  |
| rs4330013   | A | -0.0158 |
| rs62113868  | T | -0.0693 |
| rs56801401  | C | 0.0269  |
| rs76540930  | G | -0.0753 |
| rs12104184  | C | 0.0231  |
| rs4807998   | A | 0.0147  |
| rs117648604 | T | 0.0723  |
| rs8110664   | C | -0.065  |
| rs76702783  | C | 0.0318  |
| rs8104768   | C | 0.0279  |
| rs2392652   | C | 0.0296  |
| rs7254651   | A | -0.0174 |
| rs17215305  | A | -0.0627 |
| rs2379239   | A | 0.0472  |
| rs7250224   | C | 0.0236  |
| rs1799595   | A | -0.0402 |
| rs11669053  | T | 0.0217  |
| rs11882789  | T | 0.1128  |
| rs73920031  | A | -0.0941 |

|             |   |         |
|-------------|---|---------|
| rs142662427 | T | -0.099  |
| rs6510701   | C | -0.0215 |
| rs11667465  | A | -0.049  |
| rs115014492 | T | -0.1094 |
| rs77195067  | C | 0.0639  |
| rs75989646  | G | -0.0416 |
| rs113839234 | T | -0.0482 |
| rs57824425  | T | 0.0258  |
| rs3826665   | A | 0.0221  |
| rs7258495   | C | -0.0173 |
| rs117674426 | A | -0.0832 |
| rs10414183  | C | 0.0223  |
| rs143769227 | C | 0.0941  |
| rs117383051 | A | -0.0837 |
| rs143328644 | A | 0.0832  |
| rs55646134  | A | 0.0203  |
| rs146291812 | G | 0.0187  |
| rs11085206  | C | -0.0186 |
| rs117162955 | G | -0.0555 |
| rs1422259   | G | 0.0184  |
| rs113757139 | A | -0.0561 |
| rs2967536   | A | -0.1389 |
| rs3730865   | G | -0.0709 |
| rs62109943  | G | -0.0532 |
| rs2865837   | G | -0.0182 |
| rs11671521  | C | 0.0948  |
| rs12460524  | T | -0.0204 |
| rs2107454   | C | 0.0641  |
| rs6952      | G | 0.0324  |
| rs11671438  | T | 0.0182  |
| rs117284921 | C | 0.0855  |
| rs11085070  | A | -0.0211 |
| rs113270232 | T | 0.0636  |
| rs116528507 | C | 0.0245  |
| rs6511065   | T | -0.0284 |
| rs77005253  | G | -0.037  |
| rs148809154 | A | 0.0411  |
| rs74720037  | T | -0.0354 |
| rs8192711   | A | 0.0353  |
| rs55836822  | T | 0.025   |
| rs111640618 | T | -0.0391 |
| rs117914743 | G | -0.0861 |
| rs335743    | A | -0.0163 |
| rs116947721 | C | 0.0683  |
| rs113381717 | A | 0.0603  |
| rs10406633  | A | -0.0252 |
| rs74260224  | T | -0.0296 |

|             |   |         |
|-------------|---|---------|
| rs11260069  | C | -0.0155 |
| rs10401294  | G | 0.0324  |
| rs56287732  | T | -0.0581 |
| rs3848521   | C | -0.0215 |
| rs193934    | C | 0.0343  |
| rs34718     | A | -0.0217 |
| rs324091    | A | 0.0214  |
| rs10413422  | T | 0.0235  |
| rs11673556  | C | 0.0263  |
| rs142250189 | C | 0.085   |
| rs56372685  | G | -0.0562 |
| rs11879508  | T | -0.0443 |
| rs59135513  | A | 0.0519  |
| rs58161486  | A | -0.0263 |
| rs150342947 | A | -0.1151 |
| rs12979242  | C | -0.0638 |
| rs8104591   | C | 0.0391  |
| rs7255444   | G | -0.0395 |
| rs12462642  | A | -0.0201 |
| rs35515408  | T | -0.032  |
| rs62112761  | G | 0.0165  |
| rs56131139  | C | 0.0585  |
| rs147472919 | G | 0.0726  |
| rs62107517  | T | -0.0872 |
| rs73006531  | T | -0.0268 |
| rs278206    | A | -0.0187 |
| rs11881458  | A | -0.0187 |
| rs11084908  | C | 0.0294  |
| rs888864    | G | 0.0212  |
| rs76618032  | A | 0.0353  |
| rs117882650 | A | -0.0855 |
| rs35669530  | T | 0.0445  |
| rs4805902   | T | -0.0203 |
| rs111604360 | A | 0.068   |
| rs28619228  | C | -0.0256 |
| rs145604891 | T | -0.0377 |
| rs8112107   | C | 0.0231  |
| rs1645701   | A | 0.024   |
| rs2722757   | G | 0.0162  |
| rs113434779 | T | 0.1614  |
| rs10405030  | T | 0.0719  |
| rs117683814 | G | -0.0784 |
| rs73005399  | T | -0.0865 |
| rs4803115   | T | -0.0286 |
| rs7251133   | G | 0.0441  |
| rs11673407  | G | 0.0187  |
| rs76077978  | A | 0.1047  |



|             |   |         |
|-------------|---|---------|
| rs1433097   | C | -0.0308 |
| rs2365582   | G | 0.0298  |
| rs797880    | T | -0.0189 |
| rs4806921   | A | 0.0257  |
| rs113716473 | A | -0.0519 |
| rs8113192   | A | 0.0164  |
| rs78441704  | T | -0.051  |
| rs72483994  | T | -0.1191 |
| rs10420217  | C | -0.0219 |
| rs279220    | A | 0.0158  |
| rs939305    | G | 0.0169  |
| rs4522535   | A | -0.0159 |
| rs76734238  | C | 0.1163  |
| rs138681462 | C | 0.0806  |
| rs6510842   | C | 0.0218  |
| rs350912    | A | 0.0167  |
| rs11672825  | G | 0.0169  |
| rs3887111   | A | -0.0171 |
| rs62113865  | A | 0.1085  |
| rs16970555  | T | -0.0284 |
| rs75111430  | A | -0.0594 |
| rs4801605   | G | -0.0177 |
| rs10406139  | A | 0.0282  |
| rs73510792  | A | -0.0708 |
| rs10424262  | T | 0.0287  |
| rs145753667 | T | 0.1136  |
| rs28406304  | T | 0.0465  |
| rs73039249  | A | 0.0453  |
| rs10500264  | A | 0.0189  |
| rs34384935  | G | -0.0394 |
| rs79395320  | T | 0.0382  |
| rs11670026  | G | 0.0956  |
| rs77362788  | T | 0.085   |
| rs12985697  | T | 0.0303  |
| rs12463068  | T | 0.0484  |
| rs62117780  | G | 0.0306  |
| rs17836364  | A | -0.0202 |
| rs6510032   | G | -0.0261 |
| rs7258976   | A | 0.016   |
| rs80320277  | T | -0.0568 |
| rs34561079  | A | 0.0301  |
| rs113510419 | C | 0.0382  |
| rs11083941  | T | 0.0435  |
| rs34077401  | T | 0.02    |
| rs2084111   | A | 0.0391  |
| rs79827998  | T | -0.0525 |
| rs73036032  | T | 0.0509  |

|             |   |         |
|-------------|---|---------|
| rs2369252   | A | -0.0168 |
| rs56857389  | A | 0.061   |
| rs2902746   | A | 0.0211  |
| rs62120454  | C | -0.0252 |
| rs62133235  | G | 0.0169  |
| rs10418024  | C | -0.0272 |
| rs12980652  | A | 0.0436  |
| rs45459493  | T | -0.0469 |
| rs10853790  | G | -0.0441 |
| rs1973093   | G | -0.0157 |
| rs78897278  | A | 0.0213  |
| rs74320731  | T | 0.0807  |
| rs10403174  | G | 0.0343  |
| rs112990034 | G | 0.0238  |
| rs1048328   | A | -0.0262 |
| rs34306318  | G | 0.0273  |
| rs73029979  | G | 0.1005  |
| rs7246367   | T | -0.0476 |
| rs28334     | T | -0.022  |
| rs73043264  | T | -0.0494 |
| rs9967630   | A | -0.0166 |
| rs147131403 | C | -0.1108 |
| rs12972155  | C | -0.0186 |
| rs12463003  | G | -0.0212 |
| rs11881591  | A | -0.0305 |
| rs148665192 | C | 0.0858  |
| rs17722600  | G | 0.0579  |
| rs10413641  | G | 0.0643  |
| rs118095807 | T | 0.0793  |
| rs118106683 | C | 0.0595  |
| rs1051767   | T | 0.0251  |
| rs4802605   | T | 0.0201  |
| rs7248384   | G | 0.0338  |
| rs887392    | T | -0.02   |
| rs4806994   | C | 0.0222  |
| rs17658754  | G | -0.0152 |
| rs62108399  | C | -0.0294 |
| rs78414509  | T | 0.0922  |
| rs10414030  | A | 0.0717  |
| rs112340962 | C | 0.0533  |
| rs55751608  | T | 0.0229  |
| rs7258076   | G | 0.0291  |
| rs59503543  | G | 0.0351  |
| rs147121300 | T | 0.0506  |
| rs78788427  | T | 0.1231  |
| rs12977654  | A | 0.038   |
| rs145247253 | T | 0.0205  |

|             |   |         |
|-------------|---|---------|
| rs10405015  | G | -0.0242 |
| rs455994    | T | 0.0277  |
| rs11084823  | C | -0.0197 |
| rs73551586  | C | -0.0184 |
| rs752079    | T | 0.0494  |
| rs4806834   | T | 0.0462  |
| rs2304121   | C | 0.0227  |
| rs8113132   | T | -0.0149 |
| rs55918926  | T | 0.0671  |
| rs10418407  | A | 0.0203  |
| rs10404778  | A | 0.0596  |
| rs11671514  | G | 0.0585  |
| rs73493653  | A | -0.0865 |
| rs4808111   | G | 0.0817  |
| rs1650857   | T | 0.0215  |
| rs117564136 | T | -0.0307 |
| rs77751458  | C | 0.047   |
| rs78600275  | A | 0.0814  |
| rs12461754  | A | -0.0242 |
| rs186715    | G | 0.0191  |
| rs8103393   | T | 0.0261  |
| rs344564    | C | 0.0341  |
| rs10404260  | G | 0.0288  |
| rs6511938   | T | -0.0186 |
| rs2691269   | A | -0.0213 |
| rs117505142 | G | 0.0924  |
| rs111665030 | A | -0.0305 |
| rs10414922  | A | -0.0265 |
| rs11672826  | C | 0.0316  |
| rs12610729  | T | -0.0202 |
| rs62118885  | A | -0.0317 |
| rs75478653  | A | -0.064  |
| rs146054484 | A | 0.1028  |
| rs144838856 | A | -0.073  |
| rs62101914  | A | 0.0446  |
| rs17692472  | C | 0.0165  |
| rs117430819 | A | 0.0558  |
| rs62104913  | A | 0.023   |
| rs62530961  | T | -0.03   |
| rs116944697 | A | 0.0501  |
| rs4932806   | T | 0.0594  |
| rs145176510 | A | 0.0348  |
| rs140098757 | G | -0.1073 |
| rs10426311  | T | 0.0186  |
| rs2287876   | A | 0.0158  |
| rs56742042  | G | -0.0206 |
| rs886134    | A | -0.0415 |

|             |   |         |
|-------------|---|---------|
| rs75783493  | T | 0.0212  |
| rs12984777  | A | 0.0595  |
| rs73039434  | G | 0.0351  |
| rs12463156  | A | 0.015   |
| rs11673214  | G | -0.0237 |
| rs72988267  | A | 0.0731  |
| rs62125133  | A | -0.1268 |
| rs113751054 | T | -0.0405 |
| rs7250373   | T | 0.0272  |
| rs73567252  | C | 0.1291  |
| rs11083956  | G | -0.0158 |
| rs3815716   | T | 0.0285  |
| rs59881416  | A | 0.038   |
| rs302475    | A | 0.0331  |
| rs10416704  | G | -0.0327 |
| rs11880333  | T | 0.037   |
| rs142086401 | A | 0.066   |
| rs140828840 | T | -0.0497 |
| rs143005749 | A | -0.0697 |
| rs2905563   | T | 0.0217  |
| rs11668554  | G | -0.0325 |
| rs62130862  | G | 0.0171  |
| rs28930680  | G | 0.0512  |
| rs55806100  | G | 0.0174  |
| rs10425594  | A | -0.0145 |
| rs78583701  | A | -0.0271 |
| rs265297    | C | -0.0216 |
| rs12975930  | T | 0.0562  |
| rs62147270  | A | -0.0273 |
| rs71334752  | A | -0.0543 |
| rs138347150 | T | -0.0507 |
| rs1076230   | G | -0.0151 |
| rs4807441   | T | 0.0487  |
| rs1541828   | G | -0.0164 |
| rs77136978  | A | -0.0395 |
| rs79287667  | T | -0.1084 |
| rs12462855  | A | -0.0204 |
| rs798900    | C | 0.0184  |
| rs56802269  | T | -0.0265 |
| rs11673555  | T | 0.0205  |
| rs147993974 | A | -0.1061 |
| rs2003104   | T | 0.0468  |
| rs67341842  | C | 0.0392  |
| rs28723065  | T | 0.0238  |
| rs8107814   | T | 0.026   |
| rs7250829   | C | 0.0189  |
| rs2080887   | G | 0.0145  |

|             |   |         |
|-------------|---|---------|
| rs111838035 | C | -0.0866 |
| rs3212762   | G | 0.0258  |
| rs8113401   | C | -0.0204 |
| rs146091812 | A | -0.1063 |
| rs79476955  | T | 0.0466  |
| rs17756538  | T | 0.0351  |
| rs2074940   | T | 0.0177  |
| rs12151269  | T | 0.0177  |
| rs73010354  | A | -0.0349 |
| rs79089568  | A | -0.0482 |
| rs11668533  | A | 0.0164  |
| rs17722016  | T | -0.0314 |
| rs67915840  | T | -0.0215 |
| rs216278    | G | 0.0575  |
| rs11665917  | A | -0.119  |
| rs2041972   | T | 0.0169  |
| rs62126390  | T | -0.0292 |
| rs117879916 | A | 0.0441  |
| rs11880266  | G | -0.0302 |
| rs73054870  | A | -0.0248 |
| rs8101339   | G | 0.055   |
| rs79057215  | T | 0.0428  |
| rs139459590 | G | 0.0691  |
| rs4926171   | A | -0.0172 |
| rs113495004 | T | -0.0367 |
| rs62128167  | T | -0.073  |
| rs11671544  | C | 0.0247  |
| rs146179167 | G | -0.0438 |
| rs10404342  | A | -0.0305 |
| rs11667193  | A | 0.0149  |
| rs76164526  | G | 0.0651  |
| rs113832326 | T | -0.1151 |
| rs2421198   | T | 0.0174  |
| rs11083670  | G | -0.0211 |
| rs149441832 | G | 0.0722  |
| rs77400105  | G | 0.0764  |
| rs918437    | C | -0.0229 |
| rs114475810 | A | 0.0564  |
| rs1076513   | A | 0.0302  |
| rs8104167   | T | 0.0145  |
| rs35556583  | A | -0.0413 |
| rs376630    | A | -0.0816 |
| rs11879413  | T | -0.0341 |
| rs2115475   | C | -0.0149 |
| rs7260363   | G | 0.0219  |
| rs117008645 | T | 0.0637  |
| rs4803214   | A | 0.0227  |

|             |   |         |
|-------------|---|---------|
| rs141726434 | T | -0.0701 |
| rs144805360 | C | -0.0783 |
| rs10426111  | T | -0.016  |
| rs74638627  | C | 0.0346  |
| rs58091556  | A | 0.0226  |
| rs73012358  | G | -0.0317 |
| rs141871575 | T | -0.0776 |
| rs10412573  | A | -0.0183 |
| rs60163624  | A | -0.035  |
| rs147062575 | G | 0.0981  |
| rs892043    | A | 0.0434  |
| rs8101850   | C | 0.0817  |
| rs147484747 | A | -0.0996 |
| rs1428641   | T | 0.0161  |
| rs55675016  | T | 0.0371  |
| rs139373421 | T | 0.0515  |
| rs17272847  | A | -0.0286 |
| rs6510053   | G | 0.103   |
| rs143027390 | T | 0.1142  |
| rs266850    | G | 0.0184  |
| rs7339707   | T | 0.0251  |
| rs12151025  | A | 0.0798  |
| rs148077963 | A | -0.0907 |
| rs2277986   | G | -0.0207 |
| rs77870392  | A | -0.1016 |
| rs2396237   | T | 0.0179  |
| rs7256976   | G | -0.0202 |
| rs148552167 | G | 0.0716  |
| rs36113692  | G | 0.0319  |
| rs11879149  | C | -0.0437 |
| rs75052170  | T | 0.042   |
| rs12984398  | C | 0.0727  |
| rs74806369  | G | -0.038  |
| rs7255699   | A | -0.0252 |
| rs116672017 | T | -0.0415 |
| rs56227700  | G | 0.0155  |
| rs7251310   | T | -0.0713 |
| rs118135160 | G | 0.0642  |
| rs6512077   | C | 0.0137  |
| rs4808069   | C | 0.0147  |
| rs79955662  | C | -0.0226 |
| rs55893470  | G | -0.0404 |
| rs2314341   | T | 0.0219  |
| rs10518272  | A | -0.0392 |
| rs75520557  | G | 0.062   |
| rs9749331   | G | -0.0246 |
| rs12611304  | T | 0.0617  |

|             |   |         |
|-------------|---|---------|
| rs1701929   | G | 0.0186  |
| rs117697594 | T | -0.0626 |
| rs10423085  | G | -0.0147 |
| rs10410631  | C | 0.0164  |
| rs17523436  | A | -0.0168 |
| rs12973215  | A | 0.0148  |
| rs10404346  | C | -0.0225 |
| rs74182634  | T | 0.1214  |
| rs78590319  | T | 0.0257  |
| rs4806072   | T | 0.0169  |
| rs150087786 | C | 0.1005  |
| rs28535858  | T | -0.0184 |
| rs141387112 | A | 0.045   |
| rs2293695   | T | 0.014   |
| rs28654141  | A | -0.0178 |
| rs146174774 | T | -0.0735 |
| rs35643757  | G | 0.0168  |
| rs10422256  | G | 0.0144  |
| rs144971959 | C | -0.1083 |
| rs2079745   | T | -0.0208 |
| rs1122965   | C | -0.0208 |
| rs9749011   | T | -0.0198 |
| rs142259293 | C | -0.0854 |
| rs73052010  | A | -0.027  |
| rs138246871 | G | -0.1115 |
| rs117861489 | G | 0.087   |
| rs74680322  | C | -0.0559 |
| rs75153965  | G | 0.0347  |
| rs8109538   | G | 0.0166  |
| rs11084990  | G | -0.0173 |
| rs56232571  | C | 0.103   |
| rs11668898  | T | -0.0619 |
| rs115962590 | A | 0.0773  |
| rs10426826  | C | -0.0225 |
| rs116969798 | T | 0.0541  |
| rs79853162  | G | 0.0507  |
| rs56911564  | A | 0.0246  |
| rs12980312  | A | 0.015   |
| rs151225121 | G | 0.0609  |
| rs76311470  | T | 0.0524  |
| rs116927431 | T | 0.0824  |
| rs60389477  | G | -0.0403 |
| rs759074    | T | -0.0487 |
| rs80132887  | G | 0.0768  |
| rs6422428   | T | -0.0455 |
| rs7257503   | A | 0.016   |
| rs117093686 | A | -0.0919 |

|             |   |         |
|-------------|---|---------|
| rs1624358   | T | 0.0289  |
| rs173665    | A | -0.03   |
| rs145145957 | C | -0.1012 |
| rs62104170  | T | -0.0354 |
| rs117837048 | A | -0.0874 |
| rs12985277  | T | 0.0166  |
| rs140840112 | C | -0.0916 |
| rs2436531   | T | -0.0191 |
| rs8099837   | T | -0.0393 |
| rs73038312  | T | 0.0312  |
| rs78640372  | A | -0.049  |
| rs141523228 | T | -0.0561 |
| rs10411961  | G | 0.0257  |
| rs79659589  | A | 0.0847  |
| rs79214812  | T | 0.0399  |
| rs2569456   | A | -0.0139 |
| rs117000675 | T | -0.0413 |
| rs10424965  | C | -0.0198 |
| rs71337562  | A | 0.0424  |
| rs2571168   | T | -0.0181 |
| rs73053193  | A | 0.0715  |
| rs62126662  | T | -0.037  |
| rs150670916 | C | -0.0206 |
| rs117436540 | A | 0.0459  |
| rs80153844  | T | 0.0706  |
| rs11670874  | C | -0.0146 |
| rs147961011 | A | 0.0387  |
| rs111662764 | T | 0.038   |
| rs112261247 | C | -0.0592 |
| rs149563256 | T | -0.0661 |
| rs2867743   | G | -0.0137 |
| rs76142608  | A | -0.0307 |
| rs2860167   | T | 0.0307  |
| rs16970394  | T | -0.059  |
| rs145113274 | A | -0.1052 |
| rs694398    | A | -0.0168 |
| rs34295059  | T | -0.0683 |
| rs117812926 | G | 0.0618  |
| rs4807100   | A | 0.0164  |
| rs139359536 | G | 0.057   |
| rs117807208 | T | 0.0722  |
| rs35154518  | T | 0.0301  |
| rs78743260  | C | -0.0359 |
| rs73037015  | C | 0.0232  |
| rs76210236  | C | -0.0565 |
| rs348347    | A | 0.0142  |
| rs4801194   | A | -0.0224 |



|             |   |         |
|-------------|---|---------|
| rs61740687  | T | 0.0432  |
| rs75595663  | A | -0.0447 |
| rs150481707 | A | 0.1004  |
| rs10407672  | A | 0.0194  |
| rs117050996 | G | 0.0353  |
| rs12973116  | G | 0.0148  |
| rs118158898 | A | -0.0879 |
| rs74340166  | A | 0.0516  |
| rs73029116  | G | 0.0559  |
| rs11883381  | T | -0.0247 |
| rs2287826   | A | 0.0298  |
| rs34226842  | T | -0.1019 |
| rs10415779  | C | -0.0168 |
| rs4805585   | T | 0.0229  |
| rs146700252 | A | 0.0373  |
| rs73016898  | G | -0.0168 |
| rs4807437   | T | -0.017  |
| rs73924266  | T | -0.0459 |
| rs77064335  | G | -0.0875 |
| rs8104920   | G | 0.0146  |
| rs12386122  | C | 0.0185  |
| rs61740405  | C | -0.076  |
| rs77629013  | G | -0.0326 |
| rs75270968  | T | -0.0818 |
| rs16990597  | G | 0.061   |
| rs35183594  | A | 0.0312  |
| rs10426965  | C | -0.0199 |
| rs2195976   | A | 0.019   |
| rs78893384  | C | 0.0738  |
| rs1678859   | A | -0.0415 |
| rs2303558   | T | -0.0178 |
| rs73005993  | A | 0.0447  |
| rs35310199  | A | -0.0189 |
| rs73043217  | T | -0.0279 |
| rs117249591 | G | 0.0809  |
| rs8109119   | G | -0.0163 |
| rs75051036  | T | 0.0275  |
| rs115315881 | A | 0.0898  |
| rs2278498   | G | -0.015  |
| rs735240    | A | -0.0145 |
| rs3760965   | T | 0.0182  |
| rs77621954  | C | -0.0295 |
| rs35582299  | A | -0.0845 |
| rs3760897   | C | -0.0217 |
| rs338600    | C | 0.0175  |
| rs115347106 | A | -0.0204 |
| rs114560719 | A | -0.0666 |

|             |   |         |
|-------------|---|---------|
| rs8108799   | A | 0.0218  |
| rs141213603 | A | 0.0514  |
| rs281417    | T | -0.016  |
| rs12162264  | A | -0.0206 |
| rs55682720  | A | -0.0832 |
| rs4588099   | A | -0.0195 |
| rs150991061 | C | 0.0531  |
| rs149720430 | C | -0.0586 |
| rs62115779  | T | 0.0285  |
| rs117819314 | T | 0.104   |
| rs115623921 | T | 0.0625  |
| rs73030176  | T | -0.0891 |
| rs34185948  | T | 0.032   |
| rs140529236 | T | -0.0631 |
| rs118042257 | G | 0.0616  |
| rs1874490   | C | -0.021  |
| rs76359638  | C | -0.0309 |
| rs8100140   | A | 0.0194  |
| rs379327    | T | 0.0227  |
| rs34709     | G | -0.0258 |
| rs35779110  | A | -0.018  |
| rs8109494   | C | -0.0328 |
| rs11569438  | T | -0.0226 |
| rs112595450 | C | -0.0462 |
| rs55775021  | T | -0.0167 |
| rs12978780  | G | 0.0591  |
| rs146753055 | A | 0.1133  |
| rs384702    | A | -0.0297 |
| rs7246433   | T | 0.1037  |
| rs6510863   | C | 0.0178  |
| rs10401458  | T | 0.0152  |
| rs148803111 | A | 0.0349  |
| rs8110348   | T | 0.0197  |
| rs78540044  | C | 0.0204  |
| rs2238632   | G | 0.0157  |
| rs12981546  | A | -0.0277 |
| rs139826897 | T | -0.1085 |
| rs12974385  | C | 0.0166  |
| rs55997260  | C | -0.017  |
| rs143263386 | A | 0.0539  |
| rs62111293  | C | -0.0322 |
| rs10408691  | C | -0.0152 |
| rs745439    | T | -0.0307 |
| rs148374656 | T | 0.1085  |
| rs148176304 | C | 0.0663  |
| rs12972947  | T | -0.0497 |
| rs2965209   | G | 0.0252  |

|             |   |         |
|-------------|---|---------|
| rs12460030  | T | 0.0458  |
| rs79365403  | G | -0.0437 |
| rs10404959  | T | -0.014  |
| rs35531833  | G | 0.0285  |
| rs74359534  | C | 0.0358  |
| rs72988579  | G | -0.0679 |
| rs740434    | C | -0.0283 |
| rs773920    | T | -0.0136 |
| rs2722643   | G | 0.0348  |
| rs117979493 | C | -0.0752 |
| rs12981826  | C | -0.0161 |
| rs77213073  | T | 0.0747  |
| rs117589420 | C | 0.0791  |
| rs67578769  | C | -0.0265 |
| rs73044990  | G | 0.0323  |
| rs78438952  | A | -0.0834 |
| rs10426634  | G | 0.0287  |
| rs7257568   | T | -0.0616 |
| rs10854122  | T | -0.0163 |
| rs76965517  | C | -0.057  |
| rs3848581   | G | 0.0216  |
| rs1968438   | G | -0.0302 |
| rs74885640  | G | 0.0338  |
| rs145166658 | G | -0.0333 |
| rs8106432   | G | 0.0138  |
| rs12971823  | A | 0.0278  |
| rs407959    | A | 0.0192  |
| rs75264675  | C | -0.0805 |
| rs139142345 | T | -0.1071 |
| rs648624    | A | 0.0163  |
| rs150807336 | G | -0.0789 |
| rs8111866   | A | -0.0258 |
| rs7254171   | C | -0.0163 |
| rs111351579 | G | -0.0203 |
| rs111878140 | T | -0.0221 |
| rs142299722 | T | -0.0651 |
| rs73054282  | A | -0.0168 |
| rs4801212   | T | -0.0271 |
| rs78152814  | C | -0.0471 |
| rs9749556   | C | -0.0311 |
| rs11668282  | C | 0.0155  |
| rs150394140 | A | -0.0632 |
| rs11879255  | A | -0.0317 |
| rs60154733  | T | -0.0483 |
| rs10426269  | T | 0.0195  |
| rs139876278 | G | 0.077   |
| rs150191918 | G | 0.0771  |

|             |   |         |
|-------------|---|---------|
| rs8110145   | C | 0.0206  |
| rs73019238  | T | 0.0703  |
| rs12977262  | C | -0.0191 |
| rs148051545 | T | 0.0853  |
| rs75670219  | A | 0.0862  |
| rs17719222  | T | -0.0217 |
| rs146062578 | A | -0.0392 |
| rs117548140 | A | -0.0648 |
| rs580168    | G | -0.0204 |
| rs279273    | G | 0.0272  |
| rs73034545  | T | -0.0952 |
| rs190430    | C | -0.0192 |
| rs11669680  | A | 0.0139  |
| rs17691755  | G | -0.0177 |
| rs62111684  | G | 0.0619  |
| rs11666596  | T | 0.0182  |
| rs3746307   | T | 0.0483  |
| rs112215374 | T | -0.0789 |
| rs73005679  | A | 0.09    |
| rs11083483  | G | -0.0173 |
| rs117750569 | A | -0.0858 |
| rs2043289   | A | 0.0299  |
| rs35141123  | A | -0.0392 |
| rs78814973  | A | -0.0499 |
| rs4581824   | G | 0.017   |
| rs4804511   | C | -0.0176 |
| rs35605606  | A | -0.0189 |
| rs73048160  | T | 0.0685  |
| rs529807    | T | -0.0194 |
| rs73052055  | A | 0.037   |
| rs117792869 | T | -0.1092 |
| rs112981548 | C | -0.065  |
| rs62131271  | T | -0.0359 |
| rs141987172 | A | -0.0804 |
| rs10853801  | T | 0.0131  |
| rs11085852  | T | -0.0209 |
| rs60662795  | A | -0.0216 |
| rs141550019 | G | 0.0382  |
| rs74322196  | A | 0.0282  |
| rs73046809  | G | 0.0637  |
| rs11667514  | C | -0.0609 |
| rs2898691   | T | -0.0141 |
| rs28619326  | G | 0.0647  |
| rs73061949  | T | 0.0306  |
| rs79319957  | G | -0.0386 |
| rs16980145  | G | -0.0789 |
| rs34187838  | C | 0.0456  |

|             |   |         |
|-------------|---|---------|
| rs34710     | G | -0.0361 |
| rs4807121   | G | 0.0172  |
| rs1075403   | T | 0.0135  |
| rs35992500  | A | -0.0248 |
| rs77338115  | A | -0.0781 |
| rs73516539  | A | 0.0849  |
| rs12461888  | G | 0.0266  |
| rs117849177 | T | 0.0617  |
| rs113103697 | A | 0.0463  |
| rs12983658  | C | -0.0274 |
| rs62113566  | T | -0.0484 |
| rs28670042  | C | 0.0185  |
| rs4807087   | A | -0.0135 |
| rs7253519   | A | 0.0265  |
| rs11879646  | T | 0.0151  |
| rs113551364 | T | -0.0518 |
| rs150800693 | A | -0.0665 |
| rs34197373  | A | 0.0258  |
| rs62109953  | T | 0.0445  |
| rs397191    | A | 0.0162  |
| rs75043668  | C | 0.0337  |
| rs12973387  | T | 0.0209  |
| rs917545    | G | 0.0168  |
| rs77628825  | T | -0.0608 |
| rs17654456  | T | 0.0191  |
| rs58866020  | C | -0.0327 |
| rs11879029  | A | -0.0246 |
| rs10406647  | G | -0.0272 |
| rs6511689   | C | 0.0147  |
| rs4808115   | G | 0.0215  |
| rs138291523 | A | -0.0421 |
| rs11084794  | A | 0.0289  |
| rs1661178   | T | -0.0245 |
| rs11669020  | A | -0.0137 |
| rs3810169   | T | -0.0388 |
| rs111582818 | A | 0.0936  |
| rs4575642   | C | -0.0352 |
| rs150385309 | T | 0.0853  |
| rs79185030  | A | -0.0731 |
| rs112256852 | T | -0.0336 |
| rs7256423   | A | 0.0429  |
| rs7359899   | A | -0.0506 |
| rs73540861  | A | -0.0345 |
| rs279203    | C | 0.0297  |
| rs142830009 | G | -0.0455 |
| rs7254938   | C | 0.02    |
| rs147536256 | A | 0.0602  |

|             |   |         |
|-------------|---|---------|
| rs12983501  | T | 0.0132  |
| rs11668122  | G | 0.0299  |
| rs34762786  | A | -0.0266 |
| rs139368025 | T | -0.0988 |
| rs28853973  | A | -0.0279 |
| rs10854035  | T | -0.0168 |
| rs11671930  | C | 0.0185  |
| rs266852    | T | -0.0153 |
| rs34908470  | G | 0.0299  |
| rs77757514  | C | -0.0578 |
| rs1971786   | C | 0.0302  |
| rs11670127  | A | -0.0208 |
| rs142774060 | G | 0.0675  |
| rs80191405  | C | -0.0263 |
| rs34373168  | G | 0.0587  |
| rs149527935 | A | -0.0465 |
| rs113727581 | G | -0.0219 |
| rs9941464   | T | 0.0173  |
| rs118120449 | G | 0.0562  |
| rs2161568   | A | -0.0228 |
| rs80341032  | A | 0.0425  |
| rs141446888 | T | 0.0474  |
| rs113346399 | A | 0.0691  |
| rs74702653  | T | 0.0291  |
| rs11668094  | G | 0.0187  |
| rs148437700 | A | -0.05   |
| rs73027361  | C | -0.0415 |
| rs1985857   | G | -0.0429 |
| rs1643483   | A | 0.0696  |
| rs11667223  | A | -0.0184 |
| rs268889    | G | 0.0508  |
| rs2965212   | T | 0.0165  |
| rs138048435 | C | -0.0932 |
| rs55837102  | T | 0.0496  |
| rs7247304   | T | 0.0226  |
| rs10402682  | A | 0.1055  |
| rs141519324 | A | 0.0842  |
| rs8113488   | C | -0.0176 |
| rs12971803  | A | 0.0341  |
| rs12460407  | C | 0.015   |
| rs142777115 | T | 0.0762  |
| rs11673492  | T | 0.0169  |
| rs2242520   | A | 0.0276  |
| rs10404404  | C | -0.0245 |
| rs8107517   | T | 0.0147  |
| rs78598082  | T | -0.0594 |
| rs73036613  | T | -0.032  |

|             |   |         |
|-------------|---|---------|
| rs117665044 | C | 0.0724  |
| rs4804788   | T | 0.0194  |
| rs76297148  | T | -0.0245 |
| rs117281069 | A | 0.0299  |
| rs79233169  | A | 0.0368  |
| rs12461560  | T | 0.0323  |
| rs8108561   | G | 0.0151  |
| rs62105791  | T | -0.0187 |
| rs147351845 | T | 0.0403  |
| rs145458243 | T | -0.033  |
| rs892050    | T | 0.0289  |
| rs111334956 | G | -0.0559 |
| rs3731004   | G | 0.0553  |
| rs57787219  | A | -0.0265 |
| rs62125439  | A | 0.0231  |
| rs117198353 | A | 0.1044  |
| rs73042059  | T | 0.0713  |
| rs12974468  | A | 0.0328  |
| rs138238767 | C | -0.0715 |
| rs113700483 | A | -0.0778 |
| rs7260272   | G | -0.016  |
| rs7253072   | T | -0.028  |
| rs7245478   | C | -0.099  |
| rs143235511 | A | -0.0946 |
| rs12971496  | T | 0.1165  |
| rs10419994  | T | 0.0217  |
| rs80189017  | T | 0.0236  |
| rs1651550   | A | -0.071  |
| rs56100528  | G | 0.0585  |
| rs11671344  | A | -0.0229 |
| rs112976345 | G | 0.0612  |
| rs150270248 | A | -0.06   |
| rs77646034  | A | -0.0553 |
| rs312927    | A | -0.0225 |
| rs73919801  | A | 0.0283  |
| rs3745977   | T | 0.0378  |
| rs73565804  | T | -0.0697 |
| rs74180871  | A | 0.0497  |
| rs11083492  | T | -0.0127 |
| rs73050111  | T | 0.0129  |
| rs75476837  | C | 0.0262  |
| rs67385205  | T | -0.0163 |
| rs116995809 | G | -0.0745 |
| rs146661810 | A | -0.0721 |
| rs7258227   | C | 0.0144  |
| rs10422596  | G | -0.0273 |
| rs11670866  | A | -0.015  |

|             |   |         |
|-------------|---|---------|
| rs55758955  | A | -0.0383 |
| rs147885174 | T | -0.0417 |
| rs12986229  | T | -0.0476 |
| rs281398    | T | 0.0179  |
| rs3859545   | C | -0.0234 |
| rs35628877  | T | -0.0301 |
| rs4375778   | C | -0.0165 |
| rs1859949   | T | -0.013  |
| rs146304807 | G | -0.108  |
| rs7251352   | A | 0.0138  |
| rs116924700 | T | 0.0216  |
| rs56199215  | T | -0.0365 |
| rs10414036  | A | 0.0294  |
| rs2108527   | G | 0.0215  |
| rs113449764 | T | -0.0937 |
| rs10409638  | A | 0.0123  |
| rs79822129  | A | 0.0456  |
| rs55680309  | A | -0.0408 |
| rs4804633   | G | -0.0144 |
| rs113020107 | C | 0.0224  |
| rs2091825   | T | -0.0273 |
| rs1542405   | A | -0.0128 |
| rs144040836 | T | 0.1112  |
| rs117539667 | A | 0.0382  |
| rs11880448  | T | 0.0266  |
| rs145233574 | T | 0.0527  |
| rs8100653   | T | 0.0234  |
| rs2431820   | C | 0.03    |
| rs78567512  | C | -0.0822 |
| rs73547564  | A | -0.0655 |
| rs34097184  | C | -0.0862 |
| rs1981828   | C | -0.0162 |
| rs34687255  | A | 0.0264  |
| rs734108    | A | -0.0196 |
| rs4508531   | T | 0.0348  |
| rs7408477   | C | -0.0127 |
| rs145287959 | A | 0.077   |
| rs2863308   | C | -0.0156 |
| rs8102392   | A | -0.0199 |
| rs76693509  | C | -0.0783 |
| rs75570719  | T | -0.0277 |
| rs12977091  | G | 0.0156  |
| rs75759084  | T | -0.061  |
| rs1035395   | T | 0.0149  |
| rs146218796 | T | 0.0341  |
| rs117639138 | G | 0.0628  |
| rs2116926   | C | -0.0235 |



|             |   |         |
|-------------|---|---------|
| rs62111313  | T | -0.0772 |
| rs80117958  | A | 0.0458  |
| rs1293704   | T | 0.0134  |
| rs34714080  | G | 0.0213  |
| rs146780279 | A | 0.0916  |
| rs35789597  | A | 0.0319  |
| rs12974081  | T | -0.0164 |
| rs117382391 | G | -0.0524 |
| rs57295859  | T | -0.0338 |
| rs59387481  | T | 0.0412  |
| rs62127920  | G | 0.0159  |
| rs3795020   | T | -0.0136 |
| rs16996277  | G | -0.0374 |
| rs4805721   | C | -0.017  |
| rs79240659  | A | 0.0535  |
| rs4806965   | T | 0.0223  |
| rs147915270 | C | 0.0369  |
| rs1862510   | T | -0.0223 |
| rs8104151   | G | 0.0364  |
| rs1645683   | G | -0.0141 |
| rs113844990 | T | 0.0795  |
| rs78459103  | A | 0.0832  |
| rs4804280   | C | -0.0244 |
| rs4806077   | T | -0.0157 |
| rs2312724   | C | 0.0249  |
| rs2240037   | A | 0.0726  |
| rs12981802  | A | 0.0215  |
| rs59100151  | A | 0.0207  |
| rs149161493 | T | -0.0708 |
| rs73009474  | G | 0.0317  |
| rs77525050  | T | 0.081   |
| rs11669396  | A | -0.022  |
| rs11667245  | T | 0.0152  |
| rs10416904  | G | 0.0257  |
| rs73040130  | C | -0.0346 |
| rs2277996   | C | 0.0139  |
| rs4808049   | A | 0.0177  |
| rs55969411  | A | -0.0937 |
| rs8110912   | T | -0.0127 |
| rs7251594   | C | -0.0233 |
| rs77591688  | T | 0.0614  |
| rs10403515  | T | -0.0144 |
| rs10402752  | C | 0.0191  |
| rs11672683  | T | -0.0158 |
| rs12981831  | T | 0.0343  |
| rs117374543 | C | 0.0476  |
| rs7247652   | T | -0.0269 |

|             |   |         |
|-------------|---|---------|
| rs10405239  | C | 0.0213  |
| rs2016527   | T | 0.05    |
| rs2608547   | A | 0.0366  |
| rs16986899  | C | -0.0172 |
| rs74257295  | A | 0.0498  |
| rs112125416 | A | -0.0356 |
| rs10426628  | A | -0.0174 |
| rs10426272  | A | 0.0142  |
| rs28377489  | A | 0.0134  |
| rs80346234  | T | 0.0188  |
| rs6509704   | A | -0.0287 |
| rs12976441  | C | -0.0198 |
| rs77578935  | A | 0.0583  |
| rs78569322  | G | 0.0236  |
| rs76943750  | G | -0.0694 |
| rs184623    | G | -0.0131 |
| rs530942    | G | 0.0206  |
| rs12982003  | G | 0.0423  |
| rs55924438  | A | 0.0127  |
| rs11667136  | T | 0.0774  |
| rs73018307  | A | -0.036  |
| rs4283339   | A | -0.0138 |
| rs58409493  | C | -0.1015 |
| rs10403114  | G | -0.014  |
| rs78642714  | A | 0.0269  |
| rs79725225  | T | -0.0354 |
| rs1990575   | T | -0.0254 |
| rs11668173  | A | 0.0463  |
| rs12976392  | A | 0.0358  |
| rs8107133   | T | -0.042  |
| rs73061008  | A | -0.0153 |
| rs62115159  | G | -0.0174 |
| rs11084280  | G | 0.0163  |
| rs10418550  | A | 0.0139  |
| rs73591965  | A | 0.02    |
| rs76226804  | A | -0.047  |
| rs13344762  | T | 0.0122  |
| rs10414883  | G | 0.0135  |
| rs118079536 | T | 0.0486  |
| rs2353017   | T | 0.0125  |
| rs73043387  | T | 0.0525  |
| rs6509718   | A | -0.0149 |
| rs60172994  | T | -0.0325 |
| rs62110837  | T | 0.0331  |
| rs268674    | C | 0.0259  |
| rs72993589  | A | 0.0227  |
| rs10418392  | T | 0.0502  |

|             |   |         |
|-------------|---|---------|
| rs61354049  | A | 0.0475  |
| rs3339      | C | 0.0175  |
| rs118101548 | C | -0.0875 |
| rs111678424 | C | -0.0653 |
| rs111454238 | T | -0.0524 |
| rs8101137   | T | 0.0223  |
| rs73521015  | T | -0.0597 |
| rs77108053  | T | -0.0731 |
| rs112253475 | G | 0.0635  |
| rs35950993  | T | 0.0311  |
| rs4806708   | G | -0.018  |
| rs118014234 | T | -0.068  |
| rs117329178 | A | -0.0563 |
| rs4801810   | A | 0.019   |
| rs2230203   | T | -0.021  |
| rs56050670  | G | 0.0144  |
| rs11881662  | A | -0.0201 |
| rs17601885  | G | -0.0206 |
| rs10409409  | G | -0.0178 |
| rs10413702  | A | -0.0147 |
| rs79836946  | T | -0.0438 |
| rs74826995  | T | -0.034  |
| rs76710412  | C | -0.0165 |
| rs4807536   | T | 0.0312  |
| rs373916    | G | 0.0168  |
| rs143587805 | T | -0.0857 |
| rs77962345  | T | -0.0494 |
| rs118189401 | T | -0.0939 |
| rs8108796   | T | -0.0333 |
| rs7255619   | G | 0.06    |
| rs73022605  | A | -0.0358 |
| rs113607089 | T | 0.0556  |
| rs56307120  | C | 0.0264  |
| rs62121429  | A | -0.0239 |
| rs11569546  | A | -0.0252 |
| rs80082737  | C | 0.0415  |
| rs41322049  | T | -0.0557 |
| rs11671854  | G | 0.0361  |
| rs10402268  | G | 0.0324  |
| rs35368210  | G | 0.0133  |
| rs73922021  | C | 0.0227  |
| rs117532876 | C | 0.0802  |
| rs8105063   | T | -0.0683 |
| rs60500351  | G | -0.0809 |
| rs10421903  | T | -0.0282 |
| rs73570947  | G | 0.0525  |
| rs62109509  | T | -0.0219 |

|             |   |         |
|-------------|---|---------|
| rs12327821  | C | -0.0158 |
| rs75875659  | T | 0.0903  |
| rs1551562   | G | -0.0144 |
| rs78931478  | A | 0.0491  |
| rs2436514   | T | 0.0125  |
| rs117597226 | A | 0.0715  |
| rs147222494 | A | 0.0744  |
| rs117736410 | A | 0.0456  |
| rs2978642   | T | -0.0155 |
| rs268883    | T | 0.0182  |
| rs10421386  | T | 0.0135  |
| rs7254392   | G | -0.0157 |
| rs11668334  | A | -0.0191 |
| rs1975028   | C | -0.0299 |
| rs61736521  | T | 0.0304  |
| rs75334886  | C | 0.045   |
| rs4801696   | C | 0.0125  |
| rs7255513   | A | 0.0415  |
| rs887932    | T | -0.0364 |
| rs78904834  | T | -0.0568 |
| rs28379440  | G | 0.0225  |
| rs62126490  | G | -0.0531 |
| rs76268506  | T | 0.0241  |
| rs117040088 | A | -0.0668 |
| rs8110700   | A | -0.0212 |
| rs117255300 | T | 0.0605  |
| rs12609984  | T | -0.0167 |
| rs73566656  | A | 0.0164  |
| rs3745521   | A | -0.0146 |
| rs3920      | A | 0.0205  |
| rs8103909   | G | -0.0127 |
| rs55995815  | A | 0.0154  |
| rs4802705   | C | -0.0151 |
| rs77252054  | A | 0.0793  |
| rs117088104 | A | -0.0597 |
| rs113973233 | T | -0.089  |
| rs77112780  | G | -0.0643 |
| rs2116951   | G | -0.0511 |
| rs118064953 | T | 0.0307  |
| rs72479571  | A | 0.0162  |
| rs10424436  | G | -0.0247 |
| rs12463358  | T | -0.0597 |
| rs12984891  | C | -0.013  |
| rs1368464   | C | -0.0124 |
| rs8100636   | C | 0.0593  |
| rs61752561  | A | 0.0551  |
| rs45617640  | T | -0.0242 |

|             |   |         |
|-------------|---|---------|
| rs79657037  | G | -0.0358 |
| rs147040157 | T | -0.0544 |
| rs71363373  | A | -0.0245 |
| rs4804820   | T | -0.0157 |
| rs2043838   | A | 0.0358  |
| rs76874382  | G | 0.0447  |
| rs2434830   | C | -0.013  |
| rs10424816  | C | -0.012  |
| rs12984733  | T | -0.0622 |
| rs3816080   | T | 0.0183  |
| rs12461154  | G | 0.0269  |
| rs112724622 | A | 0.0628  |
| rs10424113  | C | 0.0141  |
| rs146580779 | A | -0.0242 |
| rs112344602 | T | -0.0846 |
| rs60753695  | C | 0.062   |
| rs2283629   | A | 0.0333  |
| rs346049    | T | -0.0191 |
| rs4804228   | T | 0.0152  |
| rs247771    | C | -0.013  |
| rs2431866   | A | 0.0202  |
| rs116530815 | C | 0.0377  |
| rs10425914  | A | -0.0332 |
| rs7255690   | G | 0.0128  |
| rs150347638 | A | 0.0736  |
| rs1017092   | A | 0.0132  |
| rs8108634   | C | 0.0789  |
| rs62113889  | A | 0.0459  |
| rs7251980   | C | -0.0183 |
| rs17584358  | A | -0.0427 |
| rs7247279   | C | -0.0127 |
| rs8103382   | T | -0.023  |
| rs2238635   | A | -0.0124 |
| rs62130406  | G | -0.0216 |
| rs11670442  | T | 0.0636  |
| rs113235029 | A | -0.0869 |
| rs2110586   | T | 0.0159  |
| rs35146757  | T | -0.0162 |
| rs3885743   | T | -0.0194 |
| rs73012976  | A | 0.0293  |
| rs8103280   | C | 0.0132  |
| rs56056787  | A | 0.044   |
| rs11670021  | G | -0.024  |
| rs35760174  | C | 0.0839  |
| rs62127924  | G | 0.0358  |
| rs8105325   | G | -0.0168 |
| rs8100946   | T | -0.0177 |

|             |   |         |
|-------------|---|---------|
| rs117339479 | G | -0.0844 |
| rs10405470  | T | -0.0188 |
| rs111450200 | A | 0.0726  |
| rs145374795 | C | -0.0489 |
| rs111490130 | T | 0.0514  |
| rs10423758  | T | -0.0348 |
| rs150215639 | T | 0.0386  |
| rs1643492   | T | 0.0292  |
| rs2071699   | A | 0.0742  |
| rs45623435  | C | -0.0246 |
| rs117356106 | C | 0.0663  |
| rs6510113   | T | 0.0458  |
| rs1812927   | A | -0.057  |
| rs6508849   | A | -0.0327 |
| rs113075345 | T | 0.0475  |
| rs6417255   | T | -0.0173 |
| rs2288544   | T | -0.0146 |
| rs118115723 | T | 0.0404  |
| rs138562379 | A | 0.0981  |
| rs4015      | T | 0.0143  |
| rs112497863 | A | 0.094   |
| rs6510692   | C | -0.0141 |
| rs4805420   | C | -0.0108 |
| rs2546056   | T | -0.0212 |
| rs140393702 | T | 0.0474  |
| rs8109384   | A | -0.0165 |
| rs1862516   | T | -0.0163 |
| rs117642457 | C | 0.0548  |
| rs117645372 | A | -0.0184 |
| rs11671281  | T | -0.0126 |
| rs4807576   | A | -0.0173 |
| rs16978945  | C | 0.0259  |
| rs17534120  | T | 0.0491  |
| rs478888    | A | -0.0187 |
| rs12985868  | C | -0.0139 |
| rs140220602 | T | -0.0735 |
| rs45500792  | G | -0.0176 |
| rs2112461   | T | -0.0121 |
| rs35648526  | G | 0.0572  |
| rs10416379  | T | 0.02    |
| rs77232410  | G | 0.0176  |
| rs8106609   | T | -0.0158 |
| rs78388865  | C | 0.0298  |
| rs77496345  | A | 0.0575  |
| rs74178191  | T | -0.0289 |
| rs4806165   | C | 0.0151  |
| rs111776823 | A | 0.0429  |

|             |   |         |
|-------------|---|---------|
| rs12459129  | T | -0.0211 |
| rs118146634 | A | -0.0721 |
| rs2912443   | C | -0.0107 |
| rs36040021  | G | 0.0141  |
| rs73920181  | A | 0.0555  |
| rs34495400  | T | -0.0941 |
| rs149991628 | A | -0.0576 |
| rs4299268   | G | -0.0163 |
| rs28565362  | G | -0.0386 |
| rs2901077   | T | -0.033  |
| rs112864784 | G | 0.0262  |
| rs12972416  | G | 0.0204  |
| rs74500071  | T | -0.02   |
| rs74841173  | T | 0.033   |
| rs6511023   | C | 0.0311  |
| rs7256794   | C | 0.0306  |
| rs3794986   | G | -0.0112 |
| rs401886    | A | -0.018  |
| rs73056295  | T | 0.0444  |
| rs118156145 | C | -0.0397 |
| rs148084320 | A | 0.063   |
| rs117326757 | T | 0.0347  |
| rs150558517 | T | -0.0608 |
| rs10409814  | C | 0.0288  |
| rs17849971  | A | 0.0332  |
| rs75116477  | C | -0.038  |
| rs7258466   | T | -0.0165 |
| rs7409459   | T | 0.0155  |
| rs17434453  | T | -0.0164 |
| rs2613766   | C | -0.0113 |
| rs12979752  | C | 0.0116  |
| rs8113615   | C | 0.0138  |
| rs75588884  | C | 0.0427  |
| rs2283628   | C | 0.0225  |
| rs62126332  | T | 0.0931  |
| rs13344920  | T | 0.0162  |
| rs7409420   | A | 0.0431  |
| rs350871    | A | 0.0132  |
| rs11671453  | A | 0.0158  |
| rs115190425 | T | 0.0305  |
| rs8102845   | G | 0.0149  |
| rs73024456  | A | -0.0122 |
| rs2602701   | G | 0.0141  |
| rs3745920   | G | 0.0123  |
| rs117777502 | A | 0.0585  |
| rs144292856 | A | -0.0467 |
| rs17775938  | A | -0.0292 |

|             |   |         |
|-------------|---|---------|
| rs73044299  | C | 0.0594  |
| rs6509258   | T | -0.0197 |
| rs4808836   | T | 0.0134  |
| rs34004825  | A | 0.029   |
| rs112973163 | C | -0.0589 |
| rs56034303  | A | 0.0118  |
| rs34559490  | C | -0.0241 |
| rs113799168 | C | -0.0425 |
| rs45510794  | T | -0.0567 |
| rs4802734   | C | 0.0191  |
| rs11882563  | G | -0.0215 |
| rs61729813  | G | 0.0656  |
| rs115185195 | G | -0.0546 |
| rs6510867   | T | 0.0182  |
| rs8104986   | A | -0.0161 |
| rs74812357  | T | -0.0537 |
| rs116271726 | C | -0.0386 |
| rs8104741   | T | 0.0147  |
| rs147110014 | A | 0.0439  |
| rs2335192   | T | -0.0129 |
| rs17654580  | C | -0.0122 |
| rs75400807  | T | -0.0276 |
| rs74441035  | T | -0.0464 |
| rs339396    | C | -0.0241 |
| rs138254594 | T | -0.0632 |
| rs117512253 | G | 0.0934  |
| rs35737609  | A | -0.0704 |
| rs287128    | C | -0.0159 |
| rs17701615  | G | 0.0113  |
| rs17625918  | A | -0.0226 |
| rs1654245   | G | -0.0142 |
| rs10853977  | G | -0.019  |
| rs35262626  | T | -0.0266 |
| rs570880    | T | 0.0249  |
| rs6014724   | G | -0.138  |
| rs142848510 | A | 0.2639  |
| rs16998298  | C | 0.1245  |
| rs6054767   | G | 0.2489  |
| rs645544    | G | -0.0623 |
| rs16998572  | C | -0.0971 |
| rs11696501  | G | 0.0745  |
| rs6041586   | G | 0.0615  |
| rs3091556   | A | -0.0602 |
| rs2013603   | T | 0.0702  |
| rs55853468  | G | 0.1221  |
| rs6041716   | T | -0.0602 |
| rs2057244   | T | -0.0583 |



|             |   |         |
|-------------|---|---------|
| rs1178036   | A | -0.1762 |
| rs41303935  | G | 0.0961  |
| rs6044862   | A | 0.0827  |
| rs11696646  | T | -0.084  |
| rs6080757   | G | -0.0585 |
| rs6104185   | A | 0.1353  |
| rs2143606   | G | -0.0558 |
| rs6030646   | C | 0.0803  |
| rs6022504   | A | 0.0828  |
| rs34449811  | C | 0.1174  |
| rs1555328   | A | 0.0571  |
| rs1571173   | A | 0.1099  |
| rs6097106   | A | 0.1082  |
| rs6061764   | A | 0.0615  |
| rs6034579   | T | -0.2874 |
| rs74625170  | A | 0.1101  |
| rs6075903   | C | 0.0567  |
| rs62202686  | A | 0.2546  |
| rs6012200   | G | 0.0567  |
| rs6126918   | A | 0.2627  |
| rs459465    | A | -0.0648 |
| rs13044192  | A | -0.4072 |
| rs1000972   | T | 0.0532  |
| rs13040601  | T | -0.0556 |
| rs116853339 | A | -0.2286 |
| rs73279864  | T | 0.0885  |
| rs80308467  | A | -0.3046 |
| rs1358782   | A | -0.0677 |
| rs911158    | A | 0.0506  |
| rs6092422   | A | 0.1618  |
| rs78466056  | T | 0.4142  |
| rs2296530   | A | -0.0803 |
| rs78209042  | T | -0.2068 |
| rs805765    | T | -0.0613 |
| rs76605340  | T | -0.2594 |
| rs56132615  | A | 0.1845  |
| rs2424837   | T | -0.0756 |
| rs16981473  | C | 0.1686  |
| rs6045446   | A | -0.0764 |
| rs149406558 | G | -0.2257 |
| rs6140190   | A | 0.1549  |
| rs6090488   | C | 0.102   |
| rs58697888  | G | 0.1466  |
| rs141452643 | G | 0.2693  |
| rs74173701  | A | 0.1037  |
| rs6060052   | T | 0.0508  |
| rs62208537  | A | -0.2361 |

|             |   |         |
|-------------|---|---------|
| rs117097242 | A | -0.1797 |
| rs73101449  | A | 0.0827  |
| rs1009737   | C | 0.0647  |
| rs4811987   | T | -0.0798 |
| rs60838743  | C | 0.134   |
| rs78140317  | C | 0.0793  |
| rs707544    | C | 0.0818  |
| rs17317153  | T | -0.0762 |
| rs112481118 | C | 0.2443  |
| rs60192794  | C | 0.1095  |
| rs1995995   | C | 0.0879  |
| rs41304796  | T | 0.1638  |
| rs73106041  | C | 0.1364  |
| rs6053024   | T | -0.0508 |
| rs73139544  | G | 0.1363  |
| rs6097963   | G | 0.2671  |
| rs2296036   | G | 0.0801  |
| rs516681    | G | 0.148   |
| rs117606004 | T | 0.1407  |
| rs6086839   | A | -0.0928 |
| rs117141369 | G | 0.2292  |
| rs73115543  | T | 0.298   |
| rs6014757   | A | -0.0675 |
| rs2876443   | G | 0.0508  |
| rs6022041   | C | -0.0734 |
| rs6093370   | T | -0.101  |
| rs6111030   | T | 0.0619  |
| rs73605573  | G | -0.1317 |
| rs2295097   | C | 0.0996  |
| rs12480869  | C | 0.1248  |
| rs6046832   | C | 0.0492  |
| rs151159181 | C | 0.2049  |
| rs78916769  | G | -0.1955 |
| rs55849179  | C | -0.0988 |
| rs6096747   | G | 0.0528  |
| rs6030245   | C | 0.0562  |
| rs62206655  | A | -0.0683 |
| rs62202904  | A | -0.0787 |
| rs2267908   | G | -0.0523 |
| rs817370    | C | -0.0636 |
| rs8122324   | C | 0.1615  |
| rs3887942   | G | -0.0768 |
| rs73115905  | C | 0.1161  |
| rs7272789   | C | 0.0636  |
| rs6048364   | A | 0.0945  |
| rs6097527   | T | -0.0557 |
| rs150037457 | C | -0.2397 |

|             |   |         |
|-------------|---|---------|
| rs117881740 | C | 0.1946  |
| rs34219895  | G | 0.0709  |
| rs589493    | A | 0.054   |
| rs141983487 | C | 0.2734  |
| rs73126576  | C | -0.2153 |
| rs742640    | C | 0.1533  |
| rs17878755  | T | 0.0539  |
| rs79197234  | C | -0.1732 |
| rs6579121   | C | 0.0649  |
| rs117354530 | G | 0.2369  |
| rs77092482  | A | 0.1228  |
| rs1293421   | T | 0.0481  |
| rs76915117  | A | 0.1163  |
| rs452159    | T | 0.0619  |
| rs6051365   | C | 0.1073  |
| rs77296076  | A | -0.0964 |
| rs8121085   | G | 0.2281  |
| rs77114334  | T | -0.1386 |
| rs6070776   | T | 0.0672  |
| rs35509856  | A | 0.2861  |
| rs6138488   | C | 0.0469  |
| rs598817    | A | -0.0991 |
| rs73171753  | T | -0.1649 |
| rs6037269   | G | 0.0926  |
| rs6036638   | C | -0.0454 |
| rs11700296  | A | 0.1281  |
| rs805545    | T | 0.0684  |
| rs6047122   | C | 0.0552  |
| rs13039840  | T | 0.0699  |
| rs77611985  | G | 0.3304  |
| rs1997902   | A | 0.0482  |
| rs73075758  | T | -0.2236 |
| rs6063019   | A | 0.1793  |
| rs873131    | T | 0.0812  |
| rs2983644   | C | -0.0448 |
| rs76160395  | A | 0.2128  |
| rs4253449   | A | 0.1268  |
| rs113051433 | C | 0.1578  |
| rs6077681   | C | 0.0955  |
| rs6033550   | T | 0.0476  |
| rs204763    | G | -0.0897 |
| rs1292197   | G | -0.0472 |
| rs6136226   | A | -0.0578 |
| rs112658156 | A | 0.3113  |
| rs45627731  | T | 0.2204  |
| rs35045887  | T | 0.0584  |
| rs6073791   | A | 0.098   |

|             |   |         |
|-------------|---|---------|
| rs73093063  | T | 0.1776  |
| rs12479750  | C | 0.063   |
| rs2327205   | T | 0.045   |
| rs1099620   | C | -0.0653 |
| rs140276176 | T | 0.1754  |
| rs6077712   | T | 0.0632  |
| rs35591772  | G | 0.0506  |
| rs10485758  | C | 0.0963  |
| rs112325806 | G | -0.1576 |
| rs4811325   | C | -0.0865 |
| rs6137886   | G | -0.1023 |
| rs56292332  | T | 0.0706  |
| rs6014870   | T | 0.0446  |
| rs7265616   | C | 0.1987  |
| rs6020985   | A | -0.1894 |
| rs6141040   | T | 0.0436  |
| rs6106621   | T | -0.0772 |
| rs6070703   | T | -0.0724 |
| rs73296454  | A | -0.089  |
| rs77550621  | G | 0.1853  |
| rs2870036   | A | 0.0568  |
| rs117655659 | T | 0.294   |
| rs79648789  | T | -0.2395 |
| rs4810135   | G | 0.0602  |
| rs6110969   | T | 0.0838  |
| rs6139617   | G | 0.053   |
| rs76154472  | A | -0.1352 |
| rs73124405  | T | 0.161   |
| rs62206457  | T | -0.0919 |
| rs2032517   | A | 0.0498  |
| rs8119733   | T | -0.0457 |
| rs6076594   | T | -0.0513 |
| rs6128820   | A | -0.0529 |
| rs61371065  | T | 0.0923  |
| rs79188925  | T | 0.1358  |
| rs140414288 | T | 0.1138  |
| rs62192061  | A | 0.0649  |
| rs11697711  | C | 0.1516  |
| rs1051312   | C | 0.0551  |
| rs62191440  | C | 0.0491  |
| rs76543098  | C | -0.2692 |
| rs1205706   | T | 0.0593  |
| rs6125162   | T | 0.181   |
| rs73899394  | A | 0.2182  |
| rs17718943  | G | -0.0849 |
| rs79344813  | A | 0.1846  |
| rs16983293  | G | -0.1127 |

|             |   |         |
|-------------|---|---------|
| rs59453567  | T | 0.0564  |
| rs8124973   | G | -0.0656 |
| rs2426939   | C | -0.0491 |
| rs6052765   | T | 0.1385  |
| rs3848729   | T | -0.0496 |
| rs41311304  | T | -0.2128 |
| rs13038618  | G | 0.0965  |
| rs77988558  | C | 0.1447  |
| rs6040609   | G | 0.1084  |
| rs2425781   | T | -0.0635 |
| rs7263067   | G | 0.0734  |
| rs75499349  | G | 0.1201  |
| rs56194415  | T | 0.14    |
| rs6127812   | A | 0.0695  |
| rs138628498 | A | 0.3061  |
| rs3932649   | C | 0.1556  |
| rs8121538   | C | -0.2003 |
| rs6107835   | G | -0.0925 |
| rs118047570 | C | -0.1808 |
| rs6128069   | T | -0.0893 |
| rs140787166 | T | 0.1386  |
| rs6064926   | A | -0.2053 |
| rs6084673   | A | -0.0607 |
| rs74173666  | A | -0.078  |
| rs112003677 | T | 0.1882  |
| rs6080948   | A | 0.0513  |
| rs6089041   | G | -0.0822 |
| rs6025056   | G | -0.0839 |
| rs6087851   | C | -0.1609 |
| rs6021571   | T | 0.0452  |
| rs35442028  | G | 0.0745  |
| rs1741322   | A | 0.0964  |
| rs73073684  | G | 0.2947  |
| rs75663458  | A | 0.1392  |
| rs62206372  | A | 0.1376  |
| rs4142364   | A | -0.0493 |
| rs35530561  | C | -0.0489 |
| rs118135623 | A | 0.1921  |
| rs2251544   | G | 0.0732  |
| rs126912    | A | 0.1796  |
| rs143585175 | T | 0.1421  |
| rs2868767   | G | 0.0552  |
| rs78319408  | A | 0.1117  |
| rs362988    | A | 0.043   |
| rs6041947   | G | 0.0553  |
| rs117303436 | T | 0.1098  |
| rs6579061   | G | 0.0417  |

|             |   |         |
|-------------|---|---------|
| rs113895982 | A | 0.1193  |
| rs6089578   | G | 0.0512  |
| rs6084563   | C | 0.0463  |
| rs6095076   | A | -0.0473 |
| rs6096573   | T | 0.042   |
| rs6140864   | G | 0.3124  |
| rs11699478  | A | -0.0754 |
| rs6133090   | G | 0.1689  |
| rs17675492  | A | 0.0884  |
| rs2426231   | A | -0.0677 |
| rs74177992  | C | 0.1022  |
| rs6067985   | A | -0.0946 |
| rs1476359   | C | 0.0496  |
| rs6099660   | T | -0.046  |
| rs73135933  | A | 0.2115  |
| rs116896328 | G | 0.1171  |
| rs6015877   | A | 0.0444  |
| rs1806726   | T | 0.0787  |
| rs6115019   | A | 0.1801  |
| rs139688562 | C | 0.3511  |
| rs62206176  | C | -0.0721 |
| rs4811899   | C | -0.0725 |
| rs6042462   | T | 0.0492  |
| rs1124984   | A | 0.0669  |
| rs1206760   | G | 0.0412  |
| rs117587618 | C | 0.1629  |
| rs6035155   | T | 0.0446  |
| rs74884316  | T | 0.0638  |
| rs6014125   | G | -0.0505 |
| rs6010772   | C | -0.0565 |
| rs6042873   | C | -0.0413 |
| rs79572225  | A | -0.1899 |
| rs79944692  | T | 0.1011  |
| rs8121978   | T | 0.1985  |
| rs6071347   | T | -0.0445 |
| rs6059501   | A | 0.0429  |
| rs4810717   | G | 0.0709  |
| rs6010880   | A | 0.0555  |
| rs11698061  | T | -0.2358 |
| rs62203513  | A | 0.0682  |
| rs73087799  | A | 0.1301  |
| rs5743509   | T | -0.0855 |
| rs175269    | G | -0.0417 |
| rs73900230  | T | 0.0533  |
| rs11905507  | T | -0.0871 |
| rs6108325   | G | 0.0778  |
| rs6016697   | A | 0.118   |

|             |   |         |
|-------------|---|---------|
| rs74559361  | T | 0.1225  |
| rs221981    | A | -0.0878 |
| rs17735762  | T | -0.046  |
| rs61555085  | G | -0.1617 |
| rs6134452   | A | -0.056  |
| rs6096218   | T | 0.072   |
| rs148293728 | A | -0.1571 |
| rs4813238   | T | -0.0418 |
| rs6035728   | G | -0.0505 |
| rs243888    | A | 0.0405  |
| rs117342653 | T | 0.2223  |
| rs6081085   | T | -0.0424 |
| rs34152020  | T | 0.0683  |
| rs2179446   | A | -0.0542 |
| rs142019101 | A | 0.1905  |
| rs141679325 | A | -0.0618 |
| rs117189977 | T | -0.185  |
| rs55962189  | T | 0.0453  |
| rs6092650   | G | 0.2141  |
| rs909864    | T | -0.1257 |
| rs928628    | A | -0.0432 |
| rs6075793   | A | -0.2635 |
| rs6032173   | C | 0.0595  |
| rs6027629   | T | 0.1253  |
| rs113920370 | T | 0.1287  |
| rs1811854   | T | 0.1736  |
| rs2427460   | C | -0.0449 |
| rs17389284  | C | -0.0552 |
| rs297687    | C | -0.1355 |
| rs7263666   | G | 0.1432  |
| rs6019114   | T | -0.0655 |
| rs77688198  | T | -0.0952 |
| rs34262267  | C | 0.0682  |
| rs17791789  | A | -0.0794 |
| rs4812052   | C | 0.0402  |
| rs143887340 | C | -0.2024 |
| rs10485569  | A | 0.0575  |
| rs2076642   | T | 0.0484  |
| rs77539487  | T | 0.1163  |
| rs910526    | A | 0.0646  |
| rs4811160   | G | 0.0497  |
| rs111933191 | A | 0.1038  |
| rs67651474  | C | -0.2674 |
| rs62215281  | T | -0.0756 |
| rs148330613 | T | -0.2139 |
| rs6128904   | T | 0.0538  |
| rs77317874  | C | -0.16   |

|             |   |         |
|-------------|---|---------|
| rs2427016   | T | -0.0735 |
| rs11696419  | T | -0.0568 |
| rs115118980 | A | 0.1572  |
| rs74338736  | G | 0.1658  |
| rs2426689   | T | -0.0479 |
| rs17755028  | T | 0.0484  |
| rs6122960   | A | -0.0753 |
| rs6034152   | A | -0.0664 |
| rs7270505   | G | -0.0746 |
| rs150082598 | T | 0.3133  |
| rs765148    | A | -0.0387 |
| rs6021835   | T | -0.0405 |
| rs2280094   | A | -0.0522 |
| rs2296902   | G | 0.0434  |
| rs117615713 | T | 0.1719  |
| rs73290096  | T | 0.1727  |
| rs6059018   | G | 0.0436  |
| rs2145006   | C | 0.0412  |
| rs77341270  | G | 0.1636  |
| rs55797245  | T | 0.1732  |
| rs6055747   | T | 0.0873  |
| rs6111448   | A | -0.071  |
| rs141816791 | T | 0.1298  |
| rs3091588   | G | -0.0615 |
| rs79568533  | A | 0.1313  |
| rs6128516   | A | -0.0419 |
| rs6102805   | G | 0.0389  |
| rs1578462   | C | 0.0478  |
| rs113450717 | A | 0.2664  |
| rs6063716   | A | -0.0517 |
| rs116943524 | G | 0.1126  |
| rs7268780   | A | -0.0559 |
| rs6069751   | T | -0.0464 |
| rs17662931  | A | 0.0874  |
| rs6095638   | G | -0.0766 |
| rs6104571   | G | -0.0389 |
| rs78604342  | T | 0.1698  |
| rs6068959   | T | -0.0417 |
| rs117883537 | G | -0.1255 |
| rs6096540   | C | -0.0472 |
| rs113784601 | T | 0.075   |
| rs6123685   | A | 0.0546  |
| rs2741378   | T | -0.0444 |
| rs6130672   | T | 0.4095  |
| rs8124775   | G | -0.0726 |
| rs6026349   | T | -0.0476 |
| rs113451453 | A | 0.0642  |



|             |   |         |
|-------------|---|---------|
| rs79542566  | G | 0.1542  |
| rs73246971  | T | -0.0747 |
| rs557446    | C | -0.043  |
| rs77261114  | A | 0.202   |
| rs78040083  | A | 0.0968  |
| rs76427041  | T | 0.0861  |
| rs10485739  | G | -0.0394 |
| rs73136339  | A | 0.2199  |
| rs13042951  | A | -0.0677 |
| rs117069665 | A | 0.2484  |
| rs73081844  | G | 0.1957  |
| rs76371883  | A | 0.3443  |
| rs143933999 | T | 0.2406  |
| rs111785219 | C | -0.1001 |
| rs76448725  | C | -0.1772 |
| rs6142696   | G | 0.1064  |
| rs62204030  | G | -0.1484 |
| rs6075358   | A | 0.0556  |
| rs112651437 | C | -0.2386 |
| rs117533979 | A | -0.1104 |
| rs77820885  | C | 0.1939  |
| rs2585448   | G | 0.0518  |
| rs768445    | C | -0.0386 |
| rs60327107  | A | 0.0845  |
| rs11698550  | T | 0.0668  |
| rs8123677   | T | -0.1065 |
| rs28628698  | C | -0.0761 |
| rs11698671  | C | -0.0395 |
| rs79900762  | A | 0.1916  |
| rs151029951 | C | 0.2421  |
| rs1741629   | G | -0.1422 |
| rs2179824   | A | 0.0372  |
| rs35953837  | T | -0.1144 |
| rs6018447   | G | 0.0469  |
| rs4810750   | A | -0.0375 |
| rs73288608  | G | 0.2526  |
| rs6041105   | A | -0.04   |
| rs6133451   | A | -0.0593 |
| rs144190733 | G | 0.1316  |
| rs17254239  | T | 0.3117  |
| rs116870353 | G | 0.1717  |
| rs8119682   | T | -0.1467 |
| rs12481572  | T | -0.1911 |
| rs2427335   | T | -0.045  |
| rs1412980   | G | -0.0432 |
| rs34919557  | T | 0.0767  |
| rs55675204  | T | -0.1362 |

|             |   |         |
|-------------|---|---------|
| rs6048374   | A | -0.0402 |
| rs6045685   | A | 0.1672  |
| rs6081522   | A | 0.0793  |
| rs4999429   | T | -0.0527 |
| rs1299154   | A | 0.0515  |
| rs56162037  | C | 0.0773  |
| rs6070263   | G | -0.0404 |
| rs73306692  | T | -0.0459 |
| rs17459753  | G | 0.1065  |
| rs1010180   | G | -0.0469 |
| rs6077124   | A | -0.0532 |
| rs4816116   | G | 0.0497  |
| rs12480978  | T | -0.1478 |
| rs372398    | A | 0.0777  |
| rs79300723  | G | 0.0948  |
| rs6014770   | T | 0.0502  |
| rs2425634   | T | -0.0521 |
| rs115861310 | T | 0.1757  |
| rs75602346  | A | -0.1232 |
| rs140592303 | T | -0.2702 |
| rs118184148 | T | 0.2465  |
| rs11907005  | A | -0.0476 |
| rs79287822  | T | 0.1059  |
| rs113447988 | A | 0.0693  |
| rs7261672   | G | -0.0494 |
| rs6048356   | G | 0.0564  |
| rs140001793 | T | 0.205   |
| rs6107634   | T | -0.059  |
| rs2328621   | C | 0.0506  |
| rs4810422   | A | 0.0496  |
| rs6039300   | G | -0.0569 |
| rs13045581  | G | -0.2168 |
| rs6015371   | C | -0.0457 |
| rs6073889   | T | 0.1026  |
| rs6118046   | T | 0.0576  |
| rs77480718  | G | 0.0832  |
| rs6136182   | A | -0.099  |
| rs62193988  | A | 0.0769  |
| rs7260891   | A | 0.0383  |
| rs11698673  | A | 0.0879  |
| rs113963381 | T | -0.1065 |
| rs6128983   | G | -0.0827 |
| rs6129229   | G | 0.0797  |
| rs1538070   | C | -0.1217 |
| rs1934914   | C | -0.0388 |
| rs6068995   | G | -0.0424 |
| rs1406965   | T | 0.0378  |

|             |   |         |
|-------------|---|---------|
| rs147042920 | C | -0.2429 |
| rs199578    | G | 0.0381  |
| rs112830290 | A | 0.201   |
| rs117322579 | T | 0.1403  |
| rs7262150   | C | 0.0591  |
| rs6082278   | C | 0.0409  |
| rs16993912  | C | 0.0434  |
| rs145212747 | C | -0.0867 |
| rs6131316   | T | -0.055  |
| rs2012987   | G | -0.078  |
| rs116196448 | C | -0.2126 |
| rs74809874  | A | -0.223  |
| rs6025579   | T | -0.0449 |
| rs4815836   | C | 0.0446  |
| rs56357143  | T | 0.1328  |
| rs147687527 | T | 0.2065  |
| rs992849    | G | 0.0391  |
| rs11696702  | G | 0.0888  |
| rs6045594   | T | -0.0381 |
| rs6126688   | C | 0.0423  |
| rs748454    | G | 0.0502  |
| rs77767539  | A | -0.2248 |
| rs2515692   | T | 0.12    |
| rs3852917   | T | -0.1218 |
| rs11699310  | A | -0.3022 |
| rs158520    | T | 0.0386  |
| rs6065130   | T | -0.0477 |
| rs6097197   | G | -0.0381 |
| rs149194705 | G | 0.2173  |
| rs2345383   | T | 0.0717  |
| rs75523881  | T | 0.117   |
| rs75071369  | A | -0.1135 |
| rs11698919  | G | 0.087   |
| rs6066562   | C | 0.1092  |
| rs79056432  | A | 0.0902  |
| rs75001629  | T | -0.1919 |
| rs6035176   | G | -0.0571 |
| rs1810581   | G | 0.0578  |
| rs73601871  | T | -0.0522 |
| rs6022619   | A | -0.0566 |
| rs946190    | T | 0.0458  |
| rs984922    | T | 0.04    |
| rs76924356  | A | -0.2974 |
| rs6120777   | A | -0.0471 |
| rs6107950   | C | 0.209   |
| rs147500264 | T | 0.1943  |
| rs1233763   | C | 0.0458  |

|             |   |         |
|-------------|---|---------|
| rs118062269 | G | 0.0519  |
| rs73088093  | T | -0.1269 |
| rs118047089 | T | -0.2882 |
| rs75491120  | T | 0.1518  |
| rs201593    | G | 0.0365  |
| rs6116078   | T | 0.0646  |
| rs6029263   | A | -0.0416 |
| rs113349321 | C | 0.2116  |
| rs126180    | T | 0.0641  |
| rs58480446  | A | -0.0413 |
| rs6035618   | T | -0.1637 |
| rs74177340  | T | 0.0634  |
| rs66623438  | T | -0.1621 |
| rs73176798  | A | 0.2654  |
| rs6022716   | G | 0.0358  |
| rs78158906  | A | 0.184   |
| rs75041355  | A | 0.1368  |
| rs74181503  | C | -0.0671 |
| rs73303898  | G | -0.2217 |
| rs6107569   | A | -0.0647 |
| rs117775772 | A | 0.1512  |
| rs8117869   | C | 0.1718  |
| rs503273    | T | 0.0582  |
| rs73113528  | G | -0.0765 |
| rs1155840   | T | 0.0404  |
| rs6042566   | G | 0.1651  |
| rs138212238 | C | 0.2221  |
| rs73101272  | G | 0.1119  |
| rs113638172 | A | -0.2297 |
| rs11696579  | T | 0.0474  |
| rs117436614 | T | 0.2468  |
| rs117600478 | G | 0.1616  |
| rs2180689   | T | -0.087  |
| rs141788278 | A | 0.181   |
| rs3787186   | T | -0.0405 |
| rs6103071   | C | -0.0897 |
| rs6077701   | G | 0.1608  |
| rs34009042  | A | 0.2053  |
| rs4815461   | A | -0.0541 |
| rs9808594   | T | -0.0479 |
| rs73102784  | G | 0.0641  |
| rs230012    | C | -0.0432 |
| rs852029    | G | -0.0655 |
| rs6095519   | T | -0.1639 |
| rs73914814  | G | 0.1434  |
| rs6017995   | G | -0.0593 |
| rs62195862  | C | -0.0547 |

|             |   |         |
|-------------|---|---------|
| rs113061298 | T | 0.1393  |
| rs117984698 | A | 0.1795  |
| rs6080076   | G | -0.0368 |
| rs4647954   | C | -0.0446 |
| rs112525338 | T | -0.0659 |
| rs62214557  | G | -0.0815 |
| rs6073101   | T | 0.0548  |
| rs6045738   | A | -0.0394 |
| rs6109592   | C | 0.0421  |
| rs62203917  | T | -0.0467 |
| rs73622240  | G | -0.0629 |
| rs6036207   | T | -0.0918 |
| rs74723987  | G | 0.1282  |
| rs6120277   | C | 0.1306  |
| rs150912889 | A | 0.1578  |
| rs113580784 | A | 0.1627  |
| rs13044963  | A | 0.0377  |
| rs78036974  | G | 0.2239  |
| rs34241446  | G | 0.0855  |
| rs4925200   | A | -0.0676 |
| rs117776204 | A | -0.1834 |
| rs6030469   | T | -0.0573 |
| rs2208277   | T | 0.0404  |
| rs140469670 | G | 0.1378  |
| rs3746726   | G | -0.0367 |
| rs6064783   | A | -0.0446 |
| rs7266260   | C | 0.2468  |
| rs6136938   | A | 0.0348  |
| rs1556177   | A | -0.0515 |
| rs118071989 | A | 0.1537  |
| rs1818403   | C | -0.0569 |
| rs12151943  | A | -0.051  |
| rs11086869  | C | 0.0438  |
| rs2426846   | C | -0.0446 |
| rs2328224   | T | 0.0465  |
| rs17263841  | A | -0.0762 |
| rs127433    | C | -0.0456 |
| rs117112202 | A | -0.1505 |
| rs8122331   | A | 0.1093  |
| rs144462079 | C | 0.1428  |
| rs2747565   | A | -0.0443 |
| rs6075087   | T | -0.0635 |
| rs4407318   | G | 0.0453  |
| rs143607690 | T | 0.1483  |
| rs111390691 | G | 0.0956  |
| rs148063780 | T | 0.2644  |
| rs6090775   | C | 0.0467  |

|             |   |         |
|-------------|---|---------|
| rs2143205   | T | -0.0364 |
| rs67040509  | C | 0.0667  |
| rs2425256   | A | 0.0486  |
| rs138021289 | G | -0.1308 |
| rs1321000   | A | -0.0389 |
| rs6111721   | A | 0.0438  |
| rs745455    | A | 0.0357  |
| rs6017418   | A | 0.0457  |
| rs62212659  | A | -0.1805 |
| rs146560730 | T | 0.1419  |
| rs6029111   | A | 0.0548  |
| rs17745751  | T | 0.0804  |
| rs73609690  | T | 0.0547  |
| rs6063020   | T | 0.0395  |
| rs6080086   | G | 0.0463  |
| rs2865376   | T | 0.0402  |
| rs41278222  | T | -0.0745 |
| rs6034834   | C | 0.123   |
| rs6042797   | A | 0.1693  |
| rs117577908 | A | -0.287  |
| rs7271253   | C | 0.1481  |
| rs73154607  | T | 0.1271  |
| rs6061867   | T | -0.0407 |
| rs112952740 | T | 0.2372  |
| rs6075795   | A | 0.1182  |
| rs148902838 | A | -0.2052 |
| rs8124675   | A | -0.0365 |
| rs71349703  | T | 0.0607  |
| rs16985218  | G | 0.0714  |
| rs1035179   | T | -0.0625 |
| rs13041010  | A | -0.0477 |
| rs805763    | G | 0.0374  |
| rs6081198   | T | 0.0527  |
| rs76657242  | T | 0.1392  |
| rs946359    | T | -0.0455 |
| rs8125576   | T | 0.0853  |
| rs140937894 | A | 0.2179  |
| rs77100629  | A | 0.0847  |
| rs147955628 | A | 0.1419  |
| rs1407766   | A | 0.0436  |
| rs4544513   | T | -0.0372 |
| rs6057822   | T | -0.203  |
| rs142239264 | T | -0.1543 |
| rs6013418   | T | 0.0644  |
| rs13038635  | G | -0.0475 |
| rs13043114  | A | -0.0408 |
| rs16987875  | C | 0.0912  |

|             |   |         |
|-------------|---|---------|
| rs78989595  | T | 0.1316  |
| rs78274946  | G | -0.2196 |
| rs117870831 | A | -0.2539 |
| rs79951784  | T | -0.0556 |
| rs1576399   | T | -0.1181 |
| rs999113    | A | 0.1148  |
| rs6139531   | C | -0.0749 |
| rs149036826 | C | 0.1738  |
| rs79798489  | G | 0.1583  |
| rs6092877   | A | 0.1394  |
| rs151347    | T | -0.0351 |
| rs73122473  | G | 0.1043  |
| rs3971      | G | 0.04    |
| rs8116756   | T | -0.0655 |
| rs62201870  | T | -0.2039 |
| rs6137241   | G | 0.0422  |
| rs7352928   | C | 0.0516  |
| rs6025975   | G | -0.0452 |
| rs138603457 | T | -0.277  |
| rs17192951  | T | 0.2165  |
| rs35820183  | C | 0.1015  |
| rs1739591   | C | 0.0387  |
| rs118012180 | T | 0.2842  |
| rs117049595 | T | -0.2122 |
| rs117457932 | G | 0.1186  |
| rs142246918 | A | 0.1825  |
| rs66891574  | A | 0.0716  |
| rs76030870  | A | 0.2628  |
| rs116906545 | T | 0.1609  |
| rs6108342   | A | -0.1362 |
| rs139484064 | C | -0.2497 |
| rs6086511   | C | 0.0446  |
| rs45543134  | A | 0.0811  |
| rs7269064   | G | -0.1592 |
| rs2221146   | C | -0.1383 |
| rs7264694   | C | 0.047   |
| rs6050798   | T | 0.0357  |
| rs1630688   | T | -0.0417 |
| rs60511857  | A | -0.1784 |
| rs2425771   | A | -0.0845 |
| rs148628498 | A | -0.26   |
| rs6140478   | G | 0.0467  |
| rs6011190   | A | 0.1016  |
| rs236716    | A | 0.1007  |
| rs6112403   | G | 0.1579  |
| rs148037488 | C | -0.2468 |
| rs28545707  | G | 0.0903  |

|             |   |         |
|-------------|---|---------|
| rs147102700 | A | -0.1336 |
| rs7362194   | A | -0.0511 |
| rs74592033  | A | 0.066   |
| rs6022524   | C | 0.0869  |
| rs143122640 | T | 0.1768  |
| rs328500    | T | -0.0436 |
| rs214380    | A | 0.042   |
| rs78230758  | T | -0.1832 |
| rs61281922  | C | -0.0765 |
| rs142244311 | C | -0.2281 |
| rs34722213  | A | -0.0379 |
| rs543749    | T | -0.0546 |
| rs115109271 | T | 0.0699  |
| rs6042800   | C | 0.0344  |
| rs55678760  | C | 0.0567  |
| rs2294213   | G | 0.0557  |
| rs146754677 | C | 0.1424  |
| rs147196636 | A | -0.148  |
| rs6074345   | G | 0.0536  |
| rs11699613  | C | 0.0497  |
| rs932529    | A | -0.0367 |
| rs62205303  | T | 0.0737  |
| rs1830574   | A | -0.0372 |
| rs117061356 | A | -0.1539 |
| rs6019561   | A | 0.2004  |
| rs7351882   | T | 0.3239  |
| rs80190239  | A | -0.1612 |
| rs6023476   | T | -0.0646 |
| rs1415389   | C | 0.1799  |
| rs6035231   | T | -0.0351 |
| rs117294439 | A | -0.1394 |
| rs6123263   | G | -0.2325 |
| rs78680137  | T | 0.2606  |
| rs6010685   | T | -0.0843 |
| rs62190559  | T | 0.1267  |
| rs6106033   | G | 0.0575  |
| rs73122378  | T | 0.0492  |
| rs111525742 | G | 0.1281  |
| rs528560    | T | -0.0359 |
| rs2995726   | A | -0.0344 |
| rs3907202   | G | 0.1507  |
| rs111882091 | A | 0.1914  |
| rs73083845  | T | 0.0926  |
| rs6063426   | G | -0.0385 |
| rs742992    | A | 0.09    |
| rs6065548   | T | 0.2143  |
| rs72623593  | A | 0.2148  |



|             |   |         |
|-------------|---|---------|
| rs62215669  | A | -0.0898 |
| rs4991935   | G | -0.041  |
| rs113618390 | A | -0.1529 |
| rs147618609 | G | 0.2141  |
| rs6113886   | A | 0.046   |
| rs73106131  | T | -0.1351 |
| rs6065532   | A | -0.0438 |
| rs74174957  | T | 0.188   |
| rs117883615 | T | 0.163   |
| rs6081798   | A | 0.1442  |
| rs1884646   | C | -0.064  |
| rs116924205 | A | 0.2576  |
| rs78785789  | C | 0.1054  |
| rs6031580   | A | -0.0381 |
| rs118007863 | T | -0.0804 |
| rs16999466  | C | -0.1611 |
| rs118022956 | C | 0.1563  |
| rs78648341  | A | 0.2991  |
| rs142306754 | G | 0.2049  |
| rs6515097   | T | -0.0338 |
| rs78421082  | T | 0.2217  |
| rs34671967  | T | -0.1023 |
| rs6136816   | G | -0.0516 |
| rs6108374   | G | -0.0416 |
| rs149105797 | A | -0.113  |
| rs12625239  | G | -0.0395 |
| rs73142080  | C | 0.1204  |
| rs116953268 | A | -0.1207 |
| rs6022905   | A | -0.0812 |
| rs751626    | A | -0.1461 |
| rs10485815  | T | 0.0568  |
| rs6032172   | A | -0.0358 |
| rs3789352   | T | 0.0659  |
| rs111799781 | A | 0.1642  |
| rs1041272   | A | -0.0484 |
| rs34565083  | G | 0.0351  |
| rs6041979   | C | 0.1103  |
| rs74531068  | T | -0.1303 |
| rs3915736   | G | 0.0411  |
| rs6087514   | T | 0.0395  |
| rs117545125 | A | 0.173   |
| rs6034089   | C | -0.179  |
| rs6128297   | A | 0.0769  |
| rs6076798   | G | 0.0409  |
| rs6033047   | A | 0.0589  |
| rs2904492   | C | 0.0419  |
| rs6017341   | G | 0.1879  |

|             |   |         |
|-------------|---|---------|
| rs11697735  | A | -0.0421 |
| rs2427620   | T | -0.0414 |
| rs1232556   | A | 0.0902  |
| rs142462570 | T | -0.1078 |
| rs175256    | C | 0.0466  |
| rs6082193   | T | 0.0377  |
| rs910950    | T | -0.0617 |
| rs142950903 | G | 0.2163  |
| rs6090818   | G | 0.0463  |
| rs66678311  | G | -0.0592 |
| rs237087    | T | 0.1776  |
| rs6027680   | A | -0.0354 |
| rs34281058  | C | 0.1468  |
| rs986831    | A | 0.0339  |
| rs13045381  | A | 0.0602  |
| rs6041019   | T | -0.0438 |
| rs138435071 | T | -0.2071 |
| rs6061104   | G | 0.0388  |
| rs143440097 | T | 0.1005  |
| rs2425484   | C | 0.0448  |
| rs6139917   | C | -0.1526 |
| rs118072523 | T | -0.2132 |
| rs141460459 | C | -0.3394 |
| rs74777463  | C | -0.1059 |
| rs2027237   | C | 0.0361  |
| rs232728    | T | -0.044  |
| rs1876728   | C | -0.0406 |
| rs2870037   | A | 0.145   |
| rs117714649 | A | 0.0887  |
| rs2294569   | A | 0.1398  |
| rs12481021  | G | 0.0351  |
| rs76947815  | C | 0.1139  |
| rs6052127   | A | -0.047  |
| rs79655286  | C | 0.1273  |
| rs56213147  | C | -0.1353 |
| rs1984422   | C | 0.0732  |
| rs12480835  | G | 0.0589  |
| rs112363401 | C | 0.1121  |
| rs71349790  | G | -0.1765 |
| rs144047332 | G | 0.164   |
| rs752255    | C | -0.0372 |
| rs73112279  | T | -0.0327 |
| rs2746617   | G | -0.0329 |
| rs79037510  | C | -0.1585 |
| rs117158549 | T | 0.1207  |
| rs78572314  | T | 0.1608  |
| rs6131981   | C | -0.0684 |

|             |   |         |
|-------------|---|---------|
| rs7364004   | A | 0.1528  |
| rs141114940 | A | 0.2341  |
| rs2876410   | A | -0.046  |
| rs73131309  | T | 0.1216  |
| rs113048268 | T | 0.2171  |
| rs6050878   | G | 0.0483  |
| rs6033753   | G | 0.0383  |
| rs117032899 | G | 0.1386  |
| rs67896217  | T | 0.1017  |
| rs6134628   | T | -0.0553 |
| rs2057251   | A | 0.0367  |
| rs2867061   | T | -0.0347 |
| rs6105537   | T | 0.047   |
| rs74961752  | C | 0.0652  |
| rs6069260   | A | 0.0553  |
| rs117952578 | A | 0.1037  |
| rs78914578  | T | 0.1908  |
| rs144927179 | T | 0.2136  |
| rs62209645  | G | -0.0345 |
| rs12481459  | A | -0.0632 |
| rs149272737 | A | 0.123   |
| rs13039016  | T | -0.0467 |
| rs149438989 | T | -0.2716 |
| rs6016836   | G | 0.1309  |
| rs6028974   | C | 0.0405  |
| rs6074042   | C | 0.0404  |
| rs560866    | G | 0.0325  |
| rs111624194 | A | 0.168   |
| rs74175412  | C | -0.0626 |
| rs6102659   | T | -0.0371 |
| rs41417848  | A | 0.205   |
| rs6124022   | T | 0.0943  |
| rs6040555   | A | -0.0365 |
| rs4810498   | G | -0.0859 |
| rs2327097   | A | 0.0418  |
| rs6116870   | C | -0.0484 |
| rs75716375  | T | 0.1445  |
| rs146247910 | T | -0.1313 |
| rs6014831   | C | -0.0579 |
| rs1014756   | A | 0.0336  |
| rs4142036   | T | 0.0539  |
| rs2426036   | T | 0.0591  |
| rs10084511  | T | 0.1025  |
| rs6069841   | G | 0.0761  |
| rs12481368  | T | -0.0772 |
| rs12625241  | C | -0.0354 |
| rs6133365   | G | 0.0598  |

|             |   |         |
|-------------|---|---------|
| rs78874589  | T | -0.2017 |
| rs760999    | T | -0.0923 |
| rs238653    | C | -0.0458 |
| rs13040103  | A | -0.0429 |
| rs927877    | G | 0.0375  |
| rs2427209   | T | 0.086   |
| rs2236176   | T | 0.0454  |
| rs117894370 | G | 0.285   |
| rs1811130   | C | -0.0374 |
| rs12626069  | C | -0.1175 |
| rs6022682   | A | 0.041   |
| rs80097203  | T | -0.2322 |
| rs77770871  | T | 0.2098  |
| rs12481296  | G | -0.0743 |
| rs7267819   | A | -0.0329 |
| rs6140790   | G | -0.0654 |
| rs73067904  | A | 0.0674  |
| rs138821006 | A | -0.1185 |
| rs13040401  | G | 0.0686  |
| rs204658    | A | 0.0489  |
| rs72645276  | T | -0.1577 |
| rs5014588   | T | 0.0336  |
| rs145660046 | C | -0.131  |
| rs2179706   | T | 0.0327  |
| rs927920    | A | -0.0327 |
| rs8116479   | C | 0.1096  |
| rs55637163  | A | -0.0917 |
| rs517578    | T | -0.033  |
| rs4589818   | T | -0.0517 |
| rs234629    | G | -0.0335 |
| rs817698    | G | 0.0518  |
| rs73130681  | A | -0.1072 |
| rs1987144   | C | 0.0396  |
| rs117191302 | G | 0.2012  |
| rs77895405  | G | -0.0762 |
| rs6040807   | T | -0.0421 |
| rs8117890   | T | 0.0529  |
| rs7264095   | C | -0.0422 |
| rs6139971   | T | -0.0483 |
| rs240752    | C | -0.0393 |
| rs60038425  | A | 0.0545  |
| rs149845567 | A | 0.1714  |
| rs144729301 | G | -0.1265 |
| rs34138151  | G | -0.1116 |
| rs6049296   | G | -0.1046 |
| rs775130    | T | -0.2076 |
| rs78671270  | A | -0.1401 |

|             |   |         |
|-------------|---|---------|
| rs28542509  | A | 0.0389  |
| rs2093892   | A | 0.0333  |
| rs62216863  | T | 0.0413  |
| rs13042833  | T | 0.0391  |
| rs75722502  | A | -0.0978 |
| rs76030862  | C | 0.2441  |
| rs116879215 | G | 0.1167  |
| rs144893052 | C | 0.1422  |
| rs117637533 | T | 0.138   |
| rs117213816 | T | -0.1491 |
| rs66850751  | C | -0.0666 |
| rs139119810 | T | 0.2572  |
| rs140859191 | A | -0.244  |
| rs142601116 | A | 0.1676  |
| rs6044355   | A | 0.0353  |
| rs3748486   | T | -0.039  |
| rs76212684  | A | -0.0661 |
| rs6034344   | G | -0.0598 |
| rs34969280  | A | 0.0378  |
| rs73598845  | G | -0.0935 |
| rs79453392  | A | 0.0976  |
| rs6512483   | A | -0.1245 |
| rs6011585   | T | -0.0368 |
| rs16989237  | G | 0.1     |
| rs723561    | T | 0.0658  |
| rs150479131 | T | 0.2664  |
| rs80048781  | A | 0.1615  |
| rs6054808   | A | 0.0594  |
| rs62202788  | C | -0.0871 |
| rs34470600  | A | 0.1613  |
| rs8636      | T | -0.0337 |
| rs58772600  | G | 0.1929  |
| rs137857644 | A | 0.2352  |
| rs4812800   | T | -0.0398 |
| rs146193535 | C | 0.1563  |
| rs112102760 | G | 0.0808  |
| rs282166    | A | 0.0497  |
| rs12625661  | A | -0.0455 |
| rs111293869 | T | 0.1415  |
| rs6084490   | A | -0.0491 |
| rs6039513   | G | -0.0438 |
| rs199607    | A | -0.0687 |
| rs148967444 | A | -0.1344 |
| rs804620    | T | 0.0684  |
| rs147407527 | A | -0.2277 |
| rs6039069   | C | 0.0645  |
| rs1987979   | T | -0.0422 |

|             |   |         |
|-------------|---|---------|
| rs4810782   | A | 0.0344  |
| rs149394867 | T | -0.1874 |
| rs74319215  | T | 0.1023  |
| rs6071594   | C | 0.0708  |
| rs117452095 | C | 0.1935  |
| rs2423020   | T | -0.0331 |
| rs6104943   | T | -0.0749 |
| rs79310836  | C | -0.1649 |
| rs78683858  | C | 0.0705  |
| rs6019852   | A | -0.0608 |
| rs148975794 | G | -0.1644 |
| rs6035026   | G | 0.0319  |
| rs142699857 | T | 0.1466  |
| rs3752560   | A | 0.1422  |
| rs75254796  | G | -0.1482 |
| rs6011434   | T | 0.053   |
| rs35675136  | T | -0.0438 |
| rs1999086   | C | -0.0382 |
| rs6046580   | A | -0.043  |
| rs62201014  | A | -0.1548 |
| rs4814193   | C | -0.0443 |
| rs34599904  | T | 0.1089  |
| rs6133556   | T | 0.052   |
| rs2681110   | C | -0.0612 |
| rs6110500   | T | -0.0354 |
| rs4815667   | T | 0.1242  |
| rs6082387   | T | 0.0342  |
| rs827948    | T | -0.0322 |
| rs6097838   | T | 0.1719  |
| rs8117354   | T | -0.0457 |
| rs113739600 | T | -0.0831 |
| rs117907193 | G | -0.1879 |
| rs34584569  | G | -0.1072 |
| rs2143199   | G | 0.033   |
| rs6041027   | A | 0.0344  |
| rs117245656 | G | 0.0703  |
| rs199559    | C | 0.0541  |
| rs3091995   | G | 0.041   |
| rs113502877 | T | 0.0408  |
| rs141289971 | T | -0.1606 |
| rs6089255   | T | 0.0427  |
| rs911351    | G | 0.0372  |
| rs6083498   | T | -0.1024 |
| rs744779    | T | -0.0769 |
| rs62198908  | G | -0.2583 |
| rs6135063   | T | 0.0653  |
| rs2327129   | G | -0.0411 |

|             |   |         |
|-------------|---|---------|
| rs6133610   | T | -0.0516 |
| rs6015734   | C | 0.0479  |
| rs76994098  | A | -0.0642 |
| rs6062643   | A | 0.0574  |
| rs1776252   | C | -0.0762 |
| rs6087786   | T | -0.0356 |
| rs6063841   | A | 0.0309  |
| rs117469189 | C | -0.1508 |
| rs112876579 | T | 0.2422  |
| rs7262895   | C | 0.2058  |
| rs73091590  | T | 0.1314  |
| rs4812060   | G | 0.1146  |
| rs118096590 | T | 0.2524  |
| rs197821    | T | -0.0374 |
| rs75379569  | T | 0.2298  |
| rs6078983   | C | -0.0507 |
| rs139382330 | G | 0.1325  |
| rs220544    | T | 0.1226  |
| rs111420522 | A | -0.0972 |
| rs6052369   | C | 0.0502  |
| rs11697536  | T | -0.1633 |
| rs6024710   | C | -0.0618 |
| rs204690    | G | -0.0318 |
| rs1967749   | C | -0.0544 |
| rs73242763  | C | 0.1156  |
| rs73150249  | T | -0.0475 |
| rs6109320   | G | 0.0333  |
| rs77122853  | A | 0.0834  |
| rs1407256   | G | -0.0416 |
| rs2064863   | T | -0.0337 |
| rs78275479  | C | -0.1722 |
| rs913882    | T | 0.0392  |
| rs932304    | C | -0.0324 |
| rs79097100  | T | -0.197  |
| rs8118620   | C | -0.0336 |
| rs45602035  | T | -0.147  |
| rs7262054   | T | 0.0592  |
| rs7409760   | C | 0.0845  |
| rs74347803  | C | 0.0794  |
| rs112052567 | A | -0.0943 |
| rs62200168  | A | 0.0572  |
| rs6014821   | G | 0.0986  |
| rs6094118   | A | 0.1039  |
| rs538094    | T | -0.063  |
| rs117316851 | C | -0.3408 |
| rs6127970   | T | 0.1331  |
| rs73115411  | T | -0.0774 |

|             |   |         |
|-------------|---|---------|
| rs2426712   | C | 0.0319  |
| rs6039134   | T | 0.0369  |
| rs11696578  | T | 0.1175  |
| rs2426937   | C | 0.0351  |
| rs6077282   | T | 0.1162  |
| rs2423354   | T | 0.0595  |
| rs72623571  | A | -0.0648 |
| rs78139716  | T | 0.1603  |
| rs73902875  | G | -0.0856 |
| rs35646463  | G | 0.053   |
| rs13045127  | C | 0.104   |
| rs62200425  | A | -0.1401 |
| rs77529742  | T | -0.1472 |
| rs6037998   | T | 0.0453  |
| rs77116424  | T | 0.1652  |
| rs35013700  | T | -0.1322 |
| rs6122416   | A | 0.041   |
| rs79289381  | A | 0.2674  |
| rs117101297 | T | 0.147   |
| rs28385449  | A | 0.0433  |
| rs56668103  | C | -0.052  |
| rs6118591   | C | 0.0351  |
| rs8124907   | G | 0.0432  |
| rs9798519   | A | 0.0551  |
| rs77225098  | T | -0.0731 |
| rs4810793   | C | -0.034  |
| rs73071529  | T | 0.1229  |
| rs76010812  | C | 0.1369  |
| rs58288731  | T | -0.2321 |
| rs6072689   | T | -0.0398 |
| rs66474973  | G | -0.085  |
| rs17791824  | T | -0.2319 |
| rs146572513 | T | 0.2502  |
| rs6073391   | G | 0.0965  |
| rs2681117   | C | 0.0988  |
| rs6035224   | T | 0.0436  |
| rs6064925   | A | 0.0345  |
| rs116898795 | A | -0.1981 |
| rs2902982   | T | 0.0402  |
| rs235022    | A | -0.0329 |
| rs62194889  | A | 0.0673  |
| rs150041744 | A | 0.2348  |
| rs760703    | A | -0.0377 |
| rs6037434   | G | 0.0429  |
| rs13038378  | G | 0.0599  |
| rs6025283   | G | 0.0754  |
| rs146606431 | G | -0.166  |



|             |   |         |
|-------------|---|---------|
| rs6036589   | G | -0.0402 |
| rs78624678  | A | 0.1519  |
| rs6105687   | C | 0.0366  |
| rs56356576  | A | 0.2468  |
| rs4603829   | C | 0.035   |
| rs75371355  | T | -0.1644 |
| rs13042048  | C | -0.061  |
| rs728707    | G | -0.0316 |
| rs116877683 | C | 0.1279  |
| rs6021240   | C | -0.0472 |
| rs6043540   | G | 0.1192  |
| rs4925258   | G | -0.0368 |
| rs56103695  | C | 0.117   |
| rs8123995   | T | 0.0414  |
| rs73611557  | A | 0.0746  |
| rs6080646   | G | 0.0308  |
| rs78865809  | C | -0.1225 |
| rs6073533   | C | -0.0318 |
| rs117125393 | T | 0.1199  |
| rs34025307  | T | -0.0361 |
| rs7269174   | A | -0.0394 |
| rs147235418 | T | 0.1682  |
| rs6106907   | T | -0.0793 |
| rs146850199 | G | 0.1384  |
| rs12479913  | A | 0.0552  |
| rs35416056  | A | -0.1154 |
| rs16988687  | C | -0.0443 |
| rs73093485  | T | -0.0996 |
| rs11247     | A | 0.1191  |
| rs149538925 | T | 0.1993  |
| rs73170242  | A | -0.2054 |
| rs200175    | G | -0.0398 |
| rs141125641 | C | 0.2094  |
| rs12625484  | T | -0.037  |
| rs2478981   | T | -0.0467 |
| rs79811598  | G | 0.1272  |
| rs146063946 | G | 0.1731  |
| rs6071614   | A | -0.0483 |
| rs6056546   | C | -0.0445 |
| rs13040691  | A | 0.1385  |
| rs6097776   | T | -0.0573 |
| rs6028797   | T | -0.0423 |
| rs112911838 | T | 0.0719  |
| rs12625228  | C | 0.0657  |
| rs16985448  | G | 0.05    |
| rs7508956   | T | 0.0817  |
| rs4811078   | T | 0.0448  |

|             |   |         |
|-------------|---|---------|
| rs1437208   | T | -0.0382 |
| rs6022838   | T | 0.0624  |
| rs117841423 | T | -0.1304 |
| rs2777931   | T | -0.0847 |
| rs852051    | G | -0.0362 |
| rs74682584  | T | 0.1301  |
| rs76456280  | A | -0.2134 |
| rs2425024   | C | -0.0316 |
| rs73333873  | G | 0.0788  |
| rs118042879 | A | -0.1677 |
| rs11777963  | T | -0.1011 |
| rs117650266 | T | 0.2202  |
| rs6070935   | T | 0.0699  |
| rs73136270  | T | -0.2064 |
| rs151331479 | C | 0.1573  |
| rs6015032   | A | 0.0427  |
| rs76996268  | T | -0.2819 |
| rs232649    | G | 0.0438  |
| rs73621912  | A | 0.107   |
| rs62209481  | G | 0.0959  |
| rs6123270   | T | -0.2032 |
| rs73170243  | C | -0.1731 |
| rs6034266   | A | -0.0415 |
| rs118182544 | T | 0.1836  |
| rs78561513  | T | 0.0592  |
| rs76585941  | T | 0.1657  |
| rs2745061   | T | -0.0444 |
| rs6051348   | T | 0.1367  |
| rs2425038   | G | 0.0535  |
| rs204699    | T | 0.0549  |
| rs6022220   | A | 0.0367  |
| rs2740191   | T | -0.051  |
| rs374486    | T | 0.0395  |
| rs62201174  | G | -0.0819 |
| rs80159144  | A | -0.1424 |
| rs8116150   | T | -0.0468 |
| rs4813827   | T | -0.0321 |
| rs1746282   | A | 0.0941  |
| rs6053666   | C | 0.0329  |
| rs6108331   | T | -0.0312 |
| rs56211015  | G | -0.0724 |
| rs151277346 | T | -0.2653 |
| rs6062649   | C | -0.039  |
| rs717146    | T | 0.1631  |
| rs144475389 | T | 0.1468  |
| rs34075502  | G | 0.1202  |
| rs74403011  | A | -0.0818 |

|             |   |         |
|-------------|---|---------|
| rs4812464   | A | 0.0396  |
| rs41274714  | A | 0.2311  |
| rs73893994  | C | -0.0537 |
| rs844894    | C | 0.0521  |
| rs117732153 | T | 0.1429  |
| rs77477433  | C | -0.068  |
| rs2207890   | C | 0.037   |
| rs141459119 | T | -0.0905 |
| rs6131836   | T | -0.0463 |
| rs73145362  | A | -0.2075 |
| rs6514277   | A | 0.0406  |
| rs113140123 | T | -0.1727 |
| rs112858352 | G | 0.1024  |
| rs118093162 | T | 0.1523  |
| rs6089729   | A | -0.0453 |
| rs79964807  | G | 0.1368  |
| rs4810610   | A | -0.04   |
| rs1885577   | A | 0.0646  |
| rs11698703  | G | 0.0536  |
| rs2248269   | A | 0.0312  |
| rs149362038 | T | 0.1902  |
| rs78186890  | G | 0.0904  |
| rs6081708   | C | -0.0347 |
| rs6038665   | C | -0.0441 |
| rs2230605   | G | 0.1042  |
| rs11204439  | A | -0.0547 |
| rs209966    | C | -0.0324 |
| rs151032618 | A | 0.2341  |
| rs2092474   | T | -0.0376 |
| rs1543571   | C | 0.1099  |
| rs7271275   | T | -0.0349 |
| rs221008    | G | -0.0363 |
| rs11906081  | A | 0.186   |
| rs2425482   | C | -0.0298 |
| rs112403761 | A | 0.1131  |
| rs6063942   | A | -0.0325 |
| rs74366402  | G | -0.0751 |
| rs117798563 | A | 0.0772  |
| rs6021644   | G | 0.0417  |
| rs76310942  | C | -0.153  |
| rs67310354  | C | -0.0776 |
| rs3762206   | A | -0.0439 |
| rs62197303  | A | -0.0505 |
| rs220543    | G | 0.0481  |
| rs138404653 | T | 0.1415  |
| rs235000    | A | -0.0382 |
| rs6103023   | T | -0.0304 |

|             |   |         |
|-------------|---|---------|
| rs118154426 | T | 0.0654  |
| rs80327957  | A | -0.1706 |
| rs79809837  | C | -0.072  |
| rs6133875   | C | -0.0376 |
| rs753341    | A | -0.0363 |
| rs140464630 | A | -0.2455 |
| rs149640359 | A | 0.1749  |
| rs150277531 | A | -0.146  |
| rs77341508  | T | -0.0491 |
| rs147204976 | A | 0.2171  |
| rs77919071  | C | 0.1163  |
| rs1887688   | G | 0.0308  |
| rs117761093 | T | 0.1594  |
| rs138299341 | G | -0.101  |
| rs17743099  | C | 0.0649  |
| rs151276044 | A | -0.2094 |
| rs117950717 | T | -0.0597 |
| rs6087819   | C | 0.0896  |
| rs6068643   | G | 0.0338  |
| rs6030745   | G | -0.0797 |
| rs6515131   | A | -0.0421 |
| rs6098930   | T | 0.0303  |
| rs4810137   | A | 0.0394  |
| rs6109202   | C | -0.0338 |
| rs78612681  | A | 0.1183  |
| rs7361530   | C | -0.0393 |
| rs117939135 | C | 0.1667  |
| rs6127994   | T | -0.0304 |
| rs2426183   | T | -0.0447 |
| rs6030790   | A | 0.0385  |
| rs138894752 | T | -0.1366 |
| rs139047235 | T | -0.1802 |
| rs73605561  | T | 0.0772  |
| rs6086495   | C | 0.0302  |
| rs35777099  | G | 0.0478  |
| rs10485810  | G | 0.065   |
| rs79259988  | C | 0.0513  |
| rs71333950  | C | -0.065  |
| rs62213345  | A | -0.0305 |
| rs55906438  | G | -0.0334 |
| rs78361592  | G | -0.0691 |
| rs6010742   | T | -0.0393 |
| rs8115752   | T | -0.0304 |
| rs71334888  | T | 0.0642  |
| rs59714197  | A | -0.041  |
| rs57081241  | A | 0.1145  |
| rs139723668 | T | 0.2786  |

|             |   |         |
|-------------|---|---------|
| rs1201919   | G | 0.0301  |
| rs2618574   | T | -0.0351 |
| rs17406954  | G | -0.193  |
| rs75634755  | T | 0.0928  |
| rs6127529   | C | 0.0869  |
| rs13037653  | C | -0.0603 |
| rs11697664  | T | -0.0724 |
| rs13037060  | G | -0.0971 |
| rs6054506   | A | -0.0777 |
| rs73084334  | T | 0.0539  |
| rs870500    | C | 0.0411  |
| rs16985082  | C | 0.0915  |
| rs73081680  | A | 0.0462  |
| rs151250775 | G | 0.0922  |
| rs113663142 | T | -0.1416 |
| rs75932750  | A | -0.0886 |
| rs56240681  | G | 0.0539  |
| rs8114216   | G | 0.0443  |
| rs117796967 | A | 0.0929  |
| rs6085721   | G | 0.0303  |
| rs60993304  | T | 0.037   |
| rs6021639   | T | -0.038  |
| rs6122906   | G | 0.042   |
| rs117853603 | T | 0.2062  |
| rs148264645 | A | 0.1774  |
| rs76767703  | T | 0.1542  |
| rs74819179  | A | 0.051   |
| rs118129150 | A | -0.1318 |
| rs73095343  | T | 0.0896  |
| rs6019774   | C | 0.0992  |
| rs67369019  | A | 0.0367  |
| rs79647031  | T | 0.0523  |
| rs142047253 | C | 0.1157  |
| rs74380689  | T | -0.098  |
| rs10427472  | T | -0.0908 |
| rs76851912  | C | 0.0854  |
| rs78235555  | G | 0.1365  |
| rs74366776  | G | -0.0656 |
| rs3748493   | T | 0.0303  |
| rs76012954  | T | 0.1227  |
| rs11699795  | A | 0.0789  |
| rs6104686   | C | 0.048   |
| rs34520085  | A | -0.1799 |
| rs56731761  | A | 0.1424  |
| rs2223324   | T | 0.0785  |
| rs144561616 | T | 0.1524  |
| rs3827110   | C | 0.0497  |

|             |   |         |
|-------------|---|---------|
| rs6034227   | G | 0.0609  |
| rs6064549   | G | 0.0345  |
| rs6105063   | A | 0.0398  |
| rs77523328  | C | -0.1074 |
| rs150747502 | C | -0.059  |
| rs13045209  | A | -0.0291 |
| rs6043374   | T | 0.0484  |
| rs6054625   | T | -0.0406 |
| rs6086897   | T | 0.061   |
| rs4812374   | A | 0.0297  |
| rs4813393   | G | -0.0484 |
| rs6040786   | A | -0.1447 |
| rs6516199   | T | -0.0305 |
| rs149153618 | C | -0.1325 |
| rs6056863   | A | -0.0316 |
| rs4815316   | T | -0.0389 |
| rs148623979 | C | 0.1626  |
| rs4815748   | A | -0.0701 |
| rs117446872 | C | 0.1528  |
| rs6139983   | T | 0.03    |
| rs6038064   | T | -0.0291 |
| rs6100837   | A | 0.1971  |
| rs11696348  | A | 0.0696  |
| rs2427188   | A | 0.1653  |
| rs6124254   | G | -0.03   |
| rs2904139   | G | 0.0616  |
| rs149142727 | C | 0.1659  |
| rs2873204   | C | 0.0448  |
| rs34646256  | G | 0.1109  |
| rs11698492  | A | 0.117   |
| rs116890700 | G | 0.0857  |
| rs4536701   | A | 0.0787  |
| rs6063236   | A | -0.0846 |
| rs34819106  | T | -0.0731 |
| rs4810078   | C | 0.0308  |
| rs2184250   | G | -0.0308 |
| rs4815676   | A | 0.0337  |
| rs7260918   | G | -0.03   |
| rs6139258   | C | -0.1477 |
| rs75145533  | G | -0.0702 |
| rs910141    | T | -0.0384 |
| rs6086478   | T | -0.0481 |
| rs73078112  | T | 0.1227  |
| rs156613    | C | 0.0339  |
| rs11697419  | G | -0.0672 |
| rs17685602  | T | 0.2073  |
| rs6063143   | C | -0.0304 |

|             |   |         |
|-------------|---|---------|
| rs6124041   | T | -0.0339 |
| rs3195701   | T | 0.0481  |
| rs6131421   | G | -0.031  |
| rs78532332  | A | -0.1039 |
| rs6084558   | A | -0.0424 |
| rs34313076  | A | -0.1166 |
| rs35718396  | C | 0.0371  |
| rs11698549  | T | 0.1553  |
| rs6083527   | T | 0.1003  |
| rs62212781  | C | -0.1209 |
| rs6072087   | C | 0.0338  |
| rs6089553   | T | -0.0324 |
| rs6043567   | T | -0.1548 |
| rs1452324   | T | -0.0984 |
| rs2206397   | T | -0.0413 |
| rs73089989  | A | -0.1934 |
| rs76720524  | T | 0.1529  |
| rs112961878 | T | 0.1413  |
| rs11905922  | C | 0.0746  |
| rs6033443   | G | -0.0438 |
| rs7272569   | T | -0.0541 |
| rs2208276   | G | -0.0537 |
| rs117184383 | C | 0.2033  |
| rs9917438   | T | -0.1413 |
| rs62217550  | A | 0.1482  |
| rs12624563  | T | 0.0668  |
| rs6067940   | C | -0.0711 |
| rs74974683  | A | -0.1495 |
| rs6028182   | G | -0.0712 |
| rs7263823   | A | 0.0437  |
| rs2840      | A | -0.0378 |
| rs116959857 | A | 0.1399  |
| rs41282136  | T | -0.0749 |
| rs6035613   | T | 0.0341  |
| rs6079461   | A | 0.0308  |
| rs6092524   | C | -0.0289 |
| rs140959748 | C | -0.1703 |
| rs6080962   | T | -0.0396 |
| rs297669    | A | -0.0299 |
| rs6045103   | A | 0.0312  |
| rs77075381  | T | -0.0468 |
| rs6043401   | T | 0.0489  |
| rs6072949   | A | 0.0345  |
| rs6107242   | T | -0.0675 |
| rs79972717  | A | 0.1299  |
| rs6108506   | G | 0.0505  |
| rs6086520   | A | 0.0413  |

|             |   |         |
|-------------|---|---------|
| rs111362550 | A | 0.2252  |
| rs3899452   | C | 0.0544  |
| rs7267330   | T | 0.068   |
| rs8117105   | G | 0.0836  |
| rs2424311   | G | -0.0846 |
| rs139784696 | T | 0.1256  |
| rs73071397  | A | -0.2014 |
| rs4812075   | A | 0.0653  |
| rs78539269  | C | 0.1221  |
| rs73076994  | A | -0.1467 |
| rs6085252   | C | -0.0464 |
| rs214808    | T | 0.0491  |
| rs3746638   | G | 0.0282  |
| rs79535883  | G | -0.1248 |
| rs6082199   | G | 0.0333  |
| rs74651865  | T | 0.1083  |
| rs6069674   | C | -0.0301 |
| rs6118747   | G | 0.0586  |
| rs139784553 | A | -0.2454 |
| rs6091723   | A | 0.0366  |
| rs73898303  | G | 0.0826  |
| rs6092487   | G | -0.0374 |
| rs74352474  | T | 0.0441  |
| rs1885303   | T | -0.0297 |
| rs6049848   | G | 0.0937  |
| rs3827040   | A | 0.1403  |
| rs60256305  | C | -0.0802 |
| rs145303257 | A | 0.2233  |
| rs55900834  | G | -0.0551 |
| rs117485556 | C | 0.0867  |
| rs56071941  | C | 0.0469  |
| rs6069867   | T | -0.0322 |
| rs6104658   | G | 0.0503  |
| rs34641614  | A | 0.0654  |
| rs2425462   | T | -0.1082 |
| rs17309248  | G | 0.1128  |
| rs35418657  | G | 0.0368  |
| rs540995    | T | -0.1099 |
| rs74672829  | T | 0.1887  |
| rs8117904   | A | -0.031  |
| rs1776262   | A | 0.0431  |
| rs11086499  | T | 0.0298  |
| rs17312578  | G | 0.1125  |
| rs6136514   | T | -0.04   |
| rs1776241   | T | 0.0825  |
| rs62210247  | A | -0.1051 |
| rs77896959  | T | -0.1905 |



|             |   |         |
|-------------|---|---------|
| rs6021306   | G | 0.0303  |
| rs6101870   | A | -0.0542 |
| rs17211266  | T | 0.0513  |
| rs6075658   | C | -0.0286 |
| rs150989671 | C | -0.1529 |
| rs17272940  | T | -0.0538 |
| rs6117726   | T | -0.0399 |
| rs117943415 | T | 0.1785  |
| rs75620614  | T | 0.0573  |
| rs6115893   | A | 0.1613  |
| rs61481387  | A | 0.1481  |
| rs113270355 | G | -0.0733 |
| rs13045750  | A | 0.1545  |
| rs4814133   | G | -0.055  |
| rs116982969 | A | -0.0838 |
| rs6123328   | C | 0.0341  |
| rs116511828 | A | 0.1232  |
| rs1977185   | G | -0.0324 |
| rs6123011   | A | -0.0289 |
| rs117960863 | C | 0.1273  |
| rs846222    | T | -0.0356 |
| rs77733833  | A | 0.1226  |
| rs117038860 | A | 0.1276  |
| rs4239712   | A | -0.1372 |
| rs552151    | C | -0.0411 |
| rs13039715  | T | -0.1022 |
| rs3747927   | G | 0.0325  |
| rs62209467  | A | -0.079  |
| rs7266069   | A | -0.0635 |
| rs144012983 | A | 0.0742  |
| rs117022653 | G | 0.1486  |
| rs6134590   | C | 0.0528  |
| rs6130605   | T | 0.0353  |
| rs6044371   | C | 0.0735  |
| rs7267712   | A | -0.0335 |
| rs235742    | T | 0.0392  |
| rs150744404 | T | -0.1692 |
| rs56085569  | G | 0.0305  |
| rs6132693   | T | -0.0569 |
| rs76052639  | G | 0.0848  |
| rs6097375   | C | -0.1146 |
| rs117534738 | A | -0.0906 |
| rs73618902  | A | 0.0904  |
| rs2425787   | G | -0.0559 |
| rs6099290   | G | -0.0596 |
| rs145998912 | T | 0.1979  |
| rs932435    | C | 0.168   |

|             |   |         |
|-------------|---|---------|
| rs2423893   | G | -0.1688 |
| rs2425501   | A | 0.0298  |
| rs113299095 | A | -0.1897 |
| rs6063365   | G | -0.0347 |
| rs6018027   | C | -0.0337 |
| rs4809660   | C | 0.0281  |
| rs10485447  | T | -0.0358 |
| rs1555272   | C | 0.0328  |
| rs4812858   | T | 0.0331  |
| rs73293420  | A | -0.1325 |
| rs6515857   | A | 0.194   |
| rs228851    | T | -0.0285 |
| rs41303819  | A | -0.1207 |
| rs6125025   | T | 0.0289  |
| rs11698029  | C | 0.05    |
| rs6122279   | T | -0.0821 |
| rs2050371   | T | 0.0315  |
| rs6063570   | C | 0.0575  |
| rs11905381  | A | -0.1524 |
| rs6036110   | T | 0.2396  |
| rs171024    | T | -0.0314 |
| rs2425692   | A | 0.0598  |
| rs2983291   | A | 0.0276  |
| rs6044565   | G | -0.0285 |
| rs73132873  | C | 0.086   |
| rs117849296 | C | 0.1321  |
| rs35017290  | T | 0.1467  |
| rs73134202  | G | -0.0482 |
| rs857250    | A | 0.0294  |
| rs401976    | T | -0.0295 |
| rs13045660  | A | -0.0325 |
| rs843819    | A | -0.0739 |
| rs4419281   | T | 0.0437  |
| rs7274260   | T | 0.0306  |
| rs146739578 | G | -0.117  |
| rs62209984  | T | 0.1309  |
| rs2277867   | A | 0.0299  |
| rs137890638 | G | -0.1636 |
| rs6011780   | C | -0.1025 |
| rs16998225  | G | 0.0535  |
| rs45479194  | A | 0.149   |
| rs6018471   | T | -0.036  |
| rs6121861   | A | 0.0972  |
| rs35070517  | A | 0.0934  |
| rs35596738  | C | 0.1439  |
| rs56851948  | C | 0.0299  |
| rs117166448 | T | 0.1615  |

|             |   |         |
|-------------|---|---------|
| rs6014645   | T | -0.0361 |
| rs6132743   | T | 0.0307  |
| rs6068963   | A | -0.0724 |
| rs77418220  | C | -0.1181 |
| rs13040204  | G | 0.0528  |
| rs141398924 | T | 0.1442  |
| rs240755    | T | 0.0468  |
| rs73147598  | A | -0.058  |
| rs73177777  | T | 0.0486  |
| rs148424791 | T | -0.0812 |
| rs80164935  | G | -0.0821 |
| rs77832942  | T | 0.1248  |
| rs116842503 | T | 0.1188  |
| rs114530719 | C | 0.0622  |
| rs12625310  | T | -0.0995 |
| rs61111175  | A | -0.0321 |
| rs486515    | C | -0.1396 |
| rs1150423   | A | -0.037  |
| rs2749813   | T | 0.0303  |
| rs6103035   | T | -0.0316 |
| rs143078579 | T | 0.0957  |
| rs73074396  | T | -0.0652 |
| rs62204601  | T | 0.0705  |
| rs145211341 | C | 0.1037  |
| rs117614051 | T | 0.1651  |
| rs117634158 | A | 0.1221  |
| rs139425238 | A | 0.1101  |
| rs62226699  | C | 0.0982  |
| rs2746089   | T | -0.0698 |
| rs150975722 | A | -0.1663 |
| rs149270155 | G | -0.143  |
| rs71330419  | C | 0.0532  |
| rs16983844  | A | 0.0366  |
| rs113888540 | A | 0.1469  |
| rs5602      | A | 0.0273  |
| rs4479482   | A | -0.0435 |
| rs73091700  | T | -0.0998 |
| rs117675848 | A | 0.1155  |
| rs4814142   | C | -0.0387 |
| rs910764    | A | 0.0478  |
| rs76182812  | T | 0.1158  |
| rs6061711   | T | 0.0368  |
| rs73136037  | A | 0.1464  |
| rs146441911 | T | -0.085  |
| rs6013815   | C | -0.0977 |
| rs17093035  | T | -0.1067 |
| rs62209438  | T | 0.0676  |

|             |   |         |
|-------------|---|---------|
| rs117302433 | A | 0.2179  |
| rs11697878  | T | -0.0918 |
| rs118029791 | T | -0.2857 |
| rs117614151 | C | 0.0765  |
| rs116872370 | T | 0.1106  |
| rs4428079   | T | -0.2485 |
| rs1884642   | T | -0.0281 |
| rs2295343   | G | -0.0283 |
| rs62201363  | T | -0.0422 |
| rs76482364  | C | 0.1858  |
| rs2234085   | A | 0.0495  |
| rs910873    | A | -0.0521 |
| rs117961020 | T | 0.1723  |
| rs73144977  | A | -0.0976 |
| rs112810592 | A | -0.0919 |
| rs16993000  | G | 0.1466  |
| rs11696241  | A | -0.121  |
| rs2295494   | C | 0.0415  |
| rs169225    | G | 0.0374  |
| rs1964825   | A | -0.0304 |
| rs56245805  | A | -0.0642 |
| rs112412739 | G | 0.1442  |
| rs113031094 | C | -0.1245 |
| rs13043369  | C | -0.0684 |
| rs12481463  | G | -0.0414 |
| rs6030899   | T | -0.0284 |
| rs76308043  | C | 0.0614  |
| rs62201705  | A | 0.1208  |
| rs1757785   | C | -0.0417 |
| rs79864192  | G | -0.0731 |
| rs2327454   | A | -0.03   |
| rs683808    | A | 0.0273  |
| rs117686849 | T | 0.2256  |
| rs941788    | G | -0.035  |
| rs3787273   | C | -0.0686 |
| rs80031595  | T | 0.0454  |
| rs76279553  | A | -0.0471 |
| rs13044377  | A | -0.1156 |
| rs942172    | A | -0.0576 |
| rs77689448  | T | -0.1145 |
| rs912105    | G | -0.0359 |
| rs73297517  | C | 0.0541  |
| rs17801965  | C | -0.075  |
| rs4810951   | T | 0.0288  |
| rs911157    | T | -0.0549 |
| rs12480116  | A | 0.1206  |
| rs282159    | T | -0.0335 |

|             |   |         |
|-------------|---|---------|
| rs75848721  | T | -0.165  |
| rs6083680   | G | -0.1418 |
| rs1810799   | C | -0.0443 |
| rs76332457  | T | 0.1622  |
| rs3914334   | G | 0.0302  |
| rs35033100  | C | -0.1497 |
| rs200742    | C | 0.0281  |
| rs111704858 | G | -0.1212 |
| rs73068485  | G | 0.1443  |
| rs73615366  | C | 0.0983  |
| rs6065948   | T | -0.0382 |
| rs111581382 | G | 0.1503  |
| rs73136798  | C | -0.077  |
| rs6010810   | A | 0.0309  |
| rs116857586 | G | 0.1066  |
| rs6099854   | A | -0.0408 |
| rs73101307  | G | 0.1181  |
| rs111618682 | T | 0.07    |
| rs6039487   | G | 0.0318  |
| rs6075815   | T | 0.039   |
| rs6015874   | T | 0.0355  |
| rs1776964   | A | -0.0266 |
| rs8124444   | G | 0.0465  |
| rs76119968  | C | -0.1119 |
| rs17227070  | C | 0.0387  |
| rs17340965  | C | 0.1025  |
| rs80273197  | A | 0.1117  |
| rs6072550   | A | -0.0436 |
| rs6086636   | G | 0.0566  |
| rs148259664 | C | 0.1347  |
| rs6067395   | G | 0.0308  |
| rs1407013   | C | 0.0277  |
| rs149936869 | A | -0.1018 |
| rs202379    | T | 0.0369  |
| rs73114576  | A | -0.0538 |
| rs73607434  | G | 0.098   |
| rs292143    | T | -0.0975 |
| rs73076001  | C | -0.058  |
| rs8120282   | A | -0.0325 |
| rs914869    | C | -0.0379 |
| rs77595400  | A | 0.119   |
| rs6021679   | A | 0.0371  |
| rs73112123  | A | -0.103  |
| rs6053929   | T | 0.0322  |
| rs6059076   | A | -0.0275 |
| rs62210161  | G | -0.1568 |
| rs145723432 | A | 0.1548  |

|             |   |         |
|-------------|---|---------|
| rs6131842   | A | -0.0283 |
| rs143754990 | C | 0.1646  |
| rs8123587   | A | 0.0505  |
| rs6053063   | T | 0.0446  |
| rs6132918   | C | -0.0576 |
| rs117670974 | A | -0.122  |
| rs117406150 | G | 0.1173  |
| rs4810282   | A | 0.0466  |
| rs57643404  | A | 0.0537  |
| rs6127409   | T | -0.1127 |
| rs147536904 | G | -0.1478 |
| rs147296227 | T | 0.1943  |
| rs11904945  | G | -0.127  |
| rs140492015 | A | 0.0793  |
| rs79150994  | T | -0.1646 |
| rs6015284   | T | -0.0611 |
| rs57254210  | C | 0.0429  |
| rs78056728  | C | -0.1469 |
| rs62198128  | C | 0.0576  |
| rs6513255   | A | -0.0858 |
| rs117897730 | A | 0.1147  |
| rs8118803   | T | -0.0573 |
| rs55746532  | C | 0.0639  |
| rs6129228   | A | 0.0277  |
| rs7266531   | T | -0.0441 |
| rs6022197   | C | 0.0529  |
| rs147867273 | A | 0.1782  |
| rs243876    | G | -0.0644 |
| rs6124878   | A | 0.0559  |
| rs3787537   | T | 0.0383  |
| rs1474929   | C | 0.0537  |
| rs13041014  | A | -0.0264 |
| rs118130271 | C | -0.1111 |
| rs77794232  | T | -0.1127 |
| rs6025954   | A | 0.0282  |
| rs1884658   | G | 0.0282  |
| rs149524258 | A | 0.1819  |
| rs420939    | G | 0.0433  |
| rs117652522 | C | 0.0463  |
| rs6015922   | T | 0.0292  |
| rs1233720   | G | -0.0294 |
| rs6018685   | C | 0.0286  |
| rs6071033   | C | 0.0313  |
| rs513522    | G | 0.0301  |
| rs6065006   | A | 0.0836  |
| rs62205203  | T | 0.1451  |
| rs6065921   | G | -0.0321 |

|             |   |         |
|-------------|---|---------|
| rs2024571   | T | -0.0912 |
| rs117245924 | T | -0.2028 |
| rs6087097   | A | 0.0371  |
| rs6118075   | A | 0.0263  |
| rs11908505  | A | -0.0304 |
| rs149946784 | T | 0.1488  |
| rs12625340  | T | 0.1187  |
| rs35059196  | G | -0.0763 |
| rs80303379  | T | 0.1178  |
| rs73103684  | T | -0.0824 |
| rs117907745 | A | 0.1743  |
| rs8117696   | G | 0.0621  |
| rs55828029  | G | 0.07    |
| rs2422596   | A | 0.0269  |
| rs116875157 | A | 0.2249  |
| rs6092778   | G | -0.0437 |
| rs143112880 | C | -0.1374 |
| rs112730581 | A | 0.0613  |
| rs78923090  | T | -0.089  |
| rs73619448  | T | 0.1086  |
| rs4813842   | C | 0.0341  |
| rs6070876   | C | -0.0287 |
| rs6033719   | G | 0.1578  |
| rs6080042   | A | -0.0704 |
| rs6056201   | T | 0.0976  |
| rs4009474   | G | 0.061   |
| rs75140462  | T | 0.0839  |
| rs6032788   | C | 0.1091  |
| rs140199710 | T | -0.078  |
| rs348280    | T | 0.1158  |
| rs1028526   | C | 0.0494  |
| rs6121796   | T | -0.0301 |
| rs73152703  | G | 0.0857  |
| rs143728457 | A | -0.1176 |
| rs117652695 | C | -0.111  |
| rs6049604   | G | -0.0274 |
| rs6069909   | C | -0.0424 |
| rs35788983  | T | 0.186   |
| rs61753669  | C | -0.1456 |
| rs1003855   | C | -0.0271 |
| rs55775700  | G | -0.0353 |
| rs112722075 | T | -0.1521 |
| rs17838906  | G | 0.0914  |
| rs34988522  | A | -0.0476 |
| rs6742      | T | -0.0472 |
| rs73325829  | T | 0.0716  |
| rs112198382 | A | -0.0956 |

|             |   |         |
|-------------|---|---------|
| rs73135983  | T | 0.2148  |
| rs73177677  | G | -0.0294 |
| rs1110072   | T | 0.0375  |
| rs6065438   | T | -0.0519 |
| rs6099357   | G | 0.0263  |
| rs41298344  | A | 0.0904  |
| rs6055815   | A | 0.0351  |
| rs2422567   | C | 0.0371  |
| rs6111798   | C | -0.064  |
| rs79892218  | C | 0.0761  |
| rs1984533   | G | -0.0386 |
| rs116928460 | A | 0.1249  |
| rs142285503 | A | 0.2222  |
| rs984498    | T | 0.0401  |
| rs117263993 | C | -0.1661 |
| rs77605845  | A | -0.0459 |
| rs7274061   | T | 0.0308  |
| rs34006063  | G | 0.0874  |
| rs3752310   | C | 0.0455  |
| rs2869312   | T | 0.0357  |
| rs17270636  | A | 0.0873  |
| rs1979855   | G | 0.0415  |
| rs118172079 | G | 0.1061  |
| rs7361183   | A | 0.081   |
| rs6026400   | G | -0.0331 |
| rs62231384  | T | 0.0291  |
| rs6049370   | G | 0.0765  |
| rs13039228  | A | 0.0382  |
| rs6019358   | G | 0.0333  |
| rs8122510   | G | 0.0364  |
| rs723118    | C | 0.032   |
| rs6072649   | A | 0.0336  |
| rs4810786   | C | -0.036  |
| rs6100966   | A | -0.0368 |
| rs6069501   | G | 0.0459  |
| rs6071800   | A | -0.0292 |
| rs6024358   | C | 0.0292  |
| rs78114889  | G | 0.1268  |
| rs112636646 | G | -0.0558 |
| rs12185805  | T | -0.0414 |
| rs73899849  | C | -0.1437 |
| rs6054516   | T | 0.0392  |
| rs112220926 | A | -0.0415 |
| rs6017268   | A | 0.0285  |
| rs11699856  | C | -0.0368 |
| rs12625917  | C | -0.0737 |
| rs141724212 | T | 0.119   |



|             |   |         |
|-------------|---|---------|
| rs77047740  | A | -0.1331 |
| rs2745733   | T | -0.0543 |
| rs8124722   | G | 0.1748  |
| rs41301833  | T | 0.0998  |
| rs3848789   | C | 0.1066  |
| rs6036176   | G | 0.0298  |
| rs6075456   | C | 0.0825  |
| rs13038386  | G | -0.1599 |
| rs79322193  | T | 0.1093  |
| rs6041173   | C | 0.0437  |
| rs1029273   | C | -0.0284 |
| rs116844304 | A | 0.1131  |
| rs6044857   | G | 0.0299  |
| rs6114046   | G | 0.0299  |
| rs6046235   | A | 0.0919  |
| rs35311074  | T | -0.0905 |
| rs4815715   | C | -0.0338 |
| rs6139800   | G | -0.0512 |
| rs6078167   | A | -0.0259 |
| rs74342731  | T | 0.0994  |
| rs817693    | T | -0.0476 |
| rs1374957   | C | 0.0322  |
| rs6044851   | T | 0.0261  |
| rs62204203  | G | -0.0353 |
| rs147923120 | T | -0.2498 |
| rs112169623 | T | 0.0615  |
| rs1235118   | G | -0.0287 |
| rs117391878 | A | 0.1579  |
| rs6121514   | C | 0.043   |
| rs2424406   | T | -0.048  |
| rs145645058 | A | 0.0821  |
| rs7266869   | G | 0.1336  |
| rs1158906   | G | -0.0266 |
| rs117493239 | T | 0.1026  |
| rs6077234   | A | -0.2043 |
| rs6071752   | A | 0.0323  |
| rs62205594  | G | 0.1882  |
| rs852365    | T | 0.0322  |
| rs390014    | A | 0.0857  |
| rs11698712  | T | -0.0712 |
| rs74756323  | T | 0.082   |
| rs62199120  | T | -0.0379 |
| rs8567      | G | -0.0277 |
| rs13042943  | A | -0.264  |
| rs117954711 | T | -0.1158 |
| rs17221851  | G | 0.0427  |
| rs6014678   | T | -0.0373 |

|             |   |         |
|-------------|---|---------|
| rs12479653  | T | 0.0713  |
| rs62217101  | T | 0.033   |
| rs3746424   | A | -0.029  |
| rs11697175  | A | -0.0813 |
| rs4911532   | T | 0.0271  |
| rs4815363   | C | 0.0366  |
| rs77033049  | C | -0.119  |
| rs13038570  | G | -0.0511 |
| rs55980799  | G | 0.0888  |
| rs6017783   | T | 0.0419  |
| rs1205693   | T | 0.0276  |
| rs460067    | G | -0.034  |
| rs78451644  | C | 0.1618  |
| rs58445178  | T | -0.0519 |
| rs13041339  | T | -0.0286 |
| rs4814924   | A | -0.0458 |
| rs59474447  | T | -0.0765 |
| rs73112051  | A | 0.0742  |
| rs11700254  | A | 0.0839  |
| rs6125081   | T | 0.1266  |
| rs9798580   | T | -0.0829 |
| rs146732328 | A | 0.1623  |
| rs76755795  | A | 0.1546  |
| rs6068816   | T | -0.046  |
| rs148084991 | G | 0.0879  |
| rs754568    | G | -0.034  |
| rs73611289  | C | -0.0975 |
| rs148930184 | A | 0.0857  |
| rs8122326   | T | -0.0349 |
| rs6133855   | C | 0.0688  |
| rs111858910 | G | -0.065  |
| rs7274763   | G | 0.1031  |
| rs2424228   | A | 0.061   |
| rs16995979  | T | -0.0442 |
| rs62197784  | T | 0.1189  |
| rs6062131   | G | -0.0339 |
| rs6095973   | T | -0.0288 |
| rs118162316 | A | 0.1578  |
| rs117376444 | T | 0.0458  |
| rs149635367 | A | -0.0734 |
| rs75162062  | T | 0.1812  |
| rs117347087 | T | 0.1291  |
| rs73117925  | T | 0.0739  |
| rs117524509 | C | 0.103   |
| rs6013791   | C | 0.0315  |
| rs76094687  | C | -0.1811 |
| rs116860429 | T | 0.1046  |

|             |   |         |
|-------------|---|---------|
| rs348843    | T | -0.0312 |
| rs17722073  | A | 0.0622  |
| rs150480374 | T | 0.1376  |
| rs141862453 | A | -0.0811 |
| rs6026069   | C | 0.0467  |
| rs2076555   | A | 0.0383  |
| rs1407340   | G | -0.0277 |
| rs35103049  | A | -0.1498 |
| rs1131847   | A | -0.0266 |
| rs112416087 | G | 0.1618  |
| rs6050337   | C | 0.0312  |
| rs404543    | A | 0.0256  |
| rs11698358  | G | 0.0585  |
| rs6140686   | A | -0.0726 |
| rs4815864   | A | -0.0409 |
| rs62201517  | T | -0.0736 |
| rs6136584   | A | 0.1299  |
| rs55883790  | G | 0.1484  |
| rs12480027  | G | 0.0307  |
| rs6130263   | G | 0.0298  |
| rs6066896   | C | 0.153   |
| rs4815707   | T | -0.0259 |
| rs6076225   | T | -0.0358 |
| rs116949635 | T | 0.1063  |
| rs6071988   | C | -0.1402 |
| rs6110171   | G | 0.0833  |
| rs17777402  | T | -0.0308 |
| rs6054552   | T | -0.0274 |
| rs6078862   | C | 0.0285  |
| rs2253335   | T | 0.0268  |
| rs6091000   | C | -0.0864 |
| rs6134813   | C | 0.0265  |
| rs112422661 | C | -0.1033 |
| rs76192256  | T | -0.0689 |
| rs6078906   | A | 0.0545  |
| rs7262199   | T | -0.0273 |
| rs6034469   | A | 0.0277  |
| rs35495088  | T | 0.0554  |
| rs6081143   | C | 0.126   |
| rs12625138  | G | 0.0515  |
| rs146023469 | G | -0.1348 |
| rs74699360  | A | -0.1139 |
| rs56066546  | T | 0.1608  |
| rs3803991   | T | -0.0593 |
| rs8123945   | A | 0.0477  |
| rs6088412   | A | 0.0288  |
| rs58347405  | A | 0.0274  |

|             |   |         |
|-------------|---|---------|
| rs4813166   | A | 0.0329  |
| rs4809941   | C | -0.0265 |
| rs4815897   | G | -0.0347 |
| rs1323300   | C | 0.0511  |
| rs6061785   | T | 0.0828  |
| rs523865    | G | -0.0497 |
| rs2670313   | A | 0.0273  |
| rs961821    | T | -0.1979 |
| rs138306157 | C | 0.1705  |
| rs138758009 | C | 0.1303  |
| rs74388762  | C | 0.1199  |
| rs16986641  | C | -0.0295 |
| rs6089838   | A | 0.0455  |
| rs6117432   | T | -0.0346 |
| rs260019    | T | -0.0346 |
| rs6134598   | T | 0.0551  |
| rs137946712 | T | 0.1165  |
| rs6102765   | C | 0.0376  |
| rs6081373   | A | 0.0689  |
| rs73277420  | C | 0.1158  |
| rs7268790   | T | 0.0906  |
| rs6023500   | A | -0.0533 |
| rs362604    | G | -0.027  |
| rs6026449   | T | 0.0267  |
| rs2423921   | C | -0.0289 |
| rs117433983 | A | 0.108   |
| rs6126690   | T | 0.0317  |
| rs6107422   | A | -0.05   |
| rs450110    | A | -0.0506 |
| rs113233113 | G | -0.0298 |
| rs111390776 | A | 0.0876  |
| rs75295019  | G | 0.086   |
| rs13036818  | T | -0.0536 |
| rs6025744   | T | -0.0354 |
| rs75227423  | C | 0.0578  |
| rs78079211  | A | 0.0764  |
| rs56262255  | A | 0.0708  |
| rs1740935   | G | -0.0466 |
| rs6053414   | C | 0.0278  |
| rs1407252   | T | 0.0462  |
| rs6118724   | A | 0.0274  |
| rs6080399   | C | 0.0617  |
| rs6044563   | A | -0.0486 |
| rs6064760   | G | -0.0571 |
| rs2064657   | T | -0.0268 |
| rs1570275   | C | 0.0713  |
| rs208390    | C | -0.0273 |

|             |   |         |
|-------------|---|---------|
| rs155002    | T | -0.1269 |
| rs6116814   | G | 0.0754  |
| rs3904863   | C | -0.0521 |
| rs11696327  | T | -0.0811 |
| rs73141953  | A | 0.0825  |
| rs73151630  | A | -0.0378 |
| rs11907348  | A | -0.0981 |
| rs13037488  | T | 0.0402  |
| rs6037988   | C | -0.0271 |
| rs7262174   | G | -0.0425 |
| rs6094018   | C | 0.0288  |
| rs117486948 | A | -0.0991 |
| rs7262010   | C | 0.0413  |
| rs112254912 | G | 0.1209  |
| rs6085360   | G | -0.0385 |
| rs141892692 | T | -0.0792 |
| rs6086949   | A | 0.0281  |
| rs2050223   | A | 0.031   |
| rs62206398  | A | 0.0291  |
| rs75128527  | A | -0.0461 |
| rs364652    | T | 0.0284  |
| rs8115948   | A | 0.0337  |
| rs115421977 | C | 0.1341  |
| rs141586935 | T | 0.148   |
| rs2259735   | C | 0.0266  |
| rs74828466  | T | 0.0849  |
| rs73308676  | C | 0.1621  |
| rs74564991  | A | 0.1084  |
| rs926478    | A | 0.062   |
| rs6038717   | G | 0.037   |
| rs6041609   | A | -0.0419 |
| rs17297680  | A | 0.0882  |
| rs10485812  | G | 0.0929  |
| rs6139557   | A | 0.0295  |
| rs2256423   | G | 0.0253  |
| rs73620752  | T | -0.0441 |
| rs6062733   | G | -0.0334 |
| rs2423671   | T | -0.0378 |
| rs4811645   | G | -0.0259 |
| rs6076165   | C | -0.0398 |
| rs112970780 | A | -0.0914 |
| rs79303366  | A | 0.0525  |
| rs116898415 | T | 0.1965  |
| rs35151304  | A | -0.0501 |
| rs6128028   | C | -0.0318 |
| rs6040357   | C | 0.027   |
| rs4810576   | A | -0.0271 |

|             |   |         |
|-------------|---|---------|
| rs118177338 | T | 0.1082  |
| rs36078050  | C | -0.1146 |
| rs62213185  | A | 0.0834  |
| rs6037670   | T | -0.0964 |
| rs2426511   | A | 0.0324  |
| rs6053023   | C | 0.0305  |
| rs8122094   | G | 0.0292  |
| rs6026016   | T | -0.0408 |
| rs67106437  | A | -0.1402 |
| rs4812677   | C | 0.0463  |
| rs74422706  | A | 0.1009  |
| rs8123898   | G | 0.038   |
| rs2018261   | A | 0.0355  |
| rs6514090   | G | 0.0289  |
| rs754170    | G | 0.029   |
| rs6083489   | G | -0.0855 |
| rs610412    | C | 0.0264  |
| rs2427223   | T | 0.0348  |
| rs6142377   | A | -0.0257 |
| rs2143623   | A | 0.0254  |
| rs78545268  | G | 0.0575  |
| rs75498153  | A | -0.169  |
| rs55958048  | T | 0.0478  |
| rs72626583  | G | 0.0326  |
| rs17458807  | A | 0.1075  |
| rs12624485  | A | 0.0878  |
| rs11699916  | A | -0.0314 |
| rs490514    | C | -0.0382 |
| rs6085411   | G | 0.0645  |
| rs77172576  | A | -0.0661 |
| rs6116721   | G | 0.0267  |
| rs6113840   | T | 0.0449  |
| rs6088179   | C | 0.0319  |
| rs6069865   | G | 0.0325  |
| rs56406843  | A | -0.1381 |
| rs6134248   | T | 0.0689  |
| rs6074674   | C | 0.052   |
| rs78154045  | T | 0.0653  |
| rs75036812  | T | -0.1173 |
| rs2153934   | A | -0.0311 |
| rs57083727  | A | 0.1394  |
| rs74274279  | G | -0.1914 |
| rs111887426 | G | -0.1555 |
| rs2866747   | A | 0.0398  |
| rs13043726  | G | -0.0532 |
| rs67535236  | G | 0.0355  |
| rs913664    | G | 0.0255  |

|             |   |         |
|-------------|---|---------|
| rs117975507 | C | -0.141  |
| rs6068717   | A | -0.0358 |
| rs6061348   | T | 0.036   |
| rs310650    | T | -0.1807 |
| rs6080286   | C | -0.0319 |
| rs201934    | C | -0.0292 |
| rs55640245  | C | -0.0342 |
| rs6088509   | A | -0.0986 |
| rs237722    | A | 0.0331  |
| rs73143503  | A | 0.03    |
| rs16995774  | C | -0.0506 |
| rs6067377   | C | 0.0261  |
| rs11696479  | G | -0.0406 |
| rs6126762   | A | -0.0421 |
| rs111303420 | A | -0.1003 |
| rs62202820  | T | 0.0251  |
| rs6108721   | T | 0.1212  |
| rs874033    | C | -0.1131 |
| rs73114948  | T | 0.072   |
| rs12481476  | T | 0.0672  |
| rs145263793 | A | -0.1357 |
| rs7354032   | T | 0.1029  |
| rs13039463  | A | -0.0787 |
| rs6046473   | G | -0.0559 |
| rs6025163   | T | -0.0312 |
| rs1201897   | A | 0.0258  |
| rs112083174 | A | -0.2061 |
| rs34809175  | A | 0.043   |
| rs79371140  | T | 0.2231  |
| rs116952348 | A | 0.076   |
| rs4925245   | C | -0.0329 |
| rs761008    | T | -0.0446 |
| rs6099023   | A | -0.0617 |
| rs147503277 | G | 0.1229  |
| rs117309427 | A | -0.1057 |
| rs146782041 | C | 0.1826  |
| rs62199771  | G | 0.1257  |
| rs6137883   | A | 0.0433  |
| rs73146228  | G | 0.0416  |
| rs62213336  | C | -0.0345 |
| rs139177992 | T | -0.1223 |
| rs79673673  | C | 0.1214  |
| rs118182923 | A | -0.0925 |
| rs74415499  | A | 0.0522  |
| rs113883111 | A | 0.0646  |
| rs6062878   | G | -0.029  |
| rs6128633   | G | 0.0293  |

|             |   |         |
|-------------|---|---------|
| rs117152863 | A | 0.1287  |
| rs6130112   | T | 0.1735  |
| rs143046137 | G | 0.1006  |
| rs727190    | G | 0.0452  |
| rs243898    | G | -0.0483 |
| rs4577357   | T | -0.0271 |
| rs4815300   | C | -0.027  |
| rs117047418 | T | 0.1619  |
| rs62214489  | A | -0.0884 |
| rs6022345   | G | -0.027  |
| rs6097553   | A | 0.0273  |
| rs6097352   | T | 0.1079  |
| rs6076613   | T | 0.026   |
| rs116917255 | C | 0.1486  |
| rs117916681 | T | 0.0754  |
| rs6013652   | T | 0.0335  |
| rs80193447  | A | 0.1393  |
| rs146528914 | G | 0.1301  |
| rs6017239   | T | 0.1675  |
| rs149626880 | A | 0.1358  |
| rs142043566 | C | -0.2201 |
| rs118138527 | A | 0.1036  |
| rs6116019   | C | 0.0578  |
| rs6046283   | T | -0.0288 |
| rs6109535   | C | -0.0655 |
| rs79438969  | T | -0.0954 |
| rs6070841   | A | 0.0321  |
| rs149702622 | T | 0.0644  |
| rs149924683 | T | -0.0863 |
| rs73316331  | A | 0.0524  |
| rs1555901   | G | 0.0255  |
| rs62186879  | A | -0.0487 |
| rs2254239   | T | 0.0422  |
| rs6056897   | C | -0.0633 |
| rs62205593  | A | -0.1174 |
| rs62187547  | C | -0.0372 |
| rs6087960   | A | 0.0629  |
| rs3819905   | A | 0.0282  |
| rs13043000  | T | -0.0414 |
| rs59530555  | T | 0.0653  |
| rs7273914   | C | -0.0325 |
| rs73619439  | C | 0.0549  |
| rs464145    | T | -0.0252 |
| rs6064790   | A | 0.0282  |
| rs13044506  | G | -0.0271 |
| rs6121666   | A | -0.0582 |
| rs147149478 | A | 0.169   |



|             |   |         |
|-------------|---|---------|
| rs60235509  | A | -0.0286 |
| rs111770582 | A | 0.1189  |
| rs4632434   | C | -0.068  |
| rs6108250   | T | -0.032  |
| rs4814250   | A | -0.0283 |
| rs6102671   | A | 0.1268  |
| rs76610734  | C | -0.1509 |
| rs75768013  | A | 0.1088  |
| rs6029123   | T | 0.0275  |
| rs73151637  | T | 0.0849  |
| rs6100556   | T | -0.0255 |
| rs6136119   | A | 0.1116  |
| rs6093938   | C | -0.0278 |
| rs11086984  | T | -0.0697 |
| rs75877339  | T | -0.1947 |
| rs73157488  | A | 0.0446  |
| rs74558750  | A | 0.0656  |
| rs775115    | T | -0.0291 |
| rs35491616  | C | 0.0542  |
| rs2223836   | G | -0.0521 |
| rs4618114   | C | 0.0254  |
| rs73072469  | G | -0.1173 |
| rs2853212   | G | -0.029  |
| rs11697333  | C | -0.0274 |
| rs34522262  | A | -0.0605 |
| rs17226992  | A | 0.0779  |
| rs73897828  | A | 0.0716  |
| rs73113390  | C | -0.0794 |
| rs74181924  | T | -0.0646 |
| rs6026864   | A | 0.026   |
| rs6051434   | G | -0.026  |
| rs8120689   | A | 0.0476  |
| rs34187893  | T | 0.0711  |
| rs148775633 | C | 0.0942  |
| rs62206298  | T | -0.1195 |
| rs71351232  | T | -0.1293 |
| rs146324784 | T | 0.2082  |
| rs7273160   | T | 0.0386  |
| rs34020366  | T | -0.1239 |
| rs6091136   | T | 0.0556  |
| rs60717050  | A | -0.0371 |
| rs111992088 | A | -0.0654 |
| rs6081503   | C | -0.042  |
| rs6014657   | A | -0.0299 |
| rs34131230  | T | 0.0471  |
| rs13038473  | A | 0.03    |
| rs62198432  | G | 0.0397  |

|             |   |         |
|-------------|---|---------|
| rs6084640   | T | -0.0422 |
| rs76729883  | T | -0.0952 |
| rs77689305  | C | 0.1446  |
| rs4239734   | T | -0.0466 |
| rs75412694  | T | -0.0914 |
| rs17227097  | T | 0.1266  |
| rs1575443   | G | -0.0345 |
| rs16996513  | A | -0.0836 |
| rs151009976 | T | 0.0904  |
| rs117370536 | G | 0.0863  |
| rs6043641   | G | -0.0378 |
| rs12625871  | A | 0.0555  |
| rs7260758   | C | -0.0575 |
| rs17730181  | T | -0.1399 |
| rs3212197   | T | -0.0668 |
| rs2423343   | C | -0.1523 |
| rs112572629 | G | -0.0996 |
| rs6028848   | T | 0.0357  |
| rs2425448   | A | 0.0766  |
| rs11905011  | G | -0.0302 |
| rs2070755   | G | -0.0246 |
| rs117694768 | T | 0.1265  |
| rs116865451 | A | -0.189  |
| rs76374881  | A | 0.0517  |
| rs1011643   | T | -0.04   |
| rs55916811  | C | -0.0449 |
| rs4812664   | G | 0.0279  |
| rs76285764  | C | -0.1122 |
| rs12480625  | A | -0.0276 |
| rs6022666   | G | 0.029   |
| rs76039924  | G | 0.0866  |
| rs4810499   | T | -0.0356 |
| rs8117242   | T | -0.0551 |
| rs78057386  | G | 0.1687  |
| rs67243058  | C | 0.0271  |
| rs116858387 | T | -0.1201 |
| rs6029598   | T | 0.0449  |
| rs76224190  | T | 0.067   |
| rs118059852 | G | -0.1103 |
| rs143370970 | T | 0.0919  |
| rs16988891  | T | -0.0369 |
| rs80173297  | G | -0.0769 |
| rs6076053   | A | -0.0991 |
| rs11537702  | A | -0.0438 |
| rs235195    | A | -0.0481 |
| rs142731022 | G | -0.2228 |
| rs34186757  | A | 0.0448  |

|             |   |         |
|-------------|---|---------|
| rs17774176  | G | 0.0908  |
| rs6097333   | A | 0.0464  |
| rs113369914 | T | 0.186   |
| rs6130478   | G | 0.1217  |
| rs6027571   | C | -0.0243 |
| rs73096208  | A | 0.0568  |
| rs139748643 | C | 0.1208  |
| rs6103037   | C | 0.0336  |
| rs6064095   | G | -0.064  |
| rs11698078  | T | -0.0461 |
| rs3091878   | A | -0.0239 |
| rs6015854   | A | -0.028  |
| rs34216186  | A | 0.1088  |
| rs1028395   | C | -0.0417 |
| rs844811    | T | 0.1016  |
| rs116996941 | A | -0.1737 |
| rs6077776   | T | -0.0542 |
| rs13039974  | T | -0.1132 |
| rs7262203   | C | 0.045   |
| rs73098470  | G | -0.094  |
| rs117714306 | C | -0.1636 |
| rs6018791   | A | -0.1045 |
| rs6094985   | T | 0.0441  |
| rs75124962  | A | 0.1483  |
| rs16994496  | C | 0.0746  |
| rs71338884  | C | -0.0903 |
| rs117342706 | G | -0.1151 |
| rs13433142  | G | -0.0652 |
| rs117167865 | C | 0.1235  |
| rs118040112 | T | 0.0517  |
| rs457903    | T | 0.1603  |
| rs4813881   | T | 0.0254  |
| rs1108895   | C | 0.0472  |
| rs117287601 | G | 0.1653  |
| rs62199762  | T | 0.181   |
| rs6110845   | G | 0.028   |
| rs78162372  | T | 0.1685  |
| rs73135800  | T | -0.0701 |
| rs13039605  | T | -0.029  |
| rs884851    | T | -0.0326 |
| rs6061003   | C | 0.0245  |
| rs11696807  | A | 0.0684  |
| rs17220872  | T | 0.0588  |
| rs3753137   | C | -0.0263 |
| rs73136237  | T | -0.0442 |
| rs111489740 | T | -0.1259 |
| rs117854947 | T | 0.1004  |

|             |   |         |
|-------------|---|---------|
| rs16997581  | G | -0.0425 |
| rs142883960 | A | 0.1229  |
| rs73918907  | A | 0.0546  |
| rs74515875  | T | -0.1317 |
| rs13038703  | T | -0.0318 |
| rs17678193  | T | 0.0296  |
| rs1276354   | C | -0.0276 |
| rs79979126  | C | -0.1015 |
| rs6028932   | C | 0.0322  |
| rs4630837   | T | -0.0561 |
| rs16991149  | C | 0.0519  |
| rs6085770   | T | 0.23    |
| rs79412169  | A | 0.0431  |
| rs75746121  | A | -0.0543 |
| rs73071720  | A | -0.0545 |
| rs67340628  | T | 0.0751  |
| rs371747    | C | 0.0712  |
| rs6075263   | A | 0.0335  |
| rs118173116 | A | -0.0877 |
| rs11697023  | A | 0.043   |
| rs6046824   | T | -0.0518 |
| rs74938403  | T | 0.1254  |
| rs6066443   | T | -0.0258 |
| rs6108983   | A | 0.0251  |
| rs6077332   | C | -0.0249 |
| rs6073003   | C | -0.0319 |
| rs6126358   | T | 0.0249  |
| rs148867800 | G | -0.1359 |
| rs7267551   | C | 0.0292  |
| rs34157395  | T | 0.1192  |
| rs6115792   | A | -0.0796 |
| rs158560    | C | -0.0281 |
| rs137887001 | G | 0.0947  |
| rs1543449   | C | 0.0289  |
| rs116960385 | T | 0.1182  |
| rs6072680   | A | -0.0328 |
| rs76725394  | C | 0.0591  |
| rs2249766   | T | -0.0339 |
| rs6122581   | G | -0.0659 |
| rs138442211 | C | -0.1632 |
| rs932826    | C | 0.0292  |
| rs118008636 | T | 0.1366  |
| rs6036310   | A | 0.0281  |
| rs6064703   | A | 0.0319  |
| rs10485590  | C | 0.0795  |
| rs73146425  | T | -0.0767 |
| rs644239    | T | -0.0268 |

|             |   |         |
|-------------|---|---------|
| rs175809    | C | 0.0365  |
| rs117096288 | A | -0.0931 |
| rs74533257  | T | 0.0561  |
| rs16993777  | G | 0.0816  |
| rs6020616   | A | 0.1298  |
| rs45437096  | T | 0.063   |
| rs2425806   | C | -0.0593 |
| rs6128994   | T | 0.0418  |
| rs6070475   | T | -0.0238 |
| rs6136000   | C | 0.0649  |
| rs80156836  | A | -0.0955 |
| rs78336501  | A | -0.0676 |
| rs911380    | T | -0.0252 |
| rs6124929   | A | 0.0471  |
| rs6015383   | C | 0.0302  |
| rs139824725 | T | 0.1226  |
| rs4812136   | G | 0.0756  |
| rs143869596 | C | -0.1236 |
| rs62216293  | A | 0.0428  |
| rs6059349   | A | 0.1231  |
| rs10485617  | A | 0.0608  |
| rs6126645   | C | -0.0278 |
| rs80118939  | G | 0.0349  |
| rs62210969  | C | -0.0396 |
| rs144957921 | T | -0.0482 |
| rs78928095  | T | -0.0688 |
| rs147076537 | A | -0.1085 |
| rs805541    | A | 0.1228  |
| rs117851374 | T | 0.102   |
| rs45499892  | T | 0.0774  |
| rs8120339   | G | -0.0646 |
| rs4809570   | C | 0.0614  |
| rs116855042 | C | 0.0764  |
| rs6087471   | T | -0.0557 |
| rs145772166 | C | 0.1922  |
| rs73180631  | A | 0.0557  |
| rs1000121   | C | 0.0313  |
| rs6103737   | A | -0.0705 |
| rs2144937   | G | 0.0321  |
| rs6074528   | A | -0.0268 |
| rs419274    | G | 0.0255  |
| rs4572656   | T | 0.0493  |
| rs143128825 | G | -0.2305 |
| rs62187494  | A | -0.08   |
| rs4809479   | T | -0.0413 |
| rs911528    | T | 0.1037  |
| rs55770535  | C | 0.0526  |

|             |   |         |
|-------------|---|---------|
| rs1206753   | C | 0.0768  |
| rs6070893   | G | -0.0346 |
| rs151158010 | C | 0.1141  |
| rs6122606   | T | 0.0329  |
| rs2869932   | C | 0.0439  |
| rs73148636  | G | -0.1021 |
| rs6076874   | C | -0.0252 |
| rs41275422  | G | 0.0481  |
| rs117148279 | T | 0.0916  |
| rs148448531 | T | 0.0968  |
| rs6025722   | C | -0.0379 |
| rs6107584   | C | 0.0322  |
| rs6122383   | T | 0.0547  |
| rs143926245 | A | 0.1333  |
| rs235736    | C | 0.0912  |
| rs6086403   | A | 0.0299  |
| rs142395923 | G | 0.1233  |
| rs6099903   | G | 0.0283  |
| rs415702    | A | 0.0359  |
| rs78003329  | G | -0.0882 |
| rs41282770  | A | 0.138   |
| rs6052350   | G | -0.0295 |
| rs113807457 | G | 0.1491  |
| rs755756    | A | -0.0234 |
| rs6068913   | A | 0.1319  |
| rs138467308 | T | 0.1594  |
| rs219863    | A | 0.1044  |
| rs8118432   | G | -0.0264 |
| rs2015529   | C | 0.0715  |
| rs76669166  | A | 0.1319  |
| rs148489001 | A | 0.212   |
| rs1201686   | C | 0.058   |
| rs6127784   | A | 0.0245  |
| rs62197774  | G | 0.0886  |
| rs6103863   | T | 0.0658  |
| rs6064134   | A | 0.0575  |
| rs117513557 | T | 0.1572  |
| rs4815805   | T | 0.0256  |
| rs77654614  | A | 0.0451  |
| rs117293977 | C | -0.2349 |
| rs6065411   | C | 0.0282  |
| rs117633566 | T | 0.0816  |
| rs55678247  | A | 0.0295  |
| rs58572087  | C | 0.0984  |
| rs78479182  | A | -0.1044 |
| rs211860    | T | 0.1518  |
| rs11699812  | A | 0.1227  |

|             |   |         |
|-------------|---|---------|
| rs1327230   | C | -0.0294 |
| rs6094799   | A | 0.0808  |
| rs816956    | G | -0.0285 |
| rs2423092   | A | 0.027   |
| rs10485522  | A | -0.0489 |
| rs2425156   | C | -0.0322 |
| rs1205229   | A | 0.0753  |
| rs2299725   | A | -0.0831 |
| rs8115244   | A | 0.0363  |
| rs141268089 | T | -0.1355 |
| rs6074916   | T | -0.0656 |
| rs2425612   | A | 0.0375  |
| rs73893445  | C | -0.1335 |
| rs6094514   | T | 0.0363  |
| rs6056120   | A | 0.0503  |
| rs147310568 | T | -0.1107 |
| rs117775740 | A | -0.1649 |
| rs117197223 | G | -0.0654 |
| rs8119186   | G | -0.0272 |
| rs76274135  | A | 0.1501  |
| rs7267256   | A | 0.026   |
| rs444195    | T | -0.0241 |
| rs66980079  | A | -0.0347 |
| rs73609386  | C | 0.1945  |
| rs79326413  | G | 0.0505  |
| rs17688807  | G | -0.0296 |
| rs146285498 | A | -0.1228 |
| rs73298968  | A | -0.1073 |
| rs118148307 | T | 0.1023  |
| rs56179591  | A | 0.0324  |
| rs6033830   | T | 0.0249  |
| rs113433024 | T | 0.1816  |
| rs6083743   | C | 0.0417  |
| rs35993723  | A | 0.0297  |
| rs6039829   | G | -0.0327 |
| rs60182773  | T | 0.0818  |
| rs7353549   | T | 0.0547  |
| rs2024940   | C | -0.044  |
| rs433279    | T | 0.0452  |
| rs6118228   | G | -0.0422 |
| rs12481387  | G | -0.0243 |
| rs6052929   | C | -0.0894 |
| rs6090915   | G | -0.0379 |
| rs142593868 | T | 0.0923  |
| rs6072448   | A | 0.1093  |
| rs6101860   | C | 0.0652  |
| rs117669841 | T | -0.1817 |

|             |   |         |
|-------------|---|---------|
| rs11700023  | G | 0.0447  |
| rs73915893  | G | -0.058  |
| rs79079317  | A | 0.0351  |
| rs138308963 | A | 0.1403  |
| rs666753    | T | 0.0246  |
| rs76307902  | T | 0.0624  |
| rs62204894  | A | -0.0655 |
| rs77191133  | C | -0.0573 |
| rs6089240   | A | -0.0287 |
| rs2243656   | A | -0.0265 |
| rs2801011   | T | -0.0293 |
| rs6085308   | C | 0.028   |
| rs7265376   | T | 0.0741  |
| rs73094651  | T | 0.1271  |
| rs77591862  | A | -0.1496 |
| rs6046780   | C | 0.0403  |
| rs75113125  | A | -0.0895 |
| rs3092500   | A | -0.0351 |
| rs2328366   | T | -0.037  |
| rs8764      | C | 0.0294  |
| rs75037267  | G | -0.1217 |
| rs735055    | A | 0.0355  |
| rs198494    | A | 0.0343  |
| rs17489332  | A | 0.0639  |
| rs144743370 | G | 0.1425  |
| rs6024728   | A | 0.0298  |
| rs3790201   | A | -0.0859 |
| rs742415    | A | -0.0293 |
| rs56287257  | C | -0.0431 |
| rs116967386 | T | 0.1184  |
| rs11699754  | C | 0.0505  |
| rs1535487   | A | 0.0301  |
| rs13037006  | G | -0.0233 |
| rs10470043  | T | -0.03   |
| rs4809552   | T | 0.0332  |
| rs144147995 | G | 0.1905  |
| rs1535141   | T | -0.0266 |
| rs243903    | C | 0.0422  |
| rs6112071   | G | 0.0228  |
| rs1338695   | G | 0.1365  |
| rs2423089   | C | 0.0459  |
| rs66528071  | G | 0.029   |
| rs6126053   | T | -0.1736 |
| rs6111510   | G | 0.0349  |
| rs6030445   | G | 0.0278  |
| rs4402826   | T | 0.0377  |
| rs79842685  | G | -0.1017 |



|             |   |         |
|-------------|---|---------|
| rs35829183  | T | 0.0506  |
| rs117099517 | A | -0.1475 |
| rs79043340  | T | 0.152   |
| rs6052542   | G | 0.0328  |
| rs6114896   | C | 0.07    |
| rs6135701   | A | -0.0605 |
| rs146817147 | C | 0.127   |
| rs11696799  | T | -0.023  |
| rs6117164   | G | -0.0355 |
| rs6105819   | A | -0.0627 |
| rs5007291   | A | 0.0279  |
| rs144565488 | T | -0.1537 |
| rs4911156   | A | -0.0235 |
| rs6068063   | G | -0.0561 |
| rs6034087   | A | 0.0234  |
| rs73616229  | A | -0.0712 |
| rs7269583   | C | 0.0694  |
| rs398550    | T | -0.037  |
| rs117618156 | G | -0.0597 |
| rs73915370  | A | -0.1007 |
| rs6018493   | A | -0.0399 |
| rs6066688   | G | 0.0296  |
| rs12162444  | A | 0.1061  |
| rs215551    | C | 0.03    |
| rs6074574   | C | -0.0246 |
| rs73121517  | A | 0.0865  |
| rs79521519  | C | -0.121  |
| rs6123389   | T | -0.1059 |
| rs117986619 | T | 0.1597  |
| rs3092651   | G | -0.0312 |
| rs77842645  | T | 0.1259  |
| rs6112244   | A | 0.0232  |
| rs62227074  | C | -0.0364 |
| rs140270557 | T | 0.1054  |
| rs6123618   | T | 0.0415  |
| rs78404372  | C | 0.0418  |
| rs12625235  | A | 0.0354  |
| rs79532618  | A | 0.104   |
| rs6025365   | G | 0.0252  |
| rs3026508   | C | -0.0598 |
| rs13038170  | G | 0.0372  |
| rs2426643   | G | -0.0233 |
| rs6123077   | G | -0.0275 |
| rs99595     | T | 0.0244  |
| rs10854210  | T | -0.0389 |
| rs846209    | C | 0.0225  |
| rs140408635 | T | 0.1341  |

|             |   |         |
|-------------|---|---------|
| rs6010719   | G | 0.0603  |
| rs79475204  | C | -0.0726 |
| rs1985895   | T | 0.0316  |
| rs6012939   | A | -0.0285 |
| rs1013661   | T | 0.0249  |
| rs35067340  | C | -0.1122 |
| rs13044511  | A | -0.0602 |
| rs117418718 | A | 0.2365  |
| rs6134104   | A | -0.0294 |
| rs926709    | T | 0.0403  |
| rs6025673   | A | -0.0545 |
| rs6084136   | C | -0.0244 |
| rs761567    | A | -0.0247 |
| rs6115073   | C | 0.0297  |
| rs111371088 | C | -0.094  |
| rs62203185  | A | -0.0893 |
| rs78880431  | C | -0.0718 |
| rs73110494  | G | -0.0903 |
| rs3135414   | G | -0.0525 |
| rs2179609   | G | 0.0275  |
| rs35235111  | A | -0.1113 |
| rs6023430   | A | -0.0259 |
| rs632438    | C | -0.0415 |
| rs55909236  | T | -0.0499 |
| rs4809331   | A | -0.0454 |
| rs117125781 | A | -0.1223 |
| rs10485728  | C | -0.0304 |
| rs232631    | G | -0.0418 |
| rs77693596  | T | 0.1458  |
| rs16994138  | C | 0.0429  |
| rs6030109   | C | -0.0229 |
| rs6097326   | A | -0.0348 |
| rs6076601   | G | -0.0248 |
| rs60888974  | G | -0.0481 |
| rs6062345   | C | -0.0296 |
| rs6088103   | T | 0.0815  |
| rs6071260   | C | -0.0352 |
| rs117917516 | T | -0.074  |
| rs11697538  | T | -0.0295 |
| rs11699563  | T | -0.116  |
| rs2983453   | A | -0.0295 |
| rs77946839  | A | -0.0634 |
| rs1537134   | T | 0.0254  |
| rs6090309   | T | 0.0288  |
| rs62203876  | G | 0.068   |
| rs6137197   | T | -0.0586 |
| rs117777911 | A | -0.0772 |

|             |   |         |
|-------------|---|---------|
| rs2867239   | A | -0.0291 |
| rs3817845   | C | 0.0482  |
| rs17499060  | C | 0.0666  |
| rs6096291   | A | -0.0225 |
| rs1008223   | T | 0.0431  |
| rs6029424   | C | 0.0244  |
| rs113517564 | G | 0.0846  |
| rs6077938   | C | -0.0225 |
| rs13040271  | T | 0.1177  |
| rs6123658   | T | -0.023  |
| rs58070155  | G | 0.093   |
| rs117680728 | T | 0.0978  |
| rs6117095   | C | 0.0337  |
| rs1078944   | T | -0.0551 |
| rs624422    | C | -0.0274 |
| rs36120379  | T | -0.0604 |
| rs6109762   | G | 0.0479  |
| rs8118265   | T | -0.0827 |
| rs582998    | T | -0.0254 |
| rs183174    | G | 0.0363  |
| rs708954    | C | 0.0434  |
| rs34014949  | A | -0.0526 |
| rs62212761  | T | 0.1631  |
| rs6114714   | G | -0.0231 |
| rs73181652  | A | -0.0459 |
| rs2273642   | A | -0.0238 |
| rs6132436   | C | -0.0249 |
| rs6111590   | A | 0.0798  |
| rs6100502   | A | -0.0863 |
| rs1075604   | A | 0.0322  |
| rs74835713  | A | 0.0912  |
| rs4811302   | G | 0.0235  |
| rs118191495 | A | -0.1786 |
| rs271966    | G | -0.0909 |
| rs6047800   | C | -0.0306 |
| rs117041753 | T | 0.104   |
| rs6087442   | T | -0.0397 |
| rs146862630 | A | 0.0531  |
| rs79272946  | C | 0.0518  |
| rs6512409   | G | -0.0262 |
| rs12329474  | C | -0.0701 |
| rs11700272  | G | -0.0788 |
| rs5011374   | A | -0.0222 |
| rs2425885   | C | 0.0578  |
| rs4815798   | G | 0.0261  |
| rs142784892 | T | -0.1405 |
| rs143600707 | G | -0.1756 |

|             |   |         |
|-------------|---|---------|
| rs6017309   | T | -0.0274 |
| rs6066831   | A | 0.1795  |
| rs117797871 | A | -0.1353 |
| rs58812440  | T | -0.0581 |
| rs139426882 | C | 0.0823  |
| rs10485804  | A | -0.024  |
| rs6022731   | T | -0.0265 |
| rs8124349   | T | 0.0679  |
| rs73915328  | A | 0.1549  |
| rs6032789   | G | 0.0258  |
| rs17722402  | G | -0.0224 |
| rs137866296 | C | -0.1064 |
| rs144480666 | T | -0.1493 |
| rs76541103  | T | 0.0997  |
| rs2423845   | T | 0.0329  |
| rs11699839  | C | 0.0533  |
| rs79230986  | A | 0.1402  |
| rs6050891   | C | -0.024  |
| rs1033574   | C | 0.0342  |
| rs117950134 | C | -0.1171 |
| rs73117884  | A | 0.1664  |
| rs964794    | A | 0.0237  |
| rs6065648   | T | -0.2194 |
| rs6084348   | T | 0.026   |
| rs142606262 | A | -0.138  |
| rs6015460   | T | 0.0494  |
| rs16984477  | A | 0.098   |
| rs6049782   | G | 0.0243  |
| rs79468194  | G | 0.0845  |
| rs76846567  | A | 0.0924  |
| rs1340937   | G | -0.023  |
| rs6587239   | T | 0.0323  |
| rs220989    | T | 0.0437  |
| rs79265918  | T | 0.1457  |
| rs113651391 | A | 0.0444  |
| rs6064454   | T | -0.0337 |
| rs6096589   | T | 0.0288  |
| rs6065632   | C | 0.0297  |
| rs116013021 | T | 0.1349  |
| rs4812145   | C | -0.0238 |
| rs8126162   | G | 0.0934  |
| rs117282676 | T | 0.0943  |
| rs743092    | A | 0.0239  |
| rs4809464   | T | 0.0682  |
| rs6138281   | A | 0.0316  |
| rs6039875   | A | 0.0236  |
| rs36115268  | T | 0.0289  |

|             |   |         |
|-------------|---|---------|
| rs6050363   | G | 0.0279  |
| rs75649943  | G | 0.0837  |
| rs73107066  | A | 0.0734  |
| rs2187853   | T | -0.0622 |
| rs205891    | G | -0.0471 |
| rs731200    | A | 0.0999  |
| rs6067421   | A | 0.0334  |
| rs117887580 | A | -0.1081 |
| rs6091416   | C | -0.0221 |
| rs6108165   | A | 0.0292  |
| rs6071959   | A | -0.0267 |
| rs4530437   | A | 0.0386  |
| rs6129439   | C | 0.0321  |
| rs6078924   | A | -0.0274 |
| rs118124832 | G | 0.0944  |
| rs74174997  | T | 0.0388  |
| rs116962379 | T | 0.1121  |
| rs117105141 | T | 0.1403  |
| rs748834    | G | 0.0365  |
| rs116997225 | A | 0.1194  |
| rs4810648   | C | 0.048   |
| rs6117881   | G | -0.0217 |
| rs6094456   | C | -0.0558 |
| rs7268540   | C | 0.0404  |
| rs76389403  | G | 0.0636  |
| rs218456    | T | 0.0394  |
| rs6086474   | A | 0.0266  |
| rs13044160  | C | 0.0353  |
| rs76617721  | C | -0.1088 |
| rs45456397  | A | -0.044  |
| rs11696851  | G | -0.0907 |
| rs6108305   | T | -0.0266 |
| rs13041415  | C | -0.0291 |
| rs149045781 | G | -0.1025 |
| rs58116673  | T | -0.0394 |
| rs2427384   | A | 0.0288  |
| rs139851135 | T | -0.0976 |
| rs6080504   | C | -0.047  |
| rs75582259  | T | 0.0496  |
| rs6069771   | G | -0.0419 |
| rs6139074   | C | 0.0299  |
| rs6029785   | T | -0.024  |
| rs113203305 | A | -0.1372 |
| rs117716948 | C | -0.0676 |
| rs8126317   | A | -0.1419 |
| rs6107372   | C | -0.0567 |
| rs117359973 | G | -0.0733 |

|             |   |         |
|-------------|---|---------|
| rs76902285  | A | 0.0743  |
| rs13044526  | G | 0.041   |
| rs117080162 | T | 0.1212  |
| rs4811838   | A | 0.1033  |
| rs55798845  | G | -0.0499 |
| rs138311134 | T | 0.1229  |
| rs6092424   | A | -0.0228 |
| rs62218321  | C | -0.0629 |
| rs4814959   | A | 0.0246  |
| rs149009086 | C | 0.1857  |
| rs211446    | A | 0.132   |
| rs7360540   | A | -0.0301 |
| rs6017344   | T | 0.0296  |
| rs4527262   | G | -0.0628 |
| rs34388980  | A | -0.0265 |
| rs117340493 | A | -0.0818 |
| rs148541866 | T | -0.0961 |
| rs6063148   | C | 0.0446  |
| rs578505    | C | -0.0246 |
| rs1018576   | C | -0.0252 |
| rs4813952   | A | 0.0601  |
| rs71356159  | T | -0.0762 |
| rs3787382   | T | -0.0336 |
| rs11086652  | T | -0.0267 |
| rs117811331 | T | -0.0972 |
| rs1013499   | A | -0.0217 |
| rs235731    | A | -0.0236 |
| rs6017765   | C | -0.0719 |
| rs73179443  | T | -0.0664 |
| rs6135557   | T | -0.0331 |
| rs62203786  | T | 0.0446  |
| rs117838358 | T | 0.1029  |
| rs6072344   | A | -0.2086 |
| rs911152    | G | -0.1255 |
| rs13044391  | A | -0.1006 |
| rs6025558   | A | 0.0589  |
| rs6140477   | C | 0.0394  |
| rs685119    | C | 0.0241  |
| rs34060731  | A | -0.051  |
| rs62195866  | T | 0.105   |
| rs6141394   | T | 0.1043  |
| rs78155675  | T | 0.1458  |
| rs145502460 | A | 0.1058  |
| rs118096293 | T | -0.0918 |
| rs76586047  | A | -0.1287 |
| rs1569712   | A | -0.1266 |
| rs6014562   | T | 0.032   |

|             |   |         |
|-------------|---|---------|
| rs150399411 | G | -0.1683 |
| rs76705538  | T | 0.1189  |
| rs73072199  | C | 0.0429  |
| rs6092420   | C | 0.1764  |
| rs73605546  | A | 0.0243  |
| rs62202400  | A | -0.0558 |
| rs1418796   | A | -0.0246 |
| rs78042317  | A | -0.0875 |
| rs6063670   | A | 0.0353  |
| rs3091738   | A | 0.0278  |
| rs6070018   | A | -0.0288 |
| rs6055451   | C | -0.0356 |
| rs35579509  | T | 0.1032  |
| rs62204343  | T | 0.0359  |
| rs6071505   | A | -0.0632 |
| rs62208309  | T | 0.1004  |
| rs145114825 | A | 0.1874  |
| rs118183288 | A | 0.0739  |
| rs75437069  | T | 0.143   |
| rs6128355   | G | -0.0237 |
| rs241623    | C | 0.0222  |
| rs78548526  | T | 0.1033  |
| rs118155041 | T | 0.1049  |
| rs118001141 | A | 0.091   |
| rs58546573  | C | -0.1367 |
| rs73155326  | A | -0.1273 |
| rs4810144   | T | -0.0215 |
| rs13040470  | A | -0.0678 |
| rs11699457  | A | -0.0278 |
| rs62201717  | T | 0.0885  |
| rs62227429  | G | 0.1214  |
| rs6035216   | C | -0.0604 |
| rs62205675  | G | 0.0666  |
| rs6134101   | T | 0.0869  |
| rs845983    | T | 0.0469  |
| rs6072548   | G | 0.0548  |
| rs6105829   | T | 0.0381  |
| rs41282014  | T | -0.2306 |
| rs75360143  | A | 0.0845  |
| rs1107953   | T | -0.0437 |
| rs151075835 | G | -0.092  |
| rs6102522   | C | -0.0514 |
| rs62208506  | C | -0.0282 |
| rs78339249  | G | -0.0645 |
| rs118085391 | T | -0.0534 |
| rs6050341   | T | 0.0278  |
| rs6012121   | G | 0.1647  |

|             |   |         |
|-------------|---|---------|
| rs4813189   | C | 0.0652  |
| rs34010827  | G | 0.0319  |
| rs4812972   | T | -0.0229 |
| rs6031839   | C | 0.0219  |
| rs6116024   | C | -0.0382 |
| rs118073890 | A | -0.0871 |
| rs34436556  | C | 0.0338  |
| rs145102901 | G | 0.1288  |
| rs4814568   | C | -0.0828 |
| rs148216216 | T | 0.1545  |
| rs3026617   | T | 0.0667  |
| rs72626575  | G | 0.0714  |
| rs1225897   | G | 0.0266  |
| rs137978857 | A | 0.1451  |
| rs377256    | G | 0.0214  |
| rs138707018 | T | -0.1046 |
| rs35617730  | A | -0.0637 |
| rs6028266   | G | -0.0288 |
| rs4813625   | C | 0.0255  |
| rs41303793  | T | -0.0806 |
| rs74706405  | T | 0.1042  |
| rs6015096   | T | 0.0351  |
| rs62207761  | G | 0.0809  |
| rs34065590  | G | 0.0783  |
| rs1418928   | C | 0.0471  |
| rs78055051  | A | -0.0362 |
| rs117633973 | T | 0.1547  |
| rs55872953  | G | 0.1082  |
| rs6078332   | T | 0.0229  |
| rs142865890 | T | 0.1482  |
| rs6074927   | A | -0.0219 |
| rs79740739  | A | -0.1162 |
| rs76208857  | A | -0.0968 |
| rs6127603   | A | 0.0828  |
| rs9679899   | C | 0.0432  |
| rs41303911  | A | -0.0799 |
| rs6086491   | C | 0.0553  |
| rs118053626 | C | 0.1347  |
| rs75765194  | A | -0.1672 |
| rs4813121   | A | -0.0221 |
| rs112798464 | C | 0.0594  |
| rs4815845   | G | -0.0318 |
| rs6092841   | T | 0.0619  |
| rs113969672 | T | 0.0806  |
| rs75191963  | G | -0.0978 |
| rs6138064   | A | -0.0591 |
| rs73123243  | A | -0.1068 |



|             |   |         |
|-------------|---|---------|
| rs6033266   | G | 0.033   |
| rs162076    | G | -0.0217 |
| rs6136038   | T | 0.0488  |
| rs6133096   | A | 0.0246  |
| rs1232587   | G | 0.0428  |
| rs78925297  | G | -0.0575 |
| rs116852016 | C | 0.1005  |
| rs7270222   | A | 0.0585  |
| rs74672635  | A | -0.0426 |
| rs208260    | A | -0.0568 |
| rs6079081   | G | -0.0227 |
| rs6110939   | A | 0.0303  |
| rs6089261   | A | -0.0434 |
| rs7263781   | C | 0.0826  |
| rs6087047   | C | -0.0388 |
| rs78761552  | C | 0.0692  |
| rs78885216  | T | 0.0933  |
| rs241804    | G | -0.0394 |
| rs35365214  | G | -0.1166 |
| rs6049102   | A | -0.0231 |
| rs146765911 | T | 0.1074  |
| rs116734350 | T | -0.0632 |
| rs12624799  | T | 0.1263  |
| rs6027951   | T | 0.0467  |
| rs76416232  | T | 0.0395  |
| rs78110257  | T | -0.2256 |
| rs7362501   | A | 0.0251  |
| rs391256    | C | -0.025  |
| rs7261629   | A | 0.0421  |
| rs6127895   | G | 0.0265  |
| rs73152226  | A | 0.0505  |
| rs6131047   | A | 0.0236  |
| rs139751305 | A | 0.1463  |
| rs139922580 | C | 0.1686  |
| rs13043411  | T | 0.0286  |
| rs6096989   | T | -0.0252 |
| rs2050087   | T | -0.0316 |
| rs1014436   | G | 0.0228  |
| rs11908282  | T | 0.1039  |
| rs73124177  | A | -0.0632 |
| rs56654856  | G | 0.0655  |
| rs77899546  | G | -0.0604 |
| rs58141344  | G | 0.0433  |
| rs77796076  | C | 0.0999  |
| rs6018241   | A | 0.0222  |
| rs6127670   | C | -0.0221 |
| rs1507458   | T | 0.0236  |

|             |   |         |
|-------------|---|---------|
| rs80192833  | A | 0.0448  |
| rs6043851   | T | -0.0245 |
| rs859028    | T | -0.035  |
| rs2904144   | C | -0.0284 |
| rs117650218 | A | 0.0722  |
| rs151041169 | T | 0.1047  |
| rs17773212  | G | -0.0435 |
| rs761021    | A | -0.0285 |
| rs6092606   | T | 0.0226  |
| rs719541    | T | -0.0222 |
| rs2073142   | C | 0.0423  |
| rs116930043 | A | 0.1493  |
| rs73133162  | T | -0.0997 |
| rs1206806   | T | -0.0606 |
| rs117253602 | A | -0.0453 |
| rs59680148  | T | 0.0403  |
| rs79521234  | A | 0.0933  |
| rs116870154 | C | 0.0535  |
| rs6512444   | C | -0.0332 |
| rs235716    | C | 0.0267  |
| rs56017653  | C | 0.0481  |
| rs817703    | A | 0.0524  |
| rs12479598  | T | 0.1026  |
| rs111814140 | T | -0.086  |
| rs111795077 | C | -0.1419 |
| rs6077478   | T | -0.0504 |
| rs880561    | A | -0.0215 |
| rs35530480  | T | -0.075  |
| rs76823605  | T | 0.0997  |
| rs2144642   | G | 0.0235  |
| rs116548544 | A | 0.0865  |
| rs11696158  | A | -0.0239 |
| rs6078029   | C | -0.0294 |
| rs6038611   | A | 0.0274  |
| rs76596653  | T | -0.0719 |
| rs6034240   | G | -0.032  |
| rs73124654  | T | -0.059  |
| rs736992    | G | -0.0372 |
| rs2618581   | G | -0.0387 |
| rs6030166   | T | -0.0364 |
| rs2423365   | C | -0.0618 |
| rs141566746 | G | 0.1188  |
| rs4812474   | C | -0.0406 |
| rs10485771  | C | 0.0273  |
| rs80337774  | C | -0.0901 |
| rs13037327  | G | 0.0448  |
| rs856399    | T | -0.0211 |

|             |   |         |
|-------------|---|---------|
| rs77331261  | T | 0.0741  |
| rs6119190   | A | 0.0863  |
| rs117435593 | A | 0.0681  |
| rs6031758   | T | 0.0418  |
| rs80066577  | T | 0.0731  |
| rs1076717   | T | 0.0429  |
| rs6051076   | T | -0.0271 |
| rs151020887 | C | 0.06    |
| rs55920747  | A | 0.0238  |
| rs4300902   | G | -0.0531 |
| rs2208009   | C | -0.0378 |
| rs141393158 | G | -0.1244 |
| rs117337938 | G | -0.1267 |
| rs1326014   | C | 0.1092  |
| rs1570022   | G | 0.0699  |
| rs957291    | T | 0.026   |
| rs6046605   | T | -0.022  |
| rs2003716   | T | 0.0224  |
| rs77839128  | A | -0.1356 |
| rs76935057  | G | -0.1215 |
| rs60802584  | C | -0.1203 |
| rs71337284  | G | -0.0305 |
| rs11697321  | C | -0.0241 |
| rs6054476   | T | 0.0353  |
| rs73614424  | A | -0.0543 |
| rs147296029 | T | 0.1248  |
| rs6084265   | T | -0.0231 |
| rs147988763 | G | -0.0724 |
| rs6123762   | C | 0.0297  |
| rs73134650  | T | 0.0685  |
| rs6133015   | A | -0.0362 |
| rs2144125   | A | 0.0342  |
| rs150207    | C | 0.0227  |
| rs117049135 | C | -0.062  |
| rs79693098  | T | 0.0542  |
| rs2867555   | G | -0.0322 |
| rs1555669   | A | 0.023   |
| rs74847991  | A | -0.1063 |
| rs112337602 | A | 0.0742  |
| rs145985608 | T | -0.0847 |
| rs57705377  | T | 0.031   |
| rs6090153   | T | -0.0276 |
| rs4815189   | G | 0.0385  |
| rs73078475  | C | -0.0672 |
| rs6031400   | T | 0.0288  |
| rs6142855   | T | -0.0233 |
| rs4815540   | G | 0.0334  |

|             |   |         |
|-------------|---|---------|
| rs11906263  | A | 0.0278  |
| rs74668397  | A | -0.1223 |
| rs75565600  | C | -0.0437 |
| rs6073330   | A | -0.0235 |
| rs6111844   | A | -0.0316 |
| rs6036195   | G | -0.0214 |
| rs926607    | C | 0.0232  |
| rs163803    | T | 0.0448  |
| rs2210455   | T | -0.0265 |
| rs6031587   | T | 0.0446  |
| rs8118213   | C | -0.0357 |
| rs11698567  | T | -0.0245 |
| rs2422517   | C | -0.0326 |
| rs6031108   | A | 0.0235  |
| rs148096038 | T | 0.1332  |
| rs73913016  | T | 0.0395  |
| rs2426975   | T | 0.0217  |
| rs1831323   | G | -0.0227 |
| rs79951242  | T | 0.06    |
| rs113689975 | A | 0.1474  |
| rs208811    | A | -0.0221 |
| rs226689    | G | 0.0281  |
| rs6083640   | T | -0.0653 |
| rs1534972   | G | 0.0249  |
| rs62187532  | T | 0.0457  |
| rs117669936 | A | 0.0801  |
| rs55826742  | A | -0.0295 |
| rs148748876 | G | -0.0879 |
| rs73078235  | G | 0.0413  |
| rs6082726   | A | -0.0211 |
| rs4911283   | A | -0.0228 |
| rs6024483   | C | 0.0216  |
| rs78638059  | T | -0.0345 |
| rs2295440   | T | -0.0248 |
| rs118095134 | G | 0.1234  |
| rs73069869  | C | 0.0853  |
| rs2760547   | T | 0.0213  |
| rs6135786   | T | -0.0226 |
| rs62206683  | C | 0.0413  |
| rs76142024  | T | 0.0717  |
| rs6086545   | A | -0.0241 |
| rs73895626  | A | 0.0747  |
| rs6044494   | G | 0.0751  |
| rs79436195  | T | -0.064  |
| rs58337288  | T | -0.0762 |
| rs6084295   | A | 0.0538  |
| rs13041479  | T | -0.1087 |

|             |   |         |
|-------------|---|---------|
| rs1888233   | A | 0.0255  |
| rs78419525  | G | 0.1069  |
| rs4813780   | A | -0.043  |
| rs116861641 | C | -0.0981 |
| rs80106383  | G | 0.0895  |
| rs6046258   | G | 0.0294  |
| rs148680893 | A | 0.1189  |
| rs6074178   | G | -0.0217 |
| rs35009207  | T | -0.077  |
| rs1182536   | A | -0.0611 |
| rs4813514   | G | 0.0316  |
| rs6049331   | G | -0.0311 |
| rs75637135  | T | 0.1166  |
| rs73098431  | A | -0.0578 |
| rs4812802   | G | 0.0212  |
| rs3752306   | G | 0.0223  |
| rs8994      | A | -0.0443 |
| rs55958442  | C | -0.1438 |
| rs78688823  | C | -0.1284 |
| rs117504655 | A | -0.1134 |
| rs78301565  | A | -0.1211 |
| rs140303041 | G | 0.0551  |
| rs75477800  | A | -0.0764 |
| rs6065147   | T | 0.0223  |
| rs111786851 | G | -0.074  |
| rs6070108   | T | -0.0481 |
| rs78812816  | A | -0.0733 |
| rs118148122 | G | -0.1444 |
| rs35106462  | A | 0.1212  |
| rs67438213  | G | -0.0601 |
| rs117892382 | C | -0.1585 |
| rs6097096   | T | 0.0322  |
| rs639089    | T | -0.0225 |
| rs34235785  | A | 0.0967  |
| rs12479744  | A | 0.0916  |
| rs142621227 | C | -0.1263 |
| rs13041303  | A | -0.0806 |
| rs78066098  | G | 0.098   |
| rs16996371  | G | -0.0269 |
| rs118182252 | G | -0.172  |
| rs6023566   | A | -0.034  |
| rs55897881  | G | 0.0442  |
| rs382340    | A | 0.0266  |
| rs6035194   | A | -0.0273 |
| rs7270605   | G | -0.0238 |
| rs62212360  | A | 0.0358  |
| rs6021673   | G | -0.0216 |

|             |   |         |
|-------------|---|---------|
| rs35735316  | A | 0.0436  |
| rs311492    | T | -0.0387 |
| rs1291119   | T | 0.0248  |
| rs6085450   | T | 0.0609  |
| rs34940999  | A | 0.0383  |
| rs73103789  | A | -0.0994 |
| rs78383100  | T | 0.0546  |
| rs3092198   | G | 0.0253  |
| rs2777938   | T | -0.0226 |
| rs6074899   | T | -0.0217 |
| rs8114560   | G | -0.022  |
| rs240760    | A | -0.0359 |
| rs71336722  | T | 0.0698  |
| rs116967441 | T | 0.1094  |
| rs4809907   | A | -0.0872 |
| rs6055991   | T | 0.0275  |
| rs77709598  | G | 0.0538  |
| rs271954    | T | 0.036   |
| rs73320333  | G | 0.0817  |
| rs6035991   | C | 0.0324  |
| rs78689814  | A | -0.1004 |
| rs117091911 | A | -0.1143 |
| rs13037625  | T | 0.032   |
| rs55786258  | C | 0.0267  |
| rs117741455 | T | 0.058   |
| rs138834650 | T | -0.138  |
| rs2180463   | A | -0.0209 |
| rs147635701 | A | -0.1073 |
| rs6135654   | T | -0.0325 |
| rs2866746   | C | 0.0228  |
| rs75073751  | T | -0.1032 |
| rs62187263  | A | -0.0818 |
| rs6081921   | G | 0.0313  |
| rs2281395   | G | -0.0321 |
| rs6052324   | A | -0.0686 |
| rs62199117  | G | 0.0289  |
| rs58970950  | C | 0.046   |
| rs6052017   | A | 0.0619  |
| rs75010738  | C | 0.0961  |
| rs17800568  | T | 0.0507  |
| rs73094826  | T | -0.1707 |
| rs62189077  | C | -0.1014 |
| rs62204038  | C | -0.126  |
| rs215537    | C | 0.0705  |
| rs6134289   | A | 0.0311  |
| rs151136149 | A | 0.1318  |
| rs58512455  | C | -0.0708 |

|             |   |         |
|-------------|---|---------|
| rs142512568 | A | -0.1124 |
| rs3746780   | G | 0.0283  |
| rs34181968  | G | -0.0273 |
| rs1321712   | A | 0.0996  |
| rs6139113   | T | 0.041   |
| rs71332039  | C | -0.0592 |
| rs6030257   | C | 0.021   |
| rs17357696  | A | 0.0668  |
| rs73915973  | T | 0.1334  |
| rs6086074   | G | -0.024  |
| rs71334902  | T | 0.076   |
| rs117612812 | T | 0.1164  |
| rs77617917  | A | 0.0512  |
| rs6108827   | A | 0.0265  |
| rs75834040  | T | 0.0737  |
| rs77734958  | T | -0.0337 |
| rs6047560   | G | 0.0302  |
| rs117785708 | T | 0.1262  |
| rs6124487   | T | 0.0602  |
| rs62205401  | A | -0.041  |
| rs17734471  | T | 0.1094  |
| rs2294257   | G | 0.0289  |
| rs2745764   | T | 0.0218  |
| rs2741484   | C | -0.0272 |
| rs73127812  | C | 0.1673  |
| rs1962      | C | 0.0274  |
| rs56235838  | T | 0.0478  |
| rs10485530  | G | -0.0801 |
| rs6082674   | G | 0.0358  |
| rs8117515   | C | -0.1108 |
| rs6123709   | C | 0.0257  |
| rs6128265   | T | 0.122   |
| rs34476906  | A | -0.0807 |
| rs117226897 | T | 0.0769  |
| rs62203881  | T | 0.0897  |
| rs2995718   | T | -0.0496 |
| rs56852079  | A | -0.1044 |
| rs816925    | A | -0.0244 |
| rs6514377   | A | 0.0853  |
| rs9680021   | C | -0.0235 |
| rs3746732   | A | 0.0234  |
| rs73113234  | A | -0.0947 |
| rs76742130  | G | 0.0647  |
| rs62201809  | T | 0.0364  |
| rs35561608  | G | -0.0693 |
| rs6096661   | G | -0.05   |
| rs79553513  | C | 0.0554  |

|             |   |         |
|-------------|---|---------|
| rs73096112  | T | 0.0391  |
| rs8122839   | G | 0.0301  |
| rs208226    | T | -0.0209 |
| rs11086329  | A | -0.0205 |
| rs6072564   | A | -0.0852 |
| rs2050667   | C | -0.0348 |
| rs1569968   | T | -0.0758 |
| rs76075150  | A | -0.1184 |
| rs6062771   | T | -0.0424 |
| rs6038226   | G | -0.0209 |
| rs17322191  | T | 0.09    |
| rs74623966  | G | -0.0494 |
| rs6017285   | G | -0.0301 |
| rs75194779  | G | -0.0768 |
| rs1737396   | C | 0.0669  |
| rs79546682  | T | 0.0991  |
| rs2387733   | G | -0.0214 |
| rs17092385  | A | 0.0523  |
| rs140445085 | T | -0.1122 |
| rs146511709 | A | -0.0758 |
| rs12479690  | A | -0.0309 |
| rs76448708  | G | -0.0795 |
| rs117441109 | G | 0.1239  |
| rs117405370 | A | -0.0752 |
| rs2741398   | T | -0.0262 |
| rs730477    | A | 0.0257  |
| rs17316022  | C | 0.0684  |
| rs2585436   | T | -0.0236 |
| rs2423013   | T | -0.0217 |
| rs73095839  | T | 0.0416  |
| rs143304610 | G | -0.0831 |
| rs6090380   | T | 0.0592  |
| rs34747330  | A | 0.1183  |
| rs17793491  | T | 0.0951  |
| rs7266351   | G | 0.033   |
| rs73598210  | C | 0.0714  |
| rs142796575 | G | 0.0821  |
| rs74589991  | A | 0.0313  |
| rs6136211   | C | 0.1369  |
| rs8113845   | T | -0.0233 |
| rs12053610  | A | 0.0559  |
| rs4811854   | T | -0.0375 |
| rs148453444 | T | -0.1091 |
| rs8122440   | A | -0.1196 |
| rs78297031  | C | 0.1661  |
| rs6139405   | T | 0.0238  |
| rs2193282   | C | 0.0233  |



|             |   |         |
|-------------|---|---------|
| rs73284710  | A | -0.0442 |
| rs117574830 | T | 0.1373  |
| rs292117    | G | -0.0429 |
| rs6071574   | A | 0.0408  |
| rs1556170   | A | 0.0234  |
| rs6082227   | A | 0.0963  |
| rs77023452  | A | 0.0449  |
| rs145292436 | T | 0.073   |
| rs75743174  | C | 0.1602  |
| rs6026892   | G | -0.0481 |
| rs73078948  | G | 0.0924  |
| rs142767998 | A | 0.0792  |
| rs6043590   | G | -0.0346 |
| rs140507819 | A | 0.1284  |
| rs2423350   | A | 0.0385  |
| rs881739    | G | -0.0282 |
| rs61083035  | A | -0.0423 |
| rs6017414   | G | -0.0515 |
| rs747996    | C | -0.0236 |
| rs73095192  | C | 0.1411  |
| rs118123309 | A | 0.1099  |
| rs4811115   | G | -0.0339 |
| rs118112259 | G | 0.1731  |
| rs80148880  | T | -0.0477 |
| rs6106065   | T | -0.0878 |
| rs7262344   | C | 0.0274  |
| rs6073481   | T | -0.0206 |
| rs78734384  | T | 0.1273  |
| rs117149764 | C | -0.1089 |
| rs80348494  | A | 0.0378  |
| rs141420713 | C | -0.109  |
| rs78339899  | T | 0.0632  |
| rs6018665   | C | -0.0285 |
| rs76588702  | C | 0.0587  |
| rs2180291   | C | 0.0279  |
| rs1546528   | G | -0.0236 |
| rs113609374 | T | 0.0674  |
| rs75719221  | G | 0.0345  |
| rs6073012   | C | 0.0333  |
| rs4239689   | G | 0.0228  |
| rs933240    | A | -0.0216 |
| rs749428    | T | 0.0279  |
| rs6112566   | A | 0.0243  |
| rs17790348  | C | 0.0307  |
| rs383329    | G | 0.0224  |
| rs16995983  | T | 0.0279  |
| rs115605808 | A | -0.0644 |

|             |   |         |
|-------------|---|---------|
| rs6142677   | A | 0.0255  |
| rs62190008  | T | 0.0458  |
| rs34705134  | A | -0.0255 |
| rs2016335   | G | -0.0258 |
| rs926668    | C | 0.0274  |
| rs505547    | A | 0.0459  |
| rs6017908   | C | 0.0421  |
| rs116968870 | A | 0.0597  |
| rs112448514 | C | 0.1161  |
| rs117705278 | G | 0.0738  |
| rs808683    | T | -0.0224 |
| rs117185077 | T | 0.0542  |
| rs12929     | G | -0.055  |
| rs6034837   | C | 0.0225  |
| rs113290122 | T | -0.0672 |
| rs6093893   | G | -0.0692 |
| rs113271766 | G | 0.0603  |
| rs6037769   | C | -0.0225 |
| rs143656498 | T | 0.1169  |
| rs6069741   | A | 0.0256  |
| rs149700927 | A | -0.1346 |
| rs77996256  | A | 0.0595  |
| rs6039856   | T | 0.0664  |
| rs28372903  | T | 0.0929  |
| rs13045050  | C | 0.0218  |
| rs117035225 | T | 0.0866  |
| rs117608003 | A | 0.0706  |
| rs597040    | C | 0.1     |
| rs3213170   | G | 0.092   |
| rs77329858  | T | 0.0548  |
| rs151164395 | T | -0.1391 |
| rs6092709   | A | 0.0264  |
| rs149322306 | A | 0.1521  |
| rs34427973  | A | -0.1235 |
| rs2050088   | C | 0.0263  |
| rs149165602 | G | 0.0861  |
| rs17685840  | A | -0.1108 |
| rs6079653   | T | -0.0241 |
| rs4925368   | T | 0.0221  |
| rs6067891   | T | -0.0582 |
| rs117718931 | T | -0.0739 |
| rs6128674   | A | -0.0274 |
| rs699799    | T | 0.093   |
| rs6032599   | C | 0.0447  |
| rs6060455   | A | 0.0526  |
| rs16986569  | G | -0.1115 |
| rs35352027  | T | 0.085   |

|             |   |         |
|-------------|---|---------|
| rs13045246  | G | 0.0227  |
| rs6040823   | C | -0.0642 |
| rs8118100   | C | 0.0983  |
| rs139819151 | G | -0.0439 |
| rs576839    | G | 0.0357  |
| rs6123727   | T | -0.023  |
| rs208382    | T | 0.0628  |
| rs6136322   | C | 0.0343  |
| rs6514703   | G | 0.0314  |
| rs56083778  | T | 0.0325  |
| rs4809814   | A | -0.0762 |
| rs144286556 | A | -0.0676 |
| rs74407966  | G | -0.0865 |
| rs62192825  | G | -0.087  |
| rs73123322  | A | 0.0525  |
| rs140371708 | A | 0.0784  |
| rs77620004  | C | 0.0769  |
| rs77377746  | A | -0.0521 |
| rs76243003  | G | 0.0385  |
| rs79333383  | T | -0.0479 |
| rs62194752  | C | 0.0248  |
| rs6074680   | G | 0.0203  |
| rs141417369 | T | -0.0977 |
| rs6099674   | C | -0.0209 |
| rs6053042   | T | 0.1648  |
| rs6134564   | C | 0.0537  |
| rs6110115   | A | -0.0202 |
| rs72626576  | T | -0.0368 |
| rs17733969  | T | -0.0374 |
| rs6078495   | C | 0.02    |
| rs6066209   | T | 0.0205  |
| rs72662711  | C | 0.0573  |
| rs73071383  | G | -0.0377 |
| rs2876056   | C | -0.0228 |
| rs141097293 | A | 0.0778  |
| rs17801149  | G | 0.0407  |
| rs16979934  | C | -0.0814 |
| rs846201    | G | -0.0201 |
| rs6041295   | A | -0.0379 |
| rs6067748   | G | -0.0538 |
| rs36118051  | T | -0.0339 |
| rs35198753  | G | 0.1208  |
| rs6067680   | G | 0.0217  |
| rs17812382  | G | 0.034   |
| rs1885163   | C | -0.0218 |
| rs13039627  | T | 0.0269  |
| rs149467721 | T | -0.1489 |

|             |   |         |
|-------------|---|---------|
| rs76890345  | T | 0.1009  |
| rs11906435  | T | 0.0221  |
| rs2865801   | A | -0.0258 |
| rs7274853   | T | -0.0484 |
| rs6035823   | A | -0.0224 |
| rs6014491   | T | 0.0476  |
| rs6096225   | T | 0.0199  |
| rs116917055 | T | 0.143   |
| rs73299050  | A | 0.1245  |
| rs4810345   | C | 0.0213  |
| rs117144974 | G | 0.0747  |
| rs17766253  | G | -0.1628 |
| rs45597833  | T | -0.0958 |
| rs117916782 | G | 0.0938  |
| rs6016101   | G | -0.0484 |
| rs1853091   | G | 0.0382  |
| rs117058093 | G | 0.0862  |
| rs3092525   | T | -0.0222 |
| rs66515906  | A | 0.0403  |
| rs540015    | T | 0.0307  |
| rs2144935   | C | -0.1117 |
| rs856965    | T | -0.0261 |
| rs117063323 | A | 0.1158  |
| rs6020721   | G | 0.0211  |
| rs59649021  | T | -0.0481 |
| rs1887853   | C | -0.0198 |
| rs13039527  | T | -0.0453 |
| rs74383202  | A | -0.1005 |
| rs140529886 | C | -0.1518 |
| rs60772399  | A | -0.0682 |
| rs6051643   | G | 0.1541  |
| rs8124234   | G | -0.0353 |
| rs6053991   | T | 0.0314  |
| rs2423103   | T | -0.0254 |
| rs79150571  | A | 0.0586  |
| rs3827995   | A | 0.0217  |
| rs75193673  | T | -0.0816 |
| rs62185664  | T | 0.0524  |
| rs141635400 | T | -0.1297 |
| rs74405057  | C | -0.0971 |
| rs34073337  | A | 0.0407  |
| rs77746857  | T | 0.0432  |
| rs60034064  | A | -0.0984 |
| rs6015564   | G | -0.0291 |
| rs3810483   | C | 0.0311  |
| rs6076933   | G | 0.0202  |
| rs139240392 | A | -0.1202 |

|             |   |         |
|-------------|---|---------|
| rs4809841   | G | 0.0285  |
| rs4811951   | G | 0.0232  |
| rs2867591   | A | -0.0249 |
| rs76077370  | T | -0.0873 |
| rs348800    | A | 0.0261  |
| rs6081478   | G | -0.022  |
| rs2012234   | T | 0.0254  |
| rs117881399 | T | 0.1473  |
| rs62199200  | T | 0.0551  |
| rs6033014   | T | 0.0211  |
| rs735050    | G | 0.0274  |
| rs62201229  | T | -0.0417 |
| rs6033966   | A | 0.0364  |
| rs6133792   | A | 0.0963  |
| rs78628395  | T | 0.1683  |
| rs73262244  | T | 0.0944  |
| rs8184442   | T | 0.0465  |
| rs6072916   | C | 0.0641  |
| rs117767767 | A | 0.0581  |
| rs6063754   | A | -0.0275 |
| rs6104958   | T | -0.0281 |
| rs56036639  | T | 0.0313  |
| rs117415190 | A | -0.1745 |
| rs6112187   | C | -0.0292 |
| rs4072977   | A | 0.0245  |
| rs6126477   | T | -0.04   |
| rs13043323  | T | -0.0988 |
| rs6515135   | T | -0.0462 |
| rs659523    | G | 0.0432  |
| rs6095007   | C | 0.0235  |
| rs117536963 | A | 0.0714  |
| rs6140833   | C | -0.02   |
| rs12480735  | C | 0.039   |
| rs75138806  | G | 0.084   |
| rs78602328  | C | 0.0791  |
| rs297662    | G | -0.021  |
| rs2206805   | T | 0.0404  |
| rs111674084 | G | 0.061   |
| rs62195392  | A | 0.0389  |
| rs7275145   | T | -0.0235 |
| rs3761207   | A | 0.0289  |
| rs215560    | G | -0.0319 |
| rs55991918  | T | -0.1255 |
| rs76134679  | G | 0.1265  |
| rs74668297  | T | 0.072   |
| rs79576700  | A | 0.0795  |
| rs45442591  | T | 0.1424  |

|             |   |         |
|-------------|---|---------|
| rs73912614  | T | 0.0303  |
| rs74478992  | A | -0.0625 |
| rs12479502  | G | -0.1312 |
| rs2424460   | T | 0.0205  |
| rs846744    | G | -0.0257 |
| rs6056813   | A | -0.0202 |
| rs111653635 | C | -0.0356 |
| rs6026945   | T | 0.0221  |
| rs141875185 | C | -0.0818 |
| rs6065013   | A | 0.0252  |
| rs11544169  | G | -0.1448 |
| rs142747954 | A | 0.1565  |
| rs11698878  | A | 0.0737  |
| rs142704251 | G | -0.0799 |
| rs6049208   | A | 0.0484  |
| rs111521448 | C | 0.1001  |
| rs6012664   | C | -0.0326 |
| rs146382851 | C | 0.1525  |
| rs367421    | C | -0.0197 |
| rs75544915  | C | -0.0874 |
| rs62204508  | A | -0.0594 |
| rs6071791   | T | -0.0805 |
| rs6139320   | T | -0.0293 |
| rs6046764   | T | 0.0215  |
| rs4811505   | T | -0.0301 |
| rs66760917  | C | 0.025   |
| rs579148    | C | 0.1128  |
| rs17391344  | T | -0.112  |
| rs7265103   | G | -0.0661 |
| rs4052812   | T | 0.0225  |
| rs117848022 | G | 0.1303  |
| rs6076951   | T | 0.0274  |
| rs139945350 | A | 0.0702  |
| rs62208124  | C | 0.0852  |
| rs2590949   | C | 0.0241  |
| rs4563302   | T | 0.0522  |
| rs6020749   | T | -0.0262 |
| rs6036119   | C | -0.0254 |
| rs2145697   | T | -0.0212 |
| rs117976266 | A | -0.1209 |
| rs112864829 | A | 0.0471  |
| rs4814905   | T | 0.0202  |
| rs6029210   | T | -0.0894 |
| rs35877032  | A | 0.1369  |
| rs996570    | T | 0.0212  |
| rs117498415 | A | -0.0893 |
| rs78787815  | A | 0.0393  |

|             |   |         |
|-------------|---|---------|
| rs142717689 | T | 0.1024  |
| rs6104818   | G | -0.0699 |
| rs117758861 | C | -0.1091 |
| rs6031180   | G | -0.0264 |
| rs67982417  | C | 0.0358  |
| rs4813920   | C | 0.0563  |
| rs113214904 | A | 0.1387  |
| rs2424521   | A | 0.0198  |
| rs6054158   | C | -0.0259 |
| rs34742789  | T | 0.0923  |
| rs73604106  | T | 0.0604  |
| rs1599967   | A | -0.0344 |
| rs208249    | C | -0.0356 |
| rs6088448   | T | 0.0338  |
| rs140502039 | T | -0.097  |
| rs139873382 | T | 0.0967  |
| rs12625967  | G | 0.0262  |
| rs4987243   | C | -0.0609 |
| rs4815641   | A | -0.0254 |
| rs75714750  | C | 0.0642  |
| rs1150440   | T | 0.0258  |
| rs6069458   | C | 0.0217  |
| rs957672    | T | -0.1476 |
| rs6092694   | C | -0.0216 |
| rs140594905 | T | -0.1089 |
| rs73094179  | G | 0.0995  |
| rs112345294 | T | -0.1034 |
| rs6062347   | A | 0.0306  |
| rs6135167   | C | 0.0222  |
| rs74346263  | C | 0.1345  |
| rs76512765  | T | -0.0737 |
| rs75293777  | T | 0.0932  |
| rs202387    | T | -0.0717 |
| rs502522    | T | 0.0212  |
| rs41282132  | A | -0.0487 |
| rs6091587   | C | 0.0253  |
| rs2076407   | A | -0.0261 |
| rs34991564  | A | -0.0378 |
| rs138377453 | G | 0.0696  |
| rs138053219 | A | 0.0539  |
| rs112775751 | C | -0.0293 |
| rs6085153   | G | -0.1161 |
| rs148953382 | A | -0.0615 |
| rs2387394   | A | -0.0678 |
| rs73135250  | T | 0.0726  |
| rs6071198   | G | 0.0377  |
| rs6133596   | A | -0.0591 |

|             |   |         |
|-------------|---|---------|
| rs2038211   | T | -0.0203 |
| rs6107455   | A | -0.0266 |
| rs6109720   | C | 0.0371  |
| rs143424483 | G | -0.1319 |
| rs117357377 | T | -0.1179 |
| rs78784729  | A | -0.0832 |
| rs146870399 | A | 0.0921  |
| rs118014067 | G | -0.0824 |
| rs6025237   | T | -0.0203 |
| rs947088    | G | 0.0218  |
| rs113496374 | T | -0.0469 |
| rs79740876  | A | 0.0916  |
| rs2756263   | C | 0.02    |
| rs17719352  | C | -0.0559 |
| rs73141295  | T | -0.0374 |
| rs77766214  | A | 0.1005  |
| rs57045495  | A | 0.0705  |
| rs6025177   | G | -0.0234 |
| rs148617538 | A | 0.106   |
| rs11698643  | G | -0.0221 |
| rs117390494 | C | 0.0708  |
| rs34574177  | T | -0.0526 |
| rs1321348   | T | -0.0282 |
| rs75810088  | A | -0.0785 |
| rs117924725 | G | 0.0807  |
| rs6065177   | T | 0.0268  |
| rs580502    | C | 0.0234  |
| rs275339    | T | -0.0321 |
| rs77861234  | G | -0.1319 |
| rs11086863  | A | -0.0221 |
| rs76422835  | T | -0.1115 |
| rs34431906  | A | 0.0243  |
| rs6128234   | G | 0.0204  |
| rs1569623   | G | 0.019   |
| rs34276759  | A | 0.1148  |
| rs235586    | A | -0.0512 |
| rs6056919   | A | 0.026   |
| rs117596898 | C | 0.1236  |
| rs11908461  | T | 0.0881  |
| rs6082152   | G | -0.1014 |
| rs733822    | G | -0.0319 |
| rs77950369  | T | 0.102   |
| rs2425193   | T | 0.0409  |
| rs6016443   | G | -0.0441 |
| rs6075602   | G | -0.0329 |
| rs78111008  | C | 0.0665  |
| rs77552380  | G | -0.0211 |



|             |   |         |
|-------------|---|---------|
| rs138336346 | C | -0.0769 |
| rs11698882  | T | 0.1088  |
| rs1406858   | T | 0.0219  |
| rs4815994   | T | -0.0196 |
| rs80229066  | C | 0.0657  |
| rs410068    | T | -0.0202 |
| rs6117031   | A | 0.0677  |
| rs79304811  | T | 0.1195  |
| rs6064826   | G | 0.0222  |
| rs62210012  | C | 0.0344  |
| rs1887305   | A | 0.0649  |
| rs2423121   | T | -0.0322 |
| rs1360128   | G | 0.0191  |
| rs62194814  | C | -0.1252 |
| rs79159352  | A | 0.0579  |
| rs6094958   | T | 0.0224  |
| rs111320156 | T | -0.0352 |
| rs4925269   | A | 0.0523  |
| rs1892317   | G | 0.0198  |
| rs1108093   | T | 0.0461  |
| rs156357    | T | -0.025  |
| rs16998892  | A | -0.0521 |
| rs57160070  | T | -0.0298 |
| rs6074750   | A | -0.0267 |
| rs78570102  | A | -0.1231 |
| rs137942001 | A | -0.0894 |
| rs1002452   | G | 0.0414  |
| rs7267496   | T | -0.0239 |
| rs2223540   | T | -0.0208 |
| rs8121971   | A | -0.0481 |
| rs75673256  | C | -0.0741 |
| rs79830873  | A | -0.0856 |
| rs117803481 | T | -0.1256 |
| rs6015185   | G | -0.0192 |
| rs6020431   | T | 0.0193  |
| rs1513580   | T | -0.0469 |
| rs56036747  | C | -0.1104 |
| rs117468885 | G | 0.0558  |
| rs34142456  | T | 0.0313  |
| rs13037893  | G | 0.031   |
| rs2064829   | C | -0.0242 |
| rs17812022  | T | 0.0385  |
| rs74329794  | A | 0.1146  |
| rs140148958 | T | 0.1106  |
| rs204676    | T | 0.0256  |
| rs56101650  | C | 0.0331  |
| rs6040276   | A | -0.0446 |

|             |   |         |
|-------------|---|---------|
| rs144934499 | C | 0.1089  |
| rs13044683  | A | 0.0268  |
| rs2103701   | G | 0.0316  |
| rs208262    | A | -0.0197 |
| rs117950526 | C | -0.1046 |
| rs4811867   | C | -0.0673 |
| rs112377556 | G | 0.0612  |
| rs117914513 | T | 0.1189  |
| rs932428    | G | 0.0396  |
| rs294435    | A | 0.062   |
| rs6123359   | G | 0.0342  |
| rs11908111  | C | 0.0357  |
| rs73609448  | G | 0.1803  |
| rs4813406   | A | 0.0271  |
| rs73122606  | T | -0.0854 |
| rs62206564  | T | -0.1445 |
| rs79420125  | T | -0.0513 |
| rs7270373   | C | 0.0352  |
| rs73069906  | G | 0.0276  |
| rs113891463 | A | 0.1033  |
| rs147904014 | A | -0.1198 |
| rs73103121  | G | -0.1285 |
| rs422330    | G | 0.0355  |
| rs11698932  | C | -0.0708 |
| rs115176579 | A | 0.0831  |
| rs4809300   | A | -0.0543 |
| rs16993799  | G | 0.0325  |
| rs73091528  | G | 0.05    |
| rs6134785   | C | -0.0338 |
| rs6123452   | T | -0.0252 |
| rs6046657   | G | 0.0194  |
| rs55778060  | T | 0.0324  |
| rs6064378   | C | 0.0464  |
| rs17787661  | T | 0.0951  |
| rs79919349  | A | -0.1295 |
| rs73074328  | C | -0.0841 |
| rs13041408  | C | -0.04   |
| rs235189    | G | 0.0249  |
| rs112467341 | G | 0.0657  |
| rs2295545   | C | -0.0193 |
| rs435204    | A | 0.0594  |
| rs6112818   | A | -0.0303 |
| rs34415148  | T | 0.0432  |
| rs115221642 | A | 0.0882  |
| rs6138974   | A | -0.0575 |
| rs910981    | G | 0.0929  |
| rs2281930   | T | 0.0372  |

|             |   |         |
|-------------|---|---------|
| rs75875231  | A | 0.1375  |
| rs11697517  | T | -0.0193 |
| rs148968625 | A | 0.1394  |
| rs117018863 | G | 0.1158  |
| rs6073990   | T | 0.0195  |
| rs8116357   | T | -0.0706 |
| rs6077707   | T | 0.0187  |
| rs139326730 | G | 0.1014  |
| rs2092470   | G | 0.0208  |
| rs34240493  | G | 0.0449  |
| rs77163681  | G | 0.0723  |
| rs73601213  | A | 0.1083  |
| rs35076157  | G | 0.0242  |
| rs142226386 | A | -0.136  |
| rs6074226   | G | -0.0202 |
| rs1569689   | G | 0.0227  |
| rs77608870  | C | -0.0386 |
| rs10854214  | A | 0.0215  |
| rs55756197  | T | 0.0557  |
| rs62190502  | T | -0.1076 |
| rs149310099 | C | 0.1147  |
| rs73153254  | C | 0.0663  |
| rs77220699  | T | 0.132   |
| rs78297540  | C | -0.0522 |
| rs2246056   | A | 0.0194  |
| rs118043987 | T | 0.084   |
| rs721034    | C | -0.0623 |
| rs73150609  | T | -0.0751 |
| rs78632374  | T | 0.1728  |
| rs28690399  | C | 0.0333  |
| rs6140220   | C | 0.0502  |
| rs116887584 | T | 0.0442  |
| rs4813430   | C | 0.0203  |
| rs78561809  | C | -0.0863 |
| rs118153960 | T | 0.0618  |
| rs6131396   | C | 0.0189  |
| rs6030804   | A | 0.0401  |
| rs6078501   | T | -0.0271 |
| rs2143561   | C | -0.0265 |
| rs117904289 | A | -0.0396 |
| rs6140410   | C | 0.0259  |
| rs35514997  | C | -0.0476 |
| rs41414046  | T | 0.0222  |
| rs6024571   | T | 0.1493  |
| rs6139436   | T | 0.0232  |
| rs6086477   | A | 0.0217  |
| rs4810740   | T | 0.0191  |

|             |   |         |
|-------------|---|---------|
| rs75310418  | C | -0.1163 |
| rs2250525   | T | -0.0202 |
| rs2423699   | C | -0.0433 |
| rs449849    | T | 0.0199  |
| rs117362286 | C | 0.0473  |
| rs3092479   | G | 0.0592  |
| rs112571249 | A | -0.0957 |
| rs112960074 | T | 0.061   |
| rs73099688  | T | 0.0531  |
| rs6090259   | T | -0.0195 |
| rs6080675   | A | 0.057   |
| rs2983614   | G | 0.0192  |
| rs4809246   | C | 0.0348  |
| rs75409828  | A | -0.0714 |
| rs78499157  | T | -0.0788 |
| rs6040339   | T | 0.0317  |
| rs1074406   | A | -0.0184 |
| rs117275787 | A | -0.0416 |
| rs143005211 | T | 0.046   |
| rs17698355  | G | -0.1403 |
| rs144164168 | T | 0.1211  |
| rs112644707 | A | 0.0452  |
| rs117693058 | C | 0.1356  |
| rs2252731   | A | 0.0314  |
| rs6142739   | G | -0.0443 |
| rs6077510   | G | 0.0202  |
| rs79312785  | A | 0.0463  |
| rs117666152 | C | -0.0305 |
| rs4811412   | G | -0.0272 |
| rs77886738  | T | 0.0671  |
| rs17684891  | G | -0.0277 |
| rs6083125   | C | -0.0665 |
| rs62216874  | C | 0.0211  |
| rs6107576   | C | -0.1384 |
| rs75403869  | C | -0.1125 |
| rs117427003 | A | 0.0506  |
| rs117823045 | A | -0.1413 |
| rs34900485  | C | 0.107   |
| rs75091427  | T | 0.066   |
| rs76393249  | A | 0.0813  |
| rs114770162 | A | 0.1092  |
| rs118016871 | A | 0.0791  |
| rs144888216 | T | 0.1108  |
| rs11698638  | T | 0.021   |
| rs41437650  | G | 0.0207  |
| rs140611054 | T | 0.1062  |
| rs2284277   | A | 0.0215  |

|             |   |         |
|-------------|---|---------|
| rs17732762  | G | -0.0401 |
| rs112757035 | A | -0.0619 |
| rs6136105   | G | -0.0281 |
| rs6052907   | G | -0.0252 |
| rs74745517  | A | 0.1006  |
| rs62199416  | G | 0.0748  |
| rs1997753   | A | 0.0565  |
| rs73143770  | A | -0.0595 |
| rs6135163   | A | 0.0286  |
| rs418999    | T | -0.0219 |
| rs6037591   | A | -0.0344 |
| rs17365739  | T | -0.0217 |
| rs117093212 | T | 0.1021  |
| rs566604    | G | 0.0197  |
| rs111670944 | C | 0.1011  |
| rs73120789  | A | -0.0247 |
| rs6045464   | C | 0.0246  |
| rs117428664 | T | -0.06   |
| rs17799974  | T | -0.0608 |
| rs118071766 | T | -0.0579 |
| rs141925232 | A | -0.0943 |
| rs117842119 | C | 0.1472  |
| rs74885442  | G | 0.0452  |
| rs13037366  | C | -0.0216 |
| rs118000600 | A | 0.1163  |
| rs6053314   | C | 0.0611  |
| rs6016888   | C | 0.0293  |
| rs73121793  | T | -0.0996 |
| rs80321832  | G | -0.1157 |
| rs117924682 | T | 0.0645  |
| rs73120997  | A | 0.1191  |
| rs6031215   | T | -0.0281 |
| rs2273086   | T | -0.0744 |
| rs67597752  | T | -0.0268 |
| rs112526446 | A | -0.0956 |
| rs72623599  | G | 0.0736  |
| rs12624607  | T | 0.0452  |
| rs117387564 | A | -0.0938 |
| rs7268762   | C | 0.0397  |
| rs56400707  | T | -0.0375 |
| rs6085158   | C | 0.0196  |
| rs4140467   | G | -0.0219 |
| rs6097785   | T | -0.0273 |
| rs61759838  | T | 0.1034  |
| rs6090256   | T | 0.0282  |
| rs4814710   | T | -0.0458 |
| rs111753826 | A | -0.0332 |

|             |   |         |
|-------------|---|---------|
| rs75811037  | A | 0.0557  |
| rs6042033   | C | 0.0214  |
| rs4555415   | G | -0.0222 |
| rs2326537   | A | -0.0483 |
| rs6128143   | C | -0.0212 |
| rs11696330  | G | 0.0622  |
| rs78374570  | T | -0.0974 |
| rs214834    | T | 0.021   |
| rs147908327 | T | -0.0366 |
| rs2585429   | G | 0.0211  |
| rs2223675   | C | 0.0221  |
| rs116996845 | C | 0.1041  |
| rs73121465  | T | -0.1329 |
| rs76226055  | A | 0.0506  |
| rs76638747  | A | -0.1366 |
| rs45449404  | T | 0.1222  |
| rs41305819  | G | -0.117  |
| rs6041030   | G | -0.0311 |
| rs142775896 | A | 0.1119  |
| rs6035353   | C | -0.021  |
| rs6082693   | A | 0.0386  |
| rs11698045  | T | -0.0183 |
| rs4810642   | C | -0.0196 |
| rs112903214 | G | 0.0808  |
| rs6049764   | A | 0.0292  |
| rs6020458   | T | -0.0683 |
| rs117456308 | C | 0.0748  |
| rs6139568   | T | -0.0497 |
| rs2424152   | G | 0.0329  |
| rs7264751   | C | -0.0222 |
| rs35811012  | G | -0.0583 |
| rs117317877 | T | 0.0804  |
| rs966534    | T | -0.0238 |
| rs6080539   | C | 0.0189  |
| rs80308713  | A | 0.0865  |
| rs78280227  | T | 0.0507  |
| rs11697306  | T | 0.0892  |
| rs16992853  | T | -0.0787 |
| rs6015692   | C | 0.0337  |
| rs4813627   | G | 0.0188  |
| rs6112178   | G | 0.0225  |
| rs4815228   | C | 0.0222  |
| rs6086564   | T | 0.0484  |
| rs2010156   | T | 0.0236  |
| rs79063809  | A | -0.1102 |
| rs73088014  | C | 0.087   |
| rs74774445  | G | 0.151   |

|             |   |         |
|-------------|---|---------|
| rs117909856 | C | 0.0958  |
| rs75701644  | T | 0.103   |
| rs6139515   | T | -0.0261 |
| rs79257967  | C | 0.1323  |
| rs7269351   | G | -0.0491 |
| rs73087311  | C | -0.0327 |
| rs2206484   | A | 0.035   |
| rs73591627  | T | -0.0391 |
| rs117990836 | G | -0.086  |
| rs6121891   | T | 0.0831  |
| rs6111846   | T | 0.0578  |
| rs8124354   | C | -0.0419 |
| rs3787508   | A | -0.0208 |
| rs78347812  | T | 0.0332  |
| rs117547789 | G | 0.0594  |
| rs763475    | C | -0.0328 |
| rs117326918 | T | 0.095   |
| rs6088475   | C | 0.0183  |
| rs6029427   | C | 0.0742  |
| rs12480056  | T | 0.0323  |
| rs6103379   | G | -0.0218 |
| rs8122439   | G | -0.1185 |
| rs75921559  | T | 0.0503  |
| rs2983540   | A | -0.1083 |
| rs79311665  | A | -0.0422 |
| rs115540353 | A | 0.0468  |
| rs6062015   | C | 0.0311  |
| rs3092258   | C | 0.0528  |
| rs116852640 | A | 0.0502  |
| rs56053406  | G | 0.0652  |
| rs2425785   | C | 0.0269  |
| rs71340814  | A | 0.0984  |
| rs12480534  | G | 0.0207  |
| rs35766405  | C | -0.0236 |
| rs7265535   | A | 0.0697  |
| rs118075495 | T | 0.0992  |
| rs143592317 | T | -0.143  |
| rs6052495   | A | 0.0455  |
| rs2210075   | T | 0.026   |
| rs1344430   | T | 0.1016  |
| rs77396798  | T | -0.1396 |
| rs141294883 | T | -0.0802 |
| rs139176419 | G | 0.1227  |
| rs6073385   | G | 0.0267  |
| rs77166226  | T | 0.132   |
| rs117433408 | A | 0.1166  |
| rs6056557   | G | 0.0219  |

|             |   |         |
|-------------|---|---------|
| rs4815887   | T | 0.0465  |
| rs114887336 | G | -0.1094 |
| rs75266764  | G | -0.0344 |
| rs73119317  | G | 0.0385  |
| rs73139330  | G | -0.1014 |
| rs6083553   | A | 0.1109  |
| rs4519594   | T | 0.03    |
| rs112666256 | T | -0.0668 |
| rs62208479  | A | 0.0957  |
| rs11086589  | A | 0.0181  |
| rs16987935  | A | 0.0561  |
| rs8121254   | T | -0.0228 |
| rs10485760  | C | -0.0476 |
| rs6079136   | G | 0.0199  |
| rs35532158  | A | -0.0264 |
| rs139347191 | C | -0.1118 |
| rs7264220   | T | -0.0388 |
| rs6034677   | T | -0.0227 |
| rs8119239   | G | 0.0405  |
| rs118004052 | T | -0.0434 |
| rs80231544  | G | 0.0579  |
| rs75084756  | T | -0.0797 |
| rs6093031   | A | -0.0289 |
| rs6093912   | C | 0.0973  |
| rs910893    | G | -0.0326 |
| rs6044483   | A | -0.0209 |
| rs143236114 | A | 0.1003  |
| rs2050096   | A | 0.0436  |
| rs13037722  | C | -0.0419 |
| rs2209751   | T | 0.0213  |
| rs1206744   | A | -0.0611 |
| rs74326695  | A | 0.0254  |
| rs6091420   | C | 0.0183  |
| rs76780732  | G | -0.0752 |
| rs34571054  | G | 0.0259  |
| rs146703565 | T | 0.1282  |
| rs6089803   | A | 0.0209  |
| rs138727676 | G | 0.0336  |
| rs6112589   | A | -0.0233 |
| rs139611058 | A | -0.0611 |
| rs78892715  | T | -0.0317 |
| rs112354949 | G | 0.0694  |
| rs4295072   | G | -0.0346 |
| rs11697509  | G | -0.026  |
| rs999421    | G | -0.0188 |
| rs62203490  | T | 0.0392  |
| rs71348801  | A | 0.0422  |



|             |   |         |
|-------------|---|---------|
| rs77849581  | G | -0.076  |
| rs76222200  | A | -0.0411 |
| rs290393    | A | 0.0183  |
| rs73601808  | G | 0.0316  |
| rs62213604  | G | -0.0293 |
| rs6039438   | C | 0.0896  |
| rs149935561 | T | -0.0826 |
| rs77624058  | T | -0.065  |
| rs9680100   | G | 0.071   |
| rs6051490   | C | 0.0192  |
| rs6073386   | G | 0.0708  |
| rs117739760 | A | -0.1132 |
| rs80333852  | C | -0.1596 |
| rs72484087  | C | 0.0308  |
| rs6071465   | T | -0.0185 |
| rs6011723   | C | -0.1296 |
| rs1741605   | T | 0.0336  |
| rs75057984  | G | 0.0549  |
| rs2876638   | A | 0.0363  |
| rs4816177   | G | 0.023   |
| rs17659054  | A | -0.0359 |
| rs73907513  | A | -0.0433 |
| rs16989513  | C | -0.0343 |
| rs73061891  | T | -0.0633 |
| rs17344506  | A | -0.0541 |
| rs113581335 | C | 0.1342  |
| rs7272494   | A | 0.0682  |
| rs6035707   | C | -0.0295 |
| rs6123602   | A | -0.0321 |
| rs6080175   | T | 0.0189  |
| rs74478235  | T | 0.0609  |
| rs1883270   | A | 0.0241  |
| rs75995757  | C | 0.0567  |
| rs13043431  | T | -0.0287 |
| rs879917    | G | -0.0188 |
| rs74671985  | A | -0.0685 |
| rs75573818  | C | 0.1216  |
| rs6038974   | G | 0.0428  |
| rs73249233  | G | -0.0442 |
| rs4809743   | G | -0.019  |
| rs4315587   | A | -0.0199 |
| rs4810071   | C | -0.0228 |
| rs75613432  | A | -0.0735 |
| rs6086607   | G | -0.0201 |
| rs73067489  | A | -0.0427 |
| rs139907469 | G | -0.0675 |
| rs6108801   | T | 0.0663  |

|             |   |         |
|-------------|---|---------|
| rs13042369  | T | 0.0259  |
| rs897495    | A | -0.0216 |
| rs3933240   | T | -0.0316 |
| rs6027896   | C | 0.019   |
| rs2011447   | T | -0.0218 |
| rs1217      | G | 0.0199  |
| rs2236501   | A | -0.0719 |
| rs4814715   | G | -0.0236 |
| rs594240    | A | 0.0464  |
| rs6134506   | A | -0.0182 |
| rs6029216   | C | -0.0228 |
| rs2745753   | A | -0.0177 |
| rs6124907   | A | -0.0231 |
| rs117548155 | A | 0.0757  |
| rs4811755   | T | -0.0573 |
| rs146228116 | T | -0.1113 |
| rs34800442  | G | -0.0386 |
| rs6016813   | C | -0.0428 |
| rs6142831   | C | -0.0242 |
| rs3819579   | A | -0.0191 |
| rs13043021  | T | 0.032   |
| rs2875958   | C | -0.0201 |
| rs2747564   | A | 0.0392  |
| rs2004951   | C | -0.0338 |
| rs2590954   | G | -0.0899 |
| rs67674243  | A | -0.0252 |
| rs11699110  | A | 0.0554  |
| rs456578    | A | -0.018  |
| rs4811562   | C | 0.0239  |
| rs575534    | A | -0.0193 |
| rs117847876 | T | 0.0772  |
| rs6040116   | T | 0.0384  |
| rs4395306   | T | 0.0284  |
| rs73623770  | C | -0.036  |
| rs720426    | A | -0.0438 |
| rs6068671   | C | -0.0191 |
| rs73071551  | A | -0.0621 |
| rs143636108 | C | 0.1152  |
| rs4610118   | G | 0.0177  |
| rs79236545  | C | 0.0509  |
| rs6129972   | T | -0.0294 |
| rs74627735  | T | 0.0632  |
| rs117230700 | G | -0.0702 |
| rs74447889  | A | 0.1414  |
| rs1033641   | A | -0.0182 |
| rs112042273 | T | 0.0644  |
| rs6041762   | T | 0.0177  |

|             |   |         |
|-------------|---|---------|
| rs6109798   | C | 0.0269  |
| rs117970893 | G | 0.0759  |
| rs76748346  | T | 0.0724  |
| rs73115593  | C | 0.0982  |
| rs78638327  | T | -0.0549 |
| rs73124945  | C | 0.0406  |
| rs17123528  | C | -0.1079 |
| rs7267559   | A | -0.0479 |
| rs373225    | A | 0.0177  |
| rs6020246   | A | -0.0622 |
| rs4814966   | G | -0.0313 |
| rs6085328   | A | -0.0221 |
| rs55986181  | T | -0.1195 |
| rs453573    | C | 0.0213  |
| rs146380573 | A | -0.0706 |
| rs2257      | G | -0.0242 |
| rs62204955  | C | -0.0633 |
| rs78232157  | T | -0.1018 |
| rs78451162  | A | -0.1176 |
| rs62189067  | C | -0.0838 |
| rs2149254   | T | -0.0195 |
| rs16987038  | A | 0.059   |
| rs200614    | G | 0.0203  |
| rs113640850 | A | -0.0554 |
| rs117753689 | C | -0.1188 |
| rs10211701  | T | 0.093   |
| rs6022863   | A | 0.0173  |
| rs78160407  | T | -0.068  |
| rs61546182  | T | 0.0357  |
| rs6013745   | G | -0.0277 |
| rs11698946  | G | 0.042   |
| rs73152121  | G | -0.0599 |
| rs78101684  | A | -0.1129 |
| rs6056046   | T | 0.0245  |
| rs714639    | A | 0.0303  |
| rs148265619 | T | -0.111  |
| rs2423469   | G | 0.0199  |
| rs6044930   | T | -0.0186 |
| rs10485781  | C | 0.026   |
| rs4574172   | A | -0.018  |
| rs150225657 | A | 0.0437  |
| rs138713011 | T | 0.0577  |
| rs35912954  | G | -0.0174 |
| rs59959729  | T | 0.0711  |
| rs6022462   | A | 0.0187  |
| rs6027938   | A | -0.0642 |
| rs145194614 | T | -0.111  |

|             |   |         |
|-------------|---|---------|
| rs6028129   | T | 0.0173  |
| rs6127924   | A | 0.0281  |
| rs3960930   | A | 0.021   |
| rs117308553 | A | 0.059   |
| rs1358798   | A | 0.0551  |
| rs73293566  | T | 0.1111  |
| rs145429104 | A | -0.1124 |
| rs4812400   | T | -0.028  |
| rs2425863   | T | -0.0195 |
| rs76724137  | T | 0.0775  |
| rs112425317 | T | -0.06   |
| rs117131402 | T | -0.0716 |
| rs7268425   | A | 0.0479  |
| rs2223912   | C | -0.0373 |
| rs74178006  | T | -0.1197 |
| rs34135505  | T | -0.0306 |
| rs73060350  | C | 0.0849  |
| rs6513787   | A | -0.0403 |
| rs141980964 | T | 0.0906  |
| rs62207962  | T | 0.0384  |
| rs8114336   | G | -0.0207 |
| rs910389    | A | -0.0218 |
| rs7268071   | A | -0.0255 |
| rs73187046  | G | 0.0792  |
| rs6115830   | T | -0.0209 |
| rs6075100   | T | -0.0231 |
| rs8124461   | C | 0.0356  |
| rs3795144   | A | -0.0244 |
| rs221310    | G | 0.0195  |
| rs112821138 | C | 0.0277  |
| rs2426556   | C | -0.0179 |
| rs6134190   | G | -0.0196 |
| rs78177773  | G | 0.0287  |
| rs205888    | G | -0.0437 |
| rs4605439   | G | -0.0461 |
| rs71340804  | T | -0.1277 |
| rs77604149  | A | 0.0434  |
| rs76592741  | T | 0.0443  |
| rs347465    | A | -0.0203 |
| rs6140102   | A | -0.0254 |
| rs57856344  | T | 0.0784  |
| rs140644028 | T | 0.0355  |
| rs62200211  | G | 0.028   |
| rs2326510   | T | -0.0235 |
| rs113034869 | C | 0.1157  |
| rs55797396  | A | -0.0276 |
| rs79412349  | A | 0.1053  |

|             |   |         |
|-------------|---|---------|
| rs841720    | A | -0.019  |
| rs116942760 | C | -0.0409 |
| rs149826446 | C | 0.1142  |
| rs45469992  | A | 0.0322  |
| rs67561917  | A | 0.0392  |
| rs111995266 | T | -0.0662 |
| rs150247787 | T | -0.0857 |
| rs6100884   | A | 0.0247  |
| rs6041466   | C | 0.0274  |
| rs74182007  | A | 0.064   |
| rs6019783   | T | -0.0278 |
| rs6070383   | T | -0.024  |
| rs4812198   | T | 0.0298  |
| rs4814139   | A | -0.0976 |
| rs139684082 | A | 0.0665  |
| rs73123586  | A | -0.1231 |
| rs6040250   | C | 0.0198  |
| rs13040162  | T | -0.0639 |
| rs6084816   | A | 0.0407  |
| rs6086362   | C | -0.1061 |
| rs144719754 | A | 0.1205  |
| rs2425584   | T | 0.0206  |
| rs2422954   | A | -0.0256 |
| rs111936770 | G | 0.0776  |
| rs76498347  | C | 0.0601  |
| rs6139651   | G | 0.0305  |
| rs272905    | C | 0.02    |
| rs117790167 | C | -0.0601 |
| rs2145069   | T | 0.0208  |
| rs4535117   | T | 0.0894  |
| rs116887540 | A | 0.0619  |
| rs112786411 | C | -0.0829 |
| rs3790238   | T | -0.0193 |
| rs16990934  | C | 0.0466  |
| rs6018812   | A | 0.0502  |
| rs11697232  | G | -0.0205 |
| rs79600770  | G | -0.0726 |
| rs116972743 | G | -0.0587 |
| rs117532069 | A | 0.1195  |
| rs117137367 | C | 0.0984  |
| rs148533210 | A | -0.1407 |
| rs535000    | T | -0.14   |
| rs6096130   | A | 0.025   |
| rs114904483 | A | 0.052   |
| rs117326456 | G | 0.0686  |
| rs76157760  | T | -0.1224 |
| rs78303951  | G | 0.0796  |

|             |   |         |
|-------------|---|---------|
| rs7269316   | A | 0.023   |
| rs73096872  | C | -0.0323 |
| rs118105066 | T | -0.063  |
| rs16984125  | C | -0.0347 |
| rs6052093   | C | -0.0275 |
| rs58731432  | T | 0.0452  |
| rs11087820  | G | 0.0404  |
| rs78864879  | G | -0.0741 |
| rs227137    | C | 0.0183  |
| rs147094865 | A | 0.0551  |
| rs150624852 | C | -0.0708 |
| rs242793    | G | -0.0313 |
| rs16992240  | C | 0.0587  |
| rs6014892   | C | 0.0267  |
| rs4815853   | T | 0.0175  |
| rs6073355   | C | -0.0257 |
| rs146056803 | T | 0.045   |
| rs55709719  | A | 0.0277  |
| rs235035    | T | 0.0329  |
| rs73142383  | C | -0.0718 |
| rs8122335   | G | -0.0195 |
| rs12624507  | A | -0.0563 |
| rs77103674  | T | 0.0547  |
| rs60084953  | A | 0.0375  |
| rs77312793  | T | -0.0428 |
| rs151029260 | A | 0.1067  |
| rs6080071   | A | -0.0185 |
| rs116927267 | A | -0.0766 |
| rs11696741  | T | 0.0435  |
| rs13044688  | C | -0.0233 |
| rs6105394   | T | 0.0394  |
| rs4627652   | A | 0.0493  |
| rs6084920   | T | -0.025  |
| rs2423674   | C | 0.017   |
| rs59926713  | C | 0.0343  |
| rs116880269 | T | -0.1133 |
| rs4813009   | G | 0.0619  |
| rs742698    | T | -0.0193 |
| rs4815271   | T | -0.0236 |
| rs111461327 | C | -0.032  |
| rs389905    | G | -0.0187 |
| rs6011959   | A | -0.0184 |
| rs117292925 | T | -0.0481 |
| rs74595534  | A | -0.0712 |
| rs60761970  | C | 0.0386  |
| rs77694468  | A | -0.1164 |
| rs2426430   | A | 0.1076  |

|             |   |         |
|-------------|---|---------|
| rs6113816   | A | 0.0372  |
| rs75352611  | C | 0.0371  |
| rs143291093 | C | -0.1285 |
| rs6090518   | A | -0.0287 |
| rs4815273   | T | -0.0174 |
| rs2869410   | C | 0.0174  |
| rs73915932  | G | -0.1075 |
| rs41279378  | T | 0.056   |
| rs34384345  | A | -0.0374 |
| rs6139155   | A | 0.0293  |
| rs6139845   | C | -0.0394 |
| rs6049705   | A | 0.0176  |
| rs2426288   | T | 0.0426  |
| rs4810488   | A | 0.0236  |
| rs6014408   | C | 0.0189  |
| rs74711420  | T | -0.1125 |
| rs6118366   | A | 0.1031  |
| rs6056348   | A | -0.036  |
| rs6131996   | G | -0.0279 |
| rs6116931   | A | -0.0473 |
| rs77403806  | T | -0.0328 |
| rs117755443 | G | -0.142  |
| rs116860699 | A | -0.0701 |
| rs6056032   | G | 0.0308  |
| rs4987245   | T | 0.0608  |
| rs78158403  | G | -0.0881 |
| rs117164926 | T | 0.0958  |
| rs4811757   | G | -0.0197 |
| rs4061071   | G | 0.0177  |
| rs76297090  | T | 0.1097  |
| rs78800153  | T | 0.1197  |
| rs6029006   | T | 0.0192  |
| rs878522    | G | 0.0182  |
| rs60887444  | G | 0.0485  |
| rs2196780   | T | 0.0664  |
| rs6107888   | A | -0.0761 |
| rs259971    | G | -0.0174 |
| rs6133439   | G | 0.0266  |
| rs6034423   | G | -0.0177 |
| rs117029881 | T | 0.1304  |
| rs45579635  | A | 0.1006  |
| rs79928874  | A | -0.1    |
| rs1699231   | G | -0.0191 |
| rs11697743  | A | -0.0246 |
| rs117480867 | A | -0.1239 |
| rs6111227   | A | 0.0196  |
| rs63372560  | A | -0.0643 |

|             |   |         |
|-------------|---|---------|
| rs6133151   | A | 0.1138  |
| rs28565118  | A | 0.0284  |
| rs459012    | C | 0.0239  |
| rs140087946 | T | 0.06    |
| rs77216172  | G | 0.1096  |
| rs13041762  | C | 0.0299  |
| rs56305126  | C | -0.0603 |
| rs73183007  | G | -0.0322 |
| rs2424403   | C | 0.0298  |
| rs6121814   | T | -0.041  |
| rs75480865  | A | -0.0737 |
| rs6026494   | G | 0.0256  |
| rs6041905   | C | -0.0629 |
| rs6067733   | A | 0.0349  |
| rs117921028 | T | -0.1483 |
| rs7272290   | A | -0.0179 |
| rs118143370 | T | -0.0723 |
| rs6076108   | C | 0.1071  |
| rs77624248  | G | 0.0792  |
| rs112763701 | A | 0.0831  |
| rs117222713 | G | 0.1502  |
| rs79654241  | T | 0.0401  |
| rs138511190 | T | -0.0929 |
| rs147493439 | A | -0.1552 |
| rs2876248   | C | 0.0177  |
| rs143291909 | G | -0.0579 |
| rs35366239  | A | 0.0289  |
| rs35498962  | A | -0.0246 |
| rs2092881   | C | -0.018  |
| rs745295    | A | 0.0186  |
| rs6013828   | T | 0.0357  |
| rs6016385   | G | -0.0252 |
| rs1581949   | T | 0.0956  |
| rs66503967  | T | 0.0398  |
| rs59892057  | A | 0.0397  |
| rs61248445  | T | 0.0538  |
| rs13037855  | T | -0.0316 |
| rs8113922   | T | -0.0519 |
| rs74397626  | T | 0.0508  |
| rs12479469  | A | 0.0213  |
| rs2840574   | G | 0.0908  |
| rs6085190   | C | 0.018   |
| rs6082446   | A | 0.0549  |
| rs531192    | T | -0.0324 |
| rs6090088   | A | 0.029   |
| rs112012162 | T | -0.1023 |
| rs3787260   | C | 0.0338  |



|             |   |         |
|-------------|---|---------|
| rs34515071  | A | 0.0194  |
| rs140788628 | A | -0.0896 |
| rs2422841   | G | 0.0294  |
| rs6118392   | A | 0.0188  |
| rs6087733   | T | 0.0424  |
| rs1559958   | G | -0.0227 |
| rs11570347  | A | 0.044   |
| rs77511479  | C | 0.0607  |
| rs16996363  | A | -0.0234 |
| rs13043471  | A | 0.0169  |
| rs79688337  | A | 0.0335  |
| rs6087956   | T | 0.0172  |
| rs13043356  | G | 0.0199  |
| rs77952987  | G | 0.0866  |
| rs35273008  | T | -0.0867 |
| rs12626014  | A | 0.0548  |
| rs67796110  | A | -0.0294 |
| rs137994698 | C | 0.0818  |
| rs73117070  | A | 0.0637  |
| rs6014918   | G | -0.0176 |
| rs6075001   | A | -0.0432 |
| rs878248    | G | -0.0182 |
| rs12625166  | T | 0.0389  |
| rs117388418 | G | -0.0666 |
| rs74350478  | C | -0.0398 |
| rs78184009  | A | -0.0233 |
| rs67366242  | A | 0.0522  |
| rs79344516  | C | 0.0374  |
| rs971731    | T | -0.0173 |
| rs6133341   | A | -0.0231 |
| rs149133692 | G | -0.0468 |
| rs116968927 | G | -0.0789 |
| rs575322    | A | 0.0238  |
| rs73897137  | T | -0.048  |
| rs4814648   | A | -0.0181 |
| rs6014850   | C | 0.0388  |
| rs271969    | A | -0.0204 |
| rs2741443   | G | 0.0263  |
| rs2183432   | T | -0.0225 |
| rs6089820   | T | -0.0289 |
| rs2149043   | A | -0.0192 |
| rs73193242  | A | 0.0219  |
| rs142164583 | C | -0.1743 |
| rs6031079   | T | 0.0293  |
| rs117759179 | T | -0.0528 |
| rs3092230   | G | 0.0179  |
| rs73086220  | C | -0.1072 |

|             |   |         |
|-------------|---|---------|
| rs117608698 | A | 0.0488  |
| rs11698883  | T | 0.0939  |
| rs117554085 | C | 0.0612  |
| rs76980726  | A | -0.0689 |
| rs141478685 | G | 0.0791  |
| rs117127385 | C | -0.076  |
| rs932765    | T | 0.0169  |
| rs4809553   | T | 0.0497  |
| rs117001118 | T | 0.0547  |
| rs6094783   | G | -0.0165 |
| rs11697097  | G | -0.0248 |
| rs149663545 | A | 0.0802  |
| rs6085093   | A | -0.017  |
| rs6102832   | T | 0.0208  |
| rs117734218 | T | 0.0775  |
| rs113577351 | A | 0.1258  |
| rs78154034  | T | 0.1404  |
| rs75078255  | T | -0.0458 |
| rs67647510  | A | -0.0334 |
| rs76965145  | C | -0.0879 |
| rs2294554   | A | 0.0179  |
| rs113257858 | T | -0.0562 |
| rs77005051  | A | 0.0882  |
| rs2426664   | A | -0.0199 |
| rs6117740   | A | 0.0295  |
| rs35700721  | T | -0.0291 |
| rs75121127  | T | 0.0415  |
| rs13041060  | G | 0.0498  |
| rs6084732   | A | 0.02    |
| rs6026386   | C | 0.0508  |
| rs151025317 | T | -0.0706 |
| rs76694512  | T | -0.0375 |
| rs1406972   | A | -0.0495 |
| rs12151942  | C | 0.0172  |
| rs12625750  | A | -0.0611 |
| rs150649253 | T | -0.0823 |
| rs793035    | C | -0.0305 |
| rs66767980  | A | 0.0826  |
| rs73117856  | C | -0.0471 |
| rs9789820   | C | -0.0845 |
| rs11696267  | T | -0.0288 |
| rs75175692  | A | 0.0432  |
| rs6078639   | C | -0.1341 |
| rs62196290  | A | 0.0677  |
| rs6129564   | A | -0.0955 |
| rs6017342   | A | -0.0246 |
| rs10153979  | G | 0.0359  |

|             |   |         |
|-------------|---|---------|
| rs6062952   | A | 0.0211  |
| rs2009309   | T | -0.0207 |
| rs75337428  | A | 0.0549  |
| rs11700237  | G | -0.0216 |
| rs141513662 | G | 0.162   |
| rs111922946 | G | 0.0635  |
| rs169409    | T | 0.0172  |
| rs73894468  | A | 0.0837  |
| rs6109587   | C | 0.076   |
| rs228827    | G | -0.0223 |
| rs76412642  | G | -0.0492 |
| rs34670199  | C | -0.036  |
| rs2144932   | C | 0.0566  |
| rs11905884  | G | -0.0343 |
| rs151183751 | T | -0.0728 |
| rs6101892   | C | 0.0183  |
| rs6090975   | G | -0.0165 |
| rs34924243  | T | -0.0341 |
| rs113685001 | G | -0.0413 |
| rs73136062  | A | 0.0661  |
| rs113663250 | T | -0.1033 |
| rs2207152   | T | -0.0244 |
| rs62203552  | C | -0.0712 |
| rs139089964 | C | -0.1246 |
| rs79622676  | T | -0.0349 |
| rs117010729 | T | 0.1181  |
| rs117570790 | A | -0.0588 |
| rs6122141   | G | 0.0193  |
| rs9753682   | A | 0.0574  |
| rs6044473   | T | 0.0192  |
| rs6064271   | C | -0.0295 |
| rs117551305 | A | -0.0587 |
| rs3091566   | C | -0.0222 |
| rs79680017  | A | 0.069   |
| rs75617203  | A | -0.0354 |
| rs76105176  | C | 0.0293  |
| rs6137224   | G | -0.0278 |
| rs117338791 | T | -0.1212 |
| rs804386    | A | -0.0505 |
| rs34424541  | G | 0.0646  |
| rs142432299 | G | 0.1266  |
| rs6069995   | G | -0.0389 |
| rs6114730   | T | -0.0292 |
| rs11696614  | T | 0.0258  |
| rs6132239   | T | -0.0211 |
| rs140187730 | T | 0.1205  |
| rs6097008   | A | 0.0247  |

|             |   |         |
|-------------|---|---------|
| rs6052697   | A | -0.0172 |
| rs76696732  | A | -0.0685 |
| rs34985646  | C | 0.0253  |
| rs6116241   | G | -0.0277 |
| rs2018604   | G | -0.0169 |
| rs3746816   | C | -0.0164 |
| rs11697921  | G | 0.0526  |
| rs1321936   | G | 0.0172  |
| rs77742001  | T | 0.0479  |
| rs6061087   | A | -0.0231 |
| rs35532746  | C | 0.0769  |
| rs78048358  | G | -0.045  |
| rs74783293  | T | -0.1133 |
| rs56144357  | A | -0.0725 |
| rs142599168 | A | 0.0873  |
| rs4809648   | T | -0.0279 |
| rs80192815  | C | -0.0958 |
| rs6041861   | G | -0.0225 |
| rs603112    | T | 0.0251  |
| rs117358382 | A | -0.134  |
| rs2143499   | G | -0.0569 |
| rs6090575   | G | -0.0315 |
| rs75472304  | T | -0.0283 |
| rs7267307   | A | 0.0235  |
| rs41379048  | G | -0.067  |
| rs13044468  | T | 0.0209  |
| rs16981524  | A | -0.0688 |
| rs141037084 | C | 0.0613  |
| rs73099246  | T | 0.0292  |
| rs76281385  | A | 0.1553  |
| rs6045127   | T | -0.0168 |
| rs117464274 | A | -0.0487 |
| rs6035493   | T | -0.0532 |
| rs142680920 | A | -0.0741 |
| rs6122440   | A | 0.1051  |
| rs2427637   | T | -0.022  |
| rs78714507  | T | 0.0679  |
| rs7264061   | C | -0.0217 |
| rs76876830  | G | 0.0473  |
| rs149743166 | A | -0.1046 |
| rs3787569   | G | 0.0265  |
| rs76634929  | T | 0.0484  |
| rs12479708  | A | -0.0207 |
| rs112775193 | G | 0.0364  |
| rs143721940 | G | 0.0223  |
| rs55960840  | A | 0.0752  |
| rs882683    | G | -0.0396 |

|             |   |         |
|-------------|---|---------|
| rs6131180   | G | -0.0556 |
| rs113140217 | G | -0.0835 |
| rs6055911   | A | -0.025  |
| rs113164978 | A | 0.0341  |
| rs76762356  | G | -0.0574 |
| rs77261222  | T | -0.0263 |
| rs34249296  | G | 0.133   |
| rs6074418   | G | -0.1368 |
| rs6134143   | C | 0.0244  |
| rs73075360  | A | -0.0737 |
| rs35393013  | T | 0.1417  |
| rs80154686  | C | -0.0829 |
| rs117836701 | A | 0.071   |
| rs75038219  | A | 0.0451  |
| rs141706469 | A | -0.1154 |
| rs77108923  | A | -0.0943 |
| rs35467629  | A | 0.0643  |
| rs60075773  | T | -0.028  |
| rs17339921  | C | 0.0345  |
| rs197173    | T | -0.0241 |
| rs66520711  | T | -0.0373 |
| rs58421747  | C | 0.0759  |
| rs2014045   | G | 0.0191  |
| rs7270671   | T | 0.1099  |
| rs79954987  | A | 0.0754  |
| rs79964386  | T | -0.0646 |
| rs17793372  | T | 0.1333  |
| rs117705858 | G | 0.0959  |
| rs17786449  | G | 0.0249  |
| rs117113402 | C | -0.0792 |
| rs144223495 | A | 0.1421  |
| rs6040056   | T | 0.0179  |
| rs71329712  | T | -0.0341 |
| rs2423064   | G | -0.0168 |
| rs2327029   | C | 0.0673  |
| rs13040414  | G | 0.0307  |
| rs6085681   | A | -0.0162 |
| rs146962638 | G | 0.0455  |
| rs35449500  | G | -0.0296 |
| rs16997717  | T | -0.0369 |
| rs16998549  | C | -0.0512 |
| rs6038583   | G | 0.0183  |
| rs1971446   | T | 0.017   |
| rs11696347  | A | -0.0317 |
| rs67408917  | C | -0.0213 |
| rs112431085 | T | 0.0576  |
| rs2426451   | T | -0.0355 |

|             |   |         |
|-------------|---|---------|
| rs36082436  | T | -0.047  |
| rs117509135 | G | 0.0521  |
| rs6025181   | A | 0.0188  |
| rs74801515  | A | -0.0449 |
| rs117789905 | T | -0.09   |
| rs73123327  | T | -0.0288 |
| rs4810163   | G | -0.1196 |
| rs73608192  | C | -0.0443 |
| rs6099398   | C | -0.136  |
| rs74823218  | C | 0.0415  |
| rs150524557 | T | -0.0829 |
| rs6027829   | C | -0.0515 |
| rs147166891 | T | 0.097   |
| rs115448696 | C | -0.1152 |
| rs117801728 | G | -0.0813 |
| rs59404903  | C | 0.0571  |
| rs6124768   | A | -0.0398 |
| rs111611572 | T | 0.126   |
| rs6046275   | A | 0.0196  |
| rs6049109   | T | -0.0818 |
| rs67684443  | A | 0.0518  |
| rs1546887   | G | 0.0164  |
| rs11697363  | T | -0.0645 |
| rs1093453   | C | 0.0323  |
| rs8118276   | T | -0.0365 |
| rs138324959 | A | -0.0619 |
| rs6091293   | A | -0.0183 |
| rs141214926 | A | -0.068  |
| rs74799366  | C | -0.0891 |
| rs16999772  | C | -0.0239 |
| rs77272398  | A | 0.02    |
| rs127903    | T | -0.0184 |
| rs73141111  | T | -0.0501 |
| rs137900413 | G | 0.0632  |
| rs6022239   | C | 0.0165  |
| rs6064221   | C | -0.0328 |
| rs2276510   | T | 0.0182  |
| rs75261072  | A | -0.0693 |
| rs113594110 | T | -0.0808 |
| rs6035202   | A | -0.0161 |
| rs145861901 | T | 0.0955  |
| rs297719    | C | 0.0184  |
| rs73184849  | A | -0.0479 |
| rs242791    | G | 0.0171  |
| rs487656    | A | -0.0247 |
| rs149553950 | G | 0.0652  |
| rs2424080   | A | -0.0361 |

|             |   |         |
|-------------|---|---------|
| rs79765245  | G | -0.0253 |
| rs10048851  | G | -0.0693 |
| rs117555836 | A | -0.0931 |
| rs2423961   | T | -0.0282 |
| rs6090251   | T | -0.0216 |
| rs6052916   | G | 0.0232  |
| rs3127061   | G | 0.0339  |
| rs6128176   | T | 0.0472  |
| rs80129293  | A | 0.0733  |
| rs58438406  | T | -0.0516 |
| rs11698155  | C | -0.0193 |
| rs6089541   | C | 0.021   |
| rs35587936  | A | -0.0279 |
| rs4813681   | C | -0.0171 |
| rs118140942 | T | -0.0861 |
| rs6071991   | T | -0.0221 |
| rs4814212   | C | -0.0391 |
| rs57833981  | T | 0.0672  |
| rs116506318 | T | -0.0695 |
| rs2145294   | T | 0.0261  |
| rs111478211 | T | -0.1254 |
| rs4577347   | C | 0.0255  |
| rs112460573 | G | 0.0459  |
| rs113382304 | A | -0.0578 |
| rs62207464  | G | 0.0859  |
| rs6052141   | C | -0.0294 |
| rs6064357   | T | 0.0651  |
| rs4812854   | T | 0.0194  |
| rs117739309 | G | -0.0821 |
| rs6084237   | A | 0.0304  |
| rs76384104  | G | 0.1552  |
| rs78696839  | A | -0.0692 |
| rs141002440 | T | 0.1283  |
| rs4467341   | A | 0.0157  |
| rs112713056 | A | -0.0393 |
| rs6132580   | A | -0.0226 |
| rs117909903 | T | 0.0884  |
| rs425766    | T | -0.0185 |
| rs157097    | G | 0.0173  |
| rs141731593 | T | 0.1526  |
| rs138554428 | C | 0.0605  |
| rs856318    | T | -0.0561 |
| rs6061763   | T | -0.0408 |
| rs144990458 | A | 0.1205  |
| rs73614468  | G | -0.0811 |
| rs73302915  | A | 0.0747  |
| rs79922376  | A | 0.0404  |

|             |   |         |
|-------------|---|---------|
| rs117603453 | A | 0.0987  |
| rs6091658   | A | 0.0241  |
| rs6024632   | G | -0.0164 |
| rs13038097  | T | -0.077  |
| rs3761285   | T | -0.0214 |
| rs138722358 | G | -0.0767 |
| rs74864911  | T | 0.044   |
| rs117183447 | A | 0.0751  |
| rs62208272  | C | -0.0697 |
| rs11698447  | A | 0.0205  |
| rs117367859 | G | -0.0782 |
| rs6011516   | A | -0.0208 |
| rs2427080   | A | -0.0162 |
| rs62204645  | C | -0.0719 |
| rs12481060  | A | -0.0432 |
| rs6016619   | C | -0.0177 |
| rs117390630 | A | 0.0508  |
| rs2876363   | T | -0.0206 |
| rs34940198  | A | 0.0512  |
| rs147780338 | G | 0.111   |
| rs8115156   | G | 0.0159  |
| rs6026995   | T | -0.056  |
| rs79622099  | A | -0.0828 |
| rs2425460   | G | 0.02    |
| rs80306164  | A | 0.0668  |
| rs147942964 | A | 0.0825  |
| rs6138045   | C | 0.0485  |
| rs235763    | C | 0.0163  |
| rs6074682   | T | -0.1056 |
| rs6085145   | G | -0.018  |
| rs73079448  | G | 0.077   |
| rs138953417 | G | -0.0567 |
| rs17804975  | T | -0.0216 |
| rs77030646  | G | 0.0518  |
| rs1889538   | G | 0.0186  |
| rs5741801   | C | -0.0532 |
| rs77291168  | G | 0.0848  |
| rs35036147  | A | 0.0216  |
| rs36121075  | A | 0.0283  |
| rs143955308 | T | 0.1159  |
| rs7264275   | T | 0.0973  |
| rs6048351   | A | 0.029   |
| rs77586274  | A | 0.1155  |
| rs4811944   | C | 0.0187  |
| rs6026947   | T | -0.018  |
| rs74826926  | A | -0.1007 |
| rs143832683 | G | 0.0608  |



|             |   |         |
|-------------|---|---------|
| rs6053690   | T | 0.0242  |
| rs6021544   | G | -0.0181 |
| rs16981575  | C | 0.022   |
| rs16981910  | T | 0.0365  |
| rs6020935   | T | -0.016  |
| rs2427077   | C | 0.0231  |
| rs117937965 | C | -0.0719 |
| rs11554628  | A | 0.0285  |
| rs1884600   | T | 0.0225  |
| rs6095479   | G | -0.0173 |
| rs41293120  | T | 0.1129  |
| rs59826367  | G | -0.0624 |
| rs2144568   | G | -0.0178 |
| rs6066270   | T | 0.0188  |
| rs1287072   | A | 0.0194  |
| rs2424305   | C | -0.0184 |
| rs77458368  | C | -0.0779 |
| rs144072439 | T | -0.0995 |
| rs55700107  | A | -0.0283 |
| rs117795914 | A | -0.0687 |
| rs6078293   | A | 0.065   |
| rs214819    | T | -0.0299 |
| rs11699858  | T | 0.0168  |
| rs6031406   | A | -0.0376 |
| rs78742026  | T | -0.0556 |
| rs147213606 | C | -0.058  |
| rs117007971 | G | -0.0408 |
| rs62195084  | T | -0.1251 |
| rs74420259  | A | 0.0695  |
| rs112810540 | A | 0.0618  |
| rs17363289  | G | 0.0634  |
| rs16994969  | A | 0.0202  |
| rs117040061 | A | 0.1024  |
| rs117226402 | T | -0.0733 |
| rs78870685  | C | 0.0603  |
| rs73097912  | C | 0.0796  |
| rs11087849  | G | 0.0169  |
| rs6118221   | G | 0.0302  |
| rs5023925   | T | -0.0221 |
| rs6071980   | C | 0.0234  |
| rs117158553 | T | -0.1467 |
| rs13044736  | G | 0.0154  |
| rs4816104   | T | -0.0472 |
| rs11698054  | T | 0.0222  |
| rs77990211  | A | -0.0711 |
| rs2223665   | T | -0.017  |
| rs78621422  | A | -0.0748 |

|             |   |         |
|-------------|---|---------|
| rs73090169  | G | 0.0368  |
| rs6034272   | C | 0.0209  |
| rs852064    | G | 0.1352  |
| rs78834518  | A | 0.0829  |
| rs77442367  | A | -0.073  |
| rs79306991  | C | 0.1162  |
| rs77508942  | C | -0.0772 |
| rs2983434   | T | 0.0255  |
| rs6044166   | A | 0.0151  |
| rs3934503   | T | 0.0406  |
| rs13043380  | G | 0.0458  |
| rs73148077  | T | 0.0478  |
| rs62190037  | G | -0.0183 |
| rs6011823   | A | 0.0204  |
| rs112222172 | A | 0.0466  |
| rs271950    | A | 0.0229  |
| rs6092664   | T | 0.0688  |
| rs6089985   | T | 0.0241  |
| rs2426979   | G | -0.0429 |
| rs79285130  | T | -0.0746 |
| rs76930045  | G | 0.0599  |
| rs56307857  | A | 0.0634  |
| rs11907901  | C | 0.0158  |
| rs117370454 | C | 0.0561  |
| rs4815544   | G | 0.02    |
| rs2423509   | A | 0.0255  |
| rs75615161  | T | 0.1471  |
| rs79275943  | C | 0.0206  |
| rs6031275   | T | -0.0261 |
| rs2422843   | C | 0.0189  |
| rs449202    | T | 0.0544  |
| rs6512382   | C | 0.0193  |
| rs7266754   | G | -0.0277 |
| rs6065414   | T | -0.0178 |
| rs73121346  | G | 0.1247  |
| rs6045769   | T | -0.0204 |
| rs75626113  | G | 0.0504  |
| rs117441059 | A | 0.0533  |
| rs6073301   | G | -0.016  |
| rs55990504  | G | 0.0367  |
| rs140500675 | G | -0.0431 |
| rs6107628   | A | -0.0401 |
| rs149824752 | G | 0.1212  |
| rs55926922  | C | -0.0227 |
| rs1972189   | A | -0.0176 |
| rs75057723  | C | 0.1287  |
| rs13040380  | A | -0.05   |

|             |   |         |
|-------------|---|---------|
| rs6043973   | A | -0.0176 |
| rs144308556 | A | 0.0858  |
| rs2867557   | G | 0.0311  |
| rs74473646  | A | -0.0631 |
| rs73088552  | A | -0.0404 |
| rs4809667   | A | 0.0413  |
| rs73120034  | C | -0.022  |
| rs79106890  | T | -0.0327 |
| rs145860634 | A | 0.1033  |
| rs79712339  | A | -0.0541 |
| rs117373073 | T | -0.0755 |
| rs78969821  | C | 0.0348  |
| rs35793014  | A | 0.0652  |
| rs28671182  | G | 0.0443  |
| rs6042159   | T | 0.0574  |
| rs1475477   | C | -0.0205 |
| rs6052678   | T | -0.0177 |
| rs6045850   | C | -0.0994 |
| rs2681116   | T | -0.0167 |
| rs141849105 | A | -0.0886 |
| rs275265    | A | -0.0189 |
| rs138999843 | A | 0.0711  |
| rs57532134  | A | 0.0677  |
| rs1047507   | G | -0.0515 |
| rs6078490   | C | 0.0175  |
| rs890610    | G | -0.0173 |
| rs77781449  | T | 0.0347  |
| rs73911211  | A | 0.0596  |
| rs149934537 | A | 0.0723  |
| rs6110188   | C | -0.0209 |
| rs2223975   | T | -0.039  |
| rs2425764   | G | 0.0203  |
| rs6074405   | A | 0.0189  |
| rs6129918   | G | -0.0268 |
| rs6122115   | G | -0.0201 |
| rs2107608   | A | 0.0427  |
| rs74576294  | C | 0.0754  |
| rs73093234  | C | 0.0355  |
| rs76421479  | A | 0.0729  |
| rs73112899  | C | 0.0646  |
| rs6038890   | A | -0.0336 |
| rs6049609   | G | -0.0187 |
| rs117079253 | T | -0.1368 |
| rs117887601 | T | 0.058   |
| rs117173528 | T | 0.0485  |
| rs16991992  | C | 0.0939  |
| rs58637105  | T | 0.0631  |

|             |   |         |
|-------------|---|---------|
| rs6061787   | G | 0.0205  |
| rs12481068  | A | 0.023   |
| rs2086023   | C | -0.0151 |
| rs200731    | C | 0.0235  |
| rs2423868   | G | -0.0203 |
| rs3746807   | A | 0.0242  |
| rs138959569 | A | -0.0953 |
| rs2070855   | T | 0.0216  |
| rs7264713   | A | -0.0482 |
| rs78729916  | T | -0.0646 |
| rs67367303  | C | 0.0236  |
| rs35560557  | A | 0.0316  |
| rs6131592   | A | 0.0233  |
| rs11907788  | A | 0.0659  |
| rs4814396   | A | 0.0166  |
| rs6056989   | T | 0.0493  |
| rs73115143  | G | 0.1071  |
| rs17810503  | T | -0.0454 |
| rs140910589 | C | 0.0579  |
| rs141312098 | T | -0.0909 |
| rs75477399  | C | -0.1139 |
| rs6140526   | A | 0.028   |
| rs117119545 | C | 0.0727  |
| rs13042961  | C | 0.0642  |
| rs7272125   | T | 0.0281  |
| rs12106093  | A | -0.0331 |
| rs13039634  | G | -0.0487 |
| rs4494825   | A | -0.0236 |
| rs77229674  | T | 0.0807  |
| rs6075239   | G | 0.0161  |
| rs78152432  | G | 0.0428  |
| rs221314    | A | 0.017   |
| rs17285026  | T | -0.0299 |
| rs7121      | C | -0.0206 |
| rs75162878  | T | -0.0412 |
| rs45532531  | T | 0.1049  |
| rs138522189 | C | 0.0754  |
| rs1016550   | A | 0.0152  |
| rs7270924   | T | -0.0831 |
| rs6013306   | C | -0.0177 |
| rs79010737  | G | -0.0576 |
| rs17281575  | A | 0.0236  |
| rs7492      | A | 0.0286  |
| rs117115108 | T | 0.0668  |
| rs76924111  | T | 0.078   |
| rs143563480 | G | 0.0909  |
| rs1884894   | C | -0.0582 |

|             |   |         |
|-------------|---|---------|
| rs7270717   | A | -0.0168 |
| rs117892974 | G | -0.0741 |
| rs4814911   | T | 0.0191  |
| rs8114399   | A | 0.0954  |
| rs6035182   | T | 0.0266  |
| rs141554970 | G | 0.1188  |
| rs13041801  | G | 0.0155  |
| rs873970    | A | -0.0179 |
| rs117141254 | C | 0.1448  |
| rs114056490 | A | 0.0521  |
| rs6096030   | A | 0.0421  |
| rs11699384  | G | -0.0688 |
| rs73129511  | C | -0.0747 |
| rs17502794  | A | 0.0272  |
| rs144636183 | G | 0.1083  |
| rs1475478   | T | -0.0334 |
| rs6038970   | A | -0.0447 |
| rs6096603   | T | -0.0261 |
| rs117874820 | A | 0.054   |
| rs6015477   | A | 0.0278  |
| rs6025081   | C | 0.0666  |
| rs73314070  | T | 0.0274  |
| rs17352198  | C | 0.0583  |
| rs149514391 | G | -0.1224 |
| rs78487498  | C | 0.1176  |
| rs75008808  | G | -0.1001 |
| rs4994224   | A | 0.0186  |
| rs11697133  | A | 0.0577  |
| rs77010340  | C | -0.0709 |
| rs436473    | C | -0.044  |
| rs13043331  | T | -0.0301 |
| rs6099273   | T | 0.0196  |
| rs6037419   | A | -0.0389 |
| rs6056849   | T | -0.0207 |
| rs6014765   | A | 0.0173  |
| rs6064445   | A | -0.0337 |
| rs76215157  | C | -0.1102 |
| rs62204628  | T | -0.0493 |
| rs2422979   | T | 0.0152  |
| rs6057884   | A | 0.0391  |
| rs62209952  | A | -0.0253 |
| rs6066457   | T | -0.024  |
| rs2423490   | T | 0.016   |
| rs2206497   | C | -0.0148 |
| rs6075818   | A | 0.0184  |
| rs6067773   | T | 0.0259  |
| rs62209203  | C | -0.0179 |

|             |   |         |
|-------------|---|---------|
| rs79074988  | T | -0.0563 |
| rs3092145   | G | 0.045   |
| rs139190109 | G | 0.0679  |
| rs117952492 | T | 0.1081  |
| rs2795019   | G | -0.0173 |
| rs6049798   | T | 0.015   |
| rs80227264  | T | -0.0349 |
| rs4811880   | T | -0.0189 |
| rs2234197   | A | 0.0253  |
| rs140076857 | C | 0.0822  |
| rs145028721 | A | 0.1038  |
| rs146442085 | G | -0.1    |
| rs77403747  | T | -0.0987 |
| rs6096834   | T | 0.1043  |
| rs7262069   | T | -0.015  |
| rs6113973   | A | -0.0455 |
| rs62203667  | G | -0.0961 |
| rs12626106  | C | 0.0542  |
| rs1077832   | C | -0.0173 |
| rs541760    | C | 0.0167  |
| rs75167471  | A | 0.0204  |
| rs2425454   | T | 0.0179  |
| rs2904065   | A | 0.0278  |
| rs144838824 | C | -0.0893 |
| rs78060398  | C | -0.1065 |
| rs6078410   | C | -0.0154 |
| rs73084977  | A | 0.1345  |
| rs4813222   | C | 0.084   |
| rs3810560   | C | -0.0157 |
| rs4815561   | T | -0.0156 |
| rs6134048   | T | -0.0179 |
| rs147612104 | T | 0.0863  |
| rs118183281 | T | -0.0614 |
| rs79921796  | A | 0.092   |
| rs78188241  | C | 0.0531  |
| rs6028732   | G | 0.0148  |
| rs73918431  | T | 0.081   |
| rs3848676   | T | -0.0632 |
| rs117207803 | G | 0.1091  |
| rs1571543   | A | 0.0382  |
| rs761225    | T | -0.016  |
| rs6140382   | G | -0.0315 |
| rs6044020   | A | 0.0283  |
| rs7270121   | G | 0.0208  |
| rs11697171  | A | 0.0173  |
| rs6032470   | C | 0.0223  |
| rs4812565   | T | 0.0164  |

|             |   |         |
|-------------|---|---------|
| rs76343308  | T | 0.0952  |
| rs6103157   | C | 0.015   |
| rs13044015  | T | 0.0565  |
| rs76661650  | A | -0.0993 |
| rs8115350   | T | -0.0236 |
| rs140157924 | A | -0.1123 |
| rs117202244 | A | 0.0459  |
| rs3748480   | G | -0.0233 |
| rs4811793   | G | 0.0216  |
| rs73063767  | C | 0.0361  |
| rs6515047   | A | -0.017  |
| rs1928367   | T | 0.0159  |
| rs35123420  | C | -0.0363 |
| rs6022454   | G | -0.0742 |
| rs6026565   | A | 0.0255  |
| rs143455112 | A | 0.0591  |
| rs1276467   | A | -0.0586 |
| rs4813245   | C | -0.0157 |
| rs4813668   | G | 0.0221  |
| rs73103371  | G | -0.0695 |
| rs77282951  | T | -0.048  |
| rs17452311  | A | -0.0851 |
| rs6010934   | A | -0.039  |
| rs76392363  | G | -0.0607 |
| rs13039544  | G | 0.0154  |
| rs6139039   | A | 0.0147  |
| rs3092183   | G | 0.0305  |
| rs6033300   | C | -0.0892 |
| rs4811123   | T | 0.0159  |
| rs145814523 | C | -0.0788 |
| rs144717263 | A | 0.0618  |
| rs58002671  | T | 0.069   |
| rs146496844 | A | 0.0838  |
| rs717671    | C | -0.0205 |
| rs73138671  | T | -0.0498 |
| rs78022411  | T | 0.0437  |
| rs11697813  | T | -0.057  |
| rs62210619  | T | -0.0568 |
| rs6081690   | C | 0.0302  |
| rs16995401  | C | 0.0173  |
| rs6016860   | A | -0.0266 |
| rs143828566 | T | 0.0931  |
| rs113483918 | A | 0.0552  |
| rs13036265  | C | 0.0607  |
| rs195026    | T | -0.0147 |
| rs982553    | G | 0.0155  |
| rs76116321  | T | -0.0627 |

|             |   |         |
|-------------|---|---------|
| rs6048095   | C | 0.0368  |
| rs79309723  | A | -0.071  |
| rs11905888  | A | -0.0253 |
| rs4809451   | C | 0.0528  |
| rs56351819  | C | -0.0412 |
| rs4810335   | T | -0.0453 |
| rs80313834  | C | -0.0357 |
| rs219857    | C | 0.0144  |
| rs117783181 | T | 0.0322  |
| rs116892696 | C | -0.0959 |
| rs16986733  | C | -0.0724 |
| rs13433202  | C | 0.0194  |
| rs6128090   | A | 0.0354  |
| rs11700326  | G | -0.0176 |
| rs6114803   | C | -0.0217 |
| rs6110881   | G | -0.0181 |
| rs6099733   | T | -0.0184 |
| rs76578974  | T | -0.0221 |
| rs4815810   | G | -0.0151 |
| rs6130455   | G | 0.0471  |
| rs6083462   | A | -0.016  |
| rs111374511 | A | 0.0505  |
| rs113544434 | C | -0.0456 |
| rs6045923   | A | -0.0144 |
| rs73611538  | T | -0.0395 |
| rs6048195   | A | -0.0171 |
| rs118137201 | C | 0.1056  |
| rs34093524  | T | 0.0166  |
| rs139242267 | T | 0.1064  |
| rs17315896  | T | 0.0243  |
| rs76186211  | T | -0.0848 |
| rs6129161   | G | -0.0157 |
| rs73078275  | T | -0.0187 |
| rs6013533   | T | 0.0149  |
| rs117586879 | G | -0.0649 |
| rs2867240   | T | 0.0151  |
| rs1004370   | G | 0.0175  |
| rs13037894  | A | 0.0269  |
| rs856950    | A | -0.019  |
| rs67784641  | C | -0.0273 |
| rs146598417 | C | 0.1139  |
| rs62201052  | C | -0.0747 |
| rs62211242  | C | -0.0206 |
| rs6033553   | C | -0.0197 |
| rs79404145  | G | -0.0309 |
| rs138860683 | T | 0.0569  |
| rs6114610   | T | 0.0382  |



|             |   |         |
|-------------|---|---------|
| rs6025625   | T | 0.0219  |
| rs6116852   | C | -0.0443 |
| rs117673101 | G | -0.0801 |
| rs208819    | T | -0.0747 |
| rs73107674  | G | -0.1024 |
| rs13043654  | T | 0.017   |
| rs11697413  | A | 0.0335  |
| rs6078645   | A | 0.0208  |
| rs141189173 | T | 0.094   |
| rs140514799 | G | -0.0566 |
| rs73084239  | A | -0.0312 |
| rs6102136   | T | 0.0297  |
| rs56659617  | C | -0.03   |
| rs6064111   | C | -0.0322 |
| rs77519932  | G | -0.0769 |
| rs2404887   | A | -0.0161 |
| rs6116866   | C | 0.0207  |
| rs145339681 | T | -0.0925 |
| rs62213316  | C | 0.0248  |
| rs1322107   | A | 0.015   |
| rs4815850   | C | -0.0274 |
| rs61096088  | C | 0.0244  |
| rs2423412   | A | -0.0153 |
| rs8116273   | G | -0.0328 |
| rs17426167  | A | 0.0269  |
| rs117525461 | C | 0.0414  |
| rs146287584 | T | -0.095  |
| rs143688311 | C | 0.0863  |
| rs6020425   | C | -0.0174 |
| rs4086126   | T | 0.0478  |
| rs117725610 | A | 0.0964  |
| rs143851877 | T | 0.081   |
| rs732007    | C | -0.0165 |
| rs149815840 | G | 0.0612  |
| rs62207176  | C | 0.0568  |
| rs75660948  | A | 0.0621  |
| rs138588273 | C | -0.1113 |
| rs6053268   | C | 0.0164  |
| rs17225436  | G | -0.0151 |
| rs62202174  | G | 0.0175  |
| rs6054965   | C | -0.0256 |
| rs6091661   | C | -0.0157 |
| rs6011235   | A | 0.0356  |
| rs76624484  | T | 0.0292  |
| rs113981218 | T | -0.0211 |
| rs6085580   | T | -0.0174 |
| rs11087800  | A | -0.0191 |

|             |   |         |
|-------------|---|---------|
| rs138337674 | G | 0.0972  |
| rs62200421  | A | -0.0369 |
| rs79171335  | C | -0.0669 |
| rs148537251 | C | -0.0859 |
| rs75835648  | G | 0.049   |
| rs6139518   | G | 0.0606  |
| rs17804947  | A | 0.0635  |
| rs6133360   | T | 0.0262  |
| rs151286481 | A | 0.0342  |
| rs145276342 | A | 0.0533  |
| rs76595257  | T | -0.1013 |
| rs117646279 | G | 0.0801  |
| rs117460601 | A | -0.0766 |
| rs34811005  | T | -0.0546 |
| rs7270847   | A | -0.0171 |
| rs76714328  | C | 0.0415  |
| rs6084855   | C | -0.0165 |
| rs6080388   | T | -0.0215 |
| rs117323798 | A | 0.0598  |
| rs62210125  | A | -0.0706 |
| rs845790    | C | 0.0247  |
| rs140599073 | C | -0.0807 |
| rs6081772   | C | -0.015  |
| rs11908553  | A | -0.0255 |
| rs117307133 | T | 0.1257  |
| rs55786507  | G | 0.1009  |
| rs195001    | T | -0.0155 |
| rs77297816  | C | 0.0473  |
| rs8121890   | G | 0.0656  |
| rs73087043  | C | 0.1037  |
| rs138872968 | A | -0.0303 |
| rs6071994   | A | 0.0174  |
| rs79449407  | A | 0.0862  |
| rs28547103  | C | -0.0226 |
| rs1413017   | A | 0.0139  |
| rs73257762  | C | -0.0414 |
| rs6074591   | T | -0.0193 |
| rs7273292   | C | -0.0694 |
| rs76480528  | A | 0.0282  |
| rs118008544 | A | 0.0473  |
| rs141742754 | G | 0.0907  |
| rs117850887 | A | -0.1301 |
| rs117977626 | A | -0.0523 |
| rs6069886   | G | -0.0154 |
| rs2326375   | T | -0.0258 |
| rs805747    | G | -0.02   |
| rs6068087   | G | 0.0147  |

|             |   |         |
|-------------|---|---------|
| rs6079272   | A | -0.0211 |
| rs148414402 | T | 0.0833  |
| rs6131512   | C | -0.0157 |
| rs2745809   | T | 0.0187  |
| rs6065677   | T | -0.0448 |
| rs117921143 | A | 0.0674  |
| rs4816174   | T | -0.0143 |
| rs73090254  | G | -0.0731 |
| rs2073291   | G | 0.014   |
| rs112622398 | A | -0.0858 |
| rs8297      | G | -0.0682 |
| rs35515294  | T | -0.0564 |
| rs146065732 | C | -0.0768 |
| rs148439766 | A | -0.0855 |
| rs6065751   | A | -0.0334 |
| rs151312338 | A | 0.0773  |
| rs1555350   | T | -0.0235 |
| rs16994779  | G | -0.0235 |
| rs985546    | C | -0.0263 |
| rs114602031 | G | 0.0577  |
| rs56039347  | T | 0.0595  |
| rs12480001  | G | 0.0347  |
| rs2271511   | T | 0.0207  |
| rs4814308   | G | -0.0191 |
| rs117319531 | A | -0.0556 |
| rs137927005 | T | 0.0704  |
| rs6095869   | A | 0.0688  |
| rs116868305 | T | 0.0808  |
| rs6021296   | C | -0.016  |
| rs6106080   | A | -0.0452 |
| rs78140746  | G | -0.0492 |
| rs80053117  | T | 0.0796  |
| rs74179781  | C | 0.0237  |
| rs76799017  | C | -0.0289 |
| rs62192949  | T | 0.0667  |
| rs986830    | C | -0.0194 |
| rs4810736   | C | -0.0297 |
| rs747211    | T | 0.0193  |
| rs8118279   | G | -0.0168 |
| rs6015839   | C | -0.016  |
| rs6080101   | T | 0.0156  |
| rs74173190  | A | 0.0443  |
| rs141653112 | T | -0.0246 |
| rs13043901  | G | -0.0165 |
| rs6085655   | A | -0.0864 |
| rs2425624   | G | 0.0139  |
| rs911125    | A | -0.0451 |

|             |   |         |
|-------------|---|---------|
| rs2853202   | G | 0.0143  |
| rs6076550   | T | -0.0623 |
| rs2618650   | G | 0.018   |
| rs58719211  | T | 0.0234  |
| rs6081951   | A | -0.0372 |
| rs113385377 | A | -0.106  |
| rs58889963  | A | 0.0254  |
| rs117365186 | G | -0.0446 |
| rs6015112   | T | 0.0199  |
| rs62199154  | C | -0.0304 |
| rs118110304 | G | -0.1152 |
| rs6135477   | A | 0.0139  |
| rs6018766   | G | -0.0163 |
| rs116854695 | C | 0.0881  |
| rs2770374   | G | 0.0247  |
| rs2425871   | T | -0.0197 |
| rs2327417   | G | -0.0143 |
| rs73914015  | G | 0.0721  |
| rs11905838  | A | 0.0158  |
| rs17753550  | G | 0.067   |
| rs116999089 | A | -0.0663 |
| rs13038394  | A | 0.0274  |
| rs1293441   | G | -0.0144 |
| rs6127753   | A | 0.0951  |
| rs145456780 | C | 0.0752  |
| rs141830006 | G | -0.1048 |
| rs4810551   | G | 0.0146  |
| rs6104550   | C | 0.0162  |
| rs6073675   | T | -0.0194 |
| rs4816169   | C | 0.0232  |
| rs117671467 | C | 0.0604  |
| rs62206602  | T | -0.0529 |
| rs76653884  | T | -0.066  |
| rs117949705 | C | 0.0828  |
| rs60504792  | A | -0.0262 |
| rs6056620   | A | 0.0213  |
| rs6140863   | C | 0.0218  |
| rs41304798  | T | 0.0544  |
| rs78876870  | A | -0.0496 |
| rs144079464 | A | 0.0651  |
| rs75329471  | A | -0.0981 |
| rs2296527   | A | -0.0216 |
| rs3787524   | T | -0.0203 |
| rs79989945  | A | -0.0429 |
| rs6126742   | T | 0.0333  |
| rs112377863 | C | 0.0671  |
| rs2150130   | A | 0.0153  |

|             |   |         |
|-------------|---|---------|
| rs16980864  | A | -0.0699 |
| rs1467660   | A | -0.0234 |
| rs17731537  | G | -0.0574 |
| rs112991831 | A | -0.0516 |
| rs17728634  | T | -0.1016 |
| rs77730839  | T | -0.03   |
| rs138577302 | T | 0.0416  |
| rs6090389   | A | 0.02    |
| rs117202922 | A | 0.0807  |
| rs73102249  | T | -0.0269 |
| rs2299971   | T | -0.0146 |
| rs6108334   | C | 0.0195  |
| rs62208775  | T | -0.0655 |
| rs6123946   | T | 0.037   |
| rs3911857   | T | 0.0149  |
| rs56205434  | A | -0.0296 |
| rs118005059 | T | 0.0535  |
| rs6088122   | A | 0.0165  |
| rs117778485 | T | 0.0531  |
| rs3803988   | T | -0.03   |
| rs73128074  | G | -0.0525 |
| rs200638    | C | -0.0234 |
| rs55742151  | C | 0.0628  |
| rs117851468 | G | -0.0779 |
| rs41302556  | T | 0.0757  |
| rs2064784   | A | 0.0265  |
| rs145513557 | T | 0.0639  |
| rs73148437  | T | 0.0653  |
| rs2267915   | A | -0.0433 |
| rs6065232   | G | -0.0191 |
| rs75585676  | C | 0.0603  |
| rs1883859   | C | 0.0202  |
| rs112888949 | A | 0.0449  |
| rs6035331   | T | -0.0161 |
| rs6076132   | C | -0.0501 |
| rs76726210  | T | -0.0473 |
| rs113594190 | G | 0.0487  |
| rs79401657  | C | 0.0192  |
| rs6051670   | A | 0.0336  |
| rs144017103 | T | -0.0951 |
| rs13039734  | G | -0.0397 |
| rs11699245  | C | 0.0556  |
| rs12481415  | G | 0.0421  |
| rs77584949  | G | -0.0551 |
| rs34723708  | T | -0.0202 |
| rs73083916  | G | 0.0438  |
| rs10485462  | A | -0.0163 |

|             |   |         |
|-------------|---|---------|
| rs2021789   | G | -0.0184 |
| rs6036639   | C | 0.0291  |
| rs116862624 | G | -0.0367 |
| rs34001662  | C | 0.0314  |
| rs12480965  | G | 0.0444  |
| rs6130613   | T | -0.0144 |
| rs143186100 | T | -0.0627 |
| rs1741287   | A | -0.0352 |
| rs6066126   | T | 0.0627  |
| rs79099866  | T | 0.0531  |
| rs62201704  | A | -0.0242 |
| rs2224367   | G | 0.0282  |
| rs59338851  | A | -0.0489 |
| rs2424488   | A | 0.0353  |
| rs55845064  | G | 0.0405  |
| rs17793885  | C | -0.0321 |
| rs117026282 | A | 0.0659  |
| rs111464722 | T | -0.0613 |
| rs6074232   | A | -0.016  |
| rs73095878  | C | 0.0514  |
| rs6139745   | T | -0.0249 |
| rs117414708 | C | 0.0438  |
| rs78883155  | T | 0.1201  |
| rs60079594  | T | 0.0938  |
| rs6105929   | C | 0.0624  |
| rs73616656  | T | -0.0309 |
| rs73082474  | C | 0.1046  |
| rs499731    | C | 0.0157  |
| rs6071480   | A | -0.0164 |
| rs6512563   | A | -0.081  |
| rs117369355 | A | 0.0709  |
| rs6093792   | C | 0.0182  |
| rs73234091  | C | -0.0834 |
| rs74173362  | C | 0.0231  |
| rs2474437   | T | 0.0175  |
| rs35505382  | A | -0.0165 |
| rs73302389  | T | 0.0742  |
| rs56007473  | T | -0.1005 |
| rs6084436   | T | -0.0294 |
| rs3920503   | C | 0.0386  |
| rs11697477  | T | -0.0191 |
| rs6022791   | C | 0.0305  |
| rs649846    | G | -0.0206 |
| rs78657046  | T | 0.0726  |
| rs13044945  | A | -0.0212 |
| rs73101225  | T | -0.0642 |
| rs6093631   | T | 0.0289  |

|             |   |         |
|-------------|---|---------|
| rs202522    | G | -0.0615 |
| rs77811550  | T | 0.0378  |
| rs6079852   | C | 0.0773  |
| rs6099127   | T | 0.0313  |
| rs74336636  | T | 0.053   |
| rs6094796   | G | 0.023   |
| rs76067818  | T | -0.0367 |
| rs6079224   | T | 0.0215  |
| rs4811429   | T | 0.0267  |
| rs75397596  | C | -0.0439 |
| rs6139004   | G | 0.0306  |
| rs76912633  | T | -0.0265 |
| rs3827158   | G | -0.028  |
| rs609932    | C | 0.0174  |
| rs76027654  | T | 0.0685  |
| rs6049212   | A | -0.0222 |
| rs5017803   | A | -0.0679 |
| rs34873389  | G | -0.0911 |
| rs3906937   | T | -0.0724 |
| rs111463722 | G | -0.0612 |
| rs12480784  | C | -0.0218 |
| rs34967475  | T | -0.0557 |
| rs1741280   | C | -0.019  |
| rs113107074 | T | 0.0301  |
| rs4815919   | G | 0.0292  |
| rs115549255 | G | 0.0369  |
| rs17800640  | A | 0.032   |
| rs73269083  | A | 0.0398  |
| rs6099676   | A | 0.0548  |
| rs4925249   | A | 0.016   |
| rs6116997   | G | -0.0151 |
| rs199549    | T | -0.0198 |
| rs6140874   | G | 0.0136  |
| rs6014178   | A | 0.0368  |
| rs62209459  | T | 0.0207  |
| rs79998302  | G | 0.0878  |
| rs117375112 | G | 0.074   |
| rs118146277 | C | -0.0491 |
| rs6032948   | T | -0.0147 |
| rs114609745 | T | -0.0909 |
| rs12481210  | G | -0.0226 |
| rs17811221  | A | -0.0217 |
| rs12625683  | G | -0.0169 |
| rs114005075 | T | 0.0453  |
| rs78220244  | A | 0.0563  |
| rs6114258   | T | -0.0257 |
| rs116930869 | A | -0.0483 |

|             |   |         |
|-------------|---|---------|
| rs4812713   | C | -0.0221 |
| rs8123890   | G | 0.0136  |
| rs76691090  | G | -0.0736 |
| rs75034526  | C | 0.107   |
| rs6098405   | C | -0.0207 |
| rs79634658  | T | 0.0801  |
| rs6019060   | C | 0.0416  |
| rs6131691   | A | 0.0186  |
| rs6126559   | G | 0.016   |
| rs79280859  | C | 0.0464  |
| rs16998535  | T | 0.0484  |
| rs6133086   | G | -0.014  |
| rs6116900   | A | 0.0171  |
| rs2423160   | A | 0.0138  |
| rs113447919 | C | 0.1149  |
| rs13044193  | A | -0.0197 |
| rs11908446  | A | 0.0664  |
| rs145932439 | A | 0.1011  |
| rs35378285  | A | 0.0166  |
| rs8125018   | T | -0.0233 |
| rs111883835 | G | 0.0254  |
| rs272902    | C | 0.0218  |
| rs6065265   | C | -0.0413 |
| rs2066451   | A | -0.0164 |
| rs117939218 | T | 0.0772  |
| rs6067085   | G | -0.0134 |
| rs149982525 | G | -0.0987 |
| rs13044031  | C | -0.0577 |
| rs1800963   | A | -0.016  |
| rs34492258  | G | 0.0513  |
| rs75038237  | A | -0.054  |
| rs227640    | T | 0.0453  |
| rs113560559 | A | -0.0589 |
| rs77851109  | T | -0.0346 |
| rs55826141  | T | 0.1145  |
| rs6062814   | G | 0.0952  |
| rs73604323  | A | 0.0299  |
| rs1591169   | A | 0.0147  |
| rs76397115  | A | 0.0323  |
| rs117629411 | T | 0.0499  |
| rs7273640   | C | -0.0223 |
| rs41283248  | C | 0.1302  |
| rs55976850  | G | -0.0397 |
| rs6070510   | A | -0.0178 |
| rs35976635  | G | -0.0377 |
| rs55665672  | T | 0.0708  |
| rs148527414 | C | 0.0783  |



|             |   |         |
|-------------|---|---------|
| rs1010733   | G | -0.0171 |
| rs55837599  | A | -0.0203 |
| rs16986341  | C | 0.0702  |
| rs2256095   | G | -0.0133 |
| rs111930026 | G | 0.041   |
| rs6081480   | G | -0.0179 |
| rs117492192 | A | 0.0643  |
| rs1837025   | C | -0.036  |
| rs3848811   | C | 0.0687  |
| rs73181316  | G | 0.036   |
| rs6123239   | G | 0.0479  |
| rs75339068  | C | -0.0537 |
| rs164926    | G | 0.0152  |
| rs627766    | T | 0.0471  |
| rs761685    | T | 0.0139  |
| rs6085919   | A | -0.0984 |
| rs138522858 | A | 0.0436  |
| rs6108744   | C | 0.018   |
| rs114124638 | T | -0.0959 |
| rs117786058 | C | 0.0799  |
| rs463312    | C | -0.0445 |
| rs118105732 | A | 0.0344  |
| rs142529415 | C | 0.0801  |
| rs117307209 | G | 0.0882  |
| rs78292704  | A | 0.0609  |
| rs6087099   | A | -0.0211 |
| rs4911535   | A | 0.0227  |
| rs144839057 | C | -0.0598 |
| rs112747763 | T | 0.0878  |
| rs17788960  | A | 0.0717  |
| rs150461027 | G | 0.0591  |
| rs3787430   | T | 0.0283  |
| rs142310217 | A | -0.0795 |
| rs13037373  | A | -0.1084 |
| rs2236527   | T | 0.0253  |
| rs117082178 | C | -0.0535 |
| rs76201600  | T | 0.1255  |
| rs62213167  | C | -0.0298 |
| rs112888546 | T | -0.0392 |
| rs7271526   | A | 0.0261  |
| rs62206859  | A | 0.0294  |
| rs2423516   | C | 0.0132  |
| rs73096078  | C | -0.0463 |
| rs744193    | T | -0.0194 |
| rs1028392   | T | -0.0437 |
| rs117748942 | A | -0.0498 |
| rs75369538  | A | 0.0466  |

|             |   |         |
|-------------|---|---------|
| rs75906103  | C | 0.0592  |
| rs1936307   | T | -0.0141 |
| rs7273736   | A | -0.028  |
| rs75752631  | A | -0.0872 |
| rs35890757  | A | -0.048  |
| rs736214    | G | 0.016   |
| rs6025192   | T | -0.018  |
| rs151066767 | G | 0.0416  |
| rs62210454  | G | 0.028   |
| rs3787282   | C | 0.0671  |
| rs6112599   | C | 0.0444  |
| rs1108344   | T | -0.0364 |
| rs2426228   | C | 0.0224  |
| rs13037681  | G | 0.0325  |
| rs2281279   | C | -0.0163 |
| rs6090921   | A | 0.0174  |
| rs2019129   | C | 0.0484  |
| rs13042502  | C | -0.0368 |
| rs3787184   | G | 0.0197  |
| rs6122390   | T | -0.0177 |
| rs111239784 | A | 0.0621  |
| rs9680006   | T | -0.0337 |
| rs7268263   | C | 0.0292  |
| rs145371887 | T | 0.0864  |
| rs57001576  | G | 0.0475  |
| rs75284515  | A | -0.0377 |
| rs1276423   | T | 0.0136  |
| rs75044358  | T | -0.0628 |
| rs2297199   | C | 0.0129  |
| rs62204460  | G | 0.022   |
| rs1535043   | A | 0.0129  |
| rs117759861 | A | 0.075   |
| rs150233256 | T | 0.0702  |
| rs71338885  | A | -0.0758 |
| rs73618652  | T | 0.0234  |
| rs117258063 | T | 0.047   |
| rs73892620  | A | 0.0384  |
| rs6025994   | A | -0.0143 |
| rs6035124   | G | -0.0383 |
| rs67691565  | A | -0.0212 |
| rs8116692   | T | 0.058   |
| rs55714347  | T | 0.0226  |
| rs271962    | G | 0.0201  |
| rs112700115 | T | 0.0516  |
| rs6118681   | C | -0.0142 |
| rs17299635  | A | -0.0571 |
| rs6024138   | A | 0.0359  |

|             |   |         |
|-------------|---|---------|
| rs78772900  | A | -0.0752 |
| rs117874469 | G | -0.0429 |
| rs73073739  | G | 0.0598  |
| rs1569551   | G | 0.0172  |
| rs73566357  | A | -0.0382 |
| rs78746034  | A | 0.0338  |
| rs59902181  | C | 0.0755  |
| rs6056656   | A | 0.0138  |
| rs2208183   | T | -0.0136 |
| rs73107311  | A | -0.0452 |
| rs6025640   | A | -0.0173 |
| rs113472674 | T | 0.1047  |
| rs6117405   | C | 0.0527  |
| rs3747929   | G | 0.0181  |
| rs927030    | A | 0.0263  |
| rs528890    | C | -0.0148 |
| rs1885624   | T | -0.0235 |
| rs6053976   | G | -0.015  |
| rs11906618  | A | -0.0294 |
| rs78231778  | T | 0.0316  |
| rs56031690  | A | -0.0543 |
| rs137992277 | G | 0.0647  |
| rs6104159   | G | 0.0173  |
| rs117962937 | T | -0.0547 |
| rs174701    | A | -0.0693 |
| rs6075230   | A | -0.0813 |
| rs8183538   | G | 0.0217  |
| rs116967466 | C | -0.0644 |
| rs117345247 | A | -0.0784 |
| rs111428853 | C | 0.0437  |
| rs6086616   | T | 0.0158  |
| rs209949    | T | -0.0161 |
| rs3091449   | A | 0.0243  |
| rs150718534 | A | -0.0694 |
| rs75016092  | C | -0.0187 |
| rs142973358 | C | -0.0514 |
| rs6117337   | C | 0.0148  |
| rs142881983 | G | 0.0782  |
| rs2422989   | G | -0.0145 |
| rs62205160  | T | -0.045  |
| rs4816173   | C | 0.0411  |
| rs74616320  | G | 0.0794  |
| rs112041527 | A | -0.0609 |
| rs73919504  | C | 0.0257  |
| rs115550665 | T | -0.0574 |
| rs6020768   | G | -0.0266 |
| rs6134314   | T | -0.0486 |

|             |   |         |
|-------------|---|---------|
| rs144628647 | G | 0.0838  |
| rs6034002   | A | 0.0242  |
| rs75321844  | T | -0.0389 |
| rs6096445   | C | -0.0201 |
| rs4471957   | C | 0.0151  |
| rs79412842  | C | -0.0236 |
| rs6045183   | C | 0.0199  |
| rs4814348   | T | 0.0169  |
| rs6063100   | T | 0.0315  |
| rs36000730  | C | -0.0432 |
| rs35608758  | T | -0.0485 |
| rs7265263   | C | -0.0178 |
| rs2422971   | C | -0.0225 |
| rs16980768  | A | -0.0191 |
| rs2206424   | A | 0.0139  |
| rs2244073   | A | -0.0164 |
| rs75766427  | A | -0.077  |
| rs145225078 | C | 0.065   |
| rs961197    | A | -0.0187 |
| rs11696319  | T | -0.0429 |
| rs6108046   | T | -0.0188 |
| rs6085693   | A | -0.0136 |
| rs140188658 | A | -0.0576 |
| rs6095102   | T | 0.0143  |
| rs2243399   | T | -0.0272 |
| rs2892279   | A | 0.013   |
| rs146394024 | G | -0.0291 |
| rs17693978  | C | -0.0147 |
| rs6106020   | C | -0.0436 |
| rs11087429  | A | -0.0226 |
| rs13043666  | C | -0.0215 |
| rs141614125 | T | 0.059   |
| rs16997562  | C | 0.092   |
| rs41310181  | A | 0.0496  |
| rs11908191  | T | 0.0469  |
| rs1382038   | C | -0.0235 |
| rs6041046   | G | -0.0159 |
| rs656635    | T | 0.0135  |
| rs140688508 | A | 0.0442  |
| rs139051111 | G | 0.0808  |
| rs75630064  | G | -0.0569 |
| rs118129240 | A | -0.0856 |
| rs6128320   | T | 0.0253  |
| rs73096622  | G | -0.1199 |
| rs73121359  | G | 0.0479  |
| rs75335975  | A | 0.084   |
| rs6080113   | T | -0.0143 |

|             |   |         |
|-------------|---|---------|
| rs62204014  | G | -0.0242 |
| rs62198813  | G | -0.0543 |
| rs142559084 | G | -0.0801 |
| rs117128151 | G | -0.0882 |
| rs6063062   | A | -0.0309 |
| rs6123445   | G | -0.0152 |
| rs17460648  | A | 0.0182  |
| rs55726434  | T | 0.0543  |
| rs6080874   | A | -0.0173 |
| rs7264148   | G | 0.0137  |
| rs3787158   | T | 0.0284  |
| rs205887    | G | -0.1139 |
| rs17759654  | G | 0.0424  |
| rs6140117   | G | -0.0132 |
| rs4395311   | T | -0.0178 |
| rs6084896   | T | 0.0143  |
| rs147023837 | T | -0.0609 |
| rs148706109 | A | 0.053   |
| rs139476157 | T | -0.0371 |
| rs2065010   | A | 0.0212  |
| rs6028277   | C | 0.0151  |
| rs149160812 | T | -0.0896 |
| rs74686473  | C | 0.0673  |
| rs35042303  | T | -0.0327 |
| rs708937    | G | 0.0381  |
| rs6131481   | C | 0.0153  |
| rs116914463 | T | 0.0341  |
| rs6018056   | C | -0.0145 |
| rs11699453  | A | -0.0147 |
| rs117746103 | T | 0.0771  |
| rs6074028   | G | -0.0231 |
| rs11908104  | C | 0.0458  |
| rs73073763  | T | -0.0726 |
| rs77775964  | T | 0.0656  |
| rs6046274   | T | -0.0451 |
| rs112875146 | A | -0.0328 |
| rs79608766  | T | -0.0321 |
| rs113492454 | T | -0.0593 |
| rs6128031   | A | 0.0459  |
| rs6107506   | G | 0.0133  |
| rs117758290 | C | -0.0634 |
| rs2427517   | T | -0.0213 |
| rs79315751  | T | 0.0514  |
| rs6025712   | A | -0.0479 |
| rs6065588   | G | 0.0202  |
| rs2145086   | A | -0.0324 |
| rs11905105  | T | -0.0582 |

|             |   |         |
|-------------|---|---------|
| rs1774886   | G | -0.017  |
| rs118127595 | A | 0.1328  |
| rs1101      | A | 0.0313  |
| rs10485534  | C | 0.0586  |
| rs11905590  | A | 0.0443  |
| rs6081719   | A | 0.0251  |
| rs911167    | C | 0.013   |
| rs6105654   | C | 0.0128  |
| rs116968217 | A | 0.0468  |
| rs142805207 | T | 0.0514  |
| rs77609983  | G | 0.0187  |
| rs4812755   | A | 0.0151  |
| rs66923292  | G | 0.0144  |
| rs594811    | G | 0.0144  |
| rs6131328   | T | 0.017   |
| rs2064819   | G | -0.0157 |
| rs112877772 | A | -0.0984 |
| rs73134810  | T | -0.0416 |
| rs13039327  | T | -0.0672 |
| rs79204180  | T | 0.0569  |
| rs1884753   | A | 0.0489  |
| rs147591082 | G | -0.0586 |
| rs116964204 | A | 0.065   |
| rs6061300   | T | 0.0169  |
| rs4810279   | T | 0.0134  |
| rs4925220   | T | 0.0186  |
| rs6045672   | T | -0.0199 |
| rs6116527   | T | 0.0294  |
| rs6059964   | A | -0.0437 |
| rs4810496   | A | 0.0146  |
| rs77418839  | A | -0.0711 |
| rs1182525   | A | 0.0377  |
| rs6514834   | A | 0.0134  |
| rs34168345  | A | 0.0462  |
| rs59617711  | T | 0.0403  |
| rs1777357   | G | -0.0205 |
| rs113224786 | A | 0.0431  |
| rs6067117   | T | -0.0176 |
| rs79276644  | C | 0.107   |
| rs145130860 | A | -0.0624 |
| rs146832906 | T | 0.048   |
| rs1537028   | G | 0.0134  |
| rs242534    | G | -0.0577 |
| rs149477265 | A | -0.0395 |
| rs148370259 | A | -0.0618 |
| rs4814155   | G | 0.0132  |
| rs73104210  | G | 0.0419  |

|             |   |         |
|-------------|---|---------|
| rs2427493   | C | -0.0203 |
| rs139505132 | A | -0.0688 |
| rs62208310  | C | 0.0362  |
| rs3091805   | T | -0.022  |
| rs6040200   | C | 0.0313  |
| rs13039889  | T | 0.0418  |
| rs2762942   | G | -0.0557 |
| rs6070476   | G | -0.0436 |
| rs8125112   | C | 0.0176  |
| rs6139435   | C | 0.0539  |
| rs6053821   | C | -0.0154 |
| rs75143339  | G | 0.0482  |
| rs1429447   | A | -0.0178 |
| rs62194064  | G | -0.085  |
| rs17726233  | T | 0.03    |
| rs226190    | C | -0.0187 |
| rs16999165  | G | 0.0354  |
| rs6108122   | A | 0.0132  |
| rs73307497  | A | 0.0441  |
| rs28569948  | A | -0.0259 |
| rs112379819 | A | 0.1245  |
| rs6071527   | G | -0.0122 |
| rs62201167  | A | -0.0247 |
| rs6069811   | T | 0.018   |
| rs117501903 | C | 0.0853  |
| rs6140264   | A | -0.0184 |
| rs149870133 | G | -0.0767 |
| rs77976716  | C | -0.0671 |
| rs73145714  | T | -0.0528 |
| rs77729373  | T | 0.0184  |
| rs6054709   | T | 0.0233  |
| rs62195418  | T | -0.0531 |
| rs6081819   | T | 0.0236  |
| rs74850097  | A | -0.0552 |
| rs148721114 | A | 0.084   |
| rs73100711  | A | -0.0421 |
| rs6128290   | T | 0.0166  |
| rs1853124   | T | 0.0193  |
| rs764673    | C | -0.0137 |
| rs62204191  | T | -0.048  |
| rs13038055  | G | 0.0156  |
| rs9679950   | C | -0.0237 |
| rs6025078   | T | 0.0188  |
| rs146186646 | C | -0.043  |
| rs147512650 | A | 0.0288  |
| rs144482854 | T | 0.0641  |
| rs6057610   | T | -0.0125 |

|             |   |         |
|-------------|---|---------|
| rs140072411 | G | -0.0581 |
| rs1885305   | T | -0.0219 |
| rs55802000  | G | 0.0224  |
| rs117762497 | A | 0.0887  |
| rs6110943   | C | -0.0245 |
| rs6033024   | C | -0.0144 |
| rs117545464 | G | 0.0652  |
| rs6018943   | T | 0.0279  |
| rs147670884 | A | -0.0768 |
| rs34616810  | T | -0.0556 |
| rs6100446   | T | -0.0218 |
| rs58333289  | T | 0.0181  |
| rs6131366   | C | 0.032   |
| rs6051870   | A | 0.0139  |
| rs75158520  | T | -0.0561 |
| rs1474684   | G | 0.0138  |
| rs41290880  | A | 0.0405  |
| rs2144795   | T | 0.0268  |
| rs6025453   | G | 0.0141  |
| rs2422715   | C | 0.0412  |
| rs113595207 | G | -0.1009 |
| rs117707358 | G | 0.0417  |
| rs204771    | C | 0.0166  |
| rs6100545   | G | 0.0528  |
| rs2024576   | T | 0.0505  |
| rs74658206  | C | 0.0596  |
| rs6081597   | G | 0.0322  |
| rs10485613  | T | -0.0363 |
| rs843818    | A | 0.0266  |
| rs6018658   | A | -0.029  |
| rs61740632  | G | -0.0686 |
| rs11907261  | T | -0.0455 |
| rs59355118  | A | -0.0624 |
| rs2426919   | T | 0.0166  |
| rs6018251   | A | -0.0131 |
| rs11699789  | T | -0.0223 |
| rs817687    | T | 0.0345  |
| rs74273888  | C | 0.0198  |
| rs79909673  | G | -0.1095 |
| rs62210638  | G | -0.033  |
| rs2076404   | G | -0.0158 |
| rs79178617  | T | 0.0473  |
| rs71356179  | A | -0.0198 |
| rs4925189   | G | -0.0143 |
| rs12481509  | C | -0.0431 |
| rs2870375   | G | 0.0128  |
| rs571847    | A | 0.0142  |



|             |   |         |
|-------------|---|---------|
| rs116895396 | T | 0.0517  |
| rs76735979  | T | -0.053  |
| rs28374143  | T | 0.0231  |
| rs73092423  | A | 0.0756  |
| rs6061952   | G | -0.0577 |
| rs73066355  | T | 0.0188  |
| rs77509289  | G | -0.0509 |
| rs6034327   | C | -0.0251 |
| rs2423071   | T | -0.0202 |
| rs76388191  | A | -0.0671 |
| rs35845161  | T | -0.0468 |
| rs708960    | A | -0.0121 |
| rs140579637 | T | -0.0797 |
| rs1543380   | T | -0.015  |
| rs144830778 | T | 0.0383  |
| rs79879167  | A | 0.0523  |
| rs73593139  | G | 0.066   |
| rs62207404  | C | -0.0185 |
| rs143295485 | A | -0.0515 |
| rs4810772   | G | 0.0294  |
| rs1028480   | C | -0.0164 |
| rs6012876   | C | -0.0138 |
| rs17790859  | A | 0.031   |
| rs75762834  | T | 0.0411  |
| rs142428510 | A | -0.0853 |
| rs117497451 | A | 0.0858  |
| rs11086248  | C | 0.0677  |
| rs75744682  | A | 0.0207  |
| rs71352104  | C | -0.0206 |
| rs77278393  | G | 0.0281  |
| rs1001752   | T | 0.0154  |
| rs6128954   | T | -0.0431 |
| rs1807352   | T | 0.0196  |
| rs62203762  | A | 0.0426  |
| rs56181119  | C | -0.016  |
| rs6124062   | T | 0.0181  |
| rs4813172   | A | -0.0135 |
| rs141327854 | C | 0.0491  |
| rs6055969   | G | -0.0134 |
| rs6122624   | C | -0.0229 |
| rs111506367 | A | 0.0477  |
| rs508757    | C | -0.0158 |
| rs2427251   | G | 0.0707  |
| rs6013086   | C | -0.0138 |
| rs117518062 | G | -0.07   |
| rs6045198   | C | 0.0133  |
| rs111490777 | G | -0.0333 |

|             |   |         |
|-------------|---|---------|
| rs77612118  | A | -0.0233 |
| rs78920903  | C | 0.067   |
| rs35620756  | C | -0.0186 |
| rs113305256 | T | 0.0895  |
| rs117384850 | T | -0.048  |
| rs116469485 | A | 0.0406  |
| rs78450904  | A | -0.0719 |
| rs11908624  | A | -0.0523 |
| rs113641219 | C | -0.0575 |
| rs1535271   | A | 0.0187  |
| rs6089392   | C | -0.0221 |
| rs68139331  | C | 0.0177  |
| rs67144530  | T | -0.0398 |
| rs6017427   | A | 0.0412  |
| rs9917404   | C | 0.0207  |
| rs6061812   | C | 0.0179  |
| rs2423486   | T | -0.0145 |
| rs4810306   | C | 0.0363  |
| rs56276414  | A | 0.0728  |
| rs116911351 | A | 0.0474  |
| rs140299621 | C | -0.0813 |
| rs4812607   | C | 0.012   |
| rs13041396  | G | 0.0158  |
| rs6033023   | G | 0.0695  |
| rs1578401   | G | 0.0119  |
| rs80352219  | A | -0.0547 |
| rs75768704  | T | 0.0804  |
| rs6053567   | A | 0.0196  |
| rs6045800   | A | 0.0188  |
| rs62194266  | T | 0.053   |
| rs76218566  | A | 0.0286  |
| rs118184891 | C | 0.0713  |
| rs76442182  | C | 0.0374  |
| rs74354609  | G | -0.0443 |
| rs6070906   | A | 0.0169  |
| rs13038543  | C | 0.0129  |
| rs74665725  | T | 0.0477  |
| rs1468055   | A | -0.0151 |
| rs79272091  | G | 0.0318  |
| rs6135656   | A | -0.0325 |
| rs56331184  | T | -0.0489 |
| rs79093846  | T | 0.0804  |
| rs80186993  | T | 0.0711  |
| rs2741358   | G | 0.0186  |
| rs117917768 | G | -0.0548 |
| rs2025046   | A | -0.0225 |
| rs111727120 | C | -0.0747 |

|             |   |         |
|-------------|---|---------|
| rs6067968   | A | 0.0153  |
| rs6105173   | T | -0.0178 |
| rs6072731   | C | 0.0475  |
| rs11697956  | G | 0.0125  |
| rs62215578  | T | -0.0815 |
| rs137876031 | C | 0.0878  |
| rs1100      | A | 0.0327  |
| rs79953083  | T | -0.0207 |
| rs6134015   | A | 0.0388  |
| rs6076707   | T | -0.0144 |
| rs78757981  | C | -0.0931 |
| rs147691499 | T | -0.0268 |
| rs6137427   | A | -0.0121 |
| rs139694721 | A | 0.0226  |
| rs6124298   | A | 0.0133  |
| rs6064995   | C | 0.0134  |
| rs6094276   | G | 0.0132  |
| rs117868718 | G | -0.099  |
| rs1737882   | C | 0.0295  |
| rs58451461  | A | 0.0295  |
| rs950226    | G | -0.0132 |
| rs2224324   | A | -0.0145 |
| rs76901569  | A | 0.0693  |
| rs57730401  | A | 0.0498  |
| rs79620597  | T | 0.0564  |
| rs73132378  | G | -0.0664 |
| rs4809452   | G | 0.0185  |
| rs55667849  | T | -0.0253 |
| rs143125043 | C | -0.0564 |
| rs881497    | T | -0.0131 |
| rs148357058 | A | -0.0729 |
| rs1405567   | T | 0.0253  |
| rs58064903  | A | -0.0162 |
| rs62205562  | T | 0.0456  |
| rs8123436   | T | 0.0143  |
| rs3790341   | A | 0.0287  |
| rs11086830  | A | 0.0157  |
| rs4813581   | C | -0.0235 |
| rs6053872   | A | -0.0138 |
| rs5741812   | T | 0.0204  |
| rs77857031  | G | -0.1031 |
| rs11698799  | G | 0.0319  |
| rs112621436 | A | 0.045   |
| rs6083579   | C | 0.021   |
| rs73100564  | A | -0.0735 |
| rs62205540  | A | 0.082   |
| rs73088415  | A | 0.0693  |

|             |   |         |
|-------------|---|---------|
| rs77326825  | G | 0.0239  |
| rs6078440   | G | 0.0137  |
| rs79459847  | A | 0.0701  |
| rs157640    | T | -0.0122 |
| rs6025698   | C | -0.0321 |
| rs75907296  | A | 0.0384  |
| rs73126661  | G | -0.0503 |
| rs574755    | T | -0.0149 |
| rs6093829   | G | -0.018  |
| rs6022814   | G | 0.0198  |
| rs1022574   | C | 0.0254  |
| rs79376373  | T | -0.0636 |
| rs2427245   | C | -0.0367 |
| rs79706466  | G | -0.0608 |
| rs11697014  | T | 0.036   |
| rs6142758   | T | 0.0154  |
| rs60821030  | C | 0.0312  |
| rs78324972  | G | 0.0479  |
| rs76156701  | G | -0.0532 |
| rs140680830 | T | -0.0621 |
| rs13037790  | A | 0.016   |
| rs116711798 | G | 0.0482  |
| rs146207460 | G | -0.0265 |
| rs6135309   | C | 0.0129  |
| rs6037991   | A | -0.0385 |
| rs113418859 | A | 0.0643  |
| rs116985950 | T | 0.0526  |
| rs79924551  | T | 0.0894  |
| rs34366842  | A | 0.039   |
| rs2239562   | G | 0.0231  |
| rs6040344   | C | -0.0168 |
| rs6132792   | A | 0.0149  |
| rs117909661 | A | 0.0357  |
| rs13042105  | T | 0.0491  |
| rs881565    | G | 0.0201  |
| rs158332    | G | -0.0154 |
| rs75839992  | A | -0.0811 |
| rs11907424  | G | -0.0125 |
| rs147109649 | T | -0.0948 |
| rs6079329   | A | -0.0189 |
| rs8125176   | C | -0.0322 |
| rs143364465 | T | -0.1093 |
| rs73105210  | G | 0.0707  |
| rs6061928   | A | 0.0126  |
| rs4239761   | G | 0.0158  |
| rs1984459   | T | -0.0319 |
| rs8114181   | G | -0.0536 |

|             |   |         |
|-------------|---|---------|
| rs77628996  | G | -0.0261 |
| rs200883    | G | 0.0146  |
| rs6108599   | C | 0.0205  |
| rs74650957  | T | 0.0442  |
| rs275266    | T | -0.0139 |
| rs633682    | T | -0.02   |
| rs138802721 | A | 0.0645  |
| rs79686263  | A | -0.0507 |
| rs6029986   | C | -0.0233 |
| rs6094841   | T | 0.0207  |
| rs6075033   | C | 0.0163  |
| rs6072971   | C | -0.0119 |
| rs2254603   | A | 0.0135  |
| rs113467928 | A | -0.0779 |
| rs12625427  | C | 0.0121  |
| rs111332583 | T | 0.045   |
| rs79418668  | C | -0.0642 |
| rs112044529 | C | 0.0261  |
| rs59176101  | T | -0.0507 |
| rs78809589  | C | -0.064  |
| rs113178209 | A | 0.0777  |
| rs6091182   | C | -0.015  |
| rs242824    | G | -0.0118 |
| rs75187505  | T | -0.0725 |
| rs6113825   | A | 0.0145  |
| rs16992641  | T | 0.0231  |
| rs6097354   | A | 0.0225  |
| rs111611363 | T | 0.0415  |
| rs35038085  | A | -0.0121 |
| rs117985734 | A | 0.0451  |
| rs117542689 | G | 0.058   |
| rs2250429   | A | 0.0221  |
| rs6109035   | A | -0.0121 |
| rs62187512  | G | 0.014   |
| rs9680023   | T | 0.0183  |
| rs6140747   | A | 0.0131  |
| rs117580868 | A | 0.0552  |
| rs3916170   | C | -0.0564 |
| rs1054600   | T | -0.0195 |
| rs1205194   | T | 0.0139  |
| rs113958571 | A | -0.0501 |
| rs111993652 | T | 0.0859  |
| rs118059352 | T | 0.0366  |
| rs117854993 | C | -0.07   |
| rs6070854   | A | -0.0122 |
| rs145374506 | T | -0.0554 |
| rs117091625 | T | -0.0774 |

|             |   |         |
|-------------|---|---------|
| rs2057056   | T | -0.0574 |
| rs112142602 | A | 0.0154  |
| rs2425431   | A | 0.0117  |
| rs144423045 | G | 0.0565  |
| rs6068665   | G | 0.0198  |
| rs79411828  | G | -0.0822 |
| rs6035430   | T | -0.0255 |
| rs2104252   | A | -0.0332 |
| rs11086148  | C | -0.0142 |
| rs112283674 | T | 0.0608  |
| rs77436940  | G | 0.0316  |
| rs2745015   | T | -0.0141 |
| rs35620145  | A | -0.0457 |
| rs809588    | T | -0.0271 |
| rs6076611   | A | 0.0371  |
| rs6043261   | G | 0.0195  |
| rs6104732   | C | 0.017   |
| rs6027395   | C | -0.0127 |
| rs140841793 | C | -0.0882 |
| rs10211683  | T | -0.0243 |
| rs75521078  | C | -0.0376 |
| rs13043366  | A | -0.0623 |
| rs7268203   | C | -0.0256 |
| rs73901269  | A | -0.0633 |
| rs880447    | C | 0.018   |
| rs118013121 | C | -0.049  |
| rs6103926   | A | 0.0136  |
| rs846218    | C | 0.0133  |
| rs113467420 | T | 0.0763  |
| rs6125255   | C | 0.014   |
| rs6049713   | A | -0.0118 |
| rs75278724  | T | 0.0496  |
| rs6116840   | G | -0.0209 |
| rs4815931   | T | 0.0147  |
| rs6120386   | C | 0.0629  |
| rs78503429  | A | -0.0278 |
| rs11700281  | C | -0.0279 |
| rs76080886  | A | 0.0307  |
| rs73089345  | T | 0.0215  |
| rs141553101 | T | -0.0398 |
| rs6020732   | T | -0.0168 |
| rs8115549   | T | 0.068   |
| rs725941    | A | -0.0116 |
| rs1610377   | G | -0.0134 |
| rs6084813   | T | 0.0185  |
| rs75415847  | G | 0.0312  |
| rs118169519 | C | 0.0471  |

|             |   |         |
|-------------|---|---------|
| rs6010750   | C | -0.0363 |
| rs6029319   | T | 0.0145  |
| rs62225273  | A | -0.0322 |
| rs6053463   | A | 0.0116  |
| rs62226860  | C | -0.0403 |
| rs6015057   | A | 0.0416  |
| rs116919954 | A | 0.0497  |
| rs117825776 | A | -0.0801 |
| rs6098658   | G | -0.0354 |
| rs2424119   | T | -0.0168 |
| rs117265744 | A | 0.0782  |
| rs1150425   | A | 0.013   |
| rs2326552   | C | -0.0139 |
| rs79501799  | T | 0.0384  |
| rs6067696   | A | -0.021  |
| rs6081838   | A | 0.0202  |
| rs2223955   | A | 0.0235  |
| rs6084086   | A | 0.0414  |
| rs62206161  | A | 0.0221  |
| rs75772750  | A | 0.0236  |
| rs3828016   | A | -0.0115 |
| rs2327526   | G | -0.0195 |
| rs12481067  | G | -0.0163 |
| rs371927    | G | 0.0197  |
| rs142623485 | C | -0.0653 |
| rs77422583  | T | -0.0735 |
| rs79694673  | T | -0.0216 |
| rs73117349  | C | -0.0229 |
| rs138635983 | C | 0.0472  |
| rs724110    | C | 0.0152  |
| rs76403807  | A | 0.0569  |
| rs6121797   | T | 0.0388  |
| rs117100824 | G | -0.0821 |
| rs12151878  | G | 0.0157  |
| rs209967    | T | 0.0216  |
| rs1337243   | A | 0.015   |
| rs140135831 | T | -0.0504 |
| rs73901921  | T | -0.0234 |
| rs149862612 | A | -0.1395 |
| rs112080434 | G | 0.0819  |
| rs73605545  | G | 0.0368  |
| rs511073    | G | -0.0158 |
| rs6037336   | C | -0.0179 |
| rs61148192  | G | -0.0323 |
| rs6026917   | A | 0.0191  |
| rs4813284   | T | -0.0123 |
| rs117276306 | A | 0.0408  |

|             |   |         |
|-------------|---|---------|
| rs79821982  | T | 0.0432  |
| rs11907782  | T | 0.0669  |
| rs4375934   | T | -0.0131 |
| rs6054589   | T | 0.0252  |
| rs8114057   | A | -0.0116 |
| rs1547142   | T | -0.031  |
| rs605963    | A | 0.0185  |
| rs926602    | G | 0.0249  |
| rs6121827   | C | -0.0167 |
| rs1476720   | C | -0.0132 |
| rs112186360 | A | -0.0436 |
| rs6057927   | A | 0.0132  |
| rs944887    | A | 0.0158  |
| rs6039111   | A | 0.012   |
| rs45626235  | C | 0.0518  |
| rs117797937 | T | -0.039  |
| rs156326    | A | -0.0123 |
| rs55974691  | G | 0.0746  |
| rs77883521  | A | -0.0627 |
| rs4550724   | G | 0.0234  |
| rs76075587  | G | 0.0455  |
| rs17263187  | A | -0.0167 |
| rs58604726  | G | -0.013  |
| rs6104024   | C | 0.0126  |
| rs73084471  | A | 0.0516  |
| rs6015003   | T | 0.0184  |
| rs4813031   | T | 0.0117  |
| rs6107723   | C | 0.0413  |
| rs76207462  | A | 0.0392  |
| rs77130920  | C | 0.0313  |
| rs117585338 | T | -0.0584 |
| rs6127904   | A | 0.0473  |
| rs7269891   | T | -0.0113 |
| rs150102387 | C | 0.0757  |
| rs117782107 | T | -0.054  |
| rs144501983 | G | 0.1065  |
| rs8123632   | T | -0.0198 |
| rs77939650  | A | 0.0393  |
| rs73180607  | C | -0.0286 |
| rs58965984  | C | -0.0381 |
| rs8119284   | T | -0.0122 |
| rs77685281  | C | -0.028  |
| rs16984658  | A | 0.0222  |
| rs8118393   | G | -0.023  |
| rs6012549   | G | -0.013  |
| rs77065524  | G | 0.0459  |
| rs13042192  | A | -0.0793 |



|             |   |         |
|-------------|---|---------|
| rs6116759   | C | -0.0137 |
| rs6070354   | A | -0.0124 |
| rs41282794  | C | 0.0398  |
| rs149995419 | G | 0.0824  |
| rs2300427   | T | 0.0113  |
| rs73591676  | T | -0.0955 |
| rs62224514  | A | 0.046   |
| rs73145073  | G | 0.051   |
| rs56259711  | G | 0.0526  |
| rs117076596 | A | 0.06    |
| rs531797    | C | -0.012  |
| rs112640362 | T | -0.0586 |
| rs118036933 | T | 0.0789  |
| rs78119757  | T | 0.027   |
| rs73099957  | A | 0.0384  |
| rs28366446  | A | 0.0175  |
| rs144478629 | G | 0.0454  |
| rs6100123   | C | -0.0133 |
| rs6094023   | A | 0.0504  |
| rs62190057  | T | 0.0416  |
| rs118060126 | T | 0.0901  |
| rs2423353   | A | 0.0368  |
| rs61043991  | C | -0.0202 |
| rs142491423 | T | -0.0567 |
| rs145333414 | C | 0.0506  |
| rs6095840   | A | 0.036   |
| rs117470704 | T | 0.0245  |
| rs144408000 | A | 0.0629  |
| rs147152064 | G | -0.0714 |
| rs11906369  | A | 0.0226  |
| rs146812432 | C | 0.1057  |
| rs111374610 | G | -0.0571 |
| rs13040320  | A | -0.0138 |
| rs2853210   | T | 0.0147  |
| rs113181552 | T | 0.0341  |
| rs61739314  | C | -0.0344 |
| rs74915075  | A | -0.0582 |
| rs6124113   | C | -0.0191 |
| rs6075457   | A | 0.0136  |
| rs117697053 | T | 0.0782  |
| rs2275801   | G | 0.024   |
| rs11696710  | C | 0.02    |
| rs113221070 | G | -0.0369 |
| rs80013406  | C | -0.0175 |
| rs77013110  | A | 0.0296  |
| rs6075367   | C | -0.0534 |
| rs74424391  | A | 0.0292  |

|             |   |         |
|-------------|---|---------|
| rs16997439  | A | 0.0139  |
| rs77016659  | C | 0.0267  |
| rs12625514  | T | 0.0207  |
| rs6064778   | A | 0.0113  |
| rs73144860  | T | 0.0449  |
| rs6128208   | C | 0.022   |
| rs149747746 | T | 0.0591  |
| rs150991989 | A | 0.0786  |
| rs6067134   | T | -0.0297 |
| rs200774    | C | 0.0156  |
| rs79444460  | G | 0.0623  |
| rs73078187  | T | -0.0515 |
| rs56000549  | A | -0.017  |
| rs6117850   | T | 0.0111  |
| rs73114229  | A | 0.0461  |
| rs761382    | C | -0.0112 |
| rs17804486  | T | -0.0303 |
| rs111468924 | A | -0.0352 |
| rs6132456   | T | -0.0225 |
| rs750079    | T | -0.0136 |
| rs6035309   | T | 0.0752  |
| rs75380438  | T | 0.0296  |
| rs6103190   | A | 0.0122  |
| rs138563436 | A | 0.0416  |
| rs112982186 | T | -0.0315 |
| rs13043494  | A | -0.0271 |
| rs143718889 | G | -0.0318 |
| rs112064015 | A | 0.0602  |
| rs4814731   | T | -0.0287 |
| rs6131242   | G | -0.0439 |
| rs1997796   | G | -0.0459 |
| rs73622653  | A | 0.079   |
| rs117108475 | C | 0.0278  |
| rs148913348 | C | 0.0513  |
| rs438426    | T | 0.0147  |
| rs6095020   | C | 0.0161  |
| rs6061545   | T | -0.0148 |
| rs149788251 | G | -0.0717 |
| rs149599634 | A | 0.038   |
| rs8114696   | G | -0.0171 |
| rs143731582 | T | -0.0978 |
| rs46592     | T | 0.0114  |
| rs143275303 | G | 0.028   |
| rs117777430 | A | -0.0779 |
| rs6097233   | G | -0.0418 |
| rs816945    | T | -0.0174 |
| rs6021262   | T | -0.014  |

|             |   |         |
|-------------|---|---------|
| rs117295706 | T | -0.0462 |
| rs6020523   | T | -0.0451 |
| rs2841      | A | 0.0166  |
| rs77706334  | G | 0.024   |
| rs17394442  | T | 0.0445  |
| rs73090940  | A | -0.0418 |
| rs60685497  | C | -0.0402 |
| rs119432    | A | 0.0131  |
| rs17548927  | A | -0.02   |
| rs7261220   | G | 0.0618  |
| rs62194687  | G | 0.0359  |
| rs7264882   | A | -0.0157 |
| rs998934    | T | 0.0146  |
| rs56318097  | C | -0.0377 |
| rs58346763  | A | -0.0364 |
| rs77526650  | G | 0.0389  |
| rs7270107   | T | 0.0118  |
| rs6030524   | C | 0.014   |
| rs6127971   | G | 0.0113  |
| rs7341      | T | 0.0112  |
| rs9798512   | A | -0.0209 |
| rs3918392   | C | -0.0407 |
| rs144793030 | G | -0.0417 |
| rs6141764   | T | 0.021   |
| rs13433377  | C | -0.0594 |
| rs77871608  | T | 0.0494  |
| rs114852837 | A | -0.0246 |
| rs6115682   | G | 0.0181  |
| rs2427412   | T | -0.0167 |
| rs75697264  | T | 0.0456  |
| rs2021793   | T | 0.0119  |
| rs117912562 | T | -0.0741 |
| rs932357    | A | -0.0164 |
| rs117045038 | T | -0.0303 |
| rs143763182 | A | 0.0306  |
| rs140209816 | T | 0.0471  |
| rs8392      | C | 0.0137  |
| rs73134056  | A | -0.0448 |
| rs139402175 | G | -0.0617 |
| rs16995654  | T | 0.0256  |
| rs35833554  | A | 0.0149  |
| rs78352539  | T | -0.0323 |
| rs11907865  | T | -0.0708 |
| rs76727841  | G | 0.0607  |
| rs78537112  | A | -0.0297 |
| rs56842787  | A | 0.0334  |
| rs195009    | C | -0.0254 |

|             |   |         |
|-------------|---|---------|
| rs77769157  | T | 0.0465  |
| rs113508119 | A | 0.0782  |
| rs6052743   | C | 0.0111  |
| rs2425479   | T | -0.0205 |
| rs6116354   | A | -0.0591 |
| rs6110323   | C | 0.0306  |
| rs6077675   | G | -0.0181 |
| rs138086196 | T | 0.0544  |
| rs13433103  | G | 0.0195  |
| rs116980611 | T | 0.0576  |
| rs12481701  | A | 0.0222  |
| rs4812429   | C | 0.0474  |
| rs78342802  | G | 0.0905  |
| rs58207728  | C | -0.0382 |
| rs79029522  | T | -0.0557 |
| rs158531    | C | -0.0118 |
| rs78866855  | G | -0.0729 |
| rs141327281 | T | -0.0581 |
| rs13041542  | A | -0.0126 |
| rs6072504   | C | 0.0211  |
| rs205790    | G | -0.0223 |
| rs111690751 | T | -0.0468 |
| rs55952330  | A | -0.0338 |
| rs8122451   | T | 0.0589  |
| rs35486636  | T | 0.0272  |
| rs6058789   | G | -0.0154 |
| rs2425411   | T | 0.0163  |
| rs75393943  | G | -0.0407 |
| rs168358    | G | 0.0414  |
| rs6038869   | T | 0.0115  |
| rs6064313   | G | 0.0441  |
| rs117441974 | T | -0.0563 |
| rs214390    | G | 0.0349  |
| rs913668    | T | -0.025  |
| rs78780368  | G | -0.0369 |
| rs6124157   | A | -0.0151 |
| rs138698145 | A | 0.0468  |
| rs6062954   | A | 0.0143  |
| rs76679945  | G | 0.0191  |
| rs310616    | C | -0.016  |
| rs76981217  | A | -0.0423 |
| rs6118035   | A | 0.0112  |
| rs6119908   | C | 0.0212  |
| rs743020    | C | -0.0297 |
| rs74562191  | T | -0.0384 |
| rs55682206  | T | -0.0205 |
| rs73101220  | T | -0.0807 |

|             |   |         |
|-------------|---|---------|
| rs1225891   | C | -0.0109 |
| rs6136558   | T | -0.0115 |
| rs6142867   | A | -0.0118 |
| rs6079891   | A | 0.0119  |
| rs139853614 | T | -0.0623 |
| rs8120421   | G | 0.0153  |
| rs111822930 | G | -0.0283 |
| rs6090456   | A | -0.04   |
| rs3748433   | A | -0.0186 |
| rs11569668  | T | 0.0634  |
| rs141728725 | T | 0.073   |
| rs73597770  | C | 0.033   |
| rs140322914 | A | -0.0348 |
| rs6514111   | G | 0.0162  |
| rs6010625   | A | -0.0409 |
| rs6089088   | T | 0.0735  |
| rs141172776 | T | -0.0661 |
| rs4925295   | G | 0.0166  |
| rs56089047  | T | 0.0441  |
| rs1572777   | A | -0.027  |
| rs6037908   | G | -0.0123 |
| rs805742    | C | -0.0122 |
| rs6104152   | C | -0.0307 |
| rs76837920  | G | -0.0452 |
| rs11699734  | C | -0.0431 |
| rs8132672   | A | 0.1005  |
| rs2830489   | T | -0.0692 |
| rs75272194  | T | -0.1145 |
| rs468777    | G | -0.0586 |
| rs8129216   | C | -0.1486 |
| rs2825117   | C | -0.0605 |
| rs78863435  | T | 0.1484  |
| rs2833638   | C | 0.0937  |
| rs112547745 | C | 0.0964  |
| rs743430    | G | -0.1003 |
| rs28878839  | T | -0.0739 |
| rs2154481   | C | -0.053  |
| rs228042    | C | 0.0539  |
| rs112586707 | G | 0.3377  |
| rs73359265  | T | -0.0931 |
| rs75603393  | A | -0.0723 |
| rs16999508  | T | -0.1183 |
| rs2824734   | T | -0.0579 |
| rs74314710  | G | 0.1564  |
| rs13051344  | T | -0.1648 |
| rs150101865 | C | 0.295   |
| rs17000876  | A | 0.1546  |

|             |   |         |
|-------------|---|---------|
| rs78288220  | A | -0.2058 |
| rs73208713  | G | -0.1644 |
| rs2826787   | T | 0.088   |
| rs2242783   | A | -0.0589 |
| rs2830434   | T | 0.0541  |
| rs34234617  | G | 0.1684  |
| rs28430976  | T | 0.0573  |
| rs111254454 | A | -0.0927 |
| rs9981700   | A | -0.2348 |
| rs7510030   | T | 0.0731  |
| rs2250007   | C | 0.0661  |
| rs73213236  | C | 0.1012  |
| rs11909923  | T | 0.0505  |
| rs2833551   | A | 0.0729  |
| rs73229506  | G | 0.1766  |
| rs79347769  | A | 0.2672  |
| rs111721987 | T | 0.1675  |
| rs116907908 | G | -0.1718 |
| rs1351597   | C | 0.0586  |
| rs6517383   | G | 0.0824  |
| rs55847576  | A | -0.0899 |
| rs1109499   | G | 0.0597  |
| rs139551395 | G | 0.1889  |
| rs77520715  | A | -0.2318 |
| rs12483022  | T | 0.0742  |
| rs62223840  | C | 0.1788  |
| rs77604347  | A | 0.0831  |
| rs71315771  | C | -0.1593 |
| rs13048770  | A | 0.1094  |
| rs41277544  | A | 0.1372  |
| rs12626958  | T | 0.0495  |
| rs13052953  | G | 0.0681  |
| rs142116413 | A | 0.3179  |
| rs77699745  | C | 0.1227  |
| rs55760856  | G | -0.1026 |
| rs56327405  | C | -0.0522 |
| rs28514570  | A | -0.0503 |
| rs118033810 | A | -0.2703 |
| rs13046933  | A | 0.2702  |
| rs6517656   | A | 0.0602  |
| rs3746889   | C | 0.1242  |
| rs8131076   | T | 0.0652  |
| rs75383078  | T | 0.1962  |
| rs1296968   | A | 0.0595  |
| rs17747953  | G | -0.1146 |
| rs214490    | A | 0.0702  |
| rs77038333  | G | -0.2614 |

|             |   |         |
|-------------|---|---------|
| rs117368946 | A | -0.1262 |
| rs7282321   | C | 0.0741  |
| rs145490163 | T | -0.1939 |
| rs2822748   | A | 0.0504  |
| rs117097834 | C | -0.2268 |
| rs2834920   | T | -0.0612 |
| rs2833440   | C | -0.0465 |
| rs79687737  | T | -0.115  |
| rs117995850 | C | -0.175  |
| rs58604417  | T | -0.0711 |
| rs4817097   | A | -0.0446 |
| rs41418546  | G | -0.1244 |
| rs13046673  | C | -0.3062 |
| rs2830023   | T | 0.0488  |
| rs1788420   | A | 0.0825  |
| rs73187353  | A | 0.1129  |
| rs117895378 | T | 0.1292  |
| rs117124364 | T | 0.2454  |
| rs9975962   | G | 0.0839  |
| rs1571660   | G | 0.0438  |
| rs11701776  | C | -0.0474 |
| rs2834120   | T | 0.0912  |
| rs2839110   | G | -0.0623 |
| rs73145451  | T | -0.1785 |
| rs9982303   | T | 0.0502  |
| rs389676    | T | 0.0502  |
| rs118125086 | A | -0.2432 |
| rs6586296   | C | 0.1425  |
| rs56385227  | C | 0.2291  |
| rs75701466  | A | 0.0828  |
| rs17113969  | G | -0.1646 |
| rs2824645   | G | -0.079  |
| rs240495    | C | -0.0809 |
| rs67230763  | T | -0.1329 |
| rs2242945   | G | 0.0455  |
| rs35546152  | A | -0.0487 |
| rs9647276   | A | -0.0433 |
| rs9979731   | C | 0.0806  |
| rs12626402  | T | -0.0508 |
| rs75648438  | A | 0.1284  |
| rs2837468   | G | -0.0473 |
| rs9984510   | A | -0.2286 |
| rs8129420   | G | 0.0775  |
| rs117434156 | A | -0.1223 |
| rs183387    | A | 0.0988  |
| rs34009097  | G | -0.1906 |
| rs1297212   | T | 0.0423  |

|             |   |         |
|-------------|---|---------|
| rs150198937 | C | -0.3208 |
| rs73167900  | G | 0.1438  |
| rs78184596  | C | 0.194   |
| rs2839538   | C | 0.0435  |
| rs73159674  | G | -0.061  |
| rs2027711   | T | 0.0425  |
| rs9305887   | G | 0.1825  |
| rs151073480 | G | 0.1735  |
| rs428971    | A | -0.0564 |
| rs9983386   | A | 0.0772  |
| rs72613646  | C | 0.2108  |
| rs34898829  | C | 0.0653  |
| rs12386286  | C | 0.1252  |
| rs2827977   | A | 0.0621  |
| rs9977253   | C | -0.0472 |
| rs2408822   | T | 0.0677  |
| rs56317704  | G | 0.0457  |
| rs866412    | T | -0.109  |
| rs9983494   | T | -0.0547 |
| rs73220555  | A | 0.2881  |
| rs28516727  | C | 0.159   |
| rs7277359   | G | 0.0449  |
| rs17512077  | T | -0.1001 |
| rs35640525  | A | 0.0734  |
| rs73221370  | A | 0.0819  |
| rs76834263  | T | 0.1369  |
| rs75350414  | A | 0.0596  |
| rs77205503  | T | 0.3434  |
| rs143357895 | G | 0.2283  |
| rs1782969   | G | 0.0474  |
| rs4816774   | A | 0.0597  |
| rs9975948   | C | 0.0439  |
| rs2276212   | C | -0.0588 |
| rs9976191   | G | 0.0559  |
| rs112452342 | G | -0.1455 |
| rs55792986  | T | 0.0483  |
| rs1784913   | T | -0.0582 |
| rs4819312   | A | 0.1485  |
| rs117040541 | C | -0.1914 |
| rs4818415   | C | -0.0406 |
| rs34756011  | A | -0.0764 |
| rs747803    | C | 0.0463  |
| rs1888398   | G | 0.0536  |
| rs1893332   | A | 0.044   |
| rs2824749   | A | -0.0535 |
| rs2827017   | C | 0.0427  |
| rs3842986   | T | 0.0599  |



|             |   |         |
|-------------|---|---------|
| rs62223996  | T | -0.2747 |
| rs13048790  | C | 0.0685  |
| rs2824191   | C | 0.041   |
| rs73181858  | A | -0.0783 |
| rs58544783  | G | -0.0694 |
| rs17275274  | G | -0.1395 |
| rs77436438  | A | -0.1083 |
| rs75669121  | G | 0.1063  |
| rs75978011  | T | -0.1517 |
| rs11088275  | A | 0.0814  |
| rs996634    | A | 0.0741  |
| rs2827644   | A | 0.0427  |
| rs113529847 | T | -0.1332 |
| rs79323860  | A | 0.18    |
| rs9979417   | C | -0.0453 |
| rs2246468   | C | 0.0745  |
| rs1297105   | G | 0.0761  |
| rs2824773   | C | -0.0406 |
| rs73365749  | T | 0.1813  |
| rs6517945   | C | -0.0783 |
| rs2830976   | C | -0.0485 |
| rs2268290   | A | -0.0497 |
| rs384426    | T | -0.0402 |
| rs17552278  | C | -0.2851 |
| rs876817    | C | -0.0442 |
| rs4818756   | G | -0.0426 |
| rs2154498   | G | 0.0588  |
| rs7277699   | A | -0.0732 |
| rs200704    | A | -0.0534 |
| rs4818101   | G | -0.0434 |
| rs1961443   | C | 0.0511  |
| rs28663589  | T | 0.0493  |
| rs2838007   | C | -0.0482 |
| rs116837266 | T | 0.0957  |
| rs143175673 | A | -0.2234 |
| rs3746903   | A | -0.2028 |
| rs9983699   | C | 0.0728  |
| rs79727992  | A | -0.1437 |
| rs2822999   | G | -0.0502 |
| rs2007477   | A | 0.0425  |
| rs9636587   | A | -0.041  |
| rs28700940  | T | -0.0977 |
| rs79415523  | A | -0.2578 |
| rs2833912   | A | 0.0517  |
| rs75794179  | A | 0.0881  |
| rs10482884  | T | 0.0931  |
| rs149896652 | T | -0.1757 |

|             |   |         |
|-------------|---|---------|
| rs111809637 | T | 0.16    |
| rs467364    | C | -0.0403 |
| rs8131689   | G | -0.0733 |
| rs17666683  | T | -0.0553 |
| rs140148934 | G | 0.1598  |
| rs17303582  | C | 0.196   |
| rs2284636   | G | -0.0381 |
| rs75502391  | G | -0.1223 |
| rs56177739  | A | 0.0643  |
| rs2836419   | A | -0.054  |
| rs11111133  | C | -0.1204 |
| rs2828427   | T | 0.0675  |
| rs112704409 | G | 0.2809  |
| rs77841485  | T | 0.1314  |
| rs7282525   | C | 0.0423  |
| rs229053    | C | -0.0378 |
| rs2837101   | G | 0.0407  |
| rs2205126   | G | -0.0409 |
| rs112568708 | A | -0.3263 |
| rs144494708 | T | -0.1898 |
| rs576808    | G | 0.039   |
| rs7283042   | G | -0.0688 |
| rs62208174  | A | 0.0609  |
| rs11700401  | G | -0.2055 |
| rs6517311   | A | -0.06   |
| rs17860208  | G | 0.1312  |
| rs2026882   | T | -0.0568 |
| rs28619388  | A | 0.0561  |
| rs78481844  | G | -0.0968 |
| rs117886898 | T | 0.096   |
| rs6518272   | A | 0.0431  |
| rs114061976 | T | 0.1878  |
| rs9974857   | T | -0.2412 |
| rs77420394  | C | 0.1708  |
| rs9305896   | C | -0.041  |
| rs142320219 | A | -0.1079 |
| rs117187891 | C | 0.1539  |
| rs76041977  | T | 0.1792  |
| rs17570665  | A | -0.1097 |
| rs2253532   | C | -0.044  |
| rs117810460 | T | 0.2322  |
| rs149834120 | A | -0.2375 |
| rs8128309   | A | -0.0523 |
| rs219707    | C | -0.0537 |
| rs76043018  | A | 0.0791  |
| rs11088723  | T | 0.0637  |
| rs2155599   | T | -0.041  |

|             |   |         |
|-------------|---|---------|
| rs1736148   | C | 0.0382  |
| rs111707295 | T | 0.1778  |
| rs2831779   | T | 0.0534  |
| rs2839438   | A | 0.0462  |
| rs7283210   | G | -0.1    |
| rs140070917 | T | 0.1041  |
| rs144686115 | G | 0.2051  |
| rs7280283   | T | -0.0981 |
| rs2833368   | C | -0.0422 |
| rs240486    | T | -0.0575 |
| rs55999805  | G | -0.0547 |
| rs117223896 | A | 0.2452  |
| rs8129402   | C | 0.0433  |
| rs2226589   | C | 0.0416  |
| rs62226878  | A | 0.0806  |
| rs2824744   | T | 0.0393  |
| rs4818022   | A | -0.2712 |
| rs77378500  | A | -0.2394 |
| rs2838683   | C | 0.089   |
| rs79681017  | G | 0.0794  |
| rs2843986   | G | 0.0498  |
| rs13046729  | C | -0.0598 |
| rs35982572  | A | -0.0516 |
| rs79328878  | T | 0.1305  |
| rs760166    | C | 0.096   |
| rs11909432  | T | 0.1349  |
| rs3788110   | A | 0.1193  |
| rs62226872  | G | 0.0473  |
| rs1571725   | C | -0.0452 |
| rs8130107   | C | -0.0408 |
| rs117021139 | A | -0.1503 |
| rs12053737  | T | 0.0636  |
| rs17752480  | G | 0.1259  |
| rs8127458   | C | -0.0476 |
| rs117811294 | G | -0.2661 |
| rs59829171  | A | 0.0484  |
| rs116342820 | C | 0.141   |
| rs117779778 | A | 0.0613  |
| rs7283517   | G | -0.0669 |
| rs77135918  | C | 0.1722  |
| rs75877158  | G | 0.1352  |
| rs2836724   | C | -0.0481 |
| rs10048874  | T | 0.0459  |
| rs9983495   | T | 0.0951  |
| rs11911415  | A | -0.2151 |
| rs150761    | G | 0.0543  |
| rs162489    | C | -0.0747 |

|             |   |         |
|-------------|---|---------|
| rs437841    | A | 0.055   |
| rs13048457  | G | -0.0537 |
| rs147826964 | T | 0.3232  |
| rs73897428  | G | 0.1068  |
| rs2822611   | A | 0.0474  |
| rs17769032  | G | -0.0705 |
| rs117617164 | A | 0.2638  |
| rs2824666   | A | -0.0447 |
| rs148454088 | T | 0.1399  |
| rs219682    | A | -0.2476 |
| rs117825494 | A | 0.355   |
| rs28712564  | A | 0.0763  |
| rs16979214  | C | -0.0854 |
| rs2898412   | G | -0.0418 |
| rs118038513 | T | 0.1176  |
| rs76547762  | T | -0.2013 |
| rs8133716   | G | 0.0358  |
| rs857959    | T | -0.0484 |
| rs149508662 | G | 0.3015  |
| rs1106627   | T | 0.1531  |
| rs13050874  | A | 0.0413  |
| rs17306819  | T | 0.2487  |
| rs8131623   | A | -0.175  |
| rs2298352   | C | -0.045  |
| rs2013651   | T | 0.0404  |
| rs13052027  | T | 0.293   |
| rs144911765 | C | -0.2005 |
| rs7277082   | A | 0.0478  |
| rs2830855   | T | -0.1865 |
| rs2834884   | T | 0.0381  |
| rs77062569  | C | 0.0819  |
| rs10483012  | T | 0.2389  |
| rs74512584  | A | -0.1487 |
| rs16984549  | A | -0.0478 |
| rs4818218   | C | 0.0797  |
| rs2826142   | C | 0.0356  |
| rs17879705  | T | 0.1506  |
| rs35766001  | C | 0.2427  |
| rs75486649  | A | 0.1928  |
| rs75531945  | C | 0.1512  |
| rs7510396   | T | -0.0418 |
| rs8133729   | C | -0.0602 |
| rs12481828  | G | 0.0646  |
| rs60702473  | A | -0.0437 |
| rs218368    | A | 0.0854  |
| rs59314638  | T | 0.0435  |
| rs2830292   | C | -0.0477 |

|             |   |         |
|-------------|---|---------|
| rs35851101  | T | 0.1115  |
| rs7277209   | G | -0.1107 |
| rs143137012 | T | -0.2836 |
| rs77210021  | C | -0.2072 |
| rs2834061   | G | 0.0423  |
| rs73355797  | C | -0.0638 |
| rs2142133   | C | -0.0364 |
| rs2828064   | G | -0.0633 |
| rs2829580   | T | 0.04    |
| rs17004073  | A | 0.0959  |
| rs118173242 | A | -0.2703 |
| rs78296615  | A | 0.2033  |
| rs117606823 | G | -0.2227 |
| rs144992139 | T | 0.181   |
| rs466092    | A | -0.0457 |
| rs141960812 | A | -0.1075 |
| rs7278344   | C | -0.0431 |
| rs7282482   | G | 0.1131  |
| rs8134874   | G | -0.0555 |
| rs8131157   | C | -0.0554 |
| rs56218278  | G | -0.1041 |
| rs111943632 | C | 0.1525  |
| rs1557266   | A | 0.0349  |
| rs421933    | G | -0.0411 |
| rs150617300 | T | -0.1195 |
| rs2829230   | A | -0.0459 |
| rs118149073 | T | -0.1988 |
| rs7276658   | C | 0.0466  |
| rs13049610  | A | -0.1634 |
| rs73360166  | C | 0.1408  |
| rs150254908 | C | 0.2332  |
| rs2096911   | A | -0.0342 |
| rs11702745  | C | 0.0495  |
| rs2838300   | A | -0.0635 |
| rs35941561  | A | 0.2032  |
| rs2011397   | C | 0.0803  |
| rs139337259 | A | 0.1467  |
| rs6517095   | C | -0.2054 |
| rs140436629 | T | 0.1652  |
| rs56346799  | A | -0.0701 |
| rs73195624  | C | 0.2799  |
| rs77781343  | A | 0.1415  |
| rs77294335  | T | 0.1567  |
| rs73354727  | C | -0.1079 |
| rs8126828   | G | -0.0505 |
| rs116510093 | G | 0.141   |
| rs2835473   | G | -0.0495 |

|             |   |         |
|-------------|---|---------|
| rs2827124   | C | 0.0556  |
| rs78253465  | C | 0.224   |
| rs73191271  | T | -0.0608 |
| rs13050141  | T | 0.0929  |
| rs2838629   | A | -0.0398 |
| rs28372175  | T | -0.076  |
| rs117782346 | C | 0.1156  |
| rs140685586 | A | -0.058  |
| rs76426094  | C | -0.1941 |
| rs77051774  | C | 0.1076  |
| rs468652    | A | 0.0433  |
| rs9985170   | C | -0.0947 |
| rs74781253  | C | 0.0784  |
| rs1699627   | A | 0.0627  |
| rs760159    | G | -0.113  |
| rs75836101  | C | 0.1259  |
| rs6517137   | C | 0.0679  |
| rs9680306   | C | -0.058  |
| rs2835524   | T | 0.1103  |
| rs112963055 | T | -0.2229 |
| rs73360211  | A | -0.0505 |
| rs146286695 | G | -0.1834 |
| rs113206886 | A | -0.1535 |
| rs116842558 | C | 0.2224  |
| rs77432364  | G | -0.18   |
| rs117653185 | C | -0.2008 |
| rs149664275 | G | -0.1107 |
| rs76395411  | A | -0.0867 |
| rs74644449  | T | 0.0904  |
| rs35791165  | T | -0.0772 |
| rs12627180  | G | 0.0405  |
| rs116997326 | T | 0.1075  |
| rs2836780   | C | 0.0562  |
| rs413577    | T | 0.0386  |
| rs71317458  | T | -0.1173 |
| rs1893577   | T | 0.0386  |
| rs144666206 | T | 0.1573  |
| rs17002005  | A | 0.1423  |
| rs8130662   | G | -0.0361 |
| rs7282194   | T | 0.1391  |
| rs1296490   | A | 0.0443  |
| rs116881101 | A | 0.1689  |
| rs143368537 | G | 0.2636  |
| rs9984760   | T | 0.107   |
| rs56067353  | C | -0.232  |
| rs77096110  | T | -0.1325 |
| rs13047841  | T | 0.1466  |

|             |   |         |
|-------------|---|---------|
| rs2248321   | G | 0.0372  |
| rs73348346  | T | -0.2701 |
| rs111827274 | A | -0.3356 |
| rs13047286  | T | -0.0379 |
| rs9976392   | A | 0.0777  |
| rs11909507  | A | -0.0657 |
| rs2834605   | C | -0.0504 |
| rs2833710   | A | 0.0528  |
| rs1699990   | A | -0.0391 |
| rs34062530  | T | 0.0873  |
| rs235343    | A | -0.036  |
| rs139320122 | G | -0.2903 |
| rs73213818  | T | -0.1841 |
| rs17196459  | T | 0.1946  |
| rs2834658   | T | 0.1184  |
| rs117316433 | G | 0.28    |
| rs143400985 | A | 0.052   |
| rs62212899  | A | -0.0552 |
| rs5030673   | T | 0.1279  |
| rs118137139 | C | 0.0607  |
| rs146647835 | G | 0.145   |
| rs2776377   | G | -0.042  |
| rs140795763 | A | 0.2661  |
| rs7277441   | T | 0.0366  |
| rs73341558  | C | 0.153   |
| rs75739645  | A | 0.1292  |
| rs8131480   | T | 0.0734  |
| rs28469625  | T | 0.04    |
| rs113290387 | T | 0.1208  |
| rs77570450  | C | 0.1395  |
| rs113483080 | T | 0.1447  |
| rs74621506  | C | 0.122   |
| rs1573331   | C | -0.0358 |
| rs45559536  | C | 0.1569  |
| rs2837627   | G | 0.0419  |
| rs9976422   | T | -0.2845 |
| rs220245    | T | 0.0539  |
| rs75831487  | A | -0.1243 |
| rs73175447  | G | 0.1052  |
| rs3746899   | T | -0.0404 |
| rs76523946  | C | 0.1782  |
| rs114074976 | A | 0.1598  |
| rs36082444  | A | -0.0441 |
| rs1543657   | G | 0.059   |
| rs8130149   | G | 0.0567  |
| rs116926926 | T | -0.1678 |
| rs466791    | T | 0.0505  |

|             |   |         |
|-------------|---|---------|
| rs2830042   | C | -0.0736 |
| rs2826797   | T | -0.0341 |
| rs8131452   | G | -0.0403 |
| rs7280770   | A | 0.0478  |
| rs147540421 | A | -0.2551 |
| rs80058257  | T | -0.1224 |
| rs204736    | T | 0.0772  |
| rs139010167 | T | -0.2121 |
| rs11911486  | G | -0.036  |
| rs2838654   | A | -0.0364 |
| rs12482911  | A | 0.0383  |
| rs147298087 | T | -0.0913 |
| rs718387    | A | 0.0745  |
| rs2834063   | G | 0.036   |
| rs114845558 | C | -0.0823 |
| rs750445    | C | 0.049   |
| rs9983881   | A | 0.0379  |
| rs8131857   | T | 0.0346  |
| rs395640    | A | 0.0401  |
| rs73204756  | T | -0.2394 |
| rs2826864   | C | -0.0479 |
| rs140166058 | G | -0.2043 |
| rs73191433  | C | 0.111   |
| rs4610150   | A | 0.0851  |
| rs144555756 | G | -0.3826 |
| rs2822964   | C | -0.0385 |
| rs2839452   | C | -0.038  |
| rs111867298 | A | -0.092  |
| rs73890758  | G | 0.0724  |
| rs57800817  | G | 0.0905  |
| rs111584507 | C | -0.138  |
| rs1740188   | A | -0.0408 |
| rs73898826  | T | 0.0459  |
| rs113999621 | A | 0.1092  |
| rs205681    | C | 0.0901  |
| rs2824758   | G | -0.0398 |
| rs73223693  | G | -0.0572 |
| rs117268702 | A | 0.1545  |
| rs80222517  | G | -0.1296 |
| rs423334    | C | 0.1132  |
| rs77537174  | A | 0.1474  |
| rs9977719   | G | 0.0379  |
| rs9305793   | T | -0.0472 |
| rs2835450   | C | -0.0365 |
| rs7279830   | A | -0.0572 |
| rs118095399 | G | 0.2384  |
| rs9974145   | A | 0.0411  |



|             |   |         |
|-------------|---|---------|
| rs2832596   | T | 0.0605  |
| rs79593629  | A | -0.1109 |
| rs80122325  | C | 0.1434  |
| rs74939595  | A | -0.1098 |
| rs459837    | A | 0.0553  |
| rs115593871 | A | -0.0611 |
| rs118073646 | C | 0.2347  |
| rs17816267  | T | 0.0768  |
| rs1292753   | C | 0.0844  |
| rs138069880 | T | -0.0498 |
| rs2834601   | T | 0.0621  |
| rs8129720   | G | 0.0457  |
| rs3017523   | T | 0.0416  |
| rs73164297  | A | 0.1121  |
| rs461679    | T | -0.0372 |
| rs73907499  | T | 0.1306  |
| rs73211470  | C | -0.1391 |
| rs79594300  | G | 0.085   |
| rs8128175   | G | 0.126   |
| rs76646704  | C | 0.1941  |
| rs994056    | A | 0.0348  |
| rs9985073   | T | 0.0465  |
| rs2246604   | T | 0.048   |
| rs117307522 | A | -0.2003 |
| rs2226294   | A | -0.0388 |
| rs62214031  | G | -0.0489 |
| rs9305841   | T | -0.0497 |
| rs78924614  | A | 0.1511  |
| rs55754456  | T | 0.0639  |
| rs2828219   | G | 0.0326  |
| rs71332590  | C | -0.0734 |
| rs9984378   | G | 0.0328  |
| rs55963238  | G | -0.0457 |
| rs8127044   | A | 0.0493  |
| rs8131690   | A | 0.1823  |
| rs1786434   | A | 0.0335  |
| rs1399589   | T | -0.0901 |
| rs2255892   | T | -0.0457 |
| rs2835257   | G | -0.1537 |
| rs914186    | G | 0.0331  |
| rs74803911  | A | -0.1598 |
| rs2211988   | C | 0.034   |
| rs73336646  | T | 0.0898  |
| rs9975142   | C | -0.1103 |
| rs11911229  | G | 0.0555  |
| rs1699653   | T | -0.046  |
| rs80211969  | A | -0.1182 |

|             |   |         |
|-------------|---|---------|
| rs13052424  | T | -0.0986 |
| rs218636    | G | -0.0368 |
| rs2410348   | C | 0.0578  |
| rs2836714   | C | 0.0323  |
| rs118148883 | T | 0.2039  |
| rs1072869   | C | -0.0334 |
| rs3827232   | T | 0.0386  |
| rs4819360   | T | -0.0421 |
| rs1474821   | T | 0.0568  |
| rs413785    | T | 0.0356  |
| rs2825778   | A | 0.1453  |
| rs2407251   | C | 0.0325  |
| rs7281742   | A | 0.137   |
| rs17805372  | C | -0.1238 |
| rs13052766  | T | 0.0442  |
| rs449014    | G | 0.0342  |
| rs7283839   | G | -0.1346 |
| rs2277820   | T | 0.0397  |
| rs150229285 | T | 0.0582  |
| rs4818971   | T | 0.0591  |
| rs35554635  | A | -0.0774 |
| rs9976377   | C | 0.0546  |
| rs76747837  | T | 0.1888  |
| rs78297416  | G | 0.1527  |
| rs117290439 | T | 0.1559  |
| rs2205047   | A | -0.0941 |
| rs2027659   | C | 0.1467  |
| rs3993073   | G | 0.0587  |
| rs76072379  | C | -0.1319 |
| rs2836834   | A | 0.0333  |
| rs10154249  | G | 0.2083  |
| rs2828656   | T | 0.0397  |
| rs79495004  | G | -0.0395 |
| rs146081060 | A | 0.22    |
| rs13047429  | A | 0.1155  |
| rs56081647  | T | 0.1196  |
| rs2832791   | T | -0.0345 |
| rs140855506 | A | -0.1749 |
| rs140211078 | A | 0.124   |
| rs117235452 | T | 0.169   |
| rs2825877   | T | -0.105  |
| rs1811076   | A | -0.0343 |
| rs218628    | A | 0.032   |
| rs7277498   | G | -0.0347 |
| rs141410339 | A | -0.1464 |
| rs143740851 | C | 0.1276  |
| rs8134031   | C | 0.0359  |

|             |   |         |
|-------------|---|---------|
| rs77509377  | A | 0.1179  |
| rs117610199 | G | 0.1651  |
| rs28425     | T | -0.0538 |
| rs13048753  | T | -0.0721 |
| rs34807968  | G | 0.0431  |
| rs117109857 | C | -0.15   |
| rs117685760 | C | -0.1839 |
| rs144653764 | T | -0.2016 |
| rs4816325   | A | 0.1053  |
| rs60460929  | T | 0.0338  |
| rs2245706   | A | -0.0865 |
| rs12626386  | C | 0.1442  |
| rs7279635   | G | 0.0526  |
| rs2838363   | C | 0.0343  |
| rs62208234  | G | 0.2331  |
| rs2833753   | A | 0.0366  |
| rs4816483   | C | -0.1533 |
| rs71317502  | T | 0.1974  |
| rs75692821  | A | -0.1385 |
| rs4919930   | T | 0.0629  |
| rs8132251   | T | -0.054  |
| rs437936    | G | -0.0508 |
| rs4425176   | T | 0.045   |
| rs17723200  | A | 0.157   |
| rs35993871  | G | -0.033  |
| rs2837367   | T | -0.0363 |
| rs6516745   | C | -0.0585 |
| rs400852    | G | 0.0403  |
| rs73197499  | C | -0.0762 |
| rs456498    | A | -0.1628 |
| rs76556334  | G | -0.1745 |
| rs7281481   | G | -0.0328 |
| rs2836305   | C | -0.0421 |
| rs17002178  | G | 0.1743  |
| rs117454471 | T | 0.2419  |
| rs73156693  | T | 0.0781  |
| rs145047222 | G | -0.0599 |
| rs12482051  | A | 0.0493  |
| rs2097023   | G | 0.0391  |
| rs2833469   | A | -0.0425 |
| rs73341961  | C | -0.1023 |
| rs7276741   | A | 0.0326  |
| rs148366733 | T | 0.2267  |
| rs7278312   | A | -0.0376 |
| rs73219021  | A | 0.0484  |
| rs80166167  | A | 0.1124  |
| rs113137149 | G | 0.1666  |

|             |   |         |
|-------------|---|---------|
| rs2837587   | G | 0.0304  |
| rs2833465   | T | 0.0467  |
| rs149510    | A | 0.034   |
| rs9977786   | G | -0.1121 |
| rs146175819 | T | -0.1623 |
| rs17004794  | A | 0.134   |
| rs34956452  | C | 0.0356  |
| rs78929340  | A | 0.0755  |
| rs7278439   | T | -0.0342 |
| rs2824137   | C | 0.0367  |
| rs78395587  | C | 0.122   |
| rs117870459 | T | 0.097   |
| rs9977697   | G | -0.0481 |
| rs73383753  | T | 0.2083  |
| rs12627420  | G | -0.1214 |
| rs856186    | C | 0.0358  |
| rs2823907   | A | 0.1597  |
| rs117251382 | G | 0.2693  |
| rs76955685  | C | 0.0722  |
| rs1557270   | T | 0.0586  |
| rs451887    | T | 0.054   |
| rs148136816 | A | 0.1184  |
| rs111245099 | A | 0.2311  |
| rs75241318  | T | 0.1606  |
| rs11701991  | T | -0.0794 |
| rs8130288   | A | 0.0421  |
| rs2073357   | C | 0.0389  |
| rs79593253  | T | -0.1384 |
| rs117479174 | C | 0.2328  |
| rs1358342   | C | 0.0327  |
| rs9985131   | A | 0.0393  |
| rs2834036   | C | -0.032  |
| rs60493579  | A | 0.1988  |
| rs9974334   | T | 0.0881  |
| rs28699022  | T | 0.0384  |
| rs386760    | A | -0.1074 |
| rs2269172   | T | 0.0461  |
| rs239703    | T | -0.0457 |
| rs139544847 | G | 0.0861  |
| rs1787423   | G | -0.0309 |
| rs55869169  | G | 0.2139  |
| rs60296086  | A | 0.0426  |
| rs727333    | A | -0.0573 |
| rs4550749   | C | 0.0318  |
| rs149165867 | G | -0.0924 |
| rs229450    | A | 0.0312  |
| rs140086523 | A | 0.2121  |

|             |   |         |
|-------------|---|---------|
| rs34613278  | T | -0.166  |
| rs118081780 | A | 0.1807  |
| rs117905971 | G | -0.076  |
| rs13051772  | T | 0.1558  |
| rs11702336  | G | 0.172   |
| rs11910514  | T | 0.0887  |
| rs78483849  | T | 0.0445  |
| rs145256236 | C | -0.1687 |
| rs12483507  | C | 0.1115  |
| rs77988549  | G | -0.098  |
| rs4818772   | C | 0.086   |
| rs1514414   | G | 0.0302  |
| rs78931138  | A | -0.1439 |
| rs12626381  | T | -0.0754 |
| rs2836541   | C | 0.0552  |
| rs11911177  | C | 0.0579  |
| rs184357    | G | -0.0608 |
| rs4817405   | C | -0.0308 |
| rs117871010 | C | -0.1675 |
| rs2837968   | T | 0.094   |
| rs146330935 | T | -0.1432 |
| rs73205216  | C | 0.0578  |
| rs2825665   | G | -0.0349 |
| rs150890781 | C | -0.0525 |
| rs2154700   | A | -0.0298 |
| rs117817589 | T | -0.1545 |
| rs10222182  | G | 0.0455  |
| rs78964883  | C | 0.114   |
| rs462179    | A | 0.0546  |
| rs2835156   | A | 0.0919  |
| rs73229360  | C | 0.1749  |
| rs74808397  | T | 0.2041  |
| rs145024188 | T | 0.1964  |
| rs145539442 | G | 0.2196  |
| rs75921250  | T | -0.0805 |
| rs62217809  | A | -0.1485 |
| rs73366100  | C | 0.0735  |
| rs2839077   | C | -0.045  |
| rs1580385   | C | 0.1462  |
| rs13051616  | C | 0.0365  |
| rs73233507  | T | 0.1038  |
| rs73159471  | A | 0.1225  |
| rs117782061 | C | -0.0906 |
| rs150746659 | A | -0.1221 |
| rs9305917   | A | -0.0583 |
| rs73235419  | A | 0.0831  |
| rs79503798  | C | 0.1876  |

|             |   |         |
|-------------|---|---------|
| rs75296494  | G | 0.0904  |
| rs207510    | C | -0.0366 |
| rs8992      | G | 0.0556  |
| rs8132501   | C | 0.0304  |
| rs13049182  | A | -0.0317 |
| rs222945    | C | 0.1798  |
| rs144573413 | A | -0.1799 |
| rs62208636  | G | 0.2304  |
| rs2831583   | T | 0.0934  |
| rs2838572   | T | 0.0331  |
| rs396032    | A | -0.0298 |
| rs4816977   | T | -0.0907 |
| rs1828829   | G | 0.0414  |
| rs2183557   | T | 0.032   |
| rs142807742 | T | -0.2091 |
| rs12373919  | C | -0.0467 |
| rs13048466  | C | -0.1068 |
| rs117544315 | A | -0.1104 |
| rs9976185   | A | -0.0588 |
| rs2837099   | T | -0.0405 |
| rs113599801 | T | 0.1709  |
| rs2832258   | A | 0.0347  |
| rs56012600  | T | 0.0427  |
| rs8133190   | C | 0.0507  |
| rs112968517 | A | 0.0748  |
| rs2298683   | C | -0.0299 |
| rs143805659 | G | 0.1344  |
| rs11702484  | A | 0.0511  |
| rs1789231   | T | 0.0458  |
| rs2836748   | G | 0.0672  |
| rs34838968  | C | 0.0452  |
| rs117847964 | C | 0.2095  |
| rs433836    | G | -0.045  |
| rs35061689  | C | 0.0971  |
| rs34270681  | C | 0.0309  |
| rs2824177   | A | 0.0402  |
| rs17240955  | A | -0.0653 |
| rs11089074  | T | -0.0322 |
| rs1989073   | T | -0.0323 |
| rs7277907   | A | 0.092   |
| rs2833843   | C | 0.0385  |
| rs4817116   | G | -0.0312 |
| rs75463682  | G | 0.1781  |
| rs3804040   | G | 0.0346  |
| rs7510412   | G | -0.0501 |
| rs75783507  | T | -0.0518 |
| rs11701806  | G | -0.0384 |

|             |   |         |
|-------------|---|---------|
| rs2831463   | T | -0.0494 |
| rs12482711  | T | 0.1398  |
| rs17693038  | T | 0.1022  |
| rs225433    | G | 0.0478  |
| rs147544678 | T | -0.2021 |
| rs9984209   | C | -0.1856 |
| rs673576    | C | 0.0442  |
| rs2838049   | G | -0.0338 |
| rs12627197  | C | -0.0572 |
| rs13049293  | T | 0.0338  |
| rs73219304  | A | -0.0503 |
| rs4816355   | T | -0.0626 |
| rs77879956  | C | 0.057   |
| rs118124641 | C | 0.1719  |
| rs2845820   | T | 0.0843  |
| rs7364072   | C | -0.039  |
| rs233585    | C | -0.0919 |
| rs62216438  | T | -0.0751 |
| rs9637301   | G | -0.0316 |
| rs79357966  | A | 0.09    |
| rs4817059   | A | -0.0319 |
| rs79287141  | G | 0.0928  |
| rs238997    | T | -0.1915 |
| rs2833655   | C | 0.0314  |
| rs79694962  | A | -0.1108 |
| rs62229370  | T | -0.0472 |
| rs12627433  | C | 0.073   |
| rs2834099   | C | -0.0323 |
| rs178422    | G | -0.047  |
| rs2277798   | A | 0.0303  |
| rs420726    | C | 0.0365  |
| rs9978584   | G | 0.1298  |
| rs467590    | C | -0.0298 |
| rs75817510  | A | 0.1382  |
| rs55970829  | G | 0.0515  |
| rs243614    | T | -0.0301 |
| rs11701664  | T | 0.0353  |
| rs117357275 | C | 0.0718  |
| rs2070229   | C | 0.0325  |
| rs17276117  | C | -0.076  |
| rs8127690   | T | -0.0312 |
| rs117565368 | C | -0.1338 |
| rs1297125   | T | 0.0315  |
| rs2832588   | A | 0.031   |
| rs78884188  | T | -0.2138 |
| rs111278810 | G | 0.1885  |
| rs4919949   | A | -0.0712 |

|             |   |         |
|-------------|---|---------|
| rs8127076   | C | 0.1806  |
| rs2254524   | A | 0.0313  |
| rs2027592   | C | 0.0296  |
| rs171010    | A | 0.0313  |
| rs2070649   | G | -0.0307 |
| rs73227418  | G | -0.1171 |
| rs147466511 | A | -0.1135 |
| rs845943    | C | -0.0388 |
| rs9983277   | T | -0.0295 |
| rs117614808 | A | -0.1839 |
| rs79343889  | A | 0.1987  |
| rs2827804   | A | 0.065   |
| rs77431699  | C | 0.1098  |
| rs2835057   | C | 0.0284  |
| rs2284958   | C | -0.0328 |
| rs75291200  | C | 0.0764  |
| rs9976477   | T | -0.221  |
| rs2827137   | C | -0.0368 |
| rs149721392 | T | 0.2494  |
| rs151159061 | A | 0.0696  |
| rs7510001   | G | -0.0343 |
| rs145747711 | T | -0.1783 |
| rs60727828  | A | 0.1293  |
| rs140835176 | G | 0.2202  |
| rs11908867  | T | -0.0575 |
| rs17778936  | G | -0.0795 |
| rs964035    | C | -0.0302 |
| rs8131621   | G | 0.0343  |
| rs117617749 | T | -0.0605 |
| rs2408976   | T | -0.0511 |
| rs12482475  | A | 0.0692  |
| rs7275197   | G | -0.0335 |
| rs2409412   | C | 0.0756  |
| rs9980402   | T | 0.1933  |
| rs55912899  | A | 0.058   |
| rs60944484  | G | 0.0413  |
| rs117454666 | A | -0.2356 |
| rs117741984 | G | 0.0578  |
| rs79852897  | T | 0.1401  |
| rs76272369  | T | 0.0742  |
| rs73190656  | T | -0.0419 |
| rs118005346 | G | -0.1241 |
| rs139383415 | T | -0.2423 |
| rs9979665   | T | -0.0294 |
| rs72613649  | A | -0.0602 |
| rs7283535   | A | -0.0424 |
| rs2835318   | T | 0.0397  |



|             |   |         |
|-------------|---|---------|
| rs2850133   | C | 0.0467  |
| rs11700534  | A | 0.0422  |
| rs34574907  | T | -0.0506 |
| rs143476349 | C | 0.1734  |
| rs55684257  | A | 0.1342  |
| rs9306050   | G | 0.0901  |
| rs74324428  | T | 0.1399  |
| rs117124370 | C | 0.1451  |
| rs79175465  | T | -0.1172 |
| rs62210114  | G | -0.2041 |
| rs73324123  | C | 0.0622  |
| rs730952    | T | -0.0292 |
| rs9798612   | A | 0.0816  |
| rs7276579   | C | -0.0711 |
| rs78514469  | C | -0.091  |
| rs2824150   | G | 0.0683  |
| rs73196436  | C | -0.1664 |
| rs76543275  | G | -0.2561 |
| rs2834417   | C | 0.0295  |
| rs34831514  | G | 0.1372  |
| rs17683895  | A | -0.0877 |
| rs3827160   | A | -0.0385 |
| rs62228038  | A | -0.0403 |
| rs2836421   | T | -0.0531 |
| rs854614    | A | 0.0297  |
| rs225436    | C | -0.0314 |
| rs2823748   | T | 0.0351  |
| rs7278742   | C | -0.0442 |
| rs13050786  | G | -0.0287 |
| rs11702736  | A | 0.0408  |
| rs150506733 | G | -0.1817 |
| rs77265865  | T | 0.0816  |
| rs62221618  | A | 0.0502  |
| rs62206702  | A | -0.0415 |
| rs12483023  | G | 0.0466  |
| rs79161491  | T | 0.0545  |
| rs118118070 | A | 0.2354  |
| rs9976469   | G | 0.1569  |
| rs2836351   | C | 0.0579  |
| rs147089807 | A | -0.1211 |
| rs188061    | G | 0.0336  |
| rs9983427   | T | 0.0761  |
| rs7282282   | T | 0.1178  |
| rs11088229  | G | -0.0382 |
| rs77723855  | A | 0.1541  |
| rs79233999  | G | 0.0758  |
| rs2828039   | C | -0.0359 |

|             |   |         |
|-------------|---|---------|
| rs117699353 | G | 0.076   |
| rs75785490  | T | -0.0904 |
| rs2825688   | A | -0.0318 |
| rs2205436   | T | 0.0342  |
| rs73206955  | C | 0.0415  |
| rs73208373  | T | -0.0347 |
| rs4453762   | T | 0.074   |
| rs12483164  | A | 0.0391  |
| rs7510019   | A | 0.0672  |
| rs436525    | G | -0.0368 |
| rs78183042  | C | -0.0475 |
| rs73226129  | G | 0.0336  |
| rs4816549   | G | 0.2184  |
| rs13046291  | C | 0.0387  |
| rs1160766   | T | -0.0314 |
| rs2269169   | C | -0.0286 |
| rs74915688  | A | -0.1307 |
| rs113406218 | T | -0.0785 |
| rs1005045   | T | -0.052  |
| rs2830236   | C | 0.0517  |
| rs2835719   | T | 0.0375  |
| rs117600074 | C | -0.2069 |
| rs870531    | A | 0.0291  |
| rs11911883  | A | 0.043   |
| rs73220983  | G | -0.201  |
| rs2833649   | T | 0.03    |
| rs57378383  | A | -0.0869 |
| rs11701890  | T | 0.0353  |
| rs79697477  | G | -0.1381 |
| rs2142443   | C | 0.1373  |
| rs220159    | A | 0.0281  |
| rs9979250   | T | 0.082   |
| rs74659021  | G | 0.1649  |
| rs2836574   | G | 0.1327  |
| rs2823233   | C | -0.0333 |
| rs80224785  | C | 0.0513  |
| rs7275780   | A | 0.0406  |
| rs208930    | A | 0.029   |
| rs749020    | A | 0.0294  |
| rs77572112  | C | 0.1428  |
| rs150938444 | T | 0.1025  |
| rs78823543  | A | -0.0978 |
| rs8132905   | G | 0.0337  |
| rs73195606  | T | -0.0514 |
| rs2824918   | T | 0.0273  |
| rs3788116   | T | -0.0341 |
| rs34777084  | G | -0.047  |

|             |   |         |
|-------------|---|---------|
| rs2839010   | A | 0.0317  |
| rs77963422  | T | -0.0391 |
| rs143949745 | T | 0.1252  |
| rs55916879  | T | -0.0782 |
| rs1989441   | C | 0.1994  |
| rs58952985  | T | 0.1584  |
| rs2838266   | T | -0.0341 |
| rs117726629 | T | 0.09    |
| rs140605793 | T | -0.1514 |
| rs220148    | C | -0.0282 |
| rs401217    | T | 0.0295  |
| rs4352296   | C | -0.0277 |
| rs1888501   | A | -0.0657 |
| rs366343    | A | 0.0294  |
| rs12483286  | C | 0.1349  |
| rs112779919 | T | -0.1103 |
| rs145133230 | C | -0.1743 |
| rs12626850  | T | 0.0433  |
| rs149890304 | T | 0.1873  |
| rs17816027  | T | -0.1143 |
| rs13047712  | C | -0.0529 |
| rs1041834   | G | -0.0292 |
| rs2826144   | G | -0.033  |
| rs75848850  | T | 0.0568  |
| rs74897606  | A | -0.2007 |
| rs117966632 | A | -0.0731 |
| rs77485289  | C | -0.1916 |
| rs2826064   | C | -0.0272 |
| rs2838547   | C | 0.0419  |
| rs62215000  | G | -0.0433 |
| rs151187949 | G | 0.0745  |
| rs61159257  | T | 0.0385  |
| rs9981890   | T | 0.1448  |
| rs138533490 | A | -0.0945 |
| rs17627872  | A | -0.0507 |
| rs2839637   | T | 0.0451  |
| rs16997421  | T | 0.0532  |
| rs145904301 | T | 0.1037  |
| rs2827252   | A | 0.0316  |
| rs144703009 | T | -0.0818 |
| rs143191361 | C | 0.1727  |
| rs7279897   | T | 0.0342  |
| rs140267481 | C | -0.231  |
| rs35734905  | T | 0.0707  |
| rs4402847   | G | -0.0287 |
| rs116954329 | T | 0.1056  |
| rs79156595  | A | 0.1591  |

|             |   |         |
|-------------|---|---------|
| rs68189421  | A | -0.0361 |
| rs62222229  | G | -0.1161 |
| rs11700660  | T | -0.0908 |
| rs2825050   | C | -0.0304 |
| rs6517118   | A | 0.0467  |
| rs117961998 | A | -0.1488 |
| rs77603305  | C | -0.1368 |
| rs11701037  | C | 0.1344  |
| rs2829684   | T | 0.0369  |
| rs9980524   | G | -0.0366 |
| rs4525779   | C | 0.0539  |
| rs393582    | G | -0.0398 |
| rs11701813  | C | -0.0359 |
| rs139994393 | C | 0.1543  |
| rs8127488   | T | 0.0302  |
| rs2226360   | T | -0.1417 |
| rs2839097   | A | 0.0338  |
| rs150380927 | A | 0.0652  |
| rs73208172  | A | -0.0609 |
| rs11700855  | G | 0.0469  |
| rs2830448   | G | 0.0276  |
| rs2836546   | A | 0.0283  |
| rs2831164   | T | -0.0331 |
| rs7280313   | G | -0.0563 |
| rs73315337  | A | 0.0761  |
| rs979461    | A | 0.0314  |
| rs76746024  | T | 0.1127  |
| rs59790371  | T | -0.1992 |
| rs1788306   | A | -0.0371 |
| rs2838116   | C | -0.0311 |
| rs56116019  | T | 0.0816  |
| rs78198036  | T | 0.0555  |
| rs1735886   | T | -0.0364 |
| rs433074    | T | 0.0316  |
| rs117457609 | T | 0.1054  |
| rs7282418   | C | -0.0299 |
| rs75615560  | T | 0.1895  |
| rs2823817   | A | -0.0297 |
| rs62239501  | G | -0.1747 |
| rs415731    | A | 0.0316  |
| rs17203886  | T | 0.0956  |
| rs8134244   | G | -0.0303 |
| rs7282215   | G | -0.0269 |
| rs151045459 | A | 0.2194  |
| rs75022962  | T | -0.0896 |
| rs146963847 | G | 0.1533  |
| rs456298    | T | -0.0372 |

|             |   |         |
|-------------|---|---------|
| rs117470535 | A | 0.1145  |
| rs112015019 | T | 0.2235  |
| rs75099542  | T | -0.1511 |
| rs1735726   | C | 0.0289  |
| rs2010513   | T | 0.0292  |
| rs73361270  | A | 0.0693  |
| rs2829789   | A | 0.0409  |
| rs220136    | A | 0.0264  |
| rs2836763   | C | 0.0736  |
| rs3126371   | C | -0.0783 |
| rs2822681   | A | -0.0669 |
| rs11701754  | A | -0.1155 |
| rs117832982 | C | -0.08   |
| rs9980434   | T | 0.0534  |
| rs75590416  | T | -0.0939 |
| rs76275419  | T | -0.0515 |
| rs117780679 | T | 0.1035  |
| rs363568    | A | 0.0479  |
| rs73207089  | A | 0.0686  |
| rs2830319   | G | 0.0276  |
| rs12626247  | G | -0.1119 |
| rs73901231  | G | -0.1572 |
| rs9984213   | A | 0.0484  |
| rs1475570   | G | 0.2203  |
| rs56207925  | T | 0.0494  |
| rs151077241 | T | 0.0867  |
| rs11088049  | T | -0.0358 |
| rs421241    | A | -0.0355 |
| rs229085    | G | 0.0477  |
| rs7276833   | A | 0.1339  |
| rs17000133  | T | 0.1246  |
| rs141735898 | T | 0.1633  |
| rs9975406   | C | -0.0271 |
| rs75624450  | T | -0.0959 |
| rs67858562  | T | 0.0386  |
| rs875138    | A | 0.033   |
| rs933121    | A | -0.0276 |
| rs13052002  | T | -0.0619 |
| rs8133604   | C | 0.1005  |
| rs144852133 | G | 0.1441  |
| rs138132121 | A | 0.1363  |
| rs6517815   | C | -0.0269 |
| rs41424344  | C | 0.1214  |
| rs75139679  | T | 0.2198  |
| rs71322521  | A | 0.182   |
| rs73358218  | T | -0.0722 |
| rs9983933   | T | 0.031   |

|             |   |         |
|-------------|---|---------|
| rs13046940  | A | 0.0709  |
| rs62223467  | T | 0.127   |
| rs2835841   | A | -0.0482 |
| rs7282467   | T | 0.038   |
| rs73191258  | T | -0.243  |
| rs62217084  | C | 0.0279  |
| rs149163373 | G | -0.1618 |
| rs191996    | C | -0.0266 |
| rs34975687  | C | -0.0485 |
| rs78186712  | C | 0.116   |
| rs7278145   | G | 0.0324  |
| rs2822832   | T | -0.0355 |
| rs8127991   | T | 0.1033  |
| rs76439527  | G | 0.1785  |
| rs2822808   | C | 0.1666  |
| rs2205468   | T | -0.0468 |
| rs10460708  | A | 0.035   |
| rs2829041   | C | -0.0293 |
| rs117063865 | A | -0.1159 |
| rs149486665 | C | -0.1359 |
| rs58060663  | C | -0.0761 |
| rs73370119  | T | -0.0958 |
| rs73232680  | G | -0.068  |
| rs2823400   | C | -0.0273 |
| rs143366694 | T | 0.1219  |
| rs235318    | A | 0.0389  |
| rs77720513  | G | 0.1079  |
| rs2830230   | G | -0.0382 |
| rs10854301  | A | 0.0427  |
| rs12627738  | A | -0.1512 |
| rs73193741  | T | 0.1053  |
| rs35079641  | C | -0.038  |
| rs76842854  | T | -0.2216 |
| rs67693162  | C | 0.0955  |
| rs148832797 | A | -0.1608 |
| rs7279679   | A | -0.0568 |
| rs10482992  | C | 0.0483  |
| rs8133510   | A | 0.0356  |
| rs7282276   | C | 0.0346  |
| rs7275593   | C | -0.0395 |
| rs583952    | A | 0.0412  |
| rs2834006   | C | -0.0278 |
| rs9808679   | C | 0.072   |
| rs117070430 | C | -0.1001 |
| rs3788111   | T | -0.0337 |
| rs233786    | G | 0.045   |
| rs76279918  | G | 0.0954  |

|             |   |         |
|-------------|---|---------|
| rs11088977  | C | -0.0434 |
| rs2823988   | T | 0.1549  |
| rs58315492  | T | 0.0739  |
| rs915566    | G | 0.0286  |
| rs111745087 | C | 0.2522  |
| rs75544951  | T | 0.0838  |
| rs7276238   | T | -0.0303 |
| rs73203904  | T | -0.061  |
| rs1449524   | A | 0.027   |
| rs145951290 | G | -0.2208 |
| rs2243723   | G | -0.0305 |
| rs56314582  | G | 0.1902  |
| rs13052569  | T | -0.0733 |
| rs111316100 | T | 0.1789  |
| rs138571959 | T | 0.1342  |
| rs17565611  | C | 0.1237  |
| rs78786709  | A | -0.1175 |
| rs73191626  | C | 0.1561  |
| rs218336    | C | 0.0502  |
| rs12626651  | G | -0.1702 |
| rs9653818   | C | -0.0501 |
| rs8133184   | C | -0.0328 |
| rs2837522   | A | -0.0251 |
| rs8129003   | A | -0.0777 |
| rs35004194  | T | 0.0474  |
| rs11701393  | C | -0.0341 |
| rs2032314   | T | -0.0487 |
| rs2834073   | T | -0.0633 |
| rs1699639   | A | 0.0691  |
| rs7277623   | C | 0.0262  |
| rs2836442   | G | 0.0258  |
| rs73196655  | A | 0.1152  |
| rs8130681   | A | 0.0343  |
| rs2826303   | G | -0.0287 |
| rs79761210  | G | -0.0343 |
| rs1448368   | A | -0.0264 |
| rs162365    | C | 0.0286  |
| rs1888498   | A | 0.0256  |
| rs79044819  | A | -0.1554 |
| rs75027792  | C | 0.0449  |
| rs9306109   | T | -0.0514 |
| rs1735371   | A | -0.0302 |
| rs2075875   | C | -0.0491 |
| rs113453991 | A | 0.1285  |
| rs73906476  | G | -0.0717 |
| rs117303420 | A | 0.1531  |
| rs416707    | G | 0.0301  |

|             |   |         |
|-------------|---|---------|
| rs73233027  | G | -0.07   |
| rs74699119  | G | 0.0992  |
| rs74758653  | G | 0.135   |
| rs117838152 | C | 0.0781  |
| rs7280611   | T | 0.0349  |
| rs17694166  | C | 0.0605  |
| rs77773236  | A | -0.0751 |
| rs76411915  | C | -0.0848 |
| rs117720560 | T | 0.1738  |
| rs12626960  | G | 0.0717  |
| rs145908191 | A | -0.1545 |
| rs2833482   | A | -0.0358 |
| rs468076    | C | -0.0389 |
| rs7276763   | A | 0.0504  |
| rs9978224   | A | -0.0306 |
| rs8129605   | C | 0.0268  |
| rs145689273 | A | -0.0927 |
| rs13052751  | T | 0.0271  |
| rs433223    | A | -0.0264 |
| rs4816410   | A | 0.0595  |
| rs73199882  | G | -0.0919 |
| rs80302275  | A | 0.0557  |
| rs77147477  | G | -0.0303 |
| rs9981768   | T | -0.1008 |
| rs143532407 | C | -0.1074 |
| rs11701165  | G | 0.0272  |
| rs9808684   | T | -0.0577 |
| rs363602    | T | -0.0957 |
| rs35663785  | A | 0.1011  |
| rs80075133  | T | 0.0653  |
| rs74771595  | A | -0.041  |
| rs62216867  | A | -0.0584 |
| rs8128756   | G | -0.0292 |
| rs79623645  | A | 0.0944  |
| rs11910836  | A | 0.0457  |
| rs2027719   | T | 0.0255  |
| rs75056695  | C | 0.1126  |
| rs2834649   | A | -0.0474 |
| rs13052910  | T | -0.1877 |
| rs2838358   | C | -0.0294 |
| rs73181866  | C | 0.0832  |
| rs74892007  | T | -0.1085 |
| rs1883002   | T | 0.0933  |
| rs74760835  | A | 0.1705  |
| rs56270247  | G | 0.0688  |
| rs80315588  | A | -0.0258 |
| rs118165637 | G | 0.1852  |



|             |   |         |
|-------------|---|---------|
| rs222934    | C | 0.0272  |
| rs11088827  | T | -0.0904 |
| rs62217419  | T | -0.0829 |
| rs118156117 | C | 0.1572  |
| rs2838067   | A | -0.0279 |
| rs2838475   | T | 0.0444  |
| rs111953444 | T | 0.1392  |
| rs79138463  | A | -0.0817 |
| rs77438163  | T | 0.1128  |
| rs117550857 | G | -0.1063 |
| rs2836072   | T | 0.0367  |
| rs9978825   | T | -0.0269 |
| rs77217809  | A | 0.0619  |
| rs116884457 | A | -0.098  |
| rs2830208   | T | -0.0263 |
| rs118030181 | A | -0.1084 |
| rs112679812 | G | 0.1783  |
| rs17725830  | G | -0.2221 |
| rs117558063 | A | -0.1396 |
| rs12626949  | C | 0.0392  |
| rs13050138  | T | 0.1171  |
| rs111346834 | A | -0.1588 |
| rs60614709  | A | -0.028  |
| rs2155967   | C | 0.0489  |
| rs11910139  | T | -0.0421 |
| rs144406630 | A | -0.0658 |
| rs117789728 | A | 0.1835  |
| rs13048879  | C | 0.0469  |
| rs74728378  | A | -0.1131 |
| rs13047640  | A | 0.0399  |
| rs13051356  | A | 0.0427  |
| rs1810864   | T | -0.0528 |
| rs1543761   | C | 0.0473  |
| rs2835681   | G | 0.0541  |
| rs2269135   | T | -0.0791 |
| rs111514432 | A | -0.042  |
| rs149622338 | C | -0.1384 |
| rs1989273   | A | 0.1418  |
| rs76917639  | T | 0.0558  |
| rs55993832  | C | -0.2206 |
| rs1556282   | A | -0.0284 |
| rs2834689   | C | 0.0595  |
| rs219661    | G | 0.0251  |
| rs76298616  | T | 0.1044  |
| rs79807929  | C | 0.0709  |
| rs117176234 | G | 0.1602  |
| rs148207568 | A | 0.2281  |

|             |   |         |
|-------------|---|---------|
| rs9974619   | C | -0.2269 |
| rs28520635  | C | -0.0845 |
| rs219733    | C | 0.0506  |
| rs1023372   | T | -0.0451 |
| rs56040839  | C | -0.0542 |
| rs467930    | A | -0.1364 |
| rs2410215   | T | -0.0658 |
| rs462290    | T | 0.0245  |
| rs2834291   | T | 0.0255  |
| rs62226874  | C | 0.1691  |
| rs2898401   | A | 0.027   |
| rs13047425  | T | -0.0423 |
| rs1735956   | A | -0.0351 |
| rs62209366  | T | 0.0869  |
| rs76949998  | T | -0.0786 |
| rs150339025 | T | -0.148  |
| rs2823918   | A | 0.0373  |
| rs2830382   | A | -0.0271 |
| rs117070022 | A | -0.2364 |
| rs76334547  | G | 0.1479  |
| rs117296583 | T | 0.0619  |
| rs686860    | C | 0.0261  |
| rs12151990  | T | 0.0301  |
| rs2299753   | C | -0.0364 |
| rs117244053 | C | -0.1835 |
| rs73373765  | G | 0.1073  |
| rs116870391 | G | 0.2101  |
| rs2329898   | G | 0.1712  |
| rs80251389  | T | 0.113   |
| rs76594746  | T | 0.1171  |
| rs117704399 | C | 0.1121  |
| rs2051394   | G | -0.0252 |
| rs116868186 | T | -0.1243 |
| rs76350217  | G | -0.0905 |
| rs4818651   | G | 0.1284  |
| rs1029246   | G | -0.0551 |
| rs17766637  | A | -0.0451 |
| rs118173638 | T | -0.1264 |
| rs117836053 | C | 0.0771  |
| rs3746912   | A | 0.0599  |
| rs2826253   | G | 0.0297  |
| rs74887668  | T | 0.1176  |
| rs12373938  | T | 0.1179  |
| rs751032    | T | 0.0581  |
| rs142740298 | T | -0.0933 |
| rs62215399  | G | -0.0412 |
| rs2823243   | G | 0.1052  |

|             |   |         |
|-------------|---|---------|
| rs2105577   | A | 0.0239  |
| rs2164171   | T | -0.0346 |
| rs146213489 | A | -0.1962 |
| rs2834153   | C | 0.0251  |
| rs79898362  | C | 0.1875  |
| rs7282052   | A | -0.0273 |
| rs28889886  | G | -0.0297 |
| rs59600504  | A | -0.1222 |
| rs9980428   | T | 0.0326  |
| rs77648654  | A | 0.1241  |
| rs7275222   | C | 0.0273  |
| rs2825589   | G | -0.0451 |
| rs138247802 | T | -0.1675 |
| rs28483968  | G | 0.0261  |
| rs2829291   | C | -0.0315 |
| rs2299768   | T | 0.032   |
| rs16979061  | T | 0.1844  |
| rs4816381   | A | -0.0264 |
| rs2831474   | T | -0.0275 |
| rs55781414  | A | 0.0706  |
| rs113609898 | A | 0.1496  |
| rs4592933   | T | 0.0256  |
| rs2828511   | A | -0.0239 |
| rs115199976 | A | 0.0542  |
| rs144864589 | T | -0.188  |
| rs475142    | C | 0.0329  |
| rs112711966 | T | 0.0866  |
| rs2829017   | C | -0.0535 |
| rs79567778  | T | 0.1108  |
| rs148983122 | C | 0.1071  |
| rs928261    | T | 0.0274  |
| rs9976424   | T | 0.0897  |
| rs11702815  | G | 0.1893  |
| rs151173349 | T | -0.1214 |
| rs1297124   | C | -0.03   |
| rs2830516   | T | 0.0326  |
| rs77208348  | A | 0.0914  |
| rs78248586  | T | 0.0692  |
| rs2837318   | G | -0.025  |
| rs79249663  | T | -0.0983 |
| rs78208377  | T | 0.1559  |
| rs34492022  | A | -0.0423 |
| rs9983953   | C | 0.0697  |
| rs62237612  | A | -0.0718 |
| rs989649    | A | -0.0813 |
| rs1995098   | T | -0.0313 |
| rs73194972  | A | -0.1603 |

|             |   |         |
|-------------|---|---------|
| rs11701336  | G | -0.0405 |
| rs78257027  | T | 0.0771  |
| rs11088041  | G | -0.0394 |
| rs2142123   | A | 0.0491  |
| rs118052928 | G | -0.0657 |
| rs7275627   | T | -0.0244 |
| rs8130386   | A | -0.1408 |
| rs2125866   | T | 0.0297  |
| rs9979321   | T | -0.0257 |
| rs35312269  | G | -0.108  |
| rs380011    | C | -0.0245 |
| rs118010787 | T | 0.1737  |
| rs2838031   | A | 0.11    |
| rs8127129   | A | 0.0379  |
| rs1961365   | T | 0.0432  |
| rs9305593   | T | 0.0261  |
| rs145980291 | T | 0.1169  |
| rs2410415   | C | 0.0312  |
| rs13046065  | A | -0.0336 |
| rs1783094   | C | -0.0532 |
| rs2039259   | A | -0.0343 |
| rs12481988  | C | -0.0253 |
| rs723470    | A | -0.0272 |
| rs1527510   | T | 0.0379  |
| rs7283257   | A | -0.053  |
| rs34028964  | A | -0.0308 |
| rs77267705  | T | 0.0993  |
| rs7276505   | A | 0.1311  |
| rs73140923  | A | 0.0628  |
| rs2832880   | G | -0.0811 |
| rs2845811   | C | -0.0462 |
| rs118175687 | A | 0.1069  |
| rs79491603  | C | 0.0894  |
| rs117177964 | T | -0.1124 |
| rs144759118 | T | 0.0833  |
| rs2837755   | C | 0.0373  |
| rs34025935  | C | 0.0299  |
| rs73197030  | A | 0.0521  |
| rs4816840   | A | 0.1226  |
| rs9981668   | T | -0.0532 |
| rs463440    | A | 0.0342  |
| rs2828663   | C | -0.0413 |
| rs58714932  | A | 0.083   |
| rs78728013  | C | 0.1247  |
| rs117200219 | T | 0.0759  |
| rs13046798  | T | -0.0288 |
| rs117859961 | C | 0.1253  |

|             |   |         |
|-------------|---|---------|
| rs76528216  | C | 0.0828  |
| rs1826479   | T | 0.0319  |
| rs2835824   | T | 0.0251  |
| rs8127155   | A | -0.0874 |
| rs12140     | C | -0.0582 |
| rs474142    | A | -0.0876 |
| rs2835444   | G | 0.0298  |
| rs2155968   | T | 0.0297  |
| rs2826935   | C | -0.089  |
| rs7280749   | A | -0.0241 |
| rs56076733  | G | -0.0528 |
| rs79108538  | C | -0.0655 |
| rs857551    | A | 0.0393  |
| rs2836888   | G | 0.0527  |
| rs2006089   | T | -0.0251 |
| rs74393210  | T | 0.064   |
| rs7276814   | T | -0.0406 |
| rs73218870  | A | 0.0388  |
| rs73381652  | A | 0.0551  |
| rs13433501  | T | 0.1086  |
| rs17860264  | A | 0.0713  |
| rs2051393   | G | -0.1    |
| rs62214442  | T | 0.1586  |
| rs10451853  | G | -0.0315 |
| rs4817323   | G | -0.0258 |
| rs118075055 | T | 0.1949  |
| rs55684246  | C | -0.033  |
| rs140029788 | C | 0.1065  |
| rs78348873  | T | 0.1244  |
| rs13048158  | C | -0.0633 |
| rs77895658  | T | 0.0505  |
| rs57985899  | A | 0.1212  |
| rs78288265  | G | 0.0239  |
| rs17572439  | G | 0.0348  |
| rs9305659   | T | -0.0239 |
| rs2822697   | C | -0.0357 |
| rs28416562  | T | 0.028   |
| rs11700595  | A | -0.1769 |
| rs73228394  | A | 0.1326  |
| rs117415251 | A | -0.2401 |
| rs2829482   | C | 0.0353  |
| rs113215631 | C | -0.1252 |
| rs2829121   | T | -0.0312 |
| rs117716311 | C | 0.1363  |
| rs74373568  | T | -0.0568 |
| rs12483618  | T | 0.1006  |
| rs2830902   | A | -0.0255 |

|             |   |         |
|-------------|---|---------|
| rs1943960   | T | 0.0526  |
| rs76032415  | T | -0.0557 |
| rs1735888   | G | -0.042  |
| rs8128728   | G | -0.0316 |
| rs2830111   | C | 0.0443  |
| rs141829199 | A | 0.1603  |
| rs139277153 | C | -0.1322 |
| rs2830128   | C | -0.0584 |
| rs80173631  | A | -0.0699 |
| rs62213023  | T | -0.1065 |
| rs463117    | C | -0.0342 |
| rs17632819  | A | 0.0581  |
| rs7276365   | A | 0.0267  |
| rs28481440  | G | 0.1378  |
| rs62220310  | A | -0.0897 |
| rs3814896   | G | -0.0272 |
| rs9983349   | T | 0.0379  |
| rs143661053 | T | 0.1359  |
| rs10154135  | T | -0.0507 |
| rs28620385  | C | -0.0274 |
| rs204395    | C | -0.0327 |
| rs2834549   | A | 0.0226  |
| rs13051404  | T | -0.1584 |
| rs55853145  | A | 0.0262  |
| rs146624109 | A | 0.1293  |
| rs2838291   | G | 0.0487  |
| rs2832606   | T | -0.0724 |
| rs8132055   | G | 0.0252  |
| rs9653664   | G | 0.0226  |
| rs1107119   | C | 0.0255  |
| rs13047077  | G | -0.0311 |
| rs8132902   | G | 0.0378  |
| rs7281211   | G | 0.0344  |
| rs1032002   | T | 0.0319  |
| rs10775664  | T | 0.0253  |
| rs60553890  | G | 0.0494  |
| rs111986507 | A | 0.1178  |
| rs239080    | G | -0.0474 |
| rs13046441  | A | -0.0502 |
| rs527945    | C | -0.0509 |
| rs7281646   | C | 0.0591  |
| rs2830638   | C | 0.0275  |
| rs78593706  | T | 0.0654  |
| rs369906    | C | 0.0244  |
| rs2839403   | A | 0.0231  |
| rs466386    | G | -0.0531 |
| rs77619227  | T | 0.0913  |

|             |   |         |
|-------------|---|---------|
| rs35374062  | G | 0.2046  |
| rs115281552 | C | -0.1587 |
| rs138618368 | A | -0.1405 |
| rs377419    | G | -0.03   |
| rs117395873 | G | 0.1446  |
| rs114149337 | G | -0.044  |
| rs74535100  | A | 0.1227  |
| rs13048015  | C | 0.1751  |
| rs78393454  | G | 0.0553  |
| rs59394421  | A | 0.1133  |
| rs1556326   | A | -0.0894 |
| rs71315790  | T | 0.0609  |
| rs7281841   | G | 0.0768  |
| rs2826486   | T | 0.0371  |
| rs149826616 | T | -0.1529 |
| rs117833633 | A | -0.0948 |
| rs77218221  | C | -0.126  |
| rs143274367 | C | 0.1007  |
| rs2409500   | C | 0.0294  |
| rs77037611  | G | 0.0976  |
| rs77518471  | T | 0.165   |
| rs9978236   | C | -0.0321 |
| rs3788011   | T | 0.0371  |
| rs2010779   | G | 0.0307  |
| rs9978024   | T | 0.0314  |
| rs76078856  | C | -0.2101 |
| rs8130891   | G | -0.0565 |
| rs75434286  | A | -0.0375 |
| rs28663998  | T | 0.0286  |
| rs78126278  | C | 0.0842  |
| rs9636845   | T | -0.0486 |
| rs62222914  | T | 0.0276  |
| rs9981898   | T | -0.0258 |
| rs4333012   | G | 0.0654  |
| rs2834080   | T | -0.0503 |
| rs74349957  | G | 0.0825  |
| rs1459407   | A | -0.0326 |
| rs1699660   | A | -0.1464 |
| rs4817211   | G | 0.0373  |
| rs4817701   | C | -0.0313 |
| rs117609508 | T | 0.089   |
| rs74364162  | T | 0.0987  |
| rs2826893   | C | 0.0228  |
| rs4542933   | T | -0.0477 |
| rs73204269  | G | -0.0352 |
| rs12482821  | G | 0.0907  |
| rs2014085   | C | -0.0266 |

|             |   |         |
|-------------|---|---------|
| rs73190628  | C | 0.0931  |
| rs34157675  | G | 0.0661  |
| rs117158358 | A | -0.1471 |
| rs116867279 | C | 0.1391  |
| rs78925364  | C | 0.09    |
| rs2178938   | C | 0.0313  |
| rs10222076  | G | -0.0222 |
| rs78183361  | T | 0.102   |
| rs2838100   | G | -0.0285 |
| rs857960    | T | 0.0925  |
| rs225401    | A | -0.0377 |
| rs4819065   | A | 0.0484  |
| rs9979252   | A | -0.0894 |
| rs61128886  | C | -0.0482 |
| rs2827046   | A | -0.0331 |
| rs2822553   | C | 0.0272  |
| rs9977011   | T | 0.0535  |
| rs2834841   | G | 0.026   |
| rs8131986   | C | -0.0226 |
| rs117513214 | C | -0.0906 |
| rs2051356   | A | 0.0443  |
| rs73223874  | A | -0.0667 |
| rs2828635   | C | 0.0488  |
| rs116124260 | A | -0.1143 |
| rs9325611   | A | 0.0269  |
| rs2026847   | T | -0.0254 |
| rs209278    | G | 0.0269  |
| rs9974765   | T | -0.0306 |
| rs2822995   | T | 0.0275  |
| rs116763542 | G | 0.1218  |
| rs1541291   | G | -0.0227 |
| rs626712    | T | 0.0589  |
| rs77067815  | A | -0.0406 |
| rs7279224   | T | -0.024  |
| rs73233871  | T | -0.0535 |
| rs59699345  | G | 0.0336  |
| rs73191663  | A | -0.0381 |
| rs74424451  | T | -0.0916 |
| rs73189209  | A | 0.0892  |
| rs62230787  | G | 0.0234  |
| rs9980482   | C | 0.0303  |
| rs118125610 | A | -0.1    |
| rs150684488 | T | -0.0867 |
| rs7280924   | T | 0.0235  |
| rs13047669  | T | -0.0371 |
| rs77725260  | C | 0.1836  |
| rs2516560   | T | 0.0279  |



|             |   |         |
|-------------|---|---------|
| rs8130140   | T | 0.0716  |
| rs148574312 | A | -0.1141 |
| rs78554638  | T | 0.1509  |
| rs147503684 | A | 0.167   |
| rs147229087 | C | 0.1807  |
| rs113230567 | G | -0.1014 |
| rs145681103 | C | 0.1212  |
| rs144751563 | G | -0.1346 |
| rs112093711 | G | 0.1055  |
| rs35822038  | A | 0.0575  |
| rs76040172  | A | -0.0579 |
| rs36071212  | G | 0.0488  |
| rs12483355  | G | 0.0408  |
| rs149920163 | T | -0.0811 |
| rs118188454 | G | 0.1095  |
| rs7278289   | G | -0.0272 |
| rs2827315   | C | 0.0269  |
| rs144335028 | G | -0.1562 |
| rs374162    | C | -0.0311 |
| rs4817506   | A | 0.0229  |
| rs79952904  | T | 0.0792  |
| rs2776066   | G | -0.0232 |
| rs76121513  | G | -0.0456 |
| rs117827223 | A | -0.0919 |
| rs116867272 | A | 0.1909  |
| rs9982370   | T | 0.0276  |
| rs2211947   | C | -0.0229 |
| rs62222962  | C | -0.0618 |
| rs117440128 | A | 0.1434  |
| rs73218246  | A | -0.0262 |
| rs111785472 | G | -0.1235 |
| rs444435    | G | 0.0226  |
| rs9975893   | A | -0.0694 |
| rs11909545  | A | 0.1233  |
| rs34000631  | C | -0.0432 |
| rs4920097   | C | 0.0587  |
| rs2825364   | A | -0.0303 |
| rs2832231   | C | -0.023  |
| rs138622142 | A | -0.0619 |
| rs1984304   | G | -0.027  |
| rs75152729  | T | -0.0637 |
| rs232399    | A | 0.024   |
| rs76526582  | G | 0.068   |
| rs7277610   | A | 0.0279  |
| rs2832439   | G | 0.0257  |
| rs9982980   | G | 0.0316  |
| rs1888414   | T | 0.0232  |

|             |   |         |
|-------------|---|---------|
| rs1078014   | A | -0.0326 |
| rs4343547   | C | -0.0661 |
| rs11702439  | T | -0.0895 |
| rs8127600   | T | 0.0285  |
| rs9983132   | C | 0.1806  |
| rs2825529   | C | 0.0251  |
| rs9985105   | T | -0.0234 |
| rs9977143   | C | 0.0417  |
| rs4143355   | G | 0.0458  |
| rs2838117   | T | 0.0248  |
| rs11700876  | A | -0.1272 |
| rs2226303   | C | -0.0279 |
| rs60137446  | T | 0.0322  |
| rs111975621 | A | 0.1686  |
| rs117027339 | A | 0.1794  |
| rs28576866  | G | 0.0407  |
| rs148370442 | T | -0.1216 |
| rs7276406   | C | -0.0222 |
| rs60383775  | C | 0.0601  |
| rs118110110 | A | -0.1122 |
| rs10854373  | T | -0.0287 |
| rs56942017  | G | 0.0437  |
| rs2823190   | T | 0.0332  |
| rs73235045  | G | 0.0992  |
| rs78279703  | A | 0.091   |
| rs28515690  | T | 0.0303  |
| rs73220825  | G | -0.0546 |
| rs75904028  | G | -0.0857 |
| rs28710165  | C | 0.0943  |
| rs2212667   | C | -0.0239 |
| rs144637905 | G | -0.1712 |
| rs2280965   | T | 0.0556  |
| rs73220483  | T | 0.0444  |
| rs141558194 | A | 0.1317  |
| rs1783383   | A | -0.0234 |
| rs144271394 | A | -0.1694 |
| rs2070440   | A | -0.0247 |
| rs7282236   | A | -0.0268 |
| rs2839526   | G | -0.0255 |
| rs79545821  | A | 0.0665  |
| rs12483222  | C | -0.0689 |
| rs62226688  | G | 0.0361  |
| rs71317476  | A | 0.0547  |
| rs73214731  | A | 0.1027  |
| rs4816280   | T | 0.0377  |
| rs678984    | T | -0.0506 |
| rs643355    | A | -0.0233 |

|             |   |         |
|-------------|---|---------|
| rs8128019   | C | 0.0779  |
| rs4553895   | A | 0.1148  |
| rs140685138 | G | 0.1603  |
| rs12482064  | G | 0.0248  |
| rs2212297   | G | 0.0217  |
| rs7277971   | G | -0.0557 |
| rs145608126 | C | 0.068   |
| rs225374    | G | 0.029   |
| rs73233841  | C | -0.13   |
| rs216762    | T | -0.0217 |
| rs225316    | C | -0.0267 |
| rs146583994 | A | -0.1495 |
| rs113189824 | T | -0.1014 |
| rs13048203  | T | 0.0247  |
| rs450090    | T | -0.032  |
| rs7283555   | G | 0.0277  |
| rs1735894   | A | 0.0448  |
| rs112832954 | G | -0.1354 |
| rs233232    | C | -0.0286 |
| rs4818773   | A | 0.0304  |
| rs78570444  | G | 0.0562  |
| rs11088240  | C | -0.0231 |
| rs74571767  | C | 0.0926  |
| rs2012081   | A | 0.0372  |
| rs162397    | T | -0.0634 |
| rs56093006  | T | -0.102  |
| rs71330155  | A | -0.0387 |
| rs13050920  | T | 0.0384  |
| rs73187945  | G | 0.0801  |
| rs34611453  | C | 0.0671  |
| rs466568    | C | 0.0234  |
| rs62223026  | G | 0.0483  |
| rs114757228 | G | -0.0772 |
| rs9977002   | A | -0.0317 |
| rs8133053   | C | -0.0251 |
| rs8128578   | A | 0.0437  |
| rs2848946   | G | 0.0246  |
| rs2834374   | G | -0.0232 |
| rs78150818  | T | 0.1689  |
| rs112946313 | A | -0.0764 |
| rs2822940   | T | -0.0287 |
| rs11088984  | C | 0.027   |
| rs2822850   | T | -0.0423 |
| rs17644622  | G | -0.0709 |
| rs73180109  | A | 0.037   |
| rs2834146   | A | -0.0335 |
| rs7282726   | T | -0.0227 |

|             |   |         |
|-------------|---|---------|
| rs13052056  | A | 0.0312  |
| rs12482188  | C | 0.0394  |
| rs11088302  | G | -0.021  |
| rs76330225  | T | -0.0918 |
| rs12482723  | C | 0.0612  |
| rs139617441 | G | 0.1329  |
| rs113430952 | A | -0.1223 |
| rs59507442  | C | 0.0364  |
| rs117556573 | G | -0.0977 |
| rs2837994   | A | -0.0318 |
| rs147160609 | A | 0.1056  |
| rs2837471   | T | -0.024  |
| rs66932133  | A | 0.0249  |
| rs145426760 | A | -0.0881 |
| rs76275866  | C | -0.0916 |
| rs7278838   | A | 0.0242  |
| rs148961952 | G | 0.0844  |
| rs386445    | T | 0.0221  |
| rs9976620   | A | 0.0212  |
| rs75140793  | A | 0.0868  |
| rs13047590  | T | -0.0412 |
| rs2827144   | C | -0.0326 |
| rs2299789   | G | 0.1118  |
| rs8133949   | T | -0.0234 |
| rs112111177 | A | 0.0544  |
| rs7283026   | C | 0.0309  |
| rs62211696  | T | 0.0502  |
| rs12626831  | A | -0.0252 |
| rs2825645   | A | 0.0224  |
| rs140569274 | T | 0.0372  |
| rs17240640  | A | -0.1529 |
| rs77832772  | T | -0.1103 |
| rs468607    | T | 0.0213  |
| rs76698352  | A | -0.0398 |
| rs1892679   | T | -0.0209 |
| rs9974136   | T | -0.0218 |
| rs117127021 | C | -0.0935 |
| rs220216    | T | -0.0257 |
| rs113187788 | G | -0.1116 |
| rs79727805  | C | 0.0774  |
| rs73899864  | G | -0.0386 |
| rs2776365   | T | 0.0229  |
| rs4816998   | G | -0.0259 |
| rs41277552  | G | -0.1502 |
| rs2835433   | T | -0.0221 |
| rs445088    | C | 0.0495  |
| rs2836356   | T | -0.0215 |

|             |   |         |
|-------------|---|---------|
| rs456309    | T | 0.061   |
| rs2269127   | A | -0.0282 |
| rs113457511 | T | -0.0311 |
| rs17827195  | C | 0.0434  |
| rs7278824   | A | -0.0368 |
| rs118155204 | G | 0.123   |
| rs2822690   | T | 0.0316  |
| rs117369437 | G | -0.1456 |
| rs117601587 | A | -0.1015 |
| rs73213797  | A | 0.0956  |
| rs146977834 | G | 0.1705  |
| rs113837390 | A | -0.062  |
| rs73179944  | C | 0.174   |
| rs8133547   | G | 0.0406  |
| rs117076206 | A | 0.0808  |
| rs9978558   | G | 0.0839  |
| rs58206891  | G | 0.0257  |
| rs11702740  | C | 0.0446  |
| rs220231    | T | -0.0223 |
| rs1888420   | T | -0.0227 |
| rs2839642   | T | 0.0213  |
| rs62221628  | C | 0.0277  |
| rs79701370  | G | -0.0615 |
| rs62216507  | C | 0.0279  |
| rs2827824   | C | 0.0258  |
| rs118004258 | T | -0.075  |
| rs73210116  | T | -0.1086 |
| rs2838063   | C | 0.0246  |
| rs67443586  | T | -0.0457 |
| rs2205301   | G | 0.0244  |
| rs117414124 | G | 0.0871  |
| rs9808781   | C | -0.0237 |
| rs4148122   | A | -0.0753 |
| rs2154730   | T | 0.0677  |
| rs2078203   | A | -0.0251 |
| rs235286    | G | -0.0288 |
| rs463397    | T | -0.0308 |
| rs78850081  | G | 0.1268  |
| rs580140    | G | -0.0241 |
| rs55904615  | A | -0.0438 |
| rs17652514  | T | 0.1079  |
| rs77447180  | T | 0.0707  |
| rs116960944 | G | -0.0786 |
| rs62208528  | T | 0.0281  |
| rs151291775 | T | -0.1103 |
| rs9979067   | T | 0.0266  |
| rs147730115 | A | 0.0929  |

|             |   |         |
|-------------|---|---------|
| rs117790364 | A | -0.1861 |
| rs62211040  | G | 0.0933  |
| rs9305743   | A | -0.0482 |
| rs417462    | A | -0.0256 |
| rs2837422   | C | -0.033  |
| rs60307464  | C | 0.0361  |
| rs80158495  | C | -0.092  |
| rs17548349  | A | 0.1113  |
| rs78331859  | C | -0.1034 |
| rs76449969  | G | 0.0875  |
| rs144036866 | A | 0.1108  |
| rs2834325   | A | -0.0217 |
| rs118123583 | C | -0.1085 |
| rs117569301 | G | -0.1929 |
| rs145298316 | A | 0.1756  |
| rs2826476   | A | 0.0886  |
| rs60905982  | C | -0.0295 |
| rs9981043   | A | 0.0248  |
| rs768832    | C | 0.0256  |
| rs149508210 | C | -0.1573 |
| rs2836336   | A | 0.0243  |
| rs62214459  | G | -0.0218 |
| rs17004421  | G | 0.0626  |
| rs147695960 | A | 0.1128  |
| rs8134558   | G | -0.0431 |
| rs2823016   | C | 0.0443  |
| rs436782    | G | 0.1367  |
| rs117038367 | C | 0.1064  |
| rs79898088  | T | -0.1043 |
| rs61735794  | T | 0.0659  |
| rs80013162  | A | -0.1052 |
| rs17175686  | C | -0.1209 |
| rs73203809  | G | 0.0356  |
| rs140400131 | T | 0.0816  |
| rs2154526   | C | 0.0204  |
| rs3018511   | T | 0.0227  |
| rs73197345  | A | 0.0296  |
| rs141080391 | T | -0.1078 |
| rs13048722  | C | -0.0315 |
| rs9978161   | T | 0.0253  |
| rs78596335  | A | 0.0916  |
| rs58326031  | C | -0.027  |
| rs9976484   | T | -0.0917 |
| rs2824703   | A | -0.0256 |
| rs2830784   | T | 0.0296  |
| rs4817705   | A | 0.0662  |
| rs1537112   | T | 0.0317  |

|             |   |         |
|-------------|---|---------|
| rs73184063  | C | 0.0623  |
| rs118043025 | A | -0.0924 |
| rs13050202  | A | -0.0379 |
| rs12483381  | G | 0.0549  |
| rs73228973  | A | -0.0471 |
| rs243563    | G | -0.03   |
| rs10488908  | T | -0.0533 |
| rs34189838  | A | -0.0271 |
| rs73205057  | A | -0.1022 |
| rs78217567  | C | -0.06   |
| rs73201053  | G | 0.0304  |
| rs9977563   | C | -0.0227 |
| rs117676362 | A | -0.0966 |
| rs62214330  | C | 0.1005  |
| rs78520472  | A | -0.0954 |
| rs9985030   | A | 0.0355  |
| rs2837467   | T | -0.031  |
| rs956645    | T | 0.1308  |
| rs2834628   | C | 0.034   |
| rs239053    | T | -0.0209 |
| rs73355071  | C | 0.0627  |
| rs2254456   | G | -0.0247 |
| rs117085041 | C | -0.0481 |
| rs2829390   | A | -0.02   |
| rs73220820  | C | 0.1472  |
| rs546078    | T | -0.0231 |
| rs138153125 | A | -0.1624 |
| rs464201    | A | -0.0251 |
| rs7277309   | C | -0.0511 |
| rs75003089  | T | 0.092   |
| rs2834022   | G | 0.024   |
| rs142554955 | G | -0.1623 |
| rs73358379  | A | 0.0526  |
| rs28676806  | C | -0.0413 |
| rs9975884   | T | -0.0207 |
| rs243585    | C | -0.0276 |
| rs9983581   | G | -0.0565 |
| rs1539763   | T | 0.0955  |
| rs1046769   | G | -0.0478 |
| rs4816713   | T | 0.0287  |
| rs73231955  | C | 0.0435  |
| rs9981503   | T | -0.038  |
| rs9980351   | T | 0.0332  |
| rs79848323  | C | -0.0746 |
| rs148340219 | A | 0.056   |
| rs9979868   | T | 0.0576  |
| rs77711650  | C | 0.0848  |

|             |   |         |
|-------------|---|---------|
| rs9305542   | C | 0.0278  |
| rs142825942 | T | 0.0852  |
| rs117579498 | T | 0.0929  |
| rs79545715  | C | -0.04   |
| rs11700403  | A | 0.0397  |
| rs140885503 | G | 0.0802  |
| rs117094541 | C | 0.1798  |
| rs10154196  | A | 0.0296  |
| rs141547866 | G | 0.1052  |
| rs6517630   | T | 0.118   |
| rs62209511  | T | 0.0684  |
| rs62213042  | G | -0.0411 |
| rs9974222   | C | -0.0281 |
| rs8134327   | T | 0.0296  |
| rs368269    | T | -0.0226 |
| rs12482859  | A | -0.0407 |
| rs138076668 | T | -0.1034 |
| rs45559732  | C | -0.0412 |
| rs2827158   | G | 0.0481  |
| rs78681915  | G | -0.1098 |
| rs35940083  | G | -0.0722 |
| rs117003135 | G | 0.1084  |
| rs117959686 | T | 0.136   |
| rs12626275  | A | -0.0355 |
| rs117830410 | C | -0.1189 |
| rs1788314   | G | -0.0611 |
| rs73373489  | A | -0.1424 |
| rs2824442   | G | 0.0252  |
| rs6517789   | A | 0.0313  |
| rs218635    | G | -0.025  |
| rs2823036   | C | 0.037   |
| rs883471    | G | -0.043  |
| rs11908739  | C | -0.0384 |
| rs9974920   | A | -0.0333 |
| rs11700602  | A | -0.0299 |
| rs112492490 | G | 0.0416  |
| rs147585788 | C | 0.1229  |
| rs2837763   | T | -0.0203 |
| rs10775651  | A | 0.0247  |
| rs141048045 | G | -0.1561 |
| rs78780621  | C | 0.099   |
| rs11910455  | A | -0.0335 |
| rs2834418   | T | -0.0266 |
| rs2828869   | T | 0.0375  |
| rs74960232  | T | 0.0701  |
| rs73423947  | C | 0.1208  |
| rs145564845 | T | -0.0793 |



|             |   |         |
|-------------|---|---------|
| rs143652199 | T | -0.1072 |
| rs139797684 | G | 0.1119  |
| rs8127811   | A | 0.0359  |
| rs12627131  | A | 0.0229  |
| rs78426270  | C | 0.0846  |
| rs2837455   | A | -0.0195 |
| rs2826352   | T | -0.0222 |
| rs73159764  | A | -0.0961 |
| rs73328891  | G | -0.0421 |
| rs2849714   | C | 0.0334  |
| rs9977642   | C | -0.1178 |
| rs9981547   | A | -0.0208 |
| rs1005609   | C | -0.0773 |
| rs150778308 | A | 0.1221  |
| rs73140352  | C | 0.0928  |
| rs12483210  | C | 0.0202  |
| rs139470995 | T | 0.0841  |
| rs140315848 | T | 0.1439  |
| rs75967196  | T | 0.0544  |
| rs142901667 | A | -0.0431 |
| rs28422173  | G | -0.0254 |
| rs12627725  | G | 0.0384  |
| rs113222084 | T | 0.1067  |
| rs35796750  | C | 0.0226  |
| rs77420417  | A | -0.0918 |
| rs6517709   | G | 0.0244  |
| rs17180326  | C | 0.0548  |
| rs2838522   | C | -0.0229 |
| rs73228129  | T | -0.0936 |
| rs17001492  | C | 0.0381  |
| rs11701486  | G | 0.0936  |
| rs117022633 | C | 0.1074  |
| rs16990416  | C | -0.0577 |
| rs9975831   | C | -0.0224 |
| rs117674297 | A | 0.0488  |
| rs117561731 | G | -0.0859 |
| rs11087866  | A | 0.0197  |
| rs7510515   | C | -0.0247 |
| rs2834915   | C | 0.0264  |
| rs111477837 | T | -0.1312 |
| rs2833284   | T | 0.0289  |
| rs741802    | T | -0.0208 |
| rs914244    | T | -0.0764 |
| rs2268293   | C | 0.0248  |
| rs9982678   | T | -0.0377 |
| rs12482763  | C | 0.0253  |
| rs117348038 | G | -0.1576 |

|             |   |         |
|-------------|---|---------|
| rs1534080   | G | 0.019   |
| rs17555605  | A | 0.0675  |
| rs13049966  | T | -0.1213 |
| rs2826550   | G | -0.0211 |
| rs117117044 | C | 0.112   |
| rs76750953  | G | -0.0607 |
| rs2832343   | T | -0.065  |
| rs1869770   | T | -0.044  |
| rs28446860  | T | 0.0437  |
| rs7275471   | G | 0.0485  |
| rs55713305  | G | -0.0795 |
| rs76554453  | T | 0.1035  |
| rs211959    | A | 0.0258  |
| rs2276205   | G | 0.0367  |
| rs17561661  | G | 0.1349  |
| rs17768485  | T | -0.0306 |
| rs2205321   | A | 0.0287  |
| rs71319649  | G | -0.0269 |
| rs17000804  | G | 0.0565  |
| rs74865278  | T | 0.041   |
| rs17770114  | G | 0.1216  |
| rs2832399   | A | -0.0418 |
| rs2268251   | T | 0.0347  |
| rs79988155  | G | 0.0854  |
| rs71319655  | G | -0.0494 |
| rs12152000  | G | 0.0382  |
| rs118001816 | T | -0.0781 |
| rs554781    | T | 0.0366  |
| rs113047164 | C | -0.0718 |
| rs17824585  | G | -0.0525 |
| rs150887099 | C | 0.0546  |
| rs143909090 | A | -0.0721 |
| rs13047839  | T | 0.0691  |
| rs4819317   | C | -0.0288 |
| rs75761456  | T | 0.0887  |
| rs113316547 | T | 0.0671  |
| rs73218417  | G | -0.0307 |
| rs62220727  | A | -0.0413 |
| rs36019198  | G | 0.0599  |
| rs55798478  | A | -0.1403 |
| rs220284    | A | 0.0204  |
| rs112680881 | T | -0.0696 |
| rs62214257  | C | 0.0973  |
| rs150464942 | G | 0.1105  |
| rs228039    | T | -0.0258 |
| rs1491785   | C | 0.0246  |
| rs147931125 | G | 0.1272  |

|             |   |         |
|-------------|---|---------|
| rs2212808   | T | 0.0209  |
| rs62216228  | C | -0.0321 |
| rs13046586  | T | -0.0301 |
| rs74934752  | A | 0.0575  |
| rs11701532  | G | 0.0414  |
| rs7284012   | G | 0.0404  |
| rs71317431  | T | -0.0421 |
| rs11203182  | A | 0.0388  |
| rs34441189  | C | 0.029   |
| rs67952232  | T | 0.0822  |
| rs741793    | T | 0.0227  |
| rs118100561 | C | 0.1233  |
| rs78496068  | A | -0.0448 |
| rs75924460  | G | -0.0531 |
| rs9974854   | G | 0.0244  |
| rs77485256  | A | -0.0497 |
| rs75928535  | A | -0.0458 |
| rs2827639   | T | 0.0191  |
| rs78112539  | A | 0.0644  |
| rs116867165 | C | 0.1128  |
| rs13052223  | A | -0.0239 |
| rs146978161 | A | 0.0967  |
| rs114698762 | C | 0.0784  |
| rs62228688  | G | -0.1628 |
| rs17780089  | G | 0.0754  |
| rs117436952 | T | -0.0712 |
| rs9981248   | G | -0.1308 |
| rs116866410 | G | -0.1935 |
| rs73201071  | C | -0.0671 |
| rs11701167  | C | 0.0656  |
| rs117854939 | C | -0.1555 |
| rs118165701 | A | 0.0932  |
| rs60371390  | T | -0.0378 |
| rs111622711 | A | 0.0932  |
| rs36066597  | T | -0.0658 |
| rs7283245   | T | -0.0452 |
| rs75951347  | A | -0.0824 |
| rs113596853 | A | 0.0541  |
| rs965494    | T | -0.0197 |
| rs55854621  | A | 0.0891  |
| rs71326335  | G | 0.1067  |
| rs117165655 | T | 0.0795  |
| rs2825940   | C | -0.0332 |
| rs143655461 | A | 0.0496  |
| rs144970687 | A | -0.1117 |
| rs56239694  | C | 0.0909  |
| rs73177941  | T | 0.119   |

|             |   |         |
|-------------|---|---------|
| rs67617301  | C | -0.0248 |
| rs58017672  | G | 0.0272  |
| rs115970838 | C | 0.0427  |
| rs73202262  | G | -0.0864 |
| rs146663    | A | -0.0712 |
| rs73906818  | C | -0.0387 |
| rs76754185  | T | 0.023   |
| rs9305343   | C | -0.0282 |
| rs59080254  | A | -0.0911 |
| rs17778774  | C | 0.0373  |
| rs62210260  | A | -0.0373 |
| rs111447236 | A | 0.0929  |
| rs74644264  | T | 0.0681  |
| rs76818884  | T | -0.132  |
| rs35529757  | G | 0.0284  |
| rs219715    | T | -0.0365 |
| rs143377432 | T | 0.1213  |
| rs9974512   | A | 0.0248  |
| rs80225292  | A | -0.0409 |
| rs56393630  | A | 0.023   |
| rs78577734  | T | 0.036   |
| rs11702663  | C | 0.0249  |
| rs7509790   | A | 0.0211  |
| rs2154499   | G | 0.0357  |
| rs2236431   | C | 0.0185  |
| rs112938967 | T | -0.112  |
| rs9305406   | G | -0.0246 |
| rs59004308  | A | 0.0284  |
| rs975527    | A | -0.0244 |
| rs2837295   | T | -0.0197 |
| rs118038993 | G | 0.0575  |
| rs117428310 | G | -0.0347 |
| rs62224164  | T | -0.0503 |
| rs77352021  | C | 0.0583  |
| rs2829841   | T | 0.0274  |
| rs145088931 | G | -0.0983 |
| rs74910411  | T | 0.0702  |
| rs73231967  | C | -0.0387 |
| rs138128685 | C | 0.0755  |
| rs1354484   | A | 0.0199  |
| rs873556    | T | 0.0301  |
| rs147812002 | T | 0.1138  |
| rs2226741   | G | 0.0244  |
| rs75815068  | G | 0.1081  |
| rs2105752   | C | 0.0192  |
| rs228102    | C | -0.0331 |
| rs117121380 | A | 0.0849  |

|             |   |         |
|-------------|---|---------|
| rs1074741   | G | -0.0195 |
| rs117742706 | G | -0.0832 |
| rs73193466  | C | -0.0256 |
| rs116903045 | A | 0.0661  |
| rs78353384  | G | 0.0755  |
| rs9974785   | A | -0.0231 |
| rs8133010   | C | 0.0211  |
| rs116932188 | A | -0.1461 |
| rs460166    | A | 0.0541  |
| rs117473978 | G | -0.0928 |
| rs77150091  | T | -0.0331 |
| rs9977895   | T | 0.0329  |
| rs62213046  | G | -0.0528 |
| rs56084865  | C | 0.047   |
| rs4818064   | G | 0.0482  |
| rs147578983 | A | -0.1109 |
| rs76731642  | C | 0.0837  |
| rs12626835  | T | -0.0213 |
| rs13052919  | G | -0.0315 |
| rs73205634  | A | -0.0613 |
| rs6517605   | T | 0.0197  |
| rs413650    | G | 0.0191  |
| rs881837    | A | -0.0251 |
| rs631800    | G | -0.0296 |
| rs71317620  | A | -0.1243 |
| rs376727    | G | 0.0691  |
| rs117939917 | T | 0.0517  |
| rs117238814 | G | 0.0891  |
| rs34477092  | T | 0.0335  |
| rs73200434  | T | -0.0512 |
| rs73227507  | G | -0.1105 |
| rs113660079 | G | -0.0661 |
| rs35644070  | G | -0.0344 |
| rs13049048  | C | -0.034  |
| rs146403452 | C | -0.0715 |
| rs149808498 | A | 0.1897  |
| rs8127581   | C | -0.021  |
| rs234786    | T | -0.0294 |
| rs11911918  | G | -0.0794 |
| rs78922170  | C | 0.0884  |
| rs117997335 | G | 0.0837  |
| rs17002691  | T | -0.1466 |
| rs2833549   | G | -0.0198 |
| rs2705663   | C | 0.0368  |
| rs71322544  | C | -0.0534 |
| rs9917529   | T | 0.0192  |
| rs2834459   | T | -0.0256 |

|             |   |         |
|-------------|---|---------|
| rs145324003 | C | 0.0711  |
| rs11910399  | G | 0.0243  |
| rs2835809   | G | 0.0267  |
| rs77866464  | C | -0.1168 |
| rs117378390 | T | 0.0695  |
| rs8131129   | A | 0.0426  |
| rs58184359  | C | 0.0249  |
| rs74542714  | G | 0.0415  |
| rs116971322 | G | 0.098   |
| rs77401994  | T | -0.1381 |
| rs139289059 | A | -0.1164 |
| rs2837631   | G | 0.0189  |
| rs75157971  | T | 0.1038  |
| rs112798876 | A | -0.0704 |
| rs117207578 | T | 0.1538  |
| rs28628624  | T | -0.0454 |
| rs2837948   | G | -0.0194 |
| rs766242    | T | -0.0376 |
| rs73208162  | A | -0.042  |
| rs12481734  | C | 0.0541  |
| rs2822731   | G | 0.0259  |
| rs956147    | A | -0.0229 |
| rs138543152 | T | -0.0251 |
| rs8126838   | T | 0.0234  |
| rs144043692 | A | 0.0978  |
| rs12185810  | T | 0.0593  |
| rs62217278  | T | 0.0264  |
| rs150054000 | T | -0.1504 |
| rs8128415   | G | -0.0267 |
| rs73360100  | C | -0.0241 |
| rs2839567   | G | -0.0186 |
| rs117225704 | C | 0.0859  |
| rs9980655   | A | -0.0862 |
| rs112704798 | T | -0.0426 |
| rs2835788   | G | 0.0315  |
| rs116931294 | A | -0.0887 |
| rs145121764 | A | -0.1015 |
| rs80179792  | C | -0.0514 |
| rs71323841  | G | -0.0595 |
| rs78826164  | A | -0.1381 |
| rs56104336  | A | -0.1086 |
| rs143170910 | T | 0.0865  |
| rs111961012 | T | -0.1573 |
| rs2739389   | G | 0.02    |
| rs56035786  | C | 0.0434  |
| rs972136    | T | -0.0202 |
| rs1475893   | A | -0.0226 |

|             |   |         |
|-------------|---|---------|
| rs112335247 | A | -0.0402 |
| rs76444470  | A | 0.0906  |
| rs743446    | A | -0.0175 |
| rs2253319   | T | 0.0202  |
| rs2239386   | C | -0.027  |
| rs17004695  | C | 0.046   |
| rs9977191   | T | 0.0336  |
| rs57465959  | A | 0.0192  |
| rs35353717  | T | 0.0487  |
| rs147421162 | A | 0.0698  |
| rs144071965 | C | -0.1389 |
| rs76938490  | A | -0.0198 |
| rs2830790   | A | 0.0407  |
| rs2251854   | G | 0.0187  |
| rs113493775 | C | 0.0979  |
| rs112239383 | T | 0.0761  |
| rs141632640 | T | 0.128   |
| rs79018575  | C | 0.021   |
| rs34092958  | C | 0.0183  |
| rs117214167 | A | 0.0475  |
| rs2836808   | C | -0.0304 |
| rs7275720   | A | -0.018  |
| rs80334838  | A | 0.0676  |
| rs233326    | T | -0.0228 |
| rs8132500   | A | 0.0528  |
| rs8130352   | A | -0.0195 |
| rs1131668   | A | 0.0207  |
| rs2839098   | G | 0.0241  |
| rs2256038   | A | 0.0188  |
| rs73203284  | G | 0.0339  |
| rs118036297 | T | 0.1083  |
| rs4816846   | T | -0.0185 |
| rs117995578 | T | 0.1189  |
| rs117105871 | G | 0.0963  |
| rs235950    | T | -0.0241 |
| rs2833382   | A | 0.0233  |
| rs55744933  | A | 0.0437  |
| rs1783421   | T | -0.0198 |
| rs114189767 | A | 0.0488  |
| rs1547357   | T | 0.0265  |
| rs2834731   | C | -0.0293 |
| rs4818096   | T | 0.0181  |
| rs1552465   | A | 0.0424  |
| rs12152093  | G | -0.0265 |
| rs8130303   | T | 0.091   |
| rs117184761 | T | 0.1147  |
| rs11702483  | T | -0.1509 |

|             |   |         |
|-------------|---|---------|
| rs2834442   | T | -0.0184 |
| rs149786    | A | 0.02    |
| rs7281256   | T | -0.0382 |
| rs2835146   | A | -0.0617 |
| rs2836747   | G | -0.0179 |
| rs8133419   | G | 0.0298  |
| rs11700755  | G | 0.0206  |
| rs75323187  | T | 0.0766  |
| rs2837554   | A | 0.0338  |
| rs17210156  | A | -0.0303 |
| rs2407726   | A | 0.0218  |
| rs34478608  | T | 0.0311  |
| rs205697    | C | -0.0359 |
| rs117692657 | C | 0.0874  |
| rs3753016   | T | -0.0257 |
| rs9637091   | A | 0.0582  |
| rs144263702 | A | -0.1572 |
| rs7281740   | A | -0.1221 |
| rs465883    | C | 0.0241  |
| rs1076843   | T | -0.0206 |
| rs2824684   | G | -0.0267 |
| rs118034967 | G | 0.0545  |
| rs77444076  | A | -0.0378 |
| rs148192567 | C | 0.1662  |
| rs73220462  | A | 0.0943  |
| rs9982898   | A | -0.0384 |
| rs724732    | C | 0.0376  |
| rs7280633   | T | 0.0193  |
| rs13049548  | G | 0.0744  |
| rs217037    | T | 0.0198  |
| rs7275764   | T | 0.0348  |
| rs78792999  | A | 0.0292  |
| rs72502205  | T | 0.0422  |
| rs162348    | T | -0.0233 |
| rs117989670 | A | 0.1427  |
| rs138342048 | C | -0.1169 |
| rs2837752   | T | -0.0291 |
| rs13051164  | A | -0.0574 |
| rs2836195   | T | -0.0597 |
| rs55757646  | C | -0.0208 |
| rs57453491  | C | 0.0842  |
| rs59181232  | A | -0.0607 |
| rs9975076   | T | 0.0433  |
| rs146340478 | T | 0.1059  |
| rs147275608 | C | -0.0682 |
| rs11700708  | T | 0.0304  |
| rs9983689   | A | -0.0242 |



|             |   |         |
|-------------|---|---------|
| rs1003030   | G | -0.0328 |
| rs9982310   | G | -0.0177 |
| rs9325610   | A | 0.0705  |
| rs1209949   | A | 0.0241  |
| rs138963748 | T | -0.1246 |
| rs2834767   | T | 0.0201  |
| rs77287961  | A | 0.078   |
| rs11701582  | A | -0.0231 |
| rs2838088   | T | 0.0228  |
| rs75596697  | C | -0.0809 |
| rs191889    | A | -0.0453 |
| rs2824978   | T | 0.0984  |
| rs112933700 | G | -0.0621 |
| rs117074184 | T | -0.0794 |
| rs76334526  | G | -0.0332 |
| rs13048967  | C | -0.0672 |
| rs139768222 | T | -0.1012 |
| rs234784    | T | 0.0202  |
| rs1688182   | A | -0.0222 |
| rs2828785   | T | 0.0203  |
| rs28754722  | G | 0.0239  |
| rs2831006   | T | -0.0218 |
| rs220112    | C | 0.0332  |
| rs17498154  | C | -0.0298 |
| rs1734920   | T | 0.0182  |
| rs17274058  | T | -0.0524 |
| rs111497912 | A | 0.0605  |
| rs117850867 | T | -0.1071 |
| rs116929178 | A | 0.0827  |
| rs113265490 | C | -0.1171 |
| rs118084125 | A | 0.0978  |
| rs117550365 | G | 0.0858  |
| rs1974381   | T | 0.0305  |
| rs112738490 | T | -0.1034 |
| rs2826851   | G | 0.0196  |
| rs116877439 | T | -0.0457 |
| rs67216626  | G | -0.0261 |
| rs2836316   | T | -0.0196 |
| rs117786385 | A | 0.0592  |
| rs140948775 | C | -0.1207 |
| rs77581220  | T | -0.0649 |
| rs138457970 | G | -0.1164 |
| rs1981365   | T | 0.0173  |
| rs13051967  | C | -0.0388 |
| rs73209833  | C | 0.1102  |
| rs73384614  | C | -0.071  |
| rs74338794  | T | 0.0299  |

|             |   |         |
|-------------|---|---------|
| rs28437907  | C | 0.0696  |
| rs139439630 | A | -0.138  |
| rs11911490  | G | 0.0246  |
| rs71330189  | A | -0.0329 |
| rs7276139   | A | 0.0971  |
| rs13047901  | T | 0.0228  |
| rs3827236   | G | 0.0207  |
| rs112268912 | T | -0.0893 |
| rs73229369  | T | -0.0521 |
| rs73210199  | A | 0.1115  |
| rs8130187   | C | 0.0592  |
| rs9982394   | T | 0.0205  |
| rs73159459  | G | -0.0333 |
| rs141462891 | T | 0.1052  |
| rs2828060   | T | 0.018   |
| rs74404628  | T | -0.0472 |
| rs76540594  | G | -0.09   |
| rs388034    | G | 0.0487  |
| rs8133356   | G | 0.0253  |
| rs222151    | T | 0.0206  |
| rs79083717  | T | 0.0618  |
| rs116935839 | A | 0.0873  |
| rs4816388   | C | -0.1354 |
| rs4501026   | C | 0.0267  |
| rs79904875  | T | -0.074  |
| rs510170    | A | 0.0257  |
| rs79624698  | G | 0.0849  |
| rs9978056   | T | -0.0211 |
| rs117450747 | C | 0.0635  |
| rs80246208  | A | 0.07    |
| rs79926407  | C | -0.0512 |
| rs9983727   | A | 0.0347  |
| rs2835975   | G | -0.0169 |
| rs1041868   | A | 0.0218  |
| rs243577    | A | -0.0502 |
| rs466013    | A | 0.0172  |
| rs117835226 | G | 0.0579  |
| rs113963380 | A | 0.0943  |
| rs17208913  | C | -0.0677 |
| rs2739526   | T | -0.0201 |
| rs8131901   | A | -0.0179 |
| rs2830242   | C | -0.0284 |
| rs112621923 | C | 0.1043  |
| rs62222675  | A | 0.0585  |
| rs13052580  | G | -0.0347 |
| rs73200767  | G | 0.1225  |
| rs2833136   | C | 0.0539  |

|             |   |         |
|-------------|---|---------|
| rs73216074  | A | -0.0845 |
| rs17701811  | T | 0.0179  |
| rs845682    | G | -0.0316 |
| rs79144429  | G | 0.0725  |
| rs1236102   | T | -0.0183 |
| rs858027    | A | -0.0335 |
| rs80273585  | T | -0.0437 |
| rs2835251   | C | 0.027   |
| rs62220106  | C | -0.0661 |
| rs76747009  | G | -0.0809 |
| rs4148123   | A | 0.0176  |
| rs13048825  | G | -0.0182 |
| rs116886122 | T | 0.0762  |
| rs74331866  | G | 0.0524  |
| rs73898554  | T | -0.0889 |
| rs118087975 | G | 0.1056  |
| rs17766525  | C | -0.0628 |
| rs56027221  | G | 0.075   |
| rs2242897   | A | 0.044   |
| rs11701732  | T | 0.0199  |
| rs66820219  | C | 0.0362  |
| rs8129440   | A | 0.0239  |
| rs7278654   | A | 0.0302  |
| rs117624526 | A | -0.022  |
| rs7282132   | T | -0.0224 |
| rs4637211   | A | 0.0315  |
| rs219792    | A | 0.032   |
| rs8134385   | A | -0.0339 |
| rs112685337 | T | 0.0644  |
| rs34422088  | C | 0.0594  |
| rs74727741  | A | -0.0307 |
| rs4284910   | A | -0.0201 |
| rs7277403   | T | 0.0604  |
| rs13052394  | A | 0.0312  |
| rs2014474   | T | -0.0221 |
| rs2835344   | T | -0.0203 |
| rs2836778   | T | -0.0181 |
| rs113093872 | T | -0.0563 |
| rs202416    | T | -0.1091 |
| rs2073354   | T | -0.0308 |
| rs9981625   | C | -0.0196 |
| rs116882059 | A | 0.091   |
| rs144756768 | G | 0.0691  |
| rs2836399   | T | -0.018  |
| rs3909844   | G | 0.0168  |
| rs71317486  | G | 0.0637  |
| rs148298484 | G | -0.0731 |

|             |   |         |
|-------------|---|---------|
| rs76564173  | T | 0.0608  |
| rs62218270  | C | -0.0535 |
| rs116287707 | A | 0.0582  |
| rs2823968   | T | -0.0262 |
| rs13051127  | G | 0.0338  |
| rs60617744  | G | 0.0235  |
| rs112168739 | G | -0.1284 |
| rs13433429  | A | 0.0239  |
| rs144268547 | T | 0.1022  |
| rs12483266  | A | -0.0206 |
| rs1041735   | G | -0.0181 |
| rs2234718   | G | -0.0196 |
| rs115382496 | A | -0.0268 |
| rs9982177   | G | -0.0241 |
| rs9306102   | C | 0.0206  |
| rs2838763   | T | 0.0198  |
| rs145957872 | A | -0.0442 |
| rs2155960   | A | -0.0187 |
| rs2826838   | T | 0.0241  |
| rs2825744   | A | 0.0527  |
| rs2051382   | C | 0.0188  |
| rs4816393   | C | -0.0321 |
| rs6586242   | A | -0.0251 |
| rs7277568   | T | -0.0221 |
| rs117698347 | G | -0.1205 |
| rs9979712   | T | -0.0492 |
| rs79148744  | A | 0.0419  |
| rs148119908 | A | 0.0959  |
| rs9974590   | T | 0.0336  |
| rs2178849   | G | 0.0424  |
| rs2836005   | C | -0.0406 |
| rs75433365  | T | -0.0893 |
| rs28526702  | T | -0.018  |
| rs11909247  | C | -0.0318 |
| rs79912268  | A | 0.0896  |
| rs62232377  | A | 0.0189  |
| rs78816007  | G | 0.1067  |
| rs17176576  | A | 0.067   |
| rs62226370  | A | -0.0778 |
| rs2827676   | T | -0.0252 |
| rs202855    | G | -0.0234 |
| rs9979205   | T | -0.0498 |
| rs71329096  | G | -0.0501 |
| rs142772281 | C | -0.0892 |
| rs8132079   | A | 0.0229  |
| rs2154733   | A | -0.027  |
| rs13047746  | C | 0.0995  |

|             |   |         |
|-------------|---|---------|
| rs62219738  | T | 0.0445  |
| rs9983017   | A | 0.0512  |
| rs73215384  | T | 0.0527  |
| rs2830215   | C | -0.0355 |
| rs235263    | A | 0.0439  |
| rs8128168   | A | -0.0469 |
| rs2826581   | G | 0.0205  |
| rs117913461 | A | 0.0715  |
| rs8132279   | G | 0.0525  |
| rs7277189   | C | 0.0206  |
| rs73196350  | A | 0.0716  |
| rs16993196  | A | -0.0264 |
| rs138243295 | A | -0.1041 |
| rs140703020 | T | 0.1323  |
| rs2838029   | A | 0.0248  |
| rs74423429  | A | -0.087  |
| rs73322918  | G | 0.0573  |
| rs7277829   | G | 0.0281  |
| rs57944973  | G | 0.0271  |
| rs2056890   | T | 0.0362  |
| rs67493200  | T | -0.0291 |
| rs71318580  | A | 0.1319  |
| rs73322065  | T | -0.0365 |
| rs118012573 | A | -0.0874 |
| rs62213413  | G | 0.0678  |
| rs118151685 | A | -0.0758 |
| rs2830048   | G | -0.0174 |
| rs17536311  | T | -0.0446 |
| rs2178832   | G | -0.018  |
| rs714983    | G | 0.0352  |
| rs140106462 | A | 0.1108  |
| rs149287370 | C | 0.0733  |
| rs12483482  | C | -0.0254 |
| rs112560994 | T | 0.116   |
| rs6517965   | G | 0.0616  |
| rs75622434  | A | -0.0802 |
| rs78071757  | G | -0.0557 |
| rs62209067  | A | -0.1147 |
| rs148289698 | G | 0.1406  |
| rs2833099   | T | -0.0238 |
| rs447184    | T | 0.0248  |
| rs77696019  | G | -0.0525 |
| rs7279935   | A | 0.0193  |
| rs117244583 | C | 0.1079  |
| rs73211971  | T | -0.0706 |
| rs77189961  | A | -0.053  |
| rs7277003   | C | -0.0277 |

|             |   |         |
|-------------|---|---------|
| rs10482855  | G | 0.0367  |
| rs74432937  | A | 0.0312  |
| rs7278659   | A | 0.0463  |
| rs62213026  | T | -0.0227 |
| rs1653110   | T | -0.0167 |
| rs73208392  | T | 0.0286  |
| rs76159875  | G | 0.0859  |
| rs2096826   | A | 0.0339  |
| rs11910293  | A | 0.028   |
| rs2834185   | T | 0.0171  |
| rs11088544  | C | 0.0177  |
| rs1981328   | A | -0.0305 |
| rs34304022  | A | -0.0202 |
| rs2251134   | C | -0.0177 |
| rs77600076  | C | -0.0576 |
| rs2284967   | C | -0.019  |
| rs117196567 | A | -0.041  |
| rs80081051  | G | -0.0462 |
| rs4405831   | G | -0.0166 |
| rs28370333  | G | 0.1009  |
| rs62209924  | A | -0.0713 |
| rs408654    | T | 0.0178  |
| rs117890694 | A | 0.0375  |
| rs17664292  | A | 0.0389  |
| rs13051481  | G | 0.0285  |
| rs148407022 | T | -0.0625 |
| rs2828969   | T | 0.0182  |
| rs73152893  | A | -0.0237 |
| rs73409393  | C | -0.0274 |
| rs117487557 | A | 0.0902  |
| rs117146360 | C | 0.0714  |
| rs10483010  | A | -0.0308 |
| rs2836890   | A | -0.0658 |
| rs28571658  | G | 0.0351  |
| rs62222396  | A | -0.0487 |
| rs7282528   | T | -0.0176 |
| rs76531454  | T | -0.0384 |
| rs8130638   | C | 0.0169  |
| rs2212926   | A | -0.0258 |
| rs73143664  | T | 0.0945  |
| rs144530109 | G | -0.0683 |
| rs13049545  | T | 0.0207  |
| rs2824104   | C | -0.0326 |
| rs115307854 | T | 0.0798  |
| rs77354424  | A | -0.0987 |
| rs2836885   | C | -0.0304 |
| rs11701031  | A | 0.0828  |

|             |   |         |
|-------------|---|---------|
| rs116967324 | C | -0.0955 |
| rs73208111  | C | 0.0626  |
| rs144326496 | A | 0.0789  |
| rs4920123   | T | 0.0186  |
| rs13048344  | C | 0.0178  |
| rs73221364  | A | -0.0308 |
| rs9979420   | G | -0.0175 |
| rs2834273   | G | -0.0273 |
| rs2823021   | A | -0.0198 |
| rs117199601 | C | -0.1072 |
| rs225360    | A | 0.0167  |
| rs4816452   | A | 0.0162  |
| rs76201157  | T | -0.1124 |
| rs79515188  | T | -0.0501 |
| rs117386511 | A | 0.1035  |
| rs142338807 | G | 0.0755  |
| rs141194099 | C | -0.0527 |
| rs151084116 | T | 0.0937  |
| rs1699663   | G | 0.0198  |
| rs77148589  | A | 0.108   |
| rs7280342   | T | 0.0633  |
| rs116957430 | T | 0.0617  |
| rs117352302 | C | 0.0675  |
| rs117660898 | A | -0.0826 |
| rs9636890   | A | -0.0178 |
| rs117688271 | A | -0.0812 |
| rs146538482 | G | -0.103  |
| rs71330676  | C | 0.0379  |
| rs1602549   | A | -0.0167 |
| rs8129829   | C | -0.0229 |
| rs539330    | A | 0.0435  |
| rs116898685 | T | 0.0767  |
| rs2836349   | T | 0.0182  |
| rs7276250   | T | -0.0363 |
| rs9637196   | A | 0.0479  |
| rs9980650   | A | -0.0222 |
| rs34181940  | C | 0.0515  |
| rs2823704   | C | 0.0164  |
| rs74592564  | C | 0.0474  |
| rs2150433   | C | -0.026  |
| rs117373369 | T | -0.0638 |
| rs113294282 | A | 0.097   |
| rs117626152 | G | -0.1036 |
| rs41417546  | A | 0.0806  |
| rs143934956 | A | -0.0711 |
| rs13051482  | A | 0.0238  |
| rs142324737 | C | 0.059   |

|             |   |         |
|-------------|---|---------|
| rs75484953  | T | 0.0805  |
| rs35621437  | A | -0.084  |
| rs73157764  | C | 0.0295  |
| rs450808    | T | -0.0217 |
| rs8133564   | C | 0.0167  |
| rs79810257  | T | -0.1367 |
| rs116345940 | T | -0.0932 |
| rs9983044   | G | -0.079  |
| rs12627019  | T | -0.0499 |
| rs74924059  | A | 0.074   |
| rs75220949  | T | -0.0996 |
| rs2836339   | T | -0.0262 |
| rs34125228  | A | -0.0265 |
| rs2142239   | C | -0.0163 |
| rs150355227 | T | -0.1262 |
| rs35525256  | T | 0.0274  |
| rs62207657  | A | 0.084   |
| rs1003262   | T | -0.0168 |
| rs202858    | C | 0.0185  |
| rs2824851   | A | -0.0741 |
| rs2828468   | G | 0.0163  |
| rs6518184   | G | -0.0212 |
| rs79460499  | A | -0.0841 |
| rs8175315   | G | -0.09   |
| rs73210239  | T | 0.0226  |
| rs10211937  | C | 0.0241  |
| rs79911212  | A | -0.112  |
| rs2828578   | A | -0.0273 |
| rs2835938   | A | 0.0546  |
| rs12482052  | T | 0.0236  |
| rs73223210  | C | -0.0351 |
| rs34654686  | C | 0.0684  |
| rs28385569  | A | -0.022  |
| rs2825968   | T | 0.0164  |
| rs2834318   | G | -0.0189 |
| rs9985027   | G | -0.0606 |
| rs2017196   | G | -0.0249 |
| rs62222912  | T | -0.0667 |
| rs2776341   | A | 0.0161  |
| rs2838103   | C | -0.0186 |
| rs117848277 | C | -0.0437 |
| rs62212891  | T | 0.027   |
| rs78427952  | C | -0.0364 |
| rs143847567 | T | 0.1314  |
| rs112463207 | A | -0.0738 |
| rs34351616  | G | 0.0473  |
| rs10222203  | T | 0.0886  |



|             |   |         |
|-------------|---|---------|
| rs2824414   | G | 0.0187  |
| rs4817959   | T | 0.0218  |
| rs2017879   | G | 0.0736  |
| rs12329683  | G | -0.0379 |
| rs7275327   | T | -0.0948 |
| rs113370619 | T | -0.0508 |
| rs73177992  | T | -0.0251 |
| rs13046542  | A | -0.1136 |
| rs9982936   | T | -0.0363 |
| rs208900    | T | -0.0613 |
| rs13047502  | G | -0.0454 |
| rs117866651 | G | -0.0941 |
| rs111963209 | C | -0.1141 |
| rs2284601   | C | 0.0293  |
| rs8130020   | T | 0.0158  |
| rs146497226 | T | -0.0961 |
| rs145031622 | C | 0.0628  |
| rs118120536 | T | -0.0417 |
| rs13049891  | T | -0.0334 |
| rs62216003  | C | -0.027  |
| rs73894753  | G | -0.0596 |
| rs928834    | A | 0.0305  |
| rs57799339  | A | 0.0645  |
| rs12627387  | A | 0.0208  |
| rs2643075   | A | 0.0375  |
| rs12483476  | C | -0.0312 |
| rs9984981   | G | -0.0691 |
| rs2834810   | T | -0.0463 |
| rs73900194  | C | 0.0343  |
| rs73220360  | C | -0.0239 |
| rs75101465  | A | 0.0966  |
| rs77885268  | G | 0.0569  |
| rs9980405   | A | -0.0428 |
| rs118176817 | G | -0.0641 |
| rs73238101  | T | 0.078   |
| rs2298363   | C | -0.0199 |
| rs116954548 | C | 0.0366  |
| rs73223569  | A | -0.0743 |
| rs61750208  | A | 0.0822  |
| rs2826492   | A | -0.0236 |
| rs2299757   | C | -0.0291 |
| rs58456192  | G | 0.0204  |
| rs2253204   | T | -0.0209 |
| rs150961898 | A | -0.0929 |
| rs10775660  | T | 0.023   |
| rs138148293 | A | 0.0796  |
| rs2294161   | C | 0.025   |

|             |   |         |
|-------------|---|---------|
| rs115213097 | A | 0.0417  |
| rs9305399   | A | 0.0233  |
| rs138294314 | C | -0.1026 |
| rs7276413   | C | 0.0489  |
| rs62214185  | G | -0.0296 |
| rs73198415  | T | -0.0817 |
| rs13052942  | T | 0.0461  |
| rs146698426 | A | 0.1371  |
| rs7283186   | T | 0.0428  |
| rs73226689  | G | -0.068  |
| rs8126578   | A | -0.0429 |
| rs147728338 | A | -0.0717 |
| rs117317625 | A | -0.024  |
| rs998490    | T | -0.0703 |
| rs78002269  | C | 0.0925  |
| rs3788164   | C | 0.0287  |
| rs2407727   | C | 0.0185  |
| rs117167576 | C | 0.1109  |
| rs8128271   | A | 0.0307  |
| rs466609    | G | -0.0254 |
| rs368549    | A | 0.0246  |
| rs78331949  | A | -0.0751 |
| rs117563469 | G | 0.0445  |
| rs35223581  | T | 0.0441  |
| rs75022181  | T | 0.0594  |
| rs9974639   | T | 0.016   |
| rs6517690   | G | 0.0335  |
| rs6586287   | C | 0.0201  |
| rs73227001  | G | 0.0852  |
| rs34903168  | G | 0.0198  |
| rs467653    | G | -0.048  |
| rs142183780 | T | -0.0977 |
| rs229406    | G | -0.0169 |
| rs74794515  | A | 0.0934  |
| rs9974875   | G | -0.0259 |
| rs2836383   | T | -0.0172 |
| rs2017582   | G | 0.0279  |
| rs35971295  | G | 0.0302  |
| rs2826196   | T | -0.0201 |
| rs117262551 | A | -0.1168 |
| rs77554400  | T | -0.0181 |
| rs113816117 | G | 0.1477  |
| rs1292586   | C | -0.0203 |
| rs62214748  | T | 0.0441  |
| rs117177643 | A | -0.1119 |
| rs13433503  | T | 0.0471  |
| rs466774    | G | 0.1062  |

|             |   |         |
|-------------|---|---------|
| rs111938828 | T | -0.1034 |
| rs113382956 | C | -0.0231 |
| rs2834617   | C | -0.0194 |
| rs117293260 | C | -0.0454 |
| rs11701435  | A | 0.0187  |
| rs2836431   | T | -0.0412 |
| rs56339442  | G | -0.017  |
| rs148025112 | A | -0.101  |
| rs62236606  | T | -0.0366 |
| rs73362785  | T | 0.1025  |
| rs117106392 | C | -0.0721 |
| rs9981988   | T | -0.0157 |
| rs117232091 | T | -0.1477 |
| rs117284168 | T | 0.0659  |
| rs74660554  | C | -0.0659 |
| rs73156620  | C | 0.0307  |
| rs12627113  | G | -0.0204 |
| rs13847     | A | 0.0227  |
| rs6518157   | T | 0.0282  |
| rs8130517   | G | -0.0191 |
| rs111960612 | A | 0.0926  |
| rs117241021 | A | -0.1036 |
| rs7280399   | A | -0.0214 |
| rs8132631   | T | 0.0231  |
| rs17606211  | T | -0.0465 |
| rs2835679   | A | 0.019   |
| rs240467    | C | 0.0234  |
| rs62240663  | T | 0.0837  |
| rs77516687  | C | 0.042   |
| rs2830201   | C | 0.0267  |
| rs117076068 | T | 0.0466  |
| rs9983457   | T | -0.0194 |
| rs73219499  | A | 0.1145  |
| rs2026850   | C | -0.0205 |
| rs142882448 | T | -0.1195 |
| rs17209757  | G | -0.0375 |
| rs2096512   | G | -0.0152 |
| rs7279222   | A | 0.0148  |
| rs80077519  | C | -0.0277 |
| rs1011764   | G | -0.0249 |
| rs12483294  | T | 0.028   |
| rs143955227 | C | -0.0938 |
| rs4816565   | G | 0.0365  |
| rs12627495  | T | 0.042   |
| rs117059047 | T | -0.0889 |
| rs8132871   | A | -0.0216 |
| rs9974362   | C | -0.0832 |

|             |   |         |
|-------------|---|---------|
| rs857996    | A | -0.0252 |
| rs80013596  | G | 0.112   |
| rs74312370  | T | -0.0445 |
| rs144729058 | G | 0.0479  |
| rs4819063   | G | 0.0208  |
| rs9982143   | T | 0.031   |
| rs144121281 | A | -0.0776 |
| rs76660435  | T | -0.0846 |
| rs144523980 | A | -0.1302 |
| rs61736857  | T | -0.0304 |
| rs12483713  | T | 0.061   |
| rs9981805   | G | -0.0405 |
| rs2836845   | T | -0.0285 |
| rs116840870 | A | 0.0617  |
| rs75421257  | T | -0.0892 |
| rs13052561  | A | -0.0294 |
| rs144880015 | T | 0.1043  |
| rs141037872 | T | 0.0481  |
| rs1701000   | C | 0.0171  |
| rs9975594   | T | -0.0173 |
| rs62227249  | A | 0.1276  |
| rs79022879  | A | -0.0376 |
| rs112425978 | A | -0.04   |
| rs139619852 | T | -0.0666 |
| rs111385192 | T | -0.0582 |
| rs79366430  | T | 0.0805  |
| rs113780558 | C | 0.0381  |
| rs7278964   | C | -0.0165 |
| rs9983489   | C | 0.018   |
| rs78289373  | A | -0.0824 |
| rs2226446   | A | -0.0159 |
| rs77146622  | G | -0.023  |
| rs8127118   | C | 0.0159  |
| rs914246    | A | 0.0206  |
| rs4818030   | A | -0.0292 |
| rs73168384  | A | -0.0478 |
| rs386926    | A | 0.0256  |
| rs1983538   | T | -0.0298 |
| rs56014194  | T | 0.1063  |
| rs463839    | T | 0.0197  |
| rs7276467   | G | -0.0149 |
| rs73225477  | T | -0.0353 |
| rs2826383   | A | -0.0226 |
| rs73231357  | A | -0.0436 |
| rs2833539   | C | 0.0158  |
| rs13433498  | A | -0.0261 |
| rs75284700  | T | 0.0432  |

|             |   |         |
|-------------|---|---------|
| rs9979994   | A | 0.0153  |
| rs2832474   | G | 0.0196  |
| rs59418715  | T | -0.046  |
| rs77559741  | T | 0.0884  |
| rs2834115   | G | 0.0176  |
| rs10084578  | T | 0.1252  |
| rs2828011   | A | 0.0588  |
| rs2829154   | C | -0.0465 |
| rs11088289  | A | -0.0167 |
| rs7280462   | A | 0.0305  |
| rs2253443   | A | -0.0191 |
| rs2835947   | T | 0.015   |
| rs28542132  | C | 0.0284  |
| rs75697303  | T | -0.0486 |
| rs62241785  | T | 0.0629  |
| rs77425638  | G | -0.0984 |
| rs9917515   | T | 0.0349  |
| rs73228313  | T | 0.0542  |
| rs150826074 | A | -0.0238 |
| rs116887018 | C | 0.0548  |
| rs8129564   | G | 0.0152  |
| rs2826525   | C | 0.0325  |
| rs723548    | T | -0.0208 |
| rs378690    | C | 0.0235  |
| rs75647039  | G | -0.037  |
| rs12172913  | G | -0.017  |
| rs12482000  | G | -0.0669 |
| rs116934363 | A | 0.0596  |
| rs13049301  | T | -0.0205 |
| rs2831374   | A | 0.0175  |
| rs78279244  | A | -0.0305 |
| rs1810567   | T | -0.0241 |
| rs17605002  | C | 0.0827  |
| rs79948662  | C | 0.0569  |
| rs113898698 | A | -0.0379 |
| rs2178986   | C | -0.0297 |
| rs9975713   | A | 0.0158  |
| rs111900836 | G | 0.043   |
| rs2839024   | G | -0.0207 |
| rs73200245  | A | 0.0198  |
| rs2831430   | A | 0.0287  |
| rs17114213  | A | -0.0595 |
| rs2836031   | C | -0.019  |
| rs11911204  | C | -0.0223 |
| rs2830821   | C | -0.026  |
| rs4817521   | G | -0.0174 |
| rs35098678  | G | 0.0297  |

|             |   |         |
|-------------|---|---------|
| rs879489    | C | -0.0615 |
| rs11910467  | G | 0.0248  |
| rs2406175   | C | -0.0295 |
| rs1123415   | A | -0.0166 |
| rs189649    | G | -0.0454 |
| rs2831609   | G | 0.0161  |
| rs73199525  | A | -0.0758 |
| rs1735139   | C | 0.0399  |
| rs79411283  | T | -0.0578 |
| rs8132555   | A | -0.023  |
| rs71326311  | A | 0.0239  |
| rs151026796 | C | -0.076  |
| rs2829725   | T | 0.0162  |
| rs138982656 | T | 0.0638  |
| rs75601502  | G | 0.0309  |
| rs2827182   | T | -0.0311 |
| rs9978523   | A | 0.0156  |
| rs2824224   | A | 0.0146  |
| rs141504388 | T | 0.1297  |
| rs2826569   | C | -0.0492 |
| rs79638260  | T | -0.0507 |
| rs395584    | C | 0.0586  |
| rs2835700   | G | -0.0171 |
| rs2828015   | C | 0.0195  |
| rs79941884  | T | -0.0456 |
| rs66480327  | T | 0.016   |
| rs140527637 | G | -0.0711 |
| rs1823704   | A | -0.024  |
| rs73192990  | A | 0.0246  |
| rs17699341  | T | 0.054   |
| rs143766774 | C | -0.0959 |
| rs28420434  | C | 0.0655  |
| rs2300358   | G | 0.0165  |
| rs56051401  | C | 0.0277  |
| rs75823548  | G | -0.0615 |
| rs17208214  | G | 0.0753  |
| rs2838958   | G | -0.0166 |
| rs673086    | C | 0.0177  |
| rs2830720   | A | 0.0206  |
| rs7280580   | C | -0.024  |
| rs2409842   | T | -0.0439 |
| rs873737    | G | -0.0196 |
| rs2824320   | T | 0.0153  |
| rs9975012   | G | 0.0188  |
| rs12627327  | C | 0.0385  |
| rs242344    | C | 0.018   |
| rs62217709  | A | -0.0204 |

|             |   |         |
|-------------|---|---------|
| rs145087099 | G | -0.0635 |
| rs2836076   | G | -0.0285 |
| rs74862715  | G | -0.0769 |
| rs2825289   | C | 0.0185  |
| rs2835455   | A | 0.0321  |
| rs60972205  | T | 0.1036  |
| rs2409404   | C | 0.0507  |
| rs7279815   | A | -0.0325 |
| rs78879377  | T | -0.0939 |
| rs12482500  | C | -0.0208 |
| rs116853534 | A | -0.0654 |
| rs2827388   | G | 0.027   |
| rs1507397   | A | -0.122  |
| rs11088533  | G | -0.0181 |
| rs117529309 | A | -0.1004 |
| rs76428604  | C | 0.0592  |
| rs142164918 | A | 0.1117  |
| rs9976946   | C | -0.0434 |
| rs2849905   | C | -0.0161 |
| rs73229178  | A | 0.0745  |
| rs2826664   | C | 0.0167  |
| rs77569344  | A | 0.0236  |
| rs2831753   | C | 0.0229  |
| rs207007    | C | -0.0225 |
| rs76684124  | T | -0.0353 |
| rs2217511   | A | -0.0182 |
| rs626865    | T | 0.0221  |
| rs138533387 | G | 0.0895  |
| rs59668379  | G | 0.0294  |
| rs117178107 | A | -0.071  |
| rs78777819  | C | -0.0759 |
| rs78414392  | T | 0.0673  |
| rs1981392   | C | 0.0149  |
| rs57049018  | T | -0.0158 |
| rs74791982  | C | 0.0432  |
| rs928761    | T | -0.1146 |
| rs724182    | C | -0.0158 |
| rs76351966  | T | -0.0584 |
| rs9981394   | A | -0.0255 |
| rs144964834 | T | 0.0736  |
| rs8130676   | G | -0.0162 |
| rs116416605 | A | -0.0245 |
| rs2837378   | T | -0.0146 |
| rs7277419   | C | -0.0724 |
| rs143921762 | G | -0.0941 |
| rs222971    | A | 0.0153  |
| rs150970333 | T | 0.0689  |

|             |   |         |
|-------------|---|---------|
| rs111729652 | T | -0.0532 |
| rs35415894  | T | 0.0276  |
| rs118044509 | A | -0.0735 |
| rs2839142   | C | -0.0178 |
| rs1897882   | T | -0.0261 |
| rs8129401   | T | -0.0529 |
| rs150450690 | A | 0.0992  |
| rs2037986   | T | 0.0159  |
| rs13050162  | T | 0.0428  |
| rs76307211  | A | 0.0818  |
| rs79632575  | C | -0.0605 |
| rs76400243  | A | 0.0296  |
| rs13050790  | C | -0.0153 |
| rs1893331   | T | 0.0168  |
| rs113760826 | C | -0.0586 |
| rs9975101   | C | 0.0257  |
| rs117000754 | T | -0.0584 |
| rs17182601  | A | -0.058  |
| rs112982249 | T | 0.0233  |
| rs73328369  | G | -0.0502 |
| rs117013995 | A | 0.0456  |
| rs461901    | C | -0.0241 |
| rs140591960 | A | -0.0781 |
| rs76201496  | C | -0.1195 |
| rs2877001   | A | -0.0289 |
| rs76899288  | A | 0.0307  |
| rs8129565   | C | -0.0146 |
| rs77224013  | A | -0.0327 |
| rs2828654   | C | -0.0285 |
| rs113356643 | T | 0.02    |
| rs11701256  | A | -0.0283 |
| rs113477449 | T | 0.0767  |
| rs17794516  | A | 0.081   |
| rs2026875   | C | -0.0224 |
| rs117382229 | T | -0.0917 |
| rs62235573  | C | 0.0882  |
| rs59408274  | G | -0.0452 |
| rs117947962 | G | 0.0804  |
| rs76051019  | A | 0.0458  |
| rs9978519   | A | -0.0448 |
| rs35257433  | G | 0.0412  |
| rs112778636 | C | -0.075  |
| rs232405    | C | 0.0202  |
| rs4817000   | C | -0.0155 |
| rs7283765   | G | -0.0136 |
| rs1786017   | C | 0.0217  |
| rs11700886  | C | -0.015  |



|             |   |         |
|-------------|---|---------|
| rs2837835   | G | 0.0189  |
| rs117408860 | A | 0.0713  |
| rs144919188 | T | 0.0824  |
| rs722192    | C | 0.0145  |
| rs115146137 | T | -0.0596 |
| rs71319467  | A | 0.0858  |
| rs13433469  | A | -0.038  |
| rs62226903  | A | -0.0345 |
| rs75882259  | T | 0.0883  |
| rs11702515  | T | -0.0462 |
| rs9974959   | A | -0.0149 |
| rs8133141   | A | 0.0187  |
| rs2825350   | G | 0.024   |
| rs75791131  | T | 0.0488  |
| rs117650092 | T | 0.0888  |
| rs138643587 | C | -0.0742 |
| rs113110207 | G | 0.031   |
| rs2833741   | A | -0.042  |
| rs16979358  | T | 0.0247  |
| rs140319734 | A | 0.0508  |
| rs75034227  | A | 0.0357  |
| rs7281139   | A | 0.0338  |
| rs239643    | G | -0.0187 |
| rs74708392  | G | -0.0799 |
| rs73355070  | G | 0.0158  |
| rs17811387  | C | -0.0881 |
| rs1379661   | G | -0.0216 |
| rs76456485  | G | -0.0601 |
| rs2838283   | T | 0.0175  |
| rs146548253 | T | -0.0792 |
| rs147627731 | A | 0.0583  |
| rs118170932 | A | 0.0611  |
| rs35399628  | T | 0.0258  |
| rs2824762   | T | 0.0146  |
| rs146322808 | T | 0.0222  |
| rs730144    | C | 0.0211  |
| rs13051169  | T | 0.0388  |
| rs114653592 | C | -0.0404 |
| rs473348    | A | 0.027   |
| rs143532661 | T | 0.1297  |
| rs34828223  | A | -0.0733 |
| rs2826254   | A | 0.0204  |
| rs2144203   | G | -0.0284 |
| rs11088947  | C | -0.0189 |
| rs78431215  | G | -0.0241 |
| rs138630068 | A | 0.048   |
| rs2836643   | T | -0.0306 |

|             |   |         |
|-------------|---|---------|
| rs11700819  | A | 0.0157  |
| rs75263710  | C | -0.1065 |
| rs2826666   | G | -0.0228 |
| rs1943954   | A | -0.0207 |
| rs58181349  | T | -0.0198 |
| rs34194766  | T | 0.0593  |
| rs58032873  | G | 0.0424  |
| rs150553669 | C | 0.0677  |
| rs2094885   | T | 0.0216  |
| rs2822674   | G | 0.0294  |
| rs1537081   | T | -0.0159 |
| rs117790528 | A | 0.0644  |
| rs28428866  | G | 0.0258  |
| rs28557769  | A | 0.0586  |
| rs76811994  | T | 0.0841  |
| rs116878716 | A | -0.0527 |
| rs7280160   | A | 0.0288  |
| rs4516525   | A | 0.0231  |
| rs150114410 | T | -0.0444 |
| rs117483680 | A | 0.0748  |
| rs7283890   | C | 0.0464  |
| rs225310    | T | -0.0163 |
| rs76095499  | G | 0.0687  |
| rs73330463  | C | 0.1063  |
| rs34750873  | G | -0.0361 |
| rs143798894 | T | 0.0677  |
| rs150615482 | C | 0.085   |
| rs719216    | T | 0.0197  |
| rs2824571   | T | 0.0148  |
| rs143812258 | G | 0.0657  |
| rs117629926 | C | 0.0453  |
| rs11909615  | G | -0.0614 |
| rs114187044 | A | -0.0631 |
| rs34621854  | A | 0.0137  |
| rs73901260  | A | -0.0832 |
| rs2824286   | A | -0.0138 |
| rs9983506   | A | -0.0199 |
| rs73902984  | G | 0.0582  |
| rs112771868 | G | 0.0668  |
| rs55978974  | G | -0.0959 |
| rs117196125 | G | -0.0602 |
| rs139447825 | T | 0.1317  |
| rs76763393  | T | -0.051  |
| rs116920311 | G | -0.0744 |
| rs113596566 | T | 0.1086  |
| rs2827564   | G | -0.0159 |
| rs80046560  | C | -0.0768 |

|             |   |         |
|-------------|---|---------|
| rs79751105  | G | -0.0781 |
| rs78780384  | T | 0.0904  |
| rs2284552   | T | -0.0168 |
| rs1537098   | A | 0.0259  |
| rs8134775   | C | 0.0169  |
| rs2409530   | T | 0.0278  |
| rs1554942   | T | 0.0169  |
| rs141949236 | T | 0.0904  |
| rs35328365  | A | 0.0191  |
| rs1910623   | G | 0.0168  |
| rs2244014   | G | -0.014  |
| rs7279035   | T | -0.0167 |
| rs144576991 | T | 0.121   |
| rs62221272  | C | 0.0298  |
| rs220271    | C | -0.0171 |
| rs2838255   | C | -0.0274 |
| rs1351017   | T | -0.0188 |
| rs1981390   | G | -0.0133 |
| rs79868848  | C | 0.0711  |
| rs9976464   | G | 0.0176  |
| rs2831652   | G | -0.0495 |
| rs7278303   | C | 0.0241  |
| rs6517075   | A | -0.0344 |
| rs78840262  | G | 0.0598  |
| rs28588677  | T | 0.0666  |
| rs74570949  | G | -0.0914 |
| rs143504308 | C | 0.0419  |
| rs963519    | A | 0.0209  |
| rs114308    | T | -0.0154 |
| rs117115047 | A | 0.0511  |
| rs743312    | A | -0.0194 |
| rs2142102   | C | 0.0214  |
| rs458966    | C | 0.0136  |
| rs80234615  | G | 0.0854  |
| rs77503334  | T | -0.0299 |
| rs34139638  | T | -0.0331 |
| rs2230529   | T | -0.0211 |
| rs62207099  | A | 0.0265  |
| rs11910692  | G | -0.057  |
| rs117504117 | A | -0.0469 |
| rs4817674   | A | 0.0149  |
| rs16999420  | C | 0.0841  |
| rs73213515  | G | 0.0876  |
| rs141233043 | A | 0.0419  |
| rs2836029   | A | -0.0256 |
| rs184432    | G | -0.0143 |
| rs76660124  | T | -0.0456 |

|             |   |         |
|-------------|---|---------|
| rs76291974  | A | 0.0423  |
| rs6516899   | C | 0.017   |
| rs113223755 | T | -0.038  |
| rs9978399   | T | -0.1108 |
| rs7276018   | C | 0.0224  |
| rs116907504 | A | 0.0738  |
| rs13048918  | T | -0.0396 |
| rs7282535   | T | 0.019   |
| rs117926622 | G | 0.043   |
| rs62221516  | T | 0.0384  |
| rs9808673   | T | 0.0762  |
| rs956559    | A | -0.0163 |
| rs73200605  | T | -0.0754 |
| rs112790694 | G | -0.0417 |
| rs79018063  | A | -0.0657 |
| rs4817380   | A | 0.0136  |
| rs1235344   | A | -0.0135 |
| rs384716    | G | 0.0137  |
| rs35270096  | T | 0.0519  |
| rs17784886  | C | 0.0427  |
| rs78886381  | T | -0.0215 |
| rs79092288  | T | -0.0809 |
| rs16999381  | A | 0.0362  |
| rs73194052  | G | -0.0678 |
| rs2839471   | T | 0.0133  |
| rs2253406   | G | 0.014   |
| rs2827202   | A | 0.0198  |
| rs2103500   | T | 0.0133  |
| rs35186535  | A | 0.0373  |
| rs9808635   | T | -0.0191 |
| rs225405    | T | -0.0141 |
| rs2829211   | A | -0.0221 |
| rs117250045 | A | 0.085   |
| rs6586230   | G | -0.0132 |
| rs113322934 | T | 0.0815  |
| rs9680110   | A | 0.0222  |
| rs16993109  | A | 0.0314  |
| rs34769411  | G | 0.0649  |
| rs17002345  | T | 0.0292  |
| rs13049645  | A | 0.0168  |
| rs2837912   | C | 0.0288  |
| rs75190562  | G | -0.0202 |
| rs8132826   | T | -0.0245 |
| rs234713    | A | 0.0135  |
| rs72635017  | A | -0.0798 |
| rs4148095   | C | -0.031  |
| rs116920244 | A | 0.1066  |

|             |   |         |
|-------------|---|---------|
| rs3901224   | G | -0.0313 |
| rs11701075  | G | -0.0184 |
| rs2205485   | G | -0.0189 |
| rs151172783 | G | -0.0707 |
| rs80233812  | G | 0.0396  |
| rs7276358   | A | 0.0346  |
| rs75501027  | G | -0.0306 |
| rs2834282   | T | -0.0133 |
| rs116869533 | T | -0.0634 |
| rs56000692  | A | 0.0405  |
| rs764064    | T | -0.0261 |
| rs144314416 | T | -0.0326 |
| rs142360322 | C | 0.1063  |
| rs116994951 | A | 0.0511  |
| rs2826527   | G | 0.0156  |
| rs12481908  | A | -0.0806 |
| rs117734985 | A | -0.0648 |
| rs73362403  | C | 0.0558  |
| rs117707535 | C | -0.0495 |
| rs2833160   | A | 0.0293  |
| rs860942    | A | 0.0275  |
| rs13050076  | A | -0.0545 |
| rs367503    | A | -0.0148 |
| rs79634602  | A | -0.0623 |
| rs73197390  | T | 0.0523  |
| rs11910439  | C | -0.0146 |
| rs73217906  | C | 0.0392  |
| rs11089106  | T | 0.0148  |
| rs7281611   | C | 0.0765  |
| rs2073601   | A | 0.0133  |
| rs2705573   | T | 0.0141  |
| rs141819572 | A | 0.0652  |
| rs2834819   | T | 0.016   |
| rs2091891   | G | 0.0157  |
| rs1943958   | G | 0.0343  |
| rs142798356 | T | -0.053  |
| rs73348050  | C | 0.0241  |
| rs79416128  | A | 0.0821  |
| rs139466268 | T | -0.0996 |
| rs4919938   | G | -0.019  |
| rs2409890   | A | -0.0171 |
| rs9631213   | C | 0.0238  |
| rs2826246   | T | -0.0196 |
| rs7281472   | T | -0.0616 |
| rs463068    | T | 0.0663  |
| rs17002434  | T | -0.0637 |
| rs34720205  | G | 0.0125  |

|             |   |         |
|-------------|---|---------|
| rs75543228  | G | 0.0299  |
| rs111510758 | G | 0.0418  |
| rs79474433  | G | 0.054   |
| rs73231998  | C | 0.0229  |
| rs35619787  | C | 0.0192  |
| rs7282310   | C | -0.0191 |
| rs1073524   | T | -0.0491 |
| rs997724    | C | -0.0151 |
| rs13052423  | A | -0.0162 |
| rs118065701 | A | 0.0711  |
| rs117074130 | A | -0.0488 |
| rs2839639   | G | -0.0135 |
| rs4818740   | T | 0.0228  |
| rs1571735   | C | -0.0162 |
| rs2284968   | C | 0.0148  |
| rs112673863 | A | -0.0724 |
| rs9784210   | A | 0.0145  |
| rs118097759 | C | -0.0442 |
| rs9981283   | G | 0.0221  |
| rs8134060   | A | 0.0296  |
| rs115188393 | A | 0.0715  |
| rs8131115   | C | -0.0206 |
| rs78647992  | G | -0.0898 |
| rs61732501  | T | 0.0673  |
| rs2836783   | G | -0.0138 |
| rs244131    | A | -0.0141 |
| rs73380242  | A | -0.0559 |
| rs77252874  | C | -0.0199 |
| rs117862714 | A | -0.0479 |
| rs73904471  | G | -0.0652 |
| rs7278695   | G | 0.0125  |
| rs76596580  | T | -0.0212 |
| rs62221963  | C | -0.0151 |
| rs2839651   | A | -0.0134 |
| rs59555463  | A | -0.0249 |
| rs73206002  | C | 0.0623  |
| rs74480977  | T | -0.0462 |
| rs17229685  | A | 0.0668  |
| rs117174401 | A | -0.084  |
| rs1491654   | A | -0.0132 |
| rs35232855  | T | -0.0479 |
| rs7277991   | T | -0.013  |
| rs143261594 | C | 0.0388  |
| rs77949600  | C | -0.0268 |
| rs62219627  | C | 0.0633  |
| rs11702389  | G | -0.0592 |
| rs17227161  | T | -0.0191 |

|             |   |         |
|-------------|---|---------|
| rs146597008 | T | -0.0469 |
| rs225322    | T | 0.0318  |
| rs2838357   | G | 0.0204  |
| rs404074    | T | 0.0168  |
| rs9977258   | G | -0.0121 |
| rs117222694 | G | -0.0911 |
| rs117474463 | A | 0.0461  |
| rs12482015  | C | -0.0279 |
| rs111948345 | C | 0.0838  |
| rs9636638   | G | -0.0767 |
| rs4818985   | G | 0.0214  |
| rs11203152  | A | 0.0242  |
| rs2832757   | G | -0.016  |
| rs62216091  | G | 0.0202  |
| rs1156253   | A | 0.012   |
| rs1008556   | T | -0.0155 |
| rs76123258  | A | 0.042   |
| rs148236982 | T | 0.0525  |
| rs1882914   | T | -0.0165 |
| rs2826376   | T | -0.0188 |
| rs141532918 | C | -0.0629 |
| rs856171    | T | 0.0348  |
| rs2827329   | T | 0.0162  |
| rs9984081   | G | 0.0454  |
| rs16996316  | T | -0.0265 |
| rs2776356   | T | -0.0148 |
| rs111821850 | T | 0.0594  |
| rs62214233  | C | -0.0194 |
| rs8130714   | T | 0.0301  |
| rs845933    | C | 0.0612  |
| rs2834383   | G | -0.0245 |
| rs111724295 | A | 0.0411  |
| rs113499929 | T | 0.0941  |
| rs73206011  | T | 0.0148  |
| rs13052437  | G | 0.0236  |
| rs4148118   | A | 0.0129  |
| rs80064171  | C | 0.0626  |
| rs74787388  | T | 0.0391  |
| rs11088343  | T | -0.0239 |
| rs117050103 | T | -0.0856 |
| rs988629    | C | -0.0156 |
| rs11701424  | A | 0.0196  |
| rs116527078 | A | -0.0767 |
| rs2154701   | C | -0.0129 |
| rs11088491  | G | 0.0294  |
| rs2835797   | C | -0.0123 |
| rs112126209 | T | 0.0879  |

|             |   |         |
|-------------|---|---------|
| rs148218492 | T | -0.035  |
| rs9977503   | A | 0.0652  |
| rs4819095   | C | 0.0172  |
| rs118060425 | T | 0.1108  |
| rs28696190  | T | 0.1018  |
| rs142124362 | T | 0.0534  |
| rs2236608   | G | 0.0566  |
| rs56408756  | T | 0.0282  |
| rs2839505   | A | 0.0261  |
| rs3810581   | G | -0.0557 |
| rs112939724 | G | 0.0714  |
| rs2219408   | A | -0.0126 |
| rs56358715  | T | -0.0262 |
| rs17004734  | G | 0.0193  |
| rs76826604  | A | 0.094   |
| rs78617065  | C | 0.048   |
| rs2828063   | C | -0.0281 |
| rs117592544 | T | 0.0692  |
| rs73213910  | C | 0.0529  |
| rs17000601  | C | -0.0555 |
| rs13052529  | T | -0.0271 |
| rs116971236 | A | -0.0857 |
| rs8130239   | A | 0.1099  |
| rs7280068   | C | 0.0253  |
| rs147851809 | C | -0.0427 |
| rs74412239  | C | -0.0193 |
| rs116919388 | G | -0.0506 |
| rs2833522   | A | -0.0121 |
| rs13052008  | A | -0.0425 |
| rs113726705 | T | -0.0546 |
| rs2094886   | T | -0.0199 |
| rs113351516 | C | -0.0487 |
| rs73195925  | T | 0.0223  |
| rs2824136   | G | 0.0239  |
| rs9982579   | T | -0.0133 |
| rs2268282   | T | -0.017  |
| rs73223511  | A | 0.0601  |
| rs11702294  | A | -0.0461 |
| rs117779236 | A | -0.0473 |
| rs78148807  | C | -0.0504 |
| rs8129709   | T | -0.0138 |
| rs146258645 | A | -0.0763 |
| rs78072851  | C | 0.0498  |
| rs11701789  | G | -0.0264 |
| rs149284080 | T | -0.0998 |
| rs79843039  | C | 0.0728  |
| rs2833615   | G | 0.0206  |



|             |   |         |
|-------------|---|---------|
| rs11702425  | C | -0.0141 |
| rs12627121  | C | -0.0163 |
| rs61223015  | A | -0.0349 |
| rs1157277   | G | 0.0136  |
| rs2834726   | G | 0.0211  |
| rs56348408  | C | -0.0247 |
| rs76776878  | A | 0.0313  |
| rs2837020   | T | 0.0178  |
| rs2823744   | C | -0.0266 |
| rs8127137   | T | 0.037   |
| rs2094877   | G | -0.0135 |
| rs17777660  | G | -0.0782 |
| rs2850098   | C | -0.0444 |
| rs137916469 | T | 0.0555  |
| rs149836915 | A | 0.0574  |
| rs117624360 | A | 0.0675  |
| rs11701835  | C | -0.018  |
| rs9979397   | G | -0.0121 |
| rs78867694  | A | -0.0274 |
| rs73224184  | A | 0.0484  |
| rs2838281   | A | -0.0139 |
| rs73206087  | G | 0.1143  |
| rs113234632 | G | 0.0338  |
| rs117718767 | A | 0.0641  |
| rs73210365  | C | -0.0657 |
| rs139426320 | A | 0.0922  |
| rs145996785 | T | -0.0519 |
| rs968582    | C | -0.0242 |
| rs79558683  | T | 0.046   |
| rs2823575   | G | -0.0193 |
| rs142315206 | A | -0.0658 |
| rs17690727  | G | 0.0258  |
| rs75971227  | A | 0.0448  |
| rs2831446   | C | -0.013  |
| rs2268254   | T | 0.0248  |
| rs77606945  | G | 0.0279  |
| rs117997469 | G | -0.1098 |
| rs34953833  | G | -0.0122 |
| rs7277766   | T | 0.0148  |
| rs239067    | G | 0.024   |
| rs117879463 | T | -0.0667 |
| rs9980447   | T | 0.0248  |
| rs8134125   | T | 0.0483  |
| rs79066695  | A | -0.0478 |
| rs78000666  | T | -0.0645 |
| rs2827319   | C | 0.0151  |
| rs117932440 | G | 0.056   |

|             |   |         |
|-------------|---|---------|
| rs141622518 | T | 0.0469  |
| rs10854445  | C | 0.023   |
| rs467936    | T | 0.0311  |
| rs144810129 | C | -0.0583 |
| rs16988914  | G | 0.038   |
| rs117112832 | T | 0.0467  |
| rs67323813  | A | -0.0266 |
| rs35227022  | A | -0.0434 |
| rs7282557   | A | -0.0185 |
| rs148937342 | A | 0.056   |
| rs12483293  | G | 0.0135  |
| rs692383    | G | -0.0128 |
| rs148893316 | A | 0.0479  |
| rs462903    | G | 0.0121  |
| rs2827150   | T | -0.0144 |
| rs558059    | A | 0.0136  |
| rs117149680 | A | 0.0482  |
| rs78594525  | C | -0.0297 |
| rs144817881 | T | -0.0429 |
| rs1004810   | A | 0.0197  |
| rs12483608  | T | -0.0512 |
| rs9976373   | T | 0.069   |
| rs111528493 | T | -0.0229 |
| rs144434453 | A | 0.0983  |
| rs13051413  | C | 0.0356  |
| rs74961332  | G | 0.0224  |
| rs2834012   | A | 0.0113  |
| rs80075997  | C | 0.0253  |
| rs2403806   | T | -0.0123 |
| rs12482989  | T | 0.0497  |
| rs2039236   | T | -0.0206 |
| rs117419412 | T | 0.0284  |
| rs77857836  | G | -0.0211 |
| rs2837484   | A | -0.018  |
| rs9305296   | T | -0.0113 |
| rs139447221 | A | 0.0873  |
| rs62210585  | G | 0.0181  |
| rs2051186   | A | -0.013  |
| rs111246525 | C | -0.0553 |
| rs4818127   | G | -0.015  |
| rs4353724   | T | -0.0186 |
| rs2826494   | G | -0.0196 |
| rs139041087 | A | -0.0782 |
| rs463877    | T | -0.0172 |
| rs219754    | A | 0.0124  |
| rs62228218  | T | -0.0136 |
| rs57000550  | C | 0.0139  |

|             |   |         |
|-------------|---|---------|
| rs2268202   | T | -0.0622 |
| rs111245175 | T | 0.0574  |
| rs73315197  | T | -0.0652 |
| rs80145855  | T | 0.0232  |
| rs59861729  | G | 0.0174  |
| rs77270082  | T | -0.0236 |
| rs113413326 | G | 0.0229  |
| rs9978275   | C | 0.0414  |
| rs142651835 | G | 0.0298  |
| rs2834482   | C | -0.0163 |
| rs147458704 | T | 0.0416  |
| rs2775805   | G | 0.0377  |
| rs75038405  | G | 0.0337  |
| rs13049431  | A | -0.0165 |
| rs79610004  | A | 0.0713  |
| rs12481814  | A | -0.0155 |
| rs75877313  | C | 0.0434  |
| rs62216164  | A | -0.041  |
| rs9980960   | G | 0.0467  |
| rs6517074   | C | 0.0148  |
| rs7277023   | G | -0.0413 |
| rs73231618  | A | -0.0193 |
| rs9976670   | C | 0.0113  |
| rs2268259   | A | -0.0223 |
| rs1571699   | A | 0.0222  |
| rs180319    | A | 0.0181  |
| rs150703492 | T | 0.0657  |
| rs79692361  | C | 0.0287  |
| rs73181439  | A | 0.0715  |
| rs2244189   | T | -0.0181 |
| rs17575180  | T | -0.0448 |
| rs77783452  | A | 0.0543  |
| rs233230    | A | -0.0313 |
| rs2829539   | T | 0.019   |
| rs73185403  | T | 0.0338  |
| rs117493311 | A | 0.0409  |
| rs2838042   | C | -0.0152 |
| rs17000375  | A | -0.0624 |
| rs2246610   | T | 0.0159  |
| rs1734847   | T | 0.0287  |
| rs149520727 | G | -0.0713 |
| rs111620753 | T | 0.0478  |
| rs7278274   | T | 0.0162  |
| rs71330671  | G | 0.0838  |
| rs118108078 | A | 0.0768  |
| rs2150441   | C | 0.0142  |
| rs112615110 | C | -0.0365 |

|             |   |         |
|-------------|---|---------|
| rs75876362  | G | 0.0699  |
| rs16979728  | G | 0.0637  |
| rs78091070  | T | 0.0536  |
| rs77726661  | G | 0.0543  |
| rs17765580  | T | 0.0326  |
| rs12626363  | T | 0.014   |
| rs142784143 | T | 0.0735  |
| rs7282586   | A | 0.0207  |
| rs75996970  | C | 0.0599  |
| rs1119566   | A | 0.0124  |
| rs4818907   | T | 0.0154  |
| rs73188512  | G | 0.0421  |
| rs2252109   | A | 0.0121  |
| rs35811057  | T | 0.0632  |
| rs74789072  | C | 0.0368  |
| rs146973208 | A | 0.0648  |
| rs741947    | C | 0.0127  |
| rs1987957   | A | -0.0333 |
| rs6517708   | A | -0.0125 |
| rs2268255   | A | 0.0185  |
| rs117307991 | T | 0.0739  |
| rs138364583 | T | 0.0392  |
| rs116917259 | A | 0.0572  |
| rs117519470 | A | 0.0821  |
| rs2827312   | T | 0.0117  |
| rs73894936  | A | 0.0244  |
| rs13052452  | T | -0.0181 |
| rs59535861  | A | -0.0202 |
| rs13049046  | G | -0.0568 |
| rs9978014   | G | 0.0227  |
| rs17004715  | A | 0.0697  |
| rs2823138   | A | 0.0125  |
| rs78297552  | A | 0.028   |
| rs17836432  | C | 0.0581  |
| rs17275316  | T | 0.0423  |
| rs71317607  | T | 0.0289  |
| rs2823590   | A | 0.0168  |
| rs35677462  | A | -0.0166 |
| rs9979632   | C | 0.0116  |
| rs138463172 | G | 0.0838  |
| rs116907174 | T | -0.0376 |
| rs73202434  | T | -0.0331 |
| rs71331621  | G | -0.0255 |
| rs2070398   | T | 0.0141  |
| rs2833979   | A | -0.0113 |
| rs75280183  | G | 0.0643  |
| rs2837872   | A | -0.0116 |

|             |   |         |
|-------------|---|---------|
| rs9979848   | A | -0.0198 |
| rs73220474  | T | 0.0403  |
| rs62226470  | C | -0.083  |
| rs113283329 | T | 0.0341  |
| rs2403727   | C | -0.0206 |
| rs59602964  | A | -0.0467 |
| rs689769    | A | -0.0136 |
| rs66528304  | G | 0.0182  |
| rs76651102  | A | 0.0716  |
| rs80135721  | A | 0.0554  |
| rs9977496   | T | 0.0124  |
| rs73364552  | C | -0.0232 |
| rs75022913  | C | 0.0687  |
| rs76237717  | T | -0.0611 |
| rs3900478   | G | 0.0131  |
| rs118014583 | C | 0.0205  |
| rs113435554 | A | -0.0223 |
| rs76979442  | A | -0.0383 |
| rs1153400   | T | -0.011  |
| rs9979297   | C | -0.012  |
| rs2834412   | C | 0.0158  |
| rs4464358   | T | -0.0162 |
| rs76653844  | G | 0.0392  |
| rs117104804 | A | -0.075  |
| rs2011655   | G | -0.0119 |
| rs79576668  | C | 0.0313  |
| rs2000626   | G | 0.0189  |
| rs12483587  | C | 0.0336  |
| rs143629097 | C | 0.0584  |
| rs148987974 | A | 0.0555  |
| rs7283160   | G | -0.0279 |
| rs12626788  | T | -0.0169 |
| rs881969    | A | 0.0155  |
| rs17227497  | C | -0.0281 |
| rs62239862  | A | -0.0124 |
| rs79579071  | T | -0.0893 |
| rs117846798 | C | 0.0497  |
| rs73154881  | A | 0.0704  |
| rs9789904   | C | 0.02    |
| rs78264447  | T | -0.1052 |
| rs8133223   | T | -0.0164 |
| rs34273156  | T | 0.0257  |
| rs2007284   | G | -0.0119 |
| rs4819996   | A | -0.0759 |
| rs5760076   | T | -0.0759 |
| rs136402    | A | 0.0733  |
| rs2298428   | T | -0.0844 |

|             |   |         |
|-------------|---|---------|
| rs41282607  | T | -0.2075 |
| rs13054771  | T | 0.186   |
| rs4497960   | G | 0.0681  |
| rs2269672   | T | 0.0592  |
| rs2083881   | T | 0.0846  |
| rs6007302   | G | 0.0601  |
| rs79851088  | G | -0.0756 |
| rs35710431  | T | 0.2195  |
| rs7284925   | G | 0.1574  |
| rs6005502   | G | 0.0646  |
| rs9620007   | G | -0.061  |
| rs73164179  | C | -0.0919 |
| rs117116872 | T | 0.1704  |
| rs11703741  | C | -0.2618 |
| rs80218688  | A | 0.2384  |
| rs74876332  | C | -0.0647 |
| rs117527642 | G | -0.3387 |
| rs5753961   | C | 0.0578  |
| rs7354808   | T | 0.0989  |
| rs74628120  | T | 0.2485  |
| rs7284274   | T | 0.0742  |
| rs35011392  | A | -0.1896 |
| rs10854810  | T | 0.0599  |
| rs4821712   | C | 0.0547  |
| rs738244    | T | 0.0635  |
| rs8135966   | G | 0.0589  |
| rs2179237   | A | -0.0661 |
| rs117507958 | T | 0.4682  |
| rs9628575   | C | -0.0694 |
| rs73169417  | C | 0.0669  |
| rs4820932   | G | -0.0625 |
| rs6007641   | G | -0.0698 |
| rs139116    | C | -0.0549 |
| rs9611427   | G | -0.1271 |
| rs2267366   | C | 0.0791  |
| rs71319031  | C | 0.2263  |
| rs2283980   | A | -0.0577 |
| rs56331825  | T | -0.1437 |
| rs76847350  | G | 0.0882  |
| rs56132768  | C | 0.0641  |
| rs6007450   | A | 0.081   |
| rs5765694   | T | 0.0938  |
| rs62224169  | A | -0.1553 |
| rs142911007 | T | -0.2267 |
| rs35723421  | G | 0.1095  |
| rs9605443   | C | 0.1249  |
| rs13055704  | C | 0.1407  |

|             |   |         |
|-------------|---|---------|
| rs57072226  | T | -0.0909 |
| rs5766069   | A | 0.1028  |
| rs4824042   | T | 0.0907  |
| rs12168059  | T | 0.1236  |
| rs165913    | G | -0.0492 |
| rs2283896   | C | 0.0606  |
| rs73179544  | A | -0.0629 |
| rs113953187 | A | 0.2081  |
| rs148838956 | T | -0.3331 |
| rs2238801   | C | -0.0478 |
| rs57061188  | C | -0.3161 |
| rs5764965   | T | -0.0698 |
| rs738308    | C | -0.0921 |
| rs4822422   | A | 0.0529  |
| rs73176542  | A | -0.053  |
| rs28585506  | T | -0.0668 |
| rs9616730   | G | 0.0668  |
| rs6009530   | C | 0.0513  |
| rs368588    | A | 0.1876  |
| rs5762182   | C | -0.0486 |
| rs12158781  | A | 0.0475  |
| rs12165902  | G | 0.0702  |
| rs11912578  | G | -0.0962 |
| rs41276321  | C | -0.111  |
| rs5768312   | A | 0.0497  |
| rs2413348   | T | -0.0538 |
| rs118064968 | A | -0.2811 |
| rs518350    | T | -0.0677 |
| rs6003656   | A | 0.1457  |
| rs2071731   | A | 0.0494  |
| rs56243310  | C | 0.0518  |
| rs1962733   | G | -0.075  |
| rs11089788  | C | 0.0472  |
| rs139675    | A | 0.0591  |
| rs111890054 | A | -0.1828 |
| rs4389      | G | -0.057  |
| rs9618717   | G | 0.0453  |
| rs62235055  | C | 0.1035  |
| rs55770569  | G | 0.0858  |
| rs9614363   | C | 0.0508  |
| rs41279991  | T | -0.0652 |
| rs79139858  | A | -0.1231 |
| rs5749041   | T | -0.0547 |
| rs8140686   | C | 0.0736  |
| rs9306481   | G | -0.0543 |
| rs9608536   | T | 0.1863  |
| rs5765168   | G | -0.0449 |

|             |   |         |
|-------------|---|---------|
| rs13054829  | T | 0.0644  |
| rs5763243   | T | -0.0694 |
| rs1974528   | G | 0.0552  |
| rs79008002  | G | -0.1217 |
| rs117508239 | A | 0.178   |
| rs116513585 | T | 0.2297  |
| rs33958703  | T | -0.1337 |
| rs5765943   | C | 0.0734  |
| rs361856    | T | -0.0636 |
| rs13057231  | G | 0.2416  |
| rs6003217   | A | -0.2107 |
| rs2064735   | T | 0.1466  |
| rs73165024  | G | -0.0847 |
| rs6005267   | T | -0.0447 |
| rs117699062 | T | 0.125   |
| rs147197977 | A | 0.2542  |
| rs12159264  | T | 0.0632  |
| rs138072    | A | 0.1672  |
| rs5752473   | A | -0.0467 |
| rs55743715  | A | 0.1171  |
| rs144330309 | C | -0.1434 |
| rs6000425   | G | 0.1154  |
| rs11704505  | T | 0.0808  |
| rs9612811   | T | 0.2981  |
| rs57610     | T | 0.0855  |
| rs117263612 | C | -0.1554 |
| rs5761936   | A | 0.0583  |
| rs113440352 | A | -0.2045 |
| rs78569477  | T | 0.1864  |
| rs2413282   | G | 0.1132  |
| rs5993581   | A | -0.0503 |
| rs480029    | T | -0.0801 |
| rs79412139  | G | 0.1132  |
| rs116722699 | T | 0.119   |
| rs113293360 | A | 0.267   |
| rs150610964 | A | -0.1554 |
| rs113401620 | T | -0.1803 |
| rs880883    | A | 0.0459  |
| rs6008124   | T | -0.0613 |
| rs4822732   | T | -0.079  |
| rs3747226   | G | 0.0537  |
| rs134031    | C | -0.133  |
| rs138132    | T | -0.0448 |
| rs5746971   | G | 0.0688  |
| rs75788033  | C | -0.1591 |
| rs8140080   | A | 0.0475  |
| rs741415    | T | 0.0643  |



|             |   |         |
|-------------|---|---------|
| rs2071821   | C | 0.0872  |
| rs35793536  | G | 0.1367  |
| rs926331    | T | -0.0502 |
| rs8139973   | A | -0.0642 |
| rs148646251 | G | 0.2473  |
| rs8141593   | C | -0.0603 |
| rs6002295   | T | -0.0539 |
| rs739011    | T | 0.0542  |
| rs807756    | T | -0.0869 |
| rs79290681  | G | -0.0819 |
| rs147161556 | T | 0.2629  |
| rs5768012   | A | 0.051   |
| rs1858770   | C | -0.162  |
| rs5756560   | T | -0.044  |
| rs4821450   | G | -0.057  |
| rs8138982   | A | -0.0477 |
| rs5753905   | T | -0.0484 |
| rs61063861  | C | 0.2302  |
| rs2854097   | C | 0.0772  |
| rs2269667   | A | 0.157   |
| rs75217739  | T | 0.0631  |
| rs756876    | A | 0.0433  |
| rs113565865 | T | -0.1128 |
| rs2858226   | T | -0.0419 |
| rs75117334  | T | -0.0733 |
| rs2338254   | T | -0.0439 |
| rs118061137 | T | 0.1783  |
| rs132405    | G | -0.0443 |
| rs5756898   | T | -0.1268 |
| rs5997189   | C | 0.1666  |
| rs9613568   | C | 0.0768  |
| rs149596304 | T | -0.2242 |
| rs134028    | G | 0.0998  |
| rs5757378   | G | -0.071  |
| rs117667552 | T | 0.1292  |
| rs5768882   | G | -0.0487 |
| rs140555    | T | 0.0581  |
| rs5768146   | G | -0.0412 |
| rs79058609  | A | 0.1051  |
| rs73168076  | C | 0.1851  |
| rs12165814  | G | -0.0792 |
| rs909699    | G | 0.1584  |
| rs1008561   | A | 0.0589  |
| rs4821554   | A | -0.0473 |
| rs763040    | A | -0.0501 |
| rs73166060  | G | -0.2465 |
| rs8137293   | C | 0.1156  |

|             |   |         |
|-------------|---|---------|
| rs7285013   | T | 0.0781  |
| rs61263523  | G | -0.255  |
| rs9620654   | A | 0.0773  |
| rs5754266   | T | 0.0563  |
| rs17698230  | C | 0.1453  |
| rs5755325   | C | -0.0402 |
| rs73156486  | T | -0.0806 |
| rs8137052   | G | 0.0589  |
| rs9619005   | G | -0.0745 |
| rs11705241  | G | 0.1191  |
| rs35908001  | T | 0.08    |
| rs13053973  | T | 0.0475  |
| rs9616194   | T | 0.146   |
| rs12484870  | G | 0.146   |
| rs112558404 | C | -0.0975 |
| rs131862    | T | -0.0433 |
| rs5752378   | A | 0.0535  |
| rs59112939  | C | -0.2672 |
| rs8137581   | T | -0.0624 |
| rs80194287  | T | 0.1167  |
| rs145554377 | G | -0.2679 |
| rs11703829  | A | -0.3029 |
| rs75949329  | G | -0.1493 |
| rs5764916   | A | -0.101  |
| rs118014526 | G | -0.2158 |
| rs1314      | G | -0.0527 |
| rs5998074   | C | -0.0573 |
| rs73176670  | T | -0.1154 |
| rs9615998   | T | -0.0523 |
| rs73163073  | C | 0.1074  |
| rs742096    | T | 0.0892  |
| rs9613163   | C | 0.0443  |
| rs9613438   | A | 0.049   |
| rs5769413   | T | -0.0701 |
| rs4346486   | A | 0.0483  |
| rs16984323  | A | 0.1019  |
| rs5747035   | C | 0.0784  |
| rs9616770   | G | 0.0953  |
| rs146300110 | T | 0.2168  |
| rs3213582   | A | -0.087  |
| rs9621974   | A | 0.0591  |
| rs4823433   | G | 0.0441  |
| rs139481    | T | -0.0443 |
| rs16987063  | G | 0.1322  |
| rs6008279   | T | 0.0908  |
| rs7292049   | A | -0.0491 |
| rs5755863   | A | 0.1363  |

|             |   |         |
|-------------|---|---------|
| rs10427961  | C | -0.0976 |
| rs76924887  | C | -0.3019 |
| rs5752871   | T | 0.0759  |
| rs5747066   | G | 0.1108  |
| rs5756414   | C | 0.0402  |
| rs5770120   | T | 0.0513  |
| rs2072549   | A | -0.0539 |
| rs143681999 | T | 0.2216  |
| rs135270    | T | -0.1244 |
| rs2238732   | T | -0.0937 |
| rs8137471   | C | -0.1081 |
| rs8138001   | G | -0.0394 |
| rs75549529  | G | -0.079  |
| rs2337969   | C | -0.082  |
| rs5757209   | A | 0.0414  |
| rs55789978  | A | 0.1955  |
| rs1001794   | T | 0.045   |
| rs62236483  | T | 0.1207  |
| rs17225983  | C | -0.058  |
| rs3788269   | A | -0.2244 |
| rs79849446  | G | 0.1236  |
| rs4820084   | A | 0.0894  |
| rs713599    | A | -0.1146 |
| rs16993265  | T | 0.1685  |
| rs133873    | A | 0.0514  |
| rs8135021   | A | -0.0422 |
| rs9613920   | C | 0.1984  |
| rs117718592 | A | -0.2866 |
| rs34375949  | C | -0.1017 |
| rs75993703  | T | -0.1729 |
| rs9621463   | C | -0.1236 |
| rs9607039   | T | 0.1092  |
| rs6006188   | G | -0.0478 |
| rs5766425   | C | -0.0552 |
| rs2083882   | G | 0.0454  |
| rs139412394 | C | 0.1872  |
| rs9606475   | C | 0.1373  |
| rs6520042   | T | -0.0471 |
| rs9619460   | G | -0.0484 |
| rs464694    | C | -0.0483 |
| rs6006497   | C | -0.0463 |
| rs5752534   | A | -0.0428 |
| rs147482364 | T | 0.1467  |
| rs5997787   | T | 0.0392  |
| rs75441074  | A | 0.1754  |
| rs76548119  | G | -0.2841 |
| rs2257292   | T | 0.2267  |

|             |   |         |
|-------------|---|---------|
| rs5758921   | G | 0.0579  |
| rs2592958   | A | 0.1022  |
| rs624100    | T | -0.0441 |
| rs5756536   | T | 0.0464  |
| rs79941944  | A | 0.1226  |
| rs137214    | T | -0.0419 |
| rs5994175   | T | 0.0403  |
| rs77249562  | G | 0.1216  |
| rs5765777   | T | 0.0521  |
| rs75102455  | A | 0.1499  |
| rs11912444  | G | 0.2667  |
| rs9608566   | G | 0.1272  |
| rs112902831 | T | -0.1363 |
| rs7288557   | T | 0.128   |
| rs12170776  | A | 0.0744  |
| rs117946958 | A | 0.0966  |
| rs228909    | G | 0.048   |
| rs2071751   | C | -0.0402 |
| rs8140214   | T | 0.1169  |
| rs62239275  | A | 0.0591  |
| rs73167975  | A | 0.092   |
| rs658073    | C | 0.0499  |
| rs1557619   | C | -0.0434 |
| rs6008305   | G | -0.0409 |
| rs4822900   | A | -0.0393 |
| rs6003437   | A | -0.0481 |
| rs1880004   | T | -0.0543 |
| rs695430    | A | 0.0367  |
| rs738317    | C | -0.2605 |
| rs117618411 | T | 0.1009  |
| rs5771860   | T | -0.0444 |
| rs2057114   | C | -0.0471 |
| rs117336170 | G | 0.1569  |
| rs6010501   | T | 0.07    |
| rs41172     | C | 0.0398  |
| rs117036484 | A | -0.1465 |
| rs73168270  | A | 0.0738  |
| rs1883299   | A | -0.038  |
| rs5747937   | A | -0.0412 |
| rs9306332   | A | -0.0466 |
| rs138141    | G | 0.0641  |
| rs8142640   | C | -0.0764 |
| rs117269860 | C | 0.1591  |
| rs73149988  | A | -0.1168 |
| rs113171689 | A | 0.1689  |
| rs6004416   | A | -0.0473 |
| rs525250    | A | -0.1156 |

|             |   |         |
|-------------|---|---------|
| rs8140165   | T | 0.0691  |
| rs73892216  | C | -0.0998 |
| rs5749771   | C | -0.0371 |
| rs143591969 | A | 0.2763  |
| rs73160642  | G | 0.1032  |
| rs10854859  | A | -0.0545 |
| rs78768888  | T | -0.1268 |
| rs132969    | G | -0.074  |
| rs57580948  | T | 0.156   |
| rs11704831  | A | 0.1915  |
| rs1994999   | G | -0.0589 |
| rs117366725 | T | -0.1043 |
| rs80281     | A | -0.0692 |
| rs28709111  | G | -0.0884 |
| rs8135964   | A | 0.063   |
| rs12484867  | C | 0.0574  |
| rs2179060   | A | -0.0881 |
| rs2267321   | T | 0.0383  |
| rs79429059  | A | -0.3186 |
| rs139697790 | C | 0.0846  |
| rs11704083  | G | 0.0359  |
| rs2001063   | A | -0.0367 |
| rs77241789  | G | 0.0922  |
| rs112074371 | A | -0.1339 |
| rs4358228   | A | -0.0624 |
| rs1024331   | G | -0.0413 |
| rs1986290   | T | 0.0639  |
| rs5759973   | A | 0.0677  |
| rs12710562  | G | 0.0547  |
| rs117240868 | T | 0.0865  |
| rs178287    | C | 0.0419  |
| rs132437    | G | -0.0737 |
| rs5767106   | C | 0.0727  |
| rs9609397   | G | -0.0637 |
| rs974570    | A | 0.094   |
| rs41280009  | T | -0.0886 |
| rs9627131   | A | -0.0741 |
| rs79845049  | A | -0.2709 |
| rs57259441  | G | 0.1003  |
| rs73169225  | C | -0.0794 |
| rs57079229  | G | -0.0693 |
| rs4635624   | A | -0.0367 |
| rs55776461  | C | -0.0717 |
| rs719078    | C | -0.1841 |
| rs4821042   | G | 0.0952  |
| rs5749028   | G | 0.0523  |
| rs713958    | T | -0.0392 |

|             |   |         |
|-------------|---|---------|
| rs2267185   | A | 0.0896  |
| rs111988699 | G | 0.0527  |
| rs6006945   | G | -0.2714 |
| rs73166912  | T | 0.1713  |
| rs933241    | T | -0.0882 |
| rs41281269  | G | 0.1093  |
| rs117950420 | A | -0.2188 |
| rs79141386  | A | 0.1812  |
| rs9606289   | T | -0.0994 |
| rs5754754   | A | -0.0368 |
| rs4822075   | G | -0.0569 |
| rs5992741   | A | 0.084   |
| rs8142103   | T | 0.1736  |
| rs6008313   | C | 0.0659  |
| rs1062687   | C | -0.0387 |
| rs136404    | C | 0.1955  |
| rs11705621  | T | 0.0571  |
| rs2015794   | T | 0.3069  |
| rs2330626   | G | -0.0413 |
| rs113518218 | T | -0.1549 |
| rs6008234   | A | -0.0818 |
| rs2014847   | G | 0.0404  |
| rs175180    | T | -0.1168 |
| rs441862    | G | 0.1449  |
| rs5764921   | C | 0.0449  |
| rs117663002 | C | -0.1383 |
| rs5770261   | T | -0.0383 |
| rs9616150   | T | -0.0598 |
| rs2858607   | C | 0.0544  |
| rs68062411  | G | -0.2333 |
| rs58401738  | A | 0.0617  |
| rs113133756 | T | -0.1329 |
| rs5768870   | A | 0.0439  |
| rs134806    | T | 0.0498  |
| rs9615749   | A | 0.0775  |
| rs140361974 | T | -0.2237 |
| rs147367926 | A | 0.1558  |
| rs5752663   | T | -0.0706 |
| rs79238560  | T | -0.155  |
| rs116923341 | T | -0.269  |
| rs28627565  | C | 0.074   |
| rs117235525 | A | -0.2532 |
| rs56939727  | G | -0.2576 |
| rs165739    | A | 0.0496  |
| rs34405493  | T | -0.0639 |
| rs8138092   | G | 0.1246  |
| rs10854730  | A | 0.0733  |

|             |   |         |
|-------------|---|---------|
| rs76128518  | G | -0.0679 |
| rs76541330  | C | 0.1225  |
| rs75843224  | A | 0.0978  |
| rs133937    | C | 0.0345  |
| rs150019071 | T | -0.2316 |
| rs2011406   | G | 0.0562  |
| rs58145659  | T | 0.1965  |
| rs17669761  | A | -0.1564 |
| rs73169024  | G | -0.226  |
| rs12160813  | A | -0.0708 |
| rs62621223  | A | 0.1247  |
| rs117685988 | T | 0.3416  |
| rs978695    | T | 0.0545  |
| rs139488    | T | 0.07    |
| rs8135118   | T | 0.0437  |
| rs77109544  | A | 0.12    |
| rs910545    | C | -0.0403 |
| rs9625203   | T | -0.1546 |
| rs79685620  | A | 0.0965  |
| rs1546934   | G | 0.057   |
| rs118095417 | G | -0.1453 |
| rs142422001 | G | -0.2615 |
| rs73176478  | T | -0.1109 |
| rs147021711 | T | -0.2545 |
| rs76245266  | C | 0.2695  |
| rs5762240   | T | -0.0527 |
| rs2007386   | C | 0.0438  |
| rs12158648  | C | 0.0492  |
| rs75900047  | T | -0.2529 |
| rs130628    | A | -0.1328 |
| rs17509172  | G | 0.1465  |
| rs5995570   | T | -0.042  |
| rs11704537  | C | 0.0501  |
| rs118039352 | T | -0.1542 |
| rs4642035   | A | -0.0418 |
| rs6008399   | A | 0.0764  |
| rs5760820   | T | -0.062  |
| rs144373253 | T | -0.186  |
| rs73164969  | G | -0.1496 |
| rs148982064 | C | 0.1117  |
| rs28501249  | T | 0.1086  |
| rs113197291 | A | 0.0823  |
| rs77452243  | A | -0.1365 |
| rs73162521  | A | 0.1726  |
| rs2072393   | A | 0.129   |
| rs5768001   | T | 0.0558  |
| rs73166221  | C | -0.1684 |

|             |   |         |
|-------------|---|---------|
| rs117913000 | T | -0.2126 |
| rs9620936   | T | -0.0675 |
| rs13053356  | T | 0.0459  |
| rs75763953  | C | 0.0545  |
| rs117160245 | T | 0.1031  |
| rs117799899 | A | 0.1498  |
| rs5746643   | G | 0.0531  |
| rs6010503   | T | 0.0415  |
| rs9614756   | A | 0.0728  |
| rs111941689 | A | 0.1629  |
| rs9625600   | C | -0.0464 |
| rs5755043   | A | -0.0436 |
| rs361725    | T | -0.0388 |
| rs16988632  | T | -0.0464 |
| rs113697305 | T | 0.0853  |
| rs6003932   | C | 0.0378  |
| rs136629    | A | 0.0448  |
| rs77031946  | T | 0.1996  |
| rs62228622  | G | -0.1561 |
| rs6005752   | G | 0.0366  |
| rs73163923  | A | 0.3013  |
| rs2011716   | C | -0.0358 |
| rs4820684   | G | -0.0355 |
| rs56156332  | T | -0.0701 |
| rs71328216  | A | -0.1128 |
| rs117373339 | T | -0.3038 |
| rs11554714  | C | 0.1549  |
| rs731026    | A | -0.072  |
| rs9680560   | T | 0.0881  |
| rs377976    | G | 0.0562  |
| rs9611345   | A | -0.0778 |
| rs78741488  | A | 0.0683  |
| rs28591282  | G | 0.0438  |
| rs2176659   | T | 0.0534  |
| rs8142788   | A | -0.0462 |
| rs713944    | C | -0.0368 |
| rs116978125 | A | 0.1374  |
| rs5996571   | T | 0.0577  |
| rs62224246  | A | 0.1847  |
| rs2294918   | A | 0.0338  |
| rs145180438 | T | -0.2232 |
| rs134152    | T | 0.0501  |
| rs2904560   | C | -0.0563 |
| rs5998887   | G | -0.0935 |
| rs62243680  | A | 0.0714  |
| rs7287886   | C | 0.0456  |
| rs5749011   | C | 0.0636  |



|             |   |         |
|-------------|---|---------|
| rs78431645  | A | 0.2465  |
| rs4823572   | T | -0.0638 |
| rs5765456   | C | -0.0459 |
| rs5992988   | A | 0.0364  |
| rs9620522   | T | 0.0909  |
| rs80266288  | T | 0.132   |
| rs414392    | G | 0.09    |
| rs9616864   | C | 0.0681  |
| rs8138797   | A | 0.115   |
| rs13054233  | G | -0.0529 |
| rs5748156   | C | 0.0872  |
| rs5752615   | C | 0.0524  |
| rs2017764   | A | -0.0346 |
| rs79017381  | T | -0.1132 |
| rs17434523  | G | 0.052   |
| rs9626844   | T | 0.2207  |
| rs2241306   | A | 0.066   |
| rs11705219  | A | 0.1304  |
| rs9628515   | C | 0.0762  |
| rs62225005  | A | -0.0661 |
| rs11703988  | A | -0.0701 |
| rs6004256   | A | -0.0343 |
| rs144472419 | C | -0.2364 |
| rs9619741   | C | -0.0868 |
| rs73165105  | T | 0.0575  |
| rs138166    | A | -0.0353 |
| rs17806634  | C | 0.1455  |
| rs713754    | T | -0.0378 |
| rs141277252 | A | 0.1095  |
| rs738207    | T | 0.0415  |
| rs4420796   | T | -0.0859 |
| rs147498696 | A | 0.1118  |
| rs17386314  | T | 0.2611  |
| rs9609983   | T | -0.1396 |
| rs79137     | G | 0.0354  |
| rs16987639  | C | 0.0723  |
| rs2285181   | A | 0.0482  |
| rs4822731   | G | -0.0625 |
| rs67551226  | A | 0.1539  |
| rs117362241 | G | -0.0858 |
| rs150142977 | G | 0.1584  |
| rs133274    | A | -0.0491 |
| rs79187507  | G | 0.1681  |
| rs11705487  | T | -0.1277 |
| rs2092331   | T | -0.0868 |
| rs13053958  | T | -0.0412 |
| rs140050    | A | 0.113   |

|             |   |         |
|-------------|---|---------|
| rs147131682 | G | 0.1552  |
| rs74437803  | A | -0.1016 |
| rs79455860  | A | 0.0722  |
| rs11703558  | C | -0.0637 |
| rs142554348 | A | 0.2744  |
| rs165772    | A | -0.0393 |
| rs9612556   | T | -0.2308 |
| rs117621869 | T | -0.1065 |
| rs117651913 | T | 0.2364  |
| rs113952778 | T | 0.1749  |
| rs1555242   | T | -0.0325 |
| rs17734827  | T | -0.1893 |
| rs135444    | C | -0.0341 |
| rs141247997 | C | -0.2407 |
| rs6009925   | T | -0.2296 |
| rs5762919   | C | 0.0878  |
| rs133299    | G | 0.0382  |
| rs1807570   | T | 0.1339  |
| rs62238569  | C | 0.2308  |
| rs7291493   | A | 0.0325  |
| rs34731106  | A | 0.0372  |
| rs178271    | T | -0.077  |
| rs75094022  | T | 0.1448  |
| rs9615517   | C | -0.1114 |
| rs11090722  | T | -0.05   |
| rs59699323  | A | -0.2147 |
| rs760521    | C | -0.0503 |
| rs34120785  | G | 0.083   |
| rs2267302   | C | -0.0329 |
| rs116898372 | A | 0.2476  |
| rs7511047   | G | -0.0398 |
| rs9306383   | C | 0.0341  |
| rs9607904   | A | 0.0545  |
| rs56317162  | G | 0.0722  |
| rs8137343   | A | 0.1433  |
| rs4822675   | A | 0.0628  |
| rs34593514  | T | -0.1369 |
| rs147089433 | C | 0.1729  |
| rs13054375  | C | 0.3207  |
| rs62227667  | A | -0.1663 |
| rs713620    | C | 0.1032  |
| rs136361    | A | 0.0397  |
| rs111522439 | T | -0.1301 |
| rs4820597   | G | -0.2671 |
| rs140179402 | T | 0.1551  |
| rs12170772  | A | 0.0945  |
| rs12484028  | T | 0.0806  |

|             |   |         |
|-------------|---|---------|
| rs62236155  | T | 0.0326  |
| rs1547071   | A | 0.1747  |
| rs5996580   | G | -0.0528 |
| rs78016169  | C | -0.1077 |
| rs1977068   | G | -0.0602 |
| rs118107512 | A | -0.1881 |
| rs13054995  | T | -0.0578 |
| rs78500845  | G | 0.1488  |
| rs10212091  | T | 0.0475  |
| rs73157180  | A | -0.0912 |
| rs13053731  | A | 0.0677  |
| rs9607592   | T | 0.07    |
| rs738095    | T | -0.0721 |
| rs6002731   | G | -0.0362 |
| rs9610695   | G | 0.0417  |
| rs1028283   | A | 0.0532  |
| rs7288663   | G | 0.0393  |
| rs3827392   | G | -0.0356 |
| rs138014    | T | 0.0371  |
| rs117162349 | T | 0.128   |
| rs78185428  | A | 0.21    |
| rs137100    | T | -0.0367 |
| rs975826    | A | -0.0409 |
| rs28478940  | G | -0.0807 |
| rs140616575 | T | 0.124   |
| rs78093638  | A | 0.0936  |
| rs134697    | G | -0.0472 |
| rs117129281 | T | 0.1557  |
| rs118125772 | T | 0.1452  |
| rs62229504  | T | 0.1034  |
| rs74353563  | T | 0.1752  |
| rs5751426   | C | 0.0394  |
| rs12484387  | A | 0.0418  |
| rs135578    | A | -0.0361 |
| rs2269541   | A | -0.0617 |
| rs6000825   | T | -0.0371 |
| rs5761992   | C | -0.0934 |
| rs9610220   | T | 0.0886  |
| rs117076966 | C | 0.1838  |
| rs140288180 | C | -0.0563 |
| rs142654685 | C | -0.1586 |
| rs117301803 | A | 0.1445  |
| rs1023460   | T | -0.0328 |
| rs5762125   | A | -0.0434 |
| rs34519966  | G | 0.0374  |
| rs76953927  | T | -0.2896 |
| rs763082    | T | -0.0336 |

|             |   |         |
|-------------|---|---------|
| rs12159895  | T | -0.0382 |
| rs142780018 | A | -0.2695 |
| rs6009047   | T | -0.033  |
| rs117033021 | T | 0.1549  |
| rs111932997 | G | 0.1664  |
| rs8138012   | G | 0.0725  |
| rs5765082   | C | -0.0436 |
| rs130318    | T | -0.0331 |
| rs2522314   | T | -0.0331 |
| rs581224    | C | 0.0618  |
| rs71330746  | T | -0.1671 |
| rs9605030   | T | 0.0469  |
| rs76475935  | T | 0.2017  |
| rs140004    | C | 0.0387  |
| rs5992759   | T | 0.0576  |
| rs117563391 | T | -0.1482 |
| rs5752720   | T | -0.0428 |
| rs12484281  | C | -0.0412 |
| rs4822559   | T | -0.0504 |
| rs6009311   | A | -0.0826 |
| rs130345    | G | 0.0314  |
| rs73174858  | A | 0.1236  |
| rs5754273   | T | -0.0423 |
| rs5759585   | G | 0.0355  |
| rs28502139  | T | -0.062  |
| rs73886561  | C | 0.1476  |
| rs5759876   | A | -0.036  |
| rs78364627  | T | 0.1407  |
| rs62228478  | A | 0.2578  |
| rs79511420  | A | -0.2443 |
| rs139151    | T | 0.0657  |
| rs114431778 | T | 0.058   |
| rs6005079   | T | -0.0332 |
| rs6010580   | T | -0.0754 |
| rs1005402   | T | 0.032   |
| rs8190289   | A | 0.1324  |
| rs9626532   | C | -0.0511 |
| rs6000709   | A | -0.0369 |
| rs624390    | A | -0.0321 |
| rs73164053  | A | 0.1067  |
| rs762977    | T | 0.0322  |
| rs9613397   | T | 0.0307  |
| rs62234573  | T | 0.047   |
| rs55770470  | T | 0.1421  |
| rs35407346  | A | 0.155   |
| rs145796821 | A | 0.1997  |
| rs73170361  | C | -0.0948 |

|             |   |         |
|-------------|---|---------|
| rs145832854 | A | -0.1961 |
| rs136503    | G | 0.0498  |
| rs73167430  | C | 0.0614  |
| rs7287160   | A | 0.0428  |
| rs138639389 | A | 0.1658  |
| rs392277    | A | 0.0324  |
| rs5749122   | A | -0.0336 |
| rs6008046   | T | 0.0382  |
| rs138263187 | A | -0.1016 |
| rs2413104   | G | -0.0602 |
| rs5763208   | A | 0.1071  |
| rs553327    | T | -0.0355 |
| rs148055154 | T | -0.118  |
| rs7292939   | T | 0.0383  |
| rs9615023   | G | 0.0756  |
| rs4820823   | C | 0.0567  |
| rs75353315  | C | 0.1164  |
| rs9625469   | A | -0.1347 |
| rs5760580   | A | -0.0554 |
| rs2024120   | T | 0.0503  |
| rs5769109   | C | -0.0406 |
| rs77019079  | C | -0.1718 |
| rs117043685 | C | 0.0781  |
| rs117750534 | T | 0.2209  |
| rs738223    | A | 0.0305  |
| rs35033180  | A | 0.0665  |
| rs16984073  | A | 0.0698  |
| rs1981475   | G | 0.0384  |
| rs138900    | A | 0.0541  |
| rs5754164   | A | -0.0489 |
| rs5997930   | C | -0.0731 |
| rs17379101  | A | 0.1041  |
| rs13058625  | A | 0.0483  |
| rs7292322   | A | 0.0384  |
| rs117776121 | T | 0.2345  |
| rs926837    | C | 0.0362  |
| rs131705    | T | -0.0414 |
| rs76743390  | T | 0.1397  |
| rs1807613   | C | -0.0464 |
| rs34825318  | A | -0.1563 |
| rs74684401  | C | -0.1524 |
| rs5762227   | T | 0.0448  |
| rs116985798 | T | -0.1722 |
| rs737356    | G | 0.0372  |
| rs140107290 | G | 0.197   |
| rs13056977  | C | 0.0444  |
| rs12484326  | A | 0.0865  |

|             |   |         |
|-------------|---|---------|
| rs4822848   | G | -0.0462 |
| rs11089794  | C | -0.0533 |
| rs4824048   | T | 0.0881  |
| rs135413    | A | -0.0324 |
| rs2385722   | T | 0.1287  |
| rs9616825   | G | -0.0616 |
| rs78983030  | C | 0.1032  |
| rs165928    | A | -0.0368 |
| rs138128    | G | 0.0388  |
| rs117514024 | T | 0.0455  |
| rs116914215 | T | 0.2215  |
| rs875101    | C | 0.0496  |
| rs71328255  | A | -0.1668 |
| rs737855    | G | -0.0394 |
| rs35915865  | C | -0.1101 |
| rs2215723   | G | 0.0341  |
| rs4823169   | G | -0.0328 |
| rs9616225   | A | 0.1562  |
| rs57751077  | G | -0.0819 |
| rs35381944  | T | 0.0636  |
| rs16991328  | G | -0.2241 |
| rs2516542   | T | -0.05   |
| rs915898    | T | -0.1197 |
| rs5766346   | C | -0.066  |
| rs9627530   | C | 0.0514  |
| rs138418    | T | -0.0402 |
| rs135885    | G | 0.0334  |
| rs78900351  | A | 0.1893  |
| rs117192145 | C | 0.1758  |
| rs73409833  | C | 0.1309  |
| rs2013035   | T | 0.1394  |
| rs74772207  | T | -0.1496 |
| rs117293902 | A | 0.1413  |
| rs55658730  | T | -0.0401 |
| rs62232612  | G | 0.2462  |
| rs74691459  | C | -0.0707 |
| rs62229284  | G | 0.1496  |
| rs134164    | T | 0.1092  |
| rs2267380   | C | -0.0312 |
| rs8139244   | A | 0.1008  |
| rs5770422   | C | 0.0388  |
| rs79418139  | G | 0.0726  |
| rs13053547  | A | 0.089   |
| rs9614567   | T | 0.1137  |
| rs7364255   | T | -0.0327 |
| rs5746647   | G | 0.0889  |
| rs5761608   | G | 0.0471  |

|             |   |         |
|-------------|---|---------|
| rs5748366   | C | 0.037   |
| rs8141133   | C | 0.0644  |
| rs2543519   | G | 0.0378  |
| rs719263    | T | -0.0395 |
| rs412021    | A | 0.1309  |
| rs116910985 | A | 0.1221  |
| rs132667    | G | 0.0296  |
| rs174334    | T | -0.0311 |
| rs111861646 | T | -0.2355 |
| rs133436    | C | 0.0413  |
| rs388561    | T | -0.0795 |
| rs9622556   | A | 0.1575  |
| rs35674508  | C | -0.1144 |
| rs5758935   | T | 0.0381  |
| rs5759593   | A | -0.0305 |
| rs61327482  | T | 0.0867  |
| rs146851318 | C | -0.207  |
| rs13056139  | A | -0.0381 |
| rs6000018   | G | 0.075   |
| rs12628369  | T | 0.0321  |
| rs5993834   | T | -0.0356 |
| rs73886258  | A | 0.0652  |
| rs117843471 | A | 0.1607  |
| rs8141744   | T | -0.0356 |
| rs79312272  | C | 0.0741  |
| rs4239928   | T | -0.0461 |
| rs28439423  | T | -0.0684 |
| rs138010165 | T | 0.1514  |
| rs4821877   | T | 0.0326  |
| rs5992831   | G | 0.1257  |
| rs133710    | T | -0.0305 |
| rs2540620   | C | 0.0448  |
| rs117614152 | T | -0.2306 |
| rs79568180  | G | 0.0636  |
| rs7285926   | G | 0.1102  |
| rs2276449   | A | 0.049   |
| rs137404    | T | 0.0316  |
| rs75943824  | A | -0.0723 |
| rs6000203   | A | -0.2098 |
| rs112349986 | A | 0.1169  |
| rs9614825   | C | 0.0759  |
| rs1061660   | C | -0.0322 |
| rs8135152   | G | 0.0475  |
| rs756653    | A | -0.0328 |
| rs2330092   | C | 0.0499  |
| rs2073766   | T | 0.0469  |
| rs2858519   | A | -0.0662 |

|             |   |         |
|-------------|---|---------|
| rs6010044   | C | 0.0395  |
| rs76103089  | T | -0.0942 |
| rs2144250   | T | -0.0349 |
| rs5759698   | G | 0.086   |
| rs4446      | A | -0.063  |
| rs4528878   | T | 0.1887  |
| rs713774    | C | -0.0532 |
| rs2073776   | T | 0.0416  |
| rs5759887   | T | -0.0388 |
| rs1981708   | G | -0.0472 |
| rs5770680   | T | 0.0553  |
| rs74478331  | T | -0.0525 |
| rs5750373   | A | 0.0315  |
| rs9609844   | C | 0.0448  |
| rs470019    | T | 0.035   |
| rs34390222  | T | 0.0599  |
| rs139780    | C | -0.059  |
| rs74349262  | A | 0.088   |
| rs149798846 | C | 0.1596  |
| rs130182    | G | 0.0314  |
| rs4822645   | T | 0.0473  |
| rs148039667 | A | 0.1234  |
| rs11089565  | T | 0.0408  |
| rs5996259   | A | 0.0922  |
| rs150171569 | A | 0.2396  |
| rs9614882   | T | 0.0787  |
| rs75623071  | C | -0.0902 |
| rs136674    | T | 0.0325  |
| rs8140949   | A | 0.0554  |
| rs7285082   | T | -0.0291 |
| rs114850255 | G | 0.0736  |
| rs5766886   | A | 0.0421  |
| rs5747075   | T | 0.0308  |
| rs5016339   | A | -0.0701 |
| rs7288410   | T | -0.0376 |
| rs73169217  | G | 0.0472  |
| rs1977072   | G | 0.0527  |
| rs117905236 | G | 0.2479  |
| rs77386801  | T | 0.1555  |
| rs55853243  | A | -0.0704 |
| rs2913      | G | 0.0335  |
| rs135589    | C | -0.034  |
| rs9615846   | G | -0.0323 |
| rs1894468   | G | -0.0308 |
| rs117880336 | A | 0.1529  |
| rs139906549 | T | 0.1756  |
| rs62228917  | T | 0.0897  |



|             |   |         |
|-------------|---|---------|
| rs2241252   | G | 0.1266  |
| rs2269572   | T | -0.0564 |
| rs909696    | A | 0.1331  |
| rs12483790  | A | 0.1486  |
| rs62228837  | T | -0.2116 |
| rs6008025   | A | 0.1003  |
| rs79853675  | T | -0.0679 |
| rs138046647 | C | -0.1251 |
| rs9606763   | C | 0.1021  |
| rs135695    | A | 0.0333  |
| rs2267232   | G | -0.0315 |
| rs760546    | A | 0.042   |
| rs9941940   | A | -0.1137 |
| rs112112324 | T | -0.1019 |
| rs738261    | C | 0.0299  |
| rs2092169   | T | 0.0548  |
| rs5753111   | T | 0.0327  |
| rs4819964   | G | -0.0405 |
| rs174876    | T | 0.0558  |
| rs1109052   | T | -0.0347 |
| rs2269517   | C | -0.0296 |
| rs135288    | C | -0.0316 |
| rs5992071   | T | 0.0953  |
| rs117068410 | A | 0.1351  |
| rs7285141   | T | 0.0377  |
| rs34403630  | T | 0.1231  |
| rs7291639   | C | -0.0656 |
| rs11703592  | T | 0.0733  |
| rs9606540   | G | 0.0367  |
| rs1977065   | C | -0.1078 |
| rs116956366 | G | 0.2251  |
| rs6009041   | T | -0.0351 |
| rs4823848   | G | -0.0591 |
| rs6006572   | T | 0.0365  |
| rs117444914 | A | -0.1627 |
| rs1006254   | C | -0.0408 |
| rs9621198   | T | -0.1521 |
| rs117556377 | T | 0.1282  |
| rs41424744  | T | 0.167   |
| rs111819340 | G | 0.177   |
| rs9306510   | G | -0.0299 |
| rs458480    | C | -0.0363 |
| rs761793    | C | -0.0362 |
| rs75651092  | T | 0.1373  |
| rs12166627  | A | 0.0495  |
| rs73159061  | G | 0.1108  |
| rs6005977   | T | 0.0453  |

|             |   |         |
|-------------|---|---------|
| rs149801294 | G | 0.2115  |
| rs144320509 | G | 0.1457  |
| rs138501302 | G | 0.1278  |
| rs5765019   | A | 0.1728  |
| rs9620676   | T | 0.0987  |
| rs73181109  | A | -0.1353 |
| rs35694266  | G | -0.0486 |
| rs5994814   | G | -0.1599 |
| rs5992041   | T | -0.049  |
| rs9608214   | C | -0.1417 |
| rs5766706   | A | 0.0289  |
| rs140513136 | C | 0.2052  |
| rs9609922   | A | -0.095  |
| rs129406    | A | 0.0933  |
| rs5992967   | T | 0.0365  |
| rs35972770  | T | 0.0788  |
| rs4823220   | A | 0.059   |
| rs118083289 | A | 0.2089  |
| rs11703590  | T | -0.0328 |
| rs9616098   | A | 0.1744  |
| rs8139766   | C | -0.1126 |
| rs2223335   | T | 0.0366  |
| rs1055503   | A | 0.0489  |
| rs2743839   | A | 0.0296  |
| rs2078974   | A | -0.0299 |
| rs76039265  | A | 0.1133  |
| rs116159988 | A | -0.1104 |
| rs1076650   | A | -0.0328 |
| rs738486    | C | 0.0318  |
| rs11704208  | T | -0.0354 |
| rs134678    | T | 0.0288  |
| rs5754558   | T | -0.0359 |
| rs4550760   | C | 0.0321  |
| rs9608281   | T | -0.236  |
| rs78107287  | G | 0.051   |
| rs79697179  | G | 0.0721  |
| rs9622618   | G | -0.0536 |
| rs80282014  | A | 0.1284  |
| rs5762730   | G | 0.0307  |
| rs2281118   | A | -0.0343 |
| rs16982551  | G | -0.0484 |
| rs2281108   | A | 0.0306  |
| rs5764781   | G | -0.0291 |
| rs2858508   | T | 0.0325  |
| rs17882704  | A | 0.1272  |
| rs73881473  | C | -0.0933 |
| rs55694472  | T | -0.074  |

|             |   |         |
|-------------|---|---------|
| rs464901    | C | -0.0307 |
| rs131130    | T | -0.039  |
| rs9615222   | A | 0.0448  |
| rs12170391  | C | 0.0707  |
| rs77062663  | A | -0.1169 |
| rs147225765 | T | -0.2102 |
| rs5764560   | C | -0.03   |
| rs35717986  | A | -0.071  |
| rs56228180  | T | -0.1149 |
| rs9624216   | A | -0.0546 |
| rs117301852 | T | 0.1127  |
| rs5762053   | A | -0.0453 |
| rs13056246  | T | -0.0528 |
| rs7284531   | C | 0.0345  |
| rs5757505   | A | -0.0425 |
| rs5994889   | A | 0.0309  |
| rs35283268  | A | -0.2051 |
| rs5761740   | A | 0.0508  |
| rs75292981  | G | 0.1176  |
| rs131835    | A | 0.0285  |
| rs118186439 | A | 0.1432  |
| rs4820765   | C | -0.0366 |
| rs62233184  | T | -0.0909 |
| rs5746669   | A | -0.1244 |
| rs9615390   | C | -0.03   |
| rs35542587  | C | -0.0625 |
| rs76901310  | G | 0.048   |
| rs58500554  | A | -0.0491 |
| rs739301    | A | -0.0763 |
| rs62221756  | C | 0.0383  |
| rs75860721  | C | 0.0512  |
| rs148789164 | C | 0.1262  |
| rs62228861  | A | 0.0367  |
| rs150656198 | A | 0.0887  |
| rs582028    | T | -0.0312 |
| rs58566251  | A | -0.0925 |
| rs76884142  | T | 0.0825  |
| rs57986874  | A | -0.1103 |
| rs140289    | T | 0.0393  |
| rs1883264   | C | 0.0375  |
| rs10483184  | T | 0.0531  |
| rs118175469 | C | -0.1655 |
| rs78804481  | T | 0.1935  |
| rs73156739  | A | -0.0969 |
| rs60620857  | T | -0.096  |
| rs138426988 | G | -0.1325 |
| rs239327    | G | 0.0273  |

|             |   |         |
|-------------|---|---------|
| rs9680830   | G | -0.03   |
| rs5995197   | A | 0.0391  |
| rs2012607   | A | 0.0311  |
| rs5753280   | C | -0.0462 |
| rs118091420 | T | 0.1177  |
| rs118080800 | T | 0.1504  |
| rs112709901 | G | -0.0661 |
| rs4484129   | G | 0.0302  |
| rs5765952   | A | -0.0282 |
| rs3088200   | G | -0.0395 |
| rs5756840   | T | 0.0996  |
| rs112929152 | C | 0.0743  |
| rs131840    | A | -0.0437 |
| rs117240832 | C | -0.1299 |
| rs79974807  | T | 0.1486  |
| rs11914035  | T | -0.0553 |
| rs60302228  | T | -0.1371 |
| rs701422    | C | -0.086  |
| rs9604911   | T | -0.036  |
| rs362250    | T | -0.0381 |
| rs117809488 | G | 0.1583  |
| rs11089784  | T | 0.0334  |
| rs4239871   | A | 0.0458  |
| rs2041969   | C | 0.0485  |
| rs78068506  | T | 0.0882  |
| rs79502570  | C | 0.1057  |
| rs141373695 | A | 0.1119  |
| rs134966    | T | -0.0447 |
| rs118002995 | G | 0.131   |
| rs62236070  | C | 0.0416  |
| rs7290988   | T | 0.0511  |
| rs882753    | T | 0.0427  |
| rs11089305  | G | 0.0342  |
| rs4358236   | A | 0.0418  |
| rs113708083 | C | -0.0321 |
| rs80087878  | G | -0.0674 |
| rs979179    | A | 0.1223  |
| rs2049948   | A | -0.0283 |
| rs8141494   | T | 0.0288  |
| rs9620460   | C | -0.0347 |
| rs75044293  | T | 0.0556  |
| rs132428    | T | -0.0327 |
| rs8142819   | C | -0.0289 |
| rs112326866 | A | 0.1873  |
| rs2879246   | C | 0.0363  |
| rs35836111  | T | 0.0812  |
| rs150999545 | G | -0.177  |

|             |   |         |
|-------------|---|---------|
| rs79557997  | T | 0.1387  |
| rs76553724  | T | 0.1827  |
| rs11090560  | T | 0.2257  |
| rs60498544  | G | 0.0921  |
| rs9626098   | C | -0.1029 |
| rs130474    | C | -0.0297 |
| rs8141657   | A | 0.0343  |
| rs55899845  | C | -0.1124 |
| rs139417008 | T | -0.1851 |
| rs62227033  | A | -0.2087 |
| rs10483248  | A | -0.1416 |
| rs5996934   | A | 0.0888  |
| rs79718986  | T | 0.1179  |
| rs5764854   | C | -0.0521 |
| rs147538399 | A | -0.0613 |
| rs5770341   | C | -0.0618 |
| rs139702    | T | -0.0351 |
| rs80610     | G | 0.0274  |
| rs61744286  | A | 0.0605  |
| rs5764726   | G | -0.0309 |
| rs16991063  | A | -0.0607 |
| rs112015396 | A | -0.1374 |
| rs139696415 | T | -0.2094 |
| rs6008266   | C | 0.0389  |
| rs117074216 | A | 0.1157  |
| rs17589429  | C | -0.0379 |
| rs13054609  | C | 0.0517  |
| rs62232252  | T | -0.2282 |
| rs79519596  | T | 0.1515  |
| rs4821505   | T | 0.0289  |
| rs13054977  | G | 0.0443  |
| rs9612371   | T | 0.0452  |
| rs3218312   | G | -0.0326 |
| rs117577285 | T | 0.1458  |
| rs139721    | G | 0.0477  |
| rs28654856  | C | -0.0579 |
| rs145240808 | G | 0.1737  |
| rs5760894   | C | 0.1178  |
| rs35583346  | G | 0.1282  |
| rs9306297   | A | 0.033   |
| rs13056570  | C | -0.0349 |
| rs133911    | G | 0.036   |
| rs9628506   | T | 0.0336  |
| rs2074739   | G | 0.0269  |
| rs62236202  | A | 0.0621  |
| rs7292206   | T | -0.0645 |
| rs3747273   | A | -0.0673 |

|             |   |         |
|-------------|---|---------|
| rs144508602 | T | -0.1384 |
| rs5750461   | C | 0.0485  |
| rs455049    | T | -0.0574 |
| rs8135854   | C | 0.028   |
| rs73878677  | A | -0.0423 |
| rs79183605  | A | 0.0775  |
| rs80353162  | C | -0.1215 |
| rs57967659  | G | -0.0543 |
| rs117105189 | A | 0.1138  |
| rs5769386   | G | 0.0304  |
| rs6519013   | C | 0.0504  |
| rs28460675  | T | -0.0943 |
| rs5753453   | A | -0.0931 |
| rs5996014   | T | -0.0327 |
| rs34320195  | T | -0.165  |
| rs9616350   | A | -0.0576 |
| rs79570533  | C | 0.0456  |
| rs9627749   | A | 0.1125  |
| rs6004241   | T | 0.0454  |
| rs17004024  | T | -0.0803 |
| rs171438    | T | 0.0321  |
| rs112061145 | A | 0.0696  |
| rs140009    | A | 0.0318  |
| rs16982398  | C | -0.0382 |
| rs131393    | T | 0.0783  |
| rs10222269  | A | -0.0832 |
| rs16982255  | C | -0.0869 |
| rs5747409   | G | -0.028  |
| rs1983609   | T | -0.0324 |
| rs136687    | T | 0.0634  |
| rs7287350   | T | 0.0712  |
| rs13057732  | C | -0.0828 |
| rs5761473   | T | 0.028   |
| rs61756762  | A | 0.1882  |
| rs5747103   | T | 0.0284  |
| rs11705281  | A | -0.0601 |
| rs3788461   | T | 0.0284  |
| rs12157766  | G | 0.0661  |
| rs2284057   | A | 0.1478  |
| rs2018292   | G | 0.0316  |
| rs6006687   | A | 0.038   |
| rs723553    | A | -0.0275 |
| rs1005491   | A | -0.0304 |
| rs79064620  | T | 0.0646  |
| rs139063190 | A | -0.1822 |
| rs76160051  | T | -0.1636 |
| rs146354449 | A | -0.2223 |

|             |   |         |
|-------------|---|---------|
| rs150919209 | C | 0.1263  |
| rs11089749  | C | 0.0457  |
| rs2285919   | C | 0.0489  |
| rs117506927 | A | 0.087   |
| rs5999196   | T | -0.0449 |
| rs2008519   | T | 0.0273  |
| rs117040129 | T | 0.1816  |
| rs713953    | C | 0.0474  |
| rs738370    | A | 0.0309  |
| rs79564486  | T | -0.0751 |
| rs5994033   | C | 0.0297  |
| rs397478    | C | -0.0323 |
| rs35653875  | A | -0.1104 |
| rs117937837 | G | -0.1588 |
| rs73178447  | A | -0.0749 |
| rs134793    | T | 0.0812  |
| rs112006800 | T | 0.0464  |
| rs909494    | T | -0.0407 |
| rs117691471 | T | 0.1686  |
| rs5747197   | A | 0.1042  |
| rs28431464  | A | -0.0429 |
| rs2269779   | T | 0.0541  |
| rs9608521   | T | -0.0519 |
| rs6009234   | T | 0.0277  |
| rs9622756   | A | -0.0295 |
| rs114083755 | G | -0.0912 |
| rs112035294 | T | 0.068   |
| rs79558288  | A | -0.133  |
| rs135256    | A | -0.0372 |
| rs2301501   | A | 0.0437  |
| rs7287568   | C | -0.1027 |
| rs12169892  | A | -0.0471 |
| rs117322830 | A | -0.1678 |
| rs113813999 | G | 0.1354  |
| rs117982527 | T | -0.1532 |
| rs77049949  | T | -0.0864 |
| rs140848213 | A | -0.1381 |
| rs2009374   | G | 0.0265  |
| rs80255070  | T | -0.0725 |
| rs9680567   | T | -0.0395 |
| rs141953471 | T | 0.1095  |
| rs5760637   | C | 0.0263  |
| rs55781028  | T | 0.0296  |
| rs73174925  | T | -0.0909 |
| rs5759650   | T | 0.0347  |
| rs35086751  | C | 0.0406  |
| rs137917168 | A | -0.1343 |

|             |   |         |
|-------------|---|---------|
| rs74444868  | T | 0.044   |
| rs73166082  | T | 0.088   |
| rs133985    | G | 0.0569  |
| rs2330578   | T | -0.0257 |
| rs6008688   | T | -0.0299 |
| rs1894431   | T | 0.0581  |
| rs146569038 | T | -0.1406 |
| rs142837365 | G | -0.1782 |
| rs137451    | A | -0.0484 |
| rs8135600   | G | -0.0512 |
| rs62238591  | T | -0.1477 |
| rs9618619   | T | -0.0706 |
| rs142127124 | T | -0.282  |
| rs71311690  | C | 0.0416  |
| rs5750769   | T | -0.0436 |
| rs12157457  | G | -0.0536 |
| rs2078747   | A | -0.0488 |
| rs139951647 | T | -0.1876 |
| rs4822740   | T | 0.0658  |
| rs2009816   | A | -0.038  |
| rs5999796   | A | 0.0537  |
| rs113457190 | A | -0.111  |
| rs2281113   | A | -0.1231 |
| rs9621684   | T | -0.0351 |
| rs117863931 | T | 0.0681  |
| rs133753    | G | 0.0255  |
| rs2267452   | A | -0.0338 |
| rs12170952  | A | -0.0491 |
| rs926232    | G | 0.0422  |
| rs13054111  | T | -0.0631 |
| rs58291507  | G | 0.0458  |
| rs73173191  | A | 0.1059  |
| rs78617269  | T | 0.0615  |
| rs9607468   | A | 0.0508  |
| rs149277501 | A | 0.1005  |
| rs73172241  | T | 0.0425  |
| rs1978055   | C | -0.0297 |
| rs145308917 | C | -0.0939 |
| rs7285945   | G | -0.026  |
| rs5766248   | A | -0.0342 |
| rs2267597   | T | -0.0364 |
| rs141175264 | T | -0.0394 |
| rs71318973  | T | 0.045   |
| rs13053966  | T | 0.0307  |
| rs73429402  | A | 0.1838  |
| rs4416      | A | 0.0262  |
| rs34016471  | A | 0.1762  |



|             |   |         |
|-------------|---|---------|
| rs5752431   | T | 0.0379  |
| rs5998994   | C | -0.1225 |
| rs79858848  | G | 0.0867  |
| rs11703211  | G | 0.1063  |
| rs9619869   | A | 0.0388  |
| rs62241082  | G | 0.1327  |
| rs1894241   | T | 0.0732  |
| rs75634590  | T | 0.092   |
| rs2871041   | T | -0.0351 |
| rs5761394   | G | -0.0635 |
| rs5997852   | G | -0.0289 |
| rs117399973 | A | -0.2488 |
| rs11913756  | C | -0.0416 |
| rs9615646   | T | 0.1242  |
| rs12170974  | G | -0.0587 |
| rs78725784  | C | 0.0368  |
| rs116866769 | G | 0.0874  |
| rs77144800  | A | -0.0536 |
| rs117161568 | G | 0.1494  |
| rs136805    | C | 0.031   |
| rs12628757  | G | 0.0557  |
| rs2007611   | T | 0.031   |
| rs12484945  | T | 0.0612  |
| rs62227979  | A | 0.0368  |
| rs55877906  | T | 0.1186  |
| rs2176658   | C | -0.163  |
| rs139201    | G | 0.0266  |
| rs35728210  | A | -0.1651 |
| rs74927881  | T | 0.1659  |
| rs112991254 | A | 0.0979  |
| rs1990502   | G | -0.0481 |
| rs13056905  | T | 0.0452  |
| rs111453195 | T | 0.0419  |
| rs5993457   | G | 0.1186  |
| rs7286093   | T | -0.0868 |
| rs118038042 | T | -0.1567 |
| rs9609801   | G | -0.0292 |
| rs2144784   | A | 0.0853  |
| rs73173146  | T | 0.0677  |
| rs73183332  | T | 0.1437  |
| rs8140821   | C | -0.0998 |
| rs113368793 | A | 0.0594  |
| rs2179850   | G | 0.0262  |
| rs149004280 | T | 0.2068  |
| rs2189078   | A | 0.0345  |
| rs4823345   | A | 0.043   |
| rs459177    | T | 0.0638  |

|             |   |         |
|-------------|---|---------|
| rs56413761  | A | -0.0907 |
| rs56791421  | T | 0.1116  |
| rs117556915 | A | 0.1885  |
| rs132689    | A | -0.0276 |
| rs5757746   | A | -0.0318 |
| rs11912248  | C | -0.0399 |
| rs5759758   | G | 0.0665  |
| rs5748263   | G | -0.0399 |
| rs117755943 | A | 0.2282  |
| rs78797712  | A | -0.1498 |
| rs76850983  | C | 0.101   |
| rs79080767  | A | 0.1113  |
| rs77831035  | C | 0.0786  |
| rs2472786   | G | -0.027  |
| rs885983    | G | -0.0262 |
| rs10483168  | T | -0.0337 |
| rs6009556   | C | -0.0521 |
| rs5993550   | G | -0.0285 |
| rs5750708   | A | 0.0295  |
| rs729512    | T | 0.0406  |
| rs9613317   | A | 0.0306  |
| rs116753771 | C | 0.1006  |
| rs16985013  | G | -0.0734 |
| rs148814059 | T | -0.0807 |
| rs74334826  | A | -0.118  |
| rs72656933  | T | 0.1031  |
| rs11704200  | T | -0.0796 |
| rs9621992   | T | -0.1187 |
| rs6007798   | A | 0.0272  |
| rs655656    | T | 0.0343  |
| rs84512     | A | 0.0271  |
| rs77099570  | A | 0.126   |
| rs1131603   | C | 0.0918  |
| rs73159334  | T | -0.0839 |
| rs112147479 | T | -0.1085 |
| rs382819    | A | -0.0287 |
| rs34775147  | C | -0.0644 |
| rs16982689  | T | 0.0859  |
| rs117363510 | T | -0.1395 |
| rs6005148   | T | -0.0355 |
| rs146816191 | T | 0.1673  |
| rs2234326   | A | -0.084  |
| rs138628    | C | 0.026   |
| rs5748471   | A | -0.0253 |
| rs118055717 | A | 0.1862  |
| rs5756909   | C | -0.0289 |
| rs1978060   | A | 0.0279  |

|             |   |         |
|-------------|---|---------|
| rs116365548 | T | -0.1744 |
| rs696880    | G | 0.0283  |
| rs136005    | T | -0.05   |
| rs77914367  | A | 0.1333  |
| rs151330714 | A | 0.2022  |
| rs78683492  | T | 0.148   |
| rs6008215   | G | 0.0368  |
| rs228979    | T | -0.0294 |
| rs11705400  | C | 0.0263  |
| rs62235400  | C | 0.0818  |
| rs118063921 | A | -0.0797 |
| rs35345163  | A | -0.0341 |
| rs2540646   | G | -0.0469 |
| rs139961    | C | -0.0279 |
| rs732274    | G | 0.0304  |
| rs73162329  | T | 0.2215  |
| rs10775741  | C | 0.031   |
| rs17574411  | T | 0.0488  |
| rs117462236 | A | -0.1601 |
| rs17421076  | G | -0.0558 |
| rs2157112   | T | 0.0282  |
| rs117496380 | G | 0.0894  |
| rs11090676  | C | -0.0302 |
| rs5761282   | G | -0.0286 |
| rs5756711   | G | 0.0331  |
| rs8139152   | G | 0.0298  |
| rs78276112  | T | -0.0514 |
| rs940115    | C | 0.029   |
| rs117130130 | T | 0.1481  |
| rs138246266 | G | 0.1491  |
| rs78096699  | A | 0.0754  |
| rs78561791  | A | -0.1683 |
| rs396972    | T | -0.0654 |
| rs17721625  | T | 0.0998  |
| rs196058    | A | 0.0905  |
| rs147801446 | T | 0.2307  |
| rs131418    | T | -0.0566 |
| rs139108646 | G | 0.1791  |
| rs6009658   | C | -0.0284 |
| rs112298976 | A | 0.0877  |
| rs5997301   | G | -0.0345 |
| rs9617402   | A | -0.0724 |
| rs4274683   | G | 0.0951  |
| rs117979417 | T | -0.0781 |
| rs13057470  | G | -0.0891 |
| rs36030561  | G | -0.094  |
| rs4822092   | A | 0.0475  |

|             |   |         |
|-------------|---|---------|
| rs41283201  | A | 0.0855  |
| rs7292381   | G | 0.0253  |
| rs5748982   | T | 0.0293  |
| rs76224707  | A | -0.0913 |
| rs11703360  | A | -0.1106 |
| rs12158355  | G | -0.0252 |
| rs848715    | A | -0.0275 |
| rs75933016  | C | -0.1164 |
| rs1555208   | T | 0.0468  |
| rs35991189  | T | 0.0757  |
| rs2187966   | C | 0.0552  |
| rs2179247   | T | 0.0251  |
| rs3213550   | A | -0.0418 |
| rs118167149 | G | 0.1059  |
| rs139948356 | G | 0.1452  |
| rs80000651  | G | -0.0555 |
| rs78382768  | A | 0.2132  |
| rs143815299 | A | 0.1224  |
| rs9624581   | T | 0.0704  |
| rs714006    | A | -0.0304 |
| rs150055926 | C | -0.1557 |
| rs2413211   | T | -0.0253 |
| rs112542658 | T | -0.1831 |
| rs9306229   | T | -0.0313 |
| rs6002965   | T | -0.0544 |
| rs6000690   | G | 0.027   |
| rs1884289   | G | 0.0284  |
| rs143035999 | C | 0.1894  |
| rs117938738 | A | 0.0539  |
| rs5756783   | A | -0.0269 |
| rs74386185  | T | 0.0433  |
| rs2157468   | C | -0.0281 |
| rs76870387  | T | -0.0551 |
| rs79683258  | T | 0.0685  |
| rs6004015   | A | -0.0438 |
| rs143482557 | G | 0.1216  |
| rs5768501   | C | -0.0383 |
| rs76437589  | G | 0.1981  |
| rs137985    | A | 0.0242  |
| rs6008250   | T | 0.0756  |
| rs146892078 | C | -0.0641 |
| rs135343    | T | 0.0301  |
| rs62225406  | C | -0.1431 |
| rs9611958   | A | -0.0393 |
| rs74993228  | T | 0.072   |
| rs9615092   | C | -0.1162 |
| rs74335326  | A | 0.0543  |

|             |   |         |
|-------------|---|---------|
| rs75976499  | C | -0.1096 |
| rs133419    | A | -0.054  |
| rs2064540   | C | -0.0272 |
| rs5768914   | A | 0.03    |
| rs4838852   | A | -0.0283 |
| rs117875166 | G | -0.1372 |
| rs149609089 | A | 0.1119  |
| rs78193291  | A | -0.076  |
| rs9622536   | C | -0.0344 |
| rs74624637  | T | 0.1131  |
| rs11702991  | A | 0.1181  |
| rs142750911 | G | 0.0313  |
| rs73160491  | G | 0.0365  |
| rs132719    | G | 0.0289  |
| rs73178241  | T | 0.1121  |
| rs62243115  | C | -0.0743 |
| rs141971631 | A | 0.123   |
| rs16997316  | T | 0.0437  |
| rs9610372   | T | 0.0403  |
| rs3859843   | A | 0.0882  |
| rs1015067   | T | 0.0251  |
| rs6008407   | G | 0.0315  |
| rs5769843   | C | 0.0338  |
| rs9798787   | A | 0.0583  |
| rs78725208  | G | 0.0961  |
| rs10483249  | A | -0.0931 |
| rs73178469  | C | 0.1344  |
| rs715579    | G | -0.0402 |
| rs11705120  | T | 0.035   |
| rs112350524 | T | 0.0518  |
| rs77413058  | T | 0.0712  |
| rs73164314  | G | -0.0804 |
| rs7290462   | T | -0.0441 |
| rs4342045   | G | 0.0383  |
| rs2301405   | C | 0.0413  |
| rs135424    | T | -0.0344 |
| rs141766150 | A | -0.0694 |
| rs137914    | G | 0.0497  |
| rs117267143 | A | -0.0819 |
| rs113859782 | T | 0.1412  |
| rs9623081   | A | 0.0306  |
| rs364999    | C | -0.1155 |
| rs380414    | G | -0.0865 |
| rs74432260  | T | 0.0378  |
| rs9620438   | T | 0.0568  |
| rs57670047  | T | 0.0772  |
| rs12484301  | G | 0.1732  |

|             |   |         |
|-------------|---|---------|
| rs5999773   | C | -0.0327 |
| rs1884558   | G | -0.0268 |
| rs5762196   | C | -0.0438 |
| rs118107086 | T | -0.1611 |
| rs9607089   | T | 0.1403  |
| rs147772067 | A | -0.1024 |
| rs78014020  | G | 0.1858  |
| rs76536471  | T | -0.0431 |
| rs146190149 | T | -0.1844 |
| rs73886519  | A | -0.0723 |
| rs9613352   | T | -0.0275 |
| rs76970628  | T | 0.1531  |
| rs134930    | C | 0.0273  |
| rs56408115  | G | 0.0892  |
| rs79007074  | G | -0.0724 |
| rs62231598  | T | -0.0588 |
| rs142143747 | A | -0.2103 |
| rs3752518   | C | -0.0271 |
| rs62225078  | A | 0.0571  |
| rs2401520   | G | 0.0264  |
| rs9616545   | A | -0.0378 |
| rs7289981   | T | 0.0382  |
| rs5764691   | C | -0.028  |
| rs165583    | A | -0.0236 |
| rs4822579   | A | -0.0241 |
| rs62227005  | C | -0.1578 |
| rs148241105 | A | 0.0962  |
| rs174369    | G | 0.0261  |
| rs738144    | G | 0.034   |
| rs7287094   | C | -0.043  |
| rs142191943 | T | 0.1975  |
| rs17883954  | C | 0.1362  |
| rs8141516   | C | 0.029   |
| rs9614845   | T | 0.0459  |
| rs1969643   | T | 0.0269  |
| rs5751285   | T | 0.0266  |
| rs67574038  | C | -0.1935 |
| rs117319966 | C | 0.1013  |
| rs6006921   | G | -0.0325 |
| rs62241528  | A | 0.0869  |
| rs397709    | C | -0.0312 |
| rs16983313  | T | 0.0536  |
| rs4820097   | C | 0.0244  |
| rs11913614  | A | -0.0753 |
| rs138394    | C | -0.0246 |
| rs5759025   | C | -0.0354 |
| rs28454300  | A | -0.0363 |

|             |   |         |
|-------------|---|---------|
| rs28534889  | A | -0.0331 |
| rs2179102   | G | 0.0341  |
| rs133624    | A | 0.05    |
| rs4823002   | T | 0.0239  |
| rs6005262   | A | -0.0381 |
| rs369250    | G | 0.0246  |
| rs9623058   | G | -0.0266 |
| rs9607134   | C | 0.1047  |
| rs73160565  | A | -0.0477 |
| rs116805682 | A | 0.0749  |
| rs12628516  | G | 0.0605  |
| rs143698970 | A | 0.063   |
| rs12169756  | T | 0.0508  |
| rs77238267  | T | 0.1445  |
| rs8135371   | C | 0.034   |
| rs9625961   | G | -0.0592 |
| rs2289713   | T | 0.1599  |
| rs6003150   | T | 0.0246  |
| rs35048184  | C | -0.0255 |
| rs41277317  | A | 0.1996  |
| rs9628049   | T | -0.0526 |
| rs2215724   | G | -0.0657 |
| rs11705225  | C | -0.0399 |
| rs9609505   | A | 0.0244  |
| rs71325290  | A | 0.0669  |
| rs140629380 | A | -0.1753 |
| rs11912946  | T | -0.1106 |
| rs145041360 | A | 0.1421  |
| rs79414894  | C | 0.1764  |
| rs35520672  | A | -0.098  |
| rs5752088   | C | -0.0253 |
| rs4466      | A | 0.0381  |
| rs9606166   | T | -0.0776 |
| rs9614200   | G | -0.0341 |
| rs2298432   | A | -0.0236 |
| rs12161087  | T | 0.0447  |
| rs77946097  | A | 0.0885  |
| rs7289911   | A | 0.0714  |
| rs402909    | T | 0.1264  |
| rs738353    | T | -0.0249 |
| rs116384979 | A | -0.1515 |
| rs6003723   | C | -0.0356 |
| rs4822269   | G | 0.0528  |
| rs134026    | A | 0.0808  |
| rs28431032  | G | 0.0294  |
| rs13433526  | T | -0.0949 |
| rs5764372   | A | 0.0258  |

|             |   |         |
|-------------|---|---------|
| rs9614563   | A | 0.1427  |
| rs78857754  | A | -0.0709 |
| rs4822941   | C | -0.0288 |
| rs1056484   | T | -0.0239 |
| rs5747217   | A | -0.0361 |
| rs9608216   | T | 0.0534  |
| rs75957958  | C | 0.0768  |
| rs2401125   | G | 0.0355  |
| rs5763594   | A | 0.0409  |
| rs9619262   | A | 0.0304  |
| rs1474666   | A | -0.026  |
| rs9610756   | T | 0.1275  |
| rs118179232 | T | 0.1533  |
| rs180816    | A | 0.0315  |
| rs62241739  | A | 0.0412  |
| rs2064804   | T | -0.0256 |
| rs117357062 | C | 0.111   |
| rs4820694   | T | 0.0236  |
| rs909502    | T | -0.0238 |
| rs5758731   | T | -0.0261 |
| rs5769607   | C | -0.0327 |
| rs16991833  | C | -0.0671 |
| rs5747130   | C | 0.0433  |
| rs9609643   | A | 0.0552  |
| rs35457805  | A | -0.1134 |
| rs76660130  | G | 0.0627  |
| rs112462808 | T | 0.0336  |
| rs147197125 | A | -0.1473 |
| rs146832378 | T | 0.0799  |
| rs13055536  | T | 0.0328  |
| rs743863    | A | 0.0248  |
| rs131300    | A | -0.0853 |
| rs5761212   | G | 0.0922  |
| rs6000632   | T | -0.0284 |
| rs117105495 | A | 0.1829  |
| rs2012540   | G | -0.0297 |
| rs34573078  | T | 0.0291  |
| rs11704509  | A | -0.0574 |
| rs926469    | G | -0.0429 |
| rs9608562   | T | 0.04    |
| rs6006606   | T | -0.0333 |
| rs66861801  | G | -0.0392 |
| rs113897520 | T | 0.0889  |
| rs76576785  | G | 0.0907  |
| rs139764    | T | 0.0243  |
| rs1155802   | G | 0.0236  |
| rs721930    | C | 0.0294  |



|             |   |         |
|-------------|---|---------|
| rs7286668   | C | -0.0293 |
| rs7290120   | C | 0.0481  |
| rs1000815   | A | 0.023   |
| rs8135638   | G | 0.0635  |
| rs5753518   | A | -0.0427 |
| rs1008478   | C | 0.044   |
| rs2857648   | G | -0.0236 |
| rs9615013   | G | 0.0621  |
| rs136636    | T | 0.0238  |
| rs5765956   | C | -0.0247 |
| rs13053272  | C | 0.0653  |
| rs5765769   | T | -0.0259 |
| rs117459505 | G | -0.1703 |
| rs138874858 | T | 0.1607  |
| rs2958652   | A | -0.0265 |
| rs9607211   | T | 0.0285  |
| rs111519424 | T | 0.0579  |
| rs113460254 | C | 0.1168  |
| rs16981327  | T | 0.0628  |
| rs130413    | G | -0.0311 |
| rs7286232   | G | -0.023  |
| rs480666    | T | -0.03   |
| rs5758375   | A | 0.0979  |
| rs5766037   | G | -0.034  |
| rs2267022   | C | -0.0256 |
| rs117743999 | T | -0.1754 |
| rs5771703   | A | -0.0279 |
| rs117961389 | A | 0.0395  |
| rs12166473  | G | -0.036  |
| rs143413725 | G | 0.0818  |
| rs549204    | T | -0.0239 |
| rs116822376 | C | -0.0466 |
| rs17751364  | C | 0.1019  |
| rs13057604  | T | -0.0304 |
| rs6003692   | T | 0.056   |
| rs5757725   | C | 0.024   |
| rs9624750   | C | 0.0791  |
| rs12484688  | T | -0.0317 |
| rs8138673   | G | 0.0305  |
| rs2413283   | T | -0.0673 |
| rs137821    | G | 0.0277  |
| rs2001065   | T | 0.0524  |
| rs6009937   | C | -0.0826 |
| rs4820280   | T | -0.0242 |
| rs17580791  | T | -0.0683 |
| rs7285846   | C | -0.0232 |
| rs74329052  | A | 0.0418  |

|             |   |         |
|-------------|---|---------|
| rs141771514 | T | 0.1524  |
| rs739270    | A | -0.0336 |
| rs35582295  | G | -0.0696 |
| rs112261532 | A | 0.0491  |
| rs2231398   | T | -0.0234 |
| rs2748228   | C | -0.1089 |
| rs132880    | C | -0.0357 |
| rs5992465   | G | 0.0309  |
| rs2106144   | T | -0.0649 |
| rs141627283 | G | -0.1227 |
| rs75048126  | G | 0.2092  |
| rs2742637   | T | -0.0443 |
| rs112899427 | G | -0.0786 |
| rs8136093   | A | -0.0357 |
| rs16994755  | T | 0.0479  |
| rs73883143  | T | -0.1211 |
| rs9616743   | A | 0.0421  |
| rs1580226   | T | 0.0333  |
| rs56186420  | T | 0.0709  |
| rs738802    | A | -0.0276 |
| rs77884683  | T | 0.1419  |
| rs757630    | T | -0.0284 |
| rs17762500  | T | 0.0575  |
| rs117820381 | A | 0.0972  |
| rs117068250 | A | -0.1045 |
| rs5767685   | C | -0.0465 |
| rs58489539  | T | 0.072   |
| rs137988    | A | 0.0319  |
| rs76976452  | T | -0.0788 |
| rs117253898 | G | -0.1683 |
| rs78481035  | G | -0.0539 |
| rs761598    | G | -0.0268 |
| rs3218361   | T | 0.1411  |
| rs64547     | T | -0.023  |
| rs9612738   | T | 0.0286  |
| rs4823358   | C | 0.0297  |
| rs5769101   | A | 0.0268  |
| rs60083642  | G | -0.1251 |
| rs4821573   | A | -0.0346 |
| rs5758826   | T | 0.0496  |
| rs11089825  | T | -0.0269 |
| rs763215    | G | 0.0283  |
| rs117289461 | C | 0.0701  |
| rs73888843  | A | 0.0528  |
| rs144224453 | C | -0.1541 |
| rs78239728  | A | 0.0751  |
| rs148940248 | A | 0.1542  |

|             |   |         |
|-------------|---|---------|
| rs1210414   | C | 0.0277  |
| rs149677276 | T | 0.1481  |
| rs8135214   | T | 0.0288  |
| rs9610216   | G | -0.0252 |
| rs147561029 | A | 0.1581  |
| rs132045    | T | -0.0235 |
| rs9628488   | T | 0.0292  |
| rs143013326 | C | 0.1179  |
| rs55920759  | A | -0.0856 |
| rs3218255   | A | 0.026   |
| rs34577248  | G | -0.0604 |
| rs5749394   | C | 0.0335  |
| rs117603629 | T | 0.1068  |
| rs117647168 | T | -0.0865 |
| rs6005634   | A | -0.0264 |
| rs41258354  | G | -0.066  |
| rs112375575 | T | -0.1438 |
| rs9607881   | T | 0.0593  |
| rs56291802  | T | -0.0263 |
| rs117316616 | T | 0.1164  |
| rs113959751 | T | -0.0913 |
| rs8136492   | T | 0.048   |
| rs8135091   | A | -0.0425 |
| rs111779845 | G | -0.0919 |
| rs78655229  | A | -0.1784 |
| rs8142942   | G | -0.0294 |
| rs7284331   | C | -0.0302 |
| rs385422    | C | -0.0262 |
| rs9616019   | A | 0.0233  |
| rs801646    | G | -0.0238 |
| rs10854792  | T | 0.0258  |
| rs111460013 | C | 0.1199  |
| rs9941961   | T | -0.0264 |
| rs7284291   | A | 0.1575  |
| rs17751502  | A | 0.037   |
| rs62241071  | T | 0.1034  |
| rs77954081  | A | 0.083   |
| rs75685993  | T | -0.1127 |
| rs77535580  | T | -0.1061 |
| rs5768877   | T | -0.0349 |
| rs118137006 | C | -0.1037 |
| rs57892117  | T | 0.0689  |
| rs112058074 | T | 0.0665  |
| rs4819845   | C | -0.0482 |
| rs2904573   | C | -0.0295 |
| rs62232208  | G | -0.0277 |
| rs362149    | T | 0.0372  |

|             |   |         |
|-------------|---|---------|
| rs725768    | G | -0.078  |
| rs881740    | G | 0.0375  |
| rs132282    | C | 0.0249  |
| rs5767223   | T | -0.0269 |
| rs910310    | G | -0.0451 |
| rs61729471  | A | 0.1704  |
| rs362027    | G | -0.0505 |
| rs7287624   | A | 0.0412  |
| rs135095    | T | -0.0317 |
| rs62218975  | G | -0.0456 |
| rs7285836   | T | 0.0249  |
| rs62241183  | C | -0.0274 |
| rs35411325  | T | 0.0224  |
| rs76653253  | T | 0.0656  |
| rs73181754  | C | 0.0365  |
| rs2267311   | A | -0.0459 |
| rs933222    | T | 0.025   |
| rs17463891  | A | -0.0502 |
| rs8139308   | G | 0.0327  |
| rs9537      | T | 0.0273  |
| rs3026685   | T | 0.0246  |
| rs113637408 | T | -0.1235 |
| rs7287640   | T | -0.0694 |
| rs111948780 | C | -0.0658 |
| rs73167109  | T | -0.1512 |
| rs2142536   | A | -0.0679 |
| rs140335    | C | 0.0234  |
| rs742965    | T | -0.0356 |
| rs5751206   | A | 0.0498  |
| rs2008971   | C | -0.033  |
| rs62228560  | A | 0.0551  |
| rs62225920  | T | 0.0681  |
| rs28362527  | C | -0.086  |
| rs71313095  | T | -0.0735 |
| rs9306491   | A | -0.0369 |
| rs11090417  | A | -0.0587 |
| rs151069463 | G | -0.1557 |
| rs73182607  | A | -0.0776 |
| rs117162572 | A | 0.1552  |
| rs131132    | A | -0.0633 |
| rs62243128  | G | 0.0439  |
| rs149739525 | C | 0.0672  |
| rs150059113 | C | -0.0411 |
| rs8137125   | G | 0.052   |
| rs8135120   | C | -0.0925 |
| rs2413245   | G | -0.0596 |
| rs28459018  | T | 0.0529  |

|             |   |         |
|-------------|---|---------|
| rs137682    | A | -0.026  |
| rs3905396   | A | 0.0616  |
| rs6003979   | A | 0.0775  |
| rs854970    | T | 0.0273  |
| rs4390848   | G | 0.0284  |
| rs79335891  | A | 0.0557  |
| rs74897626  | A | -0.0313 |
| rs240091    | G | 0.0272  |
| rs142682931 | G | -0.1609 |
| rs136663    | A | -0.0733 |
| rs143486600 | A | 0.167   |
| rs2958666   | T | -0.0362 |
| rs117733000 | T | 0.1201  |
| rs5995758   | A | -0.0287 |
| rs5765393   | A | 0.0514  |
| rs73166947  | T | 0.1356  |
| rs5753449   | A | 0.0292  |
| rs362241    | T | 0.037   |
| rs76804951  | T | -0.1173 |
| rs76649694  | A | -0.0744 |
| rs4145417   | G | 0.1137  |
| rs9610491   | T | 0.1464  |
| rs5757508   | T | -0.0367 |
| rs134787    | A | -0.0331 |
| rs142737602 | A | 0.1668  |
| rs4819555   | T | 0.0267  |
| rs117346148 | A | -0.0486 |
| rs117841213 | T | -0.1268 |
| rs4821140   | G | -0.0284 |
| rs112684113 | A | 0.1132  |
| rs112383740 | A | 0.0383  |
| rs77026398  | A | -0.144  |
| rs56035613  | C | -0.0231 |
| rs6009727   | C | -0.0262 |
| rs117504107 | A | 0.1615  |
| rs2070477   | A | -0.0237 |
| rs147099636 | C | 0.1615  |
| rs62231638  | T | 0.0928  |
| rs115670290 | G | 0.0823  |
| rs7289308   | A | -0.0661 |
| rs2281439   | A | -0.0357 |
| rs76433013  | T | 0.0905  |
| rs732275    | A | -0.0371 |
| rs134220    | C | 0.0336  |
| rs5753783   | T | -0.0991 |
| rs4820258   | C | 0.0318  |
| rs2318955   | A | 0.024   |

|             |   |         |
|-------------|---|---------|
| rs9614789   | C | 0.0266  |
| rs5754248   | C | -0.0222 |
| rs11090924  | T | -0.034  |
| rs4078544   | T | 0.037   |
| rs139160    | T | 0.0243  |
| rs78134116  | C | -0.0514 |
| rs2516089   | A | 0.0264  |
| rs9614194   | A | 0.0836  |
| rs34776119  | T | -0.0709 |
| rs118190879 | A | 0.0855  |
| rs117775260 | A | 0.0991  |
| rs8138705   | G | 0.0239  |
| rs150886737 | C | 0.1281  |
| rs9610023   | C | -0.0273 |
| rs117088654 | A | 0.094   |
| rs78333391  | A | 0.0884  |
| rs73184728  | G | 0.0394  |
| rs9608617   | C | -0.0259 |
| rs79317014  | T | 0.1482  |
| rs9612262   | C | -0.0857 |
| rs58238111  | C | -0.0311 |
| rs13057820  | C | 0.0246  |
| rs2276946   | A | -0.0387 |
| rs133524    | C | 0.024   |
| rs9609139   | A | -0.0341 |
| rs143499983 | A | 0.0807  |
| rs11913058  | A | -0.0549 |
| rs16999860  | T | -0.1726 |
| rs3744749   | A | 0.0313  |
| rs62224236  | T | -0.0248 |
| rs6003177   | G | -0.0614 |
| rs76047728  | G | -0.0933 |
| rs3804043   | A | 0.0235  |
| rs9620727   | A | -0.0969 |
| rs73154647  | C | -0.043  |
| rs11090364  | T | -0.0275 |
| rs9615902   | C | -0.0234 |
| rs140365449 | A | 0.0973  |
| rs77209867  | T | -0.131  |
| rs5750463   | A | -0.0551 |
| rs8135888   | A | -0.0721 |
| rs9614839   | T | 0.066   |
| rs113155536 | C | 0.0802  |
| rs76592697  | G | 0.0976  |
| rs132468    | C | 0.0399  |
| rs5748101   | C | -0.0259 |
| rs139197266 | G | -0.1068 |

|             |   |         |
|-------------|---|---------|
| rs56011191  | A | 0.0878  |
| rs138768329 | C | -0.1365 |
| rs9614324   | G | -0.0415 |
| rs138211230 | T | 0.1022  |
| rs8139912   | A | -0.041  |
| rs12157373  | G | 0.1211  |
| rs73435879  | C | -0.036  |
| rs2239763   | A | -0.0234 |
| rs132812    | C | -0.0241 |
| rs117941345 | A | 0.1891  |
| rs35129517  | A | 0.0775  |
| rs60531650  | A | 0.096   |
| rs137119    | A | 0.0285  |
| rs742964    | G | -0.031  |
| rs62235399  | T | 0.0591  |
| rs1894480   | T | -0.0311 |
| rs10427608  | C | 0.0396  |
| rs5750866   | A | 0.06    |
| rs111628534 | G | 0.0488  |
| rs5992439   | G | -0.0273 |
| rs6004586   | G | 0.0902  |
| rs73477797  | T | 0.077   |
| rs2688113   | A | 0.0296  |
| rs4822444   | C | -0.0304 |
| rs6000739   | G | 0.0242  |
| rs728099    | A | -0.0222 |
| rs5767232   | A | 0.024   |
| rs2239855   | C | 0.0887  |
| rs7286465   | G | 0.0458  |
| rs62229125  | A | -0.0348 |
| rs76564659  | G | 0.1055  |
| rs5761355   | T | 0.0239  |
| rs112461111 | A | 0.0813  |
| rs421464    | T | -0.0814 |
| rs117712900 | A | 0.1487  |
| rs41304669  | T | -0.1504 |
| rs6519569   | A | 0.021   |
| rs6519365   | T | -0.0223 |
| rs11913996  | G | 0.1444  |
| rs9612787   | T | -0.0327 |
| rs12170498  | T | 0.0329  |
| rs7456      | G | 0.0242  |
| rs73469736  | A | -0.1333 |
| rs73161899  | A | -0.0604 |
| rs6007849   | T | 0.0325  |
| rs135735    | T | 0.023   |
| rs916587    | G | 0.0455  |

|             |   |         |
|-------------|---|---------|
| rs58874138  | T | 0.0241  |
| rs12483784  | G | -0.0885 |
| rs5762401   | G | -0.0996 |
| rs117541995 | G | -0.1034 |
| rs73888085  | G | 0.0974  |
| rs9604972   | A | 0.0281  |
| rs77824277  | A | -0.128  |
| rs118111037 | T | -0.0962 |
| rs131430    | A | 0.023   |
| rs73481403  | T | -0.0732 |
| rs5770363   | G | 0.0283  |
| rs130305    | A | -0.0452 |
| rs117144213 | A | 0.0561  |
| rs117920337 | T | -0.1371 |
| rs80134322  | T | 0.0844  |
| rs149971930 | T | -0.0634 |
| rs739015    | T | -0.0428 |
| rs5994313   | G | -0.023  |
| rs738203    | G | -0.0243 |
| rs75591616  | A | -0.125  |
| rs145444539 | A | -0.1236 |
| rs75053024  | T | 0.1166  |
| rs75188079  | A | -0.0378 |
| rs56195319  | T | 0.0448  |
| rs55791681  | A | -0.0479 |
| rs2878903   | C | -0.0221 |
| rs113513392 | C | 0.0405  |
| rs136657    | T | 0.0299  |
| rs5746441   | G | 0.0226  |
| rs34829508  | T | -0.102  |
| rs2076096   | T | 0.0506  |
| rs75883819  | T | 0.0667  |
| rs9606210   | G | -0.0248 |
| rs7354810   | T | -0.0327 |
| rs7287491   | T | 0.0272  |
| rs6009534   | G | 0.0239  |
| rs16998038  | A | 0.0654  |
| rs739078    | C | 0.0229  |
| rs1043606   | C | -0.029  |
| rs9605327   | C | -0.1555 |
| rs79398422  | T | 0.0982  |
| rs148641002 | C | -0.0651 |
| rs2267098   | T | -0.0322 |
| rs9607477   | C | 0.0398  |
| rs9608865   | C | -0.0715 |
| rs9616937   | T | -0.0299 |
| rs9616807   | A | 0.0437  |



|             |   |         |
|-------------|---|---------|
| rs228976    | G | -0.0349 |
| rs17821572  | C | -0.0562 |
| rs5994130   | A | -0.0248 |
| rs73153979  | G | 0.0345  |
| rs13057369  | A | -0.0723 |
| rs5759415   | T | -0.0383 |
| rs2748221   | C | -0.0305 |
| rs7292316   | G | 0.0259  |
| rs117835064 | A | -0.0883 |
| rs4820706   | A | -0.0231 |
| rs4822717   | A | -0.038  |
| rs79374950  | A | 0.0772  |
| rs9604766   | C | 0.0487  |
| rs1894588   | T | 0.0739  |
| rs9609560   | A | 0.0221  |
| rs77542517  | G | -0.1097 |
| rs62224025  | T | 0.0677  |
| rs73170422  | A | 0.0416  |
| rs35234745  | C | 0.0542  |
| rs720439    | A | 0.025   |
| rs9617104   | C | 0.05    |
| rs5764546   | T | -0.0493 |
| rs6008166   | G | -0.0227 |
| rs9616947   | T | -0.0239 |
| rs117540147 | T | 0.0365  |
| rs11703414  | T | -0.0567 |
| rs5992883   | T | 0.0903  |
| rs5748271   | C | 0.0341  |
| rs9614274   | T | 0.1002  |
| rs12169215  | A | 0.0233  |
| rs143956315 | T | 0.1655  |
| rs363985    | C | -0.0239 |
| rs8138465   | T | -0.0614 |
| rs140104    | T | 0.0213  |
| rs34841112  | A | 0.0703  |
| rs6518816   | C | -0.0423 |
| rs139759153 | G | 0.1144  |
| rs146854087 | C | 0.0924  |
| rs9917559   | A | -0.0296 |
| rs4821478   | G | 0.0217  |
| rs5748859   | A | 0.0799  |
| rs2244104   | G | 0.0289  |
| rs5761319   | T | -0.0218 |
| rs138969780 | A | 0.1545  |
| rs35275807  | C | 0.1152  |
| rs929086    | A | -0.0509 |
| rs2071749   | A | 0.0202  |

|             |   |         |
|-------------|---|---------|
| rs13053400  | A | -0.0435 |
| rs12483811  | T | 0.0225  |
| rs74388843  | T | 0.0815  |
| rs62238539  | A | -0.0373 |
| rs118052695 | A | -0.0562 |
| rs117922318 | T | -0.1052 |
| rs148595778 | C | -0.092  |
| rs118077563 | T | 0.0881  |
| rs7285562   | A | -0.0209 |
| rs4822843   | T | -0.0221 |
| rs17696356  | A | -0.0505 |
| rs5765532   | T | 0.0242  |
| rs16980203  | G | -0.051  |
| rs17579425  | A | 0.0478  |
| rs74510107  | A | 0.0934  |
| rs12484084  | C | -0.0472 |
| rs133854    | G | -0.0235 |
| rs117482135 | A | 0.1258  |
| rs117694758 | C | 0.0928  |
| rs5749303   | A | 0.0361  |
| rs143168701 | C | -0.092  |
| rs5768770   | A | 0.0247  |
| rs2283858   | C | -0.0347 |
| rs9615146   | C | -0.0274 |
| rs1003505   | A | -0.0442 |
| rs131800    | A | -0.0781 |
| rs136719    | A | 0.0661  |
| rs34286570  | G | 0.029   |
| rs743741    | C | -0.0297 |
| rs138963    | T | -0.0283 |
| rs737724    | A | -0.0266 |
| rs11090640  | T | -0.0665 |
| rs55887944  | A | -0.056  |
| rs78477728  | T | 0.0993  |
| rs76119306  | A | 0.1191  |
| rs2231495   | C | 0.0228  |
| rs28693695  | A | 0.1276  |
| rs5756152   | A | 0.0658  |
| rs1002246   | A | 0.0303  |
| rs117154129 | G | 0.0735  |
| rs144481979 | A | 0.1247  |
| rs5747974   | C | -0.0457 |
| rs117636276 | T | 0.1421  |
| rs9623792   | T | -0.0351 |
| rs62228462  | A | 0.0717  |
| rs9608575   | G | 0.0232  |
| rs147091491 | G | -0.0964 |

|             |   |         |
|-------------|---|---------|
| rs134797    | T | 0.0239  |
| rs5771214   | T | -0.031  |
| rs5998705   | G | -0.0253 |
| rs9615237   | G | 0.0675  |
| rs9623686   | T | 0.0329  |
| rs141660144 | T | 0.1395  |
| rs5752266   | C | 0.0844  |
| rs5756531   | A | -0.0269 |
| rs117565257 | C | -0.0871 |
| rs9616879   | G | 0.0591  |
| rs145197379 | A | 0.1548  |
| rs1109081   | G | 0.0248  |
| rs4445      | A | -0.0257 |
| rs79194687  | A | -0.0535 |
| rs11703376  | T | -0.0227 |
| rs35789377  | T | -0.0405 |
| rs41281529  | T | 0.0396  |
| rs5999731   | C | 0.0311  |
| rs73889940  | T | 0.0616  |
| rs5758750   | A | -0.0409 |
| rs9612360   | G | 0.026   |
| rs133646    | C | -0.0235 |
| rs4297982   | A | -0.1132 |
| rs117236232 | A | 0.1142  |
| rs5766806   | G | -0.0788 |
| rs1014674   | A | -0.0232 |
| rs1465225   | C | -0.0221 |
| rs7289378   | G | -0.0259 |
| rs9627357   | G | -0.0766 |
| rs112058433 | A | 0.0686  |
| rs570286    | G | -0.0232 |
| rs80236166  | A | 0.0394  |
| rs6006486   | A | 0.0236  |
| rs5754085   | T | 0.0937  |
| rs5750841   | A | -0.0223 |
| rs57682652  | C | 0.1573  |
| rs556366    | A | 0.1387  |
| rs4626025   | C | -0.0213 |
| rs114263951 | T | 0.1655  |
| rs117035776 | C | -0.1202 |
| rs75947870  | A | -0.0694 |
| rs5992372   | A | 0.0252  |
| rs6001343   | A | -0.0341 |
| rs11913443  | G | 0.0715  |
| rs4821235   | A | 0.0225  |
| rs135264    | C | -0.0247 |
| rs362220    | C | -0.0213 |

|             |   |         |
|-------------|---|---------|
| rs372655    | A | 0.0293  |
| rs5765871   | C | 0.0266  |
| rs6005202   | G | 0.0675  |
| rs12163046  | G | 0.0349  |
| rs76178946  | T | 0.091   |
| rs35201299  | A | -0.039  |
| rs5747400   | G | 0.0229  |
| rs73145651  | C | -0.0857 |
| rs12628411  | A | -0.0214 |
| rs4823298   | C | -0.0204 |
| rs6008079   | T | 0.0509  |
| rs79841658  | T | -0.0575 |
| rs117474288 | T | -0.1689 |
| rs8135511   | T | -0.0402 |
| rs2238797   | C | -0.0437 |
| rs2267342   | A | 0.0222  |
| rs130135    | T | 0.0291  |
| rs79171893  | C | -0.0963 |
| rs760769    | A | -0.0212 |
| rs73165614  | C | -0.0858 |
| rs5748948   | G | -0.0276 |
| rs9620961   | C | -0.0208 |
| rs5753760   | C | 0.068   |
| rs143926502 | A | 0.1654  |
| rs9605254   | G | 0.0248  |
| rs137994    | C | -0.0262 |
| rs8139683   | C | 0.0204  |
| rs11703793  | C | 0.1023  |
| rs11570751  | A | 0.0382  |
| rs2239394   | A | 0.0442  |
| rs12628277  | A | 0.022   |
| rs4820415   | A | -0.072  |
| rs79344050  | T | -0.0264 |
| rs111290660 | C | -0.1061 |
| rs6007851   | A | -0.1252 |
| rs140947314 | A | 0.0917  |
| rs2845343   | A | -0.0315 |
| rs403478    | C | -0.023  |
| rs5996614   | G | 0.1037  |
| rs79223236  | A | 0.0728  |
| rs926233    | A | 0.0251  |
| rs9624615   | A | 0.0442  |
| rs77656474  | A | -0.0572 |
| rs56024536  | T | 0.0883  |
| rs9611183   | C | 0.0328  |
| rs2319351   | C | -0.0237 |
| rs17400681  | A | -0.1144 |

|             |   |         |
|-------------|---|---------|
| rs61174692  | T | -0.032  |
| rs113023447 | A | 0.0969  |
| rs73164860  | G | 0.1657  |
| rs143095425 | A | -0.1133 |
| rs5752503   | A | -0.0482 |
| rs12628909  | T | -0.022  |
| rs715506    | A | 0.021   |
| rs2331312   | A | 0.0313  |
| rs739140    | G | 0.0323  |
| rs6010197   | A | -0.0275 |
| rs5756881   | A | 0.0372  |
| rs56265548  | T | 0.0877  |
| rs4823685   | T | 0.0342  |
| rs73165649  | G | -0.0607 |
| rs73434537  | A | -0.0367 |
| rs117990845 | C | -0.0735 |
| rs114520758 | C | -0.0609 |
| rs1467436   | C | -0.021  |
| rs118071675 | C | -0.0889 |
| rs71311664  | A | 0.0215  |
| rs12484542  | T | -0.0975 |
| rs7292407   | A | 0.0201  |
| rs137883    | T | -0.0234 |
| rs739373    | A | 0.1091  |
| rs2285196   | T | 0.0203  |
| rs2537972   | C | 0.0213  |
| rs141303849 | C | 0.1266  |
| rs132631    | A | 0.0264  |
| rs5748508   | A | 0.0199  |
| rs78803288  | G | -0.0758 |
| rs73148927  | T | -0.1079 |
| rs117289855 | T | 0.0908  |
| rs4823468   | T | -0.0219 |
| rs2142535   | T | 0.0219  |
| rs130870    | T | 0.1     |
| rs75524370  | G | 0.0587  |
| rs372055    | G | 0.0364  |
| rs77562022  | G | -0.1295 |
| rs11704158  | T | -0.0497 |
| rs78260733  | C | 0.0762  |
| rs2076212   | T | -0.0328 |
| rs117112776 | A | -0.0338 |
| rs2858737   | A | 0.0608  |
| rs6001658   | G | -0.0296 |
| rs17001868  | C | -0.0296 |
| rs73173189  | T | 0.086   |
| rs4050099   | G | 0.0416  |

|             |   |         |
|-------------|---|---------|
| rs139701928 | T | -0.0956 |
| rs751367    | T | 0.0873  |
| rs136800    | A | -0.0223 |
| rs34261353  | G | -0.1038 |
| rs149092394 | T | 0.104   |
| rs34189568  | C | -0.0261 |
| rs8135723   | T | 0.0199  |
| rs228937    | G | -0.0378 |
| rs117243167 | T | 0.1581  |
| rs138949146 | A | 0.0788  |
| rs9621508   | C | -0.0197 |
| rs9620039   | T | 0.0202  |
| rs4822701   | A | 0.022   |
| rs73171652  | T | 0.0507  |
| rs117318992 | A | -0.0616 |
| rs1936950   | T | -0.0397 |
| rs9333321   | T | -0.1249 |
| rs13057533  | T | 0.0218  |
| rs28656779  | A | 0.0361  |
| rs150519227 | A | -0.1121 |
| rs136772    | G | -0.0363 |
| rs145610589 | T | 0.0788  |
| rs4484121   | T | 0.0376  |
| rs149457953 | T | 0.0807  |
| rs875419    | A | 0.0303  |
| rs5994129   | G | -0.0199 |
| rs5750720   | A | 0.0232  |
| rs71318962  | A | 0.0462  |
| rs383293    | T | 0.0536  |
| rs60069154  | T | -0.0589 |
| rs113834068 | G | 0.0629  |
| rs118017896 | A | -0.1023 |
| rs75269301  | A | 0.0992  |
| rs12484924  | C | 0.0388  |
| rs713683    | A | 0.0246  |
| rs4253662   | A | -0.0351 |
| rs9608102   | T | 0.0351  |
| rs56180415  | T | 0.0416  |
| rs7286910   | G | -0.022  |
| rs74752299  | C | -0.1014 |
| rs78727359  | C | -0.0754 |
| rs9610061   | A | -0.0373 |
| rs35647317  | G | 0.06    |
| rs56191632  | C | 0.0554  |
| rs5756781   | G | 0.0231  |
| rs5758918   | C | 0.0388  |
| rs77297738  | T | -0.0777 |

|             |   |         |
|-------------|---|---------|
| rs10428038  | T | 0.0487  |
| rs137307    | C | -0.0358 |
| rs12106560  | A | -0.1148 |
| rs112979011 | T | -0.1124 |
| rs11913458  | A | -0.0293 |
| rs117995693 | A | -0.1506 |
| rs59219870  | G | -0.0648 |
| rs148912779 | T | -0.1417 |
| rs3788518   | C | -0.0261 |
| rs6000671   | G | -0.0207 |
| rs118080589 | A | -0.0872 |
| rs5756232   | A | -0.116  |
| rs35411594  | G | -0.0388 |
| rs2072552   | A | 0.0549  |
| rs141207336 | T | 0.1616  |
| rs5028142   | A | -0.0213 |
| rs2179559   | A | 0.023   |
| rs145137293 | G | 0.085   |
| rs17344110  | A | -0.0563 |
| rs149570445 | A | 0.1129  |
| rs76400344  | A | 0.0639  |
| rs7290891   | C | 0.1355  |
| rs17311     | C | 0.0209  |
| rs5992154   | A | 0.0475  |
| rs743758    | A | -0.0277 |
| rs9614486   | G | 0.0222  |
| rs17000930  | T | -0.0569 |
| rs5748871   | G | 0.0197  |
| rs79627501  | T | 0.1247  |
| rs739007    | C | 0.0193  |
| rs77691176  | A | 0.086   |
| rs174696    | C | -0.0285 |
| rs11090767  | A | 0.0265  |
| rs74417775  | A | -0.105  |
| rs5995715   | C | 0.0238  |
| rs2267122   | A | 0.1361  |
| rs11913358  | G | -0.0578 |
| rs9617816   | G | 0.0537  |
| rs113070398 | G | -0.0833 |
| rs117184725 | G | 0.0992  |
| rs4474971   | G | 0.0636  |
| rs5769852   | T | 0.0241  |
| rs8135045   | G | -0.0902 |
| rs4253712   | G | -0.0586 |
| rs79971671  | G | 0.0334  |
| rs5770969   | T | 0.0694  |
| rs59650998  | A | 0.0608  |

|             |   |         |
|-------------|---|---------|
| rs117164661 | C | 0.1163  |
| rs2092079   | C | -0.0216 |
| rs1489884   | A | 0.0669  |
| rs1557528   | C | 0.1841  |
| rs4413      | C | 0.0204  |
| rs4821137   | G | -0.0237 |
| rs1997693   | G | -0.0246 |
| rs72619563  | A | 0.044   |
| rs132032    | A | -0.0235 |
| rs73473520  | C | -0.0615 |
| rs79715018  | C | 0.0709  |
| rs5759924   | T | -0.0353 |
| rs55756604  | G | 0.034   |
| rs118164803 | T | 0.0895  |
| rs146095191 | C | -0.1161 |
| rs9614474   | T | 0.0938  |
| rs41277487  | A | -0.0375 |
| rs8136166   | T | -0.0482 |
| rs76239491  | A | -0.1024 |
| rs2413440   | G | 0.019   |
| rs12484880  | G | -0.0361 |
| rs35930634  | T | -0.0519 |
| rs80210     | A | 0.1072  |
| rs130865    | A | -0.0516 |
| rs11913459  | A | -0.0481 |
| rs9625158   | G | 0.0515  |
| rs55868620  | A | -0.0344 |
| rs6009424   | A | -0.0402 |
| rs5993811   | A | 0.0352  |
| rs138882006 | A | -0.1051 |
| rs113231526 | A | 0.0593  |
| rs17742344  | A | 0.0392  |
| rs150120694 | G | 0.0922  |
| rs118066044 | A | 0.0549  |
| rs4820123   | C | 0.0972  |
| rs5746469   | C | 0.0361  |
| rs116914609 | T | -0.0573 |
| rs139973547 | A | 0.0601  |
| rs6008891   | A | -0.019  |
| rs9610404   | A | -0.0262 |
| rs549378    | C | -0.0232 |
| rs5992874   | A | -0.0212 |
| rs116899346 | T | 0.1063  |
| rs112540522 | T | -0.0513 |
| rs45474596  | T | 0.0357  |
| rs117490594 | G | 0.074   |
| rs56113849  | T | 0.0409  |



|             |   |         |
|-------------|---|---------|
| rs77709492  | A | 0.0312  |
| rs5768881   | G | 0.0333  |
| rs9616531   | C | -0.0239 |
| rs116851115 | G | -0.1856 |
| rs142834934 | T | -0.1849 |
| rs73155750  | C | -0.0794 |
| rs113683292 | A | -0.071  |
| rs9612028   | C | -0.0279 |
| rs78839760  | A | -0.0618 |
| rs202407    | A | 0.1004  |
| rs9622935   | G | 0.0653  |
| rs117039602 | C | 0.0868  |
| rs41282609  | T | 0.0754  |
| rs5765015   | A | -0.027  |
| rs9609705   | C | -0.0346 |
| rs116909307 | G | 0.1114  |
| rs74386538  | A | 0.0401  |
| rs9613187   | T | -0.0357 |
| rs80039902  | T | -0.0357 |
| rs2331169   | T | -0.0246 |
| rs77515656  | G | 0.1184  |
| rs60342582  | T | 0.0447  |
| rs369613    | G | 0.1267  |
| rs6518828   | A | 0.0223  |
| rs148842996 | A | -0.0543 |
| rs117279666 | T | -0.1211 |
| rs2213149   | G | -0.0584 |
| rs9612929   | C | -0.0598 |
| rs139089    | G | -0.0191 |
| rs150571070 | A | 0.099   |
| rs9613168   | G | 0.0207  |
| rs76233459  | A | -0.1214 |
| rs6000158   | A | -0.0272 |
| rs5748474   | A | 0.0243  |
| rs79169291  | T | -0.0963 |
| rs2232181   | C | -0.1215 |
| rs71330749  | T | -0.0311 |
| rs1663126   | T | -0.0526 |
| rs16983347  | A | 0.0472  |
| rs12166968  | G | 0.0459  |
| rs2097411   | A | 0.0254  |
| rs5761591   | A | 0.0389  |
| rs73886025  | G | 0.0296  |
| rs116968692 | G | -0.1083 |
| rs78619223  | T | -0.0375 |
| rs35881890  | A | 0.0457  |
| rs116950499 | A | -0.1925 |

|             |   |         |
|-------------|---|---------|
| rs142883180 | A | -0.1029 |
| rs9621603   | A | -0.0516 |
| rs113561208 | T | -0.0911 |
| rs133639    | A | -0.1115 |
| rs78133244  | C | -0.0729 |
| rs67831456  | A | -0.0524 |
| rs472409    | T | 0.0271  |
| rs73877351  | A | 0.031   |
| rs75757605  | G | -0.0677 |
| rs5769056   | A | 0.0312  |
| rs174760    | G | -0.0224 |
| rs4820944   | G | -0.0191 |
| rs8138760   | T | -0.0307 |
| rs5752529   | A | -0.0202 |
| rs62237616  | T | -0.0969 |
| rs117883934 | G | -0.111  |
| rs73436423  | A | -0.084  |
| rs926329    | T | 0.0207  |
| rs9628245   | C | 0.0294  |
| rs9619442   | T | 0.0771  |
| rs17635540  | A | -0.0215 |
| rs76880662  | A | 0.0533  |
| rs3788704   | T | -0.028  |
| rs76337376  | A | 0.0745  |
| rs117094767 | A | -0.0666 |
| rs9306257   | C | 0.0209  |
| rs6519817   | T | -0.0223 |
| rs2301498   | G | 0.0353  |
| rs11703656  | T | 0.1539  |
| rs137981952 | T | 0.0914  |
| rs62227567  | C | -0.1109 |
| rs139568880 | T | -0.1609 |
| rs5754794   | T | -0.0861 |
| rs34915139  | A | 0.0436  |
| rs5753356   | A | -0.0191 |
| rs150012253 | G | -0.0732 |
| rs4823325   | C | -0.0249 |
| rs67278983  | A | -0.0475 |
| rs141424920 | A | 0.0784  |
| rs6519771   | A | 0.0529  |
| rs55964650  | T | 0.0321  |
| rs5752023   | T | 0.0686  |
| rs6005922   | A | 0.0324  |
| rs6002719   | C | -0.0513 |
| rs6007062   | G | 0.0335  |
| rs117222100 | A | -0.1174 |
| rs12484807  | T | -0.0319 |

|             |   |         |
|-------------|---|---------|
| rs140475880 | G | -0.0667 |
| rs73162353  | T | 0.0392  |
| rs35413610  | T | -0.0831 |
| rs616757    | T | -0.0424 |
| rs9622775   | C | -0.0262 |
| rs151311757 | A | 0.0816  |
| rs138527999 | A | -0.0881 |
| rs5999858   | T | 0.0262  |
| rs739121    | T | -0.022  |
| rs2413597   | C | 0.021   |
| rs147969778 | T | 0.0741  |
| rs35761934  | C | -0.0591 |
| rs112637369 | A | -0.0632 |
| rs116957597 | T | -0.0713 |
| rs5754597   | G | 0.018   |
| rs8136930   | G | 0.0201  |
| rs5767229   | A | 0.0413  |
| rs73166459  | C | -0.1275 |
| rs115270691 | A | -0.0972 |
| rs12158397  | C | -0.0471 |
| rs2272857   | A | 0.0242  |
| rs117648093 | A | -0.1441 |
| rs145438721 | T | 0.0763  |
| rs483997    | G | -0.0212 |
| rs67151296  | C | -0.0225 |
| rs28701494  | C | 0.0588  |
| rs5997619   | T | 0.0428  |
| rs75091431  | A | -0.0663 |
| rs150209675 | T | -0.0862 |
| rs713999    | A | -0.0184 |
| rs139501276 | T | -0.1785 |
| rs6007235   | T | -0.0751 |
| rs909490    | C | -0.0213 |
| rs149833648 | A | 0.1138  |
| rs35586614  | A | 0.0478  |
| rs5760574   | C | 0.0311  |
| rs62235995  | T | 0.0887  |
| rs6000120   | T | -0.022  |
| rs139729    | C | -0.0289 |
| rs6010596   | C | 0.0211  |
| rs28661849  | C | -0.041  |
| rs2899279   | T | 0.0214  |
| rs62236496  | A | 0.0398  |
| rs114495935 | A | -0.0594 |
| rs5748736   | G | 0.0205  |
| rs34140548  | C | -0.0212 |
| rs6006070   | C | 0.0432  |

|             |   |         |
|-------------|---|---------|
| rs5002334   | C | -0.0339 |
| rs73391767  | T | -0.0433 |
| rs117440744 | T | -0.0839 |
| rs117824015 | T | -0.1699 |
| rs6002655   | T | 0.0188  |
| rs2688115   | T | 0.024   |
| rs77378082  | G | 0.1037  |
| rs2895332   | G | -0.0199 |
| rs117829950 | T | 0.088   |
| rs4823789   | A | 0.026   |
| rs28522179  | T | -0.0283 |
| rs9628184   | A | 0.0228  |
| rs150299953 | A | 0.0617  |
| rs8137793   | A | 0.0253  |
| rs140394    | G | -0.0205 |
| rs5768862   | C | -0.0322 |
| rs59987323  | C | -0.0268 |
| rs117359599 | C | 0.0769  |
| rs5769971   | C | 0.0289  |
| rs5755241   | C | -0.0193 |
| rs131773    | T | -0.0218 |
| rs9609728   | C | -0.0523 |
| rs112360469 | C | -0.1275 |
| rs882158    | G | 0.0283  |
| rs28546641  | T | 0.0353  |
| rs147453927 | A | 0.0934  |
| rs75807694  | G | 0.0625  |
| rs9610989   | C | 0.1015  |
| rs2272937   | A | -0.0243 |
| rs17818792  | A | 0.0201  |
| rs62218991  | A | 0.0507  |
| rs135258    | A | 0.0266  |
| rs7290691   | T | 0.0253  |
| rs12483995  | T | -0.0458 |
| rs2013686   | T | 0.0614  |
| rs4823544   | G | -0.0317 |
| rs6005417   | A | 0.0487  |
| rs12159376  | T | 0.0211  |
| rs59058721  | T | -0.0791 |
| rs35845824  | A | 0.0239  |
| rs28413977  | A | 0.0222  |
| rs117032738 | A | 0.0618  |
| rs117495199 | C | 0.0572  |
| rs713628    | G | -0.0203 |
| rs118061123 | G | 0.1281  |
| rs55784528  | A | -0.0482 |
| rs62222797  | G | -0.0511 |

|             |   |         |
|-------------|---|---------|
| rs2097445   | A | 0.0231  |
| rs74362858  | A | -0.0769 |
| rs117274015 | G | 0.059   |
| rs113054100 | T | -0.0218 |
| rs136140    | T | -0.02   |
| rs2401499   | T | -0.0238 |
| rs150685861 | A | 0.1258  |
| rs5756808   | T | -0.0282 |
| rs6000745   | T | 0.0876  |
| rs11703457  | G | 0.0502  |
| rs75790518  | T | -0.0364 |
| rs131036    | G | 0.0396  |
| rs74423436  | A | -0.0471 |
| rs6002747   | G | 0.0364  |
| rs6001621   | A | -0.0321 |
| rs13058560  | A | 0.0501  |
| rs28627610  | A | 0.07    |
| rs149342842 | A | 0.0626  |
| rs7290667   | C | 0.0393  |
| rs78718739  | A | 0.0374  |
| rs137302    | C | 0.0241  |
| rs56143758  | C | 0.055   |
| rs56249624  | T | -0.041  |
| rs5766533   | T | -0.0222 |
| rs9610183   | C | -0.0746 |
| rs17574319  | C | -0.1069 |
| rs117452563 | T | 0.0421  |
| rs2157188   | G | 0.0275  |
| rs113269600 | A | -0.11   |
| rs7289871   | A | -0.1046 |
| rs16998007  | C | 0.0285  |
| rs4819835   | A | 0.0201  |
| rs17001091  | A | 0.0273  |
| rs17764971  | T | 0.0204  |
| rs77841946  | T | 0.0514  |
| rs5771133   | G | 0.0417  |
| rs7289165   | A | -0.0362 |
| rs150711287 | T | 0.0701  |
| rs143736752 | C | 0.0843  |
| rs56077306  | A | 0.0238  |
| rs150934803 | A | -0.0544 |
| rs75696883  | T | 0.0706  |
| rs59824418  | G | -0.0549 |
| rs12483800  | G | -0.0538 |
| rs5762005   | T | 0.02    |
| rs5761665   | T | -0.0186 |
| rs5754845   | T | 0.0207  |

|             |   |         |
|-------------|---|---------|
| rs5757577   | A | -0.0219 |
| rs1573747   | T | 0.025   |
| rs145618686 | A | 0.0911  |
| rs4823047   | A | 0.0929  |
| rs74642428  | T | -0.0956 |
| rs113176204 | G | 0.047   |
| rs138579    | T | 0.0254  |
| rs4820910   | T | -0.0257 |
| rs67115     | A | 0.018   |
| rs144065672 | A | 0.0922  |
| rs5760717   | A | -0.0276 |
| rs9612548   | T | -0.0401 |
| rs78142366  | T | -0.0403 |
| rs5992650   | G | 0.0976  |
| rs1210601   | T | 0.0329  |
| rs77313540  | C | -0.0471 |
| rs12159743  | G | -0.0322 |
| rs73154578  | A | -0.0631 |
| rs149231425 | T | -0.075  |
| rs117408265 | T | 0.124   |
| rs117276455 | T | 0.1434  |
| rs12166796  | T | 0.0486  |
| rs2743819   | A | 0.022   |
| rs73174337  | G | 0.0816  |
| rs117019075 | G | -0.0879 |
| rs7284428   | T | 0.0282  |
| rs41283225  | A | -0.0943 |
| rs12162699  | C | -0.0201 |
| rs9609547   | T | -0.0693 |
| rs77708194  | C | -0.0836 |
| rs77689376  | A | -0.0829 |
| rs73162240  | G | -0.0574 |
| rs117095815 | T | -0.0568 |
| rs55951635  | A | -0.0365 |
| rs116986609 | A | -0.0425 |
| rs4501037   | C | -0.0183 |
| rs55958136  | T | 0.0903  |
| rs5755960   | C | -0.046  |
| rs362089    | G | 0.0235  |
| rs2049974   | A | -0.0194 |
| rs111426300 | A | 0.1049  |
| rs77572218  | G | 0.1003  |
| rs118027103 | C | -0.0724 |
| rs5994723   | T | 0.0702  |
| rs5758902   | A | 0.0186  |
| rs9609581   | A | 0.0394  |
| rs5768213   | T | -0.018  |

|             |   |         |
|-------------|---|---------|
| rs73154053  | T | 0.0745  |
| rs13056468  | A | -0.026  |
| rs4820028   | G | 0.0169  |
| rs112928285 | G | 0.0824  |
| rs228952    | T | 0.0274  |
| rs743531    | T | 0.0207  |
| rs114577564 | C | 0.0287  |
| rs142238209 | G | -0.0963 |
| rs1883169   | A | -0.0508 |
| rs5755447   | A | 0.021   |
| rs84511     | G | 0.0237  |
| rs9614732   | T | 0.018   |
| rs140873515 | T | 0.083   |
| rs139730315 | A | -0.0388 |
| rs5763914   | T | 0.1027  |
| rs4823981   | G | -0.0222 |
| rs2283985   | G | 0.027   |
| rs2004522   | G | 0.0704  |
| rs6005231   | A | 0.0179  |
| rs5749118   | C | -0.0253 |
| rs6003648   | A | 0.0176  |
| rs5753826   | G | 0.0334  |
| rs4501036   | C | 0.0239  |
| rs28613882  | A | 0.0732  |
| rs28606049  | C | 0.042   |
| rs73180720  | T | 0.022   |
| rs1540900   | C | -0.0559 |
| rs9609471   | T | 0.0511  |
| rs11704768  | C | 0.0483  |
| rs12158679  | C | -0.1401 |
| rs145248156 | C | -0.1033 |
| rs910541    | C | -0.0176 |
| rs4824056   | G | -0.0313 |
| rs3830108   | G | -0.0195 |
| rs62226991  | T | -0.0473 |
| rs17834998  | T | -0.0344 |
| rs688425    | A | -0.0177 |
| rs7284581   | C | -0.022  |
| rs112710777 | G | 0.0528  |
| rs1974462   | C | -0.0252 |
| rs2092196   | G | -0.0325 |
| rs112054358 | G | 0.064   |
| rs2013215   | C | 0.0435  |
| rs117903458 | A | -0.0983 |
| rs12485013  | A | 0.0305  |
| rs12483981  | A | -0.0297 |
| rs13055271  | C | -0.0222 |

|             |   |         |
|-------------|---|---------|
| rs35573979  | G | -0.0332 |
| rs5750543   | A | 0.0246  |
| rs135284    | T | -0.0278 |
| rs59996791  | G | -0.0411 |
| rs9605079   | A | 0.0231  |
| rs4645779   | T | 0.0789  |
| rs8135616   | T | 0.0502  |
| rs136958    | A | 0.0199  |
| rs130316    | T | -0.0188 |
| rs117744613 | G | 0.1156  |
| rs141081703 | T | 0.1012  |
| rs135198    | A | -0.0187 |
| rs1894453   | C | 0.0172  |
| rs58198963  | A | 0.0503  |
| rs6000214   | A | -0.0311 |
| rs5759190   | C | -0.0778 |
| rs7510927   | A | 0.019   |
| rs74910861  | A | -0.0709 |
| rs76548786  | G | 0.0691  |
| rs7285501   | A | 0.0218  |
| rs855066    | G | 0.0224  |
| rs2157538   | T | -0.0176 |
| rs139789    | C | -0.0224 |
| rs112973136 | A | 0.0583  |
| rs73171591  | C | 0.0947  |
| rs55941025  | A | 0.1083  |
| rs62227688  | C | -0.0239 |
| rs3893495   | C | -0.0174 |
| rs5769091   | A | -0.0494 |
| rs181399    | C | -0.0229 |
| rs17209532  | A | 0.021   |
| rs4819879   | C | -0.023  |
| rs5768239   | G | 0.0286  |
| rs141139016 | T | -0.1271 |
| rs74550883  | C | 0.083   |
| rs8138077   | A | 0.066   |
| rs79941757  | A | 0.1162  |
| rs56331637  | A | -0.0244 |
| rs5751950   | T | -0.0191 |
| rs5995601   | G | 0.0227  |
| rs2076672   | T | 0.0192  |
| rs986646    | C | 0.0385  |
| rs5766137   | T | 0.0405  |
| rs8137352   | T | 0.0378  |
| rs8142615   | T | 0.019   |
| rs3788315   | A | 0.0389  |
| rs145993326 | T | -0.1527 |



|             |   |         |
|-------------|---|---------|
| rs12167035  | T | -0.0228 |
| rs117089825 | G | 0.1712  |
| rs734799    | C | -0.0182 |
| rs769224    | A | 0.1177  |
| rs117090839 | T | -0.0768 |
| rs2688143   | T | -0.0196 |
| rs138142    | G | -0.042  |
| rs62230764  | A | 0.0788  |
| rs117091669 | G | 0.0568  |
| rs147793685 | A | 0.1469  |
| rs16990801  | A | -0.1086 |
| rs738799    | C | -0.0176 |
| rs5764153   | G | -0.0201 |
| rs5755418   | G | -0.0192 |
| rs6004609   | A | 0.0247  |
| rs12158985  | A | 0.0682  |
| rs143117056 | T | 0.1398  |
| rs134186    | G | 0.0168  |
| rs5995687   | A | 0.0322  |
| rs9607528   | G | -0.0209 |
| rs13055495  | G | -0.0169 |
| rs137912    | T | -0.0317 |
| rs62226388  | T | 0.0342  |
| rs9306432   | T | 0.0226  |
| rs62225705  | G | -0.0189 |
| rs4645753   | A | 0.0301  |
| rs76500988  | T | 0.0953  |
| rs73160602  | C | 0.0356  |
| rs133588    | G | -0.0218 |
| rs75279949  | T | 0.1162  |
| rs909797    | C | 0.0188  |
| rs6008614   | A | -0.0197 |
| rs5759364   | A | 0.0811  |
| rs16981208  | G | 0.0465  |
| rs16994144  | C | -0.0443 |
| rs113046252 | T | -0.0545 |
| rs7285088   | A | 0.0668  |
| rs145413860 | A | -0.0742 |
| rs12628339  | C | -0.0262 |
| rs7292029   | C | -0.0449 |
| rs9608642   | A | -0.0168 |
| rs5753472   | G | -0.0175 |
| rs7292539   | G | -0.0535 |
| rs117421558 | A | 0.0761  |
| rs2518762   | G | -0.0188 |
| rs62225715  | T | -0.0331 |
| rs73187509  | T | -0.0356 |

|             |   |         |
|-------------|---|---------|
| rs78585553  | T | 0.1543  |
| rs742271    | T | -0.0294 |
| rs75839745  | T | -0.0356 |
| rs132453    | T | -0.0291 |
| rs145566570 | A | -0.0775 |
| rs5762114   | A | -0.0705 |
| rs1985101   | T | -0.0228 |
| rs116930843 | T | 0.0203  |
| rs62224708  | C | -0.0196 |
| rs11914132  | T | 0.0202  |
| rs12484556  | C | -0.0208 |
| rs175191    | A | 0.0278  |
| rs4925406   | T | 0.0171  |
| rs2283933   | C | -0.0214 |
| rs2157733   | A | -0.0324 |
| rs9606664   | A | -0.0187 |
| rs8142865   | G | -0.0296 |
| rs9611804   | G | 0.0303  |
| rs2267198   | C | -0.0398 |
| rs11090372  | C | -0.0349 |
| rs62235263  | G | -0.0355 |
| rs78225146  | G | 0.0839  |
| rs11702960  | T | 0.0254  |
| rs23669     | G | -0.0365 |
| rs56144269  | C | -0.0284 |
| rs142382905 | A | -0.065  |
| rs138605357 | T | -0.1127 |
| rs2609850   | C | 0.0207  |
| rs2235334   | T | 0.0168  |
| rs2267332   | C | -0.0443 |
| rs16992894  | G | 0.0552  |
| rs5754403   | C | -0.0168 |
| rs73187275  | G | -0.0481 |
| rs9608247   | A | 0.0242  |
| rs2294312   | C | 0.0179  |
| rs117616637 | C | -0.0979 |
| rs715622    | T | -0.0216 |
| rs406696    | G | -0.0167 |
| rs136680    | T | 0.1064  |
| rs76956926  | T | 0.0395  |
| rs2213531   | G | -0.0169 |
| rs136695    | C | 0.0218  |
| rs73394202  | C | 0.0342  |
| rs2103586   | G | 0.0186  |
| rs6000294   | A | 0.0502  |
| rs117122218 | C | -0.087  |
| rs17761569  | A | -0.0477 |

|             |   |         |
|-------------|---|---------|
| rs2882356   | T | 0.0644  |
| rs73155116  | T | -0.0525 |
| rs75809471  | G | 0.0989  |
| rs9614539   | C | 0.0454  |
| rs117315385 | T | 0.0764  |
| rs9617497   | A | -0.0206 |
| rs6005471   | A | 0.0223  |
| rs861858    | A | 0.0252  |
| rs144054147 | G | 0.0715  |
| rs4823500   | G | -0.0256 |
| rs6010152   | G | -0.0312 |
| rs142846988 | T | 0.0584  |
| rs6005856   | A | -0.0486 |
| rs17436198  | T | -0.0795 |
| rs11704856  | T | -0.0402 |
| rs5993784   | A | 0.0173  |
| rs117051531 | G | -0.0515 |
| rs848708    | T | 0.0333  |
| rs6005353   | A | -0.0586 |
| rs131692    | C | 0.0421  |
| rs5761707   | G | 0.0176  |
| rs714191    | C | -0.0208 |
| rs142030045 | A | 0.0775  |
| rs11912319  | G | -0.0364 |
| rs17669621  | C | 0.0215  |
| rs2413239   | A | -0.0168 |
| rs74621382  | A | 0.0383  |
| rs73179587  | A | 0.07    |
| rs117262463 | C | 0.0966  |
| rs111885772 | A | 0.1099  |
| rs9621033   | C | 0.0579  |
| rs28584577  | C | -0.0191 |
| rs8137706   | T | -0.0276 |
| rs4819784   | A | 0.0211  |
| rs5754838   | G | -0.0307 |
| rs112077620 | T | -0.0835 |
| rs9619444   | A | 0.0281  |
| rs2013176   | G | 0.0719  |
| rs113641601 | C | -0.0765 |
| rs139077570 | T | 0.1163  |
| rs80186738  | T | -0.0489 |
| rs12169088  | T | 0.0225  |
| rs73167632  | C | 0.1027  |
| rs77817923  | C | 0.0439  |
| rs9608623   | C | -0.021  |
| rs7285888   | A | 0.0824  |
| rs2337496   | C | -0.0355 |

|             |   |         |
|-------------|---|---------|
| rs131824    | G | -0.0196 |
| rs148521375 | T | -0.0367 |
| rs2281025   | C | 0.0357  |
| rs5768637   | A | -0.0225 |
| rs5755769   | C | -0.018  |
| rs135308    | A | 0.0165  |
| rs138701295 | A | -0.1145 |
| rs5752298   | G | -0.018  |
| rs2006253   | C | -0.0262 |
| rs2179871   | T | 0.0205  |
| rs6006909   | T | 0.0161  |
| rs34404739  | T | 0.0604  |
| rs113183087 | G | -0.0811 |
| rs143636799 | T | 0.0679  |
| rs8140409   | G | 0.0683  |
| rs3788395   | A | -0.0202 |
| rs5758701   | G | -0.1595 |
| rs76908849  | T | 0.0281  |
| rs2051616   | G | -0.0158 |
| rs12160474  | C | 0.0876  |
| rs9606268   | T | -0.1046 |
| rs738971    | A | -0.0157 |
| rs55741024  | A | -0.0831 |
| rs6518956   | G | 0.016   |
| rs2269523   | G | -0.0169 |
| rs144660700 | G | 0.0863  |
| rs5765991   | T | -0.0255 |
| rs140947018 | A | -0.0939 |
| rs1124852   | T | -0.0616 |
| rs116943876 | A | -0.0298 |
| rs76926687  | T | -0.0752 |
| rs4821090   | C | -0.0196 |
| rs522537    | T | 0.0192  |
| rs131212    | C | 0.0356  |
| rs35826039  | T | -0.0197 |
| rs136793    | C | -0.0217 |
| rs762964    | T | -0.0261 |
| rs79419741  | A | 0.115   |
| rs910571    | A | 0.0287  |
| rs9605229   | C | 0.0349  |
| rs139543946 | A | -0.1158 |
| rs34402301  | T | -0.059  |
| rs12159217  | T | 0.0505  |
| rs7291014   | T | 0.0881  |
| rs12170368  | T | -0.038  |
| rs16981698  | T | -0.0448 |
| rs71328267  | C | 0.0436  |

|             |   |         |
|-------------|---|---------|
| rs728206    | T | 0.0188  |
| rs73154546  | A | 0.0471  |
| rs62225896  | A | -0.101  |
| rs136671    | A | 0.0808  |
| rs10483121  | C | 0.0327  |
| rs73179589  | A | 0.0265  |
| rs35119670  | G | -0.0856 |
| rs2075956   | C | 0.0383  |
| rs738276    | A | -0.0163 |
| rs12485080  | A | 0.0527  |
| rs5757628   | A | 0.0191  |
| rs142735314 | A | -0.0942 |
| rs117446426 | T | 0.067   |
| rs4822546   | A | -0.0165 |
| rs1467387   | C | -0.0203 |
| rs12627955  | G | -0.0565 |
| rs138644    | A | -0.0165 |
| rs142070203 | T | 0.0793  |
| rs79010645  | C | 0.0734  |
| rs6000648   | A | -0.0256 |
| rs5750616   | G | 0.0193  |
| rs9607010   | T | 0.0833  |
| rs34292276  | T | 0.0415  |
| rs62224198  | A | 0.0787  |
| rs13053245  | G | -0.0156 |
| rs116846750 | G | -0.0574 |
| rs5749755   | C | -0.0397 |
| rs4436      | A | -0.0186 |
| rs114270501 | A | 0.1286  |
| rs111562979 | G | 0.0629  |
| rs117884976 | T | -0.0517 |
| rs138852781 | A | 0.0984  |
| rs4822394   | A | -0.0157 |
| rs16984543  | A | 0.0238  |
| rs5766388   | A | 0.0231  |
| rs2239848   | A | 0.0766  |
| rs7284850   | T | -0.027  |
| rs12485086  | T | 0.0433  |
| rs4822549   | A | 0.0189  |
| rs138938    | A | 0.017   |
| rs133576    | A | -0.0244 |
| rs848725    | C | -0.0171 |
| rs5992732   | C | 0.0342  |
| rs4822015   | A | 0.0421  |
| rs77943822  | C | 0.0539  |
| rs142620747 | A | 0.0488  |
| rs12628156  | G | -0.0273 |

|             |   |         |
|-------------|---|---------|
| rs73168676  | C | 0.0374  |
| rs16990824  | C | 0.0321  |
| rs2349634   | G | -0.0156 |
| rs2269961   | T | 0.0192  |
| rs130252    | C | 0.019   |
| rs12330020  | C | 0.0595  |
| rs28491685  | A | -0.0977 |
| rs135004    | A | -0.0168 |
| rs638956    | T | -0.0168 |
| rs117237236 | A | -0.0958 |
| rs5758548   | T | -0.0249 |
| rs13053173  | T | 0.0225  |
| rs34926187  | A | 0.0195  |
| rs6004483   | C | -0.0165 |
| rs62225983  | C | 0.0829  |
| rs2856875   | A | 0.0161  |
| rs11704930  | G | 0.0186  |
| rs13433584  | T | 0.13    |
| rs174354    | C | 0.0689  |
| rs5993869   | T | 0.0283  |
| rs2267484   | A | -0.077  |
| rs117652084 | A | -0.1007 |
| rs75232099  | A | -0.0462 |
| rs117122138 | G | -0.0574 |
| rs80034906  | A | 0.0783  |
| rs12167599  | T | 0.0608  |
| rs117339104 | C | -0.1001 |
| rs73169839  | C | 0.0615  |
| rs5992616   | G | -0.0397 |
| rs739073    | T | 0.0278  |
| rs137203    | T | -0.0881 |
| rs62231579  | C | 0.0323  |
| rs75485620  | G | 0.078   |
| rs4820013   | T | 0.0169  |
| rs6005159   | G | -0.0225 |
| rs5994319   | G | -0.0305 |
| rs739309    | C | -0.0242 |
| rs6004919   | T | -0.0297 |
| rs111433978 | T | -0.1203 |
| rs2108577   | A | -0.0158 |
| rs73169001  | T | 0.0519  |
| rs10211984  | G | 0.0335  |
| rs113475280 | G | -0.04   |
| rs117025731 | A | 0.0524  |
| rs4362654   | C | 0.0194  |
| rs5754745   | A | -0.0271 |
| rs5755074   | T | -0.0394 |

|             |   |         |
|-------------|---|---------|
| rs17687000  | T | -0.0335 |
| rs11090932  | A | -0.0189 |
| rs78239359  | T | -0.1108 |
| rs117525367 | A | -0.0436 |
| rs73889908  | G | -0.0301 |
| rs9616297   | G | 0.0261  |
| rs1894523   | C | -0.0168 |
| rs117830061 | C | 0.0976  |
| rs76498283  | A | -0.0541 |
| rs6004104   | T | 0.0369  |
| rs139643881 | C | 0.0863  |
| rs17803678  | A | -0.061  |
| rs2235320   | T | 0.0234  |
| rs132831    | T | -0.08   |
| rs62225410  | G | 0.0465  |
| rs391085    | C | -0.0209 |
| rs973903    | T | 0.0156  |
| rs117102928 | A | 0.1482  |
| rs2542337   | T | 0.0208  |
| rs139279    | G | 0.0173  |
| rs113633706 | A | 0.0933  |
| rs4821966   | C | -0.0189 |
| rs4822919   | G | 0.017   |
| rs5766221   | T | -0.0165 |
| rs79097546  | C | 0.1361  |
| rs28714227  | T | -0.0417 |
| rs12485196  | C | -0.02   |
| rs78174430  | C | -0.0606 |
| rs181417    | A | 0.028   |
| rs9613122   | A | 0.0277  |
| rs142444761 | A | 0.0564  |
| rs62225097  | T | 0.067   |
| rs111428807 | T | 0.0596  |
| rs112114530 | A | 0.0391  |
| rs9613403   | C | 0.0158  |
| rs75426385  | A | 0.0457  |
| rs117324781 | A | 0.0668  |
| rs4822279   | A | 0.0171  |
| rs73156769  | G | 0.022   |
| rs2522289   | G | 0.0198  |
| rs41297816  | G | 0.0192  |
| rs148122504 | G | 0.0884  |
| rs9615416   | A | 0.0174  |
| rs150911578 | A | 0.0617  |
| rs5758880   | T | 0.02    |
| rs4822272   | A | -0.0457 |
| rs73157935  | T | 0.0447  |

|             |   |         |
|-------------|---|---------|
| rs9626899   | T | -0.0183 |
| rs58773949  | G | -0.033  |
| rs738235    | T | 0.033   |
| rs5769726   | G | -0.0187 |
| rs117641416 | G | 0.1115  |
| rs737612    | A | -0.0165 |
| rs9625241   | G | -0.0224 |
| rs17003642  | C | 0.0631  |
| rs2070471   | G | -0.0227 |
| rs62242890  | C | 0.1095  |
| rs59963075  | C | 0.0299  |
| rs56310790  | A | -0.0427 |
| rs9610179   | A | -0.0216 |
| rs4822842   | C | 0.0288  |
| rs149781979 | T | -0.0454 |
| rs61547005  | T | -0.0235 |
| rs136856    | C | -0.0161 |
| rs76751657  | T | -0.0577 |
| rs12628404  | T | -0.0295 |
| rs71313142  | G | 0.0224  |
| rs34453049  | C | 0.0878  |
| rs6003221   | T | -0.026  |
| rs468884    | C | -0.0161 |
| rs763105    | T | -0.0261 |
| rs7287939   | C | 0.0317  |
| rs9610875   | T | -0.0213 |
| rs34188027  | G | 0.0733  |
| rs75872566  | A | 0.0354  |
| rs137578    | A | 0.0149  |
| rs4824004   | G | 0.0163  |
| rs117982647 | T | -0.08   |
| rs34017491  | T | -0.0629 |
| rs148413375 | T | 0.0816  |
| rs6004776   | C | 0.0912  |
| rs6519698   | A | -0.0147 |
| rs77288331  | G | -0.1193 |
| rs7410504   | A | -0.0341 |
| rs9606869   | A | 0.0899  |
| rs17584043  | T | -0.0498 |
| rs399757    | C | -0.0167 |
| rs9619753   | A | 0.0194  |
| rs1859      | T | -0.0748 |
| rs9622252   | G | -0.0215 |
| rs135445    | C | -0.0723 |
| rs4925421   | C | -0.0183 |
| rs62236115  | A | -0.0436 |
| rs11089649  | A | 0.0194  |



|             |   |         |
|-------------|---|---------|
| rs5755460   | T | -0.0284 |
| rs2071727   | T | -0.0226 |
| rs117690657 | T | -0.0739 |
| rs149065121 | G | 0.1205  |
| rs4823407   | C | 0.0282  |
| rs738349    | C | -0.0182 |
| rs3859865   | A | -0.0174 |
| rs116941290 | T | 0.0987  |
| rs73166793  | G | 0.0459  |
| rs5760189   | T | -0.019  |
| rs75489045  | A | 0.0342  |
| rs2075921   | T | -0.0801 |
| rs12628115  | T | -0.0194 |
| rs4822101   | T | -0.0155 |
| rs9612662   | T | 0.0238  |
| rs11702933  | G | 0.0214  |
| rs4823188   | C | -0.0668 |
| rs17749540  | T | -0.024  |
| rs62235880  | C | -0.0667 |
| rs6006553   | C | -0.0158 |
| rs5995325   | C | -0.053  |
| rs450718    | G | 0.0267  |
| rs116962367 | G | 0.0974  |
| rs55942398  | T | 0.0745  |
| rs75950407  | T | -0.073  |
| rs142257854 | C | 0.111   |
| rs9605071   | C | 0.045   |
| rs134951    | C | -0.0189 |
| rs2267229   | C | -0.0215 |
| rs5765882   | A | -0.0691 |
| rs71316557  | C | 0.0611  |
| rs9611982   | G | 0.0637  |
| rs2235158   | A | 0.0164  |
| rs2213431   | C | -0.015  |
| rs9613375   | G | -0.0154 |
| rs41279973  | C | 0.0215  |
| rs1884134   | G | 0.0154  |
| rs144513708 | A | 0.1075  |
| rs145360172 | G | -0.1344 |
| rs9622984   | A | -0.0378 |
| rs9680838   | T | 0.0181  |
| rs1013603   | T | 0.0183  |
| rs5999855   | C | 0.0289  |
| rs9614400   | A | -0.0244 |
| rs5766503   | C | -0.0511 |
| rs4276      | G | -0.0143 |
| rs73173678  | A | 0.1532  |

|             |   |         |
|-------------|---|---------|
| rs45513196  | C | -0.06   |
| rs150018203 | A | 0.1367  |
| rs9610804   | G | -0.0156 |
| rs807677    | T | -0.0195 |
| rs12160942  | A | 0.0347  |
| rs2267592   | G | 0.0157  |
| rs78036465  | A | 0.089   |
| rs12484278  | A | -0.0181 |
| rs1533371   | G | 0.0172  |
| rs130646    | A | 0.0291  |
| rs1296748   | T | -0.0184 |
| rs5756638   | T | 0.0163  |
| rs149053722 | A | 0.1319  |
| rs9621547   | A | 0.0672  |
| rs9626344   | T | -0.018  |
| rs13054355  | A | 0.0214  |
| rs71321088  | G | -0.0531 |
| rs9613396   | T | -0.0242 |
| rs117383096 | T | -0.0786 |
| rs9306435   | G | 0.0156  |
| rs78017118  | G | -0.0549 |
| rs16981994  | T | -0.0541 |
| rs5761294   | G | 0.0159  |
| rs117979250 | A | 0.0328  |
| rs146868485 | A | 0.0407  |
| rs2413390   | T | 0.0153  |
| rs79222973  | A | 0.1411  |
| rs73170531  | G | 0.0281  |
| rs10483225  | C | -0.0262 |
| rs112201374 | C | 0.0747  |
| rs9610444   | A | -0.033  |
| rs117827431 | T | -0.1077 |
| rs2073760   | T | -0.0151 |
| rs5996309   | A | -0.0145 |
| rs9306529   | T | -0.0173 |
| rs73163951  | C | 0.034   |
| rs738228    | T | 0.0336  |
| rs41278851  | A | -0.0893 |
| rs5757347   | A | -0.0267 |
| rs73469742  | T | -0.0806 |
| rs433710    | G | 0.0647  |
| rs6000727   | T | 0.0364  |
| rs76927858  | G | -0.0332 |
| rs6519012   | A | 0.0405  |
| rs9616232   | G | 0.0199  |
| rs111360846 | G | 0.0712  |
| rs6007282   | C | -0.0239 |

|             |   |         |
|-------------|---|---------|
| rs149888492 | T | -0.0938 |
| rs17477193  | G | 0.0268  |
| rs76570751  | C | 0.0374  |
| rs74900430  | T | 0.026   |
| rs1142542   | A | -0.019  |
| rs5759543   | A | -0.0764 |
| rs2413583   | T | 0.0193  |
| rs73880723  | A | -0.0244 |
| rs138117567 | C | 0.0489  |
| rs9608859   | T | -0.0143 |
| rs17634419  | A | -0.0685 |
| rs59990120  | C | -0.0216 |
| rs73181194  | A | 0.0291  |
| rs62235155  | C | -0.0304 |
| rs141103493 | C | -0.0993 |
| rs5759265   | G | 0.0205  |
| rs2882359   | A | -0.0172 |
| rs16985863  | A | 0.0288  |
| rs2267270   | A | 0.0175  |
| rs16992551  | T | 0.0328  |
| rs116882798 | G | 0.0903  |
| rs5769662   | T | -0.0366 |
| rs137126    | G | 0.0165  |
| rs874960    | G | 0.0147  |
| rs78594621  | G | -0.0517 |
| rs62236876  | G | -0.0223 |
| rs80724     | T | 0.019   |
| rs62235058  | C | -0.1051 |
| rs17694640  | T | -0.0264 |
| rs8138196   | A | -0.0146 |
| rs137899    | A | -0.0306 |
| rs35349798  | A | -0.0864 |
| rs669184    | T | -0.0175 |
| rs2179052   | C | -0.0925 |
| rs42928     | C | -0.0182 |
| rs17179935  | T | 0.0663  |
| rs135618    | G | 0.0264  |
| rs17370615  | A | 0.0167  |
| rs78358038  | A | -0.0681 |
| rs2540628   | T | -0.0218 |
| rs75778781  | T | -0.0347 |
| rs111568133 | T | 0.0357  |
| rs9606721   | G | -0.0796 |
| rs11703546  | C | -0.0306 |
| rs117658579 | G | -0.0761 |
| rs12628868  | C | 0.0317  |
| rs138459978 | A | -0.0826 |

|             |   |         |
|-------------|---|---------|
| rs76993769  | T | -0.075  |
| rs139307962 | G | 0.0573  |
| rs801588    | C | -0.0521 |
| rs5747428   | A | -0.0301 |
| rs138480003 | A | -0.0901 |
| rs117842899 | C | -0.0836 |
| rs132692    | T | 0.0163  |
| rs73163225  | A | -0.0173 |
| rs117408550 | A | 0.1143  |
| rs116541897 | C | 0.0924  |
| rs73155909  | T | 0.0656  |
| rs142121339 | C | -0.0509 |
| rs73166186  | T | 0.0848  |
| rs73154809  | T | -0.0457 |
| rs5768714   | G | 0.0861  |
| rs5759640   | T | 0.0234  |
| rs756638    | A | 0.0166  |
| rs11705602  | A | 0.0164  |
| rs1547418   | C | 0.0218  |
| rs147489423 | A | -0.0896 |
| rs141761092 | A | -0.0706 |
| rs16992029  | C | 0.0304  |
| rs720442    | T | 0.0333  |
| rs9616622   | A | 0.019   |
| rs7675      | T | -0.0199 |
| rs9610680   | A | 0.0188  |
| rs13053551  | C | -0.0303 |
| rs2285107   | A | -0.0301 |
| rs116517135 | A | -0.0619 |
| rs142398370 | C | 0.0806  |
| rs3788610   | A | -0.0264 |
| rs881459    | A | -0.0165 |
| rs5764491   | C | 0.0162  |
| rs8140608   | C | 0.0594  |
| rs73153968  | G | -0.0499 |
| rs35526737  | T | -0.0239 |
| rs3747169   | A | -0.0548 |
| rs73429282  | T | -0.0656 |
| rs13056337  | T | -0.0249 |
| rs5752256   | T | 0.0219  |
| rs16992190  | T | -0.0274 |
| rs3213444   | A | -0.0562 |
| rs79515519  | G | 0.0911  |
| rs8184961   | A | -0.0427 |
| rs5753348   | C | -0.0214 |
| rs4821965   | A | 0.0171  |
| rs62233607  | A | 0.0508  |

|             |   |         |
|-------------|---|---------|
| rs35572234  | C | 0.0455  |
| rs6010527   | C | 0.0161  |
| rs13056576  | A | -0.0847 |
| rs35199791  | A | 0.0217  |
| rs10427819  | A | -0.0989 |
| rs62235067  | C | -0.0892 |
| rs9604738   | A | -0.016  |
| rs10427827  | G | -0.0236 |
| rs139253    | A | 0.0458  |
| rs9608852   | T | -0.0158 |
| rs5756269   | A | 0.0303  |
| rs1807714   | A | -0.0148 |
| rs117972364 | A | 0.0772  |
| rs11704272  | A | 0.0401  |
| rs9608134   | A | -0.0244 |
| rs73162756  | G | 0.0658  |
| rs135926    | C | -0.0154 |
| rs12159254  | A | -0.046  |
| rs2516090   | A | 0.0255  |
| rs9609476   | T | 0.0688  |
| rs117565281 | C | -0.062  |
| rs8190435   | T | 0.0918  |
| rs138185373 | C | 0.0859  |
| rs135092    | T | -0.1259 |
| rs9606224   | T | -0.0848 |
| rs4822873   | C | 0.0137  |
| rs113331361 | G | -0.0652 |
| rs5750457   | T | -0.0159 |
| rs9626091   | A | -0.0226 |
| rs4823351   | T | -0.0303 |
| rs6009693   | G | 0.0183  |
| rs4823265   | A | 0.0335  |
| rs9604967   | T | -0.0339 |
| rs112105386 | T | -0.0445 |
| rs17002948  | G | -0.0216 |
| rs114898190 | C | -0.0742 |
| rs117515158 | C | -0.0435 |
| rs74472161  | A | 0.0646  |
| rs13053532  | C | 0.0799  |
| rs144692759 | A | 0.0948  |
| rs8142497   | G | 0.0415  |
| rs380705    | A | 0.0347  |
| rs75255758  | G | 0.1071  |
| rs130889    | T | 0.0141  |
| rs7291524   | T | 0.0417  |
| rs146413240 | T | 0.0611  |
| rs28680412  | T | 0.0365  |

|             |   |         |
|-------------|---|---------|
| rs76777683  | A | -0.115  |
| rs713704    | T | -0.0393 |
| rs11089864  | C | 0.0486  |
| rs150162317 | C | 0.0798  |
| rs4998643   | A | -0.023  |
| rs11705479  | C | 0.033   |
| rs117212232 | G | 0.0505  |
| rs77316012  | G | -0.0658 |
| rs6010068   | T | -0.0287 |
| rs35923215  | A | 0.0247  |
| rs16984135  | C | 0.0282  |
| rs17634299  | C | -0.0189 |
| rs9614923   | T | -0.0214 |
| rs6006756   | G | -0.0244 |
| rs41282459  | G | -0.0338 |
| rs16997123  | T | 0.0479  |
| rs133596    | A | 0.0203  |
| rs72550765  | A | 0.0211  |
| rs117099200 | G | 0.0473  |
| rs117442269 | T | 0.0965  |
| rs9613411   | T | 0.0193  |
| rs12170701  | G | 0.0557  |
| rs13057108  | A | 0.032   |
| rs77467662  | G | -0.0475 |
| rs34134485  | A | 0.0489  |
| rs74815518  | T | 0.0486  |
| rs13054678  | T | 0.0145  |
| rs9613141   | T | -0.0467 |
| rs77975653  | T | 0.0878  |
| rs210809    | C | -0.0156 |
| rs5764455   | A | 0.0136  |
| rs62222833  | G | 0.0156  |
| rs117001462 | C | -0.062  |
| rs28513904  | C | 0.016   |
| rs17809826  | A | 0.1046  |
| rs113078976 | A | -0.0489 |
| rs117451052 | G | -0.1207 |
| rs1884349   | G | -0.0144 |
| rs12159011  | A | -0.0658 |
| rs11705658  | T | -0.0153 |
| rs117470728 | T | -0.0801 |
| rs4390855   | G | 0.0273  |
| rs141993496 | G | 0.0387  |
| rs6000235   | T | -0.0568 |
| rs139954992 | A | 0.0721  |
| rs78416988  | G | 0.0732  |
| rs5771315   | T | 0.0165  |

|             |   |         |
|-------------|---|---------|
| rs9608143   | C | 0.0239  |
| rs9622529   | G | -0.0442 |
| rs113323394 | T | 0.078   |
| rs4820290   | A | 0.0169  |
| rs149441158 | T | -0.0537 |
| rs113520017 | A | -0.0682 |
| rs6009741   | A | 0.0173  |
| rs116986102 | A | -0.0851 |
| rs855056    | A | -0.0243 |
| rs4821414   | T | 0.0212  |
| rs62241314  | C | 0.0669  |
| rs5748657   | C | 0.0135  |
| rs1547413   | A | -0.0142 |
| rs139909363 | C | 0.0827  |
| rs117718749 | A | 0.0721  |
| rs8136752   | T | 0.0146  |
| rs879342    | A | 0.0335  |
| rs916256    | G | -0.0132 |
| rs71314757  | A | 0.0251  |
| rs9612895   | A | -0.0249 |
| rs9619358   | T | 0.0286  |
| rs75759291  | T | 0.0624  |
| rs117544445 | C | -0.0385 |
| rs117628561 | C | 0.0552  |
| rs150228196 | C | -0.0776 |
| rs150263482 | C | -0.1306 |
| rs143659539 | G | -0.0412 |
| rs71321074  | G | -0.0182 |
| rs138647457 | T | -0.0454 |
| rs6002879   | T | -0.0221 |
| rs2223337   | T | -0.0315 |
| rs12163238  | A | -0.0149 |
| rs132747    | C | -0.0163 |
| rs113434912 | G | 0.0354  |
| rs62228374  | A | -0.0741 |
| rs77929558  | T | -0.0812 |
| rs141250171 | A | 0.0289  |
| rs130163    | G | 0.0147  |
| rs855075    | T | -0.0195 |
| rs117480194 | T | 0.0268  |
| rs2157249   | C | -0.0139 |
| rs229492    | T | -0.0196 |
| rs137865953 | C | 0.0531  |
| rs113299767 | C | -0.0696 |
| rs8136986   | T | 0.0163  |
| rs5762108   | G | -0.0597 |
| rs12485095  | G | -0.05   |

|             |   |         |
|-------------|---|---------|
| rs145662037 | C | -0.0406 |
| rs117336966 | T | -0.0653 |
| rs117958712 | C | 0.0511  |
| rs5771929   | T | 0.0146  |
| rs7293216   | G | -0.0268 |
| rs5770011   | A | -0.017  |
| rs147920629 | A | -0.0766 |
| rs78487378  | T | 0.0587  |
| rs71328675  | A | -0.017  |
| rs417153    | G | 0.027   |
| rs5751363   | T | 0.0221  |
| rs238857    | G | -0.0173 |
| rs9625944   | T | 0.0982  |
| rs5750016   | T | -0.015  |
| rs5996551   | A | -0.016  |
| rs11704857  | C | 0.0297  |
| rs73165836  | C | -0.0234 |
| rs5757511   | T | -0.0139 |
| rs12627803  | C | -0.0282 |
| rs74880766  | G | 0.056   |
| rs2385786   | A | -0.0126 |
| rs148674495 | G | -0.0586 |
| rs9617121   | C | -0.0947 |
| rs6004518   | A | -0.0248 |
| rs149617614 | C | -0.108  |
| rs117758338 | T | 0.0389  |
| rs4822583   | T | 0.0258  |
| rs62236206  | A | -0.0584 |
| rs41282467  | T | 0.0435  |
| rs2401518   | C | 0.0237  |
| rs115890912 | G | -0.0594 |
| rs16993093  | A | -0.0458 |
| rs386333    | A | 0.0237  |
| rs8142741   | A | -0.0163 |
| rs9617812   | C | -0.0219 |
| rs5761122   | A | -0.0232 |
| rs133916    | T | -0.0156 |
| rs117649327 | T | -0.1313 |
| rs1012769   | T | 0.0177  |
| rs5016417   | T | 0.015   |
| rs74721354  | C | -0.0363 |
| rs9615529   | C | 0.0554  |
| rs77078857  | T | -0.0672 |
| rs5753816   | C | 0.0141  |
| rs117086217 | G | 0.1335  |
| rs28405882  | A | 0.0456  |
| rs76353358  | A | 0.0419  |



|             |   |         |
|-------------|---|---------|
| rs17704912  | C | 0.033   |
| rs3218256   | A | 0.059   |
| rs149306831 | T | -0.0436 |
| rs5750345   | A | 0.043   |
| rs138384577 | T | 0.0928  |
| rs117058083 | G | -0.0458 |
| rs147609352 | T | -0.0738 |
| rs73179060  | C | 0.0486  |
| rs133869    | T | -0.0438 |
| rs146770626 | T | 0.0739  |
| rs150873835 | G | -0.0728 |
| rs113861262 | C | -0.0397 |
| rs144046759 | C | 0.1128  |
| rs13433634  | C | -0.0515 |
| rs139764778 | A | -0.0875 |
| rs76665416  | T | -0.0382 |
| rs79187182  | A | 0.0567  |
| rs78558175  | T | -0.0666 |
| rs62227027  | C | 0.0883  |
| rs11705104  | T | -0.0182 |
| rs148656681 | T | 0.0516  |
| rs12162707  | G | -0.067  |
| rs147749579 | T | 0.0712  |
| rs139523175 | T | -0.0564 |
| rs3788654   | A | -0.0271 |
| rs7289964   | G | -0.0448 |
| rs28512264  | T | 0.0389  |
| rs62226663  | A | -0.0425 |
| rs115834180 | G | -0.0895 |
| rs12169815  | C | 0.0988  |
| rs73168598  | T | -0.0446 |
| rs78976179  | T | 0.04    |
| rs115151152 | T | -0.0815 |
| rs2015186   | T | 0.0174  |
| rs84510     | G | 0.0241  |
| rs79111313  | G | 0.0548  |
| rs926543    | T | 0.0218  |
| rs5765145   | G | 0.0164  |
| rs7284700   | C | -0.0196 |
| rs113626752 | A | 0.0383  |
| rs16984366  | C | -0.0167 |
| rs138511532 | G | -0.0434 |
| rs118060237 | C | 0.0585  |
| rs73154698  | G | 0.0181  |
| rs145261253 | G | 0.0651  |
| rs77579392  | A | -0.0313 |
| rs41456252  | G | -0.0705 |

|             |   |         |
|-------------|---|---------|
| rs138174248 | A | -0.0568 |
| rs12166420  | A | -0.0946 |
| rs72487688  | C | 0.038   |
| rs760656    | C | -0.0161 |
| rs4244607   | A | 0.0151  |
| rs116856246 | A | -0.0998 |
| rs17812082  | T | 0.1023  |
| rs11089471  | C | 0.0567  |
| rs150596377 | T | 0.0884  |
| rs16996925  | C | -0.0523 |
| rs737796    | T | 0.0172  |
| rs78598910  | T | 0.0584  |
| rs9624260   | T | 0.0577  |
| rs75860793  | G | -0.0353 |
| rs13053889  | T | 0.0194  |
| rs149081944 | G | -0.0863 |
| rs62235968  | C | 0.0151  |
| rs135968    | A | -0.0145 |
| rs743730    | T | 0.0156  |
| rs117016540 | T | 0.0653  |
| rs74966936  | T | 0.0277  |
| rs72617273  | T | -0.0186 |
| rs147059514 | G | 0.0747  |
| rs4822760   | A | 0.017   |
| rs391649    | A | 0.0243  |
| rs73437427  | G | 0.0495  |
| rs136769    | T | -0.0311 |
| rs11703962  | A | -0.0361 |
| rs8137136   | A | 0.0165  |
| rs9617661   | G | -0.0161 |
| rs4823336   | A | -0.0124 |
| rs181396    | A | 0.0123  |
| rs135981    | G | 0.0172  |
| rs42933     | T | -0.0213 |
| rs11090797  | G | 0.0225  |
| rs9604752   | G | -0.0178 |
| rs715609    | T | -0.0137 |
| rs73479548  | C | -0.0841 |
| rs144196076 | G | -0.0165 |
| rs148258733 | T | -0.057  |
| rs74701298  | C | 0.0502  |
| rs12484890  | C | -0.0559 |
| rs435165    | G | 0.0668  |
| rs2073201   | A | -0.0305 |
| rs5760901   | T | -0.0322 |
| rs2267412   | C | 0.0166  |
| rs146878017 | A | -0.0583 |

|             |   |         |
|-------------|---|---------|
| rs1962221   | C | -0.0179 |
| rs9306539   | A | -0.0318 |
| rs62219680  | G | -0.0151 |
| rs73889895  | A | -0.0495 |
| rs77206040  | T | -0.053  |
| rs149237748 | G | 0.0633  |
| rs78497594  | A | 0.0426  |
| rs62226143  | T | 0.0186  |
| rs5768340   | C | -0.0214 |
| rs143863913 | T | 0.0492  |
| rs141029875 | G | 0.0715  |
| rs848728    | A | -0.0138 |
| rs112514152 | G | -0.0488 |
| rs10439908  | G | -0.0239 |
| rs2267220   | A | -0.0346 |
| rs73158135  | A | -0.0504 |
| rs9627753   | C | 0.0137  |
| rs929167    | A | 0.0614  |
| rs149142204 | T | -0.0688 |
| rs9613481   | A | 0.0149  |
| rs117779534 | A | -0.054  |
| rs71318410  | T | -0.0363 |
| rs71312711  | C | 0.0224  |
| rs74868449  | T | -0.0601 |
| rs1883111   | A | -0.0146 |
| rs11704468  | T | -0.0262 |
| rs5759577   | T | 0.0257  |
| rs5762048   | T | -0.0231 |
| rs9613096   | G | -0.0394 |
| rs73177086  | T | -0.0486 |
| rs140002    | A | -0.0254 |
| rs35281297  | T | -0.0825 |
| rs4425      | T | -0.027  |
| rs5750761   | C | 0.0152  |
| rs404868    | A | -0.023  |
| rs9608573   | T | -0.0224 |
| rs133090    | G | -0.0124 |
| rs75275392  | A | -0.0259 |
| rs117006621 | T | 0.0665  |
| rs138390    | A | -0.0163 |
| rs470120    | A | -0.0236 |
| rs9613105   | T | 0.0376  |
| rs141447880 | A | -0.0333 |
| rs2157189   | A | -0.0187 |
| rs45596741  | A | -0.0473 |
| rs494702    | C | -0.0134 |
| rs56020504  | A | -0.017  |

|             |   |         |
|-------------|---|---------|
| rs16994633  | A | 0.0197  |
| rs12628085  | G | 0.0168  |
| rs7288109   | T | 0.0202  |
| rs135750    | G | -0.0248 |
| rs117574693 | T | 0.0596  |
| rs4514      | C | 0.0124  |
| rs1004689   | G | 0.0155  |
| rs79612806  | G | -0.0204 |
| rs5996264   | T | 0.0799  |
| rs62226964  | T | -0.0334 |
| rs762349    | C | -0.023  |
| rs34786259  | T | -0.0533 |
| rs78500736  | C | 0.0626  |
| rs35146163  | T | 0.0187  |
| rs7289173   | A | 0.0464  |
| rs16985288  | A | 0.0454  |
| rs113946784 | T | 0.066   |
| rs53724     | G | -0.0139 |
| rs79830144  | T | 0.0492  |
| rs8137648   | G | 0.0776  |
| rs35007684  | A | 0.0595  |
| rs55790105  | T | 0.0155  |
| rs11913978  | G | 0.0424  |
| rs5758746   | A | 0.0161  |
| rs8140134   | A | 0.0178  |
| rs78591809  | T | -0.0373 |
| rs113289569 | T | 0.0757  |
| rs2267443   | A | 0.0122  |
| rs143877191 | G | -0.0935 |
| rs62234013  | T | -0.0132 |
| rs140162    | T | -0.014  |
| rs131421    | G | -0.0139 |
| rs11912062  | G | -0.0582 |
| rs17882950  | T | 0.0559  |
| rs149339239 | T | 0.0606  |
| rs5768441   | G | 0.0516  |
| rs2268787   | A | 0.023   |
| rs7290369   | G | 0.0167  |
| rs117084754 | T | -0.0497 |
| rs4838867   | A | 0.024   |
| rs9798698   | T | -0.0125 |
| rs16989702  | A | -0.0353 |
| rs55903329  | A | -0.0135 |
| rs73186732  | A | -0.0982 |
| rs34840451  | T | 0.036   |
| rs117089335 | C | 0.0395  |
| rs74999934  | T | 0.0264  |

|             |   |         |
|-------------|---|---------|
| rs1974482   | A | -0.0503 |
| rs36049601  | A | -0.071  |
| rs6007243   | A | -0.015  |
| rs79165631  | T | -0.0486 |
| rs113414858 | T | -0.0722 |
| rs5768564   | A | 0.0147  |
| rs138181617 | T | 0.0174  |
| rs112195590 | A | 0.0299  |
| rs12628699  | A | -0.026  |
| rs62225794  | T | 0.0673  |
| rs6007267   | C | 0.0714  |
| rs462055    | T | 0.0144  |
| rs60018166  | A | -0.0486 |
| rs111287093 | G | 0.0328  |
| rs135354    | A | -0.0149 |
| rs113509019 | G | -0.0856 |
| rs143900357 | G | -0.0852 |
| rs9615095   | C | 0.0254  |
| rs4988392   | A | -0.0233 |
| rs76636390  | T | 0.0477  |
| rs4820705   | A | 0.0249  |
| rs12169849  | T | 0.0315  |
| rs9615505   | C | 0.012   |
| rs78238497  | T | 0.0255  |
| rs2232857   | T | -0.0229 |
| rs60512419  | C | 0.0351  |
| rs112932931 | A | -0.0344 |
| rs1535145   | A | -0.0136 |
| rs140040762 | A | -0.0583 |
| rs68178377  | T | 0.0225  |
| rs149661573 | A | 0.09    |
| rs35061600  | T | 0.0191  |
| rs2093381   | G | -0.0299 |
| rs5759690   | A | 0.0261  |
| rs11089673  | C | 0.0123  |
| rs4823184   | T | 0.0161  |
| rs74658771  | T | -0.0733 |
| rs137318    | T | 0.013   |
| rs118047186 | G | 0.0838  |
| rs139960    | G | 0.0501  |
| rs6001366   | T | 0.0309  |
| rs117574811 | A | -0.0344 |
| rs140315227 | T | -0.0529 |
| rs5754162   | A | 0.0136  |
| rs9625943   | T | 0.0122  |
| rs4645742   | T | 0.025   |
| rs75939651  | A | -0.0267 |

|             |   |         |
|-------------|---|---------|
| rs79685048  | T | -0.0272 |
| rs759224    | A | -0.0151 |
| rs73182605  | T | 0.0496  |
| rs73885230  | T | -0.0719 |
| rs6007906   | C | 0.0209  |
| rs76153943  | T | 0.0332  |
| rs9606111   | A | -0.0142 |
| rs11913168  | A | -0.0184 |
| rs8141327   | G | 0.0412  |
| rs78760126  | A | -0.0843 |
| rs146556149 | G | 0.0975  |
| rs36069260  | T | -0.016  |
| rs76345075  | C | -0.0608 |
| rs1207395   | G | -0.0334 |
| rs2318429   | T | -0.0153 |
| rs139047    | A | 0.0138  |
| rs118187689 | C | -0.0273 |
| rs118151345 | T | 0.0837  |
| rs140458913 | T | -0.042  |
| rs9612877   | G | -0.0185 |
| rs9622722   | A | -0.024  |
| rs73176759  | G | 0.0362  |
| rs116843827 | T | -0.0706 |
| rs2072858   | C | 0.0122  |
| rs4820727   | C | -0.0225 |
| rs145888083 | C | 0.0838  |
| rs55930878  | T | -0.0393 |
| rs243001    | C | 0.0118  |
| rs4925432   | T | 0.0122  |
| rs5995370   | C | 0.0224  |
| rs4820357   | A | 0.0147  |
| rs73876446  | A | -0.0406 |
| rs142582386 | T | 0.0609  |
| rs77296339  | G | 0.0415  |
| rs926936    | A | -0.0472 |
| rs239320    | G | 0.0131  |
| rs9808873   | A | -0.0638 |
| rs73410538  | C | -0.063  |
| rs113056784 | C | -0.0578 |
| rs5766392   | C | 0.0122  |
| rs77257525  | A | -0.0294 |
| rs1966297   | C | 0.0188  |
| rs57871917  | G | 0.03    |
| rs73161707  | G | -0.048  |
| rs34110151  | A | -0.0257 |
| rs9614490   | T | -0.058  |
| rs738462    | G | -0.0221 |

|             |   |         |
|-------------|---|---------|
| rs12330006  | C | 0.0196  |
| rs56223059  | A | 0.0255  |
| rs2189132   | A | -0.0151 |
| rs55796616  | C | -0.0247 |
| rs4821184   | C | -0.0266 |
| rs116888152 | T | 0.073   |
| rs1519221   | G | 0.0162  |
| rs73154228  | A | -0.0362 |
| rs117942242 | G | 0.051   |
| rs5996171   | C | 0.0169  |
| rs111245926 | G | -0.0672 |
| rs148860096 | G | -0.0701 |
| rs117985636 | C | -0.0349 |
| rs62237828  | T | 0.0138  |
| rs73884366  | A | 0.0786  |
| rs28368226  | T | -0.0273 |
| rs6004243   | C | -0.0404 |
| rs134949    | C | 0.0198  |
| rs6006570   | A | -0.0267 |
| rs146661473 | A | 0.0933  |
| rs1883284   | C | -0.013  |
| rs117502424 | T | -0.0369 |
| rs150895116 | A | 0.0398  |
| rs8141427   | G | 0.0263  |
| rs77106870  | C | 0.0277  |
| rs738795    | T | 0.0198  |
| rs56187421  | A | -0.0164 |
| rs5756535   | G | -0.0207 |
| rs4820360   | T | -0.0204 |
| rs149296439 | A | -0.0632 |
| rs134933    | C | -0.013  |
| rs5760088   | T | 0.0126  |
| rs4820568   | A | 0.0127  |
| rs117477639 | T | -0.0775 |
| rs13054261  | T | -0.0187 |
| rs7291951   | T | 0.0542  |
| rs139606    | G | 0.0113  |
| rs11703002  | C | -0.0229 |
| rs77421051  | T | 0.0623  |
| rs117924720 | T | -0.0606 |
| rs4819837   | G | -0.0198 |
| rs5769446   | A | -0.0313 |
| rs145099605 | A | 0.0458  |
| rs11091008  | T | 0.0181  |
| rs8142823   | T | 0.0445  |
| rs137514    | G | 0.0233  |
| rs2283974   | A | -0.0364 |

|             |   |         |
|-------------|---|---------|
| rs5750411   | G | 0.0207  |
| rs55771830  | A | -0.0315 |
| rs55746052  | G | 0.041   |
| rs968488    | C | -0.0114 |
| rs5751530   | A | 0.0326  |
| rs78848174  | C | -0.0273 |
| rs9614321   | A | 0.0153  |
| rs76822044  | C | 0.0542  |
| rs62238259  | A | -0.0191 |
| rs62227570  | T | -0.0113 |
| rs12484998  | T | 0.0223  |
| rs78129837  | T | 0.0355  |
| rs76592472  | A | 0.0508  |
| rs12628932  | C | 0.0128  |
| rs147318189 | A | 0.0469  |
| rs111253779 | A | 0.0657  |
| rs147289690 | G | -0.0845 |
| rs75476729  | C | 0.0453  |
| rs62241072  | A | 0.0665  |
| rs7285905   | C | -0.0155 |
| rs9606080   | T | 0.0554  |
| rs5997260   | C | 0.0679  |
| rs11089836  | A | 0.0127  |
| rs17834926  | A | -0.0532 |
| rs118176853 | T | 0.0603  |
| rs142010096 | C | -0.0693 |
| rs62238287  | C | 0.0373  |
| rs5753349   | G | -0.0136 |
| rs174363    | C | -0.0119 |
| rs117315225 | A | -0.0353 |
| rs5768507   | A | -0.0176 |
| rs34223312  | T | 0.0234  |
| rs78647462  | A | -0.0471 |
| rs17709696  | G | 0.0181  |
| rs1990227   | C | -0.0145 |
| rs11913692  | C | -0.0128 |
| rs131003    | T | 0.0192  |
| rs8137744   | A | 0.012   |
| rs55846646  | A | 0.0433  |
| rs9306321   | G | 0.0157  |
| rs12628618  | T | 0.0198  |
| rs9612776   | C | -0.0151 |
| rs5750721   | T | -0.0175 |
| rs867108    | G | 0.023   |
| rs117102707 | T | -0.0468 |
| rs16991789  | T | 0.0727  |
| rs6518765   | C | -0.0115 |



|             |   |         |
|-------------|---|---------|
| rs3788723   | T | -0.0121 |
| rs138649538 | C | 0.0795  |
| rs77191376  | C | 0.0364  |
| rs1427385   | T | -0.0111 |
| rs79016956  | A | 0.053   |
| rs80126241  | T | 0.0929  |
| rs75764644  | A | 0.0691  |
| rs5762041   | G | 0.0414  |
| rs113500965 | A | -0.0255 |
| rs13058539  | T | -0.0234 |
| rs75880928  | T | -0.0314 |
| rs139788    | T | -0.0519 |
| rs143194880 | T | 0.0763  |
| rs2267115   | A | -0.0181 |
| rs8136357   | T | -0.0131 |
| rs929027    | G | -0.0752 |
| rs137139    | C | -0.0136 |
| rs131310    | C | -0.0192 |
| rs6005445   | A | -0.0159 |
| rs12628403  | C | -0.0332 |
| rs609351    | T | -0.0541 |
| rs136121    | T | -0.0269 |
| rs77771351  | T | -0.0829 |
| rs34145275  | A | 0.0591  |
| rs2079621   | C | -0.0148 |
| rs76977031  | C | 0.0687  |
| rs34718951  | T | -0.0206 |
| rs6009491   | A | -0.0145 |
| rs140314285 | T | -0.0407 |
| rs5746992   | A | -0.0243 |
| rs76536076  | A | 0.0272  |
| rs80294915  | C | 0.0584  |
